# Supplementary material
Source: PubMed Central journal article supplement (PMC4799695)
Supplement: Supp_Data4.pdf [file Supp_Data4.pdf]

Supplementary Data 4. output of ChromExtractor program showing results for node 14 (1 to 14).

| Genes Names | Chromosome | Specimen   | Aberration # | Amplification | Deletion  |  |  |
|-------------|------------|------------|--------------|---------------|-----------|--|--|
| AAA1        | chr7       | Shiraz-3T  | 87           | 0.198593      | 0         |  |  |
|             |            | Shiraz-4T  | 252          | 0.192083      | 0         |  |  |
|             |            | Shiraz-36T | 376          | 0.159952      | 0         |  |  |
|             |            | Shiraz-44T | 631          | 0             | -0.180312 |  |  |
|             |            | Shiraz-46T | 942          | 0.069143      | 0         |  |  |
|             |            | Shiraz-18T | 1433         | 0.250973      | 0         |  |  |
|             |            | Shiraz-22T | 1544         | 0             | -0.193579 |  |  |
|             |            | Shiraz-25T | 1697         | 0.21945       | 0         |  |  |
|             |            | Shiraz-28T | 1734         | 0.362882      | 0         |  |  |
|             |            | Shiraz-29T | 1777         | 0.156747      | 0         |  |  |
|             |            | Shiraz-38T | 1950         | 0.265916      | 0         |  |  |
|             |            | Shiraz-71T | 2236         | 0.320072      | 0         |  |  |
|             |            | Shiraz-3T  | 87           | 0.198593      | 0         |  |  |
|             |            | Shiraz-4T  | 252          | 0.192083      | 0         |  |  |
|             |            | Shiraz-36T | 376          | 0.159952      | 0         |  |  |
|             |            | Shiraz-44T | 631          | 0             | -0.180312 |  |  |
|             |            | Shiraz-46T | 942          | 0.069143      | 0         |  |  |
|             |            | Shiraz-18T | 1433         | 0.250973      | 0         |  |  |
|             |            | Shiraz-22T | 1544         | 0             | -0.193579 |  |  |
|             |            | Shiraz-25T | 1697         | 0.21945       | 0         |  |  |
|             |            | Shiraz-28T | 1734         | 0.362882      | 0         |  |  |
| Shiraz-29T  | 1777       | 0.156747   | 0            |               |           |  |  |
| Shiraz-38T  | 1950       | 0.265916   | 0            |               |           |  |  |
| Shiraz-71T  | 2236       | 0.320072   | 0            |               |           |  |  |
| Shiraz-3T   | 87         | 0.198593   | 0            |               |           |  |  |
| Shiraz-4T   | 252        | 0.192083   | 0            |               |           |  |  |
| Shiraz-36T  | 376        | 0.159952   | 0            |               |           |  |  |
| Shiraz-44T  | 631        | 0          | -0.180312    |               |           |  |  |
| Shiraz-46T  | 942        | 0.069143   | 0            |               |           |  |  |
| Shiraz-18T  | 1433       | 0.250973   | 0            |               |           |  |  |
| Shiraz-22T  | 1544       | 0          | -0.193579    |               |           |  |  |
| Shiraz-25T  | 1697       | 0.21945    | 0            |               |           |  |  |
| Shiraz-28T  | 1734       | 0.362882   | 0            |               |           |  |  |
| Shiraz-29T  | 1777       | 0.156747   | 0            |               |           |  |  |
| Shiraz-38T  | 1950       | 0.265916   | 0            |               |           |  |  |
| Shiraz-71T  | 2236       | 0.320072   | 0            |               |           |  |  |
| AASS        | chr7       | Shiraz-3T  | 90           | 0.219276      | 0         |  |  |
|             |            | Shiraz-3T  | 95           | 0             | -0.077623 |  |  |
|             |            | Shiraz-4T  | 253          | 0.372918      | 0         |  |  |
|             |            | Shiraz-36T | 378          | 0.179558      | 0         |  |  |
|             |            | Shiraz-36T | 382          | 0.081739      | 0         |  |  |
|             |            | Shiraz-44T | 641          | 0             | -0.477846 |  |  |
|             |            | Shiraz-46T | 943          | 0.093799      | 0         |  |  |
|             |            | Shiraz-46T | 947          | 0             | -0.010843 |  |  |
|             |            | Shiraz-47T | 1031         | 0             | -0.117529 |  |  |

|  |            |      |          |           |  |
|--|------------|------|----------|-----------|--|
|  | Shiraz-49T | 1121 | 0        | -0.138569 |  |
|  | Shiraz-77T | 1225 | 0        | -0.117922 |  |
|  | Shiraz-77T | 1228 | 0        | -0.238084 |  |
|  | Shiraz-18T | 1434 | 0.244465 | 0         |  |
|  | Shiraz-22T | 1549 | 0        | -0.319623 |  |
|  | Shiraz-22T | 1552 | 0        | -0.50686  |  |
|  | Shiraz-25T | 1698 | 0.21835  | 0         |  |
|  | Shiraz-28T | 1735 | 0.350744 | 0         |  |
|  | Shiraz-29T | 1778 | 0.120767 | 0         |  |
|  | Shiraz-32T | 1833 | 0.551336 | 0         |  |
|  | Shiraz-32T | 1835 | 0.092727 | 0         |  |
|  | Shiraz-38T | 1951 | 0.250891 | 0         |  |
|  | Shiraz-53T | 2078 | 0.287202 | 0         |  |
|  | Shiraz-58T | 2161 | 0        | -0.187744 |  |
|  | Shiraz-71T | 2238 | 0.603631 | 0         |  |
|  | Shiraz-3T  | 90   | 0.219276 | 0         |  |
|  | Shiraz-3T  | 95   | 0        | -0.077623 |  |
|  | Shiraz-4T  | 253  | 0.372918 | 0         |  |
|  | Shiraz-36T | 378  | 0.179558 | 0         |  |
|  | Shiraz-36T | 382  | 0.081739 | 0         |  |
|  | Shiraz-44T | 641  | 0        | -0.477846 |  |
|  | Shiraz-46T | 943  | 0.093799 | 0         |  |
|  | Shiraz-46T | 947  | 0        | -0.010843 |  |
|  | Shiraz-47T | 1031 | 0        | -0.117529 |  |
|  | Shiraz-49T | 1121 | 0        | -0.138569 |  |
|  | Shiraz-77T | 1225 | 0        | -0.117922 |  |
|  | Shiraz-77T | 1228 | 0        | -0.238084 |  |
|  | Shiraz-18T | 1434 | 0.244465 | 0         |  |
|  | Shiraz-22T | 1549 | 0        | -0.319623 |  |
|  | Shiraz-22T | 1552 | 0        | -0.50686  |  |
|  | Shiraz-25T | 1698 | 0.21835  | 0         |  |
|  | Shiraz-28T | 1735 | 0.350744 | 0         |  |
|  | Shiraz-29T | 1778 | 0.120767 | 0         |  |
|  | Shiraz-32T | 1833 | 0.551336 | 0         |  |
|  | Shiraz-32T | 1835 | 0.092727 | 0         |  |
|  | Shiraz-38T | 1951 | 0.250891 | 0         |  |
|  | Shiraz-53T | 2078 | 0.287202 | 0         |  |
|  | Shiraz-58T | 2161 | 0        | -0.187744 |  |
|  | Shiraz-71T | 2238 | 0.603631 | 0         |  |
|  | Shiraz-3T  | 90   | 0.219276 | 0         |  |
|  | Shiraz-3T  | 95   | 0        | -0.077623 |  |
|  | Shiraz-4T  | 253  | 0.372918 | 0         |  |
|  | Shiraz-36T | 378  | 0.179558 | 0         |  |
|  | Shiraz-36T | 382  | 0.081739 | 0         |  |
|  | Shiraz-44T | 641  | 0        | -0.477846 |  |
|  | Shiraz-46T | 943  | 0.093799 | 0         |  |
|  | Shiraz-46T | 947  | 0        | -0.010843 |  |

|        |      |            |      |          |           |  |  |
|--------|------|------------|------|----------|-----------|--|--|
|        |      | Shiraz-47T | 1031 | 0        | -0.117529 |  |  |
|        |      | Shiraz-49T | 1121 | 0        | -0.138569 |  |  |
|        |      | Shiraz-77T | 1225 | 0        | -0.117922 |  |  |
|        |      | Shiraz-77T | 1228 | 0        | -0.238084 |  |  |
|        |      | Shiraz-18T | 1434 | 0.244465 | 0         |  |  |
|        |      | Shiraz-22T | 1549 | 0        | -0.319623 |  |  |
|        |      | Shiraz-22T | 1552 | 0        | -0.50686  |  |  |
|        |      | Shiraz-25T | 1698 | 0.21835  | 0         |  |  |
|        |      | Shiraz-28T | 1735 | 0.350744 | 0         |  |  |
|        |      | Shiraz-29T | 1778 | 0.120767 | 0         |  |  |
|        |      | Shiraz-32T | 1833 | 0.551336 | 0         |  |  |
|        |      | Shiraz-32T | 1835 | 0.092727 | 0         |  |  |
|        |      | Shiraz-38T | 1951 | 0.250891 | 0         |  |  |
|        |      | Shiraz-53T | 2078 | 0.287202 | 0         |  |  |
|        |      | Shiraz-58T | 2161 | 0        | -0.187744 |  |  |
|        |      | Shiraz-71T | 2238 | 0.603631 | 0         |  |  |
| ABCA13 | chr7 | Shiraz-3T  | 87   | 0.198593 | 0         |  |  |
|        |      | Shiraz-4T  | 252  | 0.192083 | 0         |  |  |
|        |      | Shiraz-36T | 376  | 0.159952 | 0         |  |  |
|        |      | Shiraz-44T | 633  | 0        | -0.565095 |  |  |
|        |      | Shiraz-46T | 942  | 0.069143 | 0         |  |  |
|        |      | Shiraz-18T | 1433 | 0.250973 | 0         |  |  |
|        |      | Shiraz-22T | 1545 | 0        | -0.473676 |  |  |
|        |      | Shiraz-25T | 1697 | 0.21945  | 0         |  |  |
|        |      | Shiraz-28T | 1734 | 0.362882 | 0         |  |  |
|        |      | Shiraz-29T | 1777 | 0.156747 | 0         |  |  |
|        |      | Shiraz-38T | 1950 | 0.265916 | 0         |  |  |
|        |      | Shiraz-71T | 2236 | 0.320072 | 0         |  |  |
|        |      | Shiraz-3T  | 87   | 0.198593 | 0         |  |  |
|        |      | Shiraz-4T  | 252  | 0.192083 | 0         |  |  |
|        |      | Shiraz-36T | 376  | 0.159952 | 0         |  |  |
|        |      | Shiraz-44T | 633  | 0        | -0.565095 |  |  |
|        |      | Shiraz-46T | 942  | 0.069143 | 0         |  |  |
|        |      | Shiraz-18T | 1433 | 0.250973 | 0         |  |  |
|        |      | Shiraz-22T | 1545 | 0        | -0.473676 |  |  |
|        |      | Shiraz-25T | 1697 | 0.21945  | 0         |  |  |
|        |      | Shiraz-28T | 1734 | 0.362882 | 0         |  |  |
|        |      | Shiraz-29T | 1777 | 0.156747 | 0         |  |  |
|        |      | Shiraz-38T | 1950 | 0.265916 | 0         |  |  |
|        |      | Shiraz-71T | 2236 | 0.320072 | 0         |  |  |
|        |      | Shiraz-3T  | 87   | 0.198593 | 0         |  |  |
|        |      | Shiraz-4T  | 252  | 0.192083 | 0         |  |  |
|        |      | Shiraz-36T | 376  | 0.159952 | 0         |  |  |
|        |      | Shiraz-44T | 633  | 0        | -0.565095 |  |  |
|        |      | Shiraz-46T | 942  | 0.069143 | 0         |  |  |
|        |      | Shiraz-18T | 1433 | 0.250973 | 0         |  |  |
|        |      | Shiraz-22T | 1545 | 0        | -0.473676 |  |  |

|       |      |            |      |          |           |  |
|-------|------|------------|------|----------|-----------|--|
|       |      | Shiraz-25T | 1697 | 0.21945  | 0         |  |
|       |      | Shiraz-28T | 1734 | 0.362882 | 0         |  |
|       |      | Shiraz-29T | 1777 | 0.156747 | 0         |  |
|       |      | Shiraz-38T | 1950 | 0.265916 | 0         |  |
|       |      | Shiraz-71T | 2236 | 0.320072 | 0         |  |
| ABCB1 | chr7 | Shiraz-3T  | 90   | 0.219276 | 0         |  |
|       |      | Shiraz-3T  | 93   | 0        | -0.058023 |  |
|       |      | Shiraz-4T  | 253  | 0.372918 | 0         |  |
|       |      | Shiraz-36T | 378  | 0.179558 | 0         |  |
|       |      | Shiraz-36T | 380  | 0.083883 | 0         |  |
|       |      | Shiraz-44T | 638  | 0        | -0.433476 |  |
|       |      | Shiraz-46T | 943  | 0.093799 | 0         |  |
|       |      | Shiraz-46T | 945  | 0        | -0.014838 |  |
|       |      | Shiraz-47T | 1029 | 0        | -0.096586 |  |
|       |      | Shiraz-49T | 1119 | 0        | -0.157331 |  |
|       |      | Shiraz-77T | 1225 | 0        | -0.117922 |  |
|       |      | Shiraz-77T | 1226 | 0        | -0.233724 |  |
|       |      | Shiraz-18T | 1434 | 0.244465 | 0         |  |
|       |      | Shiraz-22T | 1549 | 0        | -0.319623 |  |
|       |      | Shiraz-22T | 1550 | 0        | -0.577052 |  |
|       |      | Shiraz-25T | 1698 | 0.21835  | 0         |  |
|       |      | Shiraz-28T | 1735 | 0.350744 | 0         |  |
|       |      | Shiraz-29T | 1778 | 0.120767 | 0         |  |
|       |      | Shiraz-38T | 1951 | 0.250891 | 0         |  |
|       |      | Shiraz-53T | 2078 | 0.287202 | 0         |  |
|       |      | Shiraz-58T | 2159 | 0        | -0.219521 |  |
|       |      | Shiraz-71T | 2238 | 0.603631 | 0         |  |
|       |      | Shiraz-3T  | 90   | 0.219276 | 0         |  |
|       |      | Shiraz-3T  | 93   | 0        | -0.058023 |  |
|       |      | Shiraz-4T  | 253  | 0.372918 | 0         |  |
|       |      | Shiraz-36T | 378  | 0.179558 | 0         |  |
|       |      | Shiraz-36T | 380  | 0.083883 | 0         |  |
|       |      | Shiraz-44T | 638  | 0        | -0.433476 |  |
|       |      | Shiraz-46T | 943  | 0.093799 | 0         |  |
|       |      | Shiraz-46T | 945  | 0        | -0.014838 |  |
|       |      | Shiraz-47T | 1029 | 0        | -0.096586 |  |
|       |      | Shiraz-49T | 1119 | 0        | -0.157331 |  |
|       |      | Shiraz-77T | 1225 | 0        | -0.117922 |  |
|       |      | Shiraz-77T | 1226 | 0        | -0.233724 |  |
|       |      | Shiraz-18T | 1434 | 0.244465 | 0         |  |
|       |      | Shiraz-22T | 1549 | 0        | -0.319623 |  |
|       |      | Shiraz-22T | 1550 | 0        | -0.577052 |  |
|       |      | Shiraz-25T | 1698 | 0.21835  | 0         |  |
|       |      | Shiraz-28T | 1735 | 0.350744 | 0         |  |
|       |      | Shiraz-29T | 1778 | 0.120767 | 0         |  |
|       |      | Shiraz-38T | 1951 | 0.250891 | 0         |  |
|       |      | Shiraz-53T | 2078 | 0.287202 | 0         |  |

|       |      |            |      |          |           |  |  |
|-------|------|------------|------|----------|-----------|--|--|
|       |      | Shiraz-58T | 2159 | 0        | -0.219521 |  |  |
|       |      | Shiraz-71T | 2238 | 0.603631 | 0         |  |  |
|       |      | Shiraz-3T  | 90   | 0.219276 | 0         |  |  |
|       |      | Shiraz-3T  | 93   | 0        | -0.058023 |  |  |
|       |      | Shiraz-4T  | 253  | 0.372918 | 0         |  |  |
|       |      | Shiraz-36T | 378  | 0.179558 | 0         |  |  |
|       |      | Shiraz-36T | 380  | 0.083883 | 0         |  |  |
|       |      | Shiraz-44T | 638  | 0        | -0.433476 |  |  |
|       |      | Shiraz-46T | 943  | 0.093799 | 0         |  |  |
|       |      | Shiraz-46T | 945  | 0        | -0.014838 |  |  |
|       |      | Shiraz-47T | 1029 | 0        | -0.096586 |  |  |
|       |      | Shiraz-49T | 1119 | 0        | -0.157331 |  |  |
|       |      | Shiraz-77T | 1225 | 0        | -0.117922 |  |  |
|       |      | Shiraz-77T | 1226 | 0        | -0.233724 |  |  |
|       |      | Shiraz-18T | 1434 | 0.244465 | 0         |  |  |
|       |      | Shiraz-22T | 1549 | 0        | -0.319623 |  |  |
|       |      | Shiraz-22T | 1550 | 0        | -0.577052 |  |  |
|       |      | Shiraz-25T | 1698 | 0.21835  | 0         |  |  |
|       |      | Shiraz-28T | 1735 | 0.350744 | 0         |  |  |
|       |      | Shiraz-29T | 1778 | 0.120767 | 0         |  |  |
|       |      | Shiraz-38T | 1951 | 0.250891 | 0         |  |  |
|       |      | Shiraz-53T | 2078 | 0.287202 | 0         |  |  |
|       |      | Shiraz-58T | 2159 | 0        | -0.219521 |  |  |
|       |      | Shiraz-71T | 2238 | 0.603631 | 0         |  |  |
| ABCB4 | chr7 | Shiraz-3T  | 90   | 0.219276 | 0         |  |  |
|       |      | Shiraz-3T  | 93   | 0        | -0.058023 |  |  |
|       |      | Shiraz-4T  | 253  | 0.372918 | 0         |  |  |
|       |      | Shiraz-36T | 378  | 0.179558 | 0         |  |  |
|       |      | Shiraz-36T | 380  | 0.083883 | 0         |  |  |
|       |      | Shiraz-44T | 638  | 0        | -0.433476 |  |  |
|       |      | Shiraz-46T | 943  | 0.093799 | 0         |  |  |
|       |      | Shiraz-46T | 945  | 0        | -0.014838 |  |  |
|       |      | Shiraz-47T | 1029 | 0        | -0.096586 |  |  |
|       |      | Shiraz-49T | 1119 | 0        | -0.157331 |  |  |
|       |      | Shiraz-77T | 1225 | 0        | -0.117922 |  |  |
|       |      | Shiraz-77T | 1226 | 0        | -0.233724 |  |  |
|       |      | Shiraz-18T | 1434 | 0.244465 | 0         |  |  |
|       |      | Shiraz-22T | 1549 | 0        | -0.319623 |  |  |
|       |      | Shiraz-22T | 1550 | 0        | -0.577052 |  |  |
|       |      | Shiraz-25T | 1698 | 0.21835  | 0         |  |  |
|       |      | Shiraz-28T | 1735 | 0.350744 | 0         |  |  |
|       |      | Shiraz-29T | 1778 | 0.120767 | 0         |  |  |
|       |      | Shiraz-38T | 1951 | 0.250891 | 0         |  |  |
|       |      | Shiraz-53T | 2078 | 0.287202 | 0         |  |  |
|       |      | Shiraz-58T | 2159 | 0        | -0.219521 |  |  |
|       |      | Shiraz-71T | 2238 | 0.603631 | 0         |  |  |
|       |      | Shiraz-3T  | 90   | 0.219276 | 0         |  |  |

|       |      |            |      |          |           |  |  |
|-------|------|------------|------|----------|-----------|--|--|
|       |      | Shiraz-3T  | 93   | 0        | -0.058023 |  |  |
|       |      | Shiraz-4T  | 253  | 0.372918 | 0         |  |  |
|       |      | Shiraz-36T | 378  | 0.179558 | 0         |  |  |
|       |      | Shiraz-36T | 380  | 0.083883 | 0         |  |  |
|       |      | Shiraz-44T | 638  | 0        | -0.433476 |  |  |
|       |      | Shiraz-46T | 943  | 0.093799 | 0         |  |  |
|       |      | Shiraz-46T | 945  | 0        | -0.014838 |  |  |
|       |      | Shiraz-47T | 1029 | 0        | -0.096586 |  |  |
|       |      | Shiraz-49T | 1119 | 0        | -0.157331 |  |  |
|       |      | Shiraz-77T | 1225 | 0        | -0.117922 |  |  |
|       |      | Shiraz-77T | 1226 | 0        | -0.233724 |  |  |
|       |      | Shiraz-18T | 1434 | 0.244465 | 0         |  |  |
|       |      | Shiraz-22T | 1549 | 0        | -0.319623 |  |  |
|       |      | Shiraz-22T | 1550 | 0        | -0.577052 |  |  |
|       |      | Shiraz-25T | 1698 | 0.21835  | 0         |  |  |
|       |      | Shiraz-28T | 1735 | 0.350744 | 0         |  |  |
|       |      | Shiraz-29T | 1778 | 0.120767 | 0         |  |  |
|       |      | Shiraz-38T | 1951 | 0.250891 | 0         |  |  |
|       |      | Shiraz-53T | 2078 | 0.287202 | 0         |  |  |
|       |      | Shiraz-58T | 2159 | 0        | -0.219521 |  |  |
|       |      | Shiraz-71T | 2238 | 0.603631 | 0         |  |  |
|       |      | Shiraz-3T  | 90   | 0.219276 | 0         |  |  |
|       |      | Shiraz-3T  | 93   | 0        | -0.058023 |  |  |
|       |      | Shiraz-4T  | 253  | 0.372918 | 0         |  |  |
|       |      | Shiraz-36T | 378  | 0.179558 | 0         |  |  |
|       |      | Shiraz-36T | 380  | 0.083883 | 0         |  |  |
|       |      | Shiraz-44T | 638  | 0        | -0.433476 |  |  |
|       |      | Shiraz-46T | 943  | 0.093799 | 0         |  |  |
|       |      | Shiraz-46T | 945  | 0        | -0.014838 |  |  |
|       |      | Shiraz-47T | 1029 | 0        | -0.096586 |  |  |
|       |      | Shiraz-49T | 1119 | 0        | -0.157331 |  |  |
|       |      | Shiraz-77T | 1225 | 0        | -0.117922 |  |  |
|       |      | Shiraz-77T | 1226 | 0        | -0.233724 |  |  |
|       |      | Shiraz-18T | 1434 | 0.244465 | 0         |  |  |
|       |      | Shiraz-22T | 1549 | 0        | -0.319623 |  |  |
|       |      | Shiraz-22T | 1550 | 0        | -0.577052 |  |  |
|       |      | Shiraz-25T | 1698 | 0.21835  | 0         |  |  |
|       |      | Shiraz-28T | 1735 | 0.350744 | 0         |  |  |
|       |      | Shiraz-29T | 1778 | 0.120767 | 0         |  |  |
|       |      | Shiraz-38T | 1951 | 0.250891 | 0         |  |  |
|       |      | Shiraz-53T | 2078 | 0.287202 | 0         |  |  |
|       |      | Shiraz-58T | 2159 | 0        | -0.219521 |  |  |
|       |      | Shiraz-71T | 2238 | 0.603631 | 0         |  |  |
| ABCBS | chr7 | Shiraz-4T  | 252  | 0.192083 | 0         |  |  |
|       |      | Shiraz-36T | 376  | 0.159952 | 0         |  |  |
|       |      | Shiraz-44T | 628  | 0        | -0.444379 |  |  |
|       |      | Shiraz-46T | 942  | 0.069143 | 0         |  |  |

|       |      |            |      |          |           |  |  |
|-------|------|------------|------|----------|-----------|--|--|
|       |      | Shiraz-47T | 1027 | 0        | -0.117848 |  |  |
|       |      | Shiraz-49T | 1117 | 0        | -0.168296 |  |  |
|       |      | Shiraz-77T | 1222 | 0        | -0.113002 |  |  |
|       |      | Shiraz-18T | 1433 | 0.250973 | 0         |  |  |
|       |      | Shiraz-22T | 1543 | 0        | -0.513696 |  |  |
|       |      | Shiraz-25T | 1697 | 0.21945  | 0         |  |  |
|       |      | Shiraz-28T | 1734 | 0.362882 | 0         |  |  |
|       |      | Shiraz-29T | 1777 | 0.156747 | 0         |  |  |
|       |      | Shiraz-38T | 1950 | 0.265916 | 0         |  |  |
|       |      | Shiraz-58T | 2157 | 0        | -0.213872 |  |  |
|       |      | Shiraz-71T | 2236 | 0.320072 | 0         |  |  |
|       |      | Shiraz-4T  | 252  | 0.192083 | 0         |  |  |
|       |      | Shiraz-36T | 376  | 0.159952 | 0         |  |  |
|       |      | Shiraz-44T | 628  | 0        | -0.444379 |  |  |
|       |      | Shiraz-46T | 942  | 0.069143 | 0         |  |  |
|       |      | Shiraz-47T | 1027 | 0        | -0.117848 |  |  |
|       |      | Shiraz-49T | 1117 | 0        | -0.168296 |  |  |
|       |      | Shiraz-77T | 1222 | 0        | -0.113002 |  |  |
|       |      | Shiraz-18T | 1433 | 0.250973 | 0         |  |  |
|       |      | Shiraz-22T | 1543 | 0        | -0.513696 |  |  |
|       |      | Shiraz-25T | 1697 | 0.21945  | 0         |  |  |
|       |      | Shiraz-28T | 1734 | 0.362882 | 0         |  |  |
|       |      | Shiraz-29T | 1777 | 0.156747 | 0         |  |  |
|       |      | Shiraz-38T | 1950 | 0.265916 | 0         |  |  |
|       |      | Shiraz-58T | 2157 | 0        | -0.213872 |  |  |
|       |      | Shiraz-71T | 2236 | 0.320072 | 0         |  |  |
|       |      | Shiraz-4T  | 252  | 0.192083 | 0         |  |  |
|       |      | Shiraz-36T | 376  | 0.159952 | 0         |  |  |
|       |      | Shiraz-44T | 628  | 0        | -0.444379 |  |  |
|       |      | Shiraz-46T | 942  | 0.069143 | 0         |  |  |
|       |      | Shiraz-47T | 1027 | 0        | -0.117848 |  |  |
|       |      | Shiraz-49T | 1117 | 0        | -0.168296 |  |  |
|       |      | Shiraz-77T | 1222 | 0        | -0.113002 |  |  |
|       |      | Shiraz-18T | 1433 | 0.250973 | 0         |  |  |
|       |      | Shiraz-22T | 1543 | 0        | -0.513696 |  |  |
|       |      | Shiraz-25T | 1697 | 0.21945  | 0         |  |  |
|       |      | Shiraz-28T | 1734 | 0.362882 | 0         |  |  |
|       |      | Shiraz-29T | 1777 | 0.156747 | 0         |  |  |
|       |      | Shiraz-38T | 1950 | 0.265916 | 0         |  |  |
|       |      | Shiraz-58T | 2157 | 0        | -0.213872 |  |  |
|       |      | Shiraz-71T | 2236 | 0.320072 | 0         |  |  |
| ABCB7 | chrX | Shiraz-3T  | 242  | 0        | -0.336434 |  |  |
|       |      | Shiraz-4T  | 261  | 0        | -0.336249 |  |  |
|       |      | Shiraz-16T | 295  | 0.591657 | 0         |  |  |
|       |      | Shiraz-36T | 433  | 0        | -0.803961 |  |  |
|       |      | Shiraz-44T | 899  | 0        | -1.09697  |  |  |
|       |      | Shiraz-49T | 1170 | 0        | -0.967436 |  |  |

|       |      |            |      |          |           |  |  |
|-------|------|------------|------|----------|-----------|--|--|
|       |      | Shiraz-18T | 1457 | 0.643204 | 0         |  |  |
|       |      | Shiraz-22T | 1673 | 0.611783 | 0         |  |  |
|       |      | Shiraz-25T | 1719 | 0.472955 | 0         |  |  |
|       |      | Shiraz-28T | 1762 | 0.562311 | 0         |  |  |
|       |      | Shiraz-29T | 1801 | 0.815343 | 0         |  |  |
|       |      | Shiraz-32T | 1870 | 0.729766 | 0         |  |  |
|       |      | Shiraz-35T | 1933 | 0.488535 | 0         |  |  |
|       |      | Shiraz-58T | 2223 | 0.833364 | 0         |  |  |
|       |      | Shiraz-71T | 2263 | 0.975531 | 0         |  |  |
|       |      | Shiraz-3T  | 242  | 0        | -0.336434 |  |  |
|       |      | Shiraz-4T  | 261  | 0        | -0.336249 |  |  |
|       |      | Shiraz-16T | 295  | 0.591657 | 0         |  |  |
|       |      | Shiraz-36T | 433  | 0        | -0.803961 |  |  |
|       |      | Shiraz-44T | 899  | 0        | -1.09697  |  |  |
|       |      | Shiraz-49T | 1170 | 0        | -0.967436 |  |  |
|       |      | Shiraz-18T | 1457 | 0.643204 | 0         |  |  |
|       |      | Shiraz-22T | 1673 | 0.611783 | 0         |  |  |
|       |      | Shiraz-25T | 1719 | 0.472955 | 0         |  |  |
|       |      | Shiraz-28T | 1762 | 0.562311 | 0         |  |  |
|       |      | Shiraz-29T | 1801 | 0.815343 | 0         |  |  |
|       |      | Shiraz-32T | 1870 | 0.729766 | 0         |  |  |
|       |      | Shiraz-35T | 1933 | 0.488535 | 0         |  |  |
|       |      | Shiraz-58T | 2223 | 0.833364 | 0         |  |  |
|       |      | Shiraz-71T | 2263 | 0.975531 | 0         |  |  |
|       |      | Shiraz-3T  | 242  | 0        | -0.336434 |  |  |
|       |      | Shiraz-4T  | 261  | 0        | -0.336249 |  |  |
|       |      | Shiraz-16T | 295  | 0.591657 | 0         |  |  |
|       |      | Shiraz-36T | 433  | 0        | -0.803961 |  |  |
|       |      | Shiraz-44T | 899  | 0        | -1.09697  |  |  |
|       |      | Shiraz-49T | 1170 | 0        | -0.967436 |  |  |
|       |      | Shiraz-18T | 1457 | 0.643204 | 0         |  |  |
|       |      | Shiraz-22T | 1673 | 0.611783 | 0         |  |  |
|       |      | Shiraz-25T | 1719 | 0.472955 | 0         |  |  |
|       |      | Shiraz-28T | 1762 | 0.562311 | 0         |  |  |
|       |      | Shiraz-29T | 1801 | 0.815343 | 0         |  |  |
|       |      | Shiraz-32T | 1870 | 0.729766 | 0         |  |  |
|       |      | Shiraz-35T | 1933 | 0.488535 | 0         |  |  |
|       |      | Shiraz-58T | 2223 | 0.833364 | 0         |  |  |
|       |      | Shiraz-71T | 2263 | 0.975531 | 0         |  |  |
| ABC88 | chr7 | Shiraz-3T  | 90   | 0.219276 | 0         |  |  |
|       |      | Shiraz-3T  | 99   | 0.454766 | 0         |  |  |
|       |      | Shiraz-4T  | 253  | 0.372918 | 0         |  |  |
|       |      | Shiraz-36T | 378  | 0.179558 | 0         |  |  |
|       |      | Shiraz-44T | 646  | 0.471276 | 0         |  |  |
|       |      | Shiraz-44T | 647  | 1.496173 | 0         |  |  |
|       |      | Shiraz-46T | 943  | 0.093799 | 0         |  |  |
|       |      | Shiraz-9T  | 1325 | 0.221899 | 0         |  |  |



|  |            |      |          |           |  |
|--|------------|------|----------|-----------|--|
|  | Shiraz-18T | 1434 | 0.244465 | 0         |  |
|  | Shiraz-22T | 1555 | 0.427999 | 0         |  |
|  | Shiraz-25T | 1698 | 0.21835  | 0         |  |
|  | Shiraz-28T | 1735 | 0.350744 | 0         |  |
|  | Shiraz-29T | 1778 | 0.120767 | 0         |  |
|  | Shiraz-32T | 1833 | 0.551336 | 0         |  |
|  | Shiraz-38T | 1951 | 0.250891 | 0         |  |
|  | Shiraz-38T | 1952 | 0        | -0.163211 |  |
|  | Shiraz-53T | 2078 | 0.287202 | 0         |  |
|  | Shiraz-58T | 2162 | 0.221505 | 0         |  |
|  | Shiraz-71T | 2238 | 0.603631 | 0         |  |
|  | Shiraz-3T  | 90   | 0.219276 | 0         |  |
|  | Shiraz-3T  | 99   | 0.454766 | 0         |  |
|  | Shiraz-4T  | 253  | 0.372918 | 0         |  |
|  | Shiraz-36T | 378  | 0.179558 | 0         |  |
|  | Shiraz-44T | 646  | 0.471276 | 0         |  |
|  | Shiraz-44T | 647  | 1.496173 | 0         |  |
|  | Shiraz-46T | 943  | 0.093799 | 0         |  |
|  | Shiraz-9T  | 1325 | 0.221899 | 0         |  |
|  | Shiraz-18T | 1434 | 0.244465 | 0         |  |
|  | Shiraz-22T | 1555 | 0.427999 | 0         |  |
|  | Shiraz-25T | 1698 | 0.21835  | 0         |  |
|  | Shiraz-28T | 1735 | 0.350744 | 0         |  |
|  | Shiraz-29T | 1778 | 0.120767 | 0         |  |
|  | Shiraz-32T | 1833 | 0.551336 | 0         |  |
|  | Shiraz-38T | 1951 | 0.250891 | 0         |  |
|  | Shiraz-38T | 1952 | 0        | -0.163211 |  |
|  | Shiraz-53T | 2078 | 0.287202 | 0         |  |
|  | Shiraz-58T | 2162 | 0.221505 | 0         |  |
|  | Shiraz-71T | 2238 | 0.603631 | 0         |  |
|  | Shiraz-3T  | 90   | 0.219276 | 0         |  |
|  | Shiraz-3T  | 99   | 0.454766 | 0         |  |
|  | Shiraz-4T  | 253  | 0.372918 | 0         |  |
|  | Shiraz-36T | 378  | 0.179558 | 0         |  |
|  | Shiraz-44T | 646  | 0.471276 | 0         |  |
|  | Shiraz-44T | 647  | 1.496173 | 0         |  |
|  | Shiraz-46T | 943  | 0.093799 | 0         |  |
|  | Shiraz-9T  | 1325 | 0.221899 | 0         |  |
|  | Shiraz-18T | 1434 | 0.244465 | 0         |  |
|  | Shiraz-22T | 1555 | 0.427999 | 0         |  |
|  | Shiraz-25T | 1698 | 0.21835  | 0         |  |
|  | Shiraz-28T | 1735 | 0.350744 | 0         |  |
|  | Shiraz-29T | 1778 | 0.120767 | 0         |  |
|  | Shiraz-32T | 1833 | 0.551336 | 0         |  |
|  | Shiraz-38T | 1951 | 0.250891 | 0         |  |
|  | Shiraz-38T | 1952 | 0        | -0.163211 |  |
|  | Shiraz-53T | 2078 | 0.287202 | 0         |  |

|       |      |            |      |          |           |  |
|-------|------|------------|------|----------|-----------|--|
|       |      | Shiraz-58T | 2162 | 0.221505 | 0         |  |
|       |      | Shiraz-71T | 2238 | 0.603631 | 0         |  |
| ABCD1 | chrX | Shiraz-3T  | 246  | 0.531858 | 0         |  |
|       |      | Shiraz-4T  | 261  | 0        | -0.336249 |  |
|       |      | Shiraz-16T | 295  | 0.591657 | 0         |  |
|       |      | Shiraz-36T | 433  | 0        | -0.803961 |  |
|       |      | Shiraz-42T | 480  | 0        | -0.232915 |  |
|       |      | Shiraz-44T | 908  | 0.466743 | 0         |  |
|       |      | Shiraz-49T | 1170 | 0        | -0.967436 |  |
|       |      | Shiraz-49T | 1173 | 0        | -0.704439 |  |
|       |      | Shiraz-9T  | 1370 | 0.690073 | 0         |  |
|       |      | Shiraz-9T  | 1371 | 1.292392 | 0         |  |
|       |      | Shiraz-18T | 1457 | 0.643204 | 0         |  |
|       |      | Shiraz-22T | 1673 | 0.611783 | 0         |  |
|       |      | Shiraz-22T | 1678 | 0.911625 | 0         |  |
|       |      | Shiraz-25T | 1719 | 0.472955 | 0         |  |
|       |      | Shiraz-28T | 1762 | 0.562311 | 0         |  |
|       |      | Shiraz-29T | 1801 | 0.815343 | 0         |  |
|       |      | Shiraz-32T | 1870 | 0.729766 | 0         |  |
|       |      | Shiraz-32T | 1872 | 1.504553 | 0         |  |
|       |      | Shiraz-35T | 1933 | 0.488535 | 0         |  |
|       |      | Shiraz-38T | 2011 | 0        | -0.406024 |  |
|       |      | Shiraz-53T | 2115 | 0.427728 | 0         |  |
|       |      | Shiraz-58T | 2223 | 0.833364 | 0         |  |
|       |      | Shiraz-58T | 2226 | 1.074663 | 0         |  |
|       |      | Shiraz-71T | 2263 | 0.975531 | 0         |  |
|       |      | Shiraz-3T  | 246  | 0.531858 | 0         |  |
|       |      | Shiraz-4T  | 261  | 0        | -0.336249 |  |
|       |      | Shiraz-16T | 295  | 0.591657 | 0         |  |
|       |      | Shiraz-36T | 433  | 0        | -0.803961 |  |
|       |      | Shiraz-42T | 480  | 0        | -0.232915 |  |
|       |      | Shiraz-44T | 908  | 0.466743 | 0         |  |
|       |      | Shiraz-49T | 1170 | 0        | -0.967436 |  |
|       |      | Shiraz-49T | 1173 | 0        | -0.704439 |  |
|       |      | Shiraz-9T  | 1370 | 0.690073 | 0         |  |
|       |      | Shiraz-9T  | 1371 | 1.292392 | 0         |  |
|       |      | Shiraz-18T | 1457 | 0.643204 | 0         |  |
|       |      | Shiraz-22T | 1673 | 0.611783 | 0         |  |
|       |      | Shiraz-22T | 1678 | 0.911625 | 0         |  |
|       |      | Shiraz-25T | 1719 | 0.472955 | 0         |  |
|       |      | Shiraz-28T | 1762 | 0.562311 | 0         |  |
|       |      | Shiraz-29T | 1801 | 0.815343 | 0         |  |
|       |      | Shiraz-32T | 1870 | 0.729766 | 0         |  |
|       |      | Shiraz-32T | 1872 | 1.504553 | 0         |  |
|       |      | Shiraz-35T | 1933 | 0.488535 | 0         |  |
|       |      | Shiraz-38T | 2011 | 0        | -0.406024 |  |
|       |      | Shiraz-53T | 2115 | 0.427728 | 0         |  |

|       |      |            |      |          |           |  |  |
|-------|------|------------|------|----------|-----------|--|--|
|       |      | Shiraz-58T | 2223 | 0.833364 | 0         |  |  |
|       |      | Shiraz-58T | 2226 | 1.074663 | 0         |  |  |
|       |      | Shiraz-71T | 2263 | 0.975531 | 0         |  |  |
|       |      | Shiraz-3T  | 246  | 0.531858 | 0         |  |  |
|       |      | Shiraz-4T  | 261  | 0        | -0.336249 |  |  |
|       |      | Shiraz-16T | 295  | 0.591657 | 0         |  |  |
|       |      | Shiraz-36T | 433  | 0        | -0.803961 |  |  |
|       |      | Shiraz-42T | 480  | 0        | -0.232915 |  |  |
|       |      | Shiraz-44T | 908  | 0.466743 | 0         |  |  |
|       |      | Shiraz-49T | 1170 | 0        | -0.967436 |  |  |
|       |      | Shiraz-49T | 1173 | 0        | -0.704439 |  |  |
|       |      | Shiraz-9T  | 1370 | 0.690073 | 0         |  |  |
|       |      | Shiraz-9T  | 1371 | 1.292392 | 0         |  |  |
|       |      | Shiraz-18T | 1457 | 0.643204 | 0         |  |  |
|       |      | Shiraz-22T | 1673 | 0.611783 | 0         |  |  |
|       |      | Shiraz-22T | 1678 | 0.911625 | 0         |  |  |
|       |      | Shiraz-25T | 1719 | 0.472955 | 0         |  |  |
|       |      | Shiraz-28T | 1762 | 0.562311 | 0         |  |  |
|       |      | Shiraz-29T | 1801 | 0.815343 | 0         |  |  |
|       |      | Shiraz-32T | 1870 | 0.729766 | 0         |  |  |
|       |      | Shiraz-32T | 1872 | 1.504553 | 0         |  |  |
|       |      | Shiraz-35T | 1933 | 0.488535 | 0         |  |  |
|       |      | Shiraz-38T | 2011 | 0        | -0.406024 |  |  |
|       |      | Shiraz-53T | 2115 | 0.427728 | 0         |  |  |
|       |      | Shiraz-58T | 2223 | 0.833364 | 0         |  |  |
|       |      | Shiraz-58T | 2226 | 1.074663 | 0         |  |  |
|       |      | Shiraz-71T | 2263 | 0.975531 | 0         |  |  |
| ABCF2 | chr7 | Shiraz-3T  | 90   | 0.219276 | 0         |  |  |
|       |      | Shiraz-3T  | 90   | 0.219276 | 0         |  |  |
|       |      | Shiraz-3T  | 99   | 0.454766 | 0         |  |  |
|       |      | Shiraz-3T  | 99   | 0.454766 | 0         |  |  |
|       |      | Shiraz-4T  | 253  | 0.372918 | 0         |  |  |
|       |      | Shiraz-4T  | 253  | 0.372918 | 0         |  |  |
|       |      | Shiraz-36T | 378  | 0.179558 | 0         |  |  |
|       |      | Shiraz-36T | 378  | 0.179558 | 0         |  |  |
|       |      | Shiraz-44T | 646  | 0.471276 | 0         |  |  |
|       |      | Shiraz-44T | 646  | 0.471276 | 0         |  |  |
|       |      | Shiraz-44T | 647  | 1.496173 | 0         |  |  |
|       |      | Shiraz-44T | 647  | 1.496173 | 0         |  |  |
|       |      | Shiraz-46T | 943  | 0.093799 | 0         |  |  |
|       |      | Shiraz-46T | 943  | 0.093799 | 0         |  |  |
|       |      | Shiraz-9T  | 1325 | 0.221899 | 0         |  |  |
|       |      | Shiraz-9T  | 1325 | 0.221899 | 0         |  |  |
|       |      | Shiraz-18T | 1434 | 0.244465 | 0         |  |  |
|       |      | Shiraz-18T | 1434 | 0.244465 | 0         |  |  |
|       |      | Shiraz-22T | 1555 | 0.427999 | 0         |  |  |
|       |      | Shiraz-22T | 1555 | 0.427999 | 0         |  |  |

|  |  |            |      |          |           |  |  |
|--|--|------------|------|----------|-----------|--|--|
|  |  | Shiraz-25T | 1698 | 0.21835  | 0         |  |  |
|  |  | Shiraz-25T | 1698 | 0.21835  | 0         |  |  |
|  |  | Shiraz-28T | 1735 | 0.350744 | 0         |  |  |
|  |  | Shiraz-28T | 1735 | 0.350744 | 0         |  |  |
|  |  | Shiraz-29T | 1778 | 0.120767 | 0         |  |  |
|  |  | Shiraz-29T | 1778 | 0.120767 | 0         |  |  |
|  |  | Shiraz-32T | 1833 | 0.551336 | 0         |  |  |
|  |  | Shiraz-32T | 1833 | 0.551336 | 0         |  |  |
|  |  | Shiraz-38T | 1951 | 0.250891 | 0         |  |  |
|  |  | Shiraz-38T | 1951 | 0.250891 | 0         |  |  |
|  |  | Shiraz-38T | 1952 | 0        | -0.163211 |  |  |
|  |  | Shiraz-38T | 1952 | 0        | -0.163211 |  |  |
|  |  | Shiraz-53T | 2078 | 0.287202 | 0         |  |  |
|  |  | Shiraz-53T | 2078 | 0.287202 | 0         |  |  |
|  |  | Shiraz-58T | 2162 | 0.221505 | 0         |  |  |
|  |  | Shiraz-58T | 2162 | 0.221505 | 0         |  |  |
|  |  | Shiraz-71T | 2238 | 0.603631 | 0         |  |  |
|  |  | Shiraz-71T | 2238 | 0.603631 | 0         |  |  |
|  |  | Shiraz-3T  | 90   | 0.219276 | 0         |  |  |
|  |  | Shiraz-3T  | 90   | 0.219276 | 0         |  |  |
|  |  | Shiraz-3T  | 99   | 0.454766 | 0         |  |  |
|  |  | Shiraz-3T  | 99   | 0.454766 | 0         |  |  |
|  |  | Shiraz-4T  | 253  | 0.372918 | 0         |  |  |
|  |  | Shiraz-4T  | 253  | 0.372918 | 0         |  |  |
|  |  | Shiraz-36T | 378  | 0.179558 | 0         |  |  |
|  |  | Shiraz-36T | 378  | 0.179558 | 0         |  |  |
|  |  | Shiraz-44T | 646  | 0.471276 | 0         |  |  |
|  |  | Shiraz-44T | 646  | 0.471276 | 0         |  |  |
|  |  | Shiraz-44T | 647  | 1.496173 | 0         |  |  |
|  |  | Shiraz-44T | 647  | 1.496173 | 0         |  |  |
|  |  | Shiraz-46T | 943  | 0.093799 | 0         |  |  |
|  |  | Shiraz-46T | 943  | 0.093799 | 0         |  |  |
|  |  | Shiraz-9T  | 1325 | 0.221899 | 0         |  |  |
|  |  | Shiraz-9T  | 1325 | 0.221899 | 0         |  |  |
|  |  | Shiraz-18T | 1434 | 0.244465 | 0         |  |  |
|  |  | Shiraz-18T | 1434 | 0.244465 | 0         |  |  |
|  |  | Shiraz-22T | 1555 | 0.427999 | 0         |  |  |
|  |  | Shiraz-22T | 1555 | 0.427999 | 0         |  |  |
|  |  | Shiraz-25T | 1698 | 0.21835  | 0         |  |  |
|  |  | Shiraz-25T | 1698 | 0.21835  | 0         |  |  |
|  |  | Shiraz-28T | 1735 | 0.350744 | 0         |  |  |
|  |  | Shiraz-28T | 1735 | 0.350744 | 0         |  |  |
|  |  | Shiraz-29T | 1778 | 0.120767 | 0         |  |  |
|  |  | Shiraz-29T | 1778 | 0.120767 | 0         |  |  |
|  |  | Shiraz-32T | 1833 | 0.551336 | 0         |  |  |
|  |  | Shiraz-32T | 1833 | 0.551336 | 0         |  |  |
|  |  | Shiraz-38T | 1951 | 0.250891 | 0         |  |  |

|  |  |            |      |          |           |  |  |
|--|--|------------|------|----------|-----------|--|--|
|  |  | Shiraz-38T | 1951 | 0.250891 | 0         |  |  |
|  |  | Shiraz-38T | 1952 | 0        | -0.163211 |  |  |
|  |  | Shiraz-38T | 1952 | 0        | -0.163211 |  |  |
|  |  | Shiraz-53T | 2078 | 0.287202 | 0         |  |  |
|  |  | Shiraz-53T | 2078 | 0.287202 | 0         |  |  |
|  |  | Shiraz-58T | 2162 | 0.221505 | 0         |  |  |
|  |  | Shiraz-58T | 2162 | 0.221505 | 0         |  |  |
|  |  | Shiraz-71T | 2238 | 0.603631 | 0         |  |  |
|  |  | Shiraz-71T | 2238 | 0.603631 | 0         |  |  |
|  |  | Shiraz-3T  | 90   | 0.219276 | 0         |  |  |
|  |  | Shiraz-3T  | 90   | 0.219276 | 0         |  |  |
|  |  | Shiraz-3T  | 99   | 0.454766 | 0         |  |  |
|  |  | Shiraz-3T  | 99   | 0.454766 | 0         |  |  |
|  |  | Shiraz-4T  | 253  | 0.372918 | 0         |  |  |
|  |  | Shiraz-4T  | 253  | 0.372918 | 0         |  |  |
|  |  | Shiraz-36T | 378  | 0.179558 | 0         |  |  |
|  |  | Shiraz-36T | 378  | 0.179558 | 0         |  |  |
|  |  | Shiraz-44T | 646  | 0.471276 | 0         |  |  |
|  |  | Shiraz-44T | 646  | 0.471276 | 0         |  |  |
|  |  | Shiraz-44T | 647  | 1.496173 | 0         |  |  |
|  |  | Shiraz-44T | 647  | 1.496173 | 0         |  |  |
|  |  | Shiraz-46T | 943  | 0.093799 | 0         |  |  |
|  |  | Shiraz-46T | 943  | 0.093799 | 0         |  |  |
|  |  | Shiraz-9T  | 1325 | 0.221899 | 0         |  |  |
|  |  | Shiraz-9T  | 1325 | 0.221899 | 0         |  |  |
|  |  | Shiraz-18T | 1434 | 0.244465 | 0         |  |  |
|  |  | Shiraz-18T | 1434 | 0.244465 | 0         |  |  |
|  |  | Shiraz-22T | 1555 | 0.427999 | 0         |  |  |
|  |  | Shiraz-22T | 1555 | 0.427999 | 0         |  |  |
|  |  | Shiraz-25T | 1698 | 0.21835  | 0         |  |  |
|  |  | Shiraz-25T | 1698 | 0.21835  | 0         |  |  |
|  |  | Shiraz-28T | 1735 | 0.350744 | 0         |  |  |
|  |  | Shiraz-28T | 1735 | 0.350744 | 0         |  |  |
|  |  | Shiraz-29T | 1778 | 0.120767 | 0         |  |  |
|  |  | Shiraz-29T | 1778 | 0.120767 | 0         |  |  |
|  |  | Shiraz-32T | 1833 | 0.551336 | 0         |  |  |
|  |  | Shiraz-32T | 1833 | 0.551336 | 0         |  |  |
|  |  | Shiraz-38T | 1951 | 0.250891 | 0         |  |  |
|  |  | Shiraz-38T | 1951 | 0.250891 | 0         |  |  |
|  |  | Shiraz-38T | 1952 | 0        | -0.163211 |  |  |
|  |  | Shiraz-38T | 1952 | 0        | -0.163211 |  |  |
|  |  | Shiraz-53T | 2078 | 0.287202 | 0         |  |  |
|  |  | Shiraz-53T | 2078 | 0.287202 | 0         |  |  |
|  |  | Shiraz-58T | 2162 | 0.221505 | 0         |  |  |
|  |  | Shiraz-58T | 2162 | 0.221505 | 0         |  |  |
|  |  | Shiraz-71T | 2238 | 0.603631 | 0         |  |  |
|  |  | Shiraz-71T | 2238 | 0.603631 | 0         |  |  |

|      |      |            |      |          |           |  |
|------|------|------------|------|----------|-----------|--|
| ABP1 | chr7 | Shiraz-3T  | 90   | 0.219276 | 0         |  |
|      |      | Shiraz-3T  | 99   | 0.454766 | 0         |  |
|      |      | Shiraz-4T  | 253  | 0.372918 | 0         |  |
|      |      | Shiraz-36T | 378  | 0.179558 | 0         |  |
|      |      | Shiraz-44T | 646  | 0.471276 | 0         |  |
|      |      | Shiraz-46T | 943  | 0.093799 | 0         |  |
|      |      | Shiraz-9T  | 1325 | 0.221899 | 0         |  |
|      |      | Shiraz-18T | 1434 | 0.244465 | 0         |  |
|      |      | Shiraz-25T | 1698 | 0.21835  | 0         |  |
|      |      | Shiraz-28T | 1735 | 0.350744 | 0         |  |
|      |      | Shiraz-29T | 1778 | 0.120767 | 0         |  |
|      |      | Shiraz-32T | 1833 | 0.551336 | 0         |  |
|      |      | Shiraz-38T | 1951 | 0.250891 | 0         |  |
|      |      | Shiraz-38T | 1952 | 0        | -0.163211 |  |
|      |      | Shiraz-53T | 2078 | 0.287202 | 0         |  |
|      |      | Shiraz-58T | 2162 | 0.221505 | 0         |  |
|      |      | Shiraz-71T | 2238 | 0.603631 | 0         |  |
|      |      | Shiraz-3T  | 90   | 0.219276 | 0         |  |
|      |      | Shiraz-3T  | 99   | 0.454766 | 0         |  |
|      |      | Shiraz-4T  | 253  | 0.372918 | 0         |  |
|      |      | Shiraz-36T | 378  | 0.179558 | 0         |  |
|      |      | Shiraz-44T | 646  | 0.471276 | 0         |  |
|      |      | Shiraz-46T | 943  | 0.093799 | 0         |  |
|      |      | Shiraz-9T  | 1325 | 0.221899 | 0         |  |
|      |      | Shiraz-18T | 1434 | 0.244465 | 0         |  |
|      |      | Shiraz-25T | 1698 | 0.21835  | 0         |  |
|      |      | Shiraz-28T | 1735 | 0.350744 | 0         |  |
|      |      | Shiraz-29T | 1778 | 0.120767 | 0         |  |
|      |      | Shiraz-32T | 1833 | 0.551336 | 0         |  |
|      |      | Shiraz-38T | 1951 | 0.250891 | 0         |  |
|      |      | Shiraz-38T | 1952 | 0        | -0.163211 |  |
|      |      | Shiraz-53T | 2078 | 0.287202 | 0         |  |
|      |      | Shiraz-58T | 2162 | 0.221505 | 0         |  |
|      |      | Shiraz-71T | 2238 | 0.603631 | 0         |  |
|      |      | Shiraz-3T  | 90   | 0.219276 | 0         |  |
|      |      | Shiraz-3T  | 99   | 0.454766 | 0         |  |
|      |      | Shiraz-4T  | 253  | 0.372918 | 0         |  |
|      |      | Shiraz-36T | 378  | 0.179558 | 0         |  |
|      |      | Shiraz-44T | 646  | 0.471276 | 0         |  |
|      |      | Shiraz-46T | 943  | 0.093799 | 0         |  |
|      |      | Shiraz-9T  | 1325 | 0.221899 | 0         |  |
|      |      | Shiraz-18T | 1434 | 0.244465 | 0         |  |
|      |      | Shiraz-25T | 1698 | 0.21835  | 0         |  |
|      |      | Shiraz-28T | 1735 | 0.350744 | 0         |  |
|      |      | Shiraz-29T | 1778 | 0.120767 | 0         |  |
|      |      | Shiraz-32T | 1833 | 0.551336 | 0         |  |
|      |      | Shiraz-38T | 1951 | 0.250891 | 0         |  |

|       |      |            |      |          |           |  |  |
|-------|------|------------|------|----------|-----------|--|--|
|       |      | Shiraz-38T | 1952 | 0        | -0.163211 |  |  |
|       |      | Shiraz-53T | 2078 | 0.287202 | 0         |  |  |
|       |      | Shiraz-58T | 2162 | 0.221505 | 0         |  |  |
|       |      | Shiraz-71T | 2238 | 0.603631 | 0         |  |  |
| ACCN3 | chr7 | Shiraz-3T  | 90   | 0.219276 | 0         |  |  |
|       |      | Shiraz-3T  | 99   | 0.454766 | 0         |  |  |
|       |      | Shiraz-4T  | 253  | 0.372918 | 0         |  |  |
|       |      | Shiraz-36T | 378  | 0.179558 | 0         |  |  |
|       |      | Shiraz-44T | 646  | 0.471276 | 0         |  |  |
|       |      | Shiraz-44T | 647  | 1.496173 | 0         |  |  |
|       |      | Shiraz-46T | 943  | 0.093799 | 0         |  |  |
|       |      | Shiraz-9T  | 1325 | 0.221899 | 0         |  |  |
|       |      | Shiraz-18T | 1434 | 0.244465 | 0         |  |  |
|       |      | Shiraz-22T | 1555 | 0.427999 | 0         |  |  |
|       |      | Shiraz-25T | 1698 | 0.21835  | 0         |  |  |
|       |      | Shiraz-28T | 1735 | 0.350744 | 0         |  |  |
|       |      | Shiraz-29T | 1778 | 0.120767 | 0         |  |  |
|       |      | Shiraz-32T | 1833 | 0.551336 | 0         |  |  |
|       |      | Shiraz-38T | 1951 | 0.250891 | 0         |  |  |
|       |      | Shiraz-38T | 1952 | 0        | -0.163211 |  |  |
|       |      | Shiraz-53T | 2078 | 0.287202 | 0         |  |  |
|       |      | Shiraz-58T | 2162 | 0.221505 | 0         |  |  |
|       |      | Shiraz-71T | 2238 | 0.603631 | 0         |  |  |
|       |      | Shiraz-3T  | 90   | 0.219276 | 0         |  |  |
|       |      | Shiraz-3T  | 99   | 0.454766 | 0         |  |  |
|       |      | Shiraz-4T  | 253  | 0.372918 | 0         |  |  |
|       |      | Shiraz-36T | 378  | 0.179558 | 0         |  |  |
|       |      | Shiraz-44T | 646  | 0.471276 | 0         |  |  |
|       |      | Shiraz-44T | 647  | 1.496173 | 0         |  |  |
|       |      | Shiraz-46T | 943  | 0.093799 | 0         |  |  |
|       |      | Shiraz-9T  | 1325 | 0.221899 | 0         |  |  |
|       |      | Shiraz-18T | 1434 | 0.244465 | 0         |  |  |
|       |      | Shiraz-22T | 1555 | 0.427999 | 0         |  |  |
|       |      | Shiraz-25T | 1698 | 0.21835  | 0         |  |  |
|       |      | Shiraz-28T | 1735 | 0.350744 | 0         |  |  |
|       |      | Shiraz-29T | 1778 | 0.120767 | 0         |  |  |
|       |      | Shiraz-32T | 1833 | 0.551336 | 0         |  |  |
|       |      | Shiraz-38T | 1951 | 0.250891 | 0         |  |  |
|       |      | Shiraz-38T | 1952 | 0        | -0.163211 |  |  |
|       |      | Shiraz-53T | 2078 | 0.287202 | 0         |  |  |
|       |      | Shiraz-58T | 2162 | 0.221505 | 0         |  |  |
|       |      | Shiraz-71T | 2238 | 0.603631 | 0         |  |  |
|       |      | Shiraz-3T  | 90   | 0.219276 | 0         |  |  |
|       |      | Shiraz-3T  | 99   | 0.454766 | 0         |  |  |
|       |      | Shiraz-4T  | 253  | 0.372918 | 0         |  |  |
|       |      | Shiraz-36T | 378  | 0.179558 | 0         |  |  |
|       |      | Shiraz-44T | 646  | 0.471276 | 0         |  |  |

|      |      |            |      |          |           |  |
|------|------|------------|------|----------|-----------|--|
|      |      | Shiraz-44T | 647  | 1.496173 | 0         |  |
|      |      | Shiraz-46T | 943  | 0.093799 | 0         |  |
|      |      | Shiraz-9T  | 1325 | 0.221899 | 0         |  |
|      |      | Shiraz-18T | 1434 | 0.244465 | 0         |  |
|      |      | Shiraz-22T | 1555 | 0.427999 | 0         |  |
|      |      | Shiraz-25T | 1698 | 0.21835  | 0         |  |
|      |      | Shiraz-28T | 1735 | 0.350744 | 0         |  |
|      |      | Shiraz-29T | 1778 | 0.120767 | 0         |  |
|      |      | Shiraz-32T | 1833 | 0.551336 | 0         |  |
|      |      | Shiraz-38T | 1951 | 0.250891 | 0         |  |
|      |      | Shiraz-38T | 1952 | 0        | -0.163211 |  |
|      |      | Shiraz-53T | 2078 | 0.287202 | 0         |  |
|      |      | Shiraz-58T | 2162 | 0.221505 | 0         |  |
|      |      | Shiraz-71T | 2238 | 0.603631 | 0         |  |
| ACE2 | chrX | Shiraz-3T  | 235  | 0        | -0.28401  |  |
|      |      | Shiraz-4T  | 260  | 0        | -0.324128 |  |
|      |      | Shiraz-16T | 294  | 0.655804 | 0         |  |
|      |      | Shiraz-36T | 431  | 0        | -0.78035  |  |
|      |      | Shiraz-44T | 891  | 0        | -0.954044 |  |
|      |      | Shiraz-49T | 1166 | 0        | -0.917235 |  |
|      |      | Shiraz-9T  | 1368 | 0.199713 | 0         |  |
|      |      | Shiraz-18T | 1455 | 0        | -0.186773 |  |
|      |      | Shiraz-22T | 1669 | 0.695915 | 0         |  |
|      |      | Shiraz-25T | 1717 | 0.420447 | 0         |  |
|      |      | Shiraz-28T | 1760 | 0.538181 | 0         |  |
|      |      | Shiraz-29T | 1800 | 0.672527 | 0         |  |
|      |      | Shiraz-32T | 1869 | 0.776805 | 0         |  |
|      |      | Shiraz-35T | 1932 | 0.507141 | 0         |  |
|      |      | Shiraz-40T | 2051 | 0.098506 | 0         |  |
|      |      | Shiraz-58T | 2221 | 0.871948 | 0         |  |
|      |      | Shiraz-71T | 2260 | 0.68394  | 0         |  |
|      |      | Shiraz-71T | 2261 | 0.508399 | 0         |  |
|      |      | Shiraz-3T  | 235  | 0        | -0.28401  |  |
|      |      | Shiraz-4T  | 260  | 0        | -0.324128 |  |
|      |      | Shiraz-16T | 294  | 0.655804 | 0         |  |
|      |      | Shiraz-36T | 431  | 0        | -0.78035  |  |
|      |      | Shiraz-44T | 891  | 0        | -0.954044 |  |
|      |      | Shiraz-49T | 1166 | 0        | -0.917235 |  |
|      |      | Shiraz-9T  | 1368 | 0.199713 | 0         |  |
|      |      | Shiraz-18T | 1455 | 0        | -0.186773 |  |
|      |      | Shiraz-22T | 1669 | 0.695915 | 0         |  |
|      |      | Shiraz-25T | 1717 | 0.420447 | 0         |  |
|      |      | Shiraz-28T | 1760 | 0.538181 | 0         |  |
|      |      | Shiraz-29T | 1800 | 0.672527 | 0         |  |
|      |      | Shiraz-32T | 1869 | 0.776805 | 0         |  |
|      |      | Shiraz-35T | 1932 | 0.507141 | 0         |  |
|      |      | Shiraz-40T | 2051 | 0.098506 | 0         |  |



|      |      |            |      |          |           |  |
|------|------|------------|------|----------|-----------|--|
|      |      | Shiraz-58T | 2221 | 0.871948 | 0         |  |
|      |      | Shiraz-71T | 2260 | 0.68394  | 0         |  |
|      |      | Shiraz-71T | 2261 | 0.508399 | 0         |  |
|      |      | Shiraz-3T  | 235  | 0        | -0.28401  |  |
|      |      | Shiraz-4T  | 260  | 0        | -0.324128 |  |
|      |      | Shiraz-16T | 294  | 0.655804 | 0         |  |
|      |      | Shiraz-36T | 431  | 0        | -0.78035  |  |
|      |      | Shiraz-44T | 891  | 0        | -0.954044 |  |
|      |      | Shiraz-49T | 1166 | 0        | -0.917235 |  |
|      |      | Shiraz-9T  | 1368 | 0.199713 | 0         |  |
|      |      | Shiraz-18T | 1455 | 0        | -0.186773 |  |
|      |      | Shiraz-22T | 1669 | 0.695915 | 0         |  |
|      |      | Shiraz-25T | 1717 | 0.420447 | 0         |  |
|      |      | Shiraz-28T | 1760 | 0.538181 | 0         |  |
|      |      | Shiraz-29T | 1800 | 0.672527 | 0         |  |
|      |      | Shiraz-32T | 1869 | 0.776805 | 0         |  |
|      |      | Shiraz-35T | 1932 | 0.507141 | 0         |  |
|      |      | Shiraz-40T | 2051 | 0.098506 | 0         |  |
|      |      | Shiraz-58T | 2221 | 0.871948 | 0         |  |
|      |      | Shiraz-71T | 2260 | 0.68394  | 0         |  |
|      |      | Shiraz-71T | 2261 | 0.508399 | 0         |  |
| ACHE | chr7 | Shiraz-3T  | 90   | 0.219276 | 0         |  |
|      |      | Shiraz-3T  | 94   | 0.74735  | 0         |  |
|      |      | Shiraz-4T  | 253  | 0.372918 | 0         |  |
|      |      | Shiraz-31T | 316  | 0.219196 | 0         |  |
|      |      | Shiraz-36T | 378  | 0.179558 | 0         |  |
|      |      | Shiraz-36T | 381  | 0.332628 | 0         |  |
|      |      | Shiraz-44T | 639  | 1.035032 | 0         |  |
|      |      | Shiraz-46T | 943  | 0.093799 | 0         |  |
|      |      | Shiraz-46T | 946  | 0.299835 | 0         |  |
|      |      | Shiraz-47T | 1030 | 0.257728 | 0         |  |
|      |      | Shiraz-49T | 1120 | 0.281656 | 0         |  |
|      |      | Shiraz-77T | 1225 | 0        | -0.117922 |  |
|      |      | Shiraz-77T | 1227 | 0.196445 | 0         |  |
|      |      | Shiraz-9T  | 1324 | 0.679266 | 0         |  |
|      |      | Shiraz-18T | 1434 | 0.244465 | 0         |  |
|      |      | Shiraz-22T | 1549 | 0        | -0.319623 |  |
|      |      | Shiraz-22T | 1551 | 0.324011 | 0         |  |
|      |      | Shiraz-25T | 1698 | 0.21835  | 0         |  |
|      |      | Shiraz-28T | 1735 | 0.350744 | 0         |  |
|      |      | Shiraz-29T | 1778 | 0.120767 | 0         |  |
|      |      | Shiraz-32T | 1833 | 0.551336 | 0         |  |
|      |      | Shiraz-32T | 1834 | 1.485392 | 0         |  |
|      |      | Shiraz-38T | 1951 | 0.250891 | 0         |  |
|      |      | Shiraz-53T | 2078 | 0.287202 | 0         |  |
|      |      | Shiraz-58T | 2160 | 0.399007 | 0         |  |
|      |      | Shiraz-71T | 2238 | 0.603631 | 0         |  |

|  |            |      |          |           |  |
|--|------------|------|----------|-----------|--|
|  | Shiraz-3T  | 90   | 0.219276 | 0         |  |
|  | Shiraz-3T  | 94   | 0.74735  | 0         |  |
|  | Shiraz-4T  | 253  | 0.372918 | 0         |  |
|  | Shiraz-31T | 316  | 0.219196 | 0         |  |
|  | Shiraz-36T | 378  | 0.179558 | 0         |  |
|  | Shiraz-36T | 381  | 0.332628 | 0         |  |
|  | Shiraz-44T | 639  | 1.035032 | 0         |  |
|  | Shiraz-46T | 943  | 0.093799 | 0         |  |
|  | Shiraz-46T | 946  | 0.299835 | 0         |  |
|  | Shiraz-47T | 1030 | 0.257728 | 0         |  |
|  | Shiraz-49T | 1120 | 0.281656 | 0         |  |
|  | Shiraz-77T | 1225 | 0        | -0.117922 |  |
|  | Shiraz-77T | 1227 | 0.196445 | 0         |  |
|  | Shiraz-9T  | 1324 | 0.679266 | 0         |  |
|  | Shiraz-18T | 1434 | 0.244465 | 0         |  |
|  | Shiraz-22T | 1549 | 0        | -0.319623 |  |
|  | Shiraz-22T | 1551 | 0.324011 | 0         |  |
|  | Shiraz-25T | 1698 | 0.21835  | 0         |  |
|  | Shiraz-28T | 1735 | 0.350744 | 0         |  |
|  | Shiraz-29T | 1778 | 0.120767 | 0         |  |
|  | Shiraz-32T | 1833 | 0.551336 | 0         |  |
|  | Shiraz-32T | 1834 | 1.485392 | 0         |  |
|  | Shiraz-38T | 1951 | 0.250891 | 0         |  |
|  | Shiraz-53T | 2078 | 0.287202 | 0         |  |
|  | Shiraz-58T | 2160 | 0.399007 | 0         |  |
|  | Shiraz-71T | 2238 | 0.603631 | 0         |  |
|  | Shiraz-3T  | 90   | 0.219276 | 0         |  |
|  | Shiraz-3T  | 94   | 0.74735  | 0         |  |
|  | Shiraz-4T  | 253  | 0.372918 | 0         |  |
|  | Shiraz-31T | 316  | 0.219196 | 0         |  |
|  | Shiraz-36T | 378  | 0.179558 | 0         |  |
|  | Shiraz-36T | 381  | 0.332628 | 0         |  |
|  | Shiraz-44T | 639  | 1.035032 | 0         |  |
|  | Shiraz-46T | 943  | 0.093799 | 0         |  |
|  | Shiraz-46T | 946  | 0.299835 | 0         |  |
|  | Shiraz-47T | 1030 | 0.257728 | 0         |  |
|  | Shiraz-49T | 1120 | 0.281656 | 0         |  |
|  | Shiraz-77T | 1225 | 0        | -0.117922 |  |
|  | Shiraz-77T | 1227 | 0.196445 | 0         |  |
|  | Shiraz-9T  | 1324 | 0.679266 | 0         |  |
|  | Shiraz-18T | 1434 | 0.244465 | 0         |  |
|  | Shiraz-22T | 1549 | 0        | -0.319623 |  |
|  | Shiraz-22T | 1551 | 0.324011 | 0         |  |
|  | Shiraz-25T | 1698 | 0.21835  | 0         |  |
|  | Shiraz-28T | 1735 | 0.350744 | 0         |  |
|  | Shiraz-29T | 1778 | 0.120767 | 0         |  |
|  | Shiraz-32T | 1833 | 0.551336 | 0         |  |

|      |      |            |      |          |           |  |
|------|------|------------|------|----------|-----------|--|
|      |      | Shiraz-32T | 1834 | 1.485392 | 0         |  |
|      |      | Shiraz-38T | 1951 | 0.250891 | 0         |  |
|      |      | Shiraz-53T | 2078 | 0.287202 | 0         |  |
|      |      | Shiraz-58T | 2160 | 0.399007 | 0         |  |
|      |      | Shiraz-71T | 2238 | 0.603631 | 0         |  |
| ACN9 | chr7 | Shiraz-3T  | 90   | 0.219276 | 0         |  |
|      |      | Shiraz-4T  | 253  | 0.372918 | 0         |  |
|      |      | Shiraz-36T | 378  | 0.179558 | 0         |  |
|      |      | Shiraz-36T | 380  | 0.083883 | 0         |  |
|      |      | Shiraz-46T | 943  | 0.093799 | 0         |  |
|      |      | Shiraz-77T | 1225 | 0        | -0.117922 |  |
|      |      | Shiraz-18T | 1434 | 0.244465 | 0         |  |
|      |      | Shiraz-22T | 1549 | 0        | -0.319623 |  |
|      |      | Shiraz-25T | 1698 | 0.21835  | 0         |  |
|      |      | Shiraz-28T | 1735 | 0.350744 | 0         |  |
|      |      | Shiraz-29T | 1778 | 0.120767 | 0         |  |
|      |      | Shiraz-32T | 1833 | 0.551336 | 0         |  |
|      |      | Shiraz-38T | 1951 | 0.250891 | 0         |  |
|      |      | Shiraz-53T | 2078 | 0.287202 | 0         |  |
|      |      | Shiraz-71T | 2238 | 0.603631 | 0         |  |
|      |      | Shiraz-3T  | 90   | 0.219276 | 0         |  |
|      |      | Shiraz-4T  | 253  | 0.372918 | 0         |  |
|      |      | Shiraz-36T | 378  | 0.179558 | 0         |  |
|      |      | Shiraz-36T | 380  | 0.083883 | 0         |  |
|      |      | Shiraz-46T | 943  | 0.093799 | 0         |  |
|      |      | Shiraz-77T | 1225 | 0        | -0.117922 |  |
|      |      | Shiraz-18T | 1434 | 0.244465 | 0         |  |
|      |      | Shiraz-22T | 1549 | 0        | -0.319623 |  |
|      |      | Shiraz-25T | 1698 | 0.21835  | 0         |  |
|      |      | Shiraz-28T | 1735 | 0.350744 | 0         |  |
|      |      | Shiraz-29T | 1778 | 0.120767 | 0         |  |
|      |      | Shiraz-32T | 1833 | 0.551336 | 0         |  |
|      |      | Shiraz-38T | 1951 | 0.250891 | 0         |  |
|      |      | Shiraz-53T | 2078 | 0.287202 | 0         |  |
|      |      | Shiraz-71T | 2238 | 0.603631 | 0         |  |
|      |      | Shiraz-3T  | 90   | 0.219276 | 0         |  |
|      |      | Shiraz-4T  | 253  | 0.372918 | 0         |  |
|      |      | Shiraz-36T | 378  | 0.179558 | 0         |  |
|      |      | Shiraz-36T | 380  | 0.083883 | 0         |  |
|      |      | Shiraz-46T | 943  | 0.093799 | 0         |  |
|      |      | Shiraz-77T | 1225 | 0        | -0.117922 |  |
|      |      | Shiraz-18T | 1434 | 0.244465 | 0         |  |
|      |      | Shiraz-22T | 1549 | 0        | -0.319623 |  |
|      |      | Shiraz-25T | 1698 | 0.21835  | 0         |  |
|      |      | Shiraz-28T | 1735 | 0.350744 | 0         |  |
|      |      | Shiraz-29T | 1778 | 0.120767 | 0         |  |
|      |      | Shiraz-32T | 1833 | 0.551336 | 0         |  |

|       |      |            |      |          |           |  |
|-------|------|------------|------|----------|-----------|--|
|       |      | Shiraz-38T | 1951 | 0.250891 | 0         |  |
|       |      | Shiraz-53T | 2078 | 0.287202 | 0         |  |
|       |      | Shiraz-71T | 2238 | 0.603631 | 0         |  |
| ACOT9 | chrX | Shiraz-3T  | 235  | 0        | -0.28401  |  |
|       |      | Shiraz-4T  | 260  | 0        | -0.324128 |  |
|       |      | Shiraz-16T | 294  | 0.655804 | 0         |  |
|       |      | Shiraz-36T | 431  | 0        | -0.78035  |  |
|       |      | Shiraz-44T | 891  | 0        | -0.954044 |  |
|       |      | Shiraz-49T | 1166 | 0        | -0.917235 |  |
|       |      | Shiraz-77T | 1281 | 0.136627 | 0         |  |
|       |      | Shiraz-9T  | 1368 | 0.199713 | 0         |  |
|       |      | Shiraz-18T | 1455 | 0        | -0.186773 |  |
|       |      | Shiraz-22T | 1669 | 0.695915 | 0         |  |
|       |      | Shiraz-25T | 1717 | 0.420447 | 0         |  |
|       |      | Shiraz-28T | 1760 | 0.538181 | 0         |  |
|       |      | Shiraz-29T | 1800 | 0.672527 | 0         |  |
|       |      | Shiraz-32T | 1869 | 0.776805 | 0         |  |
|       |      | Shiraz-35T | 1932 | 0.507141 | 0         |  |
|       |      | Shiraz-40T | 2051 | 0.098506 | 0         |  |
|       |      | Shiraz-58T | 2221 | 0.871948 | 0         |  |
|       |      | Shiraz-71T | 2260 | 0.68394  | 0         |  |
|       |      | Shiraz-71T | 2261 | 0.508399 | 0         |  |
|       |      | Shiraz-3T  | 235  | 0        | -0.28401  |  |
|       |      | Shiraz-4T  | 260  | 0        | -0.324128 |  |
|       |      | Shiraz-16T | 294  | 0.655804 | 0         |  |
|       |      | Shiraz-36T | 431  | 0        | -0.78035  |  |
|       |      | Shiraz-44T | 891  | 0        | -0.954044 |  |
|       |      | Shiraz-49T | 1166 | 0        | -0.917235 |  |
|       |      | Shiraz-77T | 1281 | 0.136627 | 0         |  |
|       |      | Shiraz-9T  | 1368 | 0.199713 | 0         |  |
|       |      | Shiraz-18T | 1455 | 0        | -0.186773 |  |
|       |      | Shiraz-22T | 1669 | 0.695915 | 0         |  |
|       |      | Shiraz-25T | 1717 | 0.420447 | 0         |  |
|       |      | Shiraz-28T | 1760 | 0.538181 | 0         |  |
|       |      | Shiraz-29T | 1800 | 0.672527 | 0         |  |
|       |      | Shiraz-32T | 1869 | 0.776805 | 0         |  |
|       |      | Shiraz-35T | 1932 | 0.507141 | 0         |  |
|       |      | Shiraz-40T | 2051 | 0.098506 | 0         |  |
|       |      | Shiraz-58T | 2221 | 0.871948 | 0         |  |
|       |      | Shiraz-71T | 2260 | 0.68394  | 0         |  |
|       |      | Shiraz-71T | 2261 | 0.508399 | 0         |  |
|       |      | Shiraz-3T  | 235  | 0        | -0.28401  |  |
|       |      | Shiraz-4T  | 260  | 0        | -0.324128 |  |
|       |      | Shiraz-16T | 294  | 0.655804 | 0         |  |
|       |      | Shiraz-36T | 431  | 0        | -0.78035  |  |
|       |      | Shiraz-44T | 891  | 0        | -0.954044 |  |
|       |      | Shiraz-49T | 1166 | 0        | -0.917235 |  |

|      |      |            |      |          |           |  |
|------|------|------------|------|----------|-----------|--|
|      |      | Shiraz-77T | 1281 | 0.136627 | 0         |  |
|      |      | Shiraz-9T  | 1368 | 0.199713 | 0         |  |
|      |      | Shiraz-18T | 1455 | 0        | -0.186773 |  |
|      |      | Shiraz-22T | 1669 | 0.695915 | 0         |  |
|      |      | Shiraz-25T | 1717 | 0.420447 | 0         |  |
|      |      | Shiraz-28T | 1760 | 0.538181 | 0         |  |
|      |      | Shiraz-29T | 1800 | 0.672527 | 0         |  |
|      |      | Shiraz-32T | 1869 | 0.776805 | 0         |  |
|      |      | Shiraz-35T | 1932 | 0.507141 | 0         |  |
|      |      | Shiraz-40T | 2051 | 0.098506 | 0         |  |
|      |      | Shiraz-58T | 2221 | 0.871948 | 0         |  |
|      |      | Shiraz-71T | 2260 | 0.68394  | 0         |  |
|      |      | Shiraz-71T | 2261 | 0.508399 | 0         |  |
| ACRC | chrX | Shiraz-4T  | 261  | 0        | -0.336249 |  |
|      |      | Shiraz-16T | 295  | 0.591657 | 0         |  |
|      |      | Shiraz-36T | 433  | 0        | -0.803961 |  |
|      |      | Shiraz-44T | 899  | 0        | -1.09697  |  |
|      |      | Shiraz-44T | 900  | 0        | -0.584284 |  |
|      |      | Shiraz-49T | 1170 | 0        | -0.967436 |  |
|      |      | Shiraz-49T | 1171 | 0        | -0.612379 |  |
|      |      | Shiraz-77T | 1283 | 0.296555 | 0         |  |
|      |      | Shiraz-18T | 1457 | 0.643204 | 0         |  |
|      |      | Shiraz-22T | 1673 | 0.611783 | 0         |  |
|      |      | Shiraz-22T | 1674 | 0.887899 | 0         |  |
|      |      | Shiraz-25T | 1719 | 0.472955 | 0         |  |
|      |      | Shiraz-28T | 1762 | 0.562311 | 0         |  |
|      |      | Shiraz-29T | 1801 | 0.815343 | 0         |  |
|      |      | Shiraz-32T | 1870 | 0.729766 | 0         |  |
|      |      | Shiraz-35T | 1933 | 0.488535 | 0         |  |
|      |      | Shiraz-58T | 2223 | 0.833364 | 0         |  |
|      |      | Shiraz-58T | 2224 | 1.076575 | 0         |  |
|      |      | Shiraz-71T | 2263 | 0.975531 | 0         |  |
|      |      | Shiraz-4T  | 261  | 0        | -0.336249 |  |
|      |      | Shiraz-16T | 295  | 0.591657 | 0         |  |
|      |      | Shiraz-36T | 433  | 0        | -0.803961 |  |
|      |      | Shiraz-44T | 899  | 0        | -1.09697  |  |
|      |      | Shiraz-44T | 900  | 0        | -0.584284 |  |
|      |      | Shiraz-49T | 1170 | 0        | -0.967436 |  |
|      |      | Shiraz-49T | 1171 | 0        | -0.612379 |  |
|      |      | Shiraz-77T | 1283 | 0.296555 | 0         |  |
|      |      | Shiraz-18T | 1457 | 0.643204 | 0         |  |
|      |      | Shiraz-22T | 1673 | 0.611783 | 0         |  |
|      |      | Shiraz-22T | 1674 | 0.887899 | 0         |  |
|      |      | Shiraz-25T | 1719 | 0.472955 | 0         |  |
|      |      | Shiraz-28T | 1762 | 0.562311 | 0         |  |
|      |      | Shiraz-29T | 1801 | 0.815343 | 0         |  |
|      |      | Shiraz-32T | 1870 | 0.729766 | 0         |  |

|       |      |            |      |          |           |  |
|-------|------|------------|------|----------|-----------|--|
|       |      | Shiraz-35T | 1933 | 0.488535 | 0         |  |
|       |      | Shiraz-58T | 2223 | 0.833364 | 0         |  |
|       |      | Shiraz-58T | 2224 | 1.076575 | 0         |  |
|       |      | Shiraz-71T | 2263 | 0.975531 | 0         |  |
|       |      | Shiraz-4T  | 261  | 0        | -0.336249 |  |
|       |      | Shiraz-16T | 295  | 0.591657 | 0         |  |
|       |      | Shiraz-36T | 433  | 0        | -0.803961 |  |
|       |      | Shiraz-44T | 899  | 0        | -1.09697  |  |
|       |      | Shiraz-44T | 900  | 0        | -0.584284 |  |
|       |      | Shiraz-49T | 1170 | 0        | -0.967436 |  |
|       |      | Shiraz-49T | 1171 | 0        | -0.612379 |  |
|       |      | Shiraz-77T | 1283 | 0.296555 | 0         |  |
|       |      | Shiraz-18T | 1457 | 0.643204 | 0         |  |
|       |      | Shiraz-22T | 1673 | 0.611783 | 0         |  |
|       |      | Shiraz-22T | 1674 | 0.887899 | 0         |  |
|       |      | Shiraz-25T | 1719 | 0.472955 | 0         |  |
|       |      | Shiraz-28T | 1762 | 0.562311 | 0         |  |
|       |      | Shiraz-29T | 1801 | 0.815343 | 0         |  |
|       |      | Shiraz-32T | 1870 | 0.729766 | 0         |  |
|       |      | Shiraz-35T | 1933 | 0.488535 | 0         |  |
|       |      | Shiraz-58T | 2223 | 0.833364 | 0         |  |
|       |      | Shiraz-58T | 2224 | 1.076575 | 0         |  |
|       |      | Shiraz-71T | 2263 | 0.975531 | 0         |  |
| ACSL4 | chrX | Shiraz-3T  | 242  | 0        | -0.336434 |  |
|       |      | Shiraz-4T  | 261  | 0        | -0.336249 |  |
|       |      | Shiraz-16T | 295  | 0.591657 | 0         |  |
|       |      | Shiraz-36T | 433  | 0        | -0.803961 |  |
|       |      | Shiraz-44T | 899  | 0        | -1.09697  |  |
|       |      | Shiraz-49T | 1170 | 0        | -0.967436 |  |
|       |      | Shiraz-18T | 1457 | 0.643204 | 0         |  |
|       |      | Shiraz-22T | 1673 | 0.611783 | 0         |  |
|       |      | Shiraz-25T | 1719 | 0.472955 | 0         |  |
|       |      | Shiraz-28T | 1762 | 0.562311 | 0         |  |
|       |      | Shiraz-29T | 1801 | 0.815343 | 0         |  |
|       |      | Shiraz-32T | 1870 | 0.729766 | 0         |  |
|       |      | Shiraz-35T | 1933 | 0.488535 | 0         |  |
|       |      | Shiraz-58T | 2223 | 0.833364 | 0         |  |
|       |      | Shiraz-71T | 2263 | 0.975531 | 0         |  |
|       |      | Shiraz-3T  | 242  | 0        | -0.336434 |  |
|       |      | Shiraz-4T  | 261  | 0        | -0.336249 |  |
|       |      | Shiraz-16T | 295  | 0.591657 | 0         |  |
|       |      | Shiraz-36T | 433  | 0        | -0.803961 |  |
|       |      | Shiraz-44T | 899  | 0        | -1.09697  |  |
|       |      | Shiraz-49T | 1170 | 0        | -0.967436 |  |
|       |      | Shiraz-18T | 1457 | 0.643204 | 0         |  |
|       |      | Shiraz-22T | 1673 | 0.611783 | 0         |  |
|       |      | Shiraz-25T | 1719 | 0.472955 | 0         |  |

|        |      |            |      |          |           |  |
|--------|------|------------|------|----------|-----------|--|
|        |      | Shiraz-28T | 1762 | 0.562311 | 0         |  |
|        |      | Shiraz-29T | 1801 | 0.815343 | 0         |  |
|        |      | Shiraz-32T | 1870 | 0.729766 | 0         |  |
|        |      | Shiraz-35T | 1933 | 0.488535 | 0         |  |
|        |      | Shiraz-58T | 2223 | 0.833364 | 0         |  |
|        |      | Shiraz-71T | 2263 | 0.975531 | 0         |  |
|        |      | Shiraz-3T  | 242  | 0        | -0.336434 |  |
|        |      | Shiraz-4T  | 261  | 0        | -0.336249 |  |
|        |      | Shiraz-16T | 295  | 0.591657 | 0         |  |
|        |      | Shiraz-36T | 433  | 0        | -0.803961 |  |
|        |      | Shiraz-44T | 899  | 0        | -1.09697  |  |
|        |      | Shiraz-49T | 1170 | 0        | -0.967436 |  |
|        |      | Shiraz-18T | 1457 | 0.643204 | 0         |  |
|        |      | Shiraz-22T | 1673 | 0.611783 | 0         |  |
|        |      | Shiraz-25T | 1719 | 0.472955 | 0         |  |
|        |      | Shiraz-28T | 1762 | 0.562311 | 0         |  |
|        |      | Shiraz-29T | 1801 | 0.815343 | 0         |  |
|        |      | Shiraz-32T | 1870 | 0.729766 | 0         |  |
|        |      | Shiraz-35T | 1933 | 0.488535 | 0         |  |
|        |      | Shiraz-58T | 2223 | 0.833364 | 0         |  |
|        |      | Shiraz-71T | 2263 | 0.975531 | 0         |  |
| ACTL6B | chr7 | Shiraz-3T  | 90   | 0.219276 | 0         |  |
|        |      | Shiraz-3T  | 94   | 0.74735  | 0         |  |
|        |      | Shiraz-4T  | 253  | 0.372918 | 0         |  |
|        |      | Shiraz-31T | 316  | 0.219196 | 0         |  |
|        |      | Shiraz-36T | 378  | 0.179558 | 0         |  |
|        |      | Shiraz-36T | 381  | 0.332628 | 0         |  |
|        |      | Shiraz-44T | 639  | 1.035032 | 0         |  |
|        |      | Shiraz-46T | 943  | 0.093799 | 0         |  |
|        |      | Shiraz-46T | 946  | 0.299835 | 0         |  |
|        |      | Shiraz-47T | 1030 | 0.257728 | 0         |  |
|        |      | Shiraz-49T | 1120 | 0.281656 | 0         |  |
|        |      | Shiraz-77T | 1225 | 0        | -0.117922 |  |
|        |      | Shiraz-77T | 1227 | 0.196445 | 0         |  |
|        |      | Shiraz-9T  | 1324 | 0.679266 | 0         |  |
|        |      | Shiraz-18T | 1434 | 0.244465 | 0         |  |
|        |      | Shiraz-22T | 1549 | 0        | -0.319623 |  |
|        |      | Shiraz-22T | 1551 | 0.324011 | 0         |  |
|        |      | Shiraz-25T | 1698 | 0.21835  | 0         |  |
|        |      | Shiraz-28T | 1735 | 0.350744 | 0         |  |
|        |      | Shiraz-29T | 1778 | 0.120767 | 0         |  |
|        |      | Shiraz-32T | 1833 | 0.551336 | 0         |  |
|        |      | Shiraz-32T | 1834 | 1.485392 | 0         |  |
|        |      | Shiraz-38T | 1951 | 0.250891 | 0         |  |
|        |      | Shiraz-53T | 2078 | 0.287202 | 0         |  |
|        |      | Shiraz-58T | 2160 | 0.399007 | 0         |  |
|        |      | Shiraz-71T | 2238 | 0.603631 | 0         |  |

|  |            |      |          |           |  |
|--|------------|------|----------|-----------|--|
|  | Shiraz-3T  | 90   | 0.219276 | 0         |  |
|  | Shiraz-3T  | 94   | 0.74735  | 0         |  |
|  | Shiraz-4T  | 253  | 0.372918 | 0         |  |
|  | Shiraz-31T | 316  | 0.219196 | 0         |  |
|  | Shiraz-36T | 378  | 0.179558 | 0         |  |
|  | Shiraz-36T | 381  | 0.332628 | 0         |  |
|  | Shiraz-44T | 639  | 1.035032 | 0         |  |
|  | Shiraz-46T | 943  | 0.093799 | 0         |  |
|  | Shiraz-46T | 946  | 0.299835 | 0         |  |
|  | Shiraz-47T | 1030 | 0.257728 | 0         |  |
|  | Shiraz-49T | 1120 | 0.281656 | 0         |  |
|  | Shiraz-77T | 1225 | 0        | -0.117922 |  |
|  | Shiraz-77T | 1227 | 0.196445 | 0         |  |
|  | Shiraz-9T  | 1324 | 0.679266 | 0         |  |
|  | Shiraz-18T | 1434 | 0.244465 | 0         |  |
|  | Shiraz-22T | 1549 | 0        | -0.319623 |  |
|  | Shiraz-22T | 1551 | 0.324011 | 0         |  |
|  | Shiraz-25T | 1698 | 0.21835  | 0         |  |
|  | Shiraz-28T | 1735 | 0.350744 | 0         |  |
|  | Shiraz-29T | 1778 | 0.120767 | 0         |  |
|  | Shiraz-32T | 1833 | 0.551336 | 0         |  |
|  | Shiraz-32T | 1834 | 1.485392 | 0         |  |
|  | Shiraz-38T | 1951 | 0.250891 | 0         |  |
|  | Shiraz-53T | 2078 | 0.287202 | 0         |  |
|  | Shiraz-58T | 2160 | 0.399007 | 0         |  |
|  | Shiraz-71T | 2238 | 0.603631 | 0         |  |
|  | Shiraz-3T  | 90   | 0.219276 | 0         |  |
|  | Shiraz-3T  | 94   | 0.74735  | 0         |  |
|  | Shiraz-4T  | 253  | 0.372918 | 0         |  |
|  | Shiraz-31T | 316  | 0.219196 | 0         |  |
|  | Shiraz-36T | 378  | 0.179558 | 0         |  |
|  | Shiraz-36T | 381  | 0.332628 | 0         |  |
|  | Shiraz-44T | 639  | 1.035032 | 0         |  |
|  | Shiraz-46T | 943  | 0.093799 | 0         |  |
|  | Shiraz-46T | 946  | 0.299835 | 0         |  |
|  | Shiraz-47T | 1030 | 0.257728 | 0         |  |
|  | Shiraz-49T | 1120 | 0.281656 | 0         |  |
|  | Shiraz-77T | 1225 | 0        | -0.117922 |  |
|  | Shiraz-77T | 1227 | 0.196445 | 0         |  |
|  | Shiraz-9T  | 1324 | 0.679266 | 0         |  |
|  | Shiraz-18T | 1434 | 0.244465 | 0         |  |
|  | Shiraz-22T | 1549 | 0        | -0.319623 |  |
|  | Shiraz-22T | 1551 | 0.324011 | 0         |  |
|  | Shiraz-25T | 1698 | 0.21835  | 0         |  |
|  | Shiraz-28T | 1735 | 0.350744 | 0         |  |
|  | Shiraz-29T | 1778 | 0.120767 | 0         |  |
|  | Shiraz-32T | 1833 | 0.551336 | 0         |  |



|        |      |            |      |          |   |  |  |
|--------|------|------------|------|----------|---|--|--|
|        |      | Shiraz-32T | 1834 | 1.485392 | 0 |  |  |
|        |      | Shiraz-38T | 1951 | 0.250891 | 0 |  |  |
|        |      | Shiraz-53T | 2078 | 0.287202 | 0 |  |  |
|        |      | Shiraz-58T | 2160 | 0.399007 | 0 |  |  |
|        |      | Shiraz-71T | 2238 | 0.603631 | 0 |  |  |
| ACTR3B | chr7 | Shiraz-3T  | 90   | 0.219276 | 0 |  |  |
|        |      | Shiraz-3T  | 99   | 0.454766 | 0 |  |  |
|        |      | Shiraz-4T  | 253  | 0.372918 | 0 |  |  |
|        |      | Shiraz-36T | 378  | 0.179558 | 0 |  |  |
|        |      | Shiraz-44T | 646  | 0.471276 | 0 |  |  |
|        |      | Shiraz-44T | 648  | 0.017909 | 0 |  |  |
|        |      | Shiraz-46T | 943  | 0.093799 | 0 |  |  |
|        |      | Shiraz-9T  | 1325 | 0.221899 | 0 |  |  |
|        |      | Shiraz-18T | 1434 | 0.244465 | 0 |  |  |
|        |      | Shiraz-25T | 1698 | 0.21835  | 0 |  |  |
|        |      | Shiraz-28T | 1735 | 0.350744 | 0 |  |  |
|        |      | Shiraz-29T | 1778 | 0.120767 | 0 |  |  |
|        |      | Shiraz-32T | 1833 | 0.551336 | 0 |  |  |
|        |      | Shiraz-38T | 1951 | 0.250891 | 0 |  |  |
|        |      | Shiraz-58T | 2162 | 0.221505 | 0 |  |  |
|        |      | Shiraz-71T | 2238 | 0.603631 | 0 |  |  |
|        |      | Shiraz-3T  | 90   | 0.219276 | 0 |  |  |
|        |      | Shiraz-3T  | 99   | 0.454766 | 0 |  |  |
|        |      | Shiraz-4T  | 253  | 0.372918 | 0 |  |  |
|        |      | Shiraz-36T | 378  | 0.179558 | 0 |  |  |
|        |      | Shiraz-44T | 646  | 0.471276 | 0 |  |  |
|        |      | Shiraz-44T | 648  | 0.017909 | 0 |  |  |
|        |      | Shiraz-46T | 943  | 0.093799 | 0 |  |  |
|        |      | Shiraz-9T  | 1325 | 0.221899 | 0 |  |  |
|        |      | Shiraz-18T | 1434 | 0.244465 | 0 |  |  |
|        |      | Shiraz-25T | 1698 | 0.21835  | 0 |  |  |
|        |      | Shiraz-28T | 1735 | 0.350744 | 0 |  |  |
|        |      | Shiraz-29T | 1778 | 0.120767 | 0 |  |  |
|        |      | Shiraz-32T | 1833 | 0.551336 | 0 |  |  |
|        |      | Shiraz-38T | 1951 | 0.250891 | 0 |  |  |
|        |      | Shiraz-58T | 2162 | 0.221505 | 0 |  |  |
|        |      | Shiraz-71T | 2238 | 0.603631 | 0 |  |  |
|        |      | Shiraz-3T  | 90   | 0.219276 | 0 |  |  |
|        |      | Shiraz-3T  | 99   | 0.454766 | 0 |  |  |
|        |      | Shiraz-4T  | 253  | 0.372918 | 0 |  |  |
|        |      | Shiraz-36T | 378  | 0.179558 | 0 |  |  |
|        |      | Shiraz-44T | 646  | 0.471276 | 0 |  |  |
|        |      | Shiraz-44T | 648  | 0.017909 | 0 |  |  |
|        |      | Shiraz-46T | 943  | 0.093799 | 0 |  |  |
|        |      | Shiraz-9T  | 1325 | 0.221899 | 0 |  |  |
|        |      | Shiraz-18T | 1434 | 0.244465 | 0 |  |  |
|        |      | Shiraz-25T | 1698 | 0.21835  | 0 |  |  |

|        |      |            |      |          |           |  |
|--------|------|------------|------|----------|-----------|--|
|        |      | Shiraz-28T | 1735 | 0.350744 | 0         |  |
|        |      | Shiraz-29T | 1778 | 0.120767 | 0         |  |
|        |      | Shiraz-32T | 1833 | 0.551336 | 0         |  |
|        |      | Shiraz-38T | 1951 | 0.250891 | 0         |  |
|        |      | Shiraz-58T | 2162 | 0.221505 | 0         |  |
|        |      | Shiraz-71T | 2238 | 0.603631 | 0         |  |
| ACTRT1 | chrX | Shiraz-3T  | 242  | 0        | -0.336434 |  |
|        |      | Shiraz-4T  | 261  | 0        | -0.336249 |  |
|        |      | Shiraz-16T | 295  | 0.591657 | 0         |  |
|        |      | Shiraz-36T | 433  | 0        | -0.803961 |  |
|        |      | Shiraz-44T | 899  | 0        | -1.09697  |  |
|        |      | Shiraz-44T | 905  | 0        | -1.465843 |  |
|        |      | Shiraz-49T | 1170 | 0        | -0.967436 |  |
|        |      | Shiraz-9T  | 1370 | 0.690073 | 0         |  |
|        |      | Shiraz-18T | 1457 | 0.643204 | 0         |  |
|        |      | Shiraz-22T | 1673 | 0.611783 | 0         |  |
|        |      | Shiraz-22T | 1676 | 0.259626 | 0         |  |
|        |      | Shiraz-25T | 1719 | 0.472955 | 0         |  |
|        |      | Shiraz-28T | 1762 | 0.562311 | 0         |  |
|        |      | Shiraz-29T | 1801 | 0.815343 | 0         |  |
|        |      | Shiraz-32T | 1870 | 0.729766 | 0         |  |
|        |      | Shiraz-35T | 1933 | 0.488535 | 0         |  |
|        |      | Shiraz-53T | 2114 | 0        | -0.727152 |  |
|        |      | Shiraz-58T | 2223 | 0.833364 | 0         |  |
|        |      | Shiraz-71T | 2263 | 0.975531 | 0         |  |
|        |      | Shiraz-3T  | 242  | 0        | -0.336434 |  |
|        |      | Shiraz-4T  | 261  | 0        | -0.336249 |  |
|        |      | Shiraz-16T | 295  | 0.591657 | 0         |  |
|        |      | Shiraz-36T | 433  | 0        | -0.803961 |  |
|        |      | Shiraz-44T | 899  | 0        | -1.09697  |  |
|        |      | Shiraz-44T | 905  | 0        | -1.465843 |  |
|        |      | Shiraz-49T | 1170 | 0        | -0.967436 |  |
|        |      | Shiraz-9T  | 1370 | 0.690073 | 0         |  |
|        |      | Shiraz-18T | 1457 | 0.643204 | 0         |  |
|        |      | Shiraz-22T | 1673 | 0.611783 | 0         |  |
|        |      | Shiraz-22T | 1676 | 0.259626 | 0         |  |
|        |      | Shiraz-25T | 1719 | 0.472955 | 0         |  |
|        |      | Shiraz-28T | 1762 | 0.562311 | 0         |  |
|        |      | Shiraz-29T | 1801 | 0.815343 | 0         |  |
|        |      | Shiraz-32T | 1870 | 0.729766 | 0         |  |
|        |      | Shiraz-35T | 1933 | 0.488535 | 0         |  |
|        |      | Shiraz-53T | 2114 | 0        | -0.727152 |  |
|        |      | Shiraz-58T | 2223 | 0.833364 | 0         |  |
|        |      | Shiraz-71T | 2263 | 0.975531 | 0         |  |
|        |      | Shiraz-3T  | 242  | 0        | -0.336434 |  |
|        |      | Shiraz-4T  | 261  | 0        | -0.336249 |  |
|        |      | Shiraz-16T | 295  | 0.591657 | 0         |  |

|        |      |            |      |          |           |  |  |
|--------|------|------------|------|----------|-----------|--|--|
|        |      | Shiraz-36T | 433  | 0        | -0.803961 |  |  |
|        |      | Shiraz-44T | 899  | 0        | -1.09697  |  |  |
|        |      | Shiraz-44T | 905  | 0        | -1.465843 |  |  |
|        |      | Shiraz-49T | 1170 | 0        | -0.967436 |  |  |
|        |      | Shiraz-9T  | 1370 | 0.690073 | 0         |  |  |
|        |      | Shiraz-18T | 1457 | 0.643204 | 0         |  |  |
|        |      | Shiraz-22T | 1673 | 0.611783 | 0         |  |  |
|        |      | Shiraz-22T | 1676 | 0.259626 | 0         |  |  |
|        |      | Shiraz-25T | 1719 | 0.472955 | 0         |  |  |
|        |      | Shiraz-28T | 1762 | 0.562311 | 0         |  |  |
|        |      | Shiraz-29T | 1801 | 0.815343 | 0         |  |  |
|        |      | Shiraz-32T | 1870 | 0.729766 | 0         |  |  |
|        |      | Shiraz-35T | 1933 | 0.488535 | 0         |  |  |
|        |      | Shiraz-53T | 2114 | 0        | -0.727152 |  |  |
|        |      | Shiraz-58T | 2223 | 0.833364 | 0         |  |  |
|        |      | Shiraz-71T | 2263 | 0.975531 | 0         |  |  |
| ADAM22 | chr7 | Shiraz-3T  | 90   | 0.219276 | 0         |  |  |
|        |      | Shiraz-3T  | 90   | 0.219276 | 0         |  |  |
|        |      | Shiraz-3T  | 93   | 0        | -0.058023 |  |  |
|        |      | Shiraz-3T  | 93   | 0        | -0.058023 |  |  |
|        |      | Shiraz-4T  | 253  | 0.372918 | 0         |  |  |
|        |      | Shiraz-4T  | 253  | 0.372918 | 0         |  |  |
|        |      | Shiraz-36T | 378  | 0.179558 | 0         |  |  |
|        |      | Shiraz-36T | 378  | 0.179558 | 0         |  |  |
|        |      | Shiraz-36T | 380  | 0.083883 | 0         |  |  |
|        |      | Shiraz-36T | 380  | 0.083883 | 0         |  |  |
|        |      | Shiraz-44T | 638  | 0        | -0.433476 |  |  |
|        |      | Shiraz-44T | 638  | 0        | -0.433476 |  |  |
|        |      | Shiraz-46T | 943  | 0.093799 | 0         |  |  |
|        |      | Shiraz-46T | 943  | 0.093799 | 0         |  |  |
|        |      | Shiraz-46T | 945  | 0        | -0.014838 |  |  |
|        |      | Shiraz-46T | 945  | 0        | -0.014838 |  |  |
|        |      | Shiraz-47T | 1029 | 0        | -0.096586 |  |  |
|        |      | Shiraz-47T | 1029 | 0        | -0.096586 |  |  |
|        |      | Shiraz-49T | 1119 | 0        | -0.157331 |  |  |
|        |      | Shiraz-49T | 1119 | 0        | -0.157331 |  |  |
|        |      | Shiraz-77T | 1225 | 0        | -0.117922 |  |  |
|        |      | Shiraz-77T | 1225 | 0        | -0.117922 |  |  |
|        |      | Shiraz-77T | 1226 | 0        | -0.233724 |  |  |
|        |      | Shiraz-77T | 1226 | 0        | -0.233724 |  |  |
|        |      | Shiraz-18T | 1434 | 0.244465 | 0         |  |  |
|        |      | Shiraz-18T | 1434 | 0.244465 | 0         |  |  |
|        |      | Shiraz-22T | 1549 | 0        | -0.319623 |  |  |
|        |      | Shiraz-22T | 1549 | 0        | -0.319623 |  |  |
|        |      | Shiraz-22T | 1550 | 0        | -0.577052 |  |  |
|        |      | Shiraz-22T | 1550 | 0        | -0.577052 |  |  |
|        |      | Shiraz-25T | 1698 | 0.21835  | 0         |  |  |

|  |  |            |      |          |           |  |  |
|--|--|------------|------|----------|-----------|--|--|
|  |  | Shiraz-25T | 1698 | 0.21835  | 0         |  |  |
|  |  | Shiraz-28T | 1735 | 0.350744 | 0         |  |  |
|  |  | Shiraz-28T | 1735 | 0.350744 | 0         |  |  |
|  |  | Shiraz-29T | 1778 | 0.120767 | 0         |  |  |
|  |  | Shiraz-29T | 1778 | 0.120767 | 0         |  |  |
|  |  | Shiraz-38T | 1951 | 0.250891 | 0         |  |  |
|  |  | Shiraz-38T | 1951 | 0.250891 | 0         |  |  |
|  |  | Shiraz-53T | 2078 | 0.287202 | 0         |  |  |
|  |  | Shiraz-53T | 2078 | 0.287202 | 0         |  |  |
|  |  | Shiraz-58T | 2159 | 0        | -0.219521 |  |  |
|  |  | Shiraz-58T | 2159 | 0        | -0.219521 |  |  |
|  |  | Shiraz-71T | 2238 | 0.603631 | 0         |  |  |
|  |  | Shiraz-71T | 2238 | 0.603631 | 0         |  |  |
|  |  | Shiraz-3T  | 90   | 0.219276 | 0         |  |  |
|  |  | Shiraz-3T  | 90   | 0.219276 | 0         |  |  |
|  |  | Shiraz-3T  | 93   | 0        | -0.058023 |  |  |
|  |  | Shiraz-3T  | 93   | 0        | -0.058023 |  |  |
|  |  | Shiraz-4T  | 253  | 0.372918 | 0         |  |  |
|  |  | Shiraz-4T  | 253  | 0.372918 | 0         |  |  |
|  |  | Shiraz-36T | 378  | 0.179558 | 0         |  |  |
|  |  | Shiraz-36T | 378  | 0.179558 | 0         |  |  |
|  |  | Shiraz-36T | 380  | 0.083883 | 0         |  |  |
|  |  | Shiraz-36T | 380  | 0.083883 | 0         |  |  |
|  |  | Shiraz-44T | 638  | 0        | -0.433476 |  |  |
|  |  | Shiraz-44T | 638  | 0        | -0.433476 |  |  |
|  |  | Shiraz-46T | 943  | 0.093799 | 0         |  |  |
|  |  | Shiraz-46T | 943  | 0.093799 | 0         |  |  |
|  |  | Shiraz-46T | 945  | 0        | -0.014838 |  |  |
|  |  | Shiraz-46T | 945  | 0        | -0.014838 |  |  |
|  |  | Shiraz-47T | 1029 | 0        | -0.096586 |  |  |
|  |  | Shiraz-47T | 1029 | 0        | -0.096586 |  |  |
|  |  | Shiraz-49T | 1119 | 0        | -0.157331 |  |  |
|  |  | Shiraz-49T | 1119 | 0        | -0.157331 |  |  |
|  |  | Shiraz-77T | 1225 | 0        | -0.117922 |  |  |
|  |  | Shiraz-77T | 1225 | 0        | -0.117922 |  |  |
|  |  | Shiraz-77T | 1226 | 0        | -0.233724 |  |  |
|  |  | Shiraz-77T | 1226 | 0        | -0.233724 |  |  |
|  |  | Shiraz-18T | 1434 | 0.244465 | 0         |  |  |
|  |  | Shiraz-18T | 1434 | 0.244465 | 0         |  |  |
|  |  | Shiraz-22T | 1549 | 0        | -0.319623 |  |  |
|  |  | Shiraz-22T | 1549 | 0        | -0.319623 |  |  |
|  |  | Shiraz-22T | 1550 | 0        | -0.577052 |  |  |
|  |  | Shiraz-22T | 1550 | 0        | -0.577052 |  |  |
|  |  | Shiraz-25T | 1698 | 0.21835  | 0         |  |  |
|  |  | Shiraz-25T | 1698 | 0.21835  | 0         |  |  |
|  |  | Shiraz-28T | 1735 | 0.350744 | 0         |  |  |
|  |  | Shiraz-28T | 1735 | 0.350744 | 0         |  |  |

|  |  |            |      |          |           |  |  |
|--|--|------------|------|----------|-----------|--|--|
|  |  | Shiraz-29T | 1778 | 0.120767 | 0         |  |  |
|  |  | Shiraz-29T | 1778 | 0.120767 | 0         |  |  |
|  |  | Shiraz-38T | 1951 | 0.250891 | 0         |  |  |
|  |  | Shiraz-38T | 1951 | 0.250891 | 0         |  |  |
|  |  | Shiraz-53T | 2078 | 0.287202 | 0         |  |  |
|  |  | Shiraz-53T | 2078 | 0.287202 | 0         |  |  |
|  |  | Shiraz-58T | 2159 | 0        | -0.219521 |  |  |
|  |  | Shiraz-58T | 2159 | 0        | -0.219521 |  |  |
|  |  | Shiraz-71T | 2238 | 0.603631 | 0         |  |  |
|  |  | Shiraz-71T | 2238 | 0.603631 | 0         |  |  |
|  |  | Shiraz-3T  | 90   | 0.219276 | 0         |  |  |
|  |  | Shiraz-3T  | 90   | 0.219276 | 0         |  |  |
|  |  | Shiraz-3T  | 93   | 0        | -0.058023 |  |  |
|  |  | Shiraz-3T  | 93   | 0        | -0.058023 |  |  |
|  |  | Shiraz-4T  | 253  | 0.372918 | 0         |  |  |
|  |  | Shiraz-4T  | 253  | 0.372918 | 0         |  |  |
|  |  | Shiraz-36T | 378  | 0.179558 | 0         |  |  |
|  |  | Shiraz-36T | 378  | 0.179558 | 0         |  |  |
|  |  | Shiraz-36T | 380  | 0.083883 | 0         |  |  |
|  |  | Shiraz-36T | 380  | 0.083883 | 0         |  |  |
|  |  | Shiraz-44T | 638  | 0        | -0.433476 |  |  |
|  |  | Shiraz-44T | 638  | 0        | -0.433476 |  |  |
|  |  | Shiraz-46T | 943  | 0.093799 | 0         |  |  |
|  |  | Shiraz-46T | 943  | 0.093799 | 0         |  |  |
|  |  | Shiraz-46T | 945  | 0        | -0.014838 |  |  |
|  |  | Shiraz-46T | 945  | 0        | -0.014838 |  |  |
|  |  | Shiraz-47T | 1029 | 0        | -0.096586 |  |  |
|  |  | Shiraz-47T | 1029 | 0        | -0.096586 |  |  |
|  |  | Shiraz-49T | 1119 | 0        | -0.157331 |  |  |
|  |  | Shiraz-49T | 1119 | 0        | -0.157331 |  |  |
|  |  | Shiraz-77T | 1225 | 0        | -0.117922 |  |  |
|  |  | Shiraz-77T | 1225 | 0        | -0.117922 |  |  |
|  |  | Shiraz-77T | 1226 | 0        | -0.233724 |  |  |
|  |  | Shiraz-77T | 1226 | 0        | -0.233724 |  |  |
|  |  | Shiraz-18T | 1434 | 0.244465 | 0         |  |  |
|  |  | Shiraz-18T | 1434 | 0.244465 | 0         |  |  |
|  |  | Shiraz-22T | 1549 | 0        | -0.319623 |  |  |
|  |  | Shiraz-22T | 1549 | 0        | -0.319623 |  |  |
|  |  | Shiraz-22T | 1550 | 0        | -0.577052 |  |  |
|  |  | Shiraz-22T | 1550 | 0        | -0.577052 |  |  |
|  |  | Shiraz-25T | 1698 | 0.21835  | 0         |  |  |
|  |  | Shiraz-25T | 1698 | 0.21835  | 0         |  |  |
|  |  | Shiraz-28T | 1735 | 0.350744 | 0         |  |  |
|  |  | Shiraz-28T | 1735 | 0.350744 | 0         |  |  |
|  |  | Shiraz-29T | 1778 | 0.120767 | 0         |  |  |
|  |  | Shiraz-29T | 1778 | 0.120767 | 0         |  |  |
|  |  | Shiraz-38T | 1951 | 0.250891 | 0         |  |  |

|          |      |            |      |          |           |  |
|----------|------|------------|------|----------|-----------|--|
|          |      | Shiraz-38T | 1951 | 0.250891 | 0         |  |
|          |      | Shiraz-53T | 2078 | 0.287202 | 0         |  |
|          |      | Shiraz-53T | 2078 | 0.287202 | 0         |  |
|          |      | Shiraz-58T | 2159 | 0        | -0.219521 |  |
|          |      | Shiraz-58T | 2159 | 0        | -0.219521 |  |
|          |      | Shiraz-71T | 2238 | 0.603631 | 0         |  |
|          |      | Shiraz-71T | 2238 | 0.603631 | 0         |  |
| ADAMTS12 | chr5 | Shiraz-4T  | 250  | 0.262252 | 0         |  |
|          |      | Shiraz-16T | 266  | 0.321724 | 0         |  |
|          |      | Shiraz-18T | 1429 | 0        | -0.314125 |  |
|          |      | Shiraz-25T | 1694 | 0.201602 | 0         |  |
|          |      | Shiraz-28T | 1731 | 0.295447 | 0         |  |
|          |      | Shiraz-29T | 1773 | 0.090981 | 0         |  |
|          |      | Shiraz-40T | 2016 | 0.376634 | 0         |  |
|          |      | Shiraz-4T  | 250  | 0.262252 | 0         |  |
|          |      | Shiraz-16T | 266  | 0.321724 | 0         |  |
|          |      | Shiraz-18T | 1429 | 0        | -0.314125 |  |
|          |      | Shiraz-25T | 1694 | 0.201602 | 0         |  |
|          |      | Shiraz-28T | 1731 | 0.295447 | 0         |  |
|          |      | Shiraz-29T | 1773 | 0.090981 | 0         |  |
|          |      | Shiraz-40T | 2016 | 0.376634 | 0         |  |
|          |      | Shiraz-4T  | 250  | 0.262252 | 0         |  |
|          |      | Shiraz-16T | 266  | 0.321724 | 0         |  |
|          |      | Shiraz-18T | 1429 | 0        | -0.314125 |  |
|          |      | Shiraz-25T | 1694 | 0.201602 | 0         |  |
|          |      | Shiraz-28T | 1731 | 0.295447 | 0         |  |
|          |      | Shiraz-29T | 1773 | 0.090981 | 0         |  |
|          |      | Shiraz-40T | 2016 | 0.376634 | 0         |  |
| ADCK2    | chr7 | Shiraz-3T  | 90   | 0.219276 | 0         |  |
|          |      | Shiraz-3T  | 97   | 0.496001 | 0         |  |
|          |      | Shiraz-4T  | 253  | 0.372918 | 0         |  |
|          |      | Shiraz-31T | 318  | 0.254373 | 0         |  |
|          |      | Shiraz-36T | 378  | 0.179558 | 0         |  |
|          |      | Shiraz-36T | 383  | 0.374586 | 0         |  |
|          |      | Shiraz-44T | 644  | 0.496536 | 0         |  |
|          |      | Shiraz-46T | 943  | 0.093799 | 0         |  |
|          |      | Shiraz-47T | 1033 | 0.220267 | 0         |  |
|          |      | Shiraz-77T | 1225 | 0        | -0.117922 |  |
|          |      | Shiraz-77T | 1230 | 0.149651 | 0         |  |
|          |      | Shiraz-9T  | 1325 | 0.221899 | 0         |  |
|          |      | Shiraz-18T | 1434 | 0.244465 | 0         |  |
|          |      | Shiraz-25T | 1698 | 0.21835  | 0         |  |
|          |      | Shiraz-28T | 1735 | 0.350744 | 0         |  |
|          |      | Shiraz-29T | 1778 | 0.120767 | 0         |  |
|          |      | Shiraz-32T | 1833 | 0.551336 | 0         |  |
|          |      | Shiraz-38T | 1951 | 0.250891 | 0         |  |
|          |      | Shiraz-53T | 2078 | 0.287202 | 0         |  |

|       |      |            |      |          |           |  |
|-------|------|------------|------|----------|-----------|--|
|       |      | Shiraz-58T | 2162 | 0.221505 | 0         |  |
|       |      | Shiraz-71T | 2238 | 0.603631 | 0         |  |
|       |      | Shiraz-3T  | 90   | 0.219276 | 0         |  |
|       |      | Shiraz-3T  | 97   | 0.496001 | 0         |  |
|       |      | Shiraz-4T  | 253  | 0.372918 | 0         |  |
|       |      | Shiraz-31T | 318  | 0.254373 | 0         |  |
|       |      | Shiraz-36T | 378  | 0.179558 | 0         |  |
|       |      | Shiraz-36T | 383  | 0.374586 | 0         |  |
|       |      | Shiraz-44T | 644  | 0.496536 | 0         |  |
|       |      | Shiraz-46T | 943  | 0.093799 | 0         |  |
|       |      | Shiraz-47T | 1033 | 0.220267 | 0         |  |
|       |      | Shiraz-77T | 1225 | 0        | -0.117922 |  |
|       |      | Shiraz-77T | 1230 | 0.149651 | 0         |  |
|       |      | Shiraz-9T  | 1325 | 0.221899 | 0         |  |
|       |      | Shiraz-18T | 1434 | 0.244465 | 0         |  |
|       |      | Shiraz-25T | 1698 | 0.21835  | 0         |  |
|       |      | Shiraz-28T | 1735 | 0.350744 | 0         |  |
|       |      | Shiraz-29T | 1778 | 0.120767 | 0         |  |
|       |      | Shiraz-32T | 1833 | 0.551336 | 0         |  |
|       |      | Shiraz-38T | 1951 | 0.250891 | 0         |  |
|       |      | Shiraz-53T | 2078 | 0.287202 | 0         |  |
|       |      | Shiraz-58T | 2162 | 0.221505 | 0         |  |
|       |      | Shiraz-71T | 2238 | 0.603631 | 0         |  |
|       |      | Shiraz-3T  | 90   | 0.219276 | 0         |  |
|       |      | Shiraz-3T  | 97   | 0.496001 | 0         |  |
|       |      | Shiraz-4T  | 253  | 0.372918 | 0         |  |
|       |      | Shiraz-31T | 318  | 0.254373 | 0         |  |
|       |      | Shiraz-36T | 378  | 0.179558 | 0         |  |
|       |      | Shiraz-36T | 383  | 0.374586 | 0         |  |
|       |      | Shiraz-44T | 644  | 0.496536 | 0         |  |
|       |      | Shiraz-46T | 943  | 0.093799 | 0         |  |
|       |      | Shiraz-47T | 1033 | 0.220267 | 0         |  |
|       |      | Shiraz-77T | 1225 | 0        | -0.117922 |  |
|       |      | Shiraz-77T | 1230 | 0.149651 | 0         |  |
|       |      | Shiraz-9T  | 1325 | 0.221899 | 0         |  |
|       |      | Shiraz-18T | 1434 | 0.244465 | 0         |  |
|       |      | Shiraz-25T | 1698 | 0.21835  | 0         |  |
|       |      | Shiraz-28T | 1735 | 0.350744 | 0         |  |
|       |      | Shiraz-29T | 1778 | 0.120767 | 0         |  |
|       |      | Shiraz-32T | 1833 | 0.551336 | 0         |  |
|       |      | Shiraz-38T | 1951 | 0.250891 | 0         |  |
|       |      | Shiraz-53T | 2078 | 0.287202 | 0         |  |
|       |      | Shiraz-58T | 2162 | 0.221505 | 0         |  |
|       |      | Shiraz-71T | 2238 | 0.603631 | 0         |  |
| ADCY1 | chr7 | Shiraz-3T  | 87   | 0.198593 | 0         |  |
|       |      | Shiraz-3T  | 89   | 0.678641 | 0         |  |
|       |      | Shiraz-4T  | 252  | 0.192083 | 0         |  |

|           |      |            |      |          |   |  |
|-----------|------|------------|------|----------|---|--|
|           |      | Shiraz-36T | 376  | 0.159952 | 0 |  |
|           |      | Shiraz-46T | 942  | 0.069143 | 0 |  |
|           |      | Shiraz-77T | 1223 | 0.215647 | 0 |  |
|           |      | Shiraz-18T | 1433 | 0.250973 | 0 |  |
|           |      | Shiraz-25T | 1697 | 0.21945  | 0 |  |
|           |      | Shiraz-28T | 1734 | 0.362882 | 0 |  |
|           |      | Shiraz-29T | 1777 | 0.156747 | 0 |  |
|           |      | Shiraz-38T | 1950 | 0.265916 | 0 |  |
|           |      | Shiraz-71T | 2236 | 0.320072 | 0 |  |
|           |      | Shiraz-3T  | 87   | 0.198593 | 0 |  |
|           |      | Shiraz-3T  | 89   | 0.678641 | 0 |  |
|           |      | Shiraz-4T  | 252  | 0.192083 | 0 |  |
|           |      | Shiraz-36T | 376  | 0.159952 | 0 |  |
|           |      | Shiraz-46T | 942  | 0.069143 | 0 |  |
|           |      | Shiraz-77T | 1223 | 0.215647 | 0 |  |
|           |      | Shiraz-18T | 1433 | 0.250973 | 0 |  |
|           |      | Shiraz-25T | 1697 | 0.21945  | 0 |  |
|           |      | Shiraz-28T | 1734 | 0.362882 | 0 |  |
|           |      | Shiraz-29T | 1777 | 0.156747 | 0 |  |
|           |      | Shiraz-38T | 1950 | 0.265916 | 0 |  |
|           |      | Shiraz-71T | 2236 | 0.320072 | 0 |  |
|           |      | Shiraz-3T  | 87   | 0.198593 | 0 |  |
|           |      | Shiraz-3T  | 89   | 0.678641 | 0 |  |
|           |      | Shiraz-4T  | 252  | 0.192083 | 0 |  |
|           |      | Shiraz-36T | 376  | 0.159952 | 0 |  |
|           |      | Shiraz-46T | 942  | 0.069143 | 0 |  |
|           |      | Shiraz-77T | 1223 | 0.215647 | 0 |  |
|           |      | Shiraz-18T | 1433 | 0.250973 | 0 |  |
|           |      | Shiraz-25T | 1697 | 0.21945  | 0 |  |
|           |      | Shiraz-28T | 1734 | 0.362882 | 0 |  |
|           |      | Shiraz-29T | 1777 | 0.156747 | 0 |  |
|           |      | Shiraz-38T | 1950 | 0.265916 | 0 |  |
|           |      | Shiraz-71T | 2236 | 0.320072 | 0 |  |
| ADCYAP1R1 | chr7 | Shiraz-3T  | 87   | 0.198593 | 0 |  |
|           |      | Shiraz-4T  | 252  | 0.192083 | 0 |  |
|           |      | Shiraz-36T | 376  | 0.159952 | 0 |  |
|           |      | Shiraz-44T | 630  | 0.903655 | 0 |  |
|           |      | Shiraz-46T | 942  | 0.069143 | 0 |  |
|           |      | Shiraz-18T | 1433 | 0.250973 | 0 |  |
|           |      | Shiraz-25T | 1697 | 0.21945  | 0 |  |
|           |      | Shiraz-28T | 1734 | 0.362882 | 0 |  |
|           |      | Shiraz-29T | 1777 | 0.156747 | 0 |  |
|           |      | Shiraz-38T | 1950 | 0.265916 | 0 |  |
|           |      | Shiraz-71T | 2236 | 0.320072 | 0 |  |
|           |      | Shiraz-3T  | 87   | 0.198593 | 0 |  |
|           |      | Shiraz-4T  | 252  | 0.192083 | 0 |  |
|           |      | Shiraz-36T | 376  | 0.159952 | 0 |  |



|       |      |            |      |          |   |  |  |
|-------|------|------------|------|----------|---|--|--|
|       |      | Shiraz-44T | 630  | 0.903655 | 0 |  |  |
|       |      | Shiraz-46T | 942  | 0.069143 | 0 |  |  |
|       |      | Shiraz-18T | 1433 | 0.250973 | 0 |  |  |
|       |      | Shiraz-25T | 1697 | 0.21945  | 0 |  |  |
|       |      | Shiraz-28T | 1734 | 0.362882 | 0 |  |  |
|       |      | Shiraz-29T | 1777 | 0.156747 | 0 |  |  |
|       |      | Shiraz-38T | 1950 | 0.265916 | 0 |  |  |
|       |      | Shiraz-71T | 2236 | 0.320072 | 0 |  |  |
|       |      | Shiraz-3T  | 87   | 0.198593 | 0 |  |  |
|       |      | Shiraz-4T  | 252  | 0.192083 | 0 |  |  |
|       |      | Shiraz-36T | 376  | 0.159952 | 0 |  |  |
|       |      | Shiraz-44T | 630  | 0.903655 | 0 |  |  |
|       |      | Shiraz-46T | 942  | 0.069143 | 0 |  |  |
|       |      | Shiraz-18T | 1433 | 0.250973 | 0 |  |  |
|       |      | Shiraz-25T | 1697 | 0.21945  | 0 |  |  |
|       |      | Shiraz-28T | 1734 | 0.362882 | 0 |  |  |
|       |      | Shiraz-29T | 1777 | 0.156747 | 0 |  |  |
|       |      | Shiraz-38T | 1950 | 0.265916 | 0 |  |  |
|       |      | Shiraz-71T | 2236 | 0.320072 | 0 |  |  |
| AEBP1 | chr7 | Shiraz-3T  | 87   | 0.198593 | 0 |  |  |
|       |      | Shiraz-3T  | 89   | 0.678641 | 0 |  |  |
|       |      | Shiraz-4T  | 252  | 0.192083 | 0 |  |  |
|       |      | Shiraz-36T | 376  | 0.159952 | 0 |  |  |
|       |      | Shiraz-44T | 632  | 0.902944 | 0 |  |  |
|       |      | Shiraz-46T | 942  | 0.069143 | 0 |  |  |
|       |      | Shiraz-77T | 1223 | 0.215647 | 0 |  |  |
|       |      | Shiraz-18T | 1433 | 0.250973 | 0 |  |  |
|       |      | Shiraz-25T | 1697 | 0.21945  | 0 |  |  |
|       |      | Shiraz-28T | 1734 | 0.362882 | 0 |  |  |
|       |      | Shiraz-29T | 1777 | 0.156747 | 0 |  |  |
|       |      | Shiraz-38T | 1950 | 0.265916 | 0 |  |  |
|       |      | Shiraz-71T | 2236 | 0.320072 | 0 |  |  |
|       |      | Shiraz-3T  | 87   | 0.198593 | 0 |  |  |
|       |      | Shiraz-3T  | 89   | 0.678641 | 0 |  |  |
|       |      | Shiraz-4T  | 252  | 0.192083 | 0 |  |  |
|       |      | Shiraz-36T | 376  | 0.159952 | 0 |  |  |
|       |      | Shiraz-44T | 632  | 0.902944 | 0 |  |  |
|       |      | Shiraz-46T | 942  | 0.069143 | 0 |  |  |
|       |      | Shiraz-77T | 1223 | 0.215647 | 0 |  |  |
|       |      | Shiraz-18T | 1433 | 0.250973 | 0 |  |  |
|       |      | Shiraz-25T | 1697 | 0.21945  | 0 |  |  |
|       |      | Shiraz-28T | 1734 | 0.362882 | 0 |  |  |
|       |      | Shiraz-29T | 1777 | 0.156747 | 0 |  |  |
|       |      | Shiraz-38T | 1950 | 0.265916 | 0 |  |  |
|       |      | Shiraz-71T | 2236 | 0.320072 | 0 |  |  |
|       |      | Shiraz-3T  | 87   | 0.198593 | 0 |  |  |
|       |      | Shiraz-3T  | 89   | 0.678641 | 0 |  |  |

|      |      |            |      |          |           |  |
|------|------|------------|------|----------|-----------|--|
|      |      | Shiraz-4T  | 252  | 0.192083 | 0         |  |
|      |      | Shiraz-36T | 376  | 0.159952 | 0         |  |
|      |      | Shiraz-44T | 632  | 0.902944 | 0         |  |
|      |      | Shiraz-46T | 942  | 0.069143 | 0         |  |
|      |      | Shiraz-77T | 1223 | 0.215647 | 0         |  |
|      |      | Shiraz-18T | 1433 | 0.250973 | 0         |  |
|      |      | Shiraz-25T | 1697 | 0.21945  | 0         |  |
|      |      | Shiraz-28T | 1734 | 0.362882 | 0         |  |
|      |      | Shiraz-29T | 1777 | 0.156747 | 0         |  |
|      |      | Shiraz-38T | 1950 | 0.265916 | 0         |  |
|      |      | Shiraz-71T | 2236 | 0.320072 | 0         |  |
| AFF2 | chrX | Shiraz-3T  | 242  | 0        | -0.336434 |  |
|      |      | Shiraz-4T  | 261  | 0        | -0.336249 |  |
|      |      | Shiraz-16T | 295  | 0.591657 | 0         |  |
|      |      | Shiraz-36T | 433  | 0        | -0.803961 |  |
|      |      | Shiraz-42T | 480  | 0        | -0.232915 |  |
|      |      | Shiraz-44T | 899  | 0        | -1.09697  |  |
|      |      | Shiraz-44T | 907  | 0        | -1.370847 |  |
|      |      | Shiraz-49T | 1170 | 0        | -0.967436 |  |
|      |      | Shiraz-9T  | 1370 | 0.690073 | 0         |  |
|      |      | Shiraz-18T | 1457 | 0.643204 | 0         |  |
|      |      | Shiraz-22T | 1673 | 0.611783 | 0         |  |
|      |      | Shiraz-22T | 1678 | 0.911625 | 0         |  |
|      |      | Shiraz-25T | 1719 | 0.472955 | 0         |  |
|      |      | Shiraz-28T | 1762 | 0.562311 | 0         |  |
|      |      | Shiraz-29T | 1801 | 0.815343 | 0         |  |
|      |      | Shiraz-32T | 1870 | 0.729766 | 0         |  |
|      |      | Shiraz-35T | 1933 | 0.488535 | 0         |  |
|      |      | Shiraz-58T | 2223 | 0.833364 | 0         |  |
|      |      | Shiraz-58T | 2226 | 1.074663 | 0         |  |
|      |      | Shiraz-71T | 2263 | 0.975531 | 0         |  |
|      |      | Shiraz-3T  | 242  | 0        | -0.336434 |  |
|      |      | Shiraz-4T  | 261  | 0        | -0.336249 |  |
|      |      | Shiraz-16T | 295  | 0.591657 | 0         |  |
|      |      | Shiraz-36T | 433  | 0        | -0.803961 |  |
|      |      | Shiraz-42T | 480  | 0        | -0.232915 |  |
|      |      | Shiraz-44T | 899  | 0        | -1.09697  |  |
|      |      | Shiraz-44T | 907  | 0        | -1.370847 |  |
|      |      | Shiraz-49T | 1170 | 0        | -0.967436 |  |
|      |      | Shiraz-9T  | 1370 | 0.690073 | 0         |  |
|      |      | Shiraz-18T | 1457 | 0.643204 | 0         |  |
|      |      | Shiraz-22T | 1673 | 0.611783 | 0         |  |
|      |      | Shiraz-22T | 1678 | 0.911625 | 0         |  |
|      |      | Shiraz-25T | 1719 | 0.472955 | 0         |  |
|      |      | Shiraz-28T | 1762 | 0.562311 | 0         |  |
|      |      | Shiraz-29T | 1801 | 0.815343 | 0         |  |
|      |      | Shiraz-32T | 1870 | 0.729766 | 0         |  |

|       |      |            |      |          |           |  |  |
|-------|------|------------|------|----------|-----------|--|--|
|       |      | Shiraz-35T | 1933 | 0.488535 | 0         |  |  |
|       |      | Shiraz-58T | 2223 | 0.833364 | 0         |  |  |
|       |      | Shiraz-58T | 2226 | 1.074663 | 0         |  |  |
|       |      | Shiraz-71T | 2263 | 0.975531 | 0         |  |  |
|       |      | Shiraz-3T  | 242  | 0        | -0.336434 |  |  |
|       |      | Shiraz-4T  | 261  | 0        | -0.336249 |  |  |
|       |      | Shiraz-16T | 295  | 0.591657 | 0         |  |  |
|       |      | Shiraz-36T | 433  | 0        | -0.803961 |  |  |
|       |      | Shiraz-42T | 480  | 0        | -0.232915 |  |  |
|       |      | Shiraz-44T | 899  | 0        | -1.09697  |  |  |
|       |      | Shiraz-44T | 907  | 0        | -1.370847 |  |  |
|       |      | Shiraz-49T | 1170 | 0        | -0.967436 |  |  |
|       |      | Shiraz-9T  | 1370 | 0.690073 | 0         |  |  |
|       |      | Shiraz-18T | 1457 | 0.643204 | 0         |  |  |
|       |      | Shiraz-22T | 1673 | 0.611783 | 0         |  |  |
|       |      | Shiraz-22T | 1678 | 0.911625 | 0         |  |  |
|       |      | Shiraz-25T | 1719 | 0.472955 | 0         |  |  |
|       |      | Shiraz-28T | 1762 | 0.562311 | 0         |  |  |
|       |      | Shiraz-29T | 1801 | 0.815343 | 0         |  |  |
|       |      | Shiraz-32T | 1870 | 0.729766 | 0         |  |  |
|       |      | Shiraz-35T | 1933 | 0.488535 | 0         |  |  |
|       |      | Shiraz-58T | 2223 | 0.833364 | 0         |  |  |
|       |      | Shiraz-58T | 2226 | 1.074663 | 0         |  |  |
|       |      | Shiraz-71T | 2263 | 0.975531 | 0         |  |  |
| AGAP3 | chr7 | Shiraz-3T  | 90   | 0.219276 | 0         |  |  |
|       |      | Shiraz-3T  | 90   | 0.219276 | 0         |  |  |
|       |      | Shiraz-3T  | 99   | 0.454766 | 0         |  |  |
|       |      | Shiraz-3T  | 99   | 0.454766 | 0         |  |  |
|       |      | Shiraz-4T  | 253  | 0.372918 | 0         |  |  |
|       |      | Shiraz-4T  | 253  | 0.372918 | 0         |  |  |
|       |      | Shiraz-36T | 378  | 0.179558 | 0         |  |  |
|       |      | Shiraz-36T | 378  | 0.179558 | 0         |  |  |
|       |      | Shiraz-44T | 646  | 0.471276 | 0         |  |  |
|       |      | Shiraz-44T | 646  | 0.471276 | 0         |  |  |
|       |      | Shiraz-44T | 647  | 1.496173 | 0         |  |  |
|       |      | Shiraz-44T | 647  | 1.496173 | 0         |  |  |
|       |      | Shiraz-46T | 943  | 0.093799 | 0         |  |  |
|       |      | Shiraz-46T | 943  | 0.093799 | 0         |  |  |
|       |      | Shiraz-9T  | 1325 | 0.221899 | 0         |  |  |
|       |      | Shiraz-9T  | 1325 | 0.221899 | 0         |  |  |
|       |      | Shiraz-18T | 1434 | 0.244465 | 0         |  |  |
|       |      | Shiraz-18T | 1434 | 0.244465 | 0         |  |  |
|       |      | Shiraz-22T | 1555 | 0.427999 | 0         |  |  |
|       |      | Shiraz-22T | 1555 | 0.427999 | 0         |  |  |
|       |      | Shiraz-25T | 1698 | 0.21835  | 0         |  |  |
|       |      | Shiraz-25T | 1698 | 0.21835  | 0         |  |  |
|       |      | Shiraz-28T | 1735 | 0.350744 | 0         |  |  |

|  |  |            |      |          |           |  |  |
|--|--|------------|------|----------|-----------|--|--|
|  |  | Shiraz-28T | 1735 | 0.350744 | 0         |  |  |
|  |  | Shiraz-29T | 1778 | 0.120767 | 0         |  |  |
|  |  | Shiraz-29T | 1778 | 0.120767 | 0         |  |  |
|  |  | Shiraz-32T | 1833 | 0.551336 | 0         |  |  |
|  |  | Shiraz-32T | 1833 | 0.551336 | 0         |  |  |
|  |  | Shiraz-38T | 1951 | 0.250891 | 0         |  |  |
|  |  | Shiraz-38T | 1951 | 0.250891 | 0         |  |  |
|  |  | Shiraz-38T | 1952 | 0        | -0.163211 |  |  |
|  |  | Shiraz-38T | 1952 | 0        | -0.163211 |  |  |
|  |  | Shiraz-53T | 2078 | 0.287202 | 0         |  |  |
|  |  | Shiraz-53T | 2078 | 0.287202 | 0         |  |  |
|  |  | Shiraz-58T | 2162 | 0.221505 | 0         |  |  |
|  |  | Shiraz-58T | 2162 | 0.221505 | 0         |  |  |
|  |  | Shiraz-71T | 2238 | 0.603631 | 0         |  |  |
|  |  | Shiraz-71T | 2238 | 0.603631 | 0         |  |  |
|  |  | Shiraz-3T  | 90   | 0.219276 | 0         |  |  |
|  |  | Shiraz-3T  | 90   | 0.219276 | 0         |  |  |
|  |  | Shiraz-3T  | 99   | 0.454766 | 0         |  |  |
|  |  | Shiraz-3T  | 99   | 0.454766 | 0         |  |  |
|  |  | Shiraz-4T  | 253  | 0.372918 | 0         |  |  |
|  |  | Shiraz-4T  | 253  | 0.372918 | 0         |  |  |
|  |  | Shiraz-36T | 378  | 0.179558 | 0         |  |  |
|  |  | Shiraz-36T | 378  | 0.179558 | 0         |  |  |
|  |  | Shiraz-44T | 646  | 0.471276 | 0         |  |  |
|  |  | Shiraz-44T | 646  | 0.471276 | 0         |  |  |
|  |  | Shiraz-44T | 647  | 1.496173 | 0         |  |  |
|  |  | Shiraz-44T | 647  | 1.496173 | 0         |  |  |
|  |  | Shiraz-46T | 943  | 0.093799 | 0         |  |  |
|  |  | Shiraz-46T | 943  | 0.093799 | 0         |  |  |
|  |  | Shiraz-9T  | 1325 | 0.221899 | 0         |  |  |
|  |  | Shiraz-9T  | 1325 | 0.221899 | 0         |  |  |
|  |  | Shiraz-18T | 1434 | 0.244465 | 0         |  |  |
|  |  | Shiraz-18T | 1434 | 0.244465 | 0         |  |  |
|  |  | Shiraz-22T | 1555 | 0.427999 | 0         |  |  |
|  |  | Shiraz-22T | 1555 | 0.427999 | 0         |  |  |
|  |  | Shiraz-25T | 1698 | 0.21835  | 0         |  |  |
|  |  | Shiraz-25T | 1698 | 0.21835  | 0         |  |  |
|  |  | Shiraz-28T | 1735 | 0.350744 | 0         |  |  |
|  |  | Shiraz-28T | 1735 | 0.350744 | 0         |  |  |
|  |  | Shiraz-29T | 1778 | 0.120767 | 0         |  |  |
|  |  | Shiraz-29T | 1778 | 0.120767 | 0         |  |  |
|  |  | Shiraz-32T | 1833 | 0.551336 | 0         |  |  |
|  |  | Shiraz-32T | 1833 | 0.551336 | 0         |  |  |
|  |  | Shiraz-38T | 1951 | 0.250891 | 0         |  |  |
|  |  | Shiraz-38T | 1951 | 0.250891 | 0         |  |  |
|  |  | Shiraz-38T | 1952 | 0        | -0.163211 |  |  |
|  |  | Shiraz-38T | 1952 | 0        | -0.163211 |  |  |

|       |      |            |      |          |           |  |
|-------|------|------------|------|----------|-----------|--|
|       |      | Shiraz-53T | 2078 | 0.287202 | 0         |  |
|       |      | Shiraz-53T | 2078 | 0.287202 | 0         |  |
|       |      | Shiraz-58T | 2162 | 0.221505 | 0         |  |
|       |      | Shiraz-58T | 2162 | 0.221505 | 0         |  |
|       |      | Shiraz-71T | 2238 | 0.603631 | 0         |  |
|       |      | Shiraz-71T | 2238 | 0.603631 | 0         |  |
|       |      | Shiraz-3T  | 90   | 0.219276 | 0         |  |
|       |      | Shiraz-3T  | 90   | 0.219276 | 0         |  |
|       |      | Shiraz-3T  | 99   | 0.454766 | 0         |  |
|       |      | Shiraz-3T  | 99   | 0.454766 | 0         |  |
|       |      | Shiraz-4T  | 253  | 0.372918 | 0         |  |
|       |      | Shiraz-4T  | 253  | 0.372918 | 0         |  |
|       |      | Shiraz-36T | 378  | 0.179558 | 0         |  |
|       |      | Shiraz-36T | 378  | 0.179558 | 0         |  |
|       |      | Shiraz-44T | 646  | 0.471276 | 0         |  |
|       |      | Shiraz-44T | 646  | 0.471276 | 0         |  |
|       |      | Shiraz-44T | 647  | 1.496173 | 0         |  |
|       |      | Shiraz-44T | 647  | 1.496173 | 0         |  |
|       |      | Shiraz-46T | 943  | 0.093799 | 0         |  |
|       |      | Shiraz-46T | 943  | 0.093799 | 0         |  |
|       |      | Shiraz-9T  | 1325 | 0.221899 | 0         |  |
|       |      | Shiraz-9T  | 1325 | 0.221899 | 0         |  |
|       |      | Shiraz-18T | 1434 | 0.244465 | 0         |  |
|       |      | Shiraz-18T | 1434 | 0.244465 | 0         |  |
|       |      | Shiraz-22T | 1555 | 0.427999 | 0         |  |
|       |      | Shiraz-22T | 1555 | 0.427999 | 0         |  |
|       |      | Shiraz-25T | 1698 | 0.21835  | 0         |  |
|       |      | Shiraz-25T | 1698 | 0.21835  | 0         |  |
|       |      | Shiraz-28T | 1735 | 0.350744 | 0         |  |
|       |      | Shiraz-28T | 1735 | 0.350744 | 0         |  |
|       |      | Shiraz-29T | 1778 | 0.120767 | 0         |  |
|       |      | Shiraz-29T | 1778 | 0.120767 | 0         |  |
|       |      | Shiraz-32T | 1833 | 0.551336 | 0         |  |
|       |      | Shiraz-32T | 1833 | 0.551336 | 0         |  |
|       |      | Shiraz-38T | 1951 | 0.250891 | 0         |  |
|       |      | Shiraz-38T | 1951 | 0.250891 | 0         |  |
|       |      | Shiraz-38T | 1952 | 0        | -0.163211 |  |
|       |      | Shiraz-38T | 1952 | 0        | -0.163211 |  |
|       |      | Shiraz-53T | 2078 | 0.287202 | 0         |  |
|       |      | Shiraz-53T | 2078 | 0.287202 | 0         |  |
|       |      | Shiraz-58T | 2162 | 0.221505 | 0         |  |
|       |      | Shiraz-58T | 2162 | 0.221505 | 0         |  |
|       |      | Shiraz-71T | 2238 | 0.603631 | 0         |  |
|       |      | Shiraz-71T | 2238 | 0.603631 | 0         |  |
| AGBL3 | chr7 | Shiraz-3T  | 90   | 0.219276 | 0         |  |
|       |      | Shiraz-4T  | 253  | 0.372918 | 0         |  |
|       |      | Shiraz-36T | 378  | 0.179558 | 0         |  |

|       |      |            |      |          |           |  |  |
|-------|------|------------|------|----------|-----------|--|--|
|       |      | Shiraz-46T | 943  | 0.093799 | 0         |  |  |
|       |      | Shiraz-77T | 1225 | 0        | -0.117922 |  |  |
|       |      | Shiraz-9T  | 1325 | 0.221899 | 0         |  |  |
|       |      | Shiraz-18T | 1434 | 0.244465 | 0         |  |  |
|       |      | Shiraz-22T | 1553 | 0        | -0.213234 |  |  |
|       |      | Shiraz-25T | 1698 | 0.21835  | 0         |  |  |
|       |      | Shiraz-28T | 1735 | 0.350744 | 0         |  |  |
|       |      | Shiraz-29T | 1778 | 0.120767 | 0         |  |  |
|       |      | Shiraz-32T | 1833 | 0.551336 | 0         |  |  |
|       |      | Shiraz-38T | 1951 | 0.250891 | 0         |  |  |
|       |      | Shiraz-53T | 2078 | 0.287202 | 0         |  |  |
|       |      | Shiraz-58T | 2162 | 0.221505 | 0         |  |  |
|       |      | Shiraz-71T | 2238 | 0.603631 | 0         |  |  |
|       |      | Shiraz-3T  | 90   | 0.219276 | 0         |  |  |
|       |      | Shiraz-4T  | 253  | 0.372918 | 0         |  |  |
|       |      | Shiraz-36T | 378  | 0.179558 | 0         |  |  |
|       |      | Shiraz-46T | 943  | 0.093799 | 0         |  |  |
|       |      | Shiraz-77T | 1225 | 0        | -0.117922 |  |  |
|       |      | Shiraz-9T  | 1325 | 0.221899 | 0         |  |  |
|       |      | Shiraz-18T | 1434 | 0.244465 | 0         |  |  |
|       |      | Shiraz-22T | 1553 | 0        | -0.213234 |  |  |
|       |      | Shiraz-25T | 1698 | 0.21835  | 0         |  |  |
|       |      | Shiraz-28T | 1735 | 0.350744 | 0         |  |  |
|       |      | Shiraz-29T | 1778 | 0.120767 | 0         |  |  |
|       |      | Shiraz-32T | 1833 | 0.551336 | 0         |  |  |
|       |      | Shiraz-38T | 1951 | 0.250891 | 0         |  |  |
|       |      | Shiraz-53T | 2078 | 0.287202 | 0         |  |  |
|       |      | Shiraz-58T | 2162 | 0.221505 | 0         |  |  |
|       |      | Shiraz-71T | 2238 | 0.603631 | 0         |  |  |
|       |      | Shiraz-3T  | 90   | 0.219276 | 0         |  |  |
|       |      | Shiraz-4T  | 253  | 0.372918 | 0         |  |  |
|       |      | Shiraz-36T | 378  | 0.179558 | 0         |  |  |
|       |      | Shiraz-46T | 943  | 0.093799 | 0         |  |  |
|       |      | Shiraz-77T | 1225 | 0        | -0.117922 |  |  |
|       |      | Shiraz-9T  | 1325 | 0.221899 | 0         |  |  |
|       |      | Shiraz-18T | 1434 | 0.244465 | 0         |  |  |
|       |      | Shiraz-22T | 1553 | 0        | -0.213234 |  |  |
|       |      | Shiraz-25T | 1698 | 0.21835  | 0         |  |  |
|       |      | Shiraz-28T | 1735 | 0.350744 | 0         |  |  |
|       |      | Shiraz-29T | 1778 | 0.120767 | 0         |  |  |
|       |      | Shiraz-32T | 1833 | 0.551336 | 0         |  |  |
|       |      | Shiraz-38T | 1951 | 0.250891 | 0         |  |  |
|       |      | Shiraz-53T | 2078 | 0.287202 | 0         |  |  |
|       |      | Shiraz-58T | 2162 | 0.221505 | 0         |  |  |
|       |      | Shiraz-71T | 2238 | 0.603631 | 0         |  |  |
| AGFG2 | chr7 | Shiraz-3T  | 90   | 0.219276 | 0         |  |  |
|       |      | Shiraz-3T  | 94   | 0.74735  | 0         |  |  |

|  |  |            |      |          |           |  |  |
|--|--|------------|------|----------|-----------|--|--|
|  |  | Shiraz-4T  | 253  | 0.372918 | 0         |  |  |
|  |  | Shiraz-31T | 316  | 0.219196 | 0         |  |  |
|  |  | Shiraz-36T | 378  | 0.179558 | 0         |  |  |
|  |  | Shiraz-36T | 381  | 0.332628 | 0         |  |  |
|  |  | Shiraz-44T | 639  | 1.035032 | 0         |  |  |
|  |  | Shiraz-46T | 943  | 0.093799 | 0         |  |  |
|  |  | Shiraz-46T | 946  | 0.299835 | 0         |  |  |
|  |  | Shiraz-47T | 1030 | 0.257728 | 0         |  |  |
|  |  | Shiraz-49T | 1120 | 0.281656 | 0         |  |  |
|  |  | Shiraz-77T | 1225 | 0        | -0.117922 |  |  |
|  |  | Shiraz-77T | 1227 | 0.196445 | 0         |  |  |
|  |  | Shiraz-9T  | 1324 | 0.679266 | 0         |  |  |
|  |  | Shiraz-18T | 1434 | 0.244465 | 0         |  |  |
|  |  | Shiraz-22T | 1549 | 0        | -0.319623 |  |  |
|  |  | Shiraz-22T | 1551 | 0.324011 | 0         |  |  |
|  |  | Shiraz-25T | 1698 | 0.21835  | 0         |  |  |
|  |  | Shiraz-28T | 1735 | 0.350744 | 0         |  |  |
|  |  | Shiraz-29T | 1778 | 0.120767 | 0         |  |  |
|  |  | Shiraz-32T | 1833 | 0.551336 | 0         |  |  |
|  |  | Shiraz-32T | 1834 | 1.485392 | 0         |  |  |
|  |  | Shiraz-38T | 1951 | 0.250891 | 0         |  |  |
|  |  | Shiraz-53T | 2078 | 0.287202 | 0         |  |  |
|  |  | Shiraz-58T | 2160 | 0.399007 | 0         |  |  |
|  |  | Shiraz-71T | 2238 | 0.603631 | 0         |  |  |
|  |  | Shiraz-3T  | 90   | 0.219276 | 0         |  |  |
|  |  | Shiraz-3T  | 94   | 0.74735  | 0         |  |  |
|  |  | Shiraz-4T  | 253  | 0.372918 | 0         |  |  |
|  |  | Shiraz-31T | 316  | 0.219196 | 0         |  |  |
|  |  | Shiraz-36T | 378  | 0.179558 | 0         |  |  |
|  |  | Shiraz-36T | 381  | 0.332628 | 0         |  |  |
|  |  | Shiraz-44T | 639  | 1.035032 | 0         |  |  |
|  |  | Shiraz-46T | 943  | 0.093799 | 0         |  |  |
|  |  | Shiraz-46T | 946  | 0.299835 | 0         |  |  |
|  |  | Shiraz-47T | 1030 | 0.257728 | 0         |  |  |
|  |  | Shiraz-49T | 1120 | 0.281656 | 0         |  |  |
|  |  | Shiraz-77T | 1225 | 0        | -0.117922 |  |  |
|  |  | Shiraz-77T | 1227 | 0.196445 | 0         |  |  |
|  |  | Shiraz-9T  | 1324 | 0.679266 | 0         |  |  |
|  |  | Shiraz-18T | 1434 | 0.244465 | 0         |  |  |
|  |  | Shiraz-22T | 1549 | 0        | -0.319623 |  |  |
|  |  | Shiraz-22T | 1551 | 0.324011 | 0         |  |  |
|  |  | Shiraz-25T | 1698 | 0.21835  | 0         |  |  |
|  |  | Shiraz-28T | 1735 | 0.350744 | 0         |  |  |
|  |  | Shiraz-29T | 1778 | 0.120767 | 0         |  |  |
|  |  | Shiraz-32T | 1833 | 0.551336 | 0         |  |  |
|  |  | Shiraz-32T | 1834 | 1.485392 | 0         |  |  |
|  |  | Shiraz-38T | 1951 | 0.250891 | 0         |  |  |

|     |      |            |      |          |           |  |
|-----|------|------------|------|----------|-----------|--|
|     |      | Shiraz-53T | 2078 | 0.287202 | 0         |  |
|     |      | Shiraz-58T | 2160 | 0.399007 | 0         |  |
|     |      | Shiraz-71T | 2238 | 0.603631 | 0         |  |
|     |      | Shiraz-3T  | 90   | 0.219276 | 0         |  |
|     |      | Shiraz-3T  | 94   | 0.74735  | 0         |  |
|     |      | Shiraz-4T  | 253  | 0.372918 | 0         |  |
|     |      | Shiraz-31T | 316  | 0.219196 | 0         |  |
|     |      | Shiraz-36T | 378  | 0.179558 | 0         |  |
|     |      | Shiraz-36T | 381  | 0.332628 | 0         |  |
|     |      | Shiraz-44T | 639  | 1.035032 | 0         |  |
|     |      | Shiraz-46T | 943  | 0.093799 | 0         |  |
|     |      | Shiraz-46T | 946  | 0.299835 | 0         |  |
|     |      | Shiraz-47T | 1030 | 0.257728 | 0         |  |
|     |      | Shiraz-49T | 1120 | 0.281656 | 0         |  |
|     |      | Shiraz-77T | 1225 | 0        | -0.117922 |  |
|     |      | Shiraz-77T | 1227 | 0.196445 | 0         |  |
|     |      | Shiraz-9T  | 1324 | 0.679266 | 0         |  |
|     |      | Shiraz-18T | 1434 | 0.244465 | 0         |  |
|     |      | Shiraz-22T | 1549 | 0        | -0.319623 |  |
|     |      | Shiraz-22T | 1551 | 0.324011 | 0         |  |
|     |      | Shiraz-25T | 1698 | 0.21835  | 0         |  |
|     |      | Shiraz-28T | 1735 | 0.350744 | 0         |  |
|     |      | Shiraz-29T | 1778 | 0.120767 | 0         |  |
|     |      | Shiraz-32T | 1833 | 0.551336 | 0         |  |
|     |      | Shiraz-32T | 1834 | 1.485392 | 0         |  |
|     |      | Shiraz-38T | 1951 | 0.250891 | 0         |  |
|     |      | Shiraz-53T | 2078 | 0.287202 | 0         |  |
|     |      | Shiraz-58T | 2160 | 0.399007 | 0         |  |
|     |      | Shiraz-71T | 2238 | 0.603631 | 0         |  |
| AGK | chr7 | Shiraz-3T  | 90   | 0.219276 | 0         |  |
|     |      | Shiraz-4T  | 253  | 0.372918 | 0         |  |
|     |      | Shiraz-36T | 378  | 0.179558 | 0         |  |
|     |      | Shiraz-46T | 943  | 0.093799 | 0         |  |
|     |      | Shiraz-77T | 1225 | 0        | -0.117922 |  |
|     |      | Shiraz-9T  | 1325 | 0.221899 | 0         |  |
|     |      | Shiraz-18T | 1434 | 0.244465 | 0         |  |
|     |      | Shiraz-25T | 1698 | 0.21835  | 0         |  |
|     |      | Shiraz-28T | 1735 | 0.350744 | 0         |  |
|     |      | Shiraz-29T | 1778 | 0.120767 | 0         |  |
|     |      | Shiraz-32T | 1833 | 0.551336 | 0         |  |
|     |      | Shiraz-38T | 1951 | 0.250891 | 0         |  |
|     |      | Shiraz-53T | 2078 | 0.287202 | 0         |  |
|     |      | Shiraz-58T | 2162 | 0.221505 | 0         |  |
|     |      | Shiraz-71T | 2238 | 0.603631 | 0         |  |
|     |      | Shiraz-3T  | 90   | 0.219276 | 0         |  |
|     |      | Shiraz-4T  | 253  | 0.372918 | 0         |  |
|     |      | Shiraz-36T | 378  | 0.179558 | 0         |  |



|      |      |            |      |          |           |  |  |
|------|------|------------|------|----------|-----------|--|--|
|      |      | Shiraz-46T | 943  | 0.093799 | 0         |  |  |
|      |      | Shiraz-77T | 1225 | 0        | -0.117922 |  |  |
|      |      | Shiraz-9T  | 1325 | 0.221899 | 0         |  |  |
|      |      | Shiraz-18T | 1434 | 0.244465 | 0         |  |  |
|      |      | Shiraz-25T | 1698 | 0.21835  | 0         |  |  |
|      |      | Shiraz-28T | 1735 | 0.350744 | 0         |  |  |
|      |      | Shiraz-29T | 1778 | 0.120767 | 0         |  |  |
|      |      | Shiraz-32T | 1833 | 0.551336 | 0         |  |  |
|      |      | Shiraz-38T | 1951 | 0.250891 | 0         |  |  |
|      |      | Shiraz-53T | 2078 | 0.287202 | 0         |  |  |
|      |      | Shiraz-58T | 2162 | 0.221505 | 0         |  |  |
|      |      | Shiraz-71T | 2238 | 0.603631 | 0         |  |  |
|      |      | Shiraz-3T  | 90   | 0.219276 | 0         |  |  |
|      |      | Shiraz-4T  | 253  | 0.372918 | 0         |  |  |
|      |      | Shiraz-36T | 378  | 0.179558 | 0         |  |  |
|      |      | Shiraz-46T | 943  | 0.093799 | 0         |  |  |
|      |      | Shiraz-77T | 1225 | 0        | -0.117922 |  |  |
|      |      | Shiraz-9T  | 1325 | 0.221899 | 0         |  |  |
|      |      | Shiraz-18T | 1434 | 0.244465 | 0         |  |  |
|      |      | Shiraz-25T | 1698 | 0.21835  | 0         |  |  |
|      |      | Shiraz-28T | 1735 | 0.350744 | 0         |  |  |
|      |      | Shiraz-29T | 1778 | 0.120767 | 0         |  |  |
|      |      | Shiraz-32T | 1833 | 0.551336 | 0         |  |  |
|      |      | Shiraz-38T | 1951 | 0.250891 | 0         |  |  |
|      |      | Shiraz-53T | 2078 | 0.287202 | 0         |  |  |
|      |      | Shiraz-58T | 2162 | 0.221505 | 0         |  |  |
|      |      | Shiraz-71T | 2238 | 0.603631 | 0         |  |  |
| AGR2 | chr7 | Shiraz-4T  | 252  | 0.192083 | 0         |  |  |
|      |      | Shiraz-36T | 376  | 0.159952 | 0         |  |  |
|      |      | Shiraz-44T | 628  | 0        | -0.444379 |  |  |
|      |      | Shiraz-47T | 1027 | 0        | -0.117848 |  |  |
|      |      | Shiraz-49T | 1117 | 0        | -0.168296 |  |  |
|      |      | Shiraz-77T | 1222 | 0        | -0.113002 |  |  |
|      |      | Shiraz-18T | 1433 | 0.250973 | 0         |  |  |
|      |      | Shiraz-22T | 1543 | 0        | -0.513696 |  |  |
|      |      | Shiraz-25T | 1697 | 0.21945  | 0         |  |  |
|      |      | Shiraz-28T | 1734 | 0.362882 | 0         |  |  |
|      |      | Shiraz-29T | 1777 | 0.156747 | 0         |  |  |
|      |      | Shiraz-38T | 1950 | 0.265916 | 0         |  |  |
|      |      | Shiraz-58T | 2157 | 0        | -0.213872 |  |  |
|      |      | Shiraz-71T | 2236 | 0.320072 | 0         |  |  |
|      |      | Shiraz-4T  | 252  | 0.192083 | 0         |  |  |
|      |      | Shiraz-36T | 376  | 0.159952 | 0         |  |  |
|      |      | Shiraz-44T | 628  | 0        | -0.444379 |  |  |
|      |      | Shiraz-47T | 1027 | 0        | -0.117848 |  |  |
|      |      | Shiraz-49T | 1117 | 0        | -0.168296 |  |  |
|      |      | Shiraz-77T | 1222 | 0        | -0.113002 |  |  |

|      |      |            |      |          |           |  |  |
|------|------|------------|------|----------|-----------|--|--|
|      |      | Shiraz-18T | 1433 | 0.250973 | 0         |  |  |
|      |      | Shiraz-22T | 1543 | 0        | -0.513696 |  |  |
|      |      | Shiraz-25T | 1697 | 0.21945  | 0         |  |  |
|      |      | Shiraz-28T | 1734 | 0.362882 | 0         |  |  |
|      |      | Shiraz-29T | 1777 | 0.156747 | 0         |  |  |
|      |      | Shiraz-38T | 1950 | 0.265916 | 0         |  |  |
|      |      | Shiraz-58T | 2157 | 0        | -0.213872 |  |  |
|      |      | Shiraz-71T | 2236 | 0.320072 | 0         |  |  |
|      |      | Shiraz-4T  | 252  | 0.192083 | 0         |  |  |
|      |      | Shiraz-36T | 376  | 0.159952 | 0         |  |  |
|      |      | Shiraz-44T | 628  | 0        | -0.444379 |  |  |
|      |      | Shiraz-47T | 1027 | 0        | -0.117848 |  |  |
|      |      | Shiraz-49T | 1117 | 0        | -0.168296 |  |  |
|      |      | Shiraz-77T | 1222 | 0        | -0.113002 |  |  |
|      |      | Shiraz-18T | 1433 | 0.250973 | 0         |  |  |
|      |      | Shiraz-22T | 1543 | 0        | -0.513696 |  |  |
|      |      | Shiraz-25T | 1697 | 0.21945  | 0         |  |  |
|      |      | Shiraz-28T | 1734 | 0.362882 | 0         |  |  |
|      |      | Shiraz-29T | 1777 | 0.156747 | 0         |  |  |
|      |      | Shiraz-38T | 1950 | 0.265916 | 0         |  |  |
|      |      | Shiraz-58T | 2157 | 0        | -0.213872 |  |  |
|      |      | Shiraz-71T | 2236 | 0.320072 | 0         |  |  |
| AGR3 | chr7 | Shiraz-4T  | 252  | 0.192083 | 0         |  |  |
|      |      | Shiraz-36T | 376  | 0.159952 | 0         |  |  |
|      |      | Shiraz-44T | 628  | 0        | -0.444379 |  |  |
|      |      | Shiraz-47T | 1027 | 0        | -0.117848 |  |  |
|      |      | Shiraz-49T | 1117 | 0        | -0.168296 |  |  |
|      |      | Shiraz-77T | 1222 | 0        | -0.113002 |  |  |
|      |      | Shiraz-18T | 1433 | 0.250973 | 0         |  |  |
|      |      | Shiraz-22T | 1543 | 0        | -0.513696 |  |  |
|      |      | Shiraz-25T | 1697 | 0.21945  | 0         |  |  |
|      |      | Shiraz-28T | 1734 | 0.362882 | 0         |  |  |
|      |      | Shiraz-29T | 1777 | 0.156747 | 0         |  |  |
|      |      | Shiraz-38T | 1950 | 0.265916 | 0         |  |  |
|      |      | Shiraz-58T | 2157 | 0        | -0.213872 |  |  |
|      |      | Shiraz-71T | 2236 | 0.320072 | 0         |  |  |
|      |      | Shiraz-4T  | 252  | 0.192083 | 0         |  |  |
|      |      | Shiraz-36T | 376  | 0.159952 | 0         |  |  |
|      |      | Shiraz-44T | 628  | 0        | -0.444379 |  |  |
|      |      | Shiraz-47T | 1027 | 0        | -0.117848 |  |  |
|      |      | Shiraz-49T | 1117 | 0        | -0.168296 |  |  |
|      |      | Shiraz-77T | 1222 | 0        | -0.113002 |  |  |
|      |      | Shiraz-18T | 1433 | 0.250973 | 0         |  |  |
|      |      | Shiraz-22T | 1543 | 0        | -0.513696 |  |  |
|      |      | Shiraz-25T | 1697 | 0.21945  | 0         |  |  |
|      |      | Shiraz-28T | 1734 | 0.362882 | 0         |  |  |
|      |      | Shiraz-29T | 1777 | 0.156747 | 0         |  |  |

|       |      |            |      |          |           |  |  |
|-------|------|------------|------|----------|-----------|--|--|
|       |      | Shiraz-38T | 1950 | 0.265916 | 0         |  |  |
|       |      | Shiraz-58T | 2157 | 0        | -0.213872 |  |  |
|       |      | Shiraz-71T | 2236 | 0.320072 | 0         |  |  |
|       |      | Shiraz-4T  | 252  | 0.192083 | 0         |  |  |
|       |      | Shiraz-36T | 376  | 0.159952 | 0         |  |  |
|       |      | Shiraz-44T | 628  | 0        | -0.444379 |  |  |
|       |      | Shiraz-47T | 1027 | 0        | -0.117848 |  |  |
|       |      | Shiraz-49T | 1117 | 0        | -0.168296 |  |  |
|       |      | Shiraz-77T | 1222 | 0        | -0.113002 |  |  |
|       |      | Shiraz-18T | 1433 | 0.250973 | 0         |  |  |
|       |      | Shiraz-22T | 1543 | 0        | -0.513696 |  |  |
|       |      | Shiraz-25T | 1697 | 0.21945  | 0         |  |  |
|       |      | Shiraz-28T | 1734 | 0.362882 | 0         |  |  |
|       |      | Shiraz-29T | 1777 | 0.156747 | 0         |  |  |
|       |      | Shiraz-38T | 1950 | 0.265916 | 0         |  |  |
|       |      | Shiraz-58T | 2157 | 0        | -0.213872 |  |  |
|       |      | Shiraz-71T | 2236 | 0.320072 | 0         |  |  |
| AGTR2 | chrX | Shiraz-3T  | 242  | 0        | -0.336434 |  |  |
|       |      | Shiraz-4T  | 261  | 0        | -0.336249 |  |  |
|       |      | Shiraz-16T | 295  | 0.591657 | 0         |  |  |
|       |      | Shiraz-36T | 433  | 0        | -0.803961 |  |  |
|       |      | Shiraz-44T | 899  | 0        | -1.09697  |  |  |
|       |      | Shiraz-49T | 1170 | 0        | -0.967436 |  |  |
|       |      | Shiraz-18T | 1457 | 0.643204 | 0         |  |  |
|       |      | Shiraz-22T | 1673 | 0.611783 | 0         |  |  |
|       |      | Shiraz-25T | 1719 | 0.472955 | 0         |  |  |
|       |      | Shiraz-28T | 1762 | 0.562311 | 0         |  |  |
|       |      | Shiraz-29T | 1801 | 0.815343 | 0         |  |  |
|       |      | Shiraz-32T | 1870 | 0.729766 | 0         |  |  |
|       |      | Shiraz-35T | 1933 | 0.488535 | 0         |  |  |
|       |      | Shiraz-58T | 2223 | 0.833364 | 0         |  |  |
|       |      | Shiraz-71T | 2263 | 0.975531 | 0         |  |  |
|       |      | Shiraz-3T  | 242  | 0        | -0.336434 |  |  |
|       |      | Shiraz-4T  | 261  | 0        | -0.336249 |  |  |
|       |      | Shiraz-16T | 295  | 0.591657 | 0         |  |  |
|       |      | Shiraz-36T | 433  | 0        | -0.803961 |  |  |
|       |      | Shiraz-44T | 899  | 0        | -1.09697  |  |  |
|       |      | Shiraz-49T | 1170 | 0        | -0.967436 |  |  |
|       |      | Shiraz-18T | 1457 | 0.643204 | 0         |  |  |
|       |      | Shiraz-22T | 1673 | 0.611783 | 0         |  |  |
|       |      | Shiraz-25T | 1719 | 0.472955 | 0         |  |  |
|       |      | Shiraz-28T | 1762 | 0.562311 | 0         |  |  |
|       |      | Shiraz-29T | 1801 | 0.815343 | 0         |  |  |
|       |      | Shiraz-32T | 1870 | 0.729766 | 0         |  |  |
|       |      | Shiraz-35T | 1933 | 0.488535 | 0         |  |  |
|       |      | Shiraz-58T | 2223 | 0.833364 | 0         |  |  |
|       |      | Shiraz-71T | 2263 | 0.975531 | 0         |  |  |

|        |      |            |      |          |           |  |  |
|--------|------|------------|------|----------|-----------|--|--|
|        |      | Shiraz-3T  | 242  | 0        | -0.336434 |  |  |
|        |      | Shiraz-4T  | 261  | 0        | -0.336249 |  |  |
|        |      | Shiraz-16T | 295  | 0.591657 | 0         |  |  |
|        |      | Shiraz-36T | 433  | 0        | -0.803961 |  |  |
|        |      | Shiraz-44T | 899  | 0        | -1.09697  |  |  |
|        |      | Shiraz-49T | 1170 | 0        | -0.967436 |  |  |
|        |      | Shiraz-18T | 1457 | 0.643204 | 0         |  |  |
|        |      | Shiraz-22T | 1673 | 0.611783 | 0         |  |  |
|        |      | Shiraz-25T | 1719 | 0.472955 | 0         |  |  |
|        |      | Shiraz-28T | 1762 | 0.562311 | 0         |  |  |
|        |      | Shiraz-29T | 1801 | 0.815343 | 0         |  |  |
|        |      | Shiraz-32T | 1870 | 0.729766 | 0         |  |  |
|        |      | Shiraz-35T | 1933 | 0.488535 | 0         |  |  |
|        |      | Shiraz-58T | 2223 | 0.833364 | 0         |  |  |
|        |      | Shiraz-71T | 2263 | 0.975531 | 0         |  |  |
| AGXT2  | chr5 | Shiraz-4T  | 250  | 0.262252 | 0         |  |  |
|        |      | Shiraz-16T | 266  | 0.321724 | 0         |  |  |
|        |      | Shiraz-18T | 1429 | 0        | -0.314125 |  |  |
|        |      | Shiraz-25T | 1694 | 0.201602 | 0         |  |  |
|        |      | Shiraz-28T | 1731 | 0.295447 | 0         |  |  |
|        |      | Shiraz-29T | 1773 | 0.090981 | 0         |  |  |
|        |      | Shiraz-40T | 2016 | 0.376634 | 0         |  |  |
|        |      | Shiraz-4T  | 250  | 0.262252 | 0         |  |  |
|        |      | Shiraz-16T | 266  | 0.321724 | 0         |  |  |
|        |      | Shiraz-18T | 1429 | 0        | -0.314125 |  |  |
|        |      | Shiraz-25T | 1694 | 0.201602 | 0         |  |  |
|        |      | Shiraz-28T | 1731 | 0.295447 | 0         |  |  |
|        |      | Shiraz-29T | 1773 | 0.090981 | 0         |  |  |
|        |      | Shiraz-40T | 2016 | 0.376634 | 0         |  |  |
|        |      | Shiraz-4T  | 250  | 0.262252 | 0         |  |  |
|        |      | Shiraz-16T | 266  | 0.321724 | 0         |  |  |
|        |      | Shiraz-18T | 1429 | 0        | -0.314125 |  |  |
|        |      | Shiraz-25T | 1694 | 0.201602 | 0         |  |  |
|        |      | Shiraz-28T | 1731 | 0.295447 | 0         |  |  |
|        |      | Shiraz-29T | 1773 | 0.090981 | 0         |  |  |
|        |      | Shiraz-40T | 2016 | 0.376634 | 0         |  |  |
| AHCYL2 | chr7 | Shiraz-3T  | 90   | 0.219276 | 0         |  |  |
|        |      | Shiraz-3T  | 90   | 0.219276 | 0         |  |  |
|        |      | Shiraz-3T  | 96   | 0.428308 | 0         |  |  |
|        |      | Shiraz-3T  | 96   | 0.428308 | 0         |  |  |
|        |      | Shiraz-4T  | 253  | 0.372918 | 0         |  |  |
|        |      | Shiraz-4T  | 253  | 0.372918 | 0         |  |  |
|        |      | Shiraz-31T | 317  | 0.204382 | 0         |  |  |
|        |      | Shiraz-31T | 317  | 0.204382 | 0         |  |  |
|        |      | Shiraz-36T | 378  | 0.179558 | 0         |  |  |
|        |      | Shiraz-36T | 378  | 0.179558 | 0         |  |  |
|        |      | Shiraz-44T | 642  | 0.408617 | 0         |  |  |

|  |  |            |      |          |           |  |  |
|--|--|------------|------|----------|-----------|--|--|
|  |  | Shiraz-44T | 642  | 0.408617 | 0         |  |  |
|  |  | Shiraz-46T | 943  | 0.093799 | 0         |  |  |
|  |  | Shiraz-46T | 943  | 0.093799 | 0         |  |  |
|  |  | Shiraz-47T | 1032 | 0.171484 | 0         |  |  |
|  |  | Shiraz-47T | 1032 | 0.171484 | 0         |  |  |
|  |  | Shiraz-77T | 1225 | 0        | -0.117922 |  |  |
|  |  | Shiraz-77T | 1225 | 0        | -0.117922 |  |  |
|  |  | Shiraz-77T | 1229 | 0.051661 | 0         |  |  |
|  |  | Shiraz-77T | 1229 | 0.051661 | 0         |  |  |
|  |  | Shiraz-9T  | 1325 | 0.221899 | 0         |  |  |
|  |  | Shiraz-9T  | 1325 | 0.221899 | 0         |  |  |
|  |  | Shiraz-18T | 1434 | 0.244465 | 0         |  |  |
|  |  | Shiraz-18T | 1434 | 0.244465 | 0         |  |  |
|  |  | Shiraz-25T | 1698 | 0.21835  | 0         |  |  |
|  |  | Shiraz-25T | 1698 | 0.21835  | 0         |  |  |
|  |  | Shiraz-28T | 1735 | 0.350744 | 0         |  |  |
|  |  | Shiraz-28T | 1735 | 0.350744 | 0         |  |  |
|  |  | Shiraz-29T | 1778 | 0.120767 | 0         |  |  |
|  |  | Shiraz-29T | 1778 | 0.120767 | 0         |  |  |
|  |  | Shiraz-32T | 1833 | 0.551336 | 0         |  |  |
|  |  | Shiraz-32T | 1833 | 0.551336 | 0         |  |  |
|  |  | Shiraz-38T | 1951 | 0.250891 | 0         |  |  |
|  |  | Shiraz-38T | 1951 | 0.250891 | 0         |  |  |
|  |  | Shiraz-53T | 2078 | 0.287202 | 0         |  |  |
|  |  | Shiraz-53T | 2078 | 0.287202 | 0         |  |  |
|  |  | Shiraz-71T | 2238 | 0.603631 | 0         |  |  |
|  |  | Shiraz-71T | 2238 | 0.603631 | 0         |  |  |
|  |  | Shiraz-3T  | 90   | 0.219276 | 0         |  |  |
|  |  | Shiraz-3T  | 90   | 0.219276 | 0         |  |  |
|  |  | Shiraz-3T  | 96   | 0.428308 | 0         |  |  |
|  |  | Shiraz-3T  | 96   | 0.428308 | 0         |  |  |
|  |  | Shiraz-4T  | 253  | 0.372918 | 0         |  |  |
|  |  | Shiraz-4T  | 253  | 0.372918 | 0         |  |  |
|  |  | Shiraz-31T | 317  | 0.204382 | 0         |  |  |
|  |  | Shiraz-31T | 317  | 0.204382 | 0         |  |  |
|  |  | Shiraz-36T | 378  | 0.179558 | 0         |  |  |
|  |  | Shiraz-36T | 378  | 0.179558 | 0         |  |  |
|  |  | Shiraz-44T | 642  | 0.408617 | 0         |  |  |
|  |  | Shiraz-44T | 642  | 0.408617 | 0         |  |  |
|  |  | Shiraz-46T | 943  | 0.093799 | 0         |  |  |
|  |  | Shiraz-46T | 943  | 0.093799 | 0         |  |  |
|  |  | Shiraz-47T | 1032 | 0.171484 | 0         |  |  |
|  |  | Shiraz-47T | 1032 | 0.171484 | 0         |  |  |
|  |  | Shiraz-77T | 1225 | 0        | -0.117922 |  |  |
|  |  | Shiraz-77T | 1225 | 0        | -0.117922 |  |  |
|  |  | Shiraz-77T | 1229 | 0.051661 | 0         |  |  |
|  |  | Shiraz-77T | 1229 | 0.051661 | 0         |  |  |

|  |  |            |      |          |           |  |  |
|--|--|------------|------|----------|-----------|--|--|
|  |  | Shiraz-9T  | 1325 | 0.221899 | 0         |  |  |
|  |  | Shiraz-9T  | 1325 | 0.221899 | 0         |  |  |
|  |  | Shiraz-18T | 1434 | 0.244465 | 0         |  |  |
|  |  | Shiraz-18T | 1434 | 0.244465 | 0         |  |  |
|  |  | Shiraz-25T | 1698 | 0.21835  | 0         |  |  |
|  |  | Shiraz-25T | 1698 | 0.21835  | 0         |  |  |
|  |  | Shiraz-28T | 1735 | 0.350744 | 0         |  |  |
|  |  | Shiraz-28T | 1735 | 0.350744 | 0         |  |  |
|  |  | Shiraz-29T | 1778 | 0.120767 | 0         |  |  |
|  |  | Shiraz-29T | 1778 | 0.120767 | 0         |  |  |
|  |  | Shiraz-32T | 1833 | 0.551336 | 0         |  |  |
|  |  | Shiraz-32T | 1833 | 0.551336 | 0         |  |  |
|  |  | Shiraz-38T | 1951 | 0.250891 | 0         |  |  |
|  |  | Shiraz-38T | 1951 | 0.250891 | 0         |  |  |
|  |  | Shiraz-53T | 2078 | 0.287202 | 0         |  |  |
|  |  | Shiraz-53T | 2078 | 0.287202 | 0         |  |  |
|  |  | Shiraz-71T | 2238 | 0.603631 | 0         |  |  |
|  |  | Shiraz-71T | 2238 | 0.603631 | 0         |  |  |
|  |  | Shiraz-3T  | 90   | 0.219276 | 0         |  |  |
|  |  | Shiraz-3T  | 90   | 0.219276 | 0         |  |  |
|  |  | Shiraz-3T  | 96   | 0.428308 | 0         |  |  |
|  |  | Shiraz-3T  | 96   | 0.428308 | 0         |  |  |
|  |  | Shiraz-4T  | 253  | 0.372918 | 0         |  |  |
|  |  | Shiraz-4T  | 253  | 0.372918 | 0         |  |  |
|  |  | Shiraz-31T | 317  | 0.204382 | 0         |  |  |
|  |  | Shiraz-31T | 317  | 0.204382 | 0         |  |  |
|  |  | Shiraz-36T | 378  | 0.179558 | 0         |  |  |
|  |  | Shiraz-36T | 378  | 0.179558 | 0         |  |  |
|  |  | Shiraz-44T | 642  | 0.408617 | 0         |  |  |
|  |  | Shiraz-44T | 642  | 0.408617 | 0         |  |  |
|  |  | Shiraz-46T | 943  | 0.093799 | 0         |  |  |
|  |  | Shiraz-46T | 943  | 0.093799 | 0         |  |  |
|  |  | Shiraz-47T | 1032 | 0.171484 | 0         |  |  |
|  |  | Shiraz-47T | 1032 | 0.171484 | 0         |  |  |
|  |  | Shiraz-77T | 1225 | 0        | -0.117922 |  |  |
|  |  | Shiraz-77T | 1225 | 0        | -0.117922 |  |  |
|  |  | Shiraz-77T | 1229 | 0.051661 | 0         |  |  |
|  |  | Shiraz-77T | 1229 | 0.051661 | 0         |  |  |
|  |  | Shiraz-9T  | 1325 | 0.221899 | 0         |  |  |
|  |  | Shiraz-9T  | 1325 | 0.221899 | 0         |  |  |
|  |  | Shiraz-18T | 1434 | 0.244465 | 0         |  |  |
|  |  | Shiraz-18T | 1434 | 0.244465 | 0         |  |  |
|  |  | Shiraz-25T | 1698 | 0.21835  | 0         |  |  |
|  |  | Shiraz-25T | 1698 | 0.21835  | 0         |  |  |
|  |  | Shiraz-28T | 1735 | 0.350744 | 0         |  |  |
|  |  | Shiraz-28T | 1735 | 0.350744 | 0         |  |  |
|  |  | Shiraz-29T | 1778 | 0.120767 | 0         |  |  |

|     |      |            |      |          |           |  |  |
|-----|------|------------|------|----------|-----------|--|--|
|     |      | Shiraz-29T | 1778 | 0.120767 | 0         |  |  |
|     |      | Shiraz-32T | 1833 | 0.551336 | 0         |  |  |
|     |      | Shiraz-32T | 1833 | 0.551336 | 0         |  |  |
|     |      | Shiraz-38T | 1951 | 0.250891 | 0         |  |  |
|     |      | Shiraz-38T | 1951 | 0.250891 | 0         |  |  |
|     |      | Shiraz-53T | 2078 | 0.287202 | 0         |  |  |
|     |      | Shiraz-53T | 2078 | 0.287202 | 0         |  |  |
|     |      | Shiraz-71T | 2238 | 0.603631 | 0         |  |  |
|     |      | Shiraz-71T | 2238 | 0.603631 | 0         |  |  |
| AHR | chr7 | Shiraz-4T  | 252  | 0.192083 | 0         |  |  |
|     |      | Shiraz-36T | 376  | 0.159952 | 0         |  |  |
|     |      | Shiraz-44T | 628  | 0        | -0.444379 |  |  |
|     |      | Shiraz-47T | 1027 | 0        | -0.117848 |  |  |
|     |      | Shiraz-49T | 1117 | 0        | -0.168296 |  |  |
|     |      | Shiraz-77T | 1222 | 0        | -0.113002 |  |  |
|     |      | Shiraz-18T | 1433 | 0.250973 | 0         |  |  |
|     |      | Shiraz-22T | 1543 | 0        | -0.513696 |  |  |
|     |      | Shiraz-25T | 1697 | 0.21945  | 0         |  |  |
|     |      | Shiraz-28T | 1734 | 0.362882 | 0         |  |  |
|     |      | Shiraz-29T | 1777 | 0.156747 | 0         |  |  |
|     |      | Shiraz-38T | 1950 | 0.265916 | 0         |  |  |
|     |      | Shiraz-58T | 2157 | 0        | -0.213872 |  |  |
|     |      | Shiraz-71T | 2236 | 0.320072 | 0         |  |  |
|     |      | Shiraz-4T  | 252  | 0.192083 | 0         |  |  |
|     |      | Shiraz-36T | 376  | 0.159952 | 0         |  |  |
|     |      | Shiraz-44T | 628  | 0        | -0.444379 |  |  |
|     |      | Shiraz-47T | 1027 | 0        | -0.117848 |  |  |
|     |      | Shiraz-49T | 1117 | 0        | -0.168296 |  |  |
|     |      | Shiraz-77T | 1222 | 0        | -0.113002 |  |  |
|     |      | Shiraz-18T | 1433 | 0.250973 | 0         |  |  |
|     |      | Shiraz-22T | 1543 | 0        | -0.513696 |  |  |
|     |      | Shiraz-25T | 1697 | 0.21945  | 0         |  |  |
|     |      | Shiraz-28T | 1734 | 0.362882 | 0         |  |  |
|     |      | Shiraz-29T | 1777 | 0.156747 | 0         |  |  |
|     |      | Shiraz-38T | 1950 | 0.265916 | 0         |  |  |
|     |      | Shiraz-58T | 2157 | 0        | -0.213872 |  |  |
|     |      | Shiraz-71T | 2236 | 0.320072 | 0         |  |  |
|     |      | Shiraz-4T  | 252  | 0.192083 | 0         |  |  |
|     |      | Shiraz-36T | 376  | 0.159952 | 0         |  |  |
|     |      | Shiraz-44T | 628  | 0        | -0.444379 |  |  |
|     |      | Shiraz-47T | 1027 | 0        | -0.117848 |  |  |
|     |      | Shiraz-49T | 1117 | 0        | -0.168296 |  |  |
|     |      | Shiraz-77T | 1222 | 0        | -0.113002 |  |  |
|     |      | Shiraz-18T | 1433 | 0.250973 | 0         |  |  |
|     |      | Shiraz-22T | 1543 | 0        | -0.513696 |  |  |
|     |      | Shiraz-25T | 1697 | 0.21945  | 0         |  |  |
|     |      | Shiraz-28T | 1734 | 0.362882 | 0         |  |  |

|       |      |            |      |          |           |  |
|-------|------|------------|------|----------|-----------|--|
|       |      | Shiraz-29T | 1777 | 0.156747 | 0         |  |
|       |      | Shiraz-38T | 1950 | 0.265916 | 0         |  |
|       |      | Shiraz-58T | 2157 | 0        | -0.213872 |  |
|       |      | Shiraz-71T | 2236 | 0.320072 | 0         |  |
| AIFM1 | chrX | Shiraz-3T  | 242  | 0        | -0.336434 |  |
|       |      | Shiraz-3T  | 242  | 0        | -0.336434 |  |
|       |      | Shiraz-3T  | 242  | 0        | -0.336434 |  |
|       |      | Shiraz-3T  | 245  | 0.224144 | 0         |  |
|       |      | Shiraz-3T  | 245  | 0.224144 | 0         |  |
|       |      | Shiraz-3T  | 245  | 0.224144 | 0         |  |
|       |      | Shiraz-4T  | 261  | 0        | -0.336249 |  |
|       |      | Shiraz-4T  | 261  | 0        | -0.336249 |  |
|       |      | Shiraz-4T  | 261  | 0        | -0.336249 |  |
|       |      | Shiraz-16T | 295  | 0.591657 | 0         |  |
|       |      | Shiraz-16T | 295  | 0.591657 | 0         |  |
|       |      | Shiraz-16T | 295  | 0.591657 | 0         |  |
|       |      | Shiraz-36T | 433  | 0        | -0.803961 |  |
|       |      | Shiraz-36T | 433  | 0        | -0.803961 |  |
|       |      | Shiraz-36T | 433  | 0        | -0.803961 |  |
|       |      | Shiraz-44T | 899  | 0        | -1.09697  |  |
|       |      | Shiraz-44T | 899  | 0        | -1.09697  |  |
|       |      | Shiraz-44T | 899  | 0        | -1.09697  |  |
|       |      | Shiraz-44T | 906  | 0        | -0.165692 |  |
|       |      | Shiraz-44T | 906  | 0        | -0.165692 |  |
|       |      | Shiraz-44T | 906  | 0        | -0.165692 |  |
|       |      | Shiraz-49T | 1170 | 0        | -0.967436 |  |
|       |      | Shiraz-49T | 1170 | 0        | -0.967436 |  |
|       |      | Shiraz-49T | 1170 | 0        | -0.967436 |  |
|       |      | Shiraz-9T  | 1370 | 0.690073 | 0         |  |
|       |      | Shiraz-9T  | 1370 | 0.690073 | 0         |  |
|       |      | Shiraz-9T  | 1370 | 0.690073 | 0         |  |
|       |      | Shiraz-18T | 1457 | 0.643204 | 0         |  |
|       |      | Shiraz-18T | 1457 | 0.643204 | 0         |  |
|       |      | Shiraz-18T | 1457 | 0.643204 | 0         |  |
|       |      | Shiraz-22T | 1673 | 0.611783 | 0         |  |
|       |      | Shiraz-22T | 1673 | 0.611783 | 0         |  |
|       |      | Shiraz-22T | 1673 | 0.611783 | 0         |  |
|       |      | Shiraz-22T | 1677 | 0.789711 | 0         |  |
|       |      | Shiraz-22T | 1677 | 0.789711 | 0         |  |
|       |      | Shiraz-22T | 1677 | 0.789711 | 0         |  |
|       |      | Shiraz-25T | 1719 | 0.472955 | 0         |  |
|       |      | Shiraz-25T | 1719 | 0.472955 | 0         |  |
|       |      | Shiraz-25T | 1719 | 0.472955 | 0         |  |
|       |      | Shiraz-28T | 1762 | 0.562311 | 0         |  |
|       |      | Shiraz-28T | 1762 | 0.562311 | 0         |  |
|       |      | Shiraz-28T | 1762 | 0.562311 | 0         |  |
|       |      | Shiraz-29T | 1801 | 0.815343 | 0         |  |



|  |  |            |      |          |           |  |  |
|--|--|------------|------|----------|-----------|--|--|
|  |  | Shiraz-29T | 1801 | 0.815343 | 0         |  |  |
|  |  | Shiraz-29T | 1801 | 0.815343 | 0         |  |  |
|  |  | Shiraz-32T | 1870 | 0.729766 | 0         |  |  |
|  |  | Shiraz-32T | 1870 | 0.729766 | 0         |  |  |
|  |  | Shiraz-32T | 1870 | 0.729766 | 0         |  |  |
|  |  | Shiraz-35T | 1933 | 0.488535 | 0         |  |  |
|  |  | Shiraz-35T | 1933 | 0.488535 | 0         |  |  |
|  |  | Shiraz-35T | 1933 | 0.488535 | 0         |  |  |
|  |  | Shiraz-58T | 2223 | 0.833364 | 0         |  |  |
|  |  | Shiraz-58T | 2223 | 0.833364 | 0         |  |  |
|  |  | Shiraz-58T | 2223 | 0.833364 | 0         |  |  |
|  |  | Shiraz-71T | 2263 | 0.975531 | 0         |  |  |
|  |  | Shiraz-71T | 2263 | 0.975531 | 0         |  |  |
|  |  | Shiraz-71T | 2263 | 0.975531 | 0         |  |  |
|  |  | Shiraz-3T  | 242  | 0        | -0.336434 |  |  |
|  |  | Shiraz-3T  | 242  | 0        | -0.336434 |  |  |
|  |  | Shiraz-3T  | 242  | 0        | -0.336434 |  |  |
|  |  | Shiraz-3T  | 245  | 0.224144 | 0         |  |  |
|  |  | Shiraz-3T  | 245  | 0.224144 | 0         |  |  |
|  |  | Shiraz-3T  | 245  | 0.224144 | 0         |  |  |
|  |  | Shiraz-4T  | 261  | 0        | -0.336249 |  |  |
|  |  | Shiraz-4T  | 261  | 0        | -0.336249 |  |  |
|  |  | Shiraz-4T  | 261  | 0        | -0.336249 |  |  |
|  |  | Shiraz-16T | 295  | 0.591657 | 0         |  |  |
|  |  | Shiraz-16T | 295  | 0.591657 | 0         |  |  |
|  |  | Shiraz-16T | 295  | 0.591657 | 0         |  |  |
|  |  | Shiraz-36T | 433  | 0        | -0.803961 |  |  |
|  |  | Shiraz-36T | 433  | 0        | -0.803961 |  |  |
|  |  | Shiraz-36T | 433  | 0        | -0.803961 |  |  |
|  |  | Shiraz-44T | 899  | 0        | -1.09697  |  |  |
|  |  | Shiraz-44T | 899  | 0        | -1.09697  |  |  |
|  |  | Shiraz-44T | 899  | 0        | -1.09697  |  |  |
|  |  | Shiraz-44T | 906  | 0        | -0.165692 |  |  |
|  |  | Shiraz-44T | 906  | 0        | -0.165692 |  |  |
|  |  | Shiraz-44T | 906  | 0        | -0.165692 |  |  |
|  |  | Shiraz-49T | 1170 | 0        | -0.967436 |  |  |
|  |  | Shiraz-49T | 1170 | 0        | -0.967436 |  |  |
|  |  | Shiraz-49T | 1170 | 0        | -0.967436 |  |  |
|  |  | Shiraz-9T  | 1370 | 0.690073 | 0         |  |  |
|  |  | Shiraz-9T  | 1370 | 0.690073 | 0         |  |  |
|  |  | Shiraz-9T  | 1370 | 0.690073 | 0         |  |  |
|  |  | Shiraz-18T | 1457 | 0.643204 | 0         |  |  |
|  |  | Shiraz-18T | 1457 | 0.643204 | 0         |  |  |
|  |  | Shiraz-18T | 1457 | 0.643204 | 0         |  |  |
|  |  | Shiraz-22T | 1673 | 0.611783 | 0         |  |  |
|  |  | Shiraz-22T | 1673 | 0.611783 | 0         |  |  |
|  |  | Shiraz-22T | 1673 | 0.611783 | 0         |  |  |

|  |  |            |      |          |           |  |  |
|--|--|------------|------|----------|-----------|--|--|
|  |  | Shiraz-22T | 1677 | 0.789711 | 0         |  |  |
|  |  | Shiraz-22T | 1677 | 0.789711 | 0         |  |  |
|  |  | Shiraz-22T | 1677 | 0.789711 | 0         |  |  |
|  |  | Shiraz-25T | 1719 | 0.472955 | 0         |  |  |
|  |  | Shiraz-25T | 1719 | 0.472955 | 0         |  |  |
|  |  | Shiraz-25T | 1719 | 0.472955 | 0         |  |  |
|  |  | Shiraz-28T | 1762 | 0.562311 | 0         |  |  |
|  |  | Shiraz-28T | 1762 | 0.562311 | 0         |  |  |
|  |  | Shiraz-28T | 1762 | 0.562311 | 0         |  |  |
|  |  | Shiraz-29T | 1801 | 0.815343 | 0         |  |  |
|  |  | Shiraz-29T | 1801 | 0.815343 | 0         |  |  |
|  |  | Shiraz-29T | 1801 | 0.815343 | 0         |  |  |
|  |  | Shiraz-32T | 1870 | 0.729766 | 0         |  |  |
|  |  | Shiraz-32T | 1870 | 0.729766 | 0         |  |  |
|  |  | Shiraz-32T | 1870 | 0.729766 | 0         |  |  |
|  |  | Shiraz-35T | 1933 | 0.488535 | 0         |  |  |
|  |  | Shiraz-35T | 1933 | 0.488535 | 0         |  |  |
|  |  | Shiraz-35T | 1933 | 0.488535 | 0         |  |  |
|  |  | Shiraz-58T | 2223 | 0.833364 | 0         |  |  |
|  |  | Shiraz-58T | 2223 | 0.833364 | 0         |  |  |
|  |  | Shiraz-58T | 2223 | 0.833364 | 0         |  |  |
|  |  | Shiraz-71T | 2263 | 0.975531 | 0         |  |  |
|  |  | Shiraz-71T | 2263 | 0.975531 | 0         |  |  |
|  |  | Shiraz-71T | 2263 | 0.975531 | 0         |  |  |
|  |  | Shiraz-3T  | 242  | 0        | -0.336434 |  |  |
|  |  | Shiraz-3T  | 242  | 0        | -0.336434 |  |  |
|  |  | Shiraz-3T  | 242  | 0        | -0.336434 |  |  |
|  |  | Shiraz-3T  | 245  | 0.224144 | 0         |  |  |
|  |  | Shiraz-3T  | 245  | 0.224144 | 0         |  |  |
|  |  | Shiraz-3T  | 245  | 0.224144 | 0         |  |  |
|  |  | Shiraz-4T  | 261  | 0        | -0.336249 |  |  |
|  |  | Shiraz-4T  | 261  | 0        | -0.336249 |  |  |
|  |  | Shiraz-4T  | 261  | 0        | -0.336249 |  |  |
|  |  | Shiraz-16T | 295  | 0.591657 | 0         |  |  |
|  |  | Shiraz-16T | 295  | 0.591657 | 0         |  |  |
|  |  | Shiraz-16T | 295  | 0.591657 | 0         |  |  |
|  |  | Shiraz-36T | 433  | 0        | -0.803961 |  |  |
|  |  | Shiraz-36T | 433  | 0        | -0.803961 |  |  |
|  |  | Shiraz-36T | 433  | 0        | -0.803961 |  |  |
|  |  | Shiraz-44T | 899  | 0        | -1.09697  |  |  |
|  |  | Shiraz-44T | 899  | 0        | -1.09697  |  |  |
|  |  | Shiraz-44T | 899  | 0        | -1.09697  |  |  |
|  |  | Shiraz-44T | 906  | 0        | -0.165692 |  |  |
|  |  | Shiraz-44T | 906  | 0        | -0.165692 |  |  |
|  |  | Shiraz-44T | 906  | 0        | -0.165692 |  |  |
|  |  | Shiraz-49T | 1170 | 0        | -0.967436 |  |  |
|  |  | Shiraz-49T | 1170 | 0        | -0.967436 |  |  |

|        |      |            |      |          |           |  |  |
|--------|------|------------|------|----------|-----------|--|--|
|        |      | Shiraz-49T | 1170 | 0        | -0.967436 |  |  |
|        |      | Shiraz-9T  | 1370 | 0.690073 | 0         |  |  |
|        |      | Shiraz-9T  | 1370 | 0.690073 | 0         |  |  |
|        |      | Shiraz-9T  | 1370 | 0.690073 | 0         |  |  |
|        |      | Shiraz-18T | 1457 | 0.643204 | 0         |  |  |
|        |      | Shiraz-18T | 1457 | 0.643204 | 0         |  |  |
|        |      | Shiraz-18T | 1457 | 0.643204 | 0         |  |  |
|        |      | Shiraz-22T | 1673 | 0.611783 | 0         |  |  |
|        |      | Shiraz-22T | 1673 | 0.611783 | 0         |  |  |
|        |      | Shiraz-22T | 1673 | 0.611783 | 0         |  |  |
|        |      | Shiraz-22T | 1677 | 0.789711 | 0         |  |  |
|        |      | Shiraz-22T | 1677 | 0.789711 | 0         |  |  |
|        |      | Shiraz-22T | 1677 | 0.789711 | 0         |  |  |
|        |      | Shiraz-25T | 1719 | 0.472955 | 0         |  |  |
|        |      | Shiraz-25T | 1719 | 0.472955 | 0         |  |  |
|        |      | Shiraz-25T | 1719 | 0.472955 | 0         |  |  |
|        |      | Shiraz-28T | 1762 | 0.562311 | 0         |  |  |
|        |      | Shiraz-28T | 1762 | 0.562311 | 0         |  |  |
|        |      | Shiraz-28T | 1762 | 0.562311 | 0         |  |  |
|        |      | Shiraz-29T | 1801 | 0.815343 | 0         |  |  |
|        |      | Shiraz-29T | 1801 | 0.815343 | 0         |  |  |
|        |      | Shiraz-29T | 1801 | 0.815343 | 0         |  |  |
|        |      | Shiraz-32T | 1870 | 0.729766 | 0         |  |  |
|        |      | Shiraz-32T | 1870 | 0.729766 | 0         |  |  |
|        |      | Shiraz-32T | 1870 | 0.729766 | 0         |  |  |
|        |      | Shiraz-35T | 1933 | 0.488535 | 0         |  |  |
|        |      | Shiraz-35T | 1933 | 0.488535 | 0         |  |  |
|        |      | Shiraz-35T | 1933 | 0.488535 | 0         |  |  |
|        |      | Shiraz-58T | 2223 | 0.833364 | 0         |  |  |
|        |      | Shiraz-58T | 2223 | 0.833364 | 0         |  |  |
|        |      | Shiraz-58T | 2223 | 0.833364 | 0         |  |  |
|        |      | Shiraz-71T | 2263 | 0.975531 | 0         |  |  |
|        |      | Shiraz-71T | 2263 | 0.975531 | 0         |  |  |
|        |      | Shiraz-71T | 2263 | 0.975531 | 0         |  |  |
| AKAP14 | chrX | Shiraz-3T  | 242  | 0        | -0.336434 |  |  |
|        |      | Shiraz-3T  | 242  | 0        | -0.336434 |  |  |
|        |      | Shiraz-3T  | 244  | 0        | -0.023749 |  |  |
|        |      | Shiraz-3T  | 244  | 0        | -0.023749 |  |  |
|        |      | Shiraz-4T  | 261  | 0        | -0.336249 |  |  |
|        |      | Shiraz-4T  | 261  | 0        | -0.336249 |  |  |
|        |      | Shiraz-16T | 295  | 0.591657 | 0         |  |  |
|        |      | Shiraz-16T | 295  | 0.591657 | 0         |  |  |
|        |      | Shiraz-36T | 433  | 0        | -0.803961 |  |  |
|        |      | Shiraz-36T | 433  | 0        | -0.803961 |  |  |
|        |      | Shiraz-44T | 899  | 0        | -1.09697  |  |  |
|        |      | Shiraz-44T | 899  | 0        | -1.09697  |  |  |
|        |      | Shiraz-44T | 904  | 0        | -0.625526 |  |  |

|  |            |      |          |           |  |
|--|------------|------|----------|-----------|--|
|  | Shiraz-44T | 904  | 0        | -0.625526 |  |
|  | Shiraz-49T | 1170 | 0        | -0.967436 |  |
|  | Shiraz-49T | 1170 | 0        | -0.967436 |  |
|  | Shiraz-9T  | 1370 | 0.690073 | 0         |  |
|  | Shiraz-9T  | 1370 | 0.690073 | 0         |  |
|  | Shiraz-18T | 1457 | 0.643204 | 0         |  |
|  | Shiraz-18T | 1457 | 0.643204 | 0         |  |
|  | Shiraz-22T | 1673 | 0.611783 | 0         |  |
|  | Shiraz-22T | 1673 | 0.611783 | 0         |  |
|  | Shiraz-25T | 1719 | 0.472955 | 0         |  |
|  | Shiraz-25T | 1719 | 0.472955 | 0         |  |
|  | Shiraz-28T | 1762 | 0.562311 | 0         |  |
|  | Shiraz-28T | 1762 | 0.562311 | 0         |  |
|  | Shiraz-29T | 1801 | 0.815343 | 0         |  |
|  | Shiraz-29T | 1801 | 0.815343 | 0         |  |
|  | Shiraz-32T | 1870 | 0.729766 | 0         |  |
|  | Shiraz-32T | 1870 | 0.729766 | 0         |  |
|  | Shiraz-35T | 1933 | 0.488535 | 0         |  |
|  | Shiraz-35T | 1933 | 0.488535 | 0         |  |
|  | Shiraz-58T | 2223 | 0.833364 | 0         |  |
|  | Shiraz-58T | 2223 | 0.833364 | 0         |  |
|  | Shiraz-71T | 2263 | 0.975531 | 0         |  |
|  | Shiraz-71T | 2263 | 0.975531 | 0         |  |
|  | Shiraz-3T  | 242  | 0        | -0.336434 |  |
|  | Shiraz-3T  | 242  | 0        | -0.336434 |  |
|  | Shiraz-3T  | 244  | 0        | -0.023749 |  |
|  | Shiraz-3T  | 244  | 0        | -0.023749 |  |
|  | Shiraz-4T  | 261  | 0        | -0.336249 |  |
|  | Shiraz-4T  | 261  | 0        | -0.336249 |  |
|  | Shiraz-16T | 295  | 0.591657 | 0         |  |
|  | Shiraz-16T | 295  | 0.591657 | 0         |  |
|  | Shiraz-36T | 433  | 0        | -0.803961 |  |
|  | Shiraz-36T | 433  | 0        | -0.803961 |  |
|  | Shiraz-44T | 899  | 0        | -1.09697  |  |
|  | Shiraz-44T | 899  | 0        | -1.09697  |  |
|  | Shiraz-44T | 904  | 0        | -0.625526 |  |
|  | Shiraz-44T | 904  | 0        | -0.625526 |  |
|  | Shiraz-49T | 1170 | 0        | -0.967436 |  |
|  | Shiraz-49T | 1170 | 0        | -0.967436 |  |
|  | Shiraz-9T  | 1370 | 0.690073 | 0         |  |
|  | Shiraz-9T  | 1370 | 0.690073 | 0         |  |
|  | Shiraz-18T | 1457 | 0.643204 | 0         |  |
|  | Shiraz-18T | 1457 | 0.643204 | 0         |  |
|  | Shiraz-22T | 1673 | 0.611783 | 0         |  |
|  | Shiraz-22T | 1673 | 0.611783 | 0         |  |
|  | Shiraz-25T | 1719 | 0.472955 | 0         |  |
|  | Shiraz-25T | 1719 | 0.472955 | 0         |  |

|  |  |            |      |          |           |  |  |
|--|--|------------|------|----------|-----------|--|--|
|  |  | Shiraz-28T | 1762 | 0.562311 | 0         |  |  |
|  |  | Shiraz-28T | 1762 | 0.562311 | 0         |  |  |
|  |  | Shiraz-29T | 1801 | 0.815343 | 0         |  |  |
|  |  | Shiraz-29T | 1801 | 0.815343 | 0         |  |  |
|  |  | Shiraz-32T | 1870 | 0.729766 | 0         |  |  |
|  |  | Shiraz-32T | 1870 | 0.729766 | 0         |  |  |
|  |  | Shiraz-35T | 1933 | 0.488535 | 0         |  |  |
|  |  | Shiraz-35T | 1933 | 0.488535 | 0         |  |  |
|  |  | Shiraz-58T | 2223 | 0.833364 | 0         |  |  |
|  |  | Shiraz-58T | 2223 | 0.833364 | 0         |  |  |
|  |  | Shiraz-71T | 2263 | 0.975531 | 0         |  |  |
|  |  | Shiraz-71T | 2263 | 0.975531 | 0         |  |  |
|  |  | Shiraz-3T  | 242  | 0        | -0.336434 |  |  |
|  |  | Shiraz-3T  | 242  | 0        | -0.336434 |  |  |
|  |  | Shiraz-3T  | 244  | 0        | -0.023749 |  |  |
|  |  | Shiraz-3T  | 244  | 0        | -0.023749 |  |  |
|  |  | Shiraz-4T  | 261  | 0        | -0.336249 |  |  |
|  |  | Shiraz-4T  | 261  | 0        | -0.336249 |  |  |
|  |  | Shiraz-16T | 295  | 0.591657 | 0         |  |  |
|  |  | Shiraz-16T | 295  | 0.591657 | 0         |  |  |
|  |  | Shiraz-36T | 433  | 0        | -0.803961 |  |  |
|  |  | Shiraz-36T | 433  | 0        | -0.803961 |  |  |
|  |  | Shiraz-44T | 899  | 0        | -1.09697  |  |  |
|  |  | Shiraz-44T | 899  | 0        | -1.09697  |  |  |
|  |  | Shiraz-44T | 904  | 0        | -0.625526 |  |  |
|  |  | Shiraz-44T | 904  | 0        | -0.625526 |  |  |
|  |  | Shiraz-49T | 1170 | 0        | -0.967436 |  |  |
|  |  | Shiraz-49T | 1170 | 0        | -0.967436 |  |  |
|  |  | Shiraz-9T  | 1370 | 0.690073 | 0         |  |  |
|  |  | Shiraz-9T  | 1370 | 0.690073 | 0         |  |  |
|  |  | Shiraz-18T | 1457 | 0.643204 | 0         |  |  |
|  |  | Shiraz-18T | 1457 | 0.643204 | 0         |  |  |
|  |  | Shiraz-22T | 1673 | 0.611783 | 0         |  |  |
|  |  | Shiraz-22T | 1673 | 0.611783 | 0         |  |  |
|  |  | Shiraz-25T | 1719 | 0.472955 | 0         |  |  |
|  |  | Shiraz-25T | 1719 | 0.472955 | 0         |  |  |
|  |  | Shiraz-28T | 1762 | 0.562311 | 0         |  |  |
|  |  | Shiraz-28T | 1762 | 0.562311 | 0         |  |  |
|  |  | Shiraz-29T | 1801 | 0.815343 | 0         |  |  |
|  |  | Shiraz-29T | 1801 | 0.815343 | 0         |  |  |
|  |  | Shiraz-32T | 1870 | 0.729766 | 0         |  |  |
|  |  | Shiraz-32T | 1870 | 0.729766 | 0         |  |  |
|  |  | Shiraz-35T | 1933 | 0.488535 | 0         |  |  |
|  |  | Shiraz-35T | 1933 | 0.488535 | 0         |  |  |
|  |  | Shiraz-58T | 2223 | 0.833364 | 0         |  |  |
|  |  | Shiraz-58T | 2223 | 0.833364 | 0         |  |  |
|  |  | Shiraz-71T | 2263 | 0.975531 | 0         |  |  |

|       |      |            |      |          |           |  |
|-------|------|------------|------|----------|-----------|--|
|       |      | Shiraz-71T | 2263 | 0.975531 | 0         |  |
| AKAP9 | chr7 | Shiraz-3T  | 90   | 0.219276 | 0         |  |
|       |      | Shiraz-3T  | 93   | 0        | -0.058023 |  |
|       |      | Shiraz-4T  | 253  | 0.372918 | 0         |  |
|       |      | Shiraz-36T | 378  | 0.179558 | 0         |  |
|       |      | Shiraz-36T | 380  | 0.083883 | 0         |  |
|       |      | Shiraz-44T | 638  | 0        | -0.433476 |  |
|       |      | Shiraz-46T | 943  | 0.093799 | 0         |  |
|       |      | Shiraz-46T | 945  | 0        | -0.014838 |  |
|       |      | Shiraz-47T | 1029 | 0        | -0.096586 |  |
|       |      | Shiraz-49T | 1119 | 0        | -0.157331 |  |
|       |      | Shiraz-77T | 1225 | 0        | -0.117922 |  |
|       |      | Shiraz-18T | 1434 | 0.244465 | 0         |  |
|       |      | Shiraz-22T | 1549 | 0        | -0.319623 |  |
|       |      | Shiraz-25T | 1698 | 0.21835  | 0         |  |
|       |      | Shiraz-28T | 1735 | 0.350744 | 0         |  |
|       |      | Shiraz-29T | 1778 | 0.120767 | 0         |  |
|       |      | Shiraz-32T | 1833 | 0.551336 | 0         |  |
|       |      | Shiraz-38T | 1951 | 0.250891 | 0         |  |
|       |      | Shiraz-53T | 2078 | 0.287202 | 0         |  |
|       |      | Shiraz-58T | 2159 | 0        | -0.219521 |  |
|       |      | Shiraz-71T | 2238 | 0.603631 | 0         |  |
|       |      | Shiraz-3T  | 90   | 0.219276 | 0         |  |
|       |      | Shiraz-3T  | 93   | 0        | -0.058023 |  |
|       |      | Shiraz-4T  | 253  | 0.372918 | 0         |  |
|       |      | Shiraz-36T | 378  | 0.179558 | 0         |  |
|       |      | Shiraz-36T | 380  | 0.083883 | 0         |  |
|       |      | Shiraz-44T | 638  | 0        | -0.433476 |  |
|       |      | Shiraz-46T | 943  | 0.093799 | 0         |  |
|       |      | Shiraz-46T | 945  | 0        | -0.014838 |  |
|       |      | Shiraz-47T | 1029 | 0        | -0.096586 |  |
|       |      | Shiraz-49T | 1119 | 0        | -0.157331 |  |
|       |      | Shiraz-77T | 1225 | 0        | -0.117922 |  |
|       |      | Shiraz-18T | 1434 | 0.244465 | 0         |  |
|       |      | Shiraz-22T | 1549 | 0        | -0.319623 |  |
|       |      | Shiraz-25T | 1698 | 0.21835  | 0         |  |
|       |      | Shiraz-28T | 1735 | 0.350744 | 0         |  |
|       |      | Shiraz-29T | 1778 | 0.120767 | 0         |  |
|       |      | Shiraz-32T | 1833 | 0.551336 | 0         |  |
|       |      | Shiraz-38T | 1951 | 0.250891 | 0         |  |
|       |      | Shiraz-53T | 2078 | 0.287202 | 0         |  |
|       |      | Shiraz-58T | 2159 | 0        | -0.219521 |  |
|       |      | Shiraz-71T | 2238 | 0.603631 | 0         |  |
|       |      | Shiraz-3T  | 90   | 0.219276 | 0         |  |
|       |      | Shiraz-3T  | 93   | 0        | -0.058023 |  |
|       |      | Shiraz-4T  | 253  | 0.372918 | 0         |  |
|       |      | Shiraz-36T | 378  | 0.179558 | 0         |  |

|        |      |            |      |          |           |  |  |
|--------|------|------------|------|----------|-----------|--|--|
|        |      | Shiraz-36T | 380  | 0.083883 | 0         |  |  |
|        |      | Shiraz-44T | 638  | 0        | -0.433476 |  |  |
|        |      | Shiraz-46T | 943  | 0.093799 | 0         |  |  |
|        |      | Shiraz-46T | 945  | 0        | -0.014838 |  |  |
|        |      | Shiraz-47T | 1029 | 0        | -0.096586 |  |  |
|        |      | Shiraz-49T | 1119 | 0        | -0.157331 |  |  |
|        |      | Shiraz-77T | 1225 | 0        | -0.117922 |  |  |
|        |      | Shiraz-18T | 1434 | 0.244465 | 0         |  |  |
|        |      | Shiraz-22T | 1549 | 0        | -0.319623 |  |  |
|        |      | Shiraz-25T | 1698 | 0.21835  | 0         |  |  |
|        |      | Shiraz-28T | 1735 | 0.350744 | 0         |  |  |
|        |      | Shiraz-29T | 1778 | 0.120767 | 0         |  |  |
|        |      | Shiraz-32T | 1833 | 0.551336 | 0         |  |  |
|        |      | Shiraz-38T | 1951 | 0.250891 | 0         |  |  |
|        |      | Shiraz-53T | 2078 | 0.287202 | 0         |  |  |
|        |      | Shiraz-58T | 2159 | 0        | -0.219521 |  |  |
|        |      | Shiraz-71T | 2238 | 0.603631 | 0         |  |  |
| AKR1B1 | chr7 | Shiraz-3T  | 90   | 0.219276 | 0         |  |  |
|        |      | Shiraz-4T  | 253  | 0.372918 | 0         |  |  |
|        |      | Shiraz-36T | 378  | 0.179558 | 0         |  |  |
|        |      | Shiraz-46T | 943  | 0.093799 | 0         |  |  |
|        |      | Shiraz-77T | 1225 | 0        | -0.117922 |  |  |
|        |      | Shiraz-9T  | 1325 | 0.221899 | 0         |  |  |
|        |      | Shiraz-18T | 1434 | 0.244465 | 0         |  |  |
|        |      | Shiraz-22T | 1553 | 0        | -0.213234 |  |  |
|        |      | Shiraz-25T | 1698 | 0.21835  | 0         |  |  |
|        |      | Shiraz-28T | 1735 | 0.350744 | 0         |  |  |
|        |      | Shiraz-29T | 1778 | 0.120767 | 0         |  |  |
|        |      | Shiraz-32T | 1833 | 0.551336 | 0         |  |  |
|        |      | Shiraz-38T | 1951 | 0.250891 | 0         |  |  |
|        |      | Shiraz-53T | 2078 | 0.287202 | 0         |  |  |
|        |      | Shiraz-58T | 2162 | 0.221505 | 0         |  |  |
|        |      | Shiraz-71T | 2238 | 0.603631 | 0         |  |  |
|        |      | Shiraz-3T  | 90   | 0.219276 | 0         |  |  |
|        |      | Shiraz-4T  | 253  | 0.372918 | 0         |  |  |
|        |      | Shiraz-36T | 378  | 0.179558 | 0         |  |  |
|        |      | Shiraz-46T | 943  | 0.093799 | 0         |  |  |
|        |      | Shiraz-77T | 1225 | 0        | -0.117922 |  |  |
|        |      | Shiraz-9T  | 1325 | 0.221899 | 0         |  |  |
|        |      | Shiraz-18T | 1434 | 0.244465 | 0         |  |  |
|        |      | Shiraz-22T | 1553 | 0        | -0.213234 |  |  |
|        |      | Shiraz-25T | 1698 | 0.21835  | 0         |  |  |
|        |      | Shiraz-28T | 1735 | 0.350744 | 0         |  |  |
|        |      | Shiraz-29T | 1778 | 0.120767 | 0         |  |  |
|        |      | Shiraz-32T | 1833 | 0.551336 | 0         |  |  |
|        |      | Shiraz-38T | 1951 | 0.250891 | 0         |  |  |
|        |      | Shiraz-53T | 2078 | 0.287202 | 0         |  |  |

|         |      |            |      |          |           |  |  |
|---------|------|------------|------|----------|-----------|--|--|
|         |      | Shiraz-58T | 2162 | 0.221505 | 0         |  |  |
|         |      | Shiraz-71T | 2238 | 0.603631 | 0         |  |  |
|         |      | Shiraz-3T  | 90   | 0.219276 | 0         |  |  |
|         |      | Shiraz-4T  | 253  | 0.372918 | 0         |  |  |
|         |      | Shiraz-36T | 378  | 0.179558 | 0         |  |  |
|         |      | Shiraz-46T | 943  | 0.093799 | 0         |  |  |
|         |      | Shiraz-77T | 1225 | 0        | -0.117922 |  |  |
|         |      | Shiraz-9T  | 1325 | 0.221899 | 0         |  |  |
|         |      | Shiraz-18T | 1434 | 0.244465 | 0         |  |  |
|         |      | Shiraz-22T | 1553 | 0        | -0.213234 |  |  |
|         |      | Shiraz-25T | 1698 | 0.21835  | 0         |  |  |
|         |      | Shiraz-28T | 1735 | 0.350744 | 0         |  |  |
|         |      | Shiraz-29T | 1778 | 0.120767 | 0         |  |  |
|         |      | Shiraz-32T | 1833 | 0.551336 | 0         |  |  |
|         |      | Shiraz-38T | 1951 | 0.250891 | 0         |  |  |
|         |      | Shiraz-53T | 2078 | 0.287202 | 0         |  |  |
|         |      | Shiraz-58T | 2162 | 0.221505 | 0         |  |  |
|         |      | Shiraz-71T | 2238 | 0.603631 | 0         |  |  |
| AKR1B10 | chr7 | Shiraz-3T  | 90   | 0.219276 | 0         |  |  |
|         |      | Shiraz-4T  | 253  | 0.372918 | 0         |  |  |
|         |      | Shiraz-36T | 378  | 0.179558 | 0         |  |  |
|         |      | Shiraz-46T | 943  | 0.093799 | 0         |  |  |
|         |      | Shiraz-77T | 1225 | 0        | -0.117922 |  |  |
|         |      | Shiraz-9T  | 1325 | 0.221899 | 0         |  |  |
|         |      | Shiraz-18T | 1434 | 0.244465 | 0         |  |  |
|         |      | Shiraz-22T | 1553 | 0        | -0.213234 |  |  |
|         |      | Shiraz-25T | 1698 | 0.21835  | 0         |  |  |
|         |      | Shiraz-28T | 1735 | 0.350744 | 0         |  |  |
|         |      | Shiraz-29T | 1778 | 0.120767 | 0         |  |  |
|         |      | Shiraz-32T | 1833 | 0.551336 | 0         |  |  |
|         |      | Shiraz-38T | 1951 | 0.250891 | 0         |  |  |
|         |      | Shiraz-53T | 2078 | 0.287202 | 0         |  |  |
|         |      | Shiraz-58T | 2162 | 0.221505 | 0         |  |  |
|         |      | Shiraz-71T | 2238 | 0.603631 | 0         |  |  |
|         |      | Shiraz-3T  | 90   | 0.219276 | 0         |  |  |
|         |      | Shiraz-4T  | 253  | 0.372918 | 0         |  |  |
|         |      | Shiraz-36T | 378  | 0.179558 | 0         |  |  |
|         |      | Shiraz-46T | 943  | 0.093799 | 0         |  |  |
|         |      | Shiraz-77T | 1225 | 0        | -0.117922 |  |  |
|         |      | Shiraz-9T  | 1325 | 0.221899 | 0         |  |  |
|         |      | Shiraz-18T | 1434 | 0.244465 | 0         |  |  |
|         |      | Shiraz-22T | 1553 | 0        | -0.213234 |  |  |
|         |      | Shiraz-25T | 1698 | 0.21835  | 0         |  |  |
|         |      | Shiraz-28T | 1735 | 0.350744 | 0         |  |  |
|         |      | Shiraz-29T | 1778 | 0.120767 | 0         |  |  |
|         |      | Shiraz-32T | 1833 | 0.551336 | 0         |  |  |
|         |      | Shiraz-38T | 1951 | 0.250891 | 0         |  |  |



|          |      |            |      |          |           |  |
|----------|------|------------|------|----------|-----------|--|
|          |      | Shiraz-53T | 2078 | 0.287202 | 0         |  |
|          |      | Shiraz-58T | 2162 | 0.221505 | 0         |  |
|          |      | Shiraz-71T | 2238 | 0.603631 | 0         |  |
|          |      | Shiraz-3T  | 90   | 0.219276 | 0         |  |
|          |      | Shiraz-4T  | 253  | 0.372918 | 0         |  |
|          |      | Shiraz-36T | 378  | 0.179558 | 0         |  |
|          |      | Shiraz-46T | 943  | 0.093799 | 0         |  |
|          |      | Shiraz-77T | 1225 | 0        | -0.117922 |  |
|          |      | Shiraz-9T  | 1325 | 0.221899 | 0         |  |
|          |      | Shiraz-18T | 1434 | 0.244465 | 0         |  |
|          |      | Shiraz-22T | 1553 | 0        | -0.213234 |  |
|          |      | Shiraz-25T | 1698 | 0.21835  | 0         |  |
|          |      | Shiraz-28T | 1735 | 0.350744 | 0         |  |
|          |      | Shiraz-29T | 1778 | 0.120767 | 0         |  |
|          |      | Shiraz-32T | 1833 | 0.551336 | 0         |  |
|          |      | Shiraz-38T | 1951 | 0.250891 | 0         |  |
|          |      | Shiraz-53T | 2078 | 0.287202 | 0         |  |
|          |      | Shiraz-58T | 2162 | 0.221505 | 0         |  |
|          |      | Shiraz-71T | 2238 | 0.603631 | 0         |  |
| AKR1B10L | chr7 | Shiraz-3T  | 90   | 0.219276 | 0         |  |
|          |      | Shiraz-4T  | 253  | 0.372918 | 0         |  |
|          |      | Shiraz-36T | 378  | 0.179558 | 0         |  |
|          |      | Shiraz-46T | 943  | 0.093799 | 0         |  |
|          |      | Shiraz-77T | 1225 | 0        | -0.117922 |  |
|          |      | Shiraz-9T  | 1325 | 0.221899 | 0         |  |
|          |      | Shiraz-18T | 1434 | 0.244465 | 0         |  |
|          |      | Shiraz-22T | 1553 | 0        | -0.213234 |  |
|          |      | Shiraz-25T | 1698 | 0.21835  | 0         |  |
|          |      | Shiraz-28T | 1735 | 0.350744 | 0         |  |
|          |      | Shiraz-29T | 1778 | 0.120767 | 0         |  |
|          |      | Shiraz-32T | 1833 | 0.551336 | 0         |  |
|          |      | Shiraz-38T | 1951 | 0.250891 | 0         |  |
|          |      | Shiraz-53T | 2078 | 0.287202 | 0         |  |
|          |      | Shiraz-58T | 2162 | 0.221505 | 0         |  |
|          |      | Shiraz-71T | 2238 | 0.603631 | 0         |  |
|          |      | Shiraz-3T  | 90   | 0.219276 | 0         |  |
|          |      | Shiraz-4T  | 253  | 0.372918 | 0         |  |
|          |      | Shiraz-36T | 378  | 0.179558 | 0         |  |
|          |      | Shiraz-46T | 943  | 0.093799 | 0         |  |
|          |      | Shiraz-77T | 1225 | 0        | -0.117922 |  |
|          |      | Shiraz-9T  | 1325 | 0.221899 | 0         |  |
|          |      | Shiraz-18T | 1434 | 0.244465 | 0         |  |
|          |      | Shiraz-22T | 1553 | 0        | -0.213234 |  |
|          |      | Shiraz-25T | 1698 | 0.21835  | 0         |  |
|          |      | Shiraz-28T | 1735 | 0.350744 | 0         |  |
|          |      | Shiraz-29T | 1778 | 0.120767 | 0         |  |
|          |      | Shiraz-32T | 1833 | 0.551336 | 0         |  |

|        |      |            |      |          |           |  |
|--------|------|------------|------|----------|-----------|--|
|        |      | Shiraz-38T | 1951 | 0.250891 | 0         |  |
|        |      | Shiraz-53T | 2078 | 0.287202 | 0         |  |
|        |      | Shiraz-58T | 2162 | 0.221505 | 0         |  |
|        |      | Shiraz-71T | 2238 | 0.603631 | 0         |  |
|        |      | Shiraz-3T  | 90   | 0.219276 | 0         |  |
|        |      | Shiraz-4T  | 253  | 0.372918 | 0         |  |
|        |      | Shiraz-36T | 378  | 0.179558 | 0         |  |
|        |      | Shiraz-46T | 943  | 0.093799 | 0         |  |
|        |      | Shiraz-77T | 1225 | 0        | -0.117922 |  |
|        |      | Shiraz-9T  | 1325 | 0.221899 | 0         |  |
|        |      | Shiraz-18T | 1434 | 0.244465 | 0         |  |
|        |      | Shiraz-22T | 1553 | 0        | -0.213234 |  |
|        |      | Shiraz-25T | 1698 | 0.21835  | 0         |  |
|        |      | Shiraz-28T | 1735 | 0.350744 | 0         |  |
|        |      | Shiraz-29T | 1778 | 0.120767 | 0         |  |
|        |      | Shiraz-32T | 1833 | 0.551336 | 0         |  |
|        |      | Shiraz-38T | 1951 | 0.250891 | 0         |  |
|        |      | Shiraz-53T | 2078 | 0.287202 | 0         |  |
|        |      | Shiraz-58T | 2162 | 0.221505 | 0         |  |
|        |      | Shiraz-71T | 2238 | 0.603631 | 0         |  |
| AKR1D1 | chr7 | Shiraz-3T  | 90   | 0.219276 | 0         |  |
|        |      | Shiraz-4T  | 253  | 0.372918 | 0         |  |
|        |      | Shiraz-36T | 378  | 0.179558 | 0         |  |
|        |      | Shiraz-46T | 943  | 0.093799 | 0         |  |
|        |      | Shiraz-77T | 1225 | 0        | -0.117922 |  |
|        |      | Shiraz-9T  | 1325 | 0.221899 | 0         |  |
|        |      | Shiraz-18T | 1434 | 0.244465 | 0         |  |
|        |      | Shiraz-25T | 1698 | 0.21835  | 0         |  |
|        |      | Shiraz-28T | 1735 | 0.350744 | 0         |  |
|        |      | Shiraz-29T | 1778 | 0.120767 | 0         |  |
|        |      | Shiraz-32T | 1833 | 0.551336 | 0         |  |
|        |      | Shiraz-38T | 1951 | 0.250891 | 0         |  |
|        |      | Shiraz-53T | 2078 | 0.287202 | 0         |  |
|        |      | Shiraz-58T | 2162 | 0.221505 | 0         |  |
|        |      | Shiraz-71T | 2238 | 0.603631 | 0         |  |
|        |      | Shiraz-3T  | 90   | 0.219276 | 0         |  |
|        |      | Shiraz-4T  | 253  | 0.372918 | 0         |  |
|        |      | Shiraz-36T | 378  | 0.179558 | 0         |  |
|        |      | Shiraz-46T | 943  | 0.093799 | 0         |  |
|        |      | Shiraz-77T | 1225 | 0        | -0.117922 |  |
|        |      | Shiraz-9T  | 1325 | 0.221899 | 0         |  |
|        |      | Shiraz-18T | 1434 | 0.244465 | 0         |  |
|        |      | Shiraz-25T | 1698 | 0.21835  | 0         |  |
|        |      | Shiraz-28T | 1735 | 0.350744 | 0         |  |
|        |      | Shiraz-29T | 1778 | 0.120767 | 0         |  |
|        |      | Shiraz-32T | 1833 | 0.551336 | 0         |  |
|        |      | Shiraz-38T | 1951 | 0.250891 | 0         |  |

|       |      |            |      |          |           |  |
|-------|------|------------|------|----------|-----------|--|
|       |      | Shiraz-53T | 2078 | 0.287202 | 0         |  |
|       |      | Shiraz-58T | 2162 | 0.221505 | 0         |  |
|       |      | Shiraz-71T | 2238 | 0.603631 | 0         |  |
|       |      | Shiraz-3T  | 90   | 0.219276 | 0         |  |
|       |      | Shiraz-4T  | 253  | 0.372918 | 0         |  |
|       |      | Shiraz-36T | 378  | 0.179558 | 0         |  |
|       |      | Shiraz-46T | 943  | 0.093799 | 0         |  |
|       |      | Shiraz-77T | 1225 | 0        | -0.117922 |  |
|       |      | Shiraz-9T  | 1325 | 0.221899 | 0         |  |
|       |      | Shiraz-18T | 1434 | 0.244465 | 0         |  |
|       |      | Shiraz-25T | 1698 | 0.21835  | 0         |  |
|       |      | Shiraz-28T | 1735 | 0.350744 | 0         |  |
|       |      | Shiraz-29T | 1778 | 0.120767 | 0         |  |
|       |      | Shiraz-32T | 1833 | 0.551336 | 0         |  |
|       |      | Shiraz-38T | 1951 | 0.250891 | 0         |  |
|       |      | Shiraz-53T | 2078 | 0.287202 | 0         |  |
|       |      | Shiraz-58T | 2162 | 0.221505 | 0         |  |
|       |      | Shiraz-71T | 2238 | 0.603631 | 0         |  |
| ALAS2 | chrX | Shiraz-3T  | 240  | 0        | -0.346245 |  |
|       |      | Shiraz-4T  | 260  | 0        | -0.324128 |  |
|       |      | Shiraz-16T | 294  | 0.655804 | 0         |  |
|       |      | Shiraz-36T | 431  | 0        | -0.78035  |  |
|       |      | Shiraz-44T | 891  | 0        | -0.954044 |  |
|       |      | Shiraz-44T | 898  | 0        | -0.515218 |  |
|       |      | Shiraz-49T | 1166 | 0        | -0.917235 |  |
|       |      | Shiraz-77T | 1282 | 0.213849 | 0         |  |
|       |      | Shiraz-9T  | 1368 | 0.199713 | 0         |  |
|       |      | Shiraz-18T | 1456 | 0.608534 | 0         |  |
|       |      | Shiraz-22T | 1669 | 0.695915 | 0         |  |
|       |      | Shiraz-25T | 1717 | 0.420447 | 0         |  |
|       |      | Shiraz-28T | 1760 | 0.538181 | 0         |  |
|       |      | Shiraz-29T | 1800 | 0.672527 | 0         |  |
|       |      | Shiraz-32T | 1869 | 0.776805 | 0         |  |
|       |      | Shiraz-35T | 1932 | 0.507141 | 0         |  |
|       |      | Shiraz-58T | 2221 | 0.871948 | 0         |  |
|       |      | Shiraz-71T | 2260 | 0.68394  | 0         |  |
|       |      | Shiraz-71T | 2262 | 0.986748 | 0         |  |
|       |      | Shiraz-3T  | 240  | 0        | -0.346245 |  |
|       |      | Shiraz-4T  | 260  | 0        | -0.324128 |  |
|       |      | Shiraz-16T | 294  | 0.655804 | 0         |  |
|       |      | Shiraz-36T | 431  | 0        | -0.78035  |  |
|       |      | Shiraz-44T | 891  | 0        | -0.954044 |  |
|       |      | Shiraz-44T | 898  | 0        | -0.515218 |  |
|       |      | Shiraz-49T | 1166 | 0        | -0.917235 |  |
|       |      | Shiraz-77T | 1282 | 0.213849 | 0         |  |
|       |      | Shiraz-9T  | 1368 | 0.199713 | 0         |  |
|       |      | Shiraz-18T | 1456 | 0.608534 | 0         |  |

|       |      |            |      |          |           |  |  |
|-------|------|------------|------|----------|-----------|--|--|
|       |      | Shiraz-22T | 1669 | 0.695915 | 0         |  |  |
|       |      | Shiraz-25T | 1717 | 0.420447 | 0         |  |  |
|       |      | Shiraz-28T | 1760 | 0.538181 | 0         |  |  |
|       |      | Shiraz-29T | 1800 | 0.672527 | 0         |  |  |
|       |      | Shiraz-32T | 1869 | 0.776805 | 0         |  |  |
|       |      | Shiraz-35T | 1932 | 0.507141 | 0         |  |  |
|       |      | Shiraz-58T | 2221 | 0.871948 | 0         |  |  |
|       |      | Shiraz-71T | 2260 | 0.68394  | 0         |  |  |
|       |      | Shiraz-71T | 2262 | 0.986748 | 0         |  |  |
|       |      | Shiraz-3T  | 240  | 0        | -0.346245 |  |  |
|       |      | Shiraz-4T  | 260  | 0        | -0.324128 |  |  |
|       |      | Shiraz-16T | 294  | 0.655804 | 0         |  |  |
|       |      | Shiraz-36T | 431  | 0        | -0.78035  |  |  |
|       |      | Shiraz-44T | 891  | 0        | -0.954044 |  |  |
|       |      | Shiraz-44T | 898  | 0        | -0.515218 |  |  |
|       |      | Shiraz-49T | 1166 | 0        | -0.917235 |  |  |
|       |      | Shiraz-77T | 1282 | 0.213849 | 0         |  |  |
|       |      | Shiraz-9T  | 1368 | 0.199713 | 0         |  |  |
|       |      | Shiraz-18T | 1456 | 0.608534 | 0         |  |  |
|       |      | Shiraz-22T | 1669 | 0.695915 | 0         |  |  |
|       |      | Shiraz-25T | 1717 | 0.420447 | 0         |  |  |
|       |      | Shiraz-28T | 1760 | 0.538181 | 0         |  |  |
|       |      | Shiraz-29T | 1800 | 0.672527 | 0         |  |  |
|       |      | Shiraz-32T | 1869 | 0.776805 | 0         |  |  |
|       |      | Shiraz-35T | 1932 | 0.507141 | 0         |  |  |
|       |      | Shiraz-58T | 2221 | 0.871948 | 0         |  |  |
|       |      | Shiraz-71T | 2260 | 0.68394  | 0         |  |  |
|       |      | Shiraz-71T | 2262 | 0.986748 | 0         |  |  |
| ALG13 | chrX | Shiraz-3T  | 242  | 0        | -0.336434 |  |  |
|       |      | Shiraz-4T  | 261  | 0        | -0.336249 |  |  |
|       |      | Shiraz-16T | 295  | 0.591657 | 0         |  |  |
|       |      | Shiraz-36T | 433  | 0        | -0.803961 |  |  |
|       |      | Shiraz-44T | 899  | 0        | -1.09697  |  |  |
|       |      | Shiraz-49T | 1170 | 0        | -0.967436 |  |  |
|       |      | Shiraz-18T | 1457 | 0.643204 | 0         |  |  |
|       |      | Shiraz-22T | 1673 | 0.611783 | 0         |  |  |
|       |      | Shiraz-25T | 1719 | 0.472955 | 0         |  |  |
|       |      | Shiraz-28T | 1762 | 0.562311 | 0         |  |  |
|       |      | Shiraz-29T | 1801 | 0.815343 | 0         |  |  |
|       |      | Shiraz-32T | 1870 | 0.729766 | 0         |  |  |
|       |      | Shiraz-35T | 1933 | 0.488535 | 0         |  |  |
|       |      | Shiraz-58T | 2223 | 0.833364 | 0         |  |  |
|       |      | Shiraz-71T | 2263 | 0.975531 | 0         |  |  |
|       |      | Shiraz-3T  | 242  | 0        | -0.336434 |  |  |
|       |      | Shiraz-4T  | 261  | 0        | -0.336249 |  |  |
|       |      | Shiraz-16T | 295  | 0.591657 | 0         |  |  |
|       |      | Shiraz-36T | 433  | 0        | -0.803961 |  |  |

|        |      |            |      |          |           |  |  |
|--------|------|------------|------|----------|-----------|--|--|
|        |      | Shiraz-44T | 899  | 0        | -1.09697  |  |  |
|        |      | Shiraz-49T | 1170 | 0        | -0.967436 |  |  |
|        |      | Shiraz-18T | 1457 | 0.643204 | 0         |  |  |
|        |      | Shiraz-22T | 1673 | 0.611783 | 0         |  |  |
|        |      | Shiraz-25T | 1719 | 0.472955 | 0         |  |  |
|        |      | Shiraz-28T | 1762 | 0.562311 | 0         |  |  |
|        |      | Shiraz-29T | 1801 | 0.815343 | 0         |  |  |
|        |      | Shiraz-32T | 1870 | 0.729766 | 0         |  |  |
|        |      | Shiraz-35T | 1933 | 0.488535 | 0         |  |  |
|        |      | Shiraz-58T | 2223 | 0.833364 | 0         |  |  |
|        |      | Shiraz-71T | 2263 | 0.975531 | 0         |  |  |
|        |      | Shiraz-3T  | 242  | 0        | -0.336434 |  |  |
|        |      | Shiraz-4T  | 261  | 0        | -0.336249 |  |  |
|        |      | Shiraz-16T | 295  | 0.591657 | 0         |  |  |
|        |      | Shiraz-36T | 433  | 0        | -0.803961 |  |  |
|        |      | Shiraz-44T | 899  | 0        | -1.09697  |  |  |
|        |      | Shiraz-49T | 1170 | 0        | -0.967436 |  |  |
|        |      | Shiraz-18T | 1457 | 0.643204 | 0         |  |  |
|        |      | Shiraz-22T | 1673 | 0.611783 | 0         |  |  |
|        |      | Shiraz-25T | 1719 | 0.472955 | 0         |  |  |
|        |      | Shiraz-28T | 1762 | 0.562311 | 0         |  |  |
|        |      | Shiraz-29T | 1801 | 0.815343 | 0         |  |  |
|        |      | Shiraz-32T | 1870 | 0.729766 | 0         |  |  |
|        |      | Shiraz-35T | 1933 | 0.488535 | 0         |  |  |
|        |      | Shiraz-58T | 2223 | 0.833364 | 0         |  |  |
|        |      | Shiraz-71T | 2263 | 0.975531 | 0         |  |  |
| ALKBH4 | chr7 | Shiraz-3T  | 90   | 0.219276 | 0         |  |  |
|        |      | Shiraz-3T  | 94   | 0.74735  | 0         |  |  |
|        |      | Shiraz-4T  | 253  | 0.372918 | 0         |  |  |
|        |      | Shiraz-31T | 316  | 0.219196 | 0         |  |  |
|        |      | Shiraz-36T | 378  | 0.179558 | 0         |  |  |
|        |      | Shiraz-36T | 381  | 0.332628 | 0         |  |  |
|        |      | Shiraz-44T | 639  | 1.035032 | 0         |  |  |
|        |      | Shiraz-46T | 943  | 0.093799 | 0         |  |  |
|        |      | Shiraz-46T | 946  | 0.299835 | 0         |  |  |
|        |      | Shiraz-47T | 1030 | 0.257728 | 0         |  |  |
|        |      | Shiraz-49T | 1120 | 0.281656 | 0         |  |  |
|        |      | Shiraz-77T | 1225 | 0        | -0.117922 |  |  |
|        |      | Shiraz-77T | 1227 | 0.196445 | 0         |  |  |
|        |      | Shiraz-9T  | 1324 | 0.679266 | 0         |  |  |
|        |      | Shiraz-18T | 1434 | 0.244465 | 0         |  |  |
|        |      | Shiraz-22T | 1549 | 0        | -0.319623 |  |  |
|        |      | Shiraz-22T | 1551 | 0.324011 | 0         |  |  |
|        |      | Shiraz-25T | 1698 | 0.21835  | 0         |  |  |
|        |      | Shiraz-28T | 1735 | 0.350744 | 0         |  |  |
|        |      | Shiraz-29T | 1778 | 0.120767 | 0         |  |  |
|        |      | Shiraz-32T | 1833 | 0.551336 | 0         |  |  |

|  |            |      |          |           |  |
|--|------------|------|----------|-----------|--|
|  | Shiraz-38T | 1951 | 0.250891 | 0         |  |
|  | Shiraz-53T | 2078 | 0.287202 | 0         |  |
|  | Shiraz-58T | 2160 | 0.399007 | 0         |  |
|  | Shiraz-71T | 2238 | 0.603631 | 0         |  |
|  | Shiraz-3T  | 90   | 0.219276 | 0         |  |
|  | Shiraz-3T  | 94   | 0.74735  | 0         |  |
|  | Shiraz-4T  | 253  | 0.372918 | 0         |  |
|  | Shiraz-31T | 316  | 0.219196 | 0         |  |
|  | Shiraz-36T | 378  | 0.179558 | 0         |  |
|  | Shiraz-36T | 381  | 0.332628 | 0         |  |
|  | Shiraz-44T | 639  | 1.035032 | 0         |  |
|  | Shiraz-46T | 943  | 0.093799 | 0         |  |
|  | Shiraz-46T | 946  | 0.299835 | 0         |  |
|  | Shiraz-47T | 1030 | 0.257728 | 0         |  |
|  | Shiraz-49T | 1120 | 0.281656 | 0         |  |
|  | Shiraz-77T | 1225 | 0        | -0.117922 |  |
|  | Shiraz-77T | 1227 | 0.196445 | 0         |  |
|  | Shiraz-9T  | 1324 | 0.679266 | 0         |  |
|  | Shiraz-18T | 1434 | 0.244465 | 0         |  |
|  | Shiraz-22T | 1549 | 0        | -0.319623 |  |
|  | Shiraz-22T | 1551 | 0.324011 | 0         |  |
|  | Shiraz-25T | 1698 | 0.21835  | 0         |  |
|  | Shiraz-28T | 1735 | 0.350744 | 0         |  |
|  | Shiraz-29T | 1778 | 0.120767 | 0         |  |
|  | Shiraz-32T | 1833 | 0.551336 | 0         |  |
|  | Shiraz-38T | 1951 | 0.250891 | 0         |  |
|  | Shiraz-53T | 2078 | 0.287202 | 0         |  |
|  | Shiraz-58T | 2160 | 0.399007 | 0         |  |
|  | Shiraz-71T | 2238 | 0.603631 | 0         |  |
|  | Shiraz-3T  | 90   | 0.219276 | 0         |  |
|  | Shiraz-3T  | 94   | 0.74735  | 0         |  |
|  | Shiraz-4T  | 253  | 0.372918 | 0         |  |
|  | Shiraz-31T | 316  | 0.219196 | 0         |  |
|  | Shiraz-36T | 378  | 0.179558 | 0         |  |
|  | Shiraz-36T | 381  | 0.332628 | 0         |  |
|  | Shiraz-44T | 639  | 1.035032 | 0         |  |
|  | Shiraz-46T | 943  | 0.093799 | 0         |  |
|  | Shiraz-46T | 946  | 0.299835 | 0         |  |
|  | Shiraz-47T | 1030 | 0.257728 | 0         |  |
|  | Shiraz-49T | 1120 | 0.281656 | 0         |  |
|  | Shiraz-77T | 1225 | 0        | -0.117922 |  |
|  | Shiraz-77T | 1227 | 0.196445 | 0         |  |
|  | Shiraz-9T  | 1324 | 0.679266 | 0         |  |
|  | Shiraz-18T | 1434 | 0.244465 | 0         |  |
|  | Shiraz-22T | 1549 | 0        | -0.319623 |  |
|  | Shiraz-22T | 1551 | 0.324011 | 0         |  |
|  | Shiraz-25T | 1698 | 0.21835  | 0         |  |

|       |      |            |      |          |           |  |
|-------|------|------------|------|----------|-----------|--|
|       |      | Shiraz-28T | 1735 | 0.350744 | 0         |  |
|       |      | Shiraz-29T | 1778 | 0.120767 | 0         |  |
|       |      | Shiraz-32T | 1833 | 0.551336 | 0         |  |
|       |      | Shiraz-38T | 1951 | 0.250891 | 0         |  |
|       |      | Shiraz-53T | 2078 | 0.287202 | 0         |  |
|       |      | Shiraz-58T | 2160 | 0.399007 | 0         |  |
|       |      | Shiraz-71T | 2238 | 0.603631 | 0         |  |
| AMACR | chr5 | Shiraz-4T  | 250  | 0.262252 | 0         |  |
|       |      | Shiraz-16T | 266  | 0.321724 | 0         |  |
|       |      | Shiraz-18T | 1429 | 0        | -0.314125 |  |
|       |      | Shiraz-25T | 1694 | 0.201602 | 0         |  |
|       |      | Shiraz-28T | 1731 | 0.295447 | 0         |  |
|       |      | Shiraz-29T | 1773 | 0.090981 | 0         |  |
|       |      | Shiraz-40T | 2016 | 0.376634 | 0         |  |
|       |      | Shiraz-4T  | 250  | 0.262252 | 0         |  |
|       |      | Shiraz-16T | 266  | 0.321724 | 0         |  |
|       |      | Shiraz-18T | 1429 | 0        | -0.314125 |  |
|       |      | Shiraz-25T | 1694 | 0.201602 | 0         |  |
|       |      | Shiraz-28T | 1731 | 0.295447 | 0         |  |
|       |      | Shiraz-29T | 1773 | 0.090981 | 0         |  |
|       |      | Shiraz-40T | 2016 | 0.376634 | 0         |  |
|       |      | Shiraz-4T  | 250  | 0.262252 | 0         |  |
|       |      | Shiraz-16T | 266  | 0.321724 | 0         |  |
|       |      | Shiraz-18T | 1429 | 0        | -0.314125 |  |
|       |      | Shiraz-25T | 1694 | 0.201602 | 0         |  |
|       |      | Shiraz-28T | 1731 | 0.295447 | 0         |  |
|       |      | Shiraz-29T | 1773 | 0.090981 | 0         |  |
|       |      | Shiraz-40T | 2016 | 0.376634 | 0         |  |
| AMELX | chrX | Shiraz-3T  | 235  | 0        | -0.28401  |  |
|       |      | Shiraz-4T  | 260  | 0        | -0.324128 |  |
|       |      | Shiraz-16T | 294  | 0.655804 | 0         |  |
|       |      | Shiraz-36T | 431  | 0        | -0.78035  |  |
|       |      | Shiraz-44T | 891  | 0        | -0.954044 |  |
|       |      | Shiraz-49T | 1166 | 0        | -0.917235 |  |
|       |      | Shiraz-49T | 1167 | 0        | -0.249329 |  |
|       |      | Shiraz-9T  | 1368 | 0.199713 | 0         |  |
|       |      | Shiraz-18T | 1455 | 0        | -0.186773 |  |
|       |      | Shiraz-22T | 1669 | 0.695915 | 0         |  |
|       |      | Shiraz-25T | 1717 | 0.420447 | 0         |  |
|       |      | Shiraz-28T | 1760 | 0.538181 | 0         |  |
|       |      | Shiraz-29T | 1800 | 0.672527 | 0         |  |
|       |      | Shiraz-32T | 1869 | 0.776805 | 0         |  |
|       |      | Shiraz-35T | 1932 | 0.507141 | 0         |  |
|       |      | Shiraz-40T | 2051 | 0.098506 | 0         |  |
|       |      | Shiraz-58T | 2221 | 0.871948 | 0         |  |
|       |      | Shiraz-71T | 2260 | 0.68394  | 0         |  |
|       |      | Shiraz-71T | 2261 | 0.508399 | 0         |  |

|         |      |            |      |          |           |  |  |
|---------|------|------------|------|----------|-----------|--|--|
|         |      | Shiraz-3T  | 235  | 0        | -0.28401  |  |  |
|         |      | Shiraz-4T  | 260  | 0        | -0.324128 |  |  |
|         |      | Shiraz-16T | 294  | 0.655804 | 0         |  |  |
|         |      | Shiraz-36T | 431  | 0        | -0.78035  |  |  |
|         |      | Shiraz-44T | 891  | 0        | -0.954044 |  |  |
|         |      | Shiraz-49T | 1166 | 0        | -0.917235 |  |  |
|         |      | Shiraz-49T | 1167 | 0        | -0.249329 |  |  |
|         |      | Shiraz-9T  | 1368 | 0.199713 | 0         |  |  |
|         |      | Shiraz-18T | 1455 | 0        | -0.186773 |  |  |
|         |      | Shiraz-22T | 1669 | 0.695915 | 0         |  |  |
|         |      | Shiraz-25T | 1717 | 0.420447 | 0         |  |  |
|         |      | Shiraz-28T | 1760 | 0.538181 | 0         |  |  |
|         |      | Shiraz-29T | 1800 | 0.672527 | 0         |  |  |
|         |      | Shiraz-32T | 1869 | 0.776805 | 0         |  |  |
|         |      | Shiraz-35T | 1932 | 0.507141 | 0         |  |  |
|         |      | Shiraz-40T | 2051 | 0.098506 | 0         |  |  |
|         |      | Shiraz-58T | 2221 | 0.871948 | 0         |  |  |
|         |      | Shiraz-71T | 2260 | 0.68394  | 0         |  |  |
|         |      | Shiraz-71T | 2261 | 0.508399 | 0         |  |  |
|         |      | Shiraz-3T  | 235  | 0        | -0.28401  |  |  |
|         |      | Shiraz-4T  | 260  | 0        | -0.324128 |  |  |
|         |      | Shiraz-16T | 294  | 0.655804 | 0         |  |  |
|         |      | Shiraz-36T | 431  | 0        | -0.78035  |  |  |
|         |      | Shiraz-44T | 891  | 0        | -0.954044 |  |  |
|         |      | Shiraz-49T | 1166 | 0        | -0.917235 |  |  |
|         |      | Shiraz-49T | 1167 | 0        | -0.249329 |  |  |
|         |      | Shiraz-9T  | 1368 | 0.199713 | 0         |  |  |
|         |      | Shiraz-18T | 1455 | 0        | -0.186773 |  |  |
|         |      | Shiraz-22T | 1669 | 0.695915 | 0         |  |  |
|         |      | Shiraz-25T | 1717 | 0.420447 | 0         |  |  |
|         |      | Shiraz-28T | 1760 | 0.538181 | 0         |  |  |
|         |      | Shiraz-29T | 1800 | 0.672527 | 0         |  |  |
|         |      | Shiraz-32T | 1869 | 0.776805 | 0         |  |  |
|         |      | Shiraz-35T | 1932 | 0.507141 | 0         |  |  |
|         |      | Shiraz-40T | 2051 | 0.098506 | 0         |  |  |
|         |      | Shiraz-58T | 2221 | 0.871948 | 0         |  |  |
|         |      | Shiraz-71T | 2260 | 0.68394  | 0         |  |  |
|         |      | Shiraz-71T | 2261 | 0.508399 | 0         |  |  |
| AMMECR1 | chrX | Shiraz-3T  | 242  | 0        | -0.336434 |  |  |
|         |      | Shiraz-4T  | 261  | 0        | -0.336249 |  |  |
|         |      | Shiraz-16T | 295  | 0.591657 | 0         |  |  |
|         |      | Shiraz-36T | 433  | 0        | -0.803961 |  |  |
|         |      | Shiraz-44T | 899  | 0        | -1.09697  |  |  |
|         |      | Shiraz-49T | 1170 | 0        | -0.967436 |  |  |
|         |      | Shiraz-18T | 1457 | 0.643204 | 0         |  |  |
|         |      | Shiraz-22T | 1673 | 0.611783 | 0         |  |  |
|         |      | Shiraz-25T | 1719 | 0.472955 | 0         |  |  |



|      |      |            |      |          |           |  |  |
|------|------|------------|------|----------|-----------|--|--|
|      |      | Shiraz-28T | 1762 | 0.562311 | 0         |  |  |
|      |      | Shiraz-29T | 1801 | 0.815343 | 0         |  |  |
|      |      | Shiraz-32T | 1870 | 0.729766 | 0         |  |  |
|      |      | Shiraz-35T | 1933 | 0.488535 | 0         |  |  |
|      |      | Shiraz-58T | 2223 | 0.833364 | 0         |  |  |
|      |      | Shiraz-71T | 2263 | 0.975531 | 0         |  |  |
|      |      | Shiraz-3T  | 242  | 0        | -0.336434 |  |  |
|      |      | Shiraz-4T  | 261  | 0        | -0.336249 |  |  |
|      |      | Shiraz-16T | 295  | 0.591657 | 0         |  |  |
|      |      | Shiraz-36T | 433  | 0        | -0.803961 |  |  |
|      |      | Shiraz-44T | 899  | 0        | -1.09697  |  |  |
|      |      | Shiraz-49T | 1170 | 0        | -0.967436 |  |  |
|      |      | Shiraz-18T | 1457 | 0.643204 | 0         |  |  |
|      |      | Shiraz-22T | 1673 | 0.611783 | 0         |  |  |
|      |      | Shiraz-25T | 1719 | 0.472955 | 0         |  |  |
|      |      | Shiraz-28T | 1762 | 0.562311 | 0         |  |  |
|      |      | Shiraz-29T | 1801 | 0.815343 | 0         |  |  |
|      |      | Shiraz-32T | 1870 | 0.729766 | 0         |  |  |
|      |      | Shiraz-35T | 1933 | 0.488535 | 0         |  |  |
|      |      | Shiraz-58T | 2223 | 0.833364 | 0         |  |  |
|      |      | Shiraz-71T | 2263 | 0.975531 | 0         |  |  |
|      |      | Shiraz-3T  | 242  | 0        | -0.336434 |  |  |
|      |      | Shiraz-4T  | 261  | 0        | -0.336249 |  |  |
|      |      | Shiraz-16T | 295  | 0.591657 | 0         |  |  |
|      |      | Shiraz-36T | 433  | 0        | -0.803961 |  |  |
|      |      | Shiraz-44T | 899  | 0        | -1.09697  |  |  |
|      |      | Shiraz-49T | 1170 | 0        | -0.967436 |  |  |
|      |      | Shiraz-18T | 1457 | 0.643204 | 0         |  |  |
|      |      | Shiraz-22T | 1673 | 0.611783 | 0         |  |  |
|      |      | Shiraz-25T | 1719 | 0.472955 | 0         |  |  |
|      |      | Shiraz-28T | 1762 | 0.562311 | 0         |  |  |
|      |      | Shiraz-29T | 1801 | 0.815343 | 0         |  |  |
|      |      | Shiraz-32T | 1870 | 0.729766 | 0         |  |  |
|      |      | Shiraz-35T | 1933 | 0.488535 | 0         |  |  |
|      |      | Shiraz-58T | 2223 | 0.833364 | 0         |  |  |
|      |      | Shiraz-71T | 2263 | 0.975531 | 0         |  |  |
| AMOT | chrX | Shiraz-3T  | 242  | 0        | -0.336434 |  |  |
|      |      | Shiraz-3T  | 242  | 0        | -0.336434 |  |  |
|      |      | Shiraz-4T  | 261  | 0        | -0.336249 |  |  |
|      |      | Shiraz-4T  | 261  | 0        | -0.336249 |  |  |
|      |      | Shiraz-16T | 295  | 0.591657 | 0         |  |  |
|      |      | Shiraz-16T | 295  | 0.591657 | 0         |  |  |
|      |      | Shiraz-36T | 433  | 0        | -0.803961 |  |  |
|      |      | Shiraz-36T | 433  | 0        | -0.803961 |  |  |
|      |      | Shiraz-44T | 899  | 0        | -1.09697  |  |  |
|      |      | Shiraz-44T | 899  | 0        | -1.09697  |  |  |
|      |      | Shiraz-49T | 1170 | 0        | -0.967436 |  |  |

|  |  |            |      |          |           |  |  |
|--|--|------------|------|----------|-----------|--|--|
|  |  | Shiraz-49T | 1170 | 0        | -0.967436 |  |  |
|  |  | Shiraz-18T | 1457 | 0.643204 | 0         |  |  |
|  |  | Shiraz-18T | 1457 | 0.643204 | 0         |  |  |
|  |  | Shiraz-22T | 1673 | 0.611783 | 0         |  |  |
|  |  | Shiraz-22T | 1673 | 0.611783 | 0         |  |  |
|  |  | Shiraz-25T | 1719 | 0.472955 | 0         |  |  |
|  |  | Shiraz-25T | 1719 | 0.472955 | 0         |  |  |
|  |  | Shiraz-28T | 1762 | 0.562311 | 0         |  |  |
|  |  | Shiraz-28T | 1762 | 0.562311 | 0         |  |  |
|  |  | Shiraz-29T | 1801 | 0.815343 | 0         |  |  |
|  |  | Shiraz-29T | 1801 | 0.815343 | 0         |  |  |
|  |  | Shiraz-32T | 1870 | 0.729766 | 0         |  |  |
|  |  | Shiraz-32T | 1870 | 0.729766 | 0         |  |  |
|  |  | Shiraz-35T | 1933 | 0.488535 | 0         |  |  |
|  |  | Shiraz-35T | 1933 | 0.488535 | 0         |  |  |
|  |  | Shiraz-58T | 2223 | 0.833364 | 0         |  |  |
|  |  | Shiraz-58T | 2223 | 0.833364 | 0         |  |  |
|  |  | Shiraz-71T | 2263 | 0.975531 | 0         |  |  |
|  |  | Shiraz-71T | 2263 | 0.975531 | 0         |  |  |
|  |  | Shiraz-3T  | 242  | 0        | -0.336434 |  |  |
|  |  | Shiraz-3T  | 242  | 0        | -0.336434 |  |  |
|  |  | Shiraz-4T  | 261  | 0        | -0.336249 |  |  |
|  |  | Shiraz-4T  | 261  | 0        | -0.336249 |  |  |
|  |  | Shiraz-16T | 295  | 0.591657 | 0         |  |  |
|  |  | Shiraz-16T | 295  | 0.591657 | 0         |  |  |
|  |  | Shiraz-36T | 433  | 0        | -0.803961 |  |  |
|  |  | Shiraz-36T | 433  | 0        | -0.803961 |  |  |
|  |  | Shiraz-44T | 899  | 0        | -1.09697  |  |  |
|  |  | Shiraz-44T | 899  | 0        | -1.09697  |  |  |
|  |  | Shiraz-49T | 1170 | 0        | -0.967436 |  |  |
|  |  | Shiraz-49T | 1170 | 0        | -0.967436 |  |  |
|  |  | Shiraz-18T | 1457 | 0.643204 | 0         |  |  |
|  |  | Shiraz-18T | 1457 | 0.643204 | 0         |  |  |
|  |  | Shiraz-22T | 1673 | 0.611783 | 0         |  |  |
|  |  | Shiraz-22T | 1673 | 0.611783 | 0         |  |  |
|  |  | Shiraz-25T | 1719 | 0.472955 | 0         |  |  |
|  |  | Shiraz-25T | 1719 | 0.472955 | 0         |  |  |
|  |  | Shiraz-28T | 1762 | 0.562311 | 0         |  |  |
|  |  | Shiraz-28T | 1762 | 0.562311 | 0         |  |  |
|  |  | Shiraz-29T | 1801 | 0.815343 | 0         |  |  |
|  |  | Shiraz-29T | 1801 | 0.815343 | 0         |  |  |
|  |  | Shiraz-32T | 1870 | 0.729766 | 0         |  |  |
|  |  | Shiraz-32T | 1870 | 0.729766 | 0         |  |  |
|  |  | Shiraz-35T | 1933 | 0.488535 | 0         |  |  |
|  |  | Shiraz-35T | 1933 | 0.488535 | 0         |  |  |
|  |  | Shiraz-58T | 2223 | 0.833364 | 0         |  |  |
|  |  | Shiraz-58T | 2223 | 0.833364 | 0         |  |  |

|      |      |            |      |          |           |  |
|------|------|------------|------|----------|-----------|--|
|      |      | Shiraz-71T | 2263 | 0.975531 | 0         |  |
|      |      | Shiraz-71T | 2263 | 0.975531 | 0         |  |
|      |      | Shiraz-3T  | 242  | 0        | -0.336434 |  |
|      |      | Shiraz-3T  | 242  | 0        | -0.336434 |  |
|      |      | Shiraz-4T  | 261  | 0        | -0.336249 |  |
|      |      | Shiraz-4T  | 261  | 0        | -0.336249 |  |
|      |      | Shiraz-16T | 295  | 0.591657 | 0         |  |
|      |      | Shiraz-16T | 295  | 0.591657 | 0         |  |
|      |      | Shiraz-36T | 433  | 0        | -0.803961 |  |
|      |      | Shiraz-36T | 433  | 0        | -0.803961 |  |
|      |      | Shiraz-44T | 899  | 0        | -1.09697  |  |
|      |      | Shiraz-44T | 899  | 0        | -1.09697  |  |
|      |      | Shiraz-49T | 1170 | 0        | -0.967436 |  |
|      |      | Shiraz-49T | 1170 | 0        | -0.967436 |  |
|      |      | Shiraz-18T | 1457 | 0.643204 | 0         |  |
|      |      | Shiraz-18T | 1457 | 0.643204 | 0         |  |
|      |      | Shiraz-22T | 1673 | 0.611783 | 0         |  |
|      |      | Shiraz-22T | 1673 | 0.611783 | 0         |  |
|      |      | Shiraz-25T | 1719 | 0.472955 | 0         |  |
|      |      | Shiraz-25T | 1719 | 0.472955 | 0         |  |
|      |      | Shiraz-28T | 1762 | 0.562311 | 0         |  |
|      |      | Shiraz-28T | 1762 | 0.562311 | 0         |  |
|      |      | Shiraz-29T | 1801 | 0.815343 | 0         |  |
|      |      | Shiraz-29T | 1801 | 0.815343 | 0         |  |
|      |      | Shiraz-32T | 1870 | 0.729766 | 0         |  |
|      |      | Shiraz-32T | 1870 | 0.729766 | 0         |  |
|      |      | Shiraz-35T | 1933 | 0.488535 | 0         |  |
|      |      | Shiraz-35T | 1933 | 0.488535 | 0         |  |
|      |      | Shiraz-58T | 2223 | 0.833364 | 0         |  |
|      |      | Shiraz-58T | 2223 | 0.833364 | 0         |  |
|      |      | Shiraz-71T | 2263 | 0.975531 | 0         |  |
|      |      | Shiraz-71T | 2263 | 0.975531 | 0         |  |
| AMPH | chr7 | Shiraz-3T  | 87   | 0.198593 | 0         |  |
|      |      | Shiraz-4T  | 252  | 0.192083 | 0         |  |
|      |      | Shiraz-36T | 376  | 0.159952 | 0         |  |
|      |      | Shiraz-44T | 631  | 0        | -0.180312 |  |
|      |      | Shiraz-46T | 942  | 0.069143 | 0         |  |
|      |      | Shiraz-18T | 1433 | 0.250973 | 0         |  |
|      |      | Shiraz-22T | 1544 | 0        | -0.193579 |  |
|      |      | Shiraz-25T | 1697 | 0.21945  | 0         |  |
|      |      | Shiraz-28T | 1734 | 0.362882 | 0         |  |
|      |      | Shiraz-29T | 1777 | 0.156747 | 0         |  |
|      |      | Shiraz-38T | 1950 | 0.265916 | 0         |  |
|      |      | Shiraz-71T | 2236 | 0.320072 | 0         |  |
|      |      | Shiraz-72T | 2277 | 0        | -0.398869 |  |
|      |      | Shiraz-3T  | 87   | 0.198593 | 0         |  |
|      |      | Shiraz-4T  | 252  | 0.192083 | 0         |  |

|        |      |            |      |          |           |  |  |
|--------|------|------------|------|----------|-----------|--|--|
|        |      | Shiraz-36T | 376  | 0.159952 | 0         |  |  |
|        |      | Shiraz-44T | 631  | 0        | -0.180312 |  |  |
|        |      | Shiraz-46T | 942  | 0.069143 | 0         |  |  |
|        |      | Shiraz-18T | 1433 | 0.250973 | 0         |  |  |
|        |      | Shiraz-22T | 1544 | 0        | -0.193579 |  |  |
|        |      | Shiraz-25T | 1697 | 0.21945  | 0         |  |  |
|        |      | Shiraz-28T | 1734 | 0.362882 | 0         |  |  |
|        |      | Shiraz-29T | 1777 | 0.156747 | 0         |  |  |
|        |      | Shiraz-38T | 1950 | 0.265916 | 0         |  |  |
|        |      | Shiraz-71T | 2236 | 0.320072 | 0         |  |  |
|        |      | Shiraz-72T | 2277 | 0        | -0.398869 |  |  |
|        |      | Shiraz-3T  | 87   | 0.198593 | 0         |  |  |
|        |      | Shiraz-4T  | 252  | 0.192083 | 0         |  |  |
|        |      | Shiraz-36T | 376  | 0.159952 | 0         |  |  |
|        |      | Shiraz-44T | 631  | 0        | -0.180312 |  |  |
|        |      | Shiraz-46T | 942  | 0.069143 | 0         |  |  |
|        |      | Shiraz-18T | 1433 | 0.250973 | 0         |  |  |
|        |      | Shiraz-22T | 1544 | 0        | -0.193579 |  |  |
|        |      | Shiraz-25T | 1697 | 0.21945  | 0         |  |  |
|        |      | Shiraz-28T | 1734 | 0.362882 | 0         |  |  |
|        |      | Shiraz-29T | 1777 | 0.156747 | 0         |  |  |
|        |      | Shiraz-38T | 1950 | 0.265916 | 0         |  |  |
|        |      | Shiraz-71T | 2236 | 0.320072 | 0         |  |  |
|        |      | Shiraz-72T | 2277 | 0        | -0.398869 |  |  |
| ANKIB1 | chr7 | Shiraz-3T  | 90   | 0.219276 | 0         |  |  |
|        |      | Shiraz-3T  | 93   | 0        | -0.058023 |  |  |
|        |      | Shiraz-4T  | 253  | 0.372918 | 0         |  |  |
|        |      | Shiraz-36T | 378  | 0.179558 | 0         |  |  |
|        |      | Shiraz-36T | 380  | 0.083883 | 0         |  |  |
|        |      | Shiraz-44T | 638  | 0        | -0.433476 |  |  |
|        |      | Shiraz-46T | 943  | 0.093799 | 0         |  |  |
|        |      | Shiraz-46T | 945  | 0        | -0.014838 |  |  |
|        |      | Shiraz-47T | 1029 | 0        | -0.096586 |  |  |
|        |      | Shiraz-49T | 1119 | 0        | -0.157331 |  |  |
|        |      | Shiraz-77T | 1225 | 0        | -0.117922 |  |  |
|        |      | Shiraz-18T | 1434 | 0.244465 | 0         |  |  |
|        |      | Shiraz-22T | 1549 | 0        | -0.319623 |  |  |
|        |      | Shiraz-25T | 1698 | 0.21835  | 0         |  |  |
|        |      | Shiraz-28T | 1735 | 0.350744 | 0         |  |  |
|        |      | Shiraz-29T | 1778 | 0.120767 | 0         |  |  |
|        |      | Shiraz-32T | 1833 | 0.551336 | 0         |  |  |
|        |      | Shiraz-38T | 1951 | 0.250891 | 0         |  |  |
|        |      | Shiraz-53T | 2078 | 0.287202 | 0         |  |  |
|        |      | Shiraz-58T | 2159 | 0        | -0.219521 |  |  |
|        |      | Shiraz-71T | 2238 | 0.603631 | 0         |  |  |
|        |      | Shiraz-3T  | 90   | 0.219276 | 0         |  |  |
|        |      | Shiraz-3T  | 93   | 0        | -0.058023 |  |  |

|        |      |            |      |          |           |  |
|--------|------|------------|------|----------|-----------|--|
|        |      | Shiraz-4T  | 253  | 0.372918 | 0         |  |
|        |      | Shiraz-36T | 378  | 0.179558 | 0         |  |
|        |      | Shiraz-36T | 380  | 0.083883 | 0         |  |
|        |      | Shiraz-44T | 638  | 0        | -0.433476 |  |
|        |      | Shiraz-46T | 943  | 0.093799 | 0         |  |
|        |      | Shiraz-46T | 945  | 0        | -0.014838 |  |
|        |      | Shiraz-47T | 1029 | 0        | -0.096586 |  |
|        |      | Shiraz-49T | 1119 | 0        | -0.157331 |  |
|        |      | Shiraz-77T | 1225 | 0        | -0.117922 |  |
|        |      | Shiraz-18T | 1434 | 0.244465 | 0         |  |
|        |      | Shiraz-22T | 1549 | 0        | -0.319623 |  |
|        |      | Shiraz-25T | 1698 | 0.21835  | 0         |  |
|        |      | Shiraz-28T | 1735 | 0.350744 | 0         |  |
|        |      | Shiraz-29T | 1778 | 0.120767 | 0         |  |
|        |      | Shiraz-32T | 1833 | 0.551336 | 0         |  |
|        |      | Shiraz-38T | 1951 | 0.250891 | 0         |  |
|        |      | Shiraz-53T | 2078 | 0.287202 | 0         |  |
|        |      | Shiraz-58T | 2159 | 0        | -0.219521 |  |
|        |      | Shiraz-71T | 2238 | 0.603631 | 0         |  |
|        |      | Shiraz-3T  | 90   | 0.219276 | 0         |  |
|        |      | Shiraz-3T  | 93   | 0        | -0.058023 |  |
|        |      | Shiraz-4T  | 253  | 0.372918 | 0         |  |
|        |      | Shiraz-36T | 378  | 0.179558 | 0         |  |
|        |      | Shiraz-36T | 380  | 0.083883 | 0         |  |
|        |      | Shiraz-44T | 638  | 0        | -0.433476 |  |
|        |      | Shiraz-46T | 943  | 0.093799 | 0         |  |
|        |      | Shiraz-46T | 945  | 0        | -0.014838 |  |
|        |      | Shiraz-47T | 1029 | 0        | -0.096586 |  |
|        |      | Shiraz-49T | 1119 | 0        | -0.157331 |  |
|        |      | Shiraz-77T | 1225 | 0        | -0.117922 |  |
|        |      | Shiraz-18T | 1434 | 0.244465 | 0         |  |
|        |      | Shiraz-22T | 1549 | 0        | -0.319623 |  |
|        |      | Shiraz-25T | 1698 | 0.21835  | 0         |  |
|        |      | Shiraz-28T | 1735 | 0.350744 | 0         |  |
|        |      | Shiraz-29T | 1778 | 0.120767 | 0         |  |
|        |      | Shiraz-32T | 1833 | 0.551336 | 0         |  |
|        |      | Shiraz-38T | 1951 | 0.250891 | 0         |  |
|        |      | Shiraz-53T | 2078 | 0.287202 | 0         |  |
|        |      | Shiraz-58T | 2159 | 0        | -0.219521 |  |
|        |      | Shiraz-71T | 2238 | 0.603631 | 0         |  |
| ANKMY2 | chr7 | Shiraz-4T  | 252  | 0.192083 | 0         |  |
|        |      | Shiraz-36T | 376  | 0.159952 | 0         |  |
|        |      | Shiraz-44T | 628  | 0        | -0.444379 |  |
|        |      | Shiraz-47T | 1027 | 0        | -0.117848 |  |
|        |      | Shiraz-49T | 1117 | 0        | -0.168296 |  |
|        |      | Shiraz-77T | 1222 | 0        | -0.113002 |  |
|        |      | Shiraz-18T | 1433 | 0.250973 | 0         |  |

|         |      |            |      |          |           |  |  |
|---------|------|------------|------|----------|-----------|--|--|
|         |      | Shiraz-22T | 1543 | 0        | -0.513696 |  |  |
|         |      | Shiraz-25T | 1697 | 0.21945  | 0         |  |  |
|         |      | Shiraz-28T | 1734 | 0.362882 | 0         |  |  |
|         |      | Shiraz-29T | 1777 | 0.156747 | 0         |  |  |
|         |      | Shiraz-38T | 1950 | 0.265916 | 0         |  |  |
|         |      | Shiraz-58T | 2157 | 0        | -0.213872 |  |  |
|         |      | Shiraz-71T | 2236 | 0.320072 | 0         |  |  |
|         |      | Shiraz-4T  | 252  | 0.192083 | 0         |  |  |
|         |      | Shiraz-36T | 376  | 0.159952 | 0         |  |  |
|         |      | Shiraz-44T | 628  | 0        | -0.444379 |  |  |
|         |      | Shiraz-47T | 1027 | 0        | -0.117848 |  |  |
|         |      | Shiraz-49T | 1117 | 0        | -0.168296 |  |  |
|         |      | Shiraz-77T | 1222 | 0        | -0.113002 |  |  |
|         |      | Shiraz-18T | 1433 | 0.250973 | 0         |  |  |
|         |      | Shiraz-22T | 1543 | 0        | -0.513696 |  |  |
|         |      | Shiraz-25T | 1697 | 0.21945  | 0         |  |  |
|         |      | Shiraz-28T | 1734 | 0.362882 | 0         |  |  |
|         |      | Shiraz-29T | 1777 | 0.156747 | 0         |  |  |
|         |      | Shiraz-38T | 1950 | 0.265916 | 0         |  |  |
|         |      | Shiraz-58T | 2157 | 0        | -0.213872 |  |  |
|         |      | Shiraz-71T | 2236 | 0.320072 | 0         |  |  |
|         |      | Shiraz-4T  | 252  | 0.192083 | 0         |  |  |
|         |      | Shiraz-36T | 376  | 0.159952 | 0         |  |  |
|         |      | Shiraz-44T | 628  | 0        | -0.444379 |  |  |
|         |      | Shiraz-47T | 1027 | 0        | -0.117848 |  |  |
|         |      | Shiraz-49T | 1117 | 0        | -0.168296 |  |  |
|         |      | Shiraz-77T | 1222 | 0        | -0.113002 |  |  |
|         |      | Shiraz-18T | 1433 | 0.250973 | 0         |  |  |
|         |      | Shiraz-22T | 1543 | 0        | -0.513696 |  |  |
|         |      | Shiraz-25T | 1697 | 0.21945  | 0         |  |  |
|         |      | Shiraz-28T | 1734 | 0.362882 | 0         |  |  |
|         |      | Shiraz-29T | 1777 | 0.156747 | 0         |  |  |
|         |      | Shiraz-38T | 1950 | 0.265916 | 0         |  |  |
|         |      | Shiraz-58T | 2157 | 0        | -0.213872 |  |  |
|         |      | Shiraz-71T | 2236 | 0.320072 | 0         |  |  |
| ANKRD58 | chrX | Shiraz-3T  | 242  | 0        | -0.336434 |  |  |
|         |      | Shiraz-3T  | 244  | 0        | -0.023749 |  |  |
|         |      | Shiraz-4T  | 261  | 0        | -0.336249 |  |  |
|         |      | Shiraz-16T | 295  | 0.591657 | 0         |  |  |
|         |      | Shiraz-36T | 433  | 0        | -0.803961 |  |  |
|         |      | Shiraz-44T | 899  | 0        | -1.09697  |  |  |
|         |      | Shiraz-44T | 904  | 0        | -0.625526 |  |  |
|         |      | Shiraz-49T | 1170 | 0        | -0.967436 |  |  |
|         |      | Shiraz-9T  | 1370 | 0.690073 | 0         |  |  |
|         |      | Shiraz-18T | 1457 | 0.643204 | 0         |  |  |
|         |      | Shiraz-22T | 1673 | 0.611783 | 0         |  |  |
|         |      | Shiraz-25T | 1719 | 0.472955 | 0         |  |  |

|        |      |            |      |          |           |  |  |
|--------|------|------------|------|----------|-----------|--|--|
|        |      | Shiraz-28T | 1762 | 0.562311 | 0         |  |  |
|        |      | Shiraz-29T | 1801 | 0.815343 | 0         |  |  |
|        |      | Shiraz-32T | 1870 | 0.729766 | 0         |  |  |
|        |      | Shiraz-35T | 1933 | 0.488535 | 0         |  |  |
|        |      | Shiraz-58T | 2223 | 0.833364 | 0         |  |  |
|        |      | Shiraz-71T | 2263 | 0.975531 | 0         |  |  |
|        |      | Shiraz-3T  | 242  | 0        | -0.336434 |  |  |
|        |      | Shiraz-3T  | 244  | 0        | -0.023749 |  |  |
|        |      | Shiraz-4T  | 261  | 0        | -0.336249 |  |  |
|        |      | Shiraz-16T | 295  | 0.591657 | 0         |  |  |
|        |      | Shiraz-36T | 433  | 0        | -0.803961 |  |  |
|        |      | Shiraz-44T | 899  | 0        | -1.09697  |  |  |
|        |      | Shiraz-44T | 904  | 0        | -0.625526 |  |  |
|        |      | Shiraz-49T | 1170 | 0        | -0.967436 |  |  |
|        |      | Shiraz-9T  | 1370 | 0.690073 | 0         |  |  |
|        |      | Shiraz-18T | 1457 | 0.643204 | 0         |  |  |
|        |      | Shiraz-22T | 1673 | 0.611783 | 0         |  |  |
|        |      | Shiraz-25T | 1719 | 0.472955 | 0         |  |  |
|        |      | Shiraz-28T | 1762 | 0.562311 | 0         |  |  |
|        |      | Shiraz-29T | 1801 | 0.815343 | 0         |  |  |
|        |      | Shiraz-32T | 1870 | 0.729766 | 0         |  |  |
|        |      | Shiraz-35T | 1933 | 0.488535 | 0         |  |  |
|        |      | Shiraz-58T | 2223 | 0.833364 | 0         |  |  |
|        |      | Shiraz-71T | 2263 | 0.975531 | 0         |  |  |
|        |      | Shiraz-3T  | 242  | 0        | -0.336434 |  |  |
|        |      | Shiraz-3T  | 244  | 0        | -0.023749 |  |  |
|        |      | Shiraz-4T  | 261  | 0        | -0.336249 |  |  |
|        |      | Shiraz-16T | 295  | 0.591657 | 0         |  |  |
|        |      | Shiraz-36T | 433  | 0        | -0.803961 |  |  |
|        |      | Shiraz-44T | 899  | 0        | -1.09697  |  |  |
|        |      | Shiraz-44T | 904  | 0        | -0.625526 |  |  |
|        |      | Shiraz-49T | 1170 | 0        | -0.967436 |  |  |
|        |      | Shiraz-9T  | 1370 | 0.690073 | 0         |  |  |
|        |      | Shiraz-18T | 1457 | 0.643204 | 0         |  |  |
|        |      | Shiraz-22T | 1673 | 0.611783 | 0         |  |  |
|        |      | Shiraz-25T | 1719 | 0.472955 | 0         |  |  |
|        |      | Shiraz-28T | 1762 | 0.562311 | 0         |  |  |
|        |      | Shiraz-29T | 1801 | 0.815343 | 0         |  |  |
|        |      | Shiraz-32T | 1870 | 0.729766 | 0         |  |  |
|        |      | Shiraz-35T | 1933 | 0.488535 | 0         |  |  |
|        |      | Shiraz-58T | 2223 | 0.833364 | 0         |  |  |
|        |      | Shiraz-71T | 2263 | 0.975531 | 0         |  |  |
| ANKRD7 | chr7 | Shiraz-3T  | 90   | 0.219276 | 0         |  |  |
|        |      | Shiraz-3T  | 95   | 0        | -0.077623 |  |  |
|        |      | Shiraz-4T  | 253  | 0.372918 | 0         |  |  |
|        |      | Shiraz-36T | 378  | 0.179558 | 0         |  |  |
|        |      | Shiraz-36T | 382  | 0.081739 | 0         |  |  |

|  |            |      |          |           |  |
|--|------------|------|----------|-----------|--|
|  | Shiraz-44T | 641  | 0        | -0.477846 |  |
|  | Shiraz-46T | 943  | 0.093799 | 0         |  |
|  | Shiraz-46T | 947  | 0        | -0.010843 |  |
|  | Shiraz-47T | 1031 | 0        | -0.117529 |  |
|  | Shiraz-49T | 1121 | 0        | -0.138569 |  |
|  | Shiraz-77T | 1225 | 0        | -0.117922 |  |
|  | Shiraz-77T | 1228 | 0        | -0.238084 |  |
|  | Shiraz-18T | 1434 | 0.244465 | 0         |  |
|  | Shiraz-22T | 1549 | 0        | -0.319623 |  |
|  | Shiraz-22T | 1552 | 0        | -0.50686  |  |
|  | Shiraz-25T | 1698 | 0.21835  | 0         |  |
|  | Shiraz-28T | 1735 | 0.350744 | 0         |  |
|  | Shiraz-29T | 1778 | 0.120767 | 0         |  |
|  | Shiraz-32T | 1833 | 0.551336 | 0         |  |
|  | Shiraz-32T | 1835 | 0.092727 | 0         |  |
|  | Shiraz-38T | 1951 | 0.250891 | 0         |  |
|  | Shiraz-53T | 2078 | 0.287202 | 0         |  |
|  | Shiraz-58T | 2161 | 0        | -0.187744 |  |
|  | Shiraz-71T | 2238 | 0.603631 | 0         |  |
|  | Shiraz-3T  | 90   | 0.219276 | 0         |  |
|  | Shiraz-3T  | 95   | 0        | -0.077623 |  |
|  | Shiraz-4T  | 253  | 0.372918 | 0         |  |
|  | Shiraz-36T | 378  | 0.179558 | 0         |  |
|  | Shiraz-36T | 382  | 0.081739 | 0         |  |
|  | Shiraz-44T | 641  | 0        | -0.477846 |  |
|  | Shiraz-46T | 943  | 0.093799 | 0         |  |
|  | Shiraz-46T | 947  | 0        | -0.010843 |  |
|  | Shiraz-47T | 1031 | 0        | -0.117529 |  |
|  | Shiraz-49T | 1121 | 0        | -0.138569 |  |
|  | Shiraz-77T | 1225 | 0        | -0.117922 |  |
|  | Shiraz-77T | 1228 | 0        | -0.238084 |  |
|  | Shiraz-18T | 1434 | 0.244465 | 0         |  |
|  | Shiraz-22T | 1549 | 0        | -0.319623 |  |
|  | Shiraz-22T | 1552 | 0        | -0.50686  |  |
|  | Shiraz-25T | 1698 | 0.21835  | 0         |  |
|  | Shiraz-28T | 1735 | 0.350744 | 0         |  |
|  | Shiraz-29T | 1778 | 0.120767 | 0         |  |
|  | Shiraz-32T | 1833 | 0.551336 | 0         |  |
|  | Shiraz-32T | 1835 | 0.092727 | 0         |  |
|  | Shiraz-38T | 1951 | 0.250891 | 0         |  |
|  | Shiraz-53T | 2078 | 0.287202 | 0         |  |
|  | Shiraz-58T | 2161 | 0        | -0.187744 |  |
|  | Shiraz-71T | 2238 | 0.603631 | 0         |  |
|  | Shiraz-3T  | 90   | 0.219276 | 0         |  |
|  | Shiraz-3T  | 95   | 0        | -0.077623 |  |
|  | Shiraz-4T  | 253  | 0.372918 | 0         |  |
|  | Shiraz-36T | 378  | 0.179558 | 0         |  |



|      |      |            |      |          |           |  |  |
|------|------|------------|------|----------|-----------|--|--|
|      |      | Shiraz-36T | 382  | 0.081739 | 0         |  |  |
|      |      | Shiraz-44T | 641  | 0        | -0.477846 |  |  |
|      |      | Shiraz-46T | 943  | 0.093799 | 0         |  |  |
|      |      | Shiraz-46T | 947  | 0        | -0.010843 |  |  |
|      |      | Shiraz-47T | 1031 | 0        | -0.117529 |  |  |
|      |      | Shiraz-49T | 1121 | 0        | -0.138569 |  |  |
|      |      | Shiraz-77T | 1225 | 0        | -0.117922 |  |  |
|      |      | Shiraz-77T | 1228 | 0        | -0.238084 |  |  |
|      |      | Shiraz-18T | 1434 | 0.244465 | 0         |  |  |
|      |      | Shiraz-22T | 1549 | 0        | -0.319623 |  |  |
|      |      | Shiraz-22T | 1552 | 0        | -0.50686  |  |  |
|      |      | Shiraz-25T | 1698 | 0.21835  | 0         |  |  |
|      |      | Shiraz-28T | 1735 | 0.350744 | 0         |  |  |
|      |      | Shiraz-29T | 1778 | 0.120767 | 0         |  |  |
|      |      | Shiraz-32T | 1833 | 0.551336 | 0         |  |  |
|      |      | Shiraz-32T | 1835 | 0.092727 | 0         |  |  |
|      |      | Shiraz-38T | 1951 | 0.250891 | 0         |  |  |
|      |      | Shiraz-53T | 2078 | 0.287202 | 0         |  |  |
|      |      | Shiraz-58T | 2161 | 0        | -0.187744 |  |  |
|      |      | Shiraz-71T | 2238 | 0.603631 | 0         |  |  |
| ANLN | chr7 | Shiraz-3T  | 87   | 0.198593 | 0         |  |  |
|      |      | Shiraz-4T  | 252  | 0.192083 | 0         |  |  |
|      |      | Shiraz-36T | 376  | 0.159952 | 0         |  |  |
|      |      | Shiraz-44T | 631  | 0        | -0.180312 |  |  |
|      |      | Shiraz-46T | 942  | 0.069143 | 0         |  |  |
|      |      | Shiraz-18T | 1433 | 0.250973 | 0         |  |  |
|      |      | Shiraz-22T | 1544 | 0        | -0.193579 |  |  |
|      |      | Shiraz-25T | 1697 | 0.21945  | 0         |  |  |
|      |      | Shiraz-28T | 1734 | 0.362882 | 0         |  |  |
|      |      | Shiraz-29T | 1777 | 0.156747 | 0         |  |  |
|      |      | Shiraz-38T | 1950 | 0.265916 | 0         |  |  |
|      |      | Shiraz-71T | 2236 | 0.320072 | 0         |  |  |
|      |      | Shiraz-72T | 2277 | 0        | -0.398869 |  |  |
|      |      | Shiraz-3T  | 87   | 0.198593 | 0         |  |  |
|      |      | Shiraz-4T  | 252  | 0.192083 | 0         |  |  |
|      |      | Shiraz-36T | 376  | 0.159952 | 0         |  |  |
|      |      | Shiraz-44T | 631  | 0        | -0.180312 |  |  |
|      |      | Shiraz-46T | 942  | 0.069143 | 0         |  |  |
|      |      | Shiraz-18T | 1433 | 0.250973 | 0         |  |  |
|      |      | Shiraz-22T | 1544 | 0        | -0.193579 |  |  |
|      |      | Shiraz-25T | 1697 | 0.21945  | 0         |  |  |
|      |      | Shiraz-28T | 1734 | 0.362882 | 0         |  |  |
|      |      | Shiraz-29T | 1777 | 0.156747 | 0         |  |  |
|      |      | Shiraz-38T | 1950 | 0.265916 | 0         |  |  |
|      |      | Shiraz-71T | 2236 | 0.320072 | 0         |  |  |
|      |      | Shiraz-72T | 2277 | 0        | -0.398869 |  |  |
|      |      | Shiraz-3T  | 87   | 0.198593 | 0         |  |  |

|      |      |            |      |          |           |  |  |
|------|------|------------|------|----------|-----------|--|--|
|      |      | Shiraz-4T  | 252  | 0.192083 | 0         |  |  |
|      |      | Shiraz-36T | 376  | 0.159952 | 0         |  |  |
|      |      | Shiraz-44T | 631  | 0        | -0.180312 |  |  |
|      |      | Shiraz-46T | 942  | 0.069143 | 0         |  |  |
|      |      | Shiraz-18T | 1433 | 0.250973 | 0         |  |  |
|      |      | Shiraz-22T | 1544 | 0        | -0.193579 |  |  |
|      |      | Shiraz-25T | 1697 | 0.21945  | 0         |  |  |
|      |      | Shiraz-28T | 1734 | 0.362882 | 0         |  |  |
|      |      | Shiraz-29T | 1777 | 0.156747 | 0         |  |  |
|      |      | Shiraz-38T | 1950 | 0.265916 | 0         |  |  |
|      |      | Shiraz-71T | 2236 | 0.320072 | 0         |  |  |
|      |      | Shiraz-72T | 2277 | 0        | -0.398869 |  |  |
| AOAH | chr7 | Shiraz-3T  | 87   | 0.198593 | 0         |  |  |
|      |      | Shiraz-4T  | 252  | 0.192083 | 0         |  |  |
|      |      | Shiraz-36T | 376  | 0.159952 | 0         |  |  |
|      |      | Shiraz-44T | 631  | 0        | -0.180312 |  |  |
|      |      | Shiraz-46T | 942  | 0.069143 | 0         |  |  |
|      |      | Shiraz-18T | 1433 | 0.250973 | 0         |  |  |
|      |      | Shiraz-22T | 1544 | 0        | -0.193579 |  |  |
|      |      | Shiraz-25T | 1697 | 0.21945  | 0         |  |  |
|      |      | Shiraz-28T | 1734 | 0.362882 | 0         |  |  |
|      |      | Shiraz-29T | 1777 | 0.156747 | 0         |  |  |
|      |      | Shiraz-38T | 1950 | 0.265916 | 0         |  |  |
|      |      | Shiraz-71T | 2236 | 0.320072 | 0         |  |  |
|      |      | Shiraz-72T | 2277 | 0        | -0.398869 |  |  |
|      |      | Shiraz-3T  | 87   | 0.198593 | 0         |  |  |
|      |      | Shiraz-4T  | 252  | 0.192083 | 0         |  |  |
|      |      | Shiraz-36T | 376  | 0.159952 | 0         |  |  |
|      |      | Shiraz-44T | 631  | 0        | -0.180312 |  |  |
|      |      | Shiraz-46T | 942  | 0.069143 | 0         |  |  |
|      |      | Shiraz-18T | 1433 | 0.250973 | 0         |  |  |
|      |      | Shiraz-22T | 1544 | 0        | -0.193579 |  |  |
|      |      | Shiraz-25T | 1697 | 0.21945  | 0         |  |  |
|      |      | Shiraz-28T | 1734 | 0.362882 | 0         |  |  |
|      |      | Shiraz-29T | 1777 | 0.156747 | 0         |  |  |
|      |      | Shiraz-38T | 1950 | 0.265916 | 0         |  |  |
|      |      | Shiraz-71T | 2236 | 0.320072 | 0         |  |  |
|      |      | Shiraz-72T | 2277 | 0        | -0.398869 |  |  |
|      |      | Shiraz-3T  | 87   | 0.198593 | 0         |  |  |
|      |      | Shiraz-4T  | 252  | 0.192083 | 0         |  |  |
|      |      | Shiraz-36T | 376  | 0.159952 | 0         |  |  |
|      |      | Shiraz-44T | 631  | 0        | -0.180312 |  |  |
|      |      | Shiraz-46T | 942  | 0.069143 | 0         |  |  |
|      |      | Shiraz-18T | 1433 | 0.250973 | 0         |  |  |
|      |      | Shiraz-22T | 1544 | 0        | -0.193579 |  |  |
|      |      | Shiraz-25T | 1697 | 0.21945  | 0         |  |  |
|      |      | Shiraz-28T | 1734 | 0.362882 | 0         |  |  |

|       |      |            |      |          |           |  |
|-------|------|------------|------|----------|-----------|--|
|       |      | Shiraz-29T | 1777 | 0.156747 | 0         |  |
|       |      | Shiraz-38T | 1950 | 0.265916 | 0         |  |
|       |      | Shiraz-71T | 2236 | 0.320072 | 0         |  |
|       |      | Shiraz-72T | 2277 | 0        | -0.398869 |  |
| AP1S1 | chr7 | Shiraz-3T  | 90   | 0.219276 | 0         |  |
|       |      | Shiraz-3T  | 94   | 0.74735  | 0         |  |
|       |      | Shiraz-4T  | 253  | 0.372918 | 0         |  |
|       |      | Shiraz-31T | 316  | 0.219196 | 0         |  |
|       |      | Shiraz-36T | 378  | 0.179558 | 0         |  |
|       |      | Shiraz-36T | 381  | 0.332628 | 0         |  |
|       |      | Shiraz-44T | 639  | 1.035032 | 0         |  |
|       |      | Shiraz-46T | 943  | 0.093799 | 0         |  |
|       |      | Shiraz-46T | 946  | 0.299835 | 0         |  |
|       |      | Shiraz-47T | 1030 | 0.257728 | 0         |  |
|       |      | Shiraz-49T | 1120 | 0.281656 | 0         |  |
|       |      | Shiraz-77T | 1225 | 0        | -0.117922 |  |
|       |      | Shiraz-77T | 1227 | 0.196445 | 0         |  |
|       |      | Shiraz-9T  | 1324 | 0.679266 | 0         |  |
|       |      | Shiraz-18T | 1434 | 0.244465 | 0         |  |
|       |      | Shiraz-22T | 1549 | 0        | -0.319623 |  |
|       |      | Shiraz-22T | 1551 | 0.324011 | 0         |  |
|       |      | Shiraz-25T | 1698 | 0.21835  | 0         |  |
|       |      | Shiraz-28T | 1735 | 0.350744 | 0         |  |
|       |      | Shiraz-29T | 1778 | 0.120767 | 0         |  |
|       |      | Shiraz-32T | 1833 | 0.551336 | 0         |  |
|       |      | Shiraz-32T | 1834 | 1.485392 | 0         |  |
|       |      | Shiraz-38T | 1951 | 0.250891 | 0         |  |
|       |      | Shiraz-53T | 2078 | 0.287202 | 0         |  |
|       |      | Shiraz-58T | 2160 | 0.399007 | 0         |  |
|       |      | Shiraz-71T | 2238 | 0.603631 | 0         |  |
|       |      | Shiraz-3T  | 90   | 0.219276 | 0         |  |
|       |      | Shiraz-3T  | 94   | 0.74735  | 0         |  |
|       |      | Shiraz-4T  | 253  | 0.372918 | 0         |  |
|       |      | Shiraz-31T | 316  | 0.219196 | 0         |  |
|       |      | Shiraz-36T | 378  | 0.179558 | 0         |  |
|       |      | Shiraz-36T | 381  | 0.332628 | 0         |  |
|       |      | Shiraz-44T | 639  | 1.035032 | 0         |  |
|       |      | Shiraz-46T | 943  | 0.093799 | 0         |  |
|       |      | Shiraz-46T | 946  | 0.299835 | 0         |  |
|       |      | Shiraz-47T | 1030 | 0.257728 | 0         |  |
|       |      | Shiraz-49T | 1120 | 0.281656 | 0         |  |
|       |      | Shiraz-77T | 1225 | 0        | -0.117922 |  |
|       |      | Shiraz-77T | 1227 | 0.196445 | 0         |  |
|       |      | Shiraz-9T  | 1324 | 0.679266 | 0         |  |
|       |      | Shiraz-18T | 1434 | 0.244465 | 0         |  |
|       |      | Shiraz-22T | 1549 | 0        | -0.319623 |  |
|       |      | Shiraz-22T | 1551 | 0.324011 | 0         |  |

|       |      |            |      |          |           |  |
|-------|------|------------|------|----------|-----------|--|
|       |      | Shiraz-25T | 1698 | 0.21835  | 0         |  |
|       |      | Shiraz-28T | 1735 | 0.350744 | 0         |  |
|       |      | Shiraz-29T | 1778 | 0.120767 | 0         |  |
|       |      | Shiraz-32T | 1833 | 0.551336 | 0         |  |
|       |      | Shiraz-32T | 1834 | 1.485392 | 0         |  |
|       |      | Shiraz-38T | 1951 | 0.250891 | 0         |  |
|       |      | Shiraz-53T | 2078 | 0.287202 | 0         |  |
|       |      | Shiraz-58T | 2160 | 0.399007 | 0         |  |
|       |      | Shiraz-71T | 2238 | 0.603631 | 0         |  |
|       |      | Shiraz-3T  | 90   | 0.219276 | 0         |  |
|       |      | Shiraz-3T  | 94   | 0.74735  | 0         |  |
|       |      | Shiraz-4T  | 253  | 0.372918 | 0         |  |
|       |      | Shiraz-31T | 316  | 0.219196 | 0         |  |
|       |      | Shiraz-36T | 378  | 0.179558 | 0         |  |
|       |      | Shiraz-36T | 381  | 0.332628 | 0         |  |
|       |      | Shiraz-44T | 639  | 1.035032 | 0         |  |
|       |      | Shiraz-46T | 943  | 0.093799 | 0         |  |
|       |      | Shiraz-46T | 946  | 0.299835 | 0         |  |
|       |      | Shiraz-47T | 1030 | 0.257728 | 0         |  |
|       |      | Shiraz-49T | 1120 | 0.281656 | 0         |  |
|       |      | Shiraz-77T | 1225 | 0        | -0.117922 |  |
|       |      | Shiraz-77T | 1227 | 0.196445 | 0         |  |
|       |      | Shiraz-9T  | 1324 | 0.679266 | 0         |  |
|       |      | Shiraz-18T | 1434 | 0.244465 | 0         |  |
|       |      | Shiraz-22T | 1549 | 0        | -0.319623 |  |
|       |      | Shiraz-22T | 1551 | 0.324011 | 0         |  |
|       |      | Shiraz-25T | 1698 | 0.21835  | 0         |  |
|       |      | Shiraz-28T | 1735 | 0.350744 | 0         |  |
|       |      | Shiraz-29T | 1778 | 0.120767 | 0         |  |
|       |      | Shiraz-32T | 1833 | 0.551336 | 0         |  |
|       |      | Shiraz-32T | 1834 | 1.485392 | 0         |  |
|       |      | Shiraz-38T | 1951 | 0.250891 | 0         |  |
|       |      | Shiraz-53T | 2078 | 0.287202 | 0         |  |
|       |      | Shiraz-58T | 2160 | 0.399007 | 0         |  |
|       |      | Shiraz-71T | 2238 | 0.603631 | 0         |  |
| AP1S2 | chrX | Shiraz-3T  | 235  | 0        | -0.28401  |  |
|       |      | Shiraz-4T  | 260  | 0        | -0.324128 |  |
|       |      | Shiraz-16T | 294  | 0.655804 | 0         |  |
|       |      | Shiraz-36T | 431  | 0        | -0.78035  |  |
|       |      | Shiraz-44T | 891  | 0        | -0.954044 |  |
|       |      | Shiraz-49T | 1166 | 0        | -0.917235 |  |
|       |      | Shiraz-9T  | 1368 | 0.199713 | 0         |  |
|       |      | Shiraz-18T | 1455 | 0        | -0.186773 |  |
|       |      | Shiraz-22T | 1669 | 0.695915 | 0         |  |
|       |      | Shiraz-25T | 1717 | 0.420447 | 0         |  |
|       |      | Shiraz-28T | 1760 | 0.538181 | 0         |  |
|       |      | Shiraz-29T | 1800 | 0.672527 | 0         |  |

|       |      |            |      |          |           |  |  |
|-------|------|------------|------|----------|-----------|--|--|
|       |      | Shiraz-32T | 1869 | 0.776805 | 0         |  |  |
|       |      | Shiraz-35T | 1932 | 0.507141 | 0         |  |  |
|       |      | Shiraz-40T | 2051 | 0.098506 | 0         |  |  |
|       |      | Shiraz-58T | 2221 | 0.871948 | 0         |  |  |
|       |      | Shiraz-71T | 2260 | 0.68394  | 0         |  |  |
|       |      | Shiraz-71T | 2261 | 0.508399 | 0         |  |  |
|       |      | Shiraz-3T  | 235  | 0        | -0.28401  |  |  |
|       |      | Shiraz-4T  | 260  | 0        | -0.324128 |  |  |
|       |      | Shiraz-16T | 294  | 0.655804 | 0         |  |  |
|       |      | Shiraz-36T | 431  | 0        | -0.78035  |  |  |
|       |      | Shiraz-44T | 891  | 0        | -0.954044 |  |  |
|       |      | Shiraz-49T | 1166 | 0        | -0.917235 |  |  |
|       |      | Shiraz-9T  | 1368 | 0.199713 | 0         |  |  |
|       |      | Shiraz-18T | 1455 | 0        | -0.186773 |  |  |
|       |      | Shiraz-22T | 1669 | 0.695915 | 0         |  |  |
|       |      | Shiraz-25T | 1717 | 0.420447 | 0         |  |  |
|       |      | Shiraz-28T | 1760 | 0.538181 | 0         |  |  |
|       |      | Shiraz-29T | 1800 | 0.672527 | 0         |  |  |
|       |      | Shiraz-32T | 1869 | 0.776805 | 0         |  |  |
|       |      | Shiraz-35T | 1932 | 0.507141 | 0         |  |  |
|       |      | Shiraz-40T | 2051 | 0.098506 | 0         |  |  |
|       |      | Shiraz-58T | 2221 | 0.871948 | 0         |  |  |
|       |      | Shiraz-71T | 2260 | 0.68394  | 0         |  |  |
|       |      | Shiraz-71T | 2261 | 0.508399 | 0         |  |  |
|       |      | Shiraz-3T  | 235  | 0        | -0.28401  |  |  |
|       |      | Shiraz-4T  | 260  | 0        | -0.324128 |  |  |
|       |      | Shiraz-16T | 294  | 0.655804 | 0         |  |  |
|       |      | Shiraz-36T | 431  | 0        | -0.78035  |  |  |
|       |      | Shiraz-44T | 891  | 0        | -0.954044 |  |  |
|       |      | Shiraz-49T | 1166 | 0        | -0.917235 |  |  |
|       |      | Shiraz-9T  | 1368 | 0.199713 | 0         |  |  |
|       |      | Shiraz-18T | 1455 | 0        | -0.186773 |  |  |
|       |      | Shiraz-22T | 1669 | 0.695915 | 0         |  |  |
|       |      | Shiraz-25T | 1717 | 0.420447 | 0         |  |  |
|       |      | Shiraz-28T | 1760 | 0.538181 | 0         |  |  |
|       |      | Shiraz-29T | 1800 | 0.672527 | 0         |  |  |
|       |      | Shiraz-32T | 1869 | 0.776805 | 0         |  |  |
|       |      | Shiraz-35T | 1932 | 0.507141 | 0         |  |  |
|       |      | Shiraz-40T | 2051 | 0.098506 | 0         |  |  |
|       |      | Shiraz-58T | 2221 | 0.871948 | 0         |  |  |
|       |      | Shiraz-71T | 2260 | 0.68394  | 0         |  |  |
|       |      | Shiraz-71T | 2261 | 0.508399 | 0         |  |  |
| AP4M1 | chr7 | Shiraz-3T  | 90   | 0.219276 | 0         |  |  |
|       |      | Shiraz-3T  | 94   | 0.74735  | 0         |  |  |
|       |      | Shiraz-4T  | 253  | 0.372918 | 0         |  |  |
|       |      | Shiraz-31T | 316  | 0.219196 | 0         |  |  |
|       |      | Shiraz-36T | 378  | 0.179558 | 0         |  |  |

|  |            |      |          |           |  |
|--|------------|------|----------|-----------|--|
|  | Shiraz-36T | 381  | 0.332628 | 0         |  |
|  | Shiraz-44T | 639  | 1.035032 | 0         |  |
|  | Shiraz-46T | 943  | 0.093799 | 0         |  |
|  | Shiraz-46T | 946  | 0.299835 | 0         |  |
|  | Shiraz-47T | 1030 | 0.257728 | 0         |  |
|  | Shiraz-49T | 1120 | 0.281656 | 0         |  |
|  | Shiraz-77T | 1225 | 0        | -0.117922 |  |
|  | Shiraz-77T | 1227 | 0.196445 | 0         |  |
|  | Shiraz-9T  | 1324 | 0.679266 | 0         |  |
|  | Shiraz-18T | 1434 | 0.244465 | 0         |  |
|  | Shiraz-22T | 1549 | 0        | -0.319623 |  |
|  | Shiraz-22T | 1551 | 0.324011 | 0         |  |
|  | Shiraz-25T | 1698 | 0.21835  | 0         |  |
|  | Shiraz-28T | 1735 | 0.350744 | 0         |  |
|  | Shiraz-29T | 1778 | 0.120767 | 0         |  |
|  | Shiraz-32T | 1833 | 0.551336 | 0         |  |
|  | Shiraz-32T | 1834 | 1.485392 | 0         |  |
|  | Shiraz-38T | 1951 | 0.250891 | 0         |  |
|  | Shiraz-53T | 2078 | 0.287202 | 0         |  |
|  | Shiraz-58T | 2160 | 0.399007 | 0         |  |
|  | Shiraz-71T | 2238 | 0.603631 | 0         |  |
|  | Shiraz-3T  | 90   | 0.219276 | 0         |  |
|  | Shiraz-3T  | 94   | 0.74735  | 0         |  |
|  | Shiraz-4T  | 253  | 0.372918 | 0         |  |
|  | Shiraz-31T | 316  | 0.219196 | 0         |  |
|  | Shiraz-36T | 378  | 0.179558 | 0         |  |
|  | Shiraz-36T | 381  | 0.332628 | 0         |  |
|  | Shiraz-44T | 639  | 1.035032 | 0         |  |
|  | Shiraz-46T | 943  | 0.093799 | 0         |  |
|  | Shiraz-46T | 946  | 0.299835 | 0         |  |
|  | Shiraz-47T | 1030 | 0.257728 | 0         |  |
|  | Shiraz-49T | 1120 | 0.281656 | 0         |  |
|  | Shiraz-77T | 1225 | 0        | -0.117922 |  |
|  | Shiraz-77T | 1227 | 0.196445 | 0         |  |
|  | Shiraz-9T  | 1324 | 0.679266 | 0         |  |
|  | Shiraz-18T | 1434 | 0.244465 | 0         |  |
|  | Shiraz-22T | 1549 | 0        | -0.319623 |  |
|  | Shiraz-22T | 1551 | 0.324011 | 0         |  |
|  | Shiraz-25T | 1698 | 0.21835  | 0         |  |
|  | Shiraz-28T | 1735 | 0.350744 | 0         |  |
|  | Shiraz-29T | 1778 | 0.120767 | 0         |  |
|  | Shiraz-32T | 1833 | 0.551336 | 0         |  |
|  | Shiraz-32T | 1834 | 1.485392 | 0         |  |
|  | Shiraz-38T | 1951 | 0.250891 | 0         |  |
|  | Shiraz-53T | 2078 | 0.287202 | 0         |  |
|  | Shiraz-58T | 2160 | 0.399007 | 0         |  |
|  | Shiraz-71T | 2238 | 0.603631 | 0         |  |

|       |      |            |      |          |           |  |
|-------|------|------------|------|----------|-----------|--|
|       |      | Shiraz-3T  | 90   | 0.219276 | 0         |  |
|       |      | Shiraz-3T  | 94   | 0.74735  | 0         |  |
|       |      | Shiraz-4T  | 253  | 0.372918 | 0         |  |
|       |      | Shiraz-31T | 316  | 0.219196 | 0         |  |
|       |      | Shiraz-36T | 378  | 0.179558 | 0         |  |
|       |      | Shiraz-36T | 381  | 0.332628 | 0         |  |
|       |      | Shiraz-44T | 639  | 1.035032 | 0         |  |
|       |      | Shiraz-46T | 943  | 0.093799 | 0         |  |
|       |      | Shiraz-46T | 946  | 0.299835 | 0         |  |
|       |      | Shiraz-47T | 1030 | 0.257728 | 0         |  |
|       |      | Shiraz-49T | 1120 | 0.281656 | 0         |  |
|       |      | Shiraz-77T | 1225 | 0        | -0.117922 |  |
|       |      | Shiraz-77T | 1227 | 0.196445 | 0         |  |
|       |      | Shiraz-9T  | 1324 | 0.679266 | 0         |  |
|       |      | Shiraz-18T | 1434 | 0.244465 | 0         |  |
|       |      | Shiraz-22T | 1549 | 0        | -0.319623 |  |
|       |      | Shiraz-22T | 1551 | 0.324011 | 0         |  |
|       |      | Shiraz-25T | 1698 | 0.21835  | 0         |  |
|       |      | Shiraz-28T | 1735 | 0.350744 | 0         |  |
|       |      | Shiraz-29T | 1778 | 0.120767 | 0         |  |
|       |      | Shiraz-32T | 1833 | 0.551336 | 0         |  |
|       |      | Shiraz-32T | 1834 | 1.485392 | 0         |  |
|       |      | Shiraz-38T | 1951 | 0.250891 | 0         |  |
|       |      | Shiraz-53T | 2078 | 0.287202 | 0         |  |
|       |      | Shiraz-58T | 2160 | 0.399007 | 0         |  |
|       |      | Shiraz-71T | 2238 | 0.603631 | 0         |  |
| APEX2 | chrX | Shiraz-4T  | 260  | 0        | -0.324128 |  |
|       |      | Shiraz-16T | 294  | 0.655804 | 0         |  |
|       |      | Shiraz-36T | 431  | 0        | -0.78035  |  |
|       |      | Shiraz-44T | 891  | 0        | -0.954044 |  |
|       |      | Shiraz-44T | 898  | 0        | -0.515218 |  |
|       |      | Shiraz-49T | 1166 | 0        | -0.917235 |  |
|       |      | Shiraz-77T | 1282 | 0.213849 | 0         |  |
|       |      | Shiraz-9T  | 1368 | 0.199713 | 0         |  |
|       |      | Shiraz-18T | 1456 | 0.608534 | 0         |  |
|       |      | Shiraz-22T | 1669 | 0.695915 | 0         |  |
|       |      | Shiraz-25T | 1717 | 0.420447 | 0         |  |
|       |      | Shiraz-28T | 1760 | 0.538181 | 0         |  |
|       |      | Shiraz-29T | 1800 | 0.672527 | 0         |  |
|       |      | Shiraz-32T | 1869 | 0.776805 | 0         |  |
|       |      | Shiraz-35T | 1932 | 0.507141 | 0         |  |
|       |      | Shiraz-58T | 2221 | 0.871948 | 0         |  |
|       |      | Shiraz-71T | 2260 | 0.68394  | 0         |  |
|       |      | Shiraz-71T | 2262 | 0.986748 | 0         |  |
|       |      | Shiraz-4T  | 260  | 0        | -0.324128 |  |
|       |      | Shiraz-16T | 294  | 0.655804 | 0         |  |
|       |      | Shiraz-36T | 431  | 0        | -0.78035  |  |

|      |      |            |      |          |           |  |  |
|------|------|------------|------|----------|-----------|--|--|
|      |      | Shiraz-44T | 891  | 0        | -0.954044 |  |  |
|      |      | Shiraz-44T | 898  | 0        | -0.515218 |  |  |
|      |      | Shiraz-49T | 1166 | 0        | -0.917235 |  |  |
|      |      | Shiraz-77T | 1282 | 0.213849 | 0         |  |  |
|      |      | Shiraz-9T  | 1368 | 0.199713 | 0         |  |  |
|      |      | Shiraz-18T | 1456 | 0.608534 | 0         |  |  |
|      |      | Shiraz-22T | 1669 | 0.695915 | 0         |  |  |
|      |      | Shiraz-25T | 1717 | 0.420447 | 0         |  |  |
|      |      | Shiraz-28T | 1760 | 0.538181 | 0         |  |  |
|      |      | Shiraz-29T | 1800 | 0.672527 | 0         |  |  |
|      |      | Shiraz-32T | 1869 | 0.776805 | 0         |  |  |
|      |      | Shiraz-35T | 1932 | 0.507141 | 0         |  |  |
|      |      | Shiraz-58T | 2221 | 0.871948 | 0         |  |  |
|      |      | Shiraz-71T | 2260 | 0.68394  | 0         |  |  |
|      |      | Shiraz-71T | 2262 | 0.986748 | 0         |  |  |
|      |      | Shiraz-4T  | 260  | 0        | -0.324128 |  |  |
|      |      | Shiraz-16T | 294  | 0.655804 | 0         |  |  |
|      |      | Shiraz-36T | 431  | 0        | -0.78035  |  |  |
|      |      | Shiraz-44T | 891  | 0        | -0.954044 |  |  |
|      |      | Shiraz-44T | 898  | 0        | -0.515218 |  |  |
|      |      | Shiraz-49T | 1166 | 0        | -0.917235 |  |  |
|      |      | Shiraz-77T | 1282 | 0.213849 | 0         |  |  |
|      |      | Shiraz-9T  | 1368 | 0.199713 | 0         |  |  |
|      |      | Shiraz-18T | 1456 | 0.608534 | 0         |  |  |
|      |      | Shiraz-22T | 1669 | 0.695915 | 0         |  |  |
|      |      | Shiraz-25T | 1717 | 0.420447 | 0         |  |  |
|      |      | Shiraz-28T | 1760 | 0.538181 | 0         |  |  |
|      |      | Shiraz-29T | 1800 | 0.672527 | 0         |  |  |
|      |      | Shiraz-32T | 1869 | 0.776805 | 0         |  |  |
|      |      | Shiraz-35T | 1932 | 0.507141 | 0         |  |  |
|      |      | Shiraz-58T | 2221 | 0.871948 | 0         |  |  |
|      |      | Shiraz-71T | 2260 | 0.68394  | 0         |  |  |
|      |      | Shiraz-71T | 2262 | 0.986748 | 0         |  |  |
| APLN | chrX | Shiraz-3T  | 242  | 0        | -0.336434 |  |  |
|      |      | Shiraz-3T  | 245  | 0.224144 | 0         |  |  |
|      |      | Shiraz-4T  | 261  | 0        | -0.336249 |  |  |
|      |      | Shiraz-16T | 295  | 0.591657 | 0         |  |  |
|      |      | Shiraz-36T | 433  | 0        | -0.803961 |  |  |
|      |      | Shiraz-44T | 899  | 0        | -1.09697  |  |  |
|      |      | Shiraz-44T | 906  | 0        | -0.165692 |  |  |
|      |      | Shiraz-49T | 1170 | 0        | -0.967436 |  |  |
|      |      | Shiraz-9T  | 1370 | 0.690073 | 0         |  |  |
|      |      | Shiraz-18T | 1457 | 0.643204 | 0         |  |  |
|      |      | Shiraz-22T | 1673 | 0.611783 | 0         |  |  |
|      |      | Shiraz-22T | 1677 | 0.789711 | 0         |  |  |
|      |      | Shiraz-25T | 1719 | 0.472955 | 0         |  |  |
|      |      | Shiraz-28T | 1762 | 0.562311 | 0         |  |  |



|      |      |            |      |          |           |  |  |
|------|------|------------|------|----------|-----------|--|--|
|      |      | Shiraz-29T | 1801 | 0.815343 | 0         |  |  |
|      |      | Shiraz-32T | 1870 | 0.729766 | 0         |  |  |
|      |      | Shiraz-35T | 1933 | 0.488535 | 0         |  |  |
|      |      | Shiraz-58T | 2223 | 0.833364 | 0         |  |  |
|      |      | Shiraz-71T | 2263 | 0.975531 | 0         |  |  |
|      |      | Shiraz-3T  | 242  | 0        | -0.336434 |  |  |
|      |      | Shiraz-3T  | 245  | 0.224144 | 0         |  |  |
|      |      | Shiraz-4T  | 261  | 0        | -0.336249 |  |  |
|      |      | Shiraz-16T | 295  | 0.591657 | 0         |  |  |
|      |      | Shiraz-36T | 433  | 0        | -0.803961 |  |  |
|      |      | Shiraz-44T | 899  | 0        | -1.09697  |  |  |
|      |      | Shiraz-44T | 906  | 0        | -0.165692 |  |  |
|      |      | Shiraz-49T | 1170 | 0        | -0.967436 |  |  |
|      |      | Shiraz-9T  | 1370 | 0.690073 | 0         |  |  |
|      |      | Shiraz-18T | 1457 | 0.643204 | 0         |  |  |
|      |      | Shiraz-22T | 1673 | 0.611783 | 0         |  |  |
|      |      | Shiraz-22T | 1677 | 0.789711 | 0         |  |  |
|      |      | Shiraz-25T | 1719 | 0.472955 | 0         |  |  |
|      |      | Shiraz-28T | 1762 | 0.562311 | 0         |  |  |
|      |      | Shiraz-29T | 1801 | 0.815343 | 0         |  |  |
|      |      | Shiraz-32T | 1870 | 0.729766 | 0         |  |  |
|      |      | Shiraz-35T | 1933 | 0.488535 | 0         |  |  |
|      |      | Shiraz-58T | 2223 | 0.833364 | 0         |  |  |
|      |      | Shiraz-71T | 2263 | 0.975531 | 0         |  |  |
|      |      | Shiraz-3T  | 242  | 0        | -0.336434 |  |  |
|      |      | Shiraz-3T  | 245  | 0.224144 | 0         |  |  |
|      |      | Shiraz-4T  | 261  | 0        | -0.336249 |  |  |
|      |      | Shiraz-16T | 295  | 0.591657 | 0         |  |  |
|      |      | Shiraz-36T | 433  | 0        | -0.803961 |  |  |
|      |      | Shiraz-44T | 899  | 0        | -1.09697  |  |  |
|      |      | Shiraz-44T | 906  | 0        | -0.165692 |  |  |
|      |      | Shiraz-49T | 1170 | 0        | -0.967436 |  |  |
|      |      | Shiraz-9T  | 1370 | 0.690073 | 0         |  |  |
|      |      | Shiraz-18T | 1457 | 0.643204 | 0         |  |  |
|      |      | Shiraz-22T | 1673 | 0.611783 | 0         |  |  |
|      |      | Shiraz-22T | 1677 | 0.789711 | 0         |  |  |
|      |      | Shiraz-25T | 1719 | 0.472955 | 0         |  |  |
|      |      | Shiraz-28T | 1762 | 0.562311 | 0         |  |  |
|      |      | Shiraz-29T | 1801 | 0.815343 | 0         |  |  |
|      |      | Shiraz-32T | 1870 | 0.729766 | 0         |  |  |
|      |      | Shiraz-35T | 1933 | 0.488535 | 0         |  |  |
|      |      | Shiraz-58T | 2223 | 0.833364 | 0         |  |  |
|      |      | Shiraz-71T | 2263 | 0.975531 | 0         |  |  |
| APOO | chrX | Shiraz-3T  | 235  | 0        | -0.28401  |  |  |
|      |      | Shiraz-4T  | 260  | 0        | -0.324128 |  |  |
|      |      | Shiraz-16T | 294  | 0.655804 | 0         |  |  |
|      |      | Shiraz-36T | 431  | 0        | -0.78035  |  |  |

|  |            |      |          |           |  |
|--|------------|------|----------|-----------|--|
|  | Shiraz-44T | 891  | 0        | -0.954044 |  |
|  | Shiraz-49T | 1166 | 0        | -0.917235 |  |
|  | Shiraz-77T | 1281 | 0.136627 | 0         |  |
|  | Shiraz-9T  | 1368 | 0.199713 | 0         |  |
|  | Shiraz-18T | 1455 | 0        | -0.186773 |  |
|  | Shiraz-22T | 1669 | 0.695915 | 0         |  |
|  | Shiraz-25T | 1717 | 0.420447 | 0         |  |
|  | Shiraz-28T | 1760 | 0.538181 | 0         |  |
|  | Shiraz-29T | 1800 | 0.672527 | 0         |  |
|  | Shiraz-32T | 1869 | 0.776805 | 0         |  |
|  | Shiraz-35T | 1932 | 0.507141 | 0         |  |
|  | Shiraz-40T | 2051 | 0.098506 | 0         |  |
|  | Shiraz-58T | 2221 | 0.871948 | 0         |  |
|  | Shiraz-71T | 2260 | 0.68394  | 0         |  |
|  | Shiraz-71T | 2261 | 0.508399 | 0         |  |
|  | Shiraz-3T  | 235  | 0        | -0.28401  |  |
|  | Shiraz-4T  | 260  | 0        | -0.324128 |  |
|  | Shiraz-16T | 294  | 0.655804 | 0         |  |
|  | Shiraz-36T | 431  | 0        | -0.78035  |  |
|  | Shiraz-44T | 891  | 0        | -0.954044 |  |
|  | Shiraz-49T | 1166 | 0        | -0.917235 |  |
|  | Shiraz-77T | 1281 | 0.136627 | 0         |  |
|  | Shiraz-9T  | 1368 | 0.199713 | 0         |  |
|  | Shiraz-18T | 1455 | 0        | -0.186773 |  |
|  | Shiraz-22T | 1669 | 0.695915 | 0         |  |
|  | Shiraz-25T | 1717 | 0.420447 | 0         |  |
|  | Shiraz-28T | 1760 | 0.538181 | 0         |  |
|  | Shiraz-29T | 1800 | 0.672527 | 0         |  |
|  | Shiraz-32T | 1869 | 0.776805 | 0         |  |
|  | Shiraz-35T | 1932 | 0.507141 | 0         |  |
|  | Shiraz-40T | 2051 | 0.098506 | 0         |  |
|  | Shiraz-58T | 2221 | 0.871948 | 0         |  |
|  | Shiraz-71T | 2260 | 0.68394  | 0         |  |
|  | Shiraz-71T | 2261 | 0.508399 | 0         |  |
|  | Shiraz-3T  | 235  | 0        | -0.28401  |  |
|  | Shiraz-4T  | 260  | 0        | -0.324128 |  |
|  | Shiraz-16T | 294  | 0.655804 | 0         |  |
|  | Shiraz-36T | 431  | 0        | -0.78035  |  |
|  | Shiraz-44T | 891  | 0        | -0.954044 |  |
|  | Shiraz-49T | 1166 | 0        | -0.917235 |  |
|  | Shiraz-77T | 1281 | 0.136627 | 0         |  |
|  | Shiraz-9T  | 1368 | 0.199713 | 0         |  |
|  | Shiraz-18T | 1455 | 0        | -0.186773 |  |
|  | Shiraz-22T | 1669 | 0.695915 | 0         |  |
|  | Shiraz-25T | 1717 | 0.420447 | 0         |  |
|  | Shiraz-28T | 1760 | 0.538181 | 0         |  |
|  | Shiraz-29T | 1800 | 0.672527 | 0         |  |

|       |      |            |      |          |           |  |
|-------|------|------------|------|----------|-----------|--|
|       |      | Shiraz-32T | 1869 | 0.776805 | 0         |  |
|       |      | Shiraz-35T | 1932 | 0.507141 | 0         |  |
|       |      | Shiraz-40T | 2051 | 0.098506 | 0         |  |
|       |      | Shiraz-58T | 2221 | 0.871948 | 0         |  |
|       |      | Shiraz-71T | 2260 | 0.68394  | 0         |  |
|       |      | Shiraz-71T | 2261 | 0.508399 | 0         |  |
| APOOL | chrX | Shiraz-3T  | 242  | 0        | -0.336434 |  |
|       |      | Shiraz-3T  | 243  | 0        | -0.549129 |  |
|       |      | Shiraz-4T  | 261  | 0        | -0.336249 |  |
|       |      | Shiraz-16T | 295  | 0.591657 | 0         |  |
|       |      | Shiraz-31T | 346  | 0        | -0.1527   |  |
|       |      | Shiraz-36T | 433  | 0        | -0.803961 |  |
|       |      | Shiraz-44T | 899  | 0        | -1.09697  |  |
|       |      | Shiraz-44T | 902  | 0        | -1.449824 |  |
|       |      | Shiraz-47T | 1085 | 0        | -0.130811 |  |
|       |      | Shiraz-49T | 1170 | 0        | -0.967436 |  |
|       |      | Shiraz-49T | 1172 | 0        | -1.123219 |  |
|       |      | Shiraz-18T | 1457 | 0.643204 | 0         |  |
|       |      | Shiraz-22T | 1673 | 0.611783 | 0         |  |
|       |      | Shiraz-22T | 1675 | 0.279253 | 0         |  |
|       |      | Shiraz-25T | 1719 | 0.472955 | 0         |  |
|       |      | Shiraz-28T | 1762 | 0.562311 | 0         |  |
|       |      | Shiraz-29T | 1801 | 0.815343 | 0         |  |
|       |      | Shiraz-32T | 1870 | 0.729766 | 0         |  |
|       |      | Shiraz-32T | 1871 | 0.292679 | 0         |  |
|       |      | Shiraz-35T | 1933 | 0.488535 | 0         |  |
|       |      | Shiraz-58T | 2223 | 0.833364 | 0         |  |
|       |      | Shiraz-58T | 2225 | 0.595784 | 0         |  |
|       |      | Shiraz-71T | 2263 | 0.975531 | 0         |  |
|       |      | Shiraz-3T  | 242  | 0        | -0.336434 |  |
|       |      | Shiraz-3T  | 243  | 0        | -0.549129 |  |
|       |      | Shiraz-4T  | 261  | 0        | -0.336249 |  |
|       |      | Shiraz-16T | 295  | 0.591657 | 0         |  |
|       |      | Shiraz-31T | 346  | 0        | -0.1527   |  |
|       |      | Shiraz-36T | 433  | 0        | -0.803961 |  |
|       |      | Shiraz-44T | 899  | 0        | -1.09697  |  |
|       |      | Shiraz-44T | 902  | 0        | -1.449824 |  |
|       |      | Shiraz-47T | 1085 | 0        | -0.130811 |  |
|       |      | Shiraz-49T | 1170 | 0        | -0.967436 |  |
|       |      | Shiraz-49T | 1172 | 0        | -1.123219 |  |
|       |      | Shiraz-18T | 1457 | 0.643204 | 0         |  |
|       |      | Shiraz-22T | 1673 | 0.611783 | 0         |  |
|       |      | Shiraz-22T | 1675 | 0.279253 | 0         |  |
|       |      | Shiraz-25T | 1719 | 0.472955 | 0         |  |
|       |      | Shiraz-28T | 1762 | 0.562311 | 0         |  |
|       |      | Shiraz-29T | 1801 | 0.815343 | 0         |  |
|       |      | Shiraz-32T | 1870 | 0.729766 | 0         |  |

|      |      |            |      |          |           |  |  |
|------|------|------------|------|----------|-----------|--|--|
|      |      | Shiraz-32T | 1871 | 0.292679 | 0         |  |  |
|      |      | Shiraz-35T | 1933 | 0.488535 | 0         |  |  |
|      |      | Shiraz-58T | 2223 | 0.833364 | 0         |  |  |
|      |      | Shiraz-58T | 2225 | 0.595784 | 0         |  |  |
|      |      | Shiraz-71T | 2263 | 0.975531 | 0         |  |  |
|      |      | Shiraz-3T  | 242  | 0        | -0.336434 |  |  |
|      |      | Shiraz-3T  | 243  | 0        | -0.549129 |  |  |
|      |      | Shiraz-4T  | 261  | 0        | -0.336249 |  |  |
|      |      | Shiraz-16T | 295  | 0.591657 | 0         |  |  |
|      |      | Shiraz-31T | 346  | 0        | -0.1527   |  |  |
|      |      | Shiraz-36T | 433  | 0        | -0.803961 |  |  |
|      |      | Shiraz-44T | 899  | 0        | -1.09697  |  |  |
|      |      | Shiraz-44T | 902  | 0        | -1.449824 |  |  |
|      |      | Shiraz-47T | 1085 | 0        | -0.130811 |  |  |
|      |      | Shiraz-49T | 1170 | 0        | -0.967436 |  |  |
|      |      | Shiraz-49T | 1172 | 0        | -1.123219 |  |  |
|      |      | Shiraz-18T | 1457 | 0.643204 | 0         |  |  |
|      |      | Shiraz-22T | 1673 | 0.611783 | 0         |  |  |
|      |      | Shiraz-22T | 1675 | 0.279253 | 0         |  |  |
|      |      | Shiraz-25T | 1719 | 0.472955 | 0         |  |  |
|      |      | Shiraz-28T | 1762 | 0.562311 | 0         |  |  |
|      |      | Shiraz-29T | 1801 | 0.815343 | 0         |  |  |
|      |      | Shiraz-32T | 1870 | 0.729766 | 0         |  |  |
|      |      | Shiraz-32T | 1871 | 0.292679 | 0         |  |  |
|      |      | Shiraz-35T | 1933 | 0.488535 | 0         |  |  |
|      |      | Shiraz-58T | 2223 | 0.833364 | 0         |  |  |
|      |      | Shiraz-58T | 2225 | 0.595784 | 0         |  |  |
|      |      | Shiraz-71T | 2263 | 0.975531 | 0         |  |  |
| AQP1 | chr7 | Shiraz-3T  | 87   | 0.198593 | 0         |  |  |
|      |      | Shiraz-4T  | 252  | 0.192083 | 0         |  |  |
|      |      | Shiraz-36T | 376  | 0.159952 | 0         |  |  |
|      |      | Shiraz-44T | 630  | 0.903655 | 0         |  |  |
|      |      | Shiraz-46T | 942  | 0.069143 | 0         |  |  |
|      |      | Shiraz-18T | 1433 | 0.250973 | 0         |  |  |
|      |      | Shiraz-25T | 1697 | 0.21945  | 0         |  |  |
|      |      | Shiraz-28T | 1734 | 0.362882 | 0         |  |  |
|      |      | Shiraz-29T | 1777 | 0.156747 | 0         |  |  |
|      |      | Shiraz-38T | 1950 | 0.265916 | 0         |  |  |
|      |      | Shiraz-71T | 2236 | 0.320072 | 0         |  |  |
|      |      | Shiraz-3T  | 87   | 0.198593 | 0         |  |  |
|      |      | Shiraz-4T  | 252  | 0.192083 | 0         |  |  |
|      |      | Shiraz-36T | 376  | 0.159952 | 0         |  |  |
|      |      | Shiraz-44T | 630  | 0.903655 | 0         |  |  |
|      |      | Shiraz-46T | 942  | 0.069143 | 0         |  |  |
|      |      | Shiraz-18T | 1433 | 0.250973 | 0         |  |  |
|      |      | Shiraz-25T | 1697 | 0.21945  | 0         |  |  |
|      |      | Shiraz-28T | 1734 | 0.362882 | 0         |  |  |

|    |      |            |      |          |           |  |  |
|----|------|------------|------|----------|-----------|--|--|
|    |      | Shiraz-29T | 1777 | 0.156747 | 0         |  |  |
|    |      | Shiraz-38T | 1950 | 0.265916 | 0         |  |  |
|    |      | Shiraz-71T | 2236 | 0.320072 | 0         |  |  |
|    |      | Shiraz-3T  | 87   | 0.198593 | 0         |  |  |
|    |      | Shiraz-4T  | 252  | 0.192083 | 0         |  |  |
|    |      | Shiraz-36T | 376  | 0.159952 | 0         |  |  |
|    |      | Shiraz-44T | 630  | 0.903655 | 0         |  |  |
|    |      | Shiraz-46T | 942  | 0.069143 | 0         |  |  |
|    |      | Shiraz-18T | 1433 | 0.250973 | 0         |  |  |
|    |      | Shiraz-25T | 1697 | 0.21945  | 0         |  |  |
|    |      | Shiraz-28T | 1734 | 0.362882 | 0         |  |  |
|    |      | Shiraz-29T | 1777 | 0.156747 | 0         |  |  |
|    |      | Shiraz-38T | 1950 | 0.265916 | 0         |  |  |
|    |      | Shiraz-71T | 2236 | 0.320072 | 0         |  |  |
| AR | chrX | Shiraz-3T  | 241  | 0        | -0.230501 |  |  |
|    |      | Shiraz-3T  | 241  | 0        | -0.230501 |  |  |
|    |      | Shiraz-4T  | 261  | 0        | -0.336249 |  |  |
|    |      | Shiraz-4T  | 261  | 0        | -0.336249 |  |  |
|    |      | Shiraz-16T | 295  | 0.591657 | 0         |  |  |
|    |      | Shiraz-16T | 295  | 0.591657 | 0         |  |  |
|    |      | Shiraz-36T | 433  | 0        | -0.803961 |  |  |
|    |      | Shiraz-36T | 433  | 0        | -0.803961 |  |  |
|    |      | Shiraz-44T | 899  | 0        | -1.09697  |  |  |
|    |      | Shiraz-44T | 899  | 0        | -1.09697  |  |  |
|    |      | Shiraz-49T | 1170 | 0        | -0.967436 |  |  |
|    |      | Shiraz-49T | 1170 | 0        | -0.967436 |  |  |
|    |      | Shiraz-18T | 1457 | 0.643204 | 0         |  |  |
|    |      | Shiraz-18T | 1457 | 0.643204 | 0         |  |  |
|    |      | Shiraz-22T | 1673 | 0.611783 | 0         |  |  |
|    |      | Shiraz-22T | 1673 | 0.611783 | 0         |  |  |
|    |      | Shiraz-25T | 1719 | 0.472955 | 0         |  |  |
|    |      | Shiraz-25T | 1719 | 0.472955 | 0         |  |  |
|    |      | Shiraz-28T | 1762 | 0.562311 | 0         |  |  |
|    |      | Shiraz-28T | 1762 | 0.562311 | 0         |  |  |
|    |      | Shiraz-29T | 1801 | 0.815343 | 0         |  |  |
|    |      | Shiraz-29T | 1801 | 0.815343 | 0         |  |  |
|    |      | Shiraz-32T | 1870 | 0.729766 | 0         |  |  |
|    |      | Shiraz-32T | 1870 | 0.729766 | 0         |  |  |
|    |      | Shiraz-35T | 1933 | 0.488535 | 0         |  |  |
|    |      | Shiraz-35T | 1933 | 0.488535 | 0         |  |  |
|    |      | Shiraz-58T | 2223 | 0.833364 | 0         |  |  |
|    |      | Shiraz-58T | 2223 | 0.833364 | 0         |  |  |
|    |      | Shiraz-71T | 2263 | 0.975531 | 0         |  |  |
|    |      | Shiraz-71T | 2263 | 0.975531 | 0         |  |  |
|    |      | Shiraz-3T  | 241  | 0        | -0.230501 |  |  |
|    |      | Shiraz-3T  | 241  | 0        | -0.230501 |  |  |
|    |      | Shiraz-4T  | 261  | 0        | -0.336249 |  |  |

|  |  |            |      |          |           |  |  |
|--|--|------------|------|----------|-----------|--|--|
|  |  | Shiraz-4T  | 261  | 0        | -0.336249 |  |  |
|  |  | Shiraz-16T | 295  | 0.591657 | 0         |  |  |
|  |  | Shiraz-16T | 295  | 0.591657 | 0         |  |  |
|  |  | Shiraz-36T | 433  | 0        | -0.803961 |  |  |
|  |  | Shiraz-36T | 433  | 0        | -0.803961 |  |  |
|  |  | Shiraz-44T | 899  | 0        | -1.09697  |  |  |
|  |  | Shiraz-44T | 899  | 0        | -1.09697  |  |  |
|  |  | Shiraz-49T | 1170 | 0        | -0.967436 |  |  |
|  |  | Shiraz-49T | 1170 | 0        | -0.967436 |  |  |
|  |  | Shiraz-18T | 1457 | 0.643204 | 0         |  |  |
|  |  | Shiraz-18T | 1457 | 0.643204 | 0         |  |  |
|  |  | Shiraz-22T | 1673 | 0.611783 | 0         |  |  |
|  |  | Shiraz-22T | 1673 | 0.611783 | 0         |  |  |
|  |  | Shiraz-25T | 1719 | 0.472955 | 0         |  |  |
|  |  | Shiraz-25T | 1719 | 0.472955 | 0         |  |  |
|  |  | Shiraz-28T | 1762 | 0.562311 | 0         |  |  |
|  |  | Shiraz-28T | 1762 | 0.562311 | 0         |  |  |
|  |  | Shiraz-29T | 1801 | 0.815343 | 0         |  |  |
|  |  | Shiraz-29T | 1801 | 0.815343 | 0         |  |  |
|  |  | Shiraz-32T | 1870 | 0.729766 | 0         |  |  |
|  |  | Shiraz-32T | 1870 | 0.729766 | 0         |  |  |
|  |  | Shiraz-35T | 1933 | 0.488535 | 0         |  |  |
|  |  | Shiraz-35T | 1933 | 0.488535 | 0         |  |  |
|  |  | Shiraz-58T | 2223 | 0.833364 | 0         |  |  |
|  |  | Shiraz-58T | 2223 | 0.833364 | 0         |  |  |
|  |  | Shiraz-71T | 2263 | 0.975531 | 0         |  |  |
|  |  | Shiraz-71T | 2263 | 0.975531 | 0         |  |  |
|  |  | Shiraz-3T  | 241  | 0        | -0.230501 |  |  |
|  |  | Shiraz-3T  | 241  | 0        | -0.230501 |  |  |
|  |  | Shiraz-4T  | 261  | 0        | -0.336249 |  |  |
|  |  | Shiraz-4T  | 261  | 0        | -0.336249 |  |  |
|  |  | Shiraz-16T | 295  | 0.591657 | 0         |  |  |
|  |  | Shiraz-16T | 295  | 0.591657 | 0         |  |  |
|  |  | Shiraz-36T | 433  | 0        | -0.803961 |  |  |
|  |  | Shiraz-36T | 433  | 0        | -0.803961 |  |  |
|  |  | Shiraz-44T | 899  | 0        | -1.09697  |  |  |
|  |  | Shiraz-44T | 899  | 0        | -1.09697  |  |  |
|  |  | Shiraz-49T | 1170 | 0        | -0.967436 |  |  |
|  |  | Shiraz-49T | 1170 | 0        | -0.967436 |  |  |
|  |  | Shiraz-18T | 1457 | 0.643204 | 0         |  |  |
|  |  | Shiraz-18T | 1457 | 0.643204 | 0         |  |  |
|  |  | Shiraz-22T | 1673 | 0.611783 | 0         |  |  |
|  |  | Shiraz-22T | 1673 | 0.611783 | 0         |  |  |
|  |  | Shiraz-25T | 1719 | 0.472955 | 0         |  |  |
|  |  | Shiraz-25T | 1719 | 0.472955 | 0         |  |  |
|  |  | Shiraz-28T | 1762 | 0.562311 | 0         |  |  |
|  |  | Shiraz-28T | 1762 | 0.562311 | 0         |  |  |

|      |      |            |      |          |           |  |  |
|------|------|------------|------|----------|-----------|--|--|
|      |      | Shiraz-29T | 1801 | 0.815343 | 0         |  |  |
|      |      | Shiraz-29T | 1801 | 0.815343 | 0         |  |  |
|      |      | Shiraz-32T | 1870 | 0.729766 | 0         |  |  |
|      |      | Shiraz-32T | 1870 | 0.729766 | 0         |  |  |
|      |      | Shiraz-35T | 1933 | 0.488535 | 0         |  |  |
|      |      | Shiraz-35T | 1933 | 0.488535 | 0         |  |  |
|      |      | Shiraz-58T | 2223 | 0.833364 | 0         |  |  |
|      |      | Shiraz-58T | 2223 | 0.833364 | 0         |  |  |
|      |      | Shiraz-71T | 2263 | 0.975531 | 0         |  |  |
|      |      | Shiraz-71T | 2263 | 0.975531 | 0         |  |  |
| ARAF | chrX | Shiraz-4T  | 260  | 0        | -0.324128 |  |  |
|      |      | Shiraz-16T | 294  | 0.655804 | 0         |  |  |
|      |      | Shiraz-31T | 345  | 0.103301 | 0         |  |  |
|      |      | Shiraz-36T | 431  | 0        | -0.78035  |  |  |
|      |      | Shiraz-36T | 432  | 0        | -0.6692   |  |  |
|      |      | Shiraz-44T | 891  | 0        | -0.954044 |  |  |
|      |      | Shiraz-44T | 896  | 0        | -0.109108 |  |  |
|      |      | Shiraz-46T | 991  | 0.139564 | 0         |  |  |
|      |      | Shiraz-47T | 1084 | 0.24185  | 0         |  |  |
|      |      | Shiraz-49T | 1166 | 0        | -0.917235 |  |  |
|      |      | Shiraz-49T | 1169 | 0        | -0.583529 |  |  |
|      |      | Shiraz-77T | 1282 | 0.213849 | 0         |  |  |
|      |      | Shiraz-9T  | 1368 | 0.199713 | 0         |  |  |
|      |      | Shiraz-9T  | 1369 | 0.703374 | 0         |  |  |
|      |      | Shiraz-18T | 1455 | 0        | -0.186773 |  |  |
|      |      | Shiraz-22T | 1669 | 0.695915 | 0         |  |  |
|      |      | Shiraz-22T | 1672 | 1.01678  | 0         |  |  |
|      |      | Shiraz-25T | 1717 | 0.420447 | 0         |  |  |
|      |      | Shiraz-28T | 1760 | 0.538181 | 0         |  |  |
|      |      | Shiraz-29T | 1800 | 0.672527 | 0         |  |  |
|      |      | Shiraz-32T | 1869 | 0.776805 | 0         |  |  |
|      |      | Shiraz-35T | 1932 | 0.507141 | 0         |  |  |
|      |      | Shiraz-40T | 2051 | 0.098506 | 0         |  |  |
|      |      | Shiraz-58T | 2221 | 0.871948 | 0         |  |  |
|      |      | Shiraz-71T | 2260 | 0.68394  | 0         |  |  |
|      |      | Shiraz-71T | 2262 | 0.986748 | 0         |  |  |
|      |      | Shiraz-4T  | 260  | 0        | -0.324128 |  |  |
|      |      | Shiraz-16T | 294  | 0.655804 | 0         |  |  |
|      |      | Shiraz-31T | 345  | 0.103301 | 0         |  |  |
|      |      | Shiraz-36T | 431  | 0        | -0.78035  |  |  |
|      |      | Shiraz-36T | 432  | 0        | -0.6692   |  |  |
|      |      | Shiraz-44T | 891  | 0        | -0.954044 |  |  |
|      |      | Shiraz-44T | 896  | 0        | -0.109108 |  |  |
|      |      | Shiraz-46T | 991  | 0.139564 | 0         |  |  |
|      |      | Shiraz-47T | 1084 | 0.24185  | 0         |  |  |
|      |      | Shiraz-49T | 1166 | 0        | -0.917235 |  |  |
|      |      | Shiraz-49T | 1169 | 0        | -0.583529 |  |  |

|       |      |            |      |          |           |  |
|-------|------|------------|------|----------|-----------|--|
|       |      | Shiraz-77T | 1282 | 0.213849 | 0         |  |
|       |      | Shiraz-9T  | 1368 | 0.199713 | 0         |  |
|       |      | Shiraz-9T  | 1369 | 0.703374 | 0         |  |
|       |      | Shiraz-18T | 1455 | 0        | -0.186773 |  |
|       |      | Shiraz-22T | 1669 | 0.695915 | 0         |  |
|       |      | Shiraz-22T | 1672 | 1.01678  | 0         |  |
|       |      | Shiraz-25T | 1717 | 0.420447 | 0         |  |
|       |      | Shiraz-28T | 1760 | 0.538181 | 0         |  |
|       |      | Shiraz-29T | 1800 | 0.672527 | 0         |  |
|       |      | Shiraz-32T | 1869 | 0.776805 | 0         |  |
|       |      | Shiraz-35T | 1932 | 0.507141 | 0         |  |
|       |      | Shiraz-40T | 2051 | 0.098506 | 0         |  |
|       |      | Shiraz-58T | 2221 | 0.871948 | 0         |  |
|       |      | Shiraz-71T | 2260 | 0.68394  | 0         |  |
|       |      | Shiraz-71T | 2262 | 0.986748 | 0         |  |
|       |      | Shiraz-4T  | 260  | 0        | -0.324128 |  |
|       |      | Shiraz-16T | 294  | 0.655804 | 0         |  |
|       |      | Shiraz-31T | 345  | 0.103301 | 0         |  |
|       |      | Shiraz-36T | 431  | 0        | -0.78035  |  |
|       |      | Shiraz-36T | 432  | 0        | -0.6692   |  |
|       |      | Shiraz-44T | 891  | 0        | -0.954044 |  |
|       |      | Shiraz-44T | 896  | 0        | -0.109108 |  |
|       |      | Shiraz-46T | 991  | 0.139564 | 0         |  |
|       |      | Shiraz-47T | 1084 | 0.24185  | 0         |  |
|       |      | Shiraz-49T | 1166 | 0        | -0.917235 |  |
|       |      | Shiraz-49T | 1169 | 0        | -0.583529 |  |
|       |      | Shiraz-77T | 1282 | 0.213849 | 0         |  |
|       |      | Shiraz-9T  | 1368 | 0.199713 | 0         |  |
|       |      | Shiraz-9T  | 1369 | 0.703374 | 0         |  |
|       |      | Shiraz-18T | 1455 | 0        | -0.186773 |  |
|       |      | Shiraz-22T | 1669 | 0.695915 | 0         |  |
|       |      | Shiraz-22T | 1672 | 1.01678  | 0         |  |
|       |      | Shiraz-25T | 1717 | 0.420447 | 0         |  |
|       |      | Shiraz-28T | 1760 | 0.538181 | 0         |  |
|       |      | Shiraz-29T | 1800 | 0.672527 | 0         |  |
|       |      | Shiraz-32T | 1869 | 0.776805 | 0         |  |
|       |      | Shiraz-35T | 1932 | 0.507141 | 0         |  |
|       |      | Shiraz-40T | 2051 | 0.098506 | 0         |  |
|       |      | Shiraz-58T | 2221 | 0.871948 | 0         |  |
|       |      | Shiraz-71T | 2260 | 0.68394  | 0         |  |
|       |      | Shiraz-71T | 2262 | 0.986748 | 0         |  |
| ARD1A | chrX | Shiraz-3T  | 246  | 0.531858 | 0         |  |
|       |      | Shiraz-4T  | 261  | 0        | -0.336249 |  |
|       |      | Shiraz-16T | 295  | 0.591657 | 0         |  |
|       |      | Shiraz-36T | 433  | 0        | -0.803961 |  |
|       |      | Shiraz-42T | 480  | 0        | -0.232915 |  |
|       |      | Shiraz-44T | 908  | 0.466743 | 0         |  |



|  |            |      |          |           |  |
|--|------------|------|----------|-----------|--|
|  | Shiraz-49T | 1170 | 0        | -0.967436 |  |
|  | Shiraz-49T | 1173 | 0        | -0.704439 |  |
|  | Shiraz-9T  | 1370 | 0.690073 | 0         |  |
|  | Shiraz-9T  | 1371 | 1.292392 | 0         |  |
|  | Shiraz-18T | 1457 | 0.643204 | 0         |  |
|  | Shiraz-22T | 1673 | 0.611783 | 0         |  |
|  | Shiraz-22T | 1678 | 0.911625 | 0         |  |
|  | Shiraz-25T | 1719 | 0.472955 | 0         |  |
|  | Shiraz-28T | 1762 | 0.562311 | 0         |  |
|  | Shiraz-29T | 1801 | 0.815343 | 0         |  |
|  | Shiraz-32T | 1870 | 0.729766 | 0         |  |
|  | Shiraz-32T | 1872 | 1.504553 | 0         |  |
|  | Shiraz-35T | 1933 | 0.488535 | 0         |  |
|  | Shiraz-38T | 2011 | 0        | -0.406024 |  |
|  | Shiraz-53T | 2115 | 0.427728 | 0         |  |
|  | Shiraz-58T | 2223 | 0.833364 | 0         |  |
|  | Shiraz-58T | 2226 | 1.074663 | 0         |  |
|  | Shiraz-71T | 2263 | 0.975531 | 0         |  |
|  | Shiraz-3T  | 246  | 0.531858 | 0         |  |
|  | Shiraz-4T  | 261  | 0        | -0.336249 |  |
|  | Shiraz-16T | 295  | 0.591657 | 0         |  |
|  | Shiraz-36T | 433  | 0        | -0.803961 |  |
|  | Shiraz-42T | 480  | 0        | -0.232915 |  |
|  | Shiraz-44T | 908  | 0.466743 | 0         |  |
|  | Shiraz-49T | 1170 | 0        | -0.967436 |  |
|  | Shiraz-49T | 1173 | 0        | -0.704439 |  |
|  | Shiraz-9T  | 1370 | 0.690073 | 0         |  |
|  | Shiraz-9T  | 1371 | 1.292392 | 0         |  |
|  | Shiraz-18T | 1457 | 0.643204 | 0         |  |
|  | Shiraz-22T | 1673 | 0.611783 | 0         |  |
|  | Shiraz-22T | 1678 | 0.911625 | 0         |  |
|  | Shiraz-25T | 1719 | 0.472955 | 0         |  |
|  | Shiraz-28T | 1762 | 0.562311 | 0         |  |
|  | Shiraz-29T | 1801 | 0.815343 | 0         |  |
|  | Shiraz-32T | 1870 | 0.729766 | 0         |  |
|  | Shiraz-32T | 1872 | 1.504553 | 0         |  |
|  | Shiraz-35T | 1933 | 0.488535 | 0         |  |
|  | Shiraz-38T | 2011 | 0        | -0.406024 |  |
|  | Shiraz-53T | 2115 | 0.427728 | 0         |  |
|  | Shiraz-58T | 2223 | 0.833364 | 0         |  |
|  | Shiraz-58T | 2226 | 1.074663 | 0         |  |
|  | Shiraz-71T | 2263 | 0.975531 | 0         |  |
|  | Shiraz-3T  | 246  | 0.531858 | 0         |  |
|  | Shiraz-4T  | 261  | 0        | -0.336249 |  |
|  | Shiraz-16T | 295  | 0.591657 | 0         |  |
|  | Shiraz-36T | 433  | 0        | -0.803961 |  |
|  | Shiraz-42T | 480  | 0        | -0.232915 |  |

|      |      |            |      |          |           |  |  |
|------|------|------------|------|----------|-----------|--|--|
|      |      | Shiraz-44T | 908  | 0.466743 | 0         |  |  |
|      |      | Shiraz-49T | 1170 | 0        | -0.967436 |  |  |
|      |      | Shiraz-49T | 1173 | 0        | -0.704439 |  |  |
|      |      | Shiraz-9T  | 1370 | 0.690073 | 0         |  |  |
|      |      | Shiraz-9T  | 1371 | 1.292392 | 0         |  |  |
|      |      | Shiraz-18T | 1457 | 0.643204 | 0         |  |  |
|      |      | Shiraz-22T | 1673 | 0.611783 | 0         |  |  |
|      |      | Shiraz-22T | 1678 | 0.911625 | 0         |  |  |
|      |      | Shiraz-25T | 1719 | 0.472955 | 0         |  |  |
|      |      | Shiraz-28T | 1762 | 0.562311 | 0         |  |  |
|      |      | Shiraz-29T | 1801 | 0.815343 | 0         |  |  |
|      |      | Shiraz-32T | 1870 | 0.729766 | 0         |  |  |
|      |      | Shiraz-32T | 1872 | 1.504553 | 0         |  |  |
|      |      | Shiraz-35T | 1933 | 0.488535 | 0         |  |  |
|      |      | Shiraz-38T | 2011 | 0        | -0.406024 |  |  |
|      |      | Shiraz-53T | 2115 | 0.427728 | 0         |  |  |
|      |      | Shiraz-58T | 2223 | 0.833364 | 0         |  |  |
|      |      | Shiraz-58T | 2226 | 1.074663 | 0         |  |  |
|      |      | Shiraz-71T | 2263 | 0.975531 | 0         |  |  |
| ARF5 | chr7 | Shiraz-3T  | 90   | 0.219276 | 0         |  |  |
|      |      | Shiraz-4T  | 253  | 0.372918 | 0         |  |  |
|      |      | Shiraz-36T | 378  | 0.179558 | 0         |  |  |
|      |      | Shiraz-36T | 382  | 0.081739 | 0         |  |  |
|      |      | Shiraz-46T | 943  | 0.093799 | 0         |  |  |
|      |      | Shiraz-46T | 947  | 0        | -0.010843 |  |  |
|      |      | Shiraz-77T | 1225 | 0        | -0.117922 |  |  |
|      |      | Shiraz-9T  | 1325 | 0.221899 | 0         |  |  |
|      |      | Shiraz-18T | 1434 | 0.244465 | 0         |  |  |
|      |      | Shiraz-25T | 1698 | 0.21835  | 0         |  |  |
|      |      | Shiraz-28T | 1735 | 0.350744 | 0         |  |  |
|      |      | Shiraz-29T | 1778 | 0.120767 | 0         |  |  |
|      |      | Shiraz-32T | 1833 | 0.551336 | 0         |  |  |
|      |      | Shiraz-38T | 1951 | 0.250891 | 0         |  |  |
|      |      | Shiraz-53T | 2078 | 0.287202 | 0         |  |  |
|      |      | Shiraz-71T | 2238 | 0.603631 | 0         |  |  |
|      |      | Shiraz-3T  | 90   | 0.219276 | 0         |  |  |
|      |      | Shiraz-4T  | 253  | 0.372918 | 0         |  |  |
|      |      | Shiraz-36T | 378  | 0.179558 | 0         |  |  |
|      |      | Shiraz-36T | 382  | 0.081739 | 0         |  |  |
|      |      | Shiraz-46T | 943  | 0.093799 | 0         |  |  |
|      |      | Shiraz-46T | 947  | 0        | -0.010843 |  |  |
|      |      | Shiraz-77T | 1225 | 0        | -0.117922 |  |  |
|      |      | Shiraz-9T  | 1325 | 0.221899 | 0         |  |  |
|      |      | Shiraz-18T | 1434 | 0.244465 | 0         |  |  |
|      |      | Shiraz-25T | 1698 | 0.21835  | 0         |  |  |
|      |      | Shiraz-28T | 1735 | 0.350744 | 0         |  |  |
|      |      | Shiraz-29T | 1778 | 0.120767 | 0         |  |  |

|         |      |            |      |          |           |  |  |
|---------|------|------------|------|----------|-----------|--|--|
|         |      | Shiraz-32T | 1833 | 0.551336 | 0         |  |  |
|         |      | Shiraz-38T | 1951 | 0.250891 | 0         |  |  |
|         |      | Shiraz-53T | 2078 | 0.287202 | 0         |  |  |
|         |      | Shiraz-71T | 2238 | 0.603631 | 0         |  |  |
|         |      | Shiraz-3T  | 90   | 0.219276 | 0         |  |  |
|         |      | Shiraz-4T  | 253  | 0.372918 | 0         |  |  |
|         |      | Shiraz-36T | 378  | 0.179558 | 0         |  |  |
|         |      | Shiraz-36T | 382  | 0.081739 | 0         |  |  |
|         |      | Shiraz-46T | 943  | 0.093799 | 0         |  |  |
|         |      | Shiraz-46T | 947  | 0        | -0.010843 |  |  |
|         |      | Shiraz-77T | 1225 | 0        | -0.117922 |  |  |
|         |      | Shiraz-9T  | 1325 | 0.221899 | 0         |  |  |
|         |      | Shiraz-18T | 1434 | 0.244465 | 0         |  |  |
|         |      | Shiraz-25T | 1698 | 0.21835  | 0         |  |  |
|         |      | Shiraz-28T | 1735 | 0.350744 | 0         |  |  |
|         |      | Shiraz-29T | 1778 | 0.120767 | 0         |  |  |
|         |      | Shiraz-32T | 1833 | 0.551336 | 0         |  |  |
|         |      | Shiraz-38T | 1951 | 0.250891 | 0         |  |  |
|         |      | Shiraz-53T | 2078 | 0.287202 | 0         |  |  |
|         |      | Shiraz-71T | 2238 | 0.603631 | 0         |  |  |
| ARHGAP4 | chrX | Shiraz-3T  | 246  | 0.531858 | 0         |  |  |
|         |      | Shiraz-4T  | 261  | 0        | -0.336249 |  |  |
|         |      | Shiraz-16T | 295  | 0.591657 | 0         |  |  |
|         |      | Shiraz-36T | 433  | 0        | -0.803961 |  |  |
|         |      | Shiraz-42T | 480  | 0        | -0.232915 |  |  |
|         |      | Shiraz-44T | 908  | 0.466743 | 0         |  |  |
|         |      | Shiraz-49T | 1170 | 0        | -0.967436 |  |  |
|         |      | Shiraz-49T | 1173 | 0        | -0.704439 |  |  |
|         |      | Shiraz-9T  | 1370 | 0.690073 | 0         |  |  |
|         |      | Shiraz-9T  | 1371 | 1.292392 | 0         |  |  |
|         |      | Shiraz-18T | 1457 | 0.643204 | 0         |  |  |
|         |      | Shiraz-22T | 1673 | 0.611783 | 0         |  |  |
|         |      | Shiraz-22T | 1678 | 0.911625 | 0         |  |  |
|         |      | Shiraz-25T | 1719 | 0.472955 | 0         |  |  |
|         |      | Shiraz-28T | 1762 | 0.562311 | 0         |  |  |
|         |      | Shiraz-29T | 1801 | 0.815343 | 0         |  |  |
|         |      | Shiraz-32T | 1870 | 0.729766 | 0         |  |  |
|         |      | Shiraz-32T | 1872 | 1.504553 | 0         |  |  |
|         |      | Shiraz-35T | 1933 | 0.488535 | 0         |  |  |
|         |      | Shiraz-38T | 2011 | 0        | -0.406024 |  |  |
|         |      | Shiraz-53T | 2115 | 0.427728 | 0         |  |  |
|         |      | Shiraz-58T | 2223 | 0.833364 | 0         |  |  |
|         |      | Shiraz-58T | 2226 | 1.074663 | 0         |  |  |
|         |      | Shiraz-71T | 2263 | 0.975531 | 0         |  |  |
|         |      | Shiraz-3T  | 246  | 0.531858 | 0         |  |  |
|         |      | Shiraz-4T  | 261  | 0        | -0.336249 |  |  |
|         |      | Shiraz-16T | 295  | 0.591657 | 0         |  |  |

|         |      |            |      |          |           |  |  |
|---------|------|------------|------|----------|-----------|--|--|
|         |      | Shiraz-36T | 433  | 0        | -0.803961 |  |  |
|         |      | Shiraz-42T | 480  | 0        | -0.232915 |  |  |
|         |      | Shiraz-44T | 908  | 0.466743 | 0         |  |  |
|         |      | Shiraz-49T | 1170 | 0        | -0.967436 |  |  |
|         |      | Shiraz-49T | 1173 | 0        | -0.704439 |  |  |
|         |      | Shiraz-9T  | 1370 | 0.690073 | 0         |  |  |
|         |      | Shiraz-9T  | 1371 | 1.292392 | 0         |  |  |
|         |      | Shiraz-18T | 1457 | 0.643204 | 0         |  |  |
|         |      | Shiraz-22T | 1673 | 0.611783 | 0         |  |  |
|         |      | Shiraz-22T | 1678 | 0.911625 | 0         |  |  |
|         |      | Shiraz-25T | 1719 | 0.472955 | 0         |  |  |
|         |      | Shiraz-28T | 1762 | 0.562311 | 0         |  |  |
|         |      | Shiraz-29T | 1801 | 0.815343 | 0         |  |  |
|         |      | Shiraz-32T | 1870 | 0.729766 | 0         |  |  |
|         |      | Shiraz-32T | 1872 | 1.504553 | 0         |  |  |
|         |      | Shiraz-35T | 1933 | 0.488535 | 0         |  |  |
|         |      | Shiraz-38T | 2011 | 0        | -0.406024 |  |  |
|         |      | Shiraz-53T | 2115 | 0.427728 | 0         |  |  |
|         |      | Shiraz-58T | 2223 | 0.833364 | 0         |  |  |
|         |      | Shiraz-58T | 2226 | 1.074663 | 0         |  |  |
|         |      | Shiraz-71T | 2263 | 0.975531 | 0         |  |  |
|         |      | Shiraz-3T  | 246  | 0.531858 | 0         |  |  |
|         |      | Shiraz-4T  | 261  | 0        | -0.336249 |  |  |
|         |      | Shiraz-16T | 295  | 0.591657 | 0         |  |  |
|         |      | Shiraz-36T | 433  | 0        | -0.803961 |  |  |
|         |      | Shiraz-42T | 480  | 0        | -0.232915 |  |  |
|         |      | Shiraz-44T | 908  | 0.466743 | 0         |  |  |
|         |      | Shiraz-49T | 1170 | 0        | -0.967436 |  |  |
|         |      | Shiraz-49T | 1173 | 0        | -0.704439 |  |  |
|         |      | Shiraz-9T  | 1370 | 0.690073 | 0         |  |  |
|         |      | Shiraz-9T  | 1371 | 1.292392 | 0         |  |  |
|         |      | Shiraz-18T | 1457 | 0.643204 | 0         |  |  |
|         |      | Shiraz-22T | 1673 | 0.611783 | 0         |  |  |
|         |      | Shiraz-22T | 1678 | 0.911625 | 0         |  |  |
|         |      | Shiraz-25T | 1719 | 0.472955 | 0         |  |  |
|         |      | Shiraz-28T | 1762 | 0.562311 | 0         |  |  |
|         |      | Shiraz-29T | 1801 | 0.815343 | 0         |  |  |
|         |      | Shiraz-32T | 1870 | 0.729766 | 0         |  |  |
|         |      | Shiraz-32T | 1872 | 1.504553 | 0         |  |  |
|         |      | Shiraz-35T | 1933 | 0.488535 | 0         |  |  |
|         |      | Shiraz-38T | 2011 | 0        | -0.406024 |  |  |
|         |      | Shiraz-53T | 2115 | 0.427728 | 0         |  |  |
|         |      | Shiraz-58T | 2223 | 0.833364 | 0         |  |  |
|         |      | Shiraz-58T | 2226 | 1.074663 | 0         |  |  |
|         |      | Shiraz-71T | 2263 | 0.975531 | 0         |  |  |
| ARHGAP6 | chrX | Shiraz-3T  | 235  | 0        | -0.28401  |  |  |
|         |      | Shiraz-3T  | 235  | 0        | -0.28401  |  |  |

|  |            |      |          |           |  |
|--|------------|------|----------|-----------|--|
|  | Shiraz-3T  | 235  | 0        | -0.28401  |  |
|  | Shiraz-4T  | 260  | 0        | -0.324128 |  |
|  | Shiraz-4T  | 260  | 0        | -0.324128 |  |
|  | Shiraz-4T  | 260  | 0        | -0.324128 |  |
|  | Shiraz-16T | 294  | 0.655804 | 0         |  |
|  | Shiraz-16T | 294  | 0.655804 | 0         |  |
|  | Shiraz-16T | 294  | 0.655804 | 0         |  |
|  | Shiraz-36T | 431  | 0        | -0.78035  |  |
|  | Shiraz-36T | 431  | 0        | -0.78035  |  |
|  | Shiraz-36T | 431  | 0        | -0.78035  |  |
|  | Shiraz-44T | 891  | 0        | -0.954044 |  |
|  | Shiraz-44T | 891  | 0        | -0.954044 |  |
|  | Shiraz-44T | 891  | 0        | -0.954044 |  |
|  | Shiraz-49T | 1166 | 0        | -0.917235 |  |
|  | Shiraz-49T | 1166 | 0        | -0.917235 |  |
|  | Shiraz-49T | 1166 | 0        | -0.917235 |  |
|  | Shiraz-49T | 1167 | 0        | -0.249329 |  |
|  | Shiraz-49T | 1167 | 0        | -0.249329 |  |
|  | Shiraz-49T | 1167 | 0        | -0.249329 |  |
|  | Shiraz-9T  | 1368 | 0.199713 | 0         |  |
|  | Shiraz-9T  | 1368 | 0.199713 | 0         |  |
|  | Shiraz-9T  | 1368 | 0.199713 | 0         |  |
|  | Shiraz-18T | 1455 | 0        | -0.186773 |  |
|  | Shiraz-18T | 1455 | 0        | -0.186773 |  |
|  | Shiraz-18T | 1455 | 0        | -0.186773 |  |
|  | Shiraz-22T | 1669 | 0.695915 | 0         |  |
|  | Shiraz-22T | 1669 | 0.695915 | 0         |  |
|  | Shiraz-22T | 1669 | 0.695915 | 0         |  |
|  | Shiraz-25T | 1717 | 0.420447 | 0         |  |
|  | Shiraz-25T | 1717 | 0.420447 | 0         |  |
|  | Shiraz-25T | 1717 | 0.420447 | 0         |  |
|  | Shiraz-28T | 1760 | 0.538181 | 0         |  |
|  | Shiraz-28T | 1760 | 0.538181 | 0         |  |
|  | Shiraz-28T | 1760 | 0.538181 | 0         |  |
|  | Shiraz-29T | 1800 | 0.672527 | 0         |  |
|  | Shiraz-29T | 1800 | 0.672527 | 0         |  |
|  | Shiraz-29T | 1800 | 0.672527 | 0         |  |
|  | Shiraz-32T | 1869 | 0.776805 | 0         |  |
|  | Shiraz-32T | 1869 | 0.776805 | 0         |  |
|  | Shiraz-32T | 1869 | 0.776805 | 0         |  |
|  | Shiraz-35T | 1932 | 0.507141 | 0         |  |
|  | Shiraz-35T | 1932 | 0.507141 | 0         |  |
|  | Shiraz-35T | 1932 | 0.507141 | 0         |  |
|  | Shiraz-40T | 2051 | 0.098506 | 0         |  |
|  | Shiraz-40T | 2051 | 0.098506 | 0         |  |
|  | Shiraz-40T | 2051 | 0.098506 | 0         |  |
|  | Shiraz-58T | 2221 | 0.871948 | 0         |  |

|  |  |            |      |          |           |  |  |
|--|--|------------|------|----------|-----------|--|--|
|  |  | Shiraz-58T | 2221 | 0.871948 | 0         |  |  |
|  |  | Shiraz-58T | 2221 | 0.871948 | 0         |  |  |
|  |  | Shiraz-71T | 2260 | 0.68394  | 0         |  |  |
|  |  | Shiraz-71T | 2260 | 0.68394  | 0         |  |  |
|  |  | Shiraz-71T | 2260 | 0.68394  | 0         |  |  |
|  |  | Shiraz-71T | 2261 | 0.508399 | 0         |  |  |
|  |  | Shiraz-71T | 2261 | 0.508399 | 0         |  |  |
|  |  | Shiraz-71T | 2261 | 0.508399 | 0         |  |  |
|  |  | Shiraz-3T  | 235  | 0        | -0.28401  |  |  |
|  |  | Shiraz-3T  | 235  | 0        | -0.28401  |  |  |
|  |  | Shiraz-3T  | 235  | 0        | -0.28401  |  |  |
|  |  | Shiraz-4T  | 260  | 0        | -0.324128 |  |  |
|  |  | Shiraz-4T  | 260  | 0        | -0.324128 |  |  |
|  |  | Shiraz-4T  | 260  | 0        | -0.324128 |  |  |
|  |  | Shiraz-16T | 294  | 0.655804 | 0         |  |  |
|  |  | Shiraz-16T | 294  | 0.655804 | 0         |  |  |
|  |  | Shiraz-16T | 294  | 0.655804 | 0         |  |  |
|  |  | Shiraz-36T | 431  | 0        | -0.78035  |  |  |
|  |  | Shiraz-36T | 431  | 0        | -0.78035  |  |  |
|  |  | Shiraz-36T | 431  | 0        | -0.78035  |  |  |
|  |  | Shiraz-44T | 891  | 0        | -0.954044 |  |  |
|  |  | Shiraz-44T | 891  | 0        | -0.954044 |  |  |
|  |  | Shiraz-44T | 891  | 0        | -0.954044 |  |  |
|  |  | Shiraz-49T | 1166 | 0        | -0.917235 |  |  |
|  |  | Shiraz-49T | 1166 | 0        | -0.917235 |  |  |
|  |  | Shiraz-49T | 1166 | 0        | -0.917235 |  |  |
|  |  | Shiraz-49T | 1167 | 0        | -0.249329 |  |  |
|  |  | Shiraz-49T | 1167 | 0        | -0.249329 |  |  |
|  |  | Shiraz-49T | 1167 | 0        | -0.249329 |  |  |
|  |  | Shiraz-9T  | 1368 | 0.199713 | 0         |  |  |
|  |  | Shiraz-9T  | 1368 | 0.199713 | 0         |  |  |
|  |  | Shiraz-9T  | 1368 | 0.199713 | 0         |  |  |
|  |  | Shiraz-18T | 1455 | 0        | -0.186773 |  |  |
|  |  | Shiraz-18T | 1455 | 0        | -0.186773 |  |  |
|  |  | Shiraz-18T | 1455 | 0        | -0.186773 |  |  |
|  |  | Shiraz-22T | 1669 | 0.695915 | 0         |  |  |
|  |  | Shiraz-22T | 1669 | 0.695915 | 0         |  |  |
|  |  | Shiraz-22T | 1669 | 0.695915 | 0         |  |  |
|  |  | Shiraz-25T | 1717 | 0.420447 | 0         |  |  |
|  |  | Shiraz-25T | 1717 | 0.420447 | 0         |  |  |
|  |  | Shiraz-25T | 1717 | 0.420447 | 0         |  |  |
|  |  | Shiraz-28T | 1760 | 0.538181 | 0         |  |  |
|  |  | Shiraz-28T | 1760 | 0.538181 | 0         |  |  |
|  |  | Shiraz-28T | 1760 | 0.538181 | 0         |  |  |
|  |  | Shiraz-29T | 1800 | 0.672527 | 0         |  |  |
|  |  | Shiraz-29T | 1800 | 0.672527 | 0         |  |  |
|  |  | Shiraz-29T | 1800 | 0.672527 | 0         |  |  |

|  |  |            |      |          |           |  |  |
|--|--|------------|------|----------|-----------|--|--|
|  |  | Shiraz-32T | 1869 | 0.776805 | 0         |  |  |
|  |  | Shiraz-32T | 1869 | 0.776805 | 0         |  |  |
|  |  | Shiraz-32T | 1869 | 0.776805 | 0         |  |  |
|  |  | Shiraz-35T | 1932 | 0.507141 | 0         |  |  |
|  |  | Shiraz-35T | 1932 | 0.507141 | 0         |  |  |
|  |  | Shiraz-35T | 1932 | 0.507141 | 0         |  |  |
|  |  | Shiraz-40T | 2051 | 0.098506 | 0         |  |  |
|  |  | Shiraz-40T | 2051 | 0.098506 | 0         |  |  |
|  |  | Shiraz-40T | 2051 | 0.098506 | 0         |  |  |
|  |  | Shiraz-58T | 2221 | 0.871948 | 0         |  |  |
|  |  | Shiraz-58T | 2221 | 0.871948 | 0         |  |  |
|  |  | Shiraz-58T | 2221 | 0.871948 | 0         |  |  |
|  |  | Shiraz-71T | 2260 | 0.68394  | 0         |  |  |
|  |  | Shiraz-71T | 2260 | 0.68394  | 0         |  |  |
|  |  | Shiraz-71T | 2260 | 0.68394  | 0         |  |  |
|  |  | Shiraz-71T | 2261 | 0.508399 | 0         |  |  |
|  |  | Shiraz-71T | 2261 | 0.508399 | 0         |  |  |
|  |  | Shiraz-71T | 2261 | 0.508399 | 0         |  |  |
|  |  | Shiraz-3T  | 235  | 0        | -0.28401  |  |  |
|  |  | Shiraz-3T  | 235  | 0        | -0.28401  |  |  |
|  |  | Shiraz-3T  | 235  | 0        | -0.28401  |  |  |
|  |  | Shiraz-4T  | 260  | 0        | -0.324128 |  |  |
|  |  | Shiraz-4T  | 260  | 0        | -0.324128 |  |  |
|  |  | Shiraz-4T  | 260  | 0        | -0.324128 |  |  |
|  |  | Shiraz-16T | 294  | 0.655804 | 0         |  |  |
|  |  | Shiraz-16T | 294  | 0.655804 | 0         |  |  |
|  |  | Shiraz-16T | 294  | 0.655804 | 0         |  |  |
|  |  | Shiraz-36T | 431  | 0        | -0.78035  |  |  |
|  |  | Shiraz-36T | 431  | 0        | -0.78035  |  |  |
|  |  | Shiraz-36T | 431  | 0        | -0.78035  |  |  |
|  |  | Shiraz-44T | 891  | 0        | -0.954044 |  |  |
|  |  | Shiraz-44T | 891  | 0        | -0.954044 |  |  |
|  |  | Shiraz-44T | 891  | 0        | -0.954044 |  |  |
|  |  | Shiraz-49T | 1166 | 0        | -0.917235 |  |  |
|  |  | Shiraz-49T | 1166 | 0        | -0.917235 |  |  |
|  |  | Shiraz-49T | 1166 | 0        | -0.917235 |  |  |
|  |  | Shiraz-49T | 1167 | 0        | -0.249329 |  |  |
|  |  | Shiraz-49T | 1167 | 0        | -0.249329 |  |  |
|  |  | Shiraz-49T | 1167 | 0        | -0.249329 |  |  |
|  |  | Shiraz-9T  | 1368 | 0.199713 | 0         |  |  |
|  |  | Shiraz-9T  | 1368 | 0.199713 | 0         |  |  |
|  |  | Shiraz-9T  | 1368 | 0.199713 | 0         |  |  |
|  |  | Shiraz-18T | 1455 | 0        | -0.186773 |  |  |
|  |  | Shiraz-18T | 1455 | 0        | -0.186773 |  |  |
|  |  | Shiraz-18T | 1455 | 0        | -0.186773 |  |  |
|  |  | Shiraz-22T | 1669 | 0.695915 | 0         |  |  |
|  |  | Shiraz-22T | 1669 | 0.695915 | 0         |  |  |

|         |      |            |      |          |           |  |
|---------|------|------------|------|----------|-----------|--|
|         |      | Shiraz-22T | 1669 | 0.695915 | 0         |  |
|         |      | Shiraz-25T | 1717 | 0.420447 | 0         |  |
|         |      | Shiraz-25T | 1717 | 0.420447 | 0         |  |
|         |      | Shiraz-25T | 1717 | 0.420447 | 0         |  |
|         |      | Shiraz-28T | 1760 | 0.538181 | 0         |  |
|         |      | Shiraz-28T | 1760 | 0.538181 | 0         |  |
|         |      | Shiraz-28T | 1760 | 0.538181 | 0         |  |
|         |      | Shiraz-29T | 1800 | 0.672527 | 0         |  |
|         |      | Shiraz-29T | 1800 | 0.672527 | 0         |  |
|         |      | Shiraz-29T | 1800 | 0.672527 | 0         |  |
|         |      | Shiraz-32T | 1869 | 0.776805 | 0         |  |
|         |      | Shiraz-32T | 1869 | 0.776805 | 0         |  |
|         |      | Shiraz-32T | 1869 | 0.776805 | 0         |  |
|         |      | Shiraz-35T | 1932 | 0.507141 | 0         |  |
|         |      | Shiraz-35T | 1932 | 0.507141 | 0         |  |
|         |      | Shiraz-35T | 1932 | 0.507141 | 0         |  |
|         |      | Shiraz-40T | 2051 | 0.098506 | 0         |  |
|         |      | Shiraz-40T | 2051 | 0.098506 | 0         |  |
|         |      | Shiraz-40T | 2051 | 0.098506 | 0         |  |
|         |      | Shiraz-58T | 2221 | 0.871948 | 0         |  |
|         |      | Shiraz-58T | 2221 | 0.871948 | 0         |  |
|         |      | Shiraz-58T | 2221 | 0.871948 | 0         |  |
|         |      | Shiraz-71T | 2260 | 0.68394  | 0         |  |
|         |      | Shiraz-71T | 2260 | 0.68394  | 0         |  |
|         |      | Shiraz-71T | 2260 | 0.68394  | 0         |  |
|         |      | Shiraz-71T | 2261 | 0.508399 | 0         |  |
|         |      | Shiraz-71T | 2261 | 0.508399 | 0         |  |
|         |      | Shiraz-71T | 2261 | 0.508399 | 0         |  |
| ARHGEF5 | chr7 | Shiraz-3T  | 90   | 0.219276 | 0         |  |
|         |      | Shiraz-3T  | 98   | 0        | -0.069276 |  |
|         |      | Shiraz-4T  | 253  | 0.372918 | 0         |  |
|         |      | Shiraz-36T | 378  | 0.179558 | 0         |  |
|         |      | Shiraz-44T | 645  | 0        | -0.474857 |  |
|         |      | Shiraz-46T | 943  | 0.093799 | 0         |  |
|         |      | Shiraz-77T | 1225 | 0        | -0.117922 |  |
|         |      | Shiraz-9T  | 1325 | 0.221899 | 0         |  |
|         |      | Shiraz-18T | 1434 | 0.244465 | 0         |  |
|         |      | Shiraz-22T | 1554 | 0        | -0.502826 |  |
|         |      | Shiraz-25T | 1698 | 0.21835  | 0         |  |
|         |      | Shiraz-28T | 1735 | 0.350744 | 0         |  |
|         |      | Shiraz-29T | 1778 | 0.120767 | 0         |  |
|         |      | Shiraz-32T | 1833 | 0.551336 | 0         |  |
|         |      | Shiraz-38T | 1951 | 0.250891 | 0         |  |
|         |      | Shiraz-53T | 2078 | 0.287202 | 0         |  |
|         |      | Shiraz-58T | 2162 | 0.221505 | 0         |  |
|         |      | Shiraz-71T | 2238 | 0.603631 | 0         |  |
|         |      | Shiraz-3T  | 90   | 0.219276 | 0         |  |



|          |      |            |      |          |           |  |  |
|----------|------|------------|------|----------|-----------|--|--|
|          |      | Shiraz-3T  | 98   | 0        | -0.069276 |  |  |
|          |      | Shiraz-4T  | 253  | 0.372918 | 0         |  |  |
|          |      | Shiraz-36T | 378  | 0.179558 | 0         |  |  |
|          |      | Shiraz-44T | 645  | 0        | -0.474857 |  |  |
|          |      | Shiraz-46T | 943  | 0.093799 | 0         |  |  |
|          |      | Shiraz-77T | 1225 | 0        | -0.117922 |  |  |
|          |      | Shiraz-9T  | 1325 | 0.221899 | 0         |  |  |
|          |      | Shiraz-18T | 1434 | 0.244465 | 0         |  |  |
|          |      | Shiraz-22T | 1554 | 0        | -0.502826 |  |  |
|          |      | Shiraz-25T | 1698 | 0.21835  | 0         |  |  |
|          |      | Shiraz-28T | 1735 | 0.350744 | 0         |  |  |
|          |      | Shiraz-29T | 1778 | 0.120767 | 0         |  |  |
|          |      | Shiraz-32T | 1833 | 0.551336 | 0         |  |  |
|          |      | Shiraz-38T | 1951 | 0.250891 | 0         |  |  |
|          |      | Shiraz-53T | 2078 | 0.287202 | 0         |  |  |
|          |      | Shiraz-58T | 2162 | 0.221505 | 0         |  |  |
|          |      | Shiraz-71T | 2238 | 0.603631 | 0         |  |  |
|          |      | Shiraz-3T  | 90   | 0.219276 | 0         |  |  |
|          |      | Shiraz-3T  | 98   | 0        | -0.069276 |  |  |
|          |      | Shiraz-4T  | 253  | 0.372918 | 0         |  |  |
|          |      | Shiraz-36T | 378  | 0.179558 | 0         |  |  |
|          |      | Shiraz-44T | 645  | 0        | -0.474857 |  |  |
|          |      | Shiraz-46T | 943  | 0.093799 | 0         |  |  |
|          |      | Shiraz-77T | 1225 | 0        | -0.117922 |  |  |
|          |      | Shiraz-9T  | 1325 | 0.221899 | 0         |  |  |
|          |      | Shiraz-18T | 1434 | 0.244465 | 0         |  |  |
|          |      | Shiraz-22T | 1554 | 0        | -0.502826 |  |  |
|          |      | Shiraz-25T | 1698 | 0.21835  | 0         |  |  |
|          |      | Shiraz-28T | 1735 | 0.350744 | 0         |  |  |
|          |      | Shiraz-29T | 1778 | 0.120767 | 0         |  |  |
|          |      | Shiraz-32T | 1833 | 0.551336 | 0         |  |  |
|          |      | Shiraz-38T | 1951 | 0.250891 | 0         |  |  |
|          |      | Shiraz-53T | 2078 | 0.287202 | 0         |  |  |
|          |      | Shiraz-58T | 2162 | 0.221505 | 0         |  |  |
|          |      | Shiraz-71T | 2238 | 0.603631 | 0         |  |  |
| ARHGEF5L | chr7 | Shiraz-3T  | 90   | 0.219276 | 0         |  |  |
|          |      | Shiraz-3T  | 98   | 0        | -0.069276 |  |  |
|          |      | Shiraz-4T  | 253  | 0.372918 | 0         |  |  |
|          |      | Shiraz-36T | 378  | 0.179558 | 0         |  |  |
|          |      | Shiraz-44T | 645  | 0        | -0.474857 |  |  |
|          |      | Shiraz-46T | 943  | 0.093799 | 0         |  |  |
|          |      | Shiraz-77T | 1225 | 0        | -0.117922 |  |  |
|          |      | Shiraz-9T  | 1325 | 0.221899 | 0         |  |  |
|          |      | Shiraz-18T | 1434 | 0.244465 | 0         |  |  |
|          |      | Shiraz-22T | 1554 | 0        | -0.502826 |  |  |
|          |      | Shiraz-25T | 1698 | 0.21835  | 0         |  |  |
|          |      | Shiraz-28T | 1735 | 0.350744 | 0         |  |  |

|         |      |            |      |          |           |  |
|---------|------|------------|------|----------|-----------|--|
|         |      | Shiraz-29T | 1778 | 0.120767 | 0         |  |
|         |      | Shiraz-32T | 1833 | 0.551336 | 0         |  |
|         |      | Shiraz-38T | 1951 | 0.250891 | 0         |  |
|         |      | Shiraz-53T | 2078 | 0.287202 | 0         |  |
|         |      | Shiraz-58T | 2162 | 0.221505 | 0         |  |
|         |      | Shiraz-71T | 2238 | 0.603631 | 0         |  |
|         |      | Shiraz-3T  | 90   | 0.219276 | 0         |  |
|         |      | Shiraz-3T  | 98   | 0        | -0.069276 |  |
|         |      | Shiraz-4T  | 253  | 0.372918 | 0         |  |
|         |      | Shiraz-36T | 378  | 0.179558 | 0         |  |
|         |      | Shiraz-44T | 645  | 0        | -0.474857 |  |
|         |      | Shiraz-46T | 943  | 0.093799 | 0         |  |
|         |      | Shiraz-77T | 1225 | 0        | -0.117922 |  |
|         |      | Shiraz-9T  | 1325 | 0.221899 | 0         |  |
|         |      | Shiraz-18T | 1434 | 0.244465 | 0         |  |
|         |      | Shiraz-22T | 1554 | 0        | -0.502826 |  |
|         |      | Shiraz-25T | 1698 | 0.21835  | 0         |  |
|         |      | Shiraz-28T | 1735 | 0.350744 | 0         |  |
|         |      | Shiraz-29T | 1778 | 0.120767 | 0         |  |
|         |      | Shiraz-32T | 1833 | 0.551336 | 0         |  |
|         |      | Shiraz-38T | 1951 | 0.250891 | 0         |  |
|         |      | Shiraz-53T | 2078 | 0.287202 | 0         |  |
|         |      | Shiraz-58T | 2162 | 0.221505 | 0         |  |
|         |      | Shiraz-71T | 2238 | 0.603631 | 0         |  |
|         |      | Shiraz-3T  | 90   | 0.219276 | 0         |  |
|         |      | Shiraz-3T  | 98   | 0        | -0.069276 |  |
|         |      | Shiraz-4T  | 253  | 0.372918 | 0         |  |
|         |      | Shiraz-36T | 378  | 0.179558 | 0         |  |
|         |      | Shiraz-44T | 645  | 0        | -0.474857 |  |
|         |      | Shiraz-46T | 943  | 0.093799 | 0         |  |
|         |      | Shiraz-77T | 1225 | 0        | -0.117922 |  |
|         |      | Shiraz-9T  | 1325 | 0.221899 | 0         |  |
|         |      | Shiraz-18T | 1434 | 0.244465 | 0         |  |
|         |      | Shiraz-22T | 1554 | 0        | -0.502826 |  |
|         |      | Shiraz-25T | 1698 | 0.21835  | 0         |  |
|         |      | Shiraz-28T | 1735 | 0.350744 | 0         |  |
|         |      | Shiraz-29T | 1778 | 0.120767 | 0         |  |
|         |      | Shiraz-32T | 1833 | 0.551336 | 0         |  |
|         |      | Shiraz-38T | 1951 | 0.250891 | 0         |  |
|         |      | Shiraz-53T | 2078 | 0.287202 | 0         |  |
|         |      | Shiraz-58T | 2162 | 0.221505 | 0         |  |
|         |      | Shiraz-71T | 2238 | 0.603631 | 0         |  |
| ARHGEF6 | chrX | Shiraz-3T  | 242  | 0        | -0.336434 |  |
|         |      | Shiraz-4T  | 261  | 0        | -0.336249 |  |
|         |      | Shiraz-16T | 295  | 0.591657 | 0         |  |
|         |      | Shiraz-36T | 433  | 0        | -0.803961 |  |
|         |      | Shiraz-44T | 899  | 0        | -1.09697  |  |

|         |      |            |      |          |           |  |  |
|---------|------|------------|------|----------|-----------|--|--|
|         |      | Shiraz-49T | 1170 | 0        | -0.967436 |  |  |
|         |      | Shiraz-9T  | 1370 | 0.690073 | 0         |  |  |
|         |      | Shiraz-18T | 1457 | 0.643204 | 0         |  |  |
|         |      | Shiraz-22T | 1673 | 0.611783 | 0         |  |  |
|         |      | Shiraz-22T | 1677 | 0.789711 | 0         |  |  |
|         |      | Shiraz-25T | 1719 | 0.472955 | 0         |  |  |
|         |      | Shiraz-28T | 1762 | 0.562311 | 0         |  |  |
|         |      | Shiraz-29T | 1801 | 0.815343 | 0         |  |  |
|         |      | Shiraz-32T | 1870 | 0.729766 | 0         |  |  |
|         |      | Shiraz-35T | 1933 | 0.488535 | 0         |  |  |
|         |      | Shiraz-58T | 2223 | 0.833364 | 0         |  |  |
|         |      | Shiraz-71T | 2263 | 0.975531 | 0         |  |  |
|         |      | Shiraz-3T  | 242  | 0        | -0.336434 |  |  |
|         |      | Shiraz-4T  | 261  | 0        | -0.336249 |  |  |
|         |      | Shiraz-16T | 295  | 0.591657 | 0         |  |  |
|         |      | Shiraz-36T | 433  | 0        | -0.803961 |  |  |
|         |      | Shiraz-44T | 899  | 0        | -1.09697  |  |  |
|         |      | Shiraz-49T | 1170 | 0        | -0.967436 |  |  |
|         |      | Shiraz-9T  | 1370 | 0.690073 | 0         |  |  |
|         |      | Shiraz-18T | 1457 | 0.643204 | 0         |  |  |
|         |      | Shiraz-22T | 1673 | 0.611783 | 0         |  |  |
|         |      | Shiraz-22T | 1677 | 0.789711 | 0         |  |  |
|         |      | Shiraz-25T | 1719 | 0.472955 | 0         |  |  |
|         |      | Shiraz-28T | 1762 | 0.562311 | 0         |  |  |
|         |      | Shiraz-29T | 1801 | 0.815343 | 0         |  |  |
|         |      | Shiraz-32T | 1870 | 0.729766 | 0         |  |  |
|         |      | Shiraz-35T | 1933 | 0.488535 | 0         |  |  |
|         |      | Shiraz-58T | 2223 | 0.833364 | 0         |  |  |
|         |      | Shiraz-71T | 2263 | 0.975531 | 0         |  |  |
|         |      | Shiraz-3T  | 242  | 0        | -0.336434 |  |  |
|         |      | Shiraz-4T  | 261  | 0        | -0.336249 |  |  |
|         |      | Shiraz-16T | 295  | 0.591657 | 0         |  |  |
|         |      | Shiraz-36T | 433  | 0        | -0.803961 |  |  |
|         |      | Shiraz-44T | 899  | 0        | -1.09697  |  |  |
|         |      | Shiraz-49T | 1170 | 0        | -0.967436 |  |  |
|         |      | Shiraz-9T  | 1370 | 0.690073 | 0         |  |  |
|         |      | Shiraz-18T | 1457 | 0.643204 | 0         |  |  |
|         |      | Shiraz-22T | 1673 | 0.611783 | 0         |  |  |
|         |      | Shiraz-22T | 1677 | 0.789711 | 0         |  |  |
|         |      | Shiraz-25T | 1719 | 0.472955 | 0         |  |  |
|         |      | Shiraz-28T | 1762 | 0.562311 | 0         |  |  |
|         |      | Shiraz-29T | 1801 | 0.815343 | 0         |  |  |
|         |      | Shiraz-32T | 1870 | 0.729766 | 0         |  |  |
|         |      | Shiraz-35T | 1933 | 0.488535 | 0         |  |  |
|         |      | Shiraz-58T | 2223 | 0.833364 | 0         |  |  |
|         |      | Shiraz-71T | 2263 | 0.975531 | 0         |  |  |
| ARHGEF9 | chrX | Shiraz-3T  | 241  | 0        | -0.230501 |  |  |

|        |      |            |      |          |           |  |  |
|--------|------|------------|------|----------|-----------|--|--|
|        |      | Shiraz-4T  | 261  | 0        | -0.336249 |  |  |
|        |      | Shiraz-16T | 295  | 0.591657 | 0         |  |  |
|        |      | Shiraz-36T | 433  | 0        | -0.803961 |  |  |
|        |      | Shiraz-44T | 899  | 0        | -1.09697  |  |  |
|        |      | Shiraz-49T | 1170 | 0        | -0.967436 |  |  |
|        |      | Shiraz-18T | 1457 | 0.643204 | 0         |  |  |
|        |      | Shiraz-22T | 1673 | 0.611783 | 0         |  |  |
|        |      | Shiraz-25T | 1719 | 0.472955 | 0         |  |  |
|        |      | Shiraz-28T | 1762 | 0.562311 | 0         |  |  |
|        |      | Shiraz-29T | 1801 | 0.815343 | 0         |  |  |
|        |      | Shiraz-32T | 1870 | 0.729766 | 0         |  |  |
|        |      | Shiraz-35T | 1933 | 0.488535 | 0         |  |  |
|        |      | Shiraz-58T | 2223 | 0.833364 | 0         |  |  |
|        |      | Shiraz-71T | 2263 | 0.975531 | 0         |  |  |
|        |      | Shiraz-3T  | 241  | 0        | -0.230501 |  |  |
|        |      | Shiraz-4T  | 261  | 0        | -0.336249 |  |  |
|        |      | Shiraz-16T | 295  | 0.591657 | 0         |  |  |
|        |      | Shiraz-36T | 433  | 0        | -0.803961 |  |  |
|        |      | Shiraz-44T | 899  | 0        | -1.09697  |  |  |
|        |      | Shiraz-49T | 1170 | 0        | -0.967436 |  |  |
|        |      | Shiraz-18T | 1457 | 0.643204 | 0         |  |  |
|        |      | Shiraz-22T | 1673 | 0.611783 | 0         |  |  |
|        |      | Shiraz-25T | 1719 | 0.472955 | 0         |  |  |
|        |      | Shiraz-28T | 1762 | 0.562311 | 0         |  |  |
|        |      | Shiraz-29T | 1801 | 0.815343 | 0         |  |  |
|        |      | Shiraz-32T | 1870 | 0.729766 | 0         |  |  |
|        |      | Shiraz-35T | 1933 | 0.488535 | 0         |  |  |
|        |      | Shiraz-58T | 2223 | 0.833364 | 0         |  |  |
|        |      | Shiraz-71T | 2263 | 0.975531 | 0         |  |  |
|        |      | Shiraz-3T  | 241  | 0        | -0.230501 |  |  |
|        |      | Shiraz-4T  | 261  | 0        | -0.336249 |  |  |
|        |      | Shiraz-16T | 295  | 0.591657 | 0         |  |  |
|        |      | Shiraz-36T | 433  | 0        | -0.803961 |  |  |
|        |      | Shiraz-44T | 899  | 0        | -1.09697  |  |  |
|        |      | Shiraz-49T | 1170 | 0        | -0.967436 |  |  |
|        |      | Shiraz-18T | 1457 | 0.643204 | 0         |  |  |
|        |      | Shiraz-22T | 1673 | 0.611783 | 0         |  |  |
|        |      | Shiraz-25T | 1719 | 0.472955 | 0         |  |  |
|        |      | Shiraz-28T | 1762 | 0.562311 | 0         |  |  |
|        |      | Shiraz-29T | 1801 | 0.815343 | 0         |  |  |
|        |      | Shiraz-32T | 1870 | 0.729766 | 0         |  |  |
|        |      | Shiraz-35T | 1933 | 0.488535 | 0         |  |  |
|        |      | Shiraz-58T | 2223 | 0.833364 | 0         |  |  |
|        |      | Shiraz-71T | 2263 | 0.975531 | 0         |  |  |
| ARL13A | chrX | Shiraz-3T  | 242  | 0        | -0.336434 |  |  |
|        |      | Shiraz-4T  | 261  | 0        | -0.336249 |  |  |
|        |      | Shiraz-16T | 295  | 0.591657 | 0         |  |  |

|       |      |            |      |          |           |  |  |
|-------|------|------------|------|----------|-----------|--|--|
|       |      | Shiraz-36T | 433  | 0        | -0.803961 |  |  |
|       |      | Shiraz-44T | 899  | 0        | -1.09697  |  |  |
|       |      | Shiraz-49T | 1170 | 0        | -0.967436 |  |  |
|       |      | Shiraz-18T | 1457 | 0.643204 | 0         |  |  |
|       |      | Shiraz-22T | 1673 | 0.611783 | 0         |  |  |
|       |      | Shiraz-25T | 1719 | 0.472955 | 0         |  |  |
|       |      | Shiraz-28T | 1762 | 0.562311 | 0         |  |  |
|       |      | Shiraz-29T | 1801 | 0.815343 | 0         |  |  |
|       |      | Shiraz-32T | 1870 | 0.729766 | 0         |  |  |
|       |      | Shiraz-35T | 1933 | 0.488535 | 0         |  |  |
|       |      | Shiraz-58T | 2223 | 0.833364 | 0         |  |  |
|       |      | Shiraz-71T | 2263 | 0.975531 | 0         |  |  |
|       |      | Shiraz-3T  | 242  | 0        | -0.336434 |  |  |
|       |      | Shiraz-4T  | 261  | 0        | -0.336249 |  |  |
|       |      | Shiraz-16T | 295  | 0.591657 | 0         |  |  |
|       |      | Shiraz-36T | 433  | 0        | -0.803961 |  |  |
|       |      | Shiraz-44T | 899  | 0        | -1.09697  |  |  |
|       |      | Shiraz-49T | 1170 | 0        | -0.967436 |  |  |
|       |      | Shiraz-18T | 1457 | 0.643204 | 0         |  |  |
|       |      | Shiraz-22T | 1673 | 0.611783 | 0         |  |  |
|       |      | Shiraz-25T | 1719 | 0.472955 | 0         |  |  |
|       |      | Shiraz-28T | 1762 | 0.562311 | 0         |  |  |
|       |      | Shiraz-29T | 1801 | 0.815343 | 0         |  |  |
|       |      | Shiraz-32T | 1870 | 0.729766 | 0         |  |  |
|       |      | Shiraz-35T | 1933 | 0.488535 | 0         |  |  |
|       |      | Shiraz-58T | 2223 | 0.833364 | 0         |  |  |
|       |      | Shiraz-71T | 2263 | 0.975531 | 0         |  |  |
|       |      | Shiraz-3T  | 242  | 0        | -0.336434 |  |  |
|       |      | Shiraz-4T  | 261  | 0        | -0.336249 |  |  |
|       |      | Shiraz-16T | 295  | 0.591657 | 0         |  |  |
|       |      | Shiraz-36T | 433  | 0        | -0.803961 |  |  |
|       |      | Shiraz-44T | 899  | 0        | -1.09697  |  |  |
|       |      | Shiraz-49T | 1170 | 0        | -0.967436 |  |  |
|       |      | Shiraz-18T | 1457 | 0.643204 | 0         |  |  |
|       |      | Shiraz-22T | 1673 | 0.611783 | 0         |  |  |
|       |      | Shiraz-25T | 1719 | 0.472955 | 0         |  |  |
|       |      | Shiraz-28T | 1762 | 0.562311 | 0         |  |  |
|       |      | Shiraz-29T | 1801 | 0.815343 | 0         |  |  |
|       |      | Shiraz-32T | 1870 | 0.729766 | 0         |  |  |
|       |      | Shiraz-35T | 1933 | 0.488535 | 0         |  |  |
|       |      | Shiraz-58T | 2223 | 0.833364 | 0         |  |  |
|       |      | Shiraz-71T | 2263 | 0.975531 | 0         |  |  |
| ARL4A | chr7 | Shiraz-4T  | 252  | 0.192083 | 0         |  |  |
|       |      | Shiraz-4T  | 252  | 0.192083 | 0         |  |  |
|       |      | Shiraz-36T | 376  | 0.159952 | 0         |  |  |
|       |      | Shiraz-36T | 376  | 0.159952 | 0         |  |  |
|       |      | Shiraz-44T | 628  | 0        | -0.444379 |  |  |

|  |            |      |          |           |  |
|--|------------|------|----------|-----------|--|
|  | Shiraz-44T | 628  | 0        | -0.444379 |  |
|  | Shiraz-47T | 1027 | 0        | -0.117848 |  |
|  | Shiraz-47T | 1027 | 0        | -0.117848 |  |
|  | Shiraz-49T | 1117 | 0        | -0.168296 |  |
|  | Shiraz-49T | 1117 | 0        | -0.168296 |  |
|  | Shiraz-77T | 1222 | 0        | -0.113002 |  |
|  | Shiraz-77T | 1222 | 0        | -0.113002 |  |
|  | Shiraz-18T | 1433 | 0.250973 | 0         |  |
|  | Shiraz-18T | 1433 | 0.250973 | 0         |  |
|  | Shiraz-22T | 1543 | 0        | -0.513696 |  |
|  | Shiraz-22T | 1543 | 0        | -0.513696 |  |
|  | Shiraz-25T | 1697 | 0.21945  | 0         |  |
|  | Shiraz-25T | 1697 | 0.21945  | 0         |  |
|  | Shiraz-28T | 1734 | 0.362882 | 0         |  |
|  | Shiraz-28T | 1734 | 0.362882 | 0         |  |
|  | Shiraz-29T | 1777 | 0.156747 | 0         |  |
|  | Shiraz-29T | 1777 | 0.156747 | 0         |  |
|  | Shiraz-38T | 1950 | 0.265916 | 0         |  |
|  | Shiraz-38T | 1950 | 0.265916 | 0         |  |
|  | Shiraz-58T | 2157 | 0        | -0.213872 |  |
|  | Shiraz-58T | 2157 | 0        | -0.213872 |  |
|  | Shiraz-71T | 2236 | 0.320072 | 0         |  |
|  | Shiraz-71T | 2236 | 0.320072 | 0         |  |
|  | Shiraz-4T  | 252  | 0.192083 | 0         |  |
|  | Shiraz-4T  | 252  | 0.192083 | 0         |  |
|  | Shiraz-36T | 376  | 0.159952 | 0         |  |
|  | Shiraz-36T | 376  | 0.159952 | 0         |  |
|  | Shiraz-44T | 628  | 0        | -0.444379 |  |
|  | Shiraz-44T | 628  | 0        | -0.444379 |  |
|  | Shiraz-47T | 1027 | 0        | -0.117848 |  |
|  | Shiraz-47T | 1027 | 0        | -0.117848 |  |
|  | Shiraz-49T | 1117 | 0        | -0.168296 |  |
|  | Shiraz-49T | 1117 | 0        | -0.168296 |  |
|  | Shiraz-77T | 1222 | 0        | -0.113002 |  |
|  | Shiraz-77T | 1222 | 0        | -0.113002 |  |
|  | Shiraz-18T | 1433 | 0.250973 | 0         |  |
|  | Shiraz-18T | 1433 | 0.250973 | 0         |  |
|  | Shiraz-22T | 1543 | 0        | -0.513696 |  |
|  | Shiraz-22T | 1543 | 0        | -0.513696 |  |
|  | Shiraz-25T | 1697 | 0.21945  | 0         |  |
|  | Shiraz-25T | 1697 | 0.21945  | 0         |  |
|  | Shiraz-28T | 1734 | 0.362882 | 0         |  |
|  | Shiraz-28T | 1734 | 0.362882 | 0         |  |
|  | Shiraz-29T | 1777 | 0.156747 | 0         |  |
|  | Shiraz-29T | 1777 | 0.156747 | 0         |  |
|  | Shiraz-38T | 1950 | 0.265916 | 0         |  |
|  | Shiraz-38T | 1950 | 0.265916 | 0         |  |

|        |      |            |      |          |           |  |  |
|--------|------|------------|------|----------|-----------|--|--|
|        |      | Shiraz-58T | 2157 | 0        | -0.213872 |  |  |
|        |      | Shiraz-58T | 2157 | 0        | -0.213872 |  |  |
|        |      | Shiraz-71T | 2236 | 0.320072 | 0         |  |  |
|        |      | Shiraz-71T | 2236 | 0.320072 | 0         |  |  |
|        |      | Shiraz-4T  | 252  | 0.192083 | 0         |  |  |
|        |      | Shiraz-4T  | 252  | 0.192083 | 0         |  |  |
|        |      | Shiraz-36T | 376  | 0.159952 | 0         |  |  |
|        |      | Shiraz-36T | 376  | 0.159952 | 0         |  |  |
|        |      | Shiraz-44T | 628  | 0        | -0.444379 |  |  |
|        |      | Shiraz-44T | 628  | 0        | -0.444379 |  |  |
|        |      | Shiraz-47T | 1027 | 0        | -0.117848 |  |  |
|        |      | Shiraz-47T | 1027 | 0        | -0.117848 |  |  |
|        |      | Shiraz-49T | 1117 | 0        | -0.168296 |  |  |
|        |      | Shiraz-49T | 1117 | 0        | -0.168296 |  |  |
|        |      | Shiraz-77T | 1222 | 0        | -0.113002 |  |  |
|        |      | Shiraz-77T | 1222 | 0        | -0.113002 |  |  |
|        |      | Shiraz-18T | 1433 | 0.250973 | 0         |  |  |
|        |      | Shiraz-18T | 1433 | 0.250973 | 0         |  |  |
|        |      | Shiraz-22T | 1543 | 0        | -0.513696 |  |  |
|        |      | Shiraz-22T | 1543 | 0        | -0.513696 |  |  |
|        |      | Shiraz-25T | 1697 | 0.21945  | 0         |  |  |
|        |      | Shiraz-25T | 1697 | 0.21945  | 0         |  |  |
|        |      | Shiraz-28T | 1734 | 0.362882 | 0         |  |  |
|        |      | Shiraz-28T | 1734 | 0.362882 | 0         |  |  |
|        |      | Shiraz-29T | 1777 | 0.156747 | 0         |  |  |
|        |      | Shiraz-29T | 1777 | 0.156747 | 0         |  |  |
|        |      | Shiraz-38T | 1950 | 0.265916 | 0         |  |  |
|        |      | Shiraz-38T | 1950 | 0.265916 | 0         |  |  |
|        |      | Shiraz-58T | 2157 | 0        | -0.213872 |  |  |
|        |      | Shiraz-58T | 2157 | 0        | -0.213872 |  |  |
|        |      | Shiraz-71T | 2236 | 0.320072 | 0         |  |  |
|        |      | Shiraz-71T | 2236 | 0.320072 | 0         |  |  |
| ARMC10 | chr7 | Shiraz-3T  | 90   | 0.219276 | 0         |  |  |
|        |      | Shiraz-4T  | 253  | 0.372918 | 0         |  |  |
|        |      | Shiraz-36T | 378  | 0.179558 | 0         |  |  |
|        |      | Shiraz-46T | 943  | 0.093799 | 0         |  |  |
|        |      | Shiraz-77T | 1225 | 0        | -0.117922 |  |  |
|        |      | Shiraz-18T | 1434 | 0.244465 | 0         |  |  |
|        |      | Shiraz-22T | 1549 | 0        | -0.319623 |  |  |
|        |      | Shiraz-25T | 1698 | 0.21835  | 0         |  |  |
|        |      | Shiraz-28T | 1735 | 0.350744 | 0         |  |  |
|        |      | Shiraz-29T | 1778 | 0.120767 | 0         |  |  |
|        |      | Shiraz-32T | 1833 | 0.551336 | 0         |  |  |
|        |      | Shiraz-38T | 1951 | 0.250891 | 0         |  |  |
|        |      | Shiraz-53T | 2078 | 0.287202 | 0         |  |  |
|        |      | Shiraz-71T | 2238 | 0.603631 | 0         |  |  |
|        |      | Shiraz-3T  | 90   | 0.219276 | 0         |  |  |

|        |      |            |      |          |           |  |
|--------|------|------------|------|----------|-----------|--|
|        |      | Shiraz-4T  | 253  | 0.372918 | 0         |  |
|        |      | Shiraz-36T | 378  | 0.179558 | 0         |  |
|        |      | Shiraz-46T | 943  | 0.093799 | 0         |  |
|        |      | Shiraz-77T | 1225 | 0        | -0.117922 |  |
|        |      | Shiraz-18T | 1434 | 0.244465 | 0         |  |
|        |      | Shiraz-22T | 1549 | 0        | -0.319623 |  |
|        |      | Shiraz-25T | 1698 | 0.21835  | 0         |  |
|        |      | Shiraz-28T | 1735 | 0.350744 | 0         |  |
|        |      | Shiraz-29T | 1778 | 0.120767 | 0         |  |
|        |      | Shiraz-32T | 1833 | 0.551336 | 0         |  |
|        |      | Shiraz-38T | 1951 | 0.250891 | 0         |  |
|        |      | Shiraz-53T | 2078 | 0.287202 | 0         |  |
|        |      | Shiraz-71T | 2238 | 0.603631 | 0         |  |
|        |      | Shiraz-3T  | 90   | 0.219276 | 0         |  |
|        |      | Shiraz-4T  | 253  | 0.372918 | 0         |  |
|        |      | Shiraz-36T | 378  | 0.179558 | 0         |  |
|        |      | Shiraz-46T | 943  | 0.093799 | 0         |  |
|        |      | Shiraz-77T | 1225 | 0        | -0.117922 |  |
|        |      | Shiraz-18T | 1434 | 0.244465 | 0         |  |
|        |      | Shiraz-22T | 1549 | 0        | -0.319623 |  |
|        |      | Shiraz-25T | 1698 | 0.21835  | 0         |  |
|        |      | Shiraz-28T | 1735 | 0.350744 | 0         |  |
|        |      | Shiraz-29T | 1778 | 0.120767 | 0         |  |
|        |      | Shiraz-32T | 1833 | 0.551336 | 0         |  |
|        |      | Shiraz-38T | 1951 | 0.250891 | 0         |  |
|        |      | Shiraz-53T | 2078 | 0.287202 | 0         |  |
|        |      | Shiraz-71T | 2238 | 0.603631 | 0         |  |
| ARMCX1 | chrX | Shiraz-3T  | 242  | 0        | -0.336434 |  |
|        |      | Shiraz-4T  | 261  | 0        | -0.336249 |  |
|        |      | Shiraz-16T | 295  | 0.591657 | 0         |  |
|        |      | Shiraz-36T | 433  | 0        | -0.803961 |  |
|        |      | Shiraz-44T | 899  | 0        | -1.09697  |  |
|        |      | Shiraz-49T | 1170 | 0        | -0.967436 |  |
|        |      | Shiraz-18T | 1457 | 0.643204 | 0         |  |
|        |      | Shiraz-22T | 1673 | 0.611783 | 0         |  |
|        |      | Shiraz-25T | 1719 | 0.472955 | 0         |  |
|        |      | Shiraz-28T | 1762 | 0.562311 | 0         |  |
|        |      | Shiraz-29T | 1801 | 0.815343 | 0         |  |
|        |      | Shiraz-32T | 1870 | 0.729766 | 0         |  |
|        |      | Shiraz-35T | 1933 | 0.488535 | 0         |  |
|        |      | Shiraz-58T | 2223 | 0.833364 | 0         |  |
|        |      | Shiraz-71T | 2263 | 0.975531 | 0         |  |
|        |      | Shiraz-3T  | 242  | 0        | -0.336434 |  |
|        |      | Shiraz-4T  | 261  | 0        | -0.336249 |  |
|        |      | Shiraz-16T | 295  | 0.591657 | 0         |  |
|        |      | Shiraz-36T | 433  | 0        | -0.803961 |  |
|        |      | Shiraz-44T | 899  | 0        | -1.09697  |  |



|        |      |            |      |          |           |  |  |
|--------|------|------------|------|----------|-----------|--|--|
|        |      | Shiraz-49T | 1170 | 0        | -0.967436 |  |  |
|        |      | Shiraz-18T | 1457 | 0.643204 | 0         |  |  |
|        |      | Shiraz-22T | 1673 | 0.611783 | 0         |  |  |
|        |      | Shiraz-25T | 1719 | 0.472955 | 0         |  |  |
|        |      | Shiraz-28T | 1762 | 0.562311 | 0         |  |  |
|        |      | Shiraz-29T | 1801 | 0.815343 | 0         |  |  |
|        |      | Shiraz-32T | 1870 | 0.729766 | 0         |  |  |
|        |      | Shiraz-35T | 1933 | 0.488535 | 0         |  |  |
|        |      | Shiraz-58T | 2223 | 0.833364 | 0         |  |  |
|        |      | Shiraz-71T | 2263 | 0.975531 | 0         |  |  |
|        |      | Shiraz-3T  | 242  | 0        | -0.336434 |  |  |
|        |      | Shiraz-4T  | 261  | 0        | -0.336249 |  |  |
|        |      | Shiraz-16T | 295  | 0.591657 | 0         |  |  |
|        |      | Shiraz-36T | 433  | 0        | -0.803961 |  |  |
|        |      | Shiraz-44T | 899  | 0        | -1.09697  |  |  |
|        |      | Shiraz-49T | 1170 | 0        | -0.967436 |  |  |
|        |      | Shiraz-18T | 1457 | 0.643204 | 0         |  |  |
|        |      | Shiraz-22T | 1673 | 0.611783 | 0         |  |  |
|        |      | Shiraz-25T | 1719 | 0.472955 | 0         |  |  |
|        |      | Shiraz-28T | 1762 | 0.562311 | 0         |  |  |
|        |      | Shiraz-29T | 1801 | 0.815343 | 0         |  |  |
|        |      | Shiraz-32T | 1870 | 0.729766 | 0         |  |  |
|        |      | Shiraz-35T | 1933 | 0.488535 | 0         |  |  |
|        |      | Shiraz-58T | 2223 | 0.833364 | 0         |  |  |
|        |      | Shiraz-71T | 2263 | 0.975531 | 0         |  |  |
| ARMCX2 | chrX | Shiraz-3T  | 242  | 0        | -0.336434 |  |  |
|        |      | Shiraz-4T  | 261  | 0        | -0.336249 |  |  |
|        |      | Shiraz-16T | 295  | 0.591657 | 0         |  |  |
|        |      | Shiraz-36T | 433  | 0        | -0.803961 |  |  |
|        |      | Shiraz-44T | 899  | 0        | -1.09697  |  |  |
|        |      | Shiraz-49T | 1170 | 0        | -0.967436 |  |  |
|        |      | Shiraz-18T | 1457 | 0.643204 | 0         |  |  |
|        |      | Shiraz-22T | 1673 | 0.611783 | 0         |  |  |
|        |      | Shiraz-25T | 1719 | 0.472955 | 0         |  |  |
|        |      | Shiraz-28T | 1762 | 0.562311 | 0         |  |  |
|        |      | Shiraz-29T | 1801 | 0.815343 | 0         |  |  |
|        |      | Shiraz-32T | 1870 | 0.729766 | 0         |  |  |
|        |      | Shiraz-35T | 1933 | 0.488535 | 0         |  |  |
|        |      | Shiraz-58T | 2223 | 0.833364 | 0         |  |  |
|        |      | Shiraz-71T | 2263 | 0.975531 | 0         |  |  |
|        |      | Shiraz-3T  | 242  | 0        | -0.336434 |  |  |
|        |      | Shiraz-4T  | 261  | 0        | -0.336249 |  |  |
|        |      | Shiraz-16T | 295  | 0.591657 | 0         |  |  |
|        |      | Shiraz-36T | 433  | 0        | -0.803961 |  |  |
|        |      | Shiraz-44T | 899  | 0        | -1.09697  |  |  |
|        |      | Shiraz-49T | 1170 | 0        | -0.967436 |  |  |
|        |      | Shiraz-18T | 1457 | 0.643204 | 0         |  |  |

|        |      |            |      |          |           |  |  |
|--------|------|------------|------|----------|-----------|--|--|
|        |      | Shiraz-22T | 1673 | 0.611783 | 0         |  |  |
|        |      | Shiraz-25T | 1719 | 0.472955 | 0         |  |  |
|        |      | Shiraz-28T | 1762 | 0.562311 | 0         |  |  |
|        |      | Shiraz-29T | 1801 | 0.815343 | 0         |  |  |
|        |      | Shiraz-32T | 1870 | 0.729766 | 0         |  |  |
|        |      | Shiraz-35T | 1933 | 0.488535 | 0         |  |  |
|        |      | Shiraz-58T | 2223 | 0.833364 | 0         |  |  |
|        |      | Shiraz-71T | 2263 | 0.975531 | 0         |  |  |
|        |      | Shiraz-3T  | 242  | 0        | -0.336434 |  |  |
|        |      | Shiraz-4T  | 261  | 0        | -0.336249 |  |  |
|        |      | Shiraz-16T | 295  | 0.591657 | 0         |  |  |
|        |      | Shiraz-36T | 433  | 0        | -0.803961 |  |  |
|        |      | Shiraz-44T | 899  | 0        | -1.09697  |  |  |
|        |      | Shiraz-49T | 1170 | 0        | -0.967436 |  |  |
|        |      | Shiraz-18T | 1457 | 0.643204 | 0         |  |  |
|        |      | Shiraz-22T | 1673 | 0.611783 | 0         |  |  |
|        |      | Shiraz-25T | 1719 | 0.472955 | 0         |  |  |
|        |      | Shiraz-28T | 1762 | 0.562311 | 0         |  |  |
|        |      | Shiraz-29T | 1801 | 0.815343 | 0         |  |  |
|        |      | Shiraz-32T | 1870 | 0.729766 | 0         |  |  |
|        |      | Shiraz-35T | 1933 | 0.488535 | 0         |  |  |
|        |      | Shiraz-58T | 2223 | 0.833364 | 0         |  |  |
|        |      | Shiraz-71T | 2263 | 0.975531 | 0         |  |  |
| ARMCX3 | chrX | Shiraz-3T  | 242  | 0        | -0.336434 |  |  |
|        |      | Shiraz-3T  | 242  | 0        | -0.336434 |  |  |
|        |      | Shiraz-4T  | 261  | 0        | -0.336249 |  |  |
|        |      | Shiraz-4T  | 261  | 0        | -0.336249 |  |  |
|        |      | Shiraz-16T | 295  | 0.591657 | 0         |  |  |
|        |      | Shiraz-16T | 295  | 0.591657 | 0         |  |  |
|        |      | Shiraz-36T | 433  | 0        | -0.803961 |  |  |
|        |      | Shiraz-36T | 433  | 0        | -0.803961 |  |  |
|        |      | Shiraz-44T | 899  | 0        | -1.09697  |  |  |
|        |      | Shiraz-44T | 899  | 0        | -1.09697  |  |  |
|        |      | Shiraz-49T | 1170 | 0        | -0.967436 |  |  |
|        |      | Shiraz-49T | 1170 | 0        | -0.967436 |  |  |
|        |      | Shiraz-18T | 1457 | 0.643204 | 0         |  |  |
|        |      | Shiraz-18T | 1457 | 0.643204 | 0         |  |  |
|        |      | Shiraz-22T | 1673 | 0.611783 | 0         |  |  |
|        |      | Shiraz-22T | 1673 | 0.611783 | 0         |  |  |
|        |      | Shiraz-25T | 1719 | 0.472955 | 0         |  |  |
|        |      | Shiraz-25T | 1719 | 0.472955 | 0         |  |  |
|        |      | Shiraz-28T | 1762 | 0.562311 | 0         |  |  |
|        |      | Shiraz-28T | 1762 | 0.562311 | 0         |  |  |
|        |      | Shiraz-29T | 1801 | 0.815343 | 0         |  |  |
|        |      | Shiraz-29T | 1801 | 0.815343 | 0         |  |  |
|        |      | Shiraz-32T | 1870 | 0.729766 | 0         |  |  |
|        |      | Shiraz-32T | 1870 | 0.729766 | 0         |  |  |

|  |            |      |          |           |  |
|--|------------|------|----------|-----------|--|
|  | Shiraz-35T | 1933 | 0.488535 | 0         |  |
|  | Shiraz-35T | 1933 | 0.488535 | 0         |  |
|  | Shiraz-58T | 2223 | 0.833364 | 0         |  |
|  | Shiraz-58T | 2223 | 0.833364 | 0         |  |
|  | Shiraz-71T | 2263 | 0.975531 | 0         |  |
|  | Shiraz-71T | 2263 | 0.975531 | 0         |  |
|  | Shiraz-3T  | 242  | 0        | -0.336434 |  |
|  | Shiraz-3T  | 242  | 0        | -0.336434 |  |
|  | Shiraz-4T  | 261  | 0        | -0.336249 |  |
|  | Shiraz-4T  | 261  | 0        | -0.336249 |  |
|  | Shiraz-16T | 295  | 0.591657 | 0         |  |
|  | Shiraz-16T | 295  | 0.591657 | 0         |  |
|  | Shiraz-36T | 433  | 0        | -0.803961 |  |
|  | Shiraz-36T | 433  | 0        | -0.803961 |  |
|  | Shiraz-44T | 899  | 0        | -1.09697  |  |
|  | Shiraz-44T | 899  | 0        | -1.09697  |  |
|  | Shiraz-49T | 1170 | 0        | -0.967436 |  |
|  | Shiraz-49T | 1170 | 0        | -0.967436 |  |
|  | Shiraz-18T | 1457 | 0.643204 | 0         |  |
|  | Shiraz-18T | 1457 | 0.643204 | 0         |  |
|  | Shiraz-22T | 1673 | 0.611783 | 0         |  |
|  | Shiraz-22T | 1673 | 0.611783 | 0         |  |
|  | Shiraz-25T | 1719 | 0.472955 | 0         |  |
|  | Shiraz-25T | 1719 | 0.472955 | 0         |  |
|  | Shiraz-28T | 1762 | 0.562311 | 0         |  |
|  | Shiraz-28T | 1762 | 0.562311 | 0         |  |
|  | Shiraz-29T | 1801 | 0.815343 | 0         |  |
|  | Shiraz-29T | 1801 | 0.815343 | 0         |  |
|  | Shiraz-32T | 1870 | 0.729766 | 0         |  |
|  | Shiraz-32T | 1870 | 0.729766 | 0         |  |
|  | Shiraz-35T | 1933 | 0.488535 | 0         |  |
|  | Shiraz-35T | 1933 | 0.488535 | 0         |  |
|  | Shiraz-58T | 2223 | 0.833364 | 0         |  |
|  | Shiraz-58T | 2223 | 0.833364 | 0         |  |
|  | Shiraz-71T | 2263 | 0.975531 | 0         |  |
|  | Shiraz-71T | 2263 | 0.975531 | 0         |  |
|  | Shiraz-3T  | 242  | 0        | -0.336434 |  |
|  | Shiraz-3T  | 242  | 0        | -0.336434 |  |
|  | Shiraz-4T  | 261  | 0        | -0.336249 |  |
|  | Shiraz-4T  | 261  | 0        | -0.336249 |  |
|  | Shiraz-16T | 295  | 0.591657 | 0         |  |
|  | Shiraz-16T | 295  | 0.591657 | 0         |  |
|  | Shiraz-36T | 433  | 0        | -0.803961 |  |
|  | Shiraz-36T | 433  | 0        | -0.803961 |  |
|  | Shiraz-44T | 899  | 0        | -1.09697  |  |
|  | Shiraz-44T | 899  | 0        | -1.09697  |  |
|  | Shiraz-49T | 1170 | 0        | -0.967436 |  |

|        |      |            |      |          |           |  |  |
|--------|------|------------|------|----------|-----------|--|--|
|        |      | Shiraz-49T | 1170 | 0        | -0.967436 |  |  |
|        |      | Shiraz-18T | 1457 | 0.643204 | 0         |  |  |
|        |      | Shiraz-18T | 1457 | 0.643204 | 0         |  |  |
|        |      | Shiraz-22T | 1673 | 0.611783 | 0         |  |  |
|        |      | Shiraz-22T | 1673 | 0.611783 | 0         |  |  |
|        |      | Shiraz-25T | 1719 | 0.472955 | 0         |  |  |
|        |      | Shiraz-25T | 1719 | 0.472955 | 0         |  |  |
|        |      | Shiraz-28T | 1762 | 0.562311 | 0         |  |  |
|        |      | Shiraz-28T | 1762 | 0.562311 | 0         |  |  |
|        |      | Shiraz-29T | 1801 | 0.815343 | 0         |  |  |
|        |      | Shiraz-29T | 1801 | 0.815343 | 0         |  |  |
|        |      | Shiraz-32T | 1870 | 0.729766 | 0         |  |  |
|        |      | Shiraz-32T | 1870 | 0.729766 | 0         |  |  |
|        |      | Shiraz-35T | 1933 | 0.488535 | 0         |  |  |
|        |      | Shiraz-35T | 1933 | 0.488535 | 0         |  |  |
|        |      | Shiraz-58T | 2223 | 0.833364 | 0         |  |  |
|        |      | Shiraz-58T | 2223 | 0.833364 | 0         |  |  |
|        |      | Shiraz-71T | 2263 | 0.975531 | 0         |  |  |
|        |      | Shiraz-71T | 2263 | 0.975531 | 0         |  |  |
| ARMCX5 | chrX | Shiraz-3T  | 242  | 0        | -0.336434 |  |  |
|        |      | Shiraz-4T  | 261  | 0        | -0.336249 |  |  |
|        |      | Shiraz-16T | 295  | 0.591657 | 0         |  |  |
|        |      | Shiraz-36T | 433  | 0        | -0.803961 |  |  |
|        |      | Shiraz-44T | 899  | 0        | -1.09697  |  |  |
|        |      | Shiraz-49T | 1170 | 0        | -0.967436 |  |  |
|        |      | Shiraz-18T | 1457 | 0.643204 | 0         |  |  |
|        |      | Shiraz-22T | 1673 | 0.611783 | 0         |  |  |
|        |      | Shiraz-25T | 1719 | 0.472955 | 0         |  |  |
|        |      | Shiraz-28T | 1762 | 0.562311 | 0         |  |  |
|        |      | Shiraz-29T | 1801 | 0.815343 | 0         |  |  |
|        |      | Shiraz-32T | 1870 | 0.729766 | 0         |  |  |
|        |      | Shiraz-35T | 1933 | 0.488535 | 0         |  |  |
|        |      | Shiraz-58T | 2223 | 0.833364 | 0         |  |  |
|        |      | Shiraz-71T | 2263 | 0.975531 | 0         |  |  |
|        |      | Shiraz-3T  | 242  | 0        | -0.336434 |  |  |
|        |      | Shiraz-4T  | 261  | 0        | -0.336249 |  |  |
|        |      | Shiraz-16T | 295  | 0.591657 | 0         |  |  |
|        |      | Shiraz-36T | 433  | 0        | -0.803961 |  |  |
|        |      | Shiraz-44T | 899  | 0        | -1.09697  |  |  |
|        |      | Shiraz-49T | 1170 | 0        | -0.967436 |  |  |
|        |      | Shiraz-18T | 1457 | 0.643204 | 0         |  |  |
|        |      | Shiraz-22T | 1673 | 0.611783 | 0         |  |  |
|        |      | Shiraz-25T | 1719 | 0.472955 | 0         |  |  |
|        |      | Shiraz-28T | 1762 | 0.562311 | 0         |  |  |
|        |      | Shiraz-29T | 1801 | 0.815343 | 0         |  |  |
|        |      | Shiraz-32T | 1870 | 0.729766 | 0         |  |  |
|        |      | Shiraz-35T | 1933 | 0.488535 | 0         |  |  |

|        |      |            |      |          |           |  |  |
|--------|------|------------|------|----------|-----------|--|--|
|        |      | Shiraz-58T | 2223 | 0.833364 | 0         |  |  |
|        |      | Shiraz-71T | 2263 | 0.975531 | 0         |  |  |
|        |      | Shiraz-3T  | 242  | 0        | -0.336434 |  |  |
|        |      | Shiraz-4T  | 261  | 0        | -0.336249 |  |  |
|        |      | Shiraz-16T | 295  | 0.591657 | 0         |  |  |
|        |      | Shiraz-36T | 433  | 0        | -0.803961 |  |  |
|        |      | Shiraz-44T | 899  | 0        | -1.09697  |  |  |
|        |      | Shiraz-49T | 1170 | 0        | -0.967436 |  |  |
|        |      | Shiraz-18T | 1457 | 0.643204 | 0         |  |  |
|        |      | Shiraz-22T | 1673 | 0.611783 | 0         |  |  |
|        |      | Shiraz-25T | 1719 | 0.472955 | 0         |  |  |
|        |      | Shiraz-28T | 1762 | 0.562311 | 0         |  |  |
|        |      | Shiraz-29T | 1801 | 0.815343 | 0         |  |  |
|        |      | Shiraz-32T | 1870 | 0.729766 | 0         |  |  |
|        |      | Shiraz-35T | 1933 | 0.488535 | 0         |  |  |
|        |      | Shiraz-58T | 2223 | 0.833364 | 0         |  |  |
|        |      | Shiraz-71T | 2263 | 0.975531 | 0         |  |  |
| ARMCX6 | chrX | Shiraz-3T  | 242  | 0        | -0.336434 |  |  |
|        |      | Shiraz-4T  | 261  | 0        | -0.336249 |  |  |
|        |      | Shiraz-16T | 295  | 0.591657 | 0         |  |  |
|        |      | Shiraz-36T | 433  | 0        | -0.803961 |  |  |
|        |      | Shiraz-44T | 899  | 0        | -1.09697  |  |  |
|        |      | Shiraz-49T | 1170 | 0        | -0.967436 |  |  |
|        |      | Shiraz-18T | 1457 | 0.643204 | 0         |  |  |
|        |      | Shiraz-22T | 1673 | 0.611783 | 0         |  |  |
|        |      | Shiraz-25T | 1719 | 0.472955 | 0         |  |  |
|        |      | Shiraz-28T | 1762 | 0.562311 | 0         |  |  |
|        |      | Shiraz-29T | 1801 | 0.815343 | 0         |  |  |
|        |      | Shiraz-32T | 1870 | 0.729766 | 0         |  |  |
|        |      | Shiraz-35T | 1933 | 0.488535 | 0         |  |  |
|        |      | Shiraz-58T | 2223 | 0.833364 | 0         |  |  |
|        |      | Shiraz-71T | 2263 | 0.975531 | 0         |  |  |
|        |      | Shiraz-3T  | 242  | 0        | -0.336434 |  |  |
|        |      | Shiraz-4T  | 261  | 0        | -0.336249 |  |  |
|        |      | Shiraz-16T | 295  | 0.591657 | 0         |  |  |
|        |      | Shiraz-36T | 433  | 0        | -0.803961 |  |  |
|        |      | Shiraz-44T | 899  | 0        | -1.09697  |  |  |
|        |      | Shiraz-49T | 1170 | 0        | -0.967436 |  |  |
|        |      | Shiraz-18T | 1457 | 0.643204 | 0         |  |  |
|        |      | Shiraz-22T | 1673 | 0.611783 | 0         |  |  |
|        |      | Shiraz-25T | 1719 | 0.472955 | 0         |  |  |
|        |      | Shiraz-28T | 1762 | 0.562311 | 0         |  |  |
|        |      | Shiraz-29T | 1801 | 0.815343 | 0         |  |  |
|        |      | Shiraz-32T | 1870 | 0.729766 | 0         |  |  |
|        |      | Shiraz-35T | 1933 | 0.488535 | 0         |  |  |
|        |      | Shiraz-58T | 2223 | 0.833364 | 0         |  |  |
|        |      | Shiraz-71T | 2263 | 0.975531 | 0         |  |  |

|        |      |            |      |          |           |  |  |
|--------|------|------------|------|----------|-----------|--|--|
|        |      | Shiraz-3T  | 242  | 0        | -0.336434 |  |  |
|        |      | Shiraz-4T  | 261  | 0        | -0.336249 |  |  |
|        |      | Shiraz-16T | 295  | 0.591657 | 0         |  |  |
|        |      | Shiraz-36T | 433  | 0        | -0.803961 |  |  |
|        |      | Shiraz-44T | 899  | 0        | -1.09697  |  |  |
|        |      | Shiraz-49T | 1170 | 0        | -0.967436 |  |  |
|        |      | Shiraz-18T | 1457 | 0.643204 | 0         |  |  |
|        |      | Shiraz-22T | 1673 | 0.611783 | 0         |  |  |
|        |      | Shiraz-25T | 1719 | 0.472955 | 0         |  |  |
|        |      | Shiraz-28T | 1762 | 0.562311 | 0         |  |  |
|        |      | Shiraz-29T | 1801 | 0.815343 | 0         |  |  |
|        |      | Shiraz-32T | 1870 | 0.729766 | 0         |  |  |
|        |      | Shiraz-35T | 1933 | 0.488535 | 0         |  |  |
|        |      | Shiraz-58T | 2223 | 0.833364 | 0         |  |  |
|        |      | Shiraz-71T | 2263 | 0.975531 | 0         |  |  |
| ARPC1A | chr7 | Shiraz-3T  | 90   | 0.219276 | 0         |  |  |
|        |      | Shiraz-3T  | 94   | 0.74735  | 0         |  |  |
|        |      | Shiraz-4T  | 253  | 0.372918 | 0         |  |  |
|        |      | Shiraz-31T | 316  | 0.219196 | 0         |  |  |
|        |      | Shiraz-36T | 378  | 0.179558 | 0         |  |  |
|        |      | Shiraz-36T | 381  | 0.332628 | 0         |  |  |
|        |      | Shiraz-44T | 639  | 1.035032 | 0         |  |  |
|        |      | Shiraz-46T | 943  | 0.093799 | 0         |  |  |
|        |      | Shiraz-46T | 946  | 0.299835 | 0         |  |  |
|        |      | Shiraz-47T | 1030 | 0.257728 | 0         |  |  |
|        |      | Shiraz-49T | 1120 | 0.281656 | 0         |  |  |
|        |      | Shiraz-77T | 1225 | 0        | -0.117922 |  |  |
|        |      | Shiraz-77T | 1227 | 0.196445 | 0         |  |  |
|        |      | Shiraz-9T  | 1324 | 0.679266 | 0         |  |  |
|        |      | Shiraz-18T | 1434 | 0.244465 | 0         |  |  |
|        |      | Shiraz-22T | 1549 | 0        | -0.319623 |  |  |
|        |      | Shiraz-22T | 1551 | 0.324011 | 0         |  |  |
|        |      | Shiraz-25T | 1698 | 0.21835  | 0         |  |  |
|        |      | Shiraz-28T | 1735 | 0.350744 | 0         |  |  |
|        |      | Shiraz-29T | 1778 | 0.120767 | 0         |  |  |
|        |      | Shiraz-32T | 1833 | 0.551336 | 0         |  |  |
|        |      | Shiraz-38T | 1951 | 0.250891 | 0         |  |  |
|        |      | Shiraz-53T | 2078 | 0.287202 | 0         |  |  |
|        |      | Shiraz-71T | 2238 | 0.603631 | 0         |  |  |
|        |      | Shiraz-3T  | 90   | 0.219276 | 0         |  |  |
|        |      | Shiraz-3T  | 94   | 0.74735  | 0         |  |  |
|        |      | Shiraz-4T  | 253  | 0.372918 | 0         |  |  |
|        |      | Shiraz-31T | 316  | 0.219196 | 0         |  |  |
|        |      | Shiraz-36T | 378  | 0.179558 | 0         |  |  |
|        |      | Shiraz-36T | 381  | 0.332628 | 0         |  |  |
|        |      | Shiraz-44T | 639  | 1.035032 | 0         |  |  |
|        |      | Shiraz-46T | 943  | 0.093799 | 0         |  |  |

|        |      |            |      |          |           |  |
|--------|------|------------|------|----------|-----------|--|
|        |      | Shiraz-46T | 946  | 0.299835 | 0         |  |
|        |      | Shiraz-47T | 1030 | 0.257728 | 0         |  |
|        |      | Shiraz-49T | 1120 | 0.281656 | 0         |  |
|        |      | Shiraz-77T | 1225 | 0        | -0.117922 |  |
|        |      | Shiraz-77T | 1227 | 0.196445 | 0         |  |
|        |      | Shiraz-9T  | 1324 | 0.679266 | 0         |  |
|        |      | Shiraz-18T | 1434 | 0.244465 | 0         |  |
|        |      | Shiraz-22T | 1549 | 0        | -0.319623 |  |
|        |      | Shiraz-22T | 1551 | 0.324011 | 0         |  |
|        |      | Shiraz-25T | 1698 | 0.21835  | 0         |  |
|        |      | Shiraz-28T | 1735 | 0.350744 | 0         |  |
|        |      | Shiraz-29T | 1778 | 0.120767 | 0         |  |
|        |      | Shiraz-32T | 1833 | 0.551336 | 0         |  |
|        |      | Shiraz-38T | 1951 | 0.250891 | 0         |  |
|        |      | Shiraz-53T | 2078 | 0.287202 | 0         |  |
|        |      | Shiraz-71T | 2238 | 0.603631 | 0         |  |
|        |      | Shiraz-3T  | 90   | 0.219276 | 0         |  |
|        |      | Shiraz-3T  | 94   | 0.74735  | 0         |  |
|        |      | Shiraz-4T  | 253  | 0.372918 | 0         |  |
|        |      | Shiraz-31T | 316  | 0.219196 | 0         |  |
|        |      | Shiraz-36T | 378  | 0.179558 | 0         |  |
|        |      | Shiraz-36T | 381  | 0.332628 | 0         |  |
|        |      | Shiraz-44T | 639  | 1.035032 | 0         |  |
|        |      | Shiraz-46T | 943  | 0.093799 | 0         |  |
|        |      | Shiraz-46T | 946  | 0.299835 | 0         |  |
|        |      | Shiraz-47T | 1030 | 0.257728 | 0         |  |
|        |      | Shiraz-49T | 1120 | 0.281656 | 0         |  |
|        |      | Shiraz-77T | 1225 | 0        | -0.117922 |  |
|        |      | Shiraz-77T | 1227 | 0.196445 | 0         |  |
|        |      | Shiraz-9T  | 1324 | 0.679266 | 0         |  |
|        |      | Shiraz-18T | 1434 | 0.244465 | 0         |  |
|        |      | Shiraz-22T | 1549 | 0        | -0.319623 |  |
|        |      | Shiraz-22T | 1551 | 0.324011 | 0         |  |
|        |      | Shiraz-25T | 1698 | 0.21835  | 0         |  |
|        |      | Shiraz-28T | 1735 | 0.350744 | 0         |  |
|        |      | Shiraz-29T | 1778 | 0.120767 | 0         |  |
|        |      | Shiraz-32T | 1833 | 0.551336 | 0         |  |
|        |      | Shiraz-38T | 1951 | 0.250891 | 0         |  |
|        |      | Shiraz-53T | 2078 | 0.287202 | 0         |  |
|        |      | Shiraz-71T | 2238 | 0.603631 | 0         |  |
| ARPC1B | chr7 | Shiraz-3T  | 90   | 0.219276 | 0         |  |
|        |      | Shiraz-3T  | 94   | 0.74735  | 0         |  |
|        |      | Shiraz-4T  | 253  | 0.372918 | 0         |  |
|        |      | Shiraz-31T | 316  | 0.219196 | 0         |  |
|        |      | Shiraz-36T | 378  | 0.179558 | 0         |  |
|        |      | Shiraz-36T | 381  | 0.332628 | 0         |  |
|        |      | Shiraz-44T | 639  | 1.035032 | 0         |  |

|  |            |      |          |           |  |
|--|------------|------|----------|-----------|--|
|  | Shiraz-46T | 943  | 0.093799 | 0         |  |
|  | Shiraz-46T | 946  | 0.299835 | 0         |  |
|  | Shiraz-47T | 1030 | 0.257728 | 0         |  |
|  | Shiraz-49T | 1120 | 0.281656 | 0         |  |
|  | Shiraz-77T | 1225 | 0        | -0.117922 |  |
|  | Shiraz-77T | 1227 | 0.196445 | 0         |  |
|  | Shiraz-9T  | 1324 | 0.679266 | 0         |  |
|  | Shiraz-18T | 1434 | 0.244465 | 0         |  |
|  | Shiraz-22T | 1549 | 0        | -0.319623 |  |
|  | Shiraz-22T | 1551 | 0.324011 | 0         |  |
|  | Shiraz-25T | 1698 | 0.21835  | 0         |  |
|  | Shiraz-28T | 1735 | 0.350744 | 0         |  |
|  | Shiraz-29T | 1778 | 0.120767 | 0         |  |
|  | Shiraz-32T | 1833 | 0.551336 | 0         |  |
|  | Shiraz-38T | 1951 | 0.250891 | 0         |  |
|  | Shiraz-53T | 2078 | 0.287202 | 0         |  |
|  | Shiraz-71T | 2238 | 0.603631 | 0         |  |
|  | Shiraz-3T  | 90   | 0.219276 | 0         |  |
|  | Shiraz-3T  | 94   | 0.74735  | 0         |  |
|  | Shiraz-4T  | 253  | 0.372918 | 0         |  |
|  | Shiraz-31T | 316  | 0.219196 | 0         |  |
|  | Shiraz-36T | 378  | 0.179558 | 0         |  |
|  | Shiraz-36T | 381  | 0.332628 | 0         |  |
|  | Shiraz-44T | 639  | 1.035032 | 0         |  |
|  | Shiraz-46T | 943  | 0.093799 | 0         |  |
|  | Shiraz-46T | 946  | 0.299835 | 0         |  |
|  | Shiraz-47T | 1030 | 0.257728 | 0         |  |
|  | Shiraz-49T | 1120 | 0.281656 | 0         |  |
|  | Shiraz-77T | 1225 | 0        | -0.117922 |  |
|  | Shiraz-77T | 1227 | 0.196445 | 0         |  |
|  | Shiraz-9T  | 1324 | 0.679266 | 0         |  |
|  | Shiraz-18T | 1434 | 0.244465 | 0         |  |
|  | Shiraz-22T | 1549 | 0        | -0.319623 |  |
|  | Shiraz-22T | 1551 | 0.324011 | 0         |  |
|  | Shiraz-25T | 1698 | 0.21835  | 0         |  |
|  | Shiraz-28T | 1735 | 0.350744 | 0         |  |
|  | Shiraz-29T | 1778 | 0.120767 | 0         |  |
|  | Shiraz-32T | 1833 | 0.551336 | 0         |  |
|  | Shiraz-38T | 1951 | 0.250891 | 0         |  |
|  | Shiraz-53T | 2078 | 0.287202 | 0         |  |
|  | Shiraz-71T | 2238 | 0.603631 | 0         |  |
|  | Shiraz-3T  | 90   | 0.219276 | 0         |  |
|  | Shiraz-3T  | 94   | 0.74735  | 0         |  |
|  | Shiraz-4T  | 253  | 0.372918 | 0         |  |
|  | Shiraz-31T | 316  | 0.219196 | 0         |  |
|  | Shiraz-36T | 378  | 0.179558 | 0         |  |
|  | Shiraz-36T | 381  | 0.332628 | 0         |  |



|      |      |            |      |          |           |  |
|------|------|------------|------|----------|-----------|--|
|      |      | Shiraz-44T | 639  | 1.035032 | 0         |  |
|      |      | Shiraz-46T | 943  | 0.093799 | 0         |  |
|      |      | Shiraz-46T | 946  | 0.299835 | 0         |  |
|      |      | Shiraz-47T | 1030 | 0.257728 | 0         |  |
|      |      | Shiraz-49T | 1120 | 0.281656 | 0         |  |
|      |      | Shiraz-77T | 1225 | 0        | -0.117922 |  |
|      |      | Shiraz-77T | 1227 | 0.196445 | 0         |  |
|      |      | Shiraz-9T  | 1324 | 0.679266 | 0         |  |
|      |      | Shiraz-18T | 1434 | 0.244465 | 0         |  |
|      |      | Shiraz-22T | 1549 | 0        | -0.319623 |  |
|      |      | Shiraz-22T | 1551 | 0.324011 | 0         |  |
|      |      | Shiraz-25T | 1698 | 0.21835  | 0         |  |
|      |      | Shiraz-28T | 1735 | 0.350744 | 0         |  |
|      |      | Shiraz-29T | 1778 | 0.120767 | 0         |  |
|      |      | Shiraz-32T | 1833 | 0.551336 | 0         |  |
|      |      | Shiraz-38T | 1951 | 0.250891 | 0         |  |
|      |      | Shiraz-53T | 2078 | 0.287202 | 0         |  |
|      |      | Shiraz-71T | 2238 | 0.603631 | 0         |  |
| ARR3 | chrX | Shiraz-4T  | 261  | 0        | -0.336249 |  |
|      |      | Shiraz-16T | 295  | 0.591657 | 0         |  |
|      |      | Shiraz-36T | 433  | 0        | -0.803961 |  |
|      |      | Shiraz-44T | 899  | 0        | -1.09697  |  |
|      |      | Shiraz-44T | 900  | 0        | -0.584284 |  |
|      |      | Shiraz-44T | 901  | 0        | -1.000082 |  |
|      |      | Shiraz-49T | 1170 | 0        | -0.967436 |  |
|      |      | Shiraz-18T | 1457 | 0.643204 | 0         |  |
|      |      | Shiraz-22T | 1673 | 0.611783 | 0         |  |
|      |      | Shiraz-22T | 1674 | 0.887899 | 0         |  |
|      |      | Shiraz-25T | 1719 | 0.472955 | 0         |  |
|      |      | Shiraz-28T | 1762 | 0.562311 | 0         |  |
|      |      | Shiraz-29T | 1801 | 0.815343 | 0         |  |
|      |      | Shiraz-32T | 1870 | 0.729766 | 0         |  |
|      |      | Shiraz-35T | 1933 | 0.488535 | 0         |  |
|      |      | Shiraz-58T | 2223 | 0.833364 | 0         |  |
|      |      | Shiraz-58T | 2224 | 1.076575 | 0         |  |
|      |      | Shiraz-71T | 2263 | 0.975531 | 0         |  |
|      |      | Shiraz-4T  | 261  | 0        | -0.336249 |  |
|      |      | Shiraz-16T | 295  | 0.591657 | 0         |  |
|      |      | Shiraz-36T | 433  | 0        | -0.803961 |  |
|      |      | Shiraz-44T | 899  | 0        | -1.09697  |  |
|      |      | Shiraz-44T | 900  | 0        | -0.584284 |  |
|      |      | Shiraz-44T | 901  | 0        | -1.000082 |  |
|      |      | Shiraz-49T | 1170 | 0        | -0.967436 |  |
|      |      | Shiraz-18T | 1457 | 0.643204 | 0         |  |
|      |      | Shiraz-22T | 1673 | 0.611783 | 0         |  |
|      |      | Shiraz-22T | 1674 | 0.887899 | 0         |  |
|      |      | Shiraz-25T | 1719 | 0.472955 | 0         |  |

|     |      |            |      |          |           |  |  |
|-----|------|------------|------|----------|-----------|--|--|
|     |      | Shiraz-28T | 1762 | 0.562311 | 0         |  |  |
|     |      | Shiraz-29T | 1801 | 0.815343 | 0         |  |  |
|     |      | Shiraz-32T | 1870 | 0.729766 | 0         |  |  |
|     |      | Shiraz-35T | 1933 | 0.488535 | 0         |  |  |
|     |      | Shiraz-58T | 2223 | 0.833364 | 0         |  |  |
|     |      | Shiraz-58T | 2224 | 1.076575 | 0         |  |  |
|     |      | Shiraz-71T | 2263 | 0.975531 | 0         |  |  |
|     |      | Shiraz-4T  | 261  | 0        | -0.336249 |  |  |
|     |      | Shiraz-16T | 295  | 0.591657 | 0         |  |  |
|     |      | Shiraz-36T | 433  | 0        | -0.803961 |  |  |
|     |      | Shiraz-44T | 899  | 0        | -1.09697  |  |  |
|     |      | Shiraz-44T | 900  | 0        | -0.584284 |  |  |
|     |      | Shiraz-44T | 901  | 0        | -1.000082 |  |  |
|     |      | Shiraz-49T | 1170 | 0        | -0.967436 |  |  |
|     |      | Shiraz-18T | 1457 | 0.643204 | 0         |  |  |
|     |      | Shiraz-22T | 1673 | 0.611783 | 0         |  |  |
|     |      | Shiraz-22T | 1674 | 0.887899 | 0         |  |  |
|     |      | Shiraz-25T | 1719 | 0.472955 | 0         |  |  |
|     |      | Shiraz-28T | 1762 | 0.562311 | 0         |  |  |
|     |      | Shiraz-29T | 1801 | 0.815343 | 0         |  |  |
|     |      | Shiraz-32T | 1870 | 0.729766 | 0         |  |  |
|     |      | Shiraz-35T | 1933 | 0.488535 | 0         |  |  |
|     |      | Shiraz-58T | 2223 | 0.833364 | 0         |  |  |
|     |      | Shiraz-58T | 2224 | 1.076575 | 0         |  |  |
|     |      | Shiraz-71T | 2263 | 0.975531 | 0         |  |  |
| ARX | chrX | Shiraz-3T  | 235  | 0        | -0.28401  |  |  |
|     |      | Shiraz-4T  | 260  | 0        | -0.324128 |  |  |
|     |      | Shiraz-16T | 294  | 0.655804 | 0         |  |  |
|     |      | Shiraz-36T | 431  | 0        | -0.78035  |  |  |
|     |      | Shiraz-44T | 891  | 0        | -0.954044 |  |  |
|     |      | Shiraz-47T | 1083 | 0        | -0.103285 |  |  |
|     |      | Shiraz-49T | 1166 | 0        | -0.917235 |  |  |
|     |      | Shiraz-49T | 1168 | 0        | -1.073859 |  |  |
|     |      | Shiraz-9T  | 1368 | 0.199713 | 0         |  |  |
|     |      | Shiraz-18T | 1455 | 0        | -0.186773 |  |  |
|     |      | Shiraz-22T | 1669 | 0.695915 | 0         |  |  |
|     |      | Shiraz-25T | 1717 | 0.420447 | 0         |  |  |
|     |      | Shiraz-28T | 1760 | 0.538181 | 0         |  |  |
|     |      | Shiraz-29T | 1800 | 0.672527 | 0         |  |  |
|     |      | Shiraz-32T | 1869 | 0.776805 | 0         |  |  |
|     |      | Shiraz-35T | 1932 | 0.507141 | 0         |  |  |
|     |      | Shiraz-40T | 2051 | 0.098506 | 0         |  |  |
|     |      | Shiraz-58T | 2221 | 0.871948 | 0         |  |  |
|     |      | Shiraz-58T | 2222 | 0.679664 | 0         |  |  |
|     |      | Shiraz-71T | 2260 | 0.68394  | 0         |  |  |
|     |      | Shiraz-71T | 2261 | 0.508399 | 0         |  |  |
|     |      | Shiraz-3T  | 235  | 0        | -0.28401  |  |  |

|       |      |            |      |          |           |  |  |
|-------|------|------------|------|----------|-----------|--|--|
|       |      | Shiraz-4T  | 260  | 0        | -0.324128 |  |  |
|       |      | Shiraz-16T | 294  | 0.655804 | 0         |  |  |
|       |      | Shiraz-36T | 431  | 0        | -0.78035  |  |  |
|       |      | Shiraz-44T | 891  | 0        | -0.954044 |  |  |
|       |      | Shiraz-47T | 1083 | 0        | -0.103285 |  |  |
|       |      | Shiraz-49T | 1166 | 0        | -0.917235 |  |  |
|       |      | Shiraz-49T | 1168 | 0        | -1.073859 |  |  |
|       |      | Shiraz-9T  | 1368 | 0.199713 | 0         |  |  |
|       |      | Shiraz-18T | 1455 | 0        | -0.186773 |  |  |
|       |      | Shiraz-22T | 1669 | 0.695915 | 0         |  |  |
|       |      | Shiraz-25T | 1717 | 0.420447 | 0         |  |  |
|       |      | Shiraz-28T | 1760 | 0.538181 | 0         |  |  |
|       |      | Shiraz-29T | 1800 | 0.672527 | 0         |  |  |
|       |      | Shiraz-32T | 1869 | 0.776805 | 0         |  |  |
|       |      | Shiraz-35T | 1932 | 0.507141 | 0         |  |  |
|       |      | Shiraz-40T | 2051 | 0.098506 | 0         |  |  |
|       |      | Shiraz-58T | 2221 | 0.871948 | 0         |  |  |
|       |      | Shiraz-58T | 2222 | 0.679664 | 0         |  |  |
|       |      | Shiraz-71T | 2260 | 0.68394  | 0         |  |  |
|       |      | Shiraz-71T | 2261 | 0.508399 | 0         |  |  |
|       |      | Shiraz-3T  | 235  | 0        | -0.28401  |  |  |
|       |      | Shiraz-4T  | 260  | 0        | -0.324128 |  |  |
|       |      | Shiraz-16T | 294  | 0.655804 | 0         |  |  |
|       |      | Shiraz-36T | 431  | 0        | -0.78035  |  |  |
|       |      | Shiraz-44T | 891  | 0        | -0.954044 |  |  |
|       |      | Shiraz-47T | 1083 | 0        | -0.103285 |  |  |
|       |      | Shiraz-49T | 1166 | 0        | -0.917235 |  |  |
|       |      | Shiraz-49T | 1168 | 0        | -1.073859 |  |  |
|       |      | Shiraz-9T  | 1368 | 0.199713 | 0         |  |  |
|       |      | Shiraz-18T | 1455 | 0        | -0.186773 |  |  |
|       |      | Shiraz-22T | 1669 | 0.695915 | 0         |  |  |
|       |      | Shiraz-25T | 1717 | 0.420447 | 0         |  |  |
|       |      | Shiraz-28T | 1760 | 0.538181 | 0         |  |  |
|       |      | Shiraz-29T | 1800 | 0.672527 | 0         |  |  |
|       |      | Shiraz-32T | 1869 | 0.776805 | 0         |  |  |
|       |      | Shiraz-35T | 1932 | 0.507141 | 0         |  |  |
|       |      | Shiraz-40T | 2051 | 0.098506 | 0         |  |  |
|       |      | Shiraz-58T | 2221 | 0.871948 | 0         |  |  |
|       |      | Shiraz-58T | 2222 | 0.679664 | 0         |  |  |
|       |      | Shiraz-71T | 2260 | 0.68394  | 0         |  |  |
|       |      | Shiraz-71T | 2261 | 0.508399 | 0         |  |  |
| ASB10 | chr7 | Shiraz-3T  | 90   | 0.219276 | 0         |  |  |
|       |      | Shiraz-3T  | 90   | 0.219276 | 0         |  |  |
|       |      | Shiraz-3T  | 99   | 0.454766 | 0         |  |  |
|       |      | Shiraz-3T  | 99   | 0.454766 | 0         |  |  |
|       |      | Shiraz-4T  | 253  | 0.372918 | 0         |  |  |
|       |      | Shiraz-4T  | 253  | 0.372918 | 0         |  |  |

|  |  |            |      |          |           |  |
|--|--|------------|------|----------|-----------|--|
|  |  | Shiraz-36T | 378  | 0.179558 | 0         |  |
|  |  | Shiraz-36T | 378  | 0.179558 | 0         |  |
|  |  | Shiraz-44T | 646  | 0.471276 | 0         |  |
|  |  | Shiraz-44T | 646  | 0.471276 | 0         |  |
|  |  | Shiraz-44T | 647  | 1.496173 | 0         |  |
|  |  | Shiraz-44T | 647  | 1.496173 | 0         |  |
|  |  | Shiraz-46T | 943  | 0.093799 | 0         |  |
|  |  | Shiraz-46T | 943  | 0.093799 | 0         |  |
|  |  | Shiraz-9T  | 1325 | 0.221899 | 0         |  |
|  |  | Shiraz-9T  | 1325 | 0.221899 | 0         |  |
|  |  | Shiraz-18T | 1434 | 0.244465 | 0         |  |
|  |  | Shiraz-18T | 1434 | 0.244465 | 0         |  |
|  |  | Shiraz-22T | 1555 | 0.427999 | 0         |  |
|  |  | Shiraz-22T | 1555 | 0.427999 | 0         |  |
|  |  | Shiraz-25T | 1698 | 0.21835  | 0         |  |
|  |  | Shiraz-25T | 1698 | 0.21835  | 0         |  |
|  |  | Shiraz-28T | 1735 | 0.350744 | 0         |  |
|  |  | Shiraz-28T | 1735 | 0.350744 | 0         |  |
|  |  | Shiraz-29T | 1778 | 0.120767 | 0         |  |
|  |  | Shiraz-29T | 1778 | 0.120767 | 0         |  |
|  |  | Shiraz-32T | 1833 | 0.551336 | 0         |  |
|  |  | Shiraz-32T | 1833 | 0.551336 | 0         |  |
|  |  | Shiraz-38T | 1951 | 0.250891 | 0         |  |
|  |  | Shiraz-38T | 1951 | 0.250891 | 0         |  |
|  |  | Shiraz-38T | 1952 | 0        | -0.163211 |  |
|  |  | Shiraz-38T | 1952 | 0        | -0.163211 |  |
|  |  | Shiraz-53T | 2078 | 0.287202 | 0         |  |
|  |  | Shiraz-53T | 2078 | 0.287202 | 0         |  |
|  |  | Shiraz-58T | 2162 | 0.221505 | 0         |  |
|  |  | Shiraz-58T | 2162 | 0.221505 | 0         |  |
|  |  | Shiraz-71T | 2238 | 0.603631 | 0         |  |
|  |  | Shiraz-71T | 2238 | 0.603631 | 0         |  |
|  |  | Shiraz-3T  | 90   | 0.219276 | 0         |  |
|  |  | Shiraz-3T  | 90   | 0.219276 | 0         |  |
|  |  | Shiraz-3T  | 99   | 0.454766 | 0         |  |
|  |  | Shiraz-3T  | 99   | 0.454766 | 0         |  |
|  |  | Shiraz-4T  | 253  | 0.372918 | 0         |  |
|  |  | Shiraz-4T  | 253  | 0.372918 | 0         |  |
|  |  | Shiraz-36T | 378  | 0.179558 | 0         |  |
|  |  | Shiraz-36T | 378  | 0.179558 | 0         |  |
|  |  | Shiraz-44T | 646  | 0.471276 | 0         |  |
|  |  | Shiraz-44T | 646  | 0.471276 | 0         |  |
|  |  | Shiraz-44T | 647  | 1.496173 | 0         |  |
|  |  | Shiraz-44T | 647  | 1.496173 | 0         |  |
|  |  | Shiraz-46T | 943  | 0.093799 | 0         |  |
|  |  | Shiraz-46T | 943  | 0.093799 | 0         |  |
|  |  | Shiraz-9T  | 1325 | 0.221899 | 0         |  |

|  |            |      |          |           |  |
|--|------------|------|----------|-----------|--|
|  | Shiraz-9T  | 1325 | 0.221899 | 0         |  |
|  | Shiraz-18T | 1434 | 0.244465 | 0         |  |
|  | Shiraz-18T | 1434 | 0.244465 | 0         |  |
|  | Shiraz-22T | 1555 | 0.427999 | 0         |  |
|  | Shiraz-22T | 1555 | 0.427999 | 0         |  |
|  | Shiraz-25T | 1698 | 0.21835  | 0         |  |
|  | Shiraz-25T | 1698 | 0.21835  | 0         |  |
|  | Shiraz-28T | 1735 | 0.350744 | 0         |  |
|  | Shiraz-28T | 1735 | 0.350744 | 0         |  |
|  | Shiraz-29T | 1778 | 0.120767 | 0         |  |
|  | Shiraz-29T | 1778 | 0.120767 | 0         |  |
|  | Shiraz-32T | 1833 | 0.551336 | 0         |  |
|  | Shiraz-32T | 1833 | 0.551336 | 0         |  |
|  | Shiraz-38T | 1951 | 0.250891 | 0         |  |
|  | Shiraz-38T | 1951 | 0.250891 | 0         |  |
|  | Shiraz-38T | 1952 | 0        | -0.163211 |  |
|  | Shiraz-38T | 1952 | 0        | -0.163211 |  |
|  | Shiraz-53T | 2078 | 0.287202 | 0         |  |
|  | Shiraz-53T | 2078 | 0.287202 | 0         |  |
|  | Shiraz-58T | 2162 | 0.221505 | 0         |  |
|  | Shiraz-58T | 2162 | 0.221505 | 0         |  |
|  | Shiraz-71T | 2238 | 0.603631 | 0         |  |
|  | Shiraz-71T | 2238 | 0.603631 | 0         |  |
|  | Shiraz-3T  | 90   | 0.219276 | 0         |  |
|  | Shiraz-3T  | 90   | 0.219276 | 0         |  |
|  | Shiraz-3T  | 99   | 0.454766 | 0         |  |
|  | Shiraz-3T  | 99   | 0.454766 | 0         |  |
|  | Shiraz-4T  | 253  | 0.372918 | 0         |  |
|  | Shiraz-4T  | 253  | 0.372918 | 0         |  |
|  | Shiraz-36T | 378  | 0.179558 | 0         |  |
|  | Shiraz-36T | 378  | 0.179558 | 0         |  |
|  | Shiraz-44T | 646  | 0.471276 | 0         |  |
|  | Shiraz-44T | 646  | 0.471276 | 0         |  |
|  | Shiraz-44T | 647  | 1.496173 | 0         |  |
|  | Shiraz-44T | 647  | 1.496173 | 0         |  |
|  | Shiraz-46T | 943  | 0.093799 | 0         |  |
|  | Shiraz-46T | 943  | 0.093799 | 0         |  |
|  | Shiraz-9T  | 1325 | 0.221899 | 0         |  |
|  | Shiraz-9T  | 1325 | 0.221899 | 0         |  |
|  | Shiraz-18T | 1434 | 0.244465 | 0         |  |
|  | Shiraz-18T | 1434 | 0.244465 | 0         |  |
|  | Shiraz-22T | 1555 | 0.427999 | 0         |  |
|  | Shiraz-22T | 1555 | 0.427999 | 0         |  |
|  | Shiraz-25T | 1698 | 0.21835  | 0         |  |
|  | Shiraz-25T | 1698 | 0.21835  | 0         |  |
|  | Shiraz-28T | 1735 | 0.350744 | 0         |  |
|  | Shiraz-28T | 1735 | 0.350744 | 0         |  |

|       |      |            |      |          |           |  |  |
|-------|------|------------|------|----------|-----------|--|--|
|       |      | Shiraz-29T | 1778 | 0.120767 | 0         |  |  |
|       |      | Shiraz-29T | 1778 | 0.120767 | 0         |  |  |
|       |      | Shiraz-32T | 1833 | 0.551336 | 0         |  |  |
|       |      | Shiraz-32T | 1833 | 0.551336 | 0         |  |  |
|       |      | Shiraz-38T | 1951 | 0.250891 | 0         |  |  |
|       |      | Shiraz-38T | 1951 | 0.250891 | 0         |  |  |
|       |      | Shiraz-38T | 1952 | 0        | -0.163211 |  |  |
|       |      | Shiraz-38T | 1952 | 0        | -0.163211 |  |  |
|       |      | Shiraz-53T | 2078 | 0.287202 | 0         |  |  |
|       |      | Shiraz-53T | 2078 | 0.287202 | 0         |  |  |
|       |      | Shiraz-58T | 2162 | 0.221505 | 0         |  |  |
|       |      | Shiraz-58T | 2162 | 0.221505 | 0         |  |  |
|       |      | Shiraz-71T | 2238 | 0.603631 | 0         |  |  |
|       |      | Shiraz-71T | 2238 | 0.603631 | 0         |  |  |
| ASB11 | chrX | Shiraz-3T  | 235  | 0        | -0.28401  |  |  |
|       |      | Shiraz-3T  | 235  | 0        | -0.28401  |  |  |
|       |      | Shiraz-4T  | 260  | 0        | -0.324128 |  |  |
|       |      | Shiraz-4T  | 260  | 0        | -0.324128 |  |  |
|       |      | Shiraz-16T | 294  | 0.655804 | 0         |  |  |
|       |      | Shiraz-16T | 294  | 0.655804 | 0         |  |  |
|       |      | Shiraz-36T | 431  | 0        | -0.78035  |  |  |
|       |      | Shiraz-36T | 431  | 0        | -0.78035  |  |  |
|       |      | Shiraz-44T | 891  | 0        | -0.954044 |  |  |
|       |      | Shiraz-44T | 891  | 0        | -0.954044 |  |  |
|       |      | Shiraz-49T | 1166 | 0        | -0.917235 |  |  |
|       |      | Shiraz-49T | 1166 | 0        | -0.917235 |  |  |
|       |      | Shiraz-9T  | 1368 | 0.199713 | 0         |  |  |
|       |      | Shiraz-9T  | 1368 | 0.199713 | 0         |  |  |
|       |      | Shiraz-18T | 1455 | 0        | -0.186773 |  |  |
|       |      | Shiraz-18T | 1455 | 0        | -0.186773 |  |  |
|       |      | Shiraz-22T | 1669 | 0.695915 | 0         |  |  |
|       |      | Shiraz-22T | 1669 | 0.695915 | 0         |  |  |
|       |      | Shiraz-25T | 1717 | 0.420447 | 0         |  |  |
|       |      | Shiraz-25T | 1717 | 0.420447 | 0         |  |  |
|       |      | Shiraz-28T | 1760 | 0.538181 | 0         |  |  |
|       |      | Shiraz-28T | 1760 | 0.538181 | 0         |  |  |
|       |      | Shiraz-29T | 1800 | 0.672527 | 0         |  |  |
|       |      | Shiraz-29T | 1800 | 0.672527 | 0         |  |  |
|       |      | Shiraz-32T | 1869 | 0.776805 | 0         |  |  |
|       |      | Shiraz-32T | 1869 | 0.776805 | 0         |  |  |
|       |      | Shiraz-35T | 1932 | 0.507141 | 0         |  |  |
|       |      | Shiraz-35T | 1932 | 0.507141 | 0         |  |  |
|       |      | Shiraz-40T | 2051 | 0.098506 | 0         |  |  |
|       |      | Shiraz-40T | 2051 | 0.098506 | 0         |  |  |
|       |      | Shiraz-58T | 2221 | 0.871948 | 0         |  |  |
|       |      | Shiraz-58T | 2221 | 0.871948 | 0         |  |  |
|       |      | Shiraz-71T | 2260 | 0.68394  | 0         |  |  |

|  |  |            |      |          |           |  |  |
|--|--|------------|------|----------|-----------|--|--|
|  |  | Shiraz-71T | 2260 | 0.68394  | 0         |  |  |
|  |  | Shiraz-71T | 2261 | 0.508399 | 0         |  |  |
|  |  | Shiraz-71T | 2261 | 0.508399 | 0         |  |  |
|  |  | Shiraz-3T  | 235  | 0        | -0.28401  |  |  |
|  |  | Shiraz-3T  | 235  | 0        | -0.28401  |  |  |
|  |  | Shiraz-4T  | 260  | 0        | -0.324128 |  |  |
|  |  | Shiraz-4T  | 260  | 0        | -0.324128 |  |  |
|  |  | Shiraz-16T | 294  | 0.655804 | 0         |  |  |
|  |  | Shiraz-16T | 294  | 0.655804 | 0         |  |  |
|  |  | Shiraz-36T | 431  | 0        | -0.78035  |  |  |
|  |  | Shiraz-36T | 431  | 0        | -0.78035  |  |  |
|  |  | Shiraz-44T | 891  | 0        | -0.954044 |  |  |
|  |  | Shiraz-44T | 891  | 0        | -0.954044 |  |  |
|  |  | Shiraz-49T | 1166 | 0        | -0.917235 |  |  |
|  |  | Shiraz-49T | 1166 | 0        | -0.917235 |  |  |
|  |  | Shiraz-9T  | 1368 | 0.199713 | 0         |  |  |
|  |  | Shiraz-9T  | 1368 | 0.199713 | 0         |  |  |
|  |  | Shiraz-18T | 1455 | 0        | -0.186773 |  |  |
|  |  | Shiraz-18T | 1455 | 0        | -0.186773 |  |  |
|  |  | Shiraz-22T | 1669 | 0.695915 | 0         |  |  |
|  |  | Shiraz-22T | 1669 | 0.695915 | 0         |  |  |
|  |  | Shiraz-25T | 1717 | 0.420447 | 0         |  |  |
|  |  | Shiraz-25T | 1717 | 0.420447 | 0         |  |  |
|  |  | Shiraz-28T | 1760 | 0.538181 | 0         |  |  |
|  |  | Shiraz-28T | 1760 | 0.538181 | 0         |  |  |
|  |  | Shiraz-29T | 1800 | 0.672527 | 0         |  |  |
|  |  | Shiraz-29T | 1800 | 0.672527 | 0         |  |  |
|  |  | Shiraz-32T | 1869 | 0.776805 | 0         |  |  |
|  |  | Shiraz-32T | 1869 | 0.776805 | 0         |  |  |
|  |  | Shiraz-35T | 1932 | 0.507141 | 0         |  |  |
|  |  | Shiraz-35T | 1932 | 0.507141 | 0         |  |  |
|  |  | Shiraz-40T | 2051 | 0.098506 | 0         |  |  |
|  |  | Shiraz-40T | 2051 | 0.098506 | 0         |  |  |
|  |  | Shiraz-58T | 2221 | 0.871948 | 0         |  |  |
|  |  | Shiraz-58T | 2221 | 0.871948 | 0         |  |  |
|  |  | Shiraz-71T | 2260 | 0.68394  | 0         |  |  |
|  |  | Shiraz-71T | 2260 | 0.68394  | 0         |  |  |
|  |  | Shiraz-71T | 2261 | 0.508399 | 0         |  |  |
|  |  | Shiraz-71T | 2261 | 0.508399 | 0         |  |  |
|  |  | Shiraz-3T  | 235  | 0        | -0.28401  |  |  |
|  |  | Shiraz-3T  | 235  | 0        | -0.28401  |  |  |
|  |  | Shiraz-4T  | 260  | 0        | -0.324128 |  |  |
|  |  | Shiraz-4T  | 260  | 0        | -0.324128 |  |  |
|  |  | Shiraz-16T | 294  | 0.655804 | 0         |  |  |
|  |  | Shiraz-16T | 294  | 0.655804 | 0         |  |  |
|  |  | Shiraz-36T | 431  | 0        | -0.78035  |  |  |
|  |  | Shiraz-36T | 431  | 0        | -0.78035  |  |  |

|       |      |            |      |          |           |  |  |
|-------|------|------------|------|----------|-----------|--|--|
|       |      | Shiraz-44T | 891  | 0        | -0.954044 |  |  |
|       |      | Shiraz-44T | 891  | 0        | -0.954044 |  |  |
|       |      | Shiraz-49T | 1166 | 0        | -0.917235 |  |  |
|       |      | Shiraz-49T | 1166 | 0        | -0.917235 |  |  |
|       |      | Shiraz-9T  | 1368 | 0.199713 | 0         |  |  |
|       |      | Shiraz-9T  | 1368 | 0.199713 | 0         |  |  |
|       |      | Shiraz-18T | 1455 | 0        | -0.186773 |  |  |
|       |      | Shiraz-18T | 1455 | 0        | -0.186773 |  |  |
|       |      | Shiraz-22T | 1669 | 0.695915 | 0         |  |  |
|       |      | Shiraz-22T | 1669 | 0.695915 | 0         |  |  |
|       |      | Shiraz-25T | 1717 | 0.420447 | 0         |  |  |
|       |      | Shiraz-25T | 1717 | 0.420447 | 0         |  |  |
|       |      | Shiraz-28T | 1760 | 0.538181 | 0         |  |  |
|       |      | Shiraz-28T | 1760 | 0.538181 | 0         |  |  |
|       |      | Shiraz-29T | 1800 | 0.672527 | 0         |  |  |
|       |      | Shiraz-29T | 1800 | 0.672527 | 0         |  |  |
|       |      | Shiraz-32T | 1869 | 0.776805 | 0         |  |  |
|       |      | Shiraz-32T | 1869 | 0.776805 | 0         |  |  |
|       |      | Shiraz-35T | 1932 | 0.507141 | 0         |  |  |
|       |      | Shiraz-35T | 1932 | 0.507141 | 0         |  |  |
|       |      | Shiraz-40T | 2051 | 0.098506 | 0         |  |  |
|       |      | Shiraz-40T | 2051 | 0.098506 | 0         |  |  |
|       |      | Shiraz-58T | 2221 | 0.871948 | 0         |  |  |
|       |      | Shiraz-58T | 2221 | 0.871948 | 0         |  |  |
|       |      | Shiraz-71T | 2260 | 0.68394  | 0         |  |  |
|       |      | Shiraz-71T | 2260 | 0.68394  | 0         |  |  |
|       |      | Shiraz-71T | 2261 | 0.508399 | 0         |  |  |
|       |      | Shiraz-71T | 2261 | 0.508399 | 0         |  |  |
| ASB12 | chrX | Shiraz-3T  | 241  | 0        | -0.230501 |  |  |
|       |      | Shiraz-4T  | 261  | 0        | -0.336249 |  |  |
|       |      | Shiraz-16T | 295  | 0.591657 | 0         |  |  |
|       |      | Shiraz-36T | 433  | 0        | -0.803961 |  |  |
|       |      | Shiraz-44T | 899  | 0        | -1.09697  |  |  |
|       |      | Shiraz-49T | 1170 | 0        | -0.967436 |  |  |
|       |      | Shiraz-18T | 1457 | 0.643204 | 0         |  |  |
|       |      | Shiraz-22T | 1673 | 0.611783 | 0         |  |  |
|       |      | Shiraz-25T | 1719 | 0.472955 | 0         |  |  |
|       |      | Shiraz-28T | 1762 | 0.562311 | 0         |  |  |
|       |      | Shiraz-29T | 1801 | 0.815343 | 0         |  |  |
|       |      | Shiraz-32T | 1870 | 0.729766 | 0         |  |  |
|       |      | Shiraz-35T | 1933 | 0.488535 | 0         |  |  |
|       |      | Shiraz-58T | 2223 | 0.833364 | 0         |  |  |
|       |      | Shiraz-71T | 2263 | 0.975531 | 0         |  |  |
|       |      | Shiraz-3T  | 241  | 0        | -0.230501 |  |  |
|       |      | Shiraz-4T  | 261  | 0        | -0.336249 |  |  |
|       |      | Shiraz-16T | 295  | 0.591657 | 0         |  |  |
|       |      | Shiraz-36T | 433  | 0        | -0.803961 |  |  |



|       |      |            |      |          |           |  |  |
|-------|------|------------|------|----------|-----------|--|--|
|       |      | Shiraz-44T | 899  | 0        | -1.09697  |  |  |
|       |      | Shiraz-49T | 1170 | 0        | -0.967436 |  |  |
|       |      | Shiraz-18T | 1457 | 0.643204 | 0         |  |  |
|       |      | Shiraz-22T | 1673 | 0.611783 | 0         |  |  |
|       |      | Shiraz-25T | 1719 | 0.472955 | 0         |  |  |
|       |      | Shiraz-28T | 1762 | 0.562311 | 0         |  |  |
|       |      | Shiraz-29T | 1801 | 0.815343 | 0         |  |  |
|       |      | Shiraz-32T | 1870 | 0.729766 | 0         |  |  |
|       |      | Shiraz-35T | 1933 | 0.488535 | 0         |  |  |
|       |      | Shiraz-58T | 2223 | 0.833364 | 0         |  |  |
|       |      | Shiraz-71T | 2263 | 0.975531 | 0         |  |  |
|       |      | Shiraz-3T  | 241  | 0        | -0.230501 |  |  |
|       |      | Shiraz-4T  | 261  | 0        | -0.336249 |  |  |
|       |      | Shiraz-16T | 295  | 0.591657 | 0         |  |  |
|       |      | Shiraz-36T | 433  | 0        | -0.803961 |  |  |
|       |      | Shiraz-44T | 899  | 0        | -1.09697  |  |  |
|       |      | Shiraz-49T | 1170 | 0        | -0.967436 |  |  |
|       |      | Shiraz-18T | 1457 | 0.643204 | 0         |  |  |
|       |      | Shiraz-22T | 1673 | 0.611783 | 0         |  |  |
|       |      | Shiraz-25T | 1719 | 0.472955 | 0         |  |  |
|       |      | Shiraz-28T | 1762 | 0.562311 | 0         |  |  |
|       |      | Shiraz-29T | 1801 | 0.815343 | 0         |  |  |
|       |      | Shiraz-32T | 1870 | 0.729766 | 0         |  |  |
|       |      | Shiraz-35T | 1933 | 0.488535 | 0         |  |  |
|       |      | Shiraz-58T | 2223 | 0.833364 | 0         |  |  |
|       |      | Shiraz-71T | 2263 | 0.975531 | 0         |  |  |
| ASB15 | chr7 | Shiraz-3T  | 90   | 0.219276 | 0         |  |  |
|       |      | Shiraz-3T  | 95   | 0        | -0.077623 |  |  |
|       |      | Shiraz-4T  | 253  | 0.372918 | 0         |  |  |
|       |      | Shiraz-36T | 378  | 0.179558 | 0         |  |  |
|       |      | Shiraz-36T | 382  | 0.081739 | 0         |  |  |
|       |      | Shiraz-44T | 641  | 0        | -0.477846 |  |  |
|       |      | Shiraz-46T | 943  | 0.093799 | 0         |  |  |
|       |      | Shiraz-46T | 947  | 0        | -0.010843 |  |  |
|       |      | Shiraz-47T | 1031 | 0        | -0.117529 |  |  |
|       |      | Shiraz-49T | 1121 | 0        | -0.138569 |  |  |
|       |      | Shiraz-77T | 1225 | 0        | -0.117922 |  |  |
|       |      | Shiraz-77T | 1228 | 0        | -0.238084 |  |  |
|       |      | Shiraz-18T | 1434 | 0.244465 | 0         |  |  |
|       |      | Shiraz-22T | 1549 | 0        | -0.319623 |  |  |
|       |      | Shiraz-22T | 1552 | 0        | -0.50686  |  |  |
|       |      | Shiraz-25T | 1698 | 0.21835  | 0         |  |  |
|       |      | Shiraz-28T | 1735 | 0.350744 | 0         |  |  |
|       |      | Shiraz-29T | 1778 | 0.120767 | 0         |  |  |
|       |      | Shiraz-32T | 1833 | 0.551336 | 0         |  |  |
|       |      | Shiraz-32T | 1835 | 0.092727 | 0         |  |  |
|       |      | Shiraz-38T | 1951 | 0.250891 | 0         |  |  |

|  |            |      |          |           |  |
|--|------------|------|----------|-----------|--|
|  | Shiraz-53T | 2078 | 0.287202 | 0         |  |
|  | Shiraz-58T | 2161 | 0        | -0.187744 |  |
|  | Shiraz-71T | 2238 | 0.603631 | 0         |  |
|  | Shiraz-3T  | 90   | 0.219276 | 0         |  |
|  | Shiraz-3T  | 95   | 0        | -0.077623 |  |
|  | Shiraz-4T  | 253  | 0.372918 | 0         |  |
|  | Shiraz-36T | 378  | 0.179558 | 0         |  |
|  | Shiraz-36T | 382  | 0.081739 | 0         |  |
|  | Shiraz-44T | 641  | 0        | -0.477846 |  |
|  | Shiraz-46T | 943  | 0.093799 | 0         |  |
|  | Shiraz-46T | 947  | 0        | -0.010843 |  |
|  | Shiraz-47T | 1031 | 0        | -0.117529 |  |
|  | Shiraz-49T | 1121 | 0        | -0.138569 |  |
|  | Shiraz-77T | 1225 | 0        | -0.117922 |  |
|  | Shiraz-77T | 1228 | 0        | -0.238084 |  |
|  | Shiraz-18T | 1434 | 0.244465 | 0         |  |
|  | Shiraz-22T | 1549 | 0        | -0.319623 |  |
|  | Shiraz-22T | 1552 | 0        | -0.50686  |  |
|  | Shiraz-25T | 1698 | 0.21835  | 0         |  |
|  | Shiraz-28T | 1735 | 0.350744 | 0         |  |
|  | Shiraz-29T | 1778 | 0.120767 | 0         |  |
|  | Shiraz-32T | 1833 | 0.551336 | 0         |  |
|  | Shiraz-32T | 1835 | 0.092727 | 0         |  |
|  | Shiraz-38T | 1951 | 0.250891 | 0         |  |
|  | Shiraz-53T | 2078 | 0.287202 | 0         |  |
|  | Shiraz-58T | 2161 | 0        | -0.187744 |  |
|  | Shiraz-71T | 2238 | 0.603631 | 0         |  |
|  | Shiraz-3T  | 90   | 0.219276 | 0         |  |
|  | Shiraz-3T  | 95   | 0        | -0.077623 |  |
|  | Shiraz-4T  | 253  | 0.372918 | 0         |  |
|  | Shiraz-36T | 378  | 0.179558 | 0         |  |
|  | Shiraz-36T | 382  | 0.081739 | 0         |  |
|  | Shiraz-44T | 641  | 0        | -0.477846 |  |
|  | Shiraz-46T | 943  | 0.093799 | 0         |  |
|  | Shiraz-46T | 947  | 0        | -0.010843 |  |
|  | Shiraz-47T | 1031 | 0        | -0.117529 |  |
|  | Shiraz-49T | 1121 | 0        | -0.138569 |  |
|  | Shiraz-77T | 1225 | 0        | -0.117922 |  |
|  | Shiraz-77T | 1228 | 0        | -0.238084 |  |
|  | Shiraz-18T | 1434 | 0.244465 | 0         |  |
|  | Shiraz-22T | 1549 | 0        | -0.319623 |  |
|  | Shiraz-22T | 1552 | 0        | -0.50686  |  |
|  | Shiraz-25T | 1698 | 0.21835  | 0         |  |
|  | Shiraz-28T | 1735 | 0.350744 | 0         |  |
|  | Shiraz-29T | 1778 | 0.120767 | 0         |  |
|  | Shiraz-32T | 1833 | 0.551336 | 0         |  |
|  | Shiraz-32T | 1835 | 0.092727 | 0         |  |

|      |      |            |      |          |           |  |  |
|------|------|------------|------|----------|-----------|--|--|
|      |      | Shiraz-38T | 1951 | 0.250891 | 0         |  |  |
|      |      | Shiraz-53T | 2078 | 0.287202 | 0         |  |  |
|      |      | Shiraz-58T | 2161 | 0        | -0.187744 |  |  |
|      |      | Shiraz-71T | 2238 | 0.603631 | 0         |  |  |
| ASB4 | chr7 | Shiraz-3T  | 90   | 0.219276 | 0         |  |  |
|      |      | Shiraz-3T  | 90   | 0.219276 | 0         |  |  |
|      |      | Shiraz-3T  | 93   | 0        | -0.058023 |  |  |
|      |      | Shiraz-3T  | 93   | 0        | -0.058023 |  |  |
|      |      | Shiraz-4T  | 253  | 0.372918 | 0         |  |  |
|      |      | Shiraz-4T  | 253  | 0.372918 | 0         |  |  |
|      |      | Shiraz-36T | 378  | 0.179558 | 0         |  |  |
|      |      | Shiraz-36T | 378  | 0.179558 | 0         |  |  |
|      |      | Shiraz-36T | 380  | 0.083883 | 0         |  |  |
|      |      | Shiraz-36T | 380  | 0.083883 | 0         |  |  |
|      |      | Shiraz-44T | 638  | 0        | -0.433476 |  |  |
|      |      | Shiraz-44T | 638  | 0        | -0.433476 |  |  |
|      |      | Shiraz-46T | 943  | 0.093799 | 0         |  |  |
|      |      | Shiraz-46T | 943  | 0.093799 | 0         |  |  |
|      |      | Shiraz-46T | 945  | 0        | -0.014838 |  |  |
|      |      | Shiraz-46T | 945  | 0        | -0.014838 |  |  |
|      |      | Shiraz-47T | 1029 | 0        | -0.096586 |  |  |
|      |      | Shiraz-47T | 1029 | 0        | -0.096586 |  |  |
|      |      | Shiraz-77T | 1225 | 0        | -0.117922 |  |  |
|      |      | Shiraz-77T | 1225 | 0        | -0.117922 |  |  |
|      |      | Shiraz-18T | 1434 | 0.244465 | 0         |  |  |
|      |      | Shiraz-18T | 1434 | 0.244465 | 0         |  |  |
|      |      | Shiraz-22T | 1549 | 0        | -0.319623 |  |  |
|      |      | Shiraz-22T | 1549 | 0        | -0.319623 |  |  |
|      |      | Shiraz-25T | 1698 | 0.21835  | 0         |  |  |
|      |      | Shiraz-25T | 1698 | 0.21835  | 0         |  |  |
|      |      | Shiraz-28T | 1735 | 0.350744 | 0         |  |  |
|      |      | Shiraz-28T | 1735 | 0.350744 | 0         |  |  |
|      |      | Shiraz-29T | 1778 | 0.120767 | 0         |  |  |
|      |      | Shiraz-29T | 1778 | 0.120767 | 0         |  |  |
|      |      | Shiraz-32T | 1833 | 0.551336 | 0         |  |  |
|      |      | Shiraz-32T | 1833 | 0.551336 | 0         |  |  |
|      |      | Shiraz-38T | 1951 | 0.250891 | 0         |  |  |
|      |      | Shiraz-38T | 1951 | 0.250891 | 0         |  |  |
|      |      | Shiraz-53T | 2078 | 0.287202 | 0         |  |  |
|      |      | Shiraz-53T | 2078 | 0.287202 | 0         |  |  |
|      |      | Shiraz-58T | 2159 | 0        | -0.219521 |  |  |
|      |      | Shiraz-58T | 2159 | 0        | -0.219521 |  |  |
|      |      | Shiraz-71T | 2238 | 0.603631 | 0         |  |  |
|      |      | Shiraz-71T | 2238 | 0.603631 | 0         |  |  |
|      |      | Shiraz-3T  | 90   | 0.219276 | 0         |  |  |
|      |      | Shiraz-3T  | 90   | 0.219276 | 0         |  |  |
|      |      | Shiraz-3T  | 93   | 0        | -0.058023 |  |  |

|  |            |      |          |           |  |
|--|------------|------|----------|-----------|--|
|  | Shiraz-3T  | 93   | 0        | -0.058023 |  |
|  | Shiraz-4T  | 253  | 0.372918 | 0         |  |
|  | Shiraz-4T  | 253  | 0.372918 | 0         |  |
|  | Shiraz-36T | 378  | 0.179558 | 0         |  |
|  | Shiraz-36T | 378  | 0.179558 | 0         |  |
|  | Shiraz-36T | 380  | 0.083883 | 0         |  |
|  | Shiraz-36T | 380  | 0.083883 | 0         |  |
|  | Shiraz-44T | 638  | 0        | -0.433476 |  |
|  | Shiraz-44T | 638  | 0        | -0.433476 |  |
|  | Shiraz-46T | 943  | 0.093799 | 0         |  |
|  | Shiraz-46T | 943  | 0.093799 | 0         |  |
|  | Shiraz-46T | 945  | 0        | -0.014838 |  |
|  | Shiraz-46T | 945  | 0        | -0.014838 |  |
|  | Shiraz-47T | 1029 | 0        | -0.096586 |  |
|  | Shiraz-47T | 1029 | 0        | -0.096586 |  |
|  | Shiraz-77T | 1225 | 0        | -0.117922 |  |
|  | Shiraz-77T | 1225 | 0        | -0.117922 |  |
|  | Shiraz-18T | 1434 | 0.244465 | 0         |  |
|  | Shiraz-18T | 1434 | 0.244465 | 0         |  |
|  | Shiraz-22T | 1549 | 0        | -0.319623 |  |
|  | Shiraz-22T | 1549 | 0        | -0.319623 |  |
|  | Shiraz-25T | 1698 | 0.21835  | 0         |  |
|  | Shiraz-25T | 1698 | 0.21835  | 0         |  |
|  | Shiraz-28T | 1735 | 0.350744 | 0         |  |
|  | Shiraz-28T | 1735 | 0.350744 | 0         |  |
|  | Shiraz-29T | 1778 | 0.120767 | 0         |  |
|  | Shiraz-29T | 1778 | 0.120767 | 0         |  |
|  | Shiraz-32T | 1833 | 0.551336 | 0         |  |
|  | Shiraz-32T | 1833 | 0.551336 | 0         |  |
|  | Shiraz-38T | 1951 | 0.250891 | 0         |  |
|  | Shiraz-38T | 1951 | 0.250891 | 0         |  |
|  | Shiraz-53T | 2078 | 0.287202 | 0         |  |
|  | Shiraz-53T | 2078 | 0.287202 | 0         |  |
|  | Shiraz-58T | 2159 | 0        | -0.219521 |  |
|  | Shiraz-58T | 2159 | 0        | -0.219521 |  |
|  | Shiraz-71T | 2238 | 0.603631 | 0         |  |
|  | Shiraz-71T | 2238 | 0.603631 | 0         |  |
|  | Shiraz-3T  | 90   | 0.219276 | 0         |  |
|  | Shiraz-3T  | 90   | 0.219276 | 0         |  |
|  | Shiraz-3T  | 93   | 0        | -0.058023 |  |
|  | Shiraz-3T  | 93   | 0        | -0.058023 |  |
|  | Shiraz-4T  | 253  | 0.372918 | 0         |  |
|  | Shiraz-4T  | 253  | 0.372918 | 0         |  |
|  | Shiraz-36T | 378  | 0.179558 | 0         |  |
|  | Shiraz-36T | 378  | 0.179558 | 0         |  |
|  | Shiraz-36T | 380  | 0.083883 | 0         |  |
|  | Shiraz-36T | 380  | 0.083883 | 0         |  |

|      |      |            |      |          |           |  |  |
|------|------|------------|------|----------|-----------|--|--|
|      |      | Shiraz-44T | 638  | 0        | -0.433476 |  |  |
|      |      | Shiraz-44T | 638  | 0        | -0.433476 |  |  |
|      |      | Shiraz-46T | 943  | 0.093799 | 0         |  |  |
|      |      | Shiraz-46T | 943  | 0.093799 | 0         |  |  |
|      |      | Shiraz-46T | 945  | 0        | -0.014838 |  |  |
|      |      | Shiraz-46T | 945  | 0        | -0.014838 |  |  |
|      |      | Shiraz-47T | 1029 | 0        | -0.096586 |  |  |
|      |      | Shiraz-47T | 1029 | 0        | -0.096586 |  |  |
|      |      | Shiraz-77T | 1225 | 0        | -0.117922 |  |  |
|      |      | Shiraz-77T | 1225 | 0        | -0.117922 |  |  |
|      |      | Shiraz-18T | 1434 | 0.244465 | 0         |  |  |
|      |      | Shiraz-18T | 1434 | 0.244465 | 0         |  |  |
|      |      | Shiraz-22T | 1549 | 0        | -0.319623 |  |  |
|      |      | Shiraz-22T | 1549 | 0        | -0.319623 |  |  |
|      |      | Shiraz-25T | 1698 | 0.21835  | 0         |  |  |
|      |      | Shiraz-25T | 1698 | 0.21835  | 0         |  |  |
|      |      | Shiraz-28T | 1735 | 0.350744 | 0         |  |  |
|      |      | Shiraz-28T | 1735 | 0.350744 | 0         |  |  |
|      |      | Shiraz-29T | 1778 | 0.120767 | 0         |  |  |
|      |      | Shiraz-29T | 1778 | 0.120767 | 0         |  |  |
|      |      | Shiraz-32T | 1833 | 0.551336 | 0         |  |  |
|      |      | Shiraz-32T | 1833 | 0.551336 | 0         |  |  |
|      |      | Shiraz-38T | 1951 | 0.250891 | 0         |  |  |
|      |      | Shiraz-38T | 1951 | 0.250891 | 0         |  |  |
|      |      | Shiraz-53T | 2078 | 0.287202 | 0         |  |  |
|      |      | Shiraz-53T | 2078 | 0.287202 | 0         |  |  |
|      |      | Shiraz-58T | 2159 | 0        | -0.219521 |  |  |
|      |      | Shiraz-58T | 2159 | 0        | -0.219521 |  |  |
|      |      | Shiraz-71T | 2238 | 0.603631 | 0         |  |  |
|      |      | Shiraz-71T | 2238 | 0.603631 | 0         |  |  |
| ASB9 | chrX | Shiraz-3T  | 235  | 0        | -0.28401  |  |  |
|      |      | Shiraz-3T  | 235  | 0        | -0.28401  |  |  |
|      |      | Shiraz-4T  | 260  | 0        | -0.324128 |  |  |
|      |      | Shiraz-4T  | 260  | 0        | -0.324128 |  |  |
|      |      | Shiraz-16T | 294  | 0.655804 | 0         |  |  |
|      |      | Shiraz-16T | 294  | 0.655804 | 0         |  |  |
|      |      | Shiraz-36T | 431  | 0        | -0.78035  |  |  |
|      |      | Shiraz-36T | 431  | 0        | -0.78035  |  |  |
|      |      | Shiraz-44T | 891  | 0        | -0.954044 |  |  |
|      |      | Shiraz-44T | 891  | 0        | -0.954044 |  |  |
|      |      | Shiraz-49T | 1166 | 0        | -0.917235 |  |  |
|      |      | Shiraz-49T | 1166 | 0        | -0.917235 |  |  |
|      |      | Shiraz-9T  | 1368 | 0.199713 | 0         |  |  |
|      |      | Shiraz-9T  | 1368 | 0.199713 | 0         |  |  |
|      |      | Shiraz-18T | 1455 | 0        | -0.186773 |  |  |
|      |      | Shiraz-18T | 1455 | 0        | -0.186773 |  |  |
|      |      | Shiraz-22T | 1669 | 0.695915 | 0         |  |  |

|  |  |            |      |          |           |  |  |
|--|--|------------|------|----------|-----------|--|--|
|  |  | Shiraz-22T | 1669 | 0.695915 | 0         |  |  |
|  |  | Shiraz-25T | 1717 | 0.420447 | 0         |  |  |
|  |  | Shiraz-25T | 1717 | 0.420447 | 0         |  |  |
|  |  | Shiraz-28T | 1760 | 0.538181 | 0         |  |  |
|  |  | Shiraz-28T | 1760 | 0.538181 | 0         |  |  |
|  |  | Shiraz-29T | 1800 | 0.672527 | 0         |  |  |
|  |  | Shiraz-29T | 1800 | 0.672527 | 0         |  |  |
|  |  | Shiraz-32T | 1869 | 0.776805 | 0         |  |  |
|  |  | Shiraz-32T | 1869 | 0.776805 | 0         |  |  |
|  |  | Shiraz-35T | 1932 | 0.507141 | 0         |  |  |
|  |  | Shiraz-35T | 1932 | 0.507141 | 0         |  |  |
|  |  | Shiraz-40T | 2051 | 0.098506 | 0         |  |  |
|  |  | Shiraz-40T | 2051 | 0.098506 | 0         |  |  |
|  |  | Shiraz-58T | 2221 | 0.871948 | 0         |  |  |
|  |  | Shiraz-58T | 2221 | 0.871948 | 0         |  |  |
|  |  | Shiraz-71T | 2260 | 0.68394  | 0         |  |  |
|  |  | Shiraz-71T | 2260 | 0.68394  | 0         |  |  |
|  |  | Shiraz-71T | 2261 | 0.508399 | 0         |  |  |
|  |  | Shiraz-71T | 2261 | 0.508399 | 0         |  |  |
|  |  | Shiraz-3T  | 235  | 0        | -0.28401  |  |  |
|  |  | Shiraz-3T  | 235  | 0        | -0.28401  |  |  |
|  |  | Shiraz-4T  | 260  | 0        | -0.324128 |  |  |
|  |  | Shiraz-4T  | 260  | 0        | -0.324128 |  |  |
|  |  | Shiraz-16T | 294  | 0.655804 | 0         |  |  |
|  |  | Shiraz-16T | 294  | 0.655804 | 0         |  |  |
|  |  | Shiraz-36T | 431  | 0        | -0.78035  |  |  |
|  |  | Shiraz-36T | 431  | 0        | -0.78035  |  |  |
|  |  | Shiraz-44T | 891  | 0        | -0.954044 |  |  |
|  |  | Shiraz-44T | 891  | 0        | -0.954044 |  |  |
|  |  | Shiraz-49T | 1166 | 0        | -0.917235 |  |  |
|  |  | Shiraz-49T | 1166 | 0        | -0.917235 |  |  |
|  |  | Shiraz-9T  | 1368 | 0.199713 | 0         |  |  |
|  |  | Shiraz-9T  | 1368 | 0.199713 | 0         |  |  |
|  |  | Shiraz-18T | 1455 | 0        | -0.186773 |  |  |
|  |  | Shiraz-18T | 1455 | 0        | -0.186773 |  |  |
|  |  | Shiraz-22T | 1669 | 0.695915 | 0         |  |  |
|  |  | Shiraz-22T | 1669 | 0.695915 | 0         |  |  |
|  |  | Shiraz-25T | 1717 | 0.420447 | 0         |  |  |
|  |  | Shiraz-25T | 1717 | 0.420447 | 0         |  |  |
|  |  | Shiraz-28T | 1760 | 0.538181 | 0         |  |  |
|  |  | Shiraz-28T | 1760 | 0.538181 | 0         |  |  |
|  |  | Shiraz-29T | 1800 | 0.672527 | 0         |  |  |
|  |  | Shiraz-29T | 1800 | 0.672527 | 0         |  |  |
|  |  | Shiraz-32T | 1869 | 0.776805 | 0         |  |  |
|  |  | Shiraz-32T | 1869 | 0.776805 | 0         |  |  |
|  |  | Shiraz-35T | 1932 | 0.507141 | 0         |  |  |
|  |  | Shiraz-35T | 1932 | 0.507141 | 0         |  |  |

|        |      |            |      |          |           |  |  |
|--------|------|------------|------|----------|-----------|--|--|
|        |      | Shiraz-40T | 2051 | 0.098506 | 0         |  |  |
|        |      | Shiraz-40T | 2051 | 0.098506 | 0         |  |  |
|        |      | Shiraz-58T | 2221 | 0.871948 | 0         |  |  |
|        |      | Shiraz-58T | 2221 | 0.871948 | 0         |  |  |
|        |      | Shiraz-71T | 2260 | 0.68394  | 0         |  |  |
|        |      | Shiraz-71T | 2260 | 0.68394  | 0         |  |  |
|        |      | Shiraz-71T | 2261 | 0.508399 | 0         |  |  |
|        |      | Shiraz-71T | 2261 | 0.508399 | 0         |  |  |
|        |      | Shiraz-3T  | 235  | 0        | -0.28401  |  |  |
|        |      | Shiraz-3T  | 235  | 0        | -0.28401  |  |  |
|        |      | Shiraz-4T  | 260  | 0        | -0.324128 |  |  |
|        |      | Shiraz-4T  | 260  | 0        | -0.324128 |  |  |
|        |      | Shiraz-16T | 294  | 0.655804 | 0         |  |  |
|        |      | Shiraz-16T | 294  | 0.655804 | 0         |  |  |
|        |      | Shiraz-36T | 431  | 0        | -0.78035  |  |  |
|        |      | Shiraz-36T | 431  | 0        | -0.78035  |  |  |
|        |      | Shiraz-44T | 891  | 0        | -0.954044 |  |  |
|        |      | Shiraz-44T | 891  | 0        | -0.954044 |  |  |
|        |      | Shiraz-49T | 1166 | 0        | -0.917235 |  |  |
|        |      | Shiraz-49T | 1166 | 0        | -0.917235 |  |  |
|        |      | Shiraz-9T  | 1368 | 0.199713 | 0         |  |  |
|        |      | Shiraz-9T  | 1368 | 0.199713 | 0         |  |  |
|        |      | Shiraz-18T | 1455 | 0        | -0.186773 |  |  |
|        |      | Shiraz-18T | 1455 | 0        | -0.186773 |  |  |
|        |      | Shiraz-22T | 1669 | 0.695915 | 0         |  |  |
|        |      | Shiraz-22T | 1669 | 0.695915 | 0         |  |  |
|        |      | Shiraz-25T | 1717 | 0.420447 | 0         |  |  |
|        |      | Shiraz-25T | 1717 | 0.420447 | 0         |  |  |
|        |      | Shiraz-28T | 1760 | 0.538181 | 0         |  |  |
|        |      | Shiraz-28T | 1760 | 0.538181 | 0         |  |  |
|        |      | Shiraz-29T | 1800 | 0.672527 | 0         |  |  |
|        |      | Shiraz-29T | 1800 | 0.672527 | 0         |  |  |
|        |      | Shiraz-32T | 1869 | 0.776805 | 0         |  |  |
|        |      | Shiraz-32T | 1869 | 0.776805 | 0         |  |  |
|        |      | Shiraz-35T | 1932 | 0.507141 | 0         |  |  |
|        |      | Shiraz-35T | 1932 | 0.507141 | 0         |  |  |
|        |      | Shiraz-40T | 2051 | 0.098506 | 0         |  |  |
|        |      | Shiraz-40T | 2051 | 0.098506 | 0         |  |  |
|        |      | Shiraz-58T | 2221 | 0.871948 | 0         |  |  |
|        |      | Shiraz-58T | 2221 | 0.871948 | 0         |  |  |
|        |      | Shiraz-71T | 2260 | 0.68394  | 0         |  |  |
|        |      | Shiraz-71T | 2260 | 0.68394  | 0         |  |  |
|        |      | Shiraz-71T | 2261 | 0.508399 | 0         |  |  |
|        |      | Shiraz-71T | 2261 | 0.508399 | 0         |  |  |
| ASFMR1 | chrX | Shiraz-3T  | 242  | 0        | -0.336434 |  |  |
|        |      | Shiraz-4T  | 261  | 0        | -0.336249 |  |  |
|        |      | Shiraz-16T | 295  | 0.591657 | 0         |  |  |

|  |            |      |          |           |  |
|--|------------|------|----------|-----------|--|
|  | Shiraz-36T | 433  | 0        | -0.803961 |  |
|  | Shiraz-44T | 899  | 0        | -1.09697  |  |
|  | Shiraz-44T | 907  | 0        | -1.370847 |  |
|  | Shiraz-49T | 1170 | 0        | -0.967436 |  |
|  | Shiraz-9T  | 1370 | 0.690073 | 0         |  |
|  | Shiraz-18T | 1457 | 0.643204 | 0         |  |
|  | Shiraz-22T | 1673 | 0.611783 | 0         |  |
|  | Shiraz-25T | 1719 | 0.472955 | 0         |  |
|  | Shiraz-28T | 1762 | 0.562311 | 0         |  |
|  | Shiraz-29T | 1801 | 0.815343 | 0         |  |
|  | Shiraz-32T | 1870 | 0.729766 | 0         |  |
|  | Shiraz-35T | 1933 | 0.488535 | 0         |  |
|  | Shiraz-58T | 2223 | 0.833364 | 0         |  |
|  | Shiraz-71T | 2263 | 0.975531 | 0         |  |
|  | Shiraz-3T  | 242  | 0        | -0.336434 |  |
|  | Shiraz-4T  | 261  | 0        | -0.336249 |  |
|  | Shiraz-16T | 295  | 0.591657 | 0         |  |
|  | Shiraz-36T | 433  | 0        | -0.803961 |  |
|  | Shiraz-44T | 899  | 0        | -1.09697  |  |
|  | Shiraz-44T | 907  | 0        | -1.370847 |  |
|  | Shiraz-49T | 1170 | 0        | -0.967436 |  |
|  | Shiraz-9T  | 1370 | 0.690073 | 0         |  |
|  | Shiraz-18T | 1457 | 0.643204 | 0         |  |
|  | Shiraz-22T | 1673 | 0.611783 | 0         |  |
|  | Shiraz-25T | 1719 | 0.472955 | 0         |  |
|  | Shiraz-28T | 1762 | 0.562311 | 0         |  |
|  | Shiraz-29T | 1801 | 0.815343 | 0         |  |
|  | Shiraz-32T | 1870 | 0.729766 | 0         |  |
|  | Shiraz-35T | 1933 | 0.488535 | 0         |  |
|  | Shiraz-58T | 2223 | 0.833364 | 0         |  |
|  | Shiraz-71T | 2263 | 0.975531 | 0         |  |
|  | Shiraz-3T  | 242  | 0        | -0.336434 |  |
|  | Shiraz-4T  | 261  | 0        | -0.336249 |  |
|  | Shiraz-16T | 295  | 0.591657 | 0         |  |
|  | Shiraz-36T | 433  | 0        | -0.803961 |  |
|  | Shiraz-44T | 899  | 0        | -1.09697  |  |
|  | Shiraz-44T | 907  | 0        | -1.370847 |  |
|  | Shiraz-49T | 1170 | 0        | -0.967436 |  |
|  | Shiraz-9T  | 1370 | 0.690073 | 0         |  |
|  | Shiraz-18T | 1457 | 0.643204 | 0         |  |
|  | Shiraz-22T | 1673 | 0.611783 | 0         |  |
|  | Shiraz-25T | 1719 | 0.472955 | 0         |  |
|  | Shiraz-28T | 1762 | 0.562311 | 0         |  |
|  | Shiraz-29T | 1801 | 0.815343 | 0         |  |
|  | Shiraz-32T | 1870 | 0.729766 | 0         |  |
|  | Shiraz-35T | 1933 | 0.488535 | 0         |  |
|  | Shiraz-58T | 2223 | 0.833364 | 0         |  |



|      |      |            |      |          |           |  |
|------|------|------------|------|----------|-----------|--|
|      |      | Shiraz-71T | 2263 | 0.975531 | 0         |  |
| ASNS | chr7 | Shiraz-3T  | 90   | 0.219276 | 0         |  |
|      |      | Shiraz-3T  | 90   | 0.219276 | 0         |  |
|      |      | Shiraz-4T  | 253  | 0.372918 | 0         |  |
|      |      | Shiraz-4T  | 253  | 0.372918 | 0         |  |
|      |      | Shiraz-31T | 316  | 0.219196 | 0         |  |
|      |      | Shiraz-31T | 316  | 0.219196 | 0         |  |
|      |      | Shiraz-36T | 378  | 0.179558 | 0         |  |
|      |      | Shiraz-36T | 378  | 0.179558 | 0         |  |
|      |      | Shiraz-36T | 381  | 0.332628 | 0         |  |
|      |      | Shiraz-36T | 381  | 0.332628 | 0         |  |
|      |      | Shiraz-46T | 943  | 0.093799 | 0         |  |
|      |      | Shiraz-46T | 943  | 0.093799 | 0         |  |
|      |      | Shiraz-46T | 946  | 0.299835 | 0         |  |
|      |      | Shiraz-46T | 946  | 0.299835 | 0         |  |
|      |      | Shiraz-77T | 1225 | 0        | -0.117922 |  |
|      |      | Shiraz-77T | 1225 | 0        | -0.117922 |  |
|      |      | Shiraz-77T | 1227 | 0.196445 | 0         |  |
|      |      | Shiraz-77T | 1227 | 0.196445 | 0         |  |
|      |      | Shiraz-18T | 1434 | 0.244465 | 0         |  |
|      |      | Shiraz-18T | 1434 | 0.244465 | 0         |  |
|      |      | Shiraz-22T | 1549 | 0        | -0.319623 |  |
|      |      | Shiraz-22T | 1549 | 0        | -0.319623 |  |
|      |      | Shiraz-25T | 1698 | 0.21835  | 0         |  |
|      |      | Shiraz-25T | 1698 | 0.21835  | 0         |  |
|      |      | Shiraz-28T | 1735 | 0.350744 | 0         |  |
|      |      | Shiraz-28T | 1735 | 0.350744 | 0         |  |
|      |      | Shiraz-29T | 1778 | 0.120767 | 0         |  |
|      |      | Shiraz-29T | 1778 | 0.120767 | 0         |  |
|      |      | Shiraz-32T | 1833 | 0.551336 | 0         |  |
|      |      | Shiraz-32T | 1833 | 0.551336 | 0         |  |
|      |      | Shiraz-38T | 1951 | 0.250891 | 0         |  |
|      |      | Shiraz-38T | 1951 | 0.250891 | 0         |  |
|      |      | Shiraz-53T | 2078 | 0.287202 | 0         |  |
|      |      | Shiraz-53T | 2078 | 0.287202 | 0         |  |
|      |      | Shiraz-71T | 2238 | 0.603631 | 0         |  |
|      |      | Shiraz-71T | 2238 | 0.603631 | 0         |  |
|      |      | Shiraz-3T  | 90   | 0.219276 | 0         |  |
|      |      | Shiraz-3T  | 90   | 0.219276 | 0         |  |
|      |      | Shiraz-4T  | 253  | 0.372918 | 0         |  |
|      |      | Shiraz-4T  | 253  | 0.372918 | 0         |  |
|      |      | Shiraz-31T | 316  | 0.219196 | 0         |  |
|      |      | Shiraz-31T | 316  | 0.219196 | 0         |  |
|      |      | Shiraz-36T | 378  | 0.179558 | 0         |  |
|      |      | Shiraz-36T | 378  | 0.179558 | 0         |  |
|      |      | Shiraz-36T | 381  | 0.332628 | 0         |  |
|      |      | Shiraz-36T | 381  | 0.332628 | 0         |  |

|  |            |      |          |           |  |
|--|------------|------|----------|-----------|--|
|  | Shiraz-46T | 943  | 0.093799 | 0         |  |
|  | Shiraz-46T | 943  | 0.093799 | 0         |  |
|  | Shiraz-46T | 946  | 0.299835 | 0         |  |
|  | Shiraz-46T | 946  | 0.299835 | 0         |  |
|  | Shiraz-77T | 1225 | 0        | -0.117922 |  |
|  | Shiraz-77T | 1225 | 0        | -0.117922 |  |
|  | Shiraz-77T | 1227 | 0.196445 | 0         |  |
|  | Shiraz-77T | 1227 | 0.196445 | 0         |  |
|  | Shiraz-18T | 1434 | 0.244465 | 0         |  |
|  | Shiraz-18T | 1434 | 0.244465 | 0         |  |
|  | Shiraz-22T | 1549 | 0        | -0.319623 |  |
|  | Shiraz-22T | 1549 | 0        | -0.319623 |  |
|  | Shiraz-25T | 1698 | 0.21835  | 0         |  |
|  | Shiraz-25T | 1698 | 0.21835  | 0         |  |
|  | Shiraz-28T | 1735 | 0.350744 | 0         |  |
|  | Shiraz-28T | 1735 | 0.350744 | 0         |  |
|  | Shiraz-29T | 1778 | 0.120767 | 0         |  |
|  | Shiraz-29T | 1778 | 0.120767 | 0         |  |
|  | Shiraz-32T | 1833 | 0.551336 | 0         |  |
|  | Shiraz-32T | 1833 | 0.551336 | 0         |  |
|  | Shiraz-38T | 1951 | 0.250891 | 0         |  |
|  | Shiraz-38T | 1951 | 0.250891 | 0         |  |
|  | Shiraz-53T | 2078 | 0.287202 | 0         |  |
|  | Shiraz-53T | 2078 | 0.287202 | 0         |  |
|  | Shiraz-71T | 2238 | 0.603631 | 0         |  |
|  | Shiraz-71T | 2238 | 0.603631 | 0         |  |
|  | Shiraz-3T  | 90   | 0.219276 | 0         |  |
|  | Shiraz-3T  | 90   | 0.219276 | 0         |  |
|  | Shiraz-4T  | 253  | 0.372918 | 0         |  |
|  | Shiraz-4T  | 253  | 0.372918 | 0         |  |
|  | Shiraz-31T | 316  | 0.219196 | 0         |  |
|  | Shiraz-31T | 316  | 0.219196 | 0         |  |
|  | Shiraz-36T | 378  | 0.179558 | 0         |  |
|  | Shiraz-36T | 378  | 0.179558 | 0         |  |
|  | Shiraz-36T | 381  | 0.332628 | 0         |  |
|  | Shiraz-36T | 381  | 0.332628 | 0         |  |
|  | Shiraz-46T | 943  | 0.093799 | 0         |  |
|  | Shiraz-46T | 943  | 0.093799 | 0         |  |
|  | Shiraz-46T | 946  | 0.299835 | 0         |  |
|  | Shiraz-46T | 946  | 0.299835 | 0         |  |
|  | Shiraz-77T | 1225 | 0        | -0.117922 |  |
|  | Shiraz-77T | 1225 | 0        | -0.117922 |  |
|  | Shiraz-77T | 1227 | 0.196445 | 0         |  |
|  | Shiraz-77T | 1227 | 0.196445 | 0         |  |
|  | Shiraz-18T | 1434 | 0.244465 | 0         |  |
|  | Shiraz-18T | 1434 | 0.244465 | 0         |  |
|  | Shiraz-22T | 1549 | 0        | -0.319623 |  |

|      |      |            |      |          |           |  |  |
|------|------|------------|------|----------|-----------|--|--|
|      |      | Shiraz-22T | 1549 | 0        | -0.319623 |  |  |
|      |      | Shiraz-25T | 1698 | 0.21835  | 0         |  |  |
|      |      | Shiraz-25T | 1698 | 0.21835  | 0         |  |  |
|      |      | Shiraz-28T | 1735 | 0.350744 | 0         |  |  |
|      |      | Shiraz-28T | 1735 | 0.350744 | 0         |  |  |
|      |      | Shiraz-29T | 1778 | 0.120767 | 0         |  |  |
|      |      | Shiraz-29T | 1778 | 0.120767 | 0         |  |  |
|      |      | Shiraz-32T | 1833 | 0.551336 | 0         |  |  |
|      |      | Shiraz-32T | 1833 | 0.551336 | 0         |  |  |
|      |      | Shiraz-38T | 1951 | 0.250891 | 0         |  |  |
|      |      | Shiraz-38T | 1951 | 0.250891 | 0         |  |  |
|      |      | Shiraz-53T | 2078 | 0.287202 | 0         |  |  |
|      |      | Shiraz-53T | 2078 | 0.287202 | 0         |  |  |
|      |      | Shiraz-71T | 2238 | 0.603631 | 0         |  |  |
|      |      | Shiraz-71T | 2238 | 0.603631 | 0         |  |  |
| ASZ1 | chr7 | Shiraz-3T  | 90   | 0.219276 | 0         |  |  |
|      |      | Shiraz-3T  | 90   | 0.219276 | 0         |  |  |
|      |      | Shiraz-3T  | 95   | 0        | -0.077623 |  |  |
|      |      | Shiraz-3T  | 95   | 0        | -0.077623 |  |  |
|      |      | Shiraz-4T  | 253  | 0.372918 | 0         |  |  |
|      |      | Shiraz-4T  | 253  | 0.372918 | 0         |  |  |
|      |      | Shiraz-36T | 378  | 0.179558 | 0         |  |  |
|      |      | Shiraz-36T | 378  | 0.179558 | 0         |  |  |
|      |      | Shiraz-36T | 382  | 0.081739 | 0         |  |  |
|      |      | Shiraz-36T | 382  | 0.081739 | 0         |  |  |
|      |      | Shiraz-44T | 641  | 0        | -0.477846 |  |  |
|      |      | Shiraz-44T | 641  | 0        | -0.477846 |  |  |
|      |      | Shiraz-46T | 943  | 0.093799 | 0         |  |  |
|      |      | Shiraz-46T | 943  | 0.093799 | 0         |  |  |
|      |      | Shiraz-46T | 947  | 0        | -0.010843 |  |  |
|      |      | Shiraz-46T | 947  | 0        | -0.010843 |  |  |
|      |      | Shiraz-47T | 1031 | 0        | -0.117529 |  |  |
|      |      | Shiraz-47T | 1031 | 0        | -0.117529 |  |  |
|      |      | Shiraz-49T | 1121 | 0        | -0.138569 |  |  |
|      |      | Shiraz-49T | 1121 | 0        | -0.138569 |  |  |
|      |      | Shiraz-77T | 1225 | 0        | -0.117922 |  |  |
|      |      | Shiraz-77T | 1225 | 0        | -0.117922 |  |  |
|      |      | Shiraz-77T | 1228 | 0        | -0.238084 |  |  |
|      |      | Shiraz-77T | 1228 | 0        | -0.238084 |  |  |
|      |      | Shiraz-18T | 1434 | 0.244465 | 0         |  |  |
|      |      | Shiraz-18T | 1434 | 0.244465 | 0         |  |  |
|      |      | Shiraz-22T | 1549 | 0        | -0.319623 |  |  |
|      |      | Shiraz-22T | 1549 | 0        | -0.319623 |  |  |
|      |      | Shiraz-22T | 1552 | 0        | -0.50686  |  |  |
|      |      | Shiraz-22T | 1552 | 0        | -0.50686  |  |  |
|      |      | Shiraz-25T | 1698 | 0.21835  | 0         |  |  |
|      |      | Shiraz-25T | 1698 | 0.21835  | 0         |  |  |

|  |            |      |          |           |  |
|--|------------|------|----------|-----------|--|
|  | Shiraz-28T | 1735 | 0.350744 | 0         |  |
|  | Shiraz-28T | 1735 | 0.350744 | 0         |  |
|  | Shiraz-29T | 1778 | 0.120767 | 0         |  |
|  | Shiraz-29T | 1778 | 0.120767 | 0         |  |
|  | Shiraz-32T | 1833 | 0.551336 | 0         |  |
|  | Shiraz-32T | 1833 | 0.551336 | 0         |  |
|  | Shiraz-32T | 1835 | 0.092727 | 0         |  |
|  | Shiraz-32T | 1835 | 0.092727 | 0         |  |
|  | Shiraz-38T | 1951 | 0.250891 | 0         |  |
|  | Shiraz-38T | 1951 | 0.250891 | 0         |  |
|  | Shiraz-53T | 2078 | 0.287202 | 0         |  |
|  | Shiraz-53T | 2078 | 0.287202 | 0         |  |
|  | Shiraz-58T | 2161 | 0        | -0.187744 |  |
|  | Shiraz-58T | 2161 | 0        | -0.187744 |  |
|  | Shiraz-71T | 2238 | 0.603631 | 0         |  |
|  | Shiraz-71T | 2238 | 0.603631 | 0         |  |
|  | Shiraz-3T  | 90   | 0.219276 | 0         |  |
|  | Shiraz-3T  | 90   | 0.219276 | 0         |  |
|  | Shiraz-3T  | 95   | 0        | -0.077623 |  |
|  | Shiraz-3T  | 95   | 0        | -0.077623 |  |
|  | Shiraz-4T  | 253  | 0.372918 | 0         |  |
|  | Shiraz-4T  | 253  | 0.372918 | 0         |  |
|  | Shiraz-36T | 378  | 0.179558 | 0         |  |
|  | Shiraz-36T | 378  | 0.179558 | 0         |  |
|  | Shiraz-36T | 382  | 0.081739 | 0         |  |
|  | Shiraz-36T | 382  | 0.081739 | 0         |  |
|  | Shiraz-44T | 641  | 0        | -0.477846 |  |
|  | Shiraz-44T | 641  | 0        | -0.477846 |  |
|  | Shiraz-46T | 943  | 0.093799 | 0         |  |
|  | Shiraz-46T | 943  | 0.093799 | 0         |  |
|  | Shiraz-46T | 947  | 0        | -0.010843 |  |
|  | Shiraz-46T | 947  | 0        | -0.010843 |  |
|  | Shiraz-47T | 1031 | 0        | -0.117529 |  |
|  | Shiraz-47T | 1031 | 0        | -0.117529 |  |
|  | Shiraz-49T | 1121 | 0        | -0.138569 |  |
|  | Shiraz-49T | 1121 | 0        | -0.138569 |  |
|  | Shiraz-77T | 1225 | 0        | -0.117922 |  |
|  | Shiraz-77T | 1225 | 0        | -0.117922 |  |
|  | Shiraz-77T | 1228 | 0        | -0.238084 |  |
|  | Shiraz-77T | 1228 | 0        | -0.238084 |  |
|  | Shiraz-18T | 1434 | 0.244465 | 0         |  |
|  | Shiraz-18T | 1434 | 0.244465 | 0         |  |
|  | Shiraz-22T | 1549 | 0        | -0.319623 |  |
|  | Shiraz-22T | 1549 | 0        | -0.319623 |  |
|  | Shiraz-22T | 1552 | 0        | -0.50686  |  |
|  | Shiraz-22T | 1552 | 0        | -0.50686  |  |
|  | Shiraz-25T | 1698 | 0.21835  | 0         |  |

|  |            |      |          |           |  |
|--|------------|------|----------|-----------|--|
|  | Shiraz-25T | 1698 | 0.21835  | 0         |  |
|  | Shiraz-28T | 1735 | 0.350744 | 0         |  |
|  | Shiraz-28T | 1735 | 0.350744 | 0         |  |
|  | Shiraz-29T | 1778 | 0.120767 | 0         |  |
|  | Shiraz-29T | 1778 | 0.120767 | 0         |  |
|  | Shiraz-32T | 1833 | 0.551336 | 0         |  |
|  | Shiraz-32T | 1833 | 0.551336 | 0         |  |
|  | Shiraz-32T | 1835 | 0.092727 | 0         |  |
|  | Shiraz-32T | 1835 | 0.092727 | 0         |  |
|  | Shiraz-38T | 1951 | 0.250891 | 0         |  |
|  | Shiraz-38T | 1951 | 0.250891 | 0         |  |
|  | Shiraz-53T | 2078 | 0.287202 | 0         |  |
|  | Shiraz-53T | 2078 | 0.287202 | 0         |  |
|  | Shiraz-58T | 2161 | 0        | -0.187744 |  |
|  | Shiraz-58T | 2161 | 0        | -0.187744 |  |
|  | Shiraz-71T | 2238 | 0.603631 | 0         |  |
|  | Shiraz-71T | 2238 | 0.603631 | 0         |  |
|  | Shiraz-3T  | 90   | 0.219276 | 0         |  |
|  | Shiraz-3T  | 90   | 0.219276 | 0         |  |
|  | Shiraz-3T  | 95   | 0        | -0.077623 |  |
|  | Shiraz-3T  | 95   | 0        | -0.077623 |  |
|  | Shiraz-4T  | 253  | 0.372918 | 0         |  |
|  | Shiraz-4T  | 253  | 0.372918 | 0         |  |
|  | Shiraz-36T | 378  | 0.179558 | 0         |  |
|  | Shiraz-36T | 378  | 0.179558 | 0         |  |
|  | Shiraz-36T | 382  | 0.081739 | 0         |  |
|  | Shiraz-36T | 382  | 0.081739 | 0         |  |
|  | Shiraz-44T | 641  | 0        | -0.477846 |  |
|  | Shiraz-44T | 641  | 0        | -0.477846 |  |
|  | Shiraz-46T | 943  | 0.093799 | 0         |  |
|  | Shiraz-46T | 943  | 0.093799 | 0         |  |
|  | Shiraz-46T | 947  | 0        | -0.010843 |  |
|  | Shiraz-46T | 947  | 0        | -0.010843 |  |
|  | Shiraz-47T | 1031 | 0        | -0.117529 |  |
|  | Shiraz-47T | 1031 | 0        | -0.117529 |  |
|  | Shiraz-49T | 1121 | 0        | -0.138569 |  |
|  | Shiraz-49T | 1121 | 0        | -0.138569 |  |
|  | Shiraz-77T | 1225 | 0        | -0.117922 |  |
|  | Shiraz-77T | 1225 | 0        | -0.117922 |  |
|  | Shiraz-77T | 1228 | 0        | -0.238084 |  |
|  | Shiraz-77T | 1228 | 0        | -0.238084 |  |
|  | Shiraz-18T | 1434 | 0.244465 | 0         |  |
|  | Shiraz-18T | 1434 | 0.244465 | 0         |  |
|  | Shiraz-22T | 1549 | 0        | -0.319623 |  |
|  | Shiraz-22T | 1549 | 0        | -0.319623 |  |
|  | Shiraz-22T | 1552 | 0        | -0.50686  |  |
|  | Shiraz-22T | 1552 | 0        | -0.50686  |  |

|       |      |            |      |          |           |  |
|-------|------|------------|------|----------|-----------|--|
|       |      | Shiraz-25T | 1698 | 0.21835  | 0         |  |
|       |      | Shiraz-25T | 1698 | 0.21835  | 0         |  |
|       |      | Shiraz-28T | 1735 | 0.350744 | 0         |  |
|       |      | Shiraz-28T | 1735 | 0.350744 | 0         |  |
|       |      | Shiraz-29T | 1778 | 0.120767 | 0         |  |
|       |      | Shiraz-29T | 1778 | 0.120767 | 0         |  |
|       |      | Shiraz-32T | 1833 | 0.551336 | 0         |  |
|       |      | Shiraz-32T | 1833 | 0.551336 | 0         |  |
|       |      | Shiraz-32T | 1835 | 0.092727 | 0         |  |
|       |      | Shiraz-32T | 1835 | 0.092727 | 0         |  |
|       |      | Shiraz-38T | 1951 | 0.250891 | 0         |  |
|       |      | Shiraz-38T | 1951 | 0.250891 | 0         |  |
|       |      | Shiraz-53T | 2078 | 0.287202 | 0         |  |
|       |      | Shiraz-53T | 2078 | 0.287202 | 0         |  |
|       |      | Shiraz-58T | 2161 | 0        | -0.187744 |  |
|       |      | Shiraz-58T | 2161 | 0        | -0.187744 |  |
|       |      | Shiraz-71T | 2238 | 0.603631 | 0         |  |
|       |      | Shiraz-71T | 2238 | 0.603631 | 0         |  |
| ATG4A | chrX | Shiraz-3T  | 242  | 0        | -0.336434 |  |
|       |      | Shiraz-4T  | 261  | 0        | -0.336249 |  |
|       |      | Shiraz-16T | 295  | 0.591657 | 0         |  |
|       |      | Shiraz-36T | 433  | 0        | -0.803961 |  |
|       |      | Shiraz-44T | 899  | 0        | -1.09697  |  |
|       |      | Shiraz-49T | 1170 | 0        | -0.967436 |  |
|       |      | Shiraz-18T | 1457 | 0.643204 | 0         |  |
|       |      | Shiraz-22T | 1673 | 0.611783 | 0         |  |
|       |      | Shiraz-25T | 1719 | 0.472955 | 0         |  |
|       |      | Shiraz-28T | 1762 | 0.562311 | 0         |  |
|       |      | Shiraz-29T | 1801 | 0.815343 | 0         |  |
|       |      | Shiraz-32T | 1870 | 0.729766 | 0         |  |
|       |      | Shiraz-35T | 1933 | 0.488535 | 0         |  |
|       |      | Shiraz-58T | 2223 | 0.833364 | 0         |  |
|       |      | Shiraz-71T | 2263 | 0.975531 | 0         |  |
|       |      | Shiraz-3T  | 242  | 0        | -0.336434 |  |
|       |      | Shiraz-4T  | 261  | 0        | -0.336249 |  |
|       |      | Shiraz-16T | 295  | 0.591657 | 0         |  |
|       |      | Shiraz-36T | 433  | 0        | -0.803961 |  |
|       |      | Shiraz-44T | 899  | 0        | -1.09697  |  |
|       |      | Shiraz-49T | 1170 | 0        | -0.967436 |  |
|       |      | Shiraz-18T | 1457 | 0.643204 | 0         |  |
|       |      | Shiraz-22T | 1673 | 0.611783 | 0         |  |
|       |      | Shiraz-25T | 1719 | 0.472955 | 0         |  |
|       |      | Shiraz-28T | 1762 | 0.562311 | 0         |  |
|       |      | Shiraz-29T | 1801 | 0.815343 | 0         |  |
|       |      | Shiraz-32T | 1870 | 0.729766 | 0         |  |
|       |      | Shiraz-35T | 1933 | 0.488535 | 0         |  |
|       |      | Shiraz-58T | 2223 | 0.833364 | 0         |  |

|       |      |            |      |          |           |  |  |
|-------|------|------------|------|----------|-----------|--|--|
|       |      | Shiraz-71T | 2263 | 0.975531 | 0         |  |  |
|       |      | Shiraz-3T  | 242  | 0        | -0.336434 |  |  |
|       |      | Shiraz-4T  | 261  | 0        | -0.336249 |  |  |
|       |      | Shiraz-16T | 295  | 0.591657 | 0         |  |  |
|       |      | Shiraz-36T | 433  | 0        | -0.803961 |  |  |
|       |      | Shiraz-44T | 899  | 0        | -1.09697  |  |  |
|       |      | Shiraz-49T | 1170 | 0        | -0.967436 |  |  |
|       |      | Shiraz-18T | 1457 | 0.643204 | 0         |  |  |
|       |      | Shiraz-22T | 1673 | 0.611783 | 0         |  |  |
|       |      | Shiraz-25T | 1719 | 0.472955 | 0         |  |  |
|       |      | Shiraz-28T | 1762 | 0.562311 | 0         |  |  |
|       |      | Shiraz-29T | 1801 | 0.815343 | 0         |  |  |
|       |      | Shiraz-32T | 1870 | 0.729766 | 0         |  |  |
|       |      | Shiraz-35T | 1933 | 0.488535 | 0         |  |  |
|       |      | Shiraz-58T | 2223 | 0.833364 | 0         |  |  |
|       |      | Shiraz-71T | 2263 | 0.975531 | 0         |  |  |
| ATG9B | chr7 | Shiraz-3T  | 90   | 0.219276 | 0         |  |  |
|       |      | Shiraz-3T  | 99   | 0.454766 | 0         |  |  |
|       |      | Shiraz-4T  | 253  | 0.372918 | 0         |  |  |
|       |      | Shiraz-36T | 378  | 0.179558 | 0         |  |  |
|       |      | Shiraz-44T | 646  | 0.471276 | 0         |  |  |
|       |      | Shiraz-44T | 647  | 1.496173 | 0         |  |  |
|       |      | Shiraz-46T | 943  | 0.093799 | 0         |  |  |
|       |      | Shiraz-9T  | 1325 | 0.221899 | 0         |  |  |
|       |      | Shiraz-18T | 1434 | 0.244465 | 0         |  |  |
|       |      | Shiraz-22T | 1555 | 0.427999 | 0         |  |  |
|       |      | Shiraz-25T | 1698 | 0.21835  | 0         |  |  |
|       |      | Shiraz-28T | 1735 | 0.350744 | 0         |  |  |
|       |      | Shiraz-29T | 1778 | 0.120767 | 0         |  |  |
|       |      | Shiraz-32T | 1833 | 0.551336 | 0         |  |  |
|       |      | Shiraz-38T | 1951 | 0.250891 | 0         |  |  |
|       |      | Shiraz-38T | 1952 | 0        | -0.163211 |  |  |
|       |      | Shiraz-53T | 2078 | 0.287202 | 0         |  |  |
|       |      | Shiraz-58T | 2162 | 0.221505 | 0         |  |  |
|       |      | Shiraz-71T | 2238 | 0.603631 | 0         |  |  |
|       |      | Shiraz-3T  | 90   | 0.219276 | 0         |  |  |
|       |      | Shiraz-3T  | 99   | 0.454766 | 0         |  |  |
|       |      | Shiraz-4T  | 253  | 0.372918 | 0         |  |  |
|       |      | Shiraz-36T | 378  | 0.179558 | 0         |  |  |
|       |      | Shiraz-44T | 646  | 0.471276 | 0         |  |  |
|       |      | Shiraz-44T | 647  | 1.496173 | 0         |  |  |
|       |      | Shiraz-46T | 943  | 0.093799 | 0         |  |  |
|       |      | Shiraz-9T  | 1325 | 0.221899 | 0         |  |  |
|       |      | Shiraz-18T | 1434 | 0.244465 | 0         |  |  |
|       |      | Shiraz-22T | 1555 | 0.427999 | 0         |  |  |
|       |      | Shiraz-25T | 1698 | 0.21835  | 0         |  |  |
|       |      | Shiraz-28T | 1735 | 0.350744 | 0         |  |  |

|        |      |            |      |          |           |  |
|--------|------|------------|------|----------|-----------|--|
|        |      | Shiraz-29T | 1778 | 0.120767 | 0         |  |
|        |      | Shiraz-32T | 1833 | 0.551336 | 0         |  |
|        |      | Shiraz-38T | 1951 | 0.250891 | 0         |  |
|        |      | Shiraz-38T | 1952 | 0        | -0.163211 |  |
|        |      | Shiraz-53T | 2078 | 0.287202 | 0         |  |
|        |      | Shiraz-58T | 2162 | 0.221505 | 0         |  |
|        |      | Shiraz-71T | 2238 | 0.603631 | 0         |  |
|        |      | Shiraz-3T  | 90   | 0.219276 | 0         |  |
|        |      | Shiraz-3T  | 99   | 0.454766 | 0         |  |
|        |      | Shiraz-4T  | 253  | 0.372918 | 0         |  |
|        |      | Shiraz-36T | 378  | 0.179558 | 0         |  |
|        |      | Shiraz-44T | 646  | 0.471276 | 0         |  |
|        |      | Shiraz-44T | 647  | 1.496173 | 0         |  |
|        |      | Shiraz-46T | 943  | 0.093799 | 0         |  |
|        |      | Shiraz-9T  | 1325 | 0.221899 | 0         |  |
|        |      | Shiraz-18T | 1434 | 0.244465 | 0         |  |
|        |      | Shiraz-22T | 1555 | 0.427999 | 0         |  |
|        |      | Shiraz-25T | 1698 | 0.21835  | 0         |  |
|        |      | Shiraz-28T | 1735 | 0.350744 | 0         |  |
|        |      | Shiraz-29T | 1778 | 0.120767 | 0         |  |
|        |      | Shiraz-32T | 1833 | 0.551336 | 0         |  |
|        |      | Shiraz-38T | 1951 | 0.250891 | 0         |  |
|        |      | Shiraz-38T | 1952 | 0        | -0.163211 |  |
|        |      | Shiraz-53T | 2078 | 0.287202 | 0         |  |
|        |      | Shiraz-58T | 2162 | 0.221505 | 0         |  |
|        |      | Shiraz-71T | 2238 | 0.603631 | 0         |  |
| ATP11C | chrX | Shiraz-3T  | 242  | 0        | -0.336434 |  |
|        |      | Shiraz-4T  | 261  | 0        | -0.336249 |  |
|        |      | Shiraz-16T | 295  | 0.591657 | 0         |  |
|        |      | Shiraz-36T | 433  | 0        | -0.803961 |  |
|        |      | Shiraz-44T | 899  | 0        | -1.09697  |  |
|        |      | Shiraz-49T | 1170 | 0        | -0.967436 |  |
|        |      | Shiraz-9T  | 1370 | 0.690073 | 0         |  |
|        |      | Shiraz-18T | 1457 | 0.643204 | 0         |  |
|        |      | Shiraz-22T | 1673 | 0.611783 | 0         |  |
|        |      | Shiraz-25T | 1719 | 0.472955 | 0         |  |
|        |      | Shiraz-28T | 1762 | 0.562311 | 0         |  |
|        |      | Shiraz-29T | 1801 | 0.815343 | 0         |  |
|        |      | Shiraz-32T | 1870 | 0.729766 | 0         |  |
|        |      | Shiraz-35T | 1933 | 0.488535 | 0         |  |
|        |      | Shiraz-58T | 2223 | 0.833364 | 0         |  |
|        |      | Shiraz-71T | 2263 | 0.975531 | 0         |  |
|        |      | Shiraz-3T  | 242  | 0        | -0.336434 |  |
|        |      | Shiraz-4T  | 261  | 0        | -0.336249 |  |
|        |      | Shiraz-16T | 295  | 0.591657 | 0         |  |
|        |      | Shiraz-36T | 433  | 0        | -0.803961 |  |
|        |      | Shiraz-44T | 899  | 0        | -1.09697  |  |



|        |      |            |      |          |           |  |  |
|--------|------|------------|------|----------|-----------|--|--|
|        |      | Shiraz-49T | 1170 | 0        | -0.967436 |  |  |
|        |      | Shiraz-9T  | 1370 | 0.690073 | 0         |  |  |
|        |      | Shiraz-18T | 1457 | 0.643204 | 0         |  |  |
|        |      | Shiraz-22T | 1673 | 0.611783 | 0         |  |  |
|        |      | Shiraz-25T | 1719 | 0.472955 | 0         |  |  |
|        |      | Shiraz-28T | 1762 | 0.562311 | 0         |  |  |
|        |      | Shiraz-29T | 1801 | 0.815343 | 0         |  |  |
|        |      | Shiraz-32T | 1870 | 0.729766 | 0         |  |  |
|        |      | Shiraz-35T | 1933 | 0.488535 | 0         |  |  |
|        |      | Shiraz-58T | 2223 | 0.833364 | 0         |  |  |
|        |      | Shiraz-71T | 2263 | 0.975531 | 0         |  |  |
|        |      | Shiraz-3T  | 242  | 0        | -0.336434 |  |  |
|        |      | Shiraz-4T  | 261  | 0        | -0.336249 |  |  |
|        |      | Shiraz-16T | 295  | 0.591657 | 0         |  |  |
|        |      | Shiraz-36T | 433  | 0        | -0.803961 |  |  |
|        |      | Shiraz-44T | 899  | 0        | -1.09697  |  |  |
|        |      | Shiraz-49T | 1170 | 0        | -0.967436 |  |  |
|        |      | Shiraz-9T  | 1370 | 0.690073 | 0         |  |  |
|        |      | Shiraz-18T | 1457 | 0.643204 | 0         |  |  |
|        |      | Shiraz-22T | 1673 | 0.611783 | 0         |  |  |
|        |      | Shiraz-25T | 1719 | 0.472955 | 0         |  |  |
|        |      | Shiraz-28T | 1762 | 0.562311 | 0         |  |  |
|        |      | Shiraz-29T | 1801 | 0.815343 | 0         |  |  |
|        |      | Shiraz-32T | 1870 | 0.729766 | 0         |  |  |
|        |      | Shiraz-35T | 1933 | 0.488535 | 0         |  |  |
|        |      | Shiraz-58T | 2223 | 0.833364 | 0         |  |  |
|        |      | Shiraz-71T | 2263 | 0.975531 | 0         |  |  |
| ATP1B4 | chrX | Shiraz-3T  | 242  | 0        | -0.336434 |  |  |
|        |      | Shiraz-3T  | 244  | 0        | -0.023749 |  |  |
|        |      | Shiraz-4T  | 261  | 0        | -0.336249 |  |  |
|        |      | Shiraz-16T | 295  | 0.591657 | 0         |  |  |
|        |      | Shiraz-36T | 433  | 0        | -0.803961 |  |  |
|        |      | Shiraz-44T | 899  | 0        | -1.09697  |  |  |
|        |      | Shiraz-44T | 904  | 0        | -0.625526 |  |  |
|        |      | Shiraz-49T | 1170 | 0        | -0.967436 |  |  |
|        |      | Shiraz-9T  | 1370 | 0.690073 | 0         |  |  |
|        |      | Shiraz-18T | 1457 | 0.643204 | 0         |  |  |
|        |      | Shiraz-22T | 1673 | 0.611783 | 0         |  |  |
|        |      | Shiraz-25T | 1719 | 0.472955 | 0         |  |  |
|        |      | Shiraz-28T | 1762 | 0.562311 | 0         |  |  |
|        |      | Shiraz-29T | 1801 | 0.815343 | 0         |  |  |
|        |      | Shiraz-32T | 1870 | 0.729766 | 0         |  |  |
|        |      | Shiraz-35T | 1933 | 0.488535 | 0         |  |  |
|        |      | Shiraz-58T | 2223 | 0.833364 | 0         |  |  |
|        |      | Shiraz-71T | 2263 | 0.975531 | 0         |  |  |
|        |      | Shiraz-3T  | 242  | 0        | -0.336434 |  |  |
|        |      | Shiraz-3T  | 244  | 0        | -0.023749 |  |  |

|        |      |            |      |          |           |  |  |
|--------|------|------------|------|----------|-----------|--|--|
|        |      | Shiraz-4T  | 261  | 0        | -0.336249 |  |  |
|        |      | Shiraz-16T | 295  | 0.591657 | 0         |  |  |
|        |      | Shiraz-36T | 433  | 0        | -0.803961 |  |  |
|        |      | Shiraz-44T | 899  | 0        | -1.09697  |  |  |
|        |      | Shiraz-44T | 904  | 0        | -0.625526 |  |  |
|        |      | Shiraz-49T | 1170 | 0        | -0.967436 |  |  |
|        |      | Shiraz-9T  | 1370 | 0.690073 | 0         |  |  |
|        |      | Shiraz-18T | 1457 | 0.643204 | 0         |  |  |
|        |      | Shiraz-22T | 1673 | 0.611783 | 0         |  |  |
|        |      | Shiraz-25T | 1719 | 0.472955 | 0         |  |  |
|        |      | Shiraz-28T | 1762 | 0.562311 | 0         |  |  |
|        |      | Shiraz-29T | 1801 | 0.815343 | 0         |  |  |
|        |      | Shiraz-32T | 1870 | 0.729766 | 0         |  |  |
|        |      | Shiraz-35T | 1933 | 0.488535 | 0         |  |  |
|        |      | Shiraz-58T | 2223 | 0.833364 | 0         |  |  |
|        |      | Shiraz-71T | 2263 | 0.975531 | 0         |  |  |
|        |      | Shiraz-3T  | 242  | 0        | -0.336434 |  |  |
|        |      | Shiraz-3T  | 244  | 0        | -0.023749 |  |  |
|        |      | Shiraz-4T  | 261  | 0        | -0.336249 |  |  |
|        |      | Shiraz-16T | 295  | 0.591657 | 0         |  |  |
|        |      | Shiraz-36T | 433  | 0        | -0.803961 |  |  |
|        |      | Shiraz-44T | 899  | 0        | -1.09697  |  |  |
|        |      | Shiraz-44T | 904  | 0        | -0.625526 |  |  |
|        |      | Shiraz-49T | 1170 | 0        | -0.967436 |  |  |
|        |      | Shiraz-9T  | 1370 | 0.690073 | 0         |  |  |
|        |      | Shiraz-18T | 1457 | 0.643204 | 0         |  |  |
|        |      | Shiraz-22T | 1673 | 0.611783 | 0         |  |  |
|        |      | Shiraz-25T | 1719 | 0.472955 | 0         |  |  |
|        |      | Shiraz-28T | 1762 | 0.562311 | 0         |  |  |
|        |      | Shiraz-29T | 1801 | 0.815343 | 0         |  |  |
|        |      | Shiraz-32T | 1870 | 0.729766 | 0         |  |  |
|        |      | Shiraz-35T | 1933 | 0.488535 | 0         |  |  |
|        |      | Shiraz-58T | 2223 | 0.833364 | 0         |  |  |
|        |      | Shiraz-71T | 2263 | 0.975531 | 0         |  |  |
| ATP2B3 | chrX | Shiraz-3T  | 246  | 0.531858 | 0         |  |  |
|        |      | Shiraz-4T  | 261  | 0        | -0.336249 |  |  |
|        |      | Shiraz-16T | 295  | 0.591657 | 0         |  |  |
|        |      | Shiraz-36T | 433  | 0        | -0.803961 |  |  |
|        |      | Shiraz-42T | 480  | 0        | -0.232915 |  |  |
|        |      | Shiraz-44T | 908  | 0.466743 | 0         |  |  |
|        |      | Shiraz-49T | 1170 | 0        | -0.967436 |  |  |
|        |      | Shiraz-49T | 1173 | 0        | -0.704439 |  |  |
|        |      | Shiraz-9T  | 1370 | 0.690073 | 0         |  |  |
|        |      | Shiraz-9T  | 1371 | 1.292392 | 0         |  |  |
|        |      | Shiraz-18T | 1457 | 0.643204 | 0         |  |  |
|        |      | Shiraz-22T | 1673 | 0.611783 | 0         |  |  |
|        |      | Shiraz-22T | 1678 | 0.911625 | 0         |  |  |

|  |  |            |      |          |           |  |  |
|--|--|------------|------|----------|-----------|--|--|
|  |  | Shiraz-25T | 1719 | 0.472955 | 0         |  |  |
|  |  | Shiraz-28T | 1762 | 0.562311 | 0         |  |  |
|  |  | Shiraz-29T | 1801 | 0.815343 | 0         |  |  |
|  |  | Shiraz-32T | 1870 | 0.729766 | 0         |  |  |
|  |  | Shiraz-32T | 1872 | 1.504553 | 0         |  |  |
|  |  | Shiraz-35T | 1933 | 0.488535 | 0         |  |  |
|  |  | Shiraz-38T | 2011 | 0        | -0.406024 |  |  |
|  |  | Shiraz-53T | 2115 | 0.427728 | 0         |  |  |
|  |  | Shiraz-58T | 2223 | 0.833364 | 0         |  |  |
|  |  | Shiraz-58T | 2226 | 1.074663 | 0         |  |  |
|  |  | Shiraz-71T | 2263 | 0.975531 | 0         |  |  |
|  |  | Shiraz-3T  | 246  | 0.531858 | 0         |  |  |
|  |  | Shiraz-4T  | 261  | 0        | -0.336249 |  |  |
|  |  | Shiraz-16T | 295  | 0.591657 | 0         |  |  |
|  |  | Shiraz-36T | 433  | 0        | -0.803961 |  |  |
|  |  | Shiraz-42T | 480  | 0        | -0.232915 |  |  |
|  |  | Shiraz-44T | 908  | 0.466743 | 0         |  |  |
|  |  | Shiraz-49T | 1170 | 0        | -0.967436 |  |  |
|  |  | Shiraz-49T | 1173 | 0        | -0.704439 |  |  |
|  |  | Shiraz-9T  | 1370 | 0.690073 | 0         |  |  |
|  |  | Shiraz-9T  | 1371 | 1.292392 | 0         |  |  |
|  |  | Shiraz-18T | 1457 | 0.643204 | 0         |  |  |
|  |  | Shiraz-22T | 1673 | 0.611783 | 0         |  |  |
|  |  | Shiraz-22T | 1678 | 0.911625 | 0         |  |  |
|  |  | Shiraz-25T | 1719 | 0.472955 | 0         |  |  |
|  |  | Shiraz-28T | 1762 | 0.562311 | 0         |  |  |
|  |  | Shiraz-29T | 1801 | 0.815343 | 0         |  |  |
|  |  | Shiraz-32T | 1870 | 0.729766 | 0         |  |  |
|  |  | Shiraz-32T | 1872 | 1.504553 | 0         |  |  |
|  |  | Shiraz-35T | 1933 | 0.488535 | 0         |  |  |
|  |  | Shiraz-38T | 2011 | 0        | -0.406024 |  |  |
|  |  | Shiraz-53T | 2115 | 0.427728 | 0         |  |  |
|  |  | Shiraz-58T | 2223 | 0.833364 | 0         |  |  |
|  |  | Shiraz-58T | 2226 | 1.074663 | 0         |  |  |
|  |  | Shiraz-71T | 2263 | 0.975531 | 0         |  |  |
|  |  | Shiraz-3T  | 246  | 0.531858 | 0         |  |  |
|  |  | Shiraz-4T  | 261  | 0        | -0.336249 |  |  |
|  |  | Shiraz-16T | 295  | 0.591657 | 0         |  |  |
|  |  | Shiraz-36T | 433  | 0        | -0.803961 |  |  |
|  |  | Shiraz-42T | 480  | 0        | -0.232915 |  |  |
|  |  | Shiraz-44T | 908  | 0.466743 | 0         |  |  |
|  |  | Shiraz-49T | 1170 | 0        | -0.967436 |  |  |
|  |  | Shiraz-49T | 1173 | 0        | -0.704439 |  |  |
|  |  | Shiraz-9T  | 1370 | 0.690073 | 0         |  |  |
|  |  | Shiraz-9T  | 1371 | 1.292392 | 0         |  |  |
|  |  | Shiraz-18T | 1457 | 0.643204 | 0         |  |  |
|  |  | Shiraz-22T | 1673 | 0.611783 | 0         |  |  |

|        |      |            |      |          |           |  |
|--------|------|------------|------|----------|-----------|--|
|        |      | Shiraz-22T | 1678 | 0.911625 | 0         |  |
|        |      | Shiraz-25T | 1719 | 0.472955 | 0         |  |
|        |      | Shiraz-28T | 1762 | 0.562311 | 0         |  |
|        |      | Shiraz-29T | 1801 | 0.815343 | 0         |  |
|        |      | Shiraz-32T | 1870 | 0.729766 | 0         |  |
|        |      | Shiraz-32T | 1872 | 1.504553 | 0         |  |
|        |      | Shiraz-35T | 1933 | 0.488535 | 0         |  |
|        |      | Shiraz-38T | 2011 | 0        | -0.406024 |  |
|        |      | Shiraz-53T | 2115 | 0.427728 | 0         |  |
|        |      | Shiraz-58T | 2223 | 0.833364 | 0         |  |
|        |      | Shiraz-58T | 2226 | 1.074663 | 0         |  |
|        |      | Shiraz-71T | 2263 | 0.975531 | 0         |  |
| ATP5J2 | chr7 | Shiraz-3T  | 90   | 0.219276 | 0         |  |
|        |      | Shiraz-3T  | 94   | 0.74735  | 0         |  |
|        |      | Shiraz-4T  | 253  | 0.372918 | 0         |  |
|        |      | Shiraz-31T | 316  | 0.219196 | 0         |  |
|        |      | Shiraz-36T | 378  | 0.179558 | 0         |  |
|        |      | Shiraz-36T | 381  | 0.332628 | 0         |  |
|        |      | Shiraz-44T | 639  | 1.035032 | 0         |  |
|        |      | Shiraz-46T | 943  | 0.093799 | 0         |  |
|        |      | Shiraz-46T | 946  | 0.299835 | 0         |  |
|        |      | Shiraz-47T | 1030 | 0.257728 | 0         |  |
|        |      | Shiraz-49T | 1120 | 0.281656 | 0         |  |
|        |      | Shiraz-77T | 1225 | 0        | -0.117922 |  |
|        |      | Shiraz-77T | 1227 | 0.196445 | 0         |  |
|        |      | Shiraz-9T  | 1324 | 0.679266 | 0         |  |
|        |      | Shiraz-18T | 1434 | 0.244465 | 0         |  |
|        |      | Shiraz-22T | 1549 | 0        | -0.319623 |  |
|        |      | Shiraz-22T | 1551 | 0.324011 | 0         |  |
|        |      | Shiraz-25T | 1698 | 0.21835  | 0         |  |
|        |      | Shiraz-28T | 1735 | 0.350744 | 0         |  |
|        |      | Shiraz-29T | 1778 | 0.120767 | 0         |  |
|        |      | Shiraz-32T | 1833 | 0.551336 | 0         |  |
|        |      | Shiraz-38T | 1951 | 0.250891 | 0         |  |
|        |      | Shiraz-53T | 2078 | 0.287202 | 0         |  |
|        |      | Shiraz-71T | 2238 | 0.603631 | 0         |  |
|        |      | Shiraz-3T  | 90   | 0.219276 | 0         |  |
|        |      | Shiraz-3T  | 94   | 0.74735  | 0         |  |
|        |      | Shiraz-4T  | 253  | 0.372918 | 0         |  |
|        |      | Shiraz-31T | 316  | 0.219196 | 0         |  |
|        |      | Shiraz-36T | 378  | 0.179558 | 0         |  |
|        |      | Shiraz-36T | 381  | 0.332628 | 0         |  |
|        |      | Shiraz-44T | 639  | 1.035032 | 0         |  |
|        |      | Shiraz-46T | 943  | 0.093799 | 0         |  |
|        |      | Shiraz-46T | 946  | 0.299835 | 0         |  |
|        |      | Shiraz-47T | 1030 | 0.257728 | 0         |  |
|        |      | Shiraz-49T | 1120 | 0.281656 | 0         |  |

|         |      |            |      |          |           |  |  |
|---------|------|------------|------|----------|-----------|--|--|
|         |      | Shiraz-77T | 1225 | 0        | -0.117922 |  |  |
|         |      | Shiraz-77T | 1227 | 0.196445 | 0         |  |  |
|         |      | Shiraz-9T  | 1324 | 0.679266 | 0         |  |  |
|         |      | Shiraz-18T | 1434 | 0.244465 | 0         |  |  |
|         |      | Shiraz-22T | 1549 | 0        | -0.319623 |  |  |
|         |      | Shiraz-22T | 1551 | 0.324011 | 0         |  |  |
|         |      | Shiraz-25T | 1698 | 0.21835  | 0         |  |  |
|         |      | Shiraz-28T | 1735 | 0.350744 | 0         |  |  |
|         |      | Shiraz-29T | 1778 | 0.120767 | 0         |  |  |
|         |      | Shiraz-32T | 1833 | 0.551336 | 0         |  |  |
|         |      | Shiraz-38T | 1951 | 0.250891 | 0         |  |  |
|         |      | Shiraz-53T | 2078 | 0.287202 | 0         |  |  |
|         |      | Shiraz-71T | 2238 | 0.603631 | 0         |  |  |
|         |      | Shiraz-3T  | 90   | 0.219276 | 0         |  |  |
|         |      | Shiraz-3T  | 94   | 0.74735  | 0         |  |  |
|         |      | Shiraz-4T  | 253  | 0.372918 | 0         |  |  |
|         |      | Shiraz-31T | 316  | 0.219196 | 0         |  |  |
|         |      | Shiraz-36T | 378  | 0.179558 | 0         |  |  |
|         |      | Shiraz-36T | 381  | 0.332628 | 0         |  |  |
|         |      | Shiraz-44T | 639  | 1.035032 | 0         |  |  |
|         |      | Shiraz-46T | 943  | 0.093799 | 0         |  |  |
|         |      | Shiraz-46T | 946  | 0.299835 | 0         |  |  |
|         |      | Shiraz-47T | 1030 | 0.257728 | 0         |  |  |
|         |      | Shiraz-49T | 1120 | 0.281656 | 0         |  |  |
|         |      | Shiraz-77T | 1225 | 0        | -0.117922 |  |  |
|         |      | Shiraz-77T | 1227 | 0.196445 | 0         |  |  |
|         |      | Shiraz-9T  | 1324 | 0.679266 | 0         |  |  |
|         |      | Shiraz-18T | 1434 | 0.244465 | 0         |  |  |
|         |      | Shiraz-22T | 1549 | 0        | -0.319623 |  |  |
|         |      | Shiraz-22T | 1551 | 0.324011 | 0         |  |  |
|         |      | Shiraz-25T | 1698 | 0.21835  | 0         |  |  |
|         |      | Shiraz-28T | 1735 | 0.350744 | 0         |  |  |
|         |      | Shiraz-29T | 1778 | 0.120767 | 0         |  |  |
|         |      | Shiraz-32T | 1833 | 0.551336 | 0         |  |  |
|         |      | Shiraz-38T | 1951 | 0.250891 | 0         |  |  |
|         |      | Shiraz-53T | 2078 | 0.287202 | 0         |  |  |
|         |      | Shiraz-71T | 2238 | 0.603631 | 0         |  |  |
| ATP6AP1 | chrX | Shiraz-3T  | 246  | 0.531858 | 0         |  |  |
|         |      | Shiraz-4T  | 261  | 0        | -0.336249 |  |  |
|         |      | Shiraz-16T | 295  | 0.591657 | 0         |  |  |
|         |      | Shiraz-36T | 433  | 0        | -0.803961 |  |  |
|         |      | Shiraz-42T | 480  | 0        | -0.232915 |  |  |
|         |      | Shiraz-44T | 908  | 0.466743 | 0         |  |  |
|         |      | Shiraz-49T | 1170 | 0        | -0.967436 |  |  |
|         |      | Shiraz-49T | 1173 | 0        | -0.704439 |  |  |
|         |      | Shiraz-9T  | 1370 | 0.690073 | 0         |  |  |
|         |      | Shiraz-9T  | 1371 | 1.292392 | 0         |  |  |

|  |            |      |          |           |  |
|--|------------|------|----------|-----------|--|
|  | Shiraz-18T | 1457 | 0.643204 | 0         |  |
|  | Shiraz-22T | 1673 | 0.611783 | 0         |  |
|  | Shiraz-22T | 1678 | 0.911625 | 0         |  |
|  | Shiraz-25T | 1719 | 0.472955 | 0         |  |
|  | Shiraz-28T | 1762 | 0.562311 | 0         |  |
|  | Shiraz-29T | 1801 | 0.815343 | 0         |  |
|  | Shiraz-32T | 1870 | 0.729766 | 0         |  |
|  | Shiraz-32T | 1872 | 1.504553 | 0         |  |
|  | Shiraz-35T | 1933 | 0.488535 | 0         |  |
|  | Shiraz-38T | 2011 | 0        | -0.406024 |  |
|  | Shiraz-53T | 2115 | 0.427728 | 0         |  |
|  | Shiraz-58T | 2223 | 0.833364 | 0         |  |
|  | Shiraz-58T | 2226 | 1.074663 | 0         |  |
|  | Shiraz-71T | 2263 | 0.975531 | 0         |  |
|  | Shiraz-3T  | 246  | 0.531858 | 0         |  |
|  | Shiraz-4T  | 261  | 0        | -0.336249 |  |
|  | Shiraz-16T | 295  | 0.591657 | 0         |  |
|  | Shiraz-36T | 433  | 0        | -0.803961 |  |
|  | Shiraz-42T | 480  | 0        | -0.232915 |  |
|  | Shiraz-44T | 908  | 0.466743 | 0         |  |
|  | Shiraz-49T | 1170 | 0        | -0.967436 |  |
|  | Shiraz-49T | 1173 | 0        | -0.704439 |  |
|  | Shiraz-9T  | 1370 | 0.690073 | 0         |  |
|  | Shiraz-9T  | 1371 | 1.292392 | 0         |  |
|  | Shiraz-18T | 1457 | 0.643204 | 0         |  |
|  | Shiraz-22T | 1673 | 0.611783 | 0         |  |
|  | Shiraz-22T | 1678 | 0.911625 | 0         |  |
|  | Shiraz-25T | 1719 | 0.472955 | 0         |  |
|  | Shiraz-28T | 1762 | 0.562311 | 0         |  |
|  | Shiraz-29T | 1801 | 0.815343 | 0         |  |
|  | Shiraz-32T | 1870 | 0.729766 | 0         |  |
|  | Shiraz-32T | 1872 | 1.504553 | 0         |  |
|  | Shiraz-35T | 1933 | 0.488535 | 0         |  |
|  | Shiraz-38T | 2011 | 0        | -0.406024 |  |
|  | Shiraz-53T | 2115 | 0.427728 | 0         |  |
|  | Shiraz-58T | 2223 | 0.833364 | 0         |  |
|  | Shiraz-58T | 2226 | 1.074663 | 0         |  |
|  | Shiraz-71T | 2263 | 0.975531 | 0         |  |
|  | Shiraz-3T  | 246  | 0.531858 | 0         |  |
|  | Shiraz-4T  | 261  | 0        | -0.336249 |  |
|  | Shiraz-16T | 295  | 0.591657 | 0         |  |
|  | Shiraz-36T | 433  | 0        | -0.803961 |  |
|  | Shiraz-42T | 480  | 0        | -0.232915 |  |
|  | Shiraz-44T | 908  | 0.466743 | 0         |  |
|  | Shiraz-49T | 1170 | 0        | -0.967436 |  |
|  | Shiraz-49T | 1173 | 0        | -0.704439 |  |
|  | Shiraz-9T  | 1370 | 0.690073 | 0         |  |

|         |      |            |      |          |           |  |
|---------|------|------------|------|----------|-----------|--|
|         |      | Shiraz-9T  | 1371 | 1.292392 | 0         |  |
|         |      | Shiraz-18T | 1457 | 0.643204 | 0         |  |
|         |      | Shiraz-22T | 1673 | 0.611783 | 0         |  |
|         |      | Shiraz-22T | 1678 | 0.911625 | 0         |  |
|         |      | Shiraz-25T | 1719 | 0.472955 | 0         |  |
|         |      | Shiraz-28T | 1762 | 0.562311 | 0         |  |
|         |      | Shiraz-29T | 1801 | 0.815343 | 0         |  |
|         |      | Shiraz-32T | 1870 | 0.729766 | 0         |  |
|         |      | Shiraz-32T | 1872 | 1.504553 | 0         |  |
|         |      | Shiraz-35T | 1933 | 0.488535 | 0         |  |
|         |      | Shiraz-38T | 2011 | 0        | -0.406024 |  |
|         |      | Shiraz-53T | 2115 | 0.427728 | 0         |  |
|         |      | Shiraz-58T | 2223 | 0.833364 | 0         |  |
|         |      | Shiraz-58T | 2226 | 1.074663 | 0         |  |
|         |      | Shiraz-71T | 2263 | 0.975531 | 0         |  |
| ATP6AP2 | chrX | Shiraz-3T  | 235  | 0        | -0.28401  |  |
|         |      | Shiraz-3T  | 237  | 0.082458 | 0         |  |
|         |      | Shiraz-4T  | 260  | 0        | -0.324128 |  |
|         |      | Shiraz-16T | 294  | 0.655804 | 0         |  |
|         |      | Shiraz-31T | 345  | 0.103301 | 0         |  |
|         |      | Shiraz-36T | 431  | 0        | -0.78035  |  |
|         |      | Shiraz-36T | 432  | 0        | -0.6692   |  |
|         |      | Shiraz-44T | 891  | 0        | -0.954044 |  |
|         |      | Shiraz-44T | 895  | 0        | -0.195747 |  |
|         |      | Shiraz-46T | 991  | 0.139564 | 0         |  |
|         |      | Shiraz-49T | 1166 | 0        | -0.917235 |  |
|         |      | Shiraz-9T  | 1368 | 0.199713 | 0         |  |
|         |      | Shiraz-18T | 1455 | 0        | -0.186773 |  |
|         |      | Shiraz-22T | 1669 | 0.695915 | 0         |  |
|         |      | Shiraz-25T | 1717 | 0.420447 | 0         |  |
|         |      | Shiraz-28T | 1760 | 0.538181 | 0         |  |
|         |      | Shiraz-29T | 1800 | 0.672527 | 0         |  |
|         |      | Shiraz-32T | 1869 | 0.776805 | 0         |  |
|         |      | Shiraz-35T | 1932 | 0.507141 | 0         |  |
|         |      | Shiraz-40T | 2051 | 0.098506 | 0         |  |
|         |      | Shiraz-58T | 2221 | 0.871948 | 0         |  |
|         |      | Shiraz-71T | 2260 | 0.68394  | 0         |  |
|         |      | Shiraz-71T | 2262 | 0.986748 | 0         |  |
|         |      | Shiraz-3T  | 235  | 0        | -0.28401  |  |
|         |      | Shiraz-3T  | 237  | 0.082458 | 0         |  |
|         |      | Shiraz-4T  | 260  | 0        | -0.324128 |  |
|         |      | Shiraz-16T | 294  | 0.655804 | 0         |  |
|         |      | Shiraz-31T | 345  | 0.103301 | 0         |  |
|         |      | Shiraz-36T | 431  | 0        | -0.78035  |  |
|         |      | Shiraz-36T | 432  | 0        | -0.6692   |  |
|         |      | Shiraz-44T | 891  | 0        | -0.954044 |  |
|         |      | Shiraz-44T | 895  | 0        | -0.195747 |  |

|          |      |            |      |          |           |  |  |
|----------|------|------------|------|----------|-----------|--|--|
|          |      | Shiraz-46T | 991  | 0.139564 | 0         |  |  |
|          |      | Shiraz-49T | 1166 | 0        | -0.917235 |  |  |
|          |      | Shiraz-9T  | 1368 | 0.199713 | 0         |  |  |
|          |      | Shiraz-18T | 1455 | 0        | -0.186773 |  |  |
|          |      | Shiraz-22T | 1669 | 0.695915 | 0         |  |  |
|          |      | Shiraz-25T | 1717 | 0.420447 | 0         |  |  |
|          |      | Shiraz-28T | 1760 | 0.538181 | 0         |  |  |
|          |      | Shiraz-29T | 1800 | 0.672527 | 0         |  |  |
|          |      | Shiraz-32T | 1869 | 0.776805 | 0         |  |  |
|          |      | Shiraz-35T | 1932 | 0.507141 | 0         |  |  |
|          |      | Shiraz-40T | 2051 | 0.098506 | 0         |  |  |
|          |      | Shiraz-58T | 2221 | 0.871948 | 0         |  |  |
|          |      | Shiraz-71T | 2260 | 0.68394  | 0         |  |  |
|          |      | Shiraz-71T | 2262 | 0.986748 | 0         |  |  |
|          |      | Shiraz-3T  | 235  | 0        | -0.28401  |  |  |
|          |      | Shiraz-3T  | 237  | 0.082458 | 0         |  |  |
|          |      | Shiraz-4T  | 260  | 0        | -0.324128 |  |  |
|          |      | Shiraz-16T | 294  | 0.655804 | 0         |  |  |
|          |      | Shiraz-31T | 345  | 0.103301 | 0         |  |  |
|          |      | Shiraz-36T | 431  | 0        | -0.78035  |  |  |
|          |      | Shiraz-36T | 432  | 0        | -0.6692   |  |  |
|          |      | Shiraz-44T | 891  | 0        | -0.954044 |  |  |
|          |      | Shiraz-44T | 895  | 0        | -0.195747 |  |  |
|          |      | Shiraz-46T | 991  | 0.139564 | 0         |  |  |
|          |      | Shiraz-49T | 1166 | 0        | -0.917235 |  |  |
|          |      | Shiraz-9T  | 1368 | 0.199713 | 0         |  |  |
|          |      | Shiraz-18T | 1455 | 0        | -0.186773 |  |  |
|          |      | Shiraz-22T | 1669 | 0.695915 | 0         |  |  |
|          |      | Shiraz-25T | 1717 | 0.420447 | 0         |  |  |
|          |      | Shiraz-28T | 1760 | 0.538181 | 0         |  |  |
|          |      | Shiraz-29T | 1800 | 0.672527 | 0         |  |  |
|          |      | Shiraz-32T | 1869 | 0.776805 | 0         |  |  |
|          |      | Shiraz-35T | 1932 | 0.507141 | 0         |  |  |
|          |      | Shiraz-40T | 2051 | 0.098506 | 0         |  |  |
|          |      | Shiraz-58T | 2221 | 0.871948 | 0         |  |  |
|          |      | Shiraz-71T | 2260 | 0.68394  | 0         |  |  |
|          |      | Shiraz-71T | 2262 | 0.986748 | 0         |  |  |
| ATP6V0A4 | chr7 | Shiraz-3T  | 90   | 0.219276 | 0         |  |  |
|          |      | Shiraz-3T  | 90   | 0.219276 | 0         |  |  |
|          |      | Shiraz-3T  | 97   | 0.496001 | 0         |  |  |
|          |      | Shiraz-3T  | 97   | 0.496001 | 0         |  |  |
|          |      | Shiraz-4T  | 253  | 0.372918 | 0         |  |  |
|          |      | Shiraz-4T  | 253  | 0.372918 | 0         |  |  |
|          |      | Shiraz-31T | 318  | 0.254373 | 0         |  |  |
|          |      | Shiraz-31T | 318  | 0.254373 | 0         |  |  |
|          |      | Shiraz-36T | 378  | 0.179558 | 0         |  |  |
|          |      | Shiraz-36T | 378  | 0.179558 | 0         |  |  |



|  |  |            |      |          |           |  |  |
|--|--|------------|------|----------|-----------|--|--|
|  |  | Shiraz-36T | 383  | 0.374586 | 0         |  |  |
|  |  | Shiraz-36T | 383  | 0.374586 | 0         |  |  |
|  |  | Shiraz-44T | 644  | 0.496536 | 0         |  |  |
|  |  | Shiraz-44T | 644  | 0.496536 | 0         |  |  |
|  |  | Shiraz-46T | 943  | 0.093799 | 0         |  |  |
|  |  | Shiraz-46T | 943  | 0.093799 | 0         |  |  |
|  |  | Shiraz-47T | 1033 | 0.220267 | 0         |  |  |
|  |  | Shiraz-47T | 1033 | 0.220267 | 0         |  |  |
|  |  | Shiraz-77T | 1225 | 0        | -0.117922 |  |  |
|  |  | Shiraz-77T | 1225 | 0        | -0.117922 |  |  |
|  |  | Shiraz-77T | 1230 | 0.149651 | 0         |  |  |
|  |  | Shiraz-77T | 1230 | 0.149651 | 0         |  |  |
|  |  | Shiraz-9T  | 1325 | 0.221899 | 0         |  |  |
|  |  | Shiraz-9T  | 1325 | 0.221899 | 0         |  |  |
|  |  | Shiraz-18T | 1434 | 0.244465 | 0         |  |  |
|  |  | Shiraz-18T | 1434 | 0.244465 | 0         |  |  |
|  |  | Shiraz-25T | 1698 | 0.21835  | 0         |  |  |
|  |  | Shiraz-25T | 1698 | 0.21835  | 0         |  |  |
|  |  | Shiraz-28T | 1735 | 0.350744 | 0         |  |  |
|  |  | Shiraz-28T | 1735 | 0.350744 | 0         |  |  |
|  |  | Shiraz-29T | 1778 | 0.120767 | 0         |  |  |
|  |  | Shiraz-29T | 1778 | 0.120767 | 0         |  |  |
|  |  | Shiraz-32T | 1833 | 0.551336 | 0         |  |  |
|  |  | Shiraz-32T | 1833 | 0.551336 | 0         |  |  |
|  |  | Shiraz-38T | 1951 | 0.250891 | 0         |  |  |
|  |  | Shiraz-38T | 1951 | 0.250891 | 0         |  |  |
|  |  | Shiraz-53T | 2078 | 0.287202 | 0         |  |  |
|  |  | Shiraz-53T | 2078 | 0.287202 | 0         |  |  |
|  |  | Shiraz-58T | 2162 | 0.221505 | 0         |  |  |
|  |  | Shiraz-58T | 2162 | 0.221505 | 0         |  |  |
|  |  | Shiraz-71T | 2238 | 0.603631 | 0         |  |  |
|  |  | Shiraz-71T | 2238 | 0.603631 | 0         |  |  |
|  |  | Shiraz-3T  | 90   | 0.219276 | 0         |  |  |
|  |  | Shiraz-3T  | 90   | 0.219276 | 0         |  |  |
|  |  | Shiraz-3T  | 97   | 0.496001 | 0         |  |  |
|  |  | Shiraz-3T  | 97   | 0.496001 | 0         |  |  |
|  |  | Shiraz-4T  | 253  | 0.372918 | 0         |  |  |
|  |  | Shiraz-4T  | 253  | 0.372918 | 0         |  |  |
|  |  | Shiraz-31T | 318  | 0.254373 | 0         |  |  |
|  |  | Shiraz-31T | 318  | 0.254373 | 0         |  |  |
|  |  | Shiraz-36T | 378  | 0.179558 | 0         |  |  |
|  |  | Shiraz-36T | 378  | 0.179558 | 0         |  |  |
|  |  | Shiraz-36T | 383  | 0.374586 | 0         |  |  |
|  |  | Shiraz-36T | 383  | 0.374586 | 0         |  |  |
|  |  | Shiraz-44T | 644  | 0.496536 | 0         |  |  |
|  |  | Shiraz-44T | 644  | 0.496536 | 0         |  |  |
|  |  | Shiraz-46T | 943  | 0.093799 | 0         |  |  |

|  |            |      |          |           |  |
|--|------------|------|----------|-----------|--|
|  | Shiraz-46T | 943  | 0.093799 | 0         |  |
|  | Shiraz-47T | 1033 | 0.220267 | 0         |  |
|  | Shiraz-47T | 1033 | 0.220267 | 0         |  |
|  | Shiraz-77T | 1225 | 0        | -0.117922 |  |
|  | Shiraz-77T | 1225 | 0        | -0.117922 |  |
|  | Shiraz-77T | 1230 | 0.149651 | 0         |  |
|  | Shiraz-77T | 1230 | 0.149651 | 0         |  |
|  | Shiraz-9T  | 1325 | 0.221899 | 0         |  |
|  | Shiraz-9T  | 1325 | 0.221899 | 0         |  |
|  | Shiraz-18T | 1434 | 0.244465 | 0         |  |
|  | Shiraz-18T | 1434 | 0.244465 | 0         |  |
|  | Shiraz-25T | 1698 | 0.21835  | 0         |  |
|  | Shiraz-25T | 1698 | 0.21835  | 0         |  |
|  | Shiraz-28T | 1735 | 0.350744 | 0         |  |
|  | Shiraz-28T | 1735 | 0.350744 | 0         |  |
|  | Shiraz-29T | 1778 | 0.120767 | 0         |  |
|  | Shiraz-29T | 1778 | 0.120767 | 0         |  |
|  | Shiraz-32T | 1833 | 0.551336 | 0         |  |
|  | Shiraz-32T | 1833 | 0.551336 | 0         |  |
|  | Shiraz-38T | 1951 | 0.250891 | 0         |  |
|  | Shiraz-38T | 1951 | 0.250891 | 0         |  |
|  | Shiraz-53T | 2078 | 0.287202 | 0         |  |
|  | Shiraz-53T | 2078 | 0.287202 | 0         |  |
|  | Shiraz-58T | 2162 | 0.221505 | 0         |  |
|  | Shiraz-58T | 2162 | 0.221505 | 0         |  |
|  | Shiraz-71T | 2238 | 0.603631 | 0         |  |
|  | Shiraz-71T | 2238 | 0.603631 | 0         |  |
|  | Shiraz-3T  | 90   | 0.219276 | 0         |  |
|  | Shiraz-3T  | 90   | 0.219276 | 0         |  |
|  | Shiraz-3T  | 97   | 0.496001 | 0         |  |
|  | Shiraz-3T  | 97   | 0.496001 | 0         |  |
|  | Shiraz-4T  | 253  | 0.372918 | 0         |  |
|  | Shiraz-4T  | 253  | 0.372918 | 0         |  |
|  | Shiraz-31T | 318  | 0.254373 | 0         |  |
|  | Shiraz-31T | 318  | 0.254373 | 0         |  |
|  | Shiraz-36T | 378  | 0.179558 | 0         |  |
|  | Shiraz-36T | 378  | 0.179558 | 0         |  |
|  | Shiraz-36T | 383  | 0.374586 | 0         |  |
|  | Shiraz-36T | 383  | 0.374586 | 0         |  |
|  | Shiraz-44T | 644  | 0.496536 | 0         |  |
|  | Shiraz-44T | 644  | 0.496536 | 0         |  |
|  | Shiraz-46T | 943  | 0.093799 | 0         |  |
|  | Shiraz-46T | 943  | 0.093799 | 0         |  |
|  | Shiraz-47T | 1033 | 0.220267 | 0         |  |
|  | Shiraz-47T | 1033 | 0.220267 | 0         |  |
|  | Shiraz-77T | 1225 | 0        | -0.117922 |  |
|  | Shiraz-77T | 1225 | 0        | -0.117922 |  |

|          |      |            |      |          |   |  |
|----------|------|------------|------|----------|---|--|
|          |      | Shiraz-77T | 1230 | 0.149651 | 0 |  |
|          |      | Shiraz-77T | 1230 | 0.149651 | 0 |  |
|          |      | Shiraz-9T  | 1325 | 0.221899 | 0 |  |
|          |      | Shiraz-9T  | 1325 | 0.221899 | 0 |  |
|          |      | Shiraz-18T | 1434 | 0.244465 | 0 |  |
|          |      | Shiraz-18T | 1434 | 0.244465 | 0 |  |
|          |      | Shiraz-25T | 1698 | 0.21835  | 0 |  |
|          |      | Shiraz-25T | 1698 | 0.21835  | 0 |  |
|          |      | Shiraz-28T | 1735 | 0.350744 | 0 |  |
|          |      | Shiraz-28T | 1735 | 0.350744 | 0 |  |
|          |      | Shiraz-29T | 1778 | 0.120767 | 0 |  |
|          |      | Shiraz-29T | 1778 | 0.120767 | 0 |  |
|          |      | Shiraz-32T | 1833 | 0.551336 | 0 |  |
|          |      | Shiraz-32T | 1833 | 0.551336 | 0 |  |
|          |      | Shiraz-38T | 1951 | 0.250891 | 0 |  |
|          |      | Shiraz-38T | 1951 | 0.250891 | 0 |  |
|          |      | Shiraz-53T | 2078 | 0.287202 | 0 |  |
|          |      | Shiraz-53T | 2078 | 0.287202 | 0 |  |
|          |      | Shiraz-58T | 2162 | 0.221505 | 0 |  |
|          |      | Shiraz-58T | 2162 | 0.221505 | 0 |  |
|          |      | Shiraz-71T | 2238 | 0.603631 | 0 |  |
|          |      | Shiraz-71T | 2238 | 0.603631 | 0 |  |
| ATP6V0E2 | chr7 | Shiraz-3T  | 90   | 0.219276 | 0 |  |
|          |      | Shiraz-3T  | 90   | 0.219276 | 0 |  |
|          |      | Shiraz-3T  | 99   | 0.454766 | 0 |  |
|          |      | Shiraz-3T  | 99   | 0.454766 | 0 |  |
|          |      | Shiraz-4T  | 253  | 0.372918 | 0 |  |
|          |      | Shiraz-4T  | 253  | 0.372918 | 0 |  |
|          |      | Shiraz-36T | 378  | 0.179558 | 0 |  |
|          |      | Shiraz-36T | 378  | 0.179558 | 0 |  |
|          |      | Shiraz-44T | 646  | 0.471276 | 0 |  |
|          |      | Shiraz-44T | 646  | 0.471276 | 0 |  |
|          |      | Shiraz-46T | 943  | 0.093799 | 0 |  |
|          |      | Shiraz-46T | 943  | 0.093799 | 0 |  |
|          |      | Shiraz-9T  | 1325 | 0.221899 | 0 |  |
|          |      | Shiraz-9T  | 1325 | 0.221899 | 0 |  |
|          |      | Shiraz-18T | 1434 | 0.244465 | 0 |  |
|          |      | Shiraz-18T | 1434 | 0.244465 | 0 |  |
|          |      | Shiraz-25T | 1698 | 0.21835  | 0 |  |
|          |      | Shiraz-25T | 1698 | 0.21835  | 0 |  |
|          |      | Shiraz-28T | 1735 | 0.350744 | 0 |  |
|          |      | Shiraz-28T | 1735 | 0.350744 | 0 |  |
|          |      | Shiraz-29T | 1778 | 0.120767 | 0 |  |
|          |      | Shiraz-29T | 1778 | 0.120767 | 0 |  |
|          |      | Shiraz-32T | 1833 | 0.551336 | 0 |  |
|          |      | Shiraz-32T | 1833 | 0.551336 | 0 |  |
|          |      | Shiraz-38T | 1951 | 0.250891 | 0 |  |

|  |  |            |      |          |   |  |  |
|--|--|------------|------|----------|---|--|--|
|  |  | Shiraz-38T | 1951 | 0.250891 | 0 |  |  |
|  |  | Shiraz-53T | 2078 | 0.287202 | 0 |  |  |
|  |  | Shiraz-53T | 2078 | 0.287202 | 0 |  |  |
|  |  | Shiraz-58T | 2162 | 0.221505 | 0 |  |  |
|  |  | Shiraz-58T | 2162 | 0.221505 | 0 |  |  |
|  |  | Shiraz-71T | 2238 | 0.603631 | 0 |  |  |
|  |  | Shiraz-71T | 2238 | 0.603631 | 0 |  |  |
|  |  | Shiraz-3T  | 90   | 0.219276 | 0 |  |  |
|  |  | Shiraz-3T  | 90   | 0.219276 | 0 |  |  |
|  |  | Shiraz-3T  | 99   | 0.454766 | 0 |  |  |
|  |  | Shiraz-3T  | 99   | 0.454766 | 0 |  |  |
|  |  | Shiraz-4T  | 253  | 0.372918 | 0 |  |  |
|  |  | Shiraz-4T  | 253  | 0.372918 | 0 |  |  |
|  |  | Shiraz-36T | 378  | 0.179558 | 0 |  |  |
|  |  | Shiraz-36T | 378  | 0.179558 | 0 |  |  |
|  |  | Shiraz-44T | 646  | 0.471276 | 0 |  |  |
|  |  | Shiraz-44T | 646  | 0.471276 | 0 |  |  |
|  |  | Shiraz-46T | 943  | 0.093799 | 0 |  |  |
|  |  | Shiraz-46T | 943  | 0.093799 | 0 |  |  |
|  |  | Shiraz-9T  | 1325 | 0.221899 | 0 |  |  |
|  |  | Shiraz-9T  | 1325 | 0.221899 | 0 |  |  |
|  |  | Shiraz-18T | 1434 | 0.244465 | 0 |  |  |
|  |  | Shiraz-18T | 1434 | 0.244465 | 0 |  |  |
|  |  | Shiraz-25T | 1698 | 0.21835  | 0 |  |  |
|  |  | Shiraz-25T | 1698 | 0.21835  | 0 |  |  |
|  |  | Shiraz-28T | 1735 | 0.350744 | 0 |  |  |
|  |  | Shiraz-28T | 1735 | 0.350744 | 0 |  |  |
|  |  | Shiraz-29T | 1778 | 0.120767 | 0 |  |  |
|  |  | Shiraz-29T | 1778 | 0.120767 | 0 |  |  |
|  |  | Shiraz-32T | 1833 | 0.551336 | 0 |  |  |
|  |  | Shiraz-32T | 1833 | 0.551336 | 0 |  |  |
|  |  | Shiraz-38T | 1951 | 0.250891 | 0 |  |  |
|  |  | Shiraz-38T | 1951 | 0.250891 | 0 |  |  |
|  |  | Shiraz-53T | 2078 | 0.287202 | 0 |  |  |
|  |  | Shiraz-53T | 2078 | 0.287202 | 0 |  |  |
|  |  | Shiraz-58T | 2162 | 0.221505 | 0 |  |  |
|  |  | Shiraz-58T | 2162 | 0.221505 | 0 |  |  |
|  |  | Shiraz-71T | 2238 | 0.603631 | 0 |  |  |
|  |  | Shiraz-71T | 2238 | 0.603631 | 0 |  |  |
|  |  | Shiraz-3T  | 90   | 0.219276 | 0 |  |  |
|  |  | Shiraz-3T  | 90   | 0.219276 | 0 |  |  |
|  |  | Shiraz-3T  | 99   | 0.454766 | 0 |  |  |
|  |  | Shiraz-3T  | 99   | 0.454766 | 0 |  |  |
|  |  | Shiraz-4T  | 253  | 0.372918 | 0 |  |  |
|  |  | Shiraz-4T  | 253  | 0.372918 | 0 |  |  |
|  |  | Shiraz-36T | 378  | 0.179558 | 0 |  |  |
|  |  | Shiraz-36T | 378  | 0.179558 | 0 |  |  |

|         |      |            |      |          |           |  |
|---------|------|------------|------|----------|-----------|--|
|         |      | Shiraz-44T | 646  | 0.471276 | 0         |  |
|         |      | Shiraz-44T | 646  | 0.471276 | 0         |  |
|         |      | Shiraz-46T | 943  | 0.093799 | 0         |  |
|         |      | Shiraz-46T | 943  | 0.093799 | 0         |  |
|         |      | Shiraz-9T  | 1325 | 0.221899 | 0         |  |
|         |      | Shiraz-9T  | 1325 | 0.221899 | 0         |  |
|         |      | Shiraz-18T | 1434 | 0.244465 | 0         |  |
|         |      | Shiraz-18T | 1434 | 0.244465 | 0         |  |
|         |      | Shiraz-25T | 1698 | 0.21835  | 0         |  |
|         |      | Shiraz-25T | 1698 | 0.21835  | 0         |  |
|         |      | Shiraz-28T | 1735 | 0.350744 | 0         |  |
|         |      | Shiraz-28T | 1735 | 0.350744 | 0         |  |
|         |      | Shiraz-29T | 1778 | 0.120767 | 0         |  |
|         |      | Shiraz-29T | 1778 | 0.120767 | 0         |  |
|         |      | Shiraz-32T | 1833 | 0.551336 | 0         |  |
|         |      | Shiraz-32T | 1833 | 0.551336 | 0         |  |
|         |      | Shiraz-38T | 1951 | 0.250891 | 0         |  |
|         |      | Shiraz-38T | 1951 | 0.250891 | 0         |  |
|         |      | Shiraz-53T | 2078 | 0.287202 | 0         |  |
|         |      | Shiraz-53T | 2078 | 0.287202 | 0         |  |
|         |      | Shiraz-58T | 2162 | 0.221505 | 0         |  |
|         |      | Shiraz-58T | 2162 | 0.221505 | 0         |  |
|         |      | Shiraz-71T | 2238 | 0.603631 | 0         |  |
|         |      | Shiraz-71T | 2238 | 0.603631 | 0         |  |
| ATP6V1F | chr7 | Shiraz-3T  | 90   | 0.219276 | 0         |  |
|         |      | Shiraz-3T  | 96   | 0.428308 | 0         |  |
|         |      | Shiraz-4T  | 253  | 0.372918 | 0         |  |
|         |      | Shiraz-31T | 317  | 0.204382 | 0         |  |
|         |      | Shiraz-36T | 378  | 0.179558 | 0         |  |
|         |      | Shiraz-44T | 642  | 0.408617 | 0         |  |
|         |      | Shiraz-46T | 943  | 0.093799 | 0         |  |
|         |      | Shiraz-47T | 1032 | 0.171484 | 0         |  |
|         |      | Shiraz-77T | 1225 | 0        | -0.117922 |  |
|         |      | Shiraz-77T | 1229 | 0.051661 | 0         |  |
|         |      | Shiraz-9T  | 1325 | 0.221899 | 0         |  |
|         |      | Shiraz-18T | 1434 | 0.244465 | 0         |  |
|         |      | Shiraz-25T | 1698 | 0.21835  | 0         |  |
|         |      | Shiraz-28T | 1735 | 0.350744 | 0         |  |
|         |      | Shiraz-29T | 1778 | 0.120767 | 0         |  |
|         |      | Shiraz-32T | 1833 | 0.551336 | 0         |  |
|         |      | Shiraz-38T | 1951 | 0.250891 | 0         |  |
|         |      | Shiraz-53T | 2078 | 0.287202 | 0         |  |
|         |      | Shiraz-71T | 2238 | 0.603631 | 0         |  |
|         |      | Shiraz-3T  | 90   | 0.219276 | 0         |  |
|         |      | Shiraz-3T  | 96   | 0.428308 | 0         |  |
|         |      | Shiraz-4T  | 253  | 0.372918 | 0         |  |
|         |      | Shiraz-31T | 317  | 0.204382 | 0         |  |

|       |      |            |      |          |           |  |
|-------|------|------------|------|----------|-----------|--|
|       |      | Shiraz-36T | 378  | 0.179558 | 0         |  |
|       |      | Shiraz-44T | 642  | 0.408617 | 0         |  |
|       |      | Shiraz-46T | 943  | 0.093799 | 0         |  |
|       |      | Shiraz-47T | 1032 | 0.171484 | 0         |  |
|       |      | Shiraz-77T | 1225 | 0        | -0.117922 |  |
|       |      | Shiraz-77T | 1229 | 0.051661 | 0         |  |
|       |      | Shiraz-9T  | 1325 | 0.221899 | 0         |  |
|       |      | Shiraz-18T | 1434 | 0.244465 | 0         |  |
|       |      | Shiraz-25T | 1698 | 0.21835  | 0         |  |
|       |      | Shiraz-28T | 1735 | 0.350744 | 0         |  |
|       |      | Shiraz-29T | 1778 | 0.120767 | 0         |  |
|       |      | Shiraz-32T | 1833 | 0.551336 | 0         |  |
|       |      | Shiraz-38T | 1951 | 0.250891 | 0         |  |
|       |      | Shiraz-53T | 2078 | 0.287202 | 0         |  |
|       |      | Shiraz-71T | 2238 | 0.603631 | 0         |  |
|       |      | Shiraz-3T  | 90   | 0.219276 | 0         |  |
|       |      | Shiraz-3T  | 96   | 0.428308 | 0         |  |
|       |      | Shiraz-4T  | 253  | 0.372918 | 0         |  |
|       |      | Shiraz-31T | 317  | 0.204382 | 0         |  |
|       |      | Shiraz-36T | 378  | 0.179558 | 0         |  |
|       |      | Shiraz-44T | 642  | 0.408617 | 0         |  |
|       |      | Shiraz-46T | 943  | 0.093799 | 0         |  |
|       |      | Shiraz-47T | 1032 | 0.171484 | 0         |  |
|       |      | Shiraz-77T | 1225 | 0        | -0.117922 |  |
|       |      | Shiraz-77T | 1229 | 0.051661 | 0         |  |
|       |      | Shiraz-9T  | 1325 | 0.221899 | 0         |  |
|       |      | Shiraz-18T | 1434 | 0.244465 | 0         |  |
|       |      | Shiraz-25T | 1698 | 0.21835  | 0         |  |
|       |      | Shiraz-28T | 1735 | 0.350744 | 0         |  |
|       |      | Shiraz-29T | 1778 | 0.120767 | 0         |  |
|       |      | Shiraz-32T | 1833 | 0.551336 | 0         |  |
|       |      | Shiraz-38T | 1951 | 0.250891 | 0         |  |
|       |      | Shiraz-53T | 2078 | 0.287202 | 0         |  |
|       |      | Shiraz-71T | 2238 | 0.603631 | 0         |  |
| ATP7A | chrX | Shiraz-3T  | 242  | 0        | -0.336434 |  |
|       |      | Shiraz-4T  | 261  | 0        | -0.336249 |  |
|       |      | Shiraz-16T | 295  | 0.591657 | 0         |  |
|       |      | Shiraz-36T | 433  | 0        | -0.803961 |  |
|       |      | Shiraz-44T | 899  | 0        | -1.09697  |  |
|       |      | Shiraz-49T | 1170 | 0        | -0.967436 |  |
|       |      | Shiraz-18T | 1457 | 0.643204 | 0         |  |
|       |      | Shiraz-22T | 1673 | 0.611783 | 0         |  |
|       |      | Shiraz-25T | 1719 | 0.472955 | 0         |  |
|       |      | Shiraz-28T | 1762 | 0.562311 | 0         |  |
|       |      | Shiraz-29T | 1801 | 0.815343 | 0         |  |
|       |      | Shiraz-32T | 1870 | 0.729766 | 0         |  |
|       |      | Shiraz-35T | 1933 | 0.488535 | 0         |  |

|      |      |            |      |          |           |  |  |
|------|------|------------|------|----------|-----------|--|--|
|      |      | Shiraz-58T | 2223 | 0.833364 | 0         |  |  |
|      |      | Shiraz-71T | 2263 | 0.975531 | 0         |  |  |
|      |      | Shiraz-3T  | 242  | 0        | -0.336434 |  |  |
|      |      | Shiraz-4T  | 261  | 0        | -0.336249 |  |  |
|      |      | Shiraz-16T | 295  | 0.591657 | 0         |  |  |
|      |      | Shiraz-36T | 433  | 0        | -0.803961 |  |  |
|      |      | Shiraz-44T | 899  | 0        | -1.09697  |  |  |
|      |      | Shiraz-49T | 1170 | 0        | -0.967436 |  |  |
|      |      | Shiraz-18T | 1457 | 0.643204 | 0         |  |  |
|      |      | Shiraz-22T | 1673 | 0.611783 | 0         |  |  |
|      |      | Shiraz-25T | 1719 | 0.472955 | 0         |  |  |
|      |      | Shiraz-28T | 1762 | 0.562311 | 0         |  |  |
|      |      | Shiraz-29T | 1801 | 0.815343 | 0         |  |  |
|      |      | Shiraz-32T | 1870 | 0.729766 | 0         |  |  |
|      |      | Shiraz-35T | 1933 | 0.488535 | 0         |  |  |
|      |      | Shiraz-58T | 2223 | 0.833364 | 0         |  |  |
|      |      | Shiraz-71T | 2263 | 0.975531 | 0         |  |  |
|      |      | Shiraz-3T  | 242  | 0        | -0.336434 |  |  |
|      |      | Shiraz-4T  | 261  | 0        | -0.336249 |  |  |
|      |      | Shiraz-16T | 295  | 0.591657 | 0         |  |  |
|      |      | Shiraz-36T | 433  | 0        | -0.803961 |  |  |
|      |      | Shiraz-44T | 899  | 0        | -1.09697  |  |  |
|      |      | Shiraz-49T | 1170 | 0        | -0.967436 |  |  |
|      |      | Shiraz-18T | 1457 | 0.643204 | 0         |  |  |
|      |      | Shiraz-22T | 1673 | 0.611783 | 0         |  |  |
|      |      | Shiraz-25T | 1719 | 0.472955 | 0         |  |  |
|      |      | Shiraz-28T | 1762 | 0.562311 | 0         |  |  |
|      |      | Shiraz-29T | 1801 | 0.815343 | 0         |  |  |
|      |      | Shiraz-32T | 1870 | 0.729766 | 0         |  |  |
|      |      | Shiraz-35T | 1933 | 0.488535 | 0         |  |  |
|      |      | Shiraz-58T | 2223 | 0.833364 | 0         |  |  |
|      |      | Shiraz-71T | 2263 | 0.975531 | 0         |  |  |
| ATRX | chrX | Shiraz-3T  | 242  | 0        | -0.336434 |  |  |
|      |      | Shiraz-4T  | 261  | 0        | -0.336249 |  |  |
|      |      | Shiraz-16T | 295  | 0.591657 | 0         |  |  |
|      |      | Shiraz-36T | 433  | 0        | -0.803961 |  |  |
|      |      | Shiraz-44T | 899  | 0        | -1.09697  |  |  |
|      |      | Shiraz-49T | 1170 | 0        | -0.967436 |  |  |
|      |      | Shiraz-18T | 1457 | 0.643204 | 0         |  |  |
|      |      | Shiraz-22T | 1673 | 0.611783 | 0         |  |  |
|      |      | Shiraz-25T | 1719 | 0.472955 | 0         |  |  |
|      |      | Shiraz-28T | 1762 | 0.562311 | 0         |  |  |
|      |      | Shiraz-29T | 1801 | 0.815343 | 0         |  |  |
|      |      | Shiraz-32T | 1870 | 0.729766 | 0         |  |  |
|      |      | Shiraz-35T | 1933 | 0.488535 | 0         |  |  |
|      |      | Shiraz-58T | 2223 | 0.833364 | 0         |  |  |
|      |      | Shiraz-71T | 2263 | 0.975531 | 0         |  |  |

|        |      |            |      |          |           |  |  |
|--------|------|------------|------|----------|-----------|--|--|
|        |      | Shiraz-3T  | 242  | 0        | -0.336434 |  |  |
|        |      | Shiraz-4T  | 261  | 0        | -0.336249 |  |  |
|        |      | Shiraz-16T | 295  | 0.591657 | 0         |  |  |
|        |      | Shiraz-36T | 433  | 0        | -0.803961 |  |  |
|        |      | Shiraz-44T | 899  | 0        | -1.09697  |  |  |
|        |      | Shiraz-49T | 1170 | 0        | -0.967436 |  |  |
|        |      | Shiraz-18T | 1457 | 0.643204 | 0         |  |  |
|        |      | Shiraz-22T | 1673 | 0.611783 | 0         |  |  |
|        |      | Shiraz-25T | 1719 | 0.472955 | 0         |  |  |
|        |      | Shiraz-28T | 1762 | 0.562311 | 0         |  |  |
|        |      | Shiraz-29T | 1801 | 0.815343 | 0         |  |  |
|        |      | Shiraz-32T | 1870 | 0.729766 | 0         |  |  |
|        |      | Shiraz-35T | 1933 | 0.488535 | 0         |  |  |
|        |      | Shiraz-58T | 2223 | 0.833364 | 0         |  |  |
|        |      | Shiraz-71T | 2263 | 0.975531 | 0         |  |  |
|        |      | Shiraz-3T  | 242  | 0        | -0.336434 |  |  |
|        |      | Shiraz-4T  | 261  | 0        | -0.336249 |  |  |
|        |      | Shiraz-16T | 295  | 0.591657 | 0         |  |  |
|        |      | Shiraz-36T | 433  | 0        | -0.803961 |  |  |
|        |      | Shiraz-44T | 899  | 0        | -1.09697  |  |  |
|        |      | Shiraz-49T | 1170 | 0        | -0.967436 |  |  |
|        |      | Shiraz-18T | 1457 | 0.643204 | 0         |  |  |
|        |      | Shiraz-22T | 1673 | 0.611783 | 0         |  |  |
|        |      | Shiraz-25T | 1719 | 0.472955 | 0         |  |  |
|        |      | Shiraz-28T | 1762 | 0.562311 | 0         |  |  |
|        |      | Shiraz-29T | 1801 | 0.815343 | 0         |  |  |
|        |      | Shiraz-32T | 1870 | 0.729766 | 0         |  |  |
|        |      | Shiraz-35T | 1933 | 0.488535 | 0         |  |  |
|        |      | Shiraz-58T | 2223 | 0.833364 | 0         |  |  |
|        |      | Shiraz-71T | 2263 | 0.975531 | 0         |  |  |
| ATXN3L | chrX | Shiraz-3T  | 235  | 0        | -0.28401  |  |  |
|        |      | Shiraz-4T  | 260  | 0        | -0.324128 |  |  |
|        |      | Shiraz-16T | 294  | 0.655804 | 0         |  |  |
|        |      | Shiraz-36T | 431  | 0        | -0.78035  |  |  |
|        |      | Shiraz-44T | 891  | 0        | -0.954044 |  |  |
|        |      | Shiraz-49T | 1166 | 0        | -0.917235 |  |  |
|        |      | Shiraz-9T  | 1368 | 0.199713 | 0         |  |  |
|        |      | Shiraz-18T | 1455 | 0        | -0.186773 |  |  |
|        |      | Shiraz-22T | 1669 | 0.695915 | 0         |  |  |
|        |      | Shiraz-25T | 1717 | 0.420447 | 0         |  |  |
|        |      | Shiraz-28T | 1760 | 0.538181 | 0         |  |  |
|        |      | Shiraz-29T | 1800 | 0.672527 | 0         |  |  |
|        |      | Shiraz-32T | 1869 | 0.776805 | 0         |  |  |
|        |      | Shiraz-35T | 1932 | 0.507141 | 0         |  |  |
|        |      | Shiraz-40T | 2051 | 0.098506 | 0         |  |  |
|        |      | Shiraz-58T | 2221 | 0.871948 | 0         |  |  |
|        |      | Shiraz-71T | 2260 | 0.68394  | 0         |  |  |



|         |      |            |      |          |           |  |  |
|---------|------|------------|------|----------|-----------|--|--|
|         |      | Shiraz-71T | 2261 | 0.508399 | 0         |  |  |
|         |      | Shiraz-3T  | 235  | 0        | -0.28401  |  |  |
|         |      | Shiraz-4T  | 260  | 0        | -0.324128 |  |  |
|         |      | Shiraz-16T | 294  | 0.655804 | 0         |  |  |
|         |      | Shiraz-36T | 431  | 0        | -0.78035  |  |  |
|         |      | Shiraz-44T | 891  | 0        | -0.954044 |  |  |
|         |      | Shiraz-49T | 1166 | 0        | -0.917235 |  |  |
|         |      | Shiraz-9T  | 1368 | 0.199713 | 0         |  |  |
|         |      | Shiraz-18T | 1455 | 0        | -0.186773 |  |  |
|         |      | Shiraz-22T | 1669 | 0.695915 | 0         |  |  |
|         |      | Shiraz-25T | 1717 | 0.420447 | 0         |  |  |
|         |      | Shiraz-28T | 1760 | 0.538181 | 0         |  |  |
|         |      | Shiraz-29T | 1800 | 0.672527 | 0         |  |  |
|         |      | Shiraz-32T | 1869 | 0.776805 | 0         |  |  |
|         |      | Shiraz-35T | 1932 | 0.507141 | 0         |  |  |
|         |      | Shiraz-40T | 2051 | 0.098506 | 0         |  |  |
|         |      | Shiraz-58T | 2221 | 0.871948 | 0         |  |  |
|         |      | Shiraz-71T | 2260 | 0.68394  | 0         |  |  |
|         |      | Shiraz-71T | 2261 | 0.508399 | 0         |  |  |
|         |      | Shiraz-3T  | 235  | 0        | -0.28401  |  |  |
|         |      | Shiraz-4T  | 260  | 0        | -0.324128 |  |  |
|         |      | Shiraz-16T | 294  | 0.655804 | 0         |  |  |
|         |      | Shiraz-36T | 431  | 0        | -0.78035  |  |  |
|         |      | Shiraz-44T | 891  | 0        | -0.954044 |  |  |
|         |      | Shiraz-49T | 1166 | 0        | -0.917235 |  |  |
|         |      | Shiraz-9T  | 1368 | 0.199713 | 0         |  |  |
|         |      | Shiraz-18T | 1455 | 0        | -0.186773 |  |  |
|         |      | Shiraz-22T | 1669 | 0.695915 | 0         |  |  |
|         |      | Shiraz-25T | 1717 | 0.420447 | 0         |  |  |
|         |      | Shiraz-28T | 1760 | 0.538181 | 0         |  |  |
|         |      | Shiraz-29T | 1800 | 0.672527 | 0         |  |  |
|         |      | Shiraz-32T | 1869 | 0.776805 | 0         |  |  |
|         |      | Shiraz-35T | 1932 | 0.507141 | 0         |  |  |
|         |      | Shiraz-40T | 2051 | 0.098506 | 0         |  |  |
|         |      | Shiraz-58T | 2221 | 0.871948 | 0         |  |  |
|         |      | Shiraz-71T | 2260 | 0.68394  | 0         |  |  |
|         |      | Shiraz-71T | 2261 | 0.508399 | 0         |  |  |
| ATXN7L1 | chr7 | Shiraz-3T  | 90   | 0.219276 | 0         |  |  |
|         |      | Shiraz-3T  | 90   | 0.219276 | 0         |  |  |
|         |      | Shiraz-3T  | 90   | 0.219276 | 0         |  |  |
|         |      | Shiraz-4T  | 253  | 0.372918 | 0         |  |  |
|         |      | Shiraz-4T  | 253  | 0.372918 | 0         |  |  |
|         |      | Shiraz-4T  | 253  | 0.372918 | 0         |  |  |
|         |      | Shiraz-36T | 378  | 0.179558 | 0         |  |  |
|         |      | Shiraz-36T | 378  | 0.179558 | 0         |  |  |
|         |      | Shiraz-36T | 378  | 0.179558 | 0         |  |  |
|         |      | Shiraz-46T | 943  | 0.093799 | 0         |  |  |

|  |  |            |      |          |           |  |  |
|--|--|------------|------|----------|-----------|--|--|
|  |  | Shiraz-46T | 943  | 0.093799 | 0         |  |  |
|  |  | Shiraz-46T | 943  | 0.093799 | 0         |  |  |
|  |  | Shiraz-77T | 1225 | 0        | -0.117922 |  |  |
|  |  | Shiraz-77T | 1225 | 0        | -0.117922 |  |  |
|  |  | Shiraz-77T | 1225 | 0        | -0.117922 |  |  |
|  |  | Shiraz-18T | 1434 | 0.244465 | 0         |  |  |
|  |  | Shiraz-18T | 1434 | 0.244465 | 0         |  |  |
|  |  | Shiraz-18T | 1434 | 0.244465 | 0         |  |  |
|  |  | Shiraz-22T | 1549 | 0        | -0.319623 |  |  |
|  |  | Shiraz-22T | 1549 | 0        | -0.319623 |  |  |
|  |  | Shiraz-22T | 1549 | 0        | -0.319623 |  |  |
|  |  | Shiraz-25T | 1698 | 0.21835  | 0         |  |  |
|  |  | Shiraz-25T | 1698 | 0.21835  | 0         |  |  |
|  |  | Shiraz-25T | 1698 | 0.21835  | 0         |  |  |
|  |  | Shiraz-28T | 1735 | 0.350744 | 0         |  |  |
|  |  | Shiraz-28T | 1735 | 0.350744 | 0         |  |  |
|  |  | Shiraz-28T | 1735 | 0.350744 | 0         |  |  |
|  |  | Shiraz-29T | 1778 | 0.120767 | 0         |  |  |
|  |  | Shiraz-29T | 1778 | 0.120767 | 0         |  |  |
|  |  | Shiraz-29T | 1778 | 0.120767 | 0         |  |  |
|  |  | Shiraz-32T | 1833 | 0.551336 | 0         |  |  |
|  |  | Shiraz-32T | 1833 | 0.551336 | 0         |  |  |
|  |  | Shiraz-32T | 1833 | 0.551336 | 0         |  |  |
|  |  | Shiraz-38T | 1951 | 0.250891 | 0         |  |  |
|  |  | Shiraz-38T | 1951 | 0.250891 | 0         |  |  |
|  |  | Shiraz-38T | 1951 | 0.250891 | 0         |  |  |
|  |  | Shiraz-53T | 2078 | 0.287202 | 0         |  |  |
|  |  | Shiraz-53T | 2078 | 0.287202 | 0         |  |  |
|  |  | Shiraz-53T | 2078 | 0.287202 | 0         |  |  |
|  |  | Shiraz-71T | 2238 | 0.603631 | 0         |  |  |
|  |  | Shiraz-71T | 2238 | 0.603631 | 0         |  |  |
|  |  | Shiraz-71T | 2238 | 0.603631 | 0         |  |  |
|  |  | Shiraz-3T  | 90   | 0.219276 | 0         |  |  |
|  |  | Shiraz-3T  | 90   | 0.219276 | 0         |  |  |
|  |  | Shiraz-3T  | 90   | 0.219276 | 0         |  |  |
|  |  | Shiraz-4T  | 253  | 0.372918 | 0         |  |  |
|  |  | Shiraz-4T  | 253  | 0.372918 | 0         |  |  |
|  |  | Shiraz-4T  | 253  | 0.372918 | 0         |  |  |
|  |  | Shiraz-36T | 378  | 0.179558 | 0         |  |  |
|  |  | Shiraz-36T | 378  | 0.179558 | 0         |  |  |
|  |  | Shiraz-36T | 378  | 0.179558 | 0         |  |  |
|  |  | Shiraz-46T | 943  | 0.093799 | 0         |  |  |
|  |  | Shiraz-46T | 943  | 0.093799 | 0         |  |  |
|  |  | Shiraz-46T | 943  | 0.093799 | 0         |  |  |
|  |  | Shiraz-77T | 1225 | 0        | -0.117922 |  |  |
|  |  | Shiraz-77T | 1225 | 0        | -0.117922 |  |  |
|  |  | Shiraz-77T | 1225 | 0        | -0.117922 |  |  |

|  |  |            |      |          |           |  |  |
|--|--|------------|------|----------|-----------|--|--|
|  |  | Shiraz-18T | 1434 | 0.244465 | 0         |  |  |
|  |  | Shiraz-18T | 1434 | 0.244465 | 0         |  |  |
|  |  | Shiraz-18T | 1434 | 0.244465 | 0         |  |  |
|  |  | Shiraz-22T | 1549 | 0        | -0.319623 |  |  |
|  |  | Shiraz-22T | 1549 | 0        | -0.319623 |  |  |
|  |  | Shiraz-22T | 1549 | 0        | -0.319623 |  |  |
|  |  | Shiraz-25T | 1698 | 0.21835  | 0         |  |  |
|  |  | Shiraz-25T | 1698 | 0.21835  | 0         |  |  |
|  |  | Shiraz-25T | 1698 | 0.21835  | 0         |  |  |
|  |  | Shiraz-28T | 1735 | 0.350744 | 0         |  |  |
|  |  | Shiraz-28T | 1735 | 0.350744 | 0         |  |  |
|  |  | Shiraz-28T | 1735 | 0.350744 | 0         |  |  |
|  |  | Shiraz-29T | 1778 | 0.120767 | 0         |  |  |
|  |  | Shiraz-29T | 1778 | 0.120767 | 0         |  |  |
|  |  | Shiraz-29T | 1778 | 0.120767 | 0         |  |  |
|  |  | Shiraz-32T | 1833 | 0.551336 | 0         |  |  |
|  |  | Shiraz-32T | 1833 | 0.551336 | 0         |  |  |
|  |  | Shiraz-32T | 1833 | 0.551336 | 0         |  |  |
|  |  | Shiraz-38T | 1951 | 0.250891 | 0         |  |  |
|  |  | Shiraz-38T | 1951 | 0.250891 | 0         |  |  |
|  |  | Shiraz-38T | 1951 | 0.250891 | 0         |  |  |
|  |  | Shiraz-53T | 2078 | 0.287202 | 0         |  |  |
|  |  | Shiraz-53T | 2078 | 0.287202 | 0         |  |  |
|  |  | Shiraz-53T | 2078 | 0.287202 | 0         |  |  |
|  |  | Shiraz-71T | 2238 | 0.603631 | 0         |  |  |
|  |  | Shiraz-71T | 2238 | 0.603631 | 0         |  |  |
|  |  | Shiraz-71T | 2238 | 0.603631 | 0         |  |  |
|  |  | Shiraz-3T  | 90   | 0.219276 | 0         |  |  |
|  |  | Shiraz-3T  | 90   | 0.219276 | 0         |  |  |
|  |  | Shiraz-3T  | 90   | 0.219276 | 0         |  |  |
|  |  | Shiraz-4T  | 253  | 0.372918 | 0         |  |  |
|  |  | Shiraz-4T  | 253  | 0.372918 | 0         |  |  |
|  |  | Shiraz-4T  | 253  | 0.372918 | 0         |  |  |
|  |  | Shiraz-36T | 378  | 0.179558 | 0         |  |  |
|  |  | Shiraz-36T | 378  | 0.179558 | 0         |  |  |
|  |  | Shiraz-36T | 378  | 0.179558 | 0         |  |  |
|  |  | Shiraz-46T | 943  | 0.093799 | 0         |  |  |
|  |  | Shiraz-46T | 943  | 0.093799 | 0         |  |  |
|  |  | Shiraz-46T | 943  | 0.093799 | 0         |  |  |
|  |  | Shiraz-77T | 1225 | 0        | -0.117922 |  |  |
|  |  | Shiraz-77T | 1225 | 0        | -0.117922 |  |  |
|  |  | Shiraz-77T | 1225 | 0        | -0.117922 |  |  |
|  |  | Shiraz-18T | 1434 | 0.244465 | 0         |  |  |
|  |  | Shiraz-18T | 1434 | 0.244465 | 0         |  |  |
|  |  | Shiraz-18T | 1434 | 0.244465 | 0         |  |  |
|  |  | Shiraz-22T | 1549 | 0        | -0.319623 |  |  |
|  |  | Shiraz-22T | 1549 | 0        | -0.319623 |  |  |

|      |      |            |      |          |           |  |  |
|------|------|------------|------|----------|-----------|--|--|
|      |      | Shiraz-22T | 1549 | 0        | -0.319623 |  |  |
|      |      | Shiraz-25T | 1698 | 0.21835  | 0         |  |  |
|      |      | Shiraz-25T | 1698 | 0.21835  | 0         |  |  |
|      |      | Shiraz-25T | 1698 | 0.21835  | 0         |  |  |
|      |      | Shiraz-28T | 1735 | 0.350744 | 0         |  |  |
|      |      | Shiraz-28T | 1735 | 0.350744 | 0         |  |  |
|      |      | Shiraz-28T | 1735 | 0.350744 | 0         |  |  |
|      |      | Shiraz-29T | 1778 | 0.120767 | 0         |  |  |
|      |      | Shiraz-29T | 1778 | 0.120767 | 0         |  |  |
|      |      | Shiraz-29T | 1778 | 0.120767 | 0         |  |  |
|      |      | Shiraz-32T | 1833 | 0.551336 | 0         |  |  |
|      |      | Shiraz-32T | 1833 | 0.551336 | 0         |  |  |
|      |      | Shiraz-32T | 1833 | 0.551336 | 0         |  |  |
|      |      | Shiraz-38T | 1951 | 0.250891 | 0         |  |  |
|      |      | Shiraz-38T | 1951 | 0.250891 | 0         |  |  |
|      |      | Shiraz-38T | 1951 | 0.250891 | 0         |  |  |
|      |      | Shiraz-53T | 2078 | 0.287202 | 0         |  |  |
|      |      | Shiraz-53T | 2078 | 0.287202 | 0         |  |  |
|      |      | Shiraz-53T | 2078 | 0.287202 | 0         |  |  |
|      |      | Shiraz-71T | 2238 | 0.603631 | 0         |  |  |
|      |      | Shiraz-71T | 2238 | 0.603631 | 0         |  |  |
|      |      | Shiraz-71T | 2238 | 0.603631 | 0         |  |  |
| AVL9 | chr7 | Shiraz-3T  | 87   | 0.198593 | 0         |  |  |
|      |      | Shiraz-4T  | 252  | 0.192083 | 0         |  |  |
|      |      | Shiraz-36T | 376  | 0.159952 | 0         |  |  |
|      |      | Shiraz-44T | 631  | 0        | -0.180312 |  |  |
|      |      | Shiraz-46T | 942  | 0.069143 | 0         |  |  |
|      |      | Shiraz-18T | 1433 | 0.250973 | 0         |  |  |
|      |      | Shiraz-22T | 1544 | 0        | -0.193579 |  |  |
|      |      | Shiraz-25T | 1697 | 0.21945  | 0         |  |  |
|      |      | Shiraz-28T | 1734 | 0.362882 | 0         |  |  |
|      |      | Shiraz-29T | 1777 | 0.156747 | 0         |  |  |
|      |      | Shiraz-38T | 1950 | 0.265916 | 0         |  |  |
|      |      | Shiraz-71T | 2236 | 0.320072 | 0         |  |  |
|      |      | Shiraz-3T  | 87   | 0.198593 | 0         |  |  |
|      |      | Shiraz-4T  | 252  | 0.192083 | 0         |  |  |
|      |      | Shiraz-36T | 376  | 0.159952 | 0         |  |  |
|      |      | Shiraz-44T | 631  | 0        | -0.180312 |  |  |
|      |      | Shiraz-46T | 942  | 0.069143 | 0         |  |  |
|      |      | Shiraz-18T | 1433 | 0.250973 | 0         |  |  |
|      |      | Shiraz-22T | 1544 | 0        | -0.193579 |  |  |
|      |      | Shiraz-25T | 1697 | 0.21945  | 0         |  |  |
|      |      | Shiraz-28T | 1734 | 0.362882 | 0         |  |  |
|      |      | Shiraz-29T | 1777 | 0.156747 | 0         |  |  |
|      |      | Shiraz-38T | 1950 | 0.265916 | 0         |  |  |
|      |      | Shiraz-71T | 2236 | 0.320072 | 0         |  |  |
|      |      | Shiraz-3T  | 87   | 0.198593 | 0         |  |  |

|       |      |            |      |          |           |  |
|-------|------|------------|------|----------|-----------|--|
|       |      | Shiraz-4T  | 252  | 0.192083 | 0         |  |
|       |      | Shiraz-36T | 376  | 0.159952 | 0         |  |
|       |      | Shiraz-44T | 631  | 0        | -0.180312 |  |
|       |      | Shiraz-46T | 942  | 0.069143 | 0         |  |
|       |      | Shiraz-18T | 1433 | 0.250973 | 0         |  |
|       |      | Shiraz-22T | 1544 | 0        | -0.193579 |  |
|       |      | Shiraz-25T | 1697 | 0.21945  | 0         |  |
|       |      | Shiraz-28T | 1734 | 0.362882 | 0         |  |
|       |      | Shiraz-29T | 1777 | 0.156747 | 0         |  |
|       |      | Shiraz-38T | 1950 | 0.265916 | 0         |  |
|       |      | Shiraz-71T | 2236 | 0.320072 | 0         |  |
| AVPR2 | chrX | Shiraz-3T  | 246  | 0.531858 | 0         |  |
|       |      | Shiraz-3T  | 246  | 0.531858 | 0         |  |
|       |      | Shiraz-4T  | 261  | 0        | -0.336249 |  |
|       |      | Shiraz-4T  | 261  | 0        | -0.336249 |  |
|       |      | Shiraz-16T | 295  | 0.591657 | 0         |  |
|       |      | Shiraz-16T | 295  | 0.591657 | 0         |  |
|       |      | Shiraz-36T | 433  | 0        | -0.803961 |  |
|       |      | Shiraz-36T | 433  | 0        | -0.803961 |  |
|       |      | Shiraz-42T | 480  | 0        | -0.232915 |  |
|       |      | Shiraz-42T | 480  | 0        | -0.232915 |  |
|       |      | Shiraz-44T | 908  | 0.466743 | 0         |  |
|       |      | Shiraz-44T | 908  | 0.466743 | 0         |  |
|       |      | Shiraz-49T | 1170 | 0        | -0.967436 |  |
|       |      | Shiraz-49T | 1170 | 0        | -0.967436 |  |
|       |      | Shiraz-49T | 1173 | 0        | -0.704439 |  |
|       |      | Shiraz-49T | 1173 | 0        | -0.704439 |  |
|       |      | Shiraz-9T  | 1370 | 0.690073 | 0         |  |
|       |      | Shiraz-9T  | 1370 | 0.690073 | 0         |  |
|       |      | Shiraz-9T  | 1371 | 1.292392 | 0         |  |
|       |      | Shiraz-9T  | 1371 | 1.292392 | 0         |  |
|       |      | Shiraz-18T | 1457 | 0.643204 | 0         |  |
|       |      | Shiraz-18T | 1457 | 0.643204 | 0         |  |
|       |      | Shiraz-22T | 1673 | 0.611783 | 0         |  |
|       |      | Shiraz-22T | 1673 | 0.611783 | 0         |  |
|       |      | Shiraz-22T | 1678 | 0.911625 | 0         |  |
|       |      | Shiraz-22T | 1678 | 0.911625 | 0         |  |
|       |      | Shiraz-25T | 1719 | 0.472955 | 0         |  |
|       |      | Shiraz-25T | 1719 | 0.472955 | 0         |  |
|       |      | Shiraz-28T | 1762 | 0.562311 | 0         |  |
|       |      | Shiraz-28T | 1762 | 0.562311 | 0         |  |
|       |      | Shiraz-29T | 1801 | 0.815343 | 0         |  |
|       |      | Shiraz-29T | 1801 | 0.815343 | 0         |  |
|       |      | Shiraz-32T | 1870 | 0.729766 | 0         |  |
|       |      | Shiraz-32T | 1870 | 0.729766 | 0         |  |
|       |      | Shiraz-32T | 1872 | 1.504553 | 0         |  |
|       |      | Shiraz-32T | 1872 | 1.504553 | 0         |  |

|  |            |      |          |           |  |
|--|------------|------|----------|-----------|--|
|  | Shiraz-35T | 1933 | 0.488535 | 0         |  |
|  | Shiraz-35T | 1933 | 0.488535 | 0         |  |
|  | Shiraz-38T | 2011 | 0        | -0.406024 |  |
|  | Shiraz-38T | 2011 | 0        | -0.406024 |  |
|  | Shiraz-53T | 2115 | 0.427728 | 0         |  |
|  | Shiraz-53T | 2115 | 0.427728 | 0         |  |
|  | Shiraz-58T | 2223 | 0.833364 | 0         |  |
|  | Shiraz-58T | 2223 | 0.833364 | 0         |  |
|  | Shiraz-58T | 2226 | 1.074663 | 0         |  |
|  | Shiraz-58T | 2226 | 1.074663 | 0         |  |
|  | Shiraz-71T | 2263 | 0.975531 | 0         |  |
|  | Shiraz-71T | 2263 | 0.975531 | 0         |  |
|  | Shiraz-3T  | 246  | 0.531858 | 0         |  |
|  | Shiraz-3T  | 246  | 0.531858 | 0         |  |
|  | Shiraz-4T  | 261  | 0        | -0.336249 |  |
|  | Shiraz-4T  | 261  | 0        | -0.336249 |  |
|  | Shiraz-16T | 295  | 0.591657 | 0         |  |
|  | Shiraz-16T | 295  | 0.591657 | 0         |  |
|  | Shiraz-36T | 433  | 0        | -0.803961 |  |
|  | Shiraz-36T | 433  | 0        | -0.803961 |  |
|  | Shiraz-42T | 480  | 0        | -0.232915 |  |
|  | Shiraz-42T | 480  | 0        | -0.232915 |  |
|  | Shiraz-44T | 908  | 0.466743 | 0         |  |
|  | Shiraz-44T | 908  | 0.466743 | 0         |  |
|  | Shiraz-49T | 1170 | 0        | -0.967436 |  |
|  | Shiraz-49T | 1170 | 0        | -0.967436 |  |
|  | Shiraz-49T | 1173 | 0        | -0.704439 |  |
|  | Shiraz-49T | 1173 | 0        | -0.704439 |  |
|  | Shiraz-9T  | 1370 | 0.690073 | 0         |  |
|  | Shiraz-9T  | 1370 | 0.690073 | 0         |  |
|  | Shiraz-9T  | 1371 | 1.292392 | 0         |  |
|  | Shiraz-9T  | 1371 | 1.292392 | 0         |  |
|  | Shiraz-18T | 1457 | 0.643204 | 0         |  |
|  | Shiraz-18T | 1457 | 0.643204 | 0         |  |
|  | Shiraz-22T | 1673 | 0.611783 | 0         |  |
|  | Shiraz-22T | 1673 | 0.611783 | 0         |  |
|  | Shiraz-22T | 1678 | 0.911625 | 0         |  |
|  | Shiraz-22T | 1678 | 0.911625 | 0         |  |
|  | Shiraz-25T | 1719 | 0.472955 | 0         |  |
|  | Shiraz-25T | 1719 | 0.472955 | 0         |  |
|  | Shiraz-28T | 1762 | 0.562311 | 0         |  |
|  | Shiraz-28T | 1762 | 0.562311 | 0         |  |
|  | Shiraz-29T | 1801 | 0.815343 | 0         |  |
|  | Shiraz-29T | 1801 | 0.815343 | 0         |  |
|  | Shiraz-32T | 1870 | 0.729766 | 0         |  |
|  | Shiraz-32T | 1870 | 0.729766 | 0         |  |
|  | Shiraz-32T | 1872 | 1.504553 | 0         |  |

|  |  |            |      |          |           |  |
|--|--|------------|------|----------|-----------|--|
|  |  | Shiraz-32T | 1872 | 1.504553 | 0         |  |
|  |  | Shiraz-35T | 1933 | 0.488535 | 0         |  |
|  |  | Shiraz-35T | 1933 | 0.488535 | 0         |  |
|  |  | Shiraz-38T | 2011 | 0        | -0.406024 |  |
|  |  | Shiraz-38T | 2011 | 0        | -0.406024 |  |
|  |  | Shiraz-53T | 2115 | 0.427728 | 0         |  |
|  |  | Shiraz-53T | 2115 | 0.427728 | 0         |  |
|  |  | Shiraz-58T | 2223 | 0.833364 | 0         |  |
|  |  | Shiraz-58T | 2223 | 0.833364 | 0         |  |
|  |  | Shiraz-58T | 2226 | 1.074663 | 0         |  |
|  |  | Shiraz-58T | 2226 | 1.074663 | 0         |  |
|  |  | Shiraz-71T | 2263 | 0.975531 | 0         |  |
|  |  | Shiraz-71T | 2263 | 0.975531 | 0         |  |
|  |  | Shiraz-3T  | 246  | 0.531858 | 0         |  |
|  |  | Shiraz-3T  | 246  | 0.531858 | 0         |  |
|  |  | Shiraz-4T  | 261  | 0        | -0.336249 |  |
|  |  | Shiraz-4T  | 261  | 0        | -0.336249 |  |
|  |  | Shiraz-16T | 295  | 0.591657 | 0         |  |
|  |  | Shiraz-16T | 295  | 0.591657 | 0         |  |
|  |  | Shiraz-36T | 433  | 0        | -0.803961 |  |
|  |  | Shiraz-36T | 433  | 0        | -0.803961 |  |
|  |  | Shiraz-42T | 480  | 0        | -0.232915 |  |
|  |  | Shiraz-42T | 480  | 0        | -0.232915 |  |
|  |  | Shiraz-44T | 908  | 0.466743 | 0         |  |
|  |  | Shiraz-44T | 908  | 0.466743 | 0         |  |
|  |  | Shiraz-49T | 1170 | 0        | -0.967436 |  |
|  |  | Shiraz-49T | 1170 | 0        | -0.967436 |  |
|  |  | Shiraz-49T | 1173 | 0        | -0.704439 |  |
|  |  | Shiraz-49T | 1173 | 0        | -0.704439 |  |
|  |  | Shiraz-9T  | 1370 | 0.690073 | 0         |  |
|  |  | Shiraz-9T  | 1370 | 0.690073 | 0         |  |
|  |  | Shiraz-9T  | 1371 | 1.292392 | 0         |  |
|  |  | Shiraz-9T  | 1371 | 1.292392 | 0         |  |
|  |  | Shiraz-18T | 1457 | 0.643204 | 0         |  |
|  |  | Shiraz-18T | 1457 | 0.643204 | 0         |  |
|  |  | Shiraz-22T | 1673 | 0.611783 | 0         |  |
|  |  | Shiraz-22T | 1673 | 0.611783 | 0         |  |
|  |  | Shiraz-22T | 1678 | 0.911625 | 0         |  |
|  |  | Shiraz-22T | 1678 | 0.911625 | 0         |  |
|  |  | Shiraz-25T | 1719 | 0.472955 | 0         |  |
|  |  | Shiraz-25T | 1719 | 0.472955 | 0         |  |
|  |  | Shiraz-28T | 1762 | 0.562311 | 0         |  |
|  |  | Shiraz-28T | 1762 | 0.562311 | 0         |  |
|  |  | Shiraz-29T | 1801 | 0.815343 | 0         |  |
|  |  | Shiraz-29T | 1801 | 0.815343 | 0         |  |
|  |  | Shiraz-32T | 1870 | 0.729766 | 0         |  |
|  |  | Shiraz-32T | 1870 | 0.729766 | 0         |  |

|       |      |            |      |          |           |  |
|-------|------|------------|------|----------|-----------|--|
|       |      | Shiraz-32T | 1872 | 1.504553 | 0         |  |
|       |      | Shiraz-32T | 1872 | 1.504553 | 0         |  |
|       |      | Shiraz-35T | 1933 | 0.488535 | 0         |  |
|       |      | Shiraz-35T | 1933 | 0.488535 | 0         |  |
|       |      | Shiraz-38T | 2011 | 0        | -0.406024 |  |
|       |      | Shiraz-38T | 2011 | 0        | -0.406024 |  |
|       |      | Shiraz-53T | 2115 | 0.427728 | 0         |  |
|       |      | Shiraz-53T | 2115 | 0.427728 | 0         |  |
|       |      | Shiraz-58T | 2223 | 0.833364 | 0         |  |
|       |      | Shiraz-58T | 2223 | 0.833364 | 0         |  |
|       |      | Shiraz-58T | 2226 | 1.074663 | 0         |  |
|       |      | Shiraz-58T | 2226 | 1.074663 | 0         |  |
|       |      | Shiraz-71T | 2263 | 0.975531 | 0         |  |
|       |      | Shiraz-71T | 2263 | 0.975531 | 0         |  |
| AWAT1 | chrX | Shiraz-3T  | 241  | 0        | -0.230501 |  |
|       |      | Shiraz-4T  | 261  | 0        | -0.336249 |  |
|       |      | Shiraz-16T | 295  | 0.591657 | 0         |  |
|       |      | Shiraz-36T | 433  | 0        | -0.803961 |  |
|       |      | Shiraz-44T | 899  | 0        | -1.09697  |  |
|       |      | Shiraz-44T | 900  | 0        | -0.584284 |  |
|       |      | Shiraz-44T | 901  | 0        | -1.000082 |  |
|       |      | Shiraz-49T | 1170 | 0        | -0.967436 |  |
|       |      | Shiraz-18T | 1457 | 0.643204 | 0         |  |
|       |      | Shiraz-22T | 1673 | 0.611783 | 0         |  |
|       |      | Shiraz-22T | 1674 | 0.887899 | 0         |  |
|       |      | Shiraz-25T | 1719 | 0.472955 | 0         |  |
|       |      | Shiraz-28T | 1762 | 0.562311 | 0         |  |
|       |      | Shiraz-29T | 1801 | 0.815343 | 0         |  |
|       |      | Shiraz-32T | 1870 | 0.729766 | 0         |  |
|       |      | Shiraz-35T | 1933 | 0.488535 | 0         |  |
|       |      | Shiraz-58T | 2223 | 0.833364 | 0         |  |
|       |      | Shiraz-58T | 2224 | 1.076575 | 0         |  |
|       |      | Shiraz-71T | 2263 | 0.975531 | 0         |  |
|       |      | Shiraz-3T  | 241  | 0        | -0.230501 |  |
|       |      | Shiraz-4T  | 261  | 0        | -0.336249 |  |
|       |      | Shiraz-16T | 295  | 0.591657 | 0         |  |
|       |      | Shiraz-36T | 433  | 0        | -0.803961 |  |
|       |      | Shiraz-44T | 899  | 0        | -1.09697  |  |
|       |      | Shiraz-44T | 900  | 0        | -0.584284 |  |
|       |      | Shiraz-44T | 901  | 0        | -1.000082 |  |
|       |      | Shiraz-49T | 1170 | 0        | -0.967436 |  |
|       |      | Shiraz-18T | 1457 | 0.643204 | 0         |  |
|       |      | Shiraz-22T | 1673 | 0.611783 | 0         |  |
|       |      | Shiraz-22T | 1674 | 0.887899 | 0         |  |
|       |      | Shiraz-25T | 1719 | 0.472955 | 0         |  |
|       |      | Shiraz-28T | 1762 | 0.562311 | 0         |  |
|       |      | Shiraz-29T | 1801 | 0.815343 | 0         |  |



|       |      |            |      |          |           |  |  |
|-------|------|------------|------|----------|-----------|--|--|
|       |      | Shiraz-32T | 1870 | 0.729766 | 0         |  |  |
|       |      | Shiraz-35T | 1933 | 0.488535 | 0         |  |  |
|       |      | Shiraz-58T | 2223 | 0.833364 | 0         |  |  |
|       |      | Shiraz-58T | 2224 | 1.076575 | 0         |  |  |
|       |      | Shiraz-71T | 2263 | 0.975531 | 0         |  |  |
|       |      | Shiraz-3T  | 241  | 0        | -0.230501 |  |  |
|       |      | Shiraz-4T  | 261  | 0        | -0.336249 |  |  |
|       |      | Shiraz-16T | 295  | 0.591657 | 0         |  |  |
|       |      | Shiraz-36T | 433  | 0        | -0.803961 |  |  |
|       |      | Shiraz-44T | 899  | 0        | -1.09697  |  |  |
|       |      | Shiraz-44T | 900  | 0        | -0.584284 |  |  |
|       |      | Shiraz-44T | 901  | 0        | -1.000082 |  |  |
|       |      | Shiraz-49T | 1170 | 0        | -0.967436 |  |  |
|       |      | Shiraz-18T | 1457 | 0.643204 | 0         |  |  |
|       |      | Shiraz-22T | 1673 | 0.611783 | 0         |  |  |
|       |      | Shiraz-22T | 1674 | 0.887899 | 0         |  |  |
|       |      | Shiraz-25T | 1719 | 0.472955 | 0         |  |  |
|       |      | Shiraz-28T | 1762 | 0.562311 | 0         |  |  |
|       |      | Shiraz-29T | 1801 | 0.815343 | 0         |  |  |
|       |      | Shiraz-32T | 1870 | 0.729766 | 0         |  |  |
|       |      | Shiraz-35T | 1933 | 0.488535 | 0         |  |  |
|       |      | Shiraz-58T | 2223 | 0.833364 | 0         |  |  |
|       |      | Shiraz-58T | 2224 | 1.076575 | 0         |  |  |
|       |      | Shiraz-71T | 2263 | 0.975531 | 0         |  |  |
| AWAT2 | chrX | Shiraz-3T  | 241  | 0        | -0.230501 |  |  |
|       |      | Shiraz-4T  | 261  | 0        | -0.336249 |  |  |
|       |      | Shiraz-16T | 295  | 0.591657 | 0         |  |  |
|       |      | Shiraz-36T | 433  | 0        | -0.803961 |  |  |
|       |      | Shiraz-44T | 899  | 0        | -1.09697  |  |  |
|       |      | Shiraz-44T | 900  | 0        | -0.584284 |  |  |
|       |      | Shiraz-44T | 901  | 0        | -1.000082 |  |  |
|       |      | Shiraz-49T | 1170 | 0        | -0.967436 |  |  |
|       |      | Shiraz-18T | 1457 | 0.643204 | 0         |  |  |
|       |      | Shiraz-22T | 1673 | 0.611783 | 0         |  |  |
|       |      | Shiraz-22T | 1674 | 0.887899 | 0         |  |  |
|       |      | Shiraz-25T | 1719 | 0.472955 | 0         |  |  |
|       |      | Shiraz-28T | 1762 | 0.562311 | 0         |  |  |
|       |      | Shiraz-29T | 1801 | 0.815343 | 0         |  |  |
|       |      | Shiraz-32T | 1870 | 0.729766 | 0         |  |  |
|       |      | Shiraz-35T | 1933 | 0.488535 | 0         |  |  |
|       |      | Shiraz-58T | 2223 | 0.833364 | 0         |  |  |
|       |      | Shiraz-58T | 2224 | 1.076575 | 0         |  |  |
|       |      | Shiraz-71T | 2263 | 0.975531 | 0         |  |  |
|       |      | Shiraz-3T  | 241  | 0        | -0.230501 |  |  |
|       |      | Shiraz-4T  | 261  | 0        | -0.336249 |  |  |
|       |      | Shiraz-16T | 295  | 0.591657 | 0         |  |  |
|       |      | Shiraz-36T | 433  | 0        | -0.803961 |  |  |

|       |      |            |      |          |           |  |  |
|-------|------|------------|------|----------|-----------|--|--|
|       |      | Shiraz-44T | 899  | 0        | -1.09697  |  |  |
|       |      | Shiraz-44T | 900  | 0        | -0.584284 |  |  |
|       |      | Shiraz-44T | 901  | 0        | -1.000082 |  |  |
|       |      | Shiraz-49T | 1170 | 0        | -0.967436 |  |  |
|       |      | Shiraz-18T | 1457 | 0.643204 | 0         |  |  |
|       |      | Shiraz-22T | 1673 | 0.611783 | 0         |  |  |
|       |      | Shiraz-22T | 1674 | 0.887899 | 0         |  |  |
|       |      | Shiraz-25T | 1719 | 0.472955 | 0         |  |  |
|       |      | Shiraz-28T | 1762 | 0.562311 | 0         |  |  |
|       |      | Shiraz-29T | 1801 | 0.815343 | 0         |  |  |
|       |      | Shiraz-32T | 1870 | 0.729766 | 0         |  |  |
|       |      | Shiraz-35T | 1933 | 0.488535 | 0         |  |  |
|       |      | Shiraz-58T | 2223 | 0.833364 | 0         |  |  |
|       |      | Shiraz-58T | 2224 | 1.076575 | 0         |  |  |
|       |      | Shiraz-71T | 2263 | 0.975531 | 0         |  |  |
|       |      | Shiraz-3T  | 241  | 0        | -0.230501 |  |  |
|       |      | Shiraz-4T  | 261  | 0        | -0.336249 |  |  |
|       |      | Shiraz-16T | 295  | 0.591657 | 0         |  |  |
|       |      | Shiraz-36T | 433  | 0        | -0.803961 |  |  |
|       |      | Shiraz-44T | 899  | 0        | -1.09697  |  |  |
|       |      | Shiraz-44T | 900  | 0        | -0.584284 |  |  |
|       |      | Shiraz-44T | 901  | 0        | -1.000082 |  |  |
|       |      | Shiraz-49T | 1170 | 0        | -0.967436 |  |  |
|       |      | Shiraz-18T | 1457 | 0.643204 | 0         |  |  |
|       |      | Shiraz-22T | 1673 | 0.611783 | 0         |  |  |
|       |      | Shiraz-22T | 1674 | 0.887899 | 0         |  |  |
|       |      | Shiraz-25T | 1719 | 0.472955 | 0         |  |  |
|       |      | Shiraz-28T | 1762 | 0.562311 | 0         |  |  |
|       |      | Shiraz-29T | 1801 | 0.815343 | 0         |  |  |
|       |      | Shiraz-32T | 1870 | 0.729766 | 0         |  |  |
|       |      | Shiraz-35T | 1933 | 0.488535 | 0         |  |  |
|       |      | Shiraz-58T | 2223 | 0.833364 | 0         |  |  |
|       |      | Shiraz-58T | 2224 | 1.076575 | 0         |  |  |
|       |      | Shiraz-71T | 2263 | 0.975531 | 0         |  |  |
| AZGP1 | chr7 | Shiraz-3T  | 90   | 0.219276 | 0         |  |  |
|       |      | Shiraz-3T  | 94   | 0.74735  | 0         |  |  |
|       |      | Shiraz-4T  | 253  | 0.372918 | 0         |  |  |
|       |      | Shiraz-31T | 316  | 0.219196 | 0         |  |  |
|       |      | Shiraz-36T | 378  | 0.179558 | 0         |  |  |
|       |      | Shiraz-36T | 381  | 0.332628 | 0         |  |  |
|       |      | Shiraz-44T | 639  | 1.035032 | 0         |  |  |
|       |      | Shiraz-46T | 943  | 0.093799 | 0         |  |  |
|       |      | Shiraz-46T | 946  | 0.299835 | 0         |  |  |
|       |      | Shiraz-47T | 1030 | 0.257728 | 0         |  |  |
|       |      | Shiraz-49T | 1120 | 0.281656 | 0         |  |  |
|       |      | Shiraz-77T | 1225 | 0        | -0.117922 |  |  |
|       |      | Shiraz-77T | 1227 | 0.196445 | 0         |  |  |

|  |            |      |          |           |  |
|--|------------|------|----------|-----------|--|
|  | Shiraz-9T  | 1324 | 0.679266 | 0         |  |
|  | Shiraz-18T | 1434 | 0.244465 | 0         |  |
|  | Shiraz-22T | 1549 | 0        | -0.319623 |  |
|  | Shiraz-22T | 1551 | 0.324011 | 0         |  |
|  | Shiraz-25T | 1698 | 0.21835  | 0         |  |
|  | Shiraz-28T | 1735 | 0.350744 | 0         |  |
|  | Shiraz-29T | 1778 | 0.120767 | 0         |  |
|  | Shiraz-32T | 1833 | 0.551336 | 0         |  |
|  | Shiraz-38T | 1951 | 0.250891 | 0         |  |
|  | Shiraz-53T | 2078 | 0.287202 | 0         |  |
|  | Shiraz-58T | 2160 | 0.399007 | 0         |  |
|  | Shiraz-71T | 2238 | 0.603631 | 0         |  |
|  | Shiraz-3T  | 90   | 0.219276 | 0         |  |
|  | Shiraz-3T  | 94   | 0.74735  | 0         |  |
|  | Shiraz-4T  | 253  | 0.372918 | 0         |  |
|  | Shiraz-31T | 316  | 0.219196 | 0         |  |
|  | Shiraz-36T | 378  | 0.179558 | 0         |  |
|  | Shiraz-36T | 381  | 0.332628 | 0         |  |
|  | Shiraz-44T | 639  | 1.035032 | 0         |  |
|  | Shiraz-46T | 943  | 0.093799 | 0         |  |
|  | Shiraz-46T | 946  | 0.299835 | 0         |  |
|  | Shiraz-47T | 1030 | 0.257728 | 0         |  |
|  | Shiraz-49T | 1120 | 0.281656 | 0         |  |
|  | Shiraz-77T | 1225 | 0        | -0.117922 |  |
|  | Shiraz-77T | 1227 | 0.196445 | 0         |  |
|  | Shiraz-9T  | 1324 | 0.679266 | 0         |  |
|  | Shiraz-18T | 1434 | 0.244465 | 0         |  |
|  | Shiraz-22T | 1549 | 0        | -0.319623 |  |
|  | Shiraz-22T | 1551 | 0.324011 | 0         |  |
|  | Shiraz-25T | 1698 | 0.21835  | 0         |  |
|  | Shiraz-28T | 1735 | 0.350744 | 0         |  |
|  | Shiraz-29T | 1778 | 0.120767 | 0         |  |
|  | Shiraz-32T | 1833 | 0.551336 | 0         |  |
|  | Shiraz-38T | 1951 | 0.250891 | 0         |  |
|  | Shiraz-53T | 2078 | 0.287202 | 0         |  |
|  | Shiraz-58T | 2160 | 0.399007 | 0         |  |
|  | Shiraz-71T | 2238 | 0.603631 | 0         |  |
|  | Shiraz-3T  | 90   | 0.219276 | 0         |  |
|  | Shiraz-3T  | 94   | 0.74735  | 0         |  |
|  | Shiraz-4T  | 253  | 0.372918 | 0         |  |
|  | Shiraz-31T | 316  | 0.219196 | 0         |  |
|  | Shiraz-36T | 378  | 0.179558 | 0         |  |
|  | Shiraz-36T | 381  | 0.332628 | 0         |  |
|  | Shiraz-44T | 639  | 1.035032 | 0         |  |
|  | Shiraz-46T | 943  | 0.093799 | 0         |  |
|  | Shiraz-46T | 946  | 0.299835 | 0         |  |
|  | Shiraz-47T | 1030 | 0.257728 | 0         |  |

|          |      |            |      |          |           |  |  |
|----------|------|------------|------|----------|-----------|--|--|
|          |      | Shiraz-49T | 1120 | 0.281656 | 0         |  |  |
|          |      | Shiraz-77T | 1225 | 0        | -0.117922 |  |  |
|          |      | Shiraz-77T | 1227 | 0.196445 | 0         |  |  |
|          |      | Shiraz-9T  | 1324 | 0.679266 | 0         |  |  |
|          |      | Shiraz-18T | 1434 | 0.244465 | 0         |  |  |
|          |      | Shiraz-22T | 1549 | 0        | -0.319623 |  |  |
|          |      | Shiraz-22T | 1551 | 0.324011 | 0         |  |  |
|          |      | Shiraz-25T | 1698 | 0.21835  | 0         |  |  |
|          |      | Shiraz-28T | 1735 | 0.350744 | 0         |  |  |
|          |      | Shiraz-29T | 1778 | 0.120767 | 0         |  |  |
|          |      | Shiraz-32T | 1833 | 0.551336 | 0         |  |  |
|          |      | Shiraz-38T | 1951 | 0.250891 | 0         |  |  |
|          |      | Shiraz-53T | 2078 | 0.287202 | 0         |  |  |
|          |      | Shiraz-58T | 2160 | 0.399007 | 0         |  |  |
|          |      | Shiraz-71T | 2238 | 0.603631 | 0         |  |  |
| BAIAP2L1 | chr7 | Shiraz-3T  | 90   | 0.219276 | 0         |  |  |
|          |      | Shiraz-3T  | 94   | 0.74735  | 0         |  |  |
|          |      | Shiraz-4T  | 253  | 0.372918 | 0         |  |  |
|          |      | Shiraz-31T | 316  | 0.219196 | 0         |  |  |
|          |      | Shiraz-36T | 378  | 0.179558 | 0         |  |  |
|          |      | Shiraz-36T | 381  | 0.332628 | 0         |  |  |
|          |      | Shiraz-44T | 639  | 1.035032 | 0         |  |  |
|          |      | Shiraz-46T | 943  | 0.093799 | 0         |  |  |
|          |      | Shiraz-46T | 946  | 0.299835 | 0         |  |  |
|          |      | Shiraz-47T | 1030 | 0.257728 | 0         |  |  |
|          |      | Shiraz-49T | 1120 | 0.281656 | 0         |  |  |
|          |      | Shiraz-77T | 1225 | 0        | -0.117922 |  |  |
|          |      | Shiraz-77T | 1227 | 0.196445 | 0         |  |  |
|          |      | Shiraz-9T  | 1324 | 0.679266 | 0         |  |  |
|          |      | Shiraz-18T | 1434 | 0.244465 | 0         |  |  |
|          |      | Shiraz-22T | 1549 | 0        | -0.319623 |  |  |
|          |      | Shiraz-22T | 1551 | 0.324011 | 0         |  |  |
|          |      | Shiraz-25T | 1698 | 0.21835  | 0         |  |  |
|          |      | Shiraz-28T | 1735 | 0.350744 | 0         |  |  |
|          |      | Shiraz-29T | 1778 | 0.120767 | 0         |  |  |
|          |      | Shiraz-32T | 1833 | 0.551336 | 0         |  |  |
|          |      | Shiraz-38T | 1951 | 0.250891 | 0         |  |  |
|          |      | Shiraz-53T | 2078 | 0.287202 | 0         |  |  |
|          |      | Shiraz-71T | 2238 | 0.603631 | 0         |  |  |
|          |      | Shiraz-3T  | 90   | 0.219276 | 0         |  |  |
|          |      | Shiraz-3T  | 94   | 0.74735  | 0         |  |  |
|          |      | Shiraz-4T  | 253  | 0.372918 | 0         |  |  |
|          |      | Shiraz-31T | 316  | 0.219196 | 0         |  |  |
|          |      | Shiraz-36T | 378  | 0.179558 | 0         |  |  |
|          |      | Shiraz-36T | 381  | 0.332628 | 0         |  |  |
|          |      | Shiraz-44T | 639  | 1.035032 | 0         |  |  |
|          |      | Shiraz-46T | 943  | 0.093799 | 0         |  |  |

|      |      |            |      |          |           |  |
|------|------|------------|------|----------|-----------|--|
|      |      | Shiraz-46T | 946  | 0.299835 | 0         |  |
|      |      | Shiraz-47T | 1030 | 0.257728 | 0         |  |
|      |      | Shiraz-49T | 1120 | 0.281656 | 0         |  |
|      |      | Shiraz-77T | 1225 | 0        | -0.117922 |  |
|      |      | Shiraz-77T | 1227 | 0.196445 | 0         |  |
|      |      | Shiraz-9T  | 1324 | 0.679266 | 0         |  |
|      |      | Shiraz-18T | 1434 | 0.244465 | 0         |  |
|      |      | Shiraz-22T | 1549 | 0        | -0.319623 |  |
|      |      | Shiraz-22T | 1551 | 0.324011 | 0         |  |
|      |      | Shiraz-25T | 1698 | 0.21835  | 0         |  |
|      |      | Shiraz-28T | 1735 | 0.350744 | 0         |  |
|      |      | Shiraz-29T | 1778 | 0.120767 | 0         |  |
|      |      | Shiraz-32T | 1833 | 0.551336 | 0         |  |
|      |      | Shiraz-38T | 1951 | 0.250891 | 0         |  |
|      |      | Shiraz-53T | 2078 | 0.287202 | 0         |  |
|      |      | Shiraz-71T | 2238 | 0.603631 | 0         |  |
|      |      | Shiraz-3T  | 90   | 0.219276 | 0         |  |
|      |      | Shiraz-3T  | 94   | 0.74735  | 0         |  |
|      |      | Shiraz-4T  | 253  | 0.372918 | 0         |  |
|      |      | Shiraz-31T | 316  | 0.219196 | 0         |  |
|      |      | Shiraz-36T | 378  | 0.179558 | 0         |  |
|      |      | Shiraz-36T | 381  | 0.332628 | 0         |  |
|      |      | Shiraz-44T | 639  | 1.035032 | 0         |  |
|      |      | Shiraz-46T | 943  | 0.093799 | 0         |  |
|      |      | Shiraz-46T | 946  | 0.299835 | 0         |  |
|      |      | Shiraz-47T | 1030 | 0.257728 | 0         |  |
|      |      | Shiraz-49T | 1120 | 0.281656 | 0         |  |
|      |      | Shiraz-77T | 1225 | 0        | -0.117922 |  |
|      |      | Shiraz-77T | 1227 | 0.196445 | 0         |  |
|      |      | Shiraz-9T  | 1324 | 0.679266 | 0         |  |
|      |      | Shiraz-18T | 1434 | 0.244465 | 0         |  |
|      |      | Shiraz-22T | 1549 | 0        | -0.319623 |  |
|      |      | Shiraz-22T | 1551 | 0.324011 | 0         |  |
|      |      | Shiraz-25T | 1698 | 0.21835  | 0         |  |
|      |      | Shiraz-28T | 1735 | 0.350744 | 0         |  |
|      |      | Shiraz-29T | 1778 | 0.120767 | 0         |  |
|      |      | Shiraz-32T | 1833 | 0.551336 | 0         |  |
|      |      | Shiraz-38T | 1951 | 0.250891 | 0         |  |
|      |      | Shiraz-53T | 2078 | 0.287202 | 0         |  |
|      |      | Shiraz-71T | 2238 | 0.603631 | 0         |  |
| BBS9 | chr7 | Shiraz-3T  | 87   | 0.198593 | 0         |  |
|      |      | Shiraz-4T  | 252  | 0.192083 | 0         |  |
|      |      | Shiraz-36T | 376  | 0.159952 | 0         |  |
|      |      | Shiraz-44T | 631  | 0        | -0.180312 |  |
|      |      | Shiraz-46T | 942  | 0.069143 | 0         |  |
|      |      | Shiraz-18T | 1433 | 0.250973 | 0         |  |
|      |      | Shiraz-22T | 1544 | 0        | -0.193579 |  |

|        |      |            |      |          |           |  |
|--------|------|------------|------|----------|-----------|--|
|        |      | Shiraz-25T | 1697 | 0.21945  | 0         |  |
|        |      | Shiraz-28T | 1734 | 0.362882 | 0         |  |
|        |      | Shiraz-29T | 1777 | 0.156747 | 0         |  |
|        |      | Shiraz-38T | 1950 | 0.265916 | 0         |  |
|        |      | Shiraz-71T | 2236 | 0.320072 | 0         |  |
|        |      | Shiraz-3T  | 87   | 0.198593 | 0         |  |
|        |      | Shiraz-4T  | 252  | 0.192083 | 0         |  |
|        |      | Shiraz-36T | 376  | 0.159952 | 0         |  |
|        |      | Shiraz-44T | 631  | 0        | -0.180312 |  |
|        |      | Shiraz-46T | 942  | 0.069143 | 0         |  |
|        |      | Shiraz-18T | 1433 | 0.250973 | 0         |  |
|        |      | Shiraz-22T | 1544 | 0        | -0.193579 |  |
|        |      | Shiraz-25T | 1697 | 0.21945  | 0         |  |
|        |      | Shiraz-28T | 1734 | 0.362882 | 0         |  |
|        |      | Shiraz-29T | 1777 | 0.156747 | 0         |  |
|        |      | Shiraz-38T | 1950 | 0.265916 | 0         |  |
|        |      | Shiraz-71T | 2236 | 0.320072 | 0         |  |
|        |      | Shiraz-3T  | 87   | 0.198593 | 0         |  |
|        |      | Shiraz-4T  | 252  | 0.192083 | 0         |  |
|        |      | Shiraz-36T | 376  | 0.159952 | 0         |  |
|        |      | Shiraz-44T | 631  | 0        | -0.180312 |  |
|        |      | Shiraz-46T | 942  | 0.069143 | 0         |  |
|        |      | Shiraz-18T | 1433 | 0.250973 | 0         |  |
|        |      | Shiraz-22T | 1544 | 0        | -0.193579 |  |
|        |      | Shiraz-25T | 1697 | 0.21945  | 0         |  |
|        |      | Shiraz-28T | 1734 | 0.362882 | 0         |  |
|        |      | Shiraz-29T | 1777 | 0.156747 | 0         |  |
|        |      | Shiraz-38T | 1950 | 0.265916 | 0         |  |
|        |      | Shiraz-71T | 2236 | 0.320072 | 0         |  |
| BCAP29 | chr7 | Shiraz-3T  | 90   | 0.219276 | 0         |  |
|        |      | Shiraz-3T  | 90   | 0.219276 | 0         |  |
|        |      | Shiraz-3T  | 90   | 0.219276 | 0         |  |
|        |      | Shiraz-3T  | 90   | 0.219276 | 0         |  |
|        |      | Shiraz-4T  | 253  | 0.372918 | 0         |  |
|        |      | Shiraz-4T  | 253  | 0.372918 | 0         |  |
|        |      | Shiraz-4T  | 253  | 0.372918 | 0         |  |
|        |      | Shiraz-4T  | 253  | 0.372918 | 0         |  |
|        |      | Shiraz-36T | 378  | 0.179558 | 0         |  |
|        |      | Shiraz-36T | 378  | 0.179558 | 0         |  |
|        |      | Shiraz-36T | 378  | 0.179558 | 0         |  |
|        |      | Shiraz-36T | 378  | 0.179558 | 0         |  |
|        |      | Shiraz-46T | 943  | 0.093799 | 0         |  |
|        |      | Shiraz-46T | 943  | 0.093799 | 0         |  |
|        |      | Shiraz-46T | 943  | 0.093799 | 0         |  |
|        |      | Shiraz-46T | 943  | 0.093799 | 0         |  |
|        |      | Shiraz-77T | 1225 | 0        | -0.117922 |  |
|        |      | Shiraz-77T | 1225 | 0        | -0.117922 |  |

|  |            |      |          |           |  |
|--|------------|------|----------|-----------|--|
|  | Shiraz-77T | 1225 | 0        | -0.117922 |  |
|  | Shiraz-77T | 1225 | 0        | -0.117922 |  |
|  | Shiraz-18T | 1434 | 0.244465 | 0         |  |
|  | Shiraz-18T | 1434 | 0.244465 | 0         |  |
|  | Shiraz-18T | 1434 | 0.244465 | 0         |  |
|  | Shiraz-18T | 1434 | 0.244465 | 0         |  |
|  | Shiraz-22T | 1549 | 0        | -0.319623 |  |
|  | Shiraz-22T | 1549 | 0        | -0.319623 |  |
|  | Shiraz-22T | 1549 | 0        | -0.319623 |  |
|  | Shiraz-22T | 1549 | 0        | -0.319623 |  |
|  | Shiraz-25T | 1698 | 0.21835  | 0         |  |
|  | Shiraz-25T | 1698 | 0.21835  | 0         |  |
|  | Shiraz-25T | 1698 | 0.21835  | 0         |  |
|  | Shiraz-25T | 1698 | 0.21835  | 0         |  |
|  | Shiraz-28T | 1735 | 0.350744 | 0         |  |
|  | Shiraz-28T | 1735 | 0.350744 | 0         |  |
|  | Shiraz-28T | 1735 | 0.350744 | 0         |  |
|  | Shiraz-28T | 1735 | 0.350744 | 0         |  |
|  | Shiraz-29T | 1778 | 0.120767 | 0         |  |
|  | Shiraz-29T | 1778 | 0.120767 | 0         |  |
|  | Shiraz-29T | 1778 | 0.120767 | 0         |  |
|  | Shiraz-29T | 1778 | 0.120767 | 0         |  |
|  | Shiraz-32T | 1833 | 0.551336 | 0         |  |
|  | Shiraz-32T | 1833 | 0.551336 | 0         |  |
|  | Shiraz-32T | 1833 | 0.551336 | 0         |  |
|  | Shiraz-32T | 1833 | 0.551336 | 0         |  |
|  | Shiraz-38T | 1951 | 0.250891 | 0         |  |
|  | Shiraz-38T | 1951 | 0.250891 | 0         |  |
|  | Shiraz-38T | 1951 | 0.250891 | 0         |  |
|  | Shiraz-38T | 1951 | 0.250891 | 0         |  |
|  | Shiraz-53T | 2078 | 0.287202 | 0         |  |
|  | Shiraz-53T | 2078 | 0.287202 | 0         |  |
|  | Shiraz-53T | 2078 | 0.287202 | 0         |  |
|  | Shiraz-53T | 2078 | 0.287202 | 0         |  |
|  | Shiraz-58T | 2161 | 0        | -0.187744 |  |
|  | Shiraz-58T | 2161 | 0        | -0.187744 |  |
|  | Shiraz-58T | 2161 | 0        | -0.187744 |  |
|  | Shiraz-58T | 2161 | 0        | -0.187744 |  |
|  | Shiraz-71T | 2238 | 0.603631 | 0         |  |
|  | Shiraz-71T | 2238 | 0.603631 | 0         |  |
|  | Shiraz-71T | 2238 | 0.603631 | 0         |  |
|  | Shiraz-71T | 2238 | 0.603631 | 0         |  |
|  | Shiraz-3T  | 90   | 0.219276 | 0         |  |
|  | Shiraz-3T  | 90   | 0.219276 | 0         |  |
|  | Shiraz-3T  | 90   | 0.219276 | 0         |  |
|  | Shiraz-3T  | 90   | 0.219276 | 0         |  |
|  | Shiraz-4T  | 253  | 0.372918 | 0         |  |

|  |  |            |      |          |           |  |  |
|--|--|------------|------|----------|-----------|--|--|
|  |  | Shiraz-4T  | 253  | 0.372918 | 0         |  |  |
|  |  | Shiraz-4T  | 253  | 0.372918 | 0         |  |  |
|  |  | Shiraz-4T  | 253  | 0.372918 | 0         |  |  |
|  |  | Shiraz-36T | 378  | 0.179558 | 0         |  |  |
|  |  | Shiraz-36T | 378  | 0.179558 | 0         |  |  |
|  |  | Shiraz-36T | 378  | 0.179558 | 0         |  |  |
|  |  | Shiraz-36T | 378  | 0.179558 | 0         |  |  |
|  |  | Shiraz-46T | 943  | 0.093799 | 0         |  |  |
|  |  | Shiraz-46T | 943  | 0.093799 | 0         |  |  |
|  |  | Shiraz-46T | 943  | 0.093799 | 0         |  |  |
|  |  | Shiraz-46T | 943  | 0.093799 | 0         |  |  |
|  |  | Shiraz-77T | 1225 | 0        | -0.117922 |  |  |
|  |  | Shiraz-77T | 1225 | 0        | -0.117922 |  |  |
|  |  | Shiraz-77T | 1225 | 0        | -0.117922 |  |  |
|  |  | Shiraz-77T | 1225 | 0        | -0.117922 |  |  |
|  |  | Shiraz-18T | 1434 | 0.244465 | 0         |  |  |
|  |  | Shiraz-18T | 1434 | 0.244465 | 0         |  |  |
|  |  | Shiraz-18T | 1434 | 0.244465 | 0         |  |  |
|  |  | Shiraz-18T | 1434 | 0.244465 | 0         |  |  |
|  |  | Shiraz-22T | 1549 | 0        | -0.319623 |  |  |
|  |  | Shiraz-22T | 1549 | 0        | -0.319623 |  |  |
|  |  | Shiraz-22T | 1549 | 0        | -0.319623 |  |  |
|  |  | Shiraz-22T | 1549 | 0        | -0.319623 |  |  |
|  |  | Shiraz-25T | 1698 | 0.21835  | 0         |  |  |
|  |  | Shiraz-25T | 1698 | 0.21835  | 0         |  |  |
|  |  | Shiraz-25T | 1698 | 0.21835  | 0         |  |  |
|  |  | Shiraz-25T | 1698 | 0.21835  | 0         |  |  |
|  |  | Shiraz-28T | 1735 | 0.350744 | 0         |  |  |
|  |  | Shiraz-28T | 1735 | 0.350744 | 0         |  |  |
|  |  | Shiraz-28T | 1735 | 0.350744 | 0         |  |  |
|  |  | Shiraz-28T | 1735 | 0.350744 | 0         |  |  |
|  |  | Shiraz-29T | 1778 | 0.120767 | 0         |  |  |
|  |  | Shiraz-29T | 1778 | 0.120767 | 0         |  |  |
|  |  | Shiraz-29T | 1778 | 0.120767 | 0         |  |  |
|  |  | Shiraz-29T | 1778 | 0.120767 | 0         |  |  |
|  |  | Shiraz-32T | 1833 | 0.551336 | 0         |  |  |
|  |  | Shiraz-32T | 1833 | 0.551336 | 0         |  |  |
|  |  | Shiraz-32T | 1833 | 0.551336 | 0         |  |  |
|  |  | Shiraz-32T | 1833 | 0.551336 | 0         |  |  |
|  |  | Shiraz-38T | 1951 | 0.250891 | 0         |  |  |
|  |  | Shiraz-38T | 1951 | 0.250891 | 0         |  |  |
|  |  | Shiraz-38T | 1951 | 0.250891 | 0         |  |  |
|  |  | Shiraz-38T | 1951 | 0.250891 | 0         |  |  |
|  |  | Shiraz-53T | 2078 | 0.287202 | 0         |  |  |
|  |  | Shiraz-53T | 2078 | 0.287202 | 0         |  |  |
|  |  | Shiraz-53T | 2078 | 0.287202 | 0         |  |  |
|  |  | Shiraz-53T | 2078 | 0.287202 | 0         |  |  |



|  |            |      |          |           |  |
|--|------------|------|----------|-----------|--|
|  | Shiraz-58T | 2161 | 0        | -0.187744 |  |
|  | Shiraz-58T | 2161 | 0        | -0.187744 |  |
|  | Shiraz-58T | 2161 | 0        | -0.187744 |  |
|  | Shiraz-58T | 2161 | 0        | -0.187744 |  |
|  | Shiraz-71T | 2238 | 0.603631 | 0         |  |
|  | Shiraz-71T | 2238 | 0.603631 | 0         |  |
|  | Shiraz-71T | 2238 | 0.603631 | 0         |  |
|  | Shiraz-71T | 2238 | 0.603631 | 0         |  |
|  | Shiraz-3T  | 90   | 0.219276 | 0         |  |
|  | Shiraz-3T  | 90   | 0.219276 | 0         |  |
|  | Shiraz-3T  | 90   | 0.219276 | 0         |  |
|  | Shiraz-3T  | 90   | 0.219276 | 0         |  |
|  | Shiraz-4T  | 253  | 0.372918 | 0         |  |
|  | Shiraz-4T  | 253  | 0.372918 | 0         |  |
|  | Shiraz-4T  | 253  | 0.372918 | 0         |  |
|  | Shiraz-4T  | 253  | 0.372918 | 0         |  |
|  | Shiraz-36T | 378  | 0.179558 | 0         |  |
|  | Shiraz-36T | 378  | 0.179558 | 0         |  |
|  | Shiraz-36T | 378  | 0.179558 | 0         |  |
|  | Shiraz-36T | 378  | 0.179558 | 0         |  |
|  | Shiraz-46T | 943  | 0.093799 | 0         |  |
|  | Shiraz-46T | 943  | 0.093799 | 0         |  |
|  | Shiraz-46T | 943  | 0.093799 | 0         |  |
|  | Shiraz-46T | 943  | 0.093799 | 0         |  |
|  | Shiraz-77T | 1225 | 0        | -0.117922 |  |
|  | Shiraz-77T | 1225 | 0        | -0.117922 |  |
|  | Shiraz-77T | 1225 | 0        | -0.117922 |  |
|  | Shiraz-77T | 1225 | 0        | -0.117922 |  |
|  | Shiraz-18T | 1434 | 0.244465 | 0         |  |
|  | Shiraz-18T | 1434 | 0.244465 | 0         |  |
|  | Shiraz-18T | 1434 | 0.244465 | 0         |  |
|  | Shiraz-18T | 1434 | 0.244465 | 0         |  |
|  | Shiraz-22T | 1549 | 0        | -0.319623 |  |
|  | Shiraz-22T | 1549 | 0        | -0.319623 |  |
|  | Shiraz-22T | 1549 | 0        | -0.319623 |  |
|  | Shiraz-22T | 1549 | 0        | -0.319623 |  |
|  | Shiraz-25T | 1698 | 0.21835  | 0         |  |
|  | Shiraz-25T | 1698 | 0.21835  | 0         |  |
|  | Shiraz-25T | 1698 | 0.21835  | 0         |  |
|  | Shiraz-25T | 1698 | 0.21835  | 0         |  |
|  | Shiraz-28T | 1735 | 0.350744 | 0         |  |
|  | Shiraz-28T | 1735 | 0.350744 | 0         |  |
|  | Shiraz-28T | 1735 | 0.350744 | 0         |  |
|  | Shiraz-28T | 1735 | 0.350744 | 0         |  |
|  | Shiraz-29T | 1778 | 0.120767 | 0         |  |
|  | Shiraz-29T | 1778 | 0.120767 | 0         |  |
|  | Shiraz-29T | 1778 | 0.120767 | 0         |  |

|        |      |            |      |          |           |  |
|--------|------|------------|------|----------|-----------|--|
|        |      | Shiraz-29T | 1778 | 0.120767 | 0         |  |
|        |      | Shiraz-32T | 1833 | 0.551336 | 0         |  |
|        |      | Shiraz-32T | 1833 | 0.551336 | 0         |  |
|        |      | Shiraz-32T | 1833 | 0.551336 | 0         |  |
|        |      | Shiraz-32T | 1833 | 0.551336 | 0         |  |
|        |      | Shiraz-38T | 1951 | 0.250891 | 0         |  |
|        |      | Shiraz-38T | 1951 | 0.250891 | 0         |  |
|        |      | Shiraz-38T | 1951 | 0.250891 | 0         |  |
|        |      | Shiraz-38T | 1951 | 0.250891 | 0         |  |
|        |      | Shiraz-53T | 2078 | 0.287202 | 0         |  |
|        |      | Shiraz-53T | 2078 | 0.287202 | 0         |  |
|        |      | Shiraz-53T | 2078 | 0.287202 | 0         |  |
|        |      | Shiraz-53T | 2078 | 0.287202 | 0         |  |
|        |      | Shiraz-58T | 2161 | 0        | -0.187744 |  |
|        |      | Shiraz-58T | 2161 | 0        | -0.187744 |  |
|        |      | Shiraz-58T | 2161 | 0        | -0.187744 |  |
|        |      | Shiraz-58T | 2161 | 0        | -0.187744 |  |
|        |      | Shiraz-71T | 2238 | 0.603631 | 0         |  |
|        |      | Shiraz-71T | 2238 | 0.603631 | 0         |  |
|        |      | Shiraz-71T | 2238 | 0.603631 | 0         |  |
|        |      | Shiraz-71T | 2238 | 0.603631 | 0         |  |
| BCAP31 | chrX | Shiraz-3T  | 246  | 0.531858 | 0         |  |
|        |      | Shiraz-3T  | 246  | 0.531858 | 0         |  |
|        |      | Shiraz-3T  | 246  | 0.531858 | 0         |  |
|        |      | Shiraz-3T  | 246  | 0.531858 | 0         |  |
|        |      | Shiraz-4T  | 261  | 0        | -0.336249 |  |
|        |      | Shiraz-4T  | 261  | 0        | -0.336249 |  |
|        |      | Shiraz-4T  | 261  | 0        | -0.336249 |  |
|        |      | Shiraz-4T  | 261  | 0        | -0.336249 |  |
|        |      | Shiraz-16T | 295  | 0.591657 | 0         |  |
|        |      | Shiraz-16T | 295  | 0.591657 | 0         |  |
|        |      | Shiraz-16T | 295  | 0.591657 | 0         |  |
|        |      | Shiraz-16T | 295  | 0.591657 | 0         |  |
|        |      | Shiraz-36T | 433  | 0        | -0.803961 |  |
|        |      | Shiraz-36T | 433  | 0        | -0.803961 |  |
|        |      | Shiraz-36T | 433  | 0        | -0.803961 |  |
|        |      | Shiraz-36T | 433  | 0        | -0.803961 |  |
|        |      | Shiraz-42T | 480  | 0        | -0.232915 |  |
|        |      | Shiraz-42T | 480  | 0        | -0.232915 |  |
|        |      | Shiraz-42T | 480  | 0        | -0.232915 |  |
|        |      | Shiraz-42T | 480  | 0        | -0.232915 |  |
|        |      | Shiraz-44T | 908  | 0.466743 | 0         |  |
|        |      | Shiraz-44T | 908  | 0.466743 | 0         |  |
|        |      | Shiraz-44T | 908  | 0.466743 | 0         |  |
|        |      | Shiraz-44T | 908  | 0.466743 | 0         |  |
|        |      | Shiraz-49T | 1170 | 0        | -0.967436 |  |
|        |      | Shiraz-49T | 1170 | 0        | -0.967436 |  |

|  |            |      |          |           |  |
|--|------------|------|----------|-----------|--|
|  | Shiraz-49T | 1170 | 0        | -0.967436 |  |
|  | Shiraz-49T | 1170 | 0        | -0.967436 |  |
|  | Shiraz-49T | 1173 | 0        | -0.704439 |  |
|  | Shiraz-49T | 1173 | 0        | -0.704439 |  |
|  | Shiraz-49T | 1173 | 0        | -0.704439 |  |
|  | Shiraz-49T | 1173 | 0        | -0.704439 |  |
|  | Shiraz-9T  | 1370 | 0.690073 | 0         |  |
|  | Shiraz-9T  | 1370 | 0.690073 | 0         |  |
|  | Shiraz-9T  | 1370 | 0.690073 | 0         |  |
|  | Shiraz-9T  | 1370 | 0.690073 | 0         |  |
|  | Shiraz-9T  | 1371 | 1.292392 | 0         |  |
|  | Shiraz-9T  | 1371 | 1.292392 | 0         |  |
|  | Shiraz-9T  | 1371 | 1.292392 | 0         |  |
|  | Shiraz-9T  | 1371 | 1.292392 | 0         |  |
|  | Shiraz-18T | 1457 | 0.643204 | 0         |  |
|  | Shiraz-18T | 1457 | 0.643204 | 0         |  |
|  | Shiraz-18T | 1457 | 0.643204 | 0         |  |
|  | Shiraz-18T | 1457 | 0.643204 | 0         |  |
|  | Shiraz-22T | 1673 | 0.611783 | 0         |  |
|  | Shiraz-22T | 1673 | 0.611783 | 0         |  |
|  | Shiraz-22T | 1673 | 0.611783 | 0         |  |
|  | Shiraz-22T | 1673 | 0.611783 | 0         |  |
|  | Shiraz-22T | 1678 | 0.911625 | 0         |  |
|  | Shiraz-22T | 1678 | 0.911625 | 0         |  |
|  | Shiraz-22T | 1678 | 0.911625 | 0         |  |
|  | Shiraz-22T | 1678 | 0.911625 | 0         |  |
|  | Shiraz-22T | 1678 | 0.911625 | 0         |  |
|  | Shiraz-25T | 1719 | 0.472955 | 0         |  |
|  | Shiraz-25T | 1719 | 0.472955 | 0         |  |
|  | Shiraz-25T | 1719 | 0.472955 | 0         |  |
|  | Shiraz-25T | 1719 | 0.472955 | 0         |  |
|  | Shiraz-28T | 1762 | 0.562311 | 0         |  |
|  | Shiraz-28T | 1762 | 0.562311 | 0         |  |
|  | Shiraz-28T | 1762 | 0.562311 | 0         |  |
|  | Shiraz-28T | 1762 | 0.562311 | 0         |  |
|  | Shiraz-29T | 1801 | 0.815343 | 0         |  |
|  | Shiraz-29T | 1801 | 0.815343 | 0         |  |
|  | Shiraz-29T | 1801 | 0.815343 | 0         |  |
|  | Shiraz-29T | 1801 | 0.815343 | 0         |  |
|  | Shiraz-32T | 1870 | 0.729766 | 0         |  |
|  | Shiraz-32T | 1870 | 0.729766 | 0         |  |
|  | Shiraz-32T | 1870 | 0.729766 | 0         |  |
|  | Shiraz-32T | 1870 | 0.729766 | 0         |  |
|  | Shiraz-32T | 1872 | 1.504553 | 0         |  |
|  | Shiraz-32T | 1872 | 1.504553 | 0         |  |
|  | Shiraz-32T | 1872 | 1.504553 | 0         |  |
|  | Shiraz-32T | 1872 | 1.504553 | 0         |  |
|  | Shiraz-35T | 1933 | 0.488535 | 0         |  |

|  |  |            |      |          |           |  |  |
|--|--|------------|------|----------|-----------|--|--|
|  |  | Shiraz-35T | 1933 | 0.488535 | 0         |  |  |
|  |  | Shiraz-35T | 1933 | 0.488535 | 0         |  |  |
|  |  | Shiraz-35T | 1933 | 0.488535 | 0         |  |  |
|  |  | Shiraz-38T | 2011 | 0        | -0.406024 |  |  |
|  |  | Shiraz-38T | 2011 | 0        | -0.406024 |  |  |
|  |  | Shiraz-38T | 2011 | 0        | -0.406024 |  |  |
|  |  | Shiraz-38T | 2011 | 0        | -0.406024 |  |  |
|  |  | Shiraz-53T | 2115 | 0.427728 | 0         |  |  |
|  |  | Shiraz-53T | 2115 | 0.427728 | 0         |  |  |
|  |  | Shiraz-53T | 2115 | 0.427728 | 0         |  |  |
|  |  | Shiraz-53T | 2115 | 0.427728 | 0         |  |  |
|  |  | Shiraz-58T | 2223 | 0.833364 | 0         |  |  |
|  |  | Shiraz-58T | 2223 | 0.833364 | 0         |  |  |
|  |  | Shiraz-58T | 2223 | 0.833364 | 0         |  |  |
|  |  | Shiraz-58T | 2223 | 0.833364 | 0         |  |  |
|  |  | Shiraz-58T | 2226 | 1.074663 | 0         |  |  |
|  |  | Shiraz-58T | 2226 | 1.074663 | 0         |  |  |
|  |  | Shiraz-58T | 2226 | 1.074663 | 0         |  |  |
|  |  | Shiraz-58T | 2226 | 1.074663 | 0         |  |  |
|  |  | Shiraz-71T | 2263 | 0.975531 | 0         |  |  |
|  |  | Shiraz-71T | 2263 | 0.975531 | 0         |  |  |
|  |  | Shiraz-71T | 2263 | 0.975531 | 0         |  |  |
|  |  | Shiraz-71T | 2263 | 0.975531 | 0         |  |  |
|  |  | Shiraz-3T  | 246  | 0.531858 | 0         |  |  |
|  |  | Shiraz-3T  | 246  | 0.531858 | 0         |  |  |
|  |  | Shiraz-3T  | 246  | 0.531858 | 0         |  |  |
|  |  | Shiraz-3T  | 246  | 0.531858 | 0         |  |  |
|  |  | Shiraz-4T  | 261  | 0        | -0.336249 |  |  |
|  |  | Shiraz-4T  | 261  | 0        | -0.336249 |  |  |
|  |  | Shiraz-4T  | 261  | 0        | -0.336249 |  |  |
|  |  | Shiraz-4T  | 261  | 0        | -0.336249 |  |  |
|  |  | Shiraz-16T | 295  | 0.591657 | 0         |  |  |
|  |  | Shiraz-16T | 295  | 0.591657 | 0         |  |  |
|  |  | Shiraz-16T | 295  | 0.591657 | 0         |  |  |
|  |  | Shiraz-16T | 295  | 0.591657 | 0         |  |  |
|  |  | Shiraz-36T | 433  | 0        | -0.803961 |  |  |
|  |  | Shiraz-36T | 433  | 0        | -0.803961 |  |  |
|  |  | Shiraz-36T | 433  | 0        | -0.803961 |  |  |
|  |  | Shiraz-36T | 433  | 0        | -0.803961 |  |  |
|  |  | Shiraz-42T | 480  | 0        | -0.232915 |  |  |
|  |  | Shiraz-42T | 480  | 0        | -0.232915 |  |  |
|  |  | Shiraz-42T | 480  | 0        | -0.232915 |  |  |
|  |  | Shiraz-42T | 480  | 0        | -0.232915 |  |  |
|  |  | Shiraz-44T | 908  | 0.466743 | 0         |  |  |
|  |  | Shiraz-44T | 908  | 0.466743 | 0         |  |  |
|  |  | Shiraz-44T | 908  | 0.466743 | 0         |  |  |
|  |  | Shiraz-44T | 908  | 0.466743 | 0         |  |  |

|  |            |      |          |           |  |
|--|------------|------|----------|-----------|--|
|  | Shiraz-49T | 1170 | 0        | -0.967436 |  |
|  | Shiraz-49T | 1170 | 0        | -0.967436 |  |
|  | Shiraz-49T | 1170 | 0        | -0.967436 |  |
|  | Shiraz-49T | 1170 | 0        | -0.967436 |  |
|  | Shiraz-49T | 1173 | 0        | -0.704439 |  |
|  | Shiraz-49T | 1173 | 0        | -0.704439 |  |
|  | Shiraz-49T | 1173 | 0        | -0.704439 |  |
|  | Shiraz-49T | 1173 | 0        | -0.704439 |  |
|  | Shiraz-9T  | 1370 | 0.690073 | 0         |  |
|  | Shiraz-9T  | 1370 | 0.690073 | 0         |  |
|  | Shiraz-9T  | 1370 | 0.690073 | 0         |  |
|  | Shiraz-9T  | 1370 | 0.690073 | 0         |  |
|  | Shiraz-9T  | 1371 | 1.292392 | 0         |  |
|  | Shiraz-9T  | 1371 | 1.292392 | 0         |  |
|  | Shiraz-9T  | 1371 | 1.292392 | 0         |  |
|  | Shiraz-9T  | 1371 | 1.292392 | 0         |  |
|  | Shiraz-18T | 1457 | 0.643204 | 0         |  |
|  | Shiraz-18T | 1457 | 0.643204 | 0         |  |
|  | Shiraz-18T | 1457 | 0.643204 | 0         |  |
|  | Shiraz-18T | 1457 | 0.643204 | 0         |  |
|  | Shiraz-22T | 1673 | 0.611783 | 0         |  |
|  | Shiraz-22T | 1673 | 0.611783 | 0         |  |
|  | Shiraz-22T | 1673 | 0.611783 | 0         |  |
|  | Shiraz-22T | 1673 | 0.611783 | 0         |  |
|  | Shiraz-22T | 1678 | 0.911625 | 0         |  |
|  | Shiraz-22T | 1678 | 0.911625 | 0         |  |
|  | Shiraz-22T | 1678 | 0.911625 | 0         |  |
|  | Shiraz-22T | 1678 | 0.911625 | 0         |  |
|  | Shiraz-25T | 1719 | 0.472955 | 0         |  |
|  | Shiraz-25T | 1719 | 0.472955 | 0         |  |
|  | Shiraz-25T | 1719 | 0.472955 | 0         |  |
|  | Shiraz-25T | 1719 | 0.472955 | 0         |  |
|  | Shiraz-28T | 1762 | 0.562311 | 0         |  |
|  | Shiraz-28T | 1762 | 0.562311 | 0         |  |
|  | Shiraz-28T | 1762 | 0.562311 | 0         |  |
|  | Shiraz-28T | 1762 | 0.562311 | 0         |  |
|  | Shiraz-29T | 1801 | 0.815343 | 0         |  |
|  | Shiraz-29T | 1801 | 0.815343 | 0         |  |
|  | Shiraz-29T | 1801 | 0.815343 | 0         |  |
|  | Shiraz-29T | 1801 | 0.815343 | 0         |  |
|  | Shiraz-32T | 1870 | 0.729766 | 0         |  |
|  | Shiraz-32T | 1870 | 0.729766 | 0         |  |
|  | Shiraz-32T | 1870 | 0.729766 | 0         |  |
|  | Shiraz-32T | 1870 | 0.729766 | 0         |  |
|  | Shiraz-32T | 1872 | 1.504553 | 0         |  |
|  | Shiraz-32T | 1872 | 1.504553 | 0         |  |
|  | Shiraz-32T | 1872 | 1.504553 | 0         |  |

|  |  |            |      |          |           |  |  |
|--|--|------------|------|----------|-----------|--|--|
|  |  | Shiraz-32T | 1872 | 1.504553 | 0         |  |  |
|  |  | Shiraz-35T | 1933 | 0.488535 | 0         |  |  |
|  |  | Shiraz-35T | 1933 | 0.488535 | 0         |  |  |
|  |  | Shiraz-35T | 1933 | 0.488535 | 0         |  |  |
|  |  | Shiraz-35T | 1933 | 0.488535 | 0         |  |  |
|  |  | Shiraz-38T | 2011 | 0        | -0.406024 |  |  |
|  |  | Shiraz-38T | 2011 | 0        | -0.406024 |  |  |
|  |  | Shiraz-38T | 2011 | 0        | -0.406024 |  |  |
|  |  | Shiraz-38T | 2011 | 0        | -0.406024 |  |  |
|  |  | Shiraz-53T | 2115 | 0.427728 | 0         |  |  |
|  |  | Shiraz-53T | 2115 | 0.427728 | 0         |  |  |
|  |  | Shiraz-53T | 2115 | 0.427728 | 0         |  |  |
|  |  | Shiraz-53T | 2115 | 0.427728 | 0         |  |  |
|  |  | Shiraz-58T | 2223 | 0.833364 | 0         |  |  |
|  |  | Shiraz-58T | 2223 | 0.833364 | 0         |  |  |
|  |  | Shiraz-58T | 2223 | 0.833364 | 0         |  |  |
|  |  | Shiraz-58T | 2223 | 0.833364 | 0         |  |  |
|  |  | Shiraz-58T | 2226 | 1.074663 | 0         |  |  |
|  |  | Shiraz-58T | 2226 | 1.074663 | 0         |  |  |
|  |  | Shiraz-58T | 2226 | 1.074663 | 0         |  |  |
|  |  | Shiraz-58T | 2226 | 1.074663 | 0         |  |  |
|  |  | Shiraz-71T | 2263 | 0.975531 | 0         |  |  |
|  |  | Shiraz-71T | 2263 | 0.975531 | 0         |  |  |
|  |  | Shiraz-71T | 2263 | 0.975531 | 0         |  |  |
|  |  | Shiraz-71T | 2263 | 0.975531 | 0         |  |  |
|  |  | Shiraz-3T  | 246  | 0.531858 | 0         |  |  |
|  |  | Shiraz-3T  | 246  | 0.531858 | 0         |  |  |
|  |  | Shiraz-3T  | 246  | 0.531858 | 0         |  |  |
|  |  | Shiraz-3T  | 246  | 0.531858 | 0         |  |  |
|  |  | Shiraz-4T  | 261  | 0        | -0.336249 |  |  |
|  |  | Shiraz-4T  | 261  | 0        | -0.336249 |  |  |
|  |  | Shiraz-4T  | 261  | 0        | -0.336249 |  |  |
|  |  | Shiraz-4T  | 261  | 0        | -0.336249 |  |  |
|  |  | Shiraz-16T | 295  | 0.591657 | 0         |  |  |
|  |  | Shiraz-16T | 295  | 0.591657 | 0         |  |  |
|  |  | Shiraz-16T | 295  | 0.591657 | 0         |  |  |
|  |  | Shiraz-16T | 295  | 0.591657 | 0         |  |  |
|  |  | Shiraz-36T | 433  | 0        | -0.803961 |  |  |
|  |  | Shiraz-36T | 433  | 0        | -0.803961 |  |  |
|  |  | Shiraz-36T | 433  | 0        | -0.803961 |  |  |
|  |  | Shiraz-36T | 433  | 0        | -0.803961 |  |  |
|  |  | Shiraz-42T | 480  | 0        | -0.232915 |  |  |
|  |  | Shiraz-42T | 480  | 0        | -0.232915 |  |  |
|  |  | Shiraz-42T | 480  | 0        | -0.232915 |  |  |
|  |  | Shiraz-42T | 480  | 0        | -0.232915 |  |  |
|  |  | Shiraz-44T | 908  | 0.466743 | 0         |  |  |
|  |  | Shiraz-44T | 908  | 0.466743 | 0         |  |  |

|  |            |      |          |           |  |
|--|------------|------|----------|-----------|--|
|  | Shiraz-44T | 908  | 0.466743 | 0         |  |
|  | Shiraz-44T | 908  | 0.466743 | 0         |  |
|  | Shiraz-49T | 1170 | 0        | -0.967436 |  |
|  | Shiraz-49T | 1170 | 0        | -0.967436 |  |
|  | Shiraz-49T | 1170 | 0        | -0.967436 |  |
|  | Shiraz-49T | 1170 | 0        | -0.967436 |  |
|  | Shiraz-49T | 1173 | 0        | -0.704439 |  |
|  | Shiraz-49T | 1173 | 0        | -0.704439 |  |
|  | Shiraz-49T | 1173 | 0        | -0.704439 |  |
|  | Shiraz-49T | 1173 | 0        | -0.704439 |  |
|  | Shiraz-9T  | 1370 | 0.690073 | 0         |  |
|  | Shiraz-9T  | 1370 | 0.690073 | 0         |  |
|  | Shiraz-9T  | 1370 | 0.690073 | 0         |  |
|  | Shiraz-9T  | 1370 | 0.690073 | 0         |  |
|  | Shiraz-9T  | 1371 | 1.292392 | 0         |  |
|  | Shiraz-9T  | 1371 | 1.292392 | 0         |  |
|  | Shiraz-9T  | 1371 | 1.292392 | 0         |  |
|  | Shiraz-9T  | 1371 | 1.292392 | 0         |  |
|  | Shiraz-18T | 1457 | 0.643204 | 0         |  |
|  | Shiraz-18T | 1457 | 0.643204 | 0         |  |
|  | Shiraz-18T | 1457 | 0.643204 | 0         |  |
|  | Shiraz-18T | 1457 | 0.643204 | 0         |  |
|  | Shiraz-22T | 1673 | 0.611783 | 0         |  |
|  | Shiraz-22T | 1673 | 0.611783 | 0         |  |
|  | Shiraz-22T | 1673 | 0.611783 | 0         |  |
|  | Shiraz-22T | 1673 | 0.611783 | 0         |  |
|  | Shiraz-22T | 1678 | 0.911625 | 0         |  |
|  | Shiraz-22T | 1678 | 0.911625 | 0         |  |
|  | Shiraz-22T | 1678 | 0.911625 | 0         |  |
|  | Shiraz-22T | 1678 | 0.911625 | 0         |  |
|  | Shiraz-25T | 1719 | 0.472955 | 0         |  |
|  | Shiraz-25T | 1719 | 0.472955 | 0         |  |
|  | Shiraz-25T | 1719 | 0.472955 | 0         |  |
|  | Shiraz-25T | 1719 | 0.472955 | 0         |  |
|  | Shiraz-28T | 1762 | 0.562311 | 0         |  |
|  | Shiraz-28T | 1762 | 0.562311 | 0         |  |
|  | Shiraz-28T | 1762 | 0.562311 | 0         |  |
|  | Shiraz-28T | 1762 | 0.562311 | 0         |  |
|  | Shiraz-29T | 1801 | 0.815343 | 0         |  |
|  | Shiraz-29T | 1801 | 0.815343 | 0         |  |
|  | Shiraz-29T | 1801 | 0.815343 | 0         |  |
|  | Shiraz-29T | 1801 | 0.815343 | 0         |  |
|  | Shiraz-32T | 1870 | 0.729766 | 0         |  |
|  | Shiraz-32T | 1870 | 0.729766 | 0         |  |
|  | Shiraz-32T | 1870 | 0.729766 | 0         |  |
|  | Shiraz-32T | 1870 | 0.729766 | 0         |  |
|  | Shiraz-32T | 1872 | 1.504553 | 0         |  |

|      |      |            |      |          |           |  |  |
|------|------|------------|------|----------|-----------|--|--|
|      |      | Shiraz-32T | 1872 | 1.504553 | 0         |  |  |
|      |      | Shiraz-32T | 1872 | 1.504553 | 0         |  |  |
|      |      | Shiraz-32T | 1872 | 1.504553 | 0         |  |  |
|      |      | Shiraz-35T | 1933 | 0.488535 | 0         |  |  |
|      |      | Shiraz-35T | 1933 | 0.488535 | 0         |  |  |
|      |      | Shiraz-35T | 1933 | 0.488535 | 0         |  |  |
|      |      | Shiraz-35T | 1933 | 0.488535 | 0         |  |  |
|      |      | Shiraz-38T | 2011 | 0        | -0.406024 |  |  |
|      |      | Shiraz-38T | 2011 | 0        | -0.406024 |  |  |
|      |      | Shiraz-38T | 2011 | 0        | -0.406024 |  |  |
|      |      | Shiraz-38T | 2011 | 0        | -0.406024 |  |  |
|      |      | Shiraz-53T | 2115 | 0.427728 | 0         |  |  |
|      |      | Shiraz-53T | 2115 | 0.427728 | 0         |  |  |
|      |      | Shiraz-53T | 2115 | 0.427728 | 0         |  |  |
|      |      | Shiraz-53T | 2115 | 0.427728 | 0         |  |  |
|      |      | Shiraz-58T | 2223 | 0.833364 | 0         |  |  |
|      |      | Shiraz-58T | 2223 | 0.833364 | 0         |  |  |
|      |      | Shiraz-58T | 2223 | 0.833364 | 0         |  |  |
|      |      | Shiraz-58T | 2223 | 0.833364 | 0         |  |  |
|      |      | Shiraz-58T | 2226 | 1.074663 | 0         |  |  |
|      |      | Shiraz-58T | 2226 | 1.074663 | 0         |  |  |
|      |      | Shiraz-58T | 2226 | 1.074663 | 0         |  |  |
|      |      | Shiraz-58T | 2226 | 1.074663 | 0         |  |  |
|      |      | Shiraz-71T | 2263 | 0.975531 | 0         |  |  |
|      |      | Shiraz-71T | 2263 | 0.975531 | 0         |  |  |
|      |      | Shiraz-71T | 2263 | 0.975531 | 0         |  |  |
|      |      | Shiraz-71T | 2263 | 0.975531 | 0         |  |  |
| BCOR | chrX | Shiraz-3T  | 235  | 0        | -0.28401  |  |  |
|      |      | Shiraz-3T  | 235  | 0        | -0.28401  |  |  |
|      |      | Shiraz-3T  | 235  | 0        | -0.28401  |  |  |
|      |      | Shiraz-3T  | 237  | 0.082458 | 0         |  |  |
|      |      | Shiraz-3T  | 237  | 0.082458 | 0         |  |  |
|      |      | Shiraz-3T  | 237  | 0.082458 | 0         |  |  |
|      |      | Shiraz-4T  | 260  | 0        | -0.324128 |  |  |
|      |      | Shiraz-4T  | 260  | 0        | -0.324128 |  |  |
|      |      | Shiraz-4T  | 260  | 0        | -0.324128 |  |  |
|      |      | Shiraz-16T | 294  | 0.655804 | 0         |  |  |
|      |      | Shiraz-16T | 294  | 0.655804 | 0         |  |  |
|      |      | Shiraz-16T | 294  | 0.655804 | 0         |  |  |
|      |      | Shiraz-31T | 345  | 0.103301 | 0         |  |  |
|      |      | Shiraz-31T | 345  | 0.103301 | 0         |  |  |
|      |      | Shiraz-31T | 345  | 0.103301 | 0         |  |  |
|      |      | Shiraz-36T | 431  | 0        | -0.78035  |  |  |
|      |      | Shiraz-36T | 431  | 0        | -0.78035  |  |  |
|      |      | Shiraz-36T | 431  | 0        | -0.78035  |  |  |
|      |      | Shiraz-36T | 432  | 0        | -0.6692   |  |  |
|      |      | Shiraz-36T | 432  | 0        | -0.6692   |  |  |



|  |            |      |          |           |  |
|--|------------|------|----------|-----------|--|
|  | Shiraz-36T | 432  | 0        | -0.6692   |  |
|  | Shiraz-44T | 891  | 0        | -0.954044 |  |
|  | Shiraz-44T | 891  | 0        | -0.954044 |  |
|  | Shiraz-44T | 891  | 0        | -0.954044 |  |
|  | Shiraz-44T | 895  | 0        | -0.195747 |  |
|  | Shiraz-44T | 895  | 0        | -0.195747 |  |
|  | Shiraz-44T | 895  | 0        | -0.195747 |  |
|  | Shiraz-46T | 991  | 0.139564 | 0         |  |
|  | Shiraz-46T | 991  | 0.139564 | 0         |  |
|  | Shiraz-46T | 991  | 0.139564 | 0         |  |
|  | Shiraz-49T | 1166 | 0        | -0.917235 |  |
|  | Shiraz-49T | 1166 | 0        | -0.917235 |  |
|  | Shiraz-49T | 1166 | 0        | -0.917235 |  |
|  | Shiraz-9T  | 1368 | 0.199713 | 0         |  |
|  | Shiraz-9T  | 1368 | 0.199713 | 0         |  |
|  | Shiraz-9T  | 1368 | 0.199713 | 0         |  |
|  | Shiraz-18T | 1455 | 0        | -0.186773 |  |
|  | Shiraz-18T | 1455 | 0        | -0.186773 |  |
|  | Shiraz-18T | 1455 | 0        | -0.186773 |  |
|  | Shiraz-22T | 1669 | 0.695915 | 0         |  |
|  | Shiraz-22T | 1669 | 0.695915 | 0         |  |
|  | Shiraz-22T | 1669 | 0.695915 | 0         |  |
|  | Shiraz-25T | 1717 | 0.420447 | 0         |  |
|  | Shiraz-25T | 1717 | 0.420447 | 0         |  |
|  | Shiraz-25T | 1717 | 0.420447 | 0         |  |
|  | Shiraz-28T | 1760 | 0.538181 | 0         |  |
|  | Shiraz-28T | 1760 | 0.538181 | 0         |  |
|  | Shiraz-28T | 1760 | 0.538181 | 0         |  |
|  | Shiraz-29T | 1800 | 0.672527 | 0         |  |
|  | Shiraz-29T | 1800 | 0.672527 | 0         |  |
|  | Shiraz-29T | 1800 | 0.672527 | 0         |  |
|  | Shiraz-32T | 1869 | 0.776805 | 0         |  |
|  | Shiraz-32T | 1869 | 0.776805 | 0         |  |
|  | Shiraz-32T | 1869 | 0.776805 | 0         |  |
|  | Shiraz-35T | 1932 | 0.507141 | 0         |  |
|  | Shiraz-35T | 1932 | 0.507141 | 0         |  |
|  | Shiraz-35T | 1932 | 0.507141 | 0         |  |
|  | Shiraz-40T | 2051 | 0.098506 | 0         |  |
|  | Shiraz-40T | 2051 | 0.098506 | 0         |  |
|  | Shiraz-40T | 2051 | 0.098506 | 0         |  |
|  | Shiraz-58T | 2221 | 0.871948 | 0         |  |
|  | Shiraz-58T | 2221 | 0.871948 | 0         |  |
|  | Shiraz-58T | 2221 | 0.871948 | 0         |  |
|  | Shiraz-71T | 2260 | 0.68394  | 0         |  |
|  | Shiraz-71T | 2260 | 0.68394  | 0         |  |
|  | Shiraz-71T | 2260 | 0.68394  | 0         |  |
|  | Shiraz-71T | 2262 | 0.986748 | 0         |  |

|  |            |      |          |           |  |
|--|------------|------|----------|-----------|--|
|  | Shiraz-71T | 2262 | 0.986748 | 0         |  |
|  | Shiraz-71T | 2262 | 0.986748 | 0         |  |
|  | Shiraz-3T  | 235  | 0        | -0.28401  |  |
|  | Shiraz-3T  | 235  | 0        | -0.28401  |  |
|  | Shiraz-3T  | 235  | 0        | -0.28401  |  |
|  | Shiraz-3T  | 237  | 0.082458 | 0         |  |
|  | Shiraz-3T  | 237  | 0.082458 | 0         |  |
|  | Shiraz-3T  | 237  | 0.082458 | 0         |  |
|  | Shiraz-4T  | 260  | 0        | -0.324128 |  |
|  | Shiraz-4T  | 260  | 0        | -0.324128 |  |
|  | Shiraz-4T  | 260  | 0        | -0.324128 |  |
|  | Shiraz-16T | 294  | 0.655804 | 0         |  |
|  | Shiraz-16T | 294  | 0.655804 | 0         |  |
|  | Shiraz-16T | 294  | 0.655804 | 0         |  |
|  | Shiraz-31T | 345  | 0.103301 | 0         |  |
|  | Shiraz-31T | 345  | 0.103301 | 0         |  |
|  | Shiraz-31T | 345  | 0.103301 | 0         |  |
|  | Shiraz-36T | 431  | 0        | -0.78035  |  |
|  | Shiraz-36T | 431  | 0        | -0.78035  |  |
|  | Shiraz-36T | 431  | 0        | -0.78035  |  |
|  | Shiraz-36T | 432  | 0        | -0.6692   |  |
|  | Shiraz-36T | 432  | 0        | -0.6692   |  |
|  | Shiraz-36T | 432  | 0        | -0.6692   |  |
|  | Shiraz-44T | 891  | 0        | -0.954044 |  |
|  | Shiraz-44T | 891  | 0        | -0.954044 |  |
|  | Shiraz-44T | 891  | 0        | -0.954044 |  |
|  | Shiraz-44T | 895  | 0        | -0.195747 |  |
|  | Shiraz-44T | 895  | 0        | -0.195747 |  |
|  | Shiraz-44T | 895  | 0        | -0.195747 |  |
|  | Shiraz-46T | 991  | 0.139564 | 0         |  |
|  | Shiraz-46T | 991  | 0.139564 | 0         |  |
|  | Shiraz-46T | 991  | 0.139564 | 0         |  |
|  | Shiraz-49T | 1166 | 0        | -0.917235 |  |
|  | Shiraz-49T | 1166 | 0        | -0.917235 |  |
|  | Shiraz-49T | 1166 | 0        | -0.917235 |  |
|  | Shiraz-9T  | 1368 | 0.199713 | 0         |  |
|  | Shiraz-9T  | 1368 | 0.199713 | 0         |  |
|  | Shiraz-9T  | 1368 | 0.199713 | 0         |  |
|  | Shiraz-18T | 1455 | 0        | -0.186773 |  |
|  | Shiraz-18T | 1455 | 0        | -0.186773 |  |
|  | Shiraz-18T | 1455 | 0        | -0.186773 |  |
|  | Shiraz-22T | 1669 | 0.695915 | 0         |  |
|  | Shiraz-22T | 1669 | 0.695915 | 0         |  |
|  | Shiraz-22T | 1669 | 0.695915 | 0         |  |
|  | Shiraz-25T | 1717 | 0.420447 | 0         |  |
|  | Shiraz-25T | 1717 | 0.420447 | 0         |  |
|  | Shiraz-25T | 1717 | 0.420447 | 0         |  |

|  |  |            |      |          |           |  |  |
|--|--|------------|------|----------|-----------|--|--|
|  |  | Shiraz-28T | 1760 | 0.538181 | 0         |  |  |
|  |  | Shiraz-28T | 1760 | 0.538181 | 0         |  |  |
|  |  | Shiraz-28T | 1760 | 0.538181 | 0         |  |  |
|  |  | Shiraz-29T | 1800 | 0.672527 | 0         |  |  |
|  |  | Shiraz-29T | 1800 | 0.672527 | 0         |  |  |
|  |  | Shiraz-29T | 1800 | 0.672527 | 0         |  |  |
|  |  | Shiraz-32T | 1869 | 0.776805 | 0         |  |  |
|  |  | Shiraz-32T | 1869 | 0.776805 | 0         |  |  |
|  |  | Shiraz-32T | 1869 | 0.776805 | 0         |  |  |
|  |  | Shiraz-35T | 1932 | 0.507141 | 0         |  |  |
|  |  | Shiraz-35T | 1932 | 0.507141 | 0         |  |  |
|  |  | Shiraz-35T | 1932 | 0.507141 | 0         |  |  |
|  |  | Shiraz-40T | 2051 | 0.098506 | 0         |  |  |
|  |  | Shiraz-40T | 2051 | 0.098506 | 0         |  |  |
|  |  | Shiraz-40T | 2051 | 0.098506 | 0         |  |  |
|  |  | Shiraz-58T | 2221 | 0.871948 | 0         |  |  |
|  |  | Shiraz-58T | 2221 | 0.871948 | 0         |  |  |
|  |  | Shiraz-58T | 2221 | 0.871948 | 0         |  |  |
|  |  | Shiraz-71T | 2260 | 0.68394  | 0         |  |  |
|  |  | Shiraz-71T | 2260 | 0.68394  | 0         |  |  |
|  |  | Shiraz-71T | 2260 | 0.68394  | 0         |  |  |
|  |  | Shiraz-71T | 2262 | 0.986748 | 0         |  |  |
|  |  | Shiraz-71T | 2262 | 0.986748 | 0         |  |  |
|  |  | Shiraz-71T | 2262 | 0.986748 | 0         |  |  |
|  |  | Shiraz-3T  | 235  | 0        | -0.28401  |  |  |
|  |  | Shiraz-3T  | 235  | 0        | -0.28401  |  |  |
|  |  | Shiraz-3T  | 235  | 0        | -0.28401  |  |  |
|  |  | Shiraz-3T  | 237  | 0.082458 | 0         |  |  |
|  |  | Shiraz-3T  | 237  | 0.082458 | 0         |  |  |
|  |  | Shiraz-3T  | 237  | 0.082458 | 0         |  |  |
|  |  | Shiraz-4T  | 260  | 0        | -0.324128 |  |  |
|  |  | Shiraz-4T  | 260  | 0        | -0.324128 |  |  |
|  |  | Shiraz-4T  | 260  | 0        | -0.324128 |  |  |
|  |  | Shiraz-16T | 294  | 0.655804 | 0         |  |  |
|  |  | Shiraz-16T | 294  | 0.655804 | 0         |  |  |
|  |  | Shiraz-16T | 294  | 0.655804 | 0         |  |  |
|  |  | Shiraz-31T | 345  | 0.103301 | 0         |  |  |
|  |  | Shiraz-31T | 345  | 0.103301 | 0         |  |  |
|  |  | Shiraz-31T | 345  | 0.103301 | 0         |  |  |
|  |  | Shiraz-36T | 431  | 0        | -0.78035  |  |  |
|  |  | Shiraz-36T | 431  | 0        | -0.78035  |  |  |
|  |  | Shiraz-36T | 431  | 0        | -0.78035  |  |  |
|  |  | Shiraz-36T | 432  | 0        | -0.6692   |  |  |
|  |  | Shiraz-36T | 432  | 0        | -0.6692   |  |  |
|  |  | Shiraz-36T | 432  | 0        | -0.6692   |  |  |
|  |  | Shiraz-44T | 891  | 0        | -0.954044 |  |  |
|  |  | Shiraz-44T | 891  | 0        | -0.954044 |  |  |

|        |      |            |      |          |           |  |  |
|--------|------|------------|------|----------|-----------|--|--|
|        |      | Shiraz-44T | 891  | 0        | -0.954044 |  |  |
|        |      | Shiraz-44T | 895  | 0        | -0.195747 |  |  |
|        |      | Shiraz-44T | 895  | 0        | -0.195747 |  |  |
|        |      | Shiraz-44T | 895  | 0        | -0.195747 |  |  |
|        |      | Shiraz-46T | 991  | 0.139564 | 0         |  |  |
|        |      | Shiraz-46T | 991  | 0.139564 | 0         |  |  |
|        |      | Shiraz-46T | 991  | 0.139564 | 0         |  |  |
|        |      | Shiraz-49T | 1166 | 0        | -0.917235 |  |  |
|        |      | Shiraz-49T | 1166 | 0        | -0.917235 |  |  |
|        |      | Shiraz-49T | 1166 | 0        | -0.917235 |  |  |
|        |      | Shiraz-9T  | 1368 | 0.199713 | 0         |  |  |
|        |      | Shiraz-9T  | 1368 | 0.199713 | 0         |  |  |
|        |      | Shiraz-9T  | 1368 | 0.199713 | 0         |  |  |
|        |      | Shiraz-18T | 1455 | 0        | -0.186773 |  |  |
|        |      | Shiraz-18T | 1455 | 0        | -0.186773 |  |  |
|        |      | Shiraz-18T | 1455 | 0        | -0.186773 |  |  |
|        |      | Shiraz-22T | 1669 | 0.695915 | 0         |  |  |
|        |      | Shiraz-22T | 1669 | 0.695915 | 0         |  |  |
|        |      | Shiraz-22T | 1669 | 0.695915 | 0         |  |  |
|        |      | Shiraz-25T | 1717 | 0.420447 | 0         |  |  |
|        |      | Shiraz-25T | 1717 | 0.420447 | 0         |  |  |
|        |      | Shiraz-25T | 1717 | 0.420447 | 0         |  |  |
|        |      | Shiraz-28T | 1760 | 0.538181 | 0         |  |  |
|        |      | Shiraz-28T | 1760 | 0.538181 | 0         |  |  |
|        |      | Shiraz-28T | 1760 | 0.538181 | 0         |  |  |
|        |      | Shiraz-29T | 1800 | 0.672527 | 0         |  |  |
|        |      | Shiraz-29T | 1800 | 0.672527 | 0         |  |  |
|        |      | Shiraz-29T | 1800 | 0.672527 | 0         |  |  |
|        |      | Shiraz-32T | 1869 | 0.776805 | 0         |  |  |
|        |      | Shiraz-32T | 1869 | 0.776805 | 0         |  |  |
|        |      | Shiraz-32T | 1869 | 0.776805 | 0         |  |  |
|        |      | Shiraz-35T | 1932 | 0.507141 | 0         |  |  |
|        |      | Shiraz-35T | 1932 | 0.507141 | 0         |  |  |
|        |      | Shiraz-35T | 1932 | 0.507141 | 0         |  |  |
|        |      | Shiraz-40T | 2051 | 0.098506 | 0         |  |  |
|        |      | Shiraz-40T | 2051 | 0.098506 | 0         |  |  |
|        |      | Shiraz-40T | 2051 | 0.098506 | 0         |  |  |
|        |      | Shiraz-58T | 2221 | 0.871948 | 0         |  |  |
|        |      | Shiraz-58T | 2221 | 0.871948 | 0         |  |  |
|        |      | Shiraz-58T | 2221 | 0.871948 | 0         |  |  |
|        |      | Shiraz-71T | 2260 | 0.68394  | 0         |  |  |
|        |      | Shiraz-71T | 2260 | 0.68394  | 0         |  |  |
|        |      | Shiraz-71T | 2260 | 0.68394  | 0         |  |  |
|        |      | Shiraz-71T | 2262 | 0.986748 | 0         |  |  |
|        |      | Shiraz-71T | 2262 | 0.986748 | 0         |  |  |
|        |      | Shiraz-71T | 2262 | 0.986748 | 0         |  |  |
| BCORL1 | chrX | Shiraz-3T  | 242  | 0        | -0.336434 |  |  |

|  |            |      |          |           |  |
|--|------------|------|----------|-----------|--|
|  | Shiraz-3T  | 245  | 0.224144 | 0         |  |
|  | Shiraz-4T  | 261  | 0        | -0.336249 |  |
|  | Shiraz-16T | 295  | 0.591657 | 0         |  |
|  | Shiraz-36T | 433  | 0        | -0.803961 |  |
|  | Shiraz-44T | 899  | 0        | -1.09697  |  |
|  | Shiraz-44T | 906  | 0        | -0.165692 |  |
|  | Shiraz-49T | 1170 | 0        | -0.967436 |  |
|  | Shiraz-9T  | 1370 | 0.690073 | 0         |  |
|  | Shiraz-18T | 1457 | 0.643204 | 0         |  |
|  | Shiraz-22T | 1673 | 0.611783 | 0         |  |
|  | Shiraz-22T | 1677 | 0.789711 | 0         |  |
|  | Shiraz-25T | 1719 | 0.472955 | 0         |  |
|  | Shiraz-28T | 1762 | 0.562311 | 0         |  |
|  | Shiraz-29T | 1801 | 0.815343 | 0         |  |
|  | Shiraz-32T | 1870 | 0.729766 | 0         |  |
|  | Shiraz-35T | 1933 | 0.488535 | 0         |  |
|  | Shiraz-58T | 2223 | 0.833364 | 0         |  |
|  | Shiraz-71T | 2263 | 0.975531 | 0         |  |
|  | Shiraz-3T  | 242  | 0        | -0.336434 |  |
|  | Shiraz-3T  | 245  | 0.224144 | 0         |  |
|  | Shiraz-4T  | 261  | 0        | -0.336249 |  |
|  | Shiraz-16T | 295  | 0.591657 | 0         |  |
|  | Shiraz-36T | 433  | 0        | -0.803961 |  |
|  | Shiraz-44T | 899  | 0        | -1.09697  |  |
|  | Shiraz-44T | 906  | 0        | -0.165692 |  |
|  | Shiraz-49T | 1170 | 0        | -0.967436 |  |
|  | Shiraz-9T  | 1370 | 0.690073 | 0         |  |
|  | Shiraz-18T | 1457 | 0.643204 | 0         |  |
|  | Shiraz-22T | 1673 | 0.611783 | 0         |  |
|  | Shiraz-22T | 1677 | 0.789711 | 0         |  |
|  | Shiraz-25T | 1719 | 0.472955 | 0         |  |
|  | Shiraz-28T | 1762 | 0.562311 | 0         |  |
|  | Shiraz-29T | 1801 | 0.815343 | 0         |  |
|  | Shiraz-32T | 1870 | 0.729766 | 0         |  |
|  | Shiraz-35T | 1933 | 0.488535 | 0         |  |
|  | Shiraz-58T | 2223 | 0.833364 | 0         |  |
|  | Shiraz-71T | 2263 | 0.975531 | 0         |  |
|  | Shiraz-3T  | 242  | 0        | -0.336434 |  |
|  | Shiraz-3T  | 245  | 0.224144 | 0         |  |
|  | Shiraz-4T  | 261  | 0        | -0.336249 |  |
|  | Shiraz-16T | 295  | 0.591657 | 0         |  |
|  | Shiraz-36T | 433  | 0        | -0.803961 |  |
|  | Shiraz-44T | 899  | 0        | -1.09697  |  |
|  | Shiraz-44T | 906  | 0        | -0.165692 |  |
|  | Shiraz-49T | 1170 | 0        | -0.967436 |  |
|  | Shiraz-9T  | 1370 | 0.690073 | 0         |  |
|  | Shiraz-18T | 1457 | 0.643204 | 0         |  |

|       |      |            |      |          |           |  |
|-------|------|------------|------|----------|-----------|--|
|       |      | Shiraz-22T | 1673 | 0.611783 | 0         |  |
|       |      | Shiraz-22T | 1677 | 0.789711 | 0         |  |
|       |      | Shiraz-25T | 1719 | 0.472955 | 0         |  |
|       |      | Shiraz-28T | 1762 | 0.562311 | 0         |  |
|       |      | Shiraz-29T | 1801 | 0.815343 | 0         |  |
|       |      | Shiraz-32T | 1870 | 0.729766 | 0         |  |
|       |      | Shiraz-35T | 1933 | 0.488535 | 0         |  |
|       |      | Shiraz-58T | 2223 | 0.833364 | 0         |  |
|       |      | Shiraz-71T | 2263 | 0.975531 | 0         |  |
| BEND2 | chrX | Shiraz-3T  | 235  | 0        | -0.28401  |  |
|       |      | Shiraz-4T  | 260  | 0        | -0.324128 |  |
|       |      | Shiraz-16T | 294  | 0.655804 | 0         |  |
|       |      | Shiraz-36T | 431  | 0        | -0.78035  |  |
|       |      | Shiraz-44T | 891  | 0        | -0.954044 |  |
|       |      | Shiraz-49T | 1166 | 0        | -0.917235 |  |
|       |      | Shiraz-9T  | 1368 | 0.199713 | 0         |  |
|       |      | Shiraz-18T | 1455 | 0        | -0.186773 |  |
|       |      | Shiraz-22T | 1669 | 0.695915 | 0         |  |
|       |      | Shiraz-25T | 1717 | 0.420447 | 0         |  |
|       |      | Shiraz-28T | 1760 | 0.538181 | 0         |  |
|       |      | Shiraz-29T | 1800 | 0.672527 | 0         |  |
|       |      | Shiraz-32T | 1869 | 0.776805 | 0         |  |
|       |      | Shiraz-35T | 1932 | 0.507141 | 0         |  |
|       |      | Shiraz-40T | 2051 | 0.098506 | 0         |  |
|       |      | Shiraz-58T | 2221 | 0.871948 | 0         |  |
|       |      | Shiraz-71T | 2260 | 0.68394  | 0         |  |
|       |      | Shiraz-71T | 2261 | 0.508399 | 0         |  |
|       |      | Shiraz-3T  | 235  | 0        | -0.28401  |  |
|       |      | Shiraz-4T  | 260  | 0        | -0.324128 |  |
|       |      | Shiraz-16T | 294  | 0.655804 | 0         |  |
|       |      | Shiraz-36T | 431  | 0        | -0.78035  |  |
|       |      | Shiraz-44T | 891  | 0        | -0.954044 |  |
|       |      | Shiraz-49T | 1166 | 0        | -0.917235 |  |
|       |      | Shiraz-9T  | 1368 | 0.199713 | 0         |  |
|       |      | Shiraz-18T | 1455 | 0        | -0.186773 |  |
|       |      | Shiraz-22T | 1669 | 0.695915 | 0         |  |
|       |      | Shiraz-25T | 1717 | 0.420447 | 0         |  |
|       |      | Shiraz-28T | 1760 | 0.538181 | 0         |  |
|       |      | Shiraz-29T | 1800 | 0.672527 | 0         |  |
|       |      | Shiraz-32T | 1869 | 0.776805 | 0         |  |
|       |      | Shiraz-35T | 1932 | 0.507141 | 0         |  |
|       |      | Shiraz-40T | 2051 | 0.098506 | 0         |  |
|       |      | Shiraz-58T | 2221 | 0.871948 | 0         |  |
|       |      | Shiraz-71T | 2260 | 0.68394  | 0         |  |
|       |      | Shiraz-71T | 2261 | 0.508399 | 0         |  |
|       |      | Shiraz-3T  | 235  | 0        | -0.28401  |  |
|       |      | Shiraz-4T  | 260  | 0        | -0.324128 |  |

|      |      |            |      |          |           |  |  |
|------|------|------------|------|----------|-----------|--|--|
|      |      | Shiraz-16T | 294  | 0.655804 | 0         |  |  |
|      |      | Shiraz-36T | 431  | 0        | -0.78035  |  |  |
|      |      | Shiraz-44T | 891  | 0        | -0.954044 |  |  |
|      |      | Shiraz-49T | 1166 | 0        | -0.917235 |  |  |
|      |      | Shiraz-9T  | 1368 | 0.199713 | 0         |  |  |
|      |      | Shiraz-18T | 1455 | 0        | -0.186773 |  |  |
|      |      | Shiraz-22T | 1669 | 0.695915 | 0         |  |  |
|      |      | Shiraz-25T | 1717 | 0.420447 | 0         |  |  |
|      |      | Shiraz-28T | 1760 | 0.538181 | 0         |  |  |
|      |      | Shiraz-29T | 1800 | 0.672527 | 0         |  |  |
|      |      | Shiraz-32T | 1869 | 0.776805 | 0         |  |  |
|      |      | Shiraz-35T | 1932 | 0.507141 | 0         |  |  |
|      |      | Shiraz-40T | 2051 | 0.098506 | 0         |  |  |
|      |      | Shiraz-58T | 2221 | 0.871948 | 0         |  |  |
|      |      | Shiraz-71T | 2260 | 0.68394  | 0         |  |  |
|      |      | Shiraz-71T | 2261 | 0.508399 | 0         |  |  |
| BET1 | chr7 | Shiraz-3T  | 90   | 0.219276 | 0         |  |  |
|      |      | Shiraz-3T  | 93   | 0        | -0.058023 |  |  |
|      |      | Shiraz-4T  | 253  | 0.372918 | 0         |  |  |
|      |      | Shiraz-36T | 378  | 0.179558 | 0         |  |  |
|      |      | Shiraz-36T | 380  | 0.083883 | 0         |  |  |
|      |      | Shiraz-44T | 638  | 0        | -0.433476 |  |  |
|      |      | Shiraz-46T | 943  | 0.093799 | 0         |  |  |
|      |      | Shiraz-46T | 945  | 0        | -0.014838 |  |  |
|      |      | Shiraz-47T | 1029 | 0        | -0.096586 |  |  |
|      |      | Shiraz-49T | 1119 | 0        | -0.157331 |  |  |
|      |      | Shiraz-77T | 1225 | 0        | -0.117922 |  |  |
|      |      | Shiraz-18T | 1434 | 0.244465 | 0         |  |  |
|      |      | Shiraz-22T | 1549 | 0        | -0.319623 |  |  |
|      |      | Shiraz-25T | 1698 | 0.21835  | 0         |  |  |
|      |      | Shiraz-28T | 1735 | 0.350744 | 0         |  |  |
|      |      | Shiraz-29T | 1778 | 0.120767 | 0         |  |  |
|      |      | Shiraz-32T | 1833 | 0.551336 | 0         |  |  |
|      |      | Shiraz-38T | 1951 | 0.250891 | 0         |  |  |
|      |      | Shiraz-53T | 2078 | 0.287202 | 0         |  |  |
|      |      | Shiraz-58T | 2159 | 0        | -0.219521 |  |  |
|      |      | Shiraz-71T | 2238 | 0.603631 | 0         |  |  |
|      |      | Shiraz-3T  | 90   | 0.219276 | 0         |  |  |
|      |      | Shiraz-3T  | 93   | 0        | -0.058023 |  |  |
|      |      | Shiraz-4T  | 253  | 0.372918 | 0         |  |  |
|      |      | Shiraz-36T | 378  | 0.179558 | 0         |  |  |
|      |      | Shiraz-36T | 380  | 0.083883 | 0         |  |  |
|      |      | Shiraz-44T | 638  | 0        | -0.433476 |  |  |
|      |      | Shiraz-46T | 943  | 0.093799 | 0         |  |  |
|      |      | Shiraz-46T | 945  | 0        | -0.014838 |  |  |
|      |      | Shiraz-47T | 1029 | 0        | -0.096586 |  |  |
|      |      | Shiraz-49T | 1119 | 0        | -0.157331 |  |  |

|      |      |            |      |          |           |  |  |
|------|------|------------|------|----------|-----------|--|--|
|      |      | Shiraz-77T | 1225 | 0        | -0.117922 |  |  |
|      |      | Shiraz-18T | 1434 | 0.244465 | 0         |  |  |
|      |      | Shiraz-22T | 1549 | 0        | -0.319623 |  |  |
|      |      | Shiraz-25T | 1698 | 0.21835  | 0         |  |  |
|      |      | Shiraz-28T | 1735 | 0.350744 | 0         |  |  |
|      |      | Shiraz-29T | 1778 | 0.120767 | 0         |  |  |
|      |      | Shiraz-32T | 1833 | 0.551336 | 0         |  |  |
|      |      | Shiraz-38T | 1951 | 0.250891 | 0         |  |  |
|      |      | Shiraz-53T | 2078 | 0.287202 | 0         |  |  |
|      |      | Shiraz-58T | 2159 | 0        | -0.219521 |  |  |
|      |      | Shiraz-71T | 2238 | 0.603631 | 0         |  |  |
|      |      | Shiraz-3T  | 90   | 0.219276 | 0         |  |  |
|      |      | Shiraz-3T  | 93   | 0        | -0.058023 |  |  |
|      |      | Shiraz-4T  | 253  | 0.372918 | 0         |  |  |
|      |      | Shiraz-36T | 378  | 0.179558 | 0         |  |  |
|      |      | Shiraz-36T | 380  | 0.083883 | 0         |  |  |
|      |      | Shiraz-44T | 638  | 0        | -0.433476 |  |  |
|      |      | Shiraz-46T | 943  | 0.093799 | 0         |  |  |
|      |      | Shiraz-46T | 945  | 0        | -0.014838 |  |  |
|      |      | Shiraz-47T | 1029 | 0        | -0.096586 |  |  |
|      |      | Shiraz-49T | 1119 | 0        | -0.157331 |  |  |
|      |      | Shiraz-77T | 1225 | 0        | -0.117922 |  |  |
|      |      | Shiraz-18T | 1434 | 0.244465 | 0         |  |  |
|      |      | Shiraz-22T | 1549 | 0        | -0.319623 |  |  |
|      |      | Shiraz-25T | 1698 | 0.21835  | 0         |  |  |
|      |      | Shiraz-28T | 1735 | 0.350744 | 0         |  |  |
|      |      | Shiraz-29T | 1778 | 0.120767 | 0         |  |  |
|      |      | Shiraz-32T | 1833 | 0.551336 | 0         |  |  |
|      |      | Shiraz-38T | 1951 | 0.250891 | 0         |  |  |
|      |      | Shiraz-53T | 2078 | 0.287202 | 0         |  |  |
|      |      | Shiraz-58T | 2159 | 0        | -0.219521 |  |  |
|      |      | Shiraz-71T | 2238 | 0.603631 | 0         |  |  |
| BEX1 | chrX | Shiraz-3T  | 242  | 0        | -0.336434 |  |  |
|      |      | Shiraz-4T  | 261  | 0        | -0.336249 |  |  |
|      |      | Shiraz-16T | 295  | 0.591657 | 0         |  |  |
|      |      | Shiraz-36T | 433  | 0        | -0.803961 |  |  |
|      |      | Shiraz-44T | 899  | 0        | -1.09697  |  |  |
|      |      | Shiraz-49T | 1170 | 0        | -0.967436 |  |  |
|      |      | Shiraz-18T | 1457 | 0.643204 | 0         |  |  |
|      |      | Shiraz-22T | 1673 | 0.611783 | 0         |  |  |
|      |      | Shiraz-25T | 1719 | 0.472955 | 0         |  |  |
|      |      | Shiraz-28T | 1762 | 0.562311 | 0         |  |  |
|      |      | Shiraz-29T | 1801 | 0.815343 | 0         |  |  |
|      |      | Shiraz-32T | 1870 | 0.729766 | 0         |  |  |
|      |      | Shiraz-35T | 1933 | 0.488535 | 0         |  |  |
|      |      | Shiraz-58T | 2223 | 0.833364 | 0         |  |  |
|      |      | Shiraz-71T | 2263 | 0.975531 | 0         |  |  |



|      |      |            |      |          |           |  |  |
|------|------|------------|------|----------|-----------|--|--|
|      |      | Shiraz-3T  | 242  | 0        | -0.336434 |  |  |
|      |      | Shiraz-4T  | 261  | 0        | -0.336249 |  |  |
|      |      | Shiraz-16T | 295  | 0.591657 | 0         |  |  |
|      |      | Shiraz-36T | 433  | 0        | -0.803961 |  |  |
|      |      | Shiraz-44T | 899  | 0        | -1.09697  |  |  |
|      |      | Shiraz-49T | 1170 | 0        | -0.967436 |  |  |
|      |      | Shiraz-18T | 1457 | 0.643204 | 0         |  |  |
|      |      | Shiraz-22T | 1673 | 0.611783 | 0         |  |  |
|      |      | Shiraz-25T | 1719 | 0.472955 | 0         |  |  |
|      |      | Shiraz-28T | 1762 | 0.562311 | 0         |  |  |
|      |      | Shiraz-29T | 1801 | 0.815343 | 0         |  |  |
|      |      | Shiraz-32T | 1870 | 0.729766 | 0         |  |  |
|      |      | Shiraz-35T | 1933 | 0.488535 | 0         |  |  |
|      |      | Shiraz-58T | 2223 | 0.833364 | 0         |  |  |
|      |      | Shiraz-71T | 2263 | 0.975531 | 0         |  |  |
|      |      | Shiraz-3T  | 242  | 0        | -0.336434 |  |  |
|      |      | Shiraz-4T  | 261  | 0        | -0.336249 |  |  |
|      |      | Shiraz-16T | 295  | 0.591657 | 0         |  |  |
|      |      | Shiraz-36T | 433  | 0        | -0.803961 |  |  |
|      |      | Shiraz-44T | 899  | 0        | -1.09697  |  |  |
|      |      | Shiraz-49T | 1170 | 0        | -0.967436 |  |  |
|      |      | Shiraz-18T | 1457 | 0.643204 | 0         |  |  |
|      |      | Shiraz-22T | 1673 | 0.611783 | 0         |  |  |
|      |      | Shiraz-25T | 1719 | 0.472955 | 0         |  |  |
|      |      | Shiraz-28T | 1762 | 0.562311 | 0         |  |  |
|      |      | Shiraz-29T | 1801 | 0.815343 | 0         |  |  |
|      |      | Shiraz-32T | 1870 | 0.729766 | 0         |  |  |
|      |      | Shiraz-35T | 1933 | 0.488535 | 0         |  |  |
|      |      | Shiraz-58T | 2223 | 0.833364 | 0         |  |  |
|      |      | Shiraz-71T | 2263 | 0.975531 | 0         |  |  |
| BEX2 | chrX | Shiraz-3T  | 242  | 0        | -0.336434 |  |  |
|      |      | Shiraz-4T  | 261  | 0        | -0.336249 |  |  |
|      |      | Shiraz-16T | 295  | 0.591657 | 0         |  |  |
|      |      | Shiraz-36T | 433  | 0        | -0.803961 |  |  |
|      |      | Shiraz-44T | 899  | 0        | -1.09697  |  |  |
|      |      | Shiraz-49T | 1170 | 0        | -0.967436 |  |  |
|      |      | Shiraz-18T | 1457 | 0.643204 | 0         |  |  |
|      |      | Shiraz-22T | 1673 | 0.611783 | 0         |  |  |
|      |      | Shiraz-25T | 1719 | 0.472955 | 0         |  |  |
|      |      | Shiraz-28T | 1762 | 0.562311 | 0         |  |  |
|      |      | Shiraz-29T | 1801 | 0.815343 | 0         |  |  |
|      |      | Shiraz-32T | 1870 | 0.729766 | 0         |  |  |
|      |      | Shiraz-35T | 1933 | 0.488535 | 0         |  |  |
|      |      | Shiraz-58T | 2223 | 0.833364 | 0         |  |  |
|      |      | Shiraz-71T | 2263 | 0.975531 | 0         |  |  |
|      |      | Shiraz-3T  | 242  | 0        | -0.336434 |  |  |
|      |      | Shiraz-4T  | 261  | 0        | -0.336249 |  |  |

|      |      |            |      |          |           |  |  |
|------|------|------------|------|----------|-----------|--|--|
|      |      | Shiraz-16T | 295  | 0.591657 | 0         |  |  |
|      |      | Shiraz-36T | 433  | 0        | -0.803961 |  |  |
|      |      | Shiraz-44T | 899  | 0        | -1.09697  |  |  |
|      |      | Shiraz-49T | 1170 | 0        | -0.967436 |  |  |
|      |      | Shiraz-18T | 1457 | 0.643204 | 0         |  |  |
|      |      | Shiraz-22T | 1673 | 0.611783 | 0         |  |  |
|      |      | Shiraz-25T | 1719 | 0.472955 | 0         |  |  |
|      |      | Shiraz-28T | 1762 | 0.562311 | 0         |  |  |
|      |      | Shiraz-29T | 1801 | 0.815343 | 0         |  |  |
|      |      | Shiraz-32T | 1870 | 0.729766 | 0         |  |  |
|      |      | Shiraz-35T | 1933 | 0.488535 | 0         |  |  |
|      |      | Shiraz-58T | 2223 | 0.833364 | 0         |  |  |
|      |      | Shiraz-71T | 2263 | 0.975531 | 0         |  |  |
|      |      | Shiraz-3T  | 242  | 0        | -0.336434 |  |  |
|      |      | Shiraz-4T  | 261  | 0        | -0.336249 |  |  |
|      |      | Shiraz-16T | 295  | 0.591657 | 0         |  |  |
|      |      | Shiraz-36T | 433  | 0        | -0.803961 |  |  |
|      |      | Shiraz-44T | 899  | 0        | -1.09697  |  |  |
|      |      | Shiraz-49T | 1170 | 0        | -0.967436 |  |  |
|      |      | Shiraz-18T | 1457 | 0.643204 | 0         |  |  |
|      |      | Shiraz-22T | 1673 | 0.611783 | 0         |  |  |
|      |      | Shiraz-25T | 1719 | 0.472955 | 0         |  |  |
|      |      | Shiraz-28T | 1762 | 0.562311 | 0         |  |  |
|      |      | Shiraz-29T | 1801 | 0.815343 | 0         |  |  |
|      |      | Shiraz-32T | 1870 | 0.729766 | 0         |  |  |
|      |      | Shiraz-35T | 1933 | 0.488535 | 0         |  |  |
|      |      | Shiraz-58T | 2223 | 0.833364 | 0         |  |  |
|      |      | Shiraz-71T | 2263 | 0.975531 | 0         |  |  |
| BEX4 | chrX | Shiraz-3T  | 242  | 0        | -0.336434 |  |  |
|      |      | Shiraz-3T  | 242  | 0        | -0.336434 |  |  |
|      |      | Shiraz-4T  | 261  | 0        | -0.336249 |  |  |
|      |      | Shiraz-4T  | 261  | 0        | -0.336249 |  |  |
|      |      | Shiraz-16T | 295  | 0.591657 | 0         |  |  |
|      |      | Shiraz-16T | 295  | 0.591657 | 0         |  |  |
|      |      | Shiraz-36T | 433  | 0        | -0.803961 |  |  |
|      |      | Shiraz-36T | 433  | 0        | -0.803961 |  |  |
|      |      | Shiraz-44T | 899  | 0        | -1.09697  |  |  |
|      |      | Shiraz-44T | 899  | 0        | -1.09697  |  |  |
|      |      | Shiraz-49T | 1170 | 0        | -0.967436 |  |  |
|      |      | Shiraz-49T | 1170 | 0        | -0.967436 |  |  |
|      |      | Shiraz-18T | 1457 | 0.643204 | 0         |  |  |
|      |      | Shiraz-18T | 1457 | 0.643204 | 0         |  |  |
|      |      | Shiraz-22T | 1673 | 0.611783 | 0         |  |  |
|      |      | Shiraz-22T | 1673 | 0.611783 | 0         |  |  |
|      |      | Shiraz-25T | 1719 | 0.472955 | 0         |  |  |
|      |      | Shiraz-25T | 1719 | 0.472955 | 0         |  |  |
|      |      | Shiraz-28T | 1762 | 0.562311 | 0         |  |  |

|  |  |            |      |          |           |  |  |
|--|--|------------|------|----------|-----------|--|--|
|  |  | Shiraz-28T | 1762 | 0.562311 | 0         |  |  |
|  |  | Shiraz-29T | 1801 | 0.815343 | 0         |  |  |
|  |  | Shiraz-29T | 1801 | 0.815343 | 0         |  |  |
|  |  | Shiraz-32T | 1870 | 0.729766 | 0         |  |  |
|  |  | Shiraz-32T | 1870 | 0.729766 | 0         |  |  |
|  |  | Shiraz-35T | 1933 | 0.488535 | 0         |  |  |
|  |  | Shiraz-35T | 1933 | 0.488535 | 0         |  |  |
|  |  | Shiraz-58T | 2223 | 0.833364 | 0         |  |  |
|  |  | Shiraz-58T | 2223 | 0.833364 | 0         |  |  |
|  |  | Shiraz-71T | 2263 | 0.975531 | 0         |  |  |
|  |  | Shiraz-71T | 2263 | 0.975531 | 0         |  |  |
|  |  | Shiraz-3T  | 242  | 0        | -0.336434 |  |  |
|  |  | Shiraz-3T  | 242  | 0        | -0.336434 |  |  |
|  |  | Shiraz-4T  | 261  | 0        | -0.336249 |  |  |
|  |  | Shiraz-4T  | 261  | 0        | -0.336249 |  |  |
|  |  | Shiraz-16T | 295  | 0.591657 | 0         |  |  |
|  |  | Shiraz-16T | 295  | 0.591657 | 0         |  |  |
|  |  | Shiraz-36T | 433  | 0        | -0.803961 |  |  |
|  |  | Shiraz-36T | 433  | 0        | -0.803961 |  |  |
|  |  | Shiraz-44T | 899  | 0        | -1.09697  |  |  |
|  |  | Shiraz-44T | 899  | 0        | -1.09697  |  |  |
|  |  | Shiraz-49T | 1170 | 0        | -0.967436 |  |  |
|  |  | Shiraz-49T | 1170 | 0        | -0.967436 |  |  |
|  |  | Shiraz-18T | 1457 | 0.643204 | 0         |  |  |
|  |  | Shiraz-18T | 1457 | 0.643204 | 0         |  |  |
|  |  | Shiraz-22T | 1673 | 0.611783 | 0         |  |  |
|  |  | Shiraz-22T | 1673 | 0.611783 | 0         |  |  |
|  |  | Shiraz-25T | 1719 | 0.472955 | 0         |  |  |
|  |  | Shiraz-25T | 1719 | 0.472955 | 0         |  |  |
|  |  | Shiraz-28T | 1762 | 0.562311 | 0         |  |  |
|  |  | Shiraz-28T | 1762 | 0.562311 | 0         |  |  |
|  |  | Shiraz-29T | 1801 | 0.815343 | 0         |  |  |
|  |  | Shiraz-29T | 1801 | 0.815343 | 0         |  |  |
|  |  | Shiraz-32T | 1870 | 0.729766 | 0         |  |  |
|  |  | Shiraz-32T | 1870 | 0.729766 | 0         |  |  |
|  |  | Shiraz-35T | 1933 | 0.488535 | 0         |  |  |
|  |  | Shiraz-35T | 1933 | 0.488535 | 0         |  |  |
|  |  | Shiraz-58T | 2223 | 0.833364 | 0         |  |  |
|  |  | Shiraz-58T | 2223 | 0.833364 | 0         |  |  |
|  |  | Shiraz-71T | 2263 | 0.975531 | 0         |  |  |
|  |  | Shiraz-71T | 2263 | 0.975531 | 0         |  |  |
|  |  | Shiraz-3T  | 242  | 0        | -0.336434 |  |  |
|  |  | Shiraz-3T  | 242  | 0        | -0.336434 |  |  |
|  |  | Shiraz-4T  | 261  | 0        | -0.336249 |  |  |
|  |  | Shiraz-4T  | 261  | 0        | -0.336249 |  |  |
|  |  | Shiraz-16T | 295  | 0.591657 | 0         |  |  |
|  |  | Shiraz-16T | 295  | 0.591657 | 0         |  |  |

|      |      |            |      |          |           |  |  |
|------|------|------------|------|----------|-----------|--|--|
|      |      | Shiraz-36T | 433  | 0        | -0.803961 |  |  |
|      |      | Shiraz-36T | 433  | 0        | -0.803961 |  |  |
|      |      | Shiraz-44T | 899  | 0        | -1.09697  |  |  |
|      |      | Shiraz-44T | 899  | 0        | -1.09697  |  |  |
|      |      | Shiraz-49T | 1170 | 0        | -0.967436 |  |  |
|      |      | Shiraz-49T | 1170 | 0        | -0.967436 |  |  |
|      |      | Shiraz-18T | 1457 | 0.643204 | 0         |  |  |
|      |      | Shiraz-18T | 1457 | 0.643204 | 0         |  |  |
|      |      | Shiraz-22T | 1673 | 0.611783 | 0         |  |  |
|      |      | Shiraz-22T | 1673 | 0.611783 | 0         |  |  |
|      |      | Shiraz-25T | 1719 | 0.472955 | 0         |  |  |
|      |      | Shiraz-25T | 1719 | 0.472955 | 0         |  |  |
|      |      | Shiraz-28T | 1762 | 0.562311 | 0         |  |  |
|      |      | Shiraz-28T | 1762 | 0.562311 | 0         |  |  |
|      |      | Shiraz-29T | 1801 | 0.815343 | 0         |  |  |
|      |      | Shiraz-29T | 1801 | 0.815343 | 0         |  |  |
|      |      | Shiraz-32T | 1870 | 0.729766 | 0         |  |  |
|      |      | Shiraz-32T | 1870 | 0.729766 | 0         |  |  |
|      |      | Shiraz-35T | 1933 | 0.488535 | 0         |  |  |
|      |      | Shiraz-35T | 1933 | 0.488535 | 0         |  |  |
|      |      | Shiraz-58T | 2223 | 0.833364 | 0         |  |  |
|      |      | Shiraz-58T | 2223 | 0.833364 | 0         |  |  |
|      |      | Shiraz-71T | 2263 | 0.975531 | 0         |  |  |
|      |      | Shiraz-71T | 2263 | 0.975531 | 0         |  |  |
| BEX5 | chrX | Shiraz-3T  | 242  | 0        | -0.336434 |  |  |
|      |      | Shiraz-4T  | 261  | 0        | -0.336249 |  |  |
|      |      | Shiraz-16T | 295  | 0.591657 | 0         |  |  |
|      |      | Shiraz-36T | 433  | 0        | -0.803961 |  |  |
|      |      | Shiraz-44T | 899  | 0        | -1.09697  |  |  |
|      |      | Shiraz-49T | 1170 | 0        | -0.967436 |  |  |
|      |      | Shiraz-18T | 1457 | 0.643204 | 0         |  |  |
|      |      | Shiraz-22T | 1673 | 0.611783 | 0         |  |  |
|      |      | Shiraz-25T | 1719 | 0.472955 | 0         |  |  |
|      |      | Shiraz-28T | 1762 | 0.562311 | 0         |  |  |
|      |      | Shiraz-29T | 1801 | 0.815343 | 0         |  |  |
|      |      | Shiraz-32T | 1870 | 0.729766 | 0         |  |  |
|      |      | Shiraz-35T | 1933 | 0.488535 | 0         |  |  |
|      |      | Shiraz-58T | 2223 | 0.833364 | 0         |  |  |
|      |      | Shiraz-71T | 2263 | 0.975531 | 0         |  |  |
|      |      | Shiraz-3T  | 242  | 0        | -0.336434 |  |  |
|      |      | Shiraz-4T  | 261  | 0        | -0.336249 |  |  |
|      |      | Shiraz-16T | 295  | 0.591657 | 0         |  |  |
|      |      | Shiraz-36T | 433  | 0        | -0.803961 |  |  |
|      |      | Shiraz-44T | 899  | 0        | -1.09697  |  |  |
|      |      | Shiraz-49T | 1170 | 0        | -0.967436 |  |  |
|      |      | Shiraz-18T | 1457 | 0.643204 | 0         |  |  |
|      |      | Shiraz-22T | 1673 | 0.611783 | 0         |  |  |

|     |      |            |      |          |           |  |  |
|-----|------|------------|------|----------|-----------|--|--|
|     |      | Shiraz-25T | 1719 | 0.472955 | 0         |  |  |
|     |      | Shiraz-28T | 1762 | 0.562311 | 0         |  |  |
|     |      | Shiraz-29T | 1801 | 0.815343 | 0         |  |  |
|     |      | Shiraz-32T | 1870 | 0.729766 | 0         |  |  |
|     |      | Shiraz-35T | 1933 | 0.488535 | 0         |  |  |
|     |      | Shiraz-58T | 2223 | 0.833364 | 0         |  |  |
|     |      | Shiraz-71T | 2263 | 0.975531 | 0         |  |  |
|     |      | Shiraz-3T  | 242  | 0        | -0.336434 |  |  |
|     |      | Shiraz-4T  | 261  | 0        | -0.336249 |  |  |
|     |      | Shiraz-16T | 295  | 0.591657 | 0         |  |  |
|     |      | Shiraz-36T | 433  | 0        | -0.803961 |  |  |
|     |      | Shiraz-44T | 899  | 0        | -1.09697  |  |  |
|     |      | Shiraz-49T | 1170 | 0        | -0.967436 |  |  |
|     |      | Shiraz-18T | 1457 | 0.643204 | 0         |  |  |
|     |      | Shiraz-22T | 1673 | 0.611783 | 0         |  |  |
|     |      | Shiraz-25T | 1719 | 0.472955 | 0         |  |  |
|     |      | Shiraz-28T | 1762 | 0.562311 | 0         |  |  |
|     |      | Shiraz-29T | 1801 | 0.815343 | 0         |  |  |
|     |      | Shiraz-32T | 1870 | 0.729766 | 0         |  |  |
|     |      | Shiraz-35T | 1933 | 0.488535 | 0         |  |  |
|     |      | Shiraz-58T | 2223 | 0.833364 | 0         |  |  |
|     |      | Shiraz-71T | 2263 | 0.975531 | 0         |  |  |
| BGN | chrX | Shiraz-3T  | 246  | 0.531858 | 0         |  |  |
|     |      | Shiraz-4T  | 261  | 0        | -0.336249 |  |  |
|     |      | Shiraz-16T | 295  | 0.591657 | 0         |  |  |
|     |      | Shiraz-36T | 433  | 0        | -0.803961 |  |  |
|     |      | Shiraz-42T | 480  | 0        | -0.232915 |  |  |
|     |      | Shiraz-44T | 908  | 0.466743 | 0         |  |  |
|     |      | Shiraz-49T | 1170 | 0        | -0.967436 |  |  |
|     |      | Shiraz-49T | 1173 | 0        | -0.704439 |  |  |
|     |      | Shiraz-9T  | 1370 | 0.690073 | 0         |  |  |
|     |      | Shiraz-9T  | 1371 | 1.292392 | 0         |  |  |
|     |      | Shiraz-18T | 1457 | 0.643204 | 0         |  |  |
|     |      | Shiraz-22T | 1673 | 0.611783 | 0         |  |  |
|     |      | Shiraz-22T | 1678 | 0.911625 | 0         |  |  |
|     |      | Shiraz-25T | 1719 | 0.472955 | 0         |  |  |
|     |      | Shiraz-28T | 1762 | 0.562311 | 0         |  |  |
|     |      | Shiraz-29T | 1801 | 0.815343 | 0         |  |  |
|     |      | Shiraz-32T | 1870 | 0.729766 | 0         |  |  |
|     |      | Shiraz-32T | 1872 | 1.504553 | 0         |  |  |
|     |      | Shiraz-35T | 1933 | 0.488535 | 0         |  |  |
|     |      | Shiraz-38T | 2011 | 0        | -0.406024 |  |  |
|     |      | Shiraz-53T | 2115 | 0.427728 | 0         |  |  |
|     |      | Shiraz-58T | 2223 | 0.833364 | 0         |  |  |
|     |      | Shiraz-58T | 2226 | 1.074663 | 0         |  |  |
|     |      | Shiraz-71T | 2263 | 0.975531 | 0         |  |  |
|     |      | Shiraz-3T  | 246  | 0.531858 | 0         |  |  |

|  |            |      |          |           |  |
|--|------------|------|----------|-----------|--|
|  | Shiraz-4T  | 261  | 0        | -0.336249 |  |
|  | Shiraz-16T | 295  | 0.591657 | 0         |  |
|  | Shiraz-36T | 433  | 0        | -0.803961 |  |
|  | Shiraz-42T | 480  | 0        | -0.232915 |  |
|  | Shiraz-44T | 908  | 0.466743 | 0         |  |
|  | Shiraz-49T | 1170 | 0        | -0.967436 |  |
|  | Shiraz-49T | 1173 | 0        | -0.704439 |  |
|  | Shiraz-9T  | 1370 | 0.690073 | 0         |  |
|  | Shiraz-9T  | 1371 | 1.292392 | 0         |  |
|  | Shiraz-18T | 1457 | 0.643204 | 0         |  |
|  | Shiraz-22T | 1673 | 0.611783 | 0         |  |
|  | Shiraz-22T | 1678 | 0.911625 | 0         |  |
|  | Shiraz-25T | 1719 | 0.472955 | 0         |  |
|  | Shiraz-28T | 1762 | 0.562311 | 0         |  |
|  | Shiraz-29T | 1801 | 0.815343 | 0         |  |
|  | Shiraz-32T | 1870 | 0.729766 | 0         |  |
|  | Shiraz-32T | 1872 | 1.504553 | 0         |  |
|  | Shiraz-35T | 1933 | 0.488535 | 0         |  |
|  | Shiraz-38T | 2011 | 0        | -0.406024 |  |
|  | Shiraz-53T | 2115 | 0.427728 | 0         |  |
|  | Shiraz-58T | 2223 | 0.833364 | 0         |  |
|  | Shiraz-58T | 2226 | 1.074663 | 0         |  |
|  | Shiraz-71T | 2263 | 0.975531 | 0         |  |
|  | Shiraz-3T  | 246  | 0.531858 | 0         |  |
|  | Shiraz-4T  | 261  | 0        | -0.336249 |  |
|  | Shiraz-16T | 295  | 0.591657 | 0         |  |
|  | Shiraz-36T | 433  | 0        | -0.803961 |  |
|  | Shiraz-42T | 480  | 0        | -0.232915 |  |
|  | Shiraz-44T | 908  | 0.466743 | 0         |  |
|  | Shiraz-49T | 1170 | 0        | -0.967436 |  |
|  | Shiraz-49T | 1173 | 0        | -0.704439 |  |
|  | Shiraz-9T  | 1370 | 0.690073 | 0         |  |
|  | Shiraz-9T  | 1371 | 1.292392 | 0         |  |
|  | Shiraz-18T | 1457 | 0.643204 | 0         |  |
|  | Shiraz-22T | 1673 | 0.611783 | 0         |  |
|  | Shiraz-22T | 1678 | 0.911625 | 0         |  |
|  | Shiraz-25T | 1719 | 0.472955 | 0         |  |
|  | Shiraz-28T | 1762 | 0.562311 | 0         |  |
|  | Shiraz-29T | 1801 | 0.815343 | 0         |  |
|  | Shiraz-32T | 1870 | 0.729766 | 0         |  |
|  | Shiraz-32T | 1872 | 1.504553 | 0         |  |
|  | Shiraz-35T | 1933 | 0.488535 | 0         |  |
|  | Shiraz-38T | 2011 | 0        | -0.406024 |  |
|  | Shiraz-53T | 2115 | 0.427728 | 0         |  |
|  | Shiraz-58T | 2223 | 0.833364 | 0         |  |
|  | Shiraz-58T | 2226 | 1.074663 | 0         |  |
|  | Shiraz-71T | 2263 | 0.975531 | 0         |  |

|         |      |            |      |          |           |  |
|---------|------|------------|------|----------|-----------|--|
| BHLHA15 | chr7 | Shiraz-3T  | 90   | 0.219276 | 0         |  |
|         |      | Shiraz-3T  | 94   | 0.74735  | 0         |  |
|         |      | Shiraz-4T  | 253  | 0.372918 | 0         |  |
|         |      | Shiraz-31T | 316  | 0.219196 | 0         |  |
|         |      | Shiraz-36T | 378  | 0.179558 | 0         |  |
|         |      | Shiraz-36T | 381  | 0.332628 | 0         |  |
|         |      | Shiraz-44T | 639  | 1.035032 | 0         |  |
|         |      | Shiraz-46T | 943  | 0.093799 | 0         |  |
|         |      | Shiraz-46T | 946  | 0.299835 | 0         |  |
|         |      | Shiraz-47T | 1030 | 0.257728 | 0         |  |
|         |      | Shiraz-49T | 1120 | 0.281656 | 0         |  |
|         |      | Shiraz-77T | 1225 | 0        | -0.117922 |  |
|         |      | Shiraz-77T | 1227 | 0.196445 | 0         |  |
|         |      | Shiraz-9T  | 1324 | 0.679266 | 0         |  |
|         |      | Shiraz-18T | 1434 | 0.244465 | 0         |  |
|         |      | Shiraz-22T | 1549 | 0        | -0.319623 |  |
|         |      | Shiraz-22T | 1551 | 0.324011 | 0         |  |
|         |      | Shiraz-25T | 1698 | 0.21835  | 0         |  |
|         |      | Shiraz-28T | 1735 | 0.350744 | 0         |  |
|         |      | Shiraz-29T | 1778 | 0.120767 | 0         |  |
|         |      | Shiraz-32T | 1833 | 0.551336 | 0         |  |
|         |      | Shiraz-38T | 1951 | 0.250891 | 0         |  |
|         |      | Shiraz-53T | 2078 | 0.287202 | 0         |  |
|         |      | Shiraz-71T | 2238 | 0.603631 | 0         |  |
|         |      | Shiraz-3T  | 90   | 0.219276 | 0         |  |
|         |      | Shiraz-3T  | 94   | 0.74735  | 0         |  |
|         |      | Shiraz-4T  | 253  | 0.372918 | 0         |  |
|         |      | Shiraz-31T | 316  | 0.219196 | 0         |  |
|         |      | Shiraz-36T | 378  | 0.179558 | 0         |  |
|         |      | Shiraz-36T | 381  | 0.332628 | 0         |  |
|         |      | Shiraz-44T | 639  | 1.035032 | 0         |  |
|         |      | Shiraz-46T | 943  | 0.093799 | 0         |  |
|         |      | Shiraz-46T | 946  | 0.299835 | 0         |  |
|         |      | Shiraz-47T | 1030 | 0.257728 | 0         |  |
|         |      | Shiraz-49T | 1120 | 0.281656 | 0         |  |
|         |      | Shiraz-77T | 1225 | 0        | -0.117922 |  |
|         |      | Shiraz-77T | 1227 | 0.196445 | 0         |  |
|         |      | Shiraz-9T  | 1324 | 0.679266 | 0         |  |
|         |      | Shiraz-18T | 1434 | 0.244465 | 0         |  |
|         |      | Shiraz-22T | 1549 | 0        | -0.319623 |  |
|         |      | Shiraz-22T | 1551 | 0.324011 | 0         |  |
|         |      | Shiraz-25T | 1698 | 0.21835  | 0         |  |
|         |      | Shiraz-28T | 1735 | 0.350744 | 0         |  |
|         |      | Shiraz-29T | 1778 | 0.120767 | 0         |  |
|         |      | Shiraz-32T | 1833 | 0.551336 | 0         |  |
|         |      | Shiraz-38T | 1951 | 0.250891 | 0         |  |
|         |      | Shiraz-53T | 2078 | 0.287202 | 0         |  |

|        |      |            |      |          |           |  |
|--------|------|------------|------|----------|-----------|--|
|        |      | Shiraz-71T | 2238 | 0.603631 | 0         |  |
|        |      | Shiraz-3T  | 90   | 0.219276 | 0         |  |
|        |      | Shiraz-3T  | 94   | 0.74735  | 0         |  |
|        |      | Shiraz-4T  | 253  | 0.372918 | 0         |  |
|        |      | Shiraz-31T | 316  | 0.219196 | 0         |  |
|        |      | Shiraz-36T | 378  | 0.179558 | 0         |  |
|        |      | Shiraz-36T | 381  | 0.332628 | 0         |  |
|        |      | Shiraz-44T | 639  | 1.035032 | 0         |  |
|        |      | Shiraz-46T | 943  | 0.093799 | 0         |  |
|        |      | Shiraz-46T | 946  | 0.299835 | 0         |  |
|        |      | Shiraz-47T | 1030 | 0.257728 | 0         |  |
|        |      | Shiraz-49T | 1120 | 0.281656 | 0         |  |
|        |      | Shiraz-77T | 1225 | 0        | -0.117922 |  |
|        |      | Shiraz-77T | 1227 | 0.196445 | 0         |  |
|        |      | Shiraz-9T  | 1324 | 0.679266 | 0         |  |
|        |      | Shiraz-18T | 1434 | 0.244465 | 0         |  |
|        |      | Shiraz-22T | 1549 | 0        | -0.319623 |  |
|        |      | Shiraz-22T | 1551 | 0.324011 | 0         |  |
|        |      | Shiraz-25T | 1698 | 0.21835  | 0         |  |
|        |      | Shiraz-28T | 1735 | 0.350744 | 0         |  |
|        |      | Shiraz-29T | 1778 | 0.120767 | 0         |  |
|        |      | Shiraz-32T | 1833 | 0.551336 | 0         |  |
|        |      | Shiraz-38T | 1951 | 0.250891 | 0         |  |
|        |      | Shiraz-53T | 2078 | 0.287202 | 0         |  |
|        |      | Shiraz-71T | 2238 | 0.603631 | 0         |  |
| BHLHB9 | chrX | Shiraz-3T  | 242  | 0        | -0.336434 |  |
|        |      | Shiraz-3T  | 242  | 0        | -0.336434 |  |
|        |      | Shiraz-4T  | 261  | 0        | -0.336249 |  |
|        |      | Shiraz-4T  | 261  | 0        | -0.336249 |  |
|        |      | Shiraz-16T | 295  | 0.591657 | 0         |  |
|        |      | Shiraz-16T | 295  | 0.591657 | 0         |  |
|        |      | Shiraz-36T | 433  | 0        | -0.803961 |  |
|        |      | Shiraz-36T | 433  | 0        | -0.803961 |  |
|        |      | Shiraz-44T | 899  | 0        | -1.09697  |  |
|        |      | Shiraz-44T | 899  | 0        | -1.09697  |  |
|        |      | Shiraz-49T | 1170 | 0        | -0.967436 |  |
|        |      | Shiraz-49T | 1170 | 0        | -0.967436 |  |
|        |      | Shiraz-18T | 1457 | 0.643204 | 0         |  |
|        |      | Shiraz-18T | 1457 | 0.643204 | 0         |  |
|        |      | Shiraz-22T | 1673 | 0.611783 | 0         |  |
|        |      | Shiraz-22T | 1673 | 0.611783 | 0         |  |
|        |      | Shiraz-25T | 1719 | 0.472955 | 0         |  |
|        |      | Shiraz-25T | 1719 | 0.472955 | 0         |  |
|        |      | Shiraz-28T | 1762 | 0.562311 | 0         |  |
|        |      | Shiraz-28T | 1762 | 0.562311 | 0         |  |
|        |      | Shiraz-29T | 1801 | 0.815343 | 0         |  |
|        |      | Shiraz-29T | 1801 | 0.815343 | 0         |  |



|  |  |            |      |          |           |  |  |
|--|--|------------|------|----------|-----------|--|--|
|  |  | Shiraz-32T | 1870 | 0.729766 | 0         |  |  |
|  |  | Shiraz-32T | 1870 | 0.729766 | 0         |  |  |
|  |  | Shiraz-35T | 1933 | 0.488535 | 0         |  |  |
|  |  | Shiraz-35T | 1933 | 0.488535 | 0         |  |  |
|  |  | Shiraz-58T | 2223 | 0.833364 | 0         |  |  |
|  |  | Shiraz-58T | 2223 | 0.833364 | 0         |  |  |
|  |  | Shiraz-71T | 2263 | 0.975531 | 0         |  |  |
|  |  | Shiraz-71T | 2263 | 0.975531 | 0         |  |  |
|  |  | Shiraz-3T  | 242  | 0        | -0.336434 |  |  |
|  |  | Shiraz-3T  | 242  | 0        | -0.336434 |  |  |
|  |  | Shiraz-4T  | 261  | 0        | -0.336249 |  |  |
|  |  | Shiraz-4T  | 261  | 0        | -0.336249 |  |  |
|  |  | Shiraz-16T | 295  | 0.591657 | 0         |  |  |
|  |  | Shiraz-16T | 295  | 0.591657 | 0         |  |  |
|  |  | Shiraz-36T | 433  | 0        | -0.803961 |  |  |
|  |  | Shiraz-36T | 433  | 0        | -0.803961 |  |  |
|  |  | Shiraz-44T | 899  | 0        | -1.09697  |  |  |
|  |  | Shiraz-44T | 899  | 0        | -1.09697  |  |  |
|  |  | Shiraz-49T | 1170 | 0        | -0.967436 |  |  |
|  |  | Shiraz-49T | 1170 | 0        | -0.967436 |  |  |
|  |  | Shiraz-18T | 1457 | 0.643204 | 0         |  |  |
|  |  | Shiraz-18T | 1457 | 0.643204 | 0         |  |  |
|  |  | Shiraz-22T | 1673 | 0.611783 | 0         |  |  |
|  |  | Shiraz-22T | 1673 | 0.611783 | 0         |  |  |
|  |  | Shiraz-25T | 1719 | 0.472955 | 0         |  |  |
|  |  | Shiraz-25T | 1719 | 0.472955 | 0         |  |  |
|  |  | Shiraz-28T | 1762 | 0.562311 | 0         |  |  |
|  |  | Shiraz-28T | 1762 | 0.562311 | 0         |  |  |
|  |  | Shiraz-29T | 1801 | 0.815343 | 0         |  |  |
|  |  | Shiraz-29T | 1801 | 0.815343 | 0         |  |  |
|  |  | Shiraz-32T | 1870 | 0.729766 | 0         |  |  |
|  |  | Shiraz-32T | 1870 | 0.729766 | 0         |  |  |
|  |  | Shiraz-35T | 1933 | 0.488535 | 0         |  |  |
|  |  | Shiraz-35T | 1933 | 0.488535 | 0         |  |  |
|  |  | Shiraz-58T | 2223 | 0.833364 | 0         |  |  |
|  |  | Shiraz-58T | 2223 | 0.833364 | 0         |  |  |
|  |  | Shiraz-71T | 2263 | 0.975531 | 0         |  |  |
|  |  | Shiraz-71T | 2263 | 0.975531 | 0         |  |  |
|  |  | Shiraz-3T  | 242  | 0        | -0.336434 |  |  |
|  |  | Shiraz-3T  | 242  | 0        | -0.336434 |  |  |
|  |  | Shiraz-4T  | 261  | 0        | -0.336249 |  |  |
|  |  | Shiraz-4T  | 261  | 0        | -0.336249 |  |  |
|  |  | Shiraz-16T | 295  | 0.591657 | 0         |  |  |
|  |  | Shiraz-16T | 295  | 0.591657 | 0         |  |  |
|  |  | Shiraz-36T | 433  | 0        | -0.803961 |  |  |
|  |  | Shiraz-36T | 433  | 0        | -0.803961 |  |  |
|  |  | Shiraz-44T | 899  | 0        | -1.09697  |  |  |

|       |      |            |      |          |           |  |  |
|-------|------|------------|------|----------|-----------|--|--|
|       |      | Shiraz-44T | 899  | 0        | -1.09697  |  |  |
|       |      | Shiraz-49T | 1170 | 0        | -0.967436 |  |  |
|       |      | Shiraz-49T | 1170 | 0        | -0.967436 |  |  |
|       |      | Shiraz-18T | 1457 | 0.643204 | 0         |  |  |
|       |      | Shiraz-18T | 1457 | 0.643204 | 0         |  |  |
|       |      | Shiraz-22T | 1673 | 0.611783 | 0         |  |  |
|       |      | Shiraz-22T | 1673 | 0.611783 | 0         |  |  |
|       |      | Shiraz-25T | 1719 | 0.472955 | 0         |  |  |
|       |      | Shiraz-25T | 1719 | 0.472955 | 0         |  |  |
|       |      | Shiraz-28T | 1762 | 0.562311 | 0         |  |  |
|       |      | Shiraz-28T | 1762 | 0.562311 | 0         |  |  |
|       |      | Shiraz-29T | 1801 | 0.815343 | 0         |  |  |
|       |      | Shiraz-29T | 1801 | 0.815343 | 0         |  |  |
|       |      | Shiraz-32T | 1870 | 0.729766 | 0         |  |  |
|       |      | Shiraz-32T | 1870 | 0.729766 | 0         |  |  |
|       |      | Shiraz-35T | 1933 | 0.488535 | 0         |  |  |
|       |      | Shiraz-35T | 1933 | 0.488535 | 0         |  |  |
|       |      | Shiraz-58T | 2223 | 0.833364 | 0         |  |  |
|       |      | Shiraz-58T | 2223 | 0.833364 | 0         |  |  |
|       |      | Shiraz-71T | 2263 | 0.975531 | 0         |  |  |
|       |      | Shiraz-71T | 2263 | 0.975531 | 0         |  |  |
| BLVRA | chr7 | Shiraz-3T  | 87   | 0.198593 | 0         |  |  |
|       |      | Shiraz-4T  | 252  | 0.192083 | 0         |  |  |
|       |      | Shiraz-36T | 376  | 0.159952 | 0         |  |  |
|       |      | Shiraz-46T | 942  | 0.069143 | 0         |  |  |
|       |      | Shiraz-77T | 1223 | 0.215647 | 0         |  |  |
|       |      | Shiraz-18T | 1433 | 0.250973 | 0         |  |  |
|       |      | Shiraz-25T | 1697 | 0.21945  | 0         |  |  |
|       |      | Shiraz-28T | 1734 | 0.362882 | 0         |  |  |
|       |      | Shiraz-29T | 1777 | 0.156747 | 0         |  |  |
|       |      | Shiraz-38T | 1950 | 0.265916 | 0         |  |  |
|       |      | Shiraz-71T | 2236 | 0.320072 | 0         |  |  |
|       |      | Shiraz-3T  | 87   | 0.198593 | 0         |  |  |
|       |      | Shiraz-4T  | 252  | 0.192083 | 0         |  |  |
|       |      | Shiraz-36T | 376  | 0.159952 | 0         |  |  |
|       |      | Shiraz-46T | 942  | 0.069143 | 0         |  |  |
|       |      | Shiraz-77T | 1223 | 0.215647 | 0         |  |  |
|       |      | Shiraz-18T | 1433 | 0.250973 | 0         |  |  |
|       |      | Shiraz-25T | 1697 | 0.21945  | 0         |  |  |
|       |      | Shiraz-28T | 1734 | 0.362882 | 0         |  |  |
|       |      | Shiraz-29T | 1777 | 0.156747 | 0         |  |  |
|       |      | Shiraz-38T | 1950 | 0.265916 | 0         |  |  |
|       |      | Shiraz-71T | 2236 | 0.320072 | 0         |  |  |
|       |      | Shiraz-3T  | 87   | 0.198593 | 0         |  |  |
|       |      | Shiraz-4T  | 252  | 0.192083 | 0         |  |  |
|       |      | Shiraz-36T | 376  | 0.159952 | 0         |  |  |
|       |      | Shiraz-46T | 942  | 0.069143 | 0         |  |  |

|       |      |            |      |          |           |  |  |
|-------|------|------------|------|----------|-----------|--|--|
|       |      | Shiraz-77T | 1223 | 0.215647 | 0         |  |  |
|       |      | Shiraz-18T | 1433 | 0.250973 | 0         |  |  |
|       |      | Shiraz-25T | 1697 | 0.21945  | 0         |  |  |
|       |      | Shiraz-28T | 1734 | 0.362882 | 0         |  |  |
|       |      | Shiraz-29T | 1777 | 0.156747 | 0         |  |  |
|       |      | Shiraz-38T | 1950 | 0.265916 | 0         |  |  |
|       |      | Shiraz-71T | 2236 | 0.320072 | 0         |  |  |
| BMPER | chr7 | Shiraz-3T  | 87   | 0.198593 | 0         |  |  |
|       |      | Shiraz-4T  | 252  | 0.192083 | 0         |  |  |
|       |      | Shiraz-36T | 376  | 0.159952 | 0         |  |  |
|       |      | Shiraz-44T | 631  | 0        | -0.180312 |  |  |
|       |      | Shiraz-46T | 942  | 0.069143 | 0         |  |  |
|       |      | Shiraz-18T | 1433 | 0.250973 | 0         |  |  |
|       |      | Shiraz-22T | 1544 | 0        | -0.193579 |  |  |
|       |      | Shiraz-25T | 1697 | 0.21945  | 0         |  |  |
|       |      | Shiraz-28T | 1734 | 0.362882 | 0         |  |  |
|       |      | Shiraz-29T | 1777 | 0.156747 | 0         |  |  |
|       |      | Shiraz-38T | 1950 | 0.265916 | 0         |  |  |
|       |      | Shiraz-71T | 2236 | 0.320072 | 0         |  |  |
|       |      | Shiraz-3T  | 87   | 0.198593 | 0         |  |  |
|       |      | Shiraz-4T  | 252  | 0.192083 | 0         |  |  |
|       |      | Shiraz-36T | 376  | 0.159952 | 0         |  |  |
|       |      | Shiraz-44T | 631  | 0        | -0.180312 |  |  |
|       |      | Shiraz-46T | 942  | 0.069143 | 0         |  |  |
|       |      | Shiraz-18T | 1433 | 0.250973 | 0         |  |  |
|       |      | Shiraz-22T | 1544 | 0        | -0.193579 |  |  |
|       |      | Shiraz-25T | 1697 | 0.21945  | 0         |  |  |
|       |      | Shiraz-28T | 1734 | 0.362882 | 0         |  |  |
|       |      | Shiraz-29T | 1777 | 0.156747 | 0         |  |  |
|       |      | Shiraz-38T | 1950 | 0.265916 | 0         |  |  |
|       |      | Shiraz-71T | 2236 | 0.320072 | 0         |  |  |
|       |      | Shiraz-3T  | 87   | 0.198593 | 0         |  |  |
|       |      | Shiraz-4T  | 252  | 0.192083 | 0         |  |  |
|       |      | Shiraz-36T | 376  | 0.159952 | 0         |  |  |
|       |      | Shiraz-44T | 631  | 0        | -0.180312 |  |  |
|       |      | Shiraz-46T | 942  | 0.069143 | 0         |  |  |
|       |      | Shiraz-18T | 1433 | 0.250973 | 0         |  |  |
|       |      | Shiraz-22T | 1544 | 0        | -0.193579 |  |  |
|       |      | Shiraz-25T | 1697 | 0.21945  | 0         |  |  |
|       |      | Shiraz-28T | 1734 | 0.362882 | 0         |  |  |
|       |      | Shiraz-29T | 1777 | 0.156747 | 0         |  |  |
|       |      | Shiraz-38T | 1950 | 0.265916 | 0         |  |  |
|       |      | Shiraz-71T | 2236 | 0.320072 | 0         |  |  |
| BMX   | chrX | Shiraz-3T  | 235  | 0        | -0.28401  |  |  |
|       |      | Shiraz-3T  | 235  | 0        | -0.28401  |  |  |
|       |      | Shiraz-4T  | 260  | 0        | -0.324128 |  |  |
|       |      | Shiraz-4T  | 260  | 0        | -0.324128 |  |  |

|  |            |      |          |           |  |
|--|------------|------|----------|-----------|--|
|  | Shiraz-16T | 294  | 0.655804 | 0         |  |
|  | Shiraz-16T | 294  | 0.655804 | 0         |  |
|  | Shiraz-36T | 431  | 0        | -0.78035  |  |
|  | Shiraz-36T | 431  | 0        | -0.78035  |  |
|  | Shiraz-44T | 891  | 0        | -0.954044 |  |
|  | Shiraz-44T | 891  | 0        | -0.954044 |  |
|  | Shiraz-49T | 1166 | 0        | -0.917235 |  |
|  | Shiraz-49T | 1166 | 0        | -0.917235 |  |
|  | Shiraz-9T  | 1368 | 0.199713 | 0         |  |
|  | Shiraz-9T  | 1368 | 0.199713 | 0         |  |
|  | Shiraz-18T | 1455 | 0        | -0.186773 |  |
|  | Shiraz-18T | 1455 | 0        | -0.186773 |  |
|  | Shiraz-22T | 1669 | 0.695915 | 0         |  |
|  | Shiraz-22T | 1669 | 0.695915 | 0         |  |
|  | Shiraz-25T | 1717 | 0.420447 | 0         |  |
|  | Shiraz-25T | 1717 | 0.420447 | 0         |  |
|  | Shiraz-28T | 1760 | 0.538181 | 0         |  |
|  | Shiraz-28T | 1760 | 0.538181 | 0         |  |
|  | Shiraz-29T | 1800 | 0.672527 | 0         |  |
|  | Shiraz-29T | 1800 | 0.672527 | 0         |  |
|  | Shiraz-32T | 1869 | 0.776805 | 0         |  |
|  | Shiraz-32T | 1869 | 0.776805 | 0         |  |
|  | Shiraz-35T | 1932 | 0.507141 | 0         |  |
|  | Shiraz-35T | 1932 | 0.507141 | 0         |  |
|  | Shiraz-40T | 2051 | 0.098506 | 0         |  |
|  | Shiraz-40T | 2051 | 0.098506 | 0         |  |
|  | Shiraz-58T | 2221 | 0.871948 | 0         |  |
|  | Shiraz-58T | 2221 | 0.871948 | 0         |  |
|  | Shiraz-71T | 2260 | 0.68394  | 0         |  |
|  | Shiraz-71T | 2260 | 0.68394  | 0         |  |
|  | Shiraz-71T | 2261 | 0.508399 | 0         |  |
|  | Shiraz-71T | 2261 | 0.508399 | 0         |  |
|  | Shiraz-3T  | 235  | 0        | -0.28401  |  |
|  | Shiraz-3T  | 235  | 0        | -0.28401  |  |
|  | Shiraz-4T  | 260  | 0        | -0.324128 |  |
|  | Shiraz-4T  | 260  | 0        | -0.324128 |  |
|  | Shiraz-16T | 294  | 0.655804 | 0         |  |
|  | Shiraz-16T | 294  | 0.655804 | 0         |  |
|  | Shiraz-36T | 431  | 0        | -0.78035  |  |
|  | Shiraz-36T | 431  | 0        | -0.78035  |  |
|  | Shiraz-44T | 891  | 0        | -0.954044 |  |
|  | Shiraz-44T | 891  | 0        | -0.954044 |  |
|  | Shiraz-49T | 1166 | 0        | -0.917235 |  |
|  | Shiraz-49T | 1166 | 0        | -0.917235 |  |
|  | Shiraz-9T  | 1368 | 0.199713 | 0         |  |
|  | Shiraz-9T  | 1368 | 0.199713 | 0         |  |
|  | Shiraz-18T | 1455 | 0        | -0.186773 |  |

|  |            |      |          |           |  |
|--|------------|------|----------|-----------|--|
|  | Shiraz-18T | 1455 | 0        | -0.186773 |  |
|  | Shiraz-22T | 1669 | 0.695915 | 0         |  |
|  | Shiraz-22T | 1669 | 0.695915 | 0         |  |
|  | Shiraz-25T | 1717 | 0.420447 | 0         |  |
|  | Shiraz-25T | 1717 | 0.420447 | 0         |  |
|  | Shiraz-28T | 1760 | 0.538181 | 0         |  |
|  | Shiraz-28T | 1760 | 0.538181 | 0         |  |
|  | Shiraz-29T | 1800 | 0.672527 | 0         |  |
|  | Shiraz-29T | 1800 | 0.672527 | 0         |  |
|  | Shiraz-32T | 1869 | 0.776805 | 0         |  |
|  | Shiraz-32T | 1869 | 0.776805 | 0         |  |
|  | Shiraz-35T | 1932 | 0.507141 | 0         |  |
|  | Shiraz-35T | 1932 | 0.507141 | 0         |  |
|  | Shiraz-40T | 2051 | 0.098506 | 0         |  |
|  | Shiraz-40T | 2051 | 0.098506 | 0         |  |
|  | Shiraz-58T | 2221 | 0.871948 | 0         |  |
|  | Shiraz-58T | 2221 | 0.871948 | 0         |  |
|  | Shiraz-71T | 2260 | 0.68394  | 0         |  |
|  | Shiraz-71T | 2260 | 0.68394  | 0         |  |
|  | Shiraz-71T | 2261 | 0.508399 | 0         |  |
|  | Shiraz-71T | 2261 | 0.508399 | 0         |  |
|  | Shiraz-3T  | 235  | 0        | -0.28401  |  |
|  | Shiraz-3T  | 235  | 0        | -0.28401  |  |
|  | Shiraz-4T  | 260  | 0        | -0.324128 |  |
|  | Shiraz-4T  | 260  | 0        | -0.324128 |  |
|  | Shiraz-16T | 294  | 0.655804 | 0         |  |
|  | Shiraz-16T | 294  | 0.655804 | 0         |  |
|  | Shiraz-36T | 431  | 0        | -0.78035  |  |
|  | Shiraz-36T | 431  | 0        | -0.78035  |  |
|  | Shiraz-44T | 891  | 0        | -0.954044 |  |
|  | Shiraz-44T | 891  | 0        | -0.954044 |  |
|  | Shiraz-49T | 1166 | 0        | -0.917235 |  |
|  | Shiraz-49T | 1166 | 0        | -0.917235 |  |
|  | Shiraz-9T  | 1368 | 0.199713 | 0         |  |
|  | Shiraz-9T  | 1368 | 0.199713 | 0         |  |
|  | Shiraz-18T | 1455 | 0        | -0.186773 |  |
|  | Shiraz-18T | 1455 | 0        | -0.186773 |  |
|  | Shiraz-22T | 1669 | 0.695915 | 0         |  |
|  | Shiraz-22T | 1669 | 0.695915 | 0         |  |
|  | Shiraz-25T | 1717 | 0.420447 | 0         |  |
|  | Shiraz-25T | 1717 | 0.420447 | 0         |  |
|  | Shiraz-28T | 1760 | 0.538181 | 0         |  |
|  | Shiraz-28T | 1760 | 0.538181 | 0         |  |
|  | Shiraz-29T | 1800 | 0.672527 | 0         |  |
|  | Shiraz-29T | 1800 | 0.672527 | 0         |  |
|  | Shiraz-32T | 1869 | 0.776805 | 0         |  |
|  | Shiraz-32T | 1869 | 0.776805 | 0         |  |

|      |      |            |      |          |           |  |
|------|------|------------|------|----------|-----------|--|
|      |      | Shiraz-35T | 1932 | 0.507141 | 0         |  |
|      |      | Shiraz-35T | 1932 | 0.507141 | 0         |  |
|      |      | Shiraz-40T | 2051 | 0.098506 | 0         |  |
|      |      | Shiraz-40T | 2051 | 0.098506 | 0         |  |
|      |      | Shiraz-58T | 2221 | 0.871948 | 0         |  |
|      |      | Shiraz-58T | 2221 | 0.871948 | 0         |  |
|      |      | Shiraz-71T | 2260 | 0.68394  | 0         |  |
|      |      | Shiraz-71T | 2260 | 0.68394  | 0         |  |
|      |      | Shiraz-71T | 2261 | 0.508399 | 0         |  |
|      |      | Shiraz-71T | 2261 | 0.508399 | 0         |  |
| BPGM | chr7 | Shiraz-3T  | 90   | 0.219276 | 0         |  |
|      |      | Shiraz-4T  | 253  | 0.372918 | 0         |  |
|      |      | Shiraz-36T | 378  | 0.179558 | 0         |  |
|      |      | Shiraz-46T | 943  | 0.093799 | 0         |  |
|      |      | Shiraz-77T | 1225 | 0        | -0.117922 |  |
|      |      | Shiraz-9T  | 1325 | 0.221899 | 0         |  |
|      |      | Shiraz-18T | 1434 | 0.244465 | 0         |  |
|      |      | Shiraz-22T | 1553 | 0        | -0.213234 |  |
|      |      | Shiraz-25T | 1698 | 0.21835  | 0         |  |
|      |      | Shiraz-28T | 1735 | 0.350744 | 0         |  |
|      |      | Shiraz-29T | 1778 | 0.120767 | 0         |  |
|      |      | Shiraz-32T | 1833 | 0.551336 | 0         |  |
|      |      | Shiraz-38T | 1951 | 0.250891 | 0         |  |
|      |      | Shiraz-53T | 2078 | 0.287202 | 0         |  |
|      |      | Shiraz-58T | 2162 | 0.221505 | 0         |  |
|      |      | Shiraz-71T | 2238 | 0.603631 | 0         |  |
|      |      | Shiraz-3T  | 90   | 0.219276 | 0         |  |
|      |      | Shiraz-4T  | 253  | 0.372918 | 0         |  |
|      |      | Shiraz-36T | 378  | 0.179558 | 0         |  |
|      |      | Shiraz-46T | 943  | 0.093799 | 0         |  |
|      |      | Shiraz-77T | 1225 | 0        | -0.117922 |  |
|      |      | Shiraz-9T  | 1325 | 0.221899 | 0         |  |
|      |      | Shiraz-18T | 1434 | 0.244465 | 0         |  |
|      |      | Shiraz-22T | 1553 | 0        | -0.213234 |  |
|      |      | Shiraz-25T | 1698 | 0.21835  | 0         |  |
|      |      | Shiraz-28T | 1735 | 0.350744 | 0         |  |
|      |      | Shiraz-29T | 1778 | 0.120767 | 0         |  |
|      |      | Shiraz-32T | 1833 | 0.551336 | 0         |  |
|      |      | Shiraz-38T | 1951 | 0.250891 | 0         |  |
|      |      | Shiraz-53T | 2078 | 0.287202 | 0         |  |
|      |      | Shiraz-58T | 2162 | 0.221505 | 0         |  |
|      |      | Shiraz-71T | 2238 | 0.603631 | 0         |  |
|      |      | Shiraz-3T  | 90   | 0.219276 | 0         |  |
|      |      | Shiraz-4T  | 253  | 0.372918 | 0         |  |
|      |      | Shiraz-36T | 378  | 0.179558 | 0         |  |
|      |      | Shiraz-46T | 943  | 0.093799 | 0         |  |
|      |      | Shiraz-77T | 1225 | 0        | -0.117922 |  |

|      |      |            |      |          |           |  |
|------|------|------------|------|----------|-----------|--|
|      |      | Shiraz-9T  | 1325 | 0.221899 | 0         |  |
|      |      | Shiraz-18T | 1434 | 0.244465 | 0         |  |
|      |      | Shiraz-22T | 1553 | 0        | -0.213234 |  |
|      |      | Shiraz-25T | 1698 | 0.21835  | 0         |  |
|      |      | Shiraz-28T | 1735 | 0.350744 | 0         |  |
|      |      | Shiraz-29T | 1778 | 0.120767 | 0         |  |
|      |      | Shiraz-32T | 1833 | 0.551336 | 0         |  |
|      |      | Shiraz-38T | 1951 | 0.250891 | 0         |  |
|      |      | Shiraz-53T | 2078 | 0.287202 | 0         |  |
|      |      | Shiraz-58T | 2162 | 0.221505 | 0         |  |
|      |      | Shiraz-71T | 2238 | 0.603631 | 0         |  |
| BRAF | chr7 | Shiraz-3T  | 90   | 0.219276 | 0         |  |
|      |      | Shiraz-4T  | 253  | 0.372918 | 0         |  |
|      |      | Shiraz-31T | 318  | 0.254373 | 0         |  |
|      |      | Shiraz-36T | 378  | 0.179558 | 0         |  |
|      |      | Shiraz-36T | 383  | 0.374586 | 0         |  |
|      |      | Shiraz-46T | 943  | 0.093799 | 0         |  |
|      |      | Shiraz-47T | 1033 | 0.220267 | 0         |  |
|      |      | Shiraz-77T | 1225 | 0        | -0.117922 |  |
|      |      | Shiraz-77T | 1230 | 0.149651 | 0         |  |
|      |      | Shiraz-9T  | 1325 | 0.221899 | 0         |  |
|      |      | Shiraz-18T | 1434 | 0.244465 | 0         |  |
|      |      | Shiraz-25T | 1698 | 0.21835  | 0         |  |
|      |      | Shiraz-28T | 1735 | 0.350744 | 0         |  |
|      |      | Shiraz-29T | 1778 | 0.120767 | 0         |  |
|      |      | Shiraz-32T | 1833 | 0.551336 | 0         |  |
|      |      | Shiraz-38T | 1951 | 0.250891 | 0         |  |
|      |      | Shiraz-53T | 2078 | 0.287202 | 0         |  |
|      |      | Shiraz-58T | 2162 | 0.221505 | 0         |  |
|      |      | Shiraz-71T | 2238 | 0.603631 | 0         |  |
|      |      | Shiraz-3T  | 90   | 0.219276 | 0         |  |
|      |      | Shiraz-4T  | 253  | 0.372918 | 0         |  |
|      |      | Shiraz-31T | 318  | 0.254373 | 0         |  |
|      |      | Shiraz-36T | 378  | 0.179558 | 0         |  |
|      |      | Shiraz-36T | 383  | 0.374586 | 0         |  |
|      |      | Shiraz-46T | 943  | 0.093799 | 0         |  |
|      |      | Shiraz-47T | 1033 | 0.220267 | 0         |  |
|      |      | Shiraz-77T | 1225 | 0        | -0.117922 |  |
|      |      | Shiraz-77T | 1230 | 0.149651 | 0         |  |
|      |      | Shiraz-9T  | 1325 | 0.221899 | 0         |  |
|      |      | Shiraz-18T | 1434 | 0.244465 | 0         |  |
|      |      | Shiraz-25T | 1698 | 0.21835  | 0         |  |
|      |      | Shiraz-28T | 1735 | 0.350744 | 0         |  |
|      |      | Shiraz-29T | 1778 | 0.120767 | 0         |  |
|      |      | Shiraz-32T | 1833 | 0.551336 | 0         |  |
|      |      | Shiraz-38T | 1951 | 0.250891 | 0         |  |
|      |      | Shiraz-53T | 2078 | 0.287202 | 0         |  |

|       |      |            |      |          |           |  |  |
|-------|------|------------|------|----------|-----------|--|--|
|       |      | Shiraz-58T | 2162 | 0.221505 | 0         |  |  |
|       |      | Shiraz-71T | 2238 | 0.603631 | 0         |  |  |
|       |      | Shiraz-3T  | 90   | 0.219276 | 0         |  |  |
|       |      | Shiraz-4T  | 253  | 0.372918 | 0         |  |  |
|       |      | Shiraz-31T | 318  | 0.254373 | 0         |  |  |
|       |      | Shiraz-36T | 378  | 0.179558 | 0         |  |  |
|       |      | Shiraz-36T | 383  | 0.374586 | 0         |  |  |
|       |      | Shiraz-46T | 943  | 0.093799 | 0         |  |  |
|       |      | Shiraz-47T | 1033 | 0.220267 | 0         |  |  |
|       |      | Shiraz-77T | 1225 | 0        | -0.117922 |  |  |
|       |      | Shiraz-77T | 1230 | 0.149651 | 0         |  |  |
|       |      | Shiraz-9T  | 1325 | 0.221899 | 0         |  |  |
|       |      | Shiraz-18T | 1434 | 0.244465 | 0         |  |  |
|       |      | Shiraz-25T | 1698 | 0.21835  | 0         |  |  |
|       |      | Shiraz-28T | 1735 | 0.350744 | 0         |  |  |
|       |      | Shiraz-29T | 1778 | 0.120767 | 0         |  |  |
|       |      | Shiraz-32T | 1833 | 0.551336 | 0         |  |  |
|       |      | Shiraz-38T | 1951 | 0.250891 | 0         |  |  |
|       |      | Shiraz-53T | 2078 | 0.287202 | 0         |  |  |
|       |      | Shiraz-58T | 2162 | 0.221505 | 0         |  |  |
|       |      | Shiraz-71T | 2238 | 0.603631 | 0         |  |  |
| BRCC3 | chrX | Shiraz-3T  | 247  | 0        | -0.421316 |  |  |
|       |      | Shiraz-4T  | 261  | 0        | -0.336249 |  |  |
|       |      | Shiraz-16T | 295  | 0.591657 | 0         |  |  |
|       |      | Shiraz-36T | 433  | 0        | -0.803961 |  |  |
|       |      | Shiraz-44T | 909  | 0        | -1.067051 |  |  |
|       |      | Shiraz-49T | 1170 | 0        | -0.967436 |  |  |
|       |      | Shiraz-9T  | 1370 | 0.690073 | 0         |  |  |
|       |      | Shiraz-18T | 1457 | 0.643204 | 0         |  |  |
|       |      | Shiraz-22T | 1673 | 0.611783 | 0         |  |  |
|       |      | Shiraz-25T | 1719 | 0.472955 | 0         |  |  |
|       |      | Shiraz-28T | 1762 | 0.562311 | 0         |  |  |
|       |      | Shiraz-29T | 1801 | 0.815343 | 0         |  |  |
|       |      | Shiraz-32T | 1870 | 0.729766 | 0         |  |  |
|       |      | Shiraz-35T | 1933 | 0.488535 | 0         |  |  |
|       |      | Shiraz-58T | 2223 | 0.833364 | 0         |  |  |
|       |      | Shiraz-71T | 2263 | 0.975531 | 0         |  |  |
|       |      | Shiraz-3T  | 247  | 0        | -0.421316 |  |  |
|       |      | Shiraz-4T  | 261  | 0        | -0.336249 |  |  |
|       |      | Shiraz-16T | 295  | 0.591657 | 0         |  |  |
|       |      | Shiraz-36T | 433  | 0        | -0.803961 |  |  |
|       |      | Shiraz-44T | 909  | 0        | -1.067051 |  |  |
|       |      | Shiraz-49T | 1170 | 0        | -0.967436 |  |  |
|       |      | Shiraz-9T  | 1370 | 0.690073 | 0         |  |  |
|       |      | Shiraz-18T | 1457 | 0.643204 | 0         |  |  |
|       |      | Shiraz-22T | 1673 | 0.611783 | 0         |  |  |
|       |      | Shiraz-25T | 1719 | 0.472955 | 0         |  |  |



|      |      |            |      |          |           |  |
|------|------|------------|------|----------|-----------|--|
|      |      | Shiraz-28T | 1762 | 0.562311 | 0         |  |
|      |      | Shiraz-29T | 1801 | 0.815343 | 0         |  |
|      |      | Shiraz-32T | 1870 | 0.729766 | 0         |  |
|      |      | Shiraz-35T | 1933 | 0.488535 | 0         |  |
|      |      | Shiraz-58T | 2223 | 0.833364 | 0         |  |
|      |      | Shiraz-71T | 2263 | 0.975531 | 0         |  |
|      |      | Shiraz-3T  | 247  | 0        | -0.421316 |  |
|      |      | Shiraz-4T  | 261  | 0        | -0.336249 |  |
|      |      | Shiraz-16T | 295  | 0.591657 | 0         |  |
|      |      | Shiraz-36T | 433  | 0        | -0.803961 |  |
|      |      | Shiraz-44T | 909  | 0        | -1.067051 |  |
|      |      | Shiraz-49T | 1170 | 0        | -0.967436 |  |
|      |      | Shiraz-9T  | 1370 | 0.690073 | 0         |  |
|      |      | Shiraz-18T | 1457 | 0.643204 | 0         |  |
|      |      | Shiraz-22T | 1673 | 0.611783 | 0         |  |
|      |      | Shiraz-25T | 1719 | 0.472955 | 0         |  |
|      |      | Shiraz-28T | 1762 | 0.562311 | 0         |  |
|      |      | Shiraz-29T | 1801 | 0.815343 | 0         |  |
|      |      | Shiraz-32T | 1870 | 0.729766 | 0         |  |
|      |      | Shiraz-35T | 1933 | 0.488535 | 0         |  |
|      |      | Shiraz-58T | 2223 | 0.833364 | 0         |  |
|      |      | Shiraz-71T | 2263 | 0.975531 | 0         |  |
| BRI3 | chr7 | Shiraz-3T  | 90   | 0.219276 | 0         |  |
|      |      | Shiraz-3T  | 94   | 0.74735  | 0         |  |
|      |      | Shiraz-4T  | 253  | 0.372918 | 0         |  |
|      |      | Shiraz-31T | 316  | 0.219196 | 0         |  |
|      |      | Shiraz-36T | 378  | 0.179558 | 0         |  |
|      |      | Shiraz-36T | 381  | 0.332628 | 0         |  |
|      |      | Shiraz-44T | 639  | 1.035032 | 0         |  |
|      |      | Shiraz-46T | 943  | 0.093799 | 0         |  |
|      |      | Shiraz-46T | 946  | 0.299835 | 0         |  |
|      |      | Shiraz-47T | 1030 | 0.257728 | 0         |  |
|      |      | Shiraz-49T | 1120 | 0.281656 | 0         |  |
|      |      | Shiraz-77T | 1225 | 0        | -0.117922 |  |
|      |      | Shiraz-77T | 1227 | 0.196445 | 0         |  |
|      |      | Shiraz-9T  | 1324 | 0.679266 | 0         |  |
|      |      | Shiraz-18T | 1434 | 0.244465 | 0         |  |
|      |      | Shiraz-22T | 1549 | 0        | -0.319623 |  |
|      |      | Shiraz-22T | 1551 | 0.324011 | 0         |  |
|      |      | Shiraz-25T | 1698 | 0.21835  | 0         |  |
|      |      | Shiraz-28T | 1735 | 0.350744 | 0         |  |
|      |      | Shiraz-29T | 1778 | 0.120767 | 0         |  |
|      |      | Shiraz-32T | 1833 | 0.551336 | 0         |  |
|      |      | Shiraz-38T | 1951 | 0.250891 | 0         |  |
|      |      | Shiraz-53T | 2078 | 0.287202 | 0         |  |
|      |      | Shiraz-71T | 2238 | 0.603631 | 0         |  |
|      |      | Shiraz-3T  | 90   | 0.219276 | 0         |  |

|  |            |      |          |           |  |
|--|------------|------|----------|-----------|--|
|  | Shiraz-3T  | 94   | 0.74735  | 0         |  |
|  | Shiraz-4T  | 253  | 0.372918 | 0         |  |
|  | Shiraz-31T | 316  | 0.219196 | 0         |  |
|  | Shiraz-36T | 378  | 0.179558 | 0         |  |
|  | Shiraz-36T | 381  | 0.332628 | 0         |  |
|  | Shiraz-44T | 639  | 1.035032 | 0         |  |
|  | Shiraz-46T | 943  | 0.093799 | 0         |  |
|  | Shiraz-46T | 946  | 0.299835 | 0         |  |
|  | Shiraz-47T | 1030 | 0.257728 | 0         |  |
|  | Shiraz-49T | 1120 | 0.281656 | 0         |  |
|  | Shiraz-77T | 1225 | 0        | -0.117922 |  |
|  | Shiraz-77T | 1227 | 0.196445 | 0         |  |
|  | Shiraz-9T  | 1324 | 0.679266 | 0         |  |
|  | Shiraz-18T | 1434 | 0.244465 | 0         |  |
|  | Shiraz-22T | 1549 | 0        | -0.319623 |  |
|  | Shiraz-22T | 1551 | 0.324011 | 0         |  |
|  | Shiraz-25T | 1698 | 0.21835  | 0         |  |
|  | Shiraz-28T | 1735 | 0.350744 | 0         |  |
|  | Shiraz-29T | 1778 | 0.120767 | 0         |  |
|  | Shiraz-32T | 1833 | 0.551336 | 0         |  |
|  | Shiraz-38T | 1951 | 0.250891 | 0         |  |
|  | Shiraz-53T | 2078 | 0.287202 | 0         |  |
|  | Shiraz-71T | 2238 | 0.603631 | 0         |  |
|  | Shiraz-3T  | 90   | 0.219276 | 0         |  |
|  | Shiraz-3T  | 94   | 0.74735  | 0         |  |
|  | Shiraz-4T  | 253  | 0.372918 | 0         |  |
|  | Shiraz-31T | 316  | 0.219196 | 0         |  |
|  | Shiraz-36T | 378  | 0.179558 | 0         |  |
|  | Shiraz-36T | 381  | 0.332628 | 0         |  |
|  | Shiraz-44T | 639  | 1.035032 | 0         |  |
|  | Shiraz-46T | 943  | 0.093799 | 0         |  |
|  | Shiraz-46T | 946  | 0.299835 | 0         |  |
|  | Shiraz-47T | 1030 | 0.257728 | 0         |  |
|  | Shiraz-49T | 1120 | 0.281656 | 0         |  |
|  | Shiraz-77T | 1225 | 0        | -0.117922 |  |
|  | Shiraz-77T | 1227 | 0.196445 | 0         |  |
|  | Shiraz-9T  | 1324 | 0.679266 | 0         |  |
|  | Shiraz-18T | 1434 | 0.244465 | 0         |  |
|  | Shiraz-22T | 1549 | 0        | -0.319623 |  |
|  | Shiraz-22T | 1551 | 0.324011 | 0         |  |
|  | Shiraz-25T | 1698 | 0.21835  | 0         |  |
|  | Shiraz-28T | 1735 | 0.350744 | 0         |  |
|  | Shiraz-29T | 1778 | 0.120767 | 0         |  |
|  | Shiraz-32T | 1833 | 0.551336 | 0         |  |
|  | Shiraz-38T | 1951 | 0.250891 | 0         |  |
|  | Shiraz-53T | 2078 | 0.287202 | 0         |  |
|  | Shiraz-71T | 2238 | 0.603631 | 0         |  |

|      |      |            |      |          |           |  |  |
|------|------|------------|------|----------|-----------|--|--|
| BRS3 | chrX | Shiraz-3T  | 242  | 0        | -0.336434 |  |  |
|      |      | Shiraz-4T  | 261  | 0        | -0.336249 |  |  |
|      |      | Shiraz-16T | 295  | 0.591657 | 0         |  |  |
|      |      | Shiraz-36T | 433  | 0        | -0.803961 |  |  |
|      |      | Shiraz-44T | 899  | 0        | -1.09697  |  |  |
|      |      | Shiraz-49T | 1170 | 0        | -0.967436 |  |  |
|      |      | Shiraz-9T  | 1370 | 0.690073 | 0         |  |  |
|      |      | Shiraz-18T | 1457 | 0.643204 | 0         |  |  |
|      |      | Shiraz-22T | 1673 | 0.611783 | 0         |  |  |
|      |      | Shiraz-22T | 1677 | 0.789711 | 0         |  |  |
|      |      | Shiraz-25T | 1719 | 0.472955 | 0         |  |  |
|      |      | Shiraz-28T | 1762 | 0.562311 | 0         |  |  |
|      |      | Shiraz-29T | 1801 | 0.815343 | 0         |  |  |
|      |      | Shiraz-32T | 1870 | 0.729766 | 0         |  |  |
|      |      | Shiraz-35T | 1933 | 0.488535 | 0         |  |  |
|      |      | Shiraz-58T | 2223 | 0.833364 | 0         |  |  |
|      |      | Shiraz-71T | 2263 | 0.975531 | 0         |  |  |
|      |      | Shiraz-3T  | 242  | 0        | -0.336434 |  |  |
|      |      | Shiraz-4T  | 261  | 0        | -0.336249 |  |  |
|      |      | Shiraz-16T | 295  | 0.591657 | 0         |  |  |
|      |      | Shiraz-36T | 433  | 0        | -0.803961 |  |  |
|      |      | Shiraz-44T | 899  | 0        | -1.09697  |  |  |
|      |      | Shiraz-49T | 1170 | 0        | -0.967436 |  |  |
|      |      | Shiraz-9T  | 1370 | 0.690073 | 0         |  |  |
|      |      | Shiraz-18T | 1457 | 0.643204 | 0         |  |  |
|      |      | Shiraz-22T | 1673 | 0.611783 | 0         |  |  |
|      |      | Shiraz-22T | 1677 | 0.789711 | 0         |  |  |
|      |      | Shiraz-25T | 1719 | 0.472955 | 0         |  |  |
|      |      | Shiraz-28T | 1762 | 0.562311 | 0         |  |  |
|      |      | Shiraz-29T | 1801 | 0.815343 | 0         |  |  |
|      |      | Shiraz-32T | 1870 | 0.729766 | 0         |  |  |
|      |      | Shiraz-35T | 1933 | 0.488535 | 0         |  |  |
|      |      | Shiraz-58T | 2223 | 0.833364 | 0         |  |  |
|      |      | Shiraz-71T | 2263 | 0.975531 | 0         |  |  |
|      |      | Shiraz-3T  | 242  | 0        | -0.336434 |  |  |
|      |      | Shiraz-4T  | 261  | 0        | -0.336249 |  |  |
|      |      | Shiraz-16T | 295  | 0.591657 | 0         |  |  |
|      |      | Shiraz-36T | 433  | 0        | -0.803961 |  |  |
|      |      | Shiraz-44T | 899  | 0        | -1.09697  |  |  |
|      |      | Shiraz-49T | 1170 | 0        | -0.967436 |  |  |
|      |      | Shiraz-9T  | 1370 | 0.690073 | 0         |  |  |
|      |      | Shiraz-18T | 1457 | 0.643204 | 0         |  |  |
|      |      | Shiraz-22T | 1673 | 0.611783 | 0         |  |  |
|      |      | Shiraz-22T | 1677 | 0.789711 | 0         |  |  |
|      |      | Shiraz-25T | 1719 | 0.472955 | 0         |  |  |
|      |      | Shiraz-28T | 1762 | 0.562311 | 0         |  |  |
|      |      | Shiraz-29T | 1801 | 0.815343 | 0         |  |  |

|       |      |            |      |          |           |  |
|-------|------|------------|------|----------|-----------|--|
|       |      | Shiraz-32T | 1870 | 0.729766 | 0         |  |
|       |      | Shiraz-35T | 1933 | 0.488535 | 0         |  |
|       |      | Shiraz-58T | 2223 | 0.833364 | 0         |  |
|       |      | Shiraz-71T | 2263 | 0.975531 | 0         |  |
| BRWD3 | chrX | Shiraz-3T  | 242  | 0        | -0.336434 |  |
|       |      | Shiraz-3T  | 243  | 0        | -0.549129 |  |
|       |      | Shiraz-4T  | 261  | 0        | -0.336249 |  |
|       |      | Shiraz-16T | 295  | 0.591657 | 0         |  |
|       |      | Shiraz-36T | 433  | 0        | -0.803961 |  |
|       |      | Shiraz-44T | 899  | 0        | -1.09697  |  |
|       |      | Shiraz-44T | 902  | 0        | -1.449824 |  |
|       |      | Shiraz-47T | 1085 | 0        | -0.130811 |  |
|       |      | Shiraz-49T | 1170 | 0        | -0.967436 |  |
|       |      | Shiraz-49T | 1172 | 0        | -1.123219 |  |
|       |      | Shiraz-18T | 1457 | 0.643204 | 0         |  |
|       |      | Shiraz-22T | 1673 | 0.611783 | 0         |  |
|       |      | Shiraz-22T | 1675 | 0.279253 | 0         |  |
|       |      | Shiraz-25T | 1719 | 0.472955 | 0         |  |
|       |      | Shiraz-28T | 1762 | 0.562311 | 0         |  |
|       |      | Shiraz-29T | 1801 | 0.815343 | 0         |  |
|       |      | Shiraz-32T | 1870 | 0.729766 | 0         |  |
|       |      | Shiraz-32T | 1871 | 0.292679 | 0         |  |
|       |      | Shiraz-35T | 1933 | 0.488535 | 0         |  |
|       |      | Shiraz-58T | 2223 | 0.833364 | 0         |  |
|       |      | Shiraz-71T | 2263 | 0.975531 | 0         |  |
|       |      | Shiraz-3T  | 242  | 0        | -0.336434 |  |
|       |      | Shiraz-3T  | 243  | 0        | -0.549129 |  |
|       |      | Shiraz-4T  | 261  | 0        | -0.336249 |  |
|       |      | Shiraz-16T | 295  | 0.591657 | 0         |  |
|       |      | Shiraz-36T | 433  | 0        | -0.803961 |  |
|       |      | Shiraz-44T | 899  | 0        | -1.09697  |  |
|       |      | Shiraz-44T | 902  | 0        | -1.449824 |  |
|       |      | Shiraz-47T | 1085 | 0        | -0.130811 |  |
|       |      | Shiraz-49T | 1170 | 0        | -0.967436 |  |
|       |      | Shiraz-49T | 1172 | 0        | -1.123219 |  |
|       |      | Shiraz-18T | 1457 | 0.643204 | 0         |  |
|       |      | Shiraz-22T | 1673 | 0.611783 | 0         |  |
|       |      | Shiraz-22T | 1675 | 0.279253 | 0         |  |
|       |      | Shiraz-25T | 1719 | 0.472955 | 0         |  |
|       |      | Shiraz-28T | 1762 | 0.562311 | 0         |  |
|       |      | Shiraz-29T | 1801 | 0.815343 | 0         |  |
|       |      | Shiraz-32T | 1870 | 0.729766 | 0         |  |
|       |      | Shiraz-32T | 1871 | 0.292679 | 0         |  |
|       |      | Shiraz-35T | 1933 | 0.488535 | 0         |  |
|       |      | Shiraz-58T | 2223 | 0.833364 | 0         |  |
|       |      | Shiraz-71T | 2263 | 0.975531 | 0         |  |
|       |      | Shiraz-3T  | 242  | 0        | -0.336434 |  |

|     |      |            |      |          |           |  |  |
|-----|------|------------|------|----------|-----------|--|--|
|     |      | Shiraz-3T  | 243  | 0        | -0.549129 |  |  |
|     |      | Shiraz-4T  | 261  | 0        | -0.336249 |  |  |
|     |      | Shiraz-16T | 295  | 0.591657 | 0         |  |  |
|     |      | Shiraz-36T | 433  | 0        | -0.803961 |  |  |
|     |      | Shiraz-44T | 899  | 0        | -1.09697  |  |  |
|     |      | Shiraz-44T | 902  | 0        | -1.449824 |  |  |
|     |      | Shiraz-47T | 1085 | 0        | -0.130811 |  |  |
|     |      | Shiraz-49T | 1170 | 0        | -0.967436 |  |  |
|     |      | Shiraz-49T | 1172 | 0        | -1.123219 |  |  |
|     |      | Shiraz-18T | 1457 | 0.643204 | 0         |  |  |
|     |      | Shiraz-22T | 1673 | 0.611783 | 0         |  |  |
|     |      | Shiraz-22T | 1675 | 0.279253 | 0         |  |  |
|     |      | Shiraz-25T | 1719 | 0.472955 | 0         |  |  |
|     |      | Shiraz-28T | 1762 | 0.562311 | 0         |  |  |
|     |      | Shiraz-29T | 1801 | 0.815343 | 0         |  |  |
|     |      | Shiraz-32T | 1870 | 0.729766 | 0         |  |  |
|     |      | Shiraz-32T | 1871 | 0.292679 | 0         |  |  |
|     |      | Shiraz-35T | 1933 | 0.488535 | 0         |  |  |
|     |      | Shiraz-58T | 2223 | 0.833364 | 0         |  |  |
|     |      | Shiraz-71T | 2263 | 0.975531 | 0         |  |  |
| BTK | chrX | Shiraz-3T  | 242  | 0        | -0.336434 |  |  |
|     |      | Shiraz-4T  | 261  | 0        | -0.336249 |  |  |
|     |      | Shiraz-16T | 295  | 0.591657 | 0         |  |  |
|     |      | Shiraz-36T | 433  | 0        | -0.803961 |  |  |
|     |      | Shiraz-44T | 899  | 0        | -1.09697  |  |  |
|     |      | Shiraz-49T | 1170 | 0        | -0.967436 |  |  |
|     |      | Shiraz-18T | 1457 | 0.643204 | 0         |  |  |
|     |      | Shiraz-22T | 1673 | 0.611783 | 0         |  |  |
|     |      | Shiraz-25T | 1719 | 0.472955 | 0         |  |  |
|     |      | Shiraz-28T | 1762 | 0.562311 | 0         |  |  |
|     |      | Shiraz-29T | 1801 | 0.815343 | 0         |  |  |
|     |      | Shiraz-32T | 1870 | 0.729766 | 0         |  |  |
|     |      | Shiraz-35T | 1933 | 0.488535 | 0         |  |  |
|     |      | Shiraz-58T | 2223 | 0.833364 | 0         |  |  |
|     |      | Shiraz-71T | 2263 | 0.975531 | 0         |  |  |
|     |      | Shiraz-3T  | 242  | 0        | -0.336434 |  |  |
|     |      | Shiraz-4T  | 261  | 0        | -0.336249 |  |  |
|     |      | Shiraz-16T | 295  | 0.591657 | 0         |  |  |
|     |      | Shiraz-36T | 433  | 0        | -0.803961 |  |  |
|     |      | Shiraz-44T | 899  | 0        | -1.09697  |  |  |
|     |      | Shiraz-49T | 1170 | 0        | -0.967436 |  |  |
|     |      | Shiraz-18T | 1457 | 0.643204 | 0         |  |  |
|     |      | Shiraz-22T | 1673 | 0.611783 | 0         |  |  |
|     |      | Shiraz-25T | 1719 | 0.472955 | 0         |  |  |
|     |      | Shiraz-28T | 1762 | 0.562311 | 0         |  |  |
|     |      | Shiraz-29T | 1801 | 0.815343 | 0         |  |  |
|     |      | Shiraz-32T | 1870 | 0.729766 | 0         |  |  |

|       |      |            |      |          |           |  |
|-------|------|------------|------|----------|-----------|--|
|       |      | Shiraz-35T | 1933 | 0.488535 | 0         |  |
|       |      | Shiraz-58T | 2223 | 0.833364 | 0         |  |
|       |      | Shiraz-71T | 2263 | 0.975531 | 0         |  |
|       |      | Shiraz-3T  | 242  | 0        | -0.336434 |  |
|       |      | Shiraz-4T  | 261  | 0        | -0.336249 |  |
|       |      | Shiraz-16T | 295  | 0.591657 | 0         |  |
|       |      | Shiraz-36T | 433  | 0        | -0.803961 |  |
|       |      | Shiraz-44T | 899  | 0        | -1.09697  |  |
|       |      | Shiraz-49T | 1170 | 0        | -0.967436 |  |
|       |      | Shiraz-18T | 1457 | 0.643204 | 0         |  |
|       |      | Shiraz-22T | 1673 | 0.611783 | 0         |  |
|       |      | Shiraz-25T | 1719 | 0.472955 | 0         |  |
|       |      | Shiraz-28T | 1762 | 0.562311 | 0         |  |
|       |      | Shiraz-29T | 1801 | 0.815343 | 0         |  |
|       |      | Shiraz-32T | 1870 | 0.729766 | 0         |  |
|       |      | Shiraz-35T | 1933 | 0.488535 | 0         |  |
|       |      | Shiraz-58T | 2223 | 0.833364 | 0         |  |
|       |      | Shiraz-71T | 2263 | 0.975531 | 0         |  |
| BUD31 | chr7 | Shiraz-3T  | 90   | 0.219276 | 0         |  |
|       |      | Shiraz-3T  | 94   | 0.74735  | 0         |  |
|       |      | Shiraz-4T  | 253  | 0.372918 | 0         |  |
|       |      | Shiraz-31T | 316  | 0.219196 | 0         |  |
|       |      | Shiraz-36T | 378  | 0.179558 | 0         |  |
|       |      | Shiraz-36T | 381  | 0.332628 | 0         |  |
|       |      | Shiraz-44T | 639  | 1.035032 | 0         |  |
|       |      | Shiraz-46T | 943  | 0.093799 | 0         |  |
|       |      | Shiraz-46T | 946  | 0.299835 | 0         |  |
|       |      | Shiraz-47T | 1030 | 0.257728 | 0         |  |
|       |      | Shiraz-49T | 1120 | 0.281656 | 0         |  |
|       |      | Shiraz-77T | 1225 | 0        | -0.117922 |  |
|       |      | Shiraz-77T | 1227 | 0.196445 | 0         |  |
|       |      | Shiraz-9T  | 1324 | 0.679266 | 0         |  |
|       |      | Shiraz-18T | 1434 | 0.244465 | 0         |  |
|       |      | Shiraz-22T | 1549 | 0        | -0.319623 |  |
|       |      | Shiraz-22T | 1551 | 0.324011 | 0         |  |
|       |      | Shiraz-25T | 1698 | 0.21835  | 0         |  |
|       |      | Shiraz-28T | 1735 | 0.350744 | 0         |  |
|       |      | Shiraz-29T | 1778 | 0.120767 | 0         |  |
|       |      | Shiraz-32T | 1833 | 0.551336 | 0         |  |
|       |      | Shiraz-38T | 1951 | 0.250891 | 0         |  |
|       |      | Shiraz-53T | 2078 | 0.287202 | 0         |  |
|       |      | Shiraz-71T | 2238 | 0.603631 | 0         |  |
|       |      | Shiraz-3T  | 90   | 0.219276 | 0         |  |
|       |      | Shiraz-3T  | 94   | 0.74735  | 0         |  |
|       |      | Shiraz-4T  | 253  | 0.372918 | 0         |  |
|       |      | Shiraz-31T | 316  | 0.219196 | 0         |  |
|       |      | Shiraz-36T | 378  | 0.179558 | 0         |  |

|       |      |            |      |          |           |  |
|-------|------|------------|------|----------|-----------|--|
|       |      | Shiraz-36T | 381  | 0.332628 | 0         |  |
|       |      | Shiraz-44T | 639  | 1.035032 | 0         |  |
|       |      | Shiraz-46T | 943  | 0.093799 | 0         |  |
|       |      | Shiraz-46T | 946  | 0.299835 | 0         |  |
|       |      | Shiraz-47T | 1030 | 0.257728 | 0         |  |
|       |      | Shiraz-49T | 1120 | 0.281656 | 0         |  |
|       |      | Shiraz-77T | 1225 | 0        | -0.117922 |  |
|       |      | Shiraz-77T | 1227 | 0.196445 | 0         |  |
|       |      | Shiraz-9T  | 1324 | 0.679266 | 0         |  |
|       |      | Shiraz-18T | 1434 | 0.244465 | 0         |  |
|       |      | Shiraz-22T | 1549 | 0        | -0.319623 |  |
|       |      | Shiraz-22T | 1551 | 0.324011 | 0         |  |
|       |      | Shiraz-25T | 1698 | 0.21835  | 0         |  |
|       |      | Shiraz-28T | 1735 | 0.350744 | 0         |  |
|       |      | Shiraz-29T | 1778 | 0.120767 | 0         |  |
|       |      | Shiraz-32T | 1833 | 0.551336 | 0         |  |
|       |      | Shiraz-38T | 1951 | 0.250891 | 0         |  |
|       |      | Shiraz-53T | 2078 | 0.287202 | 0         |  |
|       |      | Shiraz-71T | 2238 | 0.603631 | 0         |  |
|       |      | Shiraz-3T  | 90   | 0.219276 | 0         |  |
|       |      | Shiraz-3T  | 94   | 0.74735  | 0         |  |
|       |      | Shiraz-4T  | 253  | 0.372918 | 0         |  |
|       |      | Shiraz-31T | 316  | 0.219196 | 0         |  |
|       |      | Shiraz-36T | 378  | 0.179558 | 0         |  |
|       |      | Shiraz-36T | 381  | 0.332628 | 0         |  |
|       |      | Shiraz-44T | 639  | 1.035032 | 0         |  |
|       |      | Shiraz-46T | 943  | 0.093799 | 0         |  |
|       |      | Shiraz-46T | 946  | 0.299835 | 0         |  |
|       |      | Shiraz-47T | 1030 | 0.257728 | 0         |  |
|       |      | Shiraz-49T | 1120 | 0.281656 | 0         |  |
|       |      | Shiraz-77T | 1225 | 0        | -0.117922 |  |
|       |      | Shiraz-77T | 1227 | 0.196445 | 0         |  |
|       |      | Shiraz-9T  | 1324 | 0.679266 | 0         |  |
|       |      | Shiraz-18T | 1434 | 0.244465 | 0         |  |
|       |      | Shiraz-22T | 1549 | 0        | -0.319623 |  |
|       |      | Shiraz-22T | 1551 | 0.324011 | 0         |  |
|       |      | Shiraz-25T | 1698 | 0.21835  | 0         |  |
|       |      | Shiraz-28T | 1735 | 0.350744 | 0         |  |
|       |      | Shiraz-29T | 1778 | 0.120767 | 0         |  |
|       |      | Shiraz-32T | 1833 | 0.551336 | 0         |  |
|       |      | Shiraz-38T | 1951 | 0.250891 | 0         |  |
|       |      | Shiraz-53T | 2078 | 0.287202 | 0         |  |
|       |      | Shiraz-71T | 2238 | 0.603631 | 0         |  |
| BXDC2 | chr5 | Shiraz-4T  | 250  | 0.262252 | 0         |  |
|       |      | Shiraz-16T | 266  | 0.321724 | 0         |  |
|       |      | Shiraz-18T | 1429 | 0        | -0.314125 |  |
|       |      | Shiraz-25T | 1694 | 0.201602 | 0         |  |

|      |      |            |      |          |           |  |
|------|------|------------|------|----------|-----------|--|
|      |      | Shiraz-28T | 1731 | 0.295447 | 0         |  |
|      |      | Shiraz-29T | 1773 | 0.090981 | 0         |  |
|      |      | Shiraz-40T | 2016 | 0.376634 | 0         |  |
|      |      | Shiraz-4T  | 250  | 0.262252 | 0         |  |
|      |      | Shiraz-16T | 266  | 0.321724 | 0         |  |
|      |      | Shiraz-18T | 1429 | 0        | -0.314125 |  |
|      |      | Shiraz-25T | 1694 | 0.201602 | 0         |  |
|      |      | Shiraz-28T | 1731 | 0.295447 | 0         |  |
|      |      | Shiraz-29T | 1773 | 0.090981 | 0         |  |
|      |      | Shiraz-40T | 2016 | 0.376634 | 0         |  |
|      |      | Shiraz-4T  | 250  | 0.262252 | 0         |  |
|      |      | Shiraz-16T | 266  | 0.321724 | 0         |  |
|      |      | Shiraz-18T | 1429 | 0        | -0.314125 |  |
|      |      | Shiraz-25T | 1694 | 0.201602 | 0         |  |
|      |      | Shiraz-28T | 1731 | 0.295447 | 0         |  |
|      |      | Shiraz-29T | 1773 | 0.090981 | 0         |  |
|      |      | Shiraz-40T | 2016 | 0.376634 | 0         |  |
| BZW2 | chr7 | Shiraz-4T  | 252  | 0.192083 | 0         |  |
|      |      | Shiraz-36T | 376  | 0.159952 | 0         |  |
|      |      | Shiraz-44T | 628  | 0        | -0.444379 |  |
|      |      | Shiraz-47T | 1027 | 0        | -0.117848 |  |
|      |      | Shiraz-49T | 1117 | 0        | -0.168296 |  |
|      |      | Shiraz-77T | 1222 | 0        | -0.113002 |  |
|      |      | Shiraz-18T | 1433 | 0.250973 | 0         |  |
|      |      | Shiraz-22T | 1543 | 0        | -0.513696 |  |
|      |      | Shiraz-25T | 1697 | 0.21945  | 0         |  |
|      |      | Shiraz-28T | 1734 | 0.362882 | 0         |  |
|      |      | Shiraz-29T | 1777 | 0.156747 | 0         |  |
|      |      | Shiraz-38T | 1950 | 0.265916 | 0         |  |
|      |      | Shiraz-58T | 2157 | 0        | -0.213872 |  |
|      |      | Shiraz-71T | 2236 | 0.320072 | 0         |  |
|      |      | Shiraz-4T  | 252  | 0.192083 | 0         |  |
|      |      | Shiraz-36T | 376  | 0.159952 | 0         |  |
|      |      | Shiraz-44T | 628  | 0        | -0.444379 |  |
|      |      | Shiraz-47T | 1027 | 0        | -0.117848 |  |
|      |      | Shiraz-49T | 1117 | 0        | -0.168296 |  |
|      |      | Shiraz-77T | 1222 | 0        | -0.113002 |  |
|      |      | Shiraz-18T | 1433 | 0.250973 | 0         |  |
|      |      | Shiraz-22T | 1543 | 0        | -0.513696 |  |
|      |      | Shiraz-25T | 1697 | 0.21945  | 0         |  |
|      |      | Shiraz-28T | 1734 | 0.362882 | 0         |  |
|      |      | Shiraz-29T | 1777 | 0.156747 | 0         |  |
|      |      | Shiraz-38T | 1950 | 0.265916 | 0         |  |
|      |      | Shiraz-58T | 2157 | 0        | -0.213872 |  |
|      |      | Shiraz-71T | 2236 | 0.320072 | 0         |  |
|      |      | Shiraz-4T  | 252  | 0.192083 | 0         |  |
|      |      | Shiraz-36T | 376  | 0.159952 | 0         |  |



|         |      |            |      |          |           |  |  |
|---------|------|------------|------|----------|-----------|--|--|
|         |      | Shiraz-44T | 628  | 0        | -0.444379 |  |  |
|         |      | Shiraz-47T | 1027 | 0        | -0.117848 |  |  |
|         |      | Shiraz-49T | 1117 | 0        | -0.168296 |  |  |
|         |      | Shiraz-77T | 1222 | 0        | -0.113002 |  |  |
|         |      | Shiraz-18T | 1433 | 0.250973 | 0         |  |  |
|         |      | Shiraz-22T | 1543 | 0        | -0.513696 |  |  |
|         |      | Shiraz-25T | 1697 | 0.21945  | 0         |  |  |
|         |      | Shiraz-28T | 1734 | 0.362882 | 0         |  |  |
|         |      | Shiraz-29T | 1777 | 0.156747 | 0         |  |  |
|         |      | Shiraz-38T | 1950 | 0.265916 | 0         |  |  |
|         |      | Shiraz-58T | 2157 | 0        | -0.213872 |  |  |
|         |      | Shiraz-71T | 2236 | 0.320072 | 0         |  |  |
| C1GALT1 | chr7 | Shiraz-4T  | 252  | 0.192083 | 0         |  |  |
|         |      | Shiraz-31T | 314  | 0.171613 | 0         |  |  |
|         |      | Shiraz-36T | 376  | 0.159952 | 0         |  |  |
|         |      | Shiraz-44T | 628  | 0        | -0.444379 |  |  |
|         |      | Shiraz-47T | 1027 | 0        | -0.117848 |  |  |
|         |      | Shiraz-49T | 1117 | 0        | -0.168296 |  |  |
|         |      | Shiraz-18T | 1433 | 0.250973 | 0         |  |  |
|         |      | Shiraz-22T | 1543 | 0        | -0.513696 |  |  |
|         |      | Shiraz-25T | 1697 | 0.21945  | 0         |  |  |
|         |      | Shiraz-28T | 1734 | 0.362882 | 0         |  |  |
|         |      | Shiraz-29T | 1777 | 0.156747 | 0         |  |  |
|         |      | Shiraz-38T | 1950 | 0.265916 | 0         |  |  |
|         |      | Shiraz-53T | 2077 | 0.444626 | 0         |  |  |
|         |      | Shiraz-71T | 2236 | 0.320072 | 0         |  |  |
|         |      | Shiraz-4T  | 252  | 0.192083 | 0         |  |  |
|         |      | Shiraz-31T | 314  | 0.171613 | 0         |  |  |
|         |      | Shiraz-36T | 376  | 0.159952 | 0         |  |  |
|         |      | Shiraz-44T | 628  | 0        | -0.444379 |  |  |
|         |      | Shiraz-47T | 1027 | 0        | -0.117848 |  |  |
|         |      | Shiraz-49T | 1117 | 0        | -0.168296 |  |  |
|         |      | Shiraz-18T | 1433 | 0.250973 | 0         |  |  |
|         |      | Shiraz-22T | 1543 | 0        | -0.513696 |  |  |
|         |      | Shiraz-25T | 1697 | 0.21945  | 0         |  |  |
|         |      | Shiraz-28T | 1734 | 0.362882 | 0         |  |  |
|         |      | Shiraz-29T | 1777 | 0.156747 | 0         |  |  |
|         |      | Shiraz-38T | 1950 | 0.265916 | 0         |  |  |
|         |      | Shiraz-53T | 2077 | 0.444626 | 0         |  |  |
|         |      | Shiraz-71T | 2236 | 0.320072 | 0         |  |  |
|         |      | Shiraz-4T  | 252  | 0.192083 | 0         |  |  |
|         |      | Shiraz-31T | 314  | 0.171613 | 0         |  |  |
|         |      | Shiraz-36T | 376  | 0.159952 | 0         |  |  |
|         |      | Shiraz-44T | 628  | 0        | -0.444379 |  |  |
|         |      | Shiraz-47T | 1027 | 0        | -0.117848 |  |  |
|         |      | Shiraz-49T | 1117 | 0        | -0.168296 |  |  |
|         |      | Shiraz-18T | 1433 | 0.250973 | 0         |  |  |

|           |      |            |      |          |           |  |  |
|-----------|------|------------|------|----------|-----------|--|--|
|           |      | Shiraz-22T | 1543 | 0        | -0.513696 |  |  |
|           |      | Shiraz-25T | 1697 | 0.21945  | 0         |  |  |
|           |      | Shiraz-28T | 1734 | 0.362882 | 0         |  |  |
|           |      | Shiraz-29T | 1777 | 0.156747 | 0         |  |  |
|           |      | Shiraz-38T | 1950 | 0.265916 | 0         |  |  |
|           |      | Shiraz-53T | 2077 | 0.444626 | 0         |  |  |
|           |      | Shiraz-71T | 2236 | 0.320072 | 0         |  |  |
| C1GALT1C1 | chrX | Shiraz-3T  | 242  | 0        | -0.336434 |  |  |
|           |      | Shiraz-3T  | 244  | 0        | -0.023749 |  |  |
|           |      | Shiraz-4T  | 261  | 0        | -0.336249 |  |  |
|           |      | Shiraz-16T | 295  | 0.591657 | 0         |  |  |
|           |      | Shiraz-36T | 433  | 0        | -0.803961 |  |  |
|           |      | Shiraz-44T | 899  | 0        | -1.09697  |  |  |
|           |      | Shiraz-44T | 904  | 0        | -0.625526 |  |  |
|           |      | Shiraz-49T | 1170 | 0        | -0.967436 |  |  |
|           |      | Shiraz-9T  | 1370 | 0.690073 | 0         |  |  |
|           |      | Shiraz-18T | 1457 | 0.643204 | 0         |  |  |
|           |      | Shiraz-22T | 1673 | 0.611783 | 0         |  |  |
|           |      | Shiraz-25T | 1719 | 0.472955 | 0         |  |  |
|           |      | Shiraz-28T | 1762 | 0.562311 | 0         |  |  |
|           |      | Shiraz-29T | 1801 | 0.815343 | 0         |  |  |
|           |      | Shiraz-32T | 1870 | 0.729766 | 0         |  |  |
|           |      | Shiraz-35T | 1933 | 0.488535 | 0         |  |  |
|           |      | Shiraz-58T | 2223 | 0.833364 | 0         |  |  |
|           |      | Shiraz-71T | 2263 | 0.975531 | 0         |  |  |
|           |      | Shiraz-3T  | 242  | 0        | -0.336434 |  |  |
|           |      | Shiraz-3T  | 244  | 0        | -0.023749 |  |  |
|           |      | Shiraz-4T  | 261  | 0        | -0.336249 |  |  |
|           |      | Shiraz-16T | 295  | 0.591657 | 0         |  |  |
|           |      | Shiraz-36T | 433  | 0        | -0.803961 |  |  |
|           |      | Shiraz-44T | 899  | 0        | -1.09697  |  |  |
|           |      | Shiraz-44T | 904  | 0        | -0.625526 |  |  |
|           |      | Shiraz-49T | 1170 | 0        | -0.967436 |  |  |
|           |      | Shiraz-9T  | 1370 | 0.690073 | 0         |  |  |
|           |      | Shiraz-18T | 1457 | 0.643204 | 0         |  |  |
|           |      | Shiraz-22T | 1673 | 0.611783 | 0         |  |  |
|           |      | Shiraz-25T | 1719 | 0.472955 | 0         |  |  |
|           |      | Shiraz-28T | 1762 | 0.562311 | 0         |  |  |
|           |      | Shiraz-29T | 1801 | 0.815343 | 0         |  |  |
|           |      | Shiraz-32T | 1870 | 0.729766 | 0         |  |  |
|           |      | Shiraz-35T | 1933 | 0.488535 | 0         |  |  |
|           |      | Shiraz-58T | 2223 | 0.833364 | 0         |  |  |
|           |      | Shiraz-71T | 2263 | 0.975531 | 0         |  |  |
|           |      | Shiraz-3T  | 242  | 0        | -0.336434 |  |  |
|           |      | Shiraz-3T  | 244  | 0        | -0.023749 |  |  |
|           |      | Shiraz-4T  | 261  | 0        | -0.336249 |  |  |
|           |      | Shiraz-16T | 295  | 0.591657 | 0         |  |  |

|         |      |            |      |          |           |  |  |
|---------|------|------------|------|----------|-----------|--|--|
|         |      | Shiraz-36T | 433  | 0        | -0.803961 |  |  |
|         |      | Shiraz-44T | 899  | 0        | -1.09697  |  |  |
|         |      | Shiraz-44T | 904  | 0        | -0.625526 |  |  |
|         |      | Shiraz-49T | 1170 | 0        | -0.967436 |  |  |
|         |      | Shiraz-9T  | 1370 | 0.690073 | 0         |  |  |
|         |      | Shiraz-18T | 1457 | 0.643204 | 0         |  |  |
|         |      | Shiraz-22T | 1673 | 0.611783 | 0         |  |  |
|         |      | Shiraz-25T | 1719 | 0.472955 | 0         |  |  |
|         |      | Shiraz-28T | 1762 | 0.562311 | 0         |  |  |
|         |      | Shiraz-29T | 1801 | 0.815343 | 0         |  |  |
|         |      | Shiraz-32T | 1870 | 0.729766 | 0         |  |  |
|         |      | Shiraz-35T | 1933 | 0.488535 | 0         |  |  |
|         |      | Shiraz-58T | 2223 | 0.833364 | 0         |  |  |
|         |      | Shiraz-71T | 2263 | 0.975531 | 0         |  |  |
| C1QTNF3 | chr5 | Shiraz-4T  | 250  | 0.262252 | 0         |  |  |
|         |      | Shiraz-16T | 266  | 0.321724 | 0         |  |  |
|         |      | Shiraz-18T | 1429 | 0        | -0.314125 |  |  |
|         |      | Shiraz-25T | 1694 | 0.201602 | 0         |  |  |
|         |      | Shiraz-28T | 1731 | 0.295447 | 0         |  |  |
|         |      | Shiraz-29T | 1773 | 0.090981 | 0         |  |  |
|         |      | Shiraz-40T | 2016 | 0.376634 | 0         |  |  |
|         |      | Shiraz-4T  | 250  | 0.262252 | 0         |  |  |
|         |      | Shiraz-16T | 266  | 0.321724 | 0         |  |  |
|         |      | Shiraz-18T | 1429 | 0        | -0.314125 |  |  |
|         |      | Shiraz-25T | 1694 | 0.201602 | 0         |  |  |
|         |      | Shiraz-28T | 1731 | 0.295447 | 0         |  |  |
|         |      | Shiraz-29T | 1773 | 0.090981 | 0         |  |  |
|         |      | Shiraz-40T | 2016 | 0.376634 | 0         |  |  |
|         |      | Shiraz-4T  | 250  | 0.262252 | 0         |  |  |
|         |      | Shiraz-16T | 266  | 0.321724 | 0         |  |  |
|         |      | Shiraz-18T | 1429 | 0        | -0.314125 |  |  |
|         |      | Shiraz-25T | 1694 | 0.201602 | 0         |  |  |
|         |      | Shiraz-28T | 1731 | 0.295447 | 0         |  |  |
|         |      | Shiraz-29T | 1773 | 0.090981 | 0         |  |  |
|         |      | Shiraz-40T | 2016 | 0.376634 | 0         |  |  |
| C5orf22 | chr5 | Shiraz-4T  | 250  | 0.262252 | 0         |  |  |
|         |      | Shiraz-16T | 266  | 0.321724 | 0         |  |  |
|         |      | Shiraz-18T | 1429 | 0        | -0.314125 |  |  |
|         |      | Shiraz-25T | 1694 | 0.201602 | 0         |  |  |
|         |      | Shiraz-28T | 1731 | 0.295447 | 0         |  |  |
|         |      | Shiraz-29T | 1773 | 0.090981 | 0         |  |  |
|         |      | Shiraz-40T | 2016 | 0.376634 | 0         |  |  |
|         |      | Shiraz-53T | 2070 | 0        | -0.42189  |  |  |
|         |      | Shiraz-4T  | 250  | 0.262252 | 0         |  |  |
|         |      | Shiraz-16T | 266  | 0.321724 | 0         |  |  |
|         |      | Shiraz-18T | 1429 | 0        | -0.314125 |  |  |
|         |      | Shiraz-25T | 1694 | 0.201602 | 0         |  |  |

|         |      |            |      |          |           |  |
|---------|------|------------|------|----------|-----------|--|
|         |      | Shiraz-28T | 1731 | 0.295447 | 0         |  |
|         |      | Shiraz-29T | 1773 | 0.090981 | 0         |  |
|         |      | Shiraz-40T | 2016 | 0.376634 | 0         |  |
|         |      | Shiraz-53T | 2070 | 0        | -0.42189  |  |
|         |      | Shiraz-4T  | 250  | 0.262252 | 0         |  |
|         |      | Shiraz-16T | 266  | 0.321724 | 0         |  |
|         |      | Shiraz-18T | 1429 | 0        | -0.314125 |  |
|         |      | Shiraz-25T | 1694 | 0.201602 | 0         |  |
|         |      | Shiraz-28T | 1731 | 0.295447 | 0         |  |
|         |      | Shiraz-29T | 1773 | 0.090981 | 0         |  |
|         |      | Shiraz-40T | 2016 | 0.376634 | 0         |  |
|         |      | Shiraz-53T | 2070 | 0        | -0.42189  |  |
| C5orf23 | chr5 | Shiraz-4T  | 250  | 0.262252 | 0         |  |
|         |      | Shiraz-16T | 266  | 0.321724 | 0         |  |
|         |      | Shiraz-18T | 1429 | 0        | -0.314125 |  |
|         |      | Shiraz-25T | 1694 | 0.201602 | 0         |  |
|         |      | Shiraz-28T | 1731 | 0.295447 | 0         |  |
|         |      | Shiraz-29T | 1773 | 0.090981 | 0         |  |
|         |      | Shiraz-40T | 2016 | 0.376634 | 0         |  |
|         |      | Shiraz-4T  | 250  | 0.262252 | 0         |  |
|         |      | Shiraz-16T | 266  | 0.321724 | 0         |  |
|         |      | Shiraz-18T | 1429 | 0        | -0.314125 |  |
|         |      | Shiraz-25T | 1694 | 0.201602 | 0         |  |
|         |      | Shiraz-28T | 1731 | 0.295447 | 0         |  |
|         |      | Shiraz-29T | 1773 | 0.090981 | 0         |  |
|         |      | Shiraz-40T | 2016 | 0.376634 | 0         |  |
|         |      | Shiraz-4T  | 250  | 0.262252 | 0         |  |
|         |      | Shiraz-16T | 266  | 0.321724 | 0         |  |
|         |      | Shiraz-18T | 1429 | 0        | -0.314125 |  |
|         |      | Shiraz-25T | 1694 | 0.201602 | 0         |  |
|         |      | Shiraz-28T | 1731 | 0.295447 | 0         |  |
|         |      | Shiraz-29T | 1773 | 0.090981 | 0         |  |
|         |      | Shiraz-40T | 2016 | 0.376634 | 0         |  |
| C5orf28 | chr5 | Shiraz-4T  | 250  | 0.262252 | 0         |  |
|         |      | Shiraz-16T | 266  | 0.321724 | 0         |  |
|         |      | Shiraz-44T | 591  | 0        | -0.233934 |  |
|         |      | Shiraz-18T | 1429 | 0        | -0.314125 |  |
|         |      | Shiraz-22T | 1522 | 0        | -0.322688 |  |
|         |      | Shiraz-25T | 1694 | 0.201602 | 0         |  |
|         |      | Shiraz-28T | 1731 | 0.295447 | 0         |  |
|         |      | Shiraz-29T | 1773 | 0.090981 | 0         |  |
|         |      | Shiraz-40T | 2016 | 0.376634 | 0         |  |
|         |      | Shiraz-4T  | 250  | 0.262252 | 0         |  |
|         |      | Shiraz-16T | 266  | 0.321724 | 0         |  |
|         |      | Shiraz-44T | 591  | 0        | -0.233934 |  |
|         |      | Shiraz-18T | 1429 | 0        | -0.314125 |  |
|         |      | Shiraz-22T | 1522 | 0        | -0.322688 |  |

|         |      |            |      |          |           |  |  |
|---------|------|------------|------|----------|-----------|--|--|
|         |      | Shiraz-25T | 1694 | 0.201602 | 0         |  |  |
|         |      | Shiraz-28T | 1731 | 0.295447 | 0         |  |  |
|         |      | Shiraz-29T | 1773 | 0.090981 | 0         |  |  |
|         |      | Shiraz-40T | 2016 | 0.376634 | 0         |  |  |
|         |      | Shiraz-4T  | 250  | 0.262252 | 0         |  |  |
|         |      | Shiraz-16T | 266  | 0.321724 | 0         |  |  |
|         |      | Shiraz-44T | 591  | 0        | -0.233934 |  |  |
|         |      | Shiraz-18T | 1429 | 0        | -0.314125 |  |  |
|         |      | Shiraz-22T | 1522 | 0        | -0.322688 |  |  |
|         |      | Shiraz-25T | 1694 | 0.201602 | 0         |  |  |
|         |      | Shiraz-28T | 1731 | 0.295447 | 0         |  |  |
|         |      | Shiraz-29T | 1773 | 0.090981 | 0         |  |  |
|         |      | Shiraz-40T | 2016 | 0.376634 | 0         |  |  |
| C5orf33 | chr5 | Shiraz-4T  | 250  | 0.262252 | 0         |  |  |
|         |      | Shiraz-4T  | 250  | 0.262252 | 0         |  |  |
|         |      | Shiraz-16T | 266  | 0.321724 | 0         |  |  |
|         |      | Shiraz-16T | 266  | 0.321724 | 0         |  |  |
|         |      | Shiraz-44T | 591  | 0        | -0.233934 |  |  |
|         |      | Shiraz-44T | 591  | 0        | -0.233934 |  |  |
|         |      | Shiraz-18T | 1429 | 0        | -0.314125 |  |  |
|         |      | Shiraz-18T | 1429 | 0        | -0.314125 |  |  |
|         |      | Shiraz-22T | 1522 | 0        | -0.322688 |  |  |
|         |      | Shiraz-22T | 1522 | 0        | -0.322688 |  |  |
|         |      | Shiraz-25T | 1694 | 0.201602 | 0         |  |  |
|         |      | Shiraz-25T | 1694 | 0.201602 | 0         |  |  |
|         |      | Shiraz-28T | 1731 | 0.295447 | 0         |  |  |
|         |      | Shiraz-28T | 1731 | 0.295447 | 0         |  |  |
|         |      | Shiraz-29T | 1773 | 0.090981 | 0         |  |  |
|         |      | Shiraz-29T | 1773 | 0.090981 | 0         |  |  |
|         |      | Shiraz-40T | 2016 | 0.376634 | 0         |  |  |
|         |      | Shiraz-40T | 2016 | 0.376634 | 0         |  |  |
|         |      | Shiraz-4T  | 250  | 0.262252 | 0         |  |  |
|         |      | Shiraz-4T  | 250  | 0.262252 | 0         |  |  |
|         |      | Shiraz-16T | 266  | 0.321724 | 0         |  |  |
|         |      | Shiraz-16T | 266  | 0.321724 | 0         |  |  |
|         |      | Shiraz-44T | 591  | 0        | -0.233934 |  |  |
|         |      | Shiraz-44T | 591  | 0        | -0.233934 |  |  |
|         |      | Shiraz-18T | 1429 | 0        | -0.314125 |  |  |
|         |      | Shiraz-18T | 1429 | 0        | -0.314125 |  |  |
|         |      | Shiraz-22T | 1522 | 0        | -0.322688 |  |  |
|         |      | Shiraz-22T | 1522 | 0        | -0.322688 |  |  |
|         |      | Shiraz-25T | 1694 | 0.201602 | 0         |  |  |
|         |      | Shiraz-25T | 1694 | 0.201602 | 0         |  |  |
|         |      | Shiraz-28T | 1731 | 0.295447 | 0         |  |  |
|         |      | Shiraz-28T | 1731 | 0.295447 | 0         |  |  |
|         |      | Shiraz-29T | 1773 | 0.090981 | 0         |  |  |
|         |      | Shiraz-29T | 1773 | 0.090981 | 0         |  |  |

|         |      |            |      |          |           |  |  |
|---------|------|------------|------|----------|-----------|--|--|
|         |      | Shiraz-40T | 2016 | 0.376634 | 0         |  |  |
|         |      | Shiraz-40T | 2016 | 0.376634 | 0         |  |  |
|         |      | Shiraz-4T  | 250  | 0.262252 | 0         |  |  |
|         |      | Shiraz-4T  | 250  | 0.262252 | 0         |  |  |
|         |      | Shiraz-16T | 266  | 0.321724 | 0         |  |  |
|         |      | Shiraz-16T | 266  | 0.321724 | 0         |  |  |
|         |      | Shiraz-44T | 591  | 0        | -0.233934 |  |  |
|         |      | Shiraz-44T | 591  | 0        | -0.233934 |  |  |
|         |      | Shiraz-18T | 1429 | 0        | -0.314125 |  |  |
|         |      | Shiraz-18T | 1429 | 0        | -0.314125 |  |  |
|         |      | Shiraz-22T | 1522 | 0        | -0.322688 |  |  |
|         |      | Shiraz-22T | 1522 | 0        | -0.322688 |  |  |
|         |      | Shiraz-25T | 1694 | 0.201602 | 0         |  |  |
|         |      | Shiraz-25T | 1694 | 0.201602 | 0         |  |  |
|         |      | Shiraz-28T | 1731 | 0.295447 | 0         |  |  |
|         |      | Shiraz-28T | 1731 | 0.295447 | 0         |  |  |
|         |      | Shiraz-29T | 1773 | 0.090981 | 0         |  |  |
|         |      | Shiraz-29T | 1773 | 0.090981 | 0         |  |  |
|         |      | Shiraz-40T | 2016 | 0.376634 | 0         |  |  |
|         |      | Shiraz-40T | 2016 | 0.376634 | 0         |  |  |
| C5orf34 | chr5 | Shiraz-4T  | 250  | 0.262252 | 0         |  |  |
|         |      | Shiraz-16T | 266  | 0.321724 | 0         |  |  |
|         |      | Shiraz-44T | 591  | 0        | -0.233934 |  |  |
|         |      | Shiraz-18T | 1429 | 0        | -0.314125 |  |  |
|         |      | Shiraz-22T | 1522 | 0        | -0.322688 |  |  |
|         |      | Shiraz-25T | 1694 | 0.201602 | 0         |  |  |
|         |      | Shiraz-28T | 1731 | 0.295447 | 0         |  |  |
|         |      | Shiraz-29T | 1773 | 0.090981 | 0         |  |  |
|         |      | Shiraz-40T | 2016 | 0.376634 | 0         |  |  |
|         |      | Shiraz-4T  | 250  | 0.262252 | 0         |  |  |
|         |      | Shiraz-16T | 266  | 0.321724 | 0         |  |  |
|         |      | Shiraz-44T | 591  | 0        | -0.233934 |  |  |
|         |      | Shiraz-18T | 1429 | 0        | -0.314125 |  |  |
|         |      | Shiraz-22T | 1522 | 0        | -0.322688 |  |  |
|         |      | Shiraz-25T | 1694 | 0.201602 | 0         |  |  |
|         |      | Shiraz-28T | 1731 | 0.295447 | 0         |  |  |
|         |      | Shiraz-29T | 1773 | 0.090981 | 0         |  |  |
|         |      | Shiraz-40T | 2016 | 0.376634 | 0         |  |  |
|         |      | Shiraz-4T  | 250  | 0.262252 | 0         |  |  |
|         |      | Shiraz-16T | 266  | 0.321724 | 0         |  |  |
|         |      | Shiraz-44T | 591  | 0        | -0.233934 |  |  |
|         |      | Shiraz-18T | 1429 | 0        | -0.314125 |  |  |
|         |      | Shiraz-22T | 1522 | 0        | -0.322688 |  |  |
|         |      | Shiraz-25T | 1694 | 0.201602 | 0         |  |  |
|         |      | Shiraz-28T | 1731 | 0.295447 | 0         |  |  |
|         |      | Shiraz-29T | 1773 | 0.090981 | 0         |  |  |
|         |      | Shiraz-40T | 2016 | 0.376634 | 0         |  |  |

|         |      |            |      |          |           |  |  |
|---------|------|------------|------|----------|-----------|--|--|
| C5orf39 | chr5 | Shiraz-4T  | 250  | 0.262252 | 0         |  |  |
|         |      | Shiraz-16T | 266  | 0.321724 | 0         |  |  |
|         |      | Shiraz-44T | 591  | 0        | -0.233934 |  |  |
|         |      | Shiraz-18T | 1429 | 0        | -0.314125 |  |  |
|         |      | Shiraz-22T | 1522 | 0        | -0.322688 |  |  |
|         |      | Shiraz-25T | 1694 | 0.201602 | 0         |  |  |
|         |      | Shiraz-28T | 1731 | 0.295447 | 0         |  |  |
|         |      | Shiraz-29T | 1773 | 0.090981 | 0         |  |  |
|         |      | Shiraz-40T | 2016 | 0.376634 | 0         |  |  |
|         |      | Shiraz-4T  | 250  | 0.262252 | 0         |  |  |
|         |      | Shiraz-16T | 266  | 0.321724 | 0         |  |  |
|         |      | Shiraz-44T | 591  | 0        | -0.233934 |  |  |
|         |      | Shiraz-18T | 1429 | 0        | -0.314125 |  |  |
|         |      | Shiraz-22T | 1522 | 0        | -0.322688 |  |  |
|         |      | Shiraz-25T | 1694 | 0.201602 | 0         |  |  |
|         |      | Shiraz-28T | 1731 | 0.295447 | 0         |  |  |
|         |      | Shiraz-29T | 1773 | 0.090981 | 0         |  |  |
|         |      | Shiraz-40T | 2016 | 0.376634 | 0         |  |  |
|         |      | Shiraz-4T  | 250  | 0.262252 | 0         |  |  |
|         |      | Shiraz-16T | 266  | 0.321724 | 0         |  |  |
|         |      | Shiraz-44T | 591  | 0        | -0.233934 |  |  |
|         |      | Shiraz-18T | 1429 | 0        | -0.314125 |  |  |
|         |      | Shiraz-22T | 1522 | 0        | -0.322688 |  |  |
|         |      | Shiraz-25T | 1694 | 0.201602 | 0         |  |  |
|         |      | Shiraz-28T | 1731 | 0.295447 | 0         |  |  |
|         |      | Shiraz-29T | 1773 | 0.090981 | 0         |  |  |
|         |      | Shiraz-40T | 2016 | 0.376634 | 0         |  |  |
| C5orf42 | chr5 | Shiraz-4T  | 250  | 0.262252 | 0         |  |  |
|         |      | Shiraz-16T | 266  | 0.321724 | 0         |  |  |
|         |      | Shiraz-44T | 591  | 0        | -0.233934 |  |  |
|         |      | Shiraz-18T | 1429 | 0        | -0.314125 |  |  |
|         |      | Shiraz-22T | 1522 | 0        | -0.322688 |  |  |
|         |      | Shiraz-25T | 1694 | 0.201602 | 0         |  |  |
|         |      | Shiraz-28T | 1731 | 0.295447 | 0         |  |  |
|         |      | Shiraz-29T | 1773 | 0.090981 | 0         |  |  |
|         |      | Shiraz-40T | 2016 | 0.376634 | 0         |  |  |
|         |      | Shiraz-4T  | 250  | 0.262252 | 0         |  |  |
|         |      | Shiraz-16T | 266  | 0.321724 | 0         |  |  |
|         |      | Shiraz-44T | 591  | 0        | -0.233934 |  |  |
|         |      | Shiraz-18T | 1429 | 0        | -0.314125 |  |  |
|         |      | Shiraz-22T | 1522 | 0        | -0.322688 |  |  |
|         |      | Shiraz-25T | 1694 | 0.201602 | 0         |  |  |
|         |      | Shiraz-28T | 1731 | 0.295447 | 0         |  |  |
|         |      | Shiraz-29T | 1773 | 0.090981 | 0         |  |  |
|         |      | Shiraz-40T | 2016 | 0.376634 | 0         |  |  |
|         |      | Shiraz-4T  | 250  | 0.262252 | 0         |  |  |
|         |      | Shiraz-16T | 266  | 0.321724 | 0         |  |  |

|         |      |            |      |          |           |  |  |
|---------|------|------------|------|----------|-----------|--|--|
|         |      | Shiraz-44T | 591  | 0        | -0.233934 |  |  |
|         |      | Shiraz-18T | 1429 | 0        | -0.314125 |  |  |
|         |      | Shiraz-22T | 1522 | 0        | -0.322688 |  |  |
|         |      | Shiraz-25T | 1694 | 0.201602 | 0         |  |  |
|         |      | Shiraz-28T | 1731 | 0.295447 | 0         |  |  |
|         |      | Shiraz-29T | 1773 | 0.090981 | 0         |  |  |
|         |      | Shiraz-40T | 2016 | 0.376634 | 0         |  |  |
| C5orf51 | chr5 | Shiraz-4T  | 250  | 0.262252 | 0         |  |  |
|         |      | Shiraz-16T | 266  | 0.321724 | 0         |  |  |
|         |      | Shiraz-44T | 591  | 0        | -0.233934 |  |  |
|         |      | Shiraz-18T | 1429 | 0        | -0.314125 |  |  |
|         |      | Shiraz-22T | 1522 | 0        | -0.322688 |  |  |
|         |      | Shiraz-25T | 1694 | 0.201602 | 0         |  |  |
|         |      | Shiraz-28T | 1731 | 0.295447 | 0         |  |  |
|         |      | Shiraz-29T | 1773 | 0.090981 | 0         |  |  |
|         |      | Shiraz-40T | 2016 | 0.376634 | 0         |  |  |
|         |      | Shiraz-4T  | 250  | 0.262252 | 0         |  |  |
|         |      | Shiraz-16T | 266  | 0.321724 | 0         |  |  |
|         |      | Shiraz-44T | 591  | 0        | -0.233934 |  |  |
|         |      | Shiraz-18T | 1429 | 0        | -0.314125 |  |  |
|         |      | Shiraz-22T | 1522 | 0        | -0.322688 |  |  |
|         |      | Shiraz-25T | 1694 | 0.201602 | 0         |  |  |
|         |      | Shiraz-28T | 1731 | 0.295447 | 0         |  |  |
|         |      | Shiraz-29T | 1773 | 0.090981 | 0         |  |  |
|         |      | Shiraz-40T | 2016 | 0.376634 | 0         |  |  |
|         |      | Shiraz-4T  | 250  | 0.262252 | 0         |  |  |
|         |      | Shiraz-16T | 266  | 0.321724 | 0         |  |  |
|         |      | Shiraz-44T | 591  | 0        | -0.233934 |  |  |
|         |      | Shiraz-18T | 1429 | 0        | -0.314125 |  |  |
|         |      | Shiraz-22T | 1522 | 0        | -0.322688 |  |  |
|         |      | Shiraz-25T | 1694 | 0.201602 | 0         |  |  |
|         |      | Shiraz-28T | 1731 | 0.295447 | 0         |  |  |
|         |      | Shiraz-29T | 1773 | 0.090981 | 0         |  |  |
|         |      | Shiraz-40T | 2016 | 0.376634 | 0         |  |  |
| C6      | chr5 | Shiraz-4T  | 250  | 0.262252 | 0         |  |  |
|         |      | Shiraz-4T  | 250  | 0.262252 | 0         |  |  |
|         |      | Shiraz-16T | 266  | 0.321724 | 0         |  |  |
|         |      | Shiraz-16T | 266  | 0.321724 | 0         |  |  |
|         |      | Shiraz-44T | 591  | 0        | -0.233934 |  |  |
|         |      | Shiraz-44T | 591  | 0        | -0.233934 |  |  |
|         |      | Shiraz-18T | 1429 | 0        | -0.314125 |  |  |
|         |      | Shiraz-18T | 1429 | 0        | -0.314125 |  |  |
|         |      | Shiraz-22T | 1522 | 0        | -0.322688 |  |  |
|         |      | Shiraz-22T | 1522 | 0        | -0.322688 |  |  |
|         |      | Shiraz-25T | 1694 | 0.201602 | 0         |  |  |
|         |      | Shiraz-25T | 1694 | 0.201602 | 0         |  |  |
|         |      | Shiraz-28T | 1731 | 0.295447 | 0         |  |  |



|    |      |            |      |          |           |  |  |
|----|------|------------|------|----------|-----------|--|--|
|    |      | Shiraz-28T | 1731 | 0.295447 | 0         |  |  |
|    |      | Shiraz-29T | 1773 | 0.090981 | 0         |  |  |
|    |      | Shiraz-29T | 1773 | 0.090981 | 0         |  |  |
|    |      | Shiraz-40T | 2016 | 0.376634 | 0         |  |  |
|    |      | Shiraz-40T | 2016 | 0.376634 | 0         |  |  |
|    |      | Shiraz-4T  | 250  | 0.262252 | 0         |  |  |
|    |      | Shiraz-4T  | 250  | 0.262252 | 0         |  |  |
|    |      | Shiraz-16T | 266  | 0.321724 | 0         |  |  |
|    |      | Shiraz-16T | 266  | 0.321724 | 0         |  |  |
|    |      | Shiraz-44T | 591  | 0        | -0.233934 |  |  |
|    |      | Shiraz-44T | 591  | 0        | -0.233934 |  |  |
|    |      | Shiraz-18T | 1429 | 0        | -0.314125 |  |  |
|    |      | Shiraz-18T | 1429 | 0        | -0.314125 |  |  |
|    |      | Shiraz-22T | 1522 | 0        | -0.322688 |  |  |
|    |      | Shiraz-22T | 1522 | 0        | -0.322688 |  |  |
|    |      | Shiraz-25T | 1694 | 0.201602 | 0         |  |  |
|    |      | Shiraz-25T | 1694 | 0.201602 | 0         |  |  |
|    |      | Shiraz-28T | 1731 | 0.295447 | 0         |  |  |
|    |      | Shiraz-28T | 1731 | 0.295447 | 0         |  |  |
|    |      | Shiraz-29T | 1773 | 0.090981 | 0         |  |  |
|    |      | Shiraz-29T | 1773 | 0.090981 | 0         |  |  |
|    |      | Shiraz-40T | 2016 | 0.376634 | 0         |  |  |
|    |      | Shiraz-40T | 2016 | 0.376634 | 0         |  |  |
|    |      | Shiraz-4T  | 250  | 0.262252 | 0         |  |  |
|    |      | Shiraz-4T  | 250  | 0.262252 | 0         |  |  |
|    |      | Shiraz-16T | 266  | 0.321724 | 0         |  |  |
|    |      | Shiraz-16T | 266  | 0.321724 | 0         |  |  |
|    |      | Shiraz-44T | 591  | 0        | -0.233934 |  |  |
|    |      | Shiraz-44T | 591  | 0        | -0.233934 |  |  |
|    |      | Shiraz-18T | 1429 | 0        | -0.314125 |  |  |
|    |      | Shiraz-18T | 1429 | 0        | -0.314125 |  |  |
|    |      | Shiraz-22T | 1522 | 0        | -0.322688 |  |  |
|    |      | Shiraz-22T | 1522 | 0        | -0.322688 |  |  |
|    |      | Shiraz-25T | 1694 | 0.201602 | 0         |  |  |
|    |      | Shiraz-25T | 1694 | 0.201602 | 0         |  |  |
|    |      | Shiraz-28T | 1731 | 0.295447 | 0         |  |  |
|    |      | Shiraz-28T | 1731 | 0.295447 | 0         |  |  |
|    |      | Shiraz-29T | 1773 | 0.090981 | 0         |  |  |
|    |      | Shiraz-29T | 1773 | 0.090981 | 0         |  |  |
|    |      | Shiraz-40T | 2016 | 0.376634 | 0         |  |  |
|    |      | Shiraz-40T | 2016 | 0.376634 | 0         |  |  |
| C7 | chr5 | Shiraz-4T  | 250  | 0.262252 | 0         |  |  |
|    |      | Shiraz-16T | 266  | 0.321724 | 0         |  |  |
|    |      | Shiraz-44T | 591  | 0        | -0.233934 |  |  |
|    |      | Shiraz-18T | 1429 | 0        | -0.314125 |  |  |
|    |      | Shiraz-22T | 1522 | 0        | -0.322688 |  |  |
|    |      | Shiraz-25T | 1694 | 0.201602 | 0         |  |  |

|         |      |            |      |          |           |  |  |
|---------|------|------------|------|----------|-----------|--|--|
|         |      | Shiraz-28T | 1731 | 0.295447 | 0         |  |  |
|         |      | Shiraz-29T | 1773 | 0.090981 | 0         |  |  |
|         |      | Shiraz-40T | 2016 | 0.376634 | 0         |  |  |
|         |      | Shiraz-4T  | 250  | 0.262252 | 0         |  |  |
|         |      | Shiraz-16T | 266  | 0.321724 | 0         |  |  |
|         |      | Shiraz-44T | 591  | 0        | -0.233934 |  |  |
|         |      | Shiraz-18T | 1429 | 0        | -0.314125 |  |  |
|         |      | Shiraz-22T | 1522 | 0        | -0.322688 |  |  |
|         |      | Shiraz-25T | 1694 | 0.201602 | 0         |  |  |
|         |      | Shiraz-28T | 1731 | 0.295447 | 0         |  |  |
|         |      | Shiraz-29T | 1773 | 0.090981 | 0         |  |  |
|         |      | Shiraz-40T | 2016 | 0.376634 | 0         |  |  |
|         |      | Shiraz-4T  | 250  | 0.262252 | 0         |  |  |
|         |      | Shiraz-16T | 266  | 0.321724 | 0         |  |  |
|         |      | Shiraz-44T | 591  | 0        | -0.233934 |  |  |
|         |      | Shiraz-18T | 1429 | 0        | -0.314125 |  |  |
|         |      | Shiraz-22T | 1522 | 0        | -0.322688 |  |  |
|         |      | Shiraz-25T | 1694 | 0.201602 | 0         |  |  |
|         |      | Shiraz-28T | 1731 | 0.295447 | 0         |  |  |
|         |      | Shiraz-29T | 1773 | 0.090981 | 0         |  |  |
|         |      | Shiraz-40T | 2016 | 0.376634 | 0         |  |  |
| C7orf10 | chr7 | Shiraz-3T  | 87   | 0.198593 | 0         |  |  |
|         |      | Shiraz-4T  | 252  | 0.192083 | 0         |  |  |
|         |      | Shiraz-36T | 376  | 0.159952 | 0         |  |  |
|         |      | Shiraz-44T | 631  | 0        | -0.180312 |  |  |
|         |      | Shiraz-46T | 942  | 0.069143 | 0         |  |  |
|         |      | Shiraz-18T | 1433 | 0.250973 | 0         |  |  |
|         |      | Shiraz-22T | 1544 | 0        | -0.193579 |  |  |
|         |      | Shiraz-25T | 1697 | 0.21945  | 0         |  |  |
|         |      | Shiraz-28T | 1734 | 0.362882 | 0         |  |  |
|         |      | Shiraz-29T | 1777 | 0.156747 | 0         |  |  |
|         |      | Shiraz-38T | 1950 | 0.265916 | 0         |  |  |
|         |      | Shiraz-71T | 2236 | 0.320072 | 0         |  |  |
|         |      | Shiraz-72T | 2277 | 0        | -0.398869 |  |  |
|         |      | Shiraz-3T  | 87   | 0.198593 | 0         |  |  |
|         |      | Shiraz-4T  | 252  | 0.192083 | 0         |  |  |
|         |      | Shiraz-36T | 376  | 0.159952 | 0         |  |  |
|         |      | Shiraz-44T | 631  | 0        | -0.180312 |  |  |
|         |      | Shiraz-46T | 942  | 0.069143 | 0         |  |  |
|         |      | Shiraz-18T | 1433 | 0.250973 | 0         |  |  |
|         |      | Shiraz-22T | 1544 | 0        | -0.193579 |  |  |
|         |      | Shiraz-25T | 1697 | 0.21945  | 0         |  |  |
|         |      | Shiraz-28T | 1734 | 0.362882 | 0         |  |  |
|         |      | Shiraz-29T | 1777 | 0.156747 | 0         |  |  |
|         |      | Shiraz-38T | 1950 | 0.265916 | 0         |  |  |
|         |      | Shiraz-71T | 2236 | 0.320072 | 0         |  |  |
|         |      | Shiraz-72T | 2277 | 0        | -0.398869 |  |  |

|         |      |            |      |          |           |  |  |
|---------|------|------------|------|----------|-----------|--|--|
|         |      | Shiraz-3T  | 87   | 0.198593 | 0         |  |  |
|         |      | Shiraz-4T  | 252  | 0.192083 | 0         |  |  |
|         |      | Shiraz-36T | 376  | 0.159952 | 0         |  |  |
|         |      | Shiraz-44T | 631  | 0        | -0.180312 |  |  |
|         |      | Shiraz-46T | 942  | 0.069143 | 0         |  |  |
|         |      | Shiraz-18T | 1433 | 0.250973 | 0         |  |  |
|         |      | Shiraz-22T | 1544 | 0        | -0.193579 |  |  |
|         |      | Shiraz-25T | 1697 | 0.21945  | 0         |  |  |
|         |      | Shiraz-28T | 1734 | 0.362882 | 0         |  |  |
|         |      | Shiraz-29T | 1777 | 0.156747 | 0         |  |  |
|         |      | Shiraz-38T | 1950 | 0.265916 | 0         |  |  |
|         |      | Shiraz-71T | 2236 | 0.320072 | 0         |  |  |
|         |      | Shiraz-72T | 2277 | 0        | -0.398869 |  |  |
| C7orf11 | chr7 | Shiraz-3T  | 87   | 0.198593 | 0         |  |  |
|         |      | Shiraz-4T  | 252  | 0.192083 | 0         |  |  |
|         |      | Shiraz-36T | 376  | 0.159952 | 0         |  |  |
|         |      | Shiraz-44T | 631  | 0        | -0.180312 |  |  |
|         |      | Shiraz-46T | 942  | 0.069143 | 0         |  |  |
|         |      | Shiraz-18T | 1433 | 0.250973 | 0         |  |  |
|         |      | Shiraz-22T | 1544 | 0        | -0.193579 |  |  |
|         |      | Shiraz-25T | 1697 | 0.21945  | 0         |  |  |
|         |      | Shiraz-28T | 1734 | 0.362882 | 0         |  |  |
|         |      | Shiraz-29T | 1777 | 0.156747 | 0         |  |  |
|         |      | Shiraz-38T | 1950 | 0.265916 | 0         |  |  |
|         |      | Shiraz-71T | 2236 | 0.320072 | 0         |  |  |
|         |      | Shiraz-72T | 2277 | 0        | -0.398869 |  |  |
|         |      | Shiraz-3T  | 87   | 0.198593 | 0         |  |  |
|         |      | Shiraz-4T  | 252  | 0.192083 | 0         |  |  |
|         |      | Shiraz-36T | 376  | 0.159952 | 0         |  |  |
|         |      | Shiraz-44T | 631  | 0        | -0.180312 |  |  |
|         |      | Shiraz-46T | 942  | 0.069143 | 0         |  |  |
|         |      | Shiraz-18T | 1433 | 0.250973 | 0         |  |  |
|         |      | Shiraz-22T | 1544 | 0        | -0.193579 |  |  |
|         |      | Shiraz-25T | 1697 | 0.21945  | 0         |  |  |
|         |      | Shiraz-28T | 1734 | 0.362882 | 0         |  |  |
|         |      | Shiraz-29T | 1777 | 0.156747 | 0         |  |  |
|         |      | Shiraz-38T | 1950 | 0.265916 | 0         |  |  |
|         |      | Shiraz-71T | 2236 | 0.320072 | 0         |  |  |
|         |      | Shiraz-72T | 2277 | 0        | -0.398869 |  |  |
|         |      | Shiraz-3T  | 87   | 0.198593 | 0         |  |  |
|         |      | Shiraz-4T  | 252  | 0.192083 | 0         |  |  |
|         |      | Shiraz-36T | 376  | 0.159952 | 0         |  |  |
|         |      | Shiraz-44T | 631  | 0        | -0.180312 |  |  |
|         |      | Shiraz-46T | 942  | 0.069143 | 0         |  |  |
|         |      | Shiraz-18T | 1433 | 0.250973 | 0         |  |  |
|         |      | Shiraz-22T | 1544 | 0        | -0.193579 |  |  |
|         |      | Shiraz-25T | 1697 | 0.21945  | 0         |  |  |

|         |      |            |      |          |           |  |
|---------|------|------------|------|----------|-----------|--|
|         |      | Shiraz-28T | 1734 | 0.362882 | 0         |  |
|         |      | Shiraz-29T | 1777 | 0.156747 | 0         |  |
|         |      | Shiraz-38T | 1950 | 0.265916 | 0         |  |
|         |      | Shiraz-71T | 2236 | 0.320072 | 0         |  |
|         |      | Shiraz-72T | 2277 | 0        | -0.398869 |  |
| C7orf16 | chr7 | Shiraz-3T  | 87   | 0.198593 | 0         |  |
|         |      | Shiraz-4T  | 252  | 0.192083 | 0         |  |
|         |      | Shiraz-36T | 376  | 0.159952 | 0         |  |
|         |      | Shiraz-44T | 631  | 0        | -0.180312 |  |
|         |      | Shiraz-46T | 942  | 0.069143 | 0         |  |
|         |      | Shiraz-18T | 1433 | 0.250973 | 0         |  |
|         |      | Shiraz-25T | 1697 | 0.21945  | 0         |  |
|         |      | Shiraz-28T | 1734 | 0.362882 | 0         |  |
|         |      | Shiraz-29T | 1777 | 0.156747 | 0         |  |
|         |      | Shiraz-38T | 1950 | 0.265916 | 0         |  |
|         |      | Shiraz-71T | 2236 | 0.320072 | 0         |  |
|         |      | Shiraz-3T  | 87   | 0.198593 | 0         |  |
|         |      | Shiraz-4T  | 252  | 0.192083 | 0         |  |
|         |      | Shiraz-36T | 376  | 0.159952 | 0         |  |
|         |      | Shiraz-44T | 631  | 0        | -0.180312 |  |
|         |      | Shiraz-46T | 942  | 0.069143 | 0         |  |
|         |      | Shiraz-18T | 1433 | 0.250973 | 0         |  |
|         |      | Shiraz-25T | 1697 | 0.21945  | 0         |  |
|         |      | Shiraz-28T | 1734 | 0.362882 | 0         |  |
|         |      | Shiraz-29T | 1777 | 0.156747 | 0         |  |
|         |      | Shiraz-38T | 1950 | 0.265916 | 0         |  |
|         |      | Shiraz-71T | 2236 | 0.320072 | 0         |  |
|         |      | Shiraz-3T  | 87   | 0.198593 | 0         |  |
|         |      | Shiraz-4T  | 252  | 0.192083 | 0         |  |
|         |      | Shiraz-36T | 376  | 0.159952 | 0         |  |
|         |      | Shiraz-44T | 631  | 0        | -0.180312 |  |
|         |      | Shiraz-46T | 942  | 0.069143 | 0         |  |
|         |      | Shiraz-18T | 1433 | 0.250973 | 0         |  |
|         |      | Shiraz-25T | 1697 | 0.21945  | 0         |  |
|         |      | Shiraz-28T | 1734 | 0.362882 | 0         |  |
|         |      | Shiraz-29T | 1777 | 0.156747 | 0         |  |
|         |      | Shiraz-38T | 1950 | 0.265916 | 0         |  |
|         |      | Shiraz-71T | 2236 | 0.320072 | 0         |  |
| C7orf23 | chr7 | Shiraz-3T  | 90   | 0.219276 | 0         |  |
|         |      | Shiraz-3T  | 93   | 0        | -0.058023 |  |
|         |      | Shiraz-4T  | 253  | 0.372918 | 0         |  |
|         |      | Shiraz-36T | 378  | 0.179558 | 0         |  |
|         |      | Shiraz-36T | 380  | 0.083883 | 0         |  |
|         |      | Shiraz-44T | 638  | 0        | -0.433476 |  |
|         |      | Shiraz-46T | 943  | 0.093799 | 0         |  |
|         |      | Shiraz-46T | 945  | 0        | -0.014838 |  |
|         |      | Shiraz-47T | 1029 | 0        | -0.096586 |  |

|  |            |      |          |           |  |
|--|------------|------|----------|-----------|--|
|  | Shiraz-49T | 1119 | 0        | -0.157331 |  |
|  | Shiraz-77T | 1225 | 0        | -0.117922 |  |
|  | Shiraz-77T | 1226 | 0        | -0.233724 |  |
|  | Shiraz-18T | 1434 | 0.244465 | 0         |  |
|  | Shiraz-22T | 1549 | 0        | -0.319623 |  |
|  | Shiraz-22T | 1550 | 0        | -0.577052 |  |
|  | Shiraz-25T | 1698 | 0.21835  | 0         |  |
|  | Shiraz-28T | 1735 | 0.350744 | 0         |  |
|  | Shiraz-29T | 1778 | 0.120767 | 0         |  |
|  | Shiraz-38T | 1951 | 0.250891 | 0         |  |
|  | Shiraz-53T | 2078 | 0.287202 | 0         |  |
|  | Shiraz-58T | 2159 | 0        | -0.219521 |  |
|  | Shiraz-71T | 2238 | 0.603631 | 0         |  |
|  | Shiraz-3T  | 90   | 0.219276 | 0         |  |
|  | Shiraz-3T  | 93   | 0        | -0.058023 |  |
|  | Shiraz-4T  | 253  | 0.372918 | 0         |  |
|  | Shiraz-36T | 378  | 0.179558 | 0         |  |
|  | Shiraz-36T | 380  | 0.083883 | 0         |  |
|  | Shiraz-44T | 638  | 0        | -0.433476 |  |
|  | Shiraz-46T | 943  | 0.093799 | 0         |  |
|  | Shiraz-46T | 945  | 0        | -0.014838 |  |
|  | Shiraz-47T | 1029 | 0        | -0.096586 |  |
|  | Shiraz-49T | 1119 | 0        | -0.157331 |  |
|  | Shiraz-77T | 1225 | 0        | -0.117922 |  |
|  | Shiraz-77T | 1226 | 0        | -0.233724 |  |
|  | Shiraz-18T | 1434 | 0.244465 | 0         |  |
|  | Shiraz-22T | 1549 | 0        | -0.319623 |  |
|  | Shiraz-22T | 1550 | 0        | -0.577052 |  |
|  | Shiraz-25T | 1698 | 0.21835  | 0         |  |
|  | Shiraz-28T | 1735 | 0.350744 | 0         |  |
|  | Shiraz-29T | 1778 | 0.120767 | 0         |  |
|  | Shiraz-38T | 1951 | 0.250891 | 0         |  |
|  | Shiraz-53T | 2078 | 0.287202 | 0         |  |
|  | Shiraz-58T | 2159 | 0        | -0.219521 |  |
|  | Shiraz-71T | 2238 | 0.603631 | 0         |  |
|  | Shiraz-3T  | 90   | 0.219276 | 0         |  |
|  | Shiraz-3T  | 93   | 0        | -0.058023 |  |
|  | Shiraz-4T  | 253  | 0.372918 | 0         |  |
|  | Shiraz-36T | 378  | 0.179558 | 0         |  |
|  | Shiraz-36T | 380  | 0.083883 | 0         |  |
|  | Shiraz-44T | 638  | 0        | -0.433476 |  |
|  | Shiraz-46T | 943  | 0.093799 | 0         |  |
|  | Shiraz-46T | 945  | 0        | -0.014838 |  |
|  | Shiraz-47T | 1029 | 0        | -0.096586 |  |
|  | Shiraz-49T | 1119 | 0        | -0.157331 |  |
|  | Shiraz-77T | 1225 | 0        | -0.117922 |  |
|  | Shiraz-77T | 1226 | 0        | -0.233724 |  |

|          |      |            |      |          |           |  |  |
|----------|------|------------|------|----------|-----------|--|--|
|          |      | Shiraz-18T | 1434 | 0.244465 | 0         |  |  |
|          |      | Shiraz-22T | 1549 | 0        | -0.319623 |  |  |
|          |      | Shiraz-22T | 1550 | 0        | -0.577052 |  |  |
|          |      | Shiraz-25T | 1698 | 0.21835  | 0         |  |  |
|          |      | Shiraz-28T | 1735 | 0.350744 | 0         |  |  |
|          |      | Shiraz-29T | 1778 | 0.120767 | 0         |  |  |
|          |      | Shiraz-38T | 1951 | 0.250891 | 0         |  |  |
|          |      | Shiraz-53T | 2078 | 0.287202 | 0         |  |  |
|          |      | Shiraz-58T | 2159 | 0        | -0.219521 |  |  |
|          |      | Shiraz-71T | 2238 | 0.603631 | 0         |  |  |
| C7orf25  | chr7 | Shiraz-3T  | 87   | 0.198593 | 0         |  |  |
|          |      | Shiraz-4T  | 252  | 0.192083 | 0         |  |  |
|          |      | Shiraz-36T | 376  | 0.159952 | 0         |  |  |
|          |      | Shiraz-46T | 942  | 0.069143 | 0         |  |  |
|          |      | Shiraz-18T | 1433 | 0.250973 | 0         |  |  |
|          |      | Shiraz-25T | 1697 | 0.21945  | 0         |  |  |
|          |      | Shiraz-28T | 1734 | 0.362882 | 0         |  |  |
|          |      | Shiraz-29T | 1777 | 0.156747 | 0         |  |  |
|          |      | Shiraz-38T | 1950 | 0.265916 | 0         |  |  |
|          |      | Shiraz-71T | 2236 | 0.320072 | 0         |  |  |
|          |      | Shiraz-3T  | 87   | 0.198593 | 0         |  |  |
|          |      | Shiraz-4T  | 252  | 0.192083 | 0         |  |  |
|          |      | Shiraz-36T | 376  | 0.159952 | 0         |  |  |
|          |      | Shiraz-46T | 942  | 0.069143 | 0         |  |  |
|          |      | Shiraz-18T | 1433 | 0.250973 | 0         |  |  |
|          |      | Shiraz-25T | 1697 | 0.21945  | 0         |  |  |
|          |      | Shiraz-28T | 1734 | 0.362882 | 0         |  |  |
|          |      | Shiraz-29T | 1777 | 0.156747 | 0         |  |  |
|          |      | Shiraz-38T | 1950 | 0.265916 | 0         |  |  |
|          |      | Shiraz-71T | 2236 | 0.320072 | 0         |  |  |
|          |      | Shiraz-3T  | 87   | 0.198593 | 0         |  |  |
|          |      | Shiraz-4T  | 252  | 0.192083 | 0         |  |  |
|          |      | Shiraz-36T | 376  | 0.159952 | 0         |  |  |
|          |      | Shiraz-46T | 942  | 0.069143 | 0         |  |  |
|          |      | Shiraz-18T | 1433 | 0.250973 | 0         |  |  |
|          |      | Shiraz-25T | 1697 | 0.21945  | 0         |  |  |
|          |      | Shiraz-28T | 1734 | 0.362882 | 0         |  |  |
|          |      | Shiraz-29T | 1777 | 0.156747 | 0         |  |  |
|          |      | Shiraz-38T | 1950 | 0.265916 | 0         |  |  |
|          |      | Shiraz-71T | 2236 | 0.320072 | 0         |  |  |
| C7orf28B | chr7 | Shiraz-3T  | 84   | 0.693751 | 0         |  |  |
|          |      | Shiraz-4T  | 252  | 0.192083 | 0         |  |  |
|          |      | Shiraz-31T | 314  | 0.171613 | 0         |  |  |
|          |      | Shiraz-36T | 376  | 0.159952 | 0         |  |  |
|          |      | Shiraz-36T | 377  | 0.343669 | 0         |  |  |
|          |      | Shiraz-46T | 941  | 0.218485 | 0         |  |  |
|          |      | Shiraz-47T | 1026 | 0.145567 | 0         |  |  |

|         |      |            |      |          |   |  |
|---------|------|------------|------|----------|---|--|
|         |      | Shiraz-77T | 1221 | 0.212057 | 0 |  |
|         |      | Shiraz-28T | 1734 | 0.362882 | 0 |  |
|         |      | Shiraz-29T | 1777 | 0.156747 | 0 |  |
|         |      | Shiraz-38T | 1950 | 0.265916 | 0 |  |
|         |      | Shiraz-53T | 2077 | 0.444626 | 0 |  |
|         |      | Shiraz-71T | 2236 | 0.320072 | 0 |  |
|         |      | Shiraz-3T  | 84   | 0.693751 | 0 |  |
|         |      | Shiraz-4T  | 252  | 0.192083 | 0 |  |
|         |      | Shiraz-31T | 314  | 0.171613 | 0 |  |
|         |      | Shiraz-36T | 376  | 0.159952 | 0 |  |
|         |      | Shiraz-36T | 377  | 0.343669 | 0 |  |
|         |      | Shiraz-46T | 941  | 0.218485 | 0 |  |
|         |      | Shiraz-47T | 1026 | 0.145567 | 0 |  |
|         |      | Shiraz-77T | 1221 | 0.212057 | 0 |  |
|         |      | Shiraz-28T | 1734 | 0.362882 | 0 |  |
|         |      | Shiraz-29T | 1777 | 0.156747 | 0 |  |
|         |      | Shiraz-38T | 1950 | 0.265916 | 0 |  |
|         |      | Shiraz-53T | 2077 | 0.444626 | 0 |  |
|         |      | Shiraz-71T | 2236 | 0.320072 | 0 |  |
|         |      | Shiraz-3T  | 84   | 0.693751 | 0 |  |
|         |      | Shiraz-4T  | 252  | 0.192083 | 0 |  |
|         |      | Shiraz-31T | 314  | 0.171613 | 0 |  |
|         |      | Shiraz-36T | 376  | 0.159952 | 0 |  |
|         |      | Shiraz-36T | 377  | 0.343669 | 0 |  |
|         |      | Shiraz-46T | 941  | 0.218485 | 0 |  |
|         |      | Shiraz-47T | 1026 | 0.145567 | 0 |  |
|         |      | Shiraz-77T | 1221 | 0.212057 | 0 |  |
|         |      | Shiraz-28T | 1734 | 0.362882 | 0 |  |
|         |      | Shiraz-29T | 1777 | 0.156747 | 0 |  |
|         |      | Shiraz-38T | 1950 | 0.265916 | 0 |  |
|         |      | Shiraz-53T | 2077 | 0.444626 | 0 |  |
|         |      | Shiraz-71T | 2236 | 0.320072 | 0 |  |
| C7orf29 | chr7 | Shiraz-3T  | 90   | 0.219276 | 0 |  |
|         |      | Shiraz-3T  | 99   | 0.454766 | 0 |  |
|         |      | Shiraz-4T  | 253  | 0.372918 | 0 |  |
|         |      | Shiraz-36T | 378  | 0.179558 | 0 |  |
|         |      | Shiraz-44T | 646  | 0.471276 | 0 |  |
|         |      | Shiraz-46T | 943  | 0.093799 | 0 |  |
|         |      | Shiraz-9T  | 1325 | 0.221899 | 0 |  |
|         |      | Shiraz-18T | 1434 | 0.244465 | 0 |  |
|         |      | Shiraz-25T | 1698 | 0.21835  | 0 |  |
|         |      | Shiraz-28T | 1735 | 0.350744 | 0 |  |
|         |      | Shiraz-29T | 1778 | 0.120767 | 0 |  |
|         |      | Shiraz-32T | 1833 | 0.551336 | 0 |  |
|         |      | Shiraz-38T | 1951 | 0.250891 | 0 |  |
|         |      | Shiraz-53T | 2078 | 0.287202 | 0 |  |
|         |      | Shiraz-58T | 2162 | 0.221505 | 0 |  |

|         |      |            |      |          |   |  |
|---------|------|------------|------|----------|---|--|
|         |      | Shiraz-71T | 2238 | 0.603631 | 0 |  |
|         |      | Shiraz-3T  | 90   | 0.219276 | 0 |  |
|         |      | Shiraz-3T  | 99   | 0.454766 | 0 |  |
|         |      | Shiraz-4T  | 253  | 0.372918 | 0 |  |
|         |      | Shiraz-36T | 378  | 0.179558 | 0 |  |
|         |      | Shiraz-44T | 646  | 0.471276 | 0 |  |
|         |      | Shiraz-46T | 943  | 0.093799 | 0 |  |
|         |      | Shiraz-9T  | 1325 | 0.221899 | 0 |  |
|         |      | Shiraz-18T | 1434 | 0.244465 | 0 |  |
|         |      | Shiraz-25T | 1698 | 0.21835  | 0 |  |
|         |      | Shiraz-28T | 1735 | 0.350744 | 0 |  |
|         |      | Shiraz-29T | 1778 | 0.120767 | 0 |  |
|         |      | Shiraz-32T | 1833 | 0.551336 | 0 |  |
|         |      | Shiraz-38T | 1951 | 0.250891 | 0 |  |
|         |      | Shiraz-53T | 2078 | 0.287202 | 0 |  |
|         |      | Shiraz-58T | 2162 | 0.221505 | 0 |  |
|         |      | Shiraz-71T | 2238 | 0.603631 | 0 |  |
|         |      | Shiraz-3T  | 90   | 0.219276 | 0 |  |
|         |      | Shiraz-3T  | 99   | 0.454766 | 0 |  |
|         |      | Shiraz-4T  | 253  | 0.372918 | 0 |  |
|         |      | Shiraz-36T | 378  | 0.179558 | 0 |  |
|         |      | Shiraz-44T | 646  | 0.471276 | 0 |  |
|         |      | Shiraz-46T | 943  | 0.093799 | 0 |  |
|         |      | Shiraz-9T  | 1325 | 0.221899 | 0 |  |
|         |      | Shiraz-18T | 1434 | 0.244465 | 0 |  |
|         |      | Shiraz-25T | 1698 | 0.21835  | 0 |  |
|         |      | Shiraz-28T | 1735 | 0.350744 | 0 |  |
|         |      | Shiraz-29T | 1778 | 0.120767 | 0 |  |
|         |      | Shiraz-32T | 1833 | 0.551336 | 0 |  |
|         |      | Shiraz-38T | 1951 | 0.250891 | 0 |  |
|         |      | Shiraz-53T | 2078 | 0.287202 | 0 |  |
|         |      | Shiraz-58T | 2162 | 0.221505 | 0 |  |
|         |      | Shiraz-71T | 2238 | 0.603631 | 0 |  |
| C7orf30 | chr7 | Shiraz-3T  | 87   | 0.198593 | 0 |  |
|         |      | Shiraz-4T  | 252  | 0.192083 | 0 |  |
|         |      | Shiraz-36T | 376  | 0.159952 | 0 |  |
|         |      | Shiraz-46T | 942  | 0.069143 | 0 |  |
|         |      | Shiraz-18T | 1433 | 0.250973 | 0 |  |
|         |      | Shiraz-25T | 1697 | 0.21945  | 0 |  |
|         |      | Shiraz-28T | 1734 | 0.362882 | 0 |  |
|         |      | Shiraz-29T | 1777 | 0.156747 | 0 |  |
|         |      | Shiraz-38T | 1950 | 0.265916 | 0 |  |
|         |      | Shiraz-71T | 2236 | 0.320072 | 0 |  |
|         |      | Shiraz-3T  | 87   | 0.198593 | 0 |  |
|         |      | Shiraz-4T  | 252  | 0.192083 | 0 |  |
|         |      | Shiraz-36T | 376  | 0.159952 | 0 |  |
|         |      | Shiraz-46T | 942  | 0.069143 | 0 |  |



|         |      |            |      |          |   |  |
|---------|------|------------|------|----------|---|--|
|         |      | Shiraz-18T | 1433 | 0.250973 | 0 |  |
|         |      | Shiraz-25T | 1697 | 0.21945  | 0 |  |
|         |      | Shiraz-28T | 1734 | 0.362882 | 0 |  |
|         |      | Shiraz-29T | 1777 | 0.156747 | 0 |  |
|         |      | Shiraz-38T | 1950 | 0.265916 | 0 |  |
|         |      | Shiraz-71T | 2236 | 0.320072 | 0 |  |
|         |      | Shiraz-3T  | 87   | 0.198593 | 0 |  |
|         |      | Shiraz-4T  | 252  | 0.192083 | 0 |  |
|         |      | Shiraz-36T | 376  | 0.159952 | 0 |  |
|         |      | Shiraz-46T | 942  | 0.069143 | 0 |  |
|         |      | Shiraz-18T | 1433 | 0.250973 | 0 |  |
|         |      | Shiraz-25T | 1697 | 0.21945  | 0 |  |
|         |      | Shiraz-28T | 1734 | 0.362882 | 0 |  |
|         |      | Shiraz-29T | 1777 | 0.156747 | 0 |  |
|         |      | Shiraz-38T | 1950 | 0.265916 | 0 |  |
|         |      | Shiraz-71T | 2236 | 0.320072 | 0 |  |
| C7orf31 | chr7 | Shiraz-3T  | 87   | 0.198593 | 0 |  |
|         |      | Shiraz-4T  | 252  | 0.192083 | 0 |  |
|         |      | Shiraz-36T | 376  | 0.159952 | 0 |  |
|         |      | Shiraz-46T | 942  | 0.069143 | 0 |  |
|         |      | Shiraz-18T | 1433 | 0.250973 | 0 |  |
|         |      | Shiraz-25T | 1697 | 0.21945  | 0 |  |
|         |      | Shiraz-28T | 1734 | 0.362882 | 0 |  |
|         |      | Shiraz-29T | 1777 | 0.156747 | 0 |  |
|         |      | Shiraz-38T | 1950 | 0.265916 | 0 |  |
|         |      | Shiraz-71T | 2236 | 0.320072 | 0 |  |
|         |      | Shiraz-3T  | 87   | 0.198593 | 0 |  |
|         |      | Shiraz-4T  | 252  | 0.192083 | 0 |  |
|         |      | Shiraz-36T | 376  | 0.159952 | 0 |  |
|         |      | Shiraz-46T | 942  | 0.069143 | 0 |  |
|         |      | Shiraz-18T | 1433 | 0.250973 | 0 |  |
|         |      | Shiraz-25T | 1697 | 0.21945  | 0 |  |
|         |      | Shiraz-28T | 1734 | 0.362882 | 0 |  |
|         |      | Shiraz-29T | 1777 | 0.156747 | 0 |  |
|         |      | Shiraz-38T | 1950 | 0.265916 | 0 |  |
|         |      | Shiraz-71T | 2236 | 0.320072 | 0 |  |
|         |      | Shiraz-3T  | 87   | 0.198593 | 0 |  |
|         |      | Shiraz-4T  | 252  | 0.192083 | 0 |  |
|         |      | Shiraz-36T | 376  | 0.159952 | 0 |  |
|         |      | Shiraz-46T | 942  | 0.069143 | 0 |  |
|         |      | Shiraz-18T | 1433 | 0.250973 | 0 |  |
|         |      | Shiraz-25T | 1697 | 0.21945  | 0 |  |
|         |      | Shiraz-28T | 1734 | 0.362882 | 0 |  |
|         |      | Shiraz-29T | 1777 | 0.156747 | 0 |  |
|         |      | Shiraz-38T | 1950 | 0.265916 | 0 |  |
|         |      | Shiraz-71T | 2236 | 0.320072 | 0 |  |
| C7orf33 | chr7 | Shiraz-3T  | 90   | 0.219276 | 0 |  |

|         |      |            |      |          |           |  |
|---------|------|------------|------|----------|-----------|--|
|         |      | Shiraz-4T  | 253  | 0.372918 | 0         |  |
|         |      | Shiraz-36T | 378  | 0.179558 | 0         |  |
|         |      | Shiraz-46T | 943  | 0.093799 | 0         |  |
|         |      | Shiraz-9T  | 1325 | 0.221899 | 0         |  |
|         |      | Shiraz-18T | 1434 | 0.244465 | 0         |  |
|         |      | Shiraz-25T | 1698 | 0.21835  | 0         |  |
|         |      | Shiraz-28T | 1735 | 0.350744 | 0         |  |
|         |      | Shiraz-29T | 1778 | 0.120767 | 0         |  |
|         |      | Shiraz-32T | 1833 | 0.551336 | 0         |  |
|         |      | Shiraz-38T | 1951 | 0.250891 | 0         |  |
|         |      | Shiraz-53T | 2078 | 0.287202 | 0         |  |
|         |      | Shiraz-58T | 2162 | 0.221505 | 0         |  |
|         |      | Shiraz-71T | 2238 | 0.603631 | 0         |  |
|         |      | Shiraz-3T  | 90   | 0.219276 | 0         |  |
|         |      | Shiraz-4T  | 253  | 0.372918 | 0         |  |
|         |      | Shiraz-36T | 378  | 0.179558 | 0         |  |
|         |      | Shiraz-46T | 943  | 0.093799 | 0         |  |
|         |      | Shiraz-9T  | 1325 | 0.221899 | 0         |  |
|         |      | Shiraz-18T | 1434 | 0.244465 | 0         |  |
|         |      | Shiraz-25T | 1698 | 0.21835  | 0         |  |
|         |      | Shiraz-28T | 1735 | 0.350744 | 0         |  |
|         |      | Shiraz-29T | 1778 | 0.120767 | 0         |  |
|         |      | Shiraz-32T | 1833 | 0.551336 | 0         |  |
|         |      | Shiraz-38T | 1951 | 0.250891 | 0         |  |
|         |      | Shiraz-53T | 2078 | 0.287202 | 0         |  |
|         |      | Shiraz-58T | 2162 | 0.221505 | 0         |  |
|         |      | Shiraz-71T | 2238 | 0.603631 | 0         |  |
|         |      | Shiraz-3T  | 90   | 0.219276 | 0         |  |
|         |      | Shiraz-4T  | 253  | 0.372918 | 0         |  |
|         |      | Shiraz-36T | 378  | 0.179558 | 0         |  |
|         |      | Shiraz-46T | 943  | 0.093799 | 0         |  |
|         |      | Shiraz-9T  | 1325 | 0.221899 | 0         |  |
|         |      | Shiraz-18T | 1434 | 0.244465 | 0         |  |
|         |      | Shiraz-25T | 1698 | 0.21835  | 0         |  |
|         |      | Shiraz-28T | 1735 | 0.350744 | 0         |  |
|         |      | Shiraz-29T | 1778 | 0.120767 | 0         |  |
|         |      | Shiraz-32T | 1833 | 0.551336 | 0         |  |
|         |      | Shiraz-38T | 1951 | 0.250891 | 0         |  |
|         |      | Shiraz-53T | 2078 | 0.287202 | 0         |  |
|         |      | Shiraz-58T | 2162 | 0.221505 | 0         |  |
|         |      | Shiraz-71T | 2238 | 0.603631 | 0         |  |
| C7orf34 | chr7 | Shiraz-3T  | 90   | 0.219276 | 0         |  |
|         |      | Shiraz-4T  | 253  | 0.372918 | 0         |  |
|         |      | Shiraz-36T | 378  | 0.179558 | 0         |  |
|         |      | Shiraz-46T | 943  | 0.093799 | 0         |  |
|         |      | Shiraz-77T | 1225 | 0        | -0.117922 |  |
|         |      | Shiraz-9T  | 1325 | 0.221899 | 0         |  |

|         |      |            |      |          |           |  |  |
|---------|------|------------|------|----------|-----------|--|--|
|         |      | Shiraz-18T | 1434 | 0.244465 | 0         |  |  |
|         |      | Shiraz-25T | 1698 | 0.21835  | 0         |  |  |
|         |      | Shiraz-28T | 1735 | 0.350744 | 0         |  |  |
|         |      | Shiraz-29T | 1778 | 0.120767 | 0         |  |  |
|         |      | Shiraz-32T | 1833 | 0.551336 | 0         |  |  |
|         |      | Shiraz-38T | 1951 | 0.250891 | 0         |  |  |
|         |      | Shiraz-53T | 2078 | 0.287202 | 0         |  |  |
|         |      | Shiraz-58T | 2162 | 0.221505 | 0         |  |  |
|         |      | Shiraz-71T | 2238 | 0.603631 | 0         |  |  |
|         |      | Shiraz-3T  | 90   | 0.219276 | 0         |  |  |
|         |      | Shiraz-4T  | 253  | 0.372918 | 0         |  |  |
|         |      | Shiraz-36T | 378  | 0.179558 | 0         |  |  |
|         |      | Shiraz-46T | 943  | 0.093799 | 0         |  |  |
|         |      | Shiraz-77T | 1225 | 0        | -0.117922 |  |  |
|         |      | Shiraz-9T  | 1325 | 0.221899 | 0         |  |  |
|         |      | Shiraz-18T | 1434 | 0.244465 | 0         |  |  |
|         |      | Shiraz-25T | 1698 | 0.21835  | 0         |  |  |
|         |      | Shiraz-28T | 1735 | 0.350744 | 0         |  |  |
|         |      | Shiraz-29T | 1778 | 0.120767 | 0         |  |  |
|         |      | Shiraz-32T | 1833 | 0.551336 | 0         |  |  |
|         |      | Shiraz-38T | 1951 | 0.250891 | 0         |  |  |
|         |      | Shiraz-53T | 2078 | 0.287202 | 0         |  |  |
|         |      | Shiraz-58T | 2162 | 0.221505 | 0         |  |  |
|         |      | Shiraz-71T | 2238 | 0.603631 | 0         |  |  |
|         |      | Shiraz-3T  | 90   | 0.219276 | 0         |  |  |
|         |      | Shiraz-4T  | 253  | 0.372918 | 0         |  |  |
|         |      | Shiraz-36T | 378  | 0.179558 | 0         |  |  |
|         |      | Shiraz-46T | 943  | 0.093799 | 0         |  |  |
|         |      | Shiraz-77T | 1225 | 0        | -0.117922 |  |  |
|         |      | Shiraz-9T  | 1325 | 0.221899 | 0         |  |  |
|         |      | Shiraz-18T | 1434 | 0.244465 | 0         |  |  |
|         |      | Shiraz-25T | 1698 | 0.21835  | 0         |  |  |
|         |      | Shiraz-28T | 1735 | 0.350744 | 0         |  |  |
|         |      | Shiraz-29T | 1778 | 0.120767 | 0         |  |  |
|         |      | Shiraz-32T | 1833 | 0.551336 | 0         |  |  |
|         |      | Shiraz-38T | 1951 | 0.250891 | 0         |  |  |
|         |      | Shiraz-53T | 2078 | 0.287202 | 0         |  |  |
|         |      | Shiraz-58T | 2162 | 0.221505 | 0         |  |  |
|         |      | Shiraz-71T | 2238 | 0.603631 | 0         |  |  |
| C7orf36 | chr7 | Shiraz-3T  | 87   | 0.198593 | 0         |  |  |
|         |      | Shiraz-4T  | 252  | 0.192083 | 0         |  |  |
|         |      | Shiraz-36T | 376  | 0.159952 | 0         |  |  |
|         |      | Shiraz-44T | 631  | 0        | -0.180312 |  |  |
|         |      | Shiraz-46T | 942  | 0.069143 | 0         |  |  |
|         |      | Shiraz-18T | 1433 | 0.250973 | 0         |  |  |
|         |      | Shiraz-22T | 1544 | 0        | -0.193579 |  |  |
|         |      | Shiraz-25T | 1697 | 0.21945  | 0         |  |  |

|         |      |            |      |          |           |  |
|---------|------|------------|------|----------|-----------|--|
|         |      | Shiraz-28T | 1734 | 0.362882 | 0         |  |
|         |      | Shiraz-29T | 1777 | 0.156747 | 0         |  |
|         |      | Shiraz-38T | 1950 | 0.265916 | 0         |  |
|         |      | Shiraz-71T | 2236 | 0.320072 | 0         |  |
|         |      | Shiraz-72T | 2277 | 0        | -0.398869 |  |
|         |      | Shiraz-3T  | 87   | 0.198593 | 0         |  |
|         |      | Shiraz-4T  | 252  | 0.192083 | 0         |  |
|         |      | Shiraz-36T | 376  | 0.159952 | 0         |  |
|         |      | Shiraz-44T | 631  | 0        | -0.180312 |  |
|         |      | Shiraz-46T | 942  | 0.069143 | 0         |  |
|         |      | Shiraz-18T | 1433 | 0.250973 | 0         |  |
|         |      | Shiraz-22T | 1544 | 0        | -0.193579 |  |
|         |      | Shiraz-25T | 1697 | 0.21945  | 0         |  |
|         |      | Shiraz-28T | 1734 | 0.362882 | 0         |  |
|         |      | Shiraz-29T | 1777 | 0.156747 | 0         |  |
|         |      | Shiraz-38T | 1950 | 0.265916 | 0         |  |
|         |      | Shiraz-71T | 2236 | 0.320072 | 0         |  |
|         |      | Shiraz-72T | 2277 | 0        | -0.398869 |  |
|         |      | Shiraz-3T  | 87   | 0.198593 | 0         |  |
|         |      | Shiraz-4T  | 252  | 0.192083 | 0         |  |
|         |      | Shiraz-36T | 376  | 0.159952 | 0         |  |
|         |      | Shiraz-44T | 631  | 0        | -0.180312 |  |
|         |      | Shiraz-46T | 942  | 0.069143 | 0         |  |
|         |      | Shiraz-18T | 1433 | 0.250973 | 0         |  |
|         |      | Shiraz-22T | 1544 | 0        | -0.193579 |  |
|         |      | Shiraz-25T | 1697 | 0.21945  | 0         |  |
|         |      | Shiraz-28T | 1734 | 0.362882 | 0         |  |
|         |      | Shiraz-29T | 1777 | 0.156747 | 0         |  |
|         |      | Shiraz-38T | 1950 | 0.265916 | 0         |  |
|         |      | Shiraz-71T | 2236 | 0.320072 | 0         |  |
|         |      | Shiraz-72T | 2277 | 0        | -0.398869 |  |
| C7orf38 | chr7 | Shiraz-3T  | 90   | 0.219276 | 0         |  |
|         |      | Shiraz-3T  | 94   | 0.74735  | 0         |  |
|         |      | Shiraz-4T  | 253  | 0.372918 | 0         |  |
|         |      | Shiraz-31T | 316  | 0.219196 | 0         |  |
|         |      | Shiraz-36T | 378  | 0.179558 | 0         |  |
|         |      | Shiraz-36T | 381  | 0.332628 | 0         |  |
|         |      | Shiraz-44T | 639  | 1.035032 | 0         |  |
|         |      | Shiraz-44T | 640  | 0.272608 | 0         |  |
|         |      | Shiraz-46T | 943  | 0.093799 | 0         |  |
|         |      | Shiraz-46T | 946  | 0.299835 | 0         |  |
|         |      | Shiraz-47T | 1030 | 0.257728 | 0         |  |
|         |      | Shiraz-49T | 1120 | 0.281656 | 0         |  |
|         |      | Shiraz-77T | 1225 | 0        | -0.117922 |  |
|         |      | Shiraz-77T | 1227 | 0.196445 | 0         |  |
|         |      | Shiraz-9T  | 1324 | 0.679266 | 0         |  |
|         |      | Shiraz-18T | 1434 | 0.244465 | 0         |  |

|  |            |      |          |           |  |
|--|------------|------|----------|-----------|--|
|  | Shiraz-22T | 1549 | 0        | -0.319623 |  |
|  | Shiraz-22T | 1551 | 0.324011 | 0         |  |
|  | Shiraz-25T | 1698 | 0.21835  | 0         |  |
|  | Shiraz-28T | 1735 | 0.350744 | 0         |  |
|  | Shiraz-29T | 1778 | 0.120767 | 0         |  |
|  | Shiraz-32T | 1833 | 0.551336 | 0         |  |
|  | Shiraz-38T | 1951 | 0.250891 | 0         |  |
|  | Shiraz-53T | 2078 | 0.287202 | 0         |  |
|  | Shiraz-71T | 2238 | 0.603631 | 0         |  |
|  | Shiraz-3T  | 90   | 0.219276 | 0         |  |
|  | Shiraz-3T  | 94   | 0.74735  | 0         |  |
|  | Shiraz-4T  | 253  | 0.372918 | 0         |  |
|  | Shiraz-31T | 316  | 0.219196 | 0         |  |
|  | Shiraz-36T | 378  | 0.179558 | 0         |  |
|  | Shiraz-36T | 381  | 0.332628 | 0         |  |
|  | Shiraz-44T | 639  | 1.035032 | 0         |  |
|  | Shiraz-44T | 640  | 0.272608 | 0         |  |
|  | Shiraz-46T | 943  | 0.093799 | 0         |  |
|  | Shiraz-46T | 946  | 0.299835 | 0         |  |
|  | Shiraz-47T | 1030 | 0.257728 | 0         |  |
|  | Shiraz-49T | 1120 | 0.281656 | 0         |  |
|  | Shiraz-77T | 1225 | 0        | -0.117922 |  |
|  | Shiraz-77T | 1227 | 0.196445 | 0         |  |
|  | Shiraz-9T  | 1324 | 0.679266 | 0         |  |
|  | Shiraz-18T | 1434 | 0.244465 | 0         |  |
|  | Shiraz-22T | 1549 | 0        | -0.319623 |  |
|  | Shiraz-22T | 1551 | 0.324011 | 0         |  |
|  | Shiraz-25T | 1698 | 0.21835  | 0         |  |
|  | Shiraz-28T | 1735 | 0.350744 | 0         |  |
|  | Shiraz-29T | 1778 | 0.120767 | 0         |  |
|  | Shiraz-32T | 1833 | 0.551336 | 0         |  |
|  | Shiraz-38T | 1951 | 0.250891 | 0         |  |
|  | Shiraz-53T | 2078 | 0.287202 | 0         |  |
|  | Shiraz-71T | 2238 | 0.603631 | 0         |  |
|  | Shiraz-3T  | 90   | 0.219276 | 0         |  |
|  | Shiraz-3T  | 94   | 0.74735  | 0         |  |
|  | Shiraz-4T  | 253  | 0.372918 | 0         |  |
|  | Shiraz-31T | 316  | 0.219196 | 0         |  |
|  | Shiraz-36T | 378  | 0.179558 | 0         |  |
|  | Shiraz-36T | 381  | 0.332628 | 0         |  |
|  | Shiraz-44T | 639  | 1.035032 | 0         |  |
|  | Shiraz-44T | 640  | 0.272608 | 0         |  |
|  | Shiraz-46T | 943  | 0.093799 | 0         |  |
|  | Shiraz-46T | 946  | 0.299835 | 0         |  |
|  | Shiraz-47T | 1030 | 0.257728 | 0         |  |
|  | Shiraz-49T | 1120 | 0.281656 | 0         |  |
|  | Shiraz-77T | 1225 | 0        | -0.117922 |  |

|         |      |            |      |          |           |  |
|---------|------|------------|------|----------|-----------|--|
|         |      | Shiraz-77T | 1227 | 0.196445 | 0         |  |
|         |      | Shiraz-9T  | 1324 | 0.679266 | 0         |  |
|         |      | Shiraz-18T | 1434 | 0.244465 | 0         |  |
|         |      | Shiraz-22T | 1549 | 0        | -0.319623 |  |
|         |      | Shiraz-22T | 1551 | 0.324011 | 0         |  |
|         |      | Shiraz-25T | 1698 | 0.21835  | 0         |  |
|         |      | Shiraz-28T | 1735 | 0.350744 | 0         |  |
|         |      | Shiraz-29T | 1778 | 0.120767 | 0         |  |
|         |      | Shiraz-32T | 1833 | 0.551336 | 0         |  |
|         |      | Shiraz-38T | 1951 | 0.250891 | 0         |  |
|         |      | Shiraz-53T | 2078 | 0.287202 | 0         |  |
|         |      | Shiraz-71T | 2238 | 0.603631 | 0         |  |
| C7orf40 | chr7 | Shiraz-3T  | 87   | 0.198593 | 0         |  |
|         |      | Shiraz-3T  | 89   | 0.678641 | 0         |  |
|         |      | Shiraz-4T  | 252  | 0.192083 | 0         |  |
|         |      | Shiraz-36T | 376  | 0.159952 | 0         |  |
|         |      | Shiraz-44T | 632  | 0.902944 | 0         |  |
|         |      | Shiraz-46T | 942  | 0.069143 | 0         |  |
|         |      | Shiraz-77T | 1223 | 0.215647 | 0         |  |
|         |      | Shiraz-18T | 1433 | 0.250973 | 0         |  |
|         |      | Shiraz-25T | 1697 | 0.21945  | 0         |  |
|         |      | Shiraz-28T | 1734 | 0.362882 | 0         |  |
|         |      | Shiraz-29T | 1777 | 0.156747 | 0         |  |
|         |      | Shiraz-38T | 1950 | 0.265916 | 0         |  |
|         |      | Shiraz-71T | 2236 | 0.320072 | 0         |  |
|         |      | Shiraz-3T  | 87   | 0.198593 | 0         |  |
|         |      | Shiraz-3T  | 89   | 0.678641 | 0         |  |
|         |      | Shiraz-4T  | 252  | 0.192083 | 0         |  |
|         |      | Shiraz-36T | 376  | 0.159952 | 0         |  |
|         |      | Shiraz-44T | 632  | 0.902944 | 0         |  |
|         |      | Shiraz-46T | 942  | 0.069143 | 0         |  |
|         |      | Shiraz-77T | 1223 | 0.215647 | 0         |  |
|         |      | Shiraz-18T | 1433 | 0.250973 | 0         |  |
|         |      | Shiraz-25T | 1697 | 0.21945  | 0         |  |
|         |      | Shiraz-28T | 1734 | 0.362882 | 0         |  |
|         |      | Shiraz-29T | 1777 | 0.156747 | 0         |  |
|         |      | Shiraz-38T | 1950 | 0.265916 | 0         |  |
|         |      | Shiraz-71T | 2236 | 0.320072 | 0         |  |
|         |      | Shiraz-3T  | 87   | 0.198593 | 0         |  |
|         |      | Shiraz-3T  | 89   | 0.678641 | 0         |  |
|         |      | Shiraz-4T  | 252  | 0.192083 | 0         |  |
|         |      | Shiraz-36T | 376  | 0.159952 | 0         |  |
|         |      | Shiraz-44T | 632  | 0.902944 | 0         |  |
|         |      | Shiraz-46T | 942  | 0.069143 | 0         |  |
|         |      | Shiraz-77T | 1223 | 0.215647 | 0         |  |
|         |      | Shiraz-18T | 1433 | 0.250973 | 0         |  |
|         |      | Shiraz-25T | 1697 | 0.21945  | 0         |  |

|         |      |            |      |          |           |  |  |
|---------|------|------------|------|----------|-----------|--|--|
|         |      | Shiraz-28T | 1734 | 0.362882 | 0         |  |  |
|         |      | Shiraz-29T | 1777 | 0.156747 | 0         |  |  |
|         |      | Shiraz-38T | 1950 | 0.265916 | 0         |  |  |
|         |      | Shiraz-71T | 2236 | 0.320072 | 0         |  |  |
| C7orf41 | chr7 | Shiraz-3T  | 87   | 0.198593 | 0         |  |  |
|         |      | Shiraz-4T  | 252  | 0.192083 | 0         |  |  |
|         |      | Shiraz-36T | 376  | 0.159952 | 0         |  |  |
|         |      | Shiraz-46T | 942  | 0.069143 | 0         |  |  |
|         |      | Shiraz-18T | 1433 | 0.250973 | 0         |  |  |
|         |      | Shiraz-25T | 1697 | 0.21945  | 0         |  |  |
|         |      | Shiraz-28T | 1734 | 0.362882 | 0         |  |  |
|         |      | Shiraz-29T | 1777 | 0.156747 | 0         |  |  |
|         |      | Shiraz-38T | 1950 | 0.265916 | 0         |  |  |
|         |      | Shiraz-71T | 2236 | 0.320072 | 0         |  |  |
|         |      | Shiraz-3T  | 87   | 0.198593 | 0         |  |  |
|         |      | Shiraz-4T  | 252  | 0.192083 | 0         |  |  |
|         |      | Shiraz-36T | 376  | 0.159952 | 0         |  |  |
|         |      | Shiraz-46T | 942  | 0.069143 | 0         |  |  |
|         |      | Shiraz-18T | 1433 | 0.250973 | 0         |  |  |
|         |      | Shiraz-25T | 1697 | 0.21945  | 0         |  |  |
|         |      | Shiraz-28T | 1734 | 0.362882 | 0         |  |  |
|         |      | Shiraz-29T | 1777 | 0.156747 | 0         |  |  |
|         |      | Shiraz-38T | 1950 | 0.265916 | 0         |  |  |
|         |      | Shiraz-71T | 2236 | 0.320072 | 0         |  |  |
|         |      | Shiraz-3T  | 87   | 0.198593 | 0         |  |  |
|         |      | Shiraz-4T  | 252  | 0.192083 | 0         |  |  |
|         |      | Shiraz-36T | 376  | 0.159952 | 0         |  |  |
|         |      | Shiraz-46T | 942  | 0.069143 | 0         |  |  |
|         |      | Shiraz-18T | 1433 | 0.250973 | 0         |  |  |
|         |      | Shiraz-25T | 1697 | 0.21945  | 0         |  |  |
|         |      | Shiraz-28T | 1734 | 0.362882 | 0         |  |  |
|         |      | Shiraz-29T | 1777 | 0.156747 | 0         |  |  |
|         |      | Shiraz-38T | 1950 | 0.265916 | 0         |  |  |
|         |      | Shiraz-71T | 2236 | 0.320072 | 0         |  |  |
| C7orf43 | chr7 | Shiraz-3T  | 90   | 0.219276 | 0         |  |  |
|         |      | Shiraz-3T  | 94   | 0.74735  | 0         |  |  |
|         |      | Shiraz-4T  | 253  | 0.372918 | 0         |  |  |
|         |      | Shiraz-31T | 316  | 0.219196 | 0         |  |  |
|         |      | Shiraz-36T | 378  | 0.179558 | 0         |  |  |
|         |      | Shiraz-36T | 381  | 0.332628 | 0         |  |  |
|         |      | Shiraz-44T | 639  | 1.035032 | 0         |  |  |
|         |      | Shiraz-46T | 943  | 0.093799 | 0         |  |  |
|         |      | Shiraz-46T | 946  | 0.299835 | 0         |  |  |
|         |      | Shiraz-47T | 1030 | 0.257728 | 0         |  |  |
|         |      | Shiraz-49T | 1120 | 0.281656 | 0         |  |  |
|         |      | Shiraz-77T | 1225 | 0        | -0.117922 |  |  |
|         |      | Shiraz-77T | 1227 | 0.196445 | 0         |  |  |

|  |  |            |      |          |           |  |  |
|--|--|------------|------|----------|-----------|--|--|
|  |  | Shiraz-9T  | 1324 | 0.679266 | 0         |  |  |
|  |  | Shiraz-18T | 1434 | 0.244465 | 0         |  |  |
|  |  | Shiraz-22T | 1549 | 0        | -0.319623 |  |  |
|  |  | Shiraz-22T | 1551 | 0.324011 | 0         |  |  |
|  |  | Shiraz-25T | 1698 | 0.21835  | 0         |  |  |
|  |  | Shiraz-28T | 1735 | 0.350744 | 0         |  |  |
|  |  | Shiraz-29T | 1778 | 0.120767 | 0         |  |  |
|  |  | Shiraz-32T | 1833 | 0.551336 | 0         |  |  |
|  |  | Shiraz-32T | 1834 | 1.485392 | 0         |  |  |
|  |  | Shiraz-38T | 1951 | 0.250891 | 0         |  |  |
|  |  | Shiraz-53T | 2078 | 0.287202 | 0         |  |  |
|  |  | Shiraz-58T | 2160 | 0.399007 | 0         |  |  |
|  |  | Shiraz-71T | 2238 | 0.603631 | 0         |  |  |
|  |  | Shiraz-3T  | 90   | 0.219276 | 0         |  |  |
|  |  | Shiraz-3T  | 94   | 0.74735  | 0         |  |  |
|  |  | Shiraz-4T  | 253  | 0.372918 | 0         |  |  |
|  |  | Shiraz-31T | 316  | 0.219196 | 0         |  |  |
|  |  | Shiraz-36T | 378  | 0.179558 | 0         |  |  |
|  |  | Shiraz-36T | 381  | 0.332628 | 0         |  |  |
|  |  | Shiraz-44T | 639  | 1.035032 | 0         |  |  |
|  |  | Shiraz-46T | 943  | 0.093799 | 0         |  |  |
|  |  | Shiraz-46T | 946  | 0.299835 | 0         |  |  |
|  |  | Shiraz-47T | 1030 | 0.257728 | 0         |  |  |
|  |  | Shiraz-49T | 1120 | 0.281656 | 0         |  |  |
|  |  | Shiraz-77T | 1225 | 0        | -0.117922 |  |  |
|  |  | Shiraz-77T | 1227 | 0.196445 | 0         |  |  |
|  |  | Shiraz-9T  | 1324 | 0.679266 | 0         |  |  |
|  |  | Shiraz-18T | 1434 | 0.244465 | 0         |  |  |
|  |  | Shiraz-22T | 1549 | 0        | -0.319623 |  |  |
|  |  | Shiraz-22T | 1551 | 0.324011 | 0         |  |  |
|  |  | Shiraz-25T | 1698 | 0.21835  | 0         |  |  |
|  |  | Shiraz-28T | 1735 | 0.350744 | 0         |  |  |
|  |  | Shiraz-29T | 1778 | 0.120767 | 0         |  |  |
|  |  | Shiraz-32T | 1833 | 0.551336 | 0         |  |  |
|  |  | Shiraz-32T | 1834 | 1.485392 | 0         |  |  |
|  |  | Shiraz-38T | 1951 | 0.250891 | 0         |  |  |
|  |  | Shiraz-53T | 2078 | 0.287202 | 0         |  |  |
|  |  | Shiraz-58T | 2160 | 0.399007 | 0         |  |  |
|  |  | Shiraz-71T | 2238 | 0.603631 | 0         |  |  |
|  |  | Shiraz-3T  | 90   | 0.219276 | 0         |  |  |
|  |  | Shiraz-3T  | 94   | 0.74735  | 0         |  |  |
|  |  | Shiraz-4T  | 253  | 0.372918 | 0         |  |  |
|  |  | Shiraz-31T | 316  | 0.219196 | 0         |  |  |
|  |  | Shiraz-36T | 378  | 0.179558 | 0         |  |  |
|  |  | Shiraz-36T | 381  | 0.332628 | 0         |  |  |
|  |  | Shiraz-44T | 639  | 1.035032 | 0         |  |  |
|  |  | Shiraz-46T | 943  | 0.093799 | 0         |  |  |



|         |      |            |      |          |           |  |
|---------|------|------------|------|----------|-----------|--|
|         |      | Shiraz-46T | 946  | 0.299835 | 0         |  |
|         |      | Shiraz-47T | 1030 | 0.257728 | 0         |  |
|         |      | Shiraz-49T | 1120 | 0.281656 | 0         |  |
|         |      | Shiraz-77T | 1225 | 0        | -0.117922 |  |
|         |      | Shiraz-77T | 1227 | 0.196445 | 0         |  |
|         |      | Shiraz-9T  | 1324 | 0.679266 | 0         |  |
|         |      | Shiraz-18T | 1434 | 0.244465 | 0         |  |
|         |      | Shiraz-22T | 1549 | 0        | -0.319623 |  |
|         |      | Shiraz-22T | 1551 | 0.324011 | 0         |  |
|         |      | Shiraz-25T | 1698 | 0.21835  | 0         |  |
|         |      | Shiraz-28T | 1735 | 0.350744 | 0         |  |
|         |      | Shiraz-29T | 1778 | 0.120767 | 0         |  |
|         |      | Shiraz-32T | 1833 | 0.551336 | 0         |  |
|         |      | Shiraz-32T | 1834 | 1.485392 | 0         |  |
|         |      | Shiraz-38T | 1951 | 0.250891 | 0         |  |
|         |      | Shiraz-53T | 2078 | 0.287202 | 0         |  |
|         |      | Shiraz-58T | 2160 | 0.399007 | 0         |  |
|         |      | Shiraz-71T | 2238 | 0.603631 | 0         |  |
| C7orf44 | chr7 | Shiraz-3T  | 87   | 0.198593 | 0         |  |
|         |      | Shiraz-4T  | 252  | 0.192083 | 0         |  |
|         |      | Shiraz-36T | 376  | 0.159952 | 0         |  |
|         |      | Shiraz-46T | 942  | 0.069143 | 0         |  |
|         |      | Shiraz-18T | 1433 | 0.250973 | 0         |  |
|         |      | Shiraz-25T | 1697 | 0.21945  | 0         |  |
|         |      | Shiraz-28T | 1734 | 0.362882 | 0         |  |
|         |      | Shiraz-29T | 1777 | 0.156747 | 0         |  |
|         |      | Shiraz-38T | 1950 | 0.265916 | 0         |  |
|         |      | Shiraz-71T | 2236 | 0.320072 | 0         |  |
|         |      | Shiraz-3T  | 87   | 0.198593 | 0         |  |
|         |      | Shiraz-4T  | 252  | 0.192083 | 0         |  |
|         |      | Shiraz-36T | 376  | 0.159952 | 0         |  |
|         |      | Shiraz-46T | 942  | 0.069143 | 0         |  |
|         |      | Shiraz-18T | 1433 | 0.250973 | 0         |  |
|         |      | Shiraz-25T | 1697 | 0.21945  | 0         |  |
|         |      | Shiraz-28T | 1734 | 0.362882 | 0         |  |
|         |      | Shiraz-29T | 1777 | 0.156747 | 0         |  |
|         |      | Shiraz-38T | 1950 | 0.265916 | 0         |  |
|         |      | Shiraz-71T | 2236 | 0.320072 | 0         |  |
|         |      | Shiraz-3T  | 87   | 0.198593 | 0         |  |
|         |      | Shiraz-4T  | 252  | 0.192083 | 0         |  |
|         |      | Shiraz-36T | 376  | 0.159952 | 0         |  |
|         |      | Shiraz-46T | 942  | 0.069143 | 0         |  |
|         |      | Shiraz-18T | 1433 | 0.250973 | 0         |  |
|         |      | Shiraz-25T | 1697 | 0.21945  | 0         |  |
|         |      | Shiraz-28T | 1734 | 0.362882 | 0         |  |
|         |      | Shiraz-29T | 1777 | 0.156747 | 0         |  |
|         |      | Shiraz-38T | 1950 | 0.265916 | 0         |  |

|         |      |            |      |          |           |  |
|---------|------|------------|------|----------|-----------|--|
|         |      | Shiraz-71T | 2236 | 0.320072 | 0         |  |
| C7orf45 | chr7 | Shiraz-3T  | 90   | 0.219276 | 0         |  |
|         |      | Shiraz-3T  | 96   | 0.428308 | 0         |  |
|         |      | Shiraz-4T  | 253  | 0.372918 | 0         |  |
|         |      | Shiraz-31T | 317  | 0.204382 | 0         |  |
|         |      | Shiraz-36T | 378  | 0.179558 | 0         |  |
|         |      | Shiraz-44T | 642  | 0.408617 | 0         |  |
|         |      | Shiraz-46T | 943  | 0.093799 | 0         |  |
|         |      | Shiraz-47T | 1032 | 0.171484 | 0         |  |
|         |      | Shiraz-77T | 1225 | 0        | -0.117922 |  |
|         |      | Shiraz-77T | 1229 | 0.051661 | 0         |  |
|         |      | Shiraz-9T  | 1325 | 0.221899 | 0         |  |
|         |      | Shiraz-18T | 1434 | 0.244465 | 0         |  |
|         |      | Shiraz-25T | 1698 | 0.21835  | 0         |  |
|         |      | Shiraz-28T | 1735 | 0.350744 | 0         |  |
|         |      | Shiraz-29T | 1778 | 0.120767 | 0         |  |
|         |      | Shiraz-32T | 1833 | 0.551336 | 0         |  |
|         |      | Shiraz-38T | 1951 | 0.250891 | 0         |  |
|         |      | Shiraz-53T | 2078 | 0.287202 | 0         |  |
|         |      | Shiraz-71T | 2238 | 0.603631 | 0         |  |
|         |      | Shiraz-3T  | 90   | 0.219276 | 0         |  |
|         |      | Shiraz-3T  | 96   | 0.428308 | 0         |  |
|         |      | Shiraz-4T  | 253  | 0.372918 | 0         |  |
|         |      | Shiraz-31T | 317  | 0.204382 | 0         |  |
|         |      | Shiraz-36T | 378  | 0.179558 | 0         |  |
|         |      | Shiraz-44T | 642  | 0.408617 | 0         |  |
|         |      | Shiraz-46T | 943  | 0.093799 | 0         |  |
|         |      | Shiraz-47T | 1032 | 0.171484 | 0         |  |
|         |      | Shiraz-77T | 1225 | 0        | -0.117922 |  |
|         |      | Shiraz-77T | 1229 | 0.051661 | 0         |  |
|         |      | Shiraz-9T  | 1325 | 0.221899 | 0         |  |
|         |      | Shiraz-18T | 1434 | 0.244465 | 0         |  |
|         |      | Shiraz-25T | 1698 | 0.21835  | 0         |  |
|         |      | Shiraz-28T | 1735 | 0.350744 | 0         |  |
|         |      | Shiraz-29T | 1778 | 0.120767 | 0         |  |
|         |      | Shiraz-32T | 1833 | 0.551336 | 0         |  |
|         |      | Shiraz-38T | 1951 | 0.250891 | 0         |  |
|         |      | Shiraz-53T | 2078 | 0.287202 | 0         |  |
|         |      | Shiraz-71T | 2238 | 0.603631 | 0         |  |
|         |      | Shiraz-3T  | 90   | 0.219276 | 0         |  |
|         |      | Shiraz-3T  | 96   | 0.428308 | 0         |  |
|         |      | Shiraz-4T  | 253  | 0.372918 | 0         |  |
|         |      | Shiraz-31T | 317  | 0.204382 | 0         |  |
|         |      | Shiraz-36T | 378  | 0.179558 | 0         |  |
|         |      | Shiraz-44T | 642  | 0.408617 | 0         |  |
|         |      | Shiraz-46T | 943  | 0.093799 | 0         |  |
|         |      | Shiraz-47T | 1032 | 0.171484 | 0         |  |

|         |      |            |      |          |           |  |  |
|---------|------|------------|------|----------|-----------|--|--|
|         |      | Shiraz-77T | 1225 | 0        | -0.117922 |  |  |
|         |      | Shiraz-77T | 1229 | 0.051661 | 0         |  |  |
|         |      | Shiraz-9T  | 1325 | 0.221899 | 0         |  |  |
|         |      | Shiraz-18T | 1434 | 0.244465 | 0         |  |  |
|         |      | Shiraz-25T | 1698 | 0.21835  | 0         |  |  |
|         |      | Shiraz-28T | 1735 | 0.350744 | 0         |  |  |
|         |      | Shiraz-29T | 1778 | 0.120767 | 0         |  |  |
|         |      | Shiraz-32T | 1833 | 0.551336 | 0         |  |  |
|         |      | Shiraz-38T | 1951 | 0.250891 | 0         |  |  |
|         |      | Shiraz-53T | 2078 | 0.287202 | 0         |  |  |
|         |      | Shiraz-71T | 2238 | 0.603631 | 0         |  |  |
| C7orf46 | chr7 | Shiraz-3T  | 87   | 0.198593 | 0         |  |  |
|         |      | Shiraz-4T  | 252  | 0.192083 | 0         |  |  |
|         |      | Shiraz-36T | 376  | 0.159952 | 0         |  |  |
|         |      | Shiraz-46T | 942  | 0.069143 | 0         |  |  |
|         |      | Shiraz-18T | 1433 | 0.250973 | 0         |  |  |
|         |      | Shiraz-25T | 1697 | 0.21945  | 0         |  |  |
|         |      | Shiraz-28T | 1734 | 0.362882 | 0         |  |  |
|         |      | Shiraz-29T | 1777 | 0.156747 | 0         |  |  |
|         |      | Shiraz-38T | 1950 | 0.265916 | 0         |  |  |
|         |      | Shiraz-71T | 2236 | 0.320072 | 0         |  |  |
|         |      | Shiraz-3T  | 87   | 0.198593 | 0         |  |  |
|         |      | Shiraz-4T  | 252  | 0.192083 | 0         |  |  |
|         |      | Shiraz-36T | 376  | 0.159952 | 0         |  |  |
|         |      | Shiraz-46T | 942  | 0.069143 | 0         |  |  |
|         |      | Shiraz-18T | 1433 | 0.250973 | 0         |  |  |
|         |      | Shiraz-25T | 1697 | 0.21945  | 0         |  |  |
|         |      | Shiraz-28T | 1734 | 0.362882 | 0         |  |  |
|         |      | Shiraz-29T | 1777 | 0.156747 | 0         |  |  |
|         |      | Shiraz-38T | 1950 | 0.265916 | 0         |  |  |
|         |      | Shiraz-71T | 2236 | 0.320072 | 0         |  |  |
|         |      | Shiraz-3T  | 87   | 0.198593 | 0         |  |  |
|         |      | Shiraz-4T  | 252  | 0.192083 | 0         |  |  |
|         |      | Shiraz-36T | 376  | 0.159952 | 0         |  |  |
|         |      | Shiraz-46T | 942  | 0.069143 | 0         |  |  |
|         |      | Shiraz-18T | 1433 | 0.250973 | 0         |  |  |
|         |      | Shiraz-25T | 1697 | 0.21945  | 0         |  |  |
|         |      | Shiraz-28T | 1734 | 0.362882 | 0         |  |  |
|         |      | Shiraz-29T | 1777 | 0.156747 | 0         |  |  |
|         |      | Shiraz-38T | 1950 | 0.265916 | 0         |  |  |
|         |      | Shiraz-71T | 2236 | 0.320072 | 0         |  |  |
| C7orf47 | chr7 | Shiraz-3T  | 90   | 0.219276 | 0         |  |  |
|         |      | Shiraz-3T  | 94   | 0.74735  | 0         |  |  |
|         |      | Shiraz-4T  | 253  | 0.372918 | 0         |  |  |
|         |      | Shiraz-31T | 316  | 0.219196 | 0         |  |  |
|         |      | Shiraz-36T | 378  | 0.179558 | 0         |  |  |
|         |      | Shiraz-36T | 381  | 0.332628 | 0         |  |  |

|  |            |      |          |           |  |
|--|------------|------|----------|-----------|--|
|  | Shiraz-44T | 639  | 1.035032 | 0         |  |
|  | Shiraz-46T | 943  | 0.093799 | 0         |  |
|  | Shiraz-46T | 946  | 0.299835 | 0         |  |
|  | Shiraz-47T | 1030 | 0.257728 | 0         |  |
|  | Shiraz-49T | 1120 | 0.281656 | 0         |  |
|  | Shiraz-77T | 1225 | 0        | -0.117922 |  |
|  | Shiraz-77T | 1227 | 0.196445 | 0         |  |
|  | Shiraz-9T  | 1324 | 0.679266 | 0         |  |
|  | Shiraz-18T | 1434 | 0.244465 | 0         |  |
|  | Shiraz-22T | 1549 | 0        | -0.319623 |  |
|  | Shiraz-22T | 1551 | 0.324011 | 0         |  |
|  | Shiraz-25T | 1698 | 0.21835  | 0         |  |
|  | Shiraz-28T | 1735 | 0.350744 | 0         |  |
|  | Shiraz-29T | 1778 | 0.120767 | 0         |  |
|  | Shiraz-32T | 1833 | 0.551336 | 0         |  |
|  | Shiraz-32T | 1834 | 1.485392 | 0         |  |
|  | Shiraz-38T | 1951 | 0.250891 | 0         |  |
|  | Shiraz-53T | 2078 | 0.287202 | 0         |  |
|  | Shiraz-58T | 2160 | 0.399007 | 0         |  |
|  | Shiraz-71T | 2238 | 0.603631 | 0         |  |
|  | Shiraz-3T  | 90   | 0.219276 | 0         |  |
|  | Shiraz-3T  | 94   | 0.74735  | 0         |  |
|  | Shiraz-4T  | 253  | 0.372918 | 0         |  |
|  | Shiraz-31T | 316  | 0.219196 | 0         |  |
|  | Shiraz-36T | 378  | 0.179558 | 0         |  |
|  | Shiraz-36T | 381  | 0.332628 | 0         |  |
|  | Shiraz-44T | 639  | 1.035032 | 0         |  |
|  | Shiraz-46T | 943  | 0.093799 | 0         |  |
|  | Shiraz-46T | 946  | 0.299835 | 0         |  |
|  | Shiraz-47T | 1030 | 0.257728 | 0         |  |
|  | Shiraz-49T | 1120 | 0.281656 | 0         |  |
|  | Shiraz-77T | 1225 | 0        | -0.117922 |  |
|  | Shiraz-77T | 1227 | 0.196445 | 0         |  |
|  | Shiraz-9T  | 1324 | 0.679266 | 0         |  |
|  | Shiraz-18T | 1434 | 0.244465 | 0         |  |
|  | Shiraz-22T | 1549 | 0        | -0.319623 |  |
|  | Shiraz-22T | 1551 | 0.324011 | 0         |  |
|  | Shiraz-25T | 1698 | 0.21835  | 0         |  |
|  | Shiraz-28T | 1735 | 0.350744 | 0         |  |
|  | Shiraz-29T | 1778 | 0.120767 | 0         |  |
|  | Shiraz-32T | 1833 | 0.551336 | 0         |  |
|  | Shiraz-32T | 1834 | 1.485392 | 0         |  |
|  | Shiraz-38T | 1951 | 0.250891 | 0         |  |
|  | Shiraz-53T | 2078 | 0.287202 | 0         |  |
|  | Shiraz-58T | 2160 | 0.399007 | 0         |  |
|  | Shiraz-71T | 2238 | 0.603631 | 0         |  |
|  | Shiraz-3T  | 90   | 0.219276 | 0         |  |

|         |      |            |      |          |           |  |
|---------|------|------------|------|----------|-----------|--|
|         |      | Shiraz-3T  | 94   | 0.74735  | 0         |  |
|         |      | Shiraz-4T  | 253  | 0.372918 | 0         |  |
|         |      | Shiraz-31T | 316  | 0.219196 | 0         |  |
|         |      | Shiraz-36T | 378  | 0.179558 | 0         |  |
|         |      | Shiraz-36T | 381  | 0.332628 | 0         |  |
|         |      | Shiraz-44T | 639  | 1.035032 | 0         |  |
|         |      | Shiraz-46T | 943  | 0.093799 | 0         |  |
|         |      | Shiraz-46T | 946  | 0.299835 | 0         |  |
|         |      | Shiraz-47T | 1030 | 0.257728 | 0         |  |
|         |      | Shiraz-49T | 1120 | 0.281656 | 0         |  |
|         |      | Shiraz-77T | 1225 | 0        | -0.117922 |  |
|         |      | Shiraz-77T | 1227 | 0.196445 | 0         |  |
|         |      | Shiraz-9T  | 1324 | 0.679266 | 0         |  |
|         |      | Shiraz-18T | 1434 | 0.244465 | 0         |  |
|         |      | Shiraz-22T | 1549 | 0        | -0.319623 |  |
|         |      | Shiraz-22T | 1551 | 0.324011 | 0         |  |
|         |      | Shiraz-25T | 1698 | 0.21835  | 0         |  |
|         |      | Shiraz-28T | 1735 | 0.350744 | 0         |  |
|         |      | Shiraz-29T | 1778 | 0.120767 | 0         |  |
|         |      | Shiraz-32T | 1833 | 0.551336 | 0         |  |
|         |      | Shiraz-32T | 1834 | 1.485392 | 0         |  |
|         |      | Shiraz-38T | 1951 | 0.250891 | 0         |  |
|         |      | Shiraz-53T | 2078 | 0.287202 | 0         |  |
|         |      | Shiraz-58T | 2160 | 0.399007 | 0         |  |
|         |      | Shiraz-71T | 2238 | 0.603631 | 0         |  |
| C7orf49 | chr7 | Shiraz-3T  | 90   | 0.219276 | 0         |  |
|         |      | Shiraz-4T  | 253  | 0.372918 | 0         |  |
|         |      | Shiraz-36T | 378  | 0.179558 | 0         |  |
|         |      | Shiraz-46T | 943  | 0.093799 | 0         |  |
|         |      | Shiraz-77T | 1225 | 0        | -0.117922 |  |
|         |      | Shiraz-9T  | 1325 | 0.221899 | 0         |  |
|         |      | Shiraz-18T | 1434 | 0.244465 | 0         |  |
|         |      | Shiraz-22T | 1553 | 0        | -0.213234 |  |
|         |      | Shiraz-25T | 1698 | 0.21835  | 0         |  |
|         |      | Shiraz-28T | 1735 | 0.350744 | 0         |  |
|         |      | Shiraz-29T | 1778 | 0.120767 | 0         |  |
|         |      | Shiraz-32T | 1833 | 0.551336 | 0         |  |
|         |      | Shiraz-38T | 1951 | 0.250891 | 0         |  |
|         |      | Shiraz-53T | 2078 | 0.287202 | 0         |  |
|         |      | Shiraz-58T | 2162 | 0.221505 | 0         |  |
|         |      | Shiraz-71T | 2238 | 0.603631 | 0         |  |
|         |      | Shiraz-3T  | 90   | 0.219276 | 0         |  |
|         |      | Shiraz-4T  | 253  | 0.372918 | 0         |  |
|         |      | Shiraz-36T | 378  | 0.179558 | 0         |  |
|         |      | Shiraz-46T | 943  | 0.093799 | 0         |  |
|         |      | Shiraz-77T | 1225 | 0        | -0.117922 |  |
|         |      | Shiraz-9T  | 1325 | 0.221899 | 0         |  |

|         |      |            |      |          |           |  |  |
|---------|------|------------|------|----------|-----------|--|--|
|         |      | Shiraz-18T | 1434 | 0.244465 | 0         |  |  |
|         |      | Shiraz-22T | 1553 | 0        | -0.213234 |  |  |
|         |      | Shiraz-25T | 1698 | 0.21835  | 0         |  |  |
|         |      | Shiraz-28T | 1735 | 0.350744 | 0         |  |  |
|         |      | Shiraz-29T | 1778 | 0.120767 | 0         |  |  |
|         |      | Shiraz-32T | 1833 | 0.551336 | 0         |  |  |
|         |      | Shiraz-38T | 1951 | 0.250891 | 0         |  |  |
|         |      | Shiraz-53T | 2078 | 0.287202 | 0         |  |  |
|         |      | Shiraz-58T | 2162 | 0.221505 | 0         |  |  |
|         |      | Shiraz-71T | 2238 | 0.603631 | 0         |  |  |
|         |      | Shiraz-3T  | 90   | 0.219276 | 0         |  |  |
|         |      | Shiraz-4T  | 253  | 0.372918 | 0         |  |  |
|         |      | Shiraz-36T | 378  | 0.179558 | 0         |  |  |
|         |      | Shiraz-46T | 943  | 0.093799 | 0         |  |  |
|         |      | Shiraz-77T | 1225 | 0        | -0.117922 |  |  |
|         |      | Shiraz-9T  | 1325 | 0.221899 | 0         |  |  |
|         |      | Shiraz-18T | 1434 | 0.244465 | 0         |  |  |
|         |      | Shiraz-22T | 1553 | 0        | -0.213234 |  |  |
|         |      | Shiraz-25T | 1698 | 0.21835  | 0         |  |  |
|         |      | Shiraz-28T | 1735 | 0.350744 | 0         |  |  |
|         |      | Shiraz-29T | 1778 | 0.120767 | 0         |  |  |
|         |      | Shiraz-32T | 1833 | 0.551336 | 0         |  |  |
|         |      | Shiraz-38T | 1951 | 0.250891 | 0         |  |  |
|         |      | Shiraz-53T | 2078 | 0.287202 | 0         |  |  |
|         |      | Shiraz-58T | 2162 | 0.221505 | 0         |  |  |
|         |      | Shiraz-71T | 2238 | 0.603631 | 0         |  |  |
| C7orf51 | chr7 | Shiraz-3T  | 90   | 0.219276 | 0         |  |  |
|         |      | Shiraz-3T  | 94   | 0.74735  | 0         |  |  |
|         |      | Shiraz-4T  | 253  | 0.372918 | 0         |  |  |
|         |      | Shiraz-31T | 316  | 0.219196 | 0         |  |  |
|         |      | Shiraz-36T | 378  | 0.179558 | 0         |  |  |
|         |      | Shiraz-36T | 381  | 0.332628 | 0         |  |  |
|         |      | Shiraz-44T | 639  | 1.035032 | 0         |  |  |
|         |      | Shiraz-46T | 943  | 0.093799 | 0         |  |  |
|         |      | Shiraz-46T | 946  | 0.299835 | 0         |  |  |
|         |      | Shiraz-47T | 1030 | 0.257728 | 0         |  |  |
|         |      | Shiraz-49T | 1120 | 0.281656 | 0         |  |  |
|         |      | Shiraz-77T | 1225 | 0        | -0.117922 |  |  |
|         |      | Shiraz-77T | 1227 | 0.196445 | 0         |  |  |
|         |      | Shiraz-9T  | 1324 | 0.679266 | 0         |  |  |
|         |      | Shiraz-18T | 1434 | 0.244465 | 0         |  |  |
|         |      | Shiraz-22T | 1549 | 0        | -0.319623 |  |  |
|         |      | Shiraz-22T | 1551 | 0.324011 | 0         |  |  |
|         |      | Shiraz-25T | 1698 | 0.21835  | 0         |  |  |
|         |      | Shiraz-28T | 1735 | 0.350744 | 0         |  |  |
|         |      | Shiraz-29T | 1778 | 0.120767 | 0         |  |  |
|         |      | Shiraz-32T | 1833 | 0.551336 | 0         |  |  |

|  |            |      |          |           |  |
|--|------------|------|----------|-----------|--|
|  | Shiraz-32T | 1834 | 1.485392 | 0         |  |
|  | Shiraz-38T | 1951 | 0.250891 | 0         |  |
|  | Shiraz-53T | 2078 | 0.287202 | 0         |  |
|  | Shiraz-58T | 2160 | 0.399007 | 0         |  |
|  | Shiraz-71T | 2238 | 0.603631 | 0         |  |
|  | Shiraz-3T  | 90   | 0.219276 | 0         |  |
|  | Shiraz-3T  | 94   | 0.74735  | 0         |  |
|  | Shiraz-4T  | 253  | 0.372918 | 0         |  |
|  | Shiraz-31T | 316  | 0.219196 | 0         |  |
|  | Shiraz-36T | 378  | 0.179558 | 0         |  |
|  | Shiraz-36T | 381  | 0.332628 | 0         |  |
|  | Shiraz-44T | 639  | 1.035032 | 0         |  |
|  | Shiraz-46T | 943  | 0.093799 | 0         |  |
|  | Shiraz-46T | 946  | 0.299835 | 0         |  |
|  | Shiraz-47T | 1030 | 0.257728 | 0         |  |
|  | Shiraz-49T | 1120 | 0.281656 | 0         |  |
|  | Shiraz-77T | 1225 | 0        | -0.117922 |  |
|  | Shiraz-77T | 1227 | 0.196445 | 0         |  |
|  | Shiraz-9T  | 1324 | 0.679266 | 0         |  |
|  | Shiraz-18T | 1434 | 0.244465 | 0         |  |
|  | Shiraz-22T | 1549 | 0        | -0.319623 |  |
|  | Shiraz-22T | 1551 | 0.324011 | 0         |  |
|  | Shiraz-25T | 1698 | 0.21835  | 0         |  |
|  | Shiraz-28T | 1735 | 0.350744 | 0         |  |
|  | Shiraz-29T | 1778 | 0.120767 | 0         |  |
|  | Shiraz-32T | 1833 | 0.551336 | 0         |  |
|  | Shiraz-32T | 1834 | 1.485392 | 0         |  |
|  | Shiraz-38T | 1951 | 0.250891 | 0         |  |
|  | Shiraz-53T | 2078 | 0.287202 | 0         |  |
|  | Shiraz-58T | 2160 | 0.399007 | 0         |  |
|  | Shiraz-71T | 2238 | 0.603631 | 0         |  |
|  | Shiraz-3T  | 90   | 0.219276 | 0         |  |
|  | Shiraz-3T  | 94   | 0.74735  | 0         |  |
|  | Shiraz-4T  | 253  | 0.372918 | 0         |  |
|  | Shiraz-31T | 316  | 0.219196 | 0         |  |
|  | Shiraz-36T | 378  | 0.179558 | 0         |  |
|  | Shiraz-36T | 381  | 0.332628 | 0         |  |
|  | Shiraz-44T | 639  | 1.035032 | 0         |  |
|  | Shiraz-46T | 943  | 0.093799 | 0         |  |
|  | Shiraz-46T | 946  | 0.299835 | 0         |  |
|  | Shiraz-47T | 1030 | 0.257728 | 0         |  |
|  | Shiraz-49T | 1120 | 0.281656 | 0         |  |
|  | Shiraz-77T | 1225 | 0        | -0.117922 |  |
|  | Shiraz-77T | 1227 | 0.196445 | 0         |  |
|  | Shiraz-9T  | 1324 | 0.679266 | 0         |  |
|  | Shiraz-18T | 1434 | 0.244465 | 0         |  |
|  | Shiraz-22T | 1549 | 0        | -0.319623 |  |

|         |      |            |      |          |           |  |
|---------|------|------------|------|----------|-----------|--|
|         |      | Shiraz-22T | 1551 | 0.324011 | 0         |  |
|         |      | Shiraz-25T | 1698 | 0.21835  | 0         |  |
|         |      | Shiraz-28T | 1735 | 0.350744 | 0         |  |
|         |      | Shiraz-29T | 1778 | 0.120767 | 0         |  |
|         |      | Shiraz-32T | 1833 | 0.551336 | 0         |  |
|         |      | Shiraz-32T | 1834 | 1.485392 | 0         |  |
|         |      | Shiraz-38T | 1951 | 0.250891 | 0         |  |
|         |      | Shiraz-53T | 2078 | 0.287202 | 0         |  |
|         |      | Shiraz-58T | 2160 | 0.399007 | 0         |  |
|         |      | Shiraz-71T | 2238 | 0.603631 | 0         |  |
| C7orf52 | chr7 | Shiraz-3T  | 90   | 0.219276 | 0         |  |
|         |      | Shiraz-3T  | 94   | 0.74735  | 0         |  |
|         |      | Shiraz-4T  | 253  | 0.372918 | 0         |  |
|         |      | Shiraz-31T | 316  | 0.219196 | 0         |  |
|         |      | Shiraz-36T | 378  | 0.179558 | 0         |  |
|         |      | Shiraz-36T | 381  | 0.332628 | 0         |  |
|         |      | Shiraz-44T | 639  | 1.035032 | 0         |  |
|         |      | Shiraz-46T | 943  | 0.093799 | 0         |  |
|         |      | Shiraz-46T | 946  | 0.299835 | 0         |  |
|         |      | Shiraz-47T | 1030 | 0.257728 | 0         |  |
|         |      | Shiraz-49T | 1120 | 0.281656 | 0         |  |
|         |      | Shiraz-77T | 1225 | 0        | -0.117922 |  |
|         |      | Shiraz-77T | 1227 | 0.196445 | 0         |  |
|         |      | Shiraz-9T  | 1324 | 0.679266 | 0         |  |
|         |      | Shiraz-18T | 1434 | 0.244465 | 0         |  |
|         |      | Shiraz-22T | 1549 | 0        | -0.319623 |  |
|         |      | Shiraz-22T | 1551 | 0.324011 | 0         |  |
|         |      | Shiraz-25T | 1698 | 0.21835  | 0         |  |
|         |      | Shiraz-28T | 1735 | 0.350744 | 0         |  |
|         |      | Shiraz-29T | 1778 | 0.120767 | 0         |  |
|         |      | Shiraz-32T | 1833 | 0.551336 | 0         |  |
|         |      | Shiraz-32T | 1834 | 1.485392 | 0         |  |
|         |      | Shiraz-38T | 1951 | 0.250891 | 0         |  |
|         |      | Shiraz-53T | 2078 | 0.287202 | 0         |  |
|         |      | Shiraz-58T | 2160 | 0.399007 | 0         |  |
|         |      | Shiraz-71T | 2238 | 0.603631 | 0         |  |
|         |      | Shiraz-3T  | 90   | 0.219276 | 0         |  |
|         |      | Shiraz-3T  | 94   | 0.74735  | 0         |  |
|         |      | Shiraz-4T  | 253  | 0.372918 | 0         |  |
|         |      | Shiraz-31T | 316  | 0.219196 | 0         |  |
|         |      | Shiraz-36T | 378  | 0.179558 | 0         |  |
|         |      | Shiraz-36T | 381  | 0.332628 | 0         |  |
|         |      | Shiraz-44T | 639  | 1.035032 | 0         |  |
|         |      | Shiraz-46T | 943  | 0.093799 | 0         |  |
|         |      | Shiraz-46T | 946  | 0.299835 | 0         |  |
|         |      | Shiraz-47T | 1030 | 0.257728 | 0         |  |
|         |      | Shiraz-49T | 1120 | 0.281656 | 0         |  |



|         |      |            |      |          |           |  |  |
|---------|------|------------|------|----------|-----------|--|--|
|         |      | Shiraz-77T | 1225 | 0        | -0.117922 |  |  |
|         |      | Shiraz-77T | 1227 | 0.196445 | 0         |  |  |
|         |      | Shiraz-9T  | 1324 | 0.679266 | 0         |  |  |
|         |      | Shiraz-18T | 1434 | 0.244465 | 0         |  |  |
|         |      | Shiraz-22T | 1549 | 0        | -0.319623 |  |  |
|         |      | Shiraz-22T | 1551 | 0.324011 | 0         |  |  |
|         |      | Shiraz-25T | 1698 | 0.21835  | 0         |  |  |
|         |      | Shiraz-28T | 1735 | 0.350744 | 0         |  |  |
|         |      | Shiraz-29T | 1778 | 0.120767 | 0         |  |  |
|         |      | Shiraz-32T | 1833 | 0.551336 | 0         |  |  |
|         |      | Shiraz-32T | 1834 | 1.485392 | 0         |  |  |
|         |      | Shiraz-38T | 1951 | 0.250891 | 0         |  |  |
|         |      | Shiraz-53T | 2078 | 0.287202 | 0         |  |  |
|         |      | Shiraz-58T | 2160 | 0.399007 | 0         |  |  |
|         |      | Shiraz-71T | 2238 | 0.603631 | 0         |  |  |
|         |      | Shiraz-3T  | 90   | 0.219276 | 0         |  |  |
|         |      | Shiraz-3T  | 94   | 0.74735  | 0         |  |  |
|         |      | Shiraz-4T  | 253  | 0.372918 | 0         |  |  |
|         |      | Shiraz-31T | 316  | 0.219196 | 0         |  |  |
|         |      | Shiraz-36T | 378  | 0.179558 | 0         |  |  |
|         |      | Shiraz-36T | 381  | 0.332628 | 0         |  |  |
|         |      | Shiraz-44T | 639  | 1.035032 | 0         |  |  |
|         |      | Shiraz-46T | 943  | 0.093799 | 0         |  |  |
|         |      | Shiraz-46T | 946  | 0.299835 | 0         |  |  |
|         |      | Shiraz-47T | 1030 | 0.257728 | 0         |  |  |
|         |      | Shiraz-49T | 1120 | 0.281656 | 0         |  |  |
|         |      | Shiraz-77T | 1225 | 0        | -0.117922 |  |  |
|         |      | Shiraz-77T | 1227 | 0.196445 | 0         |  |  |
|         |      | Shiraz-9T  | 1324 | 0.679266 | 0         |  |  |
|         |      | Shiraz-18T | 1434 | 0.244465 | 0         |  |  |
|         |      | Shiraz-22T | 1549 | 0        | -0.319623 |  |  |
|         |      | Shiraz-22T | 1551 | 0.324011 | 0         |  |  |
|         |      | Shiraz-25T | 1698 | 0.21835  | 0         |  |  |
|         |      | Shiraz-28T | 1735 | 0.350744 | 0         |  |  |
|         |      | Shiraz-29T | 1778 | 0.120767 | 0         |  |  |
|         |      | Shiraz-32T | 1833 | 0.551336 | 0         |  |  |
|         |      | Shiraz-32T | 1834 | 1.485392 | 0         |  |  |
|         |      | Shiraz-38T | 1951 | 0.250891 | 0         |  |  |
|         |      | Shiraz-53T | 2078 | 0.287202 | 0         |  |  |
|         |      | Shiraz-58T | 2160 | 0.399007 | 0         |  |  |
|         |      | Shiraz-71T | 2238 | 0.603631 | 0         |  |  |
| C7orf53 | chr7 | Shiraz-3T  | 90   | 0.219276 | 0         |  |  |
|         |      | Shiraz-3T  | 90   | 0.219276 | 0         |  |  |
|         |      | Shiraz-3T  | 95   | 0        | -0.077623 |  |  |
|         |      | Shiraz-3T  | 95   | 0        | -0.077623 |  |  |
|         |      | Shiraz-4T  | 253  | 0.372918 | 0         |  |  |
|         |      | Shiraz-4T  | 253  | 0.372918 | 0         |  |  |

|  |            |      |          |           |  |
|--|------------|------|----------|-----------|--|
|  | Shiraz-36T | 378  | 0.179558 | 0         |  |
|  | Shiraz-36T | 378  | 0.179558 | 0         |  |
|  | Shiraz-36T | 382  | 0.081739 | 0         |  |
|  | Shiraz-36T | 382  | 0.081739 | 0         |  |
|  | Shiraz-44T | 641  | 0        | -0.477846 |  |
|  | Shiraz-44T | 641  | 0        | -0.477846 |  |
|  | Shiraz-46T | 943  | 0.093799 | 0         |  |
|  | Shiraz-46T | 943  | 0.093799 | 0         |  |
|  | Shiraz-46T | 947  | 0        | -0.010843 |  |
|  | Shiraz-46T | 947  | 0        | -0.010843 |  |
|  | Shiraz-47T | 1031 | 0        | -0.117529 |  |
|  | Shiraz-47T | 1031 | 0        | -0.117529 |  |
|  | Shiraz-49T | 1121 | 0        | -0.138569 |  |
|  | Shiraz-49T | 1121 | 0        | -0.138569 |  |
|  | Shiraz-77T | 1225 | 0        | -0.117922 |  |
|  | Shiraz-77T | 1225 | 0        | -0.117922 |  |
|  | Shiraz-77T | 1228 | 0        | -0.238084 |  |
|  | Shiraz-77T | 1228 | 0        | -0.238084 |  |
|  | Shiraz-18T | 1434 | 0.244465 | 0         |  |
|  | Shiraz-18T | 1434 | 0.244465 | 0         |  |
|  | Shiraz-22T | 1549 | 0        | -0.319623 |  |
|  | Shiraz-22T | 1549 | 0        | -0.319623 |  |
|  | Shiraz-25T | 1698 | 0.21835  | 0         |  |
|  | Shiraz-25T | 1698 | 0.21835  | 0         |  |
|  | Shiraz-28T | 1735 | 0.350744 | 0         |  |
|  | Shiraz-28T | 1735 | 0.350744 | 0         |  |
|  | Shiraz-29T | 1778 | 0.120767 | 0         |  |
|  | Shiraz-29T | 1778 | 0.120767 | 0         |  |
|  | Shiraz-32T | 1833 | 0.551336 | 0         |  |
|  | Shiraz-32T | 1833 | 0.551336 | 0         |  |
|  | Shiraz-32T | 1835 | 0.092727 | 0         |  |
|  | Shiraz-32T | 1835 | 0.092727 | 0         |  |
|  | Shiraz-38T | 1951 | 0.250891 | 0         |  |
|  | Shiraz-38T | 1951 | 0.250891 | 0         |  |
|  | Shiraz-53T | 2078 | 0.287202 | 0         |  |
|  | Shiraz-53T | 2078 | 0.287202 | 0         |  |
|  | Shiraz-58T | 2161 | 0        | -0.187744 |  |
|  | Shiraz-58T | 2161 | 0        | -0.187744 |  |
|  | Shiraz-71T | 2238 | 0.603631 | 0         |  |
|  | Shiraz-71T | 2238 | 0.603631 | 0         |  |
|  | Shiraz-3T  | 90   | 0.219276 | 0         |  |
|  | Shiraz-3T  | 90   | 0.219276 | 0         |  |
|  | Shiraz-3T  | 95   | 0        | -0.077623 |  |
|  | Shiraz-3T  | 95   | 0        | -0.077623 |  |
|  | Shiraz-4T  | 253  | 0.372918 | 0         |  |
|  | Shiraz-4T  | 253  | 0.372918 | 0         |  |
|  | Shiraz-36T | 378  | 0.179558 | 0         |  |

|  |            |      |          |           |  |
|--|------------|------|----------|-----------|--|
|  | Shiraz-36T | 378  | 0.179558 | 0         |  |
|  | Shiraz-36T | 382  | 0.081739 | 0         |  |
|  | Shiraz-36T | 382  | 0.081739 | 0         |  |
|  | Shiraz-44T | 641  | 0        | -0.477846 |  |
|  | Shiraz-44T | 641  | 0        | -0.477846 |  |
|  | Shiraz-46T | 943  | 0.093799 | 0         |  |
|  | Shiraz-46T | 943  | 0.093799 | 0         |  |
|  | Shiraz-46T | 947  | 0        | -0.010843 |  |
|  | Shiraz-46T | 947  | 0        | -0.010843 |  |
|  | Shiraz-47T | 1031 | 0        | -0.117529 |  |
|  | Shiraz-47T | 1031 | 0        | -0.117529 |  |
|  | Shiraz-49T | 1121 | 0        | -0.138569 |  |
|  | Shiraz-49T | 1121 | 0        | -0.138569 |  |
|  | Shiraz-77T | 1225 | 0        | -0.117922 |  |
|  | Shiraz-77T | 1225 | 0        | -0.117922 |  |
|  | Shiraz-77T | 1228 | 0        | -0.238084 |  |
|  | Shiraz-77T | 1228 | 0        | -0.238084 |  |
|  | Shiraz-18T | 1434 | 0.244465 | 0         |  |
|  | Shiraz-18T | 1434 | 0.244465 | 0         |  |
|  | Shiraz-22T | 1549 | 0        | -0.319623 |  |
|  | Shiraz-22T | 1549 | 0        | -0.319623 |  |
|  | Shiraz-25T | 1698 | 0.21835  | 0         |  |
|  | Shiraz-25T | 1698 | 0.21835  | 0         |  |
|  | Shiraz-28T | 1735 | 0.350744 | 0         |  |
|  | Shiraz-28T | 1735 | 0.350744 | 0         |  |
|  | Shiraz-29T | 1778 | 0.120767 | 0         |  |
|  | Shiraz-29T | 1778 | 0.120767 | 0         |  |
|  | Shiraz-32T | 1833 | 0.551336 | 0         |  |
|  | Shiraz-32T | 1833 | 0.551336 | 0         |  |
|  | Shiraz-32T | 1835 | 0.092727 | 0         |  |
|  | Shiraz-32T | 1835 | 0.092727 | 0         |  |
|  | Shiraz-38T | 1951 | 0.250891 | 0         |  |
|  | Shiraz-38T | 1951 | 0.250891 | 0         |  |
|  | Shiraz-53T | 2078 | 0.287202 | 0         |  |
|  | Shiraz-53T | 2078 | 0.287202 | 0         |  |
|  | Shiraz-58T | 2161 | 0        | -0.187744 |  |
|  | Shiraz-58T | 2161 | 0        | -0.187744 |  |
|  | Shiraz-71T | 2238 | 0.603631 | 0         |  |
|  | Shiraz-71T | 2238 | 0.603631 | 0         |  |
|  | Shiraz-3T  | 90   | 0.219276 | 0         |  |
|  | Shiraz-3T  | 90   | 0.219276 | 0         |  |
|  | Shiraz-3T  | 95   | 0        | -0.077623 |  |
|  | Shiraz-3T  | 95   | 0        | -0.077623 |  |
|  | Shiraz-4T  | 253  | 0.372918 | 0         |  |
|  | Shiraz-4T  | 253  | 0.372918 | 0         |  |
|  | Shiraz-36T | 378  | 0.179558 | 0         |  |
|  | Shiraz-36T | 378  | 0.179558 | 0         |  |

|         |      |            |      |          |           |  |
|---------|------|------------|------|----------|-----------|--|
|         |      | Shiraz-36T | 382  | 0.081739 | 0         |  |
|         |      | Shiraz-36T | 382  | 0.081739 | 0         |  |
|         |      | Shiraz-44T | 641  | 0        | -0.477846 |  |
|         |      | Shiraz-44T | 641  | 0        | -0.477846 |  |
|         |      | Shiraz-46T | 943  | 0.093799 | 0         |  |
|         |      | Shiraz-46T | 943  | 0.093799 | 0         |  |
|         |      | Shiraz-46T | 947  | 0        | -0.010843 |  |
|         |      | Shiraz-46T | 947  | 0        | -0.010843 |  |
|         |      | Shiraz-47T | 1031 | 0        | -0.117529 |  |
|         |      | Shiraz-47T | 1031 | 0        | -0.117529 |  |
|         |      | Shiraz-49T | 1121 | 0        | -0.138569 |  |
|         |      | Shiraz-49T | 1121 | 0        | -0.138569 |  |
|         |      | Shiraz-77T | 1225 | 0        | -0.117922 |  |
|         |      | Shiraz-77T | 1225 | 0        | -0.117922 |  |
|         |      | Shiraz-77T | 1228 | 0        | -0.238084 |  |
|         |      | Shiraz-77T | 1228 | 0        | -0.238084 |  |
|         |      | Shiraz-18T | 1434 | 0.244465 | 0         |  |
|         |      | Shiraz-18T | 1434 | 0.244465 | 0         |  |
|         |      | Shiraz-22T | 1549 | 0        | -0.319623 |  |
|         |      | Shiraz-22T | 1549 | 0        | -0.319623 |  |
|         |      | Shiraz-25T | 1698 | 0.21835  | 0         |  |
|         |      | Shiraz-25T | 1698 | 0.21835  | 0         |  |
|         |      | Shiraz-28T | 1735 | 0.350744 | 0         |  |
|         |      | Shiraz-28T | 1735 | 0.350744 | 0         |  |
|         |      | Shiraz-29T | 1778 | 0.120767 | 0         |  |
|         |      | Shiraz-29T | 1778 | 0.120767 | 0         |  |
|         |      | Shiraz-32T | 1833 | 0.551336 | 0         |  |
|         |      | Shiraz-32T | 1833 | 0.551336 | 0         |  |
|         |      | Shiraz-32T | 1835 | 0.092727 | 0         |  |
|         |      | Shiraz-32T | 1835 | 0.092727 | 0         |  |
|         |      | Shiraz-38T | 1951 | 0.250891 | 0         |  |
|         |      | Shiraz-38T | 1951 | 0.250891 | 0         |  |
|         |      | Shiraz-53T | 2078 | 0.287202 | 0         |  |
|         |      | Shiraz-53T | 2078 | 0.287202 | 0         |  |
|         |      | Shiraz-58T | 2161 | 0        | -0.187744 |  |
|         |      | Shiraz-58T | 2161 | 0        | -0.187744 |  |
|         |      | Shiraz-71T | 2238 | 0.603631 | 0         |  |
|         |      | Shiraz-71T | 2238 | 0.603631 | 0         |  |
| C7orf54 | chr7 | Shiraz-3T  | 90   | 0.219276 | 0         |  |
|         |      | Shiraz-3T  | 96   | 0.428308 | 0         |  |
|         |      | Shiraz-4T  | 253  | 0.372918 | 0         |  |
|         |      | Shiraz-36T | 378  | 0.179558 | 0         |  |
|         |      | Shiraz-44T | 642  | 0.408617 | 0         |  |
|         |      | Shiraz-46T | 943  | 0.093799 | 0         |  |
|         |      | Shiraz-77T | 1225 | 0        | -0.117922 |  |
|         |      | Shiraz-77T | 1229 | 0.051661 | 0         |  |
|         |      | Shiraz-9T  | 1325 | 0.221899 | 0         |  |

|         |      |            |      |          |           |  |  |
|---------|------|------------|------|----------|-----------|--|--|
|         |      | Shiraz-18T | 1434 | 0.244465 | 0         |  |  |
|         |      | Shiraz-25T | 1698 | 0.21835  | 0         |  |  |
|         |      | Shiraz-28T | 1735 | 0.350744 | 0         |  |  |
|         |      | Shiraz-29T | 1778 | 0.120767 | 0         |  |  |
|         |      | Shiraz-32T | 1833 | 0.551336 | 0         |  |  |
|         |      | Shiraz-38T | 1951 | 0.250891 | 0         |  |  |
|         |      | Shiraz-53T | 2078 | 0.287202 | 0         |  |  |
|         |      | Shiraz-71T | 2238 | 0.603631 | 0         |  |  |
|         |      | Shiraz-3T  | 90   | 0.219276 | 0         |  |  |
|         |      | Shiraz-3T  | 96   | 0.428308 | 0         |  |  |
|         |      | Shiraz-4T  | 253  | 0.372918 | 0         |  |  |
|         |      | Shiraz-36T | 378  | 0.179558 | 0         |  |  |
|         |      | Shiraz-44T | 642  | 0.408617 | 0         |  |  |
|         |      | Shiraz-46T | 943  | 0.093799 | 0         |  |  |
|         |      | Shiraz-77T | 1225 | 0        | -0.117922 |  |  |
|         |      | Shiraz-77T | 1229 | 0.051661 | 0         |  |  |
|         |      | Shiraz-9T  | 1325 | 0.221899 | 0         |  |  |
|         |      | Shiraz-18T | 1434 | 0.244465 | 0         |  |  |
|         |      | Shiraz-25T | 1698 | 0.21835  | 0         |  |  |
|         |      | Shiraz-28T | 1735 | 0.350744 | 0         |  |  |
|         |      | Shiraz-29T | 1778 | 0.120767 | 0         |  |  |
|         |      | Shiraz-32T | 1833 | 0.551336 | 0         |  |  |
|         |      | Shiraz-38T | 1951 | 0.250891 | 0         |  |  |
|         |      | Shiraz-53T | 2078 | 0.287202 | 0         |  |  |
|         |      | Shiraz-71T | 2238 | 0.603631 | 0         |  |  |
|         |      | Shiraz-3T  | 90   | 0.219276 | 0         |  |  |
|         |      | Shiraz-3T  | 96   | 0.428308 | 0         |  |  |
|         |      | Shiraz-4T  | 253  | 0.372918 | 0         |  |  |
|         |      | Shiraz-36T | 378  | 0.179558 | 0         |  |  |
|         |      | Shiraz-44T | 642  | 0.408617 | 0         |  |  |
|         |      | Shiraz-46T | 943  | 0.093799 | 0         |  |  |
|         |      | Shiraz-77T | 1225 | 0        | -0.117922 |  |  |
|         |      | Shiraz-77T | 1229 | 0.051661 | 0         |  |  |
|         |      | Shiraz-9T  | 1325 | 0.221899 | 0         |  |  |
|         |      | Shiraz-18T | 1434 | 0.244465 | 0         |  |  |
|         |      | Shiraz-25T | 1698 | 0.21835  | 0         |  |  |
|         |      | Shiraz-28T | 1735 | 0.350744 | 0         |  |  |
|         |      | Shiraz-29T | 1778 | 0.120767 | 0         |  |  |
|         |      | Shiraz-32T | 1833 | 0.551336 | 0         |  |  |
|         |      | Shiraz-38T | 1951 | 0.250891 | 0         |  |  |
|         |      | Shiraz-53T | 2078 | 0.287202 | 0         |  |  |
|         |      | Shiraz-71T | 2238 | 0.603631 | 0         |  |  |
| C7orf55 | chr7 | Shiraz-3T  | 90   | 0.219276 | 0         |  |  |
|         |      | Shiraz-3T  | 97   | 0.496001 | 0         |  |  |
|         |      | Shiraz-4T  | 253  | 0.372918 | 0         |  |  |
|         |      | Shiraz-31T | 318  | 0.254373 | 0         |  |  |
|         |      | Shiraz-36T | 378  | 0.179558 | 0         |  |  |

|  |            |      |          |           |  |
|--|------------|------|----------|-----------|--|
|  | Shiraz-36T | 383  | 0.374586 | 0         |  |
|  | Shiraz-44T | 644  | 0.496536 | 0         |  |
|  | Shiraz-46T | 943  | 0.093799 | 0         |  |
|  | Shiraz-47T | 1033 | 0.220267 | 0         |  |
|  | Shiraz-77T | 1225 | 0        | -0.117922 |  |
|  | Shiraz-77T | 1230 | 0.149651 | 0         |  |
|  | Shiraz-9T  | 1325 | 0.221899 | 0         |  |
|  | Shiraz-18T | 1434 | 0.244465 | 0         |  |
|  | Shiraz-25T | 1698 | 0.21835  | 0         |  |
|  | Shiraz-28T | 1735 | 0.350744 | 0         |  |
|  | Shiraz-29T | 1778 | 0.120767 | 0         |  |
|  | Shiraz-32T | 1833 | 0.551336 | 0         |  |
|  | Shiraz-38T | 1951 | 0.250891 | 0         |  |
|  | Shiraz-53T | 2078 | 0.287202 | 0         |  |
|  | Shiraz-58T | 2162 | 0.221505 | 0         |  |
|  | Shiraz-71T | 2238 | 0.603631 | 0         |  |
|  | Shiraz-3T  | 90   | 0.219276 | 0         |  |
|  | Shiraz-3T  | 97   | 0.496001 | 0         |  |
|  | Shiraz-4T  | 253  | 0.372918 | 0         |  |
|  | Shiraz-31T | 318  | 0.254373 | 0         |  |
|  | Shiraz-36T | 378  | 0.179558 | 0         |  |
|  | Shiraz-36T | 383  | 0.374586 | 0         |  |
|  | Shiraz-44T | 644  | 0.496536 | 0         |  |
|  | Shiraz-46T | 943  | 0.093799 | 0         |  |
|  | Shiraz-47T | 1033 | 0.220267 | 0         |  |
|  | Shiraz-77T | 1225 | 0        | -0.117922 |  |
|  | Shiraz-77T | 1230 | 0.149651 | 0         |  |
|  | Shiraz-9T  | 1325 | 0.221899 | 0         |  |
|  | Shiraz-18T | 1434 | 0.244465 | 0         |  |
|  | Shiraz-25T | 1698 | 0.21835  | 0         |  |
|  | Shiraz-28T | 1735 | 0.350744 | 0         |  |
|  | Shiraz-29T | 1778 | 0.120767 | 0         |  |
|  | Shiraz-32T | 1833 | 0.551336 | 0         |  |
|  | Shiraz-38T | 1951 | 0.250891 | 0         |  |
|  | Shiraz-53T | 2078 | 0.287202 | 0         |  |
|  | Shiraz-58T | 2162 | 0.221505 | 0         |  |
|  | Shiraz-71T | 2238 | 0.603631 | 0         |  |
|  | Shiraz-3T  | 90   | 0.219276 | 0         |  |
|  | Shiraz-3T  | 97   | 0.496001 | 0         |  |
|  | Shiraz-4T  | 253  | 0.372918 | 0         |  |
|  | Shiraz-31T | 318  | 0.254373 | 0         |  |
|  | Shiraz-36T | 378  | 0.179558 | 0         |  |
|  | Shiraz-36T | 383  | 0.374586 | 0         |  |
|  | Shiraz-44T | 644  | 0.496536 | 0         |  |
|  | Shiraz-46T | 943  | 0.093799 | 0         |  |
|  | Shiraz-47T | 1033 | 0.220267 | 0         |  |
|  | Shiraz-77T | 1225 | 0        | -0.117922 |  |

|         |      |            |      |          |           |  |
|---------|------|------------|------|----------|-----------|--|
|         |      | Shiraz-77T | 1230 | 0.149651 | 0         |  |
|         |      | Shiraz-9T  | 1325 | 0.221899 | 0         |  |
|         |      | Shiraz-18T | 1434 | 0.244465 | 0         |  |
|         |      | Shiraz-25T | 1698 | 0.21835  | 0         |  |
|         |      | Shiraz-28T | 1735 | 0.350744 | 0         |  |
|         |      | Shiraz-29T | 1778 | 0.120767 | 0         |  |
|         |      | Shiraz-32T | 1833 | 0.551336 | 0         |  |
|         |      | Shiraz-38T | 1951 | 0.250891 | 0         |  |
|         |      | Shiraz-53T | 2078 | 0.287202 | 0         |  |
|         |      | Shiraz-58T | 2162 | 0.221505 | 0         |  |
|         |      | Shiraz-71T | 2238 | 0.603631 | 0         |  |
| C7orf57 | chr7 | Shiraz-3T  | 87   | 0.198593 | 0         |  |
|         |      | Shiraz-4T  | 252  | 0.192083 | 0         |  |
|         |      | Shiraz-36T | 376  | 0.159952 | 0         |  |
|         |      | Shiraz-46T | 942  | 0.069143 | 0         |  |
|         |      | Shiraz-18T | 1433 | 0.250973 | 0         |  |
|         |      | Shiraz-25T | 1697 | 0.21945  | 0         |  |
|         |      | Shiraz-28T | 1734 | 0.362882 | 0         |  |
|         |      | Shiraz-29T | 1777 | 0.156747 | 0         |  |
|         |      | Shiraz-38T | 1950 | 0.265916 | 0         |  |
|         |      | Shiraz-71T | 2236 | 0.320072 | 0         |  |
|         |      | Shiraz-3T  | 87   | 0.198593 | 0         |  |
|         |      | Shiraz-4T  | 252  | 0.192083 | 0         |  |
|         |      | Shiraz-36T | 376  | 0.159952 | 0         |  |
|         |      | Shiraz-46T | 942  | 0.069143 | 0         |  |
|         |      | Shiraz-18T | 1433 | 0.250973 | 0         |  |
|         |      | Shiraz-25T | 1697 | 0.21945  | 0         |  |
|         |      | Shiraz-28T | 1734 | 0.362882 | 0         |  |
|         |      | Shiraz-29T | 1777 | 0.156747 | 0         |  |
|         |      | Shiraz-38T | 1950 | 0.265916 | 0         |  |
|         |      | Shiraz-71T | 2236 | 0.320072 | 0         |  |
|         |      | Shiraz-3T  | 87   | 0.198593 | 0         |  |
|         |      | Shiraz-4T  | 252  | 0.192083 | 0         |  |
|         |      | Shiraz-36T | 376  | 0.159952 | 0         |  |
|         |      | Shiraz-46T | 942  | 0.069143 | 0         |  |
|         |      | Shiraz-18T | 1433 | 0.250973 | 0         |  |
|         |      | Shiraz-25T | 1697 | 0.21945  | 0         |  |
|         |      | Shiraz-28T | 1734 | 0.362882 | 0         |  |
|         |      | Shiraz-29T | 1777 | 0.156747 | 0         |  |
|         |      | Shiraz-38T | 1950 | 0.265916 | 0         |  |
|         |      | Shiraz-71T | 2236 | 0.320072 | 0         |  |
| C7orf58 | chr7 | Shiraz-3T  | 90   | 0.219276 | 0         |  |
|         |      | Shiraz-3T  | 90   | 0.219276 | 0         |  |
|         |      | Shiraz-3T  | 95   | 0        | -0.077623 |  |
|         |      | Shiraz-3T  | 95   | 0        | -0.077623 |  |
|         |      | Shiraz-4T  | 253  | 0.372918 | 0         |  |
|         |      | Shiraz-4T  | 253  | 0.372918 | 0         |  |

|  |            |      |          |           |  |
|--|------------|------|----------|-----------|--|
|  | Shiraz-36T | 378  | 0.179558 | 0         |  |
|  | Shiraz-36T | 378  | 0.179558 | 0         |  |
|  | Shiraz-36T | 382  | 0.081739 | 0         |  |
|  | Shiraz-36T | 382  | 0.081739 | 0         |  |
|  | Shiraz-44T | 641  | 0        | -0.477846 |  |
|  | Shiraz-44T | 641  | 0        | -0.477846 |  |
|  | Shiraz-46T | 943  | 0.093799 | 0         |  |
|  | Shiraz-46T | 943  | 0.093799 | 0         |  |
|  | Shiraz-46T | 947  | 0        | -0.010843 |  |
|  | Shiraz-46T | 947  | 0        | -0.010843 |  |
|  | Shiraz-47T | 1031 | 0        | -0.117529 |  |
|  | Shiraz-47T | 1031 | 0        | -0.117529 |  |
|  | Shiraz-49T | 1121 | 0        | -0.138569 |  |
|  | Shiraz-49T | 1121 | 0        | -0.138569 |  |
|  | Shiraz-77T | 1225 | 0        | -0.117922 |  |
|  | Shiraz-77T | 1225 | 0        | -0.117922 |  |
|  | Shiraz-77T | 1228 | 0        | -0.238084 |  |
|  | Shiraz-77T | 1228 | 0        | -0.238084 |  |
|  | Shiraz-18T | 1434 | 0.244465 | 0         |  |
|  | Shiraz-18T | 1434 | 0.244465 | 0         |  |
|  | Shiraz-22T | 1549 | 0        | -0.319623 |  |
|  | Shiraz-22T | 1549 | 0        | -0.319623 |  |
|  | Shiraz-22T | 1552 | 0        | -0.50686  |  |
|  | Shiraz-22T | 1552 | 0        | -0.50686  |  |
|  | Shiraz-25T | 1698 | 0.21835  | 0         |  |
|  | Shiraz-25T | 1698 | 0.21835  | 0         |  |
|  | Shiraz-28T | 1735 | 0.350744 | 0         |  |
|  | Shiraz-28T | 1735 | 0.350744 | 0         |  |
|  | Shiraz-29T | 1778 | 0.120767 | 0         |  |
|  | Shiraz-29T | 1778 | 0.120767 | 0         |  |
|  | Shiraz-32T | 1833 | 0.551336 | 0         |  |
|  | Shiraz-32T | 1833 | 0.551336 | 0         |  |
|  | Shiraz-32T | 1835 | 0.092727 | 0         |  |
|  | Shiraz-32T | 1835 | 0.092727 | 0         |  |
|  | Shiraz-38T | 1951 | 0.250891 | 0         |  |
|  | Shiraz-38T | 1951 | 0.250891 | 0         |  |
|  | Shiraz-53T | 2078 | 0.287202 | 0         |  |
|  | Shiraz-53T | 2078 | 0.287202 | 0         |  |
|  | Shiraz-58T | 2161 | 0        | -0.187744 |  |
|  | Shiraz-58T | 2161 | 0        | -0.187744 |  |
|  | Shiraz-71T | 2238 | 0.603631 | 0         |  |
|  | Shiraz-71T | 2238 | 0.603631 | 0         |  |
|  | Shiraz-3T  | 90   | 0.219276 | 0         |  |
|  | Shiraz-3T  | 90   | 0.219276 | 0         |  |
|  | Shiraz-3T  | 95   | 0        | -0.077623 |  |
|  | Shiraz-3T  | 95   | 0        | -0.077623 |  |
|  | Shiraz-4T  | 253  | 0.372918 | 0         |  |



|  |            |      |          |           |  |
|--|------------|------|----------|-----------|--|
|  | Shiraz-4T  | 253  | 0.372918 | 0         |  |
|  | Shiraz-36T | 378  | 0.179558 | 0         |  |
|  | Shiraz-36T | 378  | 0.179558 | 0         |  |
|  | Shiraz-36T | 382  | 0.081739 | 0         |  |
|  | Shiraz-36T | 382  | 0.081739 | 0         |  |
|  | Shiraz-44T | 641  | 0        | -0.477846 |  |
|  | Shiraz-44T | 641  | 0        | -0.477846 |  |
|  | Shiraz-46T | 943  | 0.093799 | 0         |  |
|  | Shiraz-46T | 943  | 0.093799 | 0         |  |
|  | Shiraz-46T | 947  | 0        | -0.010843 |  |
|  | Shiraz-46T | 947  | 0        | -0.010843 |  |
|  | Shiraz-47T | 1031 | 0        | -0.117529 |  |
|  | Shiraz-47T | 1031 | 0        | -0.117529 |  |
|  | Shiraz-49T | 1121 | 0        | -0.138569 |  |
|  | Shiraz-49T | 1121 | 0        | -0.138569 |  |
|  | Shiraz-77T | 1225 | 0        | -0.117922 |  |
|  | Shiraz-77T | 1225 | 0        | -0.117922 |  |
|  | Shiraz-77T | 1228 | 0        | -0.238084 |  |
|  | Shiraz-77T | 1228 | 0        | -0.238084 |  |
|  | Shiraz-18T | 1434 | 0.244465 | 0         |  |
|  | Shiraz-18T | 1434 | 0.244465 | 0         |  |
|  | Shiraz-22T | 1549 | 0        | -0.319623 |  |
|  | Shiraz-22T | 1549 | 0        | -0.319623 |  |
|  | Shiraz-22T | 1552 | 0        | -0.50686  |  |
|  | Shiraz-22T | 1552 | 0        | -0.50686  |  |
|  | Shiraz-25T | 1698 | 0.21835  | 0         |  |
|  | Shiraz-25T | 1698 | 0.21835  | 0         |  |
|  | Shiraz-28T | 1735 | 0.350744 | 0         |  |
|  | Shiraz-28T | 1735 | 0.350744 | 0         |  |
|  | Shiraz-29T | 1778 | 0.120767 | 0         |  |
|  | Shiraz-29T | 1778 | 0.120767 | 0         |  |
|  | Shiraz-32T | 1833 | 0.551336 | 0         |  |
|  | Shiraz-32T | 1833 | 0.551336 | 0         |  |
|  | Shiraz-32T | 1835 | 0.092727 | 0         |  |
|  | Shiraz-32T | 1835 | 0.092727 | 0         |  |
|  | Shiraz-38T | 1951 | 0.250891 | 0         |  |
|  | Shiraz-38T | 1951 | 0.250891 | 0         |  |
|  | Shiraz-53T | 2078 | 0.287202 | 0         |  |
|  | Shiraz-53T | 2078 | 0.287202 | 0         |  |
|  | Shiraz-58T | 2161 | 0        | -0.187744 |  |
|  | Shiraz-58T | 2161 | 0        | -0.187744 |  |
|  | Shiraz-71T | 2238 | 0.603631 | 0         |  |
|  | Shiraz-71T | 2238 | 0.603631 | 0         |  |
|  | Shiraz-3T  | 90   | 0.219276 | 0         |  |
|  | Shiraz-3T  | 90   | 0.219276 | 0         |  |
|  | Shiraz-3T  | 95   | 0        | -0.077623 |  |
|  | Shiraz-3T  | 95   | 0        | -0.077623 |  |

|         |      |            |      |          |           |  |
|---------|------|------------|------|----------|-----------|--|
|         |      | Shiraz-4T  | 253  | 0.372918 | 0         |  |
|         |      | Shiraz-4T  | 253  | 0.372918 | 0         |  |
|         |      | Shiraz-36T | 378  | 0.179558 | 0         |  |
|         |      | Shiraz-36T | 378  | 0.179558 | 0         |  |
|         |      | Shiraz-36T | 382  | 0.081739 | 0         |  |
|         |      | Shiraz-36T | 382  | 0.081739 | 0         |  |
|         |      | Shiraz-44T | 641  | 0        | -0.477846 |  |
|         |      | Shiraz-44T | 641  | 0        | -0.477846 |  |
|         |      | Shiraz-46T | 943  | 0.093799 | 0         |  |
|         |      | Shiraz-46T | 943  | 0.093799 | 0         |  |
|         |      | Shiraz-46T | 947  | 0        | -0.010843 |  |
|         |      | Shiraz-46T | 947  | 0        | -0.010843 |  |
|         |      | Shiraz-47T | 1031 | 0        | -0.117529 |  |
|         |      | Shiraz-47T | 1031 | 0        | -0.117529 |  |
|         |      | Shiraz-49T | 1121 | 0        | -0.138569 |  |
|         |      | Shiraz-49T | 1121 | 0        | -0.138569 |  |
|         |      | Shiraz-77T | 1225 | 0        | -0.117922 |  |
|         |      | Shiraz-77T | 1225 | 0        | -0.117922 |  |
|         |      | Shiraz-77T | 1228 | 0        | -0.238084 |  |
|         |      | Shiraz-77T | 1228 | 0        | -0.238084 |  |
|         |      | Shiraz-18T | 1434 | 0.244465 | 0         |  |
|         |      | Shiraz-18T | 1434 | 0.244465 | 0         |  |
|         |      | Shiraz-22T | 1549 | 0        | -0.319623 |  |
|         |      | Shiraz-22T | 1549 | 0        | -0.319623 |  |
|         |      | Shiraz-22T | 1552 | 0        | -0.50686  |  |
|         |      | Shiraz-22T | 1552 | 0        | -0.50686  |  |
|         |      | Shiraz-25T | 1698 | 0.21835  | 0         |  |
|         |      | Shiraz-25T | 1698 | 0.21835  | 0         |  |
|         |      | Shiraz-28T | 1735 | 0.350744 | 0         |  |
|         |      | Shiraz-28T | 1735 | 0.350744 | 0         |  |
|         |      | Shiraz-29T | 1778 | 0.120767 | 0         |  |
|         |      | Shiraz-29T | 1778 | 0.120767 | 0         |  |
|         |      | Shiraz-32T | 1833 | 0.551336 | 0         |  |
|         |      | Shiraz-32T | 1833 | 0.551336 | 0         |  |
|         |      | Shiraz-32T | 1835 | 0.092727 | 0         |  |
|         |      | Shiraz-32T | 1835 | 0.092727 | 0         |  |
|         |      | Shiraz-38T | 1951 | 0.250891 | 0         |  |
|         |      | Shiraz-38T | 1951 | 0.250891 | 0         |  |
|         |      | Shiraz-53T | 2078 | 0.287202 | 0         |  |
|         |      | Shiraz-53T | 2078 | 0.287202 | 0         |  |
|         |      | Shiraz-58T | 2161 | 0        | -0.187744 |  |
|         |      | Shiraz-58T | 2161 | 0        | -0.187744 |  |
|         |      | Shiraz-71T | 2238 | 0.603631 | 0         |  |
|         |      | Shiraz-71T | 2238 | 0.603631 | 0         |  |
| C7orf59 | chr7 | Shiraz-3T  | 90   | 0.219276 | 0         |  |
|         |      | Shiraz-3T  | 94   | 0.74735  | 0         |  |
|         |      | Shiraz-4T  | 253  | 0.372918 | 0         |  |

|  |            |      |          |           |  |
|--|------------|------|----------|-----------|--|
|  | Shiraz-31T | 316  | 0.219196 | 0         |  |
|  | Shiraz-36T | 378  | 0.179558 | 0         |  |
|  | Shiraz-36T | 381  | 0.332628 | 0         |  |
|  | Shiraz-44T | 639  | 1.035032 | 0         |  |
|  | Shiraz-46T | 943  | 0.093799 | 0         |  |
|  | Shiraz-46T | 946  | 0.299835 | 0         |  |
|  | Shiraz-47T | 1030 | 0.257728 | 0         |  |
|  | Shiraz-49T | 1120 | 0.281656 | 0         |  |
|  | Shiraz-77T | 1225 | 0        | -0.117922 |  |
|  | Shiraz-77T | 1227 | 0.196445 | 0         |  |
|  | Shiraz-9T  | 1324 | 0.679266 | 0         |  |
|  | Shiraz-18T | 1434 | 0.244465 | 0         |  |
|  | Shiraz-22T | 1549 | 0        | -0.319623 |  |
|  | Shiraz-22T | 1551 | 0.324011 | 0         |  |
|  | Shiraz-25T | 1698 | 0.21835  | 0         |  |
|  | Shiraz-28T | 1735 | 0.350744 | 0         |  |
|  | Shiraz-29T | 1778 | 0.120767 | 0         |  |
|  | Shiraz-32T | 1833 | 0.551336 | 0         |  |
|  | Shiraz-32T | 1834 | 1.485392 | 0         |  |
|  | Shiraz-38T | 1951 | 0.250891 | 0         |  |
|  | Shiraz-53T | 2078 | 0.287202 | 0         |  |
|  | Shiraz-58T | 2160 | 0.399007 | 0         |  |
|  | Shiraz-71T | 2238 | 0.603631 | 0         |  |
|  | Shiraz-3T  | 90   | 0.219276 | 0         |  |
|  | Shiraz-3T  | 94   | 0.74735  | 0         |  |
|  | Shiraz-4T  | 253  | 0.372918 | 0         |  |
|  | Shiraz-31T | 316  | 0.219196 | 0         |  |
|  | Shiraz-36T | 378  | 0.179558 | 0         |  |
|  | Shiraz-36T | 381  | 0.332628 | 0         |  |
|  | Shiraz-44T | 639  | 1.035032 | 0         |  |
|  | Shiraz-46T | 943  | 0.093799 | 0         |  |
|  | Shiraz-46T | 946  | 0.299835 | 0         |  |
|  | Shiraz-47T | 1030 | 0.257728 | 0         |  |
|  | Shiraz-49T | 1120 | 0.281656 | 0         |  |
|  | Shiraz-77T | 1225 | 0        | -0.117922 |  |
|  | Shiraz-77T | 1227 | 0.196445 | 0         |  |
|  | Shiraz-9T  | 1324 | 0.679266 | 0         |  |
|  | Shiraz-18T | 1434 | 0.244465 | 0         |  |
|  | Shiraz-22T | 1549 | 0        | -0.319623 |  |
|  | Shiraz-22T | 1551 | 0.324011 | 0         |  |
|  | Shiraz-25T | 1698 | 0.21835  | 0         |  |
|  | Shiraz-28T | 1735 | 0.350744 | 0         |  |
|  | Shiraz-29T | 1778 | 0.120767 | 0         |  |
|  | Shiraz-32T | 1833 | 0.551336 | 0         |  |
|  | Shiraz-32T | 1834 | 1.485392 | 0         |  |
|  | Shiraz-38T | 1951 | 0.250891 | 0         |  |
|  | Shiraz-53T | 2078 | 0.287202 | 0         |  |

|         |      |            |      |          |           |  |
|---------|------|------------|------|----------|-----------|--|
|         |      | Shiraz-58T | 2160 | 0.399007 | 0         |  |
|         |      | Shiraz-71T | 2238 | 0.603631 | 0         |  |
|         |      | Shiraz-3T  | 90   | 0.219276 | 0         |  |
|         |      | Shiraz-3T  | 94   | 0.74735  | 0         |  |
|         |      | Shiraz-4T  | 253  | 0.372918 | 0         |  |
|         |      | Shiraz-31T | 316  | 0.219196 | 0         |  |
|         |      | Shiraz-36T | 378  | 0.179558 | 0         |  |
|         |      | Shiraz-36T | 381  | 0.332628 | 0         |  |
|         |      | Shiraz-44T | 639  | 1.035032 | 0         |  |
|         |      | Shiraz-46T | 943  | 0.093799 | 0         |  |
|         |      | Shiraz-46T | 946  | 0.299835 | 0         |  |
|         |      | Shiraz-47T | 1030 | 0.257728 | 0         |  |
|         |      | Shiraz-49T | 1120 | 0.281656 | 0         |  |
|         |      | Shiraz-77T | 1225 | 0        | -0.117922 |  |
|         |      | Shiraz-77T | 1227 | 0.196445 | 0         |  |
|         |      | Shiraz-9T  | 1324 | 0.679266 | 0         |  |
|         |      | Shiraz-18T | 1434 | 0.244465 | 0         |  |
|         |      | Shiraz-22T | 1549 | 0        | -0.319623 |  |
|         |      | Shiraz-22T | 1551 | 0.324011 | 0         |  |
|         |      | Shiraz-25T | 1698 | 0.21835  | 0         |  |
|         |      | Shiraz-28T | 1735 | 0.350744 | 0         |  |
|         |      | Shiraz-29T | 1778 | 0.120767 | 0         |  |
|         |      | Shiraz-32T | 1833 | 0.551336 | 0         |  |
|         |      | Shiraz-32T | 1834 | 1.485392 | 0         |  |
|         |      | Shiraz-38T | 1951 | 0.250891 | 0         |  |
|         |      | Shiraz-53T | 2078 | 0.287202 | 0         |  |
|         |      | Shiraz-58T | 2160 | 0.399007 | 0         |  |
|         |      | Shiraz-71T | 2238 | 0.603631 | 0         |  |
| C7orf60 | chr7 | Shiraz-3T  | 90   | 0.219276 | 0         |  |
|         |      | Shiraz-3T  | 95   | 0        | -0.077623 |  |
|         |      | Shiraz-4T  | 253  | 0.372918 | 0         |  |
|         |      | Shiraz-36T | 378  | 0.179558 | 0         |  |
|         |      | Shiraz-36T | 382  | 0.081739 | 0         |  |
|         |      | Shiraz-44T | 641  | 0        | -0.477846 |  |
|         |      | Shiraz-46T | 943  | 0.093799 | 0         |  |
|         |      | Shiraz-46T | 947  | 0        | -0.010843 |  |
|         |      | Shiraz-47T | 1031 | 0        | -0.117529 |  |
|         |      | Shiraz-49T | 1121 | 0        | -0.138569 |  |
|         |      | Shiraz-77T | 1225 | 0        | -0.117922 |  |
|         |      | Shiraz-77T | 1228 | 0        | -0.238084 |  |
|         |      | Shiraz-18T | 1434 | 0.244465 | 0         |  |
|         |      | Shiraz-22T | 1549 | 0        | -0.319623 |  |
|         |      | Shiraz-22T | 1552 | 0        | -0.50686  |  |
|         |      | Shiraz-25T | 1698 | 0.21835  | 0         |  |
|         |      | Shiraz-28T | 1735 | 0.350744 | 0         |  |
|         |      | Shiraz-29T | 1778 | 0.120767 | 0         |  |
|         |      | Shiraz-32T | 1833 | 0.551336 | 0         |  |

|  |            |      |          |           |  |
|--|------------|------|----------|-----------|--|
|  | Shiraz-32T | 1835 | 0.092727 | 0         |  |
|  | Shiraz-38T | 1951 | 0.250891 | 0         |  |
|  | Shiraz-53T | 2078 | 0.287202 | 0         |  |
|  | Shiraz-58T | 2161 | 0        | -0.187744 |  |
|  | Shiraz-71T | 2238 | 0.603631 | 0         |  |
|  | Shiraz-3T  | 90   | 0.219276 | 0         |  |
|  | Shiraz-3T  | 95   | 0        | -0.077623 |  |
|  | Shiraz-4T  | 253  | 0.372918 | 0         |  |
|  | Shiraz-36T | 378  | 0.179558 | 0         |  |
|  | Shiraz-36T | 382  | 0.081739 | 0         |  |
|  | Shiraz-44T | 641  | 0        | -0.477846 |  |
|  | Shiraz-46T | 943  | 0.093799 | 0         |  |
|  | Shiraz-46T | 947  | 0        | -0.010843 |  |
|  | Shiraz-47T | 1031 | 0        | -0.117529 |  |
|  | Shiraz-49T | 1121 | 0        | -0.138569 |  |
|  | Shiraz-77T | 1225 | 0        | -0.117922 |  |
|  | Shiraz-77T | 1228 | 0        | -0.238084 |  |
|  | Shiraz-18T | 1434 | 0.244465 | 0         |  |
|  | Shiraz-22T | 1549 | 0        | -0.319623 |  |
|  | Shiraz-22T | 1552 | 0        | -0.50686  |  |
|  | Shiraz-25T | 1698 | 0.21835  | 0         |  |
|  | Shiraz-28T | 1735 | 0.350744 | 0         |  |
|  | Shiraz-29T | 1778 | 0.120767 | 0         |  |
|  | Shiraz-32T | 1833 | 0.551336 | 0         |  |
|  | Shiraz-32T | 1835 | 0.092727 | 0         |  |
|  | Shiraz-38T | 1951 | 0.250891 | 0         |  |
|  | Shiraz-53T | 2078 | 0.287202 | 0         |  |
|  | Shiraz-58T | 2161 | 0        | -0.187744 |  |
|  | Shiraz-71T | 2238 | 0.603631 | 0         |  |
|  | Shiraz-3T  | 90   | 0.219276 | 0         |  |
|  | Shiraz-3T  | 95   | 0        | -0.077623 |  |
|  | Shiraz-4T  | 253  | 0.372918 | 0         |  |
|  | Shiraz-36T | 378  | 0.179558 | 0         |  |
|  | Shiraz-36T | 382  | 0.081739 | 0         |  |
|  | Shiraz-44T | 641  | 0        | -0.477846 |  |
|  | Shiraz-46T | 943  | 0.093799 | 0         |  |
|  | Shiraz-46T | 947  | 0        | -0.010843 |  |
|  | Shiraz-47T | 1031 | 0        | -0.117529 |  |
|  | Shiraz-49T | 1121 | 0        | -0.138569 |  |
|  | Shiraz-77T | 1225 | 0        | -0.117922 |  |
|  | Shiraz-77T | 1228 | 0        | -0.238084 |  |
|  | Shiraz-18T | 1434 | 0.244465 | 0         |  |
|  | Shiraz-22T | 1549 | 0        | -0.319623 |  |
|  | Shiraz-22T | 1552 | 0        | -0.50686  |  |
|  | Shiraz-25T | 1698 | 0.21835  | 0         |  |
|  | Shiraz-28T | 1735 | 0.350744 | 0         |  |
|  | Shiraz-29T | 1778 | 0.120767 | 0         |  |

|         |      |            |      |          |           |  |
|---------|------|------------|------|----------|-----------|--|
|         |      | Shiraz-32T | 1833 | 0.551336 | 0         |  |
|         |      | Shiraz-32T | 1835 | 0.092727 | 0         |  |
|         |      | Shiraz-38T | 1951 | 0.250891 | 0         |  |
|         |      | Shiraz-53T | 2078 | 0.287202 | 0         |  |
|         |      | Shiraz-58T | 2161 | 0        | -0.187744 |  |
|         |      | Shiraz-71T | 2238 | 0.603631 | 0         |  |
| C7orf63 | chr7 | Shiraz-3T  | 90   | 0.219276 | 0         |  |
|         |      | Shiraz-3T  | 93   | 0        | -0.058023 |  |
|         |      | Shiraz-4T  | 253  | 0.372918 | 0         |  |
|         |      | Shiraz-36T | 378  | 0.179558 | 0         |  |
|         |      | Shiraz-36T | 380  | 0.083883 | 0         |  |
|         |      | Shiraz-44T | 638  | 0        | -0.433476 |  |
|         |      | Shiraz-46T | 943  | 0.093799 | 0         |  |
|         |      | Shiraz-46T | 945  | 0        | -0.014838 |  |
|         |      | Shiraz-47T | 1029 | 0        | -0.096586 |  |
|         |      | Shiraz-49T | 1119 | 0        | -0.157331 |  |
|         |      | Shiraz-77T | 1225 | 0        | -0.117922 |  |
|         |      | Shiraz-77T | 1226 | 0        | -0.233724 |  |
|         |      | Shiraz-18T | 1434 | 0.244465 | 0         |  |
|         |      | Shiraz-22T | 1549 | 0        | -0.319623 |  |
|         |      | Shiraz-25T | 1698 | 0.21835  | 0         |  |
|         |      | Shiraz-28T | 1735 | 0.350744 | 0         |  |
|         |      | Shiraz-29T | 1778 | 0.120767 | 0         |  |
|         |      | Shiraz-32T | 1833 | 0.551336 | 0         |  |
|         |      | Shiraz-38T | 1951 | 0.250891 | 0         |  |
|         |      | Shiraz-53T | 2078 | 0.287202 | 0         |  |
|         |      | Shiraz-58T | 2159 | 0        | -0.219521 |  |
|         |      | Shiraz-71T | 2238 | 0.603631 | 0         |  |
|         |      | Shiraz-3T  | 90   | 0.219276 | 0         |  |
|         |      | Shiraz-3T  | 93   | 0        | -0.058023 |  |
|         |      | Shiraz-4T  | 253  | 0.372918 | 0         |  |
|         |      | Shiraz-36T | 378  | 0.179558 | 0         |  |
|         |      | Shiraz-36T | 380  | 0.083883 | 0         |  |
|         |      | Shiraz-44T | 638  | 0        | -0.433476 |  |
|         |      | Shiraz-46T | 943  | 0.093799 | 0         |  |
|         |      | Shiraz-46T | 945  | 0        | -0.014838 |  |
|         |      | Shiraz-47T | 1029 | 0        | -0.096586 |  |
|         |      | Shiraz-49T | 1119 | 0        | -0.157331 |  |
|         |      | Shiraz-77T | 1225 | 0        | -0.117922 |  |
|         |      | Shiraz-77T | 1226 | 0        | -0.233724 |  |
|         |      | Shiraz-18T | 1434 | 0.244465 | 0         |  |
|         |      | Shiraz-22T | 1549 | 0        | -0.319623 |  |
|         |      | Shiraz-25T | 1698 | 0.21835  | 0         |  |
|         |      | Shiraz-28T | 1735 | 0.350744 | 0         |  |
|         |      | Shiraz-29T | 1778 | 0.120767 | 0         |  |
|         |      | Shiraz-32T | 1833 | 0.551336 | 0         |  |
|         |      | Shiraz-38T | 1951 | 0.250891 | 0         |  |

|         |      |            |      |          |           |  |  |
|---------|------|------------|------|----------|-----------|--|--|
|         |      | Shiraz-53T | 2078 | 0.287202 | 0         |  |  |
|         |      | Shiraz-58T | 2159 | 0        | -0.219521 |  |  |
|         |      | Shiraz-71T | 2238 | 0.603631 | 0         |  |  |
|         |      | Shiraz-3T  | 90   | 0.219276 | 0         |  |  |
|         |      | Shiraz-3T  | 93   | 0        | -0.058023 |  |  |
|         |      | Shiraz-4T  | 253  | 0.372918 | 0         |  |  |
|         |      | Shiraz-36T | 378  | 0.179558 | 0         |  |  |
|         |      | Shiraz-36T | 380  | 0.083883 | 0         |  |  |
|         |      | Shiraz-44T | 638  | 0        | -0.433476 |  |  |
|         |      | Shiraz-46T | 943  | 0.093799 | 0         |  |  |
|         |      | Shiraz-46T | 945  | 0        | -0.014838 |  |  |
|         |      | Shiraz-47T | 1029 | 0        | -0.096586 |  |  |
|         |      | Shiraz-49T | 1119 | 0        | -0.157331 |  |  |
|         |      | Shiraz-77T | 1225 | 0        | -0.117922 |  |  |
|         |      | Shiraz-77T | 1226 | 0        | -0.233724 |  |  |
|         |      | Shiraz-18T | 1434 | 0.244465 | 0         |  |  |
|         |      | Shiraz-22T | 1549 | 0        | -0.319623 |  |  |
|         |      | Shiraz-25T | 1698 | 0.21835  | 0         |  |  |
|         |      | Shiraz-28T | 1735 | 0.350744 | 0         |  |  |
|         |      | Shiraz-29T | 1778 | 0.120767 | 0         |  |  |
|         |      | Shiraz-32T | 1833 | 0.551336 | 0         |  |  |
|         |      | Shiraz-38T | 1951 | 0.250891 | 0         |  |  |
|         |      | Shiraz-53T | 2078 | 0.287202 | 0         |  |  |
|         |      | Shiraz-58T | 2159 | 0        | -0.219521 |  |  |
|         |      | Shiraz-71T | 2238 | 0.603631 | 0         |  |  |
| C7orf64 | chr7 | Shiraz-3T  | 90   | 0.219276 | 0         |  |  |
|         |      | Shiraz-3T  | 93   | 0        | -0.058023 |  |  |
|         |      | Shiraz-4T  | 253  | 0.372918 | 0         |  |  |
|         |      | Shiraz-36T | 378  | 0.179558 | 0         |  |  |
|         |      | Shiraz-36T | 380  | 0.083883 | 0         |  |  |
|         |      | Shiraz-44T | 638  | 0        | -0.433476 |  |  |
|         |      | Shiraz-46T | 943  | 0.093799 | 0         |  |  |
|         |      | Shiraz-46T | 945  | 0        | -0.014838 |  |  |
|         |      | Shiraz-47T | 1029 | 0        | -0.096586 |  |  |
|         |      | Shiraz-49T | 1119 | 0        | -0.157331 |  |  |
|         |      | Shiraz-77T | 1225 | 0        | -0.117922 |  |  |
|         |      | Shiraz-18T | 1434 | 0.244465 | 0         |  |  |
|         |      | Shiraz-22T | 1549 | 0        | -0.319623 |  |  |
|         |      | Shiraz-25T | 1698 | 0.21835  | 0         |  |  |
|         |      | Shiraz-28T | 1735 | 0.350744 | 0         |  |  |
|         |      | Shiraz-29T | 1778 | 0.120767 | 0         |  |  |
|         |      | Shiraz-32T | 1833 | 0.551336 | 0         |  |  |
|         |      | Shiraz-38T | 1951 | 0.250891 | 0         |  |  |
|         |      | Shiraz-53T | 2078 | 0.287202 | 0         |  |  |
|         |      | Shiraz-58T | 2159 | 0        | -0.219521 |  |  |
|         |      | Shiraz-71T | 2238 | 0.603631 | 0         |  |  |
|         |      | Shiraz-3T  | 90   | 0.219276 | 0         |  |  |

|         |      |            |      |          |           |  |  |
|---------|------|------------|------|----------|-----------|--|--|
|         |      | Shiraz-3T  | 93   | 0        | -0.058023 |  |  |
|         |      | Shiraz-4T  | 253  | 0.372918 | 0         |  |  |
|         |      | Shiraz-36T | 378  | 0.179558 | 0         |  |  |
|         |      | Shiraz-36T | 380  | 0.083883 | 0         |  |  |
|         |      | Shiraz-44T | 638  | 0        | -0.433476 |  |  |
|         |      | Shiraz-46T | 943  | 0.093799 | 0         |  |  |
|         |      | Shiraz-46T | 945  | 0        | -0.014838 |  |  |
|         |      | Shiraz-47T | 1029 | 0        | -0.096586 |  |  |
|         |      | Shiraz-49T | 1119 | 0        | -0.157331 |  |  |
|         |      | Shiraz-77T | 1225 | 0        | -0.117922 |  |  |
|         |      | Shiraz-18T | 1434 | 0.244465 | 0         |  |  |
|         |      | Shiraz-22T | 1549 | 0        | -0.319623 |  |  |
|         |      | Shiraz-25T | 1698 | 0.21835  | 0         |  |  |
|         |      | Shiraz-28T | 1735 | 0.350744 | 0         |  |  |
|         |      | Shiraz-29T | 1778 | 0.120767 | 0         |  |  |
|         |      | Shiraz-32T | 1833 | 0.551336 | 0         |  |  |
|         |      | Shiraz-38T | 1951 | 0.250891 | 0         |  |  |
|         |      | Shiraz-53T | 2078 | 0.287202 | 0         |  |  |
|         |      | Shiraz-58T | 2159 | 0        | -0.219521 |  |  |
|         |      | Shiraz-71T | 2238 | 0.603631 | 0         |  |  |
|         |      | Shiraz-3T  | 90   | 0.219276 | 0         |  |  |
|         |      | Shiraz-3T  | 93   | 0        | -0.058023 |  |  |
|         |      | Shiraz-4T  | 253  | 0.372918 | 0         |  |  |
|         |      | Shiraz-36T | 378  | 0.179558 | 0         |  |  |
|         |      | Shiraz-36T | 380  | 0.083883 | 0         |  |  |
|         |      | Shiraz-44T | 638  | 0        | -0.433476 |  |  |
|         |      | Shiraz-46T | 943  | 0.093799 | 0         |  |  |
|         |      | Shiraz-46T | 945  | 0        | -0.014838 |  |  |
|         |      | Shiraz-47T | 1029 | 0        | -0.096586 |  |  |
|         |      | Shiraz-49T | 1119 | 0        | -0.157331 |  |  |
|         |      | Shiraz-77T | 1225 | 0        | -0.117922 |  |  |
|         |      | Shiraz-18T | 1434 | 0.244465 | 0         |  |  |
|         |      | Shiraz-22T | 1549 | 0        | -0.319623 |  |  |
|         |      | Shiraz-25T | 1698 | 0.21835  | 0         |  |  |
|         |      | Shiraz-28T | 1735 | 0.350744 | 0         |  |  |
|         |      | Shiraz-29T | 1778 | 0.120767 | 0         |  |  |
|         |      | Shiraz-32T | 1833 | 0.551336 | 0         |  |  |
|         |      | Shiraz-38T | 1951 | 0.250891 | 0         |  |  |
|         |      | Shiraz-53T | 2078 | 0.287202 | 0         |  |  |
|         |      | Shiraz-58T | 2159 | 0        | -0.219521 |  |  |
|         |      | Shiraz-71T | 2238 | 0.603631 | 0         |  |  |
| C7orf65 | chr7 | Shiraz-3T  | 87   | 0.198593 | 0         |  |  |
|         |      | Shiraz-4T  | 252  | 0.192083 | 0         |  |  |
|         |      | Shiraz-36T | 376  | 0.159952 | 0         |  |  |
|         |      | Shiraz-46T | 942  | 0.069143 | 0         |  |  |
|         |      | Shiraz-18T | 1433 | 0.250973 | 0         |  |  |
|         |      | Shiraz-25T | 1697 | 0.21945  | 0         |  |  |



|         |      |            |      |          |           |  |
|---------|------|------------|------|----------|-----------|--|
|         |      | Shiraz-28T | 1734 | 0.362882 | 0         |  |
|         |      | Shiraz-29T | 1777 | 0.156747 | 0         |  |
|         |      | Shiraz-38T | 1950 | 0.265916 | 0         |  |
|         |      | Shiraz-71T | 2236 | 0.320072 | 0         |  |
|         |      | Shiraz-3T  | 87   | 0.198593 | 0         |  |
|         |      | Shiraz-4T  | 252  | 0.192083 | 0         |  |
|         |      | Shiraz-36T | 376  | 0.159952 | 0         |  |
|         |      | Shiraz-46T | 942  | 0.069143 | 0         |  |
|         |      | Shiraz-18T | 1433 | 0.250973 | 0         |  |
|         |      | Shiraz-25T | 1697 | 0.21945  | 0         |  |
|         |      | Shiraz-28T | 1734 | 0.362882 | 0         |  |
|         |      | Shiraz-29T | 1777 | 0.156747 | 0         |  |
|         |      | Shiraz-38T | 1950 | 0.265916 | 0         |  |
|         |      | Shiraz-71T | 2236 | 0.320072 | 0         |  |
|         |      | Shiraz-3T  | 87   | 0.198593 | 0         |  |
|         |      | Shiraz-4T  | 252  | 0.192083 | 0         |  |
|         |      | Shiraz-36T | 376  | 0.159952 | 0         |  |
|         |      | Shiraz-46T | 942  | 0.069143 | 0         |  |
|         |      | Shiraz-18T | 1433 | 0.250973 | 0         |  |
|         |      | Shiraz-25T | 1697 | 0.21945  | 0         |  |
|         |      | Shiraz-28T | 1734 | 0.362882 | 0         |  |
|         |      | Shiraz-29T | 1777 | 0.156747 | 0         |  |
|         |      | Shiraz-38T | 1950 | 0.265916 | 0         |  |
|         |      | Shiraz-71T | 2236 | 0.320072 | 0         |  |
| C7orf66 | chr7 | Shiraz-3T  | 90   | 0.219276 | 0         |  |
|         |      | Shiraz-3T  | 95   | 0        | -0.077623 |  |
|         |      | Shiraz-4T  | 253  | 0.372918 | 0         |  |
|         |      | Shiraz-36T | 378  | 0.179558 | 0         |  |
|         |      | Shiraz-36T | 382  | 0.081739 | 0         |  |
|         |      | Shiraz-44T | 641  | 0        | -0.477846 |  |
|         |      | Shiraz-46T | 943  | 0.093799 | 0         |  |
|         |      | Shiraz-46T | 947  | 0        | -0.010843 |  |
|         |      | Shiraz-47T | 1031 | 0        | -0.117529 |  |
|         |      | Shiraz-49T | 1121 | 0        | -0.138569 |  |
|         |      | Shiraz-77T | 1225 | 0        | -0.117922 |  |
|         |      | Shiraz-77T | 1228 | 0        | -0.238084 |  |
|         |      | Shiraz-18T | 1434 | 0.244465 | 0         |  |
|         |      | Shiraz-22T | 1549 | 0        | -0.319623 |  |
|         |      | Shiraz-25T | 1698 | 0.21835  | 0         |  |
|         |      | Shiraz-28T | 1735 | 0.350744 | 0         |  |
|         |      | Shiraz-29T | 1778 | 0.120767 | 0         |  |
|         |      | Shiraz-32T | 1833 | 0.551336 | 0         |  |
|         |      | Shiraz-38T | 1951 | 0.250891 | 0         |  |
|         |      | Shiraz-53T | 2078 | 0.287202 | 0         |  |
|         |      | Shiraz-58T | 2161 | 0        | -0.187744 |  |
|         |      | Shiraz-71T | 2238 | 0.603631 | 0         |  |
|         |      | Shiraz-3T  | 90   | 0.219276 | 0         |  |

|         |      |            |      |          |           |  |  |
|---------|------|------------|------|----------|-----------|--|--|
|         |      | Shiraz-3T  | 95   | 0        | -0.077623 |  |  |
|         |      | Shiraz-4T  | 253  | 0.372918 | 0         |  |  |
|         |      | Shiraz-36T | 378  | 0.179558 | 0         |  |  |
|         |      | Shiraz-36T | 382  | 0.081739 | 0         |  |  |
|         |      | Shiraz-44T | 641  | 0        | -0.477846 |  |  |
|         |      | Shiraz-46T | 943  | 0.093799 | 0         |  |  |
|         |      | Shiraz-46T | 947  | 0        | -0.010843 |  |  |
|         |      | Shiraz-47T | 1031 | 0        | -0.117529 |  |  |
|         |      | Shiraz-49T | 1121 | 0        | -0.138569 |  |  |
|         |      | Shiraz-77T | 1225 | 0        | -0.117922 |  |  |
|         |      | Shiraz-77T | 1228 | 0        | -0.238084 |  |  |
|         |      | Shiraz-18T | 1434 | 0.244465 | 0         |  |  |
|         |      | Shiraz-22T | 1549 | 0        | -0.319623 |  |  |
|         |      | Shiraz-25T | 1698 | 0.21835  | 0         |  |  |
|         |      | Shiraz-28T | 1735 | 0.350744 | 0         |  |  |
|         |      | Shiraz-29T | 1778 | 0.120767 | 0         |  |  |
|         |      | Shiraz-32T | 1833 | 0.551336 | 0         |  |  |
|         |      | Shiraz-38T | 1951 | 0.250891 | 0         |  |  |
|         |      | Shiraz-53T | 2078 | 0.287202 | 0         |  |  |
|         |      | Shiraz-58T | 2161 | 0        | -0.187744 |  |  |
|         |      | Shiraz-71T | 2238 | 0.603631 | 0         |  |  |
|         |      | Shiraz-3T  | 90   | 0.219276 | 0         |  |  |
|         |      | Shiraz-3T  | 95   | 0        | -0.077623 |  |  |
|         |      | Shiraz-4T  | 253  | 0.372918 | 0         |  |  |
|         |      | Shiraz-36T | 378  | 0.179558 | 0         |  |  |
|         |      | Shiraz-36T | 382  | 0.081739 | 0         |  |  |
|         |      | Shiraz-44T | 641  | 0        | -0.477846 |  |  |
|         |      | Shiraz-46T | 943  | 0.093799 | 0         |  |  |
|         |      | Shiraz-46T | 947  | 0        | -0.010843 |  |  |
|         |      | Shiraz-47T | 1031 | 0        | -0.117529 |  |  |
|         |      | Shiraz-49T | 1121 | 0        | -0.138569 |  |  |
|         |      | Shiraz-77T | 1225 | 0        | -0.117922 |  |  |
|         |      | Shiraz-77T | 1228 | 0        | -0.238084 |  |  |
|         |      | Shiraz-18T | 1434 | 0.244465 | 0         |  |  |
|         |      | Shiraz-22T | 1549 | 0        | -0.319623 |  |  |
|         |      | Shiraz-25T | 1698 | 0.21835  | 0         |  |  |
|         |      | Shiraz-28T | 1735 | 0.350744 | 0         |  |  |
|         |      | Shiraz-29T | 1778 | 0.120767 | 0         |  |  |
|         |      | Shiraz-32T | 1833 | 0.551336 | 0         |  |  |
|         |      | Shiraz-38T | 1951 | 0.250891 | 0         |  |  |
|         |      | Shiraz-53T | 2078 | 0.287202 | 0         |  |  |
|         |      | Shiraz-58T | 2161 | 0        | -0.187744 |  |  |
|         |      | Shiraz-71T | 2238 | 0.603631 | 0         |  |  |
| C7orf67 | chr7 | Shiraz-3T  | 87   | 0.198593 | 0         |  |  |
|         |      | Shiraz-4T  | 252  | 0.192083 | 0         |  |  |
|         |      | Shiraz-36T | 376  | 0.159952 | 0         |  |  |
|         |      | Shiraz-44T | 630  | 0.903655 | 0         |  |  |

|         |      |            |      |          |           |  |
|---------|------|------------|------|----------|-----------|--|
|         |      | Shiraz-46T | 942  | 0.069143 | 0         |  |
|         |      | Shiraz-18T | 1433 | 0.250973 | 0         |  |
|         |      | Shiraz-25T | 1697 | 0.21945  | 0         |  |
|         |      | Shiraz-28T | 1734 | 0.362882 | 0         |  |
|         |      | Shiraz-29T | 1777 | 0.156747 | 0         |  |
|         |      | Shiraz-38T | 1950 | 0.265916 | 0         |  |
|         |      | Shiraz-71T | 2236 | 0.320072 | 0         |  |
|         |      | Shiraz-3T  | 87   | 0.198593 | 0         |  |
|         |      | Shiraz-4T  | 252  | 0.192083 | 0         |  |
|         |      | Shiraz-36T | 376  | 0.159952 | 0         |  |
|         |      | Shiraz-44T | 630  | 0.903655 | 0         |  |
|         |      | Shiraz-46T | 942  | 0.069143 | 0         |  |
|         |      | Shiraz-18T | 1433 | 0.250973 | 0         |  |
|         |      | Shiraz-25T | 1697 | 0.21945  | 0         |  |
|         |      | Shiraz-28T | 1734 | 0.362882 | 0         |  |
|         |      | Shiraz-29T | 1777 | 0.156747 | 0         |  |
|         |      | Shiraz-38T | 1950 | 0.265916 | 0         |  |
|         |      | Shiraz-71T | 2236 | 0.320072 | 0         |  |
|         |      | Shiraz-3T  | 87   | 0.198593 | 0         |  |
|         |      | Shiraz-4T  | 252  | 0.192083 | 0         |  |
|         |      | Shiraz-36T | 376  | 0.159952 | 0         |  |
|         |      | Shiraz-44T | 630  | 0.903655 | 0         |  |
|         |      | Shiraz-46T | 942  | 0.069143 | 0         |  |
|         |      | Shiraz-18T | 1433 | 0.250973 | 0         |  |
|         |      | Shiraz-25T | 1697 | 0.21945  | 0         |  |
|         |      | Shiraz-28T | 1734 | 0.362882 | 0         |  |
|         |      | Shiraz-29T | 1777 | 0.156747 | 0         |  |
|         |      | Shiraz-38T | 1950 | 0.265916 | 0         |  |
|         |      | Shiraz-71T | 2236 | 0.320072 | 0         |  |
| C7orf68 | chr7 | Shiraz-3T  | 90   | 0.219276 | 0         |  |
|         |      | Shiraz-3T  | 96   | 0.428308 | 0         |  |
|         |      | Shiraz-4T  | 253  | 0.372918 | 0         |  |
|         |      | Shiraz-31T | 317  | 0.204382 | 0         |  |
|         |      | Shiraz-36T | 378  | 0.179558 | 0         |  |
|         |      | Shiraz-44T | 642  | 0.408617 | 0         |  |
|         |      | Shiraz-46T | 943  | 0.093799 | 0         |  |
|         |      | Shiraz-47T | 1032 | 0.171484 | 0         |  |
|         |      | Shiraz-77T | 1225 | 0        | -0.117922 |  |
|         |      | Shiraz-77T | 1229 | 0.051661 | 0         |  |
|         |      | Shiraz-9T  | 1325 | 0.221899 | 0         |  |
|         |      | Shiraz-18T | 1434 | 0.244465 | 0         |  |
|         |      | Shiraz-25T | 1698 | 0.21835  | 0         |  |
|         |      | Shiraz-28T | 1735 | 0.350744 | 0         |  |
|         |      | Shiraz-29T | 1778 | 0.120767 | 0         |  |
|         |      | Shiraz-32T | 1833 | 0.551336 | 0         |  |
|         |      | Shiraz-38T | 1951 | 0.250891 | 0         |  |
|         |      | Shiraz-53T | 2078 | 0.287202 | 0         |  |

|         |      |            |      |          |           |  |
|---------|------|------------|------|----------|-----------|--|
|         |      | Shiraz-71T | 2238 | 0.603631 | 0         |  |
|         |      | Shiraz-3T  | 90   | 0.219276 | 0         |  |
|         |      | Shiraz-3T  | 96   | 0.428308 | 0         |  |
|         |      | Shiraz-4T  | 253  | 0.372918 | 0         |  |
|         |      | Shiraz-31T | 317  | 0.204382 | 0         |  |
|         |      | Shiraz-36T | 378  | 0.179558 | 0         |  |
|         |      | Shiraz-44T | 642  | 0.408617 | 0         |  |
|         |      | Shiraz-46T | 943  | 0.093799 | 0         |  |
|         |      | Shiraz-47T | 1032 | 0.171484 | 0         |  |
|         |      | Shiraz-77T | 1225 | 0        | -0.117922 |  |
|         |      | Shiraz-77T | 1229 | 0.051661 | 0         |  |
|         |      | Shiraz-9T  | 1325 | 0.221899 | 0         |  |
|         |      | Shiraz-18T | 1434 | 0.244465 | 0         |  |
|         |      | Shiraz-25T | 1698 | 0.21835  | 0         |  |
|         |      | Shiraz-28T | 1735 | 0.350744 | 0         |  |
|         |      | Shiraz-29T | 1778 | 0.120767 | 0         |  |
|         |      | Shiraz-32T | 1833 | 0.551336 | 0         |  |
|         |      | Shiraz-38T | 1951 | 0.250891 | 0         |  |
|         |      | Shiraz-53T | 2078 | 0.287202 | 0         |  |
|         |      | Shiraz-71T | 2238 | 0.603631 | 0         |  |
|         |      | Shiraz-3T  | 90   | 0.219276 | 0         |  |
|         |      | Shiraz-3T  | 96   | 0.428308 | 0         |  |
|         |      | Shiraz-4T  | 253  | 0.372918 | 0         |  |
|         |      | Shiraz-31T | 317  | 0.204382 | 0         |  |
|         |      | Shiraz-36T | 378  | 0.179558 | 0         |  |
|         |      | Shiraz-44T | 642  | 0.408617 | 0         |  |
|         |      | Shiraz-46T | 943  | 0.093799 | 0         |  |
|         |      | Shiraz-47T | 1032 | 0.171484 | 0         |  |
|         |      | Shiraz-77T | 1225 | 0        | -0.117922 |  |
|         |      | Shiraz-77T | 1229 | 0.051661 | 0         |  |
|         |      | Shiraz-9T  | 1325 | 0.221899 | 0         |  |
|         |      | Shiraz-18T | 1434 | 0.244465 | 0         |  |
|         |      | Shiraz-25T | 1698 | 0.21835  | 0         |  |
|         |      | Shiraz-28T | 1735 | 0.350744 | 0         |  |
|         |      | Shiraz-29T | 1778 | 0.120767 | 0         |  |
|         |      | Shiraz-32T | 1833 | 0.551336 | 0         |  |
|         |      | Shiraz-38T | 1951 | 0.250891 | 0         |  |
|         |      | Shiraz-53T | 2078 | 0.287202 | 0         |  |
|         |      | Shiraz-71T | 2238 | 0.603631 | 0         |  |
| C7orf69 | chr7 | Shiraz-3T  | 87   | 0.198593 | 0         |  |
|         |      | Shiraz-4T  | 252  | 0.192083 | 0         |  |
|         |      | Shiraz-36T | 376  | 0.159952 | 0         |  |
|         |      | Shiraz-46T | 942  | 0.069143 | 0         |  |
|         |      | Shiraz-18T | 1433 | 0.250973 | 0         |  |
|         |      | Shiraz-25T | 1697 | 0.21945  | 0         |  |
|         |      | Shiraz-28T | 1734 | 0.362882 | 0         |  |
|         |      | Shiraz-29T | 1777 | 0.156747 | 0         |  |

|    |      |            |      |          |           |  |
|----|------|------------|------|----------|-----------|--|
|    |      | Shiraz-38T | 1950 | 0.265916 | 0         |  |
|    |      | Shiraz-71T | 2236 | 0.320072 | 0         |  |
|    |      | Shiraz-3T  | 87   | 0.198593 | 0         |  |
|    |      | Shiraz-4T  | 252  | 0.192083 | 0         |  |
|    |      | Shiraz-36T | 376  | 0.159952 | 0         |  |
|    |      | Shiraz-46T | 942  | 0.069143 | 0         |  |
|    |      | Shiraz-18T | 1433 | 0.250973 | 0         |  |
|    |      | Shiraz-25T | 1697 | 0.21945  | 0         |  |
|    |      | Shiraz-28T | 1734 | 0.362882 | 0         |  |
|    |      | Shiraz-29T | 1777 | 0.156747 | 0         |  |
|    |      | Shiraz-38T | 1950 | 0.265916 | 0         |  |
|    |      | Shiraz-71T | 2236 | 0.320072 | 0         |  |
|    |      | Shiraz-3T  | 87   | 0.198593 | 0         |  |
|    |      | Shiraz-4T  | 252  | 0.192083 | 0         |  |
|    |      | Shiraz-36T | 376  | 0.159952 | 0         |  |
|    |      | Shiraz-46T | 942  | 0.069143 | 0         |  |
|    |      | Shiraz-18T | 1433 | 0.250973 | 0         |  |
|    |      | Shiraz-25T | 1697 | 0.21945  | 0         |  |
|    |      | Shiraz-28T | 1734 | 0.362882 | 0         |  |
|    |      | Shiraz-29T | 1777 | 0.156747 | 0         |  |
|    |      | Shiraz-38T | 1950 | 0.265916 | 0         |  |
|    |      | Shiraz-71T | 2236 | 0.320072 | 0         |  |
| C9 | chr5 | Shiraz-4T  | 250  | 0.262252 | 0         |  |
|    |      | Shiraz-16T | 266  | 0.321724 | 0         |  |
|    |      | Shiraz-44T | 591  | 0        | -0.233934 |  |
|    |      | Shiraz-18T | 1429 | 0        | -0.314125 |  |
|    |      | Shiraz-22T | 1522 | 0        | -0.322688 |  |
|    |      | Shiraz-25T | 1694 | 0.201602 | 0         |  |
|    |      | Shiraz-28T | 1731 | 0.295447 | 0         |  |
|    |      | Shiraz-29T | 1773 | 0.090981 | 0         |  |
|    |      | Shiraz-40T | 2016 | 0.376634 | 0         |  |
|    |      | Shiraz-4T  | 250  | 0.262252 | 0         |  |
|    |      | Shiraz-16T | 266  | 0.321724 | 0         |  |
|    |      | Shiraz-44T | 591  | 0        | -0.233934 |  |
|    |      | Shiraz-18T | 1429 | 0        | -0.314125 |  |
|    |      | Shiraz-22T | 1522 | 0        | -0.322688 |  |
|    |      | Shiraz-25T | 1694 | 0.201602 | 0         |  |
|    |      | Shiraz-28T | 1731 | 0.295447 | 0         |  |
|    |      | Shiraz-29T | 1773 | 0.090981 | 0         |  |
|    |      | Shiraz-40T | 2016 | 0.376634 | 0         |  |
|    |      | Shiraz-4T  | 250  | 0.262252 | 0         |  |
|    |      | Shiraz-16T | 266  | 0.321724 | 0         |  |
|    |      | Shiraz-44T | 591  | 0        | -0.233934 |  |
|    |      | Shiraz-18T | 1429 | 0        | -0.314125 |  |
|    |      | Shiraz-22T | 1522 | 0        | -0.322688 |  |
|    |      | Shiraz-25T | 1694 | 0.201602 | 0         |  |
|    |      | Shiraz-28T | 1731 | 0.295447 | 0         |  |

|      |      |            |      |          |           |  |
|------|------|------------|------|----------|-----------|--|
|      |      | Shiraz-29T | 1773 | 0.090981 | 0         |  |
|      |      | Shiraz-40T | 2016 | 0.376634 | 0         |  |
| CASB | chrX | Shiraz-3T  | 235  | 0        | -0.28401  |  |
|      |      | Shiraz-4T  | 260  | 0        | -0.324128 |  |
|      |      | Shiraz-16T | 294  | 0.655804 | 0         |  |
|      |      | Shiraz-36T | 431  | 0        | -0.78035  |  |
|      |      | Shiraz-44T | 891  | 0        | -0.954044 |  |
|      |      | Shiraz-49T | 1166 | 0        | -0.917235 |  |
|      |      | Shiraz-9T  | 1368 | 0.199713 | 0         |  |
|      |      | Shiraz-18T | 1455 | 0        | -0.186773 |  |
|      |      | Shiraz-22T | 1669 | 0.695915 | 0         |  |
|      |      | Shiraz-25T | 1717 | 0.420447 | 0         |  |
|      |      | Shiraz-28T | 1760 | 0.538181 | 0         |  |
|      |      | Shiraz-29T | 1800 | 0.672527 | 0         |  |
|      |      | Shiraz-32T | 1869 | 0.776805 | 0         |  |
|      |      | Shiraz-35T | 1932 | 0.507141 | 0         |  |
|      |      | Shiraz-40T | 2051 | 0.098506 | 0         |  |
|      |      | Shiraz-58T | 2221 | 0.871948 | 0         |  |
|      |      | Shiraz-71T | 2260 | 0.68394  | 0         |  |
|      |      | Shiraz-71T | 2261 | 0.508399 | 0         |  |
|      |      | Shiraz-3T  | 235  | 0        | -0.28401  |  |
|      |      | Shiraz-4T  | 260  | 0        | -0.324128 |  |
|      |      | Shiraz-16T | 294  | 0.655804 | 0         |  |
|      |      | Shiraz-36T | 431  | 0        | -0.78035  |  |
|      |      | Shiraz-44T | 891  | 0        | -0.954044 |  |
|      |      | Shiraz-49T | 1166 | 0        | -0.917235 |  |
|      |      | Shiraz-9T  | 1368 | 0.199713 | 0         |  |
|      |      | Shiraz-18T | 1455 | 0        | -0.186773 |  |
|      |      | Shiraz-22T | 1669 | 0.695915 | 0         |  |
|      |      | Shiraz-25T | 1717 | 0.420447 | 0         |  |
|      |      | Shiraz-28T | 1760 | 0.538181 | 0         |  |
|      |      | Shiraz-29T | 1800 | 0.672527 | 0         |  |
|      |      | Shiraz-32T | 1869 | 0.776805 | 0         |  |
|      |      | Shiraz-35T | 1932 | 0.507141 | 0         |  |
|      |      | Shiraz-40T | 2051 | 0.098506 | 0         |  |
|      |      | Shiraz-58T | 2221 | 0.871948 | 0         |  |
|      |      | Shiraz-71T | 2260 | 0.68394  | 0         |  |
|      |      | Shiraz-71T | 2261 | 0.508399 | 0         |  |
|      |      | Shiraz-3T  | 235  | 0        | -0.28401  |  |
|      |      | Shiraz-4T  | 260  | 0        | -0.324128 |  |
|      |      | Shiraz-16T | 294  | 0.655804 | 0         |  |
|      |      | Shiraz-36T | 431  | 0        | -0.78035  |  |
|      |      | Shiraz-44T | 891  | 0        | -0.954044 |  |
|      |      | Shiraz-49T | 1166 | 0        | -0.917235 |  |
|      |      | Shiraz-9T  | 1368 | 0.199713 | 0         |  |
|      |      | Shiraz-18T | 1455 | 0        | -0.186773 |  |
|      |      | Shiraz-22T | 1669 | 0.695915 | 0         |  |

|       |      |            |      |          |           |  |  |
|-------|------|------------|------|----------|-----------|--|--|
|       |      | Shiraz-25T | 1717 | 0.420447 | 0         |  |  |
|       |      | Shiraz-28T | 1760 | 0.538181 | 0         |  |  |
|       |      | Shiraz-29T | 1800 | 0.672527 | 0         |  |  |
|       |      | Shiraz-32T | 1869 | 0.776805 | 0         |  |  |
|       |      | Shiraz-35T | 1932 | 0.507141 | 0         |  |  |
|       |      | Shiraz-40T | 2051 | 0.098506 | 0         |  |  |
|       |      | Shiraz-58T | 2221 | 0.871948 | 0         |  |  |
|       |      | Shiraz-71T | 2260 | 0.68394  | 0         |  |  |
|       |      | Shiraz-71T | 2261 | 0.508399 | 0         |  |  |
| CA5BP | chrX | Shiraz-3T  | 235  | 0        | -0.28401  |  |  |
|       |      | Shiraz-4T  | 260  | 0        | -0.324128 |  |  |
|       |      | Shiraz-16T | 294  | 0.655804 | 0         |  |  |
|       |      | Shiraz-36T | 431  | 0        | -0.78035  |  |  |
|       |      | Shiraz-44T | 891  | 0        | -0.954044 |  |  |
|       |      | Shiraz-49T | 1166 | 0        | -0.917235 |  |  |
|       |      | Shiraz-9T  | 1368 | 0.199713 | 0         |  |  |
|       |      | Shiraz-18T | 1455 | 0        | -0.186773 |  |  |
|       |      | Shiraz-22T | 1669 | 0.695915 | 0         |  |  |
|       |      | Shiraz-25T | 1717 | 0.420447 | 0         |  |  |
|       |      | Shiraz-28T | 1760 | 0.538181 | 0         |  |  |
|       |      | Shiraz-29T | 1800 | 0.672527 | 0         |  |  |
|       |      | Shiraz-32T | 1869 | 0.776805 | 0         |  |  |
|       |      | Shiraz-35T | 1932 | 0.507141 | 0         |  |  |
|       |      | Shiraz-40T | 2051 | 0.098506 | 0         |  |  |
|       |      | Shiraz-58T | 2221 | 0.871948 | 0         |  |  |
|       |      | Shiraz-71T | 2260 | 0.68394  | 0         |  |  |
|       |      | Shiraz-71T | 2261 | 0.508399 | 0         |  |  |
|       |      | Shiraz-3T  | 235  | 0        | -0.28401  |  |  |
|       |      | Shiraz-4T  | 260  | 0        | -0.324128 |  |  |
|       |      | Shiraz-16T | 294  | 0.655804 | 0         |  |  |
|       |      | Shiraz-36T | 431  | 0        | -0.78035  |  |  |
|       |      | Shiraz-44T | 891  | 0        | -0.954044 |  |  |
|       |      | Shiraz-49T | 1166 | 0        | -0.917235 |  |  |
|       |      | Shiraz-9T  | 1368 | 0.199713 | 0         |  |  |
|       |      | Shiraz-18T | 1455 | 0        | -0.186773 |  |  |
|       |      | Shiraz-22T | 1669 | 0.695915 | 0         |  |  |
|       |      | Shiraz-25T | 1717 | 0.420447 | 0         |  |  |
|       |      | Shiraz-28T | 1760 | 0.538181 | 0         |  |  |
|       |      | Shiraz-29T | 1800 | 0.672527 | 0         |  |  |
|       |      | Shiraz-32T | 1869 | 0.776805 | 0         |  |  |
|       |      | Shiraz-35T | 1932 | 0.507141 | 0         |  |  |
|       |      | Shiraz-40T | 2051 | 0.098506 | 0         |  |  |
|       |      | Shiraz-58T | 2221 | 0.871948 | 0         |  |  |
|       |      | Shiraz-71T | 2260 | 0.68394  | 0         |  |  |
|       |      | Shiraz-71T | 2261 | 0.508399 | 0         |  |  |
|       |      | Shiraz-3T  | 235  | 0        | -0.28401  |  |  |
|       |      | Shiraz-4T  | 260  | 0        | -0.324128 |  |  |

|         |      |            |      |          |           |  |  |
|---------|------|------------|------|----------|-----------|--|--|
|         |      | Shiraz-16T | 294  | 0.655804 | 0         |  |  |
|         |      | Shiraz-36T | 431  | 0        | -0.78035  |  |  |
|         |      | Shiraz-44T | 891  | 0        | -0.954044 |  |  |
|         |      | Shiraz-49T | 1166 | 0        | -0.917235 |  |  |
|         |      | Shiraz-9T  | 1368 | 0.199713 | 0         |  |  |
|         |      | Shiraz-18T | 1455 | 0        | -0.186773 |  |  |
|         |      | Shiraz-22T | 1669 | 0.695915 | 0         |  |  |
|         |      | Shiraz-25T | 1717 | 0.420447 | 0         |  |  |
|         |      | Shiraz-28T | 1760 | 0.538181 | 0         |  |  |
|         |      | Shiraz-29T | 1800 | 0.672527 | 0         |  |  |
|         |      | Shiraz-32T | 1869 | 0.776805 | 0         |  |  |
|         |      | Shiraz-35T | 1932 | 0.507141 | 0         |  |  |
|         |      | Shiraz-40T | 2051 | 0.098506 | 0         |  |  |
|         |      | Shiraz-58T | 2221 | 0.871948 | 0         |  |  |
|         |      | Shiraz-71T | 2260 | 0.68394  | 0         |  |  |
|         |      | Shiraz-71T | 2261 | 0.508399 | 0         |  |  |
| CACNA1F | chrX | Shiraz-3T  | 238  | 0.472087 | 0         |  |  |
|         |      | Shiraz-4T  | 260  | 0        | -0.324128 |  |  |
|         |      | Shiraz-16T | 294  | 0.655804 | 0         |  |  |
|         |      | Shiraz-31T | 345  | 0.103301 | 0         |  |  |
|         |      | Shiraz-36T | 431  | 0        | -0.78035  |  |  |
|         |      | Shiraz-36T | 432  | 0        | -0.6692   |  |  |
|         |      | Shiraz-44T | 891  | 0        | -0.954044 |  |  |
|         |      | Shiraz-44T | 896  | 0        | -0.109108 |  |  |
|         |      | Shiraz-44T | 897  | 0.486937 | 0         |  |  |
|         |      | Shiraz-46T | 991  | 0.139564 | 0         |  |  |
|         |      | Shiraz-47T | 1084 | 0.24185  | 0         |  |  |
|         |      | Shiraz-49T | 1166 | 0        | -0.917235 |  |  |
|         |      | Shiraz-49T | 1169 | 0        | -0.583529 |  |  |
|         |      | Shiraz-77T | 1282 | 0.213849 | 0         |  |  |
|         |      | Shiraz-9T  | 1368 | 0.199713 | 0         |  |  |
|         |      | Shiraz-9T  | 1369 | 0.703374 | 0         |  |  |
|         |      | Shiraz-18T | 1455 | 0        | -0.186773 |  |  |
|         |      | Shiraz-22T | 1669 | 0.695915 | 0         |  |  |
|         |      | Shiraz-22T | 1672 | 1.01678  | 0         |  |  |
|         |      | Shiraz-25T | 1717 | 0.420447 | 0         |  |  |
|         |      | Shiraz-28T | 1760 | 0.538181 | 0         |  |  |
|         |      | Shiraz-29T | 1800 | 0.672527 | 0         |  |  |
|         |      | Shiraz-32T | 1869 | 0.776805 | 0         |  |  |
|         |      | Shiraz-35T | 1932 | 0.507141 | 0         |  |  |
|         |      | Shiraz-58T | 2221 | 0.871948 | 0         |  |  |
|         |      | Shiraz-71T | 2260 | 0.68394  | 0         |  |  |
|         |      | Shiraz-71T | 2262 | 0.986748 | 0         |  |  |
|         |      | Shiraz-3T  | 238  | 0.472087 | 0         |  |  |
|         |      | Shiraz-4T  | 260  | 0        | -0.324128 |  |  |
|         |      | Shiraz-16T | 294  | 0.655804 | 0         |  |  |
|         |      | Shiraz-31T | 345  | 0.103301 | 0         |  |  |



|  |            |      |          |           |  |
|--|------------|------|----------|-----------|--|
|  | Shiraz-36T | 431  | 0        | -0.78035  |  |
|  | Shiraz-36T | 432  | 0        | -0.6692   |  |
|  | Shiraz-44T | 891  | 0        | -0.954044 |  |
|  | Shiraz-44T | 896  | 0        | -0.109108 |  |
|  | Shiraz-44T | 897  | 0.486937 | 0         |  |
|  | Shiraz-46T | 991  | 0.139564 | 0         |  |
|  | Shiraz-47T | 1084 | 0.24185  | 0         |  |
|  | Shiraz-49T | 1166 | 0        | -0.917235 |  |
|  | Shiraz-49T | 1169 | 0        | -0.583529 |  |
|  | Shiraz-77T | 1282 | 0.213849 | 0         |  |
|  | Shiraz-9T  | 1368 | 0.199713 | 0         |  |
|  | Shiraz-9T  | 1369 | 0.703374 | 0         |  |
|  | Shiraz-18T | 1455 | 0        | -0.186773 |  |
|  | Shiraz-22T | 1669 | 0.695915 | 0         |  |
|  | Shiraz-22T | 1672 | 1.01678  | 0         |  |
|  | Shiraz-25T | 1717 | 0.420447 | 0         |  |
|  | Shiraz-28T | 1760 | 0.538181 | 0         |  |
|  | Shiraz-29T | 1800 | 0.672527 | 0         |  |
|  | Shiraz-32T | 1869 | 0.776805 | 0         |  |
|  | Shiraz-35T | 1932 | 0.507141 | 0         |  |
|  | Shiraz-58T | 2221 | 0.871948 | 0         |  |
|  | Shiraz-71T | 2260 | 0.68394  | 0         |  |
|  | Shiraz-71T | 2262 | 0.986748 | 0         |  |
|  | Shiraz-3T  | 238  | 0.472087 | 0         |  |
|  | Shiraz-4T  | 260  | 0        | -0.324128 |  |
|  | Shiraz-16T | 294  | 0.655804 | 0         |  |
|  | Shiraz-31T | 345  | 0.103301 | 0         |  |
|  | Shiraz-36T | 431  | 0        | -0.78035  |  |
|  | Shiraz-36T | 432  | 0        | -0.6692   |  |
|  | Shiraz-44T | 891  | 0        | -0.954044 |  |
|  | Shiraz-44T | 896  | 0        | -0.109108 |  |
|  | Shiraz-44T | 897  | 0.486937 | 0         |  |
|  | Shiraz-46T | 991  | 0.139564 | 0         |  |
|  | Shiraz-47T | 1084 | 0.24185  | 0         |  |
|  | Shiraz-49T | 1166 | 0        | -0.917235 |  |
|  | Shiraz-49T | 1169 | 0        | -0.583529 |  |
|  | Shiraz-77T | 1282 | 0.213849 | 0         |  |
|  | Shiraz-9T  | 1368 | 0.199713 | 0         |  |
|  | Shiraz-9T  | 1369 | 0.703374 | 0         |  |
|  | Shiraz-18T | 1455 | 0        | -0.186773 |  |
|  | Shiraz-22T | 1669 | 0.695915 | 0         |  |
|  | Shiraz-22T | 1672 | 1.01678  | 0         |  |
|  | Shiraz-25T | 1717 | 0.420447 | 0         |  |
|  | Shiraz-28T | 1760 | 0.538181 | 0         |  |
|  | Shiraz-29T | 1800 | 0.672527 | 0         |  |
|  | Shiraz-32T | 1869 | 0.776805 | 0         |  |
|  | Shiraz-35T | 1932 | 0.507141 | 0         |  |

|          |      |            |      |          |           |  |
|----------|------|------------|------|----------|-----------|--|
|          |      | Shiraz-58T | 2221 | 0.871948 | 0         |  |
|          |      | Shiraz-71T | 2260 | 0.68394  | 0         |  |
|          |      | Shiraz-71T | 2262 | 0.986748 | 0         |  |
| CACNA2D1 | chr7 | Shiraz-3T  | 90   | 0.219276 | 0         |  |
|          |      | Shiraz-3T  | 93   | 0        | -0.058023 |  |
|          |      | Shiraz-4T  | 253  | 0.372918 | 0         |  |
|          |      | Shiraz-36T | 378  | 0.179558 | 0         |  |
|          |      | Shiraz-36T | 380  | 0.083883 | 0         |  |
|          |      | Shiraz-44T | 638  | 0        | -0.433476 |  |
|          |      | Shiraz-46T | 943  | 0.093799 | 0         |  |
|          |      | Shiraz-46T | 945  | 0        | -0.014838 |  |
|          |      | Shiraz-47T | 1029 | 0        | -0.096586 |  |
|          |      | Shiraz-49T | 1119 | 0        | -0.157331 |  |
|          |      | Shiraz-77T | 1225 | 0        | -0.117922 |  |
|          |      | Shiraz-77T | 1226 | 0        | -0.233724 |  |
|          |      | Shiraz-12T | 1390 | 0        | -0.237897 |  |
|          |      | Shiraz-18T | 1434 | 0.244465 | 0         |  |
|          |      | Shiraz-22T | 1549 | 0        | -0.319623 |  |
|          |      | Shiraz-22T | 1550 | 0        | -0.577052 |  |
|          |      | Shiraz-25T | 1698 | 0.21835  | 0         |  |
|          |      | Shiraz-28T | 1735 | 0.350744 | 0         |  |
|          |      | Shiraz-29T | 1778 | 0.120767 | 0         |  |
|          |      | Shiraz-38T | 1951 | 0.250891 | 0         |  |
|          |      | Shiraz-53T | 2078 | 0.287202 | 0         |  |
|          |      | Shiraz-58T | 2159 | 0        | -0.219521 |  |
|          |      | Shiraz-71T | 2238 | 0.603631 | 0         |  |
|          |      | Shiraz-3T  | 90   | 0.219276 | 0         |  |
|          |      | Shiraz-3T  | 93   | 0        | -0.058023 |  |
|          |      | Shiraz-4T  | 253  | 0.372918 | 0         |  |
|          |      | Shiraz-36T | 378  | 0.179558 | 0         |  |
|          |      | Shiraz-36T | 380  | 0.083883 | 0         |  |
|          |      | Shiraz-44T | 638  | 0        | -0.433476 |  |
|          |      | Shiraz-46T | 943  | 0.093799 | 0         |  |
|          |      | Shiraz-46T | 945  | 0        | -0.014838 |  |
|          |      | Shiraz-47T | 1029 | 0        | -0.096586 |  |
|          |      | Shiraz-49T | 1119 | 0        | -0.157331 |  |
|          |      | Shiraz-77T | 1225 | 0        | -0.117922 |  |
|          |      | Shiraz-77T | 1226 | 0        | -0.233724 |  |
|          |      | Shiraz-12T | 1390 | 0        | -0.237897 |  |
|          |      | Shiraz-18T | 1434 | 0.244465 | 0         |  |
|          |      | Shiraz-22T | 1549 | 0        | -0.319623 |  |
|          |      | Shiraz-22T | 1550 | 0        | -0.577052 |  |
|          |      | Shiraz-25T | 1698 | 0.21835  | 0         |  |
|          |      | Shiraz-28T | 1735 | 0.350744 | 0         |  |
|          |      | Shiraz-29T | 1778 | 0.120767 | 0         |  |
|          |      | Shiraz-38T | 1951 | 0.250891 | 0         |  |
|          |      | Shiraz-53T | 2078 | 0.287202 | 0         |  |

|        |      |            |      |          |           |  |  |
|--------|------|------------|------|----------|-----------|--|--|
|        |      | Shiraz-58T | 2159 | 0        | -0.219521 |  |  |
|        |      | Shiraz-71T | 2238 | 0.603631 | 0         |  |  |
|        |      | Shiraz-3T  | 90   | 0.219276 | 0         |  |  |
|        |      | Shiraz-3T  | 93   | 0        | -0.058023 |  |  |
|        |      | Shiraz-4T  | 253  | 0.372918 | 0         |  |  |
|        |      | Shiraz-36T | 378  | 0.179558 | 0         |  |  |
|        |      | Shiraz-36T | 380  | 0.083883 | 0         |  |  |
|        |      | Shiraz-44T | 638  | 0        | -0.433476 |  |  |
|        |      | Shiraz-46T | 943  | 0.093799 | 0         |  |  |
|        |      | Shiraz-46T | 945  | 0        | -0.014838 |  |  |
|        |      | Shiraz-47T | 1029 | 0        | -0.096586 |  |  |
|        |      | Shiraz-49T | 1119 | 0        | -0.157331 |  |  |
|        |      | Shiraz-77T | 1225 | 0        | -0.117922 |  |  |
|        |      | Shiraz-77T | 1226 | 0        | -0.233724 |  |  |
|        |      | Shiraz-12T | 1390 | 0        | -0.237897 |  |  |
|        |      | Shiraz-18T | 1434 | 0.244465 | 0         |  |  |
|        |      | Shiraz-22T | 1549 | 0        | -0.319623 |  |  |
|        |      | Shiraz-22T | 1550 | 0        | -0.577052 |  |  |
|        |      | Shiraz-25T | 1698 | 0.21835  | 0         |  |  |
|        |      | Shiraz-28T | 1735 | 0.350744 | 0         |  |  |
|        |      | Shiraz-29T | 1778 | 0.120767 | 0         |  |  |
|        |      | Shiraz-38T | 1951 | 0.250891 | 0         |  |  |
|        |      | Shiraz-53T | 2078 | 0.287202 | 0         |  |  |
|        |      | Shiraz-58T | 2159 | 0        | -0.219521 |  |  |
|        |      | Shiraz-71T | 2238 | 0.603631 | 0         |  |  |
| CADPS2 | chr7 | Shiraz-3T  | 90   | 0.219276 | 0         |  |  |
|        |      | Shiraz-3T  | 95   | 0        | -0.077623 |  |  |
|        |      | Shiraz-4T  | 253  | 0.372918 | 0         |  |  |
|        |      | Shiraz-36T | 378  | 0.179558 | 0         |  |  |
|        |      | Shiraz-36T | 382  | 0.081739 | 0         |  |  |
|        |      | Shiraz-44T | 641  | 0        | -0.477846 |  |  |
|        |      | Shiraz-46T | 943  | 0.093799 | 0         |  |  |
|        |      | Shiraz-46T | 947  | 0        | -0.010843 |  |  |
|        |      | Shiraz-47T | 1031 | 0        | -0.117529 |  |  |
|        |      | Shiraz-49T | 1121 | 0        | -0.138569 |  |  |
|        |      | Shiraz-77T | 1225 | 0        | -0.117922 |  |  |
|        |      | Shiraz-77T | 1228 | 0        | -0.238084 |  |  |
|        |      | Shiraz-18T | 1434 | 0.244465 | 0         |  |  |
|        |      | Shiraz-22T | 1549 | 0        | -0.319623 |  |  |
|        |      | Shiraz-22T | 1552 | 0        | -0.50686  |  |  |
|        |      | Shiraz-25T | 1698 | 0.21835  | 0         |  |  |
|        |      | Shiraz-28T | 1735 | 0.350744 | 0         |  |  |
|        |      | Shiraz-29T | 1778 | 0.120767 | 0         |  |  |
|        |      | Shiraz-32T | 1833 | 0.551336 | 0         |  |  |
|        |      | Shiraz-32T | 1835 | 0.092727 | 0         |  |  |
|        |      | Shiraz-38T | 1951 | 0.250891 | 0         |  |  |
|        |      | Shiraz-53T | 2078 | 0.287202 | 0         |  |  |

|  |            |      |          |           |  |
|--|------------|------|----------|-----------|--|
|  | Shiraz-58T | 2161 | 0        | -0.187744 |  |
|  | Shiraz-71T | 2238 | 0.603631 | 0         |  |
|  | Shiraz-3T  | 90   | 0.219276 | 0         |  |
|  | Shiraz-3T  | 95   | 0        | -0.077623 |  |
|  | Shiraz-4T  | 253  | 0.372918 | 0         |  |
|  | Shiraz-36T | 378  | 0.179558 | 0         |  |
|  | Shiraz-36T | 382  | 0.081739 | 0         |  |
|  | Shiraz-44T | 641  | 0        | -0.477846 |  |
|  | Shiraz-46T | 943  | 0.093799 | 0         |  |
|  | Shiraz-46T | 947  | 0        | -0.010843 |  |
|  | Shiraz-47T | 1031 | 0        | -0.117529 |  |
|  | Shiraz-49T | 1121 | 0        | -0.138569 |  |
|  | Shiraz-77T | 1225 | 0        | -0.117922 |  |
|  | Shiraz-77T | 1228 | 0        | -0.238084 |  |
|  | Shiraz-18T | 1434 | 0.244465 | 0         |  |
|  | Shiraz-22T | 1549 | 0        | -0.319623 |  |
|  | Shiraz-22T | 1552 | 0        | -0.50686  |  |
|  | Shiraz-25T | 1698 | 0.21835  | 0         |  |
|  | Shiraz-28T | 1735 | 0.350744 | 0         |  |
|  | Shiraz-29T | 1778 | 0.120767 | 0         |  |
|  | Shiraz-32T | 1833 | 0.551336 | 0         |  |
|  | Shiraz-32T | 1835 | 0.092727 | 0         |  |
|  | Shiraz-38T | 1951 | 0.250891 | 0         |  |
|  | Shiraz-53T | 2078 | 0.287202 | 0         |  |
|  | Shiraz-58T | 2161 | 0        | -0.187744 |  |
|  | Shiraz-71T | 2238 | 0.603631 | 0         |  |
|  | Shiraz-3T  | 90   | 0.219276 | 0         |  |
|  | Shiraz-3T  | 95   | 0        | -0.077623 |  |
|  | Shiraz-4T  | 253  | 0.372918 | 0         |  |
|  | Shiraz-36T | 378  | 0.179558 | 0         |  |
|  | Shiraz-36T | 382  | 0.081739 | 0         |  |
|  | Shiraz-44T | 641  | 0        | -0.477846 |  |
|  | Shiraz-46T | 943  | 0.093799 | 0         |  |
|  | Shiraz-46T | 947  | 0        | -0.010843 |  |
|  | Shiraz-47T | 1031 | 0        | -0.117529 |  |
|  | Shiraz-49T | 1121 | 0        | -0.138569 |  |
|  | Shiraz-77T | 1225 | 0        | -0.117922 |  |
|  | Shiraz-77T | 1228 | 0        | -0.238084 |  |
|  | Shiraz-18T | 1434 | 0.244465 | 0         |  |
|  | Shiraz-22T | 1549 | 0        | -0.319623 |  |
|  | Shiraz-22T | 1552 | 0        | -0.50686  |  |
|  | Shiraz-25T | 1698 | 0.21835  | 0         |  |
|  | Shiraz-28T | 1735 | 0.350744 | 0         |  |
|  | Shiraz-29T | 1778 | 0.120767 | 0         |  |
|  | Shiraz-32T | 1833 | 0.551336 | 0         |  |
|  | Shiraz-32T | 1835 | 0.092727 | 0         |  |
|  | Shiraz-38T | 1951 | 0.250891 | 0         |  |

|       |      |            |      |          |           |  |
|-------|------|------------|------|----------|-----------|--|
|       |      | Shiraz-53T | 2078 | 0.287202 | 0         |  |
|       |      | Shiraz-58T | 2161 | 0        | -0.187744 |  |
|       |      | Shiraz-71T | 2238 | 0.603631 | 0         |  |
| CALCR | chr7 | Shiraz-3T  | 90   | 0.219276 | 0         |  |
|       |      | Shiraz-3T  | 93   | 0        | -0.058023 |  |
|       |      | Shiraz-4T  | 253  | 0.372918 | 0         |  |
|       |      | Shiraz-36T | 378  | 0.179558 | 0         |  |
|       |      | Shiraz-36T | 380  | 0.083883 | 0         |  |
|       |      | Shiraz-44T | 638  | 0        | -0.433476 |  |
|       |      | Shiraz-46T | 943  | 0.093799 | 0         |  |
|       |      | Shiraz-46T | 945  | 0        | -0.014838 |  |
|       |      | Shiraz-47T | 1029 | 0        | -0.096586 |  |
|       |      | Shiraz-49T | 1119 | 0        | -0.157331 |  |
|       |      | Shiraz-77T | 1225 | 0        | -0.117922 |  |
|       |      | Shiraz-18T | 1434 | 0.244465 | 0         |  |
|       |      | Shiraz-22T | 1549 | 0        | -0.319623 |  |
|       |      | Shiraz-25T | 1698 | 0.21835  | 0         |  |
|       |      | Shiraz-28T | 1735 | 0.350744 | 0         |  |
|       |      | Shiraz-29T | 1778 | 0.120767 | 0         |  |
|       |      | Shiraz-32T | 1833 | 0.551336 | 0         |  |
|       |      | Shiraz-38T | 1951 | 0.250891 | 0         |  |
|       |      | Shiraz-53T | 2078 | 0.287202 | 0         |  |
|       |      | Shiraz-58T | 2159 | 0        | -0.219521 |  |
|       |      | Shiraz-71T | 2238 | 0.603631 | 0         |  |
|       |      | Shiraz-3T  | 90   | 0.219276 | 0         |  |
|       |      | Shiraz-3T  | 93   | 0        | -0.058023 |  |
|       |      | Shiraz-4T  | 253  | 0.372918 | 0         |  |
|       |      | Shiraz-36T | 378  | 0.179558 | 0         |  |
|       |      | Shiraz-36T | 380  | 0.083883 | 0         |  |
|       |      | Shiraz-44T | 638  | 0        | -0.433476 |  |
|       |      | Shiraz-46T | 943  | 0.093799 | 0         |  |
|       |      | Shiraz-46T | 945  | 0        | -0.014838 |  |
|       |      | Shiraz-47T | 1029 | 0        | -0.096586 |  |
|       |      | Shiraz-49T | 1119 | 0        | -0.157331 |  |
|       |      | Shiraz-77T | 1225 | 0        | -0.117922 |  |
|       |      | Shiraz-18T | 1434 | 0.244465 | 0         |  |
|       |      | Shiraz-22T | 1549 | 0        | -0.319623 |  |
|       |      | Shiraz-25T | 1698 | 0.21835  | 0         |  |
|       |      | Shiraz-28T | 1735 | 0.350744 | 0         |  |
|       |      | Shiraz-29T | 1778 | 0.120767 | 0         |  |
|       |      | Shiraz-32T | 1833 | 0.551336 | 0         |  |
|       |      | Shiraz-38T | 1951 | 0.250891 | 0         |  |
|       |      | Shiraz-53T | 2078 | 0.287202 | 0         |  |
|       |      | Shiraz-58T | 2159 | 0        | -0.219521 |  |
|       |      | Shiraz-71T | 2238 | 0.603631 | 0         |  |
|       |      | Shiraz-3T  | 90   | 0.219276 | 0         |  |
|       |      | Shiraz-3T  | 93   | 0        | -0.058023 |  |

|       |      |            |      |          |           |  |
|-------|------|------------|------|----------|-----------|--|
|       |      | Shiraz-4T  | 253  | 0.372918 | 0         |  |
|       |      | Shiraz-36T | 378  | 0.179558 | 0         |  |
|       |      | Shiraz-36T | 380  | 0.083883 | 0         |  |
|       |      | Shiraz-44T | 638  | 0        | -0.433476 |  |
|       |      | Shiraz-46T | 943  | 0.093799 | 0         |  |
|       |      | Shiraz-46T | 945  | 0        | -0.014838 |  |
|       |      | Shiraz-47T | 1029 | 0        | -0.096586 |  |
|       |      | Shiraz-49T | 1119 | 0        | -0.157331 |  |
|       |      | Shiraz-77T | 1225 | 0        | -0.117922 |  |
|       |      | Shiraz-18T | 1434 | 0.244465 | 0         |  |
|       |      | Shiraz-22T | 1549 | 0        | -0.319623 |  |
|       |      | Shiraz-25T | 1698 | 0.21835  | 0         |  |
|       |      | Shiraz-28T | 1735 | 0.350744 | 0         |  |
|       |      | Shiraz-29T | 1778 | 0.120767 | 0         |  |
|       |      | Shiraz-32T | 1833 | 0.551336 | 0         |  |
|       |      | Shiraz-38T | 1951 | 0.250891 | 0         |  |
|       |      | Shiraz-53T | 2078 | 0.287202 | 0         |  |
|       |      | Shiraz-58T | 2159 | 0        | -0.219521 |  |
|       |      | Shiraz-71T | 2238 | 0.603631 | 0         |  |
| CALD1 | chr7 | Shiraz-3T  | 90   | 0.219276 | 0         |  |
|       |      | Shiraz-3T  | 90   | 0.219276 | 0         |  |
|       |      | Shiraz-4T  | 253  | 0.372918 | 0         |  |
|       |      | Shiraz-4T  | 253  | 0.372918 | 0         |  |
|       |      | Shiraz-36T | 378  | 0.179558 | 0         |  |
|       |      | Shiraz-36T | 378  | 0.179558 | 0         |  |
|       |      | Shiraz-46T | 943  | 0.093799 | 0         |  |
|       |      | Shiraz-46T | 943  | 0.093799 | 0         |  |
|       |      | Shiraz-77T | 1225 | 0        | -0.117922 |  |
|       |      | Shiraz-77T | 1225 | 0        | -0.117922 |  |
|       |      | Shiraz-9T  | 1325 | 0.221899 | 0         |  |
|       |      | Shiraz-9T  | 1325 | 0.221899 | 0         |  |
|       |      | Shiraz-18T | 1434 | 0.244465 | 0         |  |
|       |      | Shiraz-18T | 1434 | 0.244465 | 0         |  |
|       |      | Shiraz-22T | 1553 | 0        | -0.213234 |  |
|       |      | Shiraz-22T | 1553 | 0        | -0.213234 |  |
|       |      | Shiraz-25T | 1698 | 0.21835  | 0         |  |
|       |      | Shiraz-25T | 1698 | 0.21835  | 0         |  |
|       |      | Shiraz-28T | 1735 | 0.350744 | 0         |  |
|       |      | Shiraz-28T | 1735 | 0.350744 | 0         |  |
|       |      | Shiraz-29T | 1778 | 0.120767 | 0         |  |
|       |      | Shiraz-29T | 1778 | 0.120767 | 0         |  |
|       |      | Shiraz-32T | 1833 | 0.551336 | 0         |  |
|       |      | Shiraz-32T | 1833 | 0.551336 | 0         |  |
|       |      | Shiraz-38T | 1951 | 0.250891 | 0         |  |
|       |      | Shiraz-38T | 1951 | 0.250891 | 0         |  |
|       |      | Shiraz-53T | 2078 | 0.287202 | 0         |  |
|       |      | Shiraz-53T | 2078 | 0.287202 | 0         |  |

|  |            |      |          |           |  |
|--|------------|------|----------|-----------|--|
|  | Shiraz-58T | 2162 | 0.221505 | 0         |  |
|  | Shiraz-58T | 2162 | 0.221505 | 0         |  |
|  | Shiraz-71T | 2238 | 0.603631 | 0         |  |
|  | Shiraz-71T | 2238 | 0.603631 | 0         |  |
|  | Shiraz-3T  | 90   | 0.219276 | 0         |  |
|  | Shiraz-3T  | 90   | 0.219276 | 0         |  |
|  | Shiraz-4T  | 253  | 0.372918 | 0         |  |
|  | Shiraz-4T  | 253  | 0.372918 | 0         |  |
|  | Shiraz-36T | 378  | 0.179558 | 0         |  |
|  | Shiraz-36T | 378  | 0.179558 | 0         |  |
|  | Shiraz-46T | 943  | 0.093799 | 0         |  |
|  | Shiraz-46T | 943  | 0.093799 | 0         |  |
|  | Shiraz-77T | 1225 | 0        | -0.117922 |  |
|  | Shiraz-77T | 1225 | 0        | -0.117922 |  |
|  | Shiraz-9T  | 1325 | 0.221899 | 0         |  |
|  | Shiraz-9T  | 1325 | 0.221899 | 0         |  |
|  | Shiraz-18T | 1434 | 0.244465 | 0         |  |
|  | Shiraz-18T | 1434 | 0.244465 | 0         |  |
|  | Shiraz-22T | 1553 | 0        | -0.213234 |  |
|  | Shiraz-22T | 1553 | 0        | -0.213234 |  |
|  | Shiraz-25T | 1698 | 0.21835  | 0         |  |
|  | Shiraz-25T | 1698 | 0.21835  | 0         |  |
|  | Shiraz-28T | 1735 | 0.350744 | 0         |  |
|  | Shiraz-28T | 1735 | 0.350744 | 0         |  |
|  | Shiraz-29T | 1778 | 0.120767 | 0         |  |
|  | Shiraz-29T | 1778 | 0.120767 | 0         |  |
|  | Shiraz-32T | 1833 | 0.551336 | 0         |  |
|  | Shiraz-32T | 1833 | 0.551336 | 0         |  |
|  | Shiraz-38T | 1951 | 0.250891 | 0         |  |
|  | Shiraz-38T | 1951 | 0.250891 | 0         |  |
|  | Shiraz-53T | 2078 | 0.287202 | 0         |  |
|  | Shiraz-53T | 2078 | 0.287202 | 0         |  |
|  | Shiraz-58T | 2162 | 0.221505 | 0         |  |
|  | Shiraz-58T | 2162 | 0.221505 | 0         |  |
|  | Shiraz-71T | 2238 | 0.603631 | 0         |  |
|  | Shiraz-71T | 2238 | 0.603631 | 0         |  |
|  | Shiraz-3T  | 90   | 0.219276 | 0         |  |
|  | Shiraz-3T  | 90   | 0.219276 | 0         |  |
|  | Shiraz-4T  | 253  | 0.372918 | 0         |  |
|  | Shiraz-4T  | 253  | 0.372918 | 0         |  |
|  | Shiraz-36T | 378  | 0.179558 | 0         |  |
|  | Shiraz-36T | 378  | 0.179558 | 0         |  |
|  | Shiraz-46T | 943  | 0.093799 | 0         |  |
|  | Shiraz-46T | 943  | 0.093799 | 0         |  |
|  | Shiraz-77T | 1225 | 0        | -0.117922 |  |
|  | Shiraz-77T | 1225 | 0        | -0.117922 |  |
|  | Shiraz-9T  | 1325 | 0.221899 | 0         |  |

|      |      |            |      |          |           |  |
|------|------|------------|------|----------|-----------|--|
|      |      | Shiraz-9T  | 1325 | 0.221899 | 0         |  |
|      |      | Shiraz-18T | 1434 | 0.244465 | 0         |  |
|      |      | Shiraz-18T | 1434 | 0.244465 | 0         |  |
|      |      | Shiraz-22T | 1553 | 0        | -0.213234 |  |
|      |      | Shiraz-22T | 1553 | 0        | -0.213234 |  |
|      |      | Shiraz-25T | 1698 | 0.21835  | 0         |  |
|      |      | Shiraz-25T | 1698 | 0.21835  | 0         |  |
|      |      | Shiraz-28T | 1735 | 0.350744 | 0         |  |
|      |      | Shiraz-28T | 1735 | 0.350744 | 0         |  |
|      |      | Shiraz-29T | 1778 | 0.120767 | 0         |  |
|      |      | Shiraz-29T | 1778 | 0.120767 | 0         |  |
|      |      | Shiraz-32T | 1833 | 0.551336 | 0         |  |
|      |      | Shiraz-32T | 1833 | 0.551336 | 0         |  |
|      |      | Shiraz-38T | 1951 | 0.250891 | 0         |  |
|      |      | Shiraz-38T | 1951 | 0.250891 | 0         |  |
|      |      | Shiraz-53T | 2078 | 0.287202 | 0         |  |
|      |      | Shiraz-53T | 2078 | 0.287202 | 0         |  |
|      |      | Shiraz-58T | 2162 | 0.221505 | 0         |  |
|      |      | Shiraz-58T | 2162 | 0.221505 | 0         |  |
|      |      | Shiraz-71T | 2238 | 0.603631 | 0         |  |
|      |      | Shiraz-71T | 2238 | 0.603631 | 0         |  |
| CALU | chr7 | Shiraz-3T  | 90   | 0.219276 | 0         |  |
|      |      | Shiraz-3T  | 96   | 0.428308 | 0         |  |
|      |      | Shiraz-4T  | 253  | 0.372918 | 0         |  |
|      |      | Shiraz-31T | 317  | 0.204382 | 0         |  |
|      |      | Shiraz-36T | 378  | 0.179558 | 0         |  |
|      |      | Shiraz-44T | 642  | 0.408617 | 0         |  |
|      |      | Shiraz-46T | 943  | 0.093799 | 0         |  |
|      |      | Shiraz-47T | 1032 | 0.171484 | 0         |  |
|      |      | Shiraz-77T | 1225 | 0        | -0.117922 |  |
|      |      | Shiraz-77T | 1229 | 0.051661 | 0         |  |
|      |      | Shiraz-9T  | 1325 | 0.221899 | 0         |  |
|      |      | Shiraz-18T | 1434 | 0.244465 | 0         |  |
|      |      | Shiraz-25T | 1698 | 0.21835  | 0         |  |
|      |      | Shiraz-28T | 1735 | 0.350744 | 0         |  |
|      |      | Shiraz-29T | 1778 | 0.120767 | 0         |  |
|      |      | Shiraz-32T | 1833 | 0.551336 | 0         |  |
|      |      | Shiraz-38T | 1951 | 0.250891 | 0         |  |
|      |      | Shiraz-53T | 2078 | 0.287202 | 0         |  |
|      |      | Shiraz-71T | 2238 | 0.603631 | 0         |  |
|      |      | Shiraz-3T  | 90   | 0.219276 | 0         |  |
|      |      | Shiraz-3T  | 96   | 0.428308 | 0         |  |
|      |      | Shiraz-4T  | 253  | 0.372918 | 0         |  |
|      |      | Shiraz-31T | 317  | 0.204382 | 0         |  |
|      |      | Shiraz-36T | 378  | 0.179558 | 0         |  |
|      |      | Shiraz-44T | 642  | 0.408617 | 0         |  |
|      |      | Shiraz-46T | 943  | 0.093799 | 0         |  |



|        |      |            |      |          |           |  |  |
|--------|------|------------|------|----------|-----------|--|--|
|        |      | Shiraz-47T | 1032 | 0.171484 | 0         |  |  |
|        |      | Shiraz-77T | 1225 | 0        | -0.117922 |  |  |
|        |      | Shiraz-77T | 1229 | 0.051661 | 0         |  |  |
|        |      | Shiraz-9T  | 1325 | 0.221899 | 0         |  |  |
|        |      | Shiraz-18T | 1434 | 0.244465 | 0         |  |  |
|        |      | Shiraz-25T | 1698 | 0.21835  | 0         |  |  |
|        |      | Shiraz-28T | 1735 | 0.350744 | 0         |  |  |
|        |      | Shiraz-29T | 1778 | 0.120767 | 0         |  |  |
|        |      | Shiraz-32T | 1833 | 0.551336 | 0         |  |  |
|        |      | Shiraz-38T | 1951 | 0.250891 | 0         |  |  |
|        |      | Shiraz-53T | 2078 | 0.287202 | 0         |  |  |
|        |      | Shiraz-71T | 2238 | 0.603631 | 0         |  |  |
|        |      | Shiraz-3T  | 90   | 0.219276 | 0         |  |  |
|        |      | Shiraz-3T  | 96   | 0.428308 | 0         |  |  |
|        |      | Shiraz-4T  | 253  | 0.372918 | 0         |  |  |
|        |      | Shiraz-31T | 317  | 0.204382 | 0         |  |  |
|        |      | Shiraz-36T | 378  | 0.179558 | 0         |  |  |
|        |      | Shiraz-44T | 642  | 0.408617 | 0         |  |  |
|        |      | Shiraz-46T | 943  | 0.093799 | 0         |  |  |
|        |      | Shiraz-47T | 1032 | 0.171484 | 0         |  |  |
|        |      | Shiraz-77T | 1225 | 0        | -0.117922 |  |  |
|        |      | Shiraz-77T | 1229 | 0.051661 | 0         |  |  |
|        |      | Shiraz-9T  | 1325 | 0.221899 | 0         |  |  |
|        |      | Shiraz-18T | 1434 | 0.244465 | 0         |  |  |
|        |      | Shiraz-25T | 1698 | 0.21835  | 0         |  |  |
|        |      | Shiraz-28T | 1735 | 0.350744 | 0         |  |  |
|        |      | Shiraz-29T | 1778 | 0.120767 | 0         |  |  |
|        |      | Shiraz-32T | 1833 | 0.551336 | 0         |  |  |
|        |      | Shiraz-38T | 1951 | 0.250891 | 0         |  |  |
|        |      | Shiraz-53T | 2078 | 0.287202 | 0         |  |  |
|        |      | Shiraz-71T | 2238 | 0.603631 | 0         |  |  |
| CAMK2B | chr7 | Shiraz-3T  | 87   | 0.198593 | 0         |  |  |
|        |      | Shiraz-3T  | 89   | 0.678641 | 0         |  |  |
|        |      | Shiraz-4T  | 252  | 0.192083 | 0         |  |  |
|        |      | Shiraz-36T | 376  | 0.159952 | 0         |  |  |
|        |      | Shiraz-44T | 632  | 0.902944 | 0         |  |  |
|        |      | Shiraz-46T | 942  | 0.069143 | 0         |  |  |
|        |      | Shiraz-77T | 1223 | 0.215647 | 0         |  |  |
|        |      | Shiraz-18T | 1433 | 0.250973 | 0         |  |  |
|        |      | Shiraz-25T | 1697 | 0.21945  | 0         |  |  |
|        |      | Shiraz-28T | 1734 | 0.362882 | 0         |  |  |
|        |      | Shiraz-29T | 1777 | 0.156747 | 0         |  |  |
|        |      | Shiraz-38T | 1950 | 0.265916 | 0         |  |  |
|        |      | Shiraz-71T | 2236 | 0.320072 | 0         |  |  |
|        |      | Shiraz-3T  | 87   | 0.198593 | 0         |  |  |
|        |      | Shiraz-3T  | 89   | 0.678641 | 0         |  |  |
|        |      | Shiraz-4T  | 252  | 0.192083 | 0         |  |  |

|       |      |            |      |          |           |  |
|-------|------|------------|------|----------|-----------|--|
|       |      | Shiraz-36T | 376  | 0.159952 | 0         |  |
|       |      | Shiraz-44T | 632  | 0.902944 | 0         |  |
|       |      | Shiraz-46T | 942  | 0.069143 | 0         |  |
|       |      | Shiraz-77T | 1223 | 0.215647 | 0         |  |
|       |      | Shiraz-18T | 1433 | 0.250973 | 0         |  |
|       |      | Shiraz-25T | 1697 | 0.21945  | 0         |  |
|       |      | Shiraz-28T | 1734 | 0.362882 | 0         |  |
|       |      | Shiraz-29T | 1777 | 0.156747 | 0         |  |
|       |      | Shiraz-38T | 1950 | 0.265916 | 0         |  |
|       |      | Shiraz-71T | 2236 | 0.320072 | 0         |  |
|       |      | Shiraz-3T  | 87   | 0.198593 | 0         |  |
|       |      | Shiraz-3T  | 89   | 0.678641 | 0         |  |
|       |      | Shiraz-4T  | 252  | 0.192083 | 0         |  |
|       |      | Shiraz-36T | 376  | 0.159952 | 0         |  |
|       |      | Shiraz-44T | 632  | 0.902944 | 0         |  |
|       |      | Shiraz-46T | 942  | 0.069143 | 0         |  |
|       |      | Shiraz-77T | 1223 | 0.215647 | 0         |  |
|       |      | Shiraz-18T | 1433 | 0.250973 | 0         |  |
|       |      | Shiraz-25T | 1697 | 0.21945  | 0         |  |
|       |      | Shiraz-28T | 1734 | 0.362882 | 0         |  |
|       |      | Shiraz-29T | 1777 | 0.156747 | 0         |  |
|       |      | Shiraz-38T | 1950 | 0.265916 | 0         |  |
|       |      | Shiraz-71T | 2236 | 0.320072 | 0         |  |
| CAPN6 | chrX | Shiraz-3T  | 242  | 0        | -0.336434 |  |
|       |      | Shiraz-4T  | 261  | 0        | -0.336249 |  |
|       |      | Shiraz-16T | 295  | 0.591657 | 0         |  |
|       |      | Shiraz-36T | 433  | 0        | -0.803961 |  |
|       |      | Shiraz-44T | 899  | 0        | -1.09697  |  |
|       |      | Shiraz-49T | 1170 | 0        | -0.967436 |  |
|       |      | Shiraz-18T | 1457 | 0.643204 | 0         |  |
|       |      | Shiraz-22T | 1673 | 0.611783 | 0         |  |
|       |      | Shiraz-25T | 1719 | 0.472955 | 0         |  |
|       |      | Shiraz-28T | 1762 | 0.562311 | 0         |  |
|       |      | Shiraz-29T | 1801 | 0.815343 | 0         |  |
|       |      | Shiraz-32T | 1870 | 0.729766 | 0         |  |
|       |      | Shiraz-35T | 1933 | 0.488535 | 0         |  |
|       |      | Shiraz-58T | 2223 | 0.833364 | 0         |  |
|       |      | Shiraz-71T | 2263 | 0.975531 | 0         |  |
|       |      | Shiraz-3T  | 242  | 0        | -0.336434 |  |
|       |      | Shiraz-4T  | 261  | 0        | -0.336249 |  |
|       |      | Shiraz-16T | 295  | 0.591657 | 0         |  |
|       |      | Shiraz-36T | 433  | 0        | -0.803961 |  |
|       |      | Shiraz-44T | 899  | 0        | -1.09697  |  |
|       |      | Shiraz-49T | 1170 | 0        | -0.967436 |  |
|       |      | Shiraz-18T | 1457 | 0.643204 | 0         |  |
|       |      | Shiraz-22T | 1673 | 0.611783 | 0         |  |
|       |      | Shiraz-25T | 1719 | 0.472955 | 0         |  |

|       |      |            |      |          |           |  |  |
|-------|------|------------|------|----------|-----------|--|--|
|       |      | Shiraz-28T | 1762 | 0.562311 | 0         |  |  |
|       |      | Shiraz-29T | 1801 | 0.815343 | 0         |  |  |
|       |      | Shiraz-32T | 1870 | 0.729766 | 0         |  |  |
|       |      | Shiraz-35T | 1933 | 0.488535 | 0         |  |  |
|       |      | Shiraz-58T | 2223 | 0.833364 | 0         |  |  |
|       |      | Shiraz-71T | 2263 | 0.975531 | 0         |  |  |
|       |      | Shiraz-3T  | 242  | 0        | -0.336434 |  |  |
|       |      | Shiraz-4T  | 261  | 0        | -0.336249 |  |  |
|       |      | Shiraz-16T | 295  | 0.591657 | 0         |  |  |
|       |      | Shiraz-36T | 433  | 0        | -0.803961 |  |  |
|       |      | Shiraz-44T | 899  | 0        | -1.09697  |  |  |
|       |      | Shiraz-49T | 1170 | 0        | -0.967436 |  |  |
|       |      | Shiraz-18T | 1457 | 0.643204 | 0         |  |  |
|       |      | Shiraz-22T | 1673 | 0.611783 | 0         |  |  |
|       |      | Shiraz-25T | 1719 | 0.472955 | 0         |  |  |
|       |      | Shiraz-28T | 1762 | 0.562311 | 0         |  |  |
|       |      | Shiraz-29T | 1801 | 0.815343 | 0         |  |  |
|       |      | Shiraz-32T | 1870 | 0.729766 | 0         |  |  |
|       |      | Shiraz-35T | 1933 | 0.488535 | 0         |  |  |
|       |      | Shiraz-58T | 2223 | 0.833364 | 0         |  |  |
|       |      | Shiraz-71T | 2263 | 0.975531 | 0         |  |  |
| CAPSL | chr5 | Shiraz-4T  | 250  | 0.262252 | 0         |  |  |
|       |      | Shiraz-4T  | 250  | 0.262252 | 0         |  |  |
|       |      | Shiraz-16T | 266  | 0.321724 | 0         |  |  |
|       |      | Shiraz-16T | 266  | 0.321724 | 0         |  |  |
|       |      | Shiraz-44T | 591  | 0        | -0.233934 |  |  |
|       |      | Shiraz-44T | 591  | 0        | -0.233934 |  |  |
|       |      | Shiraz-18T | 1429 | 0        | -0.314125 |  |  |
|       |      | Shiraz-18T | 1429 | 0        | -0.314125 |  |  |
|       |      | Shiraz-22T | 1522 | 0        | -0.322688 |  |  |
|       |      | Shiraz-22T | 1522 | 0        | -0.322688 |  |  |
|       |      | Shiraz-25T | 1694 | 0.201602 | 0         |  |  |
|       |      | Shiraz-25T | 1694 | 0.201602 | 0         |  |  |
|       |      | Shiraz-28T | 1731 | 0.295447 | 0         |  |  |
|       |      | Shiraz-28T | 1731 | 0.295447 | 0         |  |  |
|       |      | Shiraz-29T | 1773 | 0.090981 | 0         |  |  |
|       |      | Shiraz-29T | 1773 | 0.090981 | 0         |  |  |
|       |      | Shiraz-40T | 2016 | 0.376634 | 0         |  |  |
|       |      | Shiraz-40T | 2016 | 0.376634 | 0         |  |  |
|       |      | Shiraz-4T  | 250  | 0.262252 | 0         |  |  |
|       |      | Shiraz-4T  | 250  | 0.262252 | 0         |  |  |
|       |      | Shiraz-16T | 266  | 0.321724 | 0         |  |  |
|       |      | Shiraz-16T | 266  | 0.321724 | 0         |  |  |
|       |      | Shiraz-44T | 591  | 0        | -0.233934 |  |  |
|       |      | Shiraz-44T | 591  | 0        | -0.233934 |  |  |
|       |      | Shiraz-18T | 1429 | 0        | -0.314125 |  |  |
|       |      | Shiraz-18T | 1429 | 0        | -0.314125 |  |  |

|        |      |            |      |          |           |  |  |
|--------|------|------------|------|----------|-----------|--|--|
|        |      | Shiraz-22T | 1522 | 0        | -0.322688 |  |  |
|        |      | Shiraz-22T | 1522 | 0        | -0.322688 |  |  |
|        |      | Shiraz-25T | 1694 | 0.201602 | 0         |  |  |
|        |      | Shiraz-25T | 1694 | 0.201602 | 0         |  |  |
|        |      | Shiraz-28T | 1731 | 0.295447 | 0         |  |  |
|        |      | Shiraz-28T | 1731 | 0.295447 | 0         |  |  |
|        |      | Shiraz-29T | 1773 | 0.090981 | 0         |  |  |
|        |      | Shiraz-29T | 1773 | 0.090981 | 0         |  |  |
|        |      | Shiraz-40T | 2016 | 0.376634 | 0         |  |  |
|        |      | Shiraz-40T | 2016 | 0.376634 | 0         |  |  |
|        |      | Shiraz-4T  | 250  | 0.262252 | 0         |  |  |
|        |      | Shiraz-4T  | 250  | 0.262252 | 0         |  |  |
|        |      | Shiraz-16T | 266  | 0.321724 | 0         |  |  |
|        |      | Shiraz-16T | 266  | 0.321724 | 0         |  |  |
|        |      | Shiraz-44T | 591  | 0        | -0.233934 |  |  |
|        |      | Shiraz-44T | 591  | 0        | -0.233934 |  |  |
|        |      | Shiraz-18T | 1429 | 0        | -0.314125 |  |  |
|        |      | Shiraz-18T | 1429 | 0        | -0.314125 |  |  |
|        |      | Shiraz-22T | 1522 | 0        | -0.322688 |  |  |
|        |      | Shiraz-22T | 1522 | 0        | -0.322688 |  |  |
|        |      | Shiraz-25T | 1694 | 0.201602 | 0         |  |  |
|        |      | Shiraz-25T | 1694 | 0.201602 | 0         |  |  |
|        |      | Shiraz-28T | 1731 | 0.295447 | 0         |  |  |
|        |      | Shiraz-28T | 1731 | 0.295447 | 0         |  |  |
|        |      | Shiraz-29T | 1773 | 0.090981 | 0         |  |  |
|        |      | Shiraz-29T | 1773 | 0.090981 | 0         |  |  |
|        |      | Shiraz-40T | 2016 | 0.376634 | 0         |  |  |
|        |      | Shiraz-40T | 2016 | 0.376634 | 0         |  |  |
| CAPZA2 | chr7 | Shiraz-3T  | 90   | 0.219276 | 0         |  |  |
|        |      | Shiraz-3T  | 95   | 0        | -0.077623 |  |  |
|        |      | Shiraz-4T  | 253  | 0.372918 | 0         |  |  |
|        |      | Shiraz-36T | 378  | 0.179558 | 0         |  |  |
|        |      | Shiraz-36T | 382  | 0.081739 | 0         |  |  |
|        |      | Shiraz-44T | 641  | 0        | -0.477846 |  |  |
|        |      | Shiraz-46T | 943  | 0.093799 | 0         |  |  |
|        |      | Shiraz-46T | 947  | 0        | -0.010843 |  |  |
|        |      | Shiraz-47T | 1031 | 0        | -0.117529 |  |  |
|        |      | Shiraz-49T | 1121 | 0        | -0.138569 |  |  |
|        |      | Shiraz-77T | 1225 | 0        | -0.117922 |  |  |
|        |      | Shiraz-77T | 1228 | 0        | -0.238084 |  |  |
|        |      | Shiraz-18T | 1434 | 0.244465 | 0         |  |  |
|        |      | Shiraz-22T | 1549 | 0        | -0.319623 |  |  |
|        |      | Shiraz-22T | 1552 | 0        | -0.50686  |  |  |
|        |      | Shiraz-25T | 1698 | 0.21835  | 0         |  |  |
|        |      | Shiraz-28T | 1735 | 0.350744 | 0         |  |  |
|        |      | Shiraz-29T | 1778 | 0.120767 | 0         |  |  |
|        |      | Shiraz-32T | 1833 | 0.551336 | 0         |  |  |

|  |            |      |          |           |  |
|--|------------|------|----------|-----------|--|
|  | Shiraz-32T | 1835 | 0.092727 | 0         |  |
|  | Shiraz-38T | 1951 | 0.250891 | 0         |  |
|  | Shiraz-53T | 2078 | 0.287202 | 0         |  |
|  | Shiraz-58T | 2161 | 0        | -0.187744 |  |
|  | Shiraz-71T | 2238 | 0.603631 | 0         |  |
|  | Shiraz-3T  | 90   | 0.219276 | 0         |  |
|  | Shiraz-3T  | 95   | 0        | -0.077623 |  |
|  | Shiraz-4T  | 253  | 0.372918 | 0         |  |
|  | Shiraz-36T | 378  | 0.179558 | 0         |  |
|  | Shiraz-36T | 382  | 0.081739 | 0         |  |
|  | Shiraz-44T | 641  | 0        | -0.477846 |  |
|  | Shiraz-46T | 943  | 0.093799 | 0         |  |
|  | Shiraz-46T | 947  | 0        | -0.010843 |  |
|  | Shiraz-47T | 1031 | 0        | -0.117529 |  |
|  | Shiraz-49T | 1121 | 0        | -0.138569 |  |
|  | Shiraz-77T | 1225 | 0        | -0.117922 |  |
|  | Shiraz-77T | 1228 | 0        | -0.238084 |  |
|  | Shiraz-18T | 1434 | 0.244465 | 0         |  |
|  | Shiraz-22T | 1549 | 0        | -0.319623 |  |
|  | Shiraz-22T | 1552 | 0        | -0.50686  |  |
|  | Shiraz-25T | 1698 | 0.21835  | 0         |  |
|  | Shiraz-28T | 1735 | 0.350744 | 0         |  |
|  | Shiraz-29T | 1778 | 0.120767 | 0         |  |
|  | Shiraz-32T | 1833 | 0.551336 | 0         |  |
|  | Shiraz-32T | 1835 | 0.092727 | 0         |  |
|  | Shiraz-38T | 1951 | 0.250891 | 0         |  |
|  | Shiraz-53T | 2078 | 0.287202 | 0         |  |
|  | Shiraz-58T | 2161 | 0        | -0.187744 |  |
|  | Shiraz-71T | 2238 | 0.603631 | 0         |  |
|  | Shiraz-3T  | 90   | 0.219276 | 0         |  |
|  | Shiraz-3T  | 95   | 0        | -0.077623 |  |
|  | Shiraz-4T  | 253  | 0.372918 | 0         |  |
|  | Shiraz-36T | 378  | 0.179558 | 0         |  |
|  | Shiraz-36T | 382  | 0.081739 | 0         |  |
|  | Shiraz-44T | 641  | 0        | -0.477846 |  |
|  | Shiraz-46T | 943  | 0.093799 | 0         |  |
|  | Shiraz-46T | 947  | 0        | -0.010843 |  |
|  | Shiraz-47T | 1031 | 0        | -0.117529 |  |
|  | Shiraz-49T | 1121 | 0        | -0.138569 |  |
|  | Shiraz-77T | 1225 | 0        | -0.117922 |  |
|  | Shiraz-77T | 1228 | 0        | -0.238084 |  |
|  | Shiraz-18T | 1434 | 0.244465 | 0         |  |
|  | Shiraz-22T | 1549 | 0        | -0.319623 |  |
|  | Shiraz-22T | 1552 | 0        | -0.50686  |  |
|  | Shiraz-25T | 1698 | 0.21835  | 0         |  |
|  | Shiraz-28T | 1735 | 0.350744 | 0         |  |
|  | Shiraz-29T | 1778 | 0.120767 | 0         |  |

|       |      |            |      |          |           |  |
|-------|------|------------|------|----------|-----------|--|
|       |      | Shiraz-32T | 1833 | 0.551336 | 0         |  |
|       |      | Shiraz-32T | 1835 | 0.092727 | 0         |  |
|       |      | Shiraz-38T | 1951 | 0.250891 | 0         |  |
|       |      | Shiraz-53T | 2078 | 0.287202 | 0         |  |
|       |      | Shiraz-58T | 2161 | 0        | -0.187744 |  |
|       |      | Shiraz-71T | 2238 | 0.603631 | 0         |  |
| CARD6 | chr5 | Shiraz-4T  | 250  | 0.262252 | 0         |  |
|       |      | Shiraz-16T | 266  | 0.321724 | 0         |  |
|       |      | Shiraz-44T | 591  | 0        | -0.233934 |  |
|       |      | Shiraz-18T | 1429 | 0        | -0.314125 |  |
|       |      | Shiraz-22T | 1522 | 0        | -0.322688 |  |
|       |      | Shiraz-25T | 1694 | 0.201602 | 0         |  |
|       |      | Shiraz-28T | 1731 | 0.295447 | 0         |  |
|       |      | Shiraz-29T | 1773 | 0.090981 | 0         |  |
|       |      | Shiraz-40T | 2016 | 0.376634 | 0         |  |
|       |      | Shiraz-4T  | 250  | 0.262252 | 0         |  |
|       |      | Shiraz-16T | 266  | 0.321724 | 0         |  |
|       |      | Shiraz-44T | 591  | 0        | -0.233934 |  |
|       |      | Shiraz-18T | 1429 | 0        | -0.314125 |  |
|       |      | Shiraz-22T | 1522 | 0        | -0.322688 |  |
|       |      | Shiraz-25T | 1694 | 0.201602 | 0         |  |
|       |      | Shiraz-28T | 1731 | 0.295447 | 0         |  |
|       |      | Shiraz-29T | 1773 | 0.090981 | 0         |  |
|       |      | Shiraz-40T | 2016 | 0.376634 | 0         |  |
|       |      | Shiraz-4T  | 250  | 0.262252 | 0         |  |
|       |      | Shiraz-16T | 266  | 0.321724 | 0         |  |
|       |      | Shiraz-44T | 591  | 0        | -0.233934 |  |
|       |      | Shiraz-18T | 1429 | 0        | -0.314125 |  |
|       |      | Shiraz-22T | 1522 | 0        | -0.322688 |  |
|       |      | Shiraz-25T | 1694 | 0.201602 | 0         |  |
|       |      | Shiraz-28T | 1731 | 0.295447 | 0         |  |
|       |      | Shiraz-29T | 1773 | 0.090981 | 0         |  |
|       |      | Shiraz-40T | 2016 | 0.376634 | 0         |  |
| CASD1 | chr7 | Shiraz-3T  | 90   | 0.219276 | 0         |  |
|       |      | Shiraz-3T  | 93   | 0        | -0.058023 |  |
|       |      | Shiraz-4T  | 253  | 0.372918 | 0         |  |
|       |      | Shiraz-36T | 378  | 0.179558 | 0         |  |
|       |      | Shiraz-36T | 380  | 0.083883 | 0         |  |
|       |      | Shiraz-44T | 638  | 0        | -0.433476 |  |
|       |      | Shiraz-46T | 943  | 0.093799 | 0         |  |
|       |      | Shiraz-46T | 945  | 0        | -0.014838 |  |
|       |      | Shiraz-47T | 1029 | 0        | -0.096586 |  |
|       |      | Shiraz-49T | 1119 | 0        | -0.157331 |  |
|       |      | Shiraz-77T | 1225 | 0        | -0.117922 |  |
|       |      | Shiraz-18T | 1434 | 0.244465 | 0         |  |
|       |      | Shiraz-22T | 1549 | 0        | -0.319623 |  |
|       |      | Shiraz-25T | 1698 | 0.21835  | 0         |  |

|  |  |            |      |          |           |  |  |
|--|--|------------|------|----------|-----------|--|--|
|  |  | Shiraz-28T | 1735 | 0.350744 | 0         |  |  |
|  |  | Shiraz-29T | 1778 | 0.120767 | 0         |  |  |
|  |  | Shiraz-32T | 1833 | 0.551336 | 0         |  |  |
|  |  | Shiraz-38T | 1951 | 0.250891 | 0         |  |  |
|  |  | Shiraz-53T | 2078 | 0.287202 | 0         |  |  |
|  |  | Shiraz-58T | 2159 | 0        | -0.219521 |  |  |
|  |  | Shiraz-71T | 2238 | 0.603631 | 0         |  |  |
|  |  | Shiraz-3T  | 90   | 0.219276 | 0         |  |  |
|  |  | Shiraz-3T  | 93   | 0        | -0.058023 |  |  |
|  |  | Shiraz-4T  | 253  | 0.372918 | 0         |  |  |
|  |  | Shiraz-36T | 378  | 0.179558 | 0         |  |  |
|  |  | Shiraz-36T | 380  | 0.083883 | 0         |  |  |
|  |  | Shiraz-44T | 638  | 0        | -0.433476 |  |  |
|  |  | Shiraz-46T | 943  | 0.093799 | 0         |  |  |
|  |  | Shiraz-46T | 945  | 0        | -0.014838 |  |  |
|  |  | Shiraz-47T | 1029 | 0        | -0.096586 |  |  |
|  |  | Shiraz-49T | 1119 | 0        | -0.157331 |  |  |
|  |  | Shiraz-77T | 1225 | 0        | -0.117922 |  |  |
|  |  | Shiraz-18T | 1434 | 0.244465 | 0         |  |  |
|  |  | Shiraz-22T | 1549 | 0        | -0.319623 |  |  |
|  |  | Shiraz-25T | 1698 | 0.21835  | 0         |  |  |
|  |  | Shiraz-28T | 1735 | 0.350744 | 0         |  |  |
|  |  | Shiraz-29T | 1778 | 0.120767 | 0         |  |  |
|  |  | Shiraz-32T | 1833 | 0.551336 | 0         |  |  |
|  |  | Shiraz-38T | 1951 | 0.250891 | 0         |  |  |
|  |  | Shiraz-53T | 2078 | 0.287202 | 0         |  |  |
|  |  | Shiraz-58T | 2159 | 0        | -0.219521 |  |  |
|  |  | Shiraz-71T | 2238 | 0.603631 | 0         |  |  |
|  |  | Shiraz-3T  | 90   | 0.219276 | 0         |  |  |
|  |  | Shiraz-3T  | 93   | 0        | -0.058023 |  |  |
|  |  | Shiraz-4T  | 253  | 0.372918 | 0         |  |  |
|  |  | Shiraz-36T | 378  | 0.179558 | 0         |  |  |
|  |  | Shiraz-36T | 380  | 0.083883 | 0         |  |  |
|  |  | Shiraz-44T | 638  | 0        | -0.433476 |  |  |
|  |  | Shiraz-46T | 943  | 0.093799 | 0         |  |  |
|  |  | Shiraz-46T | 945  | 0        | -0.014838 |  |  |
|  |  | Shiraz-47T | 1029 | 0        | -0.096586 |  |  |
|  |  | Shiraz-49T | 1119 | 0        | -0.157331 |  |  |
|  |  | Shiraz-77T | 1225 | 0        | -0.117922 |  |  |
|  |  | Shiraz-18T | 1434 | 0.244465 | 0         |  |  |
|  |  | Shiraz-22T | 1549 | 0        | -0.319623 |  |  |
|  |  | Shiraz-25T | 1698 | 0.21835  | 0         |  |  |
|  |  | Shiraz-28T | 1735 | 0.350744 | 0         |  |  |
|  |  | Shiraz-29T | 1778 | 0.120767 | 0         |  |  |
|  |  | Shiraz-32T | 1833 | 0.551336 | 0         |  |  |
|  |  | Shiraz-38T | 1951 | 0.250891 | 0         |  |  |
|  |  | Shiraz-53T | 2078 | 0.287202 | 0         |  |  |

|      |      |            |      |          |           |  |  |
|------|------|------------|------|----------|-----------|--|--|
|      |      | Shiraz-58T | 2159 | 0        | -0.219521 |  |  |
|      |      | Shiraz-71T | 2238 | 0.603631 | 0         |  |  |
| CASK | chrX | Shiraz-3T  | 235  | 0        | -0.28401  |  |  |
|      |      | Shiraz-4T  | 260  | 0        | -0.324128 |  |  |
|      |      | Shiraz-16T | 294  | 0.655804 | 0         |  |  |
|      |      | Shiraz-31T | 345  | 0.103301 | 0         |  |  |
|      |      | Shiraz-36T | 431  | 0        | -0.78035  |  |  |
|      |      | Shiraz-36T | 432  | 0        | -0.6692   |  |  |
|      |      | Shiraz-44T | 891  | 0        | -0.954044 |  |  |
|      |      | Shiraz-46T | 991  | 0.139564 | 0         |  |  |
|      |      | Shiraz-49T | 1166 | 0        | -0.917235 |  |  |
|      |      | Shiraz-9T  | 1368 | 0.199713 | 0         |  |  |
|      |      | Shiraz-18T | 1455 | 0        | -0.186773 |  |  |
|      |      | Shiraz-22T | 1669 | 0.695915 | 0         |  |  |
|      |      | Shiraz-25T | 1717 | 0.420447 | 0         |  |  |
|      |      | Shiraz-28T | 1760 | 0.538181 | 0         |  |  |
|      |      | Shiraz-29T | 1800 | 0.672527 | 0         |  |  |
|      |      | Shiraz-32T | 1869 | 0.776805 | 0         |  |  |
|      |      | Shiraz-35T | 1932 | 0.507141 | 0         |  |  |
|      |      | Shiraz-40T | 2051 | 0.098506 | 0         |  |  |
|      |      | Shiraz-58T | 2221 | 0.871948 | 0         |  |  |
|      |      | Shiraz-71T | 2260 | 0.68394  | 0         |  |  |
|      |      | Shiraz-71T | 2262 | 0.986748 | 0         |  |  |
|      |      | Shiraz-3T  | 235  | 0        | -0.28401  |  |  |
|      |      | Shiraz-4T  | 260  | 0        | -0.324128 |  |  |
|      |      | Shiraz-16T | 294  | 0.655804 | 0         |  |  |
|      |      | Shiraz-31T | 345  | 0.103301 | 0         |  |  |
|      |      | Shiraz-36T | 431  | 0        | -0.78035  |  |  |
|      |      | Shiraz-36T | 432  | 0        | -0.6692   |  |  |
|      |      | Shiraz-44T | 891  | 0        | -0.954044 |  |  |
|      |      | Shiraz-46T | 991  | 0.139564 | 0         |  |  |
|      |      | Shiraz-49T | 1166 | 0        | -0.917235 |  |  |
|      |      | Shiraz-9T  | 1368 | 0.199713 | 0         |  |  |
|      |      | Shiraz-18T | 1455 | 0        | -0.186773 |  |  |
|      |      | Shiraz-22T | 1669 | 0.695915 | 0         |  |  |
|      |      | Shiraz-25T | 1717 | 0.420447 | 0         |  |  |
|      |      | Shiraz-28T | 1760 | 0.538181 | 0         |  |  |
|      |      | Shiraz-29T | 1800 | 0.672527 | 0         |  |  |
|      |      | Shiraz-32T | 1869 | 0.776805 | 0         |  |  |
|      |      | Shiraz-35T | 1932 | 0.507141 | 0         |  |  |
|      |      | Shiraz-40T | 2051 | 0.098506 | 0         |  |  |
|      |      | Shiraz-58T | 2221 | 0.871948 | 0         |  |  |
|      |      | Shiraz-71T | 2260 | 0.68394  | 0         |  |  |
|      |      | Shiraz-71T | 2262 | 0.986748 | 0         |  |  |
|      |      | Shiraz-3T  | 235  | 0        | -0.28401  |  |  |
|      |      | Shiraz-4T  | 260  | 0        | -0.324128 |  |  |
|      |      | Shiraz-16T | 294  | 0.655804 | 0         |  |  |



|       |      |            |      |          |           |  |  |
|-------|------|------------|------|----------|-----------|--|--|
|       |      | Shiraz-31T | 345  | 0.103301 | 0         |  |  |
|       |      | Shiraz-36T | 431  | 0        | -0.78035  |  |  |
|       |      | Shiraz-36T | 432  | 0        | -0.6692   |  |  |
|       |      | Shiraz-44T | 891  | 0        | -0.954044 |  |  |
|       |      | Shiraz-46T | 991  | 0.139564 | 0         |  |  |
|       |      | Shiraz-49T | 1166 | 0        | -0.917235 |  |  |
|       |      | Shiraz-9T  | 1368 | 0.199713 | 0         |  |  |
|       |      | Shiraz-18T | 1455 | 0        | -0.186773 |  |  |
|       |      | Shiraz-22T | 1669 | 0.695915 | 0         |  |  |
|       |      | Shiraz-25T | 1717 | 0.420447 | 0         |  |  |
|       |      | Shiraz-28T | 1760 | 0.538181 | 0         |  |  |
|       |      | Shiraz-29T | 1800 | 0.672527 | 0         |  |  |
|       |      | Shiraz-32T | 1869 | 0.776805 | 0         |  |  |
|       |      | Shiraz-35T | 1932 | 0.507141 | 0         |  |  |
|       |      | Shiraz-40T | 2051 | 0.098506 | 0         |  |  |
|       |      | Shiraz-58T | 2221 | 0.871948 | 0         |  |  |
|       |      | Shiraz-71T | 2260 | 0.68394  | 0         |  |  |
|       |      | Shiraz-71T | 2262 | 0.986748 | 0         |  |  |
| CASP2 | chr7 | Shiraz-3T  | 90   | 0.219276 | 0         |  |  |
|       |      | Shiraz-4T  | 253  | 0.372918 | 0         |  |  |
|       |      | Shiraz-36T | 378  | 0.179558 | 0         |  |  |
|       |      | Shiraz-46T | 943  | 0.093799 | 0         |  |  |
|       |      | Shiraz-77T | 1225 | 0        | -0.117922 |  |  |
|       |      | Shiraz-9T  | 1325 | 0.221899 | 0         |  |  |
|       |      | Shiraz-18T | 1434 | 0.244465 | 0         |  |  |
|       |      | Shiraz-25T | 1698 | 0.21835  | 0         |  |  |
|       |      | Shiraz-28T | 1735 | 0.350744 | 0         |  |  |
|       |      | Shiraz-29T | 1778 | 0.120767 | 0         |  |  |
|       |      | Shiraz-32T | 1833 | 0.551336 | 0         |  |  |
|       |      | Shiraz-38T | 1951 | 0.250891 | 0         |  |  |
|       |      | Shiraz-53T | 2078 | 0.287202 | 0         |  |  |
|       |      | Shiraz-58T | 2162 | 0.221505 | 0         |  |  |
|       |      | Shiraz-71T | 2238 | 0.603631 | 0         |  |  |
|       |      | Shiraz-3T  | 90   | 0.219276 | 0         |  |  |
|       |      | Shiraz-4T  | 253  | 0.372918 | 0         |  |  |
|       |      | Shiraz-36T | 378  | 0.179558 | 0         |  |  |
|       |      | Shiraz-46T | 943  | 0.093799 | 0         |  |  |
|       |      | Shiraz-77T | 1225 | 0        | -0.117922 |  |  |
|       |      | Shiraz-9T  | 1325 | 0.221899 | 0         |  |  |
|       |      | Shiraz-18T | 1434 | 0.244465 | 0         |  |  |
|       |      | Shiraz-25T | 1698 | 0.21835  | 0         |  |  |
|       |      | Shiraz-28T | 1735 | 0.350744 | 0         |  |  |
|       |      | Shiraz-29T | 1778 | 0.120767 | 0         |  |  |
|       |      | Shiraz-32T | 1833 | 0.551336 | 0         |  |  |
|       |      | Shiraz-38T | 1951 | 0.250891 | 0         |  |  |
|       |      | Shiraz-53T | 2078 | 0.287202 | 0         |  |  |
|       |      | Shiraz-58T | 2162 | 0.221505 | 0         |  |  |

|      |      |            |      |          |           |  |  |
|------|------|------------|------|----------|-----------|--|--|
|      |      | Shiraz-71T | 2238 | 0.603631 | 0         |  |  |
|      |      | Shiraz-3T  | 90   | 0.219276 | 0         |  |  |
|      |      | Shiraz-4T  | 253  | 0.372918 | 0         |  |  |
|      |      | Shiraz-36T | 378  | 0.179558 | 0         |  |  |
|      |      | Shiraz-46T | 943  | 0.093799 | 0         |  |  |
|      |      | Shiraz-77T | 1225 | 0        | -0.117922 |  |  |
|      |      | Shiraz-9T  | 1325 | 0.221899 | 0         |  |  |
|      |      | Shiraz-18T | 1434 | 0.244465 | 0         |  |  |
|      |      | Shiraz-25T | 1698 | 0.21835  | 0         |  |  |
|      |      | Shiraz-28T | 1735 | 0.350744 | 0         |  |  |
|      |      | Shiraz-29T | 1778 | 0.120767 | 0         |  |  |
|      |      | Shiraz-32T | 1833 | 0.551336 | 0         |  |  |
|      |      | Shiraz-38T | 1951 | 0.250891 | 0         |  |  |
|      |      | Shiraz-53T | 2078 | 0.287202 | 0         |  |  |
|      |      | Shiraz-58T | 2162 | 0.221505 | 0         |  |  |
|      |      | Shiraz-71T | 2238 | 0.603631 | 0         |  |  |
| CAV1 | chr7 | Shiraz-3T  | 90   | 0.219276 | 0         |  |  |
|      |      | Shiraz-3T  | 95   | 0        | -0.077623 |  |  |
|      |      | Shiraz-4T  | 253  | 0.372918 | 0         |  |  |
|      |      | Shiraz-36T | 378  | 0.179558 | 0         |  |  |
|      |      | Shiraz-36T | 382  | 0.081739 | 0         |  |  |
|      |      | Shiraz-44T | 641  | 0        | -0.477846 |  |  |
|      |      | Shiraz-46T | 943  | 0.093799 | 0         |  |  |
|      |      | Shiraz-46T | 947  | 0        | -0.010843 |  |  |
|      |      | Shiraz-47T | 1031 | 0        | -0.117529 |  |  |
|      |      | Shiraz-49T | 1121 | 0        | -0.138569 |  |  |
|      |      | Shiraz-77T | 1225 | 0        | -0.117922 |  |  |
|      |      | Shiraz-77T | 1228 | 0        | -0.238084 |  |  |
|      |      | Shiraz-18T | 1434 | 0.244465 | 0         |  |  |
|      |      | Shiraz-22T | 1549 | 0        | -0.319623 |  |  |
|      |      | Shiraz-22T | 1552 | 0        | -0.50686  |  |  |
|      |      | Shiraz-25T | 1698 | 0.21835  | 0         |  |  |
|      |      | Shiraz-28T | 1735 | 0.350744 | 0         |  |  |
|      |      | Shiraz-29T | 1778 | 0.120767 | 0         |  |  |
|      |      | Shiraz-32T | 1833 | 0.551336 | 0         |  |  |
|      |      | Shiraz-32T | 1835 | 0.092727 | 0         |  |  |
|      |      | Shiraz-38T | 1951 | 0.250891 | 0         |  |  |
|      |      | Shiraz-53T | 2078 | 0.287202 | 0         |  |  |
|      |      | Shiraz-58T | 2161 | 0        | -0.187744 |  |  |
|      |      | Shiraz-71T | 2238 | 0.603631 | 0         |  |  |
|      |      | Shiraz-3T  | 90   | 0.219276 | 0         |  |  |
|      |      | Shiraz-3T  | 95   | 0        | -0.077623 |  |  |
|      |      | Shiraz-4T  | 253  | 0.372918 | 0         |  |  |
|      |      | Shiraz-36T | 378  | 0.179558 | 0         |  |  |
|      |      | Shiraz-36T | 382  | 0.081739 | 0         |  |  |
|      |      | Shiraz-44T | 641  | 0        | -0.477846 |  |  |
|      |      | Shiraz-46T | 943  | 0.093799 | 0         |  |  |

|      |      |            |      |          |           |  |  |
|------|------|------------|------|----------|-----------|--|--|
|      |      | Shiraz-46T | 947  | 0        | -0.010843 |  |  |
|      |      | Shiraz-47T | 1031 | 0        | -0.117529 |  |  |
|      |      | Shiraz-49T | 1121 | 0        | -0.138569 |  |  |
|      |      | Shiraz-77T | 1225 | 0        | -0.117922 |  |  |
|      |      | Shiraz-77T | 1228 | 0        | -0.238084 |  |  |
|      |      | Shiraz-18T | 1434 | 0.244465 | 0         |  |  |
|      |      | Shiraz-22T | 1549 | 0        | -0.319623 |  |  |
|      |      | Shiraz-22T | 1552 | 0        | -0.50686  |  |  |
|      |      | Shiraz-25T | 1698 | 0.21835  | 0         |  |  |
|      |      | Shiraz-28T | 1735 | 0.350744 | 0         |  |  |
|      |      | Shiraz-29T | 1778 | 0.120767 | 0         |  |  |
|      |      | Shiraz-32T | 1833 | 0.551336 | 0         |  |  |
|      |      | Shiraz-32T | 1835 | 0.092727 | 0         |  |  |
|      |      | Shiraz-38T | 1951 | 0.250891 | 0         |  |  |
|      |      | Shiraz-53T | 2078 | 0.287202 | 0         |  |  |
|      |      | Shiraz-58T | 2161 | 0        | -0.187744 |  |  |
|      |      | Shiraz-71T | 2238 | 0.603631 | 0         |  |  |
|      |      | Shiraz-3T  | 90   | 0.219276 | 0         |  |  |
|      |      | Shiraz-3T  | 95   | 0        | -0.077623 |  |  |
|      |      | Shiraz-4T  | 253  | 0.372918 | 0         |  |  |
|      |      | Shiraz-36T | 378  | 0.179558 | 0         |  |  |
|      |      | Shiraz-36T | 382  | 0.081739 | 0         |  |  |
|      |      | Shiraz-44T | 641  | 0        | -0.477846 |  |  |
|      |      | Shiraz-46T | 943  | 0.093799 | 0         |  |  |
|      |      | Shiraz-46T | 947  | 0        | -0.010843 |  |  |
|      |      | Shiraz-47T | 1031 | 0        | -0.117529 |  |  |
|      |      | Shiraz-49T | 1121 | 0        | -0.138569 |  |  |
|      |      | Shiraz-77T | 1225 | 0        | -0.117922 |  |  |
|      |      | Shiraz-77T | 1228 | 0        | -0.238084 |  |  |
|      |      | Shiraz-18T | 1434 | 0.244465 | 0         |  |  |
|      |      | Shiraz-22T | 1549 | 0        | -0.319623 |  |  |
|      |      | Shiraz-22T | 1552 | 0        | -0.50686  |  |  |
|      |      | Shiraz-25T | 1698 | 0.21835  | 0         |  |  |
|      |      | Shiraz-28T | 1735 | 0.350744 | 0         |  |  |
|      |      | Shiraz-29T | 1778 | 0.120767 | 0         |  |  |
|      |      | Shiraz-32T | 1833 | 0.551336 | 0         |  |  |
|      |      | Shiraz-32T | 1835 | 0.092727 | 0         |  |  |
|      |      | Shiraz-38T | 1951 | 0.250891 | 0         |  |  |
|      |      | Shiraz-53T | 2078 | 0.287202 | 0         |  |  |
|      |      | Shiraz-58T | 2161 | 0        | -0.187744 |  |  |
|      |      | Shiraz-71T | 2238 | 0.603631 | 0         |  |  |
| CAV2 | chr7 | Shiraz-3T  | 90   | 0.219276 | 0         |  |  |
|      |      | Shiraz-3T  | 95   | 0        | -0.077623 |  |  |
|      |      | Shiraz-4T  | 253  | 0.372918 | 0         |  |  |
|      |      | Shiraz-36T | 378  | 0.179558 | 0         |  |  |
|      |      | Shiraz-36T | 382  | 0.081739 | 0         |  |  |
|      |      | Shiraz-44T | 641  | 0        | -0.477846 |  |  |

|  |            |      |          |           |  |
|--|------------|------|----------|-----------|--|
|  | Shiraz-46T | 943  | 0.093799 | 0         |  |
|  | Shiraz-46T | 947  | 0        | -0.010843 |  |
|  | Shiraz-47T | 1031 | 0        | -0.117529 |  |
|  | Shiraz-49T | 1121 | 0        | -0.138569 |  |
|  | Shiraz-77T | 1225 | 0        | -0.117922 |  |
|  | Shiraz-77T | 1228 | 0        | -0.238084 |  |
|  | Shiraz-18T | 1434 | 0.244465 | 0         |  |
|  | Shiraz-22T | 1549 | 0        | -0.319623 |  |
|  | Shiraz-22T | 1552 | 0        | -0.50686  |  |
|  | Shiraz-25T | 1698 | 0.21835  | 0         |  |
|  | Shiraz-28T | 1735 | 0.350744 | 0         |  |
|  | Shiraz-29T | 1778 | 0.120767 | 0         |  |
|  | Shiraz-32T | 1833 | 0.551336 | 0         |  |
|  | Shiraz-32T | 1835 | 0.092727 | 0         |  |
|  | Shiraz-38T | 1951 | 0.250891 | 0         |  |
|  | Shiraz-53T | 2078 | 0.287202 | 0         |  |
|  | Shiraz-58T | 2161 | 0        | -0.187744 |  |
|  | Shiraz-71T | 2238 | 0.603631 | 0         |  |
|  | Shiraz-3T  | 90   | 0.219276 | 0         |  |
|  | Shiraz-3T  | 95   | 0        | -0.077623 |  |
|  | Shiraz-4T  | 253  | 0.372918 | 0         |  |
|  | Shiraz-36T | 378  | 0.179558 | 0         |  |
|  | Shiraz-36T | 382  | 0.081739 | 0         |  |
|  | Shiraz-44T | 641  | 0        | -0.477846 |  |
|  | Shiraz-46T | 943  | 0.093799 | 0         |  |
|  | Shiraz-46T | 947  | 0        | -0.010843 |  |
|  | Shiraz-47T | 1031 | 0        | -0.117529 |  |
|  | Shiraz-49T | 1121 | 0        | -0.138569 |  |
|  | Shiraz-77T | 1225 | 0        | -0.117922 |  |
|  | Shiraz-77T | 1228 | 0        | -0.238084 |  |
|  | Shiraz-18T | 1434 | 0.244465 | 0         |  |
|  | Shiraz-22T | 1549 | 0        | -0.319623 |  |
|  | Shiraz-22T | 1552 | 0        | -0.50686  |  |
|  | Shiraz-25T | 1698 | 0.21835  | 0         |  |
|  | Shiraz-28T | 1735 | 0.350744 | 0         |  |
|  | Shiraz-29T | 1778 | 0.120767 | 0         |  |
|  | Shiraz-32T | 1833 | 0.551336 | 0         |  |
|  | Shiraz-32T | 1835 | 0.092727 | 0         |  |
|  | Shiraz-38T | 1951 | 0.250891 | 0         |  |
|  | Shiraz-53T | 2078 | 0.287202 | 0         |  |
|  | Shiraz-58T | 2161 | 0        | -0.187744 |  |
|  | Shiraz-71T | 2238 | 0.603631 | 0         |  |
|  | Shiraz-3T  | 90   | 0.219276 | 0         |  |
|  | Shiraz-3T  | 95   | 0        | -0.077623 |  |
|  | Shiraz-4T  | 253  | 0.372918 | 0         |  |
|  | Shiraz-36T | 378  | 0.179558 | 0         |  |
|  | Shiraz-36T | 382  | 0.081739 | 0         |  |

|       |      |            |      |          |           |  |  |
|-------|------|------------|------|----------|-----------|--|--|
|       |      | Shiraz-44T | 641  | 0        | -0.477846 |  |  |
|       |      | Shiraz-46T | 943  | 0.093799 | 0         |  |  |
|       |      | Shiraz-46T | 947  | 0        | -0.010843 |  |  |
|       |      | Shiraz-47T | 1031 | 0        | -0.117529 |  |  |
|       |      | Shiraz-49T | 1121 | 0        | -0.138569 |  |  |
|       |      | Shiraz-77T | 1225 | 0        | -0.117922 |  |  |
|       |      | Shiraz-77T | 1228 | 0        | -0.238084 |  |  |
|       |      | Shiraz-18T | 1434 | 0.244465 | 0         |  |  |
|       |      | Shiraz-22T | 1549 | 0        | -0.319623 |  |  |
|       |      | Shiraz-22T | 1552 | 0        | -0.50686  |  |  |
|       |      | Shiraz-25T | 1698 | 0.21835  | 0         |  |  |
|       |      | Shiraz-28T | 1735 | 0.350744 | 0         |  |  |
|       |      | Shiraz-29T | 1778 | 0.120767 | 0         |  |  |
|       |      | Shiraz-32T | 1833 | 0.551336 | 0         |  |  |
|       |      | Shiraz-32T | 1835 | 0.092727 | 0         |  |  |
|       |      | Shiraz-38T | 1951 | 0.250891 | 0         |  |  |
|       |      | Shiraz-53T | 2078 | 0.287202 | 0         |  |  |
|       |      | Shiraz-58T | 2161 | 0        | -0.187744 |  |  |
|       |      | Shiraz-71T | 2238 | 0.603631 | 0         |  |  |
| CBLL1 | chr7 | Shiraz-3T  | 90   | 0.219276 | 0         |  |  |
|       |      | Shiraz-4T  | 253  | 0.372918 | 0         |  |  |
|       |      | Shiraz-36T | 378  | 0.179558 | 0         |  |  |
|       |      | Shiraz-46T | 943  | 0.093799 | 0         |  |  |
|       |      | Shiraz-77T | 1225 | 0        | -0.117922 |  |  |
|       |      | Shiraz-18T | 1434 | 0.244465 | 0         |  |  |
|       |      | Shiraz-22T | 1549 | 0        | -0.319623 |  |  |
|       |      | Shiraz-25T | 1698 | 0.21835  | 0         |  |  |
|       |      | Shiraz-28T | 1735 | 0.350744 | 0         |  |  |
|       |      | Shiraz-29T | 1778 | 0.120767 | 0         |  |  |
|       |      | Shiraz-32T | 1833 | 0.551336 | 0         |  |  |
|       |      | Shiraz-38T | 1951 | 0.250891 | 0         |  |  |
|       |      | Shiraz-53T | 2078 | 0.287202 | 0         |  |  |
|       |      | Shiraz-58T | 2161 | 0        | -0.187744 |  |  |
|       |      | Shiraz-71T | 2238 | 0.603631 | 0         |  |  |
|       |      | Shiraz-3T  | 90   | 0.219276 | 0         |  |  |
|       |      | Shiraz-4T  | 253  | 0.372918 | 0         |  |  |
|       |      | Shiraz-36T | 378  | 0.179558 | 0         |  |  |
|       |      | Shiraz-46T | 943  | 0.093799 | 0         |  |  |
|       |      | Shiraz-77T | 1225 | 0        | -0.117922 |  |  |
|       |      | Shiraz-18T | 1434 | 0.244465 | 0         |  |  |
|       |      | Shiraz-22T | 1549 | 0        | -0.319623 |  |  |
|       |      | Shiraz-25T | 1698 | 0.21835  | 0         |  |  |
|       |      | Shiraz-28T | 1735 | 0.350744 | 0         |  |  |
|       |      | Shiraz-29T | 1778 | 0.120767 | 0         |  |  |
|       |      | Shiraz-32T | 1833 | 0.551336 | 0         |  |  |
|       |      | Shiraz-38T | 1951 | 0.250891 | 0         |  |  |
|       |      | Shiraz-53T | 2078 | 0.287202 | 0         |  |  |

|      |      |            |      |          |           |  |  |
|------|------|------------|------|----------|-----------|--|--|
|      |      | Shiraz-58T | 2161 | 0        | -0.187744 |  |  |
|      |      | Shiraz-71T | 2238 | 0.603631 | 0         |  |  |
|      |      | Shiraz-3T  | 90   | 0.219276 | 0         |  |  |
|      |      | Shiraz-4T  | 253  | 0.372918 | 0         |  |  |
|      |      | Shiraz-36T | 378  | 0.179558 | 0         |  |  |
|      |      | Shiraz-46T | 943  | 0.093799 | 0         |  |  |
|      |      | Shiraz-77T | 1225 | 0        | -0.117922 |  |  |
|      |      | Shiraz-18T | 1434 | 0.244465 | 0         |  |  |
|      |      | Shiraz-22T | 1549 | 0        | -0.319623 |  |  |
|      |      | Shiraz-25T | 1698 | 0.21835  | 0         |  |  |
|      |      | Shiraz-28T | 1735 | 0.350744 | 0         |  |  |
|      |      | Shiraz-29T | 1778 | 0.120767 | 0         |  |  |
|      |      | Shiraz-32T | 1833 | 0.551336 | 0         |  |  |
|      |      | Shiraz-38T | 1951 | 0.250891 | 0         |  |  |
|      |      | Shiraz-53T | 2078 | 0.287202 | 0         |  |  |
|      |      | Shiraz-58T | 2161 | 0        | -0.187744 |  |  |
|      |      | Shiraz-71T | 2238 | 0.603631 | 0         |  |  |
| CBX3 | chr7 | Shiraz-3T  | 87   | 0.198593 | 0         |  |  |
|      |      | Shiraz-3T  | 87   | 0.198593 | 0         |  |  |
|      |      | Shiraz-4T  | 252  | 0.192083 | 0         |  |  |
|      |      | Shiraz-4T  | 252  | 0.192083 | 0         |  |  |
|      |      | Shiraz-36T | 376  | 0.159952 | 0         |  |  |
|      |      | Shiraz-36T | 376  | 0.159952 | 0         |  |  |
|      |      | Shiraz-46T | 942  | 0.069143 | 0         |  |  |
|      |      | Shiraz-46T | 942  | 0.069143 | 0         |  |  |
|      |      | Shiraz-18T | 1433 | 0.250973 | 0         |  |  |
|      |      | Shiraz-18T | 1433 | 0.250973 | 0         |  |  |
|      |      | Shiraz-25T | 1697 | 0.21945  | 0         |  |  |
|      |      | Shiraz-25T | 1697 | 0.21945  | 0         |  |  |
|      |      | Shiraz-28T | 1734 | 0.362882 | 0         |  |  |
|      |      | Shiraz-28T | 1734 | 0.362882 | 0         |  |  |
|      |      | Shiraz-29T | 1777 | 0.156747 | 0         |  |  |
|      |      | Shiraz-29T | 1777 | 0.156747 | 0         |  |  |
|      |      | Shiraz-38T | 1950 | 0.265916 | 0         |  |  |
|      |      | Shiraz-38T | 1950 | 0.265916 | 0         |  |  |
|      |      | Shiraz-71T | 2236 | 0.320072 | 0         |  |  |
|      |      | Shiraz-71T | 2236 | 0.320072 | 0         |  |  |
|      |      | Shiraz-3T  | 87   | 0.198593 | 0         |  |  |
|      |      | Shiraz-3T  | 87   | 0.198593 | 0         |  |  |
|      |      | Shiraz-4T  | 252  | 0.192083 | 0         |  |  |
|      |      | Shiraz-4T  | 252  | 0.192083 | 0         |  |  |
|      |      | Shiraz-36T | 376  | 0.159952 | 0         |  |  |
|      |      | Shiraz-36T | 376  | 0.159952 | 0         |  |  |
|      |      | Shiraz-46T | 942  | 0.069143 | 0         |  |  |
|      |      | Shiraz-46T | 942  | 0.069143 | 0         |  |  |
|      |      | Shiraz-18T | 1433 | 0.250973 | 0         |  |  |
|      |      | Shiraz-18T | 1433 | 0.250973 | 0         |  |  |

|         |      |            |      |          |           |  |
|---------|------|------------|------|----------|-----------|--|
|         |      | Shiraz-25T | 1697 | 0.21945  | 0         |  |
|         |      | Shiraz-25T | 1697 | 0.21945  | 0         |  |
|         |      | Shiraz-28T | 1734 | 0.362882 | 0         |  |
|         |      | Shiraz-28T | 1734 | 0.362882 | 0         |  |
|         |      | Shiraz-29T | 1777 | 0.156747 | 0         |  |
|         |      | Shiraz-29T | 1777 | 0.156747 | 0         |  |
|         |      | Shiraz-38T | 1950 | 0.265916 | 0         |  |
|         |      | Shiraz-38T | 1950 | 0.265916 | 0         |  |
|         |      | Shiraz-71T | 2236 | 0.320072 | 0         |  |
|         |      | Shiraz-71T | 2236 | 0.320072 | 0         |  |
|         |      | Shiraz-3T  | 87   | 0.198593 | 0         |  |
|         |      | Shiraz-3T  | 87   | 0.198593 | 0         |  |
|         |      | Shiraz-4T  | 252  | 0.192083 | 0         |  |
|         |      | Shiraz-4T  | 252  | 0.192083 | 0         |  |
|         |      | Shiraz-36T | 376  | 0.159952 | 0         |  |
|         |      | Shiraz-36T | 376  | 0.159952 | 0         |  |
|         |      | Shiraz-46T | 942  | 0.069143 | 0         |  |
|         |      | Shiraz-46T | 942  | 0.069143 | 0         |  |
|         |      | Shiraz-18T | 1433 | 0.250973 | 0         |  |
|         |      | Shiraz-18T | 1433 | 0.250973 | 0         |  |
|         |      | Shiraz-25T | 1697 | 0.21945  | 0         |  |
|         |      | Shiraz-25T | 1697 | 0.21945  | 0         |  |
|         |      | Shiraz-28T | 1734 | 0.362882 | 0         |  |
|         |      | Shiraz-28T | 1734 | 0.362882 | 0         |  |
|         |      | Shiraz-29T | 1777 | 0.156747 | 0         |  |
|         |      | Shiraz-29T | 1777 | 0.156747 | 0         |  |
|         |      | Shiraz-38T | 1950 | 0.265916 | 0         |  |
|         |      | Shiraz-38T | 1950 | 0.265916 | 0         |  |
|         |      | Shiraz-71T | 2236 | 0.320072 | 0         |  |
|         |      | Shiraz-71T | 2236 | 0.320072 | 0         |  |
| CCDC120 | chrX | Shiraz-3T  | 238  | 0.472087 | 0         |  |
|         |      | Shiraz-4T  | 260  | 0        | -0.324128 |  |
|         |      | Shiraz-16T | 294  | 0.655804 | 0         |  |
|         |      | Shiraz-31T | 345  | 0.103301 | 0         |  |
|         |      | Shiraz-36T | 431  | 0        | -0.78035  |  |
|         |      | Shiraz-36T | 432  | 0        | -0.6692   |  |
|         |      | Shiraz-44T | 891  | 0        | -0.954044 |  |
|         |      | Shiraz-44T | 896  | 0        | -0.109108 |  |
|         |      | Shiraz-44T | 897  | 0.486937 | 0         |  |
|         |      | Shiraz-46T | 991  | 0.139564 | 0         |  |
|         |      | Shiraz-47T | 1084 | 0.24185  | 0         |  |
|         |      | Shiraz-49T | 1166 | 0        | -0.917235 |  |
|         |      | Shiraz-49T | 1169 | 0        | -0.583529 |  |
|         |      | Shiraz-77T | 1282 | 0.213849 | 0         |  |
|         |      | Shiraz-9T  | 1368 | 0.199713 | 0         |  |
|         |      | Shiraz-9T  | 1369 | 0.703374 | 0         |  |
|         |      | Shiraz-18T | 1455 | 0        | -0.186773 |  |

|  |            |      |          |           |  |
|--|------------|------|----------|-----------|--|
|  | Shiraz-22T | 1669 | 0.695915 | 0         |  |
|  | Shiraz-22T | 1672 | 1.01678  | 0         |  |
|  | Shiraz-25T | 1717 | 0.420447 | 0         |  |
|  | Shiraz-28T | 1760 | 0.538181 | 0         |  |
|  | Shiraz-29T | 1800 | 0.672527 | 0         |  |
|  | Shiraz-32T | 1869 | 0.776805 | 0         |  |
|  | Shiraz-35T | 1932 | 0.507141 | 0         |  |
|  | Shiraz-58T | 2221 | 0.871948 | 0         |  |
|  | Shiraz-71T | 2260 | 0.68394  | 0         |  |
|  | Shiraz-71T | 2262 | 0.986748 | 0         |  |
|  | Shiraz-3T  | 238  | 0.472087 | 0         |  |
|  | Shiraz-4T  | 260  | 0        | -0.324128 |  |
|  | Shiraz-16T | 294  | 0.655804 | 0         |  |
|  | Shiraz-31T | 345  | 0.103301 | 0         |  |
|  | Shiraz-36T | 431  | 0        | -0.78035  |  |
|  | Shiraz-36T | 432  | 0        | -0.6692   |  |
|  | Shiraz-44T | 891  | 0        | -0.954044 |  |
|  | Shiraz-44T | 896  | 0        | -0.109108 |  |
|  | Shiraz-44T | 897  | 0.486937 | 0         |  |
|  | Shiraz-46T | 991  | 0.139564 | 0         |  |
|  | Shiraz-47T | 1084 | 0.24185  | 0         |  |
|  | Shiraz-49T | 1166 | 0        | -0.917235 |  |
|  | Shiraz-49T | 1169 | 0        | -0.583529 |  |
|  | Shiraz-77T | 1282 | 0.213849 | 0         |  |
|  | Shiraz-9T  | 1368 | 0.199713 | 0         |  |
|  | Shiraz-9T  | 1369 | 0.703374 | 0         |  |
|  | Shiraz-18T | 1455 | 0        | -0.186773 |  |
|  | Shiraz-22T | 1669 | 0.695915 | 0         |  |
|  | Shiraz-22T | 1672 | 1.01678  | 0         |  |
|  | Shiraz-25T | 1717 | 0.420447 | 0         |  |
|  | Shiraz-28T | 1760 | 0.538181 | 0         |  |
|  | Shiraz-29T | 1800 | 0.672527 | 0         |  |
|  | Shiraz-32T | 1869 | 0.776805 | 0         |  |
|  | Shiraz-35T | 1932 | 0.507141 | 0         |  |
|  | Shiraz-58T | 2221 | 0.871948 | 0         |  |
|  | Shiraz-71T | 2260 | 0.68394  | 0         |  |
|  | Shiraz-71T | 2262 | 0.986748 | 0         |  |
|  | Shiraz-3T  | 238  | 0.472087 | 0         |  |
|  | Shiraz-4T  | 260  | 0        | -0.324128 |  |
|  | Shiraz-16T | 294  | 0.655804 | 0         |  |
|  | Shiraz-31T | 345  | 0.103301 | 0         |  |
|  | Shiraz-36T | 431  | 0        | -0.78035  |  |
|  | Shiraz-36T | 432  | 0        | -0.6692   |  |
|  | Shiraz-44T | 891  | 0        | -0.954044 |  |
|  | Shiraz-44T | 896  | 0        | -0.109108 |  |
|  | Shiraz-44T | 897  | 0.486937 | 0         |  |
|  | Shiraz-46T | 991  | 0.139564 | 0         |  |



|         |      |            |      |          |           |  |  |
|---------|------|------------|------|----------|-----------|--|--|
|         |      | Shiraz-47T | 1084 | 0.24185  | 0         |  |  |
|         |      | Shiraz-49T | 1166 | 0        | -0.917235 |  |  |
|         |      | Shiraz-49T | 1169 | 0        | -0.583529 |  |  |
|         |      | Shiraz-77T | 1282 | 0.213849 | 0         |  |  |
|         |      | Shiraz-9T  | 1368 | 0.199713 | 0         |  |  |
|         |      | Shiraz-9T  | 1369 | 0.703374 | 0         |  |  |
|         |      | Shiraz-18T | 1455 | 0        | -0.186773 |  |  |
|         |      | Shiraz-22T | 1669 | 0.695915 | 0         |  |  |
|         |      | Shiraz-22T | 1672 | 1.01678  | 0         |  |  |
|         |      | Shiraz-25T | 1717 | 0.420447 | 0         |  |  |
|         |      | Shiraz-28T | 1760 | 0.538181 | 0         |  |  |
|         |      | Shiraz-29T | 1800 | 0.672527 | 0         |  |  |
|         |      | Shiraz-32T | 1869 | 0.776805 | 0         |  |  |
|         |      | Shiraz-35T | 1932 | 0.507141 | 0         |  |  |
|         |      | Shiraz-58T | 2221 | 0.871948 | 0         |  |  |
|         |      | Shiraz-71T | 2260 | 0.68394  | 0         |  |  |
|         |      | Shiraz-71T | 2262 | 0.986748 | 0         |  |  |
| CCDC126 | chr7 | Shiraz-3T  | 87   | 0.198593 | 0         |  |  |
|         |      | Shiraz-4T  | 252  | 0.192083 | 0         |  |  |
|         |      | Shiraz-36T | 376  | 0.159952 | 0         |  |  |
|         |      | Shiraz-46T | 942  | 0.069143 | 0         |  |  |
|         |      | Shiraz-18T | 1433 | 0.250973 | 0         |  |  |
|         |      | Shiraz-25T | 1697 | 0.21945  | 0         |  |  |
|         |      | Shiraz-28T | 1734 | 0.362882 | 0         |  |  |
|         |      | Shiraz-29T | 1777 | 0.156747 | 0         |  |  |
|         |      | Shiraz-38T | 1950 | 0.265916 | 0         |  |  |
|         |      | Shiraz-71T | 2236 | 0.320072 | 0         |  |  |
|         |      | Shiraz-3T  | 87   | 0.198593 | 0         |  |  |
|         |      | Shiraz-4T  | 252  | 0.192083 | 0         |  |  |
|         |      | Shiraz-36T | 376  | 0.159952 | 0         |  |  |
|         |      | Shiraz-46T | 942  | 0.069143 | 0         |  |  |
|         |      | Shiraz-18T | 1433 | 0.250973 | 0         |  |  |
|         |      | Shiraz-25T | 1697 | 0.21945  | 0         |  |  |
|         |      | Shiraz-28T | 1734 | 0.362882 | 0         |  |  |
|         |      | Shiraz-29T | 1777 | 0.156747 | 0         |  |  |
|         |      | Shiraz-38T | 1950 | 0.265916 | 0         |  |  |
|         |      | Shiraz-71T | 2236 | 0.320072 | 0         |  |  |
|         |      | Shiraz-3T  | 87   | 0.198593 | 0         |  |  |
|         |      | Shiraz-4T  | 252  | 0.192083 | 0         |  |  |
|         |      | Shiraz-36T | 376  | 0.159952 | 0         |  |  |
|         |      | Shiraz-46T | 942  | 0.069143 | 0         |  |  |
|         |      | Shiraz-18T | 1433 | 0.250973 | 0         |  |  |
|         |      | Shiraz-25T | 1697 | 0.21945  | 0         |  |  |
|         |      | Shiraz-28T | 1734 | 0.362882 | 0         |  |  |
|         |      | Shiraz-29T | 1777 | 0.156747 | 0         |  |  |
|         |      | Shiraz-38T | 1950 | 0.265916 | 0         |  |  |
|         |      | Shiraz-71T | 2236 | 0.320072 | 0         |  |  |

|         |      |            |      |          |           |  |  |
|---------|------|------------|------|----------|-----------|--|--|
| CCDC129 | chr7 | Shiraz-3T  | 87   | 0.198593 | 0         |  |  |
|         |      | Shiraz-4T  | 252  | 0.192083 | 0         |  |  |
|         |      | Shiraz-36T | 376  | 0.159952 | 0         |  |  |
|         |      | Shiraz-44T | 631  | 0        | -0.180312 |  |  |
|         |      | Shiraz-46T | 942  | 0.069143 | 0         |  |  |
|         |      | Shiraz-18T | 1433 | 0.250973 | 0         |  |  |
|         |      | Shiraz-25T | 1697 | 0.21945  | 0         |  |  |
|         |      | Shiraz-28T | 1734 | 0.362882 | 0         |  |  |
|         |      | Shiraz-29T | 1777 | 0.156747 | 0         |  |  |
|         |      | Shiraz-38T | 1950 | 0.265916 | 0         |  |  |
|         |      | Shiraz-71T | 2236 | 0.320072 | 0         |  |  |
|         |      | Shiraz-3T  | 87   | 0.198593 | 0         |  |  |
|         |      | Shiraz-4T  | 252  | 0.192083 | 0         |  |  |
|         |      | Shiraz-36T | 376  | 0.159952 | 0         |  |  |
|         |      | Shiraz-44T | 631  | 0        | -0.180312 |  |  |
|         |      | Shiraz-46T | 942  | 0.069143 | 0         |  |  |
|         |      | Shiraz-18T | 1433 | 0.250973 | 0         |  |  |
|         |      | Shiraz-25T | 1697 | 0.21945  | 0         |  |  |
|         |      | Shiraz-28T | 1734 | 0.362882 | 0         |  |  |
|         |      | Shiraz-29T | 1777 | 0.156747 | 0         |  |  |
|         |      | Shiraz-38T | 1950 | 0.265916 | 0         |  |  |
|         |      | Shiraz-71T | 2236 | 0.320072 | 0         |  |  |
|         |      | Shiraz-3T  | 87   | 0.198593 | 0         |  |  |
|         |      | Shiraz-4T  | 252  | 0.192083 | 0         |  |  |
|         |      | Shiraz-36T | 376  | 0.159952 | 0         |  |  |
|         |      | Shiraz-44T | 631  | 0        | -0.180312 |  |  |
|         |      | Shiraz-46T | 942  | 0.069143 | 0         |  |  |
|         |      | Shiraz-18T | 1433 | 0.250973 | 0         |  |  |
|         |      | Shiraz-25T | 1697 | 0.21945  | 0         |  |  |
|         |      | Shiraz-28T | 1734 | 0.362882 | 0         |  |  |
|         |      | Shiraz-29T | 1777 | 0.156747 | 0         |  |  |
|         |      | Shiraz-38T | 1950 | 0.265916 | 0         |  |  |
|         |      | Shiraz-71T | 2236 | 0.320072 | 0         |  |  |
| CCDC132 | chr7 | Shiraz-3T  | 90   | 0.219276 | 0         |  |  |
|         |      | Shiraz-3T  | 90   | 0.219276 | 0         |  |  |
|         |      | Shiraz-3T  | 93   | 0        | -0.058023 |  |  |
|         |      | Shiraz-3T  | 93   | 0        | -0.058023 |  |  |
|         |      | Shiraz-4T  | 253  | 0.372918 | 0         |  |  |
|         |      | Shiraz-4T  | 253  | 0.372918 | 0         |  |  |
|         |      | Shiraz-36T | 378  | 0.179558 | 0         |  |  |
|         |      | Shiraz-36T | 378  | 0.179558 | 0         |  |  |
|         |      | Shiraz-36T | 380  | 0.083883 | 0         |  |  |
|         |      | Shiraz-36T | 380  | 0.083883 | 0         |  |  |
|         |      | Shiraz-44T | 638  | 0        | -0.433476 |  |  |
|         |      | Shiraz-44T | 638  | 0        | -0.433476 |  |  |
|         |      | Shiraz-46T | 943  | 0.093799 | 0         |  |  |
|         |      | Shiraz-46T | 943  | 0.093799 | 0         |  |  |

|  |            |      |          |           |  |
|--|------------|------|----------|-----------|--|
|  | Shiraz-46T | 945  | 0        | -0.014838 |  |
|  | Shiraz-46T | 945  | 0        | -0.014838 |  |
|  | Shiraz-47T | 1029 | 0        | -0.096586 |  |
|  | Shiraz-47T | 1029 | 0        | -0.096586 |  |
|  | Shiraz-49T | 1119 | 0        | -0.157331 |  |
|  | Shiraz-49T | 1119 | 0        | -0.157331 |  |
|  | Shiraz-77T | 1225 | 0        | -0.117922 |  |
|  | Shiraz-77T | 1225 | 0        | -0.117922 |  |
|  | Shiraz-18T | 1434 | 0.244465 | 0         |  |
|  | Shiraz-18T | 1434 | 0.244465 | 0         |  |
|  | Shiraz-22T | 1549 | 0        | -0.319623 |  |
|  | Shiraz-22T | 1549 | 0        | -0.319623 |  |
|  | Shiraz-25T | 1698 | 0.21835  | 0         |  |
|  | Shiraz-25T | 1698 | 0.21835  | 0         |  |
|  | Shiraz-28T | 1735 | 0.350744 | 0         |  |
|  | Shiraz-28T | 1735 | 0.350744 | 0         |  |
|  | Shiraz-29T | 1778 | 0.120767 | 0         |  |
|  | Shiraz-29T | 1778 | 0.120767 | 0         |  |
|  | Shiraz-32T | 1833 | 0.551336 | 0         |  |
|  | Shiraz-32T | 1833 | 0.551336 | 0         |  |
|  | Shiraz-38T | 1951 | 0.250891 | 0         |  |
|  | Shiraz-38T | 1951 | 0.250891 | 0         |  |
|  | Shiraz-53T | 2078 | 0.287202 | 0         |  |
|  | Shiraz-53T | 2078 | 0.287202 | 0         |  |
|  | Shiraz-58T | 2159 | 0        | -0.219521 |  |
|  | Shiraz-58T | 2159 | 0        | -0.219521 |  |
|  | Shiraz-71T | 2238 | 0.603631 | 0         |  |
|  | Shiraz-71T | 2238 | 0.603631 | 0         |  |
|  | Shiraz-3T  | 90   | 0.219276 | 0         |  |
|  | Shiraz-3T  | 90   | 0.219276 | 0         |  |
|  | Shiraz-3T  | 93   | 0        | -0.058023 |  |
|  | Shiraz-3T  | 93   | 0        | -0.058023 |  |
|  | Shiraz-4T  | 253  | 0.372918 | 0         |  |
|  | Shiraz-4T  | 253  | 0.372918 | 0         |  |
|  | Shiraz-36T | 378  | 0.179558 | 0         |  |
|  | Shiraz-36T | 378  | 0.179558 | 0         |  |
|  | Shiraz-36T | 380  | 0.083883 | 0         |  |
|  | Shiraz-36T | 380  | 0.083883 | 0         |  |
|  | Shiraz-44T | 638  | 0        | -0.433476 |  |
|  | Shiraz-44T | 638  | 0        | -0.433476 |  |
|  | Shiraz-46T | 943  | 0.093799 | 0         |  |
|  | Shiraz-46T | 943  | 0.093799 | 0         |  |
|  | Shiraz-46T | 945  | 0        | -0.014838 |  |
|  | Shiraz-46T | 945  | 0        | -0.014838 |  |
|  | Shiraz-47T | 1029 | 0        | -0.096586 |  |
|  | Shiraz-47T | 1029 | 0        | -0.096586 |  |
|  | Shiraz-49T | 1119 | 0        | -0.157331 |  |

|  |            |      |          |           |  |
|--|------------|------|----------|-----------|--|
|  | Shiraz-49T | 1119 | 0        | -0.157331 |  |
|  | Shiraz-77T | 1225 | 0        | -0.117922 |  |
|  | Shiraz-77T | 1225 | 0        | -0.117922 |  |
|  | Shiraz-18T | 1434 | 0.244465 | 0         |  |
|  | Shiraz-18T | 1434 | 0.244465 | 0         |  |
|  | Shiraz-22T | 1549 | 0        | -0.319623 |  |
|  | Shiraz-22T | 1549 | 0        | -0.319623 |  |
|  | Shiraz-25T | 1698 | 0.21835  | 0         |  |
|  | Shiraz-25T | 1698 | 0.21835  | 0         |  |
|  | Shiraz-28T | 1735 | 0.350744 | 0         |  |
|  | Shiraz-28T | 1735 | 0.350744 | 0         |  |
|  | Shiraz-29T | 1778 | 0.120767 | 0         |  |
|  | Shiraz-29T | 1778 | 0.120767 | 0         |  |
|  | Shiraz-32T | 1833 | 0.551336 | 0         |  |
|  | Shiraz-32T | 1833 | 0.551336 | 0         |  |
|  | Shiraz-38T | 1951 | 0.250891 | 0         |  |
|  | Shiraz-38T | 1951 | 0.250891 | 0         |  |
|  | Shiraz-53T | 2078 | 0.287202 | 0         |  |
|  | Shiraz-53T | 2078 | 0.287202 | 0         |  |
|  | Shiraz-58T | 2159 | 0        | -0.219521 |  |
|  | Shiraz-58T | 2159 | 0        | -0.219521 |  |
|  | Shiraz-71T | 2238 | 0.603631 | 0         |  |
|  | Shiraz-71T | 2238 | 0.603631 | 0         |  |
|  | Shiraz-3T  | 90   | 0.219276 | 0         |  |
|  | Shiraz-3T  | 90   | 0.219276 | 0         |  |
|  | Shiraz-3T  | 93   | 0        | -0.058023 |  |
|  | Shiraz-3T  | 93   | 0        | -0.058023 |  |
|  | Shiraz-4T  | 253  | 0.372918 | 0         |  |
|  | Shiraz-4T  | 253  | 0.372918 | 0         |  |
|  | Shiraz-36T | 378  | 0.179558 | 0         |  |
|  | Shiraz-36T | 378  | 0.179558 | 0         |  |
|  | Shiraz-36T | 380  | 0.083883 | 0         |  |
|  | Shiraz-36T | 380  | 0.083883 | 0         |  |
|  | Shiraz-44T | 638  | 0        | -0.433476 |  |
|  | Shiraz-44T | 638  | 0        | -0.433476 |  |
|  | Shiraz-46T | 943  | 0.093799 | 0         |  |
|  | Shiraz-46T | 943  | 0.093799 | 0         |  |
|  | Shiraz-46T | 945  | 0        | -0.014838 |  |
|  | Shiraz-46T | 945  | 0        | -0.014838 |  |
|  | Shiraz-47T | 1029 | 0        | -0.096586 |  |
|  | Shiraz-47T | 1029 | 0        | -0.096586 |  |
|  | Shiraz-49T | 1119 | 0        | -0.157331 |  |
|  | Shiraz-49T | 1119 | 0        | -0.157331 |  |
|  | Shiraz-77T | 1225 | 0        | -0.117922 |  |
|  | Shiraz-77T | 1225 | 0        | -0.117922 |  |
|  | Shiraz-18T | 1434 | 0.244465 | 0         |  |
|  | Shiraz-18T | 1434 | 0.244465 | 0         |  |

|         |      |            |      |          |           |  |  |
|---------|------|------------|------|----------|-----------|--|--|
|         |      | Shiraz-22T | 1549 | 0        | -0.319623 |  |  |
|         |      | Shiraz-22T | 1549 | 0        | -0.319623 |  |  |
|         |      | Shiraz-25T | 1698 | 0.21835  | 0         |  |  |
|         |      | Shiraz-25T | 1698 | 0.21835  | 0         |  |  |
|         |      | Shiraz-28T | 1735 | 0.350744 | 0         |  |  |
|         |      | Shiraz-28T | 1735 | 0.350744 | 0         |  |  |
|         |      | Shiraz-29T | 1778 | 0.120767 | 0         |  |  |
|         |      | Shiraz-29T | 1778 | 0.120767 | 0         |  |  |
|         |      | Shiraz-32T | 1833 | 0.551336 | 0         |  |  |
|         |      | Shiraz-32T | 1833 | 0.551336 | 0         |  |  |
|         |      | Shiraz-38T | 1951 | 0.250891 | 0         |  |  |
|         |      | Shiraz-38T | 1951 | 0.250891 | 0         |  |  |
|         |      | Shiraz-53T | 2078 | 0.287202 | 0         |  |  |
|         |      | Shiraz-53T | 2078 | 0.287202 | 0         |  |  |
|         |      | Shiraz-58T | 2159 | 0        | -0.219521 |  |  |
|         |      | Shiraz-58T | 2159 | 0        | -0.219521 |  |  |
|         |      | Shiraz-71T | 2238 | 0.603631 | 0         |  |  |
|         |      | Shiraz-71T | 2238 | 0.603631 | 0         |  |  |
| CCDC136 | chr7 | Shiraz-3T  | 90   | 0.219276 | 0         |  |  |
|         |      | Shiraz-3T  | 96   | 0.428308 | 0         |  |  |
|         |      | Shiraz-4T  | 253  | 0.372918 | 0         |  |  |
|         |      | Shiraz-31T | 317  | 0.204382 | 0         |  |  |
|         |      | Shiraz-36T | 378  | 0.179558 | 0         |  |  |
|         |      | Shiraz-44T | 642  | 0.408617 | 0         |  |  |
|         |      | Shiraz-46T | 943  | 0.093799 | 0         |  |  |
|         |      | Shiraz-47T | 1032 | 0.171484 | 0         |  |  |
|         |      | Shiraz-77T | 1225 | 0        | -0.117922 |  |  |
|         |      | Shiraz-77T | 1229 | 0.051661 | 0         |  |  |
|         |      | Shiraz-9T  | 1325 | 0.221899 | 0         |  |  |
|         |      | Shiraz-18T | 1434 | 0.244465 | 0         |  |  |
|         |      | Shiraz-25T | 1698 | 0.21835  | 0         |  |  |
|         |      | Shiraz-28T | 1735 | 0.350744 | 0         |  |  |
|         |      | Shiraz-29T | 1778 | 0.120767 | 0         |  |  |
|         |      | Shiraz-32T | 1833 | 0.551336 | 0         |  |  |
|         |      | Shiraz-38T | 1951 | 0.250891 | 0         |  |  |
|         |      | Shiraz-53T | 2078 | 0.287202 | 0         |  |  |
|         |      | Shiraz-71T | 2238 | 0.603631 | 0         |  |  |
|         |      | Shiraz-3T  | 90   | 0.219276 | 0         |  |  |
|         |      | Shiraz-3T  | 96   | 0.428308 | 0         |  |  |
|         |      | Shiraz-4T  | 253  | 0.372918 | 0         |  |  |
|         |      | Shiraz-31T | 317  | 0.204382 | 0         |  |  |
|         |      | Shiraz-36T | 378  | 0.179558 | 0         |  |  |
|         |      | Shiraz-44T | 642  | 0.408617 | 0         |  |  |
|         |      | Shiraz-46T | 943  | 0.093799 | 0         |  |  |
|         |      | Shiraz-47T | 1032 | 0.171484 | 0         |  |  |
|         |      | Shiraz-77T | 1225 | 0        | -0.117922 |  |  |
|         |      | Shiraz-77T | 1229 | 0.051661 | 0         |  |  |

|         |      |            |      |          |           |  |
|---------|------|------------|------|----------|-----------|--|
|         |      | Shiraz-9T  | 1325 | 0.221899 | 0         |  |
|         |      | Shiraz-18T | 1434 | 0.244465 | 0         |  |
|         |      | Shiraz-25T | 1698 | 0.21835  | 0         |  |
|         |      | Shiraz-28T | 1735 | 0.350744 | 0         |  |
|         |      | Shiraz-29T | 1778 | 0.120767 | 0         |  |
|         |      | Shiraz-32T | 1833 | 0.551336 | 0         |  |
|         |      | Shiraz-38T | 1951 | 0.250891 | 0         |  |
|         |      | Shiraz-53T | 2078 | 0.287202 | 0         |  |
|         |      | Shiraz-71T | 2238 | 0.603631 | 0         |  |
|         |      | Shiraz-3T  | 90   | 0.219276 | 0         |  |
|         |      | Shiraz-3T  | 96   | 0.428308 | 0         |  |
|         |      | Shiraz-4T  | 253  | 0.372918 | 0         |  |
|         |      | Shiraz-31T | 317  | 0.204382 | 0         |  |
|         |      | Shiraz-36T | 378  | 0.179558 | 0         |  |
|         |      | Shiraz-44T | 642  | 0.408617 | 0         |  |
|         |      | Shiraz-46T | 943  | 0.093799 | 0         |  |
|         |      | Shiraz-47T | 1032 | 0.171484 | 0         |  |
|         |      | Shiraz-77T | 1225 | 0        | -0.117922 |  |
|         |      | Shiraz-77T | 1229 | 0.051661 | 0         |  |
|         |      | Shiraz-9T  | 1325 | 0.221899 | 0         |  |
|         |      | Shiraz-18T | 1434 | 0.244465 | 0         |  |
|         |      | Shiraz-25T | 1698 | 0.21835  | 0         |  |
|         |      | Shiraz-28T | 1735 | 0.350744 | 0         |  |
|         |      | Shiraz-29T | 1778 | 0.120767 | 0         |  |
|         |      | Shiraz-32T | 1833 | 0.551336 | 0         |  |
|         |      | Shiraz-38T | 1951 | 0.250891 | 0         |  |
|         |      | Shiraz-53T | 2078 | 0.287202 | 0         |  |
|         |      | Shiraz-71T | 2238 | 0.603631 | 0         |  |
| CCDC146 | chr7 | Shiraz-3T  | 90   | 0.219276 | 0         |  |
|         |      | Shiraz-4T  | 253  | 0.372918 | 0         |  |
|         |      | Shiraz-31T | 315  | 0.194054 | 0         |  |
|         |      | Shiraz-36T | 378  | 0.179558 | 0         |  |
|         |      | Shiraz-36T | 379  | 0.322028 | 0         |  |
|         |      | Shiraz-42T | 454  | 0.145717 | 0         |  |
|         |      | Shiraz-46T | 943  | 0.093799 | 0         |  |
|         |      | Shiraz-46T | 944  | 0.256008 | 0         |  |
|         |      | Shiraz-77T | 1225 | 0        | -0.117922 |  |
|         |      | Shiraz-18T | 1434 | 0.244465 | 0         |  |
|         |      | Shiraz-22T | 1549 | 0        | -0.319623 |  |
|         |      | Shiraz-25T | 1698 | 0.21835  | 0         |  |
|         |      | Shiraz-28T | 1735 | 0.350744 | 0         |  |
|         |      | Shiraz-29T | 1778 | 0.120767 | 0         |  |
|         |      | Shiraz-38T | 1951 | 0.250891 | 0         |  |
|         |      | Shiraz-53T | 2078 | 0.287202 | 0         |  |
|         |      | Shiraz-71T | 2238 | 0.603631 | 0         |  |
|         |      | Shiraz-71T | 2239 | 0.310785 | 0         |  |
|         |      | Shiraz-3T  | 90   | 0.219276 | 0         |  |

|         |      |            |      |          |           |  |  |
|---------|------|------------|------|----------|-----------|--|--|
|         |      | Shiraz-4T  | 253  | 0.372918 | 0         |  |  |
|         |      | Shiraz-31T | 315  | 0.194054 | 0         |  |  |
|         |      | Shiraz-36T | 378  | 0.179558 | 0         |  |  |
|         |      | Shiraz-36T | 379  | 0.322028 | 0         |  |  |
|         |      | Shiraz-42T | 454  | 0.145717 | 0         |  |  |
|         |      | Shiraz-46T | 943  | 0.093799 | 0         |  |  |
|         |      | Shiraz-46T | 944  | 0.256008 | 0         |  |  |
|         |      | Shiraz-77T | 1225 | 0        | -0.117922 |  |  |
|         |      | Shiraz-18T | 1434 | 0.244465 | 0         |  |  |
|         |      | Shiraz-22T | 1549 | 0        | -0.319623 |  |  |
|         |      | Shiraz-25T | 1698 | 0.21835  | 0         |  |  |
|         |      | Shiraz-28T | 1735 | 0.350744 | 0         |  |  |
|         |      | Shiraz-29T | 1778 | 0.120767 | 0         |  |  |
|         |      | Shiraz-38T | 1951 | 0.250891 | 0         |  |  |
|         |      | Shiraz-53T | 2078 | 0.287202 | 0         |  |  |
|         |      | Shiraz-71T | 2238 | 0.603631 | 0         |  |  |
|         |      | Shiraz-71T | 2239 | 0.310785 | 0         |  |  |
|         |      | Shiraz-3T  | 90   | 0.219276 | 0         |  |  |
|         |      | Shiraz-4T  | 253  | 0.372918 | 0         |  |  |
|         |      | Shiraz-31T | 315  | 0.194054 | 0         |  |  |
|         |      | Shiraz-36T | 378  | 0.179558 | 0         |  |  |
|         |      | Shiraz-36T | 379  | 0.322028 | 0         |  |  |
|         |      | Shiraz-42T | 454  | 0.145717 | 0         |  |  |
|         |      | Shiraz-46T | 943  | 0.093799 | 0         |  |  |
|         |      | Shiraz-46T | 944  | 0.256008 | 0         |  |  |
|         |      | Shiraz-77T | 1225 | 0        | -0.117922 |  |  |
|         |      | Shiraz-18T | 1434 | 0.244465 | 0         |  |  |
|         |      | Shiraz-22T | 1549 | 0        | -0.319623 |  |  |
|         |      | Shiraz-25T | 1698 | 0.21835  | 0         |  |  |
|         |      | Shiraz-28T | 1735 | 0.350744 | 0         |  |  |
|         |      | Shiraz-29T | 1778 | 0.120767 | 0         |  |  |
|         |      | Shiraz-38T | 1951 | 0.250891 | 0         |  |  |
|         |      | Shiraz-53T | 2078 | 0.287202 | 0         |  |  |
|         |      | Shiraz-71T | 2238 | 0.603631 | 0         |  |  |
|         |      | Shiraz-71T | 2239 | 0.310785 | 0         |  |  |
| CCDC152 | chr5 | Shiraz-4T  | 250  | 0.262252 | 0         |  |  |
|         |      | Shiraz-16T | 266  | 0.321724 | 0         |  |  |
|         |      | Shiraz-44T | 591  | 0        | -0.233934 |  |  |
|         |      | Shiraz-18T | 1429 | 0        | -0.314125 |  |  |
|         |      | Shiraz-22T | 1522 | 0        | -0.322688 |  |  |
|         |      | Shiraz-25T | 1694 | 0.201602 | 0         |  |  |
|         |      | Shiraz-28T | 1731 | 0.295447 | 0         |  |  |
|         |      | Shiraz-29T | 1773 | 0.090981 | 0         |  |  |
|         |      | Shiraz-40T | 2016 | 0.376634 | 0         |  |  |
|         |      | Shiraz-4T  | 250  | 0.262252 | 0         |  |  |
|         |      | Shiraz-16T | 266  | 0.321724 | 0         |  |  |
|         |      | Shiraz-44T | 591  | 0        | -0.233934 |  |  |

|        |      |            |      |          |           |  |  |
|--------|------|------------|------|----------|-----------|--|--|
|        |      | Shiraz-18T | 1429 | 0        | -0.314125 |  |  |
|        |      | Shiraz-22T | 1522 | 0        | -0.322688 |  |  |
|        |      | Shiraz-25T | 1694 | 0.201602 | 0         |  |  |
|        |      | Shiraz-28T | 1731 | 0.295447 | 0         |  |  |
|        |      | Shiraz-29T | 1773 | 0.090981 | 0         |  |  |
|        |      | Shiraz-40T | 2016 | 0.376634 | 0         |  |  |
|        |      | Shiraz-4T  | 250  | 0.262252 | 0         |  |  |
|        |      | Shiraz-16T | 266  | 0.321724 | 0         |  |  |
|        |      | Shiraz-44T | 591  | 0        | -0.233934 |  |  |
|        |      | Shiraz-18T | 1429 | 0        | -0.314125 |  |  |
|        |      | Shiraz-22T | 1522 | 0        | -0.322688 |  |  |
|        |      | Shiraz-25T | 1694 | 0.201602 | 0         |  |  |
|        |      | Shiraz-28T | 1731 | 0.295447 | 0         |  |  |
|        |      | Shiraz-29T | 1773 | 0.090981 | 0         |  |  |
|        |      | Shiraz-40T | 2016 | 0.376634 | 0         |  |  |
| CCDC22 | chrX | Shiraz-3T  | 238  | 0.472087 | 0         |  |  |
|        |      | Shiraz-4T  | 260  | 0        | -0.324128 |  |  |
|        |      | Shiraz-16T | 294  | 0.655804 | 0         |  |  |
|        |      | Shiraz-31T | 345  | 0.103301 | 0         |  |  |
|        |      | Shiraz-36T | 431  | 0        | -0.78035  |  |  |
|        |      | Shiraz-36T | 432  | 0        | -0.6692   |  |  |
|        |      | Shiraz-44T | 891  | 0        | -0.954044 |  |  |
|        |      | Shiraz-44T | 896  | 0        | -0.109108 |  |  |
|        |      | Shiraz-44T | 897  | 0.486937 | 0         |  |  |
|        |      | Shiraz-46T | 991  | 0.139564 | 0         |  |  |
|        |      | Shiraz-47T | 1084 | 0.24185  | 0         |  |  |
|        |      | Shiraz-49T | 1166 | 0        | -0.917235 |  |  |
|        |      | Shiraz-49T | 1169 | 0        | -0.583529 |  |  |
|        |      | Shiraz-77T | 1282 | 0.213849 | 0         |  |  |
|        |      | Shiraz-9T  | 1368 | 0.199713 | 0         |  |  |
|        |      | Shiraz-9T  | 1369 | 0.703374 | 0         |  |  |
|        |      | Shiraz-18T | 1455 | 0        | -0.186773 |  |  |
|        |      | Shiraz-22T | 1669 | 0.695915 | 0         |  |  |
|        |      | Shiraz-22T | 1672 | 1.01678  | 0         |  |  |
|        |      | Shiraz-25T | 1717 | 0.420447 | 0         |  |  |
|        |      | Shiraz-28T | 1760 | 0.538181 | 0         |  |  |
|        |      | Shiraz-29T | 1800 | 0.672527 | 0         |  |  |
|        |      | Shiraz-32T | 1869 | 0.776805 | 0         |  |  |
|        |      | Shiraz-35T | 1932 | 0.507141 | 0         |  |  |
|        |      | Shiraz-58T | 2221 | 0.871948 | 0         |  |  |
|        |      | Shiraz-71T | 2260 | 0.68394  | 0         |  |  |
|        |      | Shiraz-71T | 2262 | 0.986748 | 0         |  |  |
|        |      | Shiraz-3T  | 238  | 0.472087 | 0         |  |  |
|        |      | Shiraz-4T  | 260  | 0        | -0.324128 |  |  |
|        |      | Shiraz-16T | 294  | 0.655804 | 0         |  |  |
|        |      | Shiraz-31T | 345  | 0.103301 | 0         |  |  |
|        |      | Shiraz-36T | 431  | 0        | -0.78035  |  |  |



|  |            |      |          |           |  |
|--|------------|------|----------|-----------|--|
|  | Shiraz-36T | 432  | 0        | -0.6692   |  |
|  | Shiraz-44T | 891  | 0        | -0.954044 |  |
|  | Shiraz-44T | 896  | 0        | -0.109108 |  |
|  | Shiraz-44T | 897  | 0.486937 | 0         |  |
|  | Shiraz-46T | 991  | 0.139564 | 0         |  |
|  | Shiraz-47T | 1084 | 0.24185  | 0         |  |
|  | Shiraz-49T | 1166 | 0        | -0.917235 |  |
|  | Shiraz-49T | 1169 | 0        | -0.583529 |  |
|  | Shiraz-77T | 1282 | 0.213849 | 0         |  |
|  | Shiraz-9T  | 1368 | 0.199713 | 0         |  |
|  | Shiraz-9T  | 1369 | 0.703374 | 0         |  |
|  | Shiraz-18T | 1455 | 0        | -0.186773 |  |
|  | Shiraz-22T | 1669 | 0.695915 | 0         |  |
|  | Shiraz-22T | 1672 | 1.01678  | 0         |  |
|  | Shiraz-25T | 1717 | 0.420447 | 0         |  |
|  | Shiraz-28T | 1760 | 0.538181 | 0         |  |
|  | Shiraz-29T | 1800 | 0.672527 | 0         |  |
|  | Shiraz-32T | 1869 | 0.776805 | 0         |  |
|  | Shiraz-35T | 1932 | 0.507141 | 0         |  |
|  | Shiraz-58T | 2221 | 0.871948 | 0         |  |
|  | Shiraz-71T | 2260 | 0.68394  | 0         |  |
|  | Shiraz-71T | 2262 | 0.986748 | 0         |  |
|  | Shiraz-3T  | 238  | 0.472087 | 0         |  |
|  | Shiraz-4T  | 260  | 0        | -0.324128 |  |
|  | Shiraz-16T | 294  | 0.655804 | 0         |  |
|  | Shiraz-31T | 345  | 0.103301 | 0         |  |
|  | Shiraz-36T | 431  | 0        | -0.78035  |  |
|  | Shiraz-36T | 432  | 0        | -0.6692   |  |
|  | Shiraz-44T | 891  | 0        | -0.954044 |  |
|  | Shiraz-44T | 896  | 0        | -0.109108 |  |
|  | Shiraz-44T | 897  | 0.486937 | 0         |  |
|  | Shiraz-46T | 991  | 0.139564 | 0         |  |
|  | Shiraz-47T | 1084 | 0.24185  | 0         |  |
|  | Shiraz-49T | 1166 | 0        | -0.917235 |  |
|  | Shiraz-49T | 1169 | 0        | -0.583529 |  |
|  | Shiraz-77T | 1282 | 0.213849 | 0         |  |
|  | Shiraz-9T  | 1368 | 0.199713 | 0         |  |
|  | Shiraz-9T  | 1369 | 0.703374 | 0         |  |
|  | Shiraz-18T | 1455 | 0        | -0.186773 |  |
|  | Shiraz-22T | 1669 | 0.695915 | 0         |  |
|  | Shiraz-22T | 1672 | 1.01678  | 0         |  |
|  | Shiraz-25T | 1717 | 0.420447 | 0         |  |
|  | Shiraz-28T | 1760 | 0.538181 | 0         |  |
|  | Shiraz-29T | 1800 | 0.672527 | 0         |  |
|  | Shiraz-32T | 1869 | 0.776805 | 0         |  |
|  | Shiraz-35T | 1932 | 0.507141 | 0         |  |
|  | Shiraz-58T | 2221 | 0.871948 | 0         |  |

|       |      |            |      |          |           |  |
|-------|------|------------|------|----------|-----------|--|
|       |      | Shiraz-71T | 2260 | 0.68394  | 0         |  |
|       |      | Shiraz-71T | 2262 | 0.986748 | 0         |  |
| CCL28 | chr5 | Shiraz-4T  | 250  | 0.262252 | 0         |  |
|       |      | Shiraz-16T | 266  | 0.321724 | 0         |  |
|       |      | Shiraz-44T | 591  | 0        | -0.233934 |  |
|       |      | Shiraz-18T | 1429 | 0        | -0.314125 |  |
|       |      | Shiraz-22T | 1522 | 0        | -0.322688 |  |
|       |      | Shiraz-25T | 1694 | 0.201602 | 0         |  |
|       |      | Shiraz-28T | 1731 | 0.295447 | 0         |  |
|       |      | Shiraz-29T | 1773 | 0.090981 | 0         |  |
|       |      | Shiraz-40T | 2016 | 0.376634 | 0         |  |
|       |      | Shiraz-4T  | 250  | 0.262252 | 0         |  |
|       |      | Shiraz-16T | 266  | 0.321724 | 0         |  |
|       |      | Shiraz-44T | 591  | 0        | -0.233934 |  |
|       |      | Shiraz-18T | 1429 | 0        | -0.314125 |  |
|       |      | Shiraz-22T | 1522 | 0        | -0.322688 |  |
|       |      | Shiraz-25T | 1694 | 0.201602 | 0         |  |
|       |      | Shiraz-28T | 1731 | 0.295447 | 0         |  |
|       |      | Shiraz-29T | 1773 | 0.090981 | 0         |  |
|       |      | Shiraz-40T | 2016 | 0.376634 | 0         |  |
|       |      | Shiraz-4T  | 250  | 0.262252 | 0         |  |
|       |      | Shiraz-16T | 266  | 0.321724 | 0         |  |
|       |      | Shiraz-44T | 591  | 0        | -0.233934 |  |
|       |      | Shiraz-18T | 1429 | 0        | -0.314125 |  |
|       |      | Shiraz-22T | 1522 | 0        | -0.322688 |  |
|       |      | Shiraz-25T | 1694 | 0.201602 | 0         |  |
|       |      | Shiraz-28T | 1731 | 0.295447 | 0         |  |
|       |      | Shiraz-29T | 1773 | 0.090981 | 0         |  |
|       |      | Shiraz-40T | 2016 | 0.376634 | 0         |  |
| CCM2  | chr7 | Shiraz-3T  | 87   | 0.198593 | 0         |  |
|       |      | Shiraz-3T  | 87   | 0.198593 | 0         |  |
|       |      | Shiraz-3T  | 89   | 0.678641 | 0         |  |
|       |      | Shiraz-3T  | 89   | 0.678641 | 0         |  |
|       |      | Shiraz-4T  | 252  | 0.192083 | 0         |  |
|       |      | Shiraz-4T  | 252  | 0.192083 | 0         |  |
|       |      | Shiraz-36T | 376  | 0.159952 | 0         |  |
|       |      | Shiraz-36T | 376  | 0.159952 | 0         |  |
|       |      | Shiraz-44T | 632  | 0.902944 | 0         |  |
|       |      | Shiraz-44T | 632  | 0.902944 | 0         |  |
|       |      | Shiraz-46T | 942  | 0.069143 | 0         |  |
|       |      | Shiraz-46T | 942  | 0.069143 | 0         |  |
|       |      | Shiraz-77T | 1223 | 0.215647 | 0         |  |
|       |      | Shiraz-77T | 1223 | 0.215647 | 0         |  |
|       |      | Shiraz-18T | 1433 | 0.250973 | 0         |  |
|       |      | Shiraz-18T | 1433 | 0.250973 | 0         |  |
|       |      | Shiraz-25T | 1697 | 0.21945  | 0         |  |
|       |      | Shiraz-25T | 1697 | 0.21945  | 0         |  |

|  |  |            |      |          |   |  |  |
|--|--|------------|------|----------|---|--|--|
|  |  | Shiraz-28T | 1734 | 0.362882 | 0 |  |  |
|  |  | Shiraz-28T | 1734 | 0.362882 | 0 |  |  |
|  |  | Shiraz-29T | 1777 | 0.156747 | 0 |  |  |
|  |  | Shiraz-29T | 1777 | 0.156747 | 0 |  |  |
|  |  | Shiraz-38T | 1950 | 0.265916 | 0 |  |  |
|  |  | Shiraz-38T | 1950 | 0.265916 | 0 |  |  |
|  |  | Shiraz-71T | 2236 | 0.320072 | 0 |  |  |
|  |  | Shiraz-71T | 2236 | 0.320072 | 0 |  |  |
|  |  | Shiraz-3T  | 87   | 0.198593 | 0 |  |  |
|  |  | Shiraz-3T  | 87   | 0.198593 | 0 |  |  |
|  |  | Shiraz-3T  | 89   | 0.678641 | 0 |  |  |
|  |  | Shiraz-3T  | 89   | 0.678641 | 0 |  |  |
|  |  | Shiraz-4T  | 252  | 0.192083 | 0 |  |  |
|  |  | Shiraz-4T  | 252  | 0.192083 | 0 |  |  |
|  |  | Shiraz-36T | 376  | 0.159952 | 0 |  |  |
|  |  | Shiraz-36T | 376  | 0.159952 | 0 |  |  |
|  |  | Shiraz-44T | 632  | 0.902944 | 0 |  |  |
|  |  | Shiraz-44T | 632  | 0.902944 | 0 |  |  |
|  |  | Shiraz-46T | 942  | 0.069143 | 0 |  |  |
|  |  | Shiraz-46T | 942  | 0.069143 | 0 |  |  |
|  |  | Shiraz-77T | 1223 | 0.215647 | 0 |  |  |
|  |  | Shiraz-77T | 1223 | 0.215647 | 0 |  |  |
|  |  | Shiraz-18T | 1433 | 0.250973 | 0 |  |  |
|  |  | Shiraz-18T | 1433 | 0.250973 | 0 |  |  |
|  |  | Shiraz-25T | 1697 | 0.21945  | 0 |  |  |
|  |  | Shiraz-25T | 1697 | 0.21945  | 0 |  |  |
|  |  | Shiraz-28T | 1734 | 0.362882 | 0 |  |  |
|  |  | Shiraz-28T | 1734 | 0.362882 | 0 |  |  |
|  |  | Shiraz-29T | 1777 | 0.156747 | 0 |  |  |
|  |  | Shiraz-29T | 1777 | 0.156747 | 0 |  |  |
|  |  | Shiraz-38T | 1950 | 0.265916 | 0 |  |  |
|  |  | Shiraz-38T | 1950 | 0.265916 | 0 |  |  |
|  |  | Shiraz-71T | 2236 | 0.320072 | 0 |  |  |
|  |  | Shiraz-71T | 2236 | 0.320072 | 0 |  |  |
|  |  | Shiraz-3T  | 87   | 0.198593 | 0 |  |  |
|  |  | Shiraz-3T  | 87   | 0.198593 | 0 |  |  |
|  |  | Shiraz-3T  | 89   | 0.678641 | 0 |  |  |
|  |  | Shiraz-3T  | 89   | 0.678641 | 0 |  |  |
|  |  | Shiraz-4T  | 252  | 0.192083 | 0 |  |  |
|  |  | Shiraz-4T  | 252  | 0.192083 | 0 |  |  |
|  |  | Shiraz-36T | 376  | 0.159952 | 0 |  |  |
|  |  | Shiraz-36T | 376  | 0.159952 | 0 |  |  |
|  |  | Shiraz-44T | 632  | 0.902944 | 0 |  |  |
|  |  | Shiraz-44T | 632  | 0.902944 | 0 |  |  |
|  |  | Shiraz-46T | 942  | 0.069143 | 0 |  |  |
|  |  | Shiraz-46T | 942  | 0.069143 | 0 |  |  |
|  |  | Shiraz-77T | 1223 | 0.215647 | 0 |  |  |

|        |      |            |      |          |   |  |
|--------|------|------------|------|----------|---|--|
|        |      | Shiraz-77T | 1223 | 0.215647 | 0 |  |
|        |      | Shiraz-18T | 1433 | 0.250973 | 0 |  |
|        |      | Shiraz-18T | 1433 | 0.250973 | 0 |  |
|        |      | Shiraz-25T | 1697 | 0.21945  | 0 |  |
|        |      | Shiraz-25T | 1697 | 0.21945  | 0 |  |
|        |      | Shiraz-28T | 1734 | 0.362882 | 0 |  |
|        |      | Shiraz-28T | 1734 | 0.362882 | 0 |  |
|        |      | Shiraz-29T | 1777 | 0.156747 | 0 |  |
|        |      | Shiraz-29T | 1777 | 0.156747 | 0 |  |
|        |      | Shiraz-38T | 1950 | 0.265916 | 0 |  |
|        |      | Shiraz-38T | 1950 | 0.265916 | 0 |  |
|        |      | Shiraz-71T | 2236 | 0.320072 | 0 |  |
|        |      | Shiraz-71T | 2236 | 0.320072 | 0 |  |
| CCT8L1 | chr7 | Shiraz-3T  | 90   | 0.219276 | 0 |  |
|        |      | Shiraz-3T  | 99   | 0.454766 | 0 |  |
|        |      | Shiraz-4T  | 253  | 0.372918 | 0 |  |
|        |      | Shiraz-36T | 378  | 0.179558 | 0 |  |
|        |      | Shiraz-44T | 646  | 0.471276 | 0 |  |
|        |      | Shiraz-44T | 648  | 0.017909 | 0 |  |
|        |      | Shiraz-46T | 943  | 0.093799 | 0 |  |
|        |      | Shiraz-9T  | 1325 | 0.221899 | 0 |  |
|        |      | Shiraz-18T | 1434 | 0.244465 | 0 |  |
|        |      | Shiraz-25T | 1698 | 0.21835  | 0 |  |
|        |      | Shiraz-28T | 1735 | 0.350744 | 0 |  |
|        |      | Shiraz-29T | 1778 | 0.120767 | 0 |  |
|        |      | Shiraz-32T | 1833 | 0.551336 | 0 |  |
|        |      | Shiraz-38T | 1951 | 0.250891 | 0 |  |
|        |      | Shiraz-58T | 2162 | 0.221505 | 0 |  |
|        |      | Shiraz-71T | 2238 | 0.603631 | 0 |  |
|        |      | Shiraz-3T  | 90   | 0.219276 | 0 |  |
|        |      | Shiraz-3T  | 99   | 0.454766 | 0 |  |
|        |      | Shiraz-4T  | 253  | 0.372918 | 0 |  |
|        |      | Shiraz-36T | 378  | 0.179558 | 0 |  |
|        |      | Shiraz-44T | 646  | 0.471276 | 0 |  |
|        |      | Shiraz-44T | 648  | 0.017909 | 0 |  |
|        |      | Shiraz-46T | 943  | 0.093799 | 0 |  |
|        |      | Shiraz-9T  | 1325 | 0.221899 | 0 |  |
|        |      | Shiraz-18T | 1434 | 0.244465 | 0 |  |
|        |      | Shiraz-25T | 1698 | 0.21835  | 0 |  |
|        |      | Shiraz-28T | 1735 | 0.350744 | 0 |  |
|        |      | Shiraz-29T | 1778 | 0.120767 | 0 |  |
|        |      | Shiraz-32T | 1833 | 0.551336 | 0 |  |
|        |      | Shiraz-38T | 1951 | 0.250891 | 0 |  |
|        |      | Shiraz-58T | 2162 | 0.221505 | 0 |  |
|        |      | Shiraz-71T | 2238 | 0.603631 | 0 |  |
|        |      | Shiraz-3T  | 90   | 0.219276 | 0 |  |
|        |      | Shiraz-3T  | 99   | 0.454766 | 0 |  |

|      |      |            |      |          |           |  |  |
|------|------|------------|------|----------|-----------|--|--|
|      |      | Shiraz-4T  | 253  | 0.372918 | 0         |  |  |
|      |      | Shiraz-36T | 378  | 0.179558 | 0         |  |  |
|      |      | Shiraz-44T | 646  | 0.471276 | 0         |  |  |
|      |      | Shiraz-44T | 648  | 0.017909 | 0         |  |  |
|      |      | Shiraz-46T | 943  | 0.093799 | 0         |  |  |
|      |      | Shiraz-9T  | 1325 | 0.221899 | 0         |  |  |
|      |      | Shiraz-18T | 1434 | 0.244465 | 0         |  |  |
|      |      | Shiraz-25T | 1698 | 0.21835  | 0         |  |  |
|      |      | Shiraz-28T | 1735 | 0.350744 | 0         |  |  |
|      |      | Shiraz-29T | 1778 | 0.120767 | 0         |  |  |
|      |      | Shiraz-32T | 1833 | 0.551336 | 0         |  |  |
|      |      | Shiraz-38T | 1951 | 0.250891 | 0         |  |  |
|      |      | Shiraz-58T | 2162 | 0.221505 | 0         |  |  |
|      |      | Shiraz-71T | 2238 | 0.603631 | 0         |  |  |
| CD36 | chr7 | Shiraz-3T  | 90   | 0.219276 | 0         |  |  |
|      |      | Shiraz-3T  | 90   | 0.219276 | 0         |  |  |
|      |      | Shiraz-3T  | 90   | 0.219276 | 0         |  |  |
|      |      | Shiraz-3T  | 90   | 0.219276 | 0         |  |  |
|      |      | Shiraz-3T  | 90   | 0.219276 | 0         |  |  |
|      |      | Shiraz-3T  | 93   | 0        | -0.058023 |  |  |
|      |      | Shiraz-3T  | 93   | 0        | -0.058023 |  |  |
|      |      | Shiraz-3T  | 93   | 0        | -0.058023 |  |  |
|      |      | Shiraz-3T  | 93   | 0        | -0.058023 |  |  |
|      |      | Shiraz-3T  | 93   | 0        | -0.058023 |  |  |
|      |      | Shiraz-4T  | 253  | 0.372918 | 0         |  |  |
|      |      | Shiraz-4T  | 253  | 0.372918 | 0         |  |  |
|      |      | Shiraz-4T  | 253  | 0.372918 | 0         |  |  |
|      |      | Shiraz-4T  | 253  | 0.372918 | 0         |  |  |
|      |      | Shiraz-4T  | 253  | 0.372918 | 0         |  |  |
|      |      | Shiraz-36T | 378  | 0.179558 | 0         |  |  |
|      |      | Shiraz-36T | 378  | 0.179558 | 0         |  |  |
|      |      | Shiraz-36T | 378  | 0.179558 | 0         |  |  |
|      |      | Shiraz-36T | 378  | 0.179558 | 0         |  |  |
|      |      | Shiraz-36T | 378  | 0.179558 | 0         |  |  |
|      |      | Shiraz-36T | 380  | 0.083883 | 0         |  |  |
|      |      | Shiraz-36T | 380  | 0.083883 | 0         |  |  |
|      |      | Shiraz-36T | 380  | 0.083883 | 0         |  |  |
|      |      | Shiraz-36T | 380  | 0.083883 | 0         |  |  |
|      |      | Shiraz-36T | 380  | 0.083883 | 0         |  |  |
|      |      | Shiraz-44T | 638  | 0        | -0.433476 |  |  |
|      |      | Shiraz-44T | 638  | 0        | -0.433476 |  |  |
|      |      | Shiraz-44T | 638  | 0        | -0.433476 |  |  |
|      |      | Shiraz-44T | 638  | 0        | -0.433476 |  |  |
|      |      | Shiraz-44T | 638  | 0        | -0.433476 |  |  |
|      |      | Shiraz-46T | 943  | 0.093799 | 0         |  |  |
|      |      | Shiraz-46T | 943  | 0.093799 | 0         |  |  |
|      |      | Shiraz-46T | 943  | 0.093799 | 0         |  |  |

|  |  |            |      |          |           |  |  |
|--|--|------------|------|----------|-----------|--|--|
|  |  | Shiraz-46T | 943  | 0.093799 | 0         |  |  |
|  |  | Shiraz-46T | 943  | 0.093799 | 0         |  |  |
|  |  | Shiraz-46T | 945  | 0        | -0.014838 |  |  |
|  |  | Shiraz-46T | 945  | 0        | -0.014838 |  |  |
|  |  | Shiraz-46T | 945  | 0        | -0.014838 |  |  |
|  |  | Shiraz-46T | 945  | 0        | -0.014838 |  |  |
|  |  | Shiraz-46T | 945  | 0        | -0.014838 |  |  |
|  |  | Shiraz-47T | 1029 | 0        | -0.096586 |  |  |
|  |  | Shiraz-47T | 1029 | 0        | -0.096586 |  |  |
|  |  | Shiraz-47T | 1029 | 0        | -0.096586 |  |  |
|  |  | Shiraz-47T | 1029 | 0        | -0.096586 |  |  |
|  |  | Shiraz-47T | 1029 | 0        | -0.096586 |  |  |
|  |  | Shiraz-49T | 1119 | 0        | -0.157331 |  |  |
|  |  | Shiraz-49T | 1119 | 0        | -0.157331 |  |  |
|  |  | Shiraz-49T | 1119 | 0        | -0.157331 |  |  |
|  |  | Shiraz-49T | 1119 | 0        | -0.157331 |  |  |
|  |  | Shiraz-49T | 1119 | 0        | -0.157331 |  |  |
|  |  | Shiraz-77T | 1225 | 0        | -0.117922 |  |  |
|  |  | Shiraz-77T | 1225 | 0        | -0.117922 |  |  |
|  |  | Shiraz-77T | 1225 | 0        | -0.117922 |  |  |
|  |  | Shiraz-77T | 1225 | 0        | -0.117922 |  |  |
|  |  | Shiraz-77T | 1225 | 0        | -0.117922 |  |  |
|  |  | Shiraz-77T | 1226 | 0        | -0.233724 |  |  |
|  |  | Shiraz-77T | 1226 | 0        | -0.233724 |  |  |
|  |  | Shiraz-77T | 1226 | 0        | -0.233724 |  |  |
|  |  | Shiraz-77T | 1226 | 0        | -0.233724 |  |  |
|  |  | Shiraz-77T | 1226 | 0        | -0.233724 |  |  |
|  |  | Shiraz-12T | 1390 | 0        | -0.237897 |  |  |
|  |  | Shiraz-12T | 1390 | 0        | -0.237897 |  |  |
|  |  | Shiraz-12T | 1390 | 0        | -0.237897 |  |  |
|  |  | Shiraz-12T | 1390 | 0        | -0.237897 |  |  |
|  |  | Shiraz-12T | 1390 | 0        | -0.237897 |  |  |
|  |  | Shiraz-18T | 1434 | 0.244465 | 0         |  |  |
|  |  | Shiraz-18T | 1434 | 0.244465 | 0         |  |  |
|  |  | Shiraz-18T | 1434 | 0.244465 | 0         |  |  |
|  |  | Shiraz-18T | 1434 | 0.244465 | 0         |  |  |
|  |  | Shiraz-18T | 1434 | 0.244465 | 0         |  |  |
|  |  | Shiraz-22T | 1549 | 0        | -0.319623 |  |  |
|  |  | Shiraz-22T | 1549 | 0        | -0.319623 |  |  |
|  |  | Shiraz-22T | 1549 | 0        | -0.319623 |  |  |
|  |  | Shiraz-22T | 1549 | 0        | -0.319623 |  |  |
|  |  | Shiraz-22T | 1549 | 0        | -0.319623 |  |  |
|  |  | Shiraz-22T | 1550 | 0        | -0.577052 |  |  |
|  |  | Shiraz-22T | 1550 | 0        | -0.577052 |  |  |
|  |  | Shiraz-22T | 1550 | 0        | -0.577052 |  |  |
|  |  | Shiraz-22T | 1550 | 0        | -0.577052 |  |  |
|  |  | Shiraz-22T | 1550 | 0        | -0.577052 |  |  |

|  |  |            |      |          |           |  |  |
|--|--|------------|------|----------|-----------|--|--|
|  |  | Shiraz-25T | 1698 | 0.21835  | 0         |  |  |
|  |  | Shiraz-25T | 1698 | 0.21835  | 0         |  |  |
|  |  | Shiraz-25T | 1698 | 0.21835  | 0         |  |  |
|  |  | Shiraz-25T | 1698 | 0.21835  | 0         |  |  |
|  |  | Shiraz-25T | 1698 | 0.21835  | 0         |  |  |
|  |  | Shiraz-28T | 1735 | 0.350744 | 0         |  |  |
|  |  | Shiraz-28T | 1735 | 0.350744 | 0         |  |  |
|  |  | Shiraz-28T | 1735 | 0.350744 | 0         |  |  |
|  |  | Shiraz-28T | 1735 | 0.350744 | 0         |  |  |
|  |  | Shiraz-28T | 1735 | 0.350744 | 0         |  |  |
|  |  | Shiraz-29T | 1778 | 0.120767 | 0         |  |  |
|  |  | Shiraz-29T | 1778 | 0.120767 | 0         |  |  |
|  |  | Shiraz-29T | 1778 | 0.120767 | 0         |  |  |
|  |  | Shiraz-29T | 1778 | 0.120767 | 0         |  |  |
|  |  | Shiraz-29T | 1778 | 0.120767 | 0         |  |  |
|  |  | Shiraz-38T | 1951 | 0.250891 | 0         |  |  |
|  |  | Shiraz-38T | 1951 | 0.250891 | 0         |  |  |
|  |  | Shiraz-38T | 1951 | 0.250891 | 0         |  |  |
|  |  | Shiraz-38T | 1951 | 0.250891 | 0         |  |  |
|  |  | Shiraz-38T | 1951 | 0.250891 | 0         |  |  |
|  |  | Shiraz-53T | 2078 | 0.287202 | 0         |  |  |
|  |  | Shiraz-53T | 2078 | 0.287202 | 0         |  |  |
|  |  | Shiraz-53T | 2078 | 0.287202 | 0         |  |  |
|  |  | Shiraz-53T | 2078 | 0.287202 | 0         |  |  |
|  |  | Shiraz-53T | 2078 | 0.287202 | 0         |  |  |
|  |  | Shiraz-58T | 2159 | 0        | -0.219521 |  |  |
|  |  | Shiraz-58T | 2159 | 0        | -0.219521 |  |  |
|  |  | Shiraz-58T | 2159 | 0        | -0.219521 |  |  |
|  |  | Shiraz-58T | 2159 | 0        | -0.219521 |  |  |
|  |  | Shiraz-58T | 2159 | 0        | -0.219521 |  |  |
|  |  | Shiraz-71T | 2238 | 0.603631 | 0         |  |  |
|  |  | Shiraz-71T | 2238 | 0.603631 | 0         |  |  |
|  |  | Shiraz-71T | 2238 | 0.603631 | 0         |  |  |
|  |  | Shiraz-71T | 2238 | 0.603631 | 0         |  |  |
|  |  | Shiraz-71T | 2238 | 0.603631 | 0         |  |  |
|  |  | Shiraz-3T  | 90   | 0.219276 | 0         |  |  |
|  |  | Shiraz-3T  | 90   | 0.219276 | 0         |  |  |
|  |  | Shiraz-3T  | 90   | 0.219276 | 0         |  |  |
|  |  | Shiraz-3T  | 90   | 0.219276 | 0         |  |  |
|  |  | Shiraz-3T  | 90   | 0.219276 | 0         |  |  |
|  |  | Shiraz-3T  | 93   | 0        | -0.058023 |  |  |
|  |  | Shiraz-3T  | 93   | 0        | -0.058023 |  |  |
|  |  | Shiraz-3T  | 93   | 0        | -0.058023 |  |  |
|  |  | Shiraz-3T  | 93   | 0        | -0.058023 |  |  |
|  |  | Shiraz-3T  | 93   | 0        | -0.058023 |  |  |
|  |  | Shiraz-4T  | 253  | 0.372918 | 0         |  |  |
|  |  | Shiraz-4T  | 253  | 0.372918 | 0         |  |  |

|  |            |      |          |           |  |
|--|------------|------|----------|-----------|--|
|  | Shiraz-4T  | 253  | 0.372918 | 0         |  |
|  | Shiraz-4T  | 253  | 0.372918 | 0         |  |
|  | Shiraz-4T  | 253  | 0.372918 | 0         |  |
|  | Shiraz-36T | 378  | 0.179558 | 0         |  |
|  | Shiraz-36T | 378  | 0.179558 | 0         |  |
|  | Shiraz-36T | 378  | 0.179558 | 0         |  |
|  | Shiraz-36T | 378  | 0.179558 | 0         |  |
|  | Shiraz-36T | 378  | 0.179558 | 0         |  |
|  | Shiraz-36T | 380  | 0.083883 | 0         |  |
|  | Shiraz-36T | 380  | 0.083883 | 0         |  |
|  | Shiraz-36T | 380  | 0.083883 | 0         |  |
|  | Shiraz-36T | 380  | 0.083883 | 0         |  |
|  | Shiraz-36T | 380  | 0.083883 | 0         |  |
|  | Shiraz-44T | 638  | 0        | -0.433476 |  |
|  | Shiraz-44T | 638  | 0        | -0.433476 |  |
|  | Shiraz-44T | 638  | 0        | -0.433476 |  |
|  | Shiraz-44T | 638  | 0        | -0.433476 |  |
|  | Shiraz-44T | 638  | 0        | -0.433476 |  |
|  | Shiraz-46T | 943  | 0.093799 | 0         |  |
|  | Shiraz-46T | 943  | 0.093799 | 0         |  |
|  | Shiraz-46T | 943  | 0.093799 | 0         |  |
|  | Shiraz-46T | 943  | 0.093799 | 0         |  |
|  | Shiraz-46T | 943  | 0.093799 | 0         |  |
|  | Shiraz-46T | 945  | 0        | -0.014838 |  |
|  | Shiraz-46T | 945  | 0        | -0.014838 |  |
|  | Shiraz-46T | 945  | 0        | -0.014838 |  |
|  | Shiraz-46T | 945  | 0        | -0.014838 |  |
|  | Shiraz-46T | 945  | 0        | -0.014838 |  |
|  | Shiraz-47T | 1029 | 0        | -0.096586 |  |
|  | Shiraz-47T | 1029 | 0        | -0.096586 |  |
|  | Shiraz-47T | 1029 | 0        | -0.096586 |  |
|  | Shiraz-47T | 1029 | 0        | -0.096586 |  |
|  | Shiraz-47T | 1029 | 0        | -0.096586 |  |
|  | Shiraz-49T | 1119 | 0        | -0.157331 |  |
|  | Shiraz-49T | 1119 | 0        | -0.157331 |  |
|  | Shiraz-49T | 1119 | 0        | -0.157331 |  |
|  | Shiraz-49T | 1119 | 0        | -0.157331 |  |
|  | Shiraz-49T | 1119 | 0        | -0.157331 |  |
|  | Shiraz-77T | 1225 | 0        | -0.117922 |  |
|  | Shiraz-77T | 1225 | 0        | -0.117922 |  |
|  | Shiraz-77T | 1225 | 0        | -0.117922 |  |
|  | Shiraz-77T | 1225 | 0        | -0.117922 |  |
|  | Shiraz-77T | 1225 | 0        | -0.117922 |  |
|  | Shiraz-77T | 1226 | 0        | -0.233724 |  |
|  | Shiraz-77T | 1226 | 0        | -0.233724 |  |
|  | Shiraz-77T | 1226 | 0        | -0.233724 |  |
|  | Shiraz-77T | 1226 | 0        | -0.233724 |  |
|  | Shiraz-77T | 1226 | 0        | -0.233724 |  |



|  |            |      |          |           |  |
|--|------------|------|----------|-----------|--|
|  | Shiraz-77T | 1226 | 0        | -0.233724 |  |
|  | Shiraz-12T | 1390 | 0        | -0.237897 |  |
|  | Shiraz-12T | 1390 | 0        | -0.237897 |  |
|  | Shiraz-12T | 1390 | 0        | -0.237897 |  |
|  | Shiraz-12T | 1390 | 0        | -0.237897 |  |
|  | Shiraz-12T | 1390 | 0        | -0.237897 |  |
|  | Shiraz-18T | 1434 | 0.244465 | 0         |  |
|  | Shiraz-18T | 1434 | 0.244465 | 0         |  |
|  | Shiraz-18T | 1434 | 0.244465 | 0         |  |
|  | Shiraz-18T | 1434 | 0.244465 | 0         |  |
|  | Shiraz-18T | 1434 | 0.244465 | 0         |  |
|  | Shiraz-22T | 1549 | 0        | -0.319623 |  |
|  | Shiraz-22T | 1549 | 0        | -0.319623 |  |
|  | Shiraz-22T | 1549 | 0        | -0.319623 |  |
|  | Shiraz-22T | 1549 | 0        | -0.319623 |  |
|  | Shiraz-22T | 1549 | 0        | -0.319623 |  |
|  | Shiraz-22T | 1550 | 0        | -0.577052 |  |
|  | Shiraz-22T | 1550 | 0        | -0.577052 |  |
|  | Shiraz-22T | 1550 | 0        | -0.577052 |  |
|  | Shiraz-22T | 1550 | 0        | -0.577052 |  |
|  | Shiraz-22T | 1550 | 0        | -0.577052 |  |
|  | Shiraz-25T | 1698 | 0.21835  | 0         |  |
|  | Shiraz-25T | 1698 | 0.21835  | 0         |  |
|  | Shiraz-25T | 1698 | 0.21835  | 0         |  |
|  | Shiraz-25T | 1698 | 0.21835  | 0         |  |
|  | Shiraz-25T | 1698 | 0.21835  | 0         |  |
|  | Shiraz-28T | 1735 | 0.350744 | 0         |  |
|  | Shiraz-28T | 1735 | 0.350744 | 0         |  |
|  | Shiraz-28T | 1735 | 0.350744 | 0         |  |
|  | Shiraz-28T | 1735 | 0.350744 | 0         |  |
|  | Shiraz-28T | 1735 | 0.350744 | 0         |  |
|  | Shiraz-29T | 1778 | 0.120767 | 0         |  |
|  | Shiraz-29T | 1778 | 0.120767 | 0         |  |
|  | Shiraz-29T | 1778 | 0.120767 | 0         |  |
|  | Shiraz-29T | 1778 | 0.120767 | 0         |  |
|  | Shiraz-29T | 1778 | 0.120767 | 0         |  |
|  | Shiraz-38T | 1951 | 0.250891 | 0         |  |
|  | Shiraz-38T | 1951 | 0.250891 | 0         |  |
|  | Shiraz-38T | 1951 | 0.250891 | 0         |  |
|  | Shiraz-38T | 1951 | 0.250891 | 0         |  |
|  | Shiraz-38T | 1951 | 0.250891 | 0         |  |
|  | Shiraz-53T | 2078 | 0.287202 | 0         |  |
|  | Shiraz-53T | 2078 | 0.287202 | 0         |  |
|  | Shiraz-53T | 2078 | 0.287202 | 0         |  |
|  | Shiraz-53T | 2078 | 0.287202 | 0         |  |
|  | Shiraz-53T | 2078 | 0.287202 | 0         |  |
|  | Shiraz-58T | 2159 | 0        | -0.219521 |  |

|  |            |      |          |           |  |
|--|------------|------|----------|-----------|--|
|  | Shiraz-58T | 2159 | 0        | -0.219521 |  |
|  | Shiraz-58T | 2159 | 0        | -0.219521 |  |
|  | Shiraz-58T | 2159 | 0        | -0.219521 |  |
|  | Shiraz-58T | 2159 | 0        | -0.219521 |  |
|  | Shiraz-71T | 2238 | 0.603631 | 0         |  |
|  | Shiraz-71T | 2238 | 0.603631 | 0         |  |
|  | Shiraz-71T | 2238 | 0.603631 | 0         |  |
|  | Shiraz-71T | 2238 | 0.603631 | 0         |  |
|  | Shiraz-71T | 2238 | 0.603631 | 0         |  |
|  | Shiraz-3T  | 90   | 0.219276 | 0         |  |
|  | Shiraz-3T  | 90   | 0.219276 | 0         |  |
|  | Shiraz-3T  | 90   | 0.219276 | 0         |  |
|  | Shiraz-3T  | 90   | 0.219276 | 0         |  |
|  | Shiraz-3T  | 90   | 0.219276 | 0         |  |
|  | Shiraz-3T  | 93   | 0        | -0.058023 |  |
|  | Shiraz-3T  | 93   | 0        | -0.058023 |  |
|  | Shiraz-3T  | 93   | 0        | -0.058023 |  |
|  | Shiraz-3T  | 93   | 0        | -0.058023 |  |
|  | Shiraz-3T  | 93   | 0        | -0.058023 |  |
|  | Shiraz-4T  | 253  | 0.372918 | 0         |  |
|  | Shiraz-4T  | 253  | 0.372918 | 0         |  |
|  | Shiraz-4T  | 253  | 0.372918 | 0         |  |
|  | Shiraz-4T  | 253  | 0.372918 | 0         |  |
|  | Shiraz-4T  | 253  | 0.372918 | 0         |  |
|  | Shiraz-36T | 378  | 0.179558 | 0         |  |
|  | Shiraz-36T | 378  | 0.179558 | 0         |  |
|  | Shiraz-36T | 378  | 0.179558 | 0         |  |
|  | Shiraz-36T | 378  | 0.179558 | 0         |  |
|  | Shiraz-36T | 378  | 0.179558 | 0         |  |
|  | Shiraz-36T | 380  | 0.083883 | 0         |  |
|  | Shiraz-36T | 380  | 0.083883 | 0         |  |
|  | Shiraz-36T | 380  | 0.083883 | 0         |  |
|  | Shiraz-36T | 380  | 0.083883 | 0         |  |
|  | Shiraz-36T | 380  | 0.083883 | 0         |  |
|  | Shiraz-44T | 638  | 0        | -0.433476 |  |
|  | Shiraz-44T | 638  | 0        | -0.433476 |  |
|  | Shiraz-44T | 638  | 0        | -0.433476 |  |
|  | Shiraz-44T | 638  | 0        | -0.433476 |  |
|  | Shiraz-44T | 638  | 0        | -0.433476 |  |
|  | Shiraz-46T | 943  | 0.093799 | 0         |  |
|  | Shiraz-46T | 943  | 0.093799 | 0         |  |
|  | Shiraz-46T | 943  | 0.093799 | 0         |  |
|  | Shiraz-46T | 943  | 0.093799 | 0         |  |
|  | Shiraz-46T | 943  | 0.093799 | 0         |  |
|  | Shiraz-46T | 945  | 0        | -0.014838 |  |
|  | Shiraz-46T | 945  | 0        | -0.014838 |  |
|  | Shiraz-46T | 945  | 0        | -0.014838 |  |

|  |            |      |          |           |  |
|--|------------|------|----------|-----------|--|
|  | Shiraz-46T | 945  | 0        | -0.014838 |  |
|  | Shiraz-46T | 945  | 0        | -0.014838 |  |
|  | Shiraz-47T | 1029 | 0        | -0.096586 |  |
|  | Shiraz-47T | 1029 | 0        | -0.096586 |  |
|  | Shiraz-47T | 1029 | 0        | -0.096586 |  |
|  | Shiraz-47T | 1029 | 0        | -0.096586 |  |
|  | Shiraz-47T | 1029 | 0        | -0.096586 |  |
|  | Shiraz-49T | 1119 | 0        | -0.157331 |  |
|  | Shiraz-49T | 1119 | 0        | -0.157331 |  |
|  | Shiraz-49T | 1119 | 0        | -0.157331 |  |
|  | Shiraz-49T | 1119 | 0        | -0.157331 |  |
|  | Shiraz-49T | 1119 | 0        | -0.157331 |  |
|  | Shiraz-77T | 1225 | 0        | -0.117922 |  |
|  | Shiraz-77T | 1225 | 0        | -0.117922 |  |
|  | Shiraz-77T | 1225 | 0        | -0.117922 |  |
|  | Shiraz-77T | 1225 | 0        | -0.117922 |  |
|  | Shiraz-77T | 1225 | 0        | -0.117922 |  |
|  | Shiraz-77T | 1226 | 0        | -0.233724 |  |
|  | Shiraz-77T | 1226 | 0        | -0.233724 |  |
|  | Shiraz-77T | 1226 | 0        | -0.233724 |  |
|  | Shiraz-77T | 1226 | 0        | -0.233724 |  |
|  | Shiraz-77T | 1226 | 0        | -0.233724 |  |
|  | Shiraz-77T | 1226 | 0        | -0.233724 |  |
|  | Shiraz-12T | 1390 | 0        | -0.237897 |  |
|  | Shiraz-12T | 1390 | 0        | -0.237897 |  |
|  | Shiraz-12T | 1390 | 0        | -0.237897 |  |
|  | Shiraz-12T | 1390 | 0        | -0.237897 |  |
|  | Shiraz-12T | 1390 | 0        | -0.237897 |  |
|  | Shiraz-18T | 1434 | 0.244465 | 0         |  |
|  | Shiraz-18T | 1434 | 0.244465 | 0         |  |
|  | Shiraz-18T | 1434 | 0.244465 | 0         |  |
|  | Shiraz-18T | 1434 | 0.244465 | 0         |  |
|  | Shiraz-18T | 1434 | 0.244465 | 0         |  |
|  | Shiraz-22T | 1549 | 0        | -0.319623 |  |
|  | Shiraz-22T | 1549 | 0        | -0.319623 |  |
|  | Shiraz-22T | 1549 | 0        | -0.319623 |  |
|  | Shiraz-22T | 1549 | 0        | -0.319623 |  |
|  | Shiraz-22T | 1549 | 0        | -0.319623 |  |
|  | Shiraz-22T | 1550 | 0        | -0.577052 |  |
|  | Shiraz-22T | 1550 | 0        | -0.577052 |  |
|  | Shiraz-22T | 1550 | 0        | -0.577052 |  |
|  | Shiraz-22T | 1550 | 0        | -0.577052 |  |
|  | Shiraz-22T | 1550 | 0        | -0.577052 |  |
|  | Shiraz-25T | 1698 | 0.21835  | 0         |  |
|  | Shiraz-25T | 1698 | 0.21835  | 0         |  |
|  | Shiraz-25T | 1698 | 0.21835  | 0         |  |
|  | Shiraz-25T | 1698 | 0.21835  | 0         |  |
|  | Shiraz-25T | 1698 | 0.21835  | 0         |  |

|        |      |            |      |          |           |  |
|--------|------|------------|------|----------|-----------|--|
|        |      | Shiraz-28T | 1735 | 0.350744 | 0         |  |
|        |      | Shiraz-28T | 1735 | 0.350744 | 0         |  |
|        |      | Shiraz-28T | 1735 | 0.350744 | 0         |  |
|        |      | Shiraz-28T | 1735 | 0.350744 | 0         |  |
|        |      | Shiraz-28T | 1735 | 0.350744 | 0         |  |
|        |      | Shiraz-29T | 1778 | 0.120767 | 0         |  |
|        |      | Shiraz-29T | 1778 | 0.120767 | 0         |  |
|        |      | Shiraz-29T | 1778 | 0.120767 | 0         |  |
|        |      | Shiraz-29T | 1778 | 0.120767 | 0         |  |
|        |      | Shiraz-29T | 1778 | 0.120767 | 0         |  |
|        |      | Shiraz-38T | 1951 | 0.250891 | 0         |  |
|        |      | Shiraz-38T | 1951 | 0.250891 | 0         |  |
|        |      | Shiraz-38T | 1951 | 0.250891 | 0         |  |
|        |      | Shiraz-38T | 1951 | 0.250891 | 0         |  |
|        |      | Shiraz-38T | 1951 | 0.250891 | 0         |  |
|        |      | Shiraz-53T | 2078 | 0.287202 | 0         |  |
|        |      | Shiraz-53T | 2078 | 0.287202 | 0         |  |
|        |      | Shiraz-53T | 2078 | 0.287202 | 0         |  |
|        |      | Shiraz-53T | 2078 | 0.287202 | 0         |  |
|        |      | Shiraz-53T | 2078 | 0.287202 | 0         |  |
|        |      | Shiraz-58T | 2159 | 0        | -0.219521 |  |
|        |      | Shiraz-58T | 2159 | 0        | -0.219521 |  |
|        |      | Shiraz-58T | 2159 | 0        | -0.219521 |  |
|        |      | Shiraz-58T | 2159 | 0        | -0.219521 |  |
|        |      | Shiraz-58T | 2159 | 0        | -0.219521 |  |
|        |      | Shiraz-71T | 2238 | 0.603631 | 0         |  |
|        |      | Shiraz-71T | 2238 | 0.603631 | 0         |  |
|        |      | Shiraz-71T | 2238 | 0.603631 | 0         |  |
|        |      | Shiraz-71T | 2238 | 0.603631 | 0         |  |
|        |      | Shiraz-71T | 2238 | 0.603631 | 0         |  |
| CD40LG | chrX | Shiraz-3T  | 242  | 0        | -0.336434 |  |
|        |      | Shiraz-4T  | 261  | 0        | -0.336249 |  |
|        |      | Shiraz-16T | 295  | 0.591657 | 0         |  |
|        |      | Shiraz-36T | 433  | 0        | -0.803961 |  |
|        |      | Shiraz-44T | 899  | 0        | -1.09697  |  |
|        |      | Shiraz-49T | 1170 | 0        | -0.967436 |  |
|        |      | Shiraz-9T  | 1370 | 0.690073 | 0         |  |
|        |      | Shiraz-18T | 1457 | 0.643204 | 0         |  |
|        |      | Shiraz-22T | 1673 | 0.611783 | 0         |  |
|        |      | Shiraz-22T | 1677 | 0.789711 | 0         |  |
|        |      | Shiraz-25T | 1719 | 0.472955 | 0         |  |
|        |      | Shiraz-28T | 1762 | 0.562311 | 0         |  |
|        |      | Shiraz-29T | 1801 | 0.815343 | 0         |  |
|        |      | Shiraz-32T | 1870 | 0.729766 | 0         |  |
|        |      | Shiraz-35T | 1933 | 0.488535 | 0         |  |
|        |      | Shiraz-58T | 2223 | 0.833364 | 0         |  |
|        |      | Shiraz-71T | 2263 | 0.975531 | 0         |  |

|        |      |            |      |          |           |  |  |
|--------|------|------------|------|----------|-----------|--|--|
|        |      | Shiraz-3T  | 242  | 0        | -0.336434 |  |  |
|        |      | Shiraz-4T  | 261  | 0        | -0.336249 |  |  |
|        |      | Shiraz-16T | 295  | 0.591657 | 0         |  |  |
|        |      | Shiraz-36T | 433  | 0        | -0.803961 |  |  |
|        |      | Shiraz-44T | 899  | 0        | -1.09697  |  |  |
|        |      | Shiraz-49T | 1170 | 0        | -0.967436 |  |  |
|        |      | Shiraz-9T  | 1370 | 0.690073 | 0         |  |  |
|        |      | Shiraz-18T | 1457 | 0.643204 | 0         |  |  |
|        |      | Shiraz-22T | 1673 | 0.611783 | 0         |  |  |
|        |      | Shiraz-22T | 1677 | 0.789711 | 0         |  |  |
|        |      | Shiraz-25T | 1719 | 0.472955 | 0         |  |  |
|        |      | Shiraz-28T | 1762 | 0.562311 | 0         |  |  |
|        |      | Shiraz-29T | 1801 | 0.815343 | 0         |  |  |
|        |      | Shiraz-32T | 1870 | 0.729766 | 0         |  |  |
|        |      | Shiraz-35T | 1933 | 0.488535 | 0         |  |  |
|        |      | Shiraz-58T | 2223 | 0.833364 | 0         |  |  |
|        |      | Shiraz-71T | 2263 | 0.975531 | 0         |  |  |
|        |      | Shiraz-3T  | 242  | 0        | -0.336434 |  |  |
|        |      | Shiraz-4T  | 261  | 0        | -0.336249 |  |  |
|        |      | Shiraz-16T | 295  | 0.591657 | 0         |  |  |
|        |      | Shiraz-36T | 433  | 0        | -0.803961 |  |  |
|        |      | Shiraz-44T | 899  | 0        | -1.09697  |  |  |
|        |      | Shiraz-49T | 1170 | 0        | -0.967436 |  |  |
|        |      | Shiraz-9T  | 1370 | 0.690073 | 0         |  |  |
|        |      | Shiraz-18T | 1457 | 0.643204 | 0         |  |  |
|        |      | Shiraz-22T | 1673 | 0.611783 | 0         |  |  |
|        |      | Shiraz-22T | 1677 | 0.789711 | 0         |  |  |
|        |      | Shiraz-25T | 1719 | 0.472955 | 0         |  |  |
|        |      | Shiraz-28T | 1762 | 0.562311 | 0         |  |  |
|        |      | Shiraz-29T | 1801 | 0.815343 | 0         |  |  |
|        |      | Shiraz-32T | 1870 | 0.729766 | 0         |  |  |
|        |      | Shiraz-35T | 1933 | 0.488535 | 0         |  |  |
|        |      | Shiraz-58T | 2223 | 0.833364 | 0         |  |  |
|        |      | Shiraz-71T | 2263 | 0.975531 | 0         |  |  |
| CD99L2 | chrX | Shiraz-3T  | 242  | 0        | -0.336434 |  |  |
|        |      | Shiraz-4T  | 261  | 0        | -0.336249 |  |  |
|        |      | Shiraz-16T | 295  | 0.591657 | 0         |  |  |
|        |      | Shiraz-36T | 433  | 0        | -0.803961 |  |  |
|        |      | Shiraz-42T | 480  | 0        | -0.232915 |  |  |
|        |      | Shiraz-44T | 899  | 0        | -1.09697  |  |  |
|        |      | Shiraz-49T | 1170 | 0        | -0.967436 |  |  |
|        |      | Shiraz-9T  | 1370 | 0.690073 | 0         |  |  |
|        |      | Shiraz-18T | 1457 | 0.643204 | 0         |  |  |
|        |      | Shiraz-22T | 1673 | 0.611783 | 0         |  |  |
|        |      | Shiraz-22T | 1678 | 0.911625 | 0         |  |  |
|        |      | Shiraz-25T | 1719 | 0.472955 | 0         |  |  |
|        |      | Shiraz-28T | 1762 | 0.562311 | 0         |  |  |

|        |      |            |      |          |           |  |  |
|--------|------|------------|------|----------|-----------|--|--|
|        |      | Shiraz-29T | 1801 | 0.815343 | 0         |  |  |
|        |      | Shiraz-32T | 1870 | 0.729766 | 0         |  |  |
|        |      | Shiraz-35T | 1933 | 0.488535 | 0         |  |  |
|        |      | Shiraz-58T | 2223 | 0.833364 | 0         |  |  |
|        |      | Shiraz-58T | 2226 | 1.074663 | 0         |  |  |
|        |      | Shiraz-71T | 2263 | 0.975531 | 0         |  |  |
|        |      | Shiraz-3T  | 242  | 0        | -0.336434 |  |  |
|        |      | Shiraz-4T  | 261  | 0        | -0.336249 |  |  |
|        |      | Shiraz-16T | 295  | 0.591657 | 0         |  |  |
|        |      | Shiraz-36T | 433  | 0        | -0.803961 |  |  |
|        |      | Shiraz-42T | 480  | 0        | -0.232915 |  |  |
|        |      | Shiraz-44T | 899  | 0        | -1.09697  |  |  |
|        |      | Shiraz-49T | 1170 | 0        | -0.967436 |  |  |
|        |      | Shiraz-9T  | 1370 | 0.690073 | 0         |  |  |
|        |      | Shiraz-18T | 1457 | 0.643204 | 0         |  |  |
|        |      | Shiraz-22T | 1673 | 0.611783 | 0         |  |  |
|        |      | Shiraz-22T | 1678 | 0.911625 | 0         |  |  |
|        |      | Shiraz-25T | 1719 | 0.472955 | 0         |  |  |
|        |      | Shiraz-28T | 1762 | 0.562311 | 0         |  |  |
|        |      | Shiraz-29T | 1801 | 0.815343 | 0         |  |  |
|        |      | Shiraz-32T | 1870 | 0.729766 | 0         |  |  |
|        |      | Shiraz-35T | 1933 | 0.488535 | 0         |  |  |
|        |      | Shiraz-58T | 2223 | 0.833364 | 0         |  |  |
|        |      | Shiraz-58T | 2226 | 1.074663 | 0         |  |  |
|        |      | Shiraz-71T | 2263 | 0.975531 | 0         |  |  |
|        |      | Shiraz-3T  | 242  | 0        | -0.336434 |  |  |
|        |      | Shiraz-4T  | 261  | 0        | -0.336249 |  |  |
|        |      | Shiraz-16T | 295  | 0.591657 | 0         |  |  |
|        |      | Shiraz-36T | 433  | 0        | -0.803961 |  |  |
|        |      | Shiraz-42T | 480  | 0        | -0.232915 |  |  |
|        |      | Shiraz-44T | 899  | 0        | -1.09697  |  |  |
|        |      | Shiraz-49T | 1170 | 0        | -0.967436 |  |  |
|        |      | Shiraz-9T  | 1370 | 0.690073 | 0         |  |  |
|        |      | Shiraz-18T | 1457 | 0.643204 | 0         |  |  |
|        |      | Shiraz-22T | 1673 | 0.611783 | 0         |  |  |
|        |      | Shiraz-22T | 1678 | 0.911625 | 0         |  |  |
|        |      | Shiraz-25T | 1719 | 0.472955 | 0         |  |  |
|        |      | Shiraz-28T | 1762 | 0.562311 | 0         |  |  |
|        |      | Shiraz-29T | 1801 | 0.815343 | 0         |  |  |
|        |      | Shiraz-32T | 1870 | 0.729766 | 0         |  |  |
|        |      | Shiraz-35T | 1933 | 0.488535 | 0         |  |  |
|        |      | Shiraz-58T | 2223 | 0.833364 | 0         |  |  |
|        |      | Shiraz-58T | 2226 | 1.074663 | 0         |  |  |
|        |      | Shiraz-71T | 2263 | 0.975531 | 0         |  |  |
| CDC14C | chr7 | Shiraz-3T  | 87   | 0.198593 | 0         |  |  |
|        |      | Shiraz-4T  | 252  | 0.192083 | 0         |  |  |
|        |      | Shiraz-36T | 376  | 0.159952 | 0         |  |  |

|        |      |            |      |          |           |  |  |
|--------|------|------------|------|----------|-----------|--|--|
|        |      | Shiraz-44T | 633  | 0        | -0.565095 |  |  |
|        |      | Shiraz-46T | 942  | 0.069143 | 0         |  |  |
|        |      | Shiraz-18T | 1433 | 0.250973 | 0         |  |  |
|        |      | Shiraz-22T | 1545 | 0        | -0.473676 |  |  |
|        |      | Shiraz-25T | 1697 | 0.21945  | 0         |  |  |
|        |      | Shiraz-28T | 1734 | 0.362882 | 0         |  |  |
|        |      | Shiraz-29T | 1777 | 0.156747 | 0         |  |  |
|        |      | Shiraz-38T | 1950 | 0.265916 | 0         |  |  |
|        |      | Shiraz-71T | 2236 | 0.320072 | 0         |  |  |
|        |      | Shiraz-3T  | 87   | 0.198593 | 0         |  |  |
|        |      | Shiraz-4T  | 252  | 0.192083 | 0         |  |  |
|        |      | Shiraz-36T | 376  | 0.159952 | 0         |  |  |
|        |      | Shiraz-44T | 633  | 0        | -0.565095 |  |  |
|        |      | Shiraz-46T | 942  | 0.069143 | 0         |  |  |
|        |      | Shiraz-18T | 1433 | 0.250973 | 0         |  |  |
|        |      | Shiraz-22T | 1545 | 0        | -0.473676 |  |  |
|        |      | Shiraz-25T | 1697 | 0.21945  | 0         |  |  |
|        |      | Shiraz-28T | 1734 | 0.362882 | 0         |  |  |
|        |      | Shiraz-29T | 1777 | 0.156747 | 0         |  |  |
|        |      | Shiraz-38T | 1950 | 0.265916 | 0         |  |  |
|        |      | Shiraz-71T | 2236 | 0.320072 | 0         |  |  |
|        |      | Shiraz-3T  | 87   | 0.198593 | 0         |  |  |
|        |      | Shiraz-4T  | 252  | 0.192083 | 0         |  |  |
|        |      | Shiraz-36T | 376  | 0.159952 | 0         |  |  |
|        |      | Shiraz-44T | 633  | 0        | -0.565095 |  |  |
|        |      | Shiraz-46T | 942  | 0.069143 | 0         |  |  |
|        |      | Shiraz-18T | 1433 | 0.250973 | 0         |  |  |
|        |      | Shiraz-22T | 1545 | 0        | -0.473676 |  |  |
|        |      | Shiraz-25T | 1697 | 0.21945  | 0         |  |  |
|        |      | Shiraz-28T | 1734 | 0.362882 | 0         |  |  |
|        |      | Shiraz-29T | 1777 | 0.156747 | 0         |  |  |
|        |      | Shiraz-38T | 1950 | 0.265916 | 0         |  |  |
|        |      | Shiraz-71T | 2236 | 0.320072 | 0         |  |  |
| CDC2L5 | chr7 | Shiraz-3T  | 87   | 0.198593 | 0         |  |  |
|        |      | Shiraz-4T  | 252  | 0.192083 | 0         |  |  |
|        |      | Shiraz-36T | 376  | 0.159952 | 0         |  |  |
|        |      | Shiraz-44T | 631  | 0        | -0.180312 |  |  |
|        |      | Shiraz-46T | 942  | 0.069143 | 0         |  |  |
|        |      | Shiraz-18T | 1433 | 0.250973 | 0         |  |  |
|        |      | Shiraz-22T | 1544 | 0        | -0.193579 |  |  |
|        |      | Shiraz-25T | 1697 | 0.21945  | 0         |  |  |
|        |      | Shiraz-28T | 1734 | 0.362882 | 0         |  |  |
|        |      | Shiraz-29T | 1777 | 0.156747 | 0         |  |  |
|        |      | Shiraz-38T | 1950 | 0.265916 | 0         |  |  |
|        |      | Shiraz-71T | 2236 | 0.320072 | 0         |  |  |
|        |      | Shiraz-72T | 2277 | 0        | -0.398869 |  |  |
|        |      | Shiraz-3T  | 87   | 0.198593 | 0         |  |  |

|        |      |            |      |          |           |  |
|--------|------|------------|------|----------|-----------|--|
|        |      | Shiraz-4T  | 252  | 0.192083 | 0         |  |
|        |      | Shiraz-36T | 376  | 0.159952 | 0         |  |
|        |      | Shiraz-44T | 631  | 0        | -0.180312 |  |
|        |      | Shiraz-46T | 942  | 0.069143 | 0         |  |
|        |      | Shiraz-18T | 1433 | 0.250973 | 0         |  |
|        |      | Shiraz-22T | 1544 | 0        | -0.193579 |  |
|        |      | Shiraz-25T | 1697 | 0.21945  | 0         |  |
|        |      | Shiraz-28T | 1734 | 0.362882 | 0         |  |
|        |      | Shiraz-29T | 1777 | 0.156747 | 0         |  |
|        |      | Shiraz-38T | 1950 | 0.265916 | 0         |  |
|        |      | Shiraz-71T | 2236 | 0.320072 | 0         |  |
|        |      | Shiraz-72T | 2277 | 0        | -0.398869 |  |
|        |      | Shiraz-3T  | 87   | 0.198593 | 0         |  |
|        |      | Shiraz-4T  | 252  | 0.192083 | 0         |  |
|        |      | Shiraz-36T | 376  | 0.159952 | 0         |  |
|        |      | Shiraz-44T | 631  | 0        | -0.180312 |  |
|        |      | Shiraz-46T | 942  | 0.069143 | 0         |  |
|        |      | Shiraz-18T | 1433 | 0.250973 | 0         |  |
|        |      | Shiraz-22T | 1544 | 0        | -0.193579 |  |
|        |      | Shiraz-25T | 1697 | 0.21945  | 0         |  |
|        |      | Shiraz-28T | 1734 | 0.362882 | 0         |  |
|        |      | Shiraz-29T | 1777 | 0.156747 | 0         |  |
|        |      | Shiraz-38T | 1950 | 0.265916 | 0         |  |
|        |      | Shiraz-71T | 2236 | 0.320072 | 0         |  |
|        |      | Shiraz-72T | 2277 | 0        | -0.398869 |  |
| CDCA7L | chr7 | Shiraz-3T  | 87   | 0.198593 | 0         |  |
|        |      | Shiraz-4T  | 252  | 0.192083 | 0         |  |
|        |      | Shiraz-36T | 376  | 0.159952 | 0         |  |
|        |      | Shiraz-46T | 942  | 0.069143 | 0         |  |
|        |      | Shiraz-77T | 1222 | 0        | -0.113002 |  |
|        |      | Shiraz-18T | 1433 | 0.250973 | 0         |  |
|        |      | Shiraz-25T | 1697 | 0.21945  | 0         |  |
|        |      | Shiraz-28T | 1734 | 0.362882 | 0         |  |
|        |      | Shiraz-29T | 1777 | 0.156747 | 0         |  |
|        |      | Shiraz-38T | 1950 | 0.265916 | 0         |  |
|        |      | Shiraz-71T | 2236 | 0.320072 | 0         |  |
|        |      | Shiraz-3T  | 87   | 0.198593 | 0         |  |
|        |      | Shiraz-4T  | 252  | 0.192083 | 0         |  |
|        |      | Shiraz-36T | 376  | 0.159952 | 0         |  |
|        |      | Shiraz-46T | 942  | 0.069143 | 0         |  |
|        |      | Shiraz-77T | 1222 | 0        | -0.113002 |  |
|        |      | Shiraz-18T | 1433 | 0.250973 | 0         |  |
|        |      | Shiraz-25T | 1697 | 0.21945  | 0         |  |
|        |      | Shiraz-28T | 1734 | 0.362882 | 0         |  |
|        |      | Shiraz-29T | 1777 | 0.156747 | 0         |  |
|        |      | Shiraz-38T | 1950 | 0.265916 | 0         |  |
|        |      | Shiraz-71T | 2236 | 0.320072 | 0         |  |



|       |      |            |      |          |           |  |
|-------|------|------------|------|----------|-----------|--|
|       |      | Shiraz-3T  | 87   | 0.198593 | 0         |  |
|       |      | Shiraz-4T  | 252  | 0.192083 | 0         |  |
|       |      | Shiraz-36T | 376  | 0.159952 | 0         |  |
|       |      | Shiraz-46T | 942  | 0.069143 | 0         |  |
|       |      | Shiraz-77T | 1222 | 0        | -0.113002 |  |
|       |      | Shiraz-18T | 1433 | 0.250973 | 0         |  |
|       |      | Shiraz-25T | 1697 | 0.21945  | 0         |  |
|       |      | Shiraz-28T | 1734 | 0.362882 | 0         |  |
|       |      | Shiraz-29T | 1777 | 0.156747 | 0         |  |
|       |      | Shiraz-38T | 1950 | 0.265916 | 0         |  |
|       |      | Shiraz-71T | 2236 | 0.320072 | 0         |  |
| CDH10 | chr5 | Shiraz-3T  | 64   | 0        | -0.245291 |  |
|       |      | Shiraz-16T | 266  | 0.321724 | 0         |  |
|       |      | Shiraz-31T | 309  | 0        | -0.094564 |  |
|       |      | Shiraz-44T | 590  | 0        | -0.612646 |  |
|       |      | Shiraz-47T | 1018 | 0        | -0.144987 |  |
|       |      | Shiraz-49T | 1108 | 0        | -0.23115  |  |
|       |      | Shiraz-12T | 1384 | 0        | -0.217422 |  |
|       |      | Shiraz-18T | 1429 | 0        | -0.314125 |  |
|       |      | Shiraz-22T | 1521 | 0        | -0.698349 |  |
|       |      | Shiraz-25T | 1694 | 0.201602 | 0         |  |
|       |      | Shiraz-28T | 1731 | 0.295447 | 0         |  |
|       |      | Shiraz-29T | 1773 | 0.090981 | 0         |  |
|       |      | Shiraz-40T | 2016 | 0.376634 | 0         |  |
|       |      | Shiraz-53T | 2070 | 0        | -0.42189  |  |
|       |      | Shiraz-58T | 2145 | 0        | -0.290669 |  |
|       |      | Shiraz-3T  | 64   | 0        | -0.245291 |  |
|       |      | Shiraz-16T | 266  | 0.321724 | 0         |  |
|       |      | Shiraz-31T | 309  | 0        | -0.094564 |  |
|       |      | Shiraz-44T | 590  | 0        | -0.612646 |  |
|       |      | Shiraz-47T | 1018 | 0        | -0.144987 |  |
|       |      | Shiraz-49T | 1108 | 0        | -0.23115  |  |
|       |      | Shiraz-12T | 1384 | 0        | -0.217422 |  |
|       |      | Shiraz-18T | 1429 | 0        | -0.314125 |  |
|       |      | Shiraz-22T | 1521 | 0        | -0.698349 |  |
|       |      | Shiraz-25T | 1694 | 0.201602 | 0         |  |
|       |      | Shiraz-28T | 1731 | 0.295447 | 0         |  |
|       |      | Shiraz-29T | 1773 | 0.090981 | 0         |  |
|       |      | Shiraz-40T | 2016 | 0.376634 | 0         |  |
|       |      | Shiraz-53T | 2070 | 0        | -0.42189  |  |
|       |      | Shiraz-58T | 2145 | 0        | -0.290669 |  |
|       |      | Shiraz-3T  | 64   | 0        | -0.245291 |  |
|       |      | Shiraz-16T | 266  | 0.321724 | 0         |  |
|       |      | Shiraz-31T | 309  | 0        | -0.094564 |  |
|       |      | Shiraz-44T | 590  | 0        | -0.612646 |  |
|       |      | Shiraz-47T | 1018 | 0        | -0.144987 |  |
|       |      | Shiraz-49T | 1108 | 0        | -0.23115  |  |

|      |      |            |      |          |           |  |  |
|------|------|------------|------|----------|-----------|--|--|
|      |      | Shiraz-12T | 1384 | 0        | -0.217422 |  |  |
|      |      | Shiraz-18T | 1429 | 0        | -0.314125 |  |  |
|      |      | Shiraz-22T | 1521 | 0        | -0.698349 |  |  |
|      |      | Shiraz-25T | 1694 | 0.201602 | 0         |  |  |
|      |      | Shiraz-28T | 1731 | 0.295447 | 0         |  |  |
|      |      | Shiraz-29T | 1773 | 0.090981 | 0         |  |  |
|      |      | Shiraz-40T | 2016 | 0.376634 | 0         |  |  |
|      |      | Shiraz-53T | 2070 | 0        | -0.42189  |  |  |
|      |      | Shiraz-58T | 2145 | 0        | -0.290669 |  |  |
| CDH9 | chr5 | Shiraz-3T  | 64   | 0        | -0.245291 |  |  |
|      |      | Shiraz-4T  | 250  | 0.262252 | 0         |  |  |
|      |      | Shiraz-16T | 266  | 0.321724 | 0         |  |  |
|      |      | Shiraz-31T | 309  | 0        | -0.094564 |  |  |
|      |      | Shiraz-44T | 590  | 0        | -0.612646 |  |  |
|      |      | Shiraz-47T | 1018 | 0        | -0.144987 |  |  |
|      |      | Shiraz-49T | 1108 | 0        | -0.23115  |  |  |
|      |      | Shiraz-12T | 1384 | 0        | -0.217422 |  |  |
|      |      | Shiraz-18T | 1429 | 0        | -0.314125 |  |  |
|      |      | Shiraz-22T | 1521 | 0        | -0.698349 |  |  |
|      |      | Shiraz-25T | 1694 | 0.201602 | 0         |  |  |
|      |      | Shiraz-28T | 1731 | 0.295447 | 0         |  |  |
|      |      | Shiraz-29T | 1773 | 0.090981 | 0         |  |  |
|      |      | Shiraz-40T | 2016 | 0.376634 | 0         |  |  |
|      |      | Shiraz-53T | 2070 | 0        | -0.42189  |  |  |
|      |      | Shiraz-58T | 2145 | 0        | -0.290669 |  |  |
|      |      | Shiraz-3T  | 64   | 0        | -0.245291 |  |  |
|      |      | Shiraz-4T  | 250  | 0.262252 | 0         |  |  |
|      |      | Shiraz-16T | 266  | 0.321724 | 0         |  |  |
|      |      | Shiraz-31T | 309  | 0        | -0.094564 |  |  |
|      |      | Shiraz-44T | 590  | 0        | -0.612646 |  |  |
|      |      | Shiraz-47T | 1018 | 0        | -0.144987 |  |  |
|      |      | Shiraz-49T | 1108 | 0        | -0.23115  |  |  |
|      |      | Shiraz-12T | 1384 | 0        | -0.217422 |  |  |
|      |      | Shiraz-18T | 1429 | 0        | -0.314125 |  |  |
|      |      | Shiraz-22T | 1521 | 0        | -0.698349 |  |  |
|      |      | Shiraz-25T | 1694 | 0.201602 | 0         |  |  |
|      |      | Shiraz-28T | 1731 | 0.295447 | 0         |  |  |
|      |      | Shiraz-29T | 1773 | 0.090981 | 0         |  |  |
|      |      | Shiraz-40T | 2016 | 0.376634 | 0         |  |  |
|      |      | Shiraz-53T | 2070 | 0        | -0.42189  |  |  |
|      |      | Shiraz-58T | 2145 | 0        | -0.290669 |  |  |
|      |      | Shiraz-3T  | 64   | 0        | -0.245291 |  |  |
|      |      | Shiraz-4T  | 250  | 0.262252 | 0         |  |  |
|      |      | Shiraz-16T | 266  | 0.321724 | 0         |  |  |
|      |      | Shiraz-31T | 309  | 0        | -0.094564 |  |  |
|      |      | Shiraz-44T | 590  | 0        | -0.612646 |  |  |
|      |      | Shiraz-47T | 1018 | 0        | -0.144987 |  |  |

|      |      |            |      |          |           |  |  |
|------|------|------------|------|----------|-----------|--|--|
|      |      | Shiraz-49T | 1108 | 0        | -0.23115  |  |  |
|      |      | Shiraz-12T | 1384 | 0        | -0.217422 |  |  |
|      |      | Shiraz-18T | 1429 | 0        | -0.314125 |  |  |
|      |      | Shiraz-22T | 1521 | 0        | -0.698349 |  |  |
|      |      | Shiraz-25T | 1694 | 0.201602 | 0         |  |  |
|      |      | Shiraz-28T | 1731 | 0.295447 | 0         |  |  |
|      |      | Shiraz-29T | 1773 | 0.090981 | 0         |  |  |
|      |      | Shiraz-40T | 2016 | 0.376634 | 0         |  |  |
|      |      | Shiraz-53T | 2070 | 0        | -0.42189  |  |  |
|      |      | Shiraz-58T | 2145 | 0        | -0.290669 |  |  |
| CDK5 | chr7 | Shiraz-3T  | 90   | 0.219276 | 0         |  |  |
|      |      | Shiraz-3T  | 99   | 0.454766 | 0         |  |  |
|      |      | Shiraz-4T  | 253  | 0.372918 | 0         |  |  |
|      |      | Shiraz-36T | 378  | 0.179558 | 0         |  |  |
|      |      | Shiraz-44T | 646  | 0.471276 | 0         |  |  |
|      |      | Shiraz-44T | 647  | 1.496173 | 0         |  |  |
|      |      | Shiraz-46T | 943  | 0.093799 | 0         |  |  |
|      |      | Shiraz-9T  | 1325 | 0.221899 | 0         |  |  |
|      |      | Shiraz-18T | 1434 | 0.244465 | 0         |  |  |
|      |      | Shiraz-22T | 1555 | 0.427999 | 0         |  |  |
|      |      | Shiraz-25T | 1698 | 0.21835  | 0         |  |  |
|      |      | Shiraz-28T | 1735 | 0.350744 | 0         |  |  |
|      |      | Shiraz-29T | 1778 | 0.120767 | 0         |  |  |
|      |      | Shiraz-32T | 1833 | 0.551336 | 0         |  |  |
|      |      | Shiraz-38T | 1951 | 0.250891 | 0         |  |  |
|      |      | Shiraz-38T | 1952 | 0        | -0.163211 |  |  |
|      |      | Shiraz-53T | 2078 | 0.287202 | 0         |  |  |
|      |      | Shiraz-58T | 2162 | 0.221505 | 0         |  |  |
|      |      | Shiraz-71T | 2238 | 0.603631 | 0         |  |  |
|      |      | Shiraz-3T  | 90   | 0.219276 | 0         |  |  |
|      |      | Shiraz-3T  | 99   | 0.454766 | 0         |  |  |
|      |      | Shiraz-4T  | 253  | 0.372918 | 0         |  |  |
|      |      | Shiraz-36T | 378  | 0.179558 | 0         |  |  |
|      |      | Shiraz-44T | 646  | 0.471276 | 0         |  |  |
|      |      | Shiraz-44T | 647  | 1.496173 | 0         |  |  |
|      |      | Shiraz-46T | 943  | 0.093799 | 0         |  |  |
|      |      | Shiraz-9T  | 1325 | 0.221899 | 0         |  |  |
|      |      | Shiraz-18T | 1434 | 0.244465 | 0         |  |  |
|      |      | Shiraz-22T | 1555 | 0.427999 | 0         |  |  |
|      |      | Shiraz-25T | 1698 | 0.21835  | 0         |  |  |
|      |      | Shiraz-28T | 1735 | 0.350744 | 0         |  |  |
|      |      | Shiraz-29T | 1778 | 0.120767 | 0         |  |  |
|      |      | Shiraz-32T | 1833 | 0.551336 | 0         |  |  |
|      |      | Shiraz-38T | 1951 | 0.250891 | 0         |  |  |
|      |      | Shiraz-38T | 1952 | 0        | -0.163211 |  |  |
|      |      | Shiraz-53T | 2078 | 0.287202 | 0         |  |  |
|      |      | Shiraz-58T | 2162 | 0.221505 | 0         |  |  |

|      |      |            |      |          |           |  |
|------|------|------------|------|----------|-----------|--|
|      |      | Shiraz-71T | 2238 | 0.603631 | 0         |  |
|      |      | Shiraz-3T  | 90   | 0.219276 | 0         |  |
|      |      | Shiraz-3T  | 99   | 0.454766 | 0         |  |
|      |      | Shiraz-4T  | 253  | 0.372918 | 0         |  |
|      |      | Shiraz-36T | 378  | 0.179558 | 0         |  |
|      |      | Shiraz-44T | 646  | 0.471276 | 0         |  |
|      |      | Shiraz-44T | 647  | 1.496173 | 0         |  |
|      |      | Shiraz-46T | 943  | 0.093799 | 0         |  |
|      |      | Shiraz-9T  | 1325 | 0.221899 | 0         |  |
|      |      | Shiraz-18T | 1434 | 0.244465 | 0         |  |
|      |      | Shiraz-22T | 1555 | 0.427999 | 0         |  |
|      |      | Shiraz-25T | 1698 | 0.21835  | 0         |  |
|      |      | Shiraz-28T | 1735 | 0.350744 | 0         |  |
|      |      | Shiraz-29T | 1778 | 0.120767 | 0         |  |
|      |      | Shiraz-32T | 1833 | 0.551336 | 0         |  |
|      |      | Shiraz-38T | 1951 | 0.250891 | 0         |  |
|      |      | Shiraz-38T | 1952 | 0        | -0.163211 |  |
|      |      | Shiraz-53T | 2078 | 0.287202 | 0         |  |
|      |      | Shiraz-58T | 2162 | 0.221505 | 0         |  |
|      |      | Shiraz-71T | 2238 | 0.603631 | 0         |  |
| CDK6 | chr7 | Shiraz-3T  | 90   | 0.219276 | 0         |  |
|      |      | Shiraz-3T  | 90   | 0.219276 | 0         |  |
|      |      | Shiraz-3T  | 93   | 0        | -0.058023 |  |
|      |      | Shiraz-3T  | 93   | 0        | -0.058023 |  |
|      |      | Shiraz-4T  | 253  | 0.372918 | 0         |  |
|      |      | Shiraz-4T  | 253  | 0.372918 | 0         |  |
|      |      | Shiraz-36T | 378  | 0.179558 | 0         |  |
|      |      | Shiraz-36T | 378  | 0.179558 | 0         |  |
|      |      | Shiraz-36T | 380  | 0.083883 | 0         |  |
|      |      | Shiraz-36T | 380  | 0.083883 | 0         |  |
|      |      | Shiraz-44T | 638  | 0        | -0.433476 |  |
|      |      | Shiraz-44T | 638  | 0        | -0.433476 |  |
|      |      | Shiraz-46T | 943  | 0.093799 | 0         |  |
|      |      | Shiraz-46T | 943  | 0.093799 | 0         |  |
|      |      | Shiraz-46T | 945  | 0        | -0.014838 |  |
|      |      | Shiraz-46T | 945  | 0        | -0.014838 |  |
|      |      | Shiraz-47T | 1029 | 0        | -0.096586 |  |
|      |      | Shiraz-47T | 1029 | 0        | -0.096586 |  |
|      |      | Shiraz-49T | 1119 | 0        | -0.157331 |  |
|      |      | Shiraz-49T | 1119 | 0        | -0.157331 |  |
|      |      | Shiraz-77T | 1225 | 0        | -0.117922 |  |
|      |      | Shiraz-77T | 1225 | 0        | -0.117922 |  |
|      |      | Shiraz-18T | 1434 | 0.244465 | 0         |  |
|      |      | Shiraz-18T | 1434 | 0.244465 | 0         |  |
|      |      | Shiraz-22T | 1549 | 0        | -0.319623 |  |
|      |      | Shiraz-22T | 1549 | 0        | -0.319623 |  |
|      |      | Shiraz-25T | 1698 | 0.21835  | 0         |  |

|  |  |            |      |          |           |  |  |
|--|--|------------|------|----------|-----------|--|--|
|  |  | Shiraz-25T | 1698 | 0.21835  | 0         |  |  |
|  |  | Shiraz-28T | 1735 | 0.350744 | 0         |  |  |
|  |  | Shiraz-28T | 1735 | 0.350744 | 0         |  |  |
|  |  | Shiraz-29T | 1778 | 0.120767 | 0         |  |  |
|  |  | Shiraz-29T | 1778 | 0.120767 | 0         |  |  |
|  |  | Shiraz-32T | 1833 | 0.551336 | 0         |  |  |
|  |  | Shiraz-32T | 1833 | 0.551336 | 0         |  |  |
|  |  | Shiraz-38T | 1951 | 0.250891 | 0         |  |  |
|  |  | Shiraz-38T | 1951 | 0.250891 | 0         |  |  |
|  |  | Shiraz-53T | 2078 | 0.287202 | 0         |  |  |
|  |  | Shiraz-53T | 2078 | 0.287202 | 0         |  |  |
|  |  | Shiraz-58T | 2159 | 0        | -0.219521 |  |  |
|  |  | Shiraz-58T | 2159 | 0        | -0.219521 |  |  |
|  |  | Shiraz-71T | 2238 | 0.603631 | 0         |  |  |
|  |  | Shiraz-71T | 2238 | 0.603631 | 0         |  |  |
|  |  | Shiraz-3T  | 90   | 0.219276 | 0         |  |  |
|  |  | Shiraz-3T  | 90   | 0.219276 | 0         |  |  |
|  |  | Shiraz-3T  | 93   | 0        | -0.058023 |  |  |
|  |  | Shiraz-3T  | 93   | 0        | -0.058023 |  |  |
|  |  | Shiraz-4T  | 253  | 0.372918 | 0         |  |  |
|  |  | Shiraz-4T  | 253  | 0.372918 | 0         |  |  |
|  |  | Shiraz-36T | 378  | 0.179558 | 0         |  |  |
|  |  | Shiraz-36T | 378  | 0.179558 | 0         |  |  |
|  |  | Shiraz-36T | 380  | 0.083883 | 0         |  |  |
|  |  | Shiraz-36T | 380  | 0.083883 | 0         |  |  |
|  |  | Shiraz-44T | 638  | 0        | -0.433476 |  |  |
|  |  | Shiraz-44T | 638  | 0        | -0.433476 |  |  |
|  |  | Shiraz-46T | 943  | 0.093799 | 0         |  |  |
|  |  | Shiraz-46T | 943  | 0.093799 | 0         |  |  |
|  |  | Shiraz-46T | 945  | 0        | -0.014838 |  |  |
|  |  | Shiraz-46T | 945  | 0        | -0.014838 |  |  |
|  |  | Shiraz-47T | 1029 | 0        | -0.096586 |  |  |
|  |  | Shiraz-47T | 1029 | 0        | -0.096586 |  |  |
|  |  | Shiraz-49T | 1119 | 0        | -0.157331 |  |  |
|  |  | Shiraz-49T | 1119 | 0        | -0.157331 |  |  |
|  |  | Shiraz-77T | 1225 | 0        | -0.117922 |  |  |
|  |  | Shiraz-77T | 1225 | 0        | -0.117922 |  |  |
|  |  | Shiraz-18T | 1434 | 0.244465 | 0         |  |  |
|  |  | Shiraz-18T | 1434 | 0.244465 | 0         |  |  |
|  |  | Shiraz-22T | 1549 | 0        | -0.319623 |  |  |
|  |  | Shiraz-22T | 1549 | 0        | -0.319623 |  |  |
|  |  | Shiraz-25T | 1698 | 0.21835  | 0         |  |  |
|  |  | Shiraz-25T | 1698 | 0.21835  | 0         |  |  |
|  |  | Shiraz-28T | 1735 | 0.350744 | 0         |  |  |
|  |  | Shiraz-28T | 1735 | 0.350744 | 0         |  |  |
|  |  | Shiraz-29T | 1778 | 0.120767 | 0         |  |  |
|  |  | Shiraz-29T | 1778 | 0.120767 | 0         |  |  |

|  |            |      |          |           |  |
|--|------------|------|----------|-----------|--|
|  | Shiraz-32T | 1833 | 0.551336 | 0         |  |
|  | Shiraz-32T | 1833 | 0.551336 | 0         |  |
|  | Shiraz-38T | 1951 | 0.250891 | 0         |  |
|  | Shiraz-38T | 1951 | 0.250891 | 0         |  |
|  | Shiraz-53T | 2078 | 0.287202 | 0         |  |
|  | Shiraz-53T | 2078 | 0.287202 | 0         |  |
|  | Shiraz-58T | 2159 | 0        | -0.219521 |  |
|  | Shiraz-58T | 2159 | 0        | -0.219521 |  |
|  | Shiraz-71T | 2238 | 0.603631 | 0         |  |
|  | Shiraz-71T | 2238 | 0.603631 | 0         |  |
|  | Shiraz-3T  | 90   | 0.219276 | 0         |  |
|  | Shiraz-3T  | 90   | 0.219276 | 0         |  |
|  | Shiraz-3T  | 93   | 0        | -0.058023 |  |
|  | Shiraz-3T  | 93   | 0        | -0.058023 |  |
|  | Shiraz-4T  | 253  | 0.372918 | 0         |  |
|  | Shiraz-4T  | 253  | 0.372918 | 0         |  |
|  | Shiraz-36T | 378  | 0.179558 | 0         |  |
|  | Shiraz-36T | 378  | 0.179558 | 0         |  |
|  | Shiraz-36T | 380  | 0.083883 | 0         |  |
|  | Shiraz-36T | 380  | 0.083883 | 0         |  |
|  | Shiraz-44T | 638  | 0        | -0.433476 |  |
|  | Shiraz-44T | 638  | 0        | -0.433476 |  |
|  | Shiraz-46T | 943  | 0.093799 | 0         |  |
|  | Shiraz-46T | 943  | 0.093799 | 0         |  |
|  | Shiraz-46T | 945  | 0        | -0.014838 |  |
|  | Shiraz-46T | 945  | 0        | -0.014838 |  |
|  | Shiraz-47T | 1029 | 0        | -0.096586 |  |
|  | Shiraz-47T | 1029 | 0        | -0.096586 |  |
|  | Shiraz-49T | 1119 | 0        | -0.157331 |  |
|  | Shiraz-49T | 1119 | 0        | -0.157331 |  |
|  | Shiraz-77T | 1225 | 0        | -0.117922 |  |
|  | Shiraz-77T | 1225 | 0        | -0.117922 |  |
|  | Shiraz-18T | 1434 | 0.244465 | 0         |  |
|  | Shiraz-18T | 1434 | 0.244465 | 0         |  |
|  | Shiraz-22T | 1549 | 0        | -0.319623 |  |
|  | Shiraz-22T | 1549 | 0        | -0.319623 |  |
|  | Shiraz-25T | 1698 | 0.21835  | 0         |  |
|  | Shiraz-25T | 1698 | 0.21835  | 0         |  |
|  | Shiraz-28T | 1735 | 0.350744 | 0         |  |
|  | Shiraz-28T | 1735 | 0.350744 | 0         |  |
|  | Shiraz-29T | 1778 | 0.120767 | 0         |  |
|  | Shiraz-29T | 1778 | 0.120767 | 0         |  |
|  | Shiraz-32T | 1833 | 0.551336 | 0         |  |
|  | Shiraz-32T | 1833 | 0.551336 | 0         |  |
|  | Shiraz-38T | 1951 | 0.250891 | 0         |  |
|  | Shiraz-38T | 1951 | 0.250891 | 0         |  |
|  | Shiraz-53T | 2078 | 0.287202 | 0         |  |

|       |      |            |      |          |           |  |  |
|-------|------|------------|------|----------|-----------|--|--|
|       |      | Shiraz-53T | 2078 | 0.287202 | 0         |  |  |
|       |      | Shiraz-58T | 2159 | 0        | -0.219521 |  |  |
|       |      | Shiraz-58T | 2159 | 0        | -0.219521 |  |  |
|       |      | Shiraz-71T | 2238 | 0.603631 | 0         |  |  |
|       |      | Shiraz-71T | 2238 | 0.603631 | 0         |  |  |
| CDKL5 | chrX | Shiraz-3T  | 235  | 0        | -0.28401  |  |  |
|       |      | Shiraz-3T  | 235  | 0        | -0.28401  |  |  |
|       |      | Shiraz-4T  | 260  | 0        | -0.324128 |  |  |
|       |      | Shiraz-4T  | 260  | 0        | -0.324128 |  |  |
|       |      | Shiraz-16T | 294  | 0.655804 | 0         |  |  |
|       |      | Shiraz-16T | 294  | 0.655804 | 0         |  |  |
|       |      | Shiraz-36T | 431  | 0        | -0.78035  |  |  |
|       |      | Shiraz-36T | 431  | 0        | -0.78035  |  |  |
|       |      | Shiraz-44T | 891  | 0        | -0.954044 |  |  |
|       |      | Shiraz-44T | 891  | 0        | -0.954044 |  |  |
|       |      | Shiraz-49T | 1166 | 0        | -0.917235 |  |  |
|       |      | Shiraz-49T | 1166 | 0        | -0.917235 |  |  |
|       |      | Shiraz-77T | 1281 | 0.136627 | 0         |  |  |
|       |      | Shiraz-77T | 1281 | 0.136627 | 0         |  |  |
|       |      | Shiraz-9T  | 1368 | 0.199713 | 0         |  |  |
|       |      | Shiraz-9T  | 1368 | 0.199713 | 0         |  |  |
|       |      | Shiraz-18T | 1455 | 0        | -0.186773 |  |  |
|       |      | Shiraz-18T | 1455 | 0        | -0.186773 |  |  |
|       |      | Shiraz-22T | 1669 | 0.695915 | 0         |  |  |
|       |      | Shiraz-22T | 1669 | 0.695915 | 0         |  |  |
|       |      | Shiraz-25T | 1717 | 0.420447 | 0         |  |  |
|       |      | Shiraz-25T | 1717 | 0.420447 | 0         |  |  |
|       |      | Shiraz-28T | 1760 | 0.538181 | 0         |  |  |
|       |      | Shiraz-28T | 1760 | 0.538181 | 0         |  |  |
|       |      | Shiraz-29T | 1800 | 0.672527 | 0         |  |  |
|       |      | Shiraz-29T | 1800 | 0.672527 | 0         |  |  |
|       |      | Shiraz-32T | 1869 | 0.776805 | 0         |  |  |
|       |      | Shiraz-32T | 1869 | 0.776805 | 0         |  |  |
|       |      | Shiraz-35T | 1932 | 0.507141 | 0         |  |  |
|       |      | Shiraz-35T | 1932 | 0.507141 | 0         |  |  |
|       |      | Shiraz-40T | 2051 | 0.098506 | 0         |  |  |
|       |      | Shiraz-40T | 2051 | 0.098506 | 0         |  |  |
|       |      | Shiraz-58T | 2221 | 0.871948 | 0         |  |  |
|       |      | Shiraz-58T | 2221 | 0.871948 | 0         |  |  |
|       |      | Shiraz-71T | 2260 | 0.68394  | 0         |  |  |
|       |      | Shiraz-71T | 2260 | 0.68394  | 0         |  |  |
|       |      | Shiraz-71T | 2261 | 0.508399 | 0         |  |  |
|       |      | Shiraz-71T | 2261 | 0.508399 | 0         |  |  |
|       |      | Shiraz-3T  | 235  | 0        | -0.28401  |  |  |
|       |      | Shiraz-3T  | 235  | 0        | -0.28401  |  |  |
|       |      | Shiraz-4T  | 260  | 0        | -0.324128 |  |  |
|       |      | Shiraz-4T  | 260  | 0        | -0.324128 |  |  |

|  |  |            |      |          |           |  |  |
|--|--|------------|------|----------|-----------|--|--|
|  |  | Shiraz-16T | 294  | 0.655804 | 0         |  |  |
|  |  | Shiraz-16T | 294  | 0.655804 | 0         |  |  |
|  |  | Shiraz-36T | 431  | 0        | -0.78035  |  |  |
|  |  | Shiraz-36T | 431  | 0        | -0.78035  |  |  |
|  |  | Shiraz-44T | 891  | 0        | -0.954044 |  |  |
|  |  | Shiraz-44T | 891  | 0        | -0.954044 |  |  |
|  |  | Shiraz-49T | 1166 | 0        | -0.917235 |  |  |
|  |  | Shiraz-49T | 1166 | 0        | -0.917235 |  |  |
|  |  | Shiraz-77T | 1281 | 0.136627 | 0         |  |  |
|  |  | Shiraz-77T | 1281 | 0.136627 | 0         |  |  |
|  |  | Shiraz-9T  | 1368 | 0.199713 | 0         |  |  |
|  |  | Shiraz-9T  | 1368 | 0.199713 | 0         |  |  |
|  |  | Shiraz-18T | 1455 | 0        | -0.186773 |  |  |
|  |  | Shiraz-18T | 1455 | 0        | -0.186773 |  |  |
|  |  | Shiraz-22T | 1669 | 0.695915 | 0         |  |  |
|  |  | Shiraz-22T | 1669 | 0.695915 | 0         |  |  |
|  |  | Shiraz-25T | 1717 | 0.420447 | 0         |  |  |
|  |  | Shiraz-25T | 1717 | 0.420447 | 0         |  |  |
|  |  | Shiraz-28T | 1760 | 0.538181 | 0         |  |  |
|  |  | Shiraz-28T | 1760 | 0.538181 | 0         |  |  |
|  |  | Shiraz-29T | 1800 | 0.672527 | 0         |  |  |
|  |  | Shiraz-29T | 1800 | 0.672527 | 0         |  |  |
|  |  | Shiraz-32T | 1869 | 0.776805 | 0         |  |  |
|  |  | Shiraz-32T | 1869 | 0.776805 | 0         |  |  |
|  |  | Shiraz-35T | 1932 | 0.507141 | 0         |  |  |
|  |  | Shiraz-35T | 1932 | 0.507141 | 0         |  |  |
|  |  | Shiraz-40T | 2051 | 0.098506 | 0         |  |  |
|  |  | Shiraz-40T | 2051 | 0.098506 | 0         |  |  |
|  |  | Shiraz-58T | 2221 | 0.871948 | 0         |  |  |
|  |  | Shiraz-58T | 2221 | 0.871948 | 0         |  |  |
|  |  | Shiraz-71T | 2260 | 0.68394  | 0         |  |  |
|  |  | Shiraz-71T | 2260 | 0.68394  | 0         |  |  |
|  |  | Shiraz-71T | 2261 | 0.508399 | 0         |  |  |
|  |  | Shiraz-71T | 2261 | 0.508399 | 0         |  |  |
|  |  | Shiraz-3T  | 235  | 0        | -0.28401  |  |  |
|  |  | Shiraz-3T  | 235  | 0        | -0.28401  |  |  |
|  |  | Shiraz-4T  | 260  | 0        | -0.324128 |  |  |
|  |  | Shiraz-4T  | 260  | 0        | -0.324128 |  |  |
|  |  | Shiraz-16T | 294  | 0.655804 | 0         |  |  |
|  |  | Shiraz-16T | 294  | 0.655804 | 0         |  |  |
|  |  | Shiraz-36T | 431  | 0        | -0.78035  |  |  |
|  |  | Shiraz-36T | 431  | 0        | -0.78035  |  |  |
|  |  | Shiraz-44T | 891  | 0        | -0.954044 |  |  |
|  |  | Shiraz-44T | 891  | 0        | -0.954044 |  |  |
|  |  | Shiraz-49T | 1166 | 0        | -0.917235 |  |  |
|  |  | Shiraz-49T | 1166 | 0        | -0.917235 |  |  |
|  |  | Shiraz-77T | 1281 | 0.136627 | 0         |  |  |



|      |      |            |      |          |           |  |
|------|------|------------|------|----------|-----------|--|
|      |      | Shiraz-77T | 1281 | 0.136627 | 0         |  |
|      |      | Shiraz-9T  | 1368 | 0.199713 | 0         |  |
|      |      | Shiraz-9T  | 1368 | 0.199713 | 0         |  |
|      |      | Shiraz-18T | 1455 | 0        | -0.186773 |  |
|      |      | Shiraz-18T | 1455 | 0        | -0.186773 |  |
|      |      | Shiraz-22T | 1669 | 0.695915 | 0         |  |
|      |      | Shiraz-22T | 1669 | 0.695915 | 0         |  |
|      |      | Shiraz-25T | 1717 | 0.420447 | 0         |  |
|      |      | Shiraz-25T | 1717 | 0.420447 | 0         |  |
|      |      | Shiraz-28T | 1760 | 0.538181 | 0         |  |
|      |      | Shiraz-28T | 1760 | 0.538181 | 0         |  |
|      |      | Shiraz-29T | 1800 | 0.672527 | 0         |  |
|      |      | Shiraz-29T | 1800 | 0.672527 | 0         |  |
|      |      | Shiraz-32T | 1869 | 0.776805 | 0         |  |
|      |      | Shiraz-32T | 1869 | 0.776805 | 0         |  |
|      |      | Shiraz-35T | 1932 | 0.507141 | 0         |  |
|      |      | Shiraz-35T | 1932 | 0.507141 | 0         |  |
|      |      | Shiraz-40T | 2051 | 0.098506 | 0         |  |
|      |      | Shiraz-40T | 2051 | 0.098506 | 0         |  |
|      |      | Shiraz-58T | 2221 | 0.871948 | 0         |  |
|      |      | Shiraz-58T | 2221 | 0.871948 | 0         |  |
|      |      | Shiraz-71T | 2260 | 0.68394  | 0         |  |
|      |      | Shiraz-71T | 2260 | 0.68394  | 0         |  |
|      |      | Shiraz-71T | 2261 | 0.508399 | 0         |  |
|      |      | Shiraz-71T | 2261 | 0.508399 | 0         |  |
| CDR1 | chrX | Shiraz-3T  | 242  | 0        | -0.336434 |  |
|      |      | Shiraz-4T  | 261  | 0        | -0.336249 |  |
|      |      | Shiraz-16T | 295  | 0.591657 | 0         |  |
|      |      | Shiraz-36T | 433  | 0        | -0.803961 |  |
|      |      | Shiraz-44T | 899  | 0        | -1.09697  |  |
|      |      | Shiraz-49T | 1170 | 0        | -0.967436 |  |
|      |      | Shiraz-9T  | 1370 | 0.690073 | 0         |  |
|      |      | Shiraz-18T | 1457 | 0.643204 | 0         |  |
|      |      | Shiraz-22T | 1673 | 0.611783 | 0         |  |
|      |      | Shiraz-25T | 1719 | 0.472955 | 0         |  |
|      |      | Shiraz-28T | 1762 | 0.562311 | 0         |  |
|      |      | Shiraz-29T | 1801 | 0.815343 | 0         |  |
|      |      | Shiraz-32T | 1870 | 0.729766 | 0         |  |
|      |      | Shiraz-35T | 1933 | 0.488535 | 0         |  |
|      |      | Shiraz-58T | 2223 | 0.833364 | 0         |  |
|      |      | Shiraz-71T | 2263 | 0.975531 | 0         |  |
|      |      | Shiraz-3T  | 242  | 0        | -0.336434 |  |
|      |      | Shiraz-4T  | 261  | 0        | -0.336249 |  |
|      |      | Shiraz-16T | 295  | 0.591657 | 0         |  |
|      |      | Shiraz-36T | 433  | 0        | -0.803961 |  |
|      |      | Shiraz-44T | 899  | 0        | -1.09697  |  |
|      |      | Shiraz-49T | 1170 | 0        | -0.967436 |  |

|      |      |            |      |          |           |  |  |
|------|------|------------|------|----------|-----------|--|--|
|      |      | Shiraz-9T  | 1370 | 0.690073 | 0         |  |  |
|      |      | Shiraz-18T | 1457 | 0.643204 | 0         |  |  |
|      |      | Shiraz-22T | 1673 | 0.611783 | 0         |  |  |
|      |      | Shiraz-25T | 1719 | 0.472955 | 0         |  |  |
|      |      | Shiraz-28T | 1762 | 0.562311 | 0         |  |  |
|      |      | Shiraz-29T | 1801 | 0.815343 | 0         |  |  |
|      |      | Shiraz-32T | 1870 | 0.729766 | 0         |  |  |
|      |      | Shiraz-35T | 1933 | 0.488535 | 0         |  |  |
|      |      | Shiraz-58T | 2223 | 0.833364 | 0         |  |  |
|      |      | Shiraz-71T | 2263 | 0.975531 | 0         |  |  |
|      |      | Shiraz-3T  | 242  | 0        | -0.336434 |  |  |
|      |      | Shiraz-4T  | 261  | 0        | -0.336249 |  |  |
|      |      | Shiraz-16T | 295  | 0.591657 | 0         |  |  |
|      |      | Shiraz-36T | 433  | 0        | -0.803961 |  |  |
|      |      | Shiraz-44T | 899  | 0        | -1.09697  |  |  |
|      |      | Shiraz-49T | 1170 | 0        | -0.967436 |  |  |
|      |      | Shiraz-9T  | 1370 | 0.690073 | 0         |  |  |
|      |      | Shiraz-18T | 1457 | 0.643204 | 0         |  |  |
|      |      | Shiraz-22T | 1673 | 0.611783 | 0         |  |  |
|      |      | Shiraz-25T | 1719 | 0.472955 | 0         |  |  |
|      |      | Shiraz-28T | 1762 | 0.562311 | 0         |  |  |
|      |      | Shiraz-29T | 1801 | 0.815343 | 0         |  |  |
|      |      | Shiraz-32T | 1870 | 0.729766 | 0         |  |  |
|      |      | Shiraz-35T | 1933 | 0.488535 | 0         |  |  |
|      |      | Shiraz-58T | 2223 | 0.833364 | 0         |  |  |
|      |      | Shiraz-71T | 2263 | 0.975531 | 0         |  |  |
| CDX4 | chrX | Shiraz-3T  | 242  | 0        | -0.336434 |  |  |
|      |      | Shiraz-4T  | 261  | 0        | -0.336249 |  |  |
|      |      | Shiraz-16T | 295  | 0.591657 | 0         |  |  |
|      |      | Shiraz-36T | 433  | 0        | -0.803961 |  |  |
|      |      | Shiraz-44T | 899  | 0        | -1.09697  |  |  |
|      |      | Shiraz-49T | 1170 | 0        | -0.967436 |  |  |
|      |      | Shiraz-18T | 1457 | 0.643204 | 0         |  |  |
|      |      | Shiraz-22T | 1673 | 0.611783 | 0         |  |  |
|      |      | Shiraz-25T | 1719 | 0.472955 | 0         |  |  |
|      |      | Shiraz-28T | 1762 | 0.562311 | 0         |  |  |
|      |      | Shiraz-29T | 1801 | 0.815343 | 0         |  |  |
|      |      | Shiraz-32T | 1870 | 0.729766 | 0         |  |  |
|      |      | Shiraz-35T | 1933 | 0.488535 | 0         |  |  |
|      |      | Shiraz-58T | 2223 | 0.833364 | 0         |  |  |
|      |      | Shiraz-71T | 2263 | 0.975531 | 0         |  |  |
|      |      | Shiraz-3T  | 242  | 0        | -0.336434 |  |  |
|      |      | Shiraz-4T  | 261  | 0        | -0.336249 |  |  |
|      |      | Shiraz-16T | 295  | 0.591657 | 0         |  |  |
|      |      | Shiraz-36T | 433  | 0        | -0.803961 |  |  |
|      |      | Shiraz-44T | 899  | 0        | -1.09697  |  |  |
|      |      | Shiraz-49T | 1170 | 0        | -0.967436 |  |  |

|       |      |            |      |          |           |  |  |
|-------|------|------------|------|----------|-----------|--|--|
|       |      | Shiraz-18T | 1457 | 0.643204 | 0         |  |  |
|       |      | Shiraz-22T | 1673 | 0.611783 | 0         |  |  |
|       |      | Shiraz-25T | 1719 | 0.472955 | 0         |  |  |
|       |      | Shiraz-28T | 1762 | 0.562311 | 0         |  |  |
|       |      | Shiraz-29T | 1801 | 0.815343 | 0         |  |  |
|       |      | Shiraz-32T | 1870 | 0.729766 | 0         |  |  |
|       |      | Shiraz-35T | 1933 | 0.488535 | 0         |  |  |
|       |      | Shiraz-58T | 2223 | 0.833364 | 0         |  |  |
|       |      | Shiraz-71T | 2263 | 0.975531 | 0         |  |  |
|       |      | Shiraz-3T  | 242  | 0        | -0.336434 |  |  |
|       |      | Shiraz-4T  | 261  | 0        | -0.336249 |  |  |
|       |      | Shiraz-16T | 295  | 0.591657 | 0         |  |  |
|       |      | Shiraz-36T | 433  | 0        | -0.803961 |  |  |
|       |      | Shiraz-44T | 899  | 0        | -1.09697  |  |  |
|       |      | Shiraz-49T | 1170 | 0        | -0.967436 |  |  |
|       |      | Shiraz-18T | 1457 | 0.643204 | 0         |  |  |
|       |      | Shiraz-22T | 1673 | 0.611783 | 0         |  |  |
|       |      | Shiraz-25T | 1719 | 0.472955 | 0         |  |  |
|       |      | Shiraz-28T | 1762 | 0.562311 | 0         |  |  |
|       |      | Shiraz-29T | 1801 | 0.815343 | 0         |  |  |
|       |      | Shiraz-32T | 1870 | 0.729766 | 0         |  |  |
|       |      | Shiraz-35T | 1933 | 0.488535 | 0         |  |  |
|       |      | Shiraz-58T | 2223 | 0.833364 | 0         |  |  |
|       |      | Shiraz-71T | 2263 | 0.975531 | 0         |  |  |
| CENPI | chrX | Shiraz-3T  | 242  | 0        | -0.336434 |  |  |
|       |      | Shiraz-4T  | 261  | 0        | -0.336249 |  |  |
|       |      | Shiraz-16T | 295  | 0.591657 | 0         |  |  |
|       |      | Shiraz-36T | 433  | 0        | -0.803961 |  |  |
|       |      | Shiraz-44T | 899  | 0        | -1.09697  |  |  |
|       |      | Shiraz-49T | 1170 | 0        | -0.967436 |  |  |
|       |      | Shiraz-18T | 1457 | 0.643204 | 0         |  |  |
|       |      | Shiraz-22T | 1673 | 0.611783 | 0         |  |  |
|       |      | Shiraz-25T | 1719 | 0.472955 | 0         |  |  |
|       |      | Shiraz-28T | 1762 | 0.562311 | 0         |  |  |
|       |      | Shiraz-29T | 1801 | 0.815343 | 0         |  |  |
|       |      | Shiraz-32T | 1870 | 0.729766 | 0         |  |  |
|       |      | Shiraz-35T | 1933 | 0.488535 | 0         |  |  |
|       |      | Shiraz-58T | 2223 | 0.833364 | 0         |  |  |
|       |      | Shiraz-71T | 2263 | 0.975531 | 0         |  |  |
|       |      | Shiraz-3T  | 242  | 0        | -0.336434 |  |  |
|       |      | Shiraz-4T  | 261  | 0        | -0.336249 |  |  |
|       |      | Shiraz-16T | 295  | 0.591657 | 0         |  |  |
|       |      | Shiraz-36T | 433  | 0        | -0.803961 |  |  |
|       |      | Shiraz-44T | 899  | 0        | -1.09697  |  |  |
|       |      | Shiraz-49T | 1170 | 0        | -0.967436 |  |  |
|       |      | Shiraz-18T | 1457 | 0.643204 | 0         |  |  |
|       |      | Shiraz-22T | 1673 | 0.611783 | 0         |  |  |

|       |      |            |      |          |           |  |  |
|-------|------|------------|------|----------|-----------|--|--|
|       |      | Shiraz-25T | 1719 | 0.472955 | 0         |  |  |
|       |      | Shiraz-28T | 1762 | 0.562311 | 0         |  |  |
|       |      | Shiraz-29T | 1801 | 0.815343 | 0         |  |  |
|       |      | Shiraz-32T | 1870 | 0.729766 | 0         |  |  |
|       |      | Shiraz-35T | 1933 | 0.488535 | 0         |  |  |
|       |      | Shiraz-58T | 2223 | 0.833364 | 0         |  |  |
|       |      | Shiraz-71T | 2263 | 0.975531 | 0         |  |  |
|       |      | Shiraz-3T  | 242  | 0        | -0.336434 |  |  |
|       |      | Shiraz-4T  | 261  | 0        | -0.336249 |  |  |
|       |      | Shiraz-16T | 295  | 0.591657 | 0         |  |  |
|       |      | Shiraz-36T | 433  | 0        | -0.803961 |  |  |
|       |      | Shiraz-44T | 899  | 0        | -1.09697  |  |  |
|       |      | Shiraz-49T | 1170 | 0        | -0.967436 |  |  |
|       |      | Shiraz-18T | 1457 | 0.643204 | 0         |  |  |
|       |      | Shiraz-22T | 1673 | 0.611783 | 0         |  |  |
|       |      | Shiraz-25T | 1719 | 0.472955 | 0         |  |  |
|       |      | Shiraz-28T | 1762 | 0.562311 | 0         |  |  |
|       |      | Shiraz-29T | 1801 | 0.815343 | 0         |  |  |
|       |      | Shiraz-32T | 1870 | 0.729766 | 0         |  |  |
|       |      | Shiraz-35T | 1933 | 0.488535 | 0         |  |  |
|       |      | Shiraz-58T | 2223 | 0.833364 | 0         |  |  |
|       |      | Shiraz-71T | 2263 | 0.975531 | 0         |  |  |
| CETN2 | chrX | Shiraz-4T  | 261  | 0        | -0.336249 |  |  |
|       |      | Shiraz-16T | 295  | 0.591657 | 0         |  |  |
|       |      | Shiraz-36T | 433  | 0        | -0.803961 |  |  |
|       |      | Shiraz-42T | 480  | 0        | -0.232915 |  |  |
|       |      | Shiraz-49T | 1170 | 0        | -0.967436 |  |  |
|       |      | Shiraz-9T  | 1370 | 0.690073 | 0         |  |  |
|       |      | Shiraz-9T  | 1371 | 1.292392 | 0         |  |  |
|       |      | Shiraz-18T | 1457 | 0.643204 | 0         |  |  |
|       |      | Shiraz-22T | 1673 | 0.611783 | 0         |  |  |
|       |      | Shiraz-22T | 1678 | 0.911625 | 0         |  |  |
|       |      | Shiraz-25T | 1719 | 0.472955 | 0         |  |  |
|       |      | Shiraz-28T | 1762 | 0.562311 | 0         |  |  |
|       |      | Shiraz-29T | 1801 | 0.815343 | 0         |  |  |
|       |      | Shiraz-32T | 1870 | 0.729766 | 0         |  |  |
|       |      | Shiraz-32T | 1872 | 1.504553 | 0         |  |  |
|       |      | Shiraz-35T | 1933 | 0.488535 | 0         |  |  |
|       |      | Shiraz-53T | 2115 | 0.427728 | 0         |  |  |
|       |      | Shiraz-58T | 2223 | 0.833364 | 0         |  |  |
|       |      | Shiraz-58T | 2226 | 1.074663 | 0         |  |  |
|       |      | Shiraz-71T | 2263 | 0.975531 | 0         |  |  |
|       |      | Shiraz-4T  | 261  | 0        | -0.336249 |  |  |
|       |      | Shiraz-16T | 295  | 0.591657 | 0         |  |  |
|       |      | Shiraz-36T | 433  | 0        | -0.803961 |  |  |
|       |      | Shiraz-42T | 480  | 0        | -0.232915 |  |  |
|       |      | Shiraz-49T | 1170 | 0        | -0.967436 |  |  |

|     |      |            |      |          |           |  |
|-----|------|------------|------|----------|-----------|--|
|     |      | Shiraz-9T  | 1370 | 0.690073 | 0         |  |
|     |      | Shiraz-9T  | 1371 | 1.292392 | 0         |  |
|     |      | Shiraz-18T | 1457 | 0.643204 | 0         |  |
|     |      | Shiraz-22T | 1673 | 0.611783 | 0         |  |
|     |      | Shiraz-22T | 1678 | 0.911625 | 0         |  |
|     |      | Shiraz-25T | 1719 | 0.472955 | 0         |  |
|     |      | Shiraz-28T | 1762 | 0.562311 | 0         |  |
|     |      | Shiraz-29T | 1801 | 0.815343 | 0         |  |
|     |      | Shiraz-32T | 1870 | 0.729766 | 0         |  |
|     |      | Shiraz-32T | 1872 | 1.504553 | 0         |  |
|     |      | Shiraz-35T | 1933 | 0.488535 | 0         |  |
|     |      | Shiraz-53T | 2115 | 0.427728 | 0         |  |
|     |      | Shiraz-58T | 2223 | 0.833364 | 0         |  |
|     |      | Shiraz-58T | 2226 | 1.074663 | 0         |  |
|     |      | Shiraz-71T | 2263 | 0.975531 | 0         |  |
|     |      | Shiraz-4T  | 261  | 0        | -0.336249 |  |
|     |      | Shiraz-16T | 295  | 0.591657 | 0         |  |
|     |      | Shiraz-36T | 433  | 0        | -0.803961 |  |
|     |      | Shiraz-42T | 480  | 0        | -0.232915 |  |
|     |      | Shiraz-49T | 1170 | 0        | -0.967436 |  |
|     |      | Shiraz-9T  | 1370 | 0.690073 | 0         |  |
|     |      | Shiraz-9T  | 1371 | 1.292392 | 0         |  |
|     |      | Shiraz-18T | 1457 | 0.643204 | 0         |  |
|     |      | Shiraz-22T | 1673 | 0.611783 | 0         |  |
|     |      | Shiraz-22T | 1678 | 0.911625 | 0         |  |
|     |      | Shiraz-25T | 1719 | 0.472955 | 0         |  |
|     |      | Shiraz-28T | 1762 | 0.562311 | 0         |  |
|     |      | Shiraz-29T | 1801 | 0.815343 | 0         |  |
|     |      | Shiraz-32T | 1870 | 0.729766 | 0         |  |
|     |      | Shiraz-32T | 1872 | 1.504553 | 0         |  |
|     |      | Shiraz-35T | 1933 | 0.488535 | 0         |  |
|     |      | Shiraz-53T | 2115 | 0.427728 | 0         |  |
|     |      | Shiraz-58T | 2223 | 0.833364 | 0         |  |
|     |      | Shiraz-58T | 2226 | 1.074663 | 0         |  |
|     |      | Shiraz-71T | 2263 | 0.975531 | 0         |  |
| CFP | chrX | Shiraz-4T  | 260  | 0        | -0.324128 |  |
|     |      | Shiraz-4T  | 260  | 0        | -0.324128 |  |
|     |      | Shiraz-16T | 294  | 0.655804 | 0         |  |
|     |      | Shiraz-16T | 294  | 0.655804 | 0         |  |
|     |      | Shiraz-31T | 345  | 0.103301 | 0         |  |
|     |      | Shiraz-31T | 345  | 0.103301 | 0         |  |
|     |      | Shiraz-36T | 431  | 0        | -0.78035  |  |
|     |      | Shiraz-36T | 431  | 0        | -0.78035  |  |
|     |      | Shiraz-36T | 432  | 0        | -0.6692   |  |
|     |      | Shiraz-36T | 432  | 0        | -0.6692   |  |
|     |      | Shiraz-44T | 891  | 0        | -0.954044 |  |
|     |      | Shiraz-44T | 891  | 0        | -0.954044 |  |

|  |            |      |          |           |  |
|--|------------|------|----------|-----------|--|
|  | Shiraz-44T | 896  | 0        | -0.109108 |  |
|  | Shiraz-44T | 896  | 0        | -0.109108 |  |
|  | Shiraz-46T | 991  | 0.139564 | 0         |  |
|  | Shiraz-46T | 991  | 0.139564 | 0         |  |
|  | Shiraz-47T | 1084 | 0.24185  | 0         |  |
|  | Shiraz-47T | 1084 | 0.24185  | 0         |  |
|  | Shiraz-49T | 1166 | 0        | -0.917235 |  |
|  | Shiraz-49T | 1166 | 0        | -0.917235 |  |
|  | Shiraz-49T | 1169 | 0        | -0.583529 |  |
|  | Shiraz-49T | 1169 | 0        | -0.583529 |  |
|  | Shiraz-77T | 1282 | 0.213849 | 0         |  |
|  | Shiraz-77T | 1282 | 0.213849 | 0         |  |
|  | Shiraz-9T  | 1368 | 0.199713 | 0         |  |
|  | Shiraz-9T  | 1368 | 0.199713 | 0         |  |
|  | Shiraz-9T  | 1369 | 0.703374 | 0         |  |
|  | Shiraz-9T  | 1369 | 0.703374 | 0         |  |
|  | Shiraz-18T | 1455 | 0        | -0.186773 |  |
|  | Shiraz-18T | 1455 | 0        | -0.186773 |  |
|  | Shiraz-22T | 1669 | 0.695915 | 0         |  |
|  | Shiraz-22T | 1669 | 0.695915 | 0         |  |
|  | Shiraz-22T | 1672 | 1.01678  | 0         |  |
|  | Shiraz-22T | 1672 | 1.01678  | 0         |  |
|  | Shiraz-25T | 1717 | 0.420447 | 0         |  |
|  | Shiraz-25T | 1717 | 0.420447 | 0         |  |
|  | Shiraz-28T | 1760 | 0.538181 | 0         |  |
|  | Shiraz-28T | 1760 | 0.538181 | 0         |  |
|  | Shiraz-29T | 1800 | 0.672527 | 0         |  |
|  | Shiraz-29T | 1800 | 0.672527 | 0         |  |
|  | Shiraz-32T | 1869 | 0.776805 | 0         |  |
|  | Shiraz-32T | 1869 | 0.776805 | 0         |  |
|  | Shiraz-35T | 1932 | 0.507141 | 0         |  |
|  | Shiraz-35T | 1932 | 0.507141 | 0         |  |
|  | Shiraz-40T | 2051 | 0.098506 | 0         |  |
|  | Shiraz-40T | 2051 | 0.098506 | 0         |  |
|  | Shiraz-58T | 2221 | 0.871948 | 0         |  |
|  | Shiraz-58T | 2221 | 0.871948 | 0         |  |
|  | Shiraz-71T | 2260 | 0.68394  | 0         |  |
|  | Shiraz-71T | 2260 | 0.68394  | 0         |  |
|  | Shiraz-71T | 2262 | 0.986748 | 0         |  |
|  | Shiraz-71T | 2262 | 0.986748 | 0         |  |
|  | Shiraz-4T  | 260  | 0        | -0.324128 |  |
|  | Shiraz-4T  | 260  | 0        | -0.324128 |  |
|  | Shiraz-16T | 294  | 0.655804 | 0         |  |
|  | Shiraz-16T | 294  | 0.655804 | 0         |  |
|  | Shiraz-31T | 345  | 0.103301 | 0         |  |
|  | Shiraz-31T | 345  | 0.103301 | 0         |  |
|  | Shiraz-36T | 431  | 0        | -0.78035  |  |

|  |            |      |          |           |  |
|--|------------|------|----------|-----------|--|
|  | Shiraz-36T | 431  | 0        | -0.78035  |  |
|  | Shiraz-36T | 432  | 0        | -0.6692   |  |
|  | Shiraz-36T | 432  | 0        | -0.6692   |  |
|  | Shiraz-44T | 891  | 0        | -0.954044 |  |
|  | Shiraz-44T | 891  | 0        | -0.954044 |  |
|  | Shiraz-44T | 896  | 0        | -0.109108 |  |
|  | Shiraz-44T | 896  | 0        | -0.109108 |  |
|  | Shiraz-46T | 991  | 0.139564 | 0         |  |
|  | Shiraz-46T | 991  | 0.139564 | 0         |  |
|  | Shiraz-47T | 1084 | 0.24185  | 0         |  |
|  | Shiraz-47T | 1084 | 0.24185  | 0         |  |
|  | Shiraz-49T | 1166 | 0        | -0.917235 |  |
|  | Shiraz-49T | 1166 | 0        | -0.917235 |  |
|  | Shiraz-49T | 1169 | 0        | -0.583529 |  |
|  | Shiraz-49T | 1169 | 0        | -0.583529 |  |
|  | Shiraz-77T | 1282 | 0.213849 | 0         |  |
|  | Shiraz-77T | 1282 | 0.213849 | 0         |  |
|  | Shiraz-9T  | 1368 | 0.199713 | 0         |  |
|  | Shiraz-9T  | 1368 | 0.199713 | 0         |  |
|  | Shiraz-9T  | 1369 | 0.703374 | 0         |  |
|  | Shiraz-9T  | 1369 | 0.703374 | 0         |  |
|  | Shiraz-18T | 1455 | 0        | -0.186773 |  |
|  | Shiraz-18T | 1455 | 0        | -0.186773 |  |
|  | Shiraz-22T | 1669 | 0.695915 | 0         |  |
|  | Shiraz-22T | 1669 | 0.695915 | 0         |  |
|  | Shiraz-22T | 1672 | 1.01678  | 0         |  |
|  | Shiraz-22T | 1672 | 1.01678  | 0         |  |
|  | Shiraz-25T | 1717 | 0.420447 | 0         |  |
|  | Shiraz-25T | 1717 | 0.420447 | 0         |  |
|  | Shiraz-28T | 1760 | 0.538181 | 0         |  |
|  | Shiraz-28T | 1760 | 0.538181 | 0         |  |
|  | Shiraz-29T | 1800 | 0.672527 | 0         |  |
|  | Shiraz-29T | 1800 | 0.672527 | 0         |  |
|  | Shiraz-32T | 1869 | 0.776805 | 0         |  |
|  | Shiraz-32T | 1869 | 0.776805 | 0         |  |
|  | Shiraz-35T | 1932 | 0.507141 | 0         |  |
|  | Shiraz-35T | 1932 | 0.507141 | 0         |  |
|  | Shiraz-40T | 2051 | 0.098506 | 0         |  |
|  | Shiraz-40T | 2051 | 0.098506 | 0         |  |
|  | Shiraz-58T | 2221 | 0.871948 | 0         |  |
|  | Shiraz-58T | 2221 | 0.871948 | 0         |  |
|  | Shiraz-71T | 2260 | 0.68394  | 0         |  |
|  | Shiraz-71T | 2260 | 0.68394  | 0         |  |
|  | Shiraz-71T | 2262 | 0.986748 | 0         |  |
|  | Shiraz-71T | 2262 | 0.986748 | 0         |  |
|  | Shiraz-4T  | 260  | 0        | -0.324128 |  |
|  | Shiraz-4T  | 260  | 0        | -0.324128 |  |

|  |  |            |      |          |           |  |  |
|--|--|------------|------|----------|-----------|--|--|
|  |  | Shiraz-16T | 294  | 0.655804 | 0         |  |  |
|  |  | Shiraz-16T | 294  | 0.655804 | 0         |  |  |
|  |  | Shiraz-31T | 345  | 0.103301 | 0         |  |  |
|  |  | Shiraz-31T | 345  | 0.103301 | 0         |  |  |
|  |  | Shiraz-36T | 431  | 0        | -0.78035  |  |  |
|  |  | Shiraz-36T | 431  | 0        | -0.78035  |  |  |
|  |  | Shiraz-36T | 432  | 0        | -0.6692   |  |  |
|  |  | Shiraz-36T | 432  | 0        | -0.6692   |  |  |
|  |  | Shiraz-44T | 891  | 0        | -0.954044 |  |  |
|  |  | Shiraz-44T | 891  | 0        | -0.954044 |  |  |
|  |  | Shiraz-44T | 896  | 0        | -0.109108 |  |  |
|  |  | Shiraz-44T | 896  | 0        | -0.109108 |  |  |
|  |  | Shiraz-46T | 991  | 0.139564 | 0         |  |  |
|  |  | Shiraz-46T | 991  | 0.139564 | 0         |  |  |
|  |  | Shiraz-47T | 1084 | 0.24185  | 0         |  |  |
|  |  | Shiraz-47T | 1084 | 0.24185  | 0         |  |  |
|  |  | Shiraz-49T | 1166 | 0        | -0.917235 |  |  |
|  |  | Shiraz-49T | 1166 | 0        | -0.917235 |  |  |
|  |  | Shiraz-49T | 1169 | 0        | -0.583529 |  |  |
|  |  | Shiraz-49T | 1169 | 0        | -0.583529 |  |  |
|  |  | Shiraz-77T | 1282 | 0.213849 | 0         |  |  |
|  |  | Shiraz-77T | 1282 | 0.213849 | 0         |  |  |
|  |  | Shiraz-9T  | 1368 | 0.199713 | 0         |  |  |
|  |  | Shiraz-9T  | 1368 | 0.199713 | 0         |  |  |
|  |  | Shiraz-9T  | 1369 | 0.703374 | 0         |  |  |
|  |  | Shiraz-9T  | 1369 | 0.703374 | 0         |  |  |
|  |  | Shiraz-18T | 1455 | 0        | -0.186773 |  |  |
|  |  | Shiraz-18T | 1455 | 0        | -0.186773 |  |  |
|  |  | Shiraz-22T | 1669 | 0.695915 | 0         |  |  |
|  |  | Shiraz-22T | 1669 | 0.695915 | 0         |  |  |
|  |  | Shiraz-22T | 1672 | 1.01678  | 0         |  |  |
|  |  | Shiraz-22T | 1672 | 1.01678  | 0         |  |  |
|  |  | Shiraz-25T | 1717 | 0.420447 | 0         |  |  |
|  |  | Shiraz-25T | 1717 | 0.420447 | 0         |  |  |
|  |  | Shiraz-28T | 1760 | 0.538181 | 0         |  |  |
|  |  | Shiraz-28T | 1760 | 0.538181 | 0         |  |  |
|  |  | Shiraz-29T | 1800 | 0.672527 | 0         |  |  |
|  |  | Shiraz-29T | 1800 | 0.672527 | 0         |  |  |
|  |  | Shiraz-32T | 1869 | 0.776805 | 0         |  |  |
|  |  | Shiraz-32T | 1869 | 0.776805 | 0         |  |  |
|  |  | Shiraz-35T | 1932 | 0.507141 | 0         |  |  |
|  |  | Shiraz-35T | 1932 | 0.507141 | 0         |  |  |
|  |  | Shiraz-40T | 2051 | 0.098506 | 0         |  |  |
|  |  | Shiraz-40T | 2051 | 0.098506 | 0         |  |  |
|  |  | Shiraz-58T | 2221 | 0.871948 | 0         |  |  |
|  |  | Shiraz-58T | 2221 | 0.871948 | 0         |  |  |
|  |  | Shiraz-71T | 2260 | 0.68394  | 0         |  |  |



|      |      |            |      |          |           |  |
|------|------|------------|------|----------|-----------|--|
|      |      | Shiraz-71T | 2260 | 0.68394  | 0         |  |
|      |      | Shiraz-71T | 2262 | 0.986748 | 0         |  |
|      |      | Shiraz-71T | 2262 | 0.986748 | 0         |  |
| CFTR | chr7 | Shiraz-3T  | 90   | 0.219276 | 0         |  |
|      |      | Shiraz-3T  | 95   | 0        | -0.077623 |  |
|      |      | Shiraz-4T  | 253  | 0.372918 | 0         |  |
|      |      | Shiraz-36T | 378  | 0.179558 | 0         |  |
|      |      | Shiraz-36T | 382  | 0.081739 | 0         |  |
|      |      | Shiraz-44T | 641  | 0        | -0.477846 |  |
|      |      | Shiraz-46T | 943  | 0.093799 | 0         |  |
|      |      | Shiraz-46T | 947  | 0        | -0.010843 |  |
|      |      | Shiraz-47T | 1031 | 0        | -0.117529 |  |
|      |      | Shiraz-49T | 1121 | 0        | -0.138569 |  |
|      |      | Shiraz-77T | 1225 | 0        | -0.117922 |  |
|      |      | Shiraz-77T | 1228 | 0        | -0.238084 |  |
|      |      | Shiraz-18T | 1434 | 0.244465 | 0         |  |
|      |      | Shiraz-22T | 1549 | 0        | -0.319623 |  |
|      |      | Shiraz-22T | 1552 | 0        | -0.50686  |  |
|      |      | Shiraz-25T | 1698 | 0.21835  | 0         |  |
|      |      | Shiraz-28T | 1735 | 0.350744 | 0         |  |
|      |      | Shiraz-29T | 1778 | 0.120767 | 0         |  |
|      |      | Shiraz-32T | 1833 | 0.551336 | 0         |  |
|      |      | Shiraz-32T | 1835 | 0.092727 | 0         |  |
|      |      | Shiraz-38T | 1951 | 0.250891 | 0         |  |
|      |      | Shiraz-53T | 2078 | 0.287202 | 0         |  |
|      |      | Shiraz-58T | 2161 | 0        | -0.187744 |  |
|      |      | Shiraz-71T | 2238 | 0.603631 | 0         |  |
|      |      | Shiraz-3T  | 90   | 0.219276 | 0         |  |
|      |      | Shiraz-3T  | 95   | 0        | -0.077623 |  |
|      |      | Shiraz-4T  | 253  | 0.372918 | 0         |  |
|      |      | Shiraz-36T | 378  | 0.179558 | 0         |  |
|      |      | Shiraz-36T | 382  | 0.081739 | 0         |  |
|      |      | Shiraz-44T | 641  | 0        | -0.477846 |  |
|      |      | Shiraz-46T | 943  | 0.093799 | 0         |  |
|      |      | Shiraz-46T | 947  | 0        | -0.010843 |  |
|      |      | Shiraz-47T | 1031 | 0        | -0.117529 |  |
|      |      | Shiraz-49T | 1121 | 0        | -0.138569 |  |
|      |      | Shiraz-77T | 1225 | 0        | -0.117922 |  |
|      |      | Shiraz-77T | 1228 | 0        | -0.238084 |  |
|      |      | Shiraz-18T | 1434 | 0.244465 | 0         |  |
|      |      | Shiraz-22T | 1549 | 0        | -0.319623 |  |
|      |      | Shiraz-22T | 1552 | 0        | -0.50686  |  |
|      |      | Shiraz-25T | 1698 | 0.21835  | 0         |  |
|      |      | Shiraz-28T | 1735 | 0.350744 | 0         |  |
|      |      | Shiraz-29T | 1778 | 0.120767 | 0         |  |
|      |      | Shiraz-32T | 1833 | 0.551336 | 0         |  |
|      |      | Shiraz-32T | 1835 | 0.092727 | 0         |  |

|        |      |            |      |          |           |  |  |
|--------|------|------------|------|----------|-----------|--|--|
|        |      | Shiraz-38T | 1951 | 0.250891 | 0         |  |  |
|        |      | Shiraz-53T | 2078 | 0.287202 | 0         |  |  |
|        |      | Shiraz-58T | 2161 | 0        | -0.187744 |  |  |
|        |      | Shiraz-71T | 2238 | 0.603631 | 0         |  |  |
|        |      | Shiraz-3T  | 90   | 0.219276 | 0         |  |  |
|        |      | Shiraz-3T  | 95   | 0        | -0.077623 |  |  |
|        |      | Shiraz-4T  | 253  | 0.372918 | 0         |  |  |
|        |      | Shiraz-36T | 378  | 0.179558 | 0         |  |  |
|        |      | Shiraz-36T | 382  | 0.081739 | 0         |  |  |
|        |      | Shiraz-44T | 641  | 0        | -0.477846 |  |  |
|        |      | Shiraz-46T | 943  | 0.093799 | 0         |  |  |
|        |      | Shiraz-46T | 947  | 0        | -0.010843 |  |  |
|        |      | Shiraz-47T | 1031 | 0        | -0.117529 |  |  |
|        |      | Shiraz-49T | 1121 | 0        | -0.138569 |  |  |
|        |      | Shiraz-77T | 1225 | 0        | -0.117922 |  |  |
|        |      | Shiraz-77T | 1228 | 0        | -0.238084 |  |  |
|        |      | Shiraz-18T | 1434 | 0.244465 | 0         |  |  |
|        |      | Shiraz-22T | 1549 | 0        | -0.319623 |  |  |
|        |      | Shiraz-22T | 1552 | 0        | -0.50686  |  |  |
|        |      | Shiraz-25T | 1698 | 0.21835  | 0         |  |  |
|        |      | Shiraz-28T | 1735 | 0.350744 | 0         |  |  |
|        |      | Shiraz-29T | 1778 | 0.120767 | 0         |  |  |
|        |      | Shiraz-32T | 1833 | 0.551336 | 0         |  |  |
|        |      | Shiraz-32T | 1835 | 0.092727 | 0         |  |  |
|        |      | Shiraz-38T | 1951 | 0.250891 | 0         |  |  |
|        |      | Shiraz-53T | 2078 | 0.287202 | 0         |  |  |
|        |      | Shiraz-58T | 2161 | 0        | -0.187744 |  |  |
|        |      | Shiraz-71T | 2238 | 0.603631 | 0         |  |  |
| CHCHD3 | chr7 | Shiraz-3T  | 90   | 0.219276 | 0         |  |  |
|        |      | Shiraz-4T  | 253  | 0.372918 | 0         |  |  |
|        |      | Shiraz-36T | 378  | 0.179558 | 0         |  |  |
|        |      | Shiraz-46T | 943  | 0.093799 | 0         |  |  |
|        |      | Shiraz-77T | 1225 | 0        | -0.117922 |  |  |
|        |      | Shiraz-9T  | 1325 | 0.221899 | 0         |  |  |
|        |      | Shiraz-18T | 1434 | 0.244465 | 0         |  |  |
|        |      | Shiraz-22T | 1553 | 0        | -0.213234 |  |  |
|        |      | Shiraz-25T | 1698 | 0.21835  | 0         |  |  |
|        |      | Shiraz-28T | 1735 | 0.350744 | 0         |  |  |
|        |      | Shiraz-29T | 1778 | 0.120767 | 0         |  |  |
|        |      | Shiraz-32T | 1833 | 0.551336 | 0         |  |  |
|        |      | Shiraz-38T | 1951 | 0.250891 | 0         |  |  |
|        |      | Shiraz-53T | 2078 | 0.287202 | 0         |  |  |
|        |      | Shiraz-71T | 2238 | 0.603631 | 0         |  |  |
|        |      | Shiraz-3T  | 90   | 0.219276 | 0         |  |  |
|        |      | Shiraz-4T  | 253  | 0.372918 | 0         |  |  |
|        |      | Shiraz-36T | 378  | 0.179558 | 0         |  |  |
|        |      | Shiraz-46T | 943  | 0.093799 | 0         |  |  |

|       |      |            |      |          |           |  |  |
|-------|------|------------|------|----------|-----------|--|--|
|       |      | Shiraz-77T | 1225 | 0        | -0.117922 |  |  |
|       |      | Shiraz-9T  | 1325 | 0.221899 | 0         |  |  |
|       |      | Shiraz-18T | 1434 | 0.244465 | 0         |  |  |
|       |      | Shiraz-22T | 1553 | 0        | -0.213234 |  |  |
|       |      | Shiraz-25T | 1698 | 0.21835  | 0         |  |  |
|       |      | Shiraz-28T | 1735 | 0.350744 | 0         |  |  |
|       |      | Shiraz-29T | 1778 | 0.120767 | 0         |  |  |
|       |      | Shiraz-32T | 1833 | 0.551336 | 0         |  |  |
|       |      | Shiraz-38T | 1951 | 0.250891 | 0         |  |  |
|       |      | Shiraz-53T | 2078 | 0.287202 | 0         |  |  |
|       |      | Shiraz-71T | 2238 | 0.603631 | 0         |  |  |
|       |      | Shiraz-3T  | 90   | 0.219276 | 0         |  |  |
|       |      | Shiraz-4T  | 253  | 0.372918 | 0         |  |  |
|       |      | Shiraz-36T | 378  | 0.179558 | 0         |  |  |
|       |      | Shiraz-46T | 943  | 0.093799 | 0         |  |  |
|       |      | Shiraz-77T | 1225 | 0        | -0.117922 |  |  |
|       |      | Shiraz-9T  | 1325 | 0.221899 | 0         |  |  |
|       |      | Shiraz-18T | 1434 | 0.244465 | 0         |  |  |
|       |      | Shiraz-22T | 1553 | 0        | -0.213234 |  |  |
|       |      | Shiraz-25T | 1698 | 0.21835  | 0         |  |  |
|       |      | Shiraz-28T | 1735 | 0.350744 | 0         |  |  |
|       |      | Shiraz-29T | 1778 | 0.120767 | 0         |  |  |
|       |      | Shiraz-32T | 1833 | 0.551336 | 0         |  |  |
|       |      | Shiraz-38T | 1951 | 0.250891 | 0         |  |  |
|       |      | Shiraz-53T | 2078 | 0.287202 | 0         |  |  |
|       |      | Shiraz-71T | 2238 | 0.603631 | 0         |  |  |
| CHIC1 | chrX | Shiraz-3T  | 242  | 0        | -0.336434 |  |  |
|       |      | Shiraz-4T  | 261  | 0        | -0.336249 |  |  |
|       |      | Shiraz-16T | 295  | 0.591657 | 0         |  |  |
|       |      | Shiraz-36T | 433  | 0        | -0.803961 |  |  |
|       |      | Shiraz-44T | 899  | 0        | -1.09697  |  |  |
|       |      | Shiraz-49T | 1170 | 0        | -0.967436 |  |  |
|       |      | Shiraz-18T | 1457 | 0.643204 | 0         |  |  |
|       |      | Shiraz-22T | 1673 | 0.611783 | 0         |  |  |
|       |      | Shiraz-25T | 1719 | 0.472955 | 0         |  |  |
|       |      | Shiraz-28T | 1762 | 0.562311 | 0         |  |  |
|       |      | Shiraz-29T | 1801 | 0.815343 | 0         |  |  |
|       |      | Shiraz-32T | 1870 | 0.729766 | 0         |  |  |
|       |      | Shiraz-35T | 1933 | 0.488535 | 0         |  |  |
|       |      | Shiraz-58T | 2223 | 0.833364 | 0         |  |  |
|       |      | Shiraz-71T | 2263 | 0.975531 | 0         |  |  |
|       |      | Shiraz-3T  | 242  | 0        | -0.336434 |  |  |
|       |      | Shiraz-4T  | 261  | 0        | -0.336249 |  |  |
|       |      | Shiraz-16T | 295  | 0.591657 | 0         |  |  |
|       |      | Shiraz-36T | 433  | 0        | -0.803961 |  |  |
|       |      | Shiraz-44T | 899  | 0        | -1.09697  |  |  |
|       |      | Shiraz-49T | 1170 | 0        | -0.967436 |  |  |

|     |      |            |      |          |           |  |  |
|-----|------|------------|------|----------|-----------|--|--|
|     |      | Shiraz-18T | 1457 | 0.643204 | 0         |  |  |
|     |      | Shiraz-22T | 1673 | 0.611783 | 0         |  |  |
|     |      | Shiraz-25T | 1719 | 0.472955 | 0         |  |  |
|     |      | Shiraz-28T | 1762 | 0.562311 | 0         |  |  |
|     |      | Shiraz-29T | 1801 | 0.815343 | 0         |  |  |
|     |      | Shiraz-32T | 1870 | 0.729766 | 0         |  |  |
|     |      | Shiraz-35T | 1933 | 0.488535 | 0         |  |  |
|     |      | Shiraz-58T | 2223 | 0.833364 | 0         |  |  |
|     |      | Shiraz-71T | 2263 | 0.975531 | 0         |  |  |
|     |      | Shiraz-3T  | 242  | 0        | -0.336434 |  |  |
|     |      | Shiraz-4T  | 261  | 0        | -0.336249 |  |  |
|     |      | Shiraz-16T | 295  | 0.591657 | 0         |  |  |
|     |      | Shiraz-36T | 433  | 0        | -0.803961 |  |  |
|     |      | Shiraz-44T | 899  | 0        | -1.09697  |  |  |
|     |      | Shiraz-49T | 1170 | 0        | -0.967436 |  |  |
|     |      | Shiraz-18T | 1457 | 0.643204 | 0         |  |  |
|     |      | Shiraz-22T | 1673 | 0.611783 | 0         |  |  |
|     |      | Shiraz-25T | 1719 | 0.472955 | 0         |  |  |
|     |      | Shiraz-28T | 1762 | 0.562311 | 0         |  |  |
|     |      | Shiraz-29T | 1801 | 0.815343 | 0         |  |  |
|     |      | Shiraz-32T | 1870 | 0.729766 | 0         |  |  |
|     |      | Shiraz-35T | 1933 | 0.488535 | 0         |  |  |
|     |      | Shiraz-58T | 2223 | 0.833364 | 0         |  |  |
|     |      | Shiraz-71T | 2263 | 0.975531 | 0         |  |  |
| CHM | chrX | Shiraz-3T  | 242  | 0        | -0.336434 |  |  |
|     |      | Shiraz-3T  | 242  | 0        | -0.336434 |  |  |
|     |      | Shiraz-3T  | 243  | 0        | -0.549129 |  |  |
|     |      | Shiraz-3T  | 243  | 0        | -0.549129 |  |  |
|     |      | Shiraz-4T  | 261  | 0        | -0.336249 |  |  |
|     |      | Shiraz-4T  | 261  | 0        | -0.336249 |  |  |
|     |      | Shiraz-16T | 295  | 0.591657 | 0         |  |  |
|     |      | Shiraz-16T | 295  | 0.591657 | 0         |  |  |
|     |      | Shiraz-31T | 346  | 0        | -0.1527   |  |  |
|     |      | Shiraz-31T | 346  | 0        | -0.1527   |  |  |
|     |      | Shiraz-36T | 433  | 0        | -0.803961 |  |  |
|     |      | Shiraz-36T | 433  | 0        | -0.803961 |  |  |
|     |      | Shiraz-44T | 899  | 0        | -1.09697  |  |  |
|     |      | Shiraz-44T | 899  | 0        | -1.09697  |  |  |
|     |      | Shiraz-44T | 902  | 0        | -1.449824 |  |  |
|     |      | Shiraz-44T | 902  | 0        | -1.449824 |  |  |
|     |      | Shiraz-47T | 1085 | 0        | -0.130811 |  |  |
|     |      | Shiraz-47T | 1085 | 0        | -0.130811 |  |  |
|     |      | Shiraz-49T | 1170 | 0        | -0.967436 |  |  |
|     |      | Shiraz-49T | 1170 | 0        | -0.967436 |  |  |
|     |      | Shiraz-49T | 1172 | 0        | -1.123219 |  |  |
|     |      | Shiraz-49T | 1172 | 0        | -1.123219 |  |  |
|     |      | Shiraz-18T | 1457 | 0.643204 | 0         |  |  |

|  |            |      |          |           |  |
|--|------------|------|----------|-----------|--|
|  | Shiraz-18T | 1457 | 0.643204 | 0         |  |
|  | Shiraz-22T | 1673 | 0.611783 | 0         |  |
|  | Shiraz-22T | 1673 | 0.611783 | 0         |  |
|  | Shiraz-22T | 1675 | 0.279253 | 0         |  |
|  | Shiraz-22T | 1675 | 0.279253 | 0         |  |
|  | Shiraz-25T | 1719 | 0.472955 | 0         |  |
|  | Shiraz-25T | 1719 | 0.472955 | 0         |  |
|  | Shiraz-28T | 1762 | 0.562311 | 0         |  |
|  | Shiraz-28T | 1762 | 0.562311 | 0         |  |
|  | Shiraz-29T | 1801 | 0.815343 | 0         |  |
|  | Shiraz-29T | 1801 | 0.815343 | 0         |  |
|  | Shiraz-32T | 1870 | 0.729766 | 0         |  |
|  | Shiraz-32T | 1870 | 0.729766 | 0         |  |
|  | Shiraz-32T | 1871 | 0.292679 | 0         |  |
|  | Shiraz-32T | 1871 | 0.292679 | 0         |  |
|  | Shiraz-35T | 1933 | 0.488535 | 0         |  |
|  | Shiraz-35T | 1933 | 0.488535 | 0         |  |
|  | Shiraz-58T | 2223 | 0.833364 | 0         |  |
|  | Shiraz-58T | 2223 | 0.833364 | 0         |  |
|  | Shiraz-58T | 2225 | 0.595784 | 0         |  |
|  | Shiraz-58T | 2225 | 0.595784 | 0         |  |
|  | Shiraz-71T | 2263 | 0.975531 | 0         |  |
|  | Shiraz-71T | 2263 | 0.975531 | 0         |  |
|  | Shiraz-3T  | 242  | 0        | -0.336434 |  |
|  | Shiraz-3T  | 242  | 0        | -0.336434 |  |
|  | Shiraz-3T  | 243  | 0        | -0.549129 |  |
|  | Shiraz-3T  | 243  | 0        | -0.549129 |  |
|  | Shiraz-4T  | 261  | 0        | -0.336249 |  |
|  | Shiraz-4T  | 261  | 0        | -0.336249 |  |
|  | Shiraz-16T | 295  | 0.591657 | 0         |  |
|  | Shiraz-16T | 295  | 0.591657 | 0         |  |
|  | Shiraz-31T | 346  | 0        | -0.1527   |  |
|  | Shiraz-31T | 346  | 0        | -0.1527   |  |
|  | Shiraz-36T | 433  | 0        | -0.803961 |  |
|  | Shiraz-36T | 433  | 0        | -0.803961 |  |
|  | Shiraz-44T | 899  | 0        | -1.09697  |  |
|  | Shiraz-44T | 899  | 0        | -1.09697  |  |
|  | Shiraz-44T | 902  | 0        | -1.449824 |  |
|  | Shiraz-44T | 902  | 0        | -1.449824 |  |
|  | Shiraz-47T | 1085 | 0        | -0.130811 |  |
|  | Shiraz-47T | 1085 | 0        | -0.130811 |  |
|  | Shiraz-49T | 1170 | 0        | -0.967436 |  |
|  | Shiraz-49T | 1170 | 0        | -0.967436 |  |
|  | Shiraz-49T | 1172 | 0        | -1.123219 |  |
|  | Shiraz-49T | 1172 | 0        | -1.123219 |  |
|  | Shiraz-18T | 1457 | 0.643204 | 0         |  |
|  | Shiraz-18T | 1457 | 0.643204 | 0         |  |

|  |  |            |      |          |           |  |  |
|--|--|------------|------|----------|-----------|--|--|
|  |  | Shiraz-22T | 1673 | 0.611783 | 0         |  |  |
|  |  | Shiraz-22T | 1673 | 0.611783 | 0         |  |  |
|  |  | Shiraz-22T | 1675 | 0.279253 | 0         |  |  |
|  |  | Shiraz-22T | 1675 | 0.279253 | 0         |  |  |
|  |  | Shiraz-25T | 1719 | 0.472955 | 0         |  |  |
|  |  | Shiraz-25T | 1719 | 0.472955 | 0         |  |  |
|  |  | Shiraz-28T | 1762 | 0.562311 | 0         |  |  |
|  |  | Shiraz-28T | 1762 | 0.562311 | 0         |  |  |
|  |  | Shiraz-29T | 1801 | 0.815343 | 0         |  |  |
|  |  | Shiraz-29T | 1801 | 0.815343 | 0         |  |  |
|  |  | Shiraz-32T | 1870 | 0.729766 | 0         |  |  |
|  |  | Shiraz-32T | 1870 | 0.729766 | 0         |  |  |
|  |  | Shiraz-32T | 1871 | 0.292679 | 0         |  |  |
|  |  | Shiraz-32T | 1871 | 0.292679 | 0         |  |  |
|  |  | Shiraz-35T | 1933 | 0.488535 | 0         |  |  |
|  |  | Shiraz-35T | 1933 | 0.488535 | 0         |  |  |
|  |  | Shiraz-58T | 2223 | 0.833364 | 0         |  |  |
|  |  | Shiraz-58T | 2223 | 0.833364 | 0         |  |  |
|  |  | Shiraz-58T | 2225 | 0.595784 | 0         |  |  |
|  |  | Shiraz-58T | 2225 | 0.595784 | 0         |  |  |
|  |  | Shiraz-71T | 2263 | 0.975531 | 0         |  |  |
|  |  | Shiraz-71T | 2263 | 0.975531 | 0         |  |  |
|  |  | Shiraz-3T  | 242  | 0        | -0.336434 |  |  |
|  |  | Shiraz-3T  | 242  | 0        | -0.336434 |  |  |
|  |  | Shiraz-3T  | 243  | 0        | -0.549129 |  |  |
|  |  | Shiraz-3T  | 243  | 0        | -0.549129 |  |  |
|  |  | Shiraz-4T  | 261  | 0        | -0.336249 |  |  |
|  |  | Shiraz-4T  | 261  | 0        | -0.336249 |  |  |
|  |  | Shiraz-16T | 295  | 0.591657 | 0         |  |  |
|  |  | Shiraz-16T | 295  | 0.591657 | 0         |  |  |
|  |  | Shiraz-31T | 346  | 0        | -0.1527   |  |  |
|  |  | Shiraz-31T | 346  | 0        | -0.1527   |  |  |
|  |  | Shiraz-36T | 433  | 0        | -0.803961 |  |  |
|  |  | Shiraz-36T | 433  | 0        | -0.803961 |  |  |
|  |  | Shiraz-44T | 899  | 0        | -1.09697  |  |  |
|  |  | Shiraz-44T | 899  | 0        | -1.09697  |  |  |
|  |  | Shiraz-44T | 902  | 0        | -1.449824 |  |  |
|  |  | Shiraz-44T | 902  | 0        | -1.449824 |  |  |
|  |  | Shiraz-47T | 1085 | 0        | -0.130811 |  |  |
|  |  | Shiraz-47T | 1085 | 0        | -0.130811 |  |  |
|  |  | Shiraz-49T | 1170 | 0        | -0.967436 |  |  |
|  |  | Shiraz-49T | 1170 | 0        | -0.967436 |  |  |
|  |  | Shiraz-49T | 1172 | 0        | -1.123219 |  |  |
|  |  | Shiraz-49T | 1172 | 0        | -1.123219 |  |  |
|  |  | Shiraz-18T | 1457 | 0.643204 | 0         |  |  |
|  |  | Shiraz-18T | 1457 | 0.643204 | 0         |  |  |
|  |  | Shiraz-22T | 1673 | 0.611783 | 0         |  |  |

|      |      |            |      |          |   |  |  |
|------|------|------------|------|----------|---|--|--|
|      |      | Shiraz-22T | 1673 | 0.611783 | 0 |  |  |
|      |      | Shiraz-22T | 1675 | 0.279253 | 0 |  |  |
|      |      | Shiraz-22T | 1675 | 0.279253 | 0 |  |  |
|      |      | Shiraz-25T | 1719 | 0.472955 | 0 |  |  |
|      |      | Shiraz-25T | 1719 | 0.472955 | 0 |  |  |
|      |      | Shiraz-28T | 1762 | 0.562311 | 0 |  |  |
|      |      | Shiraz-28T | 1762 | 0.562311 | 0 |  |  |
|      |      | Shiraz-29T | 1801 | 0.815343 | 0 |  |  |
|      |      | Shiraz-29T | 1801 | 0.815343 | 0 |  |  |
|      |      | Shiraz-32T | 1870 | 0.729766 | 0 |  |  |
|      |      | Shiraz-32T | 1870 | 0.729766 | 0 |  |  |
|      |      | Shiraz-32T | 1871 | 0.292679 | 0 |  |  |
|      |      | Shiraz-32T | 1871 | 0.292679 | 0 |  |  |
|      |      | Shiraz-35T | 1933 | 0.488535 | 0 |  |  |
|      |      | Shiraz-35T | 1933 | 0.488535 | 0 |  |  |
|      |      | Shiraz-58T | 2223 | 0.833364 | 0 |  |  |
|      |      | Shiraz-58T | 2223 | 0.833364 | 0 |  |  |
|      |      | Shiraz-58T | 2225 | 0.595784 | 0 |  |  |
|      |      | Shiraz-58T | 2225 | 0.595784 | 0 |  |  |
|      |      | Shiraz-71T | 2263 | 0.975531 | 0 |  |  |
|      |      | Shiraz-71T | 2263 | 0.975531 | 0 |  |  |
| CHN2 | chr7 | Shiraz-3T  | 87   | 0.198593 | 0 |  |  |
|      |      | Shiraz-3T  | 87   | 0.198593 | 0 |  |  |
|      |      | Shiraz-4T  | 252  | 0.192083 | 0 |  |  |
|      |      | Shiraz-4T  | 252  | 0.192083 | 0 |  |  |
|      |      | Shiraz-36T | 376  | 0.159952 | 0 |  |  |
|      |      | Shiraz-36T | 376  | 0.159952 | 0 |  |  |
|      |      | Shiraz-46T | 942  | 0.069143 | 0 |  |  |
|      |      | Shiraz-46T | 942  | 0.069143 | 0 |  |  |
|      |      | Shiraz-18T | 1433 | 0.250973 | 0 |  |  |
|      |      | Shiraz-18T | 1433 | 0.250973 | 0 |  |  |
|      |      | Shiraz-25T | 1697 | 0.21945  | 0 |  |  |
|      |      | Shiraz-25T | 1697 | 0.21945  | 0 |  |  |
|      |      | Shiraz-28T | 1734 | 0.362882 | 0 |  |  |
|      |      | Shiraz-28T | 1734 | 0.362882 | 0 |  |  |
|      |      | Shiraz-29T | 1777 | 0.156747 | 0 |  |  |
|      |      | Shiraz-29T | 1777 | 0.156747 | 0 |  |  |
|      |      | Shiraz-38T | 1950 | 0.265916 | 0 |  |  |
|      |      | Shiraz-38T | 1950 | 0.265916 | 0 |  |  |
|      |      | Shiraz-71T | 2236 | 0.320072 | 0 |  |  |
|      |      | Shiraz-71T | 2236 | 0.320072 | 0 |  |  |
|      |      | Shiraz-3T  | 87   | 0.198593 | 0 |  |  |
|      |      | Shiraz-3T  | 87   | 0.198593 | 0 |  |  |
|      |      | Shiraz-4T  | 252  | 0.192083 | 0 |  |  |
|      |      | Shiraz-4T  | 252  | 0.192083 | 0 |  |  |
|      |      | Shiraz-36T | 376  | 0.159952 | 0 |  |  |
|      |      | Shiraz-36T | 376  | 0.159952 | 0 |  |  |

|       |      |            |      |          |           |  |
|-------|------|------------|------|----------|-----------|--|
|       |      | Shiraz-46T | 942  | 0.069143 | 0         |  |
|       |      | Shiraz-46T | 942  | 0.069143 | 0         |  |
|       |      | Shiraz-18T | 1433 | 0.250973 | 0         |  |
|       |      | Shiraz-18T | 1433 | 0.250973 | 0         |  |
|       |      | Shiraz-25T | 1697 | 0.21945  | 0         |  |
|       |      | Shiraz-25T | 1697 | 0.21945  | 0         |  |
|       |      | Shiraz-28T | 1734 | 0.362882 | 0         |  |
|       |      | Shiraz-28T | 1734 | 0.362882 | 0         |  |
|       |      | Shiraz-29T | 1777 | 0.156747 | 0         |  |
|       |      | Shiraz-29T | 1777 | 0.156747 | 0         |  |
|       |      | Shiraz-38T | 1950 | 0.265916 | 0         |  |
|       |      | Shiraz-38T | 1950 | 0.265916 | 0         |  |
|       |      | Shiraz-71T | 2236 | 0.320072 | 0         |  |
|       |      | Shiraz-71T | 2236 | 0.320072 | 0         |  |
|       |      | Shiraz-3T  | 87   | 0.198593 | 0         |  |
|       |      | Shiraz-3T  | 87   | 0.198593 | 0         |  |
|       |      | Shiraz-4T  | 252  | 0.192083 | 0         |  |
|       |      | Shiraz-4T  | 252  | 0.192083 | 0         |  |
|       |      | Shiraz-36T | 376  | 0.159952 | 0         |  |
|       |      | Shiraz-36T | 376  | 0.159952 | 0         |  |
|       |      | Shiraz-46T | 942  | 0.069143 | 0         |  |
|       |      | Shiraz-46T | 942  | 0.069143 | 0         |  |
|       |      | Shiraz-18T | 1433 | 0.250973 | 0         |  |
|       |      | Shiraz-18T | 1433 | 0.250973 | 0         |  |
|       |      | Shiraz-25T | 1697 | 0.21945  | 0         |  |
|       |      | Shiraz-25T | 1697 | 0.21945  | 0         |  |
|       |      | Shiraz-28T | 1734 | 0.362882 | 0         |  |
|       |      | Shiraz-28T | 1734 | 0.362882 | 0         |  |
|       |      | Shiraz-29T | 1777 | 0.156747 | 0         |  |
|       |      | Shiraz-29T | 1777 | 0.156747 | 0         |  |
|       |      | Shiraz-38T | 1950 | 0.265916 | 0         |  |
|       |      | Shiraz-38T | 1950 | 0.265916 | 0         |  |
|       |      | Shiraz-71T | 2236 | 0.320072 | 0         |  |
|       |      | Shiraz-71T | 2236 | 0.320072 | 0         |  |
| CHRD1 | chrX | Shiraz-3T  | 242  | 0        | -0.336434 |  |
|       |      | Shiraz-3T  | 242  | 0        | -0.336434 |  |
|       |      | Shiraz-4T  | 261  | 0        | -0.336249 |  |
|       |      | Shiraz-4T  | 261  | 0        | -0.336249 |  |
|       |      | Shiraz-16T | 295  | 0.591657 | 0         |  |
|       |      | Shiraz-16T | 295  | 0.591657 | 0         |  |
|       |      | Shiraz-36T | 433  | 0        | -0.803961 |  |
|       |      | Shiraz-36T | 433  | 0        | -0.803961 |  |
|       |      | Shiraz-44T | 899  | 0        | -1.09697  |  |
|       |      | Shiraz-44T | 899  | 0        | -1.09697  |  |
|       |      | Shiraz-49T | 1170 | 0        | -0.967436 |  |
|       |      | Shiraz-49T | 1170 | 0        | -0.967436 |  |
|       |      | Shiraz-18T | 1457 | 0.643204 | 0         |  |



|  |            |      |          |           |  |
|--|------------|------|----------|-----------|--|
|  | Shiraz-18T | 1457 | 0.643204 | 0         |  |
|  | Shiraz-22T | 1673 | 0.611783 | 0         |  |
|  | Shiraz-22T | 1673 | 0.611783 | 0         |  |
|  | Shiraz-25T | 1719 | 0.472955 | 0         |  |
|  | Shiraz-25T | 1719 | 0.472955 | 0         |  |
|  | Shiraz-28T | 1762 | 0.562311 | 0         |  |
|  | Shiraz-28T | 1762 | 0.562311 | 0         |  |
|  | Shiraz-29T | 1801 | 0.815343 | 0         |  |
|  | Shiraz-29T | 1801 | 0.815343 | 0         |  |
|  | Shiraz-32T | 1870 | 0.729766 | 0         |  |
|  | Shiraz-32T | 1870 | 0.729766 | 0         |  |
|  | Shiraz-35T | 1933 | 0.488535 | 0         |  |
|  | Shiraz-35T | 1933 | 0.488535 | 0         |  |
|  | Shiraz-58T | 2223 | 0.833364 | 0         |  |
|  | Shiraz-58T | 2223 | 0.833364 | 0         |  |
|  | Shiraz-71T | 2263 | 0.975531 | 0         |  |
|  | Shiraz-71T | 2263 | 0.975531 | 0         |  |
|  | Shiraz-3T  | 242  | 0        | -0.336434 |  |
|  | Shiraz-3T  | 242  | 0        | -0.336434 |  |
|  | Shiraz-4T  | 261  | 0        | -0.336249 |  |
|  | Shiraz-4T  | 261  | 0        | -0.336249 |  |
|  | Shiraz-16T | 295  | 0.591657 | 0         |  |
|  | Shiraz-16T | 295  | 0.591657 | 0         |  |
|  | Shiraz-36T | 433  | 0        | -0.803961 |  |
|  | Shiraz-36T | 433  | 0        | -0.803961 |  |
|  | Shiraz-44T | 899  | 0        | -1.09697  |  |
|  | Shiraz-44T | 899  | 0        | -1.09697  |  |
|  | Shiraz-49T | 1170 | 0        | -0.967436 |  |
|  | Shiraz-49T | 1170 | 0        | -0.967436 |  |
|  | Shiraz-18T | 1457 | 0.643204 | 0         |  |
|  | Shiraz-18T | 1457 | 0.643204 | 0         |  |
|  | Shiraz-22T | 1673 | 0.611783 | 0         |  |
|  | Shiraz-22T | 1673 | 0.611783 | 0         |  |
|  | Shiraz-25T | 1719 | 0.472955 | 0         |  |
|  | Shiraz-25T | 1719 | 0.472955 | 0         |  |
|  | Shiraz-28T | 1762 | 0.562311 | 0         |  |
|  | Shiraz-28T | 1762 | 0.562311 | 0         |  |
|  | Shiraz-29T | 1801 | 0.815343 | 0         |  |
|  | Shiraz-29T | 1801 | 0.815343 | 0         |  |
|  | Shiraz-32T | 1870 | 0.729766 | 0         |  |
|  | Shiraz-32T | 1870 | 0.729766 | 0         |  |
|  | Shiraz-35T | 1933 | 0.488535 | 0         |  |
|  | Shiraz-35T | 1933 | 0.488535 | 0         |  |
|  | Shiraz-58T | 2223 | 0.833364 | 0         |  |
|  | Shiraz-58T | 2223 | 0.833364 | 0         |  |
|  | Shiraz-71T | 2263 | 0.975531 | 0         |  |
|  | Shiraz-71T | 2263 | 0.975531 | 0         |  |

|       |      |            |      |          |           |  |  |
|-------|------|------------|------|----------|-----------|--|--|
|       |      | Shiraz-3T  | 242  | 0        | -0.336434 |  |  |
|       |      | Shiraz-3T  | 242  | 0        | -0.336434 |  |  |
|       |      | Shiraz-4T  | 261  | 0        | -0.336249 |  |  |
|       |      | Shiraz-4T  | 261  | 0        | -0.336249 |  |  |
|       |      | Shiraz-16T | 295  | 0.591657 | 0         |  |  |
|       |      | Shiraz-16T | 295  | 0.591657 | 0         |  |  |
|       |      | Shiraz-36T | 433  | 0        | -0.803961 |  |  |
|       |      | Shiraz-36T | 433  | 0        | -0.803961 |  |  |
|       |      | Shiraz-44T | 899  | 0        | -1.09697  |  |  |
|       |      | Shiraz-44T | 899  | 0        | -1.09697  |  |  |
|       |      | Shiraz-49T | 1170 | 0        | -0.967436 |  |  |
|       |      | Shiraz-49T | 1170 | 0        | -0.967436 |  |  |
|       |      | Shiraz-18T | 1457 | 0.643204 | 0         |  |  |
|       |      | Shiraz-18T | 1457 | 0.643204 | 0         |  |  |
|       |      | Shiraz-22T | 1673 | 0.611783 | 0         |  |  |
|       |      | Shiraz-22T | 1673 | 0.611783 | 0         |  |  |
|       |      | Shiraz-25T | 1719 | 0.472955 | 0         |  |  |
|       |      | Shiraz-25T | 1719 | 0.472955 | 0         |  |  |
|       |      | Shiraz-28T | 1762 | 0.562311 | 0         |  |  |
|       |      | Shiraz-28T | 1762 | 0.562311 | 0         |  |  |
|       |      | Shiraz-29T | 1801 | 0.815343 | 0         |  |  |
|       |      | Shiraz-29T | 1801 | 0.815343 | 0         |  |  |
|       |      | Shiraz-32T | 1870 | 0.729766 | 0         |  |  |
|       |      | Shiraz-32T | 1870 | 0.729766 | 0         |  |  |
|       |      | Shiraz-35T | 1933 | 0.488535 | 0         |  |  |
|       |      | Shiraz-35T | 1933 | 0.488535 | 0         |  |  |
|       |      | Shiraz-58T | 2223 | 0.833364 | 0         |  |  |
|       |      | Shiraz-58T | 2223 | 0.833364 | 0         |  |  |
|       |      | Shiraz-71T | 2263 | 0.975531 | 0         |  |  |
|       |      | Shiraz-71T | 2263 | 0.975531 | 0         |  |  |
| CHRM2 | chr7 | Shiraz-3T  | 90   | 0.219276 | 0         |  |  |
|       |      | Shiraz-3T  | 90   | 0.219276 | 0         |  |  |
|       |      | Shiraz-3T  | 90   | 0.219276 | 0         |  |  |
|       |      | Shiraz-3T  | 90   | 0.219276 | 0         |  |  |
|       |      | Shiraz-3T  | 90   | 0.219276 | 0         |  |  |
|       |      | Shiraz-4T  | 253  | 0.372918 | 0         |  |  |
|       |      | Shiraz-4T  | 253  | 0.372918 | 0         |  |  |
|       |      | Shiraz-4T  | 253  | 0.372918 | 0         |  |  |
|       |      | Shiraz-4T  | 253  | 0.372918 | 0         |  |  |
|       |      | Shiraz-4T  | 253  | 0.372918 | 0         |  |  |
|       |      | Shiraz-36T | 378  | 0.179558 | 0         |  |  |
|       |      | Shiraz-36T | 378  | 0.179558 | 0         |  |  |
|       |      | Shiraz-36T | 378  | 0.179558 | 0         |  |  |
|       |      | Shiraz-36T | 378  | 0.179558 | 0         |  |  |
|       |      | Shiraz-36T | 378  | 0.179558 | 0         |  |  |
|       |      | Shiraz-44T | 643  | 0        | -0.456761 |  |  |
|       |      | Shiraz-44T | 643  | 0        | -0.456761 |  |  |

|  |            |      |          |           |  |  |
|--|------------|------|----------|-----------|--|--|
|  | Shiraz-44T | 643  | 0        | -0.456761 |  |  |
|  | Shiraz-44T | 643  | 0        | -0.456761 |  |  |
|  | Shiraz-44T | 643  | 0        | -0.456761 |  |  |
|  | Shiraz-46T | 943  | 0.093799 | 0         |  |  |
|  | Shiraz-46T | 943  | 0.093799 | 0         |  |  |
|  | Shiraz-46T | 943  | 0.093799 | 0         |  |  |
|  | Shiraz-46T | 943  | 0.093799 | 0         |  |  |
|  | Shiraz-46T | 943  | 0.093799 | 0         |  |  |
|  | Shiraz-77T | 1225 | 0        | -0.117922 |  |  |
|  | Shiraz-77T | 1225 | 0        | -0.117922 |  |  |
|  | Shiraz-77T | 1225 | 0        | -0.117922 |  |  |
|  | Shiraz-77T | 1225 | 0        | -0.117922 |  |  |
|  | Shiraz-77T | 1225 | 0        | -0.117922 |  |  |
|  | Shiraz-9T  | 1325 | 0.221899 | 0         |  |  |
|  | Shiraz-9T  | 1325 | 0.221899 | 0         |  |  |
|  | Shiraz-9T  | 1325 | 0.221899 | 0         |  |  |
|  | Shiraz-9T  | 1325 | 0.221899 | 0         |  |  |
|  | Shiraz-9T  | 1325 | 0.221899 | 0         |  |  |
|  | Shiraz-18T | 1434 | 0.244465 | 0         |  |  |
|  | Shiraz-18T | 1434 | 0.244465 | 0         |  |  |
|  | Shiraz-18T | 1434 | 0.244465 | 0         |  |  |
|  | Shiraz-18T | 1434 | 0.244465 | 0         |  |  |
|  | Shiraz-18T | 1434 | 0.244465 | 0         |  |  |
|  | Shiraz-22T | 1553 | 0        | -0.213234 |  |  |
|  | Shiraz-22T | 1553 | 0        | -0.213234 |  |  |
|  | Shiraz-22T | 1553 | 0        | -0.213234 |  |  |
|  | Shiraz-22T | 1553 | 0        | -0.213234 |  |  |
|  | Shiraz-22T | 1553 | 0        | -0.213234 |  |  |
|  | Shiraz-25T | 1698 | 0.21835  | 0         |  |  |
|  | Shiraz-25T | 1698 | 0.21835  | 0         |  |  |
|  | Shiraz-25T | 1698 | 0.21835  | 0         |  |  |
|  | Shiraz-25T | 1698 | 0.21835  | 0         |  |  |
|  | Shiraz-25T | 1698 | 0.21835  | 0         |  |  |
|  | Shiraz-28T | 1735 | 0.350744 | 0         |  |  |
|  | Shiraz-28T | 1735 | 0.350744 | 0         |  |  |
|  | Shiraz-28T | 1735 | 0.350744 | 0         |  |  |
|  | Shiraz-28T | 1735 | 0.350744 | 0         |  |  |
|  | Shiraz-28T | 1735 | 0.350744 | 0         |  |  |
|  | Shiraz-29T | 1778 | 0.120767 | 0         |  |  |
|  | Shiraz-29T | 1778 | 0.120767 | 0         |  |  |
|  | Shiraz-29T | 1778 | 0.120767 | 0         |  |  |
|  | Shiraz-29T | 1778 | 0.120767 | 0         |  |  |
|  | Shiraz-29T | 1778 | 0.120767 | 0         |  |  |
|  | Shiraz-32T | 1833 | 0.551336 | 0         |  |  |
|  | Shiraz-32T | 1833 | 0.551336 | 0         |  |  |
|  | Shiraz-32T | 1833 | 0.551336 | 0         |  |  |
|  | Shiraz-32T | 1833 | 0.551336 | 0         |  |  |

|  |            |      |          |           |  |
|--|------------|------|----------|-----------|--|
|  | Shiraz-32T | 1833 | 0.551336 | 0         |  |
|  | Shiraz-38T | 1951 | 0.250891 | 0         |  |
|  | Shiraz-38T | 1951 | 0.250891 | 0         |  |
|  | Shiraz-38T | 1951 | 0.250891 | 0         |  |
|  | Shiraz-38T | 1951 | 0.250891 | 0         |  |
|  | Shiraz-38T | 1951 | 0.250891 | 0         |  |
|  | Shiraz-53T | 2078 | 0.287202 | 0         |  |
|  | Shiraz-53T | 2078 | 0.287202 | 0         |  |
|  | Shiraz-53T | 2078 | 0.287202 | 0         |  |
|  | Shiraz-53T | 2078 | 0.287202 | 0         |  |
|  | Shiraz-53T | 2078 | 0.287202 | 0         |  |
|  | Shiraz-58T | 2162 | 0.221505 | 0         |  |
|  | Shiraz-58T | 2162 | 0.221505 | 0         |  |
|  | Shiraz-58T | 2162 | 0.221505 | 0         |  |
|  | Shiraz-58T | 2162 | 0.221505 | 0         |  |
|  | Shiraz-58T | 2162 | 0.221505 | 0         |  |
|  | Shiraz-71T | 2238 | 0.603631 | 0         |  |
|  | Shiraz-71T | 2238 | 0.603631 | 0         |  |
|  | Shiraz-71T | 2238 | 0.603631 | 0         |  |
|  | Shiraz-71T | 2238 | 0.603631 | 0         |  |
|  | Shiraz-71T | 2238 | 0.603631 | 0         |  |
|  | Shiraz-3T  | 90   | 0.219276 | 0         |  |
|  | Shiraz-3T  | 90   | 0.219276 | 0         |  |
|  | Shiraz-3T  | 90   | 0.219276 | 0         |  |
|  | Shiraz-3T  | 90   | 0.219276 | 0         |  |
|  | Shiraz-3T  | 90   | 0.219276 | 0         |  |
|  | Shiraz-4T  | 253  | 0.372918 | 0         |  |
|  | Shiraz-4T  | 253  | 0.372918 | 0         |  |
|  | Shiraz-4T  | 253  | 0.372918 | 0         |  |
|  | Shiraz-4T  | 253  | 0.372918 | 0         |  |
|  | Shiraz-4T  | 253  | 0.372918 | 0         |  |
|  | Shiraz-36T | 378  | 0.179558 | 0         |  |
|  | Shiraz-36T | 378  | 0.179558 | 0         |  |
|  | Shiraz-36T | 378  | 0.179558 | 0         |  |
|  | Shiraz-36T | 378  | 0.179558 | 0         |  |
|  | Shiraz-36T | 378  | 0.179558 | 0         |  |
|  | Shiraz-44T | 643  | 0        | -0.456761 |  |
|  | Shiraz-44T | 643  | 0        | -0.456761 |  |
|  | Shiraz-44T | 643  | 0        | -0.456761 |  |
|  | Shiraz-44T | 643  | 0        | -0.456761 |  |
|  | Shiraz-44T | 643  | 0        | -0.456761 |  |
|  | Shiraz-46T | 943  | 0.093799 | 0         |  |
|  | Shiraz-46T | 943  | 0.093799 | 0         |  |
|  | Shiraz-46T | 943  | 0.093799 | 0         |  |
|  | Shiraz-46T | 943  | 0.093799 | 0         |  |
|  | Shiraz-46T | 943  | 0.093799 | 0         |  |
|  | Shiraz-77T | 1225 | 0        | -0.117922 |  |

|  |            |      |          |           |  |
|--|------------|------|----------|-----------|--|
|  | Shiraz-77T | 1225 | 0        | -0.117922 |  |
|  | Shiraz-77T | 1225 | 0        | -0.117922 |  |
|  | Shiraz-77T | 1225 | 0        | -0.117922 |  |
|  | Shiraz-77T | 1225 | 0        | -0.117922 |  |
|  | Shiraz-9T  | 1325 | 0.221899 | 0         |  |
|  | Shiraz-9T  | 1325 | 0.221899 | 0         |  |
|  | Shiraz-9T  | 1325 | 0.221899 | 0         |  |
|  | Shiraz-9T  | 1325 | 0.221899 | 0         |  |
|  | Shiraz-9T  | 1325 | 0.221899 | 0         |  |
|  | Shiraz-18T | 1434 | 0.244465 | 0         |  |
|  | Shiraz-18T | 1434 | 0.244465 | 0         |  |
|  | Shiraz-18T | 1434 | 0.244465 | 0         |  |
|  | Shiraz-18T | 1434 | 0.244465 | 0         |  |
|  | Shiraz-18T | 1434 | 0.244465 | 0         |  |
|  | Shiraz-22T | 1553 | 0        | -0.213234 |  |
|  | Shiraz-22T | 1553 | 0        | -0.213234 |  |
|  | Shiraz-22T | 1553 | 0        | -0.213234 |  |
|  | Shiraz-22T | 1553 | 0        | -0.213234 |  |
|  | Shiraz-22T | 1553 | 0        | -0.213234 |  |
|  | Shiraz-25T | 1698 | 0.21835  | 0         |  |
|  | Shiraz-25T | 1698 | 0.21835  | 0         |  |
|  | Shiraz-25T | 1698 | 0.21835  | 0         |  |
|  | Shiraz-25T | 1698 | 0.21835  | 0         |  |
|  | Shiraz-25T | 1698 | 0.21835  | 0         |  |
|  | Shiraz-28T | 1735 | 0.350744 | 0         |  |
|  | Shiraz-28T | 1735 | 0.350744 | 0         |  |
|  | Shiraz-28T | 1735 | 0.350744 | 0         |  |
|  | Shiraz-28T | 1735 | 0.350744 | 0         |  |
|  | Shiraz-28T | 1735 | 0.350744 | 0         |  |
|  | Shiraz-29T | 1778 | 0.120767 | 0         |  |
|  | Shiraz-29T | 1778 | 0.120767 | 0         |  |
|  | Shiraz-29T | 1778 | 0.120767 | 0         |  |
|  | Shiraz-29T | 1778 | 0.120767 | 0         |  |
|  | Shiraz-29T | 1778 | 0.120767 | 0         |  |
|  | Shiraz-32T | 1833 | 0.551336 | 0         |  |
|  | Shiraz-32T | 1833 | 0.551336 | 0         |  |
|  | Shiraz-32T | 1833 | 0.551336 | 0         |  |
|  | Shiraz-32T | 1833 | 0.551336 | 0         |  |
|  | Shiraz-32T | 1833 | 0.551336 | 0         |  |
|  | Shiraz-38T | 1951 | 0.250891 | 0         |  |
|  | Shiraz-38T | 1951 | 0.250891 | 0         |  |
|  | Shiraz-38T | 1951 | 0.250891 | 0         |  |
|  | Shiraz-38T | 1951 | 0.250891 | 0         |  |
|  | Shiraz-38T | 1951 | 0.250891 | 0         |  |
|  | Shiraz-53T | 2078 | 0.287202 | 0         |  |
|  | Shiraz-53T | 2078 | 0.287202 | 0         |  |
|  | Shiraz-53T | 2078 | 0.287202 | 0         |  |

|  |  |            |      |          |           |  |  |
|--|--|------------|------|----------|-----------|--|--|
|  |  | Shiraz-53T | 2078 | 0.287202 | 0         |  |  |
|  |  | Shiraz-53T | 2078 | 0.287202 | 0         |  |  |
|  |  | Shiraz-58T | 2162 | 0.221505 | 0         |  |  |
|  |  | Shiraz-58T | 2162 | 0.221505 | 0         |  |  |
|  |  | Shiraz-58T | 2162 | 0.221505 | 0         |  |  |
|  |  | Shiraz-58T | 2162 | 0.221505 | 0         |  |  |
|  |  | Shiraz-58T | 2162 | 0.221505 | 0         |  |  |
|  |  | Shiraz-71T | 2238 | 0.603631 | 0         |  |  |
|  |  | Shiraz-71T | 2238 | 0.603631 | 0         |  |  |
|  |  | Shiraz-71T | 2238 | 0.603631 | 0         |  |  |
|  |  | Shiraz-71T | 2238 | 0.603631 | 0         |  |  |
|  |  | Shiraz-71T | 2238 | 0.603631 | 0         |  |  |
|  |  | Shiraz-3T  | 90   | 0.219276 | 0         |  |  |
|  |  | Shiraz-3T  | 90   | 0.219276 | 0         |  |  |
|  |  | Shiraz-3T  | 90   | 0.219276 | 0         |  |  |
|  |  | Shiraz-3T  | 90   | 0.219276 | 0         |  |  |
|  |  | Shiraz-3T  | 90   | 0.219276 | 0         |  |  |
|  |  | Shiraz-4T  | 253  | 0.372918 | 0         |  |  |
|  |  | Shiraz-4T  | 253  | 0.372918 | 0         |  |  |
|  |  | Shiraz-4T  | 253  | 0.372918 | 0         |  |  |
|  |  | Shiraz-4T  | 253  | 0.372918 | 0         |  |  |
|  |  | Shiraz-4T  | 253  | 0.372918 | 0         |  |  |
|  |  | Shiraz-36T | 378  | 0.179558 | 0         |  |  |
|  |  | Shiraz-36T | 378  | 0.179558 | 0         |  |  |
|  |  | Shiraz-36T | 378  | 0.179558 | 0         |  |  |
|  |  | Shiraz-36T | 378  | 0.179558 | 0         |  |  |
|  |  | Shiraz-36T | 378  | 0.179558 | 0         |  |  |
|  |  | Shiraz-44T | 643  | 0        | -0.456761 |  |  |
|  |  | Shiraz-44T | 643  | 0        | -0.456761 |  |  |
|  |  | Shiraz-44T | 643  | 0        | -0.456761 |  |  |
|  |  | Shiraz-44T | 643  | 0        | -0.456761 |  |  |
|  |  | Shiraz-44T | 643  | 0        | -0.456761 |  |  |
|  |  | Shiraz-46T | 943  | 0.093799 | 0         |  |  |
|  |  | Shiraz-46T | 943  | 0.093799 | 0         |  |  |
|  |  | Shiraz-46T | 943  | 0.093799 | 0         |  |  |
|  |  | Shiraz-46T | 943  | 0.093799 | 0         |  |  |
|  |  | Shiraz-46T | 943  | 0.093799 | 0         |  |  |
|  |  | Shiraz-77T | 1225 | 0        | -0.117922 |  |  |
|  |  | Shiraz-77T | 1225 | 0        | -0.117922 |  |  |
|  |  | Shiraz-77T | 1225 | 0        | -0.117922 |  |  |
|  |  | Shiraz-77T | 1225 | 0        | -0.117922 |  |  |
|  |  | Shiraz-77T | 1225 | 0        | -0.117922 |  |  |
|  |  | Shiraz-9T  | 1325 | 0.221899 | 0         |  |  |
|  |  | Shiraz-9T  | 1325 | 0.221899 | 0         |  |  |
|  |  | Shiraz-9T  | 1325 | 0.221899 | 0         |  |  |
|  |  | Shiraz-9T  | 1325 | 0.221899 | 0         |  |  |
|  |  | Shiraz-9T  | 1325 | 0.221899 | 0         |  |  |

|  |  |            |      |          |           |  |  |
|--|--|------------|------|----------|-----------|--|--|
|  |  | Shiraz-18T | 1434 | 0.244465 | 0         |  |  |
|  |  | Shiraz-18T | 1434 | 0.244465 | 0         |  |  |
|  |  | Shiraz-18T | 1434 | 0.244465 | 0         |  |  |
|  |  | Shiraz-18T | 1434 | 0.244465 | 0         |  |  |
|  |  | Shiraz-18T | 1434 | 0.244465 | 0         |  |  |
|  |  | Shiraz-22T | 1553 | 0        | -0.213234 |  |  |
|  |  | Shiraz-22T | 1553 | 0        | -0.213234 |  |  |
|  |  | Shiraz-22T | 1553 | 0        | -0.213234 |  |  |
|  |  | Shiraz-22T | 1553 | 0        | -0.213234 |  |  |
|  |  | Shiraz-22T | 1553 | 0        | -0.213234 |  |  |
|  |  | Shiraz-25T | 1698 | 0.21835  | 0         |  |  |
|  |  | Shiraz-25T | 1698 | 0.21835  | 0         |  |  |
|  |  | Shiraz-25T | 1698 | 0.21835  | 0         |  |  |
|  |  | Shiraz-25T | 1698 | 0.21835  | 0         |  |  |
|  |  | Shiraz-25T | 1698 | 0.21835  | 0         |  |  |
|  |  | Shiraz-28T | 1735 | 0.350744 | 0         |  |  |
|  |  | Shiraz-28T | 1735 | 0.350744 | 0         |  |  |
|  |  | Shiraz-28T | 1735 | 0.350744 | 0         |  |  |
|  |  | Shiraz-28T | 1735 | 0.350744 | 0         |  |  |
|  |  | Shiraz-28T | 1735 | 0.350744 | 0         |  |  |
|  |  | Shiraz-29T | 1778 | 0.120767 | 0         |  |  |
|  |  | Shiraz-29T | 1778 | 0.120767 | 0         |  |  |
|  |  | Shiraz-29T | 1778 | 0.120767 | 0         |  |  |
|  |  | Shiraz-29T | 1778 | 0.120767 | 0         |  |  |
|  |  | Shiraz-32T | 1833 | 0.551336 | 0         |  |  |
|  |  | Shiraz-32T | 1833 | 0.551336 | 0         |  |  |
|  |  | Shiraz-32T | 1833 | 0.551336 | 0         |  |  |
|  |  | Shiraz-32T | 1833 | 0.551336 | 0         |  |  |
|  |  | Shiraz-32T | 1833 | 0.551336 | 0         |  |  |
|  |  | Shiraz-38T | 1951 | 0.250891 | 0         |  |  |
|  |  | Shiraz-38T | 1951 | 0.250891 | 0         |  |  |
|  |  | Shiraz-38T | 1951 | 0.250891 | 0         |  |  |
|  |  | Shiraz-38T | 1951 | 0.250891 | 0         |  |  |
|  |  | Shiraz-38T | 1951 | 0.250891 | 0         |  |  |
|  |  | Shiraz-53T | 2078 | 0.287202 | 0         |  |  |
|  |  | Shiraz-53T | 2078 | 0.287202 | 0         |  |  |
|  |  | Shiraz-53T | 2078 | 0.287202 | 0         |  |  |
|  |  | Shiraz-53T | 2078 | 0.287202 | 0         |  |  |
|  |  | Shiraz-53T | 2078 | 0.287202 | 0         |  |  |
|  |  | Shiraz-58T | 2162 | 0.221505 | 0         |  |  |
|  |  | Shiraz-58T | 2162 | 0.221505 | 0         |  |  |
|  |  | Shiraz-58T | 2162 | 0.221505 | 0         |  |  |
|  |  | Shiraz-58T | 2162 | 0.221505 | 0         |  |  |
|  |  | Shiraz-58T | 2162 | 0.221505 | 0         |  |  |
|  |  | Shiraz-71T | 2238 | 0.603631 | 0         |  |  |
|  |  | Shiraz-71T | 2238 | 0.603631 | 0         |  |  |

|       |      |            |      |          |           |  |
|-------|------|------------|------|----------|-----------|--|
|       |      | Shiraz-71T | 2238 | 0.603631 | 0         |  |
|       |      | Shiraz-71T | 2238 | 0.603631 | 0         |  |
|       |      | Shiraz-71T | 2238 | 0.603631 | 0         |  |
| CHST7 | chrX | Shiraz-3T  | 235  | 0        | -0.28401  |  |
|       |      | Shiraz-4T  | 260  | 0        | -0.324128 |  |
|       |      | Shiraz-16T | 294  | 0.655804 | 0         |  |
|       |      | Shiraz-31T | 345  | 0.103301 | 0         |  |
|       |      | Shiraz-36T | 431  | 0        | -0.78035  |  |
|       |      | Shiraz-36T | 432  | 0        | -0.6692   |  |
|       |      | Shiraz-44T | 891  | 0        | -0.954044 |  |
|       |      | Shiraz-46T | 991  | 0.139564 | 0         |  |
|       |      | Shiraz-49T | 1166 | 0        | -0.917235 |  |
|       |      | Shiraz-77T | 1282 | 0.213849 | 0         |  |
|       |      | Shiraz-9T  | 1368 | 0.199713 | 0         |  |
|       |      | Shiraz-18T | 1455 | 0        | -0.186773 |  |
|       |      | Shiraz-22T | 1669 | 0.695915 | 0         |  |
|       |      | Shiraz-25T | 1717 | 0.420447 | 0         |  |
|       |      | Shiraz-28T | 1760 | 0.538181 | 0         |  |
|       |      | Shiraz-29T | 1800 | 0.672527 | 0         |  |
|       |      | Shiraz-32T | 1869 | 0.776805 | 0         |  |
|       |      | Shiraz-35T | 1932 | 0.507141 | 0         |  |
|       |      | Shiraz-40T | 2051 | 0.098506 | 0         |  |
|       |      | Shiraz-58T | 2221 | 0.871948 | 0         |  |
|       |      | Shiraz-71T | 2260 | 0.68394  | 0         |  |
|       |      | Shiraz-71T | 2262 | 0.986748 | 0         |  |
|       |      | Shiraz-3T  | 235  | 0        | -0.28401  |  |
|       |      | Shiraz-4T  | 260  | 0        | -0.324128 |  |
|       |      | Shiraz-16T | 294  | 0.655804 | 0         |  |
|       |      | Shiraz-31T | 345  | 0.103301 | 0         |  |
|       |      | Shiraz-36T | 431  | 0        | -0.78035  |  |
|       |      | Shiraz-36T | 432  | 0        | -0.6692   |  |
|       |      | Shiraz-44T | 891  | 0        | -0.954044 |  |
|       |      | Shiraz-46T | 991  | 0.139564 | 0         |  |
|       |      | Shiraz-49T | 1166 | 0        | -0.917235 |  |
|       |      | Shiraz-77T | 1282 | 0.213849 | 0         |  |
|       |      | Shiraz-9T  | 1368 | 0.199713 | 0         |  |
|       |      | Shiraz-18T | 1455 | 0        | -0.186773 |  |
|       |      | Shiraz-22T | 1669 | 0.695915 | 0         |  |
|       |      | Shiraz-25T | 1717 | 0.420447 | 0         |  |
|       |      | Shiraz-28T | 1760 | 0.538181 | 0         |  |
|       |      | Shiraz-29T | 1800 | 0.672527 | 0         |  |
|       |      | Shiraz-32T | 1869 | 0.776805 | 0         |  |
|       |      | Shiraz-35T | 1932 | 0.507141 | 0         |  |
|       |      | Shiraz-40T | 2051 | 0.098506 | 0         |  |
|       |      | Shiraz-58T | 2221 | 0.871948 | 0         |  |
|       |      | Shiraz-71T | 2260 | 0.68394  | 0         |  |
|       |      | Shiraz-71T | 2262 | 0.986748 | 0         |  |



|        |      |            |      |          |           |  |  |
|--------|------|------------|------|----------|-----------|--|--|
|        |      | Shiraz-3T  | 235  | 0        | -0.28401  |  |  |
|        |      | Shiraz-4T  | 260  | 0        | -0.324128 |  |  |
|        |      | Shiraz-16T | 294  | 0.655804 | 0         |  |  |
|        |      | Shiraz-31T | 345  | 0.103301 | 0         |  |  |
|        |      | Shiraz-36T | 431  | 0        | -0.78035  |  |  |
|        |      | Shiraz-36T | 432  | 0        | -0.6692   |  |  |
|        |      | Shiraz-44T | 891  | 0        | -0.954044 |  |  |
|        |      | Shiraz-46T | 991  | 0.139564 | 0         |  |  |
|        |      | Shiraz-49T | 1166 | 0        | -0.917235 |  |  |
|        |      | Shiraz-77T | 1282 | 0.213849 | 0         |  |  |
|        |      | Shiraz-9T  | 1368 | 0.199713 | 0         |  |  |
|        |      | Shiraz-18T | 1455 | 0        | -0.186773 |  |  |
|        |      | Shiraz-22T | 1669 | 0.695915 | 0         |  |  |
|        |      | Shiraz-25T | 1717 | 0.420447 | 0         |  |  |
|        |      | Shiraz-28T | 1760 | 0.538181 | 0         |  |  |
|        |      | Shiraz-29T | 1800 | 0.672527 | 0         |  |  |
|        |      | Shiraz-32T | 1869 | 0.776805 | 0         |  |  |
|        |      | Shiraz-35T | 1932 | 0.507141 | 0         |  |  |
|        |      | Shiraz-40T | 2051 | 0.098506 | 0         |  |  |
|        |      | Shiraz-58T | 2221 | 0.871948 | 0         |  |  |
|        |      | Shiraz-71T | 2260 | 0.68394  | 0         |  |  |
|        |      | Shiraz-71T | 2262 | 0.986748 | 0         |  |  |
| CITED1 | chrX | Shiraz-4T  | 261  | 0        | -0.336249 |  |  |
|        |      | Shiraz-4T  | 261  | 0        | -0.336249 |  |  |
|        |      | Shiraz-4T  | 261  | 0        | -0.336249 |  |  |
|        |      | Shiraz-16T | 295  | 0.591657 | 0         |  |  |
|        |      | Shiraz-16T | 295  | 0.591657 | 0         |  |  |
|        |      | Shiraz-16T | 295  | 0.591657 | 0         |  |  |
|        |      | Shiraz-36T | 433  | 0        | -0.803961 |  |  |
|        |      | Shiraz-36T | 433  | 0        | -0.803961 |  |  |
|        |      | Shiraz-36T | 433  | 0        | -0.803961 |  |  |
|        |      | Shiraz-44T | 899  | 0        | -1.09697  |  |  |
|        |      | Shiraz-44T | 899  | 0        | -1.09697  |  |  |
|        |      | Shiraz-44T | 899  | 0        | -1.09697  |  |  |
|        |      | Shiraz-44T | 900  | 0        | -0.584284 |  |  |
|        |      | Shiraz-44T | 900  | 0        | -0.584284 |  |  |
|        |      | Shiraz-44T | 900  | 0        | -0.584284 |  |  |
|        |      | Shiraz-49T | 1170 | 0        | -0.967436 |  |  |
|        |      | Shiraz-49T | 1170 | 0        | -0.967436 |  |  |
|        |      | Shiraz-49T | 1170 | 0        | -0.967436 |  |  |
|        |      | Shiraz-49T | 1171 | 0        | -0.612379 |  |  |
|        |      | Shiraz-49T | 1171 | 0        | -0.612379 |  |  |
|        |      | Shiraz-49T | 1171 | 0        | -0.612379 |  |  |
|        |      | Shiraz-77T | 1283 | 0.296555 | 0         |  |  |
|        |      | Shiraz-77T | 1283 | 0.296555 | 0         |  |  |
|        |      | Shiraz-77T | 1283 | 0.296555 | 0         |  |  |
|        |      | Shiraz-18T | 1457 | 0.643204 | 0         |  |  |

|  |  |            |      |          |           |  |  |
|--|--|------------|------|----------|-----------|--|--|
|  |  | Shiraz-18T | 1457 | 0.643204 | 0         |  |  |
|  |  | Shiraz-18T | 1457 | 0.643204 | 0         |  |  |
|  |  | Shiraz-22T | 1673 | 0.611783 | 0         |  |  |
|  |  | Shiraz-22T | 1673 | 0.611783 | 0         |  |  |
|  |  | Shiraz-22T | 1673 | 0.611783 | 0         |  |  |
|  |  | Shiraz-22T | 1674 | 0.887899 | 0         |  |  |
|  |  | Shiraz-22T | 1674 | 0.887899 | 0         |  |  |
|  |  | Shiraz-22T | 1674 | 0.887899 | 0         |  |  |
|  |  | Shiraz-25T | 1719 | 0.472955 | 0         |  |  |
|  |  | Shiraz-25T | 1719 | 0.472955 | 0         |  |  |
|  |  | Shiraz-25T | 1719 | 0.472955 | 0         |  |  |
|  |  | Shiraz-28T | 1762 | 0.562311 | 0         |  |  |
|  |  | Shiraz-28T | 1762 | 0.562311 | 0         |  |  |
|  |  | Shiraz-28T | 1762 | 0.562311 | 0         |  |  |
|  |  | Shiraz-29T | 1801 | 0.815343 | 0         |  |  |
|  |  | Shiraz-29T | 1801 | 0.815343 | 0         |  |  |
|  |  | Shiraz-29T | 1801 | 0.815343 | 0         |  |  |
|  |  | Shiraz-32T | 1870 | 0.729766 | 0         |  |  |
|  |  | Shiraz-32T | 1870 | 0.729766 | 0         |  |  |
|  |  | Shiraz-32T | 1870 | 0.729766 | 0         |  |  |
|  |  | Shiraz-35T | 1933 | 0.488535 | 0         |  |  |
|  |  | Shiraz-35T | 1933 | 0.488535 | 0         |  |  |
|  |  | Shiraz-35T | 1933 | 0.488535 | 0         |  |  |
|  |  | Shiraz-58T | 2223 | 0.833364 | 0         |  |  |
|  |  | Shiraz-58T | 2223 | 0.833364 | 0         |  |  |
|  |  | Shiraz-58T | 2223 | 0.833364 | 0         |  |  |
|  |  | Shiraz-58T | 2224 | 1.076575 | 0         |  |  |
|  |  | Shiraz-58T | 2224 | 1.076575 | 0         |  |  |
|  |  | Shiraz-58T | 2224 | 1.076575 | 0         |  |  |
|  |  | Shiraz-71T | 2263 | 0.975531 | 0         |  |  |
|  |  | Shiraz-71T | 2263 | 0.975531 | 0         |  |  |
|  |  | Shiraz-71T | 2263 | 0.975531 | 0         |  |  |
|  |  | Shiraz-4T  | 261  | 0        | -0.336249 |  |  |
|  |  | Shiraz-4T  | 261  | 0        | -0.336249 |  |  |
|  |  | Shiraz-4T  | 261  | 0        | -0.336249 |  |  |
|  |  | Shiraz-16T | 295  | 0.591657 | 0         |  |  |
|  |  | Shiraz-16T | 295  | 0.591657 | 0         |  |  |
|  |  | Shiraz-16T | 295  | 0.591657 | 0         |  |  |
|  |  | Shiraz-36T | 433  | 0        | -0.803961 |  |  |
|  |  | Shiraz-36T | 433  | 0        | -0.803961 |  |  |
|  |  | Shiraz-36T | 433  | 0        | -0.803961 |  |  |
|  |  | Shiraz-44T | 899  | 0        | -1.09697  |  |  |
|  |  | Shiraz-44T | 899  | 0        | -1.09697  |  |  |
|  |  | Shiraz-44T | 899  | 0        | -1.09697  |  |  |
|  |  | Shiraz-44T | 900  | 0        | -0.584284 |  |  |
|  |  | Shiraz-44T | 900  | 0        | -0.584284 |  |  |
|  |  | Shiraz-44T | 900  | 0        | -0.584284 |  |  |

|  |            |      |          |           |  |
|--|------------|------|----------|-----------|--|
|  | Shiraz-49T | 1170 | 0        | -0.967436 |  |
|  | Shiraz-49T | 1170 | 0        | -0.967436 |  |
|  | Shiraz-49T | 1170 | 0        | -0.967436 |  |
|  | Shiraz-49T | 1171 | 0        | -0.612379 |  |
|  | Shiraz-49T | 1171 | 0        | -0.612379 |  |
|  | Shiraz-49T | 1171 | 0        | -0.612379 |  |
|  | Shiraz-77T | 1283 | 0.296555 | 0         |  |
|  | Shiraz-77T | 1283 | 0.296555 | 0         |  |
|  | Shiraz-77T | 1283 | 0.296555 | 0         |  |
|  | Shiraz-18T | 1457 | 0.643204 | 0         |  |
|  | Shiraz-18T | 1457 | 0.643204 | 0         |  |
|  | Shiraz-18T | 1457 | 0.643204 | 0         |  |
|  | Shiraz-22T | 1673 | 0.611783 | 0         |  |
|  | Shiraz-22T | 1673 | 0.611783 | 0         |  |
|  | Shiraz-22T | 1673 | 0.611783 | 0         |  |
|  | Shiraz-22T | 1674 | 0.887899 | 0         |  |
|  | Shiraz-22T | 1674 | 0.887899 | 0         |  |
|  | Shiraz-22T | 1674 | 0.887899 | 0         |  |
|  | Shiraz-25T | 1719 | 0.472955 | 0         |  |
|  | Shiraz-25T | 1719 | 0.472955 | 0         |  |
|  | Shiraz-25T | 1719 | 0.472955 | 0         |  |
|  | Shiraz-28T | 1762 | 0.562311 | 0         |  |
|  | Shiraz-28T | 1762 | 0.562311 | 0         |  |
|  | Shiraz-28T | 1762 | 0.562311 | 0         |  |
|  | Shiraz-29T | 1801 | 0.815343 | 0         |  |
|  | Shiraz-29T | 1801 | 0.815343 | 0         |  |
|  | Shiraz-29T | 1801 | 0.815343 | 0         |  |
|  | Shiraz-32T | 1870 | 0.729766 | 0         |  |
|  | Shiraz-32T | 1870 | 0.729766 | 0         |  |
|  | Shiraz-32T | 1870 | 0.729766 | 0         |  |
|  | Shiraz-35T | 1933 | 0.488535 | 0         |  |
|  | Shiraz-35T | 1933 | 0.488535 | 0         |  |
|  | Shiraz-35T | 1933 | 0.488535 | 0         |  |
|  | Shiraz-58T | 2223 | 0.833364 | 0         |  |
|  | Shiraz-58T | 2223 | 0.833364 | 0         |  |
|  | Shiraz-58T | 2223 | 0.833364 | 0         |  |
|  | Shiraz-58T | 2224 | 1.076575 | 0         |  |
|  | Shiraz-58T | 2224 | 1.076575 | 0         |  |
|  | Shiraz-58T | 2224 | 1.076575 | 0         |  |
|  | Shiraz-71T | 2263 | 0.975531 | 0         |  |
|  | Shiraz-71T | 2263 | 0.975531 | 0         |  |
|  | Shiraz-71T | 2263 | 0.975531 | 0         |  |
|  | Shiraz-4T  | 261  | 0        | -0.336249 |  |
|  | Shiraz-4T  | 261  | 0        | -0.336249 |  |
|  | Shiraz-4T  | 261  | 0        | -0.336249 |  |
|  | Shiraz-16T | 295  | 0.591657 | 0         |  |
|  | Shiraz-16T | 295  | 0.591657 | 0         |  |

|  |            |      |          |           |  |
|--|------------|------|----------|-----------|--|
|  | Shiraz-16T | 295  | 0.591657 | 0         |  |
|  | Shiraz-36T | 433  | 0        | -0.803961 |  |
|  | Shiraz-36T | 433  | 0        | -0.803961 |  |
|  | Shiraz-36T | 433  | 0        | -0.803961 |  |
|  | Shiraz-44T | 899  | 0        | -1.09697  |  |
|  | Shiraz-44T | 899  | 0        | -1.09697  |  |
|  | Shiraz-44T | 899  | 0        | -1.09697  |  |
|  | Shiraz-44T | 900  | 0        | -0.584284 |  |
|  | Shiraz-44T | 900  | 0        | -0.584284 |  |
|  | Shiraz-44T | 900  | 0        | -0.584284 |  |
|  | Shiraz-49T | 1170 | 0        | -0.967436 |  |
|  | Shiraz-49T | 1170 | 0        | -0.967436 |  |
|  | Shiraz-49T | 1170 | 0        | -0.967436 |  |
|  | Shiraz-49T | 1171 | 0        | -0.612379 |  |
|  | Shiraz-49T | 1171 | 0        | -0.612379 |  |
|  | Shiraz-49T | 1171 | 0        | -0.612379 |  |
|  | Shiraz-77T | 1283 | 0.296555 | 0         |  |
|  | Shiraz-77T | 1283 | 0.296555 | 0         |  |
|  | Shiraz-77T | 1283 | 0.296555 | 0         |  |
|  | Shiraz-18T | 1457 | 0.643204 | 0         |  |
|  | Shiraz-18T | 1457 | 0.643204 | 0         |  |
|  | Shiraz-18T | 1457 | 0.643204 | 0         |  |
|  | Shiraz-22T | 1673 | 0.611783 | 0         |  |
|  | Shiraz-22T | 1673 | 0.611783 | 0         |  |
|  | Shiraz-22T | 1673 | 0.611783 | 0         |  |
|  | Shiraz-22T | 1674 | 0.887899 | 0         |  |
|  | Shiraz-22T | 1674 | 0.887899 | 0         |  |
|  | Shiraz-22T | 1674 | 0.887899 | 0         |  |
|  | Shiraz-22T | 1674 | 0.887899 | 0         |  |
|  | Shiraz-25T | 1719 | 0.472955 | 0         |  |
|  | Shiraz-25T | 1719 | 0.472955 | 0         |  |
|  | Shiraz-25T | 1719 | 0.472955 | 0         |  |
|  | Shiraz-28T | 1762 | 0.562311 | 0         |  |
|  | Shiraz-28T | 1762 | 0.562311 | 0         |  |
|  | Shiraz-28T | 1762 | 0.562311 | 0         |  |
|  | Shiraz-29T | 1801 | 0.815343 | 0         |  |
|  | Shiraz-29T | 1801 | 0.815343 | 0         |  |
|  | Shiraz-29T | 1801 | 0.815343 | 0         |  |
|  | Shiraz-32T | 1870 | 0.729766 | 0         |  |
|  | Shiraz-32T | 1870 | 0.729766 | 0         |  |
|  | Shiraz-32T | 1870 | 0.729766 | 0         |  |
|  | Shiraz-35T | 1933 | 0.488535 | 0         |  |
|  | Shiraz-35T | 1933 | 0.488535 | 0         |  |
|  | Shiraz-35T | 1933 | 0.488535 | 0         |  |
|  | Shiraz-58T | 2223 | 0.833364 | 0         |  |
|  | Shiraz-58T | 2223 | 0.833364 | 0         |  |
|  | Shiraz-58T | 2223 | 0.833364 | 0         |  |
|  | Shiraz-58T | 2224 | 1.076575 | 0         |  |

|       |      |            |      |          |           |  |
|-------|------|------------|------|----------|-----------|--|
|       |      | Shiraz-58T | 2224 | 1.076575 | 0         |  |
|       |      | Shiraz-58T | 2224 | 1.076575 | 0         |  |
|       |      | Shiraz-71T | 2263 | 0.975531 | 0         |  |
|       |      | Shiraz-71T | 2263 | 0.975531 | 0         |  |
|       |      | Shiraz-71T | 2263 | 0.975531 | 0         |  |
| CLCN1 | chr7 | Shiraz-3T  | 90   | 0.219276 | 0         |  |
|       |      | Shiraz-4T  | 253  | 0.372918 | 0         |  |
|       |      | Shiraz-36T | 378  | 0.179558 | 0         |  |
|       |      | Shiraz-46T | 943  | 0.093799 | 0         |  |
|       |      | Shiraz-77T | 1225 | 0        | -0.117922 |  |
|       |      | Shiraz-9T  | 1325 | 0.221899 | 0         |  |
|       |      | Shiraz-18T | 1434 | 0.244465 | 0         |  |
|       |      | Shiraz-25T | 1698 | 0.21835  | 0         |  |
|       |      | Shiraz-28T | 1735 | 0.350744 | 0         |  |
|       |      | Shiraz-29T | 1778 | 0.120767 | 0         |  |
|       |      | Shiraz-32T | 1833 | 0.551336 | 0         |  |
|       |      | Shiraz-38T | 1951 | 0.250891 | 0         |  |
|       |      | Shiraz-53T | 2078 | 0.287202 | 0         |  |
|       |      | Shiraz-58T | 2162 | 0.221505 | 0         |  |
|       |      | Shiraz-71T | 2238 | 0.603631 | 0         |  |
|       |      | Shiraz-3T  | 90   | 0.219276 | 0         |  |
|       |      | Shiraz-4T  | 253  | 0.372918 | 0         |  |
|       |      | Shiraz-36T | 378  | 0.179558 | 0         |  |
|       |      | Shiraz-46T | 943  | 0.093799 | 0         |  |
|       |      | Shiraz-77T | 1225 | 0        | -0.117922 |  |
|       |      | Shiraz-9T  | 1325 | 0.221899 | 0         |  |
|       |      | Shiraz-18T | 1434 | 0.244465 | 0         |  |
|       |      | Shiraz-25T | 1698 | 0.21835  | 0         |  |
|       |      | Shiraz-28T | 1735 | 0.350744 | 0         |  |
|       |      | Shiraz-29T | 1778 | 0.120767 | 0         |  |
|       |      | Shiraz-32T | 1833 | 0.551336 | 0         |  |
|       |      | Shiraz-38T | 1951 | 0.250891 | 0         |  |
|       |      | Shiraz-53T | 2078 | 0.287202 | 0         |  |
|       |      | Shiraz-58T | 2162 | 0.221505 | 0         |  |
|       |      | Shiraz-71T | 2238 | 0.603631 | 0         |  |
|       |      | Shiraz-3T  | 90   | 0.219276 | 0         |  |
|       |      | Shiraz-4T  | 253  | 0.372918 | 0         |  |
|       |      | Shiraz-36T | 378  | 0.179558 | 0         |  |
|       |      | Shiraz-46T | 943  | 0.093799 | 0         |  |
|       |      | Shiraz-77T | 1225 | 0        | -0.117922 |  |
|       |      | Shiraz-9T  | 1325 | 0.221899 | 0         |  |
|       |      | Shiraz-18T | 1434 | 0.244465 | 0         |  |
|       |      | Shiraz-25T | 1698 | 0.21835  | 0         |  |
|       |      | Shiraz-28T | 1735 | 0.350744 | 0         |  |
|       |      | Shiraz-29T | 1778 | 0.120767 | 0         |  |
|       |      | Shiraz-32T | 1833 | 0.551336 | 0         |  |
|       |      | Shiraz-38T | 1951 | 0.250891 | 0         |  |

|       |      |            |      |          |           |  |
|-------|------|------------|------|----------|-----------|--|
|       |      | Shiraz-53T | 2078 | 0.287202 | 0         |  |
|       |      | Shiraz-58T | 2162 | 0.221505 | 0         |  |
|       |      | Shiraz-71T | 2238 | 0.603631 | 0         |  |
| CLCN4 | chrX | Shiraz-3T  | 235  | 0        | -0.28401  |  |
|       |      | Shiraz-4T  | 260  | 0        | -0.324128 |  |
|       |      | Shiraz-16T | 294  | 0.655804 | 0         |  |
|       |      | Shiraz-36T | 431  | 0        | -0.78035  |  |
|       |      | Shiraz-44T | 891  | 0        | -0.954044 |  |
|       |      | Shiraz-49T | 1166 | 0        | -0.917235 |  |
|       |      | Shiraz-9T  | 1368 | 0.199713 | 0         |  |
|       |      | Shiraz-18T | 1455 | 0        | -0.186773 |  |
|       |      | Shiraz-22T | 1669 | 0.695915 | 0         |  |
|       |      | Shiraz-22T | 1670 | 1.188333 | 0         |  |
|       |      | Shiraz-25T | 1717 | 0.420447 | 0         |  |
|       |      | Shiraz-28T | 1760 | 0.538181 | 0         |  |
|       |      | Shiraz-29T | 1800 | 0.672527 | 0         |  |
|       |      | Shiraz-32T | 1869 | 0.776805 | 0         |  |
|       |      | Shiraz-35T | 1932 | 0.507141 | 0         |  |
|       |      | Shiraz-40T | 2051 | 0.098506 | 0         |  |
|       |      | Shiraz-58T | 2221 | 0.871948 | 0         |  |
|       |      | Shiraz-71T | 2260 | 0.68394  | 0         |  |
|       |      | Shiraz-71T | 2261 | 0.508399 | 0         |  |
|       |      | Shiraz-3T  | 235  | 0        | -0.28401  |  |
|       |      | Shiraz-4T  | 260  | 0        | -0.324128 |  |
|       |      | Shiraz-16T | 294  | 0.655804 | 0         |  |
|       |      | Shiraz-36T | 431  | 0        | -0.78035  |  |
|       |      | Shiraz-44T | 891  | 0        | -0.954044 |  |
|       |      | Shiraz-49T | 1166 | 0        | -0.917235 |  |
|       |      | Shiraz-9T  | 1368 | 0.199713 | 0         |  |
|       |      | Shiraz-18T | 1455 | 0        | -0.186773 |  |
|       |      | Shiraz-22T | 1669 | 0.695915 | 0         |  |
|       |      | Shiraz-22T | 1670 | 1.188333 | 0         |  |
|       |      | Shiraz-25T | 1717 | 0.420447 | 0         |  |
|       |      | Shiraz-28T | 1760 | 0.538181 | 0         |  |
|       |      | Shiraz-29T | 1800 | 0.672527 | 0         |  |
|       |      | Shiraz-32T | 1869 | 0.776805 | 0         |  |
|       |      | Shiraz-35T | 1932 | 0.507141 | 0         |  |
|       |      | Shiraz-40T | 2051 | 0.098506 | 0         |  |
|       |      | Shiraz-58T | 2221 | 0.871948 | 0         |  |
|       |      | Shiraz-71T | 2260 | 0.68394  | 0         |  |
|       |      | Shiraz-71T | 2261 | 0.508399 | 0         |  |
|       |      | Shiraz-3T  | 235  | 0        | -0.28401  |  |
|       |      | Shiraz-4T  | 260  | 0        | -0.324128 |  |
|       |      | Shiraz-16T | 294  | 0.655804 | 0         |  |
|       |      | Shiraz-36T | 431  | 0        | -0.78035  |  |
|       |      | Shiraz-44T | 891  | 0        | -0.954044 |  |
|       |      | Shiraz-49T | 1166 | 0        | -0.917235 |  |

|        |      |            |      |          |           |  |  |
|--------|------|------------|------|----------|-----------|--|--|
|        |      | Shiraz-9T  | 1368 | 0.199713 | 0         |  |  |
|        |      | Shiraz-18T | 1455 | 0        | -0.186773 |  |  |
|        |      | Shiraz-22T | 1669 | 0.695915 | 0         |  |  |
|        |      | Shiraz-22T | 1670 | 1.188333 | 0         |  |  |
|        |      | Shiraz-25T | 1717 | 0.420447 | 0         |  |  |
|        |      | Shiraz-28T | 1760 | 0.538181 | 0         |  |  |
|        |      | Shiraz-29T | 1800 | 0.672527 | 0         |  |  |
|        |      | Shiraz-32T | 1869 | 0.776805 | 0         |  |  |
|        |      | Shiraz-35T | 1932 | 0.507141 | 0         |  |  |
|        |      | Shiraz-40T | 2051 | 0.098506 | 0         |  |  |
|        |      | Shiraz-58T | 2221 | 0.871948 | 0         |  |  |
|        |      | Shiraz-71T | 2260 | 0.68394  | 0         |  |  |
|        |      | Shiraz-71T | 2261 | 0.508399 | 0         |  |  |
| CLDN12 | chr7 | Shiraz-3T  | 90   | 0.219276 | 0         |  |  |
|        |      | Shiraz-3T  | 93   | 0        | -0.058023 |  |  |
|        |      | Shiraz-4T  | 253  | 0.372918 | 0         |  |  |
|        |      | Shiraz-36T | 378  | 0.179558 | 0         |  |  |
|        |      | Shiraz-36T | 380  | 0.083883 | 0         |  |  |
|        |      | Shiraz-44T | 638  | 0        | -0.433476 |  |  |
|        |      | Shiraz-46T | 943  | 0.093799 | 0         |  |  |
|        |      | Shiraz-46T | 945  | 0        | -0.014838 |  |  |
|        |      | Shiraz-47T | 1029 | 0        | -0.096586 |  |  |
|        |      | Shiraz-49T | 1119 | 0        | -0.157331 |  |  |
|        |      | Shiraz-77T | 1225 | 0        | -0.117922 |  |  |
|        |      | Shiraz-77T | 1226 | 0        | -0.233724 |  |  |
|        |      | Shiraz-18T | 1434 | 0.244465 | 0         |  |  |
|        |      | Shiraz-22T | 1549 | 0        | -0.319623 |  |  |
|        |      | Shiraz-25T | 1698 | 0.21835  | 0         |  |  |
|        |      | Shiraz-28T | 1735 | 0.350744 | 0         |  |  |
|        |      | Shiraz-29T | 1778 | 0.120767 | 0         |  |  |
|        |      | Shiraz-32T | 1833 | 0.551336 | 0         |  |  |
|        |      | Shiraz-38T | 1951 | 0.250891 | 0         |  |  |
|        |      | Shiraz-53T | 2078 | 0.287202 | 0         |  |  |
|        |      | Shiraz-58T | 2159 | 0        | -0.219521 |  |  |
|        |      | Shiraz-71T | 2238 | 0.603631 | 0         |  |  |
|        |      | Shiraz-3T  | 90   | 0.219276 | 0         |  |  |
|        |      | Shiraz-3T  | 93   | 0        | -0.058023 |  |  |
|        |      | Shiraz-4T  | 253  | 0.372918 | 0         |  |  |
|        |      | Shiraz-36T | 378  | 0.179558 | 0         |  |  |
|        |      | Shiraz-36T | 380  | 0.083883 | 0         |  |  |
|        |      | Shiraz-44T | 638  | 0        | -0.433476 |  |  |
|        |      | Shiraz-46T | 943  | 0.093799 | 0         |  |  |
|        |      | Shiraz-46T | 945  | 0        | -0.014838 |  |  |
|        |      | Shiraz-47T | 1029 | 0        | -0.096586 |  |  |
|        |      | Shiraz-49T | 1119 | 0        | -0.157331 |  |  |
|        |      | Shiraz-77T | 1225 | 0        | -0.117922 |  |  |
|        |      | Shiraz-77T | 1226 | 0        | -0.233724 |  |  |

|        |      |            |      |          |           |  |  |
|--------|------|------------|------|----------|-----------|--|--|
|        |      | Shiraz-18T | 1434 | 0.244465 | 0         |  |  |
|        |      | Shiraz-22T | 1549 | 0        | -0.319623 |  |  |
|        |      | Shiraz-25T | 1698 | 0.21835  | 0         |  |  |
|        |      | Shiraz-28T | 1735 | 0.350744 | 0         |  |  |
|        |      | Shiraz-29T | 1778 | 0.120767 | 0         |  |  |
|        |      | Shiraz-32T | 1833 | 0.551336 | 0         |  |  |
|        |      | Shiraz-38T | 1951 | 0.250891 | 0         |  |  |
|        |      | Shiraz-53T | 2078 | 0.287202 | 0         |  |  |
|        |      | Shiraz-58T | 2159 | 0        | -0.219521 |  |  |
|        |      | Shiraz-71T | 2238 | 0.603631 | 0         |  |  |
|        |      | Shiraz-3T  | 90   | 0.219276 | 0         |  |  |
|        |      | Shiraz-3T  | 93   | 0        | -0.058023 |  |  |
|        |      | Shiraz-4T  | 253  | 0.372918 | 0         |  |  |
|        |      | Shiraz-36T | 378  | 0.179558 | 0         |  |  |
|        |      | Shiraz-36T | 380  | 0.083883 | 0         |  |  |
|        |      | Shiraz-44T | 638  | 0        | -0.433476 |  |  |
|        |      | Shiraz-46T | 943  | 0.093799 | 0         |  |  |
|        |      | Shiraz-46T | 945  | 0        | -0.014838 |  |  |
|        |      | Shiraz-47T | 1029 | 0        | -0.096586 |  |  |
|        |      | Shiraz-49T | 1119 | 0        | -0.157331 |  |  |
|        |      | Shiraz-77T | 1225 | 0        | -0.117922 |  |  |
|        |      | Shiraz-77T | 1226 | 0        | -0.233724 |  |  |
|        |      | Shiraz-18T | 1434 | 0.244465 | 0         |  |  |
|        |      | Shiraz-22T | 1549 | 0        | -0.319623 |  |  |
|        |      | Shiraz-25T | 1698 | 0.21835  | 0         |  |  |
|        |      | Shiraz-28T | 1735 | 0.350744 | 0         |  |  |
|        |      | Shiraz-29T | 1778 | 0.120767 | 0         |  |  |
|        |      | Shiraz-32T | 1833 | 0.551336 | 0         |  |  |
|        |      | Shiraz-38T | 1951 | 0.250891 | 0         |  |  |
|        |      | Shiraz-53T | 2078 | 0.287202 | 0         |  |  |
|        |      | Shiraz-58T | 2159 | 0        | -0.219521 |  |  |
|        |      | Shiraz-71T | 2238 | 0.603631 | 0         |  |  |
| CLDN15 | chr7 | Shiraz-3T  | 90   | 0.219276 | 0         |  |  |
|        |      | Shiraz-3T  | 94   | 0.74735  | 0         |  |  |
|        |      | Shiraz-4T  | 253  | 0.372918 | 0         |  |  |
|        |      | Shiraz-31T | 316  | 0.219196 | 0         |  |  |
|        |      | Shiraz-36T | 378  | 0.179558 | 0         |  |  |
|        |      | Shiraz-36T | 381  | 0.332628 | 0         |  |  |
|        |      | Shiraz-44T | 639  | 1.035032 | 0         |  |  |
|        |      | Shiraz-46T | 943  | 0.093799 | 0         |  |  |
|        |      | Shiraz-46T | 946  | 0.299835 | 0         |  |  |
|        |      | Shiraz-47T | 1030 | 0.257728 | 0         |  |  |
|        |      | Shiraz-49T | 1120 | 0.281656 | 0         |  |  |
|        |      | Shiraz-77T | 1225 | 0        | -0.117922 |  |  |
|        |      | Shiraz-77T | 1227 | 0.196445 | 0         |  |  |
|        |      | Shiraz-9T  | 1324 | 0.679266 | 0         |  |  |
|        |      | Shiraz-18T | 1434 | 0.244465 | 0         |  |  |



|  |            |      |          |           |  |
|--|------------|------|----------|-----------|--|
|  | Shiraz-22T | 1549 | 0        | -0.319623 |  |
|  | Shiraz-22T | 1551 | 0.324011 | 0         |  |
|  | Shiraz-25T | 1698 | 0.21835  | 0         |  |
|  | Shiraz-28T | 1735 | 0.350744 | 0         |  |
|  | Shiraz-29T | 1778 | 0.120767 | 0         |  |
|  | Shiraz-32T | 1833 | 0.551336 | 0         |  |
|  | Shiraz-32T | 1834 | 1.485392 | 0         |  |
|  | Shiraz-38T | 1951 | 0.250891 | 0         |  |
|  | Shiraz-53T | 2078 | 0.287202 | 0         |  |
|  | Shiraz-58T | 2160 | 0.399007 | 0         |  |
|  | Shiraz-71T | 2238 | 0.603631 | 0         |  |
|  | Shiraz-3T  | 90   | 0.219276 | 0         |  |
|  | Shiraz-3T  | 94   | 0.74735  | 0         |  |
|  | Shiraz-4T  | 253  | 0.372918 | 0         |  |
|  | Shiraz-31T | 316  | 0.219196 | 0         |  |
|  | Shiraz-36T | 378  | 0.179558 | 0         |  |
|  | Shiraz-36T | 381  | 0.332628 | 0         |  |
|  | Shiraz-44T | 639  | 1.035032 | 0         |  |
|  | Shiraz-46T | 943  | 0.093799 | 0         |  |
|  | Shiraz-46T | 946  | 0.299835 | 0         |  |
|  | Shiraz-47T | 1030 | 0.257728 | 0         |  |
|  | Shiraz-49T | 1120 | 0.281656 | 0         |  |
|  | Shiraz-77T | 1225 | 0        | -0.117922 |  |
|  | Shiraz-77T | 1227 | 0.196445 | 0         |  |
|  | Shiraz-9T  | 1324 | 0.679266 | 0         |  |
|  | Shiraz-18T | 1434 | 0.244465 | 0         |  |
|  | Shiraz-22T | 1549 | 0        | -0.319623 |  |
|  | Shiraz-22T | 1551 | 0.324011 | 0         |  |
|  | Shiraz-25T | 1698 | 0.21835  | 0         |  |
|  | Shiraz-28T | 1735 | 0.350744 | 0         |  |
|  | Shiraz-29T | 1778 | 0.120767 | 0         |  |
|  | Shiraz-32T | 1833 | 0.551336 | 0         |  |
|  | Shiraz-32T | 1834 | 1.485392 | 0         |  |
|  | Shiraz-38T | 1951 | 0.250891 | 0         |  |
|  | Shiraz-53T | 2078 | 0.287202 | 0         |  |
|  | Shiraz-58T | 2160 | 0.399007 | 0         |  |
|  | Shiraz-71T | 2238 | 0.603631 | 0         |  |
|  | Shiraz-3T  | 90   | 0.219276 | 0         |  |
|  | Shiraz-3T  | 94   | 0.74735  | 0         |  |
|  | Shiraz-4T  | 253  | 0.372918 | 0         |  |
|  | Shiraz-31T | 316  | 0.219196 | 0         |  |
|  | Shiraz-36T | 378  | 0.179558 | 0         |  |
|  | Shiraz-36T | 381  | 0.332628 | 0         |  |
|  | Shiraz-44T | 639  | 1.035032 | 0         |  |
|  | Shiraz-46T | 943  | 0.093799 | 0         |  |
|  | Shiraz-46T | 946  | 0.299835 | 0         |  |
|  | Shiraz-47T | 1030 | 0.257728 | 0         |  |

|       |      |            |      |          |           |  |  |
|-------|------|------------|------|----------|-----------|--|--|
|       |      | Shiraz-49T | 1120 | 0.281656 | 0         |  |  |
|       |      | Shiraz-77T | 1225 | 0        | -0.117922 |  |  |
|       |      | Shiraz-77T | 1227 | 0.196445 | 0         |  |  |
|       |      | Shiraz-9T  | 1324 | 0.679266 | 0         |  |  |
|       |      | Shiraz-18T | 1434 | 0.244465 | 0         |  |  |
|       |      | Shiraz-22T | 1549 | 0        | -0.319623 |  |  |
|       |      | Shiraz-22T | 1551 | 0.324011 | 0         |  |  |
|       |      | Shiraz-25T | 1698 | 0.21835  | 0         |  |  |
|       |      | Shiraz-28T | 1735 | 0.350744 | 0         |  |  |
|       |      | Shiraz-29T | 1778 | 0.120767 | 0         |  |  |
|       |      | Shiraz-32T | 1833 | 0.551336 | 0         |  |  |
|       |      | Shiraz-32T | 1834 | 1.485392 | 0         |  |  |
|       |      | Shiraz-38T | 1951 | 0.250891 | 0         |  |  |
|       |      | Shiraz-53T | 2078 | 0.287202 | 0         |  |  |
|       |      | Shiraz-58T | 2160 | 0.399007 | 0         |  |  |
|       |      | Shiraz-71T | 2238 | 0.603631 | 0         |  |  |
| CLDN2 | chrX | Shiraz-3T  | 242  | 0        | -0.336434 |  |  |
|       |      | Shiraz-4T  | 261  | 0        | -0.336249 |  |  |
|       |      | Shiraz-16T | 295  | 0.591657 | 0         |  |  |
|       |      | Shiraz-36T | 433  | 0        | -0.803961 |  |  |
|       |      | Shiraz-44T | 899  | 0        | -1.09697  |  |  |
|       |      | Shiraz-49T | 1170 | 0        | -0.967436 |  |  |
|       |      | Shiraz-18T | 1457 | 0.643204 | 0         |  |  |
|       |      | Shiraz-22T | 1673 | 0.611783 | 0         |  |  |
|       |      | Shiraz-25T | 1719 | 0.472955 | 0         |  |  |
|       |      | Shiraz-28T | 1762 | 0.562311 | 0         |  |  |
|       |      | Shiraz-29T | 1801 | 0.815343 | 0         |  |  |
|       |      | Shiraz-32T | 1870 | 0.729766 | 0         |  |  |
|       |      | Shiraz-35T | 1933 | 0.488535 | 0         |  |  |
|       |      | Shiraz-58T | 2223 | 0.833364 | 0         |  |  |
|       |      | Shiraz-71T | 2263 | 0.975531 | 0         |  |  |
|       |      | Shiraz-3T  | 242  | 0        | -0.336434 |  |  |
|       |      | Shiraz-4T  | 261  | 0        | -0.336249 |  |  |
|       |      | Shiraz-16T | 295  | 0.591657 | 0         |  |  |
|       |      | Shiraz-36T | 433  | 0        | -0.803961 |  |  |
|       |      | Shiraz-44T | 899  | 0        | -1.09697  |  |  |
|       |      | Shiraz-49T | 1170 | 0        | -0.967436 |  |  |
|       |      | Shiraz-18T | 1457 | 0.643204 | 0         |  |  |
|       |      | Shiraz-22T | 1673 | 0.611783 | 0         |  |  |
|       |      | Shiraz-25T | 1719 | 0.472955 | 0         |  |  |
|       |      | Shiraz-28T | 1762 | 0.562311 | 0         |  |  |
|       |      | Shiraz-29T | 1801 | 0.815343 | 0         |  |  |
|       |      | Shiraz-32T | 1870 | 0.729766 | 0         |  |  |
|       |      | Shiraz-35T | 1933 | 0.488535 | 0         |  |  |
|       |      | Shiraz-58T | 2223 | 0.833364 | 0         |  |  |
|       |      | Shiraz-71T | 2263 | 0.975531 | 0         |  |  |
|       |      | Shiraz-3T  | 242  | 0        | -0.336434 |  |  |

|        |      |            |      |          |           |  |  |
|--------|------|------------|------|----------|-----------|--|--|
|        |      | Shiraz-4T  | 261  | 0        | -0.336249 |  |  |
|        |      | Shiraz-16T | 295  | 0.591657 | 0         |  |  |
|        |      | Shiraz-36T | 433  | 0        | -0.803961 |  |  |
|        |      | Shiraz-44T | 899  | 0        | -1.09697  |  |  |
|        |      | Shiraz-49T | 1170 | 0        | -0.967436 |  |  |
|        |      | Shiraz-18T | 1457 | 0.643204 | 0         |  |  |
|        |      | Shiraz-22T | 1673 | 0.611783 | 0         |  |  |
|        |      | Shiraz-25T | 1719 | 0.472955 | 0         |  |  |
|        |      | Shiraz-28T | 1762 | 0.562311 | 0         |  |  |
|        |      | Shiraz-29T | 1801 | 0.815343 | 0         |  |  |
|        |      | Shiraz-32T | 1870 | 0.729766 | 0         |  |  |
|        |      | Shiraz-35T | 1933 | 0.488535 | 0         |  |  |
|        |      | Shiraz-58T | 2223 | 0.833364 | 0         |  |  |
|        |      | Shiraz-71T | 2263 | 0.975531 | 0         |  |  |
| CLEC2L | chr7 | Shiraz-3T  | 90   | 0.219276 | 0         |  |  |
|        |      | Shiraz-3T  | 97   | 0.496001 | 0         |  |  |
|        |      | Shiraz-4T  | 253  | 0.372918 | 0         |  |  |
|        |      | Shiraz-31T | 318  | 0.254373 | 0         |  |  |
|        |      | Shiraz-36T | 378  | 0.179558 | 0         |  |  |
|        |      | Shiraz-36T | 383  | 0.374586 | 0         |  |  |
|        |      | Shiraz-44T | 644  | 0.496536 | 0         |  |  |
|        |      | Shiraz-46T | 943  | 0.093799 | 0         |  |  |
|        |      | Shiraz-47T | 1033 | 0.220267 | 0         |  |  |
|        |      | Shiraz-77T | 1225 | 0        | -0.117922 |  |  |
|        |      | Shiraz-77T | 1230 | 0.149651 | 0         |  |  |
|        |      | Shiraz-9T  | 1325 | 0.221899 | 0         |  |  |
|        |      | Shiraz-18T | 1434 | 0.244465 | 0         |  |  |
|        |      | Shiraz-25T | 1698 | 0.21835  | 0         |  |  |
|        |      | Shiraz-28T | 1735 | 0.350744 | 0         |  |  |
|        |      | Shiraz-29T | 1778 | 0.120767 | 0         |  |  |
|        |      | Shiraz-32T | 1833 | 0.551336 | 0         |  |  |
|        |      | Shiraz-38T | 1951 | 0.250891 | 0         |  |  |
|        |      | Shiraz-53T | 2078 | 0.287202 | 0         |  |  |
|        |      | Shiraz-58T | 2162 | 0.221505 | 0         |  |  |
|        |      | Shiraz-71T | 2238 | 0.603631 | 0         |  |  |
|        |      | Shiraz-3T  | 90   | 0.219276 | 0         |  |  |
|        |      | Shiraz-3T  | 97   | 0.496001 | 0         |  |  |
|        |      | Shiraz-4T  | 253  | 0.372918 | 0         |  |  |
|        |      | Shiraz-31T | 318  | 0.254373 | 0         |  |  |
|        |      | Shiraz-36T | 378  | 0.179558 | 0         |  |  |
|        |      | Shiraz-36T | 383  | 0.374586 | 0         |  |  |
|        |      | Shiraz-44T | 644  | 0.496536 | 0         |  |  |
|        |      | Shiraz-46T | 943  | 0.093799 | 0         |  |  |
|        |      | Shiraz-47T | 1033 | 0.220267 | 0         |  |  |
|        |      | Shiraz-77T | 1225 | 0        | -0.117922 |  |  |
|        |      | Shiraz-77T | 1230 | 0.149651 | 0         |  |  |
|        |      | Shiraz-9T  | 1325 | 0.221899 | 0         |  |  |

|        |      |            |      |          |           |  |
|--------|------|------------|------|----------|-----------|--|
|        |      | Shiraz-18T | 1434 | 0.244465 | 0         |  |
|        |      | Shiraz-25T | 1698 | 0.21835  | 0         |  |
|        |      | Shiraz-28T | 1735 | 0.350744 | 0         |  |
|        |      | Shiraz-29T | 1778 | 0.120767 | 0         |  |
|        |      | Shiraz-32T | 1833 | 0.551336 | 0         |  |
|        |      | Shiraz-38T | 1951 | 0.250891 | 0         |  |
|        |      | Shiraz-53T | 2078 | 0.287202 | 0         |  |
|        |      | Shiraz-58T | 2162 | 0.221505 | 0         |  |
|        |      | Shiraz-71T | 2238 | 0.603631 | 0         |  |
|        |      | Shiraz-3T  | 90   | 0.219276 | 0         |  |
|        |      | Shiraz-3T  | 97   | 0.496001 | 0         |  |
|        |      | Shiraz-4T  | 253  | 0.372918 | 0         |  |
|        |      | Shiraz-31T | 318  | 0.254373 | 0         |  |
|        |      | Shiraz-36T | 378  | 0.179558 | 0         |  |
|        |      | Shiraz-36T | 383  | 0.374586 | 0         |  |
|        |      | Shiraz-44T | 644  | 0.496536 | 0         |  |
|        |      | Shiraz-46T | 943  | 0.093799 | 0         |  |
|        |      | Shiraz-47T | 1033 | 0.220267 | 0         |  |
|        |      | Shiraz-77T | 1225 | 0        | -0.117922 |  |
|        |      | Shiraz-77T | 1230 | 0.149651 | 0         |  |
|        |      | Shiraz-9T  | 1325 | 0.221899 | 0         |  |
|        |      | Shiraz-18T | 1434 | 0.244465 | 0         |  |
|        |      | Shiraz-25T | 1698 | 0.21835  | 0         |  |
|        |      | Shiraz-28T | 1735 | 0.350744 | 0         |  |
|        |      | Shiraz-29T | 1778 | 0.120767 | 0         |  |
|        |      | Shiraz-32T | 1833 | 0.551336 | 0         |  |
|        |      | Shiraz-38T | 1951 | 0.250891 | 0         |  |
|        |      | Shiraz-53T | 2078 | 0.287202 | 0         |  |
|        |      | Shiraz-58T | 2162 | 0.221505 | 0         |  |
|        |      | Shiraz-71T | 2238 | 0.603631 | 0         |  |
| CLECSA | chr7 | Shiraz-3T  | 90   | 0.219276 | 0         |  |
|        |      | Shiraz-4T  | 253  | 0.372918 | 0         |  |
|        |      | Shiraz-36T | 378  | 0.179558 | 0         |  |
|        |      | Shiraz-46T | 943  | 0.093799 | 0         |  |
|        |      | Shiraz-77T | 1225 | 0        | -0.117922 |  |
|        |      | Shiraz-9T  | 1325 | 0.221899 | 0         |  |
|        |      | Shiraz-18T | 1434 | 0.244465 | 0         |  |
|        |      | Shiraz-25T | 1698 | 0.21835  | 0         |  |
|        |      | Shiraz-28T | 1735 | 0.350744 | 0         |  |
|        |      | Shiraz-29T | 1778 | 0.120767 | 0         |  |
|        |      | Shiraz-32T | 1833 | 0.551336 | 0         |  |
|        |      | Shiraz-38T | 1951 | 0.250891 | 0         |  |
|        |      | Shiraz-53T | 2078 | 0.287202 | 0         |  |
|        |      | Shiraz-58T | 2162 | 0.221505 | 0         |  |
|        |      | Shiraz-71T | 2238 | 0.603631 | 0         |  |
|        |      | Shiraz-3T  | 90   | 0.219276 | 0         |  |
|        |      | Shiraz-4T  | 253  | 0.372918 | 0         |  |

|       |      |            |      |          |           |  |  |
|-------|------|------------|------|----------|-----------|--|--|
|       |      | Shiraz-36T | 378  | 0.179558 | 0         |  |  |
|       |      | Shiraz-46T | 943  | 0.093799 | 0         |  |  |
|       |      | Shiraz-77T | 1225 | 0        | -0.117922 |  |  |
|       |      | Shiraz-9T  | 1325 | 0.221899 | 0         |  |  |
|       |      | Shiraz-18T | 1434 | 0.244465 | 0         |  |  |
|       |      | Shiraz-25T | 1698 | 0.21835  | 0         |  |  |
|       |      | Shiraz-28T | 1735 | 0.350744 | 0         |  |  |
|       |      | Shiraz-29T | 1778 | 0.120767 | 0         |  |  |
|       |      | Shiraz-32T | 1833 | 0.551336 | 0         |  |  |
|       |      | Shiraz-38T | 1951 | 0.250891 | 0         |  |  |
|       |      | Shiraz-53T | 2078 | 0.287202 | 0         |  |  |
|       |      | Shiraz-58T | 2162 | 0.221505 | 0         |  |  |
|       |      | Shiraz-71T | 2238 | 0.603631 | 0         |  |  |
|       |      | Shiraz-3T  | 90   | 0.219276 | 0         |  |  |
|       |      | Shiraz-4T  | 253  | 0.372918 | 0         |  |  |
|       |      | Shiraz-36T | 378  | 0.179558 | 0         |  |  |
|       |      | Shiraz-46T | 943  | 0.093799 | 0         |  |  |
|       |      | Shiraz-77T | 1225 | 0        | -0.117922 |  |  |
|       |      | Shiraz-9T  | 1325 | 0.221899 | 0         |  |  |
|       |      | Shiraz-18T | 1434 | 0.244465 | 0         |  |  |
|       |      | Shiraz-25T | 1698 | 0.21835  | 0         |  |  |
|       |      | Shiraz-28T | 1735 | 0.350744 | 0         |  |  |
|       |      | Shiraz-29T | 1778 | 0.120767 | 0         |  |  |
|       |      | Shiraz-32T | 1833 | 0.551336 | 0         |  |  |
|       |      | Shiraz-38T | 1951 | 0.250891 | 0         |  |  |
|       |      | Shiraz-53T | 2078 | 0.287202 | 0         |  |  |
|       |      | Shiraz-58T | 2162 | 0.221505 | 0         |  |  |
|       |      | Shiraz-71T | 2238 | 0.603631 | 0         |  |  |
| CLIC2 | chrX | Shiraz-3T  | 247  | 0        | -0.421316 |  |  |
|       |      | Shiraz-4T  | 261  | 0        | -0.336249 |  |  |
|       |      | Shiraz-16T | 295  | 0.591657 | 0         |  |  |
|       |      | Shiraz-36T | 433  | 0        | -0.803961 |  |  |
|       |      | Shiraz-44T | 909  | 0        | -1.067051 |  |  |
|       |      | Shiraz-49T | 1170 | 0        | -0.967436 |  |  |
|       |      | Shiraz-9T  | 1370 | 0.690073 | 0         |  |  |
|       |      | Shiraz-18T | 1457 | 0.643204 | 0         |  |  |
|       |      | Shiraz-22T | 1673 | 0.611783 | 0         |  |  |
|       |      | Shiraz-25T | 1719 | 0.472955 | 0         |  |  |
|       |      | Shiraz-28T | 1762 | 0.562311 | 0         |  |  |
|       |      | Shiraz-29T | 1801 | 0.815343 | 0         |  |  |
|       |      | Shiraz-35T | 1933 | 0.488535 | 0         |  |  |
|       |      | Shiraz-58T | 2223 | 0.833364 | 0         |  |  |
|       |      | Shiraz-71T | 2263 | 0.975531 | 0         |  |  |
|       |      | Shiraz-3T  | 247  | 0        | -0.421316 |  |  |
|       |      | Shiraz-4T  | 261  | 0        | -0.336249 |  |  |
|       |      | Shiraz-16T | 295  | 0.591657 | 0         |  |  |
|       |      | Shiraz-36T | 433  | 0        | -0.803961 |  |  |

|       |      |            |      |          |           |  |  |
|-------|------|------------|------|----------|-----------|--|--|
|       |      | Shiraz-44T | 909  | 0        | -1.067051 |  |  |
|       |      | Shiraz-49T | 1170 | 0        | -0.967436 |  |  |
|       |      | Shiraz-9T  | 1370 | 0.690073 | 0         |  |  |
|       |      | Shiraz-18T | 1457 | 0.643204 | 0         |  |  |
|       |      | Shiraz-22T | 1673 | 0.611783 | 0         |  |  |
|       |      | Shiraz-25T | 1719 | 0.472955 | 0         |  |  |
|       |      | Shiraz-28T | 1762 | 0.562311 | 0         |  |  |
|       |      | Shiraz-29T | 1801 | 0.815343 | 0         |  |  |
|       |      | Shiraz-35T | 1933 | 0.488535 | 0         |  |  |
|       |      | Shiraz-58T | 2223 | 0.833364 | 0         |  |  |
|       |      | Shiraz-71T | 2263 | 0.975531 | 0         |  |  |
|       |      | Shiraz-3T  | 247  | 0        | -0.421316 |  |  |
|       |      | Shiraz-4T  | 261  | 0        | -0.336249 |  |  |
|       |      | Shiraz-16T | 295  | 0.591657 | 0         |  |  |
|       |      | Shiraz-36T | 433  | 0        | -0.803961 |  |  |
|       |      | Shiraz-44T | 909  | 0        | -1.067051 |  |  |
|       |      | Shiraz-49T | 1170 | 0        | -0.967436 |  |  |
|       |      | Shiraz-9T  | 1370 | 0.690073 | 0         |  |  |
|       |      | Shiraz-18T | 1457 | 0.643204 | 0         |  |  |
|       |      | Shiraz-22T | 1673 | 0.611783 | 0         |  |  |
|       |      | Shiraz-25T | 1719 | 0.472955 | 0         |  |  |
|       |      | Shiraz-28T | 1762 | 0.562311 | 0         |  |  |
|       |      | Shiraz-29T | 1801 | 0.815343 | 0         |  |  |
|       |      | Shiraz-35T | 1933 | 0.488535 | 0         |  |  |
|       |      | Shiraz-58T | 2223 | 0.833364 | 0         |  |  |
|       |      | Shiraz-71T | 2263 | 0.975531 | 0         |  |  |
| CLK2P | chr7 | Shiraz-3T  | 87   | 0.198593 | 0         |  |  |
|       |      | Shiraz-4T  | 252  | 0.192083 | 0         |  |  |
|       |      | Shiraz-36T | 376  | 0.159952 | 0         |  |  |
|       |      | Shiraz-46T | 942  | 0.069143 | 0         |  |  |
|       |      | Shiraz-18T | 1433 | 0.250973 | 0         |  |  |
|       |      | Shiraz-25T | 1697 | 0.21945  | 0         |  |  |
|       |      | Shiraz-28T | 1734 | 0.362882 | 0         |  |  |
|       |      | Shiraz-29T | 1777 | 0.156747 | 0         |  |  |
|       |      | Shiraz-38T | 1950 | 0.265916 | 0         |  |  |
|       |      | Shiraz-71T | 2236 | 0.320072 | 0         |  |  |
|       |      | Shiraz-3T  | 87   | 0.198593 | 0         |  |  |
|       |      | Shiraz-4T  | 252  | 0.192083 | 0         |  |  |
|       |      | Shiraz-36T | 376  | 0.159952 | 0         |  |  |
|       |      | Shiraz-46T | 942  | 0.069143 | 0         |  |  |
|       |      | Shiraz-18T | 1433 | 0.250973 | 0         |  |  |
|       |      | Shiraz-25T | 1697 | 0.21945  | 0         |  |  |
|       |      | Shiraz-28T | 1734 | 0.362882 | 0         |  |  |
|       |      | Shiraz-29T | 1777 | 0.156747 | 0         |  |  |
|       |      | Shiraz-38T | 1950 | 0.265916 | 0         |  |  |
|       |      | Shiraz-71T | 2236 | 0.320072 | 0         |  |  |
|       |      | Shiraz-3T  | 87   | 0.198593 | 0         |  |  |

|       |      |            |      |          |           |  |
|-------|------|------------|------|----------|-----------|--|
|       |      | Shiraz-4T  | 252  | 0.192083 | 0         |  |
|       |      | Shiraz-36T | 376  | 0.159952 | 0         |  |
|       |      | Shiraz-46T | 942  | 0.069143 | 0         |  |
|       |      | Shiraz-18T | 1433 | 0.250973 | 0         |  |
|       |      | Shiraz-25T | 1697 | 0.21945  | 0         |  |
|       |      | Shiraz-28T | 1734 | 0.362882 | 0         |  |
|       |      | Shiraz-29T | 1777 | 0.156747 | 0         |  |
|       |      | Shiraz-38T | 1950 | 0.265916 | 0         |  |
|       |      | Shiraz-71T | 2236 | 0.320072 | 0         |  |
| CNGA2 | chrX | Shiraz-3T  | 242  | 0        | -0.336434 |  |
|       |      | Shiraz-4T  | 261  | 0        | -0.336249 |  |
|       |      | Shiraz-16T | 295  | 0.591657 | 0         |  |
|       |      | Shiraz-36T | 433  | 0        | -0.803961 |  |
|       |      | Shiraz-42T | 480  | 0        | -0.232915 |  |
|       |      | Shiraz-44T | 899  | 0        | -1.09697  |  |
|       |      | Shiraz-49T | 1170 | 0        | -0.967436 |  |
|       |      | Shiraz-9T  | 1370 | 0.690073 | 0         |  |
|       |      | Shiraz-18T | 1457 | 0.643204 | 0         |  |
|       |      | Shiraz-22T | 1673 | 0.611783 | 0         |  |
|       |      | Shiraz-22T | 1678 | 0.911625 | 0         |  |
|       |      | Shiraz-25T | 1719 | 0.472955 | 0         |  |
|       |      | Shiraz-28T | 1762 | 0.562311 | 0         |  |
|       |      | Shiraz-29T | 1801 | 0.815343 | 0         |  |
|       |      | Shiraz-32T | 1870 | 0.729766 | 0         |  |
|       |      | Shiraz-35T | 1933 | 0.488535 | 0         |  |
|       |      | Shiraz-58T | 2223 | 0.833364 | 0         |  |
|       |      | Shiraz-58T | 2226 | 1.074663 | 0         |  |
|       |      | Shiraz-71T | 2263 | 0.975531 | 0         |  |
|       |      | Shiraz-3T  | 242  | 0        | -0.336434 |  |
|       |      | Shiraz-4T  | 261  | 0        | -0.336249 |  |
|       |      | Shiraz-16T | 295  | 0.591657 | 0         |  |
|       |      | Shiraz-36T | 433  | 0        | -0.803961 |  |
|       |      | Shiraz-42T | 480  | 0        | -0.232915 |  |
|       |      | Shiraz-44T | 899  | 0        | -1.09697  |  |
|       |      | Shiraz-49T | 1170 | 0        | -0.967436 |  |
|       |      | Shiraz-9T  | 1370 | 0.690073 | 0         |  |
|       |      | Shiraz-18T | 1457 | 0.643204 | 0         |  |
|       |      | Shiraz-22T | 1673 | 0.611783 | 0         |  |
|       |      | Shiraz-22T | 1678 | 0.911625 | 0         |  |
|       |      | Shiraz-25T | 1719 | 0.472955 | 0         |  |
|       |      | Shiraz-28T | 1762 | 0.562311 | 0         |  |
|       |      | Shiraz-29T | 1801 | 0.815343 | 0         |  |
|       |      | Shiraz-32T | 1870 | 0.729766 | 0         |  |
|       |      | Shiraz-35T | 1933 | 0.488535 | 0         |  |
|       |      | Shiraz-58T | 2223 | 0.833364 | 0         |  |
|       |      | Shiraz-58T | 2226 | 1.074663 | 0         |  |
|       |      | Shiraz-71T | 2263 | 0.975531 | 0         |  |

|       |      |            |      |          |           |  |  |
|-------|------|------------|------|----------|-----------|--|--|
|       |      | Shiraz-3T  | 242  | 0        | -0.336434 |  |  |
|       |      | Shiraz-4T  | 261  | 0        | -0.336249 |  |  |
|       |      | Shiraz-16T | 295  | 0.591657 | 0         |  |  |
|       |      | Shiraz-36T | 433  | 0        | -0.803961 |  |  |
|       |      | Shiraz-42T | 480  | 0        | -0.232915 |  |  |
|       |      | Shiraz-44T | 899  | 0        | -1.09697  |  |  |
|       |      | Shiraz-49T | 1170 | 0        | -0.967436 |  |  |
|       |      | Shiraz-9T  | 1370 | 0.690073 | 0         |  |  |
|       |      | Shiraz-18T | 1457 | 0.643204 | 0         |  |  |
|       |      | Shiraz-22T | 1673 | 0.611783 | 0         |  |  |
|       |      | Shiraz-22T | 1678 | 0.911625 | 0         |  |  |
|       |      | Shiraz-25T | 1719 | 0.472955 | 0         |  |  |
|       |      | Shiraz-28T | 1762 | 0.562311 | 0         |  |  |
|       |      | Shiraz-29T | 1801 | 0.815343 | 0         |  |  |
|       |      | Shiraz-32T | 1870 | 0.729766 | 0         |  |  |
|       |      | Shiraz-35T | 1933 | 0.488535 | 0         |  |  |
|       |      | Shiraz-58T | 2223 | 0.833364 | 0         |  |  |
|       |      | Shiraz-58T | 2226 | 1.074663 | 0         |  |  |
|       |      | Shiraz-71T | 2263 | 0.975531 | 0         |  |  |
| CNKS2 | chrX | Shiraz-3T  | 235  | 0        | -0.28401  |  |  |
|       |      | Shiraz-4T  | 260  | 0        | -0.324128 |  |  |
|       |      | Shiraz-16T | 294  | 0.655804 | 0         |  |  |
|       |      | Shiraz-36T | 431  | 0        | -0.78035  |  |  |
|       |      | Shiraz-44T | 891  | 0        | -0.954044 |  |  |
|       |      | Shiraz-49T | 1166 | 0        | -0.917235 |  |  |
|       |      | Shiraz-77T | 1281 | 0.136627 | 0         |  |  |
|       |      | Shiraz-9T  | 1368 | 0.199713 | 0         |  |  |
|       |      | Shiraz-18T | 1455 | 0        | -0.186773 |  |  |
|       |      | Shiraz-22T | 1669 | 0.695915 | 0         |  |  |
|       |      | Shiraz-25T | 1717 | 0.420447 | 0         |  |  |
|       |      | Shiraz-28T | 1760 | 0.538181 | 0         |  |  |
|       |      | Shiraz-29T | 1800 | 0.672527 | 0         |  |  |
|       |      | Shiraz-32T | 1869 | 0.776805 | 0         |  |  |
|       |      | Shiraz-35T | 1932 | 0.507141 | 0         |  |  |
|       |      | Shiraz-40T | 2051 | 0.098506 | 0         |  |  |
|       |      | Shiraz-58T | 2221 | 0.871948 | 0         |  |  |
|       |      | Shiraz-71T | 2260 | 0.68394  | 0         |  |  |
|       |      | Shiraz-71T | 2261 | 0.508399 | 0         |  |  |
|       |      | Shiraz-3T  | 235  | 0        | -0.28401  |  |  |
|       |      | Shiraz-4T  | 260  | 0        | -0.324128 |  |  |
|       |      | Shiraz-16T | 294  | 0.655804 | 0         |  |  |
|       |      | Shiraz-36T | 431  | 0        | -0.78035  |  |  |
|       |      | Shiraz-44T | 891  | 0        | -0.954044 |  |  |
|       |      | Shiraz-49T | 1166 | 0        | -0.917235 |  |  |
|       |      | Shiraz-77T | 1281 | 0.136627 | 0         |  |  |
|       |      | Shiraz-9T  | 1368 | 0.199713 | 0         |  |  |
|       |      | Shiraz-18T | 1455 | 0        | -0.186773 |  |  |



|       |      |            |      |          |           |  |  |
|-------|------|------------|------|----------|-----------|--|--|
|       |      | Shiraz-22T | 1669 | 0.695915 | 0         |  |  |
|       |      | Shiraz-25T | 1717 | 0.420447 | 0         |  |  |
|       |      | Shiraz-28T | 1760 | 0.538181 | 0         |  |  |
|       |      | Shiraz-29T | 1800 | 0.672527 | 0         |  |  |
|       |      | Shiraz-32T | 1869 | 0.776805 | 0         |  |  |
|       |      | Shiraz-35T | 1932 | 0.507141 | 0         |  |  |
|       |      | Shiraz-40T | 2051 | 0.098506 | 0         |  |  |
|       |      | Shiraz-58T | 2221 | 0.871948 | 0         |  |  |
|       |      | Shiraz-71T | 2260 | 0.68394  | 0         |  |  |
|       |      | Shiraz-71T | 2261 | 0.508399 | 0         |  |  |
|       |      | Shiraz-3T  | 235  | 0        | -0.28401  |  |  |
|       |      | Shiraz-4T  | 260  | 0        | -0.324128 |  |  |
|       |      | Shiraz-16T | 294  | 0.655804 | 0         |  |  |
|       |      | Shiraz-36T | 431  | 0        | -0.78035  |  |  |
|       |      | Shiraz-44T | 891  | 0        | -0.954044 |  |  |
|       |      | Shiraz-49T | 1166 | 0        | -0.917235 |  |  |
|       |      | Shiraz-77T | 1281 | 0.136627 | 0         |  |  |
|       |      | Shiraz-9T  | 1368 | 0.199713 | 0         |  |  |
|       |      | Shiraz-18T | 1455 | 0        | -0.186773 |  |  |
|       |      | Shiraz-22T | 1669 | 0.695915 | 0         |  |  |
|       |      | Shiraz-25T | 1717 | 0.420447 | 0         |  |  |
|       |      | Shiraz-28T | 1760 | 0.538181 | 0         |  |  |
|       |      | Shiraz-29T | 1800 | 0.672527 | 0         |  |  |
|       |      | Shiraz-32T | 1869 | 0.776805 | 0         |  |  |
|       |      | Shiraz-35T | 1932 | 0.507141 | 0         |  |  |
|       |      | Shiraz-40T | 2051 | 0.098506 | 0         |  |  |
|       |      | Shiraz-58T | 2221 | 0.871948 | 0         |  |  |
|       |      | Shiraz-71T | 2260 | 0.68394  | 0         |  |  |
|       |      | Shiraz-71T | 2261 | 0.508399 | 0         |  |  |
| CNOT4 | chr7 | Shiraz-3T  | 90   | 0.219276 | 0         |  |  |
|       |      | Shiraz-3T  | 90   | 0.219276 | 0         |  |  |
|       |      | Shiraz-4T  | 253  | 0.372918 | 0         |  |  |
|       |      | Shiraz-4T  | 253  | 0.372918 | 0         |  |  |
|       |      | Shiraz-36T | 378  | 0.179558 | 0         |  |  |
|       |      | Shiraz-36T | 378  | 0.179558 | 0         |  |  |
|       |      | Shiraz-46T | 943  | 0.093799 | 0         |  |  |
|       |      | Shiraz-46T | 943  | 0.093799 | 0         |  |  |
|       |      | Shiraz-77T | 1225 | 0        | -0.117922 |  |  |
|       |      | Shiraz-77T | 1225 | 0        | -0.117922 |  |  |
|       |      | Shiraz-9T  | 1325 | 0.221899 | 0         |  |  |
|       |      | Shiraz-9T  | 1325 | 0.221899 | 0         |  |  |
|       |      | Shiraz-18T | 1434 | 0.244465 | 0         |  |  |
|       |      | Shiraz-18T | 1434 | 0.244465 | 0         |  |  |
|       |      | Shiraz-22T | 1553 | 0        | -0.213234 |  |  |
|       |      | Shiraz-22T | 1553 | 0        | -0.213234 |  |  |
|       |      | Shiraz-25T | 1698 | 0.21835  | 0         |  |  |
|       |      | Shiraz-25T | 1698 | 0.21835  | 0         |  |  |

|  |            |      |          |           |  |
|--|------------|------|----------|-----------|--|
|  | Shiraz-28T | 1735 | 0.350744 | 0         |  |
|  | Shiraz-28T | 1735 | 0.350744 | 0         |  |
|  | Shiraz-29T | 1778 | 0.120767 | 0         |  |
|  | Shiraz-29T | 1778 | 0.120767 | 0         |  |
|  | Shiraz-32T | 1833 | 0.551336 | 0         |  |
|  | Shiraz-32T | 1833 | 0.551336 | 0         |  |
|  | Shiraz-38T | 1951 | 0.250891 | 0         |  |
|  | Shiraz-38T | 1951 | 0.250891 | 0         |  |
|  | Shiraz-53T | 2078 | 0.287202 | 0         |  |
|  | Shiraz-53T | 2078 | 0.287202 | 0         |  |
|  | Shiraz-58T | 2162 | 0.221505 | 0         |  |
|  | Shiraz-58T | 2162 | 0.221505 | 0         |  |
|  | Shiraz-71T | 2238 | 0.603631 | 0         |  |
|  | Shiraz-71T | 2238 | 0.603631 | 0         |  |
|  | Shiraz-3T  | 90   | 0.219276 | 0         |  |
|  | Shiraz-3T  | 90   | 0.219276 | 0         |  |
|  | Shiraz-4T  | 253  | 0.372918 | 0         |  |
|  | Shiraz-4T  | 253  | 0.372918 | 0         |  |
|  | Shiraz-36T | 378  | 0.179558 | 0         |  |
|  | Shiraz-36T | 378  | 0.179558 | 0         |  |
|  | Shiraz-46T | 943  | 0.093799 | 0         |  |
|  | Shiraz-46T | 943  | 0.093799 | 0         |  |
|  | Shiraz-77T | 1225 | 0        | -0.117922 |  |
|  | Shiraz-77T | 1225 | 0        | -0.117922 |  |
|  | Shiraz-9T  | 1325 | 0.221899 | 0         |  |
|  | Shiraz-9T  | 1325 | 0.221899 | 0         |  |
|  | Shiraz-18T | 1434 | 0.244465 | 0         |  |
|  | Shiraz-18T | 1434 | 0.244465 | 0         |  |
|  | Shiraz-22T | 1553 | 0        | -0.213234 |  |
|  | Shiraz-22T | 1553 | 0        | -0.213234 |  |
|  | Shiraz-25T | 1698 | 0.21835  | 0         |  |
|  | Shiraz-25T | 1698 | 0.21835  | 0         |  |
|  | Shiraz-28T | 1735 | 0.350744 | 0         |  |
|  | Shiraz-28T | 1735 | 0.350744 | 0         |  |
|  | Shiraz-29T | 1778 | 0.120767 | 0         |  |
|  | Shiraz-29T | 1778 | 0.120767 | 0         |  |
|  | Shiraz-32T | 1833 | 0.551336 | 0         |  |
|  | Shiraz-32T | 1833 | 0.551336 | 0         |  |
|  | Shiraz-38T | 1951 | 0.250891 | 0         |  |
|  | Shiraz-38T | 1951 | 0.250891 | 0         |  |
|  | Shiraz-53T | 2078 | 0.287202 | 0         |  |
|  | Shiraz-53T | 2078 | 0.287202 | 0         |  |
|  | Shiraz-58T | 2162 | 0.221505 | 0         |  |
|  | Shiraz-58T | 2162 | 0.221505 | 0         |  |
|  | Shiraz-71T | 2238 | 0.603631 | 0         |  |
|  | Shiraz-71T | 2238 | 0.603631 | 0         |  |
|  | Shiraz-3T  | 90   | 0.219276 | 0         |  |

|       |      |            |      |          |           |  |  |
|-------|------|------------|------|----------|-----------|--|--|
|       |      | Shiraz-3T  | 90   | 0.219276 | 0         |  |  |
|       |      | Shiraz-4T  | 253  | 0.372918 | 0         |  |  |
|       |      | Shiraz-4T  | 253  | 0.372918 | 0         |  |  |
|       |      | Shiraz-36T | 378  | 0.179558 | 0         |  |  |
|       |      | Shiraz-36T | 378  | 0.179558 | 0         |  |  |
|       |      | Shiraz-46T | 943  | 0.093799 | 0         |  |  |
|       |      | Shiraz-46T | 943  | 0.093799 | 0         |  |  |
|       |      | Shiraz-77T | 1225 | 0        | -0.117922 |  |  |
|       |      | Shiraz-77T | 1225 | 0        | -0.117922 |  |  |
|       |      | Shiraz-9T  | 1325 | 0.221899 | 0         |  |  |
|       |      | Shiraz-9T  | 1325 | 0.221899 | 0         |  |  |
|       |      | Shiraz-18T | 1434 | 0.244465 | 0         |  |  |
|       |      | Shiraz-18T | 1434 | 0.244465 | 0         |  |  |
|       |      | Shiraz-22T | 1553 | 0        | -0.213234 |  |  |
|       |      | Shiraz-22T | 1553 | 0        | -0.213234 |  |  |
|       |      | Shiraz-25T | 1698 | 0.21835  | 0         |  |  |
|       |      | Shiraz-25T | 1698 | 0.21835  | 0         |  |  |
|       |      | Shiraz-28T | 1735 | 0.350744 | 0         |  |  |
|       |      | Shiraz-28T | 1735 | 0.350744 | 0         |  |  |
|       |      | Shiraz-29T | 1778 | 0.120767 | 0         |  |  |
|       |      | Shiraz-29T | 1778 | 0.120767 | 0         |  |  |
|       |      | Shiraz-32T | 1833 | 0.551336 | 0         |  |  |
|       |      | Shiraz-32T | 1833 | 0.551336 | 0         |  |  |
|       |      | Shiraz-38T | 1951 | 0.250891 | 0         |  |  |
|       |      | Shiraz-38T | 1951 | 0.250891 | 0         |  |  |
|       |      | Shiraz-53T | 2078 | 0.287202 | 0         |  |  |
|       |      | Shiraz-53T | 2078 | 0.287202 | 0         |  |  |
|       |      | Shiraz-58T | 2162 | 0.221505 | 0         |  |  |
|       |      | Shiraz-58T | 2162 | 0.221505 | 0         |  |  |
|       |      | Shiraz-71T | 2238 | 0.603631 | 0         |  |  |
|       |      | Shiraz-71T | 2238 | 0.603631 | 0         |  |  |
| CNPY4 | chr7 | Shiraz-3T  | 90   | 0.219276 | 0         |  |  |
|       |      | Shiraz-3T  | 94   | 0.74735  | 0         |  |  |
|       |      | Shiraz-4T  | 253  | 0.372918 | 0         |  |  |
|       |      | Shiraz-31T | 316  | 0.219196 | 0         |  |  |
|       |      | Shiraz-36T | 378  | 0.179558 | 0         |  |  |
|       |      | Shiraz-36T | 381  | 0.332628 | 0         |  |  |
|       |      | Shiraz-44T | 639  | 1.035032 | 0         |  |  |
|       |      | Shiraz-46T | 943  | 0.093799 | 0         |  |  |
|       |      | Shiraz-46T | 946  | 0.299835 | 0         |  |  |
|       |      | Shiraz-47T | 1030 | 0.257728 | 0         |  |  |
|       |      | Shiraz-49T | 1120 | 0.281656 | 0         |  |  |
|       |      | Shiraz-77T | 1225 | 0        | -0.117922 |  |  |
|       |      | Shiraz-77T | 1227 | 0.196445 | 0         |  |  |
|       |      | Shiraz-9T  | 1324 | 0.679266 | 0         |  |  |
|       |      | Shiraz-18T | 1434 | 0.244465 | 0         |  |  |
|       |      | Shiraz-22T | 1549 | 0        | -0.319623 |  |  |

|  |            |      |          |           |  |
|--|------------|------|----------|-----------|--|
|  | Shiraz-22T | 1551 | 0.324011 | 0         |  |
|  | Shiraz-25T | 1698 | 0.21835  | 0         |  |
|  | Shiraz-28T | 1735 | 0.350744 | 0         |  |
|  | Shiraz-29T | 1778 | 0.120767 | 0         |  |
|  | Shiraz-32T | 1833 | 0.551336 | 0         |  |
|  | Shiraz-32T | 1834 | 1.485392 | 0         |  |
|  | Shiraz-38T | 1951 | 0.250891 | 0         |  |
|  | Shiraz-53T | 2078 | 0.287202 | 0         |  |
|  | Shiraz-58T | 2160 | 0.399007 | 0         |  |
|  | Shiraz-71T | 2238 | 0.603631 | 0         |  |
|  | Shiraz-3T  | 90   | 0.219276 | 0         |  |
|  | Shiraz-3T  | 94   | 0.74735  | 0         |  |
|  | Shiraz-4T  | 253  | 0.372918 | 0         |  |
|  | Shiraz-31T | 316  | 0.219196 | 0         |  |
|  | Shiraz-36T | 378  | 0.179558 | 0         |  |
|  | Shiraz-36T | 381  | 0.332628 | 0         |  |
|  | Shiraz-44T | 639  | 1.035032 | 0         |  |
|  | Shiraz-46T | 943  | 0.093799 | 0         |  |
|  | Shiraz-46T | 946  | 0.299835 | 0         |  |
|  | Shiraz-47T | 1030 | 0.257728 | 0         |  |
|  | Shiraz-49T | 1120 | 0.281656 | 0         |  |
|  | Shiraz-77T | 1225 | 0        | -0.117922 |  |
|  | Shiraz-77T | 1227 | 0.196445 | 0         |  |
|  | Shiraz-9T  | 1324 | 0.679266 | 0         |  |
|  | Shiraz-18T | 1434 | 0.244465 | 0         |  |
|  | Shiraz-22T | 1549 | 0        | -0.319623 |  |
|  | Shiraz-22T | 1551 | 0.324011 | 0         |  |
|  | Shiraz-25T | 1698 | 0.21835  | 0         |  |
|  | Shiraz-28T | 1735 | 0.350744 | 0         |  |
|  | Shiraz-29T | 1778 | 0.120767 | 0         |  |
|  | Shiraz-32T | 1833 | 0.551336 | 0         |  |
|  | Shiraz-32T | 1834 | 1.485392 | 0         |  |
|  | Shiraz-38T | 1951 | 0.250891 | 0         |  |
|  | Shiraz-53T | 2078 | 0.287202 | 0         |  |
|  | Shiraz-58T | 2160 | 0.399007 | 0         |  |
|  | Shiraz-71T | 2238 | 0.603631 | 0         |  |
|  | Shiraz-3T  | 90   | 0.219276 | 0         |  |
|  | Shiraz-3T  | 94   | 0.74735  | 0         |  |
|  | Shiraz-4T  | 253  | 0.372918 | 0         |  |
|  | Shiraz-31T | 316  | 0.219196 | 0         |  |
|  | Shiraz-36T | 378  | 0.179558 | 0         |  |
|  | Shiraz-36T | 381  | 0.332628 | 0         |  |
|  | Shiraz-44T | 639  | 1.035032 | 0         |  |
|  | Shiraz-46T | 943  | 0.093799 | 0         |  |
|  | Shiraz-46T | 946  | 0.299835 | 0         |  |
|  | Shiraz-47T | 1030 | 0.257728 | 0         |  |
|  | Shiraz-49T | 1120 | 0.281656 | 0         |  |

|         |      |            |      |          |           |  |  |
|---------|------|------------|------|----------|-----------|--|--|
|         |      | Shiraz-77T | 1225 | 0        | -0.117922 |  |  |
|         |      | Shiraz-77T | 1227 | 0.196445 | 0         |  |  |
|         |      | Shiraz-9T  | 1324 | 0.679266 | 0         |  |  |
|         |      | Shiraz-18T | 1434 | 0.244465 | 0         |  |  |
|         |      | Shiraz-22T | 1549 | 0        | -0.319623 |  |  |
|         |      | Shiraz-22T | 1551 | 0.324011 | 0         |  |  |
|         |      | Shiraz-25T | 1698 | 0.21835  | 0         |  |  |
|         |      | Shiraz-28T | 1735 | 0.350744 | 0         |  |  |
|         |      | Shiraz-29T | 1778 | 0.120767 | 0         |  |  |
|         |      | Shiraz-32T | 1833 | 0.551336 | 0         |  |  |
|         |      | Shiraz-32T | 1834 | 1.485392 | 0         |  |  |
|         |      | Shiraz-38T | 1951 | 0.250891 | 0         |  |  |
|         |      | Shiraz-53T | 2078 | 0.287202 | 0         |  |  |
|         |      | Shiraz-58T | 2160 | 0.399007 | 0         |  |  |
|         |      | Shiraz-71T | 2238 | 0.603631 | 0         |  |  |
| CNTNAP2 | chr7 | Shiraz-3T  | 90   | 0.219276 | 0         |  |  |
|         |      | Shiraz-3T  | 98   | 0        | -0.069276 |  |  |
|         |      | Shiraz-4T  | 253  | 0.372918 | 0         |  |  |
|         |      | Shiraz-36T | 378  | 0.179558 | 0         |  |  |
|         |      | Shiraz-44T | 645  | 0        | -0.474857 |  |  |
|         |      | Shiraz-46T | 943  | 0.093799 | 0         |  |  |
|         |      | Shiraz-77T | 1225 | 0        | -0.117922 |  |  |
|         |      | Shiraz-9T  | 1325 | 0.221899 | 0         |  |  |
|         |      | Shiraz-18T | 1434 | 0.244465 | 0         |  |  |
|         |      | Shiraz-22T | 1554 | 0        | -0.502826 |  |  |
|         |      | Shiraz-25T | 1698 | 0.21835  | 0         |  |  |
|         |      | Shiraz-28T | 1735 | 0.350744 | 0         |  |  |
|         |      | Shiraz-29T | 1778 | 0.120767 | 0         |  |  |
|         |      | Shiraz-32T | 1833 | 0.551336 | 0         |  |  |
|         |      | Shiraz-38T | 1951 | 0.250891 | 0         |  |  |
|         |      | Shiraz-53T | 2078 | 0.287202 | 0         |  |  |
|         |      | Shiraz-58T | 2162 | 0.221505 | 0         |  |  |
|         |      | Shiraz-71T | 2238 | 0.603631 | 0         |  |  |
|         |      | Shiraz-3T  | 90   | 0.219276 | 0         |  |  |
|         |      | Shiraz-3T  | 98   | 0        | -0.069276 |  |  |
|         |      | Shiraz-4T  | 253  | 0.372918 | 0         |  |  |
|         |      | Shiraz-36T | 378  | 0.179558 | 0         |  |  |
|         |      | Shiraz-44T | 645  | 0        | -0.474857 |  |  |
|         |      | Shiraz-46T | 943  | 0.093799 | 0         |  |  |
|         |      | Shiraz-77T | 1225 | 0        | -0.117922 |  |  |
|         |      | Shiraz-9T  | 1325 | 0.221899 | 0         |  |  |
|         |      | Shiraz-18T | 1434 | 0.244465 | 0         |  |  |
|         |      | Shiraz-22T | 1554 | 0        | -0.502826 |  |  |
|         |      | Shiraz-25T | 1698 | 0.21835  | 0         |  |  |
|         |      | Shiraz-28T | 1735 | 0.350744 | 0         |  |  |
|         |      | Shiraz-29T | 1778 | 0.120767 | 0         |  |  |
|         |      | Shiraz-32T | 1833 | 0.551336 | 0         |  |  |

|      |      |            |      |          |           |  |  |
|------|------|------------|------|----------|-----------|--|--|
|      |      | Shiraz-38T | 1951 | 0.250891 | 0         |  |  |
|      |      | Shiraz-53T | 2078 | 0.287202 | 0         |  |  |
|      |      | Shiraz-58T | 2162 | 0.221505 | 0         |  |  |
|      |      | Shiraz-71T | 2238 | 0.603631 | 0         |  |  |
|      |      | Shiraz-3T  | 90   | 0.219276 | 0         |  |  |
|      |      | Shiraz-3T  | 98   | 0        | -0.069276 |  |  |
|      |      | Shiraz-4T  | 253  | 0.372918 | 0         |  |  |
|      |      | Shiraz-36T | 378  | 0.179558 | 0         |  |  |
|      |      | Shiraz-44T | 645  | 0        | -0.474857 |  |  |
|      |      | Shiraz-46T | 943  | 0.093799 | 0         |  |  |
|      |      | Shiraz-77T | 1225 | 0        | -0.117922 |  |  |
|      |      | Shiraz-9T  | 1325 | 0.221899 | 0         |  |  |
|      |      | Shiraz-18T | 1434 | 0.244465 | 0         |  |  |
|      |      | Shiraz-22T | 1554 | 0        | -0.502826 |  |  |
|      |      | Shiraz-25T | 1698 | 0.21835  | 0         |  |  |
|      |      | Shiraz-28T | 1735 | 0.350744 | 0         |  |  |
|      |      | Shiraz-29T | 1778 | 0.120767 | 0         |  |  |
|      |      | Shiraz-32T | 1833 | 0.551336 | 0         |  |  |
|      |      | Shiraz-38T | 1951 | 0.250891 | 0         |  |  |
|      |      | Shiraz-53T | 2078 | 0.287202 | 0         |  |  |
|      |      | Shiraz-58T | 2162 | 0.221505 | 0         |  |  |
|      |      | Shiraz-71T | 2238 | 0.603631 | 0         |  |  |
| COBL | chr7 | Shiraz-3T  | 87   | 0.198593 | 0         |  |  |
|      |      | Shiraz-4T  | 252  | 0.192083 | 0         |  |  |
|      |      | Shiraz-36T | 376  | 0.159952 | 0         |  |  |
|      |      | Shiraz-46T | 942  | 0.069143 | 0         |  |  |
|      |      | Shiraz-18T | 1433 | 0.250973 | 0         |  |  |
|      |      | Shiraz-25T | 1697 | 0.21945  | 0         |  |  |
|      |      | Shiraz-28T | 1734 | 0.362882 | 0         |  |  |
|      |      | Shiraz-29T | 1777 | 0.156747 | 0         |  |  |
|      |      | Shiraz-38T | 1950 | 0.265916 | 0         |  |  |
|      |      | Shiraz-71T | 2236 | 0.320072 | 0         |  |  |
|      |      | Shiraz-3T  | 87   | 0.198593 | 0         |  |  |
|      |      | Shiraz-4T  | 252  | 0.192083 | 0         |  |  |
|      |      | Shiraz-36T | 376  | 0.159952 | 0         |  |  |
|      |      | Shiraz-46T | 942  | 0.069143 | 0         |  |  |
|      |      | Shiraz-18T | 1433 | 0.250973 | 0         |  |  |
|      |      | Shiraz-25T | 1697 | 0.21945  | 0         |  |  |
|      |      | Shiraz-28T | 1734 | 0.362882 | 0         |  |  |
|      |      | Shiraz-29T | 1777 | 0.156747 | 0         |  |  |
|      |      | Shiraz-38T | 1950 | 0.265916 | 0         |  |  |
|      |      | Shiraz-71T | 2236 | 0.320072 | 0         |  |  |
|      |      | Shiraz-3T  | 87   | 0.198593 | 0         |  |  |
|      |      | Shiraz-4T  | 252  | 0.192083 | 0         |  |  |
|      |      | Shiraz-36T | 376  | 0.159952 | 0         |  |  |
|      |      | Shiraz-46T | 942  | 0.069143 | 0         |  |  |
|      |      | Shiraz-18T | 1433 | 0.250973 | 0         |  |  |

|      |      |            |      |          |           |  |
|------|------|------------|------|----------|-----------|--|
|      |      | Shiraz-25T | 1697 | 0.21945  | 0         |  |
|      |      | Shiraz-28T | 1734 | 0.362882 | 0         |  |
|      |      | Shiraz-29T | 1777 | 0.156747 | 0         |  |
|      |      | Shiraz-38T | 1950 | 0.265916 | 0         |  |
|      |      | Shiraz-71T | 2236 | 0.320072 | 0         |  |
| COG5 | chr7 | Shiraz-3T  | 90   | 0.219276 | 0         |  |
|      |      | Shiraz-4T  | 253  | 0.372918 | 0         |  |
|      |      | Shiraz-36T | 378  | 0.179558 | 0         |  |
|      |      | Shiraz-46T | 943  | 0.093799 | 0         |  |
|      |      | Shiraz-77T | 1225 | 0        | -0.117922 |  |
|      |      | Shiraz-18T | 1434 | 0.244465 | 0         |  |
|      |      | Shiraz-22T | 1549 | 0        | -0.319623 |  |
|      |      | Shiraz-25T | 1698 | 0.21835  | 0         |  |
|      |      | Shiraz-28T | 1735 | 0.350744 | 0         |  |
|      |      | Shiraz-29T | 1778 | 0.120767 | 0         |  |
|      |      | Shiraz-32T | 1833 | 0.551336 | 0         |  |
|      |      | Shiraz-38T | 1951 | 0.250891 | 0         |  |
|      |      | Shiraz-53T | 2078 | 0.287202 | 0         |  |
|      |      | Shiraz-58T | 2161 | 0        | -0.187744 |  |
|      |      | Shiraz-71T | 2238 | 0.603631 | 0         |  |
|      |      | Shiraz-3T  | 90   | 0.219276 | 0         |  |
|      |      | Shiraz-4T  | 253  | 0.372918 | 0         |  |
|      |      | Shiraz-36T | 378  | 0.179558 | 0         |  |
|      |      | Shiraz-46T | 943  | 0.093799 | 0         |  |
|      |      | Shiraz-77T | 1225 | 0        | -0.117922 |  |
|      |      | Shiraz-18T | 1434 | 0.244465 | 0         |  |
|      |      | Shiraz-22T | 1549 | 0        | -0.319623 |  |
|      |      | Shiraz-25T | 1698 | 0.21835  | 0         |  |
|      |      | Shiraz-28T | 1735 | 0.350744 | 0         |  |
|      |      | Shiraz-29T | 1778 | 0.120767 | 0         |  |
|      |      | Shiraz-32T | 1833 | 0.551336 | 0         |  |
|      |      | Shiraz-38T | 1951 | 0.250891 | 0         |  |
|      |      | Shiraz-53T | 2078 | 0.287202 | 0         |  |
|      |      | Shiraz-58T | 2161 | 0        | -0.187744 |  |
|      |      | Shiraz-71T | 2238 | 0.603631 | 0         |  |
|      |      | Shiraz-3T  | 90   | 0.219276 | 0         |  |
|      |      | Shiraz-4T  | 253  | 0.372918 | 0         |  |
|      |      | Shiraz-36T | 378  | 0.179558 | 0         |  |
|      |      | Shiraz-46T | 943  | 0.093799 | 0         |  |
|      |      | Shiraz-77T | 1225 | 0        | -0.117922 |  |
|      |      | Shiraz-18T | 1434 | 0.244465 | 0         |  |
|      |      | Shiraz-22T | 1549 | 0        | -0.319623 |  |
|      |      | Shiraz-25T | 1698 | 0.21835  | 0         |  |
|      |      | Shiraz-28T | 1735 | 0.350744 | 0         |  |
|      |      | Shiraz-29T | 1778 | 0.120767 | 0         |  |
|      |      | Shiraz-32T | 1833 | 0.551336 | 0         |  |
|      |      | Shiraz-38T | 1951 | 0.250891 | 0         |  |

|        |      |            |      |          |           |  |  |
|--------|------|------------|------|----------|-----------|--|--|
|        |      | Shiraz-53T | 2078 | 0.287202 | 0         |  |  |
|        |      | Shiraz-58T | 2161 | 0        | -0.187744 |  |  |
|        |      | Shiraz-71T | 2238 | 0.603631 | 0         |  |  |
| COL1A2 | chr7 | Shiraz-3T  | 90   | 0.219276 | 0         |  |  |
|        |      | Shiraz-3T  | 93   | 0        | -0.058023 |  |  |
|        |      | Shiraz-4T  | 253  | 0.372918 | 0         |  |  |
|        |      | Shiraz-36T | 378  | 0.179558 | 0         |  |  |
|        |      | Shiraz-36T | 380  | 0.083883 | 0         |  |  |
|        |      | Shiraz-44T | 638  | 0        | -0.433476 |  |  |
|        |      | Shiraz-46T | 943  | 0.093799 | 0         |  |  |
|        |      | Shiraz-46T | 945  | 0        | -0.014838 |  |  |
|        |      | Shiraz-47T | 1029 | 0        | -0.096586 |  |  |
|        |      | Shiraz-49T | 1119 | 0        | -0.157331 |  |  |
|        |      | Shiraz-77T | 1225 | 0        | -0.117922 |  |  |
|        |      | Shiraz-18T | 1434 | 0.244465 | 0         |  |  |
|        |      | Shiraz-22T | 1549 | 0        | -0.319623 |  |  |
|        |      | Shiraz-25T | 1698 | 0.21835  | 0         |  |  |
|        |      | Shiraz-28T | 1735 | 0.350744 | 0         |  |  |
|        |      | Shiraz-29T | 1778 | 0.120767 | 0         |  |  |
|        |      | Shiraz-32T | 1833 | 0.551336 | 0         |  |  |
|        |      | Shiraz-38T | 1951 | 0.250891 | 0         |  |  |
|        |      | Shiraz-53T | 2078 | 0.287202 | 0         |  |  |
|        |      | Shiraz-58T | 2159 | 0        | -0.219521 |  |  |
|        |      | Shiraz-71T | 2238 | 0.603631 | 0         |  |  |
|        |      | Shiraz-3T  | 90   | 0.219276 | 0         |  |  |
|        |      | Shiraz-3T  | 93   | 0        | -0.058023 |  |  |
|        |      | Shiraz-4T  | 253  | 0.372918 | 0         |  |  |
|        |      | Shiraz-36T | 378  | 0.179558 | 0         |  |  |
|        |      | Shiraz-36T | 380  | 0.083883 | 0         |  |  |
|        |      | Shiraz-44T | 638  | 0        | -0.433476 |  |  |
|        |      | Shiraz-46T | 943  | 0.093799 | 0         |  |  |
|        |      | Shiraz-46T | 945  | 0        | -0.014838 |  |  |
|        |      | Shiraz-47T | 1029 | 0        | -0.096586 |  |  |
|        |      | Shiraz-49T | 1119 | 0        | -0.157331 |  |  |
|        |      | Shiraz-77T | 1225 | 0        | -0.117922 |  |  |
|        |      | Shiraz-18T | 1434 | 0.244465 | 0         |  |  |
|        |      | Shiraz-22T | 1549 | 0        | -0.319623 |  |  |
|        |      | Shiraz-25T | 1698 | 0.21835  | 0         |  |  |
|        |      | Shiraz-28T | 1735 | 0.350744 | 0         |  |  |
|        |      | Shiraz-29T | 1778 | 0.120767 | 0         |  |  |
|        |      | Shiraz-32T | 1833 | 0.551336 | 0         |  |  |
|        |      | Shiraz-38T | 1951 | 0.250891 | 0         |  |  |
|        |      | Shiraz-53T | 2078 | 0.287202 | 0         |  |  |
|        |      | Shiraz-58T | 2159 | 0        | -0.219521 |  |  |
|        |      | Shiraz-71T | 2238 | 0.603631 | 0         |  |  |
|        |      | Shiraz-3T  | 90   | 0.219276 | 0         |  |  |
|        |      | Shiraz-3T  | 93   | 0        | -0.058023 |  |  |



|         |      |            |      |          |           |  |  |
|---------|------|------------|------|----------|-----------|--|--|
|         |      | Shiraz-4T  | 253  | 0.372918 | 0         |  |  |
|         |      | Shiraz-36T | 378  | 0.179558 | 0         |  |  |
|         |      | Shiraz-36T | 380  | 0.083883 | 0         |  |  |
|         |      | Shiraz-44T | 638  | 0        | -0.433476 |  |  |
|         |      | Shiraz-46T | 943  | 0.093799 | 0         |  |  |
|         |      | Shiraz-46T | 945  | 0        | -0.014838 |  |  |
|         |      | Shiraz-47T | 1029 | 0        | -0.096586 |  |  |
|         |      | Shiraz-49T | 1119 | 0        | -0.157331 |  |  |
|         |      | Shiraz-77T | 1225 | 0        | -0.117922 |  |  |
|         |      | Shiraz-18T | 1434 | 0.244465 | 0         |  |  |
|         |      | Shiraz-22T | 1549 | 0        | -0.319623 |  |  |
|         |      | Shiraz-25T | 1698 | 0.21835  | 0         |  |  |
|         |      | Shiraz-28T | 1735 | 0.350744 | 0         |  |  |
|         |      | Shiraz-29T | 1778 | 0.120767 | 0         |  |  |
|         |      | Shiraz-32T | 1833 | 0.551336 | 0         |  |  |
|         |      | Shiraz-38T | 1951 | 0.250891 | 0         |  |  |
|         |      | Shiraz-53T | 2078 | 0.287202 | 0         |  |  |
|         |      | Shiraz-58T | 2159 | 0        | -0.219521 |  |  |
|         |      | Shiraz-71T | 2238 | 0.603631 | 0         |  |  |
| COL28A1 | chr7 | Shiraz-4T  | 252  | 0.192083 | 0         |  |  |
|         |      | Shiraz-36T | 376  | 0.159952 | 0         |  |  |
|         |      | Shiraz-44T | 628  | 0        | -0.444379 |  |  |
|         |      | Shiraz-47T | 1027 | 0        | -0.117848 |  |  |
|         |      | Shiraz-49T | 1117 | 0        | -0.168296 |  |  |
|         |      | Shiraz-77T | 1222 | 0        | -0.113002 |  |  |
|         |      | Shiraz-18T | 1433 | 0.250973 | 0         |  |  |
|         |      | Shiraz-22T | 1543 | 0        | -0.513696 |  |  |
|         |      | Shiraz-25T | 1697 | 0.21945  | 0         |  |  |
|         |      | Shiraz-28T | 1734 | 0.362882 | 0         |  |  |
|         |      | Shiraz-29T | 1777 | 0.156747 | 0         |  |  |
|         |      | Shiraz-38T | 1950 | 0.265916 | 0         |  |  |
|         |      | Shiraz-53T | 2077 | 0.444626 | 0         |  |  |
|         |      | Shiraz-71T | 2236 | 0.320072 | 0         |  |  |
|         |      | Shiraz-4T  | 252  | 0.192083 | 0         |  |  |
|         |      | Shiraz-36T | 376  | 0.159952 | 0         |  |  |
|         |      | Shiraz-44T | 628  | 0        | -0.444379 |  |  |
|         |      | Shiraz-47T | 1027 | 0        | -0.117848 |  |  |
|         |      | Shiraz-49T | 1117 | 0        | -0.168296 |  |  |
|         |      | Shiraz-77T | 1222 | 0        | -0.113002 |  |  |
|         |      | Shiraz-18T | 1433 | 0.250973 | 0         |  |  |
|         |      | Shiraz-22T | 1543 | 0        | -0.513696 |  |  |
|         |      | Shiraz-25T | 1697 | 0.21945  | 0         |  |  |
|         |      | Shiraz-28T | 1734 | 0.362882 | 0         |  |  |
|         |      | Shiraz-29T | 1777 | 0.156747 | 0         |  |  |
|         |      | Shiraz-38T | 1950 | 0.265916 | 0         |  |  |
|         |      | Shiraz-53T | 2077 | 0.444626 | 0         |  |  |
|         |      | Shiraz-71T | 2236 | 0.320072 | 0         |  |  |

|        |      |            |      |          |           |  |  |
|--------|------|------------|------|----------|-----------|--|--|
|        |      | Shiraz-4T  | 252  | 0.192083 | 0         |  |  |
|        |      | Shiraz-36T | 376  | 0.159952 | 0         |  |  |
|        |      | Shiraz-44T | 628  | 0        | -0.444379 |  |  |
|        |      | Shiraz-47T | 1027 | 0        | -0.117848 |  |  |
|        |      | Shiraz-49T | 1117 | 0        | -0.168296 |  |  |
|        |      | Shiraz-77T | 1222 | 0        | -0.113002 |  |  |
|        |      | Shiraz-18T | 1433 | 0.250973 | 0         |  |  |
|        |      | Shiraz-22T | 1543 | 0        | -0.513696 |  |  |
|        |      | Shiraz-25T | 1697 | 0.21945  | 0         |  |  |
|        |      | Shiraz-28T | 1734 | 0.362882 | 0         |  |  |
|        |      | Shiraz-29T | 1777 | 0.156747 | 0         |  |  |
|        |      | Shiraz-38T | 1950 | 0.265916 | 0         |  |  |
|        |      | Shiraz-53T | 2077 | 0.444626 | 0         |  |  |
|        |      | Shiraz-71T | 2236 | 0.320072 | 0         |  |  |
| COL4A5 | chrX | Shiraz-3T  | 242  | 0        | -0.336434 |  |  |
|        |      | Shiraz-4T  | 261  | 0        | -0.336249 |  |  |
|        |      | Shiraz-16T | 295  | 0.591657 | 0         |  |  |
|        |      | Shiraz-36T | 433  | 0        | -0.803961 |  |  |
|        |      | Shiraz-44T | 899  | 0        | -1.09697  |  |  |
|        |      | Shiraz-49T | 1170 | 0        | -0.967436 |  |  |
|        |      | Shiraz-18T | 1457 | 0.643204 | 0         |  |  |
|        |      | Shiraz-22T | 1673 | 0.611783 | 0         |  |  |
|        |      | Shiraz-25T | 1719 | 0.472955 | 0         |  |  |
|        |      | Shiraz-28T | 1762 | 0.562311 | 0         |  |  |
|        |      | Shiraz-29T | 1801 | 0.815343 | 0         |  |  |
|        |      | Shiraz-32T | 1870 | 0.729766 | 0         |  |  |
|        |      | Shiraz-35T | 1933 | 0.488535 | 0         |  |  |
|        |      | Shiraz-58T | 2223 | 0.833364 | 0         |  |  |
|        |      | Shiraz-71T | 2263 | 0.975531 | 0         |  |  |
|        |      | Shiraz-3T  | 242  | 0        | -0.336434 |  |  |
|        |      | Shiraz-4T  | 261  | 0        | -0.336249 |  |  |
|        |      | Shiraz-16T | 295  | 0.591657 | 0         |  |  |
|        |      | Shiraz-36T | 433  | 0        | -0.803961 |  |  |
|        |      | Shiraz-44T | 899  | 0        | -1.09697  |  |  |
|        |      | Shiraz-49T | 1170 | 0        | -0.967436 |  |  |
|        |      | Shiraz-18T | 1457 | 0.643204 | 0         |  |  |
|        |      | Shiraz-22T | 1673 | 0.611783 | 0         |  |  |
|        |      | Shiraz-25T | 1719 | 0.472955 | 0         |  |  |
|        |      | Shiraz-28T | 1762 | 0.562311 | 0         |  |  |
|        |      | Shiraz-29T | 1801 | 0.815343 | 0         |  |  |
|        |      | Shiraz-32T | 1870 | 0.729766 | 0         |  |  |
|        |      | Shiraz-35T | 1933 | 0.488535 | 0         |  |  |
|        |      | Shiraz-58T | 2223 | 0.833364 | 0         |  |  |
|        |      | Shiraz-71T | 2263 | 0.975531 | 0         |  |  |
|        |      | Shiraz-3T  | 242  | 0        | -0.336434 |  |  |
|        |      | Shiraz-4T  | 261  | 0        | -0.336249 |  |  |
|        |      | Shiraz-16T | 295  | 0.591657 | 0         |  |  |

|        |      |            |      |          |           |  |  |
|--------|------|------------|------|----------|-----------|--|--|
|        |      | Shiraz-36T | 433  | 0        | -0.803961 |  |  |
|        |      | Shiraz-44T | 899  | 0        | -1.09697  |  |  |
|        |      | Shiraz-49T | 1170 | 0        | -0.967436 |  |  |
|        |      | Shiraz-18T | 1457 | 0.643204 | 0         |  |  |
|        |      | Shiraz-22T | 1673 | 0.611783 | 0         |  |  |
|        |      | Shiraz-25T | 1719 | 0.472955 | 0         |  |  |
|        |      | Shiraz-28T | 1762 | 0.562311 | 0         |  |  |
|        |      | Shiraz-29T | 1801 | 0.815343 | 0         |  |  |
|        |      | Shiraz-32T | 1870 | 0.729766 | 0         |  |  |
|        |      | Shiraz-35T | 1933 | 0.488535 | 0         |  |  |
|        |      | Shiraz-58T | 2223 | 0.833364 | 0         |  |  |
|        |      | Shiraz-71T | 2263 | 0.975531 | 0         |  |  |
| COL4A6 | chrX | Shiraz-3T  | 242  | 0        | -0.336434 |  |  |
|        |      | Shiraz-3T  | 242  | 0        | -0.336434 |  |  |
|        |      | Shiraz-4T  | 261  | 0        | -0.336249 |  |  |
|        |      | Shiraz-4T  | 261  | 0        | -0.336249 |  |  |
|        |      | Shiraz-16T | 295  | 0.591657 | 0         |  |  |
|        |      | Shiraz-16T | 295  | 0.591657 | 0         |  |  |
|        |      | Shiraz-36T | 433  | 0        | -0.803961 |  |  |
|        |      | Shiraz-36T | 433  | 0        | -0.803961 |  |  |
|        |      | Shiraz-44T | 899  | 0        | -1.09697  |  |  |
|        |      | Shiraz-44T | 899  | 0        | -1.09697  |  |  |
|        |      | Shiraz-49T | 1170 | 0        | -0.967436 |  |  |
|        |      | Shiraz-49T | 1170 | 0        | -0.967436 |  |  |
|        |      | Shiraz-18T | 1457 | 0.643204 | 0         |  |  |
|        |      | Shiraz-18T | 1457 | 0.643204 | 0         |  |  |
|        |      | Shiraz-22T | 1673 | 0.611783 | 0         |  |  |
|        |      | Shiraz-22T | 1673 | 0.611783 | 0         |  |  |
|        |      | Shiraz-25T | 1719 | 0.472955 | 0         |  |  |
|        |      | Shiraz-25T | 1719 | 0.472955 | 0         |  |  |
|        |      | Shiraz-28T | 1762 | 0.562311 | 0         |  |  |
|        |      | Shiraz-28T | 1762 | 0.562311 | 0         |  |  |
|        |      | Shiraz-29T | 1801 | 0.815343 | 0         |  |  |
|        |      | Shiraz-29T | 1801 | 0.815343 | 0         |  |  |
|        |      | Shiraz-32T | 1870 | 0.729766 | 0         |  |  |
|        |      | Shiraz-32T | 1870 | 0.729766 | 0         |  |  |
|        |      | Shiraz-35T | 1933 | 0.488535 | 0         |  |  |
|        |      | Shiraz-35T | 1933 | 0.488535 | 0         |  |  |
|        |      | Shiraz-58T | 2223 | 0.833364 | 0         |  |  |
|        |      | Shiraz-58T | 2223 | 0.833364 | 0         |  |  |
|        |      | Shiraz-71T | 2263 | 0.975531 | 0         |  |  |
|        |      | Shiraz-71T | 2263 | 0.975531 | 0         |  |  |
|        |      | Shiraz-3T  | 242  | 0        | -0.336434 |  |  |
|        |      | Shiraz-3T  | 242  | 0        | -0.336434 |  |  |
|        |      | Shiraz-4T  | 261  | 0        | -0.336249 |  |  |
|        |      | Shiraz-4T  | 261  | 0        | -0.336249 |  |  |
|        |      | Shiraz-16T | 295  | 0.591657 | 0         |  |  |

|  |            |      |          |           |  |
|--|------------|------|----------|-----------|--|
|  | Shiraz-16T | 295  | 0.591657 | 0         |  |
|  | Shiraz-36T | 433  | 0        | -0.803961 |  |
|  | Shiraz-36T | 433  | 0        | -0.803961 |  |
|  | Shiraz-44T | 899  | 0        | -1.09697  |  |
|  | Shiraz-44T | 899  | 0        | -1.09697  |  |
|  | Shiraz-49T | 1170 | 0        | -0.967436 |  |
|  | Shiraz-49T | 1170 | 0        | -0.967436 |  |
|  | Shiraz-18T | 1457 | 0.643204 | 0         |  |
|  | Shiraz-18T | 1457 | 0.643204 | 0         |  |
|  | Shiraz-22T | 1673 | 0.611783 | 0         |  |
|  | Shiraz-22T | 1673 | 0.611783 | 0         |  |
|  | Shiraz-25T | 1719 | 0.472955 | 0         |  |
|  | Shiraz-25T | 1719 | 0.472955 | 0         |  |
|  | Shiraz-28T | 1762 | 0.562311 | 0         |  |
|  | Shiraz-28T | 1762 | 0.562311 | 0         |  |
|  | Shiraz-29T | 1801 | 0.815343 | 0         |  |
|  | Shiraz-29T | 1801 | 0.815343 | 0         |  |
|  | Shiraz-32T | 1870 | 0.729766 | 0         |  |
|  | Shiraz-32T | 1870 | 0.729766 | 0         |  |
|  | Shiraz-35T | 1933 | 0.488535 | 0         |  |
|  | Shiraz-35T | 1933 | 0.488535 | 0         |  |
|  | Shiraz-58T | 2223 | 0.833364 | 0         |  |
|  | Shiraz-58T | 2223 | 0.833364 | 0         |  |
|  | Shiraz-71T | 2263 | 0.975531 | 0         |  |
|  | Shiraz-71T | 2263 | 0.975531 | 0         |  |
|  | Shiraz-3T  | 242  | 0        | -0.336434 |  |
|  | Shiraz-3T  | 242  | 0        | -0.336434 |  |
|  | Shiraz-4T  | 261  | 0        | -0.336249 |  |
|  | Shiraz-4T  | 261  | 0        | -0.336249 |  |
|  | Shiraz-16T | 295  | 0.591657 | 0         |  |
|  | Shiraz-16T | 295  | 0.591657 | 0         |  |
|  | Shiraz-36T | 433  | 0        | -0.803961 |  |
|  | Shiraz-36T | 433  | 0        | -0.803961 |  |
|  | Shiraz-44T | 899  | 0        | -1.09697  |  |
|  | Shiraz-44T | 899  | 0        | -1.09697  |  |
|  | Shiraz-49T | 1170 | 0        | -0.967436 |  |
|  | Shiraz-49T | 1170 | 0        | -0.967436 |  |
|  | Shiraz-18T | 1457 | 0.643204 | 0         |  |
|  | Shiraz-18T | 1457 | 0.643204 | 0         |  |
|  | Shiraz-22T | 1673 | 0.611783 | 0         |  |
|  | Shiraz-22T | 1673 | 0.611783 | 0         |  |
|  | Shiraz-25T | 1719 | 0.472955 | 0         |  |
|  | Shiraz-25T | 1719 | 0.472955 | 0         |  |
|  | Shiraz-28T | 1762 | 0.562311 | 0         |  |
|  | Shiraz-28T | 1762 | 0.562311 | 0         |  |
|  | Shiraz-29T | 1801 | 0.815343 | 0         |  |
|  | Shiraz-29T | 1801 | 0.815343 | 0         |  |

|       |      |            |      |          |           |  |
|-------|------|------------|------|----------|-----------|--|
|       |      | Shiraz-32T | 1870 | 0.729766 | 0         |  |
|       |      | Shiraz-32T | 1870 | 0.729766 | 0         |  |
|       |      | Shiraz-35T | 1933 | 0.488535 | 0         |  |
|       |      | Shiraz-35T | 1933 | 0.488535 | 0         |  |
|       |      | Shiraz-58T | 2223 | 0.833364 | 0         |  |
|       |      | Shiraz-58T | 2223 | 0.833364 | 0         |  |
|       |      | Shiraz-71T | 2263 | 0.975531 | 0         |  |
|       |      | Shiraz-71T | 2263 | 0.975531 | 0         |  |
| COPG2 | chr7 | Shiraz-3T  | 90   | 0.219276 | 0         |  |
|       |      | Shiraz-3T  | 96   | 0.428308 | 0         |  |
|       |      | Shiraz-4T  | 253  | 0.372918 | 0         |  |
|       |      | Shiraz-31T | 317  | 0.204382 | 0         |  |
|       |      | Shiraz-36T | 378  | 0.179558 | 0         |  |
|       |      | Shiraz-44T | 642  | 0.408617 | 0         |  |
|       |      | Shiraz-46T | 943  | 0.093799 | 0         |  |
|       |      | Shiraz-47T | 1032 | 0.171484 | 0         |  |
|       |      | Shiraz-77T | 1225 | 0        | -0.117922 |  |
|       |      | Shiraz-77T | 1229 | 0.051661 | 0         |  |
|       |      | Shiraz-9T  | 1325 | 0.221899 | 0         |  |
|       |      | Shiraz-18T | 1434 | 0.244465 | 0         |  |
|       |      | Shiraz-25T | 1698 | 0.21835  | 0         |  |
|       |      | Shiraz-28T | 1735 | 0.350744 | 0         |  |
|       |      | Shiraz-29T | 1778 | 0.120767 | 0         |  |
|       |      | Shiraz-32T | 1833 | 0.551336 | 0         |  |
|       |      | Shiraz-38T | 1951 | 0.250891 | 0         |  |
|       |      | Shiraz-53T | 2078 | 0.287202 | 0         |  |
|       |      | Shiraz-71T | 2238 | 0.603631 | 0         |  |
|       |      | Shiraz-3T  | 90   | 0.219276 | 0         |  |
|       |      | Shiraz-3T  | 96   | 0.428308 | 0         |  |
|       |      | Shiraz-4T  | 253  | 0.372918 | 0         |  |
|       |      | Shiraz-31T | 317  | 0.204382 | 0         |  |
|       |      | Shiraz-36T | 378  | 0.179558 | 0         |  |
|       |      | Shiraz-44T | 642  | 0.408617 | 0         |  |
|       |      | Shiraz-46T | 943  | 0.093799 | 0         |  |
|       |      | Shiraz-47T | 1032 | 0.171484 | 0         |  |
|       |      | Shiraz-77T | 1225 | 0        | -0.117922 |  |
|       |      | Shiraz-77T | 1229 | 0.051661 | 0         |  |
|       |      | Shiraz-9T  | 1325 | 0.221899 | 0         |  |
|       |      | Shiraz-18T | 1434 | 0.244465 | 0         |  |
|       |      | Shiraz-25T | 1698 | 0.21835  | 0         |  |
|       |      | Shiraz-28T | 1735 | 0.350744 | 0         |  |
|       |      | Shiraz-29T | 1778 | 0.120767 | 0         |  |
|       |      | Shiraz-32T | 1833 | 0.551336 | 0         |  |
|       |      | Shiraz-38T | 1951 | 0.250891 | 0         |  |
|       |      | Shiraz-53T | 2078 | 0.287202 | 0         |  |
|       |      | Shiraz-71T | 2238 | 0.603631 | 0         |  |
|       |      | Shiraz-3T  | 90   | 0.219276 | 0         |  |

|       |      |            |      |          |           |  |
|-------|------|------------|------|----------|-----------|--|
|       |      | Shiraz-3T  | 96   | 0.428308 | 0         |  |
|       |      | Shiraz-4T  | 253  | 0.372918 | 0         |  |
|       |      | Shiraz-31T | 317  | 0.204382 | 0         |  |
|       |      | Shiraz-36T | 378  | 0.179558 | 0         |  |
|       |      | Shiraz-44T | 642  | 0.408617 | 0         |  |
|       |      | Shiraz-46T | 943  | 0.093799 | 0         |  |
|       |      | Shiraz-47T | 1032 | 0.171484 | 0         |  |
|       |      | Shiraz-77T | 1225 | 0        | -0.117922 |  |
|       |      | Shiraz-77T | 1229 | 0.051661 | 0         |  |
|       |      | Shiraz-9T  | 1325 | 0.221899 | 0         |  |
|       |      | Shiraz-18T | 1434 | 0.244465 | 0         |  |
|       |      | Shiraz-25T | 1698 | 0.21835  | 0         |  |
|       |      | Shiraz-28T | 1735 | 0.350744 | 0         |  |
|       |      | Shiraz-29T | 1778 | 0.120767 | 0         |  |
|       |      | Shiraz-32T | 1833 | 0.551336 | 0         |  |
|       |      | Shiraz-38T | 1951 | 0.250891 | 0         |  |
|       |      | Shiraz-53T | 2078 | 0.287202 | 0         |  |
|       |      | Shiraz-71T | 2238 | 0.603631 | 0         |  |
| COPS6 | chr7 | Shiraz-3T  | 90   | 0.219276 | 0         |  |
|       |      | Shiraz-3T  | 94   | 0.74735  | 0         |  |
|       |      | Shiraz-4T  | 253  | 0.372918 | 0         |  |
|       |      | Shiraz-31T | 316  | 0.219196 | 0         |  |
|       |      | Shiraz-36T | 378  | 0.179558 | 0         |  |
|       |      | Shiraz-36T | 381  | 0.332628 | 0         |  |
|       |      | Shiraz-44T | 639  | 1.035032 | 0         |  |
|       |      | Shiraz-46T | 943  | 0.093799 | 0         |  |
|       |      | Shiraz-46T | 946  | 0.299835 | 0         |  |
|       |      | Shiraz-47T | 1030 | 0.257728 | 0         |  |
|       |      | Shiraz-49T | 1120 | 0.281656 | 0         |  |
|       |      | Shiraz-77T | 1225 | 0        | -0.117922 |  |
|       |      | Shiraz-77T | 1227 | 0.196445 | 0         |  |
|       |      | Shiraz-9T  | 1324 | 0.679266 | 0         |  |
|       |      | Shiraz-18T | 1434 | 0.244465 | 0         |  |
|       |      | Shiraz-22T | 1549 | 0        | -0.319623 |  |
|       |      | Shiraz-22T | 1551 | 0.324011 | 0         |  |
|       |      | Shiraz-25T | 1698 | 0.21835  | 0         |  |
|       |      | Shiraz-28T | 1735 | 0.350744 | 0         |  |
|       |      | Shiraz-29T | 1778 | 0.120767 | 0         |  |
|       |      | Shiraz-32T | 1833 | 0.551336 | 0         |  |
|       |      | Shiraz-32T | 1834 | 1.485392 | 0         |  |
|       |      | Shiraz-38T | 1951 | 0.250891 | 0         |  |
|       |      | Shiraz-53T | 2078 | 0.287202 | 0         |  |
|       |      | Shiraz-58T | 2160 | 0.399007 | 0         |  |
|       |      | Shiraz-71T | 2238 | 0.603631 | 0         |  |
|       |      | Shiraz-3T  | 90   | 0.219276 | 0         |  |
|       |      | Shiraz-3T  | 94   | 0.74735  | 0         |  |
|       |      | Shiraz-4T  | 253  | 0.372918 | 0         |  |

|  |            |      |          |           |  |
|--|------------|------|----------|-----------|--|
|  | Shiraz-31T | 316  | 0.219196 | 0         |  |
|  | Shiraz-36T | 378  | 0.179558 | 0         |  |
|  | Shiraz-36T | 381  | 0.332628 | 0         |  |
|  | Shiraz-44T | 639  | 1.035032 | 0         |  |
|  | Shiraz-46T | 943  | 0.093799 | 0         |  |
|  | Shiraz-46T | 946  | 0.299835 | 0         |  |
|  | Shiraz-47T | 1030 | 0.257728 | 0         |  |
|  | Shiraz-49T | 1120 | 0.281656 | 0         |  |
|  | Shiraz-77T | 1225 | 0        | -0.117922 |  |
|  | Shiraz-77T | 1227 | 0.196445 | 0         |  |
|  | Shiraz-9T  | 1324 | 0.679266 | 0         |  |
|  | Shiraz-18T | 1434 | 0.244465 | 0         |  |
|  | Shiraz-22T | 1549 | 0        | -0.319623 |  |
|  | Shiraz-22T | 1551 | 0.324011 | 0         |  |
|  | Shiraz-25T | 1698 | 0.21835  | 0         |  |
|  | Shiraz-28T | 1735 | 0.350744 | 0         |  |
|  | Shiraz-29T | 1778 | 0.120767 | 0         |  |
|  | Shiraz-32T | 1833 | 0.551336 | 0         |  |
|  | Shiraz-32T | 1834 | 1.485392 | 0         |  |
|  | Shiraz-38T | 1951 | 0.250891 | 0         |  |
|  | Shiraz-53T | 2078 | 0.287202 | 0         |  |
|  | Shiraz-58T | 2160 | 0.399007 | 0         |  |
|  | Shiraz-71T | 2238 | 0.603631 | 0         |  |
|  | Shiraz-3T  | 90   | 0.219276 | 0         |  |
|  | Shiraz-3T  | 94   | 0.74735  | 0         |  |
|  | Shiraz-4T  | 253  | 0.372918 | 0         |  |
|  | Shiraz-31T | 316  | 0.219196 | 0         |  |
|  | Shiraz-36T | 378  | 0.179558 | 0         |  |
|  | Shiraz-36T | 381  | 0.332628 | 0         |  |
|  | Shiraz-44T | 639  | 1.035032 | 0         |  |
|  | Shiraz-46T | 943  | 0.093799 | 0         |  |
|  | Shiraz-46T | 946  | 0.299835 | 0         |  |
|  | Shiraz-47T | 1030 | 0.257728 | 0         |  |
|  | Shiraz-49T | 1120 | 0.281656 | 0         |  |
|  | Shiraz-77T | 1225 | 0        | -0.117922 |  |
|  | Shiraz-77T | 1227 | 0.196445 | 0         |  |
|  | Shiraz-9T  | 1324 | 0.679266 | 0         |  |
|  | Shiraz-18T | 1434 | 0.244465 | 0         |  |
|  | Shiraz-22T | 1549 | 0        | -0.319623 |  |
|  | Shiraz-22T | 1551 | 0.324011 | 0         |  |
|  | Shiraz-25T | 1698 | 0.21835  | 0         |  |
|  | Shiraz-28T | 1735 | 0.350744 | 0         |  |
|  | Shiraz-29T | 1778 | 0.120767 | 0         |  |
|  | Shiraz-32T | 1833 | 0.551336 | 0         |  |
|  | Shiraz-32T | 1834 | 1.485392 | 0         |  |
|  | Shiraz-38T | 1951 | 0.250891 | 0         |  |
|  | Shiraz-53T | 2078 | 0.287202 | 0         |  |

|       |      |            |      |          |           |  |
|-------|------|------------|------|----------|-----------|--|
|       |      | Shiraz-58T | 2160 | 0.399007 | 0         |  |
|       |      | Shiraz-71T | 2238 | 0.603631 | 0         |  |
| COX7B | chrX | Shiraz-3T  | 242  | 0        | -0.336434 |  |
|       |      | Shiraz-4T  | 261  | 0        | -0.336249 |  |
|       |      | Shiraz-16T | 295  | 0.591657 | 0         |  |
|       |      | Shiraz-36T | 433  | 0        | -0.803961 |  |
|       |      | Shiraz-44T | 899  | 0        | -1.09697  |  |
|       |      | Shiraz-49T | 1170 | 0        | -0.967436 |  |
|       |      | Shiraz-18T | 1457 | 0.643204 | 0         |  |
|       |      | Shiraz-22T | 1673 | 0.611783 | 0         |  |
|       |      | Shiraz-25T | 1719 | 0.472955 | 0         |  |
|       |      | Shiraz-28T | 1762 | 0.562311 | 0         |  |
|       |      | Shiraz-29T | 1801 | 0.815343 | 0         |  |
|       |      | Shiraz-32T | 1870 | 0.729766 | 0         |  |
|       |      | Shiraz-35T | 1933 | 0.488535 | 0         |  |
|       |      | Shiraz-58T | 2223 | 0.833364 | 0         |  |
|       |      | Shiraz-71T | 2263 | 0.975531 | 0         |  |
|       |      | Shiraz-3T  | 242  | 0        | -0.336434 |  |
|       |      | Shiraz-4T  | 261  | 0        | -0.336249 |  |
|       |      | Shiraz-16T | 295  | 0.591657 | 0         |  |
|       |      | Shiraz-36T | 433  | 0        | -0.803961 |  |
|       |      | Shiraz-44T | 899  | 0        | -1.09697  |  |
|       |      | Shiraz-49T | 1170 | 0        | -0.967436 |  |
|       |      | Shiraz-18T | 1457 | 0.643204 | 0         |  |
|       |      | Shiraz-22T | 1673 | 0.611783 | 0         |  |
|       |      | Shiraz-25T | 1719 | 0.472955 | 0         |  |
|       |      | Shiraz-28T | 1762 | 0.562311 | 0         |  |
|       |      | Shiraz-29T | 1801 | 0.815343 | 0         |  |
|       |      | Shiraz-32T | 1870 | 0.729766 | 0         |  |
|       |      | Shiraz-35T | 1933 | 0.488535 | 0         |  |
|       |      | Shiraz-58T | 2223 | 0.833364 | 0         |  |
|       |      | Shiraz-71T | 2263 | 0.975531 | 0         |  |
|       |      | Shiraz-3T  | 242  | 0        | -0.336434 |  |
|       |      | Shiraz-4T  | 261  | 0        | -0.336249 |  |
|       |      | Shiraz-16T | 295  | 0.591657 | 0         |  |
|       |      | Shiraz-36T | 433  | 0        | -0.803961 |  |
|       |      | Shiraz-44T | 899  | 0        | -1.09697  |  |
|       |      | Shiraz-49T | 1170 | 0        | -0.967436 |  |
|       |      | Shiraz-18T | 1457 | 0.643204 | 0         |  |
|       |      | Shiraz-22T | 1673 | 0.611783 | 0         |  |
|       |      | Shiraz-25T | 1719 | 0.472955 | 0         |  |
|       |      | Shiraz-28T | 1762 | 0.562311 | 0         |  |
|       |      | Shiraz-29T | 1801 | 0.815343 | 0         |  |
|       |      | Shiraz-32T | 1870 | 0.729766 | 0         |  |
|       |      | Shiraz-35T | 1933 | 0.488535 | 0         |  |
|       |      | Shiraz-58T | 2223 | 0.833364 | 0         |  |
|       |      | Shiraz-71T | 2263 | 0.975531 | 0         |  |



|      |      |            |      |          |           |  |
|------|------|------------|------|----------|-----------|--|
| CPA1 | chr7 | Shiraz-3T  | 90   | 0.219276 | 0         |  |
|      |      | Shiraz-3T  | 96   | 0.428308 | 0         |  |
|      |      | Shiraz-4T  | 253  | 0.372918 | 0         |  |
|      |      | Shiraz-31T | 317  | 0.204382 | 0         |  |
|      |      | Shiraz-36T | 378  | 0.179558 | 0         |  |
|      |      | Shiraz-44T | 642  | 0.408617 | 0         |  |
|      |      | Shiraz-46T | 943  | 0.093799 | 0         |  |
|      |      | Shiraz-47T | 1032 | 0.171484 | 0         |  |
|      |      | Shiraz-77T | 1225 | 0        | -0.117922 |  |
|      |      | Shiraz-77T | 1229 | 0.051661 | 0         |  |
|      |      | Shiraz-9T  | 1325 | 0.221899 | 0         |  |
|      |      | Shiraz-18T | 1434 | 0.244465 | 0         |  |
|      |      | Shiraz-25T | 1698 | 0.21835  | 0         |  |
|      |      | Shiraz-28T | 1735 | 0.350744 | 0         |  |
|      |      | Shiraz-29T | 1778 | 0.120767 | 0         |  |
|      |      | Shiraz-32T | 1833 | 0.551336 | 0         |  |
|      |      | Shiraz-38T | 1951 | 0.250891 | 0         |  |
|      |      | Shiraz-53T | 2078 | 0.287202 | 0         |  |
|      |      | Shiraz-71T | 2238 | 0.603631 | 0         |  |
|      |      | Shiraz-3T  | 90   | 0.219276 | 0         |  |
|      |      | Shiraz-3T  | 96   | 0.428308 | 0         |  |
|      |      | Shiraz-4T  | 253  | 0.372918 | 0         |  |
|      |      | Shiraz-31T | 317  | 0.204382 | 0         |  |
|      |      | Shiraz-36T | 378  | 0.179558 | 0         |  |
|      |      | Shiraz-44T | 642  | 0.408617 | 0         |  |
|      |      | Shiraz-46T | 943  | 0.093799 | 0         |  |
|      |      | Shiraz-47T | 1032 | 0.171484 | 0         |  |
|      |      | Shiraz-77T | 1225 | 0        | -0.117922 |  |
|      |      | Shiraz-77T | 1229 | 0.051661 | 0         |  |
|      |      | Shiraz-9T  | 1325 | 0.221899 | 0         |  |
|      |      | Shiraz-18T | 1434 | 0.244465 | 0         |  |
|      |      | Shiraz-25T | 1698 | 0.21835  | 0         |  |
|      |      | Shiraz-28T | 1735 | 0.350744 | 0         |  |
|      |      | Shiraz-29T | 1778 | 0.120767 | 0         |  |
|      |      | Shiraz-32T | 1833 | 0.551336 | 0         |  |
|      |      | Shiraz-38T | 1951 | 0.250891 | 0         |  |
|      |      | Shiraz-53T | 2078 | 0.287202 | 0         |  |
|      |      | Shiraz-71T | 2238 | 0.603631 | 0         |  |
|      |      | Shiraz-3T  | 90   | 0.219276 | 0         |  |
|      |      | Shiraz-3T  | 96   | 0.428308 | 0         |  |
|      |      | Shiraz-4T  | 253  | 0.372918 | 0         |  |
|      |      | Shiraz-31T | 317  | 0.204382 | 0         |  |
|      |      | Shiraz-36T | 378  | 0.179558 | 0         |  |
|      |      | Shiraz-44T | 642  | 0.408617 | 0         |  |
|      |      | Shiraz-46T | 943  | 0.093799 | 0         |  |
|      |      | Shiraz-47T | 1032 | 0.171484 | 0         |  |
|      |      | Shiraz-77T | 1225 | 0        | -0.117922 |  |

|      |      |            |      |          |           |  |
|------|------|------------|------|----------|-----------|--|
|      |      | Shiraz-77T | 1229 | 0.051661 | 0         |  |
|      |      | Shiraz-9T  | 1325 | 0.221899 | 0         |  |
|      |      | Shiraz-18T | 1434 | 0.244465 | 0         |  |
|      |      | Shiraz-25T | 1698 | 0.21835  | 0         |  |
|      |      | Shiraz-28T | 1735 | 0.350744 | 0         |  |
|      |      | Shiraz-29T | 1778 | 0.120767 | 0         |  |
|      |      | Shiraz-32T | 1833 | 0.551336 | 0         |  |
|      |      | Shiraz-38T | 1951 | 0.250891 | 0         |  |
|      |      | Shiraz-53T | 2078 | 0.287202 | 0         |  |
|      |      | Shiraz-71T | 2238 | 0.603631 | 0         |  |
| CPA2 | chr7 | Shiraz-3T  | 90   | 0.219276 | 0         |  |
|      |      | Shiraz-3T  | 96   | 0.428308 | 0         |  |
|      |      | Shiraz-4T  | 253  | 0.372918 | 0         |  |
|      |      | Shiraz-31T | 317  | 0.204382 | 0         |  |
|      |      | Shiraz-36T | 378  | 0.179558 | 0         |  |
|      |      | Shiraz-44T | 642  | 0.408617 | 0         |  |
|      |      | Shiraz-46T | 943  | 0.093799 | 0         |  |
|      |      | Shiraz-47T | 1032 | 0.171484 | 0         |  |
|      |      | Shiraz-77T | 1225 | 0        | -0.117922 |  |
|      |      | Shiraz-77T | 1229 | 0.051661 | 0         |  |
|      |      | Shiraz-9T  | 1325 | 0.221899 | 0         |  |
|      |      | Shiraz-18T | 1434 | 0.244465 | 0         |  |
|      |      | Shiraz-25T | 1698 | 0.21835  | 0         |  |
|      |      | Shiraz-28T | 1735 | 0.350744 | 0         |  |
|      |      | Shiraz-29T | 1778 | 0.120767 | 0         |  |
|      |      | Shiraz-32T | 1833 | 0.551336 | 0         |  |
|      |      | Shiraz-38T | 1951 | 0.250891 | 0         |  |
|      |      | Shiraz-53T | 2078 | 0.287202 | 0         |  |
|      |      | Shiraz-71T | 2238 | 0.603631 | 0         |  |
|      |      | Shiraz-3T  | 90   | 0.219276 | 0         |  |
|      |      | Shiraz-3T  | 96   | 0.428308 | 0         |  |
|      |      | Shiraz-4T  | 253  | 0.372918 | 0         |  |
|      |      | Shiraz-31T | 317  | 0.204382 | 0         |  |
|      |      | Shiraz-36T | 378  | 0.179558 | 0         |  |
|      |      | Shiraz-44T | 642  | 0.408617 | 0         |  |
|      |      | Shiraz-46T | 943  | 0.093799 | 0         |  |
|      |      | Shiraz-47T | 1032 | 0.171484 | 0         |  |
|      |      | Shiraz-77T | 1225 | 0        | -0.117922 |  |
|      |      | Shiraz-77T | 1229 | 0.051661 | 0         |  |
|      |      | Shiraz-9T  | 1325 | 0.221899 | 0         |  |
|      |      | Shiraz-18T | 1434 | 0.244465 | 0         |  |
|      |      | Shiraz-25T | 1698 | 0.21835  | 0         |  |
|      |      | Shiraz-28T | 1735 | 0.350744 | 0         |  |
|      |      | Shiraz-29T | 1778 | 0.120767 | 0         |  |
|      |      | Shiraz-32T | 1833 | 0.551336 | 0         |  |
|      |      | Shiraz-38T | 1951 | 0.250891 | 0         |  |
|      |      | Shiraz-53T | 2078 | 0.287202 | 0         |  |

|      |      |            |      |          |           |  |
|------|------|------------|------|----------|-----------|--|
|      |      | Shiraz-71T | 2238 | 0.603631 | 0         |  |
|      |      | Shiraz-3T  | 90   | 0.219276 | 0         |  |
|      |      | Shiraz-3T  | 96   | 0.428308 | 0         |  |
|      |      | Shiraz-4T  | 253  | 0.372918 | 0         |  |
|      |      | Shiraz-31T | 317  | 0.204382 | 0         |  |
|      |      | Shiraz-36T | 378  | 0.179558 | 0         |  |
|      |      | Shiraz-44T | 642  | 0.408617 | 0         |  |
|      |      | Shiraz-46T | 943  | 0.093799 | 0         |  |
|      |      | Shiraz-47T | 1032 | 0.171484 | 0         |  |
|      |      | Shiraz-77T | 1225 | 0        | -0.117922 |  |
|      |      | Shiraz-77T | 1229 | 0.051661 | 0         |  |
|      |      | Shiraz-9T  | 1325 | 0.221899 | 0         |  |
|      |      | Shiraz-18T | 1434 | 0.244465 | 0         |  |
|      |      | Shiraz-25T | 1698 | 0.21835  | 0         |  |
|      |      | Shiraz-28T | 1735 | 0.350744 | 0         |  |
|      |      | Shiraz-29T | 1778 | 0.120767 | 0         |  |
|      |      | Shiraz-32T | 1833 | 0.551336 | 0         |  |
|      |      | Shiraz-38T | 1951 | 0.250891 | 0         |  |
|      |      | Shiraz-53T | 2078 | 0.287202 | 0         |  |
|      |      | Shiraz-71T | 2238 | 0.603631 | 0         |  |
| CPA4 | chr7 | Shiraz-3T  | 90   | 0.219276 | 0         |  |
|      |      | Shiraz-3T  | 96   | 0.428308 | 0         |  |
|      |      | Shiraz-4T  | 253  | 0.372918 | 0         |  |
|      |      | Shiraz-31T | 317  | 0.204382 | 0         |  |
|      |      | Shiraz-36T | 378  | 0.179558 | 0         |  |
|      |      | Shiraz-44T | 642  | 0.408617 | 0         |  |
|      |      | Shiraz-46T | 943  | 0.093799 | 0         |  |
|      |      | Shiraz-47T | 1032 | 0.171484 | 0         |  |
|      |      | Shiraz-77T | 1225 | 0        | -0.117922 |  |
|      |      | Shiraz-77T | 1229 | 0.051661 | 0         |  |
|      |      | Shiraz-9T  | 1325 | 0.221899 | 0         |  |
|      |      | Shiraz-18T | 1434 | 0.244465 | 0         |  |
|      |      | Shiraz-25T | 1698 | 0.21835  | 0         |  |
|      |      | Shiraz-28T | 1735 | 0.350744 | 0         |  |
|      |      | Shiraz-29T | 1778 | 0.120767 | 0         |  |
|      |      | Shiraz-32T | 1833 | 0.551336 | 0         |  |
|      |      | Shiraz-38T | 1951 | 0.250891 | 0         |  |
|      |      | Shiraz-53T | 2078 | 0.287202 | 0         |  |
|      |      | Shiraz-71T | 2238 | 0.603631 | 0         |  |
|      |      | Shiraz-3T  | 90   | 0.219276 | 0         |  |
|      |      | Shiraz-3T  | 96   | 0.428308 | 0         |  |
|      |      | Shiraz-4T  | 253  | 0.372918 | 0         |  |
|      |      | Shiraz-31T | 317  | 0.204382 | 0         |  |
|      |      | Shiraz-36T | 378  | 0.179558 | 0         |  |
|      |      | Shiraz-44T | 642  | 0.408617 | 0         |  |
|      |      | Shiraz-46T | 943  | 0.093799 | 0         |  |
|      |      | Shiraz-47T | 1032 | 0.171484 | 0         |  |

|      |      |            |      |          |           |  |  |
|------|------|------------|------|----------|-----------|--|--|
|      |      | Shiraz-77T | 1225 | 0        | -0.117922 |  |  |
|      |      | Shiraz-77T | 1229 | 0.051661 | 0         |  |  |
|      |      | Shiraz-9T  | 1325 | 0.221899 | 0         |  |  |
|      |      | Shiraz-18T | 1434 | 0.244465 | 0         |  |  |
|      |      | Shiraz-25T | 1698 | 0.21835  | 0         |  |  |
|      |      | Shiraz-28T | 1735 | 0.350744 | 0         |  |  |
|      |      | Shiraz-29T | 1778 | 0.120767 | 0         |  |  |
|      |      | Shiraz-32T | 1833 | 0.551336 | 0         |  |  |
|      |      | Shiraz-38T | 1951 | 0.250891 | 0         |  |  |
|      |      | Shiraz-53T | 2078 | 0.287202 | 0         |  |  |
|      |      | Shiraz-71T | 2238 | 0.603631 | 0         |  |  |
|      |      | Shiraz-3T  | 90   | 0.219276 | 0         |  |  |
|      |      | Shiraz-3T  | 96   | 0.428308 | 0         |  |  |
|      |      | Shiraz-4T  | 253  | 0.372918 | 0         |  |  |
|      |      | Shiraz-31T | 317  | 0.204382 | 0         |  |  |
|      |      | Shiraz-36T | 378  | 0.179558 | 0         |  |  |
|      |      | Shiraz-44T | 642  | 0.408617 | 0         |  |  |
|      |      | Shiraz-46T | 943  | 0.093799 | 0         |  |  |
|      |      | Shiraz-47T | 1032 | 0.171484 | 0         |  |  |
|      |      | Shiraz-77T | 1225 | 0        | -0.117922 |  |  |
|      |      | Shiraz-77T | 1229 | 0.051661 | 0         |  |  |
|      |      | Shiraz-9T  | 1325 | 0.221899 | 0         |  |  |
|      |      | Shiraz-18T | 1434 | 0.244465 | 0         |  |  |
|      |      | Shiraz-25T | 1698 | 0.21835  | 0         |  |  |
|      |      | Shiraz-28T | 1735 | 0.350744 | 0         |  |  |
|      |      | Shiraz-29T | 1778 | 0.120767 | 0         |  |  |
|      |      | Shiraz-32T | 1833 | 0.551336 | 0         |  |  |
|      |      | Shiraz-38T | 1951 | 0.250891 | 0         |  |  |
|      |      | Shiraz-53T | 2078 | 0.287202 | 0         |  |  |
|      |      | Shiraz-71T | 2238 | 0.603631 | 0         |  |  |
| CPA5 | chr7 | Shiraz-3T  | 90   | 0.219276 | 0         |  |  |
|      |      | Shiraz-3T  | 90   | 0.219276 | 0         |  |  |
|      |      | Shiraz-3T  | 96   | 0.428308 | 0         |  |  |
|      |      | Shiraz-3T  | 96   | 0.428308 | 0         |  |  |
|      |      | Shiraz-4T  | 253  | 0.372918 | 0         |  |  |
|      |      | Shiraz-4T  | 253  | 0.372918 | 0         |  |  |
|      |      | Shiraz-31T | 317  | 0.204382 | 0         |  |  |
|      |      | Shiraz-31T | 317  | 0.204382 | 0         |  |  |
|      |      | Shiraz-36T | 378  | 0.179558 | 0         |  |  |
|      |      | Shiraz-36T | 378  | 0.179558 | 0         |  |  |
|      |      | Shiraz-44T | 642  | 0.408617 | 0         |  |  |
|      |      | Shiraz-44T | 642  | 0.408617 | 0         |  |  |
|      |      | Shiraz-46T | 943  | 0.093799 | 0         |  |  |
|      |      | Shiraz-46T | 943  | 0.093799 | 0         |  |  |
|      |      | Shiraz-47T | 1032 | 0.171484 | 0         |  |  |
|      |      | Shiraz-47T | 1032 | 0.171484 | 0         |  |  |
|      |      | Shiraz-77T | 1225 | 0        | -0.117922 |  |  |

|  |            |      |          |           |  |
|--|------------|------|----------|-----------|--|
|  | Shiraz-77T | 1225 | 0        | -0.117922 |  |
|  | Shiraz-77T | 1229 | 0.051661 | 0         |  |
|  | Shiraz-77T | 1229 | 0.051661 | 0         |  |
|  | Shiraz-9T  | 1325 | 0.221899 | 0         |  |
|  | Shiraz-9T  | 1325 | 0.221899 | 0         |  |
|  | Shiraz-18T | 1434 | 0.244465 | 0         |  |
|  | Shiraz-18T | 1434 | 0.244465 | 0         |  |
|  | Shiraz-25T | 1698 | 0.21835  | 0         |  |
|  | Shiraz-25T | 1698 | 0.21835  | 0         |  |
|  | Shiraz-28T | 1735 | 0.350744 | 0         |  |
|  | Shiraz-28T | 1735 | 0.350744 | 0         |  |
|  | Shiraz-29T | 1778 | 0.120767 | 0         |  |
|  | Shiraz-29T | 1778 | 0.120767 | 0         |  |
|  | Shiraz-32T | 1833 | 0.551336 | 0         |  |
|  | Shiraz-32T | 1833 | 0.551336 | 0         |  |
|  | Shiraz-38T | 1951 | 0.250891 | 0         |  |
|  | Shiraz-38T | 1951 | 0.250891 | 0         |  |
|  | Shiraz-53T | 2078 | 0.287202 | 0         |  |
|  | Shiraz-53T | 2078 | 0.287202 | 0         |  |
|  | Shiraz-71T | 2238 | 0.603631 | 0         |  |
|  | Shiraz-71T | 2238 | 0.603631 | 0         |  |
|  | Shiraz-3T  | 90   | 0.219276 | 0         |  |
|  | Shiraz-3T  | 90   | 0.219276 | 0         |  |
|  | Shiraz-3T  | 96   | 0.428308 | 0         |  |
|  | Shiraz-3T  | 96   | 0.428308 | 0         |  |
|  | Shiraz-4T  | 253  | 0.372918 | 0         |  |
|  | Shiraz-4T  | 253  | 0.372918 | 0         |  |
|  | Shiraz-31T | 317  | 0.204382 | 0         |  |
|  | Shiraz-31T | 317  | 0.204382 | 0         |  |
|  | Shiraz-36T | 378  | 0.179558 | 0         |  |
|  | Shiraz-36T | 378  | 0.179558 | 0         |  |
|  | Shiraz-44T | 642  | 0.408617 | 0         |  |
|  | Shiraz-44T | 642  | 0.408617 | 0         |  |
|  | Shiraz-46T | 943  | 0.093799 | 0         |  |
|  | Shiraz-46T | 943  | 0.093799 | 0         |  |
|  | Shiraz-47T | 1032 | 0.171484 | 0         |  |
|  | Shiraz-47T | 1032 | 0.171484 | 0         |  |
|  | Shiraz-77T | 1225 | 0        | -0.117922 |  |
|  | Shiraz-77T | 1225 | 0        | -0.117922 |  |
|  | Shiraz-77T | 1229 | 0.051661 | 0         |  |
|  | Shiraz-77T | 1229 | 0.051661 | 0         |  |
|  | Shiraz-9T  | 1325 | 0.221899 | 0         |  |
|  | Shiraz-9T  | 1325 | 0.221899 | 0         |  |
|  | Shiraz-18T | 1434 | 0.244465 | 0         |  |
|  | Shiraz-18T | 1434 | 0.244465 | 0         |  |
|  | Shiraz-25T | 1698 | 0.21835  | 0         |  |
|  | Shiraz-25T | 1698 | 0.21835  | 0         |  |

|  |            |      |          |           |  |
|--|------------|------|----------|-----------|--|
|  | Shiraz-28T | 1735 | 0.350744 | 0         |  |
|  | Shiraz-28T | 1735 | 0.350744 | 0         |  |
|  | Shiraz-29T | 1778 | 0.120767 | 0         |  |
|  | Shiraz-29T | 1778 | 0.120767 | 0         |  |
|  | Shiraz-32T | 1833 | 0.551336 | 0         |  |
|  | Shiraz-32T | 1833 | 0.551336 | 0         |  |
|  | Shiraz-38T | 1951 | 0.250891 | 0         |  |
|  | Shiraz-38T | 1951 | 0.250891 | 0         |  |
|  | Shiraz-53T | 2078 | 0.287202 | 0         |  |
|  | Shiraz-53T | 2078 | 0.287202 | 0         |  |
|  | Shiraz-71T | 2238 | 0.603631 | 0         |  |
|  | Shiraz-71T | 2238 | 0.603631 | 0         |  |
|  | Shiraz-3T  | 90   | 0.219276 | 0         |  |
|  | Shiraz-3T  | 90   | 0.219276 | 0         |  |
|  | Shiraz-3T  | 96   | 0.428308 | 0         |  |
|  | Shiraz-3T  | 96   | 0.428308 | 0         |  |
|  | Shiraz-4T  | 253  | 0.372918 | 0         |  |
|  | Shiraz-4T  | 253  | 0.372918 | 0         |  |
|  | Shiraz-31T | 317  | 0.204382 | 0         |  |
|  | Shiraz-31T | 317  | 0.204382 | 0         |  |
|  | Shiraz-36T | 378  | 0.179558 | 0         |  |
|  | Shiraz-36T | 378  | 0.179558 | 0         |  |
|  | Shiraz-44T | 642  | 0.408617 | 0         |  |
|  | Shiraz-44T | 642  | 0.408617 | 0         |  |
|  | Shiraz-46T | 943  | 0.093799 | 0         |  |
|  | Shiraz-46T | 943  | 0.093799 | 0         |  |
|  | Shiraz-47T | 1032 | 0.171484 | 0         |  |
|  | Shiraz-47T | 1032 | 0.171484 | 0         |  |
|  | Shiraz-77T | 1225 | 0        | -0.117922 |  |
|  | Shiraz-77T | 1225 | 0        | -0.117922 |  |
|  | Shiraz-77T | 1229 | 0.051661 | 0         |  |
|  | Shiraz-77T | 1229 | 0.051661 | 0         |  |
|  | Shiraz-9T  | 1325 | 0.221899 | 0         |  |
|  | Shiraz-9T  | 1325 | 0.221899 | 0         |  |
|  | Shiraz-18T | 1434 | 0.244465 | 0         |  |
|  | Shiraz-18T | 1434 | 0.244465 | 0         |  |
|  | Shiraz-25T | 1698 | 0.21835  | 0         |  |
|  | Shiraz-25T | 1698 | 0.21835  | 0         |  |
|  | Shiraz-28T | 1735 | 0.350744 | 0         |  |
|  | Shiraz-28T | 1735 | 0.350744 | 0         |  |
|  | Shiraz-29T | 1778 | 0.120767 | 0         |  |
|  | Shiraz-29T | 1778 | 0.120767 | 0         |  |
|  | Shiraz-32T | 1833 | 0.551336 | 0         |  |
|  | Shiraz-32T | 1833 | 0.551336 | 0         |  |
|  | Shiraz-38T | 1951 | 0.250891 | 0         |  |
|  | Shiraz-38T | 1951 | 0.250891 | 0         |  |
|  | Shiraz-53T | 2078 | 0.287202 | 0         |  |

|       |      |            |      |          |           |  |
|-------|------|------------|------|----------|-----------|--|
|       |      | Shiraz-53T | 2078 | 0.287202 | 0         |  |
|       |      | Shiraz-71T | 2238 | 0.603631 | 0         |  |
|       |      | Shiraz-71T | 2238 | 0.603631 | 0         |  |
| CPSF4 | chr7 | Shiraz-3T  | 90   | 0.219276 | 0         |  |
|       |      | Shiraz-3T  | 94   | 0.74735  | 0         |  |
|       |      | Shiraz-4T  | 253  | 0.372918 | 0         |  |
|       |      | Shiraz-31T | 316  | 0.219196 | 0         |  |
|       |      | Shiraz-36T | 378  | 0.179558 | 0         |  |
|       |      | Shiraz-36T | 381  | 0.332628 | 0         |  |
|       |      | Shiraz-44T | 639  | 1.035032 | 0         |  |
|       |      | Shiraz-46T | 943  | 0.093799 | 0         |  |
|       |      | Shiraz-46T | 946  | 0.299835 | 0         |  |
|       |      | Shiraz-47T | 1030 | 0.257728 | 0         |  |
|       |      | Shiraz-49T | 1120 | 0.281656 | 0         |  |
|       |      | Shiraz-77T | 1225 | 0        | -0.117922 |  |
|       |      | Shiraz-77T | 1227 | 0.196445 | 0         |  |
|       |      | Shiraz-9T  | 1324 | 0.679266 | 0         |  |
|       |      | Shiraz-18T | 1434 | 0.244465 | 0         |  |
|       |      | Shiraz-22T | 1549 | 0        | -0.319623 |  |
|       |      | Shiraz-22T | 1551 | 0.324011 | 0         |  |
|       |      | Shiraz-25T | 1698 | 0.21835  | 0         |  |
|       |      | Shiraz-28T | 1735 | 0.350744 | 0         |  |
|       |      | Shiraz-29T | 1778 | 0.120767 | 0         |  |
|       |      | Shiraz-32T | 1833 | 0.551336 | 0         |  |
|       |      | Shiraz-38T | 1951 | 0.250891 | 0         |  |
|       |      | Shiraz-53T | 2078 | 0.287202 | 0         |  |
|       |      | Shiraz-71T | 2238 | 0.603631 | 0         |  |
|       |      | Shiraz-3T  | 90   | 0.219276 | 0         |  |
|       |      | Shiraz-3T  | 94   | 0.74735  | 0         |  |
|       |      | Shiraz-4T  | 253  | 0.372918 | 0         |  |
|       |      | Shiraz-31T | 316  | 0.219196 | 0         |  |
|       |      | Shiraz-36T | 378  | 0.179558 | 0         |  |
|       |      | Shiraz-36T | 381  | 0.332628 | 0         |  |
|       |      | Shiraz-44T | 639  | 1.035032 | 0         |  |
|       |      | Shiraz-46T | 943  | 0.093799 | 0         |  |
|       |      | Shiraz-46T | 946  | 0.299835 | 0         |  |
|       |      | Shiraz-47T | 1030 | 0.257728 | 0         |  |
|       |      | Shiraz-49T | 1120 | 0.281656 | 0         |  |
|       |      | Shiraz-77T | 1225 | 0        | -0.117922 |  |
|       |      | Shiraz-77T | 1227 | 0.196445 | 0         |  |
|       |      | Shiraz-9T  | 1324 | 0.679266 | 0         |  |
|       |      | Shiraz-18T | 1434 | 0.244465 | 0         |  |
|       |      | Shiraz-22T | 1549 | 0        | -0.319623 |  |
|       |      | Shiraz-22T | 1551 | 0.324011 | 0         |  |
|       |      | Shiraz-25T | 1698 | 0.21835  | 0         |  |
|       |      | Shiraz-28T | 1735 | 0.350744 | 0         |  |
|       |      | Shiraz-29T | 1778 | 0.120767 | 0         |  |

|      |      |            |      |          |           |  |
|------|------|------------|------|----------|-----------|--|
|      |      | Shiraz-32T | 1833 | 0.551336 | 0         |  |
|      |      | Shiraz-38T | 1951 | 0.250891 | 0         |  |
|      |      | Shiraz-53T | 2078 | 0.287202 | 0         |  |
|      |      | Shiraz-71T | 2238 | 0.603631 | 0         |  |
|      |      | Shiraz-3T  | 90   | 0.219276 | 0         |  |
|      |      | Shiraz-3T  | 94   | 0.74735  | 0         |  |
|      |      | Shiraz-4T  | 253  | 0.372918 | 0         |  |
|      |      | Shiraz-31T | 316  | 0.219196 | 0         |  |
|      |      | Shiraz-36T | 378  | 0.179558 | 0         |  |
|      |      | Shiraz-36T | 381  | 0.332628 | 0         |  |
|      |      | Shiraz-44T | 639  | 1.035032 | 0         |  |
|      |      | Shiraz-46T | 943  | 0.093799 | 0         |  |
|      |      | Shiraz-46T | 946  | 0.299835 | 0         |  |
|      |      | Shiraz-47T | 1030 | 0.257728 | 0         |  |
|      |      | Shiraz-49T | 1120 | 0.281656 | 0         |  |
|      |      | Shiraz-77T | 1225 | 0        | -0.117922 |  |
|      |      | Shiraz-77T | 1227 | 0.196445 | 0         |  |
|      |      | Shiraz-9T  | 1324 | 0.679266 | 0         |  |
|      |      | Shiraz-18T | 1434 | 0.244465 | 0         |  |
|      |      | Shiraz-22T | 1549 | 0        | -0.319623 |  |
|      |      | Shiraz-22T | 1551 | 0.324011 | 0         |  |
|      |      | Shiraz-25T | 1698 | 0.21835  | 0         |  |
|      |      | Shiraz-28T | 1735 | 0.350744 | 0         |  |
|      |      | Shiraz-29T | 1778 | 0.120767 | 0         |  |
|      |      | Shiraz-32T | 1833 | 0.551336 | 0         |  |
|      |      | Shiraz-38T | 1951 | 0.250891 | 0         |  |
|      |      | Shiraz-53T | 2078 | 0.287202 | 0         |  |
|      |      | Shiraz-71T | 2238 | 0.603631 | 0         |  |
| CPVL | chr7 | Shiraz-3T  | 87   | 0.198593 | 0         |  |
|      |      | Shiraz-4T  | 252  | 0.192083 | 0         |  |
|      |      | Shiraz-36T | 376  | 0.159952 | 0         |  |
|      |      | Shiraz-46T | 942  | 0.069143 | 0         |  |
|      |      | Shiraz-18T | 1433 | 0.250973 | 0         |  |
|      |      | Shiraz-25T | 1697 | 0.21945  | 0         |  |
|      |      | Shiraz-28T | 1734 | 0.362882 | 0         |  |
|      |      | Shiraz-29T | 1777 | 0.156747 | 0         |  |
|      |      | Shiraz-38T | 1950 | 0.265916 | 0         |  |
|      |      | Shiraz-71T | 2236 | 0.320072 | 0         |  |
|      |      | Shiraz-3T  | 87   | 0.198593 | 0         |  |
|      |      | Shiraz-4T  | 252  | 0.192083 | 0         |  |
|      |      | Shiraz-36T | 376  | 0.159952 | 0         |  |
|      |      | Shiraz-46T | 942  | 0.069143 | 0         |  |
|      |      | Shiraz-18T | 1433 | 0.250973 | 0         |  |
|      |      | Shiraz-25T | 1697 | 0.21945  | 0         |  |
|      |      | Shiraz-28T | 1734 | 0.362882 | 0         |  |
|      |      | Shiraz-29T | 1777 | 0.156747 | 0         |  |
|      |      | Shiraz-38T | 1950 | 0.265916 | 0         |  |



|        |      |            |      |          |           |  |
|--------|------|------------|------|----------|-----------|--|
|        |      | Shiraz-71T | 2236 | 0.320072 | 0         |  |
|        |      | Shiraz-3T  | 87   | 0.198593 | 0         |  |
|        |      | Shiraz-4T  | 252  | 0.192083 | 0         |  |
|        |      | Shiraz-36T | 376  | 0.159952 | 0         |  |
|        |      | Shiraz-46T | 942  | 0.069143 | 0         |  |
|        |      | Shiraz-18T | 1433 | 0.250973 | 0         |  |
|        |      | Shiraz-25T | 1697 | 0.21945  | 0         |  |
|        |      | Shiraz-28T | 1734 | 0.362882 | 0         |  |
|        |      | Shiraz-29T | 1777 | 0.156747 | 0         |  |
|        |      | Shiraz-38T | 1950 | 0.265916 | 0         |  |
|        |      | Shiraz-71T | 2236 | 0.320072 | 0         |  |
| CPXCR1 | chrX | Shiraz-3T  | 242  | 0        | -0.336434 |  |
|        |      | Shiraz-3T  | 243  | 0        | -0.549129 |  |
|        |      | Shiraz-4T  | 261  | 0        | -0.336249 |  |
|        |      | Shiraz-16T | 295  | 0.591657 | 0         |  |
|        |      | Shiraz-31T | 346  | 0        | -0.1527   |  |
|        |      | Shiraz-36T | 433  | 0        | -0.803961 |  |
|        |      | Shiraz-44T | 899  | 0        | -1.09697  |  |
|        |      | Shiraz-44T | 902  | 0        | -1.449824 |  |
|        |      | Shiraz-47T | 1085 | 0        | -0.130811 |  |
|        |      | Shiraz-49T | 1170 | 0        | -0.967436 |  |
|        |      | Shiraz-49T | 1172 | 0        | -1.123219 |  |
|        |      | Shiraz-18T | 1457 | 0.643204 | 0         |  |
|        |      | Shiraz-22T | 1673 | 0.611783 | 0         |  |
|        |      | Shiraz-22T | 1675 | 0.279253 | 0         |  |
|        |      | Shiraz-25T | 1719 | 0.472955 | 0         |  |
|        |      | Shiraz-28T | 1762 | 0.562311 | 0         |  |
|        |      | Shiraz-29T | 1801 | 0.815343 | 0         |  |
|        |      | Shiraz-32T | 1870 | 0.729766 | 0         |  |
|        |      | Shiraz-32T | 1871 | 0.292679 | 0         |  |
|        |      | Shiraz-35T | 1933 | 0.488535 | 0         |  |
|        |      | Shiraz-58T | 2223 | 0.833364 | 0         |  |
|        |      | Shiraz-58T | 2225 | 0.595784 | 0         |  |
|        |      | Shiraz-71T | 2263 | 0.975531 | 0         |  |
|        |      | Shiraz-3T  | 242  | 0        | -0.336434 |  |
|        |      | Shiraz-3T  | 243  | 0        | -0.549129 |  |
|        |      | Shiraz-4T  | 261  | 0        | -0.336249 |  |
|        |      | Shiraz-16T | 295  | 0.591657 | 0         |  |
|        |      | Shiraz-31T | 346  | 0        | -0.1527   |  |
|        |      | Shiraz-36T | 433  | 0        | -0.803961 |  |
|        |      | Shiraz-44T | 899  | 0        | -1.09697  |  |
|        |      | Shiraz-44T | 902  | 0        | -1.449824 |  |
|        |      | Shiraz-47T | 1085 | 0        | -0.130811 |  |
|        |      | Shiraz-49T | 1170 | 0        | -0.967436 |  |
|        |      | Shiraz-49T | 1172 | 0        | -1.123219 |  |
|        |      | Shiraz-18T | 1457 | 0.643204 | 0         |  |
|        |      | Shiraz-22T | 1673 | 0.611783 | 0         |  |

|         |      |            |      |          |           |  |  |
|---------|------|------------|------|----------|-----------|--|--|
|         |      | Shiraz-22T | 1675 | 0.279253 | 0         |  |  |
|         |      | Shiraz-25T | 1719 | 0.472955 | 0         |  |  |
|         |      | Shiraz-28T | 1762 | 0.562311 | 0         |  |  |
|         |      | Shiraz-29T | 1801 | 0.815343 | 0         |  |  |
|         |      | Shiraz-32T | 1870 | 0.729766 | 0         |  |  |
|         |      | Shiraz-32T | 1871 | 0.292679 | 0         |  |  |
|         |      | Shiraz-35T | 1933 | 0.488535 | 0         |  |  |
|         |      | Shiraz-58T | 2223 | 0.833364 | 0         |  |  |
|         |      | Shiraz-58T | 2225 | 0.595784 | 0         |  |  |
|         |      | Shiraz-71T | 2263 | 0.975531 | 0         |  |  |
|         |      | Shiraz-3T  | 242  | 0        | -0.336434 |  |  |
|         |      | Shiraz-3T  | 243  | 0        | -0.549129 |  |  |
|         |      | Shiraz-4T  | 261  | 0        | -0.336249 |  |  |
|         |      | Shiraz-16T | 295  | 0.591657 | 0         |  |  |
|         |      | Shiraz-31T | 346  | 0        | -0.1527   |  |  |
|         |      | Shiraz-36T | 433  | 0        | -0.803961 |  |  |
|         |      | Shiraz-44T | 899  | 0        | -1.09697  |  |  |
|         |      | Shiraz-44T | 902  | 0        | -1.449824 |  |  |
|         |      | Shiraz-47T | 1085 | 0        | -0.130811 |  |  |
|         |      | Shiraz-49T | 1170 | 0        | -0.967436 |  |  |
|         |      | Shiraz-49T | 1172 | 0        | -1.123219 |  |  |
|         |      | Shiraz-18T | 1457 | 0.643204 | 0         |  |  |
|         |      | Shiraz-22T | 1673 | 0.611783 | 0         |  |  |
|         |      | Shiraz-22T | 1675 | 0.279253 | 0         |  |  |
|         |      | Shiraz-25T | 1719 | 0.472955 | 0         |  |  |
|         |      | Shiraz-28T | 1762 | 0.562311 | 0         |  |  |
|         |      | Shiraz-29T | 1801 | 0.815343 | 0         |  |  |
|         |      | Shiraz-32T | 1870 | 0.729766 | 0         |  |  |
|         |      | Shiraz-32T | 1871 | 0.292679 | 0         |  |  |
|         |      | Shiraz-35T | 1933 | 0.488535 | 0         |  |  |
|         |      | Shiraz-58T | 2223 | 0.833364 | 0         |  |  |
|         |      | Shiraz-58T | 2225 | 0.595784 | 0         |  |  |
|         |      | Shiraz-71T | 2263 | 0.975531 | 0         |  |  |
| CREB3L2 | chr7 | Shiraz-3T  | 90   | 0.219276 | 0         |  |  |
|         |      | Shiraz-4T  | 253  | 0.372918 | 0         |  |  |
|         |      | Shiraz-36T | 378  | 0.179558 | 0         |  |  |
|         |      | Shiraz-46T | 943  | 0.093799 | 0         |  |  |
|         |      | Shiraz-77T | 1225 | 0        | -0.117922 |  |  |
|         |      | Shiraz-9T  | 1325 | 0.221899 | 0         |  |  |
|         |      | Shiraz-18T | 1434 | 0.244465 | 0         |  |  |
|         |      | Shiraz-25T | 1698 | 0.21835  | 0         |  |  |
|         |      | Shiraz-28T | 1735 | 0.350744 | 0         |  |  |
|         |      | Shiraz-29T | 1778 | 0.120767 | 0         |  |  |
|         |      | Shiraz-32T | 1833 | 0.551336 | 0         |  |  |
|         |      | Shiraz-38T | 1951 | 0.250891 | 0         |  |  |
|         |      | Shiraz-53T | 2078 | 0.287202 | 0         |  |  |
|         |      | Shiraz-58T | 2162 | 0.221505 | 0         |  |  |

|       |      |            |      |          |           |  |  |
|-------|------|------------|------|----------|-----------|--|--|
|       |      | Shiraz-71T | 2238 | 0.603631 | 0         |  |  |
|       |      | Shiraz-3T  | 90   | 0.219276 | 0         |  |  |
|       |      | Shiraz-4T  | 253  | 0.372918 | 0         |  |  |
|       |      | Shiraz-36T | 378  | 0.179558 | 0         |  |  |
|       |      | Shiraz-46T | 943  | 0.093799 | 0         |  |  |
|       |      | Shiraz-77T | 1225 | 0        | -0.117922 |  |  |
|       |      | Shiraz-9T  | 1325 | 0.221899 | 0         |  |  |
|       |      | Shiraz-18T | 1434 | 0.244465 | 0         |  |  |
|       |      | Shiraz-25T | 1698 | 0.21835  | 0         |  |  |
|       |      | Shiraz-28T | 1735 | 0.350744 | 0         |  |  |
|       |      | Shiraz-29T | 1778 | 0.120767 | 0         |  |  |
|       |      | Shiraz-32T | 1833 | 0.551336 | 0         |  |  |
|       |      | Shiraz-38T | 1951 | 0.250891 | 0         |  |  |
|       |      | Shiraz-53T | 2078 | 0.287202 | 0         |  |  |
|       |      | Shiraz-58T | 2162 | 0.221505 | 0         |  |  |
|       |      | Shiraz-71T | 2238 | 0.603631 | 0         |  |  |
|       |      | Shiraz-3T  | 90   | 0.219276 | 0         |  |  |
|       |      | Shiraz-4T  | 253  | 0.372918 | 0         |  |  |
|       |      | Shiraz-36T | 378  | 0.179558 | 0         |  |  |
|       |      | Shiraz-46T | 943  | 0.093799 | 0         |  |  |
|       |      | Shiraz-77T | 1225 | 0        | -0.117922 |  |  |
|       |      | Shiraz-9T  | 1325 | 0.221899 | 0         |  |  |
|       |      | Shiraz-18T | 1434 | 0.244465 | 0         |  |  |
|       |      | Shiraz-25T | 1698 | 0.21835  | 0         |  |  |
|       |      | Shiraz-28T | 1735 | 0.350744 | 0         |  |  |
|       |      | Shiraz-29T | 1778 | 0.120767 | 0         |  |  |
|       |      | Shiraz-32T | 1833 | 0.551336 | 0         |  |  |
|       |      | Shiraz-38T | 1951 | 0.250891 | 0         |  |  |
|       |      | Shiraz-53T | 2078 | 0.287202 | 0         |  |  |
|       |      | Shiraz-58T | 2162 | 0.221505 | 0         |  |  |
|       |      | Shiraz-71T | 2238 | 0.603631 | 0         |  |  |
| CREB5 | chr7 | Shiraz-3T  | 87   | 0.198593 | 0         |  |  |
|       |      | Shiraz-3T  | 87   | 0.198593 | 0         |  |  |
|       |      | Shiraz-3T  | 87   | 0.198593 | 0         |  |  |
|       |      | Shiraz-3T  | 87   | 0.198593 | 0         |  |  |
|       |      | Shiraz-4T  | 252  | 0.192083 | 0         |  |  |
|       |      | Shiraz-4T  | 252  | 0.192083 | 0         |  |  |
|       |      | Shiraz-4T  | 252  | 0.192083 | 0         |  |  |
|       |      | Shiraz-4T  | 252  | 0.192083 | 0         |  |  |
|       |      | Shiraz-36T | 376  | 0.159952 | 0         |  |  |
|       |      | Shiraz-36T | 376  | 0.159952 | 0         |  |  |
|       |      | Shiraz-36T | 376  | 0.159952 | 0         |  |  |
|       |      | Shiraz-36T | 376  | 0.159952 | 0         |  |  |
|       |      | Shiraz-46T | 942  | 0.069143 | 0         |  |  |
|       |      | Shiraz-46T | 942  | 0.069143 | 0         |  |  |
|       |      | Shiraz-46T | 942  | 0.069143 | 0         |  |  |
|       |      | Shiraz-46T | 942  | 0.069143 | 0         |  |  |

|  |  |            |      |          |   |  |  |
|--|--|------------|------|----------|---|--|--|
|  |  | Shiraz-18T | 1433 | 0.250973 | 0 |  |  |
|  |  | Shiraz-18T | 1433 | 0.250973 | 0 |  |  |
|  |  | Shiraz-18T | 1433 | 0.250973 | 0 |  |  |
|  |  | Shiraz-18T | 1433 | 0.250973 | 0 |  |  |
|  |  | Shiraz-25T | 1697 | 0.21945  | 0 |  |  |
|  |  | Shiraz-25T | 1697 | 0.21945  | 0 |  |  |
|  |  | Shiraz-25T | 1697 | 0.21945  | 0 |  |  |
|  |  | Shiraz-25T | 1697 | 0.21945  | 0 |  |  |
|  |  | Shiraz-28T | 1734 | 0.362882 | 0 |  |  |
|  |  | Shiraz-28T | 1734 | 0.362882 | 0 |  |  |
|  |  | Shiraz-28T | 1734 | 0.362882 | 0 |  |  |
|  |  | Shiraz-28T | 1734 | 0.362882 | 0 |  |  |
|  |  | Shiraz-29T | 1777 | 0.156747 | 0 |  |  |
|  |  | Shiraz-29T | 1777 | 0.156747 | 0 |  |  |
|  |  | Shiraz-29T | 1777 | 0.156747 | 0 |  |  |
|  |  | Shiraz-29T | 1777 | 0.156747 | 0 |  |  |
|  |  | Shiraz-38T | 1950 | 0.265916 | 0 |  |  |
|  |  | Shiraz-38T | 1950 | 0.265916 | 0 |  |  |
|  |  | Shiraz-38T | 1950 | 0.265916 | 0 |  |  |
|  |  | Shiraz-38T | 1950 | 0.265916 | 0 |  |  |
|  |  | Shiraz-71T | 2236 | 0.320072 | 0 |  |  |
|  |  | Shiraz-71T | 2236 | 0.320072 | 0 |  |  |
|  |  | Shiraz-71T | 2236 | 0.320072 | 0 |  |  |
|  |  | Shiraz-71T | 2236 | 0.320072 | 0 |  |  |
|  |  | Shiraz-3T  | 87   | 0.198593 | 0 |  |  |
|  |  | Shiraz-3T  | 87   | 0.198593 | 0 |  |  |
|  |  | Shiraz-3T  | 87   | 0.198593 | 0 |  |  |
|  |  | Shiraz-3T  | 87   | 0.198593 | 0 |  |  |
|  |  | Shiraz-4T  | 252  | 0.192083 | 0 |  |  |
|  |  | Shiraz-4T  | 252  | 0.192083 | 0 |  |  |
|  |  | Shiraz-4T  | 252  | 0.192083 | 0 |  |  |
|  |  | Shiraz-4T  | 252  | 0.192083 | 0 |  |  |
|  |  | Shiraz-36T | 376  | 0.159952 | 0 |  |  |
|  |  | Shiraz-36T | 376  | 0.159952 | 0 |  |  |
|  |  | Shiraz-36T | 376  | 0.159952 | 0 |  |  |
|  |  | Shiraz-36T | 376  | 0.159952 | 0 |  |  |
|  |  | Shiraz-46T | 942  | 0.069143 | 0 |  |  |
|  |  | Shiraz-46T | 942  | 0.069143 | 0 |  |  |
|  |  | Shiraz-46T | 942  | 0.069143 | 0 |  |  |
|  |  | Shiraz-46T | 942  | 0.069143 | 0 |  |  |
|  |  | Shiraz-18T | 1433 | 0.250973 | 0 |  |  |
|  |  | Shiraz-18T | 1433 | 0.250973 | 0 |  |  |
|  |  | Shiraz-18T | 1433 | 0.250973 | 0 |  |  |
|  |  | Shiraz-18T | 1433 | 0.250973 | 0 |  |  |
|  |  | Shiraz-25T | 1697 | 0.21945  | 0 |  |  |
|  |  | Shiraz-25T | 1697 | 0.21945  | 0 |  |  |
|  |  | Shiraz-25T | 1697 | 0.21945  | 0 |  |  |

|  |  |            |      |          |   |  |  |
|--|--|------------|------|----------|---|--|--|
|  |  | Shiraz-25T | 1697 | 0.21945  | 0 |  |  |
|  |  | Shiraz-28T | 1734 | 0.362882 | 0 |  |  |
|  |  | Shiraz-28T | 1734 | 0.362882 | 0 |  |  |
|  |  | Shiraz-28T | 1734 | 0.362882 | 0 |  |  |
|  |  | Shiraz-28T | 1734 | 0.362882 | 0 |  |  |
|  |  | Shiraz-29T | 1777 | 0.156747 | 0 |  |  |
|  |  | Shiraz-29T | 1777 | 0.156747 | 0 |  |  |
|  |  | Shiraz-29T | 1777 | 0.156747 | 0 |  |  |
|  |  | Shiraz-29T | 1777 | 0.156747 | 0 |  |  |
|  |  | Shiraz-38T | 1950 | 0.265916 | 0 |  |  |
|  |  | Shiraz-38T | 1950 | 0.265916 | 0 |  |  |
|  |  | Shiraz-38T | 1950 | 0.265916 | 0 |  |  |
|  |  | Shiraz-38T | 1950 | 0.265916 | 0 |  |  |
|  |  | Shiraz-71T | 2236 | 0.320072 | 0 |  |  |
|  |  | Shiraz-71T | 2236 | 0.320072 | 0 |  |  |
|  |  | Shiraz-71T | 2236 | 0.320072 | 0 |  |  |
|  |  | Shiraz-71T | 2236 | 0.320072 | 0 |  |  |
|  |  | Shiraz-3T  | 87   | 0.198593 | 0 |  |  |
|  |  | Shiraz-3T  | 87   | 0.198593 | 0 |  |  |
|  |  | Shiraz-3T  | 87   | 0.198593 | 0 |  |  |
|  |  | Shiraz-3T  | 87   | 0.198593 | 0 |  |  |
|  |  | Shiraz-4T  | 252  | 0.192083 | 0 |  |  |
|  |  | Shiraz-4T  | 252  | 0.192083 | 0 |  |  |
|  |  | Shiraz-4T  | 252  | 0.192083 | 0 |  |  |
|  |  | Shiraz-4T  | 252  | 0.192083 | 0 |  |  |
|  |  | Shiraz-36T | 376  | 0.159952 | 0 |  |  |
|  |  | Shiraz-36T | 376  | 0.159952 | 0 |  |  |
|  |  | Shiraz-36T | 376  | 0.159952 | 0 |  |  |
|  |  | Shiraz-36T | 376  | 0.159952 | 0 |  |  |
|  |  | Shiraz-46T | 942  | 0.069143 | 0 |  |  |
|  |  | Shiraz-46T | 942  | 0.069143 | 0 |  |  |
|  |  | Shiraz-46T | 942  | 0.069143 | 0 |  |  |
|  |  | Shiraz-46T | 942  | 0.069143 | 0 |  |  |
|  |  | Shiraz-18T | 1433 | 0.250973 | 0 |  |  |
|  |  | Shiraz-18T | 1433 | 0.250973 | 0 |  |  |
|  |  | Shiraz-18T | 1433 | 0.250973 | 0 |  |  |
|  |  | Shiraz-18T | 1433 | 0.250973 | 0 |  |  |
|  |  | Shiraz-25T | 1697 | 0.21945  | 0 |  |  |
|  |  | Shiraz-25T | 1697 | 0.21945  | 0 |  |  |
|  |  | Shiraz-25T | 1697 | 0.21945  | 0 |  |  |
|  |  | Shiraz-25T | 1697 | 0.21945  | 0 |  |  |
|  |  | Shiraz-28T | 1734 | 0.362882 | 0 |  |  |
|  |  | Shiraz-28T | 1734 | 0.362882 | 0 |  |  |
|  |  | Shiraz-28T | 1734 | 0.362882 | 0 |  |  |
|  |  | Shiraz-28T | 1734 | 0.362882 | 0 |  |  |
|  |  | Shiraz-29T | 1777 | 0.156747 | 0 |  |  |
|  |  | Shiraz-29T | 1777 | 0.156747 | 0 |  |  |

|       |      |            |      |          |           |  |  |
|-------|------|------------|------|----------|-----------|--|--|
|       |      | Shiraz-29T | 1777 | 0.156747 | 0         |  |  |
|       |      | Shiraz-29T | 1777 | 0.156747 | 0         |  |  |
|       |      | Shiraz-38T | 1950 | 0.265916 | 0         |  |  |
|       |      | Shiraz-38T | 1950 | 0.265916 | 0         |  |  |
|       |      | Shiraz-38T | 1950 | 0.265916 | 0         |  |  |
|       |      | Shiraz-38T | 1950 | 0.265916 | 0         |  |  |
|       |      | Shiraz-71T | 2236 | 0.320072 | 0         |  |  |
|       |      | Shiraz-71T | 2236 | 0.320072 | 0         |  |  |
|       |      | Shiraz-71T | 2236 | 0.320072 | 0         |  |  |
|       |      | Shiraz-71T | 2236 | 0.320072 | 0         |  |  |
| CRHR2 | chr7 | Shiraz-3T  | 87   | 0.198593 | 0         |  |  |
|       |      | Shiraz-4T  | 252  | 0.192083 | 0         |  |  |
|       |      | Shiraz-36T | 376  | 0.159952 | 0         |  |  |
|       |      | Shiraz-44T | 630  | 0.903655 | 0         |  |  |
|       |      | Shiraz-46T | 942  | 0.069143 | 0         |  |  |
|       |      | Shiraz-18T | 1433 | 0.250973 | 0         |  |  |
|       |      | Shiraz-25T | 1697 | 0.21945  | 0         |  |  |
|       |      | Shiraz-28T | 1734 | 0.362882 | 0         |  |  |
|       |      | Shiraz-29T | 1777 | 0.156747 | 0         |  |  |
|       |      | Shiraz-38T | 1950 | 0.265916 | 0         |  |  |
|       |      | Shiraz-71T | 2236 | 0.320072 | 0         |  |  |
|       |      | Shiraz-3T  | 87   | 0.198593 | 0         |  |  |
|       |      | Shiraz-4T  | 252  | 0.192083 | 0         |  |  |
|       |      | Shiraz-36T | 376  | 0.159952 | 0         |  |  |
|       |      | Shiraz-44T | 630  | 0.903655 | 0         |  |  |
|       |      | Shiraz-46T | 942  | 0.069143 | 0         |  |  |
|       |      | Shiraz-18T | 1433 | 0.250973 | 0         |  |  |
|       |      | Shiraz-25T | 1697 | 0.21945  | 0         |  |  |
|       |      | Shiraz-28T | 1734 | 0.362882 | 0         |  |  |
|       |      | Shiraz-29T | 1777 | 0.156747 | 0         |  |  |
|       |      | Shiraz-38T | 1950 | 0.265916 | 0         |  |  |
|       |      | Shiraz-71T | 2236 | 0.320072 | 0         |  |  |
|       |      | Shiraz-3T  | 87   | 0.198593 | 0         |  |  |
|       |      | Shiraz-4T  | 252  | 0.192083 | 0         |  |  |
|       |      | Shiraz-36T | 376  | 0.159952 | 0         |  |  |
|       |      | Shiraz-44T | 630  | 0.903655 | 0         |  |  |
|       |      | Shiraz-46T | 942  | 0.069143 | 0         |  |  |
|       |      | Shiraz-18T | 1433 | 0.250973 | 0         |  |  |
|       |      | Shiraz-25T | 1697 | 0.21945  | 0         |  |  |
|       |      | Shiraz-28T | 1734 | 0.362882 | 0         |  |  |
|       |      | Shiraz-29T | 1777 | 0.156747 | 0         |  |  |
|       |      | Shiraz-38T | 1950 | 0.265916 | 0         |  |  |
|       |      | Shiraz-71T | 2236 | 0.320072 | 0         |  |  |
| CROT  | chr7 | Shiraz-3T  | 90   | 0.219276 | 0         |  |  |
|       |      | Shiraz-3T  | 90   | 0.219276 | 0         |  |  |
|       |      | Shiraz-3T  | 90   | 0.219276 | 0         |  |  |
|       |      | Shiraz-3T  | 93   | 0        | -0.058023 |  |  |

|  |            |      |          |           |  |
|--|------------|------|----------|-----------|--|
|  | Shiraz-3T  | 93   | 0        | -0.058023 |  |
|  | Shiraz-3T  | 93   | 0        | -0.058023 |  |
|  | Shiraz-4T  | 253  | 0.372918 | 0         |  |
|  | Shiraz-4T  | 253  | 0.372918 | 0         |  |
|  | Shiraz-4T  | 253  | 0.372918 | 0         |  |
|  | Shiraz-36T | 378  | 0.179558 | 0         |  |
|  | Shiraz-36T | 378  | 0.179558 | 0         |  |
|  | Shiraz-36T | 378  | 0.179558 | 0         |  |
|  | Shiraz-36T | 380  | 0.083883 | 0         |  |
|  | Shiraz-36T | 380  | 0.083883 | 0         |  |
|  | Shiraz-36T | 380  | 0.083883 | 0         |  |
|  | Shiraz-44T | 638  | 0        | -0.433476 |  |
|  | Shiraz-44T | 638  | 0        | -0.433476 |  |
|  | Shiraz-44T | 638  | 0        | -0.433476 |  |
|  | Shiraz-46T | 943  | 0.093799 | 0         |  |
|  | Shiraz-46T | 943  | 0.093799 | 0         |  |
|  | Shiraz-46T | 943  | 0.093799 | 0         |  |
|  | Shiraz-46T | 945  | 0        | -0.014838 |  |
|  | Shiraz-46T | 945  | 0        | -0.014838 |  |
|  | Shiraz-46T | 945  | 0        | -0.014838 |  |
|  | Shiraz-47T | 1029 | 0        | -0.096586 |  |
|  | Shiraz-47T | 1029 | 0        | -0.096586 |  |
|  | Shiraz-47T | 1029 | 0        | -0.096586 |  |
|  | Shiraz-49T | 1119 | 0        | -0.157331 |  |
|  | Shiraz-49T | 1119 | 0        | -0.157331 |  |
|  | Shiraz-49T | 1119 | 0        | -0.157331 |  |
|  | Shiraz-77T | 1225 | 0        | -0.117922 |  |
|  | Shiraz-77T | 1225 | 0        | -0.117922 |  |
|  | Shiraz-77T | 1225 | 0        | -0.117922 |  |
|  | Shiraz-77T | 1226 | 0        | -0.233724 |  |
|  | Shiraz-77T | 1226 | 0        | -0.233724 |  |
|  | Shiraz-77T | 1226 | 0        | -0.233724 |  |
|  | Shiraz-18T | 1434 | 0.244465 | 0         |  |
|  | Shiraz-18T | 1434 | 0.244465 | 0         |  |
|  | Shiraz-18T | 1434 | 0.244465 | 0         |  |
|  | Shiraz-22T | 1549 | 0        | -0.319623 |  |
|  | Shiraz-22T | 1549 | 0        | -0.319623 |  |
|  | Shiraz-22T | 1549 | 0        | -0.319623 |  |
|  | Shiraz-22T | 1550 | 0        | -0.577052 |  |
|  | Shiraz-22T | 1550 | 0        | -0.577052 |  |
|  | Shiraz-22T | 1550 | 0        | -0.577052 |  |
|  | Shiraz-25T | 1698 | 0.21835  | 0         |  |
|  | Shiraz-25T | 1698 | 0.21835  | 0         |  |
|  | Shiraz-25T | 1698 | 0.21835  | 0         |  |
|  | Shiraz-28T | 1735 | 0.350744 | 0         |  |
|  | Shiraz-28T | 1735 | 0.350744 | 0         |  |
|  | Shiraz-28T | 1735 | 0.350744 | 0         |  |

|  |            |      |          |           |  |
|--|------------|------|----------|-----------|--|
|  | Shiraz-29T | 1778 | 0.120767 | 0         |  |
|  | Shiraz-29T | 1778 | 0.120767 | 0         |  |
|  | Shiraz-29T | 1778 | 0.120767 | 0         |  |
|  | Shiraz-38T | 1951 | 0.250891 | 0         |  |
|  | Shiraz-38T | 1951 | 0.250891 | 0         |  |
|  | Shiraz-38T | 1951 | 0.250891 | 0         |  |
|  | Shiraz-53T | 2078 | 0.287202 | 0         |  |
|  | Shiraz-53T | 2078 | 0.287202 | 0         |  |
|  | Shiraz-53T | 2078 | 0.287202 | 0         |  |
|  | Shiraz-58T | 2159 | 0        | -0.219521 |  |
|  | Shiraz-58T | 2159 | 0        | -0.219521 |  |
|  | Shiraz-58T | 2159 | 0        | -0.219521 |  |
|  | Shiraz-71T | 2238 | 0.603631 | 0         |  |
|  | Shiraz-71T | 2238 | 0.603631 | 0         |  |
|  | Shiraz-71T | 2238 | 0.603631 | 0         |  |
|  | Shiraz-3T  | 90   | 0.219276 | 0         |  |
|  | Shiraz-3T  | 90   | 0.219276 | 0         |  |
|  | Shiraz-3T  | 90   | 0.219276 | 0         |  |
|  | Shiraz-3T  | 93   | 0        | -0.058023 |  |
|  | Shiraz-3T  | 93   | 0        | -0.058023 |  |
|  | Shiraz-3T  | 93   | 0        | -0.058023 |  |
|  | Shiraz-4T  | 253  | 0.372918 | 0         |  |
|  | Shiraz-4T  | 253  | 0.372918 | 0         |  |
|  | Shiraz-4T  | 253  | 0.372918 | 0         |  |
|  | Shiraz-36T | 378  | 0.179558 | 0         |  |
|  | Shiraz-36T | 378  | 0.179558 | 0         |  |
|  | Shiraz-36T | 378  | 0.179558 | 0         |  |
|  | Shiraz-36T | 380  | 0.083883 | 0         |  |
|  | Shiraz-36T | 380  | 0.083883 | 0         |  |
|  | Shiraz-36T | 380  | 0.083883 | 0         |  |
|  | Shiraz-44T | 638  | 0        | -0.433476 |  |
|  | Shiraz-44T | 638  | 0        | -0.433476 |  |
|  | Shiraz-44T | 638  | 0        | -0.433476 |  |
|  | Shiraz-46T | 943  | 0.093799 | 0         |  |
|  | Shiraz-46T | 943  | 0.093799 | 0         |  |
|  | Shiraz-46T | 943  | 0.093799 | 0         |  |
|  | Shiraz-46T | 945  | 0        | -0.014838 |  |
|  | Shiraz-46T | 945  | 0        | -0.014838 |  |
|  | Shiraz-46T | 945  | 0        | -0.014838 |  |
|  | Shiraz-47T | 1029 | 0        | -0.096586 |  |
|  | Shiraz-47T | 1029 | 0        | -0.096586 |  |
|  | Shiraz-47T | 1029 | 0        | -0.096586 |  |
|  | Shiraz-49T | 1119 | 0        | -0.157331 |  |
|  | Shiraz-49T | 1119 | 0        | -0.157331 |  |
|  | Shiraz-49T | 1119 | 0        | -0.157331 |  |
|  | Shiraz-77T | 1225 | 0        | -0.117922 |  |
|  | Shiraz-77T | 1225 | 0        | -0.117922 |  |



|  |            |      |          |           |  |
|--|------------|------|----------|-----------|--|
|  | Shiraz-77T | 1225 | 0        | -0.117922 |  |
|  | Shiraz-77T | 1226 | 0        | -0.233724 |  |
|  | Shiraz-77T | 1226 | 0        | -0.233724 |  |
|  | Shiraz-77T | 1226 | 0        | -0.233724 |  |
|  | Shiraz-18T | 1434 | 0.244465 | 0         |  |
|  | Shiraz-18T | 1434 | 0.244465 | 0         |  |
|  | Shiraz-18T | 1434 | 0.244465 | 0         |  |
|  | Shiraz-22T | 1549 | 0        | -0.319623 |  |
|  | Shiraz-22T | 1549 | 0        | -0.319623 |  |
|  | Shiraz-22T | 1549 | 0        | -0.319623 |  |
|  | Shiraz-22T | 1550 | 0        | -0.577052 |  |
|  | Shiraz-22T | 1550 | 0        | -0.577052 |  |
|  | Shiraz-22T | 1550 | 0        | -0.577052 |  |
|  | Shiraz-25T | 1698 | 0.21835  | 0         |  |
|  | Shiraz-25T | 1698 | 0.21835  | 0         |  |
|  | Shiraz-25T | 1698 | 0.21835  | 0         |  |
|  | Shiraz-28T | 1735 | 0.350744 | 0         |  |
|  | Shiraz-28T | 1735 | 0.350744 | 0         |  |
|  | Shiraz-28T | 1735 | 0.350744 | 0         |  |
|  | Shiraz-29T | 1778 | 0.120767 | 0         |  |
|  | Shiraz-29T | 1778 | 0.120767 | 0         |  |
|  | Shiraz-29T | 1778 | 0.120767 | 0         |  |
|  | Shiraz-38T | 1951 | 0.250891 | 0         |  |
|  | Shiraz-38T | 1951 | 0.250891 | 0         |  |
|  | Shiraz-38T | 1951 | 0.250891 | 0         |  |
|  | Shiraz-53T | 2078 | 0.287202 | 0         |  |
|  | Shiraz-53T | 2078 | 0.287202 | 0         |  |
|  | Shiraz-53T | 2078 | 0.287202 | 0         |  |
|  | Shiraz-58T | 2159 | 0        | -0.219521 |  |
|  | Shiraz-58T | 2159 | 0        | -0.219521 |  |
|  | Shiraz-58T | 2159 | 0        | -0.219521 |  |
|  | Shiraz-71T | 2238 | 0.603631 | 0         |  |
|  | Shiraz-71T | 2238 | 0.603631 | 0         |  |
|  | Shiraz-71T | 2238 | 0.603631 | 0         |  |
|  | Shiraz-3T  | 90   | 0.219276 | 0         |  |
|  | Shiraz-3T  | 90   | 0.219276 | 0         |  |
|  | Shiraz-3T  | 90   | 0.219276 | 0         |  |
|  | Shiraz-3T  | 93   | 0        | -0.058023 |  |
|  | Shiraz-3T  | 93   | 0        | -0.058023 |  |
|  | Shiraz-3T  | 93   | 0        | -0.058023 |  |
|  | Shiraz-4T  | 253  | 0.372918 | 0         |  |
|  | Shiraz-4T  | 253  | 0.372918 | 0         |  |
|  | Shiraz-4T  | 253  | 0.372918 | 0         |  |
|  | Shiraz-36T | 378  | 0.179558 | 0         |  |
|  | Shiraz-36T | 378  | 0.179558 | 0         |  |
|  | Shiraz-36T | 378  | 0.179558 | 0         |  |
|  | Shiraz-36T | 380  | 0.083883 | 0         |  |

|  |  |            |      |          |           |  |  |
|--|--|------------|------|----------|-----------|--|--|
|  |  | Shiraz-36T | 380  | 0.083883 | 0         |  |  |
|  |  | Shiraz-36T | 380  | 0.083883 | 0         |  |  |
|  |  | Shiraz-44T | 638  | 0        | -0.433476 |  |  |
|  |  | Shiraz-44T | 638  | 0        | -0.433476 |  |  |
|  |  | Shiraz-44T | 638  | 0        | -0.433476 |  |  |
|  |  | Shiraz-46T | 943  | 0.093799 | 0         |  |  |
|  |  | Shiraz-46T | 943  | 0.093799 | 0         |  |  |
|  |  | Shiraz-46T | 943  | 0.093799 | 0         |  |  |
|  |  | Shiraz-46T | 945  | 0        | -0.014838 |  |  |
|  |  | Shiraz-46T | 945  | 0        | -0.014838 |  |  |
|  |  | Shiraz-46T | 945  | 0        | -0.014838 |  |  |
|  |  | Shiraz-47T | 1029 | 0        | -0.096586 |  |  |
|  |  | Shiraz-47T | 1029 | 0        | -0.096586 |  |  |
|  |  | Shiraz-47T | 1029 | 0        | -0.096586 |  |  |
|  |  | Shiraz-49T | 1119 | 0        | -0.157331 |  |  |
|  |  | Shiraz-49T | 1119 | 0        | -0.157331 |  |  |
|  |  | Shiraz-49T | 1119 | 0        | -0.157331 |  |  |
|  |  | Shiraz-77T | 1225 | 0        | -0.117922 |  |  |
|  |  | Shiraz-77T | 1225 | 0        | -0.117922 |  |  |
|  |  | Shiraz-77T | 1225 | 0        | -0.117922 |  |  |
|  |  | Shiraz-77T | 1226 | 0        | -0.233724 |  |  |
|  |  | Shiraz-77T | 1226 | 0        | -0.233724 |  |  |
|  |  | Shiraz-77T | 1226 | 0        | -0.233724 |  |  |
|  |  | Shiraz-18T | 1434 | 0.244465 | 0         |  |  |
|  |  | Shiraz-18T | 1434 | 0.244465 | 0         |  |  |
|  |  | Shiraz-18T | 1434 | 0.244465 | 0         |  |  |
|  |  | Shiraz-22T | 1549 | 0        | -0.319623 |  |  |
|  |  | Shiraz-22T | 1549 | 0        | -0.319623 |  |  |
|  |  | Shiraz-22T | 1549 | 0        | -0.319623 |  |  |
|  |  | Shiraz-22T | 1550 | 0        | -0.577052 |  |  |
|  |  | Shiraz-22T | 1550 | 0        | -0.577052 |  |  |
|  |  | Shiraz-22T | 1550 | 0        | -0.577052 |  |  |
|  |  | Shiraz-25T | 1698 | 0.21835  | 0         |  |  |
|  |  | Shiraz-25T | 1698 | 0.21835  | 0         |  |  |
|  |  | Shiraz-25T | 1698 | 0.21835  | 0         |  |  |
|  |  | Shiraz-28T | 1735 | 0.350744 | 0         |  |  |
|  |  | Shiraz-28T | 1735 | 0.350744 | 0         |  |  |
|  |  | Shiraz-28T | 1735 | 0.350744 | 0         |  |  |
|  |  | Shiraz-29T | 1778 | 0.120767 | 0         |  |  |
|  |  | Shiraz-29T | 1778 | 0.120767 | 0         |  |  |
|  |  | Shiraz-29T | 1778 | 0.120767 | 0         |  |  |
|  |  | Shiraz-38T | 1951 | 0.250891 | 0         |  |  |
|  |  | Shiraz-38T | 1951 | 0.250891 | 0         |  |  |
|  |  | Shiraz-38T | 1951 | 0.250891 | 0         |  |  |
|  |  | Shiraz-53T | 2078 | 0.287202 | 0         |  |  |
|  |  | Shiraz-53T | 2078 | 0.287202 | 0         |  |  |
|  |  | Shiraz-53T | 2078 | 0.287202 | 0         |  |  |

|       |      |            |      |          |           |  |  |
|-------|------|------------|------|----------|-----------|--|--|
|       |      | Shiraz-58T | 2159 | 0        | -0.219521 |  |  |
|       |      | Shiraz-58T | 2159 | 0        | -0.219521 |  |  |
|       |      | Shiraz-58T | 2159 | 0        | -0.219521 |  |  |
|       |      | Shiraz-71T | 2238 | 0.603631 | 0         |  |  |
|       |      | Shiraz-71T | 2238 | 0.603631 | 0         |  |  |
|       |      | Shiraz-71T | 2238 | 0.603631 | 0         |  |  |
| CRYGN | chr7 | Shiraz-3T  | 90   | 0.219276 | 0         |  |  |
|       |      | Shiraz-3T  | 99   | 0.454766 | 0         |  |  |
|       |      | Shiraz-4T  | 253  | 0.372918 | 0         |  |  |
|       |      | Shiraz-36T | 378  | 0.179558 | 0         |  |  |
|       |      | Shiraz-44T | 646  | 0.471276 | 0         |  |  |
|       |      | Shiraz-46T | 943  | 0.093799 | 0         |  |  |
|       |      | Shiraz-9T  | 1325 | 0.221899 | 0         |  |  |
|       |      | Shiraz-18T | 1434 | 0.244465 | 0         |  |  |
|       |      | Shiraz-22T | 1555 | 0.427999 | 0         |  |  |
|       |      | Shiraz-25T | 1698 | 0.21835  | 0         |  |  |
|       |      | Shiraz-28T | 1735 | 0.350744 | 0         |  |  |
|       |      | Shiraz-29T | 1778 | 0.120767 | 0         |  |  |
|       |      | Shiraz-32T | 1833 | 0.551336 | 0         |  |  |
|       |      | Shiraz-38T | 1951 | 0.250891 | 0         |  |  |
|       |      | Shiraz-53T | 2078 | 0.287202 | 0         |  |  |
|       |      | Shiraz-58T | 2162 | 0.221505 | 0         |  |  |
|       |      | Shiraz-71T | 2238 | 0.603631 | 0         |  |  |
|       |      | Shiraz-3T  | 90   | 0.219276 | 0         |  |  |
|       |      | Shiraz-3T  | 99   | 0.454766 | 0         |  |  |
|       |      | Shiraz-4T  | 253  | 0.372918 | 0         |  |  |
|       |      | Shiraz-36T | 378  | 0.179558 | 0         |  |  |
|       |      | Shiraz-44T | 646  | 0.471276 | 0         |  |  |
|       |      | Shiraz-46T | 943  | 0.093799 | 0         |  |  |
|       |      | Shiraz-9T  | 1325 | 0.221899 | 0         |  |  |
|       |      | Shiraz-18T | 1434 | 0.244465 | 0         |  |  |
|       |      | Shiraz-22T | 1555 | 0.427999 | 0         |  |  |
|       |      | Shiraz-25T | 1698 | 0.21835  | 0         |  |  |
|       |      | Shiraz-28T | 1735 | 0.350744 | 0         |  |  |
|       |      | Shiraz-29T | 1778 | 0.120767 | 0         |  |  |
|       |      | Shiraz-32T | 1833 | 0.551336 | 0         |  |  |
|       |      | Shiraz-38T | 1951 | 0.250891 | 0         |  |  |
|       |      | Shiraz-53T | 2078 | 0.287202 | 0         |  |  |
|       |      | Shiraz-58T | 2162 | 0.221505 | 0         |  |  |
|       |      | Shiraz-71T | 2238 | 0.603631 | 0         |  |  |
|       |      | Shiraz-3T  | 90   | 0.219276 | 0         |  |  |
|       |      | Shiraz-3T  | 99   | 0.454766 | 0         |  |  |
|       |      | Shiraz-4T  | 253  | 0.372918 | 0         |  |  |
|       |      | Shiraz-36T | 378  | 0.179558 | 0         |  |  |
|       |      | Shiraz-44T | 646  | 0.471276 | 0         |  |  |
|       |      | Shiraz-46T | 943  | 0.093799 | 0         |  |  |
|       |      | Shiraz-9T  | 1325 | 0.221899 | 0         |  |  |

|       |      |            |      |          |           |  |  |
|-------|------|------------|------|----------|-----------|--|--|
|       |      | Shiraz-18T | 1434 | 0.244465 | 0         |  |  |
|       |      | Shiraz-22T | 1555 | 0.427999 | 0         |  |  |
|       |      | Shiraz-25T | 1698 | 0.21835  | 0         |  |  |
|       |      | Shiraz-28T | 1735 | 0.350744 | 0         |  |  |
|       |      | Shiraz-29T | 1778 | 0.120767 | 0         |  |  |
|       |      | Shiraz-32T | 1833 | 0.551336 | 0         |  |  |
|       |      | Shiraz-38T | 1951 | 0.250891 | 0         |  |  |
|       |      | Shiraz-53T | 2078 | 0.287202 | 0         |  |  |
|       |      | Shiraz-58T | 2162 | 0.221505 | 0         |  |  |
|       |      | Shiraz-71T | 2238 | 0.603631 | 0         |  |  |
| CSAG1 | chrX | Shiraz-4T  | 261  | 0        | -0.336249 |  |  |
|       |      | Shiraz-4T  | 261  | 0        | -0.336249 |  |  |
|       |      | Shiraz-16T | 295  | 0.591657 | 0         |  |  |
|       |      | Shiraz-16T | 295  | 0.591657 | 0         |  |  |
|       |      | Shiraz-36T | 433  | 0        | -0.803961 |  |  |
|       |      | Shiraz-36T | 433  | 0        | -0.803961 |  |  |
|       |      | Shiraz-42T | 480  | 0        | -0.232915 |  |  |
|       |      | Shiraz-42T | 480  | 0        | -0.232915 |  |  |
|       |      | Shiraz-44T | 899  | 0        | -1.09697  |  |  |
|       |      | Shiraz-44T | 899  | 0        | -1.09697  |  |  |
|       |      | Shiraz-49T | 1170 | 0        | -0.967436 |  |  |
|       |      | Shiraz-49T | 1170 | 0        | -0.967436 |  |  |
|       |      | Shiraz-9T  | 1370 | 0.690073 | 0         |  |  |
|       |      | Shiraz-9T  | 1370 | 0.690073 | 0         |  |  |
|       |      | Shiraz-9T  | 1371 | 1.292392 | 0         |  |  |
|       |      | Shiraz-9T  | 1371 | 1.292392 | 0         |  |  |
|       |      | Shiraz-18T | 1457 | 0.643204 | 0         |  |  |
|       |      | Shiraz-18T | 1457 | 0.643204 | 0         |  |  |
|       |      | Shiraz-22T | 1673 | 0.611783 | 0         |  |  |
|       |      | Shiraz-22T | 1673 | 0.611783 | 0         |  |  |
|       |      | Shiraz-22T | 1678 | 0.911625 | 0         |  |  |
|       |      | Shiraz-22T | 1678 | 0.911625 | 0         |  |  |
|       |      | Shiraz-25T | 1719 | 0.472955 | 0         |  |  |
|       |      | Shiraz-25T | 1719 | 0.472955 | 0         |  |  |
|       |      | Shiraz-28T | 1762 | 0.562311 | 0         |  |  |
|       |      | Shiraz-28T | 1762 | 0.562311 | 0         |  |  |
|       |      | Shiraz-29T | 1801 | 0.815343 | 0         |  |  |
|       |      | Shiraz-29T | 1801 | 0.815343 | 0         |  |  |
|       |      | Shiraz-32T | 1870 | 0.729766 | 0         |  |  |
|       |      | Shiraz-32T | 1870 | 0.729766 | 0         |  |  |
|       |      | Shiraz-32T | 1872 | 1.504553 | 0         |  |  |
|       |      | Shiraz-32T | 1872 | 1.504553 | 0         |  |  |
|       |      | Shiraz-35T | 1933 | 0.488535 | 0         |  |  |
|       |      | Shiraz-35T | 1933 | 0.488535 | 0         |  |  |
|       |      | Shiraz-53T | 2115 | 0.427728 | 0         |  |  |
|       |      | Shiraz-53T | 2115 | 0.427728 | 0         |  |  |
|       |      | Shiraz-58T | 2223 | 0.833364 | 0         |  |  |

|  |  |            |      |          |           |  |  |
|--|--|------------|------|----------|-----------|--|--|
|  |  | Shiraz-58T | 2223 | 0.833364 | 0         |  |  |
|  |  | Shiraz-58T | 2226 | 1.074663 | 0         |  |  |
|  |  | Shiraz-58T | 2226 | 1.074663 | 0         |  |  |
|  |  | Shiraz-71T | 2263 | 0.975531 | 0         |  |  |
|  |  | Shiraz-71T | 2263 | 0.975531 | 0         |  |  |
|  |  | Shiraz-4T  | 261  | 0        | -0.336249 |  |  |
|  |  | Shiraz-4T  | 261  | 0        | -0.336249 |  |  |
|  |  | Shiraz-16T | 295  | 0.591657 | 0         |  |  |
|  |  | Shiraz-16T | 295  | 0.591657 | 0         |  |  |
|  |  | Shiraz-36T | 433  | 0        | -0.803961 |  |  |
|  |  | Shiraz-36T | 433  | 0        | -0.803961 |  |  |
|  |  | Shiraz-42T | 480  | 0        | -0.232915 |  |  |
|  |  | Shiraz-42T | 480  | 0        | -0.232915 |  |  |
|  |  | Shiraz-44T | 899  | 0        | -1.09697  |  |  |
|  |  | Shiraz-44T | 899  | 0        | -1.09697  |  |  |
|  |  | Shiraz-49T | 1170 | 0        | -0.967436 |  |  |
|  |  | Shiraz-49T | 1170 | 0        | -0.967436 |  |  |
|  |  | Shiraz-9T  | 1370 | 0.690073 | 0         |  |  |
|  |  | Shiraz-9T  | 1370 | 0.690073 | 0         |  |  |
|  |  | Shiraz-9T  | 1371 | 1.292392 | 0         |  |  |
|  |  | Shiraz-9T  | 1371 | 1.292392 | 0         |  |  |
|  |  | Shiraz-18T | 1457 | 0.643204 | 0         |  |  |
|  |  | Shiraz-18T | 1457 | 0.643204 | 0         |  |  |
|  |  | Shiraz-22T | 1673 | 0.611783 | 0         |  |  |
|  |  | Shiraz-22T | 1673 | 0.611783 | 0         |  |  |
|  |  | Shiraz-22T | 1678 | 0.911625 | 0         |  |  |
|  |  | Shiraz-22T | 1678 | 0.911625 | 0         |  |  |
|  |  | Shiraz-25T | 1719 | 0.472955 | 0         |  |  |
|  |  | Shiraz-25T | 1719 | 0.472955 | 0         |  |  |
|  |  | Shiraz-28T | 1762 | 0.562311 | 0         |  |  |
|  |  | Shiraz-28T | 1762 | 0.562311 | 0         |  |  |
|  |  | Shiraz-29T | 1801 | 0.815343 | 0         |  |  |
|  |  | Shiraz-29T | 1801 | 0.815343 | 0         |  |  |
|  |  | Shiraz-32T | 1870 | 0.729766 | 0         |  |  |
|  |  | Shiraz-32T | 1870 | 0.729766 | 0         |  |  |
|  |  | Shiraz-32T | 1872 | 1.504553 | 0         |  |  |
|  |  | Shiraz-32T | 1872 | 1.504553 | 0         |  |  |
|  |  | Shiraz-35T | 1933 | 0.488535 | 0         |  |  |
|  |  | Shiraz-35T | 1933 | 0.488535 | 0         |  |  |
|  |  | Shiraz-53T | 2115 | 0.427728 | 0         |  |  |
|  |  | Shiraz-53T | 2115 | 0.427728 | 0         |  |  |
|  |  | Shiraz-58T | 2223 | 0.833364 | 0         |  |  |
|  |  | Shiraz-58T | 2223 | 0.833364 | 0         |  |  |
|  |  | Shiraz-58T | 2226 | 1.074663 | 0         |  |  |
|  |  | Shiraz-58T | 2226 | 1.074663 | 0         |  |  |
|  |  | Shiraz-71T | 2263 | 0.975531 | 0         |  |  |
|  |  | Shiraz-71T | 2263 | 0.975531 | 0         |  |  |

|       |      |            |      |          |           |  |  |
|-------|------|------------|------|----------|-----------|--|--|
|       |      | Shiraz-4T  | 261  | 0        | -0.336249 |  |  |
|       |      | Shiraz-4T  | 261  | 0        | -0.336249 |  |  |
|       |      | Shiraz-16T | 295  | 0.591657 | 0         |  |  |
|       |      | Shiraz-16T | 295  | 0.591657 | 0         |  |  |
|       |      | Shiraz-36T | 433  | 0        | -0.803961 |  |  |
|       |      | Shiraz-36T | 433  | 0        | -0.803961 |  |  |
|       |      | Shiraz-42T | 480  | 0        | -0.232915 |  |  |
|       |      | Shiraz-42T | 480  | 0        | -0.232915 |  |  |
|       |      | Shiraz-44T | 899  | 0        | -1.09697  |  |  |
|       |      | Shiraz-44T | 899  | 0        | -1.09697  |  |  |
|       |      | Shiraz-49T | 1170 | 0        | -0.967436 |  |  |
|       |      | Shiraz-49T | 1170 | 0        | -0.967436 |  |  |
|       |      | Shiraz-9T  | 1370 | 0.690073 | 0         |  |  |
|       |      | Shiraz-9T  | 1370 | 0.690073 | 0         |  |  |
|       |      | Shiraz-9T  | 1371 | 1.292392 | 0         |  |  |
|       |      | Shiraz-9T  | 1371 | 1.292392 | 0         |  |  |
|       |      | Shiraz-18T | 1457 | 0.643204 | 0         |  |  |
|       |      | Shiraz-18T | 1457 | 0.643204 | 0         |  |  |
|       |      | Shiraz-22T | 1673 | 0.611783 | 0         |  |  |
|       |      | Shiraz-22T | 1673 | 0.611783 | 0         |  |  |
|       |      | Shiraz-22T | 1678 | 0.911625 | 0         |  |  |
|       |      | Shiraz-22T | 1678 | 0.911625 | 0         |  |  |
|       |      | Shiraz-25T | 1719 | 0.472955 | 0         |  |  |
|       |      | Shiraz-25T | 1719 | 0.472955 | 0         |  |  |
|       |      | Shiraz-28T | 1762 | 0.562311 | 0         |  |  |
|       |      | Shiraz-28T | 1762 | 0.562311 | 0         |  |  |
|       |      | Shiraz-29T | 1801 | 0.815343 | 0         |  |  |
|       |      | Shiraz-29T | 1801 | 0.815343 | 0         |  |  |
|       |      | Shiraz-32T | 1870 | 0.729766 | 0         |  |  |
|       |      | Shiraz-32T | 1870 | 0.729766 | 0         |  |  |
|       |      | Shiraz-32T | 1872 | 1.504553 | 0         |  |  |
|       |      | Shiraz-32T | 1872 | 1.504553 | 0         |  |  |
|       |      | Shiraz-35T | 1933 | 0.488535 | 0         |  |  |
|       |      | Shiraz-35T | 1933 | 0.488535 | 0         |  |  |
|       |      | Shiraz-53T | 2115 | 0.427728 | 0         |  |  |
|       |      | Shiraz-53T | 2115 | 0.427728 | 0         |  |  |
|       |      | Shiraz-58T | 2223 | 0.833364 | 0         |  |  |
|       |      | Shiraz-58T | 2223 | 0.833364 | 0         |  |  |
|       |      | Shiraz-58T | 2226 | 1.074663 | 0         |  |  |
|       |      | Shiraz-58T | 2226 | 1.074663 | 0         |  |  |
|       |      | Shiraz-71T | 2263 | 0.975531 | 0         |  |  |
|       |      | Shiraz-71T | 2263 | 0.975531 | 0         |  |  |
| CSAG2 | chrX | Shiraz-4T  | 261  | 0        | -0.336249 |  |  |
|       |      | Shiraz-4T  | 261  | 0        | -0.336249 |  |  |
|       |      | Shiraz-16T | 295  | 0.591657 | 0         |  |  |
|       |      | Shiraz-16T | 295  | 0.591657 | 0         |  |  |
|       |      | Shiraz-36T | 433  | 0        | -0.803961 |  |  |

|  |            |      |          |           |  |
|--|------------|------|----------|-----------|--|
|  | Shiraz-36T | 433  | 0        | -0.803961 |  |
|  | Shiraz-42T | 480  | 0        | -0.232915 |  |
|  | Shiraz-42T | 480  | 0        | -0.232915 |  |
|  | Shiraz-44T | 899  | 0        | -1.09697  |  |
|  | Shiraz-44T | 899  | 0        | -1.09697  |  |
|  | Shiraz-49T | 1170 | 0        | -0.967436 |  |
|  | Shiraz-49T | 1170 | 0        | -0.967436 |  |
|  | Shiraz-9T  | 1370 | 0.690073 | 0         |  |
|  | Shiraz-9T  | 1370 | 0.690073 | 0         |  |
|  | Shiraz-9T  | 1371 | 1.292392 | 0         |  |
|  | Shiraz-9T  | 1371 | 1.292392 | 0         |  |
|  | Shiraz-18T | 1457 | 0.643204 | 0         |  |
|  | Shiraz-18T | 1457 | 0.643204 | 0         |  |
|  | Shiraz-22T | 1673 | 0.611783 | 0         |  |
|  | Shiraz-22T | 1673 | 0.611783 | 0         |  |
|  | Shiraz-22T | 1678 | 0.911625 | 0         |  |
|  | Shiraz-22T | 1678 | 0.911625 | 0         |  |
|  | Shiraz-25T | 1719 | 0.472955 | 0         |  |
|  | Shiraz-25T | 1719 | 0.472955 | 0         |  |
|  | Shiraz-28T | 1762 | 0.562311 | 0         |  |
|  | Shiraz-28T | 1762 | 0.562311 | 0         |  |
|  | Shiraz-29T | 1801 | 0.815343 | 0         |  |
|  | Shiraz-29T | 1801 | 0.815343 | 0         |  |
|  | Shiraz-32T | 1870 | 0.729766 | 0         |  |
|  | Shiraz-32T | 1870 | 0.729766 | 0         |  |
|  | Shiraz-32T | 1872 | 1.504553 | 0         |  |
|  | Shiraz-32T | 1872 | 1.504553 | 0         |  |
|  | Shiraz-35T | 1933 | 0.488535 | 0         |  |
|  | Shiraz-35T | 1933 | 0.488535 | 0         |  |
|  | Shiraz-53T | 2115 | 0.427728 | 0         |  |
|  | Shiraz-53T | 2115 | 0.427728 | 0         |  |
|  | Shiraz-58T | 2223 | 0.833364 | 0         |  |
|  | Shiraz-58T | 2223 | 0.833364 | 0         |  |
|  | Shiraz-58T | 2226 | 1.074663 | 0         |  |
|  | Shiraz-58T | 2226 | 1.074663 | 0         |  |
|  | Shiraz-71T | 2263 | 0.975531 | 0         |  |
|  | Shiraz-71T | 2263 | 0.975531 | 0         |  |
|  | Shiraz-4T  | 261  | 0        | -0.336249 |  |
|  | Shiraz-4T  | 261  | 0        | -0.336249 |  |
|  | Shiraz-16T | 295  | 0.591657 | 0         |  |
|  | Shiraz-16T | 295  | 0.591657 | 0         |  |
|  | Shiraz-36T | 433  | 0        | -0.803961 |  |
|  | Shiraz-36T | 433  | 0        | -0.803961 |  |
|  | Shiraz-42T | 480  | 0        | -0.232915 |  |
|  | Shiraz-42T | 480  | 0        | -0.232915 |  |
|  | Shiraz-44T | 899  | 0        | -1.09697  |  |
|  | Shiraz-44T | 899  | 0        | -1.09697  |  |

|  |            |      |          |           |  |
|--|------------|------|----------|-----------|--|
|  | Shiraz-49T | 1170 | 0        | -0.967436 |  |
|  | Shiraz-49T | 1170 | 0        | -0.967436 |  |
|  | Shiraz-9T  | 1370 | 0.690073 | 0         |  |
|  | Shiraz-9T  | 1370 | 0.690073 | 0         |  |
|  | Shiraz-9T  | 1371 | 1.292392 | 0         |  |
|  | Shiraz-9T  | 1371 | 1.292392 | 0         |  |
|  | Shiraz-18T | 1457 | 0.643204 | 0         |  |
|  | Shiraz-18T | 1457 | 0.643204 | 0         |  |
|  | Shiraz-22T | 1673 | 0.611783 | 0         |  |
|  | Shiraz-22T | 1673 | 0.611783 | 0         |  |
|  | Shiraz-22T | 1678 | 0.911625 | 0         |  |
|  | Shiraz-22T | 1678 | 0.911625 | 0         |  |
|  | Shiraz-25T | 1719 | 0.472955 | 0         |  |
|  | Shiraz-25T | 1719 | 0.472955 | 0         |  |
|  | Shiraz-28T | 1762 | 0.562311 | 0         |  |
|  | Shiraz-28T | 1762 | 0.562311 | 0         |  |
|  | Shiraz-29T | 1801 | 0.815343 | 0         |  |
|  | Shiraz-29T | 1801 | 0.815343 | 0         |  |
|  | Shiraz-32T | 1870 | 0.729766 | 0         |  |
|  | Shiraz-32T | 1870 | 0.729766 | 0         |  |
|  | Shiraz-32T | 1872 | 1.504553 | 0         |  |
|  | Shiraz-32T | 1872 | 1.504553 | 0         |  |
|  | Shiraz-35T | 1933 | 0.488535 | 0         |  |
|  | Shiraz-35T | 1933 | 0.488535 | 0         |  |
|  | Shiraz-53T | 2115 | 0.427728 | 0         |  |
|  | Shiraz-53T | 2115 | 0.427728 | 0         |  |
|  | Shiraz-58T | 2223 | 0.833364 | 0         |  |
|  | Shiraz-58T | 2223 | 0.833364 | 0         |  |
|  | Shiraz-58T | 2226 | 1.074663 | 0         |  |
|  | Shiraz-58T | 2226 | 1.074663 | 0         |  |
|  | Shiraz-71T | 2263 | 0.975531 | 0         |  |
|  | Shiraz-71T | 2263 | 0.975531 | 0         |  |
|  | Shiraz-4T  | 261  | 0        | -0.336249 |  |
|  | Shiraz-4T  | 261  | 0        | -0.336249 |  |
|  | Shiraz-16T | 295  | 0.591657 | 0         |  |
|  | Shiraz-16T | 295  | 0.591657 | 0         |  |
|  | Shiraz-36T | 433  | 0        | -0.803961 |  |
|  | Shiraz-36T | 433  | 0        | -0.803961 |  |
|  | Shiraz-42T | 480  | 0        | -0.232915 |  |
|  | Shiraz-42T | 480  | 0        | -0.232915 |  |
|  | Shiraz-44T | 899  | 0        | -1.09697  |  |
|  | Shiraz-44T | 899  | 0        | -1.09697  |  |
|  | Shiraz-49T | 1170 | 0        | -0.967436 |  |
|  | Shiraz-49T | 1170 | 0        | -0.967436 |  |
|  | Shiraz-9T  | 1370 | 0.690073 | 0         |  |
|  | Shiraz-9T  | 1370 | 0.690073 | 0         |  |
|  | Shiraz-9T  | 1371 | 1.292392 | 0         |  |



|       |      |            |      |          |           |  |
|-------|------|------------|------|----------|-----------|--|
|       |      | Shiraz-9T  | 1371 | 1.292392 | 0         |  |
|       |      | Shiraz-18T | 1457 | 0.643204 | 0         |  |
|       |      | Shiraz-18T | 1457 | 0.643204 | 0         |  |
|       |      | Shiraz-22T | 1673 | 0.611783 | 0         |  |
|       |      | Shiraz-22T | 1673 | 0.611783 | 0         |  |
|       |      | Shiraz-22T | 1678 | 0.911625 | 0         |  |
|       |      | Shiraz-22T | 1678 | 0.911625 | 0         |  |
|       |      | Shiraz-25T | 1719 | 0.472955 | 0         |  |
|       |      | Shiraz-25T | 1719 | 0.472955 | 0         |  |
|       |      | Shiraz-28T | 1762 | 0.562311 | 0         |  |
|       |      | Shiraz-28T | 1762 | 0.562311 | 0         |  |
|       |      | Shiraz-29T | 1801 | 0.815343 | 0         |  |
|       |      | Shiraz-29T | 1801 | 0.815343 | 0         |  |
|       |      | Shiraz-32T | 1870 | 0.729766 | 0         |  |
|       |      | Shiraz-32T | 1870 | 0.729766 | 0         |  |
|       |      | Shiraz-32T | 1872 | 1.504553 | 0         |  |
|       |      | Shiraz-32T | 1872 | 1.504553 | 0         |  |
|       |      | Shiraz-35T | 1933 | 0.488535 | 0         |  |
|       |      | Shiraz-35T | 1933 | 0.488535 | 0         |  |
|       |      | Shiraz-53T | 2115 | 0.427728 | 0         |  |
|       |      | Shiraz-53T | 2115 | 0.427728 | 0         |  |
|       |      | Shiraz-58T | 2223 | 0.833364 | 0         |  |
|       |      | Shiraz-58T | 2223 | 0.833364 | 0         |  |
|       |      | Shiraz-58T | 2226 | 1.074663 | 0         |  |
|       |      | Shiraz-58T | 2226 | 1.074663 | 0         |  |
|       |      | Shiraz-71T | 2263 | 0.975531 | 0         |  |
|       |      | Shiraz-71T | 2263 | 0.975531 | 0         |  |
| CSAG3 | chrX | Shiraz-4T  | 261  | 0        | -0.336249 |  |
|       |      | Shiraz-4T  | 261  | 0        | -0.336249 |  |
|       |      | Shiraz-4T  | 261  | 0        | -0.336249 |  |
|       |      | Shiraz-4T  | 261  | 0        | -0.336249 |  |
|       |      | Shiraz-16T | 295  | 0.591657 | 0         |  |
|       |      | Shiraz-16T | 295  | 0.591657 | 0         |  |
|       |      | Shiraz-16T | 295  | 0.591657 | 0         |  |
|       |      | Shiraz-16T | 295  | 0.591657 | 0         |  |
|       |      | Shiraz-36T | 433  | 0        | -0.803961 |  |
|       |      | Shiraz-36T | 433  | 0        | -0.803961 |  |
|       |      | Shiraz-36T | 433  | 0        | -0.803961 |  |
|       |      | Shiraz-36T | 433  | 0        | -0.803961 |  |
|       |      | Shiraz-42T | 480  | 0        | -0.232915 |  |
|       |      | Shiraz-42T | 480  | 0        | -0.232915 |  |
|       |      | Shiraz-42T | 480  | 0        | -0.232915 |  |
|       |      | Shiraz-42T | 480  | 0        | -0.232915 |  |
|       |      | Shiraz-44T | 899  | 0        | -1.09697  |  |
|       |      | Shiraz-44T | 899  | 0        | -1.09697  |  |
|       |      | Shiraz-44T | 899  | 0        | -1.09697  |  |
|       |      | Shiraz-44T | 899  | 0        | -1.09697  |  |

|  |            |      |          |           |  |
|--|------------|------|----------|-----------|--|
|  | Shiraz-49T | 1170 | 0        | -0.967436 |  |
|  | Shiraz-49T | 1170 | 0        | -0.967436 |  |
|  | Shiraz-49T | 1170 | 0        | -0.967436 |  |
|  | Shiraz-49T | 1170 | 0        | -0.967436 |  |
|  | Shiraz-9T  | 1370 | 0.690073 | 0         |  |
|  | Shiraz-9T  | 1370 | 0.690073 | 0         |  |
|  | Shiraz-9T  | 1370 | 0.690073 | 0         |  |
|  | Shiraz-9T  | 1370 | 0.690073 | 0         |  |
|  | Shiraz-9T  | 1371 | 1.292392 | 0         |  |
|  | Shiraz-9T  | 1371 | 1.292392 | 0         |  |
|  | Shiraz-9T  | 1371 | 1.292392 | 0         |  |
|  | Shiraz-9T  | 1371 | 1.292392 | 0         |  |
|  | Shiraz-18T | 1457 | 0.643204 | 0         |  |
|  | Shiraz-18T | 1457 | 0.643204 | 0         |  |
|  | Shiraz-18T | 1457 | 0.643204 | 0         |  |
|  | Shiraz-18T | 1457 | 0.643204 | 0         |  |
|  | Shiraz-22T | 1673 | 0.611783 | 0         |  |
|  | Shiraz-22T | 1673 | 0.611783 | 0         |  |
|  | Shiraz-22T | 1673 | 0.611783 | 0         |  |
|  | Shiraz-22T | 1673 | 0.611783 | 0         |  |
|  | Shiraz-22T | 1678 | 0.911625 | 0         |  |
|  | Shiraz-22T | 1678 | 0.911625 | 0         |  |
|  | Shiraz-22T | 1678 | 0.911625 | 0         |  |
|  | Shiraz-22T | 1678 | 0.911625 | 0         |  |
|  | Shiraz-25T | 1719 | 0.472955 | 0         |  |
|  | Shiraz-25T | 1719 | 0.472955 | 0         |  |
|  | Shiraz-25T | 1719 | 0.472955 | 0         |  |
|  | Shiraz-25T | 1719 | 0.472955 | 0         |  |
|  | Shiraz-28T | 1762 | 0.562311 | 0         |  |
|  | Shiraz-28T | 1762 | 0.562311 | 0         |  |
|  | Shiraz-28T | 1762 | 0.562311 | 0         |  |
|  | Shiraz-28T | 1762 | 0.562311 | 0         |  |
|  | Shiraz-29T | 1801 | 0.815343 | 0         |  |
|  | Shiraz-29T | 1801 | 0.815343 | 0         |  |
|  | Shiraz-29T | 1801 | 0.815343 | 0         |  |
|  | Shiraz-29T | 1801 | 0.815343 | 0         |  |
|  | Shiraz-32T | 1870 | 0.729766 | 0         |  |
|  | Shiraz-32T | 1870 | 0.729766 | 0         |  |
|  | Shiraz-32T | 1870 | 0.729766 | 0         |  |
|  | Shiraz-32T | 1870 | 0.729766 | 0         |  |
|  | Shiraz-32T | 1872 | 1.504553 | 0         |  |
|  | Shiraz-32T | 1872 | 1.504553 | 0         |  |
|  | Shiraz-32T | 1872 | 1.504553 | 0         |  |
|  | Shiraz-32T | 1872 | 1.504553 | 0         |  |
|  | Shiraz-35T | 1933 | 0.488535 | 0         |  |
|  | Shiraz-35T | 1933 | 0.488535 | 0         |  |
|  | Shiraz-35T | 1933 | 0.488535 | 0         |  |

|  |  |            |      |          |           |  |  |
|--|--|------------|------|----------|-----------|--|--|
|  |  | Shiraz-35T | 1933 | 0.488535 | 0         |  |  |
|  |  | Shiraz-53T | 2115 | 0.427728 | 0         |  |  |
|  |  | Shiraz-53T | 2115 | 0.427728 | 0         |  |  |
|  |  | Shiraz-53T | 2115 | 0.427728 | 0         |  |  |
|  |  | Shiraz-53T | 2115 | 0.427728 | 0         |  |  |
|  |  | Shiraz-58T | 2223 | 0.833364 | 0         |  |  |
|  |  | Shiraz-58T | 2223 | 0.833364 | 0         |  |  |
|  |  | Shiraz-58T | 2223 | 0.833364 | 0         |  |  |
|  |  | Shiraz-58T | 2223 | 0.833364 | 0         |  |  |
|  |  | Shiraz-58T | 2226 | 1.074663 | 0         |  |  |
|  |  | Shiraz-58T | 2226 | 1.074663 | 0         |  |  |
|  |  | Shiraz-58T | 2226 | 1.074663 | 0         |  |  |
|  |  | Shiraz-58T | 2226 | 1.074663 | 0         |  |  |
|  |  | Shiraz-71T | 2263 | 0.975531 | 0         |  |  |
|  |  | Shiraz-71T | 2263 | 0.975531 | 0         |  |  |
|  |  | Shiraz-71T | 2263 | 0.975531 | 0         |  |  |
|  |  | Shiraz-71T | 2263 | 0.975531 | 0         |  |  |
|  |  | Shiraz-4T  | 261  | 0        | -0.336249 |  |  |
|  |  | Shiraz-4T  | 261  | 0        | -0.336249 |  |  |
|  |  | Shiraz-4T  | 261  | 0        | -0.336249 |  |  |
|  |  | Shiraz-4T  | 261  | 0        | -0.336249 |  |  |
|  |  | Shiraz-16T | 295  | 0.591657 | 0         |  |  |
|  |  | Shiraz-16T | 295  | 0.591657 | 0         |  |  |
|  |  | Shiraz-16T | 295  | 0.591657 | 0         |  |  |
|  |  | Shiraz-16T | 295  | 0.591657 | 0         |  |  |
|  |  | Shiraz-36T | 433  | 0        | -0.803961 |  |  |
|  |  | Shiraz-36T | 433  | 0        | -0.803961 |  |  |
|  |  | Shiraz-36T | 433  | 0        | -0.803961 |  |  |
|  |  | Shiraz-36T | 433  | 0        | -0.803961 |  |  |
|  |  | Shiraz-42T | 480  | 0        | -0.232915 |  |  |
|  |  | Shiraz-42T | 480  | 0        | -0.232915 |  |  |
|  |  | Shiraz-42T | 480  | 0        | -0.232915 |  |  |
|  |  | Shiraz-42T | 480  | 0        | -0.232915 |  |  |
|  |  | Shiraz-44T | 899  | 0        | -1.09697  |  |  |
|  |  | Shiraz-44T | 899  | 0        | -1.09697  |  |  |
|  |  | Shiraz-44T | 899  | 0        | -1.09697  |  |  |
|  |  | Shiraz-44T | 899  | 0        | -1.09697  |  |  |
|  |  | Shiraz-49T | 1170 | 0        | -0.967436 |  |  |
|  |  | Shiraz-49T | 1170 | 0        | -0.967436 |  |  |
|  |  | Shiraz-49T | 1170 | 0        | -0.967436 |  |  |
|  |  | Shiraz-49T | 1170 | 0        | -0.967436 |  |  |
|  |  | Shiraz-9T  | 1370 | 0.690073 | 0         |  |  |
|  |  | Shiraz-9T  | 1370 | 0.690073 | 0         |  |  |
|  |  | Shiraz-9T  | 1370 | 0.690073 | 0         |  |  |
|  |  | Shiraz-9T  | 1370 | 0.690073 | 0         |  |  |
|  |  | Shiraz-9T  | 1371 | 1.292392 | 0         |  |  |
|  |  | Shiraz-9T  | 1371 | 1.292392 | 0         |  |  |

|  |  |            |      |          |   |  |  |
|--|--|------------|------|----------|---|--|--|
|  |  | Shiraz-9T  | 1371 | 1.292392 | 0 |  |  |
|  |  | Shiraz-9T  | 1371 | 1.292392 | 0 |  |  |
|  |  | Shiraz-18T | 1457 | 0.643204 | 0 |  |  |
|  |  | Shiraz-18T | 1457 | 0.643204 | 0 |  |  |
|  |  | Shiraz-18T | 1457 | 0.643204 | 0 |  |  |
|  |  | Shiraz-18T | 1457 | 0.643204 | 0 |  |  |
|  |  | Shiraz-22T | 1673 | 0.611783 | 0 |  |  |
|  |  | Shiraz-22T | 1673 | 0.611783 | 0 |  |  |
|  |  | Shiraz-22T | 1673 | 0.611783 | 0 |  |  |
|  |  | Shiraz-22T | 1673 | 0.611783 | 0 |  |  |
|  |  | Shiraz-22T | 1678 | 0.911625 | 0 |  |  |
|  |  | Shiraz-22T | 1678 | 0.911625 | 0 |  |  |
|  |  | Shiraz-22T | 1678 | 0.911625 | 0 |  |  |
|  |  | Shiraz-22T | 1678 | 0.911625 | 0 |  |  |
|  |  | Shiraz-25T | 1719 | 0.472955 | 0 |  |  |
|  |  | Shiraz-25T | 1719 | 0.472955 | 0 |  |  |
|  |  | Shiraz-25T | 1719 | 0.472955 | 0 |  |  |
|  |  | Shiraz-25T | 1719 | 0.472955 | 0 |  |  |
|  |  | Shiraz-28T | 1762 | 0.562311 | 0 |  |  |
|  |  | Shiraz-28T | 1762 | 0.562311 | 0 |  |  |
|  |  | Shiraz-28T | 1762 | 0.562311 | 0 |  |  |
|  |  | Shiraz-28T | 1762 | 0.562311 | 0 |  |  |
|  |  | Shiraz-29T | 1801 | 0.815343 | 0 |  |  |
|  |  | Shiraz-29T | 1801 | 0.815343 | 0 |  |  |
|  |  | Shiraz-29T | 1801 | 0.815343 | 0 |  |  |
|  |  | Shiraz-29T | 1801 | 0.815343 | 0 |  |  |
|  |  | Shiraz-32T | 1870 | 0.729766 | 0 |  |  |
|  |  | Shiraz-32T | 1870 | 0.729766 | 0 |  |  |
|  |  | Shiraz-32T | 1870 | 0.729766 | 0 |  |  |
|  |  | Shiraz-32T | 1870 | 0.729766 | 0 |  |  |
|  |  | Shiraz-32T | 1872 | 1.504553 | 0 |  |  |
|  |  | Shiraz-32T | 1872 | 1.504553 | 0 |  |  |
|  |  | Shiraz-32T | 1872 | 1.504553 | 0 |  |  |
|  |  | Shiraz-32T | 1872 | 1.504553 | 0 |  |  |
|  |  | Shiraz-35T | 1933 | 0.488535 | 0 |  |  |
|  |  | Shiraz-35T | 1933 | 0.488535 | 0 |  |  |
|  |  | Shiraz-35T | 1933 | 0.488535 | 0 |  |  |
|  |  | Shiraz-35T | 1933 | 0.488535 | 0 |  |  |
|  |  | Shiraz-53T | 2115 | 0.427728 | 0 |  |  |
|  |  | Shiraz-53T | 2115 | 0.427728 | 0 |  |  |
|  |  | Shiraz-53T | 2115 | 0.427728 | 0 |  |  |
|  |  | Shiraz-53T | 2115 | 0.427728 | 0 |  |  |
|  |  | Shiraz-58T | 2223 | 0.833364 | 0 |  |  |
|  |  | Shiraz-58T | 2223 | 0.833364 | 0 |  |  |
|  |  | Shiraz-58T | 2223 | 0.833364 | 0 |  |  |
|  |  | Shiraz-58T | 2223 | 0.833364 | 0 |  |  |
|  |  | Shiraz-58T | 2226 | 1.074663 | 0 |  |  |

|  |  |            |      |          |           |  |  |
|--|--|------------|------|----------|-----------|--|--|
|  |  | Shiraz-58T | 2226 | 1.074663 | 0         |  |  |
|  |  | Shiraz-58T | 2226 | 1.074663 | 0         |  |  |
|  |  | Shiraz-58T | 2226 | 1.074663 | 0         |  |  |
|  |  | Shiraz-71T | 2263 | 0.975531 | 0         |  |  |
|  |  | Shiraz-71T | 2263 | 0.975531 | 0         |  |  |
|  |  | Shiraz-71T | 2263 | 0.975531 | 0         |  |  |
|  |  | Shiraz-71T | 2263 | 0.975531 | 0         |  |  |
|  |  | Shiraz-4T  | 261  | 0        | -0.336249 |  |  |
|  |  | Shiraz-4T  | 261  | 0        | -0.336249 |  |  |
|  |  | Shiraz-4T  | 261  | 0        | -0.336249 |  |  |
|  |  | Shiraz-4T  | 261  | 0        | -0.336249 |  |  |
|  |  | Shiraz-16T | 295  | 0.591657 | 0         |  |  |
|  |  | Shiraz-16T | 295  | 0.591657 | 0         |  |  |
|  |  | Shiraz-16T | 295  | 0.591657 | 0         |  |  |
|  |  | Shiraz-16T | 295  | 0.591657 | 0         |  |  |
|  |  | Shiraz-36T | 433  | 0        | -0.803961 |  |  |
|  |  | Shiraz-36T | 433  | 0        | -0.803961 |  |  |
|  |  | Shiraz-36T | 433  | 0        | -0.803961 |  |  |
|  |  | Shiraz-36T | 433  | 0        | -0.803961 |  |  |
|  |  | Shiraz-42T | 480  | 0        | -0.232915 |  |  |
|  |  | Shiraz-42T | 480  | 0        | -0.232915 |  |  |
|  |  | Shiraz-42T | 480  | 0        | -0.232915 |  |  |
|  |  | Shiraz-42T | 480  | 0        | -0.232915 |  |  |
|  |  | Shiraz-44T | 899  | 0        | -1.09697  |  |  |
|  |  | Shiraz-44T | 899  | 0        | -1.09697  |  |  |
|  |  | Shiraz-44T | 899  | 0        | -1.09697  |  |  |
|  |  | Shiraz-44T | 899  | 0        | -1.09697  |  |  |
|  |  | Shiraz-49T | 1170 | 0        | -0.967436 |  |  |
|  |  | Shiraz-49T | 1170 | 0        | -0.967436 |  |  |
|  |  | Shiraz-49T | 1170 | 0        | -0.967436 |  |  |
|  |  | Shiraz-49T | 1170 | 0        | -0.967436 |  |  |
|  |  | Shiraz-9T  | 1370 | 0.690073 | 0         |  |  |
|  |  | Shiraz-9T  | 1370 | 0.690073 | 0         |  |  |
|  |  | Shiraz-9T  | 1370 | 0.690073 | 0         |  |  |
|  |  | Shiraz-9T  | 1370 | 0.690073 | 0         |  |  |
|  |  | Shiraz-9T  | 1371 | 1.292392 | 0         |  |  |
|  |  | Shiraz-9T  | 1371 | 1.292392 | 0         |  |  |
|  |  | Shiraz-9T  | 1371 | 1.292392 | 0         |  |  |
|  |  | Shiraz-9T  | 1371 | 1.292392 | 0         |  |  |
|  |  | Shiraz-18T | 1457 | 0.643204 | 0         |  |  |
|  |  | Shiraz-18T | 1457 | 0.643204 | 0         |  |  |
|  |  | Shiraz-18T | 1457 | 0.643204 | 0         |  |  |
|  |  | Shiraz-18T | 1457 | 0.643204 | 0         |  |  |
|  |  | Shiraz-22T | 1673 | 0.611783 | 0         |  |  |
|  |  | Shiraz-22T | 1673 | 0.611783 | 0         |  |  |
|  |  | Shiraz-22T | 1673 | 0.611783 | 0         |  |  |
|  |  | Shiraz-22T | 1673 | 0.611783 | 0         |  |  |

|          |      |            |      |          |   |  |
|----------|------|------------|------|----------|---|--|
|          |      | Shiraz-22T | 1678 | 0.911625 | 0 |  |
|          |      | Shiraz-22T | 1678 | 0.911625 | 0 |  |
|          |      | Shiraz-22T | 1678 | 0.911625 | 0 |  |
|          |      | Shiraz-22T | 1678 | 0.911625 | 0 |  |
|          |      | Shiraz-25T | 1719 | 0.472955 | 0 |  |
|          |      | Shiraz-25T | 1719 | 0.472955 | 0 |  |
|          |      | Shiraz-25T | 1719 | 0.472955 | 0 |  |
|          |      | Shiraz-25T | 1719 | 0.472955 | 0 |  |
|          |      | Shiraz-28T | 1762 | 0.562311 | 0 |  |
|          |      | Shiraz-28T | 1762 | 0.562311 | 0 |  |
|          |      | Shiraz-28T | 1762 | 0.562311 | 0 |  |
|          |      | Shiraz-28T | 1762 | 0.562311 | 0 |  |
|          |      | Shiraz-29T | 1801 | 0.815343 | 0 |  |
|          |      | Shiraz-29T | 1801 | 0.815343 | 0 |  |
|          |      | Shiraz-29T | 1801 | 0.815343 | 0 |  |
|          |      | Shiraz-29T | 1801 | 0.815343 | 0 |  |
|          |      | Shiraz-32T | 1870 | 0.729766 | 0 |  |
|          |      | Shiraz-32T | 1870 | 0.729766 | 0 |  |
|          |      | Shiraz-32T | 1870 | 0.729766 | 0 |  |
|          |      | Shiraz-32T | 1870 | 0.729766 | 0 |  |
|          |      | Shiraz-32T | 1872 | 1.504553 | 0 |  |
|          |      | Shiraz-32T | 1872 | 1.504553 | 0 |  |
|          |      | Shiraz-32T | 1872 | 1.504553 | 0 |  |
|          |      | Shiraz-32T | 1872 | 1.504553 | 0 |  |
|          |      | Shiraz-35T | 1933 | 0.488535 | 0 |  |
|          |      | Shiraz-35T | 1933 | 0.488535 | 0 |  |
|          |      | Shiraz-35T | 1933 | 0.488535 | 0 |  |
|          |      | Shiraz-35T | 1933 | 0.488535 | 0 |  |
|          |      | Shiraz-53T | 2115 | 0.427728 | 0 |  |
|          |      | Shiraz-53T | 2115 | 0.427728 | 0 |  |
|          |      | Shiraz-53T | 2115 | 0.427728 | 0 |  |
|          |      | Shiraz-53T | 2115 | 0.427728 | 0 |  |
|          |      | Shiraz-58T | 2223 | 0.833364 | 0 |  |
|          |      | Shiraz-58T | 2223 | 0.833364 | 0 |  |
|          |      | Shiraz-58T | 2223 | 0.833364 | 0 |  |
|          |      | Shiraz-58T | 2223 | 0.833364 | 0 |  |
|          |      | Shiraz-58T | 2226 | 1.074663 | 0 |  |
|          |      | Shiraz-58T | 2226 | 1.074663 | 0 |  |
|          |      | Shiraz-58T | 2226 | 1.074663 | 0 |  |
|          |      | Shiraz-58T | 2226 | 1.074663 | 0 |  |
|          |      | Shiraz-71T | 2263 | 0.975531 | 0 |  |
|          |      | Shiraz-71T | 2263 | 0.975531 | 0 |  |
|          |      | Shiraz-71T | 2263 | 0.975531 | 0 |  |
|          |      | Shiraz-71T | 2263 | 0.975531 | 0 |  |
| CSGLCA-T | chr7 | Shiraz-3T  | 90   | 0.219276 | 0 |  |
|          |      | Shiraz-3T  | 99   | 0.454766 | 0 |  |
|          |      | Shiraz-4T  | 253  | 0.372918 | 0 |  |

|  |            |      |          |           |  |
|--|------------|------|----------|-----------|--|
|  | Shiraz-36T | 378  | 0.179558 | 0         |  |
|  | Shiraz-44T | 646  | 0.471276 | 0         |  |
|  | Shiraz-44T | 647  | 1.496173 | 0         |  |
|  | Shiraz-46T | 943  | 0.093799 | 0         |  |
|  | Shiraz-9T  | 1325 | 0.221899 | 0         |  |
|  | Shiraz-18T | 1434 | 0.244465 | 0         |  |
|  | Shiraz-22T | 1555 | 0.427999 | 0         |  |
|  | Shiraz-25T | 1698 | 0.21835  | 0         |  |
|  | Shiraz-28T | 1735 | 0.350744 | 0         |  |
|  | Shiraz-29T | 1778 | 0.120767 | 0         |  |
|  | Shiraz-32T | 1833 | 0.551336 | 0         |  |
|  | Shiraz-38T | 1951 | 0.250891 | 0         |  |
|  | Shiraz-38T | 1952 | 0        | -0.163211 |  |
|  | Shiraz-53T | 2078 | 0.287202 | 0         |  |
|  | Shiraz-58T | 2162 | 0.221505 | 0         |  |
|  | Shiraz-71T | 2238 | 0.603631 | 0         |  |
|  | Shiraz-3T  | 90   | 0.219276 | 0         |  |
|  | Shiraz-3T  | 99   | 0.454766 | 0         |  |
|  | Shiraz-4T  | 253  | 0.372918 | 0         |  |
|  | Shiraz-36T | 378  | 0.179558 | 0         |  |
|  | Shiraz-44T | 646  | 0.471276 | 0         |  |
|  | Shiraz-44T | 647  | 1.496173 | 0         |  |
|  | Shiraz-46T | 943  | 0.093799 | 0         |  |
|  | Shiraz-9T  | 1325 | 0.221899 | 0         |  |
|  | Shiraz-18T | 1434 | 0.244465 | 0         |  |
|  | Shiraz-22T | 1555 | 0.427999 | 0         |  |
|  | Shiraz-25T | 1698 | 0.21835  | 0         |  |
|  | Shiraz-28T | 1735 | 0.350744 | 0         |  |
|  | Shiraz-29T | 1778 | 0.120767 | 0         |  |
|  | Shiraz-32T | 1833 | 0.551336 | 0         |  |
|  | Shiraz-38T | 1951 | 0.250891 | 0         |  |
|  | Shiraz-38T | 1952 | 0        | -0.163211 |  |
|  | Shiraz-53T | 2078 | 0.287202 | 0         |  |
|  | Shiraz-58T | 2162 | 0.221505 | 0         |  |
|  | Shiraz-71T | 2238 | 0.603631 | 0         |  |
|  | Shiraz-3T  | 90   | 0.219276 | 0         |  |
|  | Shiraz-3T  | 99   | 0.454766 | 0         |  |
|  | Shiraz-4T  | 253  | 0.372918 | 0         |  |
|  | Shiraz-36T | 378  | 0.179558 | 0         |  |
|  | Shiraz-44T | 646  | 0.471276 | 0         |  |
|  | Shiraz-44T | 647  | 1.496173 | 0         |  |
|  | Shiraz-46T | 943  | 0.093799 | 0         |  |
|  | Shiraz-9T  | 1325 | 0.221899 | 0         |  |
|  | Shiraz-18T | 1434 | 0.244465 | 0         |  |
|  | Shiraz-22T | 1555 | 0.427999 | 0         |  |
|  | Shiraz-25T | 1698 | 0.21835  | 0         |  |
|  | Shiraz-28T | 1735 | 0.350744 | 0         |  |

|       |      |            |      |          |           |  |
|-------|------|------------|------|----------|-----------|--|
|       |      | Shiraz-29T | 1778 | 0.120767 | 0         |  |
|       |      | Shiraz-32T | 1833 | 0.551336 | 0         |  |
|       |      | Shiraz-38T | 1951 | 0.250891 | 0         |  |
|       |      | Shiraz-38T | 1952 | 0        | -0.163211 |  |
|       |      | Shiraz-53T | 2078 | 0.287202 | 0         |  |
|       |      | Shiraz-58T | 2162 | 0.221505 | 0         |  |
|       |      | Shiraz-71T | 2238 | 0.603631 | 0         |  |
| CSTF2 | chrX | Shiraz-3T  | 242  | 0        | -0.336434 |  |
|       |      | Shiraz-4T  | 261  | 0        | -0.336249 |  |
|       |      | Shiraz-16T | 295  | 0.591657 | 0         |  |
|       |      | Shiraz-36T | 433  | 0        | -0.803961 |  |
|       |      | Shiraz-44T | 899  | 0        | -1.09697  |  |
|       |      | Shiraz-49T | 1170 | 0        | -0.967436 |  |
|       |      | Shiraz-18T | 1457 | 0.643204 | 0         |  |
|       |      | Shiraz-22T | 1673 | 0.611783 | 0         |  |
|       |      | Shiraz-25T | 1719 | 0.472955 | 0         |  |
|       |      | Shiraz-28T | 1762 | 0.562311 | 0         |  |
|       |      | Shiraz-29T | 1801 | 0.815343 | 0         |  |
|       |      | Shiraz-32T | 1870 | 0.729766 | 0         |  |
|       |      | Shiraz-35T | 1933 | 0.488535 | 0         |  |
|       |      | Shiraz-58T | 2223 | 0.833364 | 0         |  |
|       |      | Shiraz-71T | 2263 | 0.975531 | 0         |  |
|       |      | Shiraz-3T  | 242  | 0        | -0.336434 |  |
|       |      | Shiraz-4T  | 261  | 0        | -0.336249 |  |
|       |      | Shiraz-16T | 295  | 0.591657 | 0         |  |
|       |      | Shiraz-36T | 433  | 0        | -0.803961 |  |
|       |      | Shiraz-44T | 899  | 0        | -1.09697  |  |
|       |      | Shiraz-49T | 1170 | 0        | -0.967436 |  |
|       |      | Shiraz-18T | 1457 | 0.643204 | 0         |  |
|       |      | Shiraz-22T | 1673 | 0.611783 | 0         |  |
|       |      | Shiraz-25T | 1719 | 0.472955 | 0         |  |
|       |      | Shiraz-28T | 1762 | 0.562311 | 0         |  |
|       |      | Shiraz-29T | 1801 | 0.815343 | 0         |  |
|       |      | Shiraz-32T | 1870 | 0.729766 | 0         |  |
|       |      | Shiraz-35T | 1933 | 0.488535 | 0         |  |
|       |      | Shiraz-58T | 2223 | 0.833364 | 0         |  |
|       |      | Shiraz-71T | 2263 | 0.975531 | 0         |  |
|       |      | Shiraz-3T  | 242  | 0        | -0.336434 |  |
|       |      | Shiraz-4T  | 261  | 0        | -0.336249 |  |
|       |      | Shiraz-16T | 295  | 0.591657 | 0         |  |
|       |      | Shiraz-36T | 433  | 0        | -0.803961 |  |
|       |      | Shiraz-44T | 899  | 0        | -1.09697  |  |
|       |      | Shiraz-49T | 1170 | 0        | -0.967436 |  |
|       |      | Shiraz-18T | 1457 | 0.643204 | 0         |  |
|       |      | Shiraz-22T | 1673 | 0.611783 | 0         |  |
|       |      | Shiraz-25T | 1719 | 0.472955 | 0         |  |
|       |      | Shiraz-28T | 1762 | 0.562311 | 0         |  |



|        |      |            |      |          |           |  |
|--------|------|------------|------|----------|-----------|--|
|        |      | Shiraz-29T | 1801 | 0.815343 | 0         |  |
|        |      | Shiraz-32T | 1870 | 0.729766 | 0         |  |
|        |      | Shiraz-35T | 1933 | 0.488535 | 0         |  |
|        |      | Shiraz-58T | 2223 | 0.833364 | 0         |  |
|        |      | Shiraz-71T | 2263 | 0.975531 | 0         |  |
| CT45A1 | chrX | Shiraz-3T  | 242  | 0        | -0.336434 |  |
|        |      | Shiraz-4T  | 261  | 0        | -0.336249 |  |
|        |      | Shiraz-16T | 295  | 0.591657 | 0         |  |
|        |      | Shiraz-36T | 433  | 0        | -0.803961 |  |
|        |      | Shiraz-44T | 899  | 0        | -1.09697  |  |
|        |      | Shiraz-49T | 1170 | 0        | -0.967436 |  |
|        |      | Shiraz-9T  | 1370 | 0.690073 | 0         |  |
|        |      | Shiraz-18T | 1457 | 0.643204 | 0         |  |
|        |      | Shiraz-22T | 1673 | 0.611783 | 0         |  |
|        |      | Shiraz-22T | 1677 | 0.789711 | 0         |  |
|        |      | Shiraz-25T | 1719 | 0.472955 | 0         |  |
|        |      | Shiraz-28T | 1762 | 0.562311 | 0         |  |
|        |      | Shiraz-29T | 1801 | 0.815343 | 0         |  |
|        |      | Shiraz-32T | 1870 | 0.729766 | 0         |  |
|        |      | Shiraz-35T | 1933 | 0.488535 | 0         |  |
|        |      | Shiraz-58T | 2223 | 0.833364 | 0         |  |
|        |      | Shiraz-71T | 2263 | 0.975531 | 0         |  |
|        |      | Shiraz-3T  | 242  | 0        | -0.336434 |  |
|        |      | Shiraz-4T  | 261  | 0        | -0.336249 |  |
|        |      | Shiraz-16T | 295  | 0.591657 | 0         |  |
|        |      | Shiraz-36T | 433  | 0        | -0.803961 |  |
|        |      | Shiraz-44T | 899  | 0        | -1.09697  |  |
|        |      | Shiraz-49T | 1170 | 0        | -0.967436 |  |
|        |      | Shiraz-9T  | 1370 | 0.690073 | 0         |  |
|        |      | Shiraz-18T | 1457 | 0.643204 | 0         |  |
|        |      | Shiraz-22T | 1673 | 0.611783 | 0         |  |
|        |      | Shiraz-22T | 1677 | 0.789711 | 0         |  |
|        |      | Shiraz-25T | 1719 | 0.472955 | 0         |  |
|        |      | Shiraz-28T | 1762 | 0.562311 | 0         |  |
|        |      | Shiraz-29T | 1801 | 0.815343 | 0         |  |
|        |      | Shiraz-32T | 1870 | 0.729766 | 0         |  |
|        |      | Shiraz-35T | 1933 | 0.488535 | 0         |  |
|        |      | Shiraz-58T | 2223 | 0.833364 | 0         |  |
|        |      | Shiraz-71T | 2263 | 0.975531 | 0         |  |
|        |      | Shiraz-3T  | 242  | 0        | -0.336434 |  |
|        |      | Shiraz-4T  | 261  | 0        | -0.336249 |  |
|        |      | Shiraz-16T | 295  | 0.591657 | 0         |  |
|        |      | Shiraz-36T | 433  | 0        | -0.803961 |  |
|        |      | Shiraz-44T | 899  | 0        | -1.09697  |  |
|        |      | Shiraz-49T | 1170 | 0        | -0.967436 |  |
|        |      | Shiraz-9T  | 1370 | 0.690073 | 0         |  |
|        |      | Shiraz-18T | 1457 | 0.643204 | 0         |  |

|        |      |            |      |          |           |  |  |
|--------|------|------------|------|----------|-----------|--|--|
|        |      | Shiraz-22T | 1673 | 0.611783 | 0         |  |  |
|        |      | Shiraz-22T | 1677 | 0.789711 | 0         |  |  |
|        |      | Shiraz-25T | 1719 | 0.472955 | 0         |  |  |
|        |      | Shiraz-28T | 1762 | 0.562311 | 0         |  |  |
|        |      | Shiraz-29T | 1801 | 0.815343 | 0         |  |  |
|        |      | Shiraz-32T | 1870 | 0.729766 | 0         |  |  |
|        |      | Shiraz-35T | 1933 | 0.488535 | 0         |  |  |
|        |      | Shiraz-58T | 2223 | 0.833364 | 0         |  |  |
|        |      | Shiraz-71T | 2263 | 0.975531 | 0         |  |  |
| CT45A2 | chrX | Shiraz-3T  | 242  | 0        | -0.336434 |  |  |
|        |      | Shiraz-4T  | 261  | 0        | -0.336249 |  |  |
|        |      | Shiraz-16T | 295  | 0.591657 | 0         |  |  |
|        |      | Shiraz-36T | 433  | 0        | -0.803961 |  |  |
|        |      | Shiraz-44T | 899  | 0        | -1.09697  |  |  |
|        |      | Shiraz-49T | 1170 | 0        | -0.967436 |  |  |
|        |      | Shiraz-9T  | 1370 | 0.690073 | 0         |  |  |
|        |      | Shiraz-18T | 1457 | 0.643204 | 0         |  |  |
|        |      | Shiraz-22T | 1673 | 0.611783 | 0         |  |  |
|        |      | Shiraz-22T | 1677 | 0.789711 | 0         |  |  |
|        |      | Shiraz-25T | 1719 | 0.472955 | 0         |  |  |
|        |      | Shiraz-28T | 1762 | 0.562311 | 0         |  |  |
|        |      | Shiraz-29T | 1801 | 0.815343 | 0         |  |  |
|        |      | Shiraz-32T | 1870 | 0.729766 | 0         |  |  |
|        |      | Shiraz-35T | 1933 | 0.488535 | 0         |  |  |
|        |      | Shiraz-58T | 2223 | 0.833364 | 0         |  |  |
|        |      | Shiraz-71T | 2263 | 0.975531 | 0         |  |  |
|        |      | Shiraz-3T  | 242  | 0        | -0.336434 |  |  |
|        |      | Shiraz-4T  | 261  | 0        | -0.336249 |  |  |
|        |      | Shiraz-16T | 295  | 0.591657 | 0         |  |  |
|        |      | Shiraz-36T | 433  | 0        | -0.803961 |  |  |
|        |      | Shiraz-44T | 899  | 0        | -1.09697  |  |  |
|        |      | Shiraz-49T | 1170 | 0        | -0.967436 |  |  |
|        |      | Shiraz-9T  | 1370 | 0.690073 | 0         |  |  |
|        |      | Shiraz-18T | 1457 | 0.643204 | 0         |  |  |
|        |      | Shiraz-22T | 1673 | 0.611783 | 0         |  |  |
|        |      | Shiraz-22T | 1677 | 0.789711 | 0         |  |  |
|        |      | Shiraz-25T | 1719 | 0.472955 | 0         |  |  |
|        |      | Shiraz-28T | 1762 | 0.562311 | 0         |  |  |
|        |      | Shiraz-29T | 1801 | 0.815343 | 0         |  |  |
|        |      | Shiraz-32T | 1870 | 0.729766 | 0         |  |  |
|        |      | Shiraz-35T | 1933 | 0.488535 | 0         |  |  |
|        |      | Shiraz-58T | 2223 | 0.833364 | 0         |  |  |
|        |      | Shiraz-71T | 2263 | 0.975531 | 0         |  |  |
|        |      | Shiraz-3T  | 242  | 0        | -0.336434 |  |  |
|        |      | Shiraz-4T  | 261  | 0        | -0.336249 |  |  |
|        |      | Shiraz-16T | 295  | 0.591657 | 0         |  |  |
|        |      | Shiraz-36T | 433  | 0        | -0.803961 |  |  |

|        |      |            |      |          |           |  |  |
|--------|------|------------|------|----------|-----------|--|--|
|        |      | Shiraz-44T | 899  | 0        | -1.09697  |  |  |
|        |      | Shiraz-49T | 1170 | 0        | -0.967436 |  |  |
|        |      | Shiraz-9T  | 1370 | 0.690073 | 0         |  |  |
|        |      | Shiraz-18T | 1457 | 0.643204 | 0         |  |  |
|        |      | Shiraz-22T | 1673 | 0.611783 | 0         |  |  |
|        |      | Shiraz-22T | 1677 | 0.789711 | 0         |  |  |
|        |      | Shiraz-25T | 1719 | 0.472955 | 0         |  |  |
|        |      | Shiraz-28T | 1762 | 0.562311 | 0         |  |  |
|        |      | Shiraz-29T | 1801 | 0.815343 | 0         |  |  |
|        |      | Shiraz-32T | 1870 | 0.729766 | 0         |  |  |
|        |      | Shiraz-35T | 1933 | 0.488535 | 0         |  |  |
|        |      | Shiraz-58T | 2223 | 0.833364 | 0         |  |  |
|        |      | Shiraz-71T | 2263 | 0.975531 | 0         |  |  |
| CT45A3 | chrX | Shiraz-3T  | 242  | 0        | -0.336434 |  |  |
|        |      | Shiraz-4T  | 261  | 0        | -0.336249 |  |  |
|        |      | Shiraz-16T | 295  | 0.591657 | 0         |  |  |
|        |      | Shiraz-36T | 433  | 0        | -0.803961 |  |  |
|        |      | Shiraz-44T | 899  | 0        | -1.09697  |  |  |
|        |      | Shiraz-49T | 1170 | 0        | -0.967436 |  |  |
|        |      | Shiraz-9T  | 1370 | 0.690073 | 0         |  |  |
|        |      | Shiraz-18T | 1457 | 0.643204 | 0         |  |  |
|        |      | Shiraz-22T | 1673 | 0.611783 | 0         |  |  |
|        |      | Shiraz-22T | 1677 | 0.789711 | 0         |  |  |
|        |      | Shiraz-25T | 1719 | 0.472955 | 0         |  |  |
|        |      | Shiraz-28T | 1762 | 0.562311 | 0         |  |  |
|        |      | Shiraz-29T | 1801 | 0.815343 | 0         |  |  |
|        |      | Shiraz-32T | 1870 | 0.729766 | 0         |  |  |
|        |      | Shiraz-35T | 1933 | 0.488535 | 0         |  |  |
|        |      | Shiraz-58T | 2223 | 0.833364 | 0         |  |  |
|        |      | Shiraz-71T | 2263 | 0.975531 | 0         |  |  |
|        |      | Shiraz-3T  | 242  | 0        | -0.336434 |  |  |
|        |      | Shiraz-4T  | 261  | 0        | -0.336249 |  |  |
|        |      | Shiraz-16T | 295  | 0.591657 | 0         |  |  |
|        |      | Shiraz-36T | 433  | 0        | -0.803961 |  |  |
|        |      | Shiraz-44T | 899  | 0        | -1.09697  |  |  |
|        |      | Shiraz-49T | 1170 | 0        | -0.967436 |  |  |
|        |      | Shiraz-9T  | 1370 | 0.690073 | 0         |  |  |
|        |      | Shiraz-18T | 1457 | 0.643204 | 0         |  |  |
|        |      | Shiraz-22T | 1673 | 0.611783 | 0         |  |  |
|        |      | Shiraz-22T | 1677 | 0.789711 | 0         |  |  |
|        |      | Shiraz-25T | 1719 | 0.472955 | 0         |  |  |
|        |      | Shiraz-28T | 1762 | 0.562311 | 0         |  |  |
|        |      | Shiraz-29T | 1801 | 0.815343 | 0         |  |  |
|        |      | Shiraz-32T | 1870 | 0.729766 | 0         |  |  |
|        |      | Shiraz-35T | 1933 | 0.488535 | 0         |  |  |
|        |      | Shiraz-58T | 2223 | 0.833364 | 0         |  |  |
|        |      | Shiraz-71T | 2263 | 0.975531 | 0         |  |  |

|        |      |            |      |          |           |  |  |
|--------|------|------------|------|----------|-----------|--|--|
|        |      | Shiraz-3T  | 242  | 0        | -0.336434 |  |  |
|        |      | Shiraz-4T  | 261  | 0        | -0.336249 |  |  |
|        |      | Shiraz-16T | 295  | 0.591657 | 0         |  |  |
|        |      | Shiraz-36T | 433  | 0        | -0.803961 |  |  |
|        |      | Shiraz-44T | 899  | 0        | -1.09697  |  |  |
|        |      | Shiraz-49T | 1170 | 0        | -0.967436 |  |  |
|        |      | Shiraz-9T  | 1370 | 0.690073 | 0         |  |  |
|        |      | Shiraz-18T | 1457 | 0.643204 | 0         |  |  |
|        |      | Shiraz-22T | 1673 | 0.611783 | 0         |  |  |
|        |      | Shiraz-22T | 1677 | 0.789711 | 0         |  |  |
|        |      | Shiraz-25T | 1719 | 0.472955 | 0         |  |  |
|        |      | Shiraz-28T | 1762 | 0.562311 | 0         |  |  |
|        |      | Shiraz-29T | 1801 | 0.815343 | 0         |  |  |
|        |      | Shiraz-32T | 1870 | 0.729766 | 0         |  |  |
|        |      | Shiraz-35T | 1933 | 0.488535 | 0         |  |  |
|        |      | Shiraz-58T | 2223 | 0.833364 | 0         |  |  |
|        |      | Shiraz-71T | 2263 | 0.975531 | 0         |  |  |
| CT45A4 | chrX | Shiraz-3T  | 242  | 0        | -0.336434 |  |  |
|        |      | Shiraz-3T  | 242  | 0        | -0.336434 |  |  |
|        |      | Shiraz-4T  | 261  | 0        | -0.336249 |  |  |
|        |      | Shiraz-4T  | 261  | 0        | -0.336249 |  |  |
|        |      | Shiraz-16T | 295  | 0.591657 | 0         |  |  |
|        |      | Shiraz-16T | 295  | 0.591657 | 0         |  |  |
|        |      | Shiraz-36T | 433  | 0        | -0.803961 |  |  |
|        |      | Shiraz-36T | 433  | 0        | -0.803961 |  |  |
|        |      | Shiraz-44T | 899  | 0        | -1.09697  |  |  |
|        |      | Shiraz-44T | 899  | 0        | -1.09697  |  |  |
|        |      | Shiraz-49T | 1170 | 0        | -0.967436 |  |  |
|        |      | Shiraz-49T | 1170 | 0        | -0.967436 |  |  |
|        |      | Shiraz-9T  | 1370 | 0.690073 | 0         |  |  |
|        |      | Shiraz-9T  | 1370 | 0.690073 | 0         |  |  |
|        |      | Shiraz-18T | 1457 | 0.643204 | 0         |  |  |
|        |      | Shiraz-18T | 1457 | 0.643204 | 0         |  |  |
|        |      | Shiraz-22T | 1673 | 0.611783 | 0         |  |  |
|        |      | Shiraz-22T | 1673 | 0.611783 | 0         |  |  |
|        |      | Shiraz-22T | 1677 | 0.789711 | 0         |  |  |
|        |      | Shiraz-22T | 1677 | 0.789711 | 0         |  |  |
|        |      | Shiraz-25T | 1719 | 0.472955 | 0         |  |  |
|        |      | Shiraz-25T | 1719 | 0.472955 | 0         |  |  |
|        |      | Shiraz-28T | 1762 | 0.562311 | 0         |  |  |
|        |      | Shiraz-28T | 1762 | 0.562311 | 0         |  |  |
|        |      | Shiraz-29T | 1801 | 0.815343 | 0         |  |  |
|        |      | Shiraz-29T | 1801 | 0.815343 | 0         |  |  |
|        |      | Shiraz-32T | 1870 | 0.729766 | 0         |  |  |
|        |      | Shiraz-32T | 1870 | 0.729766 | 0         |  |  |
|        |      | Shiraz-35T | 1933 | 0.488535 | 0         |  |  |
|        |      | Shiraz-35T | 1933 | 0.488535 | 0         |  |  |

|  |            |      |          |           |  |
|--|------------|------|----------|-----------|--|
|  | Shiraz-58T | 2223 | 0.833364 | 0         |  |
|  | Shiraz-58T | 2223 | 0.833364 | 0         |  |
|  | Shiraz-71T | 2263 | 0.975531 | 0         |  |
|  | Shiraz-71T | 2263 | 0.975531 | 0         |  |
|  | Shiraz-3T  | 242  | 0        | -0.336434 |  |
|  | Shiraz-3T  | 242  | 0        | -0.336434 |  |
|  | Shiraz-4T  | 261  | 0        | -0.336249 |  |
|  | Shiraz-4T  | 261  | 0        | -0.336249 |  |
|  | Shiraz-16T | 295  | 0.591657 | 0         |  |
|  | Shiraz-16T | 295  | 0.591657 | 0         |  |
|  | Shiraz-36T | 433  | 0        | -0.803961 |  |
|  | Shiraz-36T | 433  | 0        | -0.803961 |  |
|  | Shiraz-44T | 899  | 0        | -1.09697  |  |
|  | Shiraz-44T | 899  | 0        | -1.09697  |  |
|  | Shiraz-49T | 1170 | 0        | -0.967436 |  |
|  | Shiraz-49T | 1170 | 0        | -0.967436 |  |
|  | Shiraz-9T  | 1370 | 0.690073 | 0         |  |
|  | Shiraz-9T  | 1370 | 0.690073 | 0         |  |
|  | Shiraz-18T | 1457 | 0.643204 | 0         |  |
|  | Shiraz-18T | 1457 | 0.643204 | 0         |  |
|  | Shiraz-22T | 1673 | 0.611783 | 0         |  |
|  | Shiraz-22T | 1673 | 0.611783 | 0         |  |
|  | Shiraz-22T | 1677 | 0.789711 | 0         |  |
|  | Shiraz-22T | 1677 | 0.789711 | 0         |  |
|  | Shiraz-25T | 1719 | 0.472955 | 0         |  |
|  | Shiraz-25T | 1719 | 0.472955 | 0         |  |
|  | Shiraz-28T | 1762 | 0.562311 | 0         |  |
|  | Shiraz-28T | 1762 | 0.562311 | 0         |  |
|  | Shiraz-29T | 1801 | 0.815343 | 0         |  |
|  | Shiraz-29T | 1801 | 0.815343 | 0         |  |
|  | Shiraz-32T | 1870 | 0.729766 | 0         |  |
|  | Shiraz-32T | 1870 | 0.729766 | 0         |  |
|  | Shiraz-35T | 1933 | 0.488535 | 0         |  |
|  | Shiraz-35T | 1933 | 0.488535 | 0         |  |
|  | Shiraz-58T | 2223 | 0.833364 | 0         |  |
|  | Shiraz-58T | 2223 | 0.833364 | 0         |  |
|  | Shiraz-71T | 2263 | 0.975531 | 0         |  |
|  | Shiraz-71T | 2263 | 0.975531 | 0         |  |
|  | Shiraz-3T  | 242  | 0        | -0.336434 |  |
|  | Shiraz-3T  | 242  | 0        | -0.336434 |  |
|  | Shiraz-4T  | 261  | 0        | -0.336249 |  |
|  | Shiraz-4T  | 261  | 0        | -0.336249 |  |
|  | Shiraz-16T | 295  | 0.591657 | 0         |  |
|  | Shiraz-16T | 295  | 0.591657 | 0         |  |
|  | Shiraz-36T | 433  | 0        | -0.803961 |  |
|  | Shiraz-36T | 433  | 0        | -0.803961 |  |
|  | Shiraz-44T | 899  | 0        | -1.09697  |  |

|        |      |            |      |          |           |  |  |
|--------|------|------------|------|----------|-----------|--|--|
|        |      | Shiraz-44T | 899  | 0        | -1.09697  |  |  |
|        |      | Shiraz-49T | 1170 | 0        | -0.967436 |  |  |
|        |      | Shiraz-49T | 1170 | 0        | -0.967436 |  |  |
|        |      | Shiraz-9T  | 1370 | 0.690073 | 0         |  |  |
|        |      | Shiraz-9T  | 1370 | 0.690073 | 0         |  |  |
|        |      | Shiraz-18T | 1457 | 0.643204 | 0         |  |  |
|        |      | Shiraz-18T | 1457 | 0.643204 | 0         |  |  |
|        |      | Shiraz-22T | 1673 | 0.611783 | 0         |  |  |
|        |      | Shiraz-22T | 1673 | 0.611783 | 0         |  |  |
|        |      | Shiraz-22T | 1677 | 0.789711 | 0         |  |  |
|        |      | Shiraz-22T | 1677 | 0.789711 | 0         |  |  |
|        |      | Shiraz-25T | 1719 | 0.472955 | 0         |  |  |
|        |      | Shiraz-25T | 1719 | 0.472955 | 0         |  |  |
|        |      | Shiraz-28T | 1762 | 0.562311 | 0         |  |  |
|        |      | Shiraz-28T | 1762 | 0.562311 | 0         |  |  |
|        |      | Shiraz-29T | 1801 | 0.815343 | 0         |  |  |
|        |      | Shiraz-29T | 1801 | 0.815343 | 0         |  |  |
|        |      | Shiraz-32T | 1870 | 0.729766 | 0         |  |  |
|        |      | Shiraz-32T | 1870 | 0.729766 | 0         |  |  |
|        |      | Shiraz-35T | 1933 | 0.488535 | 0         |  |  |
|        |      | Shiraz-35T | 1933 | 0.488535 | 0         |  |  |
|        |      | Shiraz-58T | 2223 | 0.833364 | 0         |  |  |
|        |      | Shiraz-58T | 2223 | 0.833364 | 0         |  |  |
|        |      | Shiraz-71T | 2263 | 0.975531 | 0         |  |  |
|        |      | Shiraz-71T | 2263 | 0.975531 | 0         |  |  |
| CT45A5 | chrX | Shiraz-3T  | 242  | 0        | -0.336434 |  |  |
|        |      | Shiraz-4T  | 261  | 0        | -0.336249 |  |  |
|        |      | Shiraz-16T | 295  | 0.591657 | 0         |  |  |
|        |      | Shiraz-36T | 433  | 0        | -0.803961 |  |  |
|        |      | Shiraz-44T | 899  | 0        | -1.09697  |  |  |
|        |      | Shiraz-49T | 1170 | 0        | -0.967436 |  |  |
|        |      | Shiraz-9T  | 1370 | 0.690073 | 0         |  |  |
|        |      | Shiraz-18T | 1457 | 0.643204 | 0         |  |  |
|        |      | Shiraz-22T | 1673 | 0.611783 | 0         |  |  |
|        |      | Shiraz-22T | 1677 | 0.789711 | 0         |  |  |
|        |      | Shiraz-25T | 1719 | 0.472955 | 0         |  |  |
|        |      | Shiraz-28T | 1762 | 0.562311 | 0         |  |  |
|        |      | Shiraz-29T | 1801 | 0.815343 | 0         |  |  |
|        |      | Shiraz-32T | 1870 | 0.729766 | 0         |  |  |
|        |      | Shiraz-35T | 1933 | 0.488535 | 0         |  |  |
|        |      | Shiraz-58T | 2223 | 0.833364 | 0         |  |  |
|        |      | Shiraz-71T | 2263 | 0.975531 | 0         |  |  |
|        |      | Shiraz-3T  | 242  | 0        | -0.336434 |  |  |
|        |      | Shiraz-4T  | 261  | 0        | -0.336249 |  |  |
|        |      | Shiraz-16T | 295  | 0.591657 | 0         |  |  |
|        |      | Shiraz-36T | 433  | 0        | -0.803961 |  |  |
|        |      | Shiraz-44T | 899  | 0        | -1.09697  |  |  |

|        |      |            |      |          |           |  |  |
|--------|------|------------|------|----------|-----------|--|--|
|        |      | Shiraz-49T | 1170 | 0        | -0.967436 |  |  |
|        |      | Shiraz-9T  | 1370 | 0.690073 | 0         |  |  |
|        |      | Shiraz-18T | 1457 | 0.643204 | 0         |  |  |
|        |      | Shiraz-22T | 1673 | 0.611783 | 0         |  |  |
|        |      | Shiraz-22T | 1677 | 0.789711 | 0         |  |  |
|        |      | Shiraz-25T | 1719 | 0.472955 | 0         |  |  |
|        |      | Shiraz-28T | 1762 | 0.562311 | 0         |  |  |
|        |      | Shiraz-29T | 1801 | 0.815343 | 0         |  |  |
|        |      | Shiraz-32T | 1870 | 0.729766 | 0         |  |  |
|        |      | Shiraz-35T | 1933 | 0.488535 | 0         |  |  |
|        |      | Shiraz-58T | 2223 | 0.833364 | 0         |  |  |
|        |      | Shiraz-71T | 2263 | 0.975531 | 0         |  |  |
|        |      | Shiraz-3T  | 242  | 0        | -0.336434 |  |  |
|        |      | Shiraz-4T  | 261  | 0        | -0.336249 |  |  |
|        |      | Shiraz-16T | 295  | 0.591657 | 0         |  |  |
|        |      | Shiraz-36T | 433  | 0        | -0.803961 |  |  |
|        |      | Shiraz-44T | 899  | 0        | -1.09697  |  |  |
|        |      | Shiraz-49T | 1170 | 0        | -0.967436 |  |  |
|        |      | Shiraz-9T  | 1370 | 0.690073 | 0         |  |  |
|        |      | Shiraz-18T | 1457 | 0.643204 | 0         |  |  |
|        |      | Shiraz-22T | 1673 | 0.611783 | 0         |  |  |
|        |      | Shiraz-22T | 1677 | 0.789711 | 0         |  |  |
|        |      | Shiraz-25T | 1719 | 0.472955 | 0         |  |  |
|        |      | Shiraz-28T | 1762 | 0.562311 | 0         |  |  |
|        |      | Shiraz-29T | 1801 | 0.815343 | 0         |  |  |
|        |      | Shiraz-32T | 1870 | 0.729766 | 0         |  |  |
|        |      | Shiraz-35T | 1933 | 0.488535 | 0         |  |  |
|        |      | Shiraz-58T | 2223 | 0.833364 | 0         |  |  |
|        |      | Shiraz-71T | 2263 | 0.975531 | 0         |  |  |
| CT45A6 | chrX | Shiraz-3T  | 242  | 0        | -0.336434 |  |  |
|        |      | Shiraz-4T  | 261  | 0        | -0.336249 |  |  |
|        |      | Shiraz-16T | 295  | 0.591657 | 0         |  |  |
|        |      | Shiraz-36T | 433  | 0        | -0.803961 |  |  |
|        |      | Shiraz-44T | 899  | 0        | -1.09697  |  |  |
|        |      | Shiraz-49T | 1170 | 0        | -0.967436 |  |  |
|        |      | Shiraz-9T  | 1370 | 0.690073 | 0         |  |  |
|        |      | Shiraz-18T | 1457 | 0.643204 | 0         |  |  |
|        |      | Shiraz-22T | 1673 | 0.611783 | 0         |  |  |
|        |      | Shiraz-22T | 1677 | 0.789711 | 0         |  |  |
|        |      | Shiraz-25T | 1719 | 0.472955 | 0         |  |  |
|        |      | Shiraz-28T | 1762 | 0.562311 | 0         |  |  |
|        |      | Shiraz-29T | 1801 | 0.815343 | 0         |  |  |
|        |      | Shiraz-32T | 1870 | 0.729766 | 0         |  |  |
|        |      | Shiraz-35T | 1933 | 0.488535 | 0         |  |  |
|        |      | Shiraz-58T | 2223 | 0.833364 | 0         |  |  |
|        |      | Shiraz-71T | 2263 | 0.975531 | 0         |  |  |
|        |      | Shiraz-3T  | 242  | 0        | -0.336434 |  |  |

|        |      |            |      |          |           |  |  |
|--------|------|------------|------|----------|-----------|--|--|
|        |      | Shiraz-4T  | 261  | 0        | -0.336249 |  |  |
|        |      | Shiraz-16T | 295  | 0.591657 | 0         |  |  |
|        |      | Shiraz-36T | 433  | 0        | -0.803961 |  |  |
|        |      | Shiraz-44T | 899  | 0        | -1.09697  |  |  |
|        |      | Shiraz-49T | 1170 | 0        | -0.967436 |  |  |
|        |      | Shiraz-9T  | 1370 | 0.690073 | 0         |  |  |
|        |      | Shiraz-18T | 1457 | 0.643204 | 0         |  |  |
|        |      | Shiraz-22T | 1673 | 0.611783 | 0         |  |  |
|        |      | Shiraz-22T | 1677 | 0.789711 | 0         |  |  |
|        |      | Shiraz-25T | 1719 | 0.472955 | 0         |  |  |
|        |      | Shiraz-28T | 1762 | 0.562311 | 0         |  |  |
|        |      | Shiraz-29T | 1801 | 0.815343 | 0         |  |  |
|        |      | Shiraz-32T | 1870 | 0.729766 | 0         |  |  |
|        |      | Shiraz-35T | 1933 | 0.488535 | 0         |  |  |
|        |      | Shiraz-58T | 2223 | 0.833364 | 0         |  |  |
|        |      | Shiraz-71T | 2263 | 0.975531 | 0         |  |  |
|        |      | Shiraz-3T  | 242  | 0        | -0.336434 |  |  |
|        |      | Shiraz-4T  | 261  | 0        | -0.336249 |  |  |
|        |      | Shiraz-16T | 295  | 0.591657 | 0         |  |  |
|        |      | Shiraz-36T | 433  | 0        | -0.803961 |  |  |
|        |      | Shiraz-44T | 899  | 0        | -1.09697  |  |  |
|        |      | Shiraz-49T | 1170 | 0        | -0.967436 |  |  |
|        |      | Shiraz-9T  | 1370 | 0.690073 | 0         |  |  |
|        |      | Shiraz-18T | 1457 | 0.643204 | 0         |  |  |
|        |      | Shiraz-22T | 1673 | 0.611783 | 0         |  |  |
|        |      | Shiraz-22T | 1677 | 0.789711 | 0         |  |  |
|        |      | Shiraz-25T | 1719 | 0.472955 | 0         |  |  |
|        |      | Shiraz-28T | 1762 | 0.562311 | 0         |  |  |
|        |      | Shiraz-29T | 1801 | 0.815343 | 0         |  |  |
|        |      | Shiraz-32T | 1870 | 0.729766 | 0         |  |  |
|        |      | Shiraz-35T | 1933 | 0.488535 | 0         |  |  |
|        |      | Shiraz-58T | 2223 | 0.833364 | 0         |  |  |
|        |      | Shiraz-71T | 2263 | 0.975531 | 0         |  |  |
| CT47A1 | chrX | Shiraz-3T  | 242  | 0        | -0.336434 |  |  |
|        |      | Shiraz-3T  | 242  | 0        | -0.336434 |  |  |
|        |      | Shiraz-3T  | 242  | 0        | -0.336434 |  |  |
|        |      | Shiraz-3T  | 242  | 0        | -0.336434 |  |  |
|        |      | Shiraz-3T  | 242  | 0        | -0.336434 |  |  |
|        |      | Shiraz-3T  | 242  | 0        | -0.336434 |  |  |
|        |      | Shiraz-3T  | 242  | 0        | -0.336434 |  |  |
|        |      | Shiraz-3T  | 242  | 0        | -0.336434 |  |  |
|        |      | Shiraz-3T  | 242  | 0        | -0.336434 |  |  |
|        |      | Shiraz-3T  | 242  | 0        | -0.336434 |  |  |
|        |      | Shiraz-3T  | 242  | 0        | -0.336434 |  |  |
|        |      | Shiraz-3T  | 244  | 0        | -0.023749 |  |  |
|        |      | Shiraz-3T  | 244  | 0        | -0.023749 |  |  |
|        |      | Shiraz-3T  | 244  | 0        | -0.023749 |  |  |
|        |      | Shiraz-3T  | 244  | 0        | -0.023749 |  |  |



|  |            |     |          |           |  |
|--|------------|-----|----------|-----------|--|
|  | Shiraz-3T  | 244 | 0        | -0.023749 |  |
|  | Shiraz-3T  | 244 | 0        | -0.023749 |  |
|  | Shiraz-3T  | 244 | 0        | -0.023749 |  |
|  | Shiraz-3T  | 244 | 0        | -0.023749 |  |
|  | Shiraz-3T  | 244 | 0        | -0.023749 |  |
|  | Shiraz-3T  | 244 | 0        | -0.023749 |  |
|  | Shiraz-4T  | 261 | 0        | -0.336249 |  |
|  | Shiraz-4T  | 261 | 0        | -0.336249 |  |
|  | Shiraz-4T  | 261 | 0        | -0.336249 |  |
|  | Shiraz-4T  | 261 | 0        | -0.336249 |  |
|  | Shiraz-4T  | 261 | 0        | -0.336249 |  |
|  | Shiraz-4T  | 261 | 0        | -0.336249 |  |
|  | Shiraz-4T  | 261 | 0        | -0.336249 |  |
|  | Shiraz-4T  | 261 | 0        | -0.336249 |  |
|  | Shiraz-4T  | 261 | 0        | -0.336249 |  |
|  | Shiraz-4T  | 261 | 0        | -0.336249 |  |
|  | Shiraz-4T  | 261 | 0        | -0.336249 |  |
|  | Shiraz-16T | 295 | 0.591657 | 0         |  |
|  | Shiraz-16T | 295 | 0.591657 | 0         |  |
|  | Shiraz-16T | 295 | 0.591657 | 0         |  |
|  | Shiraz-16T | 295 | 0.591657 | 0         |  |
|  | Shiraz-16T | 295 | 0.591657 | 0         |  |
|  | Shiraz-16T | 295 | 0.591657 | 0         |  |
|  | Shiraz-16T | 295 | 0.591657 | 0         |  |
|  | Shiraz-16T | 295 | 0.591657 | 0         |  |
|  | Shiraz-16T | 295 | 0.591657 | 0         |  |
|  | Shiraz-16T | 295 | 0.591657 | 0         |  |
|  | Shiraz-36T | 433 | 0        | -0.803961 |  |
|  | Shiraz-36T | 433 | 0        | -0.803961 |  |
|  | Shiraz-36T | 433 | 0        | -0.803961 |  |
|  | Shiraz-36T | 433 | 0        | -0.803961 |  |
|  | Shiraz-36T | 433 | 0        | -0.803961 |  |
|  | Shiraz-36T | 433 | 0        | -0.803961 |  |
|  | Shiraz-36T | 433 | 0        | -0.803961 |  |
|  | Shiraz-36T | 433 | 0        | -0.803961 |  |
|  | Shiraz-36T | 433 | 0        | -0.803961 |  |
|  | Shiraz-36T | 433 | 0        | -0.803961 |  |
|  | Shiraz-44T | 899 | 0        | -1.09697  |  |
|  | Shiraz-44T | 899 | 0        | -1.09697  |  |
|  | Shiraz-44T | 899 | 0        | -1.09697  |  |
|  | Shiraz-44T | 899 | 0        | -1.09697  |  |
|  | Shiraz-44T | 899 | 0        | -1.09697  |  |
|  | Shiraz-44T | 899 | 0        | -1.09697  |  |
|  | Shiraz-44T | 899 | 0        | -1.09697  |  |
|  | Shiraz-44T | 899 | 0        | -1.09697  |  |
|  | Shiraz-44T | 899 | 0        | -1.09697  |  |
|  | Shiraz-44T | 899 | 0        | -1.09697  |  |
|  | Shiraz-44T | 904 | 0        | -0.625526 |  |





|  |            |      |          |           |  |
|--|------------|------|----------|-----------|--|
|  | Shiraz-35T | 1933 | 0.488535 | 0         |  |
|  | Shiraz-35T | 1933 | 0.488535 | 0         |  |
|  | Shiraz-35T | 1933 | 0.488535 | 0         |  |
|  | Shiraz-35T | 1933 | 0.488535 | 0         |  |
|  | Shiraz-35T | 1933 | 0.488535 | 0         |  |
|  | Shiraz-58T | 2223 | 0.833364 | 0         |  |
|  | Shiraz-58T | 2223 | 0.833364 | 0         |  |
|  | Shiraz-58T | 2223 | 0.833364 | 0         |  |
|  | Shiraz-58T | 2223 | 0.833364 | 0         |  |
|  | Shiraz-58T | 2223 | 0.833364 | 0         |  |
|  | Shiraz-58T | 2223 | 0.833364 | 0         |  |
|  | Shiraz-58T | 2223 | 0.833364 | 0         |  |
|  | Shiraz-58T | 2223 | 0.833364 | 0         |  |
|  | Shiraz-58T | 2223 | 0.833364 | 0         |  |
|  | Shiraz-58T | 2223 | 0.833364 | 0         |  |
|  | Shiraz-58T | 2223 | 0.833364 | 0         |  |
|  | Shiraz-58T | 2223 | 0.833364 | 0         |  |
|  | Shiraz-71T | 2263 | 0.975531 | 0         |  |
|  | Shiraz-71T | 2263 | 0.975531 | 0         |  |
|  | Shiraz-71T | 2263 | 0.975531 | 0         |  |
|  | Shiraz-71T | 2263 | 0.975531 | 0         |  |
|  | Shiraz-71T | 2263 | 0.975531 | 0         |  |
|  | Shiraz-71T | 2263 | 0.975531 | 0         |  |
|  | Shiraz-71T | 2263 | 0.975531 | 0         |  |
|  | Shiraz-71T | 2263 | 0.975531 | 0         |  |
|  | Shiraz-71T | 2263 | 0.975531 | 0         |  |
|  | Shiraz-71T | 2263 | 0.975531 | 0         |  |
|  | Shiraz-71T | 2263 | 0.975531 | 0         |  |
|  | Shiraz-3T  | 242  | 0        | -0.336434 |  |
|  | Shiraz-3T  | 242  | 0        | -0.336434 |  |
|  | Shiraz-3T  | 242  | 0        | -0.336434 |  |
|  | Shiraz-3T  | 242  | 0        | -0.336434 |  |
|  | Shiraz-3T  | 242  | 0        | -0.336434 |  |
|  | Shiraz-3T  | 242  | 0        | -0.336434 |  |
|  | Shiraz-3T  | 242  | 0        | -0.336434 |  |
|  | Shiraz-3T  | 242  | 0        | -0.336434 |  |
|  | Shiraz-3T  | 242  | 0        | -0.336434 |  |
|  | Shiraz-3T  | 242  | 0        | -0.336434 |  |
|  | Shiraz-3T  | 244  | 0        | -0.023749 |  |
|  | Shiraz-3T  | 244  | 0        | -0.023749 |  |
|  | Shiraz-3T  | 244  | 0        | -0.023749 |  |
|  | Shiraz-3T  | 244  | 0        | -0.023749 |  |
|  | Shiraz-3T  | 244  | 0        | -0.023749 |  |
|  | Shiraz-3T  | 244  | 0        | -0.023749 |  |
|  | Shiraz-3T  | 244  | 0        | -0.023749 |  |
|  | Shiraz-3T  | 244  | 0        | -0.023749 |  |
|  | Shiraz-3T  | 244  | 0        | -0.023749 |  |
|  | Shiraz-3T  | 244  | 0        | -0.023749 |  |
|  | Shiraz-3T  | 244  | 0        | -0.023749 |  |
|  | Shiraz-4T  | 261  | 0        | -0.336249 |  |
|  | Shiraz-4T  | 261  | 0        | -0.336249 |  |





|  |  |            |      |          |   |  |  |
|--|--|------------|------|----------|---|--|--|
|  |  | Shiraz-25T | 1719 | 0.472955 | 0 |  |  |
|  |  | Shiraz-25T | 1719 | 0.472955 | 0 |  |  |
|  |  | Shiraz-25T | 1719 | 0.472955 | 0 |  |  |
|  |  | Shiraz-25T | 1719 | 0.472955 | 0 |  |  |
|  |  | Shiraz-28T | 1762 | 0.562311 | 0 |  |  |
|  |  | Shiraz-28T | 1762 | 0.562311 | 0 |  |  |
|  |  | Shiraz-28T | 1762 | 0.562311 | 0 |  |  |
|  |  | Shiraz-28T | 1762 | 0.562311 | 0 |  |  |
|  |  | Shiraz-28T | 1762 | 0.562311 | 0 |  |  |
|  |  | Shiraz-28T | 1762 | 0.562311 | 0 |  |  |
|  |  | Shiraz-28T | 1762 | 0.562311 | 0 |  |  |
|  |  | Shiraz-28T | 1762 | 0.562311 | 0 |  |  |
|  |  | Shiraz-28T | 1762 | 0.562311 | 0 |  |  |
|  |  | Shiraz-28T | 1762 | 0.562311 | 0 |  |  |
|  |  | Shiraz-28T | 1762 | 0.562311 | 0 |  |  |
|  |  | Shiraz-28T | 1762 | 0.562311 | 0 |  |  |
|  |  | Shiraz-29T | 1801 | 0.815343 | 0 |  |  |
|  |  | Shiraz-29T | 1801 | 0.815343 | 0 |  |  |
|  |  | Shiraz-29T | 1801 | 0.815343 | 0 |  |  |
|  |  | Shiraz-29T | 1801 | 0.815343 | 0 |  |  |
|  |  | Shiraz-29T | 1801 | 0.815343 | 0 |  |  |
|  |  | Shiraz-29T | 1801 | 0.815343 | 0 |  |  |
|  |  | Shiraz-29T | 1801 | 0.815343 | 0 |  |  |
|  |  | Shiraz-29T | 1801 | 0.815343 | 0 |  |  |
|  |  | Shiraz-29T | 1801 | 0.815343 | 0 |  |  |
|  |  | Shiraz-29T | 1801 | 0.815343 | 0 |  |  |
|  |  | Shiraz-29T | 1801 | 0.815343 | 0 |  |  |
|  |  | Shiraz-32T | 1870 | 0.729766 | 0 |  |  |
|  |  | Shiraz-32T | 1870 | 0.729766 | 0 |  |  |
|  |  | Shiraz-32T | 1870 | 0.729766 | 0 |  |  |
|  |  | Shiraz-32T | 1870 | 0.729766 | 0 |  |  |
|  |  | Shiraz-32T | 1870 | 0.729766 | 0 |  |  |
|  |  | Shiraz-32T | 1870 | 0.729766 | 0 |  |  |
|  |  | Shiraz-32T | 1870 | 0.729766 | 0 |  |  |
|  |  | Shiraz-32T | 1870 | 0.729766 | 0 |  |  |
|  |  | Shiraz-32T | 1870 | 0.729766 | 0 |  |  |
|  |  | Shiraz-32T | 1870 | 0.729766 | 0 |  |  |
|  |  | Shiraz-32T | 1870 | 0.729766 | 0 |  |  |
|  |  | Shiraz-32T | 1870 | 0.729766 | 0 |  |  |
|  |  | Shiraz-35T | 1933 | 0.488535 | 0 |  |  |
|  |  | Shiraz-35T | 1933 | 0.488535 | 0 |  |  |
|  |  | Shiraz-35T | 1933 | 0.488535 | 0 |  |  |
|  |  | Shiraz-35T | 1933 | 0.488535 | 0 |  |  |
|  |  | Shiraz-35T | 1933 | 0.488535 | 0 |  |  |
|  |  | Shiraz-35T | 1933 | 0.488535 | 0 |  |  |
|  |  | Shiraz-35T | 1933 | 0.488535 | 0 |  |  |
|  |  | Shiraz-35T | 1933 | 0.488535 | 0 |  |  |
|  |  | Shiraz-35T | 1933 | 0.488535 | 0 |  |  |
|  |  | Shiraz-35T | 1933 | 0.488535 | 0 |  |  |
|  |  | Shiraz-35T | 1933 | 0.488535 | 0 |  |  |
|  |  | Shiraz-58T | 2223 | 0.833364 | 0 |  |  |
|  |  | Shiraz-58T | 2223 | 0.833364 | 0 |  |  |
|  |  | Shiraz-58T | 2223 | 0.833364 | 0 |  |  |







|  |            |      |          |           |  |
|--|------------|------|----------|-----------|--|
|  | Shiraz-49T | 1170 | 0        | -0.967436 |  |
|  | Shiraz-49T | 1170 | 0        | -0.967436 |  |
|  | Shiraz-49T | 1170 | 0        | -0.967436 |  |
|  | Shiraz-9T  | 1370 | 0.690073 | 0         |  |
|  | Shiraz-9T  | 1370 | 0.690073 | 0         |  |
|  | Shiraz-9T  | 1370 | 0.690073 | 0         |  |
|  | Shiraz-9T  | 1370 | 0.690073 | 0         |  |
|  | Shiraz-9T  | 1370 | 0.690073 | 0         |  |
|  | Shiraz-9T  | 1370 | 0.690073 | 0         |  |
|  | Shiraz-9T  | 1370 | 0.690073 | 0         |  |
|  | Shiraz-9T  | 1370 | 0.690073 | 0         |  |
|  | Shiraz-9T  | 1370 | 0.690073 | 0         |  |
|  | Shiraz-9T  | 1370 | 0.690073 | 0         |  |
|  | Shiraz-9T  | 1370 | 0.690073 | 0         |  |
|  | Shiraz-9T  | 1370 | 0.690073 | 0         |  |
|  | Shiraz-18T | 1457 | 0.643204 | 0         |  |
|  | Shiraz-18T | 1457 | 0.643204 | 0         |  |
|  | Shiraz-18T | 1457 | 0.643204 | 0         |  |
|  | Shiraz-18T | 1457 | 0.643204 | 0         |  |
|  | Shiraz-18T | 1457 | 0.643204 | 0         |  |
|  | Shiraz-18T | 1457 | 0.643204 | 0         |  |
|  | Shiraz-18T | 1457 | 0.643204 | 0         |  |
|  | Shiraz-18T | 1457 | 0.643204 | 0         |  |
|  | Shiraz-18T | 1457 | 0.643204 | 0         |  |
|  | Shiraz-18T | 1457 | 0.643204 | 0         |  |
|  | Shiraz-18T | 1457 | 0.643204 | 0         |  |
|  | Shiraz-22T | 1673 | 0.611783 | 0         |  |
|  | Shiraz-22T | 1673 | 0.611783 | 0         |  |
|  | Shiraz-22T | 1673 | 0.611783 | 0         |  |
|  | Shiraz-22T | 1673 | 0.611783 | 0         |  |
|  | Shiraz-22T | 1673 | 0.611783 | 0         |  |
|  | Shiraz-22T | 1673 | 0.611783 | 0         |  |
|  | Shiraz-22T | 1673 | 0.611783 | 0         |  |
|  | Shiraz-22T | 1673 | 0.611783 | 0         |  |
|  | Shiraz-22T | 1673 | 0.611783 | 0         |  |
|  | Shiraz-22T | 1673 | 0.611783 | 0         |  |
|  | Shiraz-22T | 1673 | 0.611783 | 0         |  |
|  | Shiraz-25T | 1719 | 0.472955 | 0         |  |
|  | Shiraz-25T | 1719 | 0.472955 | 0         |  |
|  | Shiraz-25T | 1719 | 0.472955 | 0         |  |
|  | Shiraz-25T | 1719 | 0.472955 | 0         |  |
|  | Shiraz-25T | 1719 | 0.472955 | 0         |  |
|  | Shiraz-25T | 1719 | 0.472955 | 0         |  |
|  | Shiraz-25T | 1719 | 0.472955 | 0         |  |
|  | Shiraz-25T | 1719 | 0.472955 | 0         |  |
|  | Shiraz-25T | 1719 | 0.472955 | 0         |  |
|  | Shiraz-25T | 1719 | 0.472955 | 0         |  |
|  | Shiraz-25T | 1719 | 0.472955 | 0         |  |
|  | Shiraz-28T | 1762 | 0.562311 | 0         |  |
|  | Shiraz-28T | 1762 | 0.562311 | 0         |  |
|  | Shiraz-28T | 1762 | 0.562311 | 0         |  |
|  | Shiraz-28T | 1762 | 0.562311 | 0         |  |

|  |  |            |      |          |   |  |  |
|--|--|------------|------|----------|---|--|--|
|  |  | Shiraz-28T | 1762 | 0.562311 | 0 |  |  |
|  |  | Shiraz-28T | 1762 | 0.562311 | 0 |  |  |
|  |  | Shiraz-28T | 1762 | 0.562311 | 0 |  |  |
|  |  | Shiraz-28T | 1762 | 0.562311 | 0 |  |  |
|  |  | Shiraz-28T | 1762 | 0.562311 | 0 |  |  |
|  |  | Shiraz-28T | 1762 | 0.562311 | 0 |  |  |
|  |  | Shiraz-29T | 1801 | 0.815343 | 0 |  |  |
|  |  | Shiraz-29T | 1801 | 0.815343 | 0 |  |  |
|  |  | Shiraz-29T | 1801 | 0.815343 | 0 |  |  |
|  |  | Shiraz-29T | 1801 | 0.815343 | 0 |  |  |
|  |  | Shiraz-29T | 1801 | 0.815343 | 0 |  |  |
|  |  | Shiraz-29T | 1801 | 0.815343 | 0 |  |  |
|  |  | Shiraz-29T | 1801 | 0.815343 | 0 |  |  |
|  |  | Shiraz-29T | 1801 | 0.815343 | 0 |  |  |
|  |  | Shiraz-29T | 1801 | 0.815343 | 0 |  |  |
|  |  | Shiraz-29T | 1801 | 0.815343 | 0 |  |  |
|  |  | Shiraz-29T | 1801 | 0.815343 | 0 |  |  |
|  |  | Shiraz-32T | 1870 | 0.729766 | 0 |  |  |
|  |  | Shiraz-32T | 1870 | 0.729766 | 0 |  |  |
|  |  | Shiraz-32T | 1870 | 0.729766 | 0 |  |  |
|  |  | Shiraz-32T | 1870 | 0.729766 | 0 |  |  |
|  |  | Shiraz-32T | 1870 | 0.729766 | 0 |  |  |
|  |  | Shiraz-32T | 1870 | 0.729766 | 0 |  |  |
|  |  | Shiraz-32T | 1870 | 0.729766 | 0 |  |  |
|  |  | Shiraz-32T | 1870 | 0.729766 | 0 |  |  |
|  |  | Shiraz-32T | 1870 | 0.729766 | 0 |  |  |
|  |  | Shiraz-32T | 1870 | 0.729766 | 0 |  |  |
|  |  | Shiraz-32T | 1870 | 0.729766 | 0 |  |  |
|  |  | Shiraz-35T | 1933 | 0.488535 | 0 |  |  |
|  |  | Shiraz-35T | 1933 | 0.488535 | 0 |  |  |
|  |  | Shiraz-35T | 1933 | 0.488535 | 0 |  |  |
|  |  | Shiraz-35T | 1933 | 0.488535 | 0 |  |  |
|  |  | Shiraz-35T | 1933 | 0.488535 | 0 |  |  |
|  |  | Shiraz-35T | 1933 | 0.488535 | 0 |  |  |
|  |  | Shiraz-35T | 1933 | 0.488535 | 0 |  |  |
|  |  | Shiraz-35T | 1933 | 0.488535 | 0 |  |  |
|  |  | Shiraz-35T | 1933 | 0.488535 | 0 |  |  |
|  |  | Shiraz-35T | 1933 | 0.488535 | 0 |  |  |
|  |  | Shiraz-35T | 1933 | 0.488535 | 0 |  |  |
|  |  | Shiraz-58T | 2223 | 0.833364 | 0 |  |  |
|  |  | Shiraz-58T | 2223 | 0.833364 | 0 |  |  |
|  |  | Shiraz-58T | 2223 | 0.833364 | 0 |  |  |
|  |  | Shiraz-58T | 2223 | 0.833364 | 0 |  |  |
|  |  | Shiraz-58T | 2223 | 0.833364 | 0 |  |  |
|  |  | Shiraz-58T | 2223 | 0.833364 | 0 |  |  |
|  |  | Shiraz-58T | 2223 | 0.833364 | 0 |  |  |
|  |  | Shiraz-58T | 2223 | 0.833364 | 0 |  |  |
|  |  | Shiraz-58T | 2223 | 0.833364 | 0 |  |  |
|  |  | Shiraz-58T | 2223 | 0.833364 | 0 |  |  |
|  |  | Shiraz-58T | 2223 | 0.833364 | 0 |  |  |
|  |  | Shiraz-71T | 2263 | 0.975531 | 0 |  |  |

|         |      |            |      |          |           |  |  |
|---------|------|------------|------|----------|-----------|--|--|
|         |      | Shiraz-71T | 2263 | 0.975531 | 0         |  |  |
|         |      | Shiraz-71T | 2263 | 0.975531 | 0         |  |  |
|         |      | Shiraz-71T | 2263 | 0.975531 | 0         |  |  |
|         |      | Shiraz-71T | 2263 | 0.975531 | 0         |  |  |
|         |      | Shiraz-71T | 2263 | 0.975531 | 0         |  |  |
|         |      | Shiraz-71T | 2263 | 0.975531 | 0         |  |  |
|         |      | Shiraz-71T | 2263 | 0.975531 | 0         |  |  |
|         |      | Shiraz-71T | 2263 | 0.975531 | 0         |  |  |
|         |      | Shiraz-71T | 2263 | 0.975531 | 0         |  |  |
| CT47A10 | chrX | Shiraz-3T  | 242  | 0        | -0.336434 |  |  |
|         |      | Shiraz-3T  | 242  | 0        | -0.336434 |  |  |
|         |      | Shiraz-3T  | 242  | 0        | -0.336434 |  |  |
|         |      | Shiraz-3T  | 242  | 0        | -0.336434 |  |  |
|         |      | Shiraz-3T  | 242  | 0        | -0.336434 |  |  |
|         |      | Shiraz-3T  | 242  | 0        | -0.336434 |  |  |
|         |      | Shiraz-3T  | 242  | 0        | -0.336434 |  |  |
|         |      | Shiraz-3T  | 242  | 0        | -0.336434 |  |  |
|         |      | Shiraz-3T  | 242  | 0        | -0.336434 |  |  |
|         |      | Shiraz-3T  | 244  | 0        | -0.023749 |  |  |
|         |      | Shiraz-3T  | 244  | 0        | -0.023749 |  |  |
|         |      | Shiraz-3T  | 244  | 0        | -0.023749 |  |  |
|         |      | Shiraz-3T  | 244  | 0        | -0.023749 |  |  |
|         |      | Shiraz-3T  | 244  | 0        | -0.023749 |  |  |
|         |      | Shiraz-3T  | 244  | 0        | -0.023749 |  |  |
|         |      | Shiraz-3T  | 244  | 0        | -0.023749 |  |  |
|         |      | Shiraz-3T  | 244  | 0        | -0.023749 |  |  |
|         |      | Shiraz-3T  | 244  | 0        | -0.023749 |  |  |
|         |      | Shiraz-3T  | 244  | 0        | -0.023749 |  |  |
|         |      | Shiraz-4T  | 261  | 0        | -0.336249 |  |  |
|         |      | Shiraz-4T  | 261  | 0        | -0.336249 |  |  |
|         |      | Shiraz-4T  | 261  | 0        | -0.336249 |  |  |
|         |      | Shiraz-4T  | 261  | 0        | -0.336249 |  |  |
|         |      | Shiraz-4T  | 261  | 0        | -0.336249 |  |  |
|         |      | Shiraz-4T  | 261  | 0        | -0.336249 |  |  |
|         |      | Shiraz-4T  | 261  | 0        | -0.336249 |  |  |
|         |      | Shiraz-4T  | 261  | 0        | -0.336249 |  |  |
|         |      | Shiraz-4T  | 261  | 0        | -0.336249 |  |  |
|         |      | Shiraz-16T | 295  | 0.591657 | 0         |  |  |
|         |      | Shiraz-16T | 295  | 0.591657 | 0         |  |  |
|         |      | Shiraz-16T | 295  | 0.591657 | 0         |  |  |
|         |      | Shiraz-16T | 295  | 0.591657 | 0         |  |  |
|         |      | Shiraz-16T | 295  | 0.591657 | 0         |  |  |
|         |      | Shiraz-16T | 295  | 0.591657 | 0         |  |  |
|         |      | Shiraz-16T | 295  | 0.591657 | 0         |  |  |
|         |      | Shiraz-16T | 295  | 0.591657 | 0         |  |  |
|         |      | Shiraz-16T | 295  | 0.591657 | 0         |  |  |
|         |      | Shiraz-36T | 433  | 0        | -0.803961 |  |  |
|         |      | Shiraz-36T | 433  | 0        | -0.803961 |  |  |

|  |  |            |      |          |           |  |  |
|--|--|------------|------|----------|-----------|--|--|
|  |  | Shiraz-36T | 433  | 0        | -0.803961 |  |  |
|  |  | Shiraz-36T | 433  | 0        | -0.803961 |  |  |
|  |  | Shiraz-36T | 433  | 0        | -0.803961 |  |  |
|  |  | Shiraz-36T | 433  | 0        | -0.803961 |  |  |
|  |  | Shiraz-36T | 433  | 0        | -0.803961 |  |  |
|  |  | Shiraz-36T | 433  | 0        | -0.803961 |  |  |
|  |  | Shiraz-36T | 433  | 0        | -0.803961 |  |  |
|  |  | Shiraz-44T | 899  | 0        | -1.09697  |  |  |
|  |  | Shiraz-44T | 899  | 0        | -1.09697  |  |  |
|  |  | Shiraz-44T | 899  | 0        | -1.09697  |  |  |
|  |  | Shiraz-44T | 899  | 0        | -1.09697  |  |  |
|  |  | Shiraz-44T | 899  | 0        | -1.09697  |  |  |
|  |  | Shiraz-44T | 899  | 0        | -1.09697  |  |  |
|  |  | Shiraz-44T | 899  | 0        | -1.09697  |  |  |
|  |  | Shiraz-44T | 899  | 0        | -1.09697  |  |  |
|  |  | Shiraz-44T | 899  | 0        | -1.09697  |  |  |
|  |  | Shiraz-44T | 899  | 0        | -1.09697  |  |  |
|  |  | Shiraz-44T | 899  | 0        | -1.09697  |  |  |
|  |  | Shiraz-44T | 904  | 0        | -0.625526 |  |  |
|  |  | Shiraz-44T | 904  | 0        | -0.625526 |  |  |
|  |  | Shiraz-44T | 904  | 0        | -0.625526 |  |  |
|  |  | Shiraz-44T | 904  | 0        | -0.625526 |  |  |
|  |  | Shiraz-44T | 904  | 0        | -0.625526 |  |  |
|  |  | Shiraz-44T | 904  | 0        | -0.625526 |  |  |
|  |  | Shiraz-44T | 904  | 0        | -0.625526 |  |  |
|  |  | Shiraz-44T | 904  | 0        | -0.625526 |  |  |
|  |  | Shiraz-44T | 904  | 0        | -0.625526 |  |  |
|  |  | Shiraz-44T | 904  | 0        | -0.625526 |  |  |
|  |  | Shiraz-49T | 1170 | 0        | -0.967436 |  |  |
|  |  | Shiraz-49T | 1170 | 0        | -0.967436 |  |  |
|  |  | Shiraz-49T | 1170 | 0        | -0.967436 |  |  |
|  |  | Shiraz-49T | 1170 | 0        | -0.967436 |  |  |
|  |  | Shiraz-49T | 1170 | 0        | -0.967436 |  |  |
|  |  | Shiraz-49T | 1170 | 0        | -0.967436 |  |  |
|  |  | Shiraz-49T | 1170 | 0        | -0.967436 |  |  |
|  |  | Shiraz-49T | 1170 | 0        | -0.967436 |  |  |
|  |  | Shiraz-49T | 1170 | 0        | -0.967436 |  |  |
|  |  | Shiraz-49T | 1170 | 0        | -0.967436 |  |  |
|  |  | Shiraz-9T  | 1370 | 0.690073 | 0         |  |  |
|  |  | Shiraz-9T  | 1370 | 0.690073 | 0         |  |  |
|  |  | Shiraz-9T  | 1370 | 0.690073 | 0         |  |  |
|  |  | Shiraz-9T  | 1370 | 0.690073 | 0         |  |  |
|  |  | Shiraz-9T  | 1370 | 0.690073 | 0         |  |  |
|  |  | Shiraz-9T  | 1370 | 0.690073 | 0         |  |  |
|  |  | Shiraz-9T  | 1370 | 0.690073 | 0         |  |  |
|  |  | Shiraz-9T  | 1370 | 0.690073 | 0         |  |  |
|  |  | Shiraz-9T  | 1370 | 0.690073 | 0         |  |  |
|  |  | Shiraz-9T  | 1370 | 0.690073 | 0         |  |  |
|  |  | Shiraz-18T | 1457 | 0.643204 | 0         |  |  |
|  |  | Shiraz-18T | 1457 | 0.643204 | 0         |  |  |
|  |  | Shiraz-18T | 1457 | 0.643204 | 0         |  |  |
|  |  | Shiraz-18T | 1457 | 0.643204 | 0         |  |  |





|  |            |      |          |           |  |
|--|------------|------|----------|-----------|--|
|  | Shiraz-3T  | 244  | 0        | -0.023749 |  |
|  | Shiraz-4T  | 261  | 0        | -0.336249 |  |
|  | Shiraz-4T  | 261  | 0        | -0.336249 |  |
|  | Shiraz-4T  | 261  | 0        | -0.336249 |  |
|  | Shiraz-4T  | 261  | 0        | -0.336249 |  |
|  | Shiraz-4T  | 261  | 0        | -0.336249 |  |
|  | Shiraz-4T  | 261  | 0        | -0.336249 |  |
|  | Shiraz-4T  | 261  | 0        | -0.336249 |  |
|  | Shiraz-4T  | 261  | 0        | -0.336249 |  |
|  | Shiraz-4T  | 261  | 0        | -0.336249 |  |
|  | Shiraz-16T | 295  | 0.591657 | 0         |  |
|  | Shiraz-16T | 295  | 0.591657 | 0         |  |
|  | Shiraz-16T | 295  | 0.591657 | 0         |  |
|  | Shiraz-16T | 295  | 0.591657 | 0         |  |
|  | Shiraz-16T | 295  | 0.591657 | 0         |  |
|  | Shiraz-16T | 295  | 0.591657 | 0         |  |
|  | Shiraz-16T | 295  | 0.591657 | 0         |  |
|  | Shiraz-16T | 295  | 0.591657 | 0         |  |
|  | Shiraz-16T | 295  | 0.591657 | 0         |  |
|  | Shiraz-16T | 295  | 0.591657 | 0         |  |
|  | Shiraz-36T | 433  | 0        | -0.803961 |  |
|  | Shiraz-36T | 433  | 0        | -0.803961 |  |
|  | Shiraz-36T | 433  | 0        | -0.803961 |  |
|  | Shiraz-36T | 433  | 0        | -0.803961 |  |
|  | Shiraz-36T | 433  | 0        | -0.803961 |  |
|  | Shiraz-36T | 433  | 0        | -0.803961 |  |
|  | Shiraz-36T | 433  | 0        | -0.803961 |  |
|  | Shiraz-36T | 433  | 0        | -0.803961 |  |
|  | Shiraz-36T | 433  | 0        | -0.803961 |  |
|  | Shiraz-36T | 433  | 0        | -0.803961 |  |
|  | Shiraz-44T | 899  | 0        | -1.09697  |  |
|  | Shiraz-44T | 899  | 0        | -1.09697  |  |
|  | Shiraz-44T | 899  | 0        | -1.09697  |  |
|  | Shiraz-44T | 899  | 0        | -1.09697  |  |
|  | Shiraz-44T | 899  | 0        | -1.09697  |  |
|  | Shiraz-44T | 899  | 0        | -1.09697  |  |
|  | Shiraz-44T | 899  | 0        | -1.09697  |  |
|  | Shiraz-44T | 899  | 0        | -1.09697  |  |
|  | Shiraz-44T | 899  | 0        | -1.09697  |  |
|  | Shiraz-44T | 904  | 0        | -0.625526 |  |
|  | Shiraz-44T | 904  | 0        | -0.625526 |  |
|  | Shiraz-44T | 904  | 0        | -0.625526 |  |
|  | Shiraz-44T | 904  | 0        | -0.625526 |  |
|  | Shiraz-44T | 904  | 0        | -0.625526 |  |
|  | Shiraz-44T | 904  | 0        | -0.625526 |  |
|  | Shiraz-44T | 904  | 0        | -0.625526 |  |
|  | Shiraz-44T | 904  | 0        | -0.625526 |  |
|  | Shiraz-44T | 904  | 0        | -0.625526 |  |
|  | Shiraz-49T | 1170 | 0        | -0.967436 |  |



|  |            |      |          |           |  |
|--|------------|------|----------|-----------|--|
|  | Shiraz-49T | 1170 | 0        | -0.967436 |  |
|  | Shiraz-49T | 1170 | 0        | -0.967436 |  |
|  | Shiraz-49T | 1170 | 0        | -0.967436 |  |
|  | Shiraz-49T | 1170 | 0        | -0.967436 |  |
|  | Shiraz-49T | 1170 | 0        | -0.967436 |  |
|  | Shiraz-49T | 1170 | 0        | -0.967436 |  |
|  | Shiraz-49T | 1170 | 0        | -0.967436 |  |
|  | Shiraz-49T | 1170 | 0        | -0.967436 |  |
|  | Shiraz-9T  | 1370 | 0.690073 | 0         |  |
|  | Shiraz-9T  | 1370 | 0.690073 | 0         |  |
|  | Shiraz-9T  | 1370 | 0.690073 | 0         |  |
|  | Shiraz-9T  | 1370 | 0.690073 | 0         |  |
|  | Shiraz-9T  | 1370 | 0.690073 | 0         |  |
|  | Shiraz-9T  | 1370 | 0.690073 | 0         |  |
|  | Shiraz-9T  | 1370 | 0.690073 | 0         |  |
|  | Shiraz-9T  | 1370 | 0.690073 | 0         |  |
|  | Shiraz-9T  | 1370 | 0.690073 | 0         |  |
|  | Shiraz-9T  | 1370 | 0.690073 | 0         |  |
|  | Shiraz-18T | 1457 | 0.643204 | 0         |  |
|  | Shiraz-18T | 1457 | 0.643204 | 0         |  |
|  | Shiraz-18T | 1457 | 0.643204 | 0         |  |
|  | Shiraz-18T | 1457 | 0.643204 | 0         |  |
|  | Shiraz-18T | 1457 | 0.643204 | 0         |  |
|  | Shiraz-18T | 1457 | 0.643204 | 0         |  |
|  | Shiraz-18T | 1457 | 0.643204 | 0         |  |
|  | Shiraz-18T | 1457 | 0.643204 | 0         |  |
|  | Shiraz-18T | 1457 | 0.643204 | 0         |  |
|  | Shiraz-18T | 1457 | 0.643204 | 0         |  |
|  | Shiraz-22T | 1673 | 0.611783 | 0         |  |
|  | Shiraz-22T | 1673 | 0.611783 | 0         |  |
|  | Shiraz-22T | 1673 | 0.611783 | 0         |  |
|  | Shiraz-22T | 1673 | 0.611783 | 0         |  |
|  | Shiraz-22T | 1673 | 0.611783 | 0         |  |
|  | Shiraz-22T | 1673 | 0.611783 | 0         |  |
|  | Shiraz-22T | 1673 | 0.611783 | 0         |  |
|  | Shiraz-22T | 1673 | 0.611783 | 0         |  |
|  | Shiraz-22T | 1673 | 0.611783 | 0         |  |
|  | Shiraz-22T | 1673 | 0.611783 | 0         |  |
|  | Shiraz-25T | 1719 | 0.472955 | 0         |  |
|  | Shiraz-25T | 1719 | 0.472955 | 0         |  |
|  | Shiraz-25T | 1719 | 0.472955 | 0         |  |
|  | Shiraz-25T | 1719 | 0.472955 | 0         |  |
|  | Shiraz-25T | 1719 | 0.472955 | 0         |  |
|  | Shiraz-25T | 1719 | 0.472955 | 0         |  |
|  | Shiraz-25T | 1719 | 0.472955 | 0         |  |
|  | Shiraz-25T | 1719 | 0.472955 | 0         |  |
|  | Shiraz-25T | 1719 | 0.472955 | 0         |  |
|  | Shiraz-25T | 1719 | 0.472955 | 0         |  |
|  | Shiraz-28T | 1762 | 0.562311 | 0         |  |
|  | Shiraz-28T | 1762 | 0.562311 | 0         |  |
|  | Shiraz-28T | 1762 | 0.562311 | 0         |  |

|  |  |            |      |          |   |  |
|--|--|------------|------|----------|---|--|
|  |  | Shiraz-28T | 1762 | 0.562311 | 0 |  |
|  |  | Shiraz-28T | 1762 | 0.562311 | 0 |  |
|  |  | Shiraz-28T | 1762 | 0.562311 | 0 |  |
|  |  | Shiraz-28T | 1762 | 0.562311 | 0 |  |
|  |  | Shiraz-28T | 1762 | 0.562311 | 0 |  |
|  |  | Shiraz-28T | 1762 | 0.562311 | 0 |  |
|  |  | Shiraz-29T | 1801 | 0.815343 | 0 |  |
|  |  | Shiraz-29T | 1801 | 0.815343 | 0 |  |
|  |  | Shiraz-29T | 1801 | 0.815343 | 0 |  |
|  |  | Shiraz-29T | 1801 | 0.815343 | 0 |  |
|  |  | Shiraz-29T | 1801 | 0.815343 | 0 |  |
|  |  | Shiraz-29T | 1801 | 0.815343 | 0 |  |
|  |  | Shiraz-29T | 1801 | 0.815343 | 0 |  |
|  |  | Shiraz-29T | 1801 | 0.815343 | 0 |  |
|  |  | Shiraz-29T | 1801 | 0.815343 | 0 |  |
|  |  | Shiraz-29T | 1801 | 0.815343 | 0 |  |
|  |  | Shiraz-32T | 1870 | 0.729766 | 0 |  |
|  |  | Shiraz-32T | 1870 | 0.729766 | 0 |  |
|  |  | Shiraz-32T | 1870 | 0.729766 | 0 |  |
|  |  | Shiraz-32T | 1870 | 0.729766 | 0 |  |
|  |  | Shiraz-32T | 1870 | 0.729766 | 0 |  |
|  |  | Shiraz-32T | 1870 | 0.729766 | 0 |  |
|  |  | Shiraz-32T | 1870 | 0.729766 | 0 |  |
|  |  | Shiraz-32T | 1870 | 0.729766 | 0 |  |
|  |  | Shiraz-32T | 1870 | 0.729766 | 0 |  |
|  |  | Shiraz-32T | 1870 | 0.729766 | 0 |  |
|  |  | Shiraz-35T | 1933 | 0.488535 | 0 |  |
|  |  | Shiraz-35T | 1933 | 0.488535 | 0 |  |
|  |  | Shiraz-35T | 1933 | 0.488535 | 0 |  |
|  |  | Shiraz-35T | 1933 | 0.488535 | 0 |  |
|  |  | Shiraz-35T | 1933 | 0.488535 | 0 |  |
|  |  | Shiraz-35T | 1933 | 0.488535 | 0 |  |
|  |  | Shiraz-35T | 1933 | 0.488535 | 0 |  |
|  |  | Shiraz-35T | 1933 | 0.488535 | 0 |  |
|  |  | Shiraz-35T | 1933 | 0.488535 | 0 |  |
|  |  | Shiraz-35T | 1933 | 0.488535 | 0 |  |
|  |  | Shiraz-58T | 2223 | 0.833364 | 0 |  |
|  |  | Shiraz-58T | 2223 | 0.833364 | 0 |  |
|  |  | Shiraz-58T | 2223 | 0.833364 | 0 |  |
|  |  | Shiraz-58T | 2223 | 0.833364 | 0 |  |
|  |  | Shiraz-58T | 2223 | 0.833364 | 0 |  |
|  |  | Shiraz-58T | 2223 | 0.833364 | 0 |  |
|  |  | Shiraz-58T | 2223 | 0.833364 | 0 |  |
|  |  | Shiraz-58T | 2223 | 0.833364 | 0 |  |
|  |  | Shiraz-58T | 2223 | 0.833364 | 0 |  |
|  |  | Shiraz-58T | 2223 | 0.833364 | 0 |  |
|  |  | Shiraz-71T | 2263 | 0.975531 | 0 |  |
|  |  | Shiraz-71T | 2263 | 0.975531 | 0 |  |
|  |  | Shiraz-71T | 2263 | 0.975531 | 0 |  |
|  |  | Shiraz-71T | 2263 | 0.975531 | 0 |  |
|  |  | Shiraz-71T | 2263 | 0.975531 | 0 |  |





|  |  |            |      |          |   |  |  |
|--|--|------------|------|----------|---|--|--|
|  |  | Shiraz-22T | 1673 | 0.611783 | 0 |  |  |
|  |  | Shiraz-22T | 1673 | 0.611783 | 0 |  |  |
|  |  | Shiraz-22T | 1673 | 0.611783 | 0 |  |  |
|  |  | Shiraz-22T | 1673 | 0.611783 | 0 |  |  |
|  |  | Shiraz-22T | 1673 | 0.611783 | 0 |  |  |
|  |  | Shiraz-22T | 1673 | 0.611783 | 0 |  |  |
|  |  | Shiraz-22T | 1673 | 0.611783 | 0 |  |  |
|  |  | Shiraz-22T | 1673 | 0.611783 | 0 |  |  |
|  |  | Shiraz-22T | 1673 | 0.611783 | 0 |  |  |
|  |  | Shiraz-25T | 1719 | 0.472955 | 0 |  |  |
|  |  | Shiraz-25T | 1719 | 0.472955 | 0 |  |  |
|  |  | Shiraz-25T | 1719 | 0.472955 | 0 |  |  |
|  |  | Shiraz-25T | 1719 | 0.472955 | 0 |  |  |
|  |  | Shiraz-25T | 1719 | 0.472955 | 0 |  |  |
|  |  | Shiraz-25T | 1719 | 0.472955 | 0 |  |  |
|  |  | Shiraz-25T | 1719 | 0.472955 | 0 |  |  |
|  |  | Shiraz-25T | 1719 | 0.472955 | 0 |  |  |
|  |  | Shiraz-25T | 1719 | 0.472955 | 0 |  |  |
|  |  | Shiraz-28T | 1762 | 0.562311 | 0 |  |  |
|  |  | Shiraz-28T | 1762 | 0.562311 | 0 |  |  |
|  |  | Shiraz-28T | 1762 | 0.562311 | 0 |  |  |
|  |  | Shiraz-28T | 1762 | 0.562311 | 0 |  |  |
|  |  | Shiraz-28T | 1762 | 0.562311 | 0 |  |  |
|  |  | Shiraz-28T | 1762 | 0.562311 | 0 |  |  |
|  |  | Shiraz-28T | 1762 | 0.562311 | 0 |  |  |
|  |  | Shiraz-28T | 1762 | 0.562311 | 0 |  |  |
|  |  | Shiraz-28T | 1762 | 0.562311 | 0 |  |  |
|  |  | Shiraz-29T | 1801 | 0.815343 | 0 |  |  |
|  |  | Shiraz-29T | 1801 | 0.815343 | 0 |  |  |
|  |  | Shiraz-29T | 1801 | 0.815343 | 0 |  |  |
|  |  | Shiraz-29T | 1801 | 0.815343 | 0 |  |  |
|  |  | Shiraz-29T | 1801 | 0.815343 | 0 |  |  |
|  |  | Shiraz-29T | 1801 | 0.815343 | 0 |  |  |
|  |  | Shiraz-29T | 1801 | 0.815343 | 0 |  |  |
|  |  | Shiraz-29T | 1801 | 0.815343 | 0 |  |  |
|  |  | Shiraz-29T | 1801 | 0.815343 | 0 |  |  |
|  |  | Shiraz-32T | 1870 | 0.729766 | 0 |  |  |
|  |  | Shiraz-32T | 1870 | 0.729766 | 0 |  |  |
|  |  | Shiraz-32T | 1870 | 0.729766 | 0 |  |  |
|  |  | Shiraz-32T | 1870 | 0.729766 | 0 |  |  |
|  |  | Shiraz-32T | 1870 | 0.729766 | 0 |  |  |
|  |  | Shiraz-32T | 1870 | 0.729766 | 0 |  |  |
|  |  | Shiraz-32T | 1870 | 0.729766 | 0 |  |  |
|  |  | Shiraz-32T | 1870 | 0.729766 | 0 |  |  |
|  |  | Shiraz-32T | 1870 | 0.729766 | 0 |  |  |
|  |  | Shiraz-35T | 1933 | 0.488535 | 0 |  |  |
|  |  | Shiraz-35T | 1933 | 0.488535 | 0 |  |  |

|         |      |            |      |          |           |  |  |
|---------|------|------------|------|----------|-----------|--|--|
|         |      | Shiraz-35T | 1933 | 0.488535 | 0         |  |  |
|         |      | Shiraz-35T | 1933 | 0.488535 | 0         |  |  |
|         |      | Shiraz-35T | 1933 | 0.488535 | 0         |  |  |
|         |      | Shiraz-35T | 1933 | 0.488535 | 0         |  |  |
|         |      | Shiraz-35T | 1933 | 0.488535 | 0         |  |  |
|         |      | Shiraz-35T | 1933 | 0.488535 | 0         |  |  |
|         |      | Shiraz-35T | 1933 | 0.488535 | 0         |  |  |
|         |      | Shiraz-58T | 2223 | 0.833364 | 0         |  |  |
|         |      | Shiraz-58T | 2223 | 0.833364 | 0         |  |  |
|         |      | Shiraz-58T | 2223 | 0.833364 | 0         |  |  |
|         |      | Shiraz-58T | 2223 | 0.833364 | 0         |  |  |
|         |      | Shiraz-58T | 2223 | 0.833364 | 0         |  |  |
|         |      | Shiraz-58T | 2223 | 0.833364 | 0         |  |  |
|         |      | Shiraz-58T | 2223 | 0.833364 | 0         |  |  |
|         |      | Shiraz-58T | 2223 | 0.833364 | 0         |  |  |
|         |      | Shiraz-58T | 2223 | 0.833364 | 0         |  |  |
|         |      | Shiraz-58T | 2223 | 0.833364 | 0         |  |  |
|         |      | Shiraz-71T | 2263 | 0.975531 | 0         |  |  |
|         |      | Shiraz-71T | 2263 | 0.975531 | 0         |  |  |
|         |      | Shiraz-71T | 2263 | 0.975531 | 0         |  |  |
|         |      | Shiraz-71T | 2263 | 0.975531 | 0         |  |  |
|         |      | Shiraz-71T | 2263 | 0.975531 | 0         |  |  |
|         |      | Shiraz-71T | 2263 | 0.975531 | 0         |  |  |
|         |      | Shiraz-71T | 2263 | 0.975531 | 0         |  |  |
|         |      | Shiraz-71T | 2263 | 0.975531 | 0         |  |  |
|         |      | Shiraz-71T | 2263 | 0.975531 | 0         |  |  |
|         |      | Shiraz-71T | 2263 | 0.975531 | 0         |  |  |
| CT47A11 | chrX | Shiraz-3T  | 242  | 0        | -0.336434 |  |  |
|         |      | Shiraz-3T  | 242  | 0        | -0.336434 |  |  |
|         |      | Shiraz-3T  | 242  | 0        | -0.336434 |  |  |
|         |      | Shiraz-3T  | 242  | 0        | -0.336434 |  |  |
|         |      | Shiraz-3T  | 242  | 0        | -0.336434 |  |  |
|         |      | Shiraz-3T  | 242  | 0        | -0.336434 |  |  |
|         |      | Shiraz-3T  | 242  | 0        | -0.336434 |  |  |
|         |      | Shiraz-3T  | 242  | 0        | -0.336434 |  |  |
|         |      | Shiraz-3T  | 242  | 0        | -0.336434 |  |  |
|         |      | Shiraz-3T  | 244  | 0        | -0.023749 |  |  |
|         |      | Shiraz-3T  | 244  | 0        | -0.023749 |  |  |
|         |      | Shiraz-3T  | 244  | 0        | -0.023749 |  |  |
|         |      | Shiraz-3T  | 244  | 0        | -0.023749 |  |  |
|         |      | Shiraz-3T  | 244  | 0        | -0.023749 |  |  |
|         |      | Shiraz-3T  | 244  | 0        | -0.023749 |  |  |
|         |      | Shiraz-3T  | 244  | 0        | -0.023749 |  |  |
|         |      | Shiraz-3T  | 244  | 0        | -0.023749 |  |  |
|         |      | Shiraz-3T  | 244  | 0        | -0.023749 |  |  |
|         |      | Shiraz-3T  | 244  | 0        | -0.023749 |  |  |
|         |      | Shiraz-4T  | 261  | 0        | -0.336249 |  |  |
|         |      | Shiraz-4T  | 261  | 0        | -0.336249 |  |  |
|         |      | Shiraz-4T  | 261  | 0        | -0.336249 |  |  |
|         |      | Shiraz-4T  | 261  | 0        | -0.336249 |  |  |







|  |            |      |          |           |  |
|--|------------|------|----------|-----------|--|
|  | Shiraz-28T | 1762 | 0.562311 | 0         |  |
|  | Shiraz-29T | 1801 | 0.815343 | 0         |  |
|  | Shiraz-29T | 1801 | 0.815343 | 0         |  |
|  | Shiraz-29T | 1801 | 0.815343 | 0         |  |
|  | Shiraz-29T | 1801 | 0.815343 | 0         |  |
|  | Shiraz-29T | 1801 | 0.815343 | 0         |  |
|  | Shiraz-29T | 1801 | 0.815343 | 0         |  |
|  | Shiraz-29T | 1801 | 0.815343 | 0         |  |
|  | Shiraz-29T | 1801 | 0.815343 | 0         |  |
|  | Shiraz-29T | 1801 | 0.815343 | 0         |  |
|  | Shiraz-32T | 1870 | 0.729766 | 0         |  |
|  | Shiraz-32T | 1870 | 0.729766 | 0         |  |
|  | Shiraz-32T | 1870 | 0.729766 | 0         |  |
|  | Shiraz-32T | 1870 | 0.729766 | 0         |  |
|  | Shiraz-32T | 1870 | 0.729766 | 0         |  |
|  | Shiraz-32T | 1870 | 0.729766 | 0         |  |
|  | Shiraz-32T | 1870 | 0.729766 | 0         |  |
|  | Shiraz-32T | 1870 | 0.729766 | 0         |  |
|  | Shiraz-32T | 1870 | 0.729766 | 0         |  |
|  | Shiraz-32T | 1870 | 0.729766 | 0         |  |
|  | Shiraz-35T | 1933 | 0.488535 | 0         |  |
|  | Shiraz-35T | 1933 | 0.488535 | 0         |  |
|  | Shiraz-35T | 1933 | 0.488535 | 0         |  |
|  | Shiraz-35T | 1933 | 0.488535 | 0         |  |
|  | Shiraz-35T | 1933 | 0.488535 | 0         |  |
|  | Shiraz-35T | 1933 | 0.488535 | 0         |  |
|  | Shiraz-35T | 1933 | 0.488535 | 0         |  |
|  | Shiraz-35T | 1933 | 0.488535 | 0         |  |
|  | Shiraz-35T | 1933 | 0.488535 | 0         |  |
|  | Shiraz-58T | 2223 | 0.833364 | 0         |  |
|  | Shiraz-58T | 2223 | 0.833364 | 0         |  |
|  | Shiraz-58T | 2223 | 0.833364 | 0         |  |
|  | Shiraz-58T | 2223 | 0.833364 | 0         |  |
|  | Shiraz-58T | 2223 | 0.833364 | 0         |  |
|  | Shiraz-58T | 2223 | 0.833364 | 0         |  |
|  | Shiraz-58T | 2223 | 0.833364 | 0         |  |
|  | Shiraz-58T | 2223 | 0.833364 | 0         |  |
|  | Shiraz-58T | 2223 | 0.833364 | 0         |  |
|  | Shiraz-58T | 2223 | 0.833364 | 0         |  |
|  | Shiraz-71T | 2263 | 0.975531 | 0         |  |
|  | Shiraz-71T | 2263 | 0.975531 | 0         |  |
|  | Shiraz-71T | 2263 | 0.975531 | 0         |  |
|  | Shiraz-71T | 2263 | 0.975531 | 0         |  |
|  | Shiraz-71T | 2263 | 0.975531 | 0         |  |
|  | Shiraz-71T | 2263 | 0.975531 | 0         |  |
|  | Shiraz-71T | 2263 | 0.975531 | 0         |  |
|  | Shiraz-71T | 2263 | 0.975531 | 0         |  |
|  | Shiraz-71T | 2263 | 0.975531 | 0         |  |
|  | Shiraz-71T | 2263 | 0.975531 | 0         |  |
|  | Shiraz-3T  | 242  | 0        | -0.336434 |  |

|  |            |     |          |           |  |
|--|------------|-----|----------|-----------|--|
|  | Shiraz-3T  | 242 | 0        | -0.336434 |  |
|  | Shiraz-3T  | 242 | 0        | -0.336434 |  |
|  | Shiraz-3T  | 242 | 0        | -0.336434 |  |
|  | Shiraz-3T  | 242 | 0        | -0.336434 |  |
|  | Shiraz-3T  | 242 | 0        | -0.336434 |  |
|  | Shiraz-3T  | 242 | 0        | -0.336434 |  |
|  | Shiraz-3T  | 242 | 0        | -0.336434 |  |
|  | Shiraz-3T  | 242 | 0        | -0.336434 |  |
|  | Shiraz-3T  | 244 | 0        | -0.023749 |  |
|  | Shiraz-3T  | 244 | 0        | -0.023749 |  |
|  | Shiraz-3T  | 244 | 0        | -0.023749 |  |
|  | Shiraz-3T  | 244 | 0        | -0.023749 |  |
|  | Shiraz-3T  | 244 | 0        | -0.023749 |  |
|  | Shiraz-3T  | 244 | 0        | -0.023749 |  |
|  | Shiraz-3T  | 244 | 0        | -0.023749 |  |
|  | Shiraz-3T  | 244 | 0        | -0.023749 |  |
|  | Shiraz-3T  | 244 | 0        | -0.023749 |  |
|  | Shiraz-4T  | 261 | 0        | -0.336249 |  |
|  | Shiraz-4T  | 261 | 0        | -0.336249 |  |
|  | Shiraz-4T  | 261 | 0        | -0.336249 |  |
|  | Shiraz-4T  | 261 | 0        | -0.336249 |  |
|  | Shiraz-4T  | 261 | 0        | -0.336249 |  |
|  | Shiraz-4T  | 261 | 0        | -0.336249 |  |
|  | Shiraz-4T  | 261 | 0        | -0.336249 |  |
|  | Shiraz-4T  | 261 | 0        | -0.336249 |  |
|  | Shiraz-4T  | 261 | 0        | -0.336249 |  |
|  | Shiraz-4T  | 261 | 0        | -0.336249 |  |
|  | Shiraz-16T | 295 | 0.591657 | 0         |  |
|  | Shiraz-16T | 295 | 0.591657 | 0         |  |
|  | Shiraz-16T | 295 | 0.591657 | 0         |  |
|  | Shiraz-16T | 295 | 0.591657 | 0         |  |
|  | Shiraz-16T | 295 | 0.591657 | 0         |  |
|  | Shiraz-16T | 295 | 0.591657 | 0         |  |
|  | Shiraz-16T | 295 | 0.591657 | 0         |  |
|  | Shiraz-16T | 295 | 0.591657 | 0         |  |
|  | Shiraz-16T | 295 | 0.591657 | 0         |  |
|  | Shiraz-36T | 433 | 0        | -0.803961 |  |
|  | Shiraz-36T | 433 | 0        | -0.803961 |  |
|  | Shiraz-36T | 433 | 0        | -0.803961 |  |
|  | Shiraz-36T | 433 | 0        | -0.803961 |  |
|  | Shiraz-36T | 433 | 0        | -0.803961 |  |
|  | Shiraz-36T | 433 | 0        | -0.803961 |  |
|  | Shiraz-36T | 433 | 0        | -0.803961 |  |
|  | Shiraz-36T | 433 | 0        | -0.803961 |  |
|  | Shiraz-36T | 433 | 0        | -0.803961 |  |
|  | Shiraz-36T | 433 | 0        | -0.803961 |  |
|  | Shiraz-44T | 899 | 0        | -1.09697  |  |
|  | Shiraz-44T | 899 | 0        | -1.09697  |  |
|  | Shiraz-44T | 899 | 0        | -1.09697  |  |







|  |            |      |          |           |  |
|--|------------|------|----------|-----------|--|
|  | Shiraz-16T | 295  | 0.591657 | 0         |  |
|  | Shiraz-16T | 295  | 0.591657 | 0         |  |
|  | Shiraz-16T | 295  | 0.591657 | 0         |  |
|  | Shiraz-16T | 295  | 0.591657 | 0         |  |
|  | Shiraz-16T | 295  | 0.591657 | 0         |  |
|  | Shiraz-16T | 295  | 0.591657 | 0         |  |
|  | Shiraz-16T | 295  | 0.591657 | 0         |  |
|  | Shiraz-16T | 295  | 0.591657 | 0         |  |
|  | Shiraz-16T | 295  | 0.591657 | 0         |  |
|  | Shiraz-36T | 433  | 0        | -0.803961 |  |
|  | Shiraz-36T | 433  | 0        | -0.803961 |  |
|  | Shiraz-36T | 433  | 0        | -0.803961 |  |
|  | Shiraz-36T | 433  | 0        | -0.803961 |  |
|  | Shiraz-36T | 433  | 0        | -0.803961 |  |
|  | Shiraz-36T | 433  | 0        | -0.803961 |  |
|  | Shiraz-36T | 433  | 0        | -0.803961 |  |
|  | Shiraz-36T | 433  | 0        | -0.803961 |  |
|  | Shiraz-36T | 433  | 0        | -0.803961 |  |
|  | Shiraz-44T | 899  | 0        | -1.09697  |  |
|  | Shiraz-44T | 899  | 0        | -1.09697  |  |
|  | Shiraz-44T | 899  | 0        | -1.09697  |  |
|  | Shiraz-44T | 899  | 0        | -1.09697  |  |
|  | Shiraz-44T | 899  | 0        | -1.09697  |  |
|  | Shiraz-44T | 899  | 0        | -1.09697  |  |
|  | Shiraz-44T | 899  | 0        | -1.09697  |  |
|  | Shiraz-44T | 899  | 0        | -1.09697  |  |
|  | Shiraz-44T | 899  | 0        | -1.09697  |  |
|  | Shiraz-44T | 904  | 0        | -0.625526 |  |
|  | Shiraz-44T | 904  | 0        | -0.625526 |  |
|  | Shiraz-44T | 904  | 0        | -0.625526 |  |
|  | Shiraz-44T | 904  | 0        | -0.625526 |  |
|  | Shiraz-44T | 904  | 0        | -0.625526 |  |
|  | Shiraz-44T | 904  | 0        | -0.625526 |  |
|  | Shiraz-44T | 904  | 0        | -0.625526 |  |
|  | Shiraz-44T | 904  | 0        | -0.625526 |  |
|  | Shiraz-44T | 904  | 0        | -0.625526 |  |
|  | Shiraz-49T | 1170 | 0        | -0.967436 |  |
|  | Shiraz-49T | 1170 | 0        | -0.967436 |  |
|  | Shiraz-49T | 1170 | 0        | -0.967436 |  |
|  | Shiraz-49T | 1170 | 0        | -0.967436 |  |
|  | Shiraz-49T | 1170 | 0        | -0.967436 |  |
|  | Shiraz-49T | 1170 | 0        | -0.967436 |  |
|  | Shiraz-49T | 1170 | 0        | -0.967436 |  |
|  | Shiraz-49T | 1170 | 0        | -0.967436 |  |
|  | Shiraz-49T | 1170 | 0        | -0.967436 |  |
|  | Shiraz-9T  | 1370 | 0.690073 | 0         |  |
|  | Shiraz-9T  | 1370 | 0.690073 | 0         |  |

|  |  |            |      |          |   |  |  |
|--|--|------------|------|----------|---|--|--|
|  |  | Shiraz-9T  | 1370 | 0.690073 | 0 |  |  |
|  |  | Shiraz-9T  | 1370 | 0.690073 | 0 |  |  |
|  |  | Shiraz-9T  | 1370 | 0.690073 | 0 |  |  |
|  |  | Shiraz-9T  | 1370 | 0.690073 | 0 |  |  |
|  |  | Shiraz-9T  | 1370 | 0.690073 | 0 |  |  |
|  |  | Shiraz-9T  | 1370 | 0.690073 | 0 |  |  |
|  |  | Shiraz-9T  | 1370 | 0.690073 | 0 |  |  |
|  |  | Shiraz-18T | 1457 | 0.643204 | 0 |  |  |
|  |  | Shiraz-18T | 1457 | 0.643204 | 0 |  |  |
|  |  | Shiraz-18T | 1457 | 0.643204 | 0 |  |  |
|  |  | Shiraz-18T | 1457 | 0.643204 | 0 |  |  |
|  |  | Shiraz-18T | 1457 | 0.643204 | 0 |  |  |
|  |  | Shiraz-18T | 1457 | 0.643204 | 0 |  |  |
|  |  | Shiraz-18T | 1457 | 0.643204 | 0 |  |  |
|  |  | Shiraz-18T | 1457 | 0.643204 | 0 |  |  |
|  |  | Shiraz-18T | 1457 | 0.643204 | 0 |  |  |
|  |  | Shiraz-22T | 1673 | 0.611783 | 0 |  |  |
|  |  | Shiraz-22T | 1673 | 0.611783 | 0 |  |  |
|  |  | Shiraz-22T | 1673 | 0.611783 | 0 |  |  |
|  |  | Shiraz-22T | 1673 | 0.611783 | 0 |  |  |
|  |  | Shiraz-22T | 1673 | 0.611783 | 0 |  |  |
|  |  | Shiraz-22T | 1673 | 0.611783 | 0 |  |  |
|  |  | Shiraz-22T | 1673 | 0.611783 | 0 |  |  |
|  |  | Shiraz-22T | 1673 | 0.611783 | 0 |  |  |
|  |  | Shiraz-22T | 1673 | 0.611783 | 0 |  |  |
|  |  | Shiraz-22T | 1673 | 0.611783 | 0 |  |  |
|  |  | Shiraz-25T | 1719 | 0.472955 | 0 |  |  |
|  |  | Shiraz-25T | 1719 | 0.472955 | 0 |  |  |
|  |  | Shiraz-25T | 1719 | 0.472955 | 0 |  |  |
|  |  | Shiraz-25T | 1719 | 0.472955 | 0 |  |  |
|  |  | Shiraz-25T | 1719 | 0.472955 | 0 |  |  |
|  |  | Shiraz-25T | 1719 | 0.472955 | 0 |  |  |
|  |  | Shiraz-25T | 1719 | 0.472955 | 0 |  |  |
|  |  | Shiraz-25T | 1719 | 0.472955 | 0 |  |  |
|  |  | Shiraz-25T | 1719 | 0.472955 | 0 |  |  |
|  |  | Shiraz-25T | 1719 | 0.472955 | 0 |  |  |
|  |  | Shiraz-28T | 1762 | 0.562311 | 0 |  |  |
|  |  | Shiraz-28T | 1762 | 0.562311 | 0 |  |  |
|  |  | Shiraz-28T | 1762 | 0.562311 | 0 |  |  |
|  |  | Shiraz-28T | 1762 | 0.562311 | 0 |  |  |
|  |  | Shiraz-28T | 1762 | 0.562311 | 0 |  |  |
|  |  | Shiraz-28T | 1762 | 0.562311 | 0 |  |  |
|  |  | Shiraz-28T | 1762 | 0.562311 | 0 |  |  |
|  |  | Shiraz-28T | 1762 | 0.562311 | 0 |  |  |
|  |  | Shiraz-28T | 1762 | 0.562311 | 0 |  |  |
|  |  | Shiraz-28T | 1762 | 0.562311 | 0 |  |  |
|  |  | Shiraz-29T | 1801 | 0.815343 | 0 |  |  |
|  |  | Shiraz-29T | 1801 | 0.815343 | 0 |  |  |
|  |  | Shiraz-29T | 1801 | 0.815343 | 0 |  |  |
|  |  | Shiraz-29T | 1801 | 0.815343 | 0 |  |  |







|  |            |      |          |           |  |
|--|------------|------|----------|-----------|--|
|  | Shiraz-44T | 899  | 0        | -1.09697  |  |
|  | Shiraz-44T | 904  | 0        | -0.625526 |  |
|  | Shiraz-44T | 904  | 0        | -0.625526 |  |
|  | Shiraz-44T | 904  | 0        | -0.625526 |  |
|  | Shiraz-44T | 904  | 0        | -0.625526 |  |
|  | Shiraz-44T | 904  | 0        | -0.625526 |  |
|  | Shiraz-44T | 904  | 0        | -0.625526 |  |
|  | Shiraz-44T | 904  | 0        | -0.625526 |  |
|  | Shiraz-44T | 904  | 0        | -0.625526 |  |
|  | Shiraz-49T | 1170 | 0        | -0.967436 |  |
|  | Shiraz-49T | 1170 | 0        | -0.967436 |  |
|  | Shiraz-49T | 1170 | 0        | -0.967436 |  |
|  | Shiraz-49T | 1170 | 0        | -0.967436 |  |
|  | Shiraz-49T | 1170 | 0        | -0.967436 |  |
|  | Shiraz-49T | 1170 | 0        | -0.967436 |  |
|  | Shiraz-49T | 1170 | 0        | -0.967436 |  |
|  | Shiraz-49T | 1170 | 0        | -0.967436 |  |
|  | Shiraz-49T | 1170 | 0        | -0.967436 |  |
|  | Shiraz-9T  | 1370 | 0.690073 | 0         |  |
|  | Shiraz-9T  | 1370 | 0.690073 | 0         |  |
|  | Shiraz-9T  | 1370 | 0.690073 | 0         |  |
|  | Shiraz-9T  | 1370 | 0.690073 | 0         |  |
|  | Shiraz-9T  | 1370 | 0.690073 | 0         |  |
|  | Shiraz-9T  | 1370 | 0.690073 | 0         |  |
|  | Shiraz-9T  | 1370 | 0.690073 | 0         |  |
|  | Shiraz-9T  | 1370 | 0.690073 | 0         |  |
|  | Shiraz-9T  | 1370 | 0.690073 | 0         |  |
|  | Shiraz-18T | 1457 | 0.643204 | 0         |  |
|  | Shiraz-18T | 1457 | 0.643204 | 0         |  |
|  | Shiraz-18T | 1457 | 0.643204 | 0         |  |
|  | Shiraz-18T | 1457 | 0.643204 | 0         |  |
|  | Shiraz-18T | 1457 | 0.643204 | 0         |  |
|  | Shiraz-18T | 1457 | 0.643204 | 0         |  |
|  | Shiraz-18T | 1457 | 0.643204 | 0         |  |
|  | Shiraz-18T | 1457 | 0.643204 | 0         |  |
|  | Shiraz-18T | 1457 | 0.643204 | 0         |  |
|  | Shiraz-22T | 1673 | 0.611783 | 0         |  |
|  | Shiraz-22T | 1673 | 0.611783 | 0         |  |
|  | Shiraz-22T | 1673 | 0.611783 | 0         |  |
|  | Shiraz-22T | 1673 | 0.611783 | 0         |  |
|  | Shiraz-22T | 1673 | 0.611783 | 0         |  |
|  | Shiraz-22T | 1673 | 0.611783 | 0         |  |
|  | Shiraz-22T | 1673 | 0.611783 | 0         |  |
|  | Shiraz-22T | 1673 | 0.611783 | 0         |  |
|  | Shiraz-22T | 1673 | 0.611783 | 0         |  |
|  | Shiraz-25T | 1719 | 0.472955 | 0         |  |

|  |  |            |      |          |   |  |
|--|--|------------|------|----------|---|--|
|  |  | Shiraz-25T | 1719 | 0.472955 | 0 |  |
|  |  | Shiraz-25T | 1719 | 0.472955 | 0 |  |
|  |  | Shiraz-25T | 1719 | 0.472955 | 0 |  |
|  |  | Shiraz-25T | 1719 | 0.472955 | 0 |  |
|  |  | Shiraz-25T | 1719 | 0.472955 | 0 |  |
|  |  | Shiraz-25T | 1719 | 0.472955 | 0 |  |
|  |  | Shiraz-25T | 1719 | 0.472955 | 0 |  |
|  |  | Shiraz-25T | 1719 | 0.472955 | 0 |  |
|  |  | Shiraz-28T | 1762 | 0.562311 | 0 |  |
|  |  | Shiraz-28T | 1762 | 0.562311 | 0 |  |
|  |  | Shiraz-28T | 1762 | 0.562311 | 0 |  |
|  |  | Shiraz-28T | 1762 | 0.562311 | 0 |  |
|  |  | Shiraz-28T | 1762 | 0.562311 | 0 |  |
|  |  | Shiraz-28T | 1762 | 0.562311 | 0 |  |
|  |  | Shiraz-28T | 1762 | 0.562311 | 0 |  |
|  |  | Shiraz-28T | 1762 | 0.562311 | 0 |  |
|  |  | Shiraz-28T | 1762 | 0.562311 | 0 |  |
|  |  | Shiraz-28T | 1762 | 0.562311 | 0 |  |
|  |  | Shiraz-28T | 1762 | 0.562311 | 0 |  |
|  |  | Shiraz-29T | 1801 | 0.815343 | 0 |  |
|  |  | Shiraz-29T | 1801 | 0.815343 | 0 |  |
|  |  | Shiraz-29T | 1801 | 0.815343 | 0 |  |
|  |  | Shiraz-29T | 1801 | 0.815343 | 0 |  |
|  |  | Shiraz-29T | 1801 | 0.815343 | 0 |  |
|  |  | Shiraz-29T | 1801 | 0.815343 | 0 |  |
|  |  | Shiraz-29T | 1801 | 0.815343 | 0 |  |
|  |  | Shiraz-29T | 1801 | 0.815343 | 0 |  |
|  |  | Shiraz-29T | 1801 | 0.815343 | 0 |  |
|  |  | Shiraz-29T | 1801 | 0.815343 | 0 |  |
|  |  | Shiraz-32T | 1870 | 0.729766 | 0 |  |
|  |  | Shiraz-32T | 1870 | 0.729766 | 0 |  |
|  |  | Shiraz-32T | 1870 | 0.729766 | 0 |  |
|  |  | Shiraz-32T | 1870 | 0.729766 | 0 |  |
|  |  | Shiraz-32T | 1870 | 0.729766 | 0 |  |
|  |  | Shiraz-32T | 1870 | 0.729766 | 0 |  |
|  |  | Shiraz-32T | 1870 | 0.729766 | 0 |  |
|  |  | Shiraz-32T | 1870 | 0.729766 | 0 |  |
|  |  | Shiraz-32T | 1870 | 0.729766 | 0 |  |
|  |  | Shiraz-32T | 1870 | 0.729766 | 0 |  |
|  |  | Shiraz-35T | 1933 | 0.488535 | 0 |  |
|  |  | Shiraz-35T | 1933 | 0.488535 | 0 |  |
|  |  | Shiraz-35T | 1933 | 0.488535 | 0 |  |
|  |  | Shiraz-35T | 1933 | 0.488535 | 0 |  |
|  |  | Shiraz-35T | 1933 | 0.488535 | 0 |  |
|  |  | Shiraz-35T | 1933 | 0.488535 | 0 |  |
|  |  | Shiraz-35T | 1933 | 0.488535 | 0 |  |
|  |  | Shiraz-35T | 1933 | 0.488535 | 0 |  |
|  |  | Shiraz-35T | 1933 | 0.488535 | 0 |  |
|  |  | Shiraz-35T | 1933 | 0.488535 | 0 |  |
|  |  | Shiraz-58T | 2223 | 0.833364 | 0 |  |
|  |  | Shiraz-58T | 2223 | 0.833364 | 0 |  |
|  |  | Shiraz-58T | 2223 | 0.833364 | 0 |  |

|  |  |            |      |          |           |  |  |
|--|--|------------|------|----------|-----------|--|--|
|  |  | Shiraz-58T | 2223 | 0.833364 | 0         |  |  |
|  |  | Shiraz-58T | 2223 | 0.833364 | 0         |  |  |
|  |  | Shiraz-58T | 2223 | 0.833364 | 0         |  |  |
|  |  | Shiraz-58T | 2223 | 0.833364 | 0         |  |  |
|  |  | Shiraz-58T | 2223 | 0.833364 | 0         |  |  |
|  |  | Shiraz-58T | 2223 | 0.833364 | 0         |  |  |
|  |  | Shiraz-71T | 2263 | 0.975531 | 0         |  |  |
|  |  | Shiraz-71T | 2263 | 0.975531 | 0         |  |  |
|  |  | Shiraz-71T | 2263 | 0.975531 | 0         |  |  |
|  |  | Shiraz-71T | 2263 | 0.975531 | 0         |  |  |
|  |  | Shiraz-71T | 2263 | 0.975531 | 0         |  |  |
|  |  | Shiraz-71T | 2263 | 0.975531 | 0         |  |  |
|  |  | Shiraz-71T | 2263 | 0.975531 | 0         |  |  |
|  |  | Shiraz-71T | 2263 | 0.975531 | 0         |  |  |
|  |  | Shiraz-71T | 2263 | 0.975531 | 0         |  |  |
|  |  | Shiraz-3T  | 242  | 0        | -0.336434 |  |  |
|  |  | Shiraz-3T  | 242  | 0        | -0.336434 |  |  |
|  |  | Shiraz-3T  | 242  | 0        | -0.336434 |  |  |
|  |  | Shiraz-3T  | 242  | 0        | -0.336434 |  |  |
|  |  | Shiraz-3T  | 242  | 0        | -0.336434 |  |  |
|  |  | Shiraz-3T  | 242  | 0        | -0.336434 |  |  |
|  |  | Shiraz-3T  | 242  | 0        | -0.336434 |  |  |
|  |  | Shiraz-3T  | 242  | 0        | -0.336434 |  |  |
|  |  | Shiraz-3T  | 242  | 0        | -0.336434 |  |  |
|  |  | Shiraz-3T  | 244  | 0        | -0.023749 |  |  |
|  |  | Shiraz-3T  | 244  | 0        | -0.023749 |  |  |
|  |  | Shiraz-3T  | 244  | 0        | -0.023749 |  |  |
|  |  | Shiraz-3T  | 244  | 0        | -0.023749 |  |  |
|  |  | Shiraz-3T  | 244  | 0        | -0.023749 |  |  |
|  |  | Shiraz-3T  | 244  | 0        | -0.023749 |  |  |
|  |  | Shiraz-3T  | 244  | 0        | -0.023749 |  |  |
|  |  | Shiraz-3T  | 244  | 0        | -0.023749 |  |  |
|  |  | Shiraz-3T  | 244  | 0        | -0.023749 |  |  |
|  |  | Shiraz-3T  | 244  | 0        | -0.023749 |  |  |
|  |  | Shiraz-4T  | 261  | 0        | -0.336249 |  |  |
|  |  | Shiraz-4T  | 261  | 0        | -0.336249 |  |  |
|  |  | Shiraz-4T  | 261  | 0        | -0.336249 |  |  |
|  |  | Shiraz-4T  | 261  | 0        | -0.336249 |  |  |
|  |  | Shiraz-4T  | 261  | 0        | -0.336249 |  |  |
|  |  | Shiraz-4T  | 261  | 0        | -0.336249 |  |  |
|  |  | Shiraz-4T  | 261  | 0        | -0.336249 |  |  |
|  |  | Shiraz-4T  | 261  | 0        | -0.336249 |  |  |
|  |  | Shiraz-4T  | 261  | 0        | -0.336249 |  |  |
|  |  | Shiraz-4T  | 261  | 0        | -0.336249 |  |  |
|  |  | Shiraz-16T | 295  | 0.591657 | 0         |  |  |
|  |  | Shiraz-16T | 295  | 0.591657 | 0         |  |  |
|  |  | Shiraz-16T | 295  | 0.591657 | 0         |  |  |
|  |  | Shiraz-16T | 295  | 0.591657 | 0         |  |  |
|  |  | Shiraz-16T | 295  | 0.591657 | 0         |  |  |





|  |  |            |      |          |           |  |  |
|--|--|------------|------|----------|-----------|--|--|
|  |  | Shiraz-32T | 1870 | 0.729766 | 0         |  |  |
|  |  | Shiraz-32T | 1870 | 0.729766 | 0         |  |  |
|  |  | Shiraz-32T | 1870 | 0.729766 | 0         |  |  |
|  |  | Shiraz-32T | 1870 | 0.729766 | 0         |  |  |
|  |  | Shiraz-32T | 1870 | 0.729766 | 0         |  |  |
|  |  | Shiraz-32T | 1870 | 0.729766 | 0         |  |  |
|  |  | Shiraz-32T | 1870 | 0.729766 | 0         |  |  |
|  |  | Shiraz-32T | 1870 | 0.729766 | 0         |  |  |
|  |  | Shiraz-32T | 1870 | 0.729766 | 0         |  |  |
|  |  | Shiraz-32T | 1870 | 0.729766 | 0         |  |  |
|  |  | Shiraz-35T | 1933 | 0.488535 | 0         |  |  |
|  |  | Shiraz-35T | 1933 | 0.488535 | 0         |  |  |
|  |  | Shiraz-35T | 1933 | 0.488535 | 0         |  |  |
|  |  | Shiraz-35T | 1933 | 0.488535 | 0         |  |  |
|  |  | Shiraz-35T | 1933 | 0.488535 | 0         |  |  |
|  |  | Shiraz-35T | 1933 | 0.488535 | 0         |  |  |
|  |  | Shiraz-35T | 1933 | 0.488535 | 0         |  |  |
|  |  | Shiraz-35T | 1933 | 0.488535 | 0         |  |  |
|  |  | Shiraz-35T | 1933 | 0.488535 | 0         |  |  |
|  |  | Shiraz-35T | 1933 | 0.488535 | 0         |  |  |
|  |  | Shiraz-58T | 2223 | 0.833364 | 0         |  |  |
|  |  | Shiraz-58T | 2223 | 0.833364 | 0         |  |  |
|  |  | Shiraz-58T | 2223 | 0.833364 | 0         |  |  |
|  |  | Shiraz-58T | 2223 | 0.833364 | 0         |  |  |
|  |  | Shiraz-58T | 2223 | 0.833364 | 0         |  |  |
|  |  | Shiraz-58T | 2223 | 0.833364 | 0         |  |  |
|  |  | Shiraz-58T | 2223 | 0.833364 | 0         |  |  |
|  |  | Shiraz-58T | 2223 | 0.833364 | 0         |  |  |
|  |  | Shiraz-58T | 2223 | 0.833364 | 0         |  |  |
|  |  | Shiraz-58T | 2223 | 0.833364 | 0         |  |  |
|  |  | Shiraz-71T | 2263 | 0.975531 | 0         |  |  |
|  |  | Shiraz-71T | 2263 | 0.975531 | 0         |  |  |
|  |  | Shiraz-71T | 2263 | 0.975531 | 0         |  |  |
|  |  | Shiraz-71T | 2263 | 0.975531 | 0         |  |  |
|  |  | Shiraz-71T | 2263 | 0.975531 | 0         |  |  |
|  |  | Shiraz-71T | 2263 | 0.975531 | 0         |  |  |
|  |  | Shiraz-71T | 2263 | 0.975531 | 0         |  |  |
|  |  | Shiraz-71T | 2263 | 0.975531 | 0         |  |  |
|  |  | Shiraz-71T | 2263 | 0.975531 | 0         |  |  |
|  |  | Shiraz-71T | 2263 | 0.975531 | 0         |  |  |
|  |  | Shiraz-3T  | 242  | 0        | -0.336434 |  |  |
|  |  | Shiraz-3T  | 242  | 0        | -0.336434 |  |  |
|  |  | Shiraz-3T  | 242  | 0        | -0.336434 |  |  |
|  |  | Shiraz-3T  | 242  | 0        | -0.336434 |  |  |
|  |  | Shiraz-3T  | 242  | 0        | -0.336434 |  |  |
|  |  | Shiraz-3T  | 242  | 0        | -0.336434 |  |  |
|  |  | Shiraz-3T  | 242  | 0        | -0.336434 |  |  |
|  |  | Shiraz-3T  | 242  | 0        | -0.336434 |  |  |
|  |  | Shiraz-3T  | 242  | 0        | -0.336434 |  |  |
|  |  | Shiraz-3T  | 244  | 0        | -0.023749 |  |  |
|  |  | Shiraz-3T  | 244  | 0        | -0.023749 |  |  |

|  |            |     |          |           |  |  |
|--|------------|-----|----------|-----------|--|--|
|  | Shiraz-3T  | 244 | 0        | -0.023749 |  |  |
|  | Shiraz-3T  | 244 | 0        | -0.023749 |  |  |
|  | Shiraz-3T  | 244 | 0        | -0.023749 |  |  |
|  | Shiraz-3T  | 244 | 0        | -0.023749 |  |  |
|  | Shiraz-3T  | 244 | 0        | -0.023749 |  |  |
|  | Shiraz-3T  | 244 | 0        | -0.023749 |  |  |
|  | Shiraz-3T  | 244 | 0        | -0.023749 |  |  |
|  | Shiraz-4T  | 261 | 0        | -0.336249 |  |  |
|  | Shiraz-4T  | 261 | 0        | -0.336249 |  |  |
|  | Shiraz-4T  | 261 | 0        | -0.336249 |  |  |
|  | Shiraz-4T  | 261 | 0        | -0.336249 |  |  |
|  | Shiraz-4T  | 261 | 0        | -0.336249 |  |  |
|  | Shiraz-4T  | 261 | 0        | -0.336249 |  |  |
|  | Shiraz-4T  | 261 | 0        | -0.336249 |  |  |
|  | Shiraz-4T  | 261 | 0        | -0.336249 |  |  |
|  | Shiraz-4T  | 261 | 0        | -0.336249 |  |  |
|  | Shiraz-4T  | 261 | 0        | -0.336249 |  |  |
|  | Shiraz-16T | 295 | 0.591657 | 0         |  |  |
|  | Shiraz-16T | 295 | 0.591657 | 0         |  |  |
|  | Shiraz-16T | 295 | 0.591657 | 0         |  |  |
|  | Shiraz-16T | 295 | 0.591657 | 0         |  |  |
|  | Shiraz-16T | 295 | 0.591657 | 0         |  |  |
|  | Shiraz-16T | 295 | 0.591657 | 0         |  |  |
|  | Shiraz-16T | 295 | 0.591657 | 0         |  |  |
|  | Shiraz-16T | 295 | 0.591657 | 0         |  |  |
|  | Shiraz-16T | 295 | 0.591657 | 0         |  |  |
|  | Shiraz-16T | 295 | 0.591657 | 0         |  |  |
|  | Shiraz-36T | 433 | 0        | -0.803961 |  |  |
|  | Shiraz-36T | 433 | 0        | -0.803961 |  |  |
|  | Shiraz-36T | 433 | 0        | -0.803961 |  |  |
|  | Shiraz-36T | 433 | 0        | -0.803961 |  |  |
|  | Shiraz-36T | 433 | 0        | -0.803961 |  |  |
|  | Shiraz-36T | 433 | 0        | -0.803961 |  |  |
|  | Shiraz-36T | 433 | 0        | -0.803961 |  |  |
|  | Shiraz-36T | 433 | 0        | -0.803961 |  |  |
|  | Shiraz-36T | 433 | 0        | -0.803961 |  |  |
|  | Shiraz-36T | 433 | 0        | -0.803961 |  |  |
|  | Shiraz-44T | 899 | 0        | -1.09697  |  |  |
|  | Shiraz-44T | 899 | 0        | -1.09697  |  |  |
|  | Shiraz-44T | 899 | 0        | -1.09697  |  |  |
|  | Shiraz-44T | 899 | 0        | -1.09697  |  |  |
|  | Shiraz-44T | 899 | 0        | -1.09697  |  |  |
|  | Shiraz-44T | 899 | 0        | -1.09697  |  |  |
|  | Shiraz-44T | 899 | 0        | -1.09697  |  |  |
|  | Shiraz-44T | 899 | 0        | -1.09697  |  |  |
|  | Shiraz-44T | 899 | 0        | -1.09697  |  |  |
|  | Shiraz-44T | 899 | 0        | -1.09697  |  |  |
|  | Shiraz-44T | 904 | 0        | -0.625526 |  |  |
|  | Shiraz-44T | 904 | 0        | -0.625526 |  |  |
|  | Shiraz-44T | 904 | 0        | -0.625526 |  |  |
|  | Shiraz-44T | 904 | 0        | -0.625526 |  |  |







|        |      |            |      |          |           |  |  |
|--------|------|------------|------|----------|-----------|--|--|
|        |      | Shiraz-58T | 2223 | 0.833364 | 0         |  |  |
|        |      | Shiraz-71T | 2263 | 0.975531 | 0         |  |  |
|        |      | Shiraz-71T | 2263 | 0.975531 | 0         |  |  |
|        |      | Shiraz-71T | 2263 | 0.975531 | 0         |  |  |
|        |      | Shiraz-71T | 2263 | 0.975531 | 0         |  |  |
|        |      | Shiraz-71T | 2263 | 0.975531 | 0         |  |  |
|        |      | Shiraz-71T | 2263 | 0.975531 | 0         |  |  |
|        |      | Shiraz-71T | 2263 | 0.975531 | 0         |  |  |
|        |      | Shiraz-71T | 2263 | 0.975531 | 0         |  |  |
|        |      | Shiraz-71T | 2263 | 0.975531 | 0         |  |  |
| CT47A3 | chrX | Shiraz-3T  | 242  | 0        | -0.336434 |  |  |
|        |      | Shiraz-3T  | 242  | 0        | -0.336434 |  |  |
|        |      | Shiraz-3T  | 242  | 0        | -0.336434 |  |  |
|        |      | Shiraz-3T  | 242  | 0        | -0.336434 |  |  |
|        |      | Shiraz-3T  | 242  | 0        | -0.336434 |  |  |
|        |      | Shiraz-3T  | 242  | 0        | -0.336434 |  |  |
|        |      | Shiraz-3T  | 242  | 0        | -0.336434 |  |  |
|        |      | Shiraz-3T  | 242  | 0        | -0.336434 |  |  |
|        |      | Shiraz-3T  | 242  | 0        | -0.336434 |  |  |
|        |      | Shiraz-3T  | 244  | 0        | -0.023749 |  |  |
|        |      | Shiraz-3T  | 244  | 0        | -0.023749 |  |  |
|        |      | Shiraz-3T  | 244  | 0        | -0.023749 |  |  |
|        |      | Shiraz-3T  | 244  | 0        | -0.023749 |  |  |
|        |      | Shiraz-3T  | 244  | 0        | -0.023749 |  |  |
|        |      | Shiraz-3T  | 244  | 0        | -0.023749 |  |  |
|        |      | Shiraz-3T  | 244  | 0        | -0.023749 |  |  |
|        |      | Shiraz-3T  | 244  | 0        | -0.023749 |  |  |
|        |      | Shiraz-3T  | 244  | 0        | -0.023749 |  |  |
|        |      | Shiraz-4T  | 261  | 0        | -0.336249 |  |  |
|        |      | Shiraz-4T  | 261  | 0        | -0.336249 |  |  |
|        |      | Shiraz-4T  | 261  | 0        | -0.336249 |  |  |
|        |      | Shiraz-4T  | 261  | 0        | -0.336249 |  |  |
|        |      | Shiraz-4T  | 261  | 0        | -0.336249 |  |  |
|        |      | Shiraz-4T  | 261  | 0        | -0.336249 |  |  |
|        |      | Shiraz-4T  | 261  | 0        | -0.336249 |  |  |
|        |      | Shiraz-4T  | 261  | 0        | -0.336249 |  |  |
|        |      | Shiraz-4T  | 261  | 0        | -0.336249 |  |  |
|        |      | Shiraz-16T | 295  | 0.591657 | 0         |  |  |
|        |      | Shiraz-16T | 295  | 0.591657 | 0         |  |  |
|        |      | Shiraz-16T | 295  | 0.591657 | 0         |  |  |
|        |      | Shiraz-16T | 295  | 0.591657 | 0         |  |  |
|        |      | Shiraz-16T | 295  | 0.591657 | 0         |  |  |
|        |      | Shiraz-16T | 295  | 0.591657 | 0         |  |  |
|        |      | Shiraz-16T | 295  | 0.591657 | 0         |  |  |
|        |      | Shiraz-16T | 295  | 0.591657 | 0         |  |  |
|        |      | Shiraz-16T | 295  | 0.591657 | 0         |  |  |
|        |      | Shiraz-36T | 433  | 0        | -0.803961 |  |  |

|  |            |      |          |           |  |  |
|--|------------|------|----------|-----------|--|--|
|  | Shiraz-36T | 433  | 0        | -0.803961 |  |  |
|  | Shiraz-36T | 433  | 0        | -0.803961 |  |  |
|  | Shiraz-36T | 433  | 0        | -0.803961 |  |  |
|  | Shiraz-36T | 433  | 0        | -0.803961 |  |  |
|  | Shiraz-36T | 433  | 0        | -0.803961 |  |  |
|  | Shiraz-36T | 433  | 0        | -0.803961 |  |  |
|  | Shiraz-36T | 433  | 0        | -0.803961 |  |  |
|  | Shiraz-36T | 433  | 0        | -0.803961 |  |  |
|  | Shiraz-44T | 899  | 0        | -1.09697  |  |  |
|  | Shiraz-44T | 899  | 0        | -1.09697  |  |  |
|  | Shiraz-44T | 899  | 0        | -1.09697  |  |  |
|  | Shiraz-44T | 899  | 0        | -1.09697  |  |  |
|  | Shiraz-44T | 899  | 0        | -1.09697  |  |  |
|  | Shiraz-44T | 899  | 0        | -1.09697  |  |  |
|  | Shiraz-44T | 899  | 0        | -1.09697  |  |  |
|  | Shiraz-44T | 899  | 0        | -1.09697  |  |  |
|  | Shiraz-44T | 899  | 0        | -1.09697  |  |  |
|  | Shiraz-44T | 899  | 0        | -1.09697  |  |  |
|  | Shiraz-44T | 899  | 0        | -1.09697  |  |  |
|  | Shiraz-44T | 899  | 0        | -1.09697  |  |  |
|  | Shiraz-44T | 904  | 0        | -0.625526 |  |  |
|  | Shiraz-44T | 904  | 0        | -0.625526 |  |  |
|  | Shiraz-44T | 904  | 0        | -0.625526 |  |  |
|  | Shiraz-44T | 904  | 0        | -0.625526 |  |  |
|  | Shiraz-44T | 904  | 0        | -0.625526 |  |  |
|  | Shiraz-44T | 904  | 0        | -0.625526 |  |  |
|  | Shiraz-44T | 904  | 0        | -0.625526 |  |  |
|  | Shiraz-44T | 904  | 0        | -0.625526 |  |  |
|  | Shiraz-44T | 904  | 0        | -0.625526 |  |  |
|  | Shiraz-44T | 904  | 0        | -0.625526 |  |  |
|  | Shiraz-49T | 1170 | 0        | -0.967436 |  |  |
|  | Shiraz-49T | 1170 | 0        | -0.967436 |  |  |
|  | Shiraz-49T | 1170 | 0        | -0.967436 |  |  |
|  | Shiraz-49T | 1170 | 0        | -0.967436 |  |  |
|  | Shiraz-49T | 1170 | 0        | -0.967436 |  |  |
|  | Shiraz-49T | 1170 | 0        | -0.967436 |  |  |
|  | Shiraz-49T | 1170 | 0        | -0.967436 |  |  |
|  | Shiraz-49T | 1170 | 0        | -0.967436 |  |  |
|  | Shiraz-49T | 1170 | 0        | -0.967436 |  |  |
|  | Shiraz-49T | 1170 | 0        | -0.967436 |  |  |
|  | Shiraz-9T  | 1370 | 0.690073 | 0         |  |  |
|  | Shiraz-9T  | 1370 | 0.690073 | 0         |  |  |
|  | Shiraz-9T  | 1370 | 0.690073 | 0         |  |  |
|  | Shiraz-9T  | 1370 | 0.690073 | 0         |  |  |
|  | Shiraz-9T  | 1370 | 0.690073 | 0         |  |  |
|  | Shiraz-9T  | 1370 | 0.690073 | 0         |  |  |
|  | Shiraz-9T  | 1370 | 0.690073 | 0         |  |  |
|  | Shiraz-9T  | 1370 | 0.690073 | 0         |  |  |
|  | Shiraz-9T  | 1370 | 0.690073 | 0         |  |  |
|  | Shiraz-9T  | 1370 | 0.690073 | 0         |  |  |
|  | Shiraz-18T | 1457 | 0.643204 | 0         |  |  |
|  | Shiraz-18T | 1457 | 0.643204 | 0         |  |  |
|  | Shiraz-18T | 1457 | 0.643204 | 0         |  |  |







|  |            |      |          |           |  |
|--|------------|------|----------|-----------|--|
|  | Shiraz-49T | 1170 | 0        | -0.967436 |  |
|  | Shiraz-49T | 1170 | 0        | -0.967436 |  |
|  | Shiraz-49T | 1170 | 0        | -0.967436 |  |
|  | Shiraz-49T | 1170 | 0        | -0.967436 |  |
|  | Shiraz-49T | 1170 | 0        | -0.967436 |  |
|  | Shiraz-49T | 1170 | 0        | -0.967436 |  |
|  | Shiraz-49T | 1170 | 0        | -0.967436 |  |
|  | Shiraz-49T | 1170 | 0        | -0.967436 |  |
|  | Shiraz-49T | 1170 | 0        | -0.967436 |  |
|  | Shiraz-9T  | 1370 | 0.690073 | 0         |  |
|  | Shiraz-9T  | 1370 | 0.690073 | 0         |  |
|  | Shiraz-9T  | 1370 | 0.690073 | 0         |  |
|  | Shiraz-9T  | 1370 | 0.690073 | 0         |  |
|  | Shiraz-9T  | 1370 | 0.690073 | 0         |  |
|  | Shiraz-9T  | 1370 | 0.690073 | 0         |  |
|  | Shiraz-9T  | 1370 | 0.690073 | 0         |  |
|  | Shiraz-9T  | 1370 | 0.690073 | 0         |  |
|  | Shiraz-9T  | 1370 | 0.690073 | 0         |  |
|  | Shiraz-18T | 1457 | 0.643204 | 0         |  |
|  | Shiraz-18T | 1457 | 0.643204 | 0         |  |
|  | Shiraz-18T | 1457 | 0.643204 | 0         |  |
|  | Shiraz-18T | 1457 | 0.643204 | 0         |  |
|  | Shiraz-18T | 1457 | 0.643204 | 0         |  |
|  | Shiraz-18T | 1457 | 0.643204 | 0         |  |
|  | Shiraz-18T | 1457 | 0.643204 | 0         |  |
|  | Shiraz-18T | 1457 | 0.643204 | 0         |  |
|  | Shiraz-18T | 1457 | 0.643204 | 0         |  |
|  | Shiraz-22T | 1673 | 0.611783 | 0         |  |
|  | Shiraz-22T | 1673 | 0.611783 | 0         |  |
|  | Shiraz-22T | 1673 | 0.611783 | 0         |  |
|  | Shiraz-22T | 1673 | 0.611783 | 0         |  |
|  | Shiraz-22T | 1673 | 0.611783 | 0         |  |
|  | Shiraz-22T | 1673 | 0.611783 | 0         |  |
|  | Shiraz-22T | 1673 | 0.611783 | 0         |  |
|  | Shiraz-22T | 1673 | 0.611783 | 0         |  |
|  | Shiraz-22T | 1673 | 0.611783 | 0         |  |
|  | Shiraz-25T | 1719 | 0.472955 | 0         |  |
|  | Shiraz-25T | 1719 | 0.472955 | 0         |  |
|  | Shiraz-25T | 1719 | 0.472955 | 0         |  |
|  | Shiraz-25T | 1719 | 0.472955 | 0         |  |
|  | Shiraz-25T | 1719 | 0.472955 | 0         |  |
|  | Shiraz-25T | 1719 | 0.472955 | 0         |  |
|  | Shiraz-25T | 1719 | 0.472955 | 0         |  |
|  | Shiraz-25T | 1719 | 0.472955 | 0         |  |
|  | Shiraz-25T | 1719 | 0.472955 | 0         |  |
|  | Shiraz-28T | 1762 | 0.562311 | 0         |  |
|  | Shiraz-28T | 1762 | 0.562311 | 0         |  |



|  |  |            |      |          |   |  |  |
|--|--|------------|------|----------|---|--|--|
|  |  | Shiraz-28T | 1762 | 0.562311 | 0 |  |  |
|  |  | Shiraz-28T | 1762 | 0.562311 | 0 |  |  |
|  |  | Shiraz-28T | 1762 | 0.562311 | 0 |  |  |
|  |  | Shiraz-28T | 1762 | 0.562311 | 0 |  |  |
|  |  | Shiraz-28T | 1762 | 0.562311 | 0 |  |  |
|  |  | Shiraz-28T | 1762 | 0.562311 | 0 |  |  |
|  |  | Shiraz-28T | 1762 | 0.562311 | 0 |  |  |
|  |  | Shiraz-29T | 1801 | 0.815343 | 0 |  |  |
|  |  | Shiraz-29T | 1801 | 0.815343 | 0 |  |  |
|  |  | Shiraz-29T | 1801 | 0.815343 | 0 |  |  |
|  |  | Shiraz-29T | 1801 | 0.815343 | 0 |  |  |
|  |  | Shiraz-29T | 1801 | 0.815343 | 0 |  |  |
|  |  | Shiraz-29T | 1801 | 0.815343 | 0 |  |  |
|  |  | Shiraz-29T | 1801 | 0.815343 | 0 |  |  |
|  |  | Shiraz-29T | 1801 | 0.815343 | 0 |  |  |
|  |  | Shiraz-29T | 1801 | 0.815343 | 0 |  |  |
|  |  | Shiraz-29T | 1801 | 0.815343 | 0 |  |  |
|  |  | Shiraz-32T | 1870 | 0.729766 | 0 |  |  |
|  |  | Shiraz-32T | 1870 | 0.729766 | 0 |  |  |
|  |  | Shiraz-32T | 1870 | 0.729766 | 0 |  |  |
|  |  | Shiraz-32T | 1870 | 0.729766 | 0 |  |  |
|  |  | Shiraz-32T | 1870 | 0.729766 | 0 |  |  |
|  |  | Shiraz-32T | 1870 | 0.729766 | 0 |  |  |
|  |  | Shiraz-32T | 1870 | 0.729766 | 0 |  |  |
|  |  | Shiraz-32T | 1870 | 0.729766 | 0 |  |  |
|  |  | Shiraz-32T | 1870 | 0.729766 | 0 |  |  |
|  |  | Shiraz-32T | 1870 | 0.729766 | 0 |  |  |
|  |  | Shiraz-35T | 1933 | 0.488535 | 0 |  |  |
|  |  | Shiraz-35T | 1933 | 0.488535 | 0 |  |  |
|  |  | Shiraz-35T | 1933 | 0.488535 | 0 |  |  |
|  |  | Shiraz-35T | 1933 | 0.488535 | 0 |  |  |
|  |  | Shiraz-35T | 1933 | 0.488535 | 0 |  |  |
|  |  | Shiraz-35T | 1933 | 0.488535 | 0 |  |  |
|  |  | Shiraz-35T | 1933 | 0.488535 | 0 |  |  |
|  |  | Shiraz-35T | 1933 | 0.488535 | 0 |  |  |
|  |  | Shiraz-35T | 1933 | 0.488535 | 0 |  |  |
|  |  | Shiraz-35T | 1933 | 0.488535 | 0 |  |  |
|  |  | Shiraz-58T | 2223 | 0.833364 | 0 |  |  |
|  |  | Shiraz-58T | 2223 | 0.833364 | 0 |  |  |
|  |  | Shiraz-58T | 2223 | 0.833364 | 0 |  |  |
|  |  | Shiraz-58T | 2223 | 0.833364 | 0 |  |  |
|  |  | Shiraz-58T | 2223 | 0.833364 | 0 |  |  |
|  |  | Shiraz-58T | 2223 | 0.833364 | 0 |  |  |
|  |  | Shiraz-58T | 2223 | 0.833364 | 0 |  |  |
|  |  | Shiraz-58T | 2223 | 0.833364 | 0 |  |  |
|  |  | Shiraz-58T | 2223 | 0.833364 | 0 |  |  |
|  |  | Shiraz-58T | 2223 | 0.833364 | 0 |  |  |
|  |  | Shiraz-71T | 2263 | 0.975531 | 0 |  |  |
|  |  | Shiraz-71T | 2263 | 0.975531 | 0 |  |  |
|  |  | Shiraz-71T | 2263 | 0.975531 | 0 |  |  |
|  |  | Shiraz-71T | 2263 | 0.975531 | 0 |  |  |





|  |  |            |      |          |   |  |  |
|--|--|------------|------|----------|---|--|--|
|  |  | Shiraz-18T | 1457 | 0.643204 | 0 |  |  |
|  |  | Shiraz-22T | 1673 | 0.611783 | 0 |  |  |
|  |  | Shiraz-22T | 1673 | 0.611783 | 0 |  |  |
|  |  | Shiraz-22T | 1673 | 0.611783 | 0 |  |  |
|  |  | Shiraz-22T | 1673 | 0.611783 | 0 |  |  |
|  |  | Shiraz-22T | 1673 | 0.611783 | 0 |  |  |
|  |  | Shiraz-22T | 1673 | 0.611783 | 0 |  |  |
|  |  | Shiraz-22T | 1673 | 0.611783 | 0 |  |  |
|  |  | Shiraz-22T | 1673 | 0.611783 | 0 |  |  |
|  |  | Shiraz-25T | 1719 | 0.472955 | 0 |  |  |
|  |  | Shiraz-25T | 1719 | 0.472955 | 0 |  |  |
|  |  | Shiraz-25T | 1719 | 0.472955 | 0 |  |  |
|  |  | Shiraz-25T | 1719 | 0.472955 | 0 |  |  |
|  |  | Shiraz-25T | 1719 | 0.472955 | 0 |  |  |
|  |  | Shiraz-25T | 1719 | 0.472955 | 0 |  |  |
|  |  | Shiraz-25T | 1719 | 0.472955 | 0 |  |  |
|  |  | Shiraz-25T | 1719 | 0.472955 | 0 |  |  |
|  |  | Shiraz-25T | 1719 | 0.472955 | 0 |  |  |
|  |  | Shiraz-28T | 1762 | 0.562311 | 0 |  |  |
|  |  | Shiraz-28T | 1762 | 0.562311 | 0 |  |  |
|  |  | Shiraz-28T | 1762 | 0.562311 | 0 |  |  |
|  |  | Shiraz-28T | 1762 | 0.562311 | 0 |  |  |
|  |  | Shiraz-28T | 1762 | 0.562311 | 0 |  |  |
|  |  | Shiraz-28T | 1762 | 0.562311 | 0 |  |  |
|  |  | Shiraz-28T | 1762 | 0.562311 | 0 |  |  |
|  |  | Shiraz-28T | 1762 | 0.562311 | 0 |  |  |
|  |  | Shiraz-28T | 1762 | 0.562311 | 0 |  |  |
|  |  | Shiraz-29T | 1801 | 0.815343 | 0 |  |  |
|  |  | Shiraz-29T | 1801 | 0.815343 | 0 |  |  |
|  |  | Shiraz-29T | 1801 | 0.815343 | 0 |  |  |
|  |  | Shiraz-29T | 1801 | 0.815343 | 0 |  |  |
|  |  | Shiraz-29T | 1801 | 0.815343 | 0 |  |  |
|  |  | Shiraz-29T | 1801 | 0.815343 | 0 |  |  |
|  |  | Shiraz-29T | 1801 | 0.815343 | 0 |  |  |
|  |  | Shiraz-29T | 1801 | 0.815343 | 0 |  |  |
|  |  | Shiraz-29T | 1801 | 0.815343 | 0 |  |  |
|  |  | Shiraz-32T | 1870 | 0.729766 | 0 |  |  |
|  |  | Shiraz-32T | 1870 | 0.729766 | 0 |  |  |
|  |  | Shiraz-32T | 1870 | 0.729766 | 0 |  |  |
|  |  | Shiraz-32T | 1870 | 0.729766 | 0 |  |  |
|  |  | Shiraz-32T | 1870 | 0.729766 | 0 |  |  |
|  |  | Shiraz-32T | 1870 | 0.729766 | 0 |  |  |
|  |  | Shiraz-32T | 1870 | 0.729766 | 0 |  |  |
|  |  | Shiraz-32T | 1870 | 0.729766 | 0 |  |  |
|  |  | Shiraz-32T | 1870 | 0.729766 | 0 |  |  |
|  |  | Shiraz-35T | 1933 | 0.488535 | 0 |  |  |

|        |      |            |      |          |           |  |  |
|--------|------|------------|------|----------|-----------|--|--|
|        |      | Shiraz-35T | 1933 | 0.488535 | 0         |  |  |
|        |      | Shiraz-35T | 1933 | 0.488535 | 0         |  |  |
|        |      | Shiraz-35T | 1933 | 0.488535 | 0         |  |  |
|        |      | Shiraz-35T | 1933 | 0.488535 | 0         |  |  |
|        |      | Shiraz-35T | 1933 | 0.488535 | 0         |  |  |
|        |      | Shiraz-35T | 1933 | 0.488535 | 0         |  |  |
|        |      | Shiraz-35T | 1933 | 0.488535 | 0         |  |  |
|        |      | Shiraz-35T | 1933 | 0.488535 | 0         |  |  |
|        |      | Shiraz-58T | 2223 | 0.833364 | 0         |  |  |
|        |      | Shiraz-58T | 2223 | 0.833364 | 0         |  |  |
|        |      | Shiraz-58T | 2223 | 0.833364 | 0         |  |  |
|        |      | Shiraz-58T | 2223 | 0.833364 | 0         |  |  |
|        |      | Shiraz-58T | 2223 | 0.833364 | 0         |  |  |
|        |      | Shiraz-58T | 2223 | 0.833364 | 0         |  |  |
|        |      | Shiraz-58T | 2223 | 0.833364 | 0         |  |  |
|        |      | Shiraz-58T | 2223 | 0.833364 | 0         |  |  |
|        |      | Shiraz-58T | 2223 | 0.833364 | 0         |  |  |
|        |      | Shiraz-58T | 2223 | 0.833364 | 0         |  |  |
|        |      | Shiraz-71T | 2263 | 0.975531 | 0         |  |  |
|        |      | Shiraz-71T | 2263 | 0.975531 | 0         |  |  |
|        |      | Shiraz-71T | 2263 | 0.975531 | 0         |  |  |
|        |      | Shiraz-71T | 2263 | 0.975531 | 0         |  |  |
|        |      | Shiraz-71T | 2263 | 0.975531 | 0         |  |  |
|        |      | Shiraz-71T | 2263 | 0.975531 | 0         |  |  |
|        |      | Shiraz-71T | 2263 | 0.975531 | 0         |  |  |
|        |      | Shiraz-71T | 2263 | 0.975531 | 0         |  |  |
|        |      | Shiraz-71T | 2263 | 0.975531 | 0         |  |  |
|        |      | Shiraz-71T | 2263 | 0.975531 | 0         |  |  |
| CT47A4 | chrX | Shiraz-3T  | 242  | 0        | -0.336434 |  |  |
|        |      | Shiraz-3T  | 242  | 0        | -0.336434 |  |  |
|        |      | Shiraz-3T  | 242  | 0        | -0.336434 |  |  |
|        |      | Shiraz-3T  | 242  | 0        | -0.336434 |  |  |
|        |      | Shiraz-3T  | 242  | 0        | -0.336434 |  |  |
|        |      | Shiraz-3T  | 242  | 0        | -0.336434 |  |  |
|        |      | Shiraz-3T  | 242  | 0        | -0.336434 |  |  |
|        |      | Shiraz-3T  | 242  | 0        | -0.336434 |  |  |
|        |      | Shiraz-3T  | 242  | 0        | -0.336434 |  |  |
|        |      | Shiraz-3T  | 244  | 0        | -0.023749 |  |  |
|        |      | Shiraz-3T  | 244  | 0        | -0.023749 |  |  |
|        |      | Shiraz-3T  | 244  | 0        | -0.023749 |  |  |
|        |      | Shiraz-3T  | 244  | 0        | -0.023749 |  |  |
|        |      | Shiraz-3T  | 244  | 0        | -0.023749 |  |  |
|        |      | Shiraz-3T  | 244  | 0        | -0.023749 |  |  |
|        |      | Shiraz-3T  | 244  | 0        | -0.023749 |  |  |
|        |      | Shiraz-3T  | 244  | 0        | -0.023749 |  |  |
|        |      | Shiraz-3T  | 244  | 0        | -0.023749 |  |  |
|        |      | Shiraz-4T  | 261  | 0        | -0.336249 |  |  |
|        |      | Shiraz-4T  | 261  | 0        | -0.336249 |  |  |
|        |      | Shiraz-4T  | 261  | 0        | -0.336249 |  |  |

|  |            |      |          |           |  |
|--|------------|------|----------|-----------|--|
|  | Shiraz-4T  | 261  | 0        | -0.336249 |  |
|  | Shiraz-4T  | 261  | 0        | -0.336249 |  |
|  | Shiraz-4T  | 261  | 0        | -0.336249 |  |
|  | Shiraz-4T  | 261  | 0        | -0.336249 |  |
|  | Shiraz-4T  | 261  | 0        | -0.336249 |  |
|  | Shiraz-4T  | 261  | 0        | -0.336249 |  |
|  | Shiraz-16T | 295  | 0.591657 | 0         |  |
|  | Shiraz-16T | 295  | 0.591657 | 0         |  |
|  | Shiraz-16T | 295  | 0.591657 | 0         |  |
|  | Shiraz-16T | 295  | 0.591657 | 0         |  |
|  | Shiraz-16T | 295  | 0.591657 | 0         |  |
|  | Shiraz-16T | 295  | 0.591657 | 0         |  |
|  | Shiraz-16T | 295  | 0.591657 | 0         |  |
|  | Shiraz-16T | 295  | 0.591657 | 0         |  |
|  | Shiraz-16T | 295  | 0.591657 | 0         |  |
|  | Shiraz-16T | 295  | 0.591657 | 0         |  |
|  | Shiraz-36T | 433  | 0        | -0.803961 |  |
|  | Shiraz-36T | 433  | 0        | -0.803961 |  |
|  | Shiraz-36T | 433  | 0        | -0.803961 |  |
|  | Shiraz-36T | 433  | 0        | -0.803961 |  |
|  | Shiraz-36T | 433  | 0        | -0.803961 |  |
|  | Shiraz-36T | 433  | 0        | -0.803961 |  |
|  | Shiraz-36T | 433  | 0        | -0.803961 |  |
|  | Shiraz-36T | 433  | 0        | -0.803961 |  |
|  | Shiraz-36T | 433  | 0        | -0.803961 |  |
|  | Shiraz-36T | 433  | 0        | -0.803961 |  |
|  | Shiraz-44T | 899  | 0        | -1.09697  |  |
|  | Shiraz-44T | 899  | 0        | -1.09697  |  |
|  | Shiraz-44T | 899  | 0        | -1.09697  |  |
|  | Shiraz-44T | 899  | 0        | -1.09697  |  |
|  | Shiraz-44T | 899  | 0        | -1.09697  |  |
|  | Shiraz-44T | 899  | 0        | -1.09697  |  |
|  | Shiraz-44T | 899  | 0        | -1.09697  |  |
|  | Shiraz-44T | 899  | 0        | -1.09697  |  |
|  | Shiraz-44T | 899  | 0        | -1.09697  |  |
|  | Shiraz-44T | 899  | 0        | -1.09697  |  |
|  | Shiraz-44T | 904  | 0        | -0.625526 |  |
|  | Shiraz-44T | 904  | 0        | -0.625526 |  |
|  | Shiraz-44T | 904  | 0        | -0.625526 |  |
|  | Shiraz-44T | 904  | 0        | -0.625526 |  |
|  | Shiraz-44T | 904  | 0        | -0.625526 |  |
|  | Shiraz-44T | 904  | 0        | -0.625526 |  |
|  | Shiraz-44T | 904  | 0        | -0.625526 |  |
|  | Shiraz-44T | 904  | 0        | -0.625526 |  |
|  | Shiraz-44T | 904  | 0        | -0.625526 |  |
|  | Shiraz-44T | 904  | 0        | -0.625526 |  |
|  | Shiraz-49T | 1170 | 0        | -0.967436 |  |
|  | Shiraz-49T | 1170 | 0        | -0.967436 |  |
|  | Shiraz-49T | 1170 | 0        | -0.967436 |  |
|  | Shiraz-49T | 1170 | 0        | -0.967436 |  |
|  | Shiraz-49T | 1170 | 0        | -0.967436 |  |







|  |            |     |          |           |  |
|--|------------|-----|----------|-----------|--|
|  | Shiraz-3T  | 242 | 0        | -0.336434 |  |
|  | Shiraz-3T  | 242 | 0        | -0.336434 |  |
|  | Shiraz-3T  | 242 | 0        | -0.336434 |  |
|  | Shiraz-3T  | 242 | 0        | -0.336434 |  |
|  | Shiraz-3T  | 242 | 0        | -0.336434 |  |
|  | Shiraz-3T  | 242 | 0        | -0.336434 |  |
|  | Shiraz-3T  | 242 | 0        | -0.336434 |  |
|  | Shiraz-3T  | 242 | 0        | -0.336434 |  |
|  | Shiraz-3T  | 242 | 0        | -0.336434 |  |
|  | Shiraz-3T  | 244 | 0        | -0.023749 |  |
|  | Shiraz-3T  | 244 | 0        | -0.023749 |  |
|  | Shiraz-3T  | 244 | 0        | -0.023749 |  |
|  | Shiraz-3T  | 244 | 0        | -0.023749 |  |
|  | Shiraz-3T  | 244 | 0        | -0.023749 |  |
|  | Shiraz-3T  | 244 | 0        | -0.023749 |  |
|  | Shiraz-3T  | 244 | 0        | -0.023749 |  |
|  | Shiraz-3T  | 244 | 0        | -0.023749 |  |
|  | Shiraz-3T  | 244 | 0        | -0.023749 |  |
|  | Shiraz-4T  | 261 | 0        | -0.336249 |  |
|  | Shiraz-4T  | 261 | 0        | -0.336249 |  |
|  | Shiraz-4T  | 261 | 0        | -0.336249 |  |
|  | Shiraz-4T  | 261 | 0        | -0.336249 |  |
|  | Shiraz-4T  | 261 | 0        | -0.336249 |  |
|  | Shiraz-4T  | 261 | 0        | -0.336249 |  |
|  | Shiraz-4T  | 261 | 0        | -0.336249 |  |
|  | Shiraz-4T  | 261 | 0        | -0.336249 |  |
|  | Shiraz-4T  | 261 | 0        | -0.336249 |  |
|  | Shiraz-16T | 295 | 0.591657 | 0         |  |
|  | Shiraz-16T | 295 | 0.591657 | 0         |  |
|  | Shiraz-16T | 295 | 0.591657 | 0         |  |
|  | Shiraz-16T | 295 | 0.591657 | 0         |  |
|  | Shiraz-16T | 295 | 0.591657 | 0         |  |
|  | Shiraz-16T | 295 | 0.591657 | 0         |  |
|  | Shiraz-16T | 295 | 0.591657 | 0         |  |
|  | Shiraz-16T | 295 | 0.591657 | 0         |  |
|  | Shiraz-16T | 295 | 0.591657 | 0         |  |
|  | Shiraz-36T | 433 | 0        | -0.803961 |  |
|  | Shiraz-36T | 433 | 0        | -0.803961 |  |
|  | Shiraz-36T | 433 | 0        | -0.803961 |  |
|  | Shiraz-36T | 433 | 0        | -0.803961 |  |
|  | Shiraz-36T | 433 | 0        | -0.803961 |  |
|  | Shiraz-36T | 433 | 0        | -0.803961 |  |
|  | Shiraz-36T | 433 | 0        | -0.803961 |  |
|  | Shiraz-36T | 433 | 0        | -0.803961 |  |
|  | Shiraz-36T | 433 | 0        | -0.803961 |  |
|  | Shiraz-44T | 899 | 0        | -1.09697  |  |
|  | Shiraz-44T | 899 | 0        | -1.09697  |  |

|  |            |      |          |           |  |
|--|------------|------|----------|-----------|--|
|  | Shiraz-44T | 899  | 0        | -1.09697  |  |
|  | Shiraz-44T | 899  | 0        | -1.09697  |  |
|  | Shiraz-44T | 899  | 0        | -1.09697  |  |
|  | Shiraz-44T | 899  | 0        | -1.09697  |  |
|  | Shiraz-44T | 899  | 0        | -1.09697  |  |
|  | Shiraz-44T | 899  | 0        | -1.09697  |  |
|  | Shiraz-44T | 899  | 0        | -1.09697  |  |
|  | Shiraz-44T | 904  | 0        | -0.625526 |  |
|  | Shiraz-44T | 904  | 0        | -0.625526 |  |
|  | Shiraz-44T | 904  | 0        | -0.625526 |  |
|  | Shiraz-44T | 904  | 0        | -0.625526 |  |
|  | Shiraz-44T | 904  | 0        | -0.625526 |  |
|  | Shiraz-44T | 904  | 0        | -0.625526 |  |
|  | Shiraz-44T | 904  | 0        | -0.625526 |  |
|  | Shiraz-44T | 904  | 0        | -0.625526 |  |
|  | Shiraz-44T | 904  | 0        | -0.625526 |  |
|  | Shiraz-49T | 1170 | 0        | -0.967436 |  |
|  | Shiraz-49T | 1170 | 0        | -0.967436 |  |
|  | Shiraz-49T | 1170 | 0        | -0.967436 |  |
|  | Shiraz-49T | 1170 | 0        | -0.967436 |  |
|  | Shiraz-49T | 1170 | 0        | -0.967436 |  |
|  | Shiraz-49T | 1170 | 0        | -0.967436 |  |
|  | Shiraz-49T | 1170 | 0        | -0.967436 |  |
|  | Shiraz-49T | 1170 | 0        | -0.967436 |  |
|  | Shiraz-49T | 1170 | 0        | -0.967436 |  |
|  | Shiraz-9T  | 1370 | 0.690073 | 0         |  |
|  | Shiraz-9T  | 1370 | 0.690073 | 0         |  |
|  | Shiraz-9T  | 1370 | 0.690073 | 0         |  |
|  | Shiraz-9T  | 1370 | 0.690073 | 0         |  |
|  | Shiraz-9T  | 1370 | 0.690073 | 0         |  |
|  | Shiraz-9T  | 1370 | 0.690073 | 0         |  |
|  | Shiraz-9T  | 1370 | 0.690073 | 0         |  |
|  | Shiraz-9T  | 1370 | 0.690073 | 0         |  |
|  | Shiraz-9T  | 1370 | 0.690073 | 0         |  |
|  | Shiraz-18T | 1457 | 0.643204 | 0         |  |
|  | Shiraz-18T | 1457 | 0.643204 | 0         |  |
|  | Shiraz-18T | 1457 | 0.643204 | 0         |  |
|  | Shiraz-18T | 1457 | 0.643204 | 0         |  |
|  | Shiraz-18T | 1457 | 0.643204 | 0         |  |
|  | Shiraz-18T | 1457 | 0.643204 | 0         |  |
|  | Shiraz-18T | 1457 | 0.643204 | 0         |  |
|  | Shiraz-18T | 1457 | 0.643204 | 0         |  |
|  | Shiraz-18T | 1457 | 0.643204 | 0         |  |
|  | Shiraz-22T | 1673 | 0.611783 | 0         |  |
|  | Shiraz-22T | 1673 | 0.611783 | 0         |  |
|  | Shiraz-22T | 1673 | 0.611783 | 0         |  |
|  | Shiraz-22T | 1673 | 0.611783 | 0         |  |





|  |            |      |          |           |  |
|--|------------|------|----------|-----------|--|
|  | Shiraz-4T  | 261  | 0        | -0.336249 |  |
|  | Shiraz-16T | 295  | 0.591657 | 0         |  |
|  | Shiraz-16T | 295  | 0.591657 | 0         |  |
|  | Shiraz-16T | 295  | 0.591657 | 0         |  |
|  | Shiraz-16T | 295  | 0.591657 | 0         |  |
|  | Shiraz-16T | 295  | 0.591657 | 0         |  |
|  | Shiraz-16T | 295  | 0.591657 | 0         |  |
|  | Shiraz-16T | 295  | 0.591657 | 0         |  |
|  | Shiraz-16T | 295  | 0.591657 | 0         |  |
|  | Shiraz-16T | 295  | 0.591657 | 0         |  |
|  | Shiraz-36T | 433  | 0        | -0.803961 |  |
|  | Shiraz-36T | 433  | 0        | -0.803961 |  |
|  | Shiraz-36T | 433  | 0        | -0.803961 |  |
|  | Shiraz-36T | 433  | 0        | -0.803961 |  |
|  | Shiraz-36T | 433  | 0        | -0.803961 |  |
|  | Shiraz-36T | 433  | 0        | -0.803961 |  |
|  | Shiraz-36T | 433  | 0        | -0.803961 |  |
|  | Shiraz-36T | 433  | 0        | -0.803961 |  |
|  | Shiraz-36T | 433  | 0        | -0.803961 |  |
|  | Shiraz-36T | 433  | 0        | -0.803961 |  |
|  | Shiraz-44T | 899  | 0        | -1.09697  |  |
|  | Shiraz-44T | 899  | 0        | -1.09697  |  |
|  | Shiraz-44T | 899  | 0        | -1.09697  |  |
|  | Shiraz-44T | 899  | 0        | -1.09697  |  |
|  | Shiraz-44T | 899  | 0        | -1.09697  |  |
|  | Shiraz-44T | 899  | 0        | -1.09697  |  |
|  | Shiraz-44T | 899  | 0        | -1.09697  |  |
|  | Shiraz-44T | 899  | 0        | -1.09697  |  |
|  | Shiraz-44T | 899  | 0        | -1.09697  |  |
|  | Shiraz-44T | 899  | 0        | -1.09697  |  |
|  | Shiraz-44T | 904  | 0        | -0.625526 |  |
|  | Shiraz-44T | 904  | 0        | -0.625526 |  |
|  | Shiraz-44T | 904  | 0        | -0.625526 |  |
|  | Shiraz-44T | 904  | 0        | -0.625526 |  |
|  | Shiraz-44T | 904  | 0        | -0.625526 |  |
|  | Shiraz-44T | 904  | 0        | -0.625526 |  |
|  | Shiraz-44T | 904  | 0        | -0.625526 |  |
|  | Shiraz-44T | 904  | 0        | -0.625526 |  |
|  | Shiraz-44T | 904  | 0        | -0.625526 |  |
|  | Shiraz-44T | 904  | 0        | -0.625526 |  |
|  | Shiraz-49T | 1170 | 0        | -0.967436 |  |
|  | Shiraz-49T | 1170 | 0        | -0.967436 |  |
|  | Shiraz-49T | 1170 | 0        | -0.967436 |  |
|  | Shiraz-49T | 1170 | 0        | -0.967436 |  |
|  | Shiraz-49T | 1170 | 0        | -0.967436 |  |
|  | Shiraz-49T | 1170 | 0        | -0.967436 |  |
|  | Shiraz-49T | 1170 | 0        | -0.967436 |  |
|  | Shiraz-49T | 1170 | 0        | -0.967436 |  |
|  | Shiraz-49T | 1170 | 0        | -0.967436 |  |
|  | Shiraz-49T | 1170 | 0        | -0.967436 |  |
|  | Shiraz-9T  | 1370 | 0.690073 | 0         |  |

|  |  |            |      |          |   |  |  |
|--|--|------------|------|----------|---|--|--|
|  |  | Shiraz-9T  | 1370 | 0.690073 | 0 |  |  |
|  |  | Shiraz-9T  | 1370 | 0.690073 | 0 |  |  |
|  |  | Shiraz-9T  | 1370 | 0.690073 | 0 |  |  |
|  |  | Shiraz-9T  | 1370 | 0.690073 | 0 |  |  |
|  |  | Shiraz-9T  | 1370 | 0.690073 | 0 |  |  |
|  |  | Shiraz-9T  | 1370 | 0.690073 | 0 |  |  |
|  |  | Shiraz-9T  | 1370 | 0.690073 | 0 |  |  |
|  |  | Shiraz-9T  | 1370 | 0.690073 | 0 |  |  |
|  |  | Shiraz-18T | 1457 | 0.643204 | 0 |  |  |
|  |  | Shiraz-18T | 1457 | 0.643204 | 0 |  |  |
|  |  | Shiraz-18T | 1457 | 0.643204 | 0 |  |  |
|  |  | Shiraz-18T | 1457 | 0.643204 | 0 |  |  |
|  |  | Shiraz-18T | 1457 | 0.643204 | 0 |  |  |
|  |  | Shiraz-18T | 1457 | 0.643204 | 0 |  |  |
|  |  | Shiraz-18T | 1457 | 0.643204 | 0 |  |  |
|  |  | Shiraz-18T | 1457 | 0.643204 | 0 |  |  |
|  |  | Shiraz-18T | 1457 | 0.643204 | 0 |  |  |
|  |  | Shiraz-22T | 1673 | 0.611783 | 0 |  |  |
|  |  | Shiraz-22T | 1673 | 0.611783 | 0 |  |  |
|  |  | Shiraz-22T | 1673 | 0.611783 | 0 |  |  |
|  |  | Shiraz-22T | 1673 | 0.611783 | 0 |  |  |
|  |  | Shiraz-22T | 1673 | 0.611783 | 0 |  |  |
|  |  | Shiraz-22T | 1673 | 0.611783 | 0 |  |  |
|  |  | Shiraz-22T | 1673 | 0.611783 | 0 |  |  |
|  |  | Shiraz-22T | 1673 | 0.611783 | 0 |  |  |
|  |  | Shiraz-22T | 1673 | 0.611783 | 0 |  |  |
|  |  | Shiraz-25T | 1719 | 0.472955 | 0 |  |  |
|  |  | Shiraz-25T | 1719 | 0.472955 | 0 |  |  |
|  |  | Shiraz-25T | 1719 | 0.472955 | 0 |  |  |
|  |  | Shiraz-25T | 1719 | 0.472955 | 0 |  |  |
|  |  | Shiraz-25T | 1719 | 0.472955 | 0 |  |  |
|  |  | Shiraz-25T | 1719 | 0.472955 | 0 |  |  |
|  |  | Shiraz-25T | 1719 | 0.472955 | 0 |  |  |
|  |  | Shiraz-25T | 1719 | 0.472955 | 0 |  |  |
|  |  | Shiraz-25T | 1719 | 0.472955 | 0 |  |  |
|  |  | Shiraz-28T | 1762 | 0.562311 | 0 |  |  |
|  |  | Shiraz-28T | 1762 | 0.562311 | 0 |  |  |
|  |  | Shiraz-28T | 1762 | 0.562311 | 0 |  |  |
|  |  | Shiraz-28T | 1762 | 0.562311 | 0 |  |  |
|  |  | Shiraz-28T | 1762 | 0.562311 | 0 |  |  |
|  |  | Shiraz-28T | 1762 | 0.562311 | 0 |  |  |
|  |  | Shiraz-28T | 1762 | 0.562311 | 0 |  |  |
|  |  | Shiraz-28T | 1762 | 0.562311 | 0 |  |  |
|  |  | Shiraz-28T | 1762 | 0.562311 | 0 |  |  |
|  |  | Shiraz-28T | 1762 | 0.562311 | 0 |  |  |
|  |  | Shiraz-29T | 1801 | 0.815343 | 0 |  |  |
|  |  | Shiraz-29T | 1801 | 0.815343 | 0 |  |  |
|  |  | Shiraz-29T | 1801 | 0.815343 | 0 |  |  |

|        |      |            |      |          |           |  |  |
|--------|------|------------|------|----------|-----------|--|--|
|        |      | Shiraz-29T | 1801 | 0.815343 | 0         |  |  |
|        |      | Shiraz-29T | 1801 | 0.815343 | 0         |  |  |
|        |      | Shiraz-29T | 1801 | 0.815343 | 0         |  |  |
|        |      | Shiraz-29T | 1801 | 0.815343 | 0         |  |  |
|        |      | Shiraz-29T | 1801 | 0.815343 | 0         |  |  |
|        |      | Shiraz-29T | 1801 | 0.815343 | 0         |  |  |
|        |      | Shiraz-32T | 1870 | 0.729766 | 0         |  |  |
|        |      | Shiraz-32T | 1870 | 0.729766 | 0         |  |  |
|        |      | Shiraz-32T | 1870 | 0.729766 | 0         |  |  |
|        |      | Shiraz-32T | 1870 | 0.729766 | 0         |  |  |
|        |      | Shiraz-32T | 1870 | 0.729766 | 0         |  |  |
|        |      | Shiraz-32T | 1870 | 0.729766 | 0         |  |  |
|        |      | Shiraz-32T | 1870 | 0.729766 | 0         |  |  |
|        |      | Shiraz-32T | 1870 | 0.729766 | 0         |  |  |
|        |      | Shiraz-32T | 1870 | 0.729766 | 0         |  |  |
|        |      | Shiraz-32T | 1870 | 0.729766 | 0         |  |  |
|        |      | Shiraz-35T | 1933 | 0.488535 | 0         |  |  |
|        |      | Shiraz-35T | 1933 | 0.488535 | 0         |  |  |
|        |      | Shiraz-35T | 1933 | 0.488535 | 0         |  |  |
|        |      | Shiraz-35T | 1933 | 0.488535 | 0         |  |  |
|        |      | Shiraz-35T | 1933 | 0.488535 | 0         |  |  |
|        |      | Shiraz-35T | 1933 | 0.488535 | 0         |  |  |
|        |      | Shiraz-35T | 1933 | 0.488535 | 0         |  |  |
|        |      | Shiraz-35T | 1933 | 0.488535 | 0         |  |  |
|        |      | Shiraz-35T | 1933 | 0.488535 | 0         |  |  |
|        |      | Shiraz-35T | 1933 | 0.488535 | 0         |  |  |
|        |      | Shiraz-35T | 1933 | 0.488535 | 0         |  |  |
|        |      | Shiraz-58T | 2223 | 0.833364 | 0         |  |  |
|        |      | Shiraz-58T | 2223 | 0.833364 | 0         |  |  |
|        |      | Shiraz-58T | 2223 | 0.833364 | 0         |  |  |
|        |      | Shiraz-58T | 2223 | 0.833364 | 0         |  |  |
|        |      | Shiraz-58T | 2223 | 0.833364 | 0         |  |  |
|        |      | Shiraz-58T | 2223 | 0.833364 | 0         |  |  |
|        |      | Shiraz-58T | 2223 | 0.833364 | 0         |  |  |
|        |      | Shiraz-58T | 2223 | 0.833364 | 0         |  |  |
|        |      | Shiraz-58T | 2223 | 0.833364 | 0         |  |  |
|        |      | Shiraz-58T | 2223 | 0.833364 | 0         |  |  |
|        |      | Shiraz-58T | 2223 | 0.833364 | 0         |  |  |
|        |      | Shiraz-71T | 2263 | 0.975531 | 0         |  |  |
|        |      | Shiraz-71T | 2263 | 0.975531 | 0         |  |  |
|        |      | Shiraz-71T | 2263 | 0.975531 | 0         |  |  |
|        |      | Shiraz-71T | 2263 | 0.975531 | 0         |  |  |
|        |      | Shiraz-71T | 2263 | 0.975531 | 0         |  |  |
|        |      | Shiraz-71T | 2263 | 0.975531 | 0         |  |  |
|        |      | Shiraz-71T | 2263 | 0.975531 | 0         |  |  |
|        |      | Shiraz-71T | 2263 | 0.975531 | 0         |  |  |
|        |      | Shiraz-71T | 2263 | 0.975531 | 0         |  |  |
|        |      | Shiraz-71T | 2263 | 0.975531 | 0         |  |  |
|        |      | Shiraz-71T | 2263 | 0.975531 | 0         |  |  |
| CT47A5 | chrX | Shiraz-3T  | 242  | 0        | -0.336434 |  |  |
|        |      | Shiraz-3T  | 242  | 0        | -0.336434 |  |  |
|        |      | Shiraz-3T  | 242  | 0        | -0.336434 |  |  |
|        |      | Shiraz-3T  | 242  | 0        | -0.336434 |  |  |
|        |      | Shiraz-3T  | 242  | 0        | -0.336434 |  |  |







|  |  |            |      |          |   |  |
|--|--|------------|------|----------|---|--|
|  |  | Shiraz-25T | 1719 | 0.472955 | 0 |  |
|  |  | Shiraz-25T | 1719 | 0.472955 | 0 |  |
|  |  | Shiraz-25T | 1719 | 0.472955 | 0 |  |
|  |  | Shiraz-25T | 1719 | 0.472955 | 0 |  |
|  |  | Shiraz-25T | 1719 | 0.472955 | 0 |  |
|  |  | Shiraz-25T | 1719 | 0.472955 | 0 |  |
|  |  | Shiraz-25T | 1719 | 0.472955 | 0 |  |
|  |  | Shiraz-25T | 1719 | 0.472955 | 0 |  |
|  |  | Shiraz-25T | 1719 | 0.472955 | 0 |  |
|  |  | Shiraz-25T | 1719 | 0.472955 | 0 |  |
|  |  | Shiraz-28T | 1762 | 0.562311 | 0 |  |
|  |  | Shiraz-28T | 1762 | 0.562311 | 0 |  |
|  |  | Shiraz-28T | 1762 | 0.562311 | 0 |  |
|  |  | Shiraz-28T | 1762 | 0.562311 | 0 |  |
|  |  | Shiraz-28T | 1762 | 0.562311 | 0 |  |
|  |  | Shiraz-28T | 1762 | 0.562311 | 0 |  |
|  |  | Shiraz-28T | 1762 | 0.562311 | 0 |  |
|  |  | Shiraz-28T | 1762 | 0.562311 | 0 |  |
|  |  | Shiraz-28T | 1762 | 0.562311 | 0 |  |
|  |  | Shiraz-28T | 1762 | 0.562311 | 0 |  |
|  |  | Shiraz-28T | 1762 | 0.562311 | 0 |  |
|  |  | Shiraz-29T | 1801 | 0.815343 | 0 |  |
|  |  | Shiraz-29T | 1801 | 0.815343 | 0 |  |
|  |  | Shiraz-29T | 1801 | 0.815343 | 0 |  |
|  |  | Shiraz-29T | 1801 | 0.815343 | 0 |  |
|  |  | Shiraz-29T | 1801 | 0.815343 | 0 |  |
|  |  | Shiraz-29T | 1801 | 0.815343 | 0 |  |
|  |  | Shiraz-29T | 1801 | 0.815343 | 0 |  |
|  |  | Shiraz-29T | 1801 | 0.815343 | 0 |  |
|  |  | Shiraz-29T | 1801 | 0.815343 | 0 |  |
|  |  | Shiraz-29T | 1801 | 0.815343 | 0 |  |
|  |  | Shiraz-29T | 1801 | 0.815343 | 0 |  |
|  |  | Shiraz-32T | 1870 | 0.729766 | 0 |  |
|  |  | Shiraz-32T | 1870 | 0.729766 | 0 |  |
|  |  | Shiraz-32T | 1870 | 0.729766 | 0 |  |
|  |  | Shiraz-32T | 1870 | 0.729766 | 0 |  |
|  |  | Shiraz-32T | 1870 | 0.729766 | 0 |  |
|  |  | Shiraz-32T | 1870 | 0.729766 | 0 |  |
|  |  | Shiraz-32T | 1870 | 0.729766 | 0 |  |
|  |  | Shiraz-32T | 1870 | 0.729766 | 0 |  |
|  |  | Shiraz-32T | 1870 | 0.729766 | 0 |  |
|  |  | Shiraz-32T | 1870 | 0.729766 | 0 |  |
|  |  | Shiraz-35T | 1933 | 0.488535 | 0 |  |
|  |  | Shiraz-35T | 1933 | 0.488535 | 0 |  |
|  |  | Shiraz-35T | 1933 | 0.488535 | 0 |  |
|  |  | Shiraz-35T | 1933 | 0.488535 | 0 |  |
|  |  | Shiraz-35T | 1933 | 0.488535 | 0 |  |
|  |  | Shiraz-35T | 1933 | 0.488535 | 0 |  |
|  |  | Shiraz-35T | 1933 | 0.488535 | 0 |  |
|  |  | Shiraz-35T | 1933 | 0.488535 | 0 |  |
|  |  | Shiraz-35T | 1933 | 0.488535 | 0 |  |
|  |  | Shiraz-35T | 1933 | 0.488535 | 0 |  |
|  |  | Shiraz-58T | 2223 | 0.833364 | 0 |  |
|  |  | Shiraz-58T | 2223 | 0.833364 | 0 |  |

|  |  |            |      |          |           |  |  |
|--|--|------------|------|----------|-----------|--|--|
|  |  | Shiraz-58T | 2223 | 0.833364 | 0         |  |  |
|  |  | Shiraz-58T | 2223 | 0.833364 | 0         |  |  |
|  |  | Shiraz-58T | 2223 | 0.833364 | 0         |  |  |
|  |  | Shiraz-58T | 2223 | 0.833364 | 0         |  |  |
|  |  | Shiraz-58T | 2223 | 0.833364 | 0         |  |  |
|  |  | Shiraz-58T | 2223 | 0.833364 | 0         |  |  |
|  |  | Shiraz-58T | 2223 | 0.833364 | 0         |  |  |
|  |  | Shiraz-71T | 2263 | 0.975531 | 0         |  |  |
|  |  | Shiraz-71T | 2263 | 0.975531 | 0         |  |  |
|  |  | Shiraz-71T | 2263 | 0.975531 | 0         |  |  |
|  |  | Shiraz-71T | 2263 | 0.975531 | 0         |  |  |
|  |  | Shiraz-71T | 2263 | 0.975531 | 0         |  |  |
|  |  | Shiraz-71T | 2263 | 0.975531 | 0         |  |  |
|  |  | Shiraz-71T | 2263 | 0.975531 | 0         |  |  |
|  |  | Shiraz-71T | 2263 | 0.975531 | 0         |  |  |
|  |  | Shiraz-71T | 2263 | 0.975531 | 0         |  |  |
|  |  | Shiraz-3T  | 242  | 0        | -0.336434 |  |  |
|  |  | Shiraz-3T  | 242  | 0        | -0.336434 |  |  |
|  |  | Shiraz-3T  | 242  | 0        | -0.336434 |  |  |
|  |  | Shiraz-3T  | 242  | 0        | -0.336434 |  |  |
|  |  | Shiraz-3T  | 242  | 0        | -0.336434 |  |  |
|  |  | Shiraz-3T  | 242  | 0        | -0.336434 |  |  |
|  |  | Shiraz-3T  | 242  | 0        | -0.336434 |  |  |
|  |  | Shiraz-3T  | 242  | 0        | -0.336434 |  |  |
|  |  | Shiraz-3T  | 242  | 0        | -0.336434 |  |  |
|  |  | Shiraz-3T  | 244  | 0        | -0.023749 |  |  |
|  |  | Shiraz-3T  | 244  | 0        | -0.023749 |  |  |
|  |  | Shiraz-3T  | 244  | 0        | -0.023749 |  |  |
|  |  | Shiraz-3T  | 244  | 0        | -0.023749 |  |  |
|  |  | Shiraz-3T  | 244  | 0        | -0.023749 |  |  |
|  |  | Shiraz-3T  | 244  | 0        | -0.023749 |  |  |
|  |  | Shiraz-3T  | 244  | 0        | -0.023749 |  |  |
|  |  | Shiraz-3T  | 244  | 0        | -0.023749 |  |  |
|  |  | Shiraz-3T  | 244  | 0        | -0.023749 |  |  |
|  |  | Shiraz-4T  | 261  | 0        | -0.336249 |  |  |
|  |  | Shiraz-4T  | 261  | 0        | -0.336249 |  |  |
|  |  | Shiraz-4T  | 261  | 0        | -0.336249 |  |  |
|  |  | Shiraz-4T  | 261  | 0        | -0.336249 |  |  |
|  |  | Shiraz-4T  | 261  | 0        | -0.336249 |  |  |
|  |  | Shiraz-4T  | 261  | 0        | -0.336249 |  |  |
|  |  | Shiraz-4T  | 261  | 0        | -0.336249 |  |  |
|  |  | Shiraz-4T  | 261  | 0        | -0.336249 |  |  |
|  |  | Shiraz-4T  | 261  | 0        | -0.336249 |  |  |
|  |  | Shiraz-16T | 295  | 0.591657 | 0         |  |  |
|  |  | Shiraz-16T | 295  | 0.591657 | 0         |  |  |
|  |  | Shiraz-16T | 295  | 0.591657 | 0         |  |  |
|  |  | Shiraz-16T | 295  | 0.591657 | 0         |  |  |





|  |  |            |      |          |           |  |  |
|--|--|------------|------|----------|-----------|--|--|
|  |  | Shiraz-29T | 1801 | 0.815343 | 0         |  |  |
|  |  | Shiraz-32T | 1870 | 0.729766 | 0         |  |  |
|  |  | Shiraz-32T | 1870 | 0.729766 | 0         |  |  |
|  |  | Shiraz-32T | 1870 | 0.729766 | 0         |  |  |
|  |  | Shiraz-32T | 1870 | 0.729766 | 0         |  |  |
|  |  | Shiraz-32T | 1870 | 0.729766 | 0         |  |  |
|  |  | Shiraz-32T | 1870 | 0.729766 | 0         |  |  |
|  |  | Shiraz-32T | 1870 | 0.729766 | 0         |  |  |
|  |  | Shiraz-32T | 1870 | 0.729766 | 0         |  |  |
|  |  | Shiraz-35T | 1933 | 0.488535 | 0         |  |  |
|  |  | Shiraz-35T | 1933 | 0.488535 | 0         |  |  |
|  |  | Shiraz-35T | 1933 | 0.488535 | 0         |  |  |
|  |  | Shiraz-35T | 1933 | 0.488535 | 0         |  |  |
|  |  | Shiraz-35T | 1933 | 0.488535 | 0         |  |  |
|  |  | Shiraz-35T | 1933 | 0.488535 | 0         |  |  |
|  |  | Shiraz-35T | 1933 | 0.488535 | 0         |  |  |
|  |  | Shiraz-35T | 1933 | 0.488535 | 0         |  |  |
|  |  | Shiraz-35T | 1933 | 0.488535 | 0         |  |  |
|  |  | Shiraz-58T | 2223 | 0.833364 | 0         |  |  |
|  |  | Shiraz-58T | 2223 | 0.833364 | 0         |  |  |
|  |  | Shiraz-58T | 2223 | 0.833364 | 0         |  |  |
|  |  | Shiraz-58T | 2223 | 0.833364 | 0         |  |  |
|  |  | Shiraz-58T | 2223 | 0.833364 | 0         |  |  |
|  |  | Shiraz-58T | 2223 | 0.833364 | 0         |  |  |
|  |  | Shiraz-58T | 2223 | 0.833364 | 0         |  |  |
|  |  | Shiraz-58T | 2223 | 0.833364 | 0         |  |  |
|  |  | Shiraz-71T | 2263 | 0.975531 | 0         |  |  |
|  |  | Shiraz-71T | 2263 | 0.975531 | 0         |  |  |
|  |  | Shiraz-71T | 2263 | 0.975531 | 0         |  |  |
|  |  | Shiraz-71T | 2263 | 0.975531 | 0         |  |  |
|  |  | Shiraz-71T | 2263 | 0.975531 | 0         |  |  |
|  |  | Shiraz-71T | 2263 | 0.975531 | 0         |  |  |
|  |  | Shiraz-71T | 2263 | 0.975531 | 0         |  |  |
|  |  | Shiraz-71T | 2263 | 0.975531 | 0         |  |  |
|  |  | Shiraz-71T | 2263 | 0.975531 | 0         |  |  |
|  |  | Shiraz-3T  | 242  | 0        | -0.336434 |  |  |
|  |  | Shiraz-3T  | 242  | 0        | -0.336434 |  |  |
|  |  | Shiraz-3T  | 242  | 0        | -0.336434 |  |  |
|  |  | Shiraz-3T  | 242  | 0        | -0.336434 |  |  |
|  |  | Shiraz-3T  | 242  | 0        | -0.336434 |  |  |
|  |  | Shiraz-3T  | 242  | 0        | -0.336434 |  |  |
|  |  | Shiraz-3T  | 242  | 0        | -0.336434 |  |  |
|  |  | Shiraz-3T  | 242  | 0        | -0.336434 |  |  |
|  |  | Shiraz-3T  | 242  | 0        | -0.336434 |  |  |
|  |  | Shiraz-3T  | 244  | 0        | -0.023749 |  |  |

|  |            |     |          |           |  |
|--|------------|-----|----------|-----------|--|
|  | Shiraz-3T  | 244 | 0        | -0.023749 |  |
|  | Shiraz-3T  | 244 | 0        | -0.023749 |  |
|  | Shiraz-3T  | 244 | 0        | -0.023749 |  |
|  | Shiraz-3T  | 244 | 0        | -0.023749 |  |
|  | Shiraz-3T  | 244 | 0        | -0.023749 |  |
|  | Shiraz-3T  | 244 | 0        | -0.023749 |  |
|  | Shiraz-3T  | 244 | 0        | -0.023749 |  |
|  | Shiraz-3T  | 244 | 0        | -0.023749 |  |
|  | Shiraz-4T  | 261 | 0        | -0.336249 |  |
|  | Shiraz-4T  | 261 | 0        | -0.336249 |  |
|  | Shiraz-4T  | 261 | 0        | -0.336249 |  |
|  | Shiraz-4T  | 261 | 0        | -0.336249 |  |
|  | Shiraz-4T  | 261 | 0        | -0.336249 |  |
|  | Shiraz-4T  | 261 | 0        | -0.336249 |  |
|  | Shiraz-4T  | 261 | 0        | -0.336249 |  |
|  | Shiraz-4T  | 261 | 0        | -0.336249 |  |
|  | Shiraz-4T  | 261 | 0        | -0.336249 |  |
|  | Shiraz-16T | 295 | 0.591657 | 0         |  |
|  | Shiraz-16T | 295 | 0.591657 | 0         |  |
|  | Shiraz-16T | 295 | 0.591657 | 0         |  |
|  | Shiraz-16T | 295 | 0.591657 | 0         |  |
|  | Shiraz-16T | 295 | 0.591657 | 0         |  |
|  | Shiraz-16T | 295 | 0.591657 | 0         |  |
|  | Shiraz-16T | 295 | 0.591657 | 0         |  |
|  | Shiraz-16T | 295 | 0.591657 | 0         |  |
|  | Shiraz-16T | 295 | 0.591657 | 0         |  |
|  | Shiraz-36T | 433 | 0        | -0.803961 |  |
|  | Shiraz-36T | 433 | 0        | -0.803961 |  |
|  | Shiraz-36T | 433 | 0        | -0.803961 |  |
|  | Shiraz-36T | 433 | 0        | -0.803961 |  |
|  | Shiraz-36T | 433 | 0        | -0.803961 |  |
|  | Shiraz-36T | 433 | 0        | -0.803961 |  |
|  | Shiraz-36T | 433 | 0        | -0.803961 |  |
|  | Shiraz-36T | 433 | 0        | -0.803961 |  |
|  | Shiraz-36T | 433 | 0        | -0.803961 |  |
|  | Shiraz-44T | 899 | 0        | -1.09697  |  |
|  | Shiraz-44T | 899 | 0        | -1.09697  |  |
|  | Shiraz-44T | 899 | 0        | -1.09697  |  |
|  | Shiraz-44T | 899 | 0        | -1.09697  |  |
|  | Shiraz-44T | 899 | 0        | -1.09697  |  |
|  | Shiraz-44T | 899 | 0        | -1.09697  |  |
|  | Shiraz-44T | 899 | 0        | -1.09697  |  |
|  | Shiraz-44T | 899 | 0        | -1.09697  |  |
|  | Shiraz-44T | 899 | 0        | -1.09697  |  |
|  | Shiraz-44T | 904 | 0        | -0.625526 |  |
|  | Shiraz-44T | 904 | 0        | -0.625526 |  |
|  | Shiraz-44T | 904 | 0        | -0.625526 |  |









|  |            |      |          |           |  |
|--|------------|------|----------|-----------|--|
|  | Shiraz-16T | 295  | 0.591657 | 0         |  |
|  | Shiraz-16T | 295  | 0.591657 | 0         |  |
|  | Shiraz-16T | 295  | 0.591657 | 0         |  |
|  | Shiraz-16T | 295  | 0.591657 | 0         |  |
|  | Shiraz-36T | 433  | 0        | -0.803961 |  |
|  | Shiraz-36T | 433  | 0        | -0.803961 |  |
|  | Shiraz-36T | 433  | 0        | -0.803961 |  |
|  | Shiraz-36T | 433  | 0        | -0.803961 |  |
|  | Shiraz-36T | 433  | 0        | -0.803961 |  |
|  | Shiraz-36T | 433  | 0        | -0.803961 |  |
|  | Shiraz-36T | 433  | 0        | -0.803961 |  |
|  | Shiraz-36T | 433  | 0        | -0.803961 |  |
|  | Shiraz-36T | 433  | 0        | -0.803961 |  |
|  | Shiraz-36T | 433  | 0        | -0.803961 |  |
|  | Shiraz-36T | 433  | 0        | -0.803961 |  |
|  | Shiraz-44T | 899  | 0        | -1.09697  |  |
|  | Shiraz-44T | 899  | 0        | -1.09697  |  |
|  | Shiraz-44T | 899  | 0        | -1.09697  |  |
|  | Shiraz-44T | 899  | 0        | -1.09697  |  |
|  | Shiraz-44T | 899  | 0        | -1.09697  |  |
|  | Shiraz-44T | 899  | 0        | -1.09697  |  |
|  | Shiraz-44T | 899  | 0        | -1.09697  |  |
|  | Shiraz-44T | 899  | 0        | -1.09697  |  |
|  | Shiraz-44T | 899  | 0        | -1.09697  |  |
|  | Shiraz-44T | 899  | 0        | -1.09697  |  |
|  | Shiraz-44T | 904  | 0        | -0.625526 |  |
|  | Shiraz-44T | 904  | 0        | -0.625526 |  |
|  | Shiraz-44T | 904  | 0        | -0.625526 |  |
|  | Shiraz-44T | 904  | 0        | -0.625526 |  |
|  | Shiraz-44T | 904  | 0        | -0.625526 |  |
|  | Shiraz-44T | 904  | 0        | -0.625526 |  |
|  | Shiraz-44T | 904  | 0        | -0.625526 |  |
|  | Shiraz-44T | 904  | 0        | -0.625526 |  |
|  | Shiraz-44T | 904  | 0        | -0.625526 |  |
|  | Shiraz-44T | 904  | 0        | -0.625526 |  |
|  | Shiraz-49T | 1170 | 0        | -0.967436 |  |
|  | Shiraz-49T | 1170 | 0        | -0.967436 |  |
|  | Shiraz-49T | 1170 | 0        | -0.967436 |  |
|  | Shiraz-49T | 1170 | 0        | -0.967436 |  |
|  | Shiraz-49T | 1170 | 0        | -0.967436 |  |
|  | Shiraz-49T | 1170 | 0        | -0.967436 |  |
|  | Shiraz-49T | 1170 | 0        | -0.967436 |  |
|  | Shiraz-49T | 1170 | 0        | -0.967436 |  |
|  | Shiraz-49T | 1170 | 0        | -0.967436 |  |
|  | Shiraz-49T | 1170 | 0        | -0.967436 |  |
|  | Shiraz-9T  | 1370 | 0.690073 | 0         |  |
|  | Shiraz-9T  | 1370 | 0.690073 | 0         |  |
|  | Shiraz-9T  | 1370 | 0.690073 | 0         |  |





|  |            |      |          |           |  |
|--|------------|------|----------|-----------|--|
|  | Shiraz-71T | 2263 | 0.975531 | 0         |  |
|  | Shiraz-71T | 2263 | 0.975531 | 0         |  |
|  | Shiraz-71T | 2263 | 0.975531 | 0         |  |
|  | Shiraz-3T  | 242  | 0        | -0.336434 |  |
|  | Shiraz-3T  | 242  | 0        | -0.336434 |  |
|  | Shiraz-3T  | 242  | 0        | -0.336434 |  |
|  | Shiraz-3T  | 242  | 0        | -0.336434 |  |
|  | Shiraz-3T  | 242  | 0        | -0.336434 |  |
|  | Shiraz-3T  | 242  | 0        | -0.336434 |  |
|  | Shiraz-3T  | 242  | 0        | -0.336434 |  |
|  | Shiraz-3T  | 242  | 0        | -0.336434 |  |
|  | Shiraz-3T  | 242  | 0        | -0.336434 |  |
|  | Shiraz-3T  | 242  | 0        | -0.336434 |  |
|  | Shiraz-3T  | 242  | 0        | -0.336434 |  |
|  | Shiraz-3T  | 242  | 0        | -0.336434 |  |
|  | Shiraz-3T  | 242  | 0        | -0.336434 |  |
|  | Shiraz-3T  | 244  | 0        | -0.023749 |  |
|  | Shiraz-3T  | 244  | 0        | -0.023749 |  |
|  | Shiraz-3T  | 244  | 0        | -0.023749 |  |
|  | Shiraz-3T  | 244  | 0        | -0.023749 |  |
|  | Shiraz-3T  | 244  | 0        | -0.023749 |  |
|  | Shiraz-3T  | 244  | 0        | -0.023749 |  |
|  | Shiraz-3T  | 244  | 0        | -0.023749 |  |
|  | Shiraz-3T  | 244  | 0        | -0.023749 |  |
|  | Shiraz-3T  | 244  | 0        | -0.023749 |  |
|  | Shiraz-3T  | 244  | 0        | -0.023749 |  |
|  | Shiraz-3T  | 244  | 0        | -0.023749 |  |
|  | Shiraz-3T  | 244  | 0        | -0.023749 |  |
|  | Shiraz-3T  | 244  | 0        | -0.023749 |  |
|  | Shiraz-4T  | 261  | 0        | -0.336249 |  |
|  | Shiraz-4T  | 261  | 0        | -0.336249 |  |
|  | Shiraz-4T  | 261  | 0        | -0.336249 |  |
|  | Shiraz-4T  | 261  | 0        | -0.336249 |  |
|  | Shiraz-4T  | 261  | 0        | -0.336249 |  |
|  | Shiraz-4T  | 261  | 0        | -0.336249 |  |
|  | Shiraz-4T  | 261  | 0        | -0.336249 |  |
|  | Shiraz-4T  | 261  | 0        | -0.336249 |  |
|  | Shiraz-4T  | 261  | 0        | -0.336249 |  |
|  | Shiraz-4T  | 261  | 0        | -0.336249 |  |
|  | Shiraz-4T  | 261  | 0        | -0.336249 |  |
|  | Shiraz-4T  | 261  | 0        | -0.336249 |  |
|  | Shiraz-4T  | 261  | 0        | -0.336249 |  |
|  | Shiraz-4T  | 261  | 0        | -0.336249 |  |
|  | Shiraz-16T | 295  | 0.591657 | 0         |  |
|  | Shiraz-16T | 295  | 0.591657 | 0         |  |
|  | Shiraz-16T | 295  | 0.591657 | 0         |  |
|  | Shiraz-16T | 295  | 0.591657 | 0         |  |
|  | Shiraz-16T | 295  | 0.591657 | 0         |  |
|  | Shiraz-16T | 295  | 0.591657 | 0         |  |
|  | Shiraz-16T | 295  | 0.591657 | 0         |  |
|  | Shiraz-16T | 295  | 0.591657 | 0         |  |
|  | Shiraz-16T | 295  | 0.591657 | 0         |  |
|  | Shiraz-16T | 295  | 0.591657 | 0         |  |
|  | Shiraz-16T | 295  | 0.591657 | 0         |  |
|  | Shiraz-16T | 295  | 0.591657 | 0         |  |
|  | Shiraz-16T | 295  | 0.591657 | 0         |  |
|  | Shiraz-36T | 433  | 0        | -0.803961 |  |
|  | Shiraz-36T | 433  | 0        | -0.803961 |  |
|  | Shiraz-36T | 433  | 0        | -0.803961 |  |
|  | Shiraz-36T | 433  | 0        | -0.803961 |  |

|  |  |            |      |          |           |  |  |
|--|--|------------|------|----------|-----------|--|--|
|  |  | Shiraz-36T | 433  | 0        | -0.803961 |  |  |
|  |  | Shiraz-36T | 433  | 0        | -0.803961 |  |  |
|  |  | Shiraz-36T | 433  | 0        | -0.803961 |  |  |
|  |  | Shiraz-36T | 433  | 0        | -0.803961 |  |  |
|  |  | Shiraz-36T | 433  | 0        | -0.803961 |  |  |
|  |  | Shiraz-36T | 433  | 0        | -0.803961 |  |  |
|  |  | Shiraz-44T | 899  | 0        | -1.09697  |  |  |
|  |  | Shiraz-44T | 899  | 0        | -1.09697  |  |  |
|  |  | Shiraz-44T | 899  | 0        | -1.09697  |  |  |
|  |  | Shiraz-44T | 899  | 0        | -1.09697  |  |  |
|  |  | Shiraz-44T | 899  | 0        | -1.09697  |  |  |
|  |  | Shiraz-44T | 899  | 0        | -1.09697  |  |  |
|  |  | Shiraz-44T | 899  | 0        | -1.09697  |  |  |
|  |  | Shiraz-44T | 899  | 0        | -1.09697  |  |  |
|  |  | Shiraz-44T | 899  | 0        | -1.09697  |  |  |
|  |  | Shiraz-44T | 899  | 0        | -1.09697  |  |  |
|  |  | Shiraz-44T | 899  | 0        | -1.09697  |  |  |
|  |  | Shiraz-44T | 899  | 0        | -1.09697  |  |  |
|  |  | Shiraz-44T | 904  | 0        | -0.625526 |  |  |
|  |  | Shiraz-44T | 904  | 0        | -0.625526 |  |  |
|  |  | Shiraz-44T | 904  | 0        | -0.625526 |  |  |
|  |  | Shiraz-44T | 904  | 0        | -0.625526 |  |  |
|  |  | Shiraz-44T | 904  | 0        | -0.625526 |  |  |
|  |  | Shiraz-44T | 904  | 0        | -0.625526 |  |  |
|  |  | Shiraz-44T | 904  | 0        | -0.625526 |  |  |
|  |  | Shiraz-44T | 904  | 0        | -0.625526 |  |  |
|  |  | Shiraz-44T | 904  | 0        | -0.625526 |  |  |
|  |  | Shiraz-44T | 904  | 0        | -0.625526 |  |  |
|  |  | Shiraz-44T | 904  | 0        | -0.625526 |  |  |
|  |  | Shiraz-49T | 1170 | 0        | -0.967436 |  |  |
|  |  | Shiraz-49T | 1170 | 0        | -0.967436 |  |  |
|  |  | Shiraz-49T | 1170 | 0        | -0.967436 |  |  |
|  |  | Shiraz-49T | 1170 | 0        | -0.967436 |  |  |
|  |  | Shiraz-49T | 1170 | 0        | -0.967436 |  |  |
|  |  | Shiraz-49T | 1170 | 0        | -0.967436 |  |  |
|  |  | Shiraz-49T | 1170 | 0        | -0.967436 |  |  |
|  |  | Shiraz-49T | 1170 | 0        | -0.967436 |  |  |
|  |  | Shiraz-49T | 1170 | 0        | -0.967436 |  |  |
|  |  | Shiraz-49T | 1170 | 0        | -0.967436 |  |  |
|  |  | Shiraz-49T | 1170 | 0        | -0.967436 |  |  |
|  |  | Shiraz-9T  | 1370 | 0.690073 | 0         |  |  |
|  |  | Shiraz-9T  | 1370 | 0.690073 | 0         |  |  |
|  |  | Shiraz-9T  | 1370 | 0.690073 | 0         |  |  |
|  |  | Shiraz-9T  | 1370 | 0.690073 | 0         |  |  |
|  |  | Shiraz-9T  | 1370 | 0.690073 | 0         |  |  |
|  |  | Shiraz-9T  | 1370 | 0.690073 | 0         |  |  |
|  |  | Shiraz-9T  | 1370 | 0.690073 | 0         |  |  |
|  |  | Shiraz-9T  | 1370 | 0.690073 | 0         |  |  |
|  |  | Shiraz-9T  | 1370 | 0.690073 | 0         |  |  |
|  |  | Shiraz-9T  | 1370 | 0.690073 | 0         |  |  |
|  |  | Shiraz-9T  | 1370 | 0.690073 | 0         |  |  |
|  |  | Shiraz-18T | 1457 | 0.643204 | 0         |  |  |





|  |  |            |      |          |           |  |  |
|--|--|------------|------|----------|-----------|--|--|
|  |  | Shiraz-29T | 1801 | 0.815343 | 0         |  |  |
|  |  | Shiraz-29T | 1801 | 0.815343 | 0         |  |  |
|  |  | Shiraz-32T | 1870 | 0.729766 | 0         |  |  |
|  |  | Shiraz-32T | 1870 | 0.729766 | 0         |  |  |
|  |  | Shiraz-32T | 1870 | 0.729766 | 0         |  |  |
|  |  | Shiraz-32T | 1870 | 0.729766 | 0         |  |  |
|  |  | Shiraz-32T | 1870 | 0.729766 | 0         |  |  |
|  |  | Shiraz-32T | 1870 | 0.729766 | 0         |  |  |
|  |  | Shiraz-32T | 1870 | 0.729766 | 0         |  |  |
|  |  | Shiraz-32T | 1870 | 0.729766 | 0         |  |  |
|  |  | Shiraz-32T | 1870 | 0.729766 | 0         |  |  |
|  |  | Shiraz-32T | 1870 | 0.729766 | 0         |  |  |
|  |  | Shiraz-32T | 1870 | 0.729766 | 0         |  |  |
|  |  | Shiraz-32T | 1870 | 0.729766 | 0         |  |  |
|  |  | Shiraz-35T | 1933 | 0.488535 | 0         |  |  |
|  |  | Shiraz-35T | 1933 | 0.488535 | 0         |  |  |
|  |  | Shiraz-35T | 1933 | 0.488535 | 0         |  |  |
|  |  | Shiraz-35T | 1933 | 0.488535 | 0         |  |  |
|  |  | Shiraz-35T | 1933 | 0.488535 | 0         |  |  |
|  |  | Shiraz-35T | 1933 | 0.488535 | 0         |  |  |
|  |  | Shiraz-35T | 1933 | 0.488535 | 0         |  |  |
|  |  | Shiraz-35T | 1933 | 0.488535 | 0         |  |  |
|  |  | Shiraz-35T | 1933 | 0.488535 | 0         |  |  |
|  |  | Shiraz-35T | 1933 | 0.488535 | 0         |  |  |
|  |  | Shiraz-35T | 1933 | 0.488535 | 0         |  |  |
|  |  | Shiraz-58T | 2223 | 0.833364 | 0         |  |  |
|  |  | Shiraz-58T | 2223 | 0.833364 | 0         |  |  |
|  |  | Shiraz-58T | 2223 | 0.833364 | 0         |  |  |
|  |  | Shiraz-58T | 2223 | 0.833364 | 0         |  |  |
|  |  | Shiraz-58T | 2223 | 0.833364 | 0         |  |  |
|  |  | Shiraz-58T | 2223 | 0.833364 | 0         |  |  |
|  |  | Shiraz-58T | 2223 | 0.833364 | 0         |  |  |
|  |  | Shiraz-58T | 2223 | 0.833364 | 0         |  |  |
|  |  | Shiraz-58T | 2223 | 0.833364 | 0         |  |  |
|  |  | Shiraz-58T | 2223 | 0.833364 | 0         |  |  |
|  |  | Shiraz-58T | 2223 | 0.833364 | 0         |  |  |
|  |  | Shiraz-71T | 2263 | 0.975531 | 0         |  |  |
|  |  | Shiraz-71T | 2263 | 0.975531 | 0         |  |  |
|  |  | Shiraz-71T | 2263 | 0.975531 | 0         |  |  |
|  |  | Shiraz-71T | 2263 | 0.975531 | 0         |  |  |
|  |  | Shiraz-71T | 2263 | 0.975531 | 0         |  |  |
|  |  | Shiraz-71T | 2263 | 0.975531 | 0         |  |  |
|  |  | Shiraz-71T | 2263 | 0.975531 | 0         |  |  |
|  |  | Shiraz-71T | 2263 | 0.975531 | 0         |  |  |
|  |  | Shiraz-71T | 2263 | 0.975531 | 0         |  |  |
|  |  | Shiraz-71T | 2263 | 0.975531 | 0         |  |  |
|  |  | Shiraz-71T | 2263 | 0.975531 | 0         |  |  |
|  |  | Shiraz-3T  | 242  | 0        | -0.336434 |  |  |
|  |  | Shiraz-3T  | 242  | 0        | -0.336434 |  |  |
|  |  | Shiraz-3T  | 242  | 0        | -0.336434 |  |  |
|  |  | Shiraz-3T  | 242  | 0        | -0.336434 |  |  |
|  |  | Shiraz-3T  | 242  | 0        | -0.336434 |  |  |

|  |            |     |          |           |  |
|--|------------|-----|----------|-----------|--|
|  | Shiraz-3T  | 242 | 0        | -0.336434 |  |
|  | Shiraz-3T  | 242 | 0        | -0.336434 |  |
|  | Shiraz-3T  | 242 | 0        | -0.336434 |  |
|  | Shiraz-3T  | 242 | 0        | -0.336434 |  |
|  | Shiraz-3T  | 242 | 0        | -0.336434 |  |
|  | Shiraz-3T  | 244 | 0        | -0.023749 |  |
|  | Shiraz-3T  | 244 | 0        | -0.023749 |  |
|  | Shiraz-3T  | 244 | 0        | -0.023749 |  |
|  | Shiraz-3T  | 244 | 0        | -0.023749 |  |
|  | Shiraz-3T  | 244 | 0        | -0.023749 |  |
|  | Shiraz-3T  | 244 | 0        | -0.023749 |  |
|  | Shiraz-3T  | 244 | 0        | -0.023749 |  |
|  | Shiraz-3T  | 244 | 0        | -0.023749 |  |
|  | Shiraz-3T  | 244 | 0        | -0.023749 |  |
|  | Shiraz-3T  | 244 | 0        | -0.023749 |  |
|  | Shiraz-3T  | 244 | 0        | -0.023749 |  |
|  | Shiraz-4T  | 261 | 0        | -0.336249 |  |
|  | Shiraz-4T  | 261 | 0        | -0.336249 |  |
|  | Shiraz-4T  | 261 | 0        | -0.336249 |  |
|  | Shiraz-4T  | 261 | 0        | -0.336249 |  |
|  | Shiraz-4T  | 261 | 0        | -0.336249 |  |
|  | Shiraz-4T  | 261 | 0        | -0.336249 |  |
|  | Shiraz-4T  | 261 | 0        | -0.336249 |  |
|  | Shiraz-4T  | 261 | 0        | -0.336249 |  |
|  | Shiraz-4T  | 261 | 0        | -0.336249 |  |
|  | Shiraz-4T  | 261 | 0        | -0.336249 |  |
|  | Shiraz-16T | 295 | 0.591657 | 0         |  |
|  | Shiraz-16T | 295 | 0.591657 | 0         |  |
|  | Shiraz-16T | 295 | 0.591657 | 0         |  |
|  | Shiraz-16T | 295 | 0.591657 | 0         |  |
|  | Shiraz-16T | 295 | 0.591657 | 0         |  |
|  | Shiraz-16T | 295 | 0.591657 | 0         |  |
|  | Shiraz-16T | 295 | 0.591657 | 0         |  |
|  | Shiraz-16T | 295 | 0.591657 | 0         |  |
|  | Shiraz-16T | 295 | 0.591657 | 0         |  |
|  | Shiraz-16T | 295 | 0.591657 | 0         |  |
|  | Shiraz-36T | 433 | 0        | -0.803961 |  |
|  | Shiraz-36T | 433 | 0        | -0.803961 |  |
|  | Shiraz-36T | 433 | 0        | -0.803961 |  |
|  | Shiraz-36T | 433 | 0        | -0.803961 |  |
|  | Shiraz-36T | 433 | 0        | -0.803961 |  |
|  | Shiraz-36T | 433 | 0        | -0.803961 |  |
|  | Shiraz-36T | 433 | 0        | -0.803961 |  |
|  | Shiraz-36T | 433 | 0        | -0.803961 |  |
|  | Shiraz-36T | 433 | 0        | -0.803961 |  |
|  | Shiraz-36T | 433 | 0        | -0.803961 |  |
|  | Shiraz-44T | 899 | 0        | -1.09697  |  |
|  | Shiraz-44T | 899 | 0        | -1.09697  |  |





|        |      |            |      |          |           |  |
|--------|------|------------|------|----------|-----------|--|
|        |      | Shiraz-32T | 1870 | 0.729766 | 0         |  |
|        |      | Shiraz-32T | 1870 | 0.729766 | 0         |  |
|        |      | Shiraz-32T | 1870 | 0.729766 | 0         |  |
|        |      | Shiraz-32T | 1870 | 0.729766 | 0         |  |
|        |      | Shiraz-35T | 1933 | 0.488535 | 0         |  |
|        |      | Shiraz-35T | 1933 | 0.488535 | 0         |  |
|        |      | Shiraz-35T | 1933 | 0.488535 | 0         |  |
|        |      | Shiraz-35T | 1933 | 0.488535 | 0         |  |
|        |      | Shiraz-35T | 1933 | 0.488535 | 0         |  |
|        |      | Shiraz-35T | 1933 | 0.488535 | 0         |  |
|        |      | Shiraz-35T | 1933 | 0.488535 | 0         |  |
|        |      | Shiraz-35T | 1933 | 0.488535 | 0         |  |
|        |      | Shiraz-35T | 1933 | 0.488535 | 0         |  |
|        |      | Shiraz-35T | 1933 | 0.488535 | 0         |  |
|        |      | Shiraz-35T | 1933 | 0.488535 | 0         |  |
|        |      | Shiraz-35T | 1933 | 0.488535 | 0         |  |
|        |      | Shiraz-35T | 1933 | 0.488535 | 0         |  |
|        |      | Shiraz-58T | 2223 | 0.833364 | 0         |  |
|        |      | Shiraz-58T | 2223 | 0.833364 | 0         |  |
|        |      | Shiraz-58T | 2223 | 0.833364 | 0         |  |
|        |      | Shiraz-58T | 2223 | 0.833364 | 0         |  |
|        |      | Shiraz-58T | 2223 | 0.833364 | 0         |  |
|        |      | Shiraz-58T | 2223 | 0.833364 | 0         |  |
|        |      | Shiraz-58T | 2223 | 0.833364 | 0         |  |
|        |      | Shiraz-58T | 2223 | 0.833364 | 0         |  |
|        |      | Shiraz-58T | 2223 | 0.833364 | 0         |  |
|        |      | Shiraz-58T | 2223 | 0.833364 | 0         |  |
|        |      | Shiraz-58T | 2223 | 0.833364 | 0         |  |
|        |      | Shiraz-58T | 2223 | 0.833364 | 0         |  |
|        |      | Shiraz-71T | 2263 | 0.975531 | 0         |  |
|        |      | Shiraz-71T | 2263 | 0.975531 | 0         |  |
|        |      | Shiraz-71T | 2263 | 0.975531 | 0         |  |
|        |      | Shiraz-71T | 2263 | 0.975531 | 0         |  |
|        |      | Shiraz-71T | 2263 | 0.975531 | 0         |  |
|        |      | Shiraz-71T | 2263 | 0.975531 | 0         |  |
|        |      | Shiraz-71T | 2263 | 0.975531 | 0         |  |
|        |      | Shiraz-71T | 2263 | 0.975531 | 0         |  |
|        |      | Shiraz-71T | 2263 | 0.975531 | 0         |  |
|        |      | Shiraz-71T | 2263 | 0.975531 | 0         |  |
|        |      | Shiraz-71T | 2263 | 0.975531 | 0         |  |
|        |      | Shiraz-71T | 2263 | 0.975531 | 0         |  |
| CT47A7 | chrX | Shiraz-3T  | 242  | 0        | -0.336434 |  |
|        |      | Shiraz-3T  | 244  | 0        | -0.023749 |  |
|        |      | Shiraz-4T  | 261  | 0        | -0.336249 |  |
|        |      | Shiraz-16T | 295  | 0.591657 | 0         |  |
|        |      | Shiraz-36T | 433  | 0        | -0.803961 |  |
|        |      | Shiraz-44T | 899  | 0        | -1.09697  |  |
|        |      | Shiraz-44T | 904  | 0        | -0.625526 |  |
|        |      | Shiraz-49T | 1170 | 0        | -0.967436 |  |
|        |      | Shiraz-9T  | 1370 | 0.690073 | 0         |  |
|        |      | Shiraz-18T | 1457 | 0.643204 | 0         |  |
|        |      | Shiraz-22T | 1673 | 0.611783 | 0         |  |
|        |      | Shiraz-25T | 1719 | 0.472955 | 0         |  |
|        |      | Shiraz-28T | 1762 | 0.562311 | 0         |  |





|  |            |      |          |           |  |
|--|------------|------|----------|-----------|--|
|  | Shiraz-44T | 899  | 0        | -1.09697  |  |
|  | Shiraz-44T | 904  | 0        | -0.625526 |  |
|  | Shiraz-44T | 904  | 0        | -0.625526 |  |
|  | Shiraz-44T | 904  | 0        | -0.625526 |  |
|  | Shiraz-44T | 904  | 0        | -0.625526 |  |
|  | Shiraz-44T | 904  | 0        | -0.625526 |  |
|  | Shiraz-44T | 904  | 0        | -0.625526 |  |
|  | Shiraz-44T | 904  | 0        | -0.625526 |  |
|  | Shiraz-44T | 904  | 0        | -0.625526 |  |
|  | Shiraz-49T | 1170 | 0        | -0.967436 |  |
|  | Shiraz-49T | 1170 | 0        | -0.967436 |  |
|  | Shiraz-49T | 1170 | 0        | -0.967436 |  |
|  | Shiraz-49T | 1170 | 0        | -0.967436 |  |
|  | Shiraz-49T | 1170 | 0        | -0.967436 |  |
|  | Shiraz-49T | 1170 | 0        | -0.967436 |  |
|  | Shiraz-49T | 1170 | 0        | -0.967436 |  |
|  | Shiraz-49T | 1170 | 0        | -0.967436 |  |
|  | Shiraz-49T | 1170 | 0        | -0.967436 |  |
|  | Shiraz-9T  | 1370 | 0.690073 | 0         |  |
|  | Shiraz-9T  | 1370 | 0.690073 | 0         |  |
|  | Shiraz-9T  | 1370 | 0.690073 | 0         |  |
|  | Shiraz-9T  | 1370 | 0.690073 | 0         |  |
|  | Shiraz-9T  | 1370 | 0.690073 | 0         |  |
|  | Shiraz-9T  | 1370 | 0.690073 | 0         |  |
|  | Shiraz-9T  | 1370 | 0.690073 | 0         |  |
|  | Shiraz-9T  | 1370 | 0.690073 | 0         |  |
|  | Shiraz-9T  | 1370 | 0.690073 | 0         |  |
|  | Shiraz-18T | 1457 | 0.643204 | 0         |  |
|  | Shiraz-18T | 1457 | 0.643204 | 0         |  |
|  | Shiraz-18T | 1457 | 0.643204 | 0         |  |
|  | Shiraz-18T | 1457 | 0.643204 | 0         |  |
|  | Shiraz-18T | 1457 | 0.643204 | 0         |  |
|  | Shiraz-18T | 1457 | 0.643204 | 0         |  |
|  | Shiraz-18T | 1457 | 0.643204 | 0         |  |
|  | Shiraz-18T | 1457 | 0.643204 | 0         |  |
|  | Shiraz-18T | 1457 | 0.643204 | 0         |  |
|  | Shiraz-22T | 1673 | 0.611783 | 0         |  |
|  | Shiraz-22T | 1673 | 0.611783 | 0         |  |
|  | Shiraz-22T | 1673 | 0.611783 | 0         |  |
|  | Shiraz-22T | 1673 | 0.611783 | 0         |  |
|  | Shiraz-22T | 1673 | 0.611783 | 0         |  |
|  | Shiraz-22T | 1673 | 0.611783 | 0         |  |
|  | Shiraz-22T | 1673 | 0.611783 | 0         |  |
|  | Shiraz-22T | 1673 | 0.611783 | 0         |  |
|  | Shiraz-22T | 1673 | 0.611783 | 0         |  |
|  | Shiraz-25T | 1719 | 0.472955 | 0         |  |



|  |  |            |      |          |   |  |  |
|--|--|------------|------|----------|---|--|--|
|  |  | Shiraz-25T | 1719 | 0.472955 | 0 |  |  |
|  |  | Shiraz-25T | 1719 | 0.472955 | 0 |  |  |
|  |  | Shiraz-25T | 1719 | 0.472955 | 0 |  |  |
|  |  | Shiraz-25T | 1719 | 0.472955 | 0 |  |  |
|  |  | Shiraz-25T | 1719 | 0.472955 | 0 |  |  |
|  |  | Shiraz-25T | 1719 | 0.472955 | 0 |  |  |
|  |  | Shiraz-25T | 1719 | 0.472955 | 0 |  |  |
|  |  | Shiraz-25T | 1719 | 0.472955 | 0 |  |  |
|  |  | Shiraz-28T | 1762 | 0.562311 | 0 |  |  |
|  |  | Shiraz-28T | 1762 | 0.562311 | 0 |  |  |
|  |  | Shiraz-28T | 1762 | 0.562311 | 0 |  |  |
|  |  | Shiraz-28T | 1762 | 0.562311 | 0 |  |  |
|  |  | Shiraz-28T | 1762 | 0.562311 | 0 |  |  |
|  |  | Shiraz-28T | 1762 | 0.562311 | 0 |  |  |
|  |  | Shiraz-28T | 1762 | 0.562311 | 0 |  |  |
|  |  | Shiraz-28T | 1762 | 0.562311 | 0 |  |  |
|  |  | Shiraz-28T | 1762 | 0.562311 | 0 |  |  |
|  |  | Shiraz-28T | 1762 | 0.562311 | 0 |  |  |
|  |  | Shiraz-28T | 1762 | 0.562311 | 0 |  |  |
|  |  | Shiraz-29T | 1801 | 0.815343 | 0 |  |  |
|  |  | Shiraz-29T | 1801 | 0.815343 | 0 |  |  |
|  |  | Shiraz-29T | 1801 | 0.815343 | 0 |  |  |
|  |  | Shiraz-29T | 1801 | 0.815343 | 0 |  |  |
|  |  | Shiraz-29T | 1801 | 0.815343 | 0 |  |  |
|  |  | Shiraz-29T | 1801 | 0.815343 | 0 |  |  |
|  |  | Shiraz-29T | 1801 | 0.815343 | 0 |  |  |
|  |  | Shiraz-29T | 1801 | 0.815343 | 0 |  |  |
|  |  | Shiraz-29T | 1801 | 0.815343 | 0 |  |  |
|  |  | Shiraz-29T | 1801 | 0.815343 | 0 |  |  |
|  |  | Shiraz-32T | 1870 | 0.729766 | 0 |  |  |
|  |  | Shiraz-32T | 1870 | 0.729766 | 0 |  |  |
|  |  | Shiraz-32T | 1870 | 0.729766 | 0 |  |  |
|  |  | Shiraz-32T | 1870 | 0.729766 | 0 |  |  |
|  |  | Shiraz-32T | 1870 | 0.729766 | 0 |  |  |
|  |  | Shiraz-32T | 1870 | 0.729766 | 0 |  |  |
|  |  | Shiraz-32T | 1870 | 0.729766 | 0 |  |  |
|  |  | Shiraz-32T | 1870 | 0.729766 | 0 |  |  |
|  |  | Shiraz-32T | 1870 | 0.729766 | 0 |  |  |
|  |  | Shiraz-32T | 1870 | 0.729766 | 0 |  |  |
|  |  | Shiraz-35T | 1933 | 0.488535 | 0 |  |  |
|  |  | Shiraz-35T | 1933 | 0.488535 | 0 |  |  |
|  |  | Shiraz-35T | 1933 | 0.488535 | 0 |  |  |
|  |  | Shiraz-35T | 1933 | 0.488535 | 0 |  |  |
|  |  | Shiraz-35T | 1933 | 0.488535 | 0 |  |  |
|  |  | Shiraz-35T | 1933 | 0.488535 | 0 |  |  |
|  |  | Shiraz-35T | 1933 | 0.488535 | 0 |  |  |
|  |  | Shiraz-35T | 1933 | 0.488535 | 0 |  |  |
|  |  | Shiraz-35T | 1933 | 0.488535 | 0 |  |  |
|  |  | Shiraz-35T | 1933 | 0.488535 | 0 |  |  |
|  |  | Shiraz-58T | 2223 | 0.833364 | 0 |  |  |
|  |  | Shiraz-58T | 2223 | 0.833364 | 0 |  |  |
|  |  | Shiraz-58T | 2223 | 0.833364 | 0 |  |  |

|  |  |            |      |          |           |  |  |
|--|--|------------|------|----------|-----------|--|--|
|  |  | Shiraz-58T | 2223 | 0.833364 | 0         |  |  |
|  |  | Shiraz-58T | 2223 | 0.833364 | 0         |  |  |
|  |  | Shiraz-58T | 2223 | 0.833364 | 0         |  |  |
|  |  | Shiraz-58T | 2223 | 0.833364 | 0         |  |  |
|  |  | Shiraz-58T | 2223 | 0.833364 | 0         |  |  |
|  |  | Shiraz-58T | 2223 | 0.833364 | 0         |  |  |
|  |  | Shiraz-71T | 2263 | 0.975531 | 0         |  |  |
|  |  | Shiraz-71T | 2263 | 0.975531 | 0         |  |  |
|  |  | Shiraz-71T | 2263 | 0.975531 | 0         |  |  |
|  |  | Shiraz-71T | 2263 | 0.975531 | 0         |  |  |
|  |  | Shiraz-71T | 2263 | 0.975531 | 0         |  |  |
|  |  | Shiraz-71T | 2263 | 0.975531 | 0         |  |  |
|  |  | Shiraz-71T | 2263 | 0.975531 | 0         |  |  |
|  |  | Shiraz-71T | 2263 | 0.975531 | 0         |  |  |
|  |  | Shiraz-71T | 2263 | 0.975531 | 0         |  |  |
|  |  | Shiraz-3T  | 242  | 0        | -0.336434 |  |  |
|  |  | Shiraz-3T  | 242  | 0        | -0.336434 |  |  |
|  |  | Shiraz-3T  | 242  | 0        | -0.336434 |  |  |
|  |  | Shiraz-3T  | 242  | 0        | -0.336434 |  |  |
|  |  | Shiraz-3T  | 242  | 0        | -0.336434 |  |  |
|  |  | Shiraz-3T  | 242  | 0        | -0.336434 |  |  |
|  |  | Shiraz-3T  | 242  | 0        | -0.336434 |  |  |
|  |  | Shiraz-3T  | 242  | 0        | -0.336434 |  |  |
|  |  | Shiraz-3T  | 242  | 0        | -0.336434 |  |  |
|  |  | Shiraz-3T  | 244  | 0        | -0.023749 |  |  |
|  |  | Shiraz-3T  | 244  | 0        | -0.023749 |  |  |
|  |  | Shiraz-3T  | 244  | 0        | -0.023749 |  |  |
|  |  | Shiraz-3T  | 244  | 0        | -0.023749 |  |  |
|  |  | Shiraz-3T  | 244  | 0        | -0.023749 |  |  |
|  |  | Shiraz-3T  | 244  | 0        | -0.023749 |  |  |
|  |  | Shiraz-3T  | 244  | 0        | -0.023749 |  |  |
|  |  | Shiraz-3T  | 244  | 0        | -0.023749 |  |  |
|  |  | Shiraz-3T  | 244  | 0        | -0.023749 |  |  |
|  |  | Shiraz-3T  | 244  | 0        | -0.023749 |  |  |
|  |  | Shiraz-4T  | 261  | 0        | -0.336249 |  |  |
|  |  | Shiraz-4T  | 261  | 0        | -0.336249 |  |  |
|  |  | Shiraz-4T  | 261  | 0        | -0.336249 |  |  |
|  |  | Shiraz-4T  | 261  | 0        | -0.336249 |  |  |
|  |  | Shiraz-4T  | 261  | 0        | -0.336249 |  |  |
|  |  | Shiraz-4T  | 261  | 0        | -0.336249 |  |  |
|  |  | Shiraz-4T  | 261  | 0        | -0.336249 |  |  |
|  |  | Shiraz-4T  | 261  | 0        | -0.336249 |  |  |
|  |  | Shiraz-4T  | 261  | 0        | -0.336249 |  |  |
|  |  | Shiraz-4T  | 261  | 0        | -0.336249 |  |  |
|  |  | Shiraz-16T | 295  | 0.591657 | 0         |  |  |
|  |  | Shiraz-16T | 295  | 0.591657 | 0         |  |  |
|  |  | Shiraz-16T | 295  | 0.591657 | 0         |  |  |
|  |  | Shiraz-16T | 295  | 0.591657 | 0         |  |  |
|  |  | Shiraz-16T | 295  | 0.591657 | 0         |  |  |





|  |  |            |      |          |           |  |  |
|--|--|------------|------|----------|-----------|--|--|
|  |  | Shiraz-32T | 1870 | 0.729766 | 0         |  |  |
|  |  | Shiraz-32T | 1870 | 0.729766 | 0         |  |  |
|  |  | Shiraz-32T | 1870 | 0.729766 | 0         |  |  |
|  |  | Shiraz-32T | 1870 | 0.729766 | 0         |  |  |
|  |  | Shiraz-32T | 1870 | 0.729766 | 0         |  |  |
|  |  | Shiraz-32T | 1870 | 0.729766 | 0         |  |  |
|  |  | Shiraz-32T | 1870 | 0.729766 | 0         |  |  |
|  |  | Shiraz-32T | 1870 | 0.729766 | 0         |  |  |
|  |  | Shiraz-32T | 1870 | 0.729766 | 0         |  |  |
|  |  | Shiraz-35T | 1933 | 0.488535 | 0         |  |  |
|  |  | Shiraz-35T | 1933 | 0.488535 | 0         |  |  |
|  |  | Shiraz-35T | 1933 | 0.488535 | 0         |  |  |
|  |  | Shiraz-35T | 1933 | 0.488535 | 0         |  |  |
|  |  | Shiraz-35T | 1933 | 0.488535 | 0         |  |  |
|  |  | Shiraz-35T | 1933 | 0.488535 | 0         |  |  |
|  |  | Shiraz-35T | 1933 | 0.488535 | 0         |  |  |
|  |  | Shiraz-35T | 1933 | 0.488535 | 0         |  |  |
|  |  | Shiraz-35T | 1933 | 0.488535 | 0         |  |  |
|  |  | Shiraz-58T | 2223 | 0.833364 | 0         |  |  |
|  |  | Shiraz-58T | 2223 | 0.833364 | 0         |  |  |
|  |  | Shiraz-58T | 2223 | 0.833364 | 0         |  |  |
|  |  | Shiraz-58T | 2223 | 0.833364 | 0         |  |  |
|  |  | Shiraz-58T | 2223 | 0.833364 | 0         |  |  |
|  |  | Shiraz-58T | 2223 | 0.833364 | 0         |  |  |
|  |  | Shiraz-58T | 2223 | 0.833364 | 0         |  |  |
|  |  | Shiraz-58T | 2223 | 0.833364 | 0         |  |  |
|  |  | Shiraz-58T | 2223 | 0.833364 | 0         |  |  |
|  |  | Shiraz-71T | 2263 | 0.975531 | 0         |  |  |
|  |  | Shiraz-71T | 2263 | 0.975531 | 0         |  |  |
|  |  | Shiraz-71T | 2263 | 0.975531 | 0         |  |  |
|  |  | Shiraz-71T | 2263 | 0.975531 | 0         |  |  |
|  |  | Shiraz-71T | 2263 | 0.975531 | 0         |  |  |
|  |  | Shiraz-71T | 2263 | 0.975531 | 0         |  |  |
|  |  | Shiraz-71T | 2263 | 0.975531 | 0         |  |  |
|  |  | Shiraz-71T | 2263 | 0.975531 | 0         |  |  |
|  |  | Shiraz-71T | 2263 | 0.975531 | 0         |  |  |
|  |  | Shiraz-3T  | 242  | 0        | -0.336434 |  |  |
|  |  | Shiraz-3T  | 242  | 0        | -0.336434 |  |  |
|  |  | Shiraz-3T  | 242  | 0        | -0.336434 |  |  |
|  |  | Shiraz-3T  | 242  | 0        | -0.336434 |  |  |
|  |  | Shiraz-3T  | 242  | 0        | -0.336434 |  |  |
|  |  | Shiraz-3T  | 242  | 0        | -0.336434 |  |  |
|  |  | Shiraz-3T  | 242  | 0        | -0.336434 |  |  |
|  |  | Shiraz-3T  | 242  | 0        | -0.336434 |  |  |
|  |  | Shiraz-3T  | 242  | 0        | -0.336434 |  |  |
|  |  | Shiraz-3T  | 244  | 0        | -0.023749 |  |  |
|  |  | Shiraz-3T  | 244  | 0        | -0.023749 |  |  |

|  |            |     |          |           |  |
|--|------------|-----|----------|-----------|--|
|  | Shiraz-3T  | 244 | 0        | -0.023749 |  |
|  | Shiraz-3T  | 244 | 0        | -0.023749 |  |
|  | Shiraz-3T  | 244 | 0        | -0.023749 |  |
|  | Shiraz-3T  | 244 | 0        | -0.023749 |  |
|  | Shiraz-3T  | 244 | 0        | -0.023749 |  |
|  | Shiraz-3T  | 244 | 0        | -0.023749 |  |
|  | Shiraz-3T  | 244 | 0        | -0.023749 |  |
|  | Shiraz-4T  | 261 | 0        | -0.336249 |  |
|  | Shiraz-4T  | 261 | 0        | -0.336249 |  |
|  | Shiraz-4T  | 261 | 0        | -0.336249 |  |
|  | Shiraz-4T  | 261 | 0        | -0.336249 |  |
|  | Shiraz-4T  | 261 | 0        | -0.336249 |  |
|  | Shiraz-4T  | 261 | 0        | -0.336249 |  |
|  | Shiraz-4T  | 261 | 0        | -0.336249 |  |
|  | Shiraz-4T  | 261 | 0        | -0.336249 |  |
|  | Shiraz-4T  | 261 | 0        | -0.336249 |  |
|  | Shiraz-4T  | 261 | 0        | -0.336249 |  |
|  | Shiraz-16T | 295 | 0.591657 | 0         |  |
|  | Shiraz-16T | 295 | 0.591657 | 0         |  |
|  | Shiraz-16T | 295 | 0.591657 | 0         |  |
|  | Shiraz-16T | 295 | 0.591657 | 0         |  |
|  | Shiraz-16T | 295 | 0.591657 | 0         |  |
|  | Shiraz-16T | 295 | 0.591657 | 0         |  |
|  | Shiraz-16T | 295 | 0.591657 | 0         |  |
|  | Shiraz-16T | 295 | 0.591657 | 0         |  |
|  | Shiraz-16T | 295 | 0.591657 | 0         |  |
|  | Shiraz-16T | 295 | 0.591657 | 0         |  |
|  | Shiraz-36T | 433 | 0        | -0.803961 |  |
|  | Shiraz-36T | 433 | 0        | -0.803961 |  |
|  | Shiraz-36T | 433 | 0        | -0.803961 |  |
|  | Shiraz-36T | 433 | 0        | -0.803961 |  |
|  | Shiraz-36T | 433 | 0        | -0.803961 |  |
|  | Shiraz-36T | 433 | 0        | -0.803961 |  |
|  | Shiraz-36T | 433 | 0        | -0.803961 |  |
|  | Shiraz-36T | 433 | 0        | -0.803961 |  |
|  | Shiraz-36T | 433 | 0        | -0.803961 |  |
|  | Shiraz-36T | 433 | 0        | -0.803961 |  |
|  | Shiraz-44T | 899 | 0        | -1.09697  |  |
|  | Shiraz-44T | 899 | 0        | -1.09697  |  |
|  | Shiraz-44T | 899 | 0        | -1.09697  |  |
|  | Shiraz-44T | 899 | 0        | -1.09697  |  |
|  | Shiraz-44T | 899 | 0        | -1.09697  |  |
|  | Shiraz-44T | 899 | 0        | -1.09697  |  |
|  | Shiraz-44T | 899 | 0        | -1.09697  |  |
|  | Shiraz-44T | 899 | 0        | -1.09697  |  |
|  | Shiraz-44T | 899 | 0        | -1.09697  |  |
|  | Shiraz-44T | 899 | 0        | -1.09697  |  |
|  | Shiraz-44T | 904 | 0        | -0.625526 |  |
|  | Shiraz-44T | 904 | 0        | -0.625526 |  |
|  | Shiraz-44T | 904 | 0        | -0.625526 |  |
|  | Shiraz-44T | 904 | 0        | -0.625526 |  |







|        |      |            |      |          |           |  |  |
|--------|------|------------|------|----------|-----------|--|--|
|        |      | Shiraz-58T | 2223 | 0.833364 | 0         |  |  |
|        |      | Shiraz-71T | 2263 | 0.975531 | 0         |  |  |
|        |      | Shiraz-71T | 2263 | 0.975531 | 0         |  |  |
|        |      | Shiraz-71T | 2263 | 0.975531 | 0         |  |  |
|        |      | Shiraz-71T | 2263 | 0.975531 | 0         |  |  |
|        |      | Shiraz-71T | 2263 | 0.975531 | 0         |  |  |
|        |      | Shiraz-71T | 2263 | 0.975531 | 0         |  |  |
|        |      | Shiraz-71T | 2263 | 0.975531 | 0         |  |  |
|        |      | Shiraz-71T | 2263 | 0.975531 | 0         |  |  |
|        |      | Shiraz-71T | 2263 | 0.975531 | 0         |  |  |
| CT47A9 | chrX | Shiraz-3T  | 242  | 0        | -0.336434 |  |  |
|        |      | Shiraz-3T  | 242  | 0        | -0.336434 |  |  |
|        |      | Shiraz-3T  | 242  | 0        | -0.336434 |  |  |
|        |      | Shiraz-3T  | 242  | 0        | -0.336434 |  |  |
|        |      | Shiraz-3T  | 242  | 0        | -0.336434 |  |  |
|        |      | Shiraz-3T  | 242  | 0        | -0.336434 |  |  |
|        |      | Shiraz-3T  | 242  | 0        | -0.336434 |  |  |
|        |      | Shiraz-3T  | 242  | 0        | -0.336434 |  |  |
|        |      | Shiraz-3T  | 242  | 0        | -0.336434 |  |  |
|        |      | Shiraz-3T  | 244  | 0        | -0.023749 |  |  |
|        |      | Shiraz-3T  | 244  | 0        | -0.023749 |  |  |
|        |      | Shiraz-3T  | 244  | 0        | -0.023749 |  |  |
|        |      | Shiraz-3T  | 244  | 0        | -0.023749 |  |  |
|        |      | Shiraz-3T  | 244  | 0        | -0.023749 |  |  |
|        |      | Shiraz-3T  | 244  | 0        | -0.023749 |  |  |
|        |      | Shiraz-3T  | 244  | 0        | -0.023749 |  |  |
|        |      | Shiraz-3T  | 244  | 0        | -0.023749 |  |  |
|        |      | Shiraz-3T  | 244  | 0        | -0.023749 |  |  |
|        |      | Shiraz-4T  | 261  | 0        | -0.336249 |  |  |
|        |      | Shiraz-4T  | 261  | 0        | -0.336249 |  |  |
|        |      | Shiraz-4T  | 261  | 0        | -0.336249 |  |  |
|        |      | Shiraz-4T  | 261  | 0        | -0.336249 |  |  |
|        |      | Shiraz-4T  | 261  | 0        | -0.336249 |  |  |
|        |      | Shiraz-4T  | 261  | 0        | -0.336249 |  |  |
|        |      | Shiraz-4T  | 261  | 0        | -0.336249 |  |  |
|        |      | Shiraz-4T  | 261  | 0        | -0.336249 |  |  |
|        |      | Shiraz-4T  | 261  | 0        | -0.336249 |  |  |
|        |      | Shiraz-16T | 295  | 0.591657 | 0         |  |  |
|        |      | Shiraz-16T | 295  | 0.591657 | 0         |  |  |
|        |      | Shiraz-16T | 295  | 0.591657 | 0         |  |  |
|        |      | Shiraz-16T | 295  | 0.591657 | 0         |  |  |
|        |      | Shiraz-16T | 295  | 0.591657 | 0         |  |  |
|        |      | Shiraz-16T | 295  | 0.591657 | 0         |  |  |
|        |      | Shiraz-16T | 295  | 0.591657 | 0         |  |  |
|        |      | Shiraz-16T | 295  | 0.591657 | 0         |  |  |
|        |      | Shiraz-16T | 295  | 0.591657 | 0         |  |  |
|        |      | Shiraz-36T | 433  | 0        | -0.803961 |  |  |

|  |  |            |      |          |           |  |  |
|--|--|------------|------|----------|-----------|--|--|
|  |  | Shiraz-36T | 433  | 0        | -0.803961 |  |  |
|  |  | Shiraz-36T | 433  | 0        | -0.803961 |  |  |
|  |  | Shiraz-36T | 433  | 0        | -0.803961 |  |  |
|  |  | Shiraz-36T | 433  | 0        | -0.803961 |  |  |
|  |  | Shiraz-36T | 433  | 0        | -0.803961 |  |  |
|  |  | Shiraz-36T | 433  | 0        | -0.803961 |  |  |
|  |  | Shiraz-36T | 433  | 0        | -0.803961 |  |  |
|  |  | Shiraz-36T | 433  | 0        | -0.803961 |  |  |
|  |  | Shiraz-44T | 899  | 0        | -1.09697  |  |  |
|  |  | Shiraz-44T | 899  | 0        | -1.09697  |  |  |
|  |  | Shiraz-44T | 899  | 0        | -1.09697  |  |  |
|  |  | Shiraz-44T | 899  | 0        | -1.09697  |  |  |
|  |  | Shiraz-44T | 899  | 0        | -1.09697  |  |  |
|  |  | Shiraz-44T | 899  | 0        | -1.09697  |  |  |
|  |  | Shiraz-44T | 899  | 0        | -1.09697  |  |  |
|  |  | Shiraz-44T | 899  | 0        | -1.09697  |  |  |
|  |  | Shiraz-44T | 899  | 0        | -1.09697  |  |  |
|  |  | Shiraz-44T | 899  | 0        | -1.09697  |  |  |
|  |  | Shiraz-44T | 899  | 0        | -1.09697  |  |  |
|  |  | Shiraz-44T | 904  | 0        | -0.625526 |  |  |
|  |  | Shiraz-44T | 904  | 0        | -0.625526 |  |  |
|  |  | Shiraz-44T | 904  | 0        | -0.625526 |  |  |
|  |  | Shiraz-44T | 904  | 0        | -0.625526 |  |  |
|  |  | Shiraz-44T | 904  | 0        | -0.625526 |  |  |
|  |  | Shiraz-44T | 904  | 0        | -0.625526 |  |  |
|  |  | Shiraz-44T | 904  | 0        | -0.625526 |  |  |
|  |  | Shiraz-44T | 904  | 0        | -0.625526 |  |  |
|  |  | Shiraz-44T | 904  | 0        | -0.625526 |  |  |
|  |  | Shiraz-49T | 1170 | 0        | -0.967436 |  |  |
|  |  | Shiraz-49T | 1170 | 0        | -0.967436 |  |  |
|  |  | Shiraz-49T | 1170 | 0        | -0.967436 |  |  |
|  |  | Shiraz-49T | 1170 | 0        | -0.967436 |  |  |
|  |  | Shiraz-49T | 1170 | 0        | -0.967436 |  |  |
|  |  | Shiraz-49T | 1170 | 0        | -0.967436 |  |  |
|  |  | Shiraz-49T | 1170 | 0        | -0.967436 |  |  |
|  |  | Shiraz-49T | 1170 | 0        | -0.967436 |  |  |
|  |  | Shiraz-49T | 1170 | 0        | -0.967436 |  |  |
|  |  | Shiraz-9T  | 1370 | 0.690073 | 0         |  |  |
|  |  | Shiraz-9T  | 1370 | 0.690073 | 0         |  |  |
|  |  | Shiraz-9T  | 1370 | 0.690073 | 0         |  |  |
|  |  | Shiraz-9T  | 1370 | 0.690073 | 0         |  |  |
|  |  | Shiraz-9T  | 1370 | 0.690073 | 0         |  |  |
|  |  | Shiraz-9T  | 1370 | 0.690073 | 0         |  |  |
|  |  | Shiraz-9T  | 1370 | 0.690073 | 0         |  |  |
|  |  | Shiraz-9T  | 1370 | 0.690073 | 0         |  |  |
|  |  | Shiraz-9T  | 1370 | 0.690073 | 0         |  |  |
|  |  | Shiraz-9T  | 1370 | 0.690073 | 0         |  |  |
|  |  | Shiraz-18T | 1457 | 0.643204 | 0         |  |  |
|  |  | Shiraz-18T | 1457 | 0.643204 | 0         |  |  |
|  |  | Shiraz-18T | 1457 | 0.643204 | 0         |  |  |







|  |            |      |          |           |  |
|--|------------|------|----------|-----------|--|
|  | Shiraz-49T | 1170 | 0        | -0.967436 |  |
|  | Shiraz-49T | 1170 | 0        | -0.967436 |  |
|  | Shiraz-49T | 1170 | 0        | -0.967436 |  |
|  | Shiraz-49T | 1170 | 0        | -0.967436 |  |
|  | Shiraz-49T | 1170 | 0        | -0.967436 |  |
|  | Shiraz-49T | 1170 | 0        | -0.967436 |  |
|  | Shiraz-49T | 1170 | 0        | -0.967436 |  |
|  | Shiraz-49T | 1170 | 0        | -0.967436 |  |
|  | Shiraz-49T | 1170 | 0        | -0.967436 |  |
|  | Shiraz-9T  | 1370 | 0.690073 | 0         |  |
|  | Shiraz-9T  | 1370 | 0.690073 | 0         |  |
|  | Shiraz-9T  | 1370 | 0.690073 | 0         |  |
|  | Shiraz-9T  | 1370 | 0.690073 | 0         |  |
|  | Shiraz-9T  | 1370 | 0.690073 | 0         |  |
|  | Shiraz-9T  | 1370 | 0.690073 | 0         |  |
|  | Shiraz-9T  | 1370 | 0.690073 | 0         |  |
|  | Shiraz-9T  | 1370 | 0.690073 | 0         |  |
|  | Shiraz-9T  | 1370 | 0.690073 | 0         |  |
|  | Shiraz-9T  | 1370 | 0.690073 | 0         |  |
|  | Shiraz-18T | 1457 | 0.643204 | 0         |  |
|  | Shiraz-18T | 1457 | 0.643204 | 0         |  |
|  | Shiraz-18T | 1457 | 0.643204 | 0         |  |
|  | Shiraz-18T | 1457 | 0.643204 | 0         |  |
|  | Shiraz-18T | 1457 | 0.643204 | 0         |  |
|  | Shiraz-18T | 1457 | 0.643204 | 0         |  |
|  | Shiraz-18T | 1457 | 0.643204 | 0         |  |
|  | Shiraz-18T | 1457 | 0.643204 | 0         |  |
|  | Shiraz-18T | 1457 | 0.643204 | 0         |  |
|  | Shiraz-18T | 1457 | 0.643204 | 0         |  |
|  | Shiraz-22T | 1673 | 0.611783 | 0         |  |
|  | Shiraz-22T | 1673 | 0.611783 | 0         |  |
|  | Shiraz-22T | 1673 | 0.611783 | 0         |  |
|  | Shiraz-22T | 1673 | 0.611783 | 0         |  |
|  | Shiraz-22T | 1673 | 0.611783 | 0         |  |
|  | Shiraz-22T | 1673 | 0.611783 | 0         |  |
|  | Shiraz-22T | 1673 | 0.611783 | 0         |  |
|  | Shiraz-22T | 1673 | 0.611783 | 0         |  |
|  | Shiraz-22T | 1673 | 0.611783 | 0         |  |
|  | Shiraz-22T | 1673 | 0.611783 | 0         |  |
|  | Shiraz-25T | 1719 | 0.472955 | 0         |  |
|  | Shiraz-25T | 1719 | 0.472955 | 0         |  |
|  | Shiraz-25T | 1719 | 0.472955 | 0         |  |
|  | Shiraz-25T | 1719 | 0.472955 | 0         |  |
|  | Shiraz-25T | 1719 | 0.472955 | 0         |  |
|  | Shiraz-25T | 1719 | 0.472955 | 0         |  |
|  | Shiraz-25T | 1719 | 0.472955 | 0         |  |
|  | Shiraz-25T | 1719 | 0.472955 | 0         |  |
|  | Shiraz-25T | 1719 | 0.472955 | 0         |  |
|  | Shiraz-25T | 1719 | 0.472955 | 0         |  |
|  | Shiraz-28T | 1762 | 0.562311 | 0         |  |
|  | Shiraz-28T | 1762 | 0.562311 | 0         |  |

|  |  |            |      |          |   |  |  |
|--|--|------------|------|----------|---|--|--|
|  |  | Shiraz-28T | 1762 | 0.562311 | 0 |  |  |
|  |  | Shiraz-28T | 1762 | 0.562311 | 0 |  |  |
|  |  | Shiraz-28T | 1762 | 0.562311 | 0 |  |  |
|  |  | Shiraz-28T | 1762 | 0.562311 | 0 |  |  |
|  |  | Shiraz-28T | 1762 | 0.562311 | 0 |  |  |
|  |  | Shiraz-28T | 1762 | 0.562311 | 0 |  |  |
|  |  | Shiraz-28T | 1762 | 0.562311 | 0 |  |  |
|  |  | Shiraz-29T | 1801 | 0.815343 | 0 |  |  |
|  |  | Shiraz-29T | 1801 | 0.815343 | 0 |  |  |
|  |  | Shiraz-29T | 1801 | 0.815343 | 0 |  |  |
|  |  | Shiraz-29T | 1801 | 0.815343 | 0 |  |  |
|  |  | Shiraz-29T | 1801 | 0.815343 | 0 |  |  |
|  |  | Shiraz-29T | 1801 | 0.815343 | 0 |  |  |
|  |  | Shiraz-29T | 1801 | 0.815343 | 0 |  |  |
|  |  | Shiraz-29T | 1801 | 0.815343 | 0 |  |  |
|  |  | Shiraz-29T | 1801 | 0.815343 | 0 |  |  |
|  |  | Shiraz-29T | 1801 | 0.815343 | 0 |  |  |
|  |  | Shiraz-32T | 1870 | 0.729766 | 0 |  |  |
|  |  | Shiraz-32T | 1870 | 0.729766 | 0 |  |  |
|  |  | Shiraz-32T | 1870 | 0.729766 | 0 |  |  |
|  |  | Shiraz-32T | 1870 | 0.729766 | 0 |  |  |
|  |  | Shiraz-32T | 1870 | 0.729766 | 0 |  |  |
|  |  | Shiraz-32T | 1870 | 0.729766 | 0 |  |  |
|  |  | Shiraz-32T | 1870 | 0.729766 | 0 |  |  |
|  |  | Shiraz-32T | 1870 | 0.729766 | 0 |  |  |
|  |  | Shiraz-32T | 1870 | 0.729766 | 0 |  |  |
|  |  | Shiraz-32T | 1870 | 0.729766 | 0 |  |  |
|  |  | Shiraz-35T | 1933 | 0.488535 | 0 |  |  |
|  |  | Shiraz-35T | 1933 | 0.488535 | 0 |  |  |
|  |  | Shiraz-35T | 1933 | 0.488535 | 0 |  |  |
|  |  | Shiraz-35T | 1933 | 0.488535 | 0 |  |  |
|  |  | Shiraz-35T | 1933 | 0.488535 | 0 |  |  |
|  |  | Shiraz-35T | 1933 | 0.488535 | 0 |  |  |
|  |  | Shiraz-35T | 1933 | 0.488535 | 0 |  |  |
|  |  | Shiraz-35T | 1933 | 0.488535 | 0 |  |  |
|  |  | Shiraz-35T | 1933 | 0.488535 | 0 |  |  |
|  |  | Shiraz-35T | 1933 | 0.488535 | 0 |  |  |
|  |  | Shiraz-58T | 2223 | 0.833364 | 0 |  |  |
|  |  | Shiraz-58T | 2223 | 0.833364 | 0 |  |  |
|  |  | Shiraz-58T | 2223 | 0.833364 | 0 |  |  |
|  |  | Shiraz-58T | 2223 | 0.833364 | 0 |  |  |
|  |  | Shiraz-58T | 2223 | 0.833364 | 0 |  |  |
|  |  | Shiraz-58T | 2223 | 0.833364 | 0 |  |  |
|  |  | Shiraz-58T | 2223 | 0.833364 | 0 |  |  |
|  |  | Shiraz-58T | 2223 | 0.833364 | 0 |  |  |
|  |  | Shiraz-58T | 2223 | 0.833364 | 0 |  |  |
|  |  | Shiraz-58T | 2223 | 0.833364 | 0 |  |  |
|  |  | Shiraz-71T | 2263 | 0.975531 | 0 |  |  |
|  |  | Shiraz-71T | 2263 | 0.975531 | 0 |  |  |
|  |  | Shiraz-71T | 2263 | 0.975531 | 0 |  |  |
|  |  | Shiraz-71T | 2263 | 0.975531 | 0 |  |  |







|  |  |            |      |          |   |  |  |
|--|--|------------|------|----------|---|--|--|
|  |  | Shiraz-18T | 1457 | 0.643204 | 0 |  |  |
|  |  | Shiraz-22T | 1673 | 0.611783 | 0 |  |  |
|  |  | Shiraz-22T | 1673 | 0.611783 | 0 |  |  |
|  |  | Shiraz-22T | 1673 | 0.611783 | 0 |  |  |
|  |  | Shiraz-22T | 1673 | 0.611783 | 0 |  |  |
|  |  | Shiraz-22T | 1673 | 0.611783 | 0 |  |  |
|  |  | Shiraz-22T | 1673 | 0.611783 | 0 |  |  |
|  |  | Shiraz-22T | 1673 | 0.611783 | 0 |  |  |
|  |  | Shiraz-22T | 1673 | 0.611783 | 0 |  |  |
|  |  | Shiraz-25T | 1719 | 0.472955 | 0 |  |  |
|  |  | Shiraz-25T | 1719 | 0.472955 | 0 |  |  |
|  |  | Shiraz-25T | 1719 | 0.472955 | 0 |  |  |
|  |  | Shiraz-25T | 1719 | 0.472955 | 0 |  |  |
|  |  | Shiraz-25T | 1719 | 0.472955 | 0 |  |  |
|  |  | Shiraz-25T | 1719 | 0.472955 | 0 |  |  |
|  |  | Shiraz-25T | 1719 | 0.472955 | 0 |  |  |
|  |  | Shiraz-25T | 1719 | 0.472955 | 0 |  |  |
|  |  | Shiraz-25T | 1719 | 0.472955 | 0 |  |  |
|  |  | Shiraz-25T | 1719 | 0.472955 | 0 |  |  |
|  |  | Shiraz-28T | 1762 | 0.562311 | 0 |  |  |
|  |  | Shiraz-28T | 1762 | 0.562311 | 0 |  |  |
|  |  | Shiraz-28T | 1762 | 0.562311 | 0 |  |  |
|  |  | Shiraz-28T | 1762 | 0.562311 | 0 |  |  |
|  |  | Shiraz-28T | 1762 | 0.562311 | 0 |  |  |
|  |  | Shiraz-28T | 1762 | 0.562311 | 0 |  |  |
|  |  | Shiraz-28T | 1762 | 0.562311 | 0 |  |  |
|  |  | Shiraz-28T | 1762 | 0.562311 | 0 |  |  |
|  |  | Shiraz-28T | 1762 | 0.562311 | 0 |  |  |
|  |  | Shiraz-28T | 1762 | 0.562311 | 0 |  |  |
|  |  | Shiraz-29T | 1801 | 0.815343 | 0 |  |  |
|  |  | Shiraz-29T | 1801 | 0.815343 | 0 |  |  |
|  |  | Shiraz-29T | 1801 | 0.815343 | 0 |  |  |
|  |  | Shiraz-29T | 1801 | 0.815343 | 0 |  |  |
|  |  | Shiraz-29T | 1801 | 0.815343 | 0 |  |  |
|  |  | Shiraz-29T | 1801 | 0.815343 | 0 |  |  |
|  |  | Shiraz-29T | 1801 | 0.815343 | 0 |  |  |
|  |  | Shiraz-29T | 1801 | 0.815343 | 0 |  |  |
|  |  | Shiraz-29T | 1801 | 0.815343 | 0 |  |  |
|  |  | Shiraz-29T | 1801 | 0.815343 | 0 |  |  |
|  |  | Shiraz-32T | 1870 | 0.729766 | 0 |  |  |
|  |  | Shiraz-32T | 1870 | 0.729766 | 0 |  |  |
|  |  | Shiraz-32T | 1870 | 0.729766 | 0 |  |  |
|  |  | Shiraz-32T | 1870 | 0.729766 | 0 |  |  |
|  |  | Shiraz-32T | 1870 | 0.729766 | 0 |  |  |
|  |  | Shiraz-32T | 1870 | 0.729766 | 0 |  |  |
|  |  | Shiraz-32T | 1870 | 0.729766 | 0 |  |  |
|  |  | Shiraz-32T | 1870 | 0.729766 | 0 |  |  |
|  |  | Shiraz-32T | 1870 | 0.729766 | 0 |  |  |
|  |  | Shiraz-32T | 1870 | 0.729766 | 0 |  |  |
|  |  | Shiraz-35T | 1933 | 0.488535 | 0 |  |  |

|        |      |            |      |          |           |  |  |
|--------|------|------------|------|----------|-----------|--|--|
|        |      | Shiraz-35T | 1933 | 0.488535 | 0         |  |  |
|        |      | Shiraz-35T | 1933 | 0.488535 | 0         |  |  |
|        |      | Shiraz-35T | 1933 | 0.488535 | 0         |  |  |
|        |      | Shiraz-35T | 1933 | 0.488535 | 0         |  |  |
|        |      | Shiraz-35T | 1933 | 0.488535 | 0         |  |  |
|        |      | Shiraz-35T | 1933 | 0.488535 | 0         |  |  |
|        |      | Shiraz-35T | 1933 | 0.488535 | 0         |  |  |
|        |      | Shiraz-35T | 1933 | 0.488535 | 0         |  |  |
|        |      | Shiraz-58T | 2223 | 0.833364 | 0         |  |  |
|        |      | Shiraz-58T | 2223 | 0.833364 | 0         |  |  |
|        |      | Shiraz-58T | 2223 | 0.833364 | 0         |  |  |
|        |      | Shiraz-58T | 2223 | 0.833364 | 0         |  |  |
|        |      | Shiraz-58T | 2223 | 0.833364 | 0         |  |  |
|        |      | Shiraz-58T | 2223 | 0.833364 | 0         |  |  |
|        |      | Shiraz-58T | 2223 | 0.833364 | 0         |  |  |
|        |      | Shiraz-58T | 2223 | 0.833364 | 0         |  |  |
|        |      | Shiraz-58T | 2223 | 0.833364 | 0         |  |  |
|        |      | Shiraz-71T | 2263 | 0.975531 | 0         |  |  |
|        |      | Shiraz-71T | 2263 | 0.975531 | 0         |  |  |
|        |      | Shiraz-71T | 2263 | 0.975531 | 0         |  |  |
|        |      | Shiraz-71T | 2263 | 0.975531 | 0         |  |  |
|        |      | Shiraz-71T | 2263 | 0.975531 | 0         |  |  |
|        |      | Shiraz-71T | 2263 | 0.975531 | 0         |  |  |
|        |      | Shiraz-71T | 2263 | 0.975531 | 0         |  |  |
|        |      | Shiraz-71T | 2263 | 0.975531 | 0         |  |  |
|        |      | Shiraz-71T | 2263 | 0.975531 | 0         |  |  |
|        |      | Shiraz-71T | 2263 | 0.975531 | 0         |  |  |
| CT47B1 | chrX | Shiraz-3T  | 242  | 0        | -0.336434 |  |  |
|        |      | Shiraz-3T  | 244  | 0        | -0.023749 |  |  |
|        |      | Shiraz-4T  | 261  | 0        | -0.336249 |  |  |
|        |      | Shiraz-16T | 295  | 0.591657 | 0         |  |  |
|        |      | Shiraz-36T | 433  | 0        | -0.803961 |  |  |
|        |      | Shiraz-44T | 899  | 0        | -1.09697  |  |  |
|        |      | Shiraz-44T | 904  | 0        | -0.625526 |  |  |
|        |      | Shiraz-49T | 1170 | 0        | -0.967436 |  |  |
|        |      | Shiraz-9T  | 1370 | 0.690073 | 0         |  |  |
|        |      | Shiraz-18T | 1457 | 0.643204 | 0         |  |  |
|        |      | Shiraz-22T | 1673 | 0.611783 | 0         |  |  |
|        |      | Shiraz-25T | 1719 | 0.472955 | 0         |  |  |
|        |      | Shiraz-28T | 1762 | 0.562311 | 0         |  |  |
|        |      | Shiraz-29T | 1801 | 0.815343 | 0         |  |  |
|        |      | Shiraz-32T | 1870 | 0.729766 | 0         |  |  |
|        |      | Shiraz-35T | 1933 | 0.488535 | 0         |  |  |
|        |      | Shiraz-58T | 2223 | 0.833364 | 0         |  |  |
|        |      | Shiraz-71T | 2263 | 0.975531 | 0         |  |  |
|        |      | Shiraz-3T  | 242  | 0        | -0.336434 |  |  |
|        |      | Shiraz-3T  | 244  | 0        | -0.023749 |  |  |
|        |      | Shiraz-4T  | 261  | 0        | -0.336249 |  |  |

|        |      |            |      |          |           |  |  |
|--------|------|------------|------|----------|-----------|--|--|
|        |      | Shiraz-16T | 295  | 0.591657 | 0         |  |  |
|        |      | Shiraz-36T | 433  | 0        | -0.803961 |  |  |
|        |      | Shiraz-44T | 899  | 0        | -1.09697  |  |  |
|        |      | Shiraz-44T | 904  | 0        | -0.625526 |  |  |
|        |      | Shiraz-49T | 1170 | 0        | -0.967436 |  |  |
|        |      | Shiraz-9T  | 1370 | 0.690073 | 0         |  |  |
|        |      | Shiraz-18T | 1457 | 0.643204 | 0         |  |  |
|        |      | Shiraz-22T | 1673 | 0.611783 | 0         |  |  |
|        |      | Shiraz-25T | 1719 | 0.472955 | 0         |  |  |
|        |      | Shiraz-28T | 1762 | 0.562311 | 0         |  |  |
|        |      | Shiraz-29T | 1801 | 0.815343 | 0         |  |  |
|        |      | Shiraz-32T | 1870 | 0.729766 | 0         |  |  |
|        |      | Shiraz-35T | 1933 | 0.488535 | 0         |  |  |
|        |      | Shiraz-58T | 2223 | 0.833364 | 0         |  |  |
|        |      | Shiraz-71T | 2263 | 0.975531 | 0         |  |  |
|        |      | Shiraz-3T  | 242  | 0        | -0.336434 |  |  |
|        |      | Shiraz-3T  | 244  | 0        | -0.023749 |  |  |
|        |      | Shiraz-4T  | 261  | 0        | -0.336249 |  |  |
|        |      | Shiraz-16T | 295  | 0.591657 | 0         |  |  |
|        |      | Shiraz-36T | 433  | 0        | -0.803961 |  |  |
|        |      | Shiraz-44T | 899  | 0        | -1.09697  |  |  |
|        |      | Shiraz-44T | 904  | 0        | -0.625526 |  |  |
|        |      | Shiraz-49T | 1170 | 0        | -0.967436 |  |  |
|        |      | Shiraz-9T  | 1370 | 0.690073 | 0         |  |  |
|        |      | Shiraz-18T | 1457 | 0.643204 | 0         |  |  |
|        |      | Shiraz-22T | 1673 | 0.611783 | 0         |  |  |
|        |      | Shiraz-25T | 1719 | 0.472955 | 0         |  |  |
|        |      | Shiraz-28T | 1762 | 0.562311 | 0         |  |  |
|        |      | Shiraz-29T | 1801 | 0.815343 | 0         |  |  |
|        |      | Shiraz-32T | 1870 | 0.729766 | 0         |  |  |
|        |      | Shiraz-35T | 1933 | 0.488535 | 0         |  |  |
|        |      | Shiraz-58T | 2223 | 0.833364 | 0         |  |  |
|        |      | Shiraz-71T | 2263 | 0.975531 | 0         |  |  |
| CTAG1A | chrX | Shiraz-3T  | 246  | 0.531858 | 0         |  |  |
|        |      | Shiraz-3T  | 246  | 0.531858 | 0         |  |  |
|        |      | Shiraz-4T  | 261  | 0        | -0.336249 |  |  |
|        |      | Shiraz-4T  | 261  | 0        | -0.336249 |  |  |
|        |      | Shiraz-16T | 295  | 0.591657 | 0         |  |  |
|        |      | Shiraz-16T | 295  | 0.591657 | 0         |  |  |
|        |      | Shiraz-36T | 433  | 0        | -0.803961 |  |  |
|        |      | Shiraz-36T | 433  | 0        | -0.803961 |  |  |
|        |      | Shiraz-49T | 1170 | 0        | -0.967436 |  |  |
|        |      | Shiraz-49T | 1170 | 0        | -0.967436 |  |  |
|        |      | Shiraz-9T  | 1370 | 0.690073 | 0         |  |  |
|        |      | Shiraz-9T  | 1370 | 0.690073 | 0         |  |  |
|        |      | Shiraz-9T  | 1371 | 1.292392 | 0         |  |  |
|        |      | Shiraz-9T  | 1371 | 1.292392 | 0         |  |  |

|  |  |            |      |          |           |  |  |
|--|--|------------|------|----------|-----------|--|--|
|  |  | Shiraz-18T | 1457 | 0.643204 | 0         |  |  |
|  |  | Shiraz-18T | 1457 | 0.643204 | 0         |  |  |
|  |  | Shiraz-22T | 1673 | 0.611783 | 0         |  |  |
|  |  | Shiraz-22T | 1673 | 0.611783 | 0         |  |  |
|  |  | Shiraz-22T | 1678 | 0.911625 | 0         |  |  |
|  |  | Shiraz-22T | 1678 | 0.911625 | 0         |  |  |
|  |  | Shiraz-25T | 1719 | 0.472955 | 0         |  |  |
|  |  | Shiraz-25T | 1719 | 0.472955 | 0         |  |  |
|  |  | Shiraz-28T | 1762 | 0.562311 | 0         |  |  |
|  |  | Shiraz-28T | 1762 | 0.562311 | 0         |  |  |
|  |  | Shiraz-29T | 1801 | 0.815343 | 0         |  |  |
|  |  | Shiraz-29T | 1801 | 0.815343 | 0         |  |  |
|  |  | Shiraz-32T | 1870 | 0.729766 | 0         |  |  |
|  |  | Shiraz-32T | 1870 | 0.729766 | 0         |  |  |
|  |  | Shiraz-32T | 1872 | 1.504553 | 0         |  |  |
|  |  | Shiraz-32T | 1872 | 1.504553 | 0         |  |  |
|  |  | Shiraz-35T | 1933 | 0.488535 | 0         |  |  |
|  |  | Shiraz-35T | 1933 | 0.488535 | 0         |  |  |
|  |  | Shiraz-38T | 2011 | 0        | -0.406024 |  |  |
|  |  | Shiraz-38T | 2011 | 0        | -0.406024 |  |  |
|  |  | Shiraz-53T | 2115 | 0.427728 | 0         |  |  |
|  |  | Shiraz-53T | 2115 | 0.427728 | 0         |  |  |
|  |  | Shiraz-58T | 2223 | 0.833364 | 0         |  |  |
|  |  | Shiraz-58T | 2223 | 0.833364 | 0         |  |  |
|  |  | Shiraz-58T | 2226 | 1.074663 | 0         |  |  |
|  |  | Shiraz-58T | 2226 | 1.074663 | 0         |  |  |
|  |  | Shiraz-71T | 2263 | 0.975531 | 0         |  |  |
|  |  | Shiraz-71T | 2263 | 0.975531 | 0         |  |  |
|  |  | Shiraz-3T  | 246  | 0.531858 | 0         |  |  |
|  |  | Shiraz-3T  | 246  | 0.531858 | 0         |  |  |
|  |  | Shiraz-4T  | 261  | 0        | -0.336249 |  |  |
|  |  | Shiraz-4T  | 261  | 0        | -0.336249 |  |  |
|  |  | Shiraz-16T | 295  | 0.591657 | 0         |  |  |
|  |  | Shiraz-16T | 295  | 0.591657 | 0         |  |  |
|  |  | Shiraz-36T | 433  | 0        | -0.803961 |  |  |
|  |  | Shiraz-36T | 433  | 0        | -0.803961 |  |  |
|  |  | Shiraz-49T | 1170 | 0        | -0.967436 |  |  |
|  |  | Shiraz-49T | 1170 | 0        | -0.967436 |  |  |
|  |  | Shiraz-9T  | 1370 | 0.690073 | 0         |  |  |
|  |  | Shiraz-9T  | 1370 | 0.690073 | 0         |  |  |
|  |  | Shiraz-9T  | 1371 | 1.292392 | 0         |  |  |
|  |  | Shiraz-9T  | 1371 | 1.292392 | 0         |  |  |
|  |  | Shiraz-18T | 1457 | 0.643204 | 0         |  |  |
|  |  | Shiraz-18T | 1457 | 0.643204 | 0         |  |  |
|  |  | Shiraz-22T | 1673 | 0.611783 | 0         |  |  |
|  |  | Shiraz-22T | 1673 | 0.611783 | 0         |  |  |
|  |  | Shiraz-22T | 1678 | 0.911625 | 0         |  |  |

|  |  |            |      |          |           |  |  |
|--|--|------------|------|----------|-----------|--|--|
|  |  | Shiraz-22T | 1678 | 0.911625 | 0         |  |  |
|  |  | Shiraz-25T | 1719 | 0.472955 | 0         |  |  |
|  |  | Shiraz-25T | 1719 | 0.472955 | 0         |  |  |
|  |  | Shiraz-28T | 1762 | 0.562311 | 0         |  |  |
|  |  | Shiraz-28T | 1762 | 0.562311 | 0         |  |  |
|  |  | Shiraz-29T | 1801 | 0.815343 | 0         |  |  |
|  |  | Shiraz-29T | 1801 | 0.815343 | 0         |  |  |
|  |  | Shiraz-32T | 1870 | 0.729766 | 0         |  |  |
|  |  | Shiraz-32T | 1870 | 0.729766 | 0         |  |  |
|  |  | Shiraz-32T | 1872 | 1.504553 | 0         |  |  |
|  |  | Shiraz-32T | 1872 | 1.504553 | 0         |  |  |
|  |  | Shiraz-35T | 1933 | 0.488535 | 0         |  |  |
|  |  | Shiraz-35T | 1933 | 0.488535 | 0         |  |  |
|  |  | Shiraz-38T | 2011 | 0        | -0.406024 |  |  |
|  |  | Shiraz-38T | 2011 | 0        | -0.406024 |  |  |
|  |  | Shiraz-53T | 2115 | 0.427728 | 0         |  |  |
|  |  | Shiraz-53T | 2115 | 0.427728 | 0         |  |  |
|  |  | Shiraz-58T | 2223 | 0.833364 | 0         |  |  |
|  |  | Shiraz-58T | 2223 | 0.833364 | 0         |  |  |
|  |  | Shiraz-58T | 2226 | 1.074663 | 0         |  |  |
|  |  | Shiraz-58T | 2226 | 1.074663 | 0         |  |  |
|  |  | Shiraz-71T | 2263 | 0.975531 | 0         |  |  |
|  |  | Shiraz-71T | 2263 | 0.975531 | 0         |  |  |
|  |  | Shiraz-3T  | 246  | 0.531858 | 0         |  |  |
|  |  | Shiraz-3T  | 246  | 0.531858 | 0         |  |  |
|  |  | Shiraz-4T  | 261  | 0        | -0.336249 |  |  |
|  |  | Shiraz-4T  | 261  | 0        | -0.336249 |  |  |
|  |  | Shiraz-16T | 295  | 0.591657 | 0         |  |  |
|  |  | Shiraz-16T | 295  | 0.591657 | 0         |  |  |
|  |  | Shiraz-36T | 433  | 0        | -0.803961 |  |  |
|  |  | Shiraz-36T | 433  | 0        | -0.803961 |  |  |
|  |  | Shiraz-49T | 1170 | 0        | -0.967436 |  |  |
|  |  | Shiraz-49T | 1170 | 0        | -0.967436 |  |  |
|  |  | Shiraz-9T  | 1370 | 0.690073 | 0         |  |  |
|  |  | Shiraz-9T  | 1370 | 0.690073 | 0         |  |  |
|  |  | Shiraz-9T  | 1371 | 1.292392 | 0         |  |  |
|  |  | Shiraz-9T  | 1371 | 1.292392 | 0         |  |  |
|  |  | Shiraz-18T | 1457 | 0.643204 | 0         |  |  |
|  |  | Shiraz-18T | 1457 | 0.643204 | 0         |  |  |
|  |  | Shiraz-22T | 1673 | 0.611783 | 0         |  |  |
|  |  | Shiraz-22T | 1673 | 0.611783 | 0         |  |  |
|  |  | Shiraz-22T | 1678 | 0.911625 | 0         |  |  |
|  |  | Shiraz-22T | 1678 | 0.911625 | 0         |  |  |
|  |  | Shiraz-25T | 1719 | 0.472955 | 0         |  |  |
|  |  | Shiraz-25T | 1719 | 0.472955 | 0         |  |  |
|  |  | Shiraz-28T | 1762 | 0.562311 | 0         |  |  |
|  |  | Shiraz-28T | 1762 | 0.562311 | 0         |  |  |

|        |      |            |      |          |           |  |
|--------|------|------------|------|----------|-----------|--|
|        |      | Shiraz-29T | 1801 | 0.815343 | 0         |  |
|        |      | Shiraz-29T | 1801 | 0.815343 | 0         |  |
|        |      | Shiraz-32T | 1870 | 0.729766 | 0         |  |
|        |      | Shiraz-32T | 1870 | 0.729766 | 0         |  |
|        |      | Shiraz-32T | 1872 | 1.504553 | 0         |  |
|        |      | Shiraz-32T | 1872 | 1.504553 | 0         |  |
|        |      | Shiraz-35T | 1933 | 0.488535 | 0         |  |
|        |      | Shiraz-35T | 1933 | 0.488535 | 0         |  |
|        |      | Shiraz-38T | 2011 | 0        | -0.406024 |  |
|        |      | Shiraz-38T | 2011 | 0        | -0.406024 |  |
|        |      | Shiraz-53T | 2115 | 0.427728 | 0         |  |
|        |      | Shiraz-53T | 2115 | 0.427728 | 0         |  |
|        |      | Shiraz-58T | 2223 | 0.833364 | 0         |  |
|        |      | Shiraz-58T | 2223 | 0.833364 | 0         |  |
|        |      | Shiraz-58T | 2226 | 1.074663 | 0         |  |
|        |      | Shiraz-58T | 2226 | 1.074663 | 0         |  |
|        |      | Shiraz-71T | 2263 | 0.975531 | 0         |  |
|        |      | Shiraz-71T | 2263 | 0.975531 | 0         |  |
| CTAG1B | chrX | Shiraz-3T  | 246  | 0.531858 | 0         |  |
|        |      | Shiraz-3T  | 246  | 0.531858 | 0         |  |
|        |      | Shiraz-4T  | 261  | 0        | -0.336249 |  |
|        |      | Shiraz-4T  | 261  | 0        | -0.336249 |  |
|        |      | Shiraz-16T | 295  | 0.591657 | 0         |  |
|        |      | Shiraz-16T | 295  | 0.591657 | 0         |  |
|        |      | Shiraz-36T | 433  | 0        | -0.803961 |  |
|        |      | Shiraz-36T | 433  | 0        | -0.803961 |  |
|        |      | Shiraz-49T | 1170 | 0        | -0.967436 |  |
|        |      | Shiraz-49T | 1170 | 0        | -0.967436 |  |
|        |      | Shiraz-9T  | 1370 | 0.690073 | 0         |  |
|        |      | Shiraz-9T  | 1370 | 0.690073 | 0         |  |
|        |      | Shiraz-9T  | 1371 | 1.292392 | 0         |  |
|        |      | Shiraz-9T  | 1371 | 1.292392 | 0         |  |
|        |      | Shiraz-18T | 1457 | 0.643204 | 0         |  |
|        |      | Shiraz-18T | 1457 | 0.643204 | 0         |  |
|        |      | Shiraz-22T | 1673 | 0.611783 | 0         |  |
|        |      | Shiraz-22T | 1673 | 0.611783 | 0         |  |
|        |      | Shiraz-22T | 1678 | 0.911625 | 0         |  |
|        |      | Shiraz-22T | 1678 | 0.911625 | 0         |  |
|        |      | Shiraz-25T | 1719 | 0.472955 | 0         |  |
|        |      | Shiraz-25T | 1719 | 0.472955 | 0         |  |
|        |      | Shiraz-28T | 1762 | 0.562311 | 0         |  |
|        |      | Shiraz-28T | 1762 | 0.562311 | 0         |  |
|        |      | Shiraz-29T | 1801 | 0.815343 | 0         |  |
|        |      | Shiraz-29T | 1801 | 0.815343 | 0         |  |
|        |      | Shiraz-32T | 1870 | 0.729766 | 0         |  |
|        |      | Shiraz-32T | 1870 | 0.729766 | 0         |  |
|        |      | Shiraz-32T | 1872 | 1.504553 | 0         |  |

|  |  |            |      |          |           |  |
|--|--|------------|------|----------|-----------|--|
|  |  | Shiraz-32T | 1872 | 1.504553 | 0         |  |
|  |  | Shiraz-35T | 1933 | 0.488535 | 0         |  |
|  |  | Shiraz-35T | 1933 | 0.488535 | 0         |  |
|  |  | Shiraz-38T | 2011 | 0        | -0.406024 |  |
|  |  | Shiraz-38T | 2011 | 0        | -0.406024 |  |
|  |  | Shiraz-53T | 2115 | 0.427728 | 0         |  |
|  |  | Shiraz-53T | 2115 | 0.427728 | 0         |  |
|  |  | Shiraz-58T | 2223 | 0.833364 | 0         |  |
|  |  | Shiraz-58T | 2223 | 0.833364 | 0         |  |
|  |  | Shiraz-58T | 2226 | 1.074663 | 0         |  |
|  |  | Shiraz-58T | 2226 | 1.074663 | 0         |  |
|  |  | Shiraz-71T | 2263 | 0.975531 | 0         |  |
|  |  | Shiraz-71T | 2263 | 0.975531 | 0         |  |
|  |  | Shiraz-3T  | 246  | 0.531858 | 0         |  |
|  |  | Shiraz-3T  | 246  | 0.531858 | 0         |  |
|  |  | Shiraz-4T  | 261  | 0        | -0.336249 |  |
|  |  | Shiraz-4T  | 261  | 0        | -0.336249 |  |
|  |  | Shiraz-16T | 295  | 0.591657 | 0         |  |
|  |  | Shiraz-16T | 295  | 0.591657 | 0         |  |
|  |  | Shiraz-36T | 433  | 0        | -0.803961 |  |
|  |  | Shiraz-36T | 433  | 0        | -0.803961 |  |
|  |  | Shiraz-49T | 1170 | 0        | -0.967436 |  |
|  |  | Shiraz-49T | 1170 | 0        | -0.967436 |  |
|  |  | Shiraz-9T  | 1370 | 0.690073 | 0         |  |
|  |  | Shiraz-9T  | 1370 | 0.690073 | 0         |  |
|  |  | Shiraz-9T  | 1371 | 1.292392 | 0         |  |
|  |  | Shiraz-9T  | 1371 | 1.292392 | 0         |  |
|  |  | Shiraz-18T | 1457 | 0.643204 | 0         |  |
|  |  | Shiraz-18T | 1457 | 0.643204 | 0         |  |
|  |  | Shiraz-22T | 1673 | 0.611783 | 0         |  |
|  |  | Shiraz-22T | 1673 | 0.611783 | 0         |  |
|  |  | Shiraz-22T | 1678 | 0.911625 | 0         |  |
|  |  | Shiraz-22T | 1678 | 0.911625 | 0         |  |
|  |  | Shiraz-25T | 1719 | 0.472955 | 0         |  |
|  |  | Shiraz-25T | 1719 | 0.472955 | 0         |  |
|  |  | Shiraz-28T | 1762 | 0.562311 | 0         |  |
|  |  | Shiraz-28T | 1762 | 0.562311 | 0         |  |
|  |  | Shiraz-29T | 1801 | 0.815343 | 0         |  |
|  |  | Shiraz-29T | 1801 | 0.815343 | 0         |  |
|  |  | Shiraz-32T | 1870 | 0.729766 | 0         |  |
|  |  | Shiraz-32T | 1870 | 0.729766 | 0         |  |
|  |  | Shiraz-32T | 1872 | 1.504553 | 0         |  |
|  |  | Shiraz-32T | 1872 | 1.504553 | 0         |  |
|  |  | Shiraz-35T | 1933 | 0.488535 | 0         |  |
|  |  | Shiraz-35T | 1933 | 0.488535 | 0         |  |
|  |  | Shiraz-38T | 2011 | 0        | -0.406024 |  |
|  |  | Shiraz-38T | 2011 | 0        | -0.406024 |  |



|  |            |      |          |           |  |
|--|------------|------|----------|-----------|--|
|  | Shiraz-53T | 2115 | 0.427728 | 0         |  |
|  | Shiraz-53T | 2115 | 0.427728 | 0         |  |
|  | Shiraz-58T | 2223 | 0.833364 | 0         |  |
|  | Shiraz-58T | 2223 | 0.833364 | 0         |  |
|  | Shiraz-58T | 2226 | 1.074663 | 0         |  |
|  | Shiraz-58T | 2226 | 1.074663 | 0         |  |
|  | Shiraz-71T | 2263 | 0.975531 | 0         |  |
|  | Shiraz-71T | 2263 | 0.975531 | 0         |  |
|  | Shiraz-3T  | 246  | 0.531858 | 0         |  |
|  | Shiraz-3T  | 246  | 0.531858 | 0         |  |
|  | Shiraz-4T  | 261  | 0        | -0.336249 |  |
|  | Shiraz-4T  | 261  | 0        | -0.336249 |  |
|  | Shiraz-16T | 295  | 0.591657 | 0         |  |
|  | Shiraz-16T | 295  | 0.591657 | 0         |  |
|  | Shiraz-36T | 433  | 0        | -0.803961 |  |
|  | Shiraz-36T | 433  | 0        | -0.803961 |  |
|  | Shiraz-49T | 1170 | 0        | -0.967436 |  |
|  | Shiraz-49T | 1170 | 0        | -0.967436 |  |
|  | Shiraz-9T  | 1370 | 0.690073 | 0         |  |
|  | Shiraz-9T  | 1370 | 0.690073 | 0         |  |
|  | Shiraz-9T  | 1371 | 1.292392 | 0         |  |
|  | Shiraz-9T  | 1371 | 1.292392 | 0         |  |
|  | Shiraz-18T | 1457 | 0.643204 | 0         |  |
|  | Shiraz-18T | 1457 | 0.643204 | 0         |  |
|  | Shiraz-22T | 1673 | 0.611783 | 0         |  |
|  | Shiraz-22T | 1673 | 0.611783 | 0         |  |
|  | Shiraz-22T | 1678 | 0.911625 | 0         |  |
|  | Shiraz-22T | 1678 | 0.911625 | 0         |  |
|  | Shiraz-25T | 1719 | 0.472955 | 0         |  |
|  | Shiraz-25T | 1719 | 0.472955 | 0         |  |
|  | Shiraz-28T | 1762 | 0.562311 | 0         |  |
|  | Shiraz-28T | 1762 | 0.562311 | 0         |  |
|  | Shiraz-29T | 1801 | 0.815343 | 0         |  |
|  | Shiraz-29T | 1801 | 0.815343 | 0         |  |
|  | Shiraz-32T | 1870 | 0.729766 | 0         |  |
|  | Shiraz-32T | 1870 | 0.729766 | 0         |  |
|  | Shiraz-32T | 1872 | 1.504553 | 0         |  |
|  | Shiraz-32T | 1872 | 1.504553 | 0         |  |
|  | Shiraz-35T | 1933 | 0.488535 | 0         |  |
|  | Shiraz-35T | 1933 | 0.488535 | 0         |  |
|  | Shiraz-38T | 2011 | 0        | -0.406024 |  |
|  | Shiraz-38T | 2011 | 0        | -0.406024 |  |
|  | Shiraz-53T | 2115 | 0.427728 | 0         |  |
|  | Shiraz-53T | 2115 | 0.427728 | 0         |  |
|  | Shiraz-58T | 2223 | 0.833364 | 0         |  |
|  | Shiraz-58T | 2223 | 0.833364 | 0         |  |
|  | Shiraz-58T | 2226 | 1.074663 | 0         |  |

|       |      |            |      |          |           |  |
|-------|------|------------|------|----------|-----------|--|
|       |      | Shiraz-58T | 2226 | 1.074663 | 0         |  |
|       |      | Shiraz-71T | 2263 | 0.975531 | 0         |  |
|       |      | Shiraz-71T | 2263 | 0.975531 | 0         |  |
| CTAG2 | chrX | Shiraz-4T  | 261  | 0        | -0.336249 |  |
|       |      | Shiraz-4T  | 261  | 0        | -0.336249 |  |
|       |      | Shiraz-16T | 295  | 0.591657 | 0         |  |
|       |      | Shiraz-16T | 295  | 0.591657 | 0         |  |
|       |      | Shiraz-36T | 433  | 0        | -0.803961 |  |
|       |      | Shiraz-36T | 433  | 0        | -0.803961 |  |
|       |      | Shiraz-49T | 1170 | 0        | -0.967436 |  |
|       |      | Shiraz-49T | 1170 | 0        | -0.967436 |  |
|       |      | Shiraz-9T  | 1370 | 0.690073 | 0         |  |
|       |      | Shiraz-9T  | 1370 | 0.690073 | 0         |  |
|       |      | Shiraz-9T  | 1371 | 1.292392 | 0         |  |
|       |      | Shiraz-9T  | 1371 | 1.292392 | 0         |  |
|       |      | Shiraz-18T | 1457 | 0.643204 | 0         |  |
|       |      | Shiraz-18T | 1457 | 0.643204 | 0         |  |
|       |      | Shiraz-22T | 1673 | 0.611783 | 0         |  |
|       |      | Shiraz-22T | 1673 | 0.611783 | 0         |  |
|       |      | Shiraz-22T | 1678 | 0.911625 | 0         |  |
|       |      | Shiraz-22T | 1678 | 0.911625 | 0         |  |
|       |      | Shiraz-25T | 1719 | 0.472955 | 0         |  |
|       |      | Shiraz-25T | 1719 | 0.472955 | 0         |  |
|       |      | Shiraz-28T | 1762 | 0.562311 | 0         |  |
|       |      | Shiraz-28T | 1762 | 0.562311 | 0         |  |
|       |      | Shiraz-29T | 1801 | 0.815343 | 0         |  |
|       |      | Shiraz-29T | 1801 | 0.815343 | 0         |  |
|       |      | Shiraz-32T | 1870 | 0.729766 | 0         |  |
|       |      | Shiraz-32T | 1870 | 0.729766 | 0         |  |
|       |      | Shiraz-32T | 1872 | 1.504553 | 0         |  |
|       |      | Shiraz-32T | 1872 | 1.504553 | 0         |  |
|       |      | Shiraz-35T | 1933 | 0.488535 | 0         |  |
|       |      | Shiraz-35T | 1933 | 0.488535 | 0         |  |
|       |      | Shiraz-53T | 2115 | 0.427728 | 0         |  |
|       |      | Shiraz-53T | 2115 | 0.427728 | 0         |  |
|       |      | Shiraz-58T | 2223 | 0.833364 | 0         |  |
|       |      | Shiraz-58T | 2223 | 0.833364 | 0         |  |
|       |      | Shiraz-58T | 2226 | 1.074663 | 0         |  |
|       |      | Shiraz-58T | 2226 | 1.074663 | 0         |  |
|       |      | Shiraz-71T | 2263 | 0.975531 | 0         |  |
|       |      | Shiraz-71T | 2263 | 0.975531 | 0         |  |
|       |      | Shiraz-4T  | 261  | 0        | -0.336249 |  |
|       |      | Shiraz-4T  | 261  | 0        | -0.336249 |  |
|       |      | Shiraz-16T | 295  | 0.591657 | 0         |  |
|       |      | Shiraz-16T | 295  | 0.591657 | 0         |  |
|       |      | Shiraz-36T | 433  | 0        | -0.803961 |  |
|       |      | Shiraz-36T | 433  | 0        | -0.803961 |  |

|  |            |      |          |           |  |
|--|------------|------|----------|-----------|--|
|  | Shiraz-49T | 1170 | 0        | -0.967436 |  |
|  | Shiraz-49T | 1170 | 0        | -0.967436 |  |
|  | Shiraz-9T  | 1370 | 0.690073 | 0         |  |
|  | Shiraz-9T  | 1370 | 0.690073 | 0         |  |
|  | Shiraz-9T  | 1371 | 1.292392 | 0         |  |
|  | Shiraz-9T  | 1371 | 1.292392 | 0         |  |
|  | Shiraz-18T | 1457 | 0.643204 | 0         |  |
|  | Shiraz-18T | 1457 | 0.643204 | 0         |  |
|  | Shiraz-22T | 1673 | 0.611783 | 0         |  |
|  | Shiraz-22T | 1673 | 0.611783 | 0         |  |
|  | Shiraz-22T | 1678 | 0.911625 | 0         |  |
|  | Shiraz-22T | 1678 | 0.911625 | 0         |  |
|  | Shiraz-25T | 1719 | 0.472955 | 0         |  |
|  | Shiraz-25T | 1719 | 0.472955 | 0         |  |
|  | Shiraz-28T | 1762 | 0.562311 | 0         |  |
|  | Shiraz-28T | 1762 | 0.562311 | 0         |  |
|  | Shiraz-29T | 1801 | 0.815343 | 0         |  |
|  | Shiraz-29T | 1801 | 0.815343 | 0         |  |
|  | Shiraz-32T | 1870 | 0.729766 | 0         |  |
|  | Shiraz-32T | 1870 | 0.729766 | 0         |  |
|  | Shiraz-32T | 1872 | 1.504553 | 0         |  |
|  | Shiraz-32T | 1872 | 1.504553 | 0         |  |
|  | Shiraz-35T | 1933 | 0.488535 | 0         |  |
|  | Shiraz-35T | 1933 | 0.488535 | 0         |  |
|  | Shiraz-53T | 2115 | 0.427728 | 0         |  |
|  | Shiraz-53T | 2115 | 0.427728 | 0         |  |
|  | Shiraz-58T | 2223 | 0.833364 | 0         |  |
|  | Shiraz-58T | 2223 | 0.833364 | 0         |  |
|  | Shiraz-58T | 2226 | 1.074663 | 0         |  |
|  | Shiraz-58T | 2226 | 1.074663 | 0         |  |
|  | Shiraz-71T | 2263 | 0.975531 | 0         |  |
|  | Shiraz-71T | 2263 | 0.975531 | 0         |  |
|  | Shiraz-4T  | 261  | 0        | -0.336249 |  |
|  | Shiraz-4T  | 261  | 0        | -0.336249 |  |
|  | Shiraz-16T | 295  | 0.591657 | 0         |  |
|  | Shiraz-16T | 295  | 0.591657 | 0         |  |
|  | Shiraz-36T | 433  | 0        | -0.803961 |  |
|  | Shiraz-36T | 433  | 0        | -0.803961 |  |
|  | Shiraz-49T | 1170 | 0        | -0.967436 |  |
|  | Shiraz-49T | 1170 | 0        | -0.967436 |  |
|  | Shiraz-9T  | 1370 | 0.690073 | 0         |  |
|  | Shiraz-9T  | 1370 | 0.690073 | 0         |  |
|  | Shiraz-9T  | 1371 | 1.292392 | 0         |  |
|  | Shiraz-9T  | 1371 | 1.292392 | 0         |  |
|  | Shiraz-18T | 1457 | 0.643204 | 0         |  |
|  | Shiraz-18T | 1457 | 0.643204 | 0         |  |
|  | Shiraz-22T | 1673 | 0.611783 | 0         |  |

|        |      |            |      |          |           |  |
|--------|------|------------|------|----------|-----------|--|
|        |      | Shiraz-22T | 1673 | 0.611783 | 0         |  |
|        |      | Shiraz-22T | 1678 | 0.911625 | 0         |  |
|        |      | Shiraz-22T | 1678 | 0.911625 | 0         |  |
|        |      | Shiraz-25T | 1719 | 0.472955 | 0         |  |
|        |      | Shiraz-25T | 1719 | 0.472955 | 0         |  |
|        |      | Shiraz-28T | 1762 | 0.562311 | 0         |  |
|        |      | Shiraz-28T | 1762 | 0.562311 | 0         |  |
|        |      | Shiraz-29T | 1801 | 0.815343 | 0         |  |
|        |      | Shiraz-29T | 1801 | 0.815343 | 0         |  |
|        |      | Shiraz-32T | 1870 | 0.729766 | 0         |  |
|        |      | Shiraz-32T | 1870 | 0.729766 | 0         |  |
|        |      | Shiraz-32T | 1872 | 1.504553 | 0         |  |
|        |      | Shiraz-32T | 1872 | 1.504553 | 0         |  |
|        |      | Shiraz-35T | 1933 | 0.488535 | 0         |  |
|        |      | Shiraz-35T | 1933 | 0.488535 | 0         |  |
|        |      | Shiraz-53T | 2115 | 0.427728 | 0         |  |
|        |      | Shiraz-53T | 2115 | 0.427728 | 0         |  |
|        |      | Shiraz-58T | 2223 | 0.833364 | 0         |  |
|        |      | Shiraz-58T | 2223 | 0.833364 | 0         |  |
|        |      | Shiraz-58T | 2226 | 1.074663 | 0         |  |
|        |      | Shiraz-58T | 2226 | 1.074663 | 0         |  |
|        |      | Shiraz-71T | 2263 | 0.975531 | 0         |  |
|        |      | Shiraz-71T | 2263 | 0.975531 | 0         |  |
| CTAGE4 | chr7 | Shiraz-3T  | 90   | 0.219276 | 0         |  |
|        |      | Shiraz-3T  | 90   | 0.219276 | 0         |  |
|        |      | Shiraz-3T  | 98   | 0        | -0.069276 |  |
|        |      | Shiraz-3T  | 98   | 0        | -0.069276 |  |
|        |      | Shiraz-4T  | 253  | 0.372918 | 0         |  |
|        |      | Shiraz-4T  | 253  | 0.372918 | 0         |  |
|        |      | Shiraz-36T | 378  | 0.179558 | 0         |  |
|        |      | Shiraz-36T | 378  | 0.179558 | 0         |  |
|        |      | Shiraz-44T | 645  | 0        | -0.474857 |  |
|        |      | Shiraz-44T | 645  | 0        | -0.474857 |  |
|        |      | Shiraz-46T | 943  | 0.093799 | 0         |  |
|        |      | Shiraz-46T | 943  | 0.093799 | 0         |  |
|        |      | Shiraz-77T | 1225 | 0        | -0.117922 |  |
|        |      | Shiraz-77T | 1225 | 0        | -0.117922 |  |
|        |      | Shiraz-9T  | 1325 | 0.221899 | 0         |  |
|        |      | Shiraz-9T  | 1325 | 0.221899 | 0         |  |
|        |      | Shiraz-18T | 1434 | 0.244465 | 0         |  |
|        |      | Shiraz-18T | 1434 | 0.244465 | 0         |  |
|        |      | Shiraz-22T | 1554 | 0        | -0.502826 |  |
|        |      | Shiraz-22T | 1554 | 0        | -0.502826 |  |
|        |      | Shiraz-25T | 1698 | 0.21835  | 0         |  |
|        |      | Shiraz-25T | 1698 | 0.21835  | 0         |  |
|        |      | Shiraz-28T | 1735 | 0.350744 | 0         |  |
|        |      | Shiraz-28T | 1735 | 0.350744 | 0         |  |

|  |            |      |          |           |  |
|--|------------|------|----------|-----------|--|
|  | Shiraz-29T | 1778 | 0.120767 | 0         |  |
|  | Shiraz-29T | 1778 | 0.120767 | 0         |  |
|  | Shiraz-32T | 1833 | 0.551336 | 0         |  |
|  | Shiraz-32T | 1833 | 0.551336 | 0         |  |
|  | Shiraz-38T | 1951 | 0.250891 | 0         |  |
|  | Shiraz-38T | 1951 | 0.250891 | 0         |  |
|  | Shiraz-53T | 2078 | 0.287202 | 0         |  |
|  | Shiraz-53T | 2078 | 0.287202 | 0         |  |
|  | Shiraz-58T | 2162 | 0.221505 | 0         |  |
|  | Shiraz-58T | 2162 | 0.221505 | 0         |  |
|  | Shiraz-71T | 2238 | 0.603631 | 0         |  |
|  | Shiraz-71T | 2238 | 0.603631 | 0         |  |
|  | Shiraz-3T  | 90   | 0.219276 | 0         |  |
|  | Shiraz-3T  | 90   | 0.219276 | 0         |  |
|  | Shiraz-3T  | 98   | 0        | -0.069276 |  |
|  | Shiraz-3T  | 98   | 0        | -0.069276 |  |
|  | Shiraz-4T  | 253  | 0.372918 | 0         |  |
|  | Shiraz-4T  | 253  | 0.372918 | 0         |  |
|  | Shiraz-36T | 378  | 0.179558 | 0         |  |
|  | Shiraz-36T | 378  | 0.179558 | 0         |  |
|  | Shiraz-44T | 645  | 0        | -0.474857 |  |
|  | Shiraz-44T | 645  | 0        | -0.474857 |  |
|  | Shiraz-46T | 943  | 0.093799 | 0         |  |
|  | Shiraz-46T | 943  | 0.093799 | 0         |  |
|  | Shiraz-77T | 1225 | 0        | -0.117922 |  |
|  | Shiraz-77T | 1225 | 0        | -0.117922 |  |
|  | Shiraz-9T  | 1325 | 0.221899 | 0         |  |
|  | Shiraz-9T  | 1325 | 0.221899 | 0         |  |
|  | Shiraz-18T | 1434 | 0.244465 | 0         |  |
|  | Shiraz-18T | 1434 | 0.244465 | 0         |  |
|  | Shiraz-22T | 1554 | 0        | -0.502826 |  |
|  | Shiraz-22T | 1554 | 0        | -0.502826 |  |
|  | Shiraz-25T | 1698 | 0.21835  | 0         |  |
|  | Shiraz-25T | 1698 | 0.21835  | 0         |  |
|  | Shiraz-28T | 1735 | 0.350744 | 0         |  |
|  | Shiraz-28T | 1735 | 0.350744 | 0         |  |
|  | Shiraz-29T | 1778 | 0.120767 | 0         |  |
|  | Shiraz-29T | 1778 | 0.120767 | 0         |  |
|  | Shiraz-32T | 1833 | 0.551336 | 0         |  |
|  | Shiraz-32T | 1833 | 0.551336 | 0         |  |
|  | Shiraz-38T | 1951 | 0.250891 | 0         |  |
|  | Shiraz-38T | 1951 | 0.250891 | 0         |  |
|  | Shiraz-53T | 2078 | 0.287202 | 0         |  |
|  | Shiraz-53T | 2078 | 0.287202 | 0         |  |
|  | Shiraz-58T | 2162 | 0.221505 | 0         |  |
|  | Shiraz-58T | 2162 | 0.221505 | 0         |  |
|  | Shiraz-71T | 2238 | 0.603631 | 0         |  |

|        |      |            |      |          |           |  |
|--------|------|------------|------|----------|-----------|--|
|        |      | Shiraz-71T | 2238 | 0.603631 | 0         |  |
|        |      | Shiraz-3T  | 90   | 0.219276 | 0         |  |
|        |      | Shiraz-3T  | 90   | 0.219276 | 0         |  |
|        |      | Shiraz-3T  | 98   | 0        | -0.069276 |  |
|        |      | Shiraz-3T  | 98   | 0        | -0.069276 |  |
|        |      | Shiraz-4T  | 253  | 0.372918 | 0         |  |
|        |      | Shiraz-4T  | 253  | 0.372918 | 0         |  |
|        |      | Shiraz-36T | 378  | 0.179558 | 0         |  |
|        |      | Shiraz-36T | 378  | 0.179558 | 0         |  |
|        |      | Shiraz-44T | 645  | 0        | -0.474857 |  |
|        |      | Shiraz-44T | 645  | 0        | -0.474857 |  |
|        |      | Shiraz-46T | 943  | 0.093799 | 0         |  |
|        |      | Shiraz-46T | 943  | 0.093799 | 0         |  |
|        |      | Shiraz-77T | 1225 | 0        | -0.117922 |  |
|        |      | Shiraz-77T | 1225 | 0        | -0.117922 |  |
|        |      | Shiraz-9T  | 1325 | 0.221899 | 0         |  |
|        |      | Shiraz-9T  | 1325 | 0.221899 | 0         |  |
|        |      | Shiraz-18T | 1434 | 0.244465 | 0         |  |
|        |      | Shiraz-18T | 1434 | 0.244465 | 0         |  |
|        |      | Shiraz-22T | 1554 | 0        | -0.502826 |  |
|        |      | Shiraz-22T | 1554 | 0        | -0.502826 |  |
|        |      | Shiraz-25T | 1698 | 0.21835  | 0         |  |
|        |      | Shiraz-25T | 1698 | 0.21835  | 0         |  |
|        |      | Shiraz-28T | 1735 | 0.350744 | 0         |  |
|        |      | Shiraz-28T | 1735 | 0.350744 | 0         |  |
|        |      | Shiraz-29T | 1778 | 0.120767 | 0         |  |
|        |      | Shiraz-29T | 1778 | 0.120767 | 0         |  |
|        |      | Shiraz-32T | 1833 | 0.551336 | 0         |  |
|        |      | Shiraz-32T | 1833 | 0.551336 | 0         |  |
|        |      | Shiraz-38T | 1951 | 0.250891 | 0         |  |
|        |      | Shiraz-38T | 1951 | 0.250891 | 0         |  |
|        |      | Shiraz-53T | 2078 | 0.287202 | 0         |  |
|        |      | Shiraz-53T | 2078 | 0.287202 | 0         |  |
|        |      | Shiraz-58T | 2162 | 0.221505 | 0         |  |
|        |      | Shiraz-58T | 2162 | 0.221505 | 0         |  |
|        |      | Shiraz-71T | 2238 | 0.603631 | 0         |  |
|        |      | Shiraz-71T | 2238 | 0.603631 | 0         |  |
| CTAGE6 | chr7 | Shiraz-3T  | 90   | 0.219276 | 0         |  |
|        |      | Shiraz-4T  | 253  | 0.372918 | 0         |  |
|        |      | Shiraz-36T | 378  | 0.179558 | 0         |  |
|        |      | Shiraz-46T | 943  | 0.093799 | 0         |  |
|        |      | Shiraz-77T | 1225 | 0        | -0.117922 |  |
|        |      | Shiraz-9T  | 1325 | 0.221899 | 0         |  |
|        |      | Shiraz-18T | 1434 | 0.244465 | 0         |  |
|        |      | Shiraz-25T | 1698 | 0.21835  | 0         |  |
|        |      | Shiraz-28T | 1735 | 0.350744 | 0         |  |
|        |      | Shiraz-29T | 1778 | 0.120767 | 0         |  |

|       |      |            |      |          |           |  |  |
|-------|------|------------|------|----------|-----------|--|--|
|       |      | Shiraz-32T | 1833 | 0.551336 | 0         |  |  |
|       |      | Shiraz-38T | 1951 | 0.250891 | 0         |  |  |
|       |      | Shiraz-53T | 2078 | 0.287202 | 0         |  |  |
|       |      | Shiraz-58T | 2162 | 0.221505 | 0         |  |  |
|       |      | Shiraz-71T | 2238 | 0.603631 | 0         |  |  |
|       |      | Shiraz-3T  | 90   | 0.219276 | 0         |  |  |
|       |      | Shiraz-4T  | 253  | 0.372918 | 0         |  |  |
|       |      | Shiraz-36T | 378  | 0.179558 | 0         |  |  |
|       |      | Shiraz-46T | 943  | 0.093799 | 0         |  |  |
|       |      | Shiraz-77T | 1225 | 0        | -0.117922 |  |  |
|       |      | Shiraz-9T  | 1325 | 0.221899 | 0         |  |  |
|       |      | Shiraz-18T | 1434 | 0.244465 | 0         |  |  |
|       |      | Shiraz-25T | 1698 | 0.21835  | 0         |  |  |
|       |      | Shiraz-28T | 1735 | 0.350744 | 0         |  |  |
|       |      | Shiraz-29T | 1778 | 0.120767 | 0         |  |  |
|       |      | Shiraz-32T | 1833 | 0.551336 | 0         |  |  |
|       |      | Shiraz-38T | 1951 | 0.250891 | 0         |  |  |
|       |      | Shiraz-53T | 2078 | 0.287202 | 0         |  |  |
|       |      | Shiraz-58T | 2162 | 0.221505 | 0         |  |  |
|       |      | Shiraz-71T | 2238 | 0.603631 | 0         |  |  |
|       |      | Shiraz-3T  | 90   | 0.219276 | 0         |  |  |
|       |      | Shiraz-4T  | 253  | 0.372918 | 0         |  |  |
|       |      | Shiraz-36T | 378  | 0.179558 | 0         |  |  |
|       |      | Shiraz-46T | 943  | 0.093799 | 0         |  |  |
|       |      | Shiraz-77T | 1225 | 0        | -0.117922 |  |  |
|       |      | Shiraz-9T  | 1325 | 0.221899 | 0         |  |  |
|       |      | Shiraz-18T | 1434 | 0.244465 | 0         |  |  |
|       |      | Shiraz-25T | 1698 | 0.21835  | 0         |  |  |
|       |      | Shiraz-28T | 1735 | 0.350744 | 0         |  |  |
|       |      | Shiraz-29T | 1778 | 0.120767 | 0         |  |  |
|       |      | Shiraz-32T | 1833 | 0.551336 | 0         |  |  |
|       |      | Shiraz-38T | 1951 | 0.250891 | 0         |  |  |
|       |      | Shiraz-53T | 2078 | 0.287202 | 0         |  |  |
|       |      | Shiraz-58T | 2162 | 0.221505 | 0         |  |  |
|       |      | Shiraz-71T | 2238 | 0.603631 | 0         |  |  |
| CTPS2 | chrX | Shiraz-3T  | 235  | 0        | -0.28401  |  |  |
|       |      | Shiraz-3T  | 235  | 0        | -0.28401  |  |  |
|       |      | Shiraz-3T  | 235  | 0        | -0.28401  |  |  |
|       |      | Shiraz-4T  | 260  | 0        | -0.324128 |  |  |
|       |      | Shiraz-4T  | 260  | 0        | -0.324128 |  |  |
|       |      | Shiraz-4T  | 260  | 0        | -0.324128 |  |  |
|       |      | Shiraz-16T | 294  | 0.655804 | 0         |  |  |
|       |      | Shiraz-16T | 294  | 0.655804 | 0         |  |  |
|       |      | Shiraz-16T | 294  | 0.655804 | 0         |  |  |
|       |      | Shiraz-36T | 431  | 0        | -0.78035  |  |  |
|       |      | Shiraz-36T | 431  | 0        | -0.78035  |  |  |
|       |      | Shiraz-36T | 431  | 0        | -0.78035  |  |  |

|  |            |      |          |           |  |
|--|------------|------|----------|-----------|--|
|  | Shiraz-44T | 891  | 0        | -0.954044 |  |
|  | Shiraz-44T | 891  | 0        | -0.954044 |  |
|  | Shiraz-44T | 891  | 0        | -0.954044 |  |
|  | Shiraz-49T | 1166 | 0        | -0.917235 |  |
|  | Shiraz-49T | 1166 | 0        | -0.917235 |  |
|  | Shiraz-49T | 1166 | 0        | -0.917235 |  |
|  | Shiraz-9T  | 1368 | 0.199713 | 0         |  |
|  | Shiraz-9T  | 1368 | 0.199713 | 0         |  |
|  | Shiraz-9T  | 1368 | 0.199713 | 0         |  |
|  | Shiraz-18T | 1455 | 0        | -0.186773 |  |
|  | Shiraz-18T | 1455 | 0        | -0.186773 |  |
|  | Shiraz-18T | 1455 | 0        | -0.186773 |  |
|  | Shiraz-22T | 1669 | 0.695915 | 0         |  |
|  | Shiraz-22T | 1669 | 0.695915 | 0         |  |
|  | Shiraz-22T | 1669 | 0.695915 | 0         |  |
|  | Shiraz-25T | 1717 | 0.420447 | 0         |  |
|  | Shiraz-25T | 1717 | 0.420447 | 0         |  |
|  | Shiraz-25T | 1717 | 0.420447 | 0         |  |
|  | Shiraz-28T | 1760 | 0.538181 | 0         |  |
|  | Shiraz-28T | 1760 | 0.538181 | 0         |  |
|  | Shiraz-28T | 1760 | 0.538181 | 0         |  |
|  | Shiraz-29T | 1800 | 0.672527 | 0         |  |
|  | Shiraz-29T | 1800 | 0.672527 | 0         |  |
|  | Shiraz-29T | 1800 | 0.672527 | 0         |  |
|  | Shiraz-32T | 1869 | 0.776805 | 0         |  |
|  | Shiraz-32T | 1869 | 0.776805 | 0         |  |
|  | Shiraz-32T | 1869 | 0.776805 | 0         |  |
|  | Shiraz-35T | 1932 | 0.507141 | 0         |  |
|  | Shiraz-35T | 1932 | 0.507141 | 0         |  |
|  | Shiraz-35T | 1932 | 0.507141 | 0         |  |
|  | Shiraz-40T | 2051 | 0.098506 | 0         |  |
|  | Shiraz-40T | 2051 | 0.098506 | 0         |  |
|  | Shiraz-40T | 2051 | 0.098506 | 0         |  |
|  | Shiraz-58T | 2221 | 0.871948 | 0         |  |
|  | Shiraz-58T | 2221 | 0.871948 | 0         |  |
|  | Shiraz-58T | 2221 | 0.871948 | 0         |  |
|  | Shiraz-71T | 2260 | 0.68394  | 0         |  |
|  | Shiraz-71T | 2260 | 0.68394  | 0         |  |
|  | Shiraz-71T | 2260 | 0.68394  | 0         |  |
|  | Shiraz-71T | 2261 | 0.508399 | 0         |  |
|  | Shiraz-71T | 2261 | 0.508399 | 0         |  |
|  | Shiraz-71T | 2261 | 0.508399 | 0         |  |
|  | Shiraz-3T  | 235  | 0        | -0.28401  |  |
|  | Shiraz-3T  | 235  | 0        | -0.28401  |  |
|  | Shiraz-3T  | 235  | 0        | -0.28401  |  |
|  | Shiraz-4T  | 260  | 0        | -0.324128 |  |
|  | Shiraz-4T  | 260  | 0        | -0.324128 |  |



|  |            |      |          |           |  |
|--|------------|------|----------|-----------|--|
|  | Shiraz-4T  | 260  | 0        | -0.324128 |  |
|  | Shiraz-16T | 294  | 0.655804 | 0         |  |
|  | Shiraz-16T | 294  | 0.655804 | 0         |  |
|  | Shiraz-16T | 294  | 0.655804 | 0         |  |
|  | Shiraz-36T | 431  | 0        | -0.78035  |  |
|  | Shiraz-36T | 431  | 0        | -0.78035  |  |
|  | Shiraz-36T | 431  | 0        | -0.78035  |  |
|  | Shiraz-44T | 891  | 0        | -0.954044 |  |
|  | Shiraz-44T | 891  | 0        | -0.954044 |  |
|  | Shiraz-44T | 891  | 0        | -0.954044 |  |
|  | Shiraz-49T | 1166 | 0        | -0.917235 |  |
|  | Shiraz-49T | 1166 | 0        | -0.917235 |  |
|  | Shiraz-49T | 1166 | 0        | -0.917235 |  |
|  | Shiraz-9T  | 1368 | 0.199713 | 0         |  |
|  | Shiraz-9T  | 1368 | 0.199713 | 0         |  |
|  | Shiraz-9T  | 1368 | 0.199713 | 0         |  |
|  | Shiraz-18T | 1455 | 0        | -0.186773 |  |
|  | Shiraz-18T | 1455 | 0        | -0.186773 |  |
|  | Shiraz-18T | 1455 | 0        | -0.186773 |  |
|  | Shiraz-22T | 1669 | 0.695915 | 0         |  |
|  | Shiraz-22T | 1669 | 0.695915 | 0         |  |
|  | Shiraz-22T | 1669 | 0.695915 | 0         |  |
|  | Shiraz-25T | 1717 | 0.420447 | 0         |  |
|  | Shiraz-25T | 1717 | 0.420447 | 0         |  |
|  | Shiraz-25T | 1717 | 0.420447 | 0         |  |
|  | Shiraz-28T | 1760 | 0.538181 | 0         |  |
|  | Shiraz-28T | 1760 | 0.538181 | 0         |  |
|  | Shiraz-28T | 1760 | 0.538181 | 0         |  |
|  | Shiraz-29T | 1800 | 0.672527 | 0         |  |
|  | Shiraz-29T | 1800 | 0.672527 | 0         |  |
|  | Shiraz-29T | 1800 | 0.672527 | 0         |  |
|  | Shiraz-32T | 1869 | 0.776805 | 0         |  |
|  | Shiraz-32T | 1869 | 0.776805 | 0         |  |
|  | Shiraz-32T | 1869 | 0.776805 | 0         |  |
|  | Shiraz-35T | 1932 | 0.507141 | 0         |  |
|  | Shiraz-35T | 1932 | 0.507141 | 0         |  |
|  | Shiraz-35T | 1932 | 0.507141 | 0         |  |
|  | Shiraz-40T | 2051 | 0.098506 | 0         |  |
|  | Shiraz-40T | 2051 | 0.098506 | 0         |  |
|  | Shiraz-40T | 2051 | 0.098506 | 0         |  |
|  | Shiraz-58T | 2221 | 0.871948 | 0         |  |
|  | Shiraz-58T | 2221 | 0.871948 | 0         |  |
|  | Shiraz-58T | 2221 | 0.871948 | 0         |  |
|  | Shiraz-71T | 2260 | 0.68394  | 0         |  |
|  | Shiraz-71T | 2260 | 0.68394  | 0         |  |
|  | Shiraz-71T | 2260 | 0.68394  | 0         |  |
|  | Shiraz-71T | 2261 | 0.508399 | 0         |  |

|  |            |      |          |           |  |
|--|------------|------|----------|-----------|--|
|  | Shiraz-71T | 2261 | 0.508399 | 0         |  |
|  | Shiraz-71T | 2261 | 0.508399 | 0         |  |
|  | Shiraz-3T  | 235  | 0        | -0.28401  |  |
|  | Shiraz-3T  | 235  | 0        | -0.28401  |  |
|  | Shiraz-3T  | 235  | 0        | -0.28401  |  |
|  | Shiraz-4T  | 260  | 0        | -0.324128 |  |
|  | Shiraz-4T  | 260  | 0        | -0.324128 |  |
|  | Shiraz-4T  | 260  | 0        | -0.324128 |  |
|  | Shiraz-16T | 294  | 0.655804 | 0         |  |
|  | Shiraz-16T | 294  | 0.655804 | 0         |  |
|  | Shiraz-16T | 294  | 0.655804 | 0         |  |
|  | Shiraz-36T | 431  | 0        | -0.78035  |  |
|  | Shiraz-36T | 431  | 0        | -0.78035  |  |
|  | Shiraz-36T | 431  | 0        | -0.78035  |  |
|  | Shiraz-44T | 891  | 0        | -0.954044 |  |
|  | Shiraz-44T | 891  | 0        | -0.954044 |  |
|  | Shiraz-44T | 891  | 0        | -0.954044 |  |
|  | Shiraz-49T | 1166 | 0        | -0.917235 |  |
|  | Shiraz-49T | 1166 | 0        | -0.917235 |  |
|  | Shiraz-49T | 1166 | 0        | -0.917235 |  |
|  | Shiraz-9T  | 1368 | 0.199713 | 0         |  |
|  | Shiraz-9T  | 1368 | 0.199713 | 0         |  |
|  | Shiraz-9T  | 1368 | 0.199713 | 0         |  |
|  | Shiraz-18T | 1455 | 0        | -0.186773 |  |
|  | Shiraz-18T | 1455 | 0        | -0.186773 |  |
|  | Shiraz-18T | 1455 | 0        | -0.186773 |  |
|  | Shiraz-22T | 1669 | 0.695915 | 0         |  |
|  | Shiraz-22T | 1669 | 0.695915 | 0         |  |
|  | Shiraz-22T | 1669 | 0.695915 | 0         |  |
|  | Shiraz-25T | 1717 | 0.420447 | 0         |  |
|  | Shiraz-25T | 1717 | 0.420447 | 0         |  |
|  | Shiraz-25T | 1717 | 0.420447 | 0         |  |
|  | Shiraz-28T | 1760 | 0.538181 | 0         |  |
|  | Shiraz-28T | 1760 | 0.538181 | 0         |  |
|  | Shiraz-28T | 1760 | 0.538181 | 0         |  |
|  | Shiraz-29T | 1800 | 0.672527 | 0         |  |
|  | Shiraz-29T | 1800 | 0.672527 | 0         |  |
|  | Shiraz-29T | 1800 | 0.672527 | 0         |  |
|  | Shiraz-32T | 1869 | 0.776805 | 0         |  |
|  | Shiraz-32T | 1869 | 0.776805 | 0         |  |
|  | Shiraz-32T | 1869 | 0.776805 | 0         |  |
|  | Shiraz-35T | 1932 | 0.507141 | 0         |  |
|  | Shiraz-35T | 1932 | 0.507141 | 0         |  |
|  | Shiraz-35T | 1932 | 0.507141 | 0         |  |
|  | Shiraz-40T | 2051 | 0.098506 | 0         |  |
|  | Shiraz-40T | 2051 | 0.098506 | 0         |  |
|  | Shiraz-40T | 2051 | 0.098506 | 0         |  |

|         |      |            |      |          |           |  |  |
|---------|------|------------|------|----------|-----------|--|--|
|         |      | Shiraz-58T | 2221 | 0.871948 | 0         |  |  |
|         |      | Shiraz-58T | 2221 | 0.871948 | 0         |  |  |
|         |      | Shiraz-58T | 2221 | 0.871948 | 0         |  |  |
|         |      | Shiraz-71T | 2260 | 0.68394  | 0         |  |  |
|         |      | Shiraz-71T | 2260 | 0.68394  | 0         |  |  |
|         |      | Shiraz-71T | 2260 | 0.68394  | 0         |  |  |
|         |      | Shiraz-71T | 2261 | 0.508399 | 0         |  |  |
|         |      | Shiraz-71T | 2261 | 0.508399 | 0         |  |  |
|         |      | Shiraz-71T | 2261 | 0.508399 | 0         |  |  |
| CTTNBP2 | chr7 | Shiraz-3T  | 90   | 0.219276 | 0         |  |  |
|         |      | Shiraz-3T  | 95   | 0        | -0.077623 |  |  |
|         |      | Shiraz-4T  | 253  | 0.372918 | 0         |  |  |
|         |      | Shiraz-36T | 378  | 0.179558 | 0         |  |  |
|         |      | Shiraz-36T | 382  | 0.081739 | 0         |  |  |
|         |      | Shiraz-44T | 641  | 0        | -0.477846 |  |  |
|         |      | Shiraz-46T | 943  | 0.093799 | 0         |  |  |
|         |      | Shiraz-46T | 947  | 0        | -0.010843 |  |  |
|         |      | Shiraz-47T | 1031 | 0        | -0.117529 |  |  |
|         |      | Shiraz-49T | 1121 | 0        | -0.138569 |  |  |
|         |      | Shiraz-77T | 1225 | 0        | -0.117922 |  |  |
|         |      | Shiraz-77T | 1228 | 0        | -0.238084 |  |  |
|         |      | Shiraz-18T | 1434 | 0.244465 | 0         |  |  |
|         |      | Shiraz-22T | 1549 | 0        | -0.319623 |  |  |
|         |      | Shiraz-22T | 1552 | 0        | -0.50686  |  |  |
|         |      | Shiraz-25T | 1698 | 0.21835  | 0         |  |  |
|         |      | Shiraz-28T | 1735 | 0.350744 | 0         |  |  |
|         |      | Shiraz-29T | 1778 | 0.120767 | 0         |  |  |
|         |      | Shiraz-32T | 1833 | 0.551336 | 0         |  |  |
|         |      | Shiraz-32T | 1835 | 0.092727 | 0         |  |  |
|         |      | Shiraz-38T | 1951 | 0.250891 | 0         |  |  |
|         |      | Shiraz-53T | 2078 | 0.287202 | 0         |  |  |
|         |      | Shiraz-58T | 2161 | 0        | -0.187744 |  |  |
|         |      | Shiraz-71T | 2238 | 0.603631 | 0         |  |  |
|         |      | Shiraz-3T  | 90   | 0.219276 | 0         |  |  |
|         |      | Shiraz-3T  | 95   | 0        | -0.077623 |  |  |
|         |      | Shiraz-4T  | 253  | 0.372918 | 0         |  |  |
|         |      | Shiraz-36T | 378  | 0.179558 | 0         |  |  |
|         |      | Shiraz-36T | 382  | 0.081739 | 0         |  |  |
|         |      | Shiraz-44T | 641  | 0        | -0.477846 |  |  |
|         |      | Shiraz-46T | 943  | 0.093799 | 0         |  |  |
|         |      | Shiraz-46T | 947  | 0        | -0.010843 |  |  |
|         |      | Shiraz-47T | 1031 | 0        | -0.117529 |  |  |
|         |      | Shiraz-49T | 1121 | 0        | -0.138569 |  |  |
|         |      | Shiraz-77T | 1225 | 0        | -0.117922 |  |  |
|         |      | Shiraz-77T | 1228 | 0        | -0.238084 |  |  |
|         |      | Shiraz-18T | 1434 | 0.244465 | 0         |  |  |
|         |      | Shiraz-22T | 1549 | 0        | -0.319623 |  |  |

|      |      |            |      |          |           |  |  |
|------|------|------------|------|----------|-----------|--|--|
|      |      | Shiraz-22T | 1552 | 0        | -0.50686  |  |  |
|      |      | Shiraz-25T | 1698 | 0.21835  | 0         |  |  |
|      |      | Shiraz-28T | 1735 | 0.350744 | 0         |  |  |
|      |      | Shiraz-29T | 1778 | 0.120767 | 0         |  |  |
|      |      | Shiraz-32T | 1833 | 0.551336 | 0         |  |  |
|      |      | Shiraz-32T | 1835 | 0.092727 | 0         |  |  |
|      |      | Shiraz-38T | 1951 | 0.250891 | 0         |  |  |
|      |      | Shiraz-53T | 2078 | 0.287202 | 0         |  |  |
|      |      | Shiraz-58T | 2161 | 0        | -0.187744 |  |  |
|      |      | Shiraz-71T | 2238 | 0.603631 | 0         |  |  |
|      |      | Shiraz-3T  | 90   | 0.219276 | 0         |  |  |
|      |      | Shiraz-3T  | 95   | 0        | -0.077623 |  |  |
|      |      | Shiraz-4T  | 253  | 0.372918 | 0         |  |  |
|      |      | Shiraz-36T | 378  | 0.179558 | 0         |  |  |
|      |      | Shiraz-36T | 382  | 0.081739 | 0         |  |  |
|      |      | Shiraz-44T | 641  | 0        | -0.477846 |  |  |
|      |      | Shiraz-46T | 943  | 0.093799 | 0         |  |  |
|      |      | Shiraz-46T | 947  | 0        | -0.010843 |  |  |
|      |      | Shiraz-47T | 1031 | 0        | -0.117529 |  |  |
|      |      | Shiraz-49T | 1121 | 0        | -0.138569 |  |  |
|      |      | Shiraz-77T | 1225 | 0        | -0.117922 |  |  |
|      |      | Shiraz-77T | 1228 | 0        | -0.238084 |  |  |
|      |      | Shiraz-18T | 1434 | 0.244465 | 0         |  |  |
|      |      | Shiraz-22T | 1549 | 0        | -0.319623 |  |  |
|      |      | Shiraz-22T | 1552 | 0        | -0.50686  |  |  |
|      |      | Shiraz-25T | 1698 | 0.21835  | 0         |  |  |
|      |      | Shiraz-28T | 1735 | 0.350744 | 0         |  |  |
|      |      | Shiraz-29T | 1778 | 0.120767 | 0         |  |  |
|      |      | Shiraz-32T | 1833 | 0.551336 | 0         |  |  |
|      |      | Shiraz-32T | 1835 | 0.092727 | 0         |  |  |
|      |      | Shiraz-38T | 1951 | 0.250891 | 0         |  |  |
|      |      | Shiraz-53T | 2078 | 0.287202 | 0         |  |  |
|      |      | Shiraz-58T | 2161 | 0        | -0.187744 |  |  |
|      |      | Shiraz-71T | 2238 | 0.603631 | 0         |  |  |
| CUL1 | chr7 | Shiraz-3T  | 90   | 0.219276 | 0         |  |  |
|      |      | Shiraz-4T  | 253  | 0.372918 | 0         |  |  |
|      |      | Shiraz-36T | 378  | 0.179558 | 0         |  |  |
|      |      | Shiraz-46T | 943  | 0.093799 | 0         |  |  |
|      |      | Shiraz-9T  | 1325 | 0.221899 | 0         |  |  |
|      |      | Shiraz-18T | 1434 | 0.244465 | 0         |  |  |
|      |      | Shiraz-25T | 1698 | 0.21835  | 0         |  |  |
|      |      | Shiraz-28T | 1735 | 0.350744 | 0         |  |  |
|      |      | Shiraz-29T | 1778 | 0.120767 | 0         |  |  |
|      |      | Shiraz-32T | 1833 | 0.551336 | 0         |  |  |
|      |      | Shiraz-38T | 1951 | 0.250891 | 0         |  |  |
|      |      | Shiraz-53T | 2078 | 0.287202 | 0         |  |  |
|      |      | Shiraz-58T | 2162 | 0.221505 | 0         |  |  |

|       |      |            |      |          |           |  |
|-------|------|------------|------|----------|-----------|--|
|       |      | Shiraz-71T | 2238 | 0.603631 | 0         |  |
|       |      | Shiraz-3T  | 90   | 0.219276 | 0         |  |
|       |      | Shiraz-4T  | 253  | 0.372918 | 0         |  |
|       |      | Shiraz-36T | 378  | 0.179558 | 0         |  |
|       |      | Shiraz-46T | 943  | 0.093799 | 0         |  |
|       |      | Shiraz-9T  | 1325 | 0.221899 | 0         |  |
|       |      | Shiraz-18T | 1434 | 0.244465 | 0         |  |
|       |      | Shiraz-25T | 1698 | 0.21835  | 0         |  |
|       |      | Shiraz-28T | 1735 | 0.350744 | 0         |  |
|       |      | Shiraz-29T | 1778 | 0.120767 | 0         |  |
|       |      | Shiraz-32T | 1833 | 0.551336 | 0         |  |
|       |      | Shiraz-38T | 1951 | 0.250891 | 0         |  |
|       |      | Shiraz-53T | 2078 | 0.287202 | 0         |  |
|       |      | Shiraz-58T | 2162 | 0.221505 | 0         |  |
|       |      | Shiraz-71T | 2238 | 0.603631 | 0         |  |
|       |      | Shiraz-3T  | 90   | 0.219276 | 0         |  |
|       |      | Shiraz-4T  | 253  | 0.372918 | 0         |  |
|       |      | Shiraz-36T | 378  | 0.179558 | 0         |  |
|       |      | Shiraz-46T | 943  | 0.093799 | 0         |  |
|       |      | Shiraz-9T  | 1325 | 0.221899 | 0         |  |
|       |      | Shiraz-18T | 1434 | 0.244465 | 0         |  |
|       |      | Shiraz-25T | 1698 | 0.21835  | 0         |  |
|       |      | Shiraz-28T | 1735 | 0.350744 | 0         |  |
|       |      | Shiraz-29T | 1778 | 0.120767 | 0         |  |
|       |      | Shiraz-32T | 1833 | 0.551336 | 0         |  |
|       |      | Shiraz-38T | 1951 | 0.250891 | 0         |  |
|       |      | Shiraz-53T | 2078 | 0.287202 | 0         |  |
|       |      | Shiraz-58T | 2162 | 0.221505 | 0         |  |
|       |      | Shiraz-71T | 2238 | 0.603631 | 0         |  |
| CUL4B | chrX | Shiraz-3T  | 242  | 0        | -0.336434 |  |
|       |      | Shiraz-3T  | 242  | 0        | -0.336434 |  |
|       |      | Shiraz-3T  | 244  | 0        | -0.023749 |  |
|       |      | Shiraz-3T  | 244  | 0        | -0.023749 |  |
|       |      | Shiraz-4T  | 261  | 0        | -0.336249 |  |
|       |      | Shiraz-4T  | 261  | 0        | -0.336249 |  |
|       |      | Shiraz-16T | 295  | 0.591657 | 0         |  |
|       |      | Shiraz-16T | 295  | 0.591657 | 0         |  |
|       |      | Shiraz-36T | 433  | 0        | -0.803961 |  |
|       |      | Shiraz-36T | 433  | 0        | -0.803961 |  |
|       |      | Shiraz-44T | 899  | 0        | -1.09697  |  |
|       |      | Shiraz-44T | 899  | 0        | -1.09697  |  |
|       |      | Shiraz-44T | 904  | 0        | -0.625526 |  |
|       |      | Shiraz-44T | 904  | 0        | -0.625526 |  |
|       |      | Shiraz-49T | 1170 | 0        | -0.967436 |  |
|       |      | Shiraz-49T | 1170 | 0        | -0.967436 |  |
|       |      | Shiraz-9T  | 1370 | 0.690073 | 0         |  |
|       |      | Shiraz-9T  | 1370 | 0.690073 | 0         |  |

|  |  |            |      |          |           |  |  |
|--|--|------------|------|----------|-----------|--|--|
|  |  | Shiraz-18T | 1457 | 0.643204 | 0         |  |  |
|  |  | Shiraz-18T | 1457 | 0.643204 | 0         |  |  |
|  |  | Shiraz-22T | 1673 | 0.611783 | 0         |  |  |
|  |  | Shiraz-22T | 1673 | 0.611783 | 0         |  |  |
|  |  | Shiraz-25T | 1719 | 0.472955 | 0         |  |  |
|  |  | Shiraz-25T | 1719 | 0.472955 | 0         |  |  |
|  |  | Shiraz-28T | 1762 | 0.562311 | 0         |  |  |
|  |  | Shiraz-28T | 1762 | 0.562311 | 0         |  |  |
|  |  | Shiraz-29T | 1801 | 0.815343 | 0         |  |  |
|  |  | Shiraz-29T | 1801 | 0.815343 | 0         |  |  |
|  |  | Shiraz-32T | 1870 | 0.729766 | 0         |  |  |
|  |  | Shiraz-32T | 1870 | 0.729766 | 0         |  |  |
|  |  | Shiraz-35T | 1933 | 0.488535 | 0         |  |  |
|  |  | Shiraz-35T | 1933 | 0.488535 | 0         |  |  |
|  |  | Shiraz-58T | 2223 | 0.833364 | 0         |  |  |
|  |  | Shiraz-58T | 2223 | 0.833364 | 0         |  |  |
|  |  | Shiraz-71T | 2263 | 0.975531 | 0         |  |  |
|  |  | Shiraz-71T | 2263 | 0.975531 | 0         |  |  |
|  |  | Shiraz-3T  | 242  | 0        | -0.336434 |  |  |
|  |  | Shiraz-3T  | 242  | 0        | -0.336434 |  |  |
|  |  | Shiraz-3T  | 244  | 0        | -0.023749 |  |  |
|  |  | Shiraz-3T  | 244  | 0        | -0.023749 |  |  |
|  |  | Shiraz-4T  | 261  | 0        | -0.336249 |  |  |
|  |  | Shiraz-4T  | 261  | 0        | -0.336249 |  |  |
|  |  | Shiraz-16T | 295  | 0.591657 | 0         |  |  |
|  |  | Shiraz-16T | 295  | 0.591657 | 0         |  |  |
|  |  | Shiraz-36T | 433  | 0        | -0.803961 |  |  |
|  |  | Shiraz-36T | 433  | 0        | -0.803961 |  |  |
|  |  | Shiraz-44T | 899  | 0        | -1.09697  |  |  |
|  |  | Shiraz-44T | 899  | 0        | -1.09697  |  |  |
|  |  | Shiraz-44T | 904  | 0        | -0.625526 |  |  |
|  |  | Shiraz-44T | 904  | 0        | -0.625526 |  |  |
|  |  | Shiraz-49T | 1170 | 0        | -0.967436 |  |  |
|  |  | Shiraz-49T | 1170 | 0        | -0.967436 |  |  |
|  |  | Shiraz-9T  | 1370 | 0.690073 | 0         |  |  |
|  |  | Shiraz-9T  | 1370 | 0.690073 | 0         |  |  |
|  |  | Shiraz-18T | 1457 | 0.643204 | 0         |  |  |
|  |  | Shiraz-18T | 1457 | 0.643204 | 0         |  |  |
|  |  | Shiraz-22T | 1673 | 0.611783 | 0         |  |  |
|  |  | Shiraz-22T | 1673 | 0.611783 | 0         |  |  |
|  |  | Shiraz-25T | 1719 | 0.472955 | 0         |  |  |
|  |  | Shiraz-25T | 1719 | 0.472955 | 0         |  |  |
|  |  | Shiraz-28T | 1762 | 0.562311 | 0         |  |  |
|  |  | Shiraz-28T | 1762 | 0.562311 | 0         |  |  |
|  |  | Shiraz-29T | 1801 | 0.815343 | 0         |  |  |
|  |  | Shiraz-29T | 1801 | 0.815343 | 0         |  |  |
|  |  | Shiraz-32T | 1870 | 0.729766 | 0         |  |  |

|      |      |            |      |          |           |  |
|------|------|------------|------|----------|-----------|--|
|      |      | Shiraz-32T | 1870 | 0.729766 | 0         |  |
|      |      | Shiraz-35T | 1933 | 0.488535 | 0         |  |
|      |      | Shiraz-35T | 1933 | 0.488535 | 0         |  |
|      |      | Shiraz-58T | 2223 | 0.833364 | 0         |  |
|      |      | Shiraz-58T | 2223 | 0.833364 | 0         |  |
|      |      | Shiraz-71T | 2263 | 0.975531 | 0         |  |
|      |      | Shiraz-71T | 2263 | 0.975531 | 0         |  |
|      |      | Shiraz-3T  | 242  | 0        | -0.336434 |  |
|      |      | Shiraz-3T  | 242  | 0        | -0.336434 |  |
|      |      | Shiraz-3T  | 244  | 0        | -0.023749 |  |
|      |      | Shiraz-3T  | 244  | 0        | -0.023749 |  |
|      |      | Shiraz-4T  | 261  | 0        | -0.336249 |  |
|      |      | Shiraz-4T  | 261  | 0        | -0.336249 |  |
|      |      | Shiraz-16T | 295  | 0.591657 | 0         |  |
|      |      | Shiraz-16T | 295  | 0.591657 | 0         |  |
|      |      | Shiraz-36T | 433  | 0        | -0.803961 |  |
|      |      | Shiraz-36T | 433  | 0        | -0.803961 |  |
|      |      | Shiraz-44T | 899  | 0        | -1.09697  |  |
|      |      | Shiraz-44T | 899  | 0        | -1.09697  |  |
|      |      | Shiraz-44T | 904  | 0        | -0.625526 |  |
|      |      | Shiraz-44T | 904  | 0        | -0.625526 |  |
|      |      | Shiraz-49T | 1170 | 0        | -0.967436 |  |
|      |      | Shiraz-49T | 1170 | 0        | -0.967436 |  |
|      |      | Shiraz-9T  | 1370 | 0.690073 | 0         |  |
|      |      | Shiraz-9T  | 1370 | 0.690073 | 0         |  |
|      |      | Shiraz-18T | 1457 | 0.643204 | 0         |  |
|      |      | Shiraz-18T | 1457 | 0.643204 | 0         |  |
|      |      | Shiraz-22T | 1673 | 0.611783 | 0         |  |
|      |      | Shiraz-22T | 1673 | 0.611783 | 0         |  |
|      |      | Shiraz-25T | 1719 | 0.472955 | 0         |  |
|      |      | Shiraz-25T | 1719 | 0.472955 | 0         |  |
|      |      | Shiraz-28T | 1762 | 0.562311 | 0         |  |
|      |      | Shiraz-28T | 1762 | 0.562311 | 0         |  |
|      |      | Shiraz-29T | 1801 | 0.815343 | 0         |  |
|      |      | Shiraz-29T | 1801 | 0.815343 | 0         |  |
|      |      | Shiraz-32T | 1870 | 0.729766 | 0         |  |
|      |      | Shiraz-32T | 1870 | 0.729766 | 0         |  |
|      |      | Shiraz-35T | 1933 | 0.488535 | 0         |  |
|      |      | Shiraz-35T | 1933 | 0.488535 | 0         |  |
|      |      | Shiraz-58T | 2223 | 0.833364 | 0         |  |
|      |      | Shiraz-58T | 2223 | 0.833364 | 0         |  |
|      |      | Shiraz-71T | 2263 | 0.975531 | 0         |  |
|      |      | Shiraz-71T | 2263 | 0.975531 | 0         |  |
| CUX1 | chr7 | Shiraz-3T  | 90   | 0.219276 | 0         |  |
|      |      | Shiraz-3T  | 90   | 0.219276 | 0         |  |
|      |      | Shiraz-3T  | 90   | 0.219276 | 0         |  |
|      |      | Shiraz-3T  | 94   | 0.74735  | 0         |  |

|  |  |            |      |          |           |  |
|--|--|------------|------|----------|-----------|--|
|  |  | Shiraz-3T  | 94   | 0.74735  | 0         |  |
|  |  | Shiraz-3T  | 94   | 0.74735  | 0         |  |
|  |  | Shiraz-4T  | 253  | 0.372918 | 0         |  |
|  |  | Shiraz-4T  | 253  | 0.372918 | 0         |  |
|  |  | Shiraz-4T  | 253  | 0.372918 | 0         |  |
|  |  | Shiraz-31T | 316  | 0.219196 | 0         |  |
|  |  | Shiraz-31T | 316  | 0.219196 | 0         |  |
|  |  | Shiraz-31T | 316  | 0.219196 | 0         |  |
|  |  | Shiraz-36T | 378  | 0.179558 | 0         |  |
|  |  | Shiraz-36T | 378  | 0.179558 | 0         |  |
|  |  | Shiraz-36T | 378  | 0.179558 | 0         |  |
|  |  | Shiraz-36T | 381  | 0.332628 | 0         |  |
|  |  | Shiraz-36T | 381  | 0.332628 | 0         |  |
|  |  | Shiraz-36T | 381  | 0.332628 | 0         |  |
|  |  | Shiraz-44T | 639  | 1.035032 | 0         |  |
|  |  | Shiraz-44T | 639  | 1.035032 | 0         |  |
|  |  | Shiraz-44T | 639  | 1.035032 | 0         |  |
|  |  | Shiraz-46T | 943  | 0.093799 | 0         |  |
|  |  | Shiraz-46T | 943  | 0.093799 | 0         |  |
|  |  | Shiraz-46T | 943  | 0.093799 | 0         |  |
|  |  | Shiraz-46T | 946  | 0.299835 | 0         |  |
|  |  | Shiraz-46T | 946  | 0.299835 | 0         |  |
|  |  | Shiraz-46T | 946  | 0.299835 | 0         |  |
|  |  | Shiraz-46T | 946  | 0.299835 | 0         |  |
|  |  | Shiraz-47T | 1030 | 0.257728 | 0         |  |
|  |  | Shiraz-47T | 1030 | 0.257728 | 0         |  |
|  |  | Shiraz-47T | 1030 | 0.257728 | 0         |  |
|  |  | Shiraz-49T | 1120 | 0.281656 | 0         |  |
|  |  | Shiraz-49T | 1120 | 0.281656 | 0         |  |
|  |  | Shiraz-49T | 1120 | 0.281656 | 0         |  |
|  |  | Shiraz-77T | 1225 | 0        | -0.117922 |  |
|  |  | Shiraz-77T | 1225 | 0        | -0.117922 |  |
|  |  | Shiraz-77T | 1225 | 0        | -0.117922 |  |
|  |  | Shiraz-77T | 1227 | 0.196445 | 0         |  |
|  |  | Shiraz-77T | 1227 | 0.196445 | 0         |  |
|  |  | Shiraz-77T | 1227 | 0.196445 | 0         |  |
|  |  | Shiraz-9T  | 1324 | 0.679266 | 0         |  |
|  |  | Shiraz-9T  | 1324 | 0.679266 | 0         |  |
|  |  | Shiraz-9T  | 1324 | 0.679266 | 0         |  |
|  |  | Shiraz-18T | 1434 | 0.244465 | 0         |  |
|  |  | Shiraz-18T | 1434 | 0.244465 | 0         |  |
|  |  | Shiraz-18T | 1434 | 0.244465 | 0         |  |
|  |  | Shiraz-22T | 1549 | 0        | -0.319623 |  |
|  |  | Shiraz-22T | 1549 | 0        | -0.319623 |  |
|  |  | Shiraz-22T | 1549 | 0        | -0.319623 |  |
|  |  | Shiraz-22T | 1551 | 0.324011 | 0         |  |
|  |  | Shiraz-22T | 1551 | 0.324011 | 0         |  |
|  |  | Shiraz-22T | 1551 | 0.324011 | 0         |  |



|  |  |            |      |          |   |  |
|--|--|------------|------|----------|---|--|
|  |  | Shiraz-25T | 1698 | 0.21835  | 0 |  |
|  |  | Shiraz-25T | 1698 | 0.21835  | 0 |  |
|  |  | Shiraz-25T | 1698 | 0.21835  | 0 |  |
|  |  | Shiraz-28T | 1735 | 0.350744 | 0 |  |
|  |  | Shiraz-28T | 1735 | 0.350744 | 0 |  |
|  |  | Shiraz-28T | 1735 | 0.350744 | 0 |  |
|  |  | Shiraz-29T | 1778 | 0.120767 | 0 |  |
|  |  | Shiraz-29T | 1778 | 0.120767 | 0 |  |
|  |  | Shiraz-29T | 1778 | 0.120767 | 0 |  |
|  |  | Shiraz-32T | 1833 | 0.551336 | 0 |  |
|  |  | Shiraz-32T | 1833 | 0.551336 | 0 |  |
|  |  | Shiraz-32T | 1833 | 0.551336 | 0 |  |
|  |  | Shiraz-38T | 1951 | 0.250891 | 0 |  |
|  |  | Shiraz-38T | 1951 | 0.250891 | 0 |  |
|  |  | Shiraz-38T | 1951 | 0.250891 | 0 |  |
|  |  | Shiraz-53T | 2078 | 0.287202 | 0 |  |
|  |  | Shiraz-53T | 2078 | 0.287202 | 0 |  |
|  |  | Shiraz-53T | 2078 | 0.287202 | 0 |  |
|  |  | Shiraz-58T | 2160 | 0.399007 | 0 |  |
|  |  | Shiraz-58T | 2160 | 0.399007 | 0 |  |
|  |  | Shiraz-58T | 2160 | 0.399007 | 0 |  |
|  |  | Shiraz-71T | 2238 | 0.603631 | 0 |  |
|  |  | Shiraz-71T | 2238 | 0.603631 | 0 |  |
|  |  | Shiraz-71T | 2238 | 0.603631 | 0 |  |
|  |  | Shiraz-3T  | 90   | 0.219276 | 0 |  |
|  |  | Shiraz-3T  | 90   | 0.219276 | 0 |  |
|  |  | Shiraz-3T  | 90   | 0.219276 | 0 |  |
|  |  | Shiraz-3T  | 94   | 0.74735  | 0 |  |
|  |  | Shiraz-3T  | 94   | 0.74735  | 0 |  |
|  |  | Shiraz-3T  | 94   | 0.74735  | 0 |  |
|  |  | Shiraz-3T  | 94   | 0.74735  | 0 |  |
|  |  | Shiraz-4T  | 253  | 0.372918 | 0 |  |
|  |  | Shiraz-4T  | 253  | 0.372918 | 0 |  |
|  |  | Shiraz-4T  | 253  | 0.372918 | 0 |  |
|  |  | Shiraz-31T | 316  | 0.219196 | 0 |  |
|  |  | Shiraz-31T | 316  | 0.219196 | 0 |  |
|  |  | Shiraz-31T | 316  | 0.219196 | 0 |  |
|  |  | Shiraz-36T | 378  | 0.179558 | 0 |  |
|  |  | Shiraz-36T | 378  | 0.179558 | 0 |  |
|  |  | Shiraz-36T | 378  | 0.179558 | 0 |  |
|  |  | Shiraz-36T | 381  | 0.332628 | 0 |  |
|  |  | Shiraz-36T | 381  | 0.332628 | 0 |  |
|  |  | Shiraz-36T | 381  | 0.332628 | 0 |  |
|  |  | Shiraz-44T | 639  | 1.035032 | 0 |  |
|  |  | Shiraz-44T | 639  | 1.035032 | 0 |  |
|  |  | Shiraz-44T | 639  | 1.035032 | 0 |  |
|  |  | Shiraz-46T | 943  | 0.093799 | 0 |  |
|  |  | Shiraz-46T | 943  | 0.093799 | 0 |  |

|  |  |            |      |          |           |  |  |
|--|--|------------|------|----------|-----------|--|--|
|  |  | Shiraz-46T | 943  | 0.093799 | 0         |  |  |
|  |  | Shiraz-46T | 946  | 0.299835 | 0         |  |  |
|  |  | Shiraz-46T | 946  | 0.299835 | 0         |  |  |
|  |  | Shiraz-46T | 946  | 0.299835 | 0         |  |  |
|  |  | Shiraz-47T | 1030 | 0.257728 | 0         |  |  |
|  |  | Shiraz-47T | 1030 | 0.257728 | 0         |  |  |
|  |  | Shiraz-47T | 1030 | 0.257728 | 0         |  |  |
|  |  | Shiraz-49T | 1120 | 0.281656 | 0         |  |  |
|  |  | Shiraz-49T | 1120 | 0.281656 | 0         |  |  |
|  |  | Shiraz-49T | 1120 | 0.281656 | 0         |  |  |
|  |  | Shiraz-77T | 1225 | 0        | -0.117922 |  |  |
|  |  | Shiraz-77T | 1225 | 0        | -0.117922 |  |  |
|  |  | Shiraz-77T | 1225 | 0        | -0.117922 |  |  |
|  |  | Shiraz-77T | 1227 | 0.196445 | 0         |  |  |
|  |  | Shiraz-77T | 1227 | 0.196445 | 0         |  |  |
|  |  | Shiraz-77T | 1227 | 0.196445 | 0         |  |  |
|  |  | Shiraz-9T  | 1324 | 0.679266 | 0         |  |  |
|  |  | Shiraz-9T  | 1324 | 0.679266 | 0         |  |  |
|  |  | Shiraz-9T  | 1324 | 0.679266 | 0         |  |  |
|  |  | Shiraz-18T | 1434 | 0.244465 | 0         |  |  |
|  |  | Shiraz-18T | 1434 | 0.244465 | 0         |  |  |
|  |  | Shiraz-18T | 1434 | 0.244465 | 0         |  |  |
|  |  | Shiraz-22T | 1549 | 0        | -0.319623 |  |  |
|  |  | Shiraz-22T | 1549 | 0        | -0.319623 |  |  |
|  |  | Shiraz-22T | 1549 | 0        | -0.319623 |  |  |
|  |  | Shiraz-22T | 1551 | 0.324011 | 0         |  |  |
|  |  | Shiraz-22T | 1551 | 0.324011 | 0         |  |  |
|  |  | Shiraz-22T | 1551 | 0.324011 | 0         |  |  |
|  |  | Shiraz-25T | 1698 | 0.21835  | 0         |  |  |
|  |  | Shiraz-25T | 1698 | 0.21835  | 0         |  |  |
|  |  | Shiraz-25T | 1698 | 0.21835  | 0         |  |  |
|  |  | Shiraz-28T | 1735 | 0.350744 | 0         |  |  |
|  |  | Shiraz-28T | 1735 | 0.350744 | 0         |  |  |
|  |  | Shiraz-28T | 1735 | 0.350744 | 0         |  |  |
|  |  | Shiraz-29T | 1778 | 0.120767 | 0         |  |  |
|  |  | Shiraz-29T | 1778 | 0.120767 | 0         |  |  |
|  |  | Shiraz-29T | 1778 | 0.120767 | 0         |  |  |
|  |  | Shiraz-32T | 1833 | 0.551336 | 0         |  |  |
|  |  | Shiraz-32T | 1833 | 0.551336 | 0         |  |  |
|  |  | Shiraz-32T | 1833 | 0.551336 | 0         |  |  |
|  |  | Shiraz-38T | 1951 | 0.250891 | 0         |  |  |
|  |  | Shiraz-38T | 1951 | 0.250891 | 0         |  |  |
|  |  | Shiraz-38T | 1951 | 0.250891 | 0         |  |  |
|  |  | Shiraz-53T | 2078 | 0.287202 | 0         |  |  |
|  |  | Shiraz-53T | 2078 | 0.287202 | 0         |  |  |
|  |  | Shiraz-53T | 2078 | 0.287202 | 0         |  |  |
|  |  | Shiraz-58T | 2160 | 0.399007 | 0         |  |  |

|  |            |      |          |           |  |
|--|------------|------|----------|-----------|--|
|  | Shiraz-58T | 2160 | 0.399007 | 0         |  |
|  | Shiraz-58T | 2160 | 0.399007 | 0         |  |
|  | Shiraz-71T | 2238 | 0.603631 | 0         |  |
|  | Shiraz-71T | 2238 | 0.603631 | 0         |  |
|  | Shiraz-71T | 2238 | 0.603631 | 0         |  |
|  | Shiraz-3T  | 90   | 0.219276 | 0         |  |
|  | Shiraz-3T  | 90   | 0.219276 | 0         |  |
|  | Shiraz-3T  | 90   | 0.219276 | 0         |  |
|  | Shiraz-3T  | 94   | 0.74735  | 0         |  |
|  | Shiraz-3T  | 94   | 0.74735  | 0         |  |
|  | Shiraz-3T  | 94   | 0.74735  | 0         |  |
|  | Shiraz-4T  | 253  | 0.372918 | 0         |  |
|  | Shiraz-4T  | 253  | 0.372918 | 0         |  |
|  | Shiraz-4T  | 253  | 0.372918 | 0         |  |
|  | Shiraz-31T | 316  | 0.219196 | 0         |  |
|  | Shiraz-31T | 316  | 0.219196 | 0         |  |
|  | Shiraz-31T | 316  | 0.219196 | 0         |  |
|  | Shiraz-36T | 378  | 0.179558 | 0         |  |
|  | Shiraz-36T | 378  | 0.179558 | 0         |  |
|  | Shiraz-36T | 378  | 0.179558 | 0         |  |
|  | Shiraz-36T | 381  | 0.332628 | 0         |  |
|  | Shiraz-36T | 381  | 0.332628 | 0         |  |
|  | Shiraz-36T | 381  | 0.332628 | 0         |  |
|  | Shiraz-44T | 639  | 1.035032 | 0         |  |
|  | Shiraz-44T | 639  | 1.035032 | 0         |  |
|  | Shiraz-44T | 639  | 1.035032 | 0         |  |
|  | Shiraz-46T | 943  | 0.093799 | 0         |  |
|  | Shiraz-46T | 943  | 0.093799 | 0         |  |
|  | Shiraz-46T | 943  | 0.093799 | 0         |  |
|  | Shiraz-46T | 946  | 0.299835 | 0         |  |
|  | Shiraz-46T | 946  | 0.299835 | 0         |  |
|  | Shiraz-46T | 946  | 0.299835 | 0         |  |
|  | Shiraz-47T | 1030 | 0.257728 | 0         |  |
|  | Shiraz-47T | 1030 | 0.257728 | 0         |  |
|  | Shiraz-47T | 1030 | 0.257728 | 0         |  |
|  | Shiraz-49T | 1120 | 0.281656 | 0         |  |
|  | Shiraz-49T | 1120 | 0.281656 | 0         |  |
|  | Shiraz-49T | 1120 | 0.281656 | 0         |  |
|  | Shiraz-77T | 1225 | 0        | -0.117922 |  |
|  | Shiraz-77T | 1225 | 0        | -0.117922 |  |
|  | Shiraz-77T | 1225 | 0        | -0.117922 |  |
|  | Shiraz-77T | 1227 | 0.196445 | 0         |  |
|  | Shiraz-77T | 1227 | 0.196445 | 0         |  |
|  | Shiraz-77T | 1227 | 0.196445 | 0         |  |
|  | Shiraz-9T  | 1324 | 0.679266 | 0         |  |
|  | Shiraz-9T  | 1324 | 0.679266 | 0         |  |
|  | Shiraz-9T  | 1324 | 0.679266 | 0         |  |

|       |      |            |      |          |           |  |  |
|-------|------|------------|------|----------|-----------|--|--|
|       |      | Shiraz-18T | 1434 | 0.244465 | 0         |  |  |
|       |      | Shiraz-18T | 1434 | 0.244465 | 0         |  |  |
|       |      | Shiraz-18T | 1434 | 0.244465 | 0         |  |  |
|       |      | Shiraz-22T | 1549 | 0        | -0.319623 |  |  |
|       |      | Shiraz-22T | 1549 | 0        | -0.319623 |  |  |
|       |      | Shiraz-22T | 1549 | 0        | -0.319623 |  |  |
|       |      | Shiraz-22T | 1551 | 0.324011 | 0         |  |  |
|       |      | Shiraz-22T | 1551 | 0.324011 | 0         |  |  |
|       |      | Shiraz-22T | 1551 | 0.324011 | 0         |  |  |
|       |      | Shiraz-25T | 1698 | 0.21835  | 0         |  |  |
|       |      | Shiraz-25T | 1698 | 0.21835  | 0         |  |  |
|       |      | Shiraz-25T | 1698 | 0.21835  | 0         |  |  |
|       |      | Shiraz-28T | 1735 | 0.350744 | 0         |  |  |
|       |      | Shiraz-28T | 1735 | 0.350744 | 0         |  |  |
|       |      | Shiraz-28T | 1735 | 0.350744 | 0         |  |  |
|       |      | Shiraz-29T | 1778 | 0.120767 | 0         |  |  |
|       |      | Shiraz-29T | 1778 | 0.120767 | 0         |  |  |
|       |      | Shiraz-29T | 1778 | 0.120767 | 0         |  |  |
|       |      | Shiraz-32T | 1833 | 0.551336 | 0         |  |  |
|       |      | Shiraz-32T | 1833 | 0.551336 | 0         |  |  |
|       |      | Shiraz-32T | 1833 | 0.551336 | 0         |  |  |
|       |      | Shiraz-38T | 1951 | 0.250891 | 0         |  |  |
|       |      | Shiraz-38T | 1951 | 0.250891 | 0         |  |  |
|       |      | Shiraz-38T | 1951 | 0.250891 | 0         |  |  |
|       |      | Shiraz-53T | 2078 | 0.287202 | 0         |  |  |
|       |      | Shiraz-53T | 2078 | 0.287202 | 0         |  |  |
|       |      | Shiraz-53T | 2078 | 0.287202 | 0         |  |  |
|       |      | Shiraz-58T | 2160 | 0.399007 | 0         |  |  |
|       |      | Shiraz-58T | 2160 | 0.399007 | 0         |  |  |
|       |      | Shiraz-58T | 2160 | 0.399007 | 0         |  |  |
|       |      | Shiraz-71T | 2238 | 0.603631 | 0         |  |  |
|       |      | Shiraz-71T | 2238 | 0.603631 | 0         |  |  |
|       |      | Shiraz-71T | 2238 | 0.603631 | 0         |  |  |
| CXCR3 | chrX | Shiraz-4T  | 261  | 0        | -0.336249 |  |  |
|       |      | Shiraz-16T | 295  | 0.591657 | 0         |  |  |
|       |      | Shiraz-36T | 433  | 0        | -0.803961 |  |  |
|       |      | Shiraz-44T | 899  | 0        | -1.09697  |  |  |
|       |      | Shiraz-44T | 900  | 0        | -0.584284 |  |  |
|       |      | Shiraz-49T | 1170 | 0        | -0.967436 |  |  |
|       |      | Shiraz-49T | 1171 | 0        | -0.612379 |  |  |
|       |      | Shiraz-77T | 1283 | 0.296555 | 0         |  |  |
|       |      | Shiraz-18T | 1457 | 0.643204 | 0         |  |  |
|       |      | Shiraz-22T | 1673 | 0.611783 | 0         |  |  |
|       |      | Shiraz-22T | 1674 | 0.887899 | 0         |  |  |
|       |      | Shiraz-25T | 1719 | 0.472955 | 0         |  |  |
|       |      | Shiraz-28T | 1762 | 0.562311 | 0         |  |  |
|       |      | Shiraz-29T | 1801 | 0.815343 | 0         |  |  |

|        |      |            |      |          |           |  |
|--------|------|------------|------|----------|-----------|--|
|        |      | Shiraz-32T | 1870 | 0.729766 | 0         |  |
|        |      | Shiraz-35T | 1933 | 0.488535 | 0         |  |
|        |      | Shiraz-58T | 2223 | 0.833364 | 0         |  |
|        |      | Shiraz-58T | 2224 | 1.076575 | 0         |  |
|        |      | Shiraz-71T | 2263 | 0.975531 | 0         |  |
|        |      | Shiraz-4T  | 261  | 0        | -0.336249 |  |
|        |      | Shiraz-16T | 295  | 0.591657 | 0         |  |
|        |      | Shiraz-36T | 433  | 0        | -0.803961 |  |
|        |      | Shiraz-44T | 899  | 0        | -1.09697  |  |
|        |      | Shiraz-44T | 900  | 0        | -0.584284 |  |
|        |      | Shiraz-49T | 1170 | 0        | -0.967436 |  |
|        |      | Shiraz-49T | 1171 | 0        | -0.612379 |  |
|        |      | Shiraz-77T | 1283 | 0.296555 | 0         |  |
|        |      | Shiraz-18T | 1457 | 0.643204 | 0         |  |
|        |      | Shiraz-22T | 1673 | 0.611783 | 0         |  |
|        |      | Shiraz-22T | 1674 | 0.887899 | 0         |  |
|        |      | Shiraz-25T | 1719 | 0.472955 | 0         |  |
|        |      | Shiraz-28T | 1762 | 0.562311 | 0         |  |
|        |      | Shiraz-29T | 1801 | 0.815343 | 0         |  |
|        |      | Shiraz-32T | 1870 | 0.729766 | 0         |  |
|        |      | Shiraz-35T | 1933 | 0.488535 | 0         |  |
|        |      | Shiraz-58T | 2223 | 0.833364 | 0         |  |
|        |      | Shiraz-58T | 2224 | 1.076575 | 0         |  |
|        |      | Shiraz-71T | 2263 | 0.975531 | 0         |  |
|        |      | Shiraz-4T  | 261  | 0        | -0.336249 |  |
|        |      | Shiraz-16T | 295  | 0.591657 | 0         |  |
|        |      | Shiraz-36T | 433  | 0        | -0.803961 |  |
|        |      | Shiraz-44T | 899  | 0        | -1.09697  |  |
|        |      | Shiraz-44T | 900  | 0        | -0.584284 |  |
|        |      | Shiraz-49T | 1170 | 0        | -0.967436 |  |
|        |      | Shiraz-49T | 1171 | 0        | -0.612379 |  |
|        |      | Shiraz-77T | 1283 | 0.296555 | 0         |  |
|        |      | Shiraz-18T | 1457 | 0.643204 | 0         |  |
|        |      | Shiraz-22T | 1673 | 0.611783 | 0         |  |
|        |      | Shiraz-22T | 1674 | 0.887899 | 0         |  |
|        |      | Shiraz-25T | 1719 | 0.472955 | 0         |  |
|        |      | Shiraz-28T | 1762 | 0.562311 | 0         |  |
|        |      | Shiraz-29T | 1801 | 0.815343 | 0         |  |
|        |      | Shiraz-32T | 1870 | 0.729766 | 0         |  |
|        |      | Shiraz-35T | 1933 | 0.488535 | 0         |  |
|        |      | Shiraz-58T | 2223 | 0.833364 | 0         |  |
|        |      | Shiraz-58T | 2224 | 1.076575 | 0         |  |
|        |      | Shiraz-71T | 2263 | 0.975531 | 0         |  |
| CXorf1 | chrX | Shiraz-3T  | 242  | 0        | -0.336434 |  |
|        |      | Shiraz-4T  | 261  | 0        | -0.336249 |  |
|        |      | Shiraz-16T | 295  | 0.591657 | 0         |  |
|        |      | Shiraz-36T | 433  | 0        | -0.803961 |  |

|  |            |      |          |           |  |
|--|------------|------|----------|-----------|--|
|  | Shiraz-44T | 899  | 0        | -1.09697  |  |
|  | Shiraz-44T | 907  | 0        | -1.370847 |  |
|  | Shiraz-49T | 1170 | 0        | -0.967436 |  |
|  | Shiraz-9T  | 1370 | 0.690073 | 0         |  |
|  | Shiraz-18T | 1457 | 0.643204 | 0         |  |
|  | Shiraz-22T | 1673 | 0.611783 | 0         |  |
|  | Shiraz-25T | 1719 | 0.472955 | 0         |  |
|  | Shiraz-28T | 1762 | 0.562311 | 0         |  |
|  | Shiraz-29T | 1801 | 0.815343 | 0         |  |
|  | Shiraz-32T | 1870 | 0.729766 | 0         |  |
|  | Shiraz-35T | 1933 | 0.488535 | 0         |  |
|  | Shiraz-58T | 2223 | 0.833364 | 0         |  |
|  | Shiraz-71T | 2263 | 0.975531 | 0         |  |
|  | Shiraz-3T  | 242  | 0        | -0.336434 |  |
|  | Shiraz-4T  | 261  | 0        | -0.336249 |  |
|  | Shiraz-16T | 295  | 0.591657 | 0         |  |
|  | Shiraz-36T | 433  | 0        | -0.803961 |  |
|  | Shiraz-44T | 899  | 0        | -1.09697  |  |
|  | Shiraz-44T | 907  | 0        | -1.370847 |  |
|  | Shiraz-49T | 1170 | 0        | -0.967436 |  |
|  | Shiraz-9T  | 1370 | 0.690073 | 0         |  |
|  | Shiraz-18T | 1457 | 0.643204 | 0         |  |
|  | Shiraz-22T | 1673 | 0.611783 | 0         |  |
|  | Shiraz-25T | 1719 | 0.472955 | 0         |  |
|  | Shiraz-28T | 1762 | 0.562311 | 0         |  |
|  | Shiraz-29T | 1801 | 0.815343 | 0         |  |
|  | Shiraz-32T | 1870 | 0.729766 | 0         |  |
|  | Shiraz-35T | 1933 | 0.488535 | 0         |  |
|  | Shiraz-58T | 2223 | 0.833364 | 0         |  |
|  | Shiraz-71T | 2263 | 0.975531 | 0         |  |
|  | Shiraz-3T  | 242  | 0        | -0.336434 |  |
|  | Shiraz-4T  | 261  | 0        | -0.336249 |  |
|  | Shiraz-16T | 295  | 0.591657 | 0         |  |
|  | Shiraz-36T | 433  | 0        | -0.803961 |  |
|  | Shiraz-44T | 899  | 0        | -1.09697  |  |
|  | Shiraz-44T | 907  | 0        | -1.370847 |  |
|  | Shiraz-49T | 1170 | 0        | -0.967436 |  |
|  | Shiraz-9T  | 1370 | 0.690073 | 0         |  |
|  | Shiraz-18T | 1457 | 0.643204 | 0         |  |
|  | Shiraz-22T | 1673 | 0.611783 | 0         |  |
|  | Shiraz-25T | 1719 | 0.472955 | 0         |  |
|  | Shiraz-28T | 1762 | 0.562311 | 0         |  |
|  | Shiraz-29T | 1801 | 0.815343 | 0         |  |
|  | Shiraz-32T | 1870 | 0.729766 | 0         |  |
|  | Shiraz-35T | 1933 | 0.488535 | 0         |  |
|  | Shiraz-58T | 2223 | 0.833364 | 0         |  |
|  | Shiraz-71T | 2263 | 0.975531 | 0         |  |

|         |      |            |      |          |           |  |  |
|---------|------|------------|------|----------|-----------|--|--|
| CXorf15 | chrX | Shiraz-3T  | 235  | 0        | -0.28401  |  |  |
|         |      | Shiraz-4T  | 260  | 0        | -0.324128 |  |  |
|         |      | Shiraz-16T | 294  | 0.655804 | 0         |  |  |
|         |      | Shiraz-36T | 431  | 0        | -0.78035  |  |  |
|         |      | Shiraz-44T | 891  | 0        | -0.954044 |  |  |
|         |      | Shiraz-49T | 1166 | 0        | -0.917235 |  |  |
|         |      | Shiraz-9T  | 1368 | 0.199713 | 0         |  |  |
|         |      | Shiraz-18T | 1455 | 0        | -0.186773 |  |  |
|         |      | Shiraz-22T | 1669 | 0.695915 | 0         |  |  |
|         |      | Shiraz-25T | 1717 | 0.420447 | 0         |  |  |
|         |      | Shiraz-28T | 1760 | 0.538181 | 0         |  |  |
|         |      | Shiraz-29T | 1800 | 0.672527 | 0         |  |  |
|         |      | Shiraz-32T | 1869 | 0.776805 | 0         |  |  |
|         |      | Shiraz-35T | 1932 | 0.507141 | 0         |  |  |
|         |      | Shiraz-40T | 2051 | 0.098506 | 0         |  |  |
|         |      | Shiraz-58T | 2221 | 0.871948 | 0         |  |  |
|         |      | Shiraz-71T | 2260 | 0.68394  | 0         |  |  |
|         |      | Shiraz-71T | 2261 | 0.508399 | 0         |  |  |
|         |      | Shiraz-3T  | 235  | 0        | -0.28401  |  |  |
|         |      | Shiraz-4T  | 260  | 0        | -0.324128 |  |  |
|         |      | Shiraz-16T | 294  | 0.655804 | 0         |  |  |
|         |      | Shiraz-36T | 431  | 0        | -0.78035  |  |  |
|         |      | Shiraz-44T | 891  | 0        | -0.954044 |  |  |
|         |      | Shiraz-49T | 1166 | 0        | -0.917235 |  |  |
|         |      | Shiraz-9T  | 1368 | 0.199713 | 0         |  |  |
|         |      | Shiraz-18T | 1455 | 0        | -0.186773 |  |  |
|         |      | Shiraz-22T | 1669 | 0.695915 | 0         |  |  |
|         |      | Shiraz-25T | 1717 | 0.420447 | 0         |  |  |
|         |      | Shiraz-28T | 1760 | 0.538181 | 0         |  |  |
|         |      | Shiraz-29T | 1800 | 0.672527 | 0         |  |  |
|         |      | Shiraz-32T | 1869 | 0.776805 | 0         |  |  |
|         |      | Shiraz-35T | 1932 | 0.507141 | 0         |  |  |
|         |      | Shiraz-40T | 2051 | 0.098506 | 0         |  |  |
|         |      | Shiraz-58T | 2221 | 0.871948 | 0         |  |  |
|         |      | Shiraz-71T | 2260 | 0.68394  | 0         |  |  |
|         |      | Shiraz-71T | 2261 | 0.508399 | 0         |  |  |
|         |      | Shiraz-3T  | 235  | 0        | -0.28401  |  |  |
|         |      | Shiraz-4T  | 260  | 0        | -0.324128 |  |  |
|         |      | Shiraz-16T | 294  | 0.655804 | 0         |  |  |
|         |      | Shiraz-36T | 431  | 0        | -0.78035  |  |  |
|         |      | Shiraz-44T | 891  | 0        | -0.954044 |  |  |
|         |      | Shiraz-49T | 1166 | 0        | -0.917235 |  |  |
|         |      | Shiraz-9T  | 1368 | 0.199713 | 0         |  |  |
|         |      | Shiraz-18T | 1455 | 0        | -0.186773 |  |  |
|         |      | Shiraz-22T | 1669 | 0.695915 | 0         |  |  |
|         |      | Shiraz-25T | 1717 | 0.420447 | 0         |  |  |
|         |      | Shiraz-28T | 1760 | 0.538181 | 0         |  |  |

|         |      |            |      |          |           |  |
|---------|------|------------|------|----------|-----------|--|
|         |      | Shiraz-29T | 1800 | 0.672527 | 0         |  |
|         |      | Shiraz-32T | 1869 | 0.776805 | 0         |  |
|         |      | Shiraz-35T | 1932 | 0.507141 | 0         |  |
|         |      | Shiraz-40T | 2051 | 0.098506 | 0         |  |
|         |      | Shiraz-58T | 2221 | 0.871948 | 0         |  |
|         |      | Shiraz-71T | 2260 | 0.68394  | 0         |  |
|         |      | Shiraz-71T | 2261 | 0.508399 | 0         |  |
| CXorf21 | chrX | Shiraz-3T  | 235  | 0        | -0.28401  |  |
|         |      | Shiraz-3T  | 236  | 0        | -0.435445 |  |
|         |      | Shiraz-4T  | 260  | 0        | -0.324128 |  |
|         |      | Shiraz-16T | 294  | 0.655804 | 0         |  |
|         |      | Shiraz-36T | 431  | 0        | -0.78035  |  |
|         |      | Shiraz-44T | 891  | 0        | -0.954044 |  |
|         |      | Shiraz-44T | 893  | 0        | -1.364406 |  |
|         |      | Shiraz-44T | 894  | 0        | -0.776734 |  |
|         |      | Shiraz-47T | 1083 | 0        | -0.103285 |  |
|         |      | Shiraz-49T | 1166 | 0        | -0.917235 |  |
|         |      | Shiraz-49T | 1168 | 0        | -1.073859 |  |
|         |      | Shiraz-9T  | 1368 | 0.199713 | 0         |  |
|         |      | Shiraz-18T | 1455 | 0        | -0.186773 |  |
|         |      | Shiraz-22T | 1669 | 0.695915 | 0         |  |
|         |      | Shiraz-22T | 1671 | 0.369309 | 0         |  |
|         |      | Shiraz-25T | 1717 | 0.420447 | 0         |  |
|         |      | Shiraz-25T | 1718 | 0        | -0.452703 |  |
|         |      | Shiraz-28T | 1760 | 0.538181 | 0         |  |
|         |      | Shiraz-28T | 1761 | 0        | -0.695601 |  |
|         |      | Shiraz-29T | 1800 | 0.672527 | 0         |  |
|         |      | Shiraz-32T | 1869 | 0.776805 | 0         |  |
|         |      | Shiraz-35T | 1932 | 0.507141 | 0         |  |
|         |      | Shiraz-40T | 2051 | 0.098506 | 0         |  |
|         |      | Shiraz-58T | 2221 | 0.871948 | 0         |  |
|         |      | Shiraz-58T | 2222 | 0.679664 | 0         |  |
|         |      | Shiraz-71T | 2260 | 0.68394  | 0         |  |
|         |      | Shiraz-71T | 2261 | 0.508399 | 0         |  |
|         |      | Shiraz-3T  | 235  | 0        | -0.28401  |  |
|         |      | Shiraz-3T  | 236  | 0        | -0.435445 |  |
|         |      | Shiraz-4T  | 260  | 0        | -0.324128 |  |
|         |      | Shiraz-16T | 294  | 0.655804 | 0         |  |
|         |      | Shiraz-36T | 431  | 0        | -0.78035  |  |
|         |      | Shiraz-44T | 891  | 0        | -0.954044 |  |
|         |      | Shiraz-44T | 893  | 0        | -1.364406 |  |
|         |      | Shiraz-44T | 894  | 0        | -0.776734 |  |
|         |      | Shiraz-47T | 1083 | 0        | -0.103285 |  |
|         |      | Shiraz-49T | 1166 | 0        | -0.917235 |  |
|         |      | Shiraz-49T | 1168 | 0        | -1.073859 |  |
|         |      | Shiraz-9T  | 1368 | 0.199713 | 0         |  |
|         |      | Shiraz-18T | 1455 | 0        | -0.186773 |  |



|         |      |            |      |          |           |  |
|---------|------|------------|------|----------|-----------|--|
|         |      | Shiraz-22T | 1669 | 0.695915 | 0         |  |
|         |      | Shiraz-22T | 1671 | 0.369309 | 0         |  |
|         |      | Shiraz-25T | 1717 | 0.420447 | 0         |  |
|         |      | Shiraz-25T | 1718 | 0        | -0.452703 |  |
|         |      | Shiraz-28T | 1760 | 0.538181 | 0         |  |
|         |      | Shiraz-28T | 1761 | 0        | -0.695601 |  |
|         |      | Shiraz-29T | 1800 | 0.672527 | 0         |  |
|         |      | Shiraz-32T | 1869 | 0.776805 | 0         |  |
|         |      | Shiraz-35T | 1932 | 0.507141 | 0         |  |
|         |      | Shiraz-40T | 2051 | 0.098506 | 0         |  |
|         |      | Shiraz-58T | 2221 | 0.871948 | 0         |  |
|         |      | Shiraz-58T | 2222 | 0.679664 | 0         |  |
|         |      | Shiraz-71T | 2260 | 0.68394  | 0         |  |
|         |      | Shiraz-71T | 2261 | 0.508399 | 0         |  |
|         |      | Shiraz-3T  | 235  | 0        | -0.28401  |  |
|         |      | Shiraz-3T  | 236  | 0        | -0.435445 |  |
|         |      | Shiraz-4T  | 260  | 0        | -0.324128 |  |
|         |      | Shiraz-16T | 294  | 0.655804 | 0         |  |
|         |      | Shiraz-36T | 431  | 0        | -0.78035  |  |
|         |      | Shiraz-44T | 891  | 0        | -0.954044 |  |
|         |      | Shiraz-44T | 893  | 0        | -1.364406 |  |
|         |      | Shiraz-44T | 894  | 0        | -0.776734 |  |
|         |      | Shiraz-47T | 1083 | 0        | -0.103285 |  |
|         |      | Shiraz-49T | 1166 | 0        | -0.917235 |  |
|         |      | Shiraz-49T | 1168 | 0        | -1.073859 |  |
|         |      | Shiraz-9T  | 1368 | 0.199713 | 0         |  |
|         |      | Shiraz-18T | 1455 | 0        | -0.186773 |  |
|         |      | Shiraz-22T | 1669 | 0.695915 | 0         |  |
|         |      | Shiraz-22T | 1671 | 0.369309 | 0         |  |
|         |      | Shiraz-25T | 1717 | 0.420447 | 0         |  |
|         |      | Shiraz-25T | 1718 | 0        | -0.452703 |  |
|         |      | Shiraz-28T | 1760 | 0.538181 | 0         |  |
|         |      | Shiraz-28T | 1761 | 0        | -0.695601 |  |
|         |      | Shiraz-29T | 1800 | 0.672527 | 0         |  |
|         |      | Shiraz-32T | 1869 | 0.776805 | 0         |  |
|         |      | Shiraz-35T | 1932 | 0.507141 | 0         |  |
|         |      | Shiraz-40T | 2051 | 0.098506 | 0         |  |
|         |      | Shiraz-58T | 2221 | 0.871948 | 0         |  |
|         |      | Shiraz-58T | 2222 | 0.679664 | 0         |  |
|         |      | Shiraz-71T | 2260 | 0.68394  | 0         |  |
|         |      | Shiraz-71T | 2261 | 0.508399 | 0         |  |
| CXorf22 | chrX | Shiraz-3T  | 235  | 0        | -0.28401  |  |
|         |      | Shiraz-3T  | 236  | 0        | -0.435445 |  |
|         |      | Shiraz-4T  | 260  | 0        | -0.324128 |  |
|         |      | Shiraz-16T | 294  | 0.655804 | 0         |  |
|         |      | Shiraz-36T | 431  | 0        | -0.78035  |  |
|         |      | Shiraz-44T | 891  | 0        | -0.954044 |  |

|  |            |      |          |           |  |
|--|------------|------|----------|-----------|--|
|  | Shiraz-44T | 893  | 0        | -1.364406 |  |
|  | Shiraz-47T | 1083 | 0        | -0.103285 |  |
|  | Shiraz-49T | 1166 | 0        | -0.917235 |  |
|  | Shiraz-49T | 1168 | 0        | -1.073859 |  |
|  | Shiraz-9T  | 1368 | 0.199713 | 0         |  |
|  | Shiraz-18T | 1455 | 0        | -0.186773 |  |
|  | Shiraz-22T | 1669 | 0.695915 | 0         |  |
|  | Shiraz-22T | 1671 | 0.369309 | 0         |  |
|  | Shiraz-25T | 1717 | 0.420447 | 0         |  |
|  | Shiraz-28T | 1760 | 0.538181 | 0         |  |
|  | Shiraz-29T | 1800 | 0.672527 | 0         |  |
|  | Shiraz-32T | 1869 | 0.776805 | 0         |  |
|  | Shiraz-35T | 1932 | 0.507141 | 0         |  |
|  | Shiraz-40T | 2051 | 0.098506 | 0         |  |
|  | Shiraz-58T | 2221 | 0.871948 | 0         |  |
|  | Shiraz-58T | 2222 | 0.679664 | 0         |  |
|  | Shiraz-71T | 2260 | 0.68394  | 0         |  |
|  | Shiraz-71T | 2261 | 0.508399 | 0         |  |
|  | Shiraz-3T  | 235  | 0        | -0.28401  |  |
|  | Shiraz-3T  | 236  | 0        | -0.435445 |  |
|  | Shiraz-4T  | 260  | 0        | -0.324128 |  |
|  | Shiraz-16T | 294  | 0.655804 | 0         |  |
|  | Shiraz-36T | 431  | 0        | -0.78035  |  |
|  | Shiraz-44T | 891  | 0        | -0.954044 |  |
|  | Shiraz-44T | 893  | 0        | -1.364406 |  |
|  | Shiraz-47T | 1083 | 0        | -0.103285 |  |
|  | Shiraz-49T | 1166 | 0        | -0.917235 |  |
|  | Shiraz-49T | 1168 | 0        | -1.073859 |  |
|  | Shiraz-9T  | 1368 | 0.199713 | 0         |  |
|  | Shiraz-18T | 1455 | 0        | -0.186773 |  |
|  | Shiraz-22T | 1669 | 0.695915 | 0         |  |
|  | Shiraz-22T | 1671 | 0.369309 | 0         |  |
|  | Shiraz-25T | 1717 | 0.420447 | 0         |  |
|  | Shiraz-28T | 1760 | 0.538181 | 0         |  |
|  | Shiraz-29T | 1800 | 0.672527 | 0         |  |
|  | Shiraz-32T | 1869 | 0.776805 | 0         |  |
|  | Shiraz-35T | 1932 | 0.507141 | 0         |  |
|  | Shiraz-40T | 2051 | 0.098506 | 0         |  |
|  | Shiraz-58T | 2221 | 0.871948 | 0         |  |
|  | Shiraz-58T | 2222 | 0.679664 | 0         |  |
|  | Shiraz-71T | 2260 | 0.68394  | 0         |  |
|  | Shiraz-71T | 2261 | 0.508399 | 0         |  |
|  | Shiraz-3T  | 235  | 0        | -0.28401  |  |
|  | Shiraz-3T  | 236  | 0        | -0.435445 |  |
|  | Shiraz-4T  | 260  | 0        | -0.324128 |  |
|  | Shiraz-16T | 294  | 0.655804 | 0         |  |
|  | Shiraz-36T | 431  | 0        | -0.78035  |  |

|         |      |            |      |          |           |  |  |
|---------|------|------------|------|----------|-----------|--|--|
|         |      | Shiraz-44T | 891  | 0        | -0.954044 |  |  |
|         |      | Shiraz-44T | 893  | 0        | -1.364406 |  |  |
|         |      | Shiraz-47T | 1083 | 0        | -0.103285 |  |  |
|         |      | Shiraz-49T | 1166 | 0        | -0.917235 |  |  |
|         |      | Shiraz-49T | 1168 | 0        | -1.073859 |  |  |
|         |      | Shiraz-9T  | 1368 | 0.199713 | 0         |  |  |
|         |      | Shiraz-18T | 1455 | 0        | -0.186773 |  |  |
|         |      | Shiraz-22T | 1669 | 0.695915 | 0         |  |  |
|         |      | Shiraz-22T | 1671 | 0.369309 | 0         |  |  |
|         |      | Shiraz-25T | 1717 | 0.420447 | 0         |  |  |
|         |      | Shiraz-28T | 1760 | 0.538181 | 0         |  |  |
|         |      | Shiraz-29T | 1800 | 0.672527 | 0         |  |  |
|         |      | Shiraz-32T | 1869 | 0.776805 | 0         |  |  |
|         |      | Shiraz-35T | 1932 | 0.507141 | 0         |  |  |
|         |      | Shiraz-40T | 2051 | 0.098506 | 0         |  |  |
|         |      | Shiraz-58T | 2221 | 0.871948 | 0         |  |  |
|         |      | Shiraz-58T | 2222 | 0.679664 | 0         |  |  |
|         |      | Shiraz-71T | 2260 | 0.68394  | 0         |  |  |
|         |      | Shiraz-71T | 2261 | 0.508399 | 0         |  |  |
| CXorf23 | chrX | Shiraz-3T  | 235  | 0        | -0.28401  |  |  |
|         |      | Shiraz-4T  | 260  | 0        | -0.324128 |  |  |
|         |      | Shiraz-16T | 294  | 0.655804 | 0         |  |  |
|         |      | Shiraz-36T | 431  | 0        | -0.78035  |  |  |
|         |      | Shiraz-44T | 891  | 0        | -0.954044 |  |  |
|         |      | Shiraz-49T | 1166 | 0        | -0.917235 |  |  |
|         |      | Shiraz-77T | 1281 | 0.136627 | 0         |  |  |
|         |      | Shiraz-9T  | 1368 | 0.199713 | 0         |  |  |
|         |      | Shiraz-18T | 1455 | 0        | -0.186773 |  |  |
|         |      | Shiraz-22T | 1669 | 0.695915 | 0         |  |  |
|         |      | Shiraz-25T | 1717 | 0.420447 | 0         |  |  |
|         |      | Shiraz-28T | 1760 | 0.538181 | 0         |  |  |
|         |      | Shiraz-29T | 1800 | 0.672527 | 0         |  |  |
|         |      | Shiraz-32T | 1869 | 0.776805 | 0         |  |  |
|         |      | Shiraz-35T | 1932 | 0.507141 | 0         |  |  |
|         |      | Shiraz-40T | 2051 | 0.098506 | 0         |  |  |
|         |      | Shiraz-58T | 2221 | 0.871948 | 0         |  |  |
|         |      | Shiraz-71T | 2260 | 0.68394  | 0         |  |  |
|         |      | Shiraz-71T | 2261 | 0.508399 | 0         |  |  |
|         |      | Shiraz-3T  | 235  | 0        | -0.28401  |  |  |
|         |      | Shiraz-4T  | 260  | 0        | -0.324128 |  |  |
|         |      | Shiraz-16T | 294  | 0.655804 | 0         |  |  |
|         |      | Shiraz-36T | 431  | 0        | -0.78035  |  |  |
|         |      | Shiraz-44T | 891  | 0        | -0.954044 |  |  |
|         |      | Shiraz-49T | 1166 | 0        | -0.917235 |  |  |
|         |      | Shiraz-77T | 1281 | 0.136627 | 0         |  |  |
|         |      | Shiraz-9T  | 1368 | 0.199713 | 0         |  |  |
|         |      | Shiraz-18T | 1455 | 0        | -0.186773 |  |  |

|         |      |            |      |          |           |  |  |
|---------|------|------------|------|----------|-----------|--|--|
|         |      | Shiraz-22T | 1669 | 0.695915 | 0         |  |  |
|         |      | Shiraz-25T | 1717 | 0.420447 | 0         |  |  |
|         |      | Shiraz-28T | 1760 | 0.538181 | 0         |  |  |
|         |      | Shiraz-29T | 1800 | 0.672527 | 0         |  |  |
|         |      | Shiraz-32T | 1869 | 0.776805 | 0         |  |  |
|         |      | Shiraz-35T | 1932 | 0.507141 | 0         |  |  |
|         |      | Shiraz-40T | 2051 | 0.098506 | 0         |  |  |
|         |      | Shiraz-58T | 2221 | 0.871948 | 0         |  |  |
|         |      | Shiraz-71T | 2260 | 0.68394  | 0         |  |  |
|         |      | Shiraz-71T | 2261 | 0.508399 | 0         |  |  |
|         |      | Shiraz-3T  | 235  | 0        | -0.28401  |  |  |
|         |      | Shiraz-4T  | 260  | 0        | -0.324128 |  |  |
|         |      | Shiraz-16T | 294  | 0.655804 | 0         |  |  |
|         |      | Shiraz-36T | 431  | 0        | -0.78035  |  |  |
|         |      | Shiraz-44T | 891  | 0        | -0.954044 |  |  |
|         |      | Shiraz-49T | 1166 | 0        | -0.917235 |  |  |
|         |      | Shiraz-77T | 1281 | 0.136627 | 0         |  |  |
|         |      | Shiraz-9T  | 1368 | 0.199713 | 0         |  |  |
|         |      | Shiraz-18T | 1455 | 0        | -0.186773 |  |  |
|         |      | Shiraz-22T | 1669 | 0.695915 | 0         |  |  |
|         |      | Shiraz-25T | 1717 | 0.420447 | 0         |  |  |
|         |      | Shiraz-28T | 1760 | 0.538181 | 0         |  |  |
|         |      | Shiraz-29T | 1800 | 0.672527 | 0         |  |  |
|         |      | Shiraz-32T | 1869 | 0.776805 | 0         |  |  |
|         |      | Shiraz-35T | 1932 | 0.507141 | 0         |  |  |
|         |      | Shiraz-40T | 2051 | 0.098506 | 0         |  |  |
|         |      | Shiraz-58T | 2221 | 0.871948 | 0         |  |  |
|         |      | Shiraz-71T | 2260 | 0.68394  | 0         |  |  |
|         |      | Shiraz-71T | 2261 | 0.508399 | 0         |  |  |
| CXorf26 | chrX | Shiraz-3T  | 242  | 0        | -0.336434 |  |  |
|         |      | Shiraz-4T  | 261  | 0        | -0.336249 |  |  |
|         |      | Shiraz-16T | 295  | 0.591657 | 0         |  |  |
|         |      | Shiraz-36T | 433  | 0        | -0.803961 |  |  |
|         |      | Shiraz-44T | 899  | 0        | -1.09697  |  |  |
|         |      | Shiraz-49T | 1170 | 0        | -0.967436 |  |  |
|         |      | Shiraz-18T | 1457 | 0.643204 | 0         |  |  |
|         |      | Shiraz-22T | 1673 | 0.611783 | 0         |  |  |
|         |      | Shiraz-25T | 1719 | 0.472955 | 0         |  |  |
|         |      | Shiraz-28T | 1762 | 0.562311 | 0         |  |  |
|         |      | Shiraz-29T | 1801 | 0.815343 | 0         |  |  |
|         |      | Shiraz-32T | 1870 | 0.729766 | 0         |  |  |
|         |      | Shiraz-35T | 1933 | 0.488535 | 0         |  |  |
|         |      | Shiraz-58T | 2223 | 0.833364 | 0         |  |  |
|         |      | Shiraz-71T | 2263 | 0.975531 | 0         |  |  |
|         |      | Shiraz-3T  | 242  | 0        | -0.336434 |  |  |
|         |      | Shiraz-4T  | 261  | 0        | -0.336249 |  |  |
|         |      | Shiraz-16T | 295  | 0.591657 | 0         |  |  |

|         |      |            |      |          |           |  |  |
|---------|------|------------|------|----------|-----------|--|--|
|         |      | Shiraz-36T | 433  | 0        | -0.803961 |  |  |
|         |      | Shiraz-44T | 899  | 0        | -1.09697  |  |  |
|         |      | Shiraz-49T | 1170 | 0        | -0.967436 |  |  |
|         |      | Shiraz-18T | 1457 | 0.643204 | 0         |  |  |
|         |      | Shiraz-22T | 1673 | 0.611783 | 0         |  |  |
|         |      | Shiraz-25T | 1719 | 0.472955 | 0         |  |  |
|         |      | Shiraz-28T | 1762 | 0.562311 | 0         |  |  |
|         |      | Shiraz-29T | 1801 | 0.815343 | 0         |  |  |
|         |      | Shiraz-32T | 1870 | 0.729766 | 0         |  |  |
|         |      | Shiraz-35T | 1933 | 0.488535 | 0         |  |  |
|         |      | Shiraz-58T | 2223 | 0.833364 | 0         |  |  |
|         |      | Shiraz-71T | 2263 | 0.975531 | 0         |  |  |
|         |      | Shiraz-3T  | 242  | 0        | -0.336434 |  |  |
|         |      | Shiraz-4T  | 261  | 0        | -0.336249 |  |  |
|         |      | Shiraz-16T | 295  | 0.591657 | 0         |  |  |
|         |      | Shiraz-36T | 433  | 0        | -0.803961 |  |  |
|         |      | Shiraz-44T | 899  | 0        | -1.09697  |  |  |
|         |      | Shiraz-49T | 1170 | 0        | -0.967436 |  |  |
|         |      | Shiraz-18T | 1457 | 0.643204 | 0         |  |  |
|         |      | Shiraz-22T | 1673 | 0.611783 | 0         |  |  |
|         |      | Shiraz-25T | 1719 | 0.472955 | 0         |  |  |
|         |      | Shiraz-28T | 1762 | 0.562311 | 0         |  |  |
|         |      | Shiraz-29T | 1801 | 0.815343 | 0         |  |  |
|         |      | Shiraz-32T | 1870 | 0.729766 | 0         |  |  |
|         |      | Shiraz-35T | 1933 | 0.488535 | 0         |  |  |
|         |      | Shiraz-58T | 2223 | 0.833364 | 0         |  |  |
|         |      | Shiraz-71T | 2263 | 0.975531 | 0         |  |  |
| CXorf27 | chrX | Shiraz-3T  | 235  | 0        | -0.28401  |  |  |
|         |      | Shiraz-4T  | 260  | 0        | -0.324128 |  |  |
|         |      | Shiraz-16T | 294  | 0.655804 | 0         |  |  |
|         |      | Shiraz-36T | 431  | 0        | -0.78035  |  |  |
|         |      | Shiraz-44T | 891  | 0        | -0.954044 |  |  |
|         |      | Shiraz-49T | 1166 | 0        | -0.917235 |  |  |
|         |      | Shiraz-49T | 1168 | 0        | -1.073859 |  |  |
|         |      | Shiraz-9T  | 1368 | 0.199713 | 0         |  |  |
|         |      | Shiraz-18T | 1455 | 0        | -0.186773 |  |  |
|         |      | Shiraz-22T | 1669 | 0.695915 | 0         |  |  |
|         |      | Shiraz-25T | 1717 | 0.420447 | 0         |  |  |
|         |      | Shiraz-28T | 1760 | 0.538181 | 0         |  |  |
|         |      | Shiraz-29T | 1800 | 0.672527 | 0         |  |  |
|         |      | Shiraz-32T | 1869 | 0.776805 | 0         |  |  |
|         |      | Shiraz-35T | 1932 | 0.507141 | 0         |  |  |
|         |      | Shiraz-40T | 2051 | 0.098506 | 0         |  |  |
|         |      | Shiraz-58T | 2221 | 0.871948 | 0         |  |  |
|         |      | Shiraz-71T | 2260 | 0.68394  | 0         |  |  |
|         |      | Shiraz-3T  | 235  | 0        | -0.28401  |  |  |
|         |      | Shiraz-4T  | 260  | 0        | -0.324128 |  |  |

|         |      |            |      |          |           |  |  |
|---------|------|------------|------|----------|-----------|--|--|
|         |      | Shiraz-16T | 294  | 0.655804 | 0         |  |  |
|         |      | Shiraz-36T | 431  | 0        | -0.78035  |  |  |
|         |      | Shiraz-44T | 891  | 0        | -0.954044 |  |  |
|         |      | Shiraz-49T | 1166 | 0        | -0.917235 |  |  |
|         |      | Shiraz-49T | 1168 | 0        | -1.073859 |  |  |
|         |      | Shiraz-9T  | 1368 | 0.199713 | 0         |  |  |
|         |      | Shiraz-18T | 1455 | 0        | -0.186773 |  |  |
|         |      | Shiraz-22T | 1669 | 0.695915 | 0         |  |  |
|         |      | Shiraz-25T | 1717 | 0.420447 | 0         |  |  |
|         |      | Shiraz-28T | 1760 | 0.538181 | 0         |  |  |
|         |      | Shiraz-29T | 1800 | 0.672527 | 0         |  |  |
|         |      | Shiraz-32T | 1869 | 0.776805 | 0         |  |  |
|         |      | Shiraz-35T | 1932 | 0.507141 | 0         |  |  |
|         |      | Shiraz-40T | 2051 | 0.098506 | 0         |  |  |
|         |      | Shiraz-58T | 2221 | 0.871948 | 0         |  |  |
|         |      | Shiraz-71T | 2260 | 0.68394  | 0         |  |  |
|         |      | Shiraz-3T  | 235  | 0        | -0.28401  |  |  |
|         |      | Shiraz-4T  | 260  | 0        | -0.324128 |  |  |
|         |      | Shiraz-16T | 294  | 0.655804 | 0         |  |  |
|         |      | Shiraz-36T | 431  | 0        | -0.78035  |  |  |
|         |      | Shiraz-44T | 891  | 0        | -0.954044 |  |  |
|         |      | Shiraz-49T | 1166 | 0        | -0.917235 |  |  |
|         |      | Shiraz-49T | 1168 | 0        | -1.073859 |  |  |
|         |      | Shiraz-9T  | 1368 | 0.199713 | 0         |  |  |
|         |      | Shiraz-18T | 1455 | 0        | -0.186773 |  |  |
|         |      | Shiraz-22T | 1669 | 0.695915 | 0         |  |  |
|         |      | Shiraz-25T | 1717 | 0.420447 | 0         |  |  |
|         |      | Shiraz-28T | 1760 | 0.538181 | 0         |  |  |
|         |      | Shiraz-29T | 1800 | 0.672527 | 0         |  |  |
|         |      | Shiraz-32T | 1869 | 0.776805 | 0         |  |  |
|         |      | Shiraz-35T | 1932 | 0.507141 | 0         |  |  |
|         |      | Shiraz-40T | 2051 | 0.098506 | 0         |  |  |
|         |      | Shiraz-58T | 2221 | 0.871948 | 0         |  |  |
|         |      | Shiraz-71T | 2260 | 0.68394  | 0         |  |  |
| CXorf30 | chrX | Shiraz-3T  | 235  | 0        | -0.28401  |  |  |
|         |      | Shiraz-3T  | 236  | 0        | -0.435445 |  |  |
|         |      | Shiraz-4T  | 260  | 0        | -0.324128 |  |  |
|         |      | Shiraz-16T | 294  | 0.655804 | 0         |  |  |
|         |      | Shiraz-36T | 431  | 0        | -0.78035  |  |  |
|         |      | Shiraz-44T | 891  | 0        | -0.954044 |  |  |
|         |      | Shiraz-44T | 893  | 0        | -1.364406 |  |  |
|         |      | Shiraz-47T | 1083 | 0        | -0.103285 |  |  |
|         |      | Shiraz-49T | 1166 | 0        | -0.917235 |  |  |
|         |      | Shiraz-49T | 1168 | 0        | -1.073859 |  |  |
|         |      | Shiraz-9T  | 1368 | 0.199713 | 0         |  |  |
|         |      | Shiraz-18T | 1455 | 0        | -0.186773 |  |  |
|         |      | Shiraz-22T | 1669 | 0.695915 | 0         |  |  |

|  |            |      |          |           |  |
|--|------------|------|----------|-----------|--|
|  | Shiraz-22T | 1671 | 0.369309 | 0         |  |
|  | Shiraz-25T | 1717 | 0.420447 | 0         |  |
|  | Shiraz-28T | 1760 | 0.538181 | 0         |  |
|  | Shiraz-29T | 1800 | 0.672527 | 0         |  |
|  | Shiraz-32T | 1869 | 0.776805 | 0         |  |
|  | Shiraz-35T | 1932 | 0.507141 | 0         |  |
|  | Shiraz-40T | 2051 | 0.098506 | 0         |  |
|  | Shiraz-58T | 2221 | 0.871948 | 0         |  |
|  | Shiraz-58T | 2222 | 0.679664 | 0         |  |
|  | Shiraz-71T | 2260 | 0.68394  | 0         |  |
|  | Shiraz-71T | 2261 | 0.508399 | 0         |  |
|  | Shiraz-3T  | 235  | 0        | -0.28401  |  |
|  | Shiraz-3T  | 236  | 0        | -0.435445 |  |
|  | Shiraz-4T  | 260  | 0        | -0.324128 |  |
|  | Shiraz-16T | 294  | 0.655804 | 0         |  |
|  | Shiraz-36T | 431  | 0        | -0.78035  |  |
|  | Shiraz-44T | 891  | 0        | -0.954044 |  |
|  | Shiraz-44T | 893  | 0        | -1.364406 |  |
|  | Shiraz-47T | 1083 | 0        | -0.103285 |  |
|  | Shiraz-49T | 1166 | 0        | -0.917235 |  |
|  | Shiraz-49T | 1168 | 0        | -1.073859 |  |
|  | Shiraz-9T  | 1368 | 0.199713 | 0         |  |
|  | Shiraz-18T | 1455 | 0        | -0.186773 |  |
|  | Shiraz-22T | 1669 | 0.695915 | 0         |  |
|  | Shiraz-22T | 1671 | 0.369309 | 0         |  |
|  | Shiraz-25T | 1717 | 0.420447 | 0         |  |
|  | Shiraz-28T | 1760 | 0.538181 | 0         |  |
|  | Shiraz-29T | 1800 | 0.672527 | 0         |  |
|  | Shiraz-32T | 1869 | 0.776805 | 0         |  |
|  | Shiraz-35T | 1932 | 0.507141 | 0         |  |
|  | Shiraz-40T | 2051 | 0.098506 | 0         |  |
|  | Shiraz-58T | 2221 | 0.871948 | 0         |  |
|  | Shiraz-58T | 2222 | 0.679664 | 0         |  |
|  | Shiraz-71T | 2260 | 0.68394  | 0         |  |
|  | Shiraz-71T | 2261 | 0.508399 | 0         |  |
|  | Shiraz-3T  | 235  | 0        | -0.28401  |  |
|  | Shiraz-3T  | 236  | 0        | -0.435445 |  |
|  | Shiraz-4T  | 260  | 0        | -0.324128 |  |
|  | Shiraz-16T | 294  | 0.655804 | 0         |  |
|  | Shiraz-36T | 431  | 0        | -0.78035  |  |
|  | Shiraz-44T | 891  | 0        | -0.954044 |  |
|  | Shiraz-44T | 893  | 0        | -1.364406 |  |
|  | Shiraz-47T | 1083 | 0        | -0.103285 |  |
|  | Shiraz-49T | 1166 | 0        | -0.917235 |  |
|  | Shiraz-49T | 1168 | 0        | -1.073859 |  |
|  | Shiraz-9T  | 1368 | 0.199713 | 0         |  |
|  | Shiraz-18T | 1455 | 0        | -0.186773 |  |

|         |      |            |      |          |           |  |
|---------|------|------------|------|----------|-----------|--|
|         |      | Shiraz-22T | 1669 | 0.695915 | 0         |  |
|         |      | Shiraz-22T | 1671 | 0.369309 | 0         |  |
|         |      | Shiraz-25T | 1717 | 0.420447 | 0         |  |
|         |      | Shiraz-28T | 1760 | 0.538181 | 0         |  |
|         |      | Shiraz-29T | 1800 | 0.672527 | 0         |  |
|         |      | Shiraz-32T | 1869 | 0.776805 | 0         |  |
|         |      | Shiraz-35T | 1932 | 0.507141 | 0         |  |
|         |      | Shiraz-40T | 2051 | 0.098506 | 0         |  |
|         |      | Shiraz-58T | 2221 | 0.871948 | 0         |  |
|         |      | Shiraz-58T | 2222 | 0.679664 | 0         |  |
|         |      | Shiraz-71T | 2260 | 0.68394  | 0         |  |
|         |      | Shiraz-71T | 2261 | 0.508399 | 0         |  |
| CXorf36 | chrX | Shiraz-3T  | 235  | 0        | -0.28401  |  |
|         |      | Shiraz-3T  | 235  | 0        | -0.28401  |  |
|         |      | Shiraz-4T  | 260  | 0        | -0.324128 |  |
|         |      | Shiraz-4T  | 260  | 0        | -0.324128 |  |
|         |      | Shiraz-16T | 294  | 0.655804 | 0         |  |
|         |      | Shiraz-16T | 294  | 0.655804 | 0         |  |
|         |      | Shiraz-31T | 345  | 0.103301 | 0         |  |
|         |      | Shiraz-31T | 345  | 0.103301 | 0         |  |
|         |      | Shiraz-36T | 431  | 0        | -0.78035  |  |
|         |      | Shiraz-36T | 431  | 0        | -0.78035  |  |
|         |      | Shiraz-36T | 432  | 0        | -0.6692   |  |
|         |      | Shiraz-36T | 432  | 0        | -0.6692   |  |
|         |      | Shiraz-44T | 891  | 0        | -0.954044 |  |
|         |      | Shiraz-44T | 891  | 0        | -0.954044 |  |
|         |      | Shiraz-46T | 991  | 0.139564 | 0         |  |
|         |      | Shiraz-46T | 991  | 0.139564 | 0         |  |
|         |      | Shiraz-49T | 1166 | 0        | -0.917235 |  |
|         |      | Shiraz-49T | 1166 | 0        | -0.917235 |  |
|         |      | Shiraz-9T  | 1368 | 0.199713 | 0         |  |
|         |      | Shiraz-9T  | 1368 | 0.199713 | 0         |  |
|         |      | Shiraz-18T | 1455 | 0        | -0.186773 |  |
|         |      | Shiraz-18T | 1455 | 0        | -0.186773 |  |
|         |      | Shiraz-22T | 1669 | 0.695915 | 0         |  |
|         |      | Shiraz-22T | 1669 | 0.695915 | 0         |  |
|         |      | Shiraz-25T | 1717 | 0.420447 | 0         |  |
|         |      | Shiraz-25T | 1717 | 0.420447 | 0         |  |
|         |      | Shiraz-28T | 1760 | 0.538181 | 0         |  |
|         |      | Shiraz-28T | 1760 | 0.538181 | 0         |  |
|         |      | Shiraz-29T | 1800 | 0.672527 | 0         |  |
|         |      | Shiraz-29T | 1800 | 0.672527 | 0         |  |
|         |      | Shiraz-32T | 1869 | 0.776805 | 0         |  |
|         |      | Shiraz-32T | 1869 | 0.776805 | 0         |  |
|         |      | Shiraz-35T | 1932 | 0.507141 | 0         |  |
|         |      | Shiraz-35T | 1932 | 0.507141 | 0         |  |
|         |      | Shiraz-40T | 2051 | 0.098506 | 0         |  |



|  |  |            |      |          |           |  |  |
|--|--|------------|------|----------|-----------|--|--|
|  |  | Shiraz-40T | 2051 | 0.098506 | 0         |  |  |
|  |  | Shiraz-58T | 2221 | 0.871948 | 0         |  |  |
|  |  | Shiraz-58T | 2221 | 0.871948 | 0         |  |  |
|  |  | Shiraz-71T | 2260 | 0.68394  | 0         |  |  |
|  |  | Shiraz-71T | 2260 | 0.68394  | 0         |  |  |
|  |  | Shiraz-71T | 2262 | 0.986748 | 0         |  |  |
|  |  | Shiraz-71T | 2262 | 0.986748 | 0         |  |  |
|  |  | Shiraz-3T  | 235  | 0        | -0.28401  |  |  |
|  |  | Shiraz-3T  | 235  | 0        | -0.28401  |  |  |
|  |  | Shiraz-4T  | 260  | 0        | -0.324128 |  |  |
|  |  | Shiraz-4T  | 260  | 0        | -0.324128 |  |  |
|  |  | Shiraz-16T | 294  | 0.655804 | 0         |  |  |
|  |  | Shiraz-16T | 294  | 0.655804 | 0         |  |  |
|  |  | Shiraz-31T | 345  | 0.103301 | 0         |  |  |
|  |  | Shiraz-31T | 345  | 0.103301 | 0         |  |  |
|  |  | Shiraz-36T | 431  | 0        | -0.78035  |  |  |
|  |  | Shiraz-36T | 431  | 0        | -0.78035  |  |  |
|  |  | Shiraz-36T | 432  | 0        | -0.6692   |  |  |
|  |  | Shiraz-36T | 432  | 0        | -0.6692   |  |  |
|  |  | Shiraz-44T | 891  | 0        | -0.954044 |  |  |
|  |  | Shiraz-44T | 891  | 0        | -0.954044 |  |  |
|  |  | Shiraz-46T | 991  | 0.139564 | 0         |  |  |
|  |  | Shiraz-46T | 991  | 0.139564 | 0         |  |  |
|  |  | Shiraz-49T | 1166 | 0        | -0.917235 |  |  |
|  |  | Shiraz-49T | 1166 | 0        | -0.917235 |  |  |
|  |  | Shiraz-9T  | 1368 | 0.199713 | 0         |  |  |
|  |  | Shiraz-9T  | 1368 | 0.199713 | 0         |  |  |
|  |  | Shiraz-18T | 1455 | 0        | -0.186773 |  |  |
|  |  | Shiraz-18T | 1455 | 0        | -0.186773 |  |  |
|  |  | Shiraz-22T | 1669 | 0.695915 | 0         |  |  |
|  |  | Shiraz-22T | 1669 | 0.695915 | 0         |  |  |
|  |  | Shiraz-25T | 1717 | 0.420447 | 0         |  |  |
|  |  | Shiraz-25T | 1717 | 0.420447 | 0         |  |  |
|  |  | Shiraz-28T | 1760 | 0.538181 | 0         |  |  |
|  |  | Shiraz-28T | 1760 | 0.538181 | 0         |  |  |
|  |  | Shiraz-29T | 1800 | 0.672527 | 0         |  |  |
|  |  | Shiraz-29T | 1800 | 0.672527 | 0         |  |  |
|  |  | Shiraz-32T | 1869 | 0.776805 | 0         |  |  |
|  |  | Shiraz-32T | 1869 | 0.776805 | 0         |  |  |
|  |  | Shiraz-35T | 1932 | 0.507141 | 0         |  |  |
|  |  | Shiraz-35T | 1932 | 0.507141 | 0         |  |  |
|  |  | Shiraz-40T | 2051 | 0.098506 | 0         |  |  |
|  |  | Shiraz-40T | 2051 | 0.098506 | 0         |  |  |
|  |  | Shiraz-58T | 2221 | 0.871948 | 0         |  |  |
|  |  | Shiraz-58T | 2221 | 0.871948 | 0         |  |  |
|  |  | Shiraz-71T | 2260 | 0.68394  | 0         |  |  |
|  |  | Shiraz-71T | 2260 | 0.68394  | 0         |  |  |

|         |      |            |      |          |           |  |  |
|---------|------|------------|------|----------|-----------|--|--|
|         |      | Shiraz-71T | 2262 | 0.986748 | 0         |  |  |
|         |      | Shiraz-71T | 2262 | 0.986748 | 0         |  |  |
|         |      | Shiraz-3T  | 235  | 0        | -0.28401  |  |  |
|         |      | Shiraz-3T  | 235  | 0        | -0.28401  |  |  |
|         |      | Shiraz-4T  | 260  | 0        | -0.324128 |  |  |
|         |      | Shiraz-4T  | 260  | 0        | -0.324128 |  |  |
|         |      | Shiraz-16T | 294  | 0.655804 | 0         |  |  |
|         |      | Shiraz-16T | 294  | 0.655804 | 0         |  |  |
|         |      | Shiraz-31T | 345  | 0.103301 | 0         |  |  |
|         |      | Shiraz-31T | 345  | 0.103301 | 0         |  |  |
|         |      | Shiraz-36T | 431  | 0        | -0.78035  |  |  |
|         |      | Shiraz-36T | 431  | 0        | -0.78035  |  |  |
|         |      | Shiraz-36T | 432  | 0        | -0.6692   |  |  |
|         |      | Shiraz-36T | 432  | 0        | -0.6692   |  |  |
|         |      | Shiraz-44T | 891  | 0        | -0.954044 |  |  |
|         |      | Shiraz-44T | 891  | 0        | -0.954044 |  |  |
|         |      | Shiraz-46T | 991  | 0.139564 | 0         |  |  |
|         |      | Shiraz-46T | 991  | 0.139564 | 0         |  |  |
|         |      | Shiraz-49T | 1166 | 0        | -0.917235 |  |  |
|         |      | Shiraz-49T | 1166 | 0        | -0.917235 |  |  |
|         |      | Shiraz-9T  | 1368 | 0.199713 | 0         |  |  |
|         |      | Shiraz-9T  | 1368 | 0.199713 | 0         |  |  |
|         |      | Shiraz-18T | 1455 | 0        | -0.186773 |  |  |
|         |      | Shiraz-18T | 1455 | 0        | -0.186773 |  |  |
|         |      | Shiraz-22T | 1669 | 0.695915 | 0         |  |  |
|         |      | Shiraz-22T | 1669 | 0.695915 | 0         |  |  |
|         |      | Shiraz-25T | 1717 | 0.420447 | 0         |  |  |
|         |      | Shiraz-25T | 1717 | 0.420447 | 0         |  |  |
|         |      | Shiraz-28T | 1760 | 0.538181 | 0         |  |  |
|         |      | Shiraz-28T | 1760 | 0.538181 | 0         |  |  |
|         |      | Shiraz-29T | 1800 | 0.672527 | 0         |  |  |
|         |      | Shiraz-29T | 1800 | 0.672527 | 0         |  |  |
|         |      | Shiraz-32T | 1869 | 0.776805 | 0         |  |  |
|         |      | Shiraz-32T | 1869 | 0.776805 | 0         |  |  |
|         |      | Shiraz-35T | 1932 | 0.507141 | 0         |  |  |
|         |      | Shiraz-35T | 1932 | 0.507141 | 0         |  |  |
|         |      | Shiraz-40T | 2051 | 0.098506 | 0         |  |  |
|         |      | Shiraz-40T | 2051 | 0.098506 | 0         |  |  |
|         |      | Shiraz-58T | 2221 | 0.871948 | 0         |  |  |
|         |      | Shiraz-58T | 2221 | 0.871948 | 0         |  |  |
|         |      | Shiraz-71T | 2260 | 0.68394  | 0         |  |  |
|         |      | Shiraz-71T | 2260 | 0.68394  | 0         |  |  |
|         |      | Shiraz-71T | 2262 | 0.986748 | 0         |  |  |
|         |      | Shiraz-71T | 2262 | 0.986748 | 0         |  |  |
| CXorf38 | chrX | Shiraz-3T  | 235  | 0        | -0.28401  |  |  |
|         |      | Shiraz-3T  | 237  | 0.082458 | 0         |  |  |
|         |      | Shiraz-4T  | 260  | 0        | -0.324128 |  |  |

|  |            |      |          |           |  |
|--|------------|------|----------|-----------|--|
|  | Shiraz-16T | 294  | 0.655804 | 0         |  |
|  | Shiraz-31T | 345  | 0.103301 | 0         |  |
|  | Shiraz-36T | 431  | 0        | -0.78035  |  |
|  | Shiraz-36T | 432  | 0        | -0.6692   |  |
|  | Shiraz-44T | 891  | 0        | -0.954044 |  |
|  | Shiraz-44T | 895  | 0        | -0.195747 |  |
|  | Shiraz-46T | 991  | 0.139564 | 0         |  |
|  | Shiraz-49T | 1166 | 0        | -0.917235 |  |
|  | Shiraz-9T  | 1368 | 0.199713 | 0         |  |
|  | Shiraz-18T | 1455 | 0        | -0.186773 |  |
|  | Shiraz-22T | 1669 | 0.695915 | 0         |  |
|  | Shiraz-25T | 1717 | 0.420447 | 0         |  |
|  | Shiraz-28T | 1760 | 0.538181 | 0         |  |
|  | Shiraz-29T | 1800 | 0.672527 | 0         |  |
|  | Shiraz-32T | 1869 | 0.776805 | 0         |  |
|  | Shiraz-35T | 1932 | 0.507141 | 0         |  |
|  | Shiraz-40T | 2051 | 0.098506 | 0         |  |
|  | Shiraz-58T | 2221 | 0.871948 | 0         |  |
|  | Shiraz-71T | 2260 | 0.68394  | 0         |  |
|  | Shiraz-71T | 2262 | 0.986748 | 0         |  |
|  | Shiraz-3T  | 235  | 0        | -0.28401  |  |
|  | Shiraz-3T  | 237  | 0.082458 | 0         |  |
|  | Shiraz-4T  | 260  | 0        | -0.324128 |  |
|  | Shiraz-16T | 294  | 0.655804 | 0         |  |
|  | Shiraz-31T | 345  | 0.103301 | 0         |  |
|  | Shiraz-36T | 431  | 0        | -0.78035  |  |
|  | Shiraz-36T | 432  | 0        | -0.6692   |  |
|  | Shiraz-44T | 891  | 0        | -0.954044 |  |
|  | Shiraz-44T | 895  | 0        | -0.195747 |  |
|  | Shiraz-46T | 991  | 0.139564 | 0         |  |
|  | Shiraz-49T | 1166 | 0        | -0.917235 |  |
|  | Shiraz-9T  | 1368 | 0.199713 | 0         |  |
|  | Shiraz-18T | 1455 | 0        | -0.186773 |  |
|  | Shiraz-22T | 1669 | 0.695915 | 0         |  |
|  | Shiraz-25T | 1717 | 0.420447 | 0         |  |
|  | Shiraz-28T | 1760 | 0.538181 | 0         |  |
|  | Shiraz-29T | 1800 | 0.672527 | 0         |  |
|  | Shiraz-32T | 1869 | 0.776805 | 0         |  |
|  | Shiraz-35T | 1932 | 0.507141 | 0         |  |
|  | Shiraz-40T | 2051 | 0.098506 | 0         |  |
|  | Shiraz-58T | 2221 | 0.871948 | 0         |  |
|  | Shiraz-71T | 2260 | 0.68394  | 0         |  |
|  | Shiraz-71T | 2262 | 0.986748 | 0         |  |
|  | Shiraz-3T  | 235  | 0        | -0.28401  |  |
|  | Shiraz-3T  | 237  | 0.082458 | 0         |  |
|  | Shiraz-4T  | 260  | 0        | -0.324128 |  |
|  | Shiraz-16T | 294  | 0.655804 | 0         |  |

|         |      |            |      |          |           |  |  |
|---------|------|------------|------|----------|-----------|--|--|
|         |      | Shiraz-31T | 345  | 0.103301 | 0         |  |  |
|         |      | Shiraz-36T | 431  | 0        | -0.78035  |  |  |
|         |      | Shiraz-36T | 432  | 0        | -0.6692   |  |  |
|         |      | Shiraz-44T | 891  | 0        | -0.954044 |  |  |
|         |      | Shiraz-44T | 895  | 0        | -0.195747 |  |  |
|         |      | Shiraz-46T | 991  | 0.139564 | 0         |  |  |
|         |      | Shiraz-49T | 1166 | 0        | -0.917235 |  |  |
|         |      | Shiraz-9T  | 1368 | 0.199713 | 0         |  |  |
|         |      | Shiraz-18T | 1455 | 0        | -0.186773 |  |  |
|         |      | Shiraz-22T | 1669 | 0.695915 | 0         |  |  |
|         |      | Shiraz-25T | 1717 | 0.420447 | 0         |  |  |
|         |      | Shiraz-28T | 1760 | 0.538181 | 0         |  |  |
|         |      | Shiraz-29T | 1800 | 0.672527 | 0         |  |  |
|         |      | Shiraz-32T | 1869 | 0.776805 | 0         |  |  |
|         |      | Shiraz-35T | 1932 | 0.507141 | 0         |  |  |
|         |      | Shiraz-40T | 2051 | 0.098506 | 0         |  |  |
|         |      | Shiraz-58T | 2221 | 0.871948 | 0         |  |  |
|         |      | Shiraz-71T | 2260 | 0.68394  | 0         |  |  |
|         |      | Shiraz-71T | 2262 | 0.986748 | 0         |  |  |
| CXorf39 | chrX | Shiraz-3T  | 242  | 0        | -0.336434 |  |  |
|         |      | Shiraz-4T  | 261  | 0        | -0.336249 |  |  |
|         |      | Shiraz-16T | 295  | 0.591657 | 0         |  |  |
|         |      | Shiraz-36T | 433  | 0        | -0.803961 |  |  |
|         |      | Shiraz-44T | 899  | 0        | -1.09697  |  |  |
|         |      | Shiraz-49T | 1170 | 0        | -0.967436 |  |  |
|         |      | Shiraz-18T | 1457 | 0.643204 | 0         |  |  |
|         |      | Shiraz-22T | 1673 | 0.611783 | 0         |  |  |
|         |      | Shiraz-25T | 1719 | 0.472955 | 0         |  |  |
|         |      | Shiraz-28T | 1762 | 0.562311 | 0         |  |  |
|         |      | Shiraz-29T | 1801 | 0.815343 | 0         |  |  |
|         |      | Shiraz-32T | 1870 | 0.729766 | 0         |  |  |
|         |      | Shiraz-35T | 1933 | 0.488535 | 0         |  |  |
|         |      | Shiraz-58T | 2223 | 0.833364 | 0         |  |  |
|         |      | Shiraz-71T | 2263 | 0.975531 | 0         |  |  |
|         |      | Shiraz-3T  | 242  | 0        | -0.336434 |  |  |
|         |      | Shiraz-4T  | 261  | 0        | -0.336249 |  |  |
|         |      | Shiraz-16T | 295  | 0.591657 | 0         |  |  |
|         |      | Shiraz-36T | 433  | 0        | -0.803961 |  |  |
|         |      | Shiraz-44T | 899  | 0        | -1.09697  |  |  |
|         |      | Shiraz-49T | 1170 | 0        | -0.967436 |  |  |
|         |      | Shiraz-18T | 1457 | 0.643204 | 0         |  |  |
|         |      | Shiraz-22T | 1673 | 0.611783 | 0         |  |  |
|         |      | Shiraz-25T | 1719 | 0.472955 | 0         |  |  |
|         |      | Shiraz-28T | 1762 | 0.562311 | 0         |  |  |
|         |      | Shiraz-29T | 1801 | 0.815343 | 0         |  |  |
|         |      | Shiraz-32T | 1870 | 0.729766 | 0         |  |  |
|         |      | Shiraz-35T | 1933 | 0.488535 | 0         |  |  |

|          |      |            |      |          |           |  |
|----------|------|------------|------|----------|-----------|--|
|          |      | Shiraz-58T | 2223 | 0.833364 | 0         |  |
|          |      | Shiraz-71T | 2263 | 0.975531 | 0         |  |
|          |      | Shiraz-3T  | 242  | 0        | -0.336434 |  |
|          |      | Shiraz-4T  | 261  | 0        | -0.336249 |  |
|          |      | Shiraz-16T | 295  | 0.591657 | 0         |  |
|          |      | Shiraz-36T | 433  | 0        | -0.803961 |  |
|          |      | Shiraz-44T | 899  | 0        | -1.09697  |  |
|          |      | Shiraz-49T | 1170 | 0        | -0.967436 |  |
|          |      | Shiraz-18T | 1457 | 0.643204 | 0         |  |
|          |      | Shiraz-22T | 1673 | 0.611783 | 0         |  |
|          |      | Shiraz-25T | 1719 | 0.472955 | 0         |  |
|          |      | Shiraz-28T | 1762 | 0.562311 | 0         |  |
|          |      | Shiraz-29T | 1801 | 0.815343 | 0         |  |
|          |      | Shiraz-32T | 1870 | 0.729766 | 0         |  |
|          |      | Shiraz-35T | 1933 | 0.488535 | 0         |  |
|          |      | Shiraz-58T | 2223 | 0.833364 | 0         |  |
|          |      | Shiraz-71T | 2263 | 0.975531 | 0         |  |
| CXorf40A | chrX | Shiraz-3T  | 242  | 0        | -0.336434 |  |
|          |      | Shiraz-4T  | 261  | 0        | -0.336249 |  |
|          |      | Shiraz-16T | 295  | 0.591657 | 0         |  |
|          |      | Shiraz-36T | 433  | 0        | -0.803961 |  |
|          |      | Shiraz-42T | 480  | 0        | -0.232915 |  |
|          |      | Shiraz-44T | 899  | 0        | -1.09697  |  |
|          |      | Shiraz-49T | 1170 | 0        | -0.967436 |  |
|          |      | Shiraz-9T  | 1370 | 0.690073 | 0         |  |
|          |      | Shiraz-18T | 1457 | 0.643204 | 0         |  |
|          |      | Shiraz-22T | 1673 | 0.611783 | 0         |  |
|          |      | Shiraz-22T | 1678 | 0.911625 | 0         |  |
|          |      | Shiraz-25T | 1719 | 0.472955 | 0         |  |
|          |      | Shiraz-28T | 1762 | 0.562311 | 0         |  |
|          |      | Shiraz-29T | 1801 | 0.815343 | 0         |  |
|          |      | Shiraz-32T | 1870 | 0.729766 | 0         |  |
|          |      | Shiraz-35T | 1933 | 0.488535 | 0         |  |
|          |      | Shiraz-58T | 2223 | 0.833364 | 0         |  |
|          |      | Shiraz-58T | 2226 | 1.074663 | 0         |  |
|          |      | Shiraz-71T | 2263 | 0.975531 | 0         |  |
|          |      | Shiraz-3T  | 242  | 0        | -0.336434 |  |
|          |      | Shiraz-4T  | 261  | 0        | -0.336249 |  |
|          |      | Shiraz-16T | 295  | 0.591657 | 0         |  |
|          |      | Shiraz-36T | 433  | 0        | -0.803961 |  |
|          |      | Shiraz-42T | 480  | 0        | -0.232915 |  |
|          |      | Shiraz-44T | 899  | 0        | -1.09697  |  |
|          |      | Shiraz-49T | 1170 | 0        | -0.967436 |  |
|          |      | Shiraz-9T  | 1370 | 0.690073 | 0         |  |
|          |      | Shiraz-18T | 1457 | 0.643204 | 0         |  |
|          |      | Shiraz-22T | 1673 | 0.611783 | 0         |  |
|          |      | Shiraz-22T | 1678 | 0.911625 | 0         |  |

|          |      |            |      |          |           |  |  |
|----------|------|------------|------|----------|-----------|--|--|
|          |      | Shiraz-25T | 1719 | 0.472955 | 0         |  |  |
|          |      | Shiraz-28T | 1762 | 0.562311 | 0         |  |  |
|          |      | Shiraz-29T | 1801 | 0.815343 | 0         |  |  |
|          |      | Shiraz-32T | 1870 | 0.729766 | 0         |  |  |
|          |      | Shiraz-35T | 1933 | 0.488535 | 0         |  |  |
|          |      | Shiraz-58T | 2223 | 0.833364 | 0         |  |  |
|          |      | Shiraz-58T | 2226 | 1.074663 | 0         |  |  |
|          |      | Shiraz-71T | 2263 | 0.975531 | 0         |  |  |
|          |      | Shiraz-3T  | 242  | 0        | -0.336434 |  |  |
|          |      | Shiraz-4T  | 261  | 0        | -0.336249 |  |  |
|          |      | Shiraz-16T | 295  | 0.591657 | 0         |  |  |
|          |      | Shiraz-36T | 433  | 0        | -0.803961 |  |  |
|          |      | Shiraz-42T | 480  | 0        | -0.232915 |  |  |
|          |      | Shiraz-44T | 899  | 0        | -1.09697  |  |  |
|          |      | Shiraz-49T | 1170 | 0        | -0.967436 |  |  |
|          |      | Shiraz-9T  | 1370 | 0.690073 | 0         |  |  |
|          |      | Shiraz-18T | 1457 | 0.643204 | 0         |  |  |
|          |      | Shiraz-22T | 1673 | 0.611783 | 0         |  |  |
|          |      | Shiraz-22T | 1678 | 0.911625 | 0         |  |  |
|          |      | Shiraz-25T | 1719 | 0.472955 | 0         |  |  |
|          |      | Shiraz-28T | 1762 | 0.562311 | 0         |  |  |
|          |      | Shiraz-29T | 1801 | 0.815343 | 0         |  |  |
|          |      | Shiraz-32T | 1870 | 0.729766 | 0         |  |  |
|          |      | Shiraz-35T | 1933 | 0.488535 | 0         |  |  |
|          |      | Shiraz-58T | 2223 | 0.833364 | 0         |  |  |
|          |      | Shiraz-58T | 2226 | 1.074663 | 0         |  |  |
|          |      | Shiraz-71T | 2263 | 0.975531 | 0         |  |  |
| CXorf40B | chrX | Shiraz-3T  | 242  | 0        | -0.336434 |  |  |
|          |      | Shiraz-4T  | 261  | 0        | -0.336249 |  |  |
|          |      | Shiraz-16T | 295  | 0.591657 | 0         |  |  |
|          |      | Shiraz-36T | 433  | 0        | -0.803961 |  |  |
|          |      | Shiraz-42T | 480  | 0        | -0.232915 |  |  |
|          |      | Shiraz-44T | 899  | 0        | -1.09697  |  |  |
|          |      | Shiraz-49T | 1170 | 0        | -0.967436 |  |  |
|          |      | Shiraz-9T  | 1370 | 0.690073 | 0         |  |  |
|          |      | Shiraz-18T | 1457 | 0.643204 | 0         |  |  |
|          |      | Shiraz-22T | 1673 | 0.611783 | 0         |  |  |
|          |      | Shiraz-22T | 1678 | 0.911625 | 0         |  |  |
|          |      | Shiraz-25T | 1719 | 0.472955 | 0         |  |  |
|          |      | Shiraz-28T | 1762 | 0.562311 | 0         |  |  |
|          |      | Shiraz-29T | 1801 | 0.815343 | 0         |  |  |
|          |      | Shiraz-32T | 1870 | 0.729766 | 0         |  |  |
|          |      | Shiraz-35T | 1933 | 0.488535 | 0         |  |  |
|          |      | Shiraz-58T | 2223 | 0.833364 | 0         |  |  |
|          |      | Shiraz-58T | 2226 | 1.074663 | 0         |  |  |
|          |      | Shiraz-71T | 2263 | 0.975531 | 0         |  |  |
|          |      | Shiraz-3T  | 242  | 0        | -0.336434 |  |  |

|         |      |            |      |          |           |  |  |
|---------|------|------------|------|----------|-----------|--|--|
|         |      | Shiraz-4T  | 261  | 0        | -0.336249 |  |  |
|         |      | Shiraz-16T | 295  | 0.591657 | 0         |  |  |
|         |      | Shiraz-36T | 433  | 0        | -0.803961 |  |  |
|         |      | Shiraz-42T | 480  | 0        | -0.232915 |  |  |
|         |      | Shiraz-44T | 899  | 0        | -1.09697  |  |  |
|         |      | Shiraz-49T | 1170 | 0        | -0.967436 |  |  |
|         |      | Shiraz-9T  | 1370 | 0.690073 | 0         |  |  |
|         |      | Shiraz-18T | 1457 | 0.643204 | 0         |  |  |
|         |      | Shiraz-22T | 1673 | 0.611783 | 0         |  |  |
|         |      | Shiraz-22T | 1678 | 0.911625 | 0         |  |  |
|         |      | Shiraz-25T | 1719 | 0.472955 | 0         |  |  |
|         |      | Shiraz-28T | 1762 | 0.562311 | 0         |  |  |
|         |      | Shiraz-29T | 1801 | 0.815343 | 0         |  |  |
|         |      | Shiraz-32T | 1870 | 0.729766 | 0         |  |  |
|         |      | Shiraz-35T | 1933 | 0.488535 | 0         |  |  |
|         |      | Shiraz-58T | 2223 | 0.833364 | 0         |  |  |
|         |      | Shiraz-58T | 2226 | 1.074663 | 0         |  |  |
|         |      | Shiraz-71T | 2263 | 0.975531 | 0         |  |  |
|         |      | Shiraz-3T  | 242  | 0        | -0.336434 |  |  |
|         |      | Shiraz-4T  | 261  | 0        | -0.336249 |  |  |
|         |      | Shiraz-16T | 295  | 0.591657 | 0         |  |  |
|         |      | Shiraz-36T | 433  | 0        | -0.803961 |  |  |
|         |      | Shiraz-42T | 480  | 0        | -0.232915 |  |  |
|         |      | Shiraz-44T | 899  | 0        | -1.09697  |  |  |
|         |      | Shiraz-49T | 1170 | 0        | -0.967436 |  |  |
|         |      | Shiraz-9T  | 1370 | 0.690073 | 0         |  |  |
|         |      | Shiraz-18T | 1457 | 0.643204 | 0         |  |  |
|         |      | Shiraz-22T | 1673 | 0.611783 | 0         |  |  |
|         |      | Shiraz-22T | 1678 | 0.911625 | 0         |  |  |
|         |      | Shiraz-25T | 1719 | 0.472955 | 0         |  |  |
|         |      | Shiraz-28T | 1762 | 0.562311 | 0         |  |  |
|         |      | Shiraz-29T | 1801 | 0.815343 | 0         |  |  |
|         |      | Shiraz-32T | 1870 | 0.729766 | 0         |  |  |
|         |      | Shiraz-35T | 1933 | 0.488535 | 0         |  |  |
|         |      | Shiraz-58T | 2223 | 0.833364 | 0         |  |  |
|         |      | Shiraz-58T | 2226 | 1.074663 | 0         |  |  |
|         |      | Shiraz-71T | 2263 | 0.975531 | 0         |  |  |
| CXorf41 | chrX | Shiraz-3T  | 242  | 0        | -0.336434 |  |  |
|         |      | Shiraz-4T  | 261  | 0        | -0.336249 |  |  |
|         |      | Shiraz-16T | 295  | 0.591657 | 0         |  |  |
|         |      | Shiraz-36T | 433  | 0        | -0.803961 |  |  |
|         |      | Shiraz-44T | 899  | 0        | -1.09697  |  |  |
|         |      | Shiraz-49T | 1170 | 0        | -0.967436 |  |  |
|         |      | Shiraz-18T | 1457 | 0.643204 | 0         |  |  |
|         |      | Shiraz-22T | 1673 | 0.611783 | 0         |  |  |
|         |      | Shiraz-25T | 1719 | 0.472955 | 0         |  |  |
|         |      | Shiraz-28T | 1762 | 0.562311 | 0         |  |  |

|         |      |            |      |          |           |  |  |
|---------|------|------------|------|----------|-----------|--|--|
|         |      | Shiraz-29T | 1801 | 0.815343 | 0         |  |  |
|         |      | Shiraz-32T | 1870 | 0.729766 | 0         |  |  |
|         |      | Shiraz-35T | 1933 | 0.488535 | 0         |  |  |
|         |      | Shiraz-58T | 2223 | 0.833364 | 0         |  |  |
|         |      | Shiraz-71T | 2263 | 0.975531 | 0         |  |  |
|         |      | Shiraz-3T  | 242  | 0        | -0.336434 |  |  |
|         |      | Shiraz-4T  | 261  | 0        | -0.336249 |  |  |
|         |      | Shiraz-16T | 295  | 0.591657 | 0         |  |  |
|         |      | Shiraz-36T | 433  | 0        | -0.803961 |  |  |
|         |      | Shiraz-44T | 899  | 0        | -1.09697  |  |  |
|         |      | Shiraz-49T | 1170 | 0        | -0.967436 |  |  |
|         |      | Shiraz-18T | 1457 | 0.643204 | 0         |  |  |
|         |      | Shiraz-22T | 1673 | 0.611783 | 0         |  |  |
|         |      | Shiraz-25T | 1719 | 0.472955 | 0         |  |  |
|         |      | Shiraz-28T | 1762 | 0.562311 | 0         |  |  |
|         |      | Shiraz-29T | 1801 | 0.815343 | 0         |  |  |
|         |      | Shiraz-32T | 1870 | 0.729766 | 0         |  |  |
|         |      | Shiraz-35T | 1933 | 0.488535 | 0         |  |  |
|         |      | Shiraz-58T | 2223 | 0.833364 | 0         |  |  |
|         |      | Shiraz-71T | 2263 | 0.975531 | 0         |  |  |
|         |      | Shiraz-3T  | 242  | 0        | -0.336434 |  |  |
|         |      | Shiraz-4T  | 261  | 0        | -0.336249 |  |  |
|         |      | Shiraz-16T | 295  | 0.591657 | 0         |  |  |
|         |      | Shiraz-36T | 433  | 0        | -0.803961 |  |  |
|         |      | Shiraz-44T | 899  | 0        | -1.09697  |  |  |
|         |      | Shiraz-49T | 1170 | 0        | -0.967436 |  |  |
|         |      | Shiraz-18T | 1457 | 0.643204 | 0         |  |  |
|         |      | Shiraz-22T | 1673 | 0.611783 | 0         |  |  |
|         |      | Shiraz-25T | 1719 | 0.472955 | 0         |  |  |
|         |      | Shiraz-28T | 1762 | 0.562311 | 0         |  |  |
|         |      | Shiraz-29T | 1801 | 0.815343 | 0         |  |  |
|         |      | Shiraz-32T | 1870 | 0.729766 | 0         |  |  |
|         |      | Shiraz-35T | 1933 | 0.488535 | 0         |  |  |
|         |      | Shiraz-58T | 2223 | 0.833364 | 0         |  |  |
|         |      | Shiraz-71T | 2263 | 0.975531 | 0         |  |  |
| CXorf42 | chrX | Shiraz-3T  | 242  | 0        | -0.336434 |  |  |
|         |      | Shiraz-3T  | 244  | 0        | -0.023749 |  |  |
|         |      | Shiraz-4T  | 261  | 0        | -0.336249 |  |  |
|         |      | Shiraz-16T | 295  | 0.591657 | 0         |  |  |
|         |      | Shiraz-36T | 433  | 0        | -0.803961 |  |  |
|         |      | Shiraz-44T | 899  | 0        | -1.09697  |  |  |
|         |      | Shiraz-44T | 904  | 0        | -0.625526 |  |  |
|         |      | Shiraz-49T | 1170 | 0        | -0.967436 |  |  |
|         |      | Shiraz-9T  | 1370 | 0.690073 | 0         |  |  |
|         |      | Shiraz-18T | 1457 | 0.643204 | 0         |  |  |
|         |      | Shiraz-22T | 1673 | 0.611783 | 0         |  |  |
|         |      | Shiraz-25T | 1719 | 0.472955 | 0         |  |  |



|         |      |            |      |          |           |  |
|---------|------|------------|------|----------|-----------|--|
|         |      | Shiraz-28T | 1762 | 0.562311 | 0         |  |
|         |      | Shiraz-29T | 1801 | 0.815343 | 0         |  |
|         |      | Shiraz-32T | 1870 | 0.729766 | 0         |  |
|         |      | Shiraz-35T | 1933 | 0.488535 | 0         |  |
|         |      | Shiraz-58T | 2223 | 0.833364 | 0         |  |
|         |      | Shiraz-71T | 2263 | 0.975531 | 0         |  |
|         |      | Shiraz-3T  | 242  | 0        | -0.336434 |  |
|         |      | Shiraz-3T  | 244  | 0        | -0.023749 |  |
|         |      | Shiraz-4T  | 261  | 0        | -0.336249 |  |
|         |      | Shiraz-16T | 295  | 0.591657 | 0         |  |
|         |      | Shiraz-36T | 433  | 0        | -0.803961 |  |
|         |      | Shiraz-44T | 899  | 0        | -1.09697  |  |
|         |      | Shiraz-44T | 904  | 0        | -0.625526 |  |
|         |      | Shiraz-49T | 1170 | 0        | -0.967436 |  |
|         |      | Shiraz-9T  | 1370 | 0.690073 | 0         |  |
|         |      | Shiraz-18T | 1457 | 0.643204 | 0         |  |
|         |      | Shiraz-22T | 1673 | 0.611783 | 0         |  |
|         |      | Shiraz-25T | 1719 | 0.472955 | 0         |  |
|         |      | Shiraz-28T | 1762 | 0.562311 | 0         |  |
|         |      | Shiraz-29T | 1801 | 0.815343 | 0         |  |
|         |      | Shiraz-32T | 1870 | 0.729766 | 0         |  |
|         |      | Shiraz-35T | 1933 | 0.488535 | 0         |  |
|         |      | Shiraz-58T | 2223 | 0.833364 | 0         |  |
|         |      | Shiraz-71T | 2263 | 0.975531 | 0         |  |
|         |      | Shiraz-3T  | 242  | 0        | -0.336434 |  |
|         |      | Shiraz-3T  | 244  | 0        | -0.023749 |  |
|         |      | Shiraz-4T  | 261  | 0        | -0.336249 |  |
|         |      | Shiraz-16T | 295  | 0.591657 | 0         |  |
|         |      | Shiraz-36T | 433  | 0        | -0.803961 |  |
|         |      | Shiraz-44T | 899  | 0        | -1.09697  |  |
|         |      | Shiraz-44T | 904  | 0        | -0.625526 |  |
|         |      | Shiraz-49T | 1170 | 0        | -0.967436 |  |
|         |      | Shiraz-9T  | 1370 | 0.690073 | 0         |  |
|         |      | Shiraz-18T | 1457 | 0.643204 | 0         |  |
|         |      | Shiraz-22T | 1673 | 0.611783 | 0         |  |
|         |      | Shiraz-25T | 1719 | 0.472955 | 0         |  |
|         |      | Shiraz-28T | 1762 | 0.562311 | 0         |  |
|         |      | Shiraz-29T | 1801 | 0.815343 | 0         |  |
|         |      | Shiraz-32T | 1870 | 0.729766 | 0         |  |
|         |      | Shiraz-35T | 1933 | 0.488535 | 0         |  |
|         |      | Shiraz-58T | 2223 | 0.833364 | 0         |  |
|         |      | Shiraz-71T | 2263 | 0.975531 | 0         |  |
| CXorf48 | chrX | Shiraz-3T  | 242  | 0        | -0.336434 |  |
|         |      | Shiraz-4T  | 261  | 0        | -0.336249 |  |
|         |      | Shiraz-16T | 295  | 0.591657 | 0         |  |
|         |      | Shiraz-36T | 433  | 0        | -0.803961 |  |
|         |      | Shiraz-44T | 899  | 0        | -1.09697  |  |

|         |      |            |      |          |           |  |  |
|---------|------|------------|------|----------|-----------|--|--|
|         |      | Shiraz-49T | 1170 | 0        | -0.967436 |  |  |
|         |      | Shiraz-9T  | 1370 | 0.690073 | 0         |  |  |
|         |      | Shiraz-18T | 1457 | 0.643204 | 0         |  |  |
|         |      | Shiraz-22T | 1673 | 0.611783 | 0         |  |  |
|         |      | Shiraz-22T | 1677 | 0.789711 | 0         |  |  |
|         |      | Shiraz-25T | 1719 | 0.472955 | 0         |  |  |
|         |      | Shiraz-28T | 1762 | 0.562311 | 0         |  |  |
|         |      | Shiraz-29T | 1801 | 0.815343 | 0         |  |  |
|         |      | Shiraz-32T | 1870 | 0.729766 | 0         |  |  |
|         |      | Shiraz-35T | 1933 | 0.488535 | 0         |  |  |
|         |      | Shiraz-58T | 2223 | 0.833364 | 0         |  |  |
|         |      | Shiraz-71T | 2263 | 0.975531 | 0         |  |  |
|         |      | Shiraz-3T  | 242  | 0        | -0.336434 |  |  |
|         |      | Shiraz-4T  | 261  | 0        | -0.336249 |  |  |
|         |      | Shiraz-16T | 295  | 0.591657 | 0         |  |  |
|         |      | Shiraz-36T | 433  | 0        | -0.803961 |  |  |
|         |      | Shiraz-44T | 899  | 0        | -1.09697  |  |  |
|         |      | Shiraz-49T | 1170 | 0        | -0.967436 |  |  |
|         |      | Shiraz-9T  | 1370 | 0.690073 | 0         |  |  |
|         |      | Shiraz-18T | 1457 | 0.643204 | 0         |  |  |
|         |      | Shiraz-22T | 1673 | 0.611783 | 0         |  |  |
|         |      | Shiraz-22T | 1677 | 0.789711 | 0         |  |  |
|         |      | Shiraz-25T | 1719 | 0.472955 | 0         |  |  |
|         |      | Shiraz-28T | 1762 | 0.562311 | 0         |  |  |
|         |      | Shiraz-29T | 1801 | 0.815343 | 0         |  |  |
|         |      | Shiraz-32T | 1870 | 0.729766 | 0         |  |  |
|         |      | Shiraz-35T | 1933 | 0.488535 | 0         |  |  |
|         |      | Shiraz-58T | 2223 | 0.833364 | 0         |  |  |
|         |      | Shiraz-71T | 2263 | 0.975531 | 0         |  |  |
|         |      | Shiraz-3T  | 242  | 0        | -0.336434 |  |  |
|         |      | Shiraz-4T  | 261  | 0        | -0.336249 |  |  |
|         |      | Shiraz-16T | 295  | 0.591657 | 0         |  |  |
|         |      | Shiraz-36T | 433  | 0        | -0.803961 |  |  |
|         |      | Shiraz-44T | 899  | 0        | -1.09697  |  |  |
|         |      | Shiraz-49T | 1170 | 0        | -0.967436 |  |  |
|         |      | Shiraz-9T  | 1370 | 0.690073 | 0         |  |  |
|         |      | Shiraz-18T | 1457 | 0.643204 | 0         |  |  |
|         |      | Shiraz-22T | 1673 | 0.611783 | 0         |  |  |
|         |      | Shiraz-22T | 1677 | 0.789711 | 0         |  |  |
|         |      | Shiraz-25T | 1719 | 0.472955 | 0         |  |  |
|         |      | Shiraz-28T | 1762 | 0.562311 | 0         |  |  |
|         |      | Shiraz-29T | 1801 | 0.815343 | 0         |  |  |
|         |      | Shiraz-32T | 1870 | 0.729766 | 0         |  |  |
|         |      | Shiraz-35T | 1933 | 0.488535 | 0         |  |  |
|         |      | Shiraz-58T | 2223 | 0.833364 | 0         |  |  |
|         |      | Shiraz-71T | 2263 | 0.975531 | 0         |  |  |
| CXorf49 | chrX | Shiraz-4T  | 261  | 0        | -0.336249 |  |  |

|  |            |      |          |           |  |
|--|------------|------|----------|-----------|--|
|  | Shiraz-4T  | 261  | 0        | -0.336249 |  |
|  | Shiraz-16T | 295  | 0.591657 | 0         |  |
|  | Shiraz-16T | 295  | 0.591657 | 0         |  |
|  | Shiraz-36T | 433  | 0        | -0.803961 |  |
|  | Shiraz-36T | 433  | 0        | -0.803961 |  |
|  | Shiraz-44T | 899  | 0        | -1.09697  |  |
|  | Shiraz-44T | 899  | 0        | -1.09697  |  |
|  | Shiraz-44T | 900  | 0        | -0.584284 |  |
|  | Shiraz-44T | 900  | 0        | -0.584284 |  |
|  | Shiraz-49T | 1170 | 0        | -0.967436 |  |
|  | Shiraz-49T | 1170 | 0        | -0.967436 |  |
|  | Shiraz-49T | 1171 | 0        | -0.612379 |  |
|  | Shiraz-49T | 1171 | 0        | -0.612379 |  |
|  | Shiraz-77T | 1283 | 0.296555 | 0         |  |
|  | Shiraz-77T | 1283 | 0.296555 | 0         |  |
|  | Shiraz-18T | 1457 | 0.643204 | 0         |  |
|  | Shiraz-18T | 1457 | 0.643204 | 0         |  |
|  | Shiraz-22T | 1673 | 0.611783 | 0         |  |
|  | Shiraz-22T | 1673 | 0.611783 | 0         |  |
|  | Shiraz-22T | 1674 | 0.887899 | 0         |  |
|  | Shiraz-22T | 1674 | 0.887899 | 0         |  |
|  | Shiraz-25T | 1719 | 0.472955 | 0         |  |
|  | Shiraz-25T | 1719 | 0.472955 | 0         |  |
|  | Shiraz-28T | 1762 | 0.562311 | 0         |  |
|  | Shiraz-28T | 1762 | 0.562311 | 0         |  |
|  | Shiraz-29T | 1801 | 0.815343 | 0         |  |
|  | Shiraz-29T | 1801 | 0.815343 | 0         |  |
|  | Shiraz-32T | 1870 | 0.729766 | 0         |  |
|  | Shiraz-32T | 1870 | 0.729766 | 0         |  |
|  | Shiraz-35T | 1933 | 0.488535 | 0         |  |
|  | Shiraz-35T | 1933 | 0.488535 | 0         |  |
|  | Shiraz-58T | 2223 | 0.833364 | 0         |  |
|  | Shiraz-58T | 2223 | 0.833364 | 0         |  |
|  | Shiraz-58T | 2224 | 1.076575 | 0         |  |
|  | Shiraz-58T | 2224 | 1.076575 | 0         |  |
|  | Shiraz-71T | 2263 | 0.975531 | 0         |  |
|  | Shiraz-71T | 2263 | 0.975531 | 0         |  |
|  | Shiraz-4T  | 261  | 0        | -0.336249 |  |
|  | Shiraz-4T  | 261  | 0        | -0.336249 |  |
|  | Shiraz-16T | 295  | 0.591657 | 0         |  |
|  | Shiraz-16T | 295  | 0.591657 | 0         |  |
|  | Shiraz-36T | 433  | 0        | -0.803961 |  |
|  | Shiraz-36T | 433  | 0        | -0.803961 |  |
|  | Shiraz-44T | 899  | 0        | -1.09697  |  |
|  | Shiraz-44T | 899  | 0        | -1.09697  |  |
|  | Shiraz-44T | 900  | 0        | -0.584284 |  |
|  | Shiraz-44T | 900  | 0        | -0.584284 |  |

|  |            |      |          |           |  |
|--|------------|------|----------|-----------|--|
|  | Shiraz-49T | 1170 | 0        | -0.967436 |  |
|  | Shiraz-49T | 1170 | 0        | -0.967436 |  |
|  | Shiraz-49T | 1171 | 0        | -0.612379 |  |
|  | Shiraz-49T | 1171 | 0        | -0.612379 |  |
|  | Shiraz-77T | 1283 | 0.296555 | 0         |  |
|  | Shiraz-77T | 1283 | 0.296555 | 0         |  |
|  | Shiraz-18T | 1457 | 0.643204 | 0         |  |
|  | Shiraz-18T | 1457 | 0.643204 | 0         |  |
|  | Shiraz-22T | 1673 | 0.611783 | 0         |  |
|  | Shiraz-22T | 1673 | 0.611783 | 0         |  |
|  | Shiraz-22T | 1674 | 0.887899 | 0         |  |
|  | Shiraz-22T | 1674 | 0.887899 | 0         |  |
|  | Shiraz-25T | 1719 | 0.472955 | 0         |  |
|  | Shiraz-25T | 1719 | 0.472955 | 0         |  |
|  | Shiraz-28T | 1762 | 0.562311 | 0         |  |
|  | Shiraz-28T | 1762 | 0.562311 | 0         |  |
|  | Shiraz-29T | 1801 | 0.815343 | 0         |  |
|  | Shiraz-29T | 1801 | 0.815343 | 0         |  |
|  | Shiraz-32T | 1870 | 0.729766 | 0         |  |
|  | Shiraz-32T | 1870 | 0.729766 | 0         |  |
|  | Shiraz-35T | 1933 | 0.488535 | 0         |  |
|  | Shiraz-35T | 1933 | 0.488535 | 0         |  |
|  | Shiraz-58T | 2223 | 0.833364 | 0         |  |
|  | Shiraz-58T | 2223 | 0.833364 | 0         |  |
|  | Shiraz-58T | 2224 | 1.076575 | 0         |  |
|  | Shiraz-58T | 2224 | 1.076575 | 0         |  |
|  | Shiraz-71T | 2263 | 0.975531 | 0         |  |
|  | Shiraz-71T | 2263 | 0.975531 | 0         |  |
|  | Shiraz-4T  | 261  | 0        | -0.336249 |  |
|  | Shiraz-4T  | 261  | 0        | -0.336249 |  |
|  | Shiraz-16T | 295  | 0.591657 | 0         |  |
|  | Shiraz-16T | 295  | 0.591657 | 0         |  |
|  | Shiraz-36T | 433  | 0        | -0.803961 |  |
|  | Shiraz-36T | 433  | 0        | -0.803961 |  |
|  | Shiraz-44T | 899  | 0        | -1.09697  |  |
|  | Shiraz-44T | 899  | 0        | -1.09697  |  |
|  | Shiraz-44T | 900  | 0        | -0.584284 |  |
|  | Shiraz-44T | 900  | 0        | -0.584284 |  |
|  | Shiraz-49T | 1170 | 0        | -0.967436 |  |
|  | Shiraz-49T | 1170 | 0        | -0.967436 |  |
|  | Shiraz-49T | 1171 | 0        | -0.612379 |  |
|  | Shiraz-49T | 1171 | 0        | -0.612379 |  |
|  | Shiraz-77T | 1283 | 0.296555 | 0         |  |
|  | Shiraz-77T | 1283 | 0.296555 | 0         |  |
|  | Shiraz-18T | 1457 | 0.643204 | 0         |  |
|  | Shiraz-18T | 1457 | 0.643204 | 0         |  |
|  | Shiraz-22T | 1673 | 0.611783 | 0         |  |

|          |      |            |      |          |           |  |  |
|----------|------|------------|------|----------|-----------|--|--|
|          |      | Shiraz-22T | 1673 | 0.611783 | 0         |  |  |
|          |      | Shiraz-22T | 1674 | 0.887899 | 0         |  |  |
|          |      | Shiraz-22T | 1674 | 0.887899 | 0         |  |  |
|          |      | Shiraz-25T | 1719 | 0.472955 | 0         |  |  |
|          |      | Shiraz-25T | 1719 | 0.472955 | 0         |  |  |
|          |      | Shiraz-28T | 1762 | 0.562311 | 0         |  |  |
|          |      | Shiraz-28T | 1762 | 0.562311 | 0         |  |  |
|          |      | Shiraz-29T | 1801 | 0.815343 | 0         |  |  |
|          |      | Shiraz-29T | 1801 | 0.815343 | 0         |  |  |
|          |      | Shiraz-32T | 1870 | 0.729766 | 0         |  |  |
|          |      | Shiraz-32T | 1870 | 0.729766 | 0         |  |  |
|          |      | Shiraz-35T | 1933 | 0.488535 | 0         |  |  |
|          |      | Shiraz-35T | 1933 | 0.488535 | 0         |  |  |
|          |      | Shiraz-58T | 2223 | 0.833364 | 0         |  |  |
|          |      | Shiraz-58T | 2223 | 0.833364 | 0         |  |  |
|          |      | Shiraz-58T | 2224 | 1.076575 | 0         |  |  |
|          |      | Shiraz-58T | 2224 | 1.076575 | 0         |  |  |
|          |      | Shiraz-71T | 2263 | 0.975531 | 0         |  |  |
|          |      | Shiraz-71T | 2263 | 0.975531 | 0         |  |  |
| CXorf49B | chrX | Shiraz-4T  | 261  | 0        | -0.336249 |  |  |
|          |      | Shiraz-4T  | 261  | 0        | -0.336249 |  |  |
|          |      | Shiraz-16T | 295  | 0.591657 | 0         |  |  |
|          |      | Shiraz-16T | 295  | 0.591657 | 0         |  |  |
|          |      | Shiraz-36T | 433  | 0        | -0.803961 |  |  |
|          |      | Shiraz-36T | 433  | 0        | -0.803961 |  |  |
|          |      | Shiraz-44T | 899  | 0        | -1.09697  |  |  |
|          |      | Shiraz-44T | 899  | 0        | -1.09697  |  |  |
|          |      | Shiraz-44T | 900  | 0        | -0.584284 |  |  |
|          |      | Shiraz-44T | 900  | 0        | -0.584284 |  |  |
|          |      | Shiraz-49T | 1170 | 0        | -0.967436 |  |  |
|          |      | Shiraz-49T | 1170 | 0        | -0.967436 |  |  |
|          |      | Shiraz-49T | 1171 | 0        | -0.612379 |  |  |
|          |      | Shiraz-49T | 1171 | 0        | -0.612379 |  |  |
|          |      | Shiraz-77T | 1283 | 0.296555 | 0         |  |  |
|          |      | Shiraz-77T | 1283 | 0.296555 | 0         |  |  |
|          |      | Shiraz-18T | 1457 | 0.643204 | 0         |  |  |
|          |      | Shiraz-18T | 1457 | 0.643204 | 0         |  |  |
|          |      | Shiraz-22T | 1673 | 0.611783 | 0         |  |  |
|          |      | Shiraz-22T | 1673 | 0.611783 | 0         |  |  |
|          |      | Shiraz-22T | 1674 | 0.887899 | 0         |  |  |
|          |      | Shiraz-22T | 1674 | 0.887899 | 0         |  |  |
|          |      | Shiraz-25T | 1719 | 0.472955 | 0         |  |  |
|          |      | Shiraz-25T | 1719 | 0.472955 | 0         |  |  |
|          |      | Shiraz-28T | 1762 | 0.562311 | 0         |  |  |
|          |      | Shiraz-28T | 1762 | 0.562311 | 0         |  |  |
|          |      | Shiraz-29T | 1801 | 0.815343 | 0         |  |  |
|          |      | Shiraz-29T | 1801 | 0.815343 | 0         |  |  |

|  |  |            |      |          |           |  |  |
|--|--|------------|------|----------|-----------|--|--|
|  |  | Shiraz-32T | 1870 | 0.729766 | 0         |  |  |
|  |  | Shiraz-32T | 1870 | 0.729766 | 0         |  |  |
|  |  | Shiraz-35T | 1933 | 0.488535 | 0         |  |  |
|  |  | Shiraz-35T | 1933 | 0.488535 | 0         |  |  |
|  |  | Shiraz-58T | 2223 | 0.833364 | 0         |  |  |
|  |  | Shiraz-58T | 2223 | 0.833364 | 0         |  |  |
|  |  | Shiraz-58T | 2224 | 1.076575 | 0         |  |  |
|  |  | Shiraz-58T | 2224 | 1.076575 | 0         |  |  |
|  |  | Shiraz-71T | 2263 | 0.975531 | 0         |  |  |
|  |  | Shiraz-71T | 2263 | 0.975531 | 0         |  |  |
|  |  | Shiraz-4T  | 261  | 0        | -0.336249 |  |  |
|  |  | Shiraz-4T  | 261  | 0        | -0.336249 |  |  |
|  |  | Shiraz-16T | 295  | 0.591657 | 0         |  |  |
|  |  | Shiraz-16T | 295  | 0.591657 | 0         |  |  |
|  |  | Shiraz-36T | 433  | 0        | -0.803961 |  |  |
|  |  | Shiraz-36T | 433  | 0        | -0.803961 |  |  |
|  |  | Shiraz-44T | 899  | 0        | -1.09697  |  |  |
|  |  | Shiraz-44T | 899  | 0        | -1.09697  |  |  |
|  |  | Shiraz-44T | 900  | 0        | -0.584284 |  |  |
|  |  | Shiraz-44T | 900  | 0        | -0.584284 |  |  |
|  |  | Shiraz-49T | 1170 | 0        | -0.967436 |  |  |
|  |  | Shiraz-49T | 1170 | 0        | -0.967436 |  |  |
|  |  | Shiraz-49T | 1171 | 0        | -0.612379 |  |  |
|  |  | Shiraz-49T | 1171 | 0        | -0.612379 |  |  |
|  |  | Shiraz-77T | 1283 | 0.296555 | 0         |  |  |
|  |  | Shiraz-77T | 1283 | 0.296555 | 0         |  |  |
|  |  | Shiraz-18T | 1457 | 0.643204 | 0         |  |  |
|  |  | Shiraz-18T | 1457 | 0.643204 | 0         |  |  |
|  |  | Shiraz-22T | 1673 | 0.611783 | 0         |  |  |
|  |  | Shiraz-22T | 1673 | 0.611783 | 0         |  |  |
|  |  | Shiraz-22T | 1674 | 0.887899 | 0         |  |  |
|  |  | Shiraz-22T | 1674 | 0.887899 | 0         |  |  |
|  |  | Shiraz-25T | 1719 | 0.472955 | 0         |  |  |
|  |  | Shiraz-25T | 1719 | 0.472955 | 0         |  |  |
|  |  | Shiraz-28T | 1762 | 0.562311 | 0         |  |  |
|  |  | Shiraz-28T | 1762 | 0.562311 | 0         |  |  |
|  |  | Shiraz-29T | 1801 | 0.815343 | 0         |  |  |
|  |  | Shiraz-29T | 1801 | 0.815343 | 0         |  |  |
|  |  | Shiraz-32T | 1870 | 0.729766 | 0         |  |  |
|  |  | Shiraz-32T | 1870 | 0.729766 | 0         |  |  |
|  |  | Shiraz-35T | 1933 | 0.488535 | 0         |  |  |
|  |  | Shiraz-35T | 1933 | 0.488535 | 0         |  |  |
|  |  | Shiraz-58T | 2223 | 0.833364 | 0         |  |  |
|  |  | Shiraz-58T | 2223 | 0.833364 | 0         |  |  |
|  |  | Shiraz-58T | 2224 | 1.076575 | 0         |  |  |
|  |  | Shiraz-58T | 2224 | 1.076575 | 0         |  |  |
|  |  | Shiraz-71T | 2263 | 0.975531 | 0         |  |  |

|         |      |            |      |          |           |  |  |
|---------|------|------------|------|----------|-----------|--|--|
|         |      | Shiraz-71T | 2263 | 0.975531 | 0         |  |  |
|         |      | Shiraz-4T  | 261  | 0        | -0.336249 |  |  |
|         |      | Shiraz-4T  | 261  | 0        | -0.336249 |  |  |
|         |      | Shiraz-16T | 295  | 0.591657 | 0         |  |  |
|         |      | Shiraz-16T | 295  | 0.591657 | 0         |  |  |
|         |      | Shiraz-36T | 433  | 0        | -0.803961 |  |  |
|         |      | Shiraz-36T | 433  | 0        | -0.803961 |  |  |
|         |      | Shiraz-44T | 899  | 0        | -1.09697  |  |  |
|         |      | Shiraz-44T | 899  | 0        | -1.09697  |  |  |
|         |      | Shiraz-44T | 900  | 0        | -0.584284 |  |  |
|         |      | Shiraz-44T | 900  | 0        | -0.584284 |  |  |
|         |      | Shiraz-49T | 1170 | 0        | -0.967436 |  |  |
|         |      | Shiraz-49T | 1170 | 0        | -0.967436 |  |  |
|         |      | Shiraz-49T | 1171 | 0        | -0.612379 |  |  |
|         |      | Shiraz-49T | 1171 | 0        | -0.612379 |  |  |
|         |      | Shiraz-77T | 1283 | 0.296555 | 0         |  |  |
|         |      | Shiraz-77T | 1283 | 0.296555 | 0         |  |  |
|         |      | Shiraz-18T | 1457 | 0.643204 | 0         |  |  |
|         |      | Shiraz-18T | 1457 | 0.643204 | 0         |  |  |
|         |      | Shiraz-22T | 1673 | 0.611783 | 0         |  |  |
|         |      | Shiraz-22T | 1673 | 0.611783 | 0         |  |  |
|         |      | Shiraz-22T | 1674 | 0.887899 | 0         |  |  |
|         |      | Shiraz-22T | 1674 | 0.887899 | 0         |  |  |
|         |      | Shiraz-25T | 1719 | 0.472955 | 0         |  |  |
|         |      | Shiraz-25T | 1719 | 0.472955 | 0         |  |  |
|         |      | Shiraz-28T | 1762 | 0.562311 | 0         |  |  |
|         |      | Shiraz-28T | 1762 | 0.562311 | 0         |  |  |
|         |      | Shiraz-29T | 1801 | 0.815343 | 0         |  |  |
|         |      | Shiraz-29T | 1801 | 0.815343 | 0         |  |  |
|         |      | Shiraz-32T | 1870 | 0.729766 | 0         |  |  |
|         |      | Shiraz-32T | 1870 | 0.729766 | 0         |  |  |
|         |      | Shiraz-35T | 1933 | 0.488535 | 0         |  |  |
|         |      | Shiraz-35T | 1933 | 0.488535 | 0         |  |  |
|         |      | Shiraz-58T | 2223 | 0.833364 | 0         |  |  |
|         |      | Shiraz-58T | 2223 | 0.833364 | 0         |  |  |
|         |      | Shiraz-58T | 2224 | 1.076575 | 0         |  |  |
|         |      | Shiraz-58T | 2224 | 1.076575 | 0         |  |  |
|         |      | Shiraz-71T | 2263 | 0.975531 | 0         |  |  |
|         |      | Shiraz-71T | 2263 | 0.975531 | 0         |  |  |
| CXorf50 | chrX | Shiraz-3T  | 242  | 0        | -0.336434 |  |  |
|         |      | Shiraz-4T  | 261  | 0        | -0.336249 |  |  |
|         |      | Shiraz-16T | 295  | 0.591657 | 0         |  |  |
|         |      | Shiraz-36T | 433  | 0        | -0.803961 |  |  |
|         |      | Shiraz-44T | 899  | 0        | -1.09697  |  |  |
|         |      | Shiraz-49T | 1170 | 0        | -0.967436 |  |  |
|         |      | Shiraz-18T | 1457 | 0.643204 | 0         |  |  |
|         |      | Shiraz-22T | 1673 | 0.611783 | 0         |  |  |

|          |      |            |      |          |           |  |  |
|----------|------|------------|------|----------|-----------|--|--|
|          |      | Shiraz-25T | 1719 | 0.472955 | 0         |  |  |
|          |      | Shiraz-28T | 1762 | 0.562311 | 0         |  |  |
|          |      | Shiraz-29T | 1801 | 0.815343 | 0         |  |  |
|          |      | Shiraz-32T | 1870 | 0.729766 | 0         |  |  |
|          |      | Shiraz-35T | 1933 | 0.488535 | 0         |  |  |
|          |      | Shiraz-58T | 2223 | 0.833364 | 0         |  |  |
|          |      | Shiraz-71T | 2263 | 0.975531 | 0         |  |  |
|          |      | Shiraz-3T  | 242  | 0        | -0.336434 |  |  |
|          |      | Shiraz-4T  | 261  | 0        | -0.336249 |  |  |
|          |      | Shiraz-16T | 295  | 0.591657 | 0         |  |  |
|          |      | Shiraz-36T | 433  | 0        | -0.803961 |  |  |
|          |      | Shiraz-44T | 899  | 0        | -1.09697  |  |  |
|          |      | Shiraz-49T | 1170 | 0        | -0.967436 |  |  |
|          |      | Shiraz-18T | 1457 | 0.643204 | 0         |  |  |
|          |      | Shiraz-22T | 1673 | 0.611783 | 0         |  |  |
|          |      | Shiraz-25T | 1719 | 0.472955 | 0         |  |  |
|          |      | Shiraz-28T | 1762 | 0.562311 | 0         |  |  |
|          |      | Shiraz-29T | 1801 | 0.815343 | 0         |  |  |
|          |      | Shiraz-32T | 1870 | 0.729766 | 0         |  |  |
|          |      | Shiraz-35T | 1933 | 0.488535 | 0         |  |  |
|          |      | Shiraz-58T | 2223 | 0.833364 | 0         |  |  |
|          |      | Shiraz-71T | 2263 | 0.975531 | 0         |  |  |
|          |      | Shiraz-3T  | 242  | 0        | -0.336434 |  |  |
|          |      | Shiraz-4T  | 261  | 0        | -0.336249 |  |  |
|          |      | Shiraz-16T | 295  | 0.591657 | 0         |  |  |
|          |      | Shiraz-36T | 433  | 0        | -0.803961 |  |  |
|          |      | Shiraz-44T | 899  | 0        | -1.09697  |  |  |
|          |      | Shiraz-49T | 1170 | 0        | -0.967436 |  |  |
|          |      | Shiraz-18T | 1457 | 0.643204 | 0         |  |  |
|          |      | Shiraz-22T | 1673 | 0.611783 | 0         |  |  |
|          |      | Shiraz-25T | 1719 | 0.472955 | 0         |  |  |
|          |      | Shiraz-28T | 1762 | 0.562311 | 0         |  |  |
|          |      | Shiraz-29T | 1801 | 0.815343 | 0         |  |  |
|          |      | Shiraz-32T | 1870 | 0.729766 | 0         |  |  |
|          |      | Shiraz-35T | 1933 | 0.488535 | 0         |  |  |
|          |      | Shiraz-58T | 2223 | 0.833364 | 0         |  |  |
|          |      | Shiraz-71T | 2263 | 0.975531 | 0         |  |  |
| CXorf50B | chrX | Shiraz-3T  | 242  | 0        | -0.336434 |  |  |
|          |      | Shiraz-4T  | 261  | 0        | -0.336249 |  |  |
|          |      | Shiraz-16T | 295  | 0.591657 | 0         |  |  |
|          |      | Shiraz-36T | 433  | 0        | -0.803961 |  |  |
|          |      | Shiraz-44T | 899  | 0        | -1.09697  |  |  |
|          |      | Shiraz-49T | 1170 | 0        | -0.967436 |  |  |
|          |      | Shiraz-18T | 1457 | 0.643204 | 0         |  |  |
|          |      | Shiraz-22T | 1673 | 0.611783 | 0         |  |  |
|          |      | Shiraz-25T | 1719 | 0.472955 | 0         |  |  |
|          |      | Shiraz-28T | 1762 | 0.562311 | 0         |  |  |



|         |      |            |      |          |           |  |  |
|---------|------|------------|------|----------|-----------|--|--|
|         |      | Shiraz-29T | 1801 | 0.815343 | 0         |  |  |
|         |      | Shiraz-32T | 1870 | 0.729766 | 0         |  |  |
|         |      | Shiraz-35T | 1933 | 0.488535 | 0         |  |  |
|         |      | Shiraz-58T | 2223 | 0.833364 | 0         |  |  |
|         |      | Shiraz-71T | 2263 | 0.975531 | 0         |  |  |
|         |      | Shiraz-3T  | 242  | 0        | -0.336434 |  |  |
|         |      | Shiraz-4T  | 261  | 0        | -0.336249 |  |  |
|         |      | Shiraz-16T | 295  | 0.591657 | 0         |  |  |
|         |      | Shiraz-36T | 433  | 0        | -0.803961 |  |  |
|         |      | Shiraz-44T | 899  | 0        | -1.09697  |  |  |
|         |      | Shiraz-49T | 1170 | 0        | -0.967436 |  |  |
|         |      | Shiraz-18T | 1457 | 0.643204 | 0         |  |  |
|         |      | Shiraz-22T | 1673 | 0.611783 | 0         |  |  |
|         |      | Shiraz-25T | 1719 | 0.472955 | 0         |  |  |
|         |      | Shiraz-28T | 1762 | 0.562311 | 0         |  |  |
|         |      | Shiraz-29T | 1801 | 0.815343 | 0         |  |  |
|         |      | Shiraz-32T | 1870 | 0.729766 | 0         |  |  |
|         |      | Shiraz-35T | 1933 | 0.488535 | 0         |  |  |
|         |      | Shiraz-58T | 2223 | 0.833364 | 0         |  |  |
|         |      | Shiraz-71T | 2263 | 0.975531 | 0         |  |  |
|         |      | Shiraz-3T  | 242  | 0        | -0.336434 |  |  |
|         |      | Shiraz-4T  | 261  | 0        | -0.336249 |  |  |
|         |      | Shiraz-16T | 295  | 0.591657 | 0         |  |  |
|         |      | Shiraz-36T | 433  | 0        | -0.803961 |  |  |
|         |      | Shiraz-44T | 899  | 0        | -1.09697  |  |  |
|         |      | Shiraz-49T | 1170 | 0        | -0.967436 |  |  |
|         |      | Shiraz-18T | 1457 | 0.643204 | 0         |  |  |
|         |      | Shiraz-22T | 1673 | 0.611783 | 0         |  |  |
|         |      | Shiraz-25T | 1719 | 0.472955 | 0         |  |  |
|         |      | Shiraz-28T | 1762 | 0.562311 | 0         |  |  |
|         |      | Shiraz-29T | 1801 | 0.815343 | 0         |  |  |
|         |      | Shiraz-32T | 1870 | 0.729766 | 0         |  |  |
|         |      | Shiraz-35T | 1933 | 0.488535 | 0         |  |  |
|         |      | Shiraz-58T | 2223 | 0.833364 | 0         |  |  |
|         |      | Shiraz-71T | 2263 | 0.975531 | 0         |  |  |
| CXorf51 | chrX | Shiraz-3T  | 242  | 0        | -0.336434 |  |  |
|         |      | Shiraz-3T  | 242  | 0        | -0.336434 |  |  |
|         |      | Shiraz-4T  | 261  | 0        | -0.336249 |  |  |
|         |      | Shiraz-4T  | 261  | 0        | -0.336249 |  |  |
|         |      | Shiraz-16T | 295  | 0.591657 | 0         |  |  |
|         |      | Shiraz-16T | 295  | 0.591657 | 0         |  |  |
|         |      | Shiraz-36T | 433  | 0        | -0.803961 |  |  |
|         |      | Shiraz-36T | 433  | 0        | -0.803961 |  |  |
|         |      | Shiraz-44T | 899  | 0        | -1.09697  |  |  |
|         |      | Shiraz-44T | 899  | 0        | -1.09697  |  |  |
|         |      | Shiraz-44T | 907  | 0        | -1.370847 |  |  |
|         |      | Shiraz-44T | 907  | 0        | -1.370847 |  |  |

|  |            |      |          |           |  |
|--|------------|------|----------|-----------|--|
|  | Shiraz-49T | 1170 | 0        | -0.967436 |  |
|  | Shiraz-49T | 1170 | 0        | -0.967436 |  |
|  | Shiraz-9T  | 1370 | 0.690073 | 0         |  |
|  | Shiraz-9T  | 1370 | 0.690073 | 0         |  |
|  | Shiraz-18T | 1457 | 0.643204 | 0         |  |
|  | Shiraz-18T | 1457 | 0.643204 | 0         |  |
|  | Shiraz-22T | 1673 | 0.611783 | 0         |  |
|  | Shiraz-22T | 1673 | 0.611783 | 0         |  |
|  | Shiraz-25T | 1719 | 0.472955 | 0         |  |
|  | Shiraz-25T | 1719 | 0.472955 | 0         |  |
|  | Shiraz-28T | 1762 | 0.562311 | 0         |  |
|  | Shiraz-28T | 1762 | 0.562311 | 0         |  |
|  | Shiraz-29T | 1801 | 0.815343 | 0         |  |
|  | Shiraz-29T | 1801 | 0.815343 | 0         |  |
|  | Shiraz-32T | 1870 | 0.729766 | 0         |  |
|  | Shiraz-32T | 1870 | 0.729766 | 0         |  |
|  | Shiraz-35T | 1933 | 0.488535 | 0         |  |
|  | Shiraz-35T | 1933 | 0.488535 | 0         |  |
|  | Shiraz-58T | 2223 | 0.833364 | 0         |  |
|  | Shiraz-58T | 2223 | 0.833364 | 0         |  |
|  | Shiraz-71T | 2263 | 0.975531 | 0         |  |
|  | Shiraz-71T | 2263 | 0.975531 | 0         |  |
|  | Shiraz-3T  | 242  | 0        | -0.336434 |  |
|  | Shiraz-3T  | 242  | 0        | -0.336434 |  |
|  | Shiraz-4T  | 261  | 0        | -0.336249 |  |
|  | Shiraz-4T  | 261  | 0        | -0.336249 |  |
|  | Shiraz-16T | 295  | 0.591657 | 0         |  |
|  | Shiraz-16T | 295  | 0.591657 | 0         |  |
|  | Shiraz-36T | 433  | 0        | -0.803961 |  |
|  | Shiraz-36T | 433  | 0        | -0.803961 |  |
|  | Shiraz-44T | 899  | 0        | -1.09697  |  |
|  | Shiraz-44T | 899  | 0        | -1.09697  |  |
|  | Shiraz-44T | 907  | 0        | -1.370847 |  |
|  | Shiraz-44T | 907  | 0        | -1.370847 |  |
|  | Shiraz-49T | 1170 | 0        | -0.967436 |  |
|  | Shiraz-49T | 1170 | 0        | -0.967436 |  |
|  | Shiraz-9T  | 1370 | 0.690073 | 0         |  |
|  | Shiraz-9T  | 1370 | 0.690073 | 0         |  |
|  | Shiraz-18T | 1457 | 0.643204 | 0         |  |
|  | Shiraz-18T | 1457 | 0.643204 | 0         |  |
|  | Shiraz-22T | 1673 | 0.611783 | 0         |  |
|  | Shiraz-22T | 1673 | 0.611783 | 0         |  |
|  | Shiraz-25T | 1719 | 0.472955 | 0         |  |
|  | Shiraz-25T | 1719 | 0.472955 | 0         |  |
|  | Shiraz-28T | 1762 | 0.562311 | 0         |  |
|  | Shiraz-28T | 1762 | 0.562311 | 0         |  |
|  | Shiraz-29T | 1801 | 0.815343 | 0         |  |

|         |      |            |      |          |           |  |  |
|---------|------|------------|------|----------|-----------|--|--|
|         |      | Shiraz-29T | 1801 | 0.815343 | 0         |  |  |
|         |      | Shiraz-32T | 1870 | 0.729766 | 0         |  |  |
|         |      | Shiraz-32T | 1870 | 0.729766 | 0         |  |  |
|         |      | Shiraz-35T | 1933 | 0.488535 | 0         |  |  |
|         |      | Shiraz-35T | 1933 | 0.488535 | 0         |  |  |
|         |      | Shiraz-58T | 2223 | 0.833364 | 0         |  |  |
|         |      | Shiraz-58T | 2223 | 0.833364 | 0         |  |  |
|         |      | Shiraz-71T | 2263 | 0.975531 | 0         |  |  |
|         |      | Shiraz-71T | 2263 | 0.975531 | 0         |  |  |
|         |      | Shiraz-3T  | 242  | 0        | -0.336434 |  |  |
|         |      | Shiraz-3T  | 242  | 0        | -0.336434 |  |  |
|         |      | Shiraz-4T  | 261  | 0        | -0.336249 |  |  |
|         |      | Shiraz-4T  | 261  | 0        | -0.336249 |  |  |
|         |      | Shiraz-16T | 295  | 0.591657 | 0         |  |  |
|         |      | Shiraz-16T | 295  | 0.591657 | 0         |  |  |
|         |      | Shiraz-36T | 433  | 0        | -0.803961 |  |  |
|         |      | Shiraz-36T | 433  | 0        | -0.803961 |  |  |
|         |      | Shiraz-44T | 899  | 0        | -1.09697  |  |  |
|         |      | Shiraz-44T | 899  | 0        | -1.09697  |  |  |
|         |      | Shiraz-44T | 907  | 0        | -1.370847 |  |  |
|         |      | Shiraz-44T | 907  | 0        | -1.370847 |  |  |
|         |      | Shiraz-49T | 1170 | 0        | -0.967436 |  |  |
|         |      | Shiraz-49T | 1170 | 0        | -0.967436 |  |  |
|         |      | Shiraz-9T  | 1370 | 0.690073 | 0         |  |  |
|         |      | Shiraz-9T  | 1370 | 0.690073 | 0         |  |  |
|         |      | Shiraz-18T | 1457 | 0.643204 | 0         |  |  |
|         |      | Shiraz-18T | 1457 | 0.643204 | 0         |  |  |
|         |      | Shiraz-22T | 1673 | 0.611783 | 0         |  |  |
|         |      | Shiraz-22T | 1673 | 0.611783 | 0         |  |  |
|         |      | Shiraz-25T | 1719 | 0.472955 | 0         |  |  |
|         |      | Shiraz-25T | 1719 | 0.472955 | 0         |  |  |
|         |      | Shiraz-28T | 1762 | 0.562311 | 0         |  |  |
|         |      | Shiraz-28T | 1762 | 0.562311 | 0         |  |  |
|         |      | Shiraz-29T | 1801 | 0.815343 | 0         |  |  |
|         |      | Shiraz-29T | 1801 | 0.815343 | 0         |  |  |
|         |      | Shiraz-32T | 1870 | 0.729766 | 0         |  |  |
|         |      | Shiraz-32T | 1870 | 0.729766 | 0         |  |  |
|         |      | Shiraz-35T | 1933 | 0.488535 | 0         |  |  |
|         |      | Shiraz-35T | 1933 | 0.488535 | 0         |  |  |
|         |      | Shiraz-58T | 2223 | 0.833364 | 0         |  |  |
|         |      | Shiraz-58T | 2223 | 0.833364 | 0         |  |  |
|         |      | Shiraz-71T | 2263 | 0.975531 | 0         |  |  |
|         |      | Shiraz-71T | 2263 | 0.975531 | 0         |  |  |
| CXorf52 | chrX | Shiraz-3T  | 246  | 0.531858 | 0         |  |  |
|         |      | Shiraz-3T  | 246  | 0.531858 | 0         |  |  |
|         |      | Shiraz-4T  | 261  | 0        | -0.336249 |  |  |
|         |      | Shiraz-4T  | 261  | 0        | -0.336249 |  |  |

|  |  |            |      |          |           |  |  |
|--|--|------------|------|----------|-----------|--|--|
|  |  | Shiraz-16T | 295  | 0.591657 | 0         |  |  |
|  |  | Shiraz-16T | 295  | 0.591657 | 0         |  |  |
|  |  | Shiraz-36T | 433  | 0        | -0.803961 |  |  |
|  |  | Shiraz-36T | 433  | 0        | -0.803961 |  |  |
|  |  | Shiraz-49T | 1170 | 0        | -0.967436 |  |  |
|  |  | Shiraz-49T | 1170 | 0        | -0.967436 |  |  |
|  |  | Shiraz-9T  | 1370 | 0.690073 | 0         |  |  |
|  |  | Shiraz-9T  | 1370 | 0.690073 | 0         |  |  |
|  |  | Shiraz-9T  | 1371 | 1.292392 | 0         |  |  |
|  |  | Shiraz-9T  | 1371 | 1.292392 | 0         |  |  |
|  |  | Shiraz-18T | 1457 | 0.643204 | 0         |  |  |
|  |  | Shiraz-18T | 1457 | 0.643204 | 0         |  |  |
|  |  | Shiraz-22T | 1673 | 0.611783 | 0         |  |  |
|  |  | Shiraz-22T | 1673 | 0.611783 | 0         |  |  |
|  |  | Shiraz-22T | 1678 | 0.911625 | 0         |  |  |
|  |  | Shiraz-22T | 1678 | 0.911625 | 0         |  |  |
|  |  | Shiraz-25T | 1719 | 0.472955 | 0         |  |  |
|  |  | Shiraz-25T | 1719 | 0.472955 | 0         |  |  |
|  |  | Shiraz-28T | 1762 | 0.562311 | 0         |  |  |
|  |  | Shiraz-28T | 1762 | 0.562311 | 0         |  |  |
|  |  | Shiraz-29T | 1801 | 0.815343 | 0         |  |  |
|  |  | Shiraz-29T | 1801 | 0.815343 | 0         |  |  |
|  |  | Shiraz-32T | 1870 | 0.729766 | 0         |  |  |
|  |  | Shiraz-32T | 1870 | 0.729766 | 0         |  |  |
|  |  | Shiraz-32T | 1872 | 1.504553 | 0         |  |  |
|  |  | Shiraz-32T | 1872 | 1.504553 | 0         |  |  |
|  |  | Shiraz-35T | 1933 | 0.488535 | 0         |  |  |
|  |  | Shiraz-35T | 1933 | 0.488535 | 0         |  |  |
|  |  | Shiraz-38T | 2011 | 0        | -0.406024 |  |  |
|  |  | Shiraz-38T | 2011 | 0        | -0.406024 |  |  |
|  |  | Shiraz-53T | 2115 | 0.427728 | 0         |  |  |
|  |  | Shiraz-53T | 2115 | 0.427728 | 0         |  |  |
|  |  | Shiraz-58T | 2223 | 0.833364 | 0         |  |  |
|  |  | Shiraz-58T | 2223 | 0.833364 | 0         |  |  |
|  |  | Shiraz-58T | 2226 | 1.074663 | 0         |  |  |
|  |  | Shiraz-58T | 2226 | 1.074663 | 0         |  |  |
|  |  | Shiraz-71T | 2263 | 0.975531 | 0         |  |  |
|  |  | Shiraz-71T | 2263 | 0.975531 | 0         |  |  |
|  |  | Shiraz-3T  | 246  | 0.531858 | 0         |  |  |
|  |  | Shiraz-3T  | 246  | 0.531858 | 0         |  |  |
|  |  | Shiraz-4T  | 261  | 0        | -0.336249 |  |  |
|  |  | Shiraz-4T  | 261  | 0        | -0.336249 |  |  |
|  |  | Shiraz-16T | 295  | 0.591657 | 0         |  |  |
|  |  | Shiraz-16T | 295  | 0.591657 | 0         |  |  |
|  |  | Shiraz-36T | 433  | 0        | -0.803961 |  |  |
|  |  | Shiraz-36T | 433  | 0        | -0.803961 |  |  |
|  |  | Shiraz-49T | 1170 | 0        | -0.967436 |  |  |

|  |            |      |          |           |  |
|--|------------|------|----------|-----------|--|
|  | Shiraz-49T | 1170 | 0        | -0.967436 |  |
|  | Shiraz-9T  | 1370 | 0.690073 | 0         |  |
|  | Shiraz-9T  | 1370 | 0.690073 | 0         |  |
|  | Shiraz-9T  | 1371 | 1.292392 | 0         |  |
|  | Shiraz-9T  | 1371 | 1.292392 | 0         |  |
|  | Shiraz-18T | 1457 | 0.643204 | 0         |  |
|  | Shiraz-18T | 1457 | 0.643204 | 0         |  |
|  | Shiraz-22T | 1673 | 0.611783 | 0         |  |
|  | Shiraz-22T | 1673 | 0.611783 | 0         |  |
|  | Shiraz-22T | 1678 | 0.911625 | 0         |  |
|  | Shiraz-22T | 1678 | 0.911625 | 0         |  |
|  | Shiraz-25T | 1719 | 0.472955 | 0         |  |
|  | Shiraz-25T | 1719 | 0.472955 | 0         |  |
|  | Shiraz-28T | 1762 | 0.562311 | 0         |  |
|  | Shiraz-28T | 1762 | 0.562311 | 0         |  |
|  | Shiraz-29T | 1801 | 0.815343 | 0         |  |
|  | Shiraz-29T | 1801 | 0.815343 | 0         |  |
|  | Shiraz-32T | 1870 | 0.729766 | 0         |  |
|  | Shiraz-32T | 1870 | 0.729766 | 0         |  |
|  | Shiraz-32T | 1872 | 1.504553 | 0         |  |
|  | Shiraz-32T | 1872 | 1.504553 | 0         |  |
|  | Shiraz-35T | 1933 | 0.488535 | 0         |  |
|  | Shiraz-35T | 1933 | 0.488535 | 0         |  |
|  | Shiraz-38T | 2011 | 0        | -0.406024 |  |
|  | Shiraz-38T | 2011 | 0        | -0.406024 |  |
|  | Shiraz-53T | 2115 | 0.427728 | 0         |  |
|  | Shiraz-53T | 2115 | 0.427728 | 0         |  |
|  | Shiraz-58T | 2223 | 0.833364 | 0         |  |
|  | Shiraz-58T | 2223 | 0.833364 | 0         |  |
|  | Shiraz-58T | 2226 | 1.074663 | 0         |  |
|  | Shiraz-58T | 2226 | 1.074663 | 0         |  |
|  | Shiraz-71T | 2263 | 0.975531 | 0         |  |
|  | Shiraz-71T | 2263 | 0.975531 | 0         |  |
|  | Shiraz-3T  | 246  | 0.531858 | 0         |  |
|  | Shiraz-3T  | 246  | 0.531858 | 0         |  |
|  | Shiraz-4T  | 261  | 0        | -0.336249 |  |
|  | Shiraz-4T  | 261  | 0        | -0.336249 |  |
|  | Shiraz-16T | 295  | 0.591657 | 0         |  |
|  | Shiraz-16T | 295  | 0.591657 | 0         |  |
|  | Shiraz-36T | 433  | 0        | -0.803961 |  |
|  | Shiraz-36T | 433  | 0        | -0.803961 |  |
|  | Shiraz-49T | 1170 | 0        | -0.967436 |  |
|  | Shiraz-49T | 1170 | 0        | -0.967436 |  |
|  | Shiraz-9T  | 1370 | 0.690073 | 0         |  |
|  | Shiraz-9T  | 1370 | 0.690073 | 0         |  |
|  | Shiraz-9T  | 1371 | 1.292392 | 0         |  |
|  | Shiraz-9T  | 1371 | 1.292392 | 0         |  |

|          |      |            |      |          |           |  |
|----------|------|------------|------|----------|-----------|--|
|          |      | Shiraz-18T | 1457 | 0.643204 | 0         |  |
|          |      | Shiraz-18T | 1457 | 0.643204 | 0         |  |
|          |      | Shiraz-22T | 1673 | 0.611783 | 0         |  |
|          |      | Shiraz-22T | 1673 | 0.611783 | 0         |  |
|          |      | Shiraz-22T | 1678 | 0.911625 | 0         |  |
|          |      | Shiraz-22T | 1678 | 0.911625 | 0         |  |
|          |      | Shiraz-25T | 1719 | 0.472955 | 0         |  |
|          |      | Shiraz-25T | 1719 | 0.472955 | 0         |  |
|          |      | Shiraz-28T | 1762 | 0.562311 | 0         |  |
|          |      | Shiraz-28T | 1762 | 0.562311 | 0         |  |
|          |      | Shiraz-29T | 1801 | 0.815343 | 0         |  |
|          |      | Shiraz-29T | 1801 | 0.815343 | 0         |  |
|          |      | Shiraz-32T | 1870 | 0.729766 | 0         |  |
|          |      | Shiraz-32T | 1870 | 0.729766 | 0         |  |
|          |      | Shiraz-32T | 1872 | 1.504553 | 0         |  |
|          |      | Shiraz-32T | 1872 | 1.504553 | 0         |  |
|          |      | Shiraz-35T | 1933 | 0.488535 | 0         |  |
|          |      | Shiraz-35T | 1933 | 0.488535 | 0         |  |
|          |      | Shiraz-38T | 2011 | 0        | -0.406024 |  |
|          |      | Shiraz-38T | 2011 | 0        | -0.406024 |  |
|          |      | Shiraz-53T | 2115 | 0.427728 | 0         |  |
|          |      | Shiraz-53T | 2115 | 0.427728 | 0         |  |
|          |      | Shiraz-58T | 2223 | 0.833364 | 0         |  |
|          |      | Shiraz-58T | 2223 | 0.833364 | 0         |  |
|          |      | Shiraz-58T | 2226 | 1.074663 | 0         |  |
|          |      | Shiraz-58T | 2226 | 1.074663 | 0         |  |
|          |      | Shiraz-71T | 2263 | 0.975531 | 0         |  |
|          |      | Shiraz-71T | 2263 | 0.975531 | 0         |  |
| CXorf52B | chrX | Shiraz-3T  | 246  | 0.531858 | 0         |  |
|          |      | Shiraz-3T  | 246  | 0.531858 | 0         |  |
|          |      | Shiraz-4T  | 261  | 0        | -0.336249 |  |
|          |      | Shiraz-4T  | 261  | 0        | -0.336249 |  |
|          |      | Shiraz-16T | 295  | 0.591657 | 0         |  |
|          |      | Shiraz-16T | 295  | 0.591657 | 0         |  |
|          |      | Shiraz-36T | 433  | 0        | -0.803961 |  |
|          |      | Shiraz-36T | 433  | 0        | -0.803961 |  |
|          |      | Shiraz-49T | 1170 | 0        | -0.967436 |  |
|          |      | Shiraz-49T | 1170 | 0        | -0.967436 |  |
|          |      | Shiraz-9T  | 1370 | 0.690073 | 0         |  |
|          |      | Shiraz-9T  | 1370 | 0.690073 | 0         |  |
|          |      | Shiraz-9T  | 1371 | 1.292392 | 0         |  |
|          |      | Shiraz-9T  | 1371 | 1.292392 | 0         |  |
|          |      | Shiraz-18T | 1457 | 0.643204 | 0         |  |
|          |      | Shiraz-18T | 1457 | 0.643204 | 0         |  |
|          |      | Shiraz-22T | 1673 | 0.611783 | 0         |  |
|          |      | Shiraz-22T | 1673 | 0.611783 | 0         |  |
|          |      | Shiraz-22T | 1678 | 0.911625 | 0         |  |

|  |            |      |          |           |  |
|--|------------|------|----------|-----------|--|
|  | Shiraz-22T | 1678 | 0.911625 | 0         |  |
|  | Shiraz-25T | 1719 | 0.472955 | 0         |  |
|  | Shiraz-25T | 1719 | 0.472955 | 0         |  |
|  | Shiraz-28T | 1762 | 0.562311 | 0         |  |
|  | Shiraz-28T | 1762 | 0.562311 | 0         |  |
|  | Shiraz-29T | 1801 | 0.815343 | 0         |  |
|  | Shiraz-29T | 1801 | 0.815343 | 0         |  |
|  | Shiraz-32T | 1870 | 0.729766 | 0         |  |
|  | Shiraz-32T | 1870 | 0.729766 | 0         |  |
|  | Shiraz-32T | 1872 | 1.504553 | 0         |  |
|  | Shiraz-32T | 1872 | 1.504553 | 0         |  |
|  | Shiraz-35T | 1933 | 0.488535 | 0         |  |
|  | Shiraz-35T | 1933 | 0.488535 | 0         |  |
|  | Shiraz-38T | 2011 | 0        | -0.406024 |  |
|  | Shiraz-38T | 2011 | 0        | -0.406024 |  |
|  | Shiraz-53T | 2115 | 0.427728 | 0         |  |
|  | Shiraz-53T | 2115 | 0.427728 | 0         |  |
|  | Shiraz-58T | 2223 | 0.833364 | 0         |  |
|  | Shiraz-58T | 2223 | 0.833364 | 0         |  |
|  | Shiraz-58T | 2226 | 1.074663 | 0         |  |
|  | Shiraz-58T | 2226 | 1.074663 | 0         |  |
|  | Shiraz-71T | 2263 | 0.975531 | 0         |  |
|  | Shiraz-71T | 2263 | 0.975531 | 0         |  |
|  | Shiraz-3T  | 246  | 0.531858 | 0         |  |
|  | Shiraz-3T  | 246  | 0.531858 | 0         |  |
|  | Shiraz-4T  | 261  | 0        | -0.336249 |  |
|  | Shiraz-4T  | 261  | 0        | -0.336249 |  |
|  | Shiraz-16T | 295  | 0.591657 | 0         |  |
|  | Shiraz-16T | 295  | 0.591657 | 0         |  |
|  | Shiraz-36T | 433  | 0        | -0.803961 |  |
|  | Shiraz-36T | 433  | 0        | -0.803961 |  |
|  | Shiraz-49T | 1170 | 0        | -0.967436 |  |
|  | Shiraz-49T | 1170 | 0        | -0.967436 |  |
|  | Shiraz-9T  | 1370 | 0.690073 | 0         |  |
|  | Shiraz-9T  | 1370 | 0.690073 | 0         |  |
|  | Shiraz-9T  | 1371 | 1.292392 | 0         |  |
|  | Shiraz-9T  | 1371 | 1.292392 | 0         |  |
|  | Shiraz-18T | 1457 | 0.643204 | 0         |  |
|  | Shiraz-18T | 1457 | 0.643204 | 0         |  |
|  | Shiraz-22T | 1673 | 0.611783 | 0         |  |
|  | Shiraz-22T | 1673 | 0.611783 | 0         |  |
|  | Shiraz-22T | 1678 | 0.911625 | 0         |  |
|  | Shiraz-22T | 1678 | 0.911625 | 0         |  |
|  | Shiraz-25T | 1719 | 0.472955 | 0         |  |
|  | Shiraz-25T | 1719 | 0.472955 | 0         |  |
|  | Shiraz-28T | 1762 | 0.562311 | 0         |  |
|  | Shiraz-28T | 1762 | 0.562311 | 0         |  |

|  |  |            |      |          |           |  |  |
|--|--|------------|------|----------|-----------|--|--|
|  |  | Shiraz-29T | 1801 | 0.815343 | 0         |  |  |
|  |  | Shiraz-29T | 1801 | 0.815343 | 0         |  |  |
|  |  | Shiraz-32T | 1870 | 0.729766 | 0         |  |  |
|  |  | Shiraz-32T | 1870 | 0.729766 | 0         |  |  |
|  |  | Shiraz-32T | 1872 | 1.504553 | 0         |  |  |
|  |  | Shiraz-32T | 1872 | 1.504553 | 0         |  |  |
|  |  | Shiraz-35T | 1933 | 0.488535 | 0         |  |  |
|  |  | Shiraz-35T | 1933 | 0.488535 | 0         |  |  |
|  |  | Shiraz-38T | 2011 | 0        | -0.406024 |  |  |
|  |  | Shiraz-38T | 2011 | 0        | -0.406024 |  |  |
|  |  | Shiraz-53T | 2115 | 0.427728 | 0         |  |  |
|  |  | Shiraz-53T | 2115 | 0.427728 | 0         |  |  |
|  |  | Shiraz-58T | 2223 | 0.833364 | 0         |  |  |
|  |  | Shiraz-58T | 2223 | 0.833364 | 0         |  |  |
|  |  | Shiraz-58T | 2226 | 1.074663 | 0         |  |  |
|  |  | Shiraz-58T | 2226 | 1.074663 | 0         |  |  |
|  |  | Shiraz-71T | 2263 | 0.975531 | 0         |  |  |
|  |  | Shiraz-71T | 2263 | 0.975531 | 0         |  |  |
|  |  | Shiraz-3T  | 246  | 0.531858 | 0         |  |  |
|  |  | Shiraz-3T  | 246  | 0.531858 | 0         |  |  |
|  |  | Shiraz-4T  | 261  | 0        | -0.336249 |  |  |
|  |  | Shiraz-4T  | 261  | 0        | -0.336249 |  |  |
|  |  | Shiraz-16T | 295  | 0.591657 | 0         |  |  |
|  |  | Shiraz-16T | 295  | 0.591657 | 0         |  |  |
|  |  | Shiraz-36T | 433  | 0        | -0.803961 |  |  |
|  |  | Shiraz-36T | 433  | 0        | -0.803961 |  |  |
|  |  | Shiraz-49T | 1170 | 0        | -0.967436 |  |  |
|  |  | Shiraz-49T | 1170 | 0        | -0.967436 |  |  |
|  |  | Shiraz-9T  | 1370 | 0.690073 | 0         |  |  |
|  |  | Shiraz-9T  | 1370 | 0.690073 | 0         |  |  |
|  |  | Shiraz-9T  | 1371 | 1.292392 | 0         |  |  |
|  |  | Shiraz-9T  | 1371 | 1.292392 | 0         |  |  |
|  |  | Shiraz-18T | 1457 | 0.643204 | 0         |  |  |
|  |  | Shiraz-18T | 1457 | 0.643204 | 0         |  |  |
|  |  | Shiraz-22T | 1673 | 0.611783 | 0         |  |  |
|  |  | Shiraz-22T | 1673 | 0.611783 | 0         |  |  |
|  |  | Shiraz-22T | 1678 | 0.911625 | 0         |  |  |
|  |  | Shiraz-22T | 1678 | 0.911625 | 0         |  |  |
|  |  | Shiraz-25T | 1719 | 0.472955 | 0         |  |  |
|  |  | Shiraz-25T | 1719 | 0.472955 | 0         |  |  |
|  |  | Shiraz-28T | 1762 | 0.562311 | 0         |  |  |
|  |  | Shiraz-28T | 1762 | 0.562311 | 0         |  |  |
|  |  | Shiraz-29T | 1801 | 0.815343 | 0         |  |  |
|  |  | Shiraz-29T | 1801 | 0.815343 | 0         |  |  |
|  |  | Shiraz-32T | 1870 | 0.729766 | 0         |  |  |
|  |  | Shiraz-32T | 1870 | 0.729766 | 0         |  |  |
|  |  | Shiraz-32T | 1872 | 1.504553 | 0         |  |  |



|         |      |            |      |          |           |  |
|---------|------|------------|------|----------|-----------|--|
|         |      | Shiraz-32T | 1872 | 1.504553 | 0         |  |
|         |      | Shiraz-35T | 1933 | 0.488535 | 0         |  |
|         |      | Shiraz-35T | 1933 | 0.488535 | 0         |  |
|         |      | Shiraz-38T | 2011 | 0        | -0.406024 |  |
|         |      | Shiraz-38T | 2011 | 0        | -0.406024 |  |
|         |      | Shiraz-53T | 2115 | 0.427728 | 0         |  |
|         |      | Shiraz-53T | 2115 | 0.427728 | 0         |  |
|         |      | Shiraz-58T | 2223 | 0.833364 | 0         |  |
|         |      | Shiraz-58T | 2223 | 0.833364 | 0         |  |
|         |      | Shiraz-58T | 2226 | 1.074663 | 0         |  |
|         |      | Shiraz-58T | 2226 | 1.074663 | 0         |  |
|         |      | Shiraz-71T | 2263 | 0.975531 | 0         |  |
|         |      | Shiraz-71T | 2263 | 0.975531 | 0         |  |
| CXorf56 | chrX | Shiraz-3T  | 242  | 0        | -0.336434 |  |
|         |      | Shiraz-3T  | 244  | 0        | -0.023749 |  |
|         |      | Shiraz-4T  | 261  | 0        | -0.336249 |  |
|         |      | Shiraz-16T | 295  | 0.591657 | 0         |  |
|         |      | Shiraz-36T | 433  | 0        | -0.803961 |  |
|         |      | Shiraz-44T | 899  | 0        | -1.09697  |  |
|         |      | Shiraz-44T | 904  | 0        | -0.625526 |  |
|         |      | Shiraz-49T | 1170 | 0        | -0.967436 |  |
|         |      | Shiraz-18T | 1457 | 0.643204 | 0         |  |
|         |      | Shiraz-22T | 1673 | 0.611783 | 0         |  |
|         |      | Shiraz-25T | 1719 | 0.472955 | 0         |  |
|         |      | Shiraz-28T | 1762 | 0.562311 | 0         |  |
|         |      | Shiraz-29T | 1801 | 0.815343 | 0         |  |
|         |      | Shiraz-32T | 1870 | 0.729766 | 0         |  |
|         |      | Shiraz-35T | 1933 | 0.488535 | 0         |  |
|         |      | Shiraz-58T | 2223 | 0.833364 | 0         |  |
|         |      | Shiraz-71T | 2263 | 0.975531 | 0         |  |
|         |      | Shiraz-3T  | 242  | 0        | -0.336434 |  |
|         |      | Shiraz-3T  | 244  | 0        | -0.023749 |  |
|         |      | Shiraz-4T  | 261  | 0        | -0.336249 |  |
|         |      | Shiraz-16T | 295  | 0.591657 | 0         |  |
|         |      | Shiraz-36T | 433  | 0        | -0.803961 |  |
|         |      | Shiraz-44T | 899  | 0        | -1.09697  |  |
|         |      | Shiraz-44T | 904  | 0        | -0.625526 |  |
|         |      | Shiraz-49T | 1170 | 0        | -0.967436 |  |
|         |      | Shiraz-18T | 1457 | 0.643204 | 0         |  |
|         |      | Shiraz-22T | 1673 | 0.611783 | 0         |  |
|         |      | Shiraz-25T | 1719 | 0.472955 | 0         |  |
|         |      | Shiraz-28T | 1762 | 0.562311 | 0         |  |
|         |      | Shiraz-29T | 1801 | 0.815343 | 0         |  |
|         |      | Shiraz-32T | 1870 | 0.729766 | 0         |  |
|         |      | Shiraz-35T | 1933 | 0.488535 | 0         |  |
|         |      | Shiraz-58T | 2223 | 0.833364 | 0         |  |
|         |      | Shiraz-71T | 2263 | 0.975531 | 0         |  |

|         |      |            |      |          |           |  |  |
|---------|------|------------|------|----------|-----------|--|--|
|         |      | Shiraz-3T  | 242  | 0        | -0.336434 |  |  |
|         |      | Shiraz-3T  | 244  | 0        | -0.023749 |  |  |
|         |      | Shiraz-4T  | 261  | 0        | -0.336249 |  |  |
|         |      | Shiraz-16T | 295  | 0.591657 | 0         |  |  |
|         |      | Shiraz-36T | 433  | 0        | -0.803961 |  |  |
|         |      | Shiraz-44T | 899  | 0        | -1.09697  |  |  |
|         |      | Shiraz-44T | 904  | 0        | -0.625526 |  |  |
|         |      | Shiraz-49T | 1170 | 0        | -0.967436 |  |  |
|         |      | Shiraz-18T | 1457 | 0.643204 | 0         |  |  |
|         |      | Shiraz-22T | 1673 | 0.611783 | 0         |  |  |
|         |      | Shiraz-25T | 1719 | 0.472955 | 0         |  |  |
|         |      | Shiraz-28T | 1762 | 0.562311 | 0         |  |  |
|         |      | Shiraz-29T | 1801 | 0.815343 | 0         |  |  |
|         |      | Shiraz-32T | 1870 | 0.729766 | 0         |  |  |
|         |      | Shiraz-35T | 1933 | 0.488535 | 0         |  |  |
|         |      | Shiraz-58T | 2223 | 0.833364 | 0         |  |  |
|         |      | Shiraz-71T | 2263 | 0.975531 | 0         |  |  |
| CXorf57 | chrX | Shiraz-3T  | 242  | 0        | -0.336434 |  |  |
|         |      | Shiraz-4T  | 261  | 0        | -0.336249 |  |  |
|         |      | Shiraz-16T | 295  | 0.591657 | 0         |  |  |
|         |      | Shiraz-36T | 433  | 0        | -0.803961 |  |  |
|         |      | Shiraz-44T | 899  | 0        | -1.09697  |  |  |
|         |      | Shiraz-49T | 1170 | 0        | -0.967436 |  |  |
|         |      | Shiraz-18T | 1457 | 0.643204 | 0         |  |  |
|         |      | Shiraz-22T | 1673 | 0.611783 | 0         |  |  |
|         |      | Shiraz-25T | 1719 | 0.472955 | 0         |  |  |
|         |      | Shiraz-28T | 1762 | 0.562311 | 0         |  |  |
|         |      | Shiraz-29T | 1801 | 0.815343 | 0         |  |  |
|         |      | Shiraz-32T | 1870 | 0.729766 | 0         |  |  |
|         |      | Shiraz-35T | 1933 | 0.488535 | 0         |  |  |
|         |      | Shiraz-58T | 2223 | 0.833364 | 0         |  |  |
|         |      | Shiraz-71T | 2263 | 0.975531 | 0         |  |  |
|         |      | Shiraz-3T  | 242  | 0        | -0.336434 |  |  |
|         |      | Shiraz-4T  | 261  | 0        | -0.336249 |  |  |
|         |      | Shiraz-16T | 295  | 0.591657 | 0         |  |  |
|         |      | Shiraz-36T | 433  | 0        | -0.803961 |  |  |
|         |      | Shiraz-44T | 899  | 0        | -1.09697  |  |  |
|         |      | Shiraz-49T | 1170 | 0        | -0.967436 |  |  |
|         |      | Shiraz-18T | 1457 | 0.643204 | 0         |  |  |
|         |      | Shiraz-22T | 1673 | 0.611783 | 0         |  |  |
|         |      | Shiraz-25T | 1719 | 0.472955 | 0         |  |  |
|         |      | Shiraz-28T | 1762 | 0.562311 | 0         |  |  |
|         |      | Shiraz-29T | 1801 | 0.815343 | 0         |  |  |
|         |      | Shiraz-32T | 1870 | 0.729766 | 0         |  |  |
|         |      | Shiraz-35T | 1933 | 0.488535 | 0         |  |  |
|         |      | Shiraz-58T | 2223 | 0.833364 | 0         |  |  |
|         |      | Shiraz-71T | 2263 | 0.975531 | 0         |  |  |

|         |      |            |      |          |           |  |  |
|---------|------|------------|------|----------|-----------|--|--|
|         |      | Shiraz-3T  | 242  | 0        | -0.336434 |  |  |
|         |      | Shiraz-4T  | 261  | 0        | -0.336249 |  |  |
|         |      | Shiraz-16T | 295  | 0.591657 | 0         |  |  |
|         |      | Shiraz-36T | 433  | 0        | -0.803961 |  |  |
|         |      | Shiraz-44T | 899  | 0        | -1.09697  |  |  |
|         |      | Shiraz-49T | 1170 | 0        | -0.967436 |  |  |
|         |      | Shiraz-18T | 1457 | 0.643204 | 0         |  |  |
|         |      | Shiraz-22T | 1673 | 0.611783 | 0         |  |  |
|         |      | Shiraz-25T | 1719 | 0.472955 | 0         |  |  |
|         |      | Shiraz-28T | 1762 | 0.562311 | 0         |  |  |
|         |      | Shiraz-29T | 1801 | 0.815343 | 0         |  |  |
|         |      | Shiraz-32T | 1870 | 0.729766 | 0         |  |  |
|         |      | Shiraz-35T | 1933 | 0.488535 | 0         |  |  |
|         |      | Shiraz-58T | 2223 | 0.833364 | 0         |  |  |
|         |      | Shiraz-71T | 2263 | 0.975531 | 0         |  |  |
| CXorf58 | chrX | Shiraz-3T  | 235  | 0        | -0.28401  |  |  |
|         |      | Shiraz-4T  | 260  | 0        | -0.324128 |  |  |
|         |      | Shiraz-16T | 294  | 0.655804 | 0         |  |  |
|         |      | Shiraz-36T | 431  | 0        | -0.78035  |  |  |
|         |      | Shiraz-44T | 891  | 0        | -0.954044 |  |  |
|         |      | Shiraz-49T | 1166 | 0        | -0.917235 |  |  |
|         |      | Shiraz-77T | 1281 | 0.136627 | 0         |  |  |
|         |      | Shiraz-9T  | 1368 | 0.199713 | 0         |  |  |
|         |      | Shiraz-18T | 1455 | 0        | -0.186773 |  |  |
|         |      | Shiraz-22T | 1669 | 0.695915 | 0         |  |  |
|         |      | Shiraz-25T | 1717 | 0.420447 | 0         |  |  |
|         |      | Shiraz-28T | 1760 | 0.538181 | 0         |  |  |
|         |      | Shiraz-29T | 1800 | 0.672527 | 0         |  |  |
|         |      | Shiraz-32T | 1869 | 0.776805 | 0         |  |  |
|         |      | Shiraz-35T | 1932 | 0.507141 | 0         |  |  |
|         |      | Shiraz-40T | 2051 | 0.098506 | 0         |  |  |
|         |      | Shiraz-58T | 2221 | 0.871948 | 0         |  |  |
|         |      | Shiraz-71T | 2260 | 0.68394  | 0         |  |  |
|         |      | Shiraz-71T | 2261 | 0.508399 | 0         |  |  |
|         |      | Shiraz-3T  | 235  | 0        | -0.28401  |  |  |
|         |      | Shiraz-4T  | 260  | 0        | -0.324128 |  |  |
|         |      | Shiraz-16T | 294  | 0.655804 | 0         |  |  |
|         |      | Shiraz-36T | 431  | 0        | -0.78035  |  |  |
|         |      | Shiraz-44T | 891  | 0        | -0.954044 |  |  |
|         |      | Shiraz-49T | 1166 | 0        | -0.917235 |  |  |
|         |      | Shiraz-77T | 1281 | 0.136627 | 0         |  |  |
|         |      | Shiraz-9T  | 1368 | 0.199713 | 0         |  |  |
|         |      | Shiraz-18T | 1455 | 0        | -0.186773 |  |  |
|         |      | Shiraz-22T | 1669 | 0.695915 | 0         |  |  |
|         |      | Shiraz-25T | 1717 | 0.420447 | 0         |  |  |
|         |      | Shiraz-28T | 1760 | 0.538181 | 0         |  |  |
|         |      | Shiraz-29T | 1800 | 0.672527 | 0         |  |  |

|         |      |            |      |          |           |  |  |
|---------|------|------------|------|----------|-----------|--|--|
|         |      | Shiraz-32T | 1869 | 0.776805 | 0         |  |  |
|         |      | Shiraz-35T | 1932 | 0.507141 | 0         |  |  |
|         |      | Shiraz-40T | 2051 | 0.098506 | 0         |  |  |
|         |      | Shiraz-58T | 2221 | 0.871948 | 0         |  |  |
|         |      | Shiraz-71T | 2260 | 0.68394  | 0         |  |  |
|         |      | Shiraz-71T | 2261 | 0.508399 | 0         |  |  |
|         |      | Shiraz-3T  | 235  | 0        | -0.28401  |  |  |
|         |      | Shiraz-4T  | 260  | 0        | -0.324128 |  |  |
|         |      | Shiraz-16T | 294  | 0.655804 | 0         |  |  |
|         |      | Shiraz-36T | 431  | 0        | -0.78035  |  |  |
|         |      | Shiraz-44T | 891  | 0        | -0.954044 |  |  |
|         |      | Shiraz-49T | 1166 | 0        | -0.917235 |  |  |
|         |      | Shiraz-77T | 1281 | 0.136627 | 0         |  |  |
|         |      | Shiraz-9T  | 1368 | 0.199713 | 0         |  |  |
|         |      | Shiraz-18T | 1455 | 0        | -0.186773 |  |  |
|         |      | Shiraz-22T | 1669 | 0.695915 | 0         |  |  |
|         |      | Shiraz-25T | 1717 | 0.420447 | 0         |  |  |
|         |      | Shiraz-28T | 1760 | 0.538181 | 0         |  |  |
|         |      | Shiraz-29T | 1800 | 0.672527 | 0         |  |  |
|         |      | Shiraz-32T | 1869 | 0.776805 | 0         |  |  |
|         |      | Shiraz-35T | 1932 | 0.507141 | 0         |  |  |
|         |      | Shiraz-40T | 2051 | 0.098506 | 0         |  |  |
|         |      | Shiraz-58T | 2221 | 0.871948 | 0         |  |  |
|         |      | Shiraz-71T | 2260 | 0.68394  | 0         |  |  |
|         |      | Shiraz-71T | 2261 | 0.508399 | 0         |  |  |
| CXorf59 | chrX | Shiraz-3T  | 235  | 0        | -0.28401  |  |  |
|         |      | Shiraz-3T  | 236  | 0        | -0.435445 |  |  |
|         |      | Shiraz-4T  | 260  | 0        | -0.324128 |  |  |
|         |      | Shiraz-16T | 294  | 0.655804 | 0         |  |  |
|         |      | Shiraz-36T | 431  | 0        | -0.78035  |  |  |
|         |      | Shiraz-44T | 891  | 0        | -0.954044 |  |  |
|         |      | Shiraz-44T | 893  | 0        | -1.364406 |  |  |
|         |      | Shiraz-47T | 1083 | 0        | -0.103285 |  |  |
|         |      | Shiraz-49T | 1166 | 0        | -0.917235 |  |  |
|         |      | Shiraz-49T | 1168 | 0        | -1.073859 |  |  |
|         |      | Shiraz-9T  | 1368 | 0.199713 | 0         |  |  |
|         |      | Shiraz-18T | 1455 | 0        | -0.186773 |  |  |
|         |      | Shiraz-22T | 1669 | 0.695915 | 0         |  |  |
|         |      | Shiraz-22T | 1671 | 0.369309 | 0         |  |  |
|         |      | Shiraz-25T | 1717 | 0.420447 | 0         |  |  |
|         |      | Shiraz-28T | 1760 | 0.538181 | 0         |  |  |
|         |      | Shiraz-29T | 1800 | 0.672527 | 0         |  |  |
|         |      | Shiraz-32T | 1869 | 0.776805 | 0         |  |  |
|         |      | Shiraz-35T | 1932 | 0.507141 | 0         |  |  |
|         |      | Shiraz-40T | 2051 | 0.098506 | 0         |  |  |
|         |      | Shiraz-58T | 2221 | 0.871948 | 0         |  |  |
|         |      | Shiraz-58T | 2222 | 0.679664 | 0         |  |  |

|  |  |            |      |          |           |  |  |
|--|--|------------|------|----------|-----------|--|--|
|  |  | Shiraz-71T | 2260 | 0.68394  | 0         |  |  |
|  |  | Shiraz-71T | 2261 | 0.508399 | 0         |  |  |
|  |  | Shiraz-3T  | 235  | 0        | -0.28401  |  |  |
|  |  | Shiraz-3T  | 236  | 0        | -0.435445 |  |  |
|  |  | Shiraz-4T  | 260  | 0        | -0.324128 |  |  |
|  |  | Shiraz-16T | 294  | 0.655804 | 0         |  |  |
|  |  | Shiraz-36T | 431  | 0        | -0.78035  |  |  |
|  |  | Shiraz-44T | 891  | 0        | -0.954044 |  |  |
|  |  | Shiraz-44T | 893  | 0        | -1.364406 |  |  |
|  |  | Shiraz-47T | 1083 | 0        | -0.103285 |  |  |
|  |  | Shiraz-49T | 1166 | 0        | -0.917235 |  |  |
|  |  | Shiraz-49T | 1168 | 0        | -1.073859 |  |  |
|  |  | Shiraz-9T  | 1368 | 0.199713 | 0         |  |  |
|  |  | Shiraz-18T | 1455 | 0        | -0.186773 |  |  |
|  |  | Shiraz-22T | 1669 | 0.695915 | 0         |  |  |
|  |  | Shiraz-22T | 1671 | 0.369309 | 0         |  |  |
|  |  | Shiraz-25T | 1717 | 0.420447 | 0         |  |  |
|  |  | Shiraz-28T | 1760 | 0.538181 | 0         |  |  |
|  |  | Shiraz-29T | 1800 | 0.672527 | 0         |  |  |
|  |  | Shiraz-32T | 1869 | 0.776805 | 0         |  |  |
|  |  | Shiraz-35T | 1932 | 0.507141 | 0         |  |  |
|  |  | Shiraz-40T | 2051 | 0.098506 | 0         |  |  |
|  |  | Shiraz-58T | 2221 | 0.871948 | 0         |  |  |
|  |  | Shiraz-58T | 2222 | 0.679664 | 0         |  |  |
|  |  | Shiraz-71T | 2260 | 0.68394  | 0         |  |  |
|  |  | Shiraz-71T | 2261 | 0.508399 | 0         |  |  |
|  |  | Shiraz-3T  | 235  | 0        | -0.28401  |  |  |
|  |  | Shiraz-3T  | 236  | 0        | -0.435445 |  |  |
|  |  | Shiraz-4T  | 260  | 0        | -0.324128 |  |  |
|  |  | Shiraz-16T | 294  | 0.655804 | 0         |  |  |
|  |  | Shiraz-36T | 431  | 0        | -0.78035  |  |  |
|  |  | Shiraz-44T | 891  | 0        | -0.954044 |  |  |
|  |  | Shiraz-44T | 893  | 0        | -1.364406 |  |  |
|  |  | Shiraz-47T | 1083 | 0        | -0.103285 |  |  |
|  |  | Shiraz-49T | 1166 | 0        | -0.917235 |  |  |
|  |  | Shiraz-49T | 1168 | 0        | -1.073859 |  |  |
|  |  | Shiraz-9T  | 1368 | 0.199713 | 0         |  |  |
|  |  | Shiraz-18T | 1455 | 0        | -0.186773 |  |  |
|  |  | Shiraz-22T | 1669 | 0.695915 | 0         |  |  |
|  |  | Shiraz-22T | 1671 | 0.369309 | 0         |  |  |
|  |  | Shiraz-25T | 1717 | 0.420447 | 0         |  |  |
|  |  | Shiraz-28T | 1760 | 0.538181 | 0         |  |  |
|  |  | Shiraz-29T | 1800 | 0.672527 | 0         |  |  |
|  |  | Shiraz-32T | 1869 | 0.776805 | 0         |  |  |
|  |  | Shiraz-35T | 1932 | 0.507141 | 0         |  |  |
|  |  | Shiraz-40T | 2051 | 0.098506 | 0         |  |  |
|  |  | Shiraz-58T | 2221 | 0.871948 | 0         |  |  |

|         |      |            |      |          |           |  |
|---------|------|------------|------|----------|-----------|--|
|         |      | Shiraz-58T | 2222 | 0.679664 | 0         |  |
|         |      | Shiraz-71T | 2260 | 0.68394  | 0         |  |
|         |      | Shiraz-71T | 2261 | 0.508399 | 0         |  |
| CXorf61 | chrX | Shiraz-3T  | 242  | 0        | -0.336434 |  |
|         |      | Shiraz-4T  | 261  | 0        | -0.336249 |  |
|         |      | Shiraz-16T | 295  | 0.591657 | 0         |  |
|         |      | Shiraz-36T | 433  | 0        | -0.803961 |  |
|         |      | Shiraz-44T | 899  | 0        | -1.09697  |  |
|         |      | Shiraz-49T | 1170 | 0        | -0.967436 |  |
|         |      | Shiraz-18T | 1457 | 0.643204 | 0         |  |
|         |      | Shiraz-22T | 1673 | 0.611783 | 0         |  |
|         |      | Shiraz-25T | 1719 | 0.472955 | 0         |  |
|         |      | Shiraz-28T | 1762 | 0.562311 | 0         |  |
|         |      | Shiraz-29T | 1801 | 0.815343 | 0         |  |
|         |      | Shiraz-32T | 1870 | 0.729766 | 0         |  |
|         |      | Shiraz-35T | 1933 | 0.488535 | 0         |  |
|         |      | Shiraz-58T | 2223 | 0.833364 | 0         |  |
|         |      | Shiraz-71T | 2263 | 0.975531 | 0         |  |
|         |      | Shiraz-3T  | 242  | 0        | -0.336434 |  |
|         |      | Shiraz-4T  | 261  | 0        | -0.336249 |  |
|         |      | Shiraz-16T | 295  | 0.591657 | 0         |  |
|         |      | Shiraz-36T | 433  | 0        | -0.803961 |  |
|         |      | Shiraz-44T | 899  | 0        | -1.09697  |  |
|         |      | Shiraz-49T | 1170 | 0        | -0.967436 |  |
|         |      | Shiraz-18T | 1457 | 0.643204 | 0         |  |
|         |      | Shiraz-22T | 1673 | 0.611783 | 0         |  |
|         |      | Shiraz-25T | 1719 | 0.472955 | 0         |  |
|         |      | Shiraz-28T | 1762 | 0.562311 | 0         |  |
|         |      | Shiraz-29T | 1801 | 0.815343 | 0         |  |
|         |      | Shiraz-32T | 1870 | 0.729766 | 0         |  |
|         |      | Shiraz-35T | 1933 | 0.488535 | 0         |  |
|         |      | Shiraz-58T | 2223 | 0.833364 | 0         |  |
|         |      | Shiraz-71T | 2263 | 0.975531 | 0         |  |
|         |      | Shiraz-3T  | 242  | 0        | -0.336434 |  |
|         |      | Shiraz-4T  | 261  | 0        | -0.336249 |  |
|         |      | Shiraz-16T | 295  | 0.591657 | 0         |  |
|         |      | Shiraz-36T | 433  | 0        | -0.803961 |  |
|         |      | Shiraz-44T | 899  | 0        | -1.09697  |  |
|         |      | Shiraz-49T | 1170 | 0        | -0.967436 |  |
|         |      | Shiraz-18T | 1457 | 0.643204 | 0         |  |
|         |      | Shiraz-22T | 1673 | 0.611783 | 0         |  |
|         |      | Shiraz-25T | 1719 | 0.472955 | 0         |  |
|         |      | Shiraz-28T | 1762 | 0.562311 | 0         |  |
|         |      | Shiraz-29T | 1801 | 0.815343 | 0         |  |
|         |      | Shiraz-32T | 1870 | 0.729766 | 0         |  |
|         |      | Shiraz-35T | 1933 | 0.488535 | 0         |  |
|         |      | Shiraz-58T | 2223 | 0.833364 | 0         |  |

|         |      |            |      |          |           |  |
|---------|------|------------|------|----------|-----------|--|
|         |      | Shiraz-71T | 2263 | 0.975531 | 0         |  |
| CXorf64 | chrX | Shiraz-3T  | 242  | 0        | -0.336434 |  |
|         |      | Shiraz-4T  | 261  | 0        | -0.336249 |  |
|         |      | Shiraz-16T | 295  | 0.591657 | 0         |  |
|         |      | Shiraz-36T | 433  | 0        | -0.803961 |  |
|         |      | Shiraz-44T | 899  | 0        | -1.09697  |  |
|         |      | Shiraz-44T | 905  | 0        | -1.465843 |  |
|         |      | Shiraz-49T | 1170 | 0        | -0.967436 |  |
|         |      | Shiraz-9T  | 1370 | 0.690073 | 0         |  |
|         |      | Shiraz-18T | 1457 | 0.643204 | 0         |  |
|         |      | Shiraz-22T | 1673 | 0.611783 | 0         |  |
|         |      | Shiraz-22T | 1676 | 0.259626 | 0         |  |
|         |      | Shiraz-25T | 1719 | 0.472955 | 0         |  |
|         |      | Shiraz-28T | 1762 | 0.562311 | 0         |  |
|         |      | Shiraz-29T | 1801 | 0.815343 | 0         |  |
|         |      | Shiraz-32T | 1870 | 0.729766 | 0         |  |
|         |      | Shiraz-35T | 1933 | 0.488535 | 0         |  |
|         |      | Shiraz-53T | 2114 | 0        | -0.727152 |  |
|         |      | Shiraz-58T | 2223 | 0.833364 | 0         |  |
|         |      | Shiraz-71T | 2263 | 0.975531 | 0         |  |
|         |      | Shiraz-3T  | 242  | 0        | -0.336434 |  |
|         |      | Shiraz-4T  | 261  | 0        | -0.336249 |  |
|         |      | Shiraz-16T | 295  | 0.591657 | 0         |  |
|         |      | Shiraz-36T | 433  | 0        | -0.803961 |  |
|         |      | Shiraz-44T | 899  | 0        | -1.09697  |  |
|         |      | Shiraz-44T | 905  | 0        | -1.465843 |  |
|         |      | Shiraz-49T | 1170 | 0        | -0.967436 |  |
|         |      | Shiraz-9T  | 1370 | 0.690073 | 0         |  |
|         |      | Shiraz-18T | 1457 | 0.643204 | 0         |  |
|         |      | Shiraz-22T | 1673 | 0.611783 | 0         |  |
|         |      | Shiraz-22T | 1676 | 0.259626 | 0         |  |
|         |      | Shiraz-25T | 1719 | 0.472955 | 0         |  |
|         |      | Shiraz-28T | 1762 | 0.562311 | 0         |  |
|         |      | Shiraz-29T | 1801 | 0.815343 | 0         |  |
|         |      | Shiraz-32T | 1870 | 0.729766 | 0         |  |
|         |      | Shiraz-35T | 1933 | 0.488535 | 0         |  |
|         |      | Shiraz-53T | 2114 | 0        | -0.727152 |  |
|         |      | Shiraz-58T | 2223 | 0.833364 | 0         |  |
|         |      | Shiraz-71T | 2263 | 0.975531 | 0         |  |
|         |      | Shiraz-3T  | 242  | 0        | -0.336434 |  |
|         |      | Shiraz-4T  | 261  | 0        | -0.336249 |  |
|         |      | Shiraz-16T | 295  | 0.591657 | 0         |  |
|         |      | Shiraz-36T | 433  | 0        | -0.803961 |  |
|         |      | Shiraz-44T | 899  | 0        | -1.09697  |  |
|         |      | Shiraz-44T | 905  | 0        | -1.465843 |  |
|         |      | Shiraz-49T | 1170 | 0        | -0.967436 |  |
|         |      | Shiraz-9T  | 1370 | 0.690073 | 0         |  |

|         |      |            |      |          |           |  |
|---------|------|------------|------|----------|-----------|--|
|         |      | Shiraz-18T | 1457 | 0.643204 | 0         |  |
|         |      | Shiraz-22T | 1673 | 0.611783 | 0         |  |
|         |      | Shiraz-22T | 1676 | 0.259626 | 0         |  |
|         |      | Shiraz-25T | 1719 | 0.472955 | 0         |  |
|         |      | Shiraz-28T | 1762 | 0.562311 | 0         |  |
|         |      | Shiraz-29T | 1801 | 0.815343 | 0         |  |
|         |      | Shiraz-32T | 1870 | 0.729766 | 0         |  |
|         |      | Shiraz-35T | 1933 | 0.488535 | 0         |  |
|         |      | Shiraz-53T | 2114 | 0        | -0.727152 |  |
|         |      | Shiraz-58T | 2223 | 0.833364 | 0         |  |
|         |      | Shiraz-71T | 2263 | 0.975531 | 0         |  |
| CXorf65 | chrX | Shiraz-4T  | 261  | 0        | -0.336249 |  |
|         |      | Shiraz-16T | 295  | 0.591657 | 0         |  |
|         |      | Shiraz-36T | 433  | 0        | -0.803961 |  |
|         |      | Shiraz-44T | 899  | 0        | -1.09697  |  |
|         |      | Shiraz-44T | 900  | 0        | -0.584284 |  |
|         |      | Shiraz-49T | 1170 | 0        | -0.967436 |  |
|         |      | Shiraz-49T | 1171 | 0        | -0.612379 |  |
|         |      | Shiraz-77T | 1283 | 0.296555 | 0         |  |
|         |      | Shiraz-18T | 1457 | 0.643204 | 0         |  |
|         |      | Shiraz-22T | 1673 | 0.611783 | 0         |  |
|         |      | Shiraz-22T | 1674 | 0.887899 | 0         |  |
|         |      | Shiraz-25T | 1719 | 0.472955 | 0         |  |
|         |      | Shiraz-28T | 1762 | 0.562311 | 0         |  |
|         |      | Shiraz-29T | 1801 | 0.815343 | 0         |  |
|         |      | Shiraz-32T | 1870 | 0.729766 | 0         |  |
|         |      | Shiraz-35T | 1933 | 0.488535 | 0         |  |
|         |      | Shiraz-58T | 2223 | 0.833364 | 0         |  |
|         |      | Shiraz-58T | 2224 | 1.076575 | 0         |  |
|         |      | Shiraz-71T | 2263 | 0.975531 | 0         |  |
|         |      | Shiraz-4T  | 261  | 0        | -0.336249 |  |
|         |      | Shiraz-16T | 295  | 0.591657 | 0         |  |
|         |      | Shiraz-36T | 433  | 0        | -0.803961 |  |
|         |      | Shiraz-44T | 899  | 0        | -1.09697  |  |
|         |      | Shiraz-44T | 900  | 0        | -0.584284 |  |
|         |      | Shiraz-49T | 1170 | 0        | -0.967436 |  |
|         |      | Shiraz-49T | 1171 | 0        | -0.612379 |  |
|         |      | Shiraz-77T | 1283 | 0.296555 | 0         |  |
|         |      | Shiraz-18T | 1457 | 0.643204 | 0         |  |
|         |      | Shiraz-22T | 1673 | 0.611783 | 0         |  |
|         |      | Shiraz-22T | 1674 | 0.887899 | 0         |  |
|         |      | Shiraz-25T | 1719 | 0.472955 | 0         |  |
|         |      | Shiraz-28T | 1762 | 0.562311 | 0         |  |
|         |      | Shiraz-29T | 1801 | 0.815343 | 0         |  |
|         |      | Shiraz-32T | 1870 | 0.729766 | 0         |  |
|         |      | Shiraz-35T | 1933 | 0.488535 | 0         |  |
|         |      | Shiraz-58T | 2223 | 0.833364 | 0         |  |



|         |      |            |      |          |           |  |
|---------|------|------------|------|----------|-----------|--|
|         |      | Shiraz-58T | 2224 | 1.076575 | 0         |  |
|         |      | Shiraz-71T | 2263 | 0.975531 | 0         |  |
|         |      | Shiraz-4T  | 261  | 0        | -0.336249 |  |
|         |      | Shiraz-16T | 295  | 0.591657 | 0         |  |
|         |      | Shiraz-36T | 433  | 0        | -0.803961 |  |
|         |      | Shiraz-44T | 899  | 0        | -1.09697  |  |
|         |      | Shiraz-44T | 900  | 0        | -0.584284 |  |
|         |      | Shiraz-49T | 1170 | 0        | -0.967436 |  |
|         |      | Shiraz-49T | 1171 | 0        | -0.612379 |  |
|         |      | Shiraz-77T | 1283 | 0.296555 | 0         |  |
|         |      | Shiraz-18T | 1457 | 0.643204 | 0         |  |
|         |      | Shiraz-22T | 1673 | 0.611783 | 0         |  |
|         |      | Shiraz-22T | 1674 | 0.887899 | 0         |  |
|         |      | Shiraz-25T | 1719 | 0.472955 | 0         |  |
|         |      | Shiraz-28T | 1762 | 0.562311 | 0         |  |
|         |      | Shiraz-29T | 1801 | 0.815343 | 0         |  |
|         |      | Shiraz-32T | 1870 | 0.729766 | 0         |  |
|         |      | Shiraz-35T | 1933 | 0.488535 | 0         |  |
|         |      | Shiraz-58T | 2223 | 0.833364 | 0         |  |
|         |      | Shiraz-58T | 2224 | 1.076575 | 0         |  |
|         |      | Shiraz-71T | 2263 | 0.975531 | 0         |  |
| CXorf66 | chrX | Shiraz-3T  | 242  | 0        | -0.336434 |  |
|         |      | Shiraz-4T  | 261  | 0        | -0.336249 |  |
|         |      | Shiraz-16T | 295  | 0.591657 | 0         |  |
|         |      | Shiraz-36T | 433  | 0        | -0.803961 |  |
|         |      | Shiraz-44T | 899  | 0        | -1.09697  |  |
|         |      | Shiraz-49T | 1170 | 0        | -0.967436 |  |
|         |      | Shiraz-9T  | 1370 | 0.690073 | 0         |  |
|         |      | Shiraz-18T | 1457 | 0.643204 | 0         |  |
|         |      | Shiraz-22T | 1673 | 0.611783 | 0         |  |
|         |      | Shiraz-25T | 1719 | 0.472955 | 0         |  |
|         |      | Shiraz-28T | 1762 | 0.562311 | 0         |  |
|         |      | Shiraz-29T | 1801 | 0.815343 | 0         |  |
|         |      | Shiraz-32T | 1870 | 0.729766 | 0         |  |
|         |      | Shiraz-35T | 1933 | 0.488535 | 0         |  |
|         |      | Shiraz-58T | 2223 | 0.833364 | 0         |  |
|         |      | Shiraz-71T | 2263 | 0.975531 | 0         |  |
|         |      | Shiraz-3T  | 242  | 0        | -0.336434 |  |
|         |      | Shiraz-4T  | 261  | 0        | -0.336249 |  |
|         |      | Shiraz-16T | 295  | 0.591657 | 0         |  |
|         |      | Shiraz-36T | 433  | 0        | -0.803961 |  |
|         |      | Shiraz-44T | 899  | 0        | -1.09697  |  |
|         |      | Shiraz-49T | 1170 | 0        | -0.967436 |  |
|         |      | Shiraz-9T  | 1370 | 0.690073 | 0         |  |
|         |      | Shiraz-18T | 1457 | 0.643204 | 0         |  |
|         |      | Shiraz-22T | 1673 | 0.611783 | 0         |  |
|         |      | Shiraz-25T | 1719 | 0.472955 | 0         |  |

|      |      |            |      |          |           |  |  |
|------|------|------------|------|----------|-----------|--|--|
|      |      | Shiraz-28T | 1762 | 0.562311 | 0         |  |  |
|      |      | Shiraz-29T | 1801 | 0.815343 | 0         |  |  |
|      |      | Shiraz-32T | 1870 | 0.729766 | 0         |  |  |
|      |      | Shiraz-35T | 1933 | 0.488535 | 0         |  |  |
|      |      | Shiraz-58T | 2223 | 0.833364 | 0         |  |  |
|      |      | Shiraz-71T | 2263 | 0.975531 | 0         |  |  |
|      |      | Shiraz-3T  | 242  | 0        | -0.336434 |  |  |
|      |      | Shiraz-4T  | 261  | 0        | -0.336249 |  |  |
|      |      | Shiraz-16T | 295  | 0.591657 | 0         |  |  |
|      |      | Shiraz-36T | 433  | 0        | -0.803961 |  |  |
|      |      | Shiraz-44T | 899  | 0        | -1.09697  |  |  |
|      |      | Shiraz-49T | 1170 | 0        | -0.967436 |  |  |
|      |      | Shiraz-9T  | 1370 | 0.690073 | 0         |  |  |
|      |      | Shiraz-18T | 1457 | 0.643204 | 0         |  |  |
|      |      | Shiraz-22T | 1673 | 0.611783 | 0         |  |  |
|      |      | Shiraz-25T | 1719 | 0.472955 | 0         |  |  |
|      |      | Shiraz-28T | 1762 | 0.562311 | 0         |  |  |
|      |      | Shiraz-29T | 1801 | 0.815343 | 0         |  |  |
|      |      | Shiraz-32T | 1870 | 0.729766 | 0         |  |  |
|      |      | Shiraz-35T | 1933 | 0.488535 | 0         |  |  |
|      |      | Shiraz-58T | 2223 | 0.833364 | 0         |  |  |
|      |      | Shiraz-71T | 2263 | 0.975531 | 0         |  |  |
| CYBB | chrX | Shiraz-3T  | 235  | 0        | -0.28401  |  |  |
|      |      | Shiraz-4T  | 260  | 0        | -0.324128 |  |  |
|      |      | Shiraz-16T | 294  | 0.655804 | 0         |  |  |
|      |      | Shiraz-36T | 431  | 0        | -0.78035  |  |  |
|      |      | Shiraz-44T | 891  | 0        | -0.954044 |  |  |
|      |      | Shiraz-49T | 1166 | 0        | -0.917235 |  |  |
|      |      | Shiraz-49T | 1168 | 0        | -1.073859 |  |  |
|      |      | Shiraz-9T  | 1368 | 0.199713 | 0         |  |  |
|      |      | Shiraz-18T | 1455 | 0        | -0.186773 |  |  |
|      |      | Shiraz-22T | 1669 | 0.695915 | 0         |  |  |
|      |      | Shiraz-25T | 1717 | 0.420447 | 0         |  |  |
|      |      | Shiraz-28T | 1760 | 0.538181 | 0         |  |  |
|      |      | Shiraz-29T | 1800 | 0.672527 | 0         |  |  |
|      |      | Shiraz-32T | 1869 | 0.776805 | 0         |  |  |
|      |      | Shiraz-35T | 1932 | 0.507141 | 0         |  |  |
|      |      | Shiraz-40T | 2051 | 0.098506 | 0         |  |  |
|      |      | Shiraz-58T | 2221 | 0.871948 | 0         |  |  |
|      |      | Shiraz-71T | 2260 | 0.68394  | 0         |  |  |
|      |      | Shiraz-71T | 2261 | 0.508399 | 0         |  |  |
|      |      | Shiraz-3T  | 235  | 0        | -0.28401  |  |  |
|      |      | Shiraz-4T  | 260  | 0        | -0.324128 |  |  |
|      |      | Shiraz-16T | 294  | 0.655804 | 0         |  |  |
|      |      | Shiraz-36T | 431  | 0        | -0.78035  |  |  |
|      |      | Shiraz-44T | 891  | 0        | -0.954044 |  |  |
|      |      | Shiraz-49T | 1166 | 0        | -0.917235 |  |  |

|      |      |            |      |          |           |  |  |
|------|------|------------|------|----------|-----------|--|--|
|      |      | Shiraz-49T | 1168 | 0        | -1.073859 |  |  |
|      |      | Shiraz-9T  | 1368 | 0.199713 | 0         |  |  |
|      |      | Shiraz-18T | 1455 | 0        | -0.186773 |  |  |
|      |      | Shiraz-22T | 1669 | 0.695915 | 0         |  |  |
|      |      | Shiraz-25T | 1717 | 0.420447 | 0         |  |  |
|      |      | Shiraz-28T | 1760 | 0.538181 | 0         |  |  |
|      |      | Shiraz-29T | 1800 | 0.672527 | 0         |  |  |
|      |      | Shiraz-32T | 1869 | 0.776805 | 0         |  |  |
|      |      | Shiraz-35T | 1932 | 0.507141 | 0         |  |  |
|      |      | Shiraz-40T | 2051 | 0.098506 | 0         |  |  |
|      |      | Shiraz-58T | 2221 | 0.871948 | 0         |  |  |
|      |      | Shiraz-71T | 2260 | 0.68394  | 0         |  |  |
|      |      | Shiraz-71T | 2261 | 0.508399 | 0         |  |  |
|      |      | Shiraz-3T  | 235  | 0        | -0.28401  |  |  |
|      |      | Shiraz-4T  | 260  | 0        | -0.324128 |  |  |
|      |      | Shiraz-16T | 294  | 0.655804 | 0         |  |  |
|      |      | Shiraz-36T | 431  | 0        | -0.78035  |  |  |
|      |      | Shiraz-44T | 891  | 0        | -0.954044 |  |  |
|      |      | Shiraz-49T | 1166 | 0        | -0.917235 |  |  |
|      |      | Shiraz-49T | 1168 | 0        | -1.073859 |  |  |
|      |      | Shiraz-9T  | 1368 | 0.199713 | 0         |  |  |
|      |      | Shiraz-18T | 1455 | 0        | -0.186773 |  |  |
|      |      | Shiraz-22T | 1669 | 0.695915 | 0         |  |  |
|      |      | Shiraz-25T | 1717 | 0.420447 | 0         |  |  |
|      |      | Shiraz-28T | 1760 | 0.538181 | 0         |  |  |
|      |      | Shiraz-29T | 1800 | 0.672527 | 0         |  |  |
|      |      | Shiraz-32T | 1869 | 0.776805 | 0         |  |  |
|      |      | Shiraz-35T | 1932 | 0.507141 | 0         |  |  |
|      |      | Shiraz-40T | 2051 | 0.098506 | 0         |  |  |
|      |      | Shiraz-58T | 2221 | 0.871948 | 0         |  |  |
|      |      | Shiraz-71T | 2260 | 0.68394  | 0         |  |  |
|      |      | Shiraz-71T | 2261 | 0.508399 | 0         |  |  |
| CYCS | chr7 | Shiraz-3T  | 87   | 0.198593 | 0         |  |  |
|      |      | Shiraz-4T  | 252  | 0.192083 | 0         |  |  |
|      |      | Shiraz-36T | 376  | 0.159952 | 0         |  |  |
|      |      | Shiraz-46T | 942  | 0.069143 | 0         |  |  |
|      |      | Shiraz-18T | 1433 | 0.250973 | 0         |  |  |
|      |      | Shiraz-25T | 1697 | 0.21945  | 0         |  |  |
|      |      | Shiraz-28T | 1734 | 0.362882 | 0         |  |  |
|      |      | Shiraz-29T | 1777 | 0.156747 | 0         |  |  |
|      |      | Shiraz-38T | 1950 | 0.265916 | 0         |  |  |
|      |      | Shiraz-71T | 2236 | 0.320072 | 0         |  |  |
|      |      | Shiraz-3T  | 87   | 0.198593 | 0         |  |  |
|      |      | Shiraz-4T  | 252  | 0.192083 | 0         |  |  |
|      |      | Shiraz-36T | 376  | 0.159952 | 0         |  |  |
|      |      | Shiraz-46T | 942  | 0.069143 | 0         |  |  |
|      |      | Shiraz-18T | 1433 | 0.250973 | 0         |  |  |

|       |      |            |      |          |           |  |  |
|-------|------|------------|------|----------|-----------|--|--|
|       |      | Shiraz-25T | 1697 | 0.21945  | 0         |  |  |
|       |      | Shiraz-28T | 1734 | 0.362882 | 0         |  |  |
|       |      | Shiraz-29T | 1777 | 0.156747 | 0         |  |  |
|       |      | Shiraz-38T | 1950 | 0.265916 | 0         |  |  |
|       |      | Shiraz-71T | 2236 | 0.320072 | 0         |  |  |
|       |      | Shiraz-3T  | 87   | 0.198593 | 0         |  |  |
|       |      | Shiraz-4T  | 252  | 0.192083 | 0         |  |  |
|       |      | Shiraz-36T | 376  | 0.159952 | 0         |  |  |
|       |      | Shiraz-46T | 942  | 0.069143 | 0         |  |  |
|       |      | Shiraz-18T | 1433 | 0.250973 | 0         |  |  |
|       |      | Shiraz-25T | 1697 | 0.21945  | 0         |  |  |
|       |      | Shiraz-28T | 1734 | 0.362882 | 0         |  |  |
|       |      | Shiraz-29T | 1777 | 0.156747 | 0         |  |  |
|       |      | Shiraz-38T | 1950 | 0.265916 | 0         |  |  |
|       |      | Shiraz-71T | 2236 | 0.320072 | 0         |  |  |
| CYLC1 | chrX | Shiraz-3T  | 242  | 0        | -0.336434 |  |  |
|       |      | Shiraz-3T  | 243  | 0        | -0.549129 |  |  |
|       |      | Shiraz-4T  | 261  | 0        | -0.336249 |  |  |
|       |      | Shiraz-16T | 295  | 0.591657 | 0         |  |  |
|       |      | Shiraz-31T | 346  | 0        | -0.1527   |  |  |
|       |      | Shiraz-36T | 433  | 0        | -0.803961 |  |  |
|       |      | Shiraz-44T | 899  | 0        | -1.09697  |  |  |
|       |      | Shiraz-44T | 902  | 0        | -1.449824 |  |  |
|       |      | Shiraz-47T | 1085 | 0        | -0.130811 |  |  |
|       |      | Shiraz-49T | 1170 | 0        | -0.967436 |  |  |
|       |      | Shiraz-49T | 1172 | 0        | -1.123219 |  |  |
|       |      | Shiraz-18T | 1457 | 0.643204 | 0         |  |  |
|       |      | Shiraz-22T | 1673 | 0.611783 | 0         |  |  |
|       |      | Shiraz-22T | 1675 | 0.279253 | 0         |  |  |
|       |      | Shiraz-25T | 1719 | 0.472955 | 0         |  |  |
|       |      | Shiraz-28T | 1762 | 0.562311 | 0         |  |  |
|       |      | Shiraz-29T | 1801 | 0.815343 | 0         |  |  |
|       |      | Shiraz-32T | 1870 | 0.729766 | 0         |  |  |
|       |      | Shiraz-32T | 1871 | 0.292679 | 0         |  |  |
|       |      | Shiraz-35T | 1933 | 0.488535 | 0         |  |  |
|       |      | Shiraz-58T | 2223 | 0.833364 | 0         |  |  |
|       |      | Shiraz-58T | 2225 | 0.595784 | 0         |  |  |
|       |      | Shiraz-71T | 2263 | 0.975531 | 0         |  |  |
|       |      | Shiraz-3T  | 242  | 0        | -0.336434 |  |  |
|       |      | Shiraz-3T  | 243  | 0        | -0.549129 |  |  |
|       |      | Shiraz-4T  | 261  | 0        | -0.336249 |  |  |
|       |      | Shiraz-16T | 295  | 0.591657 | 0         |  |  |
|       |      | Shiraz-31T | 346  | 0        | -0.1527   |  |  |
|       |      | Shiraz-36T | 433  | 0        | -0.803961 |  |  |
|       |      | Shiraz-44T | 899  | 0        | -1.09697  |  |  |
|       |      | Shiraz-44T | 902  | 0        | -1.449824 |  |  |
|       |      | Shiraz-47T | 1085 | 0        | -0.130811 |  |  |

|        |      |            |      |          |           |  |  |
|--------|------|------------|------|----------|-----------|--|--|
|        |      | Shiraz-49T | 1170 | 0        | -0.967436 |  |  |
|        |      | Shiraz-49T | 1172 | 0        | -1.123219 |  |  |
|        |      | Shiraz-18T | 1457 | 0.643204 | 0         |  |  |
|        |      | Shiraz-22T | 1673 | 0.611783 | 0         |  |  |
|        |      | Shiraz-22T | 1675 | 0.279253 | 0         |  |  |
|        |      | Shiraz-25T | 1719 | 0.472955 | 0         |  |  |
|        |      | Shiraz-28T | 1762 | 0.562311 | 0         |  |  |
|        |      | Shiraz-29T | 1801 | 0.815343 | 0         |  |  |
|        |      | Shiraz-32T | 1870 | 0.729766 | 0         |  |  |
|        |      | Shiraz-32T | 1871 | 0.292679 | 0         |  |  |
|        |      | Shiraz-35T | 1933 | 0.488535 | 0         |  |  |
|        |      | Shiraz-58T | 2223 | 0.833364 | 0         |  |  |
|        |      | Shiraz-58T | 2225 | 0.595784 | 0         |  |  |
|        |      | Shiraz-71T | 2263 | 0.975531 | 0         |  |  |
|        |      | Shiraz-3T  | 242  | 0        | -0.336434 |  |  |
|        |      | Shiraz-3T  | 243  | 0        | -0.549129 |  |  |
|        |      | Shiraz-4T  | 261  | 0        | -0.336249 |  |  |
|        |      | Shiraz-16T | 295  | 0.591657 | 0         |  |  |
|        |      | Shiraz-31T | 346  | 0        | -0.1527   |  |  |
|        |      | Shiraz-36T | 433  | 0        | -0.803961 |  |  |
|        |      | Shiraz-44T | 899  | 0        | -1.09697  |  |  |
|        |      | Shiraz-44T | 902  | 0        | -1.449824 |  |  |
|        |      | Shiraz-47T | 1085 | 0        | -0.130811 |  |  |
|        |      | Shiraz-49T | 1170 | 0        | -0.967436 |  |  |
|        |      | Shiraz-49T | 1172 | 0        | -1.123219 |  |  |
|        |      | Shiraz-18T | 1457 | 0.643204 | 0         |  |  |
|        |      | Shiraz-22T | 1673 | 0.611783 | 0         |  |  |
|        |      | Shiraz-22T | 1675 | 0.279253 | 0         |  |  |
|        |      | Shiraz-25T | 1719 | 0.472955 | 0         |  |  |
|        |      | Shiraz-28T | 1762 | 0.562311 | 0         |  |  |
|        |      | Shiraz-29T | 1801 | 0.815343 | 0         |  |  |
|        |      | Shiraz-32T | 1870 | 0.729766 | 0         |  |  |
|        |      | Shiraz-32T | 1871 | 0.292679 | 0         |  |  |
|        |      | Shiraz-35T | 1933 | 0.488535 | 0         |  |  |
|        |      | Shiraz-58T | 2223 | 0.833364 | 0         |  |  |
|        |      | Shiraz-58T | 2225 | 0.595784 | 0         |  |  |
|        |      | Shiraz-71T | 2263 | 0.975531 | 0         |  |  |
| CYP3A4 | chr7 | Shiraz-3T  | 90   | 0.219276 | 0         |  |  |
|        |      | Shiraz-3T  | 94   | 0.74735  | 0         |  |  |
|        |      | Shiraz-4T  | 253  | 0.372918 | 0         |  |  |
|        |      | Shiraz-31T | 316  | 0.219196 | 0         |  |  |
|        |      | Shiraz-36T | 378  | 0.179558 | 0         |  |  |
|        |      | Shiraz-36T | 381  | 0.332628 | 0         |  |  |
|        |      | Shiraz-44T | 639  | 1.035032 | 0         |  |  |
|        |      | Shiraz-44T | 640  | 0.272608 | 0         |  |  |
|        |      | Shiraz-46T | 943  | 0.093799 | 0         |  |  |
|        |      | Shiraz-46T | 946  | 0.299835 | 0         |  |  |

|  |            |      |          |           |  |
|--|------------|------|----------|-----------|--|
|  | Shiraz-47T | 1030 | 0.257728 | 0         |  |
|  | Shiraz-49T | 1120 | 0.281656 | 0         |  |
|  | Shiraz-77T | 1225 | 0        | -0.117922 |  |
|  | Shiraz-77T | 1227 | 0.196445 | 0         |  |
|  | Shiraz-9T  | 1324 | 0.679266 | 0         |  |
|  | Shiraz-18T | 1434 | 0.244465 | 0         |  |
|  | Shiraz-22T | 1549 | 0        | -0.319623 |  |
|  | Shiraz-22T | 1551 | 0.324011 | 0         |  |
|  | Shiraz-25T | 1698 | 0.21835  | 0         |  |
|  | Shiraz-28T | 1735 | 0.350744 | 0         |  |
|  | Shiraz-29T | 1778 | 0.120767 | 0         |  |
|  | Shiraz-32T | 1833 | 0.551336 | 0         |  |
|  | Shiraz-38T | 1951 | 0.250891 | 0         |  |
|  | Shiraz-53T | 2078 | 0.287202 | 0         |  |
|  | Shiraz-71T | 2238 | 0.603631 | 0         |  |
|  | Shiraz-3T  | 90   | 0.219276 | 0         |  |
|  | Shiraz-3T  | 94   | 0.74735  | 0         |  |
|  | Shiraz-4T  | 253  | 0.372918 | 0         |  |
|  | Shiraz-31T | 316  | 0.219196 | 0         |  |
|  | Shiraz-36T | 378  | 0.179558 | 0         |  |
|  | Shiraz-36T | 381  | 0.332628 | 0         |  |
|  | Shiraz-44T | 639  | 1.035032 | 0         |  |
|  | Shiraz-44T | 640  | 0.272608 | 0         |  |
|  | Shiraz-46T | 943  | 0.093799 | 0         |  |
|  | Shiraz-46T | 946  | 0.299835 | 0         |  |
|  | Shiraz-47T | 1030 | 0.257728 | 0         |  |
|  | Shiraz-49T | 1120 | 0.281656 | 0         |  |
|  | Shiraz-77T | 1225 | 0        | -0.117922 |  |
|  | Shiraz-77T | 1227 | 0.196445 | 0         |  |
|  | Shiraz-9T  | 1324 | 0.679266 | 0         |  |
|  | Shiraz-18T | 1434 | 0.244465 | 0         |  |
|  | Shiraz-22T | 1549 | 0        | -0.319623 |  |
|  | Shiraz-22T | 1551 | 0.324011 | 0         |  |
|  | Shiraz-25T | 1698 | 0.21835  | 0         |  |
|  | Shiraz-28T | 1735 | 0.350744 | 0         |  |
|  | Shiraz-29T | 1778 | 0.120767 | 0         |  |
|  | Shiraz-32T | 1833 | 0.551336 | 0         |  |
|  | Shiraz-38T | 1951 | 0.250891 | 0         |  |
|  | Shiraz-53T | 2078 | 0.287202 | 0         |  |
|  | Shiraz-71T | 2238 | 0.603631 | 0         |  |
|  | Shiraz-3T  | 90   | 0.219276 | 0         |  |
|  | Shiraz-3T  | 94   | 0.74735  | 0         |  |
|  | Shiraz-4T  | 253  | 0.372918 | 0         |  |
|  | Shiraz-31T | 316  | 0.219196 | 0         |  |
|  | Shiraz-36T | 378  | 0.179558 | 0         |  |
|  | Shiraz-36T | 381  | 0.332628 | 0         |  |
|  | Shiraz-44T | 639  | 1.035032 | 0         |  |

|         |      |            |      |          |           |  |
|---------|------|------------|------|----------|-----------|--|
|         |      | Shiraz-44T | 640  | 0.272608 | 0         |  |
|         |      | Shiraz-46T | 943  | 0.093799 | 0         |  |
|         |      | Shiraz-46T | 946  | 0.299835 | 0         |  |
|         |      | Shiraz-47T | 1030 | 0.257728 | 0         |  |
|         |      | Shiraz-49T | 1120 | 0.281656 | 0         |  |
|         |      | Shiraz-77T | 1225 | 0        | -0.117922 |  |
|         |      | Shiraz-77T | 1227 | 0.196445 | 0         |  |
|         |      | Shiraz-9T  | 1324 | 0.679266 | 0         |  |
|         |      | Shiraz-18T | 1434 | 0.244465 | 0         |  |
|         |      | Shiraz-22T | 1549 | 0        | -0.319623 |  |
|         |      | Shiraz-22T | 1551 | 0.324011 | 0         |  |
|         |      | Shiraz-25T | 1698 | 0.21835  | 0         |  |
|         |      | Shiraz-28T | 1735 | 0.350744 | 0         |  |
|         |      | Shiraz-29T | 1778 | 0.120767 | 0         |  |
|         |      | Shiraz-32T | 1833 | 0.551336 | 0         |  |
|         |      | Shiraz-38T | 1951 | 0.250891 | 0         |  |
|         |      | Shiraz-53T | 2078 | 0.287202 | 0         |  |
|         |      | Shiraz-71T | 2238 | 0.603631 | 0         |  |
| CYP3A43 | chr7 | Shiraz-3T  | 90   | 0.219276 | 0         |  |
|         |      | Shiraz-3T  | 94   | 0.74735  | 0         |  |
|         |      | Shiraz-4T  | 253  | 0.372918 | 0         |  |
|         |      | Shiraz-31T | 316  | 0.219196 | 0         |  |
|         |      | Shiraz-36T | 378  | 0.179558 | 0         |  |
|         |      | Shiraz-36T | 381  | 0.332628 | 0         |  |
|         |      | Shiraz-44T | 639  | 1.035032 | 0         |  |
|         |      | Shiraz-44T | 640  | 0.272608 | 0         |  |
|         |      | Shiraz-46T | 943  | 0.093799 | 0         |  |
|         |      | Shiraz-46T | 946  | 0.299835 | 0         |  |
|         |      | Shiraz-47T | 1030 | 0.257728 | 0         |  |
|         |      | Shiraz-49T | 1120 | 0.281656 | 0         |  |
|         |      | Shiraz-77T | 1225 | 0        | -0.117922 |  |
|         |      | Shiraz-77T | 1227 | 0.196445 | 0         |  |
|         |      | Shiraz-9T  | 1324 | 0.679266 | 0         |  |
|         |      | Shiraz-18T | 1434 | 0.244465 | 0         |  |
|         |      | Shiraz-22T | 1549 | 0        | -0.319623 |  |
|         |      | Shiraz-22T | 1551 | 0.324011 | 0         |  |
|         |      | Shiraz-25T | 1698 | 0.21835  | 0         |  |
|         |      | Shiraz-28T | 1735 | 0.350744 | 0         |  |
|         |      | Shiraz-29T | 1778 | 0.120767 | 0         |  |
|         |      | Shiraz-32T | 1833 | 0.551336 | 0         |  |
|         |      | Shiraz-38T | 1951 | 0.250891 | 0         |  |
|         |      | Shiraz-53T | 2078 | 0.287202 | 0         |  |
|         |      | Shiraz-71T | 2238 | 0.603631 | 0         |  |
|         |      | Shiraz-3T  | 90   | 0.219276 | 0         |  |
|         |      | Shiraz-3T  | 94   | 0.74735  | 0         |  |
|         |      | Shiraz-4T  | 253  | 0.372918 | 0         |  |
|         |      | Shiraz-31T | 316  | 0.219196 | 0         |  |

|        |      |            |      |          |           |  |
|--------|------|------------|------|----------|-----------|--|
|        |      | Shiraz-36T | 378  | 0.179558 | 0         |  |
|        |      | Shiraz-36T | 381  | 0.332628 | 0         |  |
|        |      | Shiraz-44T | 639  | 1.035032 | 0         |  |
|        |      | Shiraz-44T | 640  | 0.272608 | 0         |  |
|        |      | Shiraz-46T | 943  | 0.093799 | 0         |  |
|        |      | Shiraz-46T | 946  | 0.299835 | 0         |  |
|        |      | Shiraz-47T | 1030 | 0.257728 | 0         |  |
|        |      | Shiraz-49T | 1120 | 0.281656 | 0         |  |
|        |      | Shiraz-77T | 1225 | 0        | -0.117922 |  |
|        |      | Shiraz-77T | 1227 | 0.196445 | 0         |  |
|        |      | Shiraz-9T  | 1324 | 0.679266 | 0         |  |
|        |      | Shiraz-18T | 1434 | 0.244465 | 0         |  |
|        |      | Shiraz-22T | 1549 | 0        | -0.319623 |  |
|        |      | Shiraz-22T | 1551 | 0.324011 | 0         |  |
|        |      | Shiraz-25T | 1698 | 0.21835  | 0         |  |
|        |      | Shiraz-28T | 1735 | 0.350744 | 0         |  |
|        |      | Shiraz-29T | 1778 | 0.120767 | 0         |  |
|        |      | Shiraz-32T | 1833 | 0.551336 | 0         |  |
|        |      | Shiraz-38T | 1951 | 0.250891 | 0         |  |
|        |      | Shiraz-53T | 2078 | 0.287202 | 0         |  |
|        |      | Shiraz-71T | 2238 | 0.603631 | 0         |  |
|        |      | Shiraz-3T  | 90   | 0.219276 | 0         |  |
|        |      | Shiraz-3T  | 94   | 0.74735  | 0         |  |
|        |      | Shiraz-4T  | 253  | 0.372918 | 0         |  |
|        |      | Shiraz-31T | 316  | 0.219196 | 0         |  |
|        |      | Shiraz-36T | 378  | 0.179558 | 0         |  |
|        |      | Shiraz-36T | 381  | 0.332628 | 0         |  |
|        |      | Shiraz-44T | 639  | 1.035032 | 0         |  |
|        |      | Shiraz-44T | 640  | 0.272608 | 0         |  |
|        |      | Shiraz-46T | 943  | 0.093799 | 0         |  |
|        |      | Shiraz-46T | 946  | 0.299835 | 0         |  |
|        |      | Shiraz-47T | 1030 | 0.257728 | 0         |  |
|        |      | Shiraz-49T | 1120 | 0.281656 | 0         |  |
|        |      | Shiraz-77T | 1225 | 0        | -0.117922 |  |
|        |      | Shiraz-77T | 1227 | 0.196445 | 0         |  |
|        |      | Shiraz-9T  | 1324 | 0.679266 | 0         |  |
|        |      | Shiraz-18T | 1434 | 0.244465 | 0         |  |
|        |      | Shiraz-22T | 1549 | 0        | -0.319623 |  |
|        |      | Shiraz-22T | 1551 | 0.324011 | 0         |  |
|        |      | Shiraz-25T | 1698 | 0.21835  | 0         |  |
|        |      | Shiraz-28T | 1735 | 0.350744 | 0         |  |
|        |      | Shiraz-29T | 1778 | 0.120767 | 0         |  |
|        |      | Shiraz-32T | 1833 | 0.551336 | 0         |  |
|        |      | Shiraz-38T | 1951 | 0.250891 | 0         |  |
|        |      | Shiraz-53T | 2078 | 0.287202 | 0         |  |
|        |      | Shiraz-71T | 2238 | 0.603631 | 0         |  |
| CYP3A5 | chr7 | Shiraz-3T  | 90   | 0.219276 | 0         |  |



|  |            |      |          |           |  |
|--|------------|------|----------|-----------|--|
|  | Shiraz-3T  | 94   | 0.74735  | 0         |  |
|  | Shiraz-4T  | 253  | 0.372918 | 0         |  |
|  | Shiraz-31T | 316  | 0.219196 | 0         |  |
|  | Shiraz-36T | 378  | 0.179558 | 0         |  |
|  | Shiraz-36T | 381  | 0.332628 | 0         |  |
|  | Shiraz-44T | 639  | 1.035032 | 0         |  |
|  | Shiraz-44T | 640  | 0.272608 | 0         |  |
|  | Shiraz-46T | 943  | 0.093799 | 0         |  |
|  | Shiraz-46T | 946  | 0.299835 | 0         |  |
|  | Shiraz-47T | 1030 | 0.257728 | 0         |  |
|  | Shiraz-49T | 1120 | 0.281656 | 0         |  |
|  | Shiraz-77T | 1225 | 0        | -0.117922 |  |
|  | Shiraz-77T | 1227 | 0.196445 | 0         |  |
|  | Shiraz-9T  | 1324 | 0.679266 | 0         |  |
|  | Shiraz-18T | 1434 | 0.244465 | 0         |  |
|  | Shiraz-22T | 1549 | 0        | -0.319623 |  |
|  | Shiraz-22T | 1551 | 0.324011 | 0         |  |
|  | Shiraz-25T | 1698 | 0.21835  | 0         |  |
|  | Shiraz-28T | 1735 | 0.350744 | 0         |  |
|  | Shiraz-29T | 1778 | 0.120767 | 0         |  |
|  | Shiraz-32T | 1833 | 0.551336 | 0         |  |
|  | Shiraz-38T | 1951 | 0.250891 | 0         |  |
|  | Shiraz-53T | 2078 | 0.287202 | 0         |  |
|  | Shiraz-71T | 2238 | 0.603631 | 0         |  |
|  | Shiraz-3T  | 90   | 0.219276 | 0         |  |
|  | Shiraz-3T  | 94   | 0.74735  | 0         |  |
|  | Shiraz-4T  | 253  | 0.372918 | 0         |  |
|  | Shiraz-31T | 316  | 0.219196 | 0         |  |
|  | Shiraz-36T | 378  | 0.179558 | 0         |  |
|  | Shiraz-36T | 381  | 0.332628 | 0         |  |
|  | Shiraz-44T | 639  | 1.035032 | 0         |  |
|  | Shiraz-44T | 640  | 0.272608 | 0         |  |
|  | Shiraz-46T | 943  | 0.093799 | 0         |  |
|  | Shiraz-46T | 946  | 0.299835 | 0         |  |
|  | Shiraz-47T | 1030 | 0.257728 | 0         |  |
|  | Shiraz-49T | 1120 | 0.281656 | 0         |  |
|  | Shiraz-77T | 1225 | 0        | -0.117922 |  |
|  | Shiraz-77T | 1227 | 0.196445 | 0         |  |
|  | Shiraz-9T  | 1324 | 0.679266 | 0         |  |
|  | Shiraz-18T | 1434 | 0.244465 | 0         |  |
|  | Shiraz-22T | 1549 | 0        | -0.319623 |  |
|  | Shiraz-22T | 1551 | 0.324011 | 0         |  |
|  | Shiraz-25T | 1698 | 0.21835  | 0         |  |
|  | Shiraz-28T | 1735 | 0.350744 | 0         |  |
|  | Shiraz-29T | 1778 | 0.120767 | 0         |  |
|  | Shiraz-32T | 1833 | 0.551336 | 0         |  |
|  | Shiraz-38T | 1951 | 0.250891 | 0         |  |

|        |      |            |      |          |           |  |  |
|--------|------|------------|------|----------|-----------|--|--|
|        |      | Shiraz-53T | 2078 | 0.287202 | 0         |  |  |
|        |      | Shiraz-71T | 2238 | 0.603631 | 0         |  |  |
|        |      | Shiraz-3T  | 90   | 0.219276 | 0         |  |  |
|        |      | Shiraz-3T  | 94   | 0.74735  | 0         |  |  |
|        |      | Shiraz-4T  | 253  | 0.372918 | 0         |  |  |
|        |      | Shiraz-31T | 316  | 0.219196 | 0         |  |  |
|        |      | Shiraz-36T | 378  | 0.179558 | 0         |  |  |
|        |      | Shiraz-36T | 381  | 0.332628 | 0         |  |  |
|        |      | Shiraz-44T | 639  | 1.035032 | 0         |  |  |
|        |      | Shiraz-44T | 640  | 0.272608 | 0         |  |  |
|        |      | Shiraz-46T | 943  | 0.093799 | 0         |  |  |
|        |      | Shiraz-46T | 946  | 0.299835 | 0         |  |  |
|        |      | Shiraz-47T | 1030 | 0.257728 | 0         |  |  |
|        |      | Shiraz-49T | 1120 | 0.281656 | 0         |  |  |
|        |      | Shiraz-77T | 1225 | 0        | -0.117922 |  |  |
|        |      | Shiraz-77T | 1227 | 0.196445 | 0         |  |  |
|        |      | Shiraz-9T  | 1324 | 0.679266 | 0         |  |  |
|        |      | Shiraz-18T | 1434 | 0.244465 | 0         |  |  |
|        |      | Shiraz-22T | 1549 | 0        | -0.319623 |  |  |
|        |      | Shiraz-22T | 1551 | 0.324011 | 0         |  |  |
|        |      | Shiraz-25T | 1698 | 0.21835  | 0         |  |  |
|        |      | Shiraz-28T | 1735 | 0.350744 | 0         |  |  |
|        |      | Shiraz-29T | 1778 | 0.120767 | 0         |  |  |
|        |      | Shiraz-32T | 1833 | 0.551336 | 0         |  |  |
|        |      | Shiraz-38T | 1951 | 0.250891 | 0         |  |  |
|        |      | Shiraz-53T | 2078 | 0.287202 | 0         |  |  |
|        |      | Shiraz-71T | 2238 | 0.603631 | 0         |  |  |
| CYP3A7 | chr7 | Shiraz-3T  | 90   | 0.219276 | 0         |  |  |
|        |      | Shiraz-3T  | 94   | 0.74735  | 0         |  |  |
|        |      | Shiraz-4T  | 253  | 0.372918 | 0         |  |  |
|        |      | Shiraz-31T | 316  | 0.219196 | 0         |  |  |
|        |      | Shiraz-36T | 378  | 0.179558 | 0         |  |  |
|        |      | Shiraz-36T | 381  | 0.332628 | 0         |  |  |
|        |      | Shiraz-44T | 639  | 1.035032 | 0         |  |  |
|        |      | Shiraz-44T | 640  | 0.272608 | 0         |  |  |
|        |      | Shiraz-46T | 943  | 0.093799 | 0         |  |  |
|        |      | Shiraz-46T | 946  | 0.299835 | 0         |  |  |
|        |      | Shiraz-47T | 1030 | 0.257728 | 0         |  |  |
|        |      | Shiraz-49T | 1120 | 0.281656 | 0         |  |  |
|        |      | Shiraz-77T | 1225 | 0        | -0.117922 |  |  |
|        |      | Shiraz-77T | 1227 | 0.196445 | 0         |  |  |
|        |      | Shiraz-9T  | 1324 | 0.679266 | 0         |  |  |
|        |      | Shiraz-18T | 1434 | 0.244465 | 0         |  |  |
|        |      | Shiraz-22T | 1549 | 0        | -0.319623 |  |  |
|        |      | Shiraz-22T | 1551 | 0.324011 | 0         |  |  |
|        |      | Shiraz-25T | 1698 | 0.21835  | 0         |  |  |
|        |      | Shiraz-28T | 1735 | 0.350744 | 0         |  |  |

|  |            |      |          |           |  |
|--|------------|------|----------|-----------|--|
|  | Shiraz-29T | 1778 | 0.120767 | 0         |  |
|  | Shiraz-32T | 1833 | 0.551336 | 0         |  |
|  | Shiraz-38T | 1951 | 0.250891 | 0         |  |
|  | Shiraz-53T | 2078 | 0.287202 | 0         |  |
|  | Shiraz-71T | 2238 | 0.603631 | 0         |  |
|  | Shiraz-3T  | 90   | 0.219276 | 0         |  |
|  | Shiraz-3T  | 94   | 0.74735  | 0         |  |
|  | Shiraz-4T  | 253  | 0.372918 | 0         |  |
|  | Shiraz-31T | 316  | 0.219196 | 0         |  |
|  | Shiraz-36T | 378  | 0.179558 | 0         |  |
|  | Shiraz-36T | 381  | 0.332628 | 0         |  |
|  | Shiraz-44T | 639  | 1.035032 | 0         |  |
|  | Shiraz-44T | 640  | 0.272608 | 0         |  |
|  | Shiraz-46T | 943  | 0.093799 | 0         |  |
|  | Shiraz-46T | 946  | 0.299835 | 0         |  |
|  | Shiraz-47T | 1030 | 0.257728 | 0         |  |
|  | Shiraz-49T | 1120 | 0.281656 | 0         |  |
|  | Shiraz-77T | 1225 | 0        | -0.117922 |  |
|  | Shiraz-77T | 1227 | 0.196445 | 0         |  |
|  | Shiraz-9T  | 1324 | 0.679266 | 0         |  |
|  | Shiraz-18T | 1434 | 0.244465 | 0         |  |
|  | Shiraz-22T | 1549 | 0        | -0.319623 |  |
|  | Shiraz-22T | 1551 | 0.324011 | 0         |  |
|  | Shiraz-25T | 1698 | 0.21835  | 0         |  |
|  | Shiraz-28T | 1735 | 0.350744 | 0         |  |
|  | Shiraz-29T | 1778 | 0.120767 | 0         |  |
|  | Shiraz-32T | 1833 | 0.551336 | 0         |  |
|  | Shiraz-38T | 1951 | 0.250891 | 0         |  |
|  | Shiraz-53T | 2078 | 0.287202 | 0         |  |
|  | Shiraz-71T | 2238 | 0.603631 | 0         |  |
|  | Shiraz-3T  | 90   | 0.219276 | 0         |  |
|  | Shiraz-3T  | 94   | 0.74735  | 0         |  |
|  | Shiraz-4T  | 253  | 0.372918 | 0         |  |
|  | Shiraz-31T | 316  | 0.219196 | 0         |  |
|  | Shiraz-36T | 378  | 0.179558 | 0         |  |
|  | Shiraz-36T | 381  | 0.332628 | 0         |  |
|  | Shiraz-44T | 639  | 1.035032 | 0         |  |
|  | Shiraz-44T | 640  | 0.272608 | 0         |  |
|  | Shiraz-46T | 943  | 0.093799 | 0         |  |
|  | Shiraz-46T | 946  | 0.299835 | 0         |  |
|  | Shiraz-47T | 1030 | 0.257728 | 0         |  |
|  | Shiraz-49T | 1120 | 0.281656 | 0         |  |
|  | Shiraz-77T | 1225 | 0        | -0.117922 |  |
|  | Shiraz-77T | 1227 | 0.196445 | 0         |  |
|  | Shiraz-9T  | 1324 | 0.679266 | 0         |  |
|  | Shiraz-18T | 1434 | 0.244465 | 0         |  |
|  | Shiraz-22T | 1549 | 0        | -0.319623 |  |

|         |      |            |      |          |           |  |
|---------|------|------------|------|----------|-----------|--|
|         |      | Shiraz-22T | 1551 | 0.324011 | 0         |  |
|         |      | Shiraz-25T | 1698 | 0.21835  | 0         |  |
|         |      | Shiraz-28T | 1735 | 0.350744 | 0         |  |
|         |      | Shiraz-29T | 1778 | 0.120767 | 0         |  |
|         |      | Shiraz-32T | 1833 | 0.551336 | 0         |  |
|         |      | Shiraz-38T | 1951 | 0.250891 | 0         |  |
|         |      | Shiraz-53T | 2078 | 0.287202 | 0         |  |
|         |      | Shiraz-71T | 2238 | 0.603631 | 0         |  |
| CYP51A1 | chr7 | Shiraz-3T  | 90   | 0.219276 | 0         |  |
|         |      | Shiraz-3T  | 90   | 0.219276 | 0         |  |
|         |      | Shiraz-3T  | 93   | 0        | -0.058023 |  |
|         |      | Shiraz-3T  | 93   | 0        | -0.058023 |  |
|         |      | Shiraz-4T  | 253  | 0.372918 | 0         |  |
|         |      | Shiraz-4T  | 253  | 0.372918 | 0         |  |
|         |      | Shiraz-36T | 378  | 0.179558 | 0         |  |
|         |      | Shiraz-36T | 378  | 0.179558 | 0         |  |
|         |      | Shiraz-36T | 380  | 0.083883 | 0         |  |
|         |      | Shiraz-36T | 380  | 0.083883 | 0         |  |
|         |      | Shiraz-44T | 638  | 0        | -0.433476 |  |
|         |      | Shiraz-44T | 638  | 0        | -0.433476 |  |
|         |      | Shiraz-46T | 943  | 0.093799 | 0         |  |
|         |      | Shiraz-46T | 943  | 0.093799 | 0         |  |
|         |      | Shiraz-46T | 945  | 0        | -0.014838 |  |
|         |      | Shiraz-46T | 945  | 0        | -0.014838 |  |
|         |      | Shiraz-47T | 1029 | 0        | -0.096586 |  |
|         |      | Shiraz-47T | 1029 | 0        | -0.096586 |  |
|         |      | Shiraz-49T | 1119 | 0        | -0.157331 |  |
|         |      | Shiraz-49T | 1119 | 0        | -0.157331 |  |
|         |      | Shiraz-77T | 1225 | 0        | -0.117922 |  |
|         |      | Shiraz-77T | 1225 | 0        | -0.117922 |  |
|         |      | Shiraz-18T | 1434 | 0.244465 | 0         |  |
|         |      | Shiraz-18T | 1434 | 0.244465 | 0         |  |
|         |      | Shiraz-22T | 1549 | 0        | -0.319623 |  |
|         |      | Shiraz-22T | 1549 | 0        | -0.319623 |  |
|         |      | Shiraz-25T | 1698 | 0.21835  | 0         |  |
|         |      | Shiraz-25T | 1698 | 0.21835  | 0         |  |
|         |      | Shiraz-28T | 1735 | 0.350744 | 0         |  |
|         |      | Shiraz-28T | 1735 | 0.350744 | 0         |  |
|         |      | Shiraz-29T | 1778 | 0.120767 | 0         |  |
|         |      | Shiraz-29T | 1778 | 0.120767 | 0         |  |
|         |      | Shiraz-32T | 1833 | 0.551336 | 0         |  |
|         |      | Shiraz-32T | 1833 | 0.551336 | 0         |  |
|         |      | Shiraz-38T | 1951 | 0.250891 | 0         |  |
|         |      | Shiraz-38T | 1951 | 0.250891 | 0         |  |
|         |      | Shiraz-53T | 2078 | 0.287202 | 0         |  |
|         |      | Shiraz-53T | 2078 | 0.287202 | 0         |  |
|         |      | Shiraz-58T | 2159 | 0        | -0.219521 |  |

|  |            |      |          |           |  |
|--|------------|------|----------|-----------|--|
|  | Shiraz-58T | 2159 | 0        | -0.219521 |  |
|  | Shiraz-71T | 2238 | 0.603631 | 0         |  |
|  | Shiraz-71T | 2238 | 0.603631 | 0         |  |
|  | Shiraz-3T  | 90   | 0.219276 | 0         |  |
|  | Shiraz-3T  | 90   | 0.219276 | 0         |  |
|  | Shiraz-3T  | 93   | 0        | -0.058023 |  |
|  | Shiraz-3T  | 93   | 0        | -0.058023 |  |
|  | Shiraz-4T  | 253  | 0.372918 | 0         |  |
|  | Shiraz-4T  | 253  | 0.372918 | 0         |  |
|  | Shiraz-36T | 378  | 0.179558 | 0         |  |
|  | Shiraz-36T | 378  | 0.179558 | 0         |  |
|  | Shiraz-36T | 380  | 0.083883 | 0         |  |
|  | Shiraz-36T | 380  | 0.083883 | 0         |  |
|  | Shiraz-44T | 638  | 0        | -0.433476 |  |
|  | Shiraz-44T | 638  | 0        | -0.433476 |  |
|  | Shiraz-46T | 943  | 0.093799 | 0         |  |
|  | Shiraz-46T | 943  | 0.093799 | 0         |  |
|  | Shiraz-46T | 945  | 0        | -0.014838 |  |
|  | Shiraz-46T | 945  | 0        | -0.014838 |  |
|  | Shiraz-47T | 1029 | 0        | -0.096586 |  |
|  | Shiraz-47T | 1029 | 0        | -0.096586 |  |
|  | Shiraz-49T | 1119 | 0        | -0.157331 |  |
|  | Shiraz-49T | 1119 | 0        | -0.157331 |  |
|  | Shiraz-77T | 1225 | 0        | -0.117922 |  |
|  | Shiraz-77T | 1225 | 0        | -0.117922 |  |
|  | Shiraz-18T | 1434 | 0.244465 | 0         |  |
|  | Shiraz-18T | 1434 | 0.244465 | 0         |  |
|  | Shiraz-22T | 1549 | 0        | -0.319623 |  |
|  | Shiraz-22T | 1549 | 0        | -0.319623 |  |
|  | Shiraz-25T | 1698 | 0.21835  | 0         |  |
|  | Shiraz-25T | 1698 | 0.21835  | 0         |  |
|  | Shiraz-28T | 1735 | 0.350744 | 0         |  |
|  | Shiraz-28T | 1735 | 0.350744 | 0         |  |
|  | Shiraz-29T | 1778 | 0.120767 | 0         |  |
|  | Shiraz-29T | 1778 | 0.120767 | 0         |  |
|  | Shiraz-32T | 1833 | 0.551336 | 0         |  |
|  | Shiraz-32T | 1833 | 0.551336 | 0         |  |
|  | Shiraz-38T | 1951 | 0.250891 | 0         |  |
|  | Shiraz-38T | 1951 | 0.250891 | 0         |  |
|  | Shiraz-53T | 2078 | 0.287202 | 0         |  |
|  | Shiraz-53T | 2078 | 0.287202 | 0         |  |
|  | Shiraz-58T | 2159 | 0        | -0.219521 |  |
|  | Shiraz-58T | 2159 | 0        | -0.219521 |  |
|  | Shiraz-71T | 2238 | 0.603631 | 0         |  |
|  | Shiraz-71T | 2238 | 0.603631 | 0         |  |
|  | Shiraz-3T  | 90   | 0.219276 | 0         |  |
|  | Shiraz-3T  | 90   | 0.219276 | 0         |  |

|         |      |            |      |          |           |  |  |
|---------|------|------------|------|----------|-----------|--|--|
|         |      | Shiraz-3T  | 93   | 0        | -0.058023 |  |  |
|         |      | Shiraz-3T  | 93   | 0        | -0.058023 |  |  |
|         |      | Shiraz-4T  | 253  | 0.372918 | 0         |  |  |
|         |      | Shiraz-4T  | 253  | 0.372918 | 0         |  |  |
|         |      | Shiraz-36T | 378  | 0.179558 | 0         |  |  |
|         |      | Shiraz-36T | 378  | 0.179558 | 0         |  |  |
|         |      | Shiraz-36T | 380  | 0.083883 | 0         |  |  |
|         |      | Shiraz-36T | 380  | 0.083883 | 0         |  |  |
|         |      | Shiraz-44T | 638  | 0        | -0.433476 |  |  |
|         |      | Shiraz-44T | 638  | 0        | -0.433476 |  |  |
|         |      | Shiraz-46T | 943  | 0.093799 | 0         |  |  |
|         |      | Shiraz-46T | 943  | 0.093799 | 0         |  |  |
|         |      | Shiraz-46T | 945  | 0        | -0.014838 |  |  |
|         |      | Shiraz-46T | 945  | 0        | -0.014838 |  |  |
|         |      | Shiraz-47T | 1029 | 0        | -0.096586 |  |  |
|         |      | Shiraz-47T | 1029 | 0        | -0.096586 |  |  |
|         |      | Shiraz-49T | 1119 | 0        | -0.157331 |  |  |
|         |      | Shiraz-49T | 1119 | 0        | -0.157331 |  |  |
|         |      | Shiraz-77T | 1225 | 0        | -0.117922 |  |  |
|         |      | Shiraz-77T | 1225 | 0        | -0.117922 |  |  |
|         |      | Shiraz-18T | 1434 | 0.244465 | 0         |  |  |
|         |      | Shiraz-18T | 1434 | 0.244465 | 0         |  |  |
|         |      | Shiraz-22T | 1549 | 0        | -0.319623 |  |  |
|         |      | Shiraz-22T | 1549 | 0        | -0.319623 |  |  |
|         |      | Shiraz-25T | 1698 | 0.21835  | 0         |  |  |
|         |      | Shiraz-25T | 1698 | 0.21835  | 0         |  |  |
|         |      | Shiraz-28T | 1735 | 0.350744 | 0         |  |  |
|         |      | Shiraz-28T | 1735 | 0.350744 | 0         |  |  |
|         |      | Shiraz-29T | 1778 | 0.120767 | 0         |  |  |
|         |      | Shiraz-29T | 1778 | 0.120767 | 0         |  |  |
|         |      | Shiraz-32T | 1833 | 0.551336 | 0         |  |  |
|         |      | Shiraz-32T | 1833 | 0.551336 | 0         |  |  |
|         |      | Shiraz-38T | 1951 | 0.250891 | 0         |  |  |
|         |      | Shiraz-38T | 1951 | 0.250891 | 0         |  |  |
|         |      | Shiraz-53T | 2078 | 0.287202 | 0         |  |  |
|         |      | Shiraz-53T | 2078 | 0.287202 | 0         |  |  |
|         |      | Shiraz-58T | 2159 | 0        | -0.219521 |  |  |
|         |      | Shiraz-58T | 2159 | 0        | -0.219521 |  |  |
|         |      | Shiraz-71T | 2238 | 0.603631 | 0         |  |  |
|         |      | Shiraz-71T | 2238 | 0.603631 | 0         |  |  |
| CYSLTR1 | chrX | Shiraz-3T  | 242  | 0        | -0.336434 |  |  |
|         |      | Shiraz-4T  | 261  | 0        | -0.336249 |  |  |
|         |      | Shiraz-16T | 295  | 0.591657 | 0         |  |  |
|         |      | Shiraz-36T | 433  | 0        | -0.803961 |  |  |
|         |      | Shiraz-44T | 899  | 0        | -1.09697  |  |  |
|         |      | Shiraz-49T | 1170 | 0        | -0.967436 |  |  |
|         |      | Shiraz-18T | 1457 | 0.643204 | 0         |  |  |

|      |      |            |      |          |           |  |  |
|------|------|------------|------|----------|-----------|--|--|
|      |      | Shiraz-22T | 1673 | 0.611783 | 0         |  |  |
|      |      | Shiraz-25T | 1719 | 0.472955 | 0         |  |  |
|      |      | Shiraz-28T | 1762 | 0.562311 | 0         |  |  |
|      |      | Shiraz-29T | 1801 | 0.815343 | 0         |  |  |
|      |      | Shiraz-32T | 1870 | 0.729766 | 0         |  |  |
|      |      | Shiraz-35T | 1933 | 0.488535 | 0         |  |  |
|      |      | Shiraz-58T | 2223 | 0.833364 | 0         |  |  |
|      |      | Shiraz-71T | 2263 | 0.975531 | 0         |  |  |
|      |      | Shiraz-3T  | 242  | 0        | -0.336434 |  |  |
|      |      | Shiraz-4T  | 261  | 0        | -0.336249 |  |  |
|      |      | Shiraz-16T | 295  | 0.591657 | 0         |  |  |
|      |      | Shiraz-36T | 433  | 0        | -0.803961 |  |  |
|      |      | Shiraz-44T | 899  | 0        | -1.09697  |  |  |
|      |      | Shiraz-49T | 1170 | 0        | -0.967436 |  |  |
|      |      | Shiraz-18T | 1457 | 0.643204 | 0         |  |  |
|      |      | Shiraz-22T | 1673 | 0.611783 | 0         |  |  |
|      |      | Shiraz-25T | 1719 | 0.472955 | 0         |  |  |
|      |      | Shiraz-28T | 1762 | 0.562311 | 0         |  |  |
|      |      | Shiraz-29T | 1801 | 0.815343 | 0         |  |  |
|      |      | Shiraz-32T | 1870 | 0.729766 | 0         |  |  |
|      |      | Shiraz-35T | 1933 | 0.488535 | 0         |  |  |
|      |      | Shiraz-58T | 2223 | 0.833364 | 0         |  |  |
|      |      | Shiraz-71T | 2263 | 0.975531 | 0         |  |  |
|      |      | Shiraz-3T  | 242  | 0        | -0.336434 |  |  |
|      |      | Shiraz-4T  | 261  | 0        | -0.336249 |  |  |
|      |      | Shiraz-16T | 295  | 0.591657 | 0         |  |  |
|      |      | Shiraz-36T | 433  | 0        | -0.803961 |  |  |
|      |      | Shiraz-44T | 899  | 0        | -1.09697  |  |  |
|      |      | Shiraz-49T | 1170 | 0        | -0.967436 |  |  |
|      |      | Shiraz-18T | 1457 | 0.643204 | 0         |  |  |
|      |      | Shiraz-22T | 1673 | 0.611783 | 0         |  |  |
|      |      | Shiraz-25T | 1719 | 0.472955 | 0         |  |  |
|      |      | Shiraz-28T | 1762 | 0.562311 | 0         |  |  |
|      |      | Shiraz-29T | 1801 | 0.815343 | 0         |  |  |
|      |      | Shiraz-32T | 1870 | 0.729766 | 0         |  |  |
|      |      | Shiraz-35T | 1933 | 0.488535 | 0         |  |  |
|      |      | Shiraz-58T | 2223 | 0.833364 | 0         |  |  |
|      |      | Shiraz-71T | 2263 | 0.975531 | 0         |  |  |
| DAB2 | chr5 | Shiraz-4T  | 250  | 0.262252 | 0         |  |  |
|      |      | Shiraz-16T | 266  | 0.321724 | 0         |  |  |
|      |      | Shiraz-44T | 591  | 0        | -0.233934 |  |  |
|      |      | Shiraz-18T | 1429 | 0        | -0.314125 |  |  |
|      |      | Shiraz-22T | 1522 | 0        | -0.322688 |  |  |
|      |      | Shiraz-25T | 1694 | 0.201602 | 0         |  |  |
|      |      | Shiraz-28T | 1731 | 0.295447 | 0         |  |  |
|      |      | Shiraz-29T | 1773 | 0.090981 | 0         |  |  |
|      |      | Shiraz-40T | 2016 | 0.376634 | 0         |  |  |

|       |      |            |      |          |           |  |  |
|-------|------|------------|------|----------|-----------|--|--|
|       |      | Shiraz-4T  | 250  | 0.262252 | 0         |  |  |
|       |      | Shiraz-16T | 266  | 0.321724 | 0         |  |  |
|       |      | Shiraz-44T | 591  | 0        | -0.233934 |  |  |
|       |      | Shiraz-18T | 1429 | 0        | -0.314125 |  |  |
|       |      | Shiraz-22T | 1522 | 0        | -0.322688 |  |  |
|       |      | Shiraz-25T | 1694 | 0.201602 | 0         |  |  |
|       |      | Shiraz-28T | 1731 | 0.295447 | 0         |  |  |
|       |      | Shiraz-29T | 1773 | 0.090981 | 0         |  |  |
|       |      | Shiraz-40T | 2016 | 0.376634 | 0         |  |  |
|       |      | Shiraz-4T  | 250  | 0.262252 | 0         |  |  |
|       |      | Shiraz-16T | 266  | 0.321724 | 0         |  |  |
|       |      | Shiraz-44T | 591  | 0        | -0.233934 |  |  |
|       |      | Shiraz-18T | 1429 | 0        | -0.314125 |  |  |
|       |      | Shiraz-22T | 1522 | 0        | -0.322688 |  |  |
|       |      | Shiraz-25T | 1694 | 0.201602 | 0         |  |  |
|       |      | Shiraz-28T | 1731 | 0.295447 | 0         |  |  |
|       |      | Shiraz-29T | 1773 | 0.090981 | 0         |  |  |
|       |      | Shiraz-40T | 2016 | 0.376634 | 0         |  |  |
| DACH2 | chrX | Shiraz-3T  | 242  | 0        | -0.336434 |  |  |
|       |      | Shiraz-3T  | 242  | 0        | -0.336434 |  |  |
|       |      | Shiraz-3T  | 243  | 0        | -0.549129 |  |  |
|       |      | Shiraz-3T  | 243  | 0        | -0.549129 |  |  |
|       |      | Shiraz-4T  | 261  | 0        | -0.336249 |  |  |
|       |      | Shiraz-4T  | 261  | 0        | -0.336249 |  |  |
|       |      | Shiraz-16T | 295  | 0.591657 | 0         |  |  |
|       |      | Shiraz-16T | 295  | 0.591657 | 0         |  |  |
|       |      | Shiraz-31T | 346  | 0        | -0.1527   |  |  |
|       |      | Shiraz-31T | 346  | 0        | -0.1527   |  |  |
|       |      | Shiraz-36T | 433  | 0        | -0.803961 |  |  |
|       |      | Shiraz-36T | 433  | 0        | -0.803961 |  |  |
|       |      | Shiraz-44T | 899  | 0        | -1.09697  |  |  |
|       |      | Shiraz-44T | 899  | 0        | -1.09697  |  |  |
|       |      | Shiraz-44T | 902  | 0        | -1.449824 |  |  |
|       |      | Shiraz-44T | 902  | 0        | -1.449824 |  |  |
|       |      | Shiraz-47T | 1085 | 0        | -0.130811 |  |  |
|       |      | Shiraz-47T | 1085 | 0        | -0.130811 |  |  |
|       |      | Shiraz-49T | 1170 | 0        | -0.967436 |  |  |
|       |      | Shiraz-49T | 1170 | 0        | -0.967436 |  |  |
|       |      | Shiraz-49T | 1172 | 0        | -1.123219 |  |  |
|       |      | Shiraz-49T | 1172 | 0        | -1.123219 |  |  |
|       |      | Shiraz-18T | 1457 | 0.643204 | 0         |  |  |
|       |      | Shiraz-18T | 1457 | 0.643204 | 0         |  |  |
|       |      | Shiraz-22T | 1673 | 0.611783 | 0         |  |  |
|       |      | Shiraz-22T | 1673 | 0.611783 | 0         |  |  |
|       |      | Shiraz-22T | 1675 | 0.279253 | 0         |  |  |
|       |      | Shiraz-22T | 1675 | 0.279253 | 0         |  |  |
|       |      | Shiraz-25T | 1719 | 0.472955 | 0         |  |  |



|  |            |      |          |           |  |
|--|------------|------|----------|-----------|--|
|  | Shiraz-25T | 1719 | 0.472955 | 0         |  |
|  | Shiraz-28T | 1762 | 0.562311 | 0         |  |
|  | Shiraz-28T | 1762 | 0.562311 | 0         |  |
|  | Shiraz-29T | 1801 | 0.815343 | 0         |  |
|  | Shiraz-29T | 1801 | 0.815343 | 0         |  |
|  | Shiraz-32T | 1870 | 0.729766 | 0         |  |
|  | Shiraz-32T | 1870 | 0.729766 | 0         |  |
|  | Shiraz-32T | 1871 | 0.292679 | 0         |  |
|  | Shiraz-32T | 1871 | 0.292679 | 0         |  |
|  | Shiraz-35T | 1933 | 0.488535 | 0         |  |
|  | Shiraz-35T | 1933 | 0.488535 | 0         |  |
|  | Shiraz-58T | 2223 | 0.833364 | 0         |  |
|  | Shiraz-58T | 2223 | 0.833364 | 0         |  |
|  | Shiraz-58T | 2225 | 0.595784 | 0         |  |
|  | Shiraz-58T | 2225 | 0.595784 | 0         |  |
|  | Shiraz-71T | 2263 | 0.975531 | 0         |  |
|  | Shiraz-71T | 2263 | 0.975531 | 0         |  |
|  | Shiraz-3T  | 242  | 0        | -0.336434 |  |
|  | Shiraz-3T  | 242  | 0        | -0.336434 |  |
|  | Shiraz-3T  | 243  | 0        | -0.549129 |  |
|  | Shiraz-3T  | 243  | 0        | -0.549129 |  |
|  | Shiraz-4T  | 261  | 0        | -0.336249 |  |
|  | Shiraz-4T  | 261  | 0        | -0.336249 |  |
|  | Shiraz-16T | 295  | 0.591657 | 0         |  |
|  | Shiraz-16T | 295  | 0.591657 | 0         |  |
|  | Shiraz-31T | 346  | 0        | -0.1527   |  |
|  | Shiraz-31T | 346  | 0        | -0.1527   |  |
|  | Shiraz-36T | 433  | 0        | -0.803961 |  |
|  | Shiraz-36T | 433  | 0        | -0.803961 |  |
|  | Shiraz-44T | 899  | 0        | -1.09697  |  |
|  | Shiraz-44T | 899  | 0        | -1.09697  |  |
|  | Shiraz-44T | 902  | 0        | -1.449824 |  |
|  | Shiraz-44T | 902  | 0        | -1.449824 |  |
|  | Shiraz-47T | 1085 | 0        | -0.130811 |  |
|  | Shiraz-47T | 1085 | 0        | -0.130811 |  |
|  | Shiraz-49T | 1170 | 0        | -0.967436 |  |
|  | Shiraz-49T | 1170 | 0        | -0.967436 |  |
|  | Shiraz-49T | 1172 | 0        | -1.123219 |  |
|  | Shiraz-49T | 1172 | 0        | -1.123219 |  |
|  | Shiraz-18T | 1457 | 0.643204 | 0         |  |
|  | Shiraz-18T | 1457 | 0.643204 | 0         |  |
|  | Shiraz-22T | 1673 | 0.611783 | 0         |  |
|  | Shiraz-22T | 1673 | 0.611783 | 0         |  |
|  | Shiraz-22T | 1675 | 0.279253 | 0         |  |
|  | Shiraz-22T | 1675 | 0.279253 | 0         |  |
|  | Shiraz-25T | 1719 | 0.472955 | 0         |  |
|  | Shiraz-25T | 1719 | 0.472955 | 0         |  |

|  |            |      |          |           |  |
|--|------------|------|----------|-----------|--|
|  | Shiraz-28T | 1762 | 0.562311 | 0         |  |
|  | Shiraz-28T | 1762 | 0.562311 | 0         |  |
|  | Shiraz-29T | 1801 | 0.815343 | 0         |  |
|  | Shiraz-29T | 1801 | 0.815343 | 0         |  |
|  | Shiraz-32T | 1870 | 0.729766 | 0         |  |
|  | Shiraz-32T | 1870 | 0.729766 | 0         |  |
|  | Shiraz-32T | 1871 | 0.292679 | 0         |  |
|  | Shiraz-32T | 1871 | 0.292679 | 0         |  |
|  | Shiraz-35T | 1933 | 0.488535 | 0         |  |
|  | Shiraz-35T | 1933 | 0.488535 | 0         |  |
|  | Shiraz-58T | 2223 | 0.833364 | 0         |  |
|  | Shiraz-58T | 2223 | 0.833364 | 0         |  |
|  | Shiraz-58T | 2225 | 0.595784 | 0         |  |
|  | Shiraz-58T | 2225 | 0.595784 | 0         |  |
|  | Shiraz-71T | 2263 | 0.975531 | 0         |  |
|  | Shiraz-71T | 2263 | 0.975531 | 0         |  |
|  | Shiraz-3T  | 242  | 0        | -0.336434 |  |
|  | Shiraz-3T  | 242  | 0        | -0.336434 |  |
|  | Shiraz-3T  | 243  | 0        | -0.549129 |  |
|  | Shiraz-3T  | 243  | 0        | -0.549129 |  |
|  | Shiraz-4T  | 261  | 0        | -0.336249 |  |
|  | Shiraz-4T  | 261  | 0        | -0.336249 |  |
|  | Shiraz-16T | 295  | 0.591657 | 0         |  |
|  | Shiraz-16T | 295  | 0.591657 | 0         |  |
|  | Shiraz-31T | 346  | 0        | -0.1527   |  |
|  | Shiraz-31T | 346  | 0        | -0.1527   |  |
|  | Shiraz-36T | 433  | 0        | -0.803961 |  |
|  | Shiraz-36T | 433  | 0        | -0.803961 |  |
|  | Shiraz-44T | 899  | 0        | -1.09697  |  |
|  | Shiraz-44T | 899  | 0        | -1.09697  |  |
|  | Shiraz-44T | 902  | 0        | -1.449824 |  |
|  | Shiraz-44T | 902  | 0        | -1.449824 |  |
|  | Shiraz-47T | 1085 | 0        | -0.130811 |  |
|  | Shiraz-47T | 1085 | 0        | -0.130811 |  |
|  | Shiraz-49T | 1170 | 0        | -0.967436 |  |
|  | Shiraz-49T | 1170 | 0        | -0.967436 |  |
|  | Shiraz-49T | 1172 | 0        | -1.123219 |  |
|  | Shiraz-49T | 1172 | 0        | -1.123219 |  |
|  | Shiraz-18T | 1457 | 0.643204 | 0         |  |
|  | Shiraz-18T | 1457 | 0.643204 | 0         |  |
|  | Shiraz-22T | 1673 | 0.611783 | 0         |  |
|  | Shiraz-22T | 1673 | 0.611783 | 0         |  |
|  | Shiraz-22T | 1675 | 0.279253 | 0         |  |
|  | Shiraz-22T | 1675 | 0.279253 | 0         |  |
|  | Shiraz-25T | 1719 | 0.472955 | 0         |  |
|  | Shiraz-25T | 1719 | 0.472955 | 0         |  |
|  | Shiraz-28T | 1762 | 0.562311 | 0         |  |

|      |      |            |      |          |           |  |  |
|------|------|------------|------|----------|-----------|--|--|
|      |      | Shiraz-28T | 1762 | 0.562311 | 0         |  |  |
|      |      | Shiraz-29T | 1801 | 0.815343 | 0         |  |  |
|      |      | Shiraz-29T | 1801 | 0.815343 | 0         |  |  |
|      |      | Shiraz-32T | 1870 | 0.729766 | 0         |  |  |
|      |      | Shiraz-32T | 1870 | 0.729766 | 0         |  |  |
|      |      | Shiraz-32T | 1871 | 0.292679 | 0         |  |  |
|      |      | Shiraz-32T | 1871 | 0.292679 | 0         |  |  |
|      |      | Shiraz-35T | 1933 | 0.488535 | 0         |  |  |
|      |      | Shiraz-35T | 1933 | 0.488535 | 0         |  |  |
|      |      | Shiraz-58T | 2223 | 0.833364 | 0         |  |  |
|      |      | Shiraz-58T | 2223 | 0.833364 | 0         |  |  |
|      |      | Shiraz-58T | 2225 | 0.595784 | 0         |  |  |
|      |      | Shiraz-58T | 2225 | 0.595784 | 0         |  |  |
|      |      | Shiraz-71T | 2263 | 0.975531 | 0         |  |  |
|      |      | Shiraz-71T | 2263 | 0.975531 | 0         |  |  |
| DBF4 | chr7 | Shiraz-3T  | 90   | 0.219276 | 0         |  |  |
|      |      | Shiraz-3T  | 93   | 0        | -0.058023 |  |  |
|      |      | Shiraz-4T  | 253  | 0.372918 | 0         |  |  |
|      |      | Shiraz-36T | 378  | 0.179558 | 0         |  |  |
|      |      | Shiraz-36T | 380  | 0.083883 | 0         |  |  |
|      |      | Shiraz-44T | 638  | 0        | -0.433476 |  |  |
|      |      | Shiraz-46T | 943  | 0.093799 | 0         |  |  |
|      |      | Shiraz-46T | 945  | 0        | -0.014838 |  |  |
|      |      | Shiraz-47T | 1029 | 0        | -0.096586 |  |  |
|      |      | Shiraz-49T | 1119 | 0        | -0.157331 |  |  |
|      |      | Shiraz-77T | 1225 | 0        | -0.117922 |  |  |
|      |      | Shiraz-77T | 1226 | 0        | -0.233724 |  |  |
|      |      | Shiraz-18T | 1434 | 0.244465 | 0         |  |  |
|      |      | Shiraz-22T | 1549 | 0        | -0.319623 |  |  |
|      |      | Shiraz-22T | 1550 | 0        | -0.577052 |  |  |
|      |      | Shiraz-25T | 1698 | 0.21835  | 0         |  |  |
|      |      | Shiraz-28T | 1735 | 0.350744 | 0         |  |  |
|      |      | Shiraz-29T | 1778 | 0.120767 | 0         |  |  |
|      |      | Shiraz-38T | 1951 | 0.250891 | 0         |  |  |
|      |      | Shiraz-53T | 2078 | 0.287202 | 0         |  |  |
|      |      | Shiraz-58T | 2159 | 0        | -0.219521 |  |  |
|      |      | Shiraz-71T | 2238 | 0.603631 | 0         |  |  |
|      |      | Shiraz-3T  | 90   | 0.219276 | 0         |  |  |
|      |      | Shiraz-3T  | 93   | 0        | -0.058023 |  |  |
|      |      | Shiraz-4T  | 253  | 0.372918 | 0         |  |  |
|      |      | Shiraz-36T | 378  | 0.179558 | 0         |  |  |
|      |      | Shiraz-36T | 380  | 0.083883 | 0         |  |  |
|      |      | Shiraz-44T | 638  | 0        | -0.433476 |  |  |
|      |      | Shiraz-46T | 943  | 0.093799 | 0         |  |  |
|      |      | Shiraz-46T | 945  | 0        | -0.014838 |  |  |
|      |      | Shiraz-47T | 1029 | 0        | -0.096586 |  |  |
|      |      | Shiraz-49T | 1119 | 0        | -0.157331 |  |  |

|      |      |            |      |          |           |  |  |
|------|------|------------|------|----------|-----------|--|--|
|      |      | Shiraz-77T | 1225 | 0        | -0.117922 |  |  |
|      |      | Shiraz-77T | 1226 | 0        | -0.233724 |  |  |
|      |      | Shiraz-18T | 1434 | 0.244465 | 0         |  |  |
|      |      | Shiraz-22T | 1549 | 0        | -0.319623 |  |  |
|      |      | Shiraz-22T | 1550 | 0        | -0.577052 |  |  |
|      |      | Shiraz-25T | 1698 | 0.21835  | 0         |  |  |
|      |      | Shiraz-28T | 1735 | 0.350744 | 0         |  |  |
|      |      | Shiraz-29T | 1778 | 0.120767 | 0         |  |  |
|      |      | Shiraz-38T | 1951 | 0.250891 | 0         |  |  |
|      |      | Shiraz-53T | 2078 | 0.287202 | 0         |  |  |
|      |      | Shiraz-58T | 2159 | 0        | -0.219521 |  |  |
|      |      | Shiraz-71T | 2238 | 0.603631 | 0         |  |  |
|      |      | Shiraz-3T  | 90   | 0.219276 | 0         |  |  |
|      |      | Shiraz-3T  | 93   | 0        | -0.058023 |  |  |
|      |      | Shiraz-4T  | 253  | 0.372918 | 0         |  |  |
|      |      | Shiraz-36T | 378  | 0.179558 | 0         |  |  |
|      |      | Shiraz-36T | 380  | 0.083883 | 0         |  |  |
|      |      | Shiraz-44T | 638  | 0        | -0.433476 |  |  |
|      |      | Shiraz-46T | 943  | 0.093799 | 0         |  |  |
|      |      | Shiraz-46T | 945  | 0        | -0.014838 |  |  |
|      |      | Shiraz-47T | 1029 | 0        | -0.096586 |  |  |
|      |      | Shiraz-49T | 1119 | 0        | -0.157331 |  |  |
|      |      | Shiraz-77T | 1225 | 0        | -0.117922 |  |  |
|      |      | Shiraz-77T | 1226 | 0        | -0.233724 |  |  |
|      |      | Shiraz-18T | 1434 | 0.244465 | 0         |  |  |
|      |      | Shiraz-22T | 1549 | 0        | -0.319623 |  |  |
|      |      | Shiraz-22T | 1550 | 0        | -0.577052 |  |  |
|      |      | Shiraz-25T | 1698 | 0.21835  | 0         |  |  |
|      |      | Shiraz-28T | 1735 | 0.350744 | 0         |  |  |
|      |      | Shiraz-29T | 1778 | 0.120767 | 0         |  |  |
|      |      | Shiraz-38T | 1951 | 0.250891 | 0         |  |  |
|      |      | Shiraz-53T | 2078 | 0.287202 | 0         |  |  |
|      |      | Shiraz-58T | 2159 | 0        | -0.219521 |  |  |
|      |      | Shiraz-71T | 2238 | 0.603631 | 0         |  |  |
| DBNL | chr7 | Shiraz-3T  | 87   | 0.198593 | 0         |  |  |
|      |      | Shiraz-3T  | 89   | 0.678641 | 0         |  |  |
|      |      | Shiraz-4T  | 252  | 0.192083 | 0         |  |  |
|      |      | Shiraz-36T | 376  | 0.159952 | 0         |  |  |
|      |      | Shiraz-44T | 632  | 0.902944 | 0         |  |  |
|      |      | Shiraz-46T | 942  | 0.069143 | 0         |  |  |
|      |      | Shiraz-77T | 1223 | 0.215647 | 0         |  |  |
|      |      | Shiraz-18T | 1433 | 0.250973 | 0         |  |  |
|      |      | Shiraz-25T | 1697 | 0.21945  | 0         |  |  |
|      |      | Shiraz-28T | 1734 | 0.362882 | 0         |  |  |
|      |      | Shiraz-29T | 1777 | 0.156747 | 0         |  |  |
|      |      | Shiraz-38T | 1950 | 0.265916 | 0         |  |  |
|      |      | Shiraz-71T | 2236 | 0.320072 | 0         |  |  |

|       |      |            |      |          |   |  |
|-------|------|------------|------|----------|---|--|
|       |      | Shiraz-3T  | 87   | 0.198593 | 0 |  |
|       |      | Shiraz-3T  | 89   | 0.678641 | 0 |  |
|       |      | Shiraz-4T  | 252  | 0.192083 | 0 |  |
|       |      | Shiraz-36T | 376  | 0.159952 | 0 |  |
|       |      | Shiraz-44T | 632  | 0.902944 | 0 |  |
|       |      | Shiraz-46T | 942  | 0.069143 | 0 |  |
|       |      | Shiraz-77T | 1223 | 0.215647 | 0 |  |
|       |      | Shiraz-18T | 1433 | 0.250973 | 0 |  |
|       |      | Shiraz-25T | 1697 | 0.21945  | 0 |  |
|       |      | Shiraz-28T | 1734 | 0.362882 | 0 |  |
|       |      | Shiraz-29T | 1777 | 0.156747 | 0 |  |
|       |      | Shiraz-38T | 1950 | 0.265916 | 0 |  |
|       |      | Shiraz-71T | 2236 | 0.320072 | 0 |  |
|       |      | Shiraz-3T  | 87   | 0.198593 | 0 |  |
|       |      | Shiraz-3T  | 89   | 0.678641 | 0 |  |
|       |      | Shiraz-4T  | 252  | 0.192083 | 0 |  |
|       |      | Shiraz-36T | 376  | 0.159952 | 0 |  |
|       |      | Shiraz-44T | 632  | 0.902944 | 0 |  |
|       |      | Shiraz-46T | 942  | 0.069143 | 0 |  |
|       |      | Shiraz-77T | 1223 | 0.215647 | 0 |  |
|       |      | Shiraz-18T | 1433 | 0.250973 | 0 |  |
|       |      | Shiraz-25T | 1697 | 0.21945  | 0 |  |
|       |      | Shiraz-28T | 1734 | 0.362882 | 0 |  |
|       |      | Shiraz-29T | 1777 | 0.156747 | 0 |  |
|       |      | Shiraz-38T | 1950 | 0.265916 | 0 |  |
|       |      | Shiraz-71T | 2236 | 0.320072 | 0 |  |
| DCST1 | chr1 | Shiraz-3T  | 7    | 0.241427 | 0 |  |
|       |      | Shiraz-3T  | 8    | 0.590785 | 0 |  |
|       |      | Shiraz-31T | 298  | 0.198318 | 0 |  |
|       |      | Shiraz-36T | 349  | 0.179162 | 0 |  |
|       |      | Shiraz-36T | 350  | 0.3174   | 0 |  |
|       |      | Shiraz-44T | 499  | 0.721251 | 0 |  |
|       |      | Shiraz-44T | 501  | 1.392519 | 0 |  |
|       |      | Shiraz-46T | 921  | 0.194724 | 0 |  |
|       |      | Shiraz-47T | 995  | 0.201435 | 0 |  |
|       |      | Shiraz-49T | 1090 | 0.254464 | 0 |  |
|       |      | Shiraz-77T | 1188 | 0.248898 | 0 |  |
|       |      | Shiraz-8T  | 1287 | 0.094434 | 0 |  |
|       |      | Shiraz-9T  | 1304 | 0.217335 | 0 |  |
|       |      | Shiraz-9T  | 1305 | 0.581062 | 0 |  |
|       |      | Shiraz-12T | 1373 | 0.130542 | 0 |  |
|       |      | Shiraz-22T | 1465 | 0.300465 | 0 |  |
|       |      | Shiraz-25T | 1686 | 0.15002  | 0 |  |
|       |      | Shiraz-28T | 1724 | 0.274774 | 0 |  |
|       |      | Shiraz-32T | 1820 | 0.468948 | 0 |  |
|       |      | Shiraz-35T | 1876 | 0.120562 | 0 |  |
|       |      | Shiraz-53T | 2057 | 0.407227 | 0 |  |

|  |            |      |          |   |  |
|--|------------|------|----------|---|--|
|  | Shiraz-58T | 2121 | 0.321654 | 0 |  |
|  | Shiraz-71T | 2234 | 0.119256 | 0 |  |
|  | Shiraz-3T  | 7    | 0.241427 | 0 |  |
|  | Shiraz-3T  | 8    | 0.590785 | 0 |  |
|  | Shiraz-31T | 298  | 0.198318 | 0 |  |
|  | Shiraz-36T | 349  | 0.179162 | 0 |  |
|  | Shiraz-36T | 350  | 0.3174   | 0 |  |
|  | Shiraz-44T | 499  | 0.721251 | 0 |  |
|  | Shiraz-44T | 501  | 1.392519 | 0 |  |
|  | Shiraz-46T | 921  | 0.194724 | 0 |  |
|  | Shiraz-47T | 995  | 0.201435 | 0 |  |
|  | Shiraz-49T | 1090 | 0.254464 | 0 |  |
|  | Shiraz-77T | 1188 | 0.248898 | 0 |  |
|  | Shiraz-8T  | 1287 | 0.094434 | 0 |  |
|  | Shiraz-9T  | 1304 | 0.217335 | 0 |  |
|  | Shiraz-9T  | 1305 | 0.581062 | 0 |  |
|  | Shiraz-12T | 1373 | 0.130542 | 0 |  |
|  | Shiraz-22T | 1465 | 0.300465 | 0 |  |
|  | Shiraz-25T | 1686 | 0.15002  | 0 |  |
|  | Shiraz-28T | 1724 | 0.274774 | 0 |  |
|  | Shiraz-32T | 1820 | 0.468948 | 0 |  |
|  | Shiraz-35T | 1876 | 0.120562 | 0 |  |
|  | Shiraz-53T | 2057 | 0.407227 | 0 |  |
|  | Shiraz-58T | 2121 | 0.321654 | 0 |  |
|  | Shiraz-71T | 2234 | 0.119256 | 0 |  |
|  | Shiraz-3T  | 7    | 0.241427 | 0 |  |
|  | Shiraz-3T  | 8    | 0.590785 | 0 |  |
|  | Shiraz-31T | 298  | 0.198318 | 0 |  |
|  | Shiraz-36T | 349  | 0.179162 | 0 |  |
|  | Shiraz-36T | 350  | 0.3174   | 0 |  |
|  | Shiraz-44T | 499  | 0.721251 | 0 |  |
|  | Shiraz-44T | 501  | 1.392519 | 0 |  |
|  | Shiraz-46T | 921  | 0.194724 | 0 |  |
|  | Shiraz-47T | 995  | 0.201435 | 0 |  |
|  | Shiraz-49T | 1090 | 0.254464 | 0 |  |
|  | Shiraz-77T | 1188 | 0.248898 | 0 |  |
|  | Shiraz-8T  | 1287 | 0.094434 | 0 |  |
|  | Shiraz-9T  | 1304 | 0.217335 | 0 |  |
|  | Shiraz-9T  | 1305 | 0.581062 | 0 |  |
|  | Shiraz-12T | 1373 | 0.130542 | 0 |  |
|  | Shiraz-22T | 1465 | 0.300465 | 0 |  |
|  | Shiraz-25T | 1686 | 0.15002  | 0 |  |
|  | Shiraz-28T | 1724 | 0.274774 | 0 |  |
|  | Shiraz-32T | 1820 | 0.468948 | 0 |  |
|  | Shiraz-35T | 1876 | 0.120562 | 0 |  |
|  | Shiraz-53T | 2057 | 0.407227 | 0 |  |
|  | Shiraz-58T | 2121 | 0.321654 | 0 |  |

|     |      |            |      |          |           |  |  |
|-----|------|------------|------|----------|-----------|--|--|
|     |      | Shiraz-71T | 2234 | 0.119256 | 0         |  |  |
| DCX | chrX | Shiraz-3T  | 242  | 0        | -0.336434 |  |  |
|     |      | Shiraz-3T  | 242  | 0        | -0.336434 |  |  |
|     |      | Shiraz-3T  | 242  | 0        | -0.336434 |  |  |
|     |      | Shiraz-3T  | 242  | 0        | -0.336434 |  |  |
|     |      | Shiraz-4T  | 261  | 0        | -0.336249 |  |  |
|     |      | Shiraz-4T  | 261  | 0        | -0.336249 |  |  |
|     |      | Shiraz-4T  | 261  | 0        | -0.336249 |  |  |
|     |      | Shiraz-4T  | 261  | 0        | -0.336249 |  |  |
|     |      | Shiraz-16T | 295  | 0.591657 | 0         |  |  |
|     |      | Shiraz-16T | 295  | 0.591657 | 0         |  |  |
|     |      | Shiraz-16T | 295  | 0.591657 | 0         |  |  |
|     |      | Shiraz-16T | 295  | 0.591657 | 0         |  |  |
|     |      | Shiraz-36T | 433  | 0        | -0.803961 |  |  |
|     |      | Shiraz-36T | 433  | 0        | -0.803961 |  |  |
|     |      | Shiraz-36T | 433  | 0        | -0.803961 |  |  |
|     |      | Shiraz-36T | 433  | 0        | -0.803961 |  |  |
|     |      | Shiraz-44T | 899  | 0        | -1.09697  |  |  |
|     |      | Shiraz-44T | 899  | 0        | -1.09697  |  |  |
|     |      | Shiraz-44T | 899  | 0        | -1.09697  |  |  |
|     |      | Shiraz-44T | 899  | 0        | -1.09697  |  |  |
|     |      | Shiraz-49T | 1170 | 0        | -0.967436 |  |  |
|     |      | Shiraz-49T | 1170 | 0        | -0.967436 |  |  |
|     |      | Shiraz-49T | 1170 | 0        | -0.967436 |  |  |
|     |      | Shiraz-49T | 1170 | 0        | -0.967436 |  |  |
|     |      | Shiraz-18T | 1457 | 0.643204 | 0         |  |  |
|     |      | Shiraz-18T | 1457 | 0.643204 | 0         |  |  |
|     |      | Shiraz-18T | 1457 | 0.643204 | 0         |  |  |
|     |      | Shiraz-18T | 1457 | 0.643204 | 0         |  |  |
|     |      | Shiraz-22T | 1673 | 0.611783 | 0         |  |  |
|     |      | Shiraz-22T | 1673 | 0.611783 | 0         |  |  |
|     |      | Shiraz-22T | 1673 | 0.611783 | 0         |  |  |
|     |      | Shiraz-22T | 1673 | 0.611783 | 0         |  |  |
|     |      | Shiraz-25T | 1719 | 0.472955 | 0         |  |  |
|     |      | Shiraz-25T | 1719 | 0.472955 | 0         |  |  |
|     |      | Shiraz-25T | 1719 | 0.472955 | 0         |  |  |
|     |      | Shiraz-25T | 1719 | 0.472955 | 0         |  |  |
|     |      | Shiraz-28T | 1762 | 0.562311 | 0         |  |  |
|     |      | Shiraz-28T | 1762 | 0.562311 | 0         |  |  |
|     |      | Shiraz-28T | 1762 | 0.562311 | 0         |  |  |
|     |      | Shiraz-28T | 1762 | 0.562311 | 0         |  |  |
|     |      | Shiraz-29T | 1801 | 0.815343 | 0         |  |  |
|     |      | Shiraz-29T | 1801 | 0.815343 | 0         |  |  |
|     |      | Shiraz-29T | 1801 | 0.815343 | 0         |  |  |
|     |      | Shiraz-29T | 1801 | 0.815343 | 0         |  |  |
|     |      | Shiraz-32T | 1870 | 0.729766 | 0         |  |  |
|     |      | Shiraz-32T | 1870 | 0.729766 | 0         |  |  |

|  |  |            |      |          |           |  |  |
|--|--|------------|------|----------|-----------|--|--|
|  |  | Shiraz-32T | 1870 | 0.729766 | 0         |  |  |
|  |  | Shiraz-32T | 1870 | 0.729766 | 0         |  |  |
|  |  | Shiraz-35T | 1933 | 0.488535 | 0         |  |  |
|  |  | Shiraz-35T | 1933 | 0.488535 | 0         |  |  |
|  |  | Shiraz-35T | 1933 | 0.488535 | 0         |  |  |
|  |  | Shiraz-35T | 1933 | 0.488535 | 0         |  |  |
|  |  | Shiraz-58T | 2223 | 0.833364 | 0         |  |  |
|  |  | Shiraz-58T | 2223 | 0.833364 | 0         |  |  |
|  |  | Shiraz-58T | 2223 | 0.833364 | 0         |  |  |
|  |  | Shiraz-58T | 2223 | 0.833364 | 0         |  |  |
|  |  | Shiraz-71T | 2263 | 0.975531 | 0         |  |  |
|  |  | Shiraz-71T | 2263 | 0.975531 | 0         |  |  |
|  |  | Shiraz-71T | 2263 | 0.975531 | 0         |  |  |
|  |  | Shiraz-71T | 2263 | 0.975531 | 0         |  |  |
|  |  | Shiraz-3T  | 242  | 0        | -0.336434 |  |  |
|  |  | Shiraz-3T  | 242  | 0        | -0.336434 |  |  |
|  |  | Shiraz-3T  | 242  | 0        | -0.336434 |  |  |
|  |  | Shiraz-3T  | 242  | 0        | -0.336434 |  |  |
|  |  | Shiraz-4T  | 261  | 0        | -0.336249 |  |  |
|  |  | Shiraz-4T  | 261  | 0        | -0.336249 |  |  |
|  |  | Shiraz-4T  | 261  | 0        | -0.336249 |  |  |
|  |  | Shiraz-4T  | 261  | 0        | -0.336249 |  |  |
|  |  | Shiraz-16T | 295  | 0.591657 | 0         |  |  |
|  |  | Shiraz-16T | 295  | 0.591657 | 0         |  |  |
|  |  | Shiraz-16T | 295  | 0.591657 | 0         |  |  |
|  |  | Shiraz-16T | 295  | 0.591657 | 0         |  |  |
|  |  | Shiraz-36T | 433  | 0        | -0.803961 |  |  |
|  |  | Shiraz-36T | 433  | 0        | -0.803961 |  |  |
|  |  | Shiraz-36T | 433  | 0        | -0.803961 |  |  |
|  |  | Shiraz-36T | 433  | 0        | -0.803961 |  |  |
|  |  | Shiraz-44T | 899  | 0        | -1.09697  |  |  |
|  |  | Shiraz-44T | 899  | 0        | -1.09697  |  |  |
|  |  | Shiraz-44T | 899  | 0        | -1.09697  |  |  |
|  |  | Shiraz-44T | 899  | 0        | -1.09697  |  |  |
|  |  | Shiraz-49T | 1170 | 0        | -0.967436 |  |  |
|  |  | Shiraz-49T | 1170 | 0        | -0.967436 |  |  |
|  |  | Shiraz-49T | 1170 | 0        | -0.967436 |  |  |
|  |  | Shiraz-49T | 1170 | 0        | -0.967436 |  |  |
|  |  | Shiraz-18T | 1457 | 0.643204 | 0         |  |  |
|  |  | Shiraz-18T | 1457 | 0.643204 | 0         |  |  |
|  |  | Shiraz-18T | 1457 | 0.643204 | 0         |  |  |
|  |  | Shiraz-18T | 1457 | 0.643204 | 0         |  |  |
|  |  | Shiraz-22T | 1673 | 0.611783 | 0         |  |  |
|  |  | Shiraz-22T | 1673 | 0.611783 | 0         |  |  |
|  |  | Shiraz-22T | 1673 | 0.611783 | 0         |  |  |
|  |  | Shiraz-22T | 1673 | 0.611783 | 0         |  |  |
|  |  | Shiraz-25T | 1719 | 0.472955 | 0         |  |  |



|  |  |            |      |          |           |  |  |
|--|--|------------|------|----------|-----------|--|--|
|  |  | Shiraz-25T | 1719 | 0.472955 | 0         |  |  |
|  |  | Shiraz-25T | 1719 | 0.472955 | 0         |  |  |
|  |  | Shiraz-25T | 1719 | 0.472955 | 0         |  |  |
|  |  | Shiraz-28T | 1762 | 0.562311 | 0         |  |  |
|  |  | Shiraz-28T | 1762 | 0.562311 | 0         |  |  |
|  |  | Shiraz-28T | 1762 | 0.562311 | 0         |  |  |
|  |  | Shiraz-28T | 1762 | 0.562311 | 0         |  |  |
|  |  | Shiraz-29T | 1801 | 0.815343 | 0         |  |  |
|  |  | Shiraz-29T | 1801 | 0.815343 | 0         |  |  |
|  |  | Shiraz-29T | 1801 | 0.815343 | 0         |  |  |
|  |  | Shiraz-29T | 1801 | 0.815343 | 0         |  |  |
|  |  | Shiraz-32T | 1870 | 0.729766 | 0         |  |  |
|  |  | Shiraz-32T | 1870 | 0.729766 | 0         |  |  |
|  |  | Shiraz-32T | 1870 | 0.729766 | 0         |  |  |
|  |  | Shiraz-32T | 1870 | 0.729766 | 0         |  |  |
|  |  | Shiraz-35T | 1933 | 0.488535 | 0         |  |  |
|  |  | Shiraz-35T | 1933 | 0.488535 | 0         |  |  |
|  |  | Shiraz-35T | 1933 | 0.488535 | 0         |  |  |
|  |  | Shiraz-35T | 1933 | 0.488535 | 0         |  |  |
|  |  | Shiraz-58T | 2223 | 0.833364 | 0         |  |  |
|  |  | Shiraz-58T | 2223 | 0.833364 | 0         |  |  |
|  |  | Shiraz-58T | 2223 | 0.833364 | 0         |  |  |
|  |  | Shiraz-58T | 2223 | 0.833364 | 0         |  |  |
|  |  | Shiraz-71T | 2263 | 0.975531 | 0         |  |  |
|  |  | Shiraz-71T | 2263 | 0.975531 | 0         |  |  |
|  |  | Shiraz-71T | 2263 | 0.975531 | 0         |  |  |
|  |  | Shiraz-71T | 2263 | 0.975531 | 0         |  |  |
|  |  | Shiraz-3T  | 242  | 0        | -0.336434 |  |  |
|  |  | Shiraz-3T  | 242  | 0        | -0.336434 |  |  |
|  |  | Shiraz-3T  | 242  | 0        | -0.336434 |  |  |
|  |  | Shiraz-3T  | 242  | 0        | -0.336434 |  |  |
|  |  | Shiraz-4T  | 261  | 0        | -0.336249 |  |  |
|  |  | Shiraz-4T  | 261  | 0        | -0.336249 |  |  |
|  |  | Shiraz-4T  | 261  | 0        | -0.336249 |  |  |
|  |  | Shiraz-4T  | 261  | 0        | -0.336249 |  |  |
|  |  | Shiraz-16T | 295  | 0.591657 | 0         |  |  |
|  |  | Shiraz-16T | 295  | 0.591657 | 0         |  |  |
|  |  | Shiraz-16T | 295  | 0.591657 | 0         |  |  |
|  |  | Shiraz-16T | 295  | 0.591657 | 0         |  |  |
|  |  | Shiraz-36T | 433  | 0        | -0.803961 |  |  |
|  |  | Shiraz-36T | 433  | 0        | -0.803961 |  |  |
|  |  | Shiraz-36T | 433  | 0        | -0.803961 |  |  |
|  |  | Shiraz-36T | 433  | 0        | -0.803961 |  |  |
|  |  | Shiraz-44T | 899  | 0        | -1.09697  |  |  |
|  |  | Shiraz-44T | 899  | 0        | -1.09697  |  |  |
|  |  | Shiraz-44T | 899  | 0        | -1.09697  |  |  |
|  |  | Shiraz-44T | 899  | 0        | -1.09697  |  |  |

|     |      |            |      |          |           |  |  |
|-----|------|------------|------|----------|-----------|--|--|
|     |      | Shiraz-49T | 1170 | 0        | -0.967436 |  |  |
|     |      | Shiraz-49T | 1170 | 0        | -0.967436 |  |  |
|     |      | Shiraz-49T | 1170 | 0        | -0.967436 |  |  |
|     |      | Shiraz-49T | 1170 | 0        | -0.967436 |  |  |
|     |      | Shiraz-18T | 1457 | 0.643204 | 0         |  |  |
|     |      | Shiraz-18T | 1457 | 0.643204 | 0         |  |  |
|     |      | Shiraz-18T | 1457 | 0.643204 | 0         |  |  |
|     |      | Shiraz-18T | 1457 | 0.643204 | 0         |  |  |
|     |      | Shiraz-22T | 1673 | 0.611783 | 0         |  |  |
|     |      | Shiraz-22T | 1673 | 0.611783 | 0         |  |  |
|     |      | Shiraz-22T | 1673 | 0.611783 | 0         |  |  |
|     |      | Shiraz-22T | 1673 | 0.611783 | 0         |  |  |
|     |      | Shiraz-25T | 1719 | 0.472955 | 0         |  |  |
|     |      | Shiraz-25T | 1719 | 0.472955 | 0         |  |  |
|     |      | Shiraz-25T | 1719 | 0.472955 | 0         |  |  |
|     |      | Shiraz-25T | 1719 | 0.472955 | 0         |  |  |
|     |      | Shiraz-28T | 1762 | 0.562311 | 0         |  |  |
|     |      | Shiraz-28T | 1762 | 0.562311 | 0         |  |  |
|     |      | Shiraz-28T | 1762 | 0.562311 | 0         |  |  |
|     |      | Shiraz-28T | 1762 | 0.562311 | 0         |  |  |
|     |      | Shiraz-29T | 1801 | 0.815343 | 0         |  |  |
|     |      | Shiraz-29T | 1801 | 0.815343 | 0         |  |  |
|     |      | Shiraz-29T | 1801 | 0.815343 | 0         |  |  |
|     |      | Shiraz-29T | 1801 | 0.815343 | 0         |  |  |
|     |      | Shiraz-32T | 1870 | 0.729766 | 0         |  |  |
|     |      | Shiraz-32T | 1870 | 0.729766 | 0         |  |  |
|     |      | Shiraz-32T | 1870 | 0.729766 | 0         |  |  |
|     |      | Shiraz-32T | 1870 | 0.729766 | 0         |  |  |
|     |      | Shiraz-35T | 1933 | 0.488535 | 0         |  |  |
|     |      | Shiraz-35T | 1933 | 0.488535 | 0         |  |  |
|     |      | Shiraz-35T | 1933 | 0.488535 | 0         |  |  |
|     |      | Shiraz-35T | 1933 | 0.488535 | 0         |  |  |
|     |      | Shiraz-58T | 2223 | 0.833364 | 0         |  |  |
|     |      | Shiraz-58T | 2223 | 0.833364 | 0         |  |  |
|     |      | Shiraz-58T | 2223 | 0.833364 | 0         |  |  |
|     |      | Shiraz-58T | 2223 | 0.833364 | 0         |  |  |
|     |      | Shiraz-71T | 2263 | 0.975531 | 0         |  |  |
|     |      | Shiraz-71T | 2263 | 0.975531 | 0         |  |  |
|     |      | Shiraz-71T | 2263 | 0.975531 | 0         |  |  |
|     |      | Shiraz-71T | 2263 | 0.975531 | 0         |  |  |
| DDC | chr7 | Shiraz-3T  | 87   | 0.198593 | 0         |  |  |
|     |      | Shiraz-3T  | 87   | 0.198593 | 0         |  |  |
|     |      | Shiraz-4T  | 252  | 0.192083 | 0         |  |  |
|     |      | Shiraz-4T  | 252  | 0.192083 | 0         |  |  |
|     |      | Shiraz-36T | 376  | 0.159952 | 0         |  |  |
|     |      | Shiraz-36T | 376  | 0.159952 | 0         |  |  |
|     |      | Shiraz-46T | 942  | 0.069143 | 0         |  |  |

|  |  |            |      |          |   |  |  |
|--|--|------------|------|----------|---|--|--|
|  |  | Shiraz-46T | 942  | 0.069143 | 0 |  |  |
|  |  | Shiraz-18T | 1433 | 0.250973 | 0 |  |  |
|  |  | Shiraz-18T | 1433 | 0.250973 | 0 |  |  |
|  |  | Shiraz-25T | 1697 | 0.21945  | 0 |  |  |
|  |  | Shiraz-25T | 1697 | 0.21945  | 0 |  |  |
|  |  | Shiraz-28T | 1734 | 0.362882 | 0 |  |  |
|  |  | Shiraz-28T | 1734 | 0.362882 | 0 |  |  |
|  |  | Shiraz-29T | 1777 | 0.156747 | 0 |  |  |
|  |  | Shiraz-29T | 1777 | 0.156747 | 0 |  |  |
|  |  | Shiraz-38T | 1950 | 0.265916 | 0 |  |  |
|  |  | Shiraz-38T | 1950 | 0.265916 | 0 |  |  |
|  |  | Shiraz-71T | 2236 | 0.320072 | 0 |  |  |
|  |  | Shiraz-71T | 2236 | 0.320072 | 0 |  |  |
|  |  | Shiraz-3T  | 87   | 0.198593 | 0 |  |  |
|  |  | Shiraz-3T  | 87   | 0.198593 | 0 |  |  |
|  |  | Shiraz-4T  | 252  | 0.192083 | 0 |  |  |
|  |  | Shiraz-4T  | 252  | 0.192083 | 0 |  |  |
|  |  | Shiraz-36T | 376  | 0.159952 | 0 |  |  |
|  |  | Shiraz-36T | 376  | 0.159952 | 0 |  |  |
|  |  | Shiraz-46T | 942  | 0.069143 | 0 |  |  |
|  |  | Shiraz-46T | 942  | 0.069143 | 0 |  |  |
|  |  | Shiraz-18T | 1433 | 0.250973 | 0 |  |  |
|  |  | Shiraz-18T | 1433 | 0.250973 | 0 |  |  |
|  |  | Shiraz-25T | 1697 | 0.21945  | 0 |  |  |
|  |  | Shiraz-25T | 1697 | 0.21945  | 0 |  |  |
|  |  | Shiraz-28T | 1734 | 0.362882 | 0 |  |  |
|  |  | Shiraz-28T | 1734 | 0.362882 | 0 |  |  |
|  |  | Shiraz-29T | 1777 | 0.156747 | 0 |  |  |
|  |  | Shiraz-29T | 1777 | 0.156747 | 0 |  |  |
|  |  | Shiraz-38T | 1950 | 0.265916 | 0 |  |  |
|  |  | Shiraz-38T | 1950 | 0.265916 | 0 |  |  |
|  |  | Shiraz-71T | 2236 | 0.320072 | 0 |  |  |
|  |  | Shiraz-71T | 2236 | 0.320072 | 0 |  |  |
|  |  | Shiraz-3T  | 87   | 0.198593 | 0 |  |  |
|  |  | Shiraz-3T  | 87   | 0.198593 | 0 |  |  |
|  |  | Shiraz-4T  | 252  | 0.192083 | 0 |  |  |
|  |  | Shiraz-4T  | 252  | 0.192083 | 0 |  |  |
|  |  | Shiraz-36T | 376  | 0.159952 | 0 |  |  |
|  |  | Shiraz-36T | 376  | 0.159952 | 0 |  |  |
|  |  | Shiraz-46T | 942  | 0.069143 | 0 |  |  |
|  |  | Shiraz-46T | 942  | 0.069143 | 0 |  |  |
|  |  | Shiraz-18T | 1433 | 0.250973 | 0 |  |  |
|  |  | Shiraz-18T | 1433 | 0.250973 | 0 |  |  |
|  |  | Shiraz-25T | 1697 | 0.21945  | 0 |  |  |
|  |  | Shiraz-25T | 1697 | 0.21945  | 0 |  |  |
|  |  | Shiraz-28T | 1734 | 0.362882 | 0 |  |  |
|  |  | Shiraz-28T | 1734 | 0.362882 | 0 |  |  |

|        |      |            |      |          |           |  |  |
|--------|------|------------|------|----------|-----------|--|--|
|        |      | Shiraz-29T | 1777 | 0.156747 | 0         |  |  |
|        |      | Shiraz-29T | 1777 | 0.156747 | 0         |  |  |
|        |      | Shiraz-38T | 1950 | 0.265916 | 0         |  |  |
|        |      | Shiraz-38T | 1950 | 0.265916 | 0         |  |  |
|        |      | Shiraz-71T | 2236 | 0.320072 | 0         |  |  |
|        |      | Shiraz-71T | 2236 | 0.320072 | 0         |  |  |
| DDX26B | chrX | Shiraz-3T  | 242  | 0        | -0.336434 |  |  |
|        |      | Shiraz-4T  | 261  | 0        | -0.336249 |  |  |
|        |      | Shiraz-16T | 295  | 0.591657 | 0         |  |  |
|        |      | Shiraz-36T | 433  | 0        | -0.803961 |  |  |
|        |      | Shiraz-44T | 899  | 0        | -1.09697  |  |  |
|        |      | Shiraz-49T | 1170 | 0        | -0.967436 |  |  |
|        |      | Shiraz-9T  | 1370 | 0.690073 | 0         |  |  |
|        |      | Shiraz-18T | 1457 | 0.643204 | 0         |  |  |
|        |      | Shiraz-22T | 1673 | 0.611783 | 0         |  |  |
|        |      | Shiraz-22T | 1677 | 0.789711 | 0         |  |  |
|        |      | Shiraz-25T | 1719 | 0.472955 | 0         |  |  |
|        |      | Shiraz-28T | 1762 | 0.562311 | 0         |  |  |
|        |      | Shiraz-29T | 1801 | 0.815343 | 0         |  |  |
|        |      | Shiraz-32T | 1870 | 0.729766 | 0         |  |  |
|        |      | Shiraz-35T | 1933 | 0.488535 | 0         |  |  |
|        |      | Shiraz-58T | 2223 | 0.833364 | 0         |  |  |
|        |      | Shiraz-71T | 2263 | 0.975531 | 0         |  |  |
|        |      | Shiraz-3T  | 242  | 0        | -0.336434 |  |  |
|        |      | Shiraz-4T  | 261  | 0        | -0.336249 |  |  |
|        |      | Shiraz-16T | 295  | 0.591657 | 0         |  |  |
|        |      | Shiraz-36T | 433  | 0        | -0.803961 |  |  |
|        |      | Shiraz-44T | 899  | 0        | -1.09697  |  |  |
|        |      | Shiraz-49T | 1170 | 0        | -0.967436 |  |  |
|        |      | Shiraz-9T  | 1370 | 0.690073 | 0         |  |  |
|        |      | Shiraz-18T | 1457 | 0.643204 | 0         |  |  |
|        |      | Shiraz-22T | 1673 | 0.611783 | 0         |  |  |
|        |      | Shiraz-22T | 1677 | 0.789711 | 0         |  |  |
|        |      | Shiraz-25T | 1719 | 0.472955 | 0         |  |  |
|        |      | Shiraz-28T | 1762 | 0.562311 | 0         |  |  |
|        |      | Shiraz-29T | 1801 | 0.815343 | 0         |  |  |
|        |      | Shiraz-32T | 1870 | 0.729766 | 0         |  |  |
|        |      | Shiraz-35T | 1933 | 0.488535 | 0         |  |  |
|        |      | Shiraz-58T | 2223 | 0.833364 | 0         |  |  |
|        |      | Shiraz-71T | 2263 | 0.975531 | 0         |  |  |
|        |      | Shiraz-3T  | 242  | 0        | -0.336434 |  |  |
|        |      | Shiraz-4T  | 261  | 0        | -0.336249 |  |  |
|        |      | Shiraz-16T | 295  | 0.591657 | 0         |  |  |
|        |      | Shiraz-36T | 433  | 0        | -0.803961 |  |  |
|        |      | Shiraz-44T | 899  | 0        | -1.09697  |  |  |
|        |      | Shiraz-49T | 1170 | 0        | -0.967436 |  |  |
|        |      | Shiraz-9T  | 1370 | 0.690073 | 0         |  |  |

|       |      |            |      |          |           |  |
|-------|------|------------|------|----------|-----------|--|
|       |      | Shiraz-18T | 1457 | 0.643204 | 0         |  |
|       |      | Shiraz-22T | 1673 | 0.611783 | 0         |  |
|       |      | Shiraz-22T | 1677 | 0.789711 | 0         |  |
|       |      | Shiraz-25T | 1719 | 0.472955 | 0         |  |
|       |      | Shiraz-28T | 1762 | 0.562311 | 0         |  |
|       |      | Shiraz-29T | 1801 | 0.815343 | 0         |  |
|       |      | Shiraz-32T | 1870 | 0.729766 | 0         |  |
|       |      | Shiraz-35T | 1933 | 0.488535 | 0         |  |
|       |      | Shiraz-58T | 2223 | 0.833364 | 0         |  |
|       |      | Shiraz-71T | 2263 | 0.975531 | 0         |  |
| DDX3X | chrX | Shiraz-3T  | 235  | 0        | -0.28401  |  |
|       |      | Shiraz-3T  | 237  | 0.082458 | 0         |  |
|       |      | Shiraz-4T  | 260  | 0        | -0.324128 |  |
|       |      | Shiraz-16T | 294  | 0.655804 | 0         |  |
|       |      | Shiraz-31T | 345  | 0.103301 | 0         |  |
|       |      | Shiraz-36T | 431  | 0        | -0.78035  |  |
|       |      | Shiraz-36T | 432  | 0        | -0.6692   |  |
|       |      | Shiraz-44T | 891  | 0        | -0.954044 |  |
|       |      | Shiraz-46T | 991  | 0.139564 | 0         |  |
|       |      | Shiraz-49T | 1166 | 0        | -0.917235 |  |
|       |      | Shiraz-9T  | 1368 | 0.199713 | 0         |  |
|       |      | Shiraz-18T | 1455 | 0        | -0.186773 |  |
|       |      | Shiraz-22T | 1669 | 0.695915 | 0         |  |
|       |      | Shiraz-25T | 1717 | 0.420447 | 0         |  |
|       |      | Shiraz-28T | 1760 | 0.538181 | 0         |  |
|       |      | Shiraz-29T | 1800 | 0.672527 | 0         |  |
|       |      | Shiraz-32T | 1869 | 0.776805 | 0         |  |
|       |      | Shiraz-35T | 1932 | 0.507141 | 0         |  |
|       |      | Shiraz-40T | 2051 | 0.098506 | 0         |  |
|       |      | Shiraz-58T | 2221 | 0.871948 | 0         |  |
|       |      | Shiraz-71T | 2260 | 0.68394  | 0         |  |
|       |      | Shiraz-71T | 2262 | 0.986748 | 0         |  |
|       |      | Shiraz-3T  | 235  | 0        | -0.28401  |  |
|       |      | Shiraz-3T  | 237  | 0.082458 | 0         |  |
|       |      | Shiraz-4T  | 260  | 0        | -0.324128 |  |
|       |      | Shiraz-16T | 294  | 0.655804 | 0         |  |
|       |      | Shiraz-31T | 345  | 0.103301 | 0         |  |
|       |      | Shiraz-36T | 431  | 0        | -0.78035  |  |
|       |      | Shiraz-36T | 432  | 0        | -0.6692   |  |
|       |      | Shiraz-44T | 891  | 0        | -0.954044 |  |
|       |      | Shiraz-46T | 991  | 0.139564 | 0         |  |
|       |      | Shiraz-49T | 1166 | 0        | -0.917235 |  |
|       |      | Shiraz-9T  | 1368 | 0.199713 | 0         |  |
|       |      | Shiraz-18T | 1455 | 0        | -0.186773 |  |
|       |      | Shiraz-22T | 1669 | 0.695915 | 0         |  |
|       |      | Shiraz-25T | 1717 | 0.420447 | 0         |  |
|       |      | Shiraz-28T | 1760 | 0.538181 | 0         |  |

|       |      |            |      |          |           |  |
|-------|------|------------|------|----------|-----------|--|
|       |      | Shiraz-29T | 1800 | 0.672527 | 0         |  |
|       |      | Shiraz-32T | 1869 | 0.776805 | 0         |  |
|       |      | Shiraz-35T | 1932 | 0.507141 | 0         |  |
|       |      | Shiraz-40T | 2051 | 0.098506 | 0         |  |
|       |      | Shiraz-58T | 2221 | 0.871948 | 0         |  |
|       |      | Shiraz-71T | 2260 | 0.68394  | 0         |  |
|       |      | Shiraz-71T | 2262 | 0.986748 | 0         |  |
|       |      | Shiraz-3T  | 235  | 0        | -0.28401  |  |
|       |      | Shiraz-3T  | 237  | 0.082458 | 0         |  |
|       |      | Shiraz-4T  | 260  | 0        | -0.324128 |  |
|       |      | Shiraz-16T | 294  | 0.655804 | 0         |  |
|       |      | Shiraz-31T | 345  | 0.103301 | 0         |  |
|       |      | Shiraz-36T | 431  | 0        | -0.78035  |  |
|       |      | Shiraz-36T | 432  | 0        | -0.6692   |  |
|       |      | Shiraz-44T | 891  | 0        | -0.954044 |  |
|       |      | Shiraz-46T | 991  | 0.139564 | 0         |  |
|       |      | Shiraz-49T | 1166 | 0        | -0.917235 |  |
|       |      | Shiraz-9T  | 1368 | 0.199713 | 0         |  |
|       |      | Shiraz-18T | 1455 | 0        | -0.186773 |  |
|       |      | Shiraz-22T | 1669 | 0.695915 | 0         |  |
|       |      | Shiraz-25T | 1717 | 0.420447 | 0         |  |
|       |      | Shiraz-28T | 1760 | 0.538181 | 0         |  |
|       |      | Shiraz-29T | 1800 | 0.672527 | 0         |  |
|       |      | Shiraz-32T | 1869 | 0.776805 | 0         |  |
|       |      | Shiraz-35T | 1932 | 0.507141 | 0         |  |
|       |      | Shiraz-40T | 2051 | 0.098506 | 0         |  |
|       |      | Shiraz-58T | 2221 | 0.871948 | 0         |  |
|       |      | Shiraz-71T | 2260 | 0.68394  | 0         |  |
|       |      | Shiraz-71T | 2262 | 0.986748 | 0         |  |
| DDX53 | chrX | Shiraz-3T  | 235  | 0        | -0.28401  |  |
|       |      | Shiraz-4T  | 260  | 0        | -0.324128 |  |
|       |      | Shiraz-16T | 294  | 0.655804 | 0         |  |
|       |      | Shiraz-36T | 431  | 0        | -0.78035  |  |
|       |      | Shiraz-44T | 891  | 0        | -0.954044 |  |
|       |      | Shiraz-49T | 1166 | 0        | -0.917235 |  |
|       |      | Shiraz-77T | 1281 | 0.136627 | 0         |  |
|       |      | Shiraz-9T  | 1368 | 0.199713 | 0         |  |
|       |      | Shiraz-18T | 1455 | 0        | -0.186773 |  |
|       |      | Shiraz-22T | 1669 | 0.695915 | 0         |  |
|       |      | Shiraz-25T | 1717 | 0.420447 | 0         |  |
|       |      | Shiraz-28T | 1760 | 0.538181 | 0         |  |
|       |      | Shiraz-29T | 1800 | 0.672527 | 0         |  |
|       |      | Shiraz-32T | 1869 | 0.776805 | 0         |  |
|       |      | Shiraz-35T | 1932 | 0.507141 | 0         |  |
|       |      | Shiraz-40T | 2051 | 0.098506 | 0         |  |
|       |      | Shiraz-58T | 2221 | 0.871948 | 0         |  |
|       |      | Shiraz-71T | 2260 | 0.68394  | 0         |  |

|       |      |            |      |          |           |  |  |
|-------|------|------------|------|----------|-----------|--|--|
|       |      | Shiraz-71T | 2261 | 0.508399 | 0         |  |  |
|       |      | Shiraz-3T  | 235  | 0        | -0.28401  |  |  |
|       |      | Shiraz-4T  | 260  | 0        | -0.324128 |  |  |
|       |      | Shiraz-16T | 294  | 0.655804 | 0         |  |  |
|       |      | Shiraz-36T | 431  | 0        | -0.78035  |  |  |
|       |      | Shiraz-44T | 891  | 0        | -0.954044 |  |  |
|       |      | Shiraz-49T | 1166 | 0        | -0.917235 |  |  |
|       |      | Shiraz-77T | 1281 | 0.136627 | 0         |  |  |
|       |      | Shiraz-9T  | 1368 | 0.199713 | 0         |  |  |
|       |      | Shiraz-18T | 1455 | 0        | -0.186773 |  |  |
|       |      | Shiraz-22T | 1669 | 0.695915 | 0         |  |  |
|       |      | Shiraz-25T | 1717 | 0.420447 | 0         |  |  |
|       |      | Shiraz-28T | 1760 | 0.538181 | 0         |  |  |
|       |      | Shiraz-29T | 1800 | 0.672527 | 0         |  |  |
|       |      | Shiraz-32T | 1869 | 0.776805 | 0         |  |  |
|       |      | Shiraz-35T | 1932 | 0.507141 | 0         |  |  |
|       |      | Shiraz-40T | 2051 | 0.098506 | 0         |  |  |
|       |      | Shiraz-58T | 2221 | 0.871948 | 0         |  |  |
|       |      | Shiraz-71T | 2260 | 0.68394  | 0         |  |  |
|       |      | Shiraz-71T | 2261 | 0.508399 | 0         |  |  |
|       |      | Shiraz-3T  | 235  | 0        | -0.28401  |  |  |
|       |      | Shiraz-4T  | 260  | 0        | -0.324128 |  |  |
|       |      | Shiraz-16T | 294  | 0.655804 | 0         |  |  |
|       |      | Shiraz-36T | 431  | 0        | -0.78035  |  |  |
|       |      | Shiraz-44T | 891  | 0        | -0.954044 |  |  |
|       |      | Shiraz-49T | 1166 | 0        | -0.917235 |  |  |
|       |      | Shiraz-77T | 1281 | 0.136627 | 0         |  |  |
|       |      | Shiraz-9T  | 1368 | 0.199713 | 0         |  |  |
|       |      | Shiraz-18T | 1455 | 0        | -0.186773 |  |  |
|       |      | Shiraz-22T | 1669 | 0.695915 | 0         |  |  |
|       |      | Shiraz-25T | 1717 | 0.420447 | 0         |  |  |
|       |      | Shiraz-28T | 1760 | 0.538181 | 0         |  |  |
|       |      | Shiraz-29T | 1800 | 0.672527 | 0         |  |  |
|       |      | Shiraz-32T | 1869 | 0.776805 | 0         |  |  |
|       |      | Shiraz-35T | 1932 | 0.507141 | 0         |  |  |
|       |      | Shiraz-40T | 2051 | 0.098506 | 0         |  |  |
|       |      | Shiraz-58T | 2221 | 0.871948 | 0         |  |  |
|       |      | Shiraz-71T | 2260 | 0.68394  | 0         |  |  |
|       |      | Shiraz-71T | 2261 | 0.508399 | 0         |  |  |
| DDX56 | chr7 | Shiraz-3T  | 87   | 0.198593 | 0         |  |  |
|       |      | Shiraz-3T  | 89   | 0.678641 | 0         |  |  |
|       |      | Shiraz-4T  | 252  | 0.192083 | 0         |  |  |
|       |      | Shiraz-36T | 376  | 0.159952 | 0         |  |  |
|       |      | Shiraz-44T | 632  | 0.902944 | 0         |  |  |
|       |      | Shiraz-46T | 942  | 0.069143 | 0         |  |  |
|       |      | Shiraz-77T | 1223 | 0.215647 | 0         |  |  |
|       |      | Shiraz-18T | 1433 | 0.250973 | 0         |  |  |

|         |      |            |      |          |           |  |
|---------|------|------------|------|----------|-----------|--|
|         |      | Shiraz-25T | 1697 | 0.21945  | 0         |  |
|         |      | Shiraz-28T | 1734 | 0.362882 | 0         |  |
|         |      | Shiraz-29T | 1777 | 0.156747 | 0         |  |
|         |      | Shiraz-38T | 1950 | 0.265916 | 0         |  |
|         |      | Shiraz-71T | 2236 | 0.320072 | 0         |  |
|         |      | Shiraz-3T  | 87   | 0.198593 | 0         |  |
|         |      | Shiraz-3T  | 89   | 0.678641 | 0         |  |
|         |      | Shiraz-4T  | 252  | 0.192083 | 0         |  |
|         |      | Shiraz-36T | 376  | 0.159952 | 0         |  |
|         |      | Shiraz-44T | 632  | 0.902944 | 0         |  |
|         |      | Shiraz-46T | 942  | 0.069143 | 0         |  |
|         |      | Shiraz-77T | 1223 | 0.215647 | 0         |  |
|         |      | Shiraz-18T | 1433 | 0.250973 | 0         |  |
|         |      | Shiraz-25T | 1697 | 0.21945  | 0         |  |
|         |      | Shiraz-28T | 1734 | 0.362882 | 0         |  |
|         |      | Shiraz-29T | 1777 | 0.156747 | 0         |  |
|         |      | Shiraz-38T | 1950 | 0.265916 | 0         |  |
|         |      | Shiraz-71T | 2236 | 0.320072 | 0         |  |
|         |      | Shiraz-3T  | 87   | 0.198593 | 0         |  |
|         |      | Shiraz-3T  | 89   | 0.678641 | 0         |  |
|         |      | Shiraz-4T  | 252  | 0.192083 | 0         |  |
|         |      | Shiraz-36T | 376  | 0.159952 | 0         |  |
|         |      | Shiraz-44T | 632  | 0.902944 | 0         |  |
|         |      | Shiraz-46T | 942  | 0.069143 | 0         |  |
|         |      | Shiraz-77T | 1223 | 0.215647 | 0         |  |
|         |      | Shiraz-18T | 1433 | 0.250973 | 0         |  |
|         |      | Shiraz-25T | 1697 | 0.21945  | 0         |  |
|         |      | Shiraz-28T | 1734 | 0.362882 | 0         |  |
|         |      | Shiraz-29T | 1777 | 0.156747 | 0         |  |
|         |      | Shiraz-38T | 1950 | 0.265916 | 0         |  |
|         |      | Shiraz-71T | 2236 | 0.320072 | 0         |  |
| DENND2A | chr7 | Shiraz-3T  | 90   | 0.219276 | 0         |  |
|         |      | Shiraz-3T  | 97   | 0.496001 | 0         |  |
|         |      | Shiraz-4T  | 253  | 0.372918 | 0         |  |
|         |      | Shiraz-31T | 318  | 0.254373 | 0         |  |
|         |      | Shiraz-36T | 378  | 0.179558 | 0         |  |
|         |      | Shiraz-36T | 383  | 0.374586 | 0         |  |
|         |      | Shiraz-44T | 644  | 0.496536 | 0         |  |
|         |      | Shiraz-46T | 943  | 0.093799 | 0         |  |
|         |      | Shiraz-47T | 1033 | 0.220267 | 0         |  |
|         |      | Shiraz-77T | 1225 | 0        | -0.117922 |  |
|         |      | Shiraz-77T | 1230 | 0.149651 | 0         |  |
|         |      | Shiraz-9T  | 1325 | 0.221899 | 0         |  |
|         |      | Shiraz-18T | 1434 | 0.244465 | 0         |  |
|         |      | Shiraz-25T | 1698 | 0.21835  | 0         |  |
|         |      | Shiraz-28T | 1735 | 0.350744 | 0         |  |
|         |      | Shiraz-29T | 1778 | 0.120767 | 0         |  |



|  |  |            |      |          |           |  |  |
|--|--|------------|------|----------|-----------|--|--|
|  |  | Shiraz-32T | 1833 | 0.551336 | 0         |  |  |
|  |  | Shiraz-38T | 1951 | 0.250891 | 0         |  |  |
|  |  | Shiraz-53T | 2078 | 0.287202 | 0         |  |  |
|  |  | Shiraz-58T | 2162 | 0.221505 | 0         |  |  |
|  |  | Shiraz-71T | 2238 | 0.603631 | 0         |  |  |
|  |  | Shiraz-3T  | 90   | 0.219276 | 0         |  |  |
|  |  | Shiraz-3T  | 97   | 0.496001 | 0         |  |  |
|  |  | Shiraz-4T  | 253  | 0.372918 | 0         |  |  |
|  |  | Shiraz-31T | 318  | 0.254373 | 0         |  |  |
|  |  | Shiraz-36T | 378  | 0.179558 | 0         |  |  |
|  |  | Shiraz-36T | 383  | 0.374586 | 0         |  |  |
|  |  | Shiraz-44T | 644  | 0.496536 | 0         |  |  |
|  |  | Shiraz-46T | 943  | 0.093799 | 0         |  |  |
|  |  | Shiraz-47T | 1033 | 0.220267 | 0         |  |  |
|  |  | Shiraz-77T | 1225 | 0        | -0.117922 |  |  |
|  |  | Shiraz-77T | 1230 | 0.149651 | 0         |  |  |
|  |  | Shiraz-9T  | 1325 | 0.221899 | 0         |  |  |
|  |  | Shiraz-18T | 1434 | 0.244465 | 0         |  |  |
|  |  | Shiraz-25T | 1698 | 0.21835  | 0         |  |  |
|  |  | Shiraz-28T | 1735 | 0.350744 | 0         |  |  |
|  |  | Shiraz-29T | 1778 | 0.120767 | 0         |  |  |
|  |  | Shiraz-32T | 1833 | 0.551336 | 0         |  |  |
|  |  | Shiraz-38T | 1951 | 0.250891 | 0         |  |  |
|  |  | Shiraz-53T | 2078 | 0.287202 | 0         |  |  |
|  |  | Shiraz-58T | 2162 | 0.221505 | 0         |  |  |
|  |  | Shiraz-71T | 2238 | 0.603631 | 0         |  |  |
|  |  | Shiraz-3T  | 90   | 0.219276 | 0         |  |  |
|  |  | Shiraz-3T  | 97   | 0.496001 | 0         |  |  |
|  |  | Shiraz-4T  | 253  | 0.372918 | 0         |  |  |
|  |  | Shiraz-31T | 318  | 0.254373 | 0         |  |  |
|  |  | Shiraz-36T | 378  | 0.179558 | 0         |  |  |
|  |  | Shiraz-36T | 383  | 0.374586 | 0         |  |  |
|  |  | Shiraz-44T | 644  | 0.496536 | 0         |  |  |
|  |  | Shiraz-46T | 943  | 0.093799 | 0         |  |  |
|  |  | Shiraz-47T | 1033 | 0.220267 | 0         |  |  |
|  |  | Shiraz-77T | 1225 | 0        | -0.117922 |  |  |
|  |  | Shiraz-77T | 1230 | 0.149651 | 0         |  |  |
|  |  | Shiraz-9T  | 1325 | 0.221899 | 0         |  |  |
|  |  | Shiraz-18T | 1434 | 0.244465 | 0         |  |  |
|  |  | Shiraz-25T | 1698 | 0.21835  | 0         |  |  |
|  |  | Shiraz-28T | 1735 | 0.350744 | 0         |  |  |
|  |  | Shiraz-29T | 1778 | 0.120767 | 0         |  |  |
|  |  | Shiraz-32T | 1833 | 0.551336 | 0         |  |  |
|  |  | Shiraz-38T | 1951 | 0.250891 | 0         |  |  |
|  |  | Shiraz-53T | 2078 | 0.287202 | 0         |  |  |
|  |  | Shiraz-58T | 2162 | 0.221505 | 0         |  |  |
|  |  | Shiraz-71T | 2238 | 0.603631 | 0         |  |  |

|       |      |            |      |          |   |  |  |
|-------|------|------------|------|----------|---|--|--|
| DFNA5 | chr7 | Shiraz-3T  | 87   | 0.198593 | 0 |  |  |
|       |      | Shiraz-3T  | 87   | 0.198593 | 0 |  |  |
|       |      | Shiraz-4T  | 252  | 0.192083 | 0 |  |  |
|       |      | Shiraz-4T  | 252  | 0.192083 | 0 |  |  |
|       |      | Shiraz-36T | 376  | 0.159952 | 0 |  |  |
|       |      | Shiraz-36T | 376  | 0.159952 | 0 |  |  |
|       |      | Shiraz-46T | 942  | 0.069143 | 0 |  |  |
|       |      | Shiraz-46T | 942  | 0.069143 | 0 |  |  |
|       |      | Shiraz-18T | 1433 | 0.250973 | 0 |  |  |
|       |      | Shiraz-18T | 1433 | 0.250973 | 0 |  |  |
|       |      | Shiraz-25T | 1697 | 0.21945  | 0 |  |  |
|       |      | Shiraz-25T | 1697 | 0.21945  | 0 |  |  |
|       |      | Shiraz-28T | 1734 | 0.362882 | 0 |  |  |
|       |      | Shiraz-28T | 1734 | 0.362882 | 0 |  |  |
|       |      | Shiraz-29T | 1777 | 0.156747 | 0 |  |  |
|       |      | Shiraz-29T | 1777 | 0.156747 | 0 |  |  |
|       |      | Shiraz-38T | 1950 | 0.265916 | 0 |  |  |
|       |      | Shiraz-38T | 1950 | 0.265916 | 0 |  |  |
|       |      | Shiraz-71T | 2236 | 0.320072 | 0 |  |  |
|       |      | Shiraz-71T | 2236 | 0.320072 | 0 |  |  |
|       |      | Shiraz-3T  | 87   | 0.198593 | 0 |  |  |
|       |      | Shiraz-3T  | 87   | 0.198593 | 0 |  |  |
|       |      | Shiraz-4T  | 252  | 0.192083 | 0 |  |  |
|       |      | Shiraz-4T  | 252  | 0.192083 | 0 |  |  |
|       |      | Shiraz-36T | 376  | 0.159952 | 0 |  |  |
|       |      | Shiraz-36T | 376  | 0.159952 | 0 |  |  |
|       |      | Shiraz-46T | 942  | 0.069143 | 0 |  |  |
|       |      | Shiraz-46T | 942  | 0.069143 | 0 |  |  |
|       |      | Shiraz-18T | 1433 | 0.250973 | 0 |  |  |
|       |      | Shiraz-18T | 1433 | 0.250973 | 0 |  |  |
|       |      | Shiraz-25T | 1697 | 0.21945  | 0 |  |  |
|       |      | Shiraz-25T | 1697 | 0.21945  | 0 |  |  |
|       |      | Shiraz-28T | 1734 | 0.362882 | 0 |  |  |
|       |      | Shiraz-28T | 1734 | 0.362882 | 0 |  |  |
|       |      | Shiraz-29T | 1777 | 0.156747 | 0 |  |  |
|       |      | Shiraz-29T | 1777 | 0.156747 | 0 |  |  |
|       |      | Shiraz-38T | 1950 | 0.265916 | 0 |  |  |
|       |      | Shiraz-38T | 1950 | 0.265916 | 0 |  |  |
|       |      | Shiraz-71T | 2236 | 0.320072 | 0 |  |  |
|       |      | Shiraz-71T | 2236 | 0.320072 | 0 |  |  |
|       |      | Shiraz-3T  | 87   | 0.198593 | 0 |  |  |
|       |      | Shiraz-3T  | 87   | 0.198593 | 0 |  |  |
|       |      | Shiraz-4T  | 252  | 0.192083 | 0 |  |  |
|       |      | Shiraz-4T  | 252  | 0.192083 | 0 |  |  |
|       |      | Shiraz-36T | 376  | 0.159952 | 0 |  |  |
|       |      | Shiraz-36T | 376  | 0.159952 | 0 |  |  |
|       |      | Shiraz-46T | 942  | 0.069143 | 0 |  |  |

|         |      |            |      |          |           |  |
|---------|------|------------|------|----------|-----------|--|
|         |      | Shiraz-46T | 942  | 0.069143 | 0         |  |
|         |      | Shiraz-18T | 1433 | 0.250973 | 0         |  |
|         |      | Shiraz-18T | 1433 | 0.250973 | 0         |  |
|         |      | Shiraz-25T | 1697 | 0.21945  | 0         |  |
|         |      | Shiraz-25T | 1697 | 0.21945  | 0         |  |
|         |      | Shiraz-28T | 1734 | 0.362882 | 0         |  |
|         |      | Shiraz-28T | 1734 | 0.362882 | 0         |  |
|         |      | Shiraz-29T | 1777 | 0.156747 | 0         |  |
|         |      | Shiraz-29T | 1777 | 0.156747 | 0         |  |
|         |      | Shiraz-38T | 1950 | 0.265916 | 0         |  |
|         |      | Shiraz-38T | 1950 | 0.265916 | 0         |  |
|         |      | Shiraz-71T | 2236 | 0.320072 | 0         |  |
|         |      | Shiraz-71T | 2236 | 0.320072 | 0         |  |
| DGAT2L6 | chrX | Shiraz-3T  | 241  | 0        | -0.230501 |  |
|         |      | Shiraz-4T  | 261  | 0        | -0.336249 |  |
|         |      | Shiraz-16T | 295  | 0.591657 | 0         |  |
|         |      | Shiraz-36T | 433  | 0        | -0.803961 |  |
|         |      | Shiraz-44T | 899  | 0        | -1.09697  |  |
|         |      | Shiraz-44T | 900  | 0        | -0.584284 |  |
|         |      | Shiraz-44T | 901  | 0        | -1.000082 |  |
|         |      | Shiraz-49T | 1170 | 0        | -0.967436 |  |
|         |      | Shiraz-18T | 1457 | 0.643204 | 0         |  |
|         |      | Shiraz-22T | 1673 | 0.611783 | 0         |  |
|         |      | Shiraz-22T | 1674 | 0.887899 | 0         |  |
|         |      | Shiraz-25T | 1719 | 0.472955 | 0         |  |
|         |      | Shiraz-28T | 1762 | 0.562311 | 0         |  |
|         |      | Shiraz-29T | 1801 | 0.815343 | 0         |  |
|         |      | Shiraz-32T | 1870 | 0.729766 | 0         |  |
|         |      | Shiraz-35T | 1933 | 0.488535 | 0         |  |
|         |      | Shiraz-58T | 2223 | 0.833364 | 0         |  |
|         |      | Shiraz-58T | 2224 | 1.076575 | 0         |  |
|         |      | Shiraz-71T | 2263 | 0.975531 | 0         |  |
|         |      | Shiraz-3T  | 241  | 0        | -0.230501 |  |
|         |      | Shiraz-4T  | 261  | 0        | -0.336249 |  |
|         |      | Shiraz-16T | 295  | 0.591657 | 0         |  |
|         |      | Shiraz-36T | 433  | 0        | -0.803961 |  |
|         |      | Shiraz-44T | 899  | 0        | -1.09697  |  |
|         |      | Shiraz-44T | 900  | 0        | -0.584284 |  |
|         |      | Shiraz-44T | 901  | 0        | -1.000082 |  |
|         |      | Shiraz-49T | 1170 | 0        | -0.967436 |  |
|         |      | Shiraz-18T | 1457 | 0.643204 | 0         |  |
|         |      | Shiraz-22T | 1673 | 0.611783 | 0         |  |
|         |      | Shiraz-22T | 1674 | 0.887899 | 0         |  |
|         |      | Shiraz-25T | 1719 | 0.472955 | 0         |  |
|         |      | Shiraz-28T | 1762 | 0.562311 | 0         |  |
|         |      | Shiraz-29T | 1801 | 0.815343 | 0         |  |
|         |      | Shiraz-32T | 1870 | 0.729766 | 0         |  |

|      |      |            |      |          |           |  |  |
|------|------|------------|------|----------|-----------|--|--|
|      |      | Shiraz-35T | 1933 | 0.488535 | 0         |  |  |
|      |      | Shiraz-58T | 2223 | 0.833364 | 0         |  |  |
|      |      | Shiraz-58T | 2224 | 1.076575 | 0         |  |  |
|      |      | Shiraz-71T | 2263 | 0.975531 | 0         |  |  |
|      |      | Shiraz-3T  | 241  | 0        | -0.230501 |  |  |
|      |      | Shiraz-4T  | 261  | 0        | -0.336249 |  |  |
|      |      | Shiraz-16T | 295  | 0.591657 | 0         |  |  |
|      |      | Shiraz-36T | 433  | 0        | -0.803961 |  |  |
|      |      | Shiraz-44T | 899  | 0        | -1.09697  |  |  |
|      |      | Shiraz-44T | 900  | 0        | -0.584284 |  |  |
|      |      | Shiraz-44T | 901  | 0        | -1.000082 |  |  |
|      |      | Shiraz-49T | 1170 | 0        | -0.967436 |  |  |
|      |      | Shiraz-18T | 1457 | 0.643204 | 0         |  |  |
|      |      | Shiraz-22T | 1673 | 0.611783 | 0         |  |  |
|      |      | Shiraz-22T | 1674 | 0.887899 | 0         |  |  |
|      |      | Shiraz-25T | 1719 | 0.472955 | 0         |  |  |
|      |      | Shiraz-28T | 1762 | 0.562311 | 0         |  |  |
|      |      | Shiraz-29T | 1801 | 0.815343 | 0         |  |  |
|      |      | Shiraz-32T | 1870 | 0.729766 | 0         |  |  |
|      |      | Shiraz-35T | 1933 | 0.488535 | 0         |  |  |
|      |      | Shiraz-58T | 2223 | 0.833364 | 0         |  |  |
|      |      | Shiraz-58T | 2224 | 1.076575 | 0         |  |  |
|      |      | Shiraz-71T | 2263 | 0.975531 | 0         |  |  |
| DGKB | chr7 | Shiraz-4T  | 252  | 0.192083 | 0         |  |  |
|      |      | Shiraz-4T  | 252  | 0.192083 | 0         |  |  |
|      |      | Shiraz-36T | 376  | 0.159952 | 0         |  |  |
|      |      | Shiraz-36T | 376  | 0.159952 | 0         |  |  |
|      |      | Shiraz-44T | 628  | 0        | -0.444379 |  |  |
|      |      | Shiraz-44T | 628  | 0        | -0.444379 |  |  |
|      |      | Shiraz-47T | 1027 | 0        | -0.117848 |  |  |
|      |      | Shiraz-47T | 1027 | 0        | -0.117848 |  |  |
|      |      | Shiraz-49T | 1117 | 0        | -0.168296 |  |  |
|      |      | Shiraz-49T | 1117 | 0        | -0.168296 |  |  |
|      |      | Shiraz-77T | 1222 | 0        | -0.113002 |  |  |
|      |      | Shiraz-77T | 1222 | 0        | -0.113002 |  |  |
|      |      | Shiraz-18T | 1433 | 0.250973 | 0         |  |  |
|      |      | Shiraz-18T | 1433 | 0.250973 | 0         |  |  |
|      |      | Shiraz-22T | 1543 | 0        | -0.513696 |  |  |
|      |      | Shiraz-22T | 1543 | 0        | -0.513696 |  |  |
|      |      | Shiraz-25T | 1697 | 0.21945  | 0         |  |  |
|      |      | Shiraz-25T | 1697 | 0.21945  | 0         |  |  |
|      |      | Shiraz-28T | 1734 | 0.362882 | 0         |  |  |
|      |      | Shiraz-28T | 1734 | 0.362882 | 0         |  |  |
|      |      | Shiraz-29T | 1777 | 0.156747 | 0         |  |  |
|      |      | Shiraz-29T | 1777 | 0.156747 | 0         |  |  |
|      |      | Shiraz-38T | 1950 | 0.265916 | 0         |  |  |
|      |      | Shiraz-38T | 1950 | 0.265916 | 0         |  |  |

|  |            |      |          |           |  |
|--|------------|------|----------|-----------|--|
|  | Shiraz-58T | 2157 | 0        | -0.213872 |  |
|  | Shiraz-58T | 2157 | 0        | -0.213872 |  |
|  | Shiraz-71T | 2236 | 0.320072 | 0         |  |
|  | Shiraz-71T | 2236 | 0.320072 | 0         |  |
|  | Shiraz-4T  | 252  | 0.192083 | 0         |  |
|  | Shiraz-4T  | 252  | 0.192083 | 0         |  |
|  | Shiraz-36T | 376  | 0.159952 | 0         |  |
|  | Shiraz-36T | 376  | 0.159952 | 0         |  |
|  | Shiraz-44T | 628  | 0        | -0.444379 |  |
|  | Shiraz-44T | 628  | 0        | -0.444379 |  |
|  | Shiraz-47T | 1027 | 0        | -0.117848 |  |
|  | Shiraz-47T | 1027 | 0        | -0.117848 |  |
|  | Shiraz-49T | 1117 | 0        | -0.168296 |  |
|  | Shiraz-49T | 1117 | 0        | -0.168296 |  |
|  | Shiraz-77T | 1222 | 0        | -0.113002 |  |
|  | Shiraz-77T | 1222 | 0        | -0.113002 |  |
|  | Shiraz-18T | 1433 | 0.250973 | 0         |  |
|  | Shiraz-18T | 1433 | 0.250973 | 0         |  |
|  | Shiraz-22T | 1543 | 0        | -0.513696 |  |
|  | Shiraz-22T | 1543 | 0        | -0.513696 |  |
|  | Shiraz-25T | 1697 | 0.21945  | 0         |  |
|  | Shiraz-25T | 1697 | 0.21945  | 0         |  |
|  | Shiraz-28T | 1734 | 0.362882 | 0         |  |
|  | Shiraz-28T | 1734 | 0.362882 | 0         |  |
|  | Shiraz-29T | 1777 | 0.156747 | 0         |  |
|  | Shiraz-29T | 1777 | 0.156747 | 0         |  |
|  | Shiraz-38T | 1950 | 0.265916 | 0         |  |
|  | Shiraz-38T | 1950 | 0.265916 | 0         |  |
|  | Shiraz-58T | 2157 | 0        | -0.213872 |  |
|  | Shiraz-58T | 2157 | 0        | -0.213872 |  |
|  | Shiraz-71T | 2236 | 0.320072 | 0         |  |
|  | Shiraz-71T | 2236 | 0.320072 | 0         |  |
|  | Shiraz-4T  | 252  | 0.192083 | 0         |  |
|  | Shiraz-4T  | 252  | 0.192083 | 0         |  |
|  | Shiraz-36T | 376  | 0.159952 | 0         |  |
|  | Shiraz-36T | 376  | 0.159952 | 0         |  |
|  | Shiraz-44T | 628  | 0        | -0.444379 |  |
|  | Shiraz-44T | 628  | 0        | -0.444379 |  |
|  | Shiraz-47T | 1027 | 0        | -0.117848 |  |
|  | Shiraz-47T | 1027 | 0        | -0.117848 |  |
|  | Shiraz-49T | 1117 | 0        | -0.168296 |  |
|  | Shiraz-49T | 1117 | 0        | -0.168296 |  |
|  | Shiraz-77T | 1222 | 0        | -0.113002 |  |
|  | Shiraz-77T | 1222 | 0        | -0.113002 |  |
|  | Shiraz-18T | 1433 | 0.250973 | 0         |  |
|  | Shiraz-18T | 1433 | 0.250973 | 0         |  |
|  | Shiraz-22T | 1543 | 0        | -0.513696 |  |

|      |      |            |      |          |           |  |  |
|------|------|------------|------|----------|-----------|--|--|
|      |      | Shiraz-22T | 1543 | 0        | -0.513696 |  |  |
|      |      | Shiraz-25T | 1697 | 0.21945  | 0         |  |  |
|      |      | Shiraz-25T | 1697 | 0.21945  | 0         |  |  |
|      |      | Shiraz-28T | 1734 | 0.362882 | 0         |  |  |
|      |      | Shiraz-28T | 1734 | 0.362882 | 0         |  |  |
|      |      | Shiraz-29T | 1777 | 0.156747 | 0         |  |  |
|      |      | Shiraz-29T | 1777 | 0.156747 | 0         |  |  |
|      |      | Shiraz-38T | 1950 | 0.265916 | 0         |  |  |
|      |      | Shiraz-38T | 1950 | 0.265916 | 0         |  |  |
|      |      | Shiraz-58T | 2157 | 0        | -0.213872 |  |  |
|      |      | Shiraz-58T | 2157 | 0        | -0.213872 |  |  |
|      |      | Shiraz-71T | 2236 | 0.320072 | 0         |  |  |
|      |      | Shiraz-71T | 2236 | 0.320072 | 0         |  |  |
| DGKI | chr7 | Shiraz-3T  | 90   | 0.219276 | 0         |  |  |
|      |      | Shiraz-4T  | 253  | 0.372918 | 0         |  |  |
|      |      | Shiraz-36T | 378  | 0.179558 | 0         |  |  |
|      |      | Shiraz-44T | 643  | 0        | -0.456761 |  |  |
|      |      | Shiraz-46T | 943  | 0.093799 | 0         |  |  |
|      |      | Shiraz-77T | 1225 | 0        | -0.117922 |  |  |
|      |      | Shiraz-9T  | 1325 | 0.221899 | 0         |  |  |
|      |      | Shiraz-18T | 1434 | 0.244465 | 0         |  |  |
|      |      | Shiraz-22T | 1553 | 0        | -0.213234 |  |  |
|      |      | Shiraz-25T | 1698 | 0.21835  | 0         |  |  |
|      |      | Shiraz-28T | 1735 | 0.350744 | 0         |  |  |
|      |      | Shiraz-29T | 1778 | 0.120767 | 0         |  |  |
|      |      | Shiraz-32T | 1833 | 0.551336 | 0         |  |  |
|      |      | Shiraz-38T | 1951 | 0.250891 | 0         |  |  |
|      |      | Shiraz-53T | 2078 | 0.287202 | 0         |  |  |
|      |      | Shiraz-58T | 2162 | 0.221505 | 0         |  |  |
|      |      | Shiraz-71T | 2238 | 0.603631 | 0         |  |  |
|      |      | Shiraz-3T  | 90   | 0.219276 | 0         |  |  |
|      |      | Shiraz-4T  | 253  | 0.372918 | 0         |  |  |
|      |      | Shiraz-36T | 378  | 0.179558 | 0         |  |  |
|      |      | Shiraz-44T | 643  | 0        | -0.456761 |  |  |
|      |      | Shiraz-46T | 943  | 0.093799 | 0         |  |  |
|      |      | Shiraz-77T | 1225 | 0        | -0.117922 |  |  |
|      |      | Shiraz-9T  | 1325 | 0.221899 | 0         |  |  |
|      |      | Shiraz-18T | 1434 | 0.244465 | 0         |  |  |
|      |      | Shiraz-22T | 1553 | 0        | -0.213234 |  |  |
|      |      | Shiraz-25T | 1698 | 0.21835  | 0         |  |  |
|      |      | Shiraz-28T | 1735 | 0.350744 | 0         |  |  |
|      |      | Shiraz-29T | 1778 | 0.120767 | 0         |  |  |
|      |      | Shiraz-32T | 1833 | 0.551336 | 0         |  |  |
|      |      | Shiraz-38T | 1951 | 0.250891 | 0         |  |  |
|      |      | Shiraz-53T | 2078 | 0.287202 | 0         |  |  |
|      |      | Shiraz-58T | 2162 | 0.221505 | 0         |  |  |
|      |      | Shiraz-71T | 2238 | 0.603631 | 0         |  |  |

|        |      |            |      |          |           |  |  |
|--------|------|------------|------|----------|-----------|--|--|
|        |      | Shiraz-3T  | 90   | 0.219276 | 0         |  |  |
|        |      | Shiraz-4T  | 253  | 0.372918 | 0         |  |  |
|        |      | Shiraz-36T | 378  | 0.179558 | 0         |  |  |
|        |      | Shiraz-44T | 643  | 0        | -0.456761 |  |  |
|        |      | Shiraz-46T | 943  | 0.093799 | 0         |  |  |
|        |      | Shiraz-77T | 1225 | 0        | -0.117922 |  |  |
|        |      | Shiraz-9T  | 1325 | 0.221899 | 0         |  |  |
|        |      | Shiraz-18T | 1434 | 0.244465 | 0         |  |  |
|        |      | Shiraz-22T | 1553 | 0        | -0.213234 |  |  |
|        |      | Shiraz-25T | 1698 | 0.21835  | 0         |  |  |
|        |      | Shiraz-28T | 1735 | 0.350744 | 0         |  |  |
|        |      | Shiraz-29T | 1778 | 0.120767 | 0         |  |  |
|        |      | Shiraz-32T | 1833 | 0.551336 | 0         |  |  |
|        |      | Shiraz-38T | 1951 | 0.250891 | 0         |  |  |
|        |      | Shiraz-53T | 2078 | 0.287202 | 0         |  |  |
|        |      | Shiraz-58T | 2162 | 0.221505 | 0         |  |  |
|        |      | Shiraz-71T | 2238 | 0.603631 | 0         |  |  |
| DIAPH2 | chrX | Shiraz-3T  | 242  | 0        | -0.336434 |  |  |
|        |      | Shiraz-3T  | 242  | 0        | -0.336434 |  |  |
|        |      | Shiraz-4T  | 261  | 0        | -0.336249 |  |  |
|        |      | Shiraz-4T  | 261  | 0        | -0.336249 |  |  |
|        |      | Shiraz-16T | 295  | 0.591657 | 0         |  |  |
|        |      | Shiraz-16T | 295  | 0.591657 | 0         |  |  |
|        |      | Shiraz-31T | 346  | 0        | -0.1527   |  |  |
|        |      | Shiraz-31T | 346  | 0        | -0.1527   |  |  |
|        |      | Shiraz-36T | 433  | 0        | -0.803961 |  |  |
|        |      | Shiraz-36T | 433  | 0        | -0.803961 |  |  |
|        |      | Shiraz-44T | 899  | 0        | -1.09697  |  |  |
|        |      | Shiraz-44T | 899  | 0        | -1.09697  |  |  |
|        |      | Shiraz-44T | 902  | 0        | -1.449824 |  |  |
|        |      | Shiraz-44T | 902  | 0        | -1.449824 |  |  |
|        |      | Shiraz-47T | 1085 | 0        | -0.130811 |  |  |
|        |      | Shiraz-47T | 1085 | 0        | -0.130811 |  |  |
|        |      | Shiraz-49T | 1170 | 0        | -0.967436 |  |  |
|        |      | Shiraz-49T | 1170 | 0        | -0.967436 |  |  |
|        |      | Shiraz-49T | 1172 | 0        | -1.123219 |  |  |
|        |      | Shiraz-49T | 1172 | 0        | -1.123219 |  |  |
|        |      | Shiraz-18T | 1457 | 0.643204 | 0         |  |  |
|        |      | Shiraz-18T | 1457 | 0.643204 | 0         |  |  |
|        |      | Shiraz-22T | 1673 | 0.611783 | 0         |  |  |
|        |      | Shiraz-22T | 1673 | 0.611783 | 0         |  |  |
|        |      | Shiraz-22T | 1675 | 0.279253 | 0         |  |  |
|        |      | Shiraz-22T | 1675 | 0.279253 | 0         |  |  |
|        |      | Shiraz-25T | 1719 | 0.472955 | 0         |  |  |
|        |      | Shiraz-25T | 1719 | 0.472955 | 0         |  |  |
|        |      | Shiraz-28T | 1762 | 0.562311 | 0         |  |  |
|        |      | Shiraz-28T | 1762 | 0.562311 | 0         |  |  |

|  |  |            |      |          |           |  |  |
|--|--|------------|------|----------|-----------|--|--|
|  |  | Shiraz-29T | 1801 | 0.815343 | 0         |  |  |
|  |  | Shiraz-29T | 1801 | 0.815343 | 0         |  |  |
|  |  | Shiraz-32T | 1870 | 0.729766 | 0         |  |  |
|  |  | Shiraz-32T | 1870 | 0.729766 | 0         |  |  |
|  |  | Shiraz-32T | 1871 | 0.292679 | 0         |  |  |
|  |  | Shiraz-32T | 1871 | 0.292679 | 0         |  |  |
|  |  | Shiraz-35T | 1933 | 0.488535 | 0         |  |  |
|  |  | Shiraz-35T | 1933 | 0.488535 | 0         |  |  |
|  |  | Shiraz-58T | 2223 | 0.833364 | 0         |  |  |
|  |  | Shiraz-58T | 2223 | 0.833364 | 0         |  |  |
|  |  | Shiraz-58T | 2225 | 0.595784 | 0         |  |  |
|  |  | Shiraz-58T | 2225 | 0.595784 | 0         |  |  |
|  |  | Shiraz-71T | 2263 | 0.975531 | 0         |  |  |
|  |  | Shiraz-71T | 2263 | 0.975531 | 0         |  |  |
|  |  | Shiraz-3T  | 242  | 0        | -0.336434 |  |  |
|  |  | Shiraz-3T  | 242  | 0        | -0.336434 |  |  |
|  |  | Shiraz-4T  | 261  | 0        | -0.336249 |  |  |
|  |  | Shiraz-4T  | 261  | 0        | -0.336249 |  |  |
|  |  | Shiraz-16T | 295  | 0.591657 | 0         |  |  |
|  |  | Shiraz-16T | 295  | 0.591657 | 0         |  |  |
|  |  | Shiraz-31T | 346  | 0        | -0.1527   |  |  |
|  |  | Shiraz-31T | 346  | 0        | -0.1527   |  |  |
|  |  | Shiraz-36T | 433  | 0        | -0.803961 |  |  |
|  |  | Shiraz-36T | 433  | 0        | -0.803961 |  |  |
|  |  | Shiraz-44T | 899  | 0        | -1.09697  |  |  |
|  |  | Shiraz-44T | 899  | 0        | -1.09697  |  |  |
|  |  | Shiraz-44T | 902  | 0        | -1.449824 |  |  |
|  |  | Shiraz-44T | 902  | 0        | -1.449824 |  |  |
|  |  | Shiraz-47T | 1085 | 0        | -0.130811 |  |  |
|  |  | Shiraz-47T | 1085 | 0        | -0.130811 |  |  |
|  |  | Shiraz-49T | 1170 | 0        | -0.967436 |  |  |
|  |  | Shiraz-49T | 1170 | 0        | -0.967436 |  |  |
|  |  | Shiraz-49T | 1172 | 0        | -1.123219 |  |  |
|  |  | Shiraz-49T | 1172 | 0        | -1.123219 |  |  |
|  |  | Shiraz-18T | 1457 | 0.643204 | 0         |  |  |
|  |  | Shiraz-18T | 1457 | 0.643204 | 0         |  |  |
|  |  | Shiraz-22T | 1673 | 0.611783 | 0         |  |  |
|  |  | Shiraz-22T | 1673 | 0.611783 | 0         |  |  |
|  |  | Shiraz-22T | 1675 | 0.279253 | 0         |  |  |
|  |  | Shiraz-22T | 1675 | 0.279253 | 0         |  |  |
|  |  | Shiraz-25T | 1719 | 0.472955 | 0         |  |  |
|  |  | Shiraz-25T | 1719 | 0.472955 | 0         |  |  |
|  |  | Shiraz-28T | 1762 | 0.562311 | 0         |  |  |
|  |  | Shiraz-28T | 1762 | 0.562311 | 0         |  |  |
|  |  | Shiraz-29T | 1801 | 0.815343 | 0         |  |  |
|  |  | Shiraz-29T | 1801 | 0.815343 | 0         |  |  |
|  |  | Shiraz-32T | 1870 | 0.729766 | 0         |  |  |



|  |            |      |          |           |  |
|--|------------|------|----------|-----------|--|
|  | Shiraz-32T | 1870 | 0.729766 | 0         |  |
|  | Shiraz-32T | 1871 | 0.292679 | 0         |  |
|  | Shiraz-32T | 1871 | 0.292679 | 0         |  |
|  | Shiraz-35T | 1933 | 0.488535 | 0         |  |
|  | Shiraz-35T | 1933 | 0.488535 | 0         |  |
|  | Shiraz-58T | 2223 | 0.833364 | 0         |  |
|  | Shiraz-58T | 2223 | 0.833364 | 0         |  |
|  | Shiraz-58T | 2225 | 0.595784 | 0         |  |
|  | Shiraz-58T | 2225 | 0.595784 | 0         |  |
|  | Shiraz-71T | 2263 | 0.975531 | 0         |  |
|  | Shiraz-71T | 2263 | 0.975531 | 0         |  |
|  | Shiraz-3T  | 242  | 0        | -0.336434 |  |
|  | Shiraz-3T  | 242  | 0        | -0.336434 |  |
|  | Shiraz-4T  | 261  | 0        | -0.336249 |  |
|  | Shiraz-4T  | 261  | 0        | -0.336249 |  |
|  | Shiraz-16T | 295  | 0.591657 | 0         |  |
|  | Shiraz-16T | 295  | 0.591657 | 0         |  |
|  | Shiraz-31T | 346  | 0        | -0.1527   |  |
|  | Shiraz-31T | 346  | 0        | -0.1527   |  |
|  | Shiraz-36T | 433  | 0        | -0.803961 |  |
|  | Shiraz-36T | 433  | 0        | -0.803961 |  |
|  | Shiraz-44T | 899  | 0        | -1.09697  |  |
|  | Shiraz-44T | 899  | 0        | -1.09697  |  |
|  | Shiraz-44T | 902  | 0        | -1.449824 |  |
|  | Shiraz-44T | 902  | 0        | -1.449824 |  |
|  | Shiraz-47T | 1085 | 0        | -0.130811 |  |
|  | Shiraz-47T | 1085 | 0        | -0.130811 |  |
|  | Shiraz-49T | 1170 | 0        | -0.967436 |  |
|  | Shiraz-49T | 1170 | 0        | -0.967436 |  |
|  | Shiraz-49T | 1172 | 0        | -1.123219 |  |
|  | Shiraz-49T | 1172 | 0        | -1.123219 |  |
|  | Shiraz-18T | 1457 | 0.643204 | 0         |  |
|  | Shiraz-18T | 1457 | 0.643204 | 0         |  |
|  | Shiraz-22T | 1673 | 0.611783 | 0         |  |
|  | Shiraz-22T | 1673 | 0.611783 | 0         |  |
|  | Shiraz-22T | 1675 | 0.279253 | 0         |  |
|  | Shiraz-22T | 1675 | 0.279253 | 0         |  |
|  | Shiraz-25T | 1719 | 0.472955 | 0         |  |
|  | Shiraz-25T | 1719 | 0.472955 | 0         |  |
|  | Shiraz-28T | 1762 | 0.562311 | 0         |  |
|  | Shiraz-28T | 1762 | 0.562311 | 0         |  |
|  | Shiraz-29T | 1801 | 0.815343 | 0         |  |
|  | Shiraz-29T | 1801 | 0.815343 | 0         |  |
|  | Shiraz-32T | 1870 | 0.729766 | 0         |  |
|  | Shiraz-32T | 1870 | 0.729766 | 0         |  |
|  | Shiraz-32T | 1871 | 0.292679 | 0         |  |
|  | Shiraz-32T | 1871 | 0.292679 | 0         |  |

|      |      |            |      |          |           |  |
|------|------|------------|------|----------|-----------|--|
|      |      | Shiraz-35T | 1933 | 0.488535 | 0         |  |
|      |      | Shiraz-35T | 1933 | 0.488535 | 0         |  |
|      |      | Shiraz-58T | 2223 | 0.833364 | 0         |  |
|      |      | Shiraz-58T | 2223 | 0.833364 | 0         |  |
|      |      | Shiraz-58T | 2225 | 0.595784 | 0         |  |
|      |      | Shiraz-58T | 2225 | 0.595784 | 0         |  |
|      |      | Shiraz-71T | 2263 | 0.975531 | 0         |  |
|      |      | Shiraz-71T | 2263 | 0.975531 | 0         |  |
| DKC1 | chrX | Shiraz-4T  | 261  | 0        | -0.336249 |  |
|      |      | Shiraz-16T | 295  | 0.591657 | 0         |  |
|      |      | Shiraz-36T | 433  | 0        | -0.803961 |  |
|      |      | Shiraz-44T | 909  | 0        | -1.067051 |  |
|      |      | Shiraz-49T | 1170 | 0        | -0.967436 |  |
|      |      | Shiraz-9T  | 1370 | 0.690073 | 0         |  |
|      |      | Shiraz-9T  | 1371 | 1.292392 | 0         |  |
|      |      | Shiraz-18T | 1457 | 0.643204 | 0         |  |
|      |      | Shiraz-22T | 1673 | 0.611783 | 0         |  |
|      |      | Shiraz-22T | 1678 | 0.911625 | 0         |  |
|      |      | Shiraz-25T | 1719 | 0.472955 | 0         |  |
|      |      | Shiraz-28T | 1762 | 0.562311 | 0         |  |
|      |      | Shiraz-29T | 1801 | 0.815343 | 0         |  |
|      |      | Shiraz-32T | 1870 | 0.729766 | 0         |  |
|      |      | Shiraz-32T | 1872 | 1.504553 | 0         |  |
|      |      | Shiraz-35T | 1933 | 0.488535 | 0         |  |
|      |      | Shiraz-53T | 2115 | 0.427728 | 0         |  |
|      |      | Shiraz-58T | 2223 | 0.833364 | 0         |  |
|      |      | Shiraz-58T | 2226 | 1.074663 | 0         |  |
|      |      | Shiraz-71T | 2263 | 0.975531 | 0         |  |
|      |      | Shiraz-4T  | 261  | 0        | -0.336249 |  |
|      |      | Shiraz-16T | 295  | 0.591657 | 0         |  |
|      |      | Shiraz-36T | 433  | 0        | -0.803961 |  |
|      |      | Shiraz-44T | 909  | 0        | -1.067051 |  |
|      |      | Shiraz-49T | 1170 | 0        | -0.967436 |  |
|      |      | Shiraz-9T  | 1370 | 0.690073 | 0         |  |
|      |      | Shiraz-9T  | 1371 | 1.292392 | 0         |  |
|      |      | Shiraz-18T | 1457 | 0.643204 | 0         |  |
|      |      | Shiraz-22T | 1673 | 0.611783 | 0         |  |
|      |      | Shiraz-22T | 1678 | 0.911625 | 0         |  |
|      |      | Shiraz-25T | 1719 | 0.472955 | 0         |  |
|      |      | Shiraz-28T | 1762 | 0.562311 | 0         |  |
|      |      | Shiraz-29T | 1801 | 0.815343 | 0         |  |
|      |      | Shiraz-32T | 1870 | 0.729766 | 0         |  |
|      |      | Shiraz-32T | 1872 | 1.504553 | 0         |  |
|      |      | Shiraz-35T | 1933 | 0.488535 | 0         |  |
|      |      | Shiraz-53T | 2115 | 0.427728 | 0         |  |
|      |      | Shiraz-58T | 2223 | 0.833364 | 0         |  |
|      |      | Shiraz-58T | 2226 | 1.074663 | 0         |  |

|               |      |            |      |          |           |  |  |
|---------------|------|------------|------|----------|-----------|--|--|
|               |      | Shiraz-71T | 2263 | 0.975531 | 0         |  |  |
|               |      | Shiraz-4T  | 261  | 0        | -0.336249 |  |  |
|               |      | Shiraz-16T | 295  | 0.591657 | 0         |  |  |
|               |      | Shiraz-36T | 433  | 0        | -0.803961 |  |  |
|               |      | Shiraz-44T | 909  | 0        | -1.067051 |  |  |
|               |      | Shiraz-49T | 1170 | 0        | -0.967436 |  |  |
|               |      | Shiraz-9T  | 1370 | 0.690073 | 0         |  |  |
|               |      | Shiraz-9T  | 1371 | 1.292392 | 0         |  |  |
|               |      | Shiraz-18T | 1457 | 0.643204 | 0         |  |  |
|               |      | Shiraz-22T | 1673 | 0.611783 | 0         |  |  |
|               |      | Shiraz-22T | 1678 | 0.911625 | 0         |  |  |
|               |      | Shiraz-25T | 1719 | 0.472955 | 0         |  |  |
|               |      | Shiraz-28T | 1762 | 0.562311 | 0         |  |  |
|               |      | Shiraz-29T | 1801 | 0.815343 | 0         |  |  |
|               |      | Shiraz-32T | 1870 | 0.729766 | 0         |  |  |
|               |      | Shiraz-32T | 1872 | 1.504553 | 0         |  |  |
|               |      | Shiraz-35T | 1933 | 0.488535 | 0         |  |  |
|               |      | Shiraz-53T | 2115 | 0.427728 | 0         |  |  |
|               |      | Shiraz-58T | 2223 | 0.833364 | 0         |  |  |
|               |      | Shiraz-58T | 2226 | 1.074663 | 0         |  |  |
|               |      | Shiraz-71T | 2263 | 0.975531 | 0         |  |  |
| DKFZp564N2472 | chr7 | Shiraz-3T  | 87   | 0.198593 | 0         |  |  |
|               |      | Shiraz-4T  | 252  | 0.192083 | 0         |  |  |
|               |      | Shiraz-36T | 376  | 0.159952 | 0         |  |  |
|               |      | Shiraz-44T | 634  | 0        | -0.480272 |  |  |
|               |      | Shiraz-46T | 942  | 0.069143 | 0         |  |  |
|               |      | Shiraz-18T | 1433 | 0.250973 | 0         |  |  |
|               |      | Shiraz-22T | 1546 | 0        | -0.458543 |  |  |
|               |      | Shiraz-25T | 1697 | 0.21945  | 0         |  |  |
|               |      | Shiraz-28T | 1734 | 0.362882 | 0         |  |  |
|               |      | Shiraz-29T | 1777 | 0.156747 | 0         |  |  |
|               |      | Shiraz-38T | 1950 | 0.265916 | 0         |  |  |
|               |      | Shiraz-71T | 2236 | 0.320072 | 0         |  |  |
|               |      | Shiraz-3T  | 87   | 0.198593 | 0         |  |  |
|               |      | Shiraz-4T  | 252  | 0.192083 | 0         |  |  |
|               |      | Shiraz-36T | 376  | 0.159952 | 0         |  |  |
|               |      | Shiraz-44T | 634  | 0        | -0.480272 |  |  |
|               |      | Shiraz-46T | 942  | 0.069143 | 0         |  |  |
|               |      | Shiraz-18T | 1433 | 0.250973 | 0         |  |  |
|               |      | Shiraz-22T | 1546 | 0        | -0.458543 |  |  |
|               |      | Shiraz-25T | 1697 | 0.21945  | 0         |  |  |
|               |      | Shiraz-28T | 1734 | 0.362882 | 0         |  |  |
|               |      | Shiraz-29T | 1777 | 0.156747 | 0         |  |  |
|               |      | Shiraz-38T | 1950 | 0.265916 | 0         |  |  |
|               |      | Shiraz-71T | 2236 | 0.320072 | 0         |  |  |
|               |      | Shiraz-3T  | 87   | 0.198593 | 0         |  |  |
|               |      | Shiraz-4T  | 252  | 0.192083 | 0         |  |  |

|               |      |            |      |          |           |  |  |
|---------------|------|------------|------|----------|-----------|--|--|
|               |      | Shiraz-36T | 376  | 0.159952 | 0         |  |  |
|               |      | Shiraz-44T | 634  | 0        | -0.480272 |  |  |
|               |      | Shiraz-46T | 942  | 0.069143 | 0         |  |  |
|               |      | Shiraz-18T | 1433 | 0.250973 | 0         |  |  |
|               |      | Shiraz-22T | 1546 | 0        | -0.458543 |  |  |
|               |      | Shiraz-25T | 1697 | 0.21945  | 0         |  |  |
|               |      | Shiraz-28T | 1734 | 0.362882 | 0         |  |  |
|               |      | Shiraz-29T | 1777 | 0.156747 | 0         |  |  |
|               |      | Shiraz-38T | 1950 | 0.265916 | 0         |  |  |
|               |      | Shiraz-71T | 2236 | 0.320072 | 0         |  |  |
| DKFZP586I1420 | chr7 | Shiraz-3T  | 87   | 0.198593 | 0         |  |  |
|               |      | Shiraz-4T  | 252  | 0.192083 | 0         |  |  |
|               |      | Shiraz-36T | 376  | 0.159952 | 0         |  |  |
|               |      | Shiraz-46T | 942  | 0.069143 | 0         |  |  |
|               |      | Shiraz-18T | 1433 | 0.250973 | 0         |  |  |
|               |      | Shiraz-25T | 1697 | 0.21945  | 0         |  |  |
|               |      | Shiraz-28T | 1734 | 0.362882 | 0         |  |  |
|               |      | Shiraz-29T | 1777 | 0.156747 | 0         |  |  |
|               |      | Shiraz-38T | 1950 | 0.265916 | 0         |  |  |
|               |      | Shiraz-71T | 2236 | 0.320072 | 0         |  |  |
|               |      | Shiraz-3T  | 87   | 0.198593 | 0         |  |  |
|               |      | Shiraz-4T  | 252  | 0.192083 | 0         |  |  |
|               |      | Shiraz-36T | 376  | 0.159952 | 0         |  |  |
|               |      | Shiraz-46T | 942  | 0.069143 | 0         |  |  |
|               |      | Shiraz-18T | 1433 | 0.250973 | 0         |  |  |
|               |      | Shiraz-25T | 1697 | 0.21945  | 0         |  |  |
|               |      | Shiraz-28T | 1734 | 0.362882 | 0         |  |  |
|               |      | Shiraz-29T | 1777 | 0.156747 | 0         |  |  |
|               |      | Shiraz-38T | 1950 | 0.265916 | 0         |  |  |
|               |      | Shiraz-71T | 2236 | 0.320072 | 0         |  |  |
|               |      | Shiraz-3T  | 87   | 0.198593 | 0         |  |  |
|               |      | Shiraz-4T  | 252  | 0.192083 | 0         |  |  |
|               |      | Shiraz-36T | 376  | 0.159952 | 0         |  |  |
|               |      | Shiraz-46T | 942  | 0.069143 | 0         |  |  |
|               |      | Shiraz-18T | 1433 | 0.250973 | 0         |  |  |
|               |      | Shiraz-25T | 1697 | 0.21945  | 0         |  |  |
|               |      | Shiraz-28T | 1734 | 0.362882 | 0         |  |  |
|               |      | Shiraz-29T | 1777 | 0.156747 | 0         |  |  |
|               |      | Shiraz-38T | 1950 | 0.265916 | 0         |  |  |
|               |      | Shiraz-71T | 2236 | 0.320072 | 0         |  |  |
| DLD           | chr7 | Shiraz-3T  | 90   | 0.219276 | 0         |  |  |
|               |      | Shiraz-4T  | 253  | 0.372918 | 0         |  |  |
|               |      | Shiraz-36T | 378  | 0.179558 | 0         |  |  |
|               |      | Shiraz-46T | 943  | 0.093799 | 0         |  |  |
|               |      | Shiraz-77T | 1225 | 0        | -0.117922 |  |  |
|               |      | Shiraz-18T | 1434 | 0.244465 | 0         |  |  |
|               |      | Shiraz-22T | 1549 | 0        | -0.319623 |  |  |

|      |      |            |      |          |           |  |  |
|------|------|------------|------|----------|-----------|--|--|
|      |      | Shiraz-25T | 1698 | 0.21835  | 0         |  |  |
|      |      | Shiraz-28T | 1735 | 0.350744 | 0         |  |  |
|      |      | Shiraz-29T | 1778 | 0.120767 | 0         |  |  |
|      |      | Shiraz-32T | 1833 | 0.551336 | 0         |  |  |
|      |      | Shiraz-38T | 1951 | 0.250891 | 0         |  |  |
|      |      | Shiraz-53T | 2078 | 0.287202 | 0         |  |  |
|      |      | Shiraz-58T | 2161 | 0        | -0.187744 |  |  |
|      |      | Shiraz-71T | 2238 | 0.603631 | 0         |  |  |
|      |      | Shiraz-3T  | 90   | 0.219276 | 0         |  |  |
|      |      | Shiraz-4T  | 253  | 0.372918 | 0         |  |  |
|      |      | Shiraz-36T | 378  | 0.179558 | 0         |  |  |
|      |      | Shiraz-46T | 943  | 0.093799 | 0         |  |  |
|      |      | Shiraz-77T | 1225 | 0        | -0.117922 |  |  |
|      |      | Shiraz-18T | 1434 | 0.244465 | 0         |  |  |
|      |      | Shiraz-22T | 1549 | 0        | -0.319623 |  |  |
|      |      | Shiraz-25T | 1698 | 0.21835  | 0         |  |  |
|      |      | Shiraz-28T | 1735 | 0.350744 | 0         |  |  |
|      |      | Shiraz-29T | 1778 | 0.120767 | 0         |  |  |
|      |      | Shiraz-32T | 1833 | 0.551336 | 0         |  |  |
|      |      | Shiraz-38T | 1951 | 0.250891 | 0         |  |  |
|      |      | Shiraz-53T | 2078 | 0.287202 | 0         |  |  |
|      |      | Shiraz-58T | 2161 | 0        | -0.187744 |  |  |
|      |      | Shiraz-71T | 2238 | 0.603631 | 0         |  |  |
|      |      | Shiraz-3T  | 90   | 0.219276 | 0         |  |  |
|      |      | Shiraz-4T  | 253  | 0.372918 | 0         |  |  |
|      |      | Shiraz-36T | 378  | 0.179558 | 0         |  |  |
|      |      | Shiraz-46T | 943  | 0.093799 | 0         |  |  |
|      |      | Shiraz-77T | 1225 | 0        | -0.117922 |  |  |
|      |      | Shiraz-18T | 1434 | 0.244465 | 0         |  |  |
|      |      | Shiraz-22T | 1549 | 0        | -0.319623 |  |  |
|      |      | Shiraz-25T | 1698 | 0.21835  | 0         |  |  |
|      |      | Shiraz-28T | 1735 | 0.350744 | 0         |  |  |
|      |      | Shiraz-29T | 1778 | 0.120767 | 0         |  |  |
|      |      | Shiraz-32T | 1833 | 0.551336 | 0         |  |  |
|      |      | Shiraz-38T | 1951 | 0.250891 | 0         |  |  |
|      |      | Shiraz-53T | 2078 | 0.287202 | 0         |  |  |
|      |      | Shiraz-58T | 2161 | 0        | -0.187744 |  |  |
|      |      | Shiraz-71T | 2238 | 0.603631 | 0         |  |  |
| DLG3 | chrX | Shiraz-4T  | 261  | 0        | -0.336249 |  |  |
|      |      | Shiraz-4T  | 261  | 0        | -0.336249 |  |  |
|      |      | Shiraz-16T | 295  | 0.591657 | 0         |  |  |
|      |      | Shiraz-16T | 295  | 0.591657 | 0         |  |  |
|      |      | Shiraz-36T | 433  | 0        | -0.803961 |  |  |
|      |      | Shiraz-36T | 433  | 0        | -0.803961 |  |  |
|      |      | Shiraz-44T | 899  | 0        | -1.09697  |  |  |
|      |      | Shiraz-44T | 899  | 0        | -1.09697  |  |  |
|      |      | Shiraz-44T | 900  | 0        | -0.584284 |  |  |

|  |            |      |          |           |  |
|--|------------|------|----------|-----------|--|
|  | Shiraz-44T | 900  | 0        | -0.584284 |  |
|  | Shiraz-44T | 901  | 0        | -1.000082 |  |
|  | Shiraz-44T | 901  | 0        | -1.000082 |  |
|  | Shiraz-49T | 1170 | 0        | -0.967436 |  |
|  | Shiraz-49T | 1170 | 0        | -0.967436 |  |
|  | Shiraz-18T | 1457 | 0.643204 | 0         |  |
|  | Shiraz-18T | 1457 | 0.643204 | 0         |  |
|  | Shiraz-22T | 1673 | 0.611783 | 0         |  |
|  | Shiraz-22T | 1673 | 0.611783 | 0         |  |
|  | Shiraz-22T | 1674 | 0.887899 | 0         |  |
|  | Shiraz-22T | 1674 | 0.887899 | 0         |  |
|  | Shiraz-25T | 1719 | 0.472955 | 0         |  |
|  | Shiraz-25T | 1719 | 0.472955 | 0         |  |
|  | Shiraz-28T | 1762 | 0.562311 | 0         |  |
|  | Shiraz-28T | 1762 | 0.562311 | 0         |  |
|  | Shiraz-29T | 1801 | 0.815343 | 0         |  |
|  | Shiraz-29T | 1801 | 0.815343 | 0         |  |
|  | Shiraz-32T | 1870 | 0.729766 | 0         |  |
|  | Shiraz-32T | 1870 | 0.729766 | 0         |  |
|  | Shiraz-35T | 1933 | 0.488535 | 0         |  |
|  | Shiraz-35T | 1933 | 0.488535 | 0         |  |
|  | Shiraz-58T | 2223 | 0.833364 | 0         |  |
|  | Shiraz-58T | 2223 | 0.833364 | 0         |  |
|  | Shiraz-58T | 2224 | 1.076575 | 0         |  |
|  | Shiraz-58T | 2224 | 1.076575 | 0         |  |
|  | Shiraz-71T | 2263 | 0.975531 | 0         |  |
|  | Shiraz-71T | 2263 | 0.975531 | 0         |  |
|  | Shiraz-4T  | 261  | 0        | -0.336249 |  |
|  | Shiraz-4T  | 261  | 0        | -0.336249 |  |
|  | Shiraz-16T | 295  | 0.591657 | 0         |  |
|  | Shiraz-16T | 295  | 0.591657 | 0         |  |
|  | Shiraz-36T | 433  | 0        | -0.803961 |  |
|  | Shiraz-36T | 433  | 0        | -0.803961 |  |
|  | Shiraz-44T | 899  | 0        | -1.09697  |  |
|  | Shiraz-44T | 899  | 0        | -1.09697  |  |
|  | Shiraz-44T | 900  | 0        | -0.584284 |  |
|  | Shiraz-44T | 900  | 0        | -0.584284 |  |
|  | Shiraz-44T | 901  | 0        | -1.000082 |  |
|  | Shiraz-44T | 901  | 0        | -1.000082 |  |
|  | Shiraz-49T | 1170 | 0        | -0.967436 |  |
|  | Shiraz-49T | 1170 | 0        | -0.967436 |  |
|  | Shiraz-18T | 1457 | 0.643204 | 0         |  |
|  | Shiraz-18T | 1457 | 0.643204 | 0         |  |
|  | Shiraz-22T | 1673 | 0.611783 | 0         |  |
|  | Shiraz-22T | 1673 | 0.611783 | 0         |  |
|  | Shiraz-22T | 1674 | 0.887899 | 0         |  |
|  | Shiraz-22T | 1674 | 0.887899 | 0         |  |

|  |            |      |          |           |  |
|--|------------|------|----------|-----------|--|
|  | Shiraz-25T | 1719 | 0.472955 | 0         |  |
|  | Shiraz-25T | 1719 | 0.472955 | 0         |  |
|  | Shiraz-28T | 1762 | 0.562311 | 0         |  |
|  | Shiraz-28T | 1762 | 0.562311 | 0         |  |
|  | Shiraz-29T | 1801 | 0.815343 | 0         |  |
|  | Shiraz-29T | 1801 | 0.815343 | 0         |  |
|  | Shiraz-32T | 1870 | 0.729766 | 0         |  |
|  | Shiraz-32T | 1870 | 0.729766 | 0         |  |
|  | Shiraz-35T | 1933 | 0.488535 | 0         |  |
|  | Shiraz-35T | 1933 | 0.488535 | 0         |  |
|  | Shiraz-58T | 2223 | 0.833364 | 0         |  |
|  | Shiraz-58T | 2223 | 0.833364 | 0         |  |
|  | Shiraz-58T | 2224 | 1.076575 | 0         |  |
|  | Shiraz-58T | 2224 | 1.076575 | 0         |  |
|  | Shiraz-71T | 2263 | 0.975531 | 0         |  |
|  | Shiraz-71T | 2263 | 0.975531 | 0         |  |
|  | Shiraz-4T  | 261  | 0        | -0.336249 |  |
|  | Shiraz-4T  | 261  | 0        | -0.336249 |  |
|  | Shiraz-16T | 295  | 0.591657 | 0         |  |
|  | Shiraz-16T | 295  | 0.591657 | 0         |  |
|  | Shiraz-36T | 433  | 0        | -0.803961 |  |
|  | Shiraz-36T | 433  | 0        | -0.803961 |  |
|  | Shiraz-44T | 899  | 0        | -1.09697  |  |
|  | Shiraz-44T | 899  | 0        | -1.09697  |  |
|  | Shiraz-44T | 900  | 0        | -0.584284 |  |
|  | Shiraz-44T | 900  | 0        | -0.584284 |  |
|  | Shiraz-44T | 901  | 0        | -1.000082 |  |
|  | Shiraz-44T | 901  | 0        | -1.000082 |  |
|  | Shiraz-49T | 1170 | 0        | -0.967436 |  |
|  | Shiraz-49T | 1170 | 0        | -0.967436 |  |
|  | Shiraz-18T | 1457 | 0.643204 | 0         |  |
|  | Shiraz-18T | 1457 | 0.643204 | 0         |  |
|  | Shiraz-22T | 1673 | 0.611783 | 0         |  |
|  | Shiraz-22T | 1673 | 0.611783 | 0         |  |
|  | Shiraz-22T | 1674 | 0.887899 | 0         |  |
|  | Shiraz-22T | 1674 | 0.887899 | 0         |  |
|  | Shiraz-25T | 1719 | 0.472955 | 0         |  |
|  | Shiraz-25T | 1719 | 0.472955 | 0         |  |
|  | Shiraz-28T | 1762 | 0.562311 | 0         |  |
|  | Shiraz-28T | 1762 | 0.562311 | 0         |  |
|  | Shiraz-29T | 1801 | 0.815343 | 0         |  |
|  | Shiraz-29T | 1801 | 0.815343 | 0         |  |
|  | Shiraz-32T | 1870 | 0.729766 | 0         |  |
|  | Shiraz-32T | 1870 | 0.729766 | 0         |  |
|  | Shiraz-35T | 1933 | 0.488535 | 0         |  |
|  | Shiraz-35T | 1933 | 0.488535 | 0         |  |
|  | Shiraz-58T | 2223 | 0.833364 | 0         |  |

|      |      |            |      |          |           |  |
|------|------|------------|------|----------|-----------|--|
|      |      | Shiraz-58T | 2223 | 0.833364 | 0         |  |
|      |      | Shiraz-58T | 2224 | 1.076575 | 0         |  |
|      |      | Shiraz-58T | 2224 | 1.076575 | 0         |  |
|      |      | Shiraz-71T | 2263 | 0.975531 | 0         |  |
|      |      | Shiraz-71T | 2263 | 0.975531 | 0         |  |
| DLX5 | chr7 | Shiraz-3T  | 90   | 0.219276 | 0         |  |
|      |      | Shiraz-4T  | 253  | 0.372918 | 0         |  |
|      |      | Shiraz-36T | 378  | 0.179558 | 0         |  |
|      |      | Shiraz-36T | 380  | 0.083883 | 0         |  |
|      |      | Shiraz-46T | 943  | 0.093799 | 0         |  |
|      |      | Shiraz-77T | 1225 | 0        | -0.117922 |  |
|      |      | Shiraz-18T | 1434 | 0.244465 | 0         |  |
|      |      | Shiraz-22T | 1549 | 0        | -0.319623 |  |
|      |      | Shiraz-25T | 1698 | 0.21835  | 0         |  |
|      |      | Shiraz-28T | 1735 | 0.350744 | 0         |  |
|      |      | Shiraz-29T | 1778 | 0.120767 | 0         |  |
|      |      | Shiraz-32T | 1833 | 0.551336 | 0         |  |
|      |      | Shiraz-38T | 1951 | 0.250891 | 0         |  |
|      |      | Shiraz-53T | 2078 | 0.287202 | 0         |  |
|      |      | Shiraz-71T | 2238 | 0.603631 | 0         |  |
|      |      | Shiraz-3T  | 90   | 0.219276 | 0         |  |
|      |      | Shiraz-4T  | 253  | 0.372918 | 0         |  |
|      |      | Shiraz-36T | 378  | 0.179558 | 0         |  |
|      |      | Shiraz-36T | 380  | 0.083883 | 0         |  |
|      |      | Shiraz-46T | 943  | 0.093799 | 0         |  |
|      |      | Shiraz-77T | 1225 | 0        | -0.117922 |  |
|      |      | Shiraz-18T | 1434 | 0.244465 | 0         |  |
|      |      | Shiraz-22T | 1549 | 0        | -0.319623 |  |
|      |      | Shiraz-25T | 1698 | 0.21835  | 0         |  |
|      |      | Shiraz-28T | 1735 | 0.350744 | 0         |  |
|      |      | Shiraz-29T | 1778 | 0.120767 | 0         |  |
|      |      | Shiraz-32T | 1833 | 0.551336 | 0         |  |
|      |      | Shiraz-38T | 1951 | 0.250891 | 0         |  |
|      |      | Shiraz-53T | 2078 | 0.287202 | 0         |  |
|      |      | Shiraz-71T | 2238 | 0.603631 | 0         |  |
|      |      | Shiraz-3T  | 90   | 0.219276 | 0         |  |
|      |      | Shiraz-4T  | 253  | 0.372918 | 0         |  |
|      |      | Shiraz-36T | 378  | 0.179558 | 0         |  |
|      |      | Shiraz-36T | 380  | 0.083883 | 0         |  |
|      |      | Shiraz-46T | 943  | 0.093799 | 0         |  |
|      |      | Shiraz-77T | 1225 | 0        | -0.117922 |  |
|      |      | Shiraz-18T | 1434 | 0.244465 | 0         |  |
|      |      | Shiraz-22T | 1549 | 0        | -0.319623 |  |
|      |      | Shiraz-25T | 1698 | 0.21835  | 0         |  |
|      |      | Shiraz-28T | 1735 | 0.350744 | 0         |  |
|      |      | Shiraz-29T | 1778 | 0.120767 | 0         |  |
|      |      | Shiraz-32T | 1833 | 0.551336 | 0         |  |



|      |      |            |      |          |           |  |
|------|------|------------|------|----------|-----------|--|
|      |      | Shiraz-38T | 1951 | 0.250891 | 0         |  |
|      |      | Shiraz-53T | 2078 | 0.287202 | 0         |  |
|      |      | Shiraz-71T | 2238 | 0.603631 | 0         |  |
| DLX6 | chr7 | Shiraz-3T  | 90   | 0.219276 | 0         |  |
|      |      | Shiraz-4T  | 253  | 0.372918 | 0         |  |
|      |      | Shiraz-36T | 378  | 0.179558 | 0         |  |
|      |      | Shiraz-36T | 380  | 0.083883 | 0         |  |
|      |      | Shiraz-46T | 943  | 0.093799 | 0         |  |
|      |      | Shiraz-77T | 1225 | 0        | -0.117922 |  |
|      |      | Shiraz-18T | 1434 | 0.244465 | 0         |  |
|      |      | Shiraz-22T | 1549 | 0        | -0.319623 |  |
|      |      | Shiraz-25T | 1698 | 0.21835  | 0         |  |
|      |      | Shiraz-28T | 1735 | 0.350744 | 0         |  |
|      |      | Shiraz-29T | 1778 | 0.120767 | 0         |  |
|      |      | Shiraz-32T | 1833 | 0.551336 | 0         |  |
|      |      | Shiraz-38T | 1951 | 0.250891 | 0         |  |
|      |      | Shiraz-53T | 2078 | 0.287202 | 0         |  |
|      |      | Shiraz-71T | 2238 | 0.603631 | 0         |  |
|      |      | Shiraz-3T  | 90   | 0.219276 | 0         |  |
|      |      | Shiraz-4T  | 253  | 0.372918 | 0         |  |
|      |      | Shiraz-36T | 378  | 0.179558 | 0         |  |
|      |      | Shiraz-36T | 380  | 0.083883 | 0         |  |
|      |      | Shiraz-46T | 943  | 0.093799 | 0         |  |
|      |      | Shiraz-77T | 1225 | 0        | -0.117922 |  |
|      |      | Shiraz-18T | 1434 | 0.244465 | 0         |  |
|      |      | Shiraz-22T | 1549 | 0        | -0.319623 |  |
|      |      | Shiraz-25T | 1698 | 0.21835  | 0         |  |
|      |      | Shiraz-28T | 1735 | 0.350744 | 0         |  |
|      |      | Shiraz-29T | 1778 | 0.120767 | 0         |  |
|      |      | Shiraz-32T | 1833 | 0.551336 | 0         |  |
|      |      | Shiraz-38T | 1951 | 0.250891 | 0         |  |
|      |      | Shiraz-53T | 2078 | 0.287202 | 0         |  |
|      |      | Shiraz-71T | 2238 | 0.603631 | 0         |  |
|      |      | Shiraz-3T  | 90   | 0.219276 | 0         |  |
|      |      | Shiraz-4T  | 253  | 0.372918 | 0         |  |
|      |      | Shiraz-36T | 378  | 0.179558 | 0         |  |
|      |      | Shiraz-36T | 380  | 0.083883 | 0         |  |
|      |      | Shiraz-46T | 943  | 0.093799 | 0         |  |
|      |      | Shiraz-77T | 1225 | 0        | -0.117922 |  |
|      |      | Shiraz-18T | 1434 | 0.244465 | 0         |  |
|      |      | Shiraz-22T | 1549 | 0        | -0.319623 |  |
|      |      | Shiraz-25T | 1698 | 0.21835  | 0         |  |
|      |      | Shiraz-28T | 1735 | 0.350744 | 0         |  |
|      |      | Shiraz-29T | 1778 | 0.120767 | 0         |  |
|      |      | Shiraz-32T | 1833 | 0.551336 | 0         |  |
|      |      | Shiraz-38T | 1951 | 0.250891 | 0         |  |
|      |      | Shiraz-53T | 2078 | 0.287202 | 0         |  |





















|  |            |     |          |           |  |  |
|--|------------|-----|----------|-----------|--|--|
|  | Shiraz-3T  | 235 | 0        | -0.28401  |  |  |
|  | Shiraz-3T  | 235 | 0        | -0.28401  |  |  |
|  | Shiraz-3T  | 235 | 0        | -0.28401  |  |  |
|  | Shiraz-3T  | 235 | 0        | -0.28401  |  |  |
|  | Shiraz-3T  | 235 | 0        | -0.28401  |  |  |
|  | Shiraz-3T  | 235 | 0        | -0.28401  |  |  |
|  | Shiraz-3T  | 235 | 0        | -0.28401  |  |  |
|  | Shiraz-3T  | 235 | 0        | -0.28401  |  |  |
|  | Shiraz-3T  | 235 | 0        | -0.28401  |  |  |
|  | Shiraz-3T  | 236 | 0        | -0.435445 |  |  |
|  | Shiraz-3T  | 236 | 0        | -0.435445 |  |  |
|  | Shiraz-3T  | 236 | 0        | -0.435445 |  |  |
|  | Shiraz-3T  | 236 | 0        | -0.435445 |  |  |
|  | Shiraz-3T  | 236 | 0        | -0.435445 |  |  |
|  | Shiraz-3T  | 236 | 0        | -0.435445 |  |  |
|  | Shiraz-3T  | 236 | 0        | -0.435445 |  |  |
|  | Shiraz-3T  | 236 | 0        | -0.435445 |  |  |
|  | Shiraz-3T  | 236 | 0        | -0.435445 |  |  |
|  | Shiraz-3T  | 236 | 0        | -0.435445 |  |  |
|  | Shiraz-3T  | 236 | 0        | -0.435445 |  |  |
|  | Shiraz-3T  | 236 | 0        | -0.435445 |  |  |
|  | Shiraz-3T  | 236 | 0        | -0.435445 |  |  |
|  | Shiraz-4T  | 260 | 0        | -0.324128 |  |  |
|  | Shiraz-4T  | 260 | 0        | -0.324128 |  |  |
|  | Shiraz-4T  | 260 | 0        | -0.324128 |  |  |
|  | Shiraz-4T  | 260 | 0        | -0.324128 |  |  |
|  | Shiraz-4T  | 260 | 0        | -0.324128 |  |  |
|  | Shiraz-4T  | 260 | 0        | -0.324128 |  |  |
|  | Shiraz-4T  | 260 | 0        | -0.324128 |  |  |
|  | Shiraz-4T  | 260 | 0        | -0.324128 |  |  |
|  | Shiraz-4T  | 260 | 0        | -0.324128 |  |  |
|  | Shiraz-4T  | 260 | 0        | -0.324128 |  |  |
|  | Shiraz-4T  | 260 | 0        | -0.324128 |  |  |
|  | Shiraz-4T  | 260 | 0        | -0.324128 |  |  |
|  | Shiraz-4T  | 260 | 0        | -0.324128 |  |  |
|  | Shiraz-4T  | 260 | 0        | -0.324128 |  |  |
|  | Shiraz-4T  | 260 | 0        | -0.324128 |  |  |
|  | Shiraz-4T  | 260 | 0        | -0.324128 |  |  |
|  | Shiraz-4T  | 260 | 0        | -0.324128 |  |  |
|  | Shiraz-4T  | 260 | 0        | -0.324128 |  |  |
|  | Shiraz-16T | 294 | 0.655804 | 0         |  |  |
|  | Shiraz-16T | 294 | 0.655804 | 0         |  |  |
|  | Shiraz-16T | 294 | 0.655804 | 0         |  |  |
|  | Shiraz-16T | 294 | 0.655804 | 0         |  |  |
|  | Shiraz-16T | 294 | 0.655804 | 0         |  |  |

|  |            |     |          |           |  |
|--|------------|-----|----------|-----------|--|
|  | Shiraz-16T | 294 | 0.655804 | 0         |  |
|  | Shiraz-16T | 294 | 0.655804 | 0         |  |
|  | Shiraz-16T | 294 | 0.655804 | 0         |  |
|  | Shiraz-16T | 294 | 0.655804 | 0         |  |
|  | Shiraz-16T | 294 | 0.655804 | 0         |  |
|  | Shiraz-16T | 294 | 0.655804 | 0         |  |
|  | Shiraz-16T | 294 | 0.655804 | 0         |  |
|  | Shiraz-16T | 294 | 0.655804 | 0         |  |
|  | Shiraz-16T | 294 | 0.655804 | 0         |  |
|  | Shiraz-16T | 294 | 0.655804 | 0         |  |
|  | Shiraz-36T | 431 | 0        | -0.78035  |  |
|  | Shiraz-36T | 431 | 0        | -0.78035  |  |
|  | Shiraz-36T | 431 | 0        | -0.78035  |  |
|  | Shiraz-36T | 431 | 0        | -0.78035  |  |
|  | Shiraz-36T | 431 | 0        | -0.78035  |  |
|  | Shiraz-36T | 431 | 0        | -0.78035  |  |
|  | Shiraz-36T | 431 | 0        | -0.78035  |  |
|  | Shiraz-36T | 431 | 0        | -0.78035  |  |
|  | Shiraz-36T | 431 | 0        | -0.78035  |  |
|  | Shiraz-36T | 431 | 0        | -0.78035  |  |
|  | Shiraz-36T | 431 | 0        | -0.78035  |  |
|  | Shiraz-36T | 431 | 0        | -0.78035  |  |
|  | Shiraz-36T | 431 | 0        | -0.78035  |  |
|  | Shiraz-36T | 431 | 0        | -0.78035  |  |
|  | Shiraz-36T | 431 | 0        | -0.78035  |  |
|  | Shiraz-36T | 431 | 0        | -0.78035  |  |
|  | Shiraz-36T | 431 | 0        | -0.78035  |  |
|  | Shiraz-44T | 891 | 0        | -0.954044 |  |
|  | Shiraz-44T | 891 | 0        | -0.954044 |  |
|  | Shiraz-44T | 891 | 0        | -0.954044 |  |
|  | Shiraz-44T | 891 | 0        | -0.954044 |  |
|  | Shiraz-44T | 891 | 0        | -0.954044 |  |
|  | Shiraz-44T | 891 | 0        | -0.954044 |  |
|  | Shiraz-44T | 891 | 0        | -0.954044 |  |
|  | Shiraz-44T | 891 | 0        | -0.954044 |  |
|  | Shiraz-44T | 891 | 0        | -0.954044 |  |
|  | Shiraz-44T | 891 | 0        | -0.954044 |  |
|  | Shiraz-44T | 891 | 0        | -0.954044 |  |
|  | Shiraz-44T | 891 | 0        | -0.954044 |  |
|  | Shiraz-44T | 891 | 0        | -0.954044 |  |
|  | Shiraz-44T | 891 | 0        | -0.954044 |  |
|  | Shiraz-44T | 891 | 0        | -0.954044 |  |
|  | Shiraz-44T | 893 | 0        | -1.364406 |  |
|  | Shiraz-44T | 893 | 0        | -1.364406 |  |
|  | Shiraz-44T | 893 | 0        | -1.364406 |  |
|  | Shiraz-44T | 893 | 0        | -1.364406 |  |



|  |  |            |      |          |           |  |  |
|--|--|------------|------|----------|-----------|--|--|
|  |  | Shiraz-49T | 1168 | 0        | -1.073859 |  |  |
|  |  | Shiraz-49T | 1168 | 0        | -1.073859 |  |  |
|  |  | Shiraz-49T | 1168 | 0        | -1.073859 |  |  |
|  |  | Shiraz-49T | 1168 | 0        | -1.073859 |  |  |
|  |  | Shiraz-49T | 1168 | 0        | -1.073859 |  |  |
|  |  | Shiraz-49T | 1168 | 0        | -1.073859 |  |  |
|  |  | Shiraz-49T | 1168 | 0        | -1.073859 |  |  |
|  |  | Shiraz-49T | 1168 | 0        | -1.073859 |  |  |
|  |  | Shiraz-49T | 1168 | 0        | -1.073859 |  |  |
|  |  | Shiraz-49T | 1168 | 0        | -1.073859 |  |  |
|  |  | Shiraz-49T | 1168 | 0        | -1.073859 |  |  |
|  |  | Shiraz-49T | 1168 | 0        | -1.073859 |  |  |
|  |  | Shiraz-49T | 1168 | 0        | -1.073859 |  |  |
|  |  | Shiraz-49T | 1168 | 0        | -1.073859 |  |  |
|  |  | Shiraz-49T | 1168 | 0        | -1.073859 |  |  |
|  |  | Shiraz-9T  | 1368 | 0.199713 | 0         |  |  |
|  |  | Shiraz-9T  | 1368 | 0.199713 | 0         |  |  |
|  |  | Shiraz-9T  | 1368 | 0.199713 | 0         |  |  |
|  |  | Shiraz-9T  | 1368 | 0.199713 | 0         |  |  |
|  |  | Shiraz-9T  | 1368 | 0.199713 | 0         |  |  |
|  |  | Shiraz-9T  | 1368 | 0.199713 | 0         |  |  |
|  |  | Shiraz-9T  | 1368 | 0.199713 | 0         |  |  |
|  |  | Shiraz-9T  | 1368 | 0.199713 | 0         |  |  |
|  |  | Shiraz-9T  | 1368 | 0.199713 | 0         |  |  |
|  |  | Shiraz-9T  | 1368 | 0.199713 | 0         |  |  |
|  |  | Shiraz-9T  | 1368 | 0.199713 | 0         |  |  |
|  |  | Shiraz-9T  | 1368 | 0.199713 | 0         |  |  |
|  |  | Shiraz-9T  | 1368 | 0.199713 | 0         |  |  |
|  |  | Shiraz-9T  | 1368 | 0.199713 | 0         |  |  |
|  |  | Shiraz-9T  | 1368 | 0.199713 | 0         |  |  |
|  |  | Shiraz-9T  | 1368 | 0.199713 | 0         |  |  |
|  |  | Shiraz-9T  | 1368 | 0.199713 | 0         |  |  |
|  |  | Shiraz-18T | 1455 | 0        | -0.186773 |  |  |
|  |  | Shiraz-18T | 1455 | 0        | -0.186773 |  |  |
|  |  | Shiraz-18T | 1455 | 0        | -0.186773 |  |  |
|  |  | Shiraz-18T | 1455 | 0        | -0.186773 |  |  |
|  |  | Shiraz-18T | 1455 | 0        | -0.186773 |  |  |
|  |  | Shiraz-18T | 1455 | 0        | -0.186773 |  |  |
|  |  | Shiraz-18T | 1455 | 0        | -0.186773 |  |  |
|  |  | Shiraz-18T | 1455 | 0        | -0.186773 |  |  |
|  |  | Shiraz-18T | 1455 | 0        | -0.186773 |  |  |
|  |  | Shiraz-18T | 1455 | 0        | -0.186773 |  |  |
|  |  | Shiraz-18T | 1455 | 0        | -0.186773 |  |  |
|  |  | Shiraz-18T | 1455 | 0        | -0.186773 |  |  |
|  |  | Shiraz-18T | 1455 | 0        | -0.186773 |  |  |
|  |  | Shiraz-18T | 1455 | 0        | -0.186773 |  |  |
|  |  | Shiraz-18T | 1455 | 0        | -0.186773 |  |  |
|  |  | Shiraz-18T | 1455 | 0        | -0.186773 |  |  |
|  |  | Shiraz-18T | 1455 | 0        | -0.186773 |  |  |
|  |  | Shiraz-22T | 1669 | 0.695915 | 0         |  |  |
|  |  | Shiraz-22T | 1669 | 0.695915 | 0         |  |  |































|        |      |            |      |          |           |  |  |
|--------|------|------------|------|----------|-----------|--|--|
|        |      | Shiraz-71T | 2260 | 0.68394  | 0         |  |  |
|        |      | Shiraz-71T | 2260 | 0.68394  | 0         |  |  |
|        |      | Shiraz-71T | 2260 | 0.68394  | 0         |  |  |
|        |      | Shiraz-71T | 2260 | 0.68394  | 0         |  |  |
|        |      | Shiraz-71T | 2260 | 0.68394  | 0         |  |  |
|        |      | Shiraz-71T | 2260 | 0.68394  | 0         |  |  |
|        |      | Shiraz-71T | 2260 | 0.68394  | 0         |  |  |
|        |      | Shiraz-71T | 2260 | 0.68394  | 0         |  |  |
|        |      | Shiraz-71T | 2260 | 0.68394  | 0         |  |  |
|        |      | Shiraz-71T | 2260 | 0.68394  | 0         |  |  |
|        |      | Shiraz-71T | 2260 | 0.68394  | 0         |  |  |
|        |      | Shiraz-71T | 2261 | 0.508399 | 0         |  |  |
|        |      | Shiraz-71T | 2261 | 0.508399 | 0         |  |  |
|        |      | Shiraz-71T | 2261 | 0.508399 | 0         |  |  |
|        |      | Shiraz-71T | 2261 | 0.508399 | 0         |  |  |
|        |      | Shiraz-71T | 2261 | 0.508399 | 0         |  |  |
|        |      | Shiraz-71T | 2261 | 0.508399 | 0         |  |  |
|        |      | Shiraz-71T | 2261 | 0.508399 | 0         |  |  |
|        |      | Shiraz-71T | 2261 | 0.508399 | 0         |  |  |
|        |      | Shiraz-71T | 2261 | 0.508399 | 0         |  |  |
|        |      | Shiraz-71T | 2261 | 0.508399 | 0         |  |  |
|        |      | Shiraz-71T | 2261 | 0.508399 | 0         |  |  |
|        |      | Shiraz-71T | 2261 | 0.508399 | 0         |  |  |
|        |      | Shiraz-71T | 2261 | 0.508399 | 0         |  |  |
|        |      | Shiraz-71T | 2261 | 0.508399 | 0         |  |  |
|        |      | Shiraz-71T | 2261 | 0.508399 | 0         |  |  |
|        |      | Shiraz-71T | 2261 | 0.508399 | 0         |  |  |
|        |      | Shiraz-71T | 2261 | 0.508399 | 0         |  |  |
|        |      | Shiraz-71T | 2261 | 0.508399 | 0         |  |  |
| DMRTC1 | chrX | Shiraz-3T  | 242  | 0        | -0.336434 |  |  |
|        |      | Shiraz-3T  | 242  | 0        | -0.336434 |  |  |
|        |      | Shiraz-4T  | 261  | 0        | -0.336249 |  |  |
|        |      | Shiraz-4T  | 261  | 0        | -0.336249 |  |  |
|        |      | Shiraz-16T | 295  | 0.591657 | 0         |  |  |
|        |      | Shiraz-16T | 295  | 0.591657 | 0         |  |  |
|        |      | Shiraz-36T | 433  | 0        | -0.803961 |  |  |
|        |      | Shiraz-36T | 433  | 0        | -0.803961 |  |  |
|        |      | Shiraz-44T | 899  | 0        | -1.09697  |  |  |
|        |      | Shiraz-44T | 899  | 0        | -1.09697  |  |  |
|        |      | Shiraz-49T | 1170 | 0        | -0.967436 |  |  |
|        |      | Shiraz-49T | 1170 | 0        | -0.967436 |  |  |
|        |      | Shiraz-18T | 1457 | 0.643204 | 0         |  |  |
|        |      | Shiraz-18T | 1457 | 0.643204 | 0         |  |  |
|        |      | Shiraz-22T | 1673 | 0.611783 | 0         |  |  |
|        |      | Shiraz-22T | 1673 | 0.611783 | 0         |  |  |
|        |      | Shiraz-25T | 1719 | 0.472955 | 0         |  |  |
|        |      | Shiraz-25T | 1719 | 0.472955 | 0         |  |  |
|        |      | Shiraz-28T | 1762 | 0.562311 | 0         |  |  |
|        |      | Shiraz-28T | 1762 | 0.562311 | 0         |  |  |

|  |  |            |      |          |           |  |  |
|--|--|------------|------|----------|-----------|--|--|
|  |  | Shiraz-29T | 1801 | 0.815343 | 0         |  |  |
|  |  | Shiraz-29T | 1801 | 0.815343 | 0         |  |  |
|  |  | Shiraz-32T | 1870 | 0.729766 | 0         |  |  |
|  |  | Shiraz-32T | 1870 | 0.729766 | 0         |  |  |
|  |  | Shiraz-35T | 1933 | 0.488535 | 0         |  |  |
|  |  | Shiraz-35T | 1933 | 0.488535 | 0         |  |  |
|  |  | Shiraz-58T | 2223 | 0.833364 | 0         |  |  |
|  |  | Shiraz-58T | 2223 | 0.833364 | 0         |  |  |
|  |  | Shiraz-71T | 2263 | 0.975531 | 0         |  |  |
|  |  | Shiraz-71T | 2263 | 0.975531 | 0         |  |  |
|  |  | Shiraz-3T  | 242  | 0        | -0.336434 |  |  |
|  |  | Shiraz-3T  | 242  | 0        | -0.336434 |  |  |
|  |  | Shiraz-4T  | 261  | 0        | -0.336249 |  |  |
|  |  | Shiraz-4T  | 261  | 0        | -0.336249 |  |  |
|  |  | Shiraz-16T | 295  | 0.591657 | 0         |  |  |
|  |  | Shiraz-16T | 295  | 0.591657 | 0         |  |  |
|  |  | Shiraz-36T | 433  | 0        | -0.803961 |  |  |
|  |  | Shiraz-36T | 433  | 0        | -0.803961 |  |  |
|  |  | Shiraz-44T | 899  | 0        | -1.09697  |  |  |
|  |  | Shiraz-44T | 899  | 0        | -1.09697  |  |  |
|  |  | Shiraz-49T | 1170 | 0        | -0.967436 |  |  |
|  |  | Shiraz-49T | 1170 | 0        | -0.967436 |  |  |
|  |  | Shiraz-18T | 1457 | 0.643204 | 0         |  |  |
|  |  | Shiraz-18T | 1457 | 0.643204 | 0         |  |  |
|  |  | Shiraz-22T | 1673 | 0.611783 | 0         |  |  |
|  |  | Shiraz-22T | 1673 | 0.611783 | 0         |  |  |
|  |  | Shiraz-25T | 1719 | 0.472955 | 0         |  |  |
|  |  | Shiraz-25T | 1719 | 0.472955 | 0         |  |  |
|  |  | Shiraz-28T | 1762 | 0.562311 | 0         |  |  |
|  |  | Shiraz-28T | 1762 | 0.562311 | 0         |  |  |
|  |  | Shiraz-29T | 1801 | 0.815343 | 0         |  |  |
|  |  | Shiraz-29T | 1801 | 0.815343 | 0         |  |  |
|  |  | Shiraz-32T | 1870 | 0.729766 | 0         |  |  |
|  |  | Shiraz-32T | 1870 | 0.729766 | 0         |  |  |
|  |  | Shiraz-35T | 1933 | 0.488535 | 0         |  |  |
|  |  | Shiraz-35T | 1933 | 0.488535 | 0         |  |  |
|  |  | Shiraz-58T | 2223 | 0.833364 | 0         |  |  |
|  |  | Shiraz-58T | 2223 | 0.833364 | 0         |  |  |
|  |  | Shiraz-71T | 2263 | 0.975531 | 0         |  |  |
|  |  | Shiraz-71T | 2263 | 0.975531 | 0         |  |  |
|  |  | Shiraz-3T  | 242  | 0        | -0.336434 |  |  |
|  |  | Shiraz-3T  | 242  | 0        | -0.336434 |  |  |
|  |  | Shiraz-4T  | 261  | 0        | -0.336249 |  |  |
|  |  | Shiraz-4T  | 261  | 0        | -0.336249 |  |  |
|  |  | Shiraz-16T | 295  | 0.591657 | 0         |  |  |
|  |  | Shiraz-16T | 295  | 0.591657 | 0         |  |  |
|  |  | Shiraz-36T | 433  | 0        | -0.803961 |  |  |

|         |      |            |      |          |           |  |  |
|---------|------|------------|------|----------|-----------|--|--|
|         |      | Shiraz-36T | 433  | 0        | -0.803961 |  |  |
|         |      | Shiraz-44T | 899  | 0        | -1.09697  |  |  |
|         |      | Shiraz-44T | 899  | 0        | -1.09697  |  |  |
|         |      | Shiraz-49T | 1170 | 0        | -0.967436 |  |  |
|         |      | Shiraz-49T | 1170 | 0        | -0.967436 |  |  |
|         |      | Shiraz-18T | 1457 | 0.643204 | 0         |  |  |
|         |      | Shiraz-18T | 1457 | 0.643204 | 0         |  |  |
|         |      | Shiraz-22T | 1673 | 0.611783 | 0         |  |  |
|         |      | Shiraz-22T | 1673 | 0.611783 | 0         |  |  |
|         |      | Shiraz-25T | 1719 | 0.472955 | 0         |  |  |
|         |      | Shiraz-25T | 1719 | 0.472955 | 0         |  |  |
|         |      | Shiraz-28T | 1762 | 0.562311 | 0         |  |  |
|         |      | Shiraz-28T | 1762 | 0.562311 | 0         |  |  |
|         |      | Shiraz-29T | 1801 | 0.815343 | 0         |  |  |
|         |      | Shiraz-29T | 1801 | 0.815343 | 0         |  |  |
|         |      | Shiraz-32T | 1870 | 0.729766 | 0         |  |  |
|         |      | Shiraz-32T | 1870 | 0.729766 | 0         |  |  |
|         |      | Shiraz-35T | 1933 | 0.488535 | 0         |  |  |
|         |      | Shiraz-35T | 1933 | 0.488535 | 0         |  |  |
|         |      | Shiraz-58T | 2223 | 0.833364 | 0         |  |  |
|         |      | Shiraz-58T | 2223 | 0.833364 | 0         |  |  |
|         |      | Shiraz-71T | 2263 | 0.975531 | 0         |  |  |
|         |      | Shiraz-71T | 2263 | 0.975531 | 0         |  |  |
| DMRTC1B | chrX | Shiraz-3T  | 242  | 0        | -0.336434 |  |  |
|         |      | Shiraz-3T  | 242  | 0        | -0.336434 |  |  |
|         |      | Shiraz-4T  | 261  | 0        | -0.336249 |  |  |
|         |      | Shiraz-4T  | 261  | 0        | -0.336249 |  |  |
|         |      | Shiraz-16T | 295  | 0.591657 | 0         |  |  |
|         |      | Shiraz-16T | 295  | 0.591657 | 0         |  |  |
|         |      | Shiraz-36T | 433  | 0        | -0.803961 |  |  |
|         |      | Shiraz-36T | 433  | 0        | -0.803961 |  |  |
|         |      | Shiraz-44T | 899  | 0        | -1.09697  |  |  |
|         |      | Shiraz-44T | 899  | 0        | -1.09697  |  |  |
|         |      | Shiraz-49T | 1170 | 0        | -0.967436 |  |  |
|         |      | Shiraz-49T | 1170 | 0        | -0.967436 |  |  |
|         |      | Shiraz-18T | 1457 | 0.643204 | 0         |  |  |
|         |      | Shiraz-18T | 1457 | 0.643204 | 0         |  |  |
|         |      | Shiraz-22T | 1673 | 0.611783 | 0         |  |  |
|         |      | Shiraz-22T | 1673 | 0.611783 | 0         |  |  |
|         |      | Shiraz-25T | 1719 | 0.472955 | 0         |  |  |
|         |      | Shiraz-25T | 1719 | 0.472955 | 0         |  |  |
|         |      | Shiraz-28T | 1762 | 0.562311 | 0         |  |  |
|         |      | Shiraz-28T | 1762 | 0.562311 | 0         |  |  |
|         |      | Shiraz-29T | 1801 | 0.815343 | 0         |  |  |
|         |      | Shiraz-29T | 1801 | 0.815343 | 0         |  |  |
|         |      | Shiraz-32T | 1870 | 0.729766 | 0         |  |  |
|         |      | Shiraz-32T | 1870 | 0.729766 | 0         |  |  |

|  |            |      |          |           |  |
|--|------------|------|----------|-----------|--|
|  | Shiraz-35T | 1933 | 0.488535 | 0         |  |
|  | Shiraz-35T | 1933 | 0.488535 | 0         |  |
|  | Shiraz-58T | 2223 | 0.833364 | 0         |  |
|  | Shiraz-58T | 2223 | 0.833364 | 0         |  |
|  | Shiraz-71T | 2263 | 0.975531 | 0         |  |
|  | Shiraz-71T | 2263 | 0.975531 | 0         |  |
|  | Shiraz-3T  | 242  | 0        | -0.336434 |  |
|  | Shiraz-3T  | 242  | 0        | -0.336434 |  |
|  | Shiraz-4T  | 261  | 0        | -0.336249 |  |
|  | Shiraz-4T  | 261  | 0        | -0.336249 |  |
|  | Shiraz-16T | 295  | 0.591657 | 0         |  |
|  | Shiraz-16T | 295  | 0.591657 | 0         |  |
|  | Shiraz-36T | 433  | 0        | -0.803961 |  |
|  | Shiraz-36T | 433  | 0        | -0.803961 |  |
|  | Shiraz-44T | 899  | 0        | -1.09697  |  |
|  | Shiraz-44T | 899  | 0        | -1.09697  |  |
|  | Shiraz-49T | 1170 | 0        | -0.967436 |  |
|  | Shiraz-49T | 1170 | 0        | -0.967436 |  |
|  | Shiraz-18T | 1457 | 0.643204 | 0         |  |
|  | Shiraz-18T | 1457 | 0.643204 | 0         |  |
|  | Shiraz-22T | 1673 | 0.611783 | 0         |  |
|  | Shiraz-22T | 1673 | 0.611783 | 0         |  |
|  | Shiraz-25T | 1719 | 0.472955 | 0         |  |
|  | Shiraz-25T | 1719 | 0.472955 | 0         |  |
|  | Shiraz-28T | 1762 | 0.562311 | 0         |  |
|  | Shiraz-28T | 1762 | 0.562311 | 0         |  |
|  | Shiraz-29T | 1801 | 0.815343 | 0         |  |
|  | Shiraz-29T | 1801 | 0.815343 | 0         |  |
|  | Shiraz-32T | 1870 | 0.729766 | 0         |  |
|  | Shiraz-32T | 1870 | 0.729766 | 0         |  |
|  | Shiraz-35T | 1933 | 0.488535 | 0         |  |
|  | Shiraz-35T | 1933 | 0.488535 | 0         |  |
|  | Shiraz-58T | 2223 | 0.833364 | 0         |  |
|  | Shiraz-58T | 2223 | 0.833364 | 0         |  |
|  | Shiraz-71T | 2263 | 0.975531 | 0         |  |
|  | Shiraz-71T | 2263 | 0.975531 | 0         |  |
|  | Shiraz-3T  | 242  | 0        | -0.336434 |  |
|  | Shiraz-3T  | 242  | 0        | -0.336434 |  |
|  | Shiraz-4T  | 261  | 0        | -0.336249 |  |
|  | Shiraz-4T  | 261  | 0        | -0.336249 |  |
|  | Shiraz-16T | 295  | 0.591657 | 0         |  |
|  | Shiraz-16T | 295  | 0.591657 | 0         |  |
|  | Shiraz-36T | 433  | 0        | -0.803961 |  |
|  | Shiraz-36T | 433  | 0        | -0.803961 |  |
|  | Shiraz-44T | 899  | 0        | -1.09697  |  |
|  | Shiraz-44T | 899  | 0        | -1.09697  |  |
|  | Shiraz-49T | 1170 | 0        | -0.967436 |  |

|       |      |            |      |          |           |  |  |
|-------|------|------------|------|----------|-----------|--|--|
|       |      | Shiraz-49T | 1170 | 0        | -0.967436 |  |  |
|       |      | Shiraz-18T | 1457 | 0.643204 | 0         |  |  |
|       |      | Shiraz-18T | 1457 | 0.643204 | 0         |  |  |
|       |      | Shiraz-22T | 1673 | 0.611783 | 0         |  |  |
|       |      | Shiraz-22T | 1673 | 0.611783 | 0         |  |  |
|       |      | Shiraz-25T | 1719 | 0.472955 | 0         |  |  |
|       |      | Shiraz-25T | 1719 | 0.472955 | 0         |  |  |
|       |      | Shiraz-28T | 1762 | 0.562311 | 0         |  |  |
|       |      | Shiraz-28T | 1762 | 0.562311 | 0         |  |  |
|       |      | Shiraz-29T | 1801 | 0.815343 | 0         |  |  |
|       |      | Shiraz-29T | 1801 | 0.815343 | 0         |  |  |
|       |      | Shiraz-32T | 1870 | 0.729766 | 0         |  |  |
|       |      | Shiraz-32T | 1870 | 0.729766 | 0         |  |  |
|       |      | Shiraz-35T | 1933 | 0.488535 | 0         |  |  |
|       |      | Shiraz-35T | 1933 | 0.488535 | 0         |  |  |
|       |      | Shiraz-58T | 2223 | 0.833364 | 0         |  |  |
|       |      | Shiraz-58T | 2223 | 0.833364 | 0         |  |  |
|       |      | Shiraz-71T | 2263 | 0.975531 | 0         |  |  |
|       |      | Shiraz-71T | 2263 | 0.975531 | 0         |  |  |
| DMTF1 | chr7 | Shiraz-3T  | 90   | 0.219276 | 0         |  |  |
|       |      | Shiraz-3T  | 90   | 0.219276 | 0         |  |  |
|       |      | Shiraz-3T  | 93   | 0        | -0.058023 |  |  |
|       |      | Shiraz-3T  | 93   | 0        | -0.058023 |  |  |
|       |      | Shiraz-4T  | 253  | 0.372918 | 0         |  |  |
|       |      | Shiraz-4T  | 253  | 0.372918 | 0         |  |  |
|       |      | Shiraz-36T | 378  | 0.179558 | 0         |  |  |
|       |      | Shiraz-36T | 378  | 0.179558 | 0         |  |  |
|       |      | Shiraz-36T | 380  | 0.083883 | 0         |  |  |
|       |      | Shiraz-36T | 380  | 0.083883 | 0         |  |  |
|       |      | Shiraz-44T | 638  | 0        | -0.433476 |  |  |
|       |      | Shiraz-44T | 638  | 0        | -0.433476 |  |  |
|       |      | Shiraz-46T | 943  | 0.093799 | 0         |  |  |
|       |      | Shiraz-46T | 943  | 0.093799 | 0         |  |  |
|       |      | Shiraz-46T | 945  | 0        | -0.014838 |  |  |
|       |      | Shiraz-46T | 945  | 0        | -0.014838 |  |  |
|       |      | Shiraz-47T | 1029 | 0        | -0.096586 |  |  |
|       |      | Shiraz-47T | 1029 | 0        | -0.096586 |  |  |
|       |      | Shiraz-49T | 1119 | 0        | -0.157331 |  |  |
|       |      | Shiraz-49T | 1119 | 0        | -0.157331 |  |  |
|       |      | Shiraz-77T | 1225 | 0        | -0.117922 |  |  |
|       |      | Shiraz-77T | 1225 | 0        | -0.117922 |  |  |
|       |      | Shiraz-77T | 1226 | 0        | -0.233724 |  |  |
|       |      | Shiraz-77T | 1226 | 0        | -0.233724 |  |  |
|       |      | Shiraz-18T | 1434 | 0.244465 | 0         |  |  |
|       |      | Shiraz-18T | 1434 | 0.244465 | 0         |  |  |
|       |      | Shiraz-22T | 1549 | 0        | -0.319623 |  |  |
|       |      | Shiraz-22T | 1549 | 0        | -0.319623 |  |  |



|  |            |      |          |           |  |
|--|------------|------|----------|-----------|--|
|  | Shiraz-22T | 1550 | 0        | -0.577052 |  |
|  | Shiraz-22T | 1550 | 0        | -0.577052 |  |
|  | Shiraz-25T | 1698 | 0.21835  | 0         |  |
|  | Shiraz-25T | 1698 | 0.21835  | 0         |  |
|  | Shiraz-28T | 1735 | 0.350744 | 0         |  |
|  | Shiraz-28T | 1735 | 0.350744 | 0         |  |
|  | Shiraz-29T | 1778 | 0.120767 | 0         |  |
|  | Shiraz-29T | 1778 | 0.120767 | 0         |  |
|  | Shiraz-38T | 1951 | 0.250891 | 0         |  |
|  | Shiraz-38T | 1951 | 0.250891 | 0         |  |
|  | Shiraz-53T | 2078 | 0.287202 | 0         |  |
|  | Shiraz-53T | 2078 | 0.287202 | 0         |  |
|  | Shiraz-58T | 2159 | 0        | -0.219521 |  |
|  | Shiraz-58T | 2159 | 0        | -0.219521 |  |
|  | Shiraz-71T | 2238 | 0.603631 | 0         |  |
|  | Shiraz-71T | 2238 | 0.603631 | 0         |  |
|  | Shiraz-3T  | 90   | 0.219276 | 0         |  |
|  | Shiraz-3T  | 90   | 0.219276 | 0         |  |
|  | Shiraz-3T  | 93   | 0        | -0.058023 |  |
|  | Shiraz-3T  | 93   | 0        | -0.058023 |  |
|  | Shiraz-4T  | 253  | 0.372918 | 0         |  |
|  | Shiraz-4T  | 253  | 0.372918 | 0         |  |
|  | Shiraz-36T | 378  | 0.179558 | 0         |  |
|  | Shiraz-36T | 378  | 0.179558 | 0         |  |
|  | Shiraz-36T | 380  | 0.083883 | 0         |  |
|  | Shiraz-36T | 380  | 0.083883 | 0         |  |
|  | Shiraz-44T | 638  | 0        | -0.433476 |  |
|  | Shiraz-44T | 638  | 0        | -0.433476 |  |
|  | Shiraz-46T | 943  | 0.093799 | 0         |  |
|  | Shiraz-46T | 943  | 0.093799 | 0         |  |
|  | Shiraz-46T | 945  | 0        | -0.014838 |  |
|  | Shiraz-46T | 945  | 0        | -0.014838 |  |
|  | Shiraz-47T | 1029 | 0        | -0.096586 |  |
|  | Shiraz-47T | 1029 | 0        | -0.096586 |  |
|  | Shiraz-49T | 1119 | 0        | -0.157331 |  |
|  | Shiraz-49T | 1119 | 0        | -0.157331 |  |
|  | Shiraz-77T | 1225 | 0        | -0.117922 |  |
|  | Shiraz-77T | 1225 | 0        | -0.117922 |  |
|  | Shiraz-77T | 1226 | 0        | -0.233724 |  |
|  | Shiraz-77T | 1226 | 0        | -0.233724 |  |
|  | Shiraz-18T | 1434 | 0.244465 | 0         |  |
|  | Shiraz-18T | 1434 | 0.244465 | 0         |  |
|  | Shiraz-22T | 1549 | 0        | -0.319623 |  |
|  | Shiraz-22T | 1549 | 0        | -0.319623 |  |
|  | Shiraz-22T | 1550 | 0        | -0.577052 |  |
|  | Shiraz-22T | 1550 | 0        | -0.577052 |  |
|  | Shiraz-25T | 1698 | 0.21835  | 0         |  |

|  |  |            |      |          |           |  |  |
|--|--|------------|------|----------|-----------|--|--|
|  |  | Shiraz-25T | 1698 | 0.21835  | 0         |  |  |
|  |  | Shiraz-28T | 1735 | 0.350744 | 0         |  |  |
|  |  | Shiraz-28T | 1735 | 0.350744 | 0         |  |  |
|  |  | Shiraz-29T | 1778 | 0.120767 | 0         |  |  |
|  |  | Shiraz-29T | 1778 | 0.120767 | 0         |  |  |
|  |  | Shiraz-38T | 1951 | 0.250891 | 0         |  |  |
|  |  | Shiraz-38T | 1951 | 0.250891 | 0         |  |  |
|  |  | Shiraz-53T | 2078 | 0.287202 | 0         |  |  |
|  |  | Shiraz-53T | 2078 | 0.287202 | 0         |  |  |
|  |  | Shiraz-58T | 2159 | 0        | -0.219521 |  |  |
|  |  | Shiraz-58T | 2159 | 0        | -0.219521 |  |  |
|  |  | Shiraz-71T | 2238 | 0.603631 | 0         |  |  |
|  |  | Shiraz-71T | 2238 | 0.603631 | 0         |  |  |
|  |  | Shiraz-3T  | 90   | 0.219276 | 0         |  |  |
|  |  | Shiraz-3T  | 90   | 0.219276 | 0         |  |  |
|  |  | Shiraz-3T  | 93   | 0        | -0.058023 |  |  |
|  |  | Shiraz-3T  | 93   | 0        | -0.058023 |  |  |
|  |  | Shiraz-4T  | 253  | 0.372918 | 0         |  |  |
|  |  | Shiraz-4T  | 253  | 0.372918 | 0         |  |  |
|  |  | Shiraz-36T | 378  | 0.179558 | 0         |  |  |
|  |  | Shiraz-36T | 378  | 0.179558 | 0         |  |  |
|  |  | Shiraz-36T | 380  | 0.083883 | 0         |  |  |
|  |  | Shiraz-36T | 380  | 0.083883 | 0         |  |  |
|  |  | Shiraz-44T | 638  | 0        | -0.433476 |  |  |
|  |  | Shiraz-44T | 638  | 0        | -0.433476 |  |  |
|  |  | Shiraz-46T | 943  | 0.093799 | 0         |  |  |
|  |  | Shiraz-46T | 943  | 0.093799 | 0         |  |  |
|  |  | Shiraz-46T | 945  | 0        | -0.014838 |  |  |
|  |  | Shiraz-46T | 945  | 0        | -0.014838 |  |  |
|  |  | Shiraz-47T | 1029 | 0        | -0.096586 |  |  |
|  |  | Shiraz-47T | 1029 | 0        | -0.096586 |  |  |
|  |  | Shiraz-49T | 1119 | 0        | -0.157331 |  |  |
|  |  | Shiraz-49T | 1119 | 0        | -0.157331 |  |  |
|  |  | Shiraz-77T | 1225 | 0        | -0.117922 |  |  |
|  |  | Shiraz-77T | 1225 | 0        | -0.117922 |  |  |
|  |  | Shiraz-77T | 1226 | 0        | -0.233724 |  |  |
|  |  | Shiraz-77T | 1226 | 0        | -0.233724 |  |  |
|  |  | Shiraz-18T | 1434 | 0.244465 | 0         |  |  |
|  |  | Shiraz-18T | 1434 | 0.244465 | 0         |  |  |
|  |  | Shiraz-22T | 1549 | 0        | -0.319623 |  |  |
|  |  | Shiraz-22T | 1549 | 0        | -0.319623 |  |  |
|  |  | Shiraz-22T | 1550 | 0        | -0.577052 |  |  |
|  |  | Shiraz-22T | 1550 | 0        | -0.577052 |  |  |
|  |  | Shiraz-25T | 1698 | 0.21835  | 0         |  |  |
|  |  | Shiraz-25T | 1698 | 0.21835  | 0         |  |  |
|  |  | Shiraz-28T | 1735 | 0.350744 | 0         |  |  |
|  |  | Shiraz-28T | 1735 | 0.350744 | 0         |  |  |

|        |      |            |      |          |           |  |
|--------|------|------------|------|----------|-----------|--|
|        |      | Shiraz-29T | 1778 | 0.120767 | 0         |  |
|        |      | Shiraz-29T | 1778 | 0.120767 | 0         |  |
|        |      | Shiraz-38T | 1951 | 0.250891 | 0         |  |
|        |      | Shiraz-38T | 1951 | 0.250891 | 0         |  |
|        |      | Shiraz-53T | 2078 | 0.287202 | 0         |  |
|        |      | Shiraz-53T | 2078 | 0.287202 | 0         |  |
|        |      | Shiraz-58T | 2159 | 0        | -0.219521 |  |
|        |      | Shiraz-58T | 2159 | 0        | -0.219521 |  |
|        |      | Shiraz-71T | 2238 | 0.603631 | 0         |  |
|        |      | Shiraz-71T | 2238 | 0.603631 | 0         |  |
| DNAH11 | chr7 | Shiraz-3T  | 87   | 0.198593 | 0         |  |
|        |      | Shiraz-4T  | 252  | 0.192083 | 0         |  |
|        |      | Shiraz-36T | 376  | 0.159952 | 0         |  |
|        |      | Shiraz-44T | 628  | 0        | -0.444379 |  |
|        |      | Shiraz-46T | 942  | 0.069143 | 0         |  |
|        |      | Shiraz-47T | 1027 | 0        | -0.117848 |  |
|        |      | Shiraz-77T | 1222 | 0        | -0.113002 |  |
|        |      | Shiraz-18T | 1433 | 0.250973 | 0         |  |
|        |      | Shiraz-25T | 1697 | 0.21945  | 0         |  |
|        |      | Shiraz-28T | 1734 | 0.362882 | 0         |  |
|        |      | Shiraz-29T | 1777 | 0.156747 | 0         |  |
|        |      | Shiraz-38T | 1950 | 0.265916 | 0         |  |
|        |      | Shiraz-58T | 2157 | 0        | -0.213872 |  |
|        |      | Shiraz-71T | 2236 | 0.320072 | 0         |  |
|        |      | Shiraz-3T  | 87   | 0.198593 | 0         |  |
|        |      | Shiraz-4T  | 252  | 0.192083 | 0         |  |
|        |      | Shiraz-36T | 376  | 0.159952 | 0         |  |
|        |      | Shiraz-44T | 628  | 0        | -0.444379 |  |
|        |      | Shiraz-46T | 942  | 0.069143 | 0         |  |
|        |      | Shiraz-47T | 1027 | 0        | -0.117848 |  |
|        |      | Shiraz-77T | 1222 | 0        | -0.113002 |  |
|        |      | Shiraz-18T | 1433 | 0.250973 | 0         |  |
|        |      | Shiraz-25T | 1697 | 0.21945  | 0         |  |
|        |      | Shiraz-28T | 1734 | 0.362882 | 0         |  |
|        |      | Shiraz-29T | 1777 | 0.156747 | 0         |  |
|        |      | Shiraz-38T | 1950 | 0.265916 | 0         |  |
|        |      | Shiraz-58T | 2157 | 0        | -0.213872 |  |
|        |      | Shiraz-71T | 2236 | 0.320072 | 0         |  |
|        |      | Shiraz-3T  | 87   | 0.198593 | 0         |  |
|        |      | Shiraz-4T  | 252  | 0.192083 | 0         |  |
|        |      | Shiraz-36T | 376  | 0.159952 | 0         |  |
|        |      | Shiraz-44T | 628  | 0        | -0.444379 |  |
|        |      | Shiraz-46T | 942  | 0.069143 | 0         |  |
|        |      | Shiraz-47T | 1027 | 0        | -0.117848 |  |
|        |      | Shiraz-77T | 1222 | 0        | -0.113002 |  |
|        |      | Shiraz-18T | 1433 | 0.250973 | 0         |  |
|        |      | Shiraz-25T | 1697 | 0.21945  | 0         |  |

|        |      |            |      |          |           |  |
|--------|------|------------|------|----------|-----------|--|
|        |      | Shiraz-28T | 1734 | 0.362882 | 0         |  |
|        |      | Shiraz-29T | 1777 | 0.156747 | 0         |  |
|        |      | Shiraz-38T | 1950 | 0.265916 | 0         |  |
|        |      | Shiraz-58T | 2157 | 0        | -0.213872 |  |
|        |      | Shiraz-71T | 2236 | 0.320072 | 0         |  |
| DNAJB9 | chr7 | Shiraz-3T  | 90   | 0.219276 | 0         |  |
|        |      | Shiraz-3T  | 95   | 0        | -0.077623 |  |
|        |      | Shiraz-4T  | 253  | 0.372918 | 0         |  |
|        |      | Shiraz-36T | 378  | 0.179558 | 0         |  |
|        |      | Shiraz-36T | 382  | 0.081739 | 0         |  |
|        |      | Shiraz-44T | 641  | 0        | -0.477846 |  |
|        |      | Shiraz-46T | 943  | 0.093799 | 0         |  |
|        |      | Shiraz-46T | 947  | 0        | -0.010843 |  |
|        |      | Shiraz-47T | 1031 | 0        | -0.117529 |  |
|        |      | Shiraz-49T | 1121 | 0        | -0.138569 |  |
|        |      | Shiraz-77T | 1225 | 0        | -0.117922 |  |
|        |      | Shiraz-77T | 1228 | 0        | -0.238084 |  |
|        |      | Shiraz-18T | 1434 | 0.244465 | 0         |  |
|        |      | Shiraz-22T | 1549 | 0        | -0.319623 |  |
|        |      | Shiraz-25T | 1698 | 0.21835  | 0         |  |
|        |      | Shiraz-28T | 1735 | 0.350744 | 0         |  |
|        |      | Shiraz-29T | 1778 | 0.120767 | 0         |  |
|        |      | Shiraz-32T | 1833 | 0.551336 | 0         |  |
|        |      | Shiraz-38T | 1951 | 0.250891 | 0         |  |
|        |      | Shiraz-53T | 2078 | 0.287202 | 0         |  |
|        |      | Shiraz-58T | 2161 | 0        | -0.187744 |  |
|        |      | Shiraz-71T | 2238 | 0.603631 | 0         |  |
|        |      | Shiraz-3T  | 90   | 0.219276 | 0         |  |
|        |      | Shiraz-3T  | 95   | 0        | -0.077623 |  |
|        |      | Shiraz-4T  | 253  | 0.372918 | 0         |  |
|        |      | Shiraz-36T | 378  | 0.179558 | 0         |  |
|        |      | Shiraz-36T | 382  | 0.081739 | 0         |  |
|        |      | Shiraz-44T | 641  | 0        | -0.477846 |  |
|        |      | Shiraz-46T | 943  | 0.093799 | 0         |  |
|        |      | Shiraz-46T | 947  | 0        | -0.010843 |  |
|        |      | Shiraz-47T | 1031 | 0        | -0.117529 |  |
|        |      | Shiraz-49T | 1121 | 0        | -0.138569 |  |
|        |      | Shiraz-77T | 1225 | 0        | -0.117922 |  |
|        |      | Shiraz-77T | 1228 | 0        | -0.238084 |  |
|        |      | Shiraz-18T | 1434 | 0.244465 | 0         |  |
|        |      | Shiraz-22T | 1549 | 0        | -0.319623 |  |
|        |      | Shiraz-25T | 1698 | 0.21835  | 0         |  |
|        |      | Shiraz-28T | 1735 | 0.350744 | 0         |  |
|        |      | Shiraz-29T | 1778 | 0.120767 | 0         |  |
|        |      | Shiraz-32T | 1833 | 0.551336 | 0         |  |
|        |      | Shiraz-38T | 1951 | 0.250891 | 0         |  |
|        |      | Shiraz-53T | 2078 | 0.287202 | 0         |  |

|        |      |            |      |          |           |  |  |
|--------|------|------------|------|----------|-----------|--|--|
|        |      | Shiraz-58T | 2161 | 0        | -0.187744 |  |  |
|        |      | Shiraz-71T | 2238 | 0.603631 | 0         |  |  |
|        |      | Shiraz-3T  | 90   | 0.219276 | 0         |  |  |
|        |      | Shiraz-3T  | 95   | 0        | -0.077623 |  |  |
|        |      | Shiraz-4T  | 253  | 0.372918 | 0         |  |  |
|        |      | Shiraz-36T | 378  | 0.179558 | 0         |  |  |
|        |      | Shiraz-36T | 382  | 0.081739 | 0         |  |  |
|        |      | Shiraz-44T | 641  | 0        | -0.477846 |  |  |
|        |      | Shiraz-46T | 943  | 0.093799 | 0         |  |  |
|        |      | Shiraz-46T | 947  | 0        | -0.010843 |  |  |
|        |      | Shiraz-47T | 1031 | 0        | -0.117529 |  |  |
|        |      | Shiraz-49T | 1121 | 0        | -0.138569 |  |  |
|        |      | Shiraz-77T | 1225 | 0        | -0.117922 |  |  |
|        |      | Shiraz-77T | 1228 | 0        | -0.238084 |  |  |
|        |      | Shiraz-18T | 1434 | 0.244465 | 0         |  |  |
|        |      | Shiraz-22T | 1549 | 0        | -0.319623 |  |  |
|        |      | Shiraz-25T | 1698 | 0.21835  | 0         |  |  |
|        |      | Shiraz-28T | 1735 | 0.350744 | 0         |  |  |
|        |      | Shiraz-29T | 1778 | 0.120767 | 0         |  |  |
|        |      | Shiraz-32T | 1833 | 0.551336 | 0         |  |  |
|        |      | Shiraz-38T | 1951 | 0.250891 | 0         |  |  |
|        |      | Shiraz-53T | 2078 | 0.287202 | 0         |  |  |
|        |      | Shiraz-58T | 2161 | 0        | -0.187744 |  |  |
|        |      | Shiraz-71T | 2238 | 0.603631 | 0         |  |  |
| DNAJC2 | chr7 | Shiraz-3T  | 90   | 0.219276 | 0         |  |  |
|        |      | Shiraz-3T  | 90   | 0.219276 | 0         |  |  |
|        |      | Shiraz-4T  | 253  | 0.372918 | 0         |  |  |
|        |      | Shiraz-4T  | 253  | 0.372918 | 0         |  |  |
|        |      | Shiraz-36T | 378  | 0.179558 | 0         |  |  |
|        |      | Shiraz-36T | 378  | 0.179558 | 0         |  |  |
|        |      | Shiraz-46T | 943  | 0.093799 | 0         |  |  |
|        |      | Shiraz-46T | 943  | 0.093799 | 0         |  |  |
|        |      | Shiraz-77T | 1225 | 0        | -0.117922 |  |  |
|        |      | Shiraz-77T | 1225 | 0        | -0.117922 |  |  |
|        |      | Shiraz-18T | 1434 | 0.244465 | 0         |  |  |
|        |      | Shiraz-18T | 1434 | 0.244465 | 0         |  |  |
|        |      | Shiraz-22T | 1549 | 0        | -0.319623 |  |  |
|        |      | Shiraz-22T | 1549 | 0        | -0.319623 |  |  |
|        |      | Shiraz-25T | 1698 | 0.21835  | 0         |  |  |
|        |      | Shiraz-25T | 1698 | 0.21835  | 0         |  |  |
|        |      | Shiraz-28T | 1735 | 0.350744 | 0         |  |  |
|        |      | Shiraz-28T | 1735 | 0.350744 | 0         |  |  |
|        |      | Shiraz-29T | 1778 | 0.120767 | 0         |  |  |
|        |      | Shiraz-29T | 1778 | 0.120767 | 0         |  |  |
|        |      | Shiraz-32T | 1833 | 0.551336 | 0         |  |  |
|        |      | Shiraz-32T | 1833 | 0.551336 | 0         |  |  |
|        |      | Shiraz-38T | 1951 | 0.250891 | 0         |  |  |

|  |  |            |      |          |           |  |  |
|--|--|------------|------|----------|-----------|--|--|
|  |  | Shiraz-38T | 1951 | 0.250891 | 0         |  |  |
|  |  | Shiraz-53T | 2078 | 0.287202 | 0         |  |  |
|  |  | Shiraz-53T | 2078 | 0.287202 | 0         |  |  |
|  |  | Shiraz-71T | 2238 | 0.603631 | 0         |  |  |
|  |  | Shiraz-71T | 2238 | 0.603631 | 0         |  |  |
|  |  | Shiraz-3T  | 90   | 0.219276 | 0         |  |  |
|  |  | Shiraz-3T  | 90   | 0.219276 | 0         |  |  |
|  |  | Shiraz-4T  | 253  | 0.372918 | 0         |  |  |
|  |  | Shiraz-4T  | 253  | 0.372918 | 0         |  |  |
|  |  | Shiraz-36T | 378  | 0.179558 | 0         |  |  |
|  |  | Shiraz-36T | 378  | 0.179558 | 0         |  |  |
|  |  | Shiraz-46T | 943  | 0.093799 | 0         |  |  |
|  |  | Shiraz-46T | 943  | 0.093799 | 0         |  |  |
|  |  | Shiraz-77T | 1225 | 0        | -0.117922 |  |  |
|  |  | Shiraz-77T | 1225 | 0        | -0.117922 |  |  |
|  |  | Shiraz-18T | 1434 | 0.244465 | 0         |  |  |
|  |  | Shiraz-18T | 1434 | 0.244465 | 0         |  |  |
|  |  | Shiraz-22T | 1549 | 0        | -0.319623 |  |  |
|  |  | Shiraz-22T | 1549 | 0        | -0.319623 |  |  |
|  |  | Shiraz-25T | 1698 | 0.21835  | 0         |  |  |
|  |  | Shiraz-25T | 1698 | 0.21835  | 0         |  |  |
|  |  | Shiraz-28T | 1735 | 0.350744 | 0         |  |  |
|  |  | Shiraz-28T | 1735 | 0.350744 | 0         |  |  |
|  |  | Shiraz-29T | 1778 | 0.120767 | 0         |  |  |
|  |  | Shiraz-29T | 1778 | 0.120767 | 0         |  |  |
|  |  | Shiraz-32T | 1833 | 0.551336 | 0         |  |  |
|  |  | Shiraz-32T | 1833 | 0.551336 | 0         |  |  |
|  |  | Shiraz-38T | 1951 | 0.250891 | 0         |  |  |
|  |  | Shiraz-38T | 1951 | 0.250891 | 0         |  |  |
|  |  | Shiraz-53T | 2078 | 0.287202 | 0         |  |  |
|  |  | Shiraz-53T | 2078 | 0.287202 | 0         |  |  |
|  |  | Shiraz-71T | 2238 | 0.603631 | 0         |  |  |
|  |  | Shiraz-71T | 2238 | 0.603631 | 0         |  |  |
|  |  | Shiraz-3T  | 90   | 0.219276 | 0         |  |  |
|  |  | Shiraz-3T  | 90   | 0.219276 | 0         |  |  |
|  |  | Shiraz-4T  | 253  | 0.372918 | 0         |  |  |
|  |  | Shiraz-4T  | 253  | 0.372918 | 0         |  |  |
|  |  | Shiraz-36T | 378  | 0.179558 | 0         |  |  |
|  |  | Shiraz-36T | 378  | 0.179558 | 0         |  |  |
|  |  | Shiraz-46T | 943  | 0.093799 | 0         |  |  |
|  |  | Shiraz-46T | 943  | 0.093799 | 0         |  |  |
|  |  | Shiraz-77T | 1225 | 0        | -0.117922 |  |  |
|  |  | Shiraz-77T | 1225 | 0        | -0.117922 |  |  |
|  |  | Shiraz-18T | 1434 | 0.244465 | 0         |  |  |
|  |  | Shiraz-18T | 1434 | 0.244465 | 0         |  |  |
|  |  | Shiraz-22T | 1549 | 0        | -0.319623 |  |  |
|  |  | Shiraz-22T | 1549 | 0        | -0.319623 |  |  |

|          |      |            |      |          |           |  |  |
|----------|------|------------|------|----------|-----------|--|--|
|          |      | Shiraz-25T | 1698 | 0.21835  | 0         |  |  |
|          |      | Shiraz-25T | 1698 | 0.21835  | 0         |  |  |
|          |      | Shiraz-28T | 1735 | 0.350744 | 0         |  |  |
|          |      | Shiraz-28T | 1735 | 0.350744 | 0         |  |  |
|          |      | Shiraz-29T | 1778 | 0.120767 | 0         |  |  |
|          |      | Shiraz-29T | 1778 | 0.120767 | 0         |  |  |
|          |      | Shiraz-32T | 1833 | 0.551336 | 0         |  |  |
|          |      | Shiraz-32T | 1833 | 0.551336 | 0         |  |  |
|          |      | Shiraz-38T | 1951 | 0.250891 | 0         |  |  |
|          |      | Shiraz-38T | 1951 | 0.250891 | 0         |  |  |
|          |      | Shiraz-53T | 2078 | 0.287202 | 0         |  |  |
|          |      | Shiraz-53T | 2078 | 0.287202 | 0         |  |  |
|          |      | Shiraz-71T | 2238 | 0.603631 | 0         |  |  |
|          |      | Shiraz-71T | 2238 | 0.603631 | 0         |  |  |
| DNAJC21  | chr5 | Shiraz-4T  | 250  | 0.262252 | 0         |  |  |
|          |      | Shiraz-16T | 266  | 0.321724 | 0         |  |  |
|          |      | Shiraz-18T | 1429 | 0        | -0.314125 |  |  |
|          |      | Shiraz-25T | 1694 | 0.201602 | 0         |  |  |
|          |      | Shiraz-28T | 1731 | 0.295447 | 0         |  |  |
|          |      | Shiraz-29T | 1773 | 0.090981 | 0         |  |  |
|          |      | Shiraz-40T | 2016 | 0.376634 | 0         |  |  |
|          |      | Shiraz-4T  | 250  | 0.262252 | 0         |  |  |
|          |      | Shiraz-16T | 266  | 0.321724 | 0         |  |  |
|          |      | Shiraz-18T | 1429 | 0        | -0.314125 |  |  |
|          |      | Shiraz-25T | 1694 | 0.201602 | 0         |  |  |
|          |      | Shiraz-28T | 1731 | 0.295447 | 0         |  |  |
|          |      | Shiraz-29T | 1773 | 0.090981 | 0         |  |  |
|          |      | Shiraz-40T | 2016 | 0.376634 | 0         |  |  |
|          |      | Shiraz-4T  | 250  | 0.262252 | 0         |  |  |
|          |      | Shiraz-16T | 266  | 0.321724 | 0         |  |  |
|          |      | Shiraz-18T | 1429 | 0        | -0.314125 |  |  |
|          |      | Shiraz-25T | 1694 | 0.201602 | 0         |  |  |
|          |      | Shiraz-28T | 1731 | 0.295447 | 0         |  |  |
|          |      | Shiraz-29T | 1773 | 0.090981 | 0         |  |  |
|          |      | Shiraz-40T | 2016 | 0.376634 | 0         |  |  |
| DNASE1L1 | chrX | Shiraz-3T  | 246  | 0.531858 | 0         |  |  |
|          |      | Shiraz-3T  | 246  | 0.531858 | 0         |  |  |
|          |      | Shiraz-4T  | 261  | 0        | -0.336249 |  |  |
|          |      | Shiraz-4T  | 261  | 0        | -0.336249 |  |  |
|          |      | Shiraz-16T | 295  | 0.591657 | 0         |  |  |
|          |      | Shiraz-16T | 295  | 0.591657 | 0         |  |  |
|          |      | Shiraz-36T | 433  | 0        | -0.803961 |  |  |
|          |      | Shiraz-36T | 433  | 0        | -0.803961 |  |  |
|          |      | Shiraz-42T | 480  | 0        | -0.232915 |  |  |
|          |      | Shiraz-42T | 480  | 0        | -0.232915 |  |  |
|          |      | Shiraz-44T | 908  | 0.466743 | 0         |  |  |
|          |      | Shiraz-44T | 908  | 0.466743 | 0         |  |  |

|  |            |      |          |           |  |
|--|------------|------|----------|-----------|--|
|  | Shiraz-49T | 1170 | 0        | -0.967436 |  |
|  | Shiraz-49T | 1170 | 0        | -0.967436 |  |
|  | Shiraz-49T | 1173 | 0        | -0.704439 |  |
|  | Shiraz-49T | 1173 | 0        | -0.704439 |  |
|  | Shiraz-9T  | 1370 | 0.690073 | 0         |  |
|  | Shiraz-9T  | 1370 | 0.690073 | 0         |  |
|  | Shiraz-9T  | 1371 | 1.292392 | 0         |  |
|  | Shiraz-9T  | 1371 | 1.292392 | 0         |  |
|  | Shiraz-18T | 1457 | 0.643204 | 0         |  |
|  | Shiraz-18T | 1457 | 0.643204 | 0         |  |
|  | Shiraz-22T | 1673 | 0.611783 | 0         |  |
|  | Shiraz-22T | 1673 | 0.611783 | 0         |  |
|  | Shiraz-22T | 1678 | 0.911625 | 0         |  |
|  | Shiraz-22T | 1678 | 0.911625 | 0         |  |
|  | Shiraz-25T | 1719 | 0.472955 | 0         |  |
|  | Shiraz-25T | 1719 | 0.472955 | 0         |  |
|  | Shiraz-28T | 1762 | 0.562311 | 0         |  |
|  | Shiraz-28T | 1762 | 0.562311 | 0         |  |
|  | Shiraz-29T | 1801 | 0.815343 | 0         |  |
|  | Shiraz-29T | 1801 | 0.815343 | 0         |  |
|  | Shiraz-32T | 1870 | 0.729766 | 0         |  |
|  | Shiraz-32T | 1870 | 0.729766 | 0         |  |
|  | Shiraz-32T | 1872 | 1.504553 | 0         |  |
|  | Shiraz-32T | 1872 | 1.504553 | 0         |  |
|  | Shiraz-35T | 1933 | 0.488535 | 0         |  |
|  | Shiraz-35T | 1933 | 0.488535 | 0         |  |
|  | Shiraz-38T | 2011 | 0        | -0.406024 |  |
|  | Shiraz-38T | 2011 | 0        | -0.406024 |  |
|  | Shiraz-53T | 2115 | 0.427728 | 0         |  |
|  | Shiraz-53T | 2115 | 0.427728 | 0         |  |
|  | Shiraz-58T | 2223 | 0.833364 | 0         |  |
|  | Shiraz-58T | 2223 | 0.833364 | 0         |  |
|  | Shiraz-58T | 2226 | 1.074663 | 0         |  |
|  | Shiraz-58T | 2226 | 1.074663 | 0         |  |
|  | Shiraz-71T | 2263 | 0.975531 | 0         |  |
|  | Shiraz-71T | 2263 | 0.975531 | 0         |  |
|  | Shiraz-3T  | 246  | 0.531858 | 0         |  |
|  | Shiraz-3T  | 246  | 0.531858 | 0         |  |
|  | Shiraz-4T  | 261  | 0        | -0.336249 |  |
|  | Shiraz-4T  | 261  | 0        | -0.336249 |  |
|  | Shiraz-16T | 295  | 0.591657 | 0         |  |
|  | Shiraz-16T | 295  | 0.591657 | 0         |  |
|  | Shiraz-36T | 433  | 0        | -0.803961 |  |
|  | Shiraz-36T | 433  | 0        | -0.803961 |  |
|  | Shiraz-42T | 480  | 0        | -0.232915 |  |
|  | Shiraz-42T | 480  | 0        | -0.232915 |  |
|  | Shiraz-44T | 908  | 0.466743 | 0         |  |



|  |  |            |      |          |           |  |  |
|--|--|------------|------|----------|-----------|--|--|
|  |  | Shiraz-44T | 908  | 0.466743 | 0         |  |  |
|  |  | Shiraz-49T | 1170 | 0        | -0.967436 |  |  |
|  |  | Shiraz-49T | 1170 | 0        | -0.967436 |  |  |
|  |  | Shiraz-49T | 1173 | 0        | -0.704439 |  |  |
|  |  | Shiraz-49T | 1173 | 0        | -0.704439 |  |  |
|  |  | Shiraz-9T  | 1370 | 0.690073 | 0         |  |  |
|  |  | Shiraz-9T  | 1370 | 0.690073 | 0         |  |  |
|  |  | Shiraz-9T  | 1371 | 1.292392 | 0         |  |  |
|  |  | Shiraz-9T  | 1371 | 1.292392 | 0         |  |  |
|  |  | Shiraz-18T | 1457 | 0.643204 | 0         |  |  |
|  |  | Shiraz-18T | 1457 | 0.643204 | 0         |  |  |
|  |  | Shiraz-22T | 1673 | 0.611783 | 0         |  |  |
|  |  | Shiraz-22T | 1673 | 0.611783 | 0         |  |  |
|  |  | Shiraz-22T | 1678 | 0.911625 | 0         |  |  |
|  |  | Shiraz-22T | 1678 | 0.911625 | 0         |  |  |
|  |  | Shiraz-25T | 1719 | 0.472955 | 0         |  |  |
|  |  | Shiraz-25T | 1719 | 0.472955 | 0         |  |  |
|  |  | Shiraz-28T | 1762 | 0.562311 | 0         |  |  |
|  |  | Shiraz-28T | 1762 | 0.562311 | 0         |  |  |
|  |  | Shiraz-29T | 1801 | 0.815343 | 0         |  |  |
|  |  | Shiraz-29T | 1801 | 0.815343 | 0         |  |  |
|  |  | Shiraz-32T | 1870 | 0.729766 | 0         |  |  |
|  |  | Shiraz-32T | 1870 | 0.729766 | 0         |  |  |
|  |  | Shiraz-32T | 1872 | 1.504553 | 0         |  |  |
|  |  | Shiraz-32T | 1872 | 1.504553 | 0         |  |  |
|  |  | Shiraz-35T | 1933 | 0.488535 | 0         |  |  |
|  |  | Shiraz-35T | 1933 | 0.488535 | 0         |  |  |
|  |  | Shiraz-38T | 2011 | 0        | -0.406024 |  |  |
|  |  | Shiraz-38T | 2011 | 0        | -0.406024 |  |  |
|  |  | Shiraz-53T | 2115 | 0.427728 | 0         |  |  |
|  |  | Shiraz-53T | 2115 | 0.427728 | 0         |  |  |
|  |  | Shiraz-58T | 2223 | 0.833364 | 0         |  |  |
|  |  | Shiraz-58T | 2223 | 0.833364 | 0         |  |  |
|  |  | Shiraz-58T | 2226 | 1.074663 | 0         |  |  |
|  |  | Shiraz-58T | 2226 | 1.074663 | 0         |  |  |
|  |  | Shiraz-71T | 2263 | 0.975531 | 0         |  |  |
|  |  | Shiraz-71T | 2263 | 0.975531 | 0         |  |  |
|  |  | Shiraz-3T  | 246  | 0.531858 | 0         |  |  |
|  |  | Shiraz-3T  | 246  | 0.531858 | 0         |  |  |
|  |  | Shiraz-4T  | 261  | 0        | -0.336249 |  |  |
|  |  | Shiraz-4T  | 261  | 0        | -0.336249 |  |  |
|  |  | Shiraz-16T | 295  | 0.591657 | 0         |  |  |
|  |  | Shiraz-16T | 295  | 0.591657 | 0         |  |  |
|  |  | Shiraz-36T | 433  | 0        | -0.803961 |  |  |
|  |  | Shiraz-36T | 433  | 0        | -0.803961 |  |  |
|  |  | Shiraz-42T | 480  | 0        | -0.232915 |  |  |
|  |  | Shiraz-42T | 480  | 0        | -0.232915 |  |  |

|        |      |            |      |          |           |  |
|--------|------|------------|------|----------|-----------|--|
|        |      | Shiraz-44T | 908  | 0.466743 | 0         |  |
|        |      | Shiraz-44T | 908  | 0.466743 | 0         |  |
|        |      | Shiraz-49T | 1170 | 0        | -0.967436 |  |
|        |      | Shiraz-49T | 1170 | 0        | -0.967436 |  |
|        |      | Shiraz-49T | 1173 | 0        | -0.704439 |  |
|        |      | Shiraz-49T | 1173 | 0        | -0.704439 |  |
|        |      | Shiraz-9T  | 1370 | 0.690073 | 0         |  |
|        |      | Shiraz-9T  | 1370 | 0.690073 | 0         |  |
|        |      | Shiraz-9T  | 1371 | 1.292392 | 0         |  |
|        |      | Shiraz-9T  | 1371 | 1.292392 | 0         |  |
|        |      | Shiraz-18T | 1457 | 0.643204 | 0         |  |
|        |      | Shiraz-18T | 1457 | 0.643204 | 0         |  |
|        |      | Shiraz-22T | 1673 | 0.611783 | 0         |  |
|        |      | Shiraz-22T | 1673 | 0.611783 | 0         |  |
|        |      | Shiraz-22T | 1678 | 0.911625 | 0         |  |
|        |      | Shiraz-22T | 1678 | 0.911625 | 0         |  |
|        |      | Shiraz-25T | 1719 | 0.472955 | 0         |  |
|        |      | Shiraz-25T | 1719 | 0.472955 | 0         |  |
|        |      | Shiraz-28T | 1762 | 0.562311 | 0         |  |
|        |      | Shiraz-28T | 1762 | 0.562311 | 0         |  |
|        |      | Shiraz-29T | 1801 | 0.815343 | 0         |  |
|        |      | Shiraz-29T | 1801 | 0.815343 | 0         |  |
|        |      | Shiraz-32T | 1870 | 0.729766 | 0         |  |
|        |      | Shiraz-32T | 1870 | 0.729766 | 0         |  |
|        |      | Shiraz-32T | 1872 | 1.504553 | 0         |  |
|        |      | Shiraz-32T | 1872 | 1.504553 | 0         |  |
|        |      | Shiraz-35T | 1933 | 0.488535 | 0         |  |
|        |      | Shiraz-35T | 1933 | 0.488535 | 0         |  |
|        |      | Shiraz-38T | 2011 | 0        | -0.406024 |  |
|        |      | Shiraz-38T | 2011 | 0        | -0.406024 |  |
|        |      | Shiraz-53T | 2115 | 0.427728 | 0         |  |
|        |      | Shiraz-53T | 2115 | 0.427728 | 0         |  |
|        |      | Shiraz-58T | 2223 | 0.833364 | 0         |  |
|        |      | Shiraz-58T | 2223 | 0.833364 | 0         |  |
|        |      | Shiraz-58T | 2226 | 1.074663 | 0         |  |
|        |      | Shiraz-58T | 2226 | 1.074663 | 0         |  |
|        |      | Shiraz-71T | 2263 | 0.975531 | 0         |  |
|        |      | Shiraz-71T | 2263 | 0.975531 | 0         |  |
| DOCK11 | chrX | Shiraz-3T  | 242  | 0        | -0.336434 |  |
|        |      | Shiraz-3T  | 244  | 0        | -0.023749 |  |
|        |      | Shiraz-4T  | 261  | 0        | -0.336249 |  |
|        |      | Shiraz-16T | 295  | 0.591657 | 0         |  |
|        |      | Shiraz-36T | 433  | 0        | -0.803961 |  |
|        |      | Shiraz-44T | 899  | 0        | -1.09697  |  |
|        |      | Shiraz-49T | 1170 | 0        | -0.967436 |  |
|        |      | Shiraz-18T | 1457 | 0.643204 | 0         |  |
|        |      | Shiraz-22T | 1673 | 0.611783 | 0         |  |

|       |      |            |      |          |           |  |
|-------|------|------------|------|----------|-----------|--|
|       |      | Shiraz-25T | 1719 | 0.472955 | 0         |  |
|       |      | Shiraz-28T | 1762 | 0.562311 | 0         |  |
|       |      | Shiraz-29T | 1801 | 0.815343 | 0         |  |
|       |      | Shiraz-32T | 1870 | 0.729766 | 0         |  |
|       |      | Shiraz-35T | 1933 | 0.488535 | 0         |  |
|       |      | Shiraz-58T | 2223 | 0.833364 | 0         |  |
|       |      | Shiraz-71T | 2263 | 0.975531 | 0         |  |
|       |      | Shiraz-3T  | 242  | 0        | -0.336434 |  |
|       |      | Shiraz-3T  | 244  | 0        | -0.023749 |  |
|       |      | Shiraz-4T  | 261  | 0        | -0.336249 |  |
|       |      | Shiraz-16T | 295  | 0.591657 | 0         |  |
|       |      | Shiraz-36T | 433  | 0        | -0.803961 |  |
|       |      | Shiraz-44T | 899  | 0        | -1.09697  |  |
|       |      | Shiraz-49T | 1170 | 0        | -0.967436 |  |
|       |      | Shiraz-18T | 1457 | 0.643204 | 0         |  |
|       |      | Shiraz-22T | 1673 | 0.611783 | 0         |  |
|       |      | Shiraz-25T | 1719 | 0.472955 | 0         |  |
|       |      | Shiraz-28T | 1762 | 0.562311 | 0         |  |
|       |      | Shiraz-29T | 1801 | 0.815343 | 0         |  |
|       |      | Shiraz-32T | 1870 | 0.729766 | 0         |  |
|       |      | Shiraz-35T | 1933 | 0.488535 | 0         |  |
|       |      | Shiraz-58T | 2223 | 0.833364 | 0         |  |
|       |      | Shiraz-71T | 2263 | 0.975531 | 0         |  |
|       |      | Shiraz-3T  | 242  | 0        | -0.336434 |  |
|       |      | Shiraz-3T  | 244  | 0        | -0.023749 |  |
|       |      | Shiraz-4T  | 261  | 0        | -0.336249 |  |
|       |      | Shiraz-16T | 295  | 0.591657 | 0         |  |
|       |      | Shiraz-36T | 433  | 0        | -0.803961 |  |
|       |      | Shiraz-44T | 899  | 0        | -1.09697  |  |
|       |      | Shiraz-49T | 1170 | 0        | -0.967436 |  |
|       |      | Shiraz-18T | 1457 | 0.643204 | 0         |  |
|       |      | Shiraz-22T | 1673 | 0.611783 | 0         |  |
|       |      | Shiraz-25T | 1719 | 0.472955 | 0         |  |
|       |      | Shiraz-28T | 1762 | 0.562311 | 0         |  |
|       |      | Shiraz-29T | 1801 | 0.815343 | 0         |  |
|       |      | Shiraz-32T | 1870 | 0.729766 | 0         |  |
|       |      | Shiraz-35T | 1933 | 0.488535 | 0         |  |
|       |      | Shiraz-58T | 2223 | 0.833364 | 0         |  |
|       |      | Shiraz-71T | 2263 | 0.975531 | 0         |  |
| DOCK4 | chr7 | Shiraz-3T  | 90   | 0.219276 | 0         |  |
|       |      | Shiraz-3T  | 95   | 0        | -0.077623 |  |
|       |      | Shiraz-4T  | 253  | 0.372918 | 0         |  |
|       |      | Shiraz-36T | 378  | 0.179558 | 0         |  |
|       |      | Shiraz-36T | 382  | 0.081739 | 0         |  |
|       |      | Shiraz-44T | 641  | 0        | -0.477846 |  |
|       |      | Shiraz-46T | 943  | 0.093799 | 0         |  |
|       |      | Shiraz-46T | 947  | 0        | -0.010843 |  |

|  |            |      |          |           |  |
|--|------------|------|----------|-----------|--|
|  | Shiraz-47T | 1031 | 0        | -0.117529 |  |
|  | Shiraz-49T | 1121 | 0        | -0.138569 |  |
|  | Shiraz-77T | 1225 | 0        | -0.117922 |  |
|  | Shiraz-77T | 1228 | 0        | -0.238084 |  |
|  | Shiraz-18T | 1434 | 0.244465 | 0         |  |
|  | Shiraz-22T | 1549 | 0        | -0.319623 |  |
|  | Shiraz-25T | 1698 | 0.21835  | 0         |  |
|  | Shiraz-28T | 1735 | 0.350744 | 0         |  |
|  | Shiraz-29T | 1778 | 0.120767 | 0         |  |
|  | Shiraz-32T | 1833 | 0.551336 | 0         |  |
|  | Shiraz-32T | 1835 | 0.092727 | 0         |  |
|  | Shiraz-38T | 1951 | 0.250891 | 0         |  |
|  | Shiraz-53T | 2078 | 0.287202 | 0         |  |
|  | Shiraz-58T | 2161 | 0        | -0.187744 |  |
|  | Shiraz-71T | 2238 | 0.603631 | 0         |  |
|  | Shiraz-3T  | 90   | 0.219276 | 0         |  |
|  | Shiraz-3T  | 95   | 0        | -0.077623 |  |
|  | Shiraz-4T  | 253  | 0.372918 | 0         |  |
|  | Shiraz-36T | 378  | 0.179558 | 0         |  |
|  | Shiraz-36T | 382  | 0.081739 | 0         |  |
|  | Shiraz-44T | 641  | 0        | -0.477846 |  |
|  | Shiraz-46T | 943  | 0.093799 | 0         |  |
|  | Shiraz-46T | 947  | 0        | -0.010843 |  |
|  | Shiraz-47T | 1031 | 0        | -0.117529 |  |
|  | Shiraz-49T | 1121 | 0        | -0.138569 |  |
|  | Shiraz-77T | 1225 | 0        | -0.117922 |  |
|  | Shiraz-77T | 1228 | 0        | -0.238084 |  |
|  | Shiraz-18T | 1434 | 0.244465 | 0         |  |
|  | Shiraz-22T | 1549 | 0        | -0.319623 |  |
|  | Shiraz-25T | 1698 | 0.21835  | 0         |  |
|  | Shiraz-28T | 1735 | 0.350744 | 0         |  |
|  | Shiraz-29T | 1778 | 0.120767 | 0         |  |
|  | Shiraz-32T | 1833 | 0.551336 | 0         |  |
|  | Shiraz-32T | 1835 | 0.092727 | 0         |  |
|  | Shiraz-38T | 1951 | 0.250891 | 0         |  |
|  | Shiraz-53T | 2078 | 0.287202 | 0         |  |
|  | Shiraz-58T | 2161 | 0        | -0.187744 |  |
|  | Shiraz-71T | 2238 | 0.603631 | 0         |  |
|  | Shiraz-3T  | 90   | 0.219276 | 0         |  |
|  | Shiraz-3T  | 95   | 0        | -0.077623 |  |
|  | Shiraz-4T  | 253  | 0.372918 | 0         |  |
|  | Shiraz-36T | 378  | 0.179558 | 0         |  |
|  | Shiraz-36T | 382  | 0.081739 | 0         |  |
|  | Shiraz-44T | 641  | 0        | -0.477846 |  |
|  | Shiraz-46T | 943  | 0.093799 | 0         |  |
|  | Shiraz-46T | 947  | 0        | -0.010843 |  |
|  | Shiraz-47T | 1031 | 0        | -0.117529 |  |

|      |      |            |      |          |           |  |  |
|------|------|------------|------|----------|-----------|--|--|
|      |      | Shiraz-49T | 1121 | 0        | -0.138569 |  |  |
|      |      | Shiraz-77T | 1225 | 0        | -0.117922 |  |  |
|      |      | Shiraz-77T | 1228 | 0        | -0.238084 |  |  |
|      |      | Shiraz-18T | 1434 | 0.244465 | 0         |  |  |
|      |      | Shiraz-22T | 1549 | 0        | -0.319623 |  |  |
|      |      | Shiraz-25T | 1698 | 0.21835  | 0         |  |  |
|      |      | Shiraz-28T | 1735 | 0.350744 | 0         |  |  |
|      |      | Shiraz-29T | 1778 | 0.120767 | 0         |  |  |
|      |      | Shiraz-32T | 1833 | 0.551336 | 0         |  |  |
|      |      | Shiraz-32T | 1835 | 0.092727 | 0         |  |  |
|      |      | Shiraz-38T | 1951 | 0.250891 | 0         |  |  |
|      |      | Shiraz-53T | 2078 | 0.287202 | 0         |  |  |
|      |      | Shiraz-58T | 2161 | 0        | -0.187744 |  |  |
|      |      | Shiraz-71T | 2238 | 0.603631 | 0         |  |  |
| DPP6 | chr7 | Shiraz-3T  | 90   | 0.219276 | 0         |  |  |
|      |      | Shiraz-3T  | 90   | 0.219276 | 0         |  |  |
|      |      | Shiraz-3T  | 90   | 0.219276 | 0         |  |  |
|      |      | Shiraz-3T  | 99   | 0.454766 | 0         |  |  |
|      |      | Shiraz-3T  | 99   | 0.454766 | 0         |  |  |
|      |      | Shiraz-3T  | 99   | 0.454766 | 0         |  |  |
|      |      | Shiraz-4T  | 253  | 0.372918 | 0         |  |  |
|      |      | Shiraz-4T  | 253  | 0.372918 | 0         |  |  |
|      |      | Shiraz-4T  | 253  | 0.372918 | 0         |  |  |
|      |      | Shiraz-36T | 378  | 0.179558 | 0         |  |  |
|      |      | Shiraz-36T | 378  | 0.179558 | 0         |  |  |
|      |      | Shiraz-36T | 378  | 0.179558 | 0         |  |  |
|      |      | Shiraz-44T | 646  | 0.471276 | 0         |  |  |
|      |      | Shiraz-44T | 646  | 0.471276 | 0         |  |  |
|      |      | Shiraz-44T | 646  | 0.471276 | 0         |  |  |
|      |      | Shiraz-44T | 648  | 0.017909 | 0         |  |  |
|      |      | Shiraz-44T | 648  | 0.017909 | 0         |  |  |
|      |      | Shiraz-44T | 648  | 0.017909 | 0         |  |  |
|      |      | Shiraz-46T | 943  | 0.093799 | 0         |  |  |
|      |      | Shiraz-46T | 943  | 0.093799 | 0         |  |  |
|      |      | Shiraz-46T | 943  | 0.093799 | 0         |  |  |
|      |      | Shiraz-9T  | 1325 | 0.221899 | 0         |  |  |
|      |      | Shiraz-9T  | 1325 | 0.221899 | 0         |  |  |
|      |      | Shiraz-9T  | 1325 | 0.221899 | 0         |  |  |
|      |      | Shiraz-18T | 1434 | 0.244465 | 0         |  |  |
|      |      | Shiraz-18T | 1434 | 0.244465 | 0         |  |  |
|      |      | Shiraz-18T | 1434 | 0.244465 | 0         |  |  |
|      |      | Shiraz-25T | 1698 | 0.21835  | 0         |  |  |
|      |      | Shiraz-25T | 1698 | 0.21835  | 0         |  |  |
|      |      | Shiraz-25T | 1698 | 0.21835  | 0         |  |  |
|      |      | Shiraz-28T | 1735 | 0.350744 | 0         |  |  |
|      |      | Shiraz-28T | 1735 | 0.350744 | 0         |  |  |
|      |      | Shiraz-28T | 1735 | 0.350744 | 0         |  |  |

|  |  |            |      |          |   |  |  |
|--|--|------------|------|----------|---|--|--|
|  |  | Shiraz-29T | 1778 | 0.120767 | 0 |  |  |
|  |  | Shiraz-29T | 1778 | 0.120767 | 0 |  |  |
|  |  | Shiraz-29T | 1778 | 0.120767 | 0 |  |  |
|  |  | Shiraz-32T | 1833 | 0.551336 | 0 |  |  |
|  |  | Shiraz-32T | 1833 | 0.551336 | 0 |  |  |
|  |  | Shiraz-32T | 1833 | 0.551336 | 0 |  |  |
|  |  | Shiraz-38T | 1951 | 0.250891 | 0 |  |  |
|  |  | Shiraz-38T | 1951 | 0.250891 | 0 |  |  |
|  |  | Shiraz-38T | 1951 | 0.250891 | 0 |  |  |
|  |  | Shiraz-58T | 2162 | 0.221505 | 0 |  |  |
|  |  | Shiraz-58T | 2162 | 0.221505 | 0 |  |  |
|  |  | Shiraz-58T | 2162 | 0.221505 | 0 |  |  |
|  |  | Shiraz-71T | 2238 | 0.603631 | 0 |  |  |
|  |  | Shiraz-71T | 2238 | 0.603631 | 0 |  |  |
|  |  | Shiraz-71T | 2238 | 0.603631 | 0 |  |  |
|  |  | Shiraz-3T  | 90   | 0.219276 | 0 |  |  |
|  |  | Shiraz-3T  | 90   | 0.219276 | 0 |  |  |
|  |  | Shiraz-3T  | 90   | 0.219276 | 0 |  |  |
|  |  | Shiraz-3T  | 99   | 0.454766 | 0 |  |  |
|  |  | Shiraz-3T  | 99   | 0.454766 | 0 |  |  |
|  |  | Shiraz-3T  | 99   | 0.454766 | 0 |  |  |
|  |  | Shiraz-4T  | 253  | 0.372918 | 0 |  |  |
|  |  | Shiraz-4T  | 253  | 0.372918 | 0 |  |  |
|  |  | Shiraz-4T  | 253  | 0.372918 | 0 |  |  |
|  |  | Shiraz-36T | 378  | 0.179558 | 0 |  |  |
|  |  | Shiraz-36T | 378  | 0.179558 | 0 |  |  |
|  |  | Shiraz-36T | 378  | 0.179558 | 0 |  |  |
|  |  | Shiraz-44T | 646  | 0.471276 | 0 |  |  |
|  |  | Shiraz-44T | 646  | 0.471276 | 0 |  |  |
|  |  | Shiraz-44T | 646  | 0.471276 | 0 |  |  |
|  |  | Shiraz-44T | 648  | 0.017909 | 0 |  |  |
|  |  | Shiraz-44T | 648  | 0.017909 | 0 |  |  |
|  |  | Shiraz-44T | 648  | 0.017909 | 0 |  |  |
|  |  | Shiraz-46T | 943  | 0.093799 | 0 |  |  |
|  |  | Shiraz-46T | 943  | 0.093799 | 0 |  |  |
|  |  | Shiraz-46T | 943  | 0.093799 | 0 |  |  |
|  |  | Shiraz-9T  | 1325 | 0.221899 | 0 |  |  |
|  |  | Shiraz-9T  | 1325 | 0.221899 | 0 |  |  |
|  |  | Shiraz-9T  | 1325 | 0.221899 | 0 |  |  |
|  |  | Shiraz-18T | 1434 | 0.244465 | 0 |  |  |
|  |  | Shiraz-18T | 1434 | 0.244465 | 0 |  |  |
|  |  | Shiraz-18T | 1434 | 0.244465 | 0 |  |  |
|  |  | Shiraz-25T | 1698 | 0.21835  | 0 |  |  |
|  |  | Shiraz-25T | 1698 | 0.21835  | 0 |  |  |
|  |  | Shiraz-25T | 1698 | 0.21835  | 0 |  |  |
|  |  | Shiraz-28T | 1735 | 0.350744 | 0 |  |  |
|  |  | Shiraz-28T | 1735 | 0.350744 | 0 |  |  |

|  |  |            |      |          |   |  |  |
|--|--|------------|------|----------|---|--|--|
|  |  | Shiraz-28T | 1735 | 0.350744 | 0 |  |  |
|  |  | Shiraz-29T | 1778 | 0.120767 | 0 |  |  |
|  |  | Shiraz-29T | 1778 | 0.120767 | 0 |  |  |
|  |  | Shiraz-29T | 1778 | 0.120767 | 0 |  |  |
|  |  | Shiraz-32T | 1833 | 0.551336 | 0 |  |  |
|  |  | Shiraz-32T | 1833 | 0.551336 | 0 |  |  |
|  |  | Shiraz-32T | 1833 | 0.551336 | 0 |  |  |
|  |  | Shiraz-38T | 1951 | 0.250891 | 0 |  |  |
|  |  | Shiraz-38T | 1951 | 0.250891 | 0 |  |  |
|  |  | Shiraz-38T | 1951 | 0.250891 | 0 |  |  |
|  |  | Shiraz-58T | 2162 | 0.221505 | 0 |  |  |
|  |  | Shiraz-58T | 2162 | 0.221505 | 0 |  |  |
|  |  | Shiraz-58T | 2162 | 0.221505 | 0 |  |  |
|  |  | Shiraz-71T | 2238 | 0.603631 | 0 |  |  |
|  |  | Shiraz-71T | 2238 | 0.603631 | 0 |  |  |
|  |  | Shiraz-71T | 2238 | 0.603631 | 0 |  |  |
|  |  | Shiraz-3T  | 90   | 0.219276 | 0 |  |  |
|  |  | Shiraz-3T  | 90   | 0.219276 | 0 |  |  |
|  |  | Shiraz-3T  | 90   | 0.219276 | 0 |  |  |
|  |  | Shiraz-3T  | 99   | 0.454766 | 0 |  |  |
|  |  | Shiraz-3T  | 99   | 0.454766 | 0 |  |  |
|  |  | Shiraz-3T  | 99   | 0.454766 | 0 |  |  |
|  |  | Shiraz-4T  | 253  | 0.372918 | 0 |  |  |
|  |  | Shiraz-4T  | 253  | 0.372918 | 0 |  |  |
|  |  | Shiraz-4T  | 253  | 0.372918 | 0 |  |  |
|  |  | Shiraz-36T | 378  | 0.179558 | 0 |  |  |
|  |  | Shiraz-36T | 378  | 0.179558 | 0 |  |  |
|  |  | Shiraz-36T | 378  | 0.179558 | 0 |  |  |
|  |  | Shiraz-44T | 646  | 0.471276 | 0 |  |  |
|  |  | Shiraz-44T | 646  | 0.471276 | 0 |  |  |
|  |  | Shiraz-44T | 646  | 0.471276 | 0 |  |  |
|  |  | Shiraz-44T | 648  | 0.017909 | 0 |  |  |
|  |  | Shiraz-44T | 648  | 0.017909 | 0 |  |  |
|  |  | Shiraz-44T | 648  | 0.017909 | 0 |  |  |
|  |  | Shiraz-46T | 943  | 0.093799 | 0 |  |  |
|  |  | Shiraz-46T | 943  | 0.093799 | 0 |  |  |
|  |  | Shiraz-46T | 943  | 0.093799 | 0 |  |  |
|  |  | Shiraz-9T  | 1325 | 0.221899 | 0 |  |  |
|  |  | Shiraz-9T  | 1325 | 0.221899 | 0 |  |  |
|  |  | Shiraz-9T  | 1325 | 0.221899 | 0 |  |  |
|  |  | Shiraz-18T | 1434 | 0.244465 | 0 |  |  |
|  |  | Shiraz-18T | 1434 | 0.244465 | 0 |  |  |
|  |  | Shiraz-18T | 1434 | 0.244465 | 0 |  |  |
|  |  | Shiraz-25T | 1698 | 0.21835  | 0 |  |  |
|  |  | Shiraz-25T | 1698 | 0.21835  | 0 |  |  |
|  |  | Shiraz-25T | 1698 | 0.21835  | 0 |  |  |
|  |  | Shiraz-28T | 1735 | 0.350744 | 0 |  |  |

|         |      |            |      |          |           |  |
|---------|------|------------|------|----------|-----------|--|
|         |      | Shiraz-28T | 1735 | 0.350744 | 0         |  |
|         |      | Shiraz-28T | 1735 | 0.350744 | 0         |  |
|         |      | Shiraz-29T | 1778 | 0.120767 | 0         |  |
|         |      | Shiraz-29T | 1778 | 0.120767 | 0         |  |
|         |      | Shiraz-29T | 1778 | 0.120767 | 0         |  |
|         |      | Shiraz-32T | 1833 | 0.551336 | 0         |  |
|         |      | Shiraz-32T | 1833 | 0.551336 | 0         |  |
|         |      | Shiraz-32T | 1833 | 0.551336 | 0         |  |
|         |      | Shiraz-38T | 1951 | 0.250891 | 0         |  |
|         |      | Shiraz-38T | 1951 | 0.250891 | 0         |  |
|         |      | Shiraz-38T | 1951 | 0.250891 | 0         |  |
|         |      | Shiraz-58T | 2162 | 0.221505 | 0         |  |
|         |      | Shiraz-58T | 2162 | 0.221505 | 0         |  |
|         |      | Shiraz-58T | 2162 | 0.221505 | 0         |  |
|         |      | Shiraz-71T | 2238 | 0.603631 | 0         |  |
|         |      | Shiraz-71T | 2238 | 0.603631 | 0         |  |
|         |      | Shiraz-71T | 2238 | 0.603631 | 0         |  |
| DPY19L1 | chr7 | Shiraz-3T  | 87   | 0.198593 | 0         |  |
|         |      | Shiraz-4T  | 252  | 0.192083 | 0         |  |
|         |      | Shiraz-36T | 376  | 0.159952 | 0         |  |
|         |      | Shiraz-44T | 631  | 0        | -0.180312 |  |
|         |      | Shiraz-46T | 942  | 0.069143 | 0         |  |
|         |      | Shiraz-18T | 1433 | 0.250973 | 0         |  |
|         |      | Shiraz-22T | 1544 | 0        | -0.193579 |  |
|         |      | Shiraz-25T | 1697 | 0.21945  | 0         |  |
|         |      | Shiraz-28T | 1734 | 0.362882 | 0         |  |
|         |      | Shiraz-29T | 1777 | 0.156747 | 0         |  |
|         |      | Shiraz-38T | 1950 | 0.265916 | 0         |  |
|         |      | Shiraz-71T | 2236 | 0.320072 | 0         |  |
|         |      | Shiraz-3T  | 87   | 0.198593 | 0         |  |
|         |      | Shiraz-4T  | 252  | 0.192083 | 0         |  |
|         |      | Shiraz-36T | 376  | 0.159952 | 0         |  |
|         |      | Shiraz-44T | 631  | 0        | -0.180312 |  |
|         |      | Shiraz-46T | 942  | 0.069143 | 0         |  |
|         |      | Shiraz-18T | 1433 | 0.250973 | 0         |  |
|         |      | Shiraz-22T | 1544 | 0        | -0.193579 |  |
|         |      | Shiraz-25T | 1697 | 0.21945  | 0         |  |
|         |      | Shiraz-28T | 1734 | 0.362882 | 0         |  |
|         |      | Shiraz-29T | 1777 | 0.156747 | 0         |  |
|         |      | Shiraz-38T | 1950 | 0.265916 | 0         |  |
|         |      | Shiraz-71T | 2236 | 0.320072 | 0         |  |
|         |      | Shiraz-3T  | 87   | 0.198593 | 0         |  |
|         |      | Shiraz-4T  | 252  | 0.192083 | 0         |  |
|         |      | Shiraz-36T | 376  | 0.159952 | 0         |  |
|         |      | Shiraz-44T | 631  | 0        | -0.180312 |  |
|         |      | Shiraz-46T | 942  | 0.069143 | 0         |  |
|         |      | Shiraz-18T | 1433 | 0.250973 | 0         |  |



|           |      |            |      |          |           |  |  |
|-----------|------|------------|------|----------|-----------|--|--|
|           |      | Shiraz-22T | 1544 | 0        | -0.193579 |  |  |
|           |      | Shiraz-25T | 1697 | 0.21945  | 0         |  |  |
|           |      | Shiraz-28T | 1734 | 0.362882 | 0         |  |  |
|           |      | Shiraz-29T | 1777 | 0.156747 | 0         |  |  |
|           |      | Shiraz-38T | 1950 | 0.265916 | 0         |  |  |
|           |      | Shiraz-71T | 2236 | 0.320072 | 0         |  |  |
| DPY19L2P1 | chr7 | Shiraz-3T  | 87   | 0.198593 | 0         |  |  |
|           |      | Shiraz-4T  | 252  | 0.192083 | 0         |  |  |
|           |      | Shiraz-36T | 376  | 0.159952 | 0         |  |  |
|           |      | Shiraz-44T | 631  | 0        | -0.180312 |  |  |
|           |      | Shiraz-46T | 942  | 0.069143 | 0         |  |  |
|           |      | Shiraz-18T | 1433 | 0.250973 | 0         |  |  |
|           |      | Shiraz-22T | 1544 | 0        | -0.193579 |  |  |
|           |      | Shiraz-25T | 1697 | 0.21945  | 0         |  |  |
|           |      | Shiraz-28T | 1734 | 0.362882 | 0         |  |  |
|           |      | Shiraz-29T | 1777 | 0.156747 | 0         |  |  |
|           |      | Shiraz-38T | 1950 | 0.265916 | 0         |  |  |
|           |      | Shiraz-71T | 2236 | 0.320072 | 0         |  |  |
|           |      | Shiraz-3T  | 87   | 0.198593 | 0         |  |  |
|           |      | Shiraz-4T  | 252  | 0.192083 | 0         |  |  |
|           |      | Shiraz-36T | 376  | 0.159952 | 0         |  |  |
|           |      | Shiraz-44T | 631  | 0        | -0.180312 |  |  |
|           |      | Shiraz-46T | 942  | 0.069143 | 0         |  |  |
|           |      | Shiraz-18T | 1433 | 0.250973 | 0         |  |  |
|           |      | Shiraz-22T | 1544 | 0        | -0.193579 |  |  |
|           |      | Shiraz-25T | 1697 | 0.21945  | 0         |  |  |
|           |      | Shiraz-28T | 1734 | 0.362882 | 0         |  |  |
|           |      | Shiraz-29T | 1777 | 0.156747 | 0         |  |  |
|           |      | Shiraz-38T | 1950 | 0.265916 | 0         |  |  |
|           |      | Shiraz-71T | 2236 | 0.320072 | 0         |  |  |
|           |      | Shiraz-3T  | 87   | 0.198593 | 0         |  |  |
|           |      | Shiraz-4T  | 252  | 0.192083 | 0         |  |  |
|           |      | Shiraz-36T | 376  | 0.159952 | 0         |  |  |
|           |      | Shiraz-44T | 631  | 0        | -0.180312 |  |  |
|           |      | Shiraz-46T | 942  | 0.069143 | 0         |  |  |
|           |      | Shiraz-18T | 1433 | 0.250973 | 0         |  |  |
|           |      | Shiraz-22T | 1544 | 0        | -0.193579 |  |  |
|           |      | Shiraz-25T | 1697 | 0.21945  | 0         |  |  |
|           |      | Shiraz-28T | 1734 | 0.362882 | 0         |  |  |
|           |      | Shiraz-29T | 1777 | 0.156747 | 0         |  |  |
|           |      | Shiraz-38T | 1950 | 0.265916 | 0         |  |  |
|           |      | Shiraz-71T | 2236 | 0.320072 | 0         |  |  |
| DPY19L2P2 | chr7 | Shiraz-3T  | 90   | 0.219276 | 0         |  |  |
|           |      | Shiraz-4T  | 253  | 0.372918 | 0         |  |  |
|           |      | Shiraz-36T | 378  | 0.179558 | 0         |  |  |
|           |      | Shiraz-46T | 943  | 0.093799 | 0         |  |  |
|           |      | Shiraz-77T | 1225 | 0        | -0.117922 |  |  |

|           |      |            |      |          |           |  |  |
|-----------|------|------------|------|----------|-----------|--|--|
|           |      | Shiraz-18T | 1434 | 0.244465 | 0         |  |  |
|           |      | Shiraz-22T | 1549 | 0        | -0.319623 |  |  |
|           |      | Shiraz-25T | 1698 | 0.21835  | 0         |  |  |
|           |      | Shiraz-28T | 1735 | 0.350744 | 0         |  |  |
|           |      | Shiraz-29T | 1778 | 0.120767 | 0         |  |  |
|           |      | Shiraz-32T | 1833 | 0.551336 | 0         |  |  |
|           |      | Shiraz-38T | 1951 | 0.250891 | 0         |  |  |
|           |      | Shiraz-53T | 2078 | 0.287202 | 0         |  |  |
|           |      | Shiraz-71T | 2238 | 0.603631 | 0         |  |  |
|           |      | Shiraz-3T  | 90   | 0.219276 | 0         |  |  |
|           |      | Shiraz-4T  | 253  | 0.372918 | 0         |  |  |
|           |      | Shiraz-36T | 378  | 0.179558 | 0         |  |  |
|           |      | Shiraz-46T | 943  | 0.093799 | 0         |  |  |
|           |      | Shiraz-77T | 1225 | 0        | -0.117922 |  |  |
|           |      | Shiraz-18T | 1434 | 0.244465 | 0         |  |  |
|           |      | Shiraz-22T | 1549 | 0        | -0.319623 |  |  |
|           |      | Shiraz-25T | 1698 | 0.21835  | 0         |  |  |
|           |      | Shiraz-28T | 1735 | 0.350744 | 0         |  |  |
|           |      | Shiraz-29T | 1778 | 0.120767 | 0         |  |  |
|           |      | Shiraz-32T | 1833 | 0.551336 | 0         |  |  |
|           |      | Shiraz-38T | 1951 | 0.250891 | 0         |  |  |
|           |      | Shiraz-53T | 2078 | 0.287202 | 0         |  |  |
|           |      | Shiraz-71T | 2238 | 0.603631 | 0         |  |  |
|           |      | Shiraz-3T  | 90   | 0.219276 | 0         |  |  |
|           |      | Shiraz-4T  | 253  | 0.372918 | 0         |  |  |
|           |      | Shiraz-36T | 378  | 0.179558 | 0         |  |  |
|           |      | Shiraz-46T | 943  | 0.093799 | 0         |  |  |
|           |      | Shiraz-77T | 1225 | 0        | -0.117922 |  |  |
|           |      | Shiraz-18T | 1434 | 0.244465 | 0         |  |  |
|           |      | Shiraz-22T | 1549 | 0        | -0.319623 |  |  |
|           |      | Shiraz-25T | 1698 | 0.21835  | 0         |  |  |
|           |      | Shiraz-28T | 1735 | 0.350744 | 0         |  |  |
|           |      | Shiraz-29T | 1778 | 0.120767 | 0         |  |  |
|           |      | Shiraz-32T | 1833 | 0.551336 | 0         |  |  |
|           |      | Shiraz-38T | 1951 | 0.250891 | 0         |  |  |
|           |      | Shiraz-53T | 2078 | 0.287202 | 0         |  |  |
|           |      | Shiraz-71T | 2238 | 0.603631 | 0         |  |  |
| DPY19L2P4 | chr7 | Shiraz-3T  | 90   | 0.219276 | 0         |  |  |
|           |      | Shiraz-3T  | 93   | 0        | -0.058023 |  |  |
|           |      | Shiraz-4T  | 253  | 0.372918 | 0         |  |  |
|           |      | Shiraz-36T | 378  | 0.179558 | 0         |  |  |
|           |      | Shiraz-36T | 380  | 0.083883 | 0         |  |  |
|           |      | Shiraz-44T | 638  | 0        | -0.433476 |  |  |
|           |      | Shiraz-46T | 943  | 0.093799 | 0         |  |  |
|           |      | Shiraz-46T | 945  | 0        | -0.014838 |  |  |
|           |      | Shiraz-47T | 1029 | 0        | -0.096586 |  |  |
|           |      | Shiraz-49T | 1119 | 0        | -0.157331 |  |  |

|  |            |      |          |           |  |
|--|------------|------|----------|-----------|--|
|  | Shiraz-77T | 1225 | 0        | -0.117922 |  |
|  | Shiraz-77T | 1226 | 0        | -0.233724 |  |
|  | Shiraz-18T | 1434 | 0.244465 | 0         |  |
|  | Shiraz-22T | 1549 | 0        | -0.319623 |  |
|  | Shiraz-25T | 1698 | 0.21835  | 0         |  |
|  | Shiraz-28T | 1735 | 0.350744 | 0         |  |
|  | Shiraz-29T | 1778 | 0.120767 | 0         |  |
|  | Shiraz-32T | 1833 | 0.551336 | 0         |  |
|  | Shiraz-38T | 1951 | 0.250891 | 0         |  |
|  | Shiraz-53T | 2078 | 0.287202 | 0         |  |
|  | Shiraz-58T | 2159 | 0        | -0.219521 |  |
|  | Shiraz-71T | 2238 | 0.603631 | 0         |  |
|  | Shiraz-3T  | 90   | 0.219276 | 0         |  |
|  | Shiraz-3T  | 93   | 0        | -0.058023 |  |
|  | Shiraz-4T  | 253  | 0.372918 | 0         |  |
|  | Shiraz-36T | 378  | 0.179558 | 0         |  |
|  | Shiraz-36T | 380  | 0.083883 | 0         |  |
|  | Shiraz-44T | 638  | 0        | -0.433476 |  |
|  | Shiraz-46T | 943  | 0.093799 | 0         |  |
|  | Shiraz-46T | 945  | 0        | -0.014838 |  |
|  | Shiraz-47T | 1029 | 0        | -0.096586 |  |
|  | Shiraz-49T | 1119 | 0        | -0.157331 |  |
|  | Shiraz-77T | 1225 | 0        | -0.117922 |  |
|  | Shiraz-77T | 1226 | 0        | -0.233724 |  |
|  | Shiraz-18T | 1434 | 0.244465 | 0         |  |
|  | Shiraz-22T | 1549 | 0        | -0.319623 |  |
|  | Shiraz-25T | 1698 | 0.21835  | 0         |  |
|  | Shiraz-28T | 1735 | 0.350744 | 0         |  |
|  | Shiraz-29T | 1778 | 0.120767 | 0         |  |
|  | Shiraz-32T | 1833 | 0.551336 | 0         |  |
|  | Shiraz-38T | 1951 | 0.250891 | 0         |  |
|  | Shiraz-53T | 2078 | 0.287202 | 0         |  |
|  | Shiraz-58T | 2159 | 0        | -0.219521 |  |
|  | Shiraz-71T | 2238 | 0.603631 | 0         |  |
|  | Shiraz-3T  | 90   | 0.219276 | 0         |  |
|  | Shiraz-3T  | 93   | 0        | -0.058023 |  |
|  | Shiraz-4T  | 253  | 0.372918 | 0         |  |
|  | Shiraz-36T | 378  | 0.179558 | 0         |  |
|  | Shiraz-36T | 380  | 0.083883 | 0         |  |
|  | Shiraz-44T | 638  | 0        | -0.433476 |  |
|  | Shiraz-46T | 943  | 0.093799 | 0         |  |
|  | Shiraz-46T | 945  | 0        | -0.014838 |  |
|  | Shiraz-47T | 1029 | 0        | -0.096586 |  |
|  | Shiraz-49T | 1119 | 0        | -0.157331 |  |
|  | Shiraz-77T | 1225 | 0        | -0.117922 |  |
|  | Shiraz-77T | 1226 | 0        | -0.233724 |  |
|  | Shiraz-18T | 1434 | 0.244465 | 0         |  |

|      |      |            |      |          |           |  |  |
|------|------|------------|------|----------|-----------|--|--|
|      |      | Shiraz-22T | 1549 | 0        | -0.319623 |  |  |
|      |      | Shiraz-25T | 1698 | 0.21835  | 0         |  |  |
|      |      | Shiraz-28T | 1735 | 0.350744 | 0         |  |  |
|      |      | Shiraz-29T | 1778 | 0.120767 | 0         |  |  |
|      |      | Shiraz-32T | 1833 | 0.551336 | 0         |  |  |
|      |      | Shiraz-38T | 1951 | 0.250891 | 0         |  |  |
|      |      | Shiraz-53T | 2078 | 0.287202 | 0         |  |  |
|      |      | Shiraz-58T | 2159 | 0        | -0.219521 |  |  |
|      |      | Shiraz-71T | 2238 | 0.603631 | 0         |  |  |
| DRP2 | chrX | Shiraz-3T  | 242  | 0        | -0.336434 |  |  |
|      |      | Shiraz-4T  | 261  | 0        | -0.336249 |  |  |
|      |      | Shiraz-16T | 295  | 0.591657 | 0         |  |  |
|      |      | Shiraz-36T | 433  | 0        | -0.803961 |  |  |
|      |      | Shiraz-44T | 899  | 0        | -1.09697  |  |  |
|      |      | Shiraz-49T | 1170 | 0        | -0.967436 |  |  |
|      |      | Shiraz-18T | 1457 | 0.643204 | 0         |  |  |
|      |      | Shiraz-22T | 1673 | 0.611783 | 0         |  |  |
|      |      | Shiraz-25T | 1719 | 0.472955 | 0         |  |  |
|      |      | Shiraz-28T | 1762 | 0.562311 | 0         |  |  |
|      |      | Shiraz-29T | 1801 | 0.815343 | 0         |  |  |
|      |      | Shiraz-32T | 1870 | 0.729766 | 0         |  |  |
|      |      | Shiraz-35T | 1933 | 0.488535 | 0         |  |  |
|      |      | Shiraz-58T | 2223 | 0.833364 | 0         |  |  |
|      |      | Shiraz-71T | 2263 | 0.975531 | 0         |  |  |
|      |      | Shiraz-3T  | 242  | 0        | -0.336434 |  |  |
|      |      | Shiraz-4T  | 261  | 0        | -0.336249 |  |  |
|      |      | Shiraz-16T | 295  | 0.591657 | 0         |  |  |
|      |      | Shiraz-36T | 433  | 0        | -0.803961 |  |  |
|      |      | Shiraz-44T | 899  | 0        | -1.09697  |  |  |
|      |      | Shiraz-49T | 1170 | 0        | -0.967436 |  |  |
|      |      | Shiraz-18T | 1457 | 0.643204 | 0         |  |  |
|      |      | Shiraz-22T | 1673 | 0.611783 | 0         |  |  |
|      |      | Shiraz-25T | 1719 | 0.472955 | 0         |  |  |
|      |      | Shiraz-28T | 1762 | 0.562311 | 0         |  |  |
|      |      | Shiraz-29T | 1801 | 0.815343 | 0         |  |  |
|      |      | Shiraz-32T | 1870 | 0.729766 | 0         |  |  |
|      |      | Shiraz-35T | 1933 | 0.488535 | 0         |  |  |
|      |      | Shiraz-58T | 2223 | 0.833364 | 0         |  |  |
|      |      | Shiraz-71T | 2263 | 0.975531 | 0         |  |  |
|      |      | Shiraz-3T  | 242  | 0        | -0.336434 |  |  |
|      |      | Shiraz-4T  | 261  | 0        | -0.336249 |  |  |
|      |      | Shiraz-16T | 295  | 0.591657 | 0         |  |  |
|      |      | Shiraz-36T | 433  | 0        | -0.803961 |  |  |
|      |      | Shiraz-44T | 899  | 0        | -1.09697  |  |  |
|      |      | Shiraz-49T | 1170 | 0        | -0.967436 |  |  |
|      |      | Shiraz-18T | 1457 | 0.643204 | 0         |  |  |
|      |      | Shiraz-22T | 1673 | 0.611783 | 0         |  |  |

|      |      |            |      |          |   |  |
|------|------|------------|------|----------|---|--|
|      |      | Shiraz-25T | 1719 | 0.472955 | 0 |  |
|      |      | Shiraz-28T | 1762 | 0.562311 | 0 |  |
|      |      | Shiraz-29T | 1801 | 0.815343 | 0 |  |
|      |      | Shiraz-32T | 1870 | 0.729766 | 0 |  |
|      |      | Shiraz-35T | 1933 | 0.488535 | 0 |  |
|      |      | Shiraz-58T | 2223 | 0.833364 | 0 |  |
|      |      | Shiraz-71T | 2263 | 0.975531 | 0 |  |
| DTX2 | chr7 | Shiraz-3T  | 90   | 0.219276 | 0 |  |
|      |      | Shiraz-3T  | 90   | 0.219276 | 0 |  |
|      |      | Shiraz-3T  | 92   | 0.817021 | 0 |  |
|      |      | Shiraz-3T  | 92   | 0.817021 | 0 |  |
|      |      | Shiraz-4T  | 253  | 0.372918 | 0 |  |
|      |      | Shiraz-4T  | 253  | 0.372918 | 0 |  |
|      |      | Shiraz-31T | 315  | 0.194054 | 0 |  |
|      |      | Shiraz-31T | 315  | 0.194054 | 0 |  |
|      |      | Shiraz-36T | 378  | 0.179558 | 0 |  |
|      |      | Shiraz-36T | 378  | 0.179558 | 0 |  |
|      |      | Shiraz-36T | 379  | 0.322028 | 0 |  |
|      |      | Shiraz-36T | 379  | 0.322028 | 0 |  |
|      |      | Shiraz-42T | 454  | 0.145717 | 0 |  |
|      |      | Shiraz-42T | 454  | 0.145717 | 0 |  |
|      |      | Shiraz-44T | 637  | 1.109789 | 0 |  |
|      |      | Shiraz-44T | 637  | 1.109789 | 0 |  |
|      |      | Shiraz-46T | 943  | 0.093799 | 0 |  |
|      |      | Shiraz-46T | 943  | 0.093799 | 0 |  |
|      |      | Shiraz-46T | 944  | 0.256008 | 0 |  |
|      |      | Shiraz-46T | 944  | 0.256008 | 0 |  |
|      |      | Shiraz-47T | 1028 | 0.17896  | 0 |  |
|      |      | Shiraz-47T | 1028 | 0.17896  | 0 |  |
|      |      | Shiraz-49T | 1118 | 0.327789 | 0 |  |
|      |      | Shiraz-49T | 1118 | 0.327789 | 0 |  |
|      |      | Shiraz-77T | 1224 | 0.220539 | 0 |  |
|      |      | Shiraz-77T | 1224 | 0.220539 | 0 |  |
|      |      | Shiraz-9T  | 1323 | 0.655912 | 0 |  |
|      |      | Shiraz-9T  | 1323 | 0.655912 | 0 |  |
|      |      | Shiraz-18T | 1434 | 0.244465 | 0 |  |
|      |      | Shiraz-18T | 1434 | 0.244465 | 0 |  |
|      |      | Shiraz-22T | 1548 | 0.237572 | 0 |  |
|      |      | Shiraz-22T | 1548 | 0.237572 | 0 |  |
|      |      | Shiraz-25T | 1698 | 0.21835  | 0 |  |
|      |      | Shiraz-25T | 1698 | 0.21835  | 0 |  |
|      |      | Shiraz-28T | 1735 | 0.350744 | 0 |  |
|      |      | Shiraz-28T | 1735 | 0.350744 | 0 |  |
|      |      | Shiraz-29T | 1778 | 0.120767 | 0 |  |
|      |      | Shiraz-29T | 1778 | 0.120767 | 0 |  |
|      |      | Shiraz-38T | 1951 | 0.250891 | 0 |  |
|      |      | Shiraz-38T | 1951 | 0.250891 | 0 |  |

|  |  |            |      |          |   |  |  |
|--|--|------------|------|----------|---|--|--|
|  |  | Shiraz-53T | 2078 | 0.287202 | 0 |  |  |
|  |  | Shiraz-53T | 2078 | 0.287202 | 0 |  |  |
|  |  | Shiraz-58T | 2158 | 0.33934  | 0 |  |  |
|  |  | Shiraz-58T | 2158 | 0.33934  | 0 |  |  |
|  |  | Shiraz-71T | 2238 | 0.603631 | 0 |  |  |
|  |  | Shiraz-71T | 2238 | 0.603631 | 0 |  |  |
|  |  | Shiraz-71T | 2239 | 0.310785 | 0 |  |  |
|  |  | Shiraz-71T | 2239 | 0.310785 | 0 |  |  |
|  |  | Shiraz-3T  | 90   | 0.219276 | 0 |  |  |
|  |  | Shiraz-3T  | 90   | 0.219276 | 0 |  |  |
|  |  | Shiraz-3T  | 92   | 0.817021 | 0 |  |  |
|  |  | Shiraz-3T  | 92   | 0.817021 | 0 |  |  |
|  |  | Shiraz-4T  | 253  | 0.372918 | 0 |  |  |
|  |  | Shiraz-4T  | 253  | 0.372918 | 0 |  |  |
|  |  | Shiraz-31T | 315  | 0.194054 | 0 |  |  |
|  |  | Shiraz-31T | 315  | 0.194054 | 0 |  |  |
|  |  | Shiraz-36T | 378  | 0.179558 | 0 |  |  |
|  |  | Shiraz-36T | 378  | 0.179558 | 0 |  |  |
|  |  | Shiraz-36T | 379  | 0.322028 | 0 |  |  |
|  |  | Shiraz-36T | 379  | 0.322028 | 0 |  |  |
|  |  | Shiraz-42T | 454  | 0.145717 | 0 |  |  |
|  |  | Shiraz-42T | 454  | 0.145717 | 0 |  |  |
|  |  | Shiraz-44T | 637  | 1.109789 | 0 |  |  |
|  |  | Shiraz-44T | 637  | 1.109789 | 0 |  |  |
|  |  | Shiraz-46T | 943  | 0.093799 | 0 |  |  |
|  |  | Shiraz-46T | 943  | 0.093799 | 0 |  |  |
|  |  | Shiraz-46T | 944  | 0.256008 | 0 |  |  |
|  |  | Shiraz-46T | 944  | 0.256008 | 0 |  |  |
|  |  | Shiraz-47T | 1028 | 0.17896  | 0 |  |  |
|  |  | Shiraz-47T | 1028 | 0.17896  | 0 |  |  |
|  |  | Shiraz-49T | 1118 | 0.327789 | 0 |  |  |
|  |  | Shiraz-49T | 1118 | 0.327789 | 0 |  |  |
|  |  | Shiraz-77T | 1224 | 0.220539 | 0 |  |  |
|  |  | Shiraz-77T | 1224 | 0.220539 | 0 |  |  |
|  |  | Shiraz-9T  | 1323 | 0.655912 | 0 |  |  |
|  |  | Shiraz-9T  | 1323 | 0.655912 | 0 |  |  |
|  |  | Shiraz-18T | 1434 | 0.244465 | 0 |  |  |
|  |  | Shiraz-18T | 1434 | 0.244465 | 0 |  |  |
|  |  | Shiraz-22T | 1548 | 0.237572 | 0 |  |  |
|  |  | Shiraz-22T | 1548 | 0.237572 | 0 |  |  |
|  |  | Shiraz-25T | 1698 | 0.21835  | 0 |  |  |
|  |  | Shiraz-25T | 1698 | 0.21835  | 0 |  |  |
|  |  | Shiraz-28T | 1735 | 0.350744 | 0 |  |  |
|  |  | Shiraz-28T | 1735 | 0.350744 | 0 |  |  |
|  |  | Shiraz-29T | 1778 | 0.120767 | 0 |  |  |
|  |  | Shiraz-29T | 1778 | 0.120767 | 0 |  |  |
|  |  | Shiraz-38T | 1951 | 0.250891 | 0 |  |  |

|  |  |            |      |          |   |  |  |
|--|--|------------|------|----------|---|--|--|
|  |  | Shiraz-38T | 1951 | 0.250891 | 0 |  |  |
|  |  | Shiraz-53T | 2078 | 0.287202 | 0 |  |  |
|  |  | Shiraz-53T | 2078 | 0.287202 | 0 |  |  |
|  |  | Shiraz-58T | 2158 | 0.33934  | 0 |  |  |
|  |  | Shiraz-58T | 2158 | 0.33934  | 0 |  |  |
|  |  | Shiraz-71T | 2238 | 0.603631 | 0 |  |  |
|  |  | Shiraz-71T | 2238 | 0.603631 | 0 |  |  |
|  |  | Shiraz-71T | 2239 | 0.310785 | 0 |  |  |
|  |  | Shiraz-71T | 2239 | 0.310785 | 0 |  |  |
|  |  | Shiraz-3T  | 90   | 0.219276 | 0 |  |  |
|  |  | Shiraz-3T  | 90   | 0.219276 | 0 |  |  |
|  |  | Shiraz-3T  | 92   | 0.817021 | 0 |  |  |
|  |  | Shiraz-3T  | 92   | 0.817021 | 0 |  |  |
|  |  | Shiraz-4T  | 253  | 0.372918 | 0 |  |  |
|  |  | Shiraz-4T  | 253  | 0.372918 | 0 |  |  |
|  |  | Shiraz-31T | 315  | 0.194054 | 0 |  |  |
|  |  | Shiraz-31T | 315  | 0.194054 | 0 |  |  |
|  |  | Shiraz-36T | 378  | 0.179558 | 0 |  |  |
|  |  | Shiraz-36T | 378  | 0.179558 | 0 |  |  |
|  |  | Shiraz-36T | 379  | 0.322028 | 0 |  |  |
|  |  | Shiraz-36T | 379  | 0.322028 | 0 |  |  |
|  |  | Shiraz-42T | 454  | 0.145717 | 0 |  |  |
|  |  | Shiraz-42T | 454  | 0.145717 | 0 |  |  |
|  |  | Shiraz-44T | 637  | 1.109789 | 0 |  |  |
|  |  | Shiraz-44T | 637  | 1.109789 | 0 |  |  |
|  |  | Shiraz-46T | 943  | 0.093799 | 0 |  |  |
|  |  | Shiraz-46T | 943  | 0.093799 | 0 |  |  |
|  |  | Shiraz-46T | 944  | 0.256008 | 0 |  |  |
|  |  | Shiraz-46T | 944  | 0.256008 | 0 |  |  |
|  |  | Shiraz-47T | 1028 | 0.17896  | 0 |  |  |
|  |  | Shiraz-47T | 1028 | 0.17896  | 0 |  |  |
|  |  | Shiraz-49T | 1118 | 0.327789 | 0 |  |  |
|  |  | Shiraz-49T | 1118 | 0.327789 | 0 |  |  |
|  |  | Shiraz-77T | 1224 | 0.220539 | 0 |  |  |
|  |  | Shiraz-77T | 1224 | 0.220539 | 0 |  |  |
|  |  | Shiraz-9T  | 1323 | 0.655912 | 0 |  |  |
|  |  | Shiraz-9T  | 1323 | 0.655912 | 0 |  |  |
|  |  | Shiraz-18T | 1434 | 0.244465 | 0 |  |  |
|  |  | Shiraz-18T | 1434 | 0.244465 | 0 |  |  |
|  |  | Shiraz-22T | 1548 | 0.237572 | 0 |  |  |
|  |  | Shiraz-22T | 1548 | 0.237572 | 0 |  |  |
|  |  | Shiraz-25T | 1698 | 0.21835  | 0 |  |  |
|  |  | Shiraz-25T | 1698 | 0.21835  | 0 |  |  |
|  |  | Shiraz-28T | 1735 | 0.350744 | 0 |  |  |
|  |  | Shiraz-28T | 1735 | 0.350744 | 0 |  |  |
|  |  | Shiraz-29T | 1778 | 0.120767 | 0 |  |  |
|  |  | Shiraz-29T | 1778 | 0.120767 | 0 |  |  |

|       |      |            |      |          |           |  |
|-------|------|------------|------|----------|-----------|--|
|       |      | Shiraz-38T | 1951 | 0.250891 | 0         |  |
|       |      | Shiraz-38T | 1951 | 0.250891 | 0         |  |
|       |      | Shiraz-53T | 2078 | 0.287202 | 0         |  |
|       |      | Shiraz-53T | 2078 | 0.287202 | 0         |  |
|       |      | Shiraz-58T | 2158 | 0.33934  | 0         |  |
|       |      | Shiraz-58T | 2158 | 0.33934  | 0         |  |
|       |      | Shiraz-71T | 2238 | 0.603631 | 0         |  |
|       |      | Shiraz-71T | 2238 | 0.603631 | 0         |  |
|       |      | Shiraz-71T | 2239 | 0.310785 | 0         |  |
|       |      | Shiraz-71T | 2239 | 0.310785 | 0         |  |
| DUS4L | chr7 | Shiraz-3T  | 90   | 0.219276 | 0         |  |
|       |      | Shiraz-4T  | 253  | 0.372918 | 0         |  |
|       |      | Shiraz-36T | 378  | 0.179558 | 0         |  |
|       |      | Shiraz-46T | 943  | 0.093799 | 0         |  |
|       |      | Shiraz-77T | 1225 | 0        | -0.117922 |  |
|       |      | Shiraz-18T | 1434 | 0.244465 | 0         |  |
|       |      | Shiraz-22T | 1549 | 0        | -0.319623 |  |
|       |      | Shiraz-25T | 1698 | 0.21835  | 0         |  |
|       |      | Shiraz-28T | 1735 | 0.350744 | 0         |  |
|       |      | Shiraz-29T | 1778 | 0.120767 | 0         |  |
|       |      | Shiraz-32T | 1833 | 0.551336 | 0         |  |
|       |      | Shiraz-38T | 1951 | 0.250891 | 0         |  |
|       |      | Shiraz-53T | 2078 | 0.287202 | 0         |  |
|       |      | Shiraz-58T | 2161 | 0        | -0.187744 |  |
|       |      | Shiraz-71T | 2238 | 0.603631 | 0         |  |
|       |      | Shiraz-3T  | 90   | 0.219276 | 0         |  |
|       |      | Shiraz-4T  | 253  | 0.372918 | 0         |  |
|       |      | Shiraz-36T | 378  | 0.179558 | 0         |  |
|       |      | Shiraz-46T | 943  | 0.093799 | 0         |  |
|       |      | Shiraz-77T | 1225 | 0        | -0.117922 |  |
|       |      | Shiraz-18T | 1434 | 0.244465 | 0         |  |
|       |      | Shiraz-22T | 1549 | 0        | -0.319623 |  |
|       |      | Shiraz-25T | 1698 | 0.21835  | 0         |  |
|       |      | Shiraz-28T | 1735 | 0.350744 | 0         |  |
|       |      | Shiraz-29T | 1778 | 0.120767 | 0         |  |
|       |      | Shiraz-32T | 1833 | 0.551336 | 0         |  |
|       |      | Shiraz-38T | 1951 | 0.250891 | 0         |  |
|       |      | Shiraz-53T | 2078 | 0.287202 | 0         |  |
|       |      | Shiraz-58T | 2161 | 0        | -0.187744 |  |
|       |      | Shiraz-71T | 2238 | 0.603631 | 0         |  |
|       |      | Shiraz-3T  | 90   | 0.219276 | 0         |  |
|       |      | Shiraz-4T  | 253  | 0.372918 | 0         |  |
|       |      | Shiraz-36T | 378  | 0.179558 | 0         |  |
|       |      | Shiraz-46T | 943  | 0.093799 | 0         |  |
|       |      | Shiraz-77T | 1225 | 0        | -0.117922 |  |
|       |      | Shiraz-18T | 1434 | 0.244465 | 0         |  |
|       |      | Shiraz-22T | 1549 | 0        | -0.319623 |  |



|        |      |            |      |          |           |  |
|--------|------|------------|------|----------|-----------|--|
|        |      | Shiraz-25T | 1698 | 0.21835  | 0         |  |
|        |      | Shiraz-28T | 1735 | 0.350744 | 0         |  |
|        |      | Shiraz-29T | 1778 | 0.120767 | 0         |  |
|        |      | Shiraz-32T | 1833 | 0.551336 | 0         |  |
|        |      | Shiraz-38T | 1951 | 0.250891 | 0         |  |
|        |      | Shiraz-53T | 2078 | 0.287202 | 0         |  |
|        |      | Shiraz-58T | 2161 | 0        | -0.187744 |  |
|        |      | Shiraz-71T | 2238 | 0.603631 | 0         |  |
| DUSP21 | chrX | Shiraz-3T  | 235  | 0        | -0.28401  |  |
|        |      | Shiraz-4T  | 260  | 0        | -0.324128 |  |
|        |      | Shiraz-16T | 294  | 0.655804 | 0         |  |
|        |      | Shiraz-31T | 345  | 0.103301 | 0         |  |
|        |      | Shiraz-36T | 431  | 0        | -0.78035  |  |
|        |      | Shiraz-36T | 432  | 0        | -0.6692   |  |
|        |      | Shiraz-44T | 891  | 0        | -0.954044 |  |
|        |      | Shiraz-46T | 991  | 0.139564 | 0         |  |
|        |      | Shiraz-49T | 1166 | 0        | -0.917235 |  |
|        |      | Shiraz-9T  | 1368 | 0.199713 | 0         |  |
|        |      | Shiraz-18T | 1455 | 0        | -0.186773 |  |
|        |      | Shiraz-22T | 1669 | 0.695915 | 0         |  |
|        |      | Shiraz-25T | 1717 | 0.420447 | 0         |  |
|        |      | Shiraz-28T | 1760 | 0.538181 | 0         |  |
|        |      | Shiraz-29T | 1800 | 0.672527 | 0         |  |
|        |      | Shiraz-32T | 1869 | 0.776805 | 0         |  |
|        |      | Shiraz-35T | 1932 | 0.507141 | 0         |  |
|        |      | Shiraz-40T | 2051 | 0.098506 | 0         |  |
|        |      | Shiraz-58T | 2221 | 0.871948 | 0         |  |
|        |      | Shiraz-71T | 2260 | 0.68394  | 0         |  |
|        |      | Shiraz-71T | 2262 | 0.986748 | 0         |  |
|        |      | Shiraz-3T  | 235  | 0        | -0.28401  |  |
|        |      | Shiraz-4T  | 260  | 0        | -0.324128 |  |
|        |      | Shiraz-16T | 294  | 0.655804 | 0         |  |
|        |      | Shiraz-31T | 345  | 0.103301 | 0         |  |
|        |      | Shiraz-36T | 431  | 0        | -0.78035  |  |
|        |      | Shiraz-36T | 432  | 0        | -0.6692   |  |
|        |      | Shiraz-44T | 891  | 0        | -0.954044 |  |
|        |      | Shiraz-46T | 991  | 0.139564 | 0         |  |
|        |      | Shiraz-49T | 1166 | 0        | -0.917235 |  |
|        |      | Shiraz-9T  | 1368 | 0.199713 | 0         |  |
|        |      | Shiraz-18T | 1455 | 0        | -0.186773 |  |
|        |      | Shiraz-22T | 1669 | 0.695915 | 0         |  |
|        |      | Shiraz-25T | 1717 | 0.420447 | 0         |  |
|        |      | Shiraz-28T | 1760 | 0.538181 | 0         |  |
|        |      | Shiraz-29T | 1800 | 0.672527 | 0         |  |
|        |      | Shiraz-32T | 1869 | 0.776805 | 0         |  |
|        |      | Shiraz-35T | 1932 | 0.507141 | 0         |  |
|        |      | Shiraz-40T | 2051 | 0.098506 | 0         |  |

|       |      |            |      |          |           |  |
|-------|------|------------|------|----------|-----------|--|
|       |      | Shiraz-58T | 2221 | 0.871948 | 0         |  |
|       |      | Shiraz-71T | 2260 | 0.68394  | 0         |  |
|       |      | Shiraz-71T | 2262 | 0.986748 | 0         |  |
|       |      | Shiraz-3T  | 235  | 0        | -0.28401  |  |
|       |      | Shiraz-4T  | 260  | 0        | -0.324128 |  |
|       |      | Shiraz-16T | 294  | 0.655804 | 0         |  |
|       |      | Shiraz-31T | 345  | 0.103301 | 0         |  |
|       |      | Shiraz-36T | 431  | 0        | -0.78035  |  |
|       |      | Shiraz-36T | 432  | 0        | -0.6692   |  |
|       |      | Shiraz-44T | 891  | 0        | -0.954044 |  |
|       |      | Shiraz-46T | 991  | 0.139564 | 0         |  |
|       |      | Shiraz-49T | 1166 | 0        | -0.917235 |  |
|       |      | Shiraz-9T  | 1368 | 0.199713 | 0         |  |
|       |      | Shiraz-18T | 1455 | 0        | -0.186773 |  |
|       |      | Shiraz-22T | 1669 | 0.695915 | 0         |  |
|       |      | Shiraz-25T | 1717 | 0.420447 | 0         |  |
|       |      | Shiraz-28T | 1760 | 0.538181 | 0         |  |
|       |      | Shiraz-29T | 1800 | 0.672527 | 0         |  |
|       |      | Shiraz-32T | 1869 | 0.776805 | 0         |  |
|       |      | Shiraz-35T | 1932 | 0.507141 | 0         |  |
|       |      | Shiraz-40T | 2051 | 0.098506 | 0         |  |
|       |      | Shiraz-58T | 2221 | 0.871948 | 0         |  |
|       |      | Shiraz-71T | 2260 | 0.68394  | 0         |  |
|       |      | Shiraz-71T | 2262 | 0.986748 | 0         |  |
| DUSP9 | chrX | Shiraz-3T  | 246  | 0.531858 | 0         |  |
|       |      | Shiraz-4T  | 261  | 0        | -0.336249 |  |
|       |      | Shiraz-16T | 295  | 0.591657 | 0         |  |
|       |      | Shiraz-36T | 433  | 0        | -0.803961 |  |
|       |      | Shiraz-42T | 480  | 0        | -0.232915 |  |
|       |      | Shiraz-44T | 908  | 0.466743 | 0         |  |
|       |      | Shiraz-49T | 1170 | 0        | -0.967436 |  |
|       |      | Shiraz-49T | 1173 | 0        | -0.704439 |  |
|       |      | Shiraz-9T  | 1370 | 0.690073 | 0         |  |
|       |      | Shiraz-9T  | 1371 | 1.292392 | 0         |  |
|       |      | Shiraz-18T | 1457 | 0.643204 | 0         |  |
|       |      | Shiraz-22T | 1673 | 0.611783 | 0         |  |
|       |      | Shiraz-22T | 1678 | 0.911625 | 0         |  |
|       |      | Shiraz-25T | 1719 | 0.472955 | 0         |  |
|       |      | Shiraz-28T | 1762 | 0.562311 | 0         |  |
|       |      | Shiraz-29T | 1801 | 0.815343 | 0         |  |
|       |      | Shiraz-32T | 1870 | 0.729766 | 0         |  |
|       |      | Shiraz-32T | 1872 | 1.504553 | 0         |  |
|       |      | Shiraz-35T | 1933 | 0.488535 | 0         |  |
|       |      | Shiraz-38T | 2011 | 0        | -0.406024 |  |
|       |      | Shiraz-53T | 2115 | 0.427728 | 0         |  |
|       |      | Shiraz-58T | 2223 | 0.833364 | 0         |  |
|       |      | Shiraz-58T | 2226 | 1.074663 | 0         |  |

|  |            |      |          |           |  |
|--|------------|------|----------|-----------|--|
|  | Shiraz-71T | 2263 | 0.975531 | 0         |  |
|  | Shiraz-3T  | 246  | 0.531858 | 0         |  |
|  | Shiraz-4T  | 261  | 0        | -0.336249 |  |
|  | Shiraz-16T | 295  | 0.591657 | 0         |  |
|  | Shiraz-36T | 433  | 0        | -0.803961 |  |
|  | Shiraz-42T | 480  | 0        | -0.232915 |  |
|  | Shiraz-44T | 908  | 0.466743 | 0         |  |
|  | Shiraz-49T | 1170 | 0        | -0.967436 |  |
|  | Shiraz-49T | 1173 | 0        | -0.704439 |  |
|  | Shiraz-9T  | 1370 | 0.690073 | 0         |  |
|  | Shiraz-9T  | 1371 | 1.292392 | 0         |  |
|  | Shiraz-18T | 1457 | 0.643204 | 0         |  |
|  | Shiraz-22T | 1673 | 0.611783 | 0         |  |
|  | Shiraz-22T | 1678 | 0.911625 | 0         |  |
|  | Shiraz-25T | 1719 | 0.472955 | 0         |  |
|  | Shiraz-28T | 1762 | 0.562311 | 0         |  |
|  | Shiraz-29T | 1801 | 0.815343 | 0         |  |
|  | Shiraz-32T | 1870 | 0.729766 | 0         |  |
|  | Shiraz-32T | 1872 | 1.504553 | 0         |  |
|  | Shiraz-35T | 1933 | 0.488535 | 0         |  |
|  | Shiraz-38T | 2011 | 0        | -0.406024 |  |
|  | Shiraz-53T | 2115 | 0.427728 | 0         |  |
|  | Shiraz-58T | 2223 | 0.833364 | 0         |  |
|  | Shiraz-58T | 2226 | 1.074663 | 0         |  |
|  | Shiraz-71T | 2263 | 0.975531 | 0         |  |
|  | Shiraz-3T  | 246  | 0.531858 | 0         |  |
|  | Shiraz-4T  | 261  | 0        | -0.336249 |  |
|  | Shiraz-16T | 295  | 0.591657 | 0         |  |
|  | Shiraz-36T | 433  | 0        | -0.803961 |  |
|  | Shiraz-42T | 480  | 0        | -0.232915 |  |
|  | Shiraz-44T | 908  | 0.466743 | 0         |  |
|  | Shiraz-49T | 1170 | 0        | -0.967436 |  |
|  | Shiraz-49T | 1173 | 0        | -0.704439 |  |
|  | Shiraz-9T  | 1370 | 0.690073 | 0         |  |
|  | Shiraz-9T  | 1371 | 1.292392 | 0         |  |
|  | Shiraz-18T | 1457 | 0.643204 | 0         |  |
|  | Shiraz-22T | 1673 | 0.611783 | 0         |  |
|  | Shiraz-22T | 1678 | 0.911625 | 0         |  |
|  | Shiraz-25T | 1719 | 0.472955 | 0         |  |
|  | Shiraz-28T | 1762 | 0.562311 | 0         |  |
|  | Shiraz-29T | 1801 | 0.815343 | 0         |  |
|  | Shiraz-32T | 1870 | 0.729766 | 0         |  |
|  | Shiraz-32T | 1872 | 1.504553 | 0         |  |
|  | Shiraz-35T | 1933 | 0.488535 | 0         |  |
|  | Shiraz-38T | 2011 | 0        | -0.406024 |  |
|  | Shiraz-53T | 2115 | 0.427728 | 0         |  |
|  | Shiraz-58T | 2223 | 0.833364 | 0         |  |

|         |      |            |      |          |           |  |
|---------|------|------------|------|----------|-----------|--|
|         |      | Shiraz-58T | 2226 | 1.074663 | 0         |  |
|         |      | Shiraz-71T | 2263 | 0.975531 | 0         |  |
| DYNC111 | chr7 | Shiraz-3T  | 90   | 0.219276 | 0         |  |
|         |      | Shiraz-3T  | 93   | 0        | -0.058023 |  |
|         |      | Shiraz-4T  | 253  | 0.372918 | 0         |  |
|         |      | Shiraz-36T | 378  | 0.179558 | 0         |  |
|         |      | Shiraz-36T | 380  | 0.083883 | 0         |  |
|         |      | Shiraz-44T | 638  | 0        | -0.433476 |  |
|         |      | Shiraz-46T | 943  | 0.093799 | 0         |  |
|         |      | Shiraz-46T | 945  | 0        | -0.014838 |  |
|         |      | Shiraz-47T | 1029 | 0        | -0.096586 |  |
|         |      | Shiraz-77T | 1225 | 0        | -0.117922 |  |
|         |      | Shiraz-18T | 1434 | 0.244465 | 0         |  |
|         |      | Shiraz-22T | 1549 | 0        | -0.319623 |  |
|         |      | Shiraz-25T | 1698 | 0.21835  | 0         |  |
|         |      | Shiraz-28T | 1735 | 0.350744 | 0         |  |
|         |      | Shiraz-29T | 1778 | 0.120767 | 0         |  |
|         |      | Shiraz-32T | 1833 | 0.551336 | 0         |  |
|         |      | Shiraz-38T | 1951 | 0.250891 | 0         |  |
|         |      | Shiraz-53T | 2078 | 0.287202 | 0         |  |
|         |      | Shiraz-58T | 2159 | 0        | -0.219521 |  |
|         |      | Shiraz-71T | 2238 | 0.603631 | 0         |  |
|         |      | Shiraz-3T  | 90   | 0.219276 | 0         |  |
|         |      | Shiraz-3T  | 93   | 0        | -0.058023 |  |
|         |      | Shiraz-4T  | 253  | 0.372918 | 0         |  |
|         |      | Shiraz-36T | 378  | 0.179558 | 0         |  |
|         |      | Shiraz-36T | 380  | 0.083883 | 0         |  |
|         |      | Shiraz-44T | 638  | 0        | -0.433476 |  |
|         |      | Shiraz-46T | 943  | 0.093799 | 0         |  |
|         |      | Shiraz-46T | 945  | 0        | -0.014838 |  |
|         |      | Shiraz-47T | 1029 | 0        | -0.096586 |  |
|         |      | Shiraz-77T | 1225 | 0        | -0.117922 |  |
|         |      | Shiraz-18T | 1434 | 0.244465 | 0         |  |
|         |      | Shiraz-22T | 1549 | 0        | -0.319623 |  |
|         |      | Shiraz-25T | 1698 | 0.21835  | 0         |  |
|         |      | Shiraz-28T | 1735 | 0.350744 | 0         |  |
|         |      | Shiraz-29T | 1778 | 0.120767 | 0         |  |
|         |      | Shiraz-32T | 1833 | 0.551336 | 0         |  |
|         |      | Shiraz-38T | 1951 | 0.250891 | 0         |  |
|         |      | Shiraz-53T | 2078 | 0.287202 | 0         |  |
|         |      | Shiraz-58T | 2159 | 0        | -0.219521 |  |
|         |      | Shiraz-71T | 2238 | 0.603631 | 0         |  |
|         |      | Shiraz-3T  | 90   | 0.219276 | 0         |  |
|         |      | Shiraz-3T  | 93   | 0        | -0.058023 |  |
|         |      | Shiraz-4T  | 253  | 0.372918 | 0         |  |
|         |      | Shiraz-36T | 378  | 0.179558 | 0         |  |
|         |      | Shiraz-36T | 380  | 0.083883 | 0         |  |

|        |      |            |      |          |           |  |  |
|--------|------|------------|------|----------|-----------|--|--|
|        |      | Shiraz-44T | 638  | 0        | -0.433476 |  |  |
|        |      | Shiraz-46T | 943  | 0.093799 | 0         |  |  |
|        |      | Shiraz-46T | 945  | 0        | -0.014838 |  |  |
|        |      | Shiraz-47T | 1029 | 0        | -0.096586 |  |  |
|        |      | Shiraz-77T | 1225 | 0        | -0.117922 |  |  |
|        |      | Shiraz-18T | 1434 | 0.244465 | 0         |  |  |
|        |      | Shiraz-22T | 1549 | 0        | -0.319623 |  |  |
|        |      | Shiraz-25T | 1698 | 0.21835  | 0         |  |  |
|        |      | Shiraz-28T | 1735 | 0.350744 | 0         |  |  |
|        |      | Shiraz-29T | 1778 | 0.120767 | 0         |  |  |
|        |      | Shiraz-32T | 1833 | 0.551336 | 0         |  |  |
|        |      | Shiraz-38T | 1951 | 0.250891 | 0         |  |  |
|        |      | Shiraz-53T | 2078 | 0.287202 | 0         |  |  |
|        |      | Shiraz-58T | 2159 | 0        | -0.219521 |  |  |
|        |      | Shiraz-71T | 2238 | 0.603631 | 0         |  |  |
| DYNLT3 | chrX | Shiraz-3T  | 235  | 0        | -0.28401  |  |  |
|        |      | Shiraz-4T  | 260  | 0        | -0.324128 |  |  |
|        |      | Shiraz-16T | 294  | 0.655804 | 0         |  |  |
|        |      | Shiraz-36T | 431  | 0        | -0.78035  |  |  |
|        |      | Shiraz-44T | 891  | 0        | -0.954044 |  |  |
|        |      | Shiraz-49T | 1166 | 0        | -0.917235 |  |  |
|        |      | Shiraz-49T | 1168 | 0        | -1.073859 |  |  |
|        |      | Shiraz-9T  | 1368 | 0.199713 | 0         |  |  |
|        |      | Shiraz-18T | 1455 | 0        | -0.186773 |  |  |
|        |      | Shiraz-22T | 1669 | 0.695915 | 0         |  |  |
|        |      | Shiraz-25T | 1717 | 0.420447 | 0         |  |  |
|        |      | Shiraz-28T | 1760 | 0.538181 | 0         |  |  |
|        |      | Shiraz-29T | 1800 | 0.672527 | 0         |  |  |
|        |      | Shiraz-32T | 1869 | 0.776805 | 0         |  |  |
|        |      | Shiraz-35T | 1932 | 0.507141 | 0         |  |  |
|        |      | Shiraz-40T | 2051 | 0.098506 | 0         |  |  |
|        |      | Shiraz-58T | 2221 | 0.871948 | 0         |  |  |
|        |      | Shiraz-71T | 2260 | 0.68394  | 0         |  |  |
|        |      | Shiraz-71T | 2261 | 0.508399 | 0         |  |  |
|        |      | Shiraz-3T  | 235  | 0        | -0.28401  |  |  |
|        |      | Shiraz-4T  | 260  | 0        | -0.324128 |  |  |
|        |      | Shiraz-16T | 294  | 0.655804 | 0         |  |  |
|        |      | Shiraz-36T | 431  | 0        | -0.78035  |  |  |
|        |      | Shiraz-44T | 891  | 0        | -0.954044 |  |  |
|        |      | Shiraz-49T | 1166 | 0        | -0.917235 |  |  |
|        |      | Shiraz-49T | 1168 | 0        | -1.073859 |  |  |
|        |      | Shiraz-9T  | 1368 | 0.199713 | 0         |  |  |
|        |      | Shiraz-18T | 1455 | 0        | -0.186773 |  |  |
|        |      | Shiraz-22T | 1669 | 0.695915 | 0         |  |  |
|        |      | Shiraz-25T | 1717 | 0.420447 | 0         |  |  |
|        |      | Shiraz-28T | 1760 | 0.538181 | 0         |  |  |
|        |      | Shiraz-29T | 1800 | 0.672527 | 0         |  |  |

|     |      |            |      |          |           |  |  |
|-----|------|------------|------|----------|-----------|--|--|
|     |      | Shiraz-32T | 1869 | 0.776805 | 0         |  |  |
|     |      | Shiraz-35T | 1932 | 0.507141 | 0         |  |  |
|     |      | Shiraz-40T | 2051 | 0.098506 | 0         |  |  |
|     |      | Shiraz-58T | 2221 | 0.871948 | 0         |  |  |
|     |      | Shiraz-71T | 2260 | 0.68394  | 0         |  |  |
|     |      | Shiraz-71T | 2261 | 0.508399 | 0         |  |  |
|     |      | Shiraz-3T  | 235  | 0        | -0.28401  |  |  |
|     |      | Shiraz-4T  | 260  | 0        | -0.324128 |  |  |
|     |      | Shiraz-16T | 294  | 0.655804 | 0         |  |  |
|     |      | Shiraz-36T | 431  | 0        | -0.78035  |  |  |
|     |      | Shiraz-44T | 891  | 0        | -0.954044 |  |  |
|     |      | Shiraz-49T | 1166 | 0        | -0.917235 |  |  |
|     |      | Shiraz-49T | 1168 | 0        | -1.073859 |  |  |
|     |      | Shiraz-9T  | 1368 | 0.199713 | 0         |  |  |
|     |      | Shiraz-18T | 1455 | 0        | -0.186773 |  |  |
|     |      | Shiraz-22T | 1669 | 0.695915 | 0         |  |  |
|     |      | Shiraz-25T | 1717 | 0.420447 | 0         |  |  |
|     |      | Shiraz-28T | 1760 | 0.538181 | 0         |  |  |
|     |      | Shiraz-29T | 1800 | 0.672527 | 0         |  |  |
|     |      | Shiraz-32T | 1869 | 0.776805 | 0         |  |  |
|     |      | Shiraz-35T | 1932 | 0.507141 | 0         |  |  |
|     |      | Shiraz-40T | 2051 | 0.098506 | 0         |  |  |
|     |      | Shiraz-58T | 2221 | 0.871948 | 0         |  |  |
|     |      | Shiraz-71T | 2260 | 0.68394  | 0         |  |  |
|     |      | Shiraz-71T | 2261 | 0.508399 | 0         |  |  |
| EBP | chrX | Shiraz-3T  | 238  | 0.472087 | 0         |  |  |
|     |      | Shiraz-4T  | 260  | 0        | -0.324128 |  |  |
|     |      | Shiraz-16T | 294  | 0.655804 | 0         |  |  |
|     |      | Shiraz-31T | 345  | 0.103301 | 0         |  |  |
|     |      | Shiraz-36T | 431  | 0        | -0.78035  |  |  |
|     |      | Shiraz-36T | 432  | 0        | -0.6692   |  |  |
|     |      | Shiraz-44T | 891  | 0        | -0.954044 |  |  |
|     |      | Shiraz-44T | 896  | 0        | -0.109108 |  |  |
|     |      | Shiraz-46T | 991  | 0.139564 | 0         |  |  |
|     |      | Shiraz-47T | 1084 | 0.24185  | 0         |  |  |
|     |      | Shiraz-49T | 1166 | 0        | -0.917235 |  |  |
|     |      | Shiraz-49T | 1169 | 0        | -0.583529 |  |  |
|     |      | Shiraz-77T | 1282 | 0.213849 | 0         |  |  |
|     |      | Shiraz-9T  | 1368 | 0.199713 | 0         |  |  |
|     |      | Shiraz-9T  | 1369 | 0.703374 | 0         |  |  |
|     |      | Shiraz-18T | 1455 | 0        | -0.186773 |  |  |
|     |      | Shiraz-22T | 1669 | 0.695915 | 0         |  |  |
|     |      | Shiraz-22T | 1672 | 1.01678  | 0         |  |  |
|     |      | Shiraz-25T | 1717 | 0.420447 | 0         |  |  |
|     |      | Shiraz-28T | 1760 | 0.538181 | 0         |  |  |
|     |      | Shiraz-29T | 1800 | 0.672527 | 0         |  |  |
|     |      | Shiraz-32T | 1869 | 0.776805 | 0         |  |  |

|  |            |      |          |           |  |
|--|------------|------|----------|-----------|--|
|  | Shiraz-35T | 1932 | 0.507141 | 0         |  |
|  | Shiraz-58T | 2221 | 0.871948 | 0         |  |
|  | Shiraz-71T | 2260 | 0.68394  | 0         |  |
|  | Shiraz-71T | 2262 | 0.986748 | 0         |  |
|  | Shiraz-3T  | 238  | 0.472087 | 0         |  |
|  | Shiraz-4T  | 260  | 0        | -0.324128 |  |
|  | Shiraz-16T | 294  | 0.655804 | 0         |  |
|  | Shiraz-31T | 345  | 0.103301 | 0         |  |
|  | Shiraz-36T | 431  | 0        | -0.78035  |  |
|  | Shiraz-36T | 432  | 0        | -0.6692   |  |
|  | Shiraz-44T | 891  | 0        | -0.954044 |  |
|  | Shiraz-44T | 896  | 0        | -0.109108 |  |
|  | Shiraz-46T | 991  | 0.139564 | 0         |  |
|  | Shiraz-47T | 1084 | 0.24185  | 0         |  |
|  | Shiraz-49T | 1166 | 0        | -0.917235 |  |
|  | Shiraz-49T | 1169 | 0        | -0.583529 |  |
|  | Shiraz-77T | 1282 | 0.213849 | 0         |  |
|  | Shiraz-9T  | 1368 | 0.199713 | 0         |  |
|  | Shiraz-9T  | 1369 | 0.703374 | 0         |  |
|  | Shiraz-18T | 1455 | 0        | -0.186773 |  |
|  | Shiraz-22T | 1669 | 0.695915 | 0         |  |
|  | Shiraz-22T | 1672 | 1.01678  | 0         |  |
|  | Shiraz-25T | 1717 | 0.420447 | 0         |  |
|  | Shiraz-28T | 1760 | 0.538181 | 0         |  |
|  | Shiraz-29T | 1800 | 0.672527 | 0         |  |
|  | Shiraz-32T | 1869 | 0.776805 | 0         |  |
|  | Shiraz-35T | 1932 | 0.507141 | 0         |  |
|  | Shiraz-58T | 2221 | 0.871948 | 0         |  |
|  | Shiraz-71T | 2260 | 0.68394  | 0         |  |
|  | Shiraz-71T | 2262 | 0.986748 | 0         |  |
|  | Shiraz-3T  | 238  | 0.472087 | 0         |  |
|  | Shiraz-4T  | 260  | 0        | -0.324128 |  |
|  | Shiraz-16T | 294  | 0.655804 | 0         |  |
|  | Shiraz-31T | 345  | 0.103301 | 0         |  |
|  | Shiraz-36T | 431  | 0        | -0.78035  |  |
|  | Shiraz-36T | 432  | 0        | -0.6692   |  |
|  | Shiraz-44T | 891  | 0        | -0.954044 |  |
|  | Shiraz-44T | 896  | 0        | -0.109108 |  |
|  | Shiraz-46T | 991  | 0.139564 | 0         |  |
|  | Shiraz-47T | 1084 | 0.24185  | 0         |  |
|  | Shiraz-49T | 1166 | 0        | -0.917235 |  |
|  | Shiraz-49T | 1169 | 0        | -0.583529 |  |
|  | Shiraz-77T | 1282 | 0.213849 | 0         |  |
|  | Shiraz-9T  | 1368 | 0.199713 | 0         |  |
|  | Shiraz-9T  | 1369 | 0.703374 | 0         |  |
|  | Shiraz-18T | 1455 | 0        | -0.186773 |  |
|  | Shiraz-22T | 1669 | 0.695915 | 0         |  |

|     |      |            |      |          |           |  |  |
|-----|------|------------|------|----------|-----------|--|--|
|     |      | Shiraz-22T | 1672 | 1.01678  | 0         |  |  |
|     |      | Shiraz-25T | 1717 | 0.420447 | 0         |  |  |
|     |      | Shiraz-28T | 1760 | 0.538181 | 0         |  |  |
|     |      | Shiraz-29T | 1800 | 0.672527 | 0         |  |  |
|     |      | Shiraz-32T | 1869 | 0.776805 | 0         |  |  |
|     |      | Shiraz-35T | 1932 | 0.507141 | 0         |  |  |
|     |      | Shiraz-58T | 2221 | 0.871948 | 0         |  |  |
|     |      | Shiraz-71T | 2260 | 0.68394  | 0         |  |  |
|     |      | Shiraz-71T | 2262 | 0.986748 | 0         |  |  |
| EDA | chrX | Shiraz-3T  | 241  | 0        | -0.230501 |  |  |
|     |      | Shiraz-3T  | 241  | 0        | -0.230501 |  |  |
|     |      | Shiraz-3T  | 241  | 0        | -0.230501 |  |  |
|     |      | Shiraz-3T  | 241  | 0        | -0.230501 |  |  |
|     |      | Shiraz-3T  | 241  | 0        | -0.230501 |  |  |
|     |      | Shiraz-4T  | 261  | 0        | -0.336249 |  |  |
|     |      | Shiraz-4T  | 261  | 0        | -0.336249 |  |  |
|     |      | Shiraz-4T  | 261  | 0        | -0.336249 |  |  |
|     |      | Shiraz-4T  | 261  | 0        | -0.336249 |  |  |
|     |      | Shiraz-4T  | 261  | 0        | -0.336249 |  |  |
|     |      | Shiraz-16T | 295  | 0.591657 | 0         |  |  |
|     |      | Shiraz-16T | 295  | 0.591657 | 0         |  |  |
|     |      | Shiraz-16T | 295  | 0.591657 | 0         |  |  |
|     |      | Shiraz-16T | 295  | 0.591657 | 0         |  |  |
|     |      | Shiraz-16T | 295  | 0.591657 | 0         |  |  |
|     |      | Shiraz-36T | 433  | 0        | -0.803961 |  |  |
|     |      | Shiraz-36T | 433  | 0        | -0.803961 |  |  |
|     |      | Shiraz-36T | 433  | 0        | -0.803961 |  |  |
|     |      | Shiraz-36T | 433  | 0        | -0.803961 |  |  |
|     |      | Shiraz-36T | 433  | 0        | -0.803961 |  |  |
|     |      | Shiraz-44T | 899  | 0        | -1.09697  |  |  |
|     |      | Shiraz-44T | 899  | 0        | -1.09697  |  |  |
|     |      | Shiraz-44T | 899  | 0        | -1.09697  |  |  |
|     |      | Shiraz-44T | 899  | 0        | -1.09697  |  |  |
|     |      | Shiraz-44T | 899  | 0        | -1.09697  |  |  |
|     |      | Shiraz-44T | 900  | 0        | -0.584284 |  |  |
|     |      | Shiraz-44T | 900  | 0        | -0.584284 |  |  |
|     |      | Shiraz-44T | 900  | 0        | -0.584284 |  |  |
|     |      | Shiraz-44T | 900  | 0        | -0.584284 |  |  |
|     |      | Shiraz-44T | 900  | 0        | -0.584284 |  |  |
|     |      | Shiraz-44T | 901  | 0        | -1.000082 |  |  |
|     |      | Shiraz-44T | 901  | 0        | -1.000082 |  |  |
|     |      | Shiraz-44T | 901  | 0        | -1.000082 |  |  |
|     |      | Shiraz-44T | 901  | 0        | -1.000082 |  |  |
|     |      | Shiraz-44T | 901  | 0        | -1.000082 |  |  |
|     |      | Shiraz-49T | 1170 | 0        | -0.967436 |  |  |
|     |      | Shiraz-49T | 1170 | 0        | -0.967436 |  |  |
|     |      | Shiraz-49T | 1170 | 0        | -0.967436 |  |  |



|  |            |      |          |           |  |
|--|------------|------|----------|-----------|--|
|  | Shiraz-49T | 1170 | 0        | -0.967436 |  |
|  | Shiraz-49T | 1170 | 0        | -0.967436 |  |
|  | Shiraz-18T | 1457 | 0.643204 | 0         |  |
|  | Shiraz-18T | 1457 | 0.643204 | 0         |  |
|  | Shiraz-18T | 1457 | 0.643204 | 0         |  |
|  | Shiraz-18T | 1457 | 0.643204 | 0         |  |
|  | Shiraz-18T | 1457 | 0.643204 | 0         |  |
|  | Shiraz-22T | 1673 | 0.611783 | 0         |  |
|  | Shiraz-22T | 1673 | 0.611783 | 0         |  |
|  | Shiraz-22T | 1673 | 0.611783 | 0         |  |
|  | Shiraz-22T | 1673 | 0.611783 | 0         |  |
|  | Shiraz-22T | 1673 | 0.611783 | 0         |  |
|  | Shiraz-22T | 1674 | 0.887899 | 0         |  |
|  | Shiraz-22T | 1674 | 0.887899 | 0         |  |
|  | Shiraz-22T | 1674 | 0.887899 | 0         |  |
|  | Shiraz-22T | 1674 | 0.887899 | 0         |  |
|  | Shiraz-22T | 1674 | 0.887899 | 0         |  |
|  | Shiraz-25T | 1719 | 0.472955 | 0         |  |
|  | Shiraz-25T | 1719 | 0.472955 | 0         |  |
|  | Shiraz-25T | 1719 | 0.472955 | 0         |  |
|  | Shiraz-25T | 1719 | 0.472955 | 0         |  |
|  | Shiraz-25T | 1719 | 0.472955 | 0         |  |
|  | Shiraz-28T | 1762 | 0.562311 | 0         |  |
|  | Shiraz-28T | 1762 | 0.562311 | 0         |  |
|  | Shiraz-28T | 1762 | 0.562311 | 0         |  |
|  | Shiraz-28T | 1762 | 0.562311 | 0         |  |
|  | Shiraz-28T | 1762 | 0.562311 | 0         |  |
|  | Shiraz-29T | 1801 | 0.815343 | 0         |  |
|  | Shiraz-29T | 1801 | 0.815343 | 0         |  |
|  | Shiraz-29T | 1801 | 0.815343 | 0         |  |
|  | Shiraz-29T | 1801 | 0.815343 | 0         |  |
|  | Shiraz-32T | 1870 | 0.729766 | 0         |  |
|  | Shiraz-32T | 1870 | 0.729766 | 0         |  |
|  | Shiraz-32T | 1870 | 0.729766 | 0         |  |
|  | Shiraz-32T | 1870 | 0.729766 | 0         |  |
|  | Shiraz-35T | 1933 | 0.488535 | 0         |  |
|  | Shiraz-35T | 1933 | 0.488535 | 0         |  |
|  | Shiraz-35T | 1933 | 0.488535 | 0         |  |
|  | Shiraz-35T | 1933 | 0.488535 | 0         |  |
|  | Shiraz-35T | 1933 | 0.488535 | 0         |  |
|  | Shiraz-58T | 2223 | 0.833364 | 0         |  |
|  | Shiraz-58T | 2223 | 0.833364 | 0         |  |
|  | Shiraz-58T | 2223 | 0.833364 | 0         |  |
|  | Shiraz-58T | 2223 | 0.833364 | 0         |  |
|  | Shiraz-58T | 2223 | 0.833364 | 0         |  |

|  |  |            |      |          |           |  |  |
|--|--|------------|------|----------|-----------|--|--|
|  |  | Shiraz-58T | 2224 | 1.076575 | 0         |  |  |
|  |  | Shiraz-58T | 2224 | 1.076575 | 0         |  |  |
|  |  | Shiraz-58T | 2224 | 1.076575 | 0         |  |  |
|  |  | Shiraz-58T | 2224 | 1.076575 | 0         |  |  |
|  |  | Shiraz-58T | 2224 | 1.076575 | 0         |  |  |
|  |  | Shiraz-71T | 2263 | 0.975531 | 0         |  |  |
|  |  | Shiraz-71T | 2263 | 0.975531 | 0         |  |  |
|  |  | Shiraz-71T | 2263 | 0.975531 | 0         |  |  |
|  |  | Shiraz-71T | 2263 | 0.975531 | 0         |  |  |
|  |  | Shiraz-71T | 2263 | 0.975531 | 0         |  |  |
|  |  | Shiraz-3T  | 241  | 0        | -0.230501 |  |  |
|  |  | Shiraz-3T  | 241  | 0        | -0.230501 |  |  |
|  |  | Shiraz-3T  | 241  | 0        | -0.230501 |  |  |
|  |  | Shiraz-3T  | 241  | 0        | -0.230501 |  |  |
|  |  | Shiraz-3T  | 241  | 0        | -0.230501 |  |  |
|  |  | Shiraz-4T  | 261  | 0        | -0.336249 |  |  |
|  |  | Shiraz-4T  | 261  | 0        | -0.336249 |  |  |
|  |  | Shiraz-4T  | 261  | 0        | -0.336249 |  |  |
|  |  | Shiraz-4T  | 261  | 0        | -0.336249 |  |  |
|  |  | Shiraz-4T  | 261  | 0        | -0.336249 |  |  |
|  |  | Shiraz-16T | 295  | 0.591657 | 0         |  |  |
|  |  | Shiraz-16T | 295  | 0.591657 | 0         |  |  |
|  |  | Shiraz-16T | 295  | 0.591657 | 0         |  |  |
|  |  | Shiraz-16T | 295  | 0.591657 | 0         |  |  |
|  |  | Shiraz-16T | 295  | 0.591657 | 0         |  |  |
|  |  | Shiraz-36T | 433  | 0        | -0.803961 |  |  |
|  |  | Shiraz-36T | 433  | 0        | -0.803961 |  |  |
|  |  | Shiraz-36T | 433  | 0        | -0.803961 |  |  |
|  |  | Shiraz-36T | 433  | 0        | -0.803961 |  |  |
|  |  | Shiraz-36T | 433  | 0        | -0.803961 |  |  |
|  |  | Shiraz-44T | 899  | 0        | -1.09697  |  |  |
|  |  | Shiraz-44T | 899  | 0        | -1.09697  |  |  |
|  |  | Shiraz-44T | 899  | 0        | -1.09697  |  |  |
|  |  | Shiraz-44T | 899  | 0        | -1.09697  |  |  |
|  |  | Shiraz-44T | 899  | 0        | -1.09697  |  |  |
|  |  | Shiraz-44T | 900  | 0        | -0.584284 |  |  |
|  |  | Shiraz-44T | 900  | 0        | -0.584284 |  |  |
|  |  | Shiraz-44T | 900  | 0        | -0.584284 |  |  |
|  |  | Shiraz-44T | 900  | 0        | -0.584284 |  |  |
|  |  | Shiraz-44T | 900  | 0        | -0.584284 |  |  |
|  |  | Shiraz-44T | 901  | 0        | -1.000082 |  |  |
|  |  | Shiraz-44T | 901  | 0        | -1.000082 |  |  |
|  |  | Shiraz-44T | 901  | 0        | -1.000082 |  |  |
|  |  | Shiraz-44T | 901  | 0        | -1.000082 |  |  |
|  |  | Shiraz-44T | 901  | 0        | -1.000082 |  |  |
|  |  | Shiraz-49T | 1170 | 0        | -0.967436 |  |  |
|  |  | Shiraz-49T | 1170 | 0        | -0.967436 |  |  |

|  |            |      |          |           |  |
|--|------------|------|----------|-----------|--|
|  | Shiraz-49T | 1170 | 0        | -0.967436 |  |
|  | Shiraz-49T | 1170 | 0        | -0.967436 |  |
|  | Shiraz-49T | 1170 | 0        | -0.967436 |  |
|  | Shiraz-18T | 1457 | 0.643204 | 0         |  |
|  | Shiraz-18T | 1457 | 0.643204 | 0         |  |
|  | Shiraz-18T | 1457 | 0.643204 | 0         |  |
|  | Shiraz-18T | 1457 | 0.643204 | 0         |  |
|  | Shiraz-18T | 1457 | 0.643204 | 0         |  |
|  | Shiraz-22T | 1673 | 0.611783 | 0         |  |
|  | Shiraz-22T | 1673 | 0.611783 | 0         |  |
|  | Shiraz-22T | 1673 | 0.611783 | 0         |  |
|  | Shiraz-22T | 1673 | 0.611783 | 0         |  |
|  | Shiraz-22T | 1673 | 0.611783 | 0         |  |
|  | Shiraz-22T | 1674 | 0.887899 | 0         |  |
|  | Shiraz-22T | 1674 | 0.887899 | 0         |  |
|  | Shiraz-22T | 1674 | 0.887899 | 0         |  |
|  | Shiraz-22T | 1674 | 0.887899 | 0         |  |
|  | Shiraz-22T | 1674 | 0.887899 | 0         |  |
|  | Shiraz-22T | 1674 | 0.887899 | 0         |  |
|  | Shiraz-25T | 1719 | 0.472955 | 0         |  |
|  | Shiraz-25T | 1719 | 0.472955 | 0         |  |
|  | Shiraz-25T | 1719 | 0.472955 | 0         |  |
|  | Shiraz-25T | 1719 | 0.472955 | 0         |  |
|  | Shiraz-25T | 1719 | 0.472955 | 0         |  |
|  | Shiraz-28T | 1762 | 0.562311 | 0         |  |
|  | Shiraz-28T | 1762 | 0.562311 | 0         |  |
|  | Shiraz-28T | 1762 | 0.562311 | 0         |  |
|  | Shiraz-28T | 1762 | 0.562311 | 0         |  |
|  | Shiraz-28T | 1762 | 0.562311 | 0         |  |
|  | Shiraz-29T | 1801 | 0.815343 | 0         |  |
|  | Shiraz-29T | 1801 | 0.815343 | 0         |  |
|  | Shiraz-29T | 1801 | 0.815343 | 0         |  |
|  | Shiraz-29T | 1801 | 0.815343 | 0         |  |
|  | Shiraz-29T | 1801 | 0.815343 | 0         |  |
|  | Shiraz-32T | 1870 | 0.729766 | 0         |  |
|  | Shiraz-32T | 1870 | 0.729766 | 0         |  |
|  | Shiraz-32T | 1870 | 0.729766 | 0         |  |
|  | Shiraz-32T | 1870 | 0.729766 | 0         |  |
|  | Shiraz-32T | 1870 | 0.729766 | 0         |  |
|  | Shiraz-35T | 1933 | 0.488535 | 0         |  |
|  | Shiraz-35T | 1933 | 0.488535 | 0         |  |
|  | Shiraz-35T | 1933 | 0.488535 | 0         |  |
|  | Shiraz-35T | 1933 | 0.488535 | 0         |  |
|  | Shiraz-35T | 1933 | 0.488535 | 0         |  |
|  | Shiraz-58T | 2223 | 0.833364 | 0         |  |
|  | Shiraz-58T | 2223 | 0.833364 | 0         |  |
|  | Shiraz-58T | 2223 | 0.833364 | 0         |  |
|  | Shiraz-58T | 2223 | 0.833364 | 0         |  |

|  |  |            |      |          |           |  |  |
|--|--|------------|------|----------|-----------|--|--|
|  |  | Shiraz-58T | 2223 | 0.833364 | 0         |  |  |
|  |  | Shiraz-58T | 2224 | 1.076575 | 0         |  |  |
|  |  | Shiraz-58T | 2224 | 1.076575 | 0         |  |  |
|  |  | Shiraz-58T | 2224 | 1.076575 | 0         |  |  |
|  |  | Shiraz-58T | 2224 | 1.076575 | 0         |  |  |
|  |  | Shiraz-58T | 2224 | 1.076575 | 0         |  |  |
|  |  | Shiraz-71T | 2263 | 0.975531 | 0         |  |  |
|  |  | Shiraz-71T | 2263 | 0.975531 | 0         |  |  |
|  |  | Shiraz-71T | 2263 | 0.975531 | 0         |  |  |
|  |  | Shiraz-71T | 2263 | 0.975531 | 0         |  |  |
|  |  | Shiraz-71T | 2263 | 0.975531 | 0         |  |  |
|  |  | Shiraz-3T  | 241  | 0        | -0.230501 |  |  |
|  |  | Shiraz-3T  | 241  | 0        | -0.230501 |  |  |
|  |  | Shiraz-3T  | 241  | 0        | -0.230501 |  |  |
|  |  | Shiraz-3T  | 241  | 0        | -0.230501 |  |  |
|  |  | Shiraz-3T  | 241  | 0        | -0.230501 |  |  |
|  |  | Shiraz-4T  | 261  | 0        | -0.336249 |  |  |
|  |  | Shiraz-4T  | 261  | 0        | -0.336249 |  |  |
|  |  | Shiraz-4T  | 261  | 0        | -0.336249 |  |  |
|  |  | Shiraz-4T  | 261  | 0        | -0.336249 |  |  |
|  |  | Shiraz-4T  | 261  | 0        | -0.336249 |  |  |
|  |  | Shiraz-16T | 295  | 0.591657 | 0         |  |  |
|  |  | Shiraz-16T | 295  | 0.591657 | 0         |  |  |
|  |  | Shiraz-16T | 295  | 0.591657 | 0         |  |  |
|  |  | Shiraz-16T | 295  | 0.591657 | 0         |  |  |
|  |  | Shiraz-16T | 295  | 0.591657 | 0         |  |  |
|  |  | Shiraz-36T | 433  | 0        | -0.803961 |  |  |
|  |  | Shiraz-36T | 433  | 0        | -0.803961 |  |  |
|  |  | Shiraz-36T | 433  | 0        | -0.803961 |  |  |
|  |  | Shiraz-36T | 433  | 0        | -0.803961 |  |  |
|  |  | Shiraz-36T | 433  | 0        | -0.803961 |  |  |
|  |  | Shiraz-44T | 899  | 0        | -1.09697  |  |  |
|  |  | Shiraz-44T | 899  | 0        | -1.09697  |  |  |
|  |  | Shiraz-44T | 899  | 0        | -1.09697  |  |  |
|  |  | Shiraz-44T | 899  | 0        | -1.09697  |  |  |
|  |  | Shiraz-44T | 899  | 0        | -1.09697  |  |  |
|  |  | Shiraz-44T | 900  | 0        | -0.584284 |  |  |
|  |  | Shiraz-44T | 900  | 0        | -0.584284 |  |  |
|  |  | Shiraz-44T | 900  | 0        | -0.584284 |  |  |
|  |  | Shiraz-44T | 900  | 0        | -0.584284 |  |  |
|  |  | Shiraz-44T | 900  | 0        | -0.584284 |  |  |
|  |  | Shiraz-44T | 901  | 0        | -1.000082 |  |  |
|  |  | Shiraz-44T | 901  | 0        | -1.000082 |  |  |
|  |  | Shiraz-44T | 901  | 0        | -1.000082 |  |  |
|  |  | Shiraz-44T | 901  | 0        | -1.000082 |  |  |
|  |  | Shiraz-44T | 901  | 0        | -1.000082 |  |  |
|  |  | Shiraz-49T | 1170 | 0        | -0.967436 |  |  |

|  |            |      |          |           |  |
|--|------------|------|----------|-----------|--|
|  | Shiraz-49T | 1170 | 0        | -0.967436 |  |
|  | Shiraz-49T | 1170 | 0        | -0.967436 |  |
|  | Shiraz-49T | 1170 | 0        | -0.967436 |  |
|  | Shiraz-49T | 1170 | 0        | -0.967436 |  |
|  | Shiraz-18T | 1457 | 0.643204 | 0         |  |
|  | Shiraz-18T | 1457 | 0.643204 | 0         |  |
|  | Shiraz-18T | 1457 | 0.643204 | 0         |  |
|  | Shiraz-18T | 1457 | 0.643204 | 0         |  |
|  | Shiraz-18T | 1457 | 0.643204 | 0         |  |
|  | Shiraz-22T | 1673 | 0.611783 | 0         |  |
|  | Shiraz-22T | 1673 | 0.611783 | 0         |  |
|  | Shiraz-22T | 1673 | 0.611783 | 0         |  |
|  | Shiraz-22T | 1673 | 0.611783 | 0         |  |
|  | Shiraz-22T | 1673 | 0.611783 | 0         |  |
|  | Shiraz-22T | 1674 | 0.887899 | 0         |  |
|  | Shiraz-22T | 1674 | 0.887899 | 0         |  |
|  | Shiraz-22T | 1674 | 0.887899 | 0         |  |
|  | Shiraz-22T | 1674 | 0.887899 | 0         |  |
|  | Shiraz-22T | 1674 | 0.887899 | 0         |  |
|  | Shiraz-25T | 1719 | 0.472955 | 0         |  |
|  | Shiraz-25T | 1719 | 0.472955 | 0         |  |
|  | Shiraz-25T | 1719 | 0.472955 | 0         |  |
|  | Shiraz-25T | 1719 | 0.472955 | 0         |  |
|  | Shiraz-25T | 1719 | 0.472955 | 0         |  |
|  | Shiraz-28T | 1762 | 0.562311 | 0         |  |
|  | Shiraz-28T | 1762 | 0.562311 | 0         |  |
|  | Shiraz-28T | 1762 | 0.562311 | 0         |  |
|  | Shiraz-28T | 1762 | 0.562311 | 0         |  |
|  | Shiraz-28T | 1762 | 0.562311 | 0         |  |
|  | Shiraz-29T | 1801 | 0.815343 | 0         |  |
|  | Shiraz-29T | 1801 | 0.815343 | 0         |  |
|  | Shiraz-29T | 1801 | 0.815343 | 0         |  |
|  | Shiraz-29T | 1801 | 0.815343 | 0         |  |
|  | Shiraz-29T | 1801 | 0.815343 | 0         |  |
|  | Shiraz-32T | 1870 | 0.729766 | 0         |  |
|  | Shiraz-32T | 1870 | 0.729766 | 0         |  |
|  | Shiraz-32T | 1870 | 0.729766 | 0         |  |
|  | Shiraz-32T | 1870 | 0.729766 | 0         |  |
|  | Shiraz-32T | 1870 | 0.729766 | 0         |  |
|  | Shiraz-35T | 1933 | 0.488535 | 0         |  |
|  | Shiraz-35T | 1933 | 0.488535 | 0         |  |
|  | Shiraz-35T | 1933 | 0.488535 | 0         |  |
|  | Shiraz-35T | 1933 | 0.488535 | 0         |  |
|  | Shiraz-35T | 1933 | 0.488535 | 0         |  |
|  | Shiraz-58T | 2223 | 0.833364 | 0         |  |
|  | Shiraz-58T | 2223 | 0.833364 | 0         |  |
|  | Shiraz-58T | 2223 | 0.833364 | 0         |  |

|       |      |            |      |          |           |  |  |
|-------|------|------------|------|----------|-----------|--|--|
|       |      | Shiraz-58T | 2223 | 0.833364 | 0         |  |  |
|       |      | Shiraz-58T | 2223 | 0.833364 | 0         |  |  |
|       |      | Shiraz-58T | 2224 | 1.076575 | 0         |  |  |
|       |      | Shiraz-58T | 2224 | 1.076575 | 0         |  |  |
|       |      | Shiraz-58T | 2224 | 1.076575 | 0         |  |  |
|       |      | Shiraz-58T | 2224 | 1.076575 | 0         |  |  |
|       |      | Shiraz-58T | 2224 | 1.076575 | 0         |  |  |
|       |      | Shiraz-71T | 2263 | 0.975531 | 0         |  |  |
|       |      | Shiraz-71T | 2263 | 0.975531 | 0         |  |  |
|       |      | Shiraz-71T | 2263 | 0.975531 | 0         |  |  |
|       |      | Shiraz-71T | 2263 | 0.975531 | 0         |  |  |
|       |      | Shiraz-71T | 2263 | 0.975531 | 0         |  |  |
| EDA2R | chrX | Shiraz-3T  | 241  | 0        | -0.230501 |  |  |
|       |      | Shiraz-4T  | 261  | 0        | -0.336249 |  |  |
|       |      | Shiraz-16T | 295  | 0.591657 | 0         |  |  |
|       |      | Shiraz-36T | 433  | 0        | -0.803961 |  |  |
|       |      | Shiraz-44T | 899  | 0        | -1.09697  |  |  |
|       |      | Shiraz-49T | 1170 | 0        | -0.967436 |  |  |
|       |      | Shiraz-18T | 1457 | 0.643204 | 0         |  |  |
|       |      | Shiraz-22T | 1673 | 0.611783 | 0         |  |  |
|       |      | Shiraz-25T | 1719 | 0.472955 | 0         |  |  |
|       |      | Shiraz-28T | 1762 | 0.562311 | 0         |  |  |
|       |      | Shiraz-29T | 1801 | 0.815343 | 0         |  |  |
|       |      | Shiraz-32T | 1870 | 0.729766 | 0         |  |  |
|       |      | Shiraz-35T | 1933 | 0.488535 | 0         |  |  |
|       |      | Shiraz-58T | 2223 | 0.833364 | 0         |  |  |
|       |      | Shiraz-71T | 2263 | 0.975531 | 0         |  |  |
|       |      | Shiraz-3T  | 241  | 0        | -0.230501 |  |  |
|       |      | Shiraz-4T  | 261  | 0        | -0.336249 |  |  |
|       |      | Shiraz-16T | 295  | 0.591657 | 0         |  |  |
|       |      | Shiraz-36T | 433  | 0        | -0.803961 |  |  |
|       |      | Shiraz-44T | 899  | 0        | -1.09697  |  |  |
|       |      | Shiraz-49T | 1170 | 0        | -0.967436 |  |  |
|       |      | Shiraz-18T | 1457 | 0.643204 | 0         |  |  |
|       |      | Shiraz-22T | 1673 | 0.611783 | 0         |  |  |
|       |      | Shiraz-25T | 1719 | 0.472955 | 0         |  |  |
|       |      | Shiraz-28T | 1762 | 0.562311 | 0         |  |  |
|       |      | Shiraz-29T | 1801 | 0.815343 | 0         |  |  |
|       |      | Shiraz-32T | 1870 | 0.729766 | 0         |  |  |
|       |      | Shiraz-35T | 1933 | 0.488535 | 0         |  |  |
|       |      | Shiraz-58T | 2223 | 0.833364 | 0         |  |  |
|       |      | Shiraz-71T | 2263 | 0.975531 | 0         |  |  |
|       |      | Shiraz-3T  | 241  | 0        | -0.230501 |  |  |
|       |      | Shiraz-4T  | 261  | 0        | -0.336249 |  |  |
|       |      | Shiraz-16T | 295  | 0.591657 | 0         |  |  |
|       |      | Shiraz-36T | 433  | 0        | -0.803961 |  |  |
|       |      | Shiraz-44T | 899  | 0        | -1.09697  |  |  |

|       |      |            |      |          |           |  |  |
|-------|------|------------|------|----------|-----------|--|--|
|       |      | Shiraz-49T | 1170 | 0        | -0.967436 |  |  |
|       |      | Shiraz-18T | 1457 | 0.643204 | 0         |  |  |
|       |      | Shiraz-22T | 1673 | 0.611783 | 0         |  |  |
|       |      | Shiraz-25T | 1719 | 0.472955 | 0         |  |  |
|       |      | Shiraz-28T | 1762 | 0.562311 | 0         |  |  |
|       |      | Shiraz-29T | 1801 | 0.815343 | 0         |  |  |
|       |      | Shiraz-32T | 1870 | 0.729766 | 0         |  |  |
|       |      | Shiraz-35T | 1933 | 0.488535 | 0         |  |  |
|       |      | Shiraz-58T | 2223 | 0.833364 | 0         |  |  |
|       |      | Shiraz-71T | 2263 | 0.975531 | 0         |  |  |
| EEPD1 | chr7 | Shiraz-3T  | 87   | 0.198593 | 0         |  |  |
|       |      | Shiraz-4T  | 252  | 0.192083 | 0         |  |  |
|       |      | Shiraz-36T | 376  | 0.159952 | 0         |  |  |
|       |      | Shiraz-44T | 631  | 0        | -0.180312 |  |  |
|       |      | Shiraz-46T | 942  | 0.069143 | 0         |  |  |
|       |      | Shiraz-18T | 1433 | 0.250973 | 0         |  |  |
|       |      | Shiraz-22T | 1544 | 0        | -0.193579 |  |  |
|       |      | Shiraz-25T | 1697 | 0.21945  | 0         |  |  |
|       |      | Shiraz-28T | 1734 | 0.362882 | 0         |  |  |
|       |      | Shiraz-29T | 1777 | 0.156747 | 0         |  |  |
|       |      | Shiraz-38T | 1950 | 0.265916 | 0         |  |  |
|       |      | Shiraz-71T | 2236 | 0.320072 | 0         |  |  |
|       |      | Shiraz-72T | 2277 | 0        | -0.398869 |  |  |
|       |      | Shiraz-3T  | 87   | 0.198593 | 0         |  |  |
|       |      | Shiraz-4T  | 252  | 0.192083 | 0         |  |  |
|       |      | Shiraz-36T | 376  | 0.159952 | 0         |  |  |
|       |      | Shiraz-44T | 631  | 0        | -0.180312 |  |  |
|       |      | Shiraz-46T | 942  | 0.069143 | 0         |  |  |
|       |      | Shiraz-18T | 1433 | 0.250973 | 0         |  |  |
|       |      | Shiraz-22T | 1544 | 0        | -0.193579 |  |  |
|       |      | Shiraz-25T | 1697 | 0.21945  | 0         |  |  |
|       |      | Shiraz-28T | 1734 | 0.362882 | 0         |  |  |
|       |      | Shiraz-29T | 1777 | 0.156747 | 0         |  |  |
|       |      | Shiraz-38T | 1950 | 0.265916 | 0         |  |  |
|       |      | Shiraz-71T | 2236 | 0.320072 | 0         |  |  |
|       |      | Shiraz-72T | 2277 | 0        | -0.398869 |  |  |
|       |      | Shiraz-3T  | 87   | 0.198593 | 0         |  |  |
|       |      | Shiraz-4T  | 252  | 0.192083 | 0         |  |  |
|       |      | Shiraz-36T | 376  | 0.159952 | 0         |  |  |
|       |      | Shiraz-44T | 631  | 0        | -0.180312 |  |  |
|       |      | Shiraz-46T | 942  | 0.069143 | 0         |  |  |
|       |      | Shiraz-18T | 1433 | 0.250973 | 0         |  |  |
|       |      | Shiraz-22T | 1544 | 0        | -0.193579 |  |  |
|       |      | Shiraz-25T | 1697 | 0.21945  | 0         |  |  |
|       |      | Shiraz-28T | 1734 | 0.362882 | 0         |  |  |
|       |      | Shiraz-29T | 1777 | 0.156747 | 0         |  |  |
|       |      | Shiraz-38T | 1950 | 0.265916 | 0         |  |  |

|         |      |            |      |          |           |  |  |
|---------|------|------------|------|----------|-----------|--|--|
|         |      | Shiraz-71T | 2236 | 0.320072 | 0         |  |  |
|         |      | Shiraz-72T | 2277 | 0        | -0.398869 |  |  |
| EFCAB10 | chr7 | Shiraz-3T  | 90   | 0.219276 | 0         |  |  |
|         |      | Shiraz-4T  | 253  | 0.372918 | 0         |  |  |
|         |      | Shiraz-36T | 378  | 0.179558 | 0         |  |  |
|         |      | Shiraz-46T | 943  | 0.093799 | 0         |  |  |
|         |      | Shiraz-77T | 1225 | 0        | -0.117922 |  |  |
|         |      | Shiraz-18T | 1434 | 0.244465 | 0         |  |  |
|         |      | Shiraz-22T | 1549 | 0        | -0.319623 |  |  |
|         |      | Shiraz-25T | 1698 | 0.21835  | 0         |  |  |
|         |      | Shiraz-28T | 1735 | 0.350744 | 0         |  |  |
|         |      | Shiraz-29T | 1778 | 0.120767 | 0         |  |  |
|         |      | Shiraz-32T | 1833 | 0.551336 | 0         |  |  |
|         |      | Shiraz-38T | 1951 | 0.250891 | 0         |  |  |
|         |      | Shiraz-53T | 2078 | 0.287202 | 0         |  |  |
|         |      | Shiraz-71T | 2238 | 0.603631 | 0         |  |  |
|         |      | Shiraz-3T  | 90   | 0.219276 | 0         |  |  |
|         |      | Shiraz-4T  | 253  | 0.372918 | 0         |  |  |
|         |      | Shiraz-36T | 378  | 0.179558 | 0         |  |  |
|         |      | Shiraz-46T | 943  | 0.093799 | 0         |  |  |
|         |      | Shiraz-77T | 1225 | 0        | -0.117922 |  |  |
|         |      | Shiraz-18T | 1434 | 0.244465 | 0         |  |  |
|         |      | Shiraz-22T | 1549 | 0        | -0.319623 |  |  |
|         |      | Shiraz-25T | 1698 | 0.21835  | 0         |  |  |
|         |      | Shiraz-28T | 1735 | 0.350744 | 0         |  |  |
|         |      | Shiraz-29T | 1778 | 0.120767 | 0         |  |  |
|         |      | Shiraz-32T | 1833 | 0.551336 | 0         |  |  |
|         |      | Shiraz-38T | 1951 | 0.250891 | 0         |  |  |
|         |      | Shiraz-53T | 2078 | 0.287202 | 0         |  |  |
|         |      | Shiraz-71T | 2238 | 0.603631 | 0         |  |  |
|         |      | Shiraz-3T  | 90   | 0.219276 | 0         |  |  |
|         |      | Shiraz-4T  | 253  | 0.372918 | 0         |  |  |
|         |      | Shiraz-36T | 378  | 0.179558 | 0         |  |  |
|         |      | Shiraz-46T | 943  | 0.093799 | 0         |  |  |
|         |      | Shiraz-77T | 1225 | 0        | -0.117922 |  |  |
|         |      | Shiraz-18T | 1434 | 0.244465 | 0         |  |  |
|         |      | Shiraz-22T | 1549 | 0        | -0.319623 |  |  |
|         |      | Shiraz-25T | 1698 | 0.21835  | 0         |  |  |
|         |      | Shiraz-28T | 1735 | 0.350744 | 0         |  |  |
|         |      | Shiraz-29T | 1778 | 0.120767 | 0         |  |  |
|         |      | Shiraz-32T | 1833 | 0.551336 | 0         |  |  |
|         |      | Shiraz-38T | 1951 | 0.250891 | 0         |  |  |
|         |      | Shiraz-53T | 2078 | 0.287202 | 0         |  |  |
|         |      | Shiraz-71T | 2238 | 0.603631 | 0         |  |  |
| EFHC2   | chrX | Shiraz-3T  | 235  | 0        | -0.28401  |  |  |
|         |      | Shiraz-4T  | 260  | 0        | -0.324128 |  |  |
|         |      | Shiraz-16T | 294  | 0.655804 | 0         |  |  |



|  |  |            |      |          |           |  |  |
|--|--|------------|------|----------|-----------|--|--|
|  |  | Shiraz-31T | 345  | 0.103301 | 0         |  |  |
|  |  | Shiraz-36T | 431  | 0        | -0.78035  |  |  |
|  |  | Shiraz-36T | 432  | 0        | -0.6692   |  |  |
|  |  | Shiraz-44T | 891  | 0        | -0.954044 |  |  |
|  |  | Shiraz-46T | 991  | 0.139564 | 0         |  |  |
|  |  | Shiraz-49T | 1166 | 0        | -0.917235 |  |  |
|  |  | Shiraz-9T  | 1368 | 0.199713 | 0         |  |  |
|  |  | Shiraz-18T | 1455 | 0        | -0.186773 |  |  |
|  |  | Shiraz-22T | 1669 | 0.695915 | 0         |  |  |
|  |  | Shiraz-25T | 1717 | 0.420447 | 0         |  |  |
|  |  | Shiraz-28T | 1760 | 0.538181 | 0         |  |  |
|  |  | Shiraz-29T | 1800 | 0.672527 | 0         |  |  |
|  |  | Shiraz-32T | 1869 | 0.776805 | 0         |  |  |
|  |  | Shiraz-35T | 1932 | 0.507141 | 0         |  |  |
|  |  | Shiraz-40T | 2051 | 0.098506 | 0         |  |  |
|  |  | Shiraz-58T | 2221 | 0.871948 | 0         |  |  |
|  |  | Shiraz-71T | 2260 | 0.68394  | 0         |  |  |
|  |  | Shiraz-71T | 2262 | 0.986748 | 0         |  |  |
|  |  | Shiraz-3T  | 235  | 0        | -0.28401  |  |  |
|  |  | Shiraz-4T  | 260  | 0        | -0.324128 |  |  |
|  |  | Shiraz-16T | 294  | 0.655804 | 0         |  |  |
|  |  | Shiraz-31T | 345  | 0.103301 | 0         |  |  |
|  |  | Shiraz-36T | 431  | 0        | -0.78035  |  |  |
|  |  | Shiraz-36T | 432  | 0        | -0.6692   |  |  |
|  |  | Shiraz-44T | 891  | 0        | -0.954044 |  |  |
|  |  | Shiraz-46T | 991  | 0.139564 | 0         |  |  |
|  |  | Shiraz-49T | 1166 | 0        | -0.917235 |  |  |
|  |  | Shiraz-9T  | 1368 | 0.199713 | 0         |  |  |
|  |  | Shiraz-18T | 1455 | 0        | -0.186773 |  |  |
|  |  | Shiraz-22T | 1669 | 0.695915 | 0         |  |  |
|  |  | Shiraz-25T | 1717 | 0.420447 | 0         |  |  |
|  |  | Shiraz-28T | 1760 | 0.538181 | 0         |  |  |
|  |  | Shiraz-29T | 1800 | 0.672527 | 0         |  |  |
|  |  | Shiraz-32T | 1869 | 0.776805 | 0         |  |  |
|  |  | Shiraz-35T | 1932 | 0.507141 | 0         |  |  |
|  |  | Shiraz-40T | 2051 | 0.098506 | 0         |  |  |
|  |  | Shiraz-58T | 2221 | 0.871948 | 0         |  |  |
|  |  | Shiraz-71T | 2260 | 0.68394  | 0         |  |  |
|  |  | Shiraz-71T | 2262 | 0.986748 | 0         |  |  |
|  |  | Shiraz-3T  | 235  | 0        | -0.28401  |  |  |
|  |  | Shiraz-4T  | 260  | 0        | -0.324128 |  |  |
|  |  | Shiraz-16T | 294  | 0.655804 | 0         |  |  |
|  |  | Shiraz-31T | 345  | 0.103301 | 0         |  |  |
|  |  | Shiraz-36T | 431  | 0        | -0.78035  |  |  |
|  |  | Shiraz-36T | 432  | 0        | -0.6692   |  |  |
|  |  | Shiraz-44T | 891  | 0        | -0.954044 |  |  |
|  |  | Shiraz-46T | 991  | 0.139564 | 0         |  |  |

|       |      |            |      |          |           |  |  |
|-------|------|------------|------|----------|-----------|--|--|
|       |      | Shiraz-49T | 1166 | 0        | -0.917235 |  |  |
|       |      | Shiraz-9T  | 1368 | 0.199713 | 0         |  |  |
|       |      | Shiraz-18T | 1455 | 0        | -0.186773 |  |  |
|       |      | Shiraz-22T | 1669 | 0.695915 | 0         |  |  |
|       |      | Shiraz-25T | 1717 | 0.420447 | 0         |  |  |
|       |      | Shiraz-28T | 1760 | 0.538181 | 0         |  |  |
|       |      | Shiraz-29T | 1800 | 0.672527 | 0         |  |  |
|       |      | Shiraz-32T | 1869 | 0.776805 | 0         |  |  |
|       |      | Shiraz-35T | 1932 | 0.507141 | 0         |  |  |
|       |      | Shiraz-40T | 2051 | 0.098506 | 0         |  |  |
|       |      | Shiraz-58T | 2221 | 0.871948 | 0         |  |  |
|       |      | Shiraz-71T | 2260 | 0.68394  | 0         |  |  |
|       |      | Shiraz-71T | 2262 | 0.986748 | 0         |  |  |
| EFNB1 | chrX | Shiraz-3T  | 241  | 0        | -0.230501 |  |  |
|       |      | Shiraz-4T  | 261  | 0        | -0.336249 |  |  |
|       |      | Shiraz-16T | 295  | 0.591657 | 0         |  |  |
|       |      | Shiraz-36T | 433  | 0        | -0.803961 |  |  |
|       |      | Shiraz-44T | 899  | 0        | -1.09697  |  |  |
|       |      | Shiraz-44T | 900  | 0        | -0.584284 |  |  |
|       |      | Shiraz-49T | 1170 | 0        | -0.967436 |  |  |
|       |      | Shiraz-18T | 1457 | 0.643204 | 0         |  |  |
|       |      | Shiraz-22T | 1673 | 0.611783 | 0         |  |  |
|       |      | Shiraz-22T | 1674 | 0.887899 | 0         |  |  |
|       |      | Shiraz-25T | 1719 | 0.472955 | 0         |  |  |
|       |      | Shiraz-28T | 1762 | 0.562311 | 0         |  |  |
|       |      | Shiraz-29T | 1801 | 0.815343 | 0         |  |  |
|       |      | Shiraz-32T | 1870 | 0.729766 | 0         |  |  |
|       |      | Shiraz-35T | 1933 | 0.488535 | 0         |  |  |
|       |      | Shiraz-58T | 2223 | 0.833364 | 0         |  |  |
|       |      | Shiraz-58T | 2224 | 1.076575 | 0         |  |  |
|       |      | Shiraz-71T | 2263 | 0.975531 | 0         |  |  |
|       |      | Shiraz-3T  | 241  | 0        | -0.230501 |  |  |
|       |      | Shiraz-4T  | 261  | 0        | -0.336249 |  |  |
|       |      | Shiraz-16T | 295  | 0.591657 | 0         |  |  |
|       |      | Shiraz-36T | 433  | 0        | -0.803961 |  |  |
|       |      | Shiraz-44T | 899  | 0        | -1.09697  |  |  |
|       |      | Shiraz-44T | 900  | 0        | -0.584284 |  |  |
|       |      | Shiraz-49T | 1170 | 0        | -0.967436 |  |  |
|       |      | Shiraz-18T | 1457 | 0.643204 | 0         |  |  |
|       |      | Shiraz-22T | 1673 | 0.611783 | 0         |  |  |
|       |      | Shiraz-22T | 1674 | 0.887899 | 0         |  |  |
|       |      | Shiraz-25T | 1719 | 0.472955 | 0         |  |  |
|       |      | Shiraz-28T | 1762 | 0.562311 | 0         |  |  |
|       |      | Shiraz-29T | 1801 | 0.815343 | 0         |  |  |
|       |      | Shiraz-32T | 1870 | 0.729766 | 0         |  |  |
|       |      | Shiraz-35T | 1933 | 0.488535 | 0         |  |  |
|       |      | Shiraz-58T | 2223 | 0.833364 | 0         |  |  |

|       |      |            |      |          |           |  |
|-------|------|------------|------|----------|-----------|--|
|       |      | Shiraz-58T | 2224 | 1.076575 | 0         |  |
|       |      | Shiraz-71T | 2263 | 0.975531 | 0         |  |
|       |      | Shiraz-3T  | 241  | 0        | -0.230501 |  |
|       |      | Shiraz-4T  | 261  | 0        | -0.336249 |  |
|       |      | Shiraz-16T | 295  | 0.591657 | 0         |  |
|       |      | Shiraz-36T | 433  | 0        | -0.803961 |  |
|       |      | Shiraz-44T | 899  | 0        | -1.09697  |  |
|       |      | Shiraz-44T | 900  | 0        | -0.584284 |  |
|       |      | Shiraz-49T | 1170 | 0        | -0.967436 |  |
|       |      | Shiraz-18T | 1457 | 0.643204 | 0         |  |
|       |      | Shiraz-22T | 1673 | 0.611783 | 0         |  |
|       |      | Shiraz-22T | 1674 | 0.887899 | 0         |  |
|       |      | Shiraz-25T | 1719 | 0.472955 | 0         |  |
|       |      | Shiraz-28T | 1762 | 0.562311 | 0         |  |
|       |      | Shiraz-29T | 1801 | 0.815343 | 0         |  |
|       |      | Shiraz-32T | 1870 | 0.729766 | 0         |  |
|       |      | Shiraz-35T | 1933 | 0.488535 | 0         |  |
|       |      | Shiraz-58T | 2223 | 0.833364 | 0         |  |
|       |      | Shiraz-58T | 2224 | 1.076575 | 0         |  |
|       |      | Shiraz-71T | 2263 | 0.975531 | 0         |  |
| EGFL6 | chrX | Shiraz-3T  | 235  | 0        | -0.28401  |  |
|       |      | Shiraz-4T  | 260  | 0        | -0.324128 |  |
|       |      | Shiraz-16T | 294  | 0.655804 | 0         |  |
|       |      | Shiraz-36T | 431  | 0        | -0.78035  |  |
|       |      | Shiraz-44T | 891  | 0        | -0.954044 |  |
|       |      | Shiraz-49T | 1166 | 0        | -0.917235 |  |
|       |      | Shiraz-9T  | 1368 | 0.199713 | 0         |  |
|       |      | Shiraz-18T | 1455 | 0        | -0.186773 |  |
|       |      | Shiraz-22T | 1669 | 0.695915 | 0         |  |
|       |      | Shiraz-25T | 1717 | 0.420447 | 0         |  |
|       |      | Shiraz-28T | 1760 | 0.538181 | 0         |  |
|       |      | Shiraz-29T | 1800 | 0.672527 | 0         |  |
|       |      | Shiraz-32T | 1869 | 0.776805 | 0         |  |
|       |      | Shiraz-35T | 1932 | 0.507141 | 0         |  |
|       |      | Shiraz-40T | 2051 | 0.098506 | 0         |  |
|       |      | Shiraz-58T | 2221 | 0.871948 | 0         |  |
|       |      | Shiraz-71T | 2260 | 0.68394  | 0         |  |
|       |      | Shiraz-71T | 2261 | 0.508399 | 0         |  |
|       |      | Shiraz-3T  | 235  | 0        | -0.28401  |  |
|       |      | Shiraz-4T  | 260  | 0        | -0.324128 |  |
|       |      | Shiraz-16T | 294  | 0.655804 | 0         |  |
|       |      | Shiraz-36T | 431  | 0        | -0.78035  |  |
|       |      | Shiraz-44T | 891  | 0        | -0.954044 |  |
|       |      | Shiraz-49T | 1166 | 0        | -0.917235 |  |
|       |      | Shiraz-9T  | 1368 | 0.199713 | 0         |  |
|       |      | Shiraz-18T | 1455 | 0        | -0.186773 |  |
|       |      | Shiraz-22T | 1669 | 0.695915 | 0         |  |

|        |      |            |      |          |           |  |  |
|--------|------|------------|------|----------|-----------|--|--|
|        |      | Shiraz-25T | 1717 | 0.420447 | 0         |  |  |
|        |      | Shiraz-28T | 1760 | 0.538181 | 0         |  |  |
|        |      | Shiraz-29T | 1800 | 0.672527 | 0         |  |  |
|        |      | Shiraz-32T | 1869 | 0.776805 | 0         |  |  |
|        |      | Shiraz-35T | 1932 | 0.507141 | 0         |  |  |
|        |      | Shiraz-40T | 2051 | 0.098506 | 0         |  |  |
|        |      | Shiraz-58T | 2221 | 0.871948 | 0         |  |  |
|        |      | Shiraz-71T | 2260 | 0.68394  | 0         |  |  |
|        |      | Shiraz-71T | 2261 | 0.508399 | 0         |  |  |
|        |      | Shiraz-3T  | 235  | 0        | -0.28401  |  |  |
|        |      | Shiraz-4T  | 260  | 0        | -0.324128 |  |  |
|        |      | Shiraz-16T | 294  | 0.655804 | 0         |  |  |
|        |      | Shiraz-36T | 431  | 0        | -0.78035  |  |  |
|        |      | Shiraz-44T | 891  | 0        | -0.954044 |  |  |
|        |      | Shiraz-49T | 1166 | 0        | -0.917235 |  |  |
|        |      | Shiraz-9T  | 1368 | 0.199713 | 0         |  |  |
|        |      | Shiraz-18T | 1455 | 0        | -0.186773 |  |  |
|        |      | Shiraz-22T | 1669 | 0.695915 | 0         |  |  |
|        |      | Shiraz-25T | 1717 | 0.420447 | 0         |  |  |
|        |      | Shiraz-28T | 1760 | 0.538181 | 0         |  |  |
|        |      | Shiraz-29T | 1800 | 0.672527 | 0         |  |  |
|        |      | Shiraz-32T | 1869 | 0.776805 | 0         |  |  |
|        |      | Shiraz-35T | 1932 | 0.507141 | 0         |  |  |
|        |      | Shiraz-40T | 2051 | 0.098506 | 0         |  |  |
|        |      | Shiraz-58T | 2221 | 0.871948 | 0         |  |  |
|        |      | Shiraz-71T | 2260 | 0.68394  | 0         |  |  |
|        |      | Shiraz-71T | 2261 | 0.508399 | 0         |  |  |
| EGFLAM | chr5 | Shiraz-4T  | 250  | 0.262252 | 0         |  |  |
|        |      | Shiraz-4T  | 250  | 0.262252 | 0         |  |  |
|        |      | Shiraz-4T  | 250  | 0.262252 | 0         |  |  |
|        |      | Shiraz-4T  | 250  | 0.262252 | 0         |  |  |
|        |      | Shiraz-16T | 266  | 0.321724 | 0         |  |  |
|        |      | Shiraz-16T | 266  | 0.321724 | 0         |  |  |
|        |      | Shiraz-16T | 266  | 0.321724 | 0         |  |  |
|        |      | Shiraz-16T | 266  | 0.321724 | 0         |  |  |
|        |      | Shiraz-44T | 591  | 0        | -0.233934 |  |  |
|        |      | Shiraz-44T | 591  | 0        | -0.233934 |  |  |
|        |      | Shiraz-44T | 591  | 0        | -0.233934 |  |  |
|        |      | Shiraz-44T | 591  | 0        | -0.233934 |  |  |
|        |      | Shiraz-18T | 1429 | 0        | -0.314125 |  |  |
|        |      | Shiraz-18T | 1429 | 0        | -0.314125 |  |  |
|        |      | Shiraz-18T | 1429 | 0        | -0.314125 |  |  |
|        |      | Shiraz-18T | 1429 | 0        | -0.314125 |  |  |
|        |      | Shiraz-22T | 1522 | 0        | -0.322688 |  |  |
|        |      | Shiraz-22T | 1522 | 0        | -0.322688 |  |  |
|        |      | Shiraz-22T | 1522 | 0        | -0.322688 |  |  |
|        |      | Shiraz-22T | 1522 | 0        | -0.322688 |  |  |

|  |  |            |      |          |           |  |  |
|--|--|------------|------|----------|-----------|--|--|
|  |  | Shiraz-25T | 1694 | 0.201602 | 0         |  |  |
|  |  | Shiraz-25T | 1694 | 0.201602 | 0         |  |  |
|  |  | Shiraz-25T | 1694 | 0.201602 | 0         |  |  |
|  |  | Shiraz-25T | 1694 | 0.201602 | 0         |  |  |
|  |  | Shiraz-28T | 1731 | 0.295447 | 0         |  |  |
|  |  | Shiraz-28T | 1731 | 0.295447 | 0         |  |  |
|  |  | Shiraz-28T | 1731 | 0.295447 | 0         |  |  |
|  |  | Shiraz-28T | 1731 | 0.295447 | 0         |  |  |
|  |  | Shiraz-29T | 1773 | 0.090981 | 0         |  |  |
|  |  | Shiraz-29T | 1773 | 0.090981 | 0         |  |  |
|  |  | Shiraz-29T | 1773 | 0.090981 | 0         |  |  |
|  |  | Shiraz-29T | 1773 | 0.090981 | 0         |  |  |
|  |  | Shiraz-40T | 2016 | 0.376634 | 0         |  |  |
|  |  | Shiraz-40T | 2016 | 0.376634 | 0         |  |  |
|  |  | Shiraz-40T | 2016 | 0.376634 | 0         |  |  |
|  |  | Shiraz-40T | 2016 | 0.376634 | 0         |  |  |
|  |  | Shiraz-4T  | 250  | 0.262252 | 0         |  |  |
|  |  | Shiraz-4T  | 250  | 0.262252 | 0         |  |  |
|  |  | Shiraz-4T  | 250  | 0.262252 | 0         |  |  |
|  |  | Shiraz-4T  | 250  | 0.262252 | 0         |  |  |
|  |  | Shiraz-16T | 266  | 0.321724 | 0         |  |  |
|  |  | Shiraz-16T | 266  | 0.321724 | 0         |  |  |
|  |  | Shiraz-16T | 266  | 0.321724 | 0         |  |  |
|  |  | Shiraz-16T | 266  | 0.321724 | 0         |  |  |
|  |  | Shiraz-44T | 591  | 0        | -0.233934 |  |  |
|  |  | Shiraz-44T | 591  | 0        | -0.233934 |  |  |
|  |  | Shiraz-44T | 591  | 0        | -0.233934 |  |  |
|  |  | Shiraz-44T | 591  | 0        | -0.233934 |  |  |
|  |  | Shiraz-18T | 1429 | 0        | -0.314125 |  |  |
|  |  | Shiraz-18T | 1429 | 0        | -0.314125 |  |  |
|  |  | Shiraz-18T | 1429 | 0        | -0.314125 |  |  |
|  |  | Shiraz-18T | 1429 | 0        | -0.314125 |  |  |
|  |  | Shiraz-22T | 1522 | 0        | -0.322688 |  |  |
|  |  | Shiraz-22T | 1522 | 0        | -0.322688 |  |  |
|  |  | Shiraz-22T | 1522 | 0        | -0.322688 |  |  |
|  |  | Shiraz-22T | 1522 | 0        | -0.322688 |  |  |
|  |  | Shiraz-25T | 1694 | 0.201602 | 0         |  |  |
|  |  | Shiraz-25T | 1694 | 0.201602 | 0         |  |  |
|  |  | Shiraz-25T | 1694 | 0.201602 | 0         |  |  |
|  |  | Shiraz-25T | 1694 | 0.201602 | 0         |  |  |
|  |  | Shiraz-28T | 1731 | 0.295447 | 0         |  |  |
|  |  | Shiraz-28T | 1731 | 0.295447 | 0         |  |  |
|  |  | Shiraz-28T | 1731 | 0.295447 | 0         |  |  |
|  |  | Shiraz-28T | 1731 | 0.295447 | 0         |  |  |
|  |  | Shiraz-29T | 1773 | 0.090981 | 0         |  |  |
|  |  | Shiraz-29T | 1773 | 0.090981 | 0         |  |  |
|  |  | Shiraz-29T | 1773 | 0.090981 | 0         |  |  |

|      |      |            |      |          |           |  |  |
|------|------|------------|------|----------|-----------|--|--|
|      |      | Shiraz-29T | 1773 | 0.090981 | 0         |  |  |
|      |      | Shiraz-40T | 2016 | 0.376634 | 0         |  |  |
|      |      | Shiraz-40T | 2016 | 0.376634 | 0         |  |  |
|      |      | Shiraz-40T | 2016 | 0.376634 | 0         |  |  |
|      |      | Shiraz-40T | 2016 | 0.376634 | 0         |  |  |
|      |      | Shiraz-4T  | 250  | 0.262252 | 0         |  |  |
|      |      | Shiraz-4T  | 250  | 0.262252 | 0         |  |  |
|      |      | Shiraz-4T  | 250  | 0.262252 | 0         |  |  |
|      |      | Shiraz-4T  | 250  | 0.262252 | 0         |  |  |
|      |      | Shiraz-16T | 266  | 0.321724 | 0         |  |  |
|      |      | Shiraz-16T | 266  | 0.321724 | 0         |  |  |
|      |      | Shiraz-16T | 266  | 0.321724 | 0         |  |  |
|      |      | Shiraz-16T | 266  | 0.321724 | 0         |  |  |
|      |      | Shiraz-44T | 591  | 0        | -0.233934 |  |  |
|      |      | Shiraz-44T | 591  | 0        | -0.233934 |  |  |
|      |      | Shiraz-44T | 591  | 0        | -0.233934 |  |  |
|      |      | Shiraz-44T | 591  | 0        | -0.233934 |  |  |
|      |      | Shiraz-18T | 1429 | 0        | -0.314125 |  |  |
|      |      | Shiraz-18T | 1429 | 0        | -0.314125 |  |  |
|      |      | Shiraz-18T | 1429 | 0        | -0.314125 |  |  |
|      |      | Shiraz-18T | 1429 | 0        | -0.314125 |  |  |
|      |      | Shiraz-22T | 1522 | 0        | -0.322688 |  |  |
|      |      | Shiraz-22T | 1522 | 0        | -0.322688 |  |  |
|      |      | Shiraz-22T | 1522 | 0        | -0.322688 |  |  |
|      |      | Shiraz-22T | 1522 | 0        | -0.322688 |  |  |
|      |      | Shiraz-25T | 1694 | 0.201602 | 0         |  |  |
|      |      | Shiraz-25T | 1694 | 0.201602 | 0         |  |  |
|      |      | Shiraz-25T | 1694 | 0.201602 | 0         |  |  |
|      |      | Shiraz-25T | 1694 | 0.201602 | 0         |  |  |
|      |      | Shiraz-28T | 1731 | 0.295447 | 0         |  |  |
|      |      | Shiraz-28T | 1731 | 0.295447 | 0         |  |  |
|      |      | Shiraz-28T | 1731 | 0.295447 | 0         |  |  |
|      |      | Shiraz-28T | 1731 | 0.295447 | 0         |  |  |
|      |      | Shiraz-29T | 1773 | 0.090981 | 0         |  |  |
|      |      | Shiraz-29T | 1773 | 0.090981 | 0         |  |  |
|      |      | Shiraz-29T | 1773 | 0.090981 | 0         |  |  |
|      |      | Shiraz-29T | 1773 | 0.090981 | 0         |  |  |
|      |      | Shiraz-40T | 2016 | 0.376634 | 0         |  |  |
|      |      | Shiraz-40T | 2016 | 0.376634 | 0         |  |  |
|      |      | Shiraz-40T | 2016 | 0.376634 | 0         |  |  |
|      |      | Shiraz-40T | 2016 | 0.376634 | 0         |  |  |
| EGFR | chr7 | Shiraz-3T  | 87   | 0.198593 | 0         |  |  |
|      |      | Shiraz-3T  | 87   | 0.198593 | 0         |  |  |
|      |      | Shiraz-3T  | 87   | 0.198593 | 0         |  |  |
|      |      | Shiraz-3T  | 87   | 0.198593 | 0         |  |  |
|      |      | Shiraz-4T  | 252  | 0.192083 | 0         |  |  |
|      |      | Shiraz-4T  | 252  | 0.192083 | 0         |  |  |

|  |  |            |      |          |   |  |  |
|--|--|------------|------|----------|---|--|--|
|  |  | Shiraz-4T  | 252  | 0.192083 | 0 |  |  |
|  |  | Shiraz-4T  | 252  | 0.192083 | 0 |  |  |
|  |  | Shiraz-36T | 376  | 0.159952 | 0 |  |  |
|  |  | Shiraz-36T | 376  | 0.159952 | 0 |  |  |
|  |  | Shiraz-36T | 376  | 0.159952 | 0 |  |  |
|  |  | Shiraz-36T | 376  | 0.159952 | 0 |  |  |
|  |  | Shiraz-46T | 942  | 0.069143 | 0 |  |  |
|  |  | Shiraz-46T | 942  | 0.069143 | 0 |  |  |
|  |  | Shiraz-46T | 942  | 0.069143 | 0 |  |  |
|  |  | Shiraz-46T | 942  | 0.069143 | 0 |  |  |
|  |  | Shiraz-18T | 1433 | 0.250973 | 0 |  |  |
|  |  | Shiraz-18T | 1433 | 0.250973 | 0 |  |  |
|  |  | Shiraz-18T | 1433 | 0.250973 | 0 |  |  |
|  |  | Shiraz-18T | 1433 | 0.250973 | 0 |  |  |
|  |  | Shiraz-25T | 1697 | 0.21945  | 0 |  |  |
|  |  | Shiraz-25T | 1697 | 0.21945  | 0 |  |  |
|  |  | Shiraz-25T | 1697 | 0.21945  | 0 |  |  |
|  |  | Shiraz-25T | 1697 | 0.21945  | 0 |  |  |
|  |  | Shiraz-28T | 1734 | 0.362882 | 0 |  |  |
|  |  | Shiraz-28T | 1734 | 0.362882 | 0 |  |  |
|  |  | Shiraz-28T | 1734 | 0.362882 | 0 |  |  |
|  |  | Shiraz-28T | 1734 | 0.362882 | 0 |  |  |
|  |  | Shiraz-29T | 1777 | 0.156747 | 0 |  |  |
|  |  | Shiraz-29T | 1777 | 0.156747 | 0 |  |  |
|  |  | Shiraz-29T | 1777 | 0.156747 | 0 |  |  |
|  |  | Shiraz-29T | 1777 | 0.156747 | 0 |  |  |
|  |  | Shiraz-38T | 1950 | 0.265916 | 0 |  |  |
|  |  | Shiraz-38T | 1950 | 0.265916 | 0 |  |  |
|  |  | Shiraz-38T | 1950 | 0.265916 | 0 |  |  |
|  |  | Shiraz-38T | 1950 | 0.265916 | 0 |  |  |
|  |  | Shiraz-71T | 2236 | 0.320072 | 0 |  |  |
|  |  | Shiraz-71T | 2236 | 0.320072 | 0 |  |  |
|  |  | Shiraz-71T | 2236 | 0.320072 | 0 |  |  |
|  |  | Shiraz-71T | 2236 | 0.320072 | 0 |  |  |
|  |  | Shiraz-3T  | 87   | 0.198593 | 0 |  |  |
|  |  | Shiraz-3T  | 87   | 0.198593 | 0 |  |  |
|  |  | Shiraz-3T  | 87   | 0.198593 | 0 |  |  |
|  |  | Shiraz-3T  | 87   | 0.198593 | 0 |  |  |
|  |  | Shiraz-4T  | 252  | 0.192083 | 0 |  |  |
|  |  | Shiraz-4T  | 252  | 0.192083 | 0 |  |  |
|  |  | Shiraz-4T  | 252  | 0.192083 | 0 |  |  |
|  |  | Shiraz-4T  | 252  | 0.192083 | 0 |  |  |
|  |  | Shiraz-36T | 376  | 0.159952 | 0 |  |  |
|  |  | Shiraz-36T | 376  | 0.159952 | 0 |  |  |
|  |  | Shiraz-36T | 376  | 0.159952 | 0 |  |  |
|  |  | Shiraz-36T | 376  | 0.159952 | 0 |  |  |
|  |  | Shiraz-46T | 942  | 0.069143 | 0 |  |  |

|  |  |            |      |          |   |  |  |
|--|--|------------|------|----------|---|--|--|
|  |  | Shiraz-46T | 942  | 0.069143 | 0 |  |  |
|  |  | Shiraz-46T | 942  | 0.069143 | 0 |  |  |
|  |  | Shiraz-46T | 942  | 0.069143 | 0 |  |  |
|  |  | Shiraz-18T | 1433 | 0.250973 | 0 |  |  |
|  |  | Shiraz-18T | 1433 | 0.250973 | 0 |  |  |
|  |  | Shiraz-18T | 1433 | 0.250973 | 0 |  |  |
|  |  | Shiraz-18T | 1433 | 0.250973 | 0 |  |  |
|  |  | Shiraz-25T | 1697 | 0.21945  | 0 |  |  |
|  |  | Shiraz-25T | 1697 | 0.21945  | 0 |  |  |
|  |  | Shiraz-25T | 1697 | 0.21945  | 0 |  |  |
|  |  | Shiraz-25T | 1697 | 0.21945  | 0 |  |  |
|  |  | Shiraz-28T | 1734 | 0.362882 | 0 |  |  |
|  |  | Shiraz-28T | 1734 | 0.362882 | 0 |  |  |
|  |  | Shiraz-28T | 1734 | 0.362882 | 0 |  |  |
|  |  | Shiraz-28T | 1734 | 0.362882 | 0 |  |  |
|  |  | Shiraz-29T | 1777 | 0.156747 | 0 |  |  |
|  |  | Shiraz-29T | 1777 | 0.156747 | 0 |  |  |
|  |  | Shiraz-29T | 1777 | 0.156747 | 0 |  |  |
|  |  | Shiraz-29T | 1777 | 0.156747 | 0 |  |  |
|  |  | Shiraz-38T | 1950 | 0.265916 | 0 |  |  |
|  |  | Shiraz-38T | 1950 | 0.265916 | 0 |  |  |
|  |  | Shiraz-38T | 1950 | 0.265916 | 0 |  |  |
|  |  | Shiraz-38T | 1950 | 0.265916 | 0 |  |  |
|  |  | Shiraz-71T | 2236 | 0.320072 | 0 |  |  |
|  |  | Shiraz-71T | 2236 | 0.320072 | 0 |  |  |
|  |  | Shiraz-71T | 2236 | 0.320072 | 0 |  |  |
|  |  | Shiraz-71T | 2236 | 0.320072 | 0 |  |  |
|  |  | Shiraz-3T  | 87   | 0.198593 | 0 |  |  |
|  |  | Shiraz-3T  | 87   | 0.198593 | 0 |  |  |
|  |  | Shiraz-3T  | 87   | 0.198593 | 0 |  |  |
|  |  | Shiraz-3T  | 87   | 0.198593 | 0 |  |  |
|  |  | Shiraz-4T  | 252  | 0.192083 | 0 |  |  |
|  |  | Shiraz-4T  | 252  | 0.192083 | 0 |  |  |
|  |  | Shiraz-4T  | 252  | 0.192083 | 0 |  |  |
|  |  | Shiraz-4T  | 252  | 0.192083 | 0 |  |  |
|  |  | Shiraz-36T | 376  | 0.159952 | 0 |  |  |
|  |  | Shiraz-36T | 376  | 0.159952 | 0 |  |  |
|  |  | Shiraz-36T | 376  | 0.159952 | 0 |  |  |
|  |  | Shiraz-36T | 376  | 0.159952 | 0 |  |  |
|  |  | Shiraz-46T | 942  | 0.069143 | 0 |  |  |
|  |  | Shiraz-46T | 942  | 0.069143 | 0 |  |  |
|  |  | Shiraz-46T | 942  | 0.069143 | 0 |  |  |
|  |  | Shiraz-46T | 942  | 0.069143 | 0 |  |  |
|  |  | Shiraz-18T | 1433 | 0.250973 | 0 |  |  |
|  |  | Shiraz-18T | 1433 | 0.250973 | 0 |  |  |
|  |  | Shiraz-18T | 1433 | 0.250973 | 0 |  |  |
|  |  | Shiraz-18T | 1433 | 0.250973 | 0 |  |  |



|        |      |            |      |          |           |  |
|--------|------|------------|------|----------|-----------|--|
|        |      | Shiraz-25T | 1697 | 0.21945  | 0         |  |
|        |      | Shiraz-25T | 1697 | 0.21945  | 0         |  |
|        |      | Shiraz-25T | 1697 | 0.21945  | 0         |  |
|        |      | Shiraz-25T | 1697 | 0.21945  | 0         |  |
|        |      | Shiraz-28T | 1734 | 0.362882 | 0         |  |
|        |      | Shiraz-28T | 1734 | 0.362882 | 0         |  |
|        |      | Shiraz-28T | 1734 | 0.362882 | 0         |  |
|        |      | Shiraz-28T | 1734 | 0.362882 | 0         |  |
|        |      | Shiraz-29T | 1777 | 0.156747 | 0         |  |
|        |      | Shiraz-29T | 1777 | 0.156747 | 0         |  |
|        |      | Shiraz-29T | 1777 | 0.156747 | 0         |  |
|        |      | Shiraz-29T | 1777 | 0.156747 | 0         |  |
|        |      | Shiraz-38T | 1950 | 0.265916 | 0         |  |
|        |      | Shiraz-38T | 1950 | 0.265916 | 0         |  |
|        |      | Shiraz-38T | 1950 | 0.265916 | 0         |  |
|        |      | Shiraz-38T | 1950 | 0.265916 | 0         |  |
|        |      | Shiraz-71T | 2236 | 0.320072 | 0         |  |
|        |      | Shiraz-71T | 2236 | 0.320072 | 0         |  |
|        |      | Shiraz-71T | 2236 | 0.320072 | 0         |  |
|        |      | Shiraz-71T | 2236 | 0.320072 | 0         |  |
| EIF1AX | chrX | Shiraz-3T  | 235  | 0        | -0.28401  |  |
|        |      | Shiraz-4T  | 260  | 0        | -0.324128 |  |
|        |      | Shiraz-16T | 294  | 0.655804 | 0         |  |
|        |      | Shiraz-36T | 431  | 0        | -0.78035  |  |
|        |      | Shiraz-44T | 891  | 0        | -0.954044 |  |
|        |      | Shiraz-49T | 1166 | 0        | -0.917235 |  |
|        |      | Shiraz-77T | 1281 | 0.136627 | 0         |  |
|        |      | Shiraz-9T  | 1368 | 0.199713 | 0         |  |
|        |      | Shiraz-18T | 1455 | 0        | -0.186773 |  |
|        |      | Shiraz-22T | 1669 | 0.695915 | 0         |  |
|        |      | Shiraz-25T | 1717 | 0.420447 | 0         |  |
|        |      | Shiraz-28T | 1760 | 0.538181 | 0         |  |
|        |      | Shiraz-29T | 1800 | 0.672527 | 0         |  |
|        |      | Shiraz-32T | 1869 | 0.776805 | 0         |  |
|        |      | Shiraz-35T | 1932 | 0.507141 | 0         |  |
|        |      | Shiraz-40T | 2051 | 0.098506 | 0         |  |
|        |      | Shiraz-58T | 2221 | 0.871948 | 0         |  |
|        |      | Shiraz-71T | 2260 | 0.68394  | 0         |  |
|        |      | Shiraz-71T | 2261 | 0.508399 | 0         |  |
|        |      | Shiraz-3T  | 235  | 0        | -0.28401  |  |
|        |      | Shiraz-4T  | 260  | 0        | -0.324128 |  |
|        |      | Shiraz-16T | 294  | 0.655804 | 0         |  |
|        |      | Shiraz-36T | 431  | 0        | -0.78035  |  |
|        |      | Shiraz-44T | 891  | 0        | -0.954044 |  |
|        |      | Shiraz-49T | 1166 | 0        | -0.917235 |  |
|        |      | Shiraz-77T | 1281 | 0.136627 | 0         |  |
|        |      | Shiraz-9T  | 1368 | 0.199713 | 0         |  |

|        |      |            |      |          |           |  |  |
|--------|------|------------|------|----------|-----------|--|--|
|        |      | Shiraz-18T | 1455 | 0        | -0.186773 |  |  |
|        |      | Shiraz-22T | 1669 | 0.695915 | 0         |  |  |
|        |      | Shiraz-25T | 1717 | 0.420447 | 0         |  |  |
|        |      | Shiraz-28T | 1760 | 0.538181 | 0         |  |  |
|        |      | Shiraz-29T | 1800 | 0.672527 | 0         |  |  |
|        |      | Shiraz-32T | 1869 | 0.776805 | 0         |  |  |
|        |      | Shiraz-35T | 1932 | 0.507141 | 0         |  |  |
|        |      | Shiraz-40T | 2051 | 0.098506 | 0         |  |  |
|        |      | Shiraz-58T | 2221 | 0.871948 | 0         |  |  |
|        |      | Shiraz-71T | 2260 | 0.68394  | 0         |  |  |
|        |      | Shiraz-71T | 2261 | 0.508399 | 0         |  |  |
|        |      | Shiraz-3T  | 235  | 0        | -0.28401  |  |  |
|        |      | Shiraz-4T  | 260  | 0        | -0.324128 |  |  |
|        |      | Shiraz-16T | 294  | 0.655804 | 0         |  |  |
|        |      | Shiraz-36T | 431  | 0        | -0.78035  |  |  |
|        |      | Shiraz-44T | 891  | 0        | -0.954044 |  |  |
|        |      | Shiraz-49T | 1166 | 0        | -0.917235 |  |  |
|        |      | Shiraz-77T | 1281 | 0.136627 | 0         |  |  |
|        |      | Shiraz-9T  | 1368 | 0.199713 | 0         |  |  |
|        |      | Shiraz-18T | 1455 | 0        | -0.186773 |  |  |
|        |      | Shiraz-22T | 1669 | 0.695915 | 0         |  |  |
|        |      | Shiraz-25T | 1717 | 0.420447 | 0         |  |  |
|        |      | Shiraz-28T | 1760 | 0.538181 | 0         |  |  |
|        |      | Shiraz-29T | 1800 | 0.672527 | 0         |  |  |
|        |      | Shiraz-32T | 1869 | 0.776805 | 0         |  |  |
|        |      | Shiraz-35T | 1932 | 0.507141 | 0         |  |  |
|        |      | Shiraz-40T | 2051 | 0.098506 | 0         |  |  |
|        |      | Shiraz-58T | 2221 | 0.871948 | 0         |  |  |
|        |      | Shiraz-71T | 2260 | 0.68394  | 0         |  |  |
|        |      | Shiraz-71T | 2261 | 0.508399 | 0         |  |  |
| EIF2S3 | chrX | Shiraz-3T  | 235  | 0        | -0.28401  |  |  |
|        |      | Shiraz-4T  | 260  | 0        | -0.324128 |  |  |
|        |      | Shiraz-16T | 294  | 0.655804 | 0         |  |  |
|        |      | Shiraz-36T | 431  | 0        | -0.78035  |  |  |
|        |      | Shiraz-44T | 891  | 0        | -0.954044 |  |  |
|        |      | Shiraz-49T | 1166 | 0        | -0.917235 |  |  |
|        |      | Shiraz-77T | 1281 | 0.136627 | 0         |  |  |
|        |      | Shiraz-9T  | 1368 | 0.199713 | 0         |  |  |
|        |      | Shiraz-18T | 1455 | 0        | -0.186773 |  |  |
|        |      | Shiraz-22T | 1669 | 0.695915 | 0         |  |  |
|        |      | Shiraz-25T | 1717 | 0.420447 | 0         |  |  |
|        |      | Shiraz-28T | 1760 | 0.538181 | 0         |  |  |
|        |      | Shiraz-29T | 1800 | 0.672527 | 0         |  |  |
|        |      | Shiraz-32T | 1869 | 0.776805 | 0         |  |  |
|        |      | Shiraz-35T | 1932 | 0.507141 | 0         |  |  |
|        |      | Shiraz-40T | 2051 | 0.098506 | 0         |  |  |
|        |      | Shiraz-58T | 2221 | 0.871948 | 0         |  |  |

|         |      |            |      |          |           |  |
|---------|------|------------|------|----------|-----------|--|
|         |      | Shiraz-71T | 2260 | 0.68394  | 0         |  |
|         |      | Shiraz-71T | 2261 | 0.508399 | 0         |  |
|         |      | Shiraz-3T  | 235  | 0        | -0.28401  |  |
|         |      | Shiraz-4T  | 260  | 0        | -0.324128 |  |
|         |      | Shiraz-16T | 294  | 0.655804 | 0         |  |
|         |      | Shiraz-36T | 431  | 0        | -0.78035  |  |
|         |      | Shiraz-44T | 891  | 0        | -0.954044 |  |
|         |      | Shiraz-49T | 1166 | 0        | -0.917235 |  |
|         |      | Shiraz-77T | 1281 | 0.136627 | 0         |  |
|         |      | Shiraz-9T  | 1368 | 0.199713 | 0         |  |
|         |      | Shiraz-18T | 1455 | 0        | -0.186773 |  |
|         |      | Shiraz-22T | 1669 | 0.695915 | 0         |  |
|         |      | Shiraz-25T | 1717 | 0.420447 | 0         |  |
|         |      | Shiraz-28T | 1760 | 0.538181 | 0         |  |
|         |      | Shiraz-29T | 1800 | 0.672527 | 0         |  |
|         |      | Shiraz-32T | 1869 | 0.776805 | 0         |  |
|         |      | Shiraz-35T | 1932 | 0.507141 | 0         |  |
|         |      | Shiraz-40T | 2051 | 0.098506 | 0         |  |
|         |      | Shiraz-58T | 2221 | 0.871948 | 0         |  |
|         |      | Shiraz-71T | 2260 | 0.68394  | 0         |  |
|         |      | Shiraz-71T | 2261 | 0.508399 | 0         |  |
|         |      | Shiraz-3T  | 235  | 0        | -0.28401  |  |
|         |      | Shiraz-4T  | 260  | 0        | -0.324128 |  |
|         |      | Shiraz-16T | 294  | 0.655804 | 0         |  |
|         |      | Shiraz-36T | 431  | 0        | -0.78035  |  |
|         |      | Shiraz-44T | 891  | 0        | -0.954044 |  |
|         |      | Shiraz-49T | 1166 | 0        | -0.917235 |  |
|         |      | Shiraz-77T | 1281 | 0.136627 | 0         |  |
|         |      | Shiraz-9T  | 1368 | 0.199713 | 0         |  |
|         |      | Shiraz-18T | 1455 | 0        | -0.186773 |  |
|         |      | Shiraz-22T | 1669 | 0.695915 | 0         |  |
|         |      | Shiraz-25T | 1717 | 0.420447 | 0         |  |
|         |      | Shiraz-28T | 1760 | 0.538181 | 0         |  |
|         |      | Shiraz-29T | 1800 | 0.672527 | 0         |  |
|         |      | Shiraz-32T | 1869 | 0.776805 | 0         |  |
|         |      | Shiraz-35T | 1932 | 0.507141 | 0         |  |
|         |      | Shiraz-40T | 2051 | 0.098506 | 0         |  |
|         |      | Shiraz-58T | 2221 | 0.871948 | 0         |  |
|         |      | Shiraz-71T | 2260 | 0.68394  | 0         |  |
|         |      | Shiraz-71T | 2261 | 0.508399 | 0         |  |
| EIF3IP1 | chr7 | Shiraz-3T  | 90   | 0.219276 | 0         |  |
|         |      | Shiraz-3T  | 95   | 0        | -0.077623 |  |
|         |      | Shiraz-4T  | 253  | 0.372918 | 0         |  |
|         |      | Shiraz-36T | 378  | 0.179558 | 0         |  |
|         |      | Shiraz-36T | 382  | 0.081739 | 0         |  |
|         |      | Shiraz-44T | 641  | 0        | -0.477846 |  |
|         |      | Shiraz-46T | 943  | 0.093799 | 0         |  |

|  |            |      |          |           |  |
|--|------------|------|----------|-----------|--|
|  | Shiraz-46T | 947  | 0        | -0.010843 |  |
|  | Shiraz-47T | 1031 | 0        | -0.117529 |  |
|  | Shiraz-49T | 1121 | 0        | -0.138569 |  |
|  | Shiraz-77T | 1225 | 0        | -0.117922 |  |
|  | Shiraz-77T | 1228 | 0        | -0.238084 |  |
|  | Shiraz-18T | 1434 | 0.244465 | 0         |  |
|  | Shiraz-22T | 1549 | 0        | -0.319623 |  |
|  | Shiraz-25T | 1698 | 0.21835  | 0         |  |
|  | Shiraz-28T | 1735 | 0.350744 | 0         |  |
|  | Shiraz-29T | 1778 | 0.120767 | 0         |  |
|  | Shiraz-32T | 1833 | 0.551336 | 0         |  |
|  | Shiraz-38T | 1951 | 0.250891 | 0         |  |
|  | Shiraz-53T | 2078 | 0.287202 | 0         |  |
|  | Shiraz-58T | 2161 | 0        | -0.187744 |  |
|  | Shiraz-71T | 2238 | 0.603631 | 0         |  |
|  | Shiraz-3T  | 90   | 0.219276 | 0         |  |
|  | Shiraz-3T  | 95   | 0        | -0.077623 |  |
|  | Shiraz-4T  | 253  | 0.372918 | 0         |  |
|  | Shiraz-36T | 378  | 0.179558 | 0         |  |
|  | Shiraz-36T | 382  | 0.081739 | 0         |  |
|  | Shiraz-44T | 641  | 0        | -0.477846 |  |
|  | Shiraz-46T | 943  | 0.093799 | 0         |  |
|  | Shiraz-46T | 947  | 0        | -0.010843 |  |
|  | Shiraz-47T | 1031 | 0        | -0.117529 |  |
|  | Shiraz-49T | 1121 | 0        | -0.138569 |  |
|  | Shiraz-77T | 1225 | 0        | -0.117922 |  |
|  | Shiraz-77T | 1228 | 0        | -0.238084 |  |
|  | Shiraz-18T | 1434 | 0.244465 | 0         |  |
|  | Shiraz-22T | 1549 | 0        | -0.319623 |  |
|  | Shiraz-25T | 1698 | 0.21835  | 0         |  |
|  | Shiraz-28T | 1735 | 0.350744 | 0         |  |
|  | Shiraz-29T | 1778 | 0.120767 | 0         |  |
|  | Shiraz-32T | 1833 | 0.551336 | 0         |  |
|  | Shiraz-38T | 1951 | 0.250891 | 0         |  |
|  | Shiraz-53T | 2078 | 0.287202 | 0         |  |
|  | Shiraz-58T | 2161 | 0        | -0.187744 |  |
|  | Shiraz-71T | 2238 | 0.603631 | 0         |  |
|  | Shiraz-3T  | 90   | 0.219276 | 0         |  |
|  | Shiraz-3T  | 95   | 0        | -0.077623 |  |
|  | Shiraz-4T  | 253  | 0.372918 | 0         |  |
|  | Shiraz-36T | 378  | 0.179558 | 0         |  |
|  | Shiraz-36T | 382  | 0.081739 | 0         |  |
|  | Shiraz-44T | 641  | 0        | -0.477846 |  |
|  | Shiraz-46T | 943  | 0.093799 | 0         |  |
|  | Shiraz-46T | 947  | 0        | -0.010843 |  |
|  | Shiraz-47T | 1031 | 0        | -0.117529 |  |
|  | Shiraz-49T | 1121 | 0        | -0.138569 |  |

|      |      |            |      |          |           |  |  |
|------|------|------------|------|----------|-----------|--|--|
|      |      | Shiraz-77T | 1225 | 0        | -0.117922 |  |  |
|      |      | Shiraz-77T | 1228 | 0        | -0.238084 |  |  |
|      |      | Shiraz-18T | 1434 | 0.244465 | 0         |  |  |
|      |      | Shiraz-22T | 1549 | 0        | -0.319623 |  |  |
|      |      | Shiraz-25T | 1698 | 0.21835  | 0         |  |  |
|      |      | Shiraz-28T | 1735 | 0.350744 | 0         |  |  |
|      |      | Shiraz-29T | 1778 | 0.120767 | 0         |  |  |
|      |      | Shiraz-32T | 1833 | 0.551336 | 0         |  |  |
|      |      | Shiraz-38T | 1951 | 0.250891 | 0         |  |  |
|      |      | Shiraz-53T | 2078 | 0.287202 | 0         |  |  |
|      |      | Shiraz-58T | 2161 | 0        | -0.187744 |  |  |
|      |      | Shiraz-71T | 2238 | 0.603631 | 0         |  |  |
| ELF4 | chrX | Shiraz-3T  | 242  | 0        | -0.336434 |  |  |
|      |      | Shiraz-3T  | 242  | 0        | -0.336434 |  |  |
|      |      | Shiraz-3T  | 245  | 0.224144 | 0         |  |  |
|      |      | Shiraz-3T  | 245  | 0.224144 | 0         |  |  |
|      |      | Shiraz-4T  | 261  | 0        | -0.336249 |  |  |
|      |      | Shiraz-4T  | 261  | 0        | -0.336249 |  |  |
|      |      | Shiraz-16T | 295  | 0.591657 | 0         |  |  |
|      |      | Shiraz-16T | 295  | 0.591657 | 0         |  |  |
|      |      | Shiraz-36T | 433  | 0        | -0.803961 |  |  |
|      |      | Shiraz-36T | 433  | 0        | -0.803961 |  |  |
|      |      | Shiraz-44T | 899  | 0        | -1.09697  |  |  |
|      |      | Shiraz-44T | 899  | 0        | -1.09697  |  |  |
|      |      | Shiraz-44T | 906  | 0        | -0.165692 |  |  |
|      |      | Shiraz-44T | 906  | 0        | -0.165692 |  |  |
|      |      | Shiraz-49T | 1170 | 0        | -0.967436 |  |  |
|      |      | Shiraz-49T | 1170 | 0        | -0.967436 |  |  |
|      |      | Shiraz-9T  | 1370 | 0.690073 | 0         |  |  |
|      |      | Shiraz-9T  | 1370 | 0.690073 | 0         |  |  |
|      |      | Shiraz-18T | 1457 | 0.643204 | 0         |  |  |
|      |      | Shiraz-18T | 1457 | 0.643204 | 0         |  |  |
|      |      | Shiraz-22T | 1673 | 0.611783 | 0         |  |  |
|      |      | Shiraz-22T | 1673 | 0.611783 | 0         |  |  |
|      |      | Shiraz-22T | 1677 | 0.789711 | 0         |  |  |
|      |      | Shiraz-22T | 1677 | 0.789711 | 0         |  |  |
|      |      | Shiraz-25T | 1719 | 0.472955 | 0         |  |  |
|      |      | Shiraz-25T | 1719 | 0.472955 | 0         |  |  |
|      |      | Shiraz-28T | 1762 | 0.562311 | 0         |  |  |
|      |      | Shiraz-28T | 1762 | 0.562311 | 0         |  |  |
|      |      | Shiraz-29T | 1801 | 0.815343 | 0         |  |  |
|      |      | Shiraz-29T | 1801 | 0.815343 | 0         |  |  |
|      |      | Shiraz-32T | 1870 | 0.729766 | 0         |  |  |
|      |      | Shiraz-32T | 1870 | 0.729766 | 0         |  |  |
|      |      | Shiraz-35T | 1933 | 0.488535 | 0         |  |  |
|      |      | Shiraz-35T | 1933 | 0.488535 | 0         |  |  |
|      |      | Shiraz-58T | 2223 | 0.833364 | 0         |  |  |

|  |  |            |      |          |           |  |  |
|--|--|------------|------|----------|-----------|--|--|
|  |  | Shiraz-58T | 2223 | 0.833364 | 0         |  |  |
|  |  | Shiraz-71T | 2263 | 0.975531 | 0         |  |  |
|  |  | Shiraz-71T | 2263 | 0.975531 | 0         |  |  |
|  |  | Shiraz-3T  | 242  | 0        | -0.336434 |  |  |
|  |  | Shiraz-3T  | 242  | 0        | -0.336434 |  |  |
|  |  | Shiraz-3T  | 245  | 0.224144 | 0         |  |  |
|  |  | Shiraz-3T  | 245  | 0.224144 | 0         |  |  |
|  |  | Shiraz-4T  | 261  | 0        | -0.336249 |  |  |
|  |  | Shiraz-4T  | 261  | 0        | -0.336249 |  |  |
|  |  | Shiraz-16T | 295  | 0.591657 | 0         |  |  |
|  |  | Shiraz-16T | 295  | 0.591657 | 0         |  |  |
|  |  | Shiraz-36T | 433  | 0        | -0.803961 |  |  |
|  |  | Shiraz-36T | 433  | 0        | -0.803961 |  |  |
|  |  | Shiraz-44T | 899  | 0        | -1.09697  |  |  |
|  |  | Shiraz-44T | 899  | 0        | -1.09697  |  |  |
|  |  | Shiraz-44T | 906  | 0        | -0.165692 |  |  |
|  |  | Shiraz-44T | 906  | 0        | -0.165692 |  |  |
|  |  | Shiraz-49T | 1170 | 0        | -0.967436 |  |  |
|  |  | Shiraz-49T | 1170 | 0        | -0.967436 |  |  |
|  |  | Shiraz-9T  | 1370 | 0.690073 | 0         |  |  |
|  |  | Shiraz-9T  | 1370 | 0.690073 | 0         |  |  |
|  |  | Shiraz-18T | 1457 | 0.643204 | 0         |  |  |
|  |  | Shiraz-18T | 1457 | 0.643204 | 0         |  |  |
|  |  | Shiraz-22T | 1673 | 0.611783 | 0         |  |  |
|  |  | Shiraz-22T | 1673 | 0.611783 | 0         |  |  |
|  |  | Shiraz-22T | 1677 | 0.789711 | 0         |  |  |
|  |  | Shiraz-22T | 1677 | 0.789711 | 0         |  |  |
|  |  | Shiraz-25T | 1719 | 0.472955 | 0         |  |  |
|  |  | Shiraz-25T | 1719 | 0.472955 | 0         |  |  |
|  |  | Shiraz-28T | 1762 | 0.562311 | 0         |  |  |
|  |  | Shiraz-28T | 1762 | 0.562311 | 0         |  |  |
|  |  | Shiraz-29T | 1801 | 0.815343 | 0         |  |  |
|  |  | Shiraz-29T | 1801 | 0.815343 | 0         |  |  |
|  |  | Shiraz-32T | 1870 | 0.729766 | 0         |  |  |
|  |  | Shiraz-32T | 1870 | 0.729766 | 0         |  |  |
|  |  | Shiraz-35T | 1933 | 0.488535 | 0         |  |  |
|  |  | Shiraz-35T | 1933 | 0.488535 | 0         |  |  |
|  |  | Shiraz-58T | 2223 | 0.833364 | 0         |  |  |
|  |  | Shiraz-58T | 2223 | 0.833364 | 0         |  |  |
|  |  | Shiraz-71T | 2263 | 0.975531 | 0         |  |  |
|  |  | Shiraz-71T | 2263 | 0.975531 | 0         |  |  |
|  |  | Shiraz-3T  | 242  | 0        | -0.336434 |  |  |
|  |  | Shiraz-3T  | 242  | 0        | -0.336434 |  |  |
|  |  | Shiraz-3T  | 245  | 0.224144 | 0         |  |  |
|  |  | Shiraz-3T  | 245  | 0.224144 | 0         |  |  |
|  |  | Shiraz-4T  | 261  | 0        | -0.336249 |  |  |
|  |  | Shiraz-4T  | 261  | 0        | -0.336249 |  |  |

|      |      |            |      |          |           |  |  |
|------|------|------------|------|----------|-----------|--|--|
|      |      | Shiraz-16T | 295  | 0.591657 | 0         |  |  |
|      |      | Shiraz-16T | 295  | 0.591657 | 0         |  |  |
|      |      | Shiraz-36T | 433  | 0        | -0.803961 |  |  |
|      |      | Shiraz-36T | 433  | 0        | -0.803961 |  |  |
|      |      | Shiraz-44T | 899  | 0        | -1.09697  |  |  |
|      |      | Shiraz-44T | 899  | 0        | -1.09697  |  |  |
|      |      | Shiraz-44T | 906  | 0        | -0.165692 |  |  |
|      |      | Shiraz-44T | 906  | 0        | -0.165692 |  |  |
|      |      | Shiraz-49T | 1170 | 0        | -0.967436 |  |  |
|      |      | Shiraz-49T | 1170 | 0        | -0.967436 |  |  |
|      |      | Shiraz-9T  | 1370 | 0.690073 | 0         |  |  |
|      |      | Shiraz-9T  | 1370 | 0.690073 | 0         |  |  |
|      |      | Shiraz-18T | 1457 | 0.643204 | 0         |  |  |
|      |      | Shiraz-18T | 1457 | 0.643204 | 0         |  |  |
|      |      | Shiraz-22T | 1673 | 0.611783 | 0         |  |  |
|      |      | Shiraz-22T | 1673 | 0.611783 | 0         |  |  |
|      |      | Shiraz-22T | 1677 | 0.789711 | 0         |  |  |
|      |      | Shiraz-22T | 1677 | 0.789711 | 0         |  |  |
|      |      | Shiraz-25T | 1719 | 0.472955 | 0         |  |  |
|      |      | Shiraz-25T | 1719 | 0.472955 | 0         |  |  |
|      |      | Shiraz-28T | 1762 | 0.562311 | 0         |  |  |
|      |      | Shiraz-28T | 1762 | 0.562311 | 0         |  |  |
|      |      | Shiraz-29T | 1801 | 0.815343 | 0         |  |  |
|      |      | Shiraz-29T | 1801 | 0.815343 | 0         |  |  |
|      |      | Shiraz-32T | 1870 | 0.729766 | 0         |  |  |
|      |      | Shiraz-32T | 1870 | 0.729766 | 0         |  |  |
|      |      | Shiraz-35T | 1933 | 0.488535 | 0         |  |  |
|      |      | Shiraz-35T | 1933 | 0.488535 | 0         |  |  |
|      |      | Shiraz-58T | 2223 | 0.833364 | 0         |  |  |
|      |      | Shiraz-58T | 2223 | 0.833364 | 0         |  |  |
|      |      | Shiraz-71T | 2263 | 0.975531 | 0         |  |  |
|      |      | Shiraz-71T | 2263 | 0.975531 | 0         |  |  |
| ELK1 | chrX | Shiraz-4T  | 260  | 0        | -0.324128 |  |  |
|      |      | Shiraz-16T | 294  | 0.655804 | 0         |  |  |
|      |      | Shiraz-31T | 345  | 0.103301 | 0         |  |  |
|      |      | Shiraz-36T | 431  | 0        | -0.78035  |  |  |
|      |      | Shiraz-36T | 432  | 0        | -0.6692   |  |  |
|      |      | Shiraz-44T | 891  | 0        | -0.954044 |  |  |
|      |      | Shiraz-44T | 896  | 0        | -0.109108 |  |  |
|      |      | Shiraz-46T | 991  | 0.139564 | 0         |  |  |
|      |      | Shiraz-47T | 1084 | 0.24185  | 0         |  |  |
|      |      | Shiraz-49T | 1166 | 0        | -0.917235 |  |  |
|      |      | Shiraz-49T | 1169 | 0        | -0.583529 |  |  |
|      |      | Shiraz-77T | 1282 | 0.213849 | 0         |  |  |
|      |      | Shiraz-9T  | 1368 | 0.199713 | 0         |  |  |
|      |      | Shiraz-9T  | 1369 | 0.703374 | 0         |  |  |
|      |      | Shiraz-18T | 1455 | 0        | -0.186773 |  |  |

|  |            |      |          |           |  |
|--|------------|------|----------|-----------|--|
|  | Shiraz-22T | 1669 | 0.695915 | 0         |  |
|  | Shiraz-22T | 1672 | 1.01678  | 0         |  |
|  | Shiraz-25T | 1717 | 0.420447 | 0         |  |
|  | Shiraz-28T | 1760 | 0.538181 | 0         |  |
|  | Shiraz-29T | 1800 | 0.672527 | 0         |  |
|  | Shiraz-32T | 1869 | 0.776805 | 0         |  |
|  | Shiraz-35T | 1932 | 0.507141 | 0         |  |
|  | Shiraz-40T | 2051 | 0.098506 | 0         |  |
|  | Shiraz-58T | 2221 | 0.871948 | 0         |  |
|  | Shiraz-71T | 2260 | 0.68394  | 0         |  |
|  | Shiraz-71T | 2262 | 0.986748 | 0         |  |
|  | Shiraz-4T  | 260  | 0        | -0.324128 |  |
|  | Shiraz-16T | 294  | 0.655804 | 0         |  |
|  | Shiraz-31T | 345  | 0.103301 | 0         |  |
|  | Shiraz-36T | 431  | 0        | -0.78035  |  |
|  | Shiraz-36T | 432  | 0        | -0.6692   |  |
|  | Shiraz-44T | 891  | 0        | -0.954044 |  |
|  | Shiraz-44T | 896  | 0        | -0.109108 |  |
|  | Shiraz-46T | 991  | 0.139564 | 0         |  |
|  | Shiraz-47T | 1084 | 0.24185  | 0         |  |
|  | Shiraz-49T | 1166 | 0        | -0.917235 |  |
|  | Shiraz-49T | 1169 | 0        | -0.583529 |  |
|  | Shiraz-77T | 1282 | 0.213849 | 0         |  |
|  | Shiraz-9T  | 1368 | 0.199713 | 0         |  |
|  | Shiraz-9T  | 1369 | 0.703374 | 0         |  |
|  | Shiraz-18T | 1455 | 0        | -0.186773 |  |
|  | Shiraz-22T | 1669 | 0.695915 | 0         |  |
|  | Shiraz-22T | 1672 | 1.01678  | 0         |  |
|  | Shiraz-25T | 1717 | 0.420447 | 0         |  |
|  | Shiraz-28T | 1760 | 0.538181 | 0         |  |
|  | Shiraz-29T | 1800 | 0.672527 | 0         |  |
|  | Shiraz-32T | 1869 | 0.776805 | 0         |  |
|  | Shiraz-35T | 1932 | 0.507141 | 0         |  |
|  | Shiraz-40T | 2051 | 0.098506 | 0         |  |
|  | Shiraz-58T | 2221 | 0.871948 | 0         |  |
|  | Shiraz-71T | 2260 | 0.68394  | 0         |  |
|  | Shiraz-71T | 2262 | 0.986748 | 0         |  |
|  | Shiraz-4T  | 260  | 0        | -0.324128 |  |
|  | Shiraz-16T | 294  | 0.655804 | 0         |  |
|  | Shiraz-31T | 345  | 0.103301 | 0         |  |
|  | Shiraz-36T | 431  | 0        | -0.78035  |  |
|  | Shiraz-36T | 432  | 0        | -0.6692   |  |
|  | Shiraz-44T | 891  | 0        | -0.954044 |  |
|  | Shiraz-44T | 896  | 0        | -0.109108 |  |
|  | Shiraz-46T | 991  | 0.139564 | 0         |  |
|  | Shiraz-47T | 1084 | 0.24185  | 0         |  |
|  | Shiraz-49T | 1166 | 0        | -0.917235 |  |



|       |      |            |      |          |           |  |  |
|-------|------|------------|------|----------|-----------|--|--|
|       |      | Shiraz-49T | 1169 | 0        | -0.583529 |  |  |
|       |      | Shiraz-77T | 1282 | 0.213849 | 0         |  |  |
|       |      | Shiraz-9T  | 1368 | 0.199713 | 0         |  |  |
|       |      | Shiraz-9T  | 1369 | 0.703374 | 0         |  |  |
|       |      | Shiraz-18T | 1455 | 0        | -0.186773 |  |  |
|       |      | Shiraz-22T | 1669 | 0.695915 | 0         |  |  |
|       |      | Shiraz-22T | 1672 | 1.01678  | 0         |  |  |
|       |      | Shiraz-25T | 1717 | 0.420447 | 0         |  |  |
|       |      | Shiraz-28T | 1760 | 0.538181 | 0         |  |  |
|       |      | Shiraz-29T | 1800 | 0.672527 | 0         |  |  |
|       |      | Shiraz-32T | 1869 | 0.776805 | 0         |  |  |
|       |      | Shiraz-35T | 1932 | 0.507141 | 0         |  |  |
|       |      | Shiraz-40T | 2051 | 0.098506 | 0         |  |  |
|       |      | Shiraz-58T | 2221 | 0.871948 | 0         |  |  |
|       |      | Shiraz-71T | 2260 | 0.68394  | 0         |  |  |
|       |      | Shiraz-71T | 2262 | 0.986748 | 0         |  |  |
| ELMO1 | chr7 | Shiraz-3T  | 87   | 0.198593 | 0         |  |  |
|       |      | Shiraz-3T  | 87   | 0.198593 | 0         |  |  |
|       |      | Shiraz-3T  | 87   | 0.198593 | 0         |  |  |
|       |      | Shiraz-4T  | 252  | 0.192083 | 0         |  |  |
|       |      | Shiraz-4T  | 252  | 0.192083 | 0         |  |  |
|       |      | Shiraz-4T  | 252  | 0.192083 | 0         |  |  |
|       |      | Shiraz-36T | 376  | 0.159952 | 0         |  |  |
|       |      | Shiraz-36T | 376  | 0.159952 | 0         |  |  |
|       |      | Shiraz-36T | 376  | 0.159952 | 0         |  |  |
|       |      | Shiraz-44T | 631  | 0        | -0.180312 |  |  |
|       |      | Shiraz-44T | 631  | 0        | -0.180312 |  |  |
|       |      | Shiraz-44T | 631  | 0        | -0.180312 |  |  |
|       |      | Shiraz-46T | 942  | 0.069143 | 0         |  |  |
|       |      | Shiraz-46T | 942  | 0.069143 | 0         |  |  |
|       |      | Shiraz-46T | 942  | 0.069143 | 0         |  |  |
|       |      | Shiraz-18T | 1433 | 0.250973 | 0         |  |  |
|       |      | Shiraz-18T | 1433 | 0.250973 | 0         |  |  |
|       |      | Shiraz-18T | 1433 | 0.250973 | 0         |  |  |
|       |      | Shiraz-22T | 1544 | 0        | -0.193579 |  |  |
|       |      | Shiraz-22T | 1544 | 0        | -0.193579 |  |  |
|       |      | Shiraz-22T | 1544 | 0        | -0.193579 |  |  |
|       |      | Shiraz-25T | 1697 | 0.21945  | 0         |  |  |
|       |      | Shiraz-25T | 1697 | 0.21945  | 0         |  |  |
|       |      | Shiraz-25T | 1697 | 0.21945  | 0         |  |  |
|       |      | Shiraz-28T | 1734 | 0.362882 | 0         |  |  |
|       |      | Shiraz-28T | 1734 | 0.362882 | 0         |  |  |
|       |      | Shiraz-28T | 1734 | 0.362882 | 0         |  |  |
|       |      | Shiraz-29T | 1777 | 0.156747 | 0         |  |  |
|       |      | Shiraz-29T | 1777 | 0.156747 | 0         |  |  |
|       |      | Shiraz-29T | 1777 | 0.156747 | 0         |  |  |
|       |      | Shiraz-38T | 1950 | 0.265916 | 0         |  |  |

|  |            |      |          |           |  |
|--|------------|------|----------|-----------|--|
|  | Shiraz-38T | 1950 | 0.265916 | 0         |  |
|  | Shiraz-38T | 1950 | 0.265916 | 0         |  |
|  | Shiraz-71T | 2236 | 0.320072 | 0         |  |
|  | Shiraz-71T | 2236 | 0.320072 | 0         |  |
|  | Shiraz-71T | 2236 | 0.320072 | 0         |  |
|  | Shiraz-72T | 2277 | 0        | -0.398869 |  |
|  | Shiraz-72T | 2277 | 0        | -0.398869 |  |
|  | Shiraz-72T | 2277 | 0        | -0.398869 |  |
|  | Shiraz-3T  | 87   | 0.198593 | 0         |  |
|  | Shiraz-3T  | 87   | 0.198593 | 0         |  |
|  | Shiraz-3T  | 87   | 0.198593 | 0         |  |
|  | Shiraz-4T  | 252  | 0.192083 | 0         |  |
|  | Shiraz-4T  | 252  | 0.192083 | 0         |  |
|  | Shiraz-4T  | 252  | 0.192083 | 0         |  |
|  | Shiraz-36T | 376  | 0.159952 | 0         |  |
|  | Shiraz-36T | 376  | 0.159952 | 0         |  |
|  | Shiraz-36T | 376  | 0.159952 | 0         |  |
|  | Shiraz-44T | 631  | 0        | -0.180312 |  |
|  | Shiraz-44T | 631  | 0        | -0.180312 |  |
|  | Shiraz-44T | 631  | 0        | -0.180312 |  |
|  | Shiraz-46T | 942  | 0.069143 | 0         |  |
|  | Shiraz-46T | 942  | 0.069143 | 0         |  |
|  | Shiraz-46T | 942  | 0.069143 | 0         |  |
|  | Shiraz-18T | 1433 | 0.250973 | 0         |  |
|  | Shiraz-18T | 1433 | 0.250973 | 0         |  |
|  | Shiraz-18T | 1433 | 0.250973 | 0         |  |
|  | Shiraz-22T | 1544 | 0        | -0.193579 |  |
|  | Shiraz-22T | 1544 | 0        | -0.193579 |  |
|  | Shiraz-22T | 1544 | 0        | -0.193579 |  |
|  | Shiraz-25T | 1697 | 0.21945  | 0         |  |
|  | Shiraz-25T | 1697 | 0.21945  | 0         |  |
|  | Shiraz-25T | 1697 | 0.21945  | 0         |  |
|  | Shiraz-28T | 1734 | 0.362882 | 0         |  |
|  | Shiraz-28T | 1734 | 0.362882 | 0         |  |
|  | Shiraz-28T | 1734 | 0.362882 | 0         |  |
|  | Shiraz-29T | 1777 | 0.156747 | 0         |  |
|  | Shiraz-29T | 1777 | 0.156747 | 0         |  |
|  | Shiraz-29T | 1777 | 0.156747 | 0         |  |
|  | Shiraz-38T | 1950 | 0.265916 | 0         |  |
|  | Shiraz-38T | 1950 | 0.265916 | 0         |  |
|  | Shiraz-38T | 1950 | 0.265916 | 0         |  |
|  | Shiraz-71T | 2236 | 0.320072 | 0         |  |
|  | Shiraz-71T | 2236 | 0.320072 | 0         |  |
|  | Shiraz-71T | 2236 | 0.320072 | 0         |  |
|  | Shiraz-72T | 2277 | 0        | -0.398869 |  |
|  | Shiraz-72T | 2277 | 0        | -0.398869 |  |
|  | Shiraz-72T | 2277 | 0        | -0.398869 |  |

|     |      |            |      |          |           |  |
|-----|------|------------|------|----------|-----------|--|
|     |      | Shiraz-3T  | 87   | 0.198593 | 0         |  |
|     |      | Shiraz-3T  | 87   | 0.198593 | 0         |  |
|     |      | Shiraz-3T  | 87   | 0.198593 | 0         |  |
|     |      | Shiraz-4T  | 252  | 0.192083 | 0         |  |
|     |      | Shiraz-4T  | 252  | 0.192083 | 0         |  |
|     |      | Shiraz-4T  | 252  | 0.192083 | 0         |  |
|     |      | Shiraz-36T | 376  | 0.159952 | 0         |  |
|     |      | Shiraz-36T | 376  | 0.159952 | 0         |  |
|     |      | Shiraz-36T | 376  | 0.159952 | 0         |  |
|     |      | Shiraz-44T | 631  | 0        | -0.180312 |  |
|     |      | Shiraz-44T | 631  | 0        | -0.180312 |  |
|     |      | Shiraz-44T | 631  | 0        | -0.180312 |  |
|     |      | Shiraz-46T | 942  | 0.069143 | 0         |  |
|     |      | Shiraz-46T | 942  | 0.069143 | 0         |  |
|     |      | Shiraz-46T | 942  | 0.069143 | 0         |  |
|     |      | Shiraz-18T | 1433 | 0.250973 | 0         |  |
|     |      | Shiraz-18T | 1433 | 0.250973 | 0         |  |
|     |      | Shiraz-18T | 1433 | 0.250973 | 0         |  |
|     |      | Shiraz-22T | 1544 | 0        | -0.193579 |  |
|     |      | Shiraz-22T | 1544 | 0        | -0.193579 |  |
|     |      | Shiraz-22T | 1544 | 0        | -0.193579 |  |
|     |      | Shiraz-25T | 1697 | 0.21945  | 0         |  |
|     |      | Shiraz-25T | 1697 | 0.21945  | 0         |  |
|     |      | Shiraz-25T | 1697 | 0.21945  | 0         |  |
|     |      | Shiraz-28T | 1734 | 0.362882 | 0         |  |
|     |      | Shiraz-28T | 1734 | 0.362882 | 0         |  |
|     |      | Shiraz-28T | 1734 | 0.362882 | 0         |  |
|     |      | Shiraz-29T | 1777 | 0.156747 | 0         |  |
|     |      | Shiraz-29T | 1777 | 0.156747 | 0         |  |
|     |      | Shiraz-29T | 1777 | 0.156747 | 0         |  |
|     |      | Shiraz-38T | 1950 | 0.265916 | 0         |  |
|     |      | Shiraz-38T | 1950 | 0.265916 | 0         |  |
|     |      | Shiraz-38T | 1950 | 0.265916 | 0         |  |
|     |      | Shiraz-71T | 2236 | 0.320072 | 0         |  |
|     |      | Shiraz-71T | 2236 | 0.320072 | 0         |  |
|     |      | Shiraz-71T | 2236 | 0.320072 | 0         |  |
|     |      | Shiraz-72T | 2277 | 0        | -0.398869 |  |
|     |      | Shiraz-72T | 2277 | 0        | -0.398869 |  |
|     |      | Shiraz-72T | 2277 | 0        | -0.398869 |  |
| EMD | chrX | Shiraz-3T  | 246  | 0.531858 | 0         |  |
|     |      | Shiraz-4T  | 261  | 0        | -0.336249 |  |
|     |      | Shiraz-16T | 295  | 0.591657 | 0         |  |
|     |      | Shiraz-36T | 433  | 0        | -0.803961 |  |
|     |      | Shiraz-42T | 480  | 0        | -0.232915 |  |
|     |      | Shiraz-44T | 908  | 0.466743 | 0         |  |
|     |      | Shiraz-49T | 1170 | 0        | -0.967436 |  |
|     |      | Shiraz-49T | 1173 | 0        | -0.704439 |  |

|  |            |      |          |           |  |
|--|------------|------|----------|-----------|--|
|  | Shiraz-9T  | 1370 | 0.690073 | 0         |  |
|  | Shiraz-9T  | 1371 | 1.292392 | 0         |  |
|  | Shiraz-18T | 1457 | 0.643204 | 0         |  |
|  | Shiraz-22T | 1673 | 0.611783 | 0         |  |
|  | Shiraz-22T | 1678 | 0.911625 | 0         |  |
|  | Shiraz-25T | 1719 | 0.472955 | 0         |  |
|  | Shiraz-28T | 1762 | 0.562311 | 0         |  |
|  | Shiraz-29T | 1801 | 0.815343 | 0         |  |
|  | Shiraz-32T | 1870 | 0.729766 | 0         |  |
|  | Shiraz-32T | 1872 | 1.504553 | 0         |  |
|  | Shiraz-35T | 1933 | 0.488535 | 0         |  |
|  | Shiraz-38T | 2011 | 0        | -0.406024 |  |
|  | Shiraz-53T | 2115 | 0.427728 | 0         |  |
|  | Shiraz-58T | 2223 | 0.833364 | 0         |  |
|  | Shiraz-58T | 2226 | 1.074663 | 0         |  |
|  | Shiraz-71T | 2263 | 0.975531 | 0         |  |
|  | Shiraz-3T  | 246  | 0.531858 | 0         |  |
|  | Shiraz-4T  | 261  | 0        | -0.336249 |  |
|  | Shiraz-16T | 295  | 0.591657 | 0         |  |
|  | Shiraz-36T | 433  | 0        | -0.803961 |  |
|  | Shiraz-42T | 480  | 0        | -0.232915 |  |
|  | Shiraz-44T | 908  | 0.466743 | 0         |  |
|  | Shiraz-49T | 1170 | 0        | -0.967436 |  |
|  | Shiraz-49T | 1173 | 0        | -0.704439 |  |
|  | Shiraz-9T  | 1370 | 0.690073 | 0         |  |
|  | Shiraz-9T  | 1371 | 1.292392 | 0         |  |
|  | Shiraz-18T | 1457 | 0.643204 | 0         |  |
|  | Shiraz-22T | 1673 | 0.611783 | 0         |  |
|  | Shiraz-22T | 1678 | 0.911625 | 0         |  |
|  | Shiraz-25T | 1719 | 0.472955 | 0         |  |
|  | Shiraz-28T | 1762 | 0.562311 | 0         |  |
|  | Shiraz-29T | 1801 | 0.815343 | 0         |  |
|  | Shiraz-32T | 1870 | 0.729766 | 0         |  |
|  | Shiraz-32T | 1872 | 1.504553 | 0         |  |
|  | Shiraz-35T | 1933 | 0.488535 | 0         |  |
|  | Shiraz-38T | 2011 | 0        | -0.406024 |  |
|  | Shiraz-53T | 2115 | 0.427728 | 0         |  |
|  | Shiraz-58T | 2223 | 0.833364 | 0         |  |
|  | Shiraz-58T | 2226 | 1.074663 | 0         |  |
|  | Shiraz-71T | 2263 | 0.975531 | 0         |  |
|  | Shiraz-3T  | 246  | 0.531858 | 0         |  |
|  | Shiraz-4T  | 261  | 0        | -0.336249 |  |
|  | Shiraz-16T | 295  | 0.591657 | 0         |  |
|  | Shiraz-36T | 433  | 0        | -0.803961 |  |
|  | Shiraz-42T | 480  | 0        | -0.232915 |  |
|  | Shiraz-44T | 908  | 0.466743 | 0         |  |
|  | Shiraz-49T | 1170 | 0        | -0.967436 |  |

|       |      |            |      |          |           |  |  |
|-------|------|------------|------|----------|-----------|--|--|
|       |      | Shiraz-49T | 1173 | 0        | -0.704439 |  |  |
|       |      | Shiraz-9T  | 1370 | 0.690073 | 0         |  |  |
|       |      | Shiraz-9T  | 1371 | 1.292392 | 0         |  |  |
|       |      | Shiraz-18T | 1457 | 0.643204 | 0         |  |  |
|       |      | Shiraz-22T | 1673 | 0.611783 | 0         |  |  |
|       |      | Shiraz-22T | 1678 | 0.911625 | 0         |  |  |
|       |      | Shiraz-25T | 1719 | 0.472955 | 0         |  |  |
|       |      | Shiraz-28T | 1762 | 0.562311 | 0         |  |  |
|       |      | Shiraz-29T | 1801 | 0.815343 | 0         |  |  |
|       |      | Shiraz-32T | 1870 | 0.729766 | 0         |  |  |
|       |      | Shiraz-32T | 1872 | 1.504553 | 0         |  |  |
|       |      | Shiraz-35T | 1933 | 0.488535 | 0         |  |  |
|       |      | Shiraz-38T | 2011 | 0        | -0.406024 |  |  |
|       |      | Shiraz-53T | 2115 | 0.427728 | 0         |  |  |
|       |      | Shiraz-58T | 2223 | 0.833364 | 0         |  |  |
|       |      | Shiraz-58T | 2226 | 1.074663 | 0         |  |  |
|       |      | Shiraz-71T | 2263 | 0.975531 | 0         |  |  |
| EMID2 | chr7 | Shiraz-3T  | 90   | 0.219276 | 0         |  |  |
|       |      | Shiraz-3T  | 94   | 0.74735  | 0         |  |  |
|       |      | Shiraz-4T  | 253  | 0.372918 | 0         |  |  |
|       |      | Shiraz-31T | 316  | 0.219196 | 0         |  |  |
|       |      | Shiraz-36T | 378  | 0.179558 | 0         |  |  |
|       |      | Shiraz-36T | 381  | 0.332628 | 0         |  |  |
|       |      | Shiraz-44T | 639  | 1.035032 | 0         |  |  |
|       |      | Shiraz-46T | 943  | 0.093799 | 0         |  |  |
|       |      | Shiraz-46T | 946  | 0.299835 | 0         |  |  |
|       |      | Shiraz-47T | 1030 | 0.257728 | 0         |  |  |
|       |      | Shiraz-49T | 1120 | 0.281656 | 0         |  |  |
|       |      | Shiraz-77T | 1225 | 0        | -0.117922 |  |  |
|       |      | Shiraz-77T | 1227 | 0.196445 | 0         |  |  |
|       |      | Shiraz-9T  | 1324 | 0.679266 | 0         |  |  |
|       |      | Shiraz-18T | 1434 | 0.244465 | 0         |  |  |
|       |      | Shiraz-22T | 1549 | 0        | -0.319623 |  |  |
|       |      | Shiraz-22T | 1551 | 0.324011 | 0         |  |  |
|       |      | Shiraz-25T | 1698 | 0.21835  | 0         |  |  |
|       |      | Shiraz-28T | 1735 | 0.350744 | 0         |  |  |
|       |      | Shiraz-29T | 1778 | 0.120767 | 0         |  |  |
|       |      | Shiraz-32T | 1833 | 0.551336 | 0         |  |  |
|       |      | Shiraz-38T | 1951 | 0.250891 | 0         |  |  |
|       |      | Shiraz-53T | 2078 | 0.287202 | 0         |  |  |
|       |      | Shiraz-58T | 2160 | 0.399007 | 0         |  |  |
|       |      | Shiraz-71T | 2238 | 0.603631 | 0         |  |  |
|       |      | Shiraz-3T  | 90   | 0.219276 | 0         |  |  |
|       |      | Shiraz-3T  | 94   | 0.74735  | 0         |  |  |
|       |      | Shiraz-4T  | 253  | 0.372918 | 0         |  |  |
|       |      | Shiraz-31T | 316  | 0.219196 | 0         |  |  |
|       |      | Shiraz-36T | 378  | 0.179558 | 0         |  |  |

|       |      |            |      |          |           |  |  |
|-------|------|------------|------|----------|-----------|--|--|
|       |      | Shiraz-36T | 381  | 0.332628 | 0         |  |  |
|       |      | Shiraz-44T | 639  | 1.035032 | 0         |  |  |
|       |      | Shiraz-46T | 943  | 0.093799 | 0         |  |  |
|       |      | Shiraz-46T | 946  | 0.299835 | 0         |  |  |
|       |      | Shiraz-47T | 1030 | 0.257728 | 0         |  |  |
|       |      | Shiraz-49T | 1120 | 0.281656 | 0         |  |  |
|       |      | Shiraz-77T | 1225 | 0        | -0.117922 |  |  |
|       |      | Shiraz-77T | 1227 | 0.196445 | 0         |  |  |
|       |      | Shiraz-9T  | 1324 | 0.679266 | 0         |  |  |
|       |      | Shiraz-18T | 1434 | 0.244465 | 0         |  |  |
|       |      | Shiraz-22T | 1549 | 0        | -0.319623 |  |  |
|       |      | Shiraz-22T | 1551 | 0.324011 | 0         |  |  |
|       |      | Shiraz-25T | 1698 | 0.21835  | 0         |  |  |
|       |      | Shiraz-28T | 1735 | 0.350744 | 0         |  |  |
|       |      | Shiraz-29T | 1778 | 0.120767 | 0         |  |  |
|       |      | Shiraz-32T | 1833 | 0.551336 | 0         |  |  |
|       |      | Shiraz-38T | 1951 | 0.250891 | 0         |  |  |
|       |      | Shiraz-53T | 2078 | 0.287202 | 0         |  |  |
|       |      | Shiraz-58T | 2160 | 0.399007 | 0         |  |  |
|       |      | Shiraz-71T | 2238 | 0.603631 | 0         |  |  |
|       |      | Shiraz-3T  | 90   | 0.219276 | 0         |  |  |
|       |      | Shiraz-3T  | 94   | 0.74735  | 0         |  |  |
|       |      | Shiraz-4T  | 253  | 0.372918 | 0         |  |  |
|       |      | Shiraz-31T | 316  | 0.219196 | 0         |  |  |
|       |      | Shiraz-36T | 378  | 0.179558 | 0         |  |  |
|       |      | Shiraz-36T | 381  | 0.332628 | 0         |  |  |
|       |      | Shiraz-44T | 639  | 1.035032 | 0         |  |  |
|       |      | Shiraz-46T | 943  | 0.093799 | 0         |  |  |
|       |      | Shiraz-46T | 946  | 0.299835 | 0         |  |  |
|       |      | Shiraz-47T | 1030 | 0.257728 | 0         |  |  |
|       |      | Shiraz-49T | 1120 | 0.281656 | 0         |  |  |
|       |      | Shiraz-77T | 1225 | 0        | -0.117922 |  |  |
|       |      | Shiraz-77T | 1227 | 0.196445 | 0         |  |  |
|       |      | Shiraz-9T  | 1324 | 0.679266 | 0         |  |  |
|       |      | Shiraz-18T | 1434 | 0.244465 | 0         |  |  |
|       |      | Shiraz-22T | 1549 | 0        | -0.319623 |  |  |
|       |      | Shiraz-22T | 1551 | 0.324011 | 0         |  |  |
|       |      | Shiraz-25T | 1698 | 0.21835  | 0         |  |  |
|       |      | Shiraz-28T | 1735 | 0.350744 | 0         |  |  |
|       |      | Shiraz-29T | 1778 | 0.120767 | 0         |  |  |
|       |      | Shiraz-32T | 1833 | 0.551336 | 0         |  |  |
|       |      | Shiraz-38T | 1951 | 0.250891 | 0         |  |  |
|       |      | Shiraz-53T | 2078 | 0.287202 | 0         |  |  |
|       |      | Shiraz-58T | 2160 | 0.399007 | 0         |  |  |
|       |      | Shiraz-71T | 2238 | 0.603631 | 0         |  |  |
| ENOX2 | chrX | Shiraz-3T  | 242  | 0        | -0.336434 |  |  |
|       |      | Shiraz-4T  | 261  | 0        | -0.336249 |  |  |

|  |            |      |          |           |  |
|--|------------|------|----------|-----------|--|
|  | Shiraz-16T | 295  | 0.591657 | 0         |  |
|  | Shiraz-36T | 433  | 0        | -0.803961 |  |
|  | Shiraz-44T | 899  | 0        | -1.09697  |  |
|  | Shiraz-49T | 1170 | 0        | -0.967436 |  |
|  | Shiraz-9T  | 1370 | 0.690073 | 0         |  |
|  | Shiraz-18T | 1457 | 0.643204 | 0         |  |
|  | Shiraz-22T | 1673 | 0.611783 | 0         |  |
|  | Shiraz-22T | 1677 | 0.789711 | 0         |  |
|  | Shiraz-25T | 1719 | 0.472955 | 0         |  |
|  | Shiraz-28T | 1762 | 0.562311 | 0         |  |
|  | Shiraz-29T | 1801 | 0.815343 | 0         |  |
|  | Shiraz-32T | 1870 | 0.729766 | 0         |  |
|  | Shiraz-35T | 1933 | 0.488535 | 0         |  |
|  | Shiraz-58T | 2223 | 0.833364 | 0         |  |
|  | Shiraz-71T | 2263 | 0.975531 | 0         |  |
|  | Shiraz-3T  | 242  | 0        | -0.336434 |  |
|  | Shiraz-4T  | 261  | 0        | -0.336249 |  |
|  | Shiraz-16T | 295  | 0.591657 | 0         |  |
|  | Shiraz-36T | 433  | 0        | -0.803961 |  |
|  | Shiraz-44T | 899  | 0        | -1.09697  |  |
|  | Shiraz-49T | 1170 | 0        | -0.967436 |  |
|  | Shiraz-9T  | 1370 | 0.690073 | 0         |  |
|  | Shiraz-18T | 1457 | 0.643204 | 0         |  |
|  | Shiraz-22T | 1673 | 0.611783 | 0         |  |
|  | Shiraz-22T | 1677 | 0.789711 | 0         |  |
|  | Shiraz-25T | 1719 | 0.472955 | 0         |  |
|  | Shiraz-28T | 1762 | 0.562311 | 0         |  |
|  | Shiraz-29T | 1801 | 0.815343 | 0         |  |
|  | Shiraz-32T | 1870 | 0.729766 | 0         |  |
|  | Shiraz-35T | 1933 | 0.488535 | 0         |  |
|  | Shiraz-58T | 2223 | 0.833364 | 0         |  |
|  | Shiraz-71T | 2263 | 0.975531 | 0         |  |
|  | Shiraz-3T  | 242  | 0        | -0.336434 |  |
|  | Shiraz-4T  | 261  | 0        | -0.336249 |  |
|  | Shiraz-16T | 295  | 0.591657 | 0         |  |
|  | Shiraz-36T | 433  | 0        | -0.803961 |  |
|  | Shiraz-44T | 899  | 0        | -1.09697  |  |
|  | Shiraz-49T | 1170 | 0        | -0.967436 |  |
|  | Shiraz-9T  | 1370 | 0.690073 | 0         |  |
|  | Shiraz-18T | 1457 | 0.643204 | 0         |  |
|  | Shiraz-22T | 1673 | 0.611783 | 0         |  |
|  | Shiraz-22T | 1677 | 0.789711 | 0         |  |
|  | Shiraz-25T | 1719 | 0.472955 | 0         |  |
|  | Shiraz-28T | 1762 | 0.562311 | 0         |  |
|  | Shiraz-29T | 1801 | 0.815343 | 0         |  |
|  | Shiraz-32T | 1870 | 0.729766 | 0         |  |
|  | Shiraz-35T | 1933 | 0.488535 | 0         |  |

|       |      |            |      |          |           |  |  |
|-------|------|------------|------|----------|-----------|--|--|
|       |      | Shiraz-58T | 2223 | 0.833364 | 0         |  |  |
|       |      | Shiraz-71T | 2263 | 0.975531 | 0         |  |  |
| EPDR1 | chr7 | Shiraz-3T  | 87   | 0.198593 | 0         |  |  |
|       |      | Shiraz-4T  | 252  | 0.192083 | 0         |  |  |
|       |      | Shiraz-36T | 376  | 0.159952 | 0         |  |  |
|       |      | Shiraz-44T | 631  | 0        | -0.180312 |  |  |
|       |      | Shiraz-46T | 942  | 0.069143 | 0         |  |  |
|       |      | Shiraz-18T | 1433 | 0.250973 | 0         |  |  |
|       |      | Shiraz-22T | 1544 | 0        | -0.193579 |  |  |
|       |      | Shiraz-25T | 1697 | 0.21945  | 0         |  |  |
|       |      | Shiraz-28T | 1734 | 0.362882 | 0         |  |  |
|       |      | Shiraz-29T | 1777 | 0.156747 | 0         |  |  |
|       |      | Shiraz-38T | 1950 | 0.265916 | 0         |  |  |
|       |      | Shiraz-71T | 2236 | 0.320072 | 0         |  |  |
|       |      | Shiraz-72T | 2277 | 0        | -0.398869 |  |  |
|       |      | Shiraz-3T  | 87   | 0.198593 | 0         |  |  |
|       |      | Shiraz-4T  | 252  | 0.192083 | 0         |  |  |
|       |      | Shiraz-36T | 376  | 0.159952 | 0         |  |  |
|       |      | Shiraz-44T | 631  | 0        | -0.180312 |  |  |
|       |      | Shiraz-46T | 942  | 0.069143 | 0         |  |  |
|       |      | Shiraz-18T | 1433 | 0.250973 | 0         |  |  |
|       |      | Shiraz-22T | 1544 | 0        | -0.193579 |  |  |
|       |      | Shiraz-25T | 1697 | 0.21945  | 0         |  |  |
|       |      | Shiraz-28T | 1734 | 0.362882 | 0         |  |  |
|       |      | Shiraz-29T | 1777 | 0.156747 | 0         |  |  |
|       |      | Shiraz-38T | 1950 | 0.265916 | 0         |  |  |
|       |      | Shiraz-71T | 2236 | 0.320072 | 0         |  |  |
|       |      | Shiraz-72T | 2277 | 0        | -0.398869 |  |  |
|       |      | Shiraz-3T  | 87   | 0.198593 | 0         |  |  |
|       |      | Shiraz-4T  | 252  | 0.192083 | 0         |  |  |
|       |      | Shiraz-36T | 376  | 0.159952 | 0         |  |  |
|       |      | Shiraz-44T | 631  | 0        | -0.180312 |  |  |
|       |      | Shiraz-46T | 942  | 0.069143 | 0         |  |  |
|       |      | Shiraz-18T | 1433 | 0.250973 | 0         |  |  |
|       |      | Shiraz-22T | 1544 | 0        | -0.193579 |  |  |
|       |      | Shiraz-25T | 1697 | 0.21945  | 0         |  |  |
|       |      | Shiraz-28T | 1734 | 0.362882 | 0         |  |  |
|       |      | Shiraz-29T | 1777 | 0.156747 | 0         |  |  |
|       |      | Shiraz-38T | 1950 | 0.265916 | 0         |  |  |
|       |      | Shiraz-71T | 2236 | 0.320072 | 0         |  |  |
|       |      | Shiraz-72T | 2277 | 0        | -0.398869 |  |  |
| EPHA1 | chr7 | Shiraz-3T  | 90   | 0.219276 | 0         |  |  |
|       |      | Shiraz-4T  | 253  | 0.372918 | 0         |  |  |
|       |      | Shiraz-36T | 378  | 0.179558 | 0         |  |  |
|       |      | Shiraz-46T | 943  | 0.093799 | 0         |  |  |
|       |      | Shiraz-77T | 1225 | 0        | -0.117922 |  |  |
|       |      | Shiraz-9T  | 1325 | 0.221899 | 0         |  |  |



|       |      |            |      |          |           |  |  |
|-------|------|------------|------|----------|-----------|--|--|
|       |      | Shiraz-18T | 1434 | 0.244465 | 0         |  |  |
|       |      | Shiraz-25T | 1698 | 0.21835  | 0         |  |  |
|       |      | Shiraz-28T | 1735 | 0.350744 | 0         |  |  |
|       |      | Shiraz-29T | 1778 | 0.120767 | 0         |  |  |
|       |      | Shiraz-32T | 1833 | 0.551336 | 0         |  |  |
|       |      | Shiraz-38T | 1951 | 0.250891 | 0         |  |  |
|       |      | Shiraz-53T | 2078 | 0.287202 | 0         |  |  |
|       |      | Shiraz-58T | 2162 | 0.221505 | 0         |  |  |
|       |      | Shiraz-71T | 2238 | 0.603631 | 0         |  |  |
|       |      | Shiraz-3T  | 90   | 0.219276 | 0         |  |  |
|       |      | Shiraz-4T  | 253  | 0.372918 | 0         |  |  |
|       |      | Shiraz-36T | 378  | 0.179558 | 0         |  |  |
|       |      | Shiraz-46T | 943  | 0.093799 | 0         |  |  |
|       |      | Shiraz-77T | 1225 | 0        | -0.117922 |  |  |
|       |      | Shiraz-9T  | 1325 | 0.221899 | 0         |  |  |
|       |      | Shiraz-18T | 1434 | 0.244465 | 0         |  |  |
|       |      | Shiraz-25T | 1698 | 0.21835  | 0         |  |  |
|       |      | Shiraz-28T | 1735 | 0.350744 | 0         |  |  |
|       |      | Shiraz-29T | 1778 | 0.120767 | 0         |  |  |
|       |      | Shiraz-32T | 1833 | 0.551336 | 0         |  |  |
|       |      | Shiraz-38T | 1951 | 0.250891 | 0         |  |  |
|       |      | Shiraz-53T | 2078 | 0.287202 | 0         |  |  |
|       |      | Shiraz-58T | 2162 | 0.221505 | 0         |  |  |
|       |      | Shiraz-71T | 2238 | 0.603631 | 0         |  |  |
|       |      | Shiraz-3T  | 90   | 0.219276 | 0         |  |  |
|       |      | Shiraz-4T  | 253  | 0.372918 | 0         |  |  |
|       |      | Shiraz-36T | 378  | 0.179558 | 0         |  |  |
|       |      | Shiraz-46T | 943  | 0.093799 | 0         |  |  |
|       |      | Shiraz-77T | 1225 | 0        | -0.117922 |  |  |
|       |      | Shiraz-9T  | 1325 | 0.221899 | 0         |  |  |
|       |      | Shiraz-18T | 1434 | 0.244465 | 0         |  |  |
|       |      | Shiraz-25T | 1698 | 0.21835  | 0         |  |  |
|       |      | Shiraz-28T | 1735 | 0.350744 | 0         |  |  |
|       |      | Shiraz-29T | 1778 | 0.120767 | 0         |  |  |
|       |      | Shiraz-32T | 1833 | 0.551336 | 0         |  |  |
|       |      | Shiraz-38T | 1951 | 0.250891 | 0         |  |  |
|       |      | Shiraz-53T | 2078 | 0.287202 | 0         |  |  |
|       |      | Shiraz-58T | 2162 | 0.221505 | 0         |  |  |
|       |      | Shiraz-71T | 2238 | 0.603631 | 0         |  |  |
| EPHB4 | chr7 | Shiraz-3T  | 90   | 0.219276 | 0         |  |  |
|       |      | Shiraz-3T  | 94   | 0.74735  | 0         |  |  |
|       |      | Shiraz-4T  | 253  | 0.372918 | 0         |  |  |
|       |      | Shiraz-31T | 316  | 0.219196 | 0         |  |  |
|       |      | Shiraz-36T | 378  | 0.179558 | 0         |  |  |
|       |      | Shiraz-36T | 381  | 0.332628 | 0         |  |  |
|       |      | Shiraz-44T | 639  | 1.035032 | 0         |  |  |
|       |      | Shiraz-46T | 943  | 0.093799 | 0         |  |  |

|  |            |      |          |           |  |
|--|------------|------|----------|-----------|--|
|  | Shiraz-46T | 946  | 0.299835 | 0         |  |
|  | Shiraz-47T | 1030 | 0.257728 | 0         |  |
|  | Shiraz-49T | 1120 | 0.281656 | 0         |  |
|  | Shiraz-77T | 1225 | 0        | -0.117922 |  |
|  | Shiraz-77T | 1227 | 0.196445 | 0         |  |
|  | Shiraz-9T  | 1324 | 0.679266 | 0         |  |
|  | Shiraz-18T | 1434 | 0.244465 | 0         |  |
|  | Shiraz-22T | 1549 | 0        | -0.319623 |  |
|  | Shiraz-22T | 1551 | 0.324011 | 0         |  |
|  | Shiraz-25T | 1698 | 0.21835  | 0         |  |
|  | Shiraz-28T | 1735 | 0.350744 | 0         |  |
|  | Shiraz-29T | 1778 | 0.120767 | 0         |  |
|  | Shiraz-32T | 1833 | 0.551336 | 0         |  |
|  | Shiraz-32T | 1834 | 1.485392 | 0         |  |
|  | Shiraz-38T | 1951 | 0.250891 | 0         |  |
|  | Shiraz-53T | 2078 | 0.287202 | 0         |  |
|  | Shiraz-58T | 2160 | 0.399007 | 0         |  |
|  | Shiraz-71T | 2238 | 0.603631 | 0         |  |
|  | Shiraz-3T  | 90   | 0.219276 | 0         |  |
|  | Shiraz-3T  | 94   | 0.74735  | 0         |  |
|  | Shiraz-4T  | 253  | 0.372918 | 0         |  |
|  | Shiraz-31T | 316  | 0.219196 | 0         |  |
|  | Shiraz-36T | 378  | 0.179558 | 0         |  |
|  | Shiraz-36T | 381  | 0.332628 | 0         |  |
|  | Shiraz-44T | 639  | 1.035032 | 0         |  |
|  | Shiraz-46T | 943  | 0.093799 | 0         |  |
|  | Shiraz-46T | 946  | 0.299835 | 0         |  |
|  | Shiraz-47T | 1030 | 0.257728 | 0         |  |
|  | Shiraz-49T | 1120 | 0.281656 | 0         |  |
|  | Shiraz-77T | 1225 | 0        | -0.117922 |  |
|  | Shiraz-77T | 1227 | 0.196445 | 0         |  |
|  | Shiraz-9T  | 1324 | 0.679266 | 0         |  |
|  | Shiraz-18T | 1434 | 0.244465 | 0         |  |
|  | Shiraz-22T | 1549 | 0        | -0.319623 |  |
|  | Shiraz-22T | 1551 | 0.324011 | 0         |  |
|  | Shiraz-25T | 1698 | 0.21835  | 0         |  |
|  | Shiraz-28T | 1735 | 0.350744 | 0         |  |
|  | Shiraz-29T | 1778 | 0.120767 | 0         |  |
|  | Shiraz-32T | 1833 | 0.551336 | 0         |  |
|  | Shiraz-32T | 1834 | 1.485392 | 0         |  |
|  | Shiraz-38T | 1951 | 0.250891 | 0         |  |
|  | Shiraz-53T | 2078 | 0.287202 | 0         |  |
|  | Shiraz-58T | 2160 | 0.399007 | 0         |  |
|  | Shiraz-71T | 2238 | 0.603631 | 0         |  |
|  | Shiraz-3T  | 90   | 0.219276 | 0         |  |
|  | Shiraz-3T  | 94   | 0.74735  | 0         |  |
|  | Shiraz-4T  | 253  | 0.372918 | 0         |  |

|       |      |            |      |          |           |  |
|-------|------|------------|------|----------|-----------|--|
|       |      | Shiraz-31T | 316  | 0.219196 | 0         |  |
|       |      | Shiraz-36T | 378  | 0.179558 | 0         |  |
|       |      | Shiraz-36T | 381  | 0.332628 | 0         |  |
|       |      | Shiraz-44T | 639  | 1.035032 | 0         |  |
|       |      | Shiraz-46T | 943  | 0.093799 | 0         |  |
|       |      | Shiraz-46T | 946  | 0.299835 | 0         |  |
|       |      | Shiraz-47T | 1030 | 0.257728 | 0         |  |
|       |      | Shiraz-49T | 1120 | 0.281656 | 0         |  |
|       |      | Shiraz-77T | 1225 | 0        | -0.117922 |  |
|       |      | Shiraz-77T | 1227 | 0.196445 | 0         |  |
|       |      | Shiraz-9T  | 1324 | 0.679266 | 0         |  |
|       |      | Shiraz-18T | 1434 | 0.244465 | 0         |  |
|       |      | Shiraz-22T | 1549 | 0        | -0.319623 |  |
|       |      | Shiraz-22T | 1551 | 0.324011 | 0         |  |
|       |      | Shiraz-25T | 1698 | 0.21835  | 0         |  |
|       |      | Shiraz-28T | 1735 | 0.350744 | 0         |  |
|       |      | Shiraz-29T | 1778 | 0.120767 | 0         |  |
|       |      | Shiraz-32T | 1833 | 0.551336 | 0         |  |
|       |      | Shiraz-32T | 1834 | 1.485392 | 0         |  |
|       |      | Shiraz-38T | 1951 | 0.250891 | 0         |  |
|       |      | Shiraz-53T | 2078 | 0.287202 | 0         |  |
|       |      | Shiraz-58T | 2160 | 0.399007 | 0         |  |
|       |      | Shiraz-71T | 2238 | 0.603631 | 0         |  |
| EPHB6 | chr7 | Shiraz-3T  | 90   | 0.219276 | 0         |  |
|       |      | Shiraz-4T  | 253  | 0.372918 | 0         |  |
|       |      | Shiraz-36T | 378  | 0.179558 | 0         |  |
|       |      | Shiraz-46T | 943  | 0.093799 | 0         |  |
|       |      | Shiraz-77T | 1225 | 0        | -0.117922 |  |
|       |      | Shiraz-9T  | 1325 | 0.221899 | 0         |  |
|       |      | Shiraz-18T | 1434 | 0.244465 | 0         |  |
|       |      | Shiraz-25T | 1698 | 0.21835  | 0         |  |
|       |      | Shiraz-28T | 1735 | 0.350744 | 0         |  |
|       |      | Shiraz-29T | 1778 | 0.120767 | 0         |  |
|       |      | Shiraz-32T | 1833 | 0.551336 | 0         |  |
|       |      | Shiraz-38T | 1951 | 0.250891 | 0         |  |
|       |      | Shiraz-53T | 2078 | 0.287202 | 0         |  |
|       |      | Shiraz-58T | 2162 | 0.221505 | 0         |  |
|       |      | Shiraz-71T | 2238 | 0.603631 | 0         |  |
|       |      | Shiraz-3T  | 90   | 0.219276 | 0         |  |
|       |      | Shiraz-4T  | 253  | 0.372918 | 0         |  |
|       |      | Shiraz-36T | 378  | 0.179558 | 0         |  |
|       |      | Shiraz-46T | 943  | 0.093799 | 0         |  |
|       |      | Shiraz-77T | 1225 | 0        | -0.117922 |  |
|       |      | Shiraz-9T  | 1325 | 0.221899 | 0         |  |
|       |      | Shiraz-18T | 1434 | 0.244465 | 0         |  |
|       |      | Shiraz-25T | 1698 | 0.21835  | 0         |  |
|       |      | Shiraz-28T | 1735 | 0.350744 | 0         |  |

|     |      |            |      |          |           |  |
|-----|------|------------|------|----------|-----------|--|
|     |      | Shiraz-29T | 1778 | 0.120767 | 0         |  |
|     |      | Shiraz-32T | 1833 | 0.551336 | 0         |  |
|     |      | Shiraz-38T | 1951 | 0.250891 | 0         |  |
|     |      | Shiraz-53T | 2078 | 0.287202 | 0         |  |
|     |      | Shiraz-58T | 2162 | 0.221505 | 0         |  |
|     |      | Shiraz-71T | 2238 | 0.603631 | 0         |  |
|     |      | Shiraz-3T  | 90   | 0.219276 | 0         |  |
|     |      | Shiraz-4T  | 253  | 0.372918 | 0         |  |
|     |      | Shiraz-36T | 378  | 0.179558 | 0         |  |
|     |      | Shiraz-46T | 943  | 0.093799 | 0         |  |
|     |      | Shiraz-77T | 1225 | 0        | -0.117922 |  |
|     |      | Shiraz-9T  | 1325 | 0.221899 | 0         |  |
|     |      | Shiraz-18T | 1434 | 0.244465 | 0         |  |
|     |      | Shiraz-25T | 1698 | 0.21835  | 0         |  |
|     |      | Shiraz-28T | 1735 | 0.350744 | 0         |  |
|     |      | Shiraz-29T | 1778 | 0.120767 | 0         |  |
|     |      | Shiraz-32T | 1833 | 0.551336 | 0         |  |
|     |      | Shiraz-38T | 1951 | 0.250891 | 0         |  |
|     |      | Shiraz-53T | 2078 | 0.287202 | 0         |  |
|     |      | Shiraz-58T | 2162 | 0.221505 | 0         |  |
|     |      | Shiraz-71T | 2238 | 0.603631 | 0         |  |
| EPO | chr7 | Shiraz-3T  | 90   | 0.219276 | 0         |  |
|     |      | Shiraz-3T  | 94   | 0.74735  | 0         |  |
|     |      | Shiraz-4T  | 253  | 0.372918 | 0         |  |
|     |      | Shiraz-31T | 316  | 0.219196 | 0         |  |
|     |      | Shiraz-36T | 378  | 0.179558 | 0         |  |
|     |      | Shiraz-36T | 381  | 0.332628 | 0         |  |
|     |      | Shiraz-44T | 639  | 1.035032 | 0         |  |
|     |      | Shiraz-46T | 943  | 0.093799 | 0         |  |
|     |      | Shiraz-46T | 946  | 0.299835 | 0         |  |
|     |      | Shiraz-47T | 1030 | 0.257728 | 0         |  |
|     |      | Shiraz-49T | 1120 | 0.281656 | 0         |  |
|     |      | Shiraz-77T | 1225 | 0        | -0.117922 |  |
|     |      | Shiraz-77T | 1227 | 0.196445 | 0         |  |
|     |      | Shiraz-9T  | 1324 | 0.679266 | 0         |  |
|     |      | Shiraz-18T | 1434 | 0.244465 | 0         |  |
|     |      | Shiraz-22T | 1549 | 0        | -0.319623 |  |
|     |      | Shiraz-22T | 1551 | 0.324011 | 0         |  |
|     |      | Shiraz-25T | 1698 | 0.21835  | 0         |  |
|     |      | Shiraz-28T | 1735 | 0.350744 | 0         |  |
|     |      | Shiraz-29T | 1778 | 0.120767 | 0         |  |
|     |      | Shiraz-32T | 1833 | 0.551336 | 0         |  |
|     |      | Shiraz-32T | 1834 | 1.485392 | 0         |  |
|     |      | Shiraz-38T | 1951 | 0.250891 | 0         |  |
|     |      | Shiraz-53T | 2078 | 0.287202 | 0         |  |
|     |      | Shiraz-58T | 2160 | 0.399007 | 0         |  |
|     |      | Shiraz-71T | 2238 | 0.603631 | 0         |  |

|  |            |      |          |           |  |
|--|------------|------|----------|-----------|--|
|  | Shiraz-3T  | 90   | 0.219276 | 0         |  |
|  | Shiraz-3T  | 94   | 0.74735  | 0         |  |
|  | Shiraz-4T  | 253  | 0.372918 | 0         |  |
|  | Shiraz-31T | 316  | 0.219196 | 0         |  |
|  | Shiraz-36T | 378  | 0.179558 | 0         |  |
|  | Shiraz-36T | 381  | 0.332628 | 0         |  |
|  | Shiraz-44T | 639  | 1.035032 | 0         |  |
|  | Shiraz-46T | 943  | 0.093799 | 0         |  |
|  | Shiraz-46T | 946  | 0.299835 | 0         |  |
|  | Shiraz-47T | 1030 | 0.257728 | 0         |  |
|  | Shiraz-49T | 1120 | 0.281656 | 0         |  |
|  | Shiraz-77T | 1225 | 0        | -0.117922 |  |
|  | Shiraz-77T | 1227 | 0.196445 | 0         |  |
|  | Shiraz-9T  | 1324 | 0.679266 | 0         |  |
|  | Shiraz-18T | 1434 | 0.244465 | 0         |  |
|  | Shiraz-22T | 1549 | 0        | -0.319623 |  |
|  | Shiraz-22T | 1551 | 0.324011 | 0         |  |
|  | Shiraz-25T | 1698 | 0.21835  | 0         |  |
|  | Shiraz-28T | 1735 | 0.350744 | 0         |  |
|  | Shiraz-29T | 1778 | 0.120767 | 0         |  |
|  | Shiraz-32T | 1833 | 0.551336 | 0         |  |
|  | Shiraz-32T | 1834 | 1.485392 | 0         |  |
|  | Shiraz-38T | 1951 | 0.250891 | 0         |  |
|  | Shiraz-53T | 2078 | 0.287202 | 0         |  |
|  | Shiraz-58T | 2160 | 0.399007 | 0         |  |
|  | Shiraz-71T | 2238 | 0.603631 | 0         |  |
|  | Shiraz-3T  | 90   | 0.219276 | 0         |  |
|  | Shiraz-3T  | 94   | 0.74735  | 0         |  |
|  | Shiraz-4T  | 253  | 0.372918 | 0         |  |
|  | Shiraz-31T | 316  | 0.219196 | 0         |  |
|  | Shiraz-36T | 378  | 0.179558 | 0         |  |
|  | Shiraz-36T | 381  | 0.332628 | 0         |  |
|  | Shiraz-44T | 639  | 1.035032 | 0         |  |
|  | Shiraz-46T | 943  | 0.093799 | 0         |  |
|  | Shiraz-46T | 946  | 0.299835 | 0         |  |
|  | Shiraz-47T | 1030 | 0.257728 | 0         |  |
|  | Shiraz-49T | 1120 | 0.281656 | 0         |  |
|  | Shiraz-77T | 1225 | 0        | -0.117922 |  |
|  | Shiraz-77T | 1227 | 0.196445 | 0         |  |
|  | Shiraz-9T  | 1324 | 0.679266 | 0         |  |
|  | Shiraz-18T | 1434 | 0.244465 | 0         |  |
|  | Shiraz-22T | 1549 | 0        | -0.319623 |  |
|  | Shiraz-22T | 1551 | 0.324011 | 0         |  |
|  | Shiraz-25T | 1698 | 0.21835  | 0         |  |
|  | Shiraz-28T | 1735 | 0.350744 | 0         |  |
|  | Shiraz-29T | 1778 | 0.120767 | 0         |  |
|  | Shiraz-32T | 1833 | 0.551336 | 0         |  |

|      |      |            |      |          |           |  |
|------|------|------------|------|----------|-----------|--|
|      |      | Shiraz-32T | 1834 | 1.485392 | 0         |  |
|      |      | Shiraz-38T | 1951 | 0.250891 | 0         |  |
|      |      | Shiraz-53T | 2078 | 0.287202 | 0         |  |
|      |      | Shiraz-58T | 2160 | 0.399007 | 0         |  |
|      |      | Shiraz-71T | 2238 | 0.603631 | 0         |  |
| ERAS | chrX | Shiraz-3T  | 238  | 0.472087 | 0         |  |
|      |      | Shiraz-4T  | 260  | 0        | -0.324128 |  |
|      |      | Shiraz-16T | 294  | 0.655804 | 0         |  |
|      |      | Shiraz-31T | 345  | 0.103301 | 0         |  |
|      |      | Shiraz-36T | 431  | 0        | -0.78035  |  |
|      |      | Shiraz-36T | 432  | 0        | -0.6692   |  |
|      |      | Shiraz-44T | 891  | 0        | -0.954044 |  |
|      |      | Shiraz-44T | 896  | 0        | -0.109108 |  |
|      |      | Shiraz-46T | 991  | 0.139564 | 0         |  |
|      |      | Shiraz-47T | 1084 | 0.24185  | 0         |  |
|      |      | Shiraz-49T | 1166 | 0        | -0.917235 |  |
|      |      | Shiraz-49T | 1169 | 0        | -0.583529 |  |
|      |      | Shiraz-77T | 1282 | 0.213849 | 0         |  |
|      |      | Shiraz-9T  | 1368 | 0.199713 | 0         |  |
|      |      | Shiraz-9T  | 1369 | 0.703374 | 0         |  |
|      |      | Shiraz-18T | 1455 | 0        | -0.186773 |  |
|      |      | Shiraz-22T | 1669 | 0.695915 | 0         |  |
|      |      | Shiraz-22T | 1672 | 1.01678  | 0         |  |
|      |      | Shiraz-25T | 1717 | 0.420447 | 0         |  |
|      |      | Shiraz-28T | 1760 | 0.538181 | 0         |  |
|      |      | Shiraz-29T | 1800 | 0.672527 | 0         |  |
|      |      | Shiraz-32T | 1869 | 0.776805 | 0         |  |
|      |      | Shiraz-35T | 1932 | 0.507141 | 0         |  |
|      |      | Shiraz-58T | 2221 | 0.871948 | 0         |  |
|      |      | Shiraz-71T | 2260 | 0.68394  | 0         |  |
|      |      | Shiraz-71T | 2262 | 0.986748 | 0         |  |
|      |      | Shiraz-3T  | 238  | 0.472087 | 0         |  |
|      |      | Shiraz-4T  | 260  | 0        | -0.324128 |  |
|      |      | Shiraz-16T | 294  | 0.655804 | 0         |  |
|      |      | Shiraz-31T | 345  | 0.103301 | 0         |  |
|      |      | Shiraz-36T | 431  | 0        | -0.78035  |  |
|      |      | Shiraz-36T | 432  | 0        | -0.6692   |  |
|      |      | Shiraz-44T | 891  | 0        | -0.954044 |  |
|      |      | Shiraz-44T | 896  | 0        | -0.109108 |  |
|      |      | Shiraz-46T | 991  | 0.139564 | 0         |  |
|      |      | Shiraz-47T | 1084 | 0.24185  | 0         |  |
|      |      | Shiraz-49T | 1166 | 0        | -0.917235 |  |
|      |      | Shiraz-49T | 1169 | 0        | -0.583529 |  |
|      |      | Shiraz-77T | 1282 | 0.213849 | 0         |  |
|      |      | Shiraz-9T  | 1368 | 0.199713 | 0         |  |
|      |      | Shiraz-9T  | 1369 | 0.703374 | 0         |  |
|      |      | Shiraz-18T | 1455 | 0        | -0.186773 |  |

|        |      |            |      |          |           |  |
|--------|------|------------|------|----------|-----------|--|
|        |      | Shiraz-22T | 1669 | 0.695915 | 0         |  |
|        |      | Shiraz-22T | 1672 | 1.01678  | 0         |  |
|        |      | Shiraz-25T | 1717 | 0.420447 | 0         |  |
|        |      | Shiraz-28T | 1760 | 0.538181 | 0         |  |
|        |      | Shiraz-29T | 1800 | 0.672527 | 0         |  |
|        |      | Shiraz-32T | 1869 | 0.776805 | 0         |  |
|        |      | Shiraz-35T | 1932 | 0.507141 | 0         |  |
|        |      | Shiraz-58T | 2221 | 0.871948 | 0         |  |
|        |      | Shiraz-71T | 2260 | 0.68394  | 0         |  |
|        |      | Shiraz-71T | 2262 | 0.986748 | 0         |  |
|        |      | Shiraz-3T  | 238  | 0.472087 | 0         |  |
|        |      | Shiraz-4T  | 260  | 0        | -0.324128 |  |
|        |      | Shiraz-16T | 294  | 0.655804 | 0         |  |
|        |      | Shiraz-31T | 345  | 0.103301 | 0         |  |
|        |      | Shiraz-36T | 431  | 0        | -0.78035  |  |
|        |      | Shiraz-36T | 432  | 0        | -0.6692   |  |
|        |      | Shiraz-44T | 891  | 0        | -0.954044 |  |
|        |      | Shiraz-44T | 896  | 0        | -0.109108 |  |
|        |      | Shiraz-46T | 991  | 0.139564 | 0         |  |
|        |      | Shiraz-47T | 1084 | 0.24185  | 0         |  |
|        |      | Shiraz-49T | 1166 | 0        | -0.917235 |  |
|        |      | Shiraz-49T | 1169 | 0        | -0.583529 |  |
|        |      | Shiraz-77T | 1282 | 0.213849 | 0         |  |
|        |      | Shiraz-9T  | 1368 | 0.199713 | 0         |  |
|        |      | Shiraz-9T  | 1369 | 0.703374 | 0         |  |
|        |      | Shiraz-18T | 1455 | 0        | -0.186773 |  |
|        |      | Shiraz-22T | 1669 | 0.695915 | 0         |  |
|        |      | Shiraz-22T | 1672 | 1.01678  | 0         |  |
|        |      | Shiraz-25T | 1717 | 0.420447 | 0         |  |
|        |      | Shiraz-28T | 1760 | 0.538181 | 0         |  |
|        |      | Shiraz-29T | 1800 | 0.672527 | 0         |  |
|        |      | Shiraz-32T | 1869 | 0.776805 | 0         |  |
|        |      | Shiraz-35T | 1932 | 0.507141 | 0         |  |
|        |      | Shiraz-58T | 2221 | 0.871948 | 0         |  |
|        |      | Shiraz-71T | 2260 | 0.68394  | 0         |  |
|        |      | Shiraz-71T | 2262 | 0.986748 | 0         |  |
| ERCC6L | chrX | Shiraz-4T  | 261  | 0        | -0.336249 |  |
|        |      | Shiraz-16T | 295  | 0.591657 | 0         |  |
|        |      | Shiraz-36T | 433  | 0        | -0.803961 |  |
|        |      | Shiraz-44T | 899  | 0        | -1.09697  |  |
|        |      | Shiraz-44T | 900  | 0        | -0.584284 |  |
|        |      | Shiraz-49T | 1170 | 0        | -0.967436 |  |
|        |      | Shiraz-49T | 1171 | 0        | -0.612379 |  |
|        |      | Shiraz-77T | 1283 | 0.296555 | 0         |  |
|        |      | Shiraz-18T | 1457 | 0.643204 | 0         |  |
|        |      | Shiraz-22T | 1673 | 0.611783 | 0         |  |
|        |      | Shiraz-22T | 1674 | 0.887899 | 0         |  |

|      |      |            |      |          |           |  |
|------|------|------------|------|----------|-----------|--|
|      |      | Shiraz-25T | 1719 | 0.472955 | 0         |  |
|      |      | Shiraz-28T | 1762 | 0.562311 | 0         |  |
|      |      | Shiraz-29T | 1801 | 0.815343 | 0         |  |
|      |      | Shiraz-32T | 1870 | 0.729766 | 0         |  |
|      |      | Shiraz-35T | 1933 | 0.488535 | 0         |  |
|      |      | Shiraz-58T | 2223 | 0.833364 | 0         |  |
|      |      | Shiraz-58T | 2224 | 1.076575 | 0         |  |
|      |      | Shiraz-71T | 2263 | 0.975531 | 0         |  |
|      |      | Shiraz-4T  | 261  | 0        | -0.336249 |  |
|      |      | Shiraz-16T | 295  | 0.591657 | 0         |  |
|      |      | Shiraz-36T | 433  | 0        | -0.803961 |  |
|      |      | Shiraz-44T | 899  | 0        | -1.09697  |  |
|      |      | Shiraz-44T | 900  | 0        | -0.584284 |  |
|      |      | Shiraz-49T | 1170 | 0        | -0.967436 |  |
|      |      | Shiraz-49T | 1171 | 0        | -0.612379 |  |
|      |      | Shiraz-77T | 1283 | 0.296555 | 0         |  |
|      |      | Shiraz-18T | 1457 | 0.643204 | 0         |  |
|      |      | Shiraz-22T | 1673 | 0.611783 | 0         |  |
|      |      | Shiraz-22T | 1674 | 0.887899 | 0         |  |
|      |      | Shiraz-25T | 1719 | 0.472955 | 0         |  |
|      |      | Shiraz-28T | 1762 | 0.562311 | 0         |  |
|      |      | Shiraz-29T | 1801 | 0.815343 | 0         |  |
|      |      | Shiraz-32T | 1870 | 0.729766 | 0         |  |
|      |      | Shiraz-35T | 1933 | 0.488535 | 0         |  |
|      |      | Shiraz-58T | 2223 | 0.833364 | 0         |  |
|      |      | Shiraz-58T | 2224 | 1.076575 | 0         |  |
|      |      | Shiraz-71T | 2263 | 0.975531 | 0         |  |
|      |      | Shiraz-4T  | 261  | 0        | -0.336249 |  |
|      |      | Shiraz-16T | 295  | 0.591657 | 0         |  |
|      |      | Shiraz-36T | 433  | 0        | -0.803961 |  |
|      |      | Shiraz-44T | 899  | 0        | -1.09697  |  |
|      |      | Shiraz-44T | 900  | 0        | -0.584284 |  |
|      |      | Shiraz-49T | 1170 | 0        | -0.967436 |  |
|      |      | Shiraz-49T | 1171 | 0        | -0.612379 |  |
|      |      | Shiraz-77T | 1283 | 0.296555 | 0         |  |
|      |      | Shiraz-18T | 1457 | 0.643204 | 0         |  |
|      |      | Shiraz-22T | 1673 | 0.611783 | 0         |  |
|      |      | Shiraz-22T | 1674 | 0.887899 | 0         |  |
|      |      | Shiraz-25T | 1719 | 0.472955 | 0         |  |
|      |      | Shiraz-28T | 1762 | 0.562311 | 0         |  |
|      |      | Shiraz-29T | 1801 | 0.815343 | 0         |  |
|      |      | Shiraz-32T | 1870 | 0.729766 | 0         |  |
|      |      | Shiraz-35T | 1933 | 0.488535 | 0         |  |
|      |      | Shiraz-58T | 2223 | 0.833364 | 0         |  |
|      |      | Shiraz-58T | 2224 | 1.076575 | 0         |  |
|      |      | Shiraz-71T | 2263 | 0.975531 | 0         |  |
| ESX1 | chrX | Shiraz-3T  | 242  | 0        | -0.336434 |  |



|      |      |            |      |          |           |  |  |
|------|------|------------|------|----------|-----------|--|--|
|      |      | Shiraz-4T  | 261  | 0        | -0.336249 |  |  |
|      |      | Shiraz-16T | 295  | 0.591657 | 0         |  |  |
|      |      | Shiraz-36T | 433  | 0        | -0.803961 |  |  |
|      |      | Shiraz-44T | 899  | 0        | -1.09697  |  |  |
|      |      | Shiraz-49T | 1170 | 0        | -0.967436 |  |  |
|      |      | Shiraz-18T | 1457 | 0.643204 | 0         |  |  |
|      |      | Shiraz-22T | 1673 | 0.611783 | 0         |  |  |
|      |      | Shiraz-25T | 1719 | 0.472955 | 0         |  |  |
|      |      | Shiraz-28T | 1762 | 0.562311 | 0         |  |  |
|      |      | Shiraz-29T | 1801 | 0.815343 | 0         |  |  |
|      |      | Shiraz-32T | 1870 | 0.729766 | 0         |  |  |
|      |      | Shiraz-35T | 1933 | 0.488535 | 0         |  |  |
|      |      | Shiraz-58T | 2223 | 0.833364 | 0         |  |  |
|      |      | Shiraz-71T | 2263 | 0.975531 | 0         |  |  |
|      |      | Shiraz-3T  | 242  | 0        | -0.336434 |  |  |
|      |      | Shiraz-4T  | 261  | 0        | -0.336249 |  |  |
|      |      | Shiraz-16T | 295  | 0.591657 | 0         |  |  |
|      |      | Shiraz-36T | 433  | 0        | -0.803961 |  |  |
|      |      | Shiraz-44T | 899  | 0        | -1.09697  |  |  |
|      |      | Shiraz-49T | 1170 | 0        | -0.967436 |  |  |
|      |      | Shiraz-18T | 1457 | 0.643204 | 0         |  |  |
|      |      | Shiraz-22T | 1673 | 0.611783 | 0         |  |  |
|      |      | Shiraz-25T | 1719 | 0.472955 | 0         |  |  |
|      |      | Shiraz-28T | 1762 | 0.562311 | 0         |  |  |
|      |      | Shiraz-29T | 1801 | 0.815343 | 0         |  |  |
|      |      | Shiraz-32T | 1870 | 0.729766 | 0         |  |  |
|      |      | Shiraz-35T | 1933 | 0.488535 | 0         |  |  |
|      |      | Shiraz-58T | 2223 | 0.833364 | 0         |  |  |
|      |      | Shiraz-71T | 2263 | 0.975531 | 0         |  |  |
|      |      | Shiraz-3T  | 242  | 0        | -0.336434 |  |  |
|      |      | Shiraz-4T  | 261  | 0        | -0.336249 |  |  |
|      |      | Shiraz-16T | 295  | 0.591657 | 0         |  |  |
|      |      | Shiraz-36T | 433  | 0        | -0.803961 |  |  |
|      |      | Shiraz-44T | 899  | 0        | -1.09697  |  |  |
|      |      | Shiraz-49T | 1170 | 0        | -0.967436 |  |  |
|      |      | Shiraz-18T | 1457 | 0.643204 | 0         |  |  |
|      |      | Shiraz-22T | 1673 | 0.611783 | 0         |  |  |
|      |      | Shiraz-25T | 1719 | 0.472955 | 0         |  |  |
|      |      | Shiraz-28T | 1762 | 0.562311 | 0         |  |  |
|      |      | Shiraz-29T | 1801 | 0.815343 | 0         |  |  |
|      |      | Shiraz-32T | 1870 | 0.729766 | 0         |  |  |
|      |      | Shiraz-35T | 1933 | 0.488535 | 0         |  |  |
|      |      | Shiraz-58T | 2223 | 0.833364 | 0         |  |  |
|      |      | Shiraz-71T | 2263 | 0.975531 | 0         |  |  |
| ETV1 | chr7 | Shiraz-4T  | 252  | 0.192083 | 0         |  |  |
|      |      | Shiraz-36T | 376  | 0.159952 | 0         |  |  |
|      |      | Shiraz-44T | 628  | 0        | -0.444379 |  |  |

|      |      |            |      |          |           |  |  |
|------|------|------------|------|----------|-----------|--|--|
|      |      | Shiraz-47T | 1027 | 0        | -0.117848 |  |  |
|      |      | Shiraz-49T | 1117 | 0        | -0.168296 |  |  |
|      |      | Shiraz-77T | 1222 | 0        | -0.113002 |  |  |
|      |      | Shiraz-18T | 1433 | 0.250973 | 0         |  |  |
|      |      | Shiraz-22T | 1543 | 0        | -0.513696 |  |  |
|      |      | Shiraz-25T | 1697 | 0.21945  | 0         |  |  |
|      |      | Shiraz-28T | 1734 | 0.362882 | 0         |  |  |
|      |      | Shiraz-29T | 1777 | 0.156747 | 0         |  |  |
|      |      | Shiraz-38T | 1950 | 0.265916 | 0         |  |  |
|      |      | Shiraz-58T | 2157 | 0        | -0.213872 |  |  |
|      |      | Shiraz-71T | 2236 | 0.320072 | 0         |  |  |
|      |      | Shiraz-4T  | 252  | 0.192083 | 0         |  |  |
|      |      | Shiraz-36T | 376  | 0.159952 | 0         |  |  |
|      |      | Shiraz-44T | 628  | 0        | -0.444379 |  |  |
|      |      | Shiraz-47T | 1027 | 0        | -0.117848 |  |  |
|      |      | Shiraz-49T | 1117 | 0        | -0.168296 |  |  |
|      |      | Shiraz-77T | 1222 | 0        | -0.113002 |  |  |
|      |      | Shiraz-18T | 1433 | 0.250973 | 0         |  |  |
|      |      | Shiraz-22T | 1543 | 0        | -0.513696 |  |  |
|      |      | Shiraz-25T | 1697 | 0.21945  | 0         |  |  |
|      |      | Shiraz-28T | 1734 | 0.362882 | 0         |  |  |
|      |      | Shiraz-29T | 1777 | 0.156747 | 0         |  |  |
|      |      | Shiraz-38T | 1950 | 0.265916 | 0         |  |  |
|      |      | Shiraz-58T | 2157 | 0        | -0.213872 |  |  |
|      |      | Shiraz-71T | 2236 | 0.320072 | 0         |  |  |
|      |      | Shiraz-4T  | 252  | 0.192083 | 0         |  |  |
|      |      | Shiraz-36T | 376  | 0.159952 | 0         |  |  |
|      |      | Shiraz-44T | 628  | 0        | -0.444379 |  |  |
|      |      | Shiraz-47T | 1027 | 0        | -0.117848 |  |  |
|      |      | Shiraz-49T | 1117 | 0        | -0.168296 |  |  |
|      |      | Shiraz-77T | 1222 | 0        | -0.113002 |  |  |
|      |      | Shiraz-18T | 1433 | 0.250973 | 0         |  |  |
|      |      | Shiraz-22T | 1543 | 0        | -0.513696 |  |  |
|      |      | Shiraz-25T | 1697 | 0.21945  | 0         |  |  |
|      |      | Shiraz-28T | 1734 | 0.362882 | 0         |  |  |
|      |      | Shiraz-29T | 1777 | 0.156747 | 0         |  |  |
|      |      | Shiraz-38T | 1950 | 0.265916 | 0         |  |  |
|      |      | Shiraz-58T | 2157 | 0        | -0.213872 |  |  |
|      |      | Shiraz-71T | 2236 | 0.320072 | 0         |  |  |
| EVX1 | chr7 | Shiraz-3T  | 87   | 0.198593 | 0         |  |  |
|      |      | Shiraz-3T  | 88   | 0.832004 | 0         |  |  |
|      |      | Shiraz-4T  | 252  | 0.192083 | 0         |  |  |
|      |      | Shiraz-36T | 376  | 0.159952 | 0         |  |  |
|      |      | Shiraz-44T | 629  | 0.920681 | 0         |  |  |
|      |      | Shiraz-46T | 942  | 0.069143 | 0         |  |  |
|      |      | Shiraz-18T | 1433 | 0.250973 | 0         |  |  |
|      |      | Shiraz-25T | 1697 | 0.21945  | 0         |  |  |

|       |      |            |      |          |           |  |
|-------|------|------------|------|----------|-----------|--|
|       |      | Shiraz-28T | 1734 | 0.362882 | 0         |  |
|       |      | Shiraz-29T | 1777 | 0.156747 | 0         |  |
|       |      | Shiraz-38T | 1950 | 0.265916 | 0         |  |
|       |      | Shiraz-71T | 2236 | 0.320072 | 0         |  |
|       |      | Shiraz-3T  | 87   | 0.198593 | 0         |  |
|       |      | Shiraz-3T  | 88   | 0.832004 | 0         |  |
|       |      | Shiraz-4T  | 252  | 0.192083 | 0         |  |
|       |      | Shiraz-36T | 376  | 0.159952 | 0         |  |
|       |      | Shiraz-44T | 629  | 0.920681 | 0         |  |
|       |      | Shiraz-46T | 942  | 0.069143 | 0         |  |
|       |      | Shiraz-18T | 1433 | 0.250973 | 0         |  |
|       |      | Shiraz-25T | 1697 | 0.21945  | 0         |  |
|       |      | Shiraz-28T | 1734 | 0.362882 | 0         |  |
|       |      | Shiraz-29T | 1777 | 0.156747 | 0         |  |
|       |      | Shiraz-38T | 1950 | 0.265916 | 0         |  |
|       |      | Shiraz-71T | 2236 | 0.320072 | 0         |  |
|       |      | Shiraz-3T  | 87   | 0.198593 | 0         |  |
|       |      | Shiraz-3T  | 88   | 0.832004 | 0         |  |
|       |      | Shiraz-4T  | 252  | 0.192083 | 0         |  |
|       |      | Shiraz-36T | 376  | 0.159952 | 0         |  |
|       |      | Shiraz-44T | 629  | 0.920681 | 0         |  |
|       |      | Shiraz-46T | 942  | 0.069143 | 0         |  |
|       |      | Shiraz-18T | 1433 | 0.250973 | 0         |  |
|       |      | Shiraz-25T | 1697 | 0.21945  | 0         |  |
|       |      | Shiraz-28T | 1734 | 0.362882 | 0         |  |
|       |      | Shiraz-29T | 1777 | 0.156747 | 0         |  |
|       |      | Shiraz-38T | 1950 | 0.265916 | 0         |  |
|       |      | Shiraz-71T | 2236 | 0.320072 | 0         |  |
| EXOC4 | chr7 | Shiraz-3T  | 90   | 0.219276 | 0         |  |
|       |      | Shiraz-3T  | 90   | 0.219276 | 0         |  |
|       |      | Shiraz-4T  | 253  | 0.372918 | 0         |  |
|       |      | Shiraz-4T  | 253  | 0.372918 | 0         |  |
|       |      | Shiraz-36T | 378  | 0.179558 | 0         |  |
|       |      | Shiraz-36T | 378  | 0.179558 | 0         |  |
|       |      | Shiraz-46T | 943  | 0.093799 | 0         |  |
|       |      | Shiraz-46T | 943  | 0.093799 | 0         |  |
|       |      | Shiraz-77T | 1225 | 0        | -0.117922 |  |
|       |      | Shiraz-77T | 1225 | 0        | -0.117922 |  |
|       |      | Shiraz-9T  | 1325 | 0.221899 | 0         |  |
|       |      | Shiraz-9T  | 1325 | 0.221899 | 0         |  |
|       |      | Shiraz-18T | 1434 | 0.244465 | 0         |  |
|       |      | Shiraz-18T | 1434 | 0.244465 | 0         |  |
|       |      | Shiraz-22T | 1553 | 0        | -0.213234 |  |
|       |      | Shiraz-22T | 1553 | 0        | -0.213234 |  |
|       |      | Shiraz-25T | 1698 | 0.21835  | 0         |  |
|       |      | Shiraz-25T | 1698 | 0.21835  | 0         |  |
|       |      | Shiraz-28T | 1735 | 0.350744 | 0         |  |

|  |            |      |          |           |  |
|--|------------|------|----------|-----------|--|
|  | Shiraz-28T | 1735 | 0.350744 | 0         |  |
|  | Shiraz-29T | 1778 | 0.120767 | 0         |  |
|  | Shiraz-29T | 1778 | 0.120767 | 0         |  |
|  | Shiraz-32T | 1833 | 0.551336 | 0         |  |
|  | Shiraz-32T | 1833 | 0.551336 | 0         |  |
|  | Shiraz-38T | 1951 | 0.250891 | 0         |  |
|  | Shiraz-38T | 1951 | 0.250891 | 0         |  |
|  | Shiraz-53T | 2078 | 0.287202 | 0         |  |
|  | Shiraz-53T | 2078 | 0.287202 | 0         |  |
|  | Shiraz-71T | 2238 | 0.603631 | 0         |  |
|  | Shiraz-71T | 2238 | 0.603631 | 0         |  |
|  | Shiraz-3T  | 90   | 0.219276 | 0         |  |
|  | Shiraz-3T  | 90   | 0.219276 | 0         |  |
|  | Shiraz-4T  | 253  | 0.372918 | 0         |  |
|  | Shiraz-4T  | 253  | 0.372918 | 0         |  |
|  | Shiraz-36T | 378  | 0.179558 | 0         |  |
|  | Shiraz-36T | 378  | 0.179558 | 0         |  |
|  | Shiraz-46T | 943  | 0.093799 | 0         |  |
|  | Shiraz-46T | 943  | 0.093799 | 0         |  |
|  | Shiraz-77T | 1225 | 0        | -0.117922 |  |
|  | Shiraz-77T | 1225 | 0        | -0.117922 |  |
|  | Shiraz-9T  | 1325 | 0.221899 | 0         |  |
|  | Shiraz-9T  | 1325 | 0.221899 | 0         |  |
|  | Shiraz-18T | 1434 | 0.244465 | 0         |  |
|  | Shiraz-18T | 1434 | 0.244465 | 0         |  |
|  | Shiraz-22T | 1553 | 0        | -0.213234 |  |
|  | Shiraz-22T | 1553 | 0        | -0.213234 |  |
|  | Shiraz-25T | 1698 | 0.21835  | 0         |  |
|  | Shiraz-25T | 1698 | 0.21835  | 0         |  |
|  | Shiraz-28T | 1735 | 0.350744 | 0         |  |
|  | Shiraz-28T | 1735 | 0.350744 | 0         |  |
|  | Shiraz-29T | 1778 | 0.120767 | 0         |  |
|  | Shiraz-29T | 1778 | 0.120767 | 0         |  |
|  | Shiraz-32T | 1833 | 0.551336 | 0         |  |
|  | Shiraz-32T | 1833 | 0.551336 | 0         |  |
|  | Shiraz-38T | 1951 | 0.250891 | 0         |  |
|  | Shiraz-38T | 1951 | 0.250891 | 0         |  |
|  | Shiraz-53T | 2078 | 0.287202 | 0         |  |
|  | Shiraz-53T | 2078 | 0.287202 | 0         |  |
|  | Shiraz-71T | 2238 | 0.603631 | 0         |  |
|  | Shiraz-71T | 2238 | 0.603631 | 0         |  |
|  | Shiraz-3T  | 90   | 0.219276 | 0         |  |
|  | Shiraz-3T  | 90   | 0.219276 | 0         |  |
|  | Shiraz-4T  | 253  | 0.372918 | 0         |  |
|  | Shiraz-4T  | 253  | 0.372918 | 0         |  |
|  | Shiraz-36T | 378  | 0.179558 | 0         |  |
|  | Shiraz-36T | 378  | 0.179558 | 0         |  |

|      |      |            |      |          |           |  |  |
|------|------|------------|------|----------|-----------|--|--|
|      |      | Shiraz-46T | 943  | 0.093799 | 0         |  |  |
|      |      | Shiraz-46T | 943  | 0.093799 | 0         |  |  |
|      |      | Shiraz-77T | 1225 | 0        | -0.117922 |  |  |
|      |      | Shiraz-77T | 1225 | 0        | -0.117922 |  |  |
|      |      | Shiraz-9T  | 1325 | 0.221899 | 0         |  |  |
|      |      | Shiraz-9T  | 1325 | 0.221899 | 0         |  |  |
|      |      | Shiraz-18T | 1434 | 0.244465 | 0         |  |  |
|      |      | Shiraz-18T | 1434 | 0.244465 | 0         |  |  |
|      |      | Shiraz-22T | 1553 | 0        | -0.213234 |  |  |
|      |      | Shiraz-22T | 1553 | 0        | -0.213234 |  |  |
|      |      | Shiraz-25T | 1698 | 0.21835  | 0         |  |  |
|      |      | Shiraz-25T | 1698 | 0.21835  | 0         |  |  |
|      |      | Shiraz-28T | 1735 | 0.350744 | 0         |  |  |
|      |      | Shiraz-28T | 1735 | 0.350744 | 0         |  |  |
|      |      | Shiraz-29T | 1778 | 0.120767 | 0         |  |  |
|      |      | Shiraz-29T | 1778 | 0.120767 | 0         |  |  |
|      |      | Shiraz-32T | 1833 | 0.551336 | 0         |  |  |
|      |      | Shiraz-32T | 1833 | 0.551336 | 0         |  |  |
|      |      | Shiraz-38T | 1951 | 0.250891 | 0         |  |  |
|      |      | Shiraz-38T | 1951 | 0.250891 | 0         |  |  |
|      |      | Shiraz-53T | 2078 | 0.287202 | 0         |  |  |
|      |      | Shiraz-53T | 2078 | 0.287202 | 0         |  |  |
|      |      | Shiraz-71T | 2238 | 0.603631 | 0         |  |  |
|      |      | Shiraz-71T | 2238 | 0.603631 | 0         |  |  |
| EZH2 | chr7 | Shiraz-3T  | 90   | 0.219276 | 0         |  |  |
|      |      | Shiraz-4T  | 253  | 0.372918 | 0         |  |  |
|      |      | Shiraz-36T | 378  | 0.179558 | 0         |  |  |
|      |      | Shiraz-46T | 943  | 0.093799 | 0         |  |  |
|      |      | Shiraz-9T  | 1325 | 0.221899 | 0         |  |  |
|      |      | Shiraz-18T | 1434 | 0.244465 | 0         |  |  |
|      |      | Shiraz-25T | 1698 | 0.21835  | 0         |  |  |
|      |      | Shiraz-28T | 1735 | 0.350744 | 0         |  |  |
|      |      | Shiraz-29T | 1778 | 0.120767 | 0         |  |  |
|      |      | Shiraz-32T | 1833 | 0.551336 | 0         |  |  |
|      |      | Shiraz-38T | 1951 | 0.250891 | 0         |  |  |
|      |      | Shiraz-53T | 2078 | 0.287202 | 0         |  |  |
|      |      | Shiraz-58T | 2162 | 0.221505 | 0         |  |  |
|      |      | Shiraz-71T | 2238 | 0.603631 | 0         |  |  |
|      |      | Shiraz-3T  | 90   | 0.219276 | 0         |  |  |
|      |      | Shiraz-4T  | 253  | 0.372918 | 0         |  |  |
|      |      | Shiraz-36T | 378  | 0.179558 | 0         |  |  |
|      |      | Shiraz-46T | 943  | 0.093799 | 0         |  |  |
|      |      | Shiraz-9T  | 1325 | 0.221899 | 0         |  |  |
|      |      | Shiraz-18T | 1434 | 0.244465 | 0         |  |  |
|      |      | Shiraz-25T | 1698 | 0.21835  | 0         |  |  |
|      |      | Shiraz-28T | 1735 | 0.350744 | 0         |  |  |
|      |      | Shiraz-29T | 1778 | 0.120767 | 0         |  |  |

|    |      |            |      |          |           |  |  |
|----|------|------------|------|----------|-----------|--|--|
|    |      | Shiraz-32T | 1833 | 0.551336 | 0         |  |  |
|    |      | Shiraz-38T | 1951 | 0.250891 | 0         |  |  |
|    |      | Shiraz-53T | 2078 | 0.287202 | 0         |  |  |
|    |      | Shiraz-58T | 2162 | 0.221505 | 0         |  |  |
|    |      | Shiraz-71T | 2238 | 0.603631 | 0         |  |  |
|    |      | Shiraz-3T  | 90   | 0.219276 | 0         |  |  |
|    |      | Shiraz-4T  | 253  | 0.372918 | 0         |  |  |
|    |      | Shiraz-36T | 378  | 0.179558 | 0         |  |  |
|    |      | Shiraz-46T | 943  | 0.093799 | 0         |  |  |
|    |      | Shiraz-9T  | 1325 | 0.221899 | 0         |  |  |
|    |      | Shiraz-18T | 1434 | 0.244465 | 0         |  |  |
|    |      | Shiraz-25T | 1698 | 0.21835  | 0         |  |  |
|    |      | Shiraz-28T | 1735 | 0.350744 | 0         |  |  |
|    |      | Shiraz-29T | 1778 | 0.120767 | 0         |  |  |
|    |      | Shiraz-32T | 1833 | 0.551336 | 0         |  |  |
|    |      | Shiraz-38T | 1951 | 0.250891 | 0         |  |  |
|    |      | Shiraz-53T | 2078 | 0.287202 | 0         |  |  |
|    |      | Shiraz-58T | 2162 | 0.221505 | 0         |  |  |
|    |      | Shiraz-71T | 2238 | 0.603631 | 0         |  |  |
| F8 | chrX | Shiraz-3T  | 247  | 0        | -0.421316 |  |  |
|    |      | Shiraz-4T  | 261  | 0        | -0.336249 |  |  |
|    |      | Shiraz-4T  | 261  | 0        | -0.336249 |  |  |
|    |      | Shiraz-16T | 295  | 0.591657 | 0         |  |  |
|    |      | Shiraz-16T | 295  | 0.591657 | 0         |  |  |
|    |      | Shiraz-36T | 433  | 0        | -0.803961 |  |  |
|    |      | Shiraz-36T | 433  | 0        | -0.803961 |  |  |
|    |      | Shiraz-44T | 909  | 0        | -1.067051 |  |  |
|    |      | Shiraz-44T | 909  | 0        | -1.067051 |  |  |
|    |      | Shiraz-49T | 1170 | 0        | -0.967436 |  |  |
|    |      | Shiraz-49T | 1170 | 0        | -0.967436 |  |  |
|    |      | Shiraz-9T  | 1370 | 0.690073 | 0         |  |  |
|    |      | Shiraz-9T  | 1370 | 0.690073 | 0         |  |  |
|    |      | Shiraz-18T | 1457 | 0.643204 | 0         |  |  |
|    |      | Shiraz-18T | 1457 | 0.643204 | 0         |  |  |
|    |      | Shiraz-22T | 1673 | 0.611783 | 0         |  |  |
|    |      | Shiraz-22T | 1673 | 0.611783 | 0         |  |  |
|    |      | Shiraz-25T | 1719 | 0.472955 | 0         |  |  |
|    |      | Shiraz-25T | 1719 | 0.472955 | 0         |  |  |
|    |      | Shiraz-28T | 1762 | 0.562311 | 0         |  |  |
|    |      | Shiraz-28T | 1762 | 0.562311 | 0         |  |  |
|    |      | Shiraz-29T | 1801 | 0.815343 | 0         |  |  |
|    |      | Shiraz-29T | 1801 | 0.815343 | 0         |  |  |
|    |      | Shiraz-32T | 1870 | 0.729766 | 0         |  |  |
|    |      | Shiraz-32T | 1870 | 0.729766 | 0         |  |  |
|    |      | Shiraz-32T | 1872 | 1.504553 | 0         |  |  |
|    |      | Shiraz-32T | 1872 | 1.504553 | 0         |  |  |
|    |      | Shiraz-35T | 1933 | 0.488535 | 0         |  |  |

|  |  |            |      |          |           |  |  |
|--|--|------------|------|----------|-----------|--|--|
|  |  | Shiraz-35T | 1933 | 0.488535 | 0         |  |  |
|  |  | Shiraz-53T | 2115 | 0.427728 | 0         |  |  |
|  |  | Shiraz-53T | 2115 | 0.427728 | 0         |  |  |
|  |  | Shiraz-58T | 2223 | 0.833364 | 0         |  |  |
|  |  | Shiraz-58T | 2223 | 0.833364 | 0         |  |  |
|  |  | Shiraz-71T | 2263 | 0.975531 | 0         |  |  |
|  |  | Shiraz-71T | 2263 | 0.975531 | 0         |  |  |
|  |  | Shiraz-3T  | 247  | 0        | -0.421316 |  |  |
|  |  | Shiraz-4T  | 261  | 0        | -0.336249 |  |  |
|  |  | Shiraz-4T  | 261  | 0        | -0.336249 |  |  |
|  |  | Shiraz-16T | 295  | 0.591657 | 0         |  |  |
|  |  | Shiraz-16T | 295  | 0.591657 | 0         |  |  |
|  |  | Shiraz-36T | 433  | 0        | -0.803961 |  |  |
|  |  | Shiraz-36T | 433  | 0        | -0.803961 |  |  |
|  |  | Shiraz-44T | 909  | 0        | -1.067051 |  |  |
|  |  | Shiraz-44T | 909  | 0        | -1.067051 |  |  |
|  |  | Shiraz-49T | 1170 | 0        | -0.967436 |  |  |
|  |  | Shiraz-49T | 1170 | 0        | -0.967436 |  |  |
|  |  | Shiraz-9T  | 1370 | 0.690073 | 0         |  |  |
|  |  | Shiraz-9T  | 1370 | 0.690073 | 0         |  |  |
|  |  | Shiraz-18T | 1457 | 0.643204 | 0         |  |  |
|  |  | Shiraz-18T | 1457 | 0.643204 | 0         |  |  |
|  |  | Shiraz-22T | 1673 | 0.611783 | 0         |  |  |
|  |  | Shiraz-22T | 1673 | 0.611783 | 0         |  |  |
|  |  | Shiraz-25T | 1719 | 0.472955 | 0         |  |  |
|  |  | Shiraz-25T | 1719 | 0.472955 | 0         |  |  |
|  |  | Shiraz-28T | 1762 | 0.562311 | 0         |  |  |
|  |  | Shiraz-28T | 1762 | 0.562311 | 0         |  |  |
|  |  | Shiraz-29T | 1801 | 0.815343 | 0         |  |  |
|  |  | Shiraz-29T | 1801 | 0.815343 | 0         |  |  |
|  |  | Shiraz-32T | 1870 | 0.729766 | 0         |  |  |
|  |  | Shiraz-32T | 1870 | 0.729766 | 0         |  |  |
|  |  | Shiraz-32T | 1872 | 1.504553 | 0         |  |  |
|  |  | Shiraz-32T | 1872 | 1.504553 | 0         |  |  |
|  |  | Shiraz-35T | 1933 | 0.488535 | 0         |  |  |
|  |  | Shiraz-35T | 1933 | 0.488535 | 0         |  |  |
|  |  | Shiraz-53T | 2115 | 0.427728 | 0         |  |  |
|  |  | Shiraz-53T | 2115 | 0.427728 | 0         |  |  |
|  |  | Shiraz-58T | 2223 | 0.833364 | 0         |  |  |
|  |  | Shiraz-58T | 2223 | 0.833364 | 0         |  |  |
|  |  | Shiraz-71T | 2263 | 0.975531 | 0         |  |  |
|  |  | Shiraz-71T | 2263 | 0.975531 | 0         |  |  |
|  |  | Shiraz-3T  | 247  | 0        | -0.421316 |  |  |
|  |  | Shiraz-4T  | 261  | 0        | -0.336249 |  |  |
|  |  | Shiraz-4T  | 261  | 0        | -0.336249 |  |  |
|  |  | Shiraz-16T | 295  | 0.591657 | 0         |  |  |
|  |  | Shiraz-16T | 295  | 0.591657 | 0         |  |  |

|      |      |            |      |          |           |  |  |
|------|------|------------|------|----------|-----------|--|--|
|      |      | Shiraz-36T | 433  | 0        | -0.803961 |  |  |
|      |      | Shiraz-36T | 433  | 0        | -0.803961 |  |  |
|      |      | Shiraz-44T | 909  | 0        | -1.067051 |  |  |
|      |      | Shiraz-44T | 909  | 0        | -1.067051 |  |  |
|      |      | Shiraz-49T | 1170 | 0        | -0.967436 |  |  |
|      |      | Shiraz-49T | 1170 | 0        | -0.967436 |  |  |
|      |      | Shiraz-9T  | 1370 | 0.690073 | 0         |  |  |
|      |      | Shiraz-9T  | 1370 | 0.690073 | 0         |  |  |
|      |      | Shiraz-18T | 1457 | 0.643204 | 0         |  |  |
|      |      | Shiraz-18T | 1457 | 0.643204 | 0         |  |  |
|      |      | Shiraz-22T | 1673 | 0.611783 | 0         |  |  |
|      |      | Shiraz-22T | 1673 | 0.611783 | 0         |  |  |
|      |      | Shiraz-25T | 1719 | 0.472955 | 0         |  |  |
|      |      | Shiraz-25T | 1719 | 0.472955 | 0         |  |  |
|      |      | Shiraz-28T | 1762 | 0.562311 | 0         |  |  |
|      |      | Shiraz-28T | 1762 | 0.562311 | 0         |  |  |
|      |      | Shiraz-29T | 1801 | 0.815343 | 0         |  |  |
|      |      | Shiraz-29T | 1801 | 0.815343 | 0         |  |  |
|      |      | Shiraz-32T | 1870 | 0.729766 | 0         |  |  |
|      |      | Shiraz-32T | 1870 | 0.729766 | 0         |  |  |
|      |      | Shiraz-32T | 1872 | 1.504553 | 0         |  |  |
|      |      | Shiraz-32T | 1872 | 1.504553 | 0         |  |  |
|      |      | Shiraz-35T | 1933 | 0.488535 | 0         |  |  |
|      |      | Shiraz-35T | 1933 | 0.488535 | 0         |  |  |
|      |      | Shiraz-53T | 2115 | 0.427728 | 0         |  |  |
|      |      | Shiraz-53T | 2115 | 0.427728 | 0         |  |  |
|      |      | Shiraz-58T | 2223 | 0.833364 | 0         |  |  |
|      |      | Shiraz-58T | 2223 | 0.833364 | 0         |  |  |
|      |      | Shiraz-71T | 2263 | 0.975531 | 0         |  |  |
|      |      | Shiraz-71T | 2263 | 0.975531 | 0         |  |  |
| F8A1 | chrX | Shiraz-3T  | 247  | 0        | -0.421316 |  |  |
|      |      | Shiraz-3T  | 247  | 0        | -0.421316 |  |  |
|      |      | Shiraz-4T  | 261  | 0        | -0.336249 |  |  |
|      |      | Shiraz-4T  | 261  | 0        | -0.336249 |  |  |
|      |      | Shiraz-4T  | 261  | 0        | -0.336249 |  |  |
|      |      | Shiraz-16T | 295  | 0.591657 | 0         |  |  |
|      |      | Shiraz-36T | 433  | 0        | -0.803961 |  |  |
|      |      | Shiraz-36T | 433  | 0        | -0.803961 |  |  |
|      |      | Shiraz-36T | 433  | 0        | -0.803961 |  |  |
|      |      | Shiraz-44T | 909  | 0        | -1.067051 |  |  |
|      |      | Shiraz-44T | 909  | 0        | -1.067051 |  |  |
|      |      | Shiraz-44T | 909  | 0        | -1.067051 |  |  |
|      |      | Shiraz-49T | 1170 | 0        | -0.967436 |  |  |
|      |      | Shiraz-49T | 1170 | 0        | -0.967436 |  |  |
|      |      | Shiraz-49T | 1170 | 0        | -0.967436 |  |  |
|      |      | Shiraz-9T  | 1370 | 0.690073 | 0         |  |  |
|      |      | Shiraz-9T  | 1370 | 0.690073 | 0         |  |  |



|  |  |            |      |          |           |  |  |
|--|--|------------|------|----------|-----------|--|--|
|  |  | Shiraz-9T  | 1370 | 0.690073 | 0         |  |  |
|  |  | Shiraz-18T | 1457 | 0.643204 | 0         |  |  |
|  |  | Shiraz-18T | 1457 | 0.643204 | 0         |  |  |
|  |  | Shiraz-18T | 1457 | 0.643204 | 0         |  |  |
|  |  | Shiraz-22T | 1673 | 0.611783 | 0         |  |  |
|  |  | Shiraz-22T | 1673 | 0.611783 | 0         |  |  |
|  |  | Shiraz-22T | 1673 | 0.611783 | 0         |  |  |
|  |  | Shiraz-25T | 1719 | 0.472955 | 0         |  |  |
|  |  | Shiraz-25T | 1719 | 0.472955 | 0         |  |  |
|  |  | Shiraz-25T | 1719 | 0.472955 | 0         |  |  |
|  |  | Shiraz-28T | 1762 | 0.562311 | 0         |  |  |
|  |  | Shiraz-28T | 1762 | 0.562311 | 0         |  |  |
|  |  | Shiraz-28T | 1762 | 0.562311 | 0         |  |  |
|  |  | Shiraz-29T | 1801 | 0.815343 | 0         |  |  |
|  |  | Shiraz-29T | 1801 | 0.815343 | 0         |  |  |
|  |  | Shiraz-29T | 1801 | 0.815343 | 0         |  |  |
|  |  | Shiraz-32T | 1870 | 0.729766 | 0         |  |  |
|  |  | Shiraz-32T | 1872 | 1.504553 | 0         |  |  |
|  |  | Shiraz-35T | 1933 | 0.488535 | 0         |  |  |
|  |  | Shiraz-35T | 1933 | 0.488535 | 0         |  |  |
|  |  | Shiraz-35T | 1933 | 0.488535 | 0         |  |  |
|  |  | Shiraz-53T | 2115 | 0.427728 | 0         |  |  |
|  |  | Shiraz-58T | 2223 | 0.833364 | 0         |  |  |
|  |  | Shiraz-58T | 2223 | 0.833364 | 0         |  |  |
|  |  | Shiraz-58T | 2223 | 0.833364 | 0         |  |  |
|  |  | Shiraz-71T | 2263 | 0.975531 | 0         |  |  |
|  |  | Shiraz-71T | 2263 | 0.975531 | 0         |  |  |
|  |  | Shiraz-71T | 2263 | 0.975531 | 0         |  |  |
|  |  | Shiraz-3T  | 247  | 0        | -0.421316 |  |  |
|  |  | Shiraz-3T  | 247  | 0        | -0.421316 |  |  |
|  |  | Shiraz-4T  | 261  | 0        | -0.336249 |  |  |
|  |  | Shiraz-4T  | 261  | 0        | -0.336249 |  |  |
|  |  | Shiraz-4T  | 261  | 0        | -0.336249 |  |  |
|  |  | Shiraz-16T | 295  | 0.591657 | 0         |  |  |
|  |  | Shiraz-36T | 433  | 0        | -0.803961 |  |  |
|  |  | Shiraz-36T | 433  | 0        | -0.803961 |  |  |
|  |  | Shiraz-36T | 433  | 0        | -0.803961 |  |  |
|  |  | Shiraz-44T | 909  | 0        | -1.067051 |  |  |
|  |  | Shiraz-44T | 909  | 0        | -1.067051 |  |  |
|  |  | Shiraz-44T | 909  | 0        | -1.067051 |  |  |
|  |  | Shiraz-49T | 1170 | 0        | -0.967436 |  |  |
|  |  | Shiraz-49T | 1170 | 0        | -0.967436 |  |  |
|  |  | Shiraz-49T | 1170 | 0        | -0.967436 |  |  |
|  |  | Shiraz-9T  | 1370 | 0.690073 | 0         |  |  |
|  |  | Shiraz-9T  | 1370 | 0.690073 | 0         |  |  |
|  |  | Shiraz-9T  | 1370 | 0.690073 | 0         |  |  |
|  |  | Shiraz-18T | 1457 | 0.643204 | 0         |  |  |

|  |  |            |      |          |           |  |  |
|--|--|------------|------|----------|-----------|--|--|
|  |  | Shiraz-18T | 1457 | 0.643204 | 0         |  |  |
|  |  | Shiraz-18T | 1457 | 0.643204 | 0         |  |  |
|  |  | Shiraz-22T | 1673 | 0.611783 | 0         |  |  |
|  |  | Shiraz-22T | 1673 | 0.611783 | 0         |  |  |
|  |  | Shiraz-22T | 1673 | 0.611783 | 0         |  |  |
|  |  | Shiraz-25T | 1719 | 0.472955 | 0         |  |  |
|  |  | Shiraz-25T | 1719 | 0.472955 | 0         |  |  |
|  |  | Shiraz-25T | 1719 | 0.472955 | 0         |  |  |
|  |  | Shiraz-28T | 1762 | 0.562311 | 0         |  |  |
|  |  | Shiraz-28T | 1762 | 0.562311 | 0         |  |  |
|  |  | Shiraz-28T | 1762 | 0.562311 | 0         |  |  |
|  |  | Shiraz-29T | 1801 | 0.815343 | 0         |  |  |
|  |  | Shiraz-29T | 1801 | 0.815343 | 0         |  |  |
|  |  | Shiraz-29T | 1801 | 0.815343 | 0         |  |  |
|  |  | Shiraz-32T | 1870 | 0.729766 | 0         |  |  |
|  |  | Shiraz-32T | 1872 | 1.504553 | 0         |  |  |
|  |  | Shiraz-35T | 1933 | 0.488535 | 0         |  |  |
|  |  | Shiraz-35T | 1933 | 0.488535 | 0         |  |  |
|  |  | Shiraz-35T | 1933 | 0.488535 | 0         |  |  |
|  |  | Shiraz-53T | 2115 | 0.427728 | 0         |  |  |
|  |  | Shiraz-58T | 2223 | 0.833364 | 0         |  |  |
|  |  | Shiraz-58T | 2223 | 0.833364 | 0         |  |  |
|  |  | Shiraz-58T | 2223 | 0.833364 | 0         |  |  |
|  |  | Shiraz-71T | 2263 | 0.975531 | 0         |  |  |
|  |  | Shiraz-71T | 2263 | 0.975531 | 0         |  |  |
|  |  | Shiraz-71T | 2263 | 0.975531 | 0         |  |  |
|  |  | Shiraz-3T  | 247  | 0        | -0.421316 |  |  |
|  |  | Shiraz-3T  | 247  | 0        | -0.421316 |  |  |
|  |  | Shiraz-4T  | 261  | 0        | -0.336249 |  |  |
|  |  | Shiraz-4T  | 261  | 0        | -0.336249 |  |  |
|  |  | Shiraz-4T  | 261  | 0        | -0.336249 |  |  |
|  |  | Shiraz-16T | 295  | 0.591657 | 0         |  |  |
|  |  | Shiraz-36T | 433  | 0        | -0.803961 |  |  |
|  |  | Shiraz-36T | 433  | 0        | -0.803961 |  |  |
|  |  | Shiraz-36T | 433  | 0        | -0.803961 |  |  |
|  |  | Shiraz-44T | 909  | 0        | -1.067051 |  |  |
|  |  | Shiraz-44T | 909  | 0        | -1.067051 |  |  |
|  |  | Shiraz-44T | 909  | 0        | -1.067051 |  |  |
|  |  | Shiraz-49T | 1170 | 0        | -0.967436 |  |  |
|  |  | Shiraz-49T | 1170 | 0        | -0.967436 |  |  |
|  |  | Shiraz-49T | 1170 | 0        | -0.967436 |  |  |
|  |  | Shiraz-9T  | 1370 | 0.690073 | 0         |  |  |
|  |  | Shiraz-9T  | 1370 | 0.690073 | 0         |  |  |
|  |  | Shiraz-9T  | 1370 | 0.690073 | 0         |  |  |
|  |  | Shiraz-18T | 1457 | 0.643204 | 0         |  |  |
|  |  | Shiraz-18T | 1457 | 0.643204 | 0         |  |  |
|  |  | Shiraz-18T | 1457 | 0.643204 | 0         |  |  |

|      |      |            |      |          |           |  |  |
|------|------|------------|------|----------|-----------|--|--|
|      |      | Shiraz-22T | 1673 | 0.611783 | 0         |  |  |
|      |      | Shiraz-22T | 1673 | 0.611783 | 0         |  |  |
|      |      | Shiraz-22T | 1673 | 0.611783 | 0         |  |  |
|      |      | Shiraz-25T | 1719 | 0.472955 | 0         |  |  |
|      |      | Shiraz-25T | 1719 | 0.472955 | 0         |  |  |
|      |      | Shiraz-25T | 1719 | 0.472955 | 0         |  |  |
|      |      | Shiraz-28T | 1762 | 0.562311 | 0         |  |  |
|      |      | Shiraz-28T | 1762 | 0.562311 | 0         |  |  |
|      |      | Shiraz-28T | 1762 | 0.562311 | 0         |  |  |
|      |      | Shiraz-29T | 1801 | 0.815343 | 0         |  |  |
|      |      | Shiraz-29T | 1801 | 0.815343 | 0         |  |  |
|      |      | Shiraz-29T | 1801 | 0.815343 | 0         |  |  |
|      |      | Shiraz-32T | 1870 | 0.729766 | 0         |  |  |
|      |      | Shiraz-32T | 1872 | 1.504553 | 0         |  |  |
|      |      | Shiraz-35T | 1933 | 0.488535 | 0         |  |  |
|      |      | Shiraz-35T | 1933 | 0.488535 | 0         |  |  |
|      |      | Shiraz-35T | 1933 | 0.488535 | 0         |  |  |
|      |      | Shiraz-53T | 2115 | 0.427728 | 0         |  |  |
|      |      | Shiraz-58T | 2223 | 0.833364 | 0         |  |  |
|      |      | Shiraz-58T | 2223 | 0.833364 | 0         |  |  |
|      |      | Shiraz-58T | 2223 | 0.833364 | 0         |  |  |
|      |      | Shiraz-71T | 2263 | 0.975531 | 0         |  |  |
|      |      | Shiraz-71T | 2263 | 0.975531 | 0         |  |  |
|      |      | Shiraz-71T | 2263 | 0.975531 | 0         |  |  |
| F8A2 | chrX | Shiraz-3T  | 247  | 0        | -0.421316 |  |  |
|      |      | Shiraz-3T  | 247  | 0        | -0.421316 |  |  |
|      |      | Shiraz-4T  | 261  | 0        | -0.336249 |  |  |
|      |      | Shiraz-4T  | 261  | 0        | -0.336249 |  |  |
|      |      | Shiraz-4T  | 261  | 0        | -0.336249 |  |  |
|      |      | Shiraz-16T | 295  | 0.591657 | 0         |  |  |
|      |      | Shiraz-36T | 433  | 0        | -0.803961 |  |  |
|      |      | Shiraz-36T | 433  | 0        | -0.803961 |  |  |
|      |      | Shiraz-36T | 433  | 0        | -0.803961 |  |  |
|      |      | Shiraz-44T | 909  | 0        | -1.067051 |  |  |
|      |      | Shiraz-44T | 909  | 0        | -1.067051 |  |  |
|      |      | Shiraz-44T | 909  | 0        | -1.067051 |  |  |
|      |      | Shiraz-49T | 1170 | 0        | -0.967436 |  |  |
|      |      | Shiraz-49T | 1170 | 0        | -0.967436 |  |  |
|      |      | Shiraz-49T | 1170 | 0        | -0.967436 |  |  |
|      |      | Shiraz-9T  | 1370 | 0.690073 | 0         |  |  |
|      |      | Shiraz-9T  | 1370 | 0.690073 | 0         |  |  |
|      |      | Shiraz-9T  | 1370 | 0.690073 | 0         |  |  |
|      |      | Shiraz-18T | 1457 | 0.643204 | 0         |  |  |
|      |      | Shiraz-18T | 1457 | 0.643204 | 0         |  |  |
|      |      | Shiraz-18T | 1457 | 0.643204 | 0         |  |  |
|      |      | Shiraz-22T | 1673 | 0.611783 | 0         |  |  |
|      |      | Shiraz-22T | 1673 | 0.611783 | 0         |  |  |

|  |  |            |      |          |           |  |  |
|--|--|------------|------|----------|-----------|--|--|
|  |  | Shiraz-22T | 1673 | 0.611783 | 0         |  |  |
|  |  | Shiraz-25T | 1719 | 0.472955 | 0         |  |  |
|  |  | Shiraz-25T | 1719 | 0.472955 | 0         |  |  |
|  |  | Shiraz-25T | 1719 | 0.472955 | 0         |  |  |
|  |  | Shiraz-28T | 1762 | 0.562311 | 0         |  |  |
|  |  | Shiraz-28T | 1762 | 0.562311 | 0         |  |  |
|  |  | Shiraz-28T | 1762 | 0.562311 | 0         |  |  |
|  |  | Shiraz-29T | 1801 | 0.815343 | 0         |  |  |
|  |  | Shiraz-29T | 1801 | 0.815343 | 0         |  |  |
|  |  | Shiraz-29T | 1801 | 0.815343 | 0         |  |  |
|  |  | Shiraz-32T | 1870 | 0.729766 | 0         |  |  |
|  |  | Shiraz-32T | 1872 | 1.504553 | 0         |  |  |
|  |  | Shiraz-35T | 1933 | 0.488535 | 0         |  |  |
|  |  | Shiraz-35T | 1933 | 0.488535 | 0         |  |  |
|  |  | Shiraz-35T | 1933 | 0.488535 | 0         |  |  |
|  |  | Shiraz-53T | 2115 | 0.427728 | 0         |  |  |
|  |  | Shiraz-58T | 2223 | 0.833364 | 0         |  |  |
|  |  | Shiraz-58T | 2223 | 0.833364 | 0         |  |  |
|  |  | Shiraz-58T | 2223 | 0.833364 | 0         |  |  |
|  |  | Shiraz-71T | 2263 | 0.975531 | 0         |  |  |
|  |  | Shiraz-71T | 2263 | 0.975531 | 0         |  |  |
|  |  | Shiraz-71T | 2263 | 0.975531 | 0         |  |  |
|  |  | Shiraz-3T  | 247  | 0        | -0.421316 |  |  |
|  |  | Shiraz-3T  | 247  | 0        | -0.421316 |  |  |
|  |  | Shiraz-4T  | 261  | 0        | -0.336249 |  |  |
|  |  | Shiraz-4T  | 261  | 0        | -0.336249 |  |  |
|  |  | Shiraz-4T  | 261  | 0        | -0.336249 |  |  |
|  |  | Shiraz-16T | 295  | 0.591657 | 0         |  |  |
|  |  | Shiraz-36T | 433  | 0        | -0.803961 |  |  |
|  |  | Shiraz-36T | 433  | 0        | -0.803961 |  |  |
|  |  | Shiraz-36T | 433  | 0        | -0.803961 |  |  |
|  |  | Shiraz-44T | 909  | 0        | -1.067051 |  |  |
|  |  | Shiraz-44T | 909  | 0        | -1.067051 |  |  |
|  |  | Shiraz-44T | 909  | 0        | -1.067051 |  |  |
|  |  | Shiraz-49T | 1170 | 0        | -0.967436 |  |  |
|  |  | Shiraz-49T | 1170 | 0        | -0.967436 |  |  |
|  |  | Shiraz-49T | 1170 | 0        | -0.967436 |  |  |
|  |  | Shiraz-9T  | 1370 | 0.690073 | 0         |  |  |
|  |  | Shiraz-9T  | 1370 | 0.690073 | 0         |  |  |
|  |  | Shiraz-9T  | 1370 | 0.690073 | 0         |  |  |
|  |  | Shiraz-18T | 1457 | 0.643204 | 0         |  |  |
|  |  | Shiraz-18T | 1457 | 0.643204 | 0         |  |  |
|  |  | Shiraz-18T | 1457 | 0.643204 | 0         |  |  |
|  |  | Shiraz-22T | 1673 | 0.611783 | 0         |  |  |
|  |  | Shiraz-22T | 1673 | 0.611783 | 0         |  |  |
|  |  | Shiraz-22T | 1673 | 0.611783 | 0         |  |  |
|  |  | Shiraz-25T | 1719 | 0.472955 | 0         |  |  |

|  |  |            |      |          |           |  |  |
|--|--|------------|------|----------|-----------|--|--|
|  |  | Shiraz-25T | 1719 | 0.472955 | 0         |  |  |
|  |  | Shiraz-25T | 1719 | 0.472955 | 0         |  |  |
|  |  | Shiraz-28T | 1762 | 0.562311 | 0         |  |  |
|  |  | Shiraz-28T | 1762 | 0.562311 | 0         |  |  |
|  |  | Shiraz-28T | 1762 | 0.562311 | 0         |  |  |
|  |  | Shiraz-29T | 1801 | 0.815343 | 0         |  |  |
|  |  | Shiraz-29T | 1801 | 0.815343 | 0         |  |  |
|  |  | Shiraz-29T | 1801 | 0.815343 | 0         |  |  |
|  |  | Shiraz-32T | 1870 | 0.729766 | 0         |  |  |
|  |  | Shiraz-32T | 1872 | 1.504553 | 0         |  |  |
|  |  | Shiraz-35T | 1933 | 0.488535 | 0         |  |  |
|  |  | Shiraz-35T | 1933 | 0.488535 | 0         |  |  |
|  |  | Shiraz-35T | 1933 | 0.488535 | 0         |  |  |
|  |  | Shiraz-53T | 2115 | 0.427728 | 0         |  |  |
|  |  | Shiraz-58T | 2223 | 0.833364 | 0         |  |  |
|  |  | Shiraz-58T | 2223 | 0.833364 | 0         |  |  |
|  |  | Shiraz-58T | 2223 | 0.833364 | 0         |  |  |
|  |  | Shiraz-71T | 2263 | 0.975531 | 0         |  |  |
|  |  | Shiraz-71T | 2263 | 0.975531 | 0         |  |  |
|  |  | Shiraz-71T | 2263 | 0.975531 | 0         |  |  |
|  |  | Shiraz-3T  | 247  | 0        | -0.421316 |  |  |
|  |  | Shiraz-3T  | 247  | 0        | -0.421316 |  |  |
|  |  | Shiraz-4T  | 261  | 0        | -0.336249 |  |  |
|  |  | Shiraz-4T  | 261  | 0        | -0.336249 |  |  |
|  |  | Shiraz-4T  | 261  | 0        | -0.336249 |  |  |
|  |  | Shiraz-16T | 295  | 0.591657 | 0         |  |  |
|  |  | Shiraz-36T | 433  | 0        | -0.803961 |  |  |
|  |  | Shiraz-36T | 433  | 0        | -0.803961 |  |  |
|  |  | Shiraz-36T | 433  | 0        | -0.803961 |  |  |
|  |  | Shiraz-44T | 909  | 0        | -1.067051 |  |  |
|  |  | Shiraz-44T | 909  | 0        | -1.067051 |  |  |
|  |  | Shiraz-44T | 909  | 0        | -1.067051 |  |  |
|  |  | Shiraz-49T | 1170 | 0        | -0.967436 |  |  |
|  |  | Shiraz-49T | 1170 | 0        | -0.967436 |  |  |
|  |  | Shiraz-49T | 1170 | 0        | -0.967436 |  |  |
|  |  | Shiraz-9T  | 1370 | 0.690073 | 0         |  |  |
|  |  | Shiraz-9T  | 1370 | 0.690073 | 0         |  |  |
|  |  | Shiraz-9T  | 1370 | 0.690073 | 0         |  |  |
|  |  | Shiraz-18T | 1457 | 0.643204 | 0         |  |  |
|  |  | Shiraz-18T | 1457 | 0.643204 | 0         |  |  |
|  |  | Shiraz-18T | 1457 | 0.643204 | 0         |  |  |
|  |  | Shiraz-22T | 1673 | 0.611783 | 0         |  |  |
|  |  | Shiraz-22T | 1673 | 0.611783 | 0         |  |  |
|  |  | Shiraz-22T | 1673 | 0.611783 | 0         |  |  |
|  |  | Shiraz-25T | 1719 | 0.472955 | 0         |  |  |
|  |  | Shiraz-25T | 1719 | 0.472955 | 0         |  |  |
|  |  | Shiraz-25T | 1719 | 0.472955 | 0         |  |  |

|      |      |            |      |          |           |  |
|------|------|------------|------|----------|-----------|--|
|      |      | Shiraz-28T | 1762 | 0.562311 | 0         |  |
|      |      | Shiraz-28T | 1762 | 0.562311 | 0         |  |
|      |      | Shiraz-28T | 1762 | 0.562311 | 0         |  |
|      |      | Shiraz-29T | 1801 | 0.815343 | 0         |  |
|      |      | Shiraz-29T | 1801 | 0.815343 | 0         |  |
|      |      | Shiraz-29T | 1801 | 0.815343 | 0         |  |
|      |      | Shiraz-32T | 1870 | 0.729766 | 0         |  |
|      |      | Shiraz-32T | 1872 | 1.504553 | 0         |  |
|      |      | Shiraz-35T | 1933 | 0.488535 | 0         |  |
|      |      | Shiraz-35T | 1933 | 0.488535 | 0         |  |
|      |      | Shiraz-35T | 1933 | 0.488535 | 0         |  |
|      |      | Shiraz-53T | 2115 | 0.427728 | 0         |  |
|      |      | Shiraz-58T | 2223 | 0.833364 | 0         |  |
|      |      | Shiraz-58T | 2223 | 0.833364 | 0         |  |
|      |      | Shiraz-58T | 2223 | 0.833364 | 0         |  |
|      |      | Shiraz-71T | 2263 | 0.975531 | 0         |  |
|      |      | Shiraz-71T | 2263 | 0.975531 | 0         |  |
|      |      | Shiraz-71T | 2263 | 0.975531 | 0         |  |
| F8A3 | chrX | Shiraz-3T  | 247  | 0        | -0.421316 |  |
|      |      | Shiraz-3T  | 247  | 0        | -0.421316 |  |
|      |      | Shiraz-4T  | 261  | 0        | -0.336249 |  |
|      |      | Shiraz-4T  | 261  | 0        | -0.336249 |  |
|      |      | Shiraz-4T  | 261  | 0        | -0.336249 |  |
|      |      | Shiraz-16T | 295  | 0.591657 | 0         |  |
|      |      | Shiraz-36T | 433  | 0        | -0.803961 |  |
|      |      | Shiraz-36T | 433  | 0        | -0.803961 |  |
|      |      | Shiraz-36T | 433  | 0        | -0.803961 |  |
|      |      | Shiraz-44T | 909  | 0        | -1.067051 |  |
|      |      | Shiraz-44T | 909  | 0        | -1.067051 |  |
|      |      | Shiraz-44T | 909  | 0        | -1.067051 |  |
|      |      | Shiraz-49T | 1170 | 0        | -0.967436 |  |
|      |      | Shiraz-49T | 1170 | 0        | -0.967436 |  |
|      |      | Shiraz-49T | 1170 | 0        | -0.967436 |  |
|      |      | Shiraz-9T  | 1370 | 0.690073 | 0         |  |
|      |      | Shiraz-9T  | 1370 | 0.690073 | 0         |  |
|      |      | Shiraz-9T  | 1370 | 0.690073 | 0         |  |
|      |      | Shiraz-18T | 1457 | 0.643204 | 0         |  |
|      |      | Shiraz-18T | 1457 | 0.643204 | 0         |  |
|      |      | Shiraz-18T | 1457 | 0.643204 | 0         |  |
|      |      | Shiraz-22T | 1673 | 0.611783 | 0         |  |
|      |      | Shiraz-22T | 1673 | 0.611783 | 0         |  |
|      |      | Shiraz-22T | 1673 | 0.611783 | 0         |  |
|      |      | Shiraz-25T | 1719 | 0.472955 | 0         |  |
|      |      | Shiraz-25T | 1719 | 0.472955 | 0         |  |
|      |      | Shiraz-25T | 1719 | 0.472955 | 0         |  |
|      |      | Shiraz-28T | 1762 | 0.562311 | 0         |  |
|      |      | Shiraz-28T | 1762 | 0.562311 | 0         |  |

|  |  |            |      |          |           |  |  |
|--|--|------------|------|----------|-----------|--|--|
|  |  | Shiraz-28T | 1762 | 0.562311 | 0         |  |  |
|  |  | Shiraz-29T | 1801 | 0.815343 | 0         |  |  |
|  |  | Shiraz-29T | 1801 | 0.815343 | 0         |  |  |
|  |  | Shiraz-29T | 1801 | 0.815343 | 0         |  |  |
|  |  | Shiraz-32T | 1870 | 0.729766 | 0         |  |  |
|  |  | Shiraz-32T | 1872 | 1.504553 | 0         |  |  |
|  |  | Shiraz-35T | 1933 | 0.488535 | 0         |  |  |
|  |  | Shiraz-35T | 1933 | 0.488535 | 0         |  |  |
|  |  | Shiraz-35T | 1933 | 0.488535 | 0         |  |  |
|  |  | Shiraz-53T | 2115 | 0.427728 | 0         |  |  |
|  |  | Shiraz-58T | 2223 | 0.833364 | 0         |  |  |
|  |  | Shiraz-58T | 2223 | 0.833364 | 0         |  |  |
|  |  | Shiraz-58T | 2223 | 0.833364 | 0         |  |  |
|  |  | Shiraz-71T | 2263 | 0.975531 | 0         |  |  |
|  |  | Shiraz-71T | 2263 | 0.975531 | 0         |  |  |
|  |  | Shiraz-71T | 2263 | 0.975531 | 0         |  |  |
|  |  | Shiraz-3T  | 247  | 0        | -0.421316 |  |  |
|  |  | Shiraz-3T  | 247  | 0        | -0.421316 |  |  |
|  |  | Shiraz-4T  | 261  | 0        | -0.336249 |  |  |
|  |  | Shiraz-4T  | 261  | 0        | -0.336249 |  |  |
|  |  | Shiraz-4T  | 261  | 0        | -0.336249 |  |  |
|  |  | Shiraz-16T | 295  | 0.591657 | 0         |  |  |
|  |  | Shiraz-36T | 433  | 0        | -0.803961 |  |  |
|  |  | Shiraz-36T | 433  | 0        | -0.803961 |  |  |
|  |  | Shiraz-36T | 433  | 0        | -0.803961 |  |  |
|  |  | Shiraz-44T | 909  | 0        | -1.067051 |  |  |
|  |  | Shiraz-44T | 909  | 0        | -1.067051 |  |  |
|  |  | Shiraz-44T | 909  | 0        | -1.067051 |  |  |
|  |  | Shiraz-49T | 1170 | 0        | -0.967436 |  |  |
|  |  | Shiraz-49T | 1170 | 0        | -0.967436 |  |  |
|  |  | Shiraz-49T | 1170 | 0        | -0.967436 |  |  |
|  |  | Shiraz-9T  | 1370 | 0.690073 | 0         |  |  |
|  |  | Shiraz-9T  | 1370 | 0.690073 | 0         |  |  |
|  |  | Shiraz-9T  | 1370 | 0.690073 | 0         |  |  |
|  |  | Shiraz-18T | 1457 | 0.643204 | 0         |  |  |
|  |  | Shiraz-18T | 1457 | 0.643204 | 0         |  |  |
|  |  | Shiraz-18T | 1457 | 0.643204 | 0         |  |  |
|  |  | Shiraz-22T | 1673 | 0.611783 | 0         |  |  |
|  |  | Shiraz-22T | 1673 | 0.611783 | 0         |  |  |
|  |  | Shiraz-22T | 1673 | 0.611783 | 0         |  |  |
|  |  | Shiraz-25T | 1719 | 0.472955 | 0         |  |  |
|  |  | Shiraz-25T | 1719 | 0.472955 | 0         |  |  |
|  |  | Shiraz-25T | 1719 | 0.472955 | 0         |  |  |
|  |  | Shiraz-28T | 1762 | 0.562311 | 0         |  |  |
|  |  | Shiraz-28T | 1762 | 0.562311 | 0         |  |  |
|  |  | Shiraz-28T | 1762 | 0.562311 | 0         |  |  |
|  |  | Shiraz-29T | 1801 | 0.815343 | 0         |  |  |

|  |  |            |      |          |           |  |  |
|--|--|------------|------|----------|-----------|--|--|
|  |  | Shiraz-29T | 1801 | 0.815343 | 0         |  |  |
|  |  | Shiraz-29T | 1801 | 0.815343 | 0         |  |  |
|  |  | Shiraz-32T | 1870 | 0.729766 | 0         |  |  |
|  |  | Shiraz-32T | 1872 | 1.504553 | 0         |  |  |
|  |  | Shiraz-35T | 1933 | 0.488535 | 0         |  |  |
|  |  | Shiraz-35T | 1933 | 0.488535 | 0         |  |  |
|  |  | Shiraz-35T | 1933 | 0.488535 | 0         |  |  |
|  |  | Shiraz-53T | 2115 | 0.427728 | 0         |  |  |
|  |  | Shiraz-58T | 2223 | 0.833364 | 0         |  |  |
|  |  | Shiraz-58T | 2223 | 0.833364 | 0         |  |  |
|  |  | Shiraz-58T | 2223 | 0.833364 | 0         |  |  |
|  |  | Shiraz-71T | 2263 | 0.975531 | 0         |  |  |
|  |  | Shiraz-71T | 2263 | 0.975531 | 0         |  |  |
|  |  | Shiraz-71T | 2263 | 0.975531 | 0         |  |  |
|  |  | Shiraz-3T  | 247  | 0        | -0.421316 |  |  |
|  |  | Shiraz-3T  | 247  | 0        | -0.421316 |  |  |
|  |  | Shiraz-4T  | 261  | 0        | -0.336249 |  |  |
|  |  | Shiraz-4T  | 261  | 0        | -0.336249 |  |  |
|  |  | Shiraz-4T  | 261  | 0        | -0.336249 |  |  |
|  |  | Shiraz-16T | 295  | 0.591657 | 0         |  |  |
|  |  | Shiraz-36T | 433  | 0        | -0.803961 |  |  |
|  |  | Shiraz-36T | 433  | 0        | -0.803961 |  |  |
|  |  | Shiraz-36T | 433  | 0        | -0.803961 |  |  |
|  |  | Shiraz-44T | 909  | 0        | -1.067051 |  |  |
|  |  | Shiraz-44T | 909  | 0        | -1.067051 |  |  |
|  |  | Shiraz-44T | 909  | 0        | -1.067051 |  |  |
|  |  | Shiraz-49T | 1170 | 0        | -0.967436 |  |  |
|  |  | Shiraz-49T | 1170 | 0        | -0.967436 |  |  |
|  |  | Shiraz-49T | 1170 | 0        | -0.967436 |  |  |
|  |  | Shiraz-9T  | 1370 | 0.690073 | 0         |  |  |
|  |  | Shiraz-9T  | 1370 | 0.690073 | 0         |  |  |
|  |  | Shiraz-9T  | 1370 | 0.690073 | 0         |  |  |
|  |  | Shiraz-18T | 1457 | 0.643204 | 0         |  |  |
|  |  | Shiraz-18T | 1457 | 0.643204 | 0         |  |  |
|  |  | Shiraz-18T | 1457 | 0.643204 | 0         |  |  |
|  |  | Shiraz-22T | 1673 | 0.611783 | 0         |  |  |
|  |  | Shiraz-22T | 1673 | 0.611783 | 0         |  |  |
|  |  | Shiraz-22T | 1673 | 0.611783 | 0         |  |  |
|  |  | Shiraz-25T | 1719 | 0.472955 | 0         |  |  |
|  |  | Shiraz-25T | 1719 | 0.472955 | 0         |  |  |
|  |  | Shiraz-25T | 1719 | 0.472955 | 0         |  |  |
|  |  | Shiraz-28T | 1762 | 0.562311 | 0         |  |  |
|  |  | Shiraz-28T | 1762 | 0.562311 | 0         |  |  |
|  |  | Shiraz-28T | 1762 | 0.562311 | 0         |  |  |
|  |  | Shiraz-29T | 1801 | 0.815343 | 0         |  |  |
|  |  | Shiraz-29T | 1801 | 0.815343 | 0         |  |  |
|  |  | Shiraz-29T | 1801 | 0.815343 | 0         |  |  |



|    |      |            |      |          |           |  |
|----|------|------------|------|----------|-----------|--|
|    |      | Shiraz-32T | 1870 | 0.729766 | 0         |  |
|    |      | Shiraz-32T | 1872 | 1.504553 | 0         |  |
|    |      | Shiraz-35T | 1933 | 0.488535 | 0         |  |
|    |      | Shiraz-35T | 1933 | 0.488535 | 0         |  |
|    |      | Shiraz-35T | 1933 | 0.488535 | 0         |  |
|    |      | Shiraz-53T | 2115 | 0.427728 | 0         |  |
|    |      | Shiraz-58T | 2223 | 0.833364 | 0         |  |
|    |      | Shiraz-58T | 2223 | 0.833364 | 0         |  |
|    |      | Shiraz-58T | 2223 | 0.833364 | 0         |  |
|    |      | Shiraz-71T | 2263 | 0.975531 | 0         |  |
|    |      | Shiraz-71T | 2263 | 0.975531 | 0         |  |
|    |      | Shiraz-71T | 2263 | 0.975531 | 0         |  |
| F9 | chrX | Shiraz-3T  | 242  | 0        | -0.336434 |  |
|    |      | Shiraz-4T  | 261  | 0        | -0.336249 |  |
|    |      | Shiraz-16T | 295  | 0.591657 | 0         |  |
|    |      | Shiraz-36T | 433  | 0        | -0.803961 |  |
|    |      | Shiraz-44T | 899  | 0        | -1.09697  |  |
|    |      | Shiraz-49T | 1170 | 0        | -0.967436 |  |
|    |      | Shiraz-9T  | 1370 | 0.690073 | 0         |  |
|    |      | Shiraz-18T | 1457 | 0.643204 | 0         |  |
|    |      | Shiraz-22T | 1673 | 0.611783 | 0         |  |
|    |      | Shiraz-25T | 1719 | 0.472955 | 0         |  |
|    |      | Shiraz-28T | 1762 | 0.562311 | 0         |  |
|    |      | Shiraz-29T | 1801 | 0.815343 | 0         |  |
|    |      | Shiraz-32T | 1870 | 0.729766 | 0         |  |
|    |      | Shiraz-35T | 1933 | 0.488535 | 0         |  |
|    |      | Shiraz-58T | 2223 | 0.833364 | 0         |  |
|    |      | Shiraz-71T | 2263 | 0.975531 | 0         |  |
|    |      | Shiraz-3T  | 242  | 0        | -0.336434 |  |
|    |      | Shiraz-4T  | 261  | 0        | -0.336249 |  |
|    |      | Shiraz-16T | 295  | 0.591657 | 0         |  |
|    |      | Shiraz-36T | 433  | 0        | -0.803961 |  |
|    |      | Shiraz-44T | 899  | 0        | -1.09697  |  |
|    |      | Shiraz-49T | 1170 | 0        | -0.967436 |  |
|    |      | Shiraz-9T  | 1370 | 0.690073 | 0         |  |
|    |      | Shiraz-18T | 1457 | 0.643204 | 0         |  |
|    |      | Shiraz-22T | 1673 | 0.611783 | 0         |  |
|    |      | Shiraz-25T | 1719 | 0.472955 | 0         |  |
|    |      | Shiraz-28T | 1762 | 0.562311 | 0         |  |
|    |      | Shiraz-29T | 1801 | 0.815343 | 0         |  |
|    |      | Shiraz-32T | 1870 | 0.729766 | 0         |  |
|    |      | Shiraz-35T | 1933 | 0.488535 | 0         |  |
|    |      | Shiraz-58T | 2223 | 0.833364 | 0         |  |
|    |      | Shiraz-71T | 2263 | 0.975531 | 0         |  |
|    |      | Shiraz-3T  | 242  | 0        | -0.336434 |  |
|    |      | Shiraz-4T  | 261  | 0        | -0.336249 |  |
|    |      | Shiraz-16T | 295  | 0.591657 | 0         |  |

|       |      |            |      |          |           |  |  |
|-------|------|------------|------|----------|-----------|--|--|
|       |      | Shiraz-36T | 433  | 0        | -0.803961 |  |  |
|       |      | Shiraz-44T | 899  | 0        | -1.09697  |  |  |
|       |      | Shiraz-49T | 1170 | 0        | -0.967436 |  |  |
|       |      | Shiraz-9T  | 1370 | 0.690073 | 0         |  |  |
|       |      | Shiraz-18T | 1457 | 0.643204 | 0         |  |  |
|       |      | Shiraz-22T | 1673 | 0.611783 | 0         |  |  |
|       |      | Shiraz-25T | 1719 | 0.472955 | 0         |  |  |
|       |      | Shiraz-28T | 1762 | 0.562311 | 0         |  |  |
|       |      | Shiraz-29T | 1801 | 0.815343 | 0         |  |  |
|       |      | Shiraz-32T | 1870 | 0.729766 | 0         |  |  |
|       |      | Shiraz-35T | 1933 | 0.488535 | 0         |  |  |
|       |      | Shiraz-58T | 2223 | 0.833364 | 0         |  |  |
|       |      | Shiraz-71T | 2263 | 0.975531 | 0         |  |  |
| FAAH2 | chrX | Shiraz-3T  | 240  | 0        | -0.346245 |  |  |
|       |      | Shiraz-4T  | 260  | 0        | -0.324128 |  |  |
|       |      | Shiraz-16T | 294  | 0.655804 | 0         |  |  |
|       |      | Shiraz-36T | 431  | 0        | -0.78035  |  |  |
|       |      | Shiraz-44T | 891  | 0        | -0.954044 |  |  |
|       |      | Shiraz-49T | 1166 | 0        | -0.917235 |  |  |
|       |      | Shiraz-18T | 1456 | 0.608534 | 0         |  |  |
|       |      | Shiraz-22T | 1669 | 0.695915 | 0         |  |  |
|       |      | Shiraz-25T | 1717 | 0.420447 | 0         |  |  |
|       |      | Shiraz-28T | 1760 | 0.538181 | 0         |  |  |
|       |      | Shiraz-29T | 1800 | 0.672527 | 0         |  |  |
|       |      | Shiraz-32T | 1869 | 0.776805 | 0         |  |  |
|       |      | Shiraz-35T | 1932 | 0.507141 | 0         |  |  |
|       |      | Shiraz-58T | 2221 | 0.871948 | 0         |  |  |
|       |      | Shiraz-71T | 2260 | 0.68394  | 0         |  |  |
|       |      | Shiraz-71T | 2262 | 0.986748 | 0         |  |  |
|       |      | Shiraz-3T  | 240  | 0        | -0.346245 |  |  |
|       |      | Shiraz-4T  | 260  | 0        | -0.324128 |  |  |
|       |      | Shiraz-16T | 294  | 0.655804 | 0         |  |  |
|       |      | Shiraz-36T | 431  | 0        | -0.78035  |  |  |
|       |      | Shiraz-44T | 891  | 0        | -0.954044 |  |  |
|       |      | Shiraz-49T | 1166 | 0        | -0.917235 |  |  |
|       |      | Shiraz-18T | 1456 | 0.608534 | 0         |  |  |
|       |      | Shiraz-22T | 1669 | 0.695915 | 0         |  |  |
|       |      | Shiraz-25T | 1717 | 0.420447 | 0         |  |  |
|       |      | Shiraz-28T | 1760 | 0.538181 | 0         |  |  |
|       |      | Shiraz-29T | 1800 | 0.672527 | 0         |  |  |
|       |      | Shiraz-32T | 1869 | 0.776805 | 0         |  |  |
|       |      | Shiraz-35T | 1932 | 0.507141 | 0         |  |  |
|       |      | Shiraz-58T | 2221 | 0.871948 | 0         |  |  |
|       |      | Shiraz-71T | 2260 | 0.68394  | 0         |  |  |
|       |      | Shiraz-71T | 2262 | 0.986748 | 0         |  |  |
|       |      | Shiraz-3T  | 240  | 0        | -0.346245 |  |  |
|       |      | Shiraz-4T  | 260  | 0        | -0.324128 |  |  |

|         |      |            |      |          |           |  |  |
|---------|------|------------|------|----------|-----------|--|--|
|         |      | Shiraz-16T | 294  | 0.655804 | 0         |  |  |
|         |      | Shiraz-36T | 431  | 0        | -0.78035  |  |  |
|         |      | Shiraz-44T | 891  | 0        | -0.954044 |  |  |
|         |      | Shiraz-49T | 1166 | 0        | -0.917235 |  |  |
|         |      | Shiraz-18T | 1456 | 0.608534 | 0         |  |  |
|         |      | Shiraz-22T | 1669 | 0.695915 | 0         |  |  |
|         |      | Shiraz-25T | 1717 | 0.420447 | 0         |  |  |
|         |      | Shiraz-28T | 1760 | 0.538181 | 0         |  |  |
|         |      | Shiraz-29T | 1800 | 0.672527 | 0         |  |  |
|         |      | Shiraz-32T | 1869 | 0.776805 | 0         |  |  |
|         |      | Shiraz-35T | 1932 | 0.507141 | 0         |  |  |
|         |      | Shiraz-58T | 2221 | 0.871948 | 0         |  |  |
|         |      | Shiraz-71T | 2260 | 0.68394  | 0         |  |  |
|         |      | Shiraz-71T | 2262 | 0.986748 | 0         |  |  |
| FABP5L3 | chr7 | Shiraz-3T  | 90   | 0.219276 | 0         |  |  |
|         |      | Shiraz-3T  | 99   | 0.454766 | 0         |  |  |
|         |      | Shiraz-4T  | 253  | 0.372918 | 0         |  |  |
|         |      | Shiraz-36T | 378  | 0.179558 | 0         |  |  |
|         |      | Shiraz-44T | 646  | 0.471276 | 0         |  |  |
|         |      | Shiraz-44T | 648  | 0.017909 | 0         |  |  |
|         |      | Shiraz-46T | 943  | 0.093799 | 0         |  |  |
|         |      | Shiraz-9T  | 1325 | 0.221899 | 0         |  |  |
|         |      | Shiraz-18T | 1434 | 0.244465 | 0         |  |  |
|         |      | Shiraz-25T | 1698 | 0.21835  | 0         |  |  |
|         |      | Shiraz-28T | 1735 | 0.350744 | 0         |  |  |
|         |      | Shiraz-29T | 1778 | 0.120767 | 0         |  |  |
|         |      | Shiraz-32T | 1833 | 0.551336 | 0         |  |  |
|         |      | Shiraz-38T | 1951 | 0.250891 | 0         |  |  |
|         |      | Shiraz-58T | 2162 | 0.221505 | 0         |  |  |
|         |      | Shiraz-71T | 2238 | 0.603631 | 0         |  |  |
|         |      | Shiraz-3T  | 90   | 0.219276 | 0         |  |  |
|         |      | Shiraz-3T  | 99   | 0.454766 | 0         |  |  |
|         |      | Shiraz-4T  | 253  | 0.372918 | 0         |  |  |
|         |      | Shiraz-36T | 378  | 0.179558 | 0         |  |  |
|         |      | Shiraz-44T | 646  | 0.471276 | 0         |  |  |
|         |      | Shiraz-44T | 648  | 0.017909 | 0         |  |  |
|         |      | Shiraz-46T | 943  | 0.093799 | 0         |  |  |
|         |      | Shiraz-9T  | 1325 | 0.221899 | 0         |  |  |
|         |      | Shiraz-18T | 1434 | 0.244465 | 0         |  |  |
|         |      | Shiraz-25T | 1698 | 0.21835  | 0         |  |  |
|         |      | Shiraz-28T | 1735 | 0.350744 | 0         |  |  |
|         |      | Shiraz-29T | 1778 | 0.120767 | 0         |  |  |
|         |      | Shiraz-32T | 1833 | 0.551336 | 0         |  |  |
|         |      | Shiraz-38T | 1951 | 0.250891 | 0         |  |  |
|         |      | Shiraz-58T | 2162 | 0.221505 | 0         |  |  |
|         |      | Shiraz-71T | 2238 | 0.603631 | 0         |  |  |
|         |      | Shiraz-3T  | 90   | 0.219276 | 0         |  |  |

|         |      |            |      |          |           |  |
|---------|------|------------|------|----------|-----------|--|
|         |      | Shiraz-3T  | 99   | 0.454766 | 0         |  |
|         |      | Shiraz-4T  | 253  | 0.372918 | 0         |  |
|         |      | Shiraz-36T | 378  | 0.179558 | 0         |  |
|         |      | Shiraz-44T | 646  | 0.471276 | 0         |  |
|         |      | Shiraz-44T | 648  | 0.017909 | 0         |  |
|         |      | Shiraz-46T | 943  | 0.093799 | 0         |  |
|         |      | Shiraz-9T  | 1325 | 0.221899 | 0         |  |
|         |      | Shiraz-18T | 1434 | 0.244465 | 0         |  |
|         |      | Shiraz-25T | 1698 | 0.21835  | 0         |  |
|         |      | Shiraz-28T | 1735 | 0.350744 | 0         |  |
|         |      | Shiraz-29T | 1778 | 0.120767 | 0         |  |
|         |      | Shiraz-32T | 1833 | 0.551336 | 0         |  |
|         |      | Shiraz-38T | 1951 | 0.250891 | 0         |  |
|         |      | Shiraz-58T | 2162 | 0.221505 | 0         |  |
|         |      | Shiraz-71T | 2238 | 0.603631 | 0         |  |
| FAM104B | chrX | Shiraz-3T  | 240  | 0        | -0.346245 |  |
|         |      | Shiraz-4T  | 260  | 0        | -0.324128 |  |
|         |      | Shiraz-16T | 294  | 0.655804 | 0         |  |
|         |      | Shiraz-36T | 431  | 0        | -0.78035  |  |
|         |      | Shiraz-44T | 891  | 0        | -0.954044 |  |
|         |      | Shiraz-49T | 1166 | 0        | -0.917235 |  |
|         |      | Shiraz-9T  | 1368 | 0.199713 | 0         |  |
|         |      | Shiraz-18T | 1456 | 0.608534 | 0         |  |
|         |      | Shiraz-22T | 1669 | 0.695915 | 0         |  |
|         |      | Shiraz-25T | 1717 | 0.420447 | 0         |  |
|         |      | Shiraz-28T | 1760 | 0.538181 | 0         |  |
|         |      | Shiraz-29T | 1800 | 0.672527 | 0         |  |
|         |      | Shiraz-32T | 1869 | 0.776805 | 0         |  |
|         |      | Shiraz-35T | 1932 | 0.507141 | 0         |  |
|         |      | Shiraz-58T | 2221 | 0.871948 | 0         |  |
|         |      | Shiraz-71T | 2260 | 0.68394  | 0         |  |
|         |      | Shiraz-71T | 2262 | 0.986748 | 0         |  |
|         |      | Shiraz-3T  | 240  | 0        | -0.346245 |  |
|         |      | Shiraz-4T  | 260  | 0        | -0.324128 |  |
|         |      | Shiraz-16T | 294  | 0.655804 | 0         |  |
|         |      | Shiraz-36T | 431  | 0        | -0.78035  |  |
|         |      | Shiraz-44T | 891  | 0        | -0.954044 |  |
|         |      | Shiraz-49T | 1166 | 0        | -0.917235 |  |
|         |      | Shiraz-9T  | 1368 | 0.199713 | 0         |  |
|         |      | Shiraz-18T | 1456 | 0.608534 | 0         |  |
|         |      | Shiraz-22T | 1669 | 0.695915 | 0         |  |
|         |      | Shiraz-25T | 1717 | 0.420447 | 0         |  |
|         |      | Shiraz-28T | 1760 | 0.538181 | 0         |  |
|         |      | Shiraz-29T | 1800 | 0.672527 | 0         |  |
|         |      | Shiraz-32T | 1869 | 0.776805 | 0         |  |
|         |      | Shiraz-35T | 1932 | 0.507141 | 0         |  |
|         |      | Shiraz-58T | 2221 | 0.871948 | 0         |  |

|         |      |            |      |          |           |  |
|---------|------|------------|------|----------|-----------|--|
|         |      | Shiraz-71T | 2260 | 0.68394  | 0         |  |
|         |      | Shiraz-71T | 2262 | 0.986748 | 0         |  |
|         |      | Shiraz-3T  | 240  | 0        | -0.346245 |  |
|         |      | Shiraz-4T  | 260  | 0        | -0.324128 |  |
|         |      | Shiraz-16T | 294  | 0.655804 | 0         |  |
|         |      | Shiraz-36T | 431  | 0        | -0.78035  |  |
|         |      | Shiraz-44T | 891  | 0        | -0.954044 |  |
|         |      | Shiraz-49T | 1166 | 0        | -0.917235 |  |
|         |      | Shiraz-9T  | 1368 | 0.199713 | 0         |  |
|         |      | Shiraz-18T | 1456 | 0.608534 | 0         |  |
|         |      | Shiraz-22T | 1669 | 0.695915 | 0         |  |
|         |      | Shiraz-25T | 1717 | 0.420447 | 0         |  |
|         |      | Shiraz-28T | 1760 | 0.538181 | 0         |  |
|         |      | Shiraz-29T | 1800 | 0.672527 | 0         |  |
|         |      | Shiraz-32T | 1869 | 0.776805 | 0         |  |
|         |      | Shiraz-35T | 1932 | 0.507141 | 0         |  |
|         |      | Shiraz-58T | 2221 | 0.871948 | 0         |  |
|         |      | Shiraz-71T | 2260 | 0.68394  | 0         |  |
|         |      | Shiraz-71T | 2262 | 0.986748 | 0         |  |
| FAM115A | chr7 | Shiraz-3T  | 90   | 0.219276 | 0         |  |
|         |      | Shiraz-3T  | 98   | 0        | -0.069276 |  |
|         |      | Shiraz-4T  | 253  | 0.372918 | 0         |  |
|         |      | Shiraz-36T | 378  | 0.179558 | 0         |  |
|         |      | Shiraz-44T | 645  | 0        | -0.474857 |  |
|         |      | Shiraz-46T | 943  | 0.093799 | 0         |  |
|         |      | Shiraz-77T | 1225 | 0        | -0.117922 |  |
|         |      | Shiraz-9T  | 1325 | 0.221899 | 0         |  |
|         |      | Shiraz-18T | 1434 | 0.244465 | 0         |  |
|         |      | Shiraz-22T | 1554 | 0        | -0.502826 |  |
|         |      | Shiraz-25T | 1698 | 0.21835  | 0         |  |
|         |      | Shiraz-28T | 1735 | 0.350744 | 0         |  |
|         |      | Shiraz-29T | 1778 | 0.120767 | 0         |  |
|         |      | Shiraz-32T | 1833 | 0.551336 | 0         |  |
|         |      | Shiraz-38T | 1951 | 0.250891 | 0         |  |
|         |      | Shiraz-53T | 2078 | 0.287202 | 0         |  |
|         |      | Shiraz-58T | 2162 | 0.221505 | 0         |  |
|         |      | Shiraz-71T | 2238 | 0.603631 | 0         |  |
|         |      | Shiraz-3T  | 90   | 0.219276 | 0         |  |
|         |      | Shiraz-3T  | 98   | 0        | -0.069276 |  |
|         |      | Shiraz-4T  | 253  | 0.372918 | 0         |  |
|         |      | Shiraz-36T | 378  | 0.179558 | 0         |  |
|         |      | Shiraz-44T | 645  | 0        | -0.474857 |  |
|         |      | Shiraz-46T | 943  | 0.093799 | 0         |  |
|         |      | Shiraz-77T | 1225 | 0        | -0.117922 |  |
|         |      | Shiraz-9T  | 1325 | 0.221899 | 0         |  |
|         |      | Shiraz-18T | 1434 | 0.244465 | 0         |  |
|         |      | Shiraz-22T | 1554 | 0        | -0.502826 |  |

|         |      |            |      |          |           |  |
|---------|------|------------|------|----------|-----------|--|
|         |      | Shiraz-25T | 1698 | 0.21835  | 0         |  |
|         |      | Shiraz-28T | 1735 | 0.350744 | 0         |  |
|         |      | Shiraz-29T | 1778 | 0.120767 | 0         |  |
|         |      | Shiraz-32T | 1833 | 0.551336 | 0         |  |
|         |      | Shiraz-38T | 1951 | 0.250891 | 0         |  |
|         |      | Shiraz-53T | 2078 | 0.287202 | 0         |  |
|         |      | Shiraz-58T | 2162 | 0.221505 | 0         |  |
|         |      | Shiraz-71T | 2238 | 0.603631 | 0         |  |
|         |      | Shiraz-3T  | 90   | 0.219276 | 0         |  |
|         |      | Shiraz-3T  | 98   | 0        | -0.069276 |  |
|         |      | Shiraz-4T  | 253  | 0.372918 | 0         |  |
|         |      | Shiraz-36T | 378  | 0.179558 | 0         |  |
|         |      | Shiraz-44T | 645  | 0        | -0.474857 |  |
|         |      | Shiraz-46T | 943  | 0.093799 | 0         |  |
|         |      | Shiraz-77T | 1225 | 0        | -0.117922 |  |
|         |      | Shiraz-9T  | 1325 | 0.221899 | 0         |  |
|         |      | Shiraz-18T | 1434 | 0.244465 | 0         |  |
|         |      | Shiraz-22T | 1554 | 0        | -0.502826 |  |
|         |      | Shiraz-25T | 1698 | 0.21835  | 0         |  |
|         |      | Shiraz-28T | 1735 | 0.350744 | 0         |  |
|         |      | Shiraz-29T | 1778 | 0.120767 | 0         |  |
|         |      | Shiraz-32T | 1833 | 0.551336 | 0         |  |
|         |      | Shiraz-38T | 1951 | 0.250891 | 0         |  |
|         |      | Shiraz-53T | 2078 | 0.287202 | 0         |  |
|         |      | Shiraz-58T | 2162 | 0.221505 | 0         |  |
|         |      | Shiraz-71T | 2238 | 0.603631 | 0         |  |
| FAM115C | chr7 | Shiraz-3T  | 90   | 0.219276 | 0         |  |
|         |      | Shiraz-3T  | 90   | 0.219276 | 0         |  |
|         |      | Shiraz-4T  | 253  | 0.372918 | 0         |  |
|         |      | Shiraz-4T  | 253  | 0.372918 | 0         |  |
|         |      | Shiraz-36T | 378  | 0.179558 | 0         |  |
|         |      | Shiraz-36T | 378  | 0.179558 | 0         |  |
|         |      | Shiraz-46T | 943  | 0.093799 | 0         |  |
|         |      | Shiraz-46T | 943  | 0.093799 | 0         |  |
|         |      | Shiraz-77T | 1225 | 0        | -0.117922 |  |
|         |      | Shiraz-77T | 1225 | 0        | -0.117922 |  |
|         |      | Shiraz-9T  | 1325 | 0.221899 | 0         |  |
|         |      | Shiraz-9T  | 1325 | 0.221899 | 0         |  |
|         |      | Shiraz-18T | 1434 | 0.244465 | 0         |  |
|         |      | Shiraz-18T | 1434 | 0.244465 | 0         |  |
|         |      | Shiraz-25T | 1698 | 0.21835  | 0         |  |
|         |      | Shiraz-25T | 1698 | 0.21835  | 0         |  |
|         |      | Shiraz-28T | 1735 | 0.350744 | 0         |  |
|         |      | Shiraz-28T | 1735 | 0.350744 | 0         |  |
|         |      | Shiraz-29T | 1778 | 0.120767 | 0         |  |
|         |      | Shiraz-29T | 1778 | 0.120767 | 0         |  |
|         |      | Shiraz-32T | 1833 | 0.551336 | 0         |  |

|  |  |            |      |          |           |  |  |
|--|--|------------|------|----------|-----------|--|--|
|  |  | Shiraz-32T | 1833 | 0.551336 | 0         |  |  |
|  |  | Shiraz-38T | 1951 | 0.250891 | 0         |  |  |
|  |  | Shiraz-38T | 1951 | 0.250891 | 0         |  |  |
|  |  | Shiraz-53T | 2078 | 0.287202 | 0         |  |  |
|  |  | Shiraz-53T | 2078 | 0.287202 | 0         |  |  |
|  |  | Shiraz-58T | 2162 | 0.221505 | 0         |  |  |
|  |  | Shiraz-58T | 2162 | 0.221505 | 0         |  |  |
|  |  | Shiraz-71T | 2238 | 0.603631 | 0         |  |  |
|  |  | Shiraz-71T | 2238 | 0.603631 | 0         |  |  |
|  |  | Shiraz-3T  | 90   | 0.219276 | 0         |  |  |
|  |  | Shiraz-3T  | 90   | 0.219276 | 0         |  |  |
|  |  | Shiraz-4T  | 253  | 0.372918 | 0         |  |  |
|  |  | Shiraz-4T  | 253  | 0.372918 | 0         |  |  |
|  |  | Shiraz-36T | 378  | 0.179558 | 0         |  |  |
|  |  | Shiraz-36T | 378  | 0.179558 | 0         |  |  |
|  |  | Shiraz-46T | 943  | 0.093799 | 0         |  |  |
|  |  | Shiraz-46T | 943  | 0.093799 | 0         |  |  |
|  |  | Shiraz-77T | 1225 | 0        | -0.117922 |  |  |
|  |  | Shiraz-77T | 1225 | 0        | -0.117922 |  |  |
|  |  | Shiraz-9T  | 1325 | 0.221899 | 0         |  |  |
|  |  | Shiraz-9T  | 1325 | 0.221899 | 0         |  |  |
|  |  | Shiraz-18T | 1434 | 0.244465 | 0         |  |  |
|  |  | Shiraz-18T | 1434 | 0.244465 | 0         |  |  |
|  |  | Shiraz-25T | 1698 | 0.21835  | 0         |  |  |
|  |  | Shiraz-25T | 1698 | 0.21835  | 0         |  |  |
|  |  | Shiraz-28T | 1735 | 0.350744 | 0         |  |  |
|  |  | Shiraz-28T | 1735 | 0.350744 | 0         |  |  |
|  |  | Shiraz-29T | 1778 | 0.120767 | 0         |  |  |
|  |  | Shiraz-29T | 1778 | 0.120767 | 0         |  |  |
|  |  | Shiraz-32T | 1833 | 0.551336 | 0         |  |  |
|  |  | Shiraz-32T | 1833 | 0.551336 | 0         |  |  |
|  |  | Shiraz-38T | 1951 | 0.250891 | 0         |  |  |
|  |  | Shiraz-38T | 1951 | 0.250891 | 0         |  |  |
|  |  | Shiraz-53T | 2078 | 0.287202 | 0         |  |  |
|  |  | Shiraz-53T | 2078 | 0.287202 | 0         |  |  |
|  |  | Shiraz-58T | 2162 | 0.221505 | 0         |  |  |
|  |  | Shiraz-58T | 2162 | 0.221505 | 0         |  |  |
|  |  | Shiraz-71T | 2238 | 0.603631 | 0         |  |  |
|  |  | Shiraz-71T | 2238 | 0.603631 | 0         |  |  |
|  |  | Shiraz-3T  | 90   | 0.219276 | 0         |  |  |
|  |  | Shiraz-3T  | 90   | 0.219276 | 0         |  |  |
|  |  | Shiraz-4T  | 253  | 0.372918 | 0         |  |  |
|  |  | Shiraz-4T  | 253  | 0.372918 | 0         |  |  |
|  |  | Shiraz-36T | 378  | 0.179558 | 0         |  |  |
|  |  | Shiraz-36T | 378  | 0.179558 | 0         |  |  |
|  |  | Shiraz-46T | 943  | 0.093799 | 0         |  |  |
|  |  | Shiraz-46T | 943  | 0.093799 | 0         |  |  |

|         |      |            |      |          |           |  |  |
|---------|------|------------|------|----------|-----------|--|--|
|         |      | Shiraz-77T | 1225 | 0        | -0.117922 |  |  |
|         |      | Shiraz-77T | 1225 | 0        | -0.117922 |  |  |
|         |      | Shiraz-9T  | 1325 | 0.221899 | 0         |  |  |
|         |      | Shiraz-9T  | 1325 | 0.221899 | 0         |  |  |
|         |      | Shiraz-18T | 1434 | 0.244465 | 0         |  |  |
|         |      | Shiraz-18T | 1434 | 0.244465 | 0         |  |  |
|         |      | Shiraz-25T | 1698 | 0.21835  | 0         |  |  |
|         |      | Shiraz-25T | 1698 | 0.21835  | 0         |  |  |
|         |      | Shiraz-28T | 1735 | 0.350744 | 0         |  |  |
|         |      | Shiraz-28T | 1735 | 0.350744 | 0         |  |  |
|         |      | Shiraz-29T | 1778 | 0.120767 | 0         |  |  |
|         |      | Shiraz-29T | 1778 | 0.120767 | 0         |  |  |
|         |      | Shiraz-32T | 1833 | 0.551336 | 0         |  |  |
|         |      | Shiraz-32T | 1833 | 0.551336 | 0         |  |  |
|         |      | Shiraz-38T | 1951 | 0.250891 | 0         |  |  |
|         |      | Shiraz-38T | 1951 | 0.250891 | 0         |  |  |
|         |      | Shiraz-53T | 2078 | 0.287202 | 0         |  |  |
|         |      | Shiraz-53T | 2078 | 0.287202 | 0         |  |  |
|         |      | Shiraz-58T | 2162 | 0.221505 | 0         |  |  |
|         |      | Shiraz-58T | 2162 | 0.221505 | 0         |  |  |
|         |      | Shiraz-71T | 2238 | 0.603631 | 0         |  |  |
|         |      | Shiraz-71T | 2238 | 0.603631 | 0         |  |  |
| FAM120C | chrX | Shiraz-4T  | 260  | 0        | -0.324128 |  |  |
|         |      | Shiraz-16T | 294  | 0.655804 | 0         |  |  |
|         |      | Shiraz-31T | 345  | 0.103301 | 0         |  |  |
|         |      | Shiraz-36T | 431  | 0        | -0.78035  |  |  |
|         |      | Shiraz-36T | 432  | 0        | -0.6692   |  |  |
|         |      | Shiraz-44T | 891  | 0        | -0.954044 |  |  |
|         |      | Shiraz-44T | 898  | 0        | -0.515218 |  |  |
|         |      | Shiraz-49T | 1166 | 0        | -0.917235 |  |  |
|         |      | Shiraz-77T | 1282 | 0.213849 | 0         |  |  |
|         |      | Shiraz-9T  | 1368 | 0.199713 | 0         |  |  |
|         |      | Shiraz-18T | 1456 | 0.608534 | 0         |  |  |
|         |      | Shiraz-22T | 1669 | 0.695915 | 0         |  |  |
|         |      | Shiraz-25T | 1717 | 0.420447 | 0         |  |  |
|         |      | Shiraz-28T | 1760 | 0.538181 | 0         |  |  |
|         |      | Shiraz-29T | 1800 | 0.672527 | 0         |  |  |
|         |      | Shiraz-32T | 1869 | 0.776805 | 0         |  |  |
|         |      | Shiraz-35T | 1932 | 0.507141 | 0         |  |  |
|         |      | Shiraz-58T | 2221 | 0.871948 | 0         |  |  |
|         |      | Shiraz-71T | 2260 | 0.68394  | 0         |  |  |
|         |      | Shiraz-71T | 2262 | 0.986748 | 0         |  |  |
|         |      | Shiraz-4T  | 260  | 0        | -0.324128 |  |  |
|         |      | Shiraz-16T | 294  | 0.655804 | 0         |  |  |
|         |      | Shiraz-31T | 345  | 0.103301 | 0         |  |  |
|         |      | Shiraz-36T | 431  | 0        | -0.78035  |  |  |
|         |      | Shiraz-36T | 432  | 0        | -0.6692   |  |  |



|         |      |            |      |          |           |  |  |
|---------|------|------------|------|----------|-----------|--|--|
|         |      | Shiraz-44T | 891  | 0        | -0.954044 |  |  |
|         |      | Shiraz-44T | 898  | 0        | -0.515218 |  |  |
|         |      | Shiraz-49T | 1166 | 0        | -0.917235 |  |  |
|         |      | Shiraz-77T | 1282 | 0.213849 | 0         |  |  |
|         |      | Shiraz-9T  | 1368 | 0.199713 | 0         |  |  |
|         |      | Shiraz-18T | 1456 | 0.608534 | 0         |  |  |
|         |      | Shiraz-22T | 1669 | 0.695915 | 0         |  |  |
|         |      | Shiraz-25T | 1717 | 0.420447 | 0         |  |  |
|         |      | Shiraz-28T | 1760 | 0.538181 | 0         |  |  |
|         |      | Shiraz-29T | 1800 | 0.672527 | 0         |  |  |
|         |      | Shiraz-32T | 1869 | 0.776805 | 0         |  |  |
|         |      | Shiraz-35T | 1932 | 0.507141 | 0         |  |  |
|         |      | Shiraz-58T | 2221 | 0.871948 | 0         |  |  |
|         |      | Shiraz-71T | 2260 | 0.68394  | 0         |  |  |
|         |      | Shiraz-71T | 2262 | 0.986748 | 0         |  |  |
|         |      | Shiraz-4T  | 260  | 0        | -0.324128 |  |  |
|         |      | Shiraz-16T | 294  | 0.655804 | 0         |  |  |
|         |      | Shiraz-31T | 345  | 0.103301 | 0         |  |  |
|         |      | Shiraz-36T | 431  | 0        | -0.78035  |  |  |
|         |      | Shiraz-36T | 432  | 0        | -0.6692   |  |  |
|         |      | Shiraz-44T | 891  | 0        | -0.954044 |  |  |
|         |      | Shiraz-44T | 898  | 0        | -0.515218 |  |  |
|         |      | Shiraz-49T | 1166 | 0        | -0.917235 |  |  |
|         |      | Shiraz-77T | 1282 | 0.213849 | 0         |  |  |
|         |      | Shiraz-9T  | 1368 | 0.199713 | 0         |  |  |
|         |      | Shiraz-18T | 1456 | 0.608534 | 0         |  |  |
|         |      | Shiraz-22T | 1669 | 0.695915 | 0         |  |  |
|         |      | Shiraz-25T | 1717 | 0.420447 | 0         |  |  |
|         |      | Shiraz-28T | 1760 | 0.538181 | 0         |  |  |
|         |      | Shiraz-29T | 1800 | 0.672527 | 0         |  |  |
|         |      | Shiraz-32T | 1869 | 0.776805 | 0         |  |  |
|         |      | Shiraz-35T | 1932 | 0.507141 | 0         |  |  |
|         |      | Shiraz-58T | 2221 | 0.871948 | 0         |  |  |
|         |      | Shiraz-71T | 2260 | 0.68394  | 0         |  |  |
|         |      | Shiraz-71T | 2262 | 0.986748 | 0         |  |  |
| FAM122B | chrX | Shiraz-3T  | 242  | 0        | -0.336434 |  |  |
|         |      | Shiraz-4T  | 261  | 0        | -0.336249 |  |  |
|         |      | Shiraz-16T | 295  | 0.591657 | 0         |  |  |
|         |      | Shiraz-36T | 433  | 0        | -0.803961 |  |  |
|         |      | Shiraz-44T | 899  | 0        | -1.09697  |  |  |
|         |      | Shiraz-49T | 1170 | 0        | -0.967436 |  |  |
|         |      | Shiraz-9T  | 1370 | 0.690073 | 0         |  |  |
|         |      | Shiraz-18T | 1457 | 0.643204 | 0         |  |  |
|         |      | Shiraz-22T | 1673 | 0.611783 | 0         |  |  |
|         |      | Shiraz-22T | 1677 | 0.789711 | 0         |  |  |
|         |      | Shiraz-25T | 1719 | 0.472955 | 0         |  |  |
|         |      | Shiraz-28T | 1762 | 0.562311 | 0         |  |  |

|         |      |            |      |          |           |  |
|---------|------|------------|------|----------|-----------|--|
|         |      | Shiraz-29T | 1801 | 0.815343 | 0         |  |
|         |      | Shiraz-32T | 1870 | 0.729766 | 0         |  |
|         |      | Shiraz-35T | 1933 | 0.488535 | 0         |  |
|         |      | Shiraz-58T | 2223 | 0.833364 | 0         |  |
|         |      | Shiraz-71T | 2263 | 0.975531 | 0         |  |
|         |      | Shiraz-3T  | 242  | 0        | -0.336434 |  |
|         |      | Shiraz-4T  | 261  | 0        | -0.336249 |  |
|         |      | Shiraz-16T | 295  | 0.591657 | 0         |  |
|         |      | Shiraz-36T | 433  | 0        | -0.803961 |  |
|         |      | Shiraz-44T | 899  | 0        | -1.09697  |  |
|         |      | Shiraz-49T | 1170 | 0        | -0.967436 |  |
|         |      | Shiraz-9T  | 1370 | 0.690073 | 0         |  |
|         |      | Shiraz-18T | 1457 | 0.643204 | 0         |  |
|         |      | Shiraz-22T | 1673 | 0.611783 | 0         |  |
|         |      | Shiraz-22T | 1677 | 0.789711 | 0         |  |
|         |      | Shiraz-25T | 1719 | 0.472955 | 0         |  |
|         |      | Shiraz-28T | 1762 | 0.562311 | 0         |  |
|         |      | Shiraz-29T | 1801 | 0.815343 | 0         |  |
|         |      | Shiraz-32T | 1870 | 0.729766 | 0         |  |
|         |      | Shiraz-35T | 1933 | 0.488535 | 0         |  |
|         |      | Shiraz-58T | 2223 | 0.833364 | 0         |  |
|         |      | Shiraz-71T | 2263 | 0.975531 | 0         |  |
|         |      | Shiraz-3T  | 242  | 0        | -0.336434 |  |
|         |      | Shiraz-4T  | 261  | 0        | -0.336249 |  |
|         |      | Shiraz-16T | 295  | 0.591657 | 0         |  |
|         |      | Shiraz-36T | 433  | 0        | -0.803961 |  |
|         |      | Shiraz-44T | 899  | 0        | -1.09697  |  |
|         |      | Shiraz-49T | 1170 | 0        | -0.967436 |  |
|         |      | Shiraz-9T  | 1370 | 0.690073 | 0         |  |
|         |      | Shiraz-18T | 1457 | 0.643204 | 0         |  |
|         |      | Shiraz-22T | 1673 | 0.611783 | 0         |  |
|         |      | Shiraz-22T | 1677 | 0.789711 | 0         |  |
|         |      | Shiraz-25T | 1719 | 0.472955 | 0         |  |
|         |      | Shiraz-28T | 1762 | 0.562311 | 0         |  |
|         |      | Shiraz-29T | 1801 | 0.815343 | 0         |  |
|         |      | Shiraz-32T | 1870 | 0.729766 | 0         |  |
|         |      | Shiraz-35T | 1933 | 0.488535 | 0         |  |
|         |      | Shiraz-58T | 2223 | 0.833364 | 0         |  |
|         |      | Shiraz-71T | 2263 | 0.975531 | 0         |  |
| FAM122C | chrX | Shiraz-3T  | 242  | 0        | -0.336434 |  |
|         |      | Shiraz-4T  | 261  | 0        | -0.336249 |  |
|         |      | Shiraz-16T | 295  | 0.591657 | 0         |  |
|         |      | Shiraz-36T | 433  | 0        | -0.803961 |  |
|         |      | Shiraz-44T | 899  | 0        | -1.09697  |  |
|         |      | Shiraz-49T | 1170 | 0        | -0.967436 |  |
|         |      | Shiraz-9T  | 1370 | 0.690073 | 0         |  |
|         |      | Shiraz-18T | 1457 | 0.643204 | 0         |  |

|         |      |            |      |          |           |  |  |
|---------|------|------------|------|----------|-----------|--|--|
|         |      | Shiraz-22T | 1673 | 0.611783 | 0         |  |  |
|         |      | Shiraz-22T | 1677 | 0.789711 | 0         |  |  |
|         |      | Shiraz-25T | 1719 | 0.472955 | 0         |  |  |
|         |      | Shiraz-28T | 1762 | 0.562311 | 0         |  |  |
|         |      | Shiraz-29T | 1801 | 0.815343 | 0         |  |  |
|         |      | Shiraz-32T | 1870 | 0.729766 | 0         |  |  |
|         |      | Shiraz-35T | 1933 | 0.488535 | 0         |  |  |
|         |      | Shiraz-58T | 2223 | 0.833364 | 0         |  |  |
|         |      | Shiraz-71T | 2263 | 0.975531 | 0         |  |  |
|         |      | Shiraz-3T  | 242  | 0        | -0.336434 |  |  |
|         |      | Shiraz-4T  | 261  | 0        | -0.336249 |  |  |
|         |      | Shiraz-16T | 295  | 0.591657 | 0         |  |  |
|         |      | Shiraz-36T | 433  | 0        | -0.803961 |  |  |
|         |      | Shiraz-44T | 899  | 0        | -1.09697  |  |  |
|         |      | Shiraz-49T | 1170 | 0        | -0.967436 |  |  |
|         |      | Shiraz-9T  | 1370 | 0.690073 | 0         |  |  |
|         |      | Shiraz-18T | 1457 | 0.643204 | 0         |  |  |
|         |      | Shiraz-22T | 1673 | 0.611783 | 0         |  |  |
|         |      | Shiraz-22T | 1677 | 0.789711 | 0         |  |  |
|         |      | Shiraz-25T | 1719 | 0.472955 | 0         |  |  |
|         |      | Shiraz-28T | 1762 | 0.562311 | 0         |  |  |
|         |      | Shiraz-29T | 1801 | 0.815343 | 0         |  |  |
|         |      | Shiraz-32T | 1870 | 0.729766 | 0         |  |  |
|         |      | Shiraz-35T | 1933 | 0.488535 | 0         |  |  |
|         |      | Shiraz-58T | 2223 | 0.833364 | 0         |  |  |
|         |      | Shiraz-71T | 2263 | 0.975531 | 0         |  |  |
|         |      | Shiraz-3T  | 242  | 0        | -0.336434 |  |  |
|         |      | Shiraz-4T  | 261  | 0        | -0.336249 |  |  |
|         |      | Shiraz-16T | 295  | 0.591657 | 0         |  |  |
|         |      | Shiraz-36T | 433  | 0        | -0.803961 |  |  |
|         |      | Shiraz-44T | 899  | 0        | -1.09697  |  |  |
|         |      | Shiraz-49T | 1170 | 0        | -0.967436 |  |  |
|         |      | Shiraz-9T  | 1370 | 0.690073 | 0         |  |  |
|         |      | Shiraz-18T | 1457 | 0.643204 | 0         |  |  |
|         |      | Shiraz-22T | 1673 | 0.611783 | 0         |  |  |
|         |      | Shiraz-22T | 1677 | 0.789711 | 0         |  |  |
|         |      | Shiraz-25T | 1719 | 0.472955 | 0         |  |  |
|         |      | Shiraz-28T | 1762 | 0.562311 | 0         |  |  |
|         |      | Shiraz-29T | 1801 | 0.815343 | 0         |  |  |
|         |      | Shiraz-32T | 1870 | 0.729766 | 0         |  |  |
|         |      | Shiraz-35T | 1933 | 0.488535 | 0         |  |  |
|         |      | Shiraz-58T | 2223 | 0.833364 | 0         |  |  |
|         |      | Shiraz-71T | 2263 | 0.975531 | 0         |  |  |
| FAM123B | chrX | Shiraz-3T  | 241  | 0        | -0.230501 |  |  |
|         |      | Shiraz-4T  | 261  | 0        | -0.336249 |  |  |
|         |      | Shiraz-16T | 295  | 0.591657 | 0         |  |  |
|         |      | Shiraz-36T | 433  | 0        | -0.803961 |  |  |

|         |      |            |      |          |           |  |  |
|---------|------|------------|------|----------|-----------|--|--|
|         |      | Shiraz-44T | 899  | 0        | -1.09697  |  |  |
|         |      | Shiraz-49T | 1170 | 0        | -0.967436 |  |  |
|         |      | Shiraz-18T | 1457 | 0.643204 | 0         |  |  |
|         |      | Shiraz-22T | 1673 | 0.611783 | 0         |  |  |
|         |      | Shiraz-25T | 1719 | 0.472955 | 0         |  |  |
|         |      | Shiraz-28T | 1762 | 0.562311 | 0         |  |  |
|         |      | Shiraz-29T | 1801 | 0.815343 | 0         |  |  |
|         |      | Shiraz-32T | 1870 | 0.729766 | 0         |  |  |
|         |      | Shiraz-35T | 1933 | 0.488535 | 0         |  |  |
|         |      | Shiraz-58T | 2223 | 0.833364 | 0         |  |  |
|         |      | Shiraz-71T | 2263 | 0.975531 | 0         |  |  |
|         |      | Shiraz-3T  | 241  | 0        | -0.230501 |  |  |
|         |      | Shiraz-4T  | 261  | 0        | -0.336249 |  |  |
|         |      | Shiraz-16T | 295  | 0.591657 | 0         |  |  |
|         |      | Shiraz-36T | 433  | 0        | -0.803961 |  |  |
|         |      | Shiraz-44T | 899  | 0        | -1.09697  |  |  |
|         |      | Shiraz-49T | 1170 | 0        | -0.967436 |  |  |
|         |      | Shiraz-18T | 1457 | 0.643204 | 0         |  |  |
|         |      | Shiraz-22T | 1673 | 0.611783 | 0         |  |  |
|         |      | Shiraz-25T | 1719 | 0.472955 | 0         |  |  |
|         |      | Shiraz-28T | 1762 | 0.562311 | 0         |  |  |
|         |      | Shiraz-29T | 1801 | 0.815343 | 0         |  |  |
|         |      | Shiraz-32T | 1870 | 0.729766 | 0         |  |  |
|         |      | Shiraz-35T | 1933 | 0.488535 | 0         |  |  |
|         |      | Shiraz-58T | 2223 | 0.833364 | 0         |  |  |
|         |      | Shiraz-71T | 2263 | 0.975531 | 0         |  |  |
|         |      | Shiraz-3T  | 241  | 0        | -0.230501 |  |  |
|         |      | Shiraz-4T  | 261  | 0        | -0.336249 |  |  |
|         |      | Shiraz-16T | 295  | 0.591657 | 0         |  |  |
|         |      | Shiraz-36T | 433  | 0        | -0.803961 |  |  |
|         |      | Shiraz-44T | 899  | 0        | -1.09697  |  |  |
|         |      | Shiraz-49T | 1170 | 0        | -0.967436 |  |  |
|         |      | Shiraz-18T | 1457 | 0.643204 | 0         |  |  |
|         |      | Shiraz-22T | 1673 | 0.611783 | 0         |  |  |
|         |      | Shiraz-25T | 1719 | 0.472955 | 0         |  |  |
|         |      | Shiraz-28T | 1762 | 0.562311 | 0         |  |  |
|         |      | Shiraz-29T | 1801 | 0.815343 | 0         |  |  |
|         |      | Shiraz-32T | 1870 | 0.729766 | 0         |  |  |
|         |      | Shiraz-35T | 1933 | 0.488535 | 0         |  |  |
|         |      | Shiraz-58T | 2223 | 0.833364 | 0         |  |  |
|         |      | Shiraz-71T | 2263 | 0.975531 | 0         |  |  |
| FAM126A | chr7 | Shiraz-3T  | 87   | 0.198593 | 0         |  |  |
|         |      | Shiraz-4T  | 252  | 0.192083 | 0         |  |  |
|         |      | Shiraz-36T | 376  | 0.159952 | 0         |  |  |
|         |      | Shiraz-46T | 942  | 0.069143 | 0         |  |  |
|         |      | Shiraz-18T | 1433 | 0.250973 | 0         |  |  |
|         |      | Shiraz-25T | 1697 | 0.21945  | 0         |  |  |

|         |      |            |      |          |           |  |
|---------|------|------------|------|----------|-----------|--|
|         |      | Shiraz-28T | 1734 | 0.362882 | 0         |  |
|         |      | Shiraz-29T | 1777 | 0.156747 | 0         |  |
|         |      | Shiraz-38T | 1950 | 0.265916 | 0         |  |
|         |      | Shiraz-71T | 2236 | 0.320072 | 0         |  |
|         |      | Shiraz-3T  | 87   | 0.198593 | 0         |  |
|         |      | Shiraz-4T  | 252  | 0.192083 | 0         |  |
|         |      | Shiraz-36T | 376  | 0.159952 | 0         |  |
|         |      | Shiraz-46T | 942  | 0.069143 | 0         |  |
|         |      | Shiraz-18T | 1433 | 0.250973 | 0         |  |
|         |      | Shiraz-25T | 1697 | 0.21945  | 0         |  |
|         |      | Shiraz-28T | 1734 | 0.362882 | 0         |  |
|         |      | Shiraz-29T | 1777 | 0.156747 | 0         |  |
|         |      | Shiraz-38T | 1950 | 0.265916 | 0         |  |
|         |      | Shiraz-71T | 2236 | 0.320072 | 0         |  |
|         |      | Shiraz-3T  | 87   | 0.198593 | 0         |  |
|         |      | Shiraz-4T  | 252  | 0.192083 | 0         |  |
|         |      | Shiraz-36T | 376  | 0.159952 | 0         |  |
|         |      | Shiraz-46T | 942  | 0.069143 | 0         |  |
|         |      | Shiraz-18T | 1433 | 0.250973 | 0         |  |
|         |      | Shiraz-25T | 1697 | 0.21945  | 0         |  |
|         |      | Shiraz-28T | 1734 | 0.362882 | 0         |  |
|         |      | Shiraz-29T | 1777 | 0.156747 | 0         |  |
|         |      | Shiraz-38T | 1950 | 0.265916 | 0         |  |
|         |      | Shiraz-71T | 2236 | 0.320072 | 0         |  |
| FAM127A | chrX | Shiraz-3T  | 242  | 0        | -0.336434 |  |
|         |      | Shiraz-4T  | 261  | 0        | -0.336249 |  |
|         |      | Shiraz-16T | 295  | 0.591657 | 0         |  |
|         |      | Shiraz-36T | 433  | 0        | -0.803961 |  |
|         |      | Shiraz-44T | 899  | 0        | -1.09697  |  |
|         |      | Shiraz-49T | 1170 | 0        | -0.967436 |  |
|         |      | Shiraz-9T  | 1370 | 0.690073 | 0         |  |
|         |      | Shiraz-18T | 1457 | 0.643204 | 0         |  |
|         |      | Shiraz-22T | 1673 | 0.611783 | 0         |  |
|         |      | Shiraz-22T | 1677 | 0.789711 | 0         |  |
|         |      | Shiraz-25T | 1719 | 0.472955 | 0         |  |
|         |      | Shiraz-28T | 1762 | 0.562311 | 0         |  |
|         |      | Shiraz-29T | 1801 | 0.815343 | 0         |  |
|         |      | Shiraz-32T | 1870 | 0.729766 | 0         |  |
|         |      | Shiraz-35T | 1933 | 0.488535 | 0         |  |
|         |      | Shiraz-58T | 2223 | 0.833364 | 0         |  |
|         |      | Shiraz-71T | 2263 | 0.975531 | 0         |  |
|         |      | Shiraz-3T  | 242  | 0        | -0.336434 |  |
|         |      | Shiraz-4T  | 261  | 0        | -0.336249 |  |
|         |      | Shiraz-16T | 295  | 0.591657 | 0         |  |
|         |      | Shiraz-36T | 433  | 0        | -0.803961 |  |
|         |      | Shiraz-44T | 899  | 0        | -1.09697  |  |
|         |      | Shiraz-49T | 1170 | 0        | -0.967436 |  |

|         |      |            |      |          |           |  |
|---------|------|------------|------|----------|-----------|--|
|         |      | Shiraz-9T  | 1370 | 0.690073 | 0         |  |
|         |      | Shiraz-18T | 1457 | 0.643204 | 0         |  |
|         |      | Shiraz-22T | 1673 | 0.611783 | 0         |  |
|         |      | Shiraz-22T | 1677 | 0.789711 | 0         |  |
|         |      | Shiraz-25T | 1719 | 0.472955 | 0         |  |
|         |      | Shiraz-28T | 1762 | 0.562311 | 0         |  |
|         |      | Shiraz-29T | 1801 | 0.815343 | 0         |  |
|         |      | Shiraz-32T | 1870 | 0.729766 | 0         |  |
|         |      | Shiraz-35T | 1933 | 0.488535 | 0         |  |
|         |      | Shiraz-58T | 2223 | 0.833364 | 0         |  |
|         |      | Shiraz-71T | 2263 | 0.975531 | 0         |  |
|         |      | Shiraz-3T  | 242  | 0        | -0.336434 |  |
|         |      | Shiraz-4T  | 261  | 0        | -0.336249 |  |
|         |      | Shiraz-16T | 295  | 0.591657 | 0         |  |
|         |      | Shiraz-36T | 433  | 0        | -0.803961 |  |
|         |      | Shiraz-44T | 899  | 0        | -1.09697  |  |
|         |      | Shiraz-49T | 1170 | 0        | -0.967436 |  |
|         |      | Shiraz-9T  | 1370 | 0.690073 | 0         |  |
|         |      | Shiraz-18T | 1457 | 0.643204 | 0         |  |
|         |      | Shiraz-22T | 1673 | 0.611783 | 0         |  |
|         |      | Shiraz-22T | 1677 | 0.789711 | 0         |  |
|         |      | Shiraz-25T | 1719 | 0.472955 | 0         |  |
|         |      | Shiraz-28T | 1762 | 0.562311 | 0         |  |
|         |      | Shiraz-29T | 1801 | 0.815343 | 0         |  |
|         |      | Shiraz-32T | 1870 | 0.729766 | 0         |  |
|         |      | Shiraz-35T | 1933 | 0.488535 | 0         |  |
|         |      | Shiraz-58T | 2223 | 0.833364 | 0         |  |
|         |      | Shiraz-71T | 2263 | 0.975531 | 0         |  |
| FAM127B | chrX | Shiraz-3T  | 242  | 0        | -0.336434 |  |
|         |      | Shiraz-4T  | 261  | 0        | -0.336249 |  |
|         |      | Shiraz-16T | 295  | 0.591657 | 0         |  |
|         |      | Shiraz-36T | 433  | 0        | -0.803961 |  |
|         |      | Shiraz-44T | 899  | 0        | -1.09697  |  |
|         |      | Shiraz-49T | 1170 | 0        | -0.967436 |  |
|         |      | Shiraz-9T  | 1370 | 0.690073 | 0         |  |
|         |      | Shiraz-18T | 1457 | 0.643204 | 0         |  |
|         |      | Shiraz-22T | 1673 | 0.611783 | 0         |  |
|         |      | Shiraz-22T | 1677 | 0.789711 | 0         |  |
|         |      | Shiraz-25T | 1719 | 0.472955 | 0         |  |
|         |      | Shiraz-28T | 1762 | 0.562311 | 0         |  |
|         |      | Shiraz-29T | 1801 | 0.815343 | 0         |  |
|         |      | Shiraz-32T | 1870 | 0.729766 | 0         |  |
|         |      | Shiraz-35T | 1933 | 0.488535 | 0         |  |
|         |      | Shiraz-58T | 2223 | 0.833364 | 0         |  |
|         |      | Shiraz-71T | 2263 | 0.975531 | 0         |  |
|         |      | Shiraz-3T  | 242  | 0        | -0.336434 |  |
|         |      | Shiraz-4T  | 261  | 0        | -0.336249 |  |

|         |      |            |      |          |           |  |  |
|---------|------|------------|------|----------|-----------|--|--|
|         |      | Shiraz-16T | 295  | 0.591657 | 0         |  |  |
|         |      | Shiraz-36T | 433  | 0        | -0.803961 |  |  |
|         |      | Shiraz-44T | 899  | 0        | -1.09697  |  |  |
|         |      | Shiraz-49T | 1170 | 0        | -0.967436 |  |  |
|         |      | Shiraz-9T  | 1370 | 0.690073 | 0         |  |  |
|         |      | Shiraz-18T | 1457 | 0.643204 | 0         |  |  |
|         |      | Shiraz-22T | 1673 | 0.611783 | 0         |  |  |
|         |      | Shiraz-22T | 1677 | 0.789711 | 0         |  |  |
|         |      | Shiraz-25T | 1719 | 0.472955 | 0         |  |  |
|         |      | Shiraz-28T | 1762 | 0.562311 | 0         |  |  |
|         |      | Shiraz-29T | 1801 | 0.815343 | 0         |  |  |
|         |      | Shiraz-32T | 1870 | 0.729766 | 0         |  |  |
|         |      | Shiraz-35T | 1933 | 0.488535 | 0         |  |  |
|         |      | Shiraz-58T | 2223 | 0.833364 | 0         |  |  |
|         |      | Shiraz-71T | 2263 | 0.975531 | 0         |  |  |
|         |      | Shiraz-3T  | 242  | 0        | -0.336434 |  |  |
|         |      | Shiraz-4T  | 261  | 0        | -0.336249 |  |  |
|         |      | Shiraz-16T | 295  | 0.591657 | 0         |  |  |
|         |      | Shiraz-36T | 433  | 0        | -0.803961 |  |  |
|         |      | Shiraz-44T | 899  | 0        | -1.09697  |  |  |
|         |      | Shiraz-49T | 1170 | 0        | -0.967436 |  |  |
|         |      | Shiraz-9T  | 1370 | 0.690073 | 0         |  |  |
|         |      | Shiraz-18T | 1457 | 0.643204 | 0         |  |  |
|         |      | Shiraz-22T | 1673 | 0.611783 | 0         |  |  |
|         |      | Shiraz-22T | 1677 | 0.789711 | 0         |  |  |
|         |      | Shiraz-25T | 1719 | 0.472955 | 0         |  |  |
|         |      | Shiraz-28T | 1762 | 0.562311 | 0         |  |  |
|         |      | Shiraz-29T | 1801 | 0.815343 | 0         |  |  |
|         |      | Shiraz-32T | 1870 | 0.729766 | 0         |  |  |
|         |      | Shiraz-35T | 1933 | 0.488535 | 0         |  |  |
|         |      | Shiraz-58T | 2223 | 0.833364 | 0         |  |  |
|         |      | Shiraz-71T | 2263 | 0.975531 | 0         |  |  |
| FAM127C | chrX | Shiraz-3T  | 242  | 0        | -0.336434 |  |  |
|         |      | Shiraz-4T  | 261  | 0        | -0.336249 |  |  |
|         |      | Shiraz-16T | 295  | 0.591657 | 0         |  |  |
|         |      | Shiraz-36T | 433  | 0        | -0.803961 |  |  |
|         |      | Shiraz-44T | 899  | 0        | -1.09697  |  |  |
|         |      | Shiraz-49T | 1170 | 0        | -0.967436 |  |  |
|         |      | Shiraz-9T  | 1370 | 0.690073 | 0         |  |  |
|         |      | Shiraz-18T | 1457 | 0.643204 | 0         |  |  |
|         |      | Shiraz-22T | 1673 | 0.611783 | 0         |  |  |
|         |      | Shiraz-22T | 1677 | 0.789711 | 0         |  |  |
|         |      | Shiraz-25T | 1719 | 0.472955 | 0         |  |  |
|         |      | Shiraz-28T | 1762 | 0.562311 | 0         |  |  |
|         |      | Shiraz-29T | 1801 | 0.815343 | 0         |  |  |
|         |      | Shiraz-32T | 1870 | 0.729766 | 0         |  |  |
|         |      | Shiraz-35T | 1933 | 0.488535 | 0         |  |  |

|         |      |            |      |          |           |  |
|---------|------|------------|------|----------|-----------|--|
|         |      | Shiraz-58T | 2223 | 0.833364 | 0         |  |
|         |      | Shiraz-71T | 2263 | 0.975531 | 0         |  |
|         |      | Shiraz-3T  | 242  | 0        | -0.336434 |  |
|         |      | Shiraz-4T  | 261  | 0        | -0.336249 |  |
|         |      | Shiraz-16T | 295  | 0.591657 | 0         |  |
|         |      | Shiraz-36T | 433  | 0        | -0.803961 |  |
|         |      | Shiraz-44T | 899  | 0        | -1.09697  |  |
|         |      | Shiraz-49T | 1170 | 0        | -0.967436 |  |
|         |      | Shiraz-9T  | 1370 | 0.690073 | 0         |  |
|         |      | Shiraz-18T | 1457 | 0.643204 | 0         |  |
|         |      | Shiraz-22T | 1673 | 0.611783 | 0         |  |
|         |      | Shiraz-22T | 1677 | 0.789711 | 0         |  |
|         |      | Shiraz-25T | 1719 | 0.472955 | 0         |  |
|         |      | Shiraz-28T | 1762 | 0.562311 | 0         |  |
|         |      | Shiraz-29T | 1801 | 0.815343 | 0         |  |
|         |      | Shiraz-32T | 1870 | 0.729766 | 0         |  |
|         |      | Shiraz-35T | 1933 | 0.488535 | 0         |  |
|         |      | Shiraz-58T | 2223 | 0.833364 | 0         |  |
|         |      | Shiraz-71T | 2263 | 0.975531 | 0         |  |
|         |      | Shiraz-3T  | 242  | 0        | -0.336434 |  |
|         |      | Shiraz-4T  | 261  | 0        | -0.336249 |  |
|         |      | Shiraz-16T | 295  | 0.591657 | 0         |  |
|         |      | Shiraz-36T | 433  | 0        | -0.803961 |  |
|         |      | Shiraz-44T | 899  | 0        | -1.09697  |  |
|         |      | Shiraz-49T | 1170 | 0        | -0.967436 |  |
|         |      | Shiraz-9T  | 1370 | 0.690073 | 0         |  |
|         |      | Shiraz-18T | 1457 | 0.643204 | 0         |  |
|         |      | Shiraz-22T | 1673 | 0.611783 | 0         |  |
|         |      | Shiraz-22T | 1677 | 0.789711 | 0         |  |
|         |      | Shiraz-25T | 1719 | 0.472955 | 0         |  |
|         |      | Shiraz-28T | 1762 | 0.562311 | 0         |  |
|         |      | Shiraz-29T | 1801 | 0.815343 | 0         |  |
|         |      | Shiraz-32T | 1870 | 0.729766 | 0         |  |
|         |      | Shiraz-35T | 1933 | 0.488535 | 0         |  |
|         |      | Shiraz-58T | 2223 | 0.833364 | 0         |  |
|         |      | Shiraz-71T | 2263 | 0.975531 | 0         |  |
| FAM131B | chr7 | Shiraz-3T  | 90   | 0.219276 | 0         |  |
|         |      | Shiraz-3T  | 90   | 0.219276 | 0         |  |
|         |      | Shiraz-4T  | 253  | 0.372918 | 0         |  |
|         |      | Shiraz-4T  | 253  | 0.372918 | 0         |  |
|         |      | Shiraz-36T | 378  | 0.179558 | 0         |  |
|         |      | Shiraz-36T | 378  | 0.179558 | 0         |  |
|         |      | Shiraz-46T | 943  | 0.093799 | 0         |  |
|         |      | Shiraz-46T | 943  | 0.093799 | 0         |  |
|         |      | Shiraz-77T | 1225 | 0        | -0.117922 |  |
|         |      | Shiraz-77T | 1225 | 0        | -0.117922 |  |
|         |      | Shiraz-9T  | 1325 | 0.221899 | 0         |  |



|  |  |            |      |          |           |  |  |
|--|--|------------|------|----------|-----------|--|--|
|  |  | Shiraz-9T  | 1325 | 0.221899 | 0         |  |  |
|  |  | Shiraz-18T | 1434 | 0.244465 | 0         |  |  |
|  |  | Shiraz-18T | 1434 | 0.244465 | 0         |  |  |
|  |  | Shiraz-25T | 1698 | 0.21835  | 0         |  |  |
|  |  | Shiraz-25T | 1698 | 0.21835  | 0         |  |  |
|  |  | Shiraz-28T | 1735 | 0.350744 | 0         |  |  |
|  |  | Shiraz-28T | 1735 | 0.350744 | 0         |  |  |
|  |  | Shiraz-29T | 1778 | 0.120767 | 0         |  |  |
|  |  | Shiraz-29T | 1778 | 0.120767 | 0         |  |  |
|  |  | Shiraz-32T | 1833 | 0.551336 | 0         |  |  |
|  |  | Shiraz-32T | 1833 | 0.551336 | 0         |  |  |
|  |  | Shiraz-38T | 1951 | 0.250891 | 0         |  |  |
|  |  | Shiraz-38T | 1951 | 0.250891 | 0         |  |  |
|  |  | Shiraz-53T | 2078 | 0.287202 | 0         |  |  |
|  |  | Shiraz-53T | 2078 | 0.287202 | 0         |  |  |
|  |  | Shiraz-58T | 2162 | 0.221505 | 0         |  |  |
|  |  | Shiraz-58T | 2162 | 0.221505 | 0         |  |  |
|  |  | Shiraz-71T | 2238 | 0.603631 | 0         |  |  |
|  |  | Shiraz-71T | 2238 | 0.603631 | 0         |  |  |
|  |  | Shiraz-3T  | 90   | 0.219276 | 0         |  |  |
|  |  | Shiraz-3T  | 90   | 0.219276 | 0         |  |  |
|  |  | Shiraz-4T  | 253  | 0.372918 | 0         |  |  |
|  |  | Shiraz-4T  | 253  | 0.372918 | 0         |  |  |
|  |  | Shiraz-36T | 378  | 0.179558 | 0         |  |  |
|  |  | Shiraz-36T | 378  | 0.179558 | 0         |  |  |
|  |  | Shiraz-46T | 943  | 0.093799 | 0         |  |  |
|  |  | Shiraz-46T | 943  | 0.093799 | 0         |  |  |
|  |  | Shiraz-77T | 1225 | 0        | -0.117922 |  |  |
|  |  | Shiraz-77T | 1225 | 0        | -0.117922 |  |  |
|  |  | Shiraz-9T  | 1325 | 0.221899 | 0         |  |  |
|  |  | Shiraz-9T  | 1325 | 0.221899 | 0         |  |  |
|  |  | Shiraz-18T | 1434 | 0.244465 | 0         |  |  |
|  |  | Shiraz-18T | 1434 | 0.244465 | 0         |  |  |
|  |  | Shiraz-25T | 1698 | 0.21835  | 0         |  |  |
|  |  | Shiraz-25T | 1698 | 0.21835  | 0         |  |  |
|  |  | Shiraz-28T | 1735 | 0.350744 | 0         |  |  |
|  |  | Shiraz-28T | 1735 | 0.350744 | 0         |  |  |
|  |  | Shiraz-29T | 1778 | 0.120767 | 0         |  |  |
|  |  | Shiraz-29T | 1778 | 0.120767 | 0         |  |  |
|  |  | Shiraz-32T | 1833 | 0.551336 | 0         |  |  |
|  |  | Shiraz-32T | 1833 | 0.551336 | 0         |  |  |
|  |  | Shiraz-38T | 1951 | 0.250891 | 0         |  |  |
|  |  | Shiraz-38T | 1951 | 0.250891 | 0         |  |  |
|  |  | Shiraz-53T | 2078 | 0.287202 | 0         |  |  |
|  |  | Shiraz-53T | 2078 | 0.287202 | 0         |  |  |
|  |  | Shiraz-58T | 2162 | 0.221505 | 0         |  |  |
|  |  | Shiraz-58T | 2162 | 0.221505 | 0         |  |  |

|         |      |            |      |          |           |  |  |
|---------|------|------------|------|----------|-----------|--|--|
|         |      | Shiraz-71T | 2238 | 0.603631 | 0         |  |  |
|         |      | Shiraz-71T | 2238 | 0.603631 | 0         |  |  |
|         |      | Shiraz-3T  | 90   | 0.219276 | 0         |  |  |
|         |      | Shiraz-3T  | 90   | 0.219276 | 0         |  |  |
|         |      | Shiraz-4T  | 253  | 0.372918 | 0         |  |  |
|         |      | Shiraz-4T  | 253  | 0.372918 | 0         |  |  |
|         |      | Shiraz-36T | 378  | 0.179558 | 0         |  |  |
|         |      | Shiraz-36T | 378  | 0.179558 | 0         |  |  |
|         |      | Shiraz-46T | 943  | 0.093799 | 0         |  |  |
|         |      | Shiraz-46T | 943  | 0.093799 | 0         |  |  |
|         |      | Shiraz-77T | 1225 | 0        | -0.117922 |  |  |
|         |      | Shiraz-77T | 1225 | 0        | -0.117922 |  |  |
|         |      | Shiraz-9T  | 1325 | 0.221899 | 0         |  |  |
|         |      | Shiraz-9T  | 1325 | 0.221899 | 0         |  |  |
|         |      | Shiraz-18T | 1434 | 0.244465 | 0         |  |  |
|         |      | Shiraz-18T | 1434 | 0.244465 | 0         |  |  |
|         |      | Shiraz-25T | 1698 | 0.21835  | 0         |  |  |
|         |      | Shiraz-25T | 1698 | 0.21835  | 0         |  |  |
|         |      | Shiraz-28T | 1735 | 0.350744 | 0         |  |  |
|         |      | Shiraz-28T | 1735 | 0.350744 | 0         |  |  |
|         |      | Shiraz-29T | 1778 | 0.120767 | 0         |  |  |
|         |      | Shiraz-29T | 1778 | 0.120767 | 0         |  |  |
|         |      | Shiraz-32T | 1833 | 0.551336 | 0         |  |  |
|         |      | Shiraz-32T | 1833 | 0.551336 | 0         |  |  |
|         |      | Shiraz-38T | 1951 | 0.250891 | 0         |  |  |
|         |      | Shiraz-38T | 1951 | 0.250891 | 0         |  |  |
|         |      | Shiraz-53T | 2078 | 0.287202 | 0         |  |  |
|         |      | Shiraz-53T | 2078 | 0.287202 | 0         |  |  |
|         |      | Shiraz-58T | 2162 | 0.221505 | 0         |  |  |
|         |      | Shiraz-58T | 2162 | 0.221505 | 0         |  |  |
|         |      | Shiraz-71T | 2238 | 0.603631 | 0         |  |  |
|         |      | Shiraz-71T | 2238 | 0.603631 | 0         |  |  |
| FAM133A | chrX | Shiraz-3T  | 242  | 0        | -0.336434 |  |  |
|         |      | Shiraz-3T  | 243  | 0        | -0.549129 |  |  |
|         |      | Shiraz-4T  | 261  | 0        | -0.336249 |  |  |
|         |      | Shiraz-16T | 295  | 0.591657 | 0         |  |  |
|         |      | Shiraz-31T | 346  | 0        | -0.1527   |  |  |
|         |      | Shiraz-36T | 433  | 0        | -0.803961 |  |  |
|         |      | Shiraz-44T | 899  | 0        | -1.09697  |  |  |
|         |      | Shiraz-44T | 902  | 0        | -1.449824 |  |  |
|         |      | Shiraz-47T | 1085 | 0        | -0.130811 |  |  |
|         |      | Shiraz-49T | 1170 | 0        | -0.967436 |  |  |
|         |      | Shiraz-49T | 1172 | 0        | -1.123219 |  |  |
|         |      | Shiraz-18T | 1457 | 0.643204 | 0         |  |  |
|         |      | Shiraz-22T | 1673 | 0.611783 | 0         |  |  |
|         |      | Shiraz-22T | 1675 | 0.279253 | 0         |  |  |
|         |      | Shiraz-25T | 1719 | 0.472955 | 0         |  |  |

|  |  |            |      |          |           |  |  |
|--|--|------------|------|----------|-----------|--|--|
|  |  | Shiraz-28T | 1762 | 0.562311 | 0         |  |  |
|  |  | Shiraz-29T | 1801 | 0.815343 | 0         |  |  |
|  |  | Shiraz-32T | 1870 | 0.729766 | 0         |  |  |
|  |  | Shiraz-32T | 1871 | 0.292679 | 0         |  |  |
|  |  | Shiraz-35T | 1933 | 0.488535 | 0         |  |  |
|  |  | Shiraz-58T | 2223 | 0.833364 | 0         |  |  |
|  |  | Shiraz-58T | 2225 | 0.595784 | 0         |  |  |
|  |  | Shiraz-71T | 2263 | 0.975531 | 0         |  |  |
|  |  | Shiraz-3T  | 242  | 0        | -0.336434 |  |  |
|  |  | Shiraz-3T  | 243  | 0        | -0.549129 |  |  |
|  |  | Shiraz-4T  | 261  | 0        | -0.336249 |  |  |
|  |  | Shiraz-16T | 295  | 0.591657 | 0         |  |  |
|  |  | Shiraz-31T | 346  | 0        | -0.1527   |  |  |
|  |  | Shiraz-36T | 433  | 0        | -0.803961 |  |  |
|  |  | Shiraz-44T | 899  | 0        | -1.09697  |  |  |
|  |  | Shiraz-44T | 902  | 0        | -1.449824 |  |  |
|  |  | Shiraz-47T | 1085 | 0        | -0.130811 |  |  |
|  |  | Shiraz-49T | 1170 | 0        | -0.967436 |  |  |
|  |  | Shiraz-49T | 1172 | 0        | -1.123219 |  |  |
|  |  | Shiraz-18T | 1457 | 0.643204 | 0         |  |  |
|  |  | Shiraz-22T | 1673 | 0.611783 | 0         |  |  |
|  |  | Shiraz-22T | 1675 | 0.279253 | 0         |  |  |
|  |  | Shiraz-25T | 1719 | 0.472955 | 0         |  |  |
|  |  | Shiraz-28T | 1762 | 0.562311 | 0         |  |  |
|  |  | Shiraz-29T | 1801 | 0.815343 | 0         |  |  |
|  |  | Shiraz-32T | 1870 | 0.729766 | 0         |  |  |
|  |  | Shiraz-32T | 1871 | 0.292679 | 0         |  |  |
|  |  | Shiraz-35T | 1933 | 0.488535 | 0         |  |  |
|  |  | Shiraz-58T | 2223 | 0.833364 | 0         |  |  |
|  |  | Shiraz-58T | 2225 | 0.595784 | 0         |  |  |
|  |  | Shiraz-71T | 2263 | 0.975531 | 0         |  |  |
|  |  | Shiraz-3T  | 242  | 0        | -0.336434 |  |  |
|  |  | Shiraz-3T  | 243  | 0        | -0.549129 |  |  |
|  |  | Shiraz-4T  | 261  | 0        | -0.336249 |  |  |
|  |  | Shiraz-16T | 295  | 0.591657 | 0         |  |  |
|  |  | Shiraz-31T | 346  | 0        | -0.1527   |  |  |
|  |  | Shiraz-36T | 433  | 0        | -0.803961 |  |  |
|  |  | Shiraz-44T | 899  | 0        | -1.09697  |  |  |
|  |  | Shiraz-44T | 902  | 0        | -1.449824 |  |  |
|  |  | Shiraz-47T | 1085 | 0        | -0.130811 |  |  |
|  |  | Shiraz-49T | 1170 | 0        | -0.967436 |  |  |
|  |  | Shiraz-49T | 1172 | 0        | -1.123219 |  |  |
|  |  | Shiraz-18T | 1457 | 0.643204 | 0         |  |  |
|  |  | Shiraz-22T | 1673 | 0.611783 | 0         |  |  |
|  |  | Shiraz-22T | 1675 | 0.279253 | 0         |  |  |
|  |  | Shiraz-25T | 1719 | 0.472955 | 0         |  |  |
|  |  | Shiraz-28T | 1762 | 0.562311 | 0         |  |  |

|         |      |            |      |          |           |  |
|---------|------|------------|------|----------|-----------|--|
|         |      | Shiraz-29T | 1801 | 0.815343 | 0         |  |
|         |      | Shiraz-32T | 1870 | 0.729766 | 0         |  |
|         |      | Shiraz-32T | 1871 | 0.292679 | 0         |  |
|         |      | Shiraz-35T | 1933 | 0.488535 | 0         |  |
|         |      | Shiraz-58T | 2223 | 0.833364 | 0         |  |
|         |      | Shiraz-58T | 2225 | 0.595784 | 0         |  |
|         |      | Shiraz-71T | 2263 | 0.975531 | 0         |  |
| FAM133B | chr7 | Shiraz-3T  | 90   | 0.219276 | 0         |  |
|         |      | Shiraz-3T  | 93   | 0        | -0.058023 |  |
|         |      | Shiraz-4T  | 253  | 0.372918 | 0         |  |
|         |      | Shiraz-36T | 378  | 0.179558 | 0         |  |
|         |      | Shiraz-36T | 380  | 0.083883 | 0         |  |
|         |      | Shiraz-44T | 638  | 0        | -0.433476 |  |
|         |      | Shiraz-46T | 943  | 0.093799 | 0         |  |
|         |      | Shiraz-46T | 945  | 0        | -0.014838 |  |
|         |      | Shiraz-47T | 1029 | 0        | -0.096586 |  |
|         |      | Shiraz-49T | 1119 | 0        | -0.157331 |  |
|         |      | Shiraz-77T | 1225 | 0        | -0.117922 |  |
|         |      | Shiraz-18T | 1434 | 0.244465 | 0         |  |
|         |      | Shiraz-22T | 1549 | 0        | -0.319623 |  |
|         |      | Shiraz-25T | 1698 | 0.21835  | 0         |  |
|         |      | Shiraz-28T | 1735 | 0.350744 | 0         |  |
|         |      | Shiraz-29T | 1778 | 0.120767 | 0         |  |
|         |      | Shiraz-32T | 1833 | 0.551336 | 0         |  |
|         |      | Shiraz-38T | 1951 | 0.250891 | 0         |  |
|         |      | Shiraz-53T | 2078 | 0.287202 | 0         |  |
|         |      | Shiraz-58T | 2159 | 0        | -0.219521 |  |
|         |      | Shiraz-71T | 2238 | 0.603631 | 0         |  |
|         |      | Shiraz-3T  | 90   | 0.219276 | 0         |  |
|         |      | Shiraz-3T  | 93   | 0        | -0.058023 |  |
|         |      | Shiraz-4T  | 253  | 0.372918 | 0         |  |
|         |      | Shiraz-36T | 378  | 0.179558 | 0         |  |
|         |      | Shiraz-36T | 380  | 0.083883 | 0         |  |
|         |      | Shiraz-44T | 638  | 0        | -0.433476 |  |
|         |      | Shiraz-46T | 943  | 0.093799 | 0         |  |
|         |      | Shiraz-46T | 945  | 0        | -0.014838 |  |
|         |      | Shiraz-47T | 1029 | 0        | -0.096586 |  |
|         |      | Shiraz-49T | 1119 | 0        | -0.157331 |  |
|         |      | Shiraz-77T | 1225 | 0        | -0.117922 |  |
|         |      | Shiraz-18T | 1434 | 0.244465 | 0         |  |
|         |      | Shiraz-22T | 1549 | 0        | -0.319623 |  |
|         |      | Shiraz-25T | 1698 | 0.21835  | 0         |  |
|         |      | Shiraz-28T | 1735 | 0.350744 | 0         |  |
|         |      | Shiraz-29T | 1778 | 0.120767 | 0         |  |
|         |      | Shiraz-32T | 1833 | 0.551336 | 0         |  |
|         |      | Shiraz-38T | 1951 | 0.250891 | 0         |  |
|         |      | Shiraz-53T | 2078 | 0.287202 | 0         |  |

|         |      |            |      |          |           |  |  |
|---------|------|------------|------|----------|-----------|--|--|
|         |      | Shiraz-58T | 2159 | 0        | -0.219521 |  |  |
|         |      | Shiraz-71T | 2238 | 0.603631 | 0         |  |  |
|         |      | Shiraz-3T  | 90   | 0.219276 | 0         |  |  |
|         |      | Shiraz-3T  | 93   | 0        | -0.058023 |  |  |
|         |      | Shiraz-4T  | 253  | 0.372918 | 0         |  |  |
|         |      | Shiraz-36T | 378  | 0.179558 | 0         |  |  |
|         |      | Shiraz-36T | 380  | 0.083883 | 0         |  |  |
|         |      | Shiraz-44T | 638  | 0        | -0.433476 |  |  |
|         |      | Shiraz-46T | 943  | 0.093799 | 0         |  |  |
|         |      | Shiraz-46T | 945  | 0        | -0.014838 |  |  |
|         |      | Shiraz-47T | 1029 | 0        | -0.096586 |  |  |
|         |      | Shiraz-49T | 1119 | 0        | -0.157331 |  |  |
|         |      | Shiraz-77T | 1225 | 0        | -0.117922 |  |  |
|         |      | Shiraz-18T | 1434 | 0.244465 | 0         |  |  |
|         |      | Shiraz-22T | 1549 | 0        | -0.319623 |  |  |
|         |      | Shiraz-25T | 1698 | 0.21835  | 0         |  |  |
|         |      | Shiraz-28T | 1735 | 0.350744 | 0         |  |  |
|         |      | Shiraz-29T | 1778 | 0.120767 | 0         |  |  |
|         |      | Shiraz-32T | 1833 | 0.551336 | 0         |  |  |
|         |      | Shiraz-38T | 1951 | 0.250891 | 0         |  |  |
|         |      | Shiraz-53T | 2078 | 0.287202 | 0         |  |  |
|         |      | Shiraz-58T | 2159 | 0        | -0.219521 |  |  |
|         |      | Shiraz-71T | 2238 | 0.603631 | 0         |  |  |
| FAM155B | chrX | Shiraz-3T  | 241  | 0        | -0.230501 |  |  |
|         |      | Shiraz-4T  | 261  | 0        | -0.336249 |  |  |
|         |      | Shiraz-16T | 295  | 0.591657 | 0         |  |  |
|         |      | Shiraz-36T | 433  | 0        | -0.803961 |  |  |
|         |      | Shiraz-44T | 899  | 0        | -1.09697  |  |  |
|         |      | Shiraz-44T | 900  | 0        | -0.584284 |  |  |
|         |      | Shiraz-49T | 1170 | 0        | -0.967436 |  |  |
|         |      | Shiraz-18T | 1457 | 0.643204 | 0         |  |  |
|         |      | Shiraz-22T | 1673 | 0.611783 | 0         |  |  |
|         |      | Shiraz-22T | 1674 | 0.887899 | 0         |  |  |
|         |      | Shiraz-25T | 1719 | 0.472955 | 0         |  |  |
|         |      | Shiraz-28T | 1762 | 0.562311 | 0         |  |  |
|         |      | Shiraz-29T | 1801 | 0.815343 | 0         |  |  |
|         |      | Shiraz-32T | 1870 | 0.729766 | 0         |  |  |
|         |      | Shiraz-35T | 1933 | 0.488535 | 0         |  |  |
|         |      | Shiraz-58T | 2223 | 0.833364 | 0         |  |  |
|         |      | Shiraz-58T | 2224 | 1.076575 | 0         |  |  |
|         |      | Shiraz-71T | 2263 | 0.975531 | 0         |  |  |
|         |      | Shiraz-3T  | 241  | 0        | -0.230501 |  |  |
|         |      | Shiraz-4T  | 261  | 0        | -0.336249 |  |  |
|         |      | Shiraz-16T | 295  | 0.591657 | 0         |  |  |
|         |      | Shiraz-36T | 433  | 0        | -0.803961 |  |  |
|         |      | Shiraz-44T | 899  | 0        | -1.09697  |  |  |
|         |      | Shiraz-44T | 900  | 0        | -0.584284 |  |  |

|         |      |            |      |          |           |  |  |
|---------|------|------------|------|----------|-----------|--|--|
|         |      | Shiraz-49T | 1170 | 0        | -0.967436 |  |  |
|         |      | Shiraz-18T | 1457 | 0.643204 | 0         |  |  |
|         |      | Shiraz-22T | 1673 | 0.611783 | 0         |  |  |
|         |      | Shiraz-22T | 1674 | 0.887899 | 0         |  |  |
|         |      | Shiraz-25T | 1719 | 0.472955 | 0         |  |  |
|         |      | Shiraz-28T | 1762 | 0.562311 | 0         |  |  |
|         |      | Shiraz-29T | 1801 | 0.815343 | 0         |  |  |
|         |      | Shiraz-32T | 1870 | 0.729766 | 0         |  |  |
|         |      | Shiraz-35T | 1933 | 0.488535 | 0         |  |  |
|         |      | Shiraz-58T | 2223 | 0.833364 | 0         |  |  |
|         |      | Shiraz-58T | 2224 | 1.076575 | 0         |  |  |
|         |      | Shiraz-71T | 2263 | 0.975531 | 0         |  |  |
|         |      | Shiraz-3T  | 241  | 0        | -0.230501 |  |  |
|         |      | Shiraz-4T  | 261  | 0        | -0.336249 |  |  |
|         |      | Shiraz-16T | 295  | 0.591657 | 0         |  |  |
|         |      | Shiraz-36T | 433  | 0        | -0.803961 |  |  |
|         |      | Shiraz-44T | 899  | 0        | -1.09697  |  |  |
|         |      | Shiraz-44T | 900  | 0        | -0.584284 |  |  |
|         |      | Shiraz-49T | 1170 | 0        | -0.967436 |  |  |
|         |      | Shiraz-18T | 1457 | 0.643204 | 0         |  |  |
|         |      | Shiraz-22T | 1673 | 0.611783 | 0         |  |  |
|         |      | Shiraz-22T | 1674 | 0.887899 | 0         |  |  |
|         |      | Shiraz-25T | 1719 | 0.472955 | 0         |  |  |
|         |      | Shiraz-28T | 1762 | 0.562311 | 0         |  |  |
|         |      | Shiraz-29T | 1801 | 0.815343 | 0         |  |  |
|         |      | Shiraz-32T | 1870 | 0.729766 | 0         |  |  |
|         |      | Shiraz-35T | 1933 | 0.488535 | 0         |  |  |
|         |      | Shiraz-58T | 2223 | 0.833364 | 0         |  |  |
|         |      | Shiraz-58T | 2224 | 1.076575 | 0         |  |  |
|         |      | Shiraz-71T | 2263 | 0.975531 | 0         |  |  |
| FAM156A | chrX | Shiraz-4T  | 260  | 0        | -0.324128 |  |  |
|         |      | Shiraz-4T  | 260  | 0        | -0.324128 |  |  |
|         |      | Shiraz-16T | 294  | 0.655804 | 0         |  |  |
|         |      | Shiraz-16T | 294  | 0.655804 | 0         |  |  |
|         |      | Shiraz-31T | 345  | 0.103301 | 0         |  |  |
|         |      | Shiraz-31T | 345  | 0.103301 | 0         |  |  |
|         |      | Shiraz-36T | 431  | 0        | -0.78035  |  |  |
|         |      | Shiraz-36T | 431  | 0        | -0.78035  |  |  |
|         |      | Shiraz-36T | 432  | 0        | -0.6692   |  |  |
|         |      | Shiraz-36T | 432  | 0        | -0.6692   |  |  |
|         |      | Shiraz-44T | 891  | 0        | -0.954044 |  |  |
|         |      | Shiraz-44T | 891  | 0        | -0.954044 |  |  |
|         |      | Shiraz-44T | 898  | 0        | -0.515218 |  |  |
|         |      | Shiraz-44T | 898  | 0        | -0.515218 |  |  |
|         |      | Shiraz-49T | 1166 | 0        | -0.917235 |  |  |
|         |      | Shiraz-49T | 1166 | 0        | -0.917235 |  |  |
|         |      | Shiraz-77T | 1282 | 0.213849 | 0         |  |  |

|  |            |      |          |           |  |
|--|------------|------|----------|-----------|--|
|  | Shiraz-77T | 1282 | 0.213849 | 0         |  |
|  | Shiraz-9T  | 1368 | 0.199713 | 0         |  |
|  | Shiraz-9T  | 1368 | 0.199713 | 0         |  |
|  | Shiraz-18T | 1456 | 0.608534 | 0         |  |
|  | Shiraz-18T | 1456 | 0.608534 | 0         |  |
|  | Shiraz-22T | 1669 | 0.695915 | 0         |  |
|  | Shiraz-22T | 1669 | 0.695915 | 0         |  |
|  | Shiraz-25T | 1717 | 0.420447 | 0         |  |
|  | Shiraz-25T | 1717 | 0.420447 | 0         |  |
|  | Shiraz-28T | 1760 | 0.538181 | 0         |  |
|  | Shiraz-28T | 1760 | 0.538181 | 0         |  |
|  | Shiraz-29T | 1800 | 0.672527 | 0         |  |
|  | Shiraz-29T | 1800 | 0.672527 | 0         |  |
|  | Shiraz-32T | 1869 | 0.776805 | 0         |  |
|  | Shiraz-32T | 1869 | 0.776805 | 0         |  |
|  | Shiraz-35T | 1932 | 0.507141 | 0         |  |
|  | Shiraz-35T | 1932 | 0.507141 | 0         |  |
|  | Shiraz-58T | 2221 | 0.871948 | 0         |  |
|  | Shiraz-58T | 2221 | 0.871948 | 0         |  |
|  | Shiraz-71T | 2260 | 0.68394  | 0         |  |
|  | Shiraz-71T | 2260 | 0.68394  | 0         |  |
|  | Shiraz-71T | 2262 | 0.986748 | 0         |  |
|  | Shiraz-71T | 2262 | 0.986748 | 0         |  |
|  | Shiraz-4T  | 260  | 0        | -0.324128 |  |
|  | Shiraz-4T  | 260  | 0        | -0.324128 |  |
|  | Shiraz-16T | 294  | 0.655804 | 0         |  |
|  | Shiraz-16T | 294  | 0.655804 | 0         |  |
|  | Shiraz-31T | 345  | 0.103301 | 0         |  |
|  | Shiraz-31T | 345  | 0.103301 | 0         |  |
|  | Shiraz-36T | 431  | 0        | -0.78035  |  |
|  | Shiraz-36T | 431  | 0        | -0.78035  |  |
|  | Shiraz-36T | 432  | 0        | -0.6692   |  |
|  | Shiraz-36T | 432  | 0        | -0.6692   |  |
|  | Shiraz-44T | 891  | 0        | -0.954044 |  |
|  | Shiraz-44T | 891  | 0        | -0.954044 |  |
|  | Shiraz-44T | 898  | 0        | -0.515218 |  |
|  | Shiraz-44T | 898  | 0        | -0.515218 |  |
|  | Shiraz-49T | 1166 | 0        | -0.917235 |  |
|  | Shiraz-49T | 1166 | 0        | -0.917235 |  |
|  | Shiraz-77T | 1282 | 0.213849 | 0         |  |
|  | Shiraz-77T | 1282 | 0.213849 | 0         |  |
|  | Shiraz-9T  | 1368 | 0.199713 | 0         |  |
|  | Shiraz-9T  | 1368 | 0.199713 | 0         |  |
|  | Shiraz-18T | 1456 | 0.608534 | 0         |  |
|  | Shiraz-18T | 1456 | 0.608534 | 0         |  |
|  | Shiraz-22T | 1669 | 0.695915 | 0         |  |
|  | Shiraz-22T | 1669 | 0.695915 | 0         |  |

|  |  |            |      |          |           |  |  |
|--|--|------------|------|----------|-----------|--|--|
|  |  | Shiraz-25T | 1717 | 0.420447 | 0         |  |  |
|  |  | Shiraz-25T | 1717 | 0.420447 | 0         |  |  |
|  |  | Shiraz-28T | 1760 | 0.538181 | 0         |  |  |
|  |  | Shiraz-28T | 1760 | 0.538181 | 0         |  |  |
|  |  | Shiraz-29T | 1800 | 0.672527 | 0         |  |  |
|  |  | Shiraz-29T | 1800 | 0.672527 | 0         |  |  |
|  |  | Shiraz-32T | 1869 | 0.776805 | 0         |  |  |
|  |  | Shiraz-32T | 1869 | 0.776805 | 0         |  |  |
|  |  | Shiraz-35T | 1932 | 0.507141 | 0         |  |  |
|  |  | Shiraz-35T | 1932 | 0.507141 | 0         |  |  |
|  |  | Shiraz-58T | 2221 | 0.871948 | 0         |  |  |
|  |  | Shiraz-58T | 2221 | 0.871948 | 0         |  |  |
|  |  | Shiraz-71T | 2260 | 0.68394  | 0         |  |  |
|  |  | Shiraz-71T | 2260 | 0.68394  | 0         |  |  |
|  |  | Shiraz-71T | 2262 | 0.986748 | 0         |  |  |
|  |  | Shiraz-71T | 2262 | 0.986748 | 0         |  |  |
|  |  | Shiraz-4T  | 260  | 0        | -0.324128 |  |  |
|  |  | Shiraz-4T  | 260  | 0        | -0.324128 |  |  |
|  |  | Shiraz-16T | 294  | 0.655804 | 0         |  |  |
|  |  | Shiraz-16T | 294  | 0.655804 | 0         |  |  |
|  |  | Shiraz-31T | 345  | 0.103301 | 0         |  |  |
|  |  | Shiraz-31T | 345  | 0.103301 | 0         |  |  |
|  |  | Shiraz-36T | 431  | 0        | -0.78035  |  |  |
|  |  | Shiraz-36T | 431  | 0        | -0.78035  |  |  |
|  |  | Shiraz-36T | 432  | 0        | -0.6692   |  |  |
|  |  | Shiraz-36T | 432  | 0        | -0.6692   |  |  |
|  |  | Shiraz-44T | 891  | 0        | -0.954044 |  |  |
|  |  | Shiraz-44T | 891  | 0        | -0.954044 |  |  |
|  |  | Shiraz-44T | 898  | 0        | -0.515218 |  |  |
|  |  | Shiraz-44T | 898  | 0        | -0.515218 |  |  |
|  |  | Shiraz-49T | 1166 | 0        | -0.917235 |  |  |
|  |  | Shiraz-49T | 1166 | 0        | -0.917235 |  |  |
|  |  | Shiraz-77T | 1282 | 0.213849 | 0         |  |  |
|  |  | Shiraz-77T | 1282 | 0.213849 | 0         |  |  |
|  |  | Shiraz-9T  | 1368 | 0.199713 | 0         |  |  |
|  |  | Shiraz-9T  | 1368 | 0.199713 | 0         |  |  |
|  |  | Shiraz-18T | 1456 | 0.608534 | 0         |  |  |
|  |  | Shiraz-18T | 1456 | 0.608534 | 0         |  |  |
|  |  | Shiraz-22T | 1669 | 0.695915 | 0         |  |  |
|  |  | Shiraz-22T | 1669 | 0.695915 | 0         |  |  |
|  |  | Shiraz-25T | 1717 | 0.420447 | 0         |  |  |
|  |  | Shiraz-25T | 1717 | 0.420447 | 0         |  |  |
|  |  | Shiraz-28T | 1760 | 0.538181 | 0         |  |  |
|  |  | Shiraz-28T | 1760 | 0.538181 | 0         |  |  |
|  |  | Shiraz-29T | 1800 | 0.672527 | 0         |  |  |
|  |  | Shiraz-29T | 1800 | 0.672527 | 0         |  |  |
|  |  | Shiraz-32T | 1869 | 0.776805 | 0         |  |  |



|         |      |            |      |          |           |  |  |
|---------|------|------------|------|----------|-----------|--|--|
|         |      | Shiraz-32T | 1869 | 0.776805 | 0         |  |  |
|         |      | Shiraz-35T | 1932 | 0.507141 | 0         |  |  |
|         |      | Shiraz-35T | 1932 | 0.507141 | 0         |  |  |
|         |      | Shiraz-58T | 2221 | 0.871948 | 0         |  |  |
|         |      | Shiraz-58T | 2221 | 0.871948 | 0         |  |  |
|         |      | Shiraz-71T | 2260 | 0.68394  | 0         |  |  |
|         |      | Shiraz-71T | 2260 | 0.68394  | 0         |  |  |
|         |      | Shiraz-71T | 2262 | 0.986748 | 0         |  |  |
|         |      | Shiraz-71T | 2262 | 0.986748 | 0         |  |  |
| FAM156B | chrX | Shiraz-4T  | 260  | 0        | -0.324128 |  |  |
|         |      | Shiraz-4T  | 260  | 0        | -0.324128 |  |  |
|         |      | Shiraz-16T | 294  | 0.655804 | 0         |  |  |
|         |      | Shiraz-16T | 294  | 0.655804 | 0         |  |  |
|         |      | Shiraz-31T | 345  | 0.103301 | 0         |  |  |
|         |      | Shiraz-31T | 345  | 0.103301 | 0         |  |  |
|         |      | Shiraz-36T | 431  | 0        | -0.78035  |  |  |
|         |      | Shiraz-36T | 431  | 0        | -0.78035  |  |  |
|         |      | Shiraz-36T | 432  | 0        | -0.6692   |  |  |
|         |      | Shiraz-36T | 432  | 0        | -0.6692   |  |  |
|         |      | Shiraz-44T | 891  | 0        | -0.954044 |  |  |
|         |      | Shiraz-44T | 891  | 0        | -0.954044 |  |  |
|         |      | Shiraz-44T | 898  | 0        | -0.515218 |  |  |
|         |      | Shiraz-44T | 898  | 0        | -0.515218 |  |  |
|         |      | Shiraz-49T | 1166 | 0        | -0.917235 |  |  |
|         |      | Shiraz-49T | 1166 | 0        | -0.917235 |  |  |
|         |      | Shiraz-77T | 1282 | 0.213849 | 0         |  |  |
|         |      | Shiraz-77T | 1282 | 0.213849 | 0         |  |  |
|         |      | Shiraz-9T  | 1368 | 0.199713 | 0         |  |  |
|         |      | Shiraz-9T  | 1368 | 0.199713 | 0         |  |  |
|         |      | Shiraz-18T | 1456 | 0.608534 | 0         |  |  |
|         |      | Shiraz-18T | 1456 | 0.608534 | 0         |  |  |
|         |      | Shiraz-22T | 1669 | 0.695915 | 0         |  |  |
|         |      | Shiraz-22T | 1669 | 0.695915 | 0         |  |  |
|         |      | Shiraz-25T | 1717 | 0.420447 | 0         |  |  |
|         |      | Shiraz-25T | 1717 | 0.420447 | 0         |  |  |
|         |      | Shiraz-28T | 1760 | 0.538181 | 0         |  |  |
|         |      | Shiraz-28T | 1760 | 0.538181 | 0         |  |  |
|         |      | Shiraz-29T | 1800 | 0.672527 | 0         |  |  |
|         |      | Shiraz-29T | 1800 | 0.672527 | 0         |  |  |
|         |      | Shiraz-32T | 1869 | 0.776805 | 0         |  |  |
|         |      | Shiraz-32T | 1869 | 0.776805 | 0         |  |  |
|         |      | Shiraz-35T | 1932 | 0.507141 | 0         |  |  |
|         |      | Shiraz-35T | 1932 | 0.507141 | 0         |  |  |
|         |      | Shiraz-58T | 2221 | 0.871948 | 0         |  |  |
|         |      | Shiraz-58T | 2221 | 0.871948 | 0         |  |  |
|         |      | Shiraz-71T | 2260 | 0.68394  | 0         |  |  |
|         |      | Shiraz-71T | 2260 | 0.68394  | 0         |  |  |

|  |  |            |      |          |           |  |  |
|--|--|------------|------|----------|-----------|--|--|
|  |  | Shiraz-71T | 2262 | 0.986748 | 0         |  |  |
|  |  | Shiraz-71T | 2262 | 0.986748 | 0         |  |  |
|  |  | Shiraz-4T  | 260  | 0        | -0.324128 |  |  |
|  |  | Shiraz-4T  | 260  | 0        | -0.324128 |  |  |
|  |  | Shiraz-16T | 294  | 0.655804 | 0         |  |  |
|  |  | Shiraz-16T | 294  | 0.655804 | 0         |  |  |
|  |  | Shiraz-31T | 345  | 0.103301 | 0         |  |  |
|  |  | Shiraz-31T | 345  | 0.103301 | 0         |  |  |
|  |  | Shiraz-36T | 431  | 0        | -0.78035  |  |  |
|  |  | Shiraz-36T | 431  | 0        | -0.78035  |  |  |
|  |  | Shiraz-36T | 432  | 0        | -0.6692   |  |  |
|  |  | Shiraz-36T | 432  | 0        | -0.6692   |  |  |
|  |  | Shiraz-44T | 891  | 0        | -0.954044 |  |  |
|  |  | Shiraz-44T | 891  | 0        | -0.954044 |  |  |
|  |  | Shiraz-44T | 898  | 0        | -0.515218 |  |  |
|  |  | Shiraz-44T | 898  | 0        | -0.515218 |  |  |
|  |  | Shiraz-49T | 1166 | 0        | -0.917235 |  |  |
|  |  | Shiraz-49T | 1166 | 0        | -0.917235 |  |  |
|  |  | Shiraz-77T | 1282 | 0.213849 | 0         |  |  |
|  |  | Shiraz-77T | 1282 | 0.213849 | 0         |  |  |
|  |  | Shiraz-9T  | 1368 | 0.199713 | 0         |  |  |
|  |  | Shiraz-9T  | 1368 | 0.199713 | 0         |  |  |
|  |  | Shiraz-18T | 1456 | 0.608534 | 0         |  |  |
|  |  | Shiraz-18T | 1456 | 0.608534 | 0         |  |  |
|  |  | Shiraz-22T | 1669 | 0.695915 | 0         |  |  |
|  |  | Shiraz-22T | 1669 | 0.695915 | 0         |  |  |
|  |  | Shiraz-25T | 1717 | 0.420447 | 0         |  |  |
|  |  | Shiraz-25T | 1717 | 0.420447 | 0         |  |  |
|  |  | Shiraz-28T | 1760 | 0.538181 | 0         |  |  |
|  |  | Shiraz-28T | 1760 | 0.538181 | 0         |  |  |
|  |  | Shiraz-29T | 1800 | 0.672527 | 0         |  |  |
|  |  | Shiraz-29T | 1800 | 0.672527 | 0         |  |  |
|  |  | Shiraz-32T | 1869 | 0.776805 | 0         |  |  |
|  |  | Shiraz-32T | 1869 | 0.776805 | 0         |  |  |
|  |  | Shiraz-35T | 1932 | 0.507141 | 0         |  |  |
|  |  | Shiraz-35T | 1932 | 0.507141 | 0         |  |  |
|  |  | Shiraz-58T | 2221 | 0.871948 | 0         |  |  |
|  |  | Shiraz-58T | 2221 | 0.871948 | 0         |  |  |
|  |  | Shiraz-71T | 2260 | 0.68394  | 0         |  |  |
|  |  | Shiraz-71T | 2260 | 0.68394  | 0         |  |  |
|  |  | Shiraz-71T | 2262 | 0.986748 | 0         |  |  |
|  |  | Shiraz-71T | 2262 | 0.986748 | 0         |  |  |
|  |  | Shiraz-4T  | 260  | 0        | -0.324128 |  |  |
|  |  | Shiraz-4T  | 260  | 0        | -0.324128 |  |  |
|  |  | Shiraz-16T | 294  | 0.655804 | 0         |  |  |
|  |  | Shiraz-16T | 294  | 0.655804 | 0         |  |  |
|  |  | Shiraz-31T | 345  | 0.103301 | 0         |  |  |

|         |      |            |      |          |           |  |  |
|---------|------|------------|------|----------|-----------|--|--|
|         |      | Shiraz-31T | 345  | 0.103301 | 0         |  |  |
|         |      | Shiraz-36T | 431  | 0        | -0.78035  |  |  |
|         |      | Shiraz-36T | 431  | 0        | -0.78035  |  |  |
|         |      | Shiraz-36T | 432  | 0        | -0.6692   |  |  |
|         |      | Shiraz-36T | 432  | 0        | -0.6692   |  |  |
|         |      | Shiraz-44T | 891  | 0        | -0.954044 |  |  |
|         |      | Shiraz-44T | 891  | 0        | -0.954044 |  |  |
|         |      | Shiraz-44T | 898  | 0        | -0.515218 |  |  |
|         |      | Shiraz-44T | 898  | 0        | -0.515218 |  |  |
|         |      | Shiraz-49T | 1166 | 0        | -0.917235 |  |  |
|         |      | Shiraz-49T | 1166 | 0        | -0.917235 |  |  |
|         |      | Shiraz-77T | 1282 | 0.213849 | 0         |  |  |
|         |      | Shiraz-77T | 1282 | 0.213849 | 0         |  |  |
|         |      | Shiraz-9T  | 1368 | 0.199713 | 0         |  |  |
|         |      | Shiraz-9T  | 1368 | 0.199713 | 0         |  |  |
|         |      | Shiraz-18T | 1456 | 0.608534 | 0         |  |  |
|         |      | Shiraz-18T | 1456 | 0.608534 | 0         |  |  |
|         |      | Shiraz-22T | 1669 | 0.695915 | 0         |  |  |
|         |      | Shiraz-22T | 1669 | 0.695915 | 0         |  |  |
|         |      | Shiraz-25T | 1717 | 0.420447 | 0         |  |  |
|         |      | Shiraz-25T | 1717 | 0.420447 | 0         |  |  |
|         |      | Shiraz-28T | 1760 | 0.538181 | 0         |  |  |
|         |      | Shiraz-28T | 1760 | 0.538181 | 0         |  |  |
|         |      | Shiraz-29T | 1800 | 0.672527 | 0         |  |  |
|         |      | Shiraz-29T | 1800 | 0.672527 | 0         |  |  |
|         |      | Shiraz-32T | 1869 | 0.776805 | 0         |  |  |
|         |      | Shiraz-32T | 1869 | 0.776805 | 0         |  |  |
|         |      | Shiraz-35T | 1932 | 0.507141 | 0         |  |  |
|         |      | Shiraz-35T | 1932 | 0.507141 | 0         |  |  |
|         |      | Shiraz-58T | 2221 | 0.871948 | 0         |  |  |
|         |      | Shiraz-58T | 2221 | 0.871948 | 0         |  |  |
|         |      | Shiraz-71T | 2260 | 0.68394  | 0         |  |  |
|         |      | Shiraz-71T | 2260 | 0.68394  | 0         |  |  |
|         |      | Shiraz-71T | 2262 | 0.986748 | 0         |  |  |
|         |      | Shiraz-71T | 2262 | 0.986748 | 0         |  |  |
| FAM180A | chr7 | Shiraz-3T  | 90   | 0.219276 | 0         |  |  |
|         |      | Shiraz-4T  | 253  | 0.372918 | 0         |  |  |
|         |      | Shiraz-36T | 378  | 0.179558 | 0         |  |  |
|         |      | Shiraz-46T | 943  | 0.093799 | 0         |  |  |
|         |      | Shiraz-77T | 1225 | 0        | -0.117922 |  |  |
|         |      | Shiraz-9T  | 1325 | 0.221899 | 0         |  |  |
|         |      | Shiraz-18T | 1434 | 0.244465 | 0         |  |  |
|         |      | Shiraz-22T | 1553 | 0        | -0.213234 |  |  |
|         |      | Shiraz-25T | 1698 | 0.21835  | 0         |  |  |
|         |      | Shiraz-28T | 1735 | 0.350744 | 0         |  |  |
|         |      | Shiraz-29T | 1778 | 0.120767 | 0         |  |  |
|         |      | Shiraz-32T | 1833 | 0.551336 | 0         |  |  |

|         |      |            |      |          |           |  |
|---------|------|------------|------|----------|-----------|--|
|         |      | Shiraz-38T | 1951 | 0.250891 | 0         |  |
|         |      | Shiraz-53T | 2078 | 0.287202 | 0         |  |
|         |      | Shiraz-58T | 2162 | 0.221505 | 0         |  |
|         |      | Shiraz-71T | 2238 | 0.603631 | 0         |  |
|         |      | Shiraz-3T  | 90   | 0.219276 | 0         |  |
|         |      | Shiraz-4T  | 253  | 0.372918 | 0         |  |
|         |      | Shiraz-36T | 378  | 0.179558 | 0         |  |
|         |      | Shiraz-46T | 943  | 0.093799 | 0         |  |
|         |      | Shiraz-77T | 1225 | 0        | -0.117922 |  |
|         |      | Shiraz-9T  | 1325 | 0.221899 | 0         |  |
|         |      | Shiraz-18T | 1434 | 0.244465 | 0         |  |
|         |      | Shiraz-22T | 1553 | 0        | -0.213234 |  |
|         |      | Shiraz-25T | 1698 | 0.21835  | 0         |  |
|         |      | Shiraz-28T | 1735 | 0.350744 | 0         |  |
|         |      | Shiraz-29T | 1778 | 0.120767 | 0         |  |
|         |      | Shiraz-32T | 1833 | 0.551336 | 0         |  |
|         |      | Shiraz-38T | 1951 | 0.250891 | 0         |  |
|         |      | Shiraz-53T | 2078 | 0.287202 | 0         |  |
|         |      | Shiraz-58T | 2162 | 0.221505 | 0         |  |
|         |      | Shiraz-71T | 2238 | 0.603631 | 0         |  |
|         |      | Shiraz-3T  | 90   | 0.219276 | 0         |  |
|         |      | Shiraz-4T  | 253  | 0.372918 | 0         |  |
|         |      | Shiraz-36T | 378  | 0.179558 | 0         |  |
|         |      | Shiraz-46T | 943  | 0.093799 | 0         |  |
|         |      | Shiraz-77T | 1225 | 0        | -0.117922 |  |
|         |      | Shiraz-9T  | 1325 | 0.221899 | 0         |  |
|         |      | Shiraz-18T | 1434 | 0.244465 | 0         |  |
|         |      | Shiraz-22T | 1553 | 0        | -0.213234 |  |
|         |      | Shiraz-25T | 1698 | 0.21835  | 0         |  |
|         |      | Shiraz-28T | 1735 | 0.350744 | 0         |  |
|         |      | Shiraz-29T | 1778 | 0.120767 | 0         |  |
|         |      | Shiraz-32T | 1833 | 0.551336 | 0         |  |
|         |      | Shiraz-38T | 1951 | 0.250891 | 0         |  |
|         |      | Shiraz-53T | 2078 | 0.287202 | 0         |  |
|         |      | Shiraz-58T | 2162 | 0.221505 | 0         |  |
|         |      | Shiraz-71T | 2238 | 0.603631 | 0         |  |
| FAM183B | chr7 | Shiraz-3T  | 87   | 0.198593 | 0         |  |
|         |      | Shiraz-4T  | 252  | 0.192083 | 0         |  |
|         |      | Shiraz-36T | 376  | 0.159952 | 0         |  |
|         |      | Shiraz-44T | 631  | 0        | -0.180312 |  |
|         |      | Shiraz-46T | 942  | 0.069143 | 0         |  |
|         |      | Shiraz-18T | 1433 | 0.250973 | 0         |  |
|         |      | Shiraz-22T | 1544 | 0        | -0.193579 |  |
|         |      | Shiraz-25T | 1697 | 0.21945  | 0         |  |
|         |      | Shiraz-28T | 1734 | 0.362882 | 0         |  |
|         |      | Shiraz-29T | 1777 | 0.156747 | 0         |  |
|         |      | Shiraz-38T | 1950 | 0.265916 | 0         |  |

|         |      |            |      |          |           |  |  |
|---------|------|------------|------|----------|-----------|--|--|
|         |      | Shiraz-71T | 2236 | 0.320072 | 0         |  |  |
|         |      | Shiraz-72T | 2277 | 0        | -0.398869 |  |  |
|         |      | Shiraz-3T  | 87   | 0.198593 | 0         |  |  |
|         |      | Shiraz-4T  | 252  | 0.192083 | 0         |  |  |
|         |      | Shiraz-36T | 376  | 0.159952 | 0         |  |  |
|         |      | Shiraz-44T | 631  | 0        | -0.180312 |  |  |
|         |      | Shiraz-46T | 942  | 0.069143 | 0         |  |  |
|         |      | Shiraz-18T | 1433 | 0.250973 | 0         |  |  |
|         |      | Shiraz-22T | 1544 | 0        | -0.193579 |  |  |
|         |      | Shiraz-25T | 1697 | 0.21945  | 0         |  |  |
|         |      | Shiraz-28T | 1734 | 0.362882 | 0         |  |  |
|         |      | Shiraz-29T | 1777 | 0.156747 | 0         |  |  |
|         |      | Shiraz-38T | 1950 | 0.265916 | 0         |  |  |
|         |      | Shiraz-71T | 2236 | 0.320072 | 0         |  |  |
|         |      | Shiraz-72T | 2277 | 0        | -0.398869 |  |  |
|         |      | Shiraz-3T  | 87   | 0.198593 | 0         |  |  |
|         |      | Shiraz-4T  | 252  | 0.192083 | 0         |  |  |
|         |      | Shiraz-36T | 376  | 0.159952 | 0         |  |  |
|         |      | Shiraz-44T | 631  | 0        | -0.180312 |  |  |
|         |      | Shiraz-46T | 942  | 0.069143 | 0         |  |  |
|         |      | Shiraz-18T | 1433 | 0.250973 | 0         |  |  |
|         |      | Shiraz-22T | 1544 | 0        | -0.193579 |  |  |
|         |      | Shiraz-25T | 1697 | 0.21945  | 0         |  |  |
|         |      | Shiraz-28T | 1734 | 0.362882 | 0         |  |  |
|         |      | Shiraz-29T | 1777 | 0.156747 | 0         |  |  |
|         |      | Shiraz-38T | 1950 | 0.265916 | 0         |  |  |
|         |      | Shiraz-71T | 2236 | 0.320072 | 0         |  |  |
|         |      | Shiraz-72T | 2277 | 0        | -0.398869 |  |  |
| FAM185A | chr7 | Shiraz-3T  | 90   | 0.219276 | 0         |  |  |
|         |      | Shiraz-4T  | 253  | 0.372918 | 0         |  |  |
|         |      | Shiraz-36T | 378  | 0.179558 | 0         |  |  |
|         |      | Shiraz-46T | 943  | 0.093799 | 0         |  |  |
|         |      | Shiraz-46T | 946  | 0.299835 | 0         |  |  |
|         |      | Shiraz-77T | 1225 | 0        | -0.117922 |  |  |
|         |      | Shiraz-18T | 1434 | 0.244465 | 0         |  |  |
|         |      | Shiraz-22T | 1549 | 0        | -0.319623 |  |  |
|         |      | Shiraz-25T | 1698 | 0.21835  | 0         |  |  |
|         |      | Shiraz-28T | 1735 | 0.350744 | 0         |  |  |
|         |      | Shiraz-29T | 1778 | 0.120767 | 0         |  |  |
|         |      | Shiraz-32T | 1833 | 0.551336 | 0         |  |  |
|         |      | Shiraz-38T | 1951 | 0.250891 | 0         |  |  |
|         |      | Shiraz-53T | 2078 | 0.287202 | 0         |  |  |
|         |      | Shiraz-71T | 2238 | 0.603631 | 0         |  |  |
|         |      | Shiraz-3T  | 90   | 0.219276 | 0         |  |  |
|         |      | Shiraz-4T  | 253  | 0.372918 | 0         |  |  |
|         |      | Shiraz-36T | 378  | 0.179558 | 0         |  |  |
|         |      | Shiraz-46T | 943  | 0.093799 | 0         |  |  |

|       |      |            |      |          |           |  |  |
|-------|------|------------|------|----------|-----------|--|--|
|       |      | Shiraz-46T | 946  | 0.299835 | 0         |  |  |
|       |      | Shiraz-77T | 1225 | 0        | -0.117922 |  |  |
|       |      | Shiraz-18T | 1434 | 0.244465 | 0         |  |  |
|       |      | Shiraz-22T | 1549 | 0        | -0.319623 |  |  |
|       |      | Shiraz-25T | 1698 | 0.21835  | 0         |  |  |
|       |      | Shiraz-28T | 1735 | 0.350744 | 0         |  |  |
|       |      | Shiraz-29T | 1778 | 0.120767 | 0         |  |  |
|       |      | Shiraz-32T | 1833 | 0.551336 | 0         |  |  |
|       |      | Shiraz-38T | 1951 | 0.250891 | 0         |  |  |
|       |      | Shiraz-53T | 2078 | 0.287202 | 0         |  |  |
|       |      | Shiraz-71T | 2238 | 0.603631 | 0         |  |  |
|       |      | Shiraz-3T  | 90   | 0.219276 | 0         |  |  |
|       |      | Shiraz-4T  | 253  | 0.372918 | 0         |  |  |
|       |      | Shiraz-36T | 378  | 0.179558 | 0         |  |  |
|       |      | Shiraz-46T | 943  | 0.093799 | 0         |  |  |
|       |      | Shiraz-46T | 946  | 0.299835 | 0         |  |  |
|       |      | Shiraz-77T | 1225 | 0        | -0.117922 |  |  |
|       |      | Shiraz-18T | 1434 | 0.244465 | 0         |  |  |
|       |      | Shiraz-22T | 1549 | 0        | -0.319623 |  |  |
|       |      | Shiraz-25T | 1698 | 0.21835  | 0         |  |  |
|       |      | Shiraz-28T | 1735 | 0.350744 | 0         |  |  |
|       |      | Shiraz-29T | 1778 | 0.120767 | 0         |  |  |
|       |      | Shiraz-32T | 1833 | 0.551336 | 0         |  |  |
|       |      | Shiraz-38T | 1951 | 0.250891 | 0         |  |  |
|       |      | Shiraz-53T | 2078 | 0.287202 | 0         |  |  |
|       |      | Shiraz-71T | 2238 | 0.603631 | 0         |  |  |
| FAM3A | chrX | Shiraz-3T  | 246  | 0.531858 | 0         |  |  |
|       |      | Shiraz-4T  | 261  | 0        | -0.336249 |  |  |
|       |      | Shiraz-16T | 295  | 0.591657 | 0         |  |  |
|       |      | Shiraz-36T | 433  | 0        | -0.803961 |  |  |
|       |      | Shiraz-42T | 480  | 0        | -0.232915 |  |  |
|       |      | Shiraz-44T | 908  | 0.466743 | 0         |  |  |
|       |      | Shiraz-49T | 1170 | 0        | -0.967436 |  |  |
|       |      | Shiraz-49T | 1173 | 0        | -0.704439 |  |  |
|       |      | Shiraz-9T  | 1370 | 0.690073 | 0         |  |  |
|       |      | Shiraz-9T  | 1371 | 1.292392 | 0         |  |  |
|       |      | Shiraz-18T | 1457 | 0.643204 | 0         |  |  |
|       |      | Shiraz-22T | 1673 | 0.611783 | 0         |  |  |
|       |      | Shiraz-22T | 1678 | 0.911625 | 0         |  |  |
|       |      | Shiraz-25T | 1719 | 0.472955 | 0         |  |  |
|       |      | Shiraz-28T | 1762 | 0.562311 | 0         |  |  |
|       |      | Shiraz-29T | 1801 | 0.815343 | 0         |  |  |
|       |      | Shiraz-32T | 1870 | 0.729766 | 0         |  |  |
|       |      | Shiraz-32T | 1872 | 1.504553 | 0         |  |  |
|       |      | Shiraz-35T | 1933 | 0.488535 | 0         |  |  |
|       |      | Shiraz-38T | 2011 | 0        | -0.406024 |  |  |
|       |      | Shiraz-53T | 2115 | 0.427728 | 0         |  |  |

|  |            |      |          |           |  |
|--|------------|------|----------|-----------|--|
|  | Shiraz-58T | 2223 | 0.833364 | 0         |  |
|  | Shiraz-58T | 2226 | 1.074663 | 0         |  |
|  | Shiraz-71T | 2263 | 0.975531 | 0         |  |
|  | Shiraz-3T  | 246  | 0.531858 | 0         |  |
|  | Shiraz-4T  | 261  | 0        | -0.336249 |  |
|  | Shiraz-16T | 295  | 0.591657 | 0         |  |
|  | Shiraz-36T | 433  | 0        | -0.803961 |  |
|  | Shiraz-42T | 480  | 0        | -0.232915 |  |
|  | Shiraz-44T | 908  | 0.466743 | 0         |  |
|  | Shiraz-49T | 1170 | 0        | -0.967436 |  |
|  | Shiraz-49T | 1173 | 0        | -0.704439 |  |
|  | Shiraz-9T  | 1370 | 0.690073 | 0         |  |
|  | Shiraz-9T  | 1371 | 1.292392 | 0         |  |
|  | Shiraz-18T | 1457 | 0.643204 | 0         |  |
|  | Shiraz-22T | 1673 | 0.611783 | 0         |  |
|  | Shiraz-22T | 1678 | 0.911625 | 0         |  |
|  | Shiraz-25T | 1719 | 0.472955 | 0         |  |
|  | Shiraz-28T | 1762 | 0.562311 | 0         |  |
|  | Shiraz-29T | 1801 | 0.815343 | 0         |  |
|  | Shiraz-32T | 1870 | 0.729766 | 0         |  |
|  | Shiraz-32T | 1872 | 1.504553 | 0         |  |
|  | Shiraz-35T | 1933 | 0.488535 | 0         |  |
|  | Shiraz-38T | 2011 | 0        | -0.406024 |  |
|  | Shiraz-53T | 2115 | 0.427728 | 0         |  |
|  | Shiraz-58T | 2223 | 0.833364 | 0         |  |
|  | Shiraz-58T | 2226 | 1.074663 | 0         |  |
|  | Shiraz-71T | 2263 | 0.975531 | 0         |  |
|  | Shiraz-3T  | 246  | 0.531858 | 0         |  |
|  | Shiraz-4T  | 261  | 0        | -0.336249 |  |
|  | Shiraz-16T | 295  | 0.591657 | 0         |  |
|  | Shiraz-36T | 433  | 0        | -0.803961 |  |
|  | Shiraz-42T | 480  | 0        | -0.232915 |  |
|  | Shiraz-44T | 908  | 0.466743 | 0         |  |
|  | Shiraz-49T | 1170 | 0        | -0.967436 |  |
|  | Shiraz-49T | 1173 | 0        | -0.704439 |  |
|  | Shiraz-9T  | 1370 | 0.690073 | 0         |  |
|  | Shiraz-9T  | 1371 | 1.292392 | 0         |  |
|  | Shiraz-18T | 1457 | 0.643204 | 0         |  |
|  | Shiraz-22T | 1673 | 0.611783 | 0         |  |
|  | Shiraz-22T | 1678 | 0.911625 | 0         |  |
|  | Shiraz-25T | 1719 | 0.472955 | 0         |  |
|  | Shiraz-28T | 1762 | 0.562311 | 0         |  |
|  | Shiraz-29T | 1801 | 0.815343 | 0         |  |
|  | Shiraz-32T | 1870 | 0.729766 | 0         |  |
|  | Shiraz-32T | 1872 | 1.504553 | 0         |  |
|  | Shiraz-35T | 1933 | 0.488535 | 0         |  |
|  | Shiraz-38T | 2011 | 0        | -0.406024 |  |

|       |      |            |      |          |           |  |
|-------|------|------------|------|----------|-----------|--|
|       |      | Shiraz-53T | 2115 | 0.427728 | 0         |  |
|       |      | Shiraz-58T | 2223 | 0.833364 | 0         |  |
|       |      | Shiraz-58T | 2226 | 1.074663 | 0         |  |
|       |      | Shiraz-71T | 2263 | 0.975531 | 0         |  |
| FAM3C | chr7 | Shiraz-3T  | 90   | 0.219276 | 0         |  |
|       |      | Shiraz-3T  | 95   | 0        | -0.077623 |  |
|       |      | Shiraz-4T  | 253  | 0.372918 | 0         |  |
|       |      | Shiraz-36T | 378  | 0.179558 | 0         |  |
|       |      | Shiraz-36T | 382  | 0.081739 | 0         |  |
|       |      | Shiraz-44T | 641  | 0        | -0.477846 |  |
|       |      | Shiraz-46T | 943  | 0.093799 | 0         |  |
|       |      | Shiraz-46T | 947  | 0        | -0.010843 |  |
|       |      | Shiraz-47T | 1031 | 0        | -0.117529 |  |
|       |      | Shiraz-49T | 1121 | 0        | -0.138569 |  |
|       |      | Shiraz-77T | 1225 | 0        | -0.117922 |  |
|       |      | Shiraz-77T | 1228 | 0        | -0.238084 |  |
|       |      | Shiraz-18T | 1434 | 0.244465 | 0         |  |
|       |      | Shiraz-22T | 1549 | 0        | -0.319623 |  |
|       |      | Shiraz-22T | 1552 | 0        | -0.50686  |  |
|       |      | Shiraz-25T | 1698 | 0.21835  | 0         |  |
|       |      | Shiraz-28T | 1735 | 0.350744 | 0         |  |
|       |      | Shiraz-29T | 1778 | 0.120767 | 0         |  |
|       |      | Shiraz-32T | 1833 | 0.551336 | 0         |  |
|       |      | Shiraz-32T | 1835 | 0.092727 | 0         |  |
|       |      | Shiraz-38T | 1951 | 0.250891 | 0         |  |
|       |      | Shiraz-53T | 2078 | 0.287202 | 0         |  |
|       |      | Shiraz-58T | 2161 | 0        | -0.187744 |  |
|       |      | Shiraz-71T | 2238 | 0.603631 | 0         |  |
|       |      | Shiraz-3T  | 90   | 0.219276 | 0         |  |
|       |      | Shiraz-3T  | 95   | 0        | -0.077623 |  |
|       |      | Shiraz-4T  | 253  | 0.372918 | 0         |  |
|       |      | Shiraz-36T | 378  | 0.179558 | 0         |  |
|       |      | Shiraz-36T | 382  | 0.081739 | 0         |  |
|       |      | Shiraz-44T | 641  | 0        | -0.477846 |  |
|       |      | Shiraz-46T | 943  | 0.093799 | 0         |  |
|       |      | Shiraz-46T | 947  | 0        | -0.010843 |  |
|       |      | Shiraz-47T | 1031 | 0        | -0.117529 |  |
|       |      | Shiraz-49T | 1121 | 0        | -0.138569 |  |
|       |      | Shiraz-77T | 1225 | 0        | -0.117922 |  |
|       |      | Shiraz-77T | 1228 | 0        | -0.238084 |  |
|       |      | Shiraz-18T | 1434 | 0.244465 | 0         |  |
|       |      | Shiraz-22T | 1549 | 0        | -0.319623 |  |
|       |      | Shiraz-22T | 1552 | 0        | -0.50686  |  |
|       |      | Shiraz-25T | 1698 | 0.21835  | 0         |  |
|       |      | Shiraz-28T | 1735 | 0.350744 | 0         |  |
|       |      | Shiraz-29T | 1778 | 0.120767 | 0         |  |
|       |      | Shiraz-32T | 1833 | 0.551336 | 0         |  |



|        |      |            |      |          |           |  |
|--------|------|------------|------|----------|-----------|--|
|        |      | Shiraz-32T | 1835 | 0.092727 | 0         |  |
|        |      | Shiraz-38T | 1951 | 0.250891 | 0         |  |
|        |      | Shiraz-53T | 2078 | 0.287202 | 0         |  |
|        |      | Shiraz-58T | 2161 | 0        | -0.187744 |  |
|        |      | Shiraz-71T | 2238 | 0.603631 | 0         |  |
|        |      | Shiraz-3T  | 90   | 0.219276 | 0         |  |
|        |      | Shiraz-3T  | 95   | 0        | -0.077623 |  |
|        |      | Shiraz-4T  | 253  | 0.372918 | 0         |  |
|        |      | Shiraz-36T | 378  | 0.179558 | 0         |  |
|        |      | Shiraz-36T | 382  | 0.081739 | 0         |  |
|        |      | Shiraz-44T | 641  | 0        | -0.477846 |  |
|        |      | Shiraz-46T | 943  | 0.093799 | 0         |  |
|        |      | Shiraz-46T | 947  | 0        | -0.010843 |  |
|        |      | Shiraz-47T | 1031 | 0        | -0.117529 |  |
|        |      | Shiraz-49T | 1121 | 0        | -0.138569 |  |
|        |      | Shiraz-77T | 1225 | 0        | -0.117922 |  |
|        |      | Shiraz-77T | 1228 | 0        | -0.238084 |  |
|        |      | Shiraz-18T | 1434 | 0.244465 | 0         |  |
|        |      | Shiraz-22T | 1549 | 0        | -0.319623 |  |
|        |      | Shiraz-22T | 1552 | 0        | -0.50686  |  |
|        |      | Shiraz-25T | 1698 | 0.21835  | 0         |  |
|        |      | Shiraz-28T | 1735 | 0.350744 | 0         |  |
|        |      | Shiraz-29T | 1778 | 0.120767 | 0         |  |
|        |      | Shiraz-32T | 1833 | 0.551336 | 0         |  |
|        |      | Shiraz-32T | 1835 | 0.092727 | 0         |  |
|        |      | Shiraz-38T | 1951 | 0.250891 | 0         |  |
|        |      | Shiraz-53T | 2078 | 0.287202 | 0         |  |
|        |      | Shiraz-58T | 2161 | 0        | -0.187744 |  |
|        |      | Shiraz-71T | 2238 | 0.603631 | 0         |  |
| FAM40B | chr7 | Shiraz-3T  | 90   | 0.219276 | 0         |  |
|        |      | Shiraz-3T  | 90   | 0.219276 | 0         |  |
|        |      | Shiraz-3T  | 96   | 0.428308 | 0         |  |
|        |      | Shiraz-3T  | 96   | 0.428308 | 0         |  |
|        |      | Shiraz-4T  | 253  | 0.372918 | 0         |  |
|        |      | Shiraz-4T  | 253  | 0.372918 | 0         |  |
|        |      | Shiraz-31T | 317  | 0.204382 | 0         |  |
|        |      | Shiraz-31T | 317  | 0.204382 | 0         |  |
|        |      | Shiraz-36T | 378  | 0.179558 | 0         |  |
|        |      | Shiraz-36T | 378  | 0.179558 | 0         |  |
|        |      | Shiraz-44T | 642  | 0.408617 | 0         |  |
|        |      | Shiraz-44T | 642  | 0.408617 | 0         |  |
|        |      | Shiraz-46T | 943  | 0.093799 | 0         |  |
|        |      | Shiraz-46T | 943  | 0.093799 | 0         |  |
|        |      | Shiraz-47T | 1032 | 0.171484 | 0         |  |
|        |      | Shiraz-47T | 1032 | 0.171484 | 0         |  |
|        |      | Shiraz-77T | 1225 | 0        | -0.117922 |  |
|        |      | Shiraz-77T | 1225 | 0        | -0.117922 |  |

|  |            |      |          |           |  |
|--|------------|------|----------|-----------|--|
|  | Shiraz-77T | 1229 | 0.051661 | 0         |  |
|  | Shiraz-77T | 1229 | 0.051661 | 0         |  |
|  | Shiraz-9T  | 1325 | 0.221899 | 0         |  |
|  | Shiraz-9T  | 1325 | 0.221899 | 0         |  |
|  | Shiraz-18T | 1434 | 0.244465 | 0         |  |
|  | Shiraz-18T | 1434 | 0.244465 | 0         |  |
|  | Shiraz-25T | 1698 | 0.21835  | 0         |  |
|  | Shiraz-25T | 1698 | 0.21835  | 0         |  |
|  | Shiraz-28T | 1735 | 0.350744 | 0         |  |
|  | Shiraz-28T | 1735 | 0.350744 | 0         |  |
|  | Shiraz-29T | 1778 | 0.120767 | 0         |  |
|  | Shiraz-29T | 1778 | 0.120767 | 0         |  |
|  | Shiraz-32T | 1833 | 0.551336 | 0         |  |
|  | Shiraz-32T | 1833 | 0.551336 | 0         |  |
|  | Shiraz-38T | 1951 | 0.250891 | 0         |  |
|  | Shiraz-38T | 1951 | 0.250891 | 0         |  |
|  | Shiraz-53T | 2078 | 0.287202 | 0         |  |
|  | Shiraz-53T | 2078 | 0.287202 | 0         |  |
|  | Shiraz-71T | 2238 | 0.603631 | 0         |  |
|  | Shiraz-71T | 2238 | 0.603631 | 0         |  |
|  | Shiraz-3T  | 90   | 0.219276 | 0         |  |
|  | Shiraz-3T  | 90   | 0.219276 | 0         |  |
|  | Shiraz-3T  | 96   | 0.428308 | 0         |  |
|  | Shiraz-3T  | 96   | 0.428308 | 0         |  |
|  | Shiraz-4T  | 253  | 0.372918 | 0         |  |
|  | Shiraz-4T  | 253  | 0.372918 | 0         |  |
|  | Shiraz-31T | 317  | 0.204382 | 0         |  |
|  | Shiraz-31T | 317  | 0.204382 | 0         |  |
|  | Shiraz-36T | 378  | 0.179558 | 0         |  |
|  | Shiraz-36T | 378  | 0.179558 | 0         |  |
|  | Shiraz-44T | 642  | 0.408617 | 0         |  |
|  | Shiraz-44T | 642  | 0.408617 | 0         |  |
|  | Shiraz-46T | 943  | 0.093799 | 0         |  |
|  | Shiraz-46T | 943  | 0.093799 | 0         |  |
|  | Shiraz-47T | 1032 | 0.171484 | 0         |  |
|  | Shiraz-47T | 1032 | 0.171484 | 0         |  |
|  | Shiraz-77T | 1225 | 0        | -0.117922 |  |
|  | Shiraz-77T | 1225 | 0        | -0.117922 |  |
|  | Shiraz-77T | 1229 | 0.051661 | 0         |  |
|  | Shiraz-77T | 1229 | 0.051661 | 0         |  |
|  | Shiraz-9T  | 1325 | 0.221899 | 0         |  |
|  | Shiraz-9T  | 1325 | 0.221899 | 0         |  |
|  | Shiraz-18T | 1434 | 0.244465 | 0         |  |
|  | Shiraz-18T | 1434 | 0.244465 | 0         |  |
|  | Shiraz-25T | 1698 | 0.21835  | 0         |  |
|  | Shiraz-25T | 1698 | 0.21835  | 0         |  |
|  | Shiraz-28T | 1735 | 0.350744 | 0         |  |

|  |  |            |      |          |           |  |  |
|--|--|------------|------|----------|-----------|--|--|
|  |  | Shiraz-28T | 1735 | 0.350744 | 0         |  |  |
|  |  | Shiraz-29T | 1778 | 0.120767 | 0         |  |  |
|  |  | Shiraz-29T | 1778 | 0.120767 | 0         |  |  |
|  |  | Shiraz-32T | 1833 | 0.551336 | 0         |  |  |
|  |  | Shiraz-32T | 1833 | 0.551336 | 0         |  |  |
|  |  | Shiraz-38T | 1951 | 0.250891 | 0         |  |  |
|  |  | Shiraz-38T | 1951 | 0.250891 | 0         |  |  |
|  |  | Shiraz-53T | 2078 | 0.287202 | 0         |  |  |
|  |  | Shiraz-53T | 2078 | 0.287202 | 0         |  |  |
|  |  | Shiraz-71T | 2238 | 0.603631 | 0         |  |  |
|  |  | Shiraz-71T | 2238 | 0.603631 | 0         |  |  |
|  |  | Shiraz-3T  | 90   | 0.219276 | 0         |  |  |
|  |  | Shiraz-3T  | 90   | 0.219276 | 0         |  |  |
|  |  | Shiraz-3T  | 96   | 0.428308 | 0         |  |  |
|  |  | Shiraz-3T  | 96   | 0.428308 | 0         |  |  |
|  |  | Shiraz-4T  | 253  | 0.372918 | 0         |  |  |
|  |  | Shiraz-4T  | 253  | 0.372918 | 0         |  |  |
|  |  | Shiraz-31T | 317  | 0.204382 | 0         |  |  |
|  |  | Shiraz-31T | 317  | 0.204382 | 0         |  |  |
|  |  | Shiraz-36T | 378  | 0.179558 | 0         |  |  |
|  |  | Shiraz-36T | 378  | 0.179558 | 0         |  |  |
|  |  | Shiraz-44T | 642  | 0.408617 | 0         |  |  |
|  |  | Shiraz-44T | 642  | 0.408617 | 0         |  |  |
|  |  | Shiraz-46T | 943  | 0.093799 | 0         |  |  |
|  |  | Shiraz-46T | 943  | 0.093799 | 0         |  |  |
|  |  | Shiraz-47T | 1032 | 0.171484 | 0         |  |  |
|  |  | Shiraz-47T | 1032 | 0.171484 | 0         |  |  |
|  |  | Shiraz-77T | 1225 | 0        | -0.117922 |  |  |
|  |  | Shiraz-77T | 1225 | 0        | -0.117922 |  |  |
|  |  | Shiraz-77T | 1229 | 0.051661 | 0         |  |  |
|  |  | Shiraz-77T | 1229 | 0.051661 | 0         |  |  |
|  |  | Shiraz-9T  | 1325 | 0.221899 | 0         |  |  |
|  |  | Shiraz-9T  | 1325 | 0.221899 | 0         |  |  |
|  |  | Shiraz-18T | 1434 | 0.244465 | 0         |  |  |
|  |  | Shiraz-18T | 1434 | 0.244465 | 0         |  |  |
|  |  | Shiraz-25T | 1698 | 0.21835  | 0         |  |  |
|  |  | Shiraz-25T | 1698 | 0.21835  | 0         |  |  |
|  |  | Shiraz-28T | 1735 | 0.350744 | 0         |  |  |
|  |  | Shiraz-28T | 1735 | 0.350744 | 0         |  |  |
|  |  | Shiraz-29T | 1778 | 0.120767 | 0         |  |  |
|  |  | Shiraz-29T | 1778 | 0.120767 | 0         |  |  |
|  |  | Shiraz-32T | 1833 | 0.551336 | 0         |  |  |
|  |  | Shiraz-32T | 1833 | 0.551336 | 0         |  |  |
|  |  | Shiraz-38T | 1951 | 0.250891 | 0         |  |  |
|  |  | Shiraz-38T | 1951 | 0.250891 | 0         |  |  |
|  |  | Shiraz-53T | 2078 | 0.287202 | 0         |  |  |
|  |  | Shiraz-53T | 2078 | 0.287202 | 0         |  |  |

|        |      |            |      |          |           |  |
|--------|------|------------|------|----------|-----------|--|
|        |      | Shiraz-71T | 2238 | 0.603631 | 0         |  |
|        |      | Shiraz-71T | 2238 | 0.603631 | 0         |  |
| FAM46D | chrX | Shiraz-3T  | 242  | 0        | -0.336434 |  |
|        |      | Shiraz-4T  | 261  | 0        | -0.336249 |  |
|        |      | Shiraz-16T | 295  | 0.591657 | 0         |  |
|        |      | Shiraz-36T | 433  | 0        | -0.803961 |  |
|        |      | Shiraz-44T | 899  | 0        | -1.09697  |  |
|        |      | Shiraz-44T | 902  | 0        | -1.449824 |  |
|        |      | Shiraz-47T | 1085 | 0        | -0.130811 |  |
|        |      | Shiraz-49T | 1170 | 0        | -0.967436 |  |
|        |      | Shiraz-49T | 1172 | 0        | -1.123219 |  |
|        |      | Shiraz-18T | 1457 | 0.643204 | 0         |  |
|        |      | Shiraz-22T | 1673 | 0.611783 | 0         |  |
|        |      | Shiraz-22T | 1675 | 0.279253 | 0         |  |
|        |      | Shiraz-25T | 1719 | 0.472955 | 0         |  |
|        |      | Shiraz-28T | 1762 | 0.562311 | 0         |  |
|        |      | Shiraz-29T | 1801 | 0.815343 | 0         |  |
|        |      | Shiraz-32T | 1870 | 0.729766 | 0         |  |
|        |      | Shiraz-35T | 1933 | 0.488535 | 0         |  |
|        |      | Shiraz-58T | 2223 | 0.833364 | 0         |  |
|        |      | Shiraz-71T | 2263 | 0.975531 | 0         |  |
|        |      | Shiraz-3T  | 242  | 0        | -0.336434 |  |
|        |      | Shiraz-4T  | 261  | 0        | -0.336249 |  |
|        |      | Shiraz-16T | 295  | 0.591657 | 0         |  |
|        |      | Shiraz-36T | 433  | 0        | -0.803961 |  |
|        |      | Shiraz-44T | 899  | 0        | -1.09697  |  |
|        |      | Shiraz-44T | 902  | 0        | -1.449824 |  |
|        |      | Shiraz-47T | 1085 | 0        | -0.130811 |  |
|        |      | Shiraz-49T | 1170 | 0        | -0.967436 |  |
|        |      | Shiraz-49T | 1172 | 0        | -1.123219 |  |
|        |      | Shiraz-18T | 1457 | 0.643204 | 0         |  |
|        |      | Shiraz-22T | 1673 | 0.611783 | 0         |  |
|        |      | Shiraz-22T | 1675 | 0.279253 | 0         |  |
|        |      | Shiraz-25T | 1719 | 0.472955 | 0         |  |
|        |      | Shiraz-28T | 1762 | 0.562311 | 0         |  |
|        |      | Shiraz-29T | 1801 | 0.815343 | 0         |  |
|        |      | Shiraz-32T | 1870 | 0.729766 | 0         |  |
|        |      | Shiraz-35T | 1933 | 0.488535 | 0         |  |
|        |      | Shiraz-58T | 2223 | 0.833364 | 0         |  |
|        |      | Shiraz-71T | 2263 | 0.975531 | 0         |  |
|        |      | Shiraz-3T  | 242  | 0        | -0.336434 |  |
|        |      | Shiraz-4T  | 261  | 0        | -0.336249 |  |
|        |      | Shiraz-16T | 295  | 0.591657 | 0         |  |
|        |      | Shiraz-36T | 433  | 0        | -0.803961 |  |
|        |      | Shiraz-44T | 899  | 0        | -1.09697  |  |
|        |      | Shiraz-44T | 902  | 0        | -1.449824 |  |
|        |      | Shiraz-47T | 1085 | 0        | -0.130811 |  |

|        |      |            |      |          |           |  |  |
|--------|------|------------|------|----------|-----------|--|--|
|        |      | Shiraz-49T | 1170 | 0        | -0.967436 |  |  |
|        |      | Shiraz-49T | 1172 | 0        | -1.123219 |  |  |
|        |      | Shiraz-18T | 1457 | 0.643204 | 0         |  |  |
|        |      | Shiraz-22T | 1673 | 0.611783 | 0         |  |  |
|        |      | Shiraz-22T | 1675 | 0.279253 | 0         |  |  |
|        |      | Shiraz-25T | 1719 | 0.472955 | 0         |  |  |
|        |      | Shiraz-28T | 1762 | 0.562311 | 0         |  |  |
|        |      | Shiraz-29T | 1801 | 0.815343 | 0         |  |  |
|        |      | Shiraz-32T | 1870 | 0.729766 | 0         |  |  |
|        |      | Shiraz-35T | 1933 | 0.488535 | 0         |  |  |
|        |      | Shiraz-58T | 2223 | 0.833364 | 0         |  |  |
|        |      | Shiraz-71T | 2263 | 0.975531 | 0         |  |  |
| FAM47A | chrX | Shiraz-3T  | 235  | 0        | -0.28401  |  |  |
|        |      | Shiraz-3T  | 236  | 0        | -0.435445 |  |  |
|        |      | Shiraz-4T  | 260  | 0        | -0.324128 |  |  |
|        |      | Shiraz-16T | 294  | 0.655804 | 0         |  |  |
|        |      | Shiraz-36T | 431  | 0        | -0.78035  |  |  |
|        |      | Shiraz-44T | 891  | 0        | -0.954044 |  |  |
|        |      | Shiraz-44T | 893  | 0        | -1.364406 |  |  |
|        |      | Shiraz-47T | 1083 | 0        | -0.103285 |  |  |
|        |      | Shiraz-49T | 1166 | 0        | -0.917235 |  |  |
|        |      | Shiraz-49T | 1168 | 0        | -1.073859 |  |  |
|        |      | Shiraz-9T  | 1368 | 0.199713 | 0         |  |  |
|        |      | Shiraz-18T | 1455 | 0        | -0.186773 |  |  |
|        |      | Shiraz-22T | 1669 | 0.695915 | 0         |  |  |
|        |      | Shiraz-22T | 1671 | 0.369309 | 0         |  |  |
|        |      | Shiraz-25T | 1717 | 0.420447 | 0         |  |  |
|        |      | Shiraz-28T | 1760 | 0.538181 | 0         |  |  |
|        |      | Shiraz-29T | 1800 | 0.672527 | 0         |  |  |
|        |      | Shiraz-32T | 1869 | 0.776805 | 0         |  |  |
|        |      | Shiraz-35T | 1932 | 0.507141 | 0         |  |  |
|        |      | Shiraz-40T | 2051 | 0.098506 | 0         |  |  |
|        |      | Shiraz-58T | 2221 | 0.871948 | 0         |  |  |
|        |      | Shiraz-58T | 2222 | 0.679664 | 0         |  |  |
|        |      | Shiraz-71T | 2260 | 0.68394  | 0         |  |  |
|        |      | Shiraz-71T | 2261 | 0.508399 | 0         |  |  |
|        |      | Shiraz-3T  | 235  | 0        | -0.28401  |  |  |
|        |      | Shiraz-3T  | 236  | 0        | -0.435445 |  |  |
|        |      | Shiraz-4T  | 260  | 0        | -0.324128 |  |  |
|        |      | Shiraz-16T | 294  | 0.655804 | 0         |  |  |
|        |      | Shiraz-36T | 431  | 0        | -0.78035  |  |  |
|        |      | Shiraz-44T | 891  | 0        | -0.954044 |  |  |
|        |      | Shiraz-44T | 893  | 0        | -1.364406 |  |  |
|        |      | Shiraz-47T | 1083 | 0        | -0.103285 |  |  |
|        |      | Shiraz-49T | 1166 | 0        | -0.917235 |  |  |
|        |      | Shiraz-49T | 1168 | 0        | -1.073859 |  |  |
|        |      | Shiraz-9T  | 1368 | 0.199713 | 0         |  |  |

|        |      |            |      |          |           |  |  |
|--------|------|------------|------|----------|-----------|--|--|
|        |      | Shiraz-18T | 1455 | 0        | -0.186773 |  |  |
|        |      | Shiraz-22T | 1669 | 0.695915 | 0         |  |  |
|        |      | Shiraz-22T | 1671 | 0.369309 | 0         |  |  |
|        |      | Shiraz-25T | 1717 | 0.420447 | 0         |  |  |
|        |      | Shiraz-28T | 1760 | 0.538181 | 0         |  |  |
|        |      | Shiraz-29T | 1800 | 0.672527 | 0         |  |  |
|        |      | Shiraz-32T | 1869 | 0.776805 | 0         |  |  |
|        |      | Shiraz-35T | 1932 | 0.507141 | 0         |  |  |
|        |      | Shiraz-40T | 2051 | 0.098506 | 0         |  |  |
|        |      | Shiraz-58T | 2221 | 0.871948 | 0         |  |  |
|        |      | Shiraz-58T | 2222 | 0.679664 | 0         |  |  |
|        |      | Shiraz-71T | 2260 | 0.68394  | 0         |  |  |
|        |      | Shiraz-71T | 2261 | 0.508399 | 0         |  |  |
|        |      | Shiraz-3T  | 235  | 0        | -0.28401  |  |  |
|        |      | Shiraz-3T  | 236  | 0        | -0.435445 |  |  |
|        |      | Shiraz-4T  | 260  | 0        | -0.324128 |  |  |
|        |      | Shiraz-16T | 294  | 0.655804 | 0         |  |  |
|        |      | Shiraz-36T | 431  | 0        | -0.78035  |  |  |
|        |      | Shiraz-44T | 891  | 0        | -0.954044 |  |  |
|        |      | Shiraz-44T | 893  | 0        | -1.364406 |  |  |
|        |      | Shiraz-47T | 1083 | 0        | -0.103285 |  |  |
|        |      | Shiraz-49T | 1166 | 0        | -0.917235 |  |  |
|        |      | Shiraz-49T | 1168 | 0        | -1.073859 |  |  |
|        |      | Shiraz-9T  | 1368 | 0.199713 | 0         |  |  |
|        |      | Shiraz-18T | 1455 | 0        | -0.186773 |  |  |
|        |      | Shiraz-22T | 1669 | 0.695915 | 0         |  |  |
|        |      | Shiraz-22T | 1671 | 0.369309 | 0         |  |  |
|        |      | Shiraz-25T | 1717 | 0.420447 | 0         |  |  |
|        |      | Shiraz-28T | 1760 | 0.538181 | 0         |  |  |
|        |      | Shiraz-29T | 1800 | 0.672527 | 0         |  |  |
|        |      | Shiraz-32T | 1869 | 0.776805 | 0         |  |  |
|        |      | Shiraz-35T | 1932 | 0.507141 | 0         |  |  |
|        |      | Shiraz-40T | 2051 | 0.098506 | 0         |  |  |
|        |      | Shiraz-58T | 2221 | 0.871948 | 0         |  |  |
|        |      | Shiraz-58T | 2222 | 0.679664 | 0         |  |  |
|        |      | Shiraz-71T | 2260 | 0.68394  | 0         |  |  |
|        |      | Shiraz-71T | 2261 | 0.508399 | 0         |  |  |
| FAM47B | chrX | Shiraz-3T  | 235  | 0        | -0.28401  |  |  |
|        |      | Shiraz-3T  | 236  | 0        | -0.435445 |  |  |
|        |      | Shiraz-4T  | 260  | 0        | -0.324128 |  |  |
|        |      | Shiraz-16T | 294  | 0.655804 | 0         |  |  |
|        |      | Shiraz-36T | 431  | 0        | -0.78035  |  |  |
|        |      | Shiraz-44T | 891  | 0        | -0.954044 |  |  |
|        |      | Shiraz-44T | 893  | 0        | -1.364406 |  |  |
|        |      | Shiraz-47T | 1083 | 0        | -0.103285 |  |  |
|        |      | Shiraz-49T | 1166 | 0        | -0.917235 |  |  |
|        |      | Shiraz-49T | 1168 | 0        | -1.073859 |  |  |

|  |            |      |          |           |  |
|--|------------|------|----------|-----------|--|
|  | Shiraz-9T  | 1368 | 0.199713 | 0         |  |
|  | Shiraz-18T | 1455 | 0        | -0.186773 |  |
|  | Shiraz-22T | 1669 | 0.695915 | 0         |  |
|  | Shiraz-22T | 1671 | 0.369309 | 0         |  |
|  | Shiraz-25T | 1717 | 0.420447 | 0         |  |
|  | Shiraz-28T | 1760 | 0.538181 | 0         |  |
|  | Shiraz-29T | 1800 | 0.672527 | 0         |  |
|  | Shiraz-32T | 1869 | 0.776805 | 0         |  |
|  | Shiraz-35T | 1932 | 0.507141 | 0         |  |
|  | Shiraz-40T | 2051 | 0.098506 | 0         |  |
|  | Shiraz-58T | 2221 | 0.871948 | 0         |  |
|  | Shiraz-58T | 2222 | 0.679664 | 0         |  |
|  | Shiraz-71T | 2260 | 0.68394  | 0         |  |
|  | Shiraz-71T | 2261 | 0.508399 | 0         |  |
|  | Shiraz-3T  | 235  | 0        | -0.28401  |  |
|  | Shiraz-3T  | 236  | 0        | -0.435445 |  |
|  | Shiraz-4T  | 260  | 0        | -0.324128 |  |
|  | Shiraz-16T | 294  | 0.655804 | 0         |  |
|  | Shiraz-36T | 431  | 0        | -0.78035  |  |
|  | Shiraz-44T | 891  | 0        | -0.954044 |  |
|  | Shiraz-44T | 893  | 0        | -1.364406 |  |
|  | Shiraz-47T | 1083 | 0        | -0.103285 |  |
|  | Shiraz-49T | 1166 | 0        | -0.917235 |  |
|  | Shiraz-49T | 1168 | 0        | -1.073859 |  |
|  | Shiraz-9T  | 1368 | 0.199713 | 0         |  |
|  | Shiraz-18T | 1455 | 0        | -0.186773 |  |
|  | Shiraz-22T | 1669 | 0.695915 | 0         |  |
|  | Shiraz-22T | 1671 | 0.369309 | 0         |  |
|  | Shiraz-25T | 1717 | 0.420447 | 0         |  |
|  | Shiraz-28T | 1760 | 0.538181 | 0         |  |
|  | Shiraz-29T | 1800 | 0.672527 | 0         |  |
|  | Shiraz-32T | 1869 | 0.776805 | 0         |  |
|  | Shiraz-35T | 1932 | 0.507141 | 0         |  |
|  | Shiraz-40T | 2051 | 0.098506 | 0         |  |
|  | Shiraz-58T | 2221 | 0.871948 | 0         |  |
|  | Shiraz-58T | 2222 | 0.679664 | 0         |  |
|  | Shiraz-71T | 2260 | 0.68394  | 0         |  |
|  | Shiraz-71T | 2261 | 0.508399 | 0         |  |
|  | Shiraz-3T  | 235  | 0        | -0.28401  |  |
|  | Shiraz-3T  | 236  | 0        | -0.435445 |  |
|  | Shiraz-4T  | 260  | 0        | -0.324128 |  |
|  | Shiraz-16T | 294  | 0.655804 | 0         |  |
|  | Shiraz-36T | 431  | 0        | -0.78035  |  |
|  | Shiraz-44T | 891  | 0        | -0.954044 |  |
|  | Shiraz-44T | 893  | 0        | -1.364406 |  |
|  | Shiraz-47T | 1083 | 0        | -0.103285 |  |
|  | Shiraz-49T | 1166 | 0        | -0.917235 |  |

|        |      |            |      |          |           |  |  |
|--------|------|------------|------|----------|-----------|--|--|
|        |      | Shiraz-49T | 1168 | 0        | -1.073859 |  |  |
|        |      | Shiraz-9T  | 1368 | 0.199713 | 0         |  |  |
|        |      | Shiraz-18T | 1455 | 0        | -0.186773 |  |  |
|        |      | Shiraz-22T | 1669 | 0.695915 | 0         |  |  |
|        |      | Shiraz-22T | 1671 | 0.369309 | 0         |  |  |
|        |      | Shiraz-25T | 1717 | 0.420447 | 0         |  |  |
|        |      | Shiraz-28T | 1760 | 0.538181 | 0         |  |  |
|        |      | Shiraz-29T | 1800 | 0.672527 | 0         |  |  |
|        |      | Shiraz-32T | 1869 | 0.776805 | 0         |  |  |
|        |      | Shiraz-35T | 1932 | 0.507141 | 0         |  |  |
|        |      | Shiraz-40T | 2051 | 0.098506 | 0         |  |  |
|        |      | Shiraz-58T | 2221 | 0.871948 | 0         |  |  |
|        |      | Shiraz-58T | 2222 | 0.679664 | 0         |  |  |
|        |      | Shiraz-71T | 2260 | 0.68394  | 0         |  |  |
|        |      | Shiraz-71T | 2261 | 0.508399 | 0         |  |  |
| FAM47C | chrX | Shiraz-3T  | 235  | 0        | -0.28401  |  |  |
|        |      | Shiraz-3T  | 236  | 0        | -0.435445 |  |  |
|        |      | Shiraz-4T  | 260  | 0        | -0.324128 |  |  |
|        |      | Shiraz-16T | 294  | 0.655804 | 0         |  |  |
|        |      | Shiraz-36T | 431  | 0        | -0.78035  |  |  |
|        |      | Shiraz-44T | 891  | 0        | -0.954044 |  |  |
|        |      | Shiraz-44T | 893  | 0        | -1.364406 |  |  |
|        |      | Shiraz-47T | 1083 | 0        | -0.103285 |  |  |
|        |      | Shiraz-49T | 1166 | 0        | -0.917235 |  |  |
|        |      | Shiraz-49T | 1168 | 0        | -1.073859 |  |  |
|        |      | Shiraz-9T  | 1368 | 0.199713 | 0         |  |  |
|        |      | Shiraz-18T | 1455 | 0        | -0.186773 |  |  |
|        |      | Shiraz-22T | 1669 | 0.695915 | 0         |  |  |
|        |      | Shiraz-22T | 1671 | 0.369309 | 0         |  |  |
|        |      | Shiraz-25T | 1717 | 0.420447 | 0         |  |  |
|        |      | Shiraz-28T | 1760 | 0.538181 | 0         |  |  |
|        |      | Shiraz-29T | 1800 | 0.672527 | 0         |  |  |
|        |      | Shiraz-32T | 1869 | 0.776805 | 0         |  |  |
|        |      | Shiraz-35T | 1932 | 0.507141 | 0         |  |  |
|        |      | Shiraz-40T | 2051 | 0.098506 | 0         |  |  |
|        |      | Shiraz-58T | 2221 | 0.871948 | 0         |  |  |
|        |      | Shiraz-58T | 2222 | 0.679664 | 0         |  |  |
|        |      | Shiraz-71T | 2260 | 0.68394  | 0         |  |  |
|        |      | Shiraz-71T | 2261 | 0.508399 | 0         |  |  |
|        |      | Shiraz-3T  | 235  | 0        | -0.28401  |  |  |
|        |      | Shiraz-3T  | 236  | 0        | -0.435445 |  |  |
|        |      | Shiraz-4T  | 260  | 0        | -0.324128 |  |  |
|        |      | Shiraz-16T | 294  | 0.655804 | 0         |  |  |
|        |      | Shiraz-36T | 431  | 0        | -0.78035  |  |  |
|        |      | Shiraz-44T | 891  | 0        | -0.954044 |  |  |
|        |      | Shiraz-44T | 893  | 0        | -1.364406 |  |  |
|        |      | Shiraz-47T | 1083 | 0        | -0.103285 |  |  |



|         |      |            |      |          |           |  |  |
|---------|------|------------|------|----------|-----------|--|--|
|         |      | Shiraz-49T | 1166 | 0        | -0.917235 |  |  |
|         |      | Shiraz-49T | 1168 | 0        | -1.073859 |  |  |
|         |      | Shiraz-9T  | 1368 | 0.199713 | 0         |  |  |
|         |      | Shiraz-18T | 1455 | 0        | -0.186773 |  |  |
|         |      | Shiraz-22T | 1669 | 0.695915 | 0         |  |  |
|         |      | Shiraz-22T | 1671 | 0.369309 | 0         |  |  |
|         |      | Shiraz-25T | 1717 | 0.420447 | 0         |  |  |
|         |      | Shiraz-28T | 1760 | 0.538181 | 0         |  |  |
|         |      | Shiraz-29T | 1800 | 0.672527 | 0         |  |  |
|         |      | Shiraz-32T | 1869 | 0.776805 | 0         |  |  |
|         |      | Shiraz-35T | 1932 | 0.507141 | 0         |  |  |
|         |      | Shiraz-40T | 2051 | 0.098506 | 0         |  |  |
|         |      | Shiraz-58T | 2221 | 0.871948 | 0         |  |  |
|         |      | Shiraz-58T | 2222 | 0.679664 | 0         |  |  |
|         |      | Shiraz-71T | 2260 | 0.68394  | 0         |  |  |
|         |      | Shiraz-71T | 2261 | 0.508399 | 0         |  |  |
|         |      | Shiraz-3T  | 235  | 0        | -0.28401  |  |  |
|         |      | Shiraz-3T  | 236  | 0        | -0.435445 |  |  |
|         |      | Shiraz-4T  | 260  | 0        | -0.324128 |  |  |
|         |      | Shiraz-16T | 294  | 0.655804 | 0         |  |  |
|         |      | Shiraz-36T | 431  | 0        | -0.78035  |  |  |
|         |      | Shiraz-44T | 891  | 0        | -0.954044 |  |  |
|         |      | Shiraz-44T | 893  | 0        | -1.364406 |  |  |
|         |      | Shiraz-47T | 1083 | 0        | -0.103285 |  |  |
|         |      | Shiraz-49T | 1166 | 0        | -0.917235 |  |  |
|         |      | Shiraz-49T | 1168 | 0        | -1.073859 |  |  |
|         |      | Shiraz-9T  | 1368 | 0.199713 | 0         |  |  |
|         |      | Shiraz-18T | 1455 | 0        | -0.186773 |  |  |
|         |      | Shiraz-22T | 1669 | 0.695915 | 0         |  |  |
|         |      | Shiraz-22T | 1671 | 0.369309 | 0         |  |  |
|         |      | Shiraz-25T | 1717 | 0.420447 | 0         |  |  |
|         |      | Shiraz-28T | 1760 | 0.538181 | 0         |  |  |
|         |      | Shiraz-29T | 1800 | 0.672527 | 0         |  |  |
|         |      | Shiraz-32T | 1869 | 0.776805 | 0         |  |  |
|         |      | Shiraz-35T | 1932 | 0.507141 | 0         |  |  |
|         |      | Shiraz-40T | 2051 | 0.098506 | 0         |  |  |
|         |      | Shiraz-58T | 2221 | 0.871948 | 0         |  |  |
|         |      | Shiraz-58T | 2222 | 0.679664 | 0         |  |  |
|         |      | Shiraz-71T | 2260 | 0.68394  | 0         |  |  |
|         |      | Shiraz-71T | 2261 | 0.508399 | 0         |  |  |
| FAM48B1 | chrX | Shiraz-3T  | 235  | 0        | -0.28401  |  |  |
|         |      | Shiraz-4T  | 260  | 0        | -0.324128 |  |  |
|         |      | Shiraz-16T | 294  | 0.655804 | 0         |  |  |
|         |      | Shiraz-36T | 431  | 0        | -0.78035  |  |  |
|         |      | Shiraz-44T | 891  | 0        | -0.954044 |  |  |
|         |      | Shiraz-49T | 1166 | 0        | -0.917235 |  |  |
|         |      | Shiraz-77T | 1281 | 0.136627 | 0         |  |  |

|  |            |      |          |           |  |
|--|------------|------|----------|-----------|--|
|  | Shiraz-9T  | 1368 | 0.199713 | 0         |  |
|  | Shiraz-18T | 1455 | 0        | -0.186773 |  |
|  | Shiraz-22T | 1669 | 0.695915 | 0         |  |
|  | Shiraz-25T | 1717 | 0.420447 | 0         |  |
|  | Shiraz-28T | 1760 | 0.538181 | 0         |  |
|  | Shiraz-29T | 1800 | 0.672527 | 0         |  |
|  | Shiraz-32T | 1869 | 0.776805 | 0         |  |
|  | Shiraz-35T | 1932 | 0.507141 | 0         |  |
|  | Shiraz-40T | 2051 | 0.098506 | 0         |  |
|  | Shiraz-58T | 2221 | 0.871948 | 0         |  |
|  | Shiraz-71T | 2260 | 0.68394  | 0         |  |
|  | Shiraz-71T | 2261 | 0.508399 | 0         |  |
|  | Shiraz-3T  | 235  | 0        | -0.28401  |  |
|  | Shiraz-4T  | 260  | 0        | -0.324128 |  |
|  | Shiraz-16T | 294  | 0.655804 | 0         |  |
|  | Shiraz-36T | 431  | 0        | -0.78035  |  |
|  | Shiraz-44T | 891  | 0        | -0.954044 |  |
|  | Shiraz-49T | 1166 | 0        | -0.917235 |  |
|  | Shiraz-77T | 1281 | 0.136627 | 0         |  |
|  | Shiraz-9T  | 1368 | 0.199713 | 0         |  |
|  | Shiraz-18T | 1455 | 0        | -0.186773 |  |
|  | Shiraz-22T | 1669 | 0.695915 | 0         |  |
|  | Shiraz-25T | 1717 | 0.420447 | 0         |  |
|  | Shiraz-28T | 1760 | 0.538181 | 0         |  |
|  | Shiraz-29T | 1800 | 0.672527 | 0         |  |
|  | Shiraz-32T | 1869 | 0.776805 | 0         |  |
|  | Shiraz-35T | 1932 | 0.507141 | 0         |  |
|  | Shiraz-40T | 2051 | 0.098506 | 0         |  |
|  | Shiraz-58T | 2221 | 0.871948 | 0         |  |
|  | Shiraz-71T | 2260 | 0.68394  | 0         |  |
|  | Shiraz-71T | 2261 | 0.508399 | 0         |  |
|  | Shiraz-3T  | 235  | 0        | -0.28401  |  |
|  | Shiraz-4T  | 260  | 0        | -0.324128 |  |
|  | Shiraz-16T | 294  | 0.655804 | 0         |  |
|  | Shiraz-36T | 431  | 0        | -0.78035  |  |
|  | Shiraz-44T | 891  | 0        | -0.954044 |  |
|  | Shiraz-49T | 1166 | 0        | -0.917235 |  |
|  | Shiraz-77T | 1281 | 0.136627 | 0         |  |
|  | Shiraz-9T  | 1368 | 0.199713 | 0         |  |
|  | Shiraz-18T | 1455 | 0        | -0.186773 |  |
|  | Shiraz-22T | 1669 | 0.695915 | 0         |  |
|  | Shiraz-25T | 1717 | 0.420447 | 0         |  |
|  | Shiraz-28T | 1760 | 0.538181 | 0         |  |
|  | Shiraz-29T | 1800 | 0.672527 | 0         |  |
|  | Shiraz-32T | 1869 | 0.776805 | 0         |  |
|  | Shiraz-35T | 1932 | 0.507141 | 0         |  |
|  | Shiraz-40T | 2051 | 0.098506 | 0         |  |

|         |      |            |      |          |           |  |
|---------|------|------------|------|----------|-----------|--|
|         |      | Shiraz-58T | 2221 | 0.871948 | 0         |  |
|         |      | Shiraz-71T | 2260 | 0.68394  | 0         |  |
|         |      | Shiraz-71T | 2261 | 0.508399 | 0         |  |
| FAM48B2 | chrX | Shiraz-3T  | 235  | 0        | -0.28401  |  |
|         |      | Shiraz-4T  | 260  | 0        | -0.324128 |  |
|         |      | Shiraz-16T | 294  | 0.655804 | 0         |  |
|         |      | Shiraz-36T | 431  | 0        | -0.78035  |  |
|         |      | Shiraz-44T | 891  | 0        | -0.954044 |  |
|         |      | Shiraz-49T | 1166 | 0        | -0.917235 |  |
|         |      | Shiraz-77T | 1281 | 0.136627 | 0         |  |
|         |      | Shiraz-9T  | 1368 | 0.199713 | 0         |  |
|         |      | Shiraz-18T | 1455 | 0        | -0.186773 |  |
|         |      | Shiraz-22T | 1669 | 0.695915 | 0         |  |
|         |      | Shiraz-25T | 1717 | 0.420447 | 0         |  |
|         |      | Shiraz-28T | 1760 | 0.538181 | 0         |  |
|         |      | Shiraz-29T | 1800 | 0.672527 | 0         |  |
|         |      | Shiraz-32T | 1869 | 0.776805 | 0         |  |
|         |      | Shiraz-35T | 1932 | 0.507141 | 0         |  |
|         |      | Shiraz-40T | 2051 | 0.098506 | 0         |  |
|         |      | Shiraz-58T | 2221 | 0.871948 | 0         |  |
|         |      | Shiraz-71T | 2260 | 0.68394  | 0         |  |
|         |      | Shiraz-71T | 2261 | 0.508399 | 0         |  |
|         |      | Shiraz-3T  | 235  | 0        | -0.28401  |  |
|         |      | Shiraz-4T  | 260  | 0        | -0.324128 |  |
|         |      | Shiraz-16T | 294  | 0.655804 | 0         |  |
|         |      | Shiraz-36T | 431  | 0        | -0.78035  |  |
|         |      | Shiraz-44T | 891  | 0        | -0.954044 |  |
|         |      | Shiraz-49T | 1166 | 0        | -0.917235 |  |
|         |      | Shiraz-77T | 1281 | 0.136627 | 0         |  |
|         |      | Shiraz-9T  | 1368 | 0.199713 | 0         |  |
|         |      | Shiraz-18T | 1455 | 0        | -0.186773 |  |
|         |      | Shiraz-22T | 1669 | 0.695915 | 0         |  |
|         |      | Shiraz-25T | 1717 | 0.420447 | 0         |  |
|         |      | Shiraz-28T | 1760 | 0.538181 | 0         |  |
|         |      | Shiraz-29T | 1800 | 0.672527 | 0         |  |
|         |      | Shiraz-32T | 1869 | 0.776805 | 0         |  |
|         |      | Shiraz-35T | 1932 | 0.507141 | 0         |  |
|         |      | Shiraz-40T | 2051 | 0.098506 | 0         |  |
|         |      | Shiraz-58T | 2221 | 0.871948 | 0         |  |
|         |      | Shiraz-71T | 2260 | 0.68394  | 0         |  |
|         |      | Shiraz-71T | 2261 | 0.508399 | 0         |  |
|         |      | Shiraz-3T  | 235  | 0        | -0.28401  |  |
|         |      | Shiraz-4T  | 260  | 0        | -0.324128 |  |
|         |      | Shiraz-16T | 294  | 0.655804 | 0         |  |
|         |      | Shiraz-36T | 431  | 0        | -0.78035  |  |
|         |      | Shiraz-44T | 891  | 0        | -0.954044 |  |
|         |      | Shiraz-49T | 1166 | 0        | -0.917235 |  |

|        |      |            |      |          |           |  |
|--------|------|------------|------|----------|-----------|--|
|        |      | Shiraz-77T | 1281 | 0.136627 | 0         |  |
|        |      | Shiraz-9T  | 1368 | 0.199713 | 0         |  |
|        |      | Shiraz-18T | 1455 | 0        | -0.186773 |  |
|        |      | Shiraz-22T | 1669 | 0.695915 | 0         |  |
|        |      | Shiraz-25T | 1717 | 0.420447 | 0         |  |
|        |      | Shiraz-28T | 1760 | 0.538181 | 0         |  |
|        |      | Shiraz-29T | 1800 | 0.672527 | 0         |  |
|        |      | Shiraz-32T | 1869 | 0.776805 | 0         |  |
|        |      | Shiraz-35T | 1932 | 0.507141 | 0         |  |
|        |      | Shiraz-40T | 2051 | 0.098506 | 0         |  |
|        |      | Shiraz-58T | 2221 | 0.871948 | 0         |  |
|        |      | Shiraz-71T | 2260 | 0.68394  | 0         |  |
|        |      | Shiraz-71T | 2261 | 0.508399 | 0         |  |
| FAM50A | chrX | Shiraz-3T  | 246  | 0.531858 | 0         |  |
|        |      | Shiraz-4T  | 261  | 0        | -0.336249 |  |
|        |      | Shiraz-16T | 295  | 0.591657 | 0         |  |
|        |      | Shiraz-36T | 433  | 0        | -0.803961 |  |
|        |      | Shiraz-42T | 480  | 0        | -0.232915 |  |
|        |      | Shiraz-44T | 908  | 0.466743 | 0         |  |
|        |      | Shiraz-49T | 1170 | 0        | -0.967436 |  |
|        |      | Shiraz-49T | 1173 | 0        | -0.704439 |  |
|        |      | Shiraz-9T  | 1370 | 0.690073 | 0         |  |
|        |      | Shiraz-9T  | 1371 | 1.292392 | 0         |  |
|        |      | Shiraz-18T | 1457 | 0.643204 | 0         |  |
|        |      | Shiraz-22T | 1673 | 0.611783 | 0         |  |
|        |      | Shiraz-22T | 1678 | 0.911625 | 0         |  |
|        |      | Shiraz-25T | 1719 | 0.472955 | 0         |  |
|        |      | Shiraz-28T | 1762 | 0.562311 | 0         |  |
|        |      | Shiraz-29T | 1801 | 0.815343 | 0         |  |
|        |      | Shiraz-32T | 1870 | 0.729766 | 0         |  |
|        |      | Shiraz-32T | 1872 | 1.504553 | 0         |  |
|        |      | Shiraz-35T | 1933 | 0.488535 | 0         |  |
|        |      | Shiraz-38T | 2011 | 0        | -0.406024 |  |
|        |      | Shiraz-53T | 2115 | 0.427728 | 0         |  |
|        |      | Shiraz-58T | 2223 | 0.833364 | 0         |  |
|        |      | Shiraz-58T | 2226 | 1.074663 | 0         |  |
|        |      | Shiraz-71T | 2263 | 0.975531 | 0         |  |
|        |      | Shiraz-3T  | 246  | 0.531858 | 0         |  |
|        |      | Shiraz-4T  | 261  | 0        | -0.336249 |  |
|        |      | Shiraz-16T | 295  | 0.591657 | 0         |  |
|        |      | Shiraz-36T | 433  | 0        | -0.803961 |  |
|        |      | Shiraz-42T | 480  | 0        | -0.232915 |  |
|        |      | Shiraz-44T | 908  | 0.466743 | 0         |  |
|        |      | Shiraz-49T | 1170 | 0        | -0.967436 |  |
|        |      | Shiraz-49T | 1173 | 0        | -0.704439 |  |
|        |      | Shiraz-9T  | 1370 | 0.690073 | 0         |  |
|        |      | Shiraz-9T  | 1371 | 1.292392 | 0         |  |

|        |      |            |      |          |           |  |
|--------|------|------------|------|----------|-----------|--|
|        |      | Shiraz-18T | 1457 | 0.643204 | 0         |  |
|        |      | Shiraz-22T | 1673 | 0.611783 | 0         |  |
|        |      | Shiraz-22T | 1678 | 0.911625 | 0         |  |
|        |      | Shiraz-25T | 1719 | 0.472955 | 0         |  |
|        |      | Shiraz-28T | 1762 | 0.562311 | 0         |  |
|        |      | Shiraz-29T | 1801 | 0.815343 | 0         |  |
|        |      | Shiraz-32T | 1870 | 0.729766 | 0         |  |
|        |      | Shiraz-32T | 1872 | 1.504553 | 0         |  |
|        |      | Shiraz-35T | 1933 | 0.488535 | 0         |  |
|        |      | Shiraz-38T | 2011 | 0        | -0.406024 |  |
|        |      | Shiraz-53T | 2115 | 0.427728 | 0         |  |
|        |      | Shiraz-58T | 2223 | 0.833364 | 0         |  |
|        |      | Shiraz-58T | 2226 | 1.074663 | 0         |  |
|        |      | Shiraz-71T | 2263 | 0.975531 | 0         |  |
|        |      | Shiraz-3T  | 246  | 0.531858 | 0         |  |
|        |      | Shiraz-4T  | 261  | 0        | -0.336249 |  |
|        |      | Shiraz-16T | 295  | 0.591657 | 0         |  |
|        |      | Shiraz-36T | 433  | 0        | -0.803961 |  |
|        |      | Shiraz-42T | 480  | 0        | -0.232915 |  |
|        |      | Shiraz-44T | 908  | 0.466743 | 0         |  |
|        |      | Shiraz-49T | 1170 | 0        | -0.967436 |  |
|        |      | Shiraz-49T | 1173 | 0        | -0.704439 |  |
|        |      | Shiraz-9T  | 1370 | 0.690073 | 0         |  |
|        |      | Shiraz-9T  | 1371 | 1.292392 | 0         |  |
|        |      | Shiraz-18T | 1457 | 0.643204 | 0         |  |
|        |      | Shiraz-22T | 1673 | 0.611783 | 0         |  |
|        |      | Shiraz-22T | 1678 | 0.911625 | 0         |  |
|        |      | Shiraz-25T | 1719 | 0.472955 | 0         |  |
|        |      | Shiraz-28T | 1762 | 0.562311 | 0         |  |
|        |      | Shiraz-29T | 1801 | 0.815343 | 0         |  |
|        |      | Shiraz-32T | 1870 | 0.729766 | 0         |  |
|        |      | Shiraz-32T | 1872 | 1.504553 | 0         |  |
|        |      | Shiraz-35T | 1933 | 0.488535 | 0         |  |
|        |      | Shiraz-38T | 2011 | 0        | -0.406024 |  |
|        |      | Shiraz-53T | 2115 | 0.427728 | 0         |  |
|        |      | Shiraz-58T | 2223 | 0.833364 | 0         |  |
|        |      | Shiraz-58T | 2226 | 1.074663 | 0         |  |
|        |      | Shiraz-71T | 2263 | 0.975531 | 0         |  |
| FAM58A | chrX | Shiraz-3T  | 246  | 0.531858 | 0         |  |
|        |      | Shiraz-4T  | 261  | 0        | -0.336249 |  |
|        |      | Shiraz-16T | 295  | 0.591657 | 0         |  |
|        |      | Shiraz-36T | 433  | 0        | -0.803961 |  |
|        |      | Shiraz-42T | 480  | 0        | -0.232915 |  |
|        |      | Shiraz-44T | 908  | 0.466743 | 0         |  |
|        |      | Shiraz-49T | 1170 | 0        | -0.967436 |  |
|        |      | Shiraz-49T | 1173 | 0        | -0.704439 |  |
|        |      | Shiraz-9T  | 1370 | 0.690073 | 0         |  |

|  |            |      |          |           |  |
|--|------------|------|----------|-----------|--|
|  | Shiraz-9T  | 1371 | 1.292392 | 0         |  |
|  | Shiraz-18T | 1457 | 0.643204 | 0         |  |
|  | Shiraz-22T | 1673 | 0.611783 | 0         |  |
|  | Shiraz-22T | 1678 | 0.911625 | 0         |  |
|  | Shiraz-25T | 1719 | 0.472955 | 0         |  |
|  | Shiraz-28T | 1762 | 0.562311 | 0         |  |
|  | Shiraz-29T | 1801 | 0.815343 | 0         |  |
|  | Shiraz-32T | 1870 | 0.729766 | 0         |  |
|  | Shiraz-32T | 1872 | 1.504553 | 0         |  |
|  | Shiraz-35T | 1933 | 0.488535 | 0         |  |
|  | Shiraz-38T | 2011 | 0        | -0.406024 |  |
|  | Shiraz-53T | 2115 | 0.427728 | 0         |  |
|  | Shiraz-58T | 2223 | 0.833364 | 0         |  |
|  | Shiraz-58T | 2226 | 1.074663 | 0         |  |
|  | Shiraz-71T | 2263 | 0.975531 | 0         |  |
|  | Shiraz-3T  | 246  | 0.531858 | 0         |  |
|  | Shiraz-4T  | 261  | 0        | -0.336249 |  |
|  | Shiraz-16T | 295  | 0.591657 | 0         |  |
|  | Shiraz-36T | 433  | 0        | -0.803961 |  |
|  | Shiraz-42T | 480  | 0        | -0.232915 |  |
|  | Shiraz-44T | 908  | 0.466743 | 0         |  |
|  | Shiraz-49T | 1170 | 0        | -0.967436 |  |
|  | Shiraz-49T | 1173 | 0        | -0.704439 |  |
|  | Shiraz-9T  | 1370 | 0.690073 | 0         |  |
|  | Shiraz-9T  | 1371 | 1.292392 | 0         |  |
|  | Shiraz-18T | 1457 | 0.643204 | 0         |  |
|  | Shiraz-22T | 1673 | 0.611783 | 0         |  |
|  | Shiraz-22T | 1678 | 0.911625 | 0         |  |
|  | Shiraz-25T | 1719 | 0.472955 | 0         |  |
|  | Shiraz-28T | 1762 | 0.562311 | 0         |  |
|  | Shiraz-29T | 1801 | 0.815343 | 0         |  |
|  | Shiraz-32T | 1870 | 0.729766 | 0         |  |
|  | Shiraz-32T | 1872 | 1.504553 | 0         |  |
|  | Shiraz-35T | 1933 | 0.488535 | 0         |  |
|  | Shiraz-38T | 2011 | 0        | -0.406024 |  |
|  | Shiraz-53T | 2115 | 0.427728 | 0         |  |
|  | Shiraz-58T | 2223 | 0.833364 | 0         |  |
|  | Shiraz-58T | 2226 | 1.074663 | 0         |  |
|  | Shiraz-71T | 2263 | 0.975531 | 0         |  |
|  | Shiraz-3T  | 246  | 0.531858 | 0         |  |
|  | Shiraz-4T  | 261  | 0        | -0.336249 |  |
|  | Shiraz-16T | 295  | 0.591657 | 0         |  |
|  | Shiraz-36T | 433  | 0        | -0.803961 |  |
|  | Shiraz-42T | 480  | 0        | -0.232915 |  |
|  | Shiraz-44T | 908  | 0.466743 | 0         |  |
|  | Shiraz-49T | 1170 | 0        | -0.967436 |  |
|  | Shiraz-49T | 1173 | 0        | -0.704439 |  |

|        |      |            |      |          |           |  |
|--------|------|------------|------|----------|-----------|--|
|        |      | Shiraz-9T  | 1370 | 0.690073 | 0         |  |
|        |      | Shiraz-9T  | 1371 | 1.292392 | 0         |  |
|        |      | Shiraz-18T | 1457 | 0.643204 | 0         |  |
|        |      | Shiraz-22T | 1673 | 0.611783 | 0         |  |
|        |      | Shiraz-22T | 1678 | 0.911625 | 0         |  |
|        |      | Shiraz-25T | 1719 | 0.472955 | 0         |  |
|        |      | Shiraz-28T | 1762 | 0.562311 | 0         |  |
|        |      | Shiraz-29T | 1801 | 0.815343 | 0         |  |
|        |      | Shiraz-32T | 1870 | 0.729766 | 0         |  |
|        |      | Shiraz-32T | 1872 | 1.504553 | 0         |  |
|        |      | Shiraz-35T | 1933 | 0.488535 | 0         |  |
|        |      | Shiraz-38T | 2011 | 0        | -0.406024 |  |
|        |      | Shiraz-53T | 2115 | 0.427728 | 0         |  |
|        |      | Shiraz-58T | 2223 | 0.833364 | 0         |  |
|        |      | Shiraz-58T | 2226 | 1.074663 | 0         |  |
|        |      | Shiraz-71T | 2263 | 0.975531 | 0         |  |
| FAM70A | chrX | Shiraz-3T  | 242  | 0        | -0.336434 |  |
|        |      | Shiraz-3T  | 244  | 0        | -0.023749 |  |
|        |      | Shiraz-4T  | 261  | 0        | -0.336249 |  |
|        |      | Shiraz-16T | 295  | 0.591657 | 0         |  |
|        |      | Shiraz-36T | 433  | 0        | -0.803961 |  |
|        |      | Shiraz-44T | 899  | 0        | -1.09697  |  |
|        |      | Shiraz-44T | 904  | 0        | -0.625526 |  |
|        |      | Shiraz-49T | 1170 | 0        | -0.967436 |  |
|        |      | Shiraz-9T  | 1370 | 0.690073 | 0         |  |
|        |      | Shiraz-18T | 1457 | 0.643204 | 0         |  |
|        |      | Shiraz-22T | 1673 | 0.611783 | 0         |  |
|        |      | Shiraz-25T | 1719 | 0.472955 | 0         |  |
|        |      | Shiraz-28T | 1762 | 0.562311 | 0         |  |
|        |      | Shiraz-29T | 1801 | 0.815343 | 0         |  |
|        |      | Shiraz-32T | 1870 | 0.729766 | 0         |  |
|        |      | Shiraz-35T | 1933 | 0.488535 | 0         |  |
|        |      | Shiraz-58T | 2223 | 0.833364 | 0         |  |
|        |      | Shiraz-71T | 2263 | 0.975531 | 0         |  |
|        |      | Shiraz-3T  | 242  | 0        | -0.336434 |  |
|        |      | Shiraz-3T  | 244  | 0        | -0.023749 |  |
|        |      | Shiraz-4T  | 261  | 0        | -0.336249 |  |
|        |      | Shiraz-16T | 295  | 0.591657 | 0         |  |
|        |      | Shiraz-36T | 433  | 0        | -0.803961 |  |
|        |      | Shiraz-44T | 899  | 0        | -1.09697  |  |
|        |      | Shiraz-44T | 904  | 0        | -0.625526 |  |
|        |      | Shiraz-49T | 1170 | 0        | -0.967436 |  |
|        |      | Shiraz-9T  | 1370 | 0.690073 | 0         |  |
|        |      | Shiraz-18T | 1457 | 0.643204 | 0         |  |
|        |      | Shiraz-22T | 1673 | 0.611783 | 0         |  |
|        |      | Shiraz-25T | 1719 | 0.472955 | 0         |  |
|        |      | Shiraz-28T | 1762 | 0.562311 | 0         |  |

|         |      |            |      |          |           |  |  |
|---------|------|------------|------|----------|-----------|--|--|
|         |      | Shiraz-29T | 1801 | 0.815343 | 0         |  |  |
|         |      | Shiraz-32T | 1870 | 0.729766 | 0         |  |  |
|         |      | Shiraz-35T | 1933 | 0.488535 | 0         |  |  |
|         |      | Shiraz-58T | 2223 | 0.833364 | 0         |  |  |
|         |      | Shiraz-71T | 2263 | 0.975531 | 0         |  |  |
|         |      | Shiraz-3T  | 242  | 0        | -0.336434 |  |  |
|         |      | Shiraz-3T  | 244  | 0        | -0.023749 |  |  |
|         |      | Shiraz-4T  | 261  | 0        | -0.336249 |  |  |
|         |      | Shiraz-16T | 295  | 0.591657 | 0         |  |  |
|         |      | Shiraz-36T | 433  | 0        | -0.803961 |  |  |
|         |      | Shiraz-44T | 899  | 0        | -1.09697  |  |  |
|         |      | Shiraz-44T | 904  | 0        | -0.625526 |  |  |
|         |      | Shiraz-49T | 1170 | 0        | -0.967436 |  |  |
|         |      | Shiraz-9T  | 1370 | 0.690073 | 0         |  |  |
|         |      | Shiraz-18T | 1457 | 0.643204 | 0         |  |  |
|         |      | Shiraz-22T | 1673 | 0.611783 | 0         |  |  |
|         |      | Shiraz-25T | 1719 | 0.472955 | 0         |  |  |
|         |      | Shiraz-28T | 1762 | 0.562311 | 0         |  |  |
|         |      | Shiraz-29T | 1801 | 0.815343 | 0         |  |  |
|         |      | Shiraz-32T | 1870 | 0.729766 | 0         |  |  |
|         |      | Shiraz-35T | 1933 | 0.488535 | 0         |  |  |
|         |      | Shiraz-58T | 2223 | 0.833364 | 0         |  |  |
|         |      | Shiraz-71T | 2263 | 0.975531 | 0         |  |  |
| FAM71F1 | chr7 | Shiraz-3T  | 90   | 0.219276 | 0         |  |  |
|         |      | Shiraz-3T  | 96   | 0.428308 | 0         |  |  |
|         |      | Shiraz-4T  | 253  | 0.372918 | 0         |  |  |
|         |      | Shiraz-31T | 317  | 0.204382 | 0         |  |  |
|         |      | Shiraz-36T | 378  | 0.179558 | 0         |  |  |
|         |      | Shiraz-44T | 642  | 0.408617 | 0         |  |  |
|         |      | Shiraz-46T | 943  | 0.093799 | 0         |  |  |
|         |      | Shiraz-47T | 1032 | 0.171484 | 0         |  |  |
|         |      | Shiraz-77T | 1225 | 0        | -0.117922 |  |  |
|         |      | Shiraz-77T | 1229 | 0.051661 | 0         |  |  |
|         |      | Shiraz-9T  | 1325 | 0.221899 | 0         |  |  |
|         |      | Shiraz-18T | 1434 | 0.244465 | 0         |  |  |
|         |      | Shiraz-25T | 1698 | 0.21835  | 0         |  |  |
|         |      | Shiraz-28T | 1735 | 0.350744 | 0         |  |  |
|         |      | Shiraz-29T | 1778 | 0.120767 | 0         |  |  |
|         |      | Shiraz-32T | 1833 | 0.551336 | 0         |  |  |
|         |      | Shiraz-38T | 1951 | 0.250891 | 0         |  |  |
|         |      | Shiraz-53T | 2078 | 0.287202 | 0         |  |  |
|         |      | Shiraz-71T | 2238 | 0.603631 | 0         |  |  |
|         |      | Shiraz-3T  | 90   | 0.219276 | 0         |  |  |
|         |      | Shiraz-3T  | 96   | 0.428308 | 0         |  |  |
|         |      | Shiraz-4T  | 253  | 0.372918 | 0         |  |  |
|         |      | Shiraz-31T | 317  | 0.204382 | 0         |  |  |
|         |      | Shiraz-36T | 378  | 0.179558 | 0         |  |  |



|         |      |            |      |          |           |  |
|---------|------|------------|------|----------|-----------|--|
|         |      | Shiraz-44T | 642  | 0.408617 | 0         |  |
|         |      | Shiraz-46T | 943  | 0.093799 | 0         |  |
|         |      | Shiraz-47T | 1032 | 0.171484 | 0         |  |
|         |      | Shiraz-77T | 1225 | 0        | -0.117922 |  |
|         |      | Shiraz-77T | 1229 | 0.051661 | 0         |  |
|         |      | Shiraz-9T  | 1325 | 0.221899 | 0         |  |
|         |      | Shiraz-18T | 1434 | 0.244465 | 0         |  |
|         |      | Shiraz-25T | 1698 | 0.21835  | 0         |  |
|         |      | Shiraz-28T | 1735 | 0.350744 | 0         |  |
|         |      | Shiraz-29T | 1778 | 0.120767 | 0         |  |
|         |      | Shiraz-32T | 1833 | 0.551336 | 0         |  |
|         |      | Shiraz-38T | 1951 | 0.250891 | 0         |  |
|         |      | Shiraz-53T | 2078 | 0.287202 | 0         |  |
|         |      | Shiraz-71T | 2238 | 0.603631 | 0         |  |
|         |      | Shiraz-3T  | 90   | 0.219276 | 0         |  |
|         |      | Shiraz-3T  | 96   | 0.428308 | 0         |  |
|         |      | Shiraz-4T  | 253  | 0.372918 | 0         |  |
|         |      | Shiraz-31T | 317  | 0.204382 | 0         |  |
|         |      | Shiraz-36T | 378  | 0.179558 | 0         |  |
|         |      | Shiraz-44T | 642  | 0.408617 | 0         |  |
|         |      | Shiraz-46T | 943  | 0.093799 | 0         |  |
|         |      | Shiraz-47T | 1032 | 0.171484 | 0         |  |
|         |      | Shiraz-77T | 1225 | 0        | -0.117922 |  |
|         |      | Shiraz-77T | 1229 | 0.051661 | 0         |  |
|         |      | Shiraz-9T  | 1325 | 0.221899 | 0         |  |
|         |      | Shiraz-18T | 1434 | 0.244465 | 0         |  |
|         |      | Shiraz-25T | 1698 | 0.21835  | 0         |  |
|         |      | Shiraz-28T | 1735 | 0.350744 | 0         |  |
|         |      | Shiraz-29T | 1778 | 0.120767 | 0         |  |
|         |      | Shiraz-32T | 1833 | 0.551336 | 0         |  |
|         |      | Shiraz-38T | 1951 | 0.250891 | 0         |  |
|         |      | Shiraz-53T | 2078 | 0.287202 | 0         |  |
|         |      | Shiraz-71T | 2238 | 0.603631 | 0         |  |
| FAM71F2 | chr7 | Shiraz-3T  | 90   | 0.219276 | 0         |  |
|         |      | Shiraz-3T  | 90   | 0.219276 | 0         |  |
|         |      | Shiraz-3T  | 96   | 0.428308 | 0         |  |
|         |      | Shiraz-3T  | 96   | 0.428308 | 0         |  |
|         |      | Shiraz-4T  | 253  | 0.372918 | 0         |  |
|         |      | Shiraz-4T  | 253  | 0.372918 | 0         |  |
|         |      | Shiraz-31T | 317  | 0.204382 | 0         |  |
|         |      | Shiraz-31T | 317  | 0.204382 | 0         |  |
|         |      | Shiraz-36T | 378  | 0.179558 | 0         |  |
|         |      | Shiraz-36T | 378  | 0.179558 | 0         |  |
|         |      | Shiraz-44T | 642  | 0.408617 | 0         |  |
|         |      | Shiraz-44T | 642  | 0.408617 | 0         |  |
|         |      | Shiraz-46T | 943  | 0.093799 | 0         |  |
|         |      | Shiraz-46T | 943  | 0.093799 | 0         |  |

|  |  |            |      |          |           |  |  |
|--|--|------------|------|----------|-----------|--|--|
|  |  | Shiraz-47T | 1032 | 0.171484 | 0         |  |  |
|  |  | Shiraz-47T | 1032 | 0.171484 | 0         |  |  |
|  |  | Shiraz-77T | 1225 | 0        | -0.117922 |  |  |
|  |  | Shiraz-77T | 1225 | 0        | -0.117922 |  |  |
|  |  | Shiraz-77T | 1229 | 0.051661 | 0         |  |  |
|  |  | Shiraz-77T | 1229 | 0.051661 | 0         |  |  |
|  |  | Shiraz-9T  | 1325 | 0.221899 | 0         |  |  |
|  |  | Shiraz-9T  | 1325 | 0.221899 | 0         |  |  |
|  |  | Shiraz-18T | 1434 | 0.244465 | 0         |  |  |
|  |  | Shiraz-18T | 1434 | 0.244465 | 0         |  |  |
|  |  | Shiraz-25T | 1698 | 0.21835  | 0         |  |  |
|  |  | Shiraz-25T | 1698 | 0.21835  | 0         |  |  |
|  |  | Shiraz-28T | 1735 | 0.350744 | 0         |  |  |
|  |  | Shiraz-28T | 1735 | 0.350744 | 0         |  |  |
|  |  | Shiraz-29T | 1778 | 0.120767 | 0         |  |  |
|  |  | Shiraz-29T | 1778 | 0.120767 | 0         |  |  |
|  |  | Shiraz-32T | 1833 | 0.551336 | 0         |  |  |
|  |  | Shiraz-32T | 1833 | 0.551336 | 0         |  |  |
|  |  | Shiraz-38T | 1951 | 0.250891 | 0         |  |  |
|  |  | Shiraz-38T | 1951 | 0.250891 | 0         |  |  |
|  |  | Shiraz-53T | 2078 | 0.287202 | 0         |  |  |
|  |  | Shiraz-53T | 2078 | 0.287202 | 0         |  |  |
|  |  | Shiraz-71T | 2238 | 0.603631 | 0         |  |  |
|  |  | Shiraz-71T | 2238 | 0.603631 | 0         |  |  |
|  |  | Shiraz-3T  | 90   | 0.219276 | 0         |  |  |
|  |  | Shiraz-3T  | 90   | 0.219276 | 0         |  |  |
|  |  | Shiraz-3T  | 96   | 0.428308 | 0         |  |  |
|  |  | Shiraz-3T  | 96   | 0.428308 | 0         |  |  |
|  |  | Shiraz-4T  | 253  | 0.372918 | 0         |  |  |
|  |  | Shiraz-4T  | 253  | 0.372918 | 0         |  |  |
|  |  | Shiraz-31T | 317  | 0.204382 | 0         |  |  |
|  |  | Shiraz-31T | 317  | 0.204382 | 0         |  |  |
|  |  | Shiraz-36T | 378  | 0.179558 | 0         |  |  |
|  |  | Shiraz-36T | 378  | 0.179558 | 0         |  |  |
|  |  | Shiraz-44T | 642  | 0.408617 | 0         |  |  |
|  |  | Shiraz-44T | 642  | 0.408617 | 0         |  |  |
|  |  | Shiraz-46T | 943  | 0.093799 | 0         |  |  |
|  |  | Shiraz-46T | 943  | 0.093799 | 0         |  |  |
|  |  | Shiraz-47T | 1032 | 0.171484 | 0         |  |  |
|  |  | Shiraz-47T | 1032 | 0.171484 | 0         |  |  |
|  |  | Shiraz-77T | 1225 | 0        | -0.117922 |  |  |
|  |  | Shiraz-77T | 1225 | 0        | -0.117922 |  |  |
|  |  | Shiraz-77T | 1229 | 0.051661 | 0         |  |  |
|  |  | Shiraz-77T | 1229 | 0.051661 | 0         |  |  |
|  |  | Shiraz-9T  | 1325 | 0.221899 | 0         |  |  |
|  |  | Shiraz-9T  | 1325 | 0.221899 | 0         |  |  |
|  |  | Shiraz-18T | 1434 | 0.244465 | 0         |  |  |

|  |            |      |          |           |  |
|--|------------|------|----------|-----------|--|
|  | Shiraz-18T | 1434 | 0.244465 | 0         |  |
|  | Shiraz-25T | 1698 | 0.21835  | 0         |  |
|  | Shiraz-25T | 1698 | 0.21835  | 0         |  |
|  | Shiraz-28T | 1735 | 0.350744 | 0         |  |
|  | Shiraz-28T | 1735 | 0.350744 | 0         |  |
|  | Shiraz-29T | 1778 | 0.120767 | 0         |  |
|  | Shiraz-29T | 1778 | 0.120767 | 0         |  |
|  | Shiraz-32T | 1833 | 0.551336 | 0         |  |
|  | Shiraz-32T | 1833 | 0.551336 | 0         |  |
|  | Shiraz-38T | 1951 | 0.250891 | 0         |  |
|  | Shiraz-38T | 1951 | 0.250891 | 0         |  |
|  | Shiraz-53T | 2078 | 0.287202 | 0         |  |
|  | Shiraz-53T | 2078 | 0.287202 | 0         |  |
|  | Shiraz-71T | 2238 | 0.603631 | 0         |  |
|  | Shiraz-71T | 2238 | 0.603631 | 0         |  |
|  | Shiraz-3T  | 90   | 0.219276 | 0         |  |
|  | Shiraz-3T  | 90   | 0.219276 | 0         |  |
|  | Shiraz-3T  | 96   | 0.428308 | 0         |  |
|  | Shiraz-3T  | 96   | 0.428308 | 0         |  |
|  | Shiraz-4T  | 253  | 0.372918 | 0         |  |
|  | Shiraz-4T  | 253  | 0.372918 | 0         |  |
|  | Shiraz-31T | 317  | 0.204382 | 0         |  |
|  | Shiraz-31T | 317  | 0.204382 | 0         |  |
|  | Shiraz-36T | 378  | 0.179558 | 0         |  |
|  | Shiraz-36T | 378  | 0.179558 | 0         |  |
|  | Shiraz-44T | 642  | 0.408617 | 0         |  |
|  | Shiraz-44T | 642  | 0.408617 | 0         |  |
|  | Shiraz-46T | 943  | 0.093799 | 0         |  |
|  | Shiraz-46T | 943  | 0.093799 | 0         |  |
|  | Shiraz-47T | 1032 | 0.171484 | 0         |  |
|  | Shiraz-47T | 1032 | 0.171484 | 0         |  |
|  | Shiraz-77T | 1225 | 0        | -0.117922 |  |
|  | Shiraz-77T | 1225 | 0        | -0.117922 |  |
|  | Shiraz-77T | 1229 | 0.051661 | 0         |  |
|  | Shiraz-77T | 1229 | 0.051661 | 0         |  |
|  | Shiraz-9T  | 1325 | 0.221899 | 0         |  |
|  | Shiraz-9T  | 1325 | 0.221899 | 0         |  |
|  | Shiraz-18T | 1434 | 0.244465 | 0         |  |
|  | Shiraz-18T | 1434 | 0.244465 | 0         |  |
|  | Shiraz-25T | 1698 | 0.21835  | 0         |  |
|  | Shiraz-25T | 1698 | 0.21835  | 0         |  |
|  | Shiraz-28T | 1735 | 0.350744 | 0         |  |
|  | Shiraz-28T | 1735 | 0.350744 | 0         |  |
|  | Shiraz-29T | 1778 | 0.120767 | 0         |  |
|  | Shiraz-29T | 1778 | 0.120767 | 0         |  |
|  | Shiraz-32T | 1833 | 0.551336 | 0         |  |
|  | Shiraz-32T | 1833 | 0.551336 | 0         |  |

|       |      |            |      |          |           |  |
|-------|------|------------|------|----------|-----------|--|
|       |      | Shiraz-38T | 1951 | 0.250891 | 0         |  |
|       |      | Shiraz-38T | 1951 | 0.250891 | 0         |  |
|       |      | Shiraz-53T | 2078 | 0.287202 | 0         |  |
|       |      | Shiraz-53T | 2078 | 0.287202 | 0         |  |
|       |      | Shiraz-71T | 2238 | 0.603631 | 0         |  |
|       |      | Shiraz-71T | 2238 | 0.603631 | 0         |  |
| FAM9A | chrX | Shiraz-3T  | 235  | 0        | -0.28401  |  |
|       |      | Shiraz-4T  | 260  | 0        | -0.324128 |  |
|       |      | Shiraz-16T | 294  | 0.655804 | 0         |  |
|       |      | Shiraz-36T | 431  | 0        | -0.78035  |  |
|       |      | Shiraz-44T | 891  | 0        | -0.954044 |  |
|       |      | Shiraz-44T | 892  | 0        | -1.231333 |  |
|       |      | Shiraz-49T | 1166 | 0        | -0.917235 |  |
|       |      | Shiraz-9T  | 1368 | 0.199713 | 0         |  |
|       |      | Shiraz-18T | 1455 | 0        | -0.186773 |  |
|       |      | Shiraz-22T | 1669 | 0.695915 | 0         |  |
|       |      | Shiraz-25T | 1717 | 0.420447 | 0         |  |
|       |      | Shiraz-28T | 1760 | 0.538181 | 0         |  |
|       |      | Shiraz-29T | 1800 | 0.672527 | 0         |  |
|       |      | Shiraz-32T | 1869 | 0.776805 | 0         |  |
|       |      | Shiraz-35T | 1932 | 0.507141 | 0         |  |
|       |      | Shiraz-40T | 2051 | 0.098506 | 0         |  |
|       |      | Shiraz-58T | 2221 | 0.871948 | 0         |  |
|       |      | Shiraz-71T | 2260 | 0.68394  | 0         |  |
|       |      | Shiraz-71T | 2261 | 0.508399 | 0         |  |
|       |      | Shiraz-3T  | 235  | 0        | -0.28401  |  |
|       |      | Shiraz-4T  | 260  | 0        | -0.324128 |  |
|       |      | Shiraz-16T | 294  | 0.655804 | 0         |  |
|       |      | Shiraz-36T | 431  | 0        | -0.78035  |  |
|       |      | Shiraz-44T | 891  | 0        | -0.954044 |  |
|       |      | Shiraz-44T | 892  | 0        | -1.231333 |  |
|       |      | Shiraz-49T | 1166 | 0        | -0.917235 |  |
|       |      | Shiraz-9T  | 1368 | 0.199713 | 0         |  |
|       |      | Shiraz-18T | 1455 | 0        | -0.186773 |  |
|       |      | Shiraz-22T | 1669 | 0.695915 | 0         |  |
|       |      | Shiraz-25T | 1717 | 0.420447 | 0         |  |
|       |      | Shiraz-28T | 1760 | 0.538181 | 0         |  |
|       |      | Shiraz-29T | 1800 | 0.672527 | 0         |  |
|       |      | Shiraz-32T | 1869 | 0.776805 | 0         |  |
|       |      | Shiraz-35T | 1932 | 0.507141 | 0         |  |
|       |      | Shiraz-40T | 2051 | 0.098506 | 0         |  |
|       |      | Shiraz-58T | 2221 | 0.871948 | 0         |  |
|       |      | Shiraz-71T | 2260 | 0.68394  | 0         |  |
|       |      | Shiraz-71T | 2261 | 0.508399 | 0         |  |
|       |      | Shiraz-3T  | 235  | 0        | -0.28401  |  |
|       |      | Shiraz-4T  | 260  | 0        | -0.324128 |  |
|       |      | Shiraz-16T | 294  | 0.655804 | 0         |  |

|       |      |            |      |          |           |  |  |
|-------|------|------------|------|----------|-----------|--|--|
|       |      | Shiraz-36T | 431  | 0        | -0.78035  |  |  |
|       |      | Shiraz-44T | 891  | 0        | -0.954044 |  |  |
|       |      | Shiraz-44T | 892  | 0        | -1.231333 |  |  |
|       |      | Shiraz-49T | 1166 | 0        | -0.917235 |  |  |
|       |      | Shiraz-9T  | 1368 | 0.199713 | 0         |  |  |
|       |      | Shiraz-18T | 1455 | 0        | -0.186773 |  |  |
|       |      | Shiraz-22T | 1669 | 0.695915 | 0         |  |  |
|       |      | Shiraz-25T | 1717 | 0.420447 | 0         |  |  |
|       |      | Shiraz-28T | 1760 | 0.538181 | 0         |  |  |
|       |      | Shiraz-29T | 1800 | 0.672527 | 0         |  |  |
|       |      | Shiraz-32T | 1869 | 0.776805 | 0         |  |  |
|       |      | Shiraz-35T | 1932 | 0.507141 | 0         |  |  |
|       |      | Shiraz-40T | 2051 | 0.098506 | 0         |  |  |
|       |      | Shiraz-58T | 2221 | 0.871948 | 0         |  |  |
|       |      | Shiraz-71T | 2260 | 0.68394  | 0         |  |  |
|       |      | Shiraz-71T | 2261 | 0.508399 | 0         |  |  |
| FAM9B | chrX | Shiraz-3T  | 235  | 0        | -0.28401  |  |  |
|       |      | Shiraz-4T  | 260  | 0        | -0.324128 |  |  |
|       |      | Shiraz-16T | 294  | 0.655804 | 0         |  |  |
|       |      | Shiraz-36T | 431  | 0        | -0.78035  |  |  |
|       |      | Shiraz-44T | 891  | 0        | -0.954044 |  |  |
|       |      | Shiraz-44T | 892  | 0        | -1.231333 |  |  |
|       |      | Shiraz-49T | 1166 | 0        | -0.917235 |  |  |
|       |      | Shiraz-9T  | 1368 | 0.199713 | 0         |  |  |
|       |      | Shiraz-18T | 1455 | 0        | -0.186773 |  |  |
|       |      | Shiraz-22T | 1669 | 0.695915 | 0         |  |  |
|       |      | Shiraz-25T | 1717 | 0.420447 | 0         |  |  |
|       |      | Shiraz-28T | 1760 | 0.538181 | 0         |  |  |
|       |      | Shiraz-29T | 1800 | 0.672527 | 0         |  |  |
|       |      | Shiraz-32T | 1869 | 0.776805 | 0         |  |  |
|       |      | Shiraz-35T | 1932 | 0.507141 | 0         |  |  |
|       |      | Shiraz-40T | 2051 | 0.098506 | 0         |  |  |
|       |      | Shiraz-58T | 2221 | 0.871948 | 0         |  |  |
|       |      | Shiraz-71T | 2260 | 0.68394  | 0         |  |  |
|       |      | Shiraz-71T | 2261 | 0.508399 | 0         |  |  |
|       |      | Shiraz-3T  | 235  | 0        | -0.28401  |  |  |
|       |      | Shiraz-4T  | 260  | 0        | -0.324128 |  |  |
|       |      | Shiraz-16T | 294  | 0.655804 | 0         |  |  |
|       |      | Shiraz-36T | 431  | 0        | -0.78035  |  |  |
|       |      | Shiraz-44T | 891  | 0        | -0.954044 |  |  |
|       |      | Shiraz-44T | 892  | 0        | -1.231333 |  |  |
|       |      | Shiraz-49T | 1166 | 0        | -0.917235 |  |  |
|       |      | Shiraz-9T  | 1368 | 0.199713 | 0         |  |  |
|       |      | Shiraz-18T | 1455 | 0        | -0.186773 |  |  |
|       |      | Shiraz-22T | 1669 | 0.695915 | 0         |  |  |
|       |      | Shiraz-25T | 1717 | 0.420447 | 0         |  |  |
|       |      | Shiraz-28T | 1760 | 0.538181 | 0         |  |  |

|       |      |            |      |          |           |  |
|-------|------|------------|------|----------|-----------|--|
|       |      | Shiraz-29T | 1800 | 0.672527 | 0         |  |
|       |      | Shiraz-32T | 1869 | 0.776805 | 0         |  |
|       |      | Shiraz-35T | 1932 | 0.507141 | 0         |  |
|       |      | Shiraz-40T | 2051 | 0.098506 | 0         |  |
|       |      | Shiraz-58T | 2221 | 0.871948 | 0         |  |
|       |      | Shiraz-71T | 2260 | 0.68394  | 0         |  |
|       |      | Shiraz-71T | 2261 | 0.508399 | 0         |  |
|       |      | Shiraz-3T  | 235  | 0        | -0.28401  |  |
|       |      | Shiraz-4T  | 260  | 0        | -0.324128 |  |
|       |      | Shiraz-16T | 294  | 0.655804 | 0         |  |
|       |      | Shiraz-36T | 431  | 0        | -0.78035  |  |
|       |      | Shiraz-44T | 891  | 0        | -0.954044 |  |
|       |      | Shiraz-44T | 892  | 0        | -1.231333 |  |
|       |      | Shiraz-49T | 1166 | 0        | -0.917235 |  |
|       |      | Shiraz-9T  | 1368 | 0.199713 | 0         |  |
|       |      | Shiraz-18T | 1455 | 0        | -0.186773 |  |
|       |      | Shiraz-22T | 1669 | 0.695915 | 0         |  |
|       |      | Shiraz-25T | 1717 | 0.420447 | 0         |  |
|       |      | Shiraz-28T | 1760 | 0.538181 | 0         |  |
|       |      | Shiraz-29T | 1800 | 0.672527 | 0         |  |
|       |      | Shiraz-32T | 1869 | 0.776805 | 0         |  |
|       |      | Shiraz-35T | 1932 | 0.507141 | 0         |  |
|       |      | Shiraz-40T | 2051 | 0.098506 | 0         |  |
|       |      | Shiraz-58T | 2221 | 0.871948 | 0         |  |
|       |      | Shiraz-71T | 2260 | 0.68394  | 0         |  |
|       |      | Shiraz-71T | 2261 | 0.508399 | 0         |  |
| FAM9C | chrX | Shiraz-3T  | 235  | 0        | -0.28401  |  |
|       |      | Shiraz-4T  | 260  | 0        | -0.324128 |  |
|       |      | Shiraz-16T | 294  | 0.655804 | 0         |  |
|       |      | Shiraz-36T | 431  | 0        | -0.78035  |  |
|       |      | Shiraz-44T | 891  | 0        | -0.954044 |  |
|       |      | Shiraz-49T | 1166 | 0        | -0.917235 |  |
|       |      | Shiraz-9T  | 1368 | 0.199713 | 0         |  |
|       |      | Shiraz-18T | 1455 | 0        | -0.186773 |  |
|       |      | Shiraz-22T | 1669 | 0.695915 | 0         |  |
|       |      | Shiraz-25T | 1717 | 0.420447 | 0         |  |
|       |      | Shiraz-28T | 1760 | 0.538181 | 0         |  |
|       |      | Shiraz-29T | 1800 | 0.672527 | 0         |  |
|       |      | Shiraz-32T | 1869 | 0.776805 | 0         |  |
|       |      | Shiraz-35T | 1932 | 0.507141 | 0         |  |
|       |      | Shiraz-40T | 2051 | 0.098506 | 0         |  |
|       |      | Shiraz-58T | 2221 | 0.871948 | 0         |  |
|       |      | Shiraz-71T | 2260 | 0.68394  | 0         |  |
|       |      | Shiraz-71T | 2261 | 0.508399 | 0         |  |
|       |      | Shiraz-3T  | 235  | 0        | -0.28401  |  |
|       |      | Shiraz-4T  | 260  | 0        | -0.324128 |  |
|       |      | Shiraz-16T | 294  | 0.655804 | 0         |  |

|       |      |            |      |          |           |  |  |
|-------|------|------------|------|----------|-----------|--|--|
|       |      | Shiraz-36T | 431  | 0        | -0.78035  |  |  |
|       |      | Shiraz-44T | 891  | 0        | -0.954044 |  |  |
|       |      | Shiraz-49T | 1166 | 0        | -0.917235 |  |  |
|       |      | Shiraz-9T  | 1368 | 0.199713 | 0         |  |  |
|       |      | Shiraz-18T | 1455 | 0        | -0.186773 |  |  |
|       |      | Shiraz-22T | 1669 | 0.695915 | 0         |  |  |
|       |      | Shiraz-25T | 1717 | 0.420447 | 0         |  |  |
|       |      | Shiraz-28T | 1760 | 0.538181 | 0         |  |  |
|       |      | Shiraz-29T | 1800 | 0.672527 | 0         |  |  |
|       |      | Shiraz-32T | 1869 | 0.776805 | 0         |  |  |
|       |      | Shiraz-35T | 1932 | 0.507141 | 0         |  |  |
|       |      | Shiraz-40T | 2051 | 0.098506 | 0         |  |  |
|       |      | Shiraz-58T | 2221 | 0.871948 | 0         |  |  |
|       |      | Shiraz-71T | 2260 | 0.68394  | 0         |  |  |
|       |      | Shiraz-71T | 2261 | 0.508399 | 0         |  |  |
|       |      | Shiraz-3T  | 235  | 0        | -0.28401  |  |  |
|       |      | Shiraz-4T  | 260  | 0        | -0.324128 |  |  |
|       |      | Shiraz-16T | 294  | 0.655804 | 0         |  |  |
|       |      | Shiraz-36T | 431  | 0        | -0.78035  |  |  |
|       |      | Shiraz-44T | 891  | 0        | -0.954044 |  |  |
|       |      | Shiraz-49T | 1166 | 0        | -0.917235 |  |  |
|       |      | Shiraz-9T  | 1368 | 0.199713 | 0         |  |  |
|       |      | Shiraz-18T | 1455 | 0        | -0.186773 |  |  |
|       |      | Shiraz-22T | 1669 | 0.695915 | 0         |  |  |
|       |      | Shiraz-25T | 1717 | 0.420447 | 0         |  |  |
|       |      | Shiraz-28T | 1760 | 0.538181 | 0         |  |  |
|       |      | Shiraz-29T | 1800 | 0.672527 | 0         |  |  |
|       |      | Shiraz-32T | 1869 | 0.776805 | 0         |  |  |
|       |      | Shiraz-35T | 1932 | 0.507141 | 0         |  |  |
|       |      | Shiraz-40T | 2051 | 0.098506 | 0         |  |  |
|       |      | Shiraz-58T | 2221 | 0.871948 | 0         |  |  |
|       |      | Shiraz-71T | 2260 | 0.68394  | 0         |  |  |
|       |      | Shiraz-71T | 2261 | 0.508399 | 0         |  |  |
| FANCB | chrX | Shiraz-3T  | 235  | 0        | -0.28401  |  |  |
|       |      | Shiraz-4T  | 260  | 0        | -0.324128 |  |  |
|       |      | Shiraz-16T | 294  | 0.655804 | 0         |  |  |
|       |      | Shiraz-36T | 431  | 0        | -0.78035  |  |  |
|       |      | Shiraz-44T | 891  | 0        | -0.954044 |  |  |
|       |      | Shiraz-49T | 1166 | 0        | -0.917235 |  |  |
|       |      | Shiraz-9T  | 1368 | 0.199713 | 0         |  |  |
|       |      | Shiraz-18T | 1455 | 0        | -0.186773 |  |  |
|       |      | Shiraz-22T | 1669 | 0.695915 | 0         |  |  |
|       |      | Shiraz-25T | 1717 | 0.420447 | 0         |  |  |
|       |      | Shiraz-28T | 1760 | 0.538181 | 0         |  |  |
|       |      | Shiraz-29T | 1800 | 0.672527 | 0         |  |  |
|       |      | Shiraz-32T | 1869 | 0.776805 | 0         |  |  |
|       |      | Shiraz-35T | 1932 | 0.507141 | 0         |  |  |

|       |      |            |      |          |           |  |
|-------|------|------------|------|----------|-----------|--|
|       |      | Shiraz-40T | 2051 | 0.098506 | 0         |  |
|       |      | Shiraz-58T | 2221 | 0.871948 | 0         |  |
|       |      | Shiraz-71T | 2260 | 0.68394  | 0         |  |
|       |      | Shiraz-71T | 2261 | 0.508399 | 0         |  |
|       |      | Shiraz-3T  | 235  | 0        | -0.28401  |  |
|       |      | Shiraz-4T  | 260  | 0        | -0.324128 |  |
|       |      | Shiraz-16T | 294  | 0.655804 | 0         |  |
|       |      | Shiraz-36T | 431  | 0        | -0.78035  |  |
|       |      | Shiraz-44T | 891  | 0        | -0.954044 |  |
|       |      | Shiraz-49T | 1166 | 0        | -0.917235 |  |
|       |      | Shiraz-9T  | 1368 | 0.199713 | 0         |  |
|       |      | Shiraz-18T | 1455 | 0        | -0.186773 |  |
|       |      | Shiraz-22T | 1669 | 0.695915 | 0         |  |
|       |      | Shiraz-25T | 1717 | 0.420447 | 0         |  |
|       |      | Shiraz-28T | 1760 | 0.538181 | 0         |  |
|       |      | Shiraz-29T | 1800 | 0.672527 | 0         |  |
|       |      | Shiraz-32T | 1869 | 0.776805 | 0         |  |
|       |      | Shiraz-35T | 1932 | 0.507141 | 0         |  |
|       |      | Shiraz-40T | 2051 | 0.098506 | 0         |  |
|       |      | Shiraz-58T | 2221 | 0.871948 | 0         |  |
|       |      | Shiraz-71T | 2260 | 0.68394  | 0         |  |
|       |      | Shiraz-71T | 2261 | 0.508399 | 0         |  |
|       |      | Shiraz-3T  | 235  | 0        | -0.28401  |  |
|       |      | Shiraz-4T  | 260  | 0        | -0.324128 |  |
|       |      | Shiraz-16T | 294  | 0.655804 | 0         |  |
|       |      | Shiraz-36T | 431  | 0        | -0.78035  |  |
|       |      | Shiraz-44T | 891  | 0        | -0.954044 |  |
|       |      | Shiraz-49T | 1166 | 0        | -0.917235 |  |
|       |      | Shiraz-9T  | 1368 | 0.199713 | 0         |  |
|       |      | Shiraz-18T | 1455 | 0        | -0.186773 |  |
|       |      | Shiraz-22T | 1669 | 0.695915 | 0         |  |
|       |      | Shiraz-25T | 1717 | 0.420447 | 0         |  |
|       |      | Shiraz-28T | 1760 | 0.538181 | 0         |  |
|       |      | Shiraz-29T | 1800 | 0.672527 | 0         |  |
|       |      | Shiraz-32T | 1869 | 0.776805 | 0         |  |
|       |      | Shiraz-35T | 1932 | 0.507141 | 0         |  |
|       |      | Shiraz-40T | 2051 | 0.098506 | 0         |  |
|       |      | Shiraz-58T | 2221 | 0.871948 | 0         |  |
|       |      | Shiraz-71T | 2260 | 0.68394  | 0         |  |
|       |      | Shiraz-71T | 2261 | 0.508399 | 0         |  |
| FASTK | chr7 | Shiraz-3T  | 90   | 0.219276 | 0         |  |
|       |      | Shiraz-3T  | 99   | 0.454766 | 0         |  |
|       |      | Shiraz-4T  | 253  | 0.372918 | 0         |  |
|       |      | Shiraz-36T | 378  | 0.179558 | 0         |  |
|       |      | Shiraz-44T | 646  | 0.471276 | 0         |  |
|       |      | Shiraz-44T | 647  | 1.496173 | 0         |  |
|       |      | Shiraz-46T | 943  | 0.093799 | 0         |  |



|  |  |            |      |          |           |  |
|--|--|------------|------|----------|-----------|--|
|  |  | Shiraz-9T  | 1325 | 0.221899 | 0         |  |
|  |  | Shiraz-18T | 1434 | 0.244465 | 0         |  |
|  |  | Shiraz-22T | 1555 | 0.427999 | 0         |  |
|  |  | Shiraz-25T | 1698 | 0.21835  | 0         |  |
|  |  | Shiraz-28T | 1735 | 0.350744 | 0         |  |
|  |  | Shiraz-29T | 1778 | 0.120767 | 0         |  |
|  |  | Shiraz-32T | 1833 | 0.551336 | 0         |  |
|  |  | Shiraz-38T | 1951 | 0.250891 | 0         |  |
|  |  | Shiraz-38T | 1952 | 0        | -0.163211 |  |
|  |  | Shiraz-53T | 2078 | 0.287202 | 0         |  |
|  |  | Shiraz-58T | 2162 | 0.221505 | 0         |  |
|  |  | Shiraz-71T | 2238 | 0.603631 | 0         |  |
|  |  | Shiraz-3T  | 90   | 0.219276 | 0         |  |
|  |  | Shiraz-3T  | 99   | 0.454766 | 0         |  |
|  |  | Shiraz-4T  | 253  | 0.372918 | 0         |  |
|  |  | Shiraz-36T | 378  | 0.179558 | 0         |  |
|  |  | Shiraz-44T | 646  | 0.471276 | 0         |  |
|  |  | Shiraz-44T | 647  | 1.496173 | 0         |  |
|  |  | Shiraz-46T | 943  | 0.093799 | 0         |  |
|  |  | Shiraz-9T  | 1325 | 0.221899 | 0         |  |
|  |  | Shiraz-18T | 1434 | 0.244465 | 0         |  |
|  |  | Shiraz-22T | 1555 | 0.427999 | 0         |  |
|  |  | Shiraz-25T | 1698 | 0.21835  | 0         |  |
|  |  | Shiraz-28T | 1735 | 0.350744 | 0         |  |
|  |  | Shiraz-29T | 1778 | 0.120767 | 0         |  |
|  |  | Shiraz-32T | 1833 | 0.551336 | 0         |  |
|  |  | Shiraz-38T | 1951 | 0.250891 | 0         |  |
|  |  | Shiraz-38T | 1952 | 0        | -0.163211 |  |
|  |  | Shiraz-53T | 2078 | 0.287202 | 0         |  |
|  |  | Shiraz-58T | 2162 | 0.221505 | 0         |  |
|  |  | Shiraz-71T | 2238 | 0.603631 | 0         |  |
|  |  | Shiraz-3T  | 90   | 0.219276 | 0         |  |
|  |  | Shiraz-3T  | 99   | 0.454766 | 0         |  |
|  |  | Shiraz-4T  | 253  | 0.372918 | 0         |  |
|  |  | Shiraz-36T | 378  | 0.179558 | 0         |  |
|  |  | Shiraz-44T | 646  | 0.471276 | 0         |  |
|  |  | Shiraz-44T | 647  | 1.496173 | 0         |  |
|  |  | Shiraz-46T | 943  | 0.093799 | 0         |  |
|  |  | Shiraz-9T  | 1325 | 0.221899 | 0         |  |
|  |  | Shiraz-18T | 1434 | 0.244465 | 0         |  |
|  |  | Shiraz-22T | 1555 | 0.427999 | 0         |  |
|  |  | Shiraz-25T | 1698 | 0.21835  | 0         |  |
|  |  | Shiraz-28T | 1735 | 0.350744 | 0         |  |
|  |  | Shiraz-29T | 1778 | 0.120767 | 0         |  |
|  |  | Shiraz-32T | 1833 | 0.551336 | 0         |  |
|  |  | Shiraz-38T | 1951 | 0.250891 | 0         |  |
|  |  | Shiraz-38T | 1952 | 0        | -0.163211 |  |

|       |      |            |      |          |           |  |
|-------|------|------------|------|----------|-----------|--|
|       |      | Shiraz-53T | 2078 | 0.287202 | 0         |  |
|       |      | Shiraz-58T | 2162 | 0.221505 | 0         |  |
|       |      | Shiraz-71T | 2238 | 0.603631 | 0         |  |
| FATE1 | chrX | Shiraz-3T  | 242  | 0        | -0.336434 |  |
|       |      | Shiraz-4T  | 261  | 0        | -0.336249 |  |
|       |      | Shiraz-16T | 295  | 0.591657 | 0         |  |
|       |      | Shiraz-36T | 433  | 0        | -0.803961 |  |
|       |      | Shiraz-42T | 480  | 0        | -0.232915 |  |
|       |      | Shiraz-44T | 899  | 0        | -1.09697  |  |
|       |      | Shiraz-49T | 1170 | 0        | -0.967436 |  |
|       |      | Shiraz-9T  | 1370 | 0.690073 | 0         |  |
|       |      | Shiraz-18T | 1457 | 0.643204 | 0         |  |
|       |      | Shiraz-22T | 1673 | 0.611783 | 0         |  |
|       |      | Shiraz-22T | 1678 | 0.911625 | 0         |  |
|       |      | Shiraz-25T | 1719 | 0.472955 | 0         |  |
|       |      | Shiraz-28T | 1762 | 0.562311 | 0         |  |
|       |      | Shiraz-29T | 1801 | 0.815343 | 0         |  |
|       |      | Shiraz-32T | 1870 | 0.729766 | 0         |  |
|       |      | Shiraz-35T | 1933 | 0.488535 | 0         |  |
|       |      | Shiraz-58T | 2223 | 0.833364 | 0         |  |
|       |      | Shiraz-58T | 2226 | 1.074663 | 0         |  |
|       |      | Shiraz-71T | 2263 | 0.975531 | 0         |  |
|       |      | Shiraz-3T  | 242  | 0        | -0.336434 |  |
|       |      | Shiraz-4T  | 261  | 0        | -0.336249 |  |
|       |      | Shiraz-16T | 295  | 0.591657 | 0         |  |
|       |      | Shiraz-36T | 433  | 0        | -0.803961 |  |
|       |      | Shiraz-42T | 480  | 0        | -0.232915 |  |
|       |      | Shiraz-44T | 899  | 0        | -1.09697  |  |
|       |      | Shiraz-49T | 1170 | 0        | -0.967436 |  |
|       |      | Shiraz-9T  | 1370 | 0.690073 | 0         |  |
|       |      | Shiraz-18T | 1457 | 0.643204 | 0         |  |
|       |      | Shiraz-22T | 1673 | 0.611783 | 0         |  |
|       |      | Shiraz-22T | 1678 | 0.911625 | 0         |  |
|       |      | Shiraz-25T | 1719 | 0.472955 | 0         |  |
|       |      | Shiraz-28T | 1762 | 0.562311 | 0         |  |
|       |      | Shiraz-29T | 1801 | 0.815343 | 0         |  |
|       |      | Shiraz-32T | 1870 | 0.729766 | 0         |  |
|       |      | Shiraz-35T | 1933 | 0.488535 | 0         |  |
|       |      | Shiraz-58T | 2223 | 0.833364 | 0         |  |
|       |      | Shiraz-58T | 2226 | 1.074663 | 0         |  |
|       |      | Shiraz-71T | 2263 | 0.975531 | 0         |  |
|       |      | Shiraz-3T  | 242  | 0        | -0.336434 |  |
|       |      | Shiraz-4T  | 261  | 0        | -0.336249 |  |
|       |      | Shiraz-16T | 295  | 0.591657 | 0         |  |
|       |      | Shiraz-36T | 433  | 0        | -0.803961 |  |
|       |      | Shiraz-42T | 480  | 0        | -0.232915 |  |
|       |      | Shiraz-44T | 899  | 0        | -1.09697  |  |

|        |      |            |      |          |           |  |  |
|--------|------|------------|------|----------|-----------|--|--|
|        |      | Shiraz-49T | 1170 | 0        | -0.967436 |  |  |
|        |      | Shiraz-9T  | 1370 | 0.690073 | 0         |  |  |
|        |      | Shiraz-18T | 1457 | 0.643204 | 0         |  |  |
|        |      | Shiraz-22T | 1673 | 0.611783 | 0         |  |  |
|        |      | Shiraz-22T | 1678 | 0.911625 | 0         |  |  |
|        |      | Shiraz-25T | 1719 | 0.472955 | 0         |  |  |
|        |      | Shiraz-28T | 1762 | 0.562311 | 0         |  |  |
|        |      | Shiraz-29T | 1801 | 0.815343 | 0         |  |  |
|        |      | Shiraz-32T | 1870 | 0.729766 | 0         |  |  |
|        |      | Shiraz-35T | 1933 | 0.488535 | 0         |  |  |
|        |      | Shiraz-58T | 2223 | 0.833364 | 0         |  |  |
|        |      | Shiraz-58T | 2226 | 1.074663 | 0         |  |  |
|        |      | Shiraz-71T | 2263 | 0.975531 | 0         |  |  |
| FBXL13 | chr7 | Shiraz-3T  | 90   | 0.219276 | 0         |  |  |
|        |      | Shiraz-3T  | 90   | 0.219276 | 0         |  |  |
|        |      | Shiraz-4T  | 253  | 0.372918 | 0         |  |  |
|        |      | Shiraz-4T  | 253  | 0.372918 | 0         |  |  |
|        |      | Shiraz-36T | 378  | 0.179558 | 0         |  |  |
|        |      | Shiraz-36T | 378  | 0.179558 | 0         |  |  |
|        |      | Shiraz-46T | 943  | 0.093799 | 0         |  |  |
|        |      | Shiraz-46T | 943  | 0.093799 | 0         |  |  |
|        |      | Shiraz-77T | 1225 | 0        | -0.117922 |  |  |
|        |      | Shiraz-77T | 1225 | 0        | -0.117922 |  |  |
|        |      | Shiraz-18T | 1434 | 0.244465 | 0         |  |  |
|        |      | Shiraz-18T | 1434 | 0.244465 | 0         |  |  |
|        |      | Shiraz-22T | 1549 | 0        | -0.319623 |  |  |
|        |      | Shiraz-22T | 1549 | 0        | -0.319623 |  |  |
|        |      | Shiraz-25T | 1698 | 0.21835  | 0         |  |  |
|        |      | Shiraz-25T | 1698 | 0.21835  | 0         |  |  |
|        |      | Shiraz-28T | 1735 | 0.350744 | 0         |  |  |
|        |      | Shiraz-28T | 1735 | 0.350744 | 0         |  |  |
|        |      | Shiraz-29T | 1778 | 0.120767 | 0         |  |  |
|        |      | Shiraz-29T | 1778 | 0.120767 | 0         |  |  |
|        |      | Shiraz-32T | 1833 | 0.551336 | 0         |  |  |
|        |      | Shiraz-32T | 1833 | 0.551336 | 0         |  |  |
|        |      | Shiraz-38T | 1951 | 0.250891 | 0         |  |  |
|        |      | Shiraz-38T | 1951 | 0.250891 | 0         |  |  |
|        |      | Shiraz-53T | 2078 | 0.287202 | 0         |  |  |
|        |      | Shiraz-53T | 2078 | 0.287202 | 0         |  |  |
|        |      | Shiraz-71T | 2238 | 0.603631 | 0         |  |  |
|        |      | Shiraz-71T | 2238 | 0.603631 | 0         |  |  |
|        |      | Shiraz-3T  | 90   | 0.219276 | 0         |  |  |
|        |      | Shiraz-3T  | 90   | 0.219276 | 0         |  |  |
|        |      | Shiraz-4T  | 253  | 0.372918 | 0         |  |  |
|        |      | Shiraz-4T  | 253  | 0.372918 | 0         |  |  |
|        |      | Shiraz-36T | 378  | 0.179558 | 0         |  |  |
|        |      | Shiraz-36T | 378  | 0.179558 | 0         |  |  |

|  |  |            |      |          |           |  |  |
|--|--|------------|------|----------|-----------|--|--|
|  |  | Shiraz-46T | 943  | 0.093799 | 0         |  |  |
|  |  | Shiraz-46T | 943  | 0.093799 | 0         |  |  |
|  |  | Shiraz-77T | 1225 | 0        | -0.117922 |  |  |
|  |  | Shiraz-77T | 1225 | 0        | -0.117922 |  |  |
|  |  | Shiraz-18T | 1434 | 0.244465 | 0         |  |  |
|  |  | Shiraz-18T | 1434 | 0.244465 | 0         |  |  |
|  |  | Shiraz-22T | 1549 | 0        | -0.319623 |  |  |
|  |  | Shiraz-22T | 1549 | 0        | -0.319623 |  |  |
|  |  | Shiraz-25T | 1698 | 0.21835  | 0         |  |  |
|  |  | Shiraz-25T | 1698 | 0.21835  | 0         |  |  |
|  |  | Shiraz-28T | 1735 | 0.350744 | 0         |  |  |
|  |  | Shiraz-28T | 1735 | 0.350744 | 0         |  |  |
|  |  | Shiraz-29T | 1778 | 0.120767 | 0         |  |  |
|  |  | Shiraz-29T | 1778 | 0.120767 | 0         |  |  |
|  |  | Shiraz-32T | 1833 | 0.551336 | 0         |  |  |
|  |  | Shiraz-32T | 1833 | 0.551336 | 0         |  |  |
|  |  | Shiraz-38T | 1951 | 0.250891 | 0         |  |  |
|  |  | Shiraz-38T | 1951 | 0.250891 | 0         |  |  |
|  |  | Shiraz-53T | 2078 | 0.287202 | 0         |  |  |
|  |  | Shiraz-53T | 2078 | 0.287202 | 0         |  |  |
|  |  | Shiraz-71T | 2238 | 0.603631 | 0         |  |  |
|  |  | Shiraz-71T | 2238 | 0.603631 | 0         |  |  |
|  |  | Shiraz-3T  | 90   | 0.219276 | 0         |  |  |
|  |  | Shiraz-3T  | 90   | 0.219276 | 0         |  |  |
|  |  | Shiraz-4T  | 253  | 0.372918 | 0         |  |  |
|  |  | Shiraz-4T  | 253  | 0.372918 | 0         |  |  |
|  |  | Shiraz-36T | 378  | 0.179558 | 0         |  |  |
|  |  | Shiraz-36T | 378  | 0.179558 | 0         |  |  |
|  |  | Shiraz-46T | 943  | 0.093799 | 0         |  |  |
|  |  | Shiraz-46T | 943  | 0.093799 | 0         |  |  |
|  |  | Shiraz-77T | 1225 | 0        | -0.117922 |  |  |
|  |  | Shiraz-77T | 1225 | 0        | -0.117922 |  |  |
|  |  | Shiraz-18T | 1434 | 0.244465 | 0         |  |  |
|  |  | Shiraz-18T | 1434 | 0.244465 | 0         |  |  |
|  |  | Shiraz-22T | 1549 | 0        | -0.319623 |  |  |
|  |  | Shiraz-22T | 1549 | 0        | -0.319623 |  |  |
|  |  | Shiraz-25T | 1698 | 0.21835  | 0         |  |  |
|  |  | Shiraz-25T | 1698 | 0.21835  | 0         |  |  |
|  |  | Shiraz-28T | 1735 | 0.350744 | 0         |  |  |
|  |  | Shiraz-28T | 1735 | 0.350744 | 0         |  |  |
|  |  | Shiraz-29T | 1778 | 0.120767 | 0         |  |  |
|  |  | Shiraz-29T | 1778 | 0.120767 | 0         |  |  |
|  |  | Shiraz-32T | 1833 | 0.551336 | 0         |  |  |
|  |  | Shiraz-32T | 1833 | 0.551336 | 0         |  |  |
|  |  | Shiraz-38T | 1951 | 0.250891 | 0         |  |  |
|  |  | Shiraz-38T | 1951 | 0.250891 | 0         |  |  |
|  |  | Shiraz-53T | 2078 | 0.287202 | 0         |  |  |

|        |      |            |      |          |           |  |
|--------|------|------------|------|----------|-----------|--|
|        |      | Shiraz-53T | 2078 | 0.287202 | 0         |  |
|        |      | Shiraz-71T | 2238 | 0.603631 | 0         |  |
|        |      | Shiraz-71T | 2238 | 0.603631 | 0         |  |
| FBXO24 | chr7 | Shiraz-3T  | 90   | 0.219276 | 0         |  |
|        |      | Shiraz-3T  | 90   | 0.219276 | 0         |  |
|        |      | Shiraz-3T  | 94   | 0.74735  | 0         |  |
|        |      | Shiraz-3T  | 94   | 0.74735  | 0         |  |
|        |      | Shiraz-4T  | 253  | 0.372918 | 0         |  |
|        |      | Shiraz-4T  | 253  | 0.372918 | 0         |  |
|        |      | Shiraz-31T | 316  | 0.219196 | 0         |  |
|        |      | Shiraz-31T | 316  | 0.219196 | 0         |  |
|        |      | Shiraz-36T | 378  | 0.179558 | 0         |  |
|        |      | Shiraz-36T | 378  | 0.179558 | 0         |  |
|        |      | Shiraz-36T | 381  | 0.332628 | 0         |  |
|        |      | Shiraz-36T | 381  | 0.332628 | 0         |  |
|        |      | Shiraz-44T | 639  | 1.035032 | 0         |  |
|        |      | Shiraz-44T | 639  | 1.035032 | 0         |  |
|        |      | Shiraz-46T | 943  | 0.093799 | 0         |  |
|        |      | Shiraz-46T | 943  | 0.093799 | 0         |  |
|        |      | Shiraz-46T | 946  | 0.299835 | 0         |  |
|        |      | Shiraz-46T | 946  | 0.299835 | 0         |  |
|        |      | Shiraz-47T | 1030 | 0.257728 | 0         |  |
|        |      | Shiraz-47T | 1030 | 0.257728 | 0         |  |
|        |      | Shiraz-49T | 1120 | 0.281656 | 0         |  |
|        |      | Shiraz-49T | 1120 | 0.281656 | 0         |  |
|        |      | Shiraz-77T | 1225 | 0        | -0.117922 |  |
|        |      | Shiraz-77T | 1225 | 0        | -0.117922 |  |
|        |      | Shiraz-77T | 1227 | 0.196445 | 0         |  |
|        |      | Shiraz-77T | 1227 | 0.196445 | 0         |  |
|        |      | Shiraz-9T  | 1324 | 0.679266 | 0         |  |
|        |      | Shiraz-9T  | 1324 | 0.679266 | 0         |  |
|        |      | Shiraz-18T | 1434 | 0.244465 | 0         |  |
|        |      | Shiraz-18T | 1434 | 0.244465 | 0         |  |
|        |      | Shiraz-22T | 1549 | 0        | -0.319623 |  |
|        |      | Shiraz-22T | 1549 | 0        | -0.319623 |  |
|        |      | Shiraz-22T | 1551 | 0.324011 | 0         |  |
|        |      | Shiraz-22T | 1551 | 0.324011 | 0         |  |
|        |      | Shiraz-25T | 1698 | 0.21835  | 0         |  |
|        |      | Shiraz-25T | 1698 | 0.21835  | 0         |  |
|        |      | Shiraz-28T | 1735 | 0.350744 | 0         |  |
|        |      | Shiraz-28T | 1735 | 0.350744 | 0         |  |
|        |      | Shiraz-29T | 1778 | 0.120767 | 0         |  |
|        |      | Shiraz-29T | 1778 | 0.120767 | 0         |  |
|        |      | Shiraz-32T | 1833 | 0.551336 | 0         |  |
|        |      | Shiraz-32T | 1833 | 0.551336 | 0         |  |
|        |      | Shiraz-32T | 1834 | 1.485392 | 0         |  |
|        |      | Shiraz-32T | 1834 | 1.485392 | 0         |  |

|  |            |      |          |           |  |
|--|------------|------|----------|-----------|--|
|  | Shiraz-38T | 1951 | 0.250891 | 0         |  |
|  | Shiraz-38T | 1951 | 0.250891 | 0         |  |
|  | Shiraz-53T | 2078 | 0.287202 | 0         |  |
|  | Shiraz-53T | 2078 | 0.287202 | 0         |  |
|  | Shiraz-58T | 2160 | 0.399007 | 0         |  |
|  | Shiraz-58T | 2160 | 0.399007 | 0         |  |
|  | Shiraz-71T | 2238 | 0.603631 | 0         |  |
|  | Shiraz-71T | 2238 | 0.603631 | 0         |  |
|  | Shiraz-3T  | 90   | 0.219276 | 0         |  |
|  | Shiraz-3T  | 90   | 0.219276 | 0         |  |
|  | Shiraz-3T  | 94   | 0.74735  | 0         |  |
|  | Shiraz-3T  | 94   | 0.74735  | 0         |  |
|  | Shiraz-4T  | 253  | 0.372918 | 0         |  |
|  | Shiraz-4T  | 253  | 0.372918 | 0         |  |
|  | Shiraz-31T | 316  | 0.219196 | 0         |  |
|  | Shiraz-31T | 316  | 0.219196 | 0         |  |
|  | Shiraz-36T | 378  | 0.179558 | 0         |  |
|  | Shiraz-36T | 378  | 0.179558 | 0         |  |
|  | Shiraz-36T | 381  | 0.332628 | 0         |  |
|  | Shiraz-36T | 381  | 0.332628 | 0         |  |
|  | Shiraz-44T | 639  | 1.035032 | 0         |  |
|  | Shiraz-44T | 639  | 1.035032 | 0         |  |
|  | Shiraz-46T | 943  | 0.093799 | 0         |  |
|  | Shiraz-46T | 943  | 0.093799 | 0         |  |
|  | Shiraz-46T | 946  | 0.299835 | 0         |  |
|  | Shiraz-46T | 946  | 0.299835 | 0         |  |
|  | Shiraz-47T | 1030 | 0.257728 | 0         |  |
|  | Shiraz-47T | 1030 | 0.257728 | 0         |  |
|  | Shiraz-49T | 1120 | 0.281656 | 0         |  |
|  | Shiraz-49T | 1120 | 0.281656 | 0         |  |
|  | Shiraz-77T | 1225 | 0        | -0.117922 |  |
|  | Shiraz-77T | 1225 | 0        | -0.117922 |  |
|  | Shiraz-77T | 1227 | 0.196445 | 0         |  |
|  | Shiraz-77T | 1227 | 0.196445 | 0         |  |
|  | Shiraz-9T  | 1324 | 0.679266 | 0         |  |
|  | Shiraz-9T  | 1324 | 0.679266 | 0         |  |
|  | Shiraz-18T | 1434 | 0.244465 | 0         |  |
|  | Shiraz-18T | 1434 | 0.244465 | 0         |  |
|  | Shiraz-22T | 1549 | 0        | -0.319623 |  |
|  | Shiraz-22T | 1549 | 0        | -0.319623 |  |
|  | Shiraz-22T | 1551 | 0.324011 | 0         |  |
|  | Shiraz-22T | 1551 | 0.324011 | 0         |  |
|  | Shiraz-25T | 1698 | 0.21835  | 0         |  |
|  | Shiraz-25T | 1698 | 0.21835  | 0         |  |
|  | Shiraz-28T | 1735 | 0.350744 | 0         |  |
|  | Shiraz-28T | 1735 | 0.350744 | 0         |  |
|  | Shiraz-29T | 1778 | 0.120767 | 0         |  |

|  |            |      |          |           |  |
|--|------------|------|----------|-----------|--|
|  | Shiraz-29T | 1778 | 0.120767 | 0         |  |
|  | Shiraz-32T | 1833 | 0.551336 | 0         |  |
|  | Shiraz-32T | 1833 | 0.551336 | 0         |  |
|  | Shiraz-32T | 1834 | 1.485392 | 0         |  |
|  | Shiraz-32T | 1834 | 1.485392 | 0         |  |
|  | Shiraz-38T | 1951 | 0.250891 | 0         |  |
|  | Shiraz-38T | 1951 | 0.250891 | 0         |  |
|  | Shiraz-53T | 2078 | 0.287202 | 0         |  |
|  | Shiraz-53T | 2078 | 0.287202 | 0         |  |
|  | Shiraz-58T | 2160 | 0.399007 | 0         |  |
|  | Shiraz-58T | 2160 | 0.399007 | 0         |  |
|  | Shiraz-71T | 2238 | 0.603631 | 0         |  |
|  | Shiraz-71T | 2238 | 0.603631 | 0         |  |
|  | Shiraz-3T  | 90   | 0.219276 | 0         |  |
|  | Shiraz-3T  | 90   | 0.219276 | 0         |  |
|  | Shiraz-3T  | 94   | 0.74735  | 0         |  |
|  | Shiraz-3T  | 94   | 0.74735  | 0         |  |
|  | Shiraz-4T  | 253  | 0.372918 | 0         |  |
|  | Shiraz-4T  | 253  | 0.372918 | 0         |  |
|  | Shiraz-31T | 316  | 0.219196 | 0         |  |
|  | Shiraz-31T | 316  | 0.219196 | 0         |  |
|  | Shiraz-36T | 378  | 0.179558 | 0         |  |
|  | Shiraz-36T | 378  | 0.179558 | 0         |  |
|  | Shiraz-36T | 381  | 0.332628 | 0         |  |
|  | Shiraz-36T | 381  | 0.332628 | 0         |  |
|  | Shiraz-44T | 639  | 1.035032 | 0         |  |
|  | Shiraz-44T | 639  | 1.035032 | 0         |  |
|  | Shiraz-46T | 943  | 0.093799 | 0         |  |
|  | Shiraz-46T | 943  | 0.093799 | 0         |  |
|  | Shiraz-46T | 946  | 0.299835 | 0         |  |
|  | Shiraz-46T | 946  | 0.299835 | 0         |  |
|  | Shiraz-47T | 1030 | 0.257728 | 0         |  |
|  | Shiraz-47T | 1030 | 0.257728 | 0         |  |
|  | Shiraz-49T | 1120 | 0.281656 | 0         |  |
|  | Shiraz-49T | 1120 | 0.281656 | 0         |  |
|  | Shiraz-77T | 1225 | 0        | -0.117922 |  |
|  | Shiraz-77T | 1225 | 0        | -0.117922 |  |
|  | Shiraz-77T | 1227 | 0.196445 | 0         |  |
|  | Shiraz-77T | 1227 | 0.196445 | 0         |  |
|  | Shiraz-9T  | 1324 | 0.679266 | 0         |  |
|  | Shiraz-9T  | 1324 | 0.679266 | 0         |  |
|  | Shiraz-18T | 1434 | 0.244465 | 0         |  |
|  | Shiraz-18T | 1434 | 0.244465 | 0         |  |
|  | Shiraz-22T | 1549 | 0        | -0.319623 |  |
|  | Shiraz-22T | 1549 | 0        | -0.319623 |  |
|  | Shiraz-22T | 1551 | 0.324011 | 0         |  |
|  | Shiraz-22T | 1551 | 0.324011 | 0         |  |

|       |      |            |      |          |           |  |  |
|-------|------|------------|------|----------|-----------|--|--|
|       |      | Shiraz-25T | 1698 | 0.21835  | 0         |  |  |
|       |      | Shiraz-25T | 1698 | 0.21835  | 0         |  |  |
|       |      | Shiraz-28T | 1735 | 0.350744 | 0         |  |  |
|       |      | Shiraz-28T | 1735 | 0.350744 | 0         |  |  |
|       |      | Shiraz-29T | 1778 | 0.120767 | 0         |  |  |
|       |      | Shiraz-29T | 1778 | 0.120767 | 0         |  |  |
|       |      | Shiraz-32T | 1833 | 0.551336 | 0         |  |  |
|       |      | Shiraz-32T | 1833 | 0.551336 | 0         |  |  |
|       |      | Shiraz-32T | 1834 | 1.485392 | 0         |  |  |
|       |      | Shiraz-32T | 1834 | 1.485392 | 0         |  |  |
|       |      | Shiraz-38T | 1951 | 0.250891 | 0         |  |  |
|       |      | Shiraz-38T | 1951 | 0.250891 | 0         |  |  |
|       |      | Shiraz-53T | 2078 | 0.287202 | 0         |  |  |
|       |      | Shiraz-53T | 2078 | 0.287202 | 0         |  |  |
|       |      | Shiraz-58T | 2160 | 0.399007 | 0         |  |  |
|       |      | Shiraz-58T | 2160 | 0.399007 | 0         |  |  |
|       |      | Shiraz-71T | 2238 | 0.603631 | 0         |  |  |
|       |      | Shiraz-71T | 2238 | 0.603631 | 0         |  |  |
| FBXO4 | chr5 | Shiraz-4T  | 250  | 0.262252 | 0         |  |  |
|       |      | Shiraz-4T  | 250  | 0.262252 | 0         |  |  |
|       |      | Shiraz-16T | 266  | 0.321724 | 0         |  |  |
|       |      | Shiraz-16T | 266  | 0.321724 | 0         |  |  |
|       |      | Shiraz-44T | 591  | 0        | -0.233934 |  |  |
|       |      | Shiraz-44T | 591  | 0        | -0.233934 |  |  |
|       |      | Shiraz-18T | 1429 | 0        | -0.314125 |  |  |
|       |      | Shiraz-18T | 1429 | 0        | -0.314125 |  |  |
|       |      | Shiraz-22T | 1522 | 0        | -0.322688 |  |  |
|       |      | Shiraz-22T | 1522 | 0        | -0.322688 |  |  |
|       |      | Shiraz-25T | 1694 | 0.201602 | 0         |  |  |
|       |      | Shiraz-25T | 1694 | 0.201602 | 0         |  |  |
|       |      | Shiraz-28T | 1731 | 0.295447 | 0         |  |  |
|       |      | Shiraz-28T | 1731 | 0.295447 | 0         |  |  |
|       |      | Shiraz-29T | 1773 | 0.090981 | 0         |  |  |
|       |      | Shiraz-29T | 1773 | 0.090981 | 0         |  |  |
|       |      | Shiraz-40T | 2016 | 0.376634 | 0         |  |  |
|       |      | Shiraz-40T | 2016 | 0.376634 | 0         |  |  |
|       |      | Shiraz-4T  | 250  | 0.262252 | 0         |  |  |
|       |      | Shiraz-4T  | 250  | 0.262252 | 0         |  |  |
|       |      | Shiraz-16T | 266  | 0.321724 | 0         |  |  |
|       |      | Shiraz-16T | 266  | 0.321724 | 0         |  |  |
|       |      | Shiraz-44T | 591  | 0        | -0.233934 |  |  |
|       |      | Shiraz-44T | 591  | 0        | -0.233934 |  |  |
|       |      | Shiraz-18T | 1429 | 0        | -0.314125 |  |  |
|       |      | Shiraz-18T | 1429 | 0        | -0.314125 |  |  |
|       |      | Shiraz-22T | 1522 | 0        | -0.322688 |  |  |
|       |      | Shiraz-22T | 1522 | 0        | -0.322688 |  |  |
|       |      | Shiraz-25T | 1694 | 0.201602 | 0         |  |  |



|         |      |            |      |          |           |  |  |
|---------|------|------------|------|----------|-----------|--|--|
|         |      | Shiraz-25T | 1694 | 0.201602 | 0         |  |  |
|         |      | Shiraz-28T | 1731 | 0.295447 | 0         |  |  |
|         |      | Shiraz-28T | 1731 | 0.295447 | 0         |  |  |
|         |      | Shiraz-29T | 1773 | 0.090981 | 0         |  |  |
|         |      | Shiraz-29T | 1773 | 0.090981 | 0         |  |  |
|         |      | Shiraz-40T | 2016 | 0.376634 | 0         |  |  |
|         |      | Shiraz-40T | 2016 | 0.376634 | 0         |  |  |
|         |      | Shiraz-4T  | 250  | 0.262252 | 0         |  |  |
|         |      | Shiraz-4T  | 250  | 0.262252 | 0         |  |  |
|         |      | Shiraz-16T | 266  | 0.321724 | 0         |  |  |
|         |      | Shiraz-16T | 266  | 0.321724 | 0         |  |  |
|         |      | Shiraz-44T | 591  | 0        | -0.233934 |  |  |
|         |      | Shiraz-44T | 591  | 0        | -0.233934 |  |  |
|         |      | Shiraz-18T | 1429 | 0        | -0.314125 |  |  |
|         |      | Shiraz-18T | 1429 | 0        | -0.314125 |  |  |
|         |      | Shiraz-22T | 1522 | 0        | -0.322688 |  |  |
|         |      | Shiraz-22T | 1522 | 0        | -0.322688 |  |  |
|         |      | Shiraz-25T | 1694 | 0.201602 | 0         |  |  |
|         |      | Shiraz-25T | 1694 | 0.201602 | 0         |  |  |
|         |      | Shiraz-28T | 1731 | 0.295447 | 0         |  |  |
|         |      | Shiraz-28T | 1731 | 0.295447 | 0         |  |  |
|         |      | Shiraz-29T | 1773 | 0.090981 | 0         |  |  |
|         |      | Shiraz-29T | 1773 | 0.090981 | 0         |  |  |
|         |      | Shiraz-40T | 2016 | 0.376634 | 0         |  |  |
|         |      | Shiraz-40T | 2016 | 0.376634 | 0         |  |  |
| FDPSL2A | chr7 | Shiraz-3T  | 90   | 0.219276 | 0         |  |  |
|         |      | Shiraz-3T  | 92   | 0.817021 | 0         |  |  |
|         |      | Shiraz-4T  | 253  | 0.372918 | 0         |  |  |
|         |      | Shiraz-31T | 315  | 0.194054 | 0         |  |  |
|         |      | Shiraz-36T | 378  | 0.179558 | 0         |  |  |
|         |      | Shiraz-36T | 379  | 0.322028 | 0         |  |  |
|         |      | Shiraz-42T | 454  | 0.145717 | 0         |  |  |
|         |      | Shiraz-44T | 637  | 1.109789 | 0         |  |  |
|         |      | Shiraz-46T | 943  | 0.093799 | 0         |  |  |
|         |      | Shiraz-46T | 944  | 0.256008 | 0         |  |  |
|         |      | Shiraz-47T | 1028 | 0.17896  | 0         |  |  |
|         |      | Shiraz-49T | 1118 | 0.327789 | 0         |  |  |
|         |      | Shiraz-77T | 1224 | 0.220539 | 0         |  |  |
|         |      | Shiraz-9T  | 1323 | 0.655912 | 0         |  |  |
|         |      | Shiraz-18T | 1434 | 0.244465 | 0         |  |  |
|         |      | Shiraz-22T | 1548 | 0.237572 | 0         |  |  |
|         |      | Shiraz-25T | 1698 | 0.21835  | 0         |  |  |
|         |      | Shiraz-28T | 1735 | 0.350744 | 0         |  |  |
|         |      | Shiraz-29T | 1778 | 0.120767 | 0         |  |  |
|         |      | Shiraz-38T | 1951 | 0.250891 | 0         |  |  |
|         |      | Shiraz-53T | 2078 | 0.287202 | 0         |  |  |
|         |      | Shiraz-58T | 2158 | 0.33934  | 0         |  |  |

|  |            |      |          |   |  |
|--|------------|------|----------|---|--|
|  | Shiraz-71T | 2238 | 0.603631 | 0 |  |
|  | Shiraz-71T | 2239 | 0.310785 | 0 |  |
|  | Shiraz-3T  | 90   | 0.219276 | 0 |  |
|  | Shiraz-3T  | 92   | 0.817021 | 0 |  |
|  | Shiraz-4T  | 253  | 0.372918 | 0 |  |
|  | Shiraz-31T | 315  | 0.194054 | 0 |  |
|  | Shiraz-36T | 378  | 0.179558 | 0 |  |
|  | Shiraz-36T | 379  | 0.322028 | 0 |  |
|  | Shiraz-42T | 454  | 0.145717 | 0 |  |
|  | Shiraz-44T | 637  | 1.109789 | 0 |  |
|  | Shiraz-46T | 943  | 0.093799 | 0 |  |
|  | Shiraz-46T | 944  | 0.256008 | 0 |  |
|  | Shiraz-47T | 1028 | 0.17896  | 0 |  |
|  | Shiraz-49T | 1118 | 0.327789 | 0 |  |
|  | Shiraz-77T | 1224 | 0.220539 | 0 |  |
|  | Shiraz-9T  | 1323 | 0.655912 | 0 |  |
|  | Shiraz-18T | 1434 | 0.244465 | 0 |  |
|  | Shiraz-22T | 1548 | 0.237572 | 0 |  |
|  | Shiraz-25T | 1698 | 0.21835  | 0 |  |
|  | Shiraz-28T | 1735 | 0.350744 | 0 |  |
|  | Shiraz-29T | 1778 | 0.120767 | 0 |  |
|  | Shiraz-38T | 1951 | 0.250891 | 0 |  |
|  | Shiraz-53T | 2078 | 0.287202 | 0 |  |
|  | Shiraz-58T | 2158 | 0.33934  | 0 |  |
|  | Shiraz-71T | 2238 | 0.603631 | 0 |  |
|  | Shiraz-71T | 2239 | 0.310785 | 0 |  |
|  | Shiraz-3T  | 90   | 0.219276 | 0 |  |
|  | Shiraz-3T  | 92   | 0.817021 | 0 |  |
|  | Shiraz-4T  | 253  | 0.372918 | 0 |  |
|  | Shiraz-31T | 315  | 0.194054 | 0 |  |
|  | Shiraz-36T | 378  | 0.179558 | 0 |  |
|  | Shiraz-36T | 379  | 0.322028 | 0 |  |
|  | Shiraz-42T | 454  | 0.145717 | 0 |  |
|  | Shiraz-44T | 637  | 1.109789 | 0 |  |
|  | Shiraz-46T | 943  | 0.093799 | 0 |  |
|  | Shiraz-46T | 944  | 0.256008 | 0 |  |
|  | Shiraz-47T | 1028 | 0.17896  | 0 |  |
|  | Shiraz-49T | 1118 | 0.327789 | 0 |  |
|  | Shiraz-77T | 1224 | 0.220539 | 0 |  |
|  | Shiraz-9T  | 1323 | 0.655912 | 0 |  |
|  | Shiraz-18T | 1434 | 0.244465 | 0 |  |
|  | Shiraz-22T | 1548 | 0.237572 | 0 |  |
|  | Shiraz-25T | 1698 | 0.21835  | 0 |  |
|  | Shiraz-28T | 1735 | 0.350744 | 0 |  |
|  | Shiraz-29T | 1778 | 0.120767 | 0 |  |
|  | Shiraz-38T | 1951 | 0.250891 | 0 |  |
|  | Shiraz-53T | 2078 | 0.287202 | 0 |  |

|        |      |            |      |          |           |  |
|--------|------|------------|------|----------|-----------|--|
|        |      | Shiraz-58T | 2158 | 0.33934  | 0         |  |
|        |      | Shiraz-71T | 2238 | 0.603631 | 0         |  |
|        |      | Shiraz-71T | 2239 | 0.310785 | 0         |  |
| FERD3L | chr7 | Shiraz-4T  | 252  | 0.192083 | 0         |  |
|        |      | Shiraz-36T | 376  | 0.159952 | 0         |  |
|        |      | Shiraz-44T | 628  | 0        | -0.444379 |  |
|        |      | Shiraz-47T | 1027 | 0        | -0.117848 |  |
|        |      | Shiraz-49T | 1117 | 0        | -0.168296 |  |
|        |      | Shiraz-77T | 1222 | 0        | -0.113002 |  |
|        |      | Shiraz-18T | 1433 | 0.250973 | 0         |  |
|        |      | Shiraz-22T | 1543 | 0        | -0.513696 |  |
|        |      | Shiraz-25T | 1697 | 0.21945  | 0         |  |
|        |      | Shiraz-28T | 1734 | 0.362882 | 0         |  |
|        |      | Shiraz-29T | 1777 | 0.156747 | 0         |  |
|        |      | Shiraz-38T | 1950 | 0.265916 | 0         |  |
|        |      | Shiraz-58T | 2157 | 0        | -0.213872 |  |
|        |      | Shiraz-71T | 2236 | 0.320072 | 0         |  |
|        |      | Shiraz-4T  | 252  | 0.192083 | 0         |  |
|        |      | Shiraz-36T | 376  | 0.159952 | 0         |  |
|        |      | Shiraz-44T | 628  | 0        | -0.444379 |  |
|        |      | Shiraz-47T | 1027 | 0        | -0.117848 |  |
|        |      | Shiraz-49T | 1117 | 0        | -0.168296 |  |
|        |      | Shiraz-77T | 1222 | 0        | -0.113002 |  |
|        |      | Shiraz-18T | 1433 | 0.250973 | 0         |  |
|        |      | Shiraz-22T | 1543 | 0        | -0.513696 |  |
|        |      | Shiraz-25T | 1697 | 0.21945  | 0         |  |
|        |      | Shiraz-28T | 1734 | 0.362882 | 0         |  |
|        |      | Shiraz-29T | 1777 | 0.156747 | 0         |  |
|        |      | Shiraz-38T | 1950 | 0.265916 | 0         |  |
|        |      | Shiraz-58T | 2157 | 0        | -0.213872 |  |
|        |      | Shiraz-71T | 2236 | 0.320072 | 0         |  |
|        |      | Shiraz-4T  | 252  | 0.192083 | 0         |  |
|        |      | Shiraz-36T | 376  | 0.159952 | 0         |  |
|        |      | Shiraz-44T | 628  | 0        | -0.444379 |  |
|        |      | Shiraz-47T | 1027 | 0        | -0.117848 |  |
|        |      | Shiraz-49T | 1117 | 0        | -0.168296 |  |
|        |      | Shiraz-77T | 1222 | 0        | -0.113002 |  |
|        |      | Shiraz-18T | 1433 | 0.250973 | 0         |  |
|        |      | Shiraz-22T | 1543 | 0        | -0.513696 |  |
|        |      | Shiraz-25T | 1697 | 0.21945  | 0         |  |
|        |      | Shiraz-28T | 1734 | 0.362882 | 0         |  |
|        |      | Shiraz-29T | 1777 | 0.156747 | 0         |  |
|        |      | Shiraz-38T | 1950 | 0.265916 | 0         |  |
|        |      | Shiraz-58T | 2157 | 0        | -0.213872 |  |
|        |      | Shiraz-71T | 2236 | 0.320072 | 0         |  |
| FEZF1  | chr7 | Shiraz-3T  | 90   | 0.219276 | 0         |  |
|        |      | Shiraz-3T  | 95   | 0        | -0.077623 |  |

|  |            |      |          |           |  |
|--|------------|------|----------|-----------|--|
|  | Shiraz-4T  | 253  | 0.372918 | 0         |  |
|  | Shiraz-36T | 378  | 0.179558 | 0         |  |
|  | Shiraz-36T | 382  | 0.081739 | 0         |  |
|  | Shiraz-44T | 641  | 0        | -0.477846 |  |
|  | Shiraz-46T | 943  | 0.093799 | 0         |  |
|  | Shiraz-46T | 947  | 0        | -0.010843 |  |
|  | Shiraz-47T | 1031 | 0        | -0.117529 |  |
|  | Shiraz-49T | 1121 | 0        | -0.138569 |  |
|  | Shiraz-77T | 1225 | 0        | -0.117922 |  |
|  | Shiraz-77T | 1228 | 0        | -0.238084 |  |
|  | Shiraz-18T | 1434 | 0.244465 | 0         |  |
|  | Shiraz-22T | 1549 | 0        | -0.319623 |  |
|  | Shiraz-22T | 1552 | 0        | -0.50686  |  |
|  | Shiraz-25T | 1698 | 0.21835  | 0         |  |
|  | Shiraz-28T | 1735 | 0.350744 | 0         |  |
|  | Shiraz-29T | 1778 | 0.120767 | 0         |  |
|  | Shiraz-32T | 1833 | 0.551336 | 0         |  |
|  | Shiraz-32T | 1835 | 0.092727 | 0         |  |
|  | Shiraz-38T | 1951 | 0.250891 | 0         |  |
|  | Shiraz-53T | 2078 | 0.287202 | 0         |  |
|  | Shiraz-58T | 2161 | 0        | -0.187744 |  |
|  | Shiraz-71T | 2238 | 0.603631 | 0         |  |
|  | Shiraz-3T  | 90   | 0.219276 | 0         |  |
|  | Shiraz-3T  | 95   | 0        | -0.077623 |  |
|  | Shiraz-4T  | 253  | 0.372918 | 0         |  |
|  | Shiraz-36T | 378  | 0.179558 | 0         |  |
|  | Shiraz-36T | 382  | 0.081739 | 0         |  |
|  | Shiraz-44T | 641  | 0        | -0.477846 |  |
|  | Shiraz-46T | 943  | 0.093799 | 0         |  |
|  | Shiraz-46T | 947  | 0        | -0.010843 |  |
|  | Shiraz-47T | 1031 | 0        | -0.117529 |  |
|  | Shiraz-49T | 1121 | 0        | -0.138569 |  |
|  | Shiraz-77T | 1225 | 0        | -0.117922 |  |
|  | Shiraz-77T | 1228 | 0        | -0.238084 |  |
|  | Shiraz-18T | 1434 | 0.244465 | 0         |  |
|  | Shiraz-22T | 1549 | 0        | -0.319623 |  |
|  | Shiraz-22T | 1552 | 0        | -0.50686  |  |
|  | Shiraz-25T | 1698 | 0.21835  | 0         |  |
|  | Shiraz-28T | 1735 | 0.350744 | 0         |  |
|  | Shiraz-29T | 1778 | 0.120767 | 0         |  |
|  | Shiraz-32T | 1833 | 0.551336 | 0         |  |
|  | Shiraz-32T | 1835 | 0.092727 | 0         |  |
|  | Shiraz-38T | 1951 | 0.250891 | 0         |  |
|  | Shiraz-53T | 2078 | 0.287202 | 0         |  |
|  | Shiraz-58T | 2161 | 0        | -0.187744 |  |
|  | Shiraz-71T | 2238 | 0.603631 | 0         |  |
|  | Shiraz-3T  | 90   | 0.219276 | 0         |  |

|      |      |            |      |          |           |  |  |
|------|------|------------|------|----------|-----------|--|--|
|      |      | Shiraz-3T  | 95   | 0        | -0.077623 |  |  |
|      |      | Shiraz-4T  | 253  | 0.372918 | 0         |  |  |
|      |      | Shiraz-36T | 378  | 0.179558 | 0         |  |  |
|      |      | Shiraz-36T | 382  | 0.081739 | 0         |  |  |
|      |      | Shiraz-44T | 641  | 0        | -0.477846 |  |  |
|      |      | Shiraz-46T | 943  | 0.093799 | 0         |  |  |
|      |      | Shiraz-46T | 947  | 0        | -0.010843 |  |  |
|      |      | Shiraz-47T | 1031 | 0        | -0.117529 |  |  |
|      |      | Shiraz-49T | 1121 | 0        | -0.138569 |  |  |
|      |      | Shiraz-77T | 1225 | 0        | -0.117922 |  |  |
|      |      | Shiraz-77T | 1228 | 0        | -0.238084 |  |  |
|      |      | Shiraz-18T | 1434 | 0.244465 | 0         |  |  |
|      |      | Shiraz-22T | 1549 | 0        | -0.319623 |  |  |
|      |      | Shiraz-22T | 1552 | 0        | -0.50686  |  |  |
|      |      | Shiraz-25T | 1698 | 0.21835  | 0         |  |  |
|      |      | Shiraz-28T | 1735 | 0.350744 | 0         |  |  |
|      |      | Shiraz-29T | 1778 | 0.120767 | 0         |  |  |
|      |      | Shiraz-32T | 1833 | 0.551336 | 0         |  |  |
|      |      | Shiraz-32T | 1835 | 0.092727 | 0         |  |  |
|      |      | Shiraz-38T | 1951 | 0.250891 | 0         |  |  |
|      |      | Shiraz-53T | 2078 | 0.287202 | 0         |  |  |
|      |      | Shiraz-58T | 2161 | 0        | -0.187744 |  |  |
|      |      | Shiraz-71T | 2238 | 0.603631 | 0         |  |  |
| FGD1 | chrX | Shiraz-4T  | 260  | 0        | -0.324128 |  |  |
|      |      | Shiraz-16T | 294  | 0.655804 | 0         |  |  |
|      |      | Shiraz-31T | 345  | 0.103301 | 0         |  |  |
|      |      | Shiraz-36T | 431  | 0        | -0.78035  |  |  |
|      |      | Shiraz-36T | 432  | 0        | -0.6692   |  |  |
|      |      | Shiraz-44T | 891  | 0        | -0.954044 |  |  |
|      |      | Shiraz-44T | 898  | 0        | -0.515218 |  |  |
|      |      | Shiraz-49T | 1166 | 0        | -0.917235 |  |  |
|      |      | Shiraz-77T | 1282 | 0.213849 | 0         |  |  |
|      |      | Shiraz-9T  | 1368 | 0.199713 | 0         |  |  |
|      |      | Shiraz-18T | 1456 | 0.608534 | 0         |  |  |
|      |      | Shiraz-22T | 1669 | 0.695915 | 0         |  |  |
|      |      | Shiraz-25T | 1717 | 0.420447 | 0         |  |  |
|      |      | Shiraz-28T | 1760 | 0.538181 | 0         |  |  |
|      |      | Shiraz-29T | 1800 | 0.672527 | 0         |  |  |
|      |      | Shiraz-32T | 1869 | 0.776805 | 0         |  |  |
|      |      | Shiraz-35T | 1932 | 0.507141 | 0         |  |  |
|      |      | Shiraz-58T | 2221 | 0.871948 | 0         |  |  |
|      |      | Shiraz-71T | 2260 | 0.68394  | 0         |  |  |
|      |      | Shiraz-71T | 2262 | 0.986748 | 0         |  |  |
|      |      | Shiraz-4T  | 260  | 0        | -0.324128 |  |  |
|      |      | Shiraz-16T | 294  | 0.655804 | 0         |  |  |
|      |      | Shiraz-31T | 345  | 0.103301 | 0         |  |  |
|      |      | Shiraz-36T | 431  | 0        | -0.78035  |  |  |

|       |      |            |      |          |           |  |  |
|-------|------|------------|------|----------|-----------|--|--|
|       |      | Shiraz-36T | 432  | 0        | -0.6692   |  |  |
|       |      | Shiraz-44T | 891  | 0        | -0.954044 |  |  |
|       |      | Shiraz-44T | 898  | 0        | -0.515218 |  |  |
|       |      | Shiraz-49T | 1166 | 0        | -0.917235 |  |  |
|       |      | Shiraz-77T | 1282 | 0.213849 | 0         |  |  |
|       |      | Shiraz-9T  | 1368 | 0.199713 | 0         |  |  |
|       |      | Shiraz-18T | 1456 | 0.608534 | 0         |  |  |
|       |      | Shiraz-22T | 1669 | 0.695915 | 0         |  |  |
|       |      | Shiraz-25T | 1717 | 0.420447 | 0         |  |  |
|       |      | Shiraz-28T | 1760 | 0.538181 | 0         |  |  |
|       |      | Shiraz-29T | 1800 | 0.672527 | 0         |  |  |
|       |      | Shiraz-32T | 1869 | 0.776805 | 0         |  |  |
|       |      | Shiraz-35T | 1932 | 0.507141 | 0         |  |  |
|       |      | Shiraz-58T | 2221 | 0.871948 | 0         |  |  |
|       |      | Shiraz-71T | 2260 | 0.68394  | 0         |  |  |
|       |      | Shiraz-71T | 2262 | 0.986748 | 0         |  |  |
|       |      | Shiraz-4T  | 260  | 0        | -0.324128 |  |  |
|       |      | Shiraz-16T | 294  | 0.655804 | 0         |  |  |
|       |      | Shiraz-31T | 345  | 0.103301 | 0         |  |  |
|       |      | Shiraz-36T | 431  | 0        | -0.78035  |  |  |
|       |      | Shiraz-36T | 432  | 0        | -0.6692   |  |  |
|       |      | Shiraz-44T | 891  | 0        | -0.954044 |  |  |
|       |      | Shiraz-44T | 898  | 0        | -0.515218 |  |  |
|       |      | Shiraz-49T | 1166 | 0        | -0.917235 |  |  |
|       |      | Shiraz-77T | 1282 | 0.213849 | 0         |  |  |
|       |      | Shiraz-9T  | 1368 | 0.199713 | 0         |  |  |
|       |      | Shiraz-18T | 1456 | 0.608534 | 0         |  |  |
|       |      | Shiraz-22T | 1669 | 0.695915 | 0         |  |  |
|       |      | Shiraz-25T | 1717 | 0.420447 | 0         |  |  |
|       |      | Shiraz-28T | 1760 | 0.538181 | 0         |  |  |
|       |      | Shiraz-29T | 1800 | 0.672527 | 0         |  |  |
|       |      | Shiraz-32T | 1869 | 0.776805 | 0         |  |  |
|       |      | Shiraz-35T | 1932 | 0.507141 | 0         |  |  |
|       |      | Shiraz-58T | 2221 | 0.871948 | 0         |  |  |
|       |      | Shiraz-71T | 2260 | 0.68394  | 0         |  |  |
|       |      | Shiraz-71T | 2262 | 0.986748 | 0         |  |  |
| FGF13 | chrX | Shiraz-3T  | 242  | 0        | -0.336434 |  |  |
|       |      | Shiraz-3T  | 242  | 0        | -0.336434 |  |  |
|       |      | Shiraz-3T  | 242  | 0        | -0.336434 |  |  |
|       |      | Shiraz-3T  | 242  | 0        | -0.336434 |  |  |
|       |      | Shiraz-4T  | 261  | 0        | -0.336249 |  |  |
|       |      | Shiraz-4T  | 261  | 0        | -0.336249 |  |  |
|       |      | Shiraz-4T  | 261  | 0        | -0.336249 |  |  |
|       |      | Shiraz-4T  | 261  | 0        | -0.336249 |  |  |
|       |      | Shiraz-16T | 295  | 0.591657 | 0         |  |  |
|       |      | Shiraz-16T | 295  | 0.591657 | 0         |  |  |
|       |      | Shiraz-16T | 295  | 0.591657 | 0         |  |  |

|  |  |            |      |          |           |  |  |
|--|--|------------|------|----------|-----------|--|--|
|  |  | Shiraz-16T | 295  | 0.591657 | 0         |  |  |
|  |  | Shiraz-36T | 433  | 0        | -0.803961 |  |  |
|  |  | Shiraz-36T | 433  | 0        | -0.803961 |  |  |
|  |  | Shiraz-36T | 433  | 0        | -0.803961 |  |  |
|  |  | Shiraz-36T | 433  | 0        | -0.803961 |  |  |
|  |  | Shiraz-44T | 899  | 0        | -1.09697  |  |  |
|  |  | Shiraz-44T | 899  | 0        | -1.09697  |  |  |
|  |  | Shiraz-44T | 899  | 0        | -1.09697  |  |  |
|  |  | Shiraz-44T | 899  | 0        | -1.09697  |  |  |
|  |  | Shiraz-49T | 1170 | 0        | -0.967436 |  |  |
|  |  | Shiraz-49T | 1170 | 0        | -0.967436 |  |  |
|  |  | Shiraz-49T | 1170 | 0        | -0.967436 |  |  |
|  |  | Shiraz-49T | 1170 | 0        | -0.967436 |  |  |
|  |  | Shiraz-9T  | 1370 | 0.690073 | 0         |  |  |
|  |  | Shiraz-9T  | 1370 | 0.690073 | 0         |  |  |
|  |  | Shiraz-9T  | 1370 | 0.690073 | 0         |  |  |
|  |  | Shiraz-9T  | 1370 | 0.690073 | 0         |  |  |
|  |  | Shiraz-18T | 1457 | 0.643204 | 0         |  |  |
|  |  | Shiraz-18T | 1457 | 0.643204 | 0         |  |  |
|  |  | Shiraz-18T | 1457 | 0.643204 | 0         |  |  |
|  |  | Shiraz-18T | 1457 | 0.643204 | 0         |  |  |
|  |  | Shiraz-22T | 1673 | 0.611783 | 0         |  |  |
|  |  | Shiraz-22T | 1673 | 0.611783 | 0         |  |  |
|  |  | Shiraz-22T | 1673 | 0.611783 | 0         |  |  |
|  |  | Shiraz-22T | 1673 | 0.611783 | 0         |  |  |
|  |  | Shiraz-25T | 1719 | 0.472955 | 0         |  |  |
|  |  | Shiraz-25T | 1719 | 0.472955 | 0         |  |  |
|  |  | Shiraz-25T | 1719 | 0.472955 | 0         |  |  |
|  |  | Shiraz-25T | 1719 | 0.472955 | 0         |  |  |
|  |  | Shiraz-28T | 1762 | 0.562311 | 0         |  |  |
|  |  | Shiraz-28T | 1762 | 0.562311 | 0         |  |  |
|  |  | Shiraz-28T | 1762 | 0.562311 | 0         |  |  |
|  |  | Shiraz-28T | 1762 | 0.562311 | 0         |  |  |
|  |  | Shiraz-29T | 1801 | 0.815343 | 0         |  |  |
|  |  | Shiraz-29T | 1801 | 0.815343 | 0         |  |  |
|  |  | Shiraz-29T | 1801 | 0.815343 | 0         |  |  |
|  |  | Shiraz-29T | 1801 | 0.815343 | 0         |  |  |
|  |  | Shiraz-32T | 1870 | 0.729766 | 0         |  |  |
|  |  | Shiraz-32T | 1870 | 0.729766 | 0         |  |  |
|  |  | Shiraz-32T | 1870 | 0.729766 | 0         |  |  |
|  |  | Shiraz-32T | 1870 | 0.729766 | 0         |  |  |
|  |  | Shiraz-35T | 1933 | 0.488535 | 0         |  |  |
|  |  | Shiraz-35T | 1933 | 0.488535 | 0         |  |  |
|  |  | Shiraz-35T | 1933 | 0.488535 | 0         |  |  |
|  |  | Shiraz-35T | 1933 | 0.488535 | 0         |  |  |
|  |  | Shiraz-58T | 2223 | 0.833364 | 0         |  |  |
|  |  | Shiraz-58T | 2223 | 0.833364 | 0         |  |  |

|  |            |      |          |           |  |
|--|------------|------|----------|-----------|--|
|  | Shiraz-58T | 2223 | 0.833364 | 0         |  |
|  | Shiraz-58T | 2223 | 0.833364 | 0         |  |
|  | Shiraz-71T | 2263 | 0.975531 | 0         |  |
|  | Shiraz-71T | 2263 | 0.975531 | 0         |  |
|  | Shiraz-71T | 2263 | 0.975531 | 0         |  |
|  | Shiraz-71T | 2263 | 0.975531 | 0         |  |
|  | Shiraz-3T  | 242  | 0        | -0.336434 |  |
|  | Shiraz-3T  | 242  | 0        | -0.336434 |  |
|  | Shiraz-3T  | 242  | 0        | -0.336434 |  |
|  | Shiraz-3T  | 242  | 0        | -0.336434 |  |
|  | Shiraz-4T  | 261  | 0        | -0.336249 |  |
|  | Shiraz-4T  | 261  | 0        | -0.336249 |  |
|  | Shiraz-4T  | 261  | 0        | -0.336249 |  |
|  | Shiraz-4T  | 261  | 0        | -0.336249 |  |
|  | Shiraz-16T | 295  | 0.591657 | 0         |  |
|  | Shiraz-16T | 295  | 0.591657 | 0         |  |
|  | Shiraz-16T | 295  | 0.591657 | 0         |  |
|  | Shiraz-16T | 295  | 0.591657 | 0         |  |
|  | Shiraz-36T | 433  | 0        | -0.803961 |  |
|  | Shiraz-36T | 433  | 0        | -0.803961 |  |
|  | Shiraz-36T | 433  | 0        | -0.803961 |  |
|  | Shiraz-36T | 433  | 0        | -0.803961 |  |
|  | Shiraz-44T | 899  | 0        | -1.09697  |  |
|  | Shiraz-44T | 899  | 0        | -1.09697  |  |
|  | Shiraz-44T | 899  | 0        | -1.09697  |  |
|  | Shiraz-44T | 899  | 0        | -1.09697  |  |
|  | Shiraz-49T | 1170 | 0        | -0.967436 |  |
|  | Shiraz-49T | 1170 | 0        | -0.967436 |  |
|  | Shiraz-49T | 1170 | 0        | -0.967436 |  |
|  | Shiraz-49T | 1170 | 0        | -0.967436 |  |
|  | Shiraz-9T  | 1370 | 0.690073 | 0         |  |
|  | Shiraz-9T  | 1370 | 0.690073 | 0         |  |
|  | Shiraz-9T  | 1370 | 0.690073 | 0         |  |
|  | Shiraz-9T  | 1370 | 0.690073 | 0         |  |
|  | Shiraz-18T | 1457 | 0.643204 | 0         |  |
|  | Shiraz-18T | 1457 | 0.643204 | 0         |  |
|  | Shiraz-18T | 1457 | 0.643204 | 0         |  |
|  | Shiraz-18T | 1457 | 0.643204 | 0         |  |
|  | Shiraz-22T | 1673 | 0.611783 | 0         |  |
|  | Shiraz-22T | 1673 | 0.611783 | 0         |  |
|  | Shiraz-22T | 1673 | 0.611783 | 0         |  |
|  | Shiraz-22T | 1673 | 0.611783 | 0         |  |
|  | Shiraz-25T | 1719 | 0.472955 | 0         |  |
|  | Shiraz-25T | 1719 | 0.472955 | 0         |  |
|  | Shiraz-25T | 1719 | 0.472955 | 0         |  |
|  | Shiraz-25T | 1719 | 0.472955 | 0         |  |
|  | Shiraz-28T | 1762 | 0.562311 | 0         |  |



|  |  |            |      |          |           |  |  |
|--|--|------------|------|----------|-----------|--|--|
|  |  | Shiraz-28T | 1762 | 0.562311 | 0         |  |  |
|  |  | Shiraz-28T | 1762 | 0.562311 | 0         |  |  |
|  |  | Shiraz-28T | 1762 | 0.562311 | 0         |  |  |
|  |  | Shiraz-29T | 1801 | 0.815343 | 0         |  |  |
|  |  | Shiraz-29T | 1801 | 0.815343 | 0         |  |  |
|  |  | Shiraz-29T | 1801 | 0.815343 | 0         |  |  |
|  |  | Shiraz-29T | 1801 | 0.815343 | 0         |  |  |
|  |  | Shiraz-32T | 1870 | 0.729766 | 0         |  |  |
|  |  | Shiraz-32T | 1870 | 0.729766 | 0         |  |  |
|  |  | Shiraz-32T | 1870 | 0.729766 | 0         |  |  |
|  |  | Shiraz-32T | 1870 | 0.729766 | 0         |  |  |
|  |  | Shiraz-35T | 1933 | 0.488535 | 0         |  |  |
|  |  | Shiraz-35T | 1933 | 0.488535 | 0         |  |  |
|  |  | Shiraz-35T | 1933 | 0.488535 | 0         |  |  |
|  |  | Shiraz-35T | 1933 | 0.488535 | 0         |  |  |
|  |  | Shiraz-58T | 2223 | 0.833364 | 0         |  |  |
|  |  | Shiraz-58T | 2223 | 0.833364 | 0         |  |  |
|  |  | Shiraz-58T | 2223 | 0.833364 | 0         |  |  |
|  |  | Shiraz-58T | 2223 | 0.833364 | 0         |  |  |
|  |  | Shiraz-71T | 2263 | 0.975531 | 0         |  |  |
|  |  | Shiraz-71T | 2263 | 0.975531 | 0         |  |  |
|  |  | Shiraz-71T | 2263 | 0.975531 | 0         |  |  |
|  |  | Shiraz-71T | 2263 | 0.975531 | 0         |  |  |
|  |  | Shiraz-3T  | 242  | 0        | -0.336434 |  |  |
|  |  | Shiraz-3T  | 242  | 0        | -0.336434 |  |  |
|  |  | Shiraz-3T  | 242  | 0        | -0.336434 |  |  |
|  |  | Shiraz-3T  | 242  | 0        | -0.336434 |  |  |
|  |  | Shiraz-4T  | 261  | 0        | -0.336249 |  |  |
|  |  | Shiraz-4T  | 261  | 0        | -0.336249 |  |  |
|  |  | Shiraz-4T  | 261  | 0        | -0.336249 |  |  |
|  |  | Shiraz-4T  | 261  | 0        | -0.336249 |  |  |
|  |  | Shiraz-16T | 295  | 0.591657 | 0         |  |  |
|  |  | Shiraz-16T | 295  | 0.591657 | 0         |  |  |
|  |  | Shiraz-16T | 295  | 0.591657 | 0         |  |  |
|  |  | Shiraz-16T | 295  | 0.591657 | 0         |  |  |
|  |  | Shiraz-36T | 433  | 0        | -0.803961 |  |  |
|  |  | Shiraz-36T | 433  | 0        | -0.803961 |  |  |
|  |  | Shiraz-36T | 433  | 0        | -0.803961 |  |  |
|  |  | Shiraz-36T | 433  | 0        | -0.803961 |  |  |
|  |  | Shiraz-44T | 899  | 0        | -1.09697  |  |  |
|  |  | Shiraz-44T | 899  | 0        | -1.09697  |  |  |
|  |  | Shiraz-44T | 899  | 0        | -1.09697  |  |  |
|  |  | Shiraz-44T | 899  | 0        | -1.09697  |  |  |
|  |  | Shiraz-49T | 1170 | 0        | -0.967436 |  |  |
|  |  | Shiraz-49T | 1170 | 0        | -0.967436 |  |  |
|  |  | Shiraz-49T | 1170 | 0        | -0.967436 |  |  |
|  |  | Shiraz-49T | 1170 | 0        | -0.967436 |  |  |

|       |      |            |      |          |           |  |  |
|-------|------|------------|------|----------|-----------|--|--|
|       |      | Shiraz-9T  | 1370 | 0.690073 | 0         |  |  |
|       |      | Shiraz-9T  | 1370 | 0.690073 | 0         |  |  |
|       |      | Shiraz-9T  | 1370 | 0.690073 | 0         |  |  |
|       |      | Shiraz-9T  | 1370 | 0.690073 | 0         |  |  |
|       |      | Shiraz-18T | 1457 | 0.643204 | 0         |  |  |
|       |      | Shiraz-18T | 1457 | 0.643204 | 0         |  |  |
|       |      | Shiraz-18T | 1457 | 0.643204 | 0         |  |  |
|       |      | Shiraz-18T | 1457 | 0.643204 | 0         |  |  |
|       |      | Shiraz-22T | 1673 | 0.611783 | 0         |  |  |
|       |      | Shiraz-22T | 1673 | 0.611783 | 0         |  |  |
|       |      | Shiraz-22T | 1673 | 0.611783 | 0         |  |  |
|       |      | Shiraz-22T | 1673 | 0.611783 | 0         |  |  |
|       |      | Shiraz-25T | 1719 | 0.472955 | 0         |  |  |
|       |      | Shiraz-25T | 1719 | 0.472955 | 0         |  |  |
|       |      | Shiraz-25T | 1719 | 0.472955 | 0         |  |  |
|       |      | Shiraz-25T | 1719 | 0.472955 | 0         |  |  |
|       |      | Shiraz-28T | 1762 | 0.562311 | 0         |  |  |
|       |      | Shiraz-28T | 1762 | 0.562311 | 0         |  |  |
|       |      | Shiraz-28T | 1762 | 0.562311 | 0         |  |  |
|       |      | Shiraz-28T | 1762 | 0.562311 | 0         |  |  |
|       |      | Shiraz-29T | 1801 | 0.815343 | 0         |  |  |
|       |      | Shiraz-29T | 1801 | 0.815343 | 0         |  |  |
|       |      | Shiraz-29T | 1801 | 0.815343 | 0         |  |  |
|       |      | Shiraz-29T | 1801 | 0.815343 | 0         |  |  |
|       |      | Shiraz-32T | 1870 | 0.729766 | 0         |  |  |
|       |      | Shiraz-32T | 1870 | 0.729766 | 0         |  |  |
|       |      | Shiraz-32T | 1870 | 0.729766 | 0         |  |  |
|       |      | Shiraz-32T | 1870 | 0.729766 | 0         |  |  |
|       |      | Shiraz-35T | 1933 | 0.488535 | 0         |  |  |
|       |      | Shiraz-35T | 1933 | 0.488535 | 0         |  |  |
|       |      | Shiraz-35T | 1933 | 0.488535 | 0         |  |  |
|       |      | Shiraz-35T | 1933 | 0.488535 | 0         |  |  |
|       |      | Shiraz-58T | 2223 | 0.833364 | 0         |  |  |
|       |      | Shiraz-58T | 2223 | 0.833364 | 0         |  |  |
|       |      | Shiraz-58T | 2223 | 0.833364 | 0         |  |  |
|       |      | Shiraz-58T | 2223 | 0.833364 | 0         |  |  |
|       |      | Shiraz-71T | 2263 | 0.975531 | 0         |  |  |
|       |      | Shiraz-71T | 2263 | 0.975531 | 0         |  |  |
|       |      | Shiraz-71T | 2263 | 0.975531 | 0         |  |  |
|       |      | Shiraz-71T | 2263 | 0.975531 | 0         |  |  |
| FGF16 | chrX | Shiraz-3T  | 242  | 0        | -0.336434 |  |  |
|       |      | Shiraz-4T  | 261  | 0        | -0.336249 |  |  |
|       |      | Shiraz-16T | 295  | 0.591657 | 0         |  |  |
|       |      | Shiraz-36T | 433  | 0        | -0.803961 |  |  |
|       |      | Shiraz-44T | 899  | 0        | -1.09697  |  |  |
|       |      | Shiraz-49T | 1170 | 0        | -0.967436 |  |  |
|       |      | Shiraz-18T | 1457 | 0.643204 | 0         |  |  |

|      |      |            |      |          |           |  |  |
|------|------|------------|------|----------|-----------|--|--|
|      |      | Shiraz-22T | 1673 | 0.611783 | 0         |  |  |
|      |      | Shiraz-25T | 1719 | 0.472955 | 0         |  |  |
|      |      | Shiraz-28T | 1762 | 0.562311 | 0         |  |  |
|      |      | Shiraz-29T | 1801 | 0.815343 | 0         |  |  |
|      |      | Shiraz-32T | 1870 | 0.729766 | 0         |  |  |
|      |      | Shiraz-35T | 1933 | 0.488535 | 0         |  |  |
|      |      | Shiraz-58T | 2223 | 0.833364 | 0         |  |  |
|      |      | Shiraz-71T | 2263 | 0.975531 | 0         |  |  |
|      |      | Shiraz-3T  | 242  | 0        | -0.336434 |  |  |
|      |      | Shiraz-4T  | 261  | 0        | -0.336249 |  |  |
|      |      | Shiraz-16T | 295  | 0.591657 | 0         |  |  |
|      |      | Shiraz-36T | 433  | 0        | -0.803961 |  |  |
|      |      | Shiraz-44T | 899  | 0        | -1.09697  |  |  |
|      |      | Shiraz-49T | 1170 | 0        | -0.967436 |  |  |
|      |      | Shiraz-18T | 1457 | 0.643204 | 0         |  |  |
|      |      | Shiraz-22T | 1673 | 0.611783 | 0         |  |  |
|      |      | Shiraz-25T | 1719 | 0.472955 | 0         |  |  |
|      |      | Shiraz-28T | 1762 | 0.562311 | 0         |  |  |
|      |      | Shiraz-29T | 1801 | 0.815343 | 0         |  |  |
|      |      | Shiraz-32T | 1870 | 0.729766 | 0         |  |  |
|      |      | Shiraz-35T | 1933 | 0.488535 | 0         |  |  |
|      |      | Shiraz-58T | 2223 | 0.833364 | 0         |  |  |
|      |      | Shiraz-71T | 2263 | 0.975531 | 0         |  |  |
|      |      | Shiraz-3T  | 242  | 0        | -0.336434 |  |  |
|      |      | Shiraz-4T  | 261  | 0        | -0.336249 |  |  |
|      |      | Shiraz-16T | 295  | 0.591657 | 0         |  |  |
|      |      | Shiraz-36T | 433  | 0        | -0.803961 |  |  |
|      |      | Shiraz-44T | 899  | 0        | -1.09697  |  |  |
|      |      | Shiraz-49T | 1170 | 0        | -0.967436 |  |  |
|      |      | Shiraz-18T | 1457 | 0.643204 | 0         |  |  |
|      |      | Shiraz-22T | 1673 | 0.611783 | 0         |  |  |
|      |      | Shiraz-25T | 1719 | 0.472955 | 0         |  |  |
|      |      | Shiraz-28T | 1762 | 0.562311 | 0         |  |  |
|      |      | Shiraz-29T | 1801 | 0.815343 | 0         |  |  |
|      |      | Shiraz-32T | 1870 | 0.729766 | 0         |  |  |
|      |      | Shiraz-35T | 1933 | 0.488535 | 0         |  |  |
|      |      | Shiraz-58T | 2223 | 0.833364 | 0         |  |  |
|      |      | Shiraz-71T | 2263 | 0.975531 | 0         |  |  |
| FGL2 | chr7 | Shiraz-3T  | 90   | 0.219276 | 0         |  |  |
|      |      | Shiraz-4T  | 253  | 0.372918 | 0         |  |  |
|      |      | Shiraz-31T | 315  | 0.194054 | 0         |  |  |
|      |      | Shiraz-36T | 378  | 0.179558 | 0         |  |  |
|      |      | Shiraz-36T | 379  | 0.322028 | 0         |  |  |
|      |      | Shiraz-42T | 454  | 0.145717 | 0         |  |  |
|      |      | Shiraz-46T | 943  | 0.093799 | 0         |  |  |
|      |      | Shiraz-46T | 944  | 0.256008 | 0         |  |  |
|      |      | Shiraz-18T | 1434 | 0.244465 | 0         |  |  |

|      |      |            |      |          |           |  |  |
|------|------|------------|------|----------|-----------|--|--|
|      |      | Shiraz-22T | 1549 | 0        | -0.319623 |  |  |
|      |      | Shiraz-25T | 1698 | 0.21835  | 0         |  |  |
|      |      | Shiraz-28T | 1735 | 0.350744 | 0         |  |  |
|      |      | Shiraz-29T | 1778 | 0.120767 | 0         |  |  |
|      |      | Shiraz-38T | 1951 | 0.250891 | 0         |  |  |
|      |      | Shiraz-53T | 2078 | 0.287202 | 0         |  |  |
|      |      | Shiraz-71T | 2238 | 0.603631 | 0         |  |  |
|      |      | Shiraz-71T | 2239 | 0.310785 | 0         |  |  |
|      |      | Shiraz-3T  | 90   | 0.219276 | 0         |  |  |
|      |      | Shiraz-4T  | 253  | 0.372918 | 0         |  |  |
|      |      | Shiraz-31T | 315  | 0.194054 | 0         |  |  |
|      |      | Shiraz-36T | 378  | 0.179558 | 0         |  |  |
|      |      | Shiraz-36T | 379  | 0.322028 | 0         |  |  |
|      |      | Shiraz-42T | 454  | 0.145717 | 0         |  |  |
|      |      | Shiraz-46T | 943  | 0.093799 | 0         |  |  |
|      |      | Shiraz-46T | 944  | 0.256008 | 0         |  |  |
|      |      | Shiraz-18T | 1434 | 0.244465 | 0         |  |  |
|      |      | Shiraz-22T | 1549 | 0        | -0.319623 |  |  |
|      |      | Shiraz-25T | 1698 | 0.21835  | 0         |  |  |
|      |      | Shiraz-28T | 1735 | 0.350744 | 0         |  |  |
|      |      | Shiraz-29T | 1778 | 0.120767 | 0         |  |  |
|      |      | Shiraz-38T | 1951 | 0.250891 | 0         |  |  |
|      |      | Shiraz-53T | 2078 | 0.287202 | 0         |  |  |
|      |      | Shiraz-71T | 2238 | 0.603631 | 0         |  |  |
|      |      | Shiraz-71T | 2239 | 0.310785 | 0         |  |  |
|      |      | Shiraz-3T  | 90   | 0.219276 | 0         |  |  |
|      |      | Shiraz-4T  | 253  | 0.372918 | 0         |  |  |
|      |      | Shiraz-31T | 315  | 0.194054 | 0         |  |  |
|      |      | Shiraz-36T | 378  | 0.179558 | 0         |  |  |
|      |      | Shiraz-36T | 379  | 0.322028 | 0         |  |  |
|      |      | Shiraz-42T | 454  | 0.145717 | 0         |  |  |
|      |      | Shiraz-46T | 943  | 0.093799 | 0         |  |  |
|      |      | Shiraz-46T | 944  | 0.256008 | 0         |  |  |
|      |      | Shiraz-18T | 1434 | 0.244465 | 0         |  |  |
|      |      | Shiraz-22T | 1549 | 0        | -0.319623 |  |  |
|      |      | Shiraz-25T | 1698 | 0.21835  | 0         |  |  |
|      |      | Shiraz-28T | 1735 | 0.350744 | 0         |  |  |
|      |      | Shiraz-29T | 1778 | 0.120767 | 0         |  |  |
|      |      | Shiraz-38T | 1951 | 0.250891 | 0         |  |  |
|      |      | Shiraz-53T | 2078 | 0.287202 | 0         |  |  |
|      |      | Shiraz-71T | 2238 | 0.603631 | 0         |  |  |
|      |      | Shiraz-71T | 2239 | 0.310785 | 0         |  |  |
| FHL1 | chrX | Shiraz-3T  | 242  | 0        | -0.336434 |  |  |
|      |      | Shiraz-4T  | 261  | 0        | -0.336249 |  |  |
|      |      | Shiraz-16T | 295  | 0.591657 | 0         |  |  |
|      |      | Shiraz-36T | 433  | 0        | -0.803961 |  |  |
|      |      | Shiraz-44T | 899  | 0        | -1.09697  |  |  |

|      |      |            |      |          |           |  |  |
|------|------|------------|------|----------|-----------|--|--|
|      |      | Shiraz-49T | 1170 | 0        | -0.967436 |  |  |
|      |      | Shiraz-9T  | 1370 | 0.690073 | 0         |  |  |
|      |      | Shiraz-18T | 1457 | 0.643204 | 0         |  |  |
|      |      | Shiraz-22T | 1673 | 0.611783 | 0         |  |  |
|      |      | Shiraz-22T | 1677 | 0.789711 | 0         |  |  |
|      |      | Shiraz-25T | 1719 | 0.472955 | 0         |  |  |
|      |      | Shiraz-28T | 1762 | 0.562311 | 0         |  |  |
|      |      | Shiraz-29T | 1801 | 0.815343 | 0         |  |  |
|      |      | Shiraz-32T | 1870 | 0.729766 | 0         |  |  |
|      |      | Shiraz-35T | 1933 | 0.488535 | 0         |  |  |
|      |      | Shiraz-58T | 2223 | 0.833364 | 0         |  |  |
|      |      | Shiraz-71T | 2263 | 0.975531 | 0         |  |  |
|      |      | Shiraz-3T  | 242  | 0        | -0.336434 |  |  |
|      |      | Shiraz-4T  | 261  | 0        | -0.336249 |  |  |
|      |      | Shiraz-16T | 295  | 0.591657 | 0         |  |  |
|      |      | Shiraz-36T | 433  | 0        | -0.803961 |  |  |
|      |      | Shiraz-44T | 899  | 0        | -1.09697  |  |  |
|      |      | Shiraz-49T | 1170 | 0        | -0.967436 |  |  |
|      |      | Shiraz-9T  | 1370 | 0.690073 | 0         |  |  |
|      |      | Shiraz-18T | 1457 | 0.643204 | 0         |  |  |
|      |      | Shiraz-22T | 1673 | 0.611783 | 0         |  |  |
|      |      | Shiraz-22T | 1677 | 0.789711 | 0         |  |  |
|      |      | Shiraz-25T | 1719 | 0.472955 | 0         |  |  |
|      |      | Shiraz-28T | 1762 | 0.562311 | 0         |  |  |
|      |      | Shiraz-29T | 1801 | 0.815343 | 0         |  |  |
|      |      | Shiraz-32T | 1870 | 0.729766 | 0         |  |  |
|      |      | Shiraz-35T | 1933 | 0.488535 | 0         |  |  |
|      |      | Shiraz-58T | 2223 | 0.833364 | 0         |  |  |
|      |      | Shiraz-71T | 2263 | 0.975531 | 0         |  |  |
|      |      | Shiraz-3T  | 242  | 0        | -0.336434 |  |  |
|      |      | Shiraz-4T  | 261  | 0        | -0.336249 |  |  |
|      |      | Shiraz-16T | 295  | 0.591657 | 0         |  |  |
|      |      | Shiraz-36T | 433  | 0        | -0.803961 |  |  |
|      |      | Shiraz-44T | 899  | 0        | -1.09697  |  |  |
|      |      | Shiraz-49T | 1170 | 0        | -0.967436 |  |  |
|      |      | Shiraz-9T  | 1370 | 0.690073 | 0         |  |  |
|      |      | Shiraz-18T | 1457 | 0.643204 | 0         |  |  |
|      |      | Shiraz-22T | 1673 | 0.611783 | 0         |  |  |
|      |      | Shiraz-22T | 1677 | 0.789711 | 0         |  |  |
|      |      | Shiraz-25T | 1719 | 0.472955 | 0         |  |  |
|      |      | Shiraz-28T | 1762 | 0.562311 | 0         |  |  |
|      |      | Shiraz-29T | 1801 | 0.815343 | 0         |  |  |
|      |      | Shiraz-32T | 1870 | 0.729766 | 0         |  |  |
|      |      | Shiraz-35T | 1933 | 0.488535 | 0         |  |  |
|      |      | Shiraz-58T | 2223 | 0.833364 | 0         |  |  |
|      |      | Shiraz-71T | 2263 | 0.975531 | 0         |  |  |
| FIGF | chrX | Shiraz-3T  | 235  | 0        | -0.28401  |  |  |

|  |            |      |          |           |  |
|--|------------|------|----------|-----------|--|
|  | Shiraz-4T  | 260  | 0        | -0.324128 |  |
|  | Shiraz-16T | 294  | 0.655804 | 0         |  |
|  | Shiraz-36T | 431  | 0        | -0.78035  |  |
|  | Shiraz-44T | 891  | 0        | -0.954044 |  |
|  | Shiraz-49T | 1166 | 0        | -0.917235 |  |
|  | Shiraz-9T  | 1368 | 0.199713 | 0         |  |
|  | Shiraz-18T | 1455 | 0        | -0.186773 |  |
|  | Shiraz-22T | 1669 | 0.695915 | 0         |  |
|  | Shiraz-25T | 1717 | 0.420447 | 0         |  |
|  | Shiraz-28T | 1760 | 0.538181 | 0         |  |
|  | Shiraz-29T | 1800 | 0.672527 | 0         |  |
|  | Shiraz-32T | 1869 | 0.776805 | 0         |  |
|  | Shiraz-35T | 1932 | 0.507141 | 0         |  |
|  | Shiraz-40T | 2051 | 0.098506 | 0         |  |
|  | Shiraz-58T | 2221 | 0.871948 | 0         |  |
|  | Shiraz-71T | 2260 | 0.68394  | 0         |  |
|  | Shiraz-71T | 2261 | 0.508399 | 0         |  |
|  | Shiraz-3T  | 235  | 0        | -0.28401  |  |
|  | Shiraz-4T  | 260  | 0        | -0.324128 |  |
|  | Shiraz-16T | 294  | 0.655804 | 0         |  |
|  | Shiraz-36T | 431  | 0        | -0.78035  |  |
|  | Shiraz-44T | 891  | 0        | -0.954044 |  |
|  | Shiraz-49T | 1166 | 0        | -0.917235 |  |
|  | Shiraz-9T  | 1368 | 0.199713 | 0         |  |
|  | Shiraz-18T | 1455 | 0        | -0.186773 |  |
|  | Shiraz-22T | 1669 | 0.695915 | 0         |  |
|  | Shiraz-25T | 1717 | 0.420447 | 0         |  |
|  | Shiraz-28T | 1760 | 0.538181 | 0         |  |
|  | Shiraz-29T | 1800 | 0.672527 | 0         |  |
|  | Shiraz-32T | 1869 | 0.776805 | 0         |  |
|  | Shiraz-35T | 1932 | 0.507141 | 0         |  |
|  | Shiraz-40T | 2051 | 0.098506 | 0         |  |
|  | Shiraz-58T | 2221 | 0.871948 | 0         |  |
|  | Shiraz-71T | 2260 | 0.68394  | 0         |  |
|  | Shiraz-71T | 2261 | 0.508399 | 0         |  |
|  | Shiraz-3T  | 235  | 0        | -0.28401  |  |
|  | Shiraz-4T  | 260  | 0        | -0.324128 |  |
|  | Shiraz-16T | 294  | 0.655804 | 0         |  |
|  | Shiraz-36T | 431  | 0        | -0.78035  |  |
|  | Shiraz-44T | 891  | 0        | -0.954044 |  |
|  | Shiraz-49T | 1166 | 0        | -0.917235 |  |
|  | Shiraz-9T  | 1368 | 0.199713 | 0         |  |
|  | Shiraz-18T | 1455 | 0        | -0.186773 |  |
|  | Shiraz-22T | 1669 | 0.695915 | 0         |  |
|  | Shiraz-25T | 1717 | 0.420447 | 0         |  |
|  | Shiraz-28T | 1760 | 0.538181 | 0         |  |
|  | Shiraz-29T | 1800 | 0.672527 | 0         |  |

|        |      |            |      |          |   |  |
|--------|------|------------|------|----------|---|--|
|        |      | Shiraz-32T | 1869 | 0.776805 | 0 |  |
|        |      | Shiraz-35T | 1932 | 0.507141 | 0 |  |
|        |      | Shiraz-40T | 2051 | 0.098506 | 0 |  |
|        |      | Shiraz-58T | 2221 | 0.871948 | 0 |  |
|        |      | Shiraz-71T | 2260 | 0.68394  | 0 |  |
|        |      | Shiraz-71T | 2261 | 0.508399 | 0 |  |
| FIGNL1 | chr7 | Shiraz-3T  | 87   | 0.198593 | 0 |  |
|        |      | Shiraz-4T  | 252  | 0.192083 | 0 |  |
|        |      | Shiraz-36T | 376  | 0.159952 | 0 |  |
|        |      | Shiraz-46T | 942  | 0.069143 | 0 |  |
|        |      | Shiraz-18T | 1433 | 0.250973 | 0 |  |
|        |      | Shiraz-25T | 1697 | 0.21945  | 0 |  |
|        |      | Shiraz-28T | 1734 | 0.362882 | 0 |  |
|        |      | Shiraz-29T | 1777 | 0.156747 | 0 |  |
|        |      | Shiraz-38T | 1950 | 0.265916 | 0 |  |
|        |      | Shiraz-71T | 2236 | 0.320072 | 0 |  |
|        |      | Shiraz-3T  | 87   | 0.198593 | 0 |  |
|        |      | Shiraz-4T  | 252  | 0.192083 | 0 |  |
|        |      | Shiraz-36T | 376  | 0.159952 | 0 |  |
|        |      | Shiraz-46T | 942  | 0.069143 | 0 |  |
|        |      | Shiraz-18T | 1433 | 0.250973 | 0 |  |
|        |      | Shiraz-25T | 1697 | 0.21945  | 0 |  |
|        |      | Shiraz-28T | 1734 | 0.362882 | 0 |  |
|        |      | Shiraz-29T | 1777 | 0.156747 | 0 |  |
|        |      | Shiraz-38T | 1950 | 0.265916 | 0 |  |
|        |      | Shiraz-71T | 2236 | 0.320072 | 0 |  |
|        |      | Shiraz-3T  | 87   | 0.198593 | 0 |  |
|        |      | Shiraz-4T  | 252  | 0.192083 | 0 |  |
|        |      | Shiraz-36T | 376  | 0.159952 | 0 |  |
|        |      | Shiraz-46T | 942  | 0.069143 | 0 |  |
|        |      | Shiraz-18T | 1433 | 0.250973 | 0 |  |
|        |      | Shiraz-25T | 1697 | 0.21945  | 0 |  |
|        |      | Shiraz-28T | 1734 | 0.362882 | 0 |  |
|        |      | Shiraz-29T | 1777 | 0.156747 | 0 |  |
|        |      | Shiraz-38T | 1950 | 0.265916 | 0 |  |
|        |      | Shiraz-71T | 2236 | 0.320072 | 0 |  |
| FIS1   | chr7 | Shiraz-3T  | 90   | 0.219276 | 0 |  |
|        |      | Shiraz-3T  | 94   | 0.74735  | 0 |  |
|        |      | Shiraz-4T  | 253  | 0.372918 | 0 |  |
|        |      | Shiraz-31T | 316  | 0.219196 | 0 |  |
|        |      | Shiraz-36T | 378  | 0.179558 | 0 |  |
|        |      | Shiraz-36T | 381  | 0.332628 | 0 |  |
|        |      | Shiraz-44T | 639  | 1.035032 | 0 |  |
|        |      | Shiraz-46T | 943  | 0.093799 | 0 |  |
|        |      | Shiraz-46T | 946  | 0.299835 | 0 |  |
|        |      | Shiraz-47T | 1030 | 0.257728 | 0 |  |
|        |      | Shiraz-49T | 1120 | 0.281656 | 0 |  |

|  |            |      |          |           |  |
|--|------------|------|----------|-----------|--|
|  | Shiraz-77T | 1225 | 0        | -0.117922 |  |
|  | Shiraz-77T | 1227 | 0.196445 | 0         |  |
|  | Shiraz-9T  | 1324 | 0.679266 | 0         |  |
|  | Shiraz-18T | 1434 | 0.244465 | 0         |  |
|  | Shiraz-22T | 1549 | 0        | -0.319623 |  |
|  | Shiraz-22T | 1551 | 0.324011 | 0         |  |
|  | Shiraz-25T | 1698 | 0.21835  | 0         |  |
|  | Shiraz-28T | 1735 | 0.350744 | 0         |  |
|  | Shiraz-29T | 1778 | 0.120767 | 0         |  |
|  | Shiraz-32T | 1833 | 0.551336 | 0         |  |
|  | Shiraz-32T | 1834 | 1.485392 | 0         |  |
|  | Shiraz-38T | 1951 | 0.250891 | 0         |  |
|  | Shiraz-53T | 2078 | 0.287202 | 0         |  |
|  | Shiraz-58T | 2160 | 0.399007 | 0         |  |
|  | Shiraz-71T | 2238 | 0.603631 | 0         |  |
|  | Shiraz-3T  | 90   | 0.219276 | 0         |  |
|  | Shiraz-3T  | 94   | 0.74735  | 0         |  |
|  | Shiraz-4T  | 253  | 0.372918 | 0         |  |
|  | Shiraz-31T | 316  | 0.219196 | 0         |  |
|  | Shiraz-36T | 378  | 0.179558 | 0         |  |
|  | Shiraz-36T | 381  | 0.332628 | 0         |  |
|  | Shiraz-44T | 639  | 1.035032 | 0         |  |
|  | Shiraz-46T | 943  | 0.093799 | 0         |  |
|  | Shiraz-46T | 946  | 0.299835 | 0         |  |
|  | Shiraz-47T | 1030 | 0.257728 | 0         |  |
|  | Shiraz-49T | 1120 | 0.281656 | 0         |  |
|  | Shiraz-77T | 1225 | 0        | -0.117922 |  |
|  | Shiraz-77T | 1227 | 0.196445 | 0         |  |
|  | Shiraz-9T  | 1324 | 0.679266 | 0         |  |
|  | Shiraz-18T | 1434 | 0.244465 | 0         |  |
|  | Shiraz-22T | 1549 | 0        | -0.319623 |  |
|  | Shiraz-22T | 1551 | 0.324011 | 0         |  |
|  | Shiraz-25T | 1698 | 0.21835  | 0         |  |
|  | Shiraz-28T | 1735 | 0.350744 | 0         |  |
|  | Shiraz-29T | 1778 | 0.120767 | 0         |  |
|  | Shiraz-32T | 1833 | 0.551336 | 0         |  |
|  | Shiraz-32T | 1834 | 1.485392 | 0         |  |
|  | Shiraz-38T | 1951 | 0.250891 | 0         |  |
|  | Shiraz-53T | 2078 | 0.287202 | 0         |  |
|  | Shiraz-58T | 2160 | 0.399007 | 0         |  |
|  | Shiraz-71T | 2238 | 0.603631 | 0         |  |
|  | Shiraz-3T  | 90   | 0.219276 | 0         |  |
|  | Shiraz-3T  | 94   | 0.74735  | 0         |  |
|  | Shiraz-4T  | 253  | 0.372918 | 0         |  |
|  | Shiraz-31T | 316  | 0.219196 | 0         |  |
|  | Shiraz-36T | 378  | 0.179558 | 0         |  |
|  | Shiraz-36T | 381  | 0.332628 | 0         |  |



|        |      |            |      |          |           |  |
|--------|------|------------|------|----------|-----------|--|
|        |      | Shiraz-44T | 639  | 1.035032 | 0         |  |
|        |      | Shiraz-46T | 943  | 0.093799 | 0         |  |
|        |      | Shiraz-46T | 946  | 0.299835 | 0         |  |
|        |      | Shiraz-47T | 1030 | 0.257728 | 0         |  |
|        |      | Shiraz-49T | 1120 | 0.281656 | 0         |  |
|        |      | Shiraz-77T | 1225 | 0        | -0.117922 |  |
|        |      | Shiraz-77T | 1227 | 0.196445 | 0         |  |
|        |      | Shiraz-9T  | 1324 | 0.679266 | 0         |  |
|        |      | Shiraz-18T | 1434 | 0.244465 | 0         |  |
|        |      | Shiraz-22T | 1549 | 0        | -0.319623 |  |
|        |      | Shiraz-22T | 1551 | 0.324011 | 0         |  |
|        |      | Shiraz-25T | 1698 | 0.21835  | 0         |  |
|        |      | Shiraz-28T | 1735 | 0.350744 | 0         |  |
|        |      | Shiraz-29T | 1778 | 0.120767 | 0         |  |
|        |      | Shiraz-32T | 1833 | 0.551336 | 0         |  |
|        |      | Shiraz-32T | 1834 | 1.485392 | 0         |  |
|        |      | Shiraz-38T | 1951 | 0.250891 | 0         |  |
|        |      | Shiraz-53T | 2078 | 0.287202 | 0         |  |
|        |      | Shiraz-58T | 2160 | 0.399007 | 0         |  |
|        |      | Shiraz-71T | 2238 | 0.603631 | 0         |  |
| FKBP14 | chr7 | Shiraz-3T  | 87   | 0.198593 | 0         |  |
|        |      | Shiraz-4T  | 252  | 0.192083 | 0         |  |
|        |      | Shiraz-36T | 376  | 0.159952 | 0         |  |
|        |      | Shiraz-46T | 942  | 0.069143 | 0         |  |
|        |      | Shiraz-18T | 1433 | 0.250973 | 0         |  |
|        |      | Shiraz-25T | 1697 | 0.21945  | 0         |  |
|        |      | Shiraz-28T | 1734 | 0.362882 | 0         |  |
|        |      | Shiraz-29T | 1777 | 0.156747 | 0         |  |
|        |      | Shiraz-38T | 1950 | 0.265916 | 0         |  |
|        |      | Shiraz-71T | 2236 | 0.320072 | 0         |  |
|        |      | Shiraz-3T  | 87   | 0.198593 | 0         |  |
|        |      | Shiraz-4T  | 252  | 0.192083 | 0         |  |
|        |      | Shiraz-36T | 376  | 0.159952 | 0         |  |
|        |      | Shiraz-46T | 942  | 0.069143 | 0         |  |
|        |      | Shiraz-18T | 1433 | 0.250973 | 0         |  |
|        |      | Shiraz-25T | 1697 | 0.21945  | 0         |  |
|        |      | Shiraz-28T | 1734 | 0.362882 | 0         |  |
|        |      | Shiraz-29T | 1777 | 0.156747 | 0         |  |
|        |      | Shiraz-38T | 1950 | 0.265916 | 0         |  |
|        |      | Shiraz-71T | 2236 | 0.320072 | 0         |  |
|        |      | Shiraz-3T  | 87   | 0.198593 | 0         |  |
|        |      | Shiraz-4T  | 252  | 0.192083 | 0         |  |
|        |      | Shiraz-36T | 376  | 0.159952 | 0         |  |
|        |      | Shiraz-46T | 942  | 0.069143 | 0         |  |
|        |      | Shiraz-18T | 1433 | 0.250973 | 0         |  |
|        |      | Shiraz-25T | 1697 | 0.21945  | 0         |  |
|        |      | Shiraz-28T | 1734 | 0.362882 | 0         |  |

|          |      |            |      |          |           |  |
|----------|------|------------|------|----------|-----------|--|
|          |      | Shiraz-29T | 1777 | 0.156747 | 0         |  |
|          |      | Shiraz-38T | 1950 | 0.265916 | 0         |  |
|          |      | Shiraz-71T | 2236 | 0.320072 | 0         |  |
| FKBP9    | chr7 | Shiraz-3T  | 87   | 0.198593 | 0         |  |
|          |      | Shiraz-4T  | 252  | 0.192083 | 0         |  |
|          |      | Shiraz-36T | 376  | 0.159952 | 0         |  |
|          |      | Shiraz-44T | 631  | 0        | -0.180312 |  |
|          |      | Shiraz-46T | 942  | 0.069143 | 0         |  |
|          |      | Shiraz-18T | 1433 | 0.250973 | 0         |  |
|          |      | Shiraz-22T | 1544 | 0        | -0.193579 |  |
|          |      | Shiraz-25T | 1697 | 0.21945  | 0         |  |
|          |      | Shiraz-28T | 1734 | 0.362882 | 0         |  |
|          |      | Shiraz-29T | 1777 | 0.156747 | 0         |  |
|          |      | Shiraz-38T | 1950 | 0.265916 | 0         |  |
|          |      | Shiraz-71T | 2236 | 0.320072 | 0         |  |
|          |      | Shiraz-3T  | 87   | 0.198593 | 0         |  |
|          |      | Shiraz-4T  | 252  | 0.192083 | 0         |  |
|          |      | Shiraz-36T | 376  | 0.159952 | 0         |  |
|          |      | Shiraz-44T | 631  | 0        | -0.180312 |  |
|          |      | Shiraz-46T | 942  | 0.069143 | 0         |  |
|          |      | Shiraz-18T | 1433 | 0.250973 | 0         |  |
|          |      | Shiraz-22T | 1544 | 0        | -0.193579 |  |
|          |      | Shiraz-25T | 1697 | 0.21945  | 0         |  |
|          |      | Shiraz-28T | 1734 | 0.362882 | 0         |  |
|          |      | Shiraz-29T | 1777 | 0.156747 | 0         |  |
|          |      | Shiraz-38T | 1950 | 0.265916 | 0         |  |
|          |      | Shiraz-71T | 2236 | 0.320072 | 0         |  |
|          |      | Shiraz-3T  | 87   | 0.198593 | 0         |  |
|          |      | Shiraz-4T  | 252  | 0.192083 | 0         |  |
|          |      | Shiraz-36T | 376  | 0.159952 | 0         |  |
|          |      | Shiraz-44T | 631  | 0        | -0.180312 |  |
|          |      | Shiraz-46T | 942  | 0.069143 | 0         |  |
|          |      | Shiraz-18T | 1433 | 0.250973 | 0         |  |
|          |      | Shiraz-22T | 1544 | 0        | -0.193579 |  |
|          |      | Shiraz-25T | 1697 | 0.21945  | 0         |  |
|          |      | Shiraz-28T | 1734 | 0.362882 | 0         |  |
|          |      | Shiraz-29T | 1777 | 0.156747 | 0         |  |
|          |      | Shiraz-38T | 1950 | 0.265916 | 0         |  |
|          |      | Shiraz-71T | 2236 | 0.320072 | 0         |  |
| FLJ23834 | chr7 | Shiraz-3T  | 90   | 0.219276 | 0         |  |
|          |      | Shiraz-4T  | 253  | 0.372918 | 0         |  |
|          |      | Shiraz-36T | 378  | 0.179558 | 0         |  |
|          |      | Shiraz-46T | 943  | 0.093799 | 0         |  |
|          |      | Shiraz-77T | 1225 | 0        | -0.117922 |  |
|          |      | Shiraz-18T | 1434 | 0.244465 | 0         |  |
|          |      | Shiraz-22T | 1549 | 0        | -0.319623 |  |
|          |      | Shiraz-25T | 1698 | 0.21835  | 0         |  |

|          |      |            |      |          |           |  |
|----------|------|------------|------|----------|-----------|--|
|          |      | Shiraz-28T | 1735 | 0.350744 | 0         |  |
|          |      | Shiraz-29T | 1778 | 0.120767 | 0         |  |
|          |      | Shiraz-32T | 1833 | 0.551336 | 0         |  |
|          |      | Shiraz-38T | 1951 | 0.250891 | 0         |  |
|          |      | Shiraz-53T | 2078 | 0.287202 | 0         |  |
|          |      | Shiraz-71T | 2238 | 0.603631 | 0         |  |
|          |      | Shiraz-3T  | 90   | 0.219276 | 0         |  |
|          |      | Shiraz-4T  | 253  | 0.372918 | 0         |  |
|          |      | Shiraz-36T | 378  | 0.179558 | 0         |  |
|          |      | Shiraz-46T | 943  | 0.093799 | 0         |  |
|          |      | Shiraz-77T | 1225 | 0        | -0.117922 |  |
|          |      | Shiraz-18T | 1434 | 0.244465 | 0         |  |
|          |      | Shiraz-22T | 1549 | 0        | -0.319623 |  |
|          |      | Shiraz-25T | 1698 | 0.21835  | 0         |  |
|          |      | Shiraz-28T | 1735 | 0.350744 | 0         |  |
|          |      | Shiraz-29T | 1778 | 0.120767 | 0         |  |
|          |      | Shiraz-32T | 1833 | 0.551336 | 0         |  |
|          |      | Shiraz-38T | 1951 | 0.250891 | 0         |  |
|          |      | Shiraz-53T | 2078 | 0.287202 | 0         |  |
|          |      | Shiraz-71T | 2238 | 0.603631 | 0         |  |
|          |      | Shiraz-3T  | 90   | 0.219276 | 0         |  |
|          |      | Shiraz-4T  | 253  | 0.372918 | 0         |  |
|          |      | Shiraz-36T | 378  | 0.179558 | 0         |  |
|          |      | Shiraz-46T | 943  | 0.093799 | 0         |  |
|          |      | Shiraz-77T | 1225 | 0        | -0.117922 |  |
|          |      | Shiraz-18T | 1434 | 0.244465 | 0         |  |
|          |      | Shiraz-22T | 1549 | 0        | -0.319623 |  |
|          |      | Shiraz-25T | 1698 | 0.21835  | 0         |  |
|          |      | Shiraz-28T | 1735 | 0.350744 | 0         |  |
|          |      | Shiraz-29T | 1778 | 0.120767 | 0         |  |
|          |      | Shiraz-32T | 1833 | 0.551336 | 0         |  |
|          |      | Shiraz-38T | 1951 | 0.250891 | 0         |  |
|          |      | Shiraz-53T | 2078 | 0.287202 | 0         |  |
|          |      | Shiraz-71T | 2238 | 0.603631 | 0         |  |
| FLJ30058 | chrX | Shiraz-3T  | 242  | 0        | -0.336434 |  |
|          |      | Shiraz-4T  | 261  | 0        | -0.336249 |  |
|          |      | Shiraz-16T | 295  | 0.591657 | 0         |  |
|          |      | Shiraz-36T | 433  | 0        | -0.803961 |  |
|          |      | Shiraz-44T | 899  | 0        | -1.09697  |  |
|          |      | Shiraz-49T | 1170 | 0        | -0.967436 |  |
|          |      | Shiraz-9T  | 1370 | 0.690073 | 0         |  |
|          |      | Shiraz-18T | 1457 | 0.643204 | 0         |  |
|          |      | Shiraz-22T | 1673 | 0.611783 | 0         |  |
|          |      | Shiraz-22T | 1677 | 0.789711 | 0         |  |
|          |      | Shiraz-25T | 1719 | 0.472955 | 0         |  |
|          |      | Shiraz-28T | 1762 | 0.562311 | 0         |  |
|          |      | Shiraz-29T | 1801 | 0.815343 | 0         |  |

|          |      |            |      |          |           |  |
|----------|------|------------|------|----------|-----------|--|
|          |      | Shiraz-32T | 1870 | 0.729766 | 0         |  |
|          |      | Shiraz-35T | 1933 | 0.488535 | 0         |  |
|          |      | Shiraz-58T | 2223 | 0.833364 | 0         |  |
|          |      | Shiraz-71T | 2263 | 0.975531 | 0         |  |
|          |      | Shiraz-3T  | 242  | 0        | -0.336434 |  |
|          |      | Shiraz-4T  | 261  | 0        | -0.336249 |  |
|          |      | Shiraz-16T | 295  | 0.591657 | 0         |  |
|          |      | Shiraz-36T | 433  | 0        | -0.803961 |  |
|          |      | Shiraz-44T | 899  | 0        | -1.09697  |  |
|          |      | Shiraz-49T | 1170 | 0        | -0.967436 |  |
|          |      | Shiraz-9T  | 1370 | 0.690073 | 0         |  |
|          |      | Shiraz-18T | 1457 | 0.643204 | 0         |  |
|          |      | Shiraz-22T | 1673 | 0.611783 | 0         |  |
|          |      | Shiraz-22T | 1677 | 0.789711 | 0         |  |
|          |      | Shiraz-25T | 1719 | 0.472955 | 0         |  |
|          |      | Shiraz-28T | 1762 | 0.562311 | 0         |  |
|          |      | Shiraz-29T | 1801 | 0.815343 | 0         |  |
|          |      | Shiraz-32T | 1870 | 0.729766 | 0         |  |
|          |      | Shiraz-35T | 1933 | 0.488535 | 0         |  |
|          |      | Shiraz-58T | 2223 | 0.833364 | 0         |  |
|          |      | Shiraz-71T | 2263 | 0.975531 | 0         |  |
|          |      | Shiraz-3T  | 242  | 0        | -0.336434 |  |
|          |      | Shiraz-4T  | 261  | 0        | -0.336249 |  |
|          |      | Shiraz-16T | 295  | 0.591657 | 0         |  |
|          |      | Shiraz-36T | 433  | 0        | -0.803961 |  |
|          |      | Shiraz-44T | 899  | 0        | -1.09697  |  |
|          |      | Shiraz-49T | 1170 | 0        | -0.967436 |  |
|          |      | Shiraz-9T  | 1370 | 0.690073 | 0         |  |
|          |      | Shiraz-18T | 1457 | 0.643204 | 0         |  |
|          |      | Shiraz-22T | 1673 | 0.611783 | 0         |  |
|          |      | Shiraz-22T | 1677 | 0.789711 | 0         |  |
|          |      | Shiraz-25T | 1719 | 0.472955 | 0         |  |
|          |      | Shiraz-28T | 1762 | 0.562311 | 0         |  |
|          |      | Shiraz-29T | 1801 | 0.815343 | 0         |  |
|          |      | Shiraz-32T | 1870 | 0.729766 | 0         |  |
|          |      | Shiraz-35T | 1933 | 0.488535 | 0         |  |
|          |      | Shiraz-58T | 2223 | 0.833364 | 0         |  |
|          |      | Shiraz-71T | 2263 | 0.975531 | 0         |  |
| FLJ34048 | chr7 | Shiraz-3T  | 90   | 0.219276 | 0         |  |
|          |      | Shiraz-4T  | 253  | 0.372918 | 0         |  |
|          |      | Shiraz-36T | 378  | 0.179558 | 0         |  |
|          |      | Shiraz-36T | 380  | 0.083883 | 0         |  |
|          |      | Shiraz-46T | 943  | 0.093799 | 0         |  |
|          |      | Shiraz-77T | 1225 | 0        | -0.117922 |  |
|          |      | Shiraz-18T | 1434 | 0.244465 | 0         |  |
|          |      | Shiraz-22T | 1549 | 0        | -0.319623 |  |
|          |      | Shiraz-25T | 1698 | 0.21835  | 0         |  |

|          |      |            |      |          |           |  |  |
|----------|------|------------|------|----------|-----------|--|--|
|          |      | Shiraz-28T | 1735 | 0.350744 | 0         |  |  |
|          |      | Shiraz-29T | 1778 | 0.120767 | 0         |  |  |
|          |      | Shiraz-32T | 1833 | 0.551336 | 0         |  |  |
|          |      | Shiraz-38T | 1951 | 0.250891 | 0         |  |  |
|          |      | Shiraz-53T | 2078 | 0.287202 | 0         |  |  |
|          |      | Shiraz-71T | 2238 | 0.603631 | 0         |  |  |
|          |      | Shiraz-3T  | 90   | 0.219276 | 0         |  |  |
|          |      | Shiraz-4T  | 253  | 0.372918 | 0         |  |  |
|          |      | Shiraz-36T | 378  | 0.179558 | 0         |  |  |
|          |      | Shiraz-36T | 380  | 0.083883 | 0         |  |  |
|          |      | Shiraz-46T | 943  | 0.093799 | 0         |  |  |
|          |      | Shiraz-77T | 1225 | 0        | -0.117922 |  |  |
|          |      | Shiraz-18T | 1434 | 0.244465 | 0         |  |  |
|          |      | Shiraz-22T | 1549 | 0        | -0.319623 |  |  |
|          |      | Shiraz-25T | 1698 | 0.21835  | 0         |  |  |
|          |      | Shiraz-28T | 1735 | 0.350744 | 0         |  |  |
|          |      | Shiraz-29T | 1778 | 0.120767 | 0         |  |  |
|          |      | Shiraz-32T | 1833 | 0.551336 | 0         |  |  |
|          |      | Shiraz-38T | 1951 | 0.250891 | 0         |  |  |
|          |      | Shiraz-53T | 2078 | 0.287202 | 0         |  |  |
|          |      | Shiraz-71T | 2238 | 0.603631 | 0         |  |  |
|          |      | Shiraz-3T  | 90   | 0.219276 | 0         |  |  |
|          |      | Shiraz-4T  | 253  | 0.372918 | 0         |  |  |
|          |      | Shiraz-36T | 378  | 0.179558 | 0         |  |  |
|          |      | Shiraz-36T | 380  | 0.083883 | 0         |  |  |
|          |      | Shiraz-46T | 943  | 0.093799 | 0         |  |  |
|          |      | Shiraz-77T | 1225 | 0        | -0.117922 |  |  |
|          |      | Shiraz-18T | 1434 | 0.244465 | 0         |  |  |
|          |      | Shiraz-22T | 1549 | 0        | -0.319623 |  |  |
|          |      | Shiraz-25T | 1698 | 0.21835  | 0         |  |  |
|          |      | Shiraz-28T | 1735 | 0.350744 | 0         |  |  |
|          |      | Shiraz-29T | 1778 | 0.120767 | 0         |  |  |
|          |      | Shiraz-32T | 1833 | 0.551336 | 0         |  |  |
|          |      | Shiraz-38T | 1951 | 0.250891 | 0         |  |  |
|          |      | Shiraz-53T | 2078 | 0.287202 | 0         |  |  |
|          |      | Shiraz-71T | 2238 | 0.603631 | 0         |  |  |
| FLJ35390 | chr7 | Shiraz-3T  | 87   | 0.198593 | 0         |  |  |
|          |      | Shiraz-3T  | 87   | 0.198593 | 0         |  |  |
|          |      | Shiraz-3T  | 89   | 0.678641 | 0         |  |  |
|          |      | Shiraz-3T  | 89   | 0.678641 | 0         |  |  |
|          |      | Shiraz-4T  | 252  | 0.192083 | 0         |  |  |
|          |      | Shiraz-4T  | 252  | 0.192083 | 0         |  |  |
|          |      | Shiraz-36T | 376  | 0.159952 | 0         |  |  |
|          |      | Shiraz-36T | 376  | 0.159952 | 0         |  |  |
|          |      | Shiraz-44T | 632  | 0.902944 | 0         |  |  |
|          |      | Shiraz-44T | 632  | 0.902944 | 0         |  |  |
|          |      | Shiraz-46T | 942  | 0.069143 | 0         |  |  |

|  |  |            |      |          |   |  |  |
|--|--|------------|------|----------|---|--|--|
|  |  | Shiraz-46T | 942  | 0.069143 | 0 |  |  |
|  |  | Shiraz-77T | 1223 | 0.215647 | 0 |  |  |
|  |  | Shiraz-77T | 1223 | 0.215647 | 0 |  |  |
|  |  | Shiraz-18T | 1433 | 0.250973 | 0 |  |  |
|  |  | Shiraz-18T | 1433 | 0.250973 | 0 |  |  |
|  |  | Shiraz-25T | 1697 | 0.21945  | 0 |  |  |
|  |  | Shiraz-25T | 1697 | 0.21945  | 0 |  |  |
|  |  | Shiraz-28T | 1734 | 0.362882 | 0 |  |  |
|  |  | Shiraz-28T | 1734 | 0.362882 | 0 |  |  |
|  |  | Shiraz-29T | 1777 | 0.156747 | 0 |  |  |
|  |  | Shiraz-29T | 1777 | 0.156747 | 0 |  |  |
|  |  | Shiraz-38T | 1950 | 0.265916 | 0 |  |  |
|  |  | Shiraz-38T | 1950 | 0.265916 | 0 |  |  |
|  |  | Shiraz-71T | 2236 | 0.320072 | 0 |  |  |
|  |  | Shiraz-71T | 2236 | 0.320072 | 0 |  |  |
|  |  | Shiraz-3T  | 87   | 0.198593 | 0 |  |  |
|  |  | Shiraz-3T  | 87   | 0.198593 | 0 |  |  |
|  |  | Shiraz-3T  | 89   | 0.678641 | 0 |  |  |
|  |  | Shiraz-3T  | 89   | 0.678641 | 0 |  |  |
|  |  | Shiraz-4T  | 252  | 0.192083 | 0 |  |  |
|  |  | Shiraz-4T  | 252  | 0.192083 | 0 |  |  |
|  |  | Shiraz-36T | 376  | 0.159952 | 0 |  |  |
|  |  | Shiraz-36T | 376  | 0.159952 | 0 |  |  |
|  |  | Shiraz-44T | 632  | 0.902944 | 0 |  |  |
|  |  | Shiraz-44T | 632  | 0.902944 | 0 |  |  |
|  |  | Shiraz-46T | 942  | 0.069143 | 0 |  |  |
|  |  | Shiraz-46T | 942  | 0.069143 | 0 |  |  |
|  |  | Shiraz-77T | 1223 | 0.215647 | 0 |  |  |
|  |  | Shiraz-77T | 1223 | 0.215647 | 0 |  |  |
|  |  | Shiraz-18T | 1433 | 0.250973 | 0 |  |  |
|  |  | Shiraz-18T | 1433 | 0.250973 | 0 |  |  |
|  |  | Shiraz-25T | 1697 | 0.21945  | 0 |  |  |
|  |  | Shiraz-25T | 1697 | 0.21945  | 0 |  |  |
|  |  | Shiraz-28T | 1734 | 0.362882 | 0 |  |  |
|  |  | Shiraz-28T | 1734 | 0.362882 | 0 |  |  |
|  |  | Shiraz-29T | 1777 | 0.156747 | 0 |  |  |
|  |  | Shiraz-29T | 1777 | 0.156747 | 0 |  |  |
|  |  | Shiraz-38T | 1950 | 0.265916 | 0 |  |  |
|  |  | Shiraz-38T | 1950 | 0.265916 | 0 |  |  |
|  |  | Shiraz-71T | 2236 | 0.320072 | 0 |  |  |
|  |  | Shiraz-71T | 2236 | 0.320072 | 0 |  |  |
|  |  | Shiraz-3T  | 87   | 0.198593 | 0 |  |  |
|  |  | Shiraz-3T  | 87   | 0.198593 | 0 |  |  |
|  |  | Shiraz-3T  | 89   | 0.678641 | 0 |  |  |
|  |  | Shiraz-3T  | 89   | 0.678641 | 0 |  |  |
|  |  | Shiraz-4T  | 252  | 0.192083 | 0 |  |  |
|  |  | Shiraz-4T  | 252  | 0.192083 | 0 |  |  |

|          |      |            |      |          |           |  |
|----------|------|------------|------|----------|-----------|--|
|          |      | Shiraz-36T | 376  | 0.159952 | 0         |  |
|          |      | Shiraz-36T | 376  | 0.159952 | 0         |  |
|          |      | Shiraz-44T | 632  | 0.902944 | 0         |  |
|          |      | Shiraz-44T | 632  | 0.902944 | 0         |  |
|          |      | Shiraz-46T | 942  | 0.069143 | 0         |  |
|          |      | Shiraz-46T | 942  | 0.069143 | 0         |  |
|          |      | Shiraz-77T | 1223 | 0.215647 | 0         |  |
|          |      | Shiraz-77T | 1223 | 0.215647 | 0         |  |
|          |      | Shiraz-18T | 1433 | 0.250973 | 0         |  |
|          |      | Shiraz-18T | 1433 | 0.250973 | 0         |  |
|          |      | Shiraz-25T | 1697 | 0.21945  | 0         |  |
|          |      | Shiraz-25T | 1697 | 0.21945  | 0         |  |
|          |      | Shiraz-28T | 1734 | 0.362882 | 0         |  |
|          |      | Shiraz-28T | 1734 | 0.362882 | 0         |  |
|          |      | Shiraz-29T | 1777 | 0.156747 | 0         |  |
|          |      | Shiraz-29T | 1777 | 0.156747 | 0         |  |
|          |      | Shiraz-38T | 1950 | 0.265916 | 0         |  |
|          |      | Shiraz-38T | 1950 | 0.265916 | 0         |  |
|          |      | Shiraz-71T | 2236 | 0.320072 | 0         |  |
|          |      | Shiraz-71T | 2236 | 0.320072 | 0         |  |
| FLJ36031 | chr7 | Shiraz-3T  | 90   | 0.219276 | 0         |  |
|          |      | Shiraz-4T  | 253  | 0.372918 | 0         |  |
|          |      | Shiraz-36T | 378  | 0.179558 | 0         |  |
|          |      | Shiraz-46T | 943  | 0.093799 | 0         |  |
|          |      | Shiraz-77T | 1225 | 0        | -0.117922 |  |
|          |      | Shiraz-18T | 1434 | 0.244465 | 0         |  |
|          |      | Shiraz-22T | 1549 | 0        | -0.319623 |  |
|          |      | Shiraz-25T | 1698 | 0.21835  | 0         |  |
|          |      | Shiraz-28T | 1735 | 0.350744 | 0         |  |
|          |      | Shiraz-29T | 1778 | 0.120767 | 0         |  |
|          |      | Shiraz-32T | 1833 | 0.551336 | 0         |  |
|          |      | Shiraz-38T | 1951 | 0.250891 | 0         |  |
|          |      | Shiraz-53T | 2078 | 0.287202 | 0         |  |
|          |      | Shiraz-71T | 2238 | 0.603631 | 0         |  |
|          |      | Shiraz-3T  | 90   | 0.219276 | 0         |  |
|          |      | Shiraz-4T  | 253  | 0.372918 | 0         |  |
|          |      | Shiraz-36T | 378  | 0.179558 | 0         |  |
|          |      | Shiraz-46T | 943  | 0.093799 | 0         |  |
|          |      | Shiraz-77T | 1225 | 0        | -0.117922 |  |
|          |      | Shiraz-18T | 1434 | 0.244465 | 0         |  |
|          |      | Shiraz-22T | 1549 | 0        | -0.319623 |  |
|          |      | Shiraz-25T | 1698 | 0.21835  | 0         |  |
|          |      | Shiraz-28T | 1735 | 0.350744 | 0         |  |
|          |      | Shiraz-29T | 1778 | 0.120767 | 0         |  |
|          |      | Shiraz-32T | 1833 | 0.551336 | 0         |  |
|          |      | Shiraz-38T | 1951 | 0.250891 | 0         |  |
|          |      | Shiraz-53T | 2078 | 0.287202 | 0         |  |

|          |      |            |      |          |           |  |
|----------|------|------------|------|----------|-----------|--|
|          |      | Shiraz-71T | 2238 | 0.603631 | 0         |  |
|          |      | Shiraz-3T  | 90   | 0.219276 | 0         |  |
|          |      | Shiraz-4T  | 253  | 0.372918 | 0         |  |
|          |      | Shiraz-36T | 378  | 0.179558 | 0         |  |
|          |      | Shiraz-46T | 943  | 0.093799 | 0         |  |
|          |      | Shiraz-77T | 1225 | 0        | -0.117922 |  |
|          |      | Shiraz-18T | 1434 | 0.244465 | 0         |  |
|          |      | Shiraz-22T | 1549 | 0        | -0.319623 |  |
|          |      | Shiraz-25T | 1698 | 0.21835  | 0         |  |
|          |      | Shiraz-28T | 1735 | 0.350744 | 0         |  |
|          |      | Shiraz-29T | 1778 | 0.120767 | 0         |  |
|          |      | Shiraz-32T | 1833 | 0.551336 | 0         |  |
|          |      | Shiraz-38T | 1951 | 0.250891 | 0         |  |
|          |      | Shiraz-53T | 2078 | 0.287202 | 0         |  |
|          |      | Shiraz-71T | 2238 | 0.603631 | 0         |  |
| FLJ37078 | chr7 | Shiraz-3T  | 90   | 0.219276 | 0         |  |
|          |      | Shiraz-3T  | 92   | 0.817021 | 0         |  |
|          |      | Shiraz-4T  | 253  | 0.372918 | 0         |  |
|          |      | Shiraz-31T | 315  | 0.194054 | 0         |  |
|          |      | Shiraz-36T | 378  | 0.179558 | 0         |  |
|          |      | Shiraz-36T | 379  | 0.322028 | 0         |  |
|          |      | Shiraz-42T | 454  | 0.145717 | 0         |  |
|          |      | Shiraz-44T | 637  | 1.109789 | 0         |  |
|          |      | Shiraz-46T | 943  | 0.093799 | 0         |  |
|          |      | Shiraz-46T | 944  | 0.256008 | 0         |  |
|          |      | Shiraz-47T | 1028 | 0.17896  | 0         |  |
|          |      | Shiraz-49T | 1118 | 0.327789 | 0         |  |
|          |      | Shiraz-77T | 1224 | 0.220539 | 0         |  |
|          |      | Shiraz-9T  | 1323 | 0.655912 | 0         |  |
|          |      | Shiraz-22T | 1548 | 0.237572 | 0         |  |
|          |      | Shiraz-25T | 1698 | 0.21835  | 0         |  |
|          |      | Shiraz-28T | 1735 | 0.350744 | 0         |  |
|          |      | Shiraz-29T | 1778 | 0.120767 | 0         |  |
|          |      | Shiraz-38T | 1951 | 0.250891 | 0         |  |
|          |      | Shiraz-53T | 2078 | 0.287202 | 0         |  |
|          |      | Shiraz-58T | 2158 | 0.33934  | 0         |  |
|          |      | Shiraz-71T | 2238 | 0.603631 | 0         |  |
|          |      | Shiraz-71T | 2239 | 0.310785 | 0         |  |
|          |      | Shiraz-3T  | 90   | 0.219276 | 0         |  |
|          |      | Shiraz-3T  | 92   | 0.817021 | 0         |  |
|          |      | Shiraz-4T  | 253  | 0.372918 | 0         |  |
|          |      | Shiraz-31T | 315  | 0.194054 | 0         |  |
|          |      | Shiraz-36T | 378  | 0.179558 | 0         |  |
|          |      | Shiraz-36T | 379  | 0.322028 | 0         |  |
|          |      | Shiraz-42T | 454  | 0.145717 | 0         |  |
|          |      | Shiraz-44T | 637  | 1.109789 | 0         |  |
|          |      | Shiraz-46T | 943  | 0.093799 | 0         |  |



|          |      |            |      |          |           |  |
|----------|------|------------|------|----------|-----------|--|
|          |      | Shiraz-46T | 944  | 0.256008 | 0         |  |
|          |      | Shiraz-47T | 1028 | 0.17896  | 0         |  |
|          |      | Shiraz-49T | 1118 | 0.327789 | 0         |  |
|          |      | Shiraz-77T | 1224 | 0.220539 | 0         |  |
|          |      | Shiraz-9T  | 1323 | 0.655912 | 0         |  |
|          |      | Shiraz-22T | 1548 | 0.237572 | 0         |  |
|          |      | Shiraz-25T | 1698 | 0.21835  | 0         |  |
|          |      | Shiraz-28T | 1735 | 0.350744 | 0         |  |
|          |      | Shiraz-29T | 1778 | 0.120767 | 0         |  |
|          |      | Shiraz-38T | 1951 | 0.250891 | 0         |  |
|          |      | Shiraz-53T | 2078 | 0.287202 | 0         |  |
|          |      | Shiraz-58T | 2158 | 0.33934  | 0         |  |
|          |      | Shiraz-71T | 2238 | 0.603631 | 0         |  |
|          |      | Shiraz-71T | 2239 | 0.310785 | 0         |  |
|          |      | Shiraz-3T  | 90   | 0.219276 | 0         |  |
|          |      | Shiraz-3T  | 92   | 0.817021 | 0         |  |
|          |      | Shiraz-4T  | 253  | 0.372918 | 0         |  |
|          |      | Shiraz-31T | 315  | 0.194054 | 0         |  |
|          |      | Shiraz-36T | 378  | 0.179558 | 0         |  |
|          |      | Shiraz-36T | 379  | 0.322028 | 0         |  |
|          |      | Shiraz-42T | 454  | 0.145717 | 0         |  |
|          |      | Shiraz-44T | 637  | 1.109789 | 0         |  |
|          |      | Shiraz-46T | 943  | 0.093799 | 0         |  |
|          |      | Shiraz-46T | 944  | 0.256008 | 0         |  |
|          |      | Shiraz-47T | 1028 | 0.17896  | 0         |  |
|          |      | Shiraz-49T | 1118 | 0.327789 | 0         |  |
|          |      | Shiraz-77T | 1224 | 0.220539 | 0         |  |
|          |      | Shiraz-9T  | 1323 | 0.655912 | 0         |  |
|          |      | Shiraz-22T | 1548 | 0.237572 | 0         |  |
|          |      | Shiraz-25T | 1698 | 0.21835  | 0         |  |
|          |      | Shiraz-28T | 1735 | 0.350744 | 0         |  |
|          |      | Shiraz-29T | 1778 | 0.120767 | 0         |  |
|          |      | Shiraz-38T | 1951 | 0.250891 | 0         |  |
|          |      | Shiraz-53T | 2078 | 0.287202 | 0         |  |
|          |      | Shiraz-58T | 2158 | 0.33934  | 0         |  |
|          |      | Shiraz-71T | 2238 | 0.603631 | 0         |  |
|          |      | Shiraz-71T | 2239 | 0.310785 | 0         |  |
| FLJ40852 | chr7 | Shiraz-3T  | 90   | 0.219276 | 0         |  |
|          |      | Shiraz-4T  | 253  | 0.372918 | 0         |  |
|          |      | Shiraz-36T | 378  | 0.179558 | 0         |  |
|          |      | Shiraz-46T | 943  | 0.093799 | 0         |  |
|          |      | Shiraz-77T | 1225 | 0        | -0.117922 |  |
|          |      | Shiraz-9T  | 1325 | 0.221899 | 0         |  |
|          |      | Shiraz-18T | 1434 | 0.244465 | 0         |  |
|          |      | Shiraz-25T | 1698 | 0.21835  | 0         |  |
|          |      | Shiraz-28T | 1735 | 0.350744 | 0         |  |
|          |      | Shiraz-29T | 1778 | 0.120767 | 0         |  |

|          |      |            |      |          |           |  |  |
|----------|------|------------|------|----------|-----------|--|--|
|          |      | Shiraz-32T | 1833 | 0.551336 | 0         |  |  |
|          |      | Shiraz-38T | 1951 | 0.250891 | 0         |  |  |
|          |      | Shiraz-53T | 2078 | 0.287202 | 0         |  |  |
|          |      | Shiraz-58T | 2162 | 0.221505 | 0         |  |  |
|          |      | Shiraz-71T | 2238 | 0.603631 | 0         |  |  |
|          |      | Shiraz-3T  | 90   | 0.219276 | 0         |  |  |
|          |      | Shiraz-4T  | 253  | 0.372918 | 0         |  |  |
|          |      | Shiraz-36T | 378  | 0.179558 | 0         |  |  |
|          |      | Shiraz-46T | 943  | 0.093799 | 0         |  |  |
|          |      | Shiraz-77T | 1225 | 0        | -0.117922 |  |  |
|          |      | Shiraz-9T  | 1325 | 0.221899 | 0         |  |  |
|          |      | Shiraz-18T | 1434 | 0.244465 | 0         |  |  |
|          |      | Shiraz-25T | 1698 | 0.21835  | 0         |  |  |
|          |      | Shiraz-28T | 1735 | 0.350744 | 0         |  |  |
|          |      | Shiraz-29T | 1778 | 0.120767 | 0         |  |  |
|          |      | Shiraz-32T | 1833 | 0.551336 | 0         |  |  |
|          |      | Shiraz-38T | 1951 | 0.250891 | 0         |  |  |
|          |      | Shiraz-53T | 2078 | 0.287202 | 0         |  |  |
|          |      | Shiraz-58T | 2162 | 0.221505 | 0         |  |  |
|          |      | Shiraz-71T | 2238 | 0.603631 | 0         |  |  |
|          |      | Shiraz-3T  | 90   | 0.219276 | 0         |  |  |
|          |      | Shiraz-4T  | 253  | 0.372918 | 0         |  |  |
|          |      | Shiraz-36T | 378  | 0.179558 | 0         |  |  |
|          |      | Shiraz-46T | 943  | 0.093799 | 0         |  |  |
|          |      | Shiraz-77T | 1225 | 0        | -0.117922 |  |  |
|          |      | Shiraz-9T  | 1325 | 0.221899 | 0         |  |  |
|          |      | Shiraz-18T | 1434 | 0.244465 | 0         |  |  |
|          |      | Shiraz-25T | 1698 | 0.21835  | 0         |  |  |
|          |      | Shiraz-28T | 1735 | 0.350744 | 0         |  |  |
|          |      | Shiraz-29T | 1778 | 0.120767 | 0         |  |  |
|          |      | Shiraz-32T | 1833 | 0.551336 | 0         |  |  |
|          |      | Shiraz-38T | 1951 | 0.250891 | 0         |  |  |
|          |      | Shiraz-53T | 2078 | 0.287202 | 0         |  |  |
|          |      | Shiraz-58T | 2162 | 0.221505 | 0         |  |  |
|          |      | Shiraz-71T | 2238 | 0.603631 | 0         |  |  |
| FLJ43663 | chr7 | Shiraz-3T  | 90   | 0.219276 | 0         |  |  |
|          |      | Shiraz-3T  | 90   | 0.219276 | 0         |  |  |
|          |      | Shiraz-3T  | 96   | 0.428308 | 0         |  |  |
|          |      | Shiraz-3T  | 96   | 0.428308 | 0         |  |  |
|          |      | Shiraz-4T  | 253  | 0.372918 | 0         |  |  |
|          |      | Shiraz-4T  | 253  | 0.372918 | 0         |  |  |
|          |      | Shiraz-36T | 378  | 0.179558 | 0         |  |  |
|          |      | Shiraz-36T | 378  | 0.179558 | 0         |  |  |
|          |      | Shiraz-44T | 642  | 0.408617 | 0         |  |  |
|          |      | Shiraz-44T | 642  | 0.408617 | 0         |  |  |
|          |      | Shiraz-46T | 943  | 0.093799 | 0         |  |  |
|          |      | Shiraz-46T | 943  | 0.093799 | 0         |  |  |

|  |            |      |          |           |  |
|--|------------|------|----------|-----------|--|
|  | Shiraz-77T | 1225 | 0        | -0.117922 |  |
|  | Shiraz-77T | 1225 | 0        | -0.117922 |  |
|  | Shiraz-9T  | 1325 | 0.221899 | 0         |  |
|  | Shiraz-9T  | 1325 | 0.221899 | 0         |  |
|  | Shiraz-18T | 1434 | 0.244465 | 0         |  |
|  | Shiraz-18T | 1434 | 0.244465 | 0         |  |
|  | Shiraz-25T | 1698 | 0.21835  | 0         |  |
|  | Shiraz-25T | 1698 | 0.21835  | 0         |  |
|  | Shiraz-28T | 1735 | 0.350744 | 0         |  |
|  | Shiraz-28T | 1735 | 0.350744 | 0         |  |
|  | Shiraz-29T | 1778 | 0.120767 | 0         |  |
|  | Shiraz-29T | 1778 | 0.120767 | 0         |  |
|  | Shiraz-32T | 1833 | 0.551336 | 0         |  |
|  | Shiraz-32T | 1833 | 0.551336 | 0         |  |
|  | Shiraz-38T | 1951 | 0.250891 | 0         |  |
|  | Shiraz-38T | 1951 | 0.250891 | 0         |  |
|  | Shiraz-53T | 2078 | 0.287202 | 0         |  |
|  | Shiraz-53T | 2078 | 0.287202 | 0         |  |
|  | Shiraz-71T | 2238 | 0.603631 | 0         |  |
|  | Shiraz-71T | 2238 | 0.603631 | 0         |  |
|  | Shiraz-3T  | 90   | 0.219276 | 0         |  |
|  | Shiraz-3T  | 90   | 0.219276 | 0         |  |
|  | Shiraz-3T  | 96   | 0.428308 | 0         |  |
|  | Shiraz-3T  | 96   | 0.428308 | 0         |  |
|  | Shiraz-4T  | 253  | 0.372918 | 0         |  |
|  | Shiraz-4T  | 253  | 0.372918 | 0         |  |
|  | Shiraz-36T | 378  | 0.179558 | 0         |  |
|  | Shiraz-36T | 378  | 0.179558 | 0         |  |
|  | Shiraz-44T | 642  | 0.408617 | 0         |  |
|  | Shiraz-44T | 642  | 0.408617 | 0         |  |
|  | Shiraz-46T | 943  | 0.093799 | 0         |  |
|  | Shiraz-46T | 943  | 0.093799 | 0         |  |
|  | Shiraz-77T | 1225 | 0        | -0.117922 |  |
|  | Shiraz-77T | 1225 | 0        | -0.117922 |  |
|  | Shiraz-9T  | 1325 | 0.221899 | 0         |  |
|  | Shiraz-9T  | 1325 | 0.221899 | 0         |  |
|  | Shiraz-18T | 1434 | 0.244465 | 0         |  |
|  | Shiraz-18T | 1434 | 0.244465 | 0         |  |
|  | Shiraz-25T | 1698 | 0.21835  | 0         |  |
|  | Shiraz-25T | 1698 | 0.21835  | 0         |  |
|  | Shiraz-28T | 1735 | 0.350744 | 0         |  |
|  | Shiraz-28T | 1735 | 0.350744 | 0         |  |
|  | Shiraz-29T | 1778 | 0.120767 | 0         |  |
|  | Shiraz-29T | 1778 | 0.120767 | 0         |  |
|  | Shiraz-32T | 1833 | 0.551336 | 0         |  |
|  | Shiraz-32T | 1833 | 0.551336 | 0         |  |
|  | Shiraz-38T | 1951 | 0.250891 | 0         |  |

|          |      |            |      |          |           |  |
|----------|------|------------|------|----------|-----------|--|
|          |      | Shiraz-38T | 1951 | 0.250891 | 0         |  |
|          |      | Shiraz-53T | 2078 | 0.287202 | 0         |  |
|          |      | Shiraz-53T | 2078 | 0.287202 | 0         |  |
|          |      | Shiraz-71T | 2238 | 0.603631 | 0         |  |
|          |      | Shiraz-71T | 2238 | 0.603631 | 0         |  |
|          |      | Shiraz-3T  | 90   | 0.219276 | 0         |  |
|          |      | Shiraz-3T  | 90   | 0.219276 | 0         |  |
|          |      | Shiraz-3T  | 96   | 0.428308 | 0         |  |
|          |      | Shiraz-3T  | 96   | 0.428308 | 0         |  |
|          |      | Shiraz-4T  | 253  | 0.372918 | 0         |  |
|          |      | Shiraz-4T  | 253  | 0.372918 | 0         |  |
|          |      | Shiraz-36T | 378  | 0.179558 | 0         |  |
|          |      | Shiraz-36T | 378  | 0.179558 | 0         |  |
|          |      | Shiraz-44T | 642  | 0.408617 | 0         |  |
|          |      | Shiraz-44T | 642  | 0.408617 | 0         |  |
|          |      | Shiraz-46T | 943  | 0.093799 | 0         |  |
|          |      | Shiraz-46T | 943  | 0.093799 | 0         |  |
|          |      | Shiraz-77T | 1225 | 0        | -0.117922 |  |
|          |      | Shiraz-77T | 1225 | 0        | -0.117922 |  |
|          |      | Shiraz-9T  | 1325 | 0.221899 | 0         |  |
|          |      | Shiraz-9T  | 1325 | 0.221899 | 0         |  |
|          |      | Shiraz-18T | 1434 | 0.244465 | 0         |  |
|          |      | Shiraz-18T | 1434 | 0.244465 | 0         |  |
|          |      | Shiraz-25T | 1698 | 0.21835  | 0         |  |
|          |      | Shiraz-25T | 1698 | 0.21835  | 0         |  |
|          |      | Shiraz-28T | 1735 | 0.350744 | 0         |  |
|          |      | Shiraz-28T | 1735 | 0.350744 | 0         |  |
|          |      | Shiraz-29T | 1778 | 0.120767 | 0         |  |
|          |      | Shiraz-29T | 1778 | 0.120767 | 0         |  |
|          |      | Shiraz-32T | 1833 | 0.551336 | 0         |  |
|          |      | Shiraz-32T | 1833 | 0.551336 | 0         |  |
|          |      | Shiraz-38T | 1951 | 0.250891 | 0         |  |
|          |      | Shiraz-38T | 1951 | 0.250891 | 0         |  |
|          |      | Shiraz-53T | 2078 | 0.287202 | 0         |  |
|          |      | Shiraz-53T | 2078 | 0.287202 | 0         |  |
|          |      | Shiraz-71T | 2238 | 0.603631 | 0         |  |
|          |      | Shiraz-71T | 2238 | 0.603631 | 0         |  |
| FLJ44635 | chrX | Shiraz-4T  | 261  | 0        | -0.336249 |  |
|          |      | Shiraz-16T | 295  | 0.591657 | 0         |  |
|          |      | Shiraz-36T | 433  | 0        | -0.803961 |  |
|          |      | Shiraz-44T | 899  | 0        | -1.09697  |  |
|          |      | Shiraz-44T | 900  | 0        | -0.584284 |  |
|          |      | Shiraz-49T | 1170 | 0        | -0.967436 |  |
|          |      | Shiraz-49T | 1171 | 0        | -0.612379 |  |
|          |      | Shiraz-77T | 1283 | 0.296555 | 0         |  |
|          |      | Shiraz-18T | 1457 | 0.643204 | 0         |  |
|          |      | Shiraz-22T | 1673 | 0.611783 | 0         |  |

|  |  |            |      |          |           |  |  |
|--|--|------------|------|----------|-----------|--|--|
|  |  | Shiraz-22T | 1674 | 0.887899 | 0         |  |  |
|  |  | Shiraz-25T | 1719 | 0.472955 | 0         |  |  |
|  |  | Shiraz-28T | 1762 | 0.562311 | 0         |  |  |
|  |  | Shiraz-29T | 1801 | 0.815343 | 0         |  |  |
|  |  | Shiraz-32T | 1870 | 0.729766 | 0         |  |  |
|  |  | Shiraz-35T | 1933 | 0.488535 | 0         |  |  |
|  |  | Shiraz-58T | 2223 | 0.833364 | 0         |  |  |
|  |  | Shiraz-58T | 2224 | 1.076575 | 0         |  |  |
|  |  | Shiraz-71T | 2263 | 0.975531 | 0         |  |  |
|  |  | Shiraz-4T  | 261  | 0        | -0.336249 |  |  |
|  |  | Shiraz-16T | 295  | 0.591657 | 0         |  |  |
|  |  | Shiraz-36T | 433  | 0        | -0.803961 |  |  |
|  |  | Shiraz-44T | 899  | 0        | -1.09697  |  |  |
|  |  | Shiraz-44T | 900  | 0        | -0.584284 |  |  |
|  |  | Shiraz-49T | 1170 | 0        | -0.967436 |  |  |
|  |  | Shiraz-49T | 1171 | 0        | -0.612379 |  |  |
|  |  | Shiraz-77T | 1283 | 0.296555 | 0         |  |  |
|  |  | Shiraz-18T | 1457 | 0.643204 | 0         |  |  |
|  |  | Shiraz-22T | 1673 | 0.611783 | 0         |  |  |
|  |  | Shiraz-22T | 1674 | 0.887899 | 0         |  |  |
|  |  | Shiraz-25T | 1719 | 0.472955 | 0         |  |  |
|  |  | Shiraz-28T | 1762 | 0.562311 | 0         |  |  |
|  |  | Shiraz-29T | 1801 | 0.815343 | 0         |  |  |
|  |  | Shiraz-32T | 1870 | 0.729766 | 0         |  |  |
|  |  | Shiraz-35T | 1933 | 0.488535 | 0         |  |  |
|  |  | Shiraz-58T | 2223 | 0.833364 | 0         |  |  |
|  |  | Shiraz-58T | 2224 | 1.076575 | 0         |  |  |
|  |  | Shiraz-71T | 2263 | 0.975531 | 0         |  |  |
|  |  | Shiraz-4T  | 261  | 0        | -0.336249 |  |  |
|  |  | Shiraz-16T | 295  | 0.591657 | 0         |  |  |
|  |  | Shiraz-36T | 433  | 0        | -0.803961 |  |  |
|  |  | Shiraz-44T | 899  | 0        | -1.09697  |  |  |
|  |  | Shiraz-44T | 900  | 0        | -0.584284 |  |  |
|  |  | Shiraz-49T | 1170 | 0        | -0.967436 |  |  |
|  |  | Shiraz-49T | 1171 | 0        | -0.612379 |  |  |
|  |  | Shiraz-77T | 1283 | 0.296555 | 0         |  |  |
|  |  | Shiraz-18T | 1457 | 0.643204 | 0         |  |  |
|  |  | Shiraz-22T | 1673 | 0.611783 | 0         |  |  |
|  |  | Shiraz-22T | 1674 | 0.887899 | 0         |  |  |
|  |  | Shiraz-25T | 1719 | 0.472955 | 0         |  |  |
|  |  | Shiraz-28T | 1762 | 0.562311 | 0         |  |  |
|  |  | Shiraz-29T | 1801 | 0.815343 | 0         |  |  |
|  |  | Shiraz-32T | 1870 | 0.729766 | 0         |  |  |
|  |  | Shiraz-35T | 1933 | 0.488535 | 0         |  |  |
|  |  | Shiraz-58T | 2223 | 0.833364 | 0         |  |  |
|  |  | Shiraz-58T | 2224 | 1.076575 | 0         |  |  |
|  |  | Shiraz-71T | 2263 | 0.975531 | 0         |  |  |

|          |      |            |      |          |           |  |
|----------|------|------------|------|----------|-----------|--|
| FLJ45340 | chr7 | Shiraz-3T  | 90   | 0.219276 | 0         |  |
|          |      | Shiraz-3T  | 96   | 0.428308 | 0         |  |
|          |      | Shiraz-4T  | 253  | 0.372918 | 0         |  |
|          |      | Shiraz-31T | 317  | 0.204382 | 0         |  |
|          |      | Shiraz-36T | 378  | 0.179558 | 0         |  |
|          |      | Shiraz-44T | 642  | 0.408617 | 0         |  |
|          |      | Shiraz-46T | 943  | 0.093799 | 0         |  |
|          |      | Shiraz-47T | 1032 | 0.171484 | 0         |  |
|          |      | Shiraz-77T | 1225 | 0        | -0.117922 |  |
|          |      | Shiraz-77T | 1229 | 0.051661 | 0         |  |
|          |      | Shiraz-9T  | 1325 | 0.221899 | 0         |  |
|          |      | Shiraz-18T | 1434 | 0.244465 | 0         |  |
|          |      | Shiraz-25T | 1698 | 0.21835  | 0         |  |
|          |      | Shiraz-28T | 1735 | 0.350744 | 0         |  |
|          |      | Shiraz-29T | 1778 | 0.120767 | 0         |  |
|          |      | Shiraz-32T | 1833 | 0.551336 | 0         |  |
|          |      | Shiraz-38T | 1951 | 0.250891 | 0         |  |
|          |      | Shiraz-53T | 2078 | 0.287202 | 0         |  |
|          |      | Shiraz-71T | 2238 | 0.603631 | 0         |  |
|          |      | Shiraz-3T  | 90   | 0.219276 | 0         |  |
|          |      | Shiraz-3T  | 96   | 0.428308 | 0         |  |
|          |      | Shiraz-4T  | 253  | 0.372918 | 0         |  |
|          |      | Shiraz-31T | 317  | 0.204382 | 0         |  |
|          |      | Shiraz-36T | 378  | 0.179558 | 0         |  |
|          |      | Shiraz-44T | 642  | 0.408617 | 0         |  |
|          |      | Shiraz-46T | 943  | 0.093799 | 0         |  |
|          |      | Shiraz-47T | 1032 | 0.171484 | 0         |  |
|          |      | Shiraz-77T | 1225 | 0        | -0.117922 |  |
|          |      | Shiraz-77T | 1229 | 0.051661 | 0         |  |
|          |      | Shiraz-9T  | 1325 | 0.221899 | 0         |  |
|          |      | Shiraz-18T | 1434 | 0.244465 | 0         |  |
|          |      | Shiraz-25T | 1698 | 0.21835  | 0         |  |
|          |      | Shiraz-28T | 1735 | 0.350744 | 0         |  |
|          |      | Shiraz-29T | 1778 | 0.120767 | 0         |  |
|          |      | Shiraz-32T | 1833 | 0.551336 | 0         |  |
|          |      | Shiraz-38T | 1951 | 0.250891 | 0         |  |
|          |      | Shiraz-53T | 2078 | 0.287202 | 0         |  |
|          |      | Shiraz-71T | 2238 | 0.603631 | 0         |  |
|          |      | Shiraz-3T  | 90   | 0.219276 | 0         |  |
|          |      | Shiraz-3T  | 96   | 0.428308 | 0         |  |
|          |      | Shiraz-4T  | 253  | 0.372918 | 0         |  |
|          |      | Shiraz-31T | 317  | 0.204382 | 0         |  |
|          |      | Shiraz-36T | 378  | 0.179558 | 0         |  |
|          |      | Shiraz-44T | 642  | 0.408617 | 0         |  |
|          |      | Shiraz-46T | 943  | 0.093799 | 0         |  |
|          |      | Shiraz-47T | 1032 | 0.171484 | 0         |  |
|          |      | Shiraz-77T | 1225 | 0        | -0.117922 |  |

|      |      |            |      |          |           |  |  |
|------|------|------------|------|----------|-----------|--|--|
|      |      | Shiraz-77T | 1229 | 0.051661 | 0         |  |  |
|      |      | Shiraz-9T  | 1325 | 0.221899 | 0         |  |  |
|      |      | Shiraz-18T | 1434 | 0.244465 | 0         |  |  |
|      |      | Shiraz-25T | 1698 | 0.21835  | 0         |  |  |
|      |      | Shiraz-28T | 1735 | 0.350744 | 0         |  |  |
|      |      | Shiraz-29T | 1778 | 0.120767 | 0         |  |  |
|      |      | Shiraz-32T | 1833 | 0.551336 | 0         |  |  |
|      |      | Shiraz-38T | 1951 | 0.250891 | 0         |  |  |
|      |      | Shiraz-53T | 2078 | 0.287202 | 0         |  |  |
|      |      | Shiraz-71T | 2238 | 0.603631 | 0         |  |  |
| FLNA | chrX | Shiraz-3T  | 246  | 0.531858 | 0         |  |  |
|      |      | Shiraz-4T  | 261  | 0        | -0.336249 |  |  |
|      |      | Shiraz-16T | 295  | 0.591657 | 0         |  |  |
|      |      | Shiraz-36T | 433  | 0        | -0.803961 |  |  |
|      |      | Shiraz-42T | 480  | 0        | -0.232915 |  |  |
|      |      | Shiraz-44T | 908  | 0.466743 | 0         |  |  |
|      |      | Shiraz-49T | 1170 | 0        | -0.967436 |  |  |
|      |      | Shiraz-49T | 1173 | 0        | -0.704439 |  |  |
|      |      | Shiraz-9T  | 1370 | 0.690073 | 0         |  |  |
|      |      | Shiraz-9T  | 1371 | 1.292392 | 0         |  |  |
|      |      | Shiraz-18T | 1457 | 0.643204 | 0         |  |  |
|      |      | Shiraz-22T | 1673 | 0.611783 | 0         |  |  |
|      |      | Shiraz-22T | 1678 | 0.911625 | 0         |  |  |
|      |      | Shiraz-25T | 1719 | 0.472955 | 0         |  |  |
|      |      | Shiraz-28T | 1762 | 0.562311 | 0         |  |  |
|      |      | Shiraz-29T | 1801 | 0.815343 | 0         |  |  |
|      |      | Shiraz-32T | 1870 | 0.729766 | 0         |  |  |
|      |      | Shiraz-32T | 1872 | 1.504553 | 0         |  |  |
|      |      | Shiraz-35T | 1933 | 0.488535 | 0         |  |  |
|      |      | Shiraz-38T | 2011 | 0        | -0.406024 |  |  |
|      |      | Shiraz-53T | 2115 | 0.427728 | 0         |  |  |
|      |      | Shiraz-58T | 2223 | 0.833364 | 0         |  |  |
|      |      | Shiraz-58T | 2226 | 1.074663 | 0         |  |  |
|      |      | Shiraz-71T | 2263 | 0.975531 | 0         |  |  |
|      |      | Shiraz-3T  | 246  | 0.531858 | 0         |  |  |
|      |      | Shiraz-4T  | 261  | 0        | -0.336249 |  |  |
|      |      | Shiraz-16T | 295  | 0.591657 | 0         |  |  |
|      |      | Shiraz-36T | 433  | 0        | -0.803961 |  |  |
|      |      | Shiraz-42T | 480  | 0        | -0.232915 |  |  |
|      |      | Shiraz-44T | 908  | 0.466743 | 0         |  |  |
|      |      | Shiraz-49T | 1170 | 0        | -0.967436 |  |  |
|      |      | Shiraz-49T | 1173 | 0        | -0.704439 |  |  |
|      |      | Shiraz-9T  | 1370 | 0.690073 | 0         |  |  |
|      |      | Shiraz-9T  | 1371 | 1.292392 | 0         |  |  |
|      |      | Shiraz-18T | 1457 | 0.643204 | 0         |  |  |
|      |      | Shiraz-22T | 1673 | 0.611783 | 0         |  |  |
|      |      | Shiraz-22T | 1678 | 0.911625 | 0         |  |  |

|      |      |            |      |          |           |  |  |
|------|------|------------|------|----------|-----------|--|--|
|      |      | Shiraz-25T | 1719 | 0.472955 | 0         |  |  |
|      |      | Shiraz-28T | 1762 | 0.562311 | 0         |  |  |
|      |      | Shiraz-29T | 1801 | 0.815343 | 0         |  |  |
|      |      | Shiraz-32T | 1870 | 0.729766 | 0         |  |  |
|      |      | Shiraz-32T | 1872 | 1.504553 | 0         |  |  |
|      |      | Shiraz-35T | 1933 | 0.488535 | 0         |  |  |
|      |      | Shiraz-38T | 2011 | 0        | -0.406024 |  |  |
|      |      | Shiraz-53T | 2115 | 0.427728 | 0         |  |  |
|      |      | Shiraz-58T | 2223 | 0.833364 | 0         |  |  |
|      |      | Shiraz-58T | 2226 | 1.074663 | 0         |  |  |
|      |      | Shiraz-71T | 2263 | 0.975531 | 0         |  |  |
|      |      | Shiraz-3T  | 246  | 0.531858 | 0         |  |  |
|      |      | Shiraz-4T  | 261  | 0        | -0.336249 |  |  |
|      |      | Shiraz-16T | 295  | 0.591657 | 0         |  |  |
|      |      | Shiraz-36T | 433  | 0        | -0.803961 |  |  |
|      |      | Shiraz-42T | 480  | 0        | -0.232915 |  |  |
|      |      | Shiraz-44T | 908  | 0.466743 | 0         |  |  |
|      |      | Shiraz-49T | 1170 | 0        | -0.967436 |  |  |
|      |      | Shiraz-49T | 1173 | 0        | -0.704439 |  |  |
|      |      | Shiraz-9T  | 1370 | 0.690073 | 0         |  |  |
|      |      | Shiraz-9T  | 1371 | 1.292392 | 0         |  |  |
|      |      | Shiraz-18T | 1457 | 0.643204 | 0         |  |  |
|      |      | Shiraz-22T | 1673 | 0.611783 | 0         |  |  |
|      |      | Shiraz-22T | 1678 | 0.911625 | 0         |  |  |
|      |      | Shiraz-25T | 1719 | 0.472955 | 0         |  |  |
|      |      | Shiraz-28T | 1762 | 0.562311 | 0         |  |  |
|      |      | Shiraz-29T | 1801 | 0.815343 | 0         |  |  |
|      |      | Shiraz-32T | 1870 | 0.729766 | 0         |  |  |
|      |      | Shiraz-32T | 1872 | 1.504553 | 0         |  |  |
|      |      | Shiraz-35T | 1933 | 0.488535 | 0         |  |  |
|      |      | Shiraz-38T | 2011 | 0        | -0.406024 |  |  |
|      |      | Shiraz-53T | 2115 | 0.427728 | 0         |  |  |
|      |      | Shiraz-58T | 2223 | 0.833364 | 0         |  |  |
|      |      | Shiraz-58T | 2226 | 1.074663 | 0         |  |  |
|      |      | Shiraz-71T | 2263 | 0.975531 | 0         |  |  |
| FLNC | chr7 | Shiraz-3T  | 90   | 0.219276 | 0         |  |  |
|      |      | Shiraz-3T  | 96   | 0.428308 | 0         |  |  |
|      |      | Shiraz-4T  | 253  | 0.372918 | 0         |  |  |
|      |      | Shiraz-31T | 317  | 0.204382 | 0         |  |  |
|      |      | Shiraz-36T | 378  | 0.179558 | 0         |  |  |
|      |      | Shiraz-44T | 642  | 0.408617 | 0         |  |  |
|      |      | Shiraz-46T | 943  | 0.093799 | 0         |  |  |
|      |      | Shiraz-47T | 1032 | 0.171484 | 0         |  |  |
|      |      | Shiraz-77T | 1225 | 0        | -0.117922 |  |  |
|      |      | Shiraz-77T | 1229 | 0.051661 | 0         |  |  |
|      |      | Shiraz-9T  | 1325 | 0.221899 | 0         |  |  |
|      |      | Shiraz-18T | 1434 | 0.244465 | 0         |  |  |



|      |      |            |      |          |           |  |
|------|------|------------|------|----------|-----------|--|
|      |      | Shiraz-25T | 1698 | 0.21835  | 0         |  |
|      |      | Shiraz-28T | 1735 | 0.350744 | 0         |  |
|      |      | Shiraz-29T | 1778 | 0.120767 | 0         |  |
|      |      | Shiraz-32T | 1833 | 0.551336 | 0         |  |
|      |      | Shiraz-38T | 1951 | 0.250891 | 0         |  |
|      |      | Shiraz-53T | 2078 | 0.287202 | 0         |  |
|      |      | Shiraz-71T | 2238 | 0.603631 | 0         |  |
|      |      | Shiraz-3T  | 90   | 0.219276 | 0         |  |
|      |      | Shiraz-3T  | 96   | 0.428308 | 0         |  |
|      |      | Shiraz-4T  | 253  | 0.372918 | 0         |  |
|      |      | Shiraz-31T | 317  | 0.204382 | 0         |  |
|      |      | Shiraz-36T | 378  | 0.179558 | 0         |  |
|      |      | Shiraz-44T | 642  | 0.408617 | 0         |  |
|      |      | Shiraz-46T | 943  | 0.093799 | 0         |  |
|      |      | Shiraz-47T | 1032 | 0.171484 | 0         |  |
|      |      | Shiraz-77T | 1225 | 0        | -0.117922 |  |
|      |      | Shiraz-77T | 1229 | 0.051661 | 0         |  |
|      |      | Shiraz-9T  | 1325 | 0.221899 | 0         |  |
|      |      | Shiraz-18T | 1434 | 0.244465 | 0         |  |
|      |      | Shiraz-25T | 1698 | 0.21835  | 0         |  |
|      |      | Shiraz-28T | 1735 | 0.350744 | 0         |  |
|      |      | Shiraz-29T | 1778 | 0.120767 | 0         |  |
|      |      | Shiraz-32T | 1833 | 0.551336 | 0         |  |
|      |      | Shiraz-38T | 1951 | 0.250891 | 0         |  |
|      |      | Shiraz-53T | 2078 | 0.287202 | 0         |  |
|      |      | Shiraz-71T | 2238 | 0.603631 | 0         |  |
|      |      | Shiraz-3T  | 90   | 0.219276 | 0         |  |
|      |      | Shiraz-3T  | 96   | 0.428308 | 0         |  |
|      |      | Shiraz-4T  | 253  | 0.372918 | 0         |  |
|      |      | Shiraz-31T | 317  | 0.204382 | 0         |  |
|      |      | Shiraz-36T | 378  | 0.179558 | 0         |  |
|      |      | Shiraz-44T | 642  | 0.408617 | 0         |  |
|      |      | Shiraz-46T | 943  | 0.093799 | 0         |  |
|      |      | Shiraz-47T | 1032 | 0.171484 | 0         |  |
|      |      | Shiraz-77T | 1225 | 0        | -0.117922 |  |
|      |      | Shiraz-77T | 1229 | 0.051661 | 0         |  |
|      |      | Shiraz-9T  | 1325 | 0.221899 | 0         |  |
|      |      | Shiraz-18T | 1434 | 0.244465 | 0         |  |
|      |      | Shiraz-25T | 1698 | 0.21835  | 0         |  |
|      |      | Shiraz-28T | 1735 | 0.350744 | 0         |  |
|      |      | Shiraz-29T | 1778 | 0.120767 | 0         |  |
|      |      | Shiraz-32T | 1833 | 0.551336 | 0         |  |
|      |      | Shiraz-38T | 1951 | 0.250891 | 0         |  |
|      |      | Shiraz-53T | 2078 | 0.287202 | 0         |  |
|      |      | Shiraz-71T | 2238 | 0.603631 | 0         |  |
| FMR1 | chrX | Shiraz-3T  | 242  | 0        | -0.336434 |  |
|      |      | Shiraz-4T  | 261  | 0        | -0.336249 |  |

|  |            |      |          |           |  |
|--|------------|------|----------|-----------|--|
|  | Shiraz-16T | 295  | 0.591657 | 0         |  |
|  | Shiraz-36T | 433  | 0        | -0.803961 |  |
|  | Shiraz-44T | 899  | 0        | -1.09697  |  |
|  | Shiraz-44T | 907  | 0        | -1.370847 |  |
|  | Shiraz-49T | 1170 | 0        | -0.967436 |  |
|  | Shiraz-9T  | 1370 | 0.690073 | 0         |  |
|  | Shiraz-18T | 1457 | 0.643204 | 0         |  |
|  | Shiraz-22T | 1673 | 0.611783 | 0         |  |
|  | Shiraz-25T | 1719 | 0.472955 | 0         |  |
|  | Shiraz-28T | 1762 | 0.562311 | 0         |  |
|  | Shiraz-29T | 1801 | 0.815343 | 0         |  |
|  | Shiraz-32T | 1870 | 0.729766 | 0         |  |
|  | Shiraz-35T | 1933 | 0.488535 | 0         |  |
|  | Shiraz-58T | 2223 | 0.833364 | 0         |  |
|  | Shiraz-71T | 2263 | 0.975531 | 0         |  |
|  | Shiraz-3T  | 242  | 0        | -0.336434 |  |
|  | Shiraz-4T  | 261  | 0        | -0.336249 |  |
|  | Shiraz-16T | 295  | 0.591657 | 0         |  |
|  | Shiraz-36T | 433  | 0        | -0.803961 |  |
|  | Shiraz-44T | 899  | 0        | -1.09697  |  |
|  | Shiraz-44T | 907  | 0        | -1.370847 |  |
|  | Shiraz-49T | 1170 | 0        | -0.967436 |  |
|  | Shiraz-9T  | 1370 | 0.690073 | 0         |  |
|  | Shiraz-18T | 1457 | 0.643204 | 0         |  |
|  | Shiraz-22T | 1673 | 0.611783 | 0         |  |
|  | Shiraz-25T | 1719 | 0.472955 | 0         |  |
|  | Shiraz-28T | 1762 | 0.562311 | 0         |  |
|  | Shiraz-29T | 1801 | 0.815343 | 0         |  |
|  | Shiraz-32T | 1870 | 0.729766 | 0         |  |
|  | Shiraz-35T | 1933 | 0.488535 | 0         |  |
|  | Shiraz-58T | 2223 | 0.833364 | 0         |  |
|  | Shiraz-71T | 2263 | 0.975531 | 0         |  |
|  | Shiraz-3T  | 242  | 0        | -0.336434 |  |
|  | Shiraz-4T  | 261  | 0        | -0.336249 |  |
|  | Shiraz-16T | 295  | 0.591657 | 0         |  |
|  | Shiraz-36T | 433  | 0        | -0.803961 |  |
|  | Shiraz-44T | 899  | 0        | -1.09697  |  |
|  | Shiraz-44T | 907  | 0        | -1.370847 |  |
|  | Shiraz-49T | 1170 | 0        | -0.967436 |  |
|  | Shiraz-9T  | 1370 | 0.690073 | 0         |  |
|  | Shiraz-18T | 1457 | 0.643204 | 0         |  |
|  | Shiraz-22T | 1673 | 0.611783 | 0         |  |
|  | Shiraz-25T | 1719 | 0.472955 | 0         |  |
|  | Shiraz-28T | 1762 | 0.562311 | 0         |  |
|  | Shiraz-29T | 1801 | 0.815343 | 0         |  |
|  | Shiraz-32T | 1870 | 0.729766 | 0         |  |
|  | Shiraz-35T | 1933 | 0.488535 | 0         |  |

|        |      |            |      |          |           |  |  |
|--------|------|------------|------|----------|-----------|--|--|
|        |      | Shiraz-58T | 2223 | 0.833364 | 0         |  |  |
|        |      | Shiraz-71T | 2263 | 0.975531 | 0         |  |  |
| FMR1NB | chrX | Shiraz-3T  | 242  | 0        | -0.336434 |  |  |
|        |      | Shiraz-4T  | 261  | 0        | -0.336249 |  |  |
|        |      | Shiraz-16T | 295  | 0.591657 | 0         |  |  |
|        |      | Shiraz-36T | 433  | 0        | -0.803961 |  |  |
|        |      | Shiraz-44T | 899  | 0        | -1.09697  |  |  |
|        |      | Shiraz-44T | 907  | 0        | -1.370847 |  |  |
|        |      | Shiraz-49T | 1170 | 0        | -0.967436 |  |  |
|        |      | Shiraz-9T  | 1370 | 0.690073 | 0         |  |  |
|        |      | Shiraz-18T | 1457 | 0.643204 | 0         |  |  |
|        |      | Shiraz-22T | 1673 | 0.611783 | 0         |  |  |
|        |      | Shiraz-25T | 1719 | 0.472955 | 0         |  |  |
|        |      | Shiraz-28T | 1762 | 0.562311 | 0         |  |  |
|        |      | Shiraz-29T | 1801 | 0.815343 | 0         |  |  |
|        |      | Shiraz-32T | 1870 | 0.729766 | 0         |  |  |
|        |      | Shiraz-35T | 1933 | 0.488535 | 0         |  |  |
|        |      | Shiraz-58T | 2223 | 0.833364 | 0         |  |  |
|        |      | Shiraz-71T | 2263 | 0.975531 | 0         |  |  |
|        |      | Shiraz-3T  | 242  | 0        | -0.336434 |  |  |
|        |      | Shiraz-4T  | 261  | 0        | -0.336249 |  |  |
|        |      | Shiraz-16T | 295  | 0.591657 | 0         |  |  |
|        |      | Shiraz-36T | 433  | 0        | -0.803961 |  |  |
|        |      | Shiraz-44T | 899  | 0        | -1.09697  |  |  |
|        |      | Shiraz-44T | 907  | 0        | -1.370847 |  |  |
|        |      | Shiraz-49T | 1170 | 0        | -0.967436 |  |  |
|        |      | Shiraz-9T  | 1370 | 0.690073 | 0         |  |  |
|        |      | Shiraz-18T | 1457 | 0.643204 | 0         |  |  |
|        |      | Shiraz-22T | 1673 | 0.611783 | 0         |  |  |
|        |      | Shiraz-25T | 1719 | 0.472955 | 0         |  |  |
|        |      | Shiraz-28T | 1762 | 0.562311 | 0         |  |  |
|        |      | Shiraz-29T | 1801 | 0.815343 | 0         |  |  |
|        |      | Shiraz-32T | 1870 | 0.729766 | 0         |  |  |
|        |      | Shiraz-35T | 1933 | 0.488535 | 0         |  |  |
|        |      | Shiraz-58T | 2223 | 0.833364 | 0         |  |  |
|        |      | Shiraz-71T | 2263 | 0.975531 | 0         |  |  |
|        |      | Shiraz-3T  | 242  | 0        | -0.336434 |  |  |
|        |      | Shiraz-4T  | 261  | 0        | -0.336249 |  |  |
|        |      | Shiraz-16T | 295  | 0.591657 | 0         |  |  |
|        |      | Shiraz-36T | 433  | 0        | -0.803961 |  |  |
|        |      | Shiraz-44T | 899  | 0        | -1.09697  |  |  |
|        |      | Shiraz-44T | 907  | 0        | -1.370847 |  |  |
|        |      | Shiraz-49T | 1170 | 0        | -0.967436 |  |  |
|        |      | Shiraz-9T  | 1370 | 0.690073 | 0         |  |  |
|        |      | Shiraz-18T | 1457 | 0.643204 | 0         |  |  |
|        |      | Shiraz-22T | 1673 | 0.611783 | 0         |  |  |
|        |      | Shiraz-25T | 1719 | 0.472955 | 0         |  |  |

|       |      |            |      |          |           |  |
|-------|------|------------|------|----------|-----------|--|
|       |      | Shiraz-28T | 1762 | 0.562311 | 0         |  |
|       |      | Shiraz-29T | 1801 | 0.815343 | 0         |  |
|       |      | Shiraz-32T | 1870 | 0.729766 | 0         |  |
|       |      | Shiraz-35T | 1933 | 0.488535 | 0         |  |
|       |      | Shiraz-58T | 2223 | 0.833364 | 0         |  |
|       |      | Shiraz-71T | 2263 | 0.975531 | 0         |  |
| FOXO4 | chrX | Shiraz-4T  | 261  | 0        | -0.336249 |  |
|       |      | Shiraz-16T | 295  | 0.591657 | 0         |  |
|       |      | Shiraz-36T | 433  | 0        | -0.803961 |  |
|       |      | Shiraz-44T | 899  | 0        | -1.09697  |  |
|       |      | Shiraz-44T | 900  | 0        | -0.584284 |  |
|       |      | Shiraz-49T | 1170 | 0        | -0.967436 |  |
|       |      | Shiraz-49T | 1171 | 0        | -0.612379 |  |
|       |      | Shiraz-77T | 1283 | 0.296555 | 0         |  |
|       |      | Shiraz-18T | 1457 | 0.643204 | 0         |  |
|       |      | Shiraz-22T | 1673 | 0.611783 | 0         |  |
|       |      | Shiraz-22T | 1674 | 0.887899 | 0         |  |
|       |      | Shiraz-25T | 1719 | 0.472955 | 0         |  |
|       |      | Shiraz-28T | 1762 | 0.562311 | 0         |  |
|       |      | Shiraz-29T | 1801 | 0.815343 | 0         |  |
|       |      | Shiraz-32T | 1870 | 0.729766 | 0         |  |
|       |      | Shiraz-35T | 1933 | 0.488535 | 0         |  |
|       |      | Shiraz-58T | 2223 | 0.833364 | 0         |  |
|       |      | Shiraz-58T | 2224 | 1.076575 | 0         |  |
|       |      | Shiraz-71T | 2263 | 0.975531 | 0         |  |
|       |      | Shiraz-4T  | 261  | 0        | -0.336249 |  |
|       |      | Shiraz-16T | 295  | 0.591657 | 0         |  |
|       |      | Shiraz-36T | 433  | 0        | -0.803961 |  |
|       |      | Shiraz-44T | 899  | 0        | -1.09697  |  |
|       |      | Shiraz-44T | 900  | 0        | -0.584284 |  |
|       |      | Shiraz-49T | 1170 | 0        | -0.967436 |  |
|       |      | Shiraz-49T | 1171 | 0        | -0.612379 |  |
|       |      | Shiraz-77T | 1283 | 0.296555 | 0         |  |
|       |      | Shiraz-18T | 1457 | 0.643204 | 0         |  |
|       |      | Shiraz-22T | 1673 | 0.611783 | 0         |  |
|       |      | Shiraz-22T | 1674 | 0.887899 | 0         |  |
|       |      | Shiraz-25T | 1719 | 0.472955 | 0         |  |
|       |      | Shiraz-28T | 1762 | 0.562311 | 0         |  |
|       |      | Shiraz-29T | 1801 | 0.815343 | 0         |  |
|       |      | Shiraz-32T | 1870 | 0.729766 | 0         |  |
|       |      | Shiraz-35T | 1933 | 0.488535 | 0         |  |
|       |      | Shiraz-58T | 2223 | 0.833364 | 0         |  |
|       |      | Shiraz-58T | 2224 | 1.076575 | 0         |  |
|       |      | Shiraz-71T | 2263 | 0.975531 | 0         |  |
|       |      | Shiraz-4T  | 261  | 0        | -0.336249 |  |
|       |      | Shiraz-16T | 295  | 0.591657 | 0         |  |
|       |      | Shiraz-36T | 433  | 0        | -0.803961 |  |

|       |      |            |      |          |           |  |  |
|-------|------|------------|------|----------|-----------|--|--|
|       |      | Shiraz-44T | 899  | 0        | -1.09697  |  |  |
|       |      | Shiraz-44T | 900  | 0        | -0.584284 |  |  |
|       |      | Shiraz-49T | 1170 | 0        | -0.967436 |  |  |
|       |      | Shiraz-49T | 1171 | 0        | -0.612379 |  |  |
|       |      | Shiraz-77T | 1283 | 0.296555 | 0         |  |  |
|       |      | Shiraz-18T | 1457 | 0.643204 | 0         |  |  |
|       |      | Shiraz-22T | 1673 | 0.611783 | 0         |  |  |
|       |      | Shiraz-22T | 1674 | 0.887899 | 0         |  |  |
|       |      | Shiraz-25T | 1719 | 0.472955 | 0         |  |  |
|       |      | Shiraz-28T | 1762 | 0.562311 | 0         |  |  |
|       |      | Shiraz-29T | 1801 | 0.815343 | 0         |  |  |
|       |      | Shiraz-32T | 1870 | 0.729766 | 0         |  |  |
|       |      | Shiraz-35T | 1933 | 0.488535 | 0         |  |  |
|       |      | Shiraz-58T | 2223 | 0.833364 | 0         |  |  |
|       |      | Shiraz-58T | 2224 | 1.076575 | 0         |  |  |
|       |      | Shiraz-71T | 2263 | 0.975531 | 0         |  |  |
| FOXP2 | chr7 | Shiraz-3T  | 90   | 0.219276 | 0         |  |  |
|       |      | Shiraz-3T  | 95   | 0        | -0.077623 |  |  |
|       |      | Shiraz-4T  | 253  | 0.372918 | 0         |  |  |
|       |      | Shiraz-36T | 378  | 0.179558 | 0         |  |  |
|       |      | Shiraz-36T | 382  | 0.081739 | 0         |  |  |
|       |      | Shiraz-44T | 641  | 0        | -0.477846 |  |  |
|       |      | Shiraz-46T | 943  | 0.093799 | 0         |  |  |
|       |      | Shiraz-46T | 947  | 0        | -0.010843 |  |  |
|       |      | Shiraz-47T | 1031 | 0        | -0.117529 |  |  |
|       |      | Shiraz-49T | 1121 | 0        | -0.138569 |  |  |
|       |      | Shiraz-77T | 1225 | 0        | -0.117922 |  |  |
|       |      | Shiraz-77T | 1228 | 0        | -0.238084 |  |  |
|       |      | Shiraz-18T | 1434 | 0.244465 | 0         |  |  |
|       |      | Shiraz-22T | 1549 | 0        | -0.319623 |  |  |
|       |      | Shiraz-22T | 1552 | 0        | -0.50686  |  |  |
|       |      | Shiraz-25T | 1698 | 0.21835  | 0         |  |  |
|       |      | Shiraz-28T | 1735 | 0.350744 | 0         |  |  |
|       |      | Shiraz-29T | 1778 | 0.120767 | 0         |  |  |
|       |      | Shiraz-32T | 1833 | 0.551336 | 0         |  |  |
|       |      | Shiraz-32T | 1835 | 0.092727 | 0         |  |  |
|       |      | Shiraz-38T | 1951 | 0.250891 | 0         |  |  |
|       |      | Shiraz-53T | 2078 | 0.287202 | 0         |  |  |
|       |      | Shiraz-58T | 2161 | 0        | -0.187744 |  |  |
|       |      | Shiraz-71T | 2238 | 0.603631 | 0         |  |  |
|       |      | Shiraz-3T  | 90   | 0.219276 | 0         |  |  |
|       |      | Shiraz-3T  | 95   | 0        | -0.077623 |  |  |
|       |      | Shiraz-4T  | 253  | 0.372918 | 0         |  |  |
|       |      | Shiraz-36T | 378  | 0.179558 | 0         |  |  |
|       |      | Shiraz-36T | 382  | 0.081739 | 0         |  |  |
|       |      | Shiraz-44T | 641  | 0        | -0.477846 |  |  |
|       |      | Shiraz-46T | 943  | 0.093799 | 0         |  |  |

|       |      |            |      |          |           |  |  |
|-------|------|------------|------|----------|-----------|--|--|
|       |      | Shiraz-46T | 947  | 0        | -0.010843 |  |  |
|       |      | Shiraz-47T | 1031 | 0        | -0.117529 |  |  |
|       |      | Shiraz-49T | 1121 | 0        | -0.138569 |  |  |
|       |      | Shiraz-77T | 1225 | 0        | -0.117922 |  |  |
|       |      | Shiraz-77T | 1228 | 0        | -0.238084 |  |  |
|       |      | Shiraz-18T | 1434 | 0.244465 | 0         |  |  |
|       |      | Shiraz-22T | 1549 | 0        | -0.319623 |  |  |
|       |      | Shiraz-22T | 1552 | 0        | -0.50686  |  |  |
|       |      | Shiraz-25T | 1698 | 0.21835  | 0         |  |  |
|       |      | Shiraz-28T | 1735 | 0.350744 | 0         |  |  |
|       |      | Shiraz-29T | 1778 | 0.120767 | 0         |  |  |
|       |      | Shiraz-32T | 1833 | 0.551336 | 0         |  |  |
|       |      | Shiraz-32T | 1835 | 0.092727 | 0         |  |  |
|       |      | Shiraz-38T | 1951 | 0.250891 | 0         |  |  |
|       |      | Shiraz-53T | 2078 | 0.287202 | 0         |  |  |
|       |      | Shiraz-58T | 2161 | 0        | -0.187744 |  |  |
|       |      | Shiraz-71T | 2238 | 0.603631 | 0         |  |  |
|       |      | Shiraz-3T  | 90   | 0.219276 | 0         |  |  |
|       |      | Shiraz-3T  | 95   | 0        | -0.077623 |  |  |
|       |      | Shiraz-4T  | 253  | 0.372918 | 0         |  |  |
|       |      | Shiraz-36T | 378  | 0.179558 | 0         |  |  |
|       |      | Shiraz-36T | 382  | 0.081739 | 0         |  |  |
|       |      | Shiraz-44T | 641  | 0        | -0.477846 |  |  |
|       |      | Shiraz-46T | 943  | 0.093799 | 0         |  |  |
|       |      | Shiraz-46T | 947  | 0        | -0.010843 |  |  |
|       |      | Shiraz-47T | 1031 | 0        | -0.117529 |  |  |
|       |      | Shiraz-49T | 1121 | 0        | -0.138569 |  |  |
|       |      | Shiraz-77T | 1225 | 0        | -0.117922 |  |  |
|       |      | Shiraz-77T | 1228 | 0        | -0.238084 |  |  |
|       |      | Shiraz-18T | 1434 | 0.244465 | 0         |  |  |
|       |      | Shiraz-22T | 1549 | 0        | -0.319623 |  |  |
|       |      | Shiraz-22T | 1552 | 0        | -0.50686  |  |  |
|       |      | Shiraz-25T | 1698 | 0.21835  | 0         |  |  |
|       |      | Shiraz-28T | 1735 | 0.350744 | 0         |  |  |
|       |      | Shiraz-29T | 1778 | 0.120767 | 0         |  |  |
|       |      | Shiraz-32T | 1833 | 0.551336 | 0         |  |  |
|       |      | Shiraz-32T | 1835 | 0.092727 | 0         |  |  |
|       |      | Shiraz-38T | 1951 | 0.250891 | 0         |  |  |
|       |      | Shiraz-53T | 2078 | 0.287202 | 0         |  |  |
|       |      | Shiraz-58T | 2161 | 0        | -0.187744 |  |  |
|       |      | Shiraz-71T | 2238 | 0.603631 | 0         |  |  |
| FOXP3 | chrX | Shiraz-3T  | 238  | 0.472087 | 0         |  |  |
|       |      | Shiraz-4T  | 260  | 0        | -0.324128 |  |  |
|       |      | Shiraz-16T | 294  | 0.655804 | 0         |  |  |
|       |      | Shiraz-31T | 345  | 0.103301 | 0         |  |  |
|       |      | Shiraz-36T | 431  | 0        | -0.78035  |  |  |
|       |      | Shiraz-36T | 432  | 0        | -0.6692   |  |  |

|  |            |      |          |           |  |
|--|------------|------|----------|-----------|--|
|  | Shiraz-44T | 891  | 0        | -0.954044 |  |
|  | Shiraz-44T | 896  | 0        | -0.109108 |  |
|  | Shiraz-44T | 897  | 0.486937 | 0         |  |
|  | Shiraz-46T | 991  | 0.139564 | 0         |  |
|  | Shiraz-47T | 1084 | 0.24185  | 0         |  |
|  | Shiraz-49T | 1166 | 0        | -0.917235 |  |
|  | Shiraz-49T | 1169 | 0        | -0.583529 |  |
|  | Shiraz-77T | 1282 | 0.213849 | 0         |  |
|  | Shiraz-9T  | 1368 | 0.199713 | 0         |  |
|  | Shiraz-9T  | 1369 | 0.703374 | 0         |  |
|  | Shiraz-18T | 1455 | 0        | -0.186773 |  |
|  | Shiraz-22T | 1669 | 0.695915 | 0         |  |
|  | Shiraz-22T | 1672 | 1.01678  | 0         |  |
|  | Shiraz-25T | 1717 | 0.420447 | 0         |  |
|  | Shiraz-28T | 1760 | 0.538181 | 0         |  |
|  | Shiraz-29T | 1800 | 0.672527 | 0         |  |
|  | Shiraz-32T | 1869 | 0.776805 | 0         |  |
|  | Shiraz-35T | 1932 | 0.507141 | 0         |  |
|  | Shiraz-58T | 2221 | 0.871948 | 0         |  |
|  | Shiraz-71T | 2260 | 0.68394  | 0         |  |
|  | Shiraz-71T | 2262 | 0.986748 | 0         |  |
|  | Shiraz-3T  | 238  | 0.472087 | 0         |  |
|  | Shiraz-4T  | 260  | 0        | -0.324128 |  |
|  | Shiraz-16T | 294  | 0.655804 | 0         |  |
|  | Shiraz-31T | 345  | 0.103301 | 0         |  |
|  | Shiraz-36T | 431  | 0        | -0.78035  |  |
|  | Shiraz-36T | 432  | 0        | -0.6692   |  |
|  | Shiraz-44T | 891  | 0        | -0.954044 |  |
|  | Shiraz-44T | 896  | 0        | -0.109108 |  |
|  | Shiraz-44T | 897  | 0.486937 | 0         |  |
|  | Shiraz-46T | 991  | 0.139564 | 0         |  |
|  | Shiraz-47T | 1084 | 0.24185  | 0         |  |
|  | Shiraz-49T | 1166 | 0        | -0.917235 |  |
|  | Shiraz-49T | 1169 | 0        | -0.583529 |  |
|  | Shiraz-77T | 1282 | 0.213849 | 0         |  |
|  | Shiraz-9T  | 1368 | 0.199713 | 0         |  |
|  | Shiraz-9T  | 1369 | 0.703374 | 0         |  |
|  | Shiraz-18T | 1455 | 0        | -0.186773 |  |
|  | Shiraz-22T | 1669 | 0.695915 | 0         |  |
|  | Shiraz-22T | 1672 | 1.01678  | 0         |  |
|  | Shiraz-25T | 1717 | 0.420447 | 0         |  |
|  | Shiraz-28T | 1760 | 0.538181 | 0         |  |
|  | Shiraz-29T | 1800 | 0.672527 | 0         |  |
|  | Shiraz-32T | 1869 | 0.776805 | 0         |  |
|  | Shiraz-35T | 1932 | 0.507141 | 0         |  |
|  | Shiraz-58T | 2221 | 0.871948 | 0         |  |
|  | Shiraz-71T | 2260 | 0.68394  | 0         |  |

|       |      |            |      |          |           |  |
|-------|------|------------|------|----------|-----------|--|
|       |      | Shiraz-71T | 2262 | 0.986748 | 0         |  |
|       |      | Shiraz-3T  | 238  | 0.472087 | 0         |  |
|       |      | Shiraz-4T  | 260  | 0        | -0.324128 |  |
|       |      | Shiraz-16T | 294  | 0.655804 | 0         |  |
|       |      | Shiraz-31T | 345  | 0.103301 | 0         |  |
|       |      | Shiraz-36T | 431  | 0        | -0.78035  |  |
|       |      | Shiraz-36T | 432  | 0        | -0.6692   |  |
|       |      | Shiraz-44T | 891  | 0        | -0.954044 |  |
|       |      | Shiraz-44T | 896  | 0        | -0.109108 |  |
|       |      | Shiraz-44T | 897  | 0.486937 | 0         |  |
|       |      | Shiraz-46T | 991  | 0.139564 | 0         |  |
|       |      | Shiraz-47T | 1084 | 0.24185  | 0         |  |
|       |      | Shiraz-49T | 1166 | 0        | -0.917235 |  |
|       |      | Shiraz-49T | 1169 | 0        | -0.583529 |  |
|       |      | Shiraz-77T | 1282 | 0.213849 | 0         |  |
|       |      | Shiraz-9T  | 1368 | 0.199713 | 0         |  |
|       |      | Shiraz-9T  | 1369 | 0.703374 | 0         |  |
|       |      | Shiraz-18T | 1455 | 0        | -0.186773 |  |
|       |      | Shiraz-22T | 1669 | 0.695915 | 0         |  |
|       |      | Shiraz-22T | 1672 | 1.01678  | 0         |  |
|       |      | Shiraz-25T | 1717 | 0.420447 | 0         |  |
|       |      | Shiraz-28T | 1760 | 0.538181 | 0         |  |
|       |      | Shiraz-29T | 1800 | 0.672527 | 0         |  |
|       |      | Shiraz-32T | 1869 | 0.776805 | 0         |  |
|       |      | Shiraz-35T | 1932 | 0.507141 | 0         |  |
|       |      | Shiraz-58T | 2221 | 0.871948 | 0         |  |
|       |      | Shiraz-71T | 2260 | 0.68394  | 0         |  |
|       |      | Shiraz-71T | 2262 | 0.986748 | 0         |  |
| FOXR2 | chrX | Shiraz-3T  | 240  | 0        | -0.346245 |  |
|       |      | Shiraz-4T  | 260  | 0        | -0.324128 |  |
|       |      | Shiraz-16T | 294  | 0.655804 | 0         |  |
|       |      | Shiraz-36T | 431  | 0        | -0.78035  |  |
|       |      | Shiraz-44T | 891  | 0        | -0.954044 |  |
|       |      | Shiraz-49T | 1166 | 0        | -0.917235 |  |
|       |      | Shiraz-9T  | 1368 | 0.199713 | 0         |  |
|       |      | Shiraz-18T | 1456 | 0.608534 | 0         |  |
|       |      | Shiraz-22T | 1669 | 0.695915 | 0         |  |
|       |      | Shiraz-25T | 1717 | 0.420447 | 0         |  |
|       |      | Shiraz-28T | 1760 | 0.538181 | 0         |  |
|       |      | Shiraz-29T | 1800 | 0.672527 | 0         |  |
|       |      | Shiraz-32T | 1869 | 0.776805 | 0         |  |
|       |      | Shiraz-35T | 1932 | 0.507141 | 0         |  |
|       |      | Shiraz-58T | 2221 | 0.871948 | 0         |  |
|       |      | Shiraz-71T | 2260 | 0.68394  | 0         |  |
|       |      | Shiraz-71T | 2262 | 0.986748 | 0         |  |
|       |      | Shiraz-3T  | 240  | 0        | -0.346245 |  |
|       |      | Shiraz-4T  | 260  | 0        | -0.324128 |  |



|       |      |            |      |          |           |  |  |
|-------|------|------------|------|----------|-----------|--|--|
|       |      | Shiraz-16T | 294  | 0.655804 | 0         |  |  |
|       |      | Shiraz-36T | 431  | 0        | -0.78035  |  |  |
|       |      | Shiraz-44T | 891  | 0        | -0.954044 |  |  |
|       |      | Shiraz-49T | 1166 | 0        | -0.917235 |  |  |
|       |      | Shiraz-9T  | 1368 | 0.199713 | 0         |  |  |
|       |      | Shiraz-18T | 1456 | 0.608534 | 0         |  |  |
|       |      | Shiraz-22T | 1669 | 0.695915 | 0         |  |  |
|       |      | Shiraz-25T | 1717 | 0.420447 | 0         |  |  |
|       |      | Shiraz-28T | 1760 | 0.538181 | 0         |  |  |
|       |      | Shiraz-29T | 1800 | 0.672527 | 0         |  |  |
|       |      | Shiraz-32T | 1869 | 0.776805 | 0         |  |  |
|       |      | Shiraz-35T | 1932 | 0.507141 | 0         |  |  |
|       |      | Shiraz-58T | 2221 | 0.871948 | 0         |  |  |
|       |      | Shiraz-71T | 2260 | 0.68394  | 0         |  |  |
|       |      | Shiraz-71T | 2262 | 0.986748 | 0         |  |  |
|       |      | Shiraz-3T  | 240  | 0        | -0.346245 |  |  |
|       |      | Shiraz-4T  | 260  | 0        | -0.324128 |  |  |
|       |      | Shiraz-16T | 294  | 0.655804 | 0         |  |  |
|       |      | Shiraz-36T | 431  | 0        | -0.78035  |  |  |
|       |      | Shiraz-44T | 891  | 0        | -0.954044 |  |  |
|       |      | Shiraz-49T | 1166 | 0        | -0.917235 |  |  |
|       |      | Shiraz-9T  | 1368 | 0.199713 | 0         |  |  |
|       |      | Shiraz-18T | 1456 | 0.608534 | 0         |  |  |
|       |      | Shiraz-22T | 1669 | 0.695915 | 0         |  |  |
|       |      | Shiraz-25T | 1717 | 0.420447 | 0         |  |  |
|       |      | Shiraz-28T | 1760 | 0.538181 | 0         |  |  |
|       |      | Shiraz-29T | 1800 | 0.672527 | 0         |  |  |
|       |      | Shiraz-32T | 1869 | 0.776805 | 0         |  |  |
|       |      | Shiraz-35T | 1932 | 0.507141 | 0         |  |  |
|       |      | Shiraz-58T | 2221 | 0.871948 | 0         |  |  |
|       |      | Shiraz-71T | 2260 | 0.68394  | 0         |  |  |
|       |      | Shiraz-71T | 2262 | 0.986748 | 0         |  |  |
| FRMD7 | chrX | Shiraz-3T  | 242  | 0        | -0.336434 |  |  |
|       |      | Shiraz-4T  | 261  | 0        | -0.336249 |  |  |
|       |      | Shiraz-16T | 295  | 0.591657 | 0         |  |  |
|       |      | Shiraz-36T | 433  | 0        | -0.803961 |  |  |
|       |      | Shiraz-44T | 899  | 0        | -1.09697  |  |  |
|       |      | Shiraz-49T | 1170 | 0        | -0.967436 |  |  |
|       |      | Shiraz-9T  | 1370 | 0.690073 | 0         |  |  |
|       |      | Shiraz-18T | 1457 | 0.643204 | 0         |  |  |
|       |      | Shiraz-22T | 1673 | 0.611783 | 0         |  |  |
|       |      | Shiraz-22T | 1677 | 0.789711 | 0         |  |  |
|       |      | Shiraz-25T | 1719 | 0.472955 | 0         |  |  |
|       |      | Shiraz-28T | 1762 | 0.562311 | 0         |  |  |
|       |      | Shiraz-29T | 1801 | 0.815343 | 0         |  |  |
|       |      | Shiraz-32T | 1870 | 0.729766 | 0         |  |  |
|       |      | Shiraz-35T | 1933 | 0.488535 | 0         |  |  |

|        |      |            |      |          |           |  |  |
|--------|------|------------|------|----------|-----------|--|--|
|        |      | Shiraz-58T | 2223 | 0.833364 | 0         |  |  |
|        |      | Shiraz-71T | 2263 | 0.975531 | 0         |  |  |
|        |      | Shiraz-3T  | 242  | 0        | -0.336434 |  |  |
|        |      | Shiraz-4T  | 261  | 0        | -0.336249 |  |  |
|        |      | Shiraz-16T | 295  | 0.591657 | 0         |  |  |
|        |      | Shiraz-36T | 433  | 0        | -0.803961 |  |  |
|        |      | Shiraz-44T | 899  | 0        | -1.09697  |  |  |
|        |      | Shiraz-49T | 1170 | 0        | -0.967436 |  |  |
|        |      | Shiraz-9T  | 1370 | 0.690073 | 0         |  |  |
|        |      | Shiraz-18T | 1457 | 0.643204 | 0         |  |  |
|        |      | Shiraz-22T | 1673 | 0.611783 | 0         |  |  |
|        |      | Shiraz-22T | 1677 | 0.789711 | 0         |  |  |
|        |      | Shiraz-25T | 1719 | 0.472955 | 0         |  |  |
|        |      | Shiraz-28T | 1762 | 0.562311 | 0         |  |  |
|        |      | Shiraz-29T | 1801 | 0.815343 | 0         |  |  |
|        |      | Shiraz-32T | 1870 | 0.729766 | 0         |  |  |
|        |      | Shiraz-35T | 1933 | 0.488535 | 0         |  |  |
|        |      | Shiraz-58T | 2223 | 0.833364 | 0         |  |  |
|        |      | Shiraz-71T | 2263 | 0.975531 | 0         |  |  |
|        |      | Shiraz-3T  | 242  | 0        | -0.336434 |  |  |
|        |      | Shiraz-4T  | 261  | 0        | -0.336249 |  |  |
|        |      | Shiraz-16T | 295  | 0.591657 | 0         |  |  |
|        |      | Shiraz-36T | 433  | 0        | -0.803961 |  |  |
|        |      | Shiraz-44T | 899  | 0        | -1.09697  |  |  |
|        |      | Shiraz-49T | 1170 | 0        | -0.967436 |  |  |
|        |      | Shiraz-9T  | 1370 | 0.690073 | 0         |  |  |
|        |      | Shiraz-18T | 1457 | 0.643204 | 0         |  |  |
|        |      | Shiraz-22T | 1673 | 0.611783 | 0         |  |  |
|        |      | Shiraz-22T | 1677 | 0.789711 | 0         |  |  |
|        |      | Shiraz-25T | 1719 | 0.472955 | 0         |  |  |
|        |      | Shiraz-28T | 1762 | 0.562311 | 0         |  |  |
|        |      | Shiraz-29T | 1801 | 0.815343 | 0         |  |  |
|        |      | Shiraz-32T | 1870 | 0.729766 | 0         |  |  |
|        |      | Shiraz-35T | 1933 | 0.488535 | 0         |  |  |
|        |      | Shiraz-58T | 2223 | 0.833364 | 0         |  |  |
|        |      | Shiraz-71T | 2263 | 0.975531 | 0         |  |  |
| FRMPD4 | chrX | Shiraz-3T  | 235  | 0        | -0.28401  |  |  |
|        |      | Shiraz-4T  | 260  | 0        | -0.324128 |  |  |
|        |      | Shiraz-16T | 294  | 0.655804 | 0         |  |  |
|        |      | Shiraz-36T | 431  | 0        | -0.78035  |  |  |
|        |      | Shiraz-44T | 891  | 0        | -0.954044 |  |  |
|        |      | Shiraz-49T | 1166 | 0        | -0.917235 |  |  |
|        |      | Shiraz-9T  | 1368 | 0.199713 | 0         |  |  |
|        |      | Shiraz-18T | 1455 | 0        | -0.186773 |  |  |
|        |      | Shiraz-22T | 1669 | 0.695915 | 0         |  |  |
|        |      | Shiraz-25T | 1717 | 0.420447 | 0         |  |  |
|        |      | Shiraz-28T | 1760 | 0.538181 | 0         |  |  |

|       |      |            |      |          |           |  |
|-------|------|------------|------|----------|-----------|--|
|       |      | Shiraz-29T | 1800 | 0.672527 | 0         |  |
|       |      | Shiraz-32T | 1869 | 0.776805 | 0         |  |
|       |      | Shiraz-35T | 1932 | 0.507141 | 0         |  |
|       |      | Shiraz-40T | 2051 | 0.098506 | 0         |  |
|       |      | Shiraz-58T | 2221 | 0.871948 | 0         |  |
|       |      | Shiraz-71T | 2260 | 0.68394  | 0         |  |
|       |      | Shiraz-71T | 2261 | 0.508399 | 0         |  |
|       |      | Shiraz-3T  | 235  | 0        | -0.28401  |  |
|       |      | Shiraz-4T  | 260  | 0        | -0.324128 |  |
|       |      | Shiraz-16T | 294  | 0.655804 | 0         |  |
|       |      | Shiraz-36T | 431  | 0        | -0.78035  |  |
|       |      | Shiraz-44T | 891  | 0        | -0.954044 |  |
|       |      | Shiraz-49T | 1166 | 0        | -0.917235 |  |
|       |      | Shiraz-9T  | 1368 | 0.199713 | 0         |  |
|       |      | Shiraz-18T | 1455 | 0        | -0.186773 |  |
|       |      | Shiraz-22T | 1669 | 0.695915 | 0         |  |
|       |      | Shiraz-25T | 1717 | 0.420447 | 0         |  |
|       |      | Shiraz-28T | 1760 | 0.538181 | 0         |  |
|       |      | Shiraz-29T | 1800 | 0.672527 | 0         |  |
|       |      | Shiraz-32T | 1869 | 0.776805 | 0         |  |
|       |      | Shiraz-35T | 1932 | 0.507141 | 0         |  |
|       |      | Shiraz-40T | 2051 | 0.098506 | 0         |  |
|       |      | Shiraz-58T | 2221 | 0.871948 | 0         |  |
|       |      | Shiraz-71T | 2260 | 0.68394  | 0         |  |
|       |      | Shiraz-71T | 2261 | 0.508399 | 0         |  |
|       |      | Shiraz-3T  | 235  | 0        | -0.28401  |  |
|       |      | Shiraz-4T  | 260  | 0        | -0.324128 |  |
|       |      | Shiraz-16T | 294  | 0.655804 | 0         |  |
|       |      | Shiraz-36T | 431  | 0        | -0.78035  |  |
|       |      | Shiraz-44T | 891  | 0        | -0.954044 |  |
|       |      | Shiraz-49T | 1166 | 0        | -0.917235 |  |
|       |      | Shiraz-9T  | 1368 | 0.199713 | 0         |  |
|       |      | Shiraz-18T | 1455 | 0        | -0.186773 |  |
|       |      | Shiraz-22T | 1669 | 0.695915 | 0         |  |
|       |      | Shiraz-25T | 1717 | 0.420447 | 0         |  |
|       |      | Shiraz-28T | 1760 | 0.538181 | 0         |  |
|       |      | Shiraz-29T | 1800 | 0.672527 | 0         |  |
|       |      | Shiraz-32T | 1869 | 0.776805 | 0         |  |
|       |      | Shiraz-35T | 1932 | 0.507141 | 0         |  |
|       |      | Shiraz-40T | 2051 | 0.098506 | 0         |  |
|       |      | Shiraz-58T | 2221 | 0.871948 | 0         |  |
|       |      | Shiraz-71T | 2260 | 0.68394  | 0         |  |
|       |      | Shiraz-71T | 2261 | 0.508399 | 0         |  |
| FSCN3 | chr7 | Shiraz-3T  | 90   | 0.219276 | 0         |  |
|       |      | Shiraz-4T  | 253  | 0.372918 | 0         |  |
|       |      | Shiraz-36T | 378  | 0.179558 | 0         |  |
|       |      | Shiraz-36T | 382  | 0.081739 | 0         |  |

|        |      |            |      |          |           |  |  |
|--------|------|------------|------|----------|-----------|--|--|
|        |      | Shiraz-46T | 943  | 0.093799 | 0         |  |  |
|        |      | Shiraz-46T | 947  | 0        | -0.010843 |  |  |
|        |      | Shiraz-77T | 1225 | 0        | -0.117922 |  |  |
|        |      | Shiraz-9T  | 1325 | 0.221899 | 0         |  |  |
|        |      | Shiraz-18T | 1434 | 0.244465 | 0         |  |  |
|        |      | Shiraz-25T | 1698 | 0.21835  | 0         |  |  |
|        |      | Shiraz-28T | 1735 | 0.350744 | 0         |  |  |
|        |      | Shiraz-29T | 1778 | 0.120767 | 0         |  |  |
|        |      | Shiraz-32T | 1833 | 0.551336 | 0         |  |  |
|        |      | Shiraz-38T | 1951 | 0.250891 | 0         |  |  |
|        |      | Shiraz-53T | 2078 | 0.287202 | 0         |  |  |
|        |      | Shiraz-71T | 2238 | 0.603631 | 0         |  |  |
|        |      | Shiraz-3T  | 90   | 0.219276 | 0         |  |  |
|        |      | Shiraz-4T  | 253  | 0.372918 | 0         |  |  |
|        |      | Shiraz-36T | 378  | 0.179558 | 0         |  |  |
|        |      | Shiraz-36T | 382  | 0.081739 | 0         |  |  |
|        |      | Shiraz-46T | 943  | 0.093799 | 0         |  |  |
|        |      | Shiraz-46T | 947  | 0        | -0.010843 |  |  |
|        |      | Shiraz-77T | 1225 | 0        | -0.117922 |  |  |
|        |      | Shiraz-9T  | 1325 | 0.221899 | 0         |  |  |
|        |      | Shiraz-18T | 1434 | 0.244465 | 0         |  |  |
|        |      | Shiraz-25T | 1698 | 0.21835  | 0         |  |  |
|        |      | Shiraz-28T | 1735 | 0.350744 | 0         |  |  |
|        |      | Shiraz-29T | 1778 | 0.120767 | 0         |  |  |
|        |      | Shiraz-32T | 1833 | 0.551336 | 0         |  |  |
|        |      | Shiraz-38T | 1951 | 0.250891 | 0         |  |  |
|        |      | Shiraz-53T | 2078 | 0.287202 | 0         |  |  |
|        |      | Shiraz-71T | 2238 | 0.603631 | 0         |  |  |
|        |      | Shiraz-3T  | 90   | 0.219276 | 0         |  |  |
|        |      | Shiraz-4T  | 253  | 0.372918 | 0         |  |  |
|        |      | Shiraz-36T | 378  | 0.179558 | 0         |  |  |
|        |      | Shiraz-36T | 382  | 0.081739 | 0         |  |  |
|        |      | Shiraz-46T | 943  | 0.093799 | 0         |  |  |
|        |      | Shiraz-46T | 947  | 0        | -0.010843 |  |  |
|        |      | Shiraz-77T | 1225 | 0        | -0.117922 |  |  |
|        |      | Shiraz-9T  | 1325 | 0.221899 | 0         |  |  |
|        |      | Shiraz-18T | 1434 | 0.244465 | 0         |  |  |
|        |      | Shiraz-25T | 1698 | 0.21835  | 0         |  |  |
|        |      | Shiraz-28T | 1735 | 0.350744 | 0         |  |  |
|        |      | Shiraz-29T | 1778 | 0.120767 | 0         |  |  |
|        |      | Shiraz-32T | 1833 | 0.551336 | 0         |  |  |
|        |      | Shiraz-38T | 1951 | 0.250891 | 0         |  |  |
|        |      | Shiraz-53T | 2078 | 0.287202 | 0         |  |  |
|        |      | Shiraz-71T | 2238 | 0.603631 | 0         |  |  |
| FTHL17 | chrX | Shiraz-3T  | 235  | 0        | -0.28401  |  |  |
|        |      | Shiraz-3T  | 236  | 0        | -0.435445 |  |  |
|        |      | Shiraz-4T  | 260  | 0        | -0.324128 |  |  |

|  |  |            |      |          |           |  |  |
|--|--|------------|------|----------|-----------|--|--|
|  |  | Shiraz-16T | 294  | 0.655804 | 0         |  |  |
|  |  | Shiraz-36T | 431  | 0        | -0.78035  |  |  |
|  |  | Shiraz-44T | 891  | 0        | -0.954044 |  |  |
|  |  | Shiraz-44T | 893  | 0        | -1.364406 |  |  |
|  |  | Shiraz-44T | 894  | 0        | -0.776734 |  |  |
|  |  | Shiraz-47T | 1083 | 0        | -0.103285 |  |  |
|  |  | Shiraz-49T | 1166 | 0        | -0.917235 |  |  |
|  |  | Shiraz-49T | 1168 | 0        | -1.073859 |  |  |
|  |  | Shiraz-9T  | 1368 | 0.199713 | 0         |  |  |
|  |  | Shiraz-18T | 1455 | 0        | -0.186773 |  |  |
|  |  | Shiraz-22T | 1669 | 0.695915 | 0         |  |  |
|  |  | Shiraz-22T | 1671 | 0.369309 | 0         |  |  |
|  |  | Shiraz-25T | 1717 | 0.420447 | 0         |  |  |
|  |  | Shiraz-25T | 1718 | 0        | -0.452703 |  |  |
|  |  | Shiraz-28T | 1760 | 0.538181 | 0         |  |  |
|  |  | Shiraz-28T | 1761 | 0        | -0.695601 |  |  |
|  |  | Shiraz-29T | 1800 | 0.672527 | 0         |  |  |
|  |  | Shiraz-32T | 1869 | 0.776805 | 0         |  |  |
|  |  | Shiraz-35T | 1932 | 0.507141 | 0         |  |  |
|  |  | Shiraz-40T | 2051 | 0.098506 | 0         |  |  |
|  |  | Shiraz-58T | 2221 | 0.871948 | 0         |  |  |
|  |  | Shiraz-58T | 2222 | 0.679664 | 0         |  |  |
|  |  | Shiraz-71T | 2260 | 0.68394  | 0         |  |  |
|  |  | Shiraz-71T | 2261 | 0.508399 | 0         |  |  |
|  |  | Shiraz-3T  | 235  | 0        | -0.28401  |  |  |
|  |  | Shiraz-3T  | 236  | 0        | -0.435445 |  |  |
|  |  | Shiraz-4T  | 260  | 0        | -0.324128 |  |  |
|  |  | Shiraz-16T | 294  | 0.655804 | 0         |  |  |
|  |  | Shiraz-36T | 431  | 0        | -0.78035  |  |  |
|  |  | Shiraz-44T | 891  | 0        | -0.954044 |  |  |
|  |  | Shiraz-44T | 893  | 0        | -1.364406 |  |  |
|  |  | Shiraz-44T | 894  | 0        | -0.776734 |  |  |
|  |  | Shiraz-47T | 1083 | 0        | -0.103285 |  |  |
|  |  | Shiraz-49T | 1166 | 0        | -0.917235 |  |  |
|  |  | Shiraz-49T | 1168 | 0        | -1.073859 |  |  |
|  |  | Shiraz-9T  | 1368 | 0.199713 | 0         |  |  |
|  |  | Shiraz-18T | 1455 | 0        | -0.186773 |  |  |
|  |  | Shiraz-22T | 1669 | 0.695915 | 0         |  |  |
|  |  | Shiraz-22T | 1671 | 0.369309 | 0         |  |  |
|  |  | Shiraz-25T | 1717 | 0.420447 | 0         |  |  |
|  |  | Shiraz-25T | 1718 | 0        | -0.452703 |  |  |
|  |  | Shiraz-28T | 1760 | 0.538181 | 0         |  |  |
|  |  | Shiraz-28T | 1761 | 0        | -0.695601 |  |  |
|  |  | Shiraz-29T | 1800 | 0.672527 | 0         |  |  |
|  |  | Shiraz-32T | 1869 | 0.776805 | 0         |  |  |
|  |  | Shiraz-35T | 1932 | 0.507141 | 0         |  |  |
|  |  | Shiraz-40T | 2051 | 0.098506 | 0         |  |  |

|       |      |            |      |          |           |  |  |
|-------|------|------------|------|----------|-----------|--|--|
|       |      | Shiraz-58T | 2221 | 0.871948 | 0         |  |  |
|       |      | Shiraz-58T | 2222 | 0.679664 | 0         |  |  |
|       |      | Shiraz-71T | 2260 | 0.68394  | 0         |  |  |
|       |      | Shiraz-71T | 2261 | 0.508399 | 0         |  |  |
|       |      | Shiraz-3T  | 235  | 0        | -0.28401  |  |  |
|       |      | Shiraz-3T  | 236  | 0        | -0.435445 |  |  |
|       |      | Shiraz-4T  | 260  | 0        | -0.324128 |  |  |
|       |      | Shiraz-16T | 294  | 0.655804 | 0         |  |  |
|       |      | Shiraz-36T | 431  | 0        | -0.78035  |  |  |
|       |      | Shiraz-44T | 891  | 0        | -0.954044 |  |  |
|       |      | Shiraz-44T | 893  | 0        | -1.364406 |  |  |
|       |      | Shiraz-44T | 894  | 0        | -0.776734 |  |  |
|       |      | Shiraz-47T | 1083 | 0        | -0.103285 |  |  |
|       |      | Shiraz-49T | 1166 | 0        | -0.917235 |  |  |
|       |      | Shiraz-49T | 1168 | 0        | -1.073859 |  |  |
|       |      | Shiraz-9T  | 1368 | 0.199713 | 0         |  |  |
|       |      | Shiraz-18T | 1455 | 0        | -0.186773 |  |  |
|       |      | Shiraz-22T | 1669 | 0.695915 | 0         |  |  |
|       |      | Shiraz-22T | 1671 | 0.369309 | 0         |  |  |
|       |      | Shiraz-25T | 1717 | 0.420447 | 0         |  |  |
|       |      | Shiraz-25T | 1718 | 0        | -0.452703 |  |  |
|       |      | Shiraz-28T | 1760 | 0.538181 | 0         |  |  |
|       |      | Shiraz-28T | 1761 | 0        | -0.695601 |  |  |
|       |      | Shiraz-29T | 1800 | 0.672527 | 0         |  |  |
|       |      | Shiraz-32T | 1869 | 0.776805 | 0         |  |  |
|       |      | Shiraz-35T | 1932 | 0.507141 | 0         |  |  |
|       |      | Shiraz-40T | 2051 | 0.098506 | 0         |  |  |
|       |      | Shiraz-58T | 2221 | 0.871948 | 0         |  |  |
|       |      | Shiraz-58T | 2222 | 0.679664 | 0         |  |  |
|       |      | Shiraz-71T | 2260 | 0.68394  | 0         |  |  |
|       |      | Shiraz-71T | 2261 | 0.508399 | 0         |  |  |
| FTSJ1 | chrX | Shiraz-3T  | 238  | 0.472087 | 0         |  |  |
|       |      | Shiraz-3T  | 238  | 0.472087 | 0         |  |  |
|       |      | Shiraz-4T  | 260  | 0        | -0.324128 |  |  |
|       |      | Shiraz-4T  | 260  | 0        | -0.324128 |  |  |
|       |      | Shiraz-16T | 294  | 0.655804 | 0         |  |  |
|       |      | Shiraz-16T | 294  | 0.655804 | 0         |  |  |
|       |      | Shiraz-31T | 345  | 0.103301 | 0         |  |  |
|       |      | Shiraz-31T | 345  | 0.103301 | 0         |  |  |
|       |      | Shiraz-36T | 431  | 0        | -0.78035  |  |  |
|       |      | Shiraz-36T | 431  | 0        | -0.78035  |  |  |
|       |      | Shiraz-36T | 432  | 0        | -0.6692   |  |  |
|       |      | Shiraz-36T | 432  | 0        | -0.6692   |  |  |
|       |      | Shiraz-44T | 891  | 0        | -0.954044 |  |  |
|       |      | Shiraz-44T | 891  | 0        | -0.954044 |  |  |
|       |      | Shiraz-44T | 896  | 0        | -0.109108 |  |  |
|       |      | Shiraz-44T | 896  | 0        | -0.109108 |  |  |

|  |            |      |          |           |  |
|--|------------|------|----------|-----------|--|
|  | Shiraz-46T | 991  | 0.139564 | 0         |  |
|  | Shiraz-46T | 991  | 0.139564 | 0         |  |
|  | Shiraz-47T | 1084 | 0.24185  | 0         |  |
|  | Shiraz-47T | 1084 | 0.24185  | 0         |  |
|  | Shiraz-49T | 1166 | 0        | -0.917235 |  |
|  | Shiraz-49T | 1166 | 0        | -0.917235 |  |
|  | Shiraz-49T | 1169 | 0        | -0.583529 |  |
|  | Shiraz-49T | 1169 | 0        | -0.583529 |  |
|  | Shiraz-77T | 1282 | 0.213849 | 0         |  |
|  | Shiraz-77T | 1282 | 0.213849 | 0         |  |
|  | Shiraz-9T  | 1368 | 0.199713 | 0         |  |
|  | Shiraz-9T  | 1368 | 0.199713 | 0         |  |
|  | Shiraz-9T  | 1369 | 0.703374 | 0         |  |
|  | Shiraz-9T  | 1369 | 0.703374 | 0         |  |
|  | Shiraz-18T | 1455 | 0        | -0.186773 |  |
|  | Shiraz-18T | 1455 | 0        | -0.186773 |  |
|  | Shiraz-22T | 1669 | 0.695915 | 0         |  |
|  | Shiraz-22T | 1669 | 0.695915 | 0         |  |
|  | Shiraz-22T | 1672 | 1.01678  | 0         |  |
|  | Shiraz-22T | 1672 | 1.01678  | 0         |  |
|  | Shiraz-25T | 1717 | 0.420447 | 0         |  |
|  | Shiraz-25T | 1717 | 0.420447 | 0         |  |
|  | Shiraz-28T | 1760 | 0.538181 | 0         |  |
|  | Shiraz-28T | 1760 | 0.538181 | 0         |  |
|  | Shiraz-29T | 1800 | 0.672527 | 0         |  |
|  | Shiraz-29T | 1800 | 0.672527 | 0         |  |
|  | Shiraz-32T | 1869 | 0.776805 | 0         |  |
|  | Shiraz-32T | 1869 | 0.776805 | 0         |  |
|  | Shiraz-35T | 1932 | 0.507141 | 0         |  |
|  | Shiraz-35T | 1932 | 0.507141 | 0         |  |
|  | Shiraz-58T | 2221 | 0.871948 | 0         |  |
|  | Shiraz-58T | 2221 | 0.871948 | 0         |  |
|  | Shiraz-71T | 2260 | 0.68394  | 0         |  |
|  | Shiraz-71T | 2260 | 0.68394  | 0         |  |
|  | Shiraz-71T | 2262 | 0.986748 | 0         |  |
|  | Shiraz-71T | 2262 | 0.986748 | 0         |  |
|  | Shiraz-3T  | 238  | 0.472087 | 0         |  |
|  | Shiraz-3T  | 238  | 0.472087 | 0         |  |
|  | Shiraz-4T  | 260  | 0        | -0.324128 |  |
|  | Shiraz-4T  | 260  | 0        | -0.324128 |  |
|  | Shiraz-16T | 294  | 0.655804 | 0         |  |
|  | Shiraz-16T | 294  | 0.655804 | 0         |  |
|  | Shiraz-31T | 345  | 0.103301 | 0         |  |
|  | Shiraz-31T | 345  | 0.103301 | 0         |  |
|  | Shiraz-36T | 431  | 0        | -0.78035  |  |
|  | Shiraz-36T | 431  | 0        | -0.78035  |  |
|  | Shiraz-36T | 432  | 0        | -0.6692   |  |

|  |            |      |          |           |  |
|--|------------|------|----------|-----------|--|
|  | Shiraz-36T | 432  | 0        | -0.6692   |  |
|  | Shiraz-44T | 891  | 0        | -0.954044 |  |
|  | Shiraz-44T | 891  | 0        | -0.954044 |  |
|  | Shiraz-44T | 896  | 0        | -0.109108 |  |
|  | Shiraz-44T | 896  | 0        | -0.109108 |  |
|  | Shiraz-46T | 991  | 0.139564 | 0         |  |
|  | Shiraz-46T | 991  | 0.139564 | 0         |  |
|  | Shiraz-47T | 1084 | 0.24185  | 0         |  |
|  | Shiraz-47T | 1084 | 0.24185  | 0         |  |
|  | Shiraz-49T | 1166 | 0        | -0.917235 |  |
|  | Shiraz-49T | 1166 | 0        | -0.917235 |  |
|  | Shiraz-49T | 1169 | 0        | -0.583529 |  |
|  | Shiraz-49T | 1169 | 0        | -0.583529 |  |
|  | Shiraz-77T | 1282 | 0.213849 | 0         |  |
|  | Shiraz-77T | 1282 | 0.213849 | 0         |  |
|  | Shiraz-9T  | 1368 | 0.199713 | 0         |  |
|  | Shiraz-9T  | 1368 | 0.199713 | 0         |  |
|  | Shiraz-9T  | 1369 | 0.703374 | 0         |  |
|  | Shiraz-9T  | 1369 | 0.703374 | 0         |  |
|  | Shiraz-18T | 1455 | 0        | -0.186773 |  |
|  | Shiraz-18T | 1455 | 0        | -0.186773 |  |
|  | Shiraz-22T | 1669 | 0.695915 | 0         |  |
|  | Shiraz-22T | 1669 | 0.695915 | 0         |  |
|  | Shiraz-22T | 1672 | 1.01678  | 0         |  |
|  | Shiraz-22T | 1672 | 1.01678  | 0         |  |
|  | Shiraz-25T | 1717 | 0.420447 | 0         |  |
|  | Shiraz-25T | 1717 | 0.420447 | 0         |  |
|  | Shiraz-28T | 1760 | 0.538181 | 0         |  |
|  | Shiraz-28T | 1760 | 0.538181 | 0         |  |
|  | Shiraz-29T | 1800 | 0.672527 | 0         |  |
|  | Shiraz-29T | 1800 | 0.672527 | 0         |  |
|  | Shiraz-32T | 1869 | 0.776805 | 0         |  |
|  | Shiraz-32T | 1869 | 0.776805 | 0         |  |
|  | Shiraz-35T | 1932 | 0.507141 | 0         |  |
|  | Shiraz-35T | 1932 | 0.507141 | 0         |  |
|  | Shiraz-58T | 2221 | 0.871948 | 0         |  |
|  | Shiraz-58T | 2221 | 0.871948 | 0         |  |
|  | Shiraz-71T | 2260 | 0.68394  | 0         |  |
|  | Shiraz-71T | 2260 | 0.68394  | 0         |  |
|  | Shiraz-71T | 2262 | 0.986748 | 0         |  |
|  | Shiraz-71T | 2262 | 0.986748 | 0         |  |
|  | Shiraz-3T  | 238  | 0.472087 | 0         |  |
|  | Shiraz-3T  | 238  | 0.472087 | 0         |  |
|  | Shiraz-4T  | 260  | 0        | -0.324128 |  |
|  | Shiraz-4T  | 260  | 0        | -0.324128 |  |
|  | Shiraz-16T | 294  | 0.655804 | 0         |  |
|  | Shiraz-16T | 294  | 0.655804 | 0         |  |



|        |      |            |      |          |           |  |  |
|--------|------|------------|------|----------|-----------|--|--|
|        |      | Shiraz-31T | 345  | 0.103301 | 0         |  |  |
|        |      | Shiraz-31T | 345  | 0.103301 | 0         |  |  |
|        |      | Shiraz-36T | 431  | 0        | -0.78035  |  |  |
|        |      | Shiraz-36T | 431  | 0        | -0.78035  |  |  |
|        |      | Shiraz-36T | 432  | 0        | -0.6692   |  |  |
|        |      | Shiraz-36T | 432  | 0        | -0.6692   |  |  |
|        |      | Shiraz-44T | 891  | 0        | -0.954044 |  |  |
|        |      | Shiraz-44T | 891  | 0        | -0.954044 |  |  |
|        |      | Shiraz-44T | 896  | 0        | -0.109108 |  |  |
|        |      | Shiraz-44T | 896  | 0        | -0.109108 |  |  |
|        |      | Shiraz-46T | 991  | 0.139564 | 0         |  |  |
|        |      | Shiraz-46T | 991  | 0.139564 | 0         |  |  |
|        |      | Shiraz-47T | 1084 | 0.24185  | 0         |  |  |
|        |      | Shiraz-47T | 1084 | 0.24185  | 0         |  |  |
|        |      | Shiraz-49T | 1166 | 0        | -0.917235 |  |  |
|        |      | Shiraz-49T | 1166 | 0        | -0.917235 |  |  |
|        |      | Shiraz-49T | 1169 | 0        | -0.583529 |  |  |
|        |      | Shiraz-49T | 1169 | 0        | -0.583529 |  |  |
|        |      | Shiraz-77T | 1282 | 0.213849 | 0         |  |  |
|        |      | Shiraz-77T | 1282 | 0.213849 | 0         |  |  |
|        |      | Shiraz-9T  | 1368 | 0.199713 | 0         |  |  |
|        |      | Shiraz-9T  | 1368 | 0.199713 | 0         |  |  |
|        |      | Shiraz-9T  | 1369 | 0.703374 | 0         |  |  |
|        |      | Shiraz-9T  | 1369 | 0.703374 | 0         |  |  |
|        |      | Shiraz-18T | 1455 | 0        | -0.186773 |  |  |
|        |      | Shiraz-18T | 1455 | 0        | -0.186773 |  |  |
|        |      | Shiraz-22T | 1669 | 0.695915 | 0         |  |  |
|        |      | Shiraz-22T | 1669 | 0.695915 | 0         |  |  |
|        |      | Shiraz-22T | 1672 | 1.01678  | 0         |  |  |
|        |      | Shiraz-22T | 1672 | 1.01678  | 0         |  |  |
|        |      | Shiraz-25T | 1717 | 0.420447 | 0         |  |  |
|        |      | Shiraz-25T | 1717 | 0.420447 | 0         |  |  |
|        |      | Shiraz-28T | 1760 | 0.538181 | 0         |  |  |
|        |      | Shiraz-28T | 1760 | 0.538181 | 0         |  |  |
|        |      | Shiraz-29T | 1800 | 0.672527 | 0         |  |  |
|        |      | Shiraz-29T | 1800 | 0.672527 | 0         |  |  |
|        |      | Shiraz-32T | 1869 | 0.776805 | 0         |  |  |
|        |      | Shiraz-32T | 1869 | 0.776805 | 0         |  |  |
|        |      | Shiraz-35T | 1932 | 0.507141 | 0         |  |  |
|        |      | Shiraz-35T | 1932 | 0.507141 | 0         |  |  |
|        |      | Shiraz-58T | 2221 | 0.871948 | 0         |  |  |
|        |      | Shiraz-58T | 2221 | 0.871948 | 0         |  |  |
|        |      | Shiraz-71T | 2260 | 0.68394  | 0         |  |  |
|        |      | Shiraz-71T | 2260 | 0.68394  | 0         |  |  |
|        |      | Shiraz-71T | 2262 | 0.986748 | 0         |  |  |
|        |      | Shiraz-71T | 2262 | 0.986748 | 0         |  |  |
| FUNDC1 | chrX | Shiraz-3T  | 235  | 0        | -0.28401  |  |  |

|  |            |      |          |           |  |
|--|------------|------|----------|-----------|--|
|  | Shiraz-4T  | 260  | 0        | -0.324128 |  |
|  | Shiraz-16T | 294  | 0.655804 | 0         |  |
|  | Shiraz-31T | 345  | 0.103301 | 0         |  |
|  | Shiraz-36T | 431  | 0        | -0.78035  |  |
|  | Shiraz-36T | 432  | 0        | -0.6692   |  |
|  | Shiraz-44T | 891  | 0        | -0.954044 |  |
|  | Shiraz-46T | 991  | 0.139564 | 0         |  |
|  | Shiraz-49T | 1166 | 0        | -0.917235 |  |
|  | Shiraz-9T  | 1368 | 0.199713 | 0         |  |
|  | Shiraz-18T | 1455 | 0        | -0.186773 |  |
|  | Shiraz-22T | 1669 | 0.695915 | 0         |  |
|  | Shiraz-25T | 1717 | 0.420447 | 0         |  |
|  | Shiraz-28T | 1760 | 0.538181 | 0         |  |
|  | Shiraz-29T | 1800 | 0.672527 | 0         |  |
|  | Shiraz-32T | 1869 | 0.776805 | 0         |  |
|  | Shiraz-35T | 1932 | 0.507141 | 0         |  |
|  | Shiraz-40T | 2051 | 0.098506 | 0         |  |
|  | Shiraz-58T | 2221 | 0.871948 | 0         |  |
|  | Shiraz-71T | 2260 | 0.68394  | 0         |  |
|  | Shiraz-71T | 2262 | 0.986748 | 0         |  |
|  | Shiraz-3T  | 235  | 0        | -0.28401  |  |
|  | Shiraz-4T  | 260  | 0        | -0.324128 |  |
|  | Shiraz-16T | 294  | 0.655804 | 0         |  |
|  | Shiraz-31T | 345  | 0.103301 | 0         |  |
|  | Shiraz-36T | 431  | 0        | -0.78035  |  |
|  | Shiraz-36T | 432  | 0        | -0.6692   |  |
|  | Shiraz-44T | 891  | 0        | -0.954044 |  |
|  | Shiraz-46T | 991  | 0.139564 | 0         |  |
|  | Shiraz-49T | 1166 | 0        | -0.917235 |  |
|  | Shiraz-9T  | 1368 | 0.199713 | 0         |  |
|  | Shiraz-18T | 1455 | 0        | -0.186773 |  |
|  | Shiraz-22T | 1669 | 0.695915 | 0         |  |
|  | Shiraz-25T | 1717 | 0.420447 | 0         |  |
|  | Shiraz-28T | 1760 | 0.538181 | 0         |  |
|  | Shiraz-29T | 1800 | 0.672527 | 0         |  |
|  | Shiraz-32T | 1869 | 0.776805 | 0         |  |
|  | Shiraz-35T | 1932 | 0.507141 | 0         |  |
|  | Shiraz-40T | 2051 | 0.098506 | 0         |  |
|  | Shiraz-58T | 2221 | 0.871948 | 0         |  |
|  | Shiraz-71T | 2260 | 0.68394  | 0         |  |
|  | Shiraz-71T | 2262 | 0.986748 | 0         |  |
|  | Shiraz-3T  | 235  | 0        | -0.28401  |  |
|  | Shiraz-4T  | 260  | 0        | -0.324128 |  |
|  | Shiraz-16T | 294  | 0.655804 | 0         |  |
|  | Shiraz-31T | 345  | 0.103301 | 0         |  |
|  | Shiraz-36T | 431  | 0        | -0.78035  |  |
|  | Shiraz-36T | 432  | 0        | -0.6692   |  |

|        |      |            |      |          |           |  |  |
|--------|------|------------|------|----------|-----------|--|--|
|        |      | Shiraz-44T | 891  | 0        | -0.954044 |  |  |
|        |      | Shiraz-46T | 991  | 0.139564 | 0         |  |  |
|        |      | Shiraz-49T | 1166 | 0        | -0.917235 |  |  |
|        |      | Shiraz-9T  | 1368 | 0.199713 | 0         |  |  |
|        |      | Shiraz-18T | 1455 | 0        | -0.186773 |  |  |
|        |      | Shiraz-22T | 1669 | 0.695915 | 0         |  |  |
|        |      | Shiraz-25T | 1717 | 0.420447 | 0         |  |  |
|        |      | Shiraz-28T | 1760 | 0.538181 | 0         |  |  |
|        |      | Shiraz-29T | 1800 | 0.672527 | 0         |  |  |
|        |      | Shiraz-32T | 1869 | 0.776805 | 0         |  |  |
|        |      | Shiraz-35T | 1932 | 0.507141 | 0         |  |  |
|        |      | Shiraz-40T | 2051 | 0.098506 | 0         |  |  |
|        |      | Shiraz-58T | 2221 | 0.871948 | 0         |  |  |
|        |      | Shiraz-71T | 2260 | 0.68394  | 0         |  |  |
|        |      | Shiraz-71T | 2262 | 0.986748 | 0         |  |  |
| FUNDC2 | chrX | Shiraz-3T  | 247  | 0        | -0.421316 |  |  |
|        |      | Shiraz-4T  | 261  | 0        | -0.336249 |  |  |
|        |      | Shiraz-16T | 295  | 0.591657 | 0         |  |  |
|        |      | Shiraz-36T | 433  | 0        | -0.803961 |  |  |
|        |      | Shiraz-44T | 909  | 0        | -1.067051 |  |  |
|        |      | Shiraz-49T | 1170 | 0        | -0.967436 |  |  |
|        |      | Shiraz-9T  | 1370 | 0.690073 | 0         |  |  |
|        |      | Shiraz-18T | 1457 | 0.643204 | 0         |  |  |
|        |      | Shiraz-22T | 1673 | 0.611783 | 0         |  |  |
|        |      | Shiraz-25T | 1719 | 0.472955 | 0         |  |  |
|        |      | Shiraz-28T | 1762 | 0.562311 | 0         |  |  |
|        |      | Shiraz-29T | 1801 | 0.815343 | 0         |  |  |
|        |      | Shiraz-32T | 1870 | 0.729766 | 0         |  |  |
|        |      | Shiraz-35T | 1933 | 0.488535 | 0         |  |  |
|        |      | Shiraz-53T | 2115 | 0.427728 | 0         |  |  |
|        |      | Shiraz-58T | 2223 | 0.833364 | 0         |  |  |
|        |      | Shiraz-71T | 2263 | 0.975531 | 0         |  |  |
|        |      | Shiraz-3T  | 247  | 0        | -0.421316 |  |  |
|        |      | Shiraz-4T  | 261  | 0        | -0.336249 |  |  |
|        |      | Shiraz-16T | 295  | 0.591657 | 0         |  |  |
|        |      | Shiraz-36T | 433  | 0        | -0.803961 |  |  |
|        |      | Shiraz-44T | 909  | 0        | -1.067051 |  |  |
|        |      | Shiraz-49T | 1170 | 0        | -0.967436 |  |  |
|        |      | Shiraz-9T  | 1370 | 0.690073 | 0         |  |  |
|        |      | Shiraz-18T | 1457 | 0.643204 | 0         |  |  |
|        |      | Shiraz-22T | 1673 | 0.611783 | 0         |  |  |
|        |      | Shiraz-25T | 1719 | 0.472955 | 0         |  |  |
|        |      | Shiraz-28T | 1762 | 0.562311 | 0         |  |  |
|        |      | Shiraz-29T | 1801 | 0.815343 | 0         |  |  |
|        |      | Shiraz-32T | 1870 | 0.729766 | 0         |  |  |
|        |      | Shiraz-35T | 1933 | 0.488535 | 0         |  |  |
|        |      | Shiraz-53T | 2115 | 0.427728 | 0         |  |  |

|      |      |            |      |          |           |  |
|------|------|------------|------|----------|-----------|--|
|      |      | Shiraz-58T | 2223 | 0.833364 | 0         |  |
|      |      | Shiraz-71T | 2263 | 0.975531 | 0         |  |
|      |      | Shiraz-3T  | 247  | 0        | -0.421316 |  |
|      |      | Shiraz-4T  | 261  | 0        | -0.336249 |  |
|      |      | Shiraz-16T | 295  | 0.591657 | 0         |  |
|      |      | Shiraz-36T | 433  | 0        | -0.803961 |  |
|      |      | Shiraz-44T | 909  | 0        | -1.067051 |  |
|      |      | Shiraz-49T | 1170 | 0        | -0.967436 |  |
|      |      | Shiraz-9T  | 1370 | 0.690073 | 0         |  |
|      |      | Shiraz-18T | 1457 | 0.643204 | 0         |  |
|      |      | Shiraz-22T | 1673 | 0.611783 | 0         |  |
|      |      | Shiraz-25T | 1719 | 0.472955 | 0         |  |
|      |      | Shiraz-28T | 1762 | 0.562311 | 0         |  |
|      |      | Shiraz-29T | 1801 | 0.815343 | 0         |  |
|      |      | Shiraz-32T | 1870 | 0.729766 | 0         |  |
|      |      | Shiraz-35T | 1933 | 0.488535 | 0         |  |
|      |      | Shiraz-53T | 2115 | 0.427728 | 0         |  |
|      |      | Shiraz-58T | 2223 | 0.833364 | 0         |  |
|      |      | Shiraz-71T | 2263 | 0.975531 | 0         |  |
| FYB  | chr5 | Shiraz-4T  | 250  | 0.262252 | 0         |  |
|      |      | Shiraz-16T | 266  | 0.321724 | 0         |  |
|      |      | Shiraz-44T | 591  | 0        | -0.233934 |  |
|      |      | Shiraz-18T | 1429 | 0        | -0.314125 |  |
|      |      | Shiraz-22T | 1522 | 0        | -0.322688 |  |
|      |      | Shiraz-25T | 1694 | 0.201602 | 0         |  |
|      |      | Shiraz-28T | 1731 | 0.295447 | 0         |  |
|      |      | Shiraz-29T | 1773 | 0.090981 | 0         |  |
|      |      | Shiraz-40T | 2016 | 0.376634 | 0         |  |
|      |      | Shiraz-4T  | 250  | 0.262252 | 0         |  |
|      |      | Shiraz-16T | 266  | 0.321724 | 0         |  |
|      |      | Shiraz-44T | 591  | 0        | -0.233934 |  |
|      |      | Shiraz-18T | 1429 | 0        | -0.314125 |  |
|      |      | Shiraz-22T | 1522 | 0        | -0.322688 |  |
|      |      | Shiraz-25T | 1694 | 0.201602 | 0         |  |
|      |      | Shiraz-28T | 1731 | 0.295447 | 0         |  |
|      |      | Shiraz-29T | 1773 | 0.090981 | 0         |  |
|      |      | Shiraz-40T | 2016 | 0.376634 | 0         |  |
|      |      | Shiraz-4T  | 250  | 0.262252 | 0         |  |
|      |      | Shiraz-16T | 266  | 0.321724 | 0         |  |
|      |      | Shiraz-44T | 591  | 0        | -0.233934 |  |
|      |      | Shiraz-18T | 1429 | 0        | -0.314125 |  |
|      |      | Shiraz-22T | 1522 | 0        | -0.322688 |  |
|      |      | Shiraz-25T | 1694 | 0.201602 | 0         |  |
|      |      | Shiraz-28T | 1731 | 0.295447 | 0         |  |
|      |      | Shiraz-29T | 1773 | 0.090981 | 0         |  |
|      |      | Shiraz-40T | 2016 | 0.376634 | 0         |  |
| FZD1 | chr7 | Shiraz-3T  | 90   | 0.219276 | 0         |  |

|  |            |      |          |           |  |
|--|------------|------|----------|-----------|--|
|  | Shiraz-3T  | 93   | 0        | -0.058023 |  |
|  | Shiraz-4T  | 253  | 0.372918 | 0         |  |
|  | Shiraz-36T | 378  | 0.179558 | 0         |  |
|  | Shiraz-36T | 380  | 0.083883 | 0         |  |
|  | Shiraz-44T | 638  | 0        | -0.433476 |  |
|  | Shiraz-46T | 943  | 0.093799 | 0         |  |
|  | Shiraz-46T | 945  | 0        | -0.014838 |  |
|  | Shiraz-47T | 1029 | 0        | -0.096586 |  |
|  | Shiraz-49T | 1119 | 0        | -0.157331 |  |
|  | Shiraz-77T | 1225 | 0        | -0.117922 |  |
|  | Shiraz-18T | 1434 | 0.244465 | 0         |  |
|  | Shiraz-22T | 1549 | 0        | -0.319623 |  |
|  | Shiraz-25T | 1698 | 0.21835  | 0         |  |
|  | Shiraz-28T | 1735 | 0.350744 | 0         |  |
|  | Shiraz-29T | 1778 | 0.120767 | 0         |  |
|  | Shiraz-32T | 1833 | 0.551336 | 0         |  |
|  | Shiraz-38T | 1951 | 0.250891 | 0         |  |
|  | Shiraz-53T | 2078 | 0.287202 | 0         |  |
|  | Shiraz-58T | 2159 | 0        | -0.219521 |  |
|  | Shiraz-71T | 2238 | 0.603631 | 0         |  |
|  | Shiraz-3T  | 90   | 0.219276 | 0         |  |
|  | Shiraz-3T  | 93   | 0        | -0.058023 |  |
|  | Shiraz-4T  | 253  | 0.372918 | 0         |  |
|  | Shiraz-36T | 378  | 0.179558 | 0         |  |
|  | Shiraz-36T | 380  | 0.083883 | 0         |  |
|  | Shiraz-44T | 638  | 0        | -0.433476 |  |
|  | Shiraz-46T | 943  | 0.093799 | 0         |  |
|  | Shiraz-46T | 945  | 0        | -0.014838 |  |
|  | Shiraz-47T | 1029 | 0        | -0.096586 |  |
|  | Shiraz-49T | 1119 | 0        | -0.157331 |  |
|  | Shiraz-77T | 1225 | 0        | -0.117922 |  |
|  | Shiraz-18T | 1434 | 0.244465 | 0         |  |
|  | Shiraz-22T | 1549 | 0        | -0.319623 |  |
|  | Shiraz-25T | 1698 | 0.21835  | 0         |  |
|  | Shiraz-28T | 1735 | 0.350744 | 0         |  |
|  | Shiraz-29T | 1778 | 0.120767 | 0         |  |
|  | Shiraz-32T | 1833 | 0.551336 | 0         |  |
|  | Shiraz-38T | 1951 | 0.250891 | 0         |  |
|  | Shiraz-53T | 2078 | 0.287202 | 0         |  |
|  | Shiraz-58T | 2159 | 0        | -0.219521 |  |
|  | Shiraz-71T | 2238 | 0.603631 | 0         |  |
|  | Shiraz-3T  | 90   | 0.219276 | 0         |  |
|  | Shiraz-3T  | 93   | 0        | -0.058023 |  |
|  | Shiraz-4T  | 253  | 0.372918 | 0         |  |
|  | Shiraz-36T | 378  | 0.179558 | 0         |  |
|  | Shiraz-36T | 380  | 0.083883 | 0         |  |
|  | Shiraz-44T | 638  | 0        | -0.433476 |  |

|      |      |            |      |          |           |  |
|------|------|------------|------|----------|-----------|--|
|      |      | Shiraz-46T | 943  | 0.093799 | 0         |  |
|      |      | Shiraz-46T | 945  | 0        | -0.014838 |  |
|      |      | Shiraz-47T | 1029 | 0        | -0.096586 |  |
|      |      | Shiraz-49T | 1119 | 0        | -0.157331 |  |
|      |      | Shiraz-77T | 1225 | 0        | -0.117922 |  |
|      |      | Shiraz-18T | 1434 | 0.244465 | 0         |  |
|      |      | Shiraz-22T | 1549 | 0        | -0.319623 |  |
|      |      | Shiraz-25T | 1698 | 0.21835  | 0         |  |
|      |      | Shiraz-28T | 1735 | 0.350744 | 0         |  |
|      |      | Shiraz-29T | 1778 | 0.120767 | 0         |  |
|      |      | Shiraz-32T | 1833 | 0.551336 | 0         |  |
|      |      | Shiraz-38T | 1951 | 0.250891 | 0         |  |
|      |      | Shiraz-53T | 2078 | 0.287202 | 0         |  |
|      |      | Shiraz-58T | 2159 | 0        | -0.219521 |  |
|      |      | Shiraz-71T | 2238 | 0.603631 | 0         |  |
| G6PD | chrX | Shiraz-3T  | 246  | 0.531858 | 0         |  |
|      |      | Shiraz-3T  | 246  | 0.531858 | 0         |  |
|      |      | Shiraz-4T  | 261  | 0        | -0.336249 |  |
|      |      | Shiraz-4T  | 261  | 0        | -0.336249 |  |
|      |      | Shiraz-16T | 295  | 0.591657 | 0         |  |
|      |      | Shiraz-16T | 295  | 0.591657 | 0         |  |
|      |      | Shiraz-36T | 433  | 0        | -0.803961 |  |
|      |      | Shiraz-36T | 433  | 0        | -0.803961 |  |
|      |      | Shiraz-42T | 480  | 0        | -0.232915 |  |
|      |      | Shiraz-42T | 480  | 0        | -0.232915 |  |
|      |      | Shiraz-44T | 908  | 0.466743 | 0         |  |
|      |      | Shiraz-44T | 908  | 0.466743 | 0         |  |
|      |      | Shiraz-49T | 1170 | 0        | -0.967436 |  |
|      |      | Shiraz-49T | 1170 | 0        | -0.967436 |  |
|      |      | Shiraz-49T | 1173 | 0        | -0.704439 |  |
|      |      | Shiraz-49T | 1173 | 0        | -0.704439 |  |
|      |      | Shiraz-9T  | 1370 | 0.690073 | 0         |  |
|      |      | Shiraz-9T  | 1370 | 0.690073 | 0         |  |
|      |      | Shiraz-9T  | 1371 | 1.292392 | 0         |  |
|      |      | Shiraz-9T  | 1371 | 1.292392 | 0         |  |
|      |      | Shiraz-18T | 1457 | 0.643204 | 0         |  |
|      |      | Shiraz-18T | 1457 | 0.643204 | 0         |  |
|      |      | Shiraz-22T | 1673 | 0.611783 | 0         |  |
|      |      | Shiraz-22T | 1673 | 0.611783 | 0         |  |
|      |      | Shiraz-22T | 1678 | 0.911625 | 0         |  |
|      |      | Shiraz-22T | 1678 | 0.911625 | 0         |  |
|      |      | Shiraz-25T | 1719 | 0.472955 | 0         |  |
|      |      | Shiraz-25T | 1719 | 0.472955 | 0         |  |
|      |      | Shiraz-28T | 1762 | 0.562311 | 0         |  |
|      |      | Shiraz-28T | 1762 | 0.562311 | 0         |  |
|      |      | Shiraz-29T | 1801 | 0.815343 | 0         |  |
|      |      | Shiraz-29T | 1801 | 0.815343 | 0         |  |

|  |  |            |      |          |           |  |  |
|--|--|------------|------|----------|-----------|--|--|
|  |  | Shiraz-32T | 1870 | 0.729766 | 0         |  |  |
|  |  | Shiraz-32T | 1870 | 0.729766 | 0         |  |  |
|  |  | Shiraz-32T | 1872 | 1.504553 | 0         |  |  |
|  |  | Shiraz-32T | 1872 | 1.504553 | 0         |  |  |
|  |  | Shiraz-35T | 1933 | 0.488535 | 0         |  |  |
|  |  | Shiraz-35T | 1933 | 0.488535 | 0         |  |  |
|  |  | Shiraz-38T | 2011 | 0        | -0.406024 |  |  |
|  |  | Shiraz-38T | 2011 | 0        | -0.406024 |  |  |
|  |  | Shiraz-53T | 2115 | 0.427728 | 0         |  |  |
|  |  | Shiraz-53T | 2115 | 0.427728 | 0         |  |  |
|  |  | Shiraz-58T | 2223 | 0.833364 | 0         |  |  |
|  |  | Shiraz-58T | 2223 | 0.833364 | 0         |  |  |
|  |  | Shiraz-58T | 2226 | 1.074663 | 0         |  |  |
|  |  | Shiraz-58T | 2226 | 1.074663 | 0         |  |  |
|  |  | Shiraz-71T | 2263 | 0.975531 | 0         |  |  |
|  |  | Shiraz-71T | 2263 | 0.975531 | 0         |  |  |
|  |  | Shiraz-3T  | 246  | 0.531858 | 0         |  |  |
|  |  | Shiraz-3T  | 246  | 0.531858 | 0         |  |  |
|  |  | Shiraz-4T  | 261  | 0        | -0.336249 |  |  |
|  |  | Shiraz-4T  | 261  | 0        | -0.336249 |  |  |
|  |  | Shiraz-16T | 295  | 0.591657 | 0         |  |  |
|  |  | Shiraz-16T | 295  | 0.591657 | 0         |  |  |
|  |  | Shiraz-36T | 433  | 0        | -0.803961 |  |  |
|  |  | Shiraz-36T | 433  | 0        | -0.803961 |  |  |
|  |  | Shiraz-42T | 480  | 0        | -0.232915 |  |  |
|  |  | Shiraz-42T | 480  | 0        | -0.232915 |  |  |
|  |  | Shiraz-44T | 908  | 0.466743 | 0         |  |  |
|  |  | Shiraz-44T | 908  | 0.466743 | 0         |  |  |
|  |  | Shiraz-49T | 1170 | 0        | -0.967436 |  |  |
|  |  | Shiraz-49T | 1170 | 0        | -0.967436 |  |  |
|  |  | Shiraz-49T | 1173 | 0        | -0.704439 |  |  |
|  |  | Shiraz-49T | 1173 | 0        | -0.704439 |  |  |
|  |  | Shiraz-9T  | 1370 | 0.690073 | 0         |  |  |
|  |  | Shiraz-9T  | 1370 | 0.690073 | 0         |  |  |
|  |  | Shiraz-9T  | 1371 | 1.292392 | 0         |  |  |
|  |  | Shiraz-9T  | 1371 | 1.292392 | 0         |  |  |
|  |  | Shiraz-18T | 1457 | 0.643204 | 0         |  |  |
|  |  | Shiraz-18T | 1457 | 0.643204 | 0         |  |  |
|  |  | Shiraz-22T | 1673 | 0.611783 | 0         |  |  |
|  |  | Shiraz-22T | 1673 | 0.611783 | 0         |  |  |
|  |  | Shiraz-22T | 1678 | 0.911625 | 0         |  |  |
|  |  | Shiraz-22T | 1678 | 0.911625 | 0         |  |  |
|  |  | Shiraz-25T | 1719 | 0.472955 | 0         |  |  |
|  |  | Shiraz-25T | 1719 | 0.472955 | 0         |  |  |
|  |  | Shiraz-28T | 1762 | 0.562311 | 0         |  |  |
|  |  | Shiraz-28T | 1762 | 0.562311 | 0         |  |  |
|  |  | Shiraz-29T | 1801 | 0.815343 | 0         |  |  |

|  |            |      |          |           |  |
|--|------------|------|----------|-----------|--|
|  | Shiraz-29T | 1801 | 0.815343 | 0         |  |
|  | Shiraz-32T | 1870 | 0.729766 | 0         |  |
|  | Shiraz-32T | 1870 | 0.729766 | 0         |  |
|  | Shiraz-32T | 1872 | 1.504553 | 0         |  |
|  | Shiraz-32T | 1872 | 1.504553 | 0         |  |
|  | Shiraz-35T | 1933 | 0.488535 | 0         |  |
|  | Shiraz-35T | 1933 | 0.488535 | 0         |  |
|  | Shiraz-38T | 2011 | 0        | -0.406024 |  |
|  | Shiraz-38T | 2011 | 0        | -0.406024 |  |
|  | Shiraz-53T | 2115 | 0.427728 | 0         |  |
|  | Shiraz-53T | 2115 | 0.427728 | 0         |  |
|  | Shiraz-58T | 2223 | 0.833364 | 0         |  |
|  | Shiraz-58T | 2223 | 0.833364 | 0         |  |
|  | Shiraz-58T | 2226 | 1.074663 | 0         |  |
|  | Shiraz-58T | 2226 | 1.074663 | 0         |  |
|  | Shiraz-71T | 2263 | 0.975531 | 0         |  |
|  | Shiraz-71T | 2263 | 0.975531 | 0         |  |
|  | Shiraz-3T  | 246  | 0.531858 | 0         |  |
|  | Shiraz-3T  | 246  | 0.531858 | 0         |  |
|  | Shiraz-4T  | 261  | 0        | -0.336249 |  |
|  | Shiraz-4T  | 261  | 0        | -0.336249 |  |
|  | Shiraz-16T | 295  | 0.591657 | 0         |  |
|  | Shiraz-16T | 295  | 0.591657 | 0         |  |
|  | Shiraz-36T | 433  | 0        | -0.803961 |  |
|  | Shiraz-36T | 433  | 0        | -0.803961 |  |
|  | Shiraz-42T | 480  | 0        | -0.232915 |  |
|  | Shiraz-42T | 480  | 0        | -0.232915 |  |
|  | Shiraz-44T | 908  | 0.466743 | 0         |  |
|  | Shiraz-44T | 908  | 0.466743 | 0         |  |
|  | Shiraz-49T | 1170 | 0        | -0.967436 |  |
|  | Shiraz-49T | 1170 | 0        | -0.967436 |  |
|  | Shiraz-49T | 1173 | 0        | -0.704439 |  |
|  | Shiraz-49T | 1173 | 0        | -0.704439 |  |
|  | Shiraz-9T  | 1370 | 0.690073 | 0         |  |
|  | Shiraz-9T  | 1370 | 0.690073 | 0         |  |
|  | Shiraz-9T  | 1371 | 1.292392 | 0         |  |
|  | Shiraz-9T  | 1371 | 1.292392 | 0         |  |
|  | Shiraz-18T | 1457 | 0.643204 | 0         |  |
|  | Shiraz-18T | 1457 | 0.643204 | 0         |  |
|  | Shiraz-22T | 1673 | 0.611783 | 0         |  |
|  | Shiraz-22T | 1673 | 0.611783 | 0         |  |
|  | Shiraz-22T | 1678 | 0.911625 | 0         |  |
|  | Shiraz-22T | 1678 | 0.911625 | 0         |  |
|  | Shiraz-25T | 1719 | 0.472955 | 0         |  |
|  | Shiraz-25T | 1719 | 0.472955 | 0         |  |
|  | Shiraz-28T | 1762 | 0.562311 | 0         |  |
|  | Shiraz-28T | 1762 | 0.562311 | 0         |  |



|      |      |            |      |          |           |  |  |
|------|------|------------|------|----------|-----------|--|--|
|      |      | Shiraz-29T | 1801 | 0.815343 | 0         |  |  |
|      |      | Shiraz-29T | 1801 | 0.815343 | 0         |  |  |
|      |      | Shiraz-32T | 1870 | 0.729766 | 0         |  |  |
|      |      | Shiraz-32T | 1870 | 0.729766 | 0         |  |  |
|      |      | Shiraz-32T | 1872 | 1.504553 | 0         |  |  |
|      |      | Shiraz-32T | 1872 | 1.504553 | 0         |  |  |
|      |      | Shiraz-35T | 1933 | 0.488535 | 0         |  |  |
|      |      | Shiraz-35T | 1933 | 0.488535 | 0         |  |  |
|      |      | Shiraz-38T | 2011 | 0        | -0.406024 |  |  |
|      |      | Shiraz-38T | 2011 | 0        | -0.406024 |  |  |
|      |      | Shiraz-53T | 2115 | 0.427728 | 0         |  |  |
|      |      | Shiraz-53T | 2115 | 0.427728 | 0         |  |  |
|      |      | Shiraz-58T | 2223 | 0.833364 | 0         |  |  |
|      |      | Shiraz-58T | 2223 | 0.833364 | 0         |  |  |
|      |      | Shiraz-58T | 2226 | 1.074663 | 0         |  |  |
|      |      | Shiraz-58T | 2226 | 1.074663 | 0         |  |  |
|      |      | Shiraz-71T | 2263 | 0.975531 | 0         |  |  |
|      |      | Shiraz-71T | 2263 | 0.975531 | 0         |  |  |
| GAB3 | chrX | Shiraz-4T  | 261  | 0        | -0.336249 |  |  |
|      |      | Shiraz-16T | 295  | 0.591657 | 0         |  |  |
|      |      | Shiraz-36T | 433  | 0        | -0.803961 |  |  |
|      |      | Shiraz-44T | 909  | 0        | -1.067051 |  |  |
|      |      | Shiraz-49T | 1170 | 0        | -0.967436 |  |  |
|      |      | Shiraz-9T  | 1370 | 0.690073 | 0         |  |  |
|      |      | Shiraz-9T  | 1371 | 1.292392 | 0         |  |  |
|      |      | Shiraz-18T | 1457 | 0.643204 | 0         |  |  |
|      |      | Shiraz-22T | 1673 | 0.611783 | 0         |  |  |
|      |      | Shiraz-22T | 1678 | 0.911625 | 0         |  |  |
|      |      | Shiraz-25T | 1719 | 0.472955 | 0         |  |  |
|      |      | Shiraz-28T | 1762 | 0.562311 | 0         |  |  |
|      |      | Shiraz-29T | 1801 | 0.815343 | 0         |  |  |
|      |      | Shiraz-32T | 1870 | 0.729766 | 0         |  |  |
|      |      | Shiraz-32T | 1872 | 1.504553 | 0         |  |  |
|      |      | Shiraz-35T | 1933 | 0.488535 | 0         |  |  |
|      |      | Shiraz-53T | 2115 | 0.427728 | 0         |  |  |
|      |      | Shiraz-58T | 2223 | 0.833364 | 0         |  |  |
|      |      | Shiraz-58T | 2226 | 1.074663 | 0         |  |  |
|      |      | Shiraz-71T | 2263 | 0.975531 | 0         |  |  |
|      |      | Shiraz-4T  | 261  | 0        | -0.336249 |  |  |
|      |      | Shiraz-16T | 295  | 0.591657 | 0         |  |  |
|      |      | Shiraz-36T | 433  | 0        | -0.803961 |  |  |
|      |      | Shiraz-44T | 909  | 0        | -1.067051 |  |  |
|      |      | Shiraz-49T | 1170 | 0        | -0.967436 |  |  |
|      |      | Shiraz-9T  | 1370 | 0.690073 | 0         |  |  |
|      |      | Shiraz-9T  | 1371 | 1.292392 | 0         |  |  |
|      |      | Shiraz-18T | 1457 | 0.643204 | 0         |  |  |
|      |      | Shiraz-22T | 1673 | 0.611783 | 0         |  |  |

|        |      |            |      |          |           |  |
|--------|------|------------|------|----------|-----------|--|
|        |      | Shiraz-22T | 1678 | 0.911625 | 0         |  |
|        |      | Shiraz-25T | 1719 | 0.472955 | 0         |  |
|        |      | Shiraz-28T | 1762 | 0.562311 | 0         |  |
|        |      | Shiraz-29T | 1801 | 0.815343 | 0         |  |
|        |      | Shiraz-32T | 1870 | 0.729766 | 0         |  |
|        |      | Shiraz-32T | 1872 | 1.504553 | 0         |  |
|        |      | Shiraz-35T | 1933 | 0.488535 | 0         |  |
|        |      | Shiraz-53T | 2115 | 0.427728 | 0         |  |
|        |      | Shiraz-58T | 2223 | 0.833364 | 0         |  |
|        |      | Shiraz-58T | 2226 | 1.074663 | 0         |  |
|        |      | Shiraz-71T | 2263 | 0.975531 | 0         |  |
|        |      | Shiraz-4T  | 261  | 0        | -0.336249 |  |
|        |      | Shiraz-16T | 295  | 0.591657 | 0         |  |
|        |      | Shiraz-36T | 433  | 0        | -0.803961 |  |
|        |      | Shiraz-44T | 909  | 0        | -1.067051 |  |
|        |      | Shiraz-49T | 1170 | 0        | -0.967436 |  |
|        |      | Shiraz-9T  | 1370 | 0.690073 | 0         |  |
|        |      | Shiraz-9T  | 1371 | 1.292392 | 0         |  |
|        |      | Shiraz-18T | 1457 | 0.643204 | 0         |  |
|        |      | Shiraz-22T | 1673 | 0.611783 | 0         |  |
|        |      | Shiraz-22T | 1678 | 0.911625 | 0         |  |
|        |      | Shiraz-25T | 1719 | 0.472955 | 0         |  |
|        |      | Shiraz-28T | 1762 | 0.562311 | 0         |  |
|        |      | Shiraz-29T | 1801 | 0.815343 | 0         |  |
|        |      | Shiraz-32T | 1870 | 0.729766 | 0         |  |
|        |      | Shiraz-32T | 1872 | 1.504553 | 0         |  |
|        |      | Shiraz-35T | 1933 | 0.488535 | 0         |  |
|        |      | Shiraz-53T | 2115 | 0.427728 | 0         |  |
|        |      | Shiraz-58T | 2223 | 0.833364 | 0         |  |
|        |      | Shiraz-58T | 2226 | 1.074663 | 0         |  |
|        |      | Shiraz-71T | 2263 | 0.975531 | 0         |  |
| GABRA3 | chrX | Shiraz-3T  | 242  | 0        | -0.336434 |  |
|        |      | Shiraz-4T  | 261  | 0        | -0.336249 |  |
|        |      | Shiraz-16T | 295  | 0.591657 | 0         |  |
|        |      | Shiraz-36T | 433  | 0        | -0.803961 |  |
|        |      | Shiraz-42T | 480  | 0        | -0.232915 |  |
|        |      | Shiraz-44T | 899  | 0        | -1.09697  |  |
|        |      | Shiraz-49T | 1170 | 0        | -0.967436 |  |
|        |      | Shiraz-9T  | 1370 | 0.690073 | 0         |  |
|        |      | Shiraz-18T | 1457 | 0.643204 | 0         |  |
|        |      | Shiraz-22T | 1673 | 0.611783 | 0         |  |
|        |      | Shiraz-22T | 1678 | 0.911625 | 0         |  |
|        |      | Shiraz-25T | 1719 | 0.472955 | 0         |  |
|        |      | Shiraz-28T | 1762 | 0.562311 | 0         |  |
|        |      | Shiraz-29T | 1801 | 0.815343 | 0         |  |
|        |      | Shiraz-32T | 1870 | 0.729766 | 0         |  |
|        |      | Shiraz-35T | 1933 | 0.488535 | 0         |  |

|       |      |            |      |          |           |  |  |
|-------|------|------------|------|----------|-----------|--|--|
|       |      | Shiraz-58T | 2223 | 0.833364 | 0         |  |  |
|       |      | Shiraz-58T | 2226 | 1.074663 | 0         |  |  |
|       |      | Shiraz-71T | 2263 | 0.975531 | 0         |  |  |
|       |      | Shiraz-3T  | 242  | 0        | -0.336434 |  |  |
|       |      | Shiraz-4T  | 261  | 0        | -0.336249 |  |  |
|       |      | Shiraz-16T | 295  | 0.591657 | 0         |  |  |
|       |      | Shiraz-36T | 433  | 0        | -0.803961 |  |  |
|       |      | Shiraz-42T | 480  | 0        | -0.232915 |  |  |
|       |      | Shiraz-44T | 899  | 0        | -1.09697  |  |  |
|       |      | Shiraz-49T | 1170 | 0        | -0.967436 |  |  |
|       |      | Shiraz-9T  | 1370 | 0.690073 | 0         |  |  |
|       |      | Shiraz-18T | 1457 | 0.643204 | 0         |  |  |
|       |      | Shiraz-22T | 1673 | 0.611783 | 0         |  |  |
|       |      | Shiraz-22T | 1678 | 0.911625 | 0         |  |  |
|       |      | Shiraz-25T | 1719 | 0.472955 | 0         |  |  |
|       |      | Shiraz-28T | 1762 | 0.562311 | 0         |  |  |
|       |      | Shiraz-29T | 1801 | 0.815343 | 0         |  |  |
|       |      | Shiraz-32T | 1870 | 0.729766 | 0         |  |  |
|       |      | Shiraz-35T | 1933 | 0.488535 | 0         |  |  |
|       |      | Shiraz-58T | 2223 | 0.833364 | 0         |  |  |
|       |      | Shiraz-58T | 2226 | 1.074663 | 0         |  |  |
|       |      | Shiraz-71T | 2263 | 0.975531 | 0         |  |  |
|       |      | Shiraz-3T  | 242  | 0        | -0.336434 |  |  |
|       |      | Shiraz-4T  | 261  | 0        | -0.336249 |  |  |
|       |      | Shiraz-16T | 295  | 0.591657 | 0         |  |  |
|       |      | Shiraz-36T | 433  | 0        | -0.803961 |  |  |
|       |      | Shiraz-42T | 480  | 0        | -0.232915 |  |  |
|       |      | Shiraz-44T | 899  | 0        | -1.09697  |  |  |
|       |      | Shiraz-49T | 1170 | 0        | -0.967436 |  |  |
|       |      | Shiraz-9T  | 1370 | 0.690073 | 0         |  |  |
|       |      | Shiraz-18T | 1457 | 0.643204 | 0         |  |  |
|       |      | Shiraz-22T | 1673 | 0.611783 | 0         |  |  |
|       |      | Shiraz-22T | 1678 | 0.911625 | 0         |  |  |
|       |      | Shiraz-25T | 1719 | 0.472955 | 0         |  |  |
|       |      | Shiraz-28T | 1762 | 0.562311 | 0         |  |  |
|       |      | Shiraz-29T | 1801 | 0.815343 | 0         |  |  |
|       |      | Shiraz-32T | 1870 | 0.729766 | 0         |  |  |
|       |      | Shiraz-35T | 1933 | 0.488535 | 0         |  |  |
|       |      | Shiraz-58T | 2223 | 0.833364 | 0         |  |  |
|       |      | Shiraz-58T | 2226 | 1.074663 | 0         |  |  |
|       |      | Shiraz-71T | 2263 | 0.975531 | 0         |  |  |
| GABRE | chrX | Shiraz-3T  | 242  | 0        | -0.336434 |  |  |
|       |      | Shiraz-4T  | 261  | 0        | -0.336249 |  |  |
|       |      | Shiraz-16T | 295  | 0.591657 | 0         |  |  |
|       |      | Shiraz-36T | 433  | 0        | -0.803961 |  |  |
|       |      | Shiraz-42T | 480  | 0        | -0.232915 |  |  |
|       |      | Shiraz-44T | 899  | 0        | -1.09697  |  |  |

|  |            |      |          |           |  |
|--|------------|------|----------|-----------|--|
|  | Shiraz-49T | 1170 | 0        | -0.967436 |  |
|  | Shiraz-9T  | 1370 | 0.690073 | 0         |  |
|  | Shiraz-18T | 1457 | 0.643204 | 0         |  |
|  | Shiraz-22T | 1673 | 0.611783 | 0         |  |
|  | Shiraz-22T | 1678 | 0.911625 | 0         |  |
|  | Shiraz-25T | 1719 | 0.472955 | 0         |  |
|  | Shiraz-28T | 1762 | 0.562311 | 0         |  |
|  | Shiraz-29T | 1801 | 0.815343 | 0         |  |
|  | Shiraz-32T | 1870 | 0.729766 | 0         |  |
|  | Shiraz-35T | 1933 | 0.488535 | 0         |  |
|  | Shiraz-58T | 2223 | 0.833364 | 0         |  |
|  | Shiraz-58T | 2226 | 1.074663 | 0         |  |
|  | Shiraz-71T | 2263 | 0.975531 | 0         |  |
|  | Shiraz-3T  | 242  | 0        | -0.336434 |  |
|  | Shiraz-4T  | 261  | 0        | -0.336249 |  |
|  | Shiraz-16T | 295  | 0.591657 | 0         |  |
|  | Shiraz-36T | 433  | 0        | -0.803961 |  |
|  | Shiraz-42T | 480  | 0        | -0.232915 |  |
|  | Shiraz-44T | 899  | 0        | -1.09697  |  |
|  | Shiraz-49T | 1170 | 0        | -0.967436 |  |
|  | Shiraz-9T  | 1370 | 0.690073 | 0         |  |
|  | Shiraz-18T | 1457 | 0.643204 | 0         |  |
|  | Shiraz-22T | 1673 | 0.611783 | 0         |  |
|  | Shiraz-22T | 1678 | 0.911625 | 0         |  |
|  | Shiraz-25T | 1719 | 0.472955 | 0         |  |
|  | Shiraz-28T | 1762 | 0.562311 | 0         |  |
|  | Shiraz-29T | 1801 | 0.815343 | 0         |  |
|  | Shiraz-32T | 1870 | 0.729766 | 0         |  |
|  | Shiraz-35T | 1933 | 0.488535 | 0         |  |
|  | Shiraz-58T | 2223 | 0.833364 | 0         |  |
|  | Shiraz-58T | 2226 | 1.074663 | 0         |  |
|  | Shiraz-71T | 2263 | 0.975531 | 0         |  |
|  | Shiraz-3T  | 242  | 0        | -0.336434 |  |
|  | Shiraz-4T  | 261  | 0        | -0.336249 |  |
|  | Shiraz-16T | 295  | 0.591657 | 0         |  |
|  | Shiraz-36T | 433  | 0        | -0.803961 |  |
|  | Shiraz-42T | 480  | 0        | -0.232915 |  |
|  | Shiraz-44T | 899  | 0        | -1.09697  |  |
|  | Shiraz-49T | 1170 | 0        | -0.967436 |  |
|  | Shiraz-9T  | 1370 | 0.690073 | 0         |  |
|  | Shiraz-18T | 1457 | 0.643204 | 0         |  |
|  | Shiraz-22T | 1673 | 0.611783 | 0         |  |
|  | Shiraz-22T | 1678 | 0.911625 | 0         |  |
|  | Shiraz-25T | 1719 | 0.472955 | 0         |  |
|  | Shiraz-28T | 1762 | 0.562311 | 0         |  |
|  | Shiraz-29T | 1801 | 0.815343 | 0         |  |
|  | Shiraz-32T | 1870 | 0.729766 | 0         |  |

|       |      |            |      |          |           |  |  |
|-------|------|------------|------|----------|-----------|--|--|
|       |      | Shiraz-35T | 1933 | 0.488535 | 0         |  |  |
|       |      | Shiraz-58T | 2223 | 0.833364 | 0         |  |  |
|       |      | Shiraz-58T | 2226 | 1.074663 | 0         |  |  |
|       |      | Shiraz-71T | 2263 | 0.975531 | 0         |  |  |
| GABRQ | chrX | Shiraz-4T  | 261  | 0        | -0.336249 |  |  |
|       |      | Shiraz-16T | 295  | 0.591657 | 0         |  |  |
|       |      | Shiraz-36T | 433  | 0        | -0.803961 |  |  |
|       |      | Shiraz-42T | 480  | 0        | -0.232915 |  |  |
|       |      | Shiraz-44T | 899  | 0        | -1.09697  |  |  |
|       |      | Shiraz-49T | 1170 | 0        | -0.967436 |  |  |
|       |      | Shiraz-9T  | 1370 | 0.690073 | 0         |  |  |
|       |      | Shiraz-9T  | 1371 | 1.292392 | 0         |  |  |
|       |      | Shiraz-18T | 1457 | 0.643204 | 0         |  |  |
|       |      | Shiraz-22T | 1673 | 0.611783 | 0         |  |  |
|       |      | Shiraz-22T | 1678 | 0.911625 | 0         |  |  |
|       |      | Shiraz-25T | 1719 | 0.472955 | 0         |  |  |
|       |      | Shiraz-28T | 1762 | 0.562311 | 0         |  |  |
|       |      | Shiraz-29T | 1801 | 0.815343 | 0         |  |  |
|       |      | Shiraz-32T | 1870 | 0.729766 | 0         |  |  |
|       |      | Shiraz-32T | 1872 | 1.504553 | 0         |  |  |
|       |      | Shiraz-35T | 1933 | 0.488535 | 0         |  |  |
|       |      | Shiraz-53T | 2115 | 0.427728 | 0         |  |  |
|       |      | Shiraz-58T | 2223 | 0.833364 | 0         |  |  |
|       |      | Shiraz-58T | 2226 | 1.074663 | 0         |  |  |
|       |      | Shiraz-71T | 2263 | 0.975531 | 0         |  |  |
|       |      | Shiraz-4T  | 261  | 0        | -0.336249 |  |  |
|       |      | Shiraz-16T | 295  | 0.591657 | 0         |  |  |
|       |      | Shiraz-36T | 433  | 0        | -0.803961 |  |  |
|       |      | Shiraz-42T | 480  | 0        | -0.232915 |  |  |
|       |      | Shiraz-44T | 899  | 0        | -1.09697  |  |  |
|       |      | Shiraz-49T | 1170 | 0        | -0.967436 |  |  |
|       |      | Shiraz-9T  | 1370 | 0.690073 | 0         |  |  |
|       |      | Shiraz-9T  | 1371 | 1.292392 | 0         |  |  |
|       |      | Shiraz-18T | 1457 | 0.643204 | 0         |  |  |
|       |      | Shiraz-22T | 1673 | 0.611783 | 0         |  |  |
|       |      | Shiraz-22T | 1678 | 0.911625 | 0         |  |  |
|       |      | Shiraz-25T | 1719 | 0.472955 | 0         |  |  |
|       |      | Shiraz-28T | 1762 | 0.562311 | 0         |  |  |
|       |      | Shiraz-29T | 1801 | 0.815343 | 0         |  |  |
|       |      | Shiraz-32T | 1870 | 0.729766 | 0         |  |  |
|       |      | Shiraz-32T | 1872 | 1.504553 | 0         |  |  |
|       |      | Shiraz-35T | 1933 | 0.488535 | 0         |  |  |
|       |      | Shiraz-53T | 2115 | 0.427728 | 0         |  |  |
|       |      | Shiraz-58T | 2223 | 0.833364 | 0         |  |  |
|       |      | Shiraz-58T | 2226 | 1.074663 | 0         |  |  |
|       |      | Shiraz-71T | 2263 | 0.975531 | 0         |  |  |
|       |      | Shiraz-4T  | 261  | 0        | -0.336249 |  |  |

|       |      |            |      |          |           |  |  |
|-------|------|------------|------|----------|-----------|--|--|
|       |      | Shiraz-16T | 295  | 0.591657 | 0         |  |  |
|       |      | Shiraz-36T | 433  | 0        | -0.803961 |  |  |
|       |      | Shiraz-42T | 480  | 0        | -0.232915 |  |  |
|       |      | Shiraz-44T | 899  | 0        | -1.09697  |  |  |
|       |      | Shiraz-49T | 1170 | 0        | -0.967436 |  |  |
|       |      | Shiraz-9T  | 1370 | 0.690073 | 0         |  |  |
|       |      | Shiraz-9T  | 1371 | 1.292392 | 0         |  |  |
|       |      | Shiraz-18T | 1457 | 0.643204 | 0         |  |  |
|       |      | Shiraz-22T | 1673 | 0.611783 | 0         |  |  |
|       |      | Shiraz-22T | 1678 | 0.911625 | 0         |  |  |
|       |      | Shiraz-25T | 1719 | 0.472955 | 0         |  |  |
|       |      | Shiraz-28T | 1762 | 0.562311 | 0         |  |  |
|       |      | Shiraz-29T | 1801 | 0.815343 | 0         |  |  |
|       |      | Shiraz-32T | 1870 | 0.729766 | 0         |  |  |
|       |      | Shiraz-32T | 1872 | 1.504553 | 0         |  |  |
|       |      | Shiraz-35T | 1933 | 0.488535 | 0         |  |  |
|       |      | Shiraz-53T | 2115 | 0.427728 | 0         |  |  |
|       |      | Shiraz-58T | 2223 | 0.833364 | 0         |  |  |
|       |      | Shiraz-58T | 2226 | 1.074663 | 0         |  |  |
|       |      | Shiraz-71T | 2263 | 0.975531 | 0         |  |  |
| GAGE1 | chrX | Shiraz-4T  | 260  | 0        | -0.324128 |  |  |
|       |      | Shiraz-16T | 294  | 0.655804 | 0         |  |  |
|       |      | Shiraz-31T | 345  | 0.103301 | 0         |  |  |
|       |      | Shiraz-36T | 431  | 0        | -0.78035  |  |  |
|       |      | Shiraz-36T | 432  | 0        | -0.6692   |  |  |
|       |      | Shiraz-44T | 891  | 0        | -0.954044 |  |  |
|       |      | Shiraz-46T | 991  | 0.139564 | 0         |  |  |
|       |      | Shiraz-47T | 1084 | 0.24185  | 0         |  |  |
|       |      | Shiraz-49T | 1166 | 0        | -0.917235 |  |  |
|       |      | Shiraz-77T | 1282 | 0.213849 | 0         |  |  |
|       |      | Shiraz-9T  | 1368 | 0.199713 | 0         |  |  |
|       |      | Shiraz-18T | 1455 | 0        | -0.186773 |  |  |
|       |      | Shiraz-22T | 1669 | 0.695915 | 0         |  |  |
|       |      | Shiraz-22T | 1672 | 1.01678  | 0         |  |  |
|       |      | Shiraz-25T | 1717 | 0.420447 | 0         |  |  |
|       |      | Shiraz-28T | 1760 | 0.538181 | 0         |  |  |
|       |      | Shiraz-29T | 1800 | 0.672527 | 0         |  |  |
|       |      | Shiraz-32T | 1869 | 0.776805 | 0         |  |  |
|       |      | Shiraz-35T | 1932 | 0.507141 | 0         |  |  |
|       |      | Shiraz-58T | 2221 | 0.871948 | 0         |  |  |
|       |      | Shiraz-71T | 2260 | 0.68394  | 0         |  |  |
|       |      | Shiraz-71T | 2262 | 0.986748 | 0         |  |  |
|       |      | Shiraz-4T  | 260  | 0        | -0.324128 |  |  |
|       |      | Shiraz-16T | 294  | 0.655804 | 0         |  |  |
|       |      | Shiraz-31T | 345  | 0.103301 | 0         |  |  |
|       |      | Shiraz-36T | 431  | 0        | -0.78035  |  |  |
|       |      | Shiraz-36T | 432  | 0        | -0.6692   |  |  |

|        |      |            |      |          |           |  |  |
|--------|------|------------|------|----------|-----------|--|--|
|        |      | Shiraz-44T | 891  | 0        | -0.954044 |  |  |
|        |      | Shiraz-46T | 991  | 0.139564 | 0         |  |  |
|        |      | Shiraz-47T | 1084 | 0.24185  | 0         |  |  |
|        |      | Shiraz-49T | 1166 | 0        | -0.917235 |  |  |
|        |      | Shiraz-77T | 1282 | 0.213849 | 0         |  |  |
|        |      | Shiraz-9T  | 1368 | 0.199713 | 0         |  |  |
|        |      | Shiraz-18T | 1455 | 0        | -0.186773 |  |  |
|        |      | Shiraz-22T | 1669 | 0.695915 | 0         |  |  |
|        |      | Shiraz-22T | 1672 | 1.01678  | 0         |  |  |
|        |      | Shiraz-25T | 1717 | 0.420447 | 0         |  |  |
|        |      | Shiraz-28T | 1760 | 0.538181 | 0         |  |  |
|        |      | Shiraz-29T | 1800 | 0.672527 | 0         |  |  |
|        |      | Shiraz-32T | 1869 | 0.776805 | 0         |  |  |
|        |      | Shiraz-35T | 1932 | 0.507141 | 0         |  |  |
|        |      | Shiraz-58T | 2221 | 0.871948 | 0         |  |  |
|        |      | Shiraz-71T | 2260 | 0.68394  | 0         |  |  |
|        |      | Shiraz-71T | 2262 | 0.986748 | 0         |  |  |
|        |      | Shiraz-4T  | 260  | 0        | -0.324128 |  |  |
|        |      | Shiraz-16T | 294  | 0.655804 | 0         |  |  |
|        |      | Shiraz-31T | 345  | 0.103301 | 0         |  |  |
|        |      | Shiraz-36T | 431  | 0        | -0.78035  |  |  |
|        |      | Shiraz-36T | 432  | 0        | -0.6692   |  |  |
|        |      | Shiraz-44T | 891  | 0        | -0.954044 |  |  |
|        |      | Shiraz-46T | 991  | 0.139564 | 0         |  |  |
|        |      | Shiraz-47T | 1084 | 0.24185  | 0         |  |  |
|        |      | Shiraz-49T | 1166 | 0        | -0.917235 |  |  |
|        |      | Shiraz-77T | 1282 | 0.213849 | 0         |  |  |
|        |      | Shiraz-9T  | 1368 | 0.199713 | 0         |  |  |
|        |      | Shiraz-18T | 1455 | 0        | -0.186773 |  |  |
|        |      | Shiraz-22T | 1669 | 0.695915 | 0         |  |  |
|        |      | Shiraz-22T | 1672 | 1.01678  | 0         |  |  |
|        |      | Shiraz-25T | 1717 | 0.420447 | 0         |  |  |
|        |      | Shiraz-28T | 1760 | 0.538181 | 0         |  |  |
|        |      | Shiraz-29T | 1800 | 0.672527 | 0         |  |  |
|        |      | Shiraz-32T | 1869 | 0.776805 | 0         |  |  |
|        |      | Shiraz-35T | 1932 | 0.507141 | 0         |  |  |
|        |      | Shiraz-58T | 2221 | 0.871948 | 0         |  |  |
|        |      | Shiraz-71T | 2260 | 0.68394  | 0         |  |  |
|        |      | Shiraz-71T | 2262 | 0.986748 | 0         |  |  |
| GAGE10 | chrX | Shiraz-4T  | 260  | 0        | -0.324128 |  |  |
|        |      | Shiraz-16T | 294  | 0.655804 | 0         |  |  |
|        |      | Shiraz-31T | 345  | 0.103301 | 0         |  |  |
|        |      | Shiraz-36T | 431  | 0        | -0.78035  |  |  |
|        |      | Shiraz-36T | 432  | 0        | -0.6692   |  |  |
|        |      | Shiraz-44T | 891  | 0        | -0.954044 |  |  |
|        |      | Shiraz-44T | 896  | 0        | -0.109108 |  |  |
|        |      | Shiraz-46T | 991  | 0.139564 | 0         |  |  |

|  |  |            |      |          |           |  |  |
|--|--|------------|------|----------|-----------|--|--|
|  |  | Shiraz-47T | 1084 | 0.24185  | 0         |  |  |
|  |  | Shiraz-49T | 1166 | 0        | -0.917235 |  |  |
|  |  | Shiraz-77T | 1282 | 0.213849 | 0         |  |  |
|  |  | Shiraz-9T  | 1368 | 0.199713 | 0         |  |  |
|  |  | Shiraz-18T | 1455 | 0        | -0.186773 |  |  |
|  |  | Shiraz-22T | 1669 | 0.695915 | 0         |  |  |
|  |  | Shiraz-22T | 1672 | 1.01678  | 0         |  |  |
|  |  | Shiraz-25T | 1717 | 0.420447 | 0         |  |  |
|  |  | Shiraz-28T | 1760 | 0.538181 | 0         |  |  |
|  |  | Shiraz-29T | 1800 | 0.672527 | 0         |  |  |
|  |  | Shiraz-32T | 1869 | 0.776805 | 0         |  |  |
|  |  | Shiraz-35T | 1932 | 0.507141 | 0         |  |  |
|  |  | Shiraz-58T | 2221 | 0.871948 | 0         |  |  |
|  |  | Shiraz-71T | 2260 | 0.68394  | 0         |  |  |
|  |  | Shiraz-71T | 2262 | 0.986748 | 0         |  |  |
|  |  | Shiraz-4T  | 260  | 0        | -0.324128 |  |  |
|  |  | Shiraz-16T | 294  | 0.655804 | 0         |  |  |
|  |  | Shiraz-31T | 345  | 0.103301 | 0         |  |  |
|  |  | Shiraz-36T | 431  | 0        | -0.78035  |  |  |
|  |  | Shiraz-36T | 432  | 0        | -0.6692   |  |  |
|  |  | Shiraz-44T | 891  | 0        | -0.954044 |  |  |
|  |  | Shiraz-44T | 896  | 0        | -0.109108 |  |  |
|  |  | Shiraz-46T | 991  | 0.139564 | 0         |  |  |
|  |  | Shiraz-47T | 1084 | 0.24185  | 0         |  |  |
|  |  | Shiraz-49T | 1166 | 0        | -0.917235 |  |  |
|  |  | Shiraz-77T | 1282 | 0.213849 | 0         |  |  |
|  |  | Shiraz-9T  | 1368 | 0.199713 | 0         |  |  |
|  |  | Shiraz-18T | 1455 | 0        | -0.186773 |  |  |
|  |  | Shiraz-22T | 1669 | 0.695915 | 0         |  |  |
|  |  | Shiraz-22T | 1672 | 1.01678  | 0         |  |  |
|  |  | Shiraz-25T | 1717 | 0.420447 | 0         |  |  |
|  |  | Shiraz-28T | 1760 | 0.538181 | 0         |  |  |
|  |  | Shiraz-29T | 1800 | 0.672527 | 0         |  |  |
|  |  | Shiraz-32T | 1869 | 0.776805 | 0         |  |  |
|  |  | Shiraz-35T | 1932 | 0.507141 | 0         |  |  |
|  |  | Shiraz-58T | 2221 | 0.871948 | 0         |  |  |
|  |  | Shiraz-71T | 2260 | 0.68394  | 0         |  |  |
|  |  | Shiraz-71T | 2262 | 0.986748 | 0         |  |  |
|  |  | Shiraz-4T  | 260  | 0        | -0.324128 |  |  |
|  |  | Shiraz-16T | 294  | 0.655804 | 0         |  |  |
|  |  | Shiraz-31T | 345  | 0.103301 | 0         |  |  |
|  |  | Shiraz-36T | 431  | 0        | -0.78035  |  |  |
|  |  | Shiraz-36T | 432  | 0        | -0.6692   |  |  |
|  |  | Shiraz-44T | 891  | 0        | -0.954044 |  |  |
|  |  | Shiraz-44T | 896  | 0        | -0.109108 |  |  |
|  |  | Shiraz-46T | 991  | 0.139564 | 0         |  |  |
|  |  | Shiraz-47T | 1084 | 0.24185  | 0         |  |  |



|         |      |            |      |          |           |  |  |
|---------|------|------------|------|----------|-----------|--|--|
|         |      | Shiraz-49T | 1166 | 0        | -0.917235 |  |  |
|         |      | Shiraz-77T | 1282 | 0.213849 | 0         |  |  |
|         |      | Shiraz-9T  | 1368 | 0.199713 | 0         |  |  |
|         |      | Shiraz-18T | 1455 | 0        | -0.186773 |  |  |
|         |      | Shiraz-22T | 1669 | 0.695915 | 0         |  |  |
|         |      | Shiraz-22T | 1672 | 1.01678  | 0         |  |  |
|         |      | Shiraz-25T | 1717 | 0.420447 | 0         |  |  |
|         |      | Shiraz-28T | 1760 | 0.538181 | 0         |  |  |
|         |      | Shiraz-29T | 1800 | 0.672527 | 0         |  |  |
|         |      | Shiraz-32T | 1869 | 0.776805 | 0         |  |  |
|         |      | Shiraz-35T | 1932 | 0.507141 | 0         |  |  |
|         |      | Shiraz-58T | 2221 | 0.871948 | 0         |  |  |
|         |      | Shiraz-71T | 2260 | 0.68394  | 0         |  |  |
|         |      | Shiraz-71T | 2262 | 0.986748 | 0         |  |  |
| GAGE12B | chrX | Shiraz-4T  | 260  | 0        | -0.324128 |  |  |
|         |      | Shiraz-4T  | 260  | 0        | -0.324128 |  |  |
|         |      | Shiraz-4T  | 260  | 0        | -0.324128 |  |  |
|         |      | Shiraz-16T | 294  | 0.655804 | 0         |  |  |
|         |      | Shiraz-16T | 294  | 0.655804 | 0         |  |  |
|         |      | Shiraz-16T | 294  | 0.655804 | 0         |  |  |
|         |      | Shiraz-31T | 345  | 0.103301 | 0         |  |  |
|         |      | Shiraz-31T | 345  | 0.103301 | 0         |  |  |
|         |      | Shiraz-31T | 345  | 0.103301 | 0         |  |  |
|         |      | Shiraz-36T | 431  | 0        | -0.78035  |  |  |
|         |      | Shiraz-36T | 431  | 0        | -0.78035  |  |  |
|         |      | Shiraz-36T | 431  | 0        | -0.78035  |  |  |
|         |      | Shiraz-36T | 432  | 0        | -0.6692   |  |  |
|         |      | Shiraz-36T | 432  | 0        | -0.6692   |  |  |
|         |      | Shiraz-36T | 432  | 0        | -0.6692   |  |  |
|         |      | Shiraz-44T | 891  | 0        | -0.954044 |  |  |
|         |      | Shiraz-44T | 891  | 0        | -0.954044 |  |  |
|         |      | Shiraz-44T | 891  | 0        | -0.954044 |  |  |
|         |      | Shiraz-46T | 991  | 0.139564 | 0         |  |  |
|         |      | Shiraz-46T | 991  | 0.139564 | 0         |  |  |
|         |      | Shiraz-46T | 991  | 0.139564 | 0         |  |  |
|         |      | Shiraz-47T | 1084 | 0.24185  | 0         |  |  |
|         |      | Shiraz-47T | 1084 | 0.24185  | 0         |  |  |
|         |      | Shiraz-47T | 1084 | 0.24185  | 0         |  |  |
|         |      | Shiraz-49T | 1166 | 0        | -0.917235 |  |  |
|         |      | Shiraz-49T | 1166 | 0        | -0.917235 |  |  |
|         |      | Shiraz-49T | 1166 | 0        | -0.917235 |  |  |
|         |      | Shiraz-77T | 1282 | 0.213849 | 0         |  |  |
|         |      | Shiraz-77T | 1282 | 0.213849 | 0         |  |  |
|         |      | Shiraz-77T | 1282 | 0.213849 | 0         |  |  |
|         |      | Shiraz-9T  | 1368 | 0.199713 | 0         |  |  |
|         |      | Shiraz-9T  | 1368 | 0.199713 | 0         |  |  |
|         |      | Shiraz-9T  | 1368 | 0.199713 | 0         |  |  |

|  |            |      |          |           |  |
|--|------------|------|----------|-----------|--|
|  | Shiraz-18T | 1455 | 0        | -0.186773 |  |
|  | Shiraz-18T | 1455 | 0        | -0.186773 |  |
|  | Shiraz-18T | 1455 | 0        | -0.186773 |  |
|  | Shiraz-22T | 1669 | 0.695915 | 0         |  |
|  | Shiraz-22T | 1669 | 0.695915 | 0         |  |
|  | Shiraz-22T | 1669 | 0.695915 | 0         |  |
|  | Shiraz-22T | 1672 | 1.01678  | 0         |  |
|  | Shiraz-22T | 1672 | 1.01678  | 0         |  |
|  | Shiraz-22T | 1672 | 1.01678  | 0         |  |
|  | Shiraz-25T | 1717 | 0.420447 | 0         |  |
|  | Shiraz-25T | 1717 | 0.420447 | 0         |  |
|  | Shiraz-25T | 1717 | 0.420447 | 0         |  |
|  | Shiraz-28T | 1760 | 0.538181 | 0         |  |
|  | Shiraz-28T | 1760 | 0.538181 | 0         |  |
|  | Shiraz-28T | 1760 | 0.538181 | 0         |  |
|  | Shiraz-29T | 1800 | 0.672527 | 0         |  |
|  | Shiraz-29T | 1800 | 0.672527 | 0         |  |
|  | Shiraz-29T | 1800 | 0.672527 | 0         |  |
|  | Shiraz-32T | 1869 | 0.776805 | 0         |  |
|  | Shiraz-32T | 1869 | 0.776805 | 0         |  |
|  | Shiraz-32T | 1869 | 0.776805 | 0         |  |
|  | Shiraz-35T | 1932 | 0.507141 | 0         |  |
|  | Shiraz-35T | 1932 | 0.507141 | 0         |  |
|  | Shiraz-35T | 1932 | 0.507141 | 0         |  |
|  | Shiraz-58T | 2221 | 0.871948 | 0         |  |
|  | Shiraz-58T | 2221 | 0.871948 | 0         |  |
|  | Shiraz-58T | 2221 | 0.871948 | 0         |  |
|  | Shiraz-71T | 2260 | 0.68394  | 0         |  |
|  | Shiraz-71T | 2260 | 0.68394  | 0         |  |
|  | Shiraz-71T | 2260 | 0.68394  | 0         |  |
|  | Shiraz-71T | 2262 | 0.986748 | 0         |  |
|  | Shiraz-71T | 2262 | 0.986748 | 0         |  |
|  | Shiraz-71T | 2262 | 0.986748 | 0         |  |
|  | Shiraz-4T  | 260  | 0        | -0.324128 |  |
|  | Shiraz-4T  | 260  | 0        | -0.324128 |  |
|  | Shiraz-4T  | 260  | 0        | -0.324128 |  |
|  | Shiraz-16T | 294  | 0.655804 | 0         |  |
|  | Shiraz-16T | 294  | 0.655804 | 0         |  |
|  | Shiraz-16T | 294  | 0.655804 | 0         |  |
|  | Shiraz-31T | 345  | 0.103301 | 0         |  |
|  | Shiraz-31T | 345  | 0.103301 | 0         |  |
|  | Shiraz-31T | 345  | 0.103301 | 0         |  |
|  | Shiraz-36T | 431  | 0        | -0.78035  |  |
|  | Shiraz-36T | 431  | 0        | -0.78035  |  |
|  | Shiraz-36T | 431  | 0        | -0.78035  |  |
|  | Shiraz-36T | 432  | 0        | -0.6692   |  |
|  | Shiraz-36T | 432  | 0        | -0.6692   |  |

|  |            |      |          |           |  |
|--|------------|------|----------|-----------|--|
|  | Shiraz-36T | 432  | 0        | -0.6692   |  |
|  | Shiraz-44T | 891  | 0        | -0.954044 |  |
|  | Shiraz-44T | 891  | 0        | -0.954044 |  |
|  | Shiraz-44T | 891  | 0        | -0.954044 |  |
|  | Shiraz-46T | 991  | 0.139564 | 0         |  |
|  | Shiraz-46T | 991  | 0.139564 | 0         |  |
|  | Shiraz-46T | 991  | 0.139564 | 0         |  |
|  | Shiraz-47T | 1084 | 0.24185  | 0         |  |
|  | Shiraz-47T | 1084 | 0.24185  | 0         |  |
|  | Shiraz-47T | 1084 | 0.24185  | 0         |  |
|  | Shiraz-49T | 1166 | 0        | -0.917235 |  |
|  | Shiraz-49T | 1166 | 0        | -0.917235 |  |
|  | Shiraz-49T | 1166 | 0        | -0.917235 |  |
|  | Shiraz-77T | 1282 | 0.213849 | 0         |  |
|  | Shiraz-77T | 1282 | 0.213849 | 0         |  |
|  | Shiraz-77T | 1282 | 0.213849 | 0         |  |
|  | Shiraz-9T  | 1368 | 0.199713 | 0         |  |
|  | Shiraz-9T  | 1368 | 0.199713 | 0         |  |
|  | Shiraz-9T  | 1368 | 0.199713 | 0         |  |
|  | Shiraz-18T | 1455 | 0        | -0.186773 |  |
|  | Shiraz-18T | 1455 | 0        | -0.186773 |  |
|  | Shiraz-18T | 1455 | 0        | -0.186773 |  |
|  | Shiraz-22T | 1669 | 0.695915 | 0         |  |
|  | Shiraz-22T | 1669 | 0.695915 | 0         |  |
|  | Shiraz-22T | 1669 | 0.695915 | 0         |  |
|  | Shiraz-22T | 1672 | 1.01678  | 0         |  |
|  | Shiraz-22T | 1672 | 1.01678  | 0         |  |
|  | Shiraz-22T | 1672 | 1.01678  | 0         |  |
|  | Shiraz-25T | 1717 | 0.420447 | 0         |  |
|  | Shiraz-25T | 1717 | 0.420447 | 0         |  |
|  | Shiraz-25T | 1717 | 0.420447 | 0         |  |
|  | Shiraz-28T | 1760 | 0.538181 | 0         |  |
|  | Shiraz-28T | 1760 | 0.538181 | 0         |  |
|  | Shiraz-28T | 1760 | 0.538181 | 0         |  |
|  | Shiraz-29T | 1800 | 0.672527 | 0         |  |
|  | Shiraz-29T | 1800 | 0.672527 | 0         |  |
|  | Shiraz-29T | 1800 | 0.672527 | 0         |  |
|  | Shiraz-32T | 1869 | 0.776805 | 0         |  |
|  | Shiraz-32T | 1869 | 0.776805 | 0         |  |
|  | Shiraz-32T | 1869 | 0.776805 | 0         |  |
|  | Shiraz-35T | 1932 | 0.507141 | 0         |  |
|  | Shiraz-35T | 1932 | 0.507141 | 0         |  |
|  | Shiraz-35T | 1932 | 0.507141 | 0         |  |
|  | Shiraz-58T | 2221 | 0.871948 | 0         |  |
|  | Shiraz-58T | 2221 | 0.871948 | 0         |  |
|  | Shiraz-58T | 2221 | 0.871948 | 0         |  |
|  | Shiraz-71T | 2260 | 0.68394  | 0         |  |

|  |  |            |      |          |           |  |  |
|--|--|------------|------|----------|-----------|--|--|
|  |  | Shiraz-71T | 2260 | 0.68394  | 0         |  |  |
|  |  | Shiraz-71T | 2260 | 0.68394  | 0         |  |  |
|  |  | Shiraz-71T | 2262 | 0.986748 | 0         |  |  |
|  |  | Shiraz-71T | 2262 | 0.986748 | 0         |  |  |
|  |  | Shiraz-71T | 2262 | 0.986748 | 0         |  |  |
|  |  | Shiraz-4T  | 260  | 0        | -0.324128 |  |  |
|  |  | Shiraz-4T  | 260  | 0        | -0.324128 |  |  |
|  |  | Shiraz-4T  | 260  | 0        | -0.324128 |  |  |
|  |  | Shiraz-16T | 294  | 0.655804 | 0         |  |  |
|  |  | Shiraz-16T | 294  | 0.655804 | 0         |  |  |
|  |  | Shiraz-16T | 294  | 0.655804 | 0         |  |  |
|  |  | Shiraz-31T | 345  | 0.103301 | 0         |  |  |
|  |  | Shiraz-31T | 345  | 0.103301 | 0         |  |  |
|  |  | Shiraz-31T | 345  | 0.103301 | 0         |  |  |
|  |  | Shiraz-36T | 431  | 0        | -0.78035  |  |  |
|  |  | Shiraz-36T | 431  | 0        | -0.78035  |  |  |
|  |  | Shiraz-36T | 431  | 0        | -0.78035  |  |  |
|  |  | Shiraz-36T | 432  | 0        | -0.6692   |  |  |
|  |  | Shiraz-36T | 432  | 0        | -0.6692   |  |  |
|  |  | Shiraz-36T | 432  | 0        | -0.6692   |  |  |
|  |  | Shiraz-44T | 891  | 0        | -0.954044 |  |  |
|  |  | Shiraz-44T | 891  | 0        | -0.954044 |  |  |
|  |  | Shiraz-44T | 891  | 0        | -0.954044 |  |  |
|  |  | Shiraz-46T | 991  | 0.139564 | 0         |  |  |
|  |  | Shiraz-46T | 991  | 0.139564 | 0         |  |  |
|  |  | Shiraz-46T | 991  | 0.139564 | 0         |  |  |
|  |  | Shiraz-47T | 1084 | 0.24185  | 0         |  |  |
|  |  | Shiraz-47T | 1084 | 0.24185  | 0         |  |  |
|  |  | Shiraz-47T | 1084 | 0.24185  | 0         |  |  |
|  |  | Shiraz-49T | 1166 | 0        | -0.917235 |  |  |
|  |  | Shiraz-49T | 1166 | 0        | -0.917235 |  |  |
|  |  | Shiraz-49T | 1166 | 0        | -0.917235 |  |  |
|  |  | Shiraz-77T | 1282 | 0.213849 | 0         |  |  |
|  |  | Shiraz-77T | 1282 | 0.213849 | 0         |  |  |
|  |  | Shiraz-77T | 1282 | 0.213849 | 0         |  |  |
|  |  | Shiraz-9T  | 1368 | 0.199713 | 0         |  |  |
|  |  | Shiraz-9T  | 1368 | 0.199713 | 0         |  |  |
|  |  | Shiraz-9T  | 1368 | 0.199713 | 0         |  |  |
|  |  | Shiraz-18T | 1455 | 0        | -0.186773 |  |  |
|  |  | Shiraz-18T | 1455 | 0        | -0.186773 |  |  |
|  |  | Shiraz-18T | 1455 | 0        | -0.186773 |  |  |
|  |  | Shiraz-22T | 1669 | 0.695915 | 0         |  |  |
|  |  | Shiraz-22T | 1669 | 0.695915 | 0         |  |  |
|  |  | Shiraz-22T | 1669 | 0.695915 | 0         |  |  |
|  |  | Shiraz-22T | 1672 | 1.01678  | 0         |  |  |
|  |  | Shiraz-22T | 1672 | 1.01678  | 0         |  |  |
|  |  | Shiraz-22T | 1672 | 1.01678  | 0         |  |  |



|  |            |      |          |           |  |
|--|------------|------|----------|-----------|--|
|  | Shiraz-36T | 431  | 0        | -0.78035  |  |
|  | Shiraz-36T | 432  | 0        | -0.6692   |  |
|  | Shiraz-36T | 432  | 0        | -0.6692   |  |
|  | Shiraz-36T | 432  | 0        | -0.6692   |  |
|  | Shiraz-36T | 432  | 0        | -0.6692   |  |
|  | Shiraz-36T | 432  | 0        | -0.6692   |  |
|  | Shiraz-36T | 432  | 0        | -0.6692   |  |
|  | Shiraz-44T | 891  | 0        | -0.954044 |  |
|  | Shiraz-44T | 891  | 0        | -0.954044 |  |
|  | Shiraz-44T | 891  | 0        | -0.954044 |  |
|  | Shiraz-44T | 891  | 0        | -0.954044 |  |
|  | Shiraz-44T | 891  | 0        | -0.954044 |  |
|  | Shiraz-44T | 891  | 0        | -0.954044 |  |
|  | Shiraz-46T | 991  | 0.139564 | 0         |  |
|  | Shiraz-46T | 991  | 0.139564 | 0         |  |
|  | Shiraz-46T | 991  | 0.139564 | 0         |  |
|  | Shiraz-46T | 991  | 0.139564 | 0         |  |
|  | Shiraz-46T | 991  | 0.139564 | 0         |  |
|  | Shiraz-46T | 991  | 0.139564 | 0         |  |
|  | Shiraz-47T | 1084 | 0.24185  | 0         |  |
|  | Shiraz-47T | 1084 | 0.24185  | 0         |  |
|  | Shiraz-47T | 1084 | 0.24185  | 0         |  |
|  | Shiraz-47T | 1084 | 0.24185  | 0         |  |
|  | Shiraz-47T | 1084 | 0.24185  | 0         |  |
|  | Shiraz-49T | 1166 | 0        | -0.917235 |  |
|  | Shiraz-49T | 1166 | 0        | -0.917235 |  |
|  | Shiraz-49T | 1166 | 0        | -0.917235 |  |
|  | Shiraz-49T | 1166 | 0        | -0.917235 |  |
|  | Shiraz-49T | 1166 | 0        | -0.917235 |  |
|  | Shiraz-49T | 1166 | 0        | -0.917235 |  |
|  | Shiraz-77T | 1282 | 0.213849 | 0         |  |
|  | Shiraz-77T | 1282 | 0.213849 | 0         |  |
|  | Shiraz-77T | 1282 | 0.213849 | 0         |  |
|  | Shiraz-77T | 1282 | 0.213849 | 0         |  |
|  | Shiraz-77T | 1282 | 0.213849 | 0         |  |
|  | Shiraz-77T | 1282 | 0.213849 | 0         |  |
|  | Shiraz-9T  | 1368 | 0.199713 | 0         |  |
|  | Shiraz-9T  | 1368 | 0.199713 | 0         |  |
|  | Shiraz-9T  | 1368 | 0.199713 | 0         |  |
|  | Shiraz-9T  | 1368 | 0.199713 | 0         |  |
|  | Shiraz-9T  | 1368 | 0.199713 | 0         |  |
|  | Shiraz-18T | 1455 | 0        | -0.186773 |  |
|  | Shiraz-18T | 1455 | 0        | -0.186773 |  |
|  | Shiraz-18T | 1455 | 0        | -0.186773 |  |
|  | Shiraz-18T | 1455 | 0        | -0.186773 |  |

|  |            |      |          |           |  |
|--|------------|------|----------|-----------|--|
|  | Shiraz-18T | 1455 | 0        | -0.186773 |  |
|  | Shiraz-18T | 1455 | 0        | -0.186773 |  |
|  | Shiraz-22T | 1669 | 0.695915 | 0         |  |
|  | Shiraz-22T | 1669 | 0.695915 | 0         |  |
|  | Shiraz-22T | 1669 | 0.695915 | 0         |  |
|  | Shiraz-22T | 1669 | 0.695915 | 0         |  |
|  | Shiraz-22T | 1669 | 0.695915 | 0         |  |
|  | Shiraz-22T | 1669 | 0.695915 | 0         |  |
|  | Shiraz-22T | 1672 | 1.01678  | 0         |  |
|  | Shiraz-22T | 1672 | 1.01678  | 0         |  |
|  | Shiraz-22T | 1672 | 1.01678  | 0         |  |
|  | Shiraz-22T | 1672 | 1.01678  | 0         |  |
|  | Shiraz-22T | 1672 | 1.01678  | 0         |  |
|  | Shiraz-22T | 1672 | 1.01678  | 0         |  |
|  | Shiraz-25T | 1717 | 0.420447 | 0         |  |
|  | Shiraz-25T | 1717 | 0.420447 | 0         |  |
|  | Shiraz-25T | 1717 | 0.420447 | 0         |  |
|  | Shiraz-25T | 1717 | 0.420447 | 0         |  |
|  | Shiraz-25T | 1717 | 0.420447 | 0         |  |
|  | Shiraz-28T | 1760 | 0.538181 | 0         |  |
|  | Shiraz-28T | 1760 | 0.538181 | 0         |  |
|  | Shiraz-28T | 1760 | 0.538181 | 0         |  |
|  | Shiraz-28T | 1760 | 0.538181 | 0         |  |
|  | Shiraz-28T | 1760 | 0.538181 | 0         |  |
|  | Shiraz-29T | 1800 | 0.672527 | 0         |  |
|  | Shiraz-29T | 1800 | 0.672527 | 0         |  |
|  | Shiraz-29T | 1800 | 0.672527 | 0         |  |
|  | Shiraz-29T | 1800 | 0.672527 | 0         |  |
|  | Shiraz-29T | 1800 | 0.672527 | 0         |  |
|  | Shiraz-32T | 1869 | 0.776805 | 0         |  |
|  | Shiraz-32T | 1869 | 0.776805 | 0         |  |
|  | Shiraz-32T | 1869 | 0.776805 | 0         |  |
|  | Shiraz-32T | 1869 | 0.776805 | 0         |  |
|  | Shiraz-32T | 1869 | 0.776805 | 0         |  |
|  | Shiraz-35T | 1932 | 0.507141 | 0         |  |
|  | Shiraz-35T | 1932 | 0.507141 | 0         |  |
|  | Shiraz-35T | 1932 | 0.507141 | 0         |  |
|  | Shiraz-35T | 1932 | 0.507141 | 0         |  |
|  | Shiraz-35T | 1932 | 0.507141 | 0         |  |
|  | Shiraz-58T | 2221 | 0.871948 | 0         |  |
|  | Shiraz-58T | 2221 | 0.871948 | 0         |  |
|  | Shiraz-58T | 2221 | 0.871948 | 0         |  |

|  |  |            |      |          |           |  |  |
|--|--|------------|------|----------|-----------|--|--|
|  |  | Shiraz-58T | 2221 | 0.871948 | 0         |  |  |
|  |  | Shiraz-58T | 2221 | 0.871948 | 0         |  |  |
|  |  | Shiraz-58T | 2221 | 0.871948 | 0         |  |  |
|  |  | Shiraz-71T | 2260 | 0.68394  | 0         |  |  |
|  |  | Shiraz-71T | 2260 | 0.68394  | 0         |  |  |
|  |  | Shiraz-71T | 2260 | 0.68394  | 0         |  |  |
|  |  | Shiraz-71T | 2260 | 0.68394  | 0         |  |  |
|  |  | Shiraz-71T | 2260 | 0.68394  | 0         |  |  |
|  |  | Shiraz-71T | 2262 | 0.986748 | 0         |  |  |
|  |  | Shiraz-71T | 2262 | 0.986748 | 0         |  |  |
|  |  | Shiraz-71T | 2262 | 0.986748 | 0         |  |  |
|  |  | Shiraz-71T | 2262 | 0.986748 | 0         |  |  |
|  |  | Shiraz-71T | 2262 | 0.986748 | 0         |  |  |
|  |  | Shiraz-71T | 2262 | 0.986748 | 0         |  |  |
|  |  | Shiraz-4T  | 260  | 0        | -0.324128 |  |  |
|  |  | Shiraz-4T  | 260  | 0        | -0.324128 |  |  |
|  |  | Shiraz-4T  | 260  | 0        | -0.324128 |  |  |
|  |  | Shiraz-4T  | 260  | 0        | -0.324128 |  |  |
|  |  | Shiraz-4T  | 260  | 0        | -0.324128 |  |  |
|  |  | Shiraz-4T  | 260  | 0        | -0.324128 |  |  |
|  |  | Shiraz-16T | 294  | 0.655804 | 0         |  |  |
|  |  | Shiraz-16T | 294  | 0.655804 | 0         |  |  |
|  |  | Shiraz-16T | 294  | 0.655804 | 0         |  |  |
|  |  | Shiraz-16T | 294  | 0.655804 | 0         |  |  |
|  |  | Shiraz-16T | 294  | 0.655804 | 0         |  |  |
|  |  | Shiraz-16T | 294  | 0.655804 | 0         |  |  |
|  |  | Shiraz-31T | 345  | 0.103301 | 0         |  |  |
|  |  | Shiraz-31T | 345  | 0.103301 | 0         |  |  |
|  |  | Shiraz-31T | 345  | 0.103301 | 0         |  |  |
|  |  | Shiraz-31T | 345  | 0.103301 | 0         |  |  |
|  |  | Shiraz-31T | 345  | 0.103301 | 0         |  |  |
|  |  | Shiraz-31T | 345  | 0.103301 | 0         |  |  |
|  |  | Shiraz-36T | 431  | 0        | -0.78035  |  |  |
|  |  | Shiraz-36T | 431  | 0        | -0.78035  |  |  |
|  |  | Shiraz-36T | 431  | 0        | -0.78035  |  |  |
|  |  | Shiraz-36T | 431  | 0        | -0.78035  |  |  |
|  |  | Shiraz-36T | 431  | 0        | -0.78035  |  |  |
|  |  | Shiraz-36T | 431  | 0        | -0.78035  |  |  |
|  |  | Shiraz-36T | 432  | 0        | -0.6692   |  |  |
|  |  | Shiraz-36T | 432  | 0        | -0.6692   |  |  |
|  |  | Shiraz-36T | 432  | 0        | -0.6692   |  |  |
|  |  | Shiraz-36T | 432  | 0        | -0.6692   |  |  |
|  |  | Shiraz-36T | 432  | 0        | -0.6692   |  |  |
|  |  | Shiraz-36T | 432  | 0        | -0.6692   |  |  |
|  |  | Shiraz-44T | 891  | 0        | -0.954044 |  |  |
|  |  | Shiraz-44T | 891  | 0        | -0.954044 |  |  |



|  |            |      |          |           |  |
|--|------------|------|----------|-----------|--|
|  | Shiraz-44T | 891  | 0        | -0.954044 |  |
|  | Shiraz-44T | 891  | 0        | -0.954044 |  |
|  | Shiraz-44T | 891  | 0        | -0.954044 |  |
|  | Shiraz-44T | 891  | 0        | -0.954044 |  |
|  | Shiraz-46T | 991  | 0.139564 | 0         |  |
|  | Shiraz-46T | 991  | 0.139564 | 0         |  |
|  | Shiraz-46T | 991  | 0.139564 | 0         |  |
|  | Shiraz-46T | 991  | 0.139564 | 0         |  |
|  | Shiraz-46T | 991  | 0.139564 | 0         |  |
|  | Shiraz-46T | 991  | 0.139564 | 0         |  |
|  | Shiraz-47T | 1084 | 0.24185  | 0         |  |
|  | Shiraz-47T | 1084 | 0.24185  | 0         |  |
|  | Shiraz-47T | 1084 | 0.24185  | 0         |  |
|  | Shiraz-47T | 1084 | 0.24185  | 0         |  |
|  | Shiraz-47T | 1084 | 0.24185  | 0         |  |
|  | Shiraz-47T | 1084 | 0.24185  | 0         |  |
|  | Shiraz-49T | 1166 | 0        | -0.917235 |  |
|  | Shiraz-49T | 1166 | 0        | -0.917235 |  |
|  | Shiraz-49T | 1166 | 0        | -0.917235 |  |
|  | Shiraz-49T | 1166 | 0        | -0.917235 |  |
|  | Shiraz-49T | 1166 | 0        | -0.917235 |  |
|  | Shiraz-49T | 1166 | 0        | -0.917235 |  |
|  | Shiraz-77T | 1282 | 0.213849 | 0         |  |
|  | Shiraz-77T | 1282 | 0.213849 | 0         |  |
|  | Shiraz-77T | 1282 | 0.213849 | 0         |  |
|  | Shiraz-77T | 1282 | 0.213849 | 0         |  |
|  | Shiraz-77T | 1282 | 0.213849 | 0         |  |
|  | Shiraz-77T | 1282 | 0.213849 | 0         |  |
|  | Shiraz-9T  | 1368 | 0.199713 | 0         |  |
|  | Shiraz-9T  | 1368 | 0.199713 | 0         |  |
|  | Shiraz-9T  | 1368 | 0.199713 | 0         |  |
|  | Shiraz-9T  | 1368 | 0.199713 | 0         |  |
|  | Shiraz-9T  | 1368 | 0.199713 | 0         |  |
|  | Shiraz-18T | 1455 | 0        | -0.186773 |  |
|  | Shiraz-18T | 1455 | 0        | -0.186773 |  |
|  | Shiraz-18T | 1455 | 0        | -0.186773 |  |
|  | Shiraz-18T | 1455 | 0        | -0.186773 |  |
|  | Shiraz-18T | 1455 | 0        | -0.186773 |  |
|  | Shiraz-18T | 1455 | 0        | -0.186773 |  |
|  | Shiraz-22T | 1669 | 0.695915 | 0         |  |
|  | Shiraz-22T | 1669 | 0.695915 | 0         |  |
|  | Shiraz-22T | 1669 | 0.695915 | 0         |  |
|  | Shiraz-22T | 1669 | 0.695915 | 0         |  |
|  | Shiraz-22T | 1669 | 0.695915 | 0         |  |
|  | Shiraz-22T | 1669 | 0.695915 | 0         |  |
|  | Shiraz-22T | 1672 | 1.01678  | 0         |  |



|  |            |      |          |           |  |
|--|------------|------|----------|-----------|--|
|  | Shiraz-71T | 2262 | 0.986748 | 0         |  |
|  | Shiraz-71T | 2262 | 0.986748 | 0         |  |
|  | Shiraz-71T | 2262 | 0.986748 | 0         |  |
|  | Shiraz-71T | 2262 | 0.986748 | 0         |  |
|  | Shiraz-71T | 2262 | 0.986748 | 0         |  |
|  | Shiraz-71T | 2262 | 0.986748 | 0         |  |
|  | Shiraz-4T  | 260  | 0        | -0.324128 |  |
|  | Shiraz-4T  | 260  | 0        | -0.324128 |  |
|  | Shiraz-4T  | 260  | 0        | -0.324128 |  |
|  | Shiraz-4T  | 260  | 0        | -0.324128 |  |
|  | Shiraz-4T  | 260  | 0        | -0.324128 |  |
|  | Shiraz-4T  | 260  | 0        | -0.324128 |  |
|  | Shiraz-16T | 294  | 0.655804 | 0         |  |
|  | Shiraz-16T | 294  | 0.655804 | 0         |  |
|  | Shiraz-16T | 294  | 0.655804 | 0         |  |
|  | Shiraz-16T | 294  | 0.655804 | 0         |  |
|  | Shiraz-16T | 294  | 0.655804 | 0         |  |
|  | Shiraz-16T | 294  | 0.655804 | 0         |  |
|  | Shiraz-31T | 345  | 0.103301 | 0         |  |
|  | Shiraz-31T | 345  | 0.103301 | 0         |  |
|  | Shiraz-31T | 345  | 0.103301 | 0         |  |
|  | Shiraz-31T | 345  | 0.103301 | 0         |  |
|  | Shiraz-31T | 345  | 0.103301 | 0         |  |
|  | Shiraz-31T | 345  | 0.103301 | 0         |  |
|  | Shiraz-36T | 431  | 0        | -0.78035  |  |
|  | Shiraz-36T | 431  | 0        | -0.78035  |  |
|  | Shiraz-36T | 431  | 0        | -0.78035  |  |
|  | Shiraz-36T | 431  | 0        | -0.78035  |  |
|  | Shiraz-36T | 431  | 0        | -0.78035  |  |
|  | Shiraz-36T | 431  | 0        | -0.78035  |  |
|  | Shiraz-36T | 432  | 0        | -0.6692   |  |
|  | Shiraz-36T | 432  | 0        | -0.6692   |  |
|  | Shiraz-36T | 432  | 0        | -0.6692   |  |
|  | Shiraz-36T | 432  | 0        | -0.6692   |  |
|  | Shiraz-36T | 432  | 0        | -0.6692   |  |
|  | Shiraz-44T | 891  | 0        | -0.954044 |  |
|  | Shiraz-44T | 891  | 0        | -0.954044 |  |
|  | Shiraz-44T | 891  | 0        | -0.954044 |  |
|  | Shiraz-44T | 891  | 0        | -0.954044 |  |
|  | Shiraz-44T | 891  | 0        | -0.954044 |  |
|  | Shiraz-44T | 891  | 0        | -0.954044 |  |
|  | Shiraz-46T | 991  | 0.139564 | 0         |  |
|  | Shiraz-46T | 991  | 0.139564 | 0         |  |
|  | Shiraz-46T | 991  | 0.139564 | 0         |  |
|  | Shiraz-46T | 991  | 0.139564 | 0         |  |
|  | Shiraz-46T | 991  | 0.139564 | 0         |  |

|  |  |            |      |          |           |  |  |
|--|--|------------|------|----------|-----------|--|--|
|  |  | Shiraz-46T | 991  | 0.139564 | 0         |  |  |
|  |  | Shiraz-47T | 1084 | 0.24185  | 0         |  |  |
|  |  | Shiraz-47T | 1084 | 0.24185  | 0         |  |  |
|  |  | Shiraz-47T | 1084 | 0.24185  | 0         |  |  |
|  |  | Shiraz-47T | 1084 | 0.24185  | 0         |  |  |
|  |  | Shiraz-47T | 1084 | 0.24185  | 0         |  |  |
|  |  | Shiraz-47T | 1084 | 0.24185  | 0         |  |  |
|  |  | Shiraz-49T | 1166 | 0        | -0.917235 |  |  |
|  |  | Shiraz-49T | 1166 | 0        | -0.917235 |  |  |
|  |  | Shiraz-49T | 1166 | 0        | -0.917235 |  |  |
|  |  | Shiraz-49T | 1166 | 0        | -0.917235 |  |  |
|  |  | Shiraz-49T | 1166 | 0        | -0.917235 |  |  |
|  |  | Shiraz-49T | 1166 | 0        | -0.917235 |  |  |
|  |  | Shiraz-77T | 1282 | 0.213849 | 0         |  |  |
|  |  | Shiraz-77T | 1282 | 0.213849 | 0         |  |  |
|  |  | Shiraz-77T | 1282 | 0.213849 | 0         |  |  |
|  |  | Shiraz-77T | 1282 | 0.213849 | 0         |  |  |
|  |  | Shiraz-77T | 1282 | 0.213849 | 0         |  |  |
|  |  | Shiraz-77T | 1282 | 0.213849 | 0         |  |  |
|  |  | Shiraz-9T  | 1368 | 0.199713 | 0         |  |  |
|  |  | Shiraz-9T  | 1368 | 0.199713 | 0         |  |  |
|  |  | Shiraz-9T  | 1368 | 0.199713 | 0         |  |  |
|  |  | Shiraz-9T  | 1368 | 0.199713 | 0         |  |  |
|  |  | Shiraz-9T  | 1368 | 0.199713 | 0         |  |  |
|  |  | Shiraz-18T | 1455 | 0        | -0.186773 |  |  |
|  |  | Shiraz-18T | 1455 | 0        | -0.186773 |  |  |
|  |  | Shiraz-18T | 1455 | 0        | -0.186773 |  |  |
|  |  | Shiraz-18T | 1455 | 0        | -0.186773 |  |  |
|  |  | Shiraz-18T | 1455 | 0        | -0.186773 |  |  |
|  |  | Shiraz-18T | 1455 | 0        | -0.186773 |  |  |
|  |  | Shiraz-22T | 1669 | 0.695915 | 0         |  |  |
|  |  | Shiraz-22T | 1669 | 0.695915 | 0         |  |  |
|  |  | Shiraz-22T | 1669 | 0.695915 | 0         |  |  |
|  |  | Shiraz-22T | 1669 | 0.695915 | 0         |  |  |
|  |  | Shiraz-22T | 1669 | 0.695915 | 0         |  |  |
|  |  | Shiraz-22T | 1669 | 0.695915 | 0         |  |  |
|  |  | Shiraz-22T | 1672 | 1.01678  | 0         |  |  |
|  |  | Shiraz-22T | 1672 | 1.01678  | 0         |  |  |
|  |  | Shiraz-22T | 1672 | 1.01678  | 0         |  |  |
|  |  | Shiraz-22T | 1672 | 1.01678  | 0         |  |  |
|  |  | Shiraz-22T | 1672 | 1.01678  | 0         |  |  |
|  |  | Shiraz-25T | 1717 | 0.420447 | 0         |  |  |
|  |  | Shiraz-25T | 1717 | 0.420447 | 0         |  |  |
|  |  | Shiraz-25T | 1717 | 0.420447 | 0         |  |  |
|  |  | Shiraz-25T | 1717 | 0.420447 | 0         |  |  |

|         |      |            |      |          |           |  |  |
|---------|------|------------|------|----------|-----------|--|--|
|         |      | Shiraz-25T | 1717 | 0.420447 | 0         |  |  |
|         |      | Shiraz-25T | 1717 | 0.420447 | 0         |  |  |
|         |      | Shiraz-28T | 1760 | 0.538181 | 0         |  |  |
|         |      | Shiraz-28T | 1760 | 0.538181 | 0         |  |  |
|         |      | Shiraz-28T | 1760 | 0.538181 | 0         |  |  |
|         |      | Shiraz-28T | 1760 | 0.538181 | 0         |  |  |
|         |      | Shiraz-28T | 1760 | 0.538181 | 0         |  |  |
|         |      | Shiraz-28T | 1760 | 0.538181 | 0         |  |  |
|         |      | Shiraz-29T | 1800 | 0.672527 | 0         |  |  |
|         |      | Shiraz-29T | 1800 | 0.672527 | 0         |  |  |
|         |      | Shiraz-29T | 1800 | 0.672527 | 0         |  |  |
|         |      | Shiraz-29T | 1800 | 0.672527 | 0         |  |  |
|         |      | Shiraz-29T | 1800 | 0.672527 | 0         |  |  |
|         |      | Shiraz-29T | 1800 | 0.672527 | 0         |  |  |
|         |      | Shiraz-32T | 1869 | 0.776805 | 0         |  |  |
|         |      | Shiraz-32T | 1869 | 0.776805 | 0         |  |  |
|         |      | Shiraz-32T | 1869 | 0.776805 | 0         |  |  |
|         |      | Shiraz-32T | 1869 | 0.776805 | 0         |  |  |
|         |      | Shiraz-32T | 1869 | 0.776805 | 0         |  |  |
|         |      | Shiraz-32T | 1869 | 0.776805 | 0         |  |  |
|         |      | Shiraz-35T | 1932 | 0.507141 | 0         |  |  |
|         |      | Shiraz-35T | 1932 | 0.507141 | 0         |  |  |
|         |      | Shiraz-35T | 1932 | 0.507141 | 0         |  |  |
|         |      | Shiraz-35T | 1932 | 0.507141 | 0         |  |  |
|         |      | Shiraz-35T | 1932 | 0.507141 | 0         |  |  |
|         |      | Shiraz-58T | 2221 | 0.871948 | 0         |  |  |
|         |      | Shiraz-58T | 2221 | 0.871948 | 0         |  |  |
|         |      | Shiraz-58T | 2221 | 0.871948 | 0         |  |  |
|         |      | Shiraz-58T | 2221 | 0.871948 | 0         |  |  |
|         |      | Shiraz-58T | 2221 | 0.871948 | 0         |  |  |
|         |      | Shiraz-58T | 2221 | 0.871948 | 0         |  |  |
|         |      | Shiraz-71T | 2260 | 0.68394  | 0         |  |  |
|         |      | Shiraz-71T | 2260 | 0.68394  | 0         |  |  |
|         |      | Shiraz-71T | 2260 | 0.68394  | 0         |  |  |
|         |      | Shiraz-71T | 2260 | 0.68394  | 0         |  |  |
|         |      | Shiraz-71T | 2260 | 0.68394  | 0         |  |  |
|         |      | Shiraz-71T | 2260 | 0.68394  | 0         |  |  |
|         |      | Shiraz-71T | 2262 | 0.986748 | 0         |  |  |
|         |      | Shiraz-71T | 2262 | 0.986748 | 0         |  |  |
|         |      | Shiraz-71T | 2262 | 0.986748 | 0         |  |  |
|         |      | Shiraz-71T | 2262 | 0.986748 | 0         |  |  |
|         |      | Shiraz-71T | 2262 | 0.986748 | 0         |  |  |
|         |      | Shiraz-71T | 2262 | 0.986748 | 0         |  |  |
| GAGE12D | chrX | Shiraz-4T  | 260  | 0        | -0.324128 |  |  |
|         |      | Shiraz-4T  | 260  | 0        | -0.324128 |  |  |
|         |      | Shiraz-4T  | 260  | 0        | -0.324128 |  |  |

|  |            |      |          |           |  |
|--|------------|------|----------|-----------|--|
|  | Shiraz-4T  | 260  | 0        | -0.324128 |  |
|  | Shiraz-4T  | 260  | 0        | -0.324128 |  |
|  | Shiraz-4T  | 260  | 0        | -0.324128 |  |
|  | Shiraz-16T | 294  | 0.655804 | 0         |  |
|  | Shiraz-16T | 294  | 0.655804 | 0         |  |
|  | Shiraz-16T | 294  | 0.655804 | 0         |  |
|  | Shiraz-16T | 294  | 0.655804 | 0         |  |
|  | Shiraz-16T | 294  | 0.655804 | 0         |  |
|  | Shiraz-16T | 294  | 0.655804 | 0         |  |
|  | Shiraz-31T | 345  | 0.103301 | 0         |  |
|  | Shiraz-31T | 345  | 0.103301 | 0         |  |
|  | Shiraz-31T | 345  | 0.103301 | 0         |  |
|  | Shiraz-31T | 345  | 0.103301 | 0         |  |
|  | Shiraz-31T | 345  | 0.103301 | 0         |  |
|  | Shiraz-31T | 345  | 0.103301 | 0         |  |
|  | Shiraz-36T | 431  | 0        | -0.78035  |  |
|  | Shiraz-36T | 431  | 0        | -0.78035  |  |
|  | Shiraz-36T | 431  | 0        | -0.78035  |  |
|  | Shiraz-36T | 431  | 0        | -0.78035  |  |
|  | Shiraz-36T | 431  | 0        | -0.78035  |  |
|  | Shiraz-36T | 431  | 0        | -0.78035  |  |
|  | Shiraz-36T | 432  | 0        | -0.6692   |  |
|  | Shiraz-36T | 432  | 0        | -0.6692   |  |
|  | Shiraz-36T | 432  | 0        | -0.6692   |  |
|  | Shiraz-36T | 432  | 0        | -0.6692   |  |
|  | Shiraz-36T | 432  | 0        | -0.6692   |  |
|  | Shiraz-36T | 432  | 0        | -0.6692   |  |
|  | Shiraz-44T | 891  | 0        | -0.954044 |  |
|  | Shiraz-44T | 891  | 0        | -0.954044 |  |
|  | Shiraz-44T | 891  | 0        | -0.954044 |  |
|  | Shiraz-44T | 891  | 0        | -0.954044 |  |
|  | Shiraz-44T | 891  | 0        | -0.954044 |  |
|  | Shiraz-44T | 891  | 0        | -0.954044 |  |
|  | Shiraz-46T | 991  | 0.139564 | 0         |  |
|  | Shiraz-46T | 991  | 0.139564 | 0         |  |
|  | Shiraz-46T | 991  | 0.139564 | 0         |  |
|  | Shiraz-46T | 991  | 0.139564 | 0         |  |
|  | Shiraz-46T | 991  | 0.139564 | 0         |  |
|  | Shiraz-46T | 991  | 0.139564 | 0         |  |
|  | Shiraz-47T | 1084 | 0.24185  | 0         |  |
|  | Shiraz-47T | 1084 | 0.24185  | 0         |  |
|  | Shiraz-47T | 1084 | 0.24185  | 0         |  |
|  | Shiraz-47T | 1084 | 0.24185  | 0         |  |
|  | Shiraz-47T | 1084 | 0.24185  | 0         |  |
|  | Shiraz-47T | 1084 | 0.24185  | 0         |  |
|  | Shiraz-49T | 1166 | 0        | -0.917235 |  |
|  | Shiraz-49T | 1166 | 0        | -0.917235 |  |

|  |            |      |          |           |  |
|--|------------|------|----------|-----------|--|
|  | Shiraz-49T | 1166 | 0        | -0.917235 |  |
|  | Shiraz-49T | 1166 | 0        | -0.917235 |  |
|  | Shiraz-49T | 1166 | 0        | -0.917235 |  |
|  | Shiraz-49T | 1166 | 0        | -0.917235 |  |
|  | Shiraz-77T | 1282 | 0.213849 | 0         |  |
|  | Shiraz-77T | 1282 | 0.213849 | 0         |  |
|  | Shiraz-77T | 1282 | 0.213849 | 0         |  |
|  | Shiraz-77T | 1282 | 0.213849 | 0         |  |
|  | Shiraz-77T | 1282 | 0.213849 | 0         |  |
|  | Shiraz-77T | 1282 | 0.213849 | 0         |  |
|  | Shiraz-9T  | 1368 | 0.199713 | 0         |  |
|  | Shiraz-9T  | 1368 | 0.199713 | 0         |  |
|  | Shiraz-9T  | 1368 | 0.199713 | 0         |  |
|  | Shiraz-9T  | 1368 | 0.199713 | 0         |  |
|  | Shiraz-9T  | 1368 | 0.199713 | 0         |  |
|  | Shiraz-9T  | 1368 | 0.199713 | 0         |  |
|  | Shiraz-18T | 1455 | 0        | -0.186773 |  |
|  | Shiraz-18T | 1455 | 0        | -0.186773 |  |
|  | Shiraz-18T | 1455 | 0        | -0.186773 |  |
|  | Shiraz-18T | 1455 | 0        | -0.186773 |  |
|  | Shiraz-18T | 1455 | 0        | -0.186773 |  |
|  | Shiraz-18T | 1455 | 0        | -0.186773 |  |
|  | Shiraz-22T | 1669 | 0.695915 | 0         |  |
|  | Shiraz-22T | 1669 | 0.695915 | 0         |  |
|  | Shiraz-22T | 1669 | 0.695915 | 0         |  |
|  | Shiraz-22T | 1669 | 0.695915 | 0         |  |
|  | Shiraz-22T | 1669 | 0.695915 | 0         |  |
|  | Shiraz-22T | 1669 | 0.695915 | 0         |  |
|  | Shiraz-22T | 1672 | 1.01678  | 0         |  |
|  | Shiraz-22T | 1672 | 1.01678  | 0         |  |
|  | Shiraz-22T | 1672 | 1.01678  | 0         |  |
|  | Shiraz-22T | 1672 | 1.01678  | 0         |  |
|  | Shiraz-22T | 1672 | 1.01678  | 0         |  |
|  | Shiraz-22T | 1672 | 1.01678  | 0         |  |
|  | Shiraz-25T | 1717 | 0.420447 | 0         |  |
|  | Shiraz-25T | 1717 | 0.420447 | 0         |  |
|  | Shiraz-25T | 1717 | 0.420447 | 0         |  |
|  | Shiraz-25T | 1717 | 0.420447 | 0         |  |
|  | Shiraz-25T | 1717 | 0.420447 | 0         |  |
|  | Shiraz-25T | 1717 | 0.420447 | 0         |  |
|  | Shiraz-28T | 1760 | 0.538181 | 0         |  |
|  | Shiraz-28T | 1760 | 0.538181 | 0         |  |
|  | Shiraz-28T | 1760 | 0.538181 | 0         |  |
|  | Shiraz-28T | 1760 | 0.538181 | 0         |  |
|  | Shiraz-28T | 1760 | 0.538181 | 0         |  |
|  | Shiraz-28T | 1760 | 0.538181 | 0         |  |
|  | Shiraz-29T | 1800 | 0.672527 | 0         |  |





|  |  |            |      |          |           |  |  |
|--|--|------------|------|----------|-----------|--|--|
|  |  | Shiraz-31T | 345  | 0.103301 | 0         |  |  |
|  |  | Shiraz-31T | 345  | 0.103301 | 0         |  |  |
|  |  | Shiraz-31T | 345  | 0.103301 | 0         |  |  |
|  |  | Shiraz-31T | 345  | 0.103301 | 0         |  |  |
|  |  | Shiraz-31T | 345  | 0.103301 | 0         |  |  |
|  |  | Shiraz-31T | 345  | 0.103301 | 0         |  |  |
|  |  | Shiraz-36T | 431  | 0        | -0.78035  |  |  |
|  |  | Shiraz-36T | 431  | 0        | -0.78035  |  |  |
|  |  | Shiraz-36T | 431  | 0        | -0.78035  |  |  |
|  |  | Shiraz-36T | 431  | 0        | -0.78035  |  |  |
|  |  | Shiraz-36T | 431  | 0        | -0.78035  |  |  |
|  |  | Shiraz-36T | 431  | 0        | -0.78035  |  |  |
|  |  | Shiraz-36T | 431  | 0        | -0.78035  |  |  |
|  |  | Shiraz-36T | 432  | 0        | -0.6692   |  |  |
|  |  | Shiraz-36T | 432  | 0        | -0.6692   |  |  |
|  |  | Shiraz-36T | 432  | 0        | -0.6692   |  |  |
|  |  | Shiraz-36T | 432  | 0        | -0.6692   |  |  |
|  |  | Shiraz-36T | 432  | 0        | -0.6692   |  |  |
|  |  | Shiraz-36T | 432  | 0        | -0.6692   |  |  |
|  |  | Shiraz-44T | 891  | 0        | -0.954044 |  |  |
|  |  | Shiraz-44T | 891  | 0        | -0.954044 |  |  |
|  |  | Shiraz-44T | 891  | 0        | -0.954044 |  |  |
|  |  | Shiraz-44T | 891  | 0        | -0.954044 |  |  |
|  |  | Shiraz-44T | 891  | 0        | -0.954044 |  |  |
|  |  | Shiraz-44T | 891  | 0        | -0.954044 |  |  |
|  |  | Shiraz-46T | 991  | 0.139564 | 0         |  |  |
|  |  | Shiraz-46T | 991  | 0.139564 | 0         |  |  |
|  |  | Shiraz-46T | 991  | 0.139564 | 0         |  |  |
|  |  | Shiraz-46T | 991  | 0.139564 | 0         |  |  |
|  |  | Shiraz-46T | 991  | 0.139564 | 0         |  |  |
|  |  | Shiraz-46T | 991  | 0.139564 | 0         |  |  |
|  |  | Shiraz-47T | 1084 | 0.24185  | 0         |  |  |
|  |  | Shiraz-47T | 1084 | 0.24185  | 0         |  |  |
|  |  | Shiraz-47T | 1084 | 0.24185  | 0         |  |  |
|  |  | Shiraz-47T | 1084 | 0.24185  | 0         |  |  |
|  |  | Shiraz-47T | 1084 | 0.24185  | 0         |  |  |
|  |  | Shiraz-47T | 1084 | 0.24185  | 0         |  |  |
|  |  | Shiraz-49T | 1166 | 0        | -0.917235 |  |  |
|  |  | Shiraz-49T | 1166 | 0        | -0.917235 |  |  |
|  |  | Shiraz-49T | 1166 | 0        | -0.917235 |  |  |
|  |  | Shiraz-49T | 1166 | 0        | -0.917235 |  |  |
|  |  | Shiraz-49T | 1166 | 0        | -0.917235 |  |  |
|  |  | Shiraz-49T | 1166 | 0        | -0.917235 |  |  |
|  |  | Shiraz-77T | 1282 | 0.213849 | 0         |  |  |
|  |  | Shiraz-77T | 1282 | 0.213849 | 0         |  |  |
|  |  | Shiraz-77T | 1282 | 0.213849 | 0         |  |  |
|  |  | Shiraz-77T | 1282 | 0.213849 | 0         |  |  |
|  |  | Shiraz-77T | 1282 | 0.213849 | 0         |  |  |

|  |  |            |      |          |           |  |  |
|--|--|------------|------|----------|-----------|--|--|
|  |  | Shiraz-77T | 1282 | 0.213849 | 0         |  |  |
|  |  | Shiraz-9T  | 1368 | 0.199713 | 0         |  |  |
|  |  | Shiraz-9T  | 1368 | 0.199713 | 0         |  |  |
|  |  | Shiraz-9T  | 1368 | 0.199713 | 0         |  |  |
|  |  | Shiraz-9T  | 1368 | 0.199713 | 0         |  |  |
|  |  | Shiraz-9T  | 1368 | 0.199713 | 0         |  |  |
|  |  | Shiraz-9T  | 1368 | 0.199713 | 0         |  |  |
|  |  | Shiraz-18T | 1455 | 0        | -0.186773 |  |  |
|  |  | Shiraz-18T | 1455 | 0        | -0.186773 |  |  |
|  |  | Shiraz-18T | 1455 | 0        | -0.186773 |  |  |
|  |  | Shiraz-18T | 1455 | 0        | -0.186773 |  |  |
|  |  | Shiraz-18T | 1455 | 0        | -0.186773 |  |  |
|  |  | Shiraz-18T | 1455 | 0        | -0.186773 |  |  |
|  |  | Shiraz-22T | 1669 | 0.695915 | 0         |  |  |
|  |  | Shiraz-22T | 1669 | 0.695915 | 0         |  |  |
|  |  | Shiraz-22T | 1669 | 0.695915 | 0         |  |  |
|  |  | Shiraz-22T | 1669 | 0.695915 | 0         |  |  |
|  |  | Shiraz-22T | 1669 | 0.695915 | 0         |  |  |
|  |  | Shiraz-22T | 1669 | 0.695915 | 0         |  |  |
|  |  | Shiraz-22T | 1672 | 1.01678  | 0         |  |  |
|  |  | Shiraz-22T | 1672 | 1.01678  | 0         |  |  |
|  |  | Shiraz-22T | 1672 | 1.01678  | 0         |  |  |
|  |  | Shiraz-22T | 1672 | 1.01678  | 0         |  |  |
|  |  | Shiraz-22T | 1672 | 1.01678  | 0         |  |  |
|  |  | Shiraz-25T | 1717 | 0.420447 | 0         |  |  |
|  |  | Shiraz-25T | 1717 | 0.420447 | 0         |  |  |
|  |  | Shiraz-25T | 1717 | 0.420447 | 0         |  |  |
|  |  | Shiraz-25T | 1717 | 0.420447 | 0         |  |  |
|  |  | Shiraz-25T | 1717 | 0.420447 | 0         |  |  |
|  |  | Shiraz-25T | 1717 | 0.420447 | 0         |  |  |
|  |  | Shiraz-28T | 1760 | 0.538181 | 0         |  |  |
|  |  | Shiraz-28T | 1760 | 0.538181 | 0         |  |  |
|  |  | Shiraz-28T | 1760 | 0.538181 | 0         |  |  |
|  |  | Shiraz-28T | 1760 | 0.538181 | 0         |  |  |
|  |  | Shiraz-28T | 1760 | 0.538181 | 0         |  |  |
|  |  | Shiraz-28T | 1760 | 0.538181 | 0         |  |  |
|  |  | Shiraz-29T | 1800 | 0.672527 | 0         |  |  |
|  |  | Shiraz-29T | 1800 | 0.672527 | 0         |  |  |
|  |  | Shiraz-29T | 1800 | 0.672527 | 0         |  |  |
|  |  | Shiraz-29T | 1800 | 0.672527 | 0         |  |  |
|  |  | Shiraz-29T | 1800 | 0.672527 | 0         |  |  |
|  |  | Shiraz-29T | 1800 | 0.672527 | 0         |  |  |
|  |  | Shiraz-32T | 1869 | 0.776805 | 0         |  |  |
|  |  | Shiraz-32T | 1869 | 0.776805 | 0         |  |  |
|  |  | Shiraz-32T | 1869 | 0.776805 | 0         |  |  |
|  |  | Shiraz-32T | 1869 | 0.776805 | 0         |  |  |

|  |  |            |      |          |           |  |  |
|--|--|------------|------|----------|-----------|--|--|
|  |  | Shiraz-32T | 1869 | 0.776805 | 0         |  |  |
|  |  | Shiraz-32T | 1869 | 0.776805 | 0         |  |  |
|  |  | Shiraz-35T | 1932 | 0.507141 | 0         |  |  |
|  |  | Shiraz-35T | 1932 | 0.507141 | 0         |  |  |
|  |  | Shiraz-35T | 1932 | 0.507141 | 0         |  |  |
|  |  | Shiraz-35T | 1932 | 0.507141 | 0         |  |  |
|  |  | Shiraz-35T | 1932 | 0.507141 | 0         |  |  |
|  |  | Shiraz-35T | 1932 | 0.507141 | 0         |  |  |
|  |  | Shiraz-58T | 2221 | 0.871948 | 0         |  |  |
|  |  | Shiraz-58T | 2221 | 0.871948 | 0         |  |  |
|  |  | Shiraz-58T | 2221 | 0.871948 | 0         |  |  |
|  |  | Shiraz-58T | 2221 | 0.871948 | 0         |  |  |
|  |  | Shiraz-58T | 2221 | 0.871948 | 0         |  |  |
|  |  | Shiraz-58T | 2221 | 0.871948 | 0         |  |  |
|  |  | Shiraz-71T | 2260 | 0.68394  | 0         |  |  |
|  |  | Shiraz-71T | 2260 | 0.68394  | 0         |  |  |
|  |  | Shiraz-71T | 2260 | 0.68394  | 0         |  |  |
|  |  | Shiraz-71T | 2260 | 0.68394  | 0         |  |  |
|  |  | Shiraz-71T | 2260 | 0.68394  | 0         |  |  |
|  |  | Shiraz-71T | 2260 | 0.68394  | 0         |  |  |
|  |  | Shiraz-71T | 2262 | 0.986748 | 0         |  |  |
|  |  | Shiraz-71T | 2262 | 0.986748 | 0         |  |  |
|  |  | Shiraz-71T | 2262 | 0.986748 | 0         |  |  |
|  |  | Shiraz-71T | 2262 | 0.986748 | 0         |  |  |
|  |  | Shiraz-71T | 2262 | 0.986748 | 0         |  |  |
|  |  | Shiraz-4T  | 260  | 0        | -0.324128 |  |  |
|  |  | Shiraz-4T  | 260  | 0        | -0.324128 |  |  |
|  |  | Shiraz-4T  | 260  | 0        | -0.324128 |  |  |
|  |  | Shiraz-4T  | 260  | 0        | -0.324128 |  |  |
|  |  | Shiraz-4T  | 260  | 0        | -0.324128 |  |  |
|  |  | Shiraz-4T  | 260  | 0        | -0.324128 |  |  |
|  |  | Shiraz-16T | 294  | 0.655804 | 0         |  |  |
|  |  | Shiraz-16T | 294  | 0.655804 | 0         |  |  |
|  |  | Shiraz-16T | 294  | 0.655804 | 0         |  |  |
|  |  | Shiraz-16T | 294  | 0.655804 | 0         |  |  |
|  |  | Shiraz-16T | 294  | 0.655804 | 0         |  |  |
|  |  | Shiraz-16T | 294  | 0.655804 | 0         |  |  |
|  |  | Shiraz-31T | 345  | 0.103301 | 0         |  |  |
|  |  | Shiraz-31T | 345  | 0.103301 | 0         |  |  |
|  |  | Shiraz-31T | 345  | 0.103301 | 0         |  |  |
|  |  | Shiraz-31T | 345  | 0.103301 | 0         |  |  |
|  |  | Shiraz-31T | 345  | 0.103301 | 0         |  |  |
|  |  | Shiraz-31T | 345  | 0.103301 | 0         |  |  |
|  |  | Shiraz-36T | 431  | 0        | -0.78035  |  |  |
|  |  | Shiraz-36T | 431  | 0        | -0.78035  |  |  |
|  |  | Shiraz-36T | 431  | 0        | -0.78035  |  |  |

|  |            |      |          |           |  |
|--|------------|------|----------|-----------|--|
|  | Shiraz-36T | 431  | 0        | -0.78035  |  |
|  | Shiraz-36T | 431  | 0        | -0.78035  |  |
|  | Shiraz-36T | 431  | 0        | -0.78035  |  |
|  | Shiraz-36T | 432  | 0        | -0.6692   |  |
|  | Shiraz-36T | 432  | 0        | -0.6692   |  |
|  | Shiraz-36T | 432  | 0        | -0.6692   |  |
|  | Shiraz-36T | 432  | 0        | -0.6692   |  |
|  | Shiraz-36T | 432  | 0        | -0.6692   |  |
|  | Shiraz-36T | 432  | 0        | -0.6692   |  |
|  | Shiraz-44T | 891  | 0        | -0.954044 |  |
|  | Shiraz-44T | 891  | 0        | -0.954044 |  |
|  | Shiraz-44T | 891  | 0        | -0.954044 |  |
|  | Shiraz-44T | 891  | 0        | -0.954044 |  |
|  | Shiraz-44T | 891  | 0        | -0.954044 |  |
|  | Shiraz-44T | 891  | 0        | -0.954044 |  |
|  | Shiraz-46T | 991  | 0.139564 | 0         |  |
|  | Shiraz-46T | 991  | 0.139564 | 0         |  |
|  | Shiraz-46T | 991  | 0.139564 | 0         |  |
|  | Shiraz-46T | 991  | 0.139564 | 0         |  |
|  | Shiraz-46T | 991  | 0.139564 | 0         |  |
|  | Shiraz-46T | 991  | 0.139564 | 0         |  |
|  | Shiraz-47T | 1084 | 0.24185  | 0         |  |
|  | Shiraz-47T | 1084 | 0.24185  | 0         |  |
|  | Shiraz-47T | 1084 | 0.24185  | 0         |  |
|  | Shiraz-47T | 1084 | 0.24185  | 0         |  |
|  | Shiraz-47T | 1084 | 0.24185  | 0         |  |
|  | Shiraz-47T | 1084 | 0.24185  | 0         |  |
|  | Shiraz-49T | 1166 | 0        | -0.917235 |  |
|  | Shiraz-49T | 1166 | 0        | -0.917235 |  |
|  | Shiraz-49T | 1166 | 0        | -0.917235 |  |
|  | Shiraz-49T | 1166 | 0        | -0.917235 |  |
|  | Shiraz-49T | 1166 | 0        | -0.917235 |  |
|  | Shiraz-49T | 1166 | 0        | -0.917235 |  |
|  | Shiraz-77T | 1282 | 0.213849 | 0         |  |
|  | Shiraz-77T | 1282 | 0.213849 | 0         |  |
|  | Shiraz-77T | 1282 | 0.213849 | 0         |  |
|  | Shiraz-77T | 1282 | 0.213849 | 0         |  |
|  | Shiraz-77T | 1282 | 0.213849 | 0         |  |
|  | Shiraz-77T | 1282 | 0.213849 | 0         |  |
|  | Shiraz-9T  | 1368 | 0.199713 | 0         |  |
|  | Shiraz-9T  | 1368 | 0.199713 | 0         |  |
|  | Shiraz-9T  | 1368 | 0.199713 | 0         |  |
|  | Shiraz-9T  | 1368 | 0.199713 | 0         |  |
|  | Shiraz-9T  | 1368 | 0.199713 | 0         |  |
|  | Shiraz-9T  | 1368 | 0.199713 | 0         |  |
|  | Shiraz-18T | 1455 | 0        | -0.186773 |  |
|  | Shiraz-18T | 1455 | 0        | -0.186773 |  |

|  |            |      |          |           |  |
|--|------------|------|----------|-----------|--|
|  | Shiraz-18T | 1455 | 0        | -0.186773 |  |
|  | Shiraz-18T | 1455 | 0        | -0.186773 |  |
|  | Shiraz-18T | 1455 | 0        | -0.186773 |  |
|  | Shiraz-18T | 1455 | 0        | -0.186773 |  |
|  | Shiraz-22T | 1669 | 0.695915 | 0         |  |
|  | Shiraz-22T | 1669 | 0.695915 | 0         |  |
|  | Shiraz-22T | 1669 | 0.695915 | 0         |  |
|  | Shiraz-22T | 1669 | 0.695915 | 0         |  |
|  | Shiraz-22T | 1669 | 0.695915 | 0         |  |
|  | Shiraz-22T | 1672 | 1.01678  | 0         |  |
|  | Shiraz-22T | 1672 | 1.01678  | 0         |  |
|  | Shiraz-22T | 1672 | 1.01678  | 0         |  |
|  | Shiraz-22T | 1672 | 1.01678  | 0         |  |
|  | Shiraz-22T | 1672 | 1.01678  | 0         |  |
|  | Shiraz-22T | 1672 | 1.01678  | 0         |  |
|  | Shiraz-25T | 1717 | 0.420447 | 0         |  |
|  | Shiraz-25T | 1717 | 0.420447 | 0         |  |
|  | Shiraz-25T | 1717 | 0.420447 | 0         |  |
|  | Shiraz-25T | 1717 | 0.420447 | 0         |  |
|  | Shiraz-25T | 1717 | 0.420447 | 0         |  |
|  | Shiraz-25T | 1717 | 0.420447 | 0         |  |
|  | Shiraz-28T | 1760 | 0.538181 | 0         |  |
|  | Shiraz-28T | 1760 | 0.538181 | 0         |  |
|  | Shiraz-28T | 1760 | 0.538181 | 0         |  |
|  | Shiraz-28T | 1760 | 0.538181 | 0         |  |
|  | Shiraz-28T | 1760 | 0.538181 | 0         |  |
|  | Shiraz-28T | 1760 | 0.538181 | 0         |  |
|  | Shiraz-29T | 1800 | 0.672527 | 0         |  |
|  | Shiraz-29T | 1800 | 0.672527 | 0         |  |
|  | Shiraz-29T | 1800 | 0.672527 | 0         |  |
|  | Shiraz-29T | 1800 | 0.672527 | 0         |  |
|  | Shiraz-29T | 1800 | 0.672527 | 0         |  |
|  | Shiraz-32T | 1869 | 0.776805 | 0         |  |
|  | Shiraz-32T | 1869 | 0.776805 | 0         |  |
|  | Shiraz-32T | 1869 | 0.776805 | 0         |  |
|  | Shiraz-32T | 1869 | 0.776805 | 0         |  |
|  | Shiraz-32T | 1869 | 0.776805 | 0         |  |
|  | Shiraz-35T | 1932 | 0.507141 | 0         |  |
|  | Shiraz-35T | 1932 | 0.507141 | 0         |  |
|  | Shiraz-35T | 1932 | 0.507141 | 0         |  |
|  | Shiraz-35T | 1932 | 0.507141 | 0         |  |
|  | Shiraz-35T | 1932 | 0.507141 | 0         |  |
|  | Shiraz-58T | 2221 | 0.871948 | 0         |  |



|  |            |      |          |           |  |
|--|------------|------|----------|-----------|--|
|  | Shiraz-44T | 891  | 0        | -0.954044 |  |
|  | Shiraz-44T | 891  | 0        | -0.954044 |  |
|  | Shiraz-44T | 891  | 0        | -0.954044 |  |
|  | Shiraz-44T | 891  | 0        | -0.954044 |  |
|  | Shiraz-44T | 891  | 0        | -0.954044 |  |
|  | Shiraz-44T | 891  | 0        | -0.954044 |  |
|  | Shiraz-46T | 991  | 0.139564 | 0         |  |
|  | Shiraz-46T | 991  | 0.139564 | 0         |  |
|  | Shiraz-46T | 991  | 0.139564 | 0         |  |
|  | Shiraz-46T | 991  | 0.139564 | 0         |  |
|  | Shiraz-46T | 991  | 0.139564 | 0         |  |
|  | Shiraz-46T | 991  | 0.139564 | 0         |  |
|  | Shiraz-46T | 991  | 0.139564 | 0         |  |
|  | Shiraz-47T | 1084 | 0.24185  | 0         |  |
|  | Shiraz-47T | 1084 | 0.24185  | 0         |  |
|  | Shiraz-47T | 1084 | 0.24185  | 0         |  |
|  | Shiraz-47T | 1084 | 0.24185  | 0         |  |
|  | Shiraz-47T | 1084 | 0.24185  | 0         |  |
|  | Shiraz-47T | 1084 | 0.24185  | 0         |  |
|  | Shiraz-49T | 1166 | 0        | -0.917235 |  |
|  | Shiraz-49T | 1166 | 0        | -0.917235 |  |
|  | Shiraz-49T | 1166 | 0        | -0.917235 |  |
|  | Shiraz-49T | 1166 | 0        | -0.917235 |  |
|  | Shiraz-49T | 1166 | 0        | -0.917235 |  |
|  | Shiraz-49T | 1166 | 0        | -0.917235 |  |
|  | Shiraz-77T | 1282 | 0.213849 | 0         |  |
|  | Shiraz-77T | 1282 | 0.213849 | 0         |  |
|  | Shiraz-77T | 1282 | 0.213849 | 0         |  |
|  | Shiraz-77T | 1282 | 0.213849 | 0         |  |
|  | Shiraz-77T | 1282 | 0.213849 | 0         |  |
|  | Shiraz-77T | 1282 | 0.213849 | 0         |  |
|  | Shiraz-9T  | 1368 | 0.199713 | 0         |  |
|  | Shiraz-9T  | 1368 | 0.199713 | 0         |  |
|  | Shiraz-9T  | 1368 | 0.199713 | 0         |  |
|  | Shiraz-9T  | 1368 | 0.199713 | 0         |  |
|  | Shiraz-9T  | 1368 | 0.199713 | 0         |  |
|  | Shiraz-9T  | 1368 | 0.199713 | 0         |  |
|  | Shiraz-18T | 1455 | 0        | -0.186773 |  |
|  | Shiraz-18T | 1455 | 0        | -0.186773 |  |
|  | Shiraz-18T | 1455 | 0        | -0.186773 |  |
|  | Shiraz-18T | 1455 | 0        | -0.186773 |  |
|  | Shiraz-18T | 1455 | 0        | -0.186773 |  |
|  | Shiraz-18T | 1455 | 0        | -0.186773 |  |
|  | Shiraz-22T | 1669 | 0.695915 | 0         |  |
|  | Shiraz-22T | 1669 | 0.695915 | 0         |  |
|  | Shiraz-22T | 1669 | 0.695915 | 0         |  |
|  | Shiraz-22T | 1669 | 0.695915 | 0         |  |
|  | Shiraz-22T | 1669 | 0.695915 | 0         |  |

|  |  |            |      |          |   |  |
|--|--|------------|------|----------|---|--|
|  |  | Shiraz-22T | 1669 | 0.695915 | 0 |  |
|  |  | Shiraz-22T | 1672 | 1.01678  | 0 |  |
|  |  | Shiraz-22T | 1672 | 1.01678  | 0 |  |
|  |  | Shiraz-22T | 1672 | 1.01678  | 0 |  |
|  |  | Shiraz-22T | 1672 | 1.01678  | 0 |  |
|  |  | Shiraz-22T | 1672 | 1.01678  | 0 |  |
|  |  | Shiraz-22T | 1672 | 1.01678  | 0 |  |
|  |  | Shiraz-25T | 1717 | 0.420447 | 0 |  |
|  |  | Shiraz-25T | 1717 | 0.420447 | 0 |  |
|  |  | Shiraz-25T | 1717 | 0.420447 | 0 |  |
|  |  | Shiraz-25T | 1717 | 0.420447 | 0 |  |
|  |  | Shiraz-25T | 1717 | 0.420447 | 0 |  |
|  |  | Shiraz-25T | 1717 | 0.420447 | 0 |  |
|  |  | Shiraz-28T | 1760 | 0.538181 | 0 |  |
|  |  | Shiraz-28T | 1760 | 0.538181 | 0 |  |
|  |  | Shiraz-28T | 1760 | 0.538181 | 0 |  |
|  |  | Shiraz-28T | 1760 | 0.538181 | 0 |  |
|  |  | Shiraz-28T | 1760 | 0.538181 | 0 |  |
|  |  | Shiraz-28T | 1760 | 0.538181 | 0 |  |
|  |  | Shiraz-29T | 1800 | 0.672527 | 0 |  |
|  |  | Shiraz-29T | 1800 | 0.672527 | 0 |  |
|  |  | Shiraz-29T | 1800 | 0.672527 | 0 |  |
|  |  | Shiraz-29T | 1800 | 0.672527 | 0 |  |
|  |  | Shiraz-29T | 1800 | 0.672527 | 0 |  |
|  |  | Shiraz-32T | 1869 | 0.776805 | 0 |  |
|  |  | Shiraz-32T | 1869 | 0.776805 | 0 |  |
|  |  | Shiraz-32T | 1869 | 0.776805 | 0 |  |
|  |  | Shiraz-32T | 1869 | 0.776805 | 0 |  |
|  |  | Shiraz-32T | 1869 | 0.776805 | 0 |  |
|  |  | Shiraz-32T | 1869 | 0.776805 | 0 |  |
|  |  | Shiraz-35T | 1932 | 0.507141 | 0 |  |
|  |  | Shiraz-35T | 1932 | 0.507141 | 0 |  |
|  |  | Shiraz-35T | 1932 | 0.507141 | 0 |  |
|  |  | Shiraz-35T | 1932 | 0.507141 | 0 |  |
|  |  | Shiraz-35T | 1932 | 0.507141 | 0 |  |
|  |  | Shiraz-35T | 1932 | 0.507141 | 0 |  |
|  |  | Shiraz-58T | 2221 | 0.871948 | 0 |  |
|  |  | Shiraz-58T | 2221 | 0.871948 | 0 |  |
|  |  | Shiraz-58T | 2221 | 0.871948 | 0 |  |
|  |  | Shiraz-58T | 2221 | 0.871948 | 0 |  |
|  |  | Shiraz-58T | 2221 | 0.871948 | 0 |  |
|  |  | Shiraz-58T | 2221 | 0.871948 | 0 |  |
|  |  | Shiraz-71T | 2260 | 0.68394  | 0 |  |
|  |  | Shiraz-71T | 2260 | 0.68394  | 0 |  |
|  |  | Shiraz-71T | 2260 | 0.68394  | 0 |  |
|  |  | Shiraz-71T | 2260 | 0.68394  | 0 |  |



|  |            |      |          |           |  |
|--|------------|------|----------|-----------|--|
|  | Shiraz-71T | 2260 | 0.68394  | 0         |  |
|  | Shiraz-71T | 2260 | 0.68394  | 0         |  |
|  | Shiraz-71T | 2262 | 0.986748 | 0         |  |
|  | Shiraz-71T | 2262 | 0.986748 | 0         |  |
|  | Shiraz-71T | 2262 | 0.986748 | 0         |  |
|  | Shiraz-71T | 2262 | 0.986748 | 0         |  |
|  | Shiraz-71T | 2262 | 0.986748 | 0         |  |
|  | Shiraz-71T | 2262 | 0.986748 | 0         |  |
|  | Shiraz-4T  | 260  | 0        | -0.324128 |  |
|  | Shiraz-4T  | 260  | 0        | -0.324128 |  |
|  | Shiraz-4T  | 260  | 0        | -0.324128 |  |
|  | Shiraz-4T  | 260  | 0        | -0.324128 |  |
|  | Shiraz-4T  | 260  | 0        | -0.324128 |  |
|  | Shiraz-4T  | 260  | 0        | -0.324128 |  |
|  | Shiraz-16T | 294  | 0.655804 | 0         |  |
|  | Shiraz-16T | 294  | 0.655804 | 0         |  |
|  | Shiraz-16T | 294  | 0.655804 | 0         |  |
|  | Shiraz-16T | 294  | 0.655804 | 0         |  |
|  | Shiraz-16T | 294  | 0.655804 | 0         |  |
|  | Shiraz-16T | 294  | 0.655804 | 0         |  |
|  | Shiraz-31T | 345  | 0.103301 | 0         |  |
|  | Shiraz-31T | 345  | 0.103301 | 0         |  |
|  | Shiraz-31T | 345  | 0.103301 | 0         |  |
|  | Shiraz-31T | 345  | 0.103301 | 0         |  |
|  | Shiraz-31T | 345  | 0.103301 | 0         |  |
|  | Shiraz-36T | 431  | 0        | -0.78035  |  |
|  | Shiraz-36T | 431  | 0        | -0.78035  |  |
|  | Shiraz-36T | 431  | 0        | -0.78035  |  |
|  | Shiraz-36T | 431  | 0        | -0.78035  |  |
|  | Shiraz-36T | 431  | 0        | -0.78035  |  |
|  | Shiraz-36T | 431  | 0        | -0.78035  |  |
|  | Shiraz-36T | 432  | 0        | -0.6692   |  |
|  | Shiraz-36T | 432  | 0        | -0.6692   |  |
|  | Shiraz-36T | 432  | 0        | -0.6692   |  |
|  | Shiraz-36T | 432  | 0        | -0.6692   |  |
|  | Shiraz-36T | 432  | 0        | -0.6692   |  |
|  | Shiraz-44T | 891  | 0        | -0.954044 |  |
|  | Shiraz-44T | 891  | 0        | -0.954044 |  |
|  | Shiraz-44T | 891  | 0        | -0.954044 |  |
|  | Shiraz-44T | 891  | 0        | -0.954044 |  |
|  | Shiraz-44T | 891  | 0        | -0.954044 |  |
|  | Shiraz-46T | 991  | 0.139564 | 0         |  |
|  | Shiraz-46T | 991  | 0.139564 | 0         |  |
|  | Shiraz-46T | 991  | 0.139564 | 0         |  |

|  |  |            |      |          |           |  |  |
|--|--|------------|------|----------|-----------|--|--|
|  |  | Shiraz-46T | 991  | 0.139564 | 0         |  |  |
|  |  | Shiraz-46T | 991  | 0.139564 | 0         |  |  |
|  |  | Shiraz-46T | 991  | 0.139564 | 0         |  |  |
|  |  | Shiraz-47T | 1084 | 0.24185  | 0         |  |  |
|  |  | Shiraz-47T | 1084 | 0.24185  | 0         |  |  |
|  |  | Shiraz-47T | 1084 | 0.24185  | 0         |  |  |
|  |  | Shiraz-47T | 1084 | 0.24185  | 0         |  |  |
|  |  | Shiraz-47T | 1084 | 0.24185  | 0         |  |  |
|  |  | Shiraz-47T | 1084 | 0.24185  | 0         |  |  |
|  |  | Shiraz-49T | 1166 | 0        | -0.917235 |  |  |
|  |  | Shiraz-49T | 1166 | 0        | -0.917235 |  |  |
|  |  | Shiraz-49T | 1166 | 0        | -0.917235 |  |  |
|  |  | Shiraz-49T | 1166 | 0        | -0.917235 |  |  |
|  |  | Shiraz-49T | 1166 | 0        | -0.917235 |  |  |
|  |  | Shiraz-49T | 1166 | 0        | -0.917235 |  |  |
|  |  | Shiraz-77T | 1282 | 0.213849 | 0         |  |  |
|  |  | Shiraz-77T | 1282 | 0.213849 | 0         |  |  |
|  |  | Shiraz-77T | 1282 | 0.213849 | 0         |  |  |
|  |  | Shiraz-77T | 1282 | 0.213849 | 0         |  |  |
|  |  | Shiraz-77T | 1282 | 0.213849 | 0         |  |  |
|  |  | Shiraz-77T | 1282 | 0.213849 | 0         |  |  |
|  |  | Shiraz-9T  | 1368 | 0.199713 | 0         |  |  |
|  |  | Shiraz-9T  | 1368 | 0.199713 | 0         |  |  |
|  |  | Shiraz-9T  | 1368 | 0.199713 | 0         |  |  |
|  |  | Shiraz-9T  | 1368 | 0.199713 | 0         |  |  |
|  |  | Shiraz-9T  | 1368 | 0.199713 | 0         |  |  |
|  |  | Shiraz-9T  | 1368 | 0.199713 | 0         |  |  |
|  |  | Shiraz-18T | 1455 | 0        | -0.186773 |  |  |
|  |  | Shiraz-18T | 1455 | 0        | -0.186773 |  |  |
|  |  | Shiraz-18T | 1455 | 0        | -0.186773 |  |  |
|  |  | Shiraz-18T | 1455 | 0        | -0.186773 |  |  |
|  |  | Shiraz-18T | 1455 | 0        | -0.186773 |  |  |
|  |  | Shiraz-18T | 1455 | 0        | -0.186773 |  |  |
|  |  | Shiraz-22T | 1669 | 0.695915 | 0         |  |  |
|  |  | Shiraz-22T | 1669 | 0.695915 | 0         |  |  |
|  |  | Shiraz-22T | 1669 | 0.695915 | 0         |  |  |
|  |  | Shiraz-22T | 1669 | 0.695915 | 0         |  |  |
|  |  | Shiraz-22T | 1669 | 0.695915 | 0         |  |  |
|  |  | Shiraz-22T | 1669 | 0.695915 | 0         |  |  |
|  |  | Shiraz-22T | 1672 | 1.01678  | 0         |  |  |
|  |  | Shiraz-22T | 1672 | 1.01678  | 0         |  |  |
|  |  | Shiraz-22T | 1672 | 1.01678  | 0         |  |  |
|  |  | Shiraz-22T | 1672 | 1.01678  | 0         |  |  |
|  |  | Shiraz-22T | 1672 | 1.01678  | 0         |  |  |
|  |  | Shiraz-22T | 1672 | 1.01678  | 0         |  |  |
|  |  | Shiraz-25T | 1717 | 0.420447 | 0         |  |  |
|  |  | Shiraz-25T | 1717 | 0.420447 | 0         |  |  |

|  |  |            |      |          |           |  |  |
|--|--|------------|------|----------|-----------|--|--|
|  |  | Shiraz-25T | 1717 | 0.420447 | 0         |  |  |
|  |  | Shiraz-25T | 1717 | 0.420447 | 0         |  |  |
|  |  | Shiraz-25T | 1717 | 0.420447 | 0         |  |  |
|  |  | Shiraz-25T | 1717 | 0.420447 | 0         |  |  |
|  |  | Shiraz-28T | 1760 | 0.538181 | 0         |  |  |
|  |  | Shiraz-28T | 1760 | 0.538181 | 0         |  |  |
|  |  | Shiraz-28T | 1760 | 0.538181 | 0         |  |  |
|  |  | Shiraz-28T | 1760 | 0.538181 | 0         |  |  |
|  |  | Shiraz-28T | 1760 | 0.538181 | 0         |  |  |
|  |  | Shiraz-28T | 1760 | 0.538181 | 0         |  |  |
|  |  | Shiraz-29T | 1800 | 0.672527 | 0         |  |  |
|  |  | Shiraz-29T | 1800 | 0.672527 | 0         |  |  |
|  |  | Shiraz-29T | 1800 | 0.672527 | 0         |  |  |
|  |  | Shiraz-29T | 1800 | 0.672527 | 0         |  |  |
|  |  | Shiraz-29T | 1800 | 0.672527 | 0         |  |  |
|  |  | Shiraz-29T | 1800 | 0.672527 | 0         |  |  |
|  |  | Shiraz-32T | 1869 | 0.776805 | 0         |  |  |
|  |  | Shiraz-32T | 1869 | 0.776805 | 0         |  |  |
|  |  | Shiraz-32T | 1869 | 0.776805 | 0         |  |  |
|  |  | Shiraz-32T | 1869 | 0.776805 | 0         |  |  |
|  |  | Shiraz-32T | 1869 | 0.776805 | 0         |  |  |
|  |  | Shiraz-32T | 1869 | 0.776805 | 0         |  |  |
|  |  | Shiraz-35T | 1932 | 0.507141 | 0         |  |  |
|  |  | Shiraz-35T | 1932 | 0.507141 | 0         |  |  |
|  |  | Shiraz-35T | 1932 | 0.507141 | 0         |  |  |
|  |  | Shiraz-35T | 1932 | 0.507141 | 0         |  |  |
|  |  | Shiraz-35T | 1932 | 0.507141 | 0         |  |  |
|  |  | Shiraz-35T | 1932 | 0.507141 | 0         |  |  |
|  |  | Shiraz-58T | 2221 | 0.871948 | 0         |  |  |
|  |  | Shiraz-58T | 2221 | 0.871948 | 0         |  |  |
|  |  | Shiraz-58T | 2221 | 0.871948 | 0         |  |  |
|  |  | Shiraz-58T | 2221 | 0.871948 | 0         |  |  |
|  |  | Shiraz-58T | 2221 | 0.871948 | 0         |  |  |
|  |  | Shiraz-58T | 2221 | 0.871948 | 0         |  |  |
|  |  | Shiraz-71T | 2260 | 0.68394  | 0         |  |  |
|  |  | Shiraz-71T | 2260 | 0.68394  | 0         |  |  |
|  |  | Shiraz-71T | 2260 | 0.68394  | 0         |  |  |
|  |  | Shiraz-71T | 2260 | 0.68394  | 0         |  |  |
|  |  | Shiraz-71T | 2260 | 0.68394  | 0         |  |  |
|  |  | Shiraz-71T | 2260 | 0.68394  | 0         |  |  |
|  |  | Shiraz-71T | 2262 | 0.986748 | 0         |  |  |
|  |  | Shiraz-71T | 2262 | 0.986748 | 0         |  |  |
|  |  | Shiraz-71T | 2262 | 0.986748 | 0         |  |  |
|  |  | Shiraz-71T | 2262 | 0.986748 | 0         |  |  |
|  |  | Shiraz-71T | 2262 | 0.986748 | 0         |  |  |
|  |  | Shiraz-71T | 2262 | 0.986748 | 0         |  |  |
|  |  | Shiraz-4T  | 260  | 0        | -0.324128 |  |  |



|  |            |      |          |           |  |
|--|------------|------|----------|-----------|--|
|  | Shiraz-49T | 1166 | 0        | -0.917235 |  |
|  | Shiraz-49T | 1166 | 0        | -0.917235 |  |
|  | Shiraz-49T | 1166 | 0        | -0.917235 |  |
|  | Shiraz-49T | 1166 | 0        | -0.917235 |  |
|  | Shiraz-49T | 1166 | 0        | -0.917235 |  |
|  | Shiraz-49T | 1166 | 0        | -0.917235 |  |
|  | Shiraz-77T | 1282 | 0.213849 | 0         |  |
|  | Shiraz-77T | 1282 | 0.213849 | 0         |  |
|  | Shiraz-77T | 1282 | 0.213849 | 0         |  |
|  | Shiraz-77T | 1282 | 0.213849 | 0         |  |
|  | Shiraz-77T | 1282 | 0.213849 | 0         |  |
|  | Shiraz-77T | 1282 | 0.213849 | 0         |  |
|  | Shiraz-9T  | 1368 | 0.199713 | 0         |  |
|  | Shiraz-9T  | 1368 | 0.199713 | 0         |  |
|  | Shiraz-9T  | 1368 | 0.199713 | 0         |  |
|  | Shiraz-9T  | 1368 | 0.199713 | 0         |  |
|  | Shiraz-9T  | 1368 | 0.199713 | 0         |  |
|  | Shiraz-9T  | 1368 | 0.199713 | 0         |  |
|  | Shiraz-18T | 1455 | 0        | -0.186773 |  |
|  | Shiraz-18T | 1455 | 0        | -0.186773 |  |
|  | Shiraz-18T | 1455 | 0        | -0.186773 |  |
|  | Shiraz-18T | 1455 | 0        | -0.186773 |  |
|  | Shiraz-18T | 1455 | 0        | -0.186773 |  |
|  | Shiraz-18T | 1455 | 0        | -0.186773 |  |
|  | Shiraz-22T | 1669 | 0.695915 | 0         |  |
|  | Shiraz-22T | 1669 | 0.695915 | 0         |  |
|  | Shiraz-22T | 1669 | 0.695915 | 0         |  |
|  | Shiraz-22T | 1669 | 0.695915 | 0         |  |
|  | Shiraz-22T | 1669 | 0.695915 | 0         |  |
|  | Shiraz-22T | 1669 | 0.695915 | 0         |  |
|  | Shiraz-22T | 1672 | 1.01678  | 0         |  |
|  | Shiraz-22T | 1672 | 1.01678  | 0         |  |
|  | Shiraz-22T | 1672 | 1.01678  | 0         |  |
|  | Shiraz-22T | 1672 | 1.01678  | 0         |  |
|  | Shiraz-22T | 1672 | 1.01678  | 0         |  |
|  | Shiraz-22T | 1672 | 1.01678  | 0         |  |
|  | Shiraz-25T | 1717 | 0.420447 | 0         |  |
|  | Shiraz-25T | 1717 | 0.420447 | 0         |  |
|  | Shiraz-25T | 1717 | 0.420447 | 0         |  |
|  | Shiraz-25T | 1717 | 0.420447 | 0         |  |
|  | Shiraz-25T | 1717 | 0.420447 | 0         |  |
|  | Shiraz-25T | 1717 | 0.420447 | 0         |  |
|  | Shiraz-28T | 1760 | 0.538181 | 0         |  |
|  | Shiraz-28T | 1760 | 0.538181 | 0         |  |
|  | Shiraz-28T | 1760 | 0.538181 | 0         |  |
|  | Shiraz-28T | 1760 | 0.538181 | 0         |  |
|  | Shiraz-28T | 1760 | 0.538181 | 0         |  |

|         |      |            |      |          |           |  |  |
|---------|------|------------|------|----------|-----------|--|--|
|         |      | Shiraz-28T | 1760 | 0.538181 | 0         |  |  |
|         |      | Shiraz-29T | 1800 | 0.672527 | 0         |  |  |
|         |      | Shiraz-29T | 1800 | 0.672527 | 0         |  |  |
|         |      | Shiraz-29T | 1800 | 0.672527 | 0         |  |  |
|         |      | Shiraz-29T | 1800 | 0.672527 | 0         |  |  |
|         |      | Shiraz-29T | 1800 | 0.672527 | 0         |  |  |
|         |      | Shiraz-29T | 1800 | 0.672527 | 0         |  |  |
|         |      | Shiraz-32T | 1869 | 0.776805 | 0         |  |  |
|         |      | Shiraz-32T | 1869 | 0.776805 | 0         |  |  |
|         |      | Shiraz-32T | 1869 | 0.776805 | 0         |  |  |
|         |      | Shiraz-32T | 1869 | 0.776805 | 0         |  |  |
|         |      | Shiraz-32T | 1869 | 0.776805 | 0         |  |  |
|         |      | Shiraz-32T | 1869 | 0.776805 | 0         |  |  |
|         |      | Shiraz-35T | 1932 | 0.507141 | 0         |  |  |
|         |      | Shiraz-35T | 1932 | 0.507141 | 0         |  |  |
|         |      | Shiraz-35T | 1932 | 0.507141 | 0         |  |  |
|         |      | Shiraz-35T | 1932 | 0.507141 | 0         |  |  |
|         |      | Shiraz-35T | 1932 | 0.507141 | 0         |  |  |
|         |      | Shiraz-35T | 1932 | 0.507141 | 0         |  |  |
|         |      | Shiraz-58T | 2221 | 0.871948 | 0         |  |  |
|         |      | Shiraz-58T | 2221 | 0.871948 | 0         |  |  |
|         |      | Shiraz-58T | 2221 | 0.871948 | 0         |  |  |
|         |      | Shiraz-58T | 2221 | 0.871948 | 0         |  |  |
|         |      | Shiraz-58T | 2221 | 0.871948 | 0         |  |  |
|         |      | Shiraz-71T | 2260 | 0.68394  | 0         |  |  |
|         |      | Shiraz-71T | 2260 | 0.68394  | 0         |  |  |
|         |      | Shiraz-71T | 2260 | 0.68394  | 0         |  |  |
|         |      | Shiraz-71T | 2260 | 0.68394  | 0         |  |  |
|         |      | Shiraz-71T | 2260 | 0.68394  | 0         |  |  |
|         |      | Shiraz-71T | 2260 | 0.68394  | 0         |  |  |
|         |      | Shiraz-71T | 2262 | 0.986748 | 0         |  |  |
|         |      | Shiraz-71T | 2262 | 0.986748 | 0         |  |  |
|         |      | Shiraz-71T | 2262 | 0.986748 | 0         |  |  |
|         |      | Shiraz-71T | 2262 | 0.986748 | 0         |  |  |
|         |      | Shiraz-71T | 2262 | 0.986748 | 0         |  |  |
|         |      | Shiraz-71T | 2262 | 0.986748 | 0         |  |  |
| GAGE12F | chrX | Shiraz-4T  | 260  | 0        | -0.324128 |  |  |
|         |      | Shiraz-4T  | 260  | 0        | -0.324128 |  |  |
|         |      | Shiraz-16T | 294  | 0.655804 | 0         |  |  |
|         |      | Shiraz-16T | 294  | 0.655804 | 0         |  |  |
|         |      | Shiraz-31T | 345  | 0.103301 | 0         |  |  |
|         |      | Shiraz-31T | 345  | 0.103301 | 0         |  |  |
|         |      | Shiraz-36T | 431  | 0        | -0.78035  |  |  |
|         |      | Shiraz-36T | 431  | 0        | -0.78035  |  |  |
|         |      | Shiraz-36T | 432  | 0        | -0.6692   |  |  |
|         |      | Shiraz-36T | 432  | 0        | -0.6692   |  |  |

|  |            |      |          |           |  |
|--|------------|------|----------|-----------|--|
|  | Shiraz-44T | 891  | 0        | -0.954044 |  |
|  | Shiraz-44T | 891  | 0        | -0.954044 |  |
|  | Shiraz-46T | 991  | 0.139564 | 0         |  |
|  | Shiraz-46T | 991  | 0.139564 | 0         |  |
|  | Shiraz-47T | 1084 | 0.24185  | 0         |  |
|  | Shiraz-47T | 1084 | 0.24185  | 0         |  |
|  | Shiraz-49T | 1166 | 0        | -0.917235 |  |
|  | Shiraz-49T | 1166 | 0        | -0.917235 |  |
|  | Shiraz-77T | 1282 | 0.213849 | 0         |  |
|  | Shiraz-77T | 1282 | 0.213849 | 0         |  |
|  | Shiraz-9T  | 1368 | 0.199713 | 0         |  |
|  | Shiraz-9T  | 1368 | 0.199713 | 0         |  |
|  | Shiraz-18T | 1455 | 0        | -0.186773 |  |
|  | Shiraz-18T | 1455 | 0        | -0.186773 |  |
|  | Shiraz-22T | 1669 | 0.695915 | 0         |  |
|  | Shiraz-22T | 1669 | 0.695915 | 0         |  |
|  | Shiraz-22T | 1672 | 1.01678  | 0         |  |
|  | Shiraz-22T | 1672 | 1.01678  | 0         |  |
|  | Shiraz-25T | 1717 | 0.420447 | 0         |  |
|  | Shiraz-25T | 1717 | 0.420447 | 0         |  |
|  | Shiraz-28T | 1760 | 0.538181 | 0         |  |
|  | Shiraz-28T | 1760 | 0.538181 | 0         |  |
|  | Shiraz-29T | 1800 | 0.672527 | 0         |  |
|  | Shiraz-29T | 1800 | 0.672527 | 0         |  |
|  | Shiraz-32T | 1869 | 0.776805 | 0         |  |
|  | Shiraz-32T | 1869 | 0.776805 | 0         |  |
|  | Shiraz-35T | 1932 | 0.507141 | 0         |  |
|  | Shiraz-35T | 1932 | 0.507141 | 0         |  |
|  | Shiraz-58T | 2221 | 0.871948 | 0         |  |
|  | Shiraz-58T | 2221 | 0.871948 | 0         |  |
|  | Shiraz-71T | 2260 | 0.68394  | 0         |  |
|  | Shiraz-71T | 2260 | 0.68394  | 0         |  |
|  | Shiraz-71T | 2262 | 0.986748 | 0         |  |
|  | Shiraz-71T | 2262 | 0.986748 | 0         |  |
|  | Shiraz-4T  | 260  | 0        | -0.324128 |  |
|  | Shiraz-4T  | 260  | 0        | -0.324128 |  |
|  | Shiraz-16T | 294  | 0.655804 | 0         |  |
|  | Shiraz-16T | 294  | 0.655804 | 0         |  |
|  | Shiraz-31T | 345  | 0.103301 | 0         |  |
|  | Shiraz-31T | 345  | 0.103301 | 0         |  |
|  | Shiraz-36T | 431  | 0        | -0.78035  |  |
|  | Shiraz-36T | 431  | 0        | -0.78035  |  |
|  | Shiraz-36T | 432  | 0        | -0.6692   |  |
|  | Shiraz-36T | 432  | 0        | -0.6692   |  |
|  | Shiraz-44T | 891  | 0        | -0.954044 |  |
|  | Shiraz-44T | 891  | 0        | -0.954044 |  |
|  | Shiraz-46T | 991  | 0.139564 | 0         |  |

|  |            |      |          |           |  |
|--|------------|------|----------|-----------|--|
|  | Shiraz-46T | 991  | 0.139564 | 0         |  |
|  | Shiraz-47T | 1084 | 0.24185  | 0         |  |
|  | Shiraz-47T | 1084 | 0.24185  | 0         |  |
|  | Shiraz-49T | 1166 | 0        | -0.917235 |  |
|  | Shiraz-49T | 1166 | 0        | -0.917235 |  |
|  | Shiraz-77T | 1282 | 0.213849 | 0         |  |
|  | Shiraz-77T | 1282 | 0.213849 | 0         |  |
|  | Shiraz-9T  | 1368 | 0.199713 | 0         |  |
|  | Shiraz-9T  | 1368 | 0.199713 | 0         |  |
|  | Shiraz-18T | 1455 | 0        | -0.186773 |  |
|  | Shiraz-18T | 1455 | 0        | -0.186773 |  |
|  | Shiraz-22T | 1669 | 0.695915 | 0         |  |
|  | Shiraz-22T | 1669 | 0.695915 | 0         |  |
|  | Shiraz-22T | 1672 | 1.01678  | 0         |  |
|  | Shiraz-22T | 1672 | 1.01678  | 0         |  |
|  | Shiraz-25T | 1717 | 0.420447 | 0         |  |
|  | Shiraz-25T | 1717 | 0.420447 | 0         |  |
|  | Shiraz-28T | 1760 | 0.538181 | 0         |  |
|  | Shiraz-28T | 1760 | 0.538181 | 0         |  |
|  | Shiraz-29T | 1800 | 0.672527 | 0         |  |
|  | Shiraz-29T | 1800 | 0.672527 | 0         |  |
|  | Shiraz-32T | 1869 | 0.776805 | 0         |  |
|  | Shiraz-32T | 1869 | 0.776805 | 0         |  |
|  | Shiraz-35T | 1932 | 0.507141 | 0         |  |
|  | Shiraz-35T | 1932 | 0.507141 | 0         |  |
|  | Shiraz-58T | 2221 | 0.871948 | 0         |  |
|  | Shiraz-58T | 2221 | 0.871948 | 0         |  |
|  | Shiraz-71T | 2260 | 0.68394  | 0         |  |
|  | Shiraz-71T | 2260 | 0.68394  | 0         |  |
|  | Shiraz-71T | 2262 | 0.986748 | 0         |  |
|  | Shiraz-71T | 2262 | 0.986748 | 0         |  |
|  | Shiraz-4T  | 260  | 0        | -0.324128 |  |
|  | Shiraz-4T  | 260  | 0        | -0.324128 |  |
|  | Shiraz-16T | 294  | 0.655804 | 0         |  |
|  | Shiraz-16T | 294  | 0.655804 | 0         |  |
|  | Shiraz-31T | 345  | 0.103301 | 0         |  |
|  | Shiraz-31T | 345  | 0.103301 | 0         |  |
|  | Shiraz-36T | 431  | 0        | -0.78035  |  |
|  | Shiraz-36T | 431  | 0        | -0.78035  |  |
|  | Shiraz-36T | 432  | 0        | -0.6692   |  |
|  | Shiraz-36T | 432  | 0        | -0.6692   |  |
|  | Shiraz-44T | 891  | 0        | -0.954044 |  |
|  | Shiraz-44T | 891  | 0        | -0.954044 |  |
|  | Shiraz-46T | 991  | 0.139564 | 0         |  |
|  | Shiraz-46T | 991  | 0.139564 | 0         |  |
|  | Shiraz-47T | 1084 | 0.24185  | 0         |  |
|  | Shiraz-47T | 1084 | 0.24185  | 0         |  |



|         |      |            |      |          |           |  |  |
|---------|------|------------|------|----------|-----------|--|--|
|         |      | Shiraz-49T | 1166 | 0        | -0.917235 |  |  |
|         |      | Shiraz-49T | 1166 | 0        | -0.917235 |  |  |
|         |      | Shiraz-77T | 1282 | 0.213849 | 0         |  |  |
|         |      | Shiraz-77T | 1282 | 0.213849 | 0         |  |  |
|         |      | Shiraz-9T  | 1368 | 0.199713 | 0         |  |  |
|         |      | Shiraz-9T  | 1368 | 0.199713 | 0         |  |  |
|         |      | Shiraz-18T | 1455 | 0        | -0.186773 |  |  |
|         |      | Shiraz-18T | 1455 | 0        | -0.186773 |  |  |
|         |      | Shiraz-22T | 1669 | 0.695915 | 0         |  |  |
|         |      | Shiraz-22T | 1669 | 0.695915 | 0         |  |  |
|         |      | Shiraz-22T | 1672 | 1.01678  | 0         |  |  |
|         |      | Shiraz-22T | 1672 | 1.01678  | 0         |  |  |
|         |      | Shiraz-25T | 1717 | 0.420447 | 0         |  |  |
|         |      | Shiraz-25T | 1717 | 0.420447 | 0         |  |  |
|         |      | Shiraz-28T | 1760 | 0.538181 | 0         |  |  |
|         |      | Shiraz-28T | 1760 | 0.538181 | 0         |  |  |
|         |      | Shiraz-29T | 1800 | 0.672527 | 0         |  |  |
|         |      | Shiraz-29T | 1800 | 0.672527 | 0         |  |  |
|         |      | Shiraz-32T | 1869 | 0.776805 | 0         |  |  |
|         |      | Shiraz-32T | 1869 | 0.776805 | 0         |  |  |
|         |      | Shiraz-35T | 1932 | 0.507141 | 0         |  |  |
|         |      | Shiraz-35T | 1932 | 0.507141 | 0         |  |  |
|         |      | Shiraz-58T | 2221 | 0.871948 | 0         |  |  |
|         |      | Shiraz-58T | 2221 | 0.871948 | 0         |  |  |
|         |      | Shiraz-71T | 2260 | 0.68394  | 0         |  |  |
|         |      | Shiraz-71T | 2260 | 0.68394  | 0         |  |  |
|         |      | Shiraz-71T | 2262 | 0.986748 | 0         |  |  |
|         |      | Shiraz-71T | 2262 | 0.986748 | 0         |  |  |
| GAGE12G | chrX | Shiraz-4T  | 260  | 0        | -0.324128 |  |  |
|         |      | Shiraz-4T  | 260  | 0        | -0.324128 |  |  |
|         |      | Shiraz-4T  | 260  | 0        | -0.324128 |  |  |
|         |      | Shiraz-4T  | 260  | 0        | -0.324128 |  |  |
|         |      | Shiraz-4T  | 260  | 0        | -0.324128 |  |  |
|         |      | Shiraz-16T | 294  | 0.655804 | 0         |  |  |
|         |      | Shiraz-16T | 294  | 0.655804 | 0         |  |  |
|         |      | Shiraz-16T | 294  | 0.655804 | 0         |  |  |
|         |      | Shiraz-16T | 294  | 0.655804 | 0         |  |  |
|         |      | Shiraz-16T | 294  | 0.655804 | 0         |  |  |
|         |      | Shiraz-31T | 345  | 0.103301 | 0         |  |  |
|         |      | Shiraz-31T | 345  | 0.103301 | 0         |  |  |
|         |      | Shiraz-31T | 345  | 0.103301 | 0         |  |  |
|         |      | Shiraz-31T | 345  | 0.103301 | 0         |  |  |
|         |      | Shiraz-31T | 345  | 0.103301 | 0         |  |  |
|         |      | Shiraz-36T | 431  | 0        | -0.78035  |  |  |
|         |      | Shiraz-36T | 431  | 0        | -0.78035  |  |  |
|         |      | Shiraz-36T | 431  | 0        | -0.78035  |  |  |
|         |      | Shiraz-36T | 431  | 0        | -0.78035  |  |  |

|  |            |      |          |           |  |
|--|------------|------|----------|-----------|--|
|  | Shiraz-36T | 431  | 0        | -0.78035  |  |
|  | Shiraz-36T | 432  | 0        | -0.6692   |  |
|  | Shiraz-36T | 432  | 0        | -0.6692   |  |
|  | Shiraz-36T | 432  | 0        | -0.6692   |  |
|  | Shiraz-36T | 432  | 0        | -0.6692   |  |
|  | Shiraz-36T | 432  | 0        | -0.6692   |  |
|  | Shiraz-44T | 891  | 0        | -0.954044 |  |
|  | Shiraz-44T | 891  | 0        | -0.954044 |  |
|  | Shiraz-44T | 891  | 0        | -0.954044 |  |
|  | Shiraz-44T | 891  | 0        | -0.954044 |  |
|  | Shiraz-44T | 891  | 0        | -0.954044 |  |
|  | Shiraz-46T | 991  | 0.139564 | 0         |  |
|  | Shiraz-46T | 991  | 0.139564 | 0         |  |
|  | Shiraz-46T | 991  | 0.139564 | 0         |  |
|  | Shiraz-46T | 991  | 0.139564 | 0         |  |
|  | Shiraz-46T | 991  | 0.139564 | 0         |  |
|  | Shiraz-47T | 1084 | 0.24185  | 0         |  |
|  | Shiraz-47T | 1084 | 0.24185  | 0         |  |
|  | Shiraz-47T | 1084 | 0.24185  | 0         |  |
|  | Shiraz-47T | 1084 | 0.24185  | 0         |  |
|  | Shiraz-47T | 1084 | 0.24185  | 0         |  |
|  | Shiraz-49T | 1166 | 0        | -0.917235 |  |
|  | Shiraz-49T | 1166 | 0        | -0.917235 |  |
|  | Shiraz-49T | 1166 | 0        | -0.917235 |  |
|  | Shiraz-49T | 1166 | 0        | -0.917235 |  |
|  | Shiraz-49T | 1166 | 0        | -0.917235 |  |
|  | Shiraz-77T | 1282 | 0.213849 | 0         |  |
|  | Shiraz-77T | 1282 | 0.213849 | 0         |  |
|  | Shiraz-77T | 1282 | 0.213849 | 0         |  |
|  | Shiraz-77T | 1282 | 0.213849 | 0         |  |
|  | Shiraz-77T | 1282 | 0.213849 | 0         |  |
|  | Shiraz-9T  | 1368 | 0.199713 | 0         |  |
|  | Shiraz-9T  | 1368 | 0.199713 | 0         |  |
|  | Shiraz-9T  | 1368 | 0.199713 | 0         |  |
|  | Shiraz-9T  | 1368 | 0.199713 | 0         |  |
|  | Shiraz-9T  | 1368 | 0.199713 | 0         |  |
|  | Shiraz-18T | 1455 | 0        | -0.186773 |  |
|  | Shiraz-18T | 1455 | 0        | -0.186773 |  |
|  | Shiraz-18T | 1455 | 0        | -0.186773 |  |
|  | Shiraz-18T | 1455 | 0        | -0.186773 |  |
|  | Shiraz-18T | 1455 | 0        | -0.186773 |  |
|  | Shiraz-22T | 1669 | 0.695915 | 0         |  |
|  | Shiraz-22T | 1669 | 0.695915 | 0         |  |
|  | Shiraz-22T | 1669 | 0.695915 | 0         |  |
|  | Shiraz-22T | 1669 | 0.695915 | 0         |  |
|  | Shiraz-22T | 1669 | 0.695915 | 0         |  |
|  | Shiraz-22T | 1672 | 1.01678  | 0         |  |

|  |  |            |      |          |           |  |  |
|--|--|------------|------|----------|-----------|--|--|
|  |  | Shiraz-22T | 1672 | 1.01678  | 0         |  |  |
|  |  | Shiraz-22T | 1672 | 1.01678  | 0         |  |  |
|  |  | Shiraz-22T | 1672 | 1.01678  | 0         |  |  |
|  |  | Shiraz-22T | 1672 | 1.01678  | 0         |  |  |
|  |  | Shiraz-25T | 1717 | 0.420447 | 0         |  |  |
|  |  | Shiraz-25T | 1717 | 0.420447 | 0         |  |  |
|  |  | Shiraz-25T | 1717 | 0.420447 | 0         |  |  |
|  |  | Shiraz-25T | 1717 | 0.420447 | 0         |  |  |
|  |  | Shiraz-25T | 1717 | 0.420447 | 0         |  |  |
|  |  | Shiraz-28T | 1760 | 0.538181 | 0         |  |  |
|  |  | Shiraz-28T | 1760 | 0.538181 | 0         |  |  |
|  |  | Shiraz-28T | 1760 | 0.538181 | 0         |  |  |
|  |  | Shiraz-28T | 1760 | 0.538181 | 0         |  |  |
|  |  | Shiraz-28T | 1760 | 0.538181 | 0         |  |  |
|  |  | Shiraz-29T | 1800 | 0.672527 | 0         |  |  |
|  |  | Shiraz-29T | 1800 | 0.672527 | 0         |  |  |
|  |  | Shiraz-29T | 1800 | 0.672527 | 0         |  |  |
|  |  | Shiraz-29T | 1800 | 0.672527 | 0         |  |  |
|  |  | Shiraz-29T | 1800 | 0.672527 | 0         |  |  |
|  |  | Shiraz-32T | 1869 | 0.776805 | 0         |  |  |
|  |  | Shiraz-32T | 1869 | 0.776805 | 0         |  |  |
|  |  | Shiraz-32T | 1869 | 0.776805 | 0         |  |  |
|  |  | Shiraz-32T | 1869 | 0.776805 | 0         |  |  |
|  |  | Shiraz-32T | 1869 | 0.776805 | 0         |  |  |
|  |  | Shiraz-35T | 1932 | 0.507141 | 0         |  |  |
|  |  | Shiraz-35T | 1932 | 0.507141 | 0         |  |  |
|  |  | Shiraz-35T | 1932 | 0.507141 | 0         |  |  |
|  |  | Shiraz-35T | 1932 | 0.507141 | 0         |  |  |
|  |  | Shiraz-35T | 1932 | 0.507141 | 0         |  |  |
|  |  | Shiraz-58T | 2221 | 0.871948 | 0         |  |  |
|  |  | Shiraz-58T | 2221 | 0.871948 | 0         |  |  |
|  |  | Shiraz-58T | 2221 | 0.871948 | 0         |  |  |
|  |  | Shiraz-58T | 2221 | 0.871948 | 0         |  |  |
|  |  | Shiraz-58T | 2221 | 0.871948 | 0         |  |  |
|  |  | Shiraz-71T | 2260 | 0.68394  | 0         |  |  |
|  |  | Shiraz-71T | 2260 | 0.68394  | 0         |  |  |
|  |  | Shiraz-71T | 2260 | 0.68394  | 0         |  |  |
|  |  | Shiraz-71T | 2260 | 0.68394  | 0         |  |  |
|  |  | Shiraz-71T | 2260 | 0.68394  | 0         |  |  |
|  |  | Shiraz-71T | 2262 | 0.986748 | 0         |  |  |
|  |  | Shiraz-71T | 2262 | 0.986748 | 0         |  |  |
|  |  | Shiraz-71T | 2262 | 0.986748 | 0         |  |  |
|  |  | Shiraz-71T | 2262 | 0.986748 | 0         |  |  |
|  |  | Shiraz-71T | 2262 | 0.986748 | 0         |  |  |
|  |  | Shiraz-4T  | 260  | 0        | -0.324128 |  |  |
|  |  | Shiraz-4T  | 260  | 0        | -0.324128 |  |  |
|  |  | Shiraz-4T  | 260  | 0        | -0.324128 |  |  |

|  |            |      |          |           |  |
|--|------------|------|----------|-----------|--|
|  | Shiraz-4T  | 260  | 0        | -0.324128 |  |
|  | Shiraz-4T  | 260  | 0        | -0.324128 |  |
|  | Shiraz-16T | 294  | 0.655804 | 0         |  |
|  | Shiraz-16T | 294  | 0.655804 | 0         |  |
|  | Shiraz-16T | 294  | 0.655804 | 0         |  |
|  | Shiraz-16T | 294  | 0.655804 | 0         |  |
|  | Shiraz-16T | 294  | 0.655804 | 0         |  |
|  | Shiraz-31T | 345  | 0.103301 | 0         |  |
|  | Shiraz-31T | 345  | 0.103301 | 0         |  |
|  | Shiraz-31T | 345  | 0.103301 | 0         |  |
|  | Shiraz-31T | 345  | 0.103301 | 0         |  |
|  | Shiraz-31T | 345  | 0.103301 | 0         |  |
|  | Shiraz-36T | 431  | 0        | -0.78035  |  |
|  | Shiraz-36T | 431  | 0        | -0.78035  |  |
|  | Shiraz-36T | 431  | 0        | -0.78035  |  |
|  | Shiraz-36T | 431  | 0        | -0.78035  |  |
|  | Shiraz-36T | 431  | 0        | -0.78035  |  |
|  | Shiraz-36T | 432  | 0        | -0.6692   |  |
|  | Shiraz-36T | 432  | 0        | -0.6692   |  |
|  | Shiraz-36T | 432  | 0        | -0.6692   |  |
|  | Shiraz-36T | 432  | 0        | -0.6692   |  |
|  | Shiraz-36T | 432  | 0        | -0.6692   |  |
|  | Shiraz-44T | 891  | 0        | -0.954044 |  |
|  | Shiraz-44T | 891  | 0        | -0.954044 |  |
|  | Shiraz-44T | 891  | 0        | -0.954044 |  |
|  | Shiraz-44T | 891  | 0        | -0.954044 |  |
|  | Shiraz-44T | 891  | 0        | -0.954044 |  |
|  | Shiraz-46T | 991  | 0.139564 | 0         |  |
|  | Shiraz-46T | 991  | 0.139564 | 0         |  |
|  | Shiraz-46T | 991  | 0.139564 | 0         |  |
|  | Shiraz-46T | 991  | 0.139564 | 0         |  |
|  | Shiraz-46T | 991  | 0.139564 | 0         |  |
|  | Shiraz-47T | 1084 | 0.24185  | 0         |  |
|  | Shiraz-47T | 1084 | 0.24185  | 0         |  |
|  | Shiraz-47T | 1084 | 0.24185  | 0         |  |
|  | Shiraz-47T | 1084 | 0.24185  | 0         |  |
|  | Shiraz-47T | 1084 | 0.24185  | 0         |  |
|  | Shiraz-49T | 1166 | 0        | -0.917235 |  |
|  | Shiraz-49T | 1166 | 0        | -0.917235 |  |
|  | Shiraz-49T | 1166 | 0        | -0.917235 |  |
|  | Shiraz-49T | 1166 | 0        | -0.917235 |  |
|  | Shiraz-49T | 1166 | 0        | -0.917235 |  |
|  | Shiraz-77T | 1282 | 0.213849 | 0         |  |
|  | Shiraz-77T | 1282 | 0.213849 | 0         |  |
|  | Shiraz-77T | 1282 | 0.213849 | 0         |  |
|  | Shiraz-77T | 1282 | 0.213849 | 0         |  |
|  | Shiraz-77T | 1282 | 0.213849 | 0         |  |

|  |  |            |      |          |           |  |
|--|--|------------|------|----------|-----------|--|
|  |  | Shiraz-9T  | 1368 | 0.199713 | 0         |  |
|  |  | Shiraz-9T  | 1368 | 0.199713 | 0         |  |
|  |  | Shiraz-9T  | 1368 | 0.199713 | 0         |  |
|  |  | Shiraz-9T  | 1368 | 0.199713 | 0         |  |
|  |  | Shiraz-9T  | 1368 | 0.199713 | 0         |  |
|  |  | Shiraz-18T | 1455 | 0        | -0.186773 |  |
|  |  | Shiraz-18T | 1455 | 0        | -0.186773 |  |
|  |  | Shiraz-18T | 1455 | 0        | -0.186773 |  |
|  |  | Shiraz-18T | 1455 | 0        | -0.186773 |  |
|  |  | Shiraz-18T | 1455 | 0        | -0.186773 |  |
|  |  | Shiraz-22T | 1669 | 0.695915 | 0         |  |
|  |  | Shiraz-22T | 1669 | 0.695915 | 0         |  |
|  |  | Shiraz-22T | 1669 | 0.695915 | 0         |  |
|  |  | Shiraz-22T | 1669 | 0.695915 | 0         |  |
|  |  | Shiraz-22T | 1669 | 0.695915 | 0         |  |
|  |  | Shiraz-22T | 1672 | 1.01678  | 0         |  |
|  |  | Shiraz-22T | 1672 | 1.01678  | 0         |  |
|  |  | Shiraz-22T | 1672 | 1.01678  | 0         |  |
|  |  | Shiraz-22T | 1672 | 1.01678  | 0         |  |
|  |  | Shiraz-22T | 1672 | 1.01678  | 0         |  |
|  |  | Shiraz-25T | 1717 | 0.420447 | 0         |  |
|  |  | Shiraz-25T | 1717 | 0.420447 | 0         |  |
|  |  | Shiraz-25T | 1717 | 0.420447 | 0         |  |
|  |  | Shiraz-25T | 1717 | 0.420447 | 0         |  |
|  |  | Shiraz-25T | 1717 | 0.420447 | 0         |  |
|  |  | Shiraz-28T | 1760 | 0.538181 | 0         |  |
|  |  | Shiraz-28T | 1760 | 0.538181 | 0         |  |
|  |  | Shiraz-28T | 1760 | 0.538181 | 0         |  |
|  |  | Shiraz-28T | 1760 | 0.538181 | 0         |  |
|  |  | Shiraz-28T | 1760 | 0.538181 | 0         |  |
|  |  | Shiraz-29T | 1800 | 0.672527 | 0         |  |
|  |  | Shiraz-29T | 1800 | 0.672527 | 0         |  |
|  |  | Shiraz-29T | 1800 | 0.672527 | 0         |  |
|  |  | Shiraz-29T | 1800 | 0.672527 | 0         |  |
|  |  | Shiraz-29T | 1800 | 0.672527 | 0         |  |
|  |  | Shiraz-32T | 1869 | 0.776805 | 0         |  |
|  |  | Shiraz-32T | 1869 | 0.776805 | 0         |  |
|  |  | Shiraz-32T | 1869 | 0.776805 | 0         |  |
|  |  | Shiraz-32T | 1869 | 0.776805 | 0         |  |
|  |  | Shiraz-32T | 1869 | 0.776805 | 0         |  |
|  |  | Shiraz-35T | 1932 | 0.507141 | 0         |  |
|  |  | Shiraz-35T | 1932 | 0.507141 | 0         |  |
|  |  | Shiraz-35T | 1932 | 0.507141 | 0         |  |
|  |  | Shiraz-35T | 1932 | 0.507141 | 0         |  |
|  |  | Shiraz-35T | 1932 | 0.507141 | 0         |  |
|  |  | Shiraz-58T | 2221 | 0.871948 | 0         |  |
|  |  | Shiraz-58T | 2221 | 0.871948 | 0         |  |

|  |  |            |      |          |           |  |  |
|--|--|------------|------|----------|-----------|--|--|
|  |  | Shiraz-58T | 2221 | 0.871948 | 0         |  |  |
|  |  | Shiraz-58T | 2221 | 0.871948 | 0         |  |  |
|  |  | Shiraz-58T | 2221 | 0.871948 | 0         |  |  |
|  |  | Shiraz-71T | 2260 | 0.68394  | 0         |  |  |
|  |  | Shiraz-71T | 2260 | 0.68394  | 0         |  |  |
|  |  | Shiraz-71T | 2260 | 0.68394  | 0         |  |  |
|  |  | Shiraz-71T | 2260 | 0.68394  | 0         |  |  |
|  |  | Shiraz-71T | 2260 | 0.68394  | 0         |  |  |
|  |  | Shiraz-71T | 2262 | 0.986748 | 0         |  |  |
|  |  | Shiraz-71T | 2262 | 0.986748 | 0         |  |  |
|  |  | Shiraz-71T | 2262 | 0.986748 | 0         |  |  |
|  |  | Shiraz-71T | 2262 | 0.986748 | 0         |  |  |
|  |  | Shiraz-71T | 2262 | 0.986748 | 0         |  |  |
|  |  | Shiraz-4T  | 260  | 0        | -0.324128 |  |  |
|  |  | Shiraz-4T  | 260  | 0        | -0.324128 |  |  |
|  |  | Shiraz-4T  | 260  | 0        | -0.324128 |  |  |
|  |  | Shiraz-4T  | 260  | 0        | -0.324128 |  |  |
|  |  | Shiraz-4T  | 260  | 0        | -0.324128 |  |  |
|  |  | Shiraz-16T | 294  | 0.655804 | 0         |  |  |
|  |  | Shiraz-16T | 294  | 0.655804 | 0         |  |  |
|  |  | Shiraz-16T | 294  | 0.655804 | 0         |  |  |
|  |  | Shiraz-16T | 294  | 0.655804 | 0         |  |  |
|  |  | Shiraz-16T | 294  | 0.655804 | 0         |  |  |
|  |  | Shiraz-31T | 345  | 0.103301 | 0         |  |  |
|  |  | Shiraz-31T | 345  | 0.103301 | 0         |  |  |
|  |  | Shiraz-31T | 345  | 0.103301 | 0         |  |  |
|  |  | Shiraz-31T | 345  | 0.103301 | 0         |  |  |
|  |  | Shiraz-31T | 345  | 0.103301 | 0         |  |  |
|  |  | Shiraz-36T | 431  | 0        | -0.78035  |  |  |
|  |  | Shiraz-36T | 431  | 0        | -0.78035  |  |  |
|  |  | Shiraz-36T | 431  | 0        | -0.78035  |  |  |
|  |  | Shiraz-36T | 431  | 0        | -0.78035  |  |  |
|  |  | Shiraz-36T | 431  | 0        | -0.78035  |  |  |
|  |  | Shiraz-36T | 432  | 0        | -0.6692   |  |  |
|  |  | Shiraz-36T | 432  | 0        | -0.6692   |  |  |
|  |  | Shiraz-36T | 432  | 0        | -0.6692   |  |  |
|  |  | Shiraz-36T | 432  | 0        | -0.6692   |  |  |
|  |  | Shiraz-36T | 432  | 0        | -0.6692   |  |  |
|  |  | Shiraz-44T | 891  | 0        | -0.954044 |  |  |
|  |  | Shiraz-44T | 891  | 0        | -0.954044 |  |  |
|  |  | Shiraz-44T | 891  | 0        | -0.954044 |  |  |
|  |  | Shiraz-44T | 891  | 0        | -0.954044 |  |  |
|  |  | Shiraz-44T | 891  | 0        | -0.954044 |  |  |
|  |  | Shiraz-46T | 991  | 0.139564 | 0         |  |  |
|  |  | Shiraz-46T | 991  | 0.139564 | 0         |  |  |
|  |  | Shiraz-46T | 991  | 0.139564 | 0         |  |  |
|  |  | Shiraz-46T | 991  | 0.139564 | 0         |  |  |

|  |  |            |      |          |           |  |  |
|--|--|------------|------|----------|-----------|--|--|
|  |  | Shiraz-46T | 991  | 0.139564 | 0         |  |  |
|  |  | Shiraz-47T | 1084 | 0.24185  | 0         |  |  |
|  |  | Shiraz-47T | 1084 | 0.24185  | 0         |  |  |
|  |  | Shiraz-47T | 1084 | 0.24185  | 0         |  |  |
|  |  | Shiraz-47T | 1084 | 0.24185  | 0         |  |  |
|  |  | Shiraz-47T | 1084 | 0.24185  | 0         |  |  |
|  |  | Shiraz-49T | 1166 | 0        | -0.917235 |  |  |
|  |  | Shiraz-49T | 1166 | 0        | -0.917235 |  |  |
|  |  | Shiraz-49T | 1166 | 0        | -0.917235 |  |  |
|  |  | Shiraz-49T | 1166 | 0        | -0.917235 |  |  |
|  |  | Shiraz-49T | 1166 | 0        | -0.917235 |  |  |
|  |  | Shiraz-77T | 1282 | 0.213849 | 0         |  |  |
|  |  | Shiraz-77T | 1282 | 0.213849 | 0         |  |  |
|  |  | Shiraz-77T | 1282 | 0.213849 | 0         |  |  |
|  |  | Shiraz-77T | 1282 | 0.213849 | 0         |  |  |
|  |  | Shiraz-77T | 1282 | 0.213849 | 0         |  |  |
|  |  | Shiraz-9T  | 1368 | 0.199713 | 0         |  |  |
|  |  | Shiraz-9T  | 1368 | 0.199713 | 0         |  |  |
|  |  | Shiraz-9T  | 1368 | 0.199713 | 0         |  |  |
|  |  | Shiraz-9T  | 1368 | 0.199713 | 0         |  |  |
|  |  | Shiraz-9T  | 1368 | 0.199713 | 0         |  |  |
|  |  | Shiraz-18T | 1455 | 0        | -0.186773 |  |  |
|  |  | Shiraz-18T | 1455 | 0        | -0.186773 |  |  |
|  |  | Shiraz-18T | 1455 | 0        | -0.186773 |  |  |
|  |  | Shiraz-18T | 1455 | 0        | -0.186773 |  |  |
|  |  | Shiraz-18T | 1455 | 0        | -0.186773 |  |  |
|  |  | Shiraz-22T | 1669 | 0.695915 | 0         |  |  |
|  |  | Shiraz-22T | 1669 | 0.695915 | 0         |  |  |
|  |  | Shiraz-22T | 1669 | 0.695915 | 0         |  |  |
|  |  | Shiraz-22T | 1669 | 0.695915 | 0         |  |  |
|  |  | Shiraz-22T | 1669 | 0.695915 | 0         |  |  |
|  |  | Shiraz-22T | 1672 | 1.01678  | 0         |  |  |
|  |  | Shiraz-22T | 1672 | 1.01678  | 0         |  |  |
|  |  | Shiraz-22T | 1672 | 1.01678  | 0         |  |  |
|  |  | Shiraz-22T | 1672 | 1.01678  | 0         |  |  |
|  |  | Shiraz-22T | 1672 | 1.01678  | 0         |  |  |
|  |  | Shiraz-25T | 1717 | 0.420447 | 0         |  |  |
|  |  | Shiraz-25T | 1717 | 0.420447 | 0         |  |  |
|  |  | Shiraz-25T | 1717 | 0.420447 | 0         |  |  |
|  |  | Shiraz-25T | 1717 | 0.420447 | 0         |  |  |
|  |  | Shiraz-25T | 1717 | 0.420447 | 0         |  |  |
|  |  | Shiraz-28T | 1760 | 0.538181 | 0         |  |  |
|  |  | Shiraz-28T | 1760 | 0.538181 | 0         |  |  |
|  |  | Shiraz-28T | 1760 | 0.538181 | 0         |  |  |
|  |  | Shiraz-28T | 1760 | 0.538181 | 0         |  |  |
|  |  | Shiraz-28T | 1760 | 0.538181 | 0         |  |  |
|  |  | Shiraz-29T | 1800 | 0.672527 | 0         |  |  |

|         |      |            |      |          |           |  |
|---------|------|------------|------|----------|-----------|--|
|         |      | Shiraz-29T | 1800 | 0.672527 | 0         |  |
|         |      | Shiraz-29T | 1800 | 0.672527 | 0         |  |
|         |      | Shiraz-29T | 1800 | 0.672527 | 0         |  |
|         |      | Shiraz-29T | 1800 | 0.672527 | 0         |  |
|         |      | Shiraz-32T | 1869 | 0.776805 | 0         |  |
|         |      | Shiraz-32T | 1869 | 0.776805 | 0         |  |
|         |      | Shiraz-32T | 1869 | 0.776805 | 0         |  |
|         |      | Shiraz-32T | 1869 | 0.776805 | 0         |  |
|         |      | Shiraz-32T | 1869 | 0.776805 | 0         |  |
|         |      | Shiraz-35T | 1932 | 0.507141 | 0         |  |
|         |      | Shiraz-35T | 1932 | 0.507141 | 0         |  |
|         |      | Shiraz-35T | 1932 | 0.507141 | 0         |  |
|         |      | Shiraz-35T | 1932 | 0.507141 | 0         |  |
|         |      | Shiraz-35T | 1932 | 0.507141 | 0         |  |
|         |      | Shiraz-58T | 2221 | 0.871948 | 0         |  |
|         |      | Shiraz-58T | 2221 | 0.871948 | 0         |  |
|         |      | Shiraz-58T | 2221 | 0.871948 | 0         |  |
|         |      | Shiraz-58T | 2221 | 0.871948 | 0         |  |
|         |      | Shiraz-58T | 2221 | 0.871948 | 0         |  |
|         |      | Shiraz-71T | 2260 | 0.68394  | 0         |  |
|         |      | Shiraz-71T | 2260 | 0.68394  | 0         |  |
|         |      | Shiraz-71T | 2260 | 0.68394  | 0         |  |
|         |      | Shiraz-71T | 2260 | 0.68394  | 0         |  |
|         |      | Shiraz-71T | 2262 | 0.986748 | 0         |  |
|         |      | Shiraz-71T | 2262 | 0.986748 | 0         |  |
|         |      | Shiraz-71T | 2262 | 0.986748 | 0         |  |
|         |      | Shiraz-71T | 2262 | 0.986748 | 0         |  |
|         |      | Shiraz-71T | 2262 | 0.986748 | 0         |  |
|         |      | Shiraz-71T | 2262 | 0.986748 | 0         |  |
|         |      | Shiraz-71T | 2262 | 0.986748 | 0         |  |
|         |      | Shiraz-71T | 2262 | 0.986748 | 0         |  |
| GAGE12H | chrX | Shiraz-4T  | 260  | 0        | -0.324128 |  |
|         |      | Shiraz-4T  | 260  | 0        | -0.324128 |  |
|         |      | Shiraz-4T  | 260  | 0        | -0.324128 |  |
|         |      | Shiraz-4T  | 260  | 0        | -0.324128 |  |
|         |      | Shiraz-16T | 294  | 0.655804 | 0         |  |
|         |      | Shiraz-16T | 294  | 0.655804 | 0         |  |
|         |      | Shiraz-16T | 294  | 0.655804 | 0         |  |
|         |      | Shiraz-16T | 294  | 0.655804 | 0         |  |
|         |      | Shiraz-31T | 345  | 0.103301 | 0         |  |
|         |      | Shiraz-31T | 345  | 0.103301 | 0         |  |
|         |      | Shiraz-31T | 345  | 0.103301 | 0         |  |
|         |      | Shiraz-31T | 345  | 0.103301 | 0         |  |
|         |      | Shiraz-36T | 431  | 0        | -0.78035  |  |
|         |      | Shiraz-36T | 431  | 0        | -0.78035  |  |
|         |      | Shiraz-36T | 431  | 0        | -0.78035  |  |
|         |      | Shiraz-36T | 431  | 0        | -0.78035  |  |
|         |      | Shiraz-36T | 432  | 0        | -0.6692   |  |
|         |      | Shiraz-36T | 432  | 0        | -0.6692   |  |



|  |            |      |          |           |  |
|--|------------|------|----------|-----------|--|
|  | Shiraz-36T | 432  | 0        | -0.6692   |  |
|  | Shiraz-36T | 432  | 0        | -0.6692   |  |
|  | Shiraz-44T | 891  | 0        | -0.954044 |  |
|  | Shiraz-44T | 891  | 0        | -0.954044 |  |
|  | Shiraz-44T | 891  | 0        | -0.954044 |  |
|  | Shiraz-44T | 891  | 0        | -0.954044 |  |
|  | Shiraz-46T | 991  | 0.139564 | 0         |  |
|  | Shiraz-46T | 991  | 0.139564 | 0         |  |
|  | Shiraz-46T | 991  | 0.139564 | 0         |  |
|  | Shiraz-46T | 991  | 0.139564 | 0         |  |
|  | Shiraz-47T | 1084 | 0.24185  | 0         |  |
|  | Shiraz-47T | 1084 | 0.24185  | 0         |  |
|  | Shiraz-47T | 1084 | 0.24185  | 0         |  |
|  | Shiraz-47T | 1084 | 0.24185  | 0         |  |
|  | Shiraz-49T | 1166 | 0        | -0.917235 |  |
|  | Shiraz-49T | 1166 | 0        | -0.917235 |  |
|  | Shiraz-49T | 1166 | 0        | -0.917235 |  |
|  | Shiraz-49T | 1166 | 0        | -0.917235 |  |
|  | Shiraz-77T | 1282 | 0.213849 | 0         |  |
|  | Shiraz-77T | 1282 | 0.213849 | 0         |  |
|  | Shiraz-77T | 1282 | 0.213849 | 0         |  |
|  | Shiraz-77T | 1282 | 0.213849 | 0         |  |
|  | Shiraz-9T  | 1368 | 0.199713 | 0         |  |
|  | Shiraz-9T  | 1368 | 0.199713 | 0         |  |
|  | Shiraz-9T  | 1368 | 0.199713 | 0         |  |
|  | Shiraz-9T  | 1368 | 0.199713 | 0         |  |
|  | Shiraz-18T | 1455 | 0        | -0.186773 |  |
|  | Shiraz-18T | 1455 | 0        | -0.186773 |  |
|  | Shiraz-18T | 1455 | 0        | -0.186773 |  |
|  | Shiraz-18T | 1455 | 0        | -0.186773 |  |
|  | Shiraz-22T | 1669 | 0.695915 | 0         |  |
|  | Shiraz-22T | 1669 | 0.695915 | 0         |  |
|  | Shiraz-22T | 1669 | 0.695915 | 0         |  |
|  | Shiraz-22T | 1669 | 0.695915 | 0         |  |
|  | Shiraz-22T | 1672 | 1.01678  | 0         |  |
|  | Shiraz-22T | 1672 | 1.01678  | 0         |  |
|  | Shiraz-22T | 1672 | 1.01678  | 0         |  |
|  | Shiraz-22T | 1672 | 1.01678  | 0         |  |
|  | Shiraz-25T | 1717 | 0.420447 | 0         |  |
|  | Shiraz-25T | 1717 | 0.420447 | 0         |  |
|  | Shiraz-25T | 1717 | 0.420447 | 0         |  |
|  | Shiraz-25T | 1717 | 0.420447 | 0         |  |
|  | Shiraz-28T | 1760 | 0.538181 | 0         |  |
|  | Shiraz-28T | 1760 | 0.538181 | 0         |  |
|  | Shiraz-28T | 1760 | 0.538181 | 0         |  |
|  | Shiraz-28T | 1760 | 0.538181 | 0         |  |
|  | Shiraz-29T | 1800 | 0.672527 | 0         |  |

|  |  |            |      |          |           |  |  |
|--|--|------------|------|----------|-----------|--|--|
|  |  | Shiraz-29T | 1800 | 0.672527 | 0         |  |  |
|  |  | Shiraz-29T | 1800 | 0.672527 | 0         |  |  |
|  |  | Shiraz-29T | 1800 | 0.672527 | 0         |  |  |
|  |  | Shiraz-32T | 1869 | 0.776805 | 0         |  |  |
|  |  | Shiraz-32T | 1869 | 0.776805 | 0         |  |  |
|  |  | Shiraz-32T | 1869 | 0.776805 | 0         |  |  |
|  |  | Shiraz-32T | 1869 | 0.776805 | 0         |  |  |
|  |  | Shiraz-35T | 1932 | 0.507141 | 0         |  |  |
|  |  | Shiraz-35T | 1932 | 0.507141 | 0         |  |  |
|  |  | Shiraz-35T | 1932 | 0.507141 | 0         |  |  |
|  |  | Shiraz-35T | 1932 | 0.507141 | 0         |  |  |
|  |  | Shiraz-58T | 2221 | 0.871948 | 0         |  |  |
|  |  | Shiraz-58T | 2221 | 0.871948 | 0         |  |  |
|  |  | Shiraz-58T | 2221 | 0.871948 | 0         |  |  |
|  |  | Shiraz-58T | 2221 | 0.871948 | 0         |  |  |
|  |  | Shiraz-71T | 2260 | 0.68394  | 0         |  |  |
|  |  | Shiraz-71T | 2260 | 0.68394  | 0         |  |  |
|  |  | Shiraz-71T | 2260 | 0.68394  | 0         |  |  |
|  |  | Shiraz-71T | 2260 | 0.68394  | 0         |  |  |
|  |  | Shiraz-71T | 2262 | 0.986748 | 0         |  |  |
|  |  | Shiraz-71T | 2262 | 0.986748 | 0         |  |  |
|  |  | Shiraz-71T | 2262 | 0.986748 | 0         |  |  |
|  |  | Shiraz-71T | 2262 | 0.986748 | 0         |  |  |
|  |  | Shiraz-4T  | 260  | 0        | -0.324128 |  |  |
|  |  | Shiraz-4T  | 260  | 0        | -0.324128 |  |  |
|  |  | Shiraz-4T  | 260  | 0        | -0.324128 |  |  |
|  |  | Shiraz-4T  | 260  | 0        | -0.324128 |  |  |
|  |  | Shiraz-16T | 294  | 0.655804 | 0         |  |  |
|  |  | Shiraz-16T | 294  | 0.655804 | 0         |  |  |
|  |  | Shiraz-16T | 294  | 0.655804 | 0         |  |  |
|  |  | Shiraz-16T | 294  | 0.655804 | 0         |  |  |
|  |  | Shiraz-31T | 345  | 0.103301 | 0         |  |  |
|  |  | Shiraz-31T | 345  | 0.103301 | 0         |  |  |
|  |  | Shiraz-31T | 345  | 0.103301 | 0         |  |  |
|  |  | Shiraz-31T | 345  | 0.103301 | 0         |  |  |
|  |  | Shiraz-36T | 431  | 0        | -0.78035  |  |  |
|  |  | Shiraz-36T | 431  | 0        | -0.78035  |  |  |
|  |  | Shiraz-36T | 431  | 0        | -0.78035  |  |  |
|  |  | Shiraz-36T | 431  | 0        | -0.78035  |  |  |
|  |  | Shiraz-36T | 432  | 0        | -0.6692   |  |  |
|  |  | Shiraz-36T | 432  | 0        | -0.6692   |  |  |
|  |  | Shiraz-36T | 432  | 0        | -0.6692   |  |  |
|  |  | Shiraz-36T | 432  | 0        | -0.6692   |  |  |
|  |  | Shiraz-44T | 891  | 0        | -0.954044 |  |  |
|  |  | Shiraz-44T | 891  | 0        | -0.954044 |  |  |
|  |  | Shiraz-44T | 891  | 0        | -0.954044 |  |  |
|  |  | Shiraz-44T | 891  | 0        | -0.954044 |  |  |

|  |  |            |      |          |           |  |  |
|--|--|------------|------|----------|-----------|--|--|
|  |  | Shiraz-46T | 991  | 0.139564 | 0         |  |  |
|  |  | Shiraz-46T | 991  | 0.139564 | 0         |  |  |
|  |  | Shiraz-46T | 991  | 0.139564 | 0         |  |  |
|  |  | Shiraz-46T | 991  | 0.139564 | 0         |  |  |
|  |  | Shiraz-47T | 1084 | 0.24185  | 0         |  |  |
|  |  | Shiraz-47T | 1084 | 0.24185  | 0         |  |  |
|  |  | Shiraz-47T | 1084 | 0.24185  | 0         |  |  |
|  |  | Shiraz-47T | 1084 | 0.24185  | 0         |  |  |
|  |  | Shiraz-49T | 1166 | 0        | -0.917235 |  |  |
|  |  | Shiraz-49T | 1166 | 0        | -0.917235 |  |  |
|  |  | Shiraz-49T | 1166 | 0        | -0.917235 |  |  |
|  |  | Shiraz-49T | 1166 | 0        | -0.917235 |  |  |
|  |  | Shiraz-77T | 1282 | 0.213849 | 0         |  |  |
|  |  | Shiraz-77T | 1282 | 0.213849 | 0         |  |  |
|  |  | Shiraz-77T | 1282 | 0.213849 | 0         |  |  |
|  |  | Shiraz-77T | 1282 | 0.213849 | 0         |  |  |
|  |  | Shiraz-9T  | 1368 | 0.199713 | 0         |  |  |
|  |  | Shiraz-9T  | 1368 | 0.199713 | 0         |  |  |
|  |  | Shiraz-9T  | 1368 | 0.199713 | 0         |  |  |
|  |  | Shiraz-9T  | 1368 | 0.199713 | 0         |  |  |
|  |  | Shiraz-18T | 1455 | 0        | -0.186773 |  |  |
|  |  | Shiraz-18T | 1455 | 0        | -0.186773 |  |  |
|  |  | Shiraz-18T | 1455 | 0        | -0.186773 |  |  |
|  |  | Shiraz-18T | 1455 | 0        | -0.186773 |  |  |
|  |  | Shiraz-22T | 1669 | 0.695915 | 0         |  |  |
|  |  | Shiraz-22T | 1669 | 0.695915 | 0         |  |  |
|  |  | Shiraz-22T | 1669 | 0.695915 | 0         |  |  |
|  |  | Shiraz-22T | 1669 | 0.695915 | 0         |  |  |
|  |  | Shiraz-22T | 1672 | 1.01678  | 0         |  |  |
|  |  | Shiraz-22T | 1672 | 1.01678  | 0         |  |  |
|  |  | Shiraz-22T | 1672 | 1.01678  | 0         |  |  |
|  |  | Shiraz-22T | 1672 | 1.01678  | 0         |  |  |
|  |  | Shiraz-25T | 1717 | 0.420447 | 0         |  |  |
|  |  | Shiraz-25T | 1717 | 0.420447 | 0         |  |  |
|  |  | Shiraz-25T | 1717 | 0.420447 | 0         |  |  |
|  |  | Shiraz-25T | 1717 | 0.420447 | 0         |  |  |
|  |  | Shiraz-28T | 1760 | 0.538181 | 0         |  |  |
|  |  | Shiraz-28T | 1760 | 0.538181 | 0         |  |  |
|  |  | Shiraz-28T | 1760 | 0.538181 | 0         |  |  |
|  |  | Shiraz-28T | 1760 | 0.538181 | 0         |  |  |
|  |  | Shiraz-29T | 1800 | 0.672527 | 0         |  |  |
|  |  | Shiraz-29T | 1800 | 0.672527 | 0         |  |  |
|  |  | Shiraz-29T | 1800 | 0.672527 | 0         |  |  |
|  |  | Shiraz-29T | 1800 | 0.672527 | 0         |  |  |
|  |  | Shiraz-32T | 1869 | 0.776805 | 0         |  |  |
|  |  | Shiraz-32T | 1869 | 0.776805 | 0         |  |  |
|  |  | Shiraz-32T | 1869 | 0.776805 | 0         |  |  |

|  |  |            |      |          |           |  |  |
|--|--|------------|------|----------|-----------|--|--|
|  |  | Shiraz-32T | 1869 | 0.776805 | 0         |  |  |
|  |  | Shiraz-35T | 1932 | 0.507141 | 0         |  |  |
|  |  | Shiraz-35T | 1932 | 0.507141 | 0         |  |  |
|  |  | Shiraz-35T | 1932 | 0.507141 | 0         |  |  |
|  |  | Shiraz-35T | 1932 | 0.507141 | 0         |  |  |
|  |  | Shiraz-58T | 2221 | 0.871948 | 0         |  |  |
|  |  | Shiraz-58T | 2221 | 0.871948 | 0         |  |  |
|  |  | Shiraz-58T | 2221 | 0.871948 | 0         |  |  |
|  |  | Shiraz-58T | 2221 | 0.871948 | 0         |  |  |
|  |  | Shiraz-71T | 2260 | 0.68394  | 0         |  |  |
|  |  | Shiraz-71T | 2260 | 0.68394  | 0         |  |  |
|  |  | Shiraz-71T | 2260 | 0.68394  | 0         |  |  |
|  |  | Shiraz-71T | 2260 | 0.68394  | 0         |  |  |
|  |  | Shiraz-71T | 2262 | 0.986748 | 0         |  |  |
|  |  | Shiraz-71T | 2262 | 0.986748 | 0         |  |  |
|  |  | Shiraz-71T | 2262 | 0.986748 | 0         |  |  |
|  |  | Shiraz-71T | 2262 | 0.986748 | 0         |  |  |
|  |  | Shiraz-4T  | 260  | 0        | -0.324128 |  |  |
|  |  | Shiraz-4T  | 260  | 0        | -0.324128 |  |  |
|  |  | Shiraz-4T  | 260  | 0        | -0.324128 |  |  |
|  |  | Shiraz-4T  | 260  | 0        | -0.324128 |  |  |
|  |  | Shiraz-16T | 294  | 0.655804 | 0         |  |  |
|  |  | Shiraz-16T | 294  | 0.655804 | 0         |  |  |
|  |  | Shiraz-16T | 294  | 0.655804 | 0         |  |  |
|  |  | Shiraz-16T | 294  | 0.655804 | 0         |  |  |
|  |  | Shiraz-31T | 345  | 0.103301 | 0         |  |  |
|  |  | Shiraz-31T | 345  | 0.103301 | 0         |  |  |
|  |  | Shiraz-31T | 345  | 0.103301 | 0         |  |  |
|  |  | Shiraz-31T | 345  | 0.103301 | 0         |  |  |
|  |  | Shiraz-36T | 431  | 0        | -0.78035  |  |  |
|  |  | Shiraz-36T | 431  | 0        | -0.78035  |  |  |
|  |  | Shiraz-36T | 431  | 0        | -0.78035  |  |  |
|  |  | Shiraz-36T | 431  | 0        | -0.78035  |  |  |
|  |  | Shiraz-36T | 432  | 0        | -0.6692   |  |  |
|  |  | Shiraz-36T | 432  | 0        | -0.6692   |  |  |
|  |  | Shiraz-36T | 432  | 0        | -0.6692   |  |  |
|  |  | Shiraz-36T | 432  | 0        | -0.6692   |  |  |
|  |  | Shiraz-44T | 891  | 0        | -0.954044 |  |  |
|  |  | Shiraz-44T | 891  | 0        | -0.954044 |  |  |
|  |  | Shiraz-44T | 891  | 0        | -0.954044 |  |  |
|  |  | Shiraz-44T | 891  | 0        | -0.954044 |  |  |
|  |  | Shiraz-46T | 991  | 0.139564 | 0         |  |  |
|  |  | Shiraz-46T | 991  | 0.139564 | 0         |  |  |
|  |  | Shiraz-46T | 991  | 0.139564 | 0         |  |  |
|  |  | Shiraz-46T | 991  | 0.139564 | 0         |  |  |
|  |  | Shiraz-47T | 1084 | 0.24185  | 0         |  |  |
|  |  | Shiraz-47T | 1084 | 0.24185  | 0         |  |  |

|  |  |            |      |          |           |  |  |
|--|--|------------|------|----------|-----------|--|--|
|  |  | Shiraz-47T | 1084 | 0.24185  | 0         |  |  |
|  |  | Shiraz-47T | 1084 | 0.24185  | 0         |  |  |
|  |  | Shiraz-49T | 1166 | 0        | -0.917235 |  |  |
|  |  | Shiraz-49T | 1166 | 0        | -0.917235 |  |  |
|  |  | Shiraz-49T | 1166 | 0        | -0.917235 |  |  |
|  |  | Shiraz-49T | 1166 | 0        | -0.917235 |  |  |
|  |  | Shiraz-77T | 1282 | 0.213849 | 0         |  |  |
|  |  | Shiraz-77T | 1282 | 0.213849 | 0         |  |  |
|  |  | Shiraz-77T | 1282 | 0.213849 | 0         |  |  |
|  |  | Shiraz-77T | 1282 | 0.213849 | 0         |  |  |
|  |  | Shiraz-9T  | 1368 | 0.199713 | 0         |  |  |
|  |  | Shiraz-9T  | 1368 | 0.199713 | 0         |  |  |
|  |  | Shiraz-9T  | 1368 | 0.199713 | 0         |  |  |
|  |  | Shiraz-9T  | 1368 | 0.199713 | 0         |  |  |
|  |  | Shiraz-18T | 1455 | 0        | -0.186773 |  |  |
|  |  | Shiraz-18T | 1455 | 0        | -0.186773 |  |  |
|  |  | Shiraz-18T | 1455 | 0        | -0.186773 |  |  |
|  |  | Shiraz-18T | 1455 | 0        | -0.186773 |  |  |
|  |  | Shiraz-22T | 1669 | 0.695915 | 0         |  |  |
|  |  | Shiraz-22T | 1669 | 0.695915 | 0         |  |  |
|  |  | Shiraz-22T | 1669 | 0.695915 | 0         |  |  |
|  |  | Shiraz-22T | 1669 | 0.695915 | 0         |  |  |
|  |  | Shiraz-22T | 1672 | 1.01678  | 0         |  |  |
|  |  | Shiraz-22T | 1672 | 1.01678  | 0         |  |  |
|  |  | Shiraz-22T | 1672 | 1.01678  | 0         |  |  |
|  |  | Shiraz-22T | 1672 | 1.01678  | 0         |  |  |
|  |  | Shiraz-25T | 1717 | 0.420447 | 0         |  |  |
|  |  | Shiraz-25T | 1717 | 0.420447 | 0         |  |  |
|  |  | Shiraz-25T | 1717 | 0.420447 | 0         |  |  |
|  |  | Shiraz-25T | 1717 | 0.420447 | 0         |  |  |
|  |  | Shiraz-28T | 1760 | 0.538181 | 0         |  |  |
|  |  | Shiraz-28T | 1760 | 0.538181 | 0         |  |  |
|  |  | Shiraz-28T | 1760 | 0.538181 | 0         |  |  |
|  |  | Shiraz-28T | 1760 | 0.538181 | 0         |  |  |
|  |  | Shiraz-29T | 1800 | 0.672527 | 0         |  |  |
|  |  | Shiraz-29T | 1800 | 0.672527 | 0         |  |  |
|  |  | Shiraz-29T | 1800 | 0.672527 | 0         |  |  |
|  |  | Shiraz-29T | 1800 | 0.672527 | 0         |  |  |
|  |  | Shiraz-32T | 1869 | 0.776805 | 0         |  |  |
|  |  | Shiraz-32T | 1869 | 0.776805 | 0         |  |  |
|  |  | Shiraz-32T | 1869 | 0.776805 | 0         |  |  |
|  |  | Shiraz-32T | 1869 | 0.776805 | 0         |  |  |
|  |  | Shiraz-35T | 1932 | 0.507141 | 0         |  |  |
|  |  | Shiraz-35T | 1932 | 0.507141 | 0         |  |  |
|  |  | Shiraz-35T | 1932 | 0.507141 | 0         |  |  |
|  |  | Shiraz-35T | 1932 | 0.507141 | 0         |  |  |
|  |  | Shiraz-58T | 2221 | 0.871948 | 0         |  |  |

|         |      |            |      |          |           |  |
|---------|------|------------|------|----------|-----------|--|
|         |      | Shiraz-58T | 2221 | 0.871948 | 0         |  |
|         |      | Shiraz-58T | 2221 | 0.871948 | 0         |  |
|         |      | Shiraz-58T | 2221 | 0.871948 | 0         |  |
|         |      | Shiraz-71T | 2260 | 0.68394  | 0         |  |
|         |      | Shiraz-71T | 2260 | 0.68394  | 0         |  |
|         |      | Shiraz-71T | 2260 | 0.68394  | 0         |  |
|         |      | Shiraz-71T | 2260 | 0.68394  | 0         |  |
|         |      | Shiraz-71T | 2262 | 0.986748 | 0         |  |
|         |      | Shiraz-71T | 2262 | 0.986748 | 0         |  |
|         |      | Shiraz-71T | 2262 | 0.986748 | 0         |  |
|         |      | Shiraz-71T | 2262 | 0.986748 | 0         |  |
|         |      | Shiraz-71T | 2262 | 0.986748 | 0         |  |
| GAGE12I | chrX | Shiraz-4T  | 260  | 0        | -0.324128 |  |
|         |      | Shiraz-4T  | 260  | 0        | -0.324128 |  |
|         |      | Shiraz-16T | 294  | 0.655804 | 0         |  |
|         |      | Shiraz-16T | 294  | 0.655804 | 0         |  |
|         |      | Shiraz-31T | 345  | 0.103301 | 0         |  |
|         |      | Shiraz-31T | 345  | 0.103301 | 0         |  |
|         |      | Shiraz-36T | 431  | 0        | -0.78035  |  |
|         |      | Shiraz-36T | 431  | 0        | -0.78035  |  |
|         |      | Shiraz-36T | 432  | 0        | -0.6692   |  |
|         |      | Shiraz-36T | 432  | 0        | -0.6692   |  |
|         |      | Shiraz-44T | 891  | 0        | -0.954044 |  |
|         |      | Shiraz-44T | 891  | 0        | -0.954044 |  |
|         |      | Shiraz-46T | 991  | 0.139564 | 0         |  |
|         |      | Shiraz-46T | 991  | 0.139564 | 0         |  |
|         |      | Shiraz-47T | 1084 | 0.24185  | 0         |  |
|         |      | Shiraz-47T | 1084 | 0.24185  | 0         |  |
|         |      | Shiraz-49T | 1166 | 0        | -0.917235 |  |
|         |      | Shiraz-49T | 1166 | 0        | -0.917235 |  |
|         |      | Shiraz-77T | 1282 | 0.213849 | 0         |  |
|         |      | Shiraz-77T | 1282 | 0.213849 | 0         |  |
|         |      | Shiraz-9T  | 1368 | 0.199713 | 0         |  |
|         |      | Shiraz-9T  | 1368 | 0.199713 | 0         |  |
|         |      | Shiraz-18T | 1455 | 0        | -0.186773 |  |
|         |      | Shiraz-18T | 1455 | 0        | -0.186773 |  |
|         |      | Shiraz-22T | 1669 | 0.695915 | 0         |  |
|         |      | Shiraz-22T | 1669 | 0.695915 | 0         |  |
|         |      | Shiraz-22T | 1672 | 1.01678  | 0         |  |
|         |      | Shiraz-22T | 1672 | 1.01678  | 0         |  |
|         |      | Shiraz-25T | 1717 | 0.420447 | 0         |  |
|         |      | Shiraz-25T | 1717 | 0.420447 | 0         |  |
|         |      | Shiraz-28T | 1760 | 0.538181 | 0         |  |
|         |      | Shiraz-28T | 1760 | 0.538181 | 0         |  |
|         |      | Shiraz-29T | 1800 | 0.672527 | 0         |  |
|         |      | Shiraz-29T | 1800 | 0.672527 | 0         |  |
|         |      | Shiraz-32T | 1869 | 0.776805 | 0         |  |
|         |      | Shiraz-32T | 1869 | 0.776805 | 0         |  |

|  |  |            |      |          |           |  |  |
|--|--|------------|------|----------|-----------|--|--|
|  |  | Shiraz-35T | 1932 | 0.507141 | 0         |  |  |
|  |  | Shiraz-35T | 1932 | 0.507141 | 0         |  |  |
|  |  | Shiraz-58T | 2221 | 0.871948 | 0         |  |  |
|  |  | Shiraz-58T | 2221 | 0.871948 | 0         |  |  |
|  |  | Shiraz-71T | 2260 | 0.68394  | 0         |  |  |
|  |  | Shiraz-71T | 2260 | 0.68394  | 0         |  |  |
|  |  | Shiraz-71T | 2262 | 0.986748 | 0         |  |  |
|  |  | Shiraz-71T | 2262 | 0.986748 | 0         |  |  |
|  |  | Shiraz-4T  | 260  | 0        | -0.324128 |  |  |
|  |  | Shiraz-4T  | 260  | 0        | -0.324128 |  |  |
|  |  | Shiraz-16T | 294  | 0.655804 | 0         |  |  |
|  |  | Shiraz-16T | 294  | 0.655804 | 0         |  |  |
|  |  | Shiraz-31T | 345  | 0.103301 | 0         |  |  |
|  |  | Shiraz-31T | 345  | 0.103301 | 0         |  |  |
|  |  | Shiraz-36T | 431  | 0        | -0.78035  |  |  |
|  |  | Shiraz-36T | 431  | 0        | -0.78035  |  |  |
|  |  | Shiraz-36T | 432  | 0        | -0.6692   |  |  |
|  |  | Shiraz-36T | 432  | 0        | -0.6692   |  |  |
|  |  | Shiraz-44T | 891  | 0        | -0.954044 |  |  |
|  |  | Shiraz-44T | 891  | 0        | -0.954044 |  |  |
|  |  | Shiraz-46T | 991  | 0.139564 | 0         |  |  |
|  |  | Shiraz-46T | 991  | 0.139564 | 0         |  |  |
|  |  | Shiraz-47T | 1084 | 0.24185  | 0         |  |  |
|  |  | Shiraz-47T | 1084 | 0.24185  | 0         |  |  |
|  |  | Shiraz-49T | 1166 | 0        | -0.917235 |  |  |
|  |  | Shiraz-49T | 1166 | 0        | -0.917235 |  |  |
|  |  | Shiraz-77T | 1282 | 0.213849 | 0         |  |  |
|  |  | Shiraz-77T | 1282 | 0.213849 | 0         |  |  |
|  |  | Shiraz-9T  | 1368 | 0.199713 | 0         |  |  |
|  |  | Shiraz-9T  | 1368 | 0.199713 | 0         |  |  |
|  |  | Shiraz-18T | 1455 | 0        | -0.186773 |  |  |
|  |  | Shiraz-18T | 1455 | 0        | -0.186773 |  |  |
|  |  | Shiraz-22T | 1669 | 0.695915 | 0         |  |  |
|  |  | Shiraz-22T | 1669 | 0.695915 | 0         |  |  |
|  |  | Shiraz-22T | 1672 | 1.01678  | 0         |  |  |
|  |  | Shiraz-22T | 1672 | 1.01678  | 0         |  |  |
|  |  | Shiraz-25T | 1717 | 0.420447 | 0         |  |  |
|  |  | Shiraz-25T | 1717 | 0.420447 | 0         |  |  |
|  |  | Shiraz-28T | 1760 | 0.538181 | 0         |  |  |
|  |  | Shiraz-28T | 1760 | 0.538181 | 0         |  |  |
|  |  | Shiraz-29T | 1800 | 0.672527 | 0         |  |  |
|  |  | Shiraz-29T | 1800 | 0.672527 | 0         |  |  |
|  |  | Shiraz-32T | 1869 | 0.776805 | 0         |  |  |
|  |  | Shiraz-32T | 1869 | 0.776805 | 0         |  |  |
|  |  | Shiraz-35T | 1932 | 0.507141 | 0         |  |  |
|  |  | Shiraz-35T | 1932 | 0.507141 | 0         |  |  |
|  |  | Shiraz-58T | 2221 | 0.871948 | 0         |  |  |

|  |            |      |          |           |  |
|--|------------|------|----------|-----------|--|
|  | Shiraz-58T | 2221 | 0.871948 | 0         |  |
|  | Shiraz-71T | 2260 | 0.68394  | 0         |  |
|  | Shiraz-71T | 2260 | 0.68394  | 0         |  |
|  | Shiraz-71T | 2262 | 0.986748 | 0         |  |
|  | Shiraz-71T | 2262 | 0.986748 | 0         |  |
|  | Shiraz-4T  | 260  | 0        | -0.324128 |  |
|  | Shiraz-4T  | 260  | 0        | -0.324128 |  |
|  | Shiraz-16T | 294  | 0.655804 | 0         |  |
|  | Shiraz-16T | 294  | 0.655804 | 0         |  |
|  | Shiraz-31T | 345  | 0.103301 | 0         |  |
|  | Shiraz-31T | 345  | 0.103301 | 0         |  |
|  | Shiraz-36T | 431  | 0        | -0.78035  |  |
|  | Shiraz-36T | 431  | 0        | -0.78035  |  |
|  | Shiraz-36T | 432  | 0        | -0.6692   |  |
|  | Shiraz-36T | 432  | 0        | -0.6692   |  |
|  | Shiraz-44T | 891  | 0        | -0.954044 |  |
|  | Shiraz-44T | 891  | 0        | -0.954044 |  |
|  | Shiraz-46T | 991  | 0.139564 | 0         |  |
|  | Shiraz-46T | 991  | 0.139564 | 0         |  |
|  | Shiraz-47T | 1084 | 0.24185  | 0         |  |
|  | Shiraz-47T | 1084 | 0.24185  | 0         |  |
|  | Shiraz-49T | 1166 | 0        | -0.917235 |  |
|  | Shiraz-49T | 1166 | 0        | -0.917235 |  |
|  | Shiraz-77T | 1282 | 0.213849 | 0         |  |
|  | Shiraz-77T | 1282 | 0.213849 | 0         |  |
|  | Shiraz-9T  | 1368 | 0.199713 | 0         |  |
|  | Shiraz-9T  | 1368 | 0.199713 | 0         |  |
|  | Shiraz-18T | 1455 | 0        | -0.186773 |  |
|  | Shiraz-18T | 1455 | 0        | -0.186773 |  |
|  | Shiraz-22T | 1669 | 0.695915 | 0         |  |
|  | Shiraz-22T | 1669 | 0.695915 | 0         |  |
|  | Shiraz-22T | 1672 | 1.01678  | 0         |  |
|  | Shiraz-22T | 1672 | 1.01678  | 0         |  |
|  | Shiraz-25T | 1717 | 0.420447 | 0         |  |
|  | Shiraz-25T | 1717 | 0.420447 | 0         |  |
|  | Shiraz-28T | 1760 | 0.538181 | 0         |  |
|  | Shiraz-28T | 1760 | 0.538181 | 0         |  |
|  | Shiraz-29T | 1800 | 0.672527 | 0         |  |
|  | Shiraz-29T | 1800 | 0.672527 | 0         |  |
|  | Shiraz-32T | 1869 | 0.776805 | 0         |  |
|  | Shiraz-32T | 1869 | 0.776805 | 0         |  |
|  | Shiraz-35T | 1932 | 0.507141 | 0         |  |
|  | Shiraz-35T | 1932 | 0.507141 | 0         |  |
|  | Shiraz-58T | 2221 | 0.871948 | 0         |  |
|  | Shiraz-58T | 2221 | 0.871948 | 0         |  |
|  | Shiraz-71T | 2260 | 0.68394  | 0         |  |
|  | Shiraz-71T | 2260 | 0.68394  | 0         |  |



|         |      |            |      |          |           |  |
|---------|------|------------|------|----------|-----------|--|
|         |      | Shiraz-71T | 2262 | 0.986748 | 0         |  |
|         |      | Shiraz-71T | 2262 | 0.986748 | 0         |  |
| GAGE12J | chrX | Shiraz-4T  | 260  | 0        | -0.324128 |  |
|         |      | Shiraz-16T | 294  | 0.655804 | 0         |  |
|         |      | Shiraz-31T | 345  | 0.103301 | 0         |  |
|         |      | Shiraz-36T | 431  | 0        | -0.78035  |  |
|         |      | Shiraz-36T | 432  | 0        | -0.6692   |  |
|         |      | Shiraz-44T | 891  | 0        | -0.954044 |  |
|         |      | Shiraz-46T | 991  | 0.139564 | 0         |  |
|         |      | Shiraz-47T | 1084 | 0.24185  | 0         |  |
|         |      | Shiraz-49T | 1166 | 0        | -0.917235 |  |
|         |      | Shiraz-77T | 1282 | 0.213849 | 0         |  |
|         |      | Shiraz-9T  | 1368 | 0.199713 | 0         |  |
|         |      | Shiraz-18T | 1455 | 0        | -0.186773 |  |
|         |      | Shiraz-22T | 1669 | 0.695915 | 0         |  |
|         |      | Shiraz-22T | 1672 | 1.01678  | 0         |  |
|         |      | Shiraz-25T | 1717 | 0.420447 | 0         |  |
|         |      | Shiraz-28T | 1760 | 0.538181 | 0         |  |
|         |      | Shiraz-29T | 1800 | 0.672527 | 0         |  |
|         |      | Shiraz-32T | 1869 | 0.776805 | 0         |  |
|         |      | Shiraz-35T | 1932 | 0.507141 | 0         |  |
|         |      | Shiraz-58T | 2221 | 0.871948 | 0         |  |
|         |      | Shiraz-71T | 2260 | 0.68394  | 0         |  |
|         |      | Shiraz-71T | 2262 | 0.986748 | 0         |  |
|         |      | Shiraz-4T  | 260  | 0        | -0.324128 |  |
|         |      | Shiraz-16T | 294  | 0.655804 | 0         |  |
|         |      | Shiraz-31T | 345  | 0.103301 | 0         |  |
|         |      | Shiraz-36T | 431  | 0        | -0.78035  |  |
|         |      | Shiraz-36T | 432  | 0        | -0.6692   |  |
|         |      | Shiraz-44T | 891  | 0        | -0.954044 |  |
|         |      | Shiraz-46T | 991  | 0.139564 | 0         |  |
|         |      | Shiraz-47T | 1084 | 0.24185  | 0         |  |
|         |      | Shiraz-49T | 1166 | 0        | -0.917235 |  |
|         |      | Shiraz-77T | 1282 | 0.213849 | 0         |  |
|         |      | Shiraz-9T  | 1368 | 0.199713 | 0         |  |
|         |      | Shiraz-18T | 1455 | 0        | -0.186773 |  |
|         |      | Shiraz-22T | 1669 | 0.695915 | 0         |  |
|         |      | Shiraz-22T | 1672 | 1.01678  | 0         |  |
|         |      | Shiraz-25T | 1717 | 0.420447 | 0         |  |
|         |      | Shiraz-28T | 1760 | 0.538181 | 0         |  |
|         |      | Shiraz-29T | 1800 | 0.672527 | 0         |  |
|         |      | Shiraz-32T | 1869 | 0.776805 | 0         |  |
|         |      | Shiraz-35T | 1932 | 0.507141 | 0         |  |
|         |      | Shiraz-58T | 2221 | 0.871948 | 0         |  |
|         |      | Shiraz-71T | 2260 | 0.68394  | 0         |  |
|         |      | Shiraz-71T | 2262 | 0.986748 | 0         |  |
|         |      | Shiraz-4T  | 260  | 0        | -0.324128 |  |

|        |      |            |      |          |           |  |  |
|--------|------|------------|------|----------|-----------|--|--|
|        |      | Shiraz-16T | 294  | 0.655804 | 0         |  |  |
|        |      | Shiraz-31T | 345  | 0.103301 | 0         |  |  |
|        |      | Shiraz-36T | 431  | 0        | -0.78035  |  |  |
|        |      | Shiraz-36T | 432  | 0        | -0.6692   |  |  |
|        |      | Shiraz-44T | 891  | 0        | -0.954044 |  |  |
|        |      | Shiraz-46T | 991  | 0.139564 | 0         |  |  |
|        |      | Shiraz-47T | 1084 | 0.24185  | 0         |  |  |
|        |      | Shiraz-49T | 1166 | 0        | -0.917235 |  |  |
|        |      | Shiraz-77T | 1282 | 0.213849 | 0         |  |  |
|        |      | Shiraz-9T  | 1368 | 0.199713 | 0         |  |  |
|        |      | Shiraz-18T | 1455 | 0        | -0.186773 |  |  |
|        |      | Shiraz-22T | 1669 | 0.695915 | 0         |  |  |
|        |      | Shiraz-22T | 1672 | 1.01678  | 0         |  |  |
|        |      | Shiraz-25T | 1717 | 0.420447 | 0         |  |  |
|        |      | Shiraz-28T | 1760 | 0.538181 | 0         |  |  |
|        |      | Shiraz-29T | 1800 | 0.672527 | 0         |  |  |
|        |      | Shiraz-32T | 1869 | 0.776805 | 0         |  |  |
|        |      | Shiraz-35T | 1932 | 0.507141 | 0         |  |  |
|        |      | Shiraz-58T | 2221 | 0.871948 | 0         |  |  |
|        |      | Shiraz-71T | 2260 | 0.68394  | 0         |  |  |
|        |      | Shiraz-71T | 2262 | 0.986748 | 0         |  |  |
| GAGE13 | chrX | Shiraz-4T  | 260  | 0        | -0.324128 |  |  |
|        |      | Shiraz-16T | 294  | 0.655804 | 0         |  |  |
|        |      | Shiraz-31T | 345  | 0.103301 | 0         |  |  |
|        |      | Shiraz-36T | 431  | 0        | -0.78035  |  |  |
|        |      | Shiraz-36T | 432  | 0        | -0.6692   |  |  |
|        |      | Shiraz-44T | 891  | 0        | -0.954044 |  |  |
|        |      | Shiraz-46T | 991  | 0.139564 | 0         |  |  |
|        |      | Shiraz-47T | 1084 | 0.24185  | 0         |  |  |
|        |      | Shiraz-49T | 1166 | 0        | -0.917235 |  |  |
|        |      | Shiraz-77T | 1282 | 0.213849 | 0         |  |  |
|        |      | Shiraz-9T  | 1368 | 0.199713 | 0         |  |  |
|        |      | Shiraz-18T | 1455 | 0        | -0.186773 |  |  |
|        |      | Shiraz-22T | 1669 | 0.695915 | 0         |  |  |
|        |      | Shiraz-22T | 1672 | 1.01678  | 0         |  |  |
|        |      | Shiraz-25T | 1717 | 0.420447 | 0         |  |  |
|        |      | Shiraz-28T | 1760 | 0.538181 | 0         |  |  |
|        |      | Shiraz-29T | 1800 | 0.672527 | 0         |  |  |
|        |      | Shiraz-32T | 1869 | 0.776805 | 0         |  |  |
|        |      | Shiraz-35T | 1932 | 0.507141 | 0         |  |  |
|        |      | Shiraz-58T | 2221 | 0.871948 | 0         |  |  |
|        |      | Shiraz-71T | 2260 | 0.68394  | 0         |  |  |
|        |      | Shiraz-71T | 2262 | 0.986748 | 0         |  |  |
|        |      | Shiraz-4T  | 260  | 0        | -0.324128 |  |  |
|        |      | Shiraz-16T | 294  | 0.655804 | 0         |  |  |
|        |      | Shiraz-31T | 345  | 0.103301 | 0         |  |  |
|        |      | Shiraz-36T | 431  | 0        | -0.78035  |  |  |

|        |      |            |      |          |           |  |  |
|--------|------|------------|------|----------|-----------|--|--|
|        |      | Shiraz-36T | 432  | 0        | -0.6692   |  |  |
|        |      | Shiraz-44T | 891  | 0        | -0.954044 |  |  |
|        |      | Shiraz-46T | 991  | 0.139564 | 0         |  |  |
|        |      | Shiraz-47T | 1084 | 0.24185  | 0         |  |  |
|        |      | Shiraz-49T | 1166 | 0        | -0.917235 |  |  |
|        |      | Shiraz-77T | 1282 | 0.213849 | 0         |  |  |
|        |      | Shiraz-9T  | 1368 | 0.199713 | 0         |  |  |
|        |      | Shiraz-18T | 1455 | 0        | -0.186773 |  |  |
|        |      | Shiraz-22T | 1669 | 0.695915 | 0         |  |  |
|        |      | Shiraz-22T | 1672 | 1.01678  | 0         |  |  |
|        |      | Shiraz-25T | 1717 | 0.420447 | 0         |  |  |
|        |      | Shiraz-28T | 1760 | 0.538181 | 0         |  |  |
|        |      | Shiraz-29T | 1800 | 0.672527 | 0         |  |  |
|        |      | Shiraz-32T | 1869 | 0.776805 | 0         |  |  |
|        |      | Shiraz-35T | 1932 | 0.507141 | 0         |  |  |
|        |      | Shiraz-58T | 2221 | 0.871948 | 0         |  |  |
|        |      | Shiraz-71T | 2260 | 0.68394  | 0         |  |  |
|        |      | Shiraz-71T | 2262 | 0.986748 | 0         |  |  |
|        |      | Shiraz-4T  | 260  | 0        | -0.324128 |  |  |
|        |      | Shiraz-16T | 294  | 0.655804 | 0         |  |  |
|        |      | Shiraz-31T | 345  | 0.103301 | 0         |  |  |
|        |      | Shiraz-36T | 431  | 0        | -0.78035  |  |  |
|        |      | Shiraz-36T | 432  | 0        | -0.6692   |  |  |
|        |      | Shiraz-44T | 891  | 0        | -0.954044 |  |  |
|        |      | Shiraz-46T | 991  | 0.139564 | 0         |  |  |
|        |      | Shiraz-47T | 1084 | 0.24185  | 0         |  |  |
|        |      | Shiraz-49T | 1166 | 0        | -0.917235 |  |  |
|        |      | Shiraz-77T | 1282 | 0.213849 | 0         |  |  |
|        |      | Shiraz-9T  | 1368 | 0.199713 | 0         |  |  |
|        |      | Shiraz-18T | 1455 | 0        | -0.186773 |  |  |
|        |      | Shiraz-22T | 1669 | 0.695915 | 0         |  |  |
|        |      | Shiraz-22T | 1672 | 1.01678  | 0         |  |  |
|        |      | Shiraz-25T | 1717 | 0.420447 | 0         |  |  |
|        |      | Shiraz-28T | 1760 | 0.538181 | 0         |  |  |
|        |      | Shiraz-29T | 1800 | 0.672527 | 0         |  |  |
|        |      | Shiraz-32T | 1869 | 0.776805 | 0         |  |  |
|        |      | Shiraz-35T | 1932 | 0.507141 | 0         |  |  |
|        |      | Shiraz-58T | 2221 | 0.871948 | 0         |  |  |
|        |      | Shiraz-71T | 2260 | 0.68394  | 0         |  |  |
|        |      | Shiraz-71T | 2262 | 0.986748 | 0         |  |  |
| GAGE2A | chrX | Shiraz-4T  | 260  | 0        | -0.324128 |  |  |
|        |      | Shiraz-4T  | 260  | 0        | -0.324128 |  |  |
|        |      | Shiraz-16T | 294  | 0.655804 | 0         |  |  |
|        |      | Shiraz-16T | 294  | 0.655804 | 0         |  |  |
|        |      | Shiraz-31T | 345  | 0.103301 | 0         |  |  |
|        |      | Shiraz-31T | 345  | 0.103301 | 0         |  |  |
|        |      | Shiraz-36T | 431  | 0        | -0.78035  |  |  |

|  |            |      |          |           |  |
|--|------------|------|----------|-----------|--|
|  | Shiraz-36T | 431  | 0        | -0.78035  |  |
|  | Shiraz-36T | 432  | 0        | -0.6692   |  |
|  | Shiraz-36T | 432  | 0        | -0.6692   |  |
|  | Shiraz-44T | 891  | 0        | -0.954044 |  |
|  | Shiraz-44T | 891  | 0        | -0.954044 |  |
|  | Shiraz-46T | 991  | 0.139564 | 0         |  |
|  | Shiraz-46T | 991  | 0.139564 | 0         |  |
|  | Shiraz-47T | 1084 | 0.24185  | 0         |  |
|  | Shiraz-47T | 1084 | 0.24185  | 0         |  |
|  | Shiraz-49T | 1166 | 0        | -0.917235 |  |
|  | Shiraz-49T | 1166 | 0        | -0.917235 |  |
|  | Shiraz-77T | 1282 | 0.213849 | 0         |  |
|  | Shiraz-77T | 1282 | 0.213849 | 0         |  |
|  | Shiraz-9T  | 1368 | 0.199713 | 0         |  |
|  | Shiraz-9T  | 1368 | 0.199713 | 0         |  |
|  | Shiraz-18T | 1455 | 0        | -0.186773 |  |
|  | Shiraz-18T | 1455 | 0        | -0.186773 |  |
|  | Shiraz-22T | 1669 | 0.695915 | 0         |  |
|  | Shiraz-22T | 1669 | 0.695915 | 0         |  |
|  | Shiraz-22T | 1672 | 1.01678  | 0         |  |
|  | Shiraz-22T | 1672 | 1.01678  | 0         |  |
|  | Shiraz-25T | 1717 | 0.420447 | 0         |  |
|  | Shiraz-25T | 1717 | 0.420447 | 0         |  |
|  | Shiraz-28T | 1760 | 0.538181 | 0         |  |
|  | Shiraz-28T | 1760 | 0.538181 | 0         |  |
|  | Shiraz-29T | 1800 | 0.672527 | 0         |  |
|  | Shiraz-29T | 1800 | 0.672527 | 0         |  |
|  | Shiraz-32T | 1869 | 0.776805 | 0         |  |
|  | Shiraz-32T | 1869 | 0.776805 | 0         |  |
|  | Shiraz-35T | 1932 | 0.507141 | 0         |  |
|  | Shiraz-35T | 1932 | 0.507141 | 0         |  |
|  | Shiraz-58T | 2221 | 0.871948 | 0         |  |
|  | Shiraz-58T | 2221 | 0.871948 | 0         |  |
|  | Shiraz-71T | 2260 | 0.68394  | 0         |  |
|  | Shiraz-71T | 2260 | 0.68394  | 0         |  |
|  | Shiraz-71T | 2262 | 0.986748 | 0         |  |
|  | Shiraz-71T | 2262 | 0.986748 | 0         |  |
|  | Shiraz-4T  | 260  | 0        | -0.324128 |  |
|  | Shiraz-4T  | 260  | 0        | -0.324128 |  |
|  | Shiraz-16T | 294  | 0.655804 | 0         |  |
|  | Shiraz-16T | 294  | 0.655804 | 0         |  |
|  | Shiraz-31T | 345  | 0.103301 | 0         |  |
|  | Shiraz-31T | 345  | 0.103301 | 0         |  |
|  | Shiraz-36T | 431  | 0        | -0.78035  |  |
|  | Shiraz-36T | 431  | 0        | -0.78035  |  |
|  | Shiraz-36T | 432  | 0        | -0.6692   |  |
|  | Shiraz-36T | 432  | 0        | -0.6692   |  |

|  |            |      |          |           |  |
|--|------------|------|----------|-----------|--|
|  | Shiraz-44T | 891  | 0        | -0.954044 |  |
|  | Shiraz-44T | 891  | 0        | -0.954044 |  |
|  | Shiraz-46T | 991  | 0.139564 | 0         |  |
|  | Shiraz-46T | 991  | 0.139564 | 0         |  |
|  | Shiraz-47T | 1084 | 0.24185  | 0         |  |
|  | Shiraz-47T | 1084 | 0.24185  | 0         |  |
|  | Shiraz-49T | 1166 | 0        | -0.917235 |  |
|  | Shiraz-49T | 1166 | 0        | -0.917235 |  |
|  | Shiraz-77T | 1282 | 0.213849 | 0         |  |
|  | Shiraz-77T | 1282 | 0.213849 | 0         |  |
|  | Shiraz-9T  | 1368 | 0.199713 | 0         |  |
|  | Shiraz-9T  | 1368 | 0.199713 | 0         |  |
|  | Shiraz-18T | 1455 | 0        | -0.186773 |  |
|  | Shiraz-18T | 1455 | 0        | -0.186773 |  |
|  | Shiraz-22T | 1669 | 0.695915 | 0         |  |
|  | Shiraz-22T | 1669 | 0.695915 | 0         |  |
|  | Shiraz-22T | 1672 | 1.01678  | 0         |  |
|  | Shiraz-22T | 1672 | 1.01678  | 0         |  |
|  | Shiraz-25T | 1717 | 0.420447 | 0         |  |
|  | Shiraz-25T | 1717 | 0.420447 | 0         |  |
|  | Shiraz-28T | 1760 | 0.538181 | 0         |  |
|  | Shiraz-28T | 1760 | 0.538181 | 0         |  |
|  | Shiraz-29T | 1800 | 0.672527 | 0         |  |
|  | Shiraz-29T | 1800 | 0.672527 | 0         |  |
|  | Shiraz-32T | 1869 | 0.776805 | 0         |  |
|  | Shiraz-32T | 1869 | 0.776805 | 0         |  |
|  | Shiraz-35T | 1932 | 0.507141 | 0         |  |
|  | Shiraz-35T | 1932 | 0.507141 | 0         |  |
|  | Shiraz-58T | 2221 | 0.871948 | 0         |  |
|  | Shiraz-58T | 2221 | 0.871948 | 0         |  |
|  | Shiraz-71T | 2260 | 0.68394  | 0         |  |
|  | Shiraz-71T | 2260 | 0.68394  | 0         |  |
|  | Shiraz-71T | 2262 | 0.986748 | 0         |  |
|  | Shiraz-71T | 2262 | 0.986748 | 0         |  |
|  | Shiraz-4T  | 260  | 0        | -0.324128 |  |
|  | Shiraz-4T  | 260  | 0        | -0.324128 |  |
|  | Shiraz-16T | 294  | 0.655804 | 0         |  |
|  | Shiraz-16T | 294  | 0.655804 | 0         |  |
|  | Shiraz-31T | 345  | 0.103301 | 0         |  |
|  | Shiraz-31T | 345  | 0.103301 | 0         |  |
|  | Shiraz-36T | 431  | 0        | -0.78035  |  |
|  | Shiraz-36T | 431  | 0        | -0.78035  |  |
|  | Shiraz-36T | 432  | 0        | -0.6692   |  |
|  | Shiraz-36T | 432  | 0        | -0.6692   |  |
|  | Shiraz-44T | 891  | 0        | -0.954044 |  |
|  | Shiraz-44T | 891  | 0        | -0.954044 |  |
|  | Shiraz-46T | 991  | 0.139564 | 0         |  |

|        |      |            |      |          |           |  |
|--------|------|------------|------|----------|-----------|--|
|        |      | Shiraz-46T | 991  | 0.139564 | 0         |  |
|        |      | Shiraz-47T | 1084 | 0.24185  | 0         |  |
|        |      | Shiraz-47T | 1084 | 0.24185  | 0         |  |
|        |      | Shiraz-49T | 1166 | 0        | -0.917235 |  |
|        |      | Shiraz-49T | 1166 | 0        | -0.917235 |  |
|        |      | Shiraz-77T | 1282 | 0.213849 | 0         |  |
|        |      | Shiraz-77T | 1282 | 0.213849 | 0         |  |
|        |      | Shiraz-9T  | 1368 | 0.199713 | 0         |  |
|        |      | Shiraz-9T  | 1368 | 0.199713 | 0         |  |
|        |      | Shiraz-18T | 1455 | 0        | -0.186773 |  |
|        |      | Shiraz-18T | 1455 | 0        | -0.186773 |  |
|        |      | Shiraz-22T | 1669 | 0.695915 | 0         |  |
|        |      | Shiraz-22T | 1669 | 0.695915 | 0         |  |
|        |      | Shiraz-22T | 1672 | 1.01678  | 0         |  |
|        |      | Shiraz-22T | 1672 | 1.01678  | 0         |  |
|        |      | Shiraz-25T | 1717 | 0.420447 | 0         |  |
|        |      | Shiraz-25T | 1717 | 0.420447 | 0         |  |
|        |      | Shiraz-28T | 1760 | 0.538181 | 0         |  |
|        |      | Shiraz-28T | 1760 | 0.538181 | 0         |  |
|        |      | Shiraz-29T | 1800 | 0.672527 | 0         |  |
|        |      | Shiraz-29T | 1800 | 0.672527 | 0         |  |
|        |      | Shiraz-32T | 1869 | 0.776805 | 0         |  |
|        |      | Shiraz-32T | 1869 | 0.776805 | 0         |  |
|        |      | Shiraz-35T | 1932 | 0.507141 | 0         |  |
|        |      | Shiraz-35T | 1932 | 0.507141 | 0         |  |
|        |      | Shiraz-58T | 2221 | 0.871948 | 0         |  |
|        |      | Shiraz-58T | 2221 | 0.871948 | 0         |  |
|        |      | Shiraz-71T | 2260 | 0.68394  | 0         |  |
|        |      | Shiraz-71T | 2260 | 0.68394  | 0         |  |
|        |      | Shiraz-71T | 2262 | 0.986748 | 0         |  |
|        |      | Shiraz-71T | 2262 | 0.986748 | 0         |  |
| GAGE2B | chrX | Shiraz-4T  | 260  | 0        | -0.324128 |  |
|        |      | Shiraz-16T | 294  | 0.655804 | 0         |  |
|        |      | Shiraz-31T | 345  | 0.103301 | 0         |  |
|        |      | Shiraz-36T | 431  | 0        | -0.78035  |  |
|        |      | Shiraz-36T | 432  | 0        | -0.6692   |  |
|        |      | Shiraz-44T | 891  | 0        | -0.954044 |  |
|        |      | Shiraz-46T | 991  | 0.139564 | 0         |  |
|        |      | Shiraz-47T | 1084 | 0.24185  | 0         |  |
|        |      | Shiraz-49T | 1166 | 0        | -0.917235 |  |
|        |      | Shiraz-77T | 1282 | 0.213849 | 0         |  |
|        |      | Shiraz-9T  | 1368 | 0.199713 | 0         |  |
|        |      | Shiraz-18T | 1455 | 0        | -0.186773 |  |
|        |      | Shiraz-22T | 1669 | 0.695915 | 0         |  |
|        |      | Shiraz-22T | 1672 | 1.01678  | 0         |  |
|        |      | Shiraz-25T | 1717 | 0.420447 | 0         |  |
|        |      | Shiraz-28T | 1760 | 0.538181 | 0         |  |

|  |  |            |      |          |           |  |  |
|--|--|------------|------|----------|-----------|--|--|
|  |  | Shiraz-29T | 1800 | 0.672527 | 0         |  |  |
|  |  | Shiraz-32T | 1869 | 0.776805 | 0         |  |  |
|  |  | Shiraz-35T | 1932 | 0.507141 | 0         |  |  |
|  |  | Shiraz-58T | 2221 | 0.871948 | 0         |  |  |
|  |  | Shiraz-71T | 2260 | 0.68394  | 0         |  |  |
|  |  | Shiraz-71T | 2262 | 0.986748 | 0         |  |  |
|  |  | Shiraz-4T  | 260  | 0        | -0.324128 |  |  |
|  |  | Shiraz-16T | 294  | 0.655804 | 0         |  |  |
|  |  | Shiraz-31T | 345  | 0.103301 | 0         |  |  |
|  |  | Shiraz-36T | 431  | 0        | -0.78035  |  |  |
|  |  | Shiraz-36T | 432  | 0        | -0.6692   |  |  |
|  |  | Shiraz-44T | 891  | 0        | -0.954044 |  |  |
|  |  | Shiraz-46T | 991  | 0.139564 | 0         |  |  |
|  |  | Shiraz-47T | 1084 | 0.24185  | 0         |  |  |
|  |  | Shiraz-49T | 1166 | 0        | -0.917235 |  |  |
|  |  | Shiraz-77T | 1282 | 0.213849 | 0         |  |  |
|  |  | Shiraz-9T  | 1368 | 0.199713 | 0         |  |  |
|  |  | Shiraz-18T | 1455 | 0        | -0.186773 |  |  |
|  |  | Shiraz-22T | 1669 | 0.695915 | 0         |  |  |
|  |  | Shiraz-22T | 1672 | 1.01678  | 0         |  |  |
|  |  | Shiraz-25T | 1717 | 0.420447 | 0         |  |  |
|  |  | Shiraz-28T | 1760 | 0.538181 | 0         |  |  |
|  |  | Shiraz-29T | 1800 | 0.672527 | 0         |  |  |
|  |  | Shiraz-32T | 1869 | 0.776805 | 0         |  |  |
|  |  | Shiraz-35T | 1932 | 0.507141 | 0         |  |  |
|  |  | Shiraz-58T | 2221 | 0.871948 | 0         |  |  |
|  |  | Shiraz-71T | 2260 | 0.68394  | 0         |  |  |
|  |  | Shiraz-71T | 2262 | 0.986748 | 0         |  |  |
|  |  | Shiraz-4T  | 260  | 0        | -0.324128 |  |  |
|  |  | Shiraz-16T | 294  | 0.655804 | 0         |  |  |
|  |  | Shiraz-31T | 345  | 0.103301 | 0         |  |  |
|  |  | Shiraz-36T | 431  | 0        | -0.78035  |  |  |
|  |  | Shiraz-36T | 432  | 0        | -0.6692   |  |  |
|  |  | Shiraz-44T | 891  | 0        | -0.954044 |  |  |
|  |  | Shiraz-46T | 991  | 0.139564 | 0         |  |  |
|  |  | Shiraz-47T | 1084 | 0.24185  | 0         |  |  |
|  |  | Shiraz-49T | 1166 | 0        | -0.917235 |  |  |
|  |  | Shiraz-77T | 1282 | 0.213849 | 0         |  |  |
|  |  | Shiraz-9T  | 1368 | 0.199713 | 0         |  |  |
|  |  | Shiraz-18T | 1455 | 0        | -0.186773 |  |  |
|  |  | Shiraz-22T | 1669 | 0.695915 | 0         |  |  |
|  |  | Shiraz-22T | 1672 | 1.01678  | 0         |  |  |
|  |  | Shiraz-25T | 1717 | 0.420447 | 0         |  |  |
|  |  | Shiraz-28T | 1760 | 0.538181 | 0         |  |  |
|  |  | Shiraz-29T | 1800 | 0.672527 | 0         |  |  |
|  |  | Shiraz-32T | 1869 | 0.776805 | 0         |  |  |
|  |  | Shiraz-35T | 1932 | 0.507141 | 0         |  |  |

|        |      |            |      |          |           |  |
|--------|------|------------|------|----------|-----------|--|
|        |      | Shiraz-58T | 2221 | 0.871948 | 0         |  |
|        |      | Shiraz-71T | 2260 | 0.68394  | 0         |  |
|        |      | Shiraz-71T | 2262 | 0.986748 | 0         |  |
| GAGE2C | chrX | Shiraz-4T  | 260  | 0        | -0.324128 |  |
|        |      | Shiraz-16T | 294  | 0.655804 | 0         |  |
|        |      | Shiraz-31T | 345  | 0.103301 | 0         |  |
|        |      | Shiraz-36T | 431  | 0        | -0.78035  |  |
|        |      | Shiraz-36T | 432  | 0        | -0.6692   |  |
|        |      | Shiraz-44T | 891  | 0        | -0.954044 |  |
|        |      | Shiraz-46T | 991  | 0.139564 | 0         |  |
|        |      | Shiraz-47T | 1084 | 0.24185  | 0         |  |
|        |      | Shiraz-49T | 1166 | 0        | -0.917235 |  |
|        |      | Shiraz-77T | 1282 | 0.213849 | 0         |  |
|        |      | Shiraz-9T  | 1368 | 0.199713 | 0         |  |
|        |      | Shiraz-18T | 1455 | 0        | -0.186773 |  |
|        |      | Shiraz-22T | 1669 | 0.695915 | 0         |  |
|        |      | Shiraz-22T | 1672 | 1.01678  | 0         |  |
|        |      | Shiraz-25T | 1717 | 0.420447 | 0         |  |
|        |      | Shiraz-28T | 1760 | 0.538181 | 0         |  |
|        |      | Shiraz-29T | 1800 | 0.672527 | 0         |  |
|        |      | Shiraz-32T | 1869 | 0.776805 | 0         |  |
|        |      | Shiraz-35T | 1932 | 0.507141 | 0         |  |
|        |      | Shiraz-58T | 2221 | 0.871948 | 0         |  |
|        |      | Shiraz-71T | 2260 | 0.68394  | 0         |  |
|        |      | Shiraz-71T | 2262 | 0.986748 | 0         |  |
|        |      | Shiraz-4T  | 260  | 0        | -0.324128 |  |
|        |      | Shiraz-16T | 294  | 0.655804 | 0         |  |
|        |      | Shiraz-31T | 345  | 0.103301 | 0         |  |
|        |      | Shiraz-36T | 431  | 0        | -0.78035  |  |
|        |      | Shiraz-36T | 432  | 0        | -0.6692   |  |
|        |      | Shiraz-44T | 891  | 0        | -0.954044 |  |
|        |      | Shiraz-46T | 991  | 0.139564 | 0         |  |
|        |      | Shiraz-47T | 1084 | 0.24185  | 0         |  |
|        |      | Shiraz-49T | 1166 | 0        | -0.917235 |  |
|        |      | Shiraz-77T | 1282 | 0.213849 | 0         |  |
|        |      | Shiraz-9T  | 1368 | 0.199713 | 0         |  |
|        |      | Shiraz-18T | 1455 | 0        | -0.186773 |  |
|        |      | Shiraz-22T | 1669 | 0.695915 | 0         |  |
|        |      | Shiraz-22T | 1672 | 1.01678  | 0         |  |
|        |      | Shiraz-25T | 1717 | 0.420447 | 0         |  |
|        |      | Shiraz-28T | 1760 | 0.538181 | 0         |  |
|        |      | Shiraz-29T | 1800 | 0.672527 | 0         |  |
|        |      | Shiraz-32T | 1869 | 0.776805 | 0         |  |
|        |      | Shiraz-35T | 1932 | 0.507141 | 0         |  |
|        |      | Shiraz-58T | 2221 | 0.871948 | 0         |  |
|        |      | Shiraz-71T | 2260 | 0.68394  | 0         |  |
|        |      | Shiraz-71T | 2262 | 0.986748 | 0         |  |



|        |      |            |      |          |           |  |  |
|--------|------|------------|------|----------|-----------|--|--|
|        |      | Shiraz-4T  | 260  | 0        | -0.324128 |  |  |
|        |      | Shiraz-16T | 294  | 0.655804 | 0         |  |  |
|        |      | Shiraz-31T | 345  | 0.103301 | 0         |  |  |
|        |      | Shiraz-36T | 431  | 0        | -0.78035  |  |  |
|        |      | Shiraz-36T | 432  | 0        | -0.6692   |  |  |
|        |      | Shiraz-44T | 891  | 0        | -0.954044 |  |  |
|        |      | Shiraz-46T | 991  | 0.139564 | 0         |  |  |
|        |      | Shiraz-47T | 1084 | 0.24185  | 0         |  |  |
|        |      | Shiraz-49T | 1166 | 0        | -0.917235 |  |  |
|        |      | Shiraz-77T | 1282 | 0.213849 | 0         |  |  |
|        |      | Shiraz-9T  | 1368 | 0.199713 | 0         |  |  |
|        |      | Shiraz-18T | 1455 | 0        | -0.186773 |  |  |
|        |      | Shiraz-22T | 1669 | 0.695915 | 0         |  |  |
|        |      | Shiraz-22T | 1672 | 1.01678  | 0         |  |  |
|        |      | Shiraz-25T | 1717 | 0.420447 | 0         |  |  |
|        |      | Shiraz-28T | 1760 | 0.538181 | 0         |  |  |
|        |      | Shiraz-29T | 1800 | 0.672527 | 0         |  |  |
|        |      | Shiraz-32T | 1869 | 0.776805 | 0         |  |  |
|        |      | Shiraz-35T | 1932 | 0.507141 | 0         |  |  |
|        |      | Shiraz-58T | 2221 | 0.871948 | 0         |  |  |
|        |      | Shiraz-71T | 2260 | 0.68394  | 0         |  |  |
|        |      | Shiraz-71T | 2262 | 0.986748 | 0         |  |  |
| GAGE2D | chrX | Shiraz-4T  | 260  | 0        | -0.324128 |  |  |
|        |      | Shiraz-16T | 294  | 0.655804 | 0         |  |  |
|        |      | Shiraz-31T | 345  | 0.103301 | 0         |  |  |
|        |      | Shiraz-36T | 431  | 0        | -0.78035  |  |  |
|        |      | Shiraz-36T | 432  | 0        | -0.6692   |  |  |
|        |      | Shiraz-44T | 891  | 0        | -0.954044 |  |  |
|        |      | Shiraz-46T | 991  | 0.139564 | 0         |  |  |
|        |      | Shiraz-47T | 1084 | 0.24185  | 0         |  |  |
|        |      | Shiraz-49T | 1166 | 0        | -0.917235 |  |  |
|        |      | Shiraz-77T | 1282 | 0.213849 | 0         |  |  |
|        |      | Shiraz-9T  | 1368 | 0.199713 | 0         |  |  |
|        |      | Shiraz-18T | 1455 | 0        | -0.186773 |  |  |
|        |      | Shiraz-22T | 1669 | 0.695915 | 0         |  |  |
|        |      | Shiraz-22T | 1672 | 1.01678  | 0         |  |  |
|        |      | Shiraz-25T | 1717 | 0.420447 | 0         |  |  |
|        |      | Shiraz-28T | 1760 | 0.538181 | 0         |  |  |
|        |      | Shiraz-29T | 1800 | 0.672527 | 0         |  |  |
|        |      | Shiraz-32T | 1869 | 0.776805 | 0         |  |  |
|        |      | Shiraz-35T | 1932 | 0.507141 | 0         |  |  |
|        |      | Shiraz-58T | 2221 | 0.871948 | 0         |  |  |
|        |      | Shiraz-71T | 2260 | 0.68394  | 0         |  |  |
|        |      | Shiraz-71T | 2262 | 0.986748 | 0         |  |  |
|        |      | Shiraz-4T  | 260  | 0        | -0.324128 |  |  |
|        |      | Shiraz-16T | 294  | 0.655804 | 0         |  |  |
|        |      | Shiraz-31T | 345  | 0.103301 | 0         |  |  |

|        |      |            |      |          |           |  |  |
|--------|------|------------|------|----------|-----------|--|--|
|        |      | Shiraz-36T | 431  | 0        | -0.78035  |  |  |
|        |      | Shiraz-36T | 432  | 0        | -0.6692   |  |  |
|        |      | Shiraz-44T | 891  | 0        | -0.954044 |  |  |
|        |      | Shiraz-46T | 991  | 0.139564 | 0         |  |  |
|        |      | Shiraz-47T | 1084 | 0.24185  | 0         |  |  |
|        |      | Shiraz-49T | 1166 | 0        | -0.917235 |  |  |
|        |      | Shiraz-77T | 1282 | 0.213849 | 0         |  |  |
|        |      | Shiraz-9T  | 1368 | 0.199713 | 0         |  |  |
|        |      | Shiraz-18T | 1455 | 0        | -0.186773 |  |  |
|        |      | Shiraz-22T | 1669 | 0.695915 | 0         |  |  |
|        |      | Shiraz-22T | 1672 | 1.01678  | 0         |  |  |
|        |      | Shiraz-25T | 1717 | 0.420447 | 0         |  |  |
|        |      | Shiraz-28T | 1760 | 0.538181 | 0         |  |  |
|        |      | Shiraz-29T | 1800 | 0.672527 | 0         |  |  |
|        |      | Shiraz-32T | 1869 | 0.776805 | 0         |  |  |
|        |      | Shiraz-35T | 1932 | 0.507141 | 0         |  |  |
|        |      | Shiraz-58T | 2221 | 0.871948 | 0         |  |  |
|        |      | Shiraz-71T | 2260 | 0.68394  | 0         |  |  |
|        |      | Shiraz-71T | 2262 | 0.986748 | 0         |  |  |
|        |      | Shiraz-4T  | 260  | 0        | -0.324128 |  |  |
|        |      | Shiraz-16T | 294  | 0.655804 | 0         |  |  |
|        |      | Shiraz-31T | 345  | 0.103301 | 0         |  |  |
|        |      | Shiraz-36T | 431  | 0        | -0.78035  |  |  |
|        |      | Shiraz-36T | 432  | 0        | -0.6692   |  |  |
|        |      | Shiraz-44T | 891  | 0        | -0.954044 |  |  |
|        |      | Shiraz-46T | 991  | 0.139564 | 0         |  |  |
|        |      | Shiraz-47T | 1084 | 0.24185  | 0         |  |  |
|        |      | Shiraz-49T | 1166 | 0        | -0.917235 |  |  |
|        |      | Shiraz-77T | 1282 | 0.213849 | 0         |  |  |
|        |      | Shiraz-9T  | 1368 | 0.199713 | 0         |  |  |
|        |      | Shiraz-18T | 1455 | 0        | -0.186773 |  |  |
|        |      | Shiraz-22T | 1669 | 0.695915 | 0         |  |  |
|        |      | Shiraz-22T | 1672 | 1.01678  | 0         |  |  |
|        |      | Shiraz-25T | 1717 | 0.420447 | 0         |  |  |
|        |      | Shiraz-28T | 1760 | 0.538181 | 0         |  |  |
|        |      | Shiraz-29T | 1800 | 0.672527 | 0         |  |  |
|        |      | Shiraz-32T | 1869 | 0.776805 | 0         |  |  |
|        |      | Shiraz-35T | 1932 | 0.507141 | 0         |  |  |
|        |      | Shiraz-58T | 2221 | 0.871948 | 0         |  |  |
|        |      | Shiraz-71T | 2260 | 0.68394  | 0         |  |  |
|        |      | Shiraz-71T | 2262 | 0.986748 | 0         |  |  |
| GAGE2E | chrX | Shiraz-4T  | 260  | 0        | -0.324128 |  |  |
|        |      | Shiraz-16T | 294  | 0.655804 | 0         |  |  |
|        |      | Shiraz-31T | 345  | 0.103301 | 0         |  |  |
|        |      | Shiraz-36T | 431  | 0        | -0.78035  |  |  |
|        |      | Shiraz-36T | 432  | 0        | -0.6692   |  |  |
|        |      | Shiraz-44T | 891  | 0        | -0.954044 |  |  |

|  |            |      |          |           |  |
|--|------------|------|----------|-----------|--|
|  | Shiraz-46T | 991  | 0.139564 | 0         |  |
|  | Shiraz-47T | 1084 | 0.24185  | 0         |  |
|  | Shiraz-49T | 1166 | 0        | -0.917235 |  |
|  | Shiraz-77T | 1282 | 0.213849 | 0         |  |
|  | Shiraz-9T  | 1368 | 0.199713 | 0         |  |
|  | Shiraz-18T | 1455 | 0        | -0.186773 |  |
|  | Shiraz-22T | 1669 | 0.695915 | 0         |  |
|  | Shiraz-22T | 1672 | 1.01678  | 0         |  |
|  | Shiraz-25T | 1717 | 0.420447 | 0         |  |
|  | Shiraz-28T | 1760 | 0.538181 | 0         |  |
|  | Shiraz-29T | 1800 | 0.672527 | 0         |  |
|  | Shiraz-32T | 1869 | 0.776805 | 0         |  |
|  | Shiraz-35T | 1932 | 0.507141 | 0         |  |
|  | Shiraz-58T | 2221 | 0.871948 | 0         |  |
|  | Shiraz-71T | 2260 | 0.68394  | 0         |  |
|  | Shiraz-71T | 2262 | 0.986748 | 0         |  |
|  | Shiraz-4T  | 260  | 0        | -0.324128 |  |
|  | Shiraz-16T | 294  | 0.655804 | 0         |  |
|  | Shiraz-31T | 345  | 0.103301 | 0         |  |
|  | Shiraz-36T | 431  | 0        | -0.78035  |  |
|  | Shiraz-36T | 432  | 0        | -0.6692   |  |
|  | Shiraz-44T | 891  | 0        | -0.954044 |  |
|  | Shiraz-46T | 991  | 0.139564 | 0         |  |
|  | Shiraz-47T | 1084 | 0.24185  | 0         |  |
|  | Shiraz-49T | 1166 | 0        | -0.917235 |  |
|  | Shiraz-77T | 1282 | 0.213849 | 0         |  |
|  | Shiraz-9T  | 1368 | 0.199713 | 0         |  |
|  | Shiraz-18T | 1455 | 0        | -0.186773 |  |
|  | Shiraz-22T | 1669 | 0.695915 | 0         |  |
|  | Shiraz-22T | 1672 | 1.01678  | 0         |  |
|  | Shiraz-25T | 1717 | 0.420447 | 0         |  |
|  | Shiraz-28T | 1760 | 0.538181 | 0         |  |
|  | Shiraz-29T | 1800 | 0.672527 | 0         |  |
|  | Shiraz-32T | 1869 | 0.776805 | 0         |  |
|  | Shiraz-35T | 1932 | 0.507141 | 0         |  |
|  | Shiraz-58T | 2221 | 0.871948 | 0         |  |
|  | Shiraz-71T | 2260 | 0.68394  | 0         |  |
|  | Shiraz-71T | 2262 | 0.986748 | 0         |  |
|  | Shiraz-4T  | 260  | 0        | -0.324128 |  |
|  | Shiraz-16T | 294  | 0.655804 | 0         |  |
|  | Shiraz-31T | 345  | 0.103301 | 0         |  |
|  | Shiraz-36T | 431  | 0        | -0.78035  |  |
|  | Shiraz-36T | 432  | 0        | -0.6692   |  |
|  | Shiraz-44T | 891  | 0        | -0.954044 |  |
|  | Shiraz-46T | 991  | 0.139564 | 0         |  |
|  | Shiraz-47T | 1084 | 0.24185  | 0         |  |
|  | Shiraz-49T | 1166 | 0        | -0.917235 |  |

|       |      |            |      |          |           |  |  |
|-------|------|------------|------|----------|-----------|--|--|
|       |      | Shiraz-77T | 1282 | 0.213849 | 0         |  |  |
|       |      | Shiraz-9T  | 1368 | 0.199713 | 0         |  |  |
|       |      | Shiraz-18T | 1455 | 0        | -0.186773 |  |  |
|       |      | Shiraz-22T | 1669 | 0.695915 | 0         |  |  |
|       |      | Shiraz-22T | 1672 | 1.01678  | 0         |  |  |
|       |      | Shiraz-25T | 1717 | 0.420447 | 0         |  |  |
|       |      | Shiraz-28T | 1760 | 0.538181 | 0         |  |  |
|       |      | Shiraz-29T | 1800 | 0.672527 | 0         |  |  |
|       |      | Shiraz-32T | 1869 | 0.776805 | 0         |  |  |
|       |      | Shiraz-35T | 1932 | 0.507141 | 0         |  |  |
|       |      | Shiraz-58T | 2221 | 0.871948 | 0         |  |  |
|       |      | Shiraz-71T | 2260 | 0.68394  | 0         |  |  |
|       |      | Shiraz-71T | 2262 | 0.986748 | 0         |  |  |
| GAGE4 | chrX | Shiraz-4T  | 260  | 0        | -0.324128 |  |  |
|       |      | Shiraz-4T  | 260  | 0        | -0.324128 |  |  |
|       |      | Shiraz-16T | 294  | 0.655804 | 0         |  |  |
|       |      | Shiraz-16T | 294  | 0.655804 | 0         |  |  |
|       |      | Shiraz-31T | 345  | 0.103301 | 0         |  |  |
|       |      | Shiraz-31T | 345  | 0.103301 | 0         |  |  |
|       |      | Shiraz-36T | 431  | 0        | -0.78035  |  |  |
|       |      | Shiraz-36T | 431  | 0        | -0.78035  |  |  |
|       |      | Shiraz-36T | 432  | 0        | -0.6692   |  |  |
|       |      | Shiraz-36T | 432  | 0        | -0.6692   |  |  |
|       |      | Shiraz-44T | 891  | 0        | -0.954044 |  |  |
|       |      | Shiraz-44T | 891  | 0        | -0.954044 |  |  |
|       |      | Shiraz-46T | 991  | 0.139564 | 0         |  |  |
|       |      | Shiraz-46T | 991  | 0.139564 | 0         |  |  |
|       |      | Shiraz-47T | 1084 | 0.24185  | 0         |  |  |
|       |      | Shiraz-47T | 1084 | 0.24185  | 0         |  |  |
|       |      | Shiraz-49T | 1166 | 0        | -0.917235 |  |  |
|       |      | Shiraz-49T | 1166 | 0        | -0.917235 |  |  |
|       |      | Shiraz-77T | 1282 | 0.213849 | 0         |  |  |
|       |      | Shiraz-77T | 1282 | 0.213849 | 0         |  |  |
|       |      | Shiraz-9T  | 1368 | 0.199713 | 0         |  |  |
|       |      | Shiraz-9T  | 1368 | 0.199713 | 0         |  |  |
|       |      | Shiraz-18T | 1455 | 0        | -0.186773 |  |  |
|       |      | Shiraz-18T | 1455 | 0        | -0.186773 |  |  |
|       |      | Shiraz-22T | 1669 | 0.695915 | 0         |  |  |
|       |      | Shiraz-22T | 1669 | 0.695915 | 0         |  |  |
|       |      | Shiraz-22T | 1672 | 1.01678  | 0         |  |  |
|       |      | Shiraz-22T | 1672 | 1.01678  | 0         |  |  |
|       |      | Shiraz-25T | 1717 | 0.420447 | 0         |  |  |
|       |      | Shiraz-25T | 1717 | 0.420447 | 0         |  |  |
|       |      | Shiraz-28T | 1760 | 0.538181 | 0         |  |  |
|       |      | Shiraz-28T | 1760 | 0.538181 | 0         |  |  |
|       |      | Shiraz-29T | 1800 | 0.672527 | 0         |  |  |
|       |      | Shiraz-29T | 1800 | 0.672527 | 0         |  |  |

|  |  |            |      |          |           |  |  |
|--|--|------------|------|----------|-----------|--|--|
|  |  | Shiraz-32T | 1869 | 0.776805 | 0         |  |  |
|  |  | Shiraz-32T | 1869 | 0.776805 | 0         |  |  |
|  |  | Shiraz-35T | 1932 | 0.507141 | 0         |  |  |
|  |  | Shiraz-35T | 1932 | 0.507141 | 0         |  |  |
|  |  | Shiraz-58T | 2221 | 0.871948 | 0         |  |  |
|  |  | Shiraz-58T | 2221 | 0.871948 | 0         |  |  |
|  |  | Shiraz-71T | 2260 | 0.68394  | 0         |  |  |
|  |  | Shiraz-71T | 2260 | 0.68394  | 0         |  |  |
|  |  | Shiraz-71T | 2262 | 0.986748 | 0         |  |  |
|  |  | Shiraz-71T | 2262 | 0.986748 | 0         |  |  |
|  |  | Shiraz-4T  | 260  | 0        | -0.324128 |  |  |
|  |  | Shiraz-4T  | 260  | 0        | -0.324128 |  |  |
|  |  | Shiraz-16T | 294  | 0.655804 | 0         |  |  |
|  |  | Shiraz-16T | 294  | 0.655804 | 0         |  |  |
|  |  | Shiraz-31T | 345  | 0.103301 | 0         |  |  |
|  |  | Shiraz-31T | 345  | 0.103301 | 0         |  |  |
|  |  | Shiraz-36T | 431  | 0        | -0.78035  |  |  |
|  |  | Shiraz-36T | 431  | 0        | -0.78035  |  |  |
|  |  | Shiraz-36T | 432  | 0        | -0.6692   |  |  |
|  |  | Shiraz-36T | 432  | 0        | -0.6692   |  |  |
|  |  | Shiraz-44T | 891  | 0        | -0.954044 |  |  |
|  |  | Shiraz-44T | 891  | 0        | -0.954044 |  |  |
|  |  | Shiraz-46T | 991  | 0.139564 | 0         |  |  |
|  |  | Shiraz-46T | 991  | 0.139564 | 0         |  |  |
|  |  | Shiraz-47T | 1084 | 0.24185  | 0         |  |  |
|  |  | Shiraz-47T | 1084 | 0.24185  | 0         |  |  |
|  |  | Shiraz-49T | 1166 | 0        | -0.917235 |  |  |
|  |  | Shiraz-49T | 1166 | 0        | -0.917235 |  |  |
|  |  | Shiraz-77T | 1282 | 0.213849 | 0         |  |  |
|  |  | Shiraz-77T | 1282 | 0.213849 | 0         |  |  |
|  |  | Shiraz-9T  | 1368 | 0.199713 | 0         |  |  |
|  |  | Shiraz-9T  | 1368 | 0.199713 | 0         |  |  |
|  |  | Shiraz-18T | 1455 | 0        | -0.186773 |  |  |
|  |  | Shiraz-18T | 1455 | 0        | -0.186773 |  |  |
|  |  | Shiraz-22T | 1669 | 0.695915 | 0         |  |  |
|  |  | Shiraz-22T | 1669 | 0.695915 | 0         |  |  |
|  |  | Shiraz-22T | 1672 | 1.01678  | 0         |  |  |
|  |  | Shiraz-22T | 1672 | 1.01678  | 0         |  |  |
|  |  | Shiraz-25T | 1717 | 0.420447 | 0         |  |  |
|  |  | Shiraz-25T | 1717 | 0.420447 | 0         |  |  |
|  |  | Shiraz-28T | 1760 | 0.538181 | 0         |  |  |
|  |  | Shiraz-28T | 1760 | 0.538181 | 0         |  |  |
|  |  | Shiraz-29T | 1800 | 0.672527 | 0         |  |  |
|  |  | Shiraz-29T | 1800 | 0.672527 | 0         |  |  |
|  |  | Shiraz-32T | 1869 | 0.776805 | 0         |  |  |
|  |  | Shiraz-32T | 1869 | 0.776805 | 0         |  |  |
|  |  | Shiraz-35T | 1932 | 0.507141 | 0         |  |  |

|  |  |            |      |          |           |  |  |
|--|--|------------|------|----------|-----------|--|--|
|  |  | Shiraz-35T | 1932 | 0.507141 | 0         |  |  |
|  |  | Shiraz-58T | 2221 | 0.871948 | 0         |  |  |
|  |  | Shiraz-58T | 2221 | 0.871948 | 0         |  |  |
|  |  | Shiraz-71T | 2260 | 0.68394  | 0         |  |  |
|  |  | Shiraz-71T | 2260 | 0.68394  | 0         |  |  |
|  |  | Shiraz-71T | 2262 | 0.986748 | 0         |  |  |
|  |  | Shiraz-71T | 2262 | 0.986748 | 0         |  |  |
|  |  | Shiraz-4T  | 260  | 0        | -0.324128 |  |  |
|  |  | Shiraz-4T  | 260  | 0        | -0.324128 |  |  |
|  |  | Shiraz-16T | 294  | 0.655804 | 0         |  |  |
|  |  | Shiraz-16T | 294  | 0.655804 | 0         |  |  |
|  |  | Shiraz-31T | 345  | 0.103301 | 0         |  |  |
|  |  | Shiraz-31T | 345  | 0.103301 | 0         |  |  |
|  |  | Shiraz-36T | 431  | 0        | -0.78035  |  |  |
|  |  | Shiraz-36T | 431  | 0        | -0.78035  |  |  |
|  |  | Shiraz-36T | 432  | 0        | -0.6692   |  |  |
|  |  | Shiraz-36T | 432  | 0        | -0.6692   |  |  |
|  |  | Shiraz-44T | 891  | 0        | -0.954044 |  |  |
|  |  | Shiraz-44T | 891  | 0        | -0.954044 |  |  |
|  |  | Shiraz-46T | 991  | 0.139564 | 0         |  |  |
|  |  | Shiraz-46T | 991  | 0.139564 | 0         |  |  |
|  |  | Shiraz-47T | 1084 | 0.24185  | 0         |  |  |
|  |  | Shiraz-47T | 1084 | 0.24185  | 0         |  |  |
|  |  | Shiraz-49T | 1166 | 0        | -0.917235 |  |  |
|  |  | Shiraz-49T | 1166 | 0        | -0.917235 |  |  |
|  |  | Shiraz-77T | 1282 | 0.213849 | 0         |  |  |
|  |  | Shiraz-77T | 1282 | 0.213849 | 0         |  |  |
|  |  | Shiraz-9T  | 1368 | 0.199713 | 0         |  |  |
|  |  | Shiraz-9T  | 1368 | 0.199713 | 0         |  |  |
|  |  | Shiraz-18T | 1455 | 0        | -0.186773 |  |  |
|  |  | Shiraz-18T | 1455 | 0        | -0.186773 |  |  |
|  |  | Shiraz-22T | 1669 | 0.695915 | 0         |  |  |
|  |  | Shiraz-22T | 1669 | 0.695915 | 0         |  |  |
|  |  | Shiraz-22T | 1672 | 1.01678  | 0         |  |  |
|  |  | Shiraz-22T | 1672 | 1.01678  | 0         |  |  |
|  |  | Shiraz-25T | 1717 | 0.420447 | 0         |  |  |
|  |  | Shiraz-25T | 1717 | 0.420447 | 0         |  |  |
|  |  | Shiraz-28T | 1760 | 0.538181 | 0         |  |  |
|  |  | Shiraz-28T | 1760 | 0.538181 | 0         |  |  |
|  |  | Shiraz-29T | 1800 | 0.672527 | 0         |  |  |
|  |  | Shiraz-29T | 1800 | 0.672527 | 0         |  |  |
|  |  | Shiraz-32T | 1869 | 0.776805 | 0         |  |  |
|  |  | Shiraz-32T | 1869 | 0.776805 | 0         |  |  |
|  |  | Shiraz-35T | 1932 | 0.507141 | 0         |  |  |
|  |  | Shiraz-35T | 1932 | 0.507141 | 0         |  |  |
|  |  | Shiraz-58T | 2221 | 0.871948 | 0         |  |  |
|  |  | Shiraz-58T | 2221 | 0.871948 | 0         |  |  |

|       |      |            |      |          |           |  |
|-------|------|------------|------|----------|-----------|--|
|       |      | Shiraz-71T | 2260 | 0.68394  | 0         |  |
|       |      | Shiraz-71T | 2260 | 0.68394  | 0         |  |
|       |      | Shiraz-71T | 2262 | 0.986748 | 0         |  |
|       |      | Shiraz-71T | 2262 | 0.986748 | 0         |  |
| GAGE5 | chrX | Shiraz-4T  | 260  | 0        | -0.324128 |  |
|       |      | Shiraz-4T  | 260  | 0        | -0.324128 |  |
|       |      | Shiraz-16T | 294  | 0.655804 | 0         |  |
|       |      | Shiraz-16T | 294  | 0.655804 | 0         |  |
|       |      | Shiraz-31T | 345  | 0.103301 | 0         |  |
|       |      | Shiraz-31T | 345  | 0.103301 | 0         |  |
|       |      | Shiraz-36T | 431  | 0        | -0.78035  |  |
|       |      | Shiraz-36T | 431  | 0        | -0.78035  |  |
|       |      | Shiraz-36T | 432  | 0        | -0.6692   |  |
|       |      | Shiraz-36T | 432  | 0        | -0.6692   |  |
|       |      | Shiraz-44T | 891  | 0        | -0.954044 |  |
|       |      | Shiraz-44T | 891  | 0        | -0.954044 |  |
|       |      | Shiraz-46T | 991  | 0.139564 | 0         |  |
|       |      | Shiraz-46T | 991  | 0.139564 | 0         |  |
|       |      | Shiraz-47T | 1084 | 0.24185  | 0         |  |
|       |      | Shiraz-47T | 1084 | 0.24185  | 0         |  |
|       |      | Shiraz-49T | 1166 | 0        | -0.917235 |  |
|       |      | Shiraz-49T | 1166 | 0        | -0.917235 |  |
|       |      | Shiraz-77T | 1282 | 0.213849 | 0         |  |
|       |      | Shiraz-77T | 1282 | 0.213849 | 0         |  |
|       |      | Shiraz-9T  | 1368 | 0.199713 | 0         |  |
|       |      | Shiraz-9T  | 1368 | 0.199713 | 0         |  |
|       |      | Shiraz-18T | 1455 | 0        | -0.186773 |  |
|       |      | Shiraz-18T | 1455 | 0        | -0.186773 |  |
|       |      | Shiraz-22T | 1669 | 0.695915 | 0         |  |
|       |      | Shiraz-22T | 1669 | 0.695915 | 0         |  |
|       |      | Shiraz-22T | 1672 | 1.01678  | 0         |  |
|       |      | Shiraz-22T | 1672 | 1.01678  | 0         |  |
|       |      | Shiraz-25T | 1717 | 0.420447 | 0         |  |
|       |      | Shiraz-25T | 1717 | 0.420447 | 0         |  |
|       |      | Shiraz-28T | 1760 | 0.538181 | 0         |  |
|       |      | Shiraz-28T | 1760 | 0.538181 | 0         |  |
|       |      | Shiraz-29T | 1800 | 0.672527 | 0         |  |
|       |      | Shiraz-29T | 1800 | 0.672527 | 0         |  |
|       |      | Shiraz-32T | 1869 | 0.776805 | 0         |  |
|       |      | Shiraz-32T | 1869 | 0.776805 | 0         |  |
|       |      | Shiraz-35T | 1932 | 0.507141 | 0         |  |
|       |      | Shiraz-35T | 1932 | 0.507141 | 0         |  |
|       |      | Shiraz-58T | 2221 | 0.871948 | 0         |  |
|       |      | Shiraz-58T | 2221 | 0.871948 | 0         |  |
|       |      | Shiraz-71T | 2260 | 0.68394  | 0         |  |
|       |      | Shiraz-71T | 2260 | 0.68394  | 0         |  |
|       |      | Shiraz-71T | 2262 | 0.986748 | 0         |  |

|  |            |      |          |           |  |
|--|------------|------|----------|-----------|--|
|  | Shiraz-71T | 2262 | 0.986748 | 0         |  |
|  | Shiraz-4T  | 260  | 0        | -0.324128 |  |
|  | Shiraz-4T  | 260  | 0        | -0.324128 |  |
|  | Shiraz-16T | 294  | 0.655804 | 0         |  |
|  | Shiraz-16T | 294  | 0.655804 | 0         |  |
|  | Shiraz-31T | 345  | 0.103301 | 0         |  |
|  | Shiraz-31T | 345  | 0.103301 | 0         |  |
|  | Shiraz-36T | 431  | 0        | -0.78035  |  |
|  | Shiraz-36T | 431  | 0        | -0.78035  |  |
|  | Shiraz-36T | 432  | 0        | -0.6692   |  |
|  | Shiraz-36T | 432  | 0        | -0.6692   |  |
|  | Shiraz-44T | 891  | 0        | -0.954044 |  |
|  | Shiraz-44T | 891  | 0        | -0.954044 |  |
|  | Shiraz-46T | 991  | 0.139564 | 0         |  |
|  | Shiraz-46T | 991  | 0.139564 | 0         |  |
|  | Shiraz-47T | 1084 | 0.24185  | 0         |  |
|  | Shiraz-47T | 1084 | 0.24185  | 0         |  |
|  | Shiraz-49T | 1166 | 0        | -0.917235 |  |
|  | Shiraz-49T | 1166 | 0        | -0.917235 |  |
|  | Shiraz-77T | 1282 | 0.213849 | 0         |  |
|  | Shiraz-77T | 1282 | 0.213849 | 0         |  |
|  | Shiraz-9T  | 1368 | 0.199713 | 0         |  |
|  | Shiraz-9T  | 1368 | 0.199713 | 0         |  |
|  | Shiraz-18T | 1455 | 0        | -0.186773 |  |
|  | Shiraz-18T | 1455 | 0        | -0.186773 |  |
|  | Shiraz-22T | 1669 | 0.695915 | 0         |  |
|  | Shiraz-22T | 1669 | 0.695915 | 0         |  |
|  | Shiraz-22T | 1672 | 1.01678  | 0         |  |
|  | Shiraz-22T | 1672 | 1.01678  | 0         |  |
|  | Shiraz-25T | 1717 | 0.420447 | 0         |  |
|  | Shiraz-25T | 1717 | 0.420447 | 0         |  |
|  | Shiraz-28T | 1760 | 0.538181 | 0         |  |
|  | Shiraz-28T | 1760 | 0.538181 | 0         |  |
|  | Shiraz-29T | 1800 | 0.672527 | 0         |  |
|  | Shiraz-29T | 1800 | 0.672527 | 0         |  |
|  | Shiraz-32T | 1869 | 0.776805 | 0         |  |
|  | Shiraz-32T | 1869 | 0.776805 | 0         |  |
|  | Shiraz-35T | 1932 | 0.507141 | 0         |  |
|  | Shiraz-35T | 1932 | 0.507141 | 0         |  |
|  | Shiraz-58T | 2221 | 0.871948 | 0         |  |
|  | Shiraz-58T | 2221 | 0.871948 | 0         |  |
|  | Shiraz-71T | 2260 | 0.68394  | 0         |  |
|  | Shiraz-71T | 2260 | 0.68394  | 0         |  |
|  | Shiraz-71T | 2262 | 0.986748 | 0         |  |
|  | Shiraz-71T | 2262 | 0.986748 | 0         |  |
|  | Shiraz-4T  | 260  | 0        | -0.324128 |  |
|  | Shiraz-4T  | 260  | 0        | -0.324128 |  |



|       |      |            |      |          |           |  |  |
|-------|------|------------|------|----------|-----------|--|--|
|       |      | Shiraz-16T | 294  | 0.655804 | 0         |  |  |
|       |      | Shiraz-16T | 294  | 0.655804 | 0         |  |  |
|       |      | Shiraz-31T | 345  | 0.103301 | 0         |  |  |
|       |      | Shiraz-31T | 345  | 0.103301 | 0         |  |  |
|       |      | Shiraz-36T | 431  | 0        | -0.78035  |  |  |
|       |      | Shiraz-36T | 431  | 0        | -0.78035  |  |  |
|       |      | Shiraz-36T | 432  | 0        | -0.6692   |  |  |
|       |      | Shiraz-36T | 432  | 0        | -0.6692   |  |  |
|       |      | Shiraz-44T | 891  | 0        | -0.954044 |  |  |
|       |      | Shiraz-44T | 891  | 0        | -0.954044 |  |  |
|       |      | Shiraz-46T | 991  | 0.139564 | 0         |  |  |
|       |      | Shiraz-46T | 991  | 0.139564 | 0         |  |  |
|       |      | Shiraz-47T | 1084 | 0.24185  | 0         |  |  |
|       |      | Shiraz-47T | 1084 | 0.24185  | 0         |  |  |
|       |      | Shiraz-49T | 1166 | 0        | -0.917235 |  |  |
|       |      | Shiraz-49T | 1166 | 0        | -0.917235 |  |  |
|       |      | Shiraz-77T | 1282 | 0.213849 | 0         |  |  |
|       |      | Shiraz-77T | 1282 | 0.213849 | 0         |  |  |
|       |      | Shiraz-9T  | 1368 | 0.199713 | 0         |  |  |
|       |      | Shiraz-9T  | 1368 | 0.199713 | 0         |  |  |
|       |      | Shiraz-18T | 1455 | 0        | -0.186773 |  |  |
|       |      | Shiraz-18T | 1455 | 0        | -0.186773 |  |  |
|       |      | Shiraz-22T | 1669 | 0.695915 | 0         |  |  |
|       |      | Shiraz-22T | 1669 | 0.695915 | 0         |  |  |
|       |      | Shiraz-22T | 1672 | 1.01678  | 0         |  |  |
|       |      | Shiraz-22T | 1672 | 1.01678  | 0         |  |  |
|       |      | Shiraz-25T | 1717 | 0.420447 | 0         |  |  |
|       |      | Shiraz-25T | 1717 | 0.420447 | 0         |  |  |
|       |      | Shiraz-28T | 1760 | 0.538181 | 0         |  |  |
|       |      | Shiraz-28T | 1760 | 0.538181 | 0         |  |  |
|       |      | Shiraz-29T | 1800 | 0.672527 | 0         |  |  |
|       |      | Shiraz-29T | 1800 | 0.672527 | 0         |  |  |
|       |      | Shiraz-32T | 1869 | 0.776805 | 0         |  |  |
|       |      | Shiraz-32T | 1869 | 0.776805 | 0         |  |  |
|       |      | Shiraz-35T | 1932 | 0.507141 | 0         |  |  |
|       |      | Shiraz-35T | 1932 | 0.507141 | 0         |  |  |
|       |      | Shiraz-58T | 2221 | 0.871948 | 0         |  |  |
|       |      | Shiraz-58T | 2221 | 0.871948 | 0         |  |  |
|       |      | Shiraz-71T | 2260 | 0.68394  | 0         |  |  |
|       |      | Shiraz-71T | 2260 | 0.68394  | 0         |  |  |
|       |      | Shiraz-71T | 2262 | 0.986748 | 0         |  |  |
|       |      | Shiraz-71T | 2262 | 0.986748 | 0         |  |  |
| GAGE6 | chrX | Shiraz-4T  | 260  | 0        | -0.324128 |  |  |
|       |      | Shiraz-4T  | 260  | 0        | -0.324128 |  |  |
|       |      | Shiraz-16T | 294  | 0.655804 | 0         |  |  |
|       |      | Shiraz-16T | 294  | 0.655804 | 0         |  |  |
|       |      | Shiraz-31T | 345  | 0.103301 | 0         |  |  |

|  |  |            |      |          |           |  |  |
|--|--|------------|------|----------|-----------|--|--|
|  |  | Shiraz-31T | 345  | 0.103301 | 0         |  |  |
|  |  | Shiraz-36T | 431  | 0        | -0.78035  |  |  |
|  |  | Shiraz-36T | 431  | 0        | -0.78035  |  |  |
|  |  | Shiraz-36T | 432  | 0        | -0.6692   |  |  |
|  |  | Shiraz-36T | 432  | 0        | -0.6692   |  |  |
|  |  | Shiraz-44T | 891  | 0        | -0.954044 |  |  |
|  |  | Shiraz-44T | 891  | 0        | -0.954044 |  |  |
|  |  | Shiraz-46T | 991  | 0.139564 | 0         |  |  |
|  |  | Shiraz-46T | 991  | 0.139564 | 0         |  |  |
|  |  | Shiraz-47T | 1084 | 0.24185  | 0         |  |  |
|  |  | Shiraz-47T | 1084 | 0.24185  | 0         |  |  |
|  |  | Shiraz-49T | 1166 | 0        | -0.917235 |  |  |
|  |  | Shiraz-49T | 1166 | 0        | -0.917235 |  |  |
|  |  | Shiraz-77T | 1282 | 0.213849 | 0         |  |  |
|  |  | Shiraz-77T | 1282 | 0.213849 | 0         |  |  |
|  |  | Shiraz-9T  | 1368 | 0.199713 | 0         |  |  |
|  |  | Shiraz-9T  | 1368 | 0.199713 | 0         |  |  |
|  |  | Shiraz-18T | 1455 | 0        | -0.186773 |  |  |
|  |  | Shiraz-18T | 1455 | 0        | -0.186773 |  |  |
|  |  | Shiraz-22T | 1669 | 0.695915 | 0         |  |  |
|  |  | Shiraz-22T | 1669 | 0.695915 | 0         |  |  |
|  |  | Shiraz-22T | 1672 | 1.01678  | 0         |  |  |
|  |  | Shiraz-22T | 1672 | 1.01678  | 0         |  |  |
|  |  | Shiraz-25T | 1717 | 0.420447 | 0         |  |  |
|  |  | Shiraz-25T | 1717 | 0.420447 | 0         |  |  |
|  |  | Shiraz-28T | 1760 | 0.538181 | 0         |  |  |
|  |  | Shiraz-28T | 1760 | 0.538181 | 0         |  |  |
|  |  | Shiraz-29T | 1800 | 0.672527 | 0         |  |  |
|  |  | Shiraz-29T | 1800 | 0.672527 | 0         |  |  |
|  |  | Shiraz-32T | 1869 | 0.776805 | 0         |  |  |
|  |  | Shiraz-32T | 1869 | 0.776805 | 0         |  |  |
|  |  | Shiraz-35T | 1932 | 0.507141 | 0         |  |  |
|  |  | Shiraz-35T | 1932 | 0.507141 | 0         |  |  |
|  |  | Shiraz-58T | 2221 | 0.871948 | 0         |  |  |
|  |  | Shiraz-58T | 2221 | 0.871948 | 0         |  |  |
|  |  | Shiraz-71T | 2260 | 0.68394  | 0         |  |  |
|  |  | Shiraz-71T | 2260 | 0.68394  | 0         |  |  |
|  |  | Shiraz-71T | 2262 | 0.986748 | 0         |  |  |
|  |  | Shiraz-71T | 2262 | 0.986748 | 0         |  |  |
|  |  | Shiraz-4T  | 260  | 0        | -0.324128 |  |  |
|  |  | Shiraz-4T  | 260  | 0        | -0.324128 |  |  |
|  |  | Shiraz-16T | 294  | 0.655804 | 0         |  |  |
|  |  | Shiraz-16T | 294  | 0.655804 | 0         |  |  |
|  |  | Shiraz-31T | 345  | 0.103301 | 0         |  |  |
|  |  | Shiraz-31T | 345  | 0.103301 | 0         |  |  |
|  |  | Shiraz-36T | 431  | 0        | -0.78035  |  |  |
|  |  | Shiraz-36T | 431  | 0        | -0.78035  |  |  |

|  |            |      |          |           |  |
|--|------------|------|----------|-----------|--|
|  | Shiraz-36T | 432  | 0        | -0.6692   |  |
|  | Shiraz-36T | 432  | 0        | -0.6692   |  |
|  | Shiraz-44T | 891  | 0        | -0.954044 |  |
|  | Shiraz-44T | 891  | 0        | -0.954044 |  |
|  | Shiraz-46T | 991  | 0.139564 | 0         |  |
|  | Shiraz-46T | 991  | 0.139564 | 0         |  |
|  | Shiraz-47T | 1084 | 0.24185  | 0         |  |
|  | Shiraz-47T | 1084 | 0.24185  | 0         |  |
|  | Shiraz-49T | 1166 | 0        | -0.917235 |  |
|  | Shiraz-49T | 1166 | 0        | -0.917235 |  |
|  | Shiraz-77T | 1282 | 0.213849 | 0         |  |
|  | Shiraz-77T | 1282 | 0.213849 | 0         |  |
|  | Shiraz-9T  | 1368 | 0.199713 | 0         |  |
|  | Shiraz-9T  | 1368 | 0.199713 | 0         |  |
|  | Shiraz-18T | 1455 | 0        | -0.186773 |  |
|  | Shiraz-18T | 1455 | 0        | -0.186773 |  |
|  | Shiraz-22T | 1669 | 0.695915 | 0         |  |
|  | Shiraz-22T | 1669 | 0.695915 | 0         |  |
|  | Shiraz-22T | 1672 | 1.01678  | 0         |  |
|  | Shiraz-22T | 1672 | 1.01678  | 0         |  |
|  | Shiraz-25T | 1717 | 0.420447 | 0         |  |
|  | Shiraz-25T | 1717 | 0.420447 | 0         |  |
|  | Shiraz-28T | 1760 | 0.538181 | 0         |  |
|  | Shiraz-28T | 1760 | 0.538181 | 0         |  |
|  | Shiraz-29T | 1800 | 0.672527 | 0         |  |
|  | Shiraz-29T | 1800 | 0.672527 | 0         |  |
|  | Shiraz-32T | 1869 | 0.776805 | 0         |  |
|  | Shiraz-32T | 1869 | 0.776805 | 0         |  |
|  | Shiraz-35T | 1932 | 0.507141 | 0         |  |
|  | Shiraz-35T | 1932 | 0.507141 | 0         |  |
|  | Shiraz-58T | 2221 | 0.871948 | 0         |  |
|  | Shiraz-58T | 2221 | 0.871948 | 0         |  |
|  | Shiraz-71T | 2260 | 0.68394  | 0         |  |
|  | Shiraz-71T | 2260 | 0.68394  | 0         |  |
|  | Shiraz-71T | 2262 | 0.986748 | 0         |  |
|  | Shiraz-71T | 2262 | 0.986748 | 0         |  |
|  | Shiraz-4T  | 260  | 0        | -0.324128 |  |
|  | Shiraz-4T  | 260  | 0        | -0.324128 |  |
|  | Shiraz-16T | 294  | 0.655804 | 0         |  |
|  | Shiraz-16T | 294  | 0.655804 | 0         |  |
|  | Shiraz-31T | 345  | 0.103301 | 0         |  |
|  | Shiraz-31T | 345  | 0.103301 | 0         |  |
|  | Shiraz-36T | 431  | 0        | -0.78035  |  |
|  | Shiraz-36T | 431  | 0        | -0.78035  |  |
|  | Shiraz-36T | 432  | 0        | -0.6692   |  |
|  | Shiraz-36T | 432  | 0        | -0.6692   |  |
|  | Shiraz-44T | 891  | 0        | -0.954044 |  |

|       |      |            |      |          |           |  |  |
|-------|------|------------|------|----------|-----------|--|--|
|       |      | Shiraz-44T | 891  | 0        | -0.954044 |  |  |
|       |      | Shiraz-46T | 991  | 0.139564 | 0         |  |  |
|       |      | Shiraz-46T | 991  | 0.139564 | 0         |  |  |
|       |      | Shiraz-47T | 1084 | 0.24185  | 0         |  |  |
|       |      | Shiraz-47T | 1084 | 0.24185  | 0         |  |  |
|       |      | Shiraz-49T | 1166 | 0        | -0.917235 |  |  |
|       |      | Shiraz-49T | 1166 | 0        | -0.917235 |  |  |
|       |      | Shiraz-77T | 1282 | 0.213849 | 0         |  |  |
|       |      | Shiraz-77T | 1282 | 0.213849 | 0         |  |  |
|       |      | Shiraz-9T  | 1368 | 0.199713 | 0         |  |  |
|       |      | Shiraz-9T  | 1368 | 0.199713 | 0         |  |  |
|       |      | Shiraz-18T | 1455 | 0        | -0.186773 |  |  |
|       |      | Shiraz-18T | 1455 | 0        | -0.186773 |  |  |
|       |      | Shiraz-22T | 1669 | 0.695915 | 0         |  |  |
|       |      | Shiraz-22T | 1669 | 0.695915 | 0         |  |  |
|       |      | Shiraz-22T | 1672 | 1.01678  | 0         |  |  |
|       |      | Shiraz-22T | 1672 | 1.01678  | 0         |  |  |
|       |      | Shiraz-25T | 1717 | 0.420447 | 0         |  |  |
|       |      | Shiraz-25T | 1717 | 0.420447 | 0         |  |  |
|       |      | Shiraz-28T | 1760 | 0.538181 | 0         |  |  |
|       |      | Shiraz-28T | 1760 | 0.538181 | 0         |  |  |
|       |      | Shiraz-29T | 1800 | 0.672527 | 0         |  |  |
|       |      | Shiraz-29T | 1800 | 0.672527 | 0         |  |  |
|       |      | Shiraz-32T | 1869 | 0.776805 | 0         |  |  |
|       |      | Shiraz-32T | 1869 | 0.776805 | 0         |  |  |
|       |      | Shiraz-35T | 1932 | 0.507141 | 0         |  |  |
|       |      | Shiraz-35T | 1932 | 0.507141 | 0         |  |  |
|       |      | Shiraz-58T | 2221 | 0.871948 | 0         |  |  |
|       |      | Shiraz-58T | 2221 | 0.871948 | 0         |  |  |
|       |      | Shiraz-71T | 2260 | 0.68394  | 0         |  |  |
|       |      | Shiraz-71T | 2260 | 0.68394  | 0         |  |  |
|       |      | Shiraz-71T | 2262 | 0.986748 | 0         |  |  |
|       |      | Shiraz-71T | 2262 | 0.986748 | 0         |  |  |
| GAGE7 | chrX | Shiraz-4T  | 260  | 0        | -0.324128 |  |  |
|       |      | Shiraz-4T  | 260  | 0        | -0.324128 |  |  |
|       |      | Shiraz-16T | 294  | 0.655804 | 0         |  |  |
|       |      | Shiraz-16T | 294  | 0.655804 | 0         |  |  |
|       |      | Shiraz-31T | 345  | 0.103301 | 0         |  |  |
|       |      | Shiraz-31T | 345  | 0.103301 | 0         |  |  |
|       |      | Shiraz-36T | 431  | 0        | -0.78035  |  |  |
|       |      | Shiraz-36T | 431  | 0        | -0.78035  |  |  |
|       |      | Shiraz-36T | 432  | 0        | -0.6692   |  |  |
|       |      | Shiraz-36T | 432  | 0        | -0.6692   |  |  |
|       |      | Shiraz-44T | 891  | 0        | -0.954044 |  |  |
|       |      | Shiraz-44T | 891  | 0        | -0.954044 |  |  |
|       |      | Shiraz-46T | 991  | 0.139564 | 0         |  |  |
|       |      | Shiraz-46T | 991  | 0.139564 | 0         |  |  |

|  |  |            |      |          |           |  |  |
|--|--|------------|------|----------|-----------|--|--|
|  |  | Shiraz-47T | 1084 | 0.24185  | 0         |  |  |
|  |  | Shiraz-47T | 1084 | 0.24185  | 0         |  |  |
|  |  | Shiraz-49T | 1166 | 0        | -0.917235 |  |  |
|  |  | Shiraz-49T | 1166 | 0        | -0.917235 |  |  |
|  |  | Shiraz-77T | 1282 | 0.213849 | 0         |  |  |
|  |  | Shiraz-77T | 1282 | 0.213849 | 0         |  |  |
|  |  | Shiraz-9T  | 1368 | 0.199713 | 0         |  |  |
|  |  | Shiraz-9T  | 1368 | 0.199713 | 0         |  |  |
|  |  | Shiraz-18T | 1455 | 0        | -0.186773 |  |  |
|  |  | Shiraz-18T | 1455 | 0        | -0.186773 |  |  |
|  |  | Shiraz-22T | 1669 | 0.695915 | 0         |  |  |
|  |  | Shiraz-22T | 1669 | 0.695915 | 0         |  |  |
|  |  | Shiraz-22T | 1672 | 1.01678  | 0         |  |  |
|  |  | Shiraz-22T | 1672 | 1.01678  | 0         |  |  |
|  |  | Shiraz-25T | 1717 | 0.420447 | 0         |  |  |
|  |  | Shiraz-25T | 1717 | 0.420447 | 0         |  |  |
|  |  | Shiraz-28T | 1760 | 0.538181 | 0         |  |  |
|  |  | Shiraz-28T | 1760 | 0.538181 | 0         |  |  |
|  |  | Shiraz-29T | 1800 | 0.672527 | 0         |  |  |
|  |  | Shiraz-29T | 1800 | 0.672527 | 0         |  |  |
|  |  | Shiraz-32T | 1869 | 0.776805 | 0         |  |  |
|  |  | Shiraz-32T | 1869 | 0.776805 | 0         |  |  |
|  |  | Shiraz-35T | 1932 | 0.507141 | 0         |  |  |
|  |  | Shiraz-35T | 1932 | 0.507141 | 0         |  |  |
|  |  | Shiraz-58T | 2221 | 0.871948 | 0         |  |  |
|  |  | Shiraz-58T | 2221 | 0.871948 | 0         |  |  |
|  |  | Shiraz-71T | 2260 | 0.68394  | 0         |  |  |
|  |  | Shiraz-71T | 2260 | 0.68394  | 0         |  |  |
|  |  | Shiraz-71T | 2262 | 0.986748 | 0         |  |  |
|  |  | Shiraz-71T | 2262 | 0.986748 | 0         |  |  |
|  |  | Shiraz-4T  | 260  | 0        | -0.324128 |  |  |
|  |  | Shiraz-4T  | 260  | 0        | -0.324128 |  |  |
|  |  | Shiraz-16T | 294  | 0.655804 | 0         |  |  |
|  |  | Shiraz-16T | 294  | 0.655804 | 0         |  |  |
|  |  | Shiraz-31T | 345  | 0.103301 | 0         |  |  |
|  |  | Shiraz-31T | 345  | 0.103301 | 0         |  |  |
|  |  | Shiraz-36T | 431  | 0        | -0.78035  |  |  |
|  |  | Shiraz-36T | 431  | 0        | -0.78035  |  |  |
|  |  | Shiraz-36T | 432  | 0        | -0.6692   |  |  |
|  |  | Shiraz-36T | 432  | 0        | -0.6692   |  |  |
|  |  | Shiraz-44T | 891  | 0        | -0.954044 |  |  |
|  |  | Shiraz-44T | 891  | 0        | -0.954044 |  |  |
|  |  | Shiraz-46T | 991  | 0.139564 | 0         |  |  |
|  |  | Shiraz-46T | 991  | 0.139564 | 0         |  |  |
|  |  | Shiraz-47T | 1084 | 0.24185  | 0         |  |  |
|  |  | Shiraz-47T | 1084 | 0.24185  | 0         |  |  |
|  |  | Shiraz-49T | 1166 | 0        | -0.917235 |  |  |

|  |            |      |          |           |  |
|--|------------|------|----------|-----------|--|
|  | Shiraz-49T | 1166 | 0        | -0.917235 |  |
|  | Shiraz-77T | 1282 | 0.213849 | 0         |  |
|  | Shiraz-77T | 1282 | 0.213849 | 0         |  |
|  | Shiraz-9T  | 1368 | 0.199713 | 0         |  |
|  | Shiraz-9T  | 1368 | 0.199713 | 0         |  |
|  | Shiraz-18T | 1455 | 0        | -0.186773 |  |
|  | Shiraz-18T | 1455 | 0        | -0.186773 |  |
|  | Shiraz-22T | 1669 | 0.695915 | 0         |  |
|  | Shiraz-22T | 1669 | 0.695915 | 0         |  |
|  | Shiraz-22T | 1672 | 1.01678  | 0         |  |
|  | Shiraz-22T | 1672 | 1.01678  | 0         |  |
|  | Shiraz-25T | 1717 | 0.420447 | 0         |  |
|  | Shiraz-25T | 1717 | 0.420447 | 0         |  |
|  | Shiraz-28T | 1760 | 0.538181 | 0         |  |
|  | Shiraz-28T | 1760 | 0.538181 | 0         |  |
|  | Shiraz-29T | 1800 | 0.672527 | 0         |  |
|  | Shiraz-29T | 1800 | 0.672527 | 0         |  |
|  | Shiraz-32T | 1869 | 0.776805 | 0         |  |
|  | Shiraz-32T | 1869 | 0.776805 | 0         |  |
|  | Shiraz-35T | 1932 | 0.507141 | 0         |  |
|  | Shiraz-35T | 1932 | 0.507141 | 0         |  |
|  | Shiraz-58T | 2221 | 0.871948 | 0         |  |
|  | Shiraz-58T | 2221 | 0.871948 | 0         |  |
|  | Shiraz-71T | 2260 | 0.68394  | 0         |  |
|  | Shiraz-71T | 2260 | 0.68394  | 0         |  |
|  | Shiraz-71T | 2262 | 0.986748 | 0         |  |
|  | Shiraz-71T | 2262 | 0.986748 | 0         |  |
|  | Shiraz-4T  | 260  | 0        | -0.324128 |  |
|  | Shiraz-4T  | 260  | 0        | -0.324128 |  |
|  | Shiraz-16T | 294  | 0.655804 | 0         |  |
|  | Shiraz-16T | 294  | 0.655804 | 0         |  |
|  | Shiraz-31T | 345  | 0.103301 | 0         |  |
|  | Shiraz-31T | 345  | 0.103301 | 0         |  |
|  | Shiraz-36T | 431  | 0        | -0.78035  |  |
|  | Shiraz-36T | 431  | 0        | -0.78035  |  |
|  | Shiraz-36T | 432  | 0        | -0.6692   |  |
|  | Shiraz-36T | 432  | 0        | -0.6692   |  |
|  | Shiraz-44T | 891  | 0        | -0.954044 |  |
|  | Shiraz-44T | 891  | 0        | -0.954044 |  |
|  | Shiraz-46T | 991  | 0.139564 | 0         |  |
|  | Shiraz-46T | 991  | 0.139564 | 0         |  |
|  | Shiraz-47T | 1084 | 0.24185  | 0         |  |
|  | Shiraz-47T | 1084 | 0.24185  | 0         |  |
|  | Shiraz-49T | 1166 | 0        | -0.917235 |  |
|  | Shiraz-49T | 1166 | 0        | -0.917235 |  |
|  | Shiraz-77T | 1282 | 0.213849 | 0         |  |
|  | Shiraz-77T | 1282 | 0.213849 | 0         |  |

|       |      |            |      |          |           |  |  |
|-------|------|------------|------|----------|-----------|--|--|
|       |      | Shiraz-9T  | 1368 | 0.199713 | 0         |  |  |
|       |      | Shiraz-9T  | 1368 | 0.199713 | 0         |  |  |
|       |      | Shiraz-18T | 1455 | 0        | -0.186773 |  |  |
|       |      | Shiraz-18T | 1455 | 0        | -0.186773 |  |  |
|       |      | Shiraz-22T | 1669 | 0.695915 | 0         |  |  |
|       |      | Shiraz-22T | 1669 | 0.695915 | 0         |  |  |
|       |      | Shiraz-22T | 1672 | 1.01678  | 0         |  |  |
|       |      | Shiraz-22T | 1672 | 1.01678  | 0         |  |  |
|       |      | Shiraz-25T | 1717 | 0.420447 | 0         |  |  |
|       |      | Shiraz-25T | 1717 | 0.420447 | 0         |  |  |
|       |      | Shiraz-28T | 1760 | 0.538181 | 0         |  |  |
|       |      | Shiraz-28T | 1760 | 0.538181 | 0         |  |  |
|       |      | Shiraz-29T | 1800 | 0.672527 | 0         |  |  |
|       |      | Shiraz-29T | 1800 | 0.672527 | 0         |  |  |
|       |      | Shiraz-32T | 1869 | 0.776805 | 0         |  |  |
|       |      | Shiraz-32T | 1869 | 0.776805 | 0         |  |  |
|       |      | Shiraz-35T | 1932 | 0.507141 | 0         |  |  |
|       |      | Shiraz-35T | 1932 | 0.507141 | 0         |  |  |
|       |      | Shiraz-58T | 2221 | 0.871948 | 0         |  |  |
|       |      | Shiraz-58T | 2221 | 0.871948 | 0         |  |  |
|       |      | Shiraz-71T | 2260 | 0.68394  | 0         |  |  |
|       |      | Shiraz-71T | 2260 | 0.68394  | 0         |  |  |
|       |      | Shiraz-71T | 2262 | 0.986748 | 0         |  |  |
|       |      | Shiraz-71T | 2262 | 0.986748 | 0         |  |  |
| GAGE8 | chrX | Shiraz-4T  | 260  | 0        | -0.324128 |  |  |
|       |      | Shiraz-16T | 294  | 0.655804 | 0         |  |  |
|       |      | Shiraz-31T | 345  | 0.103301 | 0         |  |  |
|       |      | Shiraz-36T | 431  | 0        | -0.78035  |  |  |
|       |      | Shiraz-36T | 432  | 0        | -0.6692   |  |  |
|       |      | Shiraz-44T | 891  | 0        | -0.954044 |  |  |
|       |      | Shiraz-46T | 991  | 0.139564 | 0         |  |  |
|       |      | Shiraz-47T | 1084 | 0.24185  | 0         |  |  |
|       |      | Shiraz-49T | 1166 | 0        | -0.917235 |  |  |
|       |      | Shiraz-77T | 1282 | 0.213849 | 0         |  |  |
|       |      | Shiraz-9T  | 1368 | 0.199713 | 0         |  |  |
|       |      | Shiraz-18T | 1455 | 0        | -0.186773 |  |  |
|       |      | Shiraz-22T | 1669 | 0.695915 | 0         |  |  |
|       |      | Shiraz-22T | 1672 | 1.01678  | 0         |  |  |
|       |      | Shiraz-25T | 1717 | 0.420447 | 0         |  |  |
|       |      | Shiraz-28T | 1760 | 0.538181 | 0         |  |  |
|       |      | Shiraz-29T | 1800 | 0.672527 | 0         |  |  |
|       |      | Shiraz-32T | 1869 | 0.776805 | 0         |  |  |
|       |      | Shiraz-35T | 1932 | 0.507141 | 0         |  |  |
|       |      | Shiraz-58T | 2221 | 0.871948 | 0         |  |  |
|       |      | Shiraz-71T | 2260 | 0.68394  | 0         |  |  |
|       |      | Shiraz-71T | 2262 | 0.986748 | 0         |  |  |
|       |      | Shiraz-4T  | 260  | 0        | -0.324128 |  |  |

|         |      |            |      |          |           |  |
|---------|------|------------|------|----------|-----------|--|
|         |      | Shiraz-16T | 294  | 0.655804 | 0         |  |
|         |      | Shiraz-31T | 345  | 0.103301 | 0         |  |
|         |      | Shiraz-36T | 431  | 0        | -0.78035  |  |
|         |      | Shiraz-36T | 432  | 0        | -0.6692   |  |
|         |      | Shiraz-44T | 891  | 0        | -0.954044 |  |
|         |      | Shiraz-46T | 991  | 0.139564 | 0         |  |
|         |      | Shiraz-47T | 1084 | 0.24185  | 0         |  |
|         |      | Shiraz-49T | 1166 | 0        | -0.917235 |  |
|         |      | Shiraz-77T | 1282 | 0.213849 | 0         |  |
|         |      | Shiraz-9T  | 1368 | 0.199713 | 0         |  |
|         |      | Shiraz-18T | 1455 | 0        | -0.186773 |  |
|         |      | Shiraz-22T | 1669 | 0.695915 | 0         |  |
|         |      | Shiraz-22T | 1672 | 1.01678  | 0         |  |
|         |      | Shiraz-25T | 1717 | 0.420447 | 0         |  |
|         |      | Shiraz-28T | 1760 | 0.538181 | 0         |  |
|         |      | Shiraz-29T | 1800 | 0.672527 | 0         |  |
|         |      | Shiraz-32T | 1869 | 0.776805 | 0         |  |
|         |      | Shiraz-35T | 1932 | 0.507141 | 0         |  |
|         |      | Shiraz-58T | 2221 | 0.871948 | 0         |  |
|         |      | Shiraz-71T | 2260 | 0.68394  | 0         |  |
|         |      | Shiraz-71T | 2262 | 0.986748 | 0         |  |
|         |      | Shiraz-4T  | 260  | 0        | -0.324128 |  |
|         |      | Shiraz-16T | 294  | 0.655804 | 0         |  |
|         |      | Shiraz-31T | 345  | 0.103301 | 0         |  |
|         |      | Shiraz-36T | 431  | 0        | -0.78035  |  |
|         |      | Shiraz-36T | 432  | 0        | -0.6692   |  |
|         |      | Shiraz-44T | 891  | 0        | -0.954044 |  |
|         |      | Shiraz-46T | 991  | 0.139564 | 0         |  |
|         |      | Shiraz-47T | 1084 | 0.24185  | 0         |  |
|         |      | Shiraz-49T | 1166 | 0        | -0.917235 |  |
|         |      | Shiraz-77T | 1282 | 0.213849 | 0         |  |
|         |      | Shiraz-9T  | 1368 | 0.199713 | 0         |  |
|         |      | Shiraz-18T | 1455 | 0        | -0.186773 |  |
|         |      | Shiraz-22T | 1669 | 0.695915 | 0         |  |
|         |      | Shiraz-22T | 1672 | 1.01678  | 0         |  |
|         |      | Shiraz-25T | 1717 | 0.420447 | 0         |  |
|         |      | Shiraz-28T | 1760 | 0.538181 | 0         |  |
|         |      | Shiraz-29T | 1800 | 0.672527 | 0         |  |
|         |      | Shiraz-32T | 1869 | 0.776805 | 0         |  |
|         |      | Shiraz-35T | 1932 | 0.507141 | 0         |  |
|         |      | Shiraz-58T | 2221 | 0.871948 | 0         |  |
|         |      | Shiraz-71T | 2260 | 0.68394  | 0         |  |
|         |      | Shiraz-71T | 2262 | 0.986748 | 0         |  |
| GAL3ST4 | chr7 | Shiraz-3T  | 90   | 0.219276 | 0         |  |
|         |      | Shiraz-3T  | 94   | 0.74735  | 0         |  |
|         |      | Shiraz-4T  | 253  | 0.372918 | 0         |  |
|         |      | Shiraz-31T | 316  | 0.219196 | 0         |  |



|  |            |      |          |           |  |
|--|------------|------|----------|-----------|--|
|  | Shiraz-36T | 378  | 0.179558 | 0         |  |
|  | Shiraz-36T | 381  | 0.332628 | 0         |  |
|  | Shiraz-44T | 639  | 1.035032 | 0         |  |
|  | Shiraz-46T | 943  | 0.093799 | 0         |  |
|  | Shiraz-46T | 946  | 0.299835 | 0         |  |
|  | Shiraz-47T | 1030 | 0.257728 | 0         |  |
|  | Shiraz-49T | 1120 | 0.281656 | 0         |  |
|  | Shiraz-77T | 1225 | 0        | -0.117922 |  |
|  | Shiraz-77T | 1227 | 0.196445 | 0         |  |
|  | Shiraz-9T  | 1324 | 0.679266 | 0         |  |
|  | Shiraz-18T | 1434 | 0.244465 | 0         |  |
|  | Shiraz-22T | 1549 | 0        | -0.319623 |  |
|  | Shiraz-22T | 1551 | 0.324011 | 0         |  |
|  | Shiraz-25T | 1698 | 0.21835  | 0         |  |
|  | Shiraz-28T | 1735 | 0.350744 | 0         |  |
|  | Shiraz-29T | 1778 | 0.120767 | 0         |  |
|  | Shiraz-32T | 1833 | 0.551336 | 0         |  |
|  | Shiraz-32T | 1834 | 1.485392 | 0         |  |
|  | Shiraz-38T | 1951 | 0.250891 | 0         |  |
|  | Shiraz-53T | 2078 | 0.287202 | 0         |  |
|  | Shiraz-58T | 2160 | 0.399007 | 0         |  |
|  | Shiraz-71T | 2238 | 0.603631 | 0         |  |
|  | Shiraz-3T  | 90   | 0.219276 | 0         |  |
|  | Shiraz-3T  | 94   | 0.74735  | 0         |  |
|  | Shiraz-4T  | 253  | 0.372918 | 0         |  |
|  | Shiraz-31T | 316  | 0.219196 | 0         |  |
|  | Shiraz-36T | 378  | 0.179558 | 0         |  |
|  | Shiraz-36T | 381  | 0.332628 | 0         |  |
|  | Shiraz-44T | 639  | 1.035032 | 0         |  |
|  | Shiraz-46T | 943  | 0.093799 | 0         |  |
|  | Shiraz-46T | 946  | 0.299835 | 0         |  |
|  | Shiraz-47T | 1030 | 0.257728 | 0         |  |
|  | Shiraz-49T | 1120 | 0.281656 | 0         |  |
|  | Shiraz-77T | 1225 | 0        | -0.117922 |  |
|  | Shiraz-77T | 1227 | 0.196445 | 0         |  |
|  | Shiraz-9T  | 1324 | 0.679266 | 0         |  |
|  | Shiraz-18T | 1434 | 0.244465 | 0         |  |
|  | Shiraz-22T | 1549 | 0        | -0.319623 |  |
|  | Shiraz-22T | 1551 | 0.324011 | 0         |  |
|  | Shiraz-25T | 1698 | 0.21835  | 0         |  |
|  | Shiraz-28T | 1735 | 0.350744 | 0         |  |
|  | Shiraz-29T | 1778 | 0.120767 | 0         |  |
|  | Shiraz-32T | 1833 | 0.551336 | 0         |  |
|  | Shiraz-32T | 1834 | 1.485392 | 0         |  |
|  | Shiraz-38T | 1951 | 0.250891 | 0         |  |
|  | Shiraz-53T | 2078 | 0.287202 | 0         |  |
|  | Shiraz-58T | 2160 | 0.399007 | 0         |  |

|         |      |            |      |          |           |  |
|---------|------|------------|------|----------|-----------|--|
|         |      | Shiraz-71T | 2238 | 0.603631 | 0         |  |
|         |      | Shiraz-3T  | 90   | 0.219276 | 0         |  |
|         |      | Shiraz-3T  | 94   | 0.74735  | 0         |  |
|         |      | Shiraz-4T  | 253  | 0.372918 | 0         |  |
|         |      | Shiraz-31T | 316  | 0.219196 | 0         |  |
|         |      | Shiraz-36T | 378  | 0.179558 | 0         |  |
|         |      | Shiraz-36T | 381  | 0.332628 | 0         |  |
|         |      | Shiraz-44T | 639  | 1.035032 | 0         |  |
|         |      | Shiraz-46T | 943  | 0.093799 | 0         |  |
|         |      | Shiraz-46T | 946  | 0.299835 | 0         |  |
|         |      | Shiraz-47T | 1030 | 0.257728 | 0         |  |
|         |      | Shiraz-49T | 1120 | 0.281656 | 0         |  |
|         |      | Shiraz-77T | 1225 | 0        | -0.117922 |  |
|         |      | Shiraz-77T | 1227 | 0.196445 | 0         |  |
|         |      | Shiraz-9T  | 1324 | 0.679266 | 0         |  |
|         |      | Shiraz-18T | 1434 | 0.244465 | 0         |  |
|         |      | Shiraz-22T | 1549 | 0        | -0.319623 |  |
|         |      | Shiraz-22T | 1551 | 0.324011 | 0         |  |
|         |      | Shiraz-25T | 1698 | 0.21835  | 0         |  |
|         |      | Shiraz-28T | 1735 | 0.350744 | 0         |  |
|         |      | Shiraz-29T | 1778 | 0.120767 | 0         |  |
|         |      | Shiraz-32T | 1833 | 0.551336 | 0         |  |
|         |      | Shiraz-32T | 1834 | 1.485392 | 0         |  |
|         |      | Shiraz-38T | 1951 | 0.250891 | 0         |  |
|         |      | Shiraz-53T | 2078 | 0.287202 | 0         |  |
|         |      | Shiraz-58T | 2160 | 0.399007 | 0         |  |
|         |      | Shiraz-71T | 2238 | 0.603631 | 0         |  |
| GALNT11 | chr7 | Shiraz-3T  | 90   | 0.219276 | 0         |  |
|         |      | Shiraz-3T  | 99   | 0.454766 | 0         |  |
|         |      | Shiraz-4T  | 253  | 0.372918 | 0         |  |
|         |      | Shiraz-36T | 378  | 0.179558 | 0         |  |
|         |      | Shiraz-44T | 646  | 0.471276 | 0         |  |
|         |      | Shiraz-44T | 648  | 0.017909 | 0         |  |
|         |      | Shiraz-46T | 943  | 0.093799 | 0         |  |
|         |      | Shiraz-9T  | 1325 | 0.221899 | 0         |  |
|         |      | Shiraz-18T | 1434 | 0.244465 | 0         |  |
|         |      | Shiraz-25T | 1698 | 0.21835  | 0         |  |
|         |      | Shiraz-28T | 1735 | 0.350744 | 0         |  |
|         |      | Shiraz-29T | 1778 | 0.120767 | 0         |  |
|         |      | Shiraz-32T | 1833 | 0.551336 | 0         |  |
|         |      | Shiraz-38T | 1951 | 0.250891 | 0         |  |
|         |      | Shiraz-58T | 2162 | 0.221505 | 0         |  |
|         |      | Shiraz-71T | 2238 | 0.603631 | 0         |  |
|         |      | Shiraz-3T  | 90   | 0.219276 | 0         |  |
|         |      | Shiraz-3T  | 99   | 0.454766 | 0         |  |
|         |      | Shiraz-4T  | 253  | 0.372918 | 0         |  |
|         |      | Shiraz-36T | 378  | 0.179558 | 0         |  |

|         |      |            |      |          |   |  |  |
|---------|------|------------|------|----------|---|--|--|
|         |      | Shiraz-44T | 646  | 0.471276 | 0 |  |  |
|         |      | Shiraz-44T | 648  | 0.017909 | 0 |  |  |
|         |      | Shiraz-46T | 943  | 0.093799 | 0 |  |  |
|         |      | Shiraz-9T  | 1325 | 0.221899 | 0 |  |  |
|         |      | Shiraz-18T | 1434 | 0.244465 | 0 |  |  |
|         |      | Shiraz-25T | 1698 | 0.21835  | 0 |  |  |
|         |      | Shiraz-28T | 1735 | 0.350744 | 0 |  |  |
|         |      | Shiraz-29T | 1778 | 0.120767 | 0 |  |  |
|         |      | Shiraz-32T | 1833 | 0.551336 | 0 |  |  |
|         |      | Shiraz-38T | 1951 | 0.250891 | 0 |  |  |
|         |      | Shiraz-58T | 2162 | 0.221505 | 0 |  |  |
|         |      | Shiraz-71T | 2238 | 0.603631 | 0 |  |  |
|         |      | Shiraz-3T  | 90   | 0.219276 | 0 |  |  |
|         |      | Shiraz-3T  | 99   | 0.454766 | 0 |  |  |
|         |      | Shiraz-4T  | 253  | 0.372918 | 0 |  |  |
|         |      | Shiraz-36T | 378  | 0.179558 | 0 |  |  |
|         |      | Shiraz-44T | 646  | 0.471276 | 0 |  |  |
|         |      | Shiraz-44T | 648  | 0.017909 | 0 |  |  |
|         |      | Shiraz-46T | 943  | 0.093799 | 0 |  |  |
|         |      | Shiraz-9T  | 1325 | 0.221899 | 0 |  |  |
|         |      | Shiraz-18T | 1434 | 0.244465 | 0 |  |  |
|         |      | Shiraz-25T | 1698 | 0.21835  | 0 |  |  |
|         |      | Shiraz-28T | 1735 | 0.350744 | 0 |  |  |
|         |      | Shiraz-29T | 1778 | 0.120767 | 0 |  |  |
|         |      | Shiraz-32T | 1833 | 0.551336 | 0 |  |  |
|         |      | Shiraz-38T | 1951 | 0.250891 | 0 |  |  |
|         |      | Shiraz-58T | 2162 | 0.221505 | 0 |  |  |
|         |      | Shiraz-71T | 2238 | 0.603631 | 0 |  |  |
| GALNTL5 | chr7 | Shiraz-3T  | 90   | 0.219276 | 0 |  |  |
|         |      | Shiraz-3T  | 99   | 0.454766 | 0 |  |  |
|         |      | Shiraz-4T  | 253  | 0.372918 | 0 |  |  |
|         |      | Shiraz-36T | 378  | 0.179558 | 0 |  |  |
|         |      | Shiraz-44T | 646  | 0.471276 | 0 |  |  |
|         |      | Shiraz-44T | 648  | 0.017909 | 0 |  |  |
|         |      | Shiraz-46T | 943  | 0.093799 | 0 |  |  |
|         |      | Shiraz-9T  | 1325 | 0.221899 | 0 |  |  |
|         |      | Shiraz-18T | 1434 | 0.244465 | 0 |  |  |
|         |      | Shiraz-25T | 1698 | 0.21835  | 0 |  |  |
|         |      | Shiraz-28T | 1735 | 0.350744 | 0 |  |  |
|         |      | Shiraz-29T | 1778 | 0.120767 | 0 |  |  |
|         |      | Shiraz-32T | 1833 | 0.551336 | 0 |  |  |
|         |      | Shiraz-38T | 1951 | 0.250891 | 0 |  |  |
|         |      | Shiraz-53T | 2078 | 0.287202 | 0 |  |  |
|         |      | Shiraz-58T | 2162 | 0.221505 | 0 |  |  |
|         |      | Shiraz-71T | 2238 | 0.603631 | 0 |  |  |
|         |      | Shiraz-3T  | 90   | 0.219276 | 0 |  |  |
|         |      | Shiraz-3T  | 99   | 0.454766 | 0 |  |  |

|      |      |            |      |          |   |  |  |
|------|------|------------|------|----------|---|--|--|
|      |      | Shiraz-4T  | 253  | 0.372918 | 0 |  |  |
|      |      | Shiraz-36T | 378  | 0.179558 | 0 |  |  |
|      |      | Shiraz-44T | 646  | 0.471276 | 0 |  |  |
|      |      | Shiraz-44T | 648  | 0.017909 | 0 |  |  |
|      |      | Shiraz-46T | 943  | 0.093799 | 0 |  |  |
|      |      | Shiraz-9T  | 1325 | 0.221899 | 0 |  |  |
|      |      | Shiraz-18T | 1434 | 0.244465 | 0 |  |  |
|      |      | Shiraz-25T | 1698 | 0.21835  | 0 |  |  |
|      |      | Shiraz-28T | 1735 | 0.350744 | 0 |  |  |
|      |      | Shiraz-29T | 1778 | 0.120767 | 0 |  |  |
|      |      | Shiraz-32T | 1833 | 0.551336 | 0 |  |  |
|      |      | Shiraz-38T | 1951 | 0.250891 | 0 |  |  |
|      |      | Shiraz-53T | 2078 | 0.287202 | 0 |  |  |
|      |      | Shiraz-58T | 2162 | 0.221505 | 0 |  |  |
|      |      | Shiraz-71T | 2238 | 0.603631 | 0 |  |  |
|      |      | Shiraz-3T  | 90   | 0.219276 | 0 |  |  |
|      |      | Shiraz-3T  | 99   | 0.454766 | 0 |  |  |
|      |      | Shiraz-4T  | 253  | 0.372918 | 0 |  |  |
|      |      | Shiraz-36T | 378  | 0.179558 | 0 |  |  |
|      |      | Shiraz-44T | 646  | 0.471276 | 0 |  |  |
|      |      | Shiraz-44T | 648  | 0.017909 | 0 |  |  |
|      |      | Shiraz-46T | 943  | 0.093799 | 0 |  |  |
|      |      | Shiraz-9T  | 1325 | 0.221899 | 0 |  |  |
|      |      | Shiraz-18T | 1434 | 0.244465 | 0 |  |  |
|      |      | Shiraz-25T | 1698 | 0.21835  | 0 |  |  |
|      |      | Shiraz-28T | 1735 | 0.350744 | 0 |  |  |
|      |      | Shiraz-29T | 1778 | 0.120767 | 0 |  |  |
|      |      | Shiraz-32T | 1833 | 0.551336 | 0 |  |  |
|      |      | Shiraz-38T | 1951 | 0.250891 | 0 |  |  |
|      |      | Shiraz-53T | 2078 | 0.287202 | 0 |  |  |
|      |      | Shiraz-58T | 2162 | 0.221505 | 0 |  |  |
|      |      | Shiraz-71T | 2238 | 0.603631 | 0 |  |  |
| GARS | chr7 | Shiraz-3T  | 87   | 0.198593 | 0 |  |  |
|      |      | Shiraz-4T  | 252  | 0.192083 | 0 |  |  |
|      |      | Shiraz-36T | 376  | 0.159952 | 0 |  |  |
|      |      | Shiraz-46T | 942  | 0.069143 | 0 |  |  |
|      |      | Shiraz-18T | 1433 | 0.250973 | 0 |  |  |
|      |      | Shiraz-25T | 1697 | 0.21945  | 0 |  |  |
|      |      | Shiraz-28T | 1734 | 0.362882 | 0 |  |  |
|      |      | Shiraz-29T | 1777 | 0.156747 | 0 |  |  |
|      |      | Shiraz-38T | 1950 | 0.265916 | 0 |  |  |
|      |      | Shiraz-71T | 2236 | 0.320072 | 0 |  |  |
|      |      | Shiraz-3T  | 87   | 0.198593 | 0 |  |  |
|      |      | Shiraz-4T  | 252  | 0.192083 | 0 |  |  |
|      |      | Shiraz-36T | 376  | 0.159952 | 0 |  |  |
|      |      | Shiraz-46T | 942  | 0.069143 | 0 |  |  |
|      |      | Shiraz-18T | 1433 | 0.250973 | 0 |  |  |

|       |      |            |      |          |           |  |
|-------|------|------------|------|----------|-----------|--|
|       |      | Shiraz-25T | 1697 | 0.21945  | 0         |  |
|       |      | Shiraz-28T | 1734 | 0.362882 | 0         |  |
|       |      | Shiraz-29T | 1777 | 0.156747 | 0         |  |
|       |      | Shiraz-38T | 1950 | 0.265916 | 0         |  |
|       |      | Shiraz-71T | 2236 | 0.320072 | 0         |  |
|       |      | Shiraz-3T  | 87   | 0.198593 | 0         |  |
|       |      | Shiraz-4T  | 252  | 0.192083 | 0         |  |
|       |      | Shiraz-36T | 376  | 0.159952 | 0         |  |
|       |      | Shiraz-46T | 942  | 0.069143 | 0         |  |
|       |      | Shiraz-18T | 1433 | 0.250973 | 0         |  |
|       |      | Shiraz-25T | 1697 | 0.21945  | 0         |  |
|       |      | Shiraz-28T | 1734 | 0.362882 | 0         |  |
|       |      | Shiraz-29T | 1777 | 0.156747 | 0         |  |
|       |      | Shiraz-38T | 1950 | 0.265916 | 0         |  |
|       |      | Shiraz-71T | 2236 | 0.320072 | 0         |  |
| GATA1 | chrX | Shiraz-3T  | 238  | 0.472087 | 0         |  |
|       |      | Shiraz-4T  | 260  | 0        | -0.324128 |  |
|       |      | Shiraz-16T | 294  | 0.655804 | 0         |  |
|       |      | Shiraz-31T | 345  | 0.103301 | 0         |  |
|       |      | Shiraz-36T | 431  | 0        | -0.78035  |  |
|       |      | Shiraz-36T | 432  | 0        | -0.6692   |  |
|       |      | Shiraz-44T | 891  | 0        | -0.954044 |  |
|       |      | Shiraz-44T | 896  | 0        | -0.109108 |  |
|       |      | Shiraz-46T | 991  | 0.139564 | 0         |  |
|       |      | Shiraz-47T | 1084 | 0.24185  | 0         |  |
|       |      | Shiraz-49T | 1166 | 0        | -0.917235 |  |
|       |      | Shiraz-49T | 1169 | 0        | -0.583529 |  |
|       |      | Shiraz-77T | 1282 | 0.213849 | 0         |  |
|       |      | Shiraz-9T  | 1368 | 0.199713 | 0         |  |
|       |      | Shiraz-9T  | 1369 | 0.703374 | 0         |  |
|       |      | Shiraz-18T | 1455 | 0        | -0.186773 |  |
|       |      | Shiraz-22T | 1669 | 0.695915 | 0         |  |
|       |      | Shiraz-22T | 1672 | 1.01678  | 0         |  |
|       |      | Shiraz-25T | 1717 | 0.420447 | 0         |  |
|       |      | Shiraz-28T | 1760 | 0.538181 | 0         |  |
|       |      | Shiraz-29T | 1800 | 0.672527 | 0         |  |
|       |      | Shiraz-32T | 1869 | 0.776805 | 0         |  |
|       |      | Shiraz-35T | 1932 | 0.507141 | 0         |  |
|       |      | Shiraz-58T | 2221 | 0.871948 | 0         |  |
|       |      | Shiraz-71T | 2260 | 0.68394  | 0         |  |
|       |      | Shiraz-71T | 2262 | 0.986748 | 0         |  |
|       |      | Shiraz-3T  | 238  | 0.472087 | 0         |  |
|       |      | Shiraz-4T  | 260  | 0        | -0.324128 |  |
|       |      | Shiraz-16T | 294  | 0.655804 | 0         |  |
|       |      | Shiraz-31T | 345  | 0.103301 | 0         |  |
|       |      | Shiraz-36T | 431  | 0        | -0.78035  |  |
|       |      | Shiraz-36T | 432  | 0        | -0.6692   |  |

|        |      |            |      |          |           |  |  |
|--------|------|------------|------|----------|-----------|--|--|
|        |      | Shiraz-44T | 891  | 0        | -0.954044 |  |  |
|        |      | Shiraz-44T | 896  | 0        | -0.109108 |  |  |
|        |      | Shiraz-46T | 991  | 0.139564 | 0         |  |  |
|        |      | Shiraz-47T | 1084 | 0.24185  | 0         |  |  |
|        |      | Shiraz-49T | 1166 | 0        | -0.917235 |  |  |
|        |      | Shiraz-49T | 1169 | 0        | -0.583529 |  |  |
|        |      | Shiraz-77T | 1282 | 0.213849 | 0         |  |  |
|        |      | Shiraz-9T  | 1368 | 0.199713 | 0         |  |  |
|        |      | Shiraz-9T  | 1369 | 0.703374 | 0         |  |  |
|        |      | Shiraz-18T | 1455 | 0        | -0.186773 |  |  |
|        |      | Shiraz-22T | 1669 | 0.695915 | 0         |  |  |
|        |      | Shiraz-22T | 1672 | 1.01678  | 0         |  |  |
|        |      | Shiraz-25T | 1717 | 0.420447 | 0         |  |  |
|        |      | Shiraz-28T | 1760 | 0.538181 | 0         |  |  |
|        |      | Shiraz-29T | 1800 | 0.672527 | 0         |  |  |
|        |      | Shiraz-32T | 1869 | 0.776805 | 0         |  |  |
|        |      | Shiraz-35T | 1932 | 0.507141 | 0         |  |  |
|        |      | Shiraz-58T | 2221 | 0.871948 | 0         |  |  |
|        |      | Shiraz-71T | 2260 | 0.68394  | 0         |  |  |
|        |      | Shiraz-71T | 2262 | 0.986748 | 0         |  |  |
|        |      | Shiraz-3T  | 238  | 0.472087 | 0         |  |  |
|        |      | Shiraz-4T  | 260  | 0        | -0.324128 |  |  |
|        |      | Shiraz-16T | 294  | 0.655804 | 0         |  |  |
|        |      | Shiraz-31T | 345  | 0.103301 | 0         |  |  |
|        |      | Shiraz-36T | 431  | 0        | -0.78035  |  |  |
|        |      | Shiraz-36T | 432  | 0        | -0.6692   |  |  |
|        |      | Shiraz-44T | 891  | 0        | -0.954044 |  |  |
|        |      | Shiraz-44T | 896  | 0        | -0.109108 |  |  |
|        |      | Shiraz-46T | 991  | 0.139564 | 0         |  |  |
|        |      | Shiraz-47T | 1084 | 0.24185  | 0         |  |  |
|        |      | Shiraz-49T | 1166 | 0        | -0.917235 |  |  |
|        |      | Shiraz-49T | 1169 | 0        | -0.583529 |  |  |
|        |      | Shiraz-77T | 1282 | 0.213849 | 0         |  |  |
|        |      | Shiraz-9T  | 1368 | 0.199713 | 0         |  |  |
|        |      | Shiraz-9T  | 1369 | 0.703374 | 0         |  |  |
|        |      | Shiraz-18T | 1455 | 0        | -0.186773 |  |  |
|        |      | Shiraz-22T | 1669 | 0.695915 | 0         |  |  |
|        |      | Shiraz-22T | 1672 | 1.01678  | 0         |  |  |
|        |      | Shiraz-25T | 1717 | 0.420447 | 0         |  |  |
|        |      | Shiraz-28T | 1760 | 0.538181 | 0         |  |  |
|        |      | Shiraz-29T | 1800 | 0.672527 | 0         |  |  |
|        |      | Shiraz-32T | 1869 | 0.776805 | 0         |  |  |
|        |      | Shiraz-35T | 1932 | 0.507141 | 0         |  |  |
|        |      | Shiraz-58T | 2221 | 0.871948 | 0         |  |  |
|        |      | Shiraz-71T | 2260 | 0.68394  | 0         |  |  |
|        |      | Shiraz-71T | 2262 | 0.986748 | 0         |  |  |
| GATAD1 | chr7 | Shiraz-3T  | 90   | 0.219276 | 0         |  |  |

|  |            |      |          |           |  |
|--|------------|------|----------|-----------|--|
|  | Shiraz-3T  | 93   | 0        | -0.058023 |  |
|  | Shiraz-4T  | 253  | 0.372918 | 0         |  |
|  | Shiraz-36T | 378  | 0.179558 | 0         |  |
|  | Shiraz-36T | 380  | 0.083883 | 0         |  |
|  | Shiraz-44T | 638  | 0        | -0.433476 |  |
|  | Shiraz-46T | 943  | 0.093799 | 0         |  |
|  | Shiraz-46T | 945  | 0        | -0.014838 |  |
|  | Shiraz-47T | 1029 | 0        | -0.096586 |  |
|  | Shiraz-49T | 1119 | 0        | -0.157331 |  |
|  | Shiraz-77T | 1225 | 0        | -0.117922 |  |
|  | Shiraz-18T | 1434 | 0.244465 | 0         |  |
|  | Shiraz-22T | 1549 | 0        | -0.319623 |  |
|  | Shiraz-25T | 1698 | 0.21835  | 0         |  |
|  | Shiraz-28T | 1735 | 0.350744 | 0         |  |
|  | Shiraz-29T | 1778 | 0.120767 | 0         |  |
|  | Shiraz-32T | 1833 | 0.551336 | 0         |  |
|  | Shiraz-38T | 1951 | 0.250891 | 0         |  |
|  | Shiraz-53T | 2078 | 0.287202 | 0         |  |
|  | Shiraz-58T | 2159 | 0        | -0.219521 |  |
|  | Shiraz-71T | 2238 | 0.603631 | 0         |  |
|  | Shiraz-3T  | 90   | 0.219276 | 0         |  |
|  | Shiraz-3T  | 93   | 0        | -0.058023 |  |
|  | Shiraz-4T  | 253  | 0.372918 | 0         |  |
|  | Shiraz-36T | 378  | 0.179558 | 0         |  |
|  | Shiraz-36T | 380  | 0.083883 | 0         |  |
|  | Shiraz-44T | 638  | 0        | -0.433476 |  |
|  | Shiraz-46T | 943  | 0.093799 | 0         |  |
|  | Shiraz-46T | 945  | 0        | -0.014838 |  |
|  | Shiraz-47T | 1029 | 0        | -0.096586 |  |
|  | Shiraz-49T | 1119 | 0        | -0.157331 |  |
|  | Shiraz-77T | 1225 | 0        | -0.117922 |  |
|  | Shiraz-18T | 1434 | 0.244465 | 0         |  |
|  | Shiraz-22T | 1549 | 0        | -0.319623 |  |
|  | Shiraz-25T | 1698 | 0.21835  | 0         |  |
|  | Shiraz-28T | 1735 | 0.350744 | 0         |  |
|  | Shiraz-29T | 1778 | 0.120767 | 0         |  |
|  | Shiraz-32T | 1833 | 0.551336 | 0         |  |
|  | Shiraz-38T | 1951 | 0.250891 | 0         |  |
|  | Shiraz-53T | 2078 | 0.287202 | 0         |  |
|  | Shiraz-58T | 2159 | 0        | -0.219521 |  |
|  | Shiraz-71T | 2238 | 0.603631 | 0         |  |
|  | Shiraz-3T  | 90   | 0.219276 | 0         |  |
|  | Shiraz-3T  | 93   | 0        | -0.058023 |  |
|  | Shiraz-4T  | 253  | 0.372918 | 0         |  |
|  | Shiraz-36T | 378  | 0.179558 | 0         |  |
|  | Shiraz-36T | 380  | 0.083883 | 0         |  |
|  | Shiraz-44T | 638  | 0        | -0.433476 |  |

|      |      |            |      |          |           |  |  |
|------|------|------------|------|----------|-----------|--|--|
|      |      | Shiraz-46T | 943  | 0.093799 | 0         |  |  |
|      |      | Shiraz-46T | 945  | 0        | -0.014838 |  |  |
|      |      | Shiraz-47T | 1029 | 0        | -0.096586 |  |  |
|      |      | Shiraz-49T | 1119 | 0        | -0.157331 |  |  |
|      |      | Shiraz-77T | 1225 | 0        | -0.117922 |  |  |
|      |      | Shiraz-18T | 1434 | 0.244465 | 0         |  |  |
|      |      | Shiraz-22T | 1549 | 0        | -0.319623 |  |  |
|      |      | Shiraz-25T | 1698 | 0.21835  | 0         |  |  |
|      |      | Shiraz-28T | 1735 | 0.350744 | 0         |  |  |
|      |      | Shiraz-29T | 1778 | 0.120767 | 0         |  |  |
|      |      | Shiraz-32T | 1833 | 0.551336 | 0         |  |  |
|      |      | Shiraz-38T | 1951 | 0.250891 | 0         |  |  |
|      |      | Shiraz-53T | 2078 | 0.287202 | 0         |  |  |
|      |      | Shiraz-58T | 2159 | 0        | -0.219521 |  |  |
|      |      | Shiraz-71T | 2238 | 0.603631 | 0         |  |  |
| GATS | chr7 | Shiraz-3T  | 90   | 0.219276 | 0         |  |  |
|      |      | Shiraz-3T  | 94   | 0.74735  | 0         |  |  |
|      |      | Shiraz-4T  | 253  | 0.372918 | 0         |  |  |
|      |      | Shiraz-31T | 316  | 0.219196 | 0         |  |  |
|      |      | Shiraz-36T | 378  | 0.179558 | 0         |  |  |
|      |      | Shiraz-36T | 381  | 0.332628 | 0         |  |  |
|      |      | Shiraz-44T | 639  | 1.035032 | 0         |  |  |
|      |      | Shiraz-46T | 943  | 0.093799 | 0         |  |  |
|      |      | Shiraz-46T | 946  | 0.299835 | 0         |  |  |
|      |      | Shiraz-47T | 1030 | 0.257728 | 0         |  |  |
|      |      | Shiraz-49T | 1120 | 0.281656 | 0         |  |  |
|      |      | Shiraz-77T | 1225 | 0        | -0.117922 |  |  |
|      |      | Shiraz-77T | 1227 | 0.196445 | 0         |  |  |
|      |      | Shiraz-9T  | 1324 | 0.679266 | 0         |  |  |
|      |      | Shiraz-18T | 1434 | 0.244465 | 0         |  |  |
|      |      | Shiraz-22T | 1549 | 0        | -0.319623 |  |  |
|      |      | Shiraz-22T | 1551 | 0.324011 | 0         |  |  |
|      |      | Shiraz-25T | 1698 | 0.21835  | 0         |  |  |
|      |      | Shiraz-28T | 1735 | 0.350744 | 0         |  |  |
|      |      | Shiraz-29T | 1778 | 0.120767 | 0         |  |  |
|      |      | Shiraz-32T | 1833 | 0.551336 | 0         |  |  |
|      |      | Shiraz-32T | 1834 | 1.485392 | 0         |  |  |
|      |      | Shiraz-38T | 1951 | 0.250891 | 0         |  |  |
|      |      | Shiraz-53T | 2078 | 0.287202 | 0         |  |  |
|      |      | Shiraz-58T | 2160 | 0.399007 | 0         |  |  |
|      |      | Shiraz-71T | 2238 | 0.603631 | 0         |  |  |
|      |      | Shiraz-3T  | 90   | 0.219276 | 0         |  |  |
|      |      | Shiraz-3T  | 94   | 0.74735  | 0         |  |  |
|      |      | Shiraz-4T  | 253  | 0.372918 | 0         |  |  |
|      |      | Shiraz-31T | 316  | 0.219196 | 0         |  |  |
|      |      | Shiraz-36T | 378  | 0.179558 | 0         |  |  |
|      |      | Shiraz-36T | 381  | 0.332628 | 0         |  |  |



|      |      |            |      |          |           |  |  |
|------|------|------------|------|----------|-----------|--|--|
|      |      | Shiraz-44T | 639  | 1.035032 | 0         |  |  |
|      |      | Shiraz-46T | 943  | 0.093799 | 0         |  |  |
|      |      | Shiraz-46T | 946  | 0.299835 | 0         |  |  |
|      |      | Shiraz-47T | 1030 | 0.257728 | 0         |  |  |
|      |      | Shiraz-49T | 1120 | 0.281656 | 0         |  |  |
|      |      | Shiraz-77T | 1225 | 0        | -0.117922 |  |  |
|      |      | Shiraz-77T | 1227 | 0.196445 | 0         |  |  |
|      |      | Shiraz-9T  | 1324 | 0.679266 | 0         |  |  |
|      |      | Shiraz-18T | 1434 | 0.244465 | 0         |  |  |
|      |      | Shiraz-22T | 1549 | 0        | -0.319623 |  |  |
|      |      | Shiraz-22T | 1551 | 0.324011 | 0         |  |  |
|      |      | Shiraz-25T | 1698 | 0.21835  | 0         |  |  |
|      |      | Shiraz-28T | 1735 | 0.350744 | 0         |  |  |
|      |      | Shiraz-29T | 1778 | 0.120767 | 0         |  |  |
|      |      | Shiraz-32T | 1833 | 0.551336 | 0         |  |  |
|      |      | Shiraz-32T | 1834 | 1.485392 | 0         |  |  |
|      |      | Shiraz-38T | 1951 | 0.250891 | 0         |  |  |
|      |      | Shiraz-53T | 2078 | 0.287202 | 0         |  |  |
|      |      | Shiraz-58T | 2160 | 0.399007 | 0         |  |  |
|      |      | Shiraz-71T | 2238 | 0.603631 | 0         |  |  |
|      |      | Shiraz-3T  | 90   | 0.219276 | 0         |  |  |
|      |      | Shiraz-3T  | 94   | 0.74735  | 0         |  |  |
|      |      | Shiraz-4T  | 253  | 0.372918 | 0         |  |  |
|      |      | Shiraz-31T | 316  | 0.219196 | 0         |  |  |
|      |      | Shiraz-36T | 378  | 0.179558 | 0         |  |  |
|      |      | Shiraz-36T | 381  | 0.332628 | 0         |  |  |
|      |      | Shiraz-44T | 639  | 1.035032 | 0         |  |  |
|      |      | Shiraz-46T | 943  | 0.093799 | 0         |  |  |
|      |      | Shiraz-46T | 946  | 0.299835 | 0         |  |  |
|      |      | Shiraz-47T | 1030 | 0.257728 | 0         |  |  |
|      |      | Shiraz-49T | 1120 | 0.281656 | 0         |  |  |
|      |      | Shiraz-77T | 1225 | 0        | -0.117922 |  |  |
|      |      | Shiraz-77T | 1227 | 0.196445 | 0         |  |  |
|      |      | Shiraz-9T  | 1324 | 0.679266 | 0         |  |  |
|      |      | Shiraz-18T | 1434 | 0.244465 | 0         |  |  |
|      |      | Shiraz-22T | 1549 | 0        | -0.319623 |  |  |
|      |      | Shiraz-22T | 1551 | 0.324011 | 0         |  |  |
|      |      | Shiraz-25T | 1698 | 0.21835  | 0         |  |  |
|      |      | Shiraz-28T | 1735 | 0.350744 | 0         |  |  |
|      |      | Shiraz-29T | 1778 | 0.120767 | 0         |  |  |
|      |      | Shiraz-32T | 1833 | 0.551336 | 0         |  |  |
|      |      | Shiraz-32T | 1834 | 1.485392 | 0         |  |  |
|      |      | Shiraz-38T | 1951 | 0.250891 | 0         |  |  |
|      |      | Shiraz-53T | 2078 | 0.287202 | 0         |  |  |
|      |      | Shiraz-58T | 2160 | 0.399007 | 0         |  |  |
|      |      | Shiraz-71T | 2238 | 0.603631 | 0         |  |  |
| GBX1 | chr7 | Shiraz-3T  | 90   | 0.219276 | 0         |  |  |

|  |  |            |      |          |           |  |  |
|--|--|------------|------|----------|-----------|--|--|
|  |  | Shiraz-3T  | 99   | 0.454766 | 0         |  |  |
|  |  | Shiraz-4T  | 253  | 0.372918 | 0         |  |  |
|  |  | Shiraz-36T | 378  | 0.179558 | 0         |  |  |
|  |  | Shiraz-44T | 646  | 0.471276 | 0         |  |  |
|  |  | Shiraz-44T | 647  | 1.496173 | 0         |  |  |
|  |  | Shiraz-46T | 943  | 0.093799 | 0         |  |  |
|  |  | Shiraz-9T  | 1325 | 0.221899 | 0         |  |  |
|  |  | Shiraz-18T | 1434 | 0.244465 | 0         |  |  |
|  |  | Shiraz-22T | 1555 | 0.427999 | 0         |  |  |
|  |  | Shiraz-25T | 1698 | 0.21835  | 0         |  |  |
|  |  | Shiraz-28T | 1735 | 0.350744 | 0         |  |  |
|  |  | Shiraz-29T | 1778 | 0.120767 | 0         |  |  |
|  |  | Shiraz-32T | 1833 | 0.551336 | 0         |  |  |
|  |  | Shiraz-38T | 1951 | 0.250891 | 0         |  |  |
|  |  | Shiraz-38T | 1952 | 0        | -0.163211 |  |  |
|  |  | Shiraz-53T | 2078 | 0.287202 | 0         |  |  |
|  |  | Shiraz-58T | 2162 | 0.221505 | 0         |  |  |
|  |  | Shiraz-71T | 2238 | 0.603631 | 0         |  |  |
|  |  | Shiraz-3T  | 90   | 0.219276 | 0         |  |  |
|  |  | Shiraz-3T  | 99   | 0.454766 | 0         |  |  |
|  |  | Shiraz-4T  | 253  | 0.372918 | 0         |  |  |
|  |  | Shiraz-36T | 378  | 0.179558 | 0         |  |  |
|  |  | Shiraz-44T | 646  | 0.471276 | 0         |  |  |
|  |  | Shiraz-44T | 647  | 1.496173 | 0         |  |  |
|  |  | Shiraz-46T | 943  | 0.093799 | 0         |  |  |
|  |  | Shiraz-9T  | 1325 | 0.221899 | 0         |  |  |
|  |  | Shiraz-18T | 1434 | 0.244465 | 0         |  |  |
|  |  | Shiraz-22T | 1555 | 0.427999 | 0         |  |  |
|  |  | Shiraz-25T | 1698 | 0.21835  | 0         |  |  |
|  |  | Shiraz-28T | 1735 | 0.350744 | 0         |  |  |
|  |  | Shiraz-29T | 1778 | 0.120767 | 0         |  |  |
|  |  | Shiraz-32T | 1833 | 0.551336 | 0         |  |  |
|  |  | Shiraz-38T | 1951 | 0.250891 | 0         |  |  |
|  |  | Shiraz-38T | 1952 | 0        | -0.163211 |  |  |
|  |  | Shiraz-53T | 2078 | 0.287202 | 0         |  |  |
|  |  | Shiraz-58T | 2162 | 0.221505 | 0         |  |  |
|  |  | Shiraz-71T | 2238 | 0.603631 | 0         |  |  |
|  |  | Shiraz-3T  | 90   | 0.219276 | 0         |  |  |
|  |  | Shiraz-3T  | 99   | 0.454766 | 0         |  |  |
|  |  | Shiraz-4T  | 253  | 0.372918 | 0         |  |  |
|  |  | Shiraz-36T | 378  | 0.179558 | 0         |  |  |
|  |  | Shiraz-44T | 646  | 0.471276 | 0         |  |  |
|  |  | Shiraz-44T | 647  | 1.496173 | 0         |  |  |
|  |  | Shiraz-46T | 943  | 0.093799 | 0         |  |  |
|  |  | Shiraz-9T  | 1325 | 0.221899 | 0         |  |  |
|  |  | Shiraz-18T | 1434 | 0.244465 | 0         |  |  |
|  |  | Shiraz-22T | 1555 | 0.427999 | 0         |  |  |

|      |      |            |      |          |           |  |  |
|------|------|------------|------|----------|-----------|--|--|
|      |      | Shiraz-25T | 1698 | 0.21835  | 0         |  |  |
|      |      | Shiraz-28T | 1735 | 0.350744 | 0         |  |  |
|      |      | Shiraz-29T | 1778 | 0.120767 | 0         |  |  |
|      |      | Shiraz-32T | 1833 | 0.551336 | 0         |  |  |
|      |      | Shiraz-38T | 1951 | 0.250891 | 0         |  |  |
|      |      | Shiraz-38T | 1952 | 0        | -0.163211 |  |  |
|      |      | Shiraz-53T | 2078 | 0.287202 | 0         |  |  |
|      |      | Shiraz-58T | 2162 | 0.221505 | 0         |  |  |
|      |      | Shiraz-71T | 2238 | 0.603631 | 0         |  |  |
| GCC1 | chr7 | Shiraz-3T  | 90   | 0.219276 | 0         |  |  |
|      |      | Shiraz-4T  | 253  | 0.372918 | 0         |  |  |
|      |      | Shiraz-36T | 378  | 0.179558 | 0         |  |  |
|      |      | Shiraz-36T | 382  | 0.081739 | 0         |  |  |
|      |      | Shiraz-46T | 943  | 0.093799 | 0         |  |  |
|      |      | Shiraz-46T | 947  | 0        | -0.010843 |  |  |
|      |      | Shiraz-77T | 1225 | 0        | -0.117922 |  |  |
|      |      | Shiraz-9T  | 1325 | 0.221899 | 0         |  |  |
|      |      | Shiraz-18T | 1434 | 0.244465 | 0         |  |  |
|      |      | Shiraz-25T | 1698 | 0.21835  | 0         |  |  |
|      |      | Shiraz-28T | 1735 | 0.350744 | 0         |  |  |
|      |      | Shiraz-29T | 1778 | 0.120767 | 0         |  |  |
|      |      | Shiraz-32T | 1833 | 0.551336 | 0         |  |  |
|      |      | Shiraz-38T | 1951 | 0.250891 | 0         |  |  |
|      |      | Shiraz-53T | 2078 | 0.287202 | 0         |  |  |
|      |      | Shiraz-71T | 2238 | 0.603631 | 0         |  |  |
|      |      | Shiraz-3T  | 90   | 0.219276 | 0         |  |  |
|      |      | Shiraz-4T  | 253  | 0.372918 | 0         |  |  |
|      |      | Shiraz-36T | 378  | 0.179558 | 0         |  |  |
|      |      | Shiraz-36T | 382  | 0.081739 | 0         |  |  |
|      |      | Shiraz-46T | 943  | 0.093799 | 0         |  |  |
|      |      | Shiraz-46T | 947  | 0        | -0.010843 |  |  |
|      |      | Shiraz-77T | 1225 | 0        | -0.117922 |  |  |
|      |      | Shiraz-9T  | 1325 | 0.221899 | 0         |  |  |
|      |      | Shiraz-18T | 1434 | 0.244465 | 0         |  |  |
|      |      | Shiraz-25T | 1698 | 0.21835  | 0         |  |  |
|      |      | Shiraz-28T | 1735 | 0.350744 | 0         |  |  |
|      |      | Shiraz-29T | 1778 | 0.120767 | 0         |  |  |
|      |      | Shiraz-32T | 1833 | 0.551336 | 0         |  |  |
|      |      | Shiraz-38T | 1951 | 0.250891 | 0         |  |  |
|      |      | Shiraz-53T | 2078 | 0.287202 | 0         |  |  |
|      |      | Shiraz-71T | 2238 | 0.603631 | 0         |  |  |
|      |      | Shiraz-3T  | 90   | 0.219276 | 0         |  |  |
|      |      | Shiraz-4T  | 253  | 0.372918 | 0         |  |  |
|      |      | Shiraz-36T | 378  | 0.179558 | 0         |  |  |
|      |      | Shiraz-36T | 382  | 0.081739 | 0         |  |  |
|      |      | Shiraz-46T | 943  | 0.093799 | 0         |  |  |
|      |      | Shiraz-46T | 947  | 0        | -0.010843 |  |  |

|     |      |            |      |          |           |  |  |
|-----|------|------------|------|----------|-----------|--|--|
|     |      | Shiraz-77T | 1225 | 0        | -0.117922 |  |  |
|     |      | Shiraz-9T  | 1325 | 0.221899 | 0         |  |  |
|     |      | Shiraz-18T | 1434 | 0.244465 | 0         |  |  |
|     |      | Shiraz-25T | 1698 | 0.21835  | 0         |  |  |
|     |      | Shiraz-28T | 1735 | 0.350744 | 0         |  |  |
|     |      | Shiraz-29T | 1778 | 0.120767 | 0         |  |  |
|     |      | Shiraz-32T | 1833 | 0.551336 | 0         |  |  |
|     |      | Shiraz-38T | 1951 | 0.250891 | 0         |  |  |
|     |      | Shiraz-53T | 2078 | 0.287202 | 0         |  |  |
|     |      | Shiraz-71T | 2238 | 0.603631 | 0         |  |  |
| GCK | chr7 | Shiraz-3T  | 87   | 0.198593 | 0         |  |  |
|     |      | Shiraz-3T  | 87   | 0.198593 | 0         |  |  |
|     |      | Shiraz-3T  | 89   | 0.678641 | 0         |  |  |
|     |      | Shiraz-3T  | 89   | 0.678641 | 0         |  |  |
|     |      | Shiraz-4T  | 252  | 0.192083 | 0         |  |  |
|     |      | Shiraz-4T  | 252  | 0.192083 | 0         |  |  |
|     |      | Shiraz-36T | 376  | 0.159952 | 0         |  |  |
|     |      | Shiraz-36T | 376  | 0.159952 | 0         |  |  |
|     |      | Shiraz-44T | 632  | 0.902944 | 0         |  |  |
|     |      | Shiraz-44T | 632  | 0.902944 | 0         |  |  |
|     |      | Shiraz-46T | 942  | 0.069143 | 0         |  |  |
|     |      | Shiraz-46T | 942  | 0.069143 | 0         |  |  |
|     |      | Shiraz-77T | 1223 | 0.215647 | 0         |  |  |
|     |      | Shiraz-77T | 1223 | 0.215647 | 0         |  |  |
|     |      | Shiraz-18T | 1433 | 0.250973 | 0         |  |  |
|     |      | Shiraz-18T | 1433 | 0.250973 | 0         |  |  |
|     |      | Shiraz-25T | 1697 | 0.21945  | 0         |  |  |
|     |      | Shiraz-25T | 1697 | 0.21945  | 0         |  |  |
|     |      | Shiraz-28T | 1734 | 0.362882 | 0         |  |  |
|     |      | Shiraz-28T | 1734 | 0.362882 | 0         |  |  |
|     |      | Shiraz-29T | 1777 | 0.156747 | 0         |  |  |
|     |      | Shiraz-29T | 1777 | 0.156747 | 0         |  |  |
|     |      | Shiraz-38T | 1950 | 0.265916 | 0         |  |  |
|     |      | Shiraz-38T | 1950 | 0.265916 | 0         |  |  |
|     |      | Shiraz-71T | 2236 | 0.320072 | 0         |  |  |
|     |      | Shiraz-71T | 2236 | 0.320072 | 0         |  |  |
|     |      | Shiraz-3T  | 87   | 0.198593 | 0         |  |  |
|     |      | Shiraz-3T  | 87   | 0.198593 | 0         |  |  |
|     |      | Shiraz-3T  | 89   | 0.678641 | 0         |  |  |
|     |      | Shiraz-3T  | 89   | 0.678641 | 0         |  |  |
|     |      | Shiraz-4T  | 252  | 0.192083 | 0         |  |  |
|     |      | Shiraz-4T  | 252  | 0.192083 | 0         |  |  |
|     |      | Shiraz-36T | 376  | 0.159952 | 0         |  |  |
|     |      | Shiraz-36T | 376  | 0.159952 | 0         |  |  |
|     |      | Shiraz-44T | 632  | 0.902944 | 0         |  |  |
|     |      | Shiraz-44T | 632  | 0.902944 | 0         |  |  |
|     |      | Shiraz-46T | 942  | 0.069143 | 0         |  |  |

|      |      |            |      |          |           |  |
|------|------|------------|------|----------|-----------|--|
|      |      | Shiraz-46T | 942  | 0.069143 | 0         |  |
|      |      | Shiraz-77T | 1223 | 0.215647 | 0         |  |
|      |      | Shiraz-77T | 1223 | 0.215647 | 0         |  |
|      |      | Shiraz-18T | 1433 | 0.250973 | 0         |  |
|      |      | Shiraz-18T | 1433 | 0.250973 | 0         |  |
|      |      | Shiraz-25T | 1697 | 0.21945  | 0         |  |
|      |      | Shiraz-25T | 1697 | 0.21945  | 0         |  |
|      |      | Shiraz-28T | 1734 | 0.362882 | 0         |  |
|      |      | Shiraz-28T | 1734 | 0.362882 | 0         |  |
|      |      | Shiraz-29T | 1777 | 0.156747 | 0         |  |
|      |      | Shiraz-29T | 1777 | 0.156747 | 0         |  |
|      |      | Shiraz-38T | 1950 | 0.265916 | 0         |  |
|      |      | Shiraz-38T | 1950 | 0.265916 | 0         |  |
|      |      | Shiraz-71T | 2236 | 0.320072 | 0         |  |
|      |      | Shiraz-71T | 2236 | 0.320072 | 0         |  |
|      |      | Shiraz-3T  | 87   | 0.198593 | 0         |  |
|      |      | Shiraz-3T  | 87   | 0.198593 | 0         |  |
|      |      | Shiraz-3T  | 89   | 0.678641 | 0         |  |
|      |      | Shiraz-3T  | 89   | 0.678641 | 0         |  |
|      |      | Shiraz-4T  | 252  | 0.192083 | 0         |  |
|      |      | Shiraz-4T  | 252  | 0.192083 | 0         |  |
|      |      | Shiraz-36T | 376  | 0.159952 | 0         |  |
|      |      | Shiraz-36T | 376  | 0.159952 | 0         |  |
|      |      | Shiraz-44T | 632  | 0.902944 | 0         |  |
|      |      | Shiraz-44T | 632  | 0.902944 | 0         |  |
|      |      | Shiraz-46T | 942  | 0.069143 | 0         |  |
|      |      | Shiraz-46T | 942  | 0.069143 | 0         |  |
|      |      | Shiraz-77T | 1223 | 0.215647 | 0         |  |
|      |      | Shiraz-77T | 1223 | 0.215647 | 0         |  |
|      |      | Shiraz-18T | 1433 | 0.250973 | 0         |  |
|      |      | Shiraz-18T | 1433 | 0.250973 | 0         |  |
|      |      | Shiraz-25T | 1697 | 0.21945  | 0         |  |
|      |      | Shiraz-25T | 1697 | 0.21945  | 0         |  |
|      |      | Shiraz-28T | 1734 | 0.362882 | 0         |  |
|      |      | Shiraz-28T | 1734 | 0.362882 | 0         |  |
|      |      | Shiraz-29T | 1777 | 0.156747 | 0         |  |
|      |      | Shiraz-29T | 1777 | 0.156747 | 0         |  |
|      |      | Shiraz-38T | 1950 | 0.265916 | 0         |  |
|      |      | Shiraz-38T | 1950 | 0.265916 | 0         |  |
|      |      | Shiraz-71T | 2236 | 0.320072 | 0         |  |
|      |      | Shiraz-71T | 2236 | 0.320072 | 0         |  |
| GDI1 | chrX | Shiraz-3T  | 246  | 0.531858 | 0         |  |
|      |      | Shiraz-4T  | 261  | 0        | -0.336249 |  |
|      |      | Shiraz-16T | 295  | 0.591657 | 0         |  |
|      |      | Shiraz-36T | 433  | 0        | -0.803961 |  |
|      |      | Shiraz-42T | 480  | 0        | -0.232915 |  |
|      |      | Shiraz-44T | 908  | 0.466743 | 0         |  |

|  |            |      |          |           |  |
|--|------------|------|----------|-----------|--|
|  | Shiraz-49T | 1170 | 0        | -0.967436 |  |
|  | Shiraz-49T | 1173 | 0        | -0.704439 |  |
|  | Shiraz-9T  | 1370 | 0.690073 | 0         |  |
|  | Shiraz-9T  | 1371 | 1.292392 | 0         |  |
|  | Shiraz-18T | 1457 | 0.643204 | 0         |  |
|  | Shiraz-22T | 1673 | 0.611783 | 0         |  |
|  | Shiraz-22T | 1678 | 0.911625 | 0         |  |
|  | Shiraz-25T | 1719 | 0.472955 | 0         |  |
|  | Shiraz-28T | 1762 | 0.562311 | 0         |  |
|  | Shiraz-29T | 1801 | 0.815343 | 0         |  |
|  | Shiraz-32T | 1870 | 0.729766 | 0         |  |
|  | Shiraz-32T | 1872 | 1.504553 | 0         |  |
|  | Shiraz-35T | 1933 | 0.488535 | 0         |  |
|  | Shiraz-38T | 2011 | 0        | -0.406024 |  |
|  | Shiraz-53T | 2115 | 0.427728 | 0         |  |
|  | Shiraz-58T | 2223 | 0.833364 | 0         |  |
|  | Shiraz-58T | 2226 | 1.074663 | 0         |  |
|  | Shiraz-71T | 2263 | 0.975531 | 0         |  |
|  | Shiraz-3T  | 246  | 0.531858 | 0         |  |
|  | Shiraz-4T  | 261  | 0        | -0.336249 |  |
|  | Shiraz-16T | 295  | 0.591657 | 0         |  |
|  | Shiraz-36T | 433  | 0        | -0.803961 |  |
|  | Shiraz-42T | 480  | 0        | -0.232915 |  |
|  | Shiraz-44T | 908  | 0.466743 | 0         |  |
|  | Shiraz-49T | 1170 | 0        | -0.967436 |  |
|  | Shiraz-49T | 1173 | 0        | -0.704439 |  |
|  | Shiraz-9T  | 1370 | 0.690073 | 0         |  |
|  | Shiraz-9T  | 1371 | 1.292392 | 0         |  |
|  | Shiraz-18T | 1457 | 0.643204 | 0         |  |
|  | Shiraz-22T | 1673 | 0.611783 | 0         |  |
|  | Shiraz-22T | 1678 | 0.911625 | 0         |  |
|  | Shiraz-25T | 1719 | 0.472955 | 0         |  |
|  | Shiraz-28T | 1762 | 0.562311 | 0         |  |
|  | Shiraz-29T | 1801 | 0.815343 | 0         |  |
|  | Shiraz-32T | 1870 | 0.729766 | 0         |  |
|  | Shiraz-32T | 1872 | 1.504553 | 0         |  |
|  | Shiraz-35T | 1933 | 0.488535 | 0         |  |
|  | Shiraz-38T | 2011 | 0        | -0.406024 |  |
|  | Shiraz-53T | 2115 | 0.427728 | 0         |  |
|  | Shiraz-58T | 2223 | 0.833364 | 0         |  |
|  | Shiraz-58T | 2226 | 1.074663 | 0         |  |
|  | Shiraz-71T | 2263 | 0.975531 | 0         |  |
|  | Shiraz-3T  | 246  | 0.531858 | 0         |  |
|  | Shiraz-4T  | 261  | 0        | -0.336249 |  |
|  | Shiraz-16T | 295  | 0.591657 | 0         |  |
|  | Shiraz-36T | 433  | 0        | -0.803961 |  |
|  | Shiraz-42T | 480  | 0        | -0.232915 |  |

|      |      |            |      |          |           |  |  |
|------|------|------------|------|----------|-----------|--|--|
|      |      | Shiraz-44T | 908  | 0.466743 | 0         |  |  |
|      |      | Shiraz-49T | 1170 | 0        | -0.967436 |  |  |
|      |      | Shiraz-49T | 1173 | 0        | -0.704439 |  |  |
|      |      | Shiraz-9T  | 1370 | 0.690073 | 0         |  |  |
|      |      | Shiraz-9T  | 1371 | 1.292392 | 0         |  |  |
|      |      | Shiraz-18T | 1457 | 0.643204 | 0         |  |  |
|      |      | Shiraz-22T | 1673 | 0.611783 | 0         |  |  |
|      |      | Shiraz-22T | 1678 | 0.911625 | 0         |  |  |
|      |      | Shiraz-25T | 1719 | 0.472955 | 0         |  |  |
|      |      | Shiraz-28T | 1762 | 0.562311 | 0         |  |  |
|      |      | Shiraz-29T | 1801 | 0.815343 | 0         |  |  |
|      |      | Shiraz-32T | 1870 | 0.729766 | 0         |  |  |
|      |      | Shiraz-32T | 1872 | 1.504553 | 0         |  |  |
|      |      | Shiraz-35T | 1933 | 0.488535 | 0         |  |  |
|      |      | Shiraz-38T | 2011 | 0        | -0.406024 |  |  |
|      |      | Shiraz-53T | 2115 | 0.427728 | 0         |  |  |
|      |      | Shiraz-58T | 2223 | 0.833364 | 0         |  |  |
|      |      | Shiraz-58T | 2226 | 1.074663 | 0         |  |  |
|      |      | Shiraz-71T | 2263 | 0.975531 | 0         |  |  |
| GDNF | chr5 | Shiraz-4T  | 250  | 0.262252 | 0         |  |  |
|      |      | Shiraz-4T  | 250  | 0.262252 | 0         |  |  |
|      |      | Shiraz-4T  | 250  | 0.262252 | 0         |  |  |
|      |      | Shiraz-16T | 266  | 0.321724 | 0         |  |  |
|      |      | Shiraz-16T | 266  | 0.321724 | 0         |  |  |
|      |      | Shiraz-16T | 266  | 0.321724 | 0         |  |  |
|      |      | Shiraz-44T | 591  | 0        | -0.233934 |  |  |
|      |      | Shiraz-44T | 591  | 0        | -0.233934 |  |  |
|      |      | Shiraz-44T | 591  | 0        | -0.233934 |  |  |
|      |      | Shiraz-18T | 1429 | 0        | -0.314125 |  |  |
|      |      | Shiraz-18T | 1429 | 0        | -0.314125 |  |  |
|      |      | Shiraz-18T | 1429 | 0        | -0.314125 |  |  |
|      |      | Shiraz-22T | 1522 | 0        | -0.322688 |  |  |
|      |      | Shiraz-22T | 1522 | 0        | -0.322688 |  |  |
|      |      | Shiraz-22T | 1522 | 0        | -0.322688 |  |  |
|      |      | Shiraz-25T | 1694 | 0.201602 | 0         |  |  |
|      |      | Shiraz-25T | 1694 | 0.201602 | 0         |  |  |
|      |      | Shiraz-25T | 1694 | 0.201602 | 0         |  |  |
|      |      | Shiraz-28T | 1731 | 0.295447 | 0         |  |  |
|      |      | Shiraz-28T | 1731 | 0.295447 | 0         |  |  |
|      |      | Shiraz-28T | 1731 | 0.295447 | 0         |  |  |
|      |      | Shiraz-29T | 1773 | 0.090981 | 0         |  |  |
|      |      | Shiraz-29T | 1773 | 0.090981 | 0         |  |  |
|      |      | Shiraz-29T | 1773 | 0.090981 | 0         |  |  |
|      |      | Shiraz-40T | 2016 | 0.376634 | 0         |  |  |
|      |      | Shiraz-40T | 2016 | 0.376634 | 0         |  |  |
|      |      | Shiraz-40T | 2016 | 0.376634 | 0         |  |  |
|      |      | Shiraz-4T  | 250  | 0.262252 | 0         |  |  |

|  |  |            |      |          |           |  |
|--|--|------------|------|----------|-----------|--|
|  |  | Shiraz-4T  | 250  | 0.262252 | 0         |  |
|  |  | Shiraz-4T  | 250  | 0.262252 | 0         |  |
|  |  | Shiraz-16T | 266  | 0.321724 | 0         |  |
|  |  | Shiraz-16T | 266  | 0.321724 | 0         |  |
|  |  | Shiraz-16T | 266  | 0.321724 | 0         |  |
|  |  | Shiraz-44T | 591  | 0        | -0.233934 |  |
|  |  | Shiraz-44T | 591  | 0        | -0.233934 |  |
|  |  | Shiraz-44T | 591  | 0        | -0.233934 |  |
|  |  | Shiraz-18T | 1429 | 0        | -0.314125 |  |
|  |  | Shiraz-18T | 1429 | 0        | -0.314125 |  |
|  |  | Shiraz-18T | 1429 | 0        | -0.314125 |  |
|  |  | Shiraz-22T | 1522 | 0        | -0.322688 |  |
|  |  | Shiraz-22T | 1522 | 0        | -0.322688 |  |
|  |  | Shiraz-22T | 1522 | 0        | -0.322688 |  |
|  |  | Shiraz-25T | 1694 | 0.201602 | 0         |  |
|  |  | Shiraz-25T | 1694 | 0.201602 | 0         |  |
|  |  | Shiraz-25T | 1694 | 0.201602 | 0         |  |
|  |  | Shiraz-28T | 1731 | 0.295447 | 0         |  |
|  |  | Shiraz-28T | 1731 | 0.295447 | 0         |  |
|  |  | Shiraz-28T | 1731 | 0.295447 | 0         |  |
|  |  | Shiraz-29T | 1773 | 0.090981 | 0         |  |
|  |  | Shiraz-29T | 1773 | 0.090981 | 0         |  |
|  |  | Shiraz-29T | 1773 | 0.090981 | 0         |  |
|  |  | Shiraz-40T | 2016 | 0.376634 | 0         |  |
|  |  | Shiraz-40T | 2016 | 0.376634 | 0         |  |
|  |  | Shiraz-40T | 2016 | 0.376634 | 0         |  |
|  |  | Shiraz-4T  | 250  | 0.262252 | 0         |  |
|  |  | Shiraz-4T  | 250  | 0.262252 | 0         |  |
|  |  | Shiraz-4T  | 250  | 0.262252 | 0         |  |
|  |  | Shiraz-16T | 266  | 0.321724 | 0         |  |
|  |  | Shiraz-16T | 266  | 0.321724 | 0         |  |
|  |  | Shiraz-16T | 266  | 0.321724 | 0         |  |
|  |  | Shiraz-44T | 591  | 0        | -0.233934 |  |
|  |  | Shiraz-44T | 591  | 0        | -0.233934 |  |
|  |  | Shiraz-44T | 591  | 0        | -0.233934 |  |
|  |  | Shiraz-18T | 1429 | 0        | -0.314125 |  |
|  |  | Shiraz-18T | 1429 | 0        | -0.314125 |  |
|  |  | Shiraz-18T | 1429 | 0        | -0.314125 |  |
|  |  | Shiraz-22T | 1522 | 0        | -0.322688 |  |
|  |  | Shiraz-22T | 1522 | 0        | -0.322688 |  |
|  |  | Shiraz-22T | 1522 | 0        | -0.322688 |  |
|  |  | Shiraz-25T | 1694 | 0.201602 | 0         |  |
|  |  | Shiraz-25T | 1694 | 0.201602 | 0         |  |
|  |  | Shiraz-25T | 1694 | 0.201602 | 0         |  |
|  |  | Shiraz-28T | 1731 | 0.295447 | 0         |  |
|  |  | Shiraz-28T | 1731 | 0.295447 | 0         |  |
|  |  | Shiraz-28T | 1731 | 0.295447 | 0         |  |



|       |      |            |      |          |           |  |
|-------|------|------------|------|----------|-----------|--|
|       |      | Shiraz-29T | 1773 | 0.090981 | 0         |  |
|       |      | Shiraz-29T | 1773 | 0.090981 | 0         |  |
|       |      | Shiraz-29T | 1773 | 0.090981 | 0         |  |
|       |      | Shiraz-40T | 2016 | 0.376634 | 0         |  |
|       |      | Shiraz-40T | 2016 | 0.376634 | 0         |  |
|       |      | Shiraz-40T | 2016 | 0.376634 | 0         |  |
| GDPD2 | chrX | Shiraz-4T  | 261  | 0        | -0.336249 |  |
|       |      | Shiraz-16T | 295  | 0.591657 | 0         |  |
|       |      | Shiraz-36T | 433  | 0        | -0.803961 |  |
|       |      | Shiraz-44T | 899  | 0        | -1.09697  |  |
|       |      | Shiraz-44T | 900  | 0        | -0.584284 |  |
|       |      | Shiraz-44T | 901  | 0        | -1.000082 |  |
|       |      | Shiraz-49T | 1170 | 0        | -0.967436 |  |
|       |      | Shiraz-18T | 1457 | 0.643204 | 0         |  |
|       |      | Shiraz-22T | 1673 | 0.611783 | 0         |  |
|       |      | Shiraz-22T | 1674 | 0.887899 | 0         |  |
|       |      | Shiraz-25T | 1719 | 0.472955 | 0         |  |
|       |      | Shiraz-28T | 1762 | 0.562311 | 0         |  |
|       |      | Shiraz-29T | 1801 | 0.815343 | 0         |  |
|       |      | Shiraz-32T | 1870 | 0.729766 | 0         |  |
|       |      | Shiraz-35T | 1933 | 0.488535 | 0         |  |
|       |      | Shiraz-58T | 2223 | 0.833364 | 0         |  |
|       |      | Shiraz-58T | 2224 | 1.076575 | 0         |  |
|       |      | Shiraz-71T | 2263 | 0.975531 | 0         |  |
|       |      | Shiraz-4T  | 261  | 0        | -0.336249 |  |
|       |      | Shiraz-16T | 295  | 0.591657 | 0         |  |
|       |      | Shiraz-36T | 433  | 0        | -0.803961 |  |
|       |      | Shiraz-44T | 899  | 0        | -1.09697  |  |
|       |      | Shiraz-44T | 900  | 0        | -0.584284 |  |
|       |      | Shiraz-44T | 901  | 0        | -1.000082 |  |
|       |      | Shiraz-49T | 1170 | 0        | -0.967436 |  |
|       |      | Shiraz-18T | 1457 | 0.643204 | 0         |  |
|       |      | Shiraz-22T | 1673 | 0.611783 | 0         |  |
|       |      | Shiraz-22T | 1674 | 0.887899 | 0         |  |
|       |      | Shiraz-25T | 1719 | 0.472955 | 0         |  |
|       |      | Shiraz-28T | 1762 | 0.562311 | 0         |  |
|       |      | Shiraz-29T | 1801 | 0.815343 | 0         |  |
|       |      | Shiraz-32T | 1870 | 0.729766 | 0         |  |
|       |      | Shiraz-35T | 1933 | 0.488535 | 0         |  |
|       |      | Shiraz-58T | 2223 | 0.833364 | 0         |  |
|       |      | Shiraz-58T | 2224 | 1.076575 | 0         |  |
|       |      | Shiraz-71T | 2263 | 0.975531 | 0         |  |
|       |      | Shiraz-4T  | 261  | 0        | -0.336249 |  |
|       |      | Shiraz-16T | 295  | 0.591657 | 0         |  |
|       |      | Shiraz-36T | 433  | 0        | -0.803961 |  |
|       |      | Shiraz-44T | 899  | 0        | -1.09697  |  |
|       |      | Shiraz-44T | 900  | 0        | -0.584284 |  |

|        |      |            |      |          |           |  |  |
|--------|------|------------|------|----------|-----------|--|--|
|        |      | Shiraz-44T | 901  | 0        | -1.000082 |  |  |
|        |      | Shiraz-49T | 1170 | 0        | -0.967436 |  |  |
|        |      | Shiraz-18T | 1457 | 0.643204 | 0         |  |  |
|        |      | Shiraz-22T | 1673 | 0.611783 | 0         |  |  |
|        |      | Shiraz-22T | 1674 | 0.887899 | 0         |  |  |
|        |      | Shiraz-25T | 1719 | 0.472955 | 0         |  |  |
|        |      | Shiraz-28T | 1762 | 0.562311 | 0         |  |  |
|        |      | Shiraz-29T | 1801 | 0.815343 | 0         |  |  |
|        |      | Shiraz-32T | 1870 | 0.729766 | 0         |  |  |
|        |      | Shiraz-35T | 1933 | 0.488535 | 0         |  |  |
|        |      | Shiraz-58T | 2223 | 0.833364 | 0         |  |  |
|        |      | Shiraz-58T | 2224 | 1.076575 | 0         |  |  |
|        |      | Shiraz-71T | 2263 | 0.975531 | 0         |  |  |
| GEMIN8 | chrX | Shiraz-3T  | 235  | 0        | -0.28401  |  |  |
|        |      | Shiraz-4T  | 260  | 0        | -0.324128 |  |  |
|        |      | Shiraz-16T | 294  | 0.655804 | 0         |  |  |
|        |      | Shiraz-36T | 431  | 0        | -0.78035  |  |  |
|        |      | Shiraz-44T | 891  | 0        | -0.954044 |  |  |
|        |      | Shiraz-49T | 1166 | 0        | -0.917235 |  |  |
|        |      | Shiraz-9T  | 1368 | 0.199713 | 0         |  |  |
|        |      | Shiraz-18T | 1455 | 0        | -0.186773 |  |  |
|        |      | Shiraz-22T | 1669 | 0.695915 | 0         |  |  |
|        |      | Shiraz-25T | 1717 | 0.420447 | 0         |  |  |
|        |      | Shiraz-28T | 1760 | 0.538181 | 0         |  |  |
|        |      | Shiraz-29T | 1800 | 0.672527 | 0         |  |  |
|        |      | Shiraz-32T | 1869 | 0.776805 | 0         |  |  |
|        |      | Shiraz-35T | 1932 | 0.507141 | 0         |  |  |
|        |      | Shiraz-40T | 2051 | 0.098506 | 0         |  |  |
|        |      | Shiraz-58T | 2221 | 0.871948 | 0         |  |  |
|        |      | Shiraz-71T | 2260 | 0.68394  | 0         |  |  |
|        |      | Shiraz-71T | 2261 | 0.508399 | 0         |  |  |
|        |      | Shiraz-3T  | 235  | 0        | -0.28401  |  |  |
|        |      | Shiraz-4T  | 260  | 0        | -0.324128 |  |  |
|        |      | Shiraz-16T | 294  | 0.655804 | 0         |  |  |
|        |      | Shiraz-36T | 431  | 0        | -0.78035  |  |  |
|        |      | Shiraz-44T | 891  | 0        | -0.954044 |  |  |
|        |      | Shiraz-49T | 1166 | 0        | -0.917235 |  |  |
|        |      | Shiraz-9T  | 1368 | 0.199713 | 0         |  |  |
|        |      | Shiraz-18T | 1455 | 0        | -0.186773 |  |  |
|        |      | Shiraz-22T | 1669 | 0.695915 | 0         |  |  |
|        |      | Shiraz-25T | 1717 | 0.420447 | 0         |  |  |
|        |      | Shiraz-28T | 1760 | 0.538181 | 0         |  |  |
|        |      | Shiraz-29T | 1800 | 0.672527 | 0         |  |  |
|        |      | Shiraz-32T | 1869 | 0.776805 | 0         |  |  |
|        |      | Shiraz-35T | 1932 | 0.507141 | 0         |  |  |
|        |      | Shiraz-40T | 2051 | 0.098506 | 0         |  |  |
|        |      | Shiraz-58T | 2221 | 0.871948 | 0         |  |  |

|      |      |            |      |          |           |  |
|------|------|------------|------|----------|-----------|--|
|      |      | Shiraz-71T | 2260 | 0.68394  | 0         |  |
|      |      | Shiraz-71T | 2261 | 0.508399 | 0         |  |
|      |      | Shiraz-3T  | 235  | 0        | -0.28401  |  |
|      |      | Shiraz-4T  | 260  | 0        | -0.324128 |  |
|      |      | Shiraz-16T | 294  | 0.655804 | 0         |  |
|      |      | Shiraz-36T | 431  | 0        | -0.78035  |  |
|      |      | Shiraz-44T | 891  | 0        | -0.954044 |  |
|      |      | Shiraz-49T | 1166 | 0        | -0.917235 |  |
|      |      | Shiraz-9T  | 1368 | 0.199713 | 0         |  |
|      |      | Shiraz-18T | 1455 | 0        | -0.186773 |  |
|      |      | Shiraz-22T | 1669 | 0.695915 | 0         |  |
|      |      | Shiraz-25T | 1717 | 0.420447 | 0         |  |
|      |      | Shiraz-28T | 1760 | 0.538181 | 0         |  |
|      |      | Shiraz-29T | 1800 | 0.672527 | 0         |  |
|      |      | Shiraz-32T | 1869 | 0.776805 | 0         |  |
|      |      | Shiraz-35T | 1932 | 0.507141 | 0         |  |
|      |      | Shiraz-40T | 2051 | 0.098506 | 0         |  |
|      |      | Shiraz-58T | 2221 | 0.871948 | 0         |  |
|      |      | Shiraz-71T | 2260 | 0.68394  | 0         |  |
|      |      | Shiraz-71T | 2261 | 0.508399 | 0         |  |
| GGCT | chr7 | Shiraz-3T  | 87   | 0.198593 | 0         |  |
|      |      | Shiraz-4T  | 252  | 0.192083 | 0         |  |
|      |      | Shiraz-36T | 376  | 0.159952 | 0         |  |
|      |      | Shiraz-46T | 942  | 0.069143 | 0         |  |
|      |      | Shiraz-18T | 1433 | 0.250973 | 0         |  |
|      |      | Shiraz-25T | 1697 | 0.21945  | 0         |  |
|      |      | Shiraz-28T | 1734 | 0.362882 | 0         |  |
|      |      | Shiraz-29T | 1777 | 0.156747 | 0         |  |
|      |      | Shiraz-38T | 1950 | 0.265916 | 0         |  |
|      |      | Shiraz-71T | 2236 | 0.320072 | 0         |  |
|      |      | Shiraz-3T  | 87   | 0.198593 | 0         |  |
|      |      | Shiraz-4T  | 252  | 0.192083 | 0         |  |
|      |      | Shiraz-36T | 376  | 0.159952 | 0         |  |
|      |      | Shiraz-46T | 942  | 0.069143 | 0         |  |
|      |      | Shiraz-18T | 1433 | 0.250973 | 0         |  |
|      |      | Shiraz-25T | 1697 | 0.21945  | 0         |  |
|      |      | Shiraz-28T | 1734 | 0.362882 | 0         |  |
|      |      | Shiraz-29T | 1777 | 0.156747 | 0         |  |
|      |      | Shiraz-38T | 1950 | 0.265916 | 0         |  |
|      |      | Shiraz-71T | 2236 | 0.320072 | 0         |  |
|      |      | Shiraz-3T  | 87   | 0.198593 | 0         |  |
|      |      | Shiraz-4T  | 252  | 0.192083 | 0         |  |
|      |      | Shiraz-36T | 376  | 0.159952 | 0         |  |
|      |      | Shiraz-46T | 942  | 0.069143 | 0         |  |
|      |      | Shiraz-18T | 1433 | 0.250973 | 0         |  |
|      |      | Shiraz-25T | 1697 | 0.21945  | 0         |  |
|      |      | Shiraz-28T | 1734 | 0.362882 | 0         |  |

|       |      |            |      |          |           |  |
|-------|------|------------|------|----------|-----------|--|
|       |      | Shiraz-29T | 1777 | 0.156747 | 0         |  |
|       |      | Shiraz-38T | 1950 | 0.265916 | 0         |  |
|       |      | Shiraz-71T | 2236 | 0.320072 | 0         |  |
| GHR   | chr5 | Shiraz-4T  | 250  | 0.262252 | 0         |  |
|       |      | Shiraz-16T | 266  | 0.321724 | 0         |  |
|       |      | Shiraz-44T | 591  | 0        | -0.233934 |  |
|       |      | Shiraz-18T | 1429 | 0        | -0.314125 |  |
|       |      | Shiraz-22T | 1522 | 0        | -0.322688 |  |
|       |      | Shiraz-25T | 1694 | 0.201602 | 0         |  |
|       |      | Shiraz-28T | 1731 | 0.295447 | 0         |  |
|       |      | Shiraz-29T | 1773 | 0.090981 | 0         |  |
|       |      | Shiraz-40T | 2016 | 0.376634 | 0         |  |
|       |      | Shiraz-4T  | 250  | 0.262252 | 0         |  |
|       |      | Shiraz-16T | 266  | 0.321724 | 0         |  |
|       |      | Shiraz-44T | 591  | 0        | -0.233934 |  |
|       |      | Shiraz-18T | 1429 | 0        | -0.314125 |  |
|       |      | Shiraz-22T | 1522 | 0        | -0.322688 |  |
|       |      | Shiraz-25T | 1694 | 0.201602 | 0         |  |
|       |      | Shiraz-28T | 1731 | 0.295447 | 0         |  |
|       |      | Shiraz-29T | 1773 | 0.090981 | 0         |  |
|       |      | Shiraz-40T | 2016 | 0.376634 | 0         |  |
|       |      | Shiraz-4T  | 250  | 0.262252 | 0         |  |
|       |      | Shiraz-16T | 266  | 0.321724 | 0         |  |
|       |      | Shiraz-44T | 591  | 0        | -0.233934 |  |
|       |      | Shiraz-18T | 1429 | 0        | -0.314125 |  |
|       |      | Shiraz-22T | 1522 | 0        | -0.322688 |  |
|       |      | Shiraz-25T | 1694 | 0.201602 | 0         |  |
|       |      | Shiraz-28T | 1731 | 0.295447 | 0         |  |
|       |      | Shiraz-29T | 1773 | 0.090981 | 0         |  |
|       |      | Shiraz-40T | 2016 | 0.376634 | 0         |  |
| GHRHR | chr7 | Shiraz-3T  | 87   | 0.198593 | 0         |  |
|       |      | Shiraz-3T  | 87   | 0.198593 | 0         |  |
|       |      | Shiraz-4T  | 252  | 0.192083 | 0         |  |
|       |      | Shiraz-4T  | 252  | 0.192083 | 0         |  |
|       |      | Shiraz-36T | 376  | 0.159952 | 0         |  |
|       |      | Shiraz-36T | 376  | 0.159952 | 0         |  |
|       |      | Shiraz-44T | 630  | 0.903655 | 0         |  |
|       |      | Shiraz-44T | 630  | 0.903655 | 0         |  |
|       |      | Shiraz-46T | 942  | 0.069143 | 0         |  |
|       |      | Shiraz-46T | 942  | 0.069143 | 0         |  |
|       |      | Shiraz-18T | 1433 | 0.250973 | 0         |  |
|       |      | Shiraz-18T | 1433 | 0.250973 | 0         |  |
|       |      | Shiraz-25T | 1697 | 0.21945  | 0         |  |
|       |      | Shiraz-25T | 1697 | 0.21945  | 0         |  |
|       |      | Shiraz-28T | 1734 | 0.362882 | 0         |  |
|       |      | Shiraz-28T | 1734 | 0.362882 | 0         |  |
|       |      | Shiraz-29T | 1777 | 0.156747 | 0         |  |

|  |  |            |      |          |   |  |  |
|--|--|------------|------|----------|---|--|--|
|  |  | Shiraz-29T | 1777 | 0.156747 | 0 |  |  |
|  |  | Shiraz-38T | 1950 | 0.265916 | 0 |  |  |
|  |  | Shiraz-38T | 1950 | 0.265916 | 0 |  |  |
|  |  | Shiraz-71T | 2236 | 0.320072 | 0 |  |  |
|  |  | Shiraz-71T | 2236 | 0.320072 | 0 |  |  |
|  |  | Shiraz-3T  | 87   | 0.198593 | 0 |  |  |
|  |  | Shiraz-3T  | 87   | 0.198593 | 0 |  |  |
|  |  | Shiraz-4T  | 252  | 0.192083 | 0 |  |  |
|  |  | Shiraz-4T  | 252  | 0.192083 | 0 |  |  |
|  |  | Shiraz-36T | 376  | 0.159952 | 0 |  |  |
|  |  | Shiraz-36T | 376  | 0.159952 | 0 |  |  |
|  |  | Shiraz-44T | 630  | 0.903655 | 0 |  |  |
|  |  | Shiraz-44T | 630  | 0.903655 | 0 |  |  |
|  |  | Shiraz-46T | 942  | 0.069143 | 0 |  |  |
|  |  | Shiraz-46T | 942  | 0.069143 | 0 |  |  |
|  |  | Shiraz-18T | 1433 | 0.250973 | 0 |  |  |
|  |  | Shiraz-18T | 1433 | 0.250973 | 0 |  |  |
|  |  | Shiraz-25T | 1697 | 0.21945  | 0 |  |  |
|  |  | Shiraz-25T | 1697 | 0.21945  | 0 |  |  |
|  |  | Shiraz-28T | 1734 | 0.362882 | 0 |  |  |
|  |  | Shiraz-28T | 1734 | 0.362882 | 0 |  |  |
|  |  | Shiraz-29T | 1777 | 0.156747 | 0 |  |  |
|  |  | Shiraz-29T | 1777 | 0.156747 | 0 |  |  |
|  |  | Shiraz-38T | 1950 | 0.265916 | 0 |  |  |
|  |  | Shiraz-38T | 1950 | 0.265916 | 0 |  |  |
|  |  | Shiraz-71T | 2236 | 0.320072 | 0 |  |  |
|  |  | Shiraz-71T | 2236 | 0.320072 | 0 |  |  |
|  |  | Shiraz-3T  | 87   | 0.198593 | 0 |  |  |
|  |  | Shiraz-3T  | 87   | 0.198593 | 0 |  |  |
|  |  | Shiraz-4T  | 252  | 0.192083 | 0 |  |  |
|  |  | Shiraz-4T  | 252  | 0.192083 | 0 |  |  |
|  |  | Shiraz-36T | 376  | 0.159952 | 0 |  |  |
|  |  | Shiraz-36T | 376  | 0.159952 | 0 |  |  |
|  |  | Shiraz-44T | 630  | 0.903655 | 0 |  |  |
|  |  | Shiraz-44T | 630  | 0.903655 | 0 |  |  |
|  |  | Shiraz-46T | 942  | 0.069143 | 0 |  |  |
|  |  | Shiraz-46T | 942  | 0.069143 | 0 |  |  |
|  |  | Shiraz-18T | 1433 | 0.250973 | 0 |  |  |
|  |  | Shiraz-18T | 1433 | 0.250973 | 0 |  |  |
|  |  | Shiraz-25T | 1697 | 0.21945  | 0 |  |  |
|  |  | Shiraz-25T | 1697 | 0.21945  | 0 |  |  |
|  |  | Shiraz-28T | 1734 | 0.362882 | 0 |  |  |
|  |  | Shiraz-28T | 1734 | 0.362882 | 0 |  |  |
|  |  | Shiraz-29T | 1777 | 0.156747 | 0 |  |  |
|  |  | Shiraz-29T | 1777 | 0.156747 | 0 |  |  |
|  |  | Shiraz-38T | 1950 | 0.265916 | 0 |  |  |
|  |  | Shiraz-38T | 1950 | 0.265916 | 0 |  |  |

|        |      |            |      |          |           |  |
|--------|------|------------|------|----------|-----------|--|
|        |      | Shiraz-71T | 2236 | 0.320072 | 0         |  |
|        |      | Shiraz-71T | 2236 | 0.320072 | 0         |  |
| GIGYF1 | chr7 | Shiraz-3T  | 90   | 0.219276 | 0         |  |
|        |      | Shiraz-3T  | 94   | 0.74735  | 0         |  |
|        |      | Shiraz-4T  | 253  | 0.372918 | 0         |  |
|        |      | Shiraz-31T | 316  | 0.219196 | 0         |  |
|        |      | Shiraz-36T | 378  | 0.179558 | 0         |  |
|        |      | Shiraz-36T | 381  | 0.332628 | 0         |  |
|        |      | Shiraz-44T | 639  | 1.035032 | 0         |  |
|        |      | Shiraz-46T | 943  | 0.093799 | 0         |  |
|        |      | Shiraz-46T | 946  | 0.299835 | 0         |  |
|        |      | Shiraz-47T | 1030 | 0.257728 | 0         |  |
|        |      | Shiraz-49T | 1120 | 0.281656 | 0         |  |
|        |      | Shiraz-77T | 1225 | 0        | -0.117922 |  |
|        |      | Shiraz-77T | 1227 | 0.196445 | 0         |  |
|        |      | Shiraz-9T  | 1324 | 0.679266 | 0         |  |
|        |      | Shiraz-18T | 1434 | 0.244465 | 0         |  |
|        |      | Shiraz-22T | 1549 | 0        | -0.319623 |  |
|        |      | Shiraz-22T | 1551 | 0.324011 | 0         |  |
|        |      | Shiraz-25T | 1698 | 0.21835  | 0         |  |
|        |      | Shiraz-28T | 1735 | 0.350744 | 0         |  |
|        |      | Shiraz-29T | 1778 | 0.120767 | 0         |  |
|        |      | Shiraz-32T | 1833 | 0.551336 | 0         |  |
|        |      | Shiraz-32T | 1834 | 1.485392 | 0         |  |
|        |      | Shiraz-38T | 1951 | 0.250891 | 0         |  |
|        |      | Shiraz-53T | 2078 | 0.287202 | 0         |  |
|        |      | Shiraz-58T | 2160 | 0.399007 | 0         |  |
|        |      | Shiraz-71T | 2238 | 0.603631 | 0         |  |
|        |      | Shiraz-3T  | 90   | 0.219276 | 0         |  |
|        |      | Shiraz-3T  | 94   | 0.74735  | 0         |  |
|        |      | Shiraz-4T  | 253  | 0.372918 | 0         |  |
|        |      | Shiraz-31T | 316  | 0.219196 | 0         |  |
|        |      | Shiraz-36T | 378  | 0.179558 | 0         |  |
|        |      | Shiraz-36T | 381  | 0.332628 | 0         |  |
|        |      | Shiraz-44T | 639  | 1.035032 | 0         |  |
|        |      | Shiraz-46T | 943  | 0.093799 | 0         |  |
|        |      | Shiraz-46T | 946  | 0.299835 | 0         |  |
|        |      | Shiraz-47T | 1030 | 0.257728 | 0         |  |
|        |      | Shiraz-49T | 1120 | 0.281656 | 0         |  |
|        |      | Shiraz-77T | 1225 | 0        | -0.117922 |  |
|        |      | Shiraz-77T | 1227 | 0.196445 | 0         |  |
|        |      | Shiraz-9T  | 1324 | 0.679266 | 0         |  |
|        |      | Shiraz-18T | 1434 | 0.244465 | 0         |  |
|        |      | Shiraz-22T | 1549 | 0        | -0.319623 |  |
|        |      | Shiraz-22T | 1551 | 0.324011 | 0         |  |
|        |      | Shiraz-25T | 1698 | 0.21835  | 0         |  |
|        |      | Shiraz-28T | 1735 | 0.350744 | 0         |  |

|        |      |            |      |          |           |  |
|--------|------|------------|------|----------|-----------|--|
|        |      | Shiraz-29T | 1778 | 0.120767 | 0         |  |
|        |      | Shiraz-32T | 1833 | 0.551336 | 0         |  |
|        |      | Shiraz-32T | 1834 | 1.485392 | 0         |  |
|        |      | Shiraz-38T | 1951 | 0.250891 | 0         |  |
|        |      | Shiraz-53T | 2078 | 0.287202 | 0         |  |
|        |      | Shiraz-58T | 2160 | 0.399007 | 0         |  |
|        |      | Shiraz-71T | 2238 | 0.603631 | 0         |  |
|        |      | Shiraz-3T  | 90   | 0.219276 | 0         |  |
|        |      | Shiraz-3T  | 94   | 0.74735  | 0         |  |
|        |      | Shiraz-4T  | 253  | 0.372918 | 0         |  |
|        |      | Shiraz-31T | 316  | 0.219196 | 0         |  |
|        |      | Shiraz-36T | 378  | 0.179558 | 0         |  |
|        |      | Shiraz-36T | 381  | 0.332628 | 0         |  |
|        |      | Shiraz-44T | 639  | 1.035032 | 0         |  |
|        |      | Shiraz-46T | 943  | 0.093799 | 0         |  |
|        |      | Shiraz-46T | 946  | 0.299835 | 0         |  |
|        |      | Shiraz-47T | 1030 | 0.257728 | 0         |  |
|        |      | Shiraz-49T | 1120 | 0.281656 | 0         |  |
|        |      | Shiraz-77T | 1225 | 0        | -0.117922 |  |
|        |      | Shiraz-77T | 1227 | 0.196445 | 0         |  |
|        |      | Shiraz-9T  | 1324 | 0.679266 | 0         |  |
|        |      | Shiraz-18T | 1434 | 0.244465 | 0         |  |
|        |      | Shiraz-22T | 1549 | 0        | -0.319623 |  |
|        |      | Shiraz-22T | 1551 | 0.324011 | 0         |  |
|        |      | Shiraz-25T | 1698 | 0.21835  | 0         |  |
|        |      | Shiraz-28T | 1735 | 0.350744 | 0         |  |
|        |      | Shiraz-29T | 1778 | 0.120767 | 0         |  |
|        |      | Shiraz-32T | 1833 | 0.551336 | 0         |  |
|        |      | Shiraz-32T | 1834 | 1.485392 | 0         |  |
|        |      | Shiraz-38T | 1951 | 0.250891 | 0         |  |
|        |      | Shiraz-53T | 2078 | 0.287202 | 0         |  |
|        |      | Shiraz-58T | 2160 | 0.399007 | 0         |  |
|        |      | Shiraz-71T | 2238 | 0.603631 | 0         |  |
| GIMAP1 | chr7 | Shiraz-3T  | 90   | 0.219276 | 0         |  |
|        |      | Shiraz-3T  | 99   | 0.454766 | 0         |  |
|        |      | Shiraz-4T  | 253  | 0.372918 | 0         |  |
|        |      | Shiraz-36T | 378  | 0.179558 | 0         |  |
|        |      | Shiraz-44T | 646  | 0.471276 | 0         |  |
|        |      | Shiraz-46T | 943  | 0.093799 | 0         |  |
|        |      | Shiraz-9T  | 1325 | 0.221899 | 0         |  |
|        |      | Shiraz-18T | 1434 | 0.244465 | 0         |  |
|        |      | Shiraz-25T | 1698 | 0.21835  | 0         |  |
|        |      | Shiraz-28T | 1735 | 0.350744 | 0         |  |
|        |      | Shiraz-29T | 1778 | 0.120767 | 0         |  |
|        |      | Shiraz-32T | 1833 | 0.551336 | 0         |  |
|        |      | Shiraz-38T | 1951 | 0.250891 | 0         |  |
|        |      | Shiraz-53T | 2078 | 0.287202 | 0         |  |

|        |      |            |      |          |   |  |  |
|--------|------|------------|------|----------|---|--|--|
|        |      | Shiraz-58T | 2162 | 0.221505 | 0 |  |  |
|        |      | Shiraz-71T | 2238 | 0.603631 | 0 |  |  |
|        |      | Shiraz-3T  | 90   | 0.219276 | 0 |  |  |
|        |      | Shiraz-3T  | 99   | 0.454766 | 0 |  |  |
|        |      | Shiraz-4T  | 253  | 0.372918 | 0 |  |  |
|        |      | Shiraz-36T | 378  | 0.179558 | 0 |  |  |
|        |      | Shiraz-44T | 646  | 0.471276 | 0 |  |  |
|        |      | Shiraz-46T | 943  | 0.093799 | 0 |  |  |
|        |      | Shiraz-9T  | 1325 | 0.221899 | 0 |  |  |
|        |      | Shiraz-18T | 1434 | 0.244465 | 0 |  |  |
|        |      | Shiraz-25T | 1698 | 0.21835  | 0 |  |  |
|        |      | Shiraz-28T | 1735 | 0.350744 | 0 |  |  |
|        |      | Shiraz-29T | 1778 | 0.120767 | 0 |  |  |
|        |      | Shiraz-32T | 1833 | 0.551336 | 0 |  |  |
|        |      | Shiraz-38T | 1951 | 0.250891 | 0 |  |  |
|        |      | Shiraz-53T | 2078 | 0.287202 | 0 |  |  |
|        |      | Shiraz-58T | 2162 | 0.221505 | 0 |  |  |
|        |      | Shiraz-71T | 2238 | 0.603631 | 0 |  |  |
|        |      | Shiraz-3T  | 90   | 0.219276 | 0 |  |  |
|        |      | Shiraz-3T  | 99   | 0.454766 | 0 |  |  |
|        |      | Shiraz-4T  | 253  | 0.372918 | 0 |  |  |
|        |      | Shiraz-36T | 378  | 0.179558 | 0 |  |  |
|        |      | Shiraz-44T | 646  | 0.471276 | 0 |  |  |
|        |      | Shiraz-46T | 943  | 0.093799 | 0 |  |  |
|        |      | Shiraz-9T  | 1325 | 0.221899 | 0 |  |  |
|        |      | Shiraz-18T | 1434 | 0.244465 | 0 |  |  |
|        |      | Shiraz-25T | 1698 | 0.21835  | 0 |  |  |
|        |      | Shiraz-28T | 1735 | 0.350744 | 0 |  |  |
|        |      | Shiraz-29T | 1778 | 0.120767 | 0 |  |  |
|        |      | Shiraz-32T | 1833 | 0.551336 | 0 |  |  |
|        |      | Shiraz-38T | 1951 | 0.250891 | 0 |  |  |
|        |      | Shiraz-53T | 2078 | 0.287202 | 0 |  |  |
|        |      | Shiraz-58T | 2162 | 0.221505 | 0 |  |  |
|        |      | Shiraz-71T | 2238 | 0.603631 | 0 |  |  |
| GIMAP2 | chr7 | Shiraz-3T  | 90   | 0.219276 | 0 |  |  |
|        |      | Shiraz-3T  | 99   | 0.454766 | 0 |  |  |
|        |      | Shiraz-4T  | 253  | 0.372918 | 0 |  |  |
|        |      | Shiraz-36T | 378  | 0.179558 | 0 |  |  |
|        |      | Shiraz-44T | 646  | 0.471276 | 0 |  |  |
|        |      | Shiraz-46T | 943  | 0.093799 | 0 |  |  |
|        |      | Shiraz-9T  | 1325 | 0.221899 | 0 |  |  |
|        |      | Shiraz-18T | 1434 | 0.244465 | 0 |  |  |
|        |      | Shiraz-25T | 1698 | 0.21835  | 0 |  |  |
|        |      | Shiraz-28T | 1735 | 0.350744 | 0 |  |  |
|        |      | Shiraz-29T | 1778 | 0.120767 | 0 |  |  |
|        |      | Shiraz-32T | 1833 | 0.551336 | 0 |  |  |
|        |      | Shiraz-38T | 1951 | 0.250891 | 0 |  |  |



|        |      |            |      |          |   |  |
|--------|------|------------|------|----------|---|--|
|        |      | Shiraz-53T | 2078 | 0.287202 | 0 |  |
|        |      | Shiraz-58T | 2162 | 0.221505 | 0 |  |
|        |      | Shiraz-71T | 2238 | 0.603631 | 0 |  |
|        |      | Shiraz-3T  | 90   | 0.219276 | 0 |  |
|        |      | Shiraz-3T  | 99   | 0.454766 | 0 |  |
|        |      | Shiraz-4T  | 253  | 0.372918 | 0 |  |
|        |      | Shiraz-36T | 378  | 0.179558 | 0 |  |
|        |      | Shiraz-44T | 646  | 0.471276 | 0 |  |
|        |      | Shiraz-46T | 943  | 0.093799 | 0 |  |
|        |      | Shiraz-9T  | 1325 | 0.221899 | 0 |  |
|        |      | Shiraz-18T | 1434 | 0.244465 | 0 |  |
|        |      | Shiraz-25T | 1698 | 0.21835  | 0 |  |
|        |      | Shiraz-28T | 1735 | 0.350744 | 0 |  |
|        |      | Shiraz-29T | 1778 | 0.120767 | 0 |  |
|        |      | Shiraz-32T | 1833 | 0.551336 | 0 |  |
|        |      | Shiraz-38T | 1951 | 0.250891 | 0 |  |
|        |      | Shiraz-53T | 2078 | 0.287202 | 0 |  |
|        |      | Shiraz-58T | 2162 | 0.221505 | 0 |  |
|        |      | Shiraz-71T | 2238 | 0.603631 | 0 |  |
|        |      | Shiraz-3T  | 90   | 0.219276 | 0 |  |
|        |      | Shiraz-3T  | 99   | 0.454766 | 0 |  |
|        |      | Shiraz-4T  | 253  | 0.372918 | 0 |  |
|        |      | Shiraz-36T | 378  | 0.179558 | 0 |  |
|        |      | Shiraz-44T | 646  | 0.471276 | 0 |  |
|        |      | Shiraz-46T | 943  | 0.093799 | 0 |  |
|        |      | Shiraz-9T  | 1325 | 0.221899 | 0 |  |
|        |      | Shiraz-18T | 1434 | 0.244465 | 0 |  |
|        |      | Shiraz-25T | 1698 | 0.21835  | 0 |  |
|        |      | Shiraz-28T | 1735 | 0.350744 | 0 |  |
|        |      | Shiraz-29T | 1778 | 0.120767 | 0 |  |
|        |      | Shiraz-32T | 1833 | 0.551336 | 0 |  |
|        |      | Shiraz-38T | 1951 | 0.250891 | 0 |  |
|        |      | Shiraz-53T | 2078 | 0.287202 | 0 |  |
|        |      | Shiraz-58T | 2162 | 0.221505 | 0 |  |
|        |      | Shiraz-71T | 2238 | 0.603631 | 0 |  |
| GIMAP4 | chr7 | Shiraz-3T  | 90   | 0.219276 | 0 |  |
|        |      | Shiraz-3T  | 99   | 0.454766 | 0 |  |
|        |      | Shiraz-4T  | 253  | 0.372918 | 0 |  |
|        |      | Shiraz-36T | 378  | 0.179558 | 0 |  |
|        |      | Shiraz-44T | 646  | 0.471276 | 0 |  |
|        |      | Shiraz-46T | 943  | 0.093799 | 0 |  |
|        |      | Shiraz-9T  | 1325 | 0.221899 | 0 |  |
|        |      | Shiraz-18T | 1434 | 0.244465 | 0 |  |
|        |      | Shiraz-25T | 1698 | 0.21835  | 0 |  |
|        |      | Shiraz-28T | 1735 | 0.350744 | 0 |  |
|        |      | Shiraz-29T | 1778 | 0.120767 | 0 |  |
|        |      | Shiraz-32T | 1833 | 0.551336 | 0 |  |

|        |      |            |      |          |   |  |  |
|--------|------|------------|------|----------|---|--|--|
|        |      | Shiraz-38T | 1951 | 0.250891 | 0 |  |  |
|        |      | Shiraz-53T | 2078 | 0.287202 | 0 |  |  |
|        |      | Shiraz-58T | 2162 | 0.221505 | 0 |  |  |
|        |      | Shiraz-71T | 2238 | 0.603631 | 0 |  |  |
|        |      | Shiraz-3T  | 90   | 0.219276 | 0 |  |  |
|        |      | Shiraz-3T  | 99   | 0.454766 | 0 |  |  |
|        |      | Shiraz-4T  | 253  | 0.372918 | 0 |  |  |
|        |      | Shiraz-36T | 378  | 0.179558 | 0 |  |  |
|        |      | Shiraz-44T | 646  | 0.471276 | 0 |  |  |
|        |      | Shiraz-46T | 943  | 0.093799 | 0 |  |  |
|        |      | Shiraz-9T  | 1325 | 0.221899 | 0 |  |  |
|        |      | Shiraz-18T | 1434 | 0.244465 | 0 |  |  |
|        |      | Shiraz-25T | 1698 | 0.21835  | 0 |  |  |
|        |      | Shiraz-28T | 1735 | 0.350744 | 0 |  |  |
|        |      | Shiraz-29T | 1778 | 0.120767 | 0 |  |  |
|        |      | Shiraz-32T | 1833 | 0.551336 | 0 |  |  |
|        |      | Shiraz-38T | 1951 | 0.250891 | 0 |  |  |
|        |      | Shiraz-53T | 2078 | 0.287202 | 0 |  |  |
|        |      | Shiraz-58T | 2162 | 0.221505 | 0 |  |  |
|        |      | Shiraz-71T | 2238 | 0.603631 | 0 |  |  |
|        |      | Shiraz-3T  | 90   | 0.219276 | 0 |  |  |
|        |      | Shiraz-3T  | 99   | 0.454766 | 0 |  |  |
|        |      | Shiraz-4T  | 253  | 0.372918 | 0 |  |  |
|        |      | Shiraz-36T | 378  | 0.179558 | 0 |  |  |
|        |      | Shiraz-44T | 646  | 0.471276 | 0 |  |  |
|        |      | Shiraz-46T | 943  | 0.093799 | 0 |  |  |
|        |      | Shiraz-9T  | 1325 | 0.221899 | 0 |  |  |
|        |      | Shiraz-18T | 1434 | 0.244465 | 0 |  |  |
|        |      | Shiraz-25T | 1698 | 0.21835  | 0 |  |  |
|        |      | Shiraz-28T | 1735 | 0.350744 | 0 |  |  |
|        |      | Shiraz-29T | 1778 | 0.120767 | 0 |  |  |
|        |      | Shiraz-32T | 1833 | 0.551336 | 0 |  |  |
|        |      | Shiraz-38T | 1951 | 0.250891 | 0 |  |  |
|        |      | Shiraz-53T | 2078 | 0.287202 | 0 |  |  |
|        |      | Shiraz-58T | 2162 | 0.221505 | 0 |  |  |
|        |      | Shiraz-71T | 2238 | 0.603631 | 0 |  |  |
| GIMAP5 | chr7 | Shiraz-3T  | 90   | 0.219276 | 0 |  |  |
|        |      | Shiraz-3T  | 99   | 0.454766 | 0 |  |  |
|        |      | Shiraz-4T  | 253  | 0.372918 | 0 |  |  |
|        |      | Shiraz-36T | 378  | 0.179558 | 0 |  |  |
|        |      | Shiraz-44T | 646  | 0.471276 | 0 |  |  |
|        |      | Shiraz-46T | 943  | 0.093799 | 0 |  |  |
|        |      | Shiraz-9T  | 1325 | 0.221899 | 0 |  |  |
|        |      | Shiraz-18T | 1434 | 0.244465 | 0 |  |  |
|        |      | Shiraz-25T | 1698 | 0.21835  | 0 |  |  |
|        |      | Shiraz-28T | 1735 | 0.350744 | 0 |  |  |
|        |      | Shiraz-29T | 1778 | 0.120767 | 0 |  |  |

|        |      |            |      |          |   |  |  |
|--------|------|------------|------|----------|---|--|--|
|        |      | Shiraz-32T | 1833 | 0.551336 | 0 |  |  |
|        |      | Shiraz-38T | 1951 | 0.250891 | 0 |  |  |
|        |      | Shiraz-53T | 2078 | 0.287202 | 0 |  |  |
|        |      | Shiraz-58T | 2162 | 0.221505 | 0 |  |  |
|        |      | Shiraz-71T | 2238 | 0.603631 | 0 |  |  |
|        |      | Shiraz-3T  | 90   | 0.219276 | 0 |  |  |
|        |      | Shiraz-3T  | 99   | 0.454766 | 0 |  |  |
|        |      | Shiraz-4T  | 253  | 0.372918 | 0 |  |  |
|        |      | Shiraz-36T | 378  | 0.179558 | 0 |  |  |
|        |      | Shiraz-44T | 646  | 0.471276 | 0 |  |  |
|        |      | Shiraz-46T | 943  | 0.093799 | 0 |  |  |
|        |      | Shiraz-9T  | 1325 | 0.221899 | 0 |  |  |
|        |      | Shiraz-18T | 1434 | 0.244465 | 0 |  |  |
|        |      | Shiraz-25T | 1698 | 0.21835  | 0 |  |  |
|        |      | Shiraz-28T | 1735 | 0.350744 | 0 |  |  |
|        |      | Shiraz-29T | 1778 | 0.120767 | 0 |  |  |
|        |      | Shiraz-32T | 1833 | 0.551336 | 0 |  |  |
|        |      | Shiraz-38T | 1951 | 0.250891 | 0 |  |  |
|        |      | Shiraz-53T | 2078 | 0.287202 | 0 |  |  |
|        |      | Shiraz-58T | 2162 | 0.221505 | 0 |  |  |
|        |      | Shiraz-71T | 2238 | 0.603631 | 0 |  |  |
|        |      | Shiraz-3T  | 90   | 0.219276 | 0 |  |  |
|        |      | Shiraz-3T  | 99   | 0.454766 | 0 |  |  |
|        |      | Shiraz-4T  | 253  | 0.372918 | 0 |  |  |
|        |      | Shiraz-36T | 378  | 0.179558 | 0 |  |  |
|        |      | Shiraz-44T | 646  | 0.471276 | 0 |  |  |
|        |      | Shiraz-46T | 943  | 0.093799 | 0 |  |  |
|        |      | Shiraz-9T  | 1325 | 0.221899 | 0 |  |  |
|        |      | Shiraz-18T | 1434 | 0.244465 | 0 |  |  |
|        |      | Shiraz-25T | 1698 | 0.21835  | 0 |  |  |
|        |      | Shiraz-28T | 1735 | 0.350744 | 0 |  |  |
|        |      | Shiraz-29T | 1778 | 0.120767 | 0 |  |  |
|        |      | Shiraz-32T | 1833 | 0.551336 | 0 |  |  |
|        |      | Shiraz-38T | 1951 | 0.250891 | 0 |  |  |
|        |      | Shiraz-53T | 2078 | 0.287202 | 0 |  |  |
|        |      | Shiraz-58T | 2162 | 0.221505 | 0 |  |  |
|        |      | Shiraz-71T | 2238 | 0.603631 | 0 |  |  |
| GIMAP6 | chr7 | Shiraz-3T  | 90   | 0.219276 | 0 |  |  |
|        |      | Shiraz-3T  | 99   | 0.454766 | 0 |  |  |
|        |      | Shiraz-4T  | 253  | 0.372918 | 0 |  |  |
|        |      | Shiraz-36T | 378  | 0.179558 | 0 |  |  |
|        |      | Shiraz-44T | 646  | 0.471276 | 0 |  |  |
|        |      | Shiraz-46T | 943  | 0.093799 | 0 |  |  |
|        |      | Shiraz-9T  | 1325 | 0.221899 | 0 |  |  |
|        |      | Shiraz-18T | 1434 | 0.244465 | 0 |  |  |
|        |      | Shiraz-25T | 1698 | 0.21835  | 0 |  |  |
|        |      | Shiraz-28T | 1735 | 0.350744 | 0 |  |  |

|        |      |            |      |          |   |  |
|--------|------|------------|------|----------|---|--|
|        |      | Shiraz-29T | 1778 | 0.120767 | 0 |  |
|        |      | Shiraz-32T | 1833 | 0.551336 | 0 |  |
|        |      | Shiraz-38T | 1951 | 0.250891 | 0 |  |
|        |      | Shiraz-53T | 2078 | 0.287202 | 0 |  |
|        |      | Shiraz-58T | 2162 | 0.221505 | 0 |  |
|        |      | Shiraz-71T | 2238 | 0.603631 | 0 |  |
|        |      | Shiraz-3T  | 90   | 0.219276 | 0 |  |
|        |      | Shiraz-3T  | 99   | 0.454766 | 0 |  |
|        |      | Shiraz-4T  | 253  | 0.372918 | 0 |  |
|        |      | Shiraz-36T | 378  | 0.179558 | 0 |  |
|        |      | Shiraz-44T | 646  | 0.471276 | 0 |  |
|        |      | Shiraz-46T | 943  | 0.093799 | 0 |  |
|        |      | Shiraz-9T  | 1325 | 0.221899 | 0 |  |
|        |      | Shiraz-18T | 1434 | 0.244465 | 0 |  |
|        |      | Shiraz-25T | 1698 | 0.21835  | 0 |  |
|        |      | Shiraz-28T | 1735 | 0.350744 | 0 |  |
|        |      | Shiraz-29T | 1778 | 0.120767 | 0 |  |
|        |      | Shiraz-32T | 1833 | 0.551336 | 0 |  |
|        |      | Shiraz-38T | 1951 | 0.250891 | 0 |  |
|        |      | Shiraz-53T | 2078 | 0.287202 | 0 |  |
|        |      | Shiraz-58T | 2162 | 0.221505 | 0 |  |
|        |      | Shiraz-71T | 2238 | 0.603631 | 0 |  |
|        |      | Shiraz-3T  | 90   | 0.219276 | 0 |  |
|        |      | Shiraz-3T  | 99   | 0.454766 | 0 |  |
|        |      | Shiraz-4T  | 253  | 0.372918 | 0 |  |
|        |      | Shiraz-36T | 378  | 0.179558 | 0 |  |
|        |      | Shiraz-44T | 646  | 0.471276 | 0 |  |
|        |      | Shiraz-46T | 943  | 0.093799 | 0 |  |
|        |      | Shiraz-9T  | 1325 | 0.221899 | 0 |  |
|        |      | Shiraz-18T | 1434 | 0.244465 | 0 |  |
|        |      | Shiraz-25T | 1698 | 0.21835  | 0 |  |
|        |      | Shiraz-28T | 1735 | 0.350744 | 0 |  |
|        |      | Shiraz-29T | 1778 | 0.120767 | 0 |  |
|        |      | Shiraz-32T | 1833 | 0.551336 | 0 |  |
|        |      | Shiraz-38T | 1951 | 0.250891 | 0 |  |
|        |      | Shiraz-53T | 2078 | 0.287202 | 0 |  |
|        |      | Shiraz-58T | 2162 | 0.221505 | 0 |  |
|        |      | Shiraz-71T | 2238 | 0.603631 | 0 |  |
| GIMAP7 | chr7 | Shiraz-3T  | 90   | 0.219276 | 0 |  |
|        |      | Shiraz-3T  | 99   | 0.454766 | 0 |  |
|        |      | Shiraz-4T  | 253  | 0.372918 | 0 |  |
|        |      | Shiraz-36T | 378  | 0.179558 | 0 |  |
|        |      | Shiraz-44T | 646  | 0.471276 | 0 |  |
|        |      | Shiraz-46T | 943  | 0.093799 | 0 |  |
|        |      | Shiraz-9T  | 1325 | 0.221899 | 0 |  |
|        |      | Shiraz-18T | 1434 | 0.244465 | 0 |  |
|        |      | Shiraz-25T | 1698 | 0.21835  | 0 |  |

|        |      |            |      |          |   |  |  |
|--------|------|------------|------|----------|---|--|--|
|        |      | Shiraz-28T | 1735 | 0.350744 | 0 |  |  |
|        |      | Shiraz-29T | 1778 | 0.120767 | 0 |  |  |
|        |      | Shiraz-32T | 1833 | 0.551336 | 0 |  |  |
|        |      | Shiraz-38T | 1951 | 0.250891 | 0 |  |  |
|        |      | Shiraz-53T | 2078 | 0.287202 | 0 |  |  |
|        |      | Shiraz-58T | 2162 | 0.221505 | 0 |  |  |
|        |      | Shiraz-71T | 2238 | 0.603631 | 0 |  |  |
|        |      | Shiraz-3T  | 90   | 0.219276 | 0 |  |  |
|        |      | Shiraz-3T  | 99   | 0.454766 | 0 |  |  |
|        |      | Shiraz-4T  | 253  | 0.372918 | 0 |  |  |
|        |      | Shiraz-36T | 378  | 0.179558 | 0 |  |  |
|        |      | Shiraz-44T | 646  | 0.471276 | 0 |  |  |
|        |      | Shiraz-46T | 943  | 0.093799 | 0 |  |  |
|        |      | Shiraz-9T  | 1325 | 0.221899 | 0 |  |  |
|        |      | Shiraz-18T | 1434 | 0.244465 | 0 |  |  |
|        |      | Shiraz-25T | 1698 | 0.21835  | 0 |  |  |
|        |      | Shiraz-28T | 1735 | 0.350744 | 0 |  |  |
|        |      | Shiraz-29T | 1778 | 0.120767 | 0 |  |  |
|        |      | Shiraz-32T | 1833 | 0.551336 | 0 |  |  |
|        |      | Shiraz-38T | 1951 | 0.250891 | 0 |  |  |
|        |      | Shiraz-53T | 2078 | 0.287202 | 0 |  |  |
|        |      | Shiraz-58T | 2162 | 0.221505 | 0 |  |  |
|        |      | Shiraz-71T | 2238 | 0.603631 | 0 |  |  |
|        |      | Shiraz-3T  | 90   | 0.219276 | 0 |  |  |
|        |      | Shiraz-3T  | 99   | 0.454766 | 0 |  |  |
|        |      | Shiraz-4T  | 253  | 0.372918 | 0 |  |  |
|        |      | Shiraz-36T | 378  | 0.179558 | 0 |  |  |
|        |      | Shiraz-44T | 646  | 0.471276 | 0 |  |  |
|        |      | Shiraz-46T | 943  | 0.093799 | 0 |  |  |
|        |      | Shiraz-9T  | 1325 | 0.221899 | 0 |  |  |
|        |      | Shiraz-18T | 1434 | 0.244465 | 0 |  |  |
|        |      | Shiraz-25T | 1698 | 0.21835  | 0 |  |  |
|        |      | Shiraz-28T | 1735 | 0.350744 | 0 |  |  |
|        |      | Shiraz-29T | 1778 | 0.120767 | 0 |  |  |
|        |      | Shiraz-32T | 1833 | 0.551336 | 0 |  |  |
|        |      | Shiraz-38T | 1951 | 0.250891 | 0 |  |  |
|        |      | Shiraz-53T | 2078 | 0.287202 | 0 |  |  |
|        |      | Shiraz-58T | 2162 | 0.221505 | 0 |  |  |
|        |      | Shiraz-71T | 2238 | 0.603631 | 0 |  |  |
| GIMAP8 | chr7 | Shiraz-3T  | 90   | 0.219276 | 0 |  |  |
|        |      | Shiraz-3T  | 99   | 0.454766 | 0 |  |  |
|        |      | Shiraz-4T  | 253  | 0.372918 | 0 |  |  |
|        |      | Shiraz-36T | 378  | 0.179558 | 0 |  |  |
|        |      | Shiraz-44T | 646  | 0.471276 | 0 |  |  |
|        |      | Shiraz-46T | 943  | 0.093799 | 0 |  |  |
|        |      | Shiraz-9T  | 1325 | 0.221899 | 0 |  |  |
|        |      | Shiraz-18T | 1434 | 0.244465 | 0 |  |  |

|      |      |            |      |          |           |  |  |
|------|------|------------|------|----------|-----------|--|--|
|      |      | Shiraz-25T | 1698 | 0.21835  | 0         |  |  |
|      |      | Shiraz-28T | 1735 | 0.350744 | 0         |  |  |
|      |      | Shiraz-29T | 1778 | 0.120767 | 0         |  |  |
|      |      | Shiraz-32T | 1833 | 0.551336 | 0         |  |  |
|      |      | Shiraz-38T | 1951 | 0.250891 | 0         |  |  |
|      |      | Shiraz-53T | 2078 | 0.287202 | 0         |  |  |
|      |      | Shiraz-58T | 2162 | 0.221505 | 0         |  |  |
|      |      | Shiraz-71T | 2238 | 0.603631 | 0         |  |  |
|      |      | Shiraz-3T  | 90   | 0.219276 | 0         |  |  |
|      |      | Shiraz-3T  | 99   | 0.454766 | 0         |  |  |
|      |      | Shiraz-4T  | 253  | 0.372918 | 0         |  |  |
|      |      | Shiraz-36T | 378  | 0.179558 | 0         |  |  |
|      |      | Shiraz-44T | 646  | 0.471276 | 0         |  |  |
|      |      | Shiraz-46T | 943  | 0.093799 | 0         |  |  |
|      |      | Shiraz-9T  | 1325 | 0.221899 | 0         |  |  |
|      |      | Shiraz-18T | 1434 | 0.244465 | 0         |  |  |
|      |      | Shiraz-25T | 1698 | 0.21835  | 0         |  |  |
|      |      | Shiraz-28T | 1735 | 0.350744 | 0         |  |  |
|      |      | Shiraz-29T | 1778 | 0.120767 | 0         |  |  |
|      |      | Shiraz-32T | 1833 | 0.551336 | 0         |  |  |
|      |      | Shiraz-38T | 1951 | 0.250891 | 0         |  |  |
|      |      | Shiraz-53T | 2078 | 0.287202 | 0         |  |  |
|      |      | Shiraz-58T | 2162 | 0.221505 | 0         |  |  |
|      |      | Shiraz-71T | 2238 | 0.603631 | 0         |  |  |
|      |      | Shiraz-3T  | 90   | 0.219276 | 0         |  |  |
|      |      | Shiraz-3T  | 99   | 0.454766 | 0         |  |  |
|      |      | Shiraz-4T  | 253  | 0.372918 | 0         |  |  |
|      |      | Shiraz-36T | 378  | 0.179558 | 0         |  |  |
|      |      | Shiraz-44T | 646  | 0.471276 | 0         |  |  |
|      |      | Shiraz-46T | 943  | 0.093799 | 0         |  |  |
|      |      | Shiraz-9T  | 1325 | 0.221899 | 0         |  |  |
|      |      | Shiraz-18T | 1434 | 0.244465 | 0         |  |  |
|      |      | Shiraz-25T | 1698 | 0.21835  | 0         |  |  |
|      |      | Shiraz-28T | 1735 | 0.350744 | 0         |  |  |
|      |      | Shiraz-29T | 1778 | 0.120767 | 0         |  |  |
|      |      | Shiraz-32T | 1833 | 0.551336 | 0         |  |  |
|      |      | Shiraz-38T | 1951 | 0.250891 | 0         |  |  |
|      |      | Shiraz-53T | 2078 | 0.287202 | 0         |  |  |
|      |      | Shiraz-58T | 2162 | 0.221505 | 0         |  |  |
|      |      | Shiraz-71T | 2238 | 0.603631 | 0         |  |  |
| GJB1 | chrX | Shiraz-4T  | 261  | 0        | -0.336249 |  |  |
|      |      | Shiraz-4T  | 261  | 0        | -0.336249 |  |  |
|      |      | Shiraz-16T | 295  | 0.591657 | 0         |  |  |
|      |      | Shiraz-16T | 295  | 0.591657 | 0         |  |  |
|      |      | Shiraz-36T | 433  | 0        | -0.803961 |  |  |
|      |      | Shiraz-36T | 433  | 0        | -0.803961 |  |  |
|      |      | Shiraz-44T | 899  | 0        | -1.09697  |  |  |

|  |            |      |          |           |  |
|--|------------|------|----------|-----------|--|
|  | Shiraz-44T | 899  | 0        | -1.09697  |  |
|  | Shiraz-44T | 900  | 0        | -0.584284 |  |
|  | Shiraz-44T | 900  | 0        | -0.584284 |  |
|  | Shiraz-49T | 1170 | 0        | -0.967436 |  |
|  | Shiraz-49T | 1170 | 0        | -0.967436 |  |
|  | Shiraz-49T | 1171 | 0        | -0.612379 |  |
|  | Shiraz-49T | 1171 | 0        | -0.612379 |  |
|  | Shiraz-77T | 1283 | 0.296555 | 0         |  |
|  | Shiraz-77T | 1283 | 0.296555 | 0         |  |
|  | Shiraz-18T | 1457 | 0.643204 | 0         |  |
|  | Shiraz-18T | 1457 | 0.643204 | 0         |  |
|  | Shiraz-22T | 1673 | 0.611783 | 0         |  |
|  | Shiraz-22T | 1673 | 0.611783 | 0         |  |
|  | Shiraz-22T | 1674 | 0.887899 | 0         |  |
|  | Shiraz-22T | 1674 | 0.887899 | 0         |  |
|  | Shiraz-25T | 1719 | 0.472955 | 0         |  |
|  | Shiraz-25T | 1719 | 0.472955 | 0         |  |
|  | Shiraz-28T | 1762 | 0.562311 | 0         |  |
|  | Shiraz-28T | 1762 | 0.562311 | 0         |  |
|  | Shiraz-29T | 1801 | 0.815343 | 0         |  |
|  | Shiraz-29T | 1801 | 0.815343 | 0         |  |
|  | Shiraz-32T | 1870 | 0.729766 | 0         |  |
|  | Shiraz-32T | 1870 | 0.729766 | 0         |  |
|  | Shiraz-35T | 1933 | 0.488535 | 0         |  |
|  | Shiraz-35T | 1933 | 0.488535 | 0         |  |
|  | Shiraz-58T | 2223 | 0.833364 | 0         |  |
|  | Shiraz-58T | 2223 | 0.833364 | 0         |  |
|  | Shiraz-58T | 2224 | 1.076575 | 0         |  |
|  | Shiraz-58T | 2224 | 1.076575 | 0         |  |
|  | Shiraz-71T | 2263 | 0.975531 | 0         |  |
|  | Shiraz-71T | 2263 | 0.975531 | 0         |  |
|  | Shiraz-4T  | 261  | 0        | -0.336249 |  |
|  | Shiraz-4T  | 261  | 0        | -0.336249 |  |
|  | Shiraz-16T | 295  | 0.591657 | 0         |  |
|  | Shiraz-16T | 295  | 0.591657 | 0         |  |
|  | Shiraz-36T | 433  | 0        | -0.803961 |  |
|  | Shiraz-36T | 433  | 0        | -0.803961 |  |
|  | Shiraz-44T | 899  | 0        | -1.09697  |  |
|  | Shiraz-44T | 899  | 0        | -1.09697  |  |
|  | Shiraz-44T | 900  | 0        | -0.584284 |  |
|  | Shiraz-44T | 900  | 0        | -0.584284 |  |
|  | Shiraz-49T | 1170 | 0        | -0.967436 |  |
|  | Shiraz-49T | 1170 | 0        | -0.967436 |  |
|  | Shiraz-49T | 1171 | 0        | -0.612379 |  |
|  | Shiraz-49T | 1171 | 0        | -0.612379 |  |
|  | Shiraz-77T | 1283 | 0.296555 | 0         |  |
|  | Shiraz-77T | 1283 | 0.296555 | 0         |  |

|  |  |            |      |          |           |  |  |
|--|--|------------|------|----------|-----------|--|--|
|  |  | Shiraz-18T | 1457 | 0.643204 | 0         |  |  |
|  |  | Shiraz-18T | 1457 | 0.643204 | 0         |  |  |
|  |  | Shiraz-22T | 1673 | 0.611783 | 0         |  |  |
|  |  | Shiraz-22T | 1673 | 0.611783 | 0         |  |  |
|  |  | Shiraz-22T | 1674 | 0.887899 | 0         |  |  |
|  |  | Shiraz-22T | 1674 | 0.887899 | 0         |  |  |
|  |  | Shiraz-25T | 1719 | 0.472955 | 0         |  |  |
|  |  | Shiraz-25T | 1719 | 0.472955 | 0         |  |  |
|  |  | Shiraz-28T | 1762 | 0.562311 | 0         |  |  |
|  |  | Shiraz-28T | 1762 | 0.562311 | 0         |  |  |
|  |  | Shiraz-29T | 1801 | 0.815343 | 0         |  |  |
|  |  | Shiraz-29T | 1801 | 0.815343 | 0         |  |  |
|  |  | Shiraz-32T | 1870 | 0.729766 | 0         |  |  |
|  |  | Shiraz-32T | 1870 | 0.729766 | 0         |  |  |
|  |  | Shiraz-35T | 1933 | 0.488535 | 0         |  |  |
|  |  | Shiraz-35T | 1933 | 0.488535 | 0         |  |  |
|  |  | Shiraz-58T | 2223 | 0.833364 | 0         |  |  |
|  |  | Shiraz-58T | 2223 | 0.833364 | 0         |  |  |
|  |  | Shiraz-58T | 2224 | 1.076575 | 0         |  |  |
|  |  | Shiraz-58T | 2224 | 1.076575 | 0         |  |  |
|  |  | Shiraz-71T | 2263 | 0.975531 | 0         |  |  |
|  |  | Shiraz-71T | 2263 | 0.975531 | 0         |  |  |
|  |  | Shiraz-4T  | 261  | 0        | -0.336249 |  |  |
|  |  | Shiraz-4T  | 261  | 0        | -0.336249 |  |  |
|  |  | Shiraz-16T | 295  | 0.591657 | 0         |  |  |
|  |  | Shiraz-16T | 295  | 0.591657 | 0         |  |  |
|  |  | Shiraz-36T | 433  | 0        | -0.803961 |  |  |
|  |  | Shiraz-36T | 433  | 0        | -0.803961 |  |  |
|  |  | Shiraz-44T | 899  | 0        | -1.09697  |  |  |
|  |  | Shiraz-44T | 899  | 0        | -1.09697  |  |  |
|  |  | Shiraz-44T | 900  | 0        | -0.584284 |  |  |
|  |  | Shiraz-44T | 900  | 0        | -0.584284 |  |  |
|  |  | Shiraz-49T | 1170 | 0        | -0.967436 |  |  |
|  |  | Shiraz-49T | 1170 | 0        | -0.967436 |  |  |
|  |  | Shiraz-49T | 1171 | 0        | -0.612379 |  |  |
|  |  | Shiraz-49T | 1171 | 0        | -0.612379 |  |  |
|  |  | Shiraz-77T | 1283 | 0.296555 | 0         |  |  |
|  |  | Shiraz-77T | 1283 | 0.296555 | 0         |  |  |
|  |  | Shiraz-18T | 1457 | 0.643204 | 0         |  |  |
|  |  | Shiraz-18T | 1457 | 0.643204 | 0         |  |  |
|  |  | Shiraz-22T | 1673 | 0.611783 | 0         |  |  |
|  |  | Shiraz-22T | 1673 | 0.611783 | 0         |  |  |
|  |  | Shiraz-22T | 1674 | 0.887899 | 0         |  |  |
|  |  | Shiraz-22T | 1674 | 0.887899 | 0         |  |  |
|  |  | Shiraz-25T | 1719 | 0.472955 | 0         |  |  |
|  |  | Shiraz-25T | 1719 | 0.472955 | 0         |  |  |
|  |  | Shiraz-28T | 1762 | 0.562311 | 0         |  |  |



|      |      |            |      |          |           |  |
|------|------|------------|------|----------|-----------|--|
|      |      | Shiraz-28T | 1762 | 0.562311 | 0         |  |
|      |      | Shiraz-29T | 1801 | 0.815343 | 0         |  |
|      |      | Shiraz-29T | 1801 | 0.815343 | 0         |  |
|      |      | Shiraz-32T | 1870 | 0.729766 | 0         |  |
|      |      | Shiraz-32T | 1870 | 0.729766 | 0         |  |
|      |      | Shiraz-35T | 1933 | 0.488535 | 0         |  |
|      |      | Shiraz-35T | 1933 | 0.488535 | 0         |  |
|      |      | Shiraz-58T | 2223 | 0.833364 | 0         |  |
|      |      | Shiraz-58T | 2223 | 0.833364 | 0         |  |
|      |      | Shiraz-58T | 2224 | 1.076575 | 0         |  |
|      |      | Shiraz-58T | 2224 | 1.076575 | 0         |  |
|      |      | Shiraz-71T | 2263 | 0.975531 | 0         |  |
|      |      | Shiraz-71T | 2263 | 0.975531 | 0         |  |
| GJC3 | chr7 | Shiraz-3T  | 90   | 0.219276 | 0         |  |
|      |      | Shiraz-3T  | 94   | 0.74735  | 0         |  |
|      |      | Shiraz-4T  | 253  | 0.372918 | 0         |  |
|      |      | Shiraz-31T | 316  | 0.219196 | 0         |  |
|      |      | Shiraz-36T | 378  | 0.179558 | 0         |  |
|      |      | Shiraz-36T | 381  | 0.332628 | 0         |  |
|      |      | Shiraz-44T | 639  | 1.035032 | 0         |  |
|      |      | Shiraz-46T | 943  | 0.093799 | 0         |  |
|      |      | Shiraz-46T | 946  | 0.299835 | 0         |  |
|      |      | Shiraz-47T | 1030 | 0.257728 | 0         |  |
|      |      | Shiraz-49T | 1120 | 0.281656 | 0         |  |
|      |      | Shiraz-77T | 1225 | 0        | -0.117922 |  |
|      |      | Shiraz-77T | 1227 | 0.196445 | 0         |  |
|      |      | Shiraz-9T  | 1324 | 0.679266 | 0         |  |
|      |      | Shiraz-18T | 1434 | 0.244465 | 0         |  |
|      |      | Shiraz-22T | 1549 | 0        | -0.319623 |  |
|      |      | Shiraz-22T | 1551 | 0.324011 | 0         |  |
|      |      | Shiraz-25T | 1698 | 0.21835  | 0         |  |
|      |      | Shiraz-28T | 1735 | 0.350744 | 0         |  |
|      |      | Shiraz-29T | 1778 | 0.120767 | 0         |  |
|      |      | Shiraz-32T | 1833 | 0.551336 | 0         |  |
|      |      | Shiraz-38T | 1951 | 0.250891 | 0         |  |
|      |      | Shiraz-53T | 2078 | 0.287202 | 0         |  |
|      |      | Shiraz-58T | 2160 | 0.399007 | 0         |  |
|      |      | Shiraz-71T | 2238 | 0.603631 | 0         |  |
|      |      | Shiraz-3T  | 90   | 0.219276 | 0         |  |
|      |      | Shiraz-3T  | 94   | 0.74735  | 0         |  |
|      |      | Shiraz-4T  | 253  | 0.372918 | 0         |  |
|      |      | Shiraz-31T | 316  | 0.219196 | 0         |  |
|      |      | Shiraz-36T | 378  | 0.179558 | 0         |  |
|      |      | Shiraz-36T | 381  | 0.332628 | 0         |  |
|      |      | Shiraz-44T | 639  | 1.035032 | 0         |  |
|      |      | Shiraz-46T | 943  | 0.093799 | 0         |  |
|      |      | Shiraz-46T | 946  | 0.299835 | 0         |  |

|    |      |            |      |          |           |  |  |
|----|------|------------|------|----------|-----------|--|--|
|    |      | Shiraz-47T | 1030 | 0.257728 | 0         |  |  |
|    |      | Shiraz-49T | 1120 | 0.281656 | 0         |  |  |
|    |      | Shiraz-77T | 1225 | 0        | -0.117922 |  |  |
|    |      | Shiraz-77T | 1227 | 0.196445 | 0         |  |  |
|    |      | Shiraz-9T  | 1324 | 0.679266 | 0         |  |  |
|    |      | Shiraz-18T | 1434 | 0.244465 | 0         |  |  |
|    |      | Shiraz-22T | 1549 | 0        | -0.319623 |  |  |
|    |      | Shiraz-22T | 1551 | 0.324011 | 0         |  |  |
|    |      | Shiraz-25T | 1698 | 0.21835  | 0         |  |  |
|    |      | Shiraz-28T | 1735 | 0.350744 | 0         |  |  |
|    |      | Shiraz-29T | 1778 | 0.120767 | 0         |  |  |
|    |      | Shiraz-32T | 1833 | 0.551336 | 0         |  |  |
|    |      | Shiraz-38T | 1951 | 0.250891 | 0         |  |  |
|    |      | Shiraz-53T | 2078 | 0.287202 | 0         |  |  |
|    |      | Shiraz-58T | 2160 | 0.399007 | 0         |  |  |
|    |      | Shiraz-71T | 2238 | 0.603631 | 0         |  |  |
|    |      | Shiraz-3T  | 90   | 0.219276 | 0         |  |  |
|    |      | Shiraz-3T  | 94   | 0.74735  | 0         |  |  |
|    |      | Shiraz-4T  | 253  | 0.372918 | 0         |  |  |
|    |      | Shiraz-31T | 316  | 0.219196 | 0         |  |  |
|    |      | Shiraz-36T | 378  | 0.179558 | 0         |  |  |
|    |      | Shiraz-36T | 381  | 0.332628 | 0         |  |  |
|    |      | Shiraz-44T | 639  | 1.035032 | 0         |  |  |
|    |      | Shiraz-46T | 943  | 0.093799 | 0         |  |  |
|    |      | Shiraz-46T | 946  | 0.299835 | 0         |  |  |
|    |      | Shiraz-47T | 1030 | 0.257728 | 0         |  |  |
|    |      | Shiraz-49T | 1120 | 0.281656 | 0         |  |  |
|    |      | Shiraz-77T | 1225 | 0        | -0.117922 |  |  |
|    |      | Shiraz-77T | 1227 | 0.196445 | 0         |  |  |
|    |      | Shiraz-9T  | 1324 | 0.679266 | 0         |  |  |
|    |      | Shiraz-18T | 1434 | 0.244465 | 0         |  |  |
|    |      | Shiraz-22T | 1549 | 0        | -0.319623 |  |  |
|    |      | Shiraz-22T | 1551 | 0.324011 | 0         |  |  |
|    |      | Shiraz-25T | 1698 | 0.21835  | 0         |  |  |
|    |      | Shiraz-28T | 1735 | 0.350744 | 0         |  |  |
|    |      | Shiraz-29T | 1778 | 0.120767 | 0         |  |  |
|    |      | Shiraz-32T | 1833 | 0.551336 | 0         |  |  |
|    |      | Shiraz-38T | 1951 | 0.250891 | 0         |  |  |
|    |      | Shiraz-53T | 2078 | 0.287202 | 0         |  |  |
|    |      | Shiraz-58T | 2160 | 0.399007 | 0         |  |  |
|    |      | Shiraz-71T | 2238 | 0.603631 | 0         |  |  |
| GK | chrX | Shiraz-3T  | 235  | 0        | -0.28401  |  |  |
|    |      | Shiraz-3T  | 236  | 0        | -0.435445 |  |  |
|    |      | Shiraz-4T  | 260  | 0        | -0.324128 |  |  |
|    |      | Shiraz-16T | 294  | 0.655804 | 0         |  |  |
|    |      | Shiraz-36T | 431  | 0        | -0.78035  |  |  |
|    |      | Shiraz-44T | 891  | 0        | -0.954044 |  |  |

|  |            |      |          |           |  |
|--|------------|------|----------|-----------|--|
|  | Shiraz-44T | 893  | 0        | -1.364406 |  |
|  | Shiraz-44T | 894  | 0        | -0.776734 |  |
|  | Shiraz-47T | 1083 | 0        | -0.103285 |  |
|  | Shiraz-49T | 1166 | 0        | -0.917235 |  |
|  | Shiraz-49T | 1168 | 0        | -1.073859 |  |
|  | Shiraz-9T  | 1368 | 0.199713 | 0         |  |
|  | Shiraz-18T | 1455 | 0        | -0.186773 |  |
|  | Shiraz-22T | 1669 | 0.695915 | 0         |  |
|  | Shiraz-22T | 1671 | 0.369309 | 0         |  |
|  | Shiraz-25T | 1717 | 0.420447 | 0         |  |
|  | Shiraz-25T | 1718 | 0        | -0.452703 |  |
|  | Shiraz-28T | 1760 | 0.538181 | 0         |  |
|  | Shiraz-28T | 1761 | 0        | -0.695601 |  |
|  | Shiraz-29T | 1800 | 0.672527 | 0         |  |
|  | Shiraz-32T | 1869 | 0.776805 | 0         |  |
|  | Shiraz-35T | 1932 | 0.507141 | 0         |  |
|  | Shiraz-40T | 2051 | 0.098506 | 0         |  |
|  | Shiraz-58T | 2221 | 0.871948 | 0         |  |
|  | Shiraz-58T | 2222 | 0.679664 | 0         |  |
|  | Shiraz-71T | 2260 | 0.68394  | 0         |  |
|  | Shiraz-71T | 2261 | 0.508399 | 0         |  |
|  | Shiraz-3T  | 235  | 0        | -0.28401  |  |
|  | Shiraz-3T  | 236  | 0        | -0.435445 |  |
|  | Shiraz-4T  | 260  | 0        | -0.324128 |  |
|  | Shiraz-16T | 294  | 0.655804 | 0         |  |
|  | Shiraz-36T | 431  | 0        | -0.78035  |  |
|  | Shiraz-44T | 891  | 0        | -0.954044 |  |
|  | Shiraz-44T | 893  | 0        | -1.364406 |  |
|  | Shiraz-44T | 894  | 0        | -0.776734 |  |
|  | Shiraz-47T | 1083 | 0        | -0.103285 |  |
|  | Shiraz-49T | 1166 | 0        | -0.917235 |  |
|  | Shiraz-49T | 1168 | 0        | -1.073859 |  |
|  | Shiraz-9T  | 1368 | 0.199713 | 0         |  |
|  | Shiraz-18T | 1455 | 0        | -0.186773 |  |
|  | Shiraz-22T | 1669 | 0.695915 | 0         |  |
|  | Shiraz-22T | 1671 | 0.369309 | 0         |  |
|  | Shiraz-25T | 1717 | 0.420447 | 0         |  |
|  | Shiraz-25T | 1718 | 0        | -0.452703 |  |
|  | Shiraz-28T | 1760 | 0.538181 | 0         |  |
|  | Shiraz-28T | 1761 | 0        | -0.695601 |  |
|  | Shiraz-29T | 1800 | 0.672527 | 0         |  |
|  | Shiraz-32T | 1869 | 0.776805 | 0         |  |
|  | Shiraz-35T | 1932 | 0.507141 | 0         |  |
|  | Shiraz-40T | 2051 | 0.098506 | 0         |  |
|  | Shiraz-58T | 2221 | 0.871948 | 0         |  |
|  | Shiraz-58T | 2222 | 0.679664 | 0         |  |
|  | Shiraz-71T | 2260 | 0.68394  | 0         |  |

|     |      |            |      |          |           |  |  |
|-----|------|------------|------|----------|-----------|--|--|
|     |      | Shiraz-71T | 2261 | 0.508399 | 0         |  |  |
|     |      | Shiraz-3T  | 235  | 0        | -0.28401  |  |  |
|     |      | Shiraz-3T  | 236  | 0        | -0.435445 |  |  |
|     |      | Shiraz-4T  | 260  | 0        | -0.324128 |  |  |
|     |      | Shiraz-16T | 294  | 0.655804 | 0         |  |  |
|     |      | Shiraz-36T | 431  | 0        | -0.78035  |  |  |
|     |      | Shiraz-44T | 891  | 0        | -0.954044 |  |  |
|     |      | Shiraz-44T | 893  | 0        | -1.364406 |  |  |
|     |      | Shiraz-44T | 894  | 0        | -0.776734 |  |  |
|     |      | Shiraz-47T | 1083 | 0        | -0.103285 |  |  |
|     |      | Shiraz-49T | 1166 | 0        | -0.917235 |  |  |
|     |      | Shiraz-49T | 1168 | 0        | -1.073859 |  |  |
|     |      | Shiraz-9T  | 1368 | 0.199713 | 0         |  |  |
|     |      | Shiraz-18T | 1455 | 0        | -0.186773 |  |  |
|     |      | Shiraz-22T | 1669 | 0.695915 | 0         |  |  |
|     |      | Shiraz-22T | 1671 | 0.369309 | 0         |  |  |
|     |      | Shiraz-25T | 1717 | 0.420447 | 0         |  |  |
|     |      | Shiraz-25T | 1718 | 0        | -0.452703 |  |  |
|     |      | Shiraz-28T | 1760 | 0.538181 | 0         |  |  |
|     |      | Shiraz-28T | 1761 | 0        | -0.695601 |  |  |
|     |      | Shiraz-29T | 1800 | 0.672527 | 0         |  |  |
|     |      | Shiraz-32T | 1869 | 0.776805 | 0         |  |  |
|     |      | Shiraz-35T | 1932 | 0.507141 | 0         |  |  |
|     |      | Shiraz-40T | 2051 | 0.098506 | 0         |  |  |
|     |      | Shiraz-58T | 2221 | 0.871948 | 0         |  |  |
|     |      | Shiraz-58T | 2222 | 0.679664 | 0         |  |  |
|     |      | Shiraz-71T | 2260 | 0.68394  | 0         |  |  |
|     |      | Shiraz-71T | 2261 | 0.508399 | 0         |  |  |
| GLA | chrX | Shiraz-3T  | 242  | 0        | -0.336434 |  |  |
|     |      | Shiraz-4T  | 261  | 0        | -0.336249 |  |  |
|     |      | Shiraz-16T | 295  | 0.591657 | 0         |  |  |
|     |      | Shiraz-36T | 433  | 0        | -0.803961 |  |  |
|     |      | Shiraz-44T | 899  | 0        | -1.09697  |  |  |
|     |      | Shiraz-49T | 1170 | 0        | -0.967436 |  |  |
|     |      | Shiraz-18T | 1457 | 0.643204 | 0         |  |  |
|     |      | Shiraz-22T | 1673 | 0.611783 | 0         |  |  |
|     |      | Shiraz-25T | 1719 | 0.472955 | 0         |  |  |
|     |      | Shiraz-28T | 1762 | 0.562311 | 0         |  |  |
|     |      | Shiraz-29T | 1801 | 0.815343 | 0         |  |  |
|     |      | Shiraz-32T | 1870 | 0.729766 | 0         |  |  |
|     |      | Shiraz-35T | 1933 | 0.488535 | 0         |  |  |
|     |      | Shiraz-58T | 2223 | 0.833364 | 0         |  |  |
|     |      | Shiraz-71T | 2263 | 0.975531 | 0         |  |  |
|     |      | Shiraz-3T  | 242  | 0        | -0.336434 |  |  |
|     |      | Shiraz-4T  | 261  | 0        | -0.336249 |  |  |
|     |      | Shiraz-16T | 295  | 0.591657 | 0         |  |  |
|     |      | Shiraz-36T | 433  | 0        | -0.803961 |  |  |

|        |      |            |      |          |           |  |  |
|--------|------|------------|------|----------|-----------|--|--|
|        |      | Shiraz-44T | 899  | 0        | -1.09697  |  |  |
|        |      | Shiraz-49T | 1170 | 0        | -0.967436 |  |  |
|        |      | Shiraz-18T | 1457 | 0.643204 | 0         |  |  |
|        |      | Shiraz-22T | 1673 | 0.611783 | 0         |  |  |
|        |      | Shiraz-25T | 1719 | 0.472955 | 0         |  |  |
|        |      | Shiraz-28T | 1762 | 0.562311 | 0         |  |  |
|        |      | Shiraz-29T | 1801 | 0.815343 | 0         |  |  |
|        |      | Shiraz-32T | 1870 | 0.729766 | 0         |  |  |
|        |      | Shiraz-35T | 1933 | 0.488535 | 0         |  |  |
|        |      | Shiraz-58T | 2223 | 0.833364 | 0         |  |  |
|        |      | Shiraz-71T | 2263 | 0.975531 | 0         |  |  |
|        |      | Shiraz-3T  | 242  | 0        | -0.336434 |  |  |
|        |      | Shiraz-4T  | 261  | 0        | -0.336249 |  |  |
|        |      | Shiraz-16T | 295  | 0.591657 | 0         |  |  |
|        |      | Shiraz-36T | 433  | 0        | -0.803961 |  |  |
|        |      | Shiraz-44T | 899  | 0        | -1.09697  |  |  |
|        |      | Shiraz-49T | 1170 | 0        | -0.967436 |  |  |
|        |      | Shiraz-18T | 1457 | 0.643204 | 0         |  |  |
|        |      | Shiraz-22T | 1673 | 0.611783 | 0         |  |  |
|        |      | Shiraz-25T | 1719 | 0.472955 | 0         |  |  |
|        |      | Shiraz-28T | 1762 | 0.562311 | 0         |  |  |
|        |      | Shiraz-29T | 1801 | 0.815343 | 0         |  |  |
|        |      | Shiraz-32T | 1870 | 0.729766 | 0         |  |  |
|        |      | Shiraz-35T | 1933 | 0.488535 | 0         |  |  |
|        |      | Shiraz-58T | 2223 | 0.833364 | 0         |  |  |
|        |      | Shiraz-71T | 2263 | 0.975531 | 0         |  |  |
| GLCCI1 | chr7 | Shiraz-4T  | 252  | 0.192083 | 0         |  |  |
|        |      | Shiraz-36T | 376  | 0.159952 | 0         |  |  |
|        |      | Shiraz-44T | 628  | 0        | -0.444379 |  |  |
|        |      | Shiraz-47T | 1027 | 0        | -0.117848 |  |  |
|        |      | Shiraz-49T | 1117 | 0        | -0.168296 |  |  |
|        |      | Shiraz-77T | 1222 | 0        | -0.113002 |  |  |
|        |      | Shiraz-18T | 1433 | 0.250973 | 0         |  |  |
|        |      | Shiraz-22T | 1543 | 0        | -0.513696 |  |  |
|        |      | Shiraz-25T | 1697 | 0.21945  | 0         |  |  |
|        |      | Shiraz-28T | 1734 | 0.362882 | 0         |  |  |
|        |      | Shiraz-29T | 1777 | 0.156747 | 0         |  |  |
|        |      | Shiraz-38T | 1950 | 0.265916 | 0         |  |  |
|        |      | Shiraz-53T | 2077 | 0.444626 | 0         |  |  |
|        |      | Shiraz-58T | 2157 | 0        | -0.213872 |  |  |
|        |      | Shiraz-71T | 2236 | 0.320072 | 0         |  |  |
|        |      | Shiraz-4T  | 252  | 0.192083 | 0         |  |  |
|        |      | Shiraz-36T | 376  | 0.159952 | 0         |  |  |
|        |      | Shiraz-44T | 628  | 0        | -0.444379 |  |  |
|        |      | Shiraz-47T | 1027 | 0        | -0.117848 |  |  |
|        |      | Shiraz-49T | 1117 | 0        | -0.168296 |  |  |
|        |      | Shiraz-77T | 1222 | 0        | -0.113002 |  |  |

|      |      |            |      |          |           |  |  |
|------|------|------------|------|----------|-----------|--|--|
|      |      | Shiraz-18T | 1433 | 0.250973 | 0         |  |  |
|      |      | Shiraz-22T | 1543 | 0        | -0.513696 |  |  |
|      |      | Shiraz-25T | 1697 | 0.21945  | 0         |  |  |
|      |      | Shiraz-28T | 1734 | 0.362882 | 0         |  |  |
|      |      | Shiraz-29T | 1777 | 0.156747 | 0         |  |  |
|      |      | Shiraz-38T | 1950 | 0.265916 | 0         |  |  |
|      |      | Shiraz-53T | 2077 | 0.444626 | 0         |  |  |
|      |      | Shiraz-58T | 2157 | 0        | -0.213872 |  |  |
|      |      | Shiraz-71T | 2236 | 0.320072 | 0         |  |  |
|      |      | Shiraz-4T  | 252  | 0.192083 | 0         |  |  |
|      |      | Shiraz-36T | 376  | 0.159952 | 0         |  |  |
|      |      | Shiraz-44T | 628  | 0        | -0.444379 |  |  |
|      |      | Shiraz-47T | 1027 | 0        | -0.117848 |  |  |
|      |      | Shiraz-49T | 1117 | 0        | -0.168296 |  |  |
|      |      | Shiraz-77T | 1222 | 0        | -0.113002 |  |  |
|      |      | Shiraz-18T | 1433 | 0.250973 | 0         |  |  |
|      |      | Shiraz-22T | 1543 | 0        | -0.513696 |  |  |
|      |      | Shiraz-25T | 1697 | 0.21945  | 0         |  |  |
|      |      | Shiraz-28T | 1734 | 0.362882 | 0         |  |  |
|      |      | Shiraz-29T | 1777 | 0.156747 | 0         |  |  |
|      |      | Shiraz-38T | 1950 | 0.265916 | 0         |  |  |
|      |      | Shiraz-53T | 2077 | 0.444626 | 0         |  |  |
|      |      | Shiraz-58T | 2157 | 0        | -0.213872 |  |  |
|      |      | Shiraz-71T | 2236 | 0.320072 | 0         |  |  |
| GLI3 | chr7 | Shiraz-3T  | 87   | 0.198593 | 0         |  |  |
|      |      | Shiraz-4T  | 252  | 0.192083 | 0         |  |  |
|      |      | Shiraz-36T | 376  | 0.159952 | 0         |  |  |
|      |      | Shiraz-44T | 631  | 0        | -0.180312 |  |  |
|      |      | Shiraz-46T | 942  | 0.069143 | 0         |  |  |
|      |      | Shiraz-18T | 1433 | 0.250973 | 0         |  |  |
|      |      | Shiraz-25T | 1697 | 0.21945  | 0         |  |  |
|      |      | Shiraz-28T | 1734 | 0.362882 | 0         |  |  |
|      |      | Shiraz-29T | 1777 | 0.156747 | 0         |  |  |
|      |      | Shiraz-38T | 1950 | 0.265916 | 0         |  |  |
|      |      | Shiraz-71T | 2236 | 0.320072 | 0         |  |  |
|      |      | Shiraz-72T | 2277 | 0        | -0.398869 |  |  |
|      |      | Shiraz-3T  | 87   | 0.198593 | 0         |  |  |
|      |      | Shiraz-4T  | 252  | 0.192083 | 0         |  |  |
|      |      | Shiraz-36T | 376  | 0.159952 | 0         |  |  |
|      |      | Shiraz-44T | 631  | 0        | -0.180312 |  |  |
|      |      | Shiraz-46T | 942  | 0.069143 | 0         |  |  |
|      |      | Shiraz-18T | 1433 | 0.250973 | 0         |  |  |
|      |      | Shiraz-25T | 1697 | 0.21945  | 0         |  |  |
|      |      | Shiraz-28T | 1734 | 0.362882 | 0         |  |  |
|      |      | Shiraz-29T | 1777 | 0.156747 | 0         |  |  |
|      |      | Shiraz-38T | 1950 | 0.265916 | 0         |  |  |
|      |      | Shiraz-71T | 2236 | 0.320072 | 0         |  |  |

|       |      |            |      |          |           |  |  |
|-------|------|------------|------|----------|-----------|--|--|
|       |      | Shiraz-72T | 2277 | 0        | -0.398869 |  |  |
|       |      | Shiraz-3T  | 87   | 0.198593 | 0         |  |  |
|       |      | Shiraz-4T  | 252  | 0.192083 | 0         |  |  |
|       |      | Shiraz-36T | 376  | 0.159952 | 0         |  |  |
|       |      | Shiraz-44T | 631  | 0        | -0.180312 |  |  |
|       |      | Shiraz-46T | 942  | 0.069143 | 0         |  |  |
|       |      | Shiraz-18T | 1433 | 0.250973 | 0         |  |  |
|       |      | Shiraz-25T | 1697 | 0.21945  | 0         |  |  |
|       |      | Shiraz-28T | 1734 | 0.362882 | 0         |  |  |
|       |      | Shiraz-29T | 1777 | 0.156747 | 0         |  |  |
|       |      | Shiraz-38T | 1950 | 0.265916 | 0         |  |  |
|       |      | Shiraz-71T | 2236 | 0.320072 | 0         |  |  |
|       |      | Shiraz-72T | 2277 | 0        | -0.398869 |  |  |
| GLOD5 | chrX | Shiraz-3T  | 238  | 0.472087 | 0         |  |  |
|       |      | Shiraz-4T  | 260  | 0        | -0.324128 |  |  |
|       |      | Shiraz-16T | 294  | 0.655804 | 0         |  |  |
|       |      | Shiraz-31T | 345  | 0.103301 | 0         |  |  |
|       |      | Shiraz-36T | 431  | 0        | -0.78035  |  |  |
|       |      | Shiraz-36T | 432  | 0        | -0.6692   |  |  |
|       |      | Shiraz-44T | 891  | 0        | -0.954044 |  |  |
|       |      | Shiraz-44T | 896  | 0        | -0.109108 |  |  |
|       |      | Shiraz-46T | 991  | 0.139564 | 0         |  |  |
|       |      | Shiraz-47T | 1084 | 0.24185  | 0         |  |  |
|       |      | Shiraz-49T | 1166 | 0        | -0.917235 |  |  |
|       |      | Shiraz-49T | 1169 | 0        | -0.583529 |  |  |
|       |      | Shiraz-77T | 1282 | 0.213849 | 0         |  |  |
|       |      | Shiraz-9T  | 1368 | 0.199713 | 0         |  |  |
|       |      | Shiraz-9T  | 1369 | 0.703374 | 0         |  |  |
|       |      | Shiraz-18T | 1455 | 0        | -0.186773 |  |  |
|       |      | Shiraz-22T | 1669 | 0.695915 | 0         |  |  |
|       |      | Shiraz-22T | 1672 | 1.01678  | 0         |  |  |
|       |      | Shiraz-25T | 1717 | 0.420447 | 0         |  |  |
|       |      | Shiraz-28T | 1760 | 0.538181 | 0         |  |  |
|       |      | Shiraz-29T | 1800 | 0.672527 | 0         |  |  |
|       |      | Shiraz-32T | 1869 | 0.776805 | 0         |  |  |
|       |      | Shiraz-35T | 1932 | 0.507141 | 0         |  |  |
|       |      | Shiraz-58T | 2221 | 0.871948 | 0         |  |  |
|       |      | Shiraz-71T | 2260 | 0.68394  | 0         |  |  |
|       |      | Shiraz-71T | 2262 | 0.986748 | 0         |  |  |
|       |      | Shiraz-3T  | 238  | 0.472087 | 0         |  |  |
|       |      | Shiraz-4T  | 260  | 0        | -0.324128 |  |  |
|       |      | Shiraz-16T | 294  | 0.655804 | 0         |  |  |
|       |      | Shiraz-31T | 345  | 0.103301 | 0         |  |  |
|       |      | Shiraz-36T | 431  | 0        | -0.78035  |  |  |
|       |      | Shiraz-36T | 432  | 0        | -0.6692   |  |  |
|       |      | Shiraz-44T | 891  | 0        | -0.954044 |  |  |
|       |      | Shiraz-44T | 896  | 0        | -0.109108 |  |  |

|       |      |            |      |          |           |  |  |
|-------|------|------------|------|----------|-----------|--|--|
|       |      | Shiraz-46T | 991  | 0.139564 | 0         |  |  |
|       |      | Shiraz-47T | 1084 | 0.24185  | 0         |  |  |
|       |      | Shiraz-49T | 1166 | 0        | -0.917235 |  |  |
|       |      | Shiraz-49T | 1169 | 0        | -0.583529 |  |  |
|       |      | Shiraz-77T | 1282 | 0.213849 | 0         |  |  |
|       |      | Shiraz-9T  | 1368 | 0.199713 | 0         |  |  |
|       |      | Shiraz-9T  | 1369 | 0.703374 | 0         |  |  |
|       |      | Shiraz-18T | 1455 | 0        | -0.186773 |  |  |
|       |      | Shiraz-22T | 1669 | 0.695915 | 0         |  |  |
|       |      | Shiraz-22T | 1672 | 1.01678  | 0         |  |  |
|       |      | Shiraz-25T | 1717 | 0.420447 | 0         |  |  |
|       |      | Shiraz-28T | 1760 | 0.538181 | 0         |  |  |
|       |      | Shiraz-29T | 1800 | 0.672527 | 0         |  |  |
|       |      | Shiraz-32T | 1869 | 0.776805 | 0         |  |  |
|       |      | Shiraz-35T | 1932 | 0.507141 | 0         |  |  |
|       |      | Shiraz-58T | 2221 | 0.871948 | 0         |  |  |
|       |      | Shiraz-71T | 2260 | 0.68394  | 0         |  |  |
|       |      | Shiraz-71T | 2262 | 0.986748 | 0         |  |  |
|       |      | Shiraz-3T  | 238  | 0.472087 | 0         |  |  |
|       |      | Shiraz-4T  | 260  | 0        | -0.324128 |  |  |
|       |      | Shiraz-16T | 294  | 0.655804 | 0         |  |  |
|       |      | Shiraz-31T | 345  | 0.103301 | 0         |  |  |
|       |      | Shiraz-36T | 431  | 0        | -0.78035  |  |  |
|       |      | Shiraz-36T | 432  | 0        | -0.6692   |  |  |
|       |      | Shiraz-44T | 891  | 0        | -0.954044 |  |  |
|       |      | Shiraz-44T | 896  | 0        | -0.109108 |  |  |
|       |      | Shiraz-46T | 991  | 0.139564 | 0         |  |  |
|       |      | Shiraz-47T | 1084 | 0.24185  | 0         |  |  |
|       |      | Shiraz-49T | 1166 | 0        | -0.917235 |  |  |
|       |      | Shiraz-49T | 1169 | 0        | -0.583529 |  |  |
|       |      | Shiraz-77T | 1282 | 0.213849 | 0         |  |  |
|       |      | Shiraz-9T  | 1368 | 0.199713 | 0         |  |  |
|       |      | Shiraz-9T  | 1369 | 0.703374 | 0         |  |  |
|       |      | Shiraz-18T | 1455 | 0        | -0.186773 |  |  |
|       |      | Shiraz-22T | 1669 | 0.695915 | 0         |  |  |
|       |      | Shiraz-22T | 1672 | 1.01678  | 0         |  |  |
|       |      | Shiraz-25T | 1717 | 0.420447 | 0         |  |  |
|       |      | Shiraz-28T | 1760 | 0.538181 | 0         |  |  |
|       |      | Shiraz-29T | 1800 | 0.672527 | 0         |  |  |
|       |      | Shiraz-32T | 1869 | 0.776805 | 0         |  |  |
|       |      | Shiraz-35T | 1932 | 0.507141 | 0         |  |  |
|       |      | Shiraz-58T | 2221 | 0.871948 | 0         |  |  |
|       |      | Shiraz-71T | 2260 | 0.68394  | 0         |  |  |
|       |      | Shiraz-71T | 2262 | 0.986748 | 0         |  |  |
| GLRA2 | chrX | Shiraz-3T  | 235  | 0        | -0.28401  |  |  |
|       |      | Shiraz-4T  | 260  | 0        | -0.324128 |  |  |
|       |      | Shiraz-16T | 294  | 0.655804 | 0         |  |  |



|  |            |      |          |           |  |
|--|------------|------|----------|-----------|--|
|  | Shiraz-36T | 431  | 0        | -0.78035  |  |
|  | Shiraz-44T | 891  | 0        | -0.954044 |  |
|  | Shiraz-49T | 1166 | 0        | -0.917235 |  |
|  | Shiraz-9T  | 1368 | 0.199713 | 0         |  |
|  | Shiraz-18T | 1455 | 0        | -0.186773 |  |
|  | Shiraz-22T | 1669 | 0.695915 | 0         |  |
|  | Shiraz-25T | 1717 | 0.420447 | 0         |  |
|  | Shiraz-28T | 1760 | 0.538181 | 0         |  |
|  | Shiraz-29T | 1800 | 0.672527 | 0         |  |
|  | Shiraz-32T | 1869 | 0.776805 | 0         |  |
|  | Shiraz-35T | 1932 | 0.507141 | 0         |  |
|  | Shiraz-40T | 2051 | 0.098506 | 0         |  |
|  | Shiraz-58T | 2221 | 0.871948 | 0         |  |
|  | Shiraz-71T | 2260 | 0.68394  | 0         |  |
|  | Shiraz-71T | 2261 | 0.508399 | 0         |  |
|  | Shiraz-3T  | 235  | 0        | -0.28401  |  |
|  | Shiraz-4T  | 260  | 0        | -0.324128 |  |
|  | Shiraz-16T | 294  | 0.655804 | 0         |  |
|  | Shiraz-36T | 431  | 0        | -0.78035  |  |
|  | Shiraz-44T | 891  | 0        | -0.954044 |  |
|  | Shiraz-49T | 1166 | 0        | -0.917235 |  |
|  | Shiraz-9T  | 1368 | 0.199713 | 0         |  |
|  | Shiraz-18T | 1455 | 0        | -0.186773 |  |
|  | Shiraz-22T | 1669 | 0.695915 | 0         |  |
|  | Shiraz-25T | 1717 | 0.420447 | 0         |  |
|  | Shiraz-28T | 1760 | 0.538181 | 0         |  |
|  | Shiraz-29T | 1800 | 0.672527 | 0         |  |
|  | Shiraz-32T | 1869 | 0.776805 | 0         |  |
|  | Shiraz-35T | 1932 | 0.507141 | 0         |  |
|  | Shiraz-40T | 2051 | 0.098506 | 0         |  |
|  | Shiraz-58T | 2221 | 0.871948 | 0         |  |
|  | Shiraz-71T | 2260 | 0.68394  | 0         |  |
|  | Shiraz-71T | 2261 | 0.508399 | 0         |  |
|  | Shiraz-3T  | 235  | 0        | -0.28401  |  |
|  | Shiraz-4T  | 260  | 0        | -0.324128 |  |
|  | Shiraz-16T | 294  | 0.655804 | 0         |  |
|  | Shiraz-36T | 431  | 0        | -0.78035  |  |
|  | Shiraz-44T | 891  | 0        | -0.954044 |  |
|  | Shiraz-49T | 1166 | 0        | -0.917235 |  |
|  | Shiraz-9T  | 1368 | 0.199713 | 0         |  |
|  | Shiraz-18T | 1455 | 0        | -0.186773 |  |
|  | Shiraz-22T | 1669 | 0.695915 | 0         |  |
|  | Shiraz-25T | 1717 | 0.420447 | 0         |  |
|  | Shiraz-28T | 1760 | 0.538181 | 0         |  |
|  | Shiraz-29T | 1800 | 0.672527 | 0         |  |
|  | Shiraz-32T | 1869 | 0.776805 | 0         |  |
|  | Shiraz-35T | 1932 | 0.507141 | 0         |  |

|       |      |            |      |          |           |  |
|-------|------|------------|------|----------|-----------|--|
|       |      | Shiraz-40T | 2051 | 0.098506 | 0         |  |
|       |      | Shiraz-58T | 2221 | 0.871948 | 0         |  |
|       |      | Shiraz-71T | 2260 | 0.68394  | 0         |  |
|       |      | Shiraz-71T | 2261 | 0.508399 | 0         |  |
| GLRA4 | chrX | Shiraz-3T  | 242  | 0        | -0.336434 |  |
|       |      | Shiraz-4T  | 261  | 0        | -0.336249 |  |
|       |      | Shiraz-16T | 295  | 0.591657 | 0         |  |
|       |      | Shiraz-36T | 433  | 0        | -0.803961 |  |
|       |      | Shiraz-44T | 899  | 0        | -1.09697  |  |
|       |      | Shiraz-49T | 1170 | 0        | -0.967436 |  |
|       |      | Shiraz-18T | 1457 | 0.643204 | 0         |  |
|       |      | Shiraz-22T | 1673 | 0.611783 | 0         |  |
|       |      | Shiraz-25T | 1719 | 0.472955 | 0         |  |
|       |      | Shiraz-28T | 1762 | 0.562311 | 0         |  |
|       |      | Shiraz-29T | 1801 | 0.815343 | 0         |  |
|       |      | Shiraz-32T | 1870 | 0.729766 | 0         |  |
|       |      | Shiraz-35T | 1933 | 0.488535 | 0         |  |
|       |      | Shiraz-58T | 2223 | 0.833364 | 0         |  |
|       |      | Shiraz-71T | 2263 | 0.975531 | 0         |  |
|       |      | Shiraz-3T  | 242  | 0        | -0.336434 |  |
|       |      | Shiraz-4T  | 261  | 0        | -0.336249 |  |
|       |      | Shiraz-16T | 295  | 0.591657 | 0         |  |
|       |      | Shiraz-36T | 433  | 0        | -0.803961 |  |
|       |      | Shiraz-44T | 899  | 0        | -1.09697  |  |
|       |      | Shiraz-49T | 1170 | 0        | -0.967436 |  |
|       |      | Shiraz-18T | 1457 | 0.643204 | 0         |  |
|       |      | Shiraz-22T | 1673 | 0.611783 | 0         |  |
|       |      | Shiraz-25T | 1719 | 0.472955 | 0         |  |
|       |      | Shiraz-28T | 1762 | 0.562311 | 0         |  |
|       |      | Shiraz-29T | 1801 | 0.815343 | 0         |  |
|       |      | Shiraz-32T | 1870 | 0.729766 | 0         |  |
|       |      | Shiraz-35T | 1933 | 0.488535 | 0         |  |
|       |      | Shiraz-58T | 2223 | 0.833364 | 0         |  |
|       |      | Shiraz-71T | 2263 | 0.975531 | 0         |  |
|       |      | Shiraz-3T  | 242  | 0        | -0.336434 |  |
|       |      | Shiraz-4T  | 261  | 0        | -0.336249 |  |
|       |      | Shiraz-16T | 295  | 0.591657 | 0         |  |
|       |      | Shiraz-36T | 433  | 0        | -0.803961 |  |
|       |      | Shiraz-44T | 899  | 0        | -1.09697  |  |
|       |      | Shiraz-49T | 1170 | 0        | -0.967436 |  |
|       |      | Shiraz-18T | 1457 | 0.643204 | 0         |  |
|       |      | Shiraz-22T | 1673 | 0.611783 | 0         |  |
|       |      | Shiraz-25T | 1719 | 0.472955 | 0         |  |
|       |      | Shiraz-28T | 1762 | 0.562311 | 0         |  |
|       |      | Shiraz-29T | 1801 | 0.815343 | 0         |  |
|       |      | Shiraz-32T | 1870 | 0.729766 | 0         |  |
|       |      | Shiraz-35T | 1933 | 0.488535 | 0         |  |

|       |      |            |      |          |           |  |
|-------|------|------------|------|----------|-----------|--|
|       |      | Shiraz-58T | 2223 | 0.833364 | 0         |  |
|       |      | Shiraz-71T | 2263 | 0.975531 | 0         |  |
| GLUD2 | chrX | Shiraz-3T  | 242  | 0        | -0.336434 |  |
|       |      | Shiraz-4T  | 261  | 0        | -0.336249 |  |
|       |      | Shiraz-16T | 295  | 0.591657 | 0         |  |
|       |      | Shiraz-36T | 433  | 0        | -0.803961 |  |
|       |      | Shiraz-44T | 899  | 0        | -1.09697  |  |
|       |      | Shiraz-49T | 1170 | 0        | -0.967436 |  |
|       |      | Shiraz-9T  | 1370 | 0.690073 | 0         |  |
|       |      | Shiraz-18T | 1457 | 0.643204 | 0         |  |
|       |      | Shiraz-22T | 1673 | 0.611783 | 0         |  |
|       |      | Shiraz-25T | 1719 | 0.472955 | 0         |  |
|       |      | Shiraz-28T | 1762 | 0.562311 | 0         |  |
|       |      | Shiraz-29T | 1801 | 0.815343 | 0         |  |
|       |      | Shiraz-32T | 1870 | 0.729766 | 0         |  |
|       |      | Shiraz-35T | 1933 | 0.488535 | 0         |  |
|       |      | Shiraz-58T | 2223 | 0.833364 | 0         |  |
|       |      | Shiraz-71T | 2263 | 0.975531 | 0         |  |
|       |      | Shiraz-3T  | 242  | 0        | -0.336434 |  |
|       |      | Shiraz-4T  | 261  | 0        | -0.336249 |  |
|       |      | Shiraz-16T | 295  | 0.591657 | 0         |  |
|       |      | Shiraz-36T | 433  | 0        | -0.803961 |  |
|       |      | Shiraz-44T | 899  | 0        | -1.09697  |  |
|       |      | Shiraz-49T | 1170 | 0        | -0.967436 |  |
|       |      | Shiraz-9T  | 1370 | 0.690073 | 0         |  |
|       |      | Shiraz-18T | 1457 | 0.643204 | 0         |  |
|       |      | Shiraz-22T | 1673 | 0.611783 | 0         |  |
|       |      | Shiraz-25T | 1719 | 0.472955 | 0         |  |
|       |      | Shiraz-28T | 1762 | 0.562311 | 0         |  |
|       |      | Shiraz-29T | 1801 | 0.815343 | 0         |  |
|       |      | Shiraz-32T | 1870 | 0.729766 | 0         |  |
|       |      | Shiraz-35T | 1933 | 0.488535 | 0         |  |
|       |      | Shiraz-58T | 2223 | 0.833364 | 0         |  |
|       |      | Shiraz-71T | 2263 | 0.975531 | 0         |  |
|       |      | Shiraz-3T  | 242  | 0        | -0.336434 |  |
|       |      | Shiraz-4T  | 261  | 0        | -0.336249 |  |
|       |      | Shiraz-16T | 295  | 0.591657 | 0         |  |
|       |      | Shiraz-36T | 433  | 0        | -0.803961 |  |
|       |      | Shiraz-44T | 899  | 0        | -1.09697  |  |
|       |      | Shiraz-49T | 1170 | 0        | -0.967436 |  |
|       |      | Shiraz-9T  | 1370 | 0.690073 | 0         |  |
|       |      | Shiraz-18T | 1457 | 0.643204 | 0         |  |
|       |      | Shiraz-22T | 1673 | 0.611783 | 0         |  |
|       |      | Shiraz-25T | 1719 | 0.472955 | 0         |  |
|       |      | Shiraz-28T | 1762 | 0.562311 | 0         |  |
|       |      | Shiraz-29T | 1801 | 0.815343 | 0         |  |
|       |      | Shiraz-32T | 1870 | 0.729766 | 0         |  |

|       |      |            |      |          |           |  |
|-------|------|------------|------|----------|-----------|--|
|       |      | Shiraz-35T | 1933 | 0.488535 | 0         |  |
|       |      | Shiraz-58T | 2223 | 0.833364 | 0         |  |
|       |      | Shiraz-71T | 2263 | 0.975531 | 0         |  |
| GNAI1 | chr7 | Shiraz-3T  | 90   | 0.219276 | 0         |  |
|       |      | Shiraz-3T  | 93   | 0        | -0.058023 |  |
|       |      | Shiraz-4T  | 253  | 0.372918 | 0         |  |
|       |      | Shiraz-36T | 378  | 0.179558 | 0         |  |
|       |      | Shiraz-36T | 380  | 0.083883 | 0         |  |
|       |      | Shiraz-44T | 638  | 0        | -0.433476 |  |
|       |      | Shiraz-46T | 943  | 0.093799 | 0         |  |
|       |      | Shiraz-46T | 945  | 0        | -0.014838 |  |
|       |      | Shiraz-47T | 1029 | 0        | -0.096586 |  |
|       |      | Shiraz-49T | 1119 | 0        | -0.157331 |  |
|       |      | Shiraz-77T | 1225 | 0        | -0.117922 |  |
|       |      | Shiraz-77T | 1226 | 0        | -0.233724 |  |
|       |      | Shiraz-12T | 1390 | 0        | -0.237897 |  |
|       |      | Shiraz-18T | 1434 | 0.244465 | 0         |  |
|       |      | Shiraz-22T | 1549 | 0        | -0.319623 |  |
|       |      | Shiraz-22T | 1550 | 0        | -0.577052 |  |
|       |      | Shiraz-25T | 1698 | 0.21835  | 0         |  |
|       |      | Shiraz-28T | 1735 | 0.350744 | 0         |  |
|       |      | Shiraz-29T | 1778 | 0.120767 | 0         |  |
|       |      | Shiraz-38T | 1951 | 0.250891 | 0         |  |
|       |      | Shiraz-53T | 2078 | 0.287202 | 0         |  |
|       |      | Shiraz-58T | 2159 | 0        | -0.219521 |  |
|       |      | Shiraz-71T | 2238 | 0.603631 | 0         |  |
|       |      | Shiraz-3T  | 90   | 0.219276 | 0         |  |
|       |      | Shiraz-3T  | 93   | 0        | -0.058023 |  |
|       |      | Shiraz-4T  | 253  | 0.372918 | 0         |  |
|       |      | Shiraz-36T | 378  | 0.179558 | 0         |  |
|       |      | Shiraz-36T | 380  | 0.083883 | 0         |  |
|       |      | Shiraz-44T | 638  | 0        | -0.433476 |  |
|       |      | Shiraz-46T | 943  | 0.093799 | 0         |  |
|       |      | Shiraz-46T | 945  | 0        | -0.014838 |  |
|       |      | Shiraz-47T | 1029 | 0        | -0.096586 |  |
|       |      | Shiraz-49T | 1119 | 0        | -0.157331 |  |
|       |      | Shiraz-77T | 1225 | 0        | -0.117922 |  |
|       |      | Shiraz-77T | 1226 | 0        | -0.233724 |  |
|       |      | Shiraz-12T | 1390 | 0        | -0.237897 |  |
|       |      | Shiraz-18T | 1434 | 0.244465 | 0         |  |
|       |      | Shiraz-22T | 1549 | 0        | -0.319623 |  |
|       |      | Shiraz-22T | 1550 | 0        | -0.577052 |  |
|       |      | Shiraz-25T | 1698 | 0.21835  | 0         |  |
|       |      | Shiraz-28T | 1735 | 0.350744 | 0         |  |
|       |      | Shiraz-29T | 1778 | 0.120767 | 0         |  |
|       |      | Shiraz-38T | 1951 | 0.250891 | 0         |  |
|       |      | Shiraz-53T | 2078 | 0.287202 | 0         |  |

|       |      |            |      |          |           |  |  |
|-------|------|------------|------|----------|-----------|--|--|
|       |      | Shiraz-58T | 2159 | 0        | -0.219521 |  |  |
|       |      | Shiraz-71T | 2238 | 0.603631 | 0         |  |  |
|       |      | Shiraz-3T  | 90   | 0.219276 | 0         |  |  |
|       |      | Shiraz-3T  | 93   | 0        | -0.058023 |  |  |
|       |      | Shiraz-4T  | 253  | 0.372918 | 0         |  |  |
|       |      | Shiraz-36T | 378  | 0.179558 | 0         |  |  |
|       |      | Shiraz-36T | 380  | 0.083883 | 0         |  |  |
|       |      | Shiraz-44T | 638  | 0        | -0.433476 |  |  |
|       |      | Shiraz-46T | 943  | 0.093799 | 0         |  |  |
|       |      | Shiraz-46T | 945  | 0        | -0.014838 |  |  |
|       |      | Shiraz-47T | 1029 | 0        | -0.096586 |  |  |
|       |      | Shiraz-49T | 1119 | 0        | -0.157331 |  |  |
|       |      | Shiraz-77T | 1225 | 0        | -0.117922 |  |  |
|       |      | Shiraz-77T | 1226 | 0        | -0.233724 |  |  |
|       |      | Shiraz-12T | 1390 | 0        | -0.237897 |  |  |
|       |      | Shiraz-18T | 1434 | 0.244465 | 0         |  |  |
|       |      | Shiraz-22T | 1549 | 0        | -0.319623 |  |  |
|       |      | Shiraz-22T | 1550 | 0        | -0.577052 |  |  |
|       |      | Shiraz-25T | 1698 | 0.21835  | 0         |  |  |
|       |      | Shiraz-28T | 1735 | 0.350744 | 0         |  |  |
|       |      | Shiraz-29T | 1778 | 0.120767 | 0         |  |  |
|       |      | Shiraz-38T | 1951 | 0.250891 | 0         |  |  |
|       |      | Shiraz-53T | 2078 | 0.287202 | 0         |  |  |
|       |      | Shiraz-58T | 2159 | 0        | -0.219521 |  |  |
|       |      | Shiraz-71T | 2238 | 0.603631 | 0         |  |  |
| GNAT3 | chr7 | Shiraz-3T  | 90   | 0.219276 | 0         |  |  |
|       |      | Shiraz-3T  | 93   | 0        | -0.058023 |  |  |
|       |      | Shiraz-4T  | 253  | 0.372918 | 0         |  |  |
|       |      | Shiraz-36T | 378  | 0.179558 | 0         |  |  |
|       |      | Shiraz-36T | 380  | 0.083883 | 0         |  |  |
|       |      | Shiraz-44T | 638  | 0        | -0.433476 |  |  |
|       |      | Shiraz-46T | 943  | 0.093799 | 0         |  |  |
|       |      | Shiraz-46T | 945  | 0        | -0.014838 |  |  |
|       |      | Shiraz-47T | 1029 | 0        | -0.096586 |  |  |
|       |      | Shiraz-49T | 1119 | 0        | -0.157331 |  |  |
|       |      | Shiraz-77T | 1225 | 0        | -0.117922 |  |  |
|       |      | Shiraz-77T | 1226 | 0        | -0.233724 |  |  |
|       |      | Shiraz-12T | 1390 | 0        | -0.237897 |  |  |
|       |      | Shiraz-18T | 1434 | 0.244465 | 0         |  |  |
|       |      | Shiraz-22T | 1549 | 0        | -0.319623 |  |  |
|       |      | Shiraz-22T | 1550 | 0        | -0.577052 |  |  |
|       |      | Shiraz-25T | 1698 | 0.21835  | 0         |  |  |
|       |      | Shiraz-28T | 1735 | 0.350744 | 0         |  |  |
|       |      | Shiraz-29T | 1778 | 0.120767 | 0         |  |  |
|       |      | Shiraz-38T | 1951 | 0.250891 | 0         |  |  |
|       |      | Shiraz-53T | 2078 | 0.287202 | 0         |  |  |
|       |      | Shiraz-58T | 2159 | 0        | -0.219521 |  |  |

|  |            |      |          |           |  |
|--|------------|------|----------|-----------|--|
|  | Shiraz-71T | 2238 | 0.603631 | 0         |  |
|  | Shiraz-3T  | 90   | 0.219276 | 0         |  |
|  | Shiraz-3T  | 93   | 0        | -0.058023 |  |
|  | Shiraz-4T  | 253  | 0.372918 | 0         |  |
|  | Shiraz-36T | 378  | 0.179558 | 0         |  |
|  | Shiraz-36T | 380  | 0.083883 | 0         |  |
|  | Shiraz-44T | 638  | 0        | -0.433476 |  |
|  | Shiraz-46T | 943  | 0.093799 | 0         |  |
|  | Shiraz-46T | 945  | 0        | -0.014838 |  |
|  | Shiraz-47T | 1029 | 0        | -0.096586 |  |
|  | Shiraz-49T | 1119 | 0        | -0.157331 |  |
|  | Shiraz-77T | 1225 | 0        | -0.117922 |  |
|  | Shiraz-77T | 1226 | 0        | -0.233724 |  |
|  | Shiraz-12T | 1390 | 0        | -0.237897 |  |
|  | Shiraz-18T | 1434 | 0.244465 | 0         |  |
|  | Shiraz-22T | 1549 | 0        | -0.319623 |  |
|  | Shiraz-22T | 1550 | 0        | -0.577052 |  |
|  | Shiraz-25T | 1698 | 0.21835  | 0         |  |
|  | Shiraz-28T | 1735 | 0.350744 | 0         |  |
|  | Shiraz-29T | 1778 | 0.120767 | 0         |  |
|  | Shiraz-38T | 1951 | 0.250891 | 0         |  |
|  | Shiraz-53T | 2078 | 0.287202 | 0         |  |
|  | Shiraz-58T | 2159 | 0        | -0.219521 |  |
|  | Shiraz-71T | 2238 | 0.603631 | 0         |  |
|  | Shiraz-3T  | 90   | 0.219276 | 0         |  |
|  | Shiraz-3T  | 93   | 0        | -0.058023 |  |
|  | Shiraz-4T  | 253  | 0.372918 | 0         |  |
|  | Shiraz-36T | 378  | 0.179558 | 0         |  |
|  | Shiraz-36T | 380  | 0.083883 | 0         |  |
|  | Shiraz-44T | 638  | 0        | -0.433476 |  |
|  | Shiraz-46T | 943  | 0.093799 | 0         |  |
|  | Shiraz-46T | 945  | 0        | -0.014838 |  |
|  | Shiraz-47T | 1029 | 0        | -0.096586 |  |
|  | Shiraz-49T | 1119 | 0        | -0.157331 |  |
|  | Shiraz-77T | 1225 | 0        | -0.117922 |  |
|  | Shiraz-77T | 1226 | 0        | -0.233724 |  |
|  | Shiraz-12T | 1390 | 0        | -0.237897 |  |
|  | Shiraz-18T | 1434 | 0.244465 | 0         |  |
|  | Shiraz-22T | 1549 | 0        | -0.319623 |  |
|  | Shiraz-22T | 1550 | 0        | -0.577052 |  |
|  | Shiraz-25T | 1698 | 0.21835  | 0         |  |
|  | Shiraz-28T | 1735 | 0.350744 | 0         |  |
|  | Shiraz-29T | 1778 | 0.120767 | 0         |  |
|  | Shiraz-38T | 1951 | 0.250891 | 0         |  |
|  | Shiraz-53T | 2078 | 0.287202 | 0         |  |
|  | Shiraz-58T | 2159 | 0        | -0.219521 |  |
|  | Shiraz-71T | 2238 | 0.603631 | 0         |  |

|      |      |            |      |          |           |  |  |
|------|------|------------|------|----------|-----------|--|--|
| GNB2 | chr7 | Shiraz-3T  | 90   | 0.219276 | 0         |  |  |
|      |      | Shiraz-3T  | 94   | 0.74735  | 0         |  |  |
|      |      | Shiraz-4T  | 253  | 0.372918 | 0         |  |  |
|      |      | Shiraz-31T | 316  | 0.219196 | 0         |  |  |
|      |      | Shiraz-36T | 378  | 0.179558 | 0         |  |  |
|      |      | Shiraz-36T | 381  | 0.332628 | 0         |  |  |
|      |      | Shiraz-44T | 639  | 1.035032 | 0         |  |  |
|      |      | Shiraz-46T | 943  | 0.093799 | 0         |  |  |
|      |      | Shiraz-46T | 946  | 0.299835 | 0         |  |  |
|      |      | Shiraz-47T | 1030 | 0.257728 | 0         |  |  |
|      |      | Shiraz-49T | 1120 | 0.281656 | 0         |  |  |
|      |      | Shiraz-77T | 1225 | 0        | -0.117922 |  |  |
|      |      | Shiraz-77T | 1227 | 0.196445 | 0         |  |  |
|      |      | Shiraz-9T  | 1324 | 0.679266 | 0         |  |  |
|      |      | Shiraz-18T | 1434 | 0.244465 | 0         |  |  |
|      |      | Shiraz-22T | 1549 | 0        | -0.319623 |  |  |
|      |      | Shiraz-22T | 1551 | 0.324011 | 0         |  |  |
|      |      | Shiraz-25T | 1698 | 0.21835  | 0         |  |  |
|      |      | Shiraz-28T | 1735 | 0.350744 | 0         |  |  |
|      |      | Shiraz-29T | 1778 | 0.120767 | 0         |  |  |
|      |      | Shiraz-32T | 1833 | 0.551336 | 0         |  |  |
|      |      | Shiraz-32T | 1834 | 1.485392 | 0         |  |  |
|      |      | Shiraz-38T | 1951 | 0.250891 | 0         |  |  |
|      |      | Shiraz-53T | 2078 | 0.287202 | 0         |  |  |
|      |      | Shiraz-58T | 2160 | 0.399007 | 0         |  |  |
|      |      | Shiraz-71T | 2238 | 0.603631 | 0         |  |  |
|      |      | Shiraz-3T  | 90   | 0.219276 | 0         |  |  |
|      |      | Shiraz-3T  | 94   | 0.74735  | 0         |  |  |
|      |      | Shiraz-4T  | 253  | 0.372918 | 0         |  |  |
|      |      | Shiraz-31T | 316  | 0.219196 | 0         |  |  |
|      |      | Shiraz-36T | 378  | 0.179558 | 0         |  |  |
|      |      | Shiraz-36T | 381  | 0.332628 | 0         |  |  |
|      |      | Shiraz-44T | 639  | 1.035032 | 0         |  |  |
|      |      | Shiraz-46T | 943  | 0.093799 | 0         |  |  |
|      |      | Shiraz-46T | 946  | 0.299835 | 0         |  |  |
|      |      | Shiraz-47T | 1030 | 0.257728 | 0         |  |  |
|      |      | Shiraz-49T | 1120 | 0.281656 | 0         |  |  |
|      |      | Shiraz-77T | 1225 | 0        | -0.117922 |  |  |
|      |      | Shiraz-77T | 1227 | 0.196445 | 0         |  |  |
|      |      | Shiraz-9T  | 1324 | 0.679266 | 0         |  |  |
|      |      | Shiraz-18T | 1434 | 0.244465 | 0         |  |  |
|      |      | Shiraz-22T | 1549 | 0        | -0.319623 |  |  |
|      |      | Shiraz-22T | 1551 | 0.324011 | 0         |  |  |
|      |      | Shiraz-25T | 1698 | 0.21835  | 0         |  |  |
|      |      | Shiraz-28T | 1735 | 0.350744 | 0         |  |  |
|      |      | Shiraz-29T | 1778 | 0.120767 | 0         |  |  |
|      |      | Shiraz-32T | 1833 | 0.551336 | 0         |  |  |

|       |      |            |      |          |           |  |
|-------|------|------------|------|----------|-----------|--|
|       |      | Shiraz-32T | 1834 | 1.485392 | 0         |  |
|       |      | Shiraz-38T | 1951 | 0.250891 | 0         |  |
|       |      | Shiraz-53T | 2078 | 0.287202 | 0         |  |
|       |      | Shiraz-58T | 2160 | 0.399007 | 0         |  |
|       |      | Shiraz-71T | 2238 | 0.603631 | 0         |  |
|       |      | Shiraz-3T  | 90   | 0.219276 | 0         |  |
|       |      | Shiraz-3T  | 94   | 0.74735  | 0         |  |
|       |      | Shiraz-4T  | 253  | 0.372918 | 0         |  |
|       |      | Shiraz-31T | 316  | 0.219196 | 0         |  |
|       |      | Shiraz-36T | 378  | 0.179558 | 0         |  |
|       |      | Shiraz-36T | 381  | 0.332628 | 0         |  |
|       |      | Shiraz-44T | 639  | 1.035032 | 0         |  |
|       |      | Shiraz-46T | 943  | 0.093799 | 0         |  |
|       |      | Shiraz-46T | 946  | 0.299835 | 0         |  |
|       |      | Shiraz-47T | 1030 | 0.257728 | 0         |  |
|       |      | Shiraz-49T | 1120 | 0.281656 | 0         |  |
|       |      | Shiraz-77T | 1225 | 0        | -0.117922 |  |
|       |      | Shiraz-77T | 1227 | 0.196445 | 0         |  |
|       |      | Shiraz-9T  | 1324 | 0.679266 | 0         |  |
|       |      | Shiraz-18T | 1434 | 0.244465 | 0         |  |
|       |      | Shiraz-22T | 1549 | 0        | -0.319623 |  |
|       |      | Shiraz-22T | 1551 | 0.324011 | 0         |  |
|       |      | Shiraz-25T | 1698 | 0.21835  | 0         |  |
|       |      | Shiraz-28T | 1735 | 0.350744 | 0         |  |
|       |      | Shiraz-29T | 1778 | 0.120767 | 0         |  |
|       |      | Shiraz-32T | 1833 | 0.551336 | 0         |  |
|       |      | Shiraz-32T | 1834 | 1.485392 | 0         |  |
|       |      | Shiraz-38T | 1951 | 0.250891 | 0         |  |
|       |      | Shiraz-53T | 2078 | 0.287202 | 0         |  |
|       |      | Shiraz-58T | 2160 | 0.399007 | 0         |  |
|       |      | Shiraz-71T | 2238 | 0.603631 | 0         |  |
| GNG11 | chr7 | Shiraz-3T  | 90   | 0.219276 | 0         |  |
|       |      | Shiraz-3T  | 93   | 0        | -0.058023 |  |
|       |      | Shiraz-4T  | 253  | 0.372918 | 0         |  |
|       |      | Shiraz-36T | 378  | 0.179558 | 0         |  |
|       |      | Shiraz-36T | 380  | 0.083883 | 0         |  |
|       |      | Shiraz-44T | 638  | 0        | -0.433476 |  |
|       |      | Shiraz-46T | 943  | 0.093799 | 0         |  |
|       |      | Shiraz-46T | 945  | 0        | -0.014838 |  |
|       |      | Shiraz-47T | 1029 | 0        | -0.096586 |  |
|       |      | Shiraz-49T | 1119 | 0        | -0.157331 |  |
|       |      | Shiraz-77T | 1225 | 0        | -0.117922 |  |
|       |      | Shiraz-18T | 1434 | 0.244465 | 0         |  |
|       |      | Shiraz-22T | 1549 | 0        | -0.319623 |  |
|       |      | Shiraz-25T | 1698 | 0.21835  | 0         |  |
|       |      | Shiraz-28T | 1735 | 0.350744 | 0         |  |
|       |      | Shiraz-29T | 1778 | 0.120767 | 0         |  |



|  |            |      |          |           |  |
|--|------------|------|----------|-----------|--|
|  | Shiraz-32T | 1833 | 0.551336 | 0         |  |
|  | Shiraz-38T | 1951 | 0.250891 | 0         |  |
|  | Shiraz-53T | 2078 | 0.287202 | 0         |  |
|  | Shiraz-58T | 2159 | 0        | -0.219521 |  |
|  | Shiraz-71T | 2238 | 0.603631 | 0         |  |
|  | Shiraz-3T  | 90   | 0.219276 | 0         |  |
|  | Shiraz-3T  | 93   | 0        | -0.058023 |  |
|  | Shiraz-4T  | 253  | 0.372918 | 0         |  |
|  | Shiraz-36T | 378  | 0.179558 | 0         |  |
|  | Shiraz-36T | 380  | 0.083883 | 0         |  |
|  | Shiraz-44T | 638  | 0        | -0.433476 |  |
|  | Shiraz-46T | 943  | 0.093799 | 0         |  |
|  | Shiraz-46T | 945  | 0        | -0.014838 |  |
|  | Shiraz-47T | 1029 | 0        | -0.096586 |  |
|  | Shiraz-49T | 1119 | 0        | -0.157331 |  |
|  | Shiraz-77T | 1225 | 0        | -0.117922 |  |
|  | Shiraz-18T | 1434 | 0.244465 | 0         |  |
|  | Shiraz-22T | 1549 | 0        | -0.319623 |  |
|  | Shiraz-25T | 1698 | 0.21835  | 0         |  |
|  | Shiraz-28T | 1735 | 0.350744 | 0         |  |
|  | Shiraz-29T | 1778 | 0.120767 | 0         |  |
|  | Shiraz-32T | 1833 | 0.551336 | 0         |  |
|  | Shiraz-38T | 1951 | 0.250891 | 0         |  |
|  | Shiraz-53T | 2078 | 0.287202 | 0         |  |
|  | Shiraz-58T | 2159 | 0        | -0.219521 |  |
|  | Shiraz-71T | 2238 | 0.603631 | 0         |  |
|  | Shiraz-3T  | 90   | 0.219276 | 0         |  |
|  | Shiraz-3T  | 93   | 0        | -0.058023 |  |
|  | Shiraz-4T  | 253  | 0.372918 | 0         |  |
|  | Shiraz-36T | 378  | 0.179558 | 0         |  |
|  | Shiraz-36T | 380  | 0.083883 | 0         |  |
|  | Shiraz-44T | 638  | 0        | -0.433476 |  |
|  | Shiraz-46T | 943  | 0.093799 | 0         |  |
|  | Shiraz-46T | 945  | 0        | -0.014838 |  |
|  | Shiraz-47T | 1029 | 0        | -0.096586 |  |
|  | Shiraz-49T | 1119 | 0        | -0.157331 |  |
|  | Shiraz-77T | 1225 | 0        | -0.117922 |  |
|  | Shiraz-18T | 1434 | 0.244465 | 0         |  |
|  | Shiraz-22T | 1549 | 0        | -0.319623 |  |
|  | Shiraz-25T | 1698 | 0.21835  | 0         |  |
|  | Shiraz-28T | 1735 | 0.350744 | 0         |  |
|  | Shiraz-29T | 1778 | 0.120767 | 0         |  |
|  | Shiraz-32T | 1833 | 0.551336 | 0         |  |
|  | Shiraz-38T | 1951 | 0.250891 | 0         |  |
|  | Shiraz-53T | 2078 | 0.287202 | 0         |  |
|  | Shiraz-58T | 2159 | 0        | -0.219521 |  |
|  | Shiraz-71T | 2238 | 0.603631 | 0         |  |

|       |      |            |      |          |           |  |  |
|-------|------|------------|------|----------|-----------|--|--|
| GNGT1 | chr7 | Shiraz-3T  | 90   | 0.219276 | 0         |  |  |
|       |      | Shiraz-3T  | 93   | 0        | -0.058023 |  |  |
|       |      | Shiraz-4T  | 253  | 0.372918 | 0         |  |  |
|       |      | Shiraz-36T | 378  | 0.179558 | 0         |  |  |
|       |      | Shiraz-36T | 380  | 0.083883 | 0         |  |  |
|       |      | Shiraz-44T | 638  | 0        | -0.433476 |  |  |
|       |      | Shiraz-46T | 943  | 0.093799 | 0         |  |  |
|       |      | Shiraz-46T | 945  | 0        | -0.014838 |  |  |
|       |      | Shiraz-47T | 1029 | 0        | -0.096586 |  |  |
|       |      | Shiraz-49T | 1119 | 0        | -0.157331 |  |  |
|       |      | Shiraz-77T | 1225 | 0        | -0.117922 |  |  |
|       |      | Shiraz-18T | 1434 | 0.244465 | 0         |  |  |
|       |      | Shiraz-22T | 1549 | 0        | -0.319623 |  |  |
|       |      | Shiraz-25T | 1698 | 0.21835  | 0         |  |  |
|       |      | Shiraz-28T | 1735 | 0.350744 | 0         |  |  |
|       |      | Shiraz-29T | 1778 | 0.120767 | 0         |  |  |
|       |      | Shiraz-32T | 1833 | 0.551336 | 0         |  |  |
|       |      | Shiraz-38T | 1951 | 0.250891 | 0         |  |  |
|       |      | Shiraz-53T | 2078 | 0.287202 | 0         |  |  |
|       |      | Shiraz-58T | 2159 | 0        | -0.219521 |  |  |
|       |      | Shiraz-71T | 2238 | 0.603631 | 0         |  |  |
|       |      | Shiraz-3T  | 90   | 0.219276 | 0         |  |  |
|       |      | Shiraz-3T  | 93   | 0        | -0.058023 |  |  |
|       |      | Shiraz-4T  | 253  | 0.372918 | 0         |  |  |
|       |      | Shiraz-36T | 378  | 0.179558 | 0         |  |  |
|       |      | Shiraz-36T | 380  | 0.083883 | 0         |  |  |
|       |      | Shiraz-44T | 638  | 0        | -0.433476 |  |  |
|       |      | Shiraz-46T | 943  | 0.093799 | 0         |  |  |
|       |      | Shiraz-46T | 945  | 0        | -0.014838 |  |  |
|       |      | Shiraz-47T | 1029 | 0        | -0.096586 |  |  |
|       |      | Shiraz-49T | 1119 | 0        | -0.157331 |  |  |
|       |      | Shiraz-77T | 1225 | 0        | -0.117922 |  |  |
|       |      | Shiraz-18T | 1434 | 0.244465 | 0         |  |  |
|       |      | Shiraz-22T | 1549 | 0        | -0.319623 |  |  |
|       |      | Shiraz-25T | 1698 | 0.21835  | 0         |  |  |
|       |      | Shiraz-28T | 1735 | 0.350744 | 0         |  |  |
|       |      | Shiraz-29T | 1778 | 0.120767 | 0         |  |  |
|       |      | Shiraz-32T | 1833 | 0.551336 | 0         |  |  |
|       |      | Shiraz-38T | 1951 | 0.250891 | 0         |  |  |
|       |      | Shiraz-53T | 2078 | 0.287202 | 0         |  |  |
|       |      | Shiraz-58T | 2159 | 0        | -0.219521 |  |  |
|       |      | Shiraz-71T | 2238 | 0.603631 | 0         |  |  |
|       |      | Shiraz-3T  | 90   | 0.219276 | 0         |  |  |
|       |      | Shiraz-3T  | 93   | 0        | -0.058023 |  |  |
|       |      | Shiraz-4T  | 253  | 0.372918 | 0         |  |  |
|       |      | Shiraz-36T | 378  | 0.179558 | 0         |  |  |
|       |      | Shiraz-36T | 380  | 0.083883 | 0         |  |  |

|       |      |            |      |          |           |  |  |
|-------|------|------------|------|----------|-----------|--|--|
|       |      | Shiraz-44T | 638  | 0        | -0.433476 |  |  |
|       |      | Shiraz-46T | 943  | 0.093799 | 0         |  |  |
|       |      | Shiraz-46T | 945  | 0        | -0.014838 |  |  |
|       |      | Shiraz-47T | 1029 | 0        | -0.096586 |  |  |
|       |      | Shiraz-49T | 1119 | 0        | -0.157331 |  |  |
|       |      | Shiraz-77T | 1225 | 0        | -0.117922 |  |  |
|       |      | Shiraz-18T | 1434 | 0.244465 | 0         |  |  |
|       |      | Shiraz-22T | 1549 | 0        | -0.319623 |  |  |
|       |      | Shiraz-25T | 1698 | 0.21835  | 0         |  |  |
|       |      | Shiraz-28T | 1735 | 0.350744 | 0         |  |  |
|       |      | Shiraz-29T | 1778 | 0.120767 | 0         |  |  |
|       |      | Shiraz-32T | 1833 | 0.551336 | 0         |  |  |
|       |      | Shiraz-38T | 1951 | 0.250891 | 0         |  |  |
|       |      | Shiraz-53T | 2078 | 0.287202 | 0         |  |  |
|       |      | Shiraz-58T | 2159 | 0        | -0.219521 |  |  |
|       |      | Shiraz-71T | 2238 | 0.603631 | 0         |  |  |
| GNL3L | chrX | Shiraz-4T  | 260  | 0        | -0.324128 |  |  |
|       |      | Shiraz-16T | 294  | 0.655804 | 0         |  |  |
|       |      | Shiraz-36T | 431  | 0        | -0.78035  |  |  |
|       |      | Shiraz-44T | 891  | 0        | -0.954044 |  |  |
|       |      | Shiraz-44T | 898  | 0        | -0.515218 |  |  |
|       |      | Shiraz-49T | 1166 | 0        | -0.917235 |  |  |
|       |      | Shiraz-77T | 1282 | 0.213849 | 0         |  |  |
|       |      | Shiraz-9T  | 1368 | 0.199713 | 0         |  |  |
|       |      | Shiraz-18T | 1456 | 0.608534 | 0         |  |  |
|       |      | Shiraz-22T | 1669 | 0.695915 | 0         |  |  |
|       |      | Shiraz-25T | 1717 | 0.420447 | 0         |  |  |
|       |      | Shiraz-28T | 1760 | 0.538181 | 0         |  |  |
|       |      | Shiraz-29T | 1800 | 0.672527 | 0         |  |  |
|       |      | Shiraz-32T | 1869 | 0.776805 | 0         |  |  |
|       |      | Shiraz-35T | 1932 | 0.507141 | 0         |  |  |
|       |      | Shiraz-58T | 2221 | 0.871948 | 0         |  |  |
|       |      | Shiraz-71T | 2260 | 0.68394  | 0         |  |  |
|       |      | Shiraz-71T | 2262 | 0.986748 | 0         |  |  |
|       |      | Shiraz-4T  | 260  | 0        | -0.324128 |  |  |
|       |      | Shiraz-16T | 294  | 0.655804 | 0         |  |  |
|       |      | Shiraz-36T | 431  | 0        | -0.78035  |  |  |
|       |      | Shiraz-44T | 891  | 0        | -0.954044 |  |  |
|       |      | Shiraz-44T | 898  | 0        | -0.515218 |  |  |
|       |      | Shiraz-49T | 1166 | 0        | -0.917235 |  |  |
|       |      | Shiraz-77T | 1282 | 0.213849 | 0         |  |  |
|       |      | Shiraz-9T  | 1368 | 0.199713 | 0         |  |  |
|       |      | Shiraz-18T | 1456 | 0.608534 | 0         |  |  |
|       |      | Shiraz-22T | 1669 | 0.695915 | 0         |  |  |
|       |      | Shiraz-25T | 1717 | 0.420447 | 0         |  |  |
|       |      | Shiraz-28T | 1760 | 0.538181 | 0         |  |  |
|       |      | Shiraz-29T | 1800 | 0.672527 | 0         |  |  |

|           |      |            |      |          |           |  |  |
|-----------|------|------------|------|----------|-----------|--|--|
|           |      | Shiraz-32T | 1869 | 0.776805 | 0         |  |  |
|           |      | Shiraz-35T | 1932 | 0.507141 | 0         |  |  |
|           |      | Shiraz-58T | 2221 | 0.871948 | 0         |  |  |
|           |      | Shiraz-71T | 2260 | 0.68394  | 0         |  |  |
|           |      | Shiraz-71T | 2262 | 0.986748 | 0         |  |  |
|           |      | Shiraz-4T  | 260  | 0        | -0.324128 |  |  |
|           |      | Shiraz-16T | 294  | 0.655804 | 0         |  |  |
|           |      | Shiraz-36T | 431  | 0        | -0.78035  |  |  |
|           |      | Shiraz-44T | 891  | 0        | -0.954044 |  |  |
|           |      | Shiraz-44T | 898  | 0        | -0.515218 |  |  |
|           |      | Shiraz-49T | 1166 | 0        | -0.917235 |  |  |
|           |      | Shiraz-77T | 1282 | 0.213849 | 0         |  |  |
|           |      | Shiraz-9T  | 1368 | 0.199713 | 0         |  |  |
|           |      | Shiraz-18T | 1456 | 0.608534 | 0         |  |  |
|           |      | Shiraz-22T | 1669 | 0.695915 | 0         |  |  |
|           |      | Shiraz-25T | 1717 | 0.420447 | 0         |  |  |
|           |      | Shiraz-28T | 1760 | 0.538181 | 0         |  |  |
|           |      | Shiraz-29T | 1800 | 0.672527 | 0         |  |  |
|           |      | Shiraz-32T | 1869 | 0.776805 | 0         |  |  |
|           |      | Shiraz-35T | 1932 | 0.507141 | 0         |  |  |
|           |      | Shiraz-58T | 2221 | 0.871948 | 0         |  |  |
|           |      | Shiraz-71T | 2260 | 0.68394  | 0         |  |  |
|           |      | Shiraz-71T | 2262 | 0.986748 | 0         |  |  |
| GOLGA2LY2 | chrY | Shiraz-3T  | 249  | 0.517958 | 0         |  |  |
|           |      | Shiraz-3T  | 249  | 0.517958 | 0         |  |  |
|           |      | Shiraz-36T | 443  | 3.327441 | 0         |  |  |
|           |      | Shiraz-36T | 443  | 3.327441 | 0         |  |  |
|           |      | Shiraz-44T | 916  | 3.085937 | 0         |  |  |
|           |      | Shiraz-44T | 916  | 3.085937 | 0         |  |  |
|           |      | Shiraz-47T | 1087 | 0.672496 | 0         |  |  |
|           |      | Shiraz-47T | 1087 | 0.672496 | 0         |  |  |
|           |      | Shiraz-49T | 1181 | 3.048061 | 0         |  |  |
|           |      | Shiraz-49T | 1181 | 3.048061 | 0         |  |  |
|           |      | Shiraz-77T | 1285 | 0.514579 | 0         |  |  |
|           |      | Shiraz-77T | 1285 | 0.514579 | 0         |  |  |
|           |      | Shiraz-18T | 1459 | 0        | -1.126993 |  |  |
|           |      | Shiraz-18T | 1459 | 0        | -1.126993 |  |  |
|           |      | Shiraz-22T | 1682 | 0        | -1.907055 |  |  |
|           |      | Shiraz-22T | 1682 | 0        | -1.907055 |  |  |
|           |      | Shiraz-25T | 1721 | 0        | -0.608105 |  |  |
|           |      | Shiraz-25T | 1721 | 0        | -0.608105 |  |  |
|           |      | Shiraz-28T | 1764 | 0        | -0.999215 |  |  |
|           |      | Shiraz-28T | 1764 | 0        | -0.999215 |  |  |
|           |      | Shiraz-29T | 1812 | 0        | -2.03357  |  |  |
|           |      | Shiraz-29T | 1812 | 0        | -2.03357  |  |  |
|           |      | Shiraz-32T | 1874 | 0        | -1.095677 |  |  |
|           |      | Shiraz-32T | 1874 | 0        | -1.095677 |  |  |

|  |  |            |      |          |           |  |  |
|--|--|------------|------|----------|-----------|--|--|
|  |  | Shiraz-40T | 2053 | 0        | -1.704647 |  |  |
|  |  | Shiraz-40T | 2053 | 0        | -1.704647 |  |  |
|  |  | Shiraz-53T | 2117 | 0        | -0.791729 |  |  |
|  |  | Shiraz-53T | 2117 | 0        | -0.791729 |  |  |
|  |  | Shiraz-58T | 2232 | 0        | -3.375223 |  |  |
|  |  | Shiraz-58T | 2232 | 0        | -3.375223 |  |  |
|  |  | Shiraz-71T | 2267 | 0        | -3.63975  |  |  |
|  |  | Shiraz-71T | 2267 | 0        | -3.63975  |  |  |
|  |  | Shiraz-3T  | 249  | 0.517958 | 0         |  |  |
|  |  | Shiraz-3T  | 249  | 0.517958 | 0         |  |  |
|  |  | Shiraz-36T | 443  | 3.327441 | 0         |  |  |
|  |  | Shiraz-36T | 443  | 3.327441 | 0         |  |  |
|  |  | Shiraz-44T | 916  | 3.085937 | 0         |  |  |
|  |  | Shiraz-44T | 916  | 3.085937 | 0         |  |  |
|  |  | Shiraz-47T | 1087 | 0.672496 | 0         |  |  |
|  |  | Shiraz-47T | 1087 | 0.672496 | 0         |  |  |
|  |  | Shiraz-49T | 1181 | 3.048061 | 0         |  |  |
|  |  | Shiraz-49T | 1181 | 3.048061 | 0         |  |  |
|  |  | Shiraz-77T | 1285 | 0.514579 | 0         |  |  |
|  |  | Shiraz-77T | 1285 | 0.514579 | 0         |  |  |
|  |  | Shiraz-18T | 1459 | 0        | -1.126993 |  |  |
|  |  | Shiraz-18T | 1459 | 0        | -1.126993 |  |  |
|  |  | Shiraz-22T | 1682 | 0        | -1.907055 |  |  |
|  |  | Shiraz-22T | 1682 | 0        | -1.907055 |  |  |
|  |  | Shiraz-25T | 1721 | 0        | -0.608105 |  |  |
|  |  | Shiraz-25T | 1721 | 0        | -0.608105 |  |  |
|  |  | Shiraz-28T | 1764 | 0        | -0.999215 |  |  |
|  |  | Shiraz-28T | 1764 | 0        | -0.999215 |  |  |
|  |  | Shiraz-29T | 1812 | 0        | -2.03357  |  |  |
|  |  | Shiraz-29T | 1812 | 0        | -2.03357  |  |  |
|  |  | Shiraz-32T | 1874 | 0        | -1.095677 |  |  |
|  |  | Shiraz-32T | 1874 | 0        | -1.095677 |  |  |
|  |  | Shiraz-40T | 2053 | 0        | -1.704647 |  |  |
|  |  | Shiraz-40T | 2053 | 0        | -1.704647 |  |  |
|  |  | Shiraz-53T | 2117 | 0        | -0.791729 |  |  |
|  |  | Shiraz-53T | 2117 | 0        | -0.791729 |  |  |
|  |  | Shiraz-58T | 2232 | 0        | -3.375223 |  |  |
|  |  | Shiraz-58T | 2232 | 0        | -3.375223 |  |  |
|  |  | Shiraz-71T | 2267 | 0        | -3.63975  |  |  |
|  |  | Shiraz-71T | 2267 | 0        | -3.63975  |  |  |
|  |  | Shiraz-3T  | 249  | 0.517958 | 0         |  |  |
|  |  | Shiraz-3T  | 249  | 0.517958 | 0         |  |  |
|  |  | Shiraz-36T | 443  | 3.327441 | 0         |  |  |
|  |  | Shiraz-36T | 443  | 3.327441 | 0         |  |  |
|  |  | Shiraz-44T | 916  | 3.085937 | 0         |  |  |
|  |  | Shiraz-44T | 916  | 3.085937 | 0         |  |  |
|  |  | Shiraz-47T | 1087 | 0.672496 | 0         |  |  |

|        |      |            |      |          |           |  |
|--------|------|------------|------|----------|-----------|--|
|        |      | Shiraz-47T | 1087 | 0.672496 | 0         |  |
|        |      | Shiraz-49T | 1181 | 3.048061 | 0         |  |
|        |      | Shiraz-49T | 1181 | 3.048061 | 0         |  |
|        |      | Shiraz-77T | 1285 | 0.514579 | 0         |  |
|        |      | Shiraz-77T | 1285 | 0.514579 | 0         |  |
|        |      | Shiraz-18T | 1459 | 0        | -1.126993 |  |
|        |      | Shiraz-18T | 1459 | 0        | -1.126993 |  |
|        |      | Shiraz-22T | 1682 | 0        | -1.907055 |  |
|        |      | Shiraz-22T | 1682 | 0        | -1.907055 |  |
|        |      | Shiraz-25T | 1721 | 0        | -0.608105 |  |
|        |      | Shiraz-25T | 1721 | 0        | -0.608105 |  |
|        |      | Shiraz-28T | 1764 | 0        | -0.999215 |  |
|        |      | Shiraz-28T | 1764 | 0        | -0.999215 |  |
|        |      | Shiraz-29T | 1812 | 0        | -2.03357  |  |
|        |      | Shiraz-29T | 1812 | 0        | -2.03357  |  |
|        |      | Shiraz-32T | 1874 | 0        | -1.095677 |  |
|        |      | Shiraz-32T | 1874 | 0        | -1.095677 |  |
|        |      | Shiraz-40T | 2053 | 0        | -1.704647 |  |
|        |      | Shiraz-40T | 2053 | 0        | -1.704647 |  |
|        |      | Shiraz-53T | 2117 | 0        | -0.791729 |  |
|        |      | Shiraz-53T | 2117 | 0        | -0.791729 |  |
|        |      | Shiraz-58T | 2232 | 0        | -3.375223 |  |
|        |      | Shiraz-58T | 2232 | 0        | -3.375223 |  |
|        |      | Shiraz-71T | 2267 | 0        | -3.63975  |  |
|        |      | Shiraz-71T | 2267 | 0        | -3.63975  |  |
| GOLPH3 | chr5 | Shiraz-4T  | 250  | 0.262252 | 0         |  |
|        |      | Shiraz-16T | 266  | 0.321724 | 0         |  |
|        |      | Shiraz-18T | 1429 | 0        | -0.314125 |  |
|        |      | Shiraz-25T | 1694 | 0.201602 | 0         |  |
|        |      | Shiraz-28T | 1731 | 0.295447 | 0         |  |
|        |      | Shiraz-29T | 1773 | 0.090981 | 0         |  |
|        |      | Shiraz-40T | 2016 | 0.376634 | 0         |  |
|        |      | Shiraz-53T | 2070 | 0        | -0.42189  |  |
|        |      | Shiraz-4T  | 250  | 0.262252 | 0         |  |
|        |      | Shiraz-16T | 266  | 0.321724 | 0         |  |
|        |      | Shiraz-18T | 1429 | 0        | -0.314125 |  |
|        |      | Shiraz-25T | 1694 | 0.201602 | 0         |  |
|        |      | Shiraz-28T | 1731 | 0.295447 | 0         |  |
|        |      | Shiraz-29T | 1773 | 0.090981 | 0         |  |
|        |      | Shiraz-40T | 2016 | 0.376634 | 0         |  |
|        |      | Shiraz-53T | 2070 | 0        | -0.42189  |  |
|        |      | Shiraz-4T  | 250  | 0.262252 | 0         |  |
|        |      | Shiraz-16T | 266  | 0.321724 | 0         |  |
|        |      | Shiraz-18T | 1429 | 0        | -0.314125 |  |
|        |      | Shiraz-25T | 1694 | 0.201602 | 0         |  |
|        |      | Shiraz-28T | 1731 | 0.295447 | 0         |  |
|        |      | Shiraz-29T | 1773 | 0.090981 | 0         |  |

|      |      |            |      |          |           |  |
|------|------|------------|------|----------|-----------|--|
|      |      | Shiraz-40T | 2016 | 0.376634 | 0         |  |
|      |      | Shiraz-53T | 2070 | 0        | -0.42189  |  |
| GPC2 | chr7 | Shiraz-3T  | 90   | 0.219276 | 0         |  |
|      |      | Shiraz-3T  | 94   | 0.74735  | 0         |  |
|      |      | Shiraz-4T  | 253  | 0.372918 | 0         |  |
|      |      | Shiraz-31T | 316  | 0.219196 | 0         |  |
|      |      | Shiraz-36T | 378  | 0.179558 | 0         |  |
|      |      | Shiraz-36T | 381  | 0.332628 | 0         |  |
|      |      | Shiraz-44T | 639  | 1.035032 | 0         |  |
|      |      | Shiraz-46T | 943  | 0.093799 | 0         |  |
|      |      | Shiraz-46T | 946  | 0.299835 | 0         |  |
|      |      | Shiraz-47T | 1030 | 0.257728 | 0         |  |
|      |      | Shiraz-49T | 1120 | 0.281656 | 0         |  |
|      |      | Shiraz-77T | 1225 | 0        | -0.117922 |  |
|      |      | Shiraz-77T | 1227 | 0.196445 | 0         |  |
|      |      | Shiraz-9T  | 1324 | 0.679266 | 0         |  |
|      |      | Shiraz-18T | 1434 | 0.244465 | 0         |  |
|      |      | Shiraz-22T | 1549 | 0        | -0.319623 |  |
|      |      | Shiraz-22T | 1551 | 0.324011 | 0         |  |
|      |      | Shiraz-25T | 1698 | 0.21835  | 0         |  |
|      |      | Shiraz-28T | 1735 | 0.350744 | 0         |  |
|      |      | Shiraz-29T | 1778 | 0.120767 | 0         |  |
|      |      | Shiraz-32T | 1833 | 0.551336 | 0         |  |
|      |      | Shiraz-32T | 1834 | 1.485392 | 0         |  |
|      |      | Shiraz-38T | 1951 | 0.250891 | 0         |  |
|      |      | Shiraz-53T | 2078 | 0.287202 | 0         |  |
|      |      | Shiraz-58T | 2160 | 0.399007 | 0         |  |
|      |      | Shiraz-71T | 2238 | 0.603631 | 0         |  |
|      |      | Shiraz-3T  | 90   | 0.219276 | 0         |  |
|      |      | Shiraz-3T  | 94   | 0.74735  | 0         |  |
|      |      | Shiraz-4T  | 253  | 0.372918 | 0         |  |
|      |      | Shiraz-31T | 316  | 0.219196 | 0         |  |
|      |      | Shiraz-36T | 378  | 0.179558 | 0         |  |
|      |      | Shiraz-36T | 381  | 0.332628 | 0         |  |
|      |      | Shiraz-44T | 639  | 1.035032 | 0         |  |
|      |      | Shiraz-46T | 943  | 0.093799 | 0         |  |
|      |      | Shiraz-46T | 946  | 0.299835 | 0         |  |
|      |      | Shiraz-47T | 1030 | 0.257728 | 0         |  |
|      |      | Shiraz-49T | 1120 | 0.281656 | 0         |  |
|      |      | Shiraz-77T | 1225 | 0        | -0.117922 |  |
|      |      | Shiraz-77T | 1227 | 0.196445 | 0         |  |
|      |      | Shiraz-9T  | 1324 | 0.679266 | 0         |  |
|      |      | Shiraz-18T | 1434 | 0.244465 | 0         |  |
|      |      | Shiraz-22T | 1549 | 0        | -0.319623 |  |
|      |      | Shiraz-22T | 1551 | 0.324011 | 0         |  |
|      |      | Shiraz-25T | 1698 | 0.21835  | 0         |  |
|      |      | Shiraz-28T | 1735 | 0.350744 | 0         |  |

|      |      |            |      |          |           |  |
|------|------|------------|------|----------|-----------|--|
|      |      | Shiraz-29T | 1778 | 0.120767 | 0         |  |
|      |      | Shiraz-32T | 1833 | 0.551336 | 0         |  |
|      |      | Shiraz-32T | 1834 | 1.485392 | 0         |  |
|      |      | Shiraz-38T | 1951 | 0.250891 | 0         |  |
|      |      | Shiraz-53T | 2078 | 0.287202 | 0         |  |
|      |      | Shiraz-58T | 2160 | 0.399007 | 0         |  |
|      |      | Shiraz-71T | 2238 | 0.603631 | 0         |  |
|      |      | Shiraz-3T  | 90   | 0.219276 | 0         |  |
|      |      | Shiraz-3T  | 94   | 0.74735  | 0         |  |
|      |      | Shiraz-4T  | 253  | 0.372918 | 0         |  |
|      |      | Shiraz-31T | 316  | 0.219196 | 0         |  |
|      |      | Shiraz-36T | 378  | 0.179558 | 0         |  |
|      |      | Shiraz-36T | 381  | 0.332628 | 0         |  |
|      |      | Shiraz-44T | 639  | 1.035032 | 0         |  |
|      |      | Shiraz-46T | 943  | 0.093799 | 0         |  |
|      |      | Shiraz-46T | 946  | 0.299835 | 0         |  |
|      |      | Shiraz-47T | 1030 | 0.257728 | 0         |  |
|      |      | Shiraz-49T | 1120 | 0.281656 | 0         |  |
|      |      | Shiraz-77T | 1225 | 0        | -0.117922 |  |
|      |      | Shiraz-77T | 1227 | 0.196445 | 0         |  |
|      |      | Shiraz-9T  | 1324 | 0.679266 | 0         |  |
|      |      | Shiraz-18T | 1434 | 0.244465 | 0         |  |
|      |      | Shiraz-22T | 1549 | 0        | -0.319623 |  |
|      |      | Shiraz-22T | 1551 | 0.324011 | 0         |  |
|      |      | Shiraz-25T | 1698 | 0.21835  | 0         |  |
|      |      | Shiraz-28T | 1735 | 0.350744 | 0         |  |
|      |      | Shiraz-29T | 1778 | 0.120767 | 0         |  |
|      |      | Shiraz-32T | 1833 | 0.551336 | 0         |  |
|      |      | Shiraz-32T | 1834 | 1.485392 | 0         |  |
|      |      | Shiraz-38T | 1951 | 0.250891 | 0         |  |
|      |      | Shiraz-53T | 2078 | 0.287202 | 0         |  |
|      |      | Shiraz-58T | 2160 | 0.399007 | 0         |  |
|      |      | Shiraz-71T | 2238 | 0.603631 | 0         |  |
| GPC3 | chrX | Shiraz-3T  | 242  | 0        | -0.336434 |  |
|      |      | Shiraz-4T  | 261  | 0        | -0.336249 |  |
|      |      | Shiraz-16T | 295  | 0.591657 | 0         |  |
|      |      | Shiraz-36T | 433  | 0        | -0.803961 |  |
|      |      | Shiraz-44T | 899  | 0        | -1.09697  |  |
|      |      | Shiraz-49T | 1170 | 0        | -0.967436 |  |
|      |      | Shiraz-9T  | 1370 | 0.690073 | 0         |  |
|      |      | Shiraz-18T | 1457 | 0.643204 | 0         |  |
|      |      | Shiraz-22T | 1673 | 0.611783 | 0         |  |
|      |      | Shiraz-22T | 1677 | 0.789711 | 0         |  |
|      |      | Shiraz-25T | 1719 | 0.472955 | 0         |  |
|      |      | Shiraz-28T | 1762 | 0.562311 | 0         |  |
|      |      | Shiraz-29T | 1801 | 0.815343 | 0         |  |
|      |      | Shiraz-32T | 1870 | 0.729766 | 0         |  |



|      |      |            |      |          |           |  |  |
|------|------|------------|------|----------|-----------|--|--|
|      |      | Shiraz-35T | 1933 | 0.488535 | 0         |  |  |
|      |      | Shiraz-58T | 2223 | 0.833364 | 0         |  |  |
|      |      | Shiraz-71T | 2263 | 0.975531 | 0         |  |  |
|      |      | Shiraz-3T  | 242  | 0        | -0.336434 |  |  |
|      |      | Shiraz-4T  | 261  | 0        | -0.336249 |  |  |
|      |      | Shiraz-16T | 295  | 0.591657 | 0         |  |  |
|      |      | Shiraz-36T | 433  | 0        | -0.803961 |  |  |
|      |      | Shiraz-44T | 899  | 0        | -1.09697  |  |  |
|      |      | Shiraz-49T | 1170 | 0        | -0.967436 |  |  |
|      |      | Shiraz-9T  | 1370 | 0.690073 | 0         |  |  |
|      |      | Shiraz-18T | 1457 | 0.643204 | 0         |  |  |
|      |      | Shiraz-22T | 1673 | 0.611783 | 0         |  |  |
|      |      | Shiraz-22T | 1677 | 0.789711 | 0         |  |  |
|      |      | Shiraz-25T | 1719 | 0.472955 | 0         |  |  |
|      |      | Shiraz-28T | 1762 | 0.562311 | 0         |  |  |
|      |      | Shiraz-29T | 1801 | 0.815343 | 0         |  |  |
|      |      | Shiraz-32T | 1870 | 0.729766 | 0         |  |  |
|      |      | Shiraz-35T | 1933 | 0.488535 | 0         |  |  |
|      |      | Shiraz-58T | 2223 | 0.833364 | 0         |  |  |
|      |      | Shiraz-71T | 2263 | 0.975531 | 0         |  |  |
|      |      | Shiraz-3T  | 242  | 0        | -0.336434 |  |  |
|      |      | Shiraz-4T  | 261  | 0        | -0.336249 |  |  |
|      |      | Shiraz-16T | 295  | 0.591657 | 0         |  |  |
|      |      | Shiraz-36T | 433  | 0        | -0.803961 |  |  |
|      |      | Shiraz-44T | 899  | 0        | -1.09697  |  |  |
|      |      | Shiraz-49T | 1170 | 0        | -0.967436 |  |  |
|      |      | Shiraz-9T  | 1370 | 0.690073 | 0         |  |  |
|      |      | Shiraz-18T | 1457 | 0.643204 | 0         |  |  |
|      |      | Shiraz-22T | 1673 | 0.611783 | 0         |  |  |
|      |      | Shiraz-22T | 1677 | 0.789711 | 0         |  |  |
|      |      | Shiraz-25T | 1719 | 0.472955 | 0         |  |  |
|      |      | Shiraz-28T | 1762 | 0.562311 | 0         |  |  |
|      |      | Shiraz-29T | 1801 | 0.815343 | 0         |  |  |
|      |      | Shiraz-32T | 1870 | 0.729766 | 0         |  |  |
|      |      | Shiraz-35T | 1933 | 0.488535 | 0         |  |  |
|      |      | Shiraz-58T | 2223 | 0.833364 | 0         |  |  |
|      |      | Shiraz-71T | 2263 | 0.975531 | 0         |  |  |
| GPC4 | chrX | Shiraz-3T  | 242  | 0        | -0.336434 |  |  |
|      |      | Shiraz-4T  | 261  | 0        | -0.336249 |  |  |
|      |      | Shiraz-16T | 295  | 0.591657 | 0         |  |  |
|      |      | Shiraz-36T | 433  | 0        | -0.803961 |  |  |
|      |      | Shiraz-44T | 899  | 0        | -1.09697  |  |  |
|      |      | Shiraz-49T | 1170 | 0        | -0.967436 |  |  |
|      |      | Shiraz-9T  | 1370 | 0.690073 | 0         |  |  |
|      |      | Shiraz-18T | 1457 | 0.643204 | 0         |  |  |
|      |      | Shiraz-22T | 1673 | 0.611783 | 0         |  |  |
|      |      | Shiraz-22T | 1677 | 0.789711 | 0         |  |  |

|       |      |            |      |          |           |  |
|-------|------|------------|------|----------|-----------|--|
|       |      | Shiraz-25T | 1719 | 0.472955 | 0         |  |
|       |      | Shiraz-28T | 1762 | 0.562311 | 0         |  |
|       |      | Shiraz-29T | 1801 | 0.815343 | 0         |  |
|       |      | Shiraz-32T | 1870 | 0.729766 | 0         |  |
|       |      | Shiraz-35T | 1933 | 0.488535 | 0         |  |
|       |      | Shiraz-58T | 2223 | 0.833364 | 0         |  |
|       |      | Shiraz-71T | 2263 | 0.975531 | 0         |  |
|       |      | Shiraz-3T  | 242  | 0        | -0.336434 |  |
|       |      | Shiraz-4T  | 261  | 0        | -0.336249 |  |
|       |      | Shiraz-16T | 295  | 0.591657 | 0         |  |
|       |      | Shiraz-36T | 433  | 0        | -0.803961 |  |
|       |      | Shiraz-44T | 899  | 0        | -1.09697  |  |
|       |      | Shiraz-49T | 1170 | 0        | -0.967436 |  |
|       |      | Shiraz-9T  | 1370 | 0.690073 | 0         |  |
|       |      | Shiraz-18T | 1457 | 0.643204 | 0         |  |
|       |      | Shiraz-22T | 1673 | 0.611783 | 0         |  |
|       |      | Shiraz-22T | 1677 | 0.789711 | 0         |  |
|       |      | Shiraz-25T | 1719 | 0.472955 | 0         |  |
|       |      | Shiraz-28T | 1762 | 0.562311 | 0         |  |
|       |      | Shiraz-29T | 1801 | 0.815343 | 0         |  |
|       |      | Shiraz-32T | 1870 | 0.729766 | 0         |  |
|       |      | Shiraz-35T | 1933 | 0.488535 | 0         |  |
|       |      | Shiraz-58T | 2223 | 0.833364 | 0         |  |
|       |      | Shiraz-71T | 2263 | 0.975531 | 0         |  |
|       |      | Shiraz-3T  | 242  | 0        | -0.336434 |  |
|       |      | Shiraz-4T  | 261  | 0        | -0.336249 |  |
|       |      | Shiraz-16T | 295  | 0.591657 | 0         |  |
|       |      | Shiraz-36T | 433  | 0        | -0.803961 |  |
|       |      | Shiraz-44T | 899  | 0        | -1.09697  |  |
|       |      | Shiraz-49T | 1170 | 0        | -0.967436 |  |
|       |      | Shiraz-9T  | 1370 | 0.690073 | 0         |  |
|       |      | Shiraz-18T | 1457 | 0.643204 | 0         |  |
|       |      | Shiraz-22T | 1673 | 0.611783 | 0         |  |
|       |      | Shiraz-22T | 1677 | 0.789711 | 0         |  |
|       |      | Shiraz-25T | 1719 | 0.472955 | 0         |  |
|       |      | Shiraz-28T | 1762 | 0.562311 | 0         |  |
|       |      | Shiraz-29T | 1801 | 0.815343 | 0         |  |
|       |      | Shiraz-32T | 1870 | 0.729766 | 0         |  |
|       |      | Shiraz-35T | 1933 | 0.488535 | 0         |  |
|       |      | Shiraz-58T | 2223 | 0.833364 | 0         |  |
|       |      | Shiraz-71T | 2263 | 0.975531 | 0         |  |
| GPKOW | chrX | Shiraz-3T  | 238  | 0.472087 | 0         |  |
|       |      | Shiraz-4T  | 260  | 0        | -0.324128 |  |
|       |      | Shiraz-16T | 294  | 0.655804 | 0         |  |
|       |      | Shiraz-31T | 345  | 0.103301 | 0         |  |
|       |      | Shiraz-36T | 431  | 0        | -0.78035  |  |
|       |      | Shiraz-36T | 432  | 0        | -0.6692   |  |

|  |            |      |          |           |  |
|--|------------|------|----------|-----------|--|
|  | Shiraz-44T | 891  | 0        | -0.954044 |  |
|  | Shiraz-44T | 896  | 0        | -0.109108 |  |
|  | Shiraz-44T | 897  | 0.486937 | 0         |  |
|  | Shiraz-46T | 991  | 0.139564 | 0         |  |
|  | Shiraz-47T | 1084 | 0.24185  | 0         |  |
|  | Shiraz-49T | 1166 | 0        | -0.917235 |  |
|  | Shiraz-49T | 1169 | 0        | -0.583529 |  |
|  | Shiraz-77T | 1282 | 0.213849 | 0         |  |
|  | Shiraz-9T  | 1368 | 0.199713 | 0         |  |
|  | Shiraz-9T  | 1369 | 0.703374 | 0         |  |
|  | Shiraz-18T | 1455 | 0        | -0.186773 |  |
|  | Shiraz-22T | 1669 | 0.695915 | 0         |  |
|  | Shiraz-22T | 1672 | 1.01678  | 0         |  |
|  | Shiraz-25T | 1717 | 0.420447 | 0         |  |
|  | Shiraz-28T | 1760 | 0.538181 | 0         |  |
|  | Shiraz-29T | 1800 | 0.672527 | 0         |  |
|  | Shiraz-32T | 1869 | 0.776805 | 0         |  |
|  | Shiraz-35T | 1932 | 0.507141 | 0         |  |
|  | Shiraz-58T | 2221 | 0.871948 | 0         |  |
|  | Shiraz-71T | 2260 | 0.68394  | 0         |  |
|  | Shiraz-71T | 2262 | 0.986748 | 0         |  |
|  | Shiraz-3T  | 238  | 0.472087 | 0         |  |
|  | Shiraz-4T  | 260  | 0        | -0.324128 |  |
|  | Shiraz-16T | 294  | 0.655804 | 0         |  |
|  | Shiraz-31T | 345  | 0.103301 | 0         |  |
|  | Shiraz-36T | 431  | 0        | -0.78035  |  |
|  | Shiraz-36T | 432  | 0        | -0.6692   |  |
|  | Shiraz-44T | 891  | 0        | -0.954044 |  |
|  | Shiraz-44T | 896  | 0        | -0.109108 |  |
|  | Shiraz-44T | 897  | 0.486937 | 0         |  |
|  | Shiraz-46T | 991  | 0.139564 | 0         |  |
|  | Shiraz-47T | 1084 | 0.24185  | 0         |  |
|  | Shiraz-49T | 1166 | 0        | -0.917235 |  |
|  | Shiraz-49T | 1169 | 0        | -0.583529 |  |
|  | Shiraz-77T | 1282 | 0.213849 | 0         |  |
|  | Shiraz-9T  | 1368 | 0.199713 | 0         |  |
|  | Shiraz-9T  | 1369 | 0.703374 | 0         |  |
|  | Shiraz-18T | 1455 | 0        | -0.186773 |  |
|  | Shiraz-22T | 1669 | 0.695915 | 0         |  |
|  | Shiraz-22T | 1672 | 1.01678  | 0         |  |
|  | Shiraz-25T | 1717 | 0.420447 | 0         |  |
|  | Shiraz-28T | 1760 | 0.538181 | 0         |  |
|  | Shiraz-29T | 1800 | 0.672527 | 0         |  |
|  | Shiraz-32T | 1869 | 0.776805 | 0         |  |
|  | Shiraz-35T | 1932 | 0.507141 | 0         |  |
|  | Shiraz-58T | 2221 | 0.871948 | 0         |  |
|  | Shiraz-71T | 2260 | 0.68394  | 0         |  |

|       |      |            |      |          |           |  |
|-------|------|------------|------|----------|-----------|--|
|       |      | Shiraz-71T | 2262 | 0.986748 | 0         |  |
|       |      | Shiraz-3T  | 238  | 0.472087 | 0         |  |
|       |      | Shiraz-4T  | 260  | 0        | -0.324128 |  |
|       |      | Shiraz-16T | 294  | 0.655804 | 0         |  |
|       |      | Shiraz-31T | 345  | 0.103301 | 0         |  |
|       |      | Shiraz-36T | 431  | 0        | -0.78035  |  |
|       |      | Shiraz-36T | 432  | 0        | -0.6692   |  |
|       |      | Shiraz-44T | 891  | 0        | -0.954044 |  |
|       |      | Shiraz-44T | 896  | 0        | -0.109108 |  |
|       |      | Shiraz-44T | 897  | 0.486937 | 0         |  |
|       |      | Shiraz-46T | 991  | 0.139564 | 0         |  |
|       |      | Shiraz-47T | 1084 | 0.24185  | 0         |  |
|       |      | Shiraz-49T | 1166 | 0        | -0.917235 |  |
|       |      | Shiraz-49T | 1169 | 0        | -0.583529 |  |
|       |      | Shiraz-77T | 1282 | 0.213849 | 0         |  |
|       |      | Shiraz-9T  | 1368 | 0.199713 | 0         |  |
|       |      | Shiraz-9T  | 1369 | 0.703374 | 0         |  |
|       |      | Shiraz-18T | 1455 | 0        | -0.186773 |  |
|       |      | Shiraz-22T | 1669 | 0.695915 | 0         |  |
|       |      | Shiraz-22T | 1672 | 1.01678  | 0         |  |
|       |      | Shiraz-25T | 1717 | 0.420447 | 0         |  |
|       |      | Shiraz-28T | 1760 | 0.538181 | 0         |  |
|       |      | Shiraz-29T | 1800 | 0.672527 | 0         |  |
|       |      | Shiraz-32T | 1869 | 0.776805 | 0         |  |
|       |      | Shiraz-35T | 1932 | 0.507141 | 0         |  |
|       |      | Shiraz-58T | 2221 | 0.871948 | 0         |  |
|       |      | Shiraz-71T | 2260 | 0.68394  | 0         |  |
|       |      | Shiraz-71T | 2262 | 0.986748 | 0         |  |
| GPM6B | chrX | Shiraz-3T  | 235  | 0        | -0.28401  |  |
|       |      | Shiraz-3T  | 235  | 0        | -0.28401  |  |
|       |      | Shiraz-3T  | 235  | 0        | -0.28401  |  |
|       |      | Shiraz-4T  | 260  | 0        | -0.324128 |  |
|       |      | Shiraz-4T  | 260  | 0        | -0.324128 |  |
|       |      | Shiraz-4T  | 260  | 0        | -0.324128 |  |
|       |      | Shiraz-16T | 294  | 0.655804 | 0         |  |
|       |      | Shiraz-16T | 294  | 0.655804 | 0         |  |
|       |      | Shiraz-16T | 294  | 0.655804 | 0         |  |
|       |      | Shiraz-36T | 431  | 0        | -0.78035  |  |
|       |      | Shiraz-36T | 431  | 0        | -0.78035  |  |
|       |      | Shiraz-36T | 431  | 0        | -0.78035  |  |
|       |      | Shiraz-44T | 891  | 0        | -0.954044 |  |
|       |      | Shiraz-44T | 891  | 0        | -0.954044 |  |
|       |      | Shiraz-44T | 891  | 0        | -0.954044 |  |
|       |      | Shiraz-49T | 1166 | 0        | -0.917235 |  |
|       |      | Shiraz-49T | 1166 | 0        | -0.917235 |  |
|       |      | Shiraz-49T | 1166 | 0        | -0.917235 |  |
|       |      | Shiraz-9T  | 1368 | 0.199713 | 0         |  |

|  |  |            |      |          |           |  |  |
|--|--|------------|------|----------|-----------|--|--|
|  |  | Shiraz-9T  | 1368 | 0.199713 | 0         |  |  |
|  |  | Shiraz-9T  | 1368 | 0.199713 | 0         |  |  |
|  |  | Shiraz-18T | 1455 | 0        | -0.186773 |  |  |
|  |  | Shiraz-18T | 1455 | 0        | -0.186773 |  |  |
|  |  | Shiraz-18T | 1455 | 0        | -0.186773 |  |  |
|  |  | Shiraz-22T | 1669 | 0.695915 | 0         |  |  |
|  |  | Shiraz-22T | 1669 | 0.695915 | 0         |  |  |
|  |  | Shiraz-22T | 1669 | 0.695915 | 0         |  |  |
|  |  | Shiraz-25T | 1717 | 0.420447 | 0         |  |  |
|  |  | Shiraz-25T | 1717 | 0.420447 | 0         |  |  |
|  |  | Shiraz-25T | 1717 | 0.420447 | 0         |  |  |
|  |  | Shiraz-28T | 1760 | 0.538181 | 0         |  |  |
|  |  | Shiraz-28T | 1760 | 0.538181 | 0         |  |  |
|  |  | Shiraz-28T | 1760 | 0.538181 | 0         |  |  |
|  |  | Shiraz-29T | 1800 | 0.672527 | 0         |  |  |
|  |  | Shiraz-29T | 1800 | 0.672527 | 0         |  |  |
|  |  | Shiraz-29T | 1800 | 0.672527 | 0         |  |  |
|  |  | Shiraz-32T | 1869 | 0.776805 | 0         |  |  |
|  |  | Shiraz-32T | 1869 | 0.776805 | 0         |  |  |
|  |  | Shiraz-32T | 1869 | 0.776805 | 0         |  |  |
|  |  | Shiraz-35T | 1932 | 0.507141 | 0         |  |  |
|  |  | Shiraz-35T | 1932 | 0.507141 | 0         |  |  |
|  |  | Shiraz-35T | 1932 | 0.507141 | 0         |  |  |
|  |  | Shiraz-40T | 2051 | 0.098506 | 0         |  |  |
|  |  | Shiraz-40T | 2051 | 0.098506 | 0         |  |  |
|  |  | Shiraz-40T | 2051 | 0.098506 | 0         |  |  |
|  |  | Shiraz-58T | 2221 | 0.871948 | 0         |  |  |
|  |  | Shiraz-58T | 2221 | 0.871948 | 0         |  |  |
|  |  | Shiraz-58T | 2221 | 0.871948 | 0         |  |  |
|  |  | Shiraz-71T | 2260 | 0.68394  | 0         |  |  |
|  |  | Shiraz-71T | 2260 | 0.68394  | 0         |  |  |
|  |  | Shiraz-71T | 2260 | 0.68394  | 0         |  |  |
|  |  | Shiraz-71T | 2261 | 0.508399 | 0         |  |  |
|  |  | Shiraz-71T | 2261 | 0.508399 | 0         |  |  |
|  |  | Shiraz-71T | 2261 | 0.508399 | 0         |  |  |
|  |  | Shiraz-3T  | 235  | 0        | -0.28401  |  |  |
|  |  | Shiraz-3T  | 235  | 0        | -0.28401  |  |  |
|  |  | Shiraz-3T  | 235  | 0        | -0.28401  |  |  |
|  |  | Shiraz-4T  | 260  | 0        | -0.324128 |  |  |
|  |  | Shiraz-4T  | 260  | 0        | -0.324128 |  |  |
|  |  | Shiraz-4T  | 260  | 0        | -0.324128 |  |  |
|  |  | Shiraz-16T | 294  | 0.655804 | 0         |  |  |
|  |  | Shiraz-16T | 294  | 0.655804 | 0         |  |  |
|  |  | Shiraz-16T | 294  | 0.655804 | 0         |  |  |
|  |  | Shiraz-36T | 431  | 0        | -0.78035  |  |  |
|  |  | Shiraz-36T | 431  | 0        | -0.78035  |  |  |
|  |  | Shiraz-36T | 431  | 0        | -0.78035  |  |  |

|  |            |      |          |           |  |
|--|------------|------|----------|-----------|--|
|  | Shiraz-44T | 891  | 0        | -0.954044 |  |
|  | Shiraz-44T | 891  | 0        | -0.954044 |  |
|  | Shiraz-44T | 891  | 0        | -0.954044 |  |
|  | Shiraz-49T | 1166 | 0        | -0.917235 |  |
|  | Shiraz-49T | 1166 | 0        | -0.917235 |  |
|  | Shiraz-49T | 1166 | 0        | -0.917235 |  |
|  | Shiraz-9T  | 1368 | 0.199713 | 0         |  |
|  | Shiraz-9T  | 1368 | 0.199713 | 0         |  |
|  | Shiraz-9T  | 1368 | 0.199713 | 0         |  |
|  | Shiraz-18T | 1455 | 0        | -0.186773 |  |
|  | Shiraz-18T | 1455 | 0        | -0.186773 |  |
|  | Shiraz-18T | 1455 | 0        | -0.186773 |  |
|  | Shiraz-22T | 1669 | 0.695915 | 0         |  |
|  | Shiraz-22T | 1669 | 0.695915 | 0         |  |
|  | Shiraz-22T | 1669 | 0.695915 | 0         |  |
|  | Shiraz-25T | 1717 | 0.420447 | 0         |  |
|  | Shiraz-25T | 1717 | 0.420447 | 0         |  |
|  | Shiraz-25T | 1717 | 0.420447 | 0         |  |
|  | Shiraz-28T | 1760 | 0.538181 | 0         |  |
|  | Shiraz-28T | 1760 | 0.538181 | 0         |  |
|  | Shiraz-28T | 1760 | 0.538181 | 0         |  |
|  | Shiraz-29T | 1800 | 0.672527 | 0         |  |
|  | Shiraz-29T | 1800 | 0.672527 | 0         |  |
|  | Shiraz-29T | 1800 | 0.672527 | 0         |  |
|  | Shiraz-32T | 1869 | 0.776805 | 0         |  |
|  | Shiraz-32T | 1869 | 0.776805 | 0         |  |
|  | Shiraz-32T | 1869 | 0.776805 | 0         |  |
|  | Shiraz-35T | 1932 | 0.507141 | 0         |  |
|  | Shiraz-35T | 1932 | 0.507141 | 0         |  |
|  | Shiraz-35T | 1932 | 0.507141 | 0         |  |
|  | Shiraz-40T | 2051 | 0.098506 | 0         |  |
|  | Shiraz-40T | 2051 | 0.098506 | 0         |  |
|  | Shiraz-40T | 2051 | 0.098506 | 0         |  |
|  | Shiraz-58T | 2221 | 0.871948 | 0         |  |
|  | Shiraz-58T | 2221 | 0.871948 | 0         |  |
|  | Shiraz-58T | 2221 | 0.871948 | 0         |  |
|  | Shiraz-71T | 2260 | 0.68394  | 0         |  |
|  | Shiraz-71T | 2260 | 0.68394  | 0         |  |
|  | Shiraz-71T | 2260 | 0.68394  | 0         |  |
|  | Shiraz-71T | 2261 | 0.508399 | 0         |  |
|  | Shiraz-71T | 2261 | 0.508399 | 0         |  |
|  | Shiraz-71T | 2261 | 0.508399 | 0         |  |
|  | Shiraz-3T  | 235  | 0        | -0.28401  |  |
|  | Shiraz-3T  | 235  | 0        | -0.28401  |  |
|  | Shiraz-3T  | 235  | 0        | -0.28401  |  |
|  | Shiraz-4T  | 260  | 0        | -0.324128 |  |
|  | Shiraz-4T  | 260  | 0        | -0.324128 |  |

|  |            |      |          |           |  |
|--|------------|------|----------|-----------|--|
|  | Shiraz-4T  | 260  | 0        | -0.324128 |  |
|  | Shiraz-16T | 294  | 0.655804 | 0         |  |
|  | Shiraz-16T | 294  | 0.655804 | 0         |  |
|  | Shiraz-16T | 294  | 0.655804 | 0         |  |
|  | Shiraz-36T | 431  | 0        | -0.78035  |  |
|  | Shiraz-36T | 431  | 0        | -0.78035  |  |
|  | Shiraz-36T | 431  | 0        | -0.78035  |  |
|  | Shiraz-44T | 891  | 0        | -0.954044 |  |
|  | Shiraz-44T | 891  | 0        | -0.954044 |  |
|  | Shiraz-44T | 891  | 0        | -0.954044 |  |
|  | Shiraz-49T | 1166 | 0        | -0.917235 |  |
|  | Shiraz-49T | 1166 | 0        | -0.917235 |  |
|  | Shiraz-49T | 1166 | 0        | -0.917235 |  |
|  | Shiraz-9T  | 1368 | 0.199713 | 0         |  |
|  | Shiraz-9T  | 1368 | 0.199713 | 0         |  |
|  | Shiraz-9T  | 1368 | 0.199713 | 0         |  |
|  | Shiraz-18T | 1455 | 0        | -0.186773 |  |
|  | Shiraz-18T | 1455 | 0        | -0.186773 |  |
|  | Shiraz-18T | 1455 | 0        | -0.186773 |  |
|  | Shiraz-22T | 1669 | 0.695915 | 0         |  |
|  | Shiraz-22T | 1669 | 0.695915 | 0         |  |
|  | Shiraz-22T | 1669 | 0.695915 | 0         |  |
|  | Shiraz-25T | 1717 | 0.420447 | 0         |  |
|  | Shiraz-25T | 1717 | 0.420447 | 0         |  |
|  | Shiraz-25T | 1717 | 0.420447 | 0         |  |
|  | Shiraz-28T | 1760 | 0.538181 | 0         |  |
|  | Shiraz-28T | 1760 | 0.538181 | 0         |  |
|  | Shiraz-28T | 1760 | 0.538181 | 0         |  |
|  | Shiraz-29T | 1800 | 0.672527 | 0         |  |
|  | Shiraz-29T | 1800 | 0.672527 | 0         |  |
|  | Shiraz-29T | 1800 | 0.672527 | 0         |  |
|  | Shiraz-32T | 1869 | 0.776805 | 0         |  |
|  | Shiraz-32T | 1869 | 0.776805 | 0         |  |
|  | Shiraz-32T | 1869 | 0.776805 | 0         |  |
|  | Shiraz-35T | 1932 | 0.507141 | 0         |  |
|  | Shiraz-35T | 1932 | 0.507141 | 0         |  |
|  | Shiraz-35T | 1932 | 0.507141 | 0         |  |
|  | Shiraz-40T | 2051 | 0.098506 | 0         |  |
|  | Shiraz-40T | 2051 | 0.098506 | 0         |  |
|  | Shiraz-40T | 2051 | 0.098506 | 0         |  |
|  | Shiraz-58T | 2221 | 0.871948 | 0         |  |
|  | Shiraz-58T | 2221 | 0.871948 | 0         |  |
|  | Shiraz-58T | 2221 | 0.871948 | 0         |  |
|  | Shiraz-71T | 2260 | 0.68394  | 0         |  |
|  | Shiraz-71T | 2260 | 0.68394  | 0         |  |
|  | Shiraz-71T | 2260 | 0.68394  | 0         |  |
|  | Shiraz-71T | 2261 | 0.508399 | 0         |  |

|        |      |            |      |          |           |  |
|--------|------|------------|------|----------|-----------|--|
|        |      | Shiraz-71T | 2261 | 0.508399 | 0         |  |
|        |      | Shiraz-71T | 2261 | 0.508399 | 0         |  |
| GPNMB  | chr7 | Shiraz-3T  | 87   | 0.198593 | 0         |  |
|        |      | Shiraz-4T  | 252  | 0.192083 | 0         |  |
|        |      | Shiraz-36T | 376  | 0.159952 | 0         |  |
|        |      | Shiraz-46T | 942  | 0.069143 | 0         |  |
|        |      | Shiraz-18T | 1433 | 0.250973 | 0         |  |
|        |      | Shiraz-25T | 1697 | 0.21945  | 0         |  |
|        |      | Shiraz-28T | 1734 | 0.362882 | 0         |  |
|        |      | Shiraz-29T | 1777 | 0.156747 | 0         |  |
|        |      | Shiraz-38T | 1950 | 0.265916 | 0         |  |
|        |      | Shiraz-71T | 2236 | 0.320072 | 0         |  |
|        |      | Shiraz-3T  | 87   | 0.198593 | 0         |  |
|        |      | Shiraz-4T  | 252  | 0.192083 | 0         |  |
|        |      | Shiraz-36T | 376  | 0.159952 | 0         |  |
|        |      | Shiraz-46T | 942  | 0.069143 | 0         |  |
|        |      | Shiraz-18T | 1433 | 0.250973 | 0         |  |
|        |      | Shiraz-25T | 1697 | 0.21945  | 0         |  |
|        |      | Shiraz-28T | 1734 | 0.362882 | 0         |  |
|        |      | Shiraz-29T | 1777 | 0.156747 | 0         |  |
|        |      | Shiraz-38T | 1950 | 0.265916 | 0         |  |
|        |      | Shiraz-71T | 2236 | 0.320072 | 0         |  |
|        |      | Shiraz-3T  | 87   | 0.198593 | 0         |  |
|        |      | Shiraz-4T  | 252  | 0.192083 | 0         |  |
|        |      | Shiraz-36T | 376  | 0.159952 | 0         |  |
|        |      | Shiraz-46T | 942  | 0.069143 | 0         |  |
|        |      | Shiraz-18T | 1433 | 0.250973 | 0         |  |
|        |      | Shiraz-25T | 1697 | 0.21945  | 0         |  |
|        |      | Shiraz-28T | 1734 | 0.362882 | 0         |  |
|        |      | Shiraz-29T | 1777 | 0.156747 | 0         |  |
|        |      | Shiraz-38T | 1950 | 0.265916 | 0         |  |
|        |      | Shiraz-71T | 2236 | 0.320072 | 0         |  |
| GPR101 | chrX | Shiraz-3T  | 242  | 0        | -0.336434 |  |
|        |      | Shiraz-4T  | 261  | 0        | -0.336249 |  |
|        |      | Shiraz-16T | 295  | 0.591657 | 0         |  |
|        |      | Shiraz-36T | 433  | 0        | -0.803961 |  |
|        |      | Shiraz-44T | 899  | 0        | -1.09697  |  |
|        |      | Shiraz-49T | 1170 | 0        | -0.967436 |  |
|        |      | Shiraz-9T  | 1370 | 0.690073 | 0         |  |
|        |      | Shiraz-18T | 1457 | 0.643204 | 0         |  |
|        |      | Shiraz-22T | 1673 | 0.611783 | 0         |  |
|        |      | Shiraz-22T | 1677 | 0.789711 | 0         |  |
|        |      | Shiraz-25T | 1719 | 0.472955 | 0         |  |
|        |      | Shiraz-28T | 1762 | 0.562311 | 0         |  |
|        |      | Shiraz-29T | 1801 | 0.815343 | 0         |  |
|        |      | Shiraz-32T | 1870 | 0.729766 | 0         |  |
|        |      | Shiraz-35T | 1933 | 0.488535 | 0         |  |



|        |      |            |      |          |           |  |  |
|--------|------|------------|------|----------|-----------|--|--|
|        |      | Shiraz-58T | 2223 | 0.833364 | 0         |  |  |
|        |      | Shiraz-71T | 2263 | 0.975531 | 0         |  |  |
|        |      | Shiraz-3T  | 242  | 0        | -0.336434 |  |  |
|        |      | Shiraz-4T  | 261  | 0        | -0.336249 |  |  |
|        |      | Shiraz-16T | 295  | 0.591657 | 0         |  |  |
|        |      | Shiraz-36T | 433  | 0        | -0.803961 |  |  |
|        |      | Shiraz-44T | 899  | 0        | -1.09697  |  |  |
|        |      | Shiraz-49T | 1170 | 0        | -0.967436 |  |  |
|        |      | Shiraz-9T  | 1370 | 0.690073 | 0         |  |  |
|        |      | Shiraz-18T | 1457 | 0.643204 | 0         |  |  |
|        |      | Shiraz-22T | 1673 | 0.611783 | 0         |  |  |
|        |      | Shiraz-22T | 1677 | 0.789711 | 0         |  |  |
|        |      | Shiraz-25T | 1719 | 0.472955 | 0         |  |  |
|        |      | Shiraz-28T | 1762 | 0.562311 | 0         |  |  |
|        |      | Shiraz-29T | 1801 | 0.815343 | 0         |  |  |
|        |      | Shiraz-32T | 1870 | 0.729766 | 0         |  |  |
|        |      | Shiraz-35T | 1933 | 0.488535 | 0         |  |  |
|        |      | Shiraz-58T | 2223 | 0.833364 | 0         |  |  |
|        |      | Shiraz-71T | 2263 | 0.975531 | 0         |  |  |
|        |      | Shiraz-3T  | 242  | 0        | -0.336434 |  |  |
|        |      | Shiraz-4T  | 261  | 0        | -0.336249 |  |  |
|        |      | Shiraz-16T | 295  | 0.591657 | 0         |  |  |
|        |      | Shiraz-36T | 433  | 0        | -0.803961 |  |  |
|        |      | Shiraz-44T | 899  | 0        | -1.09697  |  |  |
|        |      | Shiraz-49T | 1170 | 0        | -0.967436 |  |  |
|        |      | Shiraz-9T  | 1370 | 0.690073 | 0         |  |  |
|        |      | Shiraz-18T | 1457 | 0.643204 | 0         |  |  |
|        |      | Shiraz-22T | 1673 | 0.611783 | 0         |  |  |
|        |      | Shiraz-22T | 1677 | 0.789711 | 0         |  |  |
|        |      | Shiraz-25T | 1719 | 0.472955 | 0         |  |  |
|        |      | Shiraz-28T | 1762 | 0.562311 | 0         |  |  |
|        |      | Shiraz-29T | 1801 | 0.815343 | 0         |  |  |
|        |      | Shiraz-32T | 1870 | 0.729766 | 0         |  |  |
|        |      | Shiraz-35T | 1933 | 0.488535 | 0         |  |  |
|        |      | Shiraz-58T | 2223 | 0.833364 | 0         |  |  |
|        |      | Shiraz-71T | 2263 | 0.975531 | 0         |  |  |
| GPR112 | chrX | Shiraz-3T  | 242  | 0        | -0.336434 |  |  |
|        |      | Shiraz-4T  | 261  | 0        | -0.336249 |  |  |
|        |      | Shiraz-16T | 295  | 0.591657 | 0         |  |  |
|        |      | Shiraz-36T | 433  | 0        | -0.803961 |  |  |
|        |      | Shiraz-44T | 899  | 0        | -1.09697  |  |  |
|        |      | Shiraz-49T | 1170 | 0        | -0.967436 |  |  |
|        |      | Shiraz-9T  | 1370 | 0.690073 | 0         |  |  |
|        |      | Shiraz-18T | 1457 | 0.643204 | 0         |  |  |
|        |      | Shiraz-22T | 1673 | 0.611783 | 0         |  |  |
|        |      | Shiraz-22T | 1677 | 0.789711 | 0         |  |  |
|        |      | Shiraz-25T | 1719 | 0.472955 | 0         |  |  |

|        |      |            |      |          |           |  |  |
|--------|------|------------|------|----------|-----------|--|--|
|        |      | Shiraz-28T | 1762 | 0.562311 | 0         |  |  |
|        |      | Shiraz-29T | 1801 | 0.815343 | 0         |  |  |
|        |      | Shiraz-32T | 1870 | 0.729766 | 0         |  |  |
|        |      | Shiraz-35T | 1933 | 0.488535 | 0         |  |  |
|        |      | Shiraz-58T | 2223 | 0.833364 | 0         |  |  |
|        |      | Shiraz-71T | 2263 | 0.975531 | 0         |  |  |
|        |      | Shiraz-3T  | 242  | 0        | -0.336434 |  |  |
|        |      | Shiraz-4T  | 261  | 0        | -0.336249 |  |  |
|        |      | Shiraz-16T | 295  | 0.591657 | 0         |  |  |
|        |      | Shiraz-36T | 433  | 0        | -0.803961 |  |  |
|        |      | Shiraz-44T | 899  | 0        | -1.09697  |  |  |
|        |      | Shiraz-49T | 1170 | 0        | -0.967436 |  |  |
|        |      | Shiraz-9T  | 1370 | 0.690073 | 0         |  |  |
|        |      | Shiraz-18T | 1457 | 0.643204 | 0         |  |  |
|        |      | Shiraz-22T | 1673 | 0.611783 | 0         |  |  |
|        |      | Shiraz-22T | 1677 | 0.789711 | 0         |  |  |
|        |      | Shiraz-25T | 1719 | 0.472955 | 0         |  |  |
|        |      | Shiraz-28T | 1762 | 0.562311 | 0         |  |  |
|        |      | Shiraz-29T | 1801 | 0.815343 | 0         |  |  |
|        |      | Shiraz-32T | 1870 | 0.729766 | 0         |  |  |
|        |      | Shiraz-35T | 1933 | 0.488535 | 0         |  |  |
|        |      | Shiraz-58T | 2223 | 0.833364 | 0         |  |  |
|        |      | Shiraz-71T | 2263 | 0.975531 | 0         |  |  |
|        |      | Shiraz-3T  | 242  | 0        | -0.336434 |  |  |
|        |      | Shiraz-4T  | 261  | 0        | -0.336249 |  |  |
|        |      | Shiraz-16T | 295  | 0.591657 | 0         |  |  |
|        |      | Shiraz-36T | 433  | 0        | -0.803961 |  |  |
|        |      | Shiraz-44T | 899  | 0        | -1.09697  |  |  |
|        |      | Shiraz-49T | 1170 | 0        | -0.967436 |  |  |
|        |      | Shiraz-9T  | 1370 | 0.690073 | 0         |  |  |
|        |      | Shiraz-18T | 1457 | 0.643204 | 0         |  |  |
|        |      | Shiraz-22T | 1673 | 0.611783 | 0         |  |  |
|        |      | Shiraz-22T | 1677 | 0.789711 | 0         |  |  |
|        |      | Shiraz-25T | 1719 | 0.472955 | 0         |  |  |
|        |      | Shiraz-28T | 1762 | 0.562311 | 0         |  |  |
|        |      | Shiraz-29T | 1801 | 0.815343 | 0         |  |  |
|        |      | Shiraz-32T | 1870 | 0.729766 | 0         |  |  |
|        |      | Shiraz-35T | 1933 | 0.488535 | 0         |  |  |
|        |      | Shiraz-58T | 2223 | 0.833364 | 0         |  |  |
|        |      | Shiraz-71T | 2263 | 0.975531 | 0         |  |  |
| GPR119 | chrX | Shiraz-3T  | 242  | 0        | -0.336434 |  |  |
|        |      | Shiraz-4T  | 261  | 0        | -0.336249 |  |  |
|        |      | Shiraz-16T | 295  | 0.591657 | 0         |  |  |
|        |      | Shiraz-36T | 433  | 0        | -0.803961 |  |  |
|        |      | Shiraz-44T | 899  | 0        | -1.09697  |  |  |
|        |      | Shiraz-49T | 1170 | 0        | -0.967436 |  |  |
|        |      | Shiraz-9T  | 1370 | 0.690073 | 0         |  |  |

|        |      |            |      |          |           |  |
|--------|------|------------|------|----------|-----------|--|
|        |      | Shiraz-18T | 1457 | 0.643204 | 0         |  |
|        |      | Shiraz-22T | 1673 | 0.611783 | 0         |  |
|        |      | Shiraz-22T | 1677 | 0.789711 | 0         |  |
|        |      | Shiraz-25T | 1719 | 0.472955 | 0         |  |
|        |      | Shiraz-28T | 1762 | 0.562311 | 0         |  |
|        |      | Shiraz-29T | 1801 | 0.815343 | 0         |  |
|        |      | Shiraz-32T | 1870 | 0.729766 | 0         |  |
|        |      | Shiraz-35T | 1933 | 0.488535 | 0         |  |
|        |      | Shiraz-58T | 2223 | 0.833364 | 0         |  |
|        |      | Shiraz-71T | 2263 | 0.975531 | 0         |  |
|        |      | Shiraz-3T  | 242  | 0        | -0.336434 |  |
|        |      | Shiraz-4T  | 261  | 0        | -0.336249 |  |
|        |      | Shiraz-16T | 295  | 0.591657 | 0         |  |
|        |      | Shiraz-36T | 433  | 0        | -0.803961 |  |
|        |      | Shiraz-44T | 899  | 0        | -1.09697  |  |
|        |      | Shiraz-49T | 1170 | 0        | -0.967436 |  |
|        |      | Shiraz-9T  | 1370 | 0.690073 | 0         |  |
|        |      | Shiraz-18T | 1457 | 0.643204 | 0         |  |
|        |      | Shiraz-22T | 1673 | 0.611783 | 0         |  |
|        |      | Shiraz-22T | 1677 | 0.789711 | 0         |  |
|        |      | Shiraz-25T | 1719 | 0.472955 | 0         |  |
|        |      | Shiraz-28T | 1762 | 0.562311 | 0         |  |
|        |      | Shiraz-29T | 1801 | 0.815343 | 0         |  |
|        |      | Shiraz-32T | 1870 | 0.729766 | 0         |  |
|        |      | Shiraz-35T | 1933 | 0.488535 | 0         |  |
|        |      | Shiraz-58T | 2223 | 0.833364 | 0         |  |
|        |      | Shiraz-71T | 2263 | 0.975531 | 0         |  |
|        |      | Shiraz-3T  | 242  | 0        | -0.336434 |  |
|        |      | Shiraz-4T  | 261  | 0        | -0.336249 |  |
|        |      | Shiraz-16T | 295  | 0.591657 | 0         |  |
|        |      | Shiraz-36T | 433  | 0        | -0.803961 |  |
|        |      | Shiraz-44T | 899  | 0        | -1.09697  |  |
|        |      | Shiraz-49T | 1170 | 0        | -0.967436 |  |
|        |      | Shiraz-9T  | 1370 | 0.690073 | 0         |  |
|        |      | Shiraz-18T | 1457 | 0.643204 | 0         |  |
|        |      | Shiraz-22T | 1673 | 0.611783 | 0         |  |
|        |      | Shiraz-22T | 1677 | 0.789711 | 0         |  |
|        |      | Shiraz-25T | 1719 | 0.472955 | 0         |  |
|        |      | Shiraz-28T | 1762 | 0.562311 | 0         |  |
|        |      | Shiraz-29T | 1801 | 0.815343 | 0         |  |
|        |      | Shiraz-32T | 1870 | 0.729766 | 0         |  |
|        |      | Shiraz-35T | 1933 | 0.488535 | 0         |  |
|        |      | Shiraz-58T | 2223 | 0.833364 | 0         |  |
|        |      | Shiraz-71T | 2263 | 0.975531 | 0         |  |
| GPR141 | chr7 | Shiraz-3T  | 87   | 0.198593 | 0         |  |
|        |      | Shiraz-4T  | 252  | 0.192083 | 0         |  |
|        |      | Shiraz-36T | 376  | 0.159952 | 0         |  |

|        |      |            |      |          |           |  |  |
|--------|------|------------|------|----------|-----------|--|--|
|        |      | Shiraz-44T | 631  | 0        | -0.180312 |  |  |
|        |      | Shiraz-46T | 942  | 0.069143 | 0         |  |  |
|        |      | Shiraz-18T | 1433 | 0.250973 | 0         |  |  |
|        |      | Shiraz-22T | 1544 | 0        | -0.193579 |  |  |
|        |      | Shiraz-25T | 1697 | 0.21945  | 0         |  |  |
|        |      | Shiraz-28T | 1734 | 0.362882 | 0         |  |  |
|        |      | Shiraz-29T | 1777 | 0.156747 | 0         |  |  |
|        |      | Shiraz-38T | 1950 | 0.265916 | 0         |  |  |
|        |      | Shiraz-71T | 2236 | 0.320072 | 0         |  |  |
|        |      | Shiraz-72T | 2277 | 0        | -0.398869 |  |  |
|        |      | Shiraz-3T  | 87   | 0.198593 | 0         |  |  |
|        |      | Shiraz-4T  | 252  | 0.192083 | 0         |  |  |
|        |      | Shiraz-36T | 376  | 0.159952 | 0         |  |  |
|        |      | Shiraz-44T | 631  | 0        | -0.180312 |  |  |
|        |      | Shiraz-46T | 942  | 0.069143 | 0         |  |  |
|        |      | Shiraz-18T | 1433 | 0.250973 | 0         |  |  |
|        |      | Shiraz-22T | 1544 | 0        | -0.193579 |  |  |
|        |      | Shiraz-25T | 1697 | 0.21945  | 0         |  |  |
|        |      | Shiraz-28T | 1734 | 0.362882 | 0         |  |  |
|        |      | Shiraz-29T | 1777 | 0.156747 | 0         |  |  |
|        |      | Shiraz-38T | 1950 | 0.265916 | 0         |  |  |
|        |      | Shiraz-71T | 2236 | 0.320072 | 0         |  |  |
|        |      | Shiraz-72T | 2277 | 0        | -0.398869 |  |  |
|        |      | Shiraz-3T  | 87   | 0.198593 | 0         |  |  |
|        |      | Shiraz-4T  | 252  | 0.192083 | 0         |  |  |
|        |      | Shiraz-36T | 376  | 0.159952 | 0         |  |  |
|        |      | Shiraz-44T | 631  | 0        | -0.180312 |  |  |
|        |      | Shiraz-46T | 942  | 0.069143 | 0         |  |  |
|        |      | Shiraz-18T | 1433 | 0.250973 | 0         |  |  |
|        |      | Shiraz-22T | 1544 | 0        | -0.193579 |  |  |
|        |      | Shiraz-25T | 1697 | 0.21945  | 0         |  |  |
|        |      | Shiraz-28T | 1734 | 0.362882 | 0         |  |  |
|        |      | Shiraz-29T | 1777 | 0.156747 | 0         |  |  |
|        |      | Shiraz-38T | 1950 | 0.265916 | 0         |  |  |
|        |      | Shiraz-71T | 2236 | 0.320072 | 0         |  |  |
|        |      | Shiraz-72T | 2277 | 0        | -0.398869 |  |  |
| GPR143 | chrX | Shiraz-3T  | 235  | 0        | -0.28401  |  |  |
|        |      | Shiraz-4T  | 260  | 0        | -0.324128 |  |  |
|        |      | Shiraz-16T | 294  | 0.655804 | 0         |  |  |
|        |      | Shiraz-36T | 431  | 0        | -0.78035  |  |  |
|        |      | Shiraz-44T | 891  | 0        | -0.954044 |  |  |
|        |      | Shiraz-49T | 1166 | 0        | -0.917235 |  |  |
|        |      | Shiraz-9T  | 1368 | 0.199713 | 0         |  |  |
|        |      | Shiraz-18T | 1455 | 0        | -0.186773 |  |  |
|        |      | Shiraz-22T | 1669 | 0.695915 | 0         |  |  |
|        |      | Shiraz-22T | 1670 | 1.188333 | 0         |  |  |
|        |      | Shiraz-25T | 1717 | 0.420447 | 0         |  |  |

|        |      |            |      |          |           |  |  |
|--------|------|------------|------|----------|-----------|--|--|
|        |      | Shiraz-28T | 1760 | 0.538181 | 0         |  |  |
|        |      | Shiraz-29T | 1800 | 0.672527 | 0         |  |  |
|        |      | Shiraz-32T | 1869 | 0.776805 | 0         |  |  |
|        |      | Shiraz-35T | 1932 | 0.507141 | 0         |  |  |
|        |      | Shiraz-40T | 2051 | 0.098506 | 0         |  |  |
|        |      | Shiraz-58T | 2221 | 0.871948 | 0         |  |  |
|        |      | Shiraz-71T | 2260 | 0.68394  | 0         |  |  |
|        |      | Shiraz-71T | 2261 | 0.508399 | 0         |  |  |
|        |      | Shiraz-3T  | 235  | 0        | -0.28401  |  |  |
|        |      | Shiraz-4T  | 260  | 0        | -0.324128 |  |  |
|        |      | Shiraz-16T | 294  | 0.655804 | 0         |  |  |
|        |      | Shiraz-36T | 431  | 0        | -0.78035  |  |  |
|        |      | Shiraz-44T | 891  | 0        | -0.954044 |  |  |
|        |      | Shiraz-49T | 1166 | 0        | -0.917235 |  |  |
|        |      | Shiraz-9T  | 1368 | 0.199713 | 0         |  |  |
|        |      | Shiraz-18T | 1455 | 0        | -0.186773 |  |  |
|        |      | Shiraz-22T | 1669 | 0.695915 | 0         |  |  |
|        |      | Shiraz-22T | 1670 | 1.188333 | 0         |  |  |
|        |      | Shiraz-25T | 1717 | 0.420447 | 0         |  |  |
|        |      | Shiraz-28T | 1760 | 0.538181 | 0         |  |  |
|        |      | Shiraz-29T | 1800 | 0.672527 | 0         |  |  |
|        |      | Shiraz-32T | 1869 | 0.776805 | 0         |  |  |
|        |      | Shiraz-35T | 1932 | 0.507141 | 0         |  |  |
|        |      | Shiraz-40T | 2051 | 0.098506 | 0         |  |  |
|        |      | Shiraz-58T | 2221 | 0.871948 | 0         |  |  |
|        |      | Shiraz-71T | 2260 | 0.68394  | 0         |  |  |
|        |      | Shiraz-71T | 2261 | 0.508399 | 0         |  |  |
|        |      | Shiraz-3T  | 235  | 0        | -0.28401  |  |  |
|        |      | Shiraz-4T  | 260  | 0        | -0.324128 |  |  |
|        |      | Shiraz-16T | 294  | 0.655804 | 0         |  |  |
|        |      | Shiraz-36T | 431  | 0        | -0.78035  |  |  |
|        |      | Shiraz-44T | 891  | 0        | -0.954044 |  |  |
|        |      | Shiraz-49T | 1166 | 0        | -0.917235 |  |  |
|        |      | Shiraz-9T  | 1368 | 0.199713 | 0         |  |  |
|        |      | Shiraz-18T | 1455 | 0        | -0.186773 |  |  |
|        |      | Shiraz-22T | 1669 | 0.695915 | 0         |  |  |
|        |      | Shiraz-22T | 1670 | 1.188333 | 0         |  |  |
|        |      | Shiraz-25T | 1717 | 0.420447 | 0         |  |  |
|        |      | Shiraz-28T | 1760 | 0.538181 | 0         |  |  |
|        |      | Shiraz-29T | 1800 | 0.672527 | 0         |  |  |
|        |      | Shiraz-32T | 1869 | 0.776805 | 0         |  |  |
|        |      | Shiraz-35T | 1932 | 0.507141 | 0         |  |  |
|        |      | Shiraz-40T | 2051 | 0.098506 | 0         |  |  |
|        |      | Shiraz-58T | 2221 | 0.871948 | 0         |  |  |
|        |      | Shiraz-71T | 2260 | 0.68394  | 0         |  |  |
|        |      | Shiraz-71T | 2261 | 0.508399 | 0         |  |  |
| GPR173 | chrX | Shiraz-4T  | 260  | 0        | -0.324128 |  |  |

|  |            |      |          |           |  |
|--|------------|------|----------|-----------|--|
|  | Shiraz-16T | 294  | 0.655804 | 0         |  |
|  | Shiraz-31T | 345  | 0.103301 | 0         |  |
|  | Shiraz-36T | 431  | 0        | -0.78035  |  |
|  | Shiraz-36T | 432  | 0        | -0.6692   |  |
|  | Shiraz-44T | 891  | 0        | -0.954044 |  |
|  | Shiraz-44T | 898  | 0        | -0.515218 |  |
|  | Shiraz-49T | 1166 | 0        | -0.917235 |  |
|  | Shiraz-77T | 1282 | 0.213849 | 0         |  |
|  | Shiraz-9T  | 1368 | 0.199713 | 0         |  |
|  | Shiraz-18T | 1456 | 0.608534 | 0         |  |
|  | Shiraz-22T | 1669 | 0.695915 | 0         |  |
|  | Shiraz-25T | 1717 | 0.420447 | 0         |  |
|  | Shiraz-28T | 1760 | 0.538181 | 0         |  |
|  | Shiraz-29T | 1800 | 0.672527 | 0         |  |
|  | Shiraz-32T | 1869 | 0.776805 | 0         |  |
|  | Shiraz-35T | 1932 | 0.507141 | 0         |  |
|  | Shiraz-58T | 2221 | 0.871948 | 0         |  |
|  | Shiraz-71T | 2260 | 0.68394  | 0         |  |
|  | Shiraz-71T | 2262 | 0.986748 | 0         |  |
|  | Shiraz-4T  | 260  | 0        | -0.324128 |  |
|  | Shiraz-16T | 294  | 0.655804 | 0         |  |
|  | Shiraz-31T | 345  | 0.103301 | 0         |  |
|  | Shiraz-36T | 431  | 0        | -0.78035  |  |
|  | Shiraz-36T | 432  | 0        | -0.6692   |  |
|  | Shiraz-44T | 891  | 0        | -0.954044 |  |
|  | Shiraz-44T | 898  | 0        | -0.515218 |  |
|  | Shiraz-49T | 1166 | 0        | -0.917235 |  |
|  | Shiraz-77T | 1282 | 0.213849 | 0         |  |
|  | Shiraz-9T  | 1368 | 0.199713 | 0         |  |
|  | Shiraz-18T | 1456 | 0.608534 | 0         |  |
|  | Shiraz-22T | 1669 | 0.695915 | 0         |  |
|  | Shiraz-25T | 1717 | 0.420447 | 0         |  |
|  | Shiraz-28T | 1760 | 0.538181 | 0         |  |
|  | Shiraz-29T | 1800 | 0.672527 | 0         |  |
|  | Shiraz-32T | 1869 | 0.776805 | 0         |  |
|  | Shiraz-35T | 1932 | 0.507141 | 0         |  |
|  | Shiraz-58T | 2221 | 0.871948 | 0         |  |
|  | Shiraz-71T | 2260 | 0.68394  | 0         |  |
|  | Shiraz-71T | 2262 | 0.986748 | 0         |  |
|  | Shiraz-4T  | 260  | 0        | -0.324128 |  |
|  | Shiraz-16T | 294  | 0.655804 | 0         |  |
|  | Shiraz-31T | 345  | 0.103301 | 0         |  |
|  | Shiraz-36T | 431  | 0        | -0.78035  |  |
|  | Shiraz-36T | 432  | 0        | -0.6692   |  |
|  | Shiraz-44T | 891  | 0        | -0.954044 |  |
|  | Shiraz-44T | 898  | 0        | -0.515218 |  |
|  | Shiraz-49T | 1166 | 0        | -0.917235 |  |

|        |      |            |      |          |           |  |
|--------|------|------------|------|----------|-----------|--|
|        |      | Shiraz-77T | 1282 | 0.213849 | 0         |  |
|        |      | Shiraz-9T  | 1368 | 0.199713 | 0         |  |
|        |      | Shiraz-18T | 1456 | 0.608534 | 0         |  |
|        |      | Shiraz-22T | 1669 | 0.695915 | 0         |  |
|        |      | Shiraz-25T | 1717 | 0.420447 | 0         |  |
|        |      | Shiraz-28T | 1760 | 0.538181 | 0         |  |
|        |      | Shiraz-29T | 1800 | 0.672527 | 0         |  |
|        |      | Shiraz-32T | 1869 | 0.776805 | 0         |  |
|        |      | Shiraz-35T | 1932 | 0.507141 | 0         |  |
|        |      | Shiraz-58T | 2221 | 0.871948 | 0         |  |
|        |      | Shiraz-71T | 2260 | 0.68394  | 0         |  |
|        |      | Shiraz-71T | 2262 | 0.986748 | 0         |  |
| GPR174 | chrX | Shiraz-3T  | 242  | 0        | -0.336434 |  |
|        |      | Shiraz-4T  | 261  | 0        | -0.336249 |  |
|        |      | Shiraz-16T | 295  | 0.591657 | 0         |  |
|        |      | Shiraz-36T | 433  | 0        | -0.803961 |  |
|        |      | Shiraz-44T | 899  | 0        | -1.09697  |  |
|        |      | Shiraz-49T | 1170 | 0        | -0.967436 |  |
|        |      | Shiraz-18T | 1457 | 0.643204 | 0         |  |
|        |      | Shiraz-22T | 1673 | 0.611783 | 0         |  |
|        |      | Shiraz-22T | 1675 | 0.279253 | 0         |  |
|        |      | Shiraz-25T | 1719 | 0.472955 | 0         |  |
|        |      | Shiraz-28T | 1762 | 0.562311 | 0         |  |
|        |      | Shiraz-29T | 1801 | 0.815343 | 0         |  |
|        |      | Shiraz-32T | 1870 | 0.729766 | 0         |  |
|        |      | Shiraz-35T | 1933 | 0.488535 | 0         |  |
|        |      | Shiraz-58T | 2223 | 0.833364 | 0         |  |
|        |      | Shiraz-71T | 2263 | 0.975531 | 0         |  |
|        |      | Shiraz-3T  | 242  | 0        | -0.336434 |  |
|        |      | Shiraz-4T  | 261  | 0        | -0.336249 |  |
|        |      | Shiraz-16T | 295  | 0.591657 | 0         |  |
|        |      | Shiraz-36T | 433  | 0        | -0.803961 |  |
|        |      | Shiraz-44T | 899  | 0        | -1.09697  |  |
|        |      | Shiraz-49T | 1170 | 0        | -0.967436 |  |
|        |      | Shiraz-18T | 1457 | 0.643204 | 0         |  |
|        |      | Shiraz-22T | 1673 | 0.611783 | 0         |  |
|        |      | Shiraz-22T | 1675 | 0.279253 | 0         |  |
|        |      | Shiraz-25T | 1719 | 0.472955 | 0         |  |
|        |      | Shiraz-28T | 1762 | 0.562311 | 0         |  |
|        |      | Shiraz-29T | 1801 | 0.815343 | 0         |  |
|        |      | Shiraz-32T | 1870 | 0.729766 | 0         |  |
|        |      | Shiraz-35T | 1933 | 0.488535 | 0         |  |
|        |      | Shiraz-58T | 2223 | 0.833364 | 0         |  |
|        |      | Shiraz-71T | 2263 | 0.975531 | 0         |  |
|        |      | Shiraz-3T  | 242  | 0        | -0.336434 |  |
|        |      | Shiraz-4T  | 261  | 0        | -0.336249 |  |
|        |      | Shiraz-16T | 295  | 0.591657 | 0         |  |

|       |      |            |      |          |           |  |  |
|-------|------|------------|------|----------|-----------|--|--|
|       |      | Shiraz-36T | 433  | 0        | -0.803961 |  |  |
|       |      | Shiraz-44T | 899  | 0        | -1.09697  |  |  |
|       |      | Shiraz-49T | 1170 | 0        | -0.967436 |  |  |
|       |      | Shiraz-18T | 1457 | 0.643204 | 0         |  |  |
|       |      | Shiraz-22T | 1673 | 0.611783 | 0         |  |  |
|       |      | Shiraz-22T | 1675 | 0.279253 | 0         |  |  |
|       |      | Shiraz-25T | 1719 | 0.472955 | 0         |  |  |
|       |      | Shiraz-28T | 1762 | 0.562311 | 0         |  |  |
|       |      | Shiraz-29T | 1801 | 0.815343 | 0         |  |  |
|       |      | Shiraz-32T | 1870 | 0.729766 | 0         |  |  |
|       |      | Shiraz-35T | 1933 | 0.488535 | 0         |  |  |
|       |      | Shiraz-58T | 2223 | 0.833364 | 0         |  |  |
|       |      | Shiraz-71T | 2263 | 0.975531 | 0         |  |  |
| GPR22 | chr7 | Shiraz-3T  | 90   | 0.219276 | 0         |  |  |
|       |      | Shiraz-4T  | 253  | 0.372918 | 0         |  |  |
|       |      | Shiraz-36T | 378  | 0.179558 | 0         |  |  |
|       |      | Shiraz-46T | 943  | 0.093799 | 0         |  |  |
|       |      | Shiraz-77T | 1225 | 0        | -0.117922 |  |  |
|       |      | Shiraz-18T | 1434 | 0.244465 | 0         |  |  |
|       |      | Shiraz-22T | 1549 | 0        | -0.319623 |  |  |
|       |      | Shiraz-25T | 1698 | 0.21835  | 0         |  |  |
|       |      | Shiraz-28T | 1735 | 0.350744 | 0         |  |  |
|       |      | Shiraz-29T | 1778 | 0.120767 | 0         |  |  |
|       |      | Shiraz-32T | 1833 | 0.551336 | 0         |  |  |
|       |      | Shiraz-38T | 1951 | 0.250891 | 0         |  |  |
|       |      | Shiraz-53T | 2078 | 0.287202 | 0         |  |  |
|       |      | Shiraz-58T | 2161 | 0        | -0.187744 |  |  |
|       |      | Shiraz-71T | 2238 | 0.603631 | 0         |  |  |
|       |      | Shiraz-3T  | 90   | 0.219276 | 0         |  |  |
|       |      | Shiraz-4T  | 253  | 0.372918 | 0         |  |  |
|       |      | Shiraz-36T | 378  | 0.179558 | 0         |  |  |
|       |      | Shiraz-46T | 943  | 0.093799 | 0         |  |  |
|       |      | Shiraz-77T | 1225 | 0        | -0.117922 |  |  |
|       |      | Shiraz-18T | 1434 | 0.244465 | 0         |  |  |
|       |      | Shiraz-22T | 1549 | 0        | -0.319623 |  |  |
|       |      | Shiraz-25T | 1698 | 0.21835  | 0         |  |  |
|       |      | Shiraz-28T | 1735 | 0.350744 | 0         |  |  |
|       |      | Shiraz-29T | 1778 | 0.120767 | 0         |  |  |
|       |      | Shiraz-32T | 1833 | 0.551336 | 0         |  |  |
|       |      | Shiraz-38T | 1951 | 0.250891 | 0         |  |  |
|       |      | Shiraz-53T | 2078 | 0.287202 | 0         |  |  |
|       |      | Shiraz-58T | 2161 | 0        | -0.187744 |  |  |
|       |      | Shiraz-71T | 2238 | 0.603631 | 0         |  |  |
|       |      | Shiraz-3T  | 90   | 0.219276 | 0         |  |  |
|       |      | Shiraz-4T  | 253  | 0.372918 | 0         |  |  |
|       |      | Shiraz-36T | 378  | 0.179558 | 0         |  |  |
|       |      | Shiraz-46T | 943  | 0.093799 | 0         |  |  |



|       |      |            |      |          |           |  |  |
|-------|------|------------|------|----------|-----------|--|--|
|       |      | Shiraz-77T | 1225 | 0        | -0.117922 |  |  |
|       |      | Shiraz-18T | 1434 | 0.244465 | 0         |  |  |
|       |      | Shiraz-22T | 1549 | 0        | -0.319623 |  |  |
|       |      | Shiraz-25T | 1698 | 0.21835  | 0         |  |  |
|       |      | Shiraz-28T | 1735 | 0.350744 | 0         |  |  |
|       |      | Shiraz-29T | 1778 | 0.120767 | 0         |  |  |
|       |      | Shiraz-32T | 1833 | 0.551336 | 0         |  |  |
|       |      | Shiraz-38T | 1951 | 0.250891 | 0         |  |  |
|       |      | Shiraz-53T | 2078 | 0.287202 | 0         |  |  |
|       |      | Shiraz-58T | 2161 | 0        | -0.187744 |  |  |
|       |      | Shiraz-71T | 2238 | 0.603631 | 0         |  |  |
| GPR34 | chrX | Shiraz-3T  | 235  | 0        | -0.28401  |  |  |
|       |      | Shiraz-4T  | 260  | 0        | -0.324128 |  |  |
|       |      | Shiraz-16T | 294  | 0.655804 | 0         |  |  |
|       |      | Shiraz-31T | 345  | 0.103301 | 0         |  |  |
|       |      | Shiraz-36T | 431  | 0        | -0.78035  |  |  |
|       |      | Shiraz-36T | 432  | 0        | -0.6692   |  |  |
|       |      | Shiraz-44T | 891  | 0        | -0.954044 |  |  |
|       |      | Shiraz-46T | 991  | 0.139564 | 0         |  |  |
|       |      | Shiraz-49T | 1166 | 0        | -0.917235 |  |  |
|       |      | Shiraz-9T  | 1368 | 0.199713 | 0         |  |  |
|       |      | Shiraz-18T | 1455 | 0        | -0.186773 |  |  |
|       |      | Shiraz-22T | 1669 | 0.695915 | 0         |  |  |
|       |      | Shiraz-25T | 1717 | 0.420447 | 0         |  |  |
|       |      | Shiraz-28T | 1760 | 0.538181 | 0         |  |  |
|       |      | Shiraz-29T | 1800 | 0.672527 | 0         |  |  |
|       |      | Shiraz-32T | 1869 | 0.776805 | 0         |  |  |
|       |      | Shiraz-35T | 1932 | 0.507141 | 0         |  |  |
|       |      | Shiraz-40T | 2051 | 0.098506 | 0         |  |  |
|       |      | Shiraz-58T | 2221 | 0.871948 | 0         |  |  |
|       |      | Shiraz-71T | 2260 | 0.68394  | 0         |  |  |
|       |      | Shiraz-71T | 2262 | 0.986748 | 0         |  |  |
|       |      | Shiraz-3T  | 235  | 0        | -0.28401  |  |  |
|       |      | Shiraz-4T  | 260  | 0        | -0.324128 |  |  |
|       |      | Shiraz-16T | 294  | 0.655804 | 0         |  |  |
|       |      | Shiraz-31T | 345  | 0.103301 | 0         |  |  |
|       |      | Shiraz-36T | 431  | 0        | -0.78035  |  |  |
|       |      | Shiraz-36T | 432  | 0        | -0.6692   |  |  |
|       |      | Shiraz-44T | 891  | 0        | -0.954044 |  |  |
|       |      | Shiraz-46T | 991  | 0.139564 | 0         |  |  |
|       |      | Shiraz-49T | 1166 | 0        | -0.917235 |  |  |
|       |      | Shiraz-9T  | 1368 | 0.199713 | 0         |  |  |
|       |      | Shiraz-18T | 1455 | 0        | -0.186773 |  |  |
|       |      | Shiraz-22T | 1669 | 0.695915 | 0         |  |  |
|       |      | Shiraz-25T | 1717 | 0.420447 | 0         |  |  |
|       |      | Shiraz-28T | 1760 | 0.538181 | 0         |  |  |
|       |      | Shiraz-29T | 1800 | 0.672527 | 0         |  |  |

|       |      |            |      |          |           |  |  |
|-------|------|------------|------|----------|-----------|--|--|
|       |      | Shiraz-32T | 1869 | 0.776805 | 0         |  |  |
|       |      | Shiraz-35T | 1932 | 0.507141 | 0         |  |  |
|       |      | Shiraz-40T | 2051 | 0.098506 | 0         |  |  |
|       |      | Shiraz-58T | 2221 | 0.871948 | 0         |  |  |
|       |      | Shiraz-71T | 2260 | 0.68394  | 0         |  |  |
|       |      | Shiraz-71T | 2262 | 0.986748 | 0         |  |  |
|       |      | Shiraz-3T  | 235  | 0        | -0.28401  |  |  |
|       |      | Shiraz-4T  | 260  | 0        | -0.324128 |  |  |
|       |      | Shiraz-16T | 294  | 0.655804 | 0         |  |  |
|       |      | Shiraz-31T | 345  | 0.103301 | 0         |  |  |
|       |      | Shiraz-36T | 431  | 0        | -0.78035  |  |  |
|       |      | Shiraz-36T | 432  | 0        | -0.6692   |  |  |
|       |      | Shiraz-44T | 891  | 0        | -0.954044 |  |  |
|       |      | Shiraz-46T | 991  | 0.139564 | 0         |  |  |
|       |      | Shiraz-49T | 1166 | 0        | -0.917235 |  |  |
|       |      | Shiraz-9T  | 1368 | 0.199713 | 0         |  |  |
|       |      | Shiraz-18T | 1455 | 0        | -0.186773 |  |  |
|       |      | Shiraz-22T | 1669 | 0.695915 | 0         |  |  |
|       |      | Shiraz-25T | 1717 | 0.420447 | 0         |  |  |
|       |      | Shiraz-28T | 1760 | 0.538181 | 0         |  |  |
|       |      | Shiraz-29T | 1800 | 0.672527 | 0         |  |  |
|       |      | Shiraz-32T | 1869 | 0.776805 | 0         |  |  |
|       |      | Shiraz-35T | 1932 | 0.507141 | 0         |  |  |
|       |      | Shiraz-40T | 2051 | 0.098506 | 0         |  |  |
|       |      | Shiraz-58T | 2221 | 0.871948 | 0         |  |  |
|       |      | Shiraz-71T | 2260 | 0.68394  | 0         |  |  |
|       |      | Shiraz-71T | 2262 | 0.986748 | 0         |  |  |
| GPR37 | chr7 | Shiraz-3T  | 90   | 0.219276 | 0         |  |  |
|       |      | Shiraz-3T  | 95   | 0        | -0.077623 |  |  |
|       |      | Shiraz-4T  | 253  | 0.372918 | 0         |  |  |
|       |      | Shiraz-36T | 378  | 0.179558 | 0         |  |  |
|       |      | Shiraz-36T | 382  | 0.081739 | 0         |  |  |
|       |      | Shiraz-44T | 641  | 0        | -0.477846 |  |  |
|       |      | Shiraz-46T | 943  | 0.093799 | 0         |  |  |
|       |      | Shiraz-46T | 947  | 0        | -0.010843 |  |  |
|       |      | Shiraz-47T | 1031 | 0        | -0.117529 |  |  |
|       |      | Shiraz-49T | 1121 | 0        | -0.138569 |  |  |
|       |      | Shiraz-77T | 1225 | 0        | -0.117922 |  |  |
|       |      | Shiraz-77T | 1228 | 0        | -0.238084 |  |  |
|       |      | Shiraz-18T | 1434 | 0.244465 | 0         |  |  |
|       |      | Shiraz-22T | 1549 | 0        | -0.319623 |  |  |
|       |      | Shiraz-22T | 1552 | 0        | -0.50686  |  |  |
|       |      | Shiraz-25T | 1698 | 0.21835  | 0         |  |  |
|       |      | Shiraz-28T | 1735 | 0.350744 | 0         |  |  |
|       |      | Shiraz-29T | 1778 | 0.120767 | 0         |  |  |
|       |      | Shiraz-32T | 1833 | 0.551336 | 0         |  |  |
|       |      | Shiraz-32T | 1835 | 0.092727 | 0         |  |  |

|  |  |            |      |          |           |  |  |
|--|--|------------|------|----------|-----------|--|--|
|  |  | Shiraz-38T | 1951 | 0.250891 | 0         |  |  |
|  |  | Shiraz-53T | 2078 | 0.287202 | 0         |  |  |
|  |  | Shiraz-58T | 2161 | 0        | -0.187744 |  |  |
|  |  | Shiraz-71T | 2238 | 0.603631 | 0         |  |  |
|  |  | Shiraz-3T  | 90   | 0.219276 | 0         |  |  |
|  |  | Shiraz-3T  | 95   | 0        | -0.077623 |  |  |
|  |  | Shiraz-4T  | 253  | 0.372918 | 0         |  |  |
|  |  | Shiraz-36T | 378  | 0.179558 | 0         |  |  |
|  |  | Shiraz-36T | 382  | 0.081739 | 0         |  |  |
|  |  | Shiraz-44T | 641  | 0        | -0.477846 |  |  |
|  |  | Shiraz-46T | 943  | 0.093799 | 0         |  |  |
|  |  | Shiraz-46T | 947  | 0        | -0.010843 |  |  |
|  |  | Shiraz-47T | 1031 | 0        | -0.117529 |  |  |
|  |  | Shiraz-49T | 1121 | 0        | -0.138569 |  |  |
|  |  | Shiraz-77T | 1225 | 0        | -0.117922 |  |  |
|  |  | Shiraz-77T | 1228 | 0        | -0.238084 |  |  |
|  |  | Shiraz-18T | 1434 | 0.244465 | 0         |  |  |
|  |  | Shiraz-22T | 1549 | 0        | -0.319623 |  |  |
|  |  | Shiraz-22T | 1552 | 0        | -0.50686  |  |  |
|  |  | Shiraz-25T | 1698 | 0.21835  | 0         |  |  |
|  |  | Shiraz-28T | 1735 | 0.350744 | 0         |  |  |
|  |  | Shiraz-29T | 1778 | 0.120767 | 0         |  |  |
|  |  | Shiraz-32T | 1833 | 0.551336 | 0         |  |  |
|  |  | Shiraz-32T | 1835 | 0.092727 | 0         |  |  |
|  |  | Shiraz-38T | 1951 | 0.250891 | 0         |  |  |
|  |  | Shiraz-53T | 2078 | 0.287202 | 0         |  |  |
|  |  | Shiraz-58T | 2161 | 0        | -0.187744 |  |  |
|  |  | Shiraz-71T | 2238 | 0.603631 | 0         |  |  |
|  |  | Shiraz-3T  | 90   | 0.219276 | 0         |  |  |
|  |  | Shiraz-3T  | 95   | 0        | -0.077623 |  |  |
|  |  | Shiraz-4T  | 253  | 0.372918 | 0         |  |  |
|  |  | Shiraz-36T | 378  | 0.179558 | 0         |  |  |
|  |  | Shiraz-36T | 382  | 0.081739 | 0         |  |  |
|  |  | Shiraz-44T | 641  | 0        | -0.477846 |  |  |
|  |  | Shiraz-46T | 943  | 0.093799 | 0         |  |  |
|  |  | Shiraz-46T | 947  | 0        | -0.010843 |  |  |
|  |  | Shiraz-47T | 1031 | 0        | -0.117529 |  |  |
|  |  | Shiraz-49T | 1121 | 0        | -0.138569 |  |  |
|  |  | Shiraz-77T | 1225 | 0        | -0.117922 |  |  |
|  |  | Shiraz-77T | 1228 | 0        | -0.238084 |  |  |
|  |  | Shiraz-18T | 1434 | 0.244465 | 0         |  |  |
|  |  | Shiraz-22T | 1549 | 0        | -0.319623 |  |  |
|  |  | Shiraz-22T | 1552 | 0        | -0.50686  |  |  |
|  |  | Shiraz-25T | 1698 | 0.21835  | 0         |  |  |
|  |  | Shiraz-28T | 1735 | 0.350744 | 0         |  |  |
|  |  | Shiraz-29T | 1778 | 0.120767 | 0         |  |  |
|  |  | Shiraz-32T | 1833 | 0.551336 | 0         |  |  |

|       |      |            |      |          |           |  |
|-------|------|------------|------|----------|-----------|--|
|       |      | Shiraz-32T | 1835 | 0.092727 | 0         |  |
|       |      | Shiraz-38T | 1951 | 0.250891 | 0         |  |
|       |      | Shiraz-53T | 2078 | 0.287202 | 0         |  |
|       |      | Shiraz-58T | 2161 | 0        | -0.187744 |  |
|       |      | Shiraz-71T | 2238 | 0.603631 | 0         |  |
| GPR50 | chrX | Shiraz-3T  | 242  | 0        | -0.336434 |  |
|       |      | Shiraz-4T  | 261  | 0        | -0.336249 |  |
|       |      | Shiraz-16T | 295  | 0.591657 | 0         |  |
|       |      | Shiraz-36T | 433  | 0        | -0.803961 |  |
|       |      | Shiraz-42T | 480  | 0        | -0.232915 |  |
|       |      | Shiraz-44T | 899  | 0        | -1.09697  |  |
|       |      | Shiraz-49T | 1170 | 0        | -0.967436 |  |
|       |      | Shiraz-9T  | 1370 | 0.690073 | 0         |  |
|       |      | Shiraz-18T | 1457 | 0.643204 | 0         |  |
|       |      | Shiraz-22T | 1673 | 0.611783 | 0         |  |
|       |      | Shiraz-22T | 1678 | 0.911625 | 0         |  |
|       |      | Shiraz-25T | 1719 | 0.472955 | 0         |  |
|       |      | Shiraz-28T | 1762 | 0.562311 | 0         |  |
|       |      | Shiraz-29T | 1801 | 0.815343 | 0         |  |
|       |      | Shiraz-32T | 1870 | 0.729766 | 0         |  |
|       |      | Shiraz-35T | 1933 | 0.488535 | 0         |  |
|       |      | Shiraz-58T | 2223 | 0.833364 | 0         |  |
|       |      | Shiraz-58T | 2226 | 1.074663 | 0         |  |
|       |      | Shiraz-71T | 2263 | 0.975531 | 0         |  |
|       |      | Shiraz-3T  | 242  | 0        | -0.336434 |  |
|       |      | Shiraz-4T  | 261  | 0        | -0.336249 |  |
|       |      | Shiraz-16T | 295  | 0.591657 | 0         |  |
|       |      | Shiraz-36T | 433  | 0        | -0.803961 |  |
|       |      | Shiraz-42T | 480  | 0        | -0.232915 |  |
|       |      | Shiraz-44T | 899  | 0        | -1.09697  |  |
|       |      | Shiraz-49T | 1170 | 0        | -0.967436 |  |
|       |      | Shiraz-9T  | 1370 | 0.690073 | 0         |  |
|       |      | Shiraz-18T | 1457 | 0.643204 | 0         |  |
|       |      | Shiraz-22T | 1673 | 0.611783 | 0         |  |
|       |      | Shiraz-22T | 1678 | 0.911625 | 0         |  |
|       |      | Shiraz-25T | 1719 | 0.472955 | 0         |  |
|       |      | Shiraz-28T | 1762 | 0.562311 | 0         |  |
|       |      | Shiraz-29T | 1801 | 0.815343 | 0         |  |
|       |      | Shiraz-32T | 1870 | 0.729766 | 0         |  |
|       |      | Shiraz-35T | 1933 | 0.488535 | 0         |  |
|       |      | Shiraz-58T | 2223 | 0.833364 | 0         |  |
|       |      | Shiraz-58T | 2226 | 1.074663 | 0         |  |
|       |      | Shiraz-71T | 2263 | 0.975531 | 0         |  |
|       |      | Shiraz-3T  | 242  | 0        | -0.336434 |  |
|       |      | Shiraz-4T  | 261  | 0        | -0.336249 |  |
|       |      | Shiraz-16T | 295  | 0.591657 | 0         |  |
|       |      | Shiraz-36T | 433  | 0        | -0.803961 |  |

|       |      |            |      |          |           |  |  |
|-------|------|------------|------|----------|-----------|--|--|
|       |      | Shiraz-42T | 480  | 0        | -0.232915 |  |  |
|       |      | Shiraz-44T | 899  | 0        | -1.09697  |  |  |
|       |      | Shiraz-49T | 1170 | 0        | -0.967436 |  |  |
|       |      | Shiraz-9T  | 1370 | 0.690073 | 0         |  |  |
|       |      | Shiraz-18T | 1457 | 0.643204 | 0         |  |  |
|       |      | Shiraz-22T | 1673 | 0.611783 | 0         |  |  |
|       |      | Shiraz-22T | 1678 | 0.911625 | 0         |  |  |
|       |      | Shiraz-25T | 1719 | 0.472955 | 0         |  |  |
|       |      | Shiraz-28T | 1762 | 0.562311 | 0         |  |  |
|       |      | Shiraz-29T | 1801 | 0.815343 | 0         |  |  |
|       |      | Shiraz-32T | 1870 | 0.729766 | 0         |  |  |
|       |      | Shiraz-35T | 1933 | 0.488535 | 0         |  |  |
|       |      | Shiraz-58T | 2223 | 0.833364 | 0         |  |  |
|       |      | Shiraz-58T | 2226 | 1.074663 | 0         |  |  |
|       |      | Shiraz-71T | 2263 | 0.975531 | 0         |  |  |
| GPR64 | chrX | Shiraz-3T  | 235  | 0        | -0.28401  |  |  |
|       |      | Shiraz-3T  | 235  | 0        | -0.28401  |  |  |
|       |      | Shiraz-4T  | 260  | 0        | -0.324128 |  |  |
|       |      | Shiraz-4T  | 260  | 0        | -0.324128 |  |  |
|       |      | Shiraz-16T | 294  | 0.655804 | 0         |  |  |
|       |      | Shiraz-16T | 294  | 0.655804 | 0         |  |  |
|       |      | Shiraz-36T | 431  | 0        | -0.78035  |  |  |
|       |      | Shiraz-36T | 431  | 0        | -0.78035  |  |  |
|       |      | Shiraz-44T | 891  | 0        | -0.954044 |  |  |
|       |      | Shiraz-44T | 891  | 0        | -0.954044 |  |  |
|       |      | Shiraz-49T | 1166 | 0        | -0.917235 |  |  |
|       |      | Shiraz-49T | 1166 | 0        | -0.917235 |  |  |
|       |      | Shiraz-77T | 1281 | 0.136627 | 0         |  |  |
|       |      | Shiraz-77T | 1281 | 0.136627 | 0         |  |  |
|       |      | Shiraz-9T  | 1368 | 0.199713 | 0         |  |  |
|       |      | Shiraz-9T  | 1368 | 0.199713 | 0         |  |  |
|       |      | Shiraz-18T | 1455 | 0        | -0.186773 |  |  |
|       |      | Shiraz-18T | 1455 | 0        | -0.186773 |  |  |
|       |      | Shiraz-22T | 1669 | 0.695915 | 0         |  |  |
|       |      | Shiraz-22T | 1669 | 0.695915 | 0         |  |  |
|       |      | Shiraz-25T | 1717 | 0.420447 | 0         |  |  |
|       |      | Shiraz-25T | 1717 | 0.420447 | 0         |  |  |
|       |      | Shiraz-28T | 1760 | 0.538181 | 0         |  |  |
|       |      | Shiraz-28T | 1760 | 0.538181 | 0         |  |  |
|       |      | Shiraz-29T | 1800 | 0.672527 | 0         |  |  |
|       |      | Shiraz-29T | 1800 | 0.672527 | 0         |  |  |
|       |      | Shiraz-32T | 1869 | 0.776805 | 0         |  |  |
|       |      | Shiraz-32T | 1869 | 0.776805 | 0         |  |  |
|       |      | Shiraz-35T | 1932 | 0.507141 | 0         |  |  |
|       |      | Shiraz-35T | 1932 | 0.507141 | 0         |  |  |
|       |      | Shiraz-40T | 2051 | 0.098506 | 0         |  |  |
|       |      | Shiraz-40T | 2051 | 0.098506 | 0         |  |  |

|  |  |            |      |          |           |  |  |
|--|--|------------|------|----------|-----------|--|--|
|  |  | Shiraz-58T | 2221 | 0.871948 | 0         |  |  |
|  |  | Shiraz-58T | 2221 | 0.871948 | 0         |  |  |
|  |  | Shiraz-71T | 2260 | 0.68394  | 0         |  |  |
|  |  | Shiraz-71T | 2260 | 0.68394  | 0         |  |  |
|  |  | Shiraz-71T | 2261 | 0.508399 | 0         |  |  |
|  |  | Shiraz-71T | 2261 | 0.508399 | 0         |  |  |
|  |  | Shiraz-3T  | 235  | 0        | -0.28401  |  |  |
|  |  | Shiraz-3T  | 235  | 0        | -0.28401  |  |  |
|  |  | Shiraz-4T  | 260  | 0        | -0.324128 |  |  |
|  |  | Shiraz-4T  | 260  | 0        | -0.324128 |  |  |
|  |  | Shiraz-16T | 294  | 0.655804 | 0         |  |  |
|  |  | Shiraz-16T | 294  | 0.655804 | 0         |  |  |
|  |  | Shiraz-36T | 431  | 0        | -0.78035  |  |  |
|  |  | Shiraz-36T | 431  | 0        | -0.78035  |  |  |
|  |  | Shiraz-44T | 891  | 0        | -0.954044 |  |  |
|  |  | Shiraz-44T | 891  | 0        | -0.954044 |  |  |
|  |  | Shiraz-49T | 1166 | 0        | -0.917235 |  |  |
|  |  | Shiraz-49T | 1166 | 0        | -0.917235 |  |  |
|  |  | Shiraz-77T | 1281 | 0.136627 | 0         |  |  |
|  |  | Shiraz-77T | 1281 | 0.136627 | 0         |  |  |
|  |  | Shiraz-9T  | 1368 | 0.199713 | 0         |  |  |
|  |  | Shiraz-9T  | 1368 | 0.199713 | 0         |  |  |
|  |  | Shiraz-18T | 1455 | 0        | -0.186773 |  |  |
|  |  | Shiraz-18T | 1455 | 0        | -0.186773 |  |  |
|  |  | Shiraz-22T | 1669 | 0.695915 | 0         |  |  |
|  |  | Shiraz-22T | 1669 | 0.695915 | 0         |  |  |
|  |  | Shiraz-25T | 1717 | 0.420447 | 0         |  |  |
|  |  | Shiraz-25T | 1717 | 0.420447 | 0         |  |  |
|  |  | Shiraz-28T | 1760 | 0.538181 | 0         |  |  |
|  |  | Shiraz-28T | 1760 | 0.538181 | 0         |  |  |
|  |  | Shiraz-29T | 1800 | 0.672527 | 0         |  |  |
|  |  | Shiraz-29T | 1800 | 0.672527 | 0         |  |  |
|  |  | Shiraz-32T | 1869 | 0.776805 | 0         |  |  |
|  |  | Shiraz-32T | 1869 | 0.776805 | 0         |  |  |
|  |  | Shiraz-35T | 1932 | 0.507141 | 0         |  |  |
|  |  | Shiraz-35T | 1932 | 0.507141 | 0         |  |  |
|  |  | Shiraz-40T | 2051 | 0.098506 | 0         |  |  |
|  |  | Shiraz-40T | 2051 | 0.098506 | 0         |  |  |
|  |  | Shiraz-58T | 2221 | 0.871948 | 0         |  |  |
|  |  | Shiraz-58T | 2221 | 0.871948 | 0         |  |  |
|  |  | Shiraz-71T | 2260 | 0.68394  | 0         |  |  |
|  |  | Shiraz-71T | 2260 | 0.68394  | 0         |  |  |
|  |  | Shiraz-71T | 2261 | 0.508399 | 0         |  |  |
|  |  | Shiraz-71T | 2261 | 0.508399 | 0         |  |  |
|  |  | Shiraz-3T  | 235  | 0        | -0.28401  |  |  |
|  |  | Shiraz-3T  | 235  | 0        | -0.28401  |  |  |
|  |  | Shiraz-4T  | 260  | 0        | -0.324128 |  |  |

|       |      |            |      |          |           |  |  |
|-------|------|------------|------|----------|-----------|--|--|
|       |      | Shiraz-4T  | 260  | 0        | -0.324128 |  |  |
|       |      | Shiraz-16T | 294  | 0.655804 | 0         |  |  |
|       |      | Shiraz-16T | 294  | 0.655804 | 0         |  |  |
|       |      | Shiraz-36T | 431  | 0        | -0.78035  |  |  |
|       |      | Shiraz-36T | 431  | 0        | -0.78035  |  |  |
|       |      | Shiraz-44T | 891  | 0        | -0.954044 |  |  |
|       |      | Shiraz-44T | 891  | 0        | -0.954044 |  |  |
|       |      | Shiraz-49T | 1166 | 0        | -0.917235 |  |  |
|       |      | Shiraz-49T | 1166 | 0        | -0.917235 |  |  |
|       |      | Shiraz-77T | 1281 | 0.136627 | 0         |  |  |
|       |      | Shiraz-77T | 1281 | 0.136627 | 0         |  |  |
|       |      | Shiraz-9T  | 1368 | 0.199713 | 0         |  |  |
|       |      | Shiraz-9T  | 1368 | 0.199713 | 0         |  |  |
|       |      | Shiraz-18T | 1455 | 0        | -0.186773 |  |  |
|       |      | Shiraz-18T | 1455 | 0        | -0.186773 |  |  |
|       |      | Shiraz-22T | 1669 | 0.695915 | 0         |  |  |
|       |      | Shiraz-22T | 1669 | 0.695915 | 0         |  |  |
|       |      | Shiraz-25T | 1717 | 0.420447 | 0         |  |  |
|       |      | Shiraz-25T | 1717 | 0.420447 | 0         |  |  |
|       |      | Shiraz-28T | 1760 | 0.538181 | 0         |  |  |
|       |      | Shiraz-28T | 1760 | 0.538181 | 0         |  |  |
|       |      | Shiraz-29T | 1800 | 0.672527 | 0         |  |  |
|       |      | Shiraz-29T | 1800 | 0.672527 | 0         |  |  |
|       |      | Shiraz-32T | 1869 | 0.776805 | 0         |  |  |
|       |      | Shiraz-32T | 1869 | 0.776805 | 0         |  |  |
|       |      | Shiraz-35T | 1932 | 0.507141 | 0         |  |  |
|       |      | Shiraz-35T | 1932 | 0.507141 | 0         |  |  |
|       |      | Shiraz-40T | 2051 | 0.098506 | 0         |  |  |
|       |      | Shiraz-40T | 2051 | 0.098506 | 0         |  |  |
|       |      | Shiraz-58T | 2221 | 0.871948 | 0         |  |  |
|       |      | Shiraz-58T | 2221 | 0.871948 | 0         |  |  |
|       |      | Shiraz-71T | 2260 | 0.68394  | 0         |  |  |
|       |      | Shiraz-71T | 2260 | 0.68394  | 0         |  |  |
|       |      | Shiraz-71T | 2261 | 0.508399 | 0         |  |  |
|       |      | Shiraz-71T | 2261 | 0.508399 | 0         |  |  |
| GPR82 | chrX | Shiraz-3T  | 235  | 0        | -0.28401  |  |  |
|       |      | Shiraz-4T  | 260  | 0        | -0.324128 |  |  |
|       |      | Shiraz-16T | 294  | 0.655804 | 0         |  |  |
|       |      | Shiraz-31T | 345  | 0.103301 | 0         |  |  |
|       |      | Shiraz-36T | 431  | 0        | -0.78035  |  |  |
|       |      | Shiraz-36T | 432  | 0        | -0.6692   |  |  |
|       |      | Shiraz-44T | 891  | 0        | -0.954044 |  |  |
|       |      | Shiraz-46T | 991  | 0.139564 | 0         |  |  |
|       |      | Shiraz-49T | 1166 | 0        | -0.917235 |  |  |
|       |      | Shiraz-9T  | 1368 | 0.199713 | 0         |  |  |
|       |      | Shiraz-18T | 1455 | 0        | -0.186773 |  |  |
|       |      | Shiraz-22T | 1669 | 0.695915 | 0         |  |  |

|  |  |            |      |          |           |  |  |
|--|--|------------|------|----------|-----------|--|--|
|  |  | Shiraz-25T | 1717 | 0.420447 | 0         |  |  |
|  |  | Shiraz-28T | 1760 | 0.538181 | 0         |  |  |
|  |  | Shiraz-29T | 1800 | 0.672527 | 0         |  |  |
|  |  | Shiraz-32T | 1869 | 0.776805 | 0         |  |  |
|  |  | Shiraz-35T | 1932 | 0.507141 | 0         |  |  |
|  |  | Shiraz-40T | 2051 | 0.098506 | 0         |  |  |
|  |  | Shiraz-58T | 2221 | 0.871948 | 0         |  |  |
|  |  | Shiraz-71T | 2260 | 0.68394  | 0         |  |  |
|  |  | Shiraz-71T | 2262 | 0.986748 | 0         |  |  |
|  |  | Shiraz-3T  | 235  | 0        | -0.28401  |  |  |
|  |  | Shiraz-4T  | 260  | 0        | -0.324128 |  |  |
|  |  | Shiraz-16T | 294  | 0.655804 | 0         |  |  |
|  |  | Shiraz-31T | 345  | 0.103301 | 0         |  |  |
|  |  | Shiraz-36T | 431  | 0        | -0.78035  |  |  |
|  |  | Shiraz-36T | 432  | 0        | -0.6692   |  |  |
|  |  | Shiraz-44T | 891  | 0        | -0.954044 |  |  |
|  |  | Shiraz-46T | 991  | 0.139564 | 0         |  |  |
|  |  | Shiraz-49T | 1166 | 0        | -0.917235 |  |  |
|  |  | Shiraz-9T  | 1368 | 0.199713 | 0         |  |  |
|  |  | Shiraz-18T | 1455 | 0        | -0.186773 |  |  |
|  |  | Shiraz-22T | 1669 | 0.695915 | 0         |  |  |
|  |  | Shiraz-25T | 1717 | 0.420447 | 0         |  |  |
|  |  | Shiraz-28T | 1760 | 0.538181 | 0         |  |  |
|  |  | Shiraz-29T | 1800 | 0.672527 | 0         |  |  |
|  |  | Shiraz-32T | 1869 | 0.776805 | 0         |  |  |
|  |  | Shiraz-35T | 1932 | 0.507141 | 0         |  |  |
|  |  | Shiraz-40T | 2051 | 0.098506 | 0         |  |  |
|  |  | Shiraz-58T | 2221 | 0.871948 | 0         |  |  |
|  |  | Shiraz-71T | 2260 | 0.68394  | 0         |  |  |
|  |  | Shiraz-71T | 2262 | 0.986748 | 0         |  |  |
|  |  | Shiraz-3T  | 235  | 0        | -0.28401  |  |  |
|  |  | Shiraz-4T  | 260  | 0        | -0.324128 |  |  |
|  |  | Shiraz-16T | 294  | 0.655804 | 0         |  |  |
|  |  | Shiraz-31T | 345  | 0.103301 | 0         |  |  |
|  |  | Shiraz-36T | 431  | 0        | -0.78035  |  |  |
|  |  | Shiraz-36T | 432  | 0        | -0.6692   |  |  |
|  |  | Shiraz-44T | 891  | 0        | -0.954044 |  |  |
|  |  | Shiraz-46T | 991  | 0.139564 | 0         |  |  |
|  |  | Shiraz-49T | 1166 | 0        | -0.917235 |  |  |
|  |  | Shiraz-9T  | 1368 | 0.199713 | 0         |  |  |
|  |  | Shiraz-18T | 1455 | 0        | -0.186773 |  |  |
|  |  | Shiraz-22T | 1669 | 0.695915 | 0         |  |  |
|  |  | Shiraz-25T | 1717 | 0.420447 | 0         |  |  |
|  |  | Shiraz-28T | 1760 | 0.538181 | 0         |  |  |
|  |  | Shiraz-29T | 1800 | 0.672527 | 0         |  |  |
|  |  | Shiraz-32T | 1869 | 0.776805 | 0         |  |  |
|  |  | Shiraz-35T | 1932 | 0.507141 | 0         |  |  |



|       |      |            |      |          |           |  |
|-------|------|------------|------|----------|-----------|--|
|       |      | Shiraz-40T | 2051 | 0.098506 | 0         |  |
|       |      | Shiraz-58T | 2221 | 0.871948 | 0         |  |
|       |      | Shiraz-71T | 2260 | 0.68394  | 0         |  |
|       |      | Shiraz-71T | 2262 | 0.986748 | 0         |  |
| GPR85 | chr7 | Shiraz-3T  | 90   | 0.219276 | 0         |  |
|       |      | Shiraz-3T  | 90   | 0.219276 | 0         |  |
|       |      | Shiraz-3T  | 90   | 0.219276 | 0         |  |
|       |      | Shiraz-3T  | 95   | 0        | -0.077623 |  |
|       |      | Shiraz-3T  | 95   | 0        | -0.077623 |  |
|       |      | Shiraz-3T  | 95   | 0        | -0.077623 |  |
|       |      | Shiraz-4T  | 253  | 0.372918 | 0         |  |
|       |      | Shiraz-4T  | 253  | 0.372918 | 0         |  |
|       |      | Shiraz-4T  | 253  | 0.372918 | 0         |  |
|       |      | Shiraz-36T | 378  | 0.179558 | 0         |  |
|       |      | Shiraz-36T | 378  | 0.179558 | 0         |  |
|       |      | Shiraz-36T | 378  | 0.179558 | 0         |  |
|       |      | Shiraz-36T | 382  | 0.081739 | 0         |  |
|       |      | Shiraz-36T | 382  | 0.081739 | 0         |  |
|       |      | Shiraz-36T | 382  | 0.081739 | 0         |  |
|       |      | Shiraz-44T | 641  | 0        | -0.477846 |  |
|       |      | Shiraz-44T | 641  | 0        | -0.477846 |  |
|       |      | Shiraz-44T | 641  | 0        | -0.477846 |  |
|       |      | Shiraz-46T | 943  | 0.093799 | 0         |  |
|       |      | Shiraz-46T | 943  | 0.093799 | 0         |  |
|       |      | Shiraz-46T | 943  | 0.093799 | 0         |  |
|       |      | Shiraz-46T | 947  | 0        | -0.010843 |  |
|       |      | Shiraz-46T | 947  | 0        | -0.010843 |  |
|       |      | Shiraz-46T | 947  | 0        | -0.010843 |  |
|       |      | Shiraz-47T | 1031 | 0        | -0.117529 |  |
|       |      | Shiraz-47T | 1031 | 0        | -0.117529 |  |
|       |      | Shiraz-47T | 1031 | 0        | -0.117529 |  |
|       |      | Shiraz-49T | 1121 | 0        | -0.138569 |  |
|       |      | Shiraz-49T | 1121 | 0        | -0.138569 |  |
|       |      | Shiraz-49T | 1121 | 0        | -0.138569 |  |
|       |      | Shiraz-77T | 1225 | 0        | -0.117922 |  |
|       |      | Shiraz-77T | 1225 | 0        | -0.117922 |  |
|       |      | Shiraz-77T | 1225 | 0        | -0.117922 |  |
|       |      | Shiraz-77T | 1228 | 0        | -0.238084 |  |
|       |      | Shiraz-77T | 1228 | 0        | -0.238084 |  |
|       |      | Shiraz-77T | 1228 | 0        | -0.238084 |  |
|       |      | Shiraz-18T | 1434 | 0.244465 | 0         |  |
|       |      | Shiraz-18T | 1434 | 0.244465 | 0         |  |
|       |      | Shiraz-18T | 1434 | 0.244465 | 0         |  |
|       |      | Shiraz-22T | 1549 | 0        | -0.319623 |  |
|       |      | Shiraz-22T | 1549 | 0        | -0.319623 |  |
|       |      | Shiraz-22T | 1549 | 0        | -0.319623 |  |
|       |      | Shiraz-22T | 1552 | 0        | -0.50686  |  |

|  |            |      |          |           |  |
|--|------------|------|----------|-----------|--|
|  | Shiraz-22T | 1552 | 0        | -0.50686  |  |
|  | Shiraz-22T | 1552 | 0        | -0.50686  |  |
|  | Shiraz-25T | 1698 | 0.21835  | 0         |  |
|  | Shiraz-25T | 1698 | 0.21835  | 0         |  |
|  | Shiraz-25T | 1698 | 0.21835  | 0         |  |
|  | Shiraz-28T | 1735 | 0.350744 | 0         |  |
|  | Shiraz-28T | 1735 | 0.350744 | 0         |  |
|  | Shiraz-28T | 1735 | 0.350744 | 0         |  |
|  | Shiraz-29T | 1778 | 0.120767 | 0         |  |
|  | Shiraz-29T | 1778 | 0.120767 | 0         |  |
|  | Shiraz-29T | 1778 | 0.120767 | 0         |  |
|  | Shiraz-32T | 1833 | 0.551336 | 0         |  |
|  | Shiraz-32T | 1833 | 0.551336 | 0         |  |
|  | Shiraz-32T | 1833 | 0.551336 | 0         |  |
|  | Shiraz-32T | 1835 | 0.092727 | 0         |  |
|  | Shiraz-32T | 1835 | 0.092727 | 0         |  |
|  | Shiraz-32T | 1835 | 0.092727 | 0         |  |
|  | Shiraz-38T | 1951 | 0.250891 | 0         |  |
|  | Shiraz-38T | 1951 | 0.250891 | 0         |  |
|  | Shiraz-38T | 1951 | 0.250891 | 0         |  |
|  | Shiraz-53T | 2078 | 0.287202 | 0         |  |
|  | Shiraz-53T | 2078 | 0.287202 | 0         |  |
|  | Shiraz-53T | 2078 | 0.287202 | 0         |  |
|  | Shiraz-58T | 2161 | 0        | -0.187744 |  |
|  | Shiraz-58T | 2161 | 0        | -0.187744 |  |
|  | Shiraz-58T | 2161 | 0        | -0.187744 |  |
|  | Shiraz-71T | 2238 | 0.603631 | 0         |  |
|  | Shiraz-71T | 2238 | 0.603631 | 0         |  |
|  | Shiraz-71T | 2238 | 0.603631 | 0         |  |
|  | Shiraz-3T  | 90   | 0.219276 | 0         |  |
|  | Shiraz-3T  | 90   | 0.219276 | 0         |  |
|  | Shiraz-3T  | 90   | 0.219276 | 0         |  |
|  | Shiraz-3T  | 95   | 0        | -0.077623 |  |
|  | Shiraz-3T  | 95   | 0        | -0.077623 |  |
|  | Shiraz-3T  | 95   | 0        | -0.077623 |  |
|  | Shiraz-4T  | 253  | 0.372918 | 0         |  |
|  | Shiraz-4T  | 253  | 0.372918 | 0         |  |
|  | Shiraz-4T  | 253  | 0.372918 | 0         |  |
|  | Shiraz-36T | 378  | 0.179558 | 0         |  |
|  | Shiraz-36T | 378  | 0.179558 | 0         |  |
|  | Shiraz-36T | 378  | 0.179558 | 0         |  |
|  | Shiraz-36T | 382  | 0.081739 | 0         |  |
|  | Shiraz-36T | 382  | 0.081739 | 0         |  |
|  | Shiraz-36T | 382  | 0.081739 | 0         |  |
|  | Shiraz-44T | 641  | 0        | -0.477846 |  |
|  | Shiraz-44T | 641  | 0        | -0.477846 |  |
|  | Shiraz-44T | 641  | 0        | -0.477846 |  |

|  |            |      |          |           |  |
|--|------------|------|----------|-----------|--|
|  | Shiraz-46T | 943  | 0.093799 | 0         |  |
|  | Shiraz-46T | 943  | 0.093799 | 0         |  |
|  | Shiraz-46T | 943  | 0.093799 | 0         |  |
|  | Shiraz-46T | 947  | 0        | -0.010843 |  |
|  | Shiraz-46T | 947  | 0        | -0.010843 |  |
|  | Shiraz-46T | 947  | 0        | -0.010843 |  |
|  | Shiraz-47T | 1031 | 0        | -0.117529 |  |
|  | Shiraz-47T | 1031 | 0        | -0.117529 |  |
|  | Shiraz-47T | 1031 | 0        | -0.117529 |  |
|  | Shiraz-49T | 1121 | 0        | -0.138569 |  |
|  | Shiraz-49T | 1121 | 0        | -0.138569 |  |
|  | Shiraz-49T | 1121 | 0        | -0.138569 |  |
|  | Shiraz-77T | 1225 | 0        | -0.117922 |  |
|  | Shiraz-77T | 1225 | 0        | -0.117922 |  |
|  | Shiraz-77T | 1225 | 0        | -0.117922 |  |
|  | Shiraz-77T | 1228 | 0        | -0.238084 |  |
|  | Shiraz-77T | 1228 | 0        | -0.238084 |  |
|  | Shiraz-77T | 1228 | 0        | -0.238084 |  |
|  | Shiraz-18T | 1434 | 0.244465 | 0         |  |
|  | Shiraz-18T | 1434 | 0.244465 | 0         |  |
|  | Shiraz-18T | 1434 | 0.244465 | 0         |  |
|  | Shiraz-22T | 1549 | 0        | -0.319623 |  |
|  | Shiraz-22T | 1549 | 0        | -0.319623 |  |
|  | Shiraz-22T | 1549 | 0        | -0.319623 |  |
|  | Shiraz-22T | 1552 | 0        | -0.50686  |  |
|  | Shiraz-22T | 1552 | 0        | -0.50686  |  |
|  | Shiraz-22T | 1552 | 0        | -0.50686  |  |
|  | Shiraz-25T | 1698 | 0.21835  | 0         |  |
|  | Shiraz-25T | 1698 | 0.21835  | 0         |  |
|  | Shiraz-25T | 1698 | 0.21835  | 0         |  |
|  | Shiraz-28T | 1735 | 0.350744 | 0         |  |
|  | Shiraz-28T | 1735 | 0.350744 | 0         |  |
|  | Shiraz-28T | 1735 | 0.350744 | 0         |  |
|  | Shiraz-29T | 1778 | 0.120767 | 0         |  |
|  | Shiraz-29T | 1778 | 0.120767 | 0         |  |
|  | Shiraz-29T | 1778 | 0.120767 | 0         |  |
|  | Shiraz-32T | 1833 | 0.551336 | 0         |  |
|  | Shiraz-32T | 1833 | 0.551336 | 0         |  |
|  | Shiraz-32T | 1833 | 0.551336 | 0         |  |
|  | Shiraz-32T | 1835 | 0.092727 | 0         |  |
|  | Shiraz-32T | 1835 | 0.092727 | 0         |  |
|  | Shiraz-32T | 1835 | 0.092727 | 0         |  |
|  | Shiraz-38T | 1951 | 0.250891 | 0         |  |
|  | Shiraz-38T | 1951 | 0.250891 | 0         |  |
|  | Shiraz-38T | 1951 | 0.250891 | 0         |  |
|  | Shiraz-53T | 2078 | 0.287202 | 0         |  |
|  | Shiraz-53T | 2078 | 0.287202 | 0         |  |

|  |  |            |      |          |           |  |  |
|--|--|------------|------|----------|-----------|--|--|
|  |  | Shiraz-53T | 2078 | 0.287202 | 0         |  |  |
|  |  | Shiraz-58T | 2161 | 0        | -0.187744 |  |  |
|  |  | Shiraz-58T | 2161 | 0        | -0.187744 |  |  |
|  |  | Shiraz-58T | 2161 | 0        | -0.187744 |  |  |
|  |  | Shiraz-71T | 2238 | 0.603631 | 0         |  |  |
|  |  | Shiraz-71T | 2238 | 0.603631 | 0         |  |  |
|  |  | Shiraz-71T | 2238 | 0.603631 | 0         |  |  |
|  |  | Shiraz-3T  | 90   | 0.219276 | 0         |  |  |
|  |  | Shiraz-3T  | 90   | 0.219276 | 0         |  |  |
|  |  | Shiraz-3T  | 90   | 0.219276 | 0         |  |  |
|  |  | Shiraz-3T  | 95   | 0        | -0.077623 |  |  |
|  |  | Shiraz-3T  | 95   | 0        | -0.077623 |  |  |
|  |  | Shiraz-3T  | 95   | 0        | -0.077623 |  |  |
|  |  | Shiraz-4T  | 253  | 0.372918 | 0         |  |  |
|  |  | Shiraz-4T  | 253  | 0.372918 | 0         |  |  |
|  |  | Shiraz-4T  | 253  | 0.372918 | 0         |  |  |
|  |  | Shiraz-36T | 378  | 0.179558 | 0         |  |  |
|  |  | Shiraz-36T | 378  | 0.179558 | 0         |  |  |
|  |  | Shiraz-36T | 378  | 0.179558 | 0         |  |  |
|  |  | Shiraz-36T | 382  | 0.081739 | 0         |  |  |
|  |  | Shiraz-36T | 382  | 0.081739 | 0         |  |  |
|  |  | Shiraz-36T | 382  | 0.081739 | 0         |  |  |
|  |  | Shiraz-44T | 641  | 0        | -0.477846 |  |  |
|  |  | Shiraz-44T | 641  | 0        | -0.477846 |  |  |
|  |  | Shiraz-44T | 641  | 0        | -0.477846 |  |  |
|  |  | Shiraz-46T | 943  | 0.093799 | 0         |  |  |
|  |  | Shiraz-46T | 943  | 0.093799 | 0         |  |  |
|  |  | Shiraz-46T | 943  | 0.093799 | 0         |  |  |
|  |  | Shiraz-46T | 947  | 0        | -0.010843 |  |  |
|  |  | Shiraz-46T | 947  | 0        | -0.010843 |  |  |
|  |  | Shiraz-46T | 947  | 0        | -0.010843 |  |  |
|  |  | Shiraz-47T | 1031 | 0        | -0.117529 |  |  |
|  |  | Shiraz-47T | 1031 | 0        | -0.117529 |  |  |
|  |  | Shiraz-47T | 1031 | 0        | -0.117529 |  |  |
|  |  | Shiraz-49T | 1121 | 0        | -0.138569 |  |  |
|  |  | Shiraz-49T | 1121 | 0        | -0.138569 |  |  |
|  |  | Shiraz-49T | 1121 | 0        | -0.138569 |  |  |
|  |  | Shiraz-77T | 1225 | 0        | -0.117922 |  |  |
|  |  | Shiraz-77T | 1225 | 0        | -0.117922 |  |  |
|  |  | Shiraz-77T | 1225 | 0        | -0.117922 |  |  |
|  |  | Shiraz-77T | 1228 | 0        | -0.238084 |  |  |
|  |  | Shiraz-77T | 1228 | 0        | -0.238084 |  |  |
|  |  | Shiraz-77T | 1228 | 0        | -0.238084 |  |  |
|  |  | Shiraz-18T | 1434 | 0.244465 | 0         |  |  |
|  |  | Shiraz-18T | 1434 | 0.244465 | 0         |  |  |
|  |  | Shiraz-18T | 1434 | 0.244465 | 0         |  |  |
|  |  | Shiraz-22T | 1549 | 0        | -0.319623 |  |  |

|         |      |            |      |          |           |  |  |
|---------|------|------------|------|----------|-----------|--|--|
|         |      | Shiraz-22T | 1549 | 0        | -0.319623 |  |  |
|         |      | Shiraz-22T | 1549 | 0        | -0.319623 |  |  |
|         |      | Shiraz-22T | 1552 | 0        | -0.50686  |  |  |
|         |      | Shiraz-22T | 1552 | 0        | -0.50686  |  |  |
|         |      | Shiraz-22T | 1552 | 0        | -0.50686  |  |  |
|         |      | Shiraz-25T | 1698 | 0.21835  | 0         |  |  |
|         |      | Shiraz-25T | 1698 | 0.21835  | 0         |  |  |
|         |      | Shiraz-25T | 1698 | 0.21835  | 0         |  |  |
|         |      | Shiraz-28T | 1735 | 0.350744 | 0         |  |  |
|         |      | Shiraz-28T | 1735 | 0.350744 | 0         |  |  |
|         |      | Shiraz-28T | 1735 | 0.350744 | 0         |  |  |
|         |      | Shiraz-29T | 1778 | 0.120767 | 0         |  |  |
|         |      | Shiraz-29T | 1778 | 0.120767 | 0         |  |  |
|         |      | Shiraz-29T | 1778 | 0.120767 | 0         |  |  |
|         |      | Shiraz-32T | 1833 | 0.551336 | 0         |  |  |
|         |      | Shiraz-32T | 1833 | 0.551336 | 0         |  |  |
|         |      | Shiraz-32T | 1833 | 0.551336 | 0         |  |  |
|         |      | Shiraz-32T | 1835 | 0.092727 | 0         |  |  |
|         |      | Shiraz-32T | 1835 | 0.092727 | 0         |  |  |
|         |      | Shiraz-32T | 1835 | 0.092727 | 0         |  |  |
|         |      | Shiraz-32T | 1835 | 0.092727 | 0         |  |  |
|         |      | Shiraz-38T | 1951 | 0.250891 | 0         |  |  |
|         |      | Shiraz-38T | 1951 | 0.250891 | 0         |  |  |
|         |      | Shiraz-38T | 1951 | 0.250891 | 0         |  |  |
|         |      | Shiraz-53T | 2078 | 0.287202 | 0         |  |  |
|         |      | Shiraz-53T | 2078 | 0.287202 | 0         |  |  |
|         |      | Shiraz-53T | 2078 | 0.287202 | 0         |  |  |
|         |      | Shiraz-58T | 2161 | 0        | -0.187744 |  |  |
|         |      | Shiraz-58T | 2161 | 0        | -0.187744 |  |  |
|         |      | Shiraz-58T | 2161 | 0        | -0.187744 |  |  |
|         |      | Shiraz-71T | 2238 | 0.603631 | 0         |  |  |
|         |      | Shiraz-71T | 2238 | 0.603631 | 0         |  |  |
|         |      | Shiraz-71T | 2238 | 0.603631 | 0         |  |  |
| GPRASP1 | chrX | Shiraz-3T  | 242  | 0        | -0.336434 |  |  |
|         |      | Shiraz-4T  | 261  | 0        | -0.336249 |  |  |
|         |      | Shiraz-16T | 295  | 0.591657 | 0         |  |  |
|         |      | Shiraz-36T | 433  | 0        | -0.803961 |  |  |
|         |      | Shiraz-44T | 899  | 0        | -1.09697  |  |  |
|         |      | Shiraz-49T | 1170 | 0        | -0.967436 |  |  |
|         |      | Shiraz-18T | 1457 | 0.643204 | 0         |  |  |
|         |      | Shiraz-22T | 1673 | 0.611783 | 0         |  |  |
|         |      | Shiraz-25T | 1719 | 0.472955 | 0         |  |  |
|         |      | Shiraz-28T | 1762 | 0.562311 | 0         |  |  |
|         |      | Shiraz-29T | 1801 | 0.815343 | 0         |  |  |
|         |      | Shiraz-32T | 1870 | 0.729766 | 0         |  |  |
|         |      | Shiraz-35T | 1933 | 0.488535 | 0         |  |  |
|         |      | Shiraz-58T | 2223 | 0.833364 | 0         |  |  |
|         |      | Shiraz-71T | 2263 | 0.975531 | 0         |  |  |

|         |      |            |      |          |           |  |  |
|---------|------|------------|------|----------|-----------|--|--|
|         |      | Shiraz-3T  | 242  | 0        | -0.336434 |  |  |
|         |      | Shiraz-4T  | 261  | 0        | -0.336249 |  |  |
|         |      | Shiraz-16T | 295  | 0.591657 | 0         |  |  |
|         |      | Shiraz-36T | 433  | 0        | -0.803961 |  |  |
|         |      | Shiraz-44T | 899  | 0        | -1.09697  |  |  |
|         |      | Shiraz-49T | 1170 | 0        | -0.967436 |  |  |
|         |      | Shiraz-18T | 1457 | 0.643204 | 0         |  |  |
|         |      | Shiraz-22T | 1673 | 0.611783 | 0         |  |  |
|         |      | Shiraz-25T | 1719 | 0.472955 | 0         |  |  |
|         |      | Shiraz-28T | 1762 | 0.562311 | 0         |  |  |
|         |      | Shiraz-29T | 1801 | 0.815343 | 0         |  |  |
|         |      | Shiraz-32T | 1870 | 0.729766 | 0         |  |  |
|         |      | Shiraz-35T | 1933 | 0.488535 | 0         |  |  |
|         |      | Shiraz-58T | 2223 | 0.833364 | 0         |  |  |
|         |      | Shiraz-71T | 2263 | 0.975531 | 0         |  |  |
|         |      | Shiraz-3T  | 242  | 0        | -0.336434 |  |  |
|         |      | Shiraz-4T  | 261  | 0        | -0.336249 |  |  |
|         |      | Shiraz-16T | 295  | 0.591657 | 0         |  |  |
|         |      | Shiraz-36T | 433  | 0        | -0.803961 |  |  |
|         |      | Shiraz-44T | 899  | 0        | -1.09697  |  |  |
|         |      | Shiraz-49T | 1170 | 0        | -0.967436 |  |  |
|         |      | Shiraz-18T | 1457 | 0.643204 | 0         |  |  |
|         |      | Shiraz-22T | 1673 | 0.611783 | 0         |  |  |
|         |      | Shiraz-25T | 1719 | 0.472955 | 0         |  |  |
|         |      | Shiraz-28T | 1762 | 0.562311 | 0         |  |  |
|         |      | Shiraz-29T | 1801 | 0.815343 | 0         |  |  |
|         |      | Shiraz-32T | 1870 | 0.729766 | 0         |  |  |
|         |      | Shiraz-35T | 1933 | 0.488535 | 0         |  |  |
|         |      | Shiraz-58T | 2223 | 0.833364 | 0         |  |  |
|         |      | Shiraz-71T | 2263 | 0.975531 | 0         |  |  |
| GPRASP2 | chrX | Shiraz-3T  | 242  | 0        | -0.336434 |  |  |
|         |      | Shiraz-4T  | 261  | 0        | -0.336249 |  |  |
|         |      | Shiraz-16T | 295  | 0.591657 | 0         |  |  |
|         |      | Shiraz-36T | 433  | 0        | -0.803961 |  |  |
|         |      | Shiraz-44T | 899  | 0        | -1.09697  |  |  |
|         |      | Shiraz-49T | 1170 | 0        | -0.967436 |  |  |
|         |      | Shiraz-18T | 1457 | 0.643204 | 0         |  |  |
|         |      | Shiraz-22T | 1673 | 0.611783 | 0         |  |  |
|         |      | Shiraz-25T | 1719 | 0.472955 | 0         |  |  |
|         |      | Shiraz-28T | 1762 | 0.562311 | 0         |  |  |
|         |      | Shiraz-29T | 1801 | 0.815343 | 0         |  |  |
|         |      | Shiraz-32T | 1870 | 0.729766 | 0         |  |  |
|         |      | Shiraz-35T | 1933 | 0.488535 | 0         |  |  |
|         |      | Shiraz-58T | 2223 | 0.833364 | 0         |  |  |
|         |      | Shiraz-71T | 2263 | 0.975531 | 0         |  |  |
|         |      | Shiraz-3T  | 242  | 0        | -0.336434 |  |  |
|         |      | Shiraz-4T  | 261  | 0        | -0.336249 |  |  |

|       |      |            |      |          |           |  |  |
|-------|------|------------|------|----------|-----------|--|--|
|       |      | Shiraz-16T | 295  | 0.591657 | 0         |  |  |
|       |      | Shiraz-36T | 433  | 0        | -0.803961 |  |  |
|       |      | Shiraz-44T | 899  | 0        | -1.09697  |  |  |
|       |      | Shiraz-49T | 1170 | 0        | -0.967436 |  |  |
|       |      | Shiraz-18T | 1457 | 0.643204 | 0         |  |  |
|       |      | Shiraz-22T | 1673 | 0.611783 | 0         |  |  |
|       |      | Shiraz-25T | 1719 | 0.472955 | 0         |  |  |
|       |      | Shiraz-28T | 1762 | 0.562311 | 0         |  |  |
|       |      | Shiraz-29T | 1801 | 0.815343 | 0         |  |  |
|       |      | Shiraz-32T | 1870 | 0.729766 | 0         |  |  |
|       |      | Shiraz-35T | 1933 | 0.488535 | 0         |  |  |
|       |      | Shiraz-58T | 2223 | 0.833364 | 0         |  |  |
|       |      | Shiraz-71T | 2263 | 0.975531 | 0         |  |  |
|       |      | Shiraz-3T  | 242  | 0        | -0.336434 |  |  |
|       |      | Shiraz-4T  | 261  | 0        | -0.336249 |  |  |
|       |      | Shiraz-16T | 295  | 0.591657 | 0         |  |  |
|       |      | Shiraz-36T | 433  | 0        | -0.803961 |  |  |
|       |      | Shiraz-44T | 899  | 0        | -1.09697  |  |  |
|       |      | Shiraz-49T | 1170 | 0        | -0.967436 |  |  |
|       |      | Shiraz-18T | 1457 | 0.643204 | 0         |  |  |
|       |      | Shiraz-22T | 1673 | 0.611783 | 0         |  |  |
|       |      | Shiraz-25T | 1719 | 0.472955 | 0         |  |  |
|       |      | Shiraz-28T | 1762 | 0.562311 | 0         |  |  |
|       |      | Shiraz-29T | 1801 | 0.815343 | 0         |  |  |
|       |      | Shiraz-32T | 1870 | 0.729766 | 0         |  |  |
|       |      | Shiraz-35T | 1933 | 0.488535 | 0         |  |  |
|       |      | Shiraz-58T | 2223 | 0.833364 | 0         |  |  |
|       |      | Shiraz-71T | 2263 | 0.975531 | 0         |  |  |
| GRB10 | chr7 | Shiraz-3T  | 87   | 0.198593 | 0         |  |  |
|       |      | Shiraz-3T  | 87   | 0.198593 | 0         |  |  |
|       |      | Shiraz-3T  | 87   | 0.198593 | 0         |  |  |
|       |      | Shiraz-4T  | 252  | 0.192083 | 0         |  |  |
|       |      | Shiraz-4T  | 252  | 0.192083 | 0         |  |  |
|       |      | Shiraz-4T  | 252  | 0.192083 | 0         |  |  |
|       |      | Shiraz-36T | 376  | 0.159952 | 0         |  |  |
|       |      | Shiraz-36T | 376  | 0.159952 | 0         |  |  |
|       |      | Shiraz-36T | 376  | 0.159952 | 0         |  |  |
|       |      | Shiraz-46T | 942  | 0.069143 | 0         |  |  |
|       |      | Shiraz-46T | 942  | 0.069143 | 0         |  |  |
|       |      | Shiraz-46T | 942  | 0.069143 | 0         |  |  |
|       |      | Shiraz-18T | 1433 | 0.250973 | 0         |  |  |
|       |      | Shiraz-18T | 1433 | 0.250973 | 0         |  |  |
|       |      | Shiraz-18T | 1433 | 0.250973 | 0         |  |  |
|       |      | Shiraz-25T | 1697 | 0.21945  | 0         |  |  |
|       |      | Shiraz-25T | 1697 | 0.21945  | 0         |  |  |
|       |      | Shiraz-25T | 1697 | 0.21945  | 0         |  |  |
|       |      | Shiraz-28T | 1734 | 0.362882 | 0         |  |  |

|  |  |            |      |          |   |  |  |
|--|--|------------|------|----------|---|--|--|
|  |  | Shiraz-28T | 1734 | 0.362882 | 0 |  |  |
|  |  | Shiraz-28T | 1734 | 0.362882 | 0 |  |  |
|  |  | Shiraz-29T | 1777 | 0.156747 | 0 |  |  |
|  |  | Shiraz-29T | 1777 | 0.156747 | 0 |  |  |
|  |  | Shiraz-29T | 1777 | 0.156747 | 0 |  |  |
|  |  | Shiraz-38T | 1950 | 0.265916 | 0 |  |  |
|  |  | Shiraz-38T | 1950 | 0.265916 | 0 |  |  |
|  |  | Shiraz-38T | 1950 | 0.265916 | 0 |  |  |
|  |  | Shiraz-71T | 2236 | 0.320072 | 0 |  |  |
|  |  | Shiraz-71T | 2236 | 0.320072 | 0 |  |  |
|  |  | Shiraz-71T | 2236 | 0.320072 | 0 |  |  |
|  |  | Shiraz-3T  | 87   | 0.198593 | 0 |  |  |
|  |  | Shiraz-3T  | 87   | 0.198593 | 0 |  |  |
|  |  | Shiraz-3T  | 87   | 0.198593 | 0 |  |  |
|  |  | Shiraz-4T  | 252  | 0.192083 | 0 |  |  |
|  |  | Shiraz-4T  | 252  | 0.192083 | 0 |  |  |
|  |  | Shiraz-4T  | 252  | 0.192083 | 0 |  |  |
|  |  | Shiraz-36T | 376  | 0.159952 | 0 |  |  |
|  |  | Shiraz-36T | 376  | 0.159952 | 0 |  |  |
|  |  | Shiraz-36T | 376  | 0.159952 | 0 |  |  |
|  |  | Shiraz-46T | 942  | 0.069143 | 0 |  |  |
|  |  | Shiraz-46T | 942  | 0.069143 | 0 |  |  |
|  |  | Shiraz-46T | 942  | 0.069143 | 0 |  |  |
|  |  | Shiraz-18T | 1433 | 0.250973 | 0 |  |  |
|  |  | Shiraz-18T | 1433 | 0.250973 | 0 |  |  |
|  |  | Shiraz-18T | 1433 | 0.250973 | 0 |  |  |
|  |  | Shiraz-25T | 1697 | 0.21945  | 0 |  |  |
|  |  | Shiraz-25T | 1697 | 0.21945  | 0 |  |  |
|  |  | Shiraz-25T | 1697 | 0.21945  | 0 |  |  |
|  |  | Shiraz-28T | 1734 | 0.362882 | 0 |  |  |
|  |  | Shiraz-28T | 1734 | 0.362882 | 0 |  |  |
|  |  | Shiraz-28T | 1734 | 0.362882 | 0 |  |  |
|  |  | Shiraz-29T | 1777 | 0.156747 | 0 |  |  |
|  |  | Shiraz-29T | 1777 | 0.156747 | 0 |  |  |
|  |  | Shiraz-29T | 1777 | 0.156747 | 0 |  |  |
|  |  | Shiraz-38T | 1950 | 0.265916 | 0 |  |  |
|  |  | Shiraz-38T | 1950 | 0.265916 | 0 |  |  |
|  |  | Shiraz-38T | 1950 | 0.265916 | 0 |  |  |
|  |  | Shiraz-71T | 2236 | 0.320072 | 0 |  |  |
|  |  | Shiraz-71T | 2236 | 0.320072 | 0 |  |  |
|  |  | Shiraz-71T | 2236 | 0.320072 | 0 |  |  |
|  |  | Shiraz-3T  | 87   | 0.198593 | 0 |  |  |
|  |  | Shiraz-3T  | 87   | 0.198593 | 0 |  |  |
|  |  | Shiraz-3T  | 87   | 0.198593 | 0 |  |  |
|  |  | Shiraz-4T  | 252  | 0.192083 | 0 |  |  |
|  |  | Shiraz-4T  | 252  | 0.192083 | 0 |  |  |
|  |  | Shiraz-4T  | 252  | 0.192083 | 0 |  |  |



|       |      |            |      |          |           |  |
|-------|------|------------|------|----------|-----------|--|
|       |      | Shiraz-36T | 376  | 0.159952 | 0         |  |
|       |      | Shiraz-36T | 376  | 0.159952 | 0         |  |
|       |      | Shiraz-36T | 376  | 0.159952 | 0         |  |
|       |      | Shiraz-46T | 942  | 0.069143 | 0         |  |
|       |      | Shiraz-46T | 942  | 0.069143 | 0         |  |
|       |      | Shiraz-46T | 942  | 0.069143 | 0         |  |
|       |      | Shiraz-18T | 1433 | 0.250973 | 0         |  |
|       |      | Shiraz-18T | 1433 | 0.250973 | 0         |  |
|       |      | Shiraz-18T | 1433 | 0.250973 | 0         |  |
|       |      | Shiraz-25T | 1697 | 0.21945  | 0         |  |
|       |      | Shiraz-25T | 1697 | 0.21945  | 0         |  |
|       |      | Shiraz-25T | 1697 | 0.21945  | 0         |  |
|       |      | Shiraz-28T | 1734 | 0.362882 | 0         |  |
|       |      | Shiraz-28T | 1734 | 0.362882 | 0         |  |
|       |      | Shiraz-28T | 1734 | 0.362882 | 0         |  |
|       |      | Shiraz-29T | 1777 | 0.156747 | 0         |  |
|       |      | Shiraz-29T | 1777 | 0.156747 | 0         |  |
|       |      | Shiraz-29T | 1777 | 0.156747 | 0         |  |
|       |      | Shiraz-38T | 1950 | 0.265916 | 0         |  |
|       |      | Shiraz-38T | 1950 | 0.265916 | 0         |  |
|       |      | Shiraz-38T | 1950 | 0.265916 | 0         |  |
|       |      | Shiraz-71T | 2236 | 0.320072 | 0         |  |
|       |      | Shiraz-71T | 2236 | 0.320072 | 0         |  |
|       |      | Shiraz-71T | 2236 | 0.320072 | 0         |  |
| GRIA3 | chrX | Shiraz-3T  | 242  | 0        | -0.336434 |  |
|       |      | Shiraz-4T  | 261  | 0        | -0.336249 |  |
|       |      | Shiraz-16T | 295  | 0.591657 | 0         |  |
|       |      | Shiraz-36T | 433  | 0        | -0.803961 |  |
|       |      | Shiraz-44T | 899  | 0        | -1.09697  |  |
|       |      | Shiraz-49T | 1170 | 0        | -0.967436 |  |
|       |      | Shiraz-9T  | 1370 | 0.690073 | 0         |  |
|       |      | Shiraz-18T | 1457 | 0.643204 | 0         |  |
|       |      | Shiraz-22T | 1673 | 0.611783 | 0         |  |
|       |      | Shiraz-25T | 1719 | 0.472955 | 0         |  |
|       |      | Shiraz-28T | 1762 | 0.562311 | 0         |  |
|       |      | Shiraz-29T | 1801 | 0.815343 | 0         |  |
|       |      | Shiraz-32T | 1870 | 0.729766 | 0         |  |
|       |      | Shiraz-35T | 1933 | 0.488535 | 0         |  |
|       |      | Shiraz-58T | 2223 | 0.833364 | 0         |  |
|       |      | Shiraz-71T | 2263 | 0.975531 | 0         |  |
|       |      | Shiraz-3T  | 242  | 0        | -0.336434 |  |
|       |      | Shiraz-4T  | 261  | 0        | -0.336249 |  |
|       |      | Shiraz-16T | 295  | 0.591657 | 0         |  |
|       |      | Shiraz-36T | 433  | 0        | -0.803961 |  |
|       |      | Shiraz-44T | 899  | 0        | -1.09697  |  |
|       |      | Shiraz-49T | 1170 | 0        | -0.967436 |  |
|       |      | Shiraz-9T  | 1370 | 0.690073 | 0         |  |

|         |      |            |      |          |           |  |  |
|---------|------|------------|------|----------|-----------|--|--|
|         |      | Shiraz-18T | 1457 | 0.643204 | 0         |  |  |
|         |      | Shiraz-22T | 1673 | 0.611783 | 0         |  |  |
|         |      | Shiraz-25T | 1719 | 0.472955 | 0         |  |  |
|         |      | Shiraz-28T | 1762 | 0.562311 | 0         |  |  |
|         |      | Shiraz-29T | 1801 | 0.815343 | 0         |  |  |
|         |      | Shiraz-32T | 1870 | 0.729766 | 0         |  |  |
|         |      | Shiraz-35T | 1933 | 0.488535 | 0         |  |  |
|         |      | Shiraz-58T | 2223 | 0.833364 | 0         |  |  |
|         |      | Shiraz-71T | 2263 | 0.975531 | 0         |  |  |
|         |      | Shiraz-3T  | 242  | 0        | -0.336434 |  |  |
|         |      | Shiraz-4T  | 261  | 0        | -0.336249 |  |  |
|         |      | Shiraz-16T | 295  | 0.591657 | 0         |  |  |
|         |      | Shiraz-36T | 433  | 0        | -0.803961 |  |  |
|         |      | Shiraz-44T | 899  | 0        | -1.09697  |  |  |
|         |      | Shiraz-49T | 1170 | 0        | -0.967436 |  |  |
|         |      | Shiraz-9T  | 1370 | 0.690073 | 0         |  |  |
|         |      | Shiraz-18T | 1457 | 0.643204 | 0         |  |  |
|         |      | Shiraz-22T | 1673 | 0.611783 | 0         |  |  |
|         |      | Shiraz-25T | 1719 | 0.472955 | 0         |  |  |
|         |      | Shiraz-28T | 1762 | 0.562311 | 0         |  |  |
|         |      | Shiraz-29T | 1801 | 0.815343 | 0         |  |  |
|         |      | Shiraz-32T | 1870 | 0.729766 | 0         |  |  |
|         |      | Shiraz-35T | 1933 | 0.488535 | 0         |  |  |
|         |      | Shiraz-58T | 2223 | 0.833364 | 0         |  |  |
|         |      | Shiraz-71T | 2263 | 0.975531 | 0         |  |  |
| GRIPAP1 | chrX | Shiraz-3T  | 238  | 0.472087 | 0         |  |  |
|         |      | Shiraz-3T  | 238  | 0.472087 | 0         |  |  |
|         |      | Shiraz-4T  | 260  | 0        | -0.324128 |  |  |
|         |      | Shiraz-4T  | 260  | 0        | -0.324128 |  |  |
|         |      | Shiraz-16T | 294  | 0.655804 | 0         |  |  |
|         |      | Shiraz-16T | 294  | 0.655804 | 0         |  |  |
|         |      | Shiraz-31T | 345  | 0.103301 | 0         |  |  |
|         |      | Shiraz-31T | 345  | 0.103301 | 0         |  |  |
|         |      | Shiraz-36T | 431  | 0        | -0.78035  |  |  |
|         |      | Shiraz-36T | 431  | 0        | -0.78035  |  |  |
|         |      | Shiraz-36T | 432  | 0        | -0.6692   |  |  |
|         |      | Shiraz-36T | 432  | 0        | -0.6692   |  |  |
|         |      | Shiraz-44T | 891  | 0        | -0.954044 |  |  |
|         |      | Shiraz-44T | 891  | 0        | -0.954044 |  |  |
|         |      | Shiraz-44T | 896  | 0        | -0.109108 |  |  |
|         |      | Shiraz-44T | 896  | 0        | -0.109108 |  |  |
|         |      | Shiraz-44T | 897  | 0.486937 | 0         |  |  |
|         |      | Shiraz-44T | 897  | 0.486937 | 0         |  |  |
|         |      | Shiraz-46T | 991  | 0.139564 | 0         |  |  |
|         |      | Shiraz-46T | 991  | 0.139564 | 0         |  |  |
|         |      | Shiraz-47T | 1084 | 0.24185  | 0         |  |  |
|         |      | Shiraz-47T | 1084 | 0.24185  | 0         |  |  |

|  |            |      |          |           |  |
|--|------------|------|----------|-----------|--|
|  | Shiraz-49T | 1166 | 0        | -0.917235 |  |
|  | Shiraz-49T | 1166 | 0        | -0.917235 |  |
|  | Shiraz-49T | 1169 | 0        | -0.583529 |  |
|  | Shiraz-49T | 1169 | 0        | -0.583529 |  |
|  | Shiraz-77T | 1282 | 0.213849 | 0         |  |
|  | Shiraz-77T | 1282 | 0.213849 | 0         |  |
|  | Shiraz-9T  | 1368 | 0.199713 | 0         |  |
|  | Shiraz-9T  | 1368 | 0.199713 | 0         |  |
|  | Shiraz-9T  | 1369 | 0.703374 | 0         |  |
|  | Shiraz-9T  | 1369 | 0.703374 | 0         |  |
|  | Shiraz-18T | 1455 | 0        | -0.186773 |  |
|  | Shiraz-18T | 1455 | 0        | -0.186773 |  |
|  | Shiraz-22T | 1669 | 0.695915 | 0         |  |
|  | Shiraz-22T | 1669 | 0.695915 | 0         |  |
|  | Shiraz-22T | 1672 | 1.01678  | 0         |  |
|  | Shiraz-22T | 1672 | 1.01678  | 0         |  |
|  | Shiraz-25T | 1717 | 0.420447 | 0         |  |
|  | Shiraz-25T | 1717 | 0.420447 | 0         |  |
|  | Shiraz-28T | 1760 | 0.538181 | 0         |  |
|  | Shiraz-28T | 1760 | 0.538181 | 0         |  |
|  | Shiraz-29T | 1800 | 0.672527 | 0         |  |
|  | Shiraz-29T | 1800 | 0.672527 | 0         |  |
|  | Shiraz-32T | 1869 | 0.776805 | 0         |  |
|  | Shiraz-32T | 1869 | 0.776805 | 0         |  |
|  | Shiraz-35T | 1932 | 0.507141 | 0         |  |
|  | Shiraz-35T | 1932 | 0.507141 | 0         |  |
|  | Shiraz-58T | 2221 | 0.871948 | 0         |  |
|  | Shiraz-58T | 2221 | 0.871948 | 0         |  |
|  | Shiraz-71T | 2260 | 0.68394  | 0         |  |
|  | Shiraz-71T | 2260 | 0.68394  | 0         |  |
|  | Shiraz-71T | 2262 | 0.986748 | 0         |  |
|  | Shiraz-71T | 2262 | 0.986748 | 0         |  |
|  | Shiraz-3T  | 238  | 0.472087 | 0         |  |
|  | Shiraz-3T  | 238  | 0.472087 | 0         |  |
|  | Shiraz-4T  | 260  | 0        | -0.324128 |  |
|  | Shiraz-4T  | 260  | 0        | -0.324128 |  |
|  | Shiraz-16T | 294  | 0.655804 | 0         |  |
|  | Shiraz-16T | 294  | 0.655804 | 0         |  |
|  | Shiraz-31T | 345  | 0.103301 | 0         |  |
|  | Shiraz-31T | 345  | 0.103301 | 0         |  |
|  | Shiraz-36T | 431  | 0        | -0.78035  |  |
|  | Shiraz-36T | 431  | 0        | -0.78035  |  |
|  | Shiraz-36T | 432  | 0        | -0.6692   |  |
|  | Shiraz-36T | 432  | 0        | -0.6692   |  |
|  | Shiraz-44T | 891  | 0        | -0.954044 |  |
|  | Shiraz-44T | 891  | 0        | -0.954044 |  |
|  | Shiraz-44T | 896  | 0        | -0.109108 |  |

|  |            |      |          |           |  |
|--|------------|------|----------|-----------|--|
|  | Shiraz-44T | 896  | 0        | -0.109108 |  |
|  | Shiraz-44T | 897  | 0.486937 | 0         |  |
|  | Shiraz-44T | 897  | 0.486937 | 0         |  |
|  | Shiraz-46T | 991  | 0.139564 | 0         |  |
|  | Shiraz-46T | 991  | 0.139564 | 0         |  |
|  | Shiraz-47T | 1084 | 0.24185  | 0         |  |
|  | Shiraz-47T | 1084 | 0.24185  | 0         |  |
|  | Shiraz-49T | 1166 | 0        | -0.917235 |  |
|  | Shiraz-49T | 1166 | 0        | -0.917235 |  |
|  | Shiraz-49T | 1169 | 0        | -0.583529 |  |
|  | Shiraz-49T | 1169 | 0        | -0.583529 |  |
|  | Shiraz-77T | 1282 | 0.213849 | 0         |  |
|  | Shiraz-77T | 1282 | 0.213849 | 0         |  |
|  | Shiraz-9T  | 1368 | 0.199713 | 0         |  |
|  | Shiraz-9T  | 1368 | 0.199713 | 0         |  |
|  | Shiraz-9T  | 1369 | 0.703374 | 0         |  |
|  | Shiraz-9T  | 1369 | 0.703374 | 0         |  |
|  | Shiraz-18T | 1455 | 0        | -0.186773 |  |
|  | Shiraz-18T | 1455 | 0        | -0.186773 |  |
|  | Shiraz-22T | 1669 | 0.695915 | 0         |  |
|  | Shiraz-22T | 1669 | 0.695915 | 0         |  |
|  | Shiraz-22T | 1672 | 1.01678  | 0         |  |
|  | Shiraz-22T | 1672 | 1.01678  | 0         |  |
|  | Shiraz-25T | 1717 | 0.420447 | 0         |  |
|  | Shiraz-25T | 1717 | 0.420447 | 0         |  |
|  | Shiraz-28T | 1760 | 0.538181 | 0         |  |
|  | Shiraz-28T | 1760 | 0.538181 | 0         |  |
|  | Shiraz-29T | 1800 | 0.672527 | 0         |  |
|  | Shiraz-29T | 1800 | 0.672527 | 0         |  |
|  | Shiraz-32T | 1869 | 0.776805 | 0         |  |
|  | Shiraz-32T | 1869 | 0.776805 | 0         |  |
|  | Shiraz-35T | 1932 | 0.507141 | 0         |  |
|  | Shiraz-35T | 1932 | 0.507141 | 0         |  |
|  | Shiraz-58T | 2221 | 0.871948 | 0         |  |
|  | Shiraz-58T | 2221 | 0.871948 | 0         |  |
|  | Shiraz-71T | 2260 | 0.68394  | 0         |  |
|  | Shiraz-71T | 2260 | 0.68394  | 0         |  |
|  | Shiraz-71T | 2262 | 0.986748 | 0         |  |
|  | Shiraz-71T | 2262 | 0.986748 | 0         |  |
|  | Shiraz-3T  | 238  | 0.472087 | 0         |  |
|  | Shiraz-3T  | 238  | 0.472087 | 0         |  |
|  | Shiraz-4T  | 260  | 0        | -0.324128 |  |
|  | Shiraz-4T  | 260  | 0        | -0.324128 |  |
|  | Shiraz-16T | 294  | 0.655804 | 0         |  |
|  | Shiraz-16T | 294  | 0.655804 | 0         |  |
|  | Shiraz-31T | 345  | 0.103301 | 0         |  |
|  | Shiraz-31T | 345  | 0.103301 | 0         |  |

|      |      |            |      |          |           |  |  |
|------|------|------------|------|----------|-----------|--|--|
|      |      | Shiraz-36T | 431  | 0        | -0.78035  |  |  |
|      |      | Shiraz-36T | 431  | 0        | -0.78035  |  |  |
|      |      | Shiraz-36T | 432  | 0        | -0.6692   |  |  |
|      |      | Shiraz-36T | 432  | 0        | -0.6692   |  |  |
|      |      | Shiraz-44T | 891  | 0        | -0.954044 |  |  |
|      |      | Shiraz-44T | 891  | 0        | -0.954044 |  |  |
|      |      | Shiraz-44T | 896  | 0        | -0.109108 |  |  |
|      |      | Shiraz-44T | 896  | 0        | -0.109108 |  |  |
|      |      | Shiraz-44T | 897  | 0.486937 | 0         |  |  |
|      |      | Shiraz-44T | 897  | 0.486937 | 0         |  |  |
|      |      | Shiraz-46T | 991  | 0.139564 | 0         |  |  |
|      |      | Shiraz-46T | 991  | 0.139564 | 0         |  |  |
|      |      | Shiraz-47T | 1084 | 0.24185  | 0         |  |  |
|      |      | Shiraz-47T | 1084 | 0.24185  | 0         |  |  |
|      |      | Shiraz-49T | 1166 | 0        | -0.917235 |  |  |
|      |      | Shiraz-49T | 1166 | 0        | -0.917235 |  |  |
|      |      | Shiraz-49T | 1169 | 0        | -0.583529 |  |  |
|      |      | Shiraz-49T | 1169 | 0        | -0.583529 |  |  |
|      |      | Shiraz-77T | 1282 | 0.213849 | 0         |  |  |
|      |      | Shiraz-77T | 1282 | 0.213849 | 0         |  |  |
|      |      | Shiraz-9T  | 1368 | 0.199713 | 0         |  |  |
|      |      | Shiraz-9T  | 1368 | 0.199713 | 0         |  |  |
|      |      | Shiraz-9T  | 1369 | 0.703374 | 0         |  |  |
|      |      | Shiraz-9T  | 1369 | 0.703374 | 0         |  |  |
|      |      | Shiraz-18T | 1455 | 0        | -0.186773 |  |  |
|      |      | Shiraz-18T | 1455 | 0        | -0.186773 |  |  |
|      |      | Shiraz-22T | 1669 | 0.695915 | 0         |  |  |
|      |      | Shiraz-22T | 1669 | 0.695915 | 0         |  |  |
|      |      | Shiraz-22T | 1672 | 1.01678  | 0         |  |  |
|      |      | Shiraz-22T | 1672 | 1.01678  | 0         |  |  |
|      |      | Shiraz-25T | 1717 | 0.420447 | 0         |  |  |
|      |      | Shiraz-25T | 1717 | 0.420447 | 0         |  |  |
|      |      | Shiraz-28T | 1760 | 0.538181 | 0         |  |  |
|      |      | Shiraz-28T | 1760 | 0.538181 | 0         |  |  |
|      |      | Shiraz-29T | 1800 | 0.672527 | 0         |  |  |
|      |      | Shiraz-29T | 1800 | 0.672527 | 0         |  |  |
|      |      | Shiraz-32T | 1869 | 0.776805 | 0         |  |  |
|      |      | Shiraz-32T | 1869 | 0.776805 | 0         |  |  |
|      |      | Shiraz-35T | 1932 | 0.507141 | 0         |  |  |
|      |      | Shiraz-35T | 1932 | 0.507141 | 0         |  |  |
|      |      | Shiraz-58T | 2221 | 0.871948 | 0         |  |  |
|      |      | Shiraz-58T | 2221 | 0.871948 | 0         |  |  |
|      |      | Shiraz-71T | 2260 | 0.68394  | 0         |  |  |
|      |      | Shiraz-71T | 2260 | 0.68394  | 0         |  |  |
|      |      | Shiraz-71T | 2262 | 0.986748 | 0         |  |  |
|      |      | Shiraz-71T | 2262 | 0.986748 | 0         |  |  |
| GRM3 | chr7 | Shiraz-3T  | 90   | 0.219276 | 0         |  |  |

|  |            |      |          |           |  |
|--|------------|------|----------|-----------|--|
|  | Shiraz-3T  | 93   | 0        | -0.058023 |  |
|  | Shiraz-4T  | 253  | 0.372918 | 0         |  |
|  | Shiraz-36T | 378  | 0.179558 | 0         |  |
|  | Shiraz-36T | 380  | 0.083883 | 0         |  |
|  | Shiraz-44T | 638  | 0        | -0.433476 |  |
|  | Shiraz-46T | 943  | 0.093799 | 0         |  |
|  | Shiraz-46T | 945  | 0        | -0.014838 |  |
|  | Shiraz-47T | 1029 | 0        | -0.096586 |  |
|  | Shiraz-49T | 1119 | 0        | -0.157331 |  |
|  | Shiraz-77T | 1225 | 0        | -0.117922 |  |
|  | Shiraz-77T | 1226 | 0        | -0.233724 |  |
|  | Shiraz-12T | 1390 | 0        | -0.237897 |  |
|  | Shiraz-18T | 1434 | 0.244465 | 0         |  |
|  | Shiraz-22T | 1549 | 0        | -0.319623 |  |
|  | Shiraz-22T | 1550 | 0        | -0.577052 |  |
|  | Shiraz-25T | 1698 | 0.21835  | 0         |  |
|  | Shiraz-28T | 1735 | 0.350744 | 0         |  |
|  | Shiraz-29T | 1778 | 0.120767 | 0         |  |
|  | Shiraz-38T | 1951 | 0.250891 | 0         |  |
|  | Shiraz-53T | 2078 | 0.287202 | 0         |  |
|  | Shiraz-58T | 2159 | 0        | -0.219521 |  |
|  | Shiraz-71T | 2238 | 0.603631 | 0         |  |
|  | Shiraz-3T  | 90   | 0.219276 | 0         |  |
|  | Shiraz-3T  | 93   | 0        | -0.058023 |  |
|  | Shiraz-4T  | 253  | 0.372918 | 0         |  |
|  | Shiraz-36T | 378  | 0.179558 | 0         |  |
|  | Shiraz-36T | 380  | 0.083883 | 0         |  |
|  | Shiraz-44T | 638  | 0        | -0.433476 |  |
|  | Shiraz-46T | 943  | 0.093799 | 0         |  |
|  | Shiraz-46T | 945  | 0        | -0.014838 |  |
|  | Shiraz-47T | 1029 | 0        | -0.096586 |  |
|  | Shiraz-49T | 1119 | 0        | -0.157331 |  |
|  | Shiraz-77T | 1225 | 0        | -0.117922 |  |
|  | Shiraz-77T | 1226 | 0        | -0.233724 |  |
|  | Shiraz-12T | 1390 | 0        | -0.237897 |  |
|  | Shiraz-18T | 1434 | 0.244465 | 0         |  |
|  | Shiraz-22T | 1549 | 0        | -0.319623 |  |
|  | Shiraz-22T | 1550 | 0        | -0.577052 |  |
|  | Shiraz-25T | 1698 | 0.21835  | 0         |  |
|  | Shiraz-28T | 1735 | 0.350744 | 0         |  |
|  | Shiraz-29T | 1778 | 0.120767 | 0         |  |
|  | Shiraz-38T | 1951 | 0.250891 | 0         |  |
|  | Shiraz-53T | 2078 | 0.287202 | 0         |  |
|  | Shiraz-58T | 2159 | 0        | -0.219521 |  |
|  | Shiraz-71T | 2238 | 0.603631 | 0         |  |
|  | Shiraz-3T  | 90   | 0.219276 | 0         |  |
|  | Shiraz-3T  | 93   | 0        | -0.058023 |  |

|      |      |            |      |          |           |  |
|------|------|------------|------|----------|-----------|--|
|      |      | Shiraz-4T  | 253  | 0.372918 | 0         |  |
|      |      | Shiraz-36T | 378  | 0.179558 | 0         |  |
|      |      | Shiraz-36T | 380  | 0.083883 | 0         |  |
|      |      | Shiraz-44T | 638  | 0        | -0.433476 |  |
|      |      | Shiraz-46T | 943  | 0.093799 | 0         |  |
|      |      | Shiraz-46T | 945  | 0        | -0.014838 |  |
|      |      | Shiraz-47T | 1029 | 0        | -0.096586 |  |
|      |      | Shiraz-49T | 1119 | 0        | -0.157331 |  |
|      |      | Shiraz-77T | 1225 | 0        | -0.117922 |  |
|      |      | Shiraz-77T | 1226 | 0        | -0.233724 |  |
|      |      | Shiraz-12T | 1390 | 0        | -0.237897 |  |
|      |      | Shiraz-18T | 1434 | 0.244465 | 0         |  |
|      |      | Shiraz-22T | 1549 | 0        | -0.319623 |  |
|      |      | Shiraz-22T | 1550 | 0        | -0.577052 |  |
|      |      | Shiraz-25T | 1698 | 0.21835  | 0         |  |
|      |      | Shiraz-28T | 1735 | 0.350744 | 0         |  |
|      |      | Shiraz-29T | 1778 | 0.120767 | 0         |  |
|      |      | Shiraz-38T | 1951 | 0.250891 | 0         |  |
|      |      | Shiraz-53T | 2078 | 0.287202 | 0         |  |
|      |      | Shiraz-58T | 2159 | 0        | -0.219521 |  |
|      |      | Shiraz-71T | 2238 | 0.603631 | 0         |  |
| GRM8 | chr7 | Shiraz-3T  | 90   | 0.219276 | 0         |  |
|      |      | Shiraz-3T  | 90   | 0.219276 | 0         |  |
|      |      | Shiraz-3T  | 90   | 0.219276 | 0         |  |
|      |      | Shiraz-3T  | 95   | 0        | -0.077623 |  |
|      |      | Shiraz-3T  | 95   | 0        | -0.077623 |  |
|      |      | Shiraz-3T  | 95   | 0        | -0.077623 |  |
|      |      | Shiraz-4T  | 253  | 0.372918 | 0         |  |
|      |      | Shiraz-4T  | 253  | 0.372918 | 0         |  |
|      |      | Shiraz-4T  | 253  | 0.372918 | 0         |  |
|      |      | Shiraz-36T | 378  | 0.179558 | 0         |  |
|      |      | Shiraz-36T | 378  | 0.179558 | 0         |  |
|      |      | Shiraz-36T | 378  | 0.179558 | 0         |  |
|      |      | Shiraz-36T | 382  | 0.081739 | 0         |  |
|      |      | Shiraz-36T | 382  | 0.081739 | 0         |  |
|      |      | Shiraz-36T | 382  | 0.081739 | 0         |  |
|      |      | Shiraz-44T | 641  | 0        | -0.477846 |  |
|      |      | Shiraz-44T | 641  | 0        | -0.477846 |  |
|      |      | Shiraz-44T | 641  | 0        | -0.477846 |  |
|      |      | Shiraz-46T | 943  | 0.093799 | 0         |  |
|      |      | Shiraz-46T | 943  | 0.093799 | 0         |  |
|      |      | Shiraz-46T | 943  | 0.093799 | 0         |  |
|      |      | Shiraz-46T | 947  | 0        | -0.010843 |  |
|      |      | Shiraz-46T | 947  | 0        | -0.010843 |  |
|      |      | Shiraz-46T | 947  | 0        | -0.010843 |  |
|      |      | Shiraz-47T | 1031 | 0        | -0.117529 |  |
|      |      | Shiraz-47T | 1031 | 0        | -0.117529 |  |

|  |            |      |          |           |  |  |
|--|------------|------|----------|-----------|--|--|
|  | Shiraz-47T | 1031 | 0        | -0.117529 |  |  |
|  | Shiraz-49T | 1121 | 0        | -0.138569 |  |  |
|  | Shiraz-49T | 1121 | 0        | -0.138569 |  |  |
|  | Shiraz-49T | 1121 | 0        | -0.138569 |  |  |
|  | Shiraz-77T | 1225 | 0        | -0.117922 |  |  |
|  | Shiraz-77T | 1225 | 0        | -0.117922 |  |  |
|  | Shiraz-77T | 1225 | 0        | -0.117922 |  |  |
|  | Shiraz-77T | 1228 | 0        | -0.238084 |  |  |
|  | Shiraz-77T | 1228 | 0        | -0.238084 |  |  |
|  | Shiraz-77T | 1228 | 0        | -0.238084 |  |  |
|  | Shiraz-18T | 1434 | 0.244465 | 0         |  |  |
|  | Shiraz-18T | 1434 | 0.244465 | 0         |  |  |
|  | Shiraz-18T | 1434 | 0.244465 | 0         |  |  |
|  | Shiraz-22T | 1549 | 0        | -0.319623 |  |  |
|  | Shiraz-22T | 1549 | 0        | -0.319623 |  |  |
|  | Shiraz-22T | 1549 | 0        | -0.319623 |  |  |
|  | Shiraz-25T | 1698 | 0.21835  | 0         |  |  |
|  | Shiraz-25T | 1698 | 0.21835  | 0         |  |  |
|  | Shiraz-25T | 1698 | 0.21835  | 0         |  |  |
|  | Shiraz-28T | 1735 | 0.350744 | 0         |  |  |
|  | Shiraz-28T | 1735 | 0.350744 | 0         |  |  |
|  | Shiraz-28T | 1735 | 0.350744 | 0         |  |  |
|  | Shiraz-29T | 1778 | 0.120767 | 0         |  |  |
|  | Shiraz-29T | 1778 | 0.120767 | 0         |  |  |
|  | Shiraz-29T | 1778 | 0.120767 | 0         |  |  |
|  | Shiraz-32T | 1833 | 0.551336 | 0         |  |  |
|  | Shiraz-32T | 1833 | 0.551336 | 0         |  |  |
|  | Shiraz-32T | 1833 | 0.551336 | 0         |  |  |
|  | Shiraz-38T | 1951 | 0.250891 | 0         |  |  |
|  | Shiraz-38T | 1951 | 0.250891 | 0         |  |  |
|  | Shiraz-38T | 1951 | 0.250891 | 0         |  |  |
|  | Shiraz-53T | 2078 | 0.287202 | 0         |  |  |
|  | Shiraz-53T | 2078 | 0.287202 | 0         |  |  |
|  | Shiraz-53T | 2078 | 0.287202 | 0         |  |  |
|  | Shiraz-58T | 2161 | 0        | -0.187744 |  |  |
|  | Shiraz-58T | 2161 | 0        | -0.187744 |  |  |
|  | Shiraz-58T | 2161 | 0        | -0.187744 |  |  |
|  | Shiraz-71T | 2238 | 0.603631 | 0         |  |  |
|  | Shiraz-71T | 2238 | 0.603631 | 0         |  |  |
|  | Shiraz-71T | 2238 | 0.603631 | 0         |  |  |
|  | Shiraz-3T  | 90   | 0.219276 | 0         |  |  |
|  | Shiraz-3T  | 90   | 0.219276 | 0         |  |  |
|  | Shiraz-3T  | 90   | 0.219276 | 0         |  |  |
|  | Shiraz-3T  | 95   | 0        | -0.077623 |  |  |
|  | Shiraz-3T  | 95   | 0        | -0.077623 |  |  |
|  | Shiraz-3T  | 95   | 0        | -0.077623 |  |  |
|  | Shiraz-4T  | 253  | 0.372918 | 0         |  |  |



|  |  |            |      |          |           |  |
|--|--|------------|------|----------|-----------|--|
|  |  | Shiraz-4T  | 253  | 0.372918 | 0         |  |
|  |  | Shiraz-4T  | 253  | 0.372918 | 0         |  |
|  |  | Shiraz-36T | 378  | 0.179558 | 0         |  |
|  |  | Shiraz-36T | 378  | 0.179558 | 0         |  |
|  |  | Shiraz-36T | 378  | 0.179558 | 0         |  |
|  |  | Shiraz-36T | 382  | 0.081739 | 0         |  |
|  |  | Shiraz-36T | 382  | 0.081739 | 0         |  |
|  |  | Shiraz-36T | 382  | 0.081739 | 0         |  |
|  |  | Shiraz-44T | 641  | 0        | -0.477846 |  |
|  |  | Shiraz-44T | 641  | 0        | -0.477846 |  |
|  |  | Shiraz-44T | 641  | 0        | -0.477846 |  |
|  |  | Shiraz-46T | 943  | 0.093799 | 0         |  |
|  |  | Shiraz-46T | 943  | 0.093799 | 0         |  |
|  |  | Shiraz-46T | 943  | 0.093799 | 0         |  |
|  |  | Shiraz-46T | 947  | 0        | -0.010843 |  |
|  |  | Shiraz-46T | 947  | 0        | -0.010843 |  |
|  |  | Shiraz-46T | 947  | 0        | -0.010843 |  |
|  |  | Shiraz-47T | 1031 | 0        | -0.117529 |  |
|  |  | Shiraz-47T | 1031 | 0        | -0.117529 |  |
|  |  | Shiraz-47T | 1031 | 0        | -0.117529 |  |
|  |  | Shiraz-49T | 1121 | 0        | -0.138569 |  |
|  |  | Shiraz-49T | 1121 | 0        | -0.138569 |  |
|  |  | Shiraz-49T | 1121 | 0        | -0.138569 |  |
|  |  | Shiraz-77T | 1225 | 0        | -0.117922 |  |
|  |  | Shiraz-77T | 1225 | 0        | -0.117922 |  |
|  |  | Shiraz-77T | 1225 | 0        | -0.117922 |  |
|  |  | Shiraz-77T | 1228 | 0        | -0.238084 |  |
|  |  | Shiraz-77T | 1228 | 0        | -0.238084 |  |
|  |  | Shiraz-77T | 1228 | 0        | -0.238084 |  |
|  |  | Shiraz-18T | 1434 | 0.244465 | 0         |  |
|  |  | Shiraz-18T | 1434 | 0.244465 | 0         |  |
|  |  | Shiraz-18T | 1434 | 0.244465 | 0         |  |
|  |  | Shiraz-22T | 1549 | 0        | -0.319623 |  |
|  |  | Shiraz-22T | 1549 | 0        | -0.319623 |  |
|  |  | Shiraz-22T | 1549 | 0        | -0.319623 |  |
|  |  | Shiraz-25T | 1698 | 0.21835  | 0         |  |
|  |  | Shiraz-25T | 1698 | 0.21835  | 0         |  |
|  |  | Shiraz-25T | 1698 | 0.21835  | 0         |  |
|  |  | Shiraz-28T | 1735 | 0.350744 | 0         |  |
|  |  | Shiraz-28T | 1735 | 0.350744 | 0         |  |
|  |  | Shiraz-28T | 1735 | 0.350744 | 0         |  |
|  |  | Shiraz-29T | 1778 | 0.120767 | 0         |  |
|  |  | Shiraz-29T | 1778 | 0.120767 | 0         |  |
|  |  | Shiraz-29T | 1778 | 0.120767 | 0         |  |
|  |  | Shiraz-32T | 1833 | 0.551336 | 0         |  |
|  |  | Shiraz-32T | 1833 | 0.551336 | 0         |  |
|  |  | Shiraz-32T | 1833 | 0.551336 | 0         |  |

|  |  |            |      |          |           |  |  |
|--|--|------------|------|----------|-----------|--|--|
|  |  | Shiraz-38T | 1951 | 0.250891 | 0         |  |  |
|  |  | Shiraz-38T | 1951 | 0.250891 | 0         |  |  |
|  |  | Shiraz-38T | 1951 | 0.250891 | 0         |  |  |
|  |  | Shiraz-53T | 2078 | 0.287202 | 0         |  |  |
|  |  | Shiraz-53T | 2078 | 0.287202 | 0         |  |  |
|  |  | Shiraz-53T | 2078 | 0.287202 | 0         |  |  |
|  |  | Shiraz-58T | 2161 | 0        | -0.187744 |  |  |
|  |  | Shiraz-58T | 2161 | 0        | -0.187744 |  |  |
|  |  | Shiraz-58T | 2161 | 0        | -0.187744 |  |  |
|  |  | Shiraz-71T | 2238 | 0.603631 | 0         |  |  |
|  |  | Shiraz-71T | 2238 | 0.603631 | 0         |  |  |
|  |  | Shiraz-71T | 2238 | 0.603631 | 0         |  |  |
|  |  | Shiraz-3T  | 90   | 0.219276 | 0         |  |  |
|  |  | Shiraz-3T  | 90   | 0.219276 | 0         |  |  |
|  |  | Shiraz-3T  | 90   | 0.219276 | 0         |  |  |
|  |  | Shiraz-3T  | 95   | 0        | -0.077623 |  |  |
|  |  | Shiraz-3T  | 95   | 0        | -0.077623 |  |  |
|  |  | Shiraz-3T  | 95   | 0        | -0.077623 |  |  |
|  |  | Shiraz-4T  | 253  | 0.372918 | 0         |  |  |
|  |  | Shiraz-4T  | 253  | 0.372918 | 0         |  |  |
|  |  | Shiraz-4T  | 253  | 0.372918 | 0         |  |  |
|  |  | Shiraz-36T | 378  | 0.179558 | 0         |  |  |
|  |  | Shiraz-36T | 378  | 0.179558 | 0         |  |  |
|  |  | Shiraz-36T | 378  | 0.179558 | 0         |  |  |
|  |  | Shiraz-36T | 382  | 0.081739 | 0         |  |  |
|  |  | Shiraz-36T | 382  | 0.081739 | 0         |  |  |
|  |  | Shiraz-36T | 382  | 0.081739 | 0         |  |  |
|  |  | Shiraz-44T | 641  | 0        | -0.477846 |  |  |
|  |  | Shiraz-44T | 641  | 0        | -0.477846 |  |  |
|  |  | Shiraz-44T | 641  | 0        | -0.477846 |  |  |
|  |  | Shiraz-46T | 943  | 0.093799 | 0         |  |  |
|  |  | Shiraz-46T | 943  | 0.093799 | 0         |  |  |
|  |  | Shiraz-46T | 943  | 0.093799 | 0         |  |  |
|  |  | Shiraz-46T | 947  | 0        | -0.010843 |  |  |
|  |  | Shiraz-46T | 947  | 0        | -0.010843 |  |  |
|  |  | Shiraz-46T | 947  | 0        | -0.010843 |  |  |
|  |  | Shiraz-47T | 1031 | 0        | -0.117529 |  |  |
|  |  | Shiraz-47T | 1031 | 0        | -0.117529 |  |  |
|  |  | Shiraz-47T | 1031 | 0        | -0.117529 |  |  |
|  |  | Shiraz-49T | 1121 | 0        | -0.138569 |  |  |
|  |  | Shiraz-49T | 1121 | 0        | -0.138569 |  |  |
|  |  | Shiraz-49T | 1121 | 0        | -0.138569 |  |  |
|  |  | Shiraz-77T | 1225 | 0        | -0.117922 |  |  |
|  |  | Shiraz-77T | 1225 | 0        | -0.117922 |  |  |
|  |  | Shiraz-77T | 1225 | 0        | -0.117922 |  |  |
|  |  | Shiraz-77T | 1228 | 0        | -0.238084 |  |  |
|  |  | Shiraz-77T | 1228 | 0        | -0.238084 |  |  |

|      |      |            |      |          |           |  |  |
|------|------|------------|------|----------|-----------|--|--|
|      |      | Shiraz-77T | 1228 | 0        | -0.238084 |  |  |
|      |      | Shiraz-18T | 1434 | 0.244465 | 0         |  |  |
|      |      | Shiraz-18T | 1434 | 0.244465 | 0         |  |  |
|      |      | Shiraz-18T | 1434 | 0.244465 | 0         |  |  |
|      |      | Shiraz-22T | 1549 | 0        | -0.319623 |  |  |
|      |      | Shiraz-22T | 1549 | 0        | -0.319623 |  |  |
|      |      | Shiraz-22T | 1549 | 0        | -0.319623 |  |  |
|      |      | Shiraz-25T | 1698 | 0.21835  | 0         |  |  |
|      |      | Shiraz-25T | 1698 | 0.21835  | 0         |  |  |
|      |      | Shiraz-25T | 1698 | 0.21835  | 0         |  |  |
|      |      | Shiraz-28T | 1735 | 0.350744 | 0         |  |  |
|      |      | Shiraz-28T | 1735 | 0.350744 | 0         |  |  |
|      |      | Shiraz-28T | 1735 | 0.350744 | 0         |  |  |
|      |      | Shiraz-29T | 1778 | 0.120767 | 0         |  |  |
|      |      | Shiraz-29T | 1778 | 0.120767 | 0         |  |  |
|      |      | Shiraz-29T | 1778 | 0.120767 | 0         |  |  |
|      |      | Shiraz-32T | 1833 | 0.551336 | 0         |  |  |
|      |      | Shiraz-32T | 1833 | 0.551336 | 0         |  |  |
|      |      | Shiraz-32T | 1833 | 0.551336 | 0         |  |  |
|      |      | Shiraz-38T | 1951 | 0.250891 | 0         |  |  |
|      |      | Shiraz-38T | 1951 | 0.250891 | 0         |  |  |
|      |      | Shiraz-38T | 1951 | 0.250891 | 0         |  |  |
|      |      | Shiraz-53T | 2078 | 0.287202 | 0         |  |  |
|      |      | Shiraz-53T | 2078 | 0.287202 | 0         |  |  |
|      |      | Shiraz-53T | 2078 | 0.287202 | 0         |  |  |
|      |      | Shiraz-58T | 2161 | 0        | -0.187744 |  |  |
|      |      | Shiraz-58T | 2161 | 0        | -0.187744 |  |  |
|      |      | Shiraz-58T | 2161 | 0        | -0.187744 |  |  |
|      |      | Shiraz-71T | 2238 | 0.603631 | 0         |  |  |
|      |      | Shiraz-71T | 2238 | 0.603631 | 0         |  |  |
|      |      | Shiraz-71T | 2238 | 0.603631 | 0         |  |  |
| GRPR | chrX | Shiraz-3T  | 235  | 0        | -0.28401  |  |  |
|      |      | Shiraz-4T  | 260  | 0        | -0.324128 |  |  |
|      |      | Shiraz-16T | 294  | 0.655804 | 0         |  |  |
|      |      | Shiraz-36T | 431  | 0        | -0.78035  |  |  |
|      |      | Shiraz-44T | 891  | 0        | -0.954044 |  |  |
|      |      | Shiraz-49T | 1166 | 0        | -0.917235 |  |  |
|      |      | Shiraz-9T  | 1368 | 0.199713 | 0         |  |  |
|      |      | Shiraz-18T | 1455 | 0        | -0.186773 |  |  |
|      |      | Shiraz-22T | 1669 | 0.695915 | 0         |  |  |
|      |      | Shiraz-25T | 1717 | 0.420447 | 0         |  |  |
|      |      | Shiraz-28T | 1760 | 0.538181 | 0         |  |  |
|      |      | Shiraz-29T | 1800 | 0.672527 | 0         |  |  |
|      |      | Shiraz-32T | 1869 | 0.776805 | 0         |  |  |
|      |      | Shiraz-35T | 1932 | 0.507141 | 0         |  |  |
|      |      | Shiraz-40T | 2051 | 0.098506 | 0         |  |  |
|      |      | Shiraz-58T | 2221 | 0.871948 | 0         |  |  |

|       |      |            |      |          |           |  |
|-------|------|------------|------|----------|-----------|--|
|       |      | Shiraz-71T | 2260 | 0.68394  | 0         |  |
|       |      | Shiraz-71T | 2261 | 0.508399 | 0         |  |
|       |      | Shiraz-3T  | 235  | 0        | -0.28401  |  |
|       |      | Shiraz-4T  | 260  | 0        | -0.324128 |  |
|       |      | Shiraz-16T | 294  | 0.655804 | 0         |  |
|       |      | Shiraz-36T | 431  | 0        | -0.78035  |  |
|       |      | Shiraz-44T | 891  | 0        | -0.954044 |  |
|       |      | Shiraz-49T | 1166 | 0        | -0.917235 |  |
|       |      | Shiraz-9T  | 1368 | 0.199713 | 0         |  |
|       |      | Shiraz-18T | 1455 | 0        | -0.186773 |  |
|       |      | Shiraz-22T | 1669 | 0.695915 | 0         |  |
|       |      | Shiraz-25T | 1717 | 0.420447 | 0         |  |
|       |      | Shiraz-28T | 1760 | 0.538181 | 0         |  |
|       |      | Shiraz-29T | 1800 | 0.672527 | 0         |  |
|       |      | Shiraz-32T | 1869 | 0.776805 | 0         |  |
|       |      | Shiraz-35T | 1932 | 0.507141 | 0         |  |
|       |      | Shiraz-40T | 2051 | 0.098506 | 0         |  |
|       |      | Shiraz-58T | 2221 | 0.871948 | 0         |  |
|       |      | Shiraz-71T | 2260 | 0.68394  | 0         |  |
|       |      | Shiraz-71T | 2261 | 0.508399 | 0         |  |
|       |      | Shiraz-3T  | 235  | 0        | -0.28401  |  |
|       |      | Shiraz-4T  | 260  | 0        | -0.324128 |  |
|       |      | Shiraz-16T | 294  | 0.655804 | 0         |  |
|       |      | Shiraz-36T | 431  | 0        | -0.78035  |  |
|       |      | Shiraz-44T | 891  | 0        | -0.954044 |  |
|       |      | Shiraz-49T | 1166 | 0        | -0.917235 |  |
|       |      | Shiraz-9T  | 1368 | 0.199713 | 0         |  |
|       |      | Shiraz-18T | 1455 | 0        | -0.186773 |  |
|       |      | Shiraz-22T | 1669 | 0.695915 | 0         |  |
|       |      | Shiraz-25T | 1717 | 0.420447 | 0         |  |
|       |      | Shiraz-28T | 1760 | 0.538181 | 0         |  |
|       |      | Shiraz-29T | 1800 | 0.672527 | 0         |  |
|       |      | Shiraz-32T | 1869 | 0.776805 | 0         |  |
|       |      | Shiraz-35T | 1932 | 0.507141 | 0         |  |
|       |      | Shiraz-40T | 2051 | 0.098506 | 0         |  |
|       |      | Shiraz-58T | 2221 | 0.871948 | 0         |  |
|       |      | Shiraz-71T | 2260 | 0.68394  | 0         |  |
|       |      | Shiraz-71T | 2261 | 0.508399 | 0         |  |
| GSPT2 | chrX | Shiraz-3T  | 239  | 0        | -0.28395  |  |
|       |      | Shiraz-4T  | 260  | 0        | -0.324128 |  |
|       |      | Shiraz-16T | 294  | 0.655804 | 0         |  |
|       |      | Shiraz-31T | 345  | 0.103301 | 0         |  |
|       |      | Shiraz-36T | 431  | 0        | -0.78035  |  |
|       |      | Shiraz-36T | 432  | 0        | -0.6692   |  |
|       |      | Shiraz-44T | 891  | 0        | -0.954044 |  |
|       |      | Shiraz-49T | 1166 | 0        | -0.917235 |  |
|       |      | Shiraz-77T | 1282 | 0.213849 | 0         |  |

|  |            |      |          |           |  |
|--|------------|------|----------|-----------|--|
|  | Shiraz-9T  | 1368 | 0.199713 | 0         |  |
|  | Shiraz-18T | 1456 | 0.608534 | 0         |  |
|  | Shiraz-22T | 1669 | 0.695915 | 0         |  |
|  | Shiraz-25T | 1717 | 0.420447 | 0         |  |
|  | Shiraz-28T | 1760 | 0.538181 | 0         |  |
|  | Shiraz-29T | 1800 | 0.672527 | 0         |  |
|  | Shiraz-32T | 1869 | 0.776805 | 0         |  |
|  | Shiraz-35T | 1932 | 0.507141 | 0         |  |
|  | Shiraz-58T | 2221 | 0.871948 | 0         |  |
|  | Shiraz-71T | 2260 | 0.68394  | 0         |  |
|  | Shiraz-71T | 2262 | 0.986748 | 0         |  |
|  | Shiraz-3T  | 239  | 0        | -0.28395  |  |
|  | Shiraz-4T  | 260  | 0        | -0.324128 |  |
|  | Shiraz-16T | 294  | 0.655804 | 0         |  |
|  | Shiraz-31T | 345  | 0.103301 | 0         |  |
|  | Shiraz-36T | 431  | 0        | -0.78035  |  |
|  | Shiraz-36T | 432  | 0        | -0.6692   |  |
|  | Shiraz-44T | 891  | 0        | -0.954044 |  |
|  | Shiraz-49T | 1166 | 0        | -0.917235 |  |
|  | Shiraz-77T | 1282 | 0.213849 | 0         |  |
|  | Shiraz-9T  | 1368 | 0.199713 | 0         |  |
|  | Shiraz-18T | 1456 | 0.608534 | 0         |  |
|  | Shiraz-22T | 1669 | 0.695915 | 0         |  |
|  | Shiraz-25T | 1717 | 0.420447 | 0         |  |
|  | Shiraz-28T | 1760 | 0.538181 | 0         |  |
|  | Shiraz-29T | 1800 | 0.672527 | 0         |  |
|  | Shiraz-32T | 1869 | 0.776805 | 0         |  |
|  | Shiraz-35T | 1932 | 0.507141 | 0         |  |
|  | Shiraz-58T | 2221 | 0.871948 | 0         |  |
|  | Shiraz-71T | 2260 | 0.68394  | 0         |  |
|  | Shiraz-71T | 2262 | 0.986748 | 0         |  |
|  | Shiraz-3T  | 239  | 0        | -0.28395  |  |
|  | Shiraz-4T  | 260  | 0        | -0.324128 |  |
|  | Shiraz-16T | 294  | 0.655804 | 0         |  |
|  | Shiraz-31T | 345  | 0.103301 | 0         |  |
|  | Shiraz-36T | 431  | 0        | -0.78035  |  |
|  | Shiraz-36T | 432  | 0        | -0.6692   |  |
|  | Shiraz-44T | 891  | 0        | -0.954044 |  |
|  | Shiraz-49T | 1166 | 0        | -0.917235 |  |
|  | Shiraz-77T | 1282 | 0.213849 | 0         |  |
|  | Shiraz-9T  | 1368 | 0.199713 | 0         |  |
|  | Shiraz-18T | 1456 | 0.608534 | 0         |  |
|  | Shiraz-22T | 1669 | 0.695915 | 0         |  |
|  | Shiraz-25T | 1717 | 0.420447 | 0         |  |
|  | Shiraz-28T | 1760 | 0.538181 | 0         |  |
|  | Shiraz-29T | 1800 | 0.672527 | 0         |  |
|  | Shiraz-32T | 1869 | 0.776805 | 0         |  |

|       |      |            |      |          |           |  |
|-------|------|------------|------|----------|-----------|--|
|       |      | Shiraz-35T | 1932 | 0.507141 | 0         |  |
|       |      | Shiraz-58T | 2221 | 0.871948 | 0         |  |
|       |      | Shiraz-71T | 2260 | 0.68394  | 0         |  |
|       |      | Shiraz-71T | 2262 | 0.986748 | 0         |  |
| GSTK1 | chr7 | Shiraz-3T  | 90   | 0.219276 | 0         |  |
|       |      | Shiraz-4T  | 253  | 0.372918 | 0         |  |
|       |      | Shiraz-36T | 378  | 0.179558 | 0         |  |
|       |      | Shiraz-46T | 943  | 0.093799 | 0         |  |
|       |      | Shiraz-77T | 1225 | 0        | -0.117922 |  |
|       |      | Shiraz-9T  | 1325 | 0.221899 | 0         |  |
|       |      | Shiraz-18T | 1434 | 0.244465 | 0         |  |
|       |      | Shiraz-25T | 1698 | 0.21835  | 0         |  |
|       |      | Shiraz-28T | 1735 | 0.350744 | 0         |  |
|       |      | Shiraz-29T | 1778 | 0.120767 | 0         |  |
|       |      | Shiraz-32T | 1833 | 0.551336 | 0         |  |
|       |      | Shiraz-38T | 1951 | 0.250891 | 0         |  |
|       |      | Shiraz-53T | 2078 | 0.287202 | 0         |  |
|       |      | Shiraz-58T | 2162 | 0.221505 | 0         |  |
|       |      | Shiraz-71T | 2238 | 0.603631 | 0         |  |
|       |      | Shiraz-3T  | 90   | 0.219276 | 0         |  |
|       |      | Shiraz-4T  | 253  | 0.372918 | 0         |  |
|       |      | Shiraz-36T | 378  | 0.179558 | 0         |  |
|       |      | Shiraz-46T | 943  | 0.093799 | 0         |  |
|       |      | Shiraz-77T | 1225 | 0        | -0.117922 |  |
|       |      | Shiraz-9T  | 1325 | 0.221899 | 0         |  |
|       |      | Shiraz-18T | 1434 | 0.244465 | 0         |  |
|       |      | Shiraz-25T | 1698 | 0.21835  | 0         |  |
|       |      | Shiraz-28T | 1735 | 0.350744 | 0         |  |
|       |      | Shiraz-29T | 1778 | 0.120767 | 0         |  |
|       |      | Shiraz-32T | 1833 | 0.551336 | 0         |  |
|       |      | Shiraz-38T | 1951 | 0.250891 | 0         |  |
|       |      | Shiraz-53T | 2078 | 0.287202 | 0         |  |
|       |      | Shiraz-58T | 2162 | 0.221505 | 0         |  |
|       |      | Shiraz-71T | 2238 | 0.603631 | 0         |  |
|       |      | Shiraz-3T  | 90   | 0.219276 | 0         |  |
|       |      | Shiraz-4T  | 253  | 0.372918 | 0         |  |
|       |      | Shiraz-36T | 378  | 0.179558 | 0         |  |
|       |      | Shiraz-46T | 943  | 0.093799 | 0         |  |
|       |      | Shiraz-77T | 1225 | 0        | -0.117922 |  |
|       |      | Shiraz-9T  | 1325 | 0.221899 | 0         |  |
|       |      | Shiraz-18T | 1434 | 0.244465 | 0         |  |
|       |      | Shiraz-25T | 1698 | 0.21835  | 0         |  |
|       |      | Shiraz-28T | 1735 | 0.350744 | 0         |  |
|       |      | Shiraz-29T | 1778 | 0.120767 | 0         |  |
|       |      | Shiraz-32T | 1833 | 0.551336 | 0         |  |
|       |      | Shiraz-38T | 1951 | 0.250891 | 0         |  |
|       |      | Shiraz-53T | 2078 | 0.287202 | 0         |  |

|         |      |            |      |          |           |  |
|---------|------|------------|------|----------|-----------|--|
|         |      | Shiraz-58T | 2162 | 0.221505 | 0         |  |
|         |      | Shiraz-71T | 2238 | 0.603631 | 0         |  |
| GTPBP10 | chr7 | Shiraz-3T  | 90   | 0.219276 | 0         |  |
|         |      | Shiraz-3T  | 93   | 0        | -0.058023 |  |
|         |      | Shiraz-4T  | 253  | 0.372918 | 0         |  |
|         |      | Shiraz-36T | 378  | 0.179558 | 0         |  |
|         |      | Shiraz-36T | 380  | 0.083883 | 0         |  |
|         |      | Shiraz-44T | 638  | 0        | -0.433476 |  |
|         |      | Shiraz-46T | 943  | 0.093799 | 0         |  |
|         |      | Shiraz-46T | 945  | 0        | -0.014838 |  |
|         |      | Shiraz-47T | 1029 | 0        | -0.096586 |  |
|         |      | Shiraz-49T | 1119 | 0        | -0.157331 |  |
|         |      | Shiraz-77T | 1225 | 0        | -0.117922 |  |
|         |      | Shiraz-77T | 1226 | 0        | -0.233724 |  |
|         |      | Shiraz-18T | 1434 | 0.244465 | 0         |  |
|         |      | Shiraz-22T | 1549 | 0        | -0.319623 |  |
|         |      | Shiraz-25T | 1698 | 0.21835  | 0         |  |
|         |      | Shiraz-28T | 1735 | 0.350744 | 0         |  |
|         |      | Shiraz-29T | 1778 | 0.120767 | 0         |  |
|         |      | Shiraz-32T | 1833 | 0.551336 | 0         |  |
|         |      | Shiraz-38T | 1951 | 0.250891 | 0         |  |
|         |      | Shiraz-53T | 2078 | 0.287202 | 0         |  |
|         |      | Shiraz-58T | 2159 | 0        | -0.219521 |  |
|         |      | Shiraz-71T | 2238 | 0.603631 | 0         |  |
|         |      | Shiraz-3T  | 90   | 0.219276 | 0         |  |
|         |      | Shiraz-3T  | 93   | 0        | -0.058023 |  |
|         |      | Shiraz-4T  | 253  | 0.372918 | 0         |  |
|         |      | Shiraz-36T | 378  | 0.179558 | 0         |  |
|         |      | Shiraz-36T | 380  | 0.083883 | 0         |  |
|         |      | Shiraz-44T | 638  | 0        | -0.433476 |  |
|         |      | Shiraz-46T | 943  | 0.093799 | 0         |  |
|         |      | Shiraz-46T | 945  | 0        | -0.014838 |  |
|         |      | Shiraz-47T | 1029 | 0        | -0.096586 |  |
|         |      | Shiraz-49T | 1119 | 0        | -0.157331 |  |
|         |      | Shiraz-77T | 1225 | 0        | -0.117922 |  |
|         |      | Shiraz-77T | 1226 | 0        | -0.233724 |  |
|         |      | Shiraz-18T | 1434 | 0.244465 | 0         |  |
|         |      | Shiraz-22T | 1549 | 0        | -0.319623 |  |
|         |      | Shiraz-25T | 1698 | 0.21835  | 0         |  |
|         |      | Shiraz-28T | 1735 | 0.350744 | 0         |  |
|         |      | Shiraz-29T | 1778 | 0.120767 | 0         |  |
|         |      | Shiraz-32T | 1833 | 0.551336 | 0         |  |
|         |      | Shiraz-38T | 1951 | 0.250891 | 0         |  |
|         |      | Shiraz-53T | 2078 | 0.287202 | 0         |  |
|         |      | Shiraz-58T | 2159 | 0        | -0.219521 |  |
|         |      | Shiraz-71T | 2238 | 0.603631 | 0         |  |
|         |      | Shiraz-3T  | 90   | 0.219276 | 0         |  |

|        |      |            |      |          |           |  |  |
|--------|------|------------|------|----------|-----------|--|--|
|        |      | Shiraz-3T  | 93   | 0        | -0.058023 |  |  |
|        |      | Shiraz-4T  | 253  | 0.372918 | 0         |  |  |
|        |      | Shiraz-36T | 378  | 0.179558 | 0         |  |  |
|        |      | Shiraz-36T | 380  | 0.083883 | 0         |  |  |
|        |      | Shiraz-44T | 638  | 0        | -0.433476 |  |  |
|        |      | Shiraz-46T | 943  | 0.093799 | 0         |  |  |
|        |      | Shiraz-46T | 945  | 0        | -0.014838 |  |  |
|        |      | Shiraz-47T | 1029 | 0        | -0.096586 |  |  |
|        |      | Shiraz-49T | 1119 | 0        | -0.157331 |  |  |
|        |      | Shiraz-77T | 1225 | 0        | -0.117922 |  |  |
|        |      | Shiraz-77T | 1226 | 0        | -0.233724 |  |  |
|        |      | Shiraz-18T | 1434 | 0.244465 | 0         |  |  |
|        |      | Shiraz-22T | 1549 | 0        | -0.319623 |  |  |
|        |      | Shiraz-25T | 1698 | 0.21835  | 0         |  |  |
|        |      | Shiraz-28T | 1735 | 0.350744 | 0         |  |  |
|        |      | Shiraz-29T | 1778 | 0.120767 | 0         |  |  |
|        |      | Shiraz-32T | 1833 | 0.551336 | 0         |  |  |
|        |      | Shiraz-38T | 1951 | 0.250891 | 0         |  |  |
|        |      | Shiraz-53T | 2078 | 0.287202 | 0         |  |  |
|        |      | Shiraz-58T | 2159 | 0        | -0.219521 |  |  |
|        |      | Shiraz-71T | 2238 | 0.603631 | 0         |  |  |
| GUCY2F | chrX | Shiraz-3T  | 242  | 0        | -0.336434 |  |  |
|        |      | Shiraz-4T  | 261  | 0        | -0.336249 |  |  |
|        |      | Shiraz-16T | 295  | 0.591657 | 0         |  |  |
|        |      | Shiraz-36T | 433  | 0        | -0.803961 |  |  |
|        |      | Shiraz-44T | 899  | 0        | -1.09697  |  |  |
|        |      | Shiraz-49T | 1170 | 0        | -0.967436 |  |  |
|        |      | Shiraz-18T | 1457 | 0.643204 | 0         |  |  |
|        |      | Shiraz-22T | 1673 | 0.611783 | 0         |  |  |
|        |      | Shiraz-25T | 1719 | 0.472955 | 0         |  |  |
|        |      | Shiraz-28T | 1762 | 0.562311 | 0         |  |  |
|        |      | Shiraz-29T | 1801 | 0.815343 | 0         |  |  |
|        |      | Shiraz-32T | 1870 | 0.729766 | 0         |  |  |
|        |      | Shiraz-35T | 1933 | 0.488535 | 0         |  |  |
|        |      | Shiraz-58T | 2223 | 0.833364 | 0         |  |  |
|        |      | Shiraz-71T | 2263 | 0.975531 | 0         |  |  |
|        |      | Shiraz-3T  | 242  | 0        | -0.336434 |  |  |
|        |      | Shiraz-4T  | 261  | 0        | -0.336249 |  |  |
|        |      | Shiraz-16T | 295  | 0.591657 | 0         |  |  |
|        |      | Shiraz-36T | 433  | 0        | -0.803961 |  |  |
|        |      | Shiraz-44T | 899  | 0        | -1.09697  |  |  |
|        |      | Shiraz-49T | 1170 | 0        | -0.967436 |  |  |
|        |      | Shiraz-18T | 1457 | 0.643204 | 0         |  |  |
|        |      | Shiraz-22T | 1673 | 0.611783 | 0         |  |  |
|        |      | Shiraz-25T | 1719 | 0.472955 | 0         |  |  |
|        |      | Shiraz-28T | 1762 | 0.562311 | 0         |  |  |
|        |      | Shiraz-29T | 1801 | 0.815343 | 0         |  |  |



|        |      |            |      |          |           |  |  |
|--------|------|------------|------|----------|-----------|--|--|
|        |      | Shiraz-32T | 1870 | 0.729766 | 0         |  |  |
|        |      | Shiraz-35T | 1933 | 0.488535 | 0         |  |  |
|        |      | Shiraz-58T | 2223 | 0.833364 | 0         |  |  |
|        |      | Shiraz-71T | 2263 | 0.975531 | 0         |  |  |
|        |      | Shiraz-3T  | 242  | 0        | -0.336434 |  |  |
|        |      | Shiraz-4T  | 261  | 0        | -0.336249 |  |  |
|        |      | Shiraz-16T | 295  | 0.591657 | 0         |  |  |
|        |      | Shiraz-36T | 433  | 0        | -0.803961 |  |  |
|        |      | Shiraz-44T | 899  | 0        | -1.09697  |  |  |
|        |      | Shiraz-49T | 1170 | 0        | -0.967436 |  |  |
|        |      | Shiraz-18T | 1457 | 0.643204 | 0         |  |  |
|        |      | Shiraz-22T | 1673 | 0.611783 | 0         |  |  |
|        |      | Shiraz-25T | 1719 | 0.472955 | 0         |  |  |
|        |      | Shiraz-28T | 1762 | 0.562311 | 0         |  |  |
|        |      | Shiraz-29T | 1801 | 0.815343 | 0         |  |  |
|        |      | Shiraz-32T | 1870 | 0.729766 | 0         |  |  |
|        |      | Shiraz-35T | 1933 | 0.488535 | 0         |  |  |
|        |      | Shiraz-58T | 2223 | 0.833364 | 0         |  |  |
|        |      | Shiraz-71T | 2263 | 0.975531 | 0         |  |  |
| H2AFB1 | chrX | Shiraz-3T  | 247  | 0        | -0.421316 |  |  |
|        |      | Shiraz-3T  | 247  | 0        | -0.421316 |  |  |
|        |      | Shiraz-4T  | 261  | 0        | -0.336249 |  |  |
|        |      | Shiraz-4T  | 261  | 0        | -0.336249 |  |  |
|        |      | Shiraz-4T  | 261  | 0        | -0.336249 |  |  |
|        |      | Shiraz-16T | 295  | 0.591657 | 0         |  |  |
|        |      | Shiraz-36T | 433  | 0        | -0.803961 |  |  |
|        |      | Shiraz-36T | 433  | 0        | -0.803961 |  |  |
|        |      | Shiraz-36T | 433  | 0        | -0.803961 |  |  |
|        |      | Shiraz-44T | 909  | 0        | -1.067051 |  |  |
|        |      | Shiraz-44T | 909  | 0        | -1.067051 |  |  |
|        |      | Shiraz-44T | 909  | 0        | -1.067051 |  |  |
|        |      | Shiraz-49T | 1170 | 0        | -0.967436 |  |  |
|        |      | Shiraz-49T | 1170 | 0        | -0.967436 |  |  |
|        |      | Shiraz-49T | 1170 | 0        | -0.967436 |  |  |
|        |      | Shiraz-9T  | 1370 | 0.690073 | 0         |  |  |
|        |      | Shiraz-9T  | 1370 | 0.690073 | 0         |  |  |
|        |      | Shiraz-9T  | 1370 | 0.690073 | 0         |  |  |
|        |      | Shiraz-18T | 1457 | 0.643204 | 0         |  |  |
|        |      | Shiraz-18T | 1457 | 0.643204 | 0         |  |  |
|        |      | Shiraz-18T | 1457 | 0.643204 | 0         |  |  |
|        |      | Shiraz-22T | 1673 | 0.611783 | 0         |  |  |
|        |      | Shiraz-22T | 1673 | 0.611783 | 0         |  |  |
|        |      | Shiraz-22T | 1673 | 0.611783 | 0         |  |  |
|        |      | Shiraz-25T | 1719 | 0.472955 | 0         |  |  |
|        |      | Shiraz-25T | 1719 | 0.472955 | 0         |  |  |
|        |      | Shiraz-25T | 1719 | 0.472955 | 0         |  |  |
|        |      | Shiraz-28T | 1762 | 0.562311 | 0         |  |  |

|  |  |            |      |          |           |  |  |
|--|--|------------|------|----------|-----------|--|--|
|  |  | Shiraz-28T | 1762 | 0.562311 | 0         |  |  |
|  |  | Shiraz-28T | 1762 | 0.562311 | 0         |  |  |
|  |  | Shiraz-29T | 1801 | 0.815343 | 0         |  |  |
|  |  | Shiraz-29T | 1801 | 0.815343 | 0         |  |  |
|  |  | Shiraz-29T | 1801 | 0.815343 | 0         |  |  |
|  |  | Shiraz-32T | 1870 | 0.729766 | 0         |  |  |
|  |  | Shiraz-32T | 1872 | 1.504553 | 0         |  |  |
|  |  | Shiraz-35T | 1933 | 0.488535 | 0         |  |  |
|  |  | Shiraz-35T | 1933 | 0.488535 | 0         |  |  |
|  |  | Shiraz-35T | 1933 | 0.488535 | 0         |  |  |
|  |  | Shiraz-53T | 2115 | 0.427728 | 0         |  |  |
|  |  | Shiraz-58T | 2223 | 0.833364 | 0         |  |  |
|  |  | Shiraz-58T | 2223 | 0.833364 | 0         |  |  |
|  |  | Shiraz-58T | 2223 | 0.833364 | 0         |  |  |
|  |  | Shiraz-71T | 2263 | 0.975531 | 0         |  |  |
|  |  | Shiraz-71T | 2263 | 0.975531 | 0         |  |  |
|  |  | Shiraz-71T | 2263 | 0.975531 | 0         |  |  |
|  |  | Shiraz-3T  | 247  | 0        | -0.421316 |  |  |
|  |  | Shiraz-3T  | 247  | 0        | -0.421316 |  |  |
|  |  | Shiraz-4T  | 261  | 0        | -0.336249 |  |  |
|  |  | Shiraz-4T  | 261  | 0        | -0.336249 |  |  |
|  |  | Shiraz-4T  | 261  | 0        | -0.336249 |  |  |
|  |  | Shiraz-16T | 295  | 0.591657 | 0         |  |  |
|  |  | Shiraz-36T | 433  | 0        | -0.803961 |  |  |
|  |  | Shiraz-36T | 433  | 0        | -0.803961 |  |  |
|  |  | Shiraz-36T | 433  | 0        | -0.803961 |  |  |
|  |  | Shiraz-44T | 909  | 0        | -1.067051 |  |  |
|  |  | Shiraz-44T | 909  | 0        | -1.067051 |  |  |
|  |  | Shiraz-44T | 909  | 0        | -1.067051 |  |  |
|  |  | Shiraz-49T | 1170 | 0        | -0.967436 |  |  |
|  |  | Shiraz-49T | 1170 | 0        | -0.967436 |  |  |
|  |  | Shiraz-49T | 1170 | 0        | -0.967436 |  |  |
|  |  | Shiraz-9T  | 1370 | 0.690073 | 0         |  |  |
|  |  | Shiraz-9T  | 1370 | 0.690073 | 0         |  |  |
|  |  | Shiraz-9T  | 1370 | 0.690073 | 0         |  |  |
|  |  | Shiraz-18T | 1457 | 0.643204 | 0         |  |  |
|  |  | Shiraz-18T | 1457 | 0.643204 | 0         |  |  |
|  |  | Shiraz-18T | 1457 | 0.643204 | 0         |  |  |
|  |  | Shiraz-22T | 1673 | 0.611783 | 0         |  |  |
|  |  | Shiraz-22T | 1673 | 0.611783 | 0         |  |  |
|  |  | Shiraz-22T | 1673 | 0.611783 | 0         |  |  |
|  |  | Shiraz-25T | 1719 | 0.472955 | 0         |  |  |
|  |  | Shiraz-25T | 1719 | 0.472955 | 0         |  |  |
|  |  | Shiraz-25T | 1719 | 0.472955 | 0         |  |  |
|  |  | Shiraz-28T | 1762 | 0.562311 | 0         |  |  |
|  |  | Shiraz-28T | 1762 | 0.562311 | 0         |  |  |
|  |  | Shiraz-28T | 1762 | 0.562311 | 0         |  |  |

|  |            |      |          |           |  |
|--|------------|------|----------|-----------|--|
|  | Shiraz-29T | 1801 | 0.815343 | 0         |  |
|  | Shiraz-29T | 1801 | 0.815343 | 0         |  |
|  | Shiraz-29T | 1801 | 0.815343 | 0         |  |
|  | Shiraz-32T | 1870 | 0.729766 | 0         |  |
|  | Shiraz-32T | 1872 | 1.504553 | 0         |  |
|  | Shiraz-35T | 1933 | 0.488535 | 0         |  |
|  | Shiraz-35T | 1933 | 0.488535 | 0         |  |
|  | Shiraz-35T | 1933 | 0.488535 | 0         |  |
|  | Shiraz-53T | 2115 | 0.427728 | 0         |  |
|  | Shiraz-58T | 2223 | 0.833364 | 0         |  |
|  | Shiraz-58T | 2223 | 0.833364 | 0         |  |
|  | Shiraz-58T | 2223 | 0.833364 | 0         |  |
|  | Shiraz-71T | 2263 | 0.975531 | 0         |  |
|  | Shiraz-71T | 2263 | 0.975531 | 0         |  |
|  | Shiraz-71T | 2263 | 0.975531 | 0         |  |
|  | Shiraz-3T  | 247  | 0        | -0.421316 |  |
|  | Shiraz-3T  | 247  | 0        | -0.421316 |  |
|  | Shiraz-4T  | 261  | 0        | -0.336249 |  |
|  | Shiraz-4T  | 261  | 0        | -0.336249 |  |
|  | Shiraz-4T  | 261  | 0        | -0.336249 |  |
|  | Shiraz-16T | 295  | 0.591657 | 0         |  |
|  | Shiraz-36T | 433  | 0        | -0.803961 |  |
|  | Shiraz-36T | 433  | 0        | -0.803961 |  |
|  | Shiraz-36T | 433  | 0        | -0.803961 |  |
|  | Shiraz-44T | 909  | 0        | -1.067051 |  |
|  | Shiraz-44T | 909  | 0        | -1.067051 |  |
|  | Shiraz-44T | 909  | 0        | -1.067051 |  |
|  | Shiraz-49T | 1170 | 0        | -0.967436 |  |
|  | Shiraz-49T | 1170 | 0        | -0.967436 |  |
|  | Shiraz-49T | 1170 | 0        | -0.967436 |  |
|  | Shiraz-9T  | 1370 | 0.690073 | 0         |  |
|  | Shiraz-9T  | 1370 | 0.690073 | 0         |  |
|  | Shiraz-9T  | 1370 | 0.690073 | 0         |  |
|  | Shiraz-18T | 1457 | 0.643204 | 0         |  |
|  | Shiraz-18T | 1457 | 0.643204 | 0         |  |
|  | Shiraz-18T | 1457 | 0.643204 | 0         |  |
|  | Shiraz-22T | 1673 | 0.611783 | 0         |  |
|  | Shiraz-22T | 1673 | 0.611783 | 0         |  |
|  | Shiraz-22T | 1673 | 0.611783 | 0         |  |
|  | Shiraz-25T | 1719 | 0.472955 | 0         |  |
|  | Shiraz-25T | 1719 | 0.472955 | 0         |  |
|  | Shiraz-25T | 1719 | 0.472955 | 0         |  |
|  | Shiraz-28T | 1762 | 0.562311 | 0         |  |
|  | Shiraz-28T | 1762 | 0.562311 | 0         |  |
|  | Shiraz-28T | 1762 | 0.562311 | 0         |  |
|  | Shiraz-29T | 1801 | 0.815343 | 0         |  |
|  | Shiraz-29T | 1801 | 0.815343 | 0         |  |

|        |      |            |      |          |           |  |  |
|--------|------|------------|------|----------|-----------|--|--|
|        |      | Shiraz-29T | 1801 | 0.815343 | 0         |  |  |
|        |      | Shiraz-32T | 1870 | 0.729766 | 0         |  |  |
|        |      | Shiraz-32T | 1872 | 1.504553 | 0         |  |  |
|        |      | Shiraz-35T | 1933 | 0.488535 | 0         |  |  |
|        |      | Shiraz-35T | 1933 | 0.488535 | 0         |  |  |
|        |      | Shiraz-35T | 1933 | 0.488535 | 0         |  |  |
|        |      | Shiraz-53T | 2115 | 0.427728 | 0         |  |  |
|        |      | Shiraz-58T | 2223 | 0.833364 | 0         |  |  |
|        |      | Shiraz-58T | 2223 | 0.833364 | 0         |  |  |
|        |      | Shiraz-58T | 2223 | 0.833364 | 0         |  |  |
|        |      | Shiraz-71T | 2263 | 0.975531 | 0         |  |  |
|        |      | Shiraz-71T | 2263 | 0.975531 | 0         |  |  |
|        |      | Shiraz-71T | 2263 | 0.975531 | 0         |  |  |
| H2AFB2 | chrX | Shiraz-3T  | 247  | 0        | -0.421316 |  |  |
|        |      | Shiraz-3T  | 247  | 0        | -0.421316 |  |  |
|        |      | Shiraz-4T  | 261  | 0        | -0.336249 |  |  |
|        |      | Shiraz-4T  | 261  | 0        | -0.336249 |  |  |
|        |      | Shiraz-36T | 433  | 0        | -0.803961 |  |  |
|        |      | Shiraz-36T | 433  | 0        | -0.803961 |  |  |
|        |      | Shiraz-44T | 909  | 0        | -1.067051 |  |  |
|        |      | Shiraz-44T | 909  | 0        | -1.067051 |  |  |
|        |      | Shiraz-49T | 1170 | 0        | -0.967436 |  |  |
|        |      | Shiraz-49T | 1170 | 0        | -0.967436 |  |  |
|        |      | Shiraz-9T  | 1370 | 0.690073 | 0         |  |  |
|        |      | Shiraz-9T  | 1370 | 0.690073 | 0         |  |  |
|        |      | Shiraz-18T | 1457 | 0.643204 | 0         |  |  |
|        |      | Shiraz-18T | 1457 | 0.643204 | 0         |  |  |
|        |      | Shiraz-22T | 1673 | 0.611783 | 0         |  |  |
|        |      | Shiraz-22T | 1673 | 0.611783 | 0         |  |  |
|        |      | Shiraz-25T | 1719 | 0.472955 | 0         |  |  |
|        |      | Shiraz-25T | 1719 | 0.472955 | 0         |  |  |
|        |      | Shiraz-28T | 1762 | 0.562311 | 0         |  |  |
|        |      | Shiraz-28T | 1762 | 0.562311 | 0         |  |  |
|        |      | Shiraz-29T | 1801 | 0.815343 | 0         |  |  |
|        |      | Shiraz-29T | 1801 | 0.815343 | 0         |  |  |
|        |      | Shiraz-35T | 1933 | 0.488535 | 0         |  |  |
|        |      | Shiraz-35T | 1933 | 0.488535 | 0         |  |  |
|        |      | Shiraz-58T | 2223 | 0.833364 | 0         |  |  |
|        |      | Shiraz-58T | 2223 | 0.833364 | 0         |  |  |
|        |      | Shiraz-71T | 2263 | 0.975531 | 0         |  |  |
|        |      | Shiraz-71T | 2263 | 0.975531 | 0         |  |  |
|        |      | Shiraz-3T  | 247  | 0        | -0.421316 |  |  |
|        |      | Shiraz-3T  | 247  | 0        | -0.421316 |  |  |
|        |      | Shiraz-4T  | 261  | 0        | -0.336249 |  |  |
|        |      | Shiraz-4T  | 261  | 0        | -0.336249 |  |  |
|        |      | Shiraz-36T | 433  | 0        | -0.803961 |  |  |
|        |      | Shiraz-36T | 433  | 0        | -0.803961 |  |  |

|  |            |      |          |           |  |  |
|--|------------|------|----------|-----------|--|--|
|  | Shiraz-44T | 909  | 0        | -1.067051 |  |  |
|  | Shiraz-44T | 909  | 0        | -1.067051 |  |  |
|  | Shiraz-49T | 1170 | 0        | -0.967436 |  |  |
|  | Shiraz-49T | 1170 | 0        | -0.967436 |  |  |
|  | Shiraz-9T  | 1370 | 0.690073 | 0         |  |  |
|  | Shiraz-9T  | 1370 | 0.690073 | 0         |  |  |
|  | Shiraz-18T | 1457 | 0.643204 | 0         |  |  |
|  | Shiraz-18T | 1457 | 0.643204 | 0         |  |  |
|  | Shiraz-22T | 1673 | 0.611783 | 0         |  |  |
|  | Shiraz-22T | 1673 | 0.611783 | 0         |  |  |
|  | Shiraz-25T | 1719 | 0.472955 | 0         |  |  |
|  | Shiraz-25T | 1719 | 0.472955 | 0         |  |  |
|  | Shiraz-28T | 1762 | 0.562311 | 0         |  |  |
|  | Shiraz-28T | 1762 | 0.562311 | 0         |  |  |
|  | Shiraz-29T | 1801 | 0.815343 | 0         |  |  |
|  | Shiraz-29T | 1801 | 0.815343 | 0         |  |  |
|  | Shiraz-35T | 1933 | 0.488535 | 0         |  |  |
|  | Shiraz-35T | 1933 | 0.488535 | 0         |  |  |
|  | Shiraz-58T | 2223 | 0.833364 | 0         |  |  |
|  | Shiraz-58T | 2223 | 0.833364 | 0         |  |  |
|  | Shiraz-71T | 2263 | 0.975531 | 0         |  |  |
|  | Shiraz-71T | 2263 | 0.975531 | 0         |  |  |
|  | Shiraz-3T  | 247  | 0        | -0.421316 |  |  |
|  | Shiraz-3T  | 247  | 0        | -0.421316 |  |  |
|  | Shiraz-4T  | 261  | 0        | -0.336249 |  |  |
|  | Shiraz-4T  | 261  | 0        | -0.336249 |  |  |
|  | Shiraz-36T | 433  | 0        | -0.803961 |  |  |
|  | Shiraz-36T | 433  | 0        | -0.803961 |  |  |
|  | Shiraz-44T | 909  | 0        | -1.067051 |  |  |
|  | Shiraz-44T | 909  | 0        | -1.067051 |  |  |
|  | Shiraz-49T | 1170 | 0        | -0.967436 |  |  |
|  | Shiraz-49T | 1170 | 0        | -0.967436 |  |  |
|  | Shiraz-9T  | 1370 | 0.690073 | 0         |  |  |
|  | Shiraz-9T  | 1370 | 0.690073 | 0         |  |  |
|  | Shiraz-18T | 1457 | 0.643204 | 0         |  |  |
|  | Shiraz-18T | 1457 | 0.643204 | 0         |  |  |
|  | Shiraz-22T | 1673 | 0.611783 | 0         |  |  |
|  | Shiraz-22T | 1673 | 0.611783 | 0         |  |  |
|  | Shiraz-25T | 1719 | 0.472955 | 0         |  |  |
|  | Shiraz-25T | 1719 | 0.472955 | 0         |  |  |
|  | Shiraz-28T | 1762 | 0.562311 | 0         |  |  |
|  | Shiraz-28T | 1762 | 0.562311 | 0         |  |  |
|  | Shiraz-29T | 1801 | 0.815343 | 0         |  |  |
|  | Shiraz-29T | 1801 | 0.815343 | 0         |  |  |
|  | Shiraz-35T | 1933 | 0.488535 | 0         |  |  |
|  | Shiraz-35T | 1933 | 0.488535 | 0         |  |  |
|  | Shiraz-58T | 2223 | 0.833364 | 0         |  |  |

|        |      |            |      |          |           |  |
|--------|------|------------|------|----------|-----------|--|
|        |      | Shiraz-58T | 2223 | 0.833364 | 0         |  |
|        |      | Shiraz-71T | 2263 | 0.975531 | 0         |  |
|        |      | Shiraz-71T | 2263 | 0.975531 | 0         |  |
| H2AFB3 | chrX | Shiraz-3T  | 247  | 0        | -0.421316 |  |
|        |      | Shiraz-3T  | 247  | 0        | -0.421316 |  |
|        |      | Shiraz-4T  | 261  | 0        | -0.336249 |  |
|        |      | Shiraz-4T  | 261  | 0        | -0.336249 |  |
|        |      | Shiraz-4T  | 261  | 0        | -0.336249 |  |
|        |      | Shiraz-16T | 295  | 0.591657 | 0         |  |
|        |      | Shiraz-36T | 433  | 0        | -0.803961 |  |
|        |      | Shiraz-36T | 433  | 0        | -0.803961 |  |
|        |      | Shiraz-36T | 433  | 0        | -0.803961 |  |
|        |      | Shiraz-44T | 909  | 0        | -1.067051 |  |
|        |      | Shiraz-44T | 909  | 0        | -1.067051 |  |
|        |      | Shiraz-44T | 909  | 0        | -1.067051 |  |
|        |      | Shiraz-49T | 1170 | 0        | -0.967436 |  |
|        |      | Shiraz-49T | 1170 | 0        | -0.967436 |  |
|        |      | Shiraz-49T | 1170 | 0        | -0.967436 |  |
|        |      | Shiraz-9T  | 1370 | 0.690073 | 0         |  |
|        |      | Shiraz-9T  | 1370 | 0.690073 | 0         |  |
|        |      | Shiraz-9T  | 1370 | 0.690073 | 0         |  |
|        |      | Shiraz-18T | 1457 | 0.643204 | 0         |  |
|        |      | Shiraz-18T | 1457 | 0.643204 | 0         |  |
|        |      | Shiraz-18T | 1457 | 0.643204 | 0         |  |
|        |      | Shiraz-22T | 1673 | 0.611783 | 0         |  |
|        |      | Shiraz-22T | 1673 | 0.611783 | 0         |  |
|        |      | Shiraz-22T | 1673 | 0.611783 | 0         |  |
|        |      | Shiraz-25T | 1719 | 0.472955 | 0         |  |
|        |      | Shiraz-25T | 1719 | 0.472955 | 0         |  |
|        |      | Shiraz-25T | 1719 | 0.472955 | 0         |  |
|        |      | Shiraz-28T | 1762 | 0.562311 | 0         |  |
|        |      | Shiraz-28T | 1762 | 0.562311 | 0         |  |
|        |      | Shiraz-28T | 1762 | 0.562311 | 0         |  |
|        |      | Shiraz-29T | 1801 | 0.815343 | 0         |  |
|        |      | Shiraz-29T | 1801 | 0.815343 | 0         |  |
|        |      | Shiraz-29T | 1801 | 0.815343 | 0         |  |
|        |      | Shiraz-32T | 1870 | 0.729766 | 0         |  |
|        |      | Shiraz-32T | 1872 | 1.504553 | 0         |  |
|        |      | Shiraz-35T | 1933 | 0.488535 | 0         |  |
|        |      | Shiraz-35T | 1933 | 0.488535 | 0         |  |
|        |      | Shiraz-35T | 1933 | 0.488535 | 0         |  |
|        |      | Shiraz-53T | 2115 | 0.427728 | 0         |  |
|        |      | Shiraz-58T | 2223 | 0.833364 | 0         |  |
|        |      | Shiraz-58T | 2223 | 0.833364 | 0         |  |
|        |      | Shiraz-58T | 2223 | 0.833364 | 0         |  |
|        |      | Shiraz-71T | 2263 | 0.975531 | 0         |  |
|        |      | Shiraz-71T | 2263 | 0.975531 | 0         |  |

|  |            |      |          |           |  |
|--|------------|------|----------|-----------|--|
|  | Shiraz-71T | 2263 | 0.975531 | 0         |  |
|  | Shiraz-3T  | 247  | 0        | -0.421316 |  |
|  | Shiraz-3T  | 247  | 0        | -0.421316 |  |
|  | Shiraz-4T  | 261  | 0        | -0.336249 |  |
|  | Shiraz-4T  | 261  | 0        | -0.336249 |  |
|  | Shiraz-4T  | 261  | 0        | -0.336249 |  |
|  | Shiraz-16T | 295  | 0.591657 | 0         |  |
|  | Shiraz-36T | 433  | 0        | -0.803961 |  |
|  | Shiraz-36T | 433  | 0        | -0.803961 |  |
|  | Shiraz-36T | 433  | 0        | -0.803961 |  |
|  | Shiraz-44T | 909  | 0        | -1.067051 |  |
|  | Shiraz-44T | 909  | 0        | -1.067051 |  |
|  | Shiraz-44T | 909  | 0        | -1.067051 |  |
|  | Shiraz-49T | 1170 | 0        | -0.967436 |  |
|  | Shiraz-49T | 1170 | 0        | -0.967436 |  |
|  | Shiraz-49T | 1170 | 0        | -0.967436 |  |
|  | Shiraz-9T  | 1370 | 0.690073 | 0         |  |
|  | Shiraz-9T  | 1370 | 0.690073 | 0         |  |
|  | Shiraz-9T  | 1370 | 0.690073 | 0         |  |
|  | Shiraz-18T | 1457 | 0.643204 | 0         |  |
|  | Shiraz-18T | 1457 | 0.643204 | 0         |  |
|  | Shiraz-18T | 1457 | 0.643204 | 0         |  |
|  | Shiraz-22T | 1673 | 0.611783 | 0         |  |
|  | Shiraz-22T | 1673 | 0.611783 | 0         |  |
|  | Shiraz-22T | 1673 | 0.611783 | 0         |  |
|  | Shiraz-25T | 1719 | 0.472955 | 0         |  |
|  | Shiraz-25T | 1719 | 0.472955 | 0         |  |
|  | Shiraz-25T | 1719 | 0.472955 | 0         |  |
|  | Shiraz-28T | 1762 | 0.562311 | 0         |  |
|  | Shiraz-28T | 1762 | 0.562311 | 0         |  |
|  | Shiraz-28T | 1762 | 0.562311 | 0         |  |
|  | Shiraz-29T | 1801 | 0.815343 | 0         |  |
|  | Shiraz-29T | 1801 | 0.815343 | 0         |  |
|  | Shiraz-29T | 1801 | 0.815343 | 0         |  |
|  | Shiraz-32T | 1870 | 0.729766 | 0         |  |
|  | Shiraz-32T | 1872 | 1.504553 | 0         |  |
|  | Shiraz-35T | 1933 | 0.488535 | 0         |  |
|  | Shiraz-35T | 1933 | 0.488535 | 0         |  |
|  | Shiraz-35T | 1933 | 0.488535 | 0         |  |
|  | Shiraz-53T | 2115 | 0.427728 | 0         |  |
|  | Shiraz-58T | 2223 | 0.833364 | 0         |  |
|  | Shiraz-58T | 2223 | 0.833364 | 0         |  |
|  | Shiraz-58T | 2223 | 0.833364 | 0         |  |
|  | Shiraz-71T | 2263 | 0.975531 | 0         |  |
|  | Shiraz-71T | 2263 | 0.975531 | 0         |  |
|  | Shiraz-71T | 2263 | 0.975531 | 0         |  |
|  | Shiraz-3T  | 247  | 0        | -0.421316 |  |

|       |      |            |      |          |           |  |  |
|-------|------|------------|------|----------|-----------|--|--|
|       |      | Shiraz-3T  | 247  | 0        | -0.421316 |  |  |
|       |      | Shiraz-4T  | 261  | 0        | -0.336249 |  |  |
|       |      | Shiraz-4T  | 261  | 0        | -0.336249 |  |  |
|       |      | Shiraz-4T  | 261  | 0        | -0.336249 |  |  |
|       |      | Shiraz-16T | 295  | 0.591657 | 0         |  |  |
|       |      | Shiraz-36T | 433  | 0        | -0.803961 |  |  |
|       |      | Shiraz-36T | 433  | 0        | -0.803961 |  |  |
|       |      | Shiraz-36T | 433  | 0        | -0.803961 |  |  |
|       |      | Shiraz-44T | 909  | 0        | -1.067051 |  |  |
|       |      | Shiraz-44T | 909  | 0        | -1.067051 |  |  |
|       |      | Shiraz-44T | 909  | 0        | -1.067051 |  |  |
|       |      | Shiraz-49T | 1170 | 0        | -0.967436 |  |  |
|       |      | Shiraz-49T | 1170 | 0        | -0.967436 |  |  |
|       |      | Shiraz-49T | 1170 | 0        | -0.967436 |  |  |
|       |      | Shiraz-9T  | 1370 | 0.690073 | 0         |  |  |
|       |      | Shiraz-9T  | 1370 | 0.690073 | 0         |  |  |
|       |      | Shiraz-9T  | 1370 | 0.690073 | 0         |  |  |
|       |      | Shiraz-18T | 1457 | 0.643204 | 0         |  |  |
|       |      | Shiraz-18T | 1457 | 0.643204 | 0         |  |  |
|       |      | Shiraz-18T | 1457 | 0.643204 | 0         |  |  |
|       |      | Shiraz-22T | 1673 | 0.611783 | 0         |  |  |
|       |      | Shiraz-22T | 1673 | 0.611783 | 0         |  |  |
|       |      | Shiraz-22T | 1673 | 0.611783 | 0         |  |  |
|       |      | Shiraz-25T | 1719 | 0.472955 | 0         |  |  |
|       |      | Shiraz-25T | 1719 | 0.472955 | 0         |  |  |
|       |      | Shiraz-25T | 1719 | 0.472955 | 0         |  |  |
|       |      | Shiraz-28T | 1762 | 0.562311 | 0         |  |  |
|       |      | Shiraz-28T | 1762 | 0.562311 | 0         |  |  |
|       |      | Shiraz-28T | 1762 | 0.562311 | 0         |  |  |
|       |      | Shiraz-29T | 1801 | 0.815343 | 0         |  |  |
|       |      | Shiraz-29T | 1801 | 0.815343 | 0         |  |  |
|       |      | Shiraz-29T | 1801 | 0.815343 | 0         |  |  |
|       |      | Shiraz-32T | 1870 | 0.729766 | 0         |  |  |
|       |      | Shiraz-32T | 1872 | 1.504553 | 0         |  |  |
|       |      | Shiraz-35T | 1933 | 0.488535 | 0         |  |  |
|       |      | Shiraz-35T | 1933 | 0.488535 | 0         |  |  |
|       |      | Shiraz-35T | 1933 | 0.488535 | 0         |  |  |
|       |      | Shiraz-53T | 2115 | 0.427728 | 0         |  |  |
|       |      | Shiraz-58T | 2223 | 0.833364 | 0         |  |  |
|       |      | Shiraz-58T | 2223 | 0.833364 | 0         |  |  |
|       |      | Shiraz-58T | 2223 | 0.833364 | 0         |  |  |
|       |      | Shiraz-71T | 2263 | 0.975531 | 0         |  |  |
|       |      | Shiraz-71T | 2263 | 0.975531 | 0         |  |  |
|       |      | Shiraz-71T | 2263 | 0.975531 | 0         |  |  |
| H2AFV | chr7 | Shiraz-3T  | 87   | 0.198593 | 0         |  |  |
|       |      | Shiraz-3T  | 87   | 0.198593 | 0         |  |  |
|       |      | Shiraz-3T  | 89   | 0.678641 | 0         |  |  |



|  |  |            |      |          |   |  |  |
|--|--|------------|------|----------|---|--|--|
|  |  | Shiraz-3T  | 89   | 0.678641 | 0 |  |  |
|  |  | Shiraz-4T  | 252  | 0.192083 | 0 |  |  |
|  |  | Shiraz-4T  | 252  | 0.192083 | 0 |  |  |
|  |  | Shiraz-36T | 376  | 0.159952 | 0 |  |  |
|  |  | Shiraz-36T | 376  | 0.159952 | 0 |  |  |
|  |  | Shiraz-44T | 632  | 0.902944 | 0 |  |  |
|  |  | Shiraz-44T | 632  | 0.902944 | 0 |  |  |
|  |  | Shiraz-46T | 942  | 0.069143 | 0 |  |  |
|  |  | Shiraz-46T | 942  | 0.069143 | 0 |  |  |
|  |  | Shiraz-77T | 1223 | 0.215647 | 0 |  |  |
|  |  | Shiraz-77T | 1223 | 0.215647 | 0 |  |  |
|  |  | Shiraz-18T | 1433 | 0.250973 | 0 |  |  |
|  |  | Shiraz-18T | 1433 | 0.250973 | 0 |  |  |
|  |  | Shiraz-25T | 1697 | 0.21945  | 0 |  |  |
|  |  | Shiraz-25T | 1697 | 0.21945  | 0 |  |  |
|  |  | Shiraz-28T | 1734 | 0.362882 | 0 |  |  |
|  |  | Shiraz-28T | 1734 | 0.362882 | 0 |  |  |
|  |  | Shiraz-29T | 1777 | 0.156747 | 0 |  |  |
|  |  | Shiraz-29T | 1777 | 0.156747 | 0 |  |  |
|  |  | Shiraz-38T | 1950 | 0.265916 | 0 |  |  |
|  |  | Shiraz-38T | 1950 | 0.265916 | 0 |  |  |
|  |  | Shiraz-71T | 2236 | 0.320072 | 0 |  |  |
|  |  | Shiraz-71T | 2236 | 0.320072 | 0 |  |  |
|  |  | Shiraz-3T  | 87   | 0.198593 | 0 |  |  |
|  |  | Shiraz-3T  | 87   | 0.198593 | 0 |  |  |
|  |  | Shiraz-3T  | 89   | 0.678641 | 0 |  |  |
|  |  | Shiraz-3T  | 89   | 0.678641 | 0 |  |  |
|  |  | Shiraz-4T  | 252  | 0.192083 | 0 |  |  |
|  |  | Shiraz-4T  | 252  | 0.192083 | 0 |  |  |
|  |  | Shiraz-36T | 376  | 0.159952 | 0 |  |  |
|  |  | Shiraz-36T | 376  | 0.159952 | 0 |  |  |
|  |  | Shiraz-44T | 632  | 0.902944 | 0 |  |  |
|  |  | Shiraz-44T | 632  | 0.902944 | 0 |  |  |
|  |  | Shiraz-46T | 942  | 0.069143 | 0 |  |  |
|  |  | Shiraz-46T | 942  | 0.069143 | 0 |  |  |
|  |  | Shiraz-77T | 1223 | 0.215647 | 0 |  |  |
|  |  | Shiraz-77T | 1223 | 0.215647 | 0 |  |  |
|  |  | Shiraz-18T | 1433 | 0.250973 | 0 |  |  |
|  |  | Shiraz-18T | 1433 | 0.250973 | 0 |  |  |
|  |  | Shiraz-25T | 1697 | 0.21945  | 0 |  |  |
|  |  | Shiraz-25T | 1697 | 0.21945  | 0 |  |  |
|  |  | Shiraz-28T | 1734 | 0.362882 | 0 |  |  |
|  |  | Shiraz-28T | 1734 | 0.362882 | 0 |  |  |
|  |  | Shiraz-29T | 1777 | 0.156747 | 0 |  |  |
|  |  | Shiraz-29T | 1777 | 0.156747 | 0 |  |  |
|  |  | Shiraz-38T | 1950 | 0.265916 | 0 |  |  |
|  |  | Shiraz-38T | 1950 | 0.265916 | 0 |  |  |

|        |      |            |      |          |           |  |
|--------|------|------------|------|----------|-----------|--|
|        |      | Shiraz-71T | 2236 | 0.320072 | 0         |  |
|        |      | Shiraz-71T | 2236 | 0.320072 | 0         |  |
|        |      | Shiraz-3T  | 87   | 0.198593 | 0         |  |
|        |      | Shiraz-3T  | 87   | 0.198593 | 0         |  |
|        |      | Shiraz-3T  | 89   | 0.678641 | 0         |  |
|        |      | Shiraz-3T  | 89   | 0.678641 | 0         |  |
|        |      | Shiraz-4T  | 252  | 0.192083 | 0         |  |
|        |      | Shiraz-4T  | 252  | 0.192083 | 0         |  |
|        |      | Shiraz-36T | 376  | 0.159952 | 0         |  |
|        |      | Shiraz-36T | 376  | 0.159952 | 0         |  |
|        |      | Shiraz-44T | 632  | 0.902944 | 0         |  |
|        |      | Shiraz-44T | 632  | 0.902944 | 0         |  |
|        |      | Shiraz-46T | 942  | 0.069143 | 0         |  |
|        |      | Shiraz-46T | 942  | 0.069143 | 0         |  |
|        |      | Shiraz-77T | 1223 | 0.215647 | 0         |  |
|        |      | Shiraz-77T | 1223 | 0.215647 | 0         |  |
|        |      | Shiraz-18T | 1433 | 0.250973 | 0         |  |
|        |      | Shiraz-18T | 1433 | 0.250973 | 0         |  |
|        |      | Shiraz-25T | 1697 | 0.21945  | 0         |  |
|        |      | Shiraz-25T | 1697 | 0.21945  | 0         |  |
|        |      | Shiraz-28T | 1734 | 0.362882 | 0         |  |
|        |      | Shiraz-28T | 1734 | 0.362882 | 0         |  |
|        |      | Shiraz-29T | 1777 | 0.156747 | 0         |  |
|        |      | Shiraz-29T | 1777 | 0.156747 | 0         |  |
|        |      | Shiraz-38T | 1950 | 0.265916 | 0         |  |
|        |      | Shiraz-38T | 1950 | 0.265916 | 0         |  |
|        |      | Shiraz-71T | 2236 | 0.320072 | 0         |  |
|        |      | Shiraz-71T | 2236 | 0.320072 | 0         |  |
| H2BFWT | chrX | Shiraz-3T  | 242  | 0        | -0.336434 |  |
|        |      | Shiraz-4T  | 261  | 0        | -0.336249 |  |
|        |      | Shiraz-16T | 295  | 0.591657 | 0         |  |
|        |      | Shiraz-36T | 433  | 0        | -0.803961 |  |
|        |      | Shiraz-44T | 899  | 0        | -1.09697  |  |
|        |      | Shiraz-49T | 1170 | 0        | -0.967436 |  |
|        |      | Shiraz-18T | 1457 | 0.643204 | 0         |  |
|        |      | Shiraz-22T | 1673 | 0.611783 | 0         |  |
|        |      | Shiraz-25T | 1719 | 0.472955 | 0         |  |
|        |      | Shiraz-28T | 1762 | 0.562311 | 0         |  |
|        |      | Shiraz-29T | 1801 | 0.815343 | 0         |  |
|        |      | Shiraz-32T | 1870 | 0.729766 | 0         |  |
|        |      | Shiraz-35T | 1933 | 0.488535 | 0         |  |
|        |      | Shiraz-58T | 2223 | 0.833364 | 0         |  |
|        |      | Shiraz-71T | 2263 | 0.975531 | 0         |  |
|        |      | Shiraz-3T  | 242  | 0        | -0.336434 |  |
|        |      | Shiraz-4T  | 261  | 0        | -0.336249 |  |
|        |      | Shiraz-16T | 295  | 0.591657 | 0         |  |
|        |      | Shiraz-36T | 433  | 0        | -0.803961 |  |

|        |      |            |      |          |           |  |  |
|--------|------|------------|------|----------|-----------|--|--|
|        |      | Shiraz-44T | 899  | 0        | -1.09697  |  |  |
|        |      | Shiraz-49T | 1170 | 0        | -0.967436 |  |  |
|        |      | Shiraz-18T | 1457 | 0.643204 | 0         |  |  |
|        |      | Shiraz-22T | 1673 | 0.611783 | 0         |  |  |
|        |      | Shiraz-25T | 1719 | 0.472955 | 0         |  |  |
|        |      | Shiraz-28T | 1762 | 0.562311 | 0         |  |  |
|        |      | Shiraz-29T | 1801 | 0.815343 | 0         |  |  |
|        |      | Shiraz-32T | 1870 | 0.729766 | 0         |  |  |
|        |      | Shiraz-35T | 1933 | 0.488535 | 0         |  |  |
|        |      | Shiraz-58T | 2223 | 0.833364 | 0         |  |  |
|        |      | Shiraz-71T | 2263 | 0.975531 | 0         |  |  |
|        |      | Shiraz-3T  | 242  | 0        | -0.336434 |  |  |
|        |      | Shiraz-4T  | 261  | 0        | -0.336249 |  |  |
|        |      | Shiraz-16T | 295  | 0.591657 | 0         |  |  |
|        |      | Shiraz-36T | 433  | 0        | -0.803961 |  |  |
|        |      | Shiraz-44T | 899  | 0        | -1.09697  |  |  |
|        |      | Shiraz-49T | 1170 | 0        | -0.967436 |  |  |
|        |      | Shiraz-18T | 1457 | 0.643204 | 0         |  |  |
|        |      | Shiraz-22T | 1673 | 0.611783 | 0         |  |  |
|        |      | Shiraz-25T | 1719 | 0.472955 | 0         |  |  |
|        |      | Shiraz-28T | 1762 | 0.562311 | 0         |  |  |
|        |      | Shiraz-29T | 1801 | 0.815343 | 0         |  |  |
|        |      | Shiraz-32T | 1870 | 0.729766 | 0         |  |  |
|        |      | Shiraz-35T | 1933 | 0.488535 | 0         |  |  |
|        |      | Shiraz-58T | 2223 | 0.833364 | 0         |  |  |
|        |      | Shiraz-71T | 2263 | 0.975531 | 0         |  |  |
| H2BFXP | chrX | Shiraz-3T  | 242  | 0        | -0.336434 |  |  |
|        |      | Shiraz-3T  | 242  | 0        | -0.336434 |  |  |
|        |      | Shiraz-4T  | 261  | 0        | -0.336249 |  |  |
|        |      | Shiraz-4T  | 261  | 0        | -0.336249 |  |  |
|        |      | Shiraz-16T | 295  | 0.591657 | 0         |  |  |
|        |      | Shiraz-16T | 295  | 0.591657 | 0         |  |  |
|        |      | Shiraz-36T | 433  | 0        | -0.803961 |  |  |
|        |      | Shiraz-36T | 433  | 0        | -0.803961 |  |  |
|        |      | Shiraz-44T | 899  | 0        | -1.09697  |  |  |
|        |      | Shiraz-44T | 899  | 0        | -1.09697  |  |  |
|        |      | Shiraz-49T | 1170 | 0        | -0.967436 |  |  |
|        |      | Shiraz-49T | 1170 | 0        | -0.967436 |  |  |
|        |      | Shiraz-18T | 1457 | 0.643204 | 0         |  |  |
|        |      | Shiraz-18T | 1457 | 0.643204 | 0         |  |  |
|        |      | Shiraz-22T | 1673 | 0.611783 | 0         |  |  |
|        |      | Shiraz-22T | 1673 | 0.611783 | 0         |  |  |
|        |      | Shiraz-25T | 1719 | 0.472955 | 0         |  |  |
|        |      | Shiraz-25T | 1719 | 0.472955 | 0         |  |  |
|        |      | Shiraz-28T | 1762 | 0.562311 | 0         |  |  |
|        |      | Shiraz-28T | 1762 | 0.562311 | 0         |  |  |
|        |      | Shiraz-29T | 1801 | 0.815343 | 0         |  |  |

|  |  |            |      |          |           |  |  |
|--|--|------------|------|----------|-----------|--|--|
|  |  | Shiraz-29T | 1801 | 0.815343 | 0         |  |  |
|  |  | Shiraz-32T | 1870 | 0.729766 | 0         |  |  |
|  |  | Shiraz-32T | 1870 | 0.729766 | 0         |  |  |
|  |  | Shiraz-35T | 1933 | 0.488535 | 0         |  |  |
|  |  | Shiraz-35T | 1933 | 0.488535 | 0         |  |  |
|  |  | Shiraz-58T | 2223 | 0.833364 | 0         |  |  |
|  |  | Shiraz-58T | 2223 | 0.833364 | 0         |  |  |
|  |  | Shiraz-71T | 2263 | 0.975531 | 0         |  |  |
|  |  | Shiraz-71T | 2263 | 0.975531 | 0         |  |  |
|  |  | Shiraz-3T  | 242  | 0        | -0.336434 |  |  |
|  |  | Shiraz-3T  | 242  | 0        | -0.336434 |  |  |
|  |  | Shiraz-4T  | 261  | 0        | -0.336249 |  |  |
|  |  | Shiraz-4T  | 261  | 0        | -0.336249 |  |  |
|  |  | Shiraz-16T | 295  | 0.591657 | 0         |  |  |
|  |  | Shiraz-16T | 295  | 0.591657 | 0         |  |  |
|  |  | Shiraz-36T | 433  | 0        | -0.803961 |  |  |
|  |  | Shiraz-36T | 433  | 0        | -0.803961 |  |  |
|  |  | Shiraz-44T | 899  | 0        | -1.09697  |  |  |
|  |  | Shiraz-44T | 899  | 0        | -1.09697  |  |  |
|  |  | Shiraz-49T | 1170 | 0        | -0.967436 |  |  |
|  |  | Shiraz-49T | 1170 | 0        | -0.967436 |  |  |
|  |  | Shiraz-18T | 1457 | 0.643204 | 0         |  |  |
|  |  | Shiraz-18T | 1457 | 0.643204 | 0         |  |  |
|  |  | Shiraz-22T | 1673 | 0.611783 | 0         |  |  |
|  |  | Shiraz-22T | 1673 | 0.611783 | 0         |  |  |
|  |  | Shiraz-25T | 1719 | 0.472955 | 0         |  |  |
|  |  | Shiraz-25T | 1719 | 0.472955 | 0         |  |  |
|  |  | Shiraz-28T | 1762 | 0.562311 | 0         |  |  |
|  |  | Shiraz-28T | 1762 | 0.562311 | 0         |  |  |
|  |  | Shiraz-29T | 1801 | 0.815343 | 0         |  |  |
|  |  | Shiraz-29T | 1801 | 0.815343 | 0         |  |  |
|  |  | Shiraz-32T | 1870 | 0.729766 | 0         |  |  |
|  |  | Shiraz-32T | 1870 | 0.729766 | 0         |  |  |
|  |  | Shiraz-35T | 1933 | 0.488535 | 0         |  |  |
|  |  | Shiraz-35T | 1933 | 0.488535 | 0         |  |  |
|  |  | Shiraz-58T | 2223 | 0.833364 | 0         |  |  |
|  |  | Shiraz-58T | 2223 | 0.833364 | 0         |  |  |
|  |  | Shiraz-71T | 2263 | 0.975531 | 0         |  |  |
|  |  | Shiraz-71T | 2263 | 0.975531 | 0         |  |  |
|  |  | Shiraz-3T  | 242  | 0        | -0.336434 |  |  |
|  |  | Shiraz-3T  | 242  | 0        | -0.336434 |  |  |
|  |  | Shiraz-4T  | 261  | 0        | -0.336249 |  |  |
|  |  | Shiraz-4T  | 261  | 0        | -0.336249 |  |  |
|  |  | Shiraz-16T | 295  | 0.591657 | 0         |  |  |
|  |  | Shiraz-16T | 295  | 0.591657 | 0         |  |  |
|  |  | Shiraz-36T | 433  | 0        | -0.803961 |  |  |
|  |  | Shiraz-36T | 433  | 0        | -0.803961 |  |  |

|       |      |            |      |          |           |  |  |
|-------|------|------------|------|----------|-----------|--|--|
|       |      | Shiraz-44T | 899  | 0        | -1.09697  |  |  |
|       |      | Shiraz-44T | 899  | 0        | -1.09697  |  |  |
|       |      | Shiraz-49T | 1170 | 0        | -0.967436 |  |  |
|       |      | Shiraz-49T | 1170 | 0        | -0.967436 |  |  |
|       |      | Shiraz-18T | 1457 | 0.643204 | 0         |  |  |
|       |      | Shiraz-18T | 1457 | 0.643204 | 0         |  |  |
|       |      | Shiraz-22T | 1673 | 0.611783 | 0         |  |  |
|       |      | Shiraz-22T | 1673 | 0.611783 | 0         |  |  |
|       |      | Shiraz-25T | 1719 | 0.472955 | 0         |  |  |
|       |      | Shiraz-25T | 1719 | 0.472955 | 0         |  |  |
|       |      | Shiraz-28T | 1762 | 0.562311 | 0         |  |  |
|       |      | Shiraz-28T | 1762 | 0.562311 | 0         |  |  |
|       |      | Shiraz-29T | 1801 | 0.815343 | 0         |  |  |
|       |      | Shiraz-29T | 1801 | 0.815343 | 0         |  |  |
|       |      | Shiraz-32T | 1870 | 0.729766 | 0         |  |  |
|       |      | Shiraz-32T | 1870 | 0.729766 | 0         |  |  |
|       |      | Shiraz-35T | 1933 | 0.488535 | 0         |  |  |
|       |      | Shiraz-35T | 1933 | 0.488535 | 0         |  |  |
|       |      | Shiraz-58T | 2223 | 0.833364 | 0         |  |  |
|       |      | Shiraz-58T | 2223 | 0.833364 | 0         |  |  |
|       |      | Shiraz-71T | 2263 | 0.975531 | 0         |  |  |
|       |      | Shiraz-71T | 2263 | 0.975531 | 0         |  |  |
| HAUS7 | chrX | Shiraz-3T  | 246  | 0.531858 | 0         |  |  |
|       |      | Shiraz-4T  | 261  | 0        | -0.336249 |  |  |
|       |      | Shiraz-16T | 295  | 0.591657 | 0         |  |  |
|       |      | Shiraz-36T | 433  | 0        | -0.803961 |  |  |
|       |      | Shiraz-42T | 480  | 0        | -0.232915 |  |  |
|       |      | Shiraz-44T | 908  | 0.466743 | 0         |  |  |
|       |      | Shiraz-49T | 1170 | 0        | -0.967436 |  |  |
|       |      | Shiraz-49T | 1173 | 0        | -0.704439 |  |  |
|       |      | Shiraz-9T  | 1370 | 0.690073 | 0         |  |  |
|       |      | Shiraz-9T  | 1371 | 1.292392 | 0         |  |  |
|       |      | Shiraz-18T | 1457 | 0.643204 | 0         |  |  |
|       |      | Shiraz-22T | 1673 | 0.611783 | 0         |  |  |
|       |      | Shiraz-22T | 1678 | 0.911625 | 0         |  |  |
|       |      | Shiraz-25T | 1719 | 0.472955 | 0         |  |  |
|       |      | Shiraz-28T | 1762 | 0.562311 | 0         |  |  |
|       |      | Shiraz-29T | 1801 | 0.815343 | 0         |  |  |
|       |      | Shiraz-32T | 1870 | 0.729766 | 0         |  |  |
|       |      | Shiraz-32T | 1872 | 1.504553 | 0         |  |  |
|       |      | Shiraz-35T | 1933 | 0.488535 | 0         |  |  |
|       |      | Shiraz-38T | 2011 | 0        | -0.406024 |  |  |
|       |      | Shiraz-53T | 2115 | 0.427728 | 0         |  |  |
|       |      | Shiraz-58T | 2223 | 0.833364 | 0         |  |  |
|       |      | Shiraz-58T | 2226 | 1.074663 | 0         |  |  |
|       |      | Shiraz-71T | 2263 | 0.975531 | 0         |  |  |
|       |      | Shiraz-3T  | 246  | 0.531858 | 0         |  |  |

|  |            |      |          |           |  |
|--|------------|------|----------|-----------|--|
|  | Shiraz-4T  | 261  | 0        | -0.336249 |  |
|  | Shiraz-16T | 295  | 0.591657 | 0         |  |
|  | Shiraz-36T | 433  | 0        | -0.803961 |  |
|  | Shiraz-42T | 480  | 0        | -0.232915 |  |
|  | Shiraz-44T | 908  | 0.466743 | 0         |  |
|  | Shiraz-49T | 1170 | 0        | -0.967436 |  |
|  | Shiraz-49T | 1173 | 0        | -0.704439 |  |
|  | Shiraz-9T  | 1370 | 0.690073 | 0         |  |
|  | Shiraz-9T  | 1371 | 1.292392 | 0         |  |
|  | Shiraz-18T | 1457 | 0.643204 | 0         |  |
|  | Shiraz-22T | 1673 | 0.611783 | 0         |  |
|  | Shiraz-22T | 1678 | 0.911625 | 0         |  |
|  | Shiraz-25T | 1719 | 0.472955 | 0         |  |
|  | Shiraz-28T | 1762 | 0.562311 | 0         |  |
|  | Shiraz-29T | 1801 | 0.815343 | 0         |  |
|  | Shiraz-32T | 1870 | 0.729766 | 0         |  |
|  | Shiraz-32T | 1872 | 1.504553 | 0         |  |
|  | Shiraz-35T | 1933 | 0.488535 | 0         |  |
|  | Shiraz-38T | 2011 | 0        | -0.406024 |  |
|  | Shiraz-53T | 2115 | 0.427728 | 0         |  |
|  | Shiraz-58T | 2223 | 0.833364 | 0         |  |
|  | Shiraz-58T | 2226 | 1.074663 | 0         |  |
|  | Shiraz-71T | 2263 | 0.975531 | 0         |  |
|  | Shiraz-3T  | 246  | 0.531858 | 0         |  |
|  | Shiraz-4T  | 261  | 0        | -0.336249 |  |
|  | Shiraz-16T | 295  | 0.591657 | 0         |  |
|  | Shiraz-36T | 433  | 0        | -0.803961 |  |
|  | Shiraz-42T | 480  | 0        | -0.232915 |  |
|  | Shiraz-44T | 908  | 0.466743 | 0         |  |
|  | Shiraz-49T | 1170 | 0        | -0.967436 |  |
|  | Shiraz-49T | 1173 | 0        | -0.704439 |  |
|  | Shiraz-9T  | 1370 | 0.690073 | 0         |  |
|  | Shiraz-9T  | 1371 | 1.292392 | 0         |  |
|  | Shiraz-18T | 1457 | 0.643204 | 0         |  |
|  | Shiraz-22T | 1673 | 0.611783 | 0         |  |
|  | Shiraz-22T | 1678 | 0.911625 | 0         |  |
|  | Shiraz-25T | 1719 | 0.472955 | 0         |  |
|  | Shiraz-28T | 1762 | 0.562311 | 0         |  |
|  | Shiraz-29T | 1801 | 0.815343 | 0         |  |
|  | Shiraz-32T | 1870 | 0.729766 | 0         |  |
|  | Shiraz-32T | 1872 | 1.504553 | 0         |  |
|  | Shiraz-35T | 1933 | 0.488535 | 0         |  |
|  | Shiraz-38T | 2011 | 0        | -0.406024 |  |
|  | Shiraz-53T | 2115 | 0.427728 | 0         |  |
|  | Shiraz-58T | 2223 | 0.833364 | 0         |  |
|  | Shiraz-58T | 2226 | 1.074663 | 0         |  |
|  | Shiraz-71T | 2263 | 0.975531 | 0         |  |

|      |      |            |      |          |           |  |
|------|------|------------|------|----------|-----------|--|
| HBP1 | chr7 | Shiraz-3T  | 90   | 0.219276 | 0         |  |
|      |      | Shiraz-4T  | 253  | 0.372918 | 0         |  |
|      |      | Shiraz-36T | 378  | 0.179558 | 0         |  |
|      |      | Shiraz-46T | 943  | 0.093799 | 0         |  |
|      |      | Shiraz-77T | 1225 | 0        | -0.117922 |  |
|      |      | Shiraz-18T | 1434 | 0.244465 | 0         |  |
|      |      | Shiraz-22T | 1549 | 0        | -0.319623 |  |
|      |      | Shiraz-25T | 1698 | 0.21835  | 0         |  |
|      |      | Shiraz-28T | 1735 | 0.350744 | 0         |  |
|      |      | Shiraz-29T | 1778 | 0.120767 | 0         |  |
|      |      | Shiraz-32T | 1833 | 0.551336 | 0         |  |
|      |      | Shiraz-38T | 1951 | 0.250891 | 0         |  |
|      |      | Shiraz-53T | 2078 | 0.287202 | 0         |  |
|      |      | Shiraz-71T | 2238 | 0.603631 | 0         |  |
|      |      | Shiraz-3T  | 90   | 0.219276 | 0         |  |
|      |      | Shiraz-4T  | 253  | 0.372918 | 0         |  |
|      |      | Shiraz-36T | 378  | 0.179558 | 0         |  |
|      |      | Shiraz-46T | 943  | 0.093799 | 0         |  |
|      |      | Shiraz-77T | 1225 | 0        | -0.117922 |  |
|      |      | Shiraz-18T | 1434 | 0.244465 | 0         |  |
|      |      | Shiraz-22T | 1549 | 0        | -0.319623 |  |
|      |      | Shiraz-25T | 1698 | 0.21835  | 0         |  |
|      |      | Shiraz-28T | 1735 | 0.350744 | 0         |  |
|      |      | Shiraz-29T | 1778 | 0.120767 | 0         |  |
|      |      | Shiraz-32T | 1833 | 0.551336 | 0         |  |
|      |      | Shiraz-38T | 1951 | 0.250891 | 0         |  |
|      |      | Shiraz-53T | 2078 | 0.287202 | 0         |  |
|      |      | Shiraz-71T | 2238 | 0.603631 | 0         |  |
|      |      | Shiraz-3T  | 90   | 0.219276 | 0         |  |
|      |      | Shiraz-4T  | 253  | 0.372918 | 0         |  |
|      |      | Shiraz-36T | 378  | 0.179558 | 0         |  |
|      |      | Shiraz-46T | 943  | 0.093799 | 0         |  |
|      |      | Shiraz-77T | 1225 | 0        | -0.117922 |  |
|      |      | Shiraz-18T | 1434 | 0.244465 | 0         |  |
|      |      | Shiraz-22T | 1549 | 0        | -0.319623 |  |
|      |      | Shiraz-25T | 1698 | 0.21835  | 0         |  |
|      |      | Shiraz-28T | 1735 | 0.350744 | 0         |  |
|      |      | Shiraz-29T | 1778 | 0.120767 | 0         |  |
|      |      | Shiraz-32T | 1833 | 0.551336 | 0         |  |
|      |      | Shiraz-38T | 1951 | 0.250891 | 0         |  |
|      |      | Shiraz-53T | 2078 | 0.287202 | 0         |  |
|      |      | Shiraz-71T | 2238 | 0.603631 | 0         |  |
| HCCS | chrX | Shiraz-3T  | 235  | 0        | -0.28401  |  |
|      |      | Shiraz-4T  | 260  | 0        | -0.324128 |  |
|      |      | Shiraz-16T | 294  | 0.655804 | 0         |  |
|      |      | Shiraz-36T | 431  | 0        | -0.78035  |  |
|      |      | Shiraz-44T | 891  | 0        | -0.954044 |  |

|  |            |      |          |           |  |
|--|------------|------|----------|-----------|--|
|  | Shiraz-49T | 1166 | 0        | -0.917235 |  |
|  | Shiraz-49T | 1167 | 0        | -0.249329 |  |
|  | Shiraz-9T  | 1368 | 0.199713 | 0         |  |
|  | Shiraz-18T | 1455 | 0        | -0.186773 |  |
|  | Shiraz-22T | 1669 | 0.695915 | 0         |  |
|  | Shiraz-25T | 1717 | 0.420447 | 0         |  |
|  | Shiraz-28T | 1760 | 0.538181 | 0         |  |
|  | Shiraz-29T | 1800 | 0.672527 | 0         |  |
|  | Shiraz-32T | 1869 | 0.776805 | 0         |  |
|  | Shiraz-35T | 1932 | 0.507141 | 0         |  |
|  | Shiraz-40T | 2051 | 0.098506 | 0         |  |
|  | Shiraz-58T | 2221 | 0.871948 | 0         |  |
|  | Shiraz-71T | 2260 | 0.68394  | 0         |  |
|  | Shiraz-71T | 2261 | 0.508399 | 0         |  |
|  | Shiraz-3T  | 235  | 0        | -0.28401  |  |
|  | Shiraz-4T  | 260  | 0        | -0.324128 |  |
|  | Shiraz-16T | 294  | 0.655804 | 0         |  |
|  | Shiraz-36T | 431  | 0        | -0.78035  |  |
|  | Shiraz-44T | 891  | 0        | -0.954044 |  |
|  | Shiraz-49T | 1166 | 0        | -0.917235 |  |
|  | Shiraz-49T | 1167 | 0        | -0.249329 |  |
|  | Shiraz-9T  | 1368 | 0.199713 | 0         |  |
|  | Shiraz-18T | 1455 | 0        | -0.186773 |  |
|  | Shiraz-22T | 1669 | 0.695915 | 0         |  |
|  | Shiraz-25T | 1717 | 0.420447 | 0         |  |
|  | Shiraz-28T | 1760 | 0.538181 | 0         |  |
|  | Shiraz-29T | 1800 | 0.672527 | 0         |  |
|  | Shiraz-32T | 1869 | 0.776805 | 0         |  |
|  | Shiraz-35T | 1932 | 0.507141 | 0         |  |
|  | Shiraz-40T | 2051 | 0.098506 | 0         |  |
|  | Shiraz-58T | 2221 | 0.871948 | 0         |  |
|  | Shiraz-71T | 2260 | 0.68394  | 0         |  |
|  | Shiraz-71T | 2261 | 0.508399 | 0         |  |
|  | Shiraz-3T  | 235  | 0        | -0.28401  |  |
|  | Shiraz-4T  | 260  | 0        | -0.324128 |  |
|  | Shiraz-16T | 294  | 0.655804 | 0         |  |
|  | Shiraz-36T | 431  | 0        | -0.78035  |  |
|  | Shiraz-44T | 891  | 0        | -0.954044 |  |
|  | Shiraz-49T | 1166 | 0        | -0.917235 |  |
|  | Shiraz-49T | 1167 | 0        | -0.249329 |  |
|  | Shiraz-9T  | 1368 | 0.199713 | 0         |  |
|  | Shiraz-18T | 1455 | 0        | -0.186773 |  |
|  | Shiraz-22T | 1669 | 0.695915 | 0         |  |
|  | Shiraz-25T | 1717 | 0.420447 | 0         |  |
|  | Shiraz-28T | 1760 | 0.538181 | 0         |  |
|  | Shiraz-29T | 1800 | 0.672527 | 0         |  |
|  | Shiraz-32T | 1869 | 0.776805 | 0         |  |



|       |      |            |      |          |           |  |
|-------|------|------------|------|----------|-----------|--|
|       |      | Shiraz-35T | 1932 | 0.507141 | 0         |  |
|       |      | Shiraz-40T | 2051 | 0.098506 | 0         |  |
|       |      | Shiraz-58T | 2221 | 0.871948 | 0         |  |
|       |      | Shiraz-71T | 2260 | 0.68394  | 0         |  |
|       |      | Shiraz-71T | 2261 | 0.508399 | 0         |  |
| HCFC1 | chrX | Shiraz-3T  | 246  | 0.531858 | 0         |  |
|       |      | Shiraz-4T  | 261  | 0        | -0.336249 |  |
|       |      | Shiraz-16T | 295  | 0.591657 | 0         |  |
|       |      | Shiraz-36T | 433  | 0        | -0.803961 |  |
|       |      | Shiraz-42T | 480  | 0        | -0.232915 |  |
|       |      | Shiraz-44T | 908  | 0.466743 | 0         |  |
|       |      | Shiraz-49T | 1170 | 0        | -0.967436 |  |
|       |      | Shiraz-49T | 1173 | 0        | -0.704439 |  |
|       |      | Shiraz-9T  | 1370 | 0.690073 | 0         |  |
|       |      | Shiraz-9T  | 1371 | 1.292392 | 0         |  |
|       |      | Shiraz-18T | 1457 | 0.643204 | 0         |  |
|       |      | Shiraz-22T | 1673 | 0.611783 | 0         |  |
|       |      | Shiraz-22T | 1678 | 0.911625 | 0         |  |
|       |      | Shiraz-25T | 1719 | 0.472955 | 0         |  |
|       |      | Shiraz-28T | 1762 | 0.562311 | 0         |  |
|       |      | Shiraz-29T | 1801 | 0.815343 | 0         |  |
|       |      | Shiraz-32T | 1870 | 0.729766 | 0         |  |
|       |      | Shiraz-32T | 1872 | 1.504553 | 0         |  |
|       |      | Shiraz-35T | 1933 | 0.488535 | 0         |  |
|       |      | Shiraz-38T | 2011 | 0        | -0.406024 |  |
|       |      | Shiraz-53T | 2115 | 0.427728 | 0         |  |
|       |      | Shiraz-58T | 2223 | 0.833364 | 0         |  |
|       |      | Shiraz-58T | 2226 | 1.074663 | 0         |  |
|       |      | Shiraz-71T | 2263 | 0.975531 | 0         |  |
|       |      | Shiraz-3T  | 246  | 0.531858 | 0         |  |
|       |      | Shiraz-4T  | 261  | 0        | -0.336249 |  |
|       |      | Shiraz-16T | 295  | 0.591657 | 0         |  |
|       |      | Shiraz-36T | 433  | 0        | -0.803961 |  |
|       |      | Shiraz-42T | 480  | 0        | -0.232915 |  |
|       |      | Shiraz-44T | 908  | 0.466743 | 0         |  |
|       |      | Shiraz-49T | 1170 | 0        | -0.967436 |  |
|       |      | Shiraz-49T | 1173 | 0        | -0.704439 |  |
|       |      | Shiraz-9T  | 1370 | 0.690073 | 0         |  |
|       |      | Shiraz-9T  | 1371 | 1.292392 | 0         |  |
|       |      | Shiraz-18T | 1457 | 0.643204 | 0         |  |
|       |      | Shiraz-22T | 1673 | 0.611783 | 0         |  |
|       |      | Shiraz-22T | 1678 | 0.911625 | 0         |  |
|       |      | Shiraz-25T | 1719 | 0.472955 | 0         |  |
|       |      | Shiraz-28T | 1762 | 0.562311 | 0         |  |
|       |      | Shiraz-29T | 1801 | 0.815343 | 0         |  |
|       |      | Shiraz-32T | 1870 | 0.729766 | 0         |  |
|       |      | Shiraz-32T | 1872 | 1.504553 | 0         |  |

|       |      |            |      |          |           |  |  |
|-------|------|------------|------|----------|-----------|--|--|
|       |      | Shiraz-35T | 1933 | 0.488535 | 0         |  |  |
|       |      | Shiraz-38T | 2011 | 0        | -0.406024 |  |  |
|       |      | Shiraz-53T | 2115 | 0.427728 | 0         |  |  |
|       |      | Shiraz-58T | 2223 | 0.833364 | 0         |  |  |
|       |      | Shiraz-58T | 2226 | 1.074663 | 0         |  |  |
|       |      | Shiraz-71T | 2263 | 0.975531 | 0         |  |  |
|       |      | Shiraz-3T  | 246  | 0.531858 | 0         |  |  |
|       |      | Shiraz-4T  | 261  | 0        | -0.336249 |  |  |
|       |      | Shiraz-16T | 295  | 0.591657 | 0         |  |  |
|       |      | Shiraz-36T | 433  | 0        | -0.803961 |  |  |
|       |      | Shiraz-42T | 480  | 0        | -0.232915 |  |  |
|       |      | Shiraz-44T | 908  | 0.466743 | 0         |  |  |
|       |      | Shiraz-49T | 1170 | 0        | -0.967436 |  |  |
|       |      | Shiraz-49T | 1173 | 0        | -0.704439 |  |  |
|       |      | Shiraz-9T  | 1370 | 0.690073 | 0         |  |  |
|       |      | Shiraz-9T  | 1371 | 1.292392 | 0         |  |  |
|       |      | Shiraz-18T | 1457 | 0.643204 | 0         |  |  |
|       |      | Shiraz-22T | 1673 | 0.611783 | 0         |  |  |
|       |      | Shiraz-22T | 1678 | 0.911625 | 0         |  |  |
|       |      | Shiraz-25T | 1719 | 0.472955 | 0         |  |  |
|       |      | Shiraz-28T | 1762 | 0.562311 | 0         |  |  |
|       |      | Shiraz-29T | 1801 | 0.815343 | 0         |  |  |
|       |      | Shiraz-32T | 1870 | 0.729766 | 0         |  |  |
|       |      | Shiraz-32T | 1872 | 1.504553 | 0         |  |  |
|       |      | Shiraz-35T | 1933 | 0.488535 | 0         |  |  |
|       |      | Shiraz-38T | 2011 | 0        | -0.406024 |  |  |
|       |      | Shiraz-53T | 2115 | 0.427728 | 0         |  |  |
|       |      | Shiraz-58T | 2223 | 0.833364 | 0         |  |  |
|       |      | Shiraz-58T | 2226 | 1.074663 | 0         |  |  |
|       |      | Shiraz-71T | 2263 | 0.975531 | 0         |  |  |
| HDAC6 | chrX | Shiraz-3T  | 238  | 0.472087 | 0         |  |  |
|       |      | Shiraz-4T  | 260  | 0        | -0.324128 |  |  |
|       |      | Shiraz-16T | 294  | 0.655804 | 0         |  |  |
|       |      | Shiraz-31T | 345  | 0.103301 | 0         |  |  |
|       |      | Shiraz-36T | 431  | 0        | -0.78035  |  |  |
|       |      | Shiraz-36T | 432  | 0        | -0.6692   |  |  |
|       |      | Shiraz-44T | 891  | 0        | -0.954044 |  |  |
|       |      | Shiraz-44T | 896  | 0        | -0.109108 |  |  |
|       |      | Shiraz-46T | 991  | 0.139564 | 0         |  |  |
|       |      | Shiraz-47T | 1084 | 0.24185  | 0         |  |  |
|       |      | Shiraz-49T | 1166 | 0        | -0.917235 |  |  |
|       |      | Shiraz-49T | 1169 | 0        | -0.583529 |  |  |
|       |      | Shiraz-77T | 1282 | 0.213849 | 0         |  |  |
|       |      | Shiraz-9T  | 1368 | 0.199713 | 0         |  |  |
|       |      | Shiraz-9T  | 1369 | 0.703374 | 0         |  |  |
|       |      | Shiraz-18T | 1455 | 0        | -0.186773 |  |  |
|       |      | Shiraz-22T | 1669 | 0.695915 | 0         |  |  |

|  |  |            |      |          |           |  |
|--|--|------------|------|----------|-----------|--|
|  |  | Shiraz-22T | 1672 | 1.01678  | 0         |  |
|  |  | Shiraz-25T | 1717 | 0.420447 | 0         |  |
|  |  | Shiraz-28T | 1760 | 0.538181 | 0         |  |
|  |  | Shiraz-29T | 1800 | 0.672527 | 0         |  |
|  |  | Shiraz-32T | 1869 | 0.776805 | 0         |  |
|  |  | Shiraz-35T | 1932 | 0.507141 | 0         |  |
|  |  | Shiraz-58T | 2221 | 0.871948 | 0         |  |
|  |  | Shiraz-71T | 2260 | 0.68394  | 0         |  |
|  |  | Shiraz-71T | 2262 | 0.986748 | 0         |  |
|  |  | Shiraz-3T  | 238  | 0.472087 | 0         |  |
|  |  | Shiraz-4T  | 260  | 0        | -0.324128 |  |
|  |  | Shiraz-16T | 294  | 0.655804 | 0         |  |
|  |  | Shiraz-31T | 345  | 0.103301 | 0         |  |
|  |  | Shiraz-36T | 431  | 0        | -0.78035  |  |
|  |  | Shiraz-36T | 432  | 0        | -0.6692   |  |
|  |  | Shiraz-44T | 891  | 0        | -0.954044 |  |
|  |  | Shiraz-44T | 896  | 0        | -0.109108 |  |
|  |  | Shiraz-46T | 991  | 0.139564 | 0         |  |
|  |  | Shiraz-47T | 1084 | 0.24185  | 0         |  |
|  |  | Shiraz-49T | 1166 | 0        | -0.917235 |  |
|  |  | Shiraz-49T | 1169 | 0        | -0.583529 |  |
|  |  | Shiraz-77T | 1282 | 0.213849 | 0         |  |
|  |  | Shiraz-9T  | 1368 | 0.199713 | 0         |  |
|  |  | Shiraz-9T  | 1369 | 0.703374 | 0         |  |
|  |  | Shiraz-18T | 1455 | 0        | -0.186773 |  |
|  |  | Shiraz-22T | 1669 | 0.695915 | 0         |  |
|  |  | Shiraz-22T | 1672 | 1.01678  | 0         |  |
|  |  | Shiraz-25T | 1717 | 0.420447 | 0         |  |
|  |  | Shiraz-28T | 1760 | 0.538181 | 0         |  |
|  |  | Shiraz-29T | 1800 | 0.672527 | 0         |  |
|  |  | Shiraz-32T | 1869 | 0.776805 | 0         |  |
|  |  | Shiraz-35T | 1932 | 0.507141 | 0         |  |
|  |  | Shiraz-58T | 2221 | 0.871948 | 0         |  |
|  |  | Shiraz-71T | 2260 | 0.68394  | 0         |  |
|  |  | Shiraz-71T | 2262 | 0.986748 | 0         |  |
|  |  | Shiraz-3T  | 238  | 0.472087 | 0         |  |
|  |  | Shiraz-4T  | 260  | 0        | -0.324128 |  |
|  |  | Shiraz-16T | 294  | 0.655804 | 0         |  |
|  |  | Shiraz-31T | 345  | 0.103301 | 0         |  |
|  |  | Shiraz-36T | 431  | 0        | -0.78035  |  |
|  |  | Shiraz-36T | 432  | 0        | -0.6692   |  |
|  |  | Shiraz-44T | 891  | 0        | -0.954044 |  |
|  |  | Shiraz-44T | 896  | 0        | -0.109108 |  |
|  |  | Shiraz-46T | 991  | 0.139564 | 0         |  |
|  |  | Shiraz-47T | 1084 | 0.24185  | 0         |  |
|  |  | Shiraz-49T | 1166 | 0        | -0.917235 |  |
|  |  | Shiraz-49T | 1169 | 0        | -0.583529 |  |

|       |      |            |      |          |           |  |
|-------|------|------------|------|----------|-----------|--|
|       |      | Shiraz-77T | 1282 | 0.213849 | 0         |  |
|       |      | Shiraz-9T  | 1368 | 0.199713 | 0         |  |
|       |      | Shiraz-9T  | 1369 | 0.703374 | 0         |  |
|       |      | Shiraz-18T | 1455 | 0        | -0.186773 |  |
|       |      | Shiraz-22T | 1669 | 0.695915 | 0         |  |
|       |      | Shiraz-22T | 1672 | 1.01678  | 0         |  |
|       |      | Shiraz-25T | 1717 | 0.420447 | 0         |  |
|       |      | Shiraz-28T | 1760 | 0.538181 | 0         |  |
|       |      | Shiraz-29T | 1800 | 0.672527 | 0         |  |
|       |      | Shiraz-32T | 1869 | 0.776805 | 0         |  |
|       |      | Shiraz-35T | 1932 | 0.507141 | 0         |  |
|       |      | Shiraz-58T | 2221 | 0.871948 | 0         |  |
|       |      | Shiraz-71T | 2260 | 0.68394  | 0         |  |
|       |      | Shiraz-71T | 2262 | 0.986748 | 0         |  |
| HDAC8 | chrX | Shiraz-3T  | 242  | 0        | -0.336434 |  |
|       |      | Shiraz-4T  | 261  | 0        | -0.336249 |  |
|       |      | Shiraz-16T | 295  | 0.591657 | 0         |  |
|       |      | Shiraz-36T | 433  | 0        | -0.803961 |  |
|       |      | Shiraz-44T | 899  | 0        | -1.09697  |  |
|       |      | Shiraz-44T | 900  | 0        | -0.584284 |  |
|       |      | Shiraz-49T | 1170 | 0        | -0.967436 |  |
|       |      | Shiraz-49T | 1171 | 0        | -0.612379 |  |
|       |      | Shiraz-77T | 1283 | 0.296555 | 0         |  |
|       |      | Shiraz-18T | 1457 | 0.643204 | 0         |  |
|       |      | Shiraz-22T | 1673 | 0.611783 | 0         |  |
|       |      | Shiraz-22T | 1674 | 0.887899 | 0         |  |
|       |      | Shiraz-25T | 1719 | 0.472955 | 0         |  |
|       |      | Shiraz-28T | 1762 | 0.562311 | 0         |  |
|       |      | Shiraz-29T | 1801 | 0.815343 | 0         |  |
|       |      | Shiraz-32T | 1870 | 0.729766 | 0         |  |
|       |      | Shiraz-35T | 1933 | 0.488535 | 0         |  |
|       |      | Shiraz-58T | 2223 | 0.833364 | 0         |  |
|       |      | Shiraz-58T | 2224 | 1.076575 | 0         |  |
|       |      | Shiraz-71T | 2263 | 0.975531 | 0         |  |
|       |      | Shiraz-3T  | 242  | 0        | -0.336434 |  |
|       |      | Shiraz-4T  | 261  | 0        | -0.336249 |  |
|       |      | Shiraz-16T | 295  | 0.591657 | 0         |  |
|       |      | Shiraz-36T | 433  | 0        | -0.803961 |  |
|       |      | Shiraz-44T | 899  | 0        | -1.09697  |  |
|       |      | Shiraz-44T | 900  | 0        | -0.584284 |  |
|       |      | Shiraz-49T | 1170 | 0        | -0.967436 |  |
|       |      | Shiraz-49T | 1171 | 0        | -0.612379 |  |
|       |      | Shiraz-77T | 1283 | 0.296555 | 0         |  |
|       |      | Shiraz-18T | 1457 | 0.643204 | 0         |  |
|       |      | Shiraz-22T | 1673 | 0.611783 | 0         |  |
|       |      | Shiraz-22T | 1674 | 0.887899 | 0         |  |
|       |      | Shiraz-25T | 1719 | 0.472955 | 0         |  |



|  |            |      |          |           |  |
|--|------------|------|----------|-----------|--|
|  | Shiraz-49T | 1117 | 0        | -0.168296 |  |
|  | Shiraz-49T | 1117 | 0        | -0.168296 |  |
|  | Shiraz-49T | 1117 | 0        | -0.168296 |  |
|  | Shiraz-49T | 1117 | 0        | -0.168296 |  |
|  | Shiraz-49T | 1117 | 0        | -0.168296 |  |
|  | Shiraz-77T | 1222 | 0        | -0.113002 |  |
|  | Shiraz-77T | 1222 | 0        | -0.113002 |  |
|  | Shiraz-77T | 1222 | 0        | -0.113002 |  |
|  | Shiraz-77T | 1222 | 0        | -0.113002 |  |
|  | Shiraz-77T | 1222 | 0        | -0.113002 |  |
|  | Shiraz-18T | 1433 | 0.250973 | 0         |  |
|  | Shiraz-18T | 1433 | 0.250973 | 0         |  |
|  | Shiraz-18T | 1433 | 0.250973 | 0         |  |
|  | Shiraz-18T | 1433 | 0.250973 | 0         |  |
|  | Shiraz-18T | 1433 | 0.250973 | 0         |  |
|  | Shiraz-22T | 1543 | 0        | -0.513696 |  |
|  | Shiraz-22T | 1543 | 0        | -0.513696 |  |
|  | Shiraz-22T | 1543 | 0        | -0.513696 |  |
|  | Shiraz-22T | 1543 | 0        | -0.513696 |  |
|  | Shiraz-22T | 1543 | 0        | -0.513696 |  |
|  | Shiraz-25T | 1697 | 0.21945  | 0         |  |
|  | Shiraz-25T | 1697 | 0.21945  | 0         |  |
|  | Shiraz-25T | 1697 | 0.21945  | 0         |  |
|  | Shiraz-25T | 1697 | 0.21945  | 0         |  |
|  | Shiraz-25T | 1697 | 0.21945  | 0         |  |
|  | Shiraz-28T | 1734 | 0.362882 | 0         |  |
|  | Shiraz-28T | 1734 | 0.362882 | 0         |  |
|  | Shiraz-28T | 1734 | 0.362882 | 0         |  |
|  | Shiraz-28T | 1734 | 0.362882 | 0         |  |
|  | Shiraz-28T | 1734 | 0.362882 | 0         |  |
|  | Shiraz-29T | 1777 | 0.156747 | 0         |  |
|  | Shiraz-29T | 1777 | 0.156747 | 0         |  |
|  | Shiraz-29T | 1777 | 0.156747 | 0         |  |
|  | Shiraz-29T | 1777 | 0.156747 | 0         |  |
|  | Shiraz-29T | 1777 | 0.156747 | 0         |  |
|  | Shiraz-38T | 1950 | 0.265916 | 0         |  |
|  | Shiraz-38T | 1950 | 0.265916 | 0         |  |
|  | Shiraz-38T | 1950 | 0.265916 | 0         |  |
|  | Shiraz-38T | 1950 | 0.265916 | 0         |  |
|  | Shiraz-38T | 1950 | 0.265916 | 0         |  |
|  | Shiraz-58T | 2157 | 0        | -0.213872 |  |
|  | Shiraz-58T | 2157 | 0        | -0.213872 |  |
|  | Shiraz-58T | 2157 | 0        | -0.213872 |  |
|  | Shiraz-58T | 2157 | 0        | -0.213872 |  |
|  | Shiraz-58T | 2157 | 0        | -0.213872 |  |
|  | Shiraz-71T | 2236 | 0.320072 | 0         |  |
|  | Shiraz-71T | 2236 | 0.320072 | 0         |  |

|  |  |            |      |          |           |  |  |
|--|--|------------|------|----------|-----------|--|--|
|  |  | Shiraz-71T | 2236 | 0.320072 | 0         |  |  |
|  |  | Shiraz-71T | 2236 | 0.320072 | 0         |  |  |
|  |  | Shiraz-71T | 2236 | 0.320072 | 0         |  |  |
|  |  | Shiraz-4T  | 252  | 0.192083 | 0         |  |  |
|  |  | Shiraz-4T  | 252  | 0.192083 | 0         |  |  |
|  |  | Shiraz-4T  | 252  | 0.192083 | 0         |  |  |
|  |  | Shiraz-4T  | 252  | 0.192083 | 0         |  |  |
|  |  | Shiraz-4T  | 252  | 0.192083 | 0         |  |  |
|  |  | Shiraz-36T | 376  | 0.159952 | 0         |  |  |
|  |  | Shiraz-36T | 376  | 0.159952 | 0         |  |  |
|  |  | Shiraz-36T | 376  | 0.159952 | 0         |  |  |
|  |  | Shiraz-36T | 376  | 0.159952 | 0         |  |  |
|  |  | Shiraz-36T | 376  | 0.159952 | 0         |  |  |
|  |  | Shiraz-44T | 628  | 0        | -0.444379 |  |  |
|  |  | Shiraz-44T | 628  | 0        | -0.444379 |  |  |
|  |  | Shiraz-44T | 628  | 0        | -0.444379 |  |  |
|  |  | Shiraz-44T | 628  | 0        | -0.444379 |  |  |
|  |  | Shiraz-44T | 628  | 0        | -0.444379 |  |  |
|  |  | Shiraz-47T | 1027 | 0        | -0.117848 |  |  |
|  |  | Shiraz-47T | 1027 | 0        | -0.117848 |  |  |
|  |  | Shiraz-47T | 1027 | 0        | -0.117848 |  |  |
|  |  | Shiraz-47T | 1027 | 0        | -0.117848 |  |  |
|  |  | Shiraz-47T | 1027 | 0        | -0.117848 |  |  |
|  |  | Shiraz-49T | 1117 | 0        | -0.168296 |  |  |
|  |  | Shiraz-49T | 1117 | 0        | -0.168296 |  |  |
|  |  | Shiraz-49T | 1117 | 0        | -0.168296 |  |  |
|  |  | Shiraz-49T | 1117 | 0        | -0.168296 |  |  |
|  |  | Shiraz-49T | 1117 | 0        | -0.168296 |  |  |
|  |  | Shiraz-77T | 1222 | 0        | -0.113002 |  |  |
|  |  | Shiraz-77T | 1222 | 0        | -0.113002 |  |  |
|  |  | Shiraz-77T | 1222 | 0        | -0.113002 |  |  |
|  |  | Shiraz-77T | 1222 | 0        | -0.113002 |  |  |
|  |  | Shiraz-77T | 1222 | 0        | -0.113002 |  |  |
|  |  | Shiraz-18T | 1433 | 0.250973 | 0         |  |  |
|  |  | Shiraz-18T | 1433 | 0.250973 | 0         |  |  |
|  |  | Shiraz-18T | 1433 | 0.250973 | 0         |  |  |
|  |  | Shiraz-18T | 1433 | 0.250973 | 0         |  |  |
|  |  | Shiraz-18T | 1433 | 0.250973 | 0         |  |  |
|  |  | Shiraz-22T | 1543 | 0        | -0.513696 |  |  |
|  |  | Shiraz-22T | 1543 | 0        | -0.513696 |  |  |
|  |  | Shiraz-22T | 1543 | 0        | -0.513696 |  |  |
|  |  | Shiraz-22T | 1543 | 0        | -0.513696 |  |  |
|  |  | Shiraz-22T | 1543 | 0        | -0.513696 |  |  |
|  |  | Shiraz-25T | 1697 | 0.21945  | 0         |  |  |
|  |  | Shiraz-25T | 1697 | 0.21945  | 0         |  |  |
|  |  | Shiraz-25T | 1697 | 0.21945  | 0         |  |  |
|  |  | Shiraz-25T | 1697 | 0.21945  | 0         |  |  |

|  |  |            |      |          |           |  |  |
|--|--|------------|------|----------|-----------|--|--|
|  |  | Shiraz-25T | 1697 | 0.21945  | 0         |  |  |
|  |  | Shiraz-28T | 1734 | 0.362882 | 0         |  |  |
|  |  | Shiraz-28T | 1734 | 0.362882 | 0         |  |  |
|  |  | Shiraz-28T | 1734 | 0.362882 | 0         |  |  |
|  |  | Shiraz-28T | 1734 | 0.362882 | 0         |  |  |
|  |  | Shiraz-28T | 1734 | 0.362882 | 0         |  |  |
|  |  | Shiraz-29T | 1777 | 0.156747 | 0         |  |  |
|  |  | Shiraz-29T | 1777 | 0.156747 | 0         |  |  |
|  |  | Shiraz-29T | 1777 | 0.156747 | 0         |  |  |
|  |  | Shiraz-29T | 1777 | 0.156747 | 0         |  |  |
|  |  | Shiraz-29T | 1777 | 0.156747 | 0         |  |  |
|  |  | Shiraz-38T | 1950 | 0.265916 | 0         |  |  |
|  |  | Shiraz-38T | 1950 | 0.265916 | 0         |  |  |
|  |  | Shiraz-38T | 1950 | 0.265916 | 0         |  |  |
|  |  | Shiraz-38T | 1950 | 0.265916 | 0         |  |  |
|  |  | Shiraz-38T | 1950 | 0.265916 | 0         |  |  |
|  |  | Shiraz-58T | 2157 | 0        | -0.213872 |  |  |
|  |  | Shiraz-58T | 2157 | 0        | -0.213872 |  |  |
|  |  | Shiraz-58T | 2157 | 0        | -0.213872 |  |  |
|  |  | Shiraz-58T | 2157 | 0        | -0.213872 |  |  |
|  |  | Shiraz-58T | 2157 | 0        | -0.213872 |  |  |
|  |  | Shiraz-71T | 2236 | 0.320072 | 0         |  |  |
|  |  | Shiraz-71T | 2236 | 0.320072 | 0         |  |  |
|  |  | Shiraz-71T | 2236 | 0.320072 | 0         |  |  |
|  |  | Shiraz-71T | 2236 | 0.320072 | 0         |  |  |
|  |  | Shiraz-71T | 2236 | 0.320072 | 0         |  |  |
|  |  | Shiraz-4T  | 252  | 0.192083 | 0         |  |  |
|  |  | Shiraz-4T  | 252  | 0.192083 | 0         |  |  |
|  |  | Shiraz-4T  | 252  | 0.192083 | 0         |  |  |
|  |  | Shiraz-4T  | 252  | 0.192083 | 0         |  |  |
|  |  | Shiraz-4T  | 252  | 0.192083 | 0         |  |  |
|  |  | Shiraz-36T | 376  | 0.159952 | 0         |  |  |
|  |  | Shiraz-36T | 376  | 0.159952 | 0         |  |  |
|  |  | Shiraz-36T | 376  | 0.159952 | 0         |  |  |
|  |  | Shiraz-36T | 376  | 0.159952 | 0         |  |  |
|  |  | Shiraz-36T | 376  | 0.159952 | 0         |  |  |
|  |  | Shiraz-44T | 628  | 0        | -0.444379 |  |  |
|  |  | Shiraz-44T | 628  | 0        | -0.444379 |  |  |
|  |  | Shiraz-44T | 628  | 0        | -0.444379 |  |  |
|  |  | Shiraz-44T | 628  | 0        | -0.444379 |  |  |
|  |  | Shiraz-44T | 628  | 0        | -0.444379 |  |  |
|  |  | Shiraz-47T | 1027 | 0        | -0.117848 |  |  |
|  |  | Shiraz-47T | 1027 | 0        | -0.117848 |  |  |
|  |  | Shiraz-47T | 1027 | 0        | -0.117848 |  |  |
|  |  | Shiraz-47T | 1027 | 0        | -0.117848 |  |  |
|  |  | Shiraz-47T | 1027 | 0        | -0.117848 |  |  |
|  |  | Shiraz-49T | 1117 | 0        | -0.168296 |  |  |



|  |            |      |          |           |  |
|--|------------|------|----------|-----------|--|
|  | Shiraz-49T | 1117 | 0        | -0.168296 |  |
|  | Shiraz-49T | 1117 | 0        | -0.168296 |  |
|  | Shiraz-49T | 1117 | 0        | -0.168296 |  |
|  | Shiraz-49T | 1117 | 0        | -0.168296 |  |
|  | Shiraz-77T | 1222 | 0        | -0.113002 |  |
|  | Shiraz-77T | 1222 | 0        | -0.113002 |  |
|  | Shiraz-77T | 1222 | 0        | -0.113002 |  |
|  | Shiraz-77T | 1222 | 0        | -0.113002 |  |
|  | Shiraz-77T | 1222 | 0        | -0.113002 |  |
|  | Shiraz-18T | 1433 | 0.250973 | 0         |  |
|  | Shiraz-18T | 1433 | 0.250973 | 0         |  |
|  | Shiraz-18T | 1433 | 0.250973 | 0         |  |
|  | Shiraz-18T | 1433 | 0.250973 | 0         |  |
|  | Shiraz-18T | 1433 | 0.250973 | 0         |  |
|  | Shiraz-22T | 1543 | 0        | -0.513696 |  |
|  | Shiraz-22T | 1543 | 0        | -0.513696 |  |
|  | Shiraz-22T | 1543 | 0        | -0.513696 |  |
|  | Shiraz-22T | 1543 | 0        | -0.513696 |  |
|  | Shiraz-22T | 1543 | 0        | -0.513696 |  |
|  | Shiraz-25T | 1697 | 0.21945  | 0         |  |
|  | Shiraz-25T | 1697 | 0.21945  | 0         |  |
|  | Shiraz-25T | 1697 | 0.21945  | 0         |  |
|  | Shiraz-25T | 1697 | 0.21945  | 0         |  |
|  | Shiraz-25T | 1697 | 0.21945  | 0         |  |
|  | Shiraz-28T | 1734 | 0.362882 | 0         |  |
|  | Shiraz-28T | 1734 | 0.362882 | 0         |  |
|  | Shiraz-28T | 1734 | 0.362882 | 0         |  |
|  | Shiraz-28T | 1734 | 0.362882 | 0         |  |
|  | Shiraz-28T | 1734 | 0.362882 | 0         |  |
|  | Shiraz-29T | 1777 | 0.156747 | 0         |  |
|  | Shiraz-29T | 1777 | 0.156747 | 0         |  |
|  | Shiraz-29T | 1777 | 0.156747 | 0         |  |
|  | Shiraz-29T | 1777 | 0.156747 | 0         |  |
|  | Shiraz-29T | 1777 | 0.156747 | 0         |  |
|  | Shiraz-38T | 1950 | 0.265916 | 0         |  |
|  | Shiraz-38T | 1950 | 0.265916 | 0         |  |
|  | Shiraz-38T | 1950 | 0.265916 | 0         |  |
|  | Shiraz-38T | 1950 | 0.265916 | 0         |  |
|  | Shiraz-38T | 1950 | 0.265916 | 0         |  |
|  | Shiraz-58T | 2157 | 0        | -0.213872 |  |
|  | Shiraz-58T | 2157 | 0        | -0.213872 |  |
|  | Shiraz-58T | 2157 | 0        | -0.213872 |  |
|  | Shiraz-58T | 2157 | 0        | -0.213872 |  |
|  | Shiraz-58T | 2157 | 0        | -0.213872 |  |
|  | Shiraz-71T | 2236 | 0.320072 | 0         |  |
|  | Shiraz-71T | 2236 | 0.320072 | 0         |  |
|  | Shiraz-71T | 2236 | 0.320072 | 0         |  |

|        |      |            |      |          |           |  |  |
|--------|------|------------|------|----------|-----------|--|--|
|        |      | Shiraz-71T | 2236 | 0.320072 | 0         |  |  |
|        |      | Shiraz-71T | 2236 | 0.320072 | 0         |  |  |
| HDHD1A | chrX | Shiraz-3T  | 235  | 0        | -0.28401  |  |  |
|        |      | Shiraz-4T  | 260  | 0        | -0.324128 |  |  |
|        |      | Shiraz-16T | 294  | 0.655804 | 0         |  |  |
|        |      | Shiraz-36T | 431  | 0        | -0.78035  |  |  |
|        |      | Shiraz-44T | 891  | 0        | -0.954044 |  |  |
|        |      | Shiraz-44T | 892  | 0        | -1.231333 |  |  |
|        |      | Shiraz-46T | 990  | 0        | -0.370066 |  |  |
|        |      | Shiraz-49T | 1166 | 0        | -0.917235 |  |  |
|        |      | Shiraz-9T  | 1368 | 0.199713 | 0         |  |  |
|        |      | Shiraz-18T | 1455 | 0        | -0.186773 |  |  |
|        |      | Shiraz-22T | 1669 | 0.695915 | 0         |  |  |
|        |      | Shiraz-25T | 1717 | 0.420447 | 0         |  |  |
|        |      | Shiraz-28T | 1760 | 0.538181 | 0         |  |  |
|        |      | Shiraz-29T | 1800 | 0.672527 | 0         |  |  |
|        |      | Shiraz-32T | 1869 | 0.776805 | 0         |  |  |
|        |      | Shiraz-35T | 1932 | 0.507141 | 0         |  |  |
|        |      | Shiraz-40T | 2051 | 0.098506 | 0         |  |  |
|        |      | Shiraz-58T | 2221 | 0.871948 | 0         |  |  |
|        |      | Shiraz-71T | 2260 | 0.68394  | 0         |  |  |
|        |      | Shiraz-71T | 2261 | 0.508399 | 0         |  |  |
|        |      | Shiraz-3T  | 235  | 0        | -0.28401  |  |  |
|        |      | Shiraz-4T  | 260  | 0        | -0.324128 |  |  |
|        |      | Shiraz-16T | 294  | 0.655804 | 0         |  |  |
|        |      | Shiraz-36T | 431  | 0        | -0.78035  |  |  |
|        |      | Shiraz-44T | 891  | 0        | -0.954044 |  |  |
|        |      | Shiraz-44T | 892  | 0        | -1.231333 |  |  |
|        |      | Shiraz-46T | 990  | 0        | -0.370066 |  |  |
|        |      | Shiraz-49T | 1166 | 0        | -0.917235 |  |  |
|        |      | Shiraz-9T  | 1368 | 0.199713 | 0         |  |  |
|        |      | Shiraz-18T | 1455 | 0        | -0.186773 |  |  |
|        |      | Shiraz-22T | 1669 | 0.695915 | 0         |  |  |
|        |      | Shiraz-25T | 1717 | 0.420447 | 0         |  |  |
|        |      | Shiraz-28T | 1760 | 0.538181 | 0         |  |  |
|        |      | Shiraz-29T | 1800 | 0.672527 | 0         |  |  |
|        |      | Shiraz-32T | 1869 | 0.776805 | 0         |  |  |
|        |      | Shiraz-35T | 1932 | 0.507141 | 0         |  |  |
|        |      | Shiraz-40T | 2051 | 0.098506 | 0         |  |  |
|        |      | Shiraz-58T | 2221 | 0.871948 | 0         |  |  |
|        |      | Shiraz-71T | 2260 | 0.68394  | 0         |  |  |
|        |      | Shiraz-71T | 2261 | 0.508399 | 0         |  |  |
|        |      | Shiraz-3T  | 235  | 0        | -0.28401  |  |  |
|        |      | Shiraz-4T  | 260  | 0        | -0.324128 |  |  |
|        |      | Shiraz-16T | 294  | 0.655804 | 0         |  |  |
|        |      | Shiraz-36T | 431  | 0        | -0.78035  |  |  |
|        |      | Shiraz-44T | 891  | 0        | -0.954044 |  |  |

|     |      |            |      |          |           |  |  |
|-----|------|------------|------|----------|-----------|--|--|
|     |      | Shiraz-44T | 892  | 0        | -1.231333 |  |  |
|     |      | Shiraz-46T | 990  | 0        | -0.370066 |  |  |
|     |      | Shiraz-49T | 1166 | 0        | -0.917235 |  |  |
|     |      | Shiraz-9T  | 1368 | 0.199713 | 0         |  |  |
|     |      | Shiraz-18T | 1455 | 0        | -0.186773 |  |  |
|     |      | Shiraz-22T | 1669 | 0.695915 | 0         |  |  |
|     |      | Shiraz-25T | 1717 | 0.420447 | 0         |  |  |
|     |      | Shiraz-28T | 1760 | 0.538181 | 0         |  |  |
|     |      | Shiraz-29T | 1800 | 0.672527 | 0         |  |  |
|     |      | Shiraz-32T | 1869 | 0.776805 | 0         |  |  |
|     |      | Shiraz-35T | 1932 | 0.507141 | 0         |  |  |
|     |      | Shiraz-40T | 2051 | 0.098506 | 0         |  |  |
|     |      | Shiraz-58T | 2221 | 0.871948 | 0         |  |  |
|     |      | Shiraz-71T | 2260 | 0.68394  | 0         |  |  |
|     |      | Shiraz-71T | 2261 | 0.508399 | 0         |  |  |
| HDX | chrX | Shiraz-3T  | 242  | 0        | -0.336434 |  |  |
|     |      | Shiraz-3T  | 243  | 0        | -0.549129 |  |  |
|     |      | Shiraz-4T  | 261  | 0        | -0.336249 |  |  |
|     |      | Shiraz-16T | 295  | 0.591657 | 0         |  |  |
|     |      | Shiraz-31T | 346  | 0        | -0.1527   |  |  |
|     |      | Shiraz-36T | 433  | 0        | -0.803961 |  |  |
|     |      | Shiraz-44T | 899  | 0        | -1.09697  |  |  |
|     |      | Shiraz-44T | 902  | 0        | -1.449824 |  |  |
|     |      | Shiraz-47T | 1085 | 0        | -0.130811 |  |  |
|     |      | Shiraz-49T | 1170 | 0        | -0.967436 |  |  |
|     |      | Shiraz-49T | 1172 | 0        | -1.123219 |  |  |
|     |      | Shiraz-18T | 1457 | 0.643204 | 0         |  |  |
|     |      | Shiraz-22T | 1673 | 0.611783 | 0         |  |  |
|     |      | Shiraz-22T | 1675 | 0.279253 | 0         |  |  |
|     |      | Shiraz-25T | 1719 | 0.472955 | 0         |  |  |
|     |      | Shiraz-28T | 1762 | 0.562311 | 0         |  |  |
|     |      | Shiraz-29T | 1801 | 0.815343 | 0         |  |  |
|     |      | Shiraz-32T | 1870 | 0.729766 | 0         |  |  |
|     |      | Shiraz-32T | 1871 | 0.292679 | 0         |  |  |
|     |      | Shiraz-35T | 1933 | 0.488535 | 0         |  |  |
|     |      | Shiraz-58T | 2223 | 0.833364 | 0         |  |  |
|     |      | Shiraz-58T | 2225 | 0.595784 | 0         |  |  |
|     |      | Shiraz-71T | 2263 | 0.975531 | 0         |  |  |
|     |      | Shiraz-3T  | 242  | 0        | -0.336434 |  |  |
|     |      | Shiraz-3T  | 243  | 0        | -0.549129 |  |  |
|     |      | Shiraz-4T  | 261  | 0        | -0.336249 |  |  |
|     |      | Shiraz-16T | 295  | 0.591657 | 0         |  |  |
|     |      | Shiraz-31T | 346  | 0        | -0.1527   |  |  |
|     |      | Shiraz-36T | 433  | 0        | -0.803961 |  |  |
|     |      | Shiraz-44T | 899  | 0        | -1.09697  |  |  |
|     |      | Shiraz-44T | 902  | 0        | -1.449824 |  |  |
|     |      | Shiraz-47T | 1085 | 0        | -0.130811 |  |  |

|          |      |            |      |          |           |  |  |
|----------|------|------------|------|----------|-----------|--|--|
|          |      | Shiraz-49T | 1170 | 0        | -0.967436 |  |  |
|          |      | Shiraz-49T | 1172 | 0        | -1.123219 |  |  |
|          |      | Shiraz-18T | 1457 | 0.643204 | 0         |  |  |
|          |      | Shiraz-22T | 1673 | 0.611783 | 0         |  |  |
|          |      | Shiraz-22T | 1675 | 0.279253 | 0         |  |  |
|          |      | Shiraz-25T | 1719 | 0.472955 | 0         |  |  |
|          |      | Shiraz-28T | 1762 | 0.562311 | 0         |  |  |
|          |      | Shiraz-29T | 1801 | 0.815343 | 0         |  |  |
|          |      | Shiraz-32T | 1870 | 0.729766 | 0         |  |  |
|          |      | Shiraz-32T | 1871 | 0.292679 | 0         |  |  |
|          |      | Shiraz-35T | 1933 | 0.488535 | 0         |  |  |
|          |      | Shiraz-58T | 2223 | 0.833364 | 0         |  |  |
|          |      | Shiraz-58T | 2225 | 0.595784 | 0         |  |  |
|          |      | Shiraz-71T | 2263 | 0.975531 | 0         |  |  |
|          |      | Shiraz-3T  | 242  | 0        | -0.336434 |  |  |
|          |      | Shiraz-3T  | 243  | 0        | -0.549129 |  |  |
|          |      | Shiraz-4T  | 261  | 0        | -0.336249 |  |  |
|          |      | Shiraz-16T | 295  | 0.591657 | 0         |  |  |
|          |      | Shiraz-31T | 346  | 0        | -0.1527   |  |  |
|          |      | Shiraz-36T | 433  | 0        | -0.803961 |  |  |
|          |      | Shiraz-44T | 899  | 0        | -1.09697  |  |  |
|          |      | Shiraz-44T | 902  | 0        | -1.449824 |  |  |
|          |      | Shiraz-47T | 1085 | 0        | -0.130811 |  |  |
|          |      | Shiraz-49T | 1170 | 0        | -0.967436 |  |  |
|          |      | Shiraz-49T | 1172 | 0        | -1.123219 |  |  |
|          |      | Shiraz-18T | 1457 | 0.643204 | 0         |  |  |
|          |      | Shiraz-22T | 1673 | 0.611783 | 0         |  |  |
|          |      | Shiraz-22T | 1675 | 0.279253 | 0         |  |  |
|          |      | Shiraz-25T | 1719 | 0.472955 | 0         |  |  |
|          |      | Shiraz-28T | 1762 | 0.562311 | 0         |  |  |
|          |      | Shiraz-29T | 1801 | 0.815343 | 0         |  |  |
|          |      | Shiraz-32T | 1870 | 0.729766 | 0         |  |  |
|          |      | Shiraz-32T | 1871 | 0.292679 | 0         |  |  |
|          |      | Shiraz-35T | 1933 | 0.488535 | 0         |  |  |
|          |      | Shiraz-58T | 2223 | 0.833364 | 0         |  |  |
|          |      | Shiraz-58T | 2225 | 0.595784 | 0         |  |  |
|          |      | Shiraz-71T | 2263 | 0.975531 | 0         |  |  |
| HEATR7B2 | chr5 | Shiraz-4T  | 250  | 0.262252 | 0         |  |  |
|          |      | Shiraz-16T | 266  | 0.321724 | 0         |  |  |
|          |      | Shiraz-44T | 591  | 0        | -0.233934 |  |  |
|          |      | Shiraz-18T | 1429 | 0        | -0.314125 |  |  |
|          |      | Shiraz-22T | 1522 | 0        | -0.322688 |  |  |
|          |      | Shiraz-25T | 1694 | 0.201602 | 0         |  |  |
|          |      | Shiraz-28T | 1731 | 0.295447 | 0         |  |  |
|          |      | Shiraz-29T | 1773 | 0.090981 | 0         |  |  |
|          |      | Shiraz-40T | 2016 | 0.376634 | 0         |  |  |
|          |      | Shiraz-4T  | 250  | 0.262252 | 0         |  |  |

|       |      |            |      |          |           |  |  |
|-------|------|------------|------|----------|-----------|--|--|
|       |      | Shiraz-16T | 266  | 0.321724 | 0         |  |  |
|       |      | Shiraz-44T | 591  | 0        | -0.233934 |  |  |
|       |      | Shiraz-18T | 1429 | 0        | -0.314125 |  |  |
|       |      | Shiraz-22T | 1522 | 0        | -0.322688 |  |  |
|       |      | Shiraz-25T | 1694 | 0.201602 | 0         |  |  |
|       |      | Shiraz-28T | 1731 | 0.295447 | 0         |  |  |
|       |      | Shiraz-29T | 1773 | 0.090981 | 0         |  |  |
|       |      | Shiraz-40T | 2016 | 0.376634 | 0         |  |  |
|       |      | Shiraz-4T  | 250  | 0.262252 | 0         |  |  |
|       |      | Shiraz-16T | 266  | 0.321724 | 0         |  |  |
|       |      | Shiraz-44T | 591  | 0        | -0.233934 |  |  |
|       |      | Shiraz-18T | 1429 | 0        | -0.314125 |  |  |
|       |      | Shiraz-22T | 1522 | 0        | -0.322688 |  |  |
|       |      | Shiraz-25T | 1694 | 0.201602 | 0         |  |  |
|       |      | Shiraz-28T | 1731 | 0.295447 | 0         |  |  |
|       |      | Shiraz-29T | 1773 | 0.090981 | 0         |  |  |
|       |      | Shiraz-40T | 2016 | 0.376634 | 0         |  |  |
| HECW1 | chr7 | Shiraz-3T  | 87   | 0.198593 | 0         |  |  |
|       |      | Shiraz-4T  | 252  | 0.192083 | 0         |  |  |
|       |      | Shiraz-36T | 376  | 0.159952 | 0         |  |  |
|       |      | Shiraz-46T | 942  | 0.069143 | 0         |  |  |
|       |      | Shiraz-18T | 1433 | 0.250973 | 0         |  |  |
|       |      | Shiraz-25T | 1697 | 0.21945  | 0         |  |  |
|       |      | Shiraz-28T | 1734 | 0.362882 | 0         |  |  |
|       |      | Shiraz-29T | 1777 | 0.156747 | 0         |  |  |
|       |      | Shiraz-38T | 1950 | 0.265916 | 0         |  |  |
|       |      | Shiraz-71T | 2236 | 0.320072 | 0         |  |  |
|       |      | Shiraz-3T  | 87   | 0.198593 | 0         |  |  |
|       |      | Shiraz-4T  | 252  | 0.192083 | 0         |  |  |
|       |      | Shiraz-36T | 376  | 0.159952 | 0         |  |  |
|       |      | Shiraz-46T | 942  | 0.069143 | 0         |  |  |
|       |      | Shiraz-18T | 1433 | 0.250973 | 0         |  |  |
|       |      | Shiraz-25T | 1697 | 0.21945  | 0         |  |  |
|       |      | Shiraz-28T | 1734 | 0.362882 | 0         |  |  |
|       |      | Shiraz-29T | 1777 | 0.156747 | 0         |  |  |
|       |      | Shiraz-38T | 1950 | 0.265916 | 0         |  |  |
|       |      | Shiraz-71T | 2236 | 0.320072 | 0         |  |  |
|       |      | Shiraz-3T  | 87   | 0.198593 | 0         |  |  |
|       |      | Shiraz-4T  | 252  | 0.192083 | 0         |  |  |
|       |      | Shiraz-36T | 376  | 0.159952 | 0         |  |  |
|       |      | Shiraz-46T | 942  | 0.069143 | 0         |  |  |
|       |      | Shiraz-18T | 1433 | 0.250973 | 0         |  |  |
|       |      | Shiraz-25T | 1697 | 0.21945  | 0         |  |  |
|       |      | Shiraz-28T | 1734 | 0.362882 | 0         |  |  |
|       |      | Shiraz-29T | 1777 | 0.156747 | 0         |  |  |
|       |      | Shiraz-38T | 1950 | 0.265916 | 0         |  |  |
|       |      | Shiraz-71T | 2236 | 0.320072 | 0         |  |  |

|          |      |            |      |          |           |  |
|----------|------|------------|------|----------|-----------|--|
| HEPACAM2 | chr7 | Shiraz-3T  | 90   | 0.219276 | 0         |  |
|          |      | Shiraz-3T  | 90   | 0.219276 | 0         |  |
|          |      | Shiraz-3T  | 93   | 0        | -0.058023 |  |
|          |      | Shiraz-3T  | 93   | 0        | -0.058023 |  |
|          |      | Shiraz-4T  | 253  | 0.372918 | 0         |  |
|          |      | Shiraz-4T  | 253  | 0.372918 | 0         |  |
|          |      | Shiraz-36T | 378  | 0.179558 | 0         |  |
|          |      | Shiraz-36T | 378  | 0.179558 | 0         |  |
|          |      | Shiraz-36T | 380  | 0.083883 | 0         |  |
|          |      | Shiraz-36T | 380  | 0.083883 | 0         |  |
|          |      | Shiraz-44T | 638  | 0        | -0.433476 |  |
|          |      | Shiraz-44T | 638  | 0        | -0.433476 |  |
|          |      | Shiraz-46T | 943  | 0.093799 | 0         |  |
|          |      | Shiraz-46T | 943  | 0.093799 | 0         |  |
|          |      | Shiraz-46T | 945  | 0        | -0.014838 |  |
|          |      | Shiraz-46T | 945  | 0        | -0.014838 |  |
|          |      | Shiraz-47T | 1029 | 0        | -0.096586 |  |
|          |      | Shiraz-47T | 1029 | 0        | -0.096586 |  |
|          |      | Shiraz-49T | 1119 | 0        | -0.157331 |  |
|          |      | Shiraz-49T | 1119 | 0        | -0.157331 |  |
|          |      | Shiraz-77T | 1225 | 0        | -0.117922 |  |
|          |      | Shiraz-77T | 1225 | 0        | -0.117922 |  |
|          |      | Shiraz-18T | 1434 | 0.244465 | 0         |  |
|          |      | Shiraz-18T | 1434 | 0.244465 | 0         |  |
|          |      | Shiraz-22T | 1549 | 0        | -0.319623 |  |
|          |      | Shiraz-22T | 1549 | 0        | -0.319623 |  |
|          |      | Shiraz-25T | 1698 | 0.21835  | 0         |  |
|          |      | Shiraz-25T | 1698 | 0.21835  | 0         |  |
|          |      | Shiraz-28T | 1735 | 0.350744 | 0         |  |
|          |      | Shiraz-28T | 1735 | 0.350744 | 0         |  |
|          |      | Shiraz-29T | 1778 | 0.120767 | 0         |  |
|          |      | Shiraz-29T | 1778 | 0.120767 | 0         |  |
|          |      | Shiraz-32T | 1833 | 0.551336 | 0         |  |
|          |      | Shiraz-32T | 1833 | 0.551336 | 0         |  |
|          |      | Shiraz-38T | 1951 | 0.250891 | 0         |  |
|          |      | Shiraz-38T | 1951 | 0.250891 | 0         |  |
|          |      | Shiraz-53T | 2078 | 0.287202 | 0         |  |
|          |      | Shiraz-53T | 2078 | 0.287202 | 0         |  |
|          |      | Shiraz-58T | 2159 | 0        | -0.219521 |  |
|          |      | Shiraz-58T | 2159 | 0        | -0.219521 |  |
|          |      | Shiraz-71T | 2238 | 0.603631 | 0         |  |
|          |      | Shiraz-71T | 2238 | 0.603631 | 0         |  |
|          |      | Shiraz-3T  | 90   | 0.219276 | 0         |  |
|          |      | Shiraz-3T  | 90   | 0.219276 | 0         |  |
|          |      | Shiraz-3T  | 93   | 0        | -0.058023 |  |
|          |      | Shiraz-3T  | 93   | 0        | -0.058023 |  |
|          |      | Shiraz-4T  | 253  | 0.372918 | 0         |  |

|  |  |            |      |          |           |  |  |
|--|--|------------|------|----------|-----------|--|--|
|  |  | Shiraz-4T  | 253  | 0.372918 | 0         |  |  |
|  |  | Shiraz-36T | 378  | 0.179558 | 0         |  |  |
|  |  | Shiraz-36T | 378  | 0.179558 | 0         |  |  |
|  |  | Shiraz-36T | 380  | 0.083883 | 0         |  |  |
|  |  | Shiraz-36T | 380  | 0.083883 | 0         |  |  |
|  |  | Shiraz-44T | 638  | 0        | -0.433476 |  |  |
|  |  | Shiraz-44T | 638  | 0        | -0.433476 |  |  |
|  |  | Shiraz-46T | 943  | 0.093799 | 0         |  |  |
|  |  | Shiraz-46T | 943  | 0.093799 | 0         |  |  |
|  |  | Shiraz-46T | 945  | 0        | -0.014838 |  |  |
|  |  | Shiraz-46T | 945  | 0        | -0.014838 |  |  |
|  |  | Shiraz-47T | 1029 | 0        | -0.096586 |  |  |
|  |  | Shiraz-47T | 1029 | 0        | -0.096586 |  |  |
|  |  | Shiraz-49T | 1119 | 0        | -0.157331 |  |  |
|  |  | Shiraz-49T | 1119 | 0        | -0.157331 |  |  |
|  |  | Shiraz-77T | 1225 | 0        | -0.117922 |  |  |
|  |  | Shiraz-77T | 1225 | 0        | -0.117922 |  |  |
|  |  | Shiraz-18T | 1434 | 0.244465 | 0         |  |  |
|  |  | Shiraz-18T | 1434 | 0.244465 | 0         |  |  |
|  |  | Shiraz-22T | 1549 | 0        | -0.319623 |  |  |
|  |  | Shiraz-22T | 1549 | 0        | -0.319623 |  |  |
|  |  | Shiraz-25T | 1698 | 0.21835  | 0         |  |  |
|  |  | Shiraz-25T | 1698 | 0.21835  | 0         |  |  |
|  |  | Shiraz-28T | 1735 | 0.350744 | 0         |  |  |
|  |  | Shiraz-28T | 1735 | 0.350744 | 0         |  |  |
|  |  | Shiraz-29T | 1778 | 0.120767 | 0         |  |  |
|  |  | Shiraz-29T | 1778 | 0.120767 | 0         |  |  |
|  |  | Shiraz-32T | 1833 | 0.551336 | 0         |  |  |
|  |  | Shiraz-32T | 1833 | 0.551336 | 0         |  |  |
|  |  | Shiraz-38T | 1951 | 0.250891 | 0         |  |  |
|  |  | Shiraz-38T | 1951 | 0.250891 | 0         |  |  |
|  |  | Shiraz-53T | 2078 | 0.287202 | 0         |  |  |
|  |  | Shiraz-53T | 2078 | 0.287202 | 0         |  |  |
|  |  | Shiraz-58T | 2159 | 0        | -0.219521 |  |  |
|  |  | Shiraz-58T | 2159 | 0        | -0.219521 |  |  |
|  |  | Shiraz-71T | 2238 | 0.603631 | 0         |  |  |
|  |  | Shiraz-71T | 2238 | 0.603631 | 0         |  |  |
|  |  | Shiraz-3T  | 90   | 0.219276 | 0         |  |  |
|  |  | Shiraz-3T  | 90   | 0.219276 | 0         |  |  |
|  |  | Shiraz-3T  | 93   | 0        | -0.058023 |  |  |
|  |  | Shiraz-3T  | 93   | 0        | -0.058023 |  |  |
|  |  | Shiraz-4T  | 253  | 0.372918 | 0         |  |  |
|  |  | Shiraz-4T  | 253  | 0.372918 | 0         |  |  |
|  |  | Shiraz-36T | 378  | 0.179558 | 0         |  |  |
|  |  | Shiraz-36T | 378  | 0.179558 | 0         |  |  |
|  |  | Shiraz-36T | 380  | 0.083883 | 0         |  |  |
|  |  | Shiraz-36T | 380  | 0.083883 | 0         |  |  |

|      |      |            |      |          |           |  |  |
|------|------|------------|------|----------|-----------|--|--|
|      |      | Shiraz-44T | 638  | 0        | -0.433476 |  |  |
|      |      | Shiraz-44T | 638  | 0        | -0.433476 |  |  |
|      |      | Shiraz-46T | 943  | 0.093799 | 0         |  |  |
|      |      | Shiraz-46T | 943  | 0.093799 | 0         |  |  |
|      |      | Shiraz-46T | 945  | 0        | -0.014838 |  |  |
|      |      | Shiraz-46T | 945  | 0        | -0.014838 |  |  |
|      |      | Shiraz-47T | 1029 | 0        | -0.096586 |  |  |
|      |      | Shiraz-47T | 1029 | 0        | -0.096586 |  |  |
|      |      | Shiraz-49T | 1119 | 0        | -0.157331 |  |  |
|      |      | Shiraz-49T | 1119 | 0        | -0.157331 |  |  |
|      |      | Shiraz-77T | 1225 | 0        | -0.117922 |  |  |
|      |      | Shiraz-77T | 1225 | 0        | -0.117922 |  |  |
|      |      | Shiraz-18T | 1434 | 0.244465 | 0         |  |  |
|      |      | Shiraz-18T | 1434 | 0.244465 | 0         |  |  |
|      |      | Shiraz-22T | 1549 | 0        | -0.319623 |  |  |
|      |      | Shiraz-22T | 1549 | 0        | -0.319623 |  |  |
|      |      | Shiraz-25T | 1698 | 0.21835  | 0         |  |  |
|      |      | Shiraz-25T | 1698 | 0.21835  | 0         |  |  |
|      |      | Shiraz-28T | 1735 | 0.350744 | 0         |  |  |
|      |      | Shiraz-28T | 1735 | 0.350744 | 0         |  |  |
|      |      | Shiraz-29T | 1778 | 0.120767 | 0         |  |  |
|      |      | Shiraz-29T | 1778 | 0.120767 | 0         |  |  |
|      |      | Shiraz-32T | 1833 | 0.551336 | 0         |  |  |
|      |      | Shiraz-32T | 1833 | 0.551336 | 0         |  |  |
|      |      | Shiraz-38T | 1951 | 0.250891 | 0         |  |  |
|      |      | Shiraz-38T | 1951 | 0.250891 | 0         |  |  |
|      |      | Shiraz-53T | 2078 | 0.287202 | 0         |  |  |
|      |      | Shiraz-53T | 2078 | 0.287202 | 0         |  |  |
|      |      | Shiraz-58T | 2159 | 0        | -0.219521 |  |  |
|      |      | Shiraz-58T | 2159 | 0        | -0.219521 |  |  |
|      |      | Shiraz-71T | 2238 | 0.603631 | 0         |  |  |
|      |      | Shiraz-71T | 2238 | 0.603631 | 0         |  |  |
| HEPH | chrX | Shiraz-3T  | 241  | 0        | -0.230501 |  |  |
|      |      | Shiraz-3T  | 241  | 0        | -0.230501 |  |  |
|      |      | Shiraz-4T  | 261  | 0        | -0.336249 |  |  |
|      |      | Shiraz-4T  | 261  | 0        | -0.336249 |  |  |
|      |      | Shiraz-16T | 295  | 0.591657 | 0         |  |  |
|      |      | Shiraz-16T | 295  | 0.591657 | 0         |  |  |
|      |      | Shiraz-36T | 433  | 0        | -0.803961 |  |  |
|      |      | Shiraz-36T | 433  | 0        | -0.803961 |  |  |
|      |      | Shiraz-44T | 899  | 0        | -1.09697  |  |  |
|      |      | Shiraz-44T | 899  | 0        | -1.09697  |  |  |
|      |      | Shiraz-49T | 1170 | 0        | -0.967436 |  |  |
|      |      | Shiraz-49T | 1170 | 0        | -0.967436 |  |  |
|      |      | Shiraz-18T | 1457 | 0.643204 | 0         |  |  |
|      |      | Shiraz-18T | 1457 | 0.643204 | 0         |  |  |
|      |      | Shiraz-22T | 1673 | 0.611783 | 0         |  |  |



|  |  |            |      |          |           |  |  |
|--|--|------------|------|----------|-----------|--|--|
|  |  | Shiraz-22T | 1673 | 0.611783 | 0         |  |  |
|  |  | Shiraz-25T | 1719 | 0.472955 | 0         |  |  |
|  |  | Shiraz-25T | 1719 | 0.472955 | 0         |  |  |
|  |  | Shiraz-28T | 1762 | 0.562311 | 0         |  |  |
|  |  | Shiraz-28T | 1762 | 0.562311 | 0         |  |  |
|  |  | Shiraz-29T | 1801 | 0.815343 | 0         |  |  |
|  |  | Shiraz-29T | 1801 | 0.815343 | 0         |  |  |
|  |  | Shiraz-32T | 1870 | 0.729766 | 0         |  |  |
|  |  | Shiraz-32T | 1870 | 0.729766 | 0         |  |  |
|  |  | Shiraz-35T | 1933 | 0.488535 | 0         |  |  |
|  |  | Shiraz-35T | 1933 | 0.488535 | 0         |  |  |
|  |  | Shiraz-58T | 2223 | 0.833364 | 0         |  |  |
|  |  | Shiraz-58T | 2223 | 0.833364 | 0         |  |  |
|  |  | Shiraz-71T | 2263 | 0.975531 | 0         |  |  |
|  |  | Shiraz-71T | 2263 | 0.975531 | 0         |  |  |
|  |  | Shiraz-3T  | 241  | 0        | -0.230501 |  |  |
|  |  | Shiraz-3T  | 241  | 0        | -0.230501 |  |  |
|  |  | Shiraz-4T  | 261  | 0        | -0.336249 |  |  |
|  |  | Shiraz-4T  | 261  | 0        | -0.336249 |  |  |
|  |  | Shiraz-16T | 295  | 0.591657 | 0         |  |  |
|  |  | Shiraz-16T | 295  | 0.591657 | 0         |  |  |
|  |  | Shiraz-36T | 433  | 0        | -0.803961 |  |  |
|  |  | Shiraz-36T | 433  | 0        | -0.803961 |  |  |
|  |  | Shiraz-44T | 899  | 0        | -1.09697  |  |  |
|  |  | Shiraz-44T | 899  | 0        | -1.09697  |  |  |
|  |  | Shiraz-49T | 1170 | 0        | -0.967436 |  |  |
|  |  | Shiraz-49T | 1170 | 0        | -0.967436 |  |  |
|  |  | Shiraz-18T | 1457 | 0.643204 | 0         |  |  |
|  |  | Shiraz-18T | 1457 | 0.643204 | 0         |  |  |
|  |  | Shiraz-22T | 1673 | 0.611783 | 0         |  |  |
|  |  | Shiraz-22T | 1673 | 0.611783 | 0         |  |  |
|  |  | Shiraz-25T | 1719 | 0.472955 | 0         |  |  |
|  |  | Shiraz-25T | 1719 | 0.472955 | 0         |  |  |
|  |  | Shiraz-28T | 1762 | 0.562311 | 0         |  |  |
|  |  | Shiraz-28T | 1762 | 0.562311 | 0         |  |  |
|  |  | Shiraz-29T | 1801 | 0.815343 | 0         |  |  |
|  |  | Shiraz-29T | 1801 | 0.815343 | 0         |  |  |
|  |  | Shiraz-32T | 1870 | 0.729766 | 0         |  |  |
|  |  | Shiraz-32T | 1870 | 0.729766 | 0         |  |  |
|  |  | Shiraz-35T | 1933 | 0.488535 | 0         |  |  |
|  |  | Shiraz-35T | 1933 | 0.488535 | 0         |  |  |
|  |  | Shiraz-58T | 2223 | 0.833364 | 0         |  |  |
|  |  | Shiraz-58T | 2223 | 0.833364 | 0         |  |  |
|  |  | Shiraz-71T | 2263 | 0.975531 | 0         |  |  |
|  |  | Shiraz-71T | 2263 | 0.975531 | 0         |  |  |
|  |  | Shiraz-3T  | 241  | 0        | -0.230501 |  |  |
|  |  | Shiraz-3T  | 241  | 0        | -0.230501 |  |  |

|         |      |            |      |          |           |  |  |
|---------|------|------------|------|----------|-----------|--|--|
|         |      | Shiraz-4T  | 261  | 0        | -0.336249 |  |  |
|         |      | Shiraz-4T  | 261  | 0        | -0.336249 |  |  |
|         |      | Shiraz-16T | 295  | 0.591657 | 0         |  |  |
|         |      | Shiraz-16T | 295  | 0.591657 | 0         |  |  |
|         |      | Shiraz-36T | 433  | 0        | -0.803961 |  |  |
|         |      | Shiraz-36T | 433  | 0        | -0.803961 |  |  |
|         |      | Shiraz-44T | 899  | 0        | -1.09697  |  |  |
|         |      | Shiraz-44T | 899  | 0        | -1.09697  |  |  |
|         |      | Shiraz-49T | 1170 | 0        | -0.967436 |  |  |
|         |      | Shiraz-49T | 1170 | 0        | -0.967436 |  |  |
|         |      | Shiraz-18T | 1457 | 0.643204 | 0         |  |  |
|         |      | Shiraz-18T | 1457 | 0.643204 | 0         |  |  |
|         |      | Shiraz-22T | 1673 | 0.611783 | 0         |  |  |
|         |      | Shiraz-22T | 1673 | 0.611783 | 0         |  |  |
|         |      | Shiraz-25T | 1719 | 0.472955 | 0         |  |  |
|         |      | Shiraz-25T | 1719 | 0.472955 | 0         |  |  |
|         |      | Shiraz-28T | 1762 | 0.562311 | 0         |  |  |
|         |      | Shiraz-28T | 1762 | 0.562311 | 0         |  |  |
|         |      | Shiraz-29T | 1801 | 0.815343 | 0         |  |  |
|         |      | Shiraz-29T | 1801 | 0.815343 | 0         |  |  |
|         |      | Shiraz-32T | 1870 | 0.729766 | 0         |  |  |
|         |      | Shiraz-32T | 1870 | 0.729766 | 0         |  |  |
|         |      | Shiraz-35T | 1933 | 0.488535 | 0         |  |  |
|         |      | Shiraz-35T | 1933 | 0.488535 | 0         |  |  |
|         |      | Shiraz-58T | 2223 | 0.833364 | 0         |  |  |
|         |      | Shiraz-58T | 2223 | 0.833364 | 0         |  |  |
|         |      | Shiraz-71T | 2263 | 0.975531 | 0         |  |  |
|         |      | Shiraz-71T | 2263 | 0.975531 | 0         |  |  |
| HERPUD2 | chr7 | Shiraz-3T  | 87   | 0.198593 | 0         |  |  |
|         |      | Shiraz-4T  | 252  | 0.192083 | 0         |  |  |
|         |      | Shiraz-36T | 376  | 0.159952 | 0         |  |  |
|         |      | Shiraz-44T | 631  | 0        | -0.180312 |  |  |
|         |      | Shiraz-46T | 942  | 0.069143 | 0         |  |  |
|         |      | Shiraz-18T | 1433 | 0.250973 | 0         |  |  |
|         |      | Shiraz-22T | 1544 | 0        | -0.193579 |  |  |
|         |      | Shiraz-25T | 1697 | 0.21945  | 0         |  |  |
|         |      | Shiraz-28T | 1734 | 0.362882 | 0         |  |  |
|         |      | Shiraz-29T | 1777 | 0.156747 | 0         |  |  |
|         |      | Shiraz-38T | 1950 | 0.265916 | 0         |  |  |
|         |      | Shiraz-71T | 2236 | 0.320072 | 0         |  |  |
|         |      | Shiraz-3T  | 87   | 0.198593 | 0         |  |  |
|         |      | Shiraz-4T  | 252  | 0.192083 | 0         |  |  |
|         |      | Shiraz-36T | 376  | 0.159952 | 0         |  |  |
|         |      | Shiraz-44T | 631  | 0        | -0.180312 |  |  |
|         |      | Shiraz-46T | 942  | 0.069143 | 0         |  |  |
|         |      | Shiraz-18T | 1433 | 0.250973 | 0         |  |  |
|         |      | Shiraz-22T | 1544 | 0        | -0.193579 |  |  |

|     |      |            |      |          |           |  |
|-----|------|------------|------|----------|-----------|--|
|     |      | Shiraz-25T | 1697 | 0.21945  | 0         |  |
|     |      | Shiraz-28T | 1734 | 0.362882 | 0         |  |
|     |      | Shiraz-29T | 1777 | 0.156747 | 0         |  |
|     |      | Shiraz-38T | 1950 | 0.265916 | 0         |  |
|     |      | Shiraz-71T | 2236 | 0.320072 | 0         |  |
|     |      | Shiraz-3T  | 87   | 0.198593 | 0         |  |
|     |      | Shiraz-4T  | 252  | 0.192083 | 0         |  |
|     |      | Shiraz-36T | 376  | 0.159952 | 0         |  |
|     |      | Shiraz-44T | 631  | 0        | -0.180312 |  |
|     |      | Shiraz-46T | 942  | 0.069143 | 0         |  |
|     |      | Shiraz-18T | 1433 | 0.250973 | 0         |  |
|     |      | Shiraz-22T | 1544 | 0        | -0.193579 |  |
|     |      | Shiraz-25T | 1697 | 0.21945  | 0         |  |
|     |      | Shiraz-28T | 1734 | 0.362882 | 0         |  |
|     |      | Shiraz-29T | 1777 | 0.156747 | 0         |  |
|     |      | Shiraz-38T | 1950 | 0.265916 | 0         |  |
|     |      | Shiraz-71T | 2236 | 0.320072 | 0         |  |
| HGF | chr7 | Shiraz-3T  | 90   | 0.219276 | 0         |  |
|     |      | Shiraz-3T  | 90   | 0.219276 | 0         |  |
|     |      | Shiraz-3T  | 90   | 0.219276 | 0         |  |
|     |      | Shiraz-3T  | 93   | 0        | -0.058023 |  |
|     |      | Shiraz-3T  | 93   | 0        | -0.058023 |  |
|     |      | Shiraz-3T  | 93   | 0        | -0.058023 |  |
|     |      | Shiraz-4T  | 253  | 0.372918 | 0         |  |
|     |      | Shiraz-4T  | 253  | 0.372918 | 0         |  |
|     |      | Shiraz-4T  | 253  | 0.372918 | 0         |  |
|     |      | Shiraz-36T | 378  | 0.179558 | 0         |  |
|     |      | Shiraz-36T | 378  | 0.179558 | 0         |  |
|     |      | Shiraz-36T | 378  | 0.179558 | 0         |  |
|     |      | Shiraz-36T | 380  | 0.083883 | 0         |  |
|     |      | Shiraz-36T | 380  | 0.083883 | 0         |  |
|     |      | Shiraz-36T | 380  | 0.083883 | 0         |  |
|     |      | Shiraz-44T | 638  | 0        | -0.433476 |  |
|     |      | Shiraz-44T | 638  | 0        | -0.433476 |  |
|     |      | Shiraz-44T | 638  | 0        | -0.433476 |  |
|     |      | Shiraz-46T | 943  | 0.093799 | 0         |  |
|     |      | Shiraz-46T | 943  | 0.093799 | 0         |  |
|     |      | Shiraz-46T | 943  | 0.093799 | 0         |  |
|     |      | Shiraz-46T | 945  | 0        | -0.014838 |  |
|     |      | Shiraz-46T | 945  | 0        | -0.014838 |  |
|     |      | Shiraz-46T | 945  | 0        | -0.014838 |  |
|     |      | Shiraz-47T | 1029 | 0        | -0.096586 |  |
|     |      | Shiraz-47T | 1029 | 0        | -0.096586 |  |
|     |      | Shiraz-47T | 1029 | 0        | -0.096586 |  |
|     |      | Shiraz-49T | 1119 | 0        | -0.157331 |  |
|     |      | Shiraz-49T | 1119 | 0        | -0.157331 |  |
|     |      | Shiraz-49T | 1119 | 0        | -0.157331 |  |

|  |            |      |          |           |  |
|--|------------|------|----------|-----------|--|
|  | Shiraz-77T | 1225 | 0        | -0.117922 |  |
|  | Shiraz-77T | 1225 | 0        | -0.117922 |  |
|  | Shiraz-77T | 1225 | 0        | -0.117922 |  |
|  | Shiraz-77T | 1226 | 0        | -0.233724 |  |
|  | Shiraz-77T | 1226 | 0        | -0.233724 |  |
|  | Shiraz-77T | 1226 | 0        | -0.233724 |  |
|  | Shiraz-12T | 1390 | 0        | -0.237897 |  |
|  | Shiraz-12T | 1390 | 0        | -0.237897 |  |
|  | Shiraz-12T | 1390 | 0        | -0.237897 |  |
|  | Shiraz-18T | 1434 | 0.244465 | 0         |  |
|  | Shiraz-18T | 1434 | 0.244465 | 0         |  |
|  | Shiraz-18T | 1434 | 0.244465 | 0         |  |
|  | Shiraz-22T | 1549 | 0        | -0.319623 |  |
|  | Shiraz-22T | 1549 | 0        | -0.319623 |  |
|  | Shiraz-22T | 1549 | 0        | -0.319623 |  |
|  | Shiraz-22T | 1550 | 0        | -0.577052 |  |
|  | Shiraz-22T | 1550 | 0        | -0.577052 |  |
|  | Shiraz-22T | 1550 | 0        | -0.577052 |  |
|  | Shiraz-25T | 1698 | 0.21835  | 0         |  |
|  | Shiraz-25T | 1698 | 0.21835  | 0         |  |
|  | Shiraz-25T | 1698 | 0.21835  | 0         |  |
|  | Shiraz-28T | 1735 | 0.350744 | 0         |  |
|  | Shiraz-28T | 1735 | 0.350744 | 0         |  |
|  | Shiraz-28T | 1735 | 0.350744 | 0         |  |
|  | Shiraz-29T | 1778 | 0.120767 | 0         |  |
|  | Shiraz-29T | 1778 | 0.120767 | 0         |  |
|  | Shiraz-29T | 1778 | 0.120767 | 0         |  |
|  | Shiraz-38T | 1951 | 0.250891 | 0         |  |
|  | Shiraz-38T | 1951 | 0.250891 | 0         |  |
|  | Shiraz-38T | 1951 | 0.250891 | 0         |  |
|  | Shiraz-53T | 2078 | 0.287202 | 0         |  |
|  | Shiraz-53T | 2078 | 0.287202 | 0         |  |
|  | Shiraz-53T | 2078 | 0.287202 | 0         |  |
|  | Shiraz-58T | 2159 | 0        | -0.219521 |  |
|  | Shiraz-58T | 2159 | 0        | -0.219521 |  |
|  | Shiraz-58T | 2159 | 0        | -0.219521 |  |
|  | Shiraz-71T | 2238 | 0.603631 | 0         |  |
|  | Shiraz-71T | 2238 | 0.603631 | 0         |  |
|  | Shiraz-71T | 2238 | 0.603631 | 0         |  |
|  | Shiraz-3T  | 90   | 0.219276 | 0         |  |
|  | Shiraz-3T  | 90   | 0.219276 | 0         |  |
|  | Shiraz-3T  | 90   | 0.219276 | 0         |  |
|  | Shiraz-3T  | 93   | 0        | -0.058023 |  |
|  | Shiraz-3T  | 93   | 0        | -0.058023 |  |
|  | Shiraz-3T  | 93   | 0        | -0.058023 |  |
|  | Shiraz-4T  | 253  | 0.372918 | 0         |  |
|  | Shiraz-4T  | 253  | 0.372918 | 0         |  |

|  |  |            |      |          |           |  |  |
|--|--|------------|------|----------|-----------|--|--|
|  |  | Shiraz-4T  | 253  | 0.372918 | 0         |  |  |
|  |  | Shiraz-36T | 378  | 0.179558 | 0         |  |  |
|  |  | Shiraz-36T | 378  | 0.179558 | 0         |  |  |
|  |  | Shiraz-36T | 378  | 0.179558 | 0         |  |  |
|  |  | Shiraz-36T | 380  | 0.083883 | 0         |  |  |
|  |  | Shiraz-36T | 380  | 0.083883 | 0         |  |  |
|  |  | Shiraz-36T | 380  | 0.083883 | 0         |  |  |
|  |  | Shiraz-44T | 638  | 0        | -0.433476 |  |  |
|  |  | Shiraz-44T | 638  | 0        | -0.433476 |  |  |
|  |  | Shiraz-44T | 638  | 0        | -0.433476 |  |  |
|  |  | Shiraz-46T | 943  | 0.093799 | 0         |  |  |
|  |  | Shiraz-46T | 943  | 0.093799 | 0         |  |  |
|  |  | Shiraz-46T | 943  | 0.093799 | 0         |  |  |
|  |  | Shiraz-46T | 945  | 0        | -0.014838 |  |  |
|  |  | Shiraz-46T | 945  | 0        | -0.014838 |  |  |
|  |  | Shiraz-46T | 945  | 0        | -0.014838 |  |  |
|  |  | Shiraz-47T | 1029 | 0        | -0.096586 |  |  |
|  |  | Shiraz-47T | 1029 | 0        | -0.096586 |  |  |
|  |  | Shiraz-47T | 1029 | 0        | -0.096586 |  |  |
|  |  | Shiraz-49T | 1119 | 0        | -0.157331 |  |  |
|  |  | Shiraz-49T | 1119 | 0        | -0.157331 |  |  |
|  |  | Shiraz-49T | 1119 | 0        | -0.157331 |  |  |
|  |  | Shiraz-77T | 1225 | 0        | -0.117922 |  |  |
|  |  | Shiraz-77T | 1225 | 0        | -0.117922 |  |  |
|  |  | Shiraz-77T | 1225 | 0        | -0.117922 |  |  |
|  |  | Shiraz-77T | 1226 | 0        | -0.233724 |  |  |
|  |  | Shiraz-77T | 1226 | 0        | -0.233724 |  |  |
|  |  | Shiraz-77T | 1226 | 0        | -0.233724 |  |  |
|  |  | Shiraz-12T | 1390 | 0        | -0.237897 |  |  |
|  |  | Shiraz-12T | 1390 | 0        | -0.237897 |  |  |
|  |  | Shiraz-12T | 1390 | 0        | -0.237897 |  |  |
|  |  | Shiraz-18T | 1434 | 0.244465 | 0         |  |  |
|  |  | Shiraz-18T | 1434 | 0.244465 | 0         |  |  |
|  |  | Shiraz-18T | 1434 | 0.244465 | 0         |  |  |
|  |  | Shiraz-22T | 1549 | 0        | -0.319623 |  |  |
|  |  | Shiraz-22T | 1549 | 0        | -0.319623 |  |  |
|  |  | Shiraz-22T | 1549 | 0        | -0.319623 |  |  |
|  |  | Shiraz-22T | 1550 | 0        | -0.577052 |  |  |
|  |  | Shiraz-22T | 1550 | 0        | -0.577052 |  |  |
|  |  | Shiraz-22T | 1550 | 0        | -0.577052 |  |  |
|  |  | Shiraz-25T | 1698 | 0.21835  | 0         |  |  |
|  |  | Shiraz-25T | 1698 | 0.21835  | 0         |  |  |
|  |  | Shiraz-25T | 1698 | 0.21835  | 0         |  |  |
|  |  | Shiraz-28T | 1735 | 0.350744 | 0         |  |  |
|  |  | Shiraz-28T | 1735 | 0.350744 | 0         |  |  |
|  |  | Shiraz-28T | 1735 | 0.350744 | 0         |  |  |
|  |  | Shiraz-29T | 1778 | 0.120767 | 0         |  |  |

|  |            |      |          |           |  |
|--|------------|------|----------|-----------|--|
|  | Shiraz-29T | 1778 | 0.120767 | 0         |  |
|  | Shiraz-29T | 1778 | 0.120767 | 0         |  |
|  | Shiraz-38T | 1951 | 0.250891 | 0         |  |
|  | Shiraz-38T | 1951 | 0.250891 | 0         |  |
|  | Shiraz-38T | 1951 | 0.250891 | 0         |  |
|  | Shiraz-53T | 2078 | 0.287202 | 0         |  |
|  | Shiraz-53T | 2078 | 0.287202 | 0         |  |
|  | Shiraz-53T | 2078 | 0.287202 | 0         |  |
|  | Shiraz-58T | 2159 | 0        | -0.219521 |  |
|  | Shiraz-58T | 2159 | 0        | -0.219521 |  |
|  | Shiraz-58T | 2159 | 0        | -0.219521 |  |
|  | Shiraz-71T | 2238 | 0.603631 | 0         |  |
|  | Shiraz-71T | 2238 | 0.603631 | 0         |  |
|  | Shiraz-71T | 2238 | 0.603631 | 0         |  |
|  | Shiraz-3T  | 90   | 0.219276 | 0         |  |
|  | Shiraz-3T  | 90   | 0.219276 | 0         |  |
|  | Shiraz-3T  | 90   | 0.219276 | 0         |  |
|  | Shiraz-3T  | 93   | 0        | -0.058023 |  |
|  | Shiraz-3T  | 93   | 0        | -0.058023 |  |
|  | Shiraz-3T  | 93   | 0        | -0.058023 |  |
|  | Shiraz-4T  | 253  | 0.372918 | 0         |  |
|  | Shiraz-4T  | 253  | 0.372918 | 0         |  |
|  | Shiraz-4T  | 253  | 0.372918 | 0         |  |
|  | Shiraz-36T | 378  | 0.179558 | 0         |  |
|  | Shiraz-36T | 378  | 0.179558 | 0         |  |
|  | Shiraz-36T | 378  | 0.179558 | 0         |  |
|  | Shiraz-36T | 380  | 0.083883 | 0         |  |
|  | Shiraz-36T | 380  | 0.083883 | 0         |  |
|  | Shiraz-36T | 380  | 0.083883 | 0         |  |
|  | Shiraz-44T | 638  | 0        | -0.433476 |  |
|  | Shiraz-44T | 638  | 0        | -0.433476 |  |
|  | Shiraz-44T | 638  | 0        | -0.433476 |  |
|  | Shiraz-46T | 943  | 0.093799 | 0         |  |
|  | Shiraz-46T | 943  | 0.093799 | 0         |  |
|  | Shiraz-46T | 943  | 0.093799 | 0         |  |
|  | Shiraz-46T | 945  | 0        | -0.014838 |  |
|  | Shiraz-46T | 945  | 0        | -0.014838 |  |
|  | Shiraz-46T | 945  | 0        | -0.014838 |  |
|  | Shiraz-47T | 1029 | 0        | -0.096586 |  |
|  | Shiraz-47T | 1029 | 0        | -0.096586 |  |
|  | Shiraz-47T | 1029 | 0        | -0.096586 |  |
|  | Shiraz-49T | 1119 | 0        | -0.157331 |  |
|  | Shiraz-49T | 1119 | 0        | -0.157331 |  |
|  | Shiraz-49T | 1119 | 0        | -0.157331 |  |
|  | Shiraz-77T | 1225 | 0        | -0.117922 |  |
|  | Shiraz-77T | 1225 | 0        | -0.117922 |  |
|  | Shiraz-77T | 1225 | 0        | -0.117922 |  |

|        |      |            |      |          |           |  |  |
|--------|------|------------|------|----------|-----------|--|--|
|        |      | Shiraz-77T | 1226 | 0        | -0.233724 |  |  |
|        |      | Shiraz-77T | 1226 | 0        | -0.233724 |  |  |
|        |      | Shiraz-77T | 1226 | 0        | -0.233724 |  |  |
|        |      | Shiraz-12T | 1390 | 0        | -0.237897 |  |  |
|        |      | Shiraz-12T | 1390 | 0        | -0.237897 |  |  |
|        |      | Shiraz-12T | 1390 | 0        | -0.237897 |  |  |
|        |      | Shiraz-18T | 1434 | 0.244465 | 0         |  |  |
|        |      | Shiraz-18T | 1434 | 0.244465 | 0         |  |  |
|        |      | Shiraz-18T | 1434 | 0.244465 | 0         |  |  |
|        |      | Shiraz-22T | 1549 | 0        | -0.319623 |  |  |
|        |      | Shiraz-22T | 1549 | 0        | -0.319623 |  |  |
|        |      | Shiraz-22T | 1549 | 0        | -0.319623 |  |  |
|        |      | Shiraz-22T | 1550 | 0        | -0.577052 |  |  |
|        |      | Shiraz-22T | 1550 | 0        | -0.577052 |  |  |
|        |      | Shiraz-22T | 1550 | 0        | -0.577052 |  |  |
|        |      | Shiraz-25T | 1698 | 0.21835  | 0         |  |  |
|        |      | Shiraz-25T | 1698 | 0.21835  | 0         |  |  |
|        |      | Shiraz-25T | 1698 | 0.21835  | 0         |  |  |
|        |      | Shiraz-28T | 1735 | 0.350744 | 0         |  |  |
|        |      | Shiraz-28T | 1735 | 0.350744 | 0         |  |  |
|        |      | Shiraz-28T | 1735 | 0.350744 | 0         |  |  |
|        |      | Shiraz-29T | 1778 | 0.120767 | 0         |  |  |
|        |      | Shiraz-29T | 1778 | 0.120767 | 0         |  |  |
|        |      | Shiraz-29T | 1778 | 0.120767 | 0         |  |  |
|        |      | Shiraz-38T | 1951 | 0.250891 | 0         |  |  |
|        |      | Shiraz-38T | 1951 | 0.250891 | 0         |  |  |
|        |      | Shiraz-38T | 1951 | 0.250891 | 0         |  |  |
|        |      | Shiraz-53T | 2078 | 0.287202 | 0         |  |  |
|        |      | Shiraz-53T | 2078 | 0.287202 | 0         |  |  |
|        |      | Shiraz-53T | 2078 | 0.287202 | 0         |  |  |
|        |      | Shiraz-58T | 2159 | 0        | -0.219521 |  |  |
|        |      | Shiraz-58T | 2159 | 0        | -0.219521 |  |  |
|        |      | Shiraz-58T | 2159 | 0        | -0.219521 |  |  |
|        |      | Shiraz-71T | 2238 | 0.603631 | 0         |  |  |
|        |      | Shiraz-71T | 2238 | 0.603631 | 0         |  |  |
|        |      | Shiraz-71T | 2238 | 0.603631 | 0         |  |  |
| HIBADH | chr7 | Shiraz-3T  | 87   | 0.198593 | 0         |  |  |
|        |      | Shiraz-4T  | 252  | 0.192083 | 0         |  |  |
|        |      | Shiraz-36T | 376  | 0.159952 | 0         |  |  |
|        |      | Shiraz-46T | 942  | 0.069143 | 0         |  |  |
|        |      | Shiraz-18T | 1433 | 0.250973 | 0         |  |  |
|        |      | Shiraz-25T | 1697 | 0.21945  | 0         |  |  |
|        |      | Shiraz-28T | 1734 | 0.362882 | 0         |  |  |
|        |      | Shiraz-29T | 1777 | 0.156747 | 0         |  |  |
|        |      | Shiraz-38T | 1950 | 0.265916 | 0         |  |  |
|        |      | Shiraz-71T | 2236 | 0.320072 | 0         |  |  |
|        |      | Shiraz-3T  | 87   | 0.198593 | 0         |  |  |

|       |      |            |      |          |           |  |
|-------|------|------------|------|----------|-----------|--|
|       |      | Shiraz-4T  | 252  | 0.192083 | 0         |  |
|       |      | Shiraz-36T | 376  | 0.159952 | 0         |  |
|       |      | Shiraz-46T | 942  | 0.069143 | 0         |  |
|       |      | Shiraz-18T | 1433 | 0.250973 | 0         |  |
|       |      | Shiraz-25T | 1697 | 0.21945  | 0         |  |
|       |      | Shiraz-28T | 1734 | 0.362882 | 0         |  |
|       |      | Shiraz-29T | 1777 | 0.156747 | 0         |  |
|       |      | Shiraz-38T | 1950 | 0.265916 | 0         |  |
|       |      | Shiraz-71T | 2236 | 0.320072 | 0         |  |
|       |      | Shiraz-3T  | 87   | 0.198593 | 0         |  |
|       |      | Shiraz-4T  | 252  | 0.192083 | 0         |  |
|       |      | Shiraz-36T | 376  | 0.159952 | 0         |  |
|       |      | Shiraz-46T | 942  | 0.069143 | 0         |  |
|       |      | Shiraz-18T | 1433 | 0.250973 | 0         |  |
|       |      | Shiraz-25T | 1697 | 0.21945  | 0         |  |
|       |      | Shiraz-28T | 1734 | 0.362882 | 0         |  |
|       |      | Shiraz-29T | 1777 | 0.156747 | 0         |  |
|       |      | Shiraz-38T | 1950 | 0.265916 | 0         |  |
|       |      | Shiraz-71T | 2236 | 0.320072 | 0         |  |
| HIPK2 | chr7 | Shiraz-3T  | 90   | 0.219276 | 0         |  |
|       |      | Shiraz-3T  | 97   | 0.496001 | 0         |  |
|       |      | Shiraz-4T  | 253  | 0.372918 | 0         |  |
|       |      | Shiraz-31T | 318  | 0.254373 | 0         |  |
|       |      | Shiraz-36T | 378  | 0.179558 | 0         |  |
|       |      | Shiraz-36T | 383  | 0.374586 | 0         |  |
|       |      | Shiraz-44T | 644  | 0.496536 | 0         |  |
|       |      | Shiraz-46T | 943  | 0.093799 | 0         |  |
|       |      | Shiraz-47T | 1033 | 0.220267 | 0         |  |
|       |      | Shiraz-77T | 1225 | 0        | -0.117922 |  |
|       |      | Shiraz-77T | 1230 | 0.149651 | 0         |  |
|       |      | Shiraz-9T  | 1325 | 0.221899 | 0         |  |
|       |      | Shiraz-18T | 1434 | 0.244465 | 0         |  |
|       |      | Shiraz-25T | 1698 | 0.21835  | 0         |  |
|       |      | Shiraz-28T | 1735 | 0.350744 | 0         |  |
|       |      | Shiraz-29T | 1778 | 0.120767 | 0         |  |
|       |      | Shiraz-32T | 1833 | 0.551336 | 0         |  |
|       |      | Shiraz-38T | 1951 | 0.250891 | 0         |  |
|       |      | Shiraz-53T | 2078 | 0.287202 | 0         |  |
|       |      | Shiraz-58T | 2162 | 0.221505 | 0         |  |
|       |      | Shiraz-71T | 2238 | 0.603631 | 0         |  |
|       |      | Shiraz-3T  | 90   | 0.219276 | 0         |  |
|       |      | Shiraz-3T  | 97   | 0.496001 | 0         |  |
|       |      | Shiraz-4T  | 253  | 0.372918 | 0         |  |
|       |      | Shiraz-31T | 318  | 0.254373 | 0         |  |
|       |      | Shiraz-36T | 378  | 0.179558 | 0         |  |
|       |      | Shiraz-36T | 383  | 0.374586 | 0         |  |
|       |      | Shiraz-44T | 644  | 0.496536 | 0         |  |



|       |      |            |      |          |           |  |
|-------|------|------------|------|----------|-----------|--|
|       |      | Shiraz-46T | 943  | 0.093799 | 0         |  |
|       |      | Shiraz-47T | 1033 | 0.220267 | 0         |  |
|       |      | Shiraz-77T | 1225 | 0        | -0.117922 |  |
|       |      | Shiraz-77T | 1230 | 0.149651 | 0         |  |
|       |      | Shiraz-9T  | 1325 | 0.221899 | 0         |  |
|       |      | Shiraz-18T | 1434 | 0.244465 | 0         |  |
|       |      | Shiraz-25T | 1698 | 0.21835  | 0         |  |
|       |      | Shiraz-28T | 1735 | 0.350744 | 0         |  |
|       |      | Shiraz-29T | 1778 | 0.120767 | 0         |  |
|       |      | Shiraz-32T | 1833 | 0.551336 | 0         |  |
|       |      | Shiraz-38T | 1951 | 0.250891 | 0         |  |
|       |      | Shiraz-53T | 2078 | 0.287202 | 0         |  |
|       |      | Shiraz-58T | 2162 | 0.221505 | 0         |  |
|       |      | Shiraz-71T | 2238 | 0.603631 | 0         |  |
|       |      | Shiraz-3T  | 90   | 0.219276 | 0         |  |
|       |      | Shiraz-3T  | 97   | 0.496001 | 0         |  |
|       |      | Shiraz-4T  | 253  | 0.372918 | 0         |  |
|       |      | Shiraz-31T | 318  | 0.254373 | 0         |  |
|       |      | Shiraz-36T | 378  | 0.179558 | 0         |  |
|       |      | Shiraz-36T | 383  | 0.374586 | 0         |  |
|       |      | Shiraz-44T | 644  | 0.496536 | 0         |  |
|       |      | Shiraz-46T | 943  | 0.093799 | 0         |  |
|       |      | Shiraz-47T | 1033 | 0.220267 | 0         |  |
|       |      | Shiraz-77T | 1225 | 0        | -0.117922 |  |
|       |      | Shiraz-77T | 1230 | 0.149651 | 0         |  |
|       |      | Shiraz-9T  | 1325 | 0.221899 | 0         |  |
|       |      | Shiraz-18T | 1434 | 0.244465 | 0         |  |
|       |      | Shiraz-25T | 1698 | 0.21835  | 0         |  |
|       |      | Shiraz-28T | 1735 | 0.350744 | 0         |  |
|       |      | Shiraz-29T | 1778 | 0.120767 | 0         |  |
|       |      | Shiraz-32T | 1833 | 0.551336 | 0         |  |
|       |      | Shiraz-38T | 1951 | 0.250891 | 0         |  |
|       |      | Shiraz-53T | 2078 | 0.287202 | 0         |  |
|       |      | Shiraz-58T | 2162 | 0.221505 | 0         |  |
|       |      | Shiraz-71T | 2238 | 0.603631 | 0         |  |
| HMGB3 | chrX | Shiraz-3T  | 242  | 0        | -0.336434 |  |
|       |      | Shiraz-4T  | 261  | 0        | -0.336249 |  |
|       |      | Shiraz-16T | 295  | 0.591657 | 0         |  |
|       |      | Shiraz-36T | 433  | 0        | -0.803961 |  |
|       |      | Shiraz-42T | 480  | 0        | -0.232915 |  |
|       |      | Shiraz-44T | 899  | 0        | -1.09697  |  |
|       |      | Shiraz-49T | 1170 | 0        | -0.967436 |  |
|       |      | Shiraz-9T  | 1370 | 0.690073 | 0         |  |
|       |      | Shiraz-18T | 1457 | 0.643204 | 0         |  |
|       |      | Shiraz-22T | 1673 | 0.611783 | 0         |  |
|       |      | Shiraz-22T | 1678 | 0.911625 | 0         |  |
|       |      | Shiraz-25T | 1719 | 0.472955 | 0         |  |

|        |      |            |      |          |           |  |  |
|--------|------|------------|------|----------|-----------|--|--|
|        |      | Shiraz-28T | 1762 | 0.562311 | 0         |  |  |
|        |      | Shiraz-29T | 1801 | 0.815343 | 0         |  |  |
|        |      | Shiraz-32T | 1870 | 0.729766 | 0         |  |  |
|        |      | Shiraz-35T | 1933 | 0.488535 | 0         |  |  |
|        |      | Shiraz-58T | 2223 | 0.833364 | 0         |  |  |
|        |      | Shiraz-58T | 2226 | 1.074663 | 0         |  |  |
|        |      | Shiraz-71T | 2263 | 0.975531 | 0         |  |  |
|        |      | Shiraz-3T  | 242  | 0        | -0.336434 |  |  |
|        |      | Shiraz-4T  | 261  | 0        | -0.336249 |  |  |
|        |      | Shiraz-16T | 295  | 0.591657 | 0         |  |  |
|        |      | Shiraz-36T | 433  | 0        | -0.803961 |  |  |
|        |      | Shiraz-42T | 480  | 0        | -0.232915 |  |  |
|        |      | Shiraz-44T | 899  | 0        | -1.09697  |  |  |
|        |      | Shiraz-49T | 1170 | 0        | -0.967436 |  |  |
|        |      | Shiraz-9T  | 1370 | 0.690073 | 0         |  |  |
|        |      | Shiraz-18T | 1457 | 0.643204 | 0         |  |  |
|        |      | Shiraz-22T | 1673 | 0.611783 | 0         |  |  |
|        |      | Shiraz-22T | 1678 | 0.911625 | 0         |  |  |
|        |      | Shiraz-25T | 1719 | 0.472955 | 0         |  |  |
|        |      | Shiraz-28T | 1762 | 0.562311 | 0         |  |  |
|        |      | Shiraz-29T | 1801 | 0.815343 | 0         |  |  |
|        |      | Shiraz-32T | 1870 | 0.729766 | 0         |  |  |
|        |      | Shiraz-35T | 1933 | 0.488535 | 0         |  |  |
|        |      | Shiraz-58T | 2223 | 0.833364 | 0         |  |  |
|        |      | Shiraz-58T | 2226 | 1.074663 | 0         |  |  |
|        |      | Shiraz-71T | 2263 | 0.975531 | 0         |  |  |
|        |      | Shiraz-3T  | 242  | 0        | -0.336434 |  |  |
|        |      | Shiraz-4T  | 261  | 0        | -0.336249 |  |  |
|        |      | Shiraz-16T | 295  | 0.591657 | 0         |  |  |
|        |      | Shiraz-36T | 433  | 0        | -0.803961 |  |  |
|        |      | Shiraz-42T | 480  | 0        | -0.232915 |  |  |
|        |      | Shiraz-44T | 899  | 0        | -1.09697  |  |  |
|        |      | Shiraz-49T | 1170 | 0        | -0.967436 |  |  |
|        |      | Shiraz-9T  | 1370 | 0.690073 | 0         |  |  |
|        |      | Shiraz-18T | 1457 | 0.643204 | 0         |  |  |
|        |      | Shiraz-22T | 1673 | 0.611783 | 0         |  |  |
|        |      | Shiraz-22T | 1678 | 0.911625 | 0         |  |  |
|        |      | Shiraz-25T | 1719 | 0.472955 | 0         |  |  |
|        |      | Shiraz-28T | 1762 | 0.562311 | 0         |  |  |
|        |      | Shiraz-29T | 1801 | 0.815343 | 0         |  |  |
|        |      | Shiraz-32T | 1870 | 0.729766 | 0         |  |  |
|        |      | Shiraz-35T | 1933 | 0.488535 | 0         |  |  |
|        |      | Shiraz-58T | 2223 | 0.833364 | 0         |  |  |
|        |      | Shiraz-58T | 2226 | 1.074663 | 0         |  |  |
|        |      | Shiraz-71T | 2263 | 0.975531 | 0         |  |  |
| HMGCS1 | chr5 | Shiraz-4T  | 250  | 0.262252 | 0         |  |  |
|        |      | Shiraz-16T | 266  | 0.321724 | 0         |  |  |

|           |      |            |      |          |           |  |  |
|-----------|------|------------|------|----------|-----------|--|--|
|           |      | Shiraz-44T | 591  | 0        | -0.233934 |  |  |
|           |      | Shiraz-18T | 1429 | 0        | -0.314125 |  |  |
|           |      | Shiraz-22T | 1522 | 0        | -0.322688 |  |  |
|           |      | Shiraz-25T | 1694 | 0.201602 | 0         |  |  |
|           |      | Shiraz-28T | 1731 | 0.295447 | 0         |  |  |
|           |      | Shiraz-29T | 1773 | 0.090981 | 0         |  |  |
|           |      | Shiraz-40T | 2016 | 0.376634 | 0         |  |  |
|           |      | Shiraz-4T  | 250  | 0.262252 | 0         |  |  |
|           |      | Shiraz-16T | 266  | 0.321724 | 0         |  |  |
|           |      | Shiraz-44T | 591  | 0        | -0.233934 |  |  |
|           |      | Shiraz-18T | 1429 | 0        | -0.314125 |  |  |
|           |      | Shiraz-22T | 1522 | 0        | -0.322688 |  |  |
|           |      | Shiraz-25T | 1694 | 0.201602 | 0         |  |  |
|           |      | Shiraz-28T | 1731 | 0.295447 | 0         |  |  |
|           |      | Shiraz-29T | 1773 | 0.090981 | 0         |  |  |
|           |      | Shiraz-40T | 2016 | 0.376634 | 0         |  |  |
|           |      | Shiraz-4T  | 250  | 0.262252 | 0         |  |  |
|           |      | Shiraz-16T | 266  | 0.321724 | 0         |  |  |
|           |      | Shiraz-44T | 591  | 0        | -0.233934 |  |  |
|           |      | Shiraz-18T | 1429 | 0        | -0.314125 |  |  |
|           |      | Shiraz-22T | 1522 | 0        | -0.322688 |  |  |
|           |      | Shiraz-25T | 1694 | 0.201602 | 0         |  |  |
|           |      | Shiraz-28T | 1731 | 0.295447 | 0         |  |  |
|           |      | Shiraz-29T | 1773 | 0.090981 | 0         |  |  |
|           |      | Shiraz-40T | 2016 | 0.376634 | 0         |  |  |
| HNRNPA2B1 | chr7 | Shiraz-3T  | 87   | 0.198593 | 0         |  |  |
|           |      | Shiraz-4T  | 252  | 0.192083 | 0         |  |  |
|           |      | Shiraz-36T | 376  | 0.159952 | 0         |  |  |
|           |      | Shiraz-46T | 942  | 0.069143 | 0         |  |  |
|           |      | Shiraz-18T | 1433 | 0.250973 | 0         |  |  |
|           |      | Shiraz-25T | 1697 | 0.21945  | 0         |  |  |
|           |      | Shiraz-28T | 1734 | 0.362882 | 0         |  |  |
|           |      | Shiraz-29T | 1777 | 0.156747 | 0         |  |  |
|           |      | Shiraz-38T | 1950 | 0.265916 | 0         |  |  |
|           |      | Shiraz-71T | 2236 | 0.320072 | 0         |  |  |
|           |      | Shiraz-3T  | 87   | 0.198593 | 0         |  |  |
|           |      | Shiraz-4T  | 252  | 0.192083 | 0         |  |  |
|           |      | Shiraz-36T | 376  | 0.159952 | 0         |  |  |
|           |      | Shiraz-46T | 942  | 0.069143 | 0         |  |  |
|           |      | Shiraz-18T | 1433 | 0.250973 | 0         |  |  |
|           |      | Shiraz-25T | 1697 | 0.21945  | 0         |  |  |
|           |      | Shiraz-28T | 1734 | 0.362882 | 0         |  |  |
|           |      | Shiraz-29T | 1777 | 0.156747 | 0         |  |  |
|           |      | Shiraz-38T | 1950 | 0.265916 | 0         |  |  |
|           |      | Shiraz-71T | 2236 | 0.320072 | 0         |  |  |
|           |      | Shiraz-3T  | 87   | 0.198593 | 0         |  |  |
|           |      | Shiraz-4T  | 252  | 0.192083 | 0         |  |  |

|         |      |            |      |          |           |  |
|---------|------|------------|------|----------|-----------|--|
|         |      | Shiraz-36T | 376  | 0.159952 | 0         |  |
|         |      | Shiraz-46T | 942  | 0.069143 | 0         |  |
|         |      | Shiraz-18T | 1433 | 0.250973 | 0         |  |
|         |      | Shiraz-25T | 1697 | 0.21945  | 0         |  |
|         |      | Shiraz-28T | 1734 | 0.362882 | 0         |  |
|         |      | Shiraz-29T | 1777 | 0.156747 | 0         |  |
|         |      | Shiraz-38T | 1950 | 0.265916 | 0         |  |
|         |      | Shiraz-71T | 2236 | 0.320072 | 0         |  |
| HNRNPH2 | chrX | Shiraz-3T  | 242  | 0        | -0.336434 |  |
|         |      | Shiraz-4T  | 261  | 0        | -0.336249 |  |
|         |      | Shiraz-16T | 295  | 0.591657 | 0         |  |
|         |      | Shiraz-36T | 433  | 0        | -0.803961 |  |
|         |      | Shiraz-44T | 899  | 0        | -1.09697  |  |
|         |      | Shiraz-49T | 1170 | 0        | -0.967436 |  |
|         |      | Shiraz-18T | 1457 | 0.643204 | 0         |  |
|         |      | Shiraz-22T | 1673 | 0.611783 | 0         |  |
|         |      | Shiraz-25T | 1719 | 0.472955 | 0         |  |
|         |      | Shiraz-28T | 1762 | 0.562311 | 0         |  |
|         |      | Shiraz-29T | 1801 | 0.815343 | 0         |  |
|         |      | Shiraz-32T | 1870 | 0.729766 | 0         |  |
|         |      | Shiraz-35T | 1933 | 0.488535 | 0         |  |
|         |      | Shiraz-58T | 2223 | 0.833364 | 0         |  |
|         |      | Shiraz-71T | 2263 | 0.975531 | 0         |  |
|         |      | Shiraz-3T  | 242  | 0        | -0.336434 |  |
|         |      | Shiraz-4T  | 261  | 0        | -0.336249 |  |
|         |      | Shiraz-16T | 295  | 0.591657 | 0         |  |
|         |      | Shiraz-36T | 433  | 0        | -0.803961 |  |
|         |      | Shiraz-44T | 899  | 0        | -1.09697  |  |
|         |      | Shiraz-49T | 1170 | 0        | -0.967436 |  |
|         |      | Shiraz-18T | 1457 | 0.643204 | 0         |  |
|         |      | Shiraz-22T | 1673 | 0.611783 | 0         |  |
|         |      | Shiraz-25T | 1719 | 0.472955 | 0         |  |
|         |      | Shiraz-28T | 1762 | 0.562311 | 0         |  |
|         |      | Shiraz-29T | 1801 | 0.815343 | 0         |  |
|         |      | Shiraz-32T | 1870 | 0.729766 | 0         |  |
|         |      | Shiraz-35T | 1933 | 0.488535 | 0         |  |
|         |      | Shiraz-58T | 2223 | 0.833364 | 0         |  |
|         |      | Shiraz-71T | 2263 | 0.975531 | 0         |  |
|         |      | Shiraz-3T  | 242  | 0        | -0.336434 |  |
|         |      | Shiraz-4T  | 261  | 0        | -0.336249 |  |
|         |      | Shiraz-16T | 295  | 0.591657 | 0         |  |
|         |      | Shiraz-36T | 433  | 0        | -0.803961 |  |
|         |      | Shiraz-44T | 899  | 0        | -1.09697  |  |
|         |      | Shiraz-49T | 1170 | 0        | -0.967436 |  |
|         |      | Shiraz-18T | 1457 | 0.643204 | 0         |  |
|         |      | Shiraz-22T | 1673 | 0.611783 | 0         |  |
|         |      | Shiraz-25T | 1719 | 0.472955 | 0         |  |

|        |      |            |      |          |   |  |  |
|--------|------|------------|------|----------|---|--|--|
|        |      | Shiraz-28T | 1762 | 0.562311 | 0 |  |  |
|        |      | Shiraz-29T | 1801 | 0.815343 | 0 |  |  |
|        |      | Shiraz-32T | 1870 | 0.729766 | 0 |  |  |
|        |      | Shiraz-35T | 1933 | 0.488535 | 0 |  |  |
|        |      | Shiraz-58T | 2223 | 0.833364 | 0 |  |  |
|        |      | Shiraz-71T | 2263 | 0.975531 | 0 |  |  |
| HOXA1  | chr7 | Shiraz-3T  | 87   | 0.198593 | 0 |  |  |
|        |      | Shiraz-4T  | 252  | 0.192083 | 0 |  |  |
|        |      | Shiraz-36T | 376  | 0.159952 | 0 |  |  |
|        |      | Shiraz-46T | 942  | 0.069143 | 0 |  |  |
|        |      | Shiraz-18T | 1433 | 0.250973 | 0 |  |  |
|        |      | Shiraz-25T | 1697 | 0.21945  | 0 |  |  |
|        |      | Shiraz-28T | 1734 | 0.362882 | 0 |  |  |
|        |      | Shiraz-29T | 1777 | 0.156747 | 0 |  |  |
|        |      | Shiraz-38T | 1950 | 0.265916 | 0 |  |  |
|        |      | Shiraz-71T | 2236 | 0.320072 | 0 |  |  |
|        |      | Shiraz-3T  | 87   | 0.198593 | 0 |  |  |
|        |      | Shiraz-4T  | 252  | 0.192083 | 0 |  |  |
|        |      | Shiraz-36T | 376  | 0.159952 | 0 |  |  |
|        |      | Shiraz-46T | 942  | 0.069143 | 0 |  |  |
|        |      | Shiraz-18T | 1433 | 0.250973 | 0 |  |  |
|        |      | Shiraz-25T | 1697 | 0.21945  | 0 |  |  |
|        |      | Shiraz-28T | 1734 | 0.362882 | 0 |  |  |
|        |      | Shiraz-29T | 1777 | 0.156747 | 0 |  |  |
|        |      | Shiraz-38T | 1950 | 0.265916 | 0 |  |  |
|        |      | Shiraz-71T | 2236 | 0.320072 | 0 |  |  |
|        |      | Shiraz-3T  | 87   | 0.198593 | 0 |  |  |
|        |      | Shiraz-4T  | 252  | 0.192083 | 0 |  |  |
|        |      | Shiraz-36T | 376  | 0.159952 | 0 |  |  |
|        |      | Shiraz-46T | 942  | 0.069143 | 0 |  |  |
|        |      | Shiraz-18T | 1433 | 0.250973 | 0 |  |  |
|        |      | Shiraz-25T | 1697 | 0.21945  | 0 |  |  |
|        |      | Shiraz-28T | 1734 | 0.362882 | 0 |  |  |
|        |      | Shiraz-29T | 1777 | 0.156747 | 0 |  |  |
|        |      | Shiraz-38T | 1950 | 0.265916 | 0 |  |  |
|        |      | Shiraz-71T | 2236 | 0.320072 | 0 |  |  |
| HOXA10 | chr7 | Shiraz-3T  | 87   | 0.198593 | 0 |  |  |
|        |      | Shiraz-3T  | 87   | 0.198593 | 0 |  |  |
|        |      | Shiraz-3T  | 88   | 0.832004 | 0 |  |  |
|        |      | Shiraz-3T  | 88   | 0.832004 | 0 |  |  |
|        |      | Shiraz-4T  | 252  | 0.192083 | 0 |  |  |
|        |      | Shiraz-4T  | 252  | 0.192083 | 0 |  |  |
|        |      | Shiraz-36T | 376  | 0.159952 | 0 |  |  |
|        |      | Shiraz-36T | 376  | 0.159952 | 0 |  |  |
|        |      | Shiraz-44T | 629  | 0.920681 | 0 |  |  |
|        |      | Shiraz-44T | 629  | 0.920681 | 0 |  |  |
|        |      | Shiraz-46T | 942  | 0.069143 | 0 |  |  |

|  |  |            |      |          |   |  |
|--|--|------------|------|----------|---|--|
|  |  | Shiraz-46T | 942  | 0.069143 | 0 |  |
|  |  | Shiraz-18T | 1433 | 0.250973 | 0 |  |
|  |  | Shiraz-18T | 1433 | 0.250973 | 0 |  |
|  |  | Shiraz-25T | 1697 | 0.21945  | 0 |  |
|  |  | Shiraz-25T | 1697 | 0.21945  | 0 |  |
|  |  | Shiraz-28T | 1734 | 0.362882 | 0 |  |
|  |  | Shiraz-28T | 1734 | 0.362882 | 0 |  |
|  |  | Shiraz-29T | 1777 | 0.156747 | 0 |  |
|  |  | Shiraz-29T | 1777 | 0.156747 | 0 |  |
|  |  | Shiraz-38T | 1950 | 0.265916 | 0 |  |
|  |  | Shiraz-38T | 1950 | 0.265916 | 0 |  |
|  |  | Shiraz-71T | 2236 | 0.320072 | 0 |  |
|  |  | Shiraz-71T | 2236 | 0.320072 | 0 |  |
|  |  | Shiraz-3T  | 87   | 0.198593 | 0 |  |
|  |  | Shiraz-3T  | 87   | 0.198593 | 0 |  |
|  |  | Shiraz-3T  | 88   | 0.832004 | 0 |  |
|  |  | Shiraz-3T  | 88   | 0.832004 | 0 |  |
|  |  | Shiraz-4T  | 252  | 0.192083 | 0 |  |
|  |  | Shiraz-4T  | 252  | 0.192083 | 0 |  |
|  |  | Shiraz-36T | 376  | 0.159952 | 0 |  |
|  |  | Shiraz-36T | 376  | 0.159952 | 0 |  |
|  |  | Shiraz-44T | 629  | 0.920681 | 0 |  |
|  |  | Shiraz-44T | 629  | 0.920681 | 0 |  |
|  |  | Shiraz-46T | 942  | 0.069143 | 0 |  |
|  |  | Shiraz-46T | 942  | 0.069143 | 0 |  |
|  |  | Shiraz-18T | 1433 | 0.250973 | 0 |  |
|  |  | Shiraz-18T | 1433 | 0.250973 | 0 |  |
|  |  | Shiraz-25T | 1697 | 0.21945  | 0 |  |
|  |  | Shiraz-25T | 1697 | 0.21945  | 0 |  |
|  |  | Shiraz-28T | 1734 | 0.362882 | 0 |  |
|  |  | Shiraz-28T | 1734 | 0.362882 | 0 |  |
|  |  | Shiraz-29T | 1777 | 0.156747 | 0 |  |
|  |  | Shiraz-29T | 1777 | 0.156747 | 0 |  |
|  |  | Shiraz-38T | 1950 | 0.265916 | 0 |  |
|  |  | Shiraz-38T | 1950 | 0.265916 | 0 |  |
|  |  | Shiraz-71T | 2236 | 0.320072 | 0 |  |
|  |  | Shiraz-71T | 2236 | 0.320072 | 0 |  |
|  |  | Shiraz-3T  | 87   | 0.198593 | 0 |  |
|  |  | Shiraz-3T  | 87   | 0.198593 | 0 |  |
|  |  | Shiraz-3T  | 88   | 0.832004 | 0 |  |
|  |  | Shiraz-3T  | 88   | 0.832004 | 0 |  |
|  |  | Shiraz-4T  | 252  | 0.192083 | 0 |  |
|  |  | Shiraz-4T  | 252  | 0.192083 | 0 |  |
|  |  | Shiraz-36T | 376  | 0.159952 | 0 |  |
|  |  | Shiraz-36T | 376  | 0.159952 | 0 |  |
|  |  | Shiraz-44T | 629  | 0.920681 | 0 |  |
|  |  | Shiraz-44T | 629  | 0.920681 | 0 |  |

|        |      |            |      |          |   |  |
|--------|------|------------|------|----------|---|--|
|        |      | Shiraz-46T | 942  | 0.069143 | 0 |  |
|        |      | Shiraz-46T | 942  | 0.069143 | 0 |  |
|        |      | Shiraz-18T | 1433 | 0.250973 | 0 |  |
|        |      | Shiraz-18T | 1433 | 0.250973 | 0 |  |
|        |      | Shiraz-25T | 1697 | 0.21945  | 0 |  |
|        |      | Shiraz-25T | 1697 | 0.21945  | 0 |  |
|        |      | Shiraz-28T | 1734 | 0.362882 | 0 |  |
|        |      | Shiraz-28T | 1734 | 0.362882 | 0 |  |
|        |      | Shiraz-29T | 1777 | 0.156747 | 0 |  |
|        |      | Shiraz-29T | 1777 | 0.156747 | 0 |  |
|        |      | Shiraz-38T | 1950 | 0.265916 | 0 |  |
|        |      | Shiraz-38T | 1950 | 0.265916 | 0 |  |
|        |      | Shiraz-71T | 2236 | 0.320072 | 0 |  |
|        |      | Shiraz-71T | 2236 | 0.320072 | 0 |  |
| HOXA11 | chr7 | Shiraz-3T  | 87   | 0.198593 | 0 |  |
|        |      | Shiraz-3T  | 88   | 0.832004 | 0 |  |
|        |      | Shiraz-4T  | 252  | 0.192083 | 0 |  |
|        |      | Shiraz-36T | 376  | 0.159952 | 0 |  |
|        |      | Shiraz-44T | 629  | 0.920681 | 0 |  |
|        |      | Shiraz-46T | 942  | 0.069143 | 0 |  |
|        |      | Shiraz-18T | 1433 | 0.250973 | 0 |  |
|        |      | Shiraz-25T | 1697 | 0.21945  | 0 |  |
|        |      | Shiraz-28T | 1734 | 0.362882 | 0 |  |
|        |      | Shiraz-29T | 1777 | 0.156747 | 0 |  |
|        |      | Shiraz-38T | 1950 | 0.265916 | 0 |  |
|        |      | Shiraz-71T | 2236 | 0.320072 | 0 |  |
|        |      | Shiraz-3T  | 87   | 0.198593 | 0 |  |
|        |      | Shiraz-3T  | 88   | 0.832004 | 0 |  |
|        |      | Shiraz-4T  | 252  | 0.192083 | 0 |  |
|        |      | Shiraz-36T | 376  | 0.159952 | 0 |  |
|        |      | Shiraz-44T | 629  | 0.920681 | 0 |  |
|        |      | Shiraz-46T | 942  | 0.069143 | 0 |  |
|        |      | Shiraz-18T | 1433 | 0.250973 | 0 |  |
|        |      | Shiraz-25T | 1697 | 0.21945  | 0 |  |
|        |      | Shiraz-28T | 1734 | 0.362882 | 0 |  |
|        |      | Shiraz-29T | 1777 | 0.156747 | 0 |  |
|        |      | Shiraz-38T | 1950 | 0.265916 | 0 |  |
|        |      | Shiraz-71T | 2236 | 0.320072 | 0 |  |
|        |      | Shiraz-3T  | 87   | 0.198593 | 0 |  |
|        |      | Shiraz-3T  | 88   | 0.832004 | 0 |  |
|        |      | Shiraz-4T  | 252  | 0.192083 | 0 |  |
|        |      | Shiraz-36T | 376  | 0.159952 | 0 |  |
|        |      | Shiraz-44T | 629  | 0.920681 | 0 |  |
|        |      | Shiraz-46T | 942  | 0.069143 | 0 |  |
|        |      | Shiraz-18T | 1433 | 0.250973 | 0 |  |
|        |      | Shiraz-25T | 1697 | 0.21945  | 0 |  |
|        |      | Shiraz-28T | 1734 | 0.362882 | 0 |  |

|          |      |            |      |          |   |  |  |
|----------|------|------------|------|----------|---|--|--|
|          |      | Shiraz-29T | 1777 | 0.156747 | 0 |  |  |
|          |      | Shiraz-38T | 1950 | 0.265916 | 0 |  |  |
|          |      | Shiraz-71T | 2236 | 0.320072 | 0 |  |  |
| HOXA11AS | chr7 | Shiraz-3T  | 87   | 0.198593 | 0 |  |  |
|          |      | Shiraz-3T  | 88   | 0.832004 | 0 |  |  |
|          |      | Shiraz-4T  | 252  | 0.192083 | 0 |  |  |
|          |      | Shiraz-36T | 376  | 0.159952 | 0 |  |  |
|          |      | Shiraz-44T | 629  | 0.920681 | 0 |  |  |
|          |      | Shiraz-46T | 942  | 0.069143 | 0 |  |  |
|          |      | Shiraz-18T | 1433 | 0.250973 | 0 |  |  |
|          |      | Shiraz-25T | 1697 | 0.21945  | 0 |  |  |
|          |      | Shiraz-28T | 1734 | 0.362882 | 0 |  |  |
|          |      | Shiraz-29T | 1777 | 0.156747 | 0 |  |  |
|          |      | Shiraz-38T | 1950 | 0.265916 | 0 |  |  |
|          |      | Shiraz-71T | 2236 | 0.320072 | 0 |  |  |
|          |      | Shiraz-3T  | 87   | 0.198593 | 0 |  |  |
|          |      | Shiraz-3T  | 88   | 0.832004 | 0 |  |  |
|          |      | Shiraz-4T  | 252  | 0.192083 | 0 |  |  |
|          |      | Shiraz-36T | 376  | 0.159952 | 0 |  |  |
|          |      | Shiraz-44T | 629  | 0.920681 | 0 |  |  |
|          |      | Shiraz-46T | 942  | 0.069143 | 0 |  |  |
|          |      | Shiraz-18T | 1433 | 0.250973 | 0 |  |  |
|          |      | Shiraz-25T | 1697 | 0.21945  | 0 |  |  |
|          |      | Shiraz-28T | 1734 | 0.362882 | 0 |  |  |
|          |      | Shiraz-29T | 1777 | 0.156747 | 0 |  |  |
|          |      | Shiraz-38T | 1950 | 0.265916 | 0 |  |  |
|          |      | Shiraz-71T | 2236 | 0.320072 | 0 |  |  |
|          |      | Shiraz-3T  | 87   | 0.198593 | 0 |  |  |
|          |      | Shiraz-3T  | 88   | 0.832004 | 0 |  |  |
|          |      | Shiraz-4T  | 252  | 0.192083 | 0 |  |  |
|          |      | Shiraz-36T | 376  | 0.159952 | 0 |  |  |
|          |      | Shiraz-44T | 629  | 0.920681 | 0 |  |  |
|          |      | Shiraz-46T | 942  | 0.069143 | 0 |  |  |
|          |      | Shiraz-18T | 1433 | 0.250973 | 0 |  |  |
|          |      | Shiraz-25T | 1697 | 0.21945  | 0 |  |  |
|          |      | Shiraz-28T | 1734 | 0.362882 | 0 |  |  |
|          |      | Shiraz-29T | 1777 | 0.156747 | 0 |  |  |
|          |      | Shiraz-38T | 1950 | 0.265916 | 0 |  |  |
|          |      | Shiraz-71T | 2236 | 0.320072 | 0 |  |  |
| HOXA13   | chr7 | Shiraz-3T  | 87   | 0.198593 | 0 |  |  |
|          |      | Shiraz-3T  | 88   | 0.832004 | 0 |  |  |
|          |      | Shiraz-4T  | 252  | 0.192083 | 0 |  |  |
|          |      | Shiraz-36T | 376  | 0.159952 | 0 |  |  |
|          |      | Shiraz-44T | 629  | 0.920681 | 0 |  |  |
|          |      | Shiraz-46T | 942  | 0.069143 | 0 |  |  |
|          |      | Shiraz-18T | 1433 | 0.250973 | 0 |  |  |
|          |      | Shiraz-25T | 1697 | 0.21945  | 0 |  |  |



|       |      |            |      |          |   |  |
|-------|------|------------|------|----------|---|--|
|       |      | Shiraz-28T | 1734 | 0.362882 | 0 |  |
|       |      | Shiraz-29T | 1777 | 0.156747 | 0 |  |
|       |      | Shiraz-38T | 1950 | 0.265916 | 0 |  |
|       |      | Shiraz-71T | 2236 | 0.320072 | 0 |  |
|       |      | Shiraz-3T  | 87   | 0.198593 | 0 |  |
|       |      | Shiraz-3T  | 88   | 0.832004 | 0 |  |
|       |      | Shiraz-4T  | 252  | 0.192083 | 0 |  |
|       |      | Shiraz-36T | 376  | 0.159952 | 0 |  |
|       |      | Shiraz-44T | 629  | 0.920681 | 0 |  |
|       |      | Shiraz-46T | 942  | 0.069143 | 0 |  |
|       |      | Shiraz-18T | 1433 | 0.250973 | 0 |  |
|       |      | Shiraz-25T | 1697 | 0.21945  | 0 |  |
|       |      | Shiraz-28T | 1734 | 0.362882 | 0 |  |
|       |      | Shiraz-29T | 1777 | 0.156747 | 0 |  |
|       |      | Shiraz-38T | 1950 | 0.265916 | 0 |  |
|       |      | Shiraz-71T | 2236 | 0.320072 | 0 |  |
|       |      | Shiraz-3T  | 87   | 0.198593 | 0 |  |
|       |      | Shiraz-3T  | 88   | 0.832004 | 0 |  |
|       |      | Shiraz-4T  | 252  | 0.192083 | 0 |  |
|       |      | Shiraz-36T | 376  | 0.159952 | 0 |  |
|       |      | Shiraz-44T | 629  | 0.920681 | 0 |  |
|       |      | Shiraz-46T | 942  | 0.069143 | 0 |  |
|       |      | Shiraz-18T | 1433 | 0.250973 | 0 |  |
|       |      | Shiraz-25T | 1697 | 0.21945  | 0 |  |
|       |      | Shiraz-28T | 1734 | 0.362882 | 0 |  |
|       |      | Shiraz-29T | 1777 | 0.156747 | 0 |  |
|       |      | Shiraz-38T | 1950 | 0.265916 | 0 |  |
|       |      | Shiraz-71T | 2236 | 0.320072 | 0 |  |
| HOXA2 | chr7 | Shiraz-3T  | 87   | 0.198593 | 0 |  |
|       |      | Shiraz-3T  | 88   | 0.832004 | 0 |  |
|       |      | Shiraz-4T  | 252  | 0.192083 | 0 |  |
|       |      | Shiraz-36T | 376  | 0.159952 | 0 |  |
|       |      | Shiraz-44T | 629  | 0.920681 | 0 |  |
|       |      | Shiraz-46T | 942  | 0.069143 | 0 |  |
|       |      | Shiraz-18T | 1433 | 0.250973 | 0 |  |
|       |      | Shiraz-25T | 1697 | 0.21945  | 0 |  |
|       |      | Shiraz-28T | 1734 | 0.362882 | 0 |  |
|       |      | Shiraz-29T | 1777 | 0.156747 | 0 |  |
|       |      | Shiraz-38T | 1950 | 0.265916 | 0 |  |
|       |      | Shiraz-71T | 2236 | 0.320072 | 0 |  |
|       |      | Shiraz-3T  | 87   | 0.198593 | 0 |  |
|       |      | Shiraz-3T  | 88   | 0.832004 | 0 |  |
|       |      | Shiraz-4T  | 252  | 0.192083 | 0 |  |
|       |      | Shiraz-36T | 376  | 0.159952 | 0 |  |
|       |      | Shiraz-44T | 629  | 0.920681 | 0 |  |
|       |      | Shiraz-46T | 942  | 0.069143 | 0 |  |
|       |      | Shiraz-18T | 1433 | 0.250973 | 0 |  |

|       |      |            |      |          |   |  |
|-------|------|------------|------|----------|---|--|
|       |      | Shiraz-25T | 1697 | 0.21945  | 0 |  |
|       |      | Shiraz-28T | 1734 | 0.362882 | 0 |  |
|       |      | Shiraz-29T | 1777 | 0.156747 | 0 |  |
|       |      | Shiraz-38T | 1950 | 0.265916 | 0 |  |
|       |      | Shiraz-71T | 2236 | 0.320072 | 0 |  |
|       |      | Shiraz-3T  | 87   | 0.198593 | 0 |  |
|       |      | Shiraz-3T  | 88   | 0.832004 | 0 |  |
|       |      | Shiraz-4T  | 252  | 0.192083 | 0 |  |
|       |      | Shiraz-36T | 376  | 0.159952 | 0 |  |
|       |      | Shiraz-44T | 629  | 0.920681 | 0 |  |
|       |      | Shiraz-46T | 942  | 0.069143 | 0 |  |
|       |      | Shiraz-18T | 1433 | 0.250973 | 0 |  |
|       |      | Shiraz-25T | 1697 | 0.21945  | 0 |  |
|       |      | Shiraz-28T | 1734 | 0.362882 | 0 |  |
|       |      | Shiraz-29T | 1777 | 0.156747 | 0 |  |
|       |      | Shiraz-38T | 1950 | 0.265916 | 0 |  |
|       |      | Shiraz-71T | 2236 | 0.320072 | 0 |  |
| HOXA3 | chr7 | Shiraz-3T  | 87   | 0.198593 | 0 |  |
|       |      | Shiraz-3T  | 87   | 0.198593 | 0 |  |
|       |      | Shiraz-3T  | 87   | 0.198593 | 0 |  |
|       |      | Shiraz-3T  | 88   | 0.832004 | 0 |  |
|       |      | Shiraz-3T  | 88   | 0.832004 | 0 |  |
|       |      | Shiraz-3T  | 88   | 0.832004 | 0 |  |
|       |      | Shiraz-4T  | 252  | 0.192083 | 0 |  |
|       |      | Shiraz-4T  | 252  | 0.192083 | 0 |  |
|       |      | Shiraz-4T  | 252  | 0.192083 | 0 |  |
|       |      | Shiraz-36T | 376  | 0.159952 | 0 |  |
|       |      | Shiraz-36T | 376  | 0.159952 | 0 |  |
|       |      | Shiraz-36T | 376  | 0.159952 | 0 |  |
|       |      | Shiraz-44T | 629  | 0.920681 | 0 |  |
|       |      | Shiraz-44T | 629  | 0.920681 | 0 |  |
|       |      | Shiraz-44T | 629  | 0.920681 | 0 |  |
|       |      | Shiraz-46T | 942  | 0.069143 | 0 |  |
|       |      | Shiraz-46T | 942  | 0.069143 | 0 |  |
|       |      | Shiraz-46T | 942  | 0.069143 | 0 |  |
|       |      | Shiraz-18T | 1433 | 0.250973 | 0 |  |
|       |      | Shiraz-18T | 1433 | 0.250973 | 0 |  |
|       |      | Shiraz-18T | 1433 | 0.250973 | 0 |  |
|       |      | Shiraz-25T | 1697 | 0.21945  | 0 |  |
|       |      | Shiraz-25T | 1697 | 0.21945  | 0 |  |
|       |      | Shiraz-25T | 1697 | 0.21945  | 0 |  |
|       |      | Shiraz-28T | 1734 | 0.362882 | 0 |  |
|       |      | Shiraz-28T | 1734 | 0.362882 | 0 |  |
|       |      | Shiraz-28T | 1734 | 0.362882 | 0 |  |
|       |      | Shiraz-29T | 1777 | 0.156747 | 0 |  |
|       |      | Shiraz-29T | 1777 | 0.156747 | 0 |  |
|       |      | Shiraz-29T | 1777 | 0.156747 | 0 |  |

|  |  |            |      |          |   |  |  |
|--|--|------------|------|----------|---|--|--|
|  |  | Shiraz-38T | 1950 | 0.265916 | 0 |  |  |
|  |  | Shiraz-38T | 1950 | 0.265916 | 0 |  |  |
|  |  | Shiraz-38T | 1950 | 0.265916 | 0 |  |  |
|  |  | Shiraz-71T | 2236 | 0.320072 | 0 |  |  |
|  |  | Shiraz-71T | 2236 | 0.320072 | 0 |  |  |
|  |  | Shiraz-71T | 2236 | 0.320072 | 0 |  |  |
|  |  | Shiraz-3T  | 87   | 0.198593 | 0 |  |  |
|  |  | Shiraz-3T  | 87   | 0.198593 | 0 |  |  |
|  |  | Shiraz-3T  | 87   | 0.198593 | 0 |  |  |
|  |  | Shiraz-3T  | 88   | 0.832004 | 0 |  |  |
|  |  | Shiraz-3T  | 88   | 0.832004 | 0 |  |  |
|  |  | Shiraz-3T  | 88   | 0.832004 | 0 |  |  |
|  |  | Shiraz-4T  | 252  | 0.192083 | 0 |  |  |
|  |  | Shiraz-4T  | 252  | 0.192083 | 0 |  |  |
|  |  | Shiraz-4T  | 252  | 0.192083 | 0 |  |  |
|  |  | Shiraz-36T | 376  | 0.159952 | 0 |  |  |
|  |  | Shiraz-36T | 376  | 0.159952 | 0 |  |  |
|  |  | Shiraz-36T | 376  | 0.159952 | 0 |  |  |
|  |  | Shiraz-44T | 629  | 0.920681 | 0 |  |  |
|  |  | Shiraz-44T | 629  | 0.920681 | 0 |  |  |
|  |  | Shiraz-44T | 629  | 0.920681 | 0 |  |  |
|  |  | Shiraz-46T | 942  | 0.069143 | 0 |  |  |
|  |  | Shiraz-46T | 942  | 0.069143 | 0 |  |  |
|  |  | Shiraz-46T | 942  | 0.069143 | 0 |  |  |
|  |  | Shiraz-18T | 1433 | 0.250973 | 0 |  |  |
|  |  | Shiraz-18T | 1433 | 0.250973 | 0 |  |  |
|  |  | Shiraz-18T | 1433 | 0.250973 | 0 |  |  |
|  |  | Shiraz-25T | 1697 | 0.21945  | 0 |  |  |
|  |  | Shiraz-25T | 1697 | 0.21945  | 0 |  |  |
|  |  | Shiraz-25T | 1697 | 0.21945  | 0 |  |  |
|  |  | Shiraz-28T | 1734 | 0.362882 | 0 |  |  |
|  |  | Shiraz-28T | 1734 | 0.362882 | 0 |  |  |
|  |  | Shiraz-28T | 1734 | 0.362882 | 0 |  |  |
|  |  | Shiraz-29T | 1777 | 0.156747 | 0 |  |  |
|  |  | Shiraz-29T | 1777 | 0.156747 | 0 |  |  |
|  |  | Shiraz-29T | 1777 | 0.156747 | 0 |  |  |
|  |  | Shiraz-38T | 1950 | 0.265916 | 0 |  |  |
|  |  | Shiraz-38T | 1950 | 0.265916 | 0 |  |  |
|  |  | Shiraz-38T | 1950 | 0.265916 | 0 |  |  |
|  |  | Shiraz-71T | 2236 | 0.320072 | 0 |  |  |
|  |  | Shiraz-71T | 2236 | 0.320072 | 0 |  |  |
|  |  | Shiraz-71T | 2236 | 0.320072 | 0 |  |  |
|  |  | Shiraz-3T  | 87   | 0.198593 | 0 |  |  |
|  |  | Shiraz-3T  | 87   | 0.198593 | 0 |  |  |
|  |  | Shiraz-3T  | 87   | 0.198593 | 0 |  |  |
|  |  | Shiraz-3T  | 88   | 0.832004 | 0 |  |  |
|  |  | Shiraz-3T  | 88   | 0.832004 | 0 |  |  |

|       |      |            |      |          |   |  |  |
|-------|------|------------|------|----------|---|--|--|
|       |      | Shiraz-3T  | 88   | 0.832004 | 0 |  |  |
|       |      | Shiraz-4T  | 252  | 0.192083 | 0 |  |  |
|       |      | Shiraz-4T  | 252  | 0.192083 | 0 |  |  |
|       |      | Shiraz-4T  | 252  | 0.192083 | 0 |  |  |
|       |      | Shiraz-36T | 376  | 0.159952 | 0 |  |  |
|       |      | Shiraz-36T | 376  | 0.159952 | 0 |  |  |
|       |      | Shiraz-36T | 376  | 0.159952 | 0 |  |  |
|       |      | Shiraz-44T | 629  | 0.920681 | 0 |  |  |
|       |      | Shiraz-44T | 629  | 0.920681 | 0 |  |  |
|       |      | Shiraz-44T | 629  | 0.920681 | 0 |  |  |
|       |      | Shiraz-46T | 942  | 0.069143 | 0 |  |  |
|       |      | Shiraz-46T | 942  | 0.069143 | 0 |  |  |
|       |      | Shiraz-46T | 942  | 0.069143 | 0 |  |  |
|       |      | Shiraz-18T | 1433 | 0.250973 | 0 |  |  |
|       |      | Shiraz-18T | 1433 | 0.250973 | 0 |  |  |
|       |      | Shiraz-18T | 1433 | 0.250973 | 0 |  |  |
|       |      | Shiraz-25T | 1697 | 0.21945  | 0 |  |  |
|       |      | Shiraz-25T | 1697 | 0.21945  | 0 |  |  |
|       |      | Shiraz-25T | 1697 | 0.21945  | 0 |  |  |
|       |      | Shiraz-28T | 1734 | 0.362882 | 0 |  |  |
|       |      | Shiraz-28T | 1734 | 0.362882 | 0 |  |  |
|       |      | Shiraz-28T | 1734 | 0.362882 | 0 |  |  |
|       |      | Shiraz-29T | 1777 | 0.156747 | 0 |  |  |
|       |      | Shiraz-29T | 1777 | 0.156747 | 0 |  |  |
|       |      | Shiraz-29T | 1777 | 0.156747 | 0 |  |  |
|       |      | Shiraz-38T | 1950 | 0.265916 | 0 |  |  |
|       |      | Shiraz-38T | 1950 | 0.265916 | 0 |  |  |
|       |      | Shiraz-38T | 1950 | 0.265916 | 0 |  |  |
|       |      | Shiraz-71T | 2236 | 0.320072 | 0 |  |  |
|       |      | Shiraz-71T | 2236 | 0.320072 | 0 |  |  |
|       |      | Shiraz-71T | 2236 | 0.320072 | 0 |  |  |
| HOXA4 | chr7 | Shiraz-3T  | 87   | 0.198593 | 0 |  |  |
|       |      | Shiraz-3T  | 88   | 0.832004 | 0 |  |  |
|       |      | Shiraz-4T  | 252  | 0.192083 | 0 |  |  |
|       |      | Shiraz-36T | 376  | 0.159952 | 0 |  |  |
|       |      | Shiraz-44T | 629  | 0.920681 | 0 |  |  |
|       |      | Shiraz-46T | 942  | 0.069143 | 0 |  |  |
|       |      | Shiraz-18T | 1433 | 0.250973 | 0 |  |  |
|       |      | Shiraz-25T | 1697 | 0.21945  | 0 |  |  |
|       |      | Shiraz-28T | 1734 | 0.362882 | 0 |  |  |
|       |      | Shiraz-29T | 1777 | 0.156747 | 0 |  |  |
|       |      | Shiraz-38T | 1950 | 0.265916 | 0 |  |  |
|       |      | Shiraz-71T | 2236 | 0.320072 | 0 |  |  |
|       |      | Shiraz-3T  | 87   | 0.198593 | 0 |  |  |
|       |      | Shiraz-3T  | 88   | 0.832004 | 0 |  |  |
|       |      | Shiraz-4T  | 252  | 0.192083 | 0 |  |  |
|       |      | Shiraz-36T | 376  | 0.159952 | 0 |  |  |

|       |      |            |      |          |   |  |  |
|-------|------|------------|------|----------|---|--|--|
|       |      | Shiraz-44T | 629  | 0.920681 | 0 |  |  |
|       |      | Shiraz-46T | 942  | 0.069143 | 0 |  |  |
|       |      | Shiraz-18T | 1433 | 0.250973 | 0 |  |  |
|       |      | Shiraz-25T | 1697 | 0.21945  | 0 |  |  |
|       |      | Shiraz-28T | 1734 | 0.362882 | 0 |  |  |
|       |      | Shiraz-29T | 1777 | 0.156747 | 0 |  |  |
|       |      | Shiraz-38T | 1950 | 0.265916 | 0 |  |  |
|       |      | Shiraz-71T | 2236 | 0.320072 | 0 |  |  |
|       |      | Shiraz-3T  | 87   | 0.198593 | 0 |  |  |
|       |      | Shiraz-3T  | 88   | 0.832004 | 0 |  |  |
|       |      | Shiraz-4T  | 252  | 0.192083 | 0 |  |  |
|       |      | Shiraz-36T | 376  | 0.159952 | 0 |  |  |
|       |      | Shiraz-44T | 629  | 0.920681 | 0 |  |  |
|       |      | Shiraz-46T | 942  | 0.069143 | 0 |  |  |
|       |      | Shiraz-18T | 1433 | 0.250973 | 0 |  |  |
|       |      | Shiraz-25T | 1697 | 0.21945  | 0 |  |  |
|       |      | Shiraz-28T | 1734 | 0.362882 | 0 |  |  |
|       |      | Shiraz-29T | 1777 | 0.156747 | 0 |  |  |
|       |      | Shiraz-38T | 1950 | 0.265916 | 0 |  |  |
|       |      | Shiraz-71T | 2236 | 0.320072 | 0 |  |  |
| HOXA5 | chr7 | Shiraz-3T  | 87   | 0.198593 | 0 |  |  |
|       |      | Shiraz-3T  | 88   | 0.832004 | 0 |  |  |
|       |      | Shiraz-4T  | 252  | 0.192083 | 0 |  |  |
|       |      | Shiraz-36T | 376  | 0.159952 | 0 |  |  |
|       |      | Shiraz-44T | 629  | 0.920681 | 0 |  |  |
|       |      | Shiraz-46T | 942  | 0.069143 | 0 |  |  |
|       |      | Shiraz-18T | 1433 | 0.250973 | 0 |  |  |
|       |      | Shiraz-25T | 1697 | 0.21945  | 0 |  |  |
|       |      | Shiraz-28T | 1734 | 0.362882 | 0 |  |  |
|       |      | Shiraz-29T | 1777 | 0.156747 | 0 |  |  |
|       |      | Shiraz-38T | 1950 | 0.265916 | 0 |  |  |
|       |      | Shiraz-71T | 2236 | 0.320072 | 0 |  |  |
|       |      | Shiraz-3T  | 87   | 0.198593 | 0 |  |  |
|       |      | Shiraz-3T  | 88   | 0.832004 | 0 |  |  |
|       |      | Shiraz-4T  | 252  | 0.192083 | 0 |  |  |
|       |      | Shiraz-36T | 376  | 0.159952 | 0 |  |  |
|       |      | Shiraz-44T | 629  | 0.920681 | 0 |  |  |
|       |      | Shiraz-46T | 942  | 0.069143 | 0 |  |  |
|       |      | Shiraz-18T | 1433 | 0.250973 | 0 |  |  |
|       |      | Shiraz-25T | 1697 | 0.21945  | 0 |  |  |
|       |      | Shiraz-28T | 1734 | 0.362882 | 0 |  |  |
|       |      | Shiraz-29T | 1777 | 0.156747 | 0 |  |  |
|       |      | Shiraz-38T | 1950 | 0.265916 | 0 |  |  |
|       |      | Shiraz-71T | 2236 | 0.320072 | 0 |  |  |
|       |      | Shiraz-3T  | 87   | 0.198593 | 0 |  |  |
|       |      | Shiraz-3T  | 88   | 0.832004 | 0 |  |  |
|       |      | Shiraz-4T  | 252  | 0.192083 | 0 |  |  |

|       |      |            |      |          |   |  |
|-------|------|------------|------|----------|---|--|
|       |      | Shiraz-36T | 376  | 0.159952 | 0 |  |
|       |      | Shiraz-44T | 629  | 0.920681 | 0 |  |
|       |      | Shiraz-46T | 942  | 0.069143 | 0 |  |
|       |      | Shiraz-18T | 1433 | 0.250973 | 0 |  |
|       |      | Shiraz-25T | 1697 | 0.21945  | 0 |  |
|       |      | Shiraz-28T | 1734 | 0.362882 | 0 |  |
|       |      | Shiraz-29T | 1777 | 0.156747 | 0 |  |
|       |      | Shiraz-38T | 1950 | 0.265916 | 0 |  |
|       |      | Shiraz-71T | 2236 | 0.320072 | 0 |  |
| HOXA6 | chr7 | Shiraz-3T  | 87   | 0.198593 | 0 |  |
|       |      | Shiraz-3T  | 88   | 0.832004 | 0 |  |
|       |      | Shiraz-4T  | 252  | 0.192083 | 0 |  |
|       |      | Shiraz-36T | 376  | 0.159952 | 0 |  |
|       |      | Shiraz-44T | 629  | 0.920681 | 0 |  |
|       |      | Shiraz-46T | 942  | 0.069143 | 0 |  |
|       |      | Shiraz-18T | 1433 | 0.250973 | 0 |  |
|       |      | Shiraz-25T | 1697 | 0.21945  | 0 |  |
|       |      | Shiraz-28T | 1734 | 0.362882 | 0 |  |
|       |      | Shiraz-29T | 1777 | 0.156747 | 0 |  |
|       |      | Shiraz-38T | 1950 | 0.265916 | 0 |  |
|       |      | Shiraz-71T | 2236 | 0.320072 | 0 |  |
|       |      | Shiraz-3T  | 87   | 0.198593 | 0 |  |
|       |      | Shiraz-3T  | 88   | 0.832004 | 0 |  |
|       |      | Shiraz-4T  | 252  | 0.192083 | 0 |  |
|       |      | Shiraz-36T | 376  | 0.159952 | 0 |  |
|       |      | Shiraz-44T | 629  | 0.920681 | 0 |  |
|       |      | Shiraz-46T | 942  | 0.069143 | 0 |  |
|       |      | Shiraz-18T | 1433 | 0.250973 | 0 |  |
|       |      | Shiraz-25T | 1697 | 0.21945  | 0 |  |
|       |      | Shiraz-28T | 1734 | 0.362882 | 0 |  |
|       |      | Shiraz-29T | 1777 | 0.156747 | 0 |  |
|       |      | Shiraz-38T | 1950 | 0.265916 | 0 |  |
|       |      | Shiraz-71T | 2236 | 0.320072 | 0 |  |
|       |      | Shiraz-3T  | 87   | 0.198593 | 0 |  |
|       |      | Shiraz-3T  | 88   | 0.832004 | 0 |  |
|       |      | Shiraz-4T  | 252  | 0.192083 | 0 |  |
|       |      | Shiraz-36T | 376  | 0.159952 | 0 |  |
|       |      | Shiraz-44T | 629  | 0.920681 | 0 |  |
|       |      | Shiraz-46T | 942  | 0.069143 | 0 |  |
|       |      | Shiraz-18T | 1433 | 0.250973 | 0 |  |
|       |      | Shiraz-25T | 1697 | 0.21945  | 0 |  |
|       |      | Shiraz-28T | 1734 | 0.362882 | 0 |  |
|       |      | Shiraz-29T | 1777 | 0.156747 | 0 |  |
|       |      | Shiraz-38T | 1950 | 0.265916 | 0 |  |
|       |      | Shiraz-71T | 2236 | 0.320072 | 0 |  |
| HOXA7 | chr7 | Shiraz-3T  | 87   | 0.198593 | 0 |  |
|       |      | Shiraz-3T  | 88   | 0.832004 | 0 |  |

|       |      |            |      |          |   |  |  |
|-------|------|------------|------|----------|---|--|--|
|       |      | Shiraz-4T  | 252  | 0.192083 | 0 |  |  |
|       |      | Shiraz-36T | 376  | 0.159952 | 0 |  |  |
|       |      | Shiraz-44T | 629  | 0.920681 | 0 |  |  |
|       |      | Shiraz-46T | 942  | 0.069143 | 0 |  |  |
|       |      | Shiraz-18T | 1433 | 0.250973 | 0 |  |  |
|       |      | Shiraz-25T | 1697 | 0.21945  | 0 |  |  |
|       |      | Shiraz-28T | 1734 | 0.362882 | 0 |  |  |
|       |      | Shiraz-29T | 1777 | 0.156747 | 0 |  |  |
|       |      | Shiraz-38T | 1950 | 0.265916 | 0 |  |  |
|       |      | Shiraz-71T | 2236 | 0.320072 | 0 |  |  |
|       |      | Shiraz-3T  | 87   | 0.198593 | 0 |  |  |
|       |      | Shiraz-3T  | 88   | 0.832004 | 0 |  |  |
|       |      | Shiraz-4T  | 252  | 0.192083 | 0 |  |  |
|       |      | Shiraz-36T | 376  | 0.159952 | 0 |  |  |
|       |      | Shiraz-44T | 629  | 0.920681 | 0 |  |  |
|       |      | Shiraz-46T | 942  | 0.069143 | 0 |  |  |
|       |      | Shiraz-18T | 1433 | 0.250973 | 0 |  |  |
|       |      | Shiraz-25T | 1697 | 0.21945  | 0 |  |  |
|       |      | Shiraz-28T | 1734 | 0.362882 | 0 |  |  |
|       |      | Shiraz-29T | 1777 | 0.156747 | 0 |  |  |
|       |      | Shiraz-38T | 1950 | 0.265916 | 0 |  |  |
|       |      | Shiraz-71T | 2236 | 0.320072 | 0 |  |  |
|       |      | Shiraz-3T  | 87   | 0.198593 | 0 |  |  |
|       |      | Shiraz-3T  | 88   | 0.832004 | 0 |  |  |
|       |      | Shiraz-4T  | 252  | 0.192083 | 0 |  |  |
|       |      | Shiraz-36T | 376  | 0.159952 | 0 |  |  |
|       |      | Shiraz-44T | 629  | 0.920681 | 0 |  |  |
|       |      | Shiraz-46T | 942  | 0.069143 | 0 |  |  |
|       |      | Shiraz-18T | 1433 | 0.250973 | 0 |  |  |
|       |      | Shiraz-25T | 1697 | 0.21945  | 0 |  |  |
|       |      | Shiraz-28T | 1734 | 0.362882 | 0 |  |  |
|       |      | Shiraz-29T | 1777 | 0.156747 | 0 |  |  |
|       |      | Shiraz-38T | 1950 | 0.265916 | 0 |  |  |
|       |      | Shiraz-71T | 2236 | 0.320072 | 0 |  |  |
| HOXA9 | chr7 | Shiraz-3T  | 87   | 0.198593 | 0 |  |  |
|       |      | Shiraz-3T  | 88   | 0.832004 | 0 |  |  |
|       |      | Shiraz-4T  | 252  | 0.192083 | 0 |  |  |
|       |      | Shiraz-36T | 376  | 0.159952 | 0 |  |  |
|       |      | Shiraz-44T | 629  | 0.920681 | 0 |  |  |
|       |      | Shiraz-46T | 942  | 0.069143 | 0 |  |  |
|       |      | Shiraz-18T | 1433 | 0.250973 | 0 |  |  |
|       |      | Shiraz-25T | 1697 | 0.21945  | 0 |  |  |
|       |      | Shiraz-28T | 1734 | 0.362882 | 0 |  |  |
|       |      | Shiraz-29T | 1777 | 0.156747 | 0 |  |  |
|       |      | Shiraz-38T | 1950 | 0.265916 | 0 |  |  |
|       |      | Shiraz-71T | 2236 | 0.320072 | 0 |  |  |
|       |      | Shiraz-3T  | 87   | 0.198593 | 0 |  |  |

|       |      |            |      |          |           |  |
|-------|------|------------|------|----------|-----------|--|
|       |      | Shiraz-3T  | 88   | 0.832004 | 0         |  |
|       |      | Shiraz-4T  | 252  | 0.192083 | 0         |  |
|       |      | Shiraz-36T | 376  | 0.159952 | 0         |  |
|       |      | Shiraz-44T | 629  | 0.920681 | 0         |  |
|       |      | Shiraz-46T | 942  | 0.069143 | 0         |  |
|       |      | Shiraz-18T | 1433 | 0.250973 | 0         |  |
|       |      | Shiraz-25T | 1697 | 0.21945  | 0         |  |
|       |      | Shiraz-28T | 1734 | 0.362882 | 0         |  |
|       |      | Shiraz-29T | 1777 | 0.156747 | 0         |  |
|       |      | Shiraz-38T | 1950 | 0.265916 | 0         |  |
|       |      | Shiraz-71T | 2236 | 0.320072 | 0         |  |
|       |      | Shiraz-3T  | 87   | 0.198593 | 0         |  |
|       |      | Shiraz-3T  | 88   | 0.832004 | 0         |  |
|       |      | Shiraz-4T  | 252  | 0.192083 | 0         |  |
|       |      | Shiraz-36T | 376  | 0.159952 | 0         |  |
|       |      | Shiraz-44T | 629  | 0.920681 | 0         |  |
|       |      | Shiraz-46T | 942  | 0.069143 | 0         |  |
|       |      | Shiraz-18T | 1433 | 0.250973 | 0         |  |
|       |      | Shiraz-25T | 1697 | 0.21945  | 0         |  |
|       |      | Shiraz-28T | 1734 | 0.362882 | 0         |  |
|       |      | Shiraz-29T | 1777 | 0.156747 | 0         |  |
|       |      | Shiraz-38T | 1950 | 0.265916 | 0         |  |
|       |      | Shiraz-71T | 2236 | 0.320072 | 0         |  |
| HPRT1 | chrX | Shiraz-3T  | 242  | 0        | -0.336434 |  |
|       |      | Shiraz-4T  | 261  | 0        | -0.336249 |  |
|       |      | Shiraz-16T | 295  | 0.591657 | 0         |  |
|       |      | Shiraz-36T | 433  | 0        | -0.803961 |  |
|       |      | Shiraz-44T | 899  | 0        | -1.09697  |  |
|       |      | Shiraz-49T | 1170 | 0        | -0.967436 |  |
|       |      | Shiraz-9T  | 1370 | 0.690073 | 0         |  |
|       |      | Shiraz-18T | 1457 | 0.643204 | 0         |  |
|       |      | Shiraz-22T | 1673 | 0.611783 | 0         |  |
|       |      | Shiraz-22T | 1677 | 0.789711 | 0         |  |
|       |      | Shiraz-25T | 1719 | 0.472955 | 0         |  |
|       |      | Shiraz-28T | 1762 | 0.562311 | 0         |  |
|       |      | Shiraz-29T | 1801 | 0.815343 | 0         |  |
|       |      | Shiraz-32T | 1870 | 0.729766 | 0         |  |
|       |      | Shiraz-35T | 1933 | 0.488535 | 0         |  |
|       |      | Shiraz-58T | 2223 | 0.833364 | 0         |  |
|       |      | Shiraz-71T | 2263 | 0.975531 | 0         |  |
|       |      | Shiraz-3T  | 242  | 0        | -0.336434 |  |
|       |      | Shiraz-4T  | 261  | 0        | -0.336249 |  |
|       |      | Shiraz-16T | 295  | 0.591657 | 0         |  |
|       |      | Shiraz-36T | 433  | 0        | -0.803961 |  |
|       |      | Shiraz-44T | 899  | 0        | -1.09697  |  |
|       |      | Shiraz-49T | 1170 | 0        | -0.967436 |  |
|       |      | Shiraz-9T  | 1370 | 0.690073 | 0         |  |



|       |      |            |      |          |           |  |
|-------|------|------------|------|----------|-----------|--|
|       |      | Shiraz-18T | 1457 | 0.643204 | 0         |  |
|       |      | Shiraz-22T | 1673 | 0.611783 | 0         |  |
|       |      | Shiraz-22T | 1677 | 0.789711 | 0         |  |
|       |      | Shiraz-25T | 1719 | 0.472955 | 0         |  |
|       |      | Shiraz-28T | 1762 | 0.562311 | 0         |  |
|       |      | Shiraz-29T | 1801 | 0.815343 | 0         |  |
|       |      | Shiraz-32T | 1870 | 0.729766 | 0         |  |
|       |      | Shiraz-35T | 1933 | 0.488535 | 0         |  |
|       |      | Shiraz-58T | 2223 | 0.833364 | 0         |  |
|       |      | Shiraz-71T | 2263 | 0.975531 | 0         |  |
|       |      | Shiraz-3T  | 242  | 0        | -0.336434 |  |
|       |      | Shiraz-4T  | 261  | 0        | -0.336249 |  |
|       |      | Shiraz-16T | 295  | 0.591657 | 0         |  |
|       |      | Shiraz-36T | 433  | 0        | -0.803961 |  |
|       |      | Shiraz-44T | 899  | 0        | -1.09697  |  |
|       |      | Shiraz-49T | 1170 | 0        | -0.967436 |  |
|       |      | Shiraz-9T  | 1370 | 0.690073 | 0         |  |
|       |      | Shiraz-18T | 1457 | 0.643204 | 0         |  |
|       |      | Shiraz-22T | 1673 | 0.611783 | 0         |  |
|       |      | Shiraz-22T | 1677 | 0.789711 | 0         |  |
|       |      | Shiraz-25T | 1719 | 0.472955 | 0         |  |
|       |      | Shiraz-28T | 1762 | 0.562311 | 0         |  |
|       |      | Shiraz-29T | 1801 | 0.815343 | 0         |  |
|       |      | Shiraz-32T | 1870 | 0.729766 | 0         |  |
|       |      | Shiraz-35T | 1933 | 0.488535 | 0         |  |
|       |      | Shiraz-58T | 2223 | 0.833364 | 0         |  |
|       |      | Shiraz-71T | 2263 | 0.975531 | 0         |  |
| HPVC1 | chr7 | Shiraz-3T  | 87   | 0.198593 | 0         |  |
|       |      | Shiraz-4T  | 252  | 0.192083 | 0         |  |
|       |      | Shiraz-36T | 376  | 0.159952 | 0         |  |
|       |      | Shiraz-44T | 634  | 0        | -0.480272 |  |
|       |      | Shiraz-46T | 942  | 0.069143 | 0         |  |
|       |      | Shiraz-18T | 1433 | 0.250973 | 0         |  |
|       |      | Shiraz-22T | 1546 | 0        | -0.458543 |  |
|       |      | Shiraz-25T | 1697 | 0.21945  | 0         |  |
|       |      | Shiraz-28T | 1734 | 0.362882 | 0         |  |
|       |      | Shiraz-29T | 1777 | 0.156747 | 0         |  |
|       |      | Shiraz-38T | 1950 | 0.265916 | 0         |  |
|       |      | Shiraz-71T | 2236 | 0.320072 | 0         |  |
|       |      | Shiraz-3T  | 87   | 0.198593 | 0         |  |
|       |      | Shiraz-4T  | 252  | 0.192083 | 0         |  |
|       |      | Shiraz-36T | 376  | 0.159952 | 0         |  |
|       |      | Shiraz-44T | 634  | 0        | -0.480272 |  |
|       |      | Shiraz-46T | 942  | 0.069143 | 0         |  |
|       |      | Shiraz-18T | 1433 | 0.250973 | 0         |  |
|       |      | Shiraz-22T | 1546 | 0        | -0.458543 |  |
|       |      | Shiraz-25T | 1697 | 0.21945  | 0         |  |

|        |      |            |      |          |           |  |
|--------|------|------------|------|----------|-----------|--|
|        |      | Shiraz-28T | 1734 | 0.362882 | 0         |  |
|        |      | Shiraz-29T | 1777 | 0.156747 | 0         |  |
|        |      | Shiraz-38T | 1950 | 0.265916 | 0         |  |
|        |      | Shiraz-71T | 2236 | 0.320072 | 0         |  |
|        |      | Shiraz-3T  | 87   | 0.198593 | 0         |  |
|        |      | Shiraz-4T  | 252  | 0.192083 | 0         |  |
|        |      | Shiraz-36T | 376  | 0.159952 | 0         |  |
|        |      | Shiraz-44T | 634  | 0        | -0.480272 |  |
|        |      | Shiraz-46T | 942  | 0.069143 | 0         |  |
|        |      | Shiraz-18T | 1433 | 0.250973 | 0         |  |
|        |      | Shiraz-22T | 1546 | 0        | -0.458543 |  |
|        |      | Shiraz-25T | 1697 | 0.21945  | 0         |  |
|        |      | Shiraz-28T | 1734 | 0.362882 | 0         |  |
|        |      | Shiraz-29T | 1777 | 0.156747 | 0         |  |
|        |      | Shiraz-38T | 1950 | 0.265916 | 0         |  |
|        |      | Shiraz-71T | 2236 | 0.320072 | 0         |  |
| HS6ST2 | chrX | Shiraz-3T  | 242  | 0        | -0.336434 |  |
|        |      | Shiraz-4T  | 261  | 0        | -0.336249 |  |
|        |      | Shiraz-16T | 295  | 0.591657 | 0         |  |
|        |      | Shiraz-36T | 433  | 0        | -0.803961 |  |
|        |      | Shiraz-44T | 899  | 0        | -1.09697  |  |
|        |      | Shiraz-49T | 1170 | 0        | -0.967436 |  |
|        |      | Shiraz-9T  | 1370 | 0.690073 | 0         |  |
|        |      | Shiraz-18T | 1457 | 0.643204 | 0         |  |
|        |      | Shiraz-22T | 1673 | 0.611783 | 0         |  |
|        |      | Shiraz-22T | 1677 | 0.789711 | 0         |  |
|        |      | Shiraz-25T | 1719 | 0.472955 | 0         |  |
|        |      | Shiraz-28T | 1762 | 0.562311 | 0         |  |
|        |      | Shiraz-29T | 1801 | 0.815343 | 0         |  |
|        |      | Shiraz-32T | 1870 | 0.729766 | 0         |  |
|        |      | Shiraz-35T | 1933 | 0.488535 | 0         |  |
|        |      | Shiraz-58T | 2223 | 0.833364 | 0         |  |
|        |      | Shiraz-71T | 2263 | 0.975531 | 0         |  |
|        |      | Shiraz-3T  | 242  | 0        | -0.336434 |  |
|        |      | Shiraz-4T  | 261  | 0        | -0.336249 |  |
|        |      | Shiraz-16T | 295  | 0.591657 | 0         |  |
|        |      | Shiraz-36T | 433  | 0        | -0.803961 |  |
|        |      | Shiraz-44T | 899  | 0        | -1.09697  |  |
|        |      | Shiraz-49T | 1170 | 0        | -0.967436 |  |
|        |      | Shiraz-9T  | 1370 | 0.690073 | 0         |  |
|        |      | Shiraz-18T | 1457 | 0.643204 | 0         |  |
|        |      | Shiraz-22T | 1673 | 0.611783 | 0         |  |
|        |      | Shiraz-22T | 1677 | 0.789711 | 0         |  |
|        |      | Shiraz-25T | 1719 | 0.472955 | 0         |  |
|        |      | Shiraz-28T | 1762 | 0.562311 | 0         |  |
|        |      | Shiraz-29T | 1801 | 0.815343 | 0         |  |
|        |      | Shiraz-32T | 1870 | 0.729766 | 0         |  |

|          |      |            |      |          |           |  |
|----------|------|------------|------|----------|-----------|--|
|          |      | Shiraz-35T | 1933 | 0.488535 | 0         |  |
|          |      | Shiraz-58T | 2223 | 0.833364 | 0         |  |
|          |      | Shiraz-71T | 2263 | 0.975531 | 0         |  |
|          |      | Shiraz-3T  | 242  | 0        | -0.336434 |  |
|          |      | Shiraz-4T  | 261  | 0        | -0.336249 |  |
|          |      | Shiraz-16T | 295  | 0.591657 | 0         |  |
|          |      | Shiraz-36T | 433  | 0        | -0.803961 |  |
|          |      | Shiraz-44T | 899  | 0        | -1.09697  |  |
|          |      | Shiraz-49T | 1170 | 0        | -0.967436 |  |
|          |      | Shiraz-9T  | 1370 | 0.690073 | 0         |  |
|          |      | Shiraz-18T | 1457 | 0.643204 | 0         |  |
|          |      | Shiraz-22T | 1673 | 0.611783 | 0         |  |
|          |      | Shiraz-22T | 1677 | 0.789711 | 0         |  |
|          |      | Shiraz-25T | 1719 | 0.472955 | 0         |  |
|          |      | Shiraz-28T | 1762 | 0.562311 | 0         |  |
|          |      | Shiraz-29T | 1801 | 0.815343 | 0         |  |
|          |      | Shiraz-32T | 1870 | 0.729766 | 0         |  |
|          |      | Shiraz-35T | 1933 | 0.488535 | 0         |  |
|          |      | Shiraz-58T | 2223 | 0.833364 | 0         |  |
|          |      | Shiraz-71T | 2263 | 0.975531 | 0         |  |
| HSD17B10 | chrX | Shiraz-4T  | 260  | 0        | -0.324128 |  |
|          |      | Shiraz-16T | 294  | 0.655804 | 0         |  |
|          |      | Shiraz-31T | 345  | 0.103301 | 0         |  |
|          |      | Shiraz-36T | 431  | 0        | -0.78035  |  |
|          |      | Shiraz-36T | 432  | 0        | -0.6692   |  |
|          |      | Shiraz-44T | 891  | 0        | -0.954044 |  |
|          |      | Shiraz-44T | 898  | 0        | -0.515218 |  |
|          |      | Shiraz-49T | 1166 | 0        | -0.917235 |  |
|          |      | Shiraz-77T | 1282 | 0.213849 | 0         |  |
|          |      | Shiraz-9T  | 1368 | 0.199713 | 0         |  |
|          |      | Shiraz-18T | 1456 | 0.608534 | 0         |  |
|          |      | Shiraz-22T | 1669 | 0.695915 | 0         |  |
|          |      | Shiraz-25T | 1717 | 0.420447 | 0         |  |
|          |      | Shiraz-28T | 1760 | 0.538181 | 0         |  |
|          |      | Shiraz-29T | 1800 | 0.672527 | 0         |  |
|          |      | Shiraz-32T | 1869 | 0.776805 | 0         |  |
|          |      | Shiraz-35T | 1932 | 0.507141 | 0         |  |
|          |      | Shiraz-58T | 2221 | 0.871948 | 0         |  |
|          |      | Shiraz-71T | 2260 | 0.68394  | 0         |  |
|          |      | Shiraz-71T | 2262 | 0.986748 | 0         |  |
|          |      | Shiraz-4T  | 260  | 0        | -0.324128 |  |
|          |      | Shiraz-16T | 294  | 0.655804 | 0         |  |
|          |      | Shiraz-31T | 345  | 0.103301 | 0         |  |
|          |      | Shiraz-36T | 431  | 0        | -0.78035  |  |
|          |      | Shiraz-36T | 432  | 0        | -0.6692   |  |
|          |      | Shiraz-44T | 891  | 0        | -0.954044 |  |
|          |      | Shiraz-44T | 898  | 0        | -0.515218 |  |

|       |      |            |      |          |           |  |  |
|-------|------|------------|------|----------|-----------|--|--|
|       |      | Shiraz-49T | 1166 | 0        | -0.917235 |  |  |
|       |      | Shiraz-77T | 1282 | 0.213849 | 0         |  |  |
|       |      | Shiraz-9T  | 1368 | 0.199713 | 0         |  |  |
|       |      | Shiraz-18T | 1456 | 0.608534 | 0         |  |  |
|       |      | Shiraz-22T | 1669 | 0.695915 | 0         |  |  |
|       |      | Shiraz-25T | 1717 | 0.420447 | 0         |  |  |
|       |      | Shiraz-28T | 1760 | 0.538181 | 0         |  |  |
|       |      | Shiraz-29T | 1800 | 0.672527 | 0         |  |  |
|       |      | Shiraz-32T | 1869 | 0.776805 | 0         |  |  |
|       |      | Shiraz-35T | 1932 | 0.507141 | 0         |  |  |
|       |      | Shiraz-58T | 2221 | 0.871948 | 0         |  |  |
|       |      | Shiraz-71T | 2260 | 0.68394  | 0         |  |  |
|       |      | Shiraz-71T | 2262 | 0.986748 | 0         |  |  |
|       |      | Shiraz-4T  | 260  | 0        | -0.324128 |  |  |
|       |      | Shiraz-16T | 294  | 0.655804 | 0         |  |  |
|       |      | Shiraz-31T | 345  | 0.103301 | 0         |  |  |
|       |      | Shiraz-36T | 431  | 0        | -0.78035  |  |  |
|       |      | Shiraz-36T | 432  | 0        | -0.6692   |  |  |
|       |      | Shiraz-44T | 891  | 0        | -0.954044 |  |  |
|       |      | Shiraz-44T | 898  | 0        | -0.515218 |  |  |
|       |      | Shiraz-49T | 1166 | 0        | -0.917235 |  |  |
|       |      | Shiraz-77T | 1282 | 0.213849 | 0         |  |  |
|       |      | Shiraz-9T  | 1368 | 0.199713 | 0         |  |  |
|       |      | Shiraz-18T | 1456 | 0.608534 | 0         |  |  |
|       |      | Shiraz-22T | 1669 | 0.695915 | 0         |  |  |
|       |      | Shiraz-25T | 1717 | 0.420447 | 0         |  |  |
|       |      | Shiraz-28T | 1760 | 0.538181 | 0         |  |  |
|       |      | Shiraz-29T | 1800 | 0.672527 | 0         |  |  |
|       |      | Shiraz-32T | 1869 | 0.776805 | 0         |  |  |
|       |      | Shiraz-35T | 1932 | 0.507141 | 0         |  |  |
|       |      | Shiraz-58T | 2221 | 0.871948 | 0         |  |  |
|       |      | Shiraz-71T | 2260 | 0.68394  | 0         |  |  |
|       |      | Shiraz-71T | 2262 | 0.986748 | 0         |  |  |
| HSFX1 | chrX | Shiraz-3T  | 242  | 0        | -0.336434 |  |  |
|       |      | Shiraz-3T  | 242  | 0        | -0.336434 |  |  |
|       |      | Shiraz-4T  | 261  | 0        | -0.336249 |  |  |
|       |      | Shiraz-4T  | 261  | 0        | -0.336249 |  |  |
|       |      | Shiraz-16T | 295  | 0.591657 | 0         |  |  |
|       |      | Shiraz-16T | 295  | 0.591657 | 0         |  |  |
|       |      | Shiraz-36T | 433  | 0        | -0.803961 |  |  |
|       |      | Shiraz-36T | 433  | 0        | -0.803961 |  |  |
|       |      | Shiraz-42T | 480  | 0        | -0.232915 |  |  |
|       |      | Shiraz-42T | 480  | 0        | -0.232915 |  |  |
|       |      | Shiraz-44T | 899  | 0        | -1.09697  |  |  |
|       |      | Shiraz-44T | 899  | 0        | -1.09697  |  |  |
|       |      | Shiraz-49T | 1170 | 0        | -0.967436 |  |  |
|       |      | Shiraz-49T | 1170 | 0        | -0.967436 |  |  |

|  |  |            |      |          |           |  |  |
|--|--|------------|------|----------|-----------|--|--|
|  |  | Shiraz-9T  | 1370 | 0.690073 | 0         |  |  |
|  |  | Shiraz-9T  | 1370 | 0.690073 | 0         |  |  |
|  |  | Shiraz-18T | 1457 | 0.643204 | 0         |  |  |
|  |  | Shiraz-18T | 1457 | 0.643204 | 0         |  |  |
|  |  | Shiraz-22T | 1673 | 0.611783 | 0         |  |  |
|  |  | Shiraz-22T | 1673 | 0.611783 | 0         |  |  |
|  |  | Shiraz-22T | 1678 | 0.911625 | 0         |  |  |
|  |  | Shiraz-22T | 1678 | 0.911625 | 0         |  |  |
|  |  | Shiraz-25T | 1719 | 0.472955 | 0         |  |  |
|  |  | Shiraz-25T | 1719 | 0.472955 | 0         |  |  |
|  |  | Shiraz-28T | 1762 | 0.562311 | 0         |  |  |
|  |  | Shiraz-28T | 1762 | 0.562311 | 0         |  |  |
|  |  | Shiraz-29T | 1801 | 0.815343 | 0         |  |  |
|  |  | Shiraz-29T | 1801 | 0.815343 | 0         |  |  |
|  |  | Shiraz-32T | 1870 | 0.729766 | 0         |  |  |
|  |  | Shiraz-32T | 1870 | 0.729766 | 0         |  |  |
|  |  | Shiraz-35T | 1933 | 0.488535 | 0         |  |  |
|  |  | Shiraz-35T | 1933 | 0.488535 | 0         |  |  |
|  |  | Shiraz-58T | 2223 | 0.833364 | 0         |  |  |
|  |  | Shiraz-58T | 2223 | 0.833364 | 0         |  |  |
|  |  | Shiraz-58T | 2226 | 1.074663 | 0         |  |  |
|  |  | Shiraz-58T | 2226 | 1.074663 | 0         |  |  |
|  |  | Shiraz-71T | 2263 | 0.975531 | 0         |  |  |
|  |  | Shiraz-71T | 2263 | 0.975531 | 0         |  |  |
|  |  | Shiraz-3T  | 242  | 0        | -0.336434 |  |  |
|  |  | Shiraz-3T  | 242  | 0        | -0.336434 |  |  |
|  |  | Shiraz-4T  | 261  | 0        | -0.336249 |  |  |
|  |  | Shiraz-4T  | 261  | 0        | -0.336249 |  |  |
|  |  | Shiraz-16T | 295  | 0.591657 | 0         |  |  |
|  |  | Shiraz-16T | 295  | 0.591657 | 0         |  |  |
|  |  | Shiraz-36T | 433  | 0        | -0.803961 |  |  |
|  |  | Shiraz-36T | 433  | 0        | -0.803961 |  |  |
|  |  | Shiraz-42T | 480  | 0        | -0.232915 |  |  |
|  |  | Shiraz-42T | 480  | 0        | -0.232915 |  |  |
|  |  | Shiraz-44T | 899  | 0        | -1.09697  |  |  |
|  |  | Shiraz-44T | 899  | 0        | -1.09697  |  |  |
|  |  | Shiraz-49T | 1170 | 0        | -0.967436 |  |  |
|  |  | Shiraz-49T | 1170 | 0        | -0.967436 |  |  |
|  |  | Shiraz-9T  | 1370 | 0.690073 | 0         |  |  |
|  |  | Shiraz-9T  | 1370 | 0.690073 | 0         |  |  |
|  |  | Shiraz-18T | 1457 | 0.643204 | 0         |  |  |
|  |  | Shiraz-18T | 1457 | 0.643204 | 0         |  |  |
|  |  | Shiraz-22T | 1673 | 0.611783 | 0         |  |  |
|  |  | Shiraz-22T | 1673 | 0.611783 | 0         |  |  |
|  |  | Shiraz-22T | 1678 | 0.911625 | 0         |  |  |
|  |  | Shiraz-22T | 1678 | 0.911625 | 0         |  |  |
|  |  | Shiraz-25T | 1719 | 0.472955 | 0         |  |  |

|  |            |      |          |           |  |
|--|------------|------|----------|-----------|--|
|  | Shiraz-25T | 1719 | 0.472955 | 0         |  |
|  | Shiraz-28T | 1762 | 0.562311 | 0         |  |
|  | Shiraz-28T | 1762 | 0.562311 | 0         |  |
|  | Shiraz-29T | 1801 | 0.815343 | 0         |  |
|  | Shiraz-29T | 1801 | 0.815343 | 0         |  |
|  | Shiraz-32T | 1870 | 0.729766 | 0         |  |
|  | Shiraz-32T | 1870 | 0.729766 | 0         |  |
|  | Shiraz-35T | 1933 | 0.488535 | 0         |  |
|  | Shiraz-35T | 1933 | 0.488535 | 0         |  |
|  | Shiraz-58T | 2223 | 0.833364 | 0         |  |
|  | Shiraz-58T | 2223 | 0.833364 | 0         |  |
|  | Shiraz-58T | 2226 | 1.074663 | 0         |  |
|  | Shiraz-58T | 2226 | 1.074663 | 0         |  |
|  | Shiraz-71T | 2263 | 0.975531 | 0         |  |
|  | Shiraz-71T | 2263 | 0.975531 | 0         |  |
|  | Shiraz-3T  | 242  | 0        | -0.336434 |  |
|  | Shiraz-3T  | 242  | 0        | -0.336434 |  |
|  | Shiraz-4T  | 261  | 0        | -0.336249 |  |
|  | Shiraz-4T  | 261  | 0        | -0.336249 |  |
|  | Shiraz-16T | 295  | 0.591657 | 0         |  |
|  | Shiraz-16T | 295  | 0.591657 | 0         |  |
|  | Shiraz-36T | 433  | 0        | -0.803961 |  |
|  | Shiraz-36T | 433  | 0        | -0.803961 |  |
|  | Shiraz-42T | 480  | 0        | -0.232915 |  |
|  | Shiraz-42T | 480  | 0        | -0.232915 |  |
|  | Shiraz-44T | 899  | 0        | -1.09697  |  |
|  | Shiraz-44T | 899  | 0        | -1.09697  |  |
|  | Shiraz-49T | 1170 | 0        | -0.967436 |  |
|  | Shiraz-49T | 1170 | 0        | -0.967436 |  |
|  | Shiraz-9T  | 1370 | 0.690073 | 0         |  |
|  | Shiraz-9T  | 1370 | 0.690073 | 0         |  |
|  | Shiraz-18T | 1457 | 0.643204 | 0         |  |
|  | Shiraz-18T | 1457 | 0.643204 | 0         |  |
|  | Shiraz-22T | 1673 | 0.611783 | 0         |  |
|  | Shiraz-22T | 1673 | 0.611783 | 0         |  |
|  | Shiraz-22T | 1678 | 0.911625 | 0         |  |
|  | Shiraz-22T | 1678 | 0.911625 | 0         |  |
|  | Shiraz-25T | 1719 | 0.472955 | 0         |  |
|  | Shiraz-25T | 1719 | 0.472955 | 0         |  |
|  | Shiraz-28T | 1762 | 0.562311 | 0         |  |
|  | Shiraz-28T | 1762 | 0.562311 | 0         |  |
|  | Shiraz-29T | 1801 | 0.815343 | 0         |  |
|  | Shiraz-29T | 1801 | 0.815343 | 0         |  |
|  | Shiraz-32T | 1870 | 0.729766 | 0         |  |
|  | Shiraz-32T | 1870 | 0.729766 | 0         |  |
|  | Shiraz-35T | 1933 | 0.488535 | 0         |  |
|  | Shiraz-35T | 1933 | 0.488535 | 0         |  |

|       |      |            |      |          |   |  |
|-------|------|------------|------|----------|---|--|
|       |      | Shiraz-58T | 2223 | 0.833364 | 0 |  |
|       |      | Shiraz-58T | 2223 | 0.833364 | 0 |  |
|       |      | Shiraz-58T | 2226 | 1.074663 | 0 |  |
|       |      | Shiraz-58T | 2226 | 1.074663 | 0 |  |
|       |      | Shiraz-71T | 2263 | 0.975531 | 0 |  |
|       |      | Shiraz-71T | 2263 | 0.975531 | 0 |  |
| HSPB1 | chr7 | Shiraz-3T  | 90   | 0.219276 | 0 |  |
|       |      | Shiraz-3T  | 92   | 0.817021 | 0 |  |
|       |      | Shiraz-4T  | 253  | 0.372918 | 0 |  |
|       |      | Shiraz-31T | 315  | 0.194054 | 0 |  |
|       |      | Shiraz-36T | 378  | 0.179558 | 0 |  |
|       |      | Shiraz-36T | 379  | 0.322028 | 0 |  |
|       |      | Shiraz-42T | 454  | 0.145717 | 0 |  |
|       |      | Shiraz-44T | 637  | 1.109789 | 0 |  |
|       |      | Shiraz-46T | 943  | 0.093799 | 0 |  |
|       |      | Shiraz-46T | 944  | 0.256008 | 0 |  |
|       |      | Shiraz-47T | 1028 | 0.17896  | 0 |  |
|       |      | Shiraz-49T | 1118 | 0.327789 | 0 |  |
|       |      | Shiraz-77T | 1224 | 0.220539 | 0 |  |
|       |      | Shiraz-9T  | 1323 | 0.655912 | 0 |  |
|       |      | Shiraz-18T | 1434 | 0.244465 | 0 |  |
|       |      | Shiraz-22T | 1548 | 0.237572 | 0 |  |
|       |      | Shiraz-25T | 1698 | 0.21835  | 0 |  |
|       |      | Shiraz-28T | 1735 | 0.350744 | 0 |  |
|       |      | Shiraz-29T | 1778 | 0.120767 | 0 |  |
|       |      | Shiraz-38T | 1951 | 0.250891 | 0 |  |
|       |      | Shiraz-53T | 2078 | 0.287202 | 0 |  |
|       |      | Shiraz-58T | 2158 | 0.33934  | 0 |  |
|       |      | Shiraz-71T | 2238 | 0.603631 | 0 |  |
|       |      | Shiraz-71T | 2239 | 0.310785 | 0 |  |
|       |      | Shiraz-3T  | 90   | 0.219276 | 0 |  |
|       |      | Shiraz-3T  | 92   | 0.817021 | 0 |  |
|       |      | Shiraz-4T  | 253  | 0.372918 | 0 |  |
|       |      | Shiraz-31T | 315  | 0.194054 | 0 |  |
|       |      | Shiraz-36T | 378  | 0.179558 | 0 |  |
|       |      | Shiraz-36T | 379  | 0.322028 | 0 |  |
|       |      | Shiraz-42T | 454  | 0.145717 | 0 |  |
|       |      | Shiraz-44T | 637  | 1.109789 | 0 |  |
|       |      | Shiraz-46T | 943  | 0.093799 | 0 |  |
|       |      | Shiraz-46T | 944  | 0.256008 | 0 |  |
|       |      | Shiraz-47T | 1028 | 0.17896  | 0 |  |
|       |      | Shiraz-49T | 1118 | 0.327789 | 0 |  |
|       |      | Shiraz-77T | 1224 | 0.220539 | 0 |  |
|       |      | Shiraz-9T  | 1323 | 0.655912 | 0 |  |
|       |      | Shiraz-18T | 1434 | 0.244465 | 0 |  |
|       |      | Shiraz-22T | 1548 | 0.237572 | 0 |  |
|       |      | Shiraz-25T | 1698 | 0.21835  | 0 |  |

|         |      |            |      |          |           |  |  |
|---------|------|------------|------|----------|-----------|--|--|
|         |      | Shiraz-28T | 1735 | 0.350744 | 0         |  |  |
|         |      | Shiraz-29T | 1778 | 0.120767 | 0         |  |  |
|         |      | Shiraz-38T | 1951 | 0.250891 | 0         |  |  |
|         |      | Shiraz-53T | 2078 | 0.287202 | 0         |  |  |
|         |      | Shiraz-58T | 2158 | 0.33934  | 0         |  |  |
|         |      | Shiraz-71T | 2238 | 0.603631 | 0         |  |  |
|         |      | Shiraz-71T | 2239 | 0.310785 | 0         |  |  |
|         |      | Shiraz-3T  | 90   | 0.219276 | 0         |  |  |
|         |      | Shiraz-3T  | 92   | 0.817021 | 0         |  |  |
|         |      | Shiraz-4T  | 253  | 0.372918 | 0         |  |  |
|         |      | Shiraz-31T | 315  | 0.194054 | 0         |  |  |
|         |      | Shiraz-36T | 378  | 0.179558 | 0         |  |  |
|         |      | Shiraz-36T | 379  | 0.322028 | 0         |  |  |
|         |      | Shiraz-42T | 454  | 0.145717 | 0         |  |  |
|         |      | Shiraz-44T | 637  | 1.109789 | 0         |  |  |
|         |      | Shiraz-46T | 943  | 0.093799 | 0         |  |  |
|         |      | Shiraz-46T | 944  | 0.256008 | 0         |  |  |
|         |      | Shiraz-47T | 1028 | 0.17896  | 0         |  |  |
|         |      | Shiraz-49T | 1118 | 0.327789 | 0         |  |  |
|         |      | Shiraz-77T | 1224 | 0.220539 | 0         |  |  |
|         |      | Shiraz-9T  | 1323 | 0.655912 | 0         |  |  |
|         |      | Shiraz-18T | 1434 | 0.244465 | 0         |  |  |
|         |      | Shiraz-22T | 1548 | 0.237572 | 0         |  |  |
|         |      | Shiraz-25T | 1698 | 0.21835  | 0         |  |  |
|         |      | Shiraz-28T | 1735 | 0.350744 | 0         |  |  |
|         |      | Shiraz-29T | 1778 | 0.120767 | 0         |  |  |
|         |      | Shiraz-38T | 1951 | 0.250891 | 0         |  |  |
|         |      | Shiraz-53T | 2078 | 0.287202 | 0         |  |  |
|         |      | Shiraz-58T | 2158 | 0.33934  | 0         |  |  |
|         |      | Shiraz-71T | 2238 | 0.603631 | 0         |  |  |
|         |      | Shiraz-71T | 2239 | 0.310785 | 0         |  |  |
| HTATSF1 | chrX | Shiraz-3T  | 242  | 0        | -0.336434 |  |  |
|         |      | Shiraz-4T  | 261  | 0        | -0.336249 |  |  |
|         |      | Shiraz-16T | 295  | 0.591657 | 0         |  |  |
|         |      | Shiraz-36T | 433  | 0        | -0.803961 |  |  |
|         |      | Shiraz-44T | 899  | 0        | -1.09697  |  |  |
|         |      | Shiraz-49T | 1170 | 0        | -0.967436 |  |  |
|         |      | Shiraz-9T  | 1370 | 0.690073 | 0         |  |  |
|         |      | Shiraz-18T | 1457 | 0.643204 | 0         |  |  |
|         |      | Shiraz-22T | 1673 | 0.611783 | 0         |  |  |
|         |      | Shiraz-22T | 1677 | 0.789711 | 0         |  |  |
|         |      | Shiraz-25T | 1719 | 0.472955 | 0         |  |  |
|         |      | Shiraz-28T | 1762 | 0.562311 | 0         |  |  |
|         |      | Shiraz-29T | 1801 | 0.815343 | 0         |  |  |
|         |      | Shiraz-32T | 1870 | 0.729766 | 0         |  |  |
|         |      | Shiraz-35T | 1933 | 0.488535 | 0         |  |  |
|         |      | Shiraz-58T | 2223 | 0.833364 | 0         |  |  |



|       |      |            |      |          |           |  |  |
|-------|------|------------|------|----------|-----------|--|--|
|       |      | Shiraz-71T | 2263 | 0.975531 | 0         |  |  |
|       |      | Shiraz-3T  | 242  | 0        | -0.336434 |  |  |
|       |      | Shiraz-4T  | 261  | 0        | -0.336249 |  |  |
|       |      | Shiraz-16T | 295  | 0.591657 | 0         |  |  |
|       |      | Shiraz-36T | 433  | 0        | -0.803961 |  |  |
|       |      | Shiraz-44T | 899  | 0        | -1.09697  |  |  |
|       |      | Shiraz-49T | 1170 | 0        | -0.967436 |  |  |
|       |      | Shiraz-9T  | 1370 | 0.690073 | 0         |  |  |
|       |      | Shiraz-18T | 1457 | 0.643204 | 0         |  |  |
|       |      | Shiraz-22T | 1673 | 0.611783 | 0         |  |  |
|       |      | Shiraz-22T | 1677 | 0.789711 | 0         |  |  |
|       |      | Shiraz-25T | 1719 | 0.472955 | 0         |  |  |
|       |      | Shiraz-28T | 1762 | 0.562311 | 0         |  |  |
|       |      | Shiraz-29T | 1801 | 0.815343 | 0         |  |  |
|       |      | Shiraz-32T | 1870 | 0.729766 | 0         |  |  |
|       |      | Shiraz-35T | 1933 | 0.488535 | 0         |  |  |
|       |      | Shiraz-58T | 2223 | 0.833364 | 0         |  |  |
|       |      | Shiraz-71T | 2263 | 0.975531 | 0         |  |  |
|       |      | Shiraz-3T  | 242  | 0        | -0.336434 |  |  |
|       |      | Shiraz-4T  | 261  | 0        | -0.336249 |  |  |
|       |      | Shiraz-16T | 295  | 0.591657 | 0         |  |  |
|       |      | Shiraz-36T | 433  | 0        | -0.803961 |  |  |
|       |      | Shiraz-44T | 899  | 0        | -1.09697  |  |  |
|       |      | Shiraz-49T | 1170 | 0        | -0.967436 |  |  |
|       |      | Shiraz-9T  | 1370 | 0.690073 | 0         |  |  |
|       |      | Shiraz-18T | 1457 | 0.643204 | 0         |  |  |
|       |      | Shiraz-22T | 1673 | 0.611783 | 0         |  |  |
|       |      | Shiraz-22T | 1677 | 0.789711 | 0         |  |  |
|       |      | Shiraz-25T | 1719 | 0.472955 | 0         |  |  |
|       |      | Shiraz-28T | 1762 | 0.562311 | 0         |  |  |
|       |      | Shiraz-29T | 1801 | 0.815343 | 0         |  |  |
|       |      | Shiraz-32T | 1870 | 0.729766 | 0         |  |  |
|       |      | Shiraz-35T | 1933 | 0.488535 | 0         |  |  |
|       |      | Shiraz-58T | 2223 | 0.833364 | 0         |  |  |
|       |      | Shiraz-71T | 2263 | 0.975531 | 0         |  |  |
| HTR2C | chrX | Shiraz-3T  | 242  | 0        | -0.336434 |  |  |
|       |      | Shiraz-4T  | 261  | 0        | -0.336249 |  |  |
|       |      | Shiraz-16T | 295  | 0.591657 | 0         |  |  |
|       |      | Shiraz-36T | 433  | 0        | -0.803961 |  |  |
|       |      | Shiraz-44T | 899  | 0        | -1.09697  |  |  |
|       |      | Shiraz-49T | 1170 | 0        | -0.967436 |  |  |
|       |      | Shiraz-18T | 1457 | 0.643204 | 0         |  |  |
|       |      | Shiraz-22T | 1673 | 0.611783 | 0         |  |  |
|       |      | Shiraz-25T | 1719 | 0.472955 | 0         |  |  |
|       |      | Shiraz-28T | 1762 | 0.562311 | 0         |  |  |
|       |      | Shiraz-29T | 1801 | 0.815343 | 0         |  |  |
|       |      | Shiraz-32T | 1870 | 0.729766 | 0         |  |  |

|      |      |            |      |          |           |  |  |
|------|------|------------|------|----------|-----------|--|--|
|      |      | Shiraz-35T | 1933 | 0.488535 | 0         |  |  |
|      |      | Shiraz-58T | 2223 | 0.833364 | 0         |  |  |
|      |      | Shiraz-71T | 2263 | 0.975531 | 0         |  |  |
|      |      | Shiraz-3T  | 242  | 0        | -0.336434 |  |  |
|      |      | Shiraz-4T  | 261  | 0        | -0.336249 |  |  |
|      |      | Shiraz-16T | 295  | 0.591657 | 0         |  |  |
|      |      | Shiraz-36T | 433  | 0        | -0.803961 |  |  |
|      |      | Shiraz-44T | 899  | 0        | -1.09697  |  |  |
|      |      | Shiraz-49T | 1170 | 0        | -0.967436 |  |  |
|      |      | Shiraz-18T | 1457 | 0.643204 | 0         |  |  |
|      |      | Shiraz-22T | 1673 | 0.611783 | 0         |  |  |
|      |      | Shiraz-25T | 1719 | 0.472955 | 0         |  |  |
|      |      | Shiraz-28T | 1762 | 0.562311 | 0         |  |  |
|      |      | Shiraz-29T | 1801 | 0.815343 | 0         |  |  |
|      |      | Shiraz-32T | 1870 | 0.729766 | 0         |  |  |
|      |      | Shiraz-35T | 1933 | 0.488535 | 0         |  |  |
|      |      | Shiraz-58T | 2223 | 0.833364 | 0         |  |  |
|      |      | Shiraz-71T | 2263 | 0.975531 | 0         |  |  |
|      |      | Shiraz-3T  | 242  | 0        | -0.336434 |  |  |
|      |      | Shiraz-4T  | 261  | 0        | -0.336249 |  |  |
|      |      | Shiraz-16T | 295  | 0.591657 | 0         |  |  |
|      |      | Shiraz-36T | 433  | 0        | -0.803961 |  |  |
|      |      | Shiraz-44T | 899  | 0        | -1.09697  |  |  |
|      |      | Shiraz-49T | 1170 | 0        | -0.967436 |  |  |
|      |      | Shiraz-18T | 1457 | 0.643204 | 0         |  |  |
|      |      | Shiraz-22T | 1673 | 0.611783 | 0         |  |  |
|      |      | Shiraz-25T | 1719 | 0.472955 | 0         |  |  |
|      |      | Shiraz-28T | 1762 | 0.562311 | 0         |  |  |
|      |      | Shiraz-29T | 1801 | 0.815343 | 0         |  |  |
|      |      | Shiraz-32T | 1870 | 0.729766 | 0         |  |  |
|      |      | Shiraz-35T | 1933 | 0.488535 | 0         |  |  |
|      |      | Shiraz-58T | 2223 | 0.833364 | 0         |  |  |
|      |      | Shiraz-71T | 2263 | 0.975531 | 0         |  |  |
| HUS1 | chr7 | Shiraz-3T  | 87   | 0.198593 | 0         |  |  |
|      |      | Shiraz-4T  | 252  | 0.192083 | 0         |  |  |
|      |      | Shiraz-36T | 376  | 0.159952 | 0         |  |  |
|      |      | Shiraz-46T | 942  | 0.069143 | 0         |  |  |
|      |      | Shiraz-18T | 1433 | 0.250973 | 0         |  |  |
|      |      | Shiraz-25T | 1697 | 0.21945  | 0         |  |  |
|      |      | Shiraz-28T | 1734 | 0.362882 | 0         |  |  |
|      |      | Shiraz-29T | 1777 | 0.156747 | 0         |  |  |
|      |      | Shiraz-38T | 1950 | 0.265916 | 0         |  |  |
|      |      | Shiraz-71T | 2236 | 0.320072 | 0         |  |  |
|      |      | Shiraz-3T  | 87   | 0.198593 | 0         |  |  |
|      |      | Shiraz-4T  | 252  | 0.192083 | 0         |  |  |
|      |      | Shiraz-36T | 376  | 0.159952 | 0         |  |  |
|      |      | Shiraz-46T | 942  | 0.069143 | 0         |  |  |

|       |      |            |      |          |           |  |
|-------|------|------------|------|----------|-----------|--|
|       |      | Shiraz-18T | 1433 | 0.250973 | 0         |  |
|       |      | Shiraz-25T | 1697 | 0.21945  | 0         |  |
|       |      | Shiraz-28T | 1734 | 0.362882 | 0         |  |
|       |      | Shiraz-29T | 1777 | 0.156747 | 0         |  |
|       |      | Shiraz-38T | 1950 | 0.265916 | 0         |  |
|       |      | Shiraz-71T | 2236 | 0.320072 | 0         |  |
|       |      | Shiraz-3T  | 87   | 0.198593 | 0         |  |
|       |      | Shiraz-4T  | 252  | 0.192083 | 0         |  |
|       |      | Shiraz-36T | 376  | 0.159952 | 0         |  |
|       |      | Shiraz-46T | 942  | 0.069143 | 0         |  |
|       |      | Shiraz-18T | 1433 | 0.250973 | 0         |  |
|       |      | Shiraz-25T | 1697 | 0.21945  | 0         |  |
|       |      | Shiraz-28T | 1734 | 0.362882 | 0         |  |
|       |      | Shiraz-29T | 1777 | 0.156747 | 0         |  |
|       |      | Shiraz-38T | 1950 | 0.265916 | 0         |  |
|       |      | Shiraz-71T | 2236 | 0.320072 | 0         |  |
| HUWE1 | chrX | Shiraz-4T  | 260  | 0        | -0.324128 |  |
|       |      | Shiraz-16T | 294  | 0.655804 | 0         |  |
|       |      | Shiraz-31T | 345  | 0.103301 | 0         |  |
|       |      | Shiraz-36T | 431  | 0        | -0.78035  |  |
|       |      | Shiraz-36T | 432  | 0        | -0.6692   |  |
|       |      | Shiraz-44T | 891  | 0        | -0.954044 |  |
|       |      | Shiraz-44T | 898  | 0        | -0.515218 |  |
|       |      | Shiraz-49T | 1166 | 0        | -0.917235 |  |
|       |      | Shiraz-77T | 1282 | 0.213849 | 0         |  |
|       |      | Shiraz-9T  | 1368 | 0.199713 | 0         |  |
|       |      | Shiraz-18T | 1456 | 0.608534 | 0         |  |
|       |      | Shiraz-22T | 1669 | 0.695915 | 0         |  |
|       |      | Shiraz-25T | 1717 | 0.420447 | 0         |  |
|       |      | Shiraz-28T | 1760 | 0.538181 | 0         |  |
|       |      | Shiraz-29T | 1800 | 0.672527 | 0         |  |
|       |      | Shiraz-32T | 1869 | 0.776805 | 0         |  |
|       |      | Shiraz-35T | 1932 | 0.507141 | 0         |  |
|       |      | Shiraz-58T | 2221 | 0.871948 | 0         |  |
|       |      | Shiraz-71T | 2260 | 0.68394  | 0         |  |
|       |      | Shiraz-71T | 2262 | 0.986748 | 0         |  |
|       |      | Shiraz-4T  | 260  | 0        | -0.324128 |  |
|       |      | Shiraz-16T | 294  | 0.655804 | 0         |  |
|       |      | Shiraz-31T | 345  | 0.103301 | 0         |  |
|       |      | Shiraz-36T | 431  | 0        | -0.78035  |  |
|       |      | Shiraz-36T | 432  | 0        | -0.6692   |  |
|       |      | Shiraz-44T | 891  | 0        | -0.954044 |  |
|       |      | Shiraz-44T | 898  | 0        | -0.515218 |  |
|       |      | Shiraz-49T | 1166 | 0        | -0.917235 |  |
|       |      | Shiraz-77T | 1282 | 0.213849 | 0         |  |
|       |      | Shiraz-9T  | 1368 | 0.199713 | 0         |  |
|       |      | Shiraz-18T | 1456 | 0.608534 | 0         |  |

|       |      |            |      |          |           |  |
|-------|------|------------|------|----------|-----------|--|
|       |      | Shiraz-22T | 1669 | 0.695915 | 0         |  |
|       |      | Shiraz-25T | 1717 | 0.420447 | 0         |  |
|       |      | Shiraz-28T | 1760 | 0.538181 | 0         |  |
|       |      | Shiraz-29T | 1800 | 0.672527 | 0         |  |
|       |      | Shiraz-32T | 1869 | 0.776805 | 0         |  |
|       |      | Shiraz-35T | 1932 | 0.507141 | 0         |  |
|       |      | Shiraz-58T | 2221 | 0.871948 | 0         |  |
|       |      | Shiraz-71T | 2260 | 0.68394  | 0         |  |
|       |      | Shiraz-71T | 2262 | 0.986748 | 0         |  |
|       |      | Shiraz-4T  | 260  | 0        | -0.324128 |  |
|       |      | Shiraz-16T | 294  | 0.655804 | 0         |  |
|       |      | Shiraz-31T | 345  | 0.103301 | 0         |  |
|       |      | Shiraz-36T | 431  | 0        | -0.78035  |  |
|       |      | Shiraz-36T | 432  | 0        | -0.6692   |  |
|       |      | Shiraz-44T | 891  | 0        | -0.954044 |  |
|       |      | Shiraz-44T | 898  | 0        | -0.515218 |  |
|       |      | Shiraz-49T | 1166 | 0        | -0.917235 |  |
|       |      | Shiraz-77T | 1282 | 0.213849 | 0         |  |
|       |      | Shiraz-9T  | 1368 | 0.199713 | 0         |  |
|       |      | Shiraz-18T | 1456 | 0.608534 | 0         |  |
|       |      | Shiraz-22T | 1669 | 0.695915 | 0         |  |
|       |      | Shiraz-25T | 1717 | 0.420447 | 0         |  |
|       |      | Shiraz-28T | 1760 | 0.538181 | 0         |  |
|       |      | Shiraz-29T | 1800 | 0.672527 | 0         |  |
|       |      | Shiraz-32T | 1869 | 0.776805 | 0         |  |
|       |      | Shiraz-35T | 1932 | 0.507141 | 0         |  |
|       |      | Shiraz-58T | 2221 | 0.871948 | 0         |  |
|       |      | Shiraz-71T | 2260 | 0.68394  | 0         |  |
|       |      | Shiraz-71T | 2262 | 0.986748 | 0         |  |
| HYAL4 | chr7 | Shiraz-3T  | 90   | 0.219276 | 0         |  |
|       |      | Shiraz-3T  | 95   | 0        | -0.077623 |  |
|       |      | Shiraz-4T  | 253  | 0.372918 | 0         |  |
|       |      | Shiraz-36T | 378  | 0.179558 | 0         |  |
|       |      | Shiraz-36T | 382  | 0.081739 | 0         |  |
|       |      | Shiraz-44T | 641  | 0        | -0.477846 |  |
|       |      | Shiraz-46T | 943  | 0.093799 | 0         |  |
|       |      | Shiraz-46T | 947  | 0        | -0.010843 |  |
|       |      | Shiraz-47T | 1031 | 0        | -0.117529 |  |
|       |      | Shiraz-49T | 1121 | 0        | -0.138569 |  |
|       |      | Shiraz-77T | 1225 | 0        | -0.117922 |  |
|       |      | Shiraz-77T | 1228 | 0        | -0.238084 |  |
|       |      | Shiraz-18T | 1434 | 0.244465 | 0         |  |
|       |      | Shiraz-22T | 1549 | 0        | -0.319623 |  |
|       |      | Shiraz-22T | 1552 | 0        | -0.50686  |  |
|       |      | Shiraz-25T | 1698 | 0.21835  | 0         |  |
|       |      | Shiraz-28T | 1735 | 0.350744 | 0         |  |
|       |      | Shiraz-29T | 1778 | 0.120767 | 0         |  |

|  |            |      |          |           |  |
|--|------------|------|----------|-----------|--|
|  | Shiraz-32T | 1833 | 0.551336 | 0         |  |
|  | Shiraz-32T | 1835 | 0.092727 | 0         |  |
|  | Shiraz-38T | 1951 | 0.250891 | 0         |  |
|  | Shiraz-53T | 2078 | 0.287202 | 0         |  |
|  | Shiraz-58T | 2161 | 0        | -0.187744 |  |
|  | Shiraz-71T | 2238 | 0.603631 | 0         |  |
|  | Shiraz-3T  | 90   | 0.219276 | 0         |  |
|  | Shiraz-3T  | 95   | 0        | -0.077623 |  |
|  | Shiraz-4T  | 253  | 0.372918 | 0         |  |
|  | Shiraz-36T | 378  | 0.179558 | 0         |  |
|  | Shiraz-36T | 382  | 0.081739 | 0         |  |
|  | Shiraz-44T | 641  | 0        | -0.477846 |  |
|  | Shiraz-46T | 943  | 0.093799 | 0         |  |
|  | Shiraz-46T | 947  | 0        | -0.010843 |  |
|  | Shiraz-47T | 1031 | 0        | -0.117529 |  |
|  | Shiraz-49T | 1121 | 0        | -0.138569 |  |
|  | Shiraz-77T | 1225 | 0        | -0.117922 |  |
|  | Shiraz-77T | 1228 | 0        | -0.238084 |  |
|  | Shiraz-18T | 1434 | 0.244465 | 0         |  |
|  | Shiraz-22T | 1549 | 0        | -0.319623 |  |
|  | Shiraz-22T | 1552 | 0        | -0.50686  |  |
|  | Shiraz-25T | 1698 | 0.21835  | 0         |  |
|  | Shiraz-28T | 1735 | 0.350744 | 0         |  |
|  | Shiraz-29T | 1778 | 0.120767 | 0         |  |
|  | Shiraz-32T | 1833 | 0.551336 | 0         |  |
|  | Shiraz-32T | 1835 | 0.092727 | 0         |  |
|  | Shiraz-38T | 1951 | 0.250891 | 0         |  |
|  | Shiraz-53T | 2078 | 0.287202 | 0         |  |
|  | Shiraz-58T | 2161 | 0        | -0.187744 |  |
|  | Shiraz-71T | 2238 | 0.603631 | 0         |  |
|  | Shiraz-3T  | 90   | 0.219276 | 0         |  |
|  | Shiraz-3T  | 95   | 0        | -0.077623 |  |
|  | Shiraz-4T  | 253  | 0.372918 | 0         |  |
|  | Shiraz-36T | 378  | 0.179558 | 0         |  |
|  | Shiraz-36T | 382  | 0.081739 | 0         |  |
|  | Shiraz-44T | 641  | 0        | -0.477846 |  |
|  | Shiraz-46T | 943  | 0.093799 | 0         |  |
|  | Shiraz-46T | 947  | 0        | -0.010843 |  |
|  | Shiraz-47T | 1031 | 0        | -0.117529 |  |
|  | Shiraz-49T | 1121 | 0        | -0.138569 |  |
|  | Shiraz-77T | 1225 | 0        | -0.117922 |  |
|  | Shiraz-77T | 1228 | 0        | -0.238084 |  |
|  | Shiraz-18T | 1434 | 0.244465 | 0         |  |
|  | Shiraz-22T | 1549 | 0        | -0.319623 |  |
|  | Shiraz-22T | 1552 | 0        | -0.50686  |  |
|  | Shiraz-25T | 1698 | 0.21835  | 0         |  |
|  | Shiraz-28T | 1735 | 0.350744 | 0         |  |

|        |      |            |      |          |           |  |
|--------|------|------------|------|----------|-----------|--|
|        |      | Shiraz-29T | 1778 | 0.120767 | 0         |  |
|        |      | Shiraz-32T | 1833 | 0.551336 | 0         |  |
|        |      | Shiraz-32T | 1835 | 0.092727 | 0         |  |
|        |      | Shiraz-38T | 1951 | 0.250891 | 0         |  |
|        |      | Shiraz-53T | 2078 | 0.287202 | 0         |  |
|        |      | Shiraz-58T | 2161 | 0        | -0.187744 |  |
|        |      | Shiraz-71T | 2238 | 0.603631 | 0         |  |
| HYALP1 | chr7 | Shiraz-3T  | 90   | 0.219276 | 0         |  |
|        |      | Shiraz-3T  | 95   | 0        | -0.077623 |  |
|        |      | Shiraz-4T  | 253  | 0.372918 | 0         |  |
|        |      | Shiraz-36T | 378  | 0.179558 | 0         |  |
|        |      | Shiraz-36T | 382  | 0.081739 | 0         |  |
|        |      | Shiraz-44T | 641  | 0        | -0.477846 |  |
|        |      | Shiraz-46T | 943  | 0.093799 | 0         |  |
|        |      | Shiraz-46T | 947  | 0        | -0.010843 |  |
|        |      | Shiraz-47T | 1031 | 0        | -0.117529 |  |
|        |      | Shiraz-49T | 1121 | 0        | -0.138569 |  |
|        |      | Shiraz-77T | 1225 | 0        | -0.117922 |  |
|        |      | Shiraz-77T | 1228 | 0        | -0.238084 |  |
|        |      | Shiraz-18T | 1434 | 0.244465 | 0         |  |
|        |      | Shiraz-22T | 1549 | 0        | -0.319623 |  |
|        |      | Shiraz-22T | 1552 | 0        | -0.50686  |  |
|        |      | Shiraz-25T | 1698 | 0.21835  | 0         |  |
|        |      | Shiraz-28T | 1735 | 0.350744 | 0         |  |
|        |      | Shiraz-29T | 1778 | 0.120767 | 0         |  |
|        |      | Shiraz-32T | 1833 | 0.551336 | 0         |  |
|        |      | Shiraz-32T | 1835 | 0.092727 | 0         |  |
|        |      | Shiraz-38T | 1951 | 0.250891 | 0         |  |
|        |      | Shiraz-53T | 2078 | 0.287202 | 0         |  |
|        |      | Shiraz-58T | 2161 | 0        | -0.187744 |  |
|        |      | Shiraz-71T | 2238 | 0.603631 | 0         |  |
|        |      | Shiraz-3T  | 90   | 0.219276 | 0         |  |
|        |      | Shiraz-3T  | 95   | 0        | -0.077623 |  |
|        |      | Shiraz-4T  | 253  | 0.372918 | 0         |  |
|        |      | Shiraz-36T | 378  | 0.179558 | 0         |  |
|        |      | Shiraz-36T | 382  | 0.081739 | 0         |  |
|        |      | Shiraz-44T | 641  | 0        | -0.477846 |  |
|        |      | Shiraz-46T | 943  | 0.093799 | 0         |  |
|        |      | Shiraz-46T | 947  | 0        | -0.010843 |  |
|        |      | Shiraz-47T | 1031 | 0        | -0.117529 |  |
|        |      | Shiraz-49T | 1121 | 0        | -0.138569 |  |
|        |      | Shiraz-77T | 1225 | 0        | -0.117922 |  |
|        |      | Shiraz-77T | 1228 | 0        | -0.238084 |  |
|        |      | Shiraz-18T | 1434 | 0.244465 | 0         |  |
|        |      | Shiraz-22T | 1549 | 0        | -0.319623 |  |
|        |      | Shiraz-22T | 1552 | 0        | -0.50686  |  |
|        |      | Shiraz-25T | 1698 | 0.21835  | 0         |  |

|      |      |            |      |          |           |  |  |
|------|------|------------|------|----------|-----------|--|--|
|      |      | Shiraz-28T | 1735 | 0.350744 | 0         |  |  |
|      |      | Shiraz-29T | 1778 | 0.120767 | 0         |  |  |
|      |      | Shiraz-32T | 1833 | 0.551336 | 0         |  |  |
|      |      | Shiraz-32T | 1835 | 0.092727 | 0         |  |  |
|      |      | Shiraz-38T | 1951 | 0.250891 | 0         |  |  |
|      |      | Shiraz-53T | 2078 | 0.287202 | 0         |  |  |
|      |      | Shiraz-58T | 2161 | 0        | -0.187744 |  |  |
|      |      | Shiraz-71T | 2238 | 0.603631 | 0         |  |  |
|      |      | Shiraz-3T  | 90   | 0.219276 | 0         |  |  |
|      |      | Shiraz-3T  | 95   | 0        | -0.077623 |  |  |
|      |      | Shiraz-4T  | 253  | 0.372918 | 0         |  |  |
|      |      | Shiraz-36T | 378  | 0.179558 | 0         |  |  |
|      |      | Shiraz-36T | 382  | 0.081739 | 0         |  |  |
|      |      | Shiraz-44T | 641  | 0        | -0.477846 |  |  |
|      |      | Shiraz-46T | 943  | 0.093799 | 0         |  |  |
|      |      | Shiraz-46T | 947  | 0        | -0.010843 |  |  |
|      |      | Shiraz-47T | 1031 | 0        | -0.117529 |  |  |
|      |      | Shiraz-49T | 1121 | 0        | -0.138569 |  |  |
|      |      | Shiraz-77T | 1225 | 0        | -0.117922 |  |  |
|      |      | Shiraz-77T | 1228 | 0        | -0.238084 |  |  |
|      |      | Shiraz-18T | 1434 | 0.244465 | 0         |  |  |
|      |      | Shiraz-22T | 1549 | 0        | -0.319623 |  |  |
|      |      | Shiraz-22T | 1552 | 0        | -0.50686  |  |  |
|      |      | Shiraz-25T | 1698 | 0.21835  | 0         |  |  |
|      |      | Shiraz-28T | 1735 | 0.350744 | 0         |  |  |
|      |      | Shiraz-29T | 1778 | 0.120767 | 0         |  |  |
|      |      | Shiraz-32T | 1833 | 0.551336 | 0         |  |  |
|      |      | Shiraz-32T | 1835 | 0.092727 | 0         |  |  |
|      |      | Shiraz-38T | 1951 | 0.250891 | 0         |  |  |
|      |      | Shiraz-53T | 2078 | 0.287202 | 0         |  |  |
|      |      | Shiraz-58T | 2161 | 0        | -0.187744 |  |  |
|      |      | Shiraz-71T | 2238 | 0.603631 | 0         |  |  |
| ICA1 | chr7 | Shiraz-4T  | 252  | 0.192083 | 0         |  |  |
|      |      | Shiraz-4T  | 252  | 0.192083 | 0         |  |  |
|      |      | Shiraz-4T  | 252  | 0.192083 | 0         |  |  |
|      |      | Shiraz-36T | 376  | 0.159952 | 0         |  |  |
|      |      | Shiraz-36T | 376  | 0.159952 | 0         |  |  |
|      |      | Shiraz-36T | 376  | 0.159952 | 0         |  |  |
|      |      | Shiraz-44T | 628  | 0        | -0.444379 |  |  |
|      |      | Shiraz-44T | 628  | 0        | -0.444379 |  |  |
|      |      | Shiraz-44T | 628  | 0        | -0.444379 |  |  |
|      |      | Shiraz-47T | 1027 | 0        | -0.117848 |  |  |
|      |      | Shiraz-47T | 1027 | 0        | -0.117848 |  |  |
|      |      | Shiraz-47T | 1027 | 0        | -0.117848 |  |  |
|      |      | Shiraz-49T | 1117 | 0        | -0.168296 |  |  |
|      |      | Shiraz-49T | 1117 | 0        | -0.168296 |  |  |
|      |      | Shiraz-49T | 1117 | 0        | -0.168296 |  |  |

|  |            |      |          |           |  |
|--|------------|------|----------|-----------|--|
|  | Shiraz-77T | 1222 | 0        | -0.113002 |  |
|  | Shiraz-77T | 1222 | 0        | -0.113002 |  |
|  | Shiraz-77T | 1222 | 0        | -0.113002 |  |
|  | Shiraz-18T | 1433 | 0.250973 | 0         |  |
|  | Shiraz-18T | 1433 | 0.250973 | 0         |  |
|  | Shiraz-18T | 1433 | 0.250973 | 0         |  |
|  | Shiraz-22T | 1543 | 0        | -0.513696 |  |
|  | Shiraz-22T | 1543 | 0        | -0.513696 |  |
|  | Shiraz-22T | 1543 | 0        | -0.513696 |  |
|  | Shiraz-25T | 1697 | 0.21945  | 0         |  |
|  | Shiraz-25T | 1697 | 0.21945  | 0         |  |
|  | Shiraz-25T | 1697 | 0.21945  | 0         |  |
|  | Shiraz-28T | 1734 | 0.362882 | 0         |  |
|  | Shiraz-28T | 1734 | 0.362882 | 0         |  |
|  | Shiraz-28T | 1734 | 0.362882 | 0         |  |
|  | Shiraz-29T | 1777 | 0.156747 | 0         |  |
|  | Shiraz-29T | 1777 | 0.156747 | 0         |  |
|  | Shiraz-29T | 1777 | 0.156747 | 0         |  |
|  | Shiraz-38T | 1950 | 0.265916 | 0         |  |
|  | Shiraz-38T | 1950 | 0.265916 | 0         |  |
|  | Shiraz-38T | 1950 | 0.265916 | 0         |  |
|  | Shiraz-53T | 2077 | 0.444626 | 0         |  |
|  | Shiraz-53T | 2077 | 0.444626 | 0         |  |
|  | Shiraz-53T | 2077 | 0.444626 | 0         |  |
|  | Shiraz-58T | 2157 | 0        | -0.213872 |  |
|  | Shiraz-58T | 2157 | 0        | -0.213872 |  |
|  | Shiraz-58T | 2157 | 0        | -0.213872 |  |
|  | Shiraz-71T | 2236 | 0.320072 | 0         |  |
|  | Shiraz-71T | 2236 | 0.320072 | 0         |  |
|  | Shiraz-71T | 2236 | 0.320072 | 0         |  |
|  | Shiraz-4T  | 252  | 0.192083 | 0         |  |
|  | Shiraz-4T  | 252  | 0.192083 | 0         |  |
|  | Shiraz-4T  | 252  | 0.192083 | 0         |  |
|  | Shiraz-36T | 376  | 0.159952 | 0         |  |
|  | Shiraz-36T | 376  | 0.159952 | 0         |  |
|  | Shiraz-36T | 376  | 0.159952 | 0         |  |
|  | Shiraz-44T | 628  | 0        | -0.444379 |  |
|  | Shiraz-44T | 628  | 0        | -0.444379 |  |
|  | Shiraz-44T | 628  | 0        | -0.444379 |  |
|  | Shiraz-47T | 1027 | 0        | -0.117848 |  |
|  | Shiraz-47T | 1027 | 0        | -0.117848 |  |
|  | Shiraz-47T | 1027 | 0        | -0.117848 |  |
|  | Shiraz-49T | 1117 | 0        | -0.168296 |  |
|  | Shiraz-49T | 1117 | 0        | -0.168296 |  |
|  | Shiraz-49T | 1117 | 0        | -0.168296 |  |
|  | Shiraz-77T | 1222 | 0        | -0.113002 |  |
|  | Shiraz-77T | 1222 | 0        | -0.113002 |  |



|  |            |      |          |           |  |
|--|------------|------|----------|-----------|--|
|  | Shiraz-77T | 1222 | 0        | -0.113002 |  |
|  | Shiraz-18T | 1433 | 0.250973 | 0         |  |
|  | Shiraz-18T | 1433 | 0.250973 | 0         |  |
|  | Shiraz-18T | 1433 | 0.250973 | 0         |  |
|  | Shiraz-22T | 1543 | 0        | -0.513696 |  |
|  | Shiraz-22T | 1543 | 0        | -0.513696 |  |
|  | Shiraz-22T | 1543 | 0        | -0.513696 |  |
|  | Shiraz-25T | 1697 | 0.21945  | 0         |  |
|  | Shiraz-25T | 1697 | 0.21945  | 0         |  |
|  | Shiraz-25T | 1697 | 0.21945  | 0         |  |
|  | Shiraz-28T | 1734 | 0.362882 | 0         |  |
|  | Shiraz-28T | 1734 | 0.362882 | 0         |  |
|  | Shiraz-28T | 1734 | 0.362882 | 0         |  |
|  | Shiraz-29T | 1777 | 0.156747 | 0         |  |
|  | Shiraz-29T | 1777 | 0.156747 | 0         |  |
|  | Shiraz-29T | 1777 | 0.156747 | 0         |  |
|  | Shiraz-38T | 1950 | 0.265916 | 0         |  |
|  | Shiraz-38T | 1950 | 0.265916 | 0         |  |
|  | Shiraz-38T | 1950 | 0.265916 | 0         |  |
|  | Shiraz-53T | 2077 | 0.444626 | 0         |  |
|  | Shiraz-53T | 2077 | 0.444626 | 0         |  |
|  | Shiraz-53T | 2077 | 0.444626 | 0         |  |
|  | Shiraz-58T | 2157 | 0        | -0.213872 |  |
|  | Shiraz-58T | 2157 | 0        | -0.213872 |  |
|  | Shiraz-58T | 2157 | 0        | -0.213872 |  |
|  | Shiraz-71T | 2236 | 0.320072 | 0         |  |
|  | Shiraz-71T | 2236 | 0.320072 | 0         |  |
|  | Shiraz-71T | 2236 | 0.320072 | 0         |  |
|  | Shiraz-4T  | 252  | 0.192083 | 0         |  |
|  | Shiraz-4T  | 252  | 0.192083 | 0         |  |
|  | Shiraz-4T  | 252  | 0.192083 | 0         |  |
|  | Shiraz-36T | 376  | 0.159952 | 0         |  |
|  | Shiraz-36T | 376  | 0.159952 | 0         |  |
|  | Shiraz-36T | 376  | 0.159952 | 0         |  |
|  | Shiraz-44T | 628  | 0        | -0.444379 |  |
|  | Shiraz-44T | 628  | 0        | -0.444379 |  |
|  | Shiraz-44T | 628  | 0        | -0.444379 |  |
|  | Shiraz-47T | 1027 | 0        | -0.117848 |  |
|  | Shiraz-47T | 1027 | 0        | -0.117848 |  |
|  | Shiraz-47T | 1027 | 0        | -0.117848 |  |
|  | Shiraz-49T | 1117 | 0        | -0.168296 |  |
|  | Shiraz-49T | 1117 | 0        | -0.168296 |  |
|  | Shiraz-49T | 1117 | 0        | -0.168296 |  |
|  | Shiraz-77T | 1222 | 0        | -0.113002 |  |
|  | Shiraz-77T | 1222 | 0        | -0.113002 |  |
|  | Shiraz-77T | 1222 | 0        | -0.113002 |  |
|  | Shiraz-18T | 1433 | 0.250973 | 0         |  |

|       |      |            |      |          |           |  |  |
|-------|------|------------|------|----------|-----------|--|--|
|       |      | Shiraz-18T | 1433 | 0.250973 | 0         |  |  |
|       |      | Shiraz-18T | 1433 | 0.250973 | 0         |  |  |
|       |      | Shiraz-22T | 1543 | 0        | -0.513696 |  |  |
|       |      | Shiraz-22T | 1543 | 0        | -0.513696 |  |  |
|       |      | Shiraz-22T | 1543 | 0        | -0.513696 |  |  |
|       |      | Shiraz-25T | 1697 | 0.21945  | 0         |  |  |
|       |      | Shiraz-25T | 1697 | 0.21945  | 0         |  |  |
|       |      | Shiraz-25T | 1697 | 0.21945  | 0         |  |  |
|       |      | Shiraz-28T | 1734 | 0.362882 | 0         |  |  |
|       |      | Shiraz-28T | 1734 | 0.362882 | 0         |  |  |
|       |      | Shiraz-28T | 1734 | 0.362882 | 0         |  |  |
|       |      | Shiraz-29T | 1777 | 0.156747 | 0         |  |  |
|       |      | Shiraz-29T | 1777 | 0.156747 | 0         |  |  |
|       |      | Shiraz-29T | 1777 | 0.156747 | 0         |  |  |
|       |      | Shiraz-38T | 1950 | 0.265916 | 0         |  |  |
|       |      | Shiraz-38T | 1950 | 0.265916 | 0         |  |  |
|       |      | Shiraz-38T | 1950 | 0.265916 | 0         |  |  |
|       |      | Shiraz-53T | 2077 | 0.444626 | 0         |  |  |
|       |      | Shiraz-53T | 2077 | 0.444626 | 0         |  |  |
|       |      | Shiraz-53T | 2077 | 0.444626 | 0         |  |  |
|       |      | Shiraz-58T | 2157 | 0        | -0.213872 |  |  |
|       |      | Shiraz-58T | 2157 | 0        | -0.213872 |  |  |
|       |      | Shiraz-58T | 2157 | 0        | -0.213872 |  |  |
|       |      | Shiraz-71T | 2236 | 0.320072 | 0         |  |  |
|       |      | Shiraz-71T | 2236 | 0.320072 | 0         |  |  |
|       |      | Shiraz-71T | 2236 | 0.320072 | 0         |  |  |
| IDH3G | chrX | Shiraz-3T  | 246  | 0.531858 | 0         |  |  |
|       |      | Shiraz-4T  | 261  | 0        | -0.336249 |  |  |
|       |      | Shiraz-16T | 295  | 0.591657 | 0         |  |  |
|       |      | Shiraz-36T | 433  | 0        | -0.803961 |  |  |
|       |      | Shiraz-42T | 480  | 0        | -0.232915 |  |  |
|       |      | Shiraz-44T | 908  | 0.466743 | 0         |  |  |
|       |      | Shiraz-49T | 1170 | 0        | -0.967436 |  |  |
|       |      | Shiraz-49T | 1173 | 0        | -0.704439 |  |  |
|       |      | Shiraz-9T  | 1370 | 0.690073 | 0         |  |  |
|       |      | Shiraz-9T  | 1371 | 1.292392 | 0         |  |  |
|       |      | Shiraz-18T | 1457 | 0.643204 | 0         |  |  |
|       |      | Shiraz-22T | 1673 | 0.611783 | 0         |  |  |
|       |      | Shiraz-22T | 1678 | 0.911625 | 0         |  |  |
|       |      | Shiraz-25T | 1719 | 0.472955 | 0         |  |  |
|       |      | Shiraz-28T | 1762 | 0.562311 | 0         |  |  |
|       |      | Shiraz-29T | 1801 | 0.815343 | 0         |  |  |
|       |      | Shiraz-32T | 1870 | 0.729766 | 0         |  |  |
|       |      | Shiraz-32T | 1872 | 1.504553 | 0         |  |  |
|       |      | Shiraz-35T | 1933 | 0.488535 | 0         |  |  |
|       |      | Shiraz-38T | 2011 | 0        | -0.406024 |  |  |
|       |      | Shiraz-53T | 2115 | 0.427728 | 0         |  |  |

|  |            |      |          |           |  |
|--|------------|------|----------|-----------|--|
|  | Shiraz-58T | 2223 | 0.833364 | 0         |  |
|  | Shiraz-58T | 2226 | 1.074663 | 0         |  |
|  | Shiraz-71T | 2263 | 0.975531 | 0         |  |
|  | Shiraz-3T  | 246  | 0.531858 | 0         |  |
|  | Shiraz-4T  | 261  | 0        | -0.336249 |  |
|  | Shiraz-16T | 295  | 0.591657 | 0         |  |
|  | Shiraz-36T | 433  | 0        | -0.803961 |  |
|  | Shiraz-42T | 480  | 0        | -0.232915 |  |
|  | Shiraz-44T | 908  | 0.466743 | 0         |  |
|  | Shiraz-49T | 1170 | 0        | -0.967436 |  |
|  | Shiraz-49T | 1173 | 0        | -0.704439 |  |
|  | Shiraz-9T  | 1370 | 0.690073 | 0         |  |
|  | Shiraz-9T  | 1371 | 1.292392 | 0         |  |
|  | Shiraz-18T | 1457 | 0.643204 | 0         |  |
|  | Shiraz-22T | 1673 | 0.611783 | 0         |  |
|  | Shiraz-22T | 1678 | 0.911625 | 0         |  |
|  | Shiraz-25T | 1719 | 0.472955 | 0         |  |
|  | Shiraz-28T | 1762 | 0.562311 | 0         |  |
|  | Shiraz-29T | 1801 | 0.815343 | 0         |  |
|  | Shiraz-32T | 1870 | 0.729766 | 0         |  |
|  | Shiraz-32T | 1872 | 1.504553 | 0         |  |
|  | Shiraz-35T | 1933 | 0.488535 | 0         |  |
|  | Shiraz-38T | 2011 | 0        | -0.406024 |  |
|  | Shiraz-53T | 2115 | 0.427728 | 0         |  |
|  | Shiraz-58T | 2223 | 0.833364 | 0         |  |
|  | Shiraz-58T | 2226 | 1.074663 | 0         |  |
|  | Shiraz-71T | 2263 | 0.975531 | 0         |  |
|  | Shiraz-3T  | 246  | 0.531858 | 0         |  |
|  | Shiraz-4T  | 261  | 0        | -0.336249 |  |
|  | Shiraz-16T | 295  | 0.591657 | 0         |  |
|  | Shiraz-36T | 433  | 0        | -0.803961 |  |
|  | Shiraz-42T | 480  | 0        | -0.232915 |  |
|  | Shiraz-44T | 908  | 0.466743 | 0         |  |
|  | Shiraz-49T | 1170 | 0        | -0.967436 |  |
|  | Shiraz-49T | 1173 | 0        | -0.704439 |  |
|  | Shiraz-9T  | 1370 | 0.690073 | 0         |  |
|  | Shiraz-9T  | 1371 | 1.292392 | 0         |  |
|  | Shiraz-18T | 1457 | 0.643204 | 0         |  |
|  | Shiraz-22T | 1673 | 0.611783 | 0         |  |
|  | Shiraz-22T | 1678 | 0.911625 | 0         |  |
|  | Shiraz-25T | 1719 | 0.472955 | 0         |  |
|  | Shiraz-28T | 1762 | 0.562311 | 0         |  |
|  | Shiraz-29T | 1801 | 0.815343 | 0         |  |
|  | Shiraz-32T | 1870 | 0.729766 | 0         |  |
|  | Shiraz-32T | 1872 | 1.504553 | 0         |  |
|  | Shiraz-35T | 1933 | 0.488535 | 0         |  |
|  | Shiraz-38T | 2011 | 0        | -0.406024 |  |

|     |      |            |      |          |           |  |
|-----|------|------------|------|----------|-----------|--|
|     |      | Shiraz-53T | 2115 | 0.427728 | 0         |  |
|     |      | Shiraz-58T | 2223 | 0.833364 | 0         |  |
|     |      | Shiraz-58T | 2226 | 1.074663 | 0         |  |
|     |      | Shiraz-71T | 2263 | 0.975531 | 0         |  |
| IDS | chrX | Shiraz-3T  | 242  | 0        | -0.336434 |  |
|     |      | Shiraz-3T  | 242  | 0        | -0.336434 |  |
|     |      | Shiraz-4T  | 261  | 0        | -0.336249 |  |
|     |      | Shiraz-4T  | 261  | 0        | -0.336249 |  |
|     |      | Shiraz-16T | 295  | 0.591657 | 0         |  |
|     |      | Shiraz-16T | 295  | 0.591657 | 0         |  |
|     |      | Shiraz-36T | 433  | 0        | -0.803961 |  |
|     |      | Shiraz-36T | 433  | 0        | -0.803961 |  |
|     |      | Shiraz-42T | 480  | 0        | -0.232915 |  |
|     |      | Shiraz-42T | 480  | 0        | -0.232915 |  |
|     |      | Shiraz-44T | 899  | 0        | -1.09697  |  |
|     |      | Shiraz-44T | 899  | 0        | -1.09697  |  |
|     |      | Shiraz-49T | 1170 | 0        | -0.967436 |  |
|     |      | Shiraz-49T | 1170 | 0        | -0.967436 |  |
|     |      | Shiraz-9T  | 1370 | 0.690073 | 0         |  |
|     |      | Shiraz-9T  | 1370 | 0.690073 | 0         |  |
|     |      | Shiraz-18T | 1457 | 0.643204 | 0         |  |
|     |      | Shiraz-18T | 1457 | 0.643204 | 0         |  |
|     |      | Shiraz-22T | 1673 | 0.611783 | 0         |  |
|     |      | Shiraz-22T | 1673 | 0.611783 | 0         |  |
|     |      | Shiraz-22T | 1678 | 0.911625 | 0         |  |
|     |      | Shiraz-22T | 1678 | 0.911625 | 0         |  |
|     |      | Shiraz-25T | 1719 | 0.472955 | 0         |  |
|     |      | Shiraz-25T | 1719 | 0.472955 | 0         |  |
|     |      | Shiraz-28T | 1762 | 0.562311 | 0         |  |
|     |      | Shiraz-28T | 1762 | 0.562311 | 0         |  |
|     |      | Shiraz-29T | 1801 | 0.815343 | 0         |  |
|     |      | Shiraz-29T | 1801 | 0.815343 | 0         |  |
|     |      | Shiraz-32T | 1870 | 0.729766 | 0         |  |
|     |      | Shiraz-32T | 1870 | 0.729766 | 0         |  |
|     |      | Shiraz-35T | 1933 | 0.488535 | 0         |  |
|     |      | Shiraz-35T | 1933 | 0.488535 | 0         |  |
|     |      | Shiraz-58T | 2223 | 0.833364 | 0         |  |
|     |      | Shiraz-58T | 2223 | 0.833364 | 0         |  |
|     |      | Shiraz-58T | 2226 | 1.074663 | 0         |  |
|     |      | Shiraz-58T | 2226 | 1.074663 | 0         |  |
|     |      | Shiraz-71T | 2263 | 0.975531 | 0         |  |
|     |      | Shiraz-71T | 2263 | 0.975531 | 0         |  |
|     |      | Shiraz-3T  | 242  | 0        | -0.336434 |  |
|     |      | Shiraz-3T  | 242  | 0        | -0.336434 |  |
|     |      | Shiraz-4T  | 261  | 0        | -0.336249 |  |
|     |      | Shiraz-4T  | 261  | 0        | -0.336249 |  |
|     |      | Shiraz-16T | 295  | 0.591657 | 0         |  |

|  |  |            |      |          |           |  |  |
|--|--|------------|------|----------|-----------|--|--|
|  |  | Shiraz-16T | 295  | 0.591657 | 0         |  |  |
|  |  | Shiraz-36T | 433  | 0        | -0.803961 |  |  |
|  |  | Shiraz-36T | 433  | 0        | -0.803961 |  |  |
|  |  | Shiraz-42T | 480  | 0        | -0.232915 |  |  |
|  |  | Shiraz-42T | 480  | 0        | -0.232915 |  |  |
|  |  | Shiraz-44T | 899  | 0        | -1.09697  |  |  |
|  |  | Shiraz-44T | 899  | 0        | -1.09697  |  |  |
|  |  | Shiraz-49T | 1170 | 0        | -0.967436 |  |  |
|  |  | Shiraz-49T | 1170 | 0        | -0.967436 |  |  |
|  |  | Shiraz-9T  | 1370 | 0.690073 | 0         |  |  |
|  |  | Shiraz-9T  | 1370 | 0.690073 | 0         |  |  |
|  |  | Shiraz-18T | 1457 | 0.643204 | 0         |  |  |
|  |  | Shiraz-18T | 1457 | 0.643204 | 0         |  |  |
|  |  | Shiraz-22T | 1673 | 0.611783 | 0         |  |  |
|  |  | Shiraz-22T | 1673 | 0.611783 | 0         |  |  |
|  |  | Shiraz-22T | 1678 | 0.911625 | 0         |  |  |
|  |  | Shiraz-22T | 1678 | 0.911625 | 0         |  |  |
|  |  | Shiraz-25T | 1719 | 0.472955 | 0         |  |  |
|  |  | Shiraz-25T | 1719 | 0.472955 | 0         |  |  |
|  |  | Shiraz-28T | 1762 | 0.562311 | 0         |  |  |
|  |  | Shiraz-28T | 1762 | 0.562311 | 0         |  |  |
|  |  | Shiraz-29T | 1801 | 0.815343 | 0         |  |  |
|  |  | Shiraz-29T | 1801 | 0.815343 | 0         |  |  |
|  |  | Shiraz-32T | 1870 | 0.729766 | 0         |  |  |
|  |  | Shiraz-32T | 1870 | 0.729766 | 0         |  |  |
|  |  | Shiraz-35T | 1933 | 0.488535 | 0         |  |  |
|  |  | Shiraz-35T | 1933 | 0.488535 | 0         |  |  |
|  |  | Shiraz-58T | 2223 | 0.833364 | 0         |  |  |
|  |  | Shiraz-58T | 2223 | 0.833364 | 0         |  |  |
|  |  | Shiraz-58T | 2226 | 1.074663 | 0         |  |  |
|  |  | Shiraz-58T | 2226 | 1.074663 | 0         |  |  |
|  |  | Shiraz-71T | 2263 | 0.975531 | 0         |  |  |
|  |  | Shiraz-71T | 2263 | 0.975531 | 0         |  |  |
|  |  | Shiraz-3T  | 242  | 0        | -0.336434 |  |  |
|  |  | Shiraz-3T  | 242  | 0        | -0.336434 |  |  |
|  |  | Shiraz-4T  | 261  | 0        | -0.336249 |  |  |
|  |  | Shiraz-4T  | 261  | 0        | -0.336249 |  |  |
|  |  | Shiraz-16T | 295  | 0.591657 | 0         |  |  |
|  |  | Shiraz-16T | 295  | 0.591657 | 0         |  |  |
|  |  | Shiraz-36T | 433  | 0        | -0.803961 |  |  |
|  |  | Shiraz-36T | 433  | 0        | -0.803961 |  |  |
|  |  | Shiraz-42T | 480  | 0        | -0.232915 |  |  |
|  |  | Shiraz-42T | 480  | 0        | -0.232915 |  |  |
|  |  | Shiraz-44T | 899  | 0        | -1.09697  |  |  |
|  |  | Shiraz-44T | 899  | 0        | -1.09697  |  |  |
|  |  | Shiraz-49T | 1170 | 0        | -0.967436 |  |  |
|  |  | Shiraz-49T | 1170 | 0        | -0.967436 |  |  |

|       |      |            |      |          |           |  |  |
|-------|------|------------|------|----------|-----------|--|--|
|       |      | Shiraz-9T  | 1370 | 0.690073 | 0         |  |  |
|       |      | Shiraz-9T  | 1370 | 0.690073 | 0         |  |  |
|       |      | Shiraz-18T | 1457 | 0.643204 | 0         |  |  |
|       |      | Shiraz-18T | 1457 | 0.643204 | 0         |  |  |
|       |      | Shiraz-22T | 1673 | 0.611783 | 0         |  |  |
|       |      | Shiraz-22T | 1673 | 0.611783 | 0         |  |  |
|       |      | Shiraz-22T | 1678 | 0.911625 | 0         |  |  |
|       |      | Shiraz-22T | 1678 | 0.911625 | 0         |  |  |
|       |      | Shiraz-25T | 1719 | 0.472955 | 0         |  |  |
|       |      | Shiraz-25T | 1719 | 0.472955 | 0         |  |  |
|       |      | Shiraz-28T | 1762 | 0.562311 | 0         |  |  |
|       |      | Shiraz-28T | 1762 | 0.562311 | 0         |  |  |
|       |      | Shiraz-29T | 1801 | 0.815343 | 0         |  |  |
|       |      | Shiraz-29T | 1801 | 0.815343 | 0         |  |  |
|       |      | Shiraz-32T | 1870 | 0.729766 | 0         |  |  |
|       |      | Shiraz-32T | 1870 | 0.729766 | 0         |  |  |
|       |      | Shiraz-35T | 1933 | 0.488535 | 0         |  |  |
|       |      | Shiraz-35T | 1933 | 0.488535 | 0         |  |  |
|       |      | Shiraz-58T | 2223 | 0.833364 | 0         |  |  |
|       |      | Shiraz-58T | 2223 | 0.833364 | 0         |  |  |
|       |      | Shiraz-58T | 2226 | 1.074663 | 0         |  |  |
|       |      | Shiraz-58T | 2226 | 1.074663 | 0         |  |  |
|       |      | Shiraz-71T | 2263 | 0.975531 | 0         |  |  |
|       |      | Shiraz-71T | 2263 | 0.975531 | 0         |  |  |
| IFRD1 | chr7 | Shiraz-3T  | 90   | 0.219276 | 0         |  |  |
|       |      | Shiraz-3T  | 90   | 0.219276 | 0         |  |  |
|       |      | Shiraz-3T  | 95   | 0        | -0.077623 |  |  |
|       |      | Shiraz-3T  | 95   | 0        | -0.077623 |  |  |
|       |      | Shiraz-4T  | 253  | 0.372918 | 0         |  |  |
|       |      | Shiraz-4T  | 253  | 0.372918 | 0         |  |  |
|       |      | Shiraz-36T | 378  | 0.179558 | 0         |  |  |
|       |      | Shiraz-36T | 378  | 0.179558 | 0         |  |  |
|       |      | Shiraz-36T | 382  | 0.081739 | 0         |  |  |
|       |      | Shiraz-36T | 382  | 0.081739 | 0         |  |  |
|       |      | Shiraz-44T | 641  | 0        | -0.477846 |  |  |
|       |      | Shiraz-44T | 641  | 0        | -0.477846 |  |  |
|       |      | Shiraz-46T | 943  | 0.093799 | 0         |  |  |
|       |      | Shiraz-46T | 943  | 0.093799 | 0         |  |  |
|       |      | Shiraz-46T | 947  | 0        | -0.010843 |  |  |
|       |      | Shiraz-46T | 947  | 0        | -0.010843 |  |  |
|       |      | Shiraz-47T | 1031 | 0        | -0.117529 |  |  |
|       |      | Shiraz-47T | 1031 | 0        | -0.117529 |  |  |
|       |      | Shiraz-49T | 1121 | 0        | -0.138569 |  |  |
|       |      | Shiraz-49T | 1121 | 0        | -0.138569 |  |  |
|       |      | Shiraz-77T | 1225 | 0        | -0.117922 |  |  |
|       |      | Shiraz-77T | 1225 | 0        | -0.117922 |  |  |
|       |      | Shiraz-77T | 1228 | 0        | -0.238084 |  |  |

|  |            |      |          |           |  |
|--|------------|------|----------|-----------|--|
|  | Shiraz-77T | 1228 | 0        | -0.238084 |  |
|  | Shiraz-18T | 1434 | 0.244465 | 0         |  |
|  | Shiraz-18T | 1434 | 0.244465 | 0         |  |
|  | Shiraz-22T | 1549 | 0        | -0.319623 |  |
|  | Shiraz-22T | 1549 | 0        | -0.319623 |  |
|  | Shiraz-25T | 1698 | 0.21835  | 0         |  |
|  | Shiraz-25T | 1698 | 0.21835  | 0         |  |
|  | Shiraz-28T | 1735 | 0.350744 | 0         |  |
|  | Shiraz-28T | 1735 | 0.350744 | 0         |  |
|  | Shiraz-29T | 1778 | 0.120767 | 0         |  |
|  | Shiraz-29T | 1778 | 0.120767 | 0         |  |
|  | Shiraz-32T | 1833 | 0.551336 | 0         |  |
|  | Shiraz-32T | 1833 | 0.551336 | 0         |  |
|  | Shiraz-32T | 1835 | 0.092727 | 0         |  |
|  | Shiraz-32T | 1835 | 0.092727 | 0         |  |
|  | Shiraz-38T | 1951 | 0.250891 | 0         |  |
|  | Shiraz-38T | 1951 | 0.250891 | 0         |  |
|  | Shiraz-53T | 2078 | 0.287202 | 0         |  |
|  | Shiraz-53T | 2078 | 0.287202 | 0         |  |
|  | Shiraz-58T | 2161 | 0        | -0.187744 |  |
|  | Shiraz-58T | 2161 | 0        | -0.187744 |  |
|  | Shiraz-71T | 2238 | 0.603631 | 0         |  |
|  | Shiraz-71T | 2238 | 0.603631 | 0         |  |
|  | Shiraz-3T  | 90   | 0.219276 | 0         |  |
|  | Shiraz-3T  | 90   | 0.219276 | 0         |  |
|  | Shiraz-3T  | 95   | 0        | -0.077623 |  |
|  | Shiraz-3T  | 95   | 0        | -0.077623 |  |
|  | Shiraz-4T  | 253  | 0.372918 | 0         |  |
|  | Shiraz-4T  | 253  | 0.372918 | 0         |  |
|  | Shiraz-36T | 378  | 0.179558 | 0         |  |
|  | Shiraz-36T | 378  | 0.179558 | 0         |  |
|  | Shiraz-36T | 382  | 0.081739 | 0         |  |
|  | Shiraz-36T | 382  | 0.081739 | 0         |  |
|  | Shiraz-44T | 641  | 0        | -0.477846 |  |
|  | Shiraz-44T | 641  | 0        | -0.477846 |  |
|  | Shiraz-46T | 943  | 0.093799 | 0         |  |
|  | Shiraz-46T | 943  | 0.093799 | 0         |  |
|  | Shiraz-46T | 947  | 0        | -0.010843 |  |
|  | Shiraz-46T | 947  | 0        | -0.010843 |  |
|  | Shiraz-47T | 1031 | 0        | -0.117529 |  |
|  | Shiraz-47T | 1031 | 0        | -0.117529 |  |
|  | Shiraz-49T | 1121 | 0        | -0.138569 |  |
|  | Shiraz-49T | 1121 | 0        | -0.138569 |  |
|  | Shiraz-77T | 1225 | 0        | -0.117922 |  |
|  | Shiraz-77T | 1225 | 0        | -0.117922 |  |
|  | Shiraz-77T | 1228 | 0        | -0.238084 |  |
|  | Shiraz-77T | 1228 | 0        | -0.238084 |  |

|  |  |            |      |          |           |  |  |
|--|--|------------|------|----------|-----------|--|--|
|  |  | Shiraz-18T | 1434 | 0.244465 | 0         |  |  |
|  |  | Shiraz-18T | 1434 | 0.244465 | 0         |  |  |
|  |  | Shiraz-22T | 1549 | 0        | -0.319623 |  |  |
|  |  | Shiraz-22T | 1549 | 0        | -0.319623 |  |  |
|  |  | Shiraz-25T | 1698 | 0.21835  | 0         |  |  |
|  |  | Shiraz-25T | 1698 | 0.21835  | 0         |  |  |
|  |  | Shiraz-28T | 1735 | 0.350744 | 0         |  |  |
|  |  | Shiraz-28T | 1735 | 0.350744 | 0         |  |  |
|  |  | Shiraz-29T | 1778 | 0.120767 | 0         |  |  |
|  |  | Shiraz-29T | 1778 | 0.120767 | 0         |  |  |
|  |  | Shiraz-32T | 1833 | 0.551336 | 0         |  |  |
|  |  | Shiraz-32T | 1833 | 0.551336 | 0         |  |  |
|  |  | Shiraz-32T | 1835 | 0.092727 | 0         |  |  |
|  |  | Shiraz-32T | 1835 | 0.092727 | 0         |  |  |
|  |  | Shiraz-38T | 1951 | 0.250891 | 0         |  |  |
|  |  | Shiraz-38T | 1951 | 0.250891 | 0         |  |  |
|  |  | Shiraz-53T | 2078 | 0.287202 | 0         |  |  |
|  |  | Shiraz-53T | 2078 | 0.287202 | 0         |  |  |
|  |  | Shiraz-58T | 2161 | 0        | -0.187744 |  |  |
|  |  | Shiraz-58T | 2161 | 0        | -0.187744 |  |  |
|  |  | Shiraz-71T | 2238 | 0.603631 | 0         |  |  |
|  |  | Shiraz-71T | 2238 | 0.603631 | 0         |  |  |
|  |  | Shiraz-3T  | 90   | 0.219276 | 0         |  |  |
|  |  | Shiraz-3T  | 90   | 0.219276 | 0         |  |  |
|  |  | Shiraz-3T  | 95   | 0        | -0.077623 |  |  |
|  |  | Shiraz-3T  | 95   | 0        | -0.077623 |  |  |
|  |  | Shiraz-4T  | 253  | 0.372918 | 0         |  |  |
|  |  | Shiraz-4T  | 253  | 0.372918 | 0         |  |  |
|  |  | Shiraz-36T | 378  | 0.179558 | 0         |  |  |
|  |  | Shiraz-36T | 378  | 0.179558 | 0         |  |  |
|  |  | Shiraz-36T | 382  | 0.081739 | 0         |  |  |
|  |  | Shiraz-36T | 382  | 0.081739 | 0         |  |  |
|  |  | Shiraz-44T | 641  | 0        | -0.477846 |  |  |
|  |  | Shiraz-44T | 641  | 0        | -0.477846 |  |  |
|  |  | Shiraz-46T | 943  | 0.093799 | 0         |  |  |
|  |  | Shiraz-46T | 943  | 0.093799 | 0         |  |  |
|  |  | Shiraz-46T | 947  | 0        | -0.010843 |  |  |
|  |  | Shiraz-46T | 947  | 0        | -0.010843 |  |  |
|  |  | Shiraz-47T | 1031 | 0        | -0.117529 |  |  |
|  |  | Shiraz-47T | 1031 | 0        | -0.117529 |  |  |
|  |  | Shiraz-49T | 1121 | 0        | -0.138569 |  |  |
|  |  | Shiraz-49T | 1121 | 0        | -0.138569 |  |  |
|  |  | Shiraz-77T | 1225 | 0        | -0.117922 |  |  |
|  |  | Shiraz-77T | 1225 | 0        | -0.117922 |  |  |
|  |  | Shiraz-77T | 1228 | 0        | -0.238084 |  |  |
|  |  | Shiraz-77T | 1228 | 0        | -0.238084 |  |  |
|  |  | Shiraz-18T | 1434 | 0.244465 | 0         |  |  |



|       |      |            |      |          |           |  |  |
|-------|------|------------|------|----------|-----------|--|--|
|       |      | Shiraz-18T | 1434 | 0.244465 | 0         |  |  |
|       |      | Shiraz-22T | 1549 | 0        | -0.319623 |  |  |
|       |      | Shiraz-22T | 1549 | 0        | -0.319623 |  |  |
|       |      | Shiraz-25T | 1698 | 0.21835  | 0         |  |  |
|       |      | Shiraz-25T | 1698 | 0.21835  | 0         |  |  |
|       |      | Shiraz-28T | 1735 | 0.350744 | 0         |  |  |
|       |      | Shiraz-28T | 1735 | 0.350744 | 0         |  |  |
|       |      | Shiraz-29T | 1778 | 0.120767 | 0         |  |  |
|       |      | Shiraz-29T | 1778 | 0.120767 | 0         |  |  |
|       |      | Shiraz-32T | 1833 | 0.551336 | 0         |  |  |
|       |      | Shiraz-32T | 1833 | 0.551336 | 0         |  |  |
|       |      | Shiraz-32T | 1835 | 0.092727 | 0         |  |  |
|       |      | Shiraz-32T | 1835 | 0.092727 | 0         |  |  |
|       |      | Shiraz-38T | 1951 | 0.250891 | 0         |  |  |
|       |      | Shiraz-38T | 1951 | 0.250891 | 0         |  |  |
|       |      | Shiraz-53T | 2078 | 0.287202 | 0         |  |  |
|       |      | Shiraz-53T | 2078 | 0.287202 | 0         |  |  |
|       |      | Shiraz-58T | 2161 | 0        | -0.187744 |  |  |
|       |      | Shiraz-58T | 2161 | 0        | -0.187744 |  |  |
|       |      | Shiraz-71T | 2238 | 0.603631 | 0         |  |  |
|       |      | Shiraz-71T | 2238 | 0.603631 | 0         |  |  |
| IGBP1 | chrX | Shiraz-3T  | 241  | 0        | -0.230501 |  |  |
|       |      | Shiraz-4T  | 261  | 0        | -0.336249 |  |  |
|       |      | Shiraz-16T | 295  | 0.591657 | 0         |  |  |
|       |      | Shiraz-36T | 433  | 0        | -0.803961 |  |  |
|       |      | Shiraz-44T | 899  | 0        | -1.09697  |  |  |
|       |      | Shiraz-44T | 900  | 0        | -0.584284 |  |  |
|       |      | Shiraz-44T | 901  | 0        | -1.000082 |  |  |
|       |      | Shiraz-49T | 1170 | 0        | -0.967436 |  |  |
|       |      | Shiraz-18T | 1457 | 0.643204 | 0         |  |  |
|       |      | Shiraz-22T | 1673 | 0.611783 | 0         |  |  |
|       |      | Shiraz-22T | 1674 | 0.887899 | 0         |  |  |
|       |      | Shiraz-25T | 1719 | 0.472955 | 0         |  |  |
|       |      | Shiraz-28T | 1762 | 0.562311 | 0         |  |  |
|       |      | Shiraz-29T | 1801 | 0.815343 | 0         |  |  |
|       |      | Shiraz-32T | 1870 | 0.729766 | 0         |  |  |
|       |      | Shiraz-35T | 1933 | 0.488535 | 0         |  |  |
|       |      | Shiraz-58T | 2223 | 0.833364 | 0         |  |  |
|       |      | Shiraz-58T | 2224 | 1.076575 | 0         |  |  |
|       |      | Shiraz-71T | 2263 | 0.975531 | 0         |  |  |
|       |      | Shiraz-3T  | 241  | 0        | -0.230501 |  |  |
|       |      | Shiraz-4T  | 261  | 0        | -0.336249 |  |  |
|       |      | Shiraz-16T | 295  | 0.591657 | 0         |  |  |
|       |      | Shiraz-36T | 433  | 0        | -0.803961 |  |  |
|       |      | Shiraz-44T | 899  | 0        | -1.09697  |  |  |
|       |      | Shiraz-44T | 900  | 0        | -0.584284 |  |  |
|       |      | Shiraz-44T | 901  | 0        | -1.000082 |  |  |

|         |      |            |      |          |           |  |  |
|---------|------|------------|------|----------|-----------|--|--|
|         |      | Shiraz-49T | 1170 | 0        | -0.967436 |  |  |
|         |      | Shiraz-18T | 1457 | 0.643204 | 0         |  |  |
|         |      | Shiraz-22T | 1673 | 0.611783 | 0         |  |  |
|         |      | Shiraz-22T | 1674 | 0.887899 | 0         |  |  |
|         |      | Shiraz-25T | 1719 | 0.472955 | 0         |  |  |
|         |      | Shiraz-28T | 1762 | 0.562311 | 0         |  |  |
|         |      | Shiraz-29T | 1801 | 0.815343 | 0         |  |  |
|         |      | Shiraz-32T | 1870 | 0.729766 | 0         |  |  |
|         |      | Shiraz-35T | 1933 | 0.488535 | 0         |  |  |
|         |      | Shiraz-58T | 2223 | 0.833364 | 0         |  |  |
|         |      | Shiraz-58T | 2224 | 1.076575 | 0         |  |  |
|         |      | Shiraz-71T | 2263 | 0.975531 | 0         |  |  |
|         |      | Shiraz-3T  | 241  | 0        | -0.230501 |  |  |
|         |      | Shiraz-4T  | 261  | 0        | -0.336249 |  |  |
|         |      | Shiraz-16T | 295  | 0.591657 | 0         |  |  |
|         |      | Shiraz-36T | 433  | 0        | -0.803961 |  |  |
|         |      | Shiraz-44T | 899  | 0        | -1.09697  |  |  |
|         |      | Shiraz-44T | 900  | 0        | -0.584284 |  |  |
|         |      | Shiraz-44T | 901  | 0        | -1.000082 |  |  |
|         |      | Shiraz-49T | 1170 | 0        | -0.967436 |  |  |
|         |      | Shiraz-18T | 1457 | 0.643204 | 0         |  |  |
|         |      | Shiraz-22T | 1673 | 0.611783 | 0         |  |  |
|         |      | Shiraz-22T | 1674 | 0.887899 | 0         |  |  |
|         |      | Shiraz-25T | 1719 | 0.472955 | 0         |  |  |
|         |      | Shiraz-28T | 1762 | 0.562311 | 0         |  |  |
|         |      | Shiraz-29T | 1801 | 0.815343 | 0         |  |  |
|         |      | Shiraz-32T | 1870 | 0.729766 | 0         |  |  |
|         |      | Shiraz-35T | 1933 | 0.488535 | 0         |  |  |
|         |      | Shiraz-58T | 2223 | 0.833364 | 0         |  |  |
|         |      | Shiraz-58T | 2224 | 1.076575 | 0         |  |  |
|         |      | Shiraz-71T | 2263 | 0.975531 | 0         |  |  |
| IGF2BP3 | chr7 | Shiraz-3T  | 87   | 0.198593 | 0         |  |  |
|         |      | Shiraz-4T  | 252  | 0.192083 | 0         |  |  |
|         |      | Shiraz-36T | 376  | 0.159952 | 0         |  |  |
|         |      | Shiraz-46T | 942  | 0.069143 | 0         |  |  |
|         |      | Shiraz-18T | 1433 | 0.250973 | 0         |  |  |
|         |      | Shiraz-25T | 1697 | 0.21945  | 0         |  |  |
|         |      | Shiraz-28T | 1734 | 0.362882 | 0         |  |  |
|         |      | Shiraz-29T | 1777 | 0.156747 | 0         |  |  |
|         |      | Shiraz-38T | 1950 | 0.265916 | 0         |  |  |
|         |      | Shiraz-71T | 2236 | 0.320072 | 0         |  |  |
|         |      | Shiraz-3T  | 87   | 0.198593 | 0         |  |  |
|         |      | Shiraz-4T  | 252  | 0.192083 | 0         |  |  |
|         |      | Shiraz-36T | 376  | 0.159952 | 0         |  |  |
|         |      | Shiraz-46T | 942  | 0.069143 | 0         |  |  |
|         |      | Shiraz-18T | 1433 | 0.250973 | 0         |  |  |
|         |      | Shiraz-25T | 1697 | 0.21945  | 0         |  |  |

|        |      |            |      |          |   |  |
|--------|------|------------|------|----------|---|--|
|        |      | Shiraz-28T | 1734 | 0.362882 | 0 |  |
|        |      | Shiraz-29T | 1777 | 0.156747 | 0 |  |
|        |      | Shiraz-38T | 1950 | 0.265916 | 0 |  |
|        |      | Shiraz-71T | 2236 | 0.320072 | 0 |  |
|        |      | Shiraz-3T  | 87   | 0.198593 | 0 |  |
|        |      | Shiraz-4T  | 252  | 0.192083 | 0 |  |
|        |      | Shiraz-36T | 376  | 0.159952 | 0 |  |
|        |      | Shiraz-46T | 942  | 0.069143 | 0 |  |
|        |      | Shiraz-18T | 1433 | 0.250973 | 0 |  |
|        |      | Shiraz-25T | 1697 | 0.21945  | 0 |  |
|        |      | Shiraz-28T | 1734 | 0.362882 | 0 |  |
|        |      | Shiraz-29T | 1777 | 0.156747 | 0 |  |
|        |      | Shiraz-38T | 1950 | 0.265916 | 0 |  |
|        |      | Shiraz-71T | 2236 | 0.320072 | 0 |  |
| IGFBP1 | chr7 | Shiraz-3T  | 87   | 0.198593 | 0 |  |
|        |      | Shiraz-3T  | 89   | 0.678641 | 0 |  |
|        |      | Shiraz-4T  | 252  | 0.192083 | 0 |  |
|        |      | Shiraz-36T | 376  | 0.159952 | 0 |  |
|        |      | Shiraz-46T | 942  | 0.069143 | 0 |  |
|        |      | Shiraz-18T | 1433 | 0.250973 | 0 |  |
|        |      | Shiraz-25T | 1697 | 0.21945  | 0 |  |
|        |      | Shiraz-28T | 1734 | 0.362882 | 0 |  |
|        |      | Shiraz-29T | 1777 | 0.156747 | 0 |  |
|        |      | Shiraz-38T | 1950 | 0.265916 | 0 |  |
|        |      | Shiraz-71T | 2236 | 0.320072 | 0 |  |
|        |      | Shiraz-3T  | 87   | 0.198593 | 0 |  |
|        |      | Shiraz-3T  | 89   | 0.678641 | 0 |  |
|        |      | Shiraz-4T  | 252  | 0.192083 | 0 |  |
|        |      | Shiraz-36T | 376  | 0.159952 | 0 |  |
|        |      | Shiraz-46T | 942  | 0.069143 | 0 |  |
|        |      | Shiraz-18T | 1433 | 0.250973 | 0 |  |
|        |      | Shiraz-25T | 1697 | 0.21945  | 0 |  |
|        |      | Shiraz-28T | 1734 | 0.362882 | 0 |  |
|        |      | Shiraz-29T | 1777 | 0.156747 | 0 |  |
|        |      | Shiraz-38T | 1950 | 0.265916 | 0 |  |
|        |      | Shiraz-71T | 2236 | 0.320072 | 0 |  |
|        |      | Shiraz-3T  | 87   | 0.198593 | 0 |  |
|        |      | Shiraz-3T  | 89   | 0.678641 | 0 |  |
|        |      | Shiraz-4T  | 252  | 0.192083 | 0 |  |
|        |      | Shiraz-36T | 376  | 0.159952 | 0 |  |
|        |      | Shiraz-46T | 942  | 0.069143 | 0 |  |
|        |      | Shiraz-18T | 1433 | 0.250973 | 0 |  |
|        |      | Shiraz-25T | 1697 | 0.21945  | 0 |  |
|        |      | Shiraz-28T | 1734 | 0.362882 | 0 |  |
|        |      | Shiraz-29T | 1777 | 0.156747 | 0 |  |
|        |      | Shiraz-38T | 1950 | 0.265916 | 0 |  |
|        |      | Shiraz-71T | 2236 | 0.320072 | 0 |  |

|        |      |            |      |          |           |  |
|--------|------|------------|------|----------|-----------|--|
| IGFBP3 | chr7 | Shiraz-3T  | 87   | 0.198593 | 0         |  |
|        |      | Shiraz-4T  | 252  | 0.192083 | 0         |  |
|        |      | Shiraz-36T | 376  | 0.159952 | 0         |  |
|        |      | Shiraz-46T | 942  | 0.069143 | 0         |  |
|        |      | Shiraz-18T | 1433 | 0.250973 | 0         |  |
|        |      | Shiraz-25T | 1697 | 0.21945  | 0         |  |
|        |      | Shiraz-28T | 1734 | 0.362882 | 0         |  |
|        |      | Shiraz-29T | 1777 | 0.156747 | 0         |  |
|        |      | Shiraz-38T | 1950 | 0.265916 | 0         |  |
|        |      | Shiraz-71T | 2236 | 0.320072 | 0         |  |
|        |      | Shiraz-3T  | 87   | 0.198593 | 0         |  |
|        |      | Shiraz-4T  | 252  | 0.192083 | 0         |  |
|        |      | Shiraz-36T | 376  | 0.159952 | 0         |  |
|        |      | Shiraz-46T | 942  | 0.069143 | 0         |  |
|        |      | Shiraz-18T | 1433 | 0.250973 | 0         |  |
|        |      | Shiraz-25T | 1697 | 0.21945  | 0         |  |
|        |      | Shiraz-28T | 1734 | 0.362882 | 0         |  |
|        |      | Shiraz-29T | 1777 | 0.156747 | 0         |  |
|        |      | Shiraz-38T | 1950 | 0.265916 | 0         |  |
|        |      | Shiraz-71T | 2236 | 0.320072 | 0         |  |
|        |      | Shiraz-3T  | 87   | 0.198593 | 0         |  |
|        |      | Shiraz-4T  | 252  | 0.192083 | 0         |  |
|        |      | Shiraz-36T | 376  | 0.159952 | 0         |  |
|        |      | Shiraz-46T | 942  | 0.069143 | 0         |  |
|        |      | Shiraz-18T | 1433 | 0.250973 | 0         |  |
|        |      | Shiraz-25T | 1697 | 0.21945  | 0         |  |
|        |      | Shiraz-28T | 1734 | 0.362882 | 0         |  |
|        |      | Shiraz-29T | 1777 | 0.156747 | 0         |  |
|        |      | Shiraz-38T | 1950 | 0.265916 | 0         |  |
|        |      | Shiraz-71T | 2236 | 0.320072 | 0         |  |
| IGSF1  | chrX | Shiraz-3T  | 242  | 0        | -0.336434 |  |
|        |      | Shiraz-3T  | 242  | 0        | -0.336434 |  |
|        |      | Shiraz-4T  | 261  | 0        | -0.336249 |  |
|        |      | Shiraz-4T  | 261  | 0        | -0.336249 |  |
|        |      | Shiraz-16T | 295  | 0.591657 | 0         |  |
|        |      | Shiraz-16T | 295  | 0.591657 | 0         |  |
|        |      | Shiraz-36T | 433  | 0        | -0.803961 |  |
|        |      | Shiraz-36T | 433  | 0        | -0.803961 |  |
|        |      | Shiraz-44T | 899  | 0        | -1.09697  |  |
|        |      | Shiraz-44T | 899  | 0        | -1.09697  |  |
|        |      | Shiraz-49T | 1170 | 0        | -0.967436 |  |
|        |      | Shiraz-49T | 1170 | 0        | -0.967436 |  |
|        |      | Shiraz-9T  | 1370 | 0.690073 | 0         |  |
|        |      | Shiraz-9T  | 1370 | 0.690073 | 0         |  |
|        |      | Shiraz-18T | 1457 | 0.643204 | 0         |  |
|        |      | Shiraz-18T | 1457 | 0.643204 | 0         |  |
|        |      | Shiraz-22T | 1673 | 0.611783 | 0         |  |

|  |  |            |      |          |           |  |  |
|--|--|------------|------|----------|-----------|--|--|
|  |  | Shiraz-22T | 1673 | 0.611783 | 0         |  |  |
|  |  | Shiraz-22T | 1677 | 0.789711 | 0         |  |  |
|  |  | Shiraz-22T | 1677 | 0.789711 | 0         |  |  |
|  |  | Shiraz-25T | 1719 | 0.472955 | 0         |  |  |
|  |  | Shiraz-25T | 1719 | 0.472955 | 0         |  |  |
|  |  | Shiraz-28T | 1762 | 0.562311 | 0         |  |  |
|  |  | Shiraz-28T | 1762 | 0.562311 | 0         |  |  |
|  |  | Shiraz-29T | 1801 | 0.815343 | 0         |  |  |
|  |  | Shiraz-29T | 1801 | 0.815343 | 0         |  |  |
|  |  | Shiraz-32T | 1870 | 0.729766 | 0         |  |  |
|  |  | Shiraz-32T | 1870 | 0.729766 | 0         |  |  |
|  |  | Shiraz-35T | 1933 | 0.488535 | 0         |  |  |
|  |  | Shiraz-35T | 1933 | 0.488535 | 0         |  |  |
|  |  | Shiraz-58T | 2223 | 0.833364 | 0         |  |  |
|  |  | Shiraz-58T | 2223 | 0.833364 | 0         |  |  |
|  |  | Shiraz-71T | 2263 | 0.975531 | 0         |  |  |
|  |  | Shiraz-71T | 2263 | 0.975531 | 0         |  |  |
|  |  | Shiraz-3T  | 242  | 0        | -0.336434 |  |  |
|  |  | Shiraz-3T  | 242  | 0        | -0.336434 |  |  |
|  |  | Shiraz-4T  | 261  | 0        | -0.336249 |  |  |
|  |  | Shiraz-4T  | 261  | 0        | -0.336249 |  |  |
|  |  | Shiraz-16T | 295  | 0.591657 | 0         |  |  |
|  |  | Shiraz-16T | 295  | 0.591657 | 0         |  |  |
|  |  | Shiraz-36T | 433  | 0        | -0.803961 |  |  |
|  |  | Shiraz-36T | 433  | 0        | -0.803961 |  |  |
|  |  | Shiraz-44T | 899  | 0        | -1.09697  |  |  |
|  |  | Shiraz-44T | 899  | 0        | -1.09697  |  |  |
|  |  | Shiraz-49T | 1170 | 0        | -0.967436 |  |  |
|  |  | Shiraz-49T | 1170 | 0        | -0.967436 |  |  |
|  |  | Shiraz-9T  | 1370 | 0.690073 | 0         |  |  |
|  |  | Shiraz-9T  | 1370 | 0.690073 | 0         |  |  |
|  |  | Shiraz-18T | 1457 | 0.643204 | 0         |  |  |
|  |  | Shiraz-18T | 1457 | 0.643204 | 0         |  |  |
|  |  | Shiraz-22T | 1673 | 0.611783 | 0         |  |  |
|  |  | Shiraz-22T | 1673 | 0.611783 | 0         |  |  |
|  |  | Shiraz-22T | 1677 | 0.789711 | 0         |  |  |
|  |  | Shiraz-22T | 1677 | 0.789711 | 0         |  |  |
|  |  | Shiraz-25T | 1719 | 0.472955 | 0         |  |  |
|  |  | Shiraz-25T | 1719 | 0.472955 | 0         |  |  |
|  |  | Shiraz-28T | 1762 | 0.562311 | 0         |  |  |
|  |  | Shiraz-28T | 1762 | 0.562311 | 0         |  |  |
|  |  | Shiraz-29T | 1801 | 0.815343 | 0         |  |  |
|  |  | Shiraz-29T | 1801 | 0.815343 | 0         |  |  |
|  |  | Shiraz-32T | 1870 | 0.729766 | 0         |  |  |
|  |  | Shiraz-32T | 1870 | 0.729766 | 0         |  |  |
|  |  | Shiraz-35T | 1933 | 0.488535 | 0         |  |  |
|  |  | Shiraz-35T | 1933 | 0.488535 | 0         |  |  |

|       |      |            |      |          |           |  |  |
|-------|------|------------|------|----------|-----------|--|--|
|       |      | Shiraz-58T | 2223 | 0.833364 | 0         |  |  |
|       |      | Shiraz-58T | 2223 | 0.833364 | 0         |  |  |
|       |      | Shiraz-71T | 2263 | 0.975531 | 0         |  |  |
|       |      | Shiraz-71T | 2263 | 0.975531 | 0         |  |  |
|       |      | Shiraz-3T  | 242  | 0        | -0.336434 |  |  |
|       |      | Shiraz-3T  | 242  | 0        | -0.336434 |  |  |
|       |      | Shiraz-4T  | 261  | 0        | -0.336249 |  |  |
|       |      | Shiraz-4T  | 261  | 0        | -0.336249 |  |  |
|       |      | Shiraz-16T | 295  | 0.591657 | 0         |  |  |
|       |      | Shiraz-16T | 295  | 0.591657 | 0         |  |  |
|       |      | Shiraz-36T | 433  | 0        | -0.803961 |  |  |
|       |      | Shiraz-36T | 433  | 0        | -0.803961 |  |  |
|       |      | Shiraz-44T | 899  | 0        | -1.09697  |  |  |
|       |      | Shiraz-44T | 899  | 0        | -1.09697  |  |  |
|       |      | Shiraz-49T | 1170 | 0        | -0.967436 |  |  |
|       |      | Shiraz-49T | 1170 | 0        | -0.967436 |  |  |
|       |      | Shiraz-9T  | 1370 | 0.690073 | 0         |  |  |
|       |      | Shiraz-9T  | 1370 | 0.690073 | 0         |  |  |
|       |      | Shiraz-18T | 1457 | 0.643204 | 0         |  |  |
|       |      | Shiraz-18T | 1457 | 0.643204 | 0         |  |  |
|       |      | Shiraz-22T | 1673 | 0.611783 | 0         |  |  |
|       |      | Shiraz-22T | 1673 | 0.611783 | 0         |  |  |
|       |      | Shiraz-22T | 1677 | 0.789711 | 0         |  |  |
|       |      | Shiraz-22T | 1677 | 0.789711 | 0         |  |  |
|       |      | Shiraz-25T | 1719 | 0.472955 | 0         |  |  |
|       |      | Shiraz-25T | 1719 | 0.472955 | 0         |  |  |
|       |      | Shiraz-28T | 1762 | 0.562311 | 0         |  |  |
|       |      | Shiraz-28T | 1762 | 0.562311 | 0         |  |  |
|       |      | Shiraz-29T | 1801 | 0.815343 | 0         |  |  |
|       |      | Shiraz-29T | 1801 | 0.815343 | 0         |  |  |
|       |      | Shiraz-32T | 1870 | 0.729766 | 0         |  |  |
|       |      | Shiraz-32T | 1870 | 0.729766 | 0         |  |  |
|       |      | Shiraz-35T | 1933 | 0.488535 | 0         |  |  |
|       |      | Shiraz-35T | 1933 | 0.488535 | 0         |  |  |
|       |      | Shiraz-58T | 2223 | 0.833364 | 0         |  |  |
|       |      | Shiraz-58T | 2223 | 0.833364 | 0         |  |  |
|       |      | Shiraz-71T | 2263 | 0.975531 | 0         |  |  |
|       |      | Shiraz-71T | 2263 | 0.975531 | 0         |  |  |
| IKBKG | chrX | Shiraz-3T  | 246  | 0.531858 | 0         |  |  |
|       |      | Shiraz-3T  | 246  | 0.531858 | 0         |  |  |
|       |      | Shiraz-3T  | 246  | 0.531858 | 0         |  |  |
|       |      | Shiraz-3T  | 246  | 0.531858 | 0         |  |  |
|       |      | Shiraz-4T  | 261  | 0        | -0.336249 |  |  |
|       |      | Shiraz-4T  | 261  | 0        | -0.336249 |  |  |
|       |      | Shiraz-4T  | 261  | 0        | -0.336249 |  |  |
|       |      | Shiraz-4T  | 261  | 0        | -0.336249 |  |  |
|       |      | Shiraz-16T | 295  | 0.591657 | 0         |  |  |

|  |            |      |          |           |  |
|--|------------|------|----------|-----------|--|
|  | Shiraz-16T | 295  | 0.591657 | 0         |  |
|  | Shiraz-16T | 295  | 0.591657 | 0         |  |
|  | Shiraz-16T | 295  | 0.591657 | 0         |  |
|  | Shiraz-36T | 433  | 0        | -0.803961 |  |
|  | Shiraz-36T | 433  | 0        | -0.803961 |  |
|  | Shiraz-36T | 433  | 0        | -0.803961 |  |
|  | Shiraz-36T | 433  | 0        | -0.803961 |  |
|  | Shiraz-44T | 908  | 0.466743 | 0         |  |
|  | Shiraz-44T | 908  | 0.466743 | 0         |  |
|  | Shiraz-44T | 908  | 0.466743 | 0         |  |
|  | Shiraz-44T | 908  | 0.466743 | 0         |  |
|  | Shiraz-49T | 1170 | 0        | -0.967436 |  |
|  | Shiraz-49T | 1170 | 0        | -0.967436 |  |
|  | Shiraz-49T | 1170 | 0        | -0.967436 |  |
|  | Shiraz-49T | 1170 | 0        | -0.967436 |  |
|  | Shiraz-49T | 1173 | 0        | -0.704439 |  |
|  | Shiraz-49T | 1173 | 0        | -0.704439 |  |
|  | Shiraz-49T | 1173 | 0        | -0.704439 |  |
|  | Shiraz-49T | 1173 | 0        | -0.704439 |  |
|  | Shiraz-9T  | 1370 | 0.690073 | 0         |  |
|  | Shiraz-9T  | 1370 | 0.690073 | 0         |  |
|  | Shiraz-9T  | 1370 | 0.690073 | 0         |  |
|  | Shiraz-9T  | 1370 | 0.690073 | 0         |  |
|  | Shiraz-9T  | 1371 | 1.292392 | 0         |  |
|  | Shiraz-9T  | 1371 | 1.292392 | 0         |  |
|  | Shiraz-9T  | 1371 | 1.292392 | 0         |  |
|  | Shiraz-9T  | 1371 | 1.292392 | 0         |  |
|  | Shiraz-18T | 1457 | 0.643204 | 0         |  |
|  | Shiraz-18T | 1457 | 0.643204 | 0         |  |
|  | Shiraz-18T | 1457 | 0.643204 | 0         |  |
|  | Shiraz-18T | 1457 | 0.643204 | 0         |  |
|  | Shiraz-22T | 1673 | 0.611783 | 0         |  |
|  | Shiraz-22T | 1673 | 0.611783 | 0         |  |
|  | Shiraz-22T | 1673 | 0.611783 | 0         |  |
|  | Shiraz-22T | 1673 | 0.611783 | 0         |  |
|  | Shiraz-22T | 1678 | 0.911625 | 0         |  |
|  | Shiraz-22T | 1678 | 0.911625 | 0         |  |
|  | Shiraz-22T | 1678 | 0.911625 | 0         |  |
|  | Shiraz-22T | 1678 | 0.911625 | 0         |  |
|  | Shiraz-25T | 1719 | 0.472955 | 0         |  |
|  | Shiraz-25T | 1719 | 0.472955 | 0         |  |
|  | Shiraz-25T | 1719 | 0.472955 | 0         |  |
|  | Shiraz-25T | 1719 | 0.472955 | 0         |  |
|  | Shiraz-28T | 1762 | 0.562311 | 0         |  |
|  | Shiraz-28T | 1762 | 0.562311 | 0         |  |
|  | Shiraz-28T | 1762 | 0.562311 | 0         |  |
|  | Shiraz-28T | 1762 | 0.562311 | 0         |  |

|  |  |            |      |          |           |  |  |
|--|--|------------|------|----------|-----------|--|--|
|  |  | Shiraz-29T | 1801 | 0.815343 | 0         |  |  |
|  |  | Shiraz-29T | 1801 | 0.815343 | 0         |  |  |
|  |  | Shiraz-29T | 1801 | 0.815343 | 0         |  |  |
|  |  | Shiraz-29T | 1801 | 0.815343 | 0         |  |  |
|  |  | Shiraz-32T | 1870 | 0.729766 | 0         |  |  |
|  |  | Shiraz-32T | 1870 | 0.729766 | 0         |  |  |
|  |  | Shiraz-32T | 1870 | 0.729766 | 0         |  |  |
|  |  | Shiraz-32T | 1870 | 0.729766 | 0         |  |  |
|  |  | Shiraz-32T | 1872 | 1.504553 | 0         |  |  |
|  |  | Shiraz-32T | 1872 | 1.504553 | 0         |  |  |
|  |  | Shiraz-32T | 1872 | 1.504553 | 0         |  |  |
|  |  | Shiraz-32T | 1872 | 1.504553 | 0         |  |  |
|  |  | Shiraz-35T | 1933 | 0.488535 | 0         |  |  |
|  |  | Shiraz-35T | 1933 | 0.488535 | 0         |  |  |
|  |  | Shiraz-35T | 1933 | 0.488535 | 0         |  |  |
|  |  | Shiraz-35T | 1933 | 0.488535 | 0         |  |  |
|  |  | Shiraz-38T | 2011 | 0        | -0.406024 |  |  |
|  |  | Shiraz-38T | 2011 | 0        | -0.406024 |  |  |
|  |  | Shiraz-38T | 2011 | 0        | -0.406024 |  |  |
|  |  | Shiraz-38T | 2011 | 0        | -0.406024 |  |  |
|  |  | Shiraz-53T | 2115 | 0.427728 | 0         |  |  |
|  |  | Shiraz-53T | 2115 | 0.427728 | 0         |  |  |
|  |  | Shiraz-53T | 2115 | 0.427728 | 0         |  |  |
|  |  | Shiraz-53T | 2115 | 0.427728 | 0         |  |  |
|  |  | Shiraz-58T | 2223 | 0.833364 | 0         |  |  |
|  |  | Shiraz-58T | 2223 | 0.833364 | 0         |  |  |
|  |  | Shiraz-58T | 2223 | 0.833364 | 0         |  |  |
|  |  | Shiraz-58T | 2223 | 0.833364 | 0         |  |  |
|  |  | Shiraz-58T | 2226 | 1.074663 | 0         |  |  |
|  |  | Shiraz-58T | 2226 | 1.074663 | 0         |  |  |
|  |  | Shiraz-58T | 2226 | 1.074663 | 0         |  |  |
|  |  | Shiraz-58T | 2226 | 1.074663 | 0         |  |  |
|  |  | Shiraz-71T | 2263 | 0.975531 | 0         |  |  |
|  |  | Shiraz-71T | 2263 | 0.975531 | 0         |  |  |
|  |  | Shiraz-71T | 2263 | 0.975531 | 0         |  |  |
|  |  | Shiraz-71T | 2263 | 0.975531 | 0         |  |  |
|  |  | Shiraz-3T  | 246  | 0.531858 | 0         |  |  |
|  |  | Shiraz-3T  | 246  | 0.531858 | 0         |  |  |
|  |  | Shiraz-3T  | 246  | 0.531858 | 0         |  |  |
|  |  | Shiraz-3T  | 246  | 0.531858 | 0         |  |  |
|  |  | Shiraz-4T  | 261  | 0        | -0.336249 |  |  |
|  |  | Shiraz-4T  | 261  | 0        | -0.336249 |  |  |
|  |  | Shiraz-4T  | 261  | 0        | -0.336249 |  |  |
|  |  | Shiraz-4T  | 261  | 0        | -0.336249 |  |  |
|  |  | Shiraz-16T | 295  | 0.591657 | 0         |  |  |
|  |  | Shiraz-16T | 295  | 0.591657 | 0         |  |  |
|  |  | Shiraz-16T | 295  | 0.591657 | 0         |  |  |



|  |  |            |      |          |           |  |  |
|--|--|------------|------|----------|-----------|--|--|
|  |  | Shiraz-16T | 295  | 0.591657 | 0         |  |  |
|  |  | Shiraz-36T | 433  | 0        | -0.803961 |  |  |
|  |  | Shiraz-36T | 433  | 0        | -0.803961 |  |  |
|  |  | Shiraz-36T | 433  | 0        | -0.803961 |  |  |
|  |  | Shiraz-36T | 433  | 0        | -0.803961 |  |  |
|  |  | Shiraz-44T | 908  | 0.466743 | 0         |  |  |
|  |  | Shiraz-44T | 908  | 0.466743 | 0         |  |  |
|  |  | Shiraz-44T | 908  | 0.466743 | 0         |  |  |
|  |  | Shiraz-44T | 908  | 0.466743 | 0         |  |  |
|  |  | Shiraz-49T | 1170 | 0        | -0.967436 |  |  |
|  |  | Shiraz-49T | 1170 | 0        | -0.967436 |  |  |
|  |  | Shiraz-49T | 1170 | 0        | -0.967436 |  |  |
|  |  | Shiraz-49T | 1170 | 0        | -0.967436 |  |  |
|  |  | Shiraz-49T | 1173 | 0        | -0.704439 |  |  |
|  |  | Shiraz-49T | 1173 | 0        | -0.704439 |  |  |
|  |  | Shiraz-49T | 1173 | 0        | -0.704439 |  |  |
|  |  | Shiraz-49T | 1173 | 0        | -0.704439 |  |  |
|  |  | Shiraz-9T  | 1370 | 0.690073 | 0         |  |  |
|  |  | Shiraz-9T  | 1370 | 0.690073 | 0         |  |  |
|  |  | Shiraz-9T  | 1370 | 0.690073 | 0         |  |  |
|  |  | Shiraz-9T  | 1370 | 0.690073 | 0         |  |  |
|  |  | Shiraz-9T  | 1371 | 1.292392 | 0         |  |  |
|  |  | Shiraz-9T  | 1371 | 1.292392 | 0         |  |  |
|  |  | Shiraz-9T  | 1371 | 1.292392 | 0         |  |  |
|  |  | Shiraz-9T  | 1371 | 1.292392 | 0         |  |  |
|  |  | Shiraz-18T | 1457 | 0.643204 | 0         |  |  |
|  |  | Shiraz-18T | 1457 | 0.643204 | 0         |  |  |
|  |  | Shiraz-18T | 1457 | 0.643204 | 0         |  |  |
|  |  | Shiraz-18T | 1457 | 0.643204 | 0         |  |  |
|  |  | Shiraz-22T | 1673 | 0.611783 | 0         |  |  |
|  |  | Shiraz-22T | 1673 | 0.611783 | 0         |  |  |
|  |  | Shiraz-22T | 1673 | 0.611783 | 0         |  |  |
|  |  | Shiraz-22T | 1673 | 0.611783 | 0         |  |  |
|  |  | Shiraz-22T | 1678 | 0.911625 | 0         |  |  |
|  |  | Shiraz-22T | 1678 | 0.911625 | 0         |  |  |
|  |  | Shiraz-22T | 1678 | 0.911625 | 0         |  |  |
|  |  | Shiraz-22T | 1678 | 0.911625 | 0         |  |  |
|  |  | Shiraz-25T | 1719 | 0.472955 | 0         |  |  |
|  |  | Shiraz-25T | 1719 | 0.472955 | 0         |  |  |
|  |  | Shiraz-25T | 1719 | 0.472955 | 0         |  |  |
|  |  | Shiraz-25T | 1719 | 0.472955 | 0         |  |  |
|  |  | Shiraz-28T | 1762 | 0.562311 | 0         |  |  |
|  |  | Shiraz-28T | 1762 | 0.562311 | 0         |  |  |
|  |  | Shiraz-28T | 1762 | 0.562311 | 0         |  |  |
|  |  | Shiraz-28T | 1762 | 0.562311 | 0         |  |  |
|  |  | Shiraz-29T | 1801 | 0.815343 | 0         |  |  |
|  |  | Shiraz-29T | 1801 | 0.815343 | 0         |  |  |

|  |  |            |      |          |           |  |  |
|--|--|------------|------|----------|-----------|--|--|
|  |  | Shiraz-29T | 1801 | 0.815343 | 0         |  |  |
|  |  | Shiraz-29T | 1801 | 0.815343 | 0         |  |  |
|  |  | Shiraz-32T | 1870 | 0.729766 | 0         |  |  |
|  |  | Shiraz-32T | 1870 | 0.729766 | 0         |  |  |
|  |  | Shiraz-32T | 1870 | 0.729766 | 0         |  |  |
|  |  | Shiraz-32T | 1870 | 0.729766 | 0         |  |  |
|  |  | Shiraz-32T | 1872 | 1.504553 | 0         |  |  |
|  |  | Shiraz-32T | 1872 | 1.504553 | 0         |  |  |
|  |  | Shiraz-32T | 1872 | 1.504553 | 0         |  |  |
|  |  | Shiraz-32T | 1872 | 1.504553 | 0         |  |  |
|  |  | Shiraz-35T | 1933 | 0.488535 | 0         |  |  |
|  |  | Shiraz-35T | 1933 | 0.488535 | 0         |  |  |
|  |  | Shiraz-35T | 1933 | 0.488535 | 0         |  |  |
|  |  | Shiraz-35T | 1933 | 0.488535 | 0         |  |  |
|  |  | Shiraz-38T | 2011 | 0        | -0.406024 |  |  |
|  |  | Shiraz-38T | 2011 | 0        | -0.406024 |  |  |
|  |  | Shiraz-38T | 2011 | 0        | -0.406024 |  |  |
|  |  | Shiraz-38T | 2011 | 0        | -0.406024 |  |  |
|  |  | Shiraz-53T | 2115 | 0.427728 | 0         |  |  |
|  |  | Shiraz-53T | 2115 | 0.427728 | 0         |  |  |
|  |  | Shiraz-53T | 2115 | 0.427728 | 0         |  |  |
|  |  | Shiraz-53T | 2115 | 0.427728 | 0         |  |  |
|  |  | Shiraz-58T | 2223 | 0.833364 | 0         |  |  |
|  |  | Shiraz-58T | 2223 | 0.833364 | 0         |  |  |
|  |  | Shiraz-58T | 2223 | 0.833364 | 0         |  |  |
|  |  | Shiraz-58T | 2223 | 0.833364 | 0         |  |  |
|  |  | Shiraz-58T | 2226 | 1.074663 | 0         |  |  |
|  |  | Shiraz-58T | 2226 | 1.074663 | 0         |  |  |
|  |  | Shiraz-58T | 2226 | 1.074663 | 0         |  |  |
|  |  | Shiraz-58T | 2226 | 1.074663 | 0         |  |  |
|  |  | Shiraz-71T | 2263 | 0.975531 | 0         |  |  |
|  |  | Shiraz-71T | 2263 | 0.975531 | 0         |  |  |
|  |  | Shiraz-71T | 2263 | 0.975531 | 0         |  |  |
|  |  | Shiraz-71T | 2263 | 0.975531 | 0         |  |  |
|  |  | Shiraz-3T  | 246  | 0.531858 | 0         |  |  |
|  |  | Shiraz-3T  | 246  | 0.531858 | 0         |  |  |
|  |  | Shiraz-3T  | 246  | 0.531858 | 0         |  |  |
|  |  | Shiraz-3T  | 246  | 0.531858 | 0         |  |  |
|  |  | Shiraz-4T  | 261  | 0        | -0.336249 |  |  |
|  |  | Shiraz-4T  | 261  | 0        | -0.336249 |  |  |
|  |  | Shiraz-4T  | 261  | 0        | -0.336249 |  |  |
|  |  | Shiraz-4T  | 261  | 0        | -0.336249 |  |  |
|  |  | Shiraz-16T | 295  | 0.591657 | 0         |  |  |
|  |  | Shiraz-16T | 295  | 0.591657 | 0         |  |  |
|  |  | Shiraz-16T | 295  | 0.591657 | 0         |  |  |
|  |  | Shiraz-16T | 295  | 0.591657 | 0         |  |  |
|  |  | Shiraz-36T | 433  | 0        | -0.803961 |  |  |

|  |            |      |          |           |  |
|--|------------|------|----------|-----------|--|
|  | Shiraz-36T | 433  | 0        | -0.803961 |  |
|  | Shiraz-36T | 433  | 0        | -0.803961 |  |
|  | Shiraz-36T | 433  | 0        | -0.803961 |  |
|  | Shiraz-44T | 908  | 0.466743 | 0         |  |
|  | Shiraz-44T | 908  | 0.466743 | 0         |  |
|  | Shiraz-44T | 908  | 0.466743 | 0         |  |
|  | Shiraz-44T | 908  | 0.466743 | 0         |  |
|  | Shiraz-49T | 1170 | 0        | -0.967436 |  |
|  | Shiraz-49T | 1170 | 0        | -0.967436 |  |
|  | Shiraz-49T | 1170 | 0        | -0.967436 |  |
|  | Shiraz-49T | 1170 | 0        | -0.967436 |  |
|  | Shiraz-49T | 1173 | 0        | -0.704439 |  |
|  | Shiraz-49T | 1173 | 0        | -0.704439 |  |
|  | Shiraz-49T | 1173 | 0        | -0.704439 |  |
|  | Shiraz-49T | 1173 | 0        | -0.704439 |  |
|  | Shiraz-9T  | 1370 | 0.690073 | 0         |  |
|  | Shiraz-9T  | 1370 | 0.690073 | 0         |  |
|  | Shiraz-9T  | 1370 | 0.690073 | 0         |  |
|  | Shiraz-9T  | 1370 | 0.690073 | 0         |  |
|  | Shiraz-9T  | 1371 | 1.292392 | 0         |  |
|  | Shiraz-9T  | 1371 | 1.292392 | 0         |  |
|  | Shiraz-9T  | 1371 | 1.292392 | 0         |  |
|  | Shiraz-9T  | 1371 | 1.292392 | 0         |  |
|  | Shiraz-18T | 1457 | 0.643204 | 0         |  |
|  | Shiraz-18T | 1457 | 0.643204 | 0         |  |
|  | Shiraz-18T | 1457 | 0.643204 | 0         |  |
|  | Shiraz-18T | 1457 | 0.643204 | 0         |  |
|  | Shiraz-22T | 1673 | 0.611783 | 0         |  |
|  | Shiraz-22T | 1673 | 0.611783 | 0         |  |
|  | Shiraz-22T | 1673 | 0.611783 | 0         |  |
|  | Shiraz-22T | 1673 | 0.611783 | 0         |  |
|  | Shiraz-22T | 1678 | 0.911625 | 0         |  |
|  | Shiraz-22T | 1678 | 0.911625 | 0         |  |
|  | Shiraz-22T | 1678 | 0.911625 | 0         |  |
|  | Shiraz-22T | 1678 | 0.911625 | 0         |  |
|  | Shiraz-25T | 1719 | 0.472955 | 0         |  |
|  | Shiraz-25T | 1719 | 0.472955 | 0         |  |
|  | Shiraz-25T | 1719 | 0.472955 | 0         |  |
|  | Shiraz-25T | 1719 | 0.472955 | 0         |  |
|  | Shiraz-28T | 1762 | 0.562311 | 0         |  |
|  | Shiraz-28T | 1762 | 0.562311 | 0         |  |
|  | Shiraz-28T | 1762 | 0.562311 | 0         |  |
|  | Shiraz-28T | 1762 | 0.562311 | 0         |  |
|  | Shiraz-29T | 1801 | 0.815343 | 0         |  |
|  | Shiraz-29T | 1801 | 0.815343 | 0         |  |
|  | Shiraz-29T | 1801 | 0.815343 | 0         |  |
|  | Shiraz-29T | 1801 | 0.815343 | 0         |  |

|       |      |            |      |          |           |  |  |
|-------|------|------------|------|----------|-----------|--|--|
|       |      | Shiraz-32T | 1870 | 0.729766 | 0         |  |  |
|       |      | Shiraz-32T | 1870 | 0.729766 | 0         |  |  |
|       |      | Shiraz-32T | 1870 | 0.729766 | 0         |  |  |
|       |      | Shiraz-32T | 1870 | 0.729766 | 0         |  |  |
|       |      | Shiraz-32T | 1872 | 1.504553 | 0         |  |  |
|       |      | Shiraz-32T | 1872 | 1.504553 | 0         |  |  |
|       |      | Shiraz-32T | 1872 | 1.504553 | 0         |  |  |
|       |      | Shiraz-32T | 1872 | 1.504553 | 0         |  |  |
|       |      | Shiraz-35T | 1933 | 0.488535 | 0         |  |  |
|       |      | Shiraz-35T | 1933 | 0.488535 | 0         |  |  |
|       |      | Shiraz-35T | 1933 | 0.488535 | 0         |  |  |
|       |      | Shiraz-35T | 1933 | 0.488535 | 0         |  |  |
|       |      | Shiraz-38T | 2011 | 0        | -0.406024 |  |  |
|       |      | Shiraz-38T | 2011 | 0        | -0.406024 |  |  |
|       |      | Shiraz-38T | 2011 | 0        | -0.406024 |  |  |
|       |      | Shiraz-38T | 2011 | 0        | -0.406024 |  |  |
|       |      | Shiraz-53T | 2115 | 0.427728 | 0         |  |  |
|       |      | Shiraz-53T | 2115 | 0.427728 | 0         |  |  |
|       |      | Shiraz-53T | 2115 | 0.427728 | 0         |  |  |
|       |      | Shiraz-53T | 2115 | 0.427728 | 0         |  |  |
|       |      | Shiraz-58T | 2223 | 0.833364 | 0         |  |  |
|       |      | Shiraz-58T | 2223 | 0.833364 | 0         |  |  |
|       |      | Shiraz-58T | 2223 | 0.833364 | 0         |  |  |
|       |      | Shiraz-58T | 2223 | 0.833364 | 0         |  |  |
|       |      | Shiraz-58T | 2226 | 1.074663 | 0         |  |  |
|       |      | Shiraz-58T | 2226 | 1.074663 | 0         |  |  |
|       |      | Shiraz-58T | 2226 | 1.074663 | 0         |  |  |
|       |      | Shiraz-58T | 2226 | 1.074663 | 0         |  |  |
|       |      | Shiraz-71T | 2263 | 0.975531 | 0         |  |  |
|       |      | Shiraz-71T | 2263 | 0.975531 | 0         |  |  |
|       |      | Shiraz-71T | 2263 | 0.975531 | 0         |  |  |
|       |      | Shiraz-71T | 2263 | 0.975531 | 0         |  |  |
| IKZF1 | chr7 | Shiraz-3T  | 87   | 0.198593 | 0         |  |  |
|       |      | Shiraz-4T  | 252  | 0.192083 | 0         |  |  |
|       |      | Shiraz-36T | 376  | 0.159952 | 0         |  |  |
|       |      | Shiraz-46T | 942  | 0.069143 | 0         |  |  |
|       |      | Shiraz-18T | 1433 | 0.250973 | 0         |  |  |
|       |      | Shiraz-25T | 1697 | 0.21945  | 0         |  |  |
|       |      | Shiraz-28T | 1734 | 0.362882 | 0         |  |  |
|       |      | Shiraz-29T | 1777 | 0.156747 | 0         |  |  |
|       |      | Shiraz-38T | 1950 | 0.265916 | 0         |  |  |
|       |      | Shiraz-71T | 2236 | 0.320072 | 0         |  |  |
|       |      | Shiraz-3T  | 87   | 0.198593 | 0         |  |  |
|       |      | Shiraz-4T  | 252  | 0.192083 | 0         |  |  |
|       |      | Shiraz-36T | 376  | 0.159952 | 0         |  |  |
|       |      | Shiraz-46T | 942  | 0.069143 | 0         |  |  |
|       |      | Shiraz-18T | 1433 | 0.250973 | 0         |  |  |

|         |      |            |      |          |           |  |
|---------|------|------------|------|----------|-----------|--|
|         |      | Shiraz-25T | 1697 | 0.21945  | 0         |  |
|         |      | Shiraz-28T | 1734 | 0.362882 | 0         |  |
|         |      | Shiraz-29T | 1777 | 0.156747 | 0         |  |
|         |      | Shiraz-38T | 1950 | 0.265916 | 0         |  |
|         |      | Shiraz-71T | 2236 | 0.320072 | 0         |  |
|         |      | Shiraz-3T  | 87   | 0.198593 | 0         |  |
|         |      | Shiraz-4T  | 252  | 0.192083 | 0         |  |
|         |      | Shiraz-36T | 376  | 0.159952 | 0         |  |
|         |      | Shiraz-46T | 942  | 0.069143 | 0         |  |
|         |      | Shiraz-18T | 1433 | 0.250973 | 0         |  |
|         |      | Shiraz-25T | 1697 | 0.21945  | 0         |  |
|         |      | Shiraz-28T | 1734 | 0.362882 | 0         |  |
|         |      | Shiraz-29T | 1777 | 0.156747 | 0         |  |
|         |      | Shiraz-38T | 1950 | 0.265916 | 0         |  |
|         |      | Shiraz-71T | 2236 | 0.320072 | 0         |  |
| IL13RA1 | chrX | Shiraz-3T  | 242  | 0        | -0.336434 |  |
|         |      | Shiraz-3T  | 244  | 0        | -0.023749 |  |
|         |      | Shiraz-4T  | 261  | 0        | -0.336249 |  |
|         |      | Shiraz-16T | 295  | 0.591657 | 0         |  |
|         |      | Shiraz-36T | 433  | 0        | -0.803961 |  |
|         |      | Shiraz-44T | 899  | 0        | -1.09697  |  |
|         |      | Shiraz-44T | 904  | 0        | -0.625526 |  |
|         |      | Shiraz-49T | 1170 | 0        | -0.967436 |  |
|         |      | Shiraz-18T | 1457 | 0.643204 | 0         |  |
|         |      | Shiraz-22T | 1673 | 0.611783 | 0         |  |
|         |      | Shiraz-25T | 1719 | 0.472955 | 0         |  |
|         |      | Shiraz-28T | 1762 | 0.562311 | 0         |  |
|         |      | Shiraz-29T | 1801 | 0.815343 | 0         |  |
|         |      | Shiraz-32T | 1870 | 0.729766 | 0         |  |
|         |      | Shiraz-35T | 1933 | 0.488535 | 0         |  |
|         |      | Shiraz-58T | 2223 | 0.833364 | 0         |  |
|         |      | Shiraz-71T | 2263 | 0.975531 | 0         |  |
|         |      | Shiraz-3T  | 242  | 0        | -0.336434 |  |
|         |      | Shiraz-3T  | 244  | 0        | -0.023749 |  |
|         |      | Shiraz-4T  | 261  | 0        | -0.336249 |  |
|         |      | Shiraz-16T | 295  | 0.591657 | 0         |  |
|         |      | Shiraz-36T | 433  | 0        | -0.803961 |  |
|         |      | Shiraz-44T | 899  | 0        | -1.09697  |  |
|         |      | Shiraz-44T | 904  | 0        | -0.625526 |  |
|         |      | Shiraz-49T | 1170 | 0        | -0.967436 |  |
|         |      | Shiraz-18T | 1457 | 0.643204 | 0         |  |
|         |      | Shiraz-22T | 1673 | 0.611783 | 0         |  |
|         |      | Shiraz-25T | 1719 | 0.472955 | 0         |  |
|         |      | Shiraz-28T | 1762 | 0.562311 | 0         |  |
|         |      | Shiraz-29T | 1801 | 0.815343 | 0         |  |
|         |      | Shiraz-32T | 1870 | 0.729766 | 0         |  |
|         |      | Shiraz-35T | 1933 | 0.488535 | 0         |  |

|         |      |            |      |          |           |  |
|---------|------|------------|------|----------|-----------|--|
|         |      | Shiraz-58T | 2223 | 0.833364 | 0         |  |
|         |      | Shiraz-71T | 2263 | 0.975531 | 0         |  |
|         |      | Shiraz-3T  | 242  | 0        | -0.336434 |  |
|         |      | Shiraz-3T  | 244  | 0        | -0.023749 |  |
|         |      | Shiraz-4T  | 261  | 0        | -0.336249 |  |
|         |      | Shiraz-16T | 295  | 0.591657 | 0         |  |
|         |      | Shiraz-36T | 433  | 0        | -0.803961 |  |
|         |      | Shiraz-44T | 899  | 0        | -1.09697  |  |
|         |      | Shiraz-44T | 904  | 0        | -0.625526 |  |
|         |      | Shiraz-49T | 1170 | 0        | -0.967436 |  |
|         |      | Shiraz-18T | 1457 | 0.643204 | 0         |  |
|         |      | Shiraz-22T | 1673 | 0.611783 | 0         |  |
|         |      | Shiraz-25T | 1719 | 0.472955 | 0         |  |
|         |      | Shiraz-28T | 1762 | 0.562311 | 0         |  |
|         |      | Shiraz-29T | 1801 | 0.815343 | 0         |  |
|         |      | Shiraz-32T | 1870 | 0.729766 | 0         |  |
|         |      | Shiraz-35T | 1933 | 0.488535 | 0         |  |
|         |      | Shiraz-58T | 2223 | 0.833364 | 0         |  |
|         |      | Shiraz-71T | 2263 | 0.975531 | 0         |  |
| IL13RA2 | chrX | Shiraz-3T  | 242  | 0        | -0.336434 |  |
|         |      | Shiraz-4T  | 261  | 0        | -0.336249 |  |
|         |      | Shiraz-16T | 295  | 0.591657 | 0         |  |
|         |      | Shiraz-36T | 433  | 0        | -0.803961 |  |
|         |      | Shiraz-44T | 899  | 0        | -1.09697  |  |
|         |      | Shiraz-49T | 1170 | 0        | -0.967436 |  |
|         |      | Shiraz-18T | 1457 | 0.643204 | 0         |  |
|         |      | Shiraz-22T | 1673 | 0.611783 | 0         |  |
|         |      | Shiraz-25T | 1719 | 0.472955 | 0         |  |
|         |      | Shiraz-28T | 1762 | 0.562311 | 0         |  |
|         |      | Shiraz-29T | 1801 | 0.815343 | 0         |  |
|         |      | Shiraz-32T | 1870 | 0.729766 | 0         |  |
|         |      | Shiraz-35T | 1933 | 0.488535 | 0         |  |
|         |      | Shiraz-58T | 2223 | 0.833364 | 0         |  |
|         |      | Shiraz-71T | 2263 | 0.975531 | 0         |  |
|         |      | Shiraz-3T  | 242  | 0        | -0.336434 |  |
|         |      | Shiraz-4T  | 261  | 0        | -0.336249 |  |
|         |      | Shiraz-16T | 295  | 0.591657 | 0         |  |
|         |      | Shiraz-36T | 433  | 0        | -0.803961 |  |
|         |      | Shiraz-44T | 899  | 0        | -1.09697  |  |
|         |      | Shiraz-49T | 1170 | 0        | -0.967436 |  |
|         |      | Shiraz-18T | 1457 | 0.643204 | 0         |  |
|         |      | Shiraz-22T | 1673 | 0.611783 | 0         |  |
|         |      | Shiraz-25T | 1719 | 0.472955 | 0         |  |
|         |      | Shiraz-28T | 1762 | 0.562311 | 0         |  |
|         |      | Shiraz-29T | 1801 | 0.815343 | 0         |  |
|         |      | Shiraz-32T | 1870 | 0.729766 | 0         |  |
|         |      | Shiraz-35T | 1933 | 0.488535 | 0         |  |

|          |      |            |      |          |           |  |
|----------|------|------------|------|----------|-----------|--|
|          |      | Shiraz-58T | 2223 | 0.833364 | 0         |  |
|          |      | Shiraz-71T | 2263 | 0.975531 | 0         |  |
|          |      | Shiraz-3T  | 242  | 0        | -0.336434 |  |
|          |      | Shiraz-4T  | 261  | 0        | -0.336249 |  |
|          |      | Shiraz-16T | 295  | 0.591657 | 0         |  |
|          |      | Shiraz-36T | 433  | 0        | -0.803961 |  |
|          |      | Shiraz-44T | 899  | 0        | -1.09697  |  |
|          |      | Shiraz-49T | 1170 | 0        | -0.967436 |  |
|          |      | Shiraz-18T | 1457 | 0.643204 | 0         |  |
|          |      | Shiraz-22T | 1673 | 0.611783 | 0         |  |
|          |      | Shiraz-25T | 1719 | 0.472955 | 0         |  |
|          |      | Shiraz-28T | 1762 | 0.562311 | 0         |  |
|          |      | Shiraz-29T | 1801 | 0.815343 | 0         |  |
|          |      | Shiraz-32T | 1870 | 0.729766 | 0         |  |
|          |      | Shiraz-35T | 1933 | 0.488535 | 0         |  |
|          |      | Shiraz-58T | 2223 | 0.833364 | 0         |  |
|          |      | Shiraz-71T | 2263 | 0.975531 | 0         |  |
| IL1RAPL1 | chrX | Shiraz-3T  | 235  | 0        | -0.28401  |  |
|          |      | Shiraz-3T  | 236  | 0        | -0.435445 |  |
|          |      | Shiraz-4T  | 260  | 0        | -0.324128 |  |
|          |      | Shiraz-16T | 294  | 0.655804 | 0         |  |
|          |      | Shiraz-36T | 431  | 0        | -0.78035  |  |
|          |      | Shiraz-44T | 891  | 0        | -0.954044 |  |
|          |      | Shiraz-44T | 893  | 0        | -1.364406 |  |
|          |      | Shiraz-47T | 1083 | 0        | -0.103285 |  |
|          |      | Shiraz-49T | 1166 | 0        | -0.917235 |  |
|          |      | Shiraz-49T | 1168 | 0        | -1.073859 |  |
|          |      | Shiraz-9T  | 1368 | 0.199713 | 0         |  |
|          |      | Shiraz-18T | 1455 | 0        | -0.186773 |  |
|          |      | Shiraz-22T | 1669 | 0.695915 | 0         |  |
|          |      | Shiraz-22T | 1671 | 0.369309 | 0         |  |
|          |      | Shiraz-25T | 1717 | 0.420447 | 0         |  |
|          |      | Shiraz-25T | 1718 | 0        | -0.452703 |  |
|          |      | Shiraz-28T | 1760 | 0.538181 | 0         |  |
|          |      | Shiraz-28T | 1761 | 0        | -0.695601 |  |
|          |      | Shiraz-29T | 1800 | 0.672527 | 0         |  |
|          |      | Shiraz-32T | 1869 | 0.776805 | 0         |  |
|          |      | Shiraz-35T | 1932 | 0.507141 | 0         |  |
|          |      | Shiraz-40T | 2051 | 0.098506 | 0         |  |
|          |      | Shiraz-58T | 2221 | 0.871948 | 0         |  |
|          |      | Shiraz-58T | 2222 | 0.679664 | 0         |  |
|          |      | Shiraz-71T | 2260 | 0.68394  | 0         |  |
|          |      | Shiraz-71T | 2261 | 0.508399 | 0         |  |
|          |      | Shiraz-3T  | 235  | 0        | -0.28401  |  |
|          |      | Shiraz-3T  | 236  | 0        | -0.435445 |  |
|          |      | Shiraz-4T  | 260  | 0        | -0.324128 |  |
|          |      | Shiraz-16T | 294  | 0.655804 | 0         |  |

|  |            |      |          |           |  |
|--|------------|------|----------|-----------|--|
|  | Shiraz-36T | 431  | 0        | -0.78035  |  |
|  | Shiraz-44T | 891  | 0        | -0.954044 |  |
|  | Shiraz-44T | 893  | 0        | -1.364406 |  |
|  | Shiraz-47T | 1083 | 0        | -0.103285 |  |
|  | Shiraz-49T | 1166 | 0        | -0.917235 |  |
|  | Shiraz-49T | 1168 | 0        | -1.073859 |  |
|  | Shiraz-9T  | 1368 | 0.199713 | 0         |  |
|  | Shiraz-18T | 1455 | 0        | -0.186773 |  |
|  | Shiraz-22T | 1669 | 0.695915 | 0         |  |
|  | Shiraz-22T | 1671 | 0.369309 | 0         |  |
|  | Shiraz-25T | 1717 | 0.420447 | 0         |  |
|  | Shiraz-25T | 1718 | 0        | -0.452703 |  |
|  | Shiraz-28T | 1760 | 0.538181 | 0         |  |
|  | Shiraz-28T | 1761 | 0        | -0.695601 |  |
|  | Shiraz-29T | 1800 | 0.672527 | 0         |  |
|  | Shiraz-32T | 1869 | 0.776805 | 0         |  |
|  | Shiraz-35T | 1932 | 0.507141 | 0         |  |
|  | Shiraz-40T | 2051 | 0.098506 | 0         |  |
|  | Shiraz-58T | 2221 | 0.871948 | 0         |  |
|  | Shiraz-58T | 2222 | 0.679664 | 0         |  |
|  | Shiraz-71T | 2260 | 0.68394  | 0         |  |
|  | Shiraz-71T | 2261 | 0.508399 | 0         |  |
|  | Shiraz-3T  | 235  | 0        | -0.28401  |  |
|  | Shiraz-3T  | 236  | 0        | -0.435445 |  |
|  | Shiraz-4T  | 260  | 0        | -0.324128 |  |
|  | Shiraz-16T | 294  | 0.655804 | 0         |  |
|  | Shiraz-36T | 431  | 0        | -0.78035  |  |
|  | Shiraz-44T | 891  | 0        | -0.954044 |  |
|  | Shiraz-44T | 893  | 0        | -1.364406 |  |
|  | Shiraz-47T | 1083 | 0        | -0.103285 |  |
|  | Shiraz-49T | 1166 | 0        | -0.917235 |  |
|  | Shiraz-49T | 1168 | 0        | -1.073859 |  |
|  | Shiraz-9T  | 1368 | 0.199713 | 0         |  |
|  | Shiraz-18T | 1455 | 0        | -0.186773 |  |
|  | Shiraz-22T | 1669 | 0.695915 | 0         |  |
|  | Shiraz-22T | 1671 | 0.369309 | 0         |  |
|  | Shiraz-25T | 1717 | 0.420447 | 0         |  |
|  | Shiraz-25T | 1718 | 0        | -0.452703 |  |
|  | Shiraz-28T | 1760 | 0.538181 | 0         |  |
|  | Shiraz-28T | 1761 | 0        | -0.695601 |  |
|  | Shiraz-29T | 1800 | 0.672527 | 0         |  |
|  | Shiraz-32T | 1869 | 0.776805 | 0         |  |
|  | Shiraz-35T | 1932 | 0.507141 | 0         |  |
|  | Shiraz-40T | 2051 | 0.098506 | 0         |  |
|  | Shiraz-58T | 2221 | 0.871948 | 0         |  |
|  | Shiraz-58T | 2222 | 0.679664 | 0         |  |
|  | Shiraz-71T | 2260 | 0.68394  | 0         |  |



|          |      |            |      |          |           |  |  |
|----------|------|------------|------|----------|-----------|--|--|
|          |      | Shiraz-71T | 2261 | 0.508399 | 0         |  |  |
| IL1RAPL2 | chrX | Shiraz-3T  | 242  | 0        | -0.336434 |  |  |
|          |      | Shiraz-4T  | 261  | 0        | -0.336249 |  |  |
|          |      | Shiraz-16T | 295  | 0.591657 | 0         |  |  |
|          |      | Shiraz-36T | 433  | 0        | -0.803961 |  |  |
|          |      | Shiraz-44T | 899  | 0        | -1.09697  |  |  |
|          |      | Shiraz-49T | 1170 | 0        | -0.967436 |  |  |
|          |      | Shiraz-18T | 1457 | 0.643204 | 0         |  |  |
|          |      | Shiraz-22T | 1673 | 0.611783 | 0         |  |  |
|          |      | Shiraz-25T | 1719 | 0.472955 | 0         |  |  |
|          |      | Shiraz-28T | 1762 | 0.562311 | 0         |  |  |
|          |      | Shiraz-29T | 1801 | 0.815343 | 0         |  |  |
|          |      | Shiraz-32T | 1870 | 0.729766 | 0         |  |  |
|          |      | Shiraz-35T | 1933 | 0.488535 | 0         |  |  |
|          |      | Shiraz-58T | 2223 | 0.833364 | 0         |  |  |
|          |      | Shiraz-71T | 2263 | 0.975531 | 0         |  |  |
|          |      | Shiraz-3T  | 242  | 0        | -0.336434 |  |  |
|          |      | Shiraz-4T  | 261  | 0        | -0.336249 |  |  |
|          |      | Shiraz-16T | 295  | 0.591657 | 0         |  |  |
|          |      | Shiraz-36T | 433  | 0        | -0.803961 |  |  |
|          |      | Shiraz-44T | 899  | 0        | -1.09697  |  |  |
|          |      | Shiraz-49T | 1170 | 0        | -0.967436 |  |  |
|          |      | Shiraz-18T | 1457 | 0.643204 | 0         |  |  |
|          |      | Shiraz-22T | 1673 | 0.611783 | 0         |  |  |
|          |      | Shiraz-25T | 1719 | 0.472955 | 0         |  |  |
|          |      | Shiraz-28T | 1762 | 0.562311 | 0         |  |  |
|          |      | Shiraz-29T | 1801 | 0.815343 | 0         |  |  |
|          |      | Shiraz-32T | 1870 | 0.729766 | 0         |  |  |
|          |      | Shiraz-35T | 1933 | 0.488535 | 0         |  |  |
|          |      | Shiraz-58T | 2223 | 0.833364 | 0         |  |  |
|          |      | Shiraz-71T | 2263 | 0.975531 | 0         |  |  |
|          |      | Shiraz-3T  | 242  | 0        | -0.336434 |  |  |
|          |      | Shiraz-4T  | 261  | 0        | -0.336249 |  |  |
|          |      | Shiraz-16T | 295  | 0.591657 | 0         |  |  |
|          |      | Shiraz-36T | 433  | 0        | -0.803961 |  |  |
|          |      | Shiraz-44T | 899  | 0        | -1.09697  |  |  |
|          |      | Shiraz-49T | 1170 | 0        | -0.967436 |  |  |
|          |      | Shiraz-18T | 1457 | 0.643204 | 0         |  |  |
|          |      | Shiraz-22T | 1673 | 0.611783 | 0         |  |  |
|          |      | Shiraz-25T | 1719 | 0.472955 | 0         |  |  |
|          |      | Shiraz-28T | 1762 | 0.562311 | 0         |  |  |
|          |      | Shiraz-29T | 1801 | 0.815343 | 0         |  |  |
|          |      | Shiraz-32T | 1870 | 0.729766 | 0         |  |  |
|          |      | Shiraz-35T | 1933 | 0.488535 | 0         |  |  |
|          |      | Shiraz-58T | 2223 | 0.833364 | 0         |  |  |
|          |      | Shiraz-71T | 2263 | 0.975531 | 0         |  |  |
| IL2RG    | chrX | Shiraz-4T  | 261  | 0        | -0.336249 |  |  |

|  |            |      |          |           |  |
|--|------------|------|----------|-----------|--|
|  | Shiraz-16T | 295  | 0.591657 | 0         |  |
|  | Shiraz-36T | 433  | 0        | -0.803961 |  |
|  | Shiraz-44T | 899  | 0        | -1.09697  |  |
|  | Shiraz-44T | 900  | 0        | -0.584284 |  |
|  | Shiraz-49T | 1170 | 0        | -0.967436 |  |
|  | Shiraz-49T | 1171 | 0        | -0.612379 |  |
|  | Shiraz-77T | 1283 | 0.296555 | 0         |  |
|  | Shiraz-18T | 1457 | 0.643204 | 0         |  |
|  | Shiraz-22T | 1673 | 0.611783 | 0         |  |
|  | Shiraz-22T | 1674 | 0.887899 | 0         |  |
|  | Shiraz-25T | 1719 | 0.472955 | 0         |  |
|  | Shiraz-28T | 1762 | 0.562311 | 0         |  |
|  | Shiraz-29T | 1801 | 0.815343 | 0         |  |
|  | Shiraz-32T | 1870 | 0.729766 | 0         |  |
|  | Shiraz-35T | 1933 | 0.488535 | 0         |  |
|  | Shiraz-58T | 2223 | 0.833364 | 0         |  |
|  | Shiraz-58T | 2224 | 1.076575 | 0         |  |
|  | Shiraz-71T | 2263 | 0.975531 | 0         |  |
|  | Shiraz-4T  | 261  | 0        | -0.336249 |  |
|  | Shiraz-16T | 295  | 0.591657 | 0         |  |
|  | Shiraz-36T | 433  | 0        | -0.803961 |  |
|  | Shiraz-44T | 899  | 0        | -1.09697  |  |
|  | Shiraz-44T | 900  | 0        | -0.584284 |  |
|  | Shiraz-49T | 1170 | 0        | -0.967436 |  |
|  | Shiraz-49T | 1171 | 0        | -0.612379 |  |
|  | Shiraz-77T | 1283 | 0.296555 | 0         |  |
|  | Shiraz-18T | 1457 | 0.643204 | 0         |  |
|  | Shiraz-22T | 1673 | 0.611783 | 0         |  |
|  | Shiraz-22T | 1674 | 0.887899 | 0         |  |
|  | Shiraz-25T | 1719 | 0.472955 | 0         |  |
|  | Shiraz-28T | 1762 | 0.562311 | 0         |  |
|  | Shiraz-29T | 1801 | 0.815343 | 0         |  |
|  | Shiraz-32T | 1870 | 0.729766 | 0         |  |
|  | Shiraz-35T | 1933 | 0.488535 | 0         |  |
|  | Shiraz-58T | 2223 | 0.833364 | 0         |  |
|  | Shiraz-58T | 2224 | 1.076575 | 0         |  |
|  | Shiraz-71T | 2263 | 0.975531 | 0         |  |
|  | Shiraz-4T  | 261  | 0        | -0.336249 |  |
|  | Shiraz-16T | 295  | 0.591657 | 0         |  |
|  | Shiraz-36T | 433  | 0        | -0.803961 |  |
|  | Shiraz-44T | 899  | 0        | -1.09697  |  |
|  | Shiraz-44T | 900  | 0        | -0.584284 |  |
|  | Shiraz-49T | 1170 | 0        | -0.967436 |  |
|  | Shiraz-49T | 1171 | 0        | -0.612379 |  |
|  | Shiraz-77T | 1283 | 0.296555 | 0         |  |
|  | Shiraz-18T | 1457 | 0.643204 | 0         |  |
|  | Shiraz-22T | 1673 | 0.611783 | 0         |  |

|      |      |            |      |          |           |  |
|------|------|------------|------|----------|-----------|--|
|      |      | Shiraz-22T | 1674 | 0.887899 | 0         |  |
|      |      | Shiraz-25T | 1719 | 0.472955 | 0         |  |
|      |      | Shiraz-28T | 1762 | 0.562311 | 0         |  |
|      |      | Shiraz-29T | 1801 | 0.815343 | 0         |  |
|      |      | Shiraz-32T | 1870 | 0.729766 | 0         |  |
|      |      | Shiraz-35T | 1933 | 0.488535 | 0         |  |
|      |      | Shiraz-58T | 2223 | 0.833364 | 0         |  |
|      |      | Shiraz-58T | 2224 | 1.076575 | 0         |  |
|      |      | Shiraz-71T | 2263 | 0.975531 | 0         |  |
| IL6  | chr7 | Shiraz-3T  | 87   | 0.198593 | 0         |  |
|      |      | Shiraz-4T  | 252  | 0.192083 | 0         |  |
|      |      | Shiraz-36T | 376  | 0.159952 | 0         |  |
|      |      | Shiraz-46T | 942  | 0.069143 | 0         |  |
|      |      | Shiraz-18T | 1433 | 0.250973 | 0         |  |
|      |      | Shiraz-25T | 1697 | 0.21945  | 0         |  |
|      |      | Shiraz-28T | 1734 | 0.362882 | 0         |  |
|      |      | Shiraz-29T | 1777 | 0.156747 | 0         |  |
|      |      | Shiraz-38T | 1950 | 0.265916 | 0         |  |
|      |      | Shiraz-71T | 2236 | 0.320072 | 0         |  |
|      |      | Shiraz-3T  | 87   | 0.198593 | 0         |  |
|      |      | Shiraz-4T  | 252  | 0.192083 | 0         |  |
|      |      | Shiraz-36T | 376  | 0.159952 | 0         |  |
|      |      | Shiraz-46T | 942  | 0.069143 | 0         |  |
|      |      | Shiraz-18T | 1433 | 0.250973 | 0         |  |
|      |      | Shiraz-25T | 1697 | 0.21945  | 0         |  |
|      |      | Shiraz-28T | 1734 | 0.362882 | 0         |  |
|      |      | Shiraz-29T | 1777 | 0.156747 | 0         |  |
|      |      | Shiraz-38T | 1950 | 0.265916 | 0         |  |
|      |      | Shiraz-71T | 2236 | 0.320072 | 0         |  |
|      |      | Shiraz-3T  | 87   | 0.198593 | 0         |  |
|      |      | Shiraz-4T  | 252  | 0.192083 | 0         |  |
|      |      | Shiraz-36T | 376  | 0.159952 | 0         |  |
|      |      | Shiraz-46T | 942  | 0.069143 | 0         |  |
|      |      | Shiraz-18T | 1433 | 0.250973 | 0         |  |
|      |      | Shiraz-25T | 1697 | 0.21945  | 0         |  |
|      |      | Shiraz-28T | 1734 | 0.362882 | 0         |  |
|      |      | Shiraz-29T | 1777 | 0.156747 | 0         |  |
|      |      | Shiraz-38T | 1950 | 0.265916 | 0         |  |
|      |      | Shiraz-71T | 2236 | 0.320072 | 0         |  |
| IL7R | chr5 | Shiraz-4T  | 250  | 0.262252 | 0         |  |
|      |      | Shiraz-16T | 266  | 0.321724 | 0         |  |
|      |      | Shiraz-44T | 591  | 0        | -0.233934 |  |
|      |      | Shiraz-18T | 1429 | 0        | -0.314125 |  |
|      |      | Shiraz-22T | 1522 | 0        | -0.322688 |  |
|      |      | Shiraz-25T | 1694 | 0.201602 | 0         |  |
|      |      | Shiraz-28T | 1731 | 0.295447 | 0         |  |
|      |      | Shiraz-29T | 1773 | 0.090981 | 0         |  |

|        |      |            |      |          |           |  |  |
|--------|------|------------|------|----------|-----------|--|--|
|        |      | Shiraz-40T | 2016 | 0.376634 | 0         |  |  |
|        |      | Shiraz-4T  | 250  | 0.262252 | 0         |  |  |
|        |      | Shiraz-16T | 266  | 0.321724 | 0         |  |  |
|        |      | Shiraz-44T | 591  | 0        | -0.233934 |  |  |
|        |      | Shiraz-18T | 1429 | 0        | -0.314125 |  |  |
|        |      | Shiraz-22T | 1522 | 0        | -0.322688 |  |  |
|        |      | Shiraz-25T | 1694 | 0.201602 | 0         |  |  |
|        |      | Shiraz-28T | 1731 | 0.295447 | 0         |  |  |
|        |      | Shiraz-29T | 1773 | 0.090981 | 0         |  |  |
|        |      | Shiraz-40T | 2016 | 0.376634 | 0         |  |  |
|        |      | Shiraz-4T  | 250  | 0.262252 | 0         |  |  |
|        |      | Shiraz-16T | 266  | 0.321724 | 0         |  |  |
|        |      | Shiraz-44T | 591  | 0        | -0.233934 |  |  |
|        |      | Shiraz-18T | 1429 | 0        | -0.314125 |  |  |
|        |      | Shiraz-22T | 1522 | 0        | -0.322688 |  |  |
|        |      | Shiraz-25T | 1694 | 0.201602 | 0         |  |  |
|        |      | Shiraz-28T | 1731 | 0.295447 | 0         |  |  |
|        |      | Shiraz-29T | 1773 | 0.090981 | 0         |  |  |
|        |      | Shiraz-40T | 2016 | 0.376634 | 0         |  |  |
| IMMP2L | chr7 | Shiraz-3T  | 90   | 0.219276 | 0         |  |  |
|        |      | Shiraz-3T  | 95   | 0        | -0.077623 |  |  |
|        |      | Shiraz-4T  | 253  | 0.372918 | 0         |  |  |
|        |      | Shiraz-36T | 378  | 0.179558 | 0         |  |  |
|        |      | Shiraz-36T | 382  | 0.081739 | 0         |  |  |
|        |      | Shiraz-44T | 641  | 0        | -0.477846 |  |  |
|        |      | Shiraz-46T | 943  | 0.093799 | 0         |  |  |
|        |      | Shiraz-46T | 947  | 0        | -0.010843 |  |  |
|        |      | Shiraz-47T | 1031 | 0        | -0.117529 |  |  |
|        |      | Shiraz-49T | 1121 | 0        | -0.138569 |  |  |
|        |      | Shiraz-77T | 1225 | 0        | -0.117922 |  |  |
|        |      | Shiraz-77T | 1228 | 0        | -0.238084 |  |  |
|        |      | Shiraz-18T | 1434 | 0.244465 | 0         |  |  |
|        |      | Shiraz-22T | 1549 | 0        | -0.319623 |  |  |
|        |      | Shiraz-25T | 1698 | 0.21835  | 0         |  |  |
|        |      | Shiraz-28T | 1735 | 0.350744 | 0         |  |  |
|        |      | Shiraz-29T | 1778 | 0.120767 | 0         |  |  |
|        |      | Shiraz-32T | 1833 | 0.551336 | 0         |  |  |
|        |      | Shiraz-38T | 1951 | 0.250891 | 0         |  |  |
|        |      | Shiraz-53T | 2078 | 0.287202 | 0         |  |  |
|        |      | Shiraz-58T | 2161 | 0        | -0.187744 |  |  |
|        |      | Shiraz-71T | 2238 | 0.603631 | 0         |  |  |
|        |      | Shiraz-3T  | 90   | 0.219276 | 0         |  |  |
|        |      | Shiraz-3T  | 95   | 0        | -0.077623 |  |  |
|        |      | Shiraz-4T  | 253  | 0.372918 | 0         |  |  |
|        |      | Shiraz-36T | 378  | 0.179558 | 0         |  |  |
|        |      | Shiraz-36T | 382  | 0.081739 | 0         |  |  |
|        |      | Shiraz-44T | 641  | 0        | -0.477846 |  |  |

|        |      |            |      |          |           |  |  |
|--------|------|------------|------|----------|-----------|--|--|
|        |      | Shiraz-46T | 943  | 0.093799 | 0         |  |  |
|        |      | Shiraz-46T | 947  | 0        | -0.010843 |  |  |
|        |      | Shiraz-47T | 1031 | 0        | -0.117529 |  |  |
|        |      | Shiraz-49T | 1121 | 0        | -0.138569 |  |  |
|        |      | Shiraz-77T | 1225 | 0        | -0.117922 |  |  |
|        |      | Shiraz-77T | 1228 | 0        | -0.238084 |  |  |
|        |      | Shiraz-18T | 1434 | 0.244465 | 0         |  |  |
|        |      | Shiraz-22T | 1549 | 0        | -0.319623 |  |  |
|        |      | Shiraz-25T | 1698 | 0.21835  | 0         |  |  |
|        |      | Shiraz-28T | 1735 | 0.350744 | 0         |  |  |
|        |      | Shiraz-29T | 1778 | 0.120767 | 0         |  |  |
|        |      | Shiraz-32T | 1833 | 0.551336 | 0         |  |  |
|        |      | Shiraz-38T | 1951 | 0.250891 | 0         |  |  |
|        |      | Shiraz-53T | 2078 | 0.287202 | 0         |  |  |
|        |      | Shiraz-58T | 2161 | 0        | -0.187744 |  |  |
|        |      | Shiraz-71T | 2238 | 0.603631 | 0         |  |  |
|        |      | Shiraz-3T  | 90   | 0.219276 | 0         |  |  |
|        |      | Shiraz-3T  | 95   | 0        | -0.077623 |  |  |
|        |      | Shiraz-4T  | 253  | 0.372918 | 0         |  |  |
|        |      | Shiraz-36T | 378  | 0.179558 | 0         |  |  |
|        |      | Shiraz-36T | 382  | 0.081739 | 0         |  |  |
|        |      | Shiraz-44T | 641  | 0        | -0.477846 |  |  |
|        |      | Shiraz-46T | 943  | 0.093799 | 0         |  |  |
|        |      | Shiraz-46T | 947  | 0        | -0.010843 |  |  |
|        |      | Shiraz-47T | 1031 | 0        | -0.117529 |  |  |
|        |      | Shiraz-49T | 1121 | 0        | -0.138569 |  |  |
|        |      | Shiraz-77T | 1225 | 0        | -0.117922 |  |  |
|        |      | Shiraz-77T | 1228 | 0        | -0.238084 |  |  |
|        |      | Shiraz-18T | 1434 | 0.244465 | 0         |  |  |
|        |      | Shiraz-22T | 1549 | 0        | -0.319623 |  |  |
|        |      | Shiraz-25T | 1698 | 0.21835  | 0         |  |  |
|        |      | Shiraz-28T | 1735 | 0.350744 | 0         |  |  |
|        |      | Shiraz-29T | 1778 | 0.120767 | 0         |  |  |
|        |      | Shiraz-32T | 1833 | 0.551336 | 0         |  |  |
|        |      | Shiraz-38T | 1951 | 0.250891 | 0         |  |  |
|        |      | Shiraz-53T | 2078 | 0.287202 | 0         |  |  |
|        |      | Shiraz-58T | 2161 | 0        | -0.187744 |  |  |
|        |      | Shiraz-71T | 2238 | 0.603631 | 0         |  |  |
| IMPDH1 | chr7 | Shiraz-3T  | 90   | 0.219276 | 0         |  |  |
|        |      | Shiraz-3T  | 90   | 0.219276 | 0         |  |  |
|        |      | Shiraz-3T  | 90   | 0.219276 | 0         |  |  |
|        |      | Shiraz-3T  | 96   | 0.428308 | 0         |  |  |
|        |      | Shiraz-3T  | 96   | 0.428308 | 0         |  |  |
|        |      | Shiraz-3T  | 96   | 0.428308 | 0         |  |  |
|        |      | Shiraz-4T  | 253  | 0.372918 | 0         |  |  |
|        |      | Shiraz-4T  | 253  | 0.372918 | 0         |  |  |
|        |      | Shiraz-4T  | 253  | 0.372918 | 0         |  |  |

|  |            |      |          |           |  |
|--|------------|------|----------|-----------|--|
|  | Shiraz-31T | 317  | 0.204382 | 0         |  |
|  | Shiraz-31T | 317  | 0.204382 | 0         |  |
|  | Shiraz-31T | 317  | 0.204382 | 0         |  |
|  | Shiraz-36T | 378  | 0.179558 | 0         |  |
|  | Shiraz-36T | 378  | 0.179558 | 0         |  |
|  | Shiraz-36T | 378  | 0.179558 | 0         |  |
|  | Shiraz-44T | 642  | 0.408617 | 0         |  |
|  | Shiraz-44T | 642  | 0.408617 | 0         |  |
|  | Shiraz-44T | 642  | 0.408617 | 0         |  |
|  | Shiraz-46T | 943  | 0.093799 | 0         |  |
|  | Shiraz-46T | 943  | 0.093799 | 0         |  |
|  | Shiraz-46T | 943  | 0.093799 | 0         |  |
|  | Shiraz-47T | 1032 | 0.171484 | 0         |  |
|  | Shiraz-47T | 1032 | 0.171484 | 0         |  |
|  | Shiraz-47T | 1032 | 0.171484 | 0         |  |
|  | Shiraz-77T | 1225 | 0        | -0.117922 |  |
|  | Shiraz-77T | 1225 | 0        | -0.117922 |  |
|  | Shiraz-77T | 1225 | 0        | -0.117922 |  |
|  | Shiraz-77T | 1229 | 0.051661 | 0         |  |
|  | Shiraz-77T | 1229 | 0.051661 | 0         |  |
|  | Shiraz-77T | 1229 | 0.051661 | 0         |  |
|  | Shiraz-9T  | 1325 | 0.221899 | 0         |  |
|  | Shiraz-9T  | 1325 | 0.221899 | 0         |  |
|  | Shiraz-9T  | 1325 | 0.221899 | 0         |  |
|  | Shiraz-18T | 1434 | 0.244465 | 0         |  |
|  | Shiraz-18T | 1434 | 0.244465 | 0         |  |
|  | Shiraz-18T | 1434 | 0.244465 | 0         |  |
|  | Shiraz-25T | 1698 | 0.21835  | 0         |  |
|  | Shiraz-25T | 1698 | 0.21835  | 0         |  |
|  | Shiraz-25T | 1698 | 0.21835  | 0         |  |
|  | Shiraz-28T | 1735 | 0.350744 | 0         |  |
|  | Shiraz-28T | 1735 | 0.350744 | 0         |  |
|  | Shiraz-28T | 1735 | 0.350744 | 0         |  |
|  | Shiraz-29T | 1778 | 0.120767 | 0         |  |
|  | Shiraz-29T | 1778 | 0.120767 | 0         |  |
|  | Shiraz-29T | 1778 | 0.120767 | 0         |  |
|  | Shiraz-32T | 1833 | 0.551336 | 0         |  |
|  | Shiraz-32T | 1833 | 0.551336 | 0         |  |
|  | Shiraz-32T | 1833 | 0.551336 | 0         |  |
|  | Shiraz-38T | 1951 | 0.250891 | 0         |  |
|  | Shiraz-38T | 1951 | 0.250891 | 0         |  |
|  | Shiraz-38T | 1951 | 0.250891 | 0         |  |
|  | Shiraz-53T | 2078 | 0.287202 | 0         |  |
|  | Shiraz-53T | 2078 | 0.287202 | 0         |  |
|  | Shiraz-53T | 2078 | 0.287202 | 0         |  |
|  | Shiraz-71T | 2238 | 0.603631 | 0         |  |
|  | Shiraz-71T | 2238 | 0.603631 | 0         |  |

|  |  |            |      |          |           |  |
|--|--|------------|------|----------|-----------|--|
|  |  | Shiraz-71T | 2238 | 0.603631 | 0         |  |
|  |  | Shiraz-3T  | 90   | 0.219276 | 0         |  |
|  |  | Shiraz-3T  | 90   | 0.219276 | 0         |  |
|  |  | Shiraz-3T  | 90   | 0.219276 | 0         |  |
|  |  | Shiraz-3T  | 96   | 0.428308 | 0         |  |
|  |  | Shiraz-3T  | 96   | 0.428308 | 0         |  |
|  |  | Shiraz-3T  | 96   | 0.428308 | 0         |  |
|  |  | Shiraz-4T  | 253  | 0.372918 | 0         |  |
|  |  | Shiraz-4T  | 253  | 0.372918 | 0         |  |
|  |  | Shiraz-4T  | 253  | 0.372918 | 0         |  |
|  |  | Shiraz-31T | 317  | 0.204382 | 0         |  |
|  |  | Shiraz-31T | 317  | 0.204382 | 0         |  |
|  |  | Shiraz-31T | 317  | 0.204382 | 0         |  |
|  |  | Shiraz-36T | 378  | 0.179558 | 0         |  |
|  |  | Shiraz-36T | 378  | 0.179558 | 0         |  |
|  |  | Shiraz-36T | 378  | 0.179558 | 0         |  |
|  |  | Shiraz-44T | 642  | 0.408617 | 0         |  |
|  |  | Shiraz-44T | 642  | 0.408617 | 0         |  |
|  |  | Shiraz-44T | 642  | 0.408617 | 0         |  |
|  |  | Shiraz-46T | 943  | 0.093799 | 0         |  |
|  |  | Shiraz-46T | 943  | 0.093799 | 0         |  |
|  |  | Shiraz-46T | 943  | 0.093799 | 0         |  |
|  |  | Shiraz-47T | 1032 | 0.171484 | 0         |  |
|  |  | Shiraz-47T | 1032 | 0.171484 | 0         |  |
|  |  | Shiraz-47T | 1032 | 0.171484 | 0         |  |
|  |  | Shiraz-77T | 1225 | 0        | -0.117922 |  |
|  |  | Shiraz-77T | 1225 | 0        | -0.117922 |  |
|  |  | Shiraz-77T | 1225 | 0        | -0.117922 |  |
|  |  | Shiraz-77T | 1229 | 0.051661 | 0         |  |
|  |  | Shiraz-77T | 1229 | 0.051661 | 0         |  |
|  |  | Shiraz-77T | 1229 | 0.051661 | 0         |  |
|  |  | Shiraz-9T  | 1325 | 0.221899 | 0         |  |
|  |  | Shiraz-9T  | 1325 | 0.221899 | 0         |  |
|  |  | Shiraz-9T  | 1325 | 0.221899 | 0         |  |
|  |  | Shiraz-18T | 1434 | 0.244465 | 0         |  |
|  |  | Shiraz-18T | 1434 | 0.244465 | 0         |  |
|  |  | Shiraz-18T | 1434 | 0.244465 | 0         |  |
|  |  | Shiraz-25T | 1698 | 0.21835  | 0         |  |
|  |  | Shiraz-25T | 1698 | 0.21835  | 0         |  |
|  |  | Shiraz-25T | 1698 | 0.21835  | 0         |  |
|  |  | Shiraz-28T | 1735 | 0.350744 | 0         |  |
|  |  | Shiraz-28T | 1735 | 0.350744 | 0         |  |
|  |  | Shiraz-28T | 1735 | 0.350744 | 0         |  |
|  |  | Shiraz-29T | 1778 | 0.120767 | 0         |  |
|  |  | Shiraz-29T | 1778 | 0.120767 | 0         |  |
|  |  | Shiraz-29T | 1778 | 0.120767 | 0         |  |
|  |  | Shiraz-32T | 1833 | 0.551336 | 0         |  |

|  |            |      |          |           |  |
|--|------------|------|----------|-----------|--|
|  | Shiraz-32T | 1833 | 0.551336 | 0         |  |
|  | Shiraz-32T | 1833 | 0.551336 | 0         |  |
|  | Shiraz-38T | 1951 | 0.250891 | 0         |  |
|  | Shiraz-38T | 1951 | 0.250891 | 0         |  |
|  | Shiraz-38T | 1951 | 0.250891 | 0         |  |
|  | Shiraz-53T | 2078 | 0.287202 | 0         |  |
|  | Shiraz-53T | 2078 | 0.287202 | 0         |  |
|  | Shiraz-53T | 2078 | 0.287202 | 0         |  |
|  | Shiraz-71T | 2238 | 0.603631 | 0         |  |
|  | Shiraz-71T | 2238 | 0.603631 | 0         |  |
|  | Shiraz-71T | 2238 | 0.603631 | 0         |  |
|  | Shiraz-3T  | 90   | 0.219276 | 0         |  |
|  | Shiraz-3T  | 90   | 0.219276 | 0         |  |
|  | Shiraz-3T  | 90   | 0.219276 | 0         |  |
|  | Shiraz-3T  | 96   | 0.428308 | 0         |  |
|  | Shiraz-3T  | 96   | 0.428308 | 0         |  |
|  | Shiraz-3T  | 96   | 0.428308 | 0         |  |
|  | Shiraz-4T  | 253  | 0.372918 | 0         |  |
|  | Shiraz-4T  | 253  | 0.372918 | 0         |  |
|  | Shiraz-4T  | 253  | 0.372918 | 0         |  |
|  | Shiraz-31T | 317  | 0.204382 | 0         |  |
|  | Shiraz-31T | 317  | 0.204382 | 0         |  |
|  | Shiraz-31T | 317  | 0.204382 | 0         |  |
|  | Shiraz-36T | 378  | 0.179558 | 0         |  |
|  | Shiraz-36T | 378  | 0.179558 | 0         |  |
|  | Shiraz-36T | 378  | 0.179558 | 0         |  |
|  | Shiraz-44T | 642  | 0.408617 | 0         |  |
|  | Shiraz-44T | 642  | 0.408617 | 0         |  |
|  | Shiraz-44T | 642  | 0.408617 | 0         |  |
|  | Shiraz-46T | 943  | 0.093799 | 0         |  |
|  | Shiraz-46T | 943  | 0.093799 | 0         |  |
|  | Shiraz-46T | 943  | 0.093799 | 0         |  |
|  | Shiraz-47T | 1032 | 0.171484 | 0         |  |
|  | Shiraz-47T | 1032 | 0.171484 | 0         |  |
|  | Shiraz-47T | 1032 | 0.171484 | 0         |  |
|  | Shiraz-77T | 1225 | 0        | -0.117922 |  |
|  | Shiraz-77T | 1225 | 0        | -0.117922 |  |
|  | Shiraz-77T | 1225 | 0        | -0.117922 |  |
|  | Shiraz-77T | 1229 | 0.051661 | 0         |  |
|  | Shiraz-77T | 1229 | 0.051661 | 0         |  |
|  | Shiraz-77T | 1229 | 0.051661 | 0         |  |
|  | Shiraz-9T  | 1325 | 0.221899 | 0         |  |
|  | Shiraz-9T  | 1325 | 0.221899 | 0         |  |
|  | Shiraz-9T  | 1325 | 0.221899 | 0         |  |
|  | Shiraz-18T | 1434 | 0.244465 | 0         |  |
|  | Shiraz-18T | 1434 | 0.244465 | 0         |  |
|  | Shiraz-18T | 1434 | 0.244465 | 0         |  |



|      |      |            |      |          |           |  |
|------|------|------------|------|----------|-----------|--|
|      |      | Shiraz-25T | 1698 | 0.21835  | 0         |  |
|      |      | Shiraz-25T | 1698 | 0.21835  | 0         |  |
|      |      | Shiraz-25T | 1698 | 0.21835  | 0         |  |
|      |      | Shiraz-28T | 1735 | 0.350744 | 0         |  |
|      |      | Shiraz-28T | 1735 | 0.350744 | 0         |  |
|      |      | Shiraz-28T | 1735 | 0.350744 | 0         |  |
|      |      | Shiraz-29T | 1778 | 0.120767 | 0         |  |
|      |      | Shiraz-29T | 1778 | 0.120767 | 0         |  |
|      |      | Shiraz-29T | 1778 | 0.120767 | 0         |  |
|      |      | Shiraz-32T | 1833 | 0.551336 | 0         |  |
|      |      | Shiraz-32T | 1833 | 0.551336 | 0         |  |
|      |      | Shiraz-32T | 1833 | 0.551336 | 0         |  |
|      |      | Shiraz-38T | 1951 | 0.250891 | 0         |  |
|      |      | Shiraz-38T | 1951 | 0.250891 | 0         |  |
|      |      | Shiraz-38T | 1951 | 0.250891 | 0         |  |
|      |      | Shiraz-53T | 2078 | 0.287202 | 0         |  |
|      |      | Shiraz-53T | 2078 | 0.287202 | 0         |  |
|      |      | Shiraz-53T | 2078 | 0.287202 | 0         |  |
|      |      | Shiraz-71T | 2238 | 0.603631 | 0         |  |
|      |      | Shiraz-71T | 2238 | 0.603631 | 0         |  |
|      |      | Shiraz-71T | 2238 | 0.603631 | 0         |  |
| INE1 | chrX | Shiraz-4T  | 260  | 0        | -0.324128 |  |
|      |      | Shiraz-16T | 294  | 0.655804 | 0         |  |
|      |      | Shiraz-31T | 345  | 0.103301 | 0         |  |
|      |      | Shiraz-36T | 431  | 0        | -0.78035  |  |
|      |      | Shiraz-36T | 432  | 0        | -0.6692   |  |
|      |      | Shiraz-44T | 891  | 0        | -0.954044 |  |
|      |      | Shiraz-44T | 896  | 0        | -0.109108 |  |
|      |      | Shiraz-46T | 991  | 0.139564 | 0         |  |
|      |      | Shiraz-47T | 1084 | 0.24185  | 0         |  |
|      |      | Shiraz-49T | 1166 | 0        | -0.917235 |  |
|      |      | Shiraz-49T | 1169 | 0        | -0.583529 |  |
|      |      | Shiraz-77T | 1282 | 0.213849 | 0         |  |
|      |      | Shiraz-9T  | 1368 | 0.199713 | 0         |  |
|      |      | Shiraz-9T  | 1369 | 0.703374 | 0         |  |
|      |      | Shiraz-18T | 1455 | 0        | -0.186773 |  |
|      |      | Shiraz-22T | 1669 | 0.695915 | 0         |  |
|      |      | Shiraz-22T | 1672 | 1.01678  | 0         |  |
|      |      | Shiraz-25T | 1717 | 0.420447 | 0         |  |
|      |      | Shiraz-28T | 1760 | 0.538181 | 0         |  |
|      |      | Shiraz-29T | 1800 | 0.672527 | 0         |  |
|      |      | Shiraz-32T | 1869 | 0.776805 | 0         |  |
|      |      | Shiraz-35T | 1932 | 0.507141 | 0         |  |
|      |      | Shiraz-40T | 2051 | 0.098506 | 0         |  |
|      |      | Shiraz-58T | 2221 | 0.871948 | 0         |  |
|      |      | Shiraz-71T | 2260 | 0.68394  | 0         |  |
|      |      | Shiraz-71T | 2262 | 0.986748 | 0         |  |

|  |            |      |          |           |  |
|--|------------|------|----------|-----------|--|
|  | Shiraz-4T  | 260  | 0        | -0.324128 |  |
|  | Shiraz-16T | 294  | 0.655804 | 0         |  |
|  | Shiraz-31T | 345  | 0.103301 | 0         |  |
|  | Shiraz-36T | 431  | 0        | -0.78035  |  |
|  | Shiraz-36T | 432  | 0        | -0.6692   |  |
|  | Shiraz-44T | 891  | 0        | -0.954044 |  |
|  | Shiraz-44T | 896  | 0        | -0.109108 |  |
|  | Shiraz-46T | 991  | 0.139564 | 0         |  |
|  | Shiraz-47T | 1084 | 0.24185  | 0         |  |
|  | Shiraz-49T | 1166 | 0        | -0.917235 |  |
|  | Shiraz-49T | 1169 | 0        | -0.583529 |  |
|  | Shiraz-77T | 1282 | 0.213849 | 0         |  |
|  | Shiraz-9T  | 1368 | 0.199713 | 0         |  |
|  | Shiraz-9T  | 1369 | 0.703374 | 0         |  |
|  | Shiraz-18T | 1455 | 0        | -0.186773 |  |
|  | Shiraz-22T | 1669 | 0.695915 | 0         |  |
|  | Shiraz-22T | 1672 | 1.01678  | 0         |  |
|  | Shiraz-25T | 1717 | 0.420447 | 0         |  |
|  | Shiraz-28T | 1760 | 0.538181 | 0         |  |
|  | Shiraz-29T | 1800 | 0.672527 | 0         |  |
|  | Shiraz-32T | 1869 | 0.776805 | 0         |  |
|  | Shiraz-35T | 1932 | 0.507141 | 0         |  |
|  | Shiraz-40T | 2051 | 0.098506 | 0         |  |
|  | Shiraz-58T | 2221 | 0.871948 | 0         |  |
|  | Shiraz-71T | 2260 | 0.68394  | 0         |  |
|  | Shiraz-71T | 2262 | 0.986748 | 0         |  |
|  | Shiraz-4T  | 260  | 0        | -0.324128 |  |
|  | Shiraz-16T | 294  | 0.655804 | 0         |  |
|  | Shiraz-31T | 345  | 0.103301 | 0         |  |
|  | Shiraz-36T | 431  | 0        | -0.78035  |  |
|  | Shiraz-36T | 432  | 0        | -0.6692   |  |
|  | Shiraz-44T | 891  | 0        | -0.954044 |  |
|  | Shiraz-44T | 896  | 0        | -0.109108 |  |
|  | Shiraz-46T | 991  | 0.139564 | 0         |  |
|  | Shiraz-47T | 1084 | 0.24185  | 0         |  |
|  | Shiraz-49T | 1166 | 0        | -0.917235 |  |
|  | Shiraz-49T | 1169 | 0        | -0.583529 |  |
|  | Shiraz-77T | 1282 | 0.213849 | 0         |  |
|  | Shiraz-9T  | 1368 | 0.199713 | 0         |  |
|  | Shiraz-9T  | 1369 | 0.703374 | 0         |  |
|  | Shiraz-18T | 1455 | 0        | -0.186773 |  |
|  | Shiraz-22T | 1669 | 0.695915 | 0         |  |
|  | Shiraz-22T | 1672 | 1.01678  | 0         |  |
|  | Shiraz-25T | 1717 | 0.420447 | 0         |  |
|  | Shiraz-28T | 1760 | 0.538181 | 0         |  |
|  | Shiraz-29T | 1800 | 0.672527 | 0         |  |
|  | Shiraz-32T | 1869 | 0.776805 | 0         |  |

|      |      |            |      |          |           |  |  |
|------|------|------------|------|----------|-----------|--|--|
|      |      | Shiraz-35T | 1932 | 0.507141 | 0         |  |  |
|      |      | Shiraz-40T | 2051 | 0.098506 | 0         |  |  |
|      |      | Shiraz-58T | 2221 | 0.871948 | 0         |  |  |
|      |      | Shiraz-71T | 2260 | 0.68394  | 0         |  |  |
|      |      | Shiraz-71T | 2262 | 0.986748 | 0         |  |  |
| INE2 | chrX | Shiraz-3T  | 235  | 0        | -0.28401  |  |  |
|      |      | Shiraz-4T  | 260  | 0        | -0.324128 |  |  |
|      |      | Shiraz-16T | 294  | 0.655804 | 0         |  |  |
|      |      | Shiraz-36T | 431  | 0        | -0.78035  |  |  |
|      |      | Shiraz-44T | 891  | 0        | -0.954044 |  |  |
|      |      | Shiraz-49T | 1166 | 0        | -0.917235 |  |  |
|      |      | Shiraz-9T  | 1368 | 0.199713 | 0         |  |  |
|      |      | Shiraz-18T | 1455 | 0        | -0.186773 |  |  |
|      |      | Shiraz-22T | 1669 | 0.695915 | 0         |  |  |
|      |      | Shiraz-25T | 1717 | 0.420447 | 0         |  |  |
|      |      | Shiraz-28T | 1760 | 0.538181 | 0         |  |  |
|      |      | Shiraz-29T | 1800 | 0.672527 | 0         |  |  |
|      |      | Shiraz-32T | 1869 | 0.776805 | 0         |  |  |
|      |      | Shiraz-35T | 1932 | 0.507141 | 0         |  |  |
|      |      | Shiraz-40T | 2051 | 0.098506 | 0         |  |  |
|      |      | Shiraz-58T | 2221 | 0.871948 | 0         |  |  |
|      |      | Shiraz-71T | 2260 | 0.68394  | 0         |  |  |
|      |      | Shiraz-71T | 2261 | 0.508399 | 0         |  |  |
|      |      | Shiraz-3T  | 235  | 0        | -0.28401  |  |  |
|      |      | Shiraz-4T  | 260  | 0        | -0.324128 |  |  |
|      |      | Shiraz-16T | 294  | 0.655804 | 0         |  |  |
|      |      | Shiraz-36T | 431  | 0        | -0.78035  |  |  |
|      |      | Shiraz-44T | 891  | 0        | -0.954044 |  |  |
|      |      | Shiraz-49T | 1166 | 0        | -0.917235 |  |  |
|      |      | Shiraz-9T  | 1368 | 0.199713 | 0         |  |  |
|      |      | Shiraz-18T | 1455 | 0        | -0.186773 |  |  |
|      |      | Shiraz-22T | 1669 | 0.695915 | 0         |  |  |
|      |      | Shiraz-25T | 1717 | 0.420447 | 0         |  |  |
|      |      | Shiraz-28T | 1760 | 0.538181 | 0         |  |  |
|      |      | Shiraz-29T | 1800 | 0.672527 | 0         |  |  |
|      |      | Shiraz-32T | 1869 | 0.776805 | 0         |  |  |
|      |      | Shiraz-35T | 1932 | 0.507141 | 0         |  |  |
|      |      | Shiraz-40T | 2051 | 0.098506 | 0         |  |  |
|      |      | Shiraz-58T | 2221 | 0.871948 | 0         |  |  |
|      |      | Shiraz-71T | 2260 | 0.68394  | 0         |  |  |
|      |      | Shiraz-71T | 2261 | 0.508399 | 0         |  |  |
|      |      | Shiraz-3T  | 235  | 0        | -0.28401  |  |  |
|      |      | Shiraz-4T  | 260  | 0        | -0.324128 |  |  |
|      |      | Shiraz-16T | 294  | 0.655804 | 0         |  |  |
|      |      | Shiraz-36T | 431  | 0        | -0.78035  |  |  |
|      |      | Shiraz-44T | 891  | 0        | -0.954044 |  |  |
|      |      | Shiraz-49T | 1166 | 0        | -0.917235 |  |  |

|      |      |            |      |          |           |  |  |
|------|------|------------|------|----------|-----------|--|--|
|      |      | Shiraz-9T  | 1368 | 0.199713 | 0         |  |  |
|      |      | Shiraz-18T | 1455 | 0        | -0.186773 |  |  |
|      |      | Shiraz-22T | 1669 | 0.695915 | 0         |  |  |
|      |      | Shiraz-25T | 1717 | 0.420447 | 0         |  |  |
|      |      | Shiraz-28T | 1760 | 0.538181 | 0         |  |  |
|      |      | Shiraz-29T | 1800 | 0.672527 | 0         |  |  |
|      |      | Shiraz-32T | 1869 | 0.776805 | 0         |  |  |
|      |      | Shiraz-35T | 1932 | 0.507141 | 0         |  |  |
|      |      | Shiraz-40T | 2051 | 0.098506 | 0         |  |  |
|      |      | Shiraz-58T | 2221 | 0.871948 | 0         |  |  |
|      |      | Shiraz-71T | 2260 | 0.68394  | 0         |  |  |
|      |      | Shiraz-71T | 2261 | 0.508399 | 0         |  |  |
| ING3 | chr7 | Shiraz-3T  | 90   | 0.219276 | 0         |  |  |
|      |      | Shiraz-3T  | 90   | 0.219276 | 0         |  |  |
|      |      | Shiraz-3T  | 95   | 0        | -0.077623 |  |  |
|      |      | Shiraz-3T  | 95   | 0        | -0.077623 |  |  |
|      |      | Shiraz-4T  | 253  | 0.372918 | 0         |  |  |
|      |      | Shiraz-4T  | 253  | 0.372918 | 0         |  |  |
|      |      | Shiraz-36T | 378  | 0.179558 | 0         |  |  |
|      |      | Shiraz-36T | 378  | 0.179558 | 0         |  |  |
|      |      | Shiraz-36T | 382  | 0.081739 | 0         |  |  |
|      |      | Shiraz-36T | 382  | 0.081739 | 0         |  |  |
|      |      | Shiraz-44T | 641  | 0        | -0.477846 |  |  |
|      |      | Shiraz-44T | 641  | 0        | -0.477846 |  |  |
|      |      | Shiraz-46T | 943  | 0.093799 | 0         |  |  |
|      |      | Shiraz-46T | 943  | 0.093799 | 0         |  |  |
|      |      | Shiraz-46T | 947  | 0        | -0.010843 |  |  |
|      |      | Shiraz-46T | 947  | 0        | -0.010843 |  |  |
|      |      | Shiraz-47T | 1031 | 0        | -0.117529 |  |  |
|      |      | Shiraz-47T | 1031 | 0        | -0.117529 |  |  |
|      |      | Shiraz-49T | 1121 | 0        | -0.138569 |  |  |
|      |      | Shiraz-49T | 1121 | 0        | -0.138569 |  |  |
|      |      | Shiraz-77T | 1225 | 0        | -0.117922 |  |  |
|      |      | Shiraz-77T | 1225 | 0        | -0.117922 |  |  |
|      |      | Shiraz-77T | 1228 | 0        | -0.238084 |  |  |
|      |      | Shiraz-77T | 1228 | 0        | -0.238084 |  |  |
|      |      | Shiraz-18T | 1434 | 0.244465 | 0         |  |  |
|      |      | Shiraz-18T | 1434 | 0.244465 | 0         |  |  |
|      |      | Shiraz-22T | 1549 | 0        | -0.319623 |  |  |
|      |      | Shiraz-22T | 1549 | 0        | -0.319623 |  |  |
|      |      | Shiraz-22T | 1552 | 0        | -0.50686  |  |  |
|      |      | Shiraz-22T | 1552 | 0        | -0.50686  |  |  |
|      |      | Shiraz-25T | 1698 | 0.21835  | 0         |  |  |
|      |      | Shiraz-25T | 1698 | 0.21835  | 0         |  |  |
|      |      | Shiraz-28T | 1735 | 0.350744 | 0         |  |  |
|      |      | Shiraz-28T | 1735 | 0.350744 | 0         |  |  |
|      |      | Shiraz-29T | 1778 | 0.120767 | 0         |  |  |

|  |  |            |      |          |           |  |  |
|--|--|------------|------|----------|-----------|--|--|
|  |  | Shiraz-29T | 1778 | 0.120767 | 0         |  |  |
|  |  | Shiraz-32T | 1833 | 0.551336 | 0         |  |  |
|  |  | Shiraz-32T | 1833 | 0.551336 | 0         |  |  |
|  |  | Shiraz-32T | 1835 | 0.092727 | 0         |  |  |
|  |  | Shiraz-32T | 1835 | 0.092727 | 0         |  |  |
|  |  | Shiraz-38T | 1951 | 0.250891 | 0         |  |  |
|  |  | Shiraz-38T | 1951 | 0.250891 | 0         |  |  |
|  |  | Shiraz-53T | 2078 | 0.287202 | 0         |  |  |
|  |  | Shiraz-53T | 2078 | 0.287202 | 0         |  |  |
|  |  | Shiraz-58T | 2161 | 0        | -0.187744 |  |  |
|  |  | Shiraz-58T | 2161 | 0        | -0.187744 |  |  |
|  |  | Shiraz-71T | 2238 | 0.603631 | 0         |  |  |
|  |  | Shiraz-71T | 2238 | 0.603631 | 0         |  |  |
|  |  | Shiraz-3T  | 90   | 0.219276 | 0         |  |  |
|  |  | Shiraz-3T  | 90   | 0.219276 | 0         |  |  |
|  |  | Shiraz-3T  | 95   | 0        | -0.077623 |  |  |
|  |  | Shiraz-3T  | 95   | 0        | -0.077623 |  |  |
|  |  | Shiraz-4T  | 253  | 0.372918 | 0         |  |  |
|  |  | Shiraz-4T  | 253  | 0.372918 | 0         |  |  |
|  |  | Shiraz-36T | 378  | 0.179558 | 0         |  |  |
|  |  | Shiraz-36T | 378  | 0.179558 | 0         |  |  |
|  |  | Shiraz-36T | 382  | 0.081739 | 0         |  |  |
|  |  | Shiraz-36T | 382  | 0.081739 | 0         |  |  |
|  |  | Shiraz-44T | 641  | 0        | -0.477846 |  |  |
|  |  | Shiraz-44T | 641  | 0        | -0.477846 |  |  |
|  |  | Shiraz-46T | 943  | 0.093799 | 0         |  |  |
|  |  | Shiraz-46T | 943  | 0.093799 | 0         |  |  |
|  |  | Shiraz-46T | 947  | 0        | -0.010843 |  |  |
|  |  | Shiraz-46T | 947  | 0        | -0.010843 |  |  |
|  |  | Shiraz-47T | 1031 | 0        | -0.117529 |  |  |
|  |  | Shiraz-47T | 1031 | 0        | -0.117529 |  |  |
|  |  | Shiraz-49T | 1121 | 0        | -0.138569 |  |  |
|  |  | Shiraz-49T | 1121 | 0        | -0.138569 |  |  |
|  |  | Shiraz-77T | 1225 | 0        | -0.117922 |  |  |
|  |  | Shiraz-77T | 1225 | 0        | -0.117922 |  |  |
|  |  | Shiraz-77T | 1228 | 0        | -0.238084 |  |  |
|  |  | Shiraz-77T | 1228 | 0        | -0.238084 |  |  |
|  |  | Shiraz-18T | 1434 | 0.244465 | 0         |  |  |
|  |  | Shiraz-18T | 1434 | 0.244465 | 0         |  |  |
|  |  | Shiraz-22T | 1549 | 0        | -0.319623 |  |  |
|  |  | Shiraz-22T | 1549 | 0        | -0.319623 |  |  |
|  |  | Shiraz-22T | 1552 | 0        | -0.50686  |  |  |
|  |  | Shiraz-22T | 1552 | 0        | -0.50686  |  |  |
|  |  | Shiraz-25T | 1698 | 0.21835  | 0         |  |  |
|  |  | Shiraz-25T | 1698 | 0.21835  | 0         |  |  |
|  |  | Shiraz-28T | 1735 | 0.350744 | 0         |  |  |
|  |  | Shiraz-28T | 1735 | 0.350744 | 0         |  |  |

|  |  |            |      |          |           |  |  |
|--|--|------------|------|----------|-----------|--|--|
|  |  | Shiraz-29T | 1778 | 0.120767 | 0         |  |  |
|  |  | Shiraz-29T | 1778 | 0.120767 | 0         |  |  |
|  |  | Shiraz-32T | 1833 | 0.551336 | 0         |  |  |
|  |  | Shiraz-32T | 1833 | 0.551336 | 0         |  |  |
|  |  | Shiraz-32T | 1835 | 0.092727 | 0         |  |  |
|  |  | Shiraz-32T | 1835 | 0.092727 | 0         |  |  |
|  |  | Shiraz-38T | 1951 | 0.250891 | 0         |  |  |
|  |  | Shiraz-38T | 1951 | 0.250891 | 0         |  |  |
|  |  | Shiraz-53T | 2078 | 0.287202 | 0         |  |  |
|  |  | Shiraz-53T | 2078 | 0.287202 | 0         |  |  |
|  |  | Shiraz-58T | 2161 | 0        | -0.187744 |  |  |
|  |  | Shiraz-58T | 2161 | 0        | -0.187744 |  |  |
|  |  | Shiraz-71T | 2238 | 0.603631 | 0         |  |  |
|  |  | Shiraz-71T | 2238 | 0.603631 | 0         |  |  |
|  |  | Shiraz-3T  | 90   | 0.219276 | 0         |  |  |
|  |  | Shiraz-3T  | 90   | 0.219276 | 0         |  |  |
|  |  | Shiraz-3T  | 95   | 0        | -0.077623 |  |  |
|  |  | Shiraz-3T  | 95   | 0        | -0.077623 |  |  |
|  |  | Shiraz-4T  | 253  | 0.372918 | 0         |  |  |
|  |  | Shiraz-4T  | 253  | 0.372918 | 0         |  |  |
|  |  | Shiraz-36T | 378  | 0.179558 | 0         |  |  |
|  |  | Shiraz-36T | 378  | 0.179558 | 0         |  |  |
|  |  | Shiraz-36T | 382  | 0.081739 | 0         |  |  |
|  |  | Shiraz-36T | 382  | 0.081739 | 0         |  |  |
|  |  | Shiraz-44T | 641  | 0        | -0.477846 |  |  |
|  |  | Shiraz-44T | 641  | 0        | -0.477846 |  |  |
|  |  | Shiraz-46T | 943  | 0.093799 | 0         |  |  |
|  |  | Shiraz-46T | 943  | 0.093799 | 0         |  |  |
|  |  | Shiraz-46T | 947  | 0        | -0.010843 |  |  |
|  |  | Shiraz-46T | 947  | 0        | -0.010843 |  |  |
|  |  | Shiraz-47T | 1031 | 0        | -0.117529 |  |  |
|  |  | Shiraz-47T | 1031 | 0        | -0.117529 |  |  |
|  |  | Shiraz-49T | 1121 | 0        | -0.138569 |  |  |
|  |  | Shiraz-49T | 1121 | 0        | -0.138569 |  |  |
|  |  | Shiraz-77T | 1225 | 0        | -0.117922 |  |  |
|  |  | Shiraz-77T | 1225 | 0        | -0.117922 |  |  |
|  |  | Shiraz-77T | 1228 | 0        | -0.238084 |  |  |
|  |  | Shiraz-77T | 1228 | 0        | -0.238084 |  |  |
|  |  | Shiraz-18T | 1434 | 0.244465 | 0         |  |  |
|  |  | Shiraz-18T | 1434 | 0.244465 | 0         |  |  |
|  |  | Shiraz-22T | 1549 | 0        | -0.319623 |  |  |
|  |  | Shiraz-22T | 1549 | 0        | -0.319623 |  |  |
|  |  | Shiraz-22T | 1552 | 0        | -0.50686  |  |  |
|  |  | Shiraz-22T | 1552 | 0        | -0.50686  |  |  |
|  |  | Shiraz-25T | 1698 | 0.21835  | 0         |  |  |
|  |  | Shiraz-25T | 1698 | 0.21835  | 0         |  |  |
|  |  | Shiraz-28T | 1735 | 0.350744 | 0         |  |  |

|      |      |            |      |          |           |  |
|------|------|------------|------|----------|-----------|--|
|      |      | Shiraz-28T | 1735 | 0.350744 | 0         |  |
|      |      | Shiraz-29T | 1778 | 0.120767 | 0         |  |
|      |      | Shiraz-29T | 1778 | 0.120767 | 0         |  |
|      |      | Shiraz-32T | 1833 | 0.551336 | 0         |  |
|      |      | Shiraz-32T | 1833 | 0.551336 | 0         |  |
|      |      | Shiraz-32T | 1835 | 0.092727 | 0         |  |
|      |      | Shiraz-32T | 1835 | 0.092727 | 0         |  |
|      |      | Shiraz-38T | 1951 | 0.250891 | 0         |  |
|      |      | Shiraz-38T | 1951 | 0.250891 | 0         |  |
|      |      | Shiraz-53T | 2078 | 0.287202 | 0         |  |
|      |      | Shiraz-53T | 2078 | 0.287202 | 0         |  |
|      |      | Shiraz-58T | 2161 | 0        | -0.187744 |  |
|      |      | Shiraz-58T | 2161 | 0        | -0.187744 |  |
|      |      | Shiraz-71T | 2238 | 0.603631 | 0         |  |
|      |      | Shiraz-71T | 2238 | 0.603631 | 0         |  |
| INGX | chrX | Shiraz-4T  | 261  | 0        | -0.336249 |  |
|      |      | Shiraz-16T | 295  | 0.591657 | 0         |  |
|      |      | Shiraz-36T | 433  | 0        | -0.803961 |  |
|      |      | Shiraz-44T | 899  | 0        | -1.09697  |  |
|      |      | Shiraz-44T | 900  | 0        | -0.584284 |  |
|      |      | Shiraz-49T | 1170 | 0        | -0.967436 |  |
|      |      | Shiraz-49T | 1171 | 0        | -0.612379 |  |
|      |      | Shiraz-77T | 1283 | 0.296555 | 0         |  |
|      |      | Shiraz-18T | 1457 | 0.643204 | 0         |  |
|      |      | Shiraz-22T | 1673 | 0.611783 | 0         |  |
|      |      | Shiraz-22T | 1674 | 0.887899 | 0         |  |
|      |      | Shiraz-25T | 1719 | 0.472955 | 0         |  |
|      |      | Shiraz-28T | 1762 | 0.562311 | 0         |  |
|      |      | Shiraz-29T | 1801 | 0.815343 | 0         |  |
|      |      | Shiraz-32T | 1870 | 0.729766 | 0         |  |
|      |      | Shiraz-35T | 1933 | 0.488535 | 0         |  |
|      |      | Shiraz-58T | 2223 | 0.833364 | 0         |  |
|      |      | Shiraz-58T | 2224 | 1.076575 | 0         |  |
|      |      | Shiraz-71T | 2263 | 0.975531 | 0         |  |
|      |      | Shiraz-4T  | 261  | 0        | -0.336249 |  |
|      |      | Shiraz-16T | 295  | 0.591657 | 0         |  |
|      |      | Shiraz-36T | 433  | 0        | -0.803961 |  |
|      |      | Shiraz-44T | 899  | 0        | -1.09697  |  |
|      |      | Shiraz-44T | 900  | 0        | -0.584284 |  |
|      |      | Shiraz-49T | 1170 | 0        | -0.967436 |  |
|      |      | Shiraz-49T | 1171 | 0        | -0.612379 |  |
|      |      | Shiraz-77T | 1283 | 0.296555 | 0         |  |
|      |      | Shiraz-18T | 1457 | 0.643204 | 0         |  |
|      |      | Shiraz-22T | 1673 | 0.611783 | 0         |  |
|      |      | Shiraz-22T | 1674 | 0.887899 | 0         |  |
|      |      | Shiraz-25T | 1719 | 0.472955 | 0         |  |
|      |      | Shiraz-28T | 1762 | 0.562311 | 0         |  |

|       |      |            |      |          |           |  |
|-------|------|------------|------|----------|-----------|--|
|       |      | Shiraz-29T | 1801 | 0.815343 | 0         |  |
|       |      | Shiraz-32T | 1870 | 0.729766 | 0         |  |
|       |      | Shiraz-35T | 1933 | 0.488535 | 0         |  |
|       |      | Shiraz-58T | 2223 | 0.833364 | 0         |  |
|       |      | Shiraz-58T | 2224 | 1.076575 | 0         |  |
|       |      | Shiraz-71T | 2263 | 0.975531 | 0         |  |
|       |      | Shiraz-4T  | 261  | 0        | -0.336249 |  |
|       |      | Shiraz-16T | 295  | 0.591657 | 0         |  |
|       |      | Shiraz-36T | 433  | 0        | -0.803961 |  |
|       |      | Shiraz-44T | 899  | 0        | -1.09697  |  |
|       |      | Shiraz-44T | 900  | 0        | -0.584284 |  |
|       |      | Shiraz-49T | 1170 | 0        | -0.967436 |  |
|       |      | Shiraz-49T | 1171 | 0        | -0.612379 |  |
|       |      | Shiraz-77T | 1283 | 0.296555 | 0         |  |
|       |      | Shiraz-18T | 1457 | 0.643204 | 0         |  |
|       |      | Shiraz-22T | 1673 | 0.611783 | 0         |  |
|       |      | Shiraz-22T | 1674 | 0.887899 | 0         |  |
|       |      | Shiraz-25T | 1719 | 0.472955 | 0         |  |
|       |      | Shiraz-28T | 1762 | 0.562311 | 0         |  |
|       |      | Shiraz-29T | 1801 | 0.815343 | 0         |  |
|       |      | Shiraz-32T | 1870 | 0.729766 | 0         |  |
|       |      | Shiraz-35T | 1933 | 0.488535 | 0         |  |
|       |      | Shiraz-58T | 2223 | 0.833364 | 0         |  |
|       |      | Shiraz-58T | 2224 | 1.076575 | 0         |  |
|       |      | Shiraz-71T | 2263 | 0.975531 | 0         |  |
| INHBA | chr7 | Shiraz-3T  | 87   | 0.198593 | 0         |  |
|       |      | Shiraz-4T  | 252  | 0.192083 | 0         |  |
|       |      | Shiraz-36T | 376  | 0.159952 | 0         |  |
|       |      | Shiraz-44T | 631  | 0        | -0.180312 |  |
|       |      | Shiraz-46T | 942  | 0.069143 | 0         |  |
|       |      | Shiraz-18T | 1433 | 0.250973 | 0         |  |
|       |      | Shiraz-25T | 1697 | 0.21945  | 0         |  |
|       |      | Shiraz-28T | 1734 | 0.362882 | 0         |  |
|       |      | Shiraz-29T | 1777 | 0.156747 | 0         |  |
|       |      | Shiraz-38T | 1950 | 0.265916 | 0         |  |
|       |      | Shiraz-71T | 2236 | 0.320072 | 0         |  |
|       |      | Shiraz-72T | 2277 | 0        | -0.398869 |  |
|       |      | Shiraz-3T  | 87   | 0.198593 | 0         |  |
|       |      | Shiraz-4T  | 252  | 0.192083 | 0         |  |
|       |      | Shiraz-36T | 376  | 0.159952 | 0         |  |
|       |      | Shiraz-44T | 631  | 0        | -0.180312 |  |
|       |      | Shiraz-46T | 942  | 0.069143 | 0         |  |
|       |      | Shiraz-18T | 1433 | 0.250973 | 0         |  |
|       |      | Shiraz-25T | 1697 | 0.21945  | 0         |  |
|       |      | Shiraz-28T | 1734 | 0.362882 | 0         |  |
|       |      | Shiraz-29T | 1777 | 0.156747 | 0         |  |
|       |      | Shiraz-38T | 1950 | 0.265916 | 0         |  |



|      |      |            |      |          |           |  |  |
|------|------|------------|------|----------|-----------|--|--|
|      |      | Shiraz-71T | 2236 | 0.320072 | 0         |  |  |
|      |      | Shiraz-72T | 2277 | 0        | -0.398869 |  |  |
|      |      | Shiraz-3T  | 87   | 0.198593 | 0         |  |  |
|      |      | Shiraz-4T  | 252  | 0.192083 | 0         |  |  |
|      |      | Shiraz-36T | 376  | 0.159952 | 0         |  |  |
|      |      | Shiraz-44T | 631  | 0        | -0.180312 |  |  |
|      |      | Shiraz-46T | 942  | 0.069143 | 0         |  |  |
|      |      | Shiraz-18T | 1433 | 0.250973 | 0         |  |  |
|      |      | Shiraz-25T | 1697 | 0.21945  | 0         |  |  |
|      |      | Shiraz-28T | 1734 | 0.362882 | 0         |  |  |
|      |      | Shiraz-29T | 1777 | 0.156747 | 0         |  |  |
|      |      | Shiraz-38T | 1950 | 0.265916 | 0         |  |  |
|      |      | Shiraz-71T | 2236 | 0.320072 | 0         |  |  |
|      |      | Shiraz-72T | 2277 | 0        | -0.398869 |  |  |
| INMT | chr7 | Shiraz-3T  | 87   | 0.198593 | 0         |  |  |
|      |      | Shiraz-4T  | 252  | 0.192083 | 0         |  |  |
|      |      | Shiraz-36T | 376  | 0.159952 | 0         |  |  |
|      |      | Shiraz-44T | 630  | 0.903655 | 0         |  |  |
|      |      | Shiraz-46T | 942  | 0.069143 | 0         |  |  |
|      |      | Shiraz-18T | 1433 | 0.250973 | 0         |  |  |
|      |      | Shiraz-25T | 1697 | 0.21945  | 0         |  |  |
|      |      | Shiraz-28T | 1734 | 0.362882 | 0         |  |  |
|      |      | Shiraz-29T | 1777 | 0.156747 | 0         |  |  |
|      |      | Shiraz-38T | 1950 | 0.265916 | 0         |  |  |
|      |      | Shiraz-71T | 2236 | 0.320072 | 0         |  |  |
|      |      | Shiraz-3T  | 87   | 0.198593 | 0         |  |  |
|      |      | Shiraz-4T  | 252  | 0.192083 | 0         |  |  |
|      |      | Shiraz-36T | 376  | 0.159952 | 0         |  |  |
|      |      | Shiraz-44T | 630  | 0.903655 | 0         |  |  |
|      |      | Shiraz-46T | 942  | 0.069143 | 0         |  |  |
|      |      | Shiraz-18T | 1433 | 0.250973 | 0         |  |  |
|      |      | Shiraz-25T | 1697 | 0.21945  | 0         |  |  |
|      |      | Shiraz-28T | 1734 | 0.362882 | 0         |  |  |
|      |      | Shiraz-29T | 1777 | 0.156747 | 0         |  |  |
|      |      | Shiraz-38T | 1950 | 0.265916 | 0         |  |  |
|      |      | Shiraz-71T | 2236 | 0.320072 | 0         |  |  |
|      |      | Shiraz-3T  | 87   | 0.198593 | 0         |  |  |
|      |      | Shiraz-4T  | 252  | 0.192083 | 0         |  |  |
|      |      | Shiraz-36T | 376  | 0.159952 | 0         |  |  |
|      |      | Shiraz-44T | 630  | 0.903655 | 0         |  |  |
|      |      | Shiraz-46T | 942  | 0.069143 | 0         |  |  |
|      |      | Shiraz-18T | 1433 | 0.250973 | 0         |  |  |
|      |      | Shiraz-25T | 1697 | 0.21945  | 0         |  |  |
|      |      | Shiraz-28T | 1734 | 0.362882 | 0         |  |  |
|      |      | Shiraz-29T | 1777 | 0.156747 | 0         |  |  |
|      |      | Shiraz-38T | 1950 | 0.265916 | 0         |  |  |
|      |      | Shiraz-71T | 2236 | 0.320072 | 0         |  |  |

|        |      |            |      |          |           |  |  |
|--------|------|------------|------|----------|-----------|--|--|
| IQSEC2 | chrX | Shiraz-4T  | 260  | 0        | -0.324128 |  |  |
|        |      | Shiraz-4T  | 260  | 0        | -0.324128 |  |  |
|        |      | Shiraz-4T  | 260  | 0        | -0.324128 |  |  |
|        |      | Shiraz-16T | 294  | 0.655804 | 0         |  |  |
|        |      | Shiraz-16T | 294  | 0.655804 | 0         |  |  |
|        |      | Shiraz-16T | 294  | 0.655804 | 0         |  |  |
|        |      | Shiraz-31T | 345  | 0.103301 | 0         |  |  |
|        |      | Shiraz-31T | 345  | 0.103301 | 0         |  |  |
|        |      | Shiraz-31T | 345  | 0.103301 | 0         |  |  |
|        |      | Shiraz-36T | 431  | 0        | -0.78035  |  |  |
|        |      | Shiraz-36T | 431  | 0        | -0.78035  |  |  |
|        |      | Shiraz-36T | 431  | 0        | -0.78035  |  |  |
|        |      | Shiraz-36T | 432  | 0        | -0.6692   |  |  |
|        |      | Shiraz-36T | 432  | 0        | -0.6692   |  |  |
|        |      | Shiraz-36T | 432  | 0        | -0.6692   |  |  |
|        |      | Shiraz-44T | 891  | 0        | -0.954044 |  |  |
|        |      | Shiraz-44T | 891  | 0        | -0.954044 |  |  |
|        |      | Shiraz-44T | 891  | 0        | -0.954044 |  |  |
|        |      | Shiraz-44T | 898  | 0        | -0.515218 |  |  |
|        |      | Shiraz-44T | 898  | 0        | -0.515218 |  |  |
|        |      | Shiraz-44T | 898  | 0        | -0.515218 |  |  |
|        |      | Shiraz-49T | 1166 | 0        | -0.917235 |  |  |
|        |      | Shiraz-49T | 1166 | 0        | -0.917235 |  |  |
|        |      | Shiraz-49T | 1166 | 0        | -0.917235 |  |  |
|        |      | Shiraz-77T | 1282 | 0.213849 | 0         |  |  |
|        |      | Shiraz-77T | 1282 | 0.213849 | 0         |  |  |
|        |      | Shiraz-77T | 1282 | 0.213849 | 0         |  |  |
|        |      | Shiraz-9T  | 1368 | 0.199713 | 0         |  |  |
|        |      | Shiraz-9T  | 1368 | 0.199713 | 0         |  |  |
|        |      | Shiraz-9T  | 1368 | 0.199713 | 0         |  |  |
|        |      | Shiraz-18T | 1456 | 0.608534 | 0         |  |  |
|        |      | Shiraz-18T | 1456 | 0.608534 | 0         |  |  |
|        |      | Shiraz-18T | 1456 | 0.608534 | 0         |  |  |
|        |      | Shiraz-22T | 1669 | 0.695915 | 0         |  |  |
|        |      | Shiraz-22T | 1669 | 0.695915 | 0         |  |  |
|        |      | Shiraz-22T | 1669 | 0.695915 | 0         |  |  |
|        |      | Shiraz-25T | 1717 | 0.420447 | 0         |  |  |
|        |      | Shiraz-25T | 1717 | 0.420447 | 0         |  |  |
|        |      | Shiraz-25T | 1717 | 0.420447 | 0         |  |  |
|        |      | Shiraz-28T | 1760 | 0.538181 | 0         |  |  |
|        |      | Shiraz-28T | 1760 | 0.538181 | 0         |  |  |
|        |      | Shiraz-28T | 1760 | 0.538181 | 0         |  |  |
|        |      | Shiraz-29T | 1800 | 0.672527 | 0         |  |  |
|        |      | Shiraz-29T | 1800 | 0.672527 | 0         |  |  |
|        |      | Shiraz-29T | 1800 | 0.672527 | 0         |  |  |
|        |      | Shiraz-32T | 1869 | 0.776805 | 0         |  |  |
|        |      | Shiraz-32T | 1869 | 0.776805 | 0         |  |  |

|  |  |            |      |          |           |  |  |
|--|--|------------|------|----------|-----------|--|--|
|  |  | Shiraz-32T | 1869 | 0.776805 | 0         |  |  |
|  |  | Shiraz-35T | 1932 | 0.507141 | 0         |  |  |
|  |  | Shiraz-35T | 1932 | 0.507141 | 0         |  |  |
|  |  | Shiraz-35T | 1932 | 0.507141 | 0         |  |  |
|  |  | Shiraz-58T | 2221 | 0.871948 | 0         |  |  |
|  |  | Shiraz-58T | 2221 | 0.871948 | 0         |  |  |
|  |  | Shiraz-58T | 2221 | 0.871948 | 0         |  |  |
|  |  | Shiraz-71T | 2260 | 0.68394  | 0         |  |  |
|  |  | Shiraz-71T | 2260 | 0.68394  | 0         |  |  |
|  |  | Shiraz-71T | 2260 | 0.68394  | 0         |  |  |
|  |  | Shiraz-71T | 2262 | 0.986748 | 0         |  |  |
|  |  | Shiraz-71T | 2262 | 0.986748 | 0         |  |  |
|  |  | Shiraz-71T | 2262 | 0.986748 | 0         |  |  |
|  |  | Shiraz-4T  | 260  | 0        | -0.324128 |  |  |
|  |  | Shiraz-4T  | 260  | 0        | -0.324128 |  |  |
|  |  | Shiraz-4T  | 260  | 0        | -0.324128 |  |  |
|  |  | Shiraz-16T | 294  | 0.655804 | 0         |  |  |
|  |  | Shiraz-16T | 294  | 0.655804 | 0         |  |  |
|  |  | Shiraz-16T | 294  | 0.655804 | 0         |  |  |
|  |  | Shiraz-31T | 345  | 0.103301 | 0         |  |  |
|  |  | Shiraz-31T | 345  | 0.103301 | 0         |  |  |
|  |  | Shiraz-31T | 345  | 0.103301 | 0         |  |  |
|  |  | Shiraz-36T | 431  | 0        | -0.78035  |  |  |
|  |  | Shiraz-36T | 431  | 0        | -0.78035  |  |  |
|  |  | Shiraz-36T | 431  | 0        | -0.78035  |  |  |
|  |  | Shiraz-36T | 432  | 0        | -0.6692   |  |  |
|  |  | Shiraz-36T | 432  | 0        | -0.6692   |  |  |
|  |  | Shiraz-36T | 432  | 0        | -0.6692   |  |  |
|  |  | Shiraz-44T | 891  | 0        | -0.954044 |  |  |
|  |  | Shiraz-44T | 891  | 0        | -0.954044 |  |  |
|  |  | Shiraz-44T | 891  | 0        | -0.954044 |  |  |
|  |  | Shiraz-44T | 898  | 0        | -0.515218 |  |  |
|  |  | Shiraz-44T | 898  | 0        | -0.515218 |  |  |
|  |  | Shiraz-44T | 898  | 0        | -0.515218 |  |  |
|  |  | Shiraz-49T | 1166 | 0        | -0.917235 |  |  |
|  |  | Shiraz-49T | 1166 | 0        | -0.917235 |  |  |
|  |  | Shiraz-49T | 1166 | 0        | -0.917235 |  |  |
|  |  | Shiraz-77T | 1282 | 0.213849 | 0         |  |  |
|  |  | Shiraz-77T | 1282 | 0.213849 | 0         |  |  |
|  |  | Shiraz-77T | 1282 | 0.213849 | 0         |  |  |
|  |  | Shiraz-9T  | 1368 | 0.199713 | 0         |  |  |
|  |  | Shiraz-9T  | 1368 | 0.199713 | 0         |  |  |
|  |  | Shiraz-9T  | 1368 | 0.199713 | 0         |  |  |
|  |  | Shiraz-18T | 1456 | 0.608534 | 0         |  |  |
|  |  | Shiraz-18T | 1456 | 0.608534 | 0         |  |  |
|  |  | Shiraz-18T | 1456 | 0.608534 | 0         |  |  |
|  |  | Shiraz-22T | 1669 | 0.695915 | 0         |  |  |

|  |  |            |      |          |           |  |  |
|--|--|------------|------|----------|-----------|--|--|
|  |  | Shiraz-22T | 1669 | 0.695915 | 0         |  |  |
|  |  | Shiraz-22T | 1669 | 0.695915 | 0         |  |  |
|  |  | Shiraz-25T | 1717 | 0.420447 | 0         |  |  |
|  |  | Shiraz-25T | 1717 | 0.420447 | 0         |  |  |
|  |  | Shiraz-25T | 1717 | 0.420447 | 0         |  |  |
|  |  | Shiraz-28T | 1760 | 0.538181 | 0         |  |  |
|  |  | Shiraz-28T | 1760 | 0.538181 | 0         |  |  |
|  |  | Shiraz-28T | 1760 | 0.538181 | 0         |  |  |
|  |  | Shiraz-29T | 1800 | 0.672527 | 0         |  |  |
|  |  | Shiraz-29T | 1800 | 0.672527 | 0         |  |  |
|  |  | Shiraz-29T | 1800 | 0.672527 | 0         |  |  |
|  |  | Shiraz-32T | 1869 | 0.776805 | 0         |  |  |
|  |  | Shiraz-32T | 1869 | 0.776805 | 0         |  |  |
|  |  | Shiraz-32T | 1869 | 0.776805 | 0         |  |  |
|  |  | Shiraz-35T | 1932 | 0.507141 | 0         |  |  |
|  |  | Shiraz-35T | 1932 | 0.507141 | 0         |  |  |
|  |  | Shiraz-35T | 1932 | 0.507141 | 0         |  |  |
|  |  | Shiraz-58T | 2221 | 0.871948 | 0         |  |  |
|  |  | Shiraz-58T | 2221 | 0.871948 | 0         |  |  |
|  |  | Shiraz-58T | 2221 | 0.871948 | 0         |  |  |
|  |  | Shiraz-71T | 2260 | 0.68394  | 0         |  |  |
|  |  | Shiraz-71T | 2260 | 0.68394  | 0         |  |  |
|  |  | Shiraz-71T | 2260 | 0.68394  | 0         |  |  |
|  |  | Shiraz-71T | 2262 | 0.986748 | 0         |  |  |
|  |  | Shiraz-71T | 2262 | 0.986748 | 0         |  |  |
|  |  | Shiraz-71T | 2262 | 0.986748 | 0         |  |  |
|  |  | Shiraz-4T  | 260  | 0        | -0.324128 |  |  |
|  |  | Shiraz-4T  | 260  | 0        | -0.324128 |  |  |
|  |  | Shiraz-4T  | 260  | 0        | -0.324128 |  |  |
|  |  | Shiraz-16T | 294  | 0.655804 | 0         |  |  |
|  |  | Shiraz-16T | 294  | 0.655804 | 0         |  |  |
|  |  | Shiraz-16T | 294  | 0.655804 | 0         |  |  |
|  |  | Shiraz-31T | 345  | 0.103301 | 0         |  |  |
|  |  | Shiraz-31T | 345  | 0.103301 | 0         |  |  |
|  |  | Shiraz-31T | 345  | 0.103301 | 0         |  |  |
|  |  | Shiraz-36T | 431  | 0        | -0.78035  |  |  |
|  |  | Shiraz-36T | 431  | 0        | -0.78035  |  |  |
|  |  | Shiraz-36T | 431  | 0        | -0.78035  |  |  |
|  |  | Shiraz-36T | 432  | 0        | -0.6692   |  |  |
|  |  | Shiraz-36T | 432  | 0        | -0.6692   |  |  |
|  |  | Shiraz-36T | 432  | 0        | -0.6692   |  |  |
|  |  | Shiraz-44T | 891  | 0        | -0.954044 |  |  |
|  |  | Shiraz-44T | 891  | 0        | -0.954044 |  |  |
|  |  | Shiraz-44T | 891  | 0        | -0.954044 |  |  |
|  |  | Shiraz-44T | 898  | 0        | -0.515218 |  |  |
|  |  | Shiraz-44T | 898  | 0        | -0.515218 |  |  |
|  |  | Shiraz-44T | 898  | 0        | -0.515218 |  |  |

|      |      |            |      |          |           |  |  |
|------|------|------------|------|----------|-----------|--|--|
|      |      | Shiraz-49T | 1166 | 0        | -0.917235 |  |  |
|      |      | Shiraz-49T | 1166 | 0        | -0.917235 |  |  |
|      |      | Shiraz-49T | 1166 | 0        | -0.917235 |  |  |
|      |      | Shiraz-77T | 1282 | 0.213849 | 0         |  |  |
|      |      | Shiraz-77T | 1282 | 0.213849 | 0         |  |  |
|      |      | Shiraz-77T | 1282 | 0.213849 | 0         |  |  |
|      |      | Shiraz-9T  | 1368 | 0.199713 | 0         |  |  |
|      |      | Shiraz-9T  | 1368 | 0.199713 | 0         |  |  |
|      |      | Shiraz-9T  | 1368 | 0.199713 | 0         |  |  |
|      |      | Shiraz-18T | 1456 | 0.608534 | 0         |  |  |
|      |      | Shiraz-18T | 1456 | 0.608534 | 0         |  |  |
|      |      | Shiraz-18T | 1456 | 0.608534 | 0         |  |  |
|      |      | Shiraz-22T | 1669 | 0.695915 | 0         |  |  |
|      |      | Shiraz-22T | 1669 | 0.695915 | 0         |  |  |
|      |      | Shiraz-22T | 1669 | 0.695915 | 0         |  |  |
|      |      | Shiraz-25T | 1717 | 0.420447 | 0         |  |  |
|      |      | Shiraz-25T | 1717 | 0.420447 | 0         |  |  |
|      |      | Shiraz-25T | 1717 | 0.420447 | 0         |  |  |
|      |      | Shiraz-28T | 1760 | 0.538181 | 0         |  |  |
|      |      | Shiraz-28T | 1760 | 0.538181 | 0         |  |  |
|      |      | Shiraz-28T | 1760 | 0.538181 | 0         |  |  |
|      |      | Shiraz-29T | 1800 | 0.672527 | 0         |  |  |
|      |      | Shiraz-29T | 1800 | 0.672527 | 0         |  |  |
|      |      | Shiraz-29T | 1800 | 0.672527 | 0         |  |  |
|      |      | Shiraz-32T | 1869 | 0.776805 | 0         |  |  |
|      |      | Shiraz-32T | 1869 | 0.776805 | 0         |  |  |
|      |      | Shiraz-32T | 1869 | 0.776805 | 0         |  |  |
|      |      | Shiraz-35T | 1932 | 0.507141 | 0         |  |  |
|      |      | Shiraz-35T | 1932 | 0.507141 | 0         |  |  |
|      |      | Shiraz-35T | 1932 | 0.507141 | 0         |  |  |
|      |      | Shiraz-58T | 2221 | 0.871948 | 0         |  |  |
|      |      | Shiraz-58T | 2221 | 0.871948 | 0         |  |  |
|      |      | Shiraz-58T | 2221 | 0.871948 | 0         |  |  |
|      |      | Shiraz-71T | 2260 | 0.68394  | 0         |  |  |
|      |      | Shiraz-71T | 2260 | 0.68394  | 0         |  |  |
|      |      | Shiraz-71T | 2260 | 0.68394  | 0         |  |  |
|      |      | Shiraz-71T | 2262 | 0.986748 | 0         |  |  |
|      |      | Shiraz-71T | 2262 | 0.986748 | 0         |  |  |
|      |      | Shiraz-71T | 2262 | 0.986748 | 0         |  |  |
| IQUB | chr7 | Shiraz-3T  | 90   | 0.219276 | 0         |  |  |
|      |      | Shiraz-3T  | 95   | 0        | -0.077623 |  |  |
|      |      | Shiraz-4T  | 253  | 0.372918 | 0         |  |  |
|      |      | Shiraz-36T | 378  | 0.179558 | 0         |  |  |
|      |      | Shiraz-36T | 382  | 0.081739 | 0         |  |  |
|      |      | Shiraz-44T | 641  | 0        | -0.477846 |  |  |
|      |      | Shiraz-46T | 943  | 0.093799 | 0         |  |  |
|      |      | Shiraz-46T | 947  | 0        | -0.010843 |  |  |

|  |            |      |          |           |  |
|--|------------|------|----------|-----------|--|
|  | Shiraz-47T | 1031 | 0        | -0.117529 |  |
|  | Shiraz-49T | 1121 | 0        | -0.138569 |  |
|  | Shiraz-77T | 1225 | 0        | -0.117922 |  |
|  | Shiraz-77T | 1228 | 0        | -0.238084 |  |
|  | Shiraz-18T | 1434 | 0.244465 | 0         |  |
|  | Shiraz-22T | 1549 | 0        | -0.319623 |  |
|  | Shiraz-22T | 1552 | 0        | -0.50686  |  |
|  | Shiraz-25T | 1698 | 0.21835  | 0         |  |
|  | Shiraz-28T | 1735 | 0.350744 | 0         |  |
|  | Shiraz-29T | 1778 | 0.120767 | 0         |  |
|  | Shiraz-32T | 1833 | 0.551336 | 0         |  |
|  | Shiraz-32T | 1835 | 0.092727 | 0         |  |
|  | Shiraz-38T | 1951 | 0.250891 | 0         |  |
|  | Shiraz-53T | 2078 | 0.287202 | 0         |  |
|  | Shiraz-58T | 2161 | 0        | -0.187744 |  |
|  | Shiraz-71T | 2238 | 0.603631 | 0         |  |
|  | Shiraz-3T  | 90   | 0.219276 | 0         |  |
|  | Shiraz-3T  | 95   | 0        | -0.077623 |  |
|  | Shiraz-4T  | 253  | 0.372918 | 0         |  |
|  | Shiraz-36T | 378  | 0.179558 | 0         |  |
|  | Shiraz-36T | 382  | 0.081739 | 0         |  |
|  | Shiraz-44T | 641  | 0        | -0.477846 |  |
|  | Shiraz-46T | 943  | 0.093799 | 0         |  |
|  | Shiraz-46T | 947  | 0        | -0.010843 |  |
|  | Shiraz-47T | 1031 | 0        | -0.117529 |  |
|  | Shiraz-49T | 1121 | 0        | -0.138569 |  |
|  | Shiraz-77T | 1225 | 0        | -0.117922 |  |
|  | Shiraz-77T | 1228 | 0        | -0.238084 |  |
|  | Shiraz-18T | 1434 | 0.244465 | 0         |  |
|  | Shiraz-22T | 1549 | 0        | -0.319623 |  |
|  | Shiraz-22T | 1552 | 0        | -0.50686  |  |
|  | Shiraz-25T | 1698 | 0.21835  | 0         |  |
|  | Shiraz-28T | 1735 | 0.350744 | 0         |  |
|  | Shiraz-29T | 1778 | 0.120767 | 0         |  |
|  | Shiraz-32T | 1833 | 0.551336 | 0         |  |
|  | Shiraz-32T | 1835 | 0.092727 | 0         |  |
|  | Shiraz-38T | 1951 | 0.250891 | 0         |  |
|  | Shiraz-53T | 2078 | 0.287202 | 0         |  |
|  | Shiraz-58T | 2161 | 0        | -0.187744 |  |
|  | Shiraz-71T | 2238 | 0.603631 | 0         |  |
|  | Shiraz-3T  | 90   | 0.219276 | 0         |  |
|  | Shiraz-3T  | 95   | 0        | -0.077623 |  |
|  | Shiraz-4T  | 253  | 0.372918 | 0         |  |
|  | Shiraz-36T | 378  | 0.179558 | 0         |  |
|  | Shiraz-36T | 382  | 0.081739 | 0         |  |
|  | Shiraz-44T | 641  | 0        | -0.477846 |  |
|  | Shiraz-46T | 943  | 0.093799 | 0         |  |

|       |      |            |      |          |           |  |  |
|-------|------|------------|------|----------|-----------|--|--|
|       |      | Shiraz-46T | 947  | 0        | -0.010843 |  |  |
|       |      | Shiraz-47T | 1031 | 0        | -0.117529 |  |  |
|       |      | Shiraz-49T | 1121 | 0        | -0.138569 |  |  |
|       |      | Shiraz-77T | 1225 | 0        | -0.117922 |  |  |
|       |      | Shiraz-77T | 1228 | 0        | -0.238084 |  |  |
|       |      | Shiraz-18T | 1434 | 0.244465 | 0         |  |  |
|       |      | Shiraz-22T | 1549 | 0        | -0.319623 |  |  |
|       |      | Shiraz-22T | 1552 | 0        | -0.50686  |  |  |
|       |      | Shiraz-25T | 1698 | 0.21835  | 0         |  |  |
|       |      | Shiraz-28T | 1735 | 0.350744 | 0         |  |  |
|       |      | Shiraz-29T | 1778 | 0.120767 | 0         |  |  |
|       |      | Shiraz-32T | 1833 | 0.551336 | 0         |  |  |
|       |      | Shiraz-32T | 1835 | 0.092727 | 0         |  |  |
|       |      | Shiraz-38T | 1951 | 0.250891 | 0         |  |  |
|       |      | Shiraz-53T | 2078 | 0.287202 | 0         |  |  |
|       |      | Shiraz-58T | 2161 | 0        | -0.187744 |  |  |
|       |      | Shiraz-71T | 2238 | 0.603631 | 0         |  |  |
| IRAK1 | chrX | Shiraz-3T  | 246  | 0.531858 | 0         |  |  |
|       |      | Shiraz-4T  | 261  | 0        | -0.336249 |  |  |
|       |      | Shiraz-16T | 295  | 0.591657 | 0         |  |  |
|       |      | Shiraz-36T | 433  | 0        | -0.803961 |  |  |
|       |      | Shiraz-42T | 480  | 0        | -0.232915 |  |  |
|       |      | Shiraz-44T | 908  | 0.466743 | 0         |  |  |
|       |      | Shiraz-49T | 1170 | 0        | -0.967436 |  |  |
|       |      | Shiraz-49T | 1173 | 0        | -0.704439 |  |  |
|       |      | Shiraz-9T  | 1370 | 0.690073 | 0         |  |  |
|       |      | Shiraz-9T  | 1371 | 1.292392 | 0         |  |  |
|       |      | Shiraz-18T | 1457 | 0.643204 | 0         |  |  |
|       |      | Shiraz-22T | 1673 | 0.611783 | 0         |  |  |
|       |      | Shiraz-22T | 1678 | 0.911625 | 0         |  |  |
|       |      | Shiraz-25T | 1719 | 0.472955 | 0         |  |  |
|       |      | Shiraz-28T | 1762 | 0.562311 | 0         |  |  |
|       |      | Shiraz-29T | 1801 | 0.815343 | 0         |  |  |
|       |      | Shiraz-32T | 1870 | 0.729766 | 0         |  |  |
|       |      | Shiraz-32T | 1872 | 1.504553 | 0         |  |  |
|       |      | Shiraz-35T | 1933 | 0.488535 | 0         |  |  |
|       |      | Shiraz-38T | 2011 | 0        | -0.406024 |  |  |
|       |      | Shiraz-53T | 2115 | 0.427728 | 0         |  |  |
|       |      | Shiraz-58T | 2223 | 0.833364 | 0         |  |  |
|       |      | Shiraz-58T | 2226 | 1.074663 | 0         |  |  |
|       |      | Shiraz-71T | 2263 | 0.975531 | 0         |  |  |
|       |      | Shiraz-3T  | 246  | 0.531858 | 0         |  |  |
|       |      | Shiraz-4T  | 261  | 0        | -0.336249 |  |  |
|       |      | Shiraz-16T | 295  | 0.591657 | 0         |  |  |
|       |      | Shiraz-36T | 433  | 0        | -0.803961 |  |  |
|       |      | Shiraz-42T | 480  | 0        | -0.232915 |  |  |
|       |      | Shiraz-44T | 908  | 0.466743 | 0         |  |  |

|      |      |            |      |          |           |  |  |
|------|------|------------|------|----------|-----------|--|--|
|      |      | Shiraz-49T | 1170 | 0        | -0.967436 |  |  |
|      |      | Shiraz-49T | 1173 | 0        | -0.704439 |  |  |
|      |      | Shiraz-9T  | 1370 | 0.690073 | 0         |  |  |
|      |      | Shiraz-9T  | 1371 | 1.292392 | 0         |  |  |
|      |      | Shiraz-18T | 1457 | 0.643204 | 0         |  |  |
|      |      | Shiraz-22T | 1673 | 0.611783 | 0         |  |  |
|      |      | Shiraz-22T | 1678 | 0.911625 | 0         |  |  |
|      |      | Shiraz-25T | 1719 | 0.472955 | 0         |  |  |
|      |      | Shiraz-28T | 1762 | 0.562311 | 0         |  |  |
|      |      | Shiraz-29T | 1801 | 0.815343 | 0         |  |  |
|      |      | Shiraz-32T | 1870 | 0.729766 | 0         |  |  |
|      |      | Shiraz-32T | 1872 | 1.504553 | 0         |  |  |
|      |      | Shiraz-35T | 1933 | 0.488535 | 0         |  |  |
|      |      | Shiraz-38T | 2011 | 0        | -0.406024 |  |  |
|      |      | Shiraz-53T | 2115 | 0.427728 | 0         |  |  |
|      |      | Shiraz-58T | 2223 | 0.833364 | 0         |  |  |
|      |      | Shiraz-58T | 2226 | 1.074663 | 0         |  |  |
|      |      | Shiraz-71T | 2263 | 0.975531 | 0         |  |  |
|      |      | Shiraz-3T  | 246  | 0.531858 | 0         |  |  |
|      |      | Shiraz-4T  | 261  | 0        | -0.336249 |  |  |
|      |      | Shiraz-16T | 295  | 0.591657 | 0         |  |  |
|      |      | Shiraz-36T | 433  | 0        | -0.803961 |  |  |
|      |      | Shiraz-42T | 480  | 0        | -0.232915 |  |  |
|      |      | Shiraz-44T | 908  | 0.466743 | 0         |  |  |
|      |      | Shiraz-49T | 1170 | 0        | -0.967436 |  |  |
|      |      | Shiraz-49T | 1173 | 0        | -0.704439 |  |  |
|      |      | Shiraz-9T  | 1370 | 0.690073 | 0         |  |  |
|      |      | Shiraz-9T  | 1371 | 1.292392 | 0         |  |  |
|      |      | Shiraz-18T | 1457 | 0.643204 | 0         |  |  |
|      |      | Shiraz-22T | 1673 | 0.611783 | 0         |  |  |
|      |      | Shiraz-22T | 1678 | 0.911625 | 0         |  |  |
|      |      | Shiraz-25T | 1719 | 0.472955 | 0         |  |  |
|      |      | Shiraz-28T | 1762 | 0.562311 | 0         |  |  |
|      |      | Shiraz-29T | 1801 | 0.815343 | 0         |  |  |
|      |      | Shiraz-32T | 1870 | 0.729766 | 0         |  |  |
|      |      | Shiraz-32T | 1872 | 1.504553 | 0         |  |  |
|      |      | Shiraz-35T | 1933 | 0.488535 | 0         |  |  |
|      |      | Shiraz-38T | 2011 | 0        | -0.406024 |  |  |
|      |      | Shiraz-53T | 2115 | 0.427728 | 0         |  |  |
|      |      | Shiraz-58T | 2223 | 0.833364 | 0         |  |  |
|      |      | Shiraz-58T | 2226 | 1.074663 | 0         |  |  |
|      |      | Shiraz-71T | 2263 | 0.975531 | 0         |  |  |
| IRF5 | chr7 | Shiraz-3T  | 90   | 0.219276 | 0         |  |  |
|      |      | Shiraz-3T  | 90   | 0.219276 | 0         |  |  |
|      |      | Shiraz-3T  | 90   | 0.219276 | 0         |  |  |
|      |      | Shiraz-3T  | 90   | 0.219276 | 0         |  |  |
|      |      | Shiraz-3T  | 90   | 0.219276 | 0         |  |  |



|  |            |      |          |           |  |
|--|------------|------|----------|-----------|--|
|  | Shiraz-3T  | 90   | 0.219276 | 0         |  |
|  | Shiraz-3T  | 96   | 0.428308 | 0         |  |
|  | Shiraz-3T  | 96   | 0.428308 | 0         |  |
|  | Shiraz-3T  | 96   | 0.428308 | 0         |  |
|  | Shiraz-3T  | 96   | 0.428308 | 0         |  |
|  | Shiraz-3T  | 96   | 0.428308 | 0         |  |
|  | Shiraz-3T  | 96   | 0.428308 | 0         |  |
|  | Shiraz-4T  | 253  | 0.372918 | 0         |  |
|  | Shiraz-4T  | 253  | 0.372918 | 0         |  |
|  | Shiraz-4T  | 253  | 0.372918 | 0         |  |
|  | Shiraz-4T  | 253  | 0.372918 | 0         |  |
|  | Shiraz-4T  | 253  | 0.372918 | 0         |  |
|  | Shiraz-4T  | 253  | 0.372918 | 0         |  |
|  | Shiraz-31T | 317  | 0.204382 | 0         |  |
|  | Shiraz-31T | 317  | 0.204382 | 0         |  |
|  | Shiraz-31T | 317  | 0.204382 | 0         |  |
|  | Shiraz-31T | 317  | 0.204382 | 0         |  |
|  | Shiraz-31T | 317  | 0.204382 | 0         |  |
|  | Shiraz-31T | 317  | 0.204382 | 0         |  |
|  | Shiraz-36T | 378  | 0.179558 | 0         |  |
|  | Shiraz-36T | 378  | 0.179558 | 0         |  |
|  | Shiraz-36T | 378  | 0.179558 | 0         |  |
|  | Shiraz-36T | 378  | 0.179558 | 0         |  |
|  | Shiraz-36T | 378  | 0.179558 | 0         |  |
|  | Shiraz-44T | 642  | 0.408617 | 0         |  |
|  | Shiraz-44T | 642  | 0.408617 | 0         |  |
|  | Shiraz-44T | 642  | 0.408617 | 0         |  |
|  | Shiraz-44T | 642  | 0.408617 | 0         |  |
|  | Shiraz-44T | 642  | 0.408617 | 0         |  |
|  | Shiraz-44T | 642  | 0.408617 | 0         |  |
|  | Shiraz-46T | 943  | 0.093799 | 0         |  |
|  | Shiraz-46T | 943  | 0.093799 | 0         |  |
|  | Shiraz-46T | 943  | 0.093799 | 0         |  |
|  | Shiraz-46T | 943  | 0.093799 | 0         |  |
|  | Shiraz-46T | 943  | 0.093799 | 0         |  |
|  | Shiraz-46T | 943  | 0.093799 | 0         |  |
|  | Shiraz-47T | 1032 | 0.171484 | 0         |  |
|  | Shiraz-47T | 1032 | 0.171484 | 0         |  |
|  | Shiraz-47T | 1032 | 0.171484 | 0         |  |
|  | Shiraz-47T | 1032 | 0.171484 | 0         |  |
|  | Shiraz-47T | 1032 | 0.171484 | 0         |  |
|  | Shiraz-47T | 1032 | 0.171484 | 0         |  |
|  | Shiraz-77T | 1225 | 0        | -0.117922 |  |
|  | Shiraz-77T | 1225 | 0        | -0.117922 |  |
|  | Shiraz-77T | 1225 | 0        | -0.117922 |  |
|  | Shiraz-77T | 1225 | 0        | -0.117922 |  |

|  |            |      |          |           |  |
|--|------------|------|----------|-----------|--|
|  | Shiraz-77T | 1225 | 0        | -0.117922 |  |
|  | Shiraz-77T | 1225 | 0        | -0.117922 |  |
|  | Shiraz-77T | 1229 | 0.051661 | 0         |  |
|  | Shiraz-77T | 1229 | 0.051661 | 0         |  |
|  | Shiraz-77T | 1229 | 0.051661 | 0         |  |
|  | Shiraz-77T | 1229 | 0.051661 | 0         |  |
|  | Shiraz-77T | 1229 | 0.051661 | 0         |  |
|  | Shiraz-77T | 1229 | 0.051661 | 0         |  |
|  | Shiraz-9T  | 1325 | 0.221899 | 0         |  |
|  | Shiraz-9T  | 1325 | 0.221899 | 0         |  |
|  | Shiraz-9T  | 1325 | 0.221899 | 0         |  |
|  | Shiraz-9T  | 1325 | 0.221899 | 0         |  |
|  | Shiraz-9T  | 1325 | 0.221899 | 0         |  |
|  | Shiraz-9T  | 1325 | 0.221899 | 0         |  |
|  | Shiraz-18T | 1434 | 0.244465 | 0         |  |
|  | Shiraz-18T | 1434 | 0.244465 | 0         |  |
|  | Shiraz-18T | 1434 | 0.244465 | 0         |  |
|  | Shiraz-18T | 1434 | 0.244465 | 0         |  |
|  | Shiraz-18T | 1434 | 0.244465 | 0         |  |
|  | Shiraz-18T | 1434 | 0.244465 | 0         |  |
|  | Shiraz-25T | 1698 | 0.21835  | 0         |  |
|  | Shiraz-25T | 1698 | 0.21835  | 0         |  |
|  | Shiraz-25T | 1698 | 0.21835  | 0         |  |
|  | Shiraz-25T | 1698 | 0.21835  | 0         |  |
|  | Shiraz-25T | 1698 | 0.21835  | 0         |  |
|  | Shiraz-28T | 1735 | 0.350744 | 0         |  |
|  | Shiraz-28T | 1735 | 0.350744 | 0         |  |
|  | Shiraz-28T | 1735 | 0.350744 | 0         |  |
|  | Shiraz-28T | 1735 | 0.350744 | 0         |  |
|  | Shiraz-28T | 1735 | 0.350744 | 0         |  |
|  | Shiraz-28T | 1735 | 0.350744 | 0         |  |
|  | Shiraz-29T | 1778 | 0.120767 | 0         |  |
|  | Shiraz-29T | 1778 | 0.120767 | 0         |  |
|  | Shiraz-29T | 1778 | 0.120767 | 0         |  |
|  | Shiraz-29T | 1778 | 0.120767 | 0         |  |
|  | Shiraz-29T | 1778 | 0.120767 | 0         |  |
|  | Shiraz-29T | 1778 | 0.120767 | 0         |  |
|  | Shiraz-32T | 1833 | 0.551336 | 0         |  |
|  | Shiraz-32T | 1833 | 0.551336 | 0         |  |
|  | Shiraz-32T | 1833 | 0.551336 | 0         |  |
|  | Shiraz-32T | 1833 | 0.551336 | 0         |  |
|  | Shiraz-32T | 1833 | 0.551336 | 0         |  |
|  | Shiraz-32T | 1833 | 0.551336 | 0         |  |
|  | Shiraz-38T | 1951 | 0.250891 | 0         |  |
|  | Shiraz-38T | 1951 | 0.250891 | 0         |  |
|  | Shiraz-38T | 1951 | 0.250891 | 0         |  |

|  |  |            |      |          |   |  |  |
|--|--|------------|------|----------|---|--|--|
|  |  | Shiraz-38T | 1951 | 0.250891 | 0 |  |  |
|  |  | Shiraz-38T | 1951 | 0.250891 | 0 |  |  |
|  |  | Shiraz-38T | 1951 | 0.250891 | 0 |  |  |
|  |  | Shiraz-53T | 2078 | 0.287202 | 0 |  |  |
|  |  | Shiraz-53T | 2078 | 0.287202 | 0 |  |  |
|  |  | Shiraz-53T | 2078 | 0.287202 | 0 |  |  |
|  |  | Shiraz-53T | 2078 | 0.287202 | 0 |  |  |
|  |  | Shiraz-53T | 2078 | 0.287202 | 0 |  |  |
|  |  | Shiraz-53T | 2078 | 0.287202 | 0 |  |  |
|  |  | Shiraz-71T | 2238 | 0.603631 | 0 |  |  |
|  |  | Shiraz-71T | 2238 | 0.603631 | 0 |  |  |
|  |  | Shiraz-71T | 2238 | 0.603631 | 0 |  |  |
|  |  | Shiraz-71T | 2238 | 0.603631 | 0 |  |  |
|  |  | Shiraz-71T | 2238 | 0.603631 | 0 |  |  |
|  |  | Shiraz-3T  | 90   | 0.219276 | 0 |  |  |
|  |  | Shiraz-3T  | 90   | 0.219276 | 0 |  |  |
|  |  | Shiraz-3T  | 90   | 0.219276 | 0 |  |  |
|  |  | Shiraz-3T  | 90   | 0.219276 | 0 |  |  |
|  |  | Shiraz-3T  | 90   | 0.219276 | 0 |  |  |
|  |  | Shiraz-3T  | 90   | 0.219276 | 0 |  |  |
|  |  | Shiraz-3T  | 96   | 0.428308 | 0 |  |  |
|  |  | Shiraz-3T  | 96   | 0.428308 | 0 |  |  |
|  |  | Shiraz-3T  | 96   | 0.428308 | 0 |  |  |
|  |  | Shiraz-3T  | 96   | 0.428308 | 0 |  |  |
|  |  | Shiraz-3T  | 96   | 0.428308 | 0 |  |  |
|  |  | Shiraz-3T  | 96   | 0.428308 | 0 |  |  |
|  |  | Shiraz-4T  | 253  | 0.372918 | 0 |  |  |
|  |  | Shiraz-4T  | 253  | 0.372918 | 0 |  |  |
|  |  | Shiraz-4T  | 253  | 0.372918 | 0 |  |  |
|  |  | Shiraz-4T  | 253  | 0.372918 | 0 |  |  |
|  |  | Shiraz-4T  | 253  | 0.372918 | 0 |  |  |
|  |  | Shiraz-4T  | 253  | 0.372918 | 0 |  |  |
|  |  | Shiraz-31T | 317  | 0.204382 | 0 |  |  |
|  |  | Shiraz-31T | 317  | 0.204382 | 0 |  |  |
|  |  | Shiraz-31T | 317  | 0.204382 | 0 |  |  |
|  |  | Shiraz-31T | 317  | 0.204382 | 0 |  |  |
|  |  | Shiraz-31T | 317  | 0.204382 | 0 |  |  |
|  |  | Shiraz-36T | 378  | 0.179558 | 0 |  |  |
|  |  | Shiraz-36T | 378  | 0.179558 | 0 |  |  |
|  |  | Shiraz-36T | 378  | 0.179558 | 0 |  |  |
|  |  | Shiraz-36T | 378  | 0.179558 | 0 |  |  |
|  |  | Shiraz-36T | 378  | 0.179558 | 0 |  |  |
|  |  | Shiraz-44T | 642  | 0.408617 | 0 |  |  |
|  |  | Shiraz-44T | 642  | 0.408617 | 0 |  |  |

|  |  |            |      |          |           |  |  |
|--|--|------------|------|----------|-----------|--|--|
|  |  | Shiraz-44T | 642  | 0.408617 | 0         |  |  |
|  |  | Shiraz-44T | 642  | 0.408617 | 0         |  |  |
|  |  | Shiraz-44T | 642  | 0.408617 | 0         |  |  |
|  |  | Shiraz-44T | 642  | 0.408617 | 0         |  |  |
|  |  | Shiraz-46T | 943  | 0.093799 | 0         |  |  |
|  |  | Shiraz-46T | 943  | 0.093799 | 0         |  |  |
|  |  | Shiraz-46T | 943  | 0.093799 | 0         |  |  |
|  |  | Shiraz-46T | 943  | 0.093799 | 0         |  |  |
|  |  | Shiraz-46T | 943  | 0.093799 | 0         |  |  |
|  |  | Shiraz-46T | 943  | 0.093799 | 0         |  |  |
|  |  | Shiraz-47T | 1032 | 0.171484 | 0         |  |  |
|  |  | Shiraz-47T | 1032 | 0.171484 | 0         |  |  |
|  |  | Shiraz-47T | 1032 | 0.171484 | 0         |  |  |
|  |  | Shiraz-47T | 1032 | 0.171484 | 0         |  |  |
|  |  | Shiraz-47T | 1032 | 0.171484 | 0         |  |  |
|  |  | Shiraz-47T | 1032 | 0.171484 | 0         |  |  |
|  |  | Shiraz-77T | 1225 | 0        | -0.117922 |  |  |
|  |  | Shiraz-77T | 1225 | 0        | -0.117922 |  |  |
|  |  | Shiraz-77T | 1225 | 0        | -0.117922 |  |  |
|  |  | Shiraz-77T | 1225 | 0        | -0.117922 |  |  |
|  |  | Shiraz-77T | 1225 | 0        | -0.117922 |  |  |
|  |  | Shiraz-77T | 1225 | 0        | -0.117922 |  |  |
|  |  | Shiraz-77T | 1229 | 0.051661 | 0         |  |  |
|  |  | Shiraz-77T | 1229 | 0.051661 | 0         |  |  |
|  |  | Shiraz-77T | 1229 | 0.051661 | 0         |  |  |
|  |  | Shiraz-77T | 1229 | 0.051661 | 0         |  |  |
|  |  | Shiraz-77T | 1229 | 0.051661 | 0         |  |  |
|  |  | Shiraz-77T | 1229 | 0.051661 | 0         |  |  |
|  |  | Shiraz-9T  | 1325 | 0.221899 | 0         |  |  |
|  |  | Shiraz-9T  | 1325 | 0.221899 | 0         |  |  |
|  |  | Shiraz-9T  | 1325 | 0.221899 | 0         |  |  |
|  |  | Shiraz-9T  | 1325 | 0.221899 | 0         |  |  |
|  |  | Shiraz-9T  | 1325 | 0.221899 | 0         |  |  |
|  |  | Shiraz-18T | 1434 | 0.244465 | 0         |  |  |
|  |  | Shiraz-18T | 1434 | 0.244465 | 0         |  |  |
|  |  | Shiraz-18T | 1434 | 0.244465 | 0         |  |  |
|  |  | Shiraz-18T | 1434 | 0.244465 | 0         |  |  |
|  |  | Shiraz-18T | 1434 | 0.244465 | 0         |  |  |
|  |  | Shiraz-25T | 1698 | 0.21835  | 0         |  |  |
|  |  | Shiraz-25T | 1698 | 0.21835  | 0         |  |  |
|  |  | Shiraz-25T | 1698 | 0.21835  | 0         |  |  |
|  |  | Shiraz-25T | 1698 | 0.21835  | 0         |  |  |
|  |  | Shiraz-25T | 1698 | 0.21835  | 0         |  |  |
|  |  | Shiraz-28T | 1735 | 0.350744 | 0         |  |  |



|  |            |      |          |           |  |
|--|------------|------|----------|-----------|--|
|  | Shiraz-4T  | 253  | 0.372918 | 0         |  |
|  | Shiraz-4T  | 253  | 0.372918 | 0         |  |
|  | Shiraz-4T  | 253  | 0.372918 | 0         |  |
|  | Shiraz-4T  | 253  | 0.372918 | 0         |  |
|  | Shiraz-4T  | 253  | 0.372918 | 0         |  |
|  | Shiraz-4T  | 253  | 0.372918 | 0         |  |
|  | Shiraz-31T | 317  | 0.204382 | 0         |  |
|  | Shiraz-31T | 317  | 0.204382 | 0         |  |
|  | Shiraz-31T | 317  | 0.204382 | 0         |  |
|  | Shiraz-31T | 317  | 0.204382 | 0         |  |
|  | Shiraz-31T | 317  | 0.204382 | 0         |  |
|  | Shiraz-31T | 317  | 0.204382 | 0         |  |
|  | Shiraz-36T | 378  | 0.179558 | 0         |  |
|  | Shiraz-36T | 378  | 0.179558 | 0         |  |
|  | Shiraz-36T | 378  | 0.179558 | 0         |  |
|  | Shiraz-36T | 378  | 0.179558 | 0         |  |
|  | Shiraz-36T | 378  | 0.179558 | 0         |  |
|  | Shiraz-36T | 378  | 0.179558 | 0         |  |
|  | Shiraz-44T | 642  | 0.408617 | 0         |  |
|  | Shiraz-44T | 642  | 0.408617 | 0         |  |
|  | Shiraz-44T | 642  | 0.408617 | 0         |  |
|  | Shiraz-44T | 642  | 0.408617 | 0         |  |
|  | Shiraz-44T | 642  | 0.408617 | 0         |  |
|  | Shiraz-44T | 642  | 0.408617 | 0         |  |
|  | Shiraz-46T | 943  | 0.093799 | 0         |  |
|  | Shiraz-46T | 943  | 0.093799 | 0         |  |
|  | Shiraz-46T | 943  | 0.093799 | 0         |  |
|  | Shiraz-46T | 943  | 0.093799 | 0         |  |
|  | Shiraz-46T | 943  | 0.093799 | 0         |  |
|  | Shiraz-46T | 943  | 0.093799 | 0         |  |
|  | Shiraz-47T | 1032 | 0.171484 | 0         |  |
|  | Shiraz-47T | 1032 | 0.171484 | 0         |  |
|  | Shiraz-47T | 1032 | 0.171484 | 0         |  |
|  | Shiraz-47T | 1032 | 0.171484 | 0         |  |
|  | Shiraz-47T | 1032 | 0.171484 | 0         |  |
|  | Shiraz-47T | 1032 | 0.171484 | 0         |  |
|  | Shiraz-77T | 1225 | 0        | -0.117922 |  |
|  | Shiraz-77T | 1225 | 0        | -0.117922 |  |
|  | Shiraz-77T | 1225 | 0        | -0.117922 |  |
|  | Shiraz-77T | 1225 | 0        | -0.117922 |  |
|  | Shiraz-77T | 1225 | 0        | -0.117922 |  |
|  | Shiraz-77T | 1225 | 0        | -0.117922 |  |
|  | Shiraz-77T | 1229 | 0.051661 | 0         |  |
|  | Shiraz-77T | 1229 | 0.051661 | 0         |  |
|  | Shiraz-77T | 1229 | 0.051661 | 0         |  |
|  | Shiraz-77T | 1229 | 0.051661 | 0         |  |
|  | Shiraz-77T | 1229 | 0.051661 | 0         |  |

|  |  |            |      |          |   |  |  |
|--|--|------------|------|----------|---|--|--|
|  |  | Shiraz-77T | 1229 | 0.051661 | 0 |  |  |
|  |  | Shiraz-9T  | 1325 | 0.221899 | 0 |  |  |
|  |  | Shiraz-9T  | 1325 | 0.221899 | 0 |  |  |
|  |  | Shiraz-9T  | 1325 | 0.221899 | 0 |  |  |
|  |  | Shiraz-9T  | 1325 | 0.221899 | 0 |  |  |
|  |  | Shiraz-9T  | 1325 | 0.221899 | 0 |  |  |
|  |  | Shiraz-9T  | 1325 | 0.221899 | 0 |  |  |
|  |  | Shiraz-18T | 1434 | 0.244465 | 0 |  |  |
|  |  | Shiraz-18T | 1434 | 0.244465 | 0 |  |  |
|  |  | Shiraz-18T | 1434 | 0.244465 | 0 |  |  |
|  |  | Shiraz-18T | 1434 | 0.244465 | 0 |  |  |
|  |  | Shiraz-18T | 1434 | 0.244465 | 0 |  |  |
|  |  | Shiraz-18T | 1434 | 0.244465 | 0 |  |  |
|  |  | Shiraz-25T | 1698 | 0.21835  | 0 |  |  |
|  |  | Shiraz-25T | 1698 | 0.21835  | 0 |  |  |
|  |  | Shiraz-25T | 1698 | 0.21835  | 0 |  |  |
|  |  | Shiraz-25T | 1698 | 0.21835  | 0 |  |  |
|  |  | Shiraz-25T | 1698 | 0.21835  | 0 |  |  |
|  |  | Shiraz-25T | 1698 | 0.21835  | 0 |  |  |
|  |  | Shiraz-28T | 1735 | 0.350744 | 0 |  |  |
|  |  | Shiraz-28T | 1735 | 0.350744 | 0 |  |  |
|  |  | Shiraz-28T | 1735 | 0.350744 | 0 |  |  |
|  |  | Shiraz-28T | 1735 | 0.350744 | 0 |  |  |
|  |  | Shiraz-28T | 1735 | 0.350744 | 0 |  |  |
|  |  | Shiraz-28T | 1735 | 0.350744 | 0 |  |  |
|  |  | Shiraz-29T | 1778 | 0.120767 | 0 |  |  |
|  |  | Shiraz-29T | 1778 | 0.120767 | 0 |  |  |
|  |  | Shiraz-29T | 1778 | 0.120767 | 0 |  |  |
|  |  | Shiraz-29T | 1778 | 0.120767 | 0 |  |  |
|  |  | Shiraz-29T | 1778 | 0.120767 | 0 |  |  |
|  |  | Shiraz-29T | 1778 | 0.120767 | 0 |  |  |
|  |  | Shiraz-32T | 1833 | 0.551336 | 0 |  |  |
|  |  | Shiraz-32T | 1833 | 0.551336 | 0 |  |  |
|  |  | Shiraz-32T | 1833 | 0.551336 | 0 |  |  |
|  |  | Shiraz-32T | 1833 | 0.551336 | 0 |  |  |
|  |  | Shiraz-32T | 1833 | 0.551336 | 0 |  |  |
|  |  | Shiraz-32T | 1833 | 0.551336 | 0 |  |  |
|  |  | Shiraz-38T | 1951 | 0.250891 | 0 |  |  |
|  |  | Shiraz-38T | 1951 | 0.250891 | 0 |  |  |
|  |  | Shiraz-38T | 1951 | 0.250891 | 0 |  |  |
|  |  | Shiraz-38T | 1951 | 0.250891 | 0 |  |  |
|  |  | Shiraz-38T | 1951 | 0.250891 | 0 |  |  |
|  |  | Shiraz-38T | 1951 | 0.250891 | 0 |  |  |
|  |  | Shiraz-53T | 2078 | 0.287202 | 0 |  |  |
|  |  | Shiraz-53T | 2078 | 0.287202 | 0 |  |  |
|  |  | Shiraz-53T | 2078 | 0.287202 | 0 |  |  |
|  |  | Shiraz-53T | 2078 | 0.287202 | 0 |  |  |

|      |      |            |      |          |           |  |
|------|------|------------|------|----------|-----------|--|
|      |      | Shiraz-53T | 2078 | 0.287202 | 0         |  |
|      |      | Shiraz-53T | 2078 | 0.287202 | 0         |  |
|      |      | Shiraz-71T | 2238 | 0.603631 | 0         |  |
|      |      | Shiraz-71T | 2238 | 0.603631 | 0         |  |
|      |      | Shiraz-71T | 2238 | 0.603631 | 0         |  |
|      |      | Shiraz-71T | 2238 | 0.603631 | 0         |  |
|      |      | Shiraz-71T | 2238 | 0.603631 | 0         |  |
|      |      | Shiraz-71T | 2238 | 0.603631 | 0         |  |
| IRS4 | chrX | Shiraz-3T  | 242  | 0        | -0.336434 |  |
|      |      | Shiraz-4T  | 261  | 0        | -0.336249 |  |
|      |      | Shiraz-16T | 295  | 0.591657 | 0         |  |
|      |      | Shiraz-36T | 433  | 0        | -0.803961 |  |
|      |      | Shiraz-44T | 899  | 0        | -1.09697  |  |
|      |      | Shiraz-49T | 1170 | 0        | -0.967436 |  |
|      |      | Shiraz-18T | 1457 | 0.643204 | 0         |  |
|      |      | Shiraz-22T | 1673 | 0.611783 | 0         |  |
|      |      | Shiraz-25T | 1719 | 0.472955 | 0         |  |
|      |      | Shiraz-28T | 1762 | 0.562311 | 0         |  |
|      |      | Shiraz-29T | 1801 | 0.815343 | 0         |  |
|      |      | Shiraz-32T | 1870 | 0.729766 | 0         |  |
|      |      | Shiraz-35T | 1933 | 0.488535 | 0         |  |
|      |      | Shiraz-58T | 2223 | 0.833364 | 0         |  |
|      |      | Shiraz-71T | 2263 | 0.975531 | 0         |  |
|      |      | Shiraz-3T  | 242  | 0        | -0.336434 |  |
|      |      | Shiraz-4T  | 261  | 0        | -0.336249 |  |
|      |      | Shiraz-16T | 295  | 0.591657 | 0         |  |
|      |      | Shiraz-36T | 433  | 0        | -0.803961 |  |
|      |      | Shiraz-44T | 899  | 0        | -1.09697  |  |
|      |      | Shiraz-49T | 1170 | 0        | -0.967436 |  |
|      |      | Shiraz-18T | 1457 | 0.643204 | 0         |  |
|      |      | Shiraz-22T | 1673 | 0.611783 | 0         |  |
|      |      | Shiraz-25T | 1719 | 0.472955 | 0         |  |
|      |      | Shiraz-28T | 1762 | 0.562311 | 0         |  |
|      |      | Shiraz-29T | 1801 | 0.815343 | 0         |  |
|      |      | Shiraz-32T | 1870 | 0.729766 | 0         |  |
|      |      | Shiraz-35T | 1933 | 0.488535 | 0         |  |
|      |      | Shiraz-58T | 2223 | 0.833364 | 0         |  |
|      |      | Shiraz-71T | 2263 | 0.975531 | 0         |  |
|      |      | Shiraz-3T  | 242  | 0        | -0.336434 |  |
|      |      | Shiraz-4T  | 261  | 0        | -0.336249 |  |
|      |      | Shiraz-16T | 295  | 0.591657 | 0         |  |
|      |      | Shiraz-36T | 433  | 0        | -0.803961 |  |
|      |      | Shiraz-44T | 899  | 0        | -1.09697  |  |
|      |      | Shiraz-49T | 1170 | 0        | -0.967436 |  |
|      |      | Shiraz-18T | 1457 | 0.643204 | 0         |  |
|      |      | Shiraz-22T | 1673 | 0.611783 | 0         |  |
|      |      | Shiraz-25T | 1719 | 0.472955 | 0         |  |



|          |      |            |      |          |           |  |
|----------|------|------------|------|----------|-----------|--|
|          |      | Shiraz-28T | 1762 | 0.562311 | 0         |  |
|          |      | Shiraz-29T | 1801 | 0.815343 | 0         |  |
|          |      | Shiraz-32T | 1870 | 0.729766 | 0         |  |
|          |      | Shiraz-35T | 1933 | 0.488535 | 0         |  |
|          |      | Shiraz-58T | 2223 | 0.833364 | 0         |  |
|          |      | Shiraz-71T | 2263 | 0.975531 | 0         |  |
| ITGB1BP2 | chrX | Shiraz-4T  | 261  | 0        | -0.336249 |  |
|          |      | Shiraz-16T | 295  | 0.591657 | 0         |  |
|          |      | Shiraz-36T | 433  | 0        | -0.803961 |  |
|          |      | Shiraz-44T | 899  | 0        | -1.09697  |  |
|          |      | Shiraz-44T | 900  | 0        | -0.584284 |  |
|          |      | Shiraz-49T | 1170 | 0        | -0.967436 |  |
|          |      | Shiraz-49T | 1171 | 0        | -0.612379 |  |
|          |      | Shiraz-77T | 1283 | 0.296555 | 0         |  |
|          |      | Shiraz-18T | 1457 | 0.643204 | 0         |  |
|          |      | Shiraz-22T | 1673 | 0.611783 | 0         |  |
|          |      | Shiraz-22T | 1674 | 0.887899 | 0         |  |
|          |      | Shiraz-25T | 1719 | 0.472955 | 0         |  |
|          |      | Shiraz-28T | 1762 | 0.562311 | 0         |  |
|          |      | Shiraz-29T | 1801 | 0.815343 | 0         |  |
|          |      | Shiraz-32T | 1870 | 0.729766 | 0         |  |
|          |      | Shiraz-35T | 1933 | 0.488535 | 0         |  |
|          |      | Shiraz-58T | 2223 | 0.833364 | 0         |  |
|          |      | Shiraz-58T | 2224 | 1.076575 | 0         |  |
|          |      | Shiraz-71T | 2263 | 0.975531 | 0         |  |
|          |      | Shiraz-4T  | 261  | 0        | -0.336249 |  |
|          |      | Shiraz-16T | 295  | 0.591657 | 0         |  |
|          |      | Shiraz-36T | 433  | 0        | -0.803961 |  |
|          |      | Shiraz-44T | 899  | 0        | -1.09697  |  |
|          |      | Shiraz-44T | 900  | 0        | -0.584284 |  |
|          |      | Shiraz-49T | 1170 | 0        | -0.967436 |  |
|          |      | Shiraz-49T | 1171 | 0        | -0.612379 |  |
|          |      | Shiraz-77T | 1283 | 0.296555 | 0         |  |
|          |      | Shiraz-18T | 1457 | 0.643204 | 0         |  |
|          |      | Shiraz-22T | 1673 | 0.611783 | 0         |  |
|          |      | Shiraz-22T | 1674 | 0.887899 | 0         |  |
|          |      | Shiraz-25T | 1719 | 0.472955 | 0         |  |
|          |      | Shiraz-28T | 1762 | 0.562311 | 0         |  |
|          |      | Shiraz-29T | 1801 | 0.815343 | 0         |  |
|          |      | Shiraz-32T | 1870 | 0.729766 | 0         |  |
|          |      | Shiraz-35T | 1933 | 0.488535 | 0         |  |
|          |      | Shiraz-58T | 2223 | 0.833364 | 0         |  |
|          |      | Shiraz-58T | 2224 | 1.076575 | 0         |  |
|          |      | Shiraz-71T | 2263 | 0.975531 | 0         |  |
|          |      | Shiraz-4T  | 261  | 0        | -0.336249 |  |
|          |      | Shiraz-16T | 295  | 0.591657 | 0         |  |
|          |      | Shiraz-36T | 433  | 0        | -0.803961 |  |

|       |      |            |      |          |           |  |  |
|-------|------|------------|------|----------|-----------|--|--|
|       |      | Shiraz-44T | 899  | 0        | -1.09697  |  |  |
|       |      | Shiraz-44T | 900  | 0        | -0.584284 |  |  |
|       |      | Shiraz-49T | 1170 | 0        | -0.967436 |  |  |
|       |      | Shiraz-49T | 1171 | 0        | -0.612379 |  |  |
|       |      | Shiraz-77T | 1283 | 0.296555 | 0         |  |  |
|       |      | Shiraz-18T | 1457 | 0.643204 | 0         |  |  |
|       |      | Shiraz-22T | 1673 | 0.611783 | 0         |  |  |
|       |      | Shiraz-22T | 1674 | 0.887899 | 0         |  |  |
|       |      | Shiraz-25T | 1719 | 0.472955 | 0         |  |  |
|       |      | Shiraz-28T | 1762 | 0.562311 | 0         |  |  |
|       |      | Shiraz-29T | 1801 | 0.815343 | 0         |  |  |
|       |      | Shiraz-32T | 1870 | 0.729766 | 0         |  |  |
|       |      | Shiraz-35T | 1933 | 0.488535 | 0         |  |  |
|       |      | Shiraz-58T | 2223 | 0.833364 | 0         |  |  |
|       |      | Shiraz-58T | 2224 | 1.076575 | 0         |  |  |
|       |      | Shiraz-71T | 2263 | 0.975531 | 0         |  |  |
| ITGB8 | chr7 | Shiraz-4T  | 252  | 0.192083 | 0         |  |  |
|       |      | Shiraz-36T | 376  | 0.159952 | 0         |  |  |
|       |      | Shiraz-44T | 628  | 0        | -0.444379 |  |  |
|       |      | Shiraz-47T | 1027 | 0        | -0.117848 |  |  |
|       |      | Shiraz-49T | 1117 | 0        | -0.168296 |  |  |
|       |      | Shiraz-77T | 1222 | 0        | -0.113002 |  |  |
|       |      | Shiraz-18T | 1433 | 0.250973 | 0         |  |  |
|       |      | Shiraz-22T | 1543 | 0        | -0.513696 |  |  |
|       |      | Shiraz-25T | 1697 | 0.21945  | 0         |  |  |
|       |      | Shiraz-28T | 1734 | 0.362882 | 0         |  |  |
|       |      | Shiraz-29T | 1777 | 0.156747 | 0         |  |  |
|       |      | Shiraz-38T | 1950 | 0.265916 | 0         |  |  |
|       |      | Shiraz-58T | 2157 | 0        | -0.213872 |  |  |
|       |      | Shiraz-71T | 2236 | 0.320072 | 0         |  |  |
|       |      | Shiraz-4T  | 252  | 0.192083 | 0         |  |  |
|       |      | Shiraz-36T | 376  | 0.159952 | 0         |  |  |
|       |      | Shiraz-44T | 628  | 0        | -0.444379 |  |  |
|       |      | Shiraz-47T | 1027 | 0        | -0.117848 |  |  |
|       |      | Shiraz-49T | 1117 | 0        | -0.168296 |  |  |
|       |      | Shiraz-77T | 1222 | 0        | -0.113002 |  |  |
|       |      | Shiraz-18T | 1433 | 0.250973 | 0         |  |  |
|       |      | Shiraz-22T | 1543 | 0        | -0.513696 |  |  |
|       |      | Shiraz-25T | 1697 | 0.21945  | 0         |  |  |
|       |      | Shiraz-28T | 1734 | 0.362882 | 0         |  |  |
|       |      | Shiraz-29T | 1777 | 0.156747 | 0         |  |  |
|       |      | Shiraz-38T | 1950 | 0.265916 | 0         |  |  |
|       |      | Shiraz-58T | 2157 | 0        | -0.213872 |  |  |
|       |      | Shiraz-71T | 2236 | 0.320072 | 0         |  |  |
|       |      | Shiraz-4T  | 252  | 0.192083 | 0         |  |  |
|       |      | Shiraz-36T | 376  | 0.159952 | 0         |  |  |
|       |      | Shiraz-44T | 628  | 0        | -0.444379 |  |  |

|        |      |            |      |          |           |  |  |
|--------|------|------------|------|----------|-----------|--|--|
|        |      | Shiraz-47T | 1027 | 0        | -0.117848 |  |  |
|        |      | Shiraz-49T | 1117 | 0        | -0.168296 |  |  |
|        |      | Shiraz-77T | 1222 | 0        | -0.113002 |  |  |
|        |      | Shiraz-18T | 1433 | 0.250973 | 0         |  |  |
|        |      | Shiraz-22T | 1543 | 0        | -0.513696 |  |  |
|        |      | Shiraz-25T | 1697 | 0.21945  | 0         |  |  |
|        |      | Shiraz-28T | 1734 | 0.362882 | 0         |  |  |
|        |      | Shiraz-29T | 1777 | 0.156747 | 0         |  |  |
|        |      | Shiraz-38T | 1950 | 0.265916 | 0         |  |  |
|        |      | Shiraz-58T | 2157 | 0        | -0.213872 |  |  |
|        |      | Shiraz-71T | 2236 | 0.320072 | 0         |  |  |
| ITIH5L | chrX | Shiraz-4T  | 260  | 0        | -0.324128 |  |  |
|        |      | Shiraz-16T | 294  | 0.655804 | 0         |  |  |
|        |      | Shiraz-36T | 431  | 0        | -0.78035  |  |  |
|        |      | Shiraz-44T | 891  | 0        | -0.954044 |  |  |
|        |      | Shiraz-44T | 898  | 0        | -0.515218 |  |  |
|        |      | Shiraz-49T | 1166 | 0        | -0.917235 |  |  |
|        |      | Shiraz-77T | 1282 | 0.213849 | 0         |  |  |
|        |      | Shiraz-9T  | 1368 | 0.199713 | 0         |  |  |
|        |      | Shiraz-18T | 1456 | 0.608534 | 0         |  |  |
|        |      | Shiraz-22T | 1669 | 0.695915 | 0         |  |  |
|        |      | Shiraz-25T | 1717 | 0.420447 | 0         |  |  |
|        |      | Shiraz-28T | 1760 | 0.538181 | 0         |  |  |
|        |      | Shiraz-29T | 1800 | 0.672527 | 0         |  |  |
|        |      | Shiraz-32T | 1869 | 0.776805 | 0         |  |  |
|        |      | Shiraz-35T | 1932 | 0.507141 | 0         |  |  |
|        |      | Shiraz-58T | 2221 | 0.871948 | 0         |  |  |
|        |      | Shiraz-71T | 2260 | 0.68394  | 0         |  |  |
|        |      | Shiraz-71T | 2262 | 0.986748 | 0         |  |  |
|        |      | Shiraz-4T  | 260  | 0        | -0.324128 |  |  |
|        |      | Shiraz-16T | 294  | 0.655804 | 0         |  |  |
|        |      | Shiraz-36T | 431  | 0        | -0.78035  |  |  |
|        |      | Shiraz-44T | 891  | 0        | -0.954044 |  |  |
|        |      | Shiraz-44T | 898  | 0        | -0.515218 |  |  |
|        |      | Shiraz-49T | 1166 | 0        | -0.917235 |  |  |
|        |      | Shiraz-77T | 1282 | 0.213849 | 0         |  |  |
|        |      | Shiraz-9T  | 1368 | 0.199713 | 0         |  |  |
|        |      | Shiraz-18T | 1456 | 0.608534 | 0         |  |  |
|        |      | Shiraz-22T | 1669 | 0.695915 | 0         |  |  |
|        |      | Shiraz-25T | 1717 | 0.420447 | 0         |  |  |
|        |      | Shiraz-28T | 1760 | 0.538181 | 0         |  |  |
|        |      | Shiraz-29T | 1800 | 0.672527 | 0         |  |  |
|        |      | Shiraz-32T | 1869 | 0.776805 | 0         |  |  |
|        |      | Shiraz-35T | 1932 | 0.507141 | 0         |  |  |
|        |      | Shiraz-58T | 2221 | 0.871948 | 0         |  |  |
|        |      | Shiraz-71T | 2260 | 0.68394  | 0         |  |  |
|        |      | Shiraz-71T | 2262 | 0.986748 | 0         |  |  |

|       |      |            |      |          |           |  |  |
|-------|------|------------|------|----------|-----------|--|--|
|       |      | Shiraz-4T  | 260  | 0        | -0.324128 |  |  |
|       |      | Shiraz-16T | 294  | 0.655804 | 0         |  |  |
|       |      | Shiraz-36T | 431  | 0        | -0.78035  |  |  |
|       |      | Shiraz-44T | 891  | 0        | -0.954044 |  |  |
|       |      | Shiraz-44T | 898  | 0        | -0.515218 |  |  |
|       |      | Shiraz-49T | 1166 | 0        | -0.917235 |  |  |
|       |      | Shiraz-77T | 1282 | 0.213849 | 0         |  |  |
|       |      | Shiraz-9T  | 1368 | 0.199713 | 0         |  |  |
|       |      | Shiraz-18T | 1456 | 0.608534 | 0         |  |  |
|       |      | Shiraz-22T | 1669 | 0.695915 | 0         |  |  |
|       |      | Shiraz-25T | 1717 | 0.420447 | 0         |  |  |
|       |      | Shiraz-28T | 1760 | 0.538181 | 0         |  |  |
|       |      | Shiraz-29T | 1800 | 0.672527 | 0         |  |  |
|       |      | Shiraz-32T | 1869 | 0.776805 | 0         |  |  |
|       |      | Shiraz-35T | 1932 | 0.507141 | 0         |  |  |
|       |      | Shiraz-58T | 2221 | 0.871948 | 0         |  |  |
|       |      | Shiraz-71T | 2260 | 0.68394  | 0         |  |  |
|       |      | Shiraz-71T | 2262 | 0.986748 | 0         |  |  |
| ITM2A | chrX | Shiraz-3T  | 242  | 0        | -0.336434 |  |  |
|       |      | Shiraz-4T  | 261  | 0        | -0.336249 |  |  |
|       |      | Shiraz-16T | 295  | 0.591657 | 0         |  |  |
|       |      | Shiraz-36T | 433  | 0        | -0.803961 |  |  |
|       |      | Shiraz-44T | 899  | 0        | -1.09697  |  |  |
|       |      | Shiraz-47T | 1085 | 0        | -0.130811 |  |  |
|       |      | Shiraz-49T | 1170 | 0        | -0.967436 |  |  |
|       |      | Shiraz-18T | 1457 | 0.643204 | 0         |  |  |
|       |      | Shiraz-22T | 1673 | 0.611783 | 0         |  |  |
|       |      | Shiraz-22T | 1675 | 0.279253 | 0         |  |  |
|       |      | Shiraz-25T | 1719 | 0.472955 | 0         |  |  |
|       |      | Shiraz-28T | 1762 | 0.562311 | 0         |  |  |
|       |      | Shiraz-29T | 1801 | 0.815343 | 0         |  |  |
|       |      | Shiraz-32T | 1870 | 0.729766 | 0         |  |  |
|       |      | Shiraz-35T | 1933 | 0.488535 | 0         |  |  |
|       |      | Shiraz-58T | 2223 | 0.833364 | 0         |  |  |
|       |      | Shiraz-71T | 2263 | 0.975531 | 0         |  |  |
|       |      | Shiraz-3T  | 242  | 0        | -0.336434 |  |  |
|       |      | Shiraz-4T  | 261  | 0        | -0.336249 |  |  |
|       |      | Shiraz-16T | 295  | 0.591657 | 0         |  |  |
|       |      | Shiraz-36T | 433  | 0        | -0.803961 |  |  |
|       |      | Shiraz-44T | 899  | 0        | -1.09697  |  |  |
|       |      | Shiraz-47T | 1085 | 0        | -0.130811 |  |  |
|       |      | Shiraz-49T | 1170 | 0        | -0.967436 |  |  |
|       |      | Shiraz-18T | 1457 | 0.643204 | 0         |  |  |
|       |      | Shiraz-22T | 1673 | 0.611783 | 0         |  |  |
|       |      | Shiraz-22T | 1675 | 0.279253 | 0         |  |  |
|       |      | Shiraz-25T | 1719 | 0.472955 | 0         |  |  |
|       |      | Shiraz-28T | 1762 | 0.562311 | 0         |  |  |

|       |      |            |      |          |           |  |  |
|-------|------|------------|------|----------|-----------|--|--|
|       |      | Shiraz-29T | 1801 | 0.815343 | 0         |  |  |
|       |      | Shiraz-32T | 1870 | 0.729766 | 0         |  |  |
|       |      | Shiraz-35T | 1933 | 0.488535 | 0         |  |  |
|       |      | Shiraz-58T | 2223 | 0.833364 | 0         |  |  |
|       |      | Shiraz-71T | 2263 | 0.975531 | 0         |  |  |
|       |      | Shiraz-3T  | 242  | 0        | -0.336434 |  |  |
|       |      | Shiraz-4T  | 261  | 0        | -0.336249 |  |  |
|       |      | Shiraz-16T | 295  | 0.591657 | 0         |  |  |
|       |      | Shiraz-36T | 433  | 0        | -0.803961 |  |  |
|       |      | Shiraz-44T | 899  | 0        | -1.09697  |  |  |
|       |      | Shiraz-47T | 1085 | 0        | -0.130811 |  |  |
|       |      | Shiraz-49T | 1170 | 0        | -0.967436 |  |  |
|       |      | Shiraz-18T | 1457 | 0.643204 | 0         |  |  |
|       |      | Shiraz-22T | 1673 | 0.611783 | 0         |  |  |
|       |      | Shiraz-22T | 1675 | 0.279253 | 0         |  |  |
|       |      | Shiraz-25T | 1719 | 0.472955 | 0         |  |  |
|       |      | Shiraz-28T | 1762 | 0.562311 | 0         |  |  |
|       |      | Shiraz-29T | 1801 | 0.815343 | 0         |  |  |
|       |      | Shiraz-32T | 1870 | 0.729766 | 0         |  |  |
|       |      | Shiraz-35T | 1933 | 0.488535 | 0         |  |  |
|       |      | Shiraz-58T | 2223 | 0.833364 | 0         |  |  |
|       |      | Shiraz-71T | 2263 | 0.975531 | 0         |  |  |
| JAZF1 | chr7 | Shiraz-3T  | 87   | 0.198593 | 0         |  |  |
|       |      | Shiraz-4T  | 252  | 0.192083 | 0         |  |  |
|       |      | Shiraz-36T | 376  | 0.159952 | 0         |  |  |
|       |      | Shiraz-46T | 942  | 0.069143 | 0         |  |  |
|       |      | Shiraz-18T | 1433 | 0.250973 | 0         |  |  |
|       |      | Shiraz-25T | 1697 | 0.21945  | 0         |  |  |
|       |      | Shiraz-28T | 1734 | 0.362882 | 0         |  |  |
|       |      | Shiraz-29T | 1777 | 0.156747 | 0         |  |  |
|       |      | Shiraz-38T | 1950 | 0.265916 | 0         |  |  |
|       |      | Shiraz-71T | 2236 | 0.320072 | 0         |  |  |
|       |      | Shiraz-3T  | 87   | 0.198593 | 0         |  |  |
|       |      | Shiraz-4T  | 252  | 0.192083 | 0         |  |  |
|       |      | Shiraz-36T | 376  | 0.159952 | 0         |  |  |
|       |      | Shiraz-46T | 942  | 0.069143 | 0         |  |  |
|       |      | Shiraz-18T | 1433 | 0.250973 | 0         |  |  |
|       |      | Shiraz-25T | 1697 | 0.21945  | 0         |  |  |
|       |      | Shiraz-28T | 1734 | 0.362882 | 0         |  |  |
|       |      | Shiraz-29T | 1777 | 0.156747 | 0         |  |  |
|       |      | Shiraz-38T | 1950 | 0.265916 | 0         |  |  |
|       |      | Shiraz-71T | 2236 | 0.320072 | 0         |  |  |
|       |      | Shiraz-3T  | 87   | 0.198593 | 0         |  |  |
|       |      | Shiraz-4T  | 252  | 0.192083 | 0         |  |  |
|       |      | Shiraz-36T | 376  | 0.159952 | 0         |  |  |
|       |      | Shiraz-46T | 942  | 0.069143 | 0         |  |  |
|       |      | Shiraz-18T | 1433 | 0.250973 | 0         |  |  |

|        |      |            |      |          |           |  |
|--------|------|------------|------|----------|-----------|--|
|        |      | Shiraz-25T | 1697 | 0.21945  | 0         |  |
|        |      | Shiraz-28T | 1734 | 0.362882 | 0         |  |
|        |      | Shiraz-29T | 1777 | 0.156747 | 0         |  |
|        |      | Shiraz-38T | 1950 | 0.265916 | 0         |  |
|        |      | Shiraz-71T | 2236 | 0.320072 | 0         |  |
| JHDM1D | chr7 | Shiraz-3T  | 90   | 0.219276 | 0         |  |
|        |      | Shiraz-3T  | 97   | 0.496001 | 0         |  |
|        |      | Shiraz-4T  | 253  | 0.372918 | 0         |  |
|        |      | Shiraz-31T | 318  | 0.254373 | 0         |  |
|        |      | Shiraz-36T | 378  | 0.179558 | 0         |  |
|        |      | Shiraz-36T | 383  | 0.374586 | 0         |  |
|        |      | Shiraz-44T | 644  | 0.496536 | 0         |  |
|        |      | Shiraz-46T | 943  | 0.093799 | 0         |  |
|        |      | Shiraz-47T | 1033 | 0.220267 | 0         |  |
|        |      | Shiraz-77T | 1225 | 0        | -0.117922 |  |
|        |      | Shiraz-77T | 1230 | 0.149651 | 0         |  |
|        |      | Shiraz-9T  | 1325 | 0.221899 | 0         |  |
|        |      | Shiraz-18T | 1434 | 0.244465 | 0         |  |
|        |      | Shiraz-25T | 1698 | 0.21835  | 0         |  |
|        |      | Shiraz-28T | 1735 | 0.350744 | 0         |  |
|        |      | Shiraz-29T | 1778 | 0.120767 | 0         |  |
|        |      | Shiraz-32T | 1833 | 0.551336 | 0         |  |
|        |      | Shiraz-38T | 1951 | 0.250891 | 0         |  |
|        |      | Shiraz-53T | 2078 | 0.287202 | 0         |  |
|        |      | Shiraz-58T | 2162 | 0.221505 | 0         |  |
|        |      | Shiraz-71T | 2238 | 0.603631 | 0         |  |
|        |      | Shiraz-3T  | 90   | 0.219276 | 0         |  |
|        |      | Shiraz-3T  | 97   | 0.496001 | 0         |  |
|        |      | Shiraz-4T  | 253  | 0.372918 | 0         |  |
|        |      | Shiraz-31T | 318  | 0.254373 | 0         |  |
|        |      | Shiraz-36T | 378  | 0.179558 | 0         |  |
|        |      | Shiraz-36T | 383  | 0.374586 | 0         |  |
|        |      | Shiraz-44T | 644  | 0.496536 | 0         |  |
|        |      | Shiraz-46T | 943  | 0.093799 | 0         |  |
|        |      | Shiraz-47T | 1033 | 0.220267 | 0         |  |
|        |      | Shiraz-77T | 1225 | 0        | -0.117922 |  |
|        |      | Shiraz-77T | 1230 | 0.149651 | 0         |  |
|        |      | Shiraz-9T  | 1325 | 0.221899 | 0         |  |
|        |      | Shiraz-18T | 1434 | 0.244465 | 0         |  |
|        |      | Shiraz-25T | 1698 | 0.21835  | 0         |  |
|        |      | Shiraz-28T | 1735 | 0.350744 | 0         |  |
|        |      | Shiraz-29T | 1778 | 0.120767 | 0         |  |
|        |      | Shiraz-32T | 1833 | 0.551336 | 0         |  |
|        |      | Shiraz-38T | 1951 | 0.250891 | 0         |  |
|        |      | Shiraz-53T | 2078 | 0.287202 | 0         |  |
|        |      | Shiraz-58T | 2162 | 0.221505 | 0         |  |
|        |      | Shiraz-71T | 2238 | 0.603631 | 0         |  |

|      |      |            |      |          |           |  |
|------|------|------------|------|----------|-----------|--|
|      |      | Shiraz-3T  | 90   | 0.219276 | 0         |  |
|      |      | Shiraz-3T  | 97   | 0.496001 | 0         |  |
|      |      | Shiraz-4T  | 253  | 0.372918 | 0         |  |
|      |      | Shiraz-31T | 318  | 0.254373 | 0         |  |
|      |      | Shiraz-36T | 378  | 0.179558 | 0         |  |
|      |      | Shiraz-36T | 383  | 0.374586 | 0         |  |
|      |      | Shiraz-44T | 644  | 0.496536 | 0         |  |
|      |      | Shiraz-46T | 943  | 0.093799 | 0         |  |
|      |      | Shiraz-47T | 1033 | 0.220267 | 0         |  |
|      |      | Shiraz-77T | 1225 | 0        | -0.117922 |  |
|      |      | Shiraz-77T | 1230 | 0.149651 | 0         |  |
|      |      | Shiraz-9T  | 1325 | 0.221899 | 0         |  |
|      |      | Shiraz-18T | 1434 | 0.244465 | 0         |  |
|      |      | Shiraz-25T | 1698 | 0.21835  | 0         |  |
|      |      | Shiraz-28T | 1735 | 0.350744 | 0         |  |
|      |      | Shiraz-29T | 1778 | 0.120767 | 0         |  |
|      |      | Shiraz-32T | 1833 | 0.551336 | 0         |  |
|      |      | Shiraz-38T | 1951 | 0.250891 | 0         |  |
|      |      | Shiraz-53T | 2078 | 0.287202 | 0         |  |
|      |      | Shiraz-58T | 2162 | 0.221505 | 0         |  |
|      |      | Shiraz-71T | 2238 | 0.603631 | 0         |  |
| KAL1 | chrX | Shiraz-3T  | 235  | 0        | -0.28401  |  |
|      |      | Shiraz-4T  | 260  | 0        | -0.324128 |  |
|      |      | Shiraz-16T | 294  | 0.655804 | 0         |  |
|      |      | Shiraz-36T | 431  | 0        | -0.78035  |  |
|      |      | Shiraz-44T | 891  | 0        | -0.954044 |  |
|      |      | Shiraz-44T | 892  | 0        | -1.231333 |  |
|      |      | Shiraz-49T | 1166 | 0        | -0.917235 |  |
|      |      | Shiraz-9T  | 1368 | 0.199713 | 0         |  |
|      |      | Shiraz-18T | 1455 | 0        | -0.186773 |  |
|      |      | Shiraz-22T | 1669 | 0.695915 | 0         |  |
|      |      | Shiraz-25T | 1717 | 0.420447 | 0         |  |
|      |      | Shiraz-28T | 1760 | 0.538181 | 0         |  |
|      |      | Shiraz-29T | 1800 | 0.672527 | 0         |  |
|      |      | Shiraz-32T | 1869 | 0.776805 | 0         |  |
|      |      | Shiraz-35T | 1932 | 0.507141 | 0         |  |
|      |      | Shiraz-40T | 2051 | 0.098506 | 0         |  |
|      |      | Shiraz-58T | 2221 | 0.871948 | 0         |  |
|      |      | Shiraz-71T | 2260 | 0.68394  | 0         |  |
|      |      | Shiraz-71T | 2261 | 0.508399 | 0         |  |
|      |      | Shiraz-3T  | 235  | 0        | -0.28401  |  |
|      |      | Shiraz-4T  | 260  | 0        | -0.324128 |  |
|      |      | Shiraz-16T | 294  | 0.655804 | 0         |  |
|      |      | Shiraz-36T | 431  | 0        | -0.78035  |  |
|      |      | Shiraz-44T | 891  | 0        | -0.954044 |  |
|      |      | Shiraz-44T | 892  | 0        | -1.231333 |  |
|      |      | Shiraz-49T | 1166 | 0        | -0.917235 |  |

|       |      |            |      |          |           |  |  |
|-------|------|------------|------|----------|-----------|--|--|
|       |      | Shiraz-9T  | 1368 | 0.199713 | 0         |  |  |
|       |      | Shiraz-18T | 1455 | 0        | -0.186773 |  |  |
|       |      | Shiraz-22T | 1669 | 0.695915 | 0         |  |  |
|       |      | Shiraz-25T | 1717 | 0.420447 | 0         |  |  |
|       |      | Shiraz-28T | 1760 | 0.538181 | 0         |  |  |
|       |      | Shiraz-29T | 1800 | 0.672527 | 0         |  |  |
|       |      | Shiraz-32T | 1869 | 0.776805 | 0         |  |  |
|       |      | Shiraz-35T | 1932 | 0.507141 | 0         |  |  |
|       |      | Shiraz-40T | 2051 | 0.098506 | 0         |  |  |
|       |      | Shiraz-58T | 2221 | 0.871948 | 0         |  |  |
|       |      | Shiraz-71T | 2260 | 0.68394  | 0         |  |  |
|       |      | Shiraz-71T | 2261 | 0.508399 | 0         |  |  |
|       |      | Shiraz-3T  | 235  | 0        | -0.28401  |  |  |
|       |      | Shiraz-4T  | 260  | 0        | -0.324128 |  |  |
|       |      | Shiraz-16T | 294  | 0.655804 | 0         |  |  |
|       |      | Shiraz-36T | 431  | 0        | -0.78035  |  |  |
|       |      | Shiraz-44T | 891  | 0        | -0.954044 |  |  |
|       |      | Shiraz-44T | 892  | 0        | -1.231333 |  |  |
|       |      | Shiraz-49T | 1166 | 0        | -0.917235 |  |  |
|       |      | Shiraz-9T  | 1368 | 0.199713 | 0         |  |  |
|       |      | Shiraz-18T | 1455 | 0        | -0.186773 |  |  |
|       |      | Shiraz-22T | 1669 | 0.695915 | 0         |  |  |
|       |      | Shiraz-25T | 1717 | 0.420447 | 0         |  |  |
|       |      | Shiraz-28T | 1760 | 0.538181 | 0         |  |  |
|       |      | Shiraz-29T | 1800 | 0.672527 | 0         |  |  |
|       |      | Shiraz-32T | 1869 | 0.776805 | 0         |  |  |
|       |      | Shiraz-35T | 1932 | 0.507141 | 0         |  |  |
|       |      | Shiraz-40T | 2051 | 0.098506 | 0         |  |  |
|       |      | Shiraz-58T | 2221 | 0.871948 | 0         |  |  |
|       |      | Shiraz-71T | 2260 | 0.68394  | 0         |  |  |
|       |      | Shiraz-71T | 2261 | 0.508399 | 0         |  |  |
| KBTD2 | chr7 | Shiraz-3T  | 87   | 0.198593 | 0         |  |  |
|       |      | Shiraz-4T  | 252  | 0.192083 | 0         |  |  |
|       |      | Shiraz-36T | 376  | 0.159952 | 0         |  |  |
|       |      | Shiraz-44T | 631  | 0        | -0.180312 |  |  |
|       |      | Shiraz-46T | 942  | 0.069143 | 0         |  |  |
|       |      | Shiraz-18T | 1433 | 0.250973 | 0         |  |  |
|       |      | Shiraz-22T | 1544 | 0        | -0.193579 |  |  |
|       |      | Shiraz-25T | 1697 | 0.21945  | 0         |  |  |
|       |      | Shiraz-28T | 1734 | 0.362882 | 0         |  |  |
|       |      | Shiraz-29T | 1777 | 0.156747 | 0         |  |  |
|       |      | Shiraz-38T | 1950 | 0.265916 | 0         |  |  |
|       |      | Shiraz-71T | 2236 | 0.320072 | 0         |  |  |
|       |      | Shiraz-3T  | 87   | 0.198593 | 0         |  |  |
|       |      | Shiraz-4T  | 252  | 0.192083 | 0         |  |  |
|       |      | Shiraz-36T | 376  | 0.159952 | 0         |  |  |
|       |      | Shiraz-44T | 631  | 0        | -0.180312 |  |  |



|       |      |            |      |          |           |  |
|-------|------|------------|------|----------|-----------|--|
|       |      | Shiraz-46T | 942  | 0.069143 | 0         |  |
|       |      | Shiraz-18T | 1433 | 0.250973 | 0         |  |
|       |      | Shiraz-22T | 1544 | 0        | -0.193579 |  |
|       |      | Shiraz-25T | 1697 | 0.21945  | 0         |  |
|       |      | Shiraz-28T | 1734 | 0.362882 | 0         |  |
|       |      | Shiraz-29T | 1777 | 0.156747 | 0         |  |
|       |      | Shiraz-38T | 1950 | 0.265916 | 0         |  |
|       |      | Shiraz-71T | 2236 | 0.320072 | 0         |  |
|       |      | Shiraz-3T  | 87   | 0.198593 | 0         |  |
|       |      | Shiraz-4T  | 252  | 0.192083 | 0         |  |
|       |      | Shiraz-36T | 376  | 0.159952 | 0         |  |
|       |      | Shiraz-44T | 631  | 0        | -0.180312 |  |
|       |      | Shiraz-46T | 942  | 0.069143 | 0         |  |
|       |      | Shiraz-18T | 1433 | 0.250973 | 0         |  |
|       |      | Shiraz-22T | 1544 | 0        | -0.193579 |  |
|       |      | Shiraz-25T | 1697 | 0.21945  | 0         |  |
|       |      | Shiraz-28T | 1734 | 0.362882 | 0         |  |
|       |      | Shiraz-29T | 1777 | 0.156747 | 0         |  |
|       |      | Shiraz-38T | 1950 | 0.265916 | 0         |  |
|       |      | Shiraz-71T | 2236 | 0.320072 | 0         |  |
| KCND1 | chrX | Shiraz-3T  | 238  | 0.472087 | 0         |  |
|       |      | Shiraz-4T  | 260  | 0        | -0.324128 |  |
|       |      | Shiraz-16T | 294  | 0.655804 | 0         |  |
|       |      | Shiraz-31T | 345  | 0.103301 | 0         |  |
|       |      | Shiraz-36T | 431  | 0        | -0.78035  |  |
|       |      | Shiraz-36T | 432  | 0        | -0.6692   |  |
|       |      | Shiraz-44T | 891  | 0        | -0.954044 |  |
|       |      | Shiraz-44T | 896  | 0        | -0.109108 |  |
|       |      | Shiraz-44T | 897  | 0.486937 | 0         |  |
|       |      | Shiraz-46T | 991  | 0.139564 | 0         |  |
|       |      | Shiraz-47T | 1084 | 0.24185  | 0         |  |
|       |      | Shiraz-49T | 1166 | 0        | -0.917235 |  |
|       |      | Shiraz-49T | 1169 | 0        | -0.583529 |  |
|       |      | Shiraz-77T | 1282 | 0.213849 | 0         |  |
|       |      | Shiraz-9T  | 1368 | 0.199713 | 0         |  |
|       |      | Shiraz-9T  | 1369 | 0.703374 | 0         |  |
|       |      | Shiraz-18T | 1455 | 0        | -0.186773 |  |
|       |      | Shiraz-22T | 1669 | 0.695915 | 0         |  |
|       |      | Shiraz-22T | 1672 | 1.01678  | 0         |  |
|       |      | Shiraz-25T | 1717 | 0.420447 | 0         |  |
|       |      | Shiraz-28T | 1760 | 0.538181 | 0         |  |
|       |      | Shiraz-29T | 1800 | 0.672527 | 0         |  |
|       |      | Shiraz-32T | 1869 | 0.776805 | 0         |  |
|       |      | Shiraz-35T | 1932 | 0.507141 | 0         |  |
|       |      | Shiraz-58T | 2221 | 0.871948 | 0         |  |
|       |      | Shiraz-71T | 2260 | 0.68394  | 0         |  |
|       |      | Shiraz-71T | 2262 | 0.986748 | 0         |  |

|  |            |      |          |           |  |
|--|------------|------|----------|-----------|--|
|  | Shiraz-3T  | 238  | 0.472087 | 0         |  |
|  | Shiraz-4T  | 260  | 0        | -0.324128 |  |
|  | Shiraz-16T | 294  | 0.655804 | 0         |  |
|  | Shiraz-31T | 345  | 0.103301 | 0         |  |
|  | Shiraz-36T | 431  | 0        | -0.78035  |  |
|  | Shiraz-36T | 432  | 0        | -0.6692   |  |
|  | Shiraz-44T | 891  | 0        | -0.954044 |  |
|  | Shiraz-44T | 896  | 0        | -0.109108 |  |
|  | Shiraz-44T | 897  | 0.486937 | 0         |  |
|  | Shiraz-46T | 991  | 0.139564 | 0         |  |
|  | Shiraz-47T | 1084 | 0.24185  | 0         |  |
|  | Shiraz-49T | 1166 | 0        | -0.917235 |  |
|  | Shiraz-49T | 1169 | 0        | -0.583529 |  |
|  | Shiraz-77T | 1282 | 0.213849 | 0         |  |
|  | Shiraz-9T  | 1368 | 0.199713 | 0         |  |
|  | Shiraz-9T  | 1369 | 0.703374 | 0         |  |
|  | Shiraz-18T | 1455 | 0        | -0.186773 |  |
|  | Shiraz-22T | 1669 | 0.695915 | 0         |  |
|  | Shiraz-22T | 1672 | 1.01678  | 0         |  |
|  | Shiraz-25T | 1717 | 0.420447 | 0         |  |
|  | Shiraz-28T | 1760 | 0.538181 | 0         |  |
|  | Shiraz-29T | 1800 | 0.672527 | 0         |  |
|  | Shiraz-32T | 1869 | 0.776805 | 0         |  |
|  | Shiraz-35T | 1932 | 0.507141 | 0         |  |
|  | Shiraz-58T | 2221 | 0.871948 | 0         |  |
|  | Shiraz-71T | 2260 | 0.68394  | 0         |  |
|  | Shiraz-71T | 2262 | 0.986748 | 0         |  |
|  | Shiraz-3T  | 238  | 0.472087 | 0         |  |
|  | Shiraz-4T  | 260  | 0        | -0.324128 |  |
|  | Shiraz-16T | 294  | 0.655804 | 0         |  |
|  | Shiraz-31T | 345  | 0.103301 | 0         |  |
|  | Shiraz-36T | 431  | 0        | -0.78035  |  |
|  | Shiraz-36T | 432  | 0        | -0.6692   |  |
|  | Shiraz-44T | 891  | 0        | -0.954044 |  |
|  | Shiraz-44T | 896  | 0        | -0.109108 |  |
|  | Shiraz-44T | 897  | 0.486937 | 0         |  |
|  | Shiraz-46T | 991  | 0.139564 | 0         |  |
|  | Shiraz-47T | 1084 | 0.24185  | 0         |  |
|  | Shiraz-49T | 1166 | 0        | -0.917235 |  |
|  | Shiraz-49T | 1169 | 0        | -0.583529 |  |
|  | Shiraz-77T | 1282 | 0.213849 | 0         |  |
|  | Shiraz-9T  | 1368 | 0.199713 | 0         |  |
|  | Shiraz-9T  | 1369 | 0.703374 | 0         |  |
|  | Shiraz-18T | 1455 | 0        | -0.186773 |  |
|  | Shiraz-22T | 1669 | 0.695915 | 0         |  |
|  | Shiraz-22T | 1672 | 1.01678  | 0         |  |
|  | Shiraz-25T | 1717 | 0.420447 | 0         |  |

|       |      |            |      |          |           |  |
|-------|------|------------|------|----------|-----------|--|
|       |      | Shiraz-28T | 1760 | 0.538181 | 0         |  |
|       |      | Shiraz-29T | 1800 | 0.672527 | 0         |  |
|       |      | Shiraz-32T | 1869 | 0.776805 | 0         |  |
|       |      | Shiraz-35T | 1932 | 0.507141 | 0         |  |
|       |      | Shiraz-58T | 2221 | 0.871948 | 0         |  |
|       |      | Shiraz-71T | 2260 | 0.68394  | 0         |  |
|       |      | Shiraz-71T | 2262 | 0.986748 | 0         |  |
| KCND2 | chr7 | Shiraz-3T  | 90   | 0.219276 | 0         |  |
|       |      | Shiraz-3T  | 95   | 0        | -0.077623 |  |
|       |      | Shiraz-4T  | 253  | 0.372918 | 0         |  |
|       |      | Shiraz-36T | 378  | 0.179558 | 0         |  |
|       |      | Shiraz-36T | 382  | 0.081739 | 0         |  |
|       |      | Shiraz-44T | 641  | 0        | -0.477846 |  |
|       |      | Shiraz-46T | 943  | 0.093799 | 0         |  |
|       |      | Shiraz-46T | 947  | 0        | -0.010843 |  |
|       |      | Shiraz-47T | 1031 | 0        | -0.117529 |  |
|       |      | Shiraz-49T | 1121 | 0        | -0.138569 |  |
|       |      | Shiraz-77T | 1225 | 0        | -0.117922 |  |
|       |      | Shiraz-77T | 1228 | 0        | -0.238084 |  |
|       |      | Shiraz-18T | 1434 | 0.244465 | 0         |  |
|       |      | Shiraz-22T | 1549 | 0        | -0.319623 |  |
|       |      | Shiraz-22T | 1552 | 0        | -0.50686  |  |
|       |      | Shiraz-25T | 1698 | 0.21835  | 0         |  |
|       |      | Shiraz-28T | 1735 | 0.350744 | 0         |  |
|       |      | Shiraz-29T | 1778 | 0.120767 | 0         |  |
|       |      | Shiraz-32T | 1833 | 0.551336 | 0         |  |
|       |      | Shiraz-32T | 1835 | 0.092727 | 0         |  |
|       |      | Shiraz-38T | 1951 | 0.250891 | 0         |  |
|       |      | Shiraz-53T | 2078 | 0.287202 | 0         |  |
|       |      | Shiraz-58T | 2161 | 0        | -0.187744 |  |
|       |      | Shiraz-71T | 2238 | 0.603631 | 0         |  |
|       |      | Shiraz-3T  | 90   | 0.219276 | 0         |  |
|       |      | Shiraz-3T  | 95   | 0        | -0.077623 |  |
|       |      | Shiraz-4T  | 253  | 0.372918 | 0         |  |
|       |      | Shiraz-36T | 378  | 0.179558 | 0         |  |
|       |      | Shiraz-36T | 382  | 0.081739 | 0         |  |
|       |      | Shiraz-44T | 641  | 0        | -0.477846 |  |
|       |      | Shiraz-46T | 943  | 0.093799 | 0         |  |
|       |      | Shiraz-46T | 947  | 0        | -0.010843 |  |
|       |      | Shiraz-47T | 1031 | 0        | -0.117529 |  |
|       |      | Shiraz-49T | 1121 | 0        | -0.138569 |  |
|       |      | Shiraz-77T | 1225 | 0        | -0.117922 |  |
|       |      | Shiraz-77T | 1228 | 0        | -0.238084 |  |
|       |      | Shiraz-18T | 1434 | 0.244465 | 0         |  |
|       |      | Shiraz-22T | 1549 | 0        | -0.319623 |  |
|       |      | Shiraz-22T | 1552 | 0        | -0.50686  |  |
|       |      | Shiraz-25T | 1698 | 0.21835  | 0         |  |

|        |      |            |      |          |           |  |  |
|--------|------|------------|------|----------|-----------|--|--|
|        |      | Shiraz-28T | 1735 | 0.350744 | 0         |  |  |
|        |      | Shiraz-29T | 1778 | 0.120767 | 0         |  |  |
|        |      | Shiraz-32T | 1833 | 0.551336 | 0         |  |  |
|        |      | Shiraz-32T | 1835 | 0.092727 | 0         |  |  |
|        |      | Shiraz-38T | 1951 | 0.250891 | 0         |  |  |
|        |      | Shiraz-53T | 2078 | 0.287202 | 0         |  |  |
|        |      | Shiraz-58T | 2161 | 0        | -0.187744 |  |  |
|        |      | Shiraz-71T | 2238 | 0.603631 | 0         |  |  |
|        |      | Shiraz-3T  | 90   | 0.219276 | 0         |  |  |
|        |      | Shiraz-3T  | 95   | 0        | -0.077623 |  |  |
|        |      | Shiraz-4T  | 253  | 0.372918 | 0         |  |  |
|        |      | Shiraz-36T | 378  | 0.179558 | 0         |  |  |
|        |      | Shiraz-36T | 382  | 0.081739 | 0         |  |  |
|        |      | Shiraz-44T | 641  | 0        | -0.477846 |  |  |
|        |      | Shiraz-46T | 943  | 0.093799 | 0         |  |  |
|        |      | Shiraz-46T | 947  | 0        | -0.010843 |  |  |
|        |      | Shiraz-47T | 1031 | 0        | -0.117529 |  |  |
|        |      | Shiraz-49T | 1121 | 0        | -0.138569 |  |  |
|        |      | Shiraz-77T | 1225 | 0        | -0.117922 |  |  |
|        |      | Shiraz-77T | 1228 | 0        | -0.238084 |  |  |
|        |      | Shiraz-18T | 1434 | 0.244465 | 0         |  |  |
|        |      | Shiraz-22T | 1549 | 0        | -0.319623 |  |  |
|        |      | Shiraz-22T | 1552 | 0        | -0.50686  |  |  |
|        |      | Shiraz-25T | 1698 | 0.21835  | 0         |  |  |
|        |      | Shiraz-28T | 1735 | 0.350744 | 0         |  |  |
|        |      | Shiraz-29T | 1778 | 0.120767 | 0         |  |  |
|        |      | Shiraz-32T | 1833 | 0.551336 | 0         |  |  |
|        |      | Shiraz-32T | 1835 | 0.092727 | 0         |  |  |
|        |      | Shiraz-38T | 1951 | 0.250891 | 0         |  |  |
|        |      | Shiraz-53T | 2078 | 0.287202 | 0         |  |  |
|        |      | Shiraz-58T | 2161 | 0        | -0.187744 |  |  |
|        |      | Shiraz-71T | 2238 | 0.603631 | 0         |  |  |
| KCNE1L | chrX | Shiraz-3T  | 242  | 0        | -0.336434 |  |  |
|        |      | Shiraz-4T  | 261  | 0        | -0.336249 |  |  |
|        |      | Shiraz-16T | 295  | 0.591657 | 0         |  |  |
|        |      | Shiraz-36T | 433  | 0        | -0.803961 |  |  |
|        |      | Shiraz-44T | 899  | 0        | -1.09697  |  |  |
|        |      | Shiraz-49T | 1170 | 0        | -0.967436 |  |  |
|        |      | Shiraz-18T | 1457 | 0.643204 | 0         |  |  |
|        |      | Shiraz-22T | 1673 | 0.611783 | 0         |  |  |
|        |      | Shiraz-25T | 1719 | 0.472955 | 0         |  |  |
|        |      | Shiraz-28T | 1762 | 0.562311 | 0         |  |  |
|        |      | Shiraz-29T | 1801 | 0.815343 | 0         |  |  |
|        |      | Shiraz-32T | 1870 | 0.729766 | 0         |  |  |
|        |      | Shiraz-35T | 1933 | 0.488535 | 0         |  |  |
|        |      | Shiraz-58T | 2223 | 0.833364 | 0         |  |  |
|        |      | Shiraz-71T | 2263 | 0.975531 | 0         |  |  |

|       |      |            |      |          |           |  |  |
|-------|------|------------|------|----------|-----------|--|--|
|       |      | Shiraz-3T  | 242  | 0        | -0.336434 |  |  |
|       |      | Shiraz-4T  | 261  | 0        | -0.336249 |  |  |
|       |      | Shiraz-16T | 295  | 0.591657 | 0         |  |  |
|       |      | Shiraz-36T | 433  | 0        | -0.803961 |  |  |
|       |      | Shiraz-44T | 899  | 0        | -1.09697  |  |  |
|       |      | Shiraz-49T | 1170 | 0        | -0.967436 |  |  |
|       |      | Shiraz-18T | 1457 | 0.643204 | 0         |  |  |
|       |      | Shiraz-22T | 1673 | 0.611783 | 0         |  |  |
|       |      | Shiraz-25T | 1719 | 0.472955 | 0         |  |  |
|       |      | Shiraz-28T | 1762 | 0.562311 | 0         |  |  |
|       |      | Shiraz-29T | 1801 | 0.815343 | 0         |  |  |
|       |      | Shiraz-32T | 1870 | 0.729766 | 0         |  |  |
|       |      | Shiraz-35T | 1933 | 0.488535 | 0         |  |  |
|       |      | Shiraz-58T | 2223 | 0.833364 | 0         |  |  |
|       |      | Shiraz-71T | 2263 | 0.975531 | 0         |  |  |
|       |      | Shiraz-3T  | 242  | 0        | -0.336434 |  |  |
|       |      | Shiraz-4T  | 261  | 0        | -0.336249 |  |  |
|       |      | Shiraz-16T | 295  | 0.591657 | 0         |  |  |
|       |      | Shiraz-36T | 433  | 0        | -0.803961 |  |  |
|       |      | Shiraz-44T | 899  | 0        | -1.09697  |  |  |
|       |      | Shiraz-49T | 1170 | 0        | -0.967436 |  |  |
|       |      | Shiraz-18T | 1457 | 0.643204 | 0         |  |  |
|       |      | Shiraz-22T | 1673 | 0.611783 | 0         |  |  |
|       |      | Shiraz-25T | 1719 | 0.472955 | 0         |  |  |
|       |      | Shiraz-28T | 1762 | 0.562311 | 0         |  |  |
|       |      | Shiraz-29T | 1801 | 0.815343 | 0         |  |  |
|       |      | Shiraz-32T | 1870 | 0.729766 | 0         |  |  |
|       |      | Shiraz-35T | 1933 | 0.488535 | 0         |  |  |
|       |      | Shiraz-58T | 2223 | 0.833364 | 0         |  |  |
|       |      | Shiraz-71T | 2263 | 0.975531 | 0         |  |  |
| KCNH2 | chr7 | Shiraz-3T  | 90   | 0.219276 | 0         |  |  |
|       |      | Shiraz-3T  | 90   | 0.219276 | 0         |  |  |
|       |      | Shiraz-3T  | 90   | 0.219276 | 0         |  |  |
|       |      | Shiraz-3T  | 99   | 0.454766 | 0         |  |  |
|       |      | Shiraz-3T  | 99   | 0.454766 | 0         |  |  |
|       |      | Shiraz-3T  | 99   | 0.454766 | 0         |  |  |
|       |      | Shiraz-4T  | 253  | 0.372918 | 0         |  |  |
|       |      | Shiraz-4T  | 253  | 0.372918 | 0         |  |  |
|       |      | Shiraz-4T  | 253  | 0.372918 | 0         |  |  |
|       |      | Shiraz-36T | 378  | 0.179558 | 0         |  |  |
|       |      | Shiraz-36T | 378  | 0.179558 | 0         |  |  |
|       |      | Shiraz-36T | 378  | 0.179558 | 0         |  |  |
|       |      | Shiraz-44T | 646  | 0.471276 | 0         |  |  |
|       |      | Shiraz-44T | 646  | 0.471276 | 0         |  |  |
|       |      | Shiraz-44T | 646  | 0.471276 | 0         |  |  |
|       |      | Shiraz-44T | 647  | 1.496173 | 0         |  |  |
|       |      | Shiraz-44T | 647  | 1.496173 | 0         |  |  |

|  |  |            |      |          |           |  |  |
|--|--|------------|------|----------|-----------|--|--|
|  |  | Shiraz-44T | 647  | 1.496173 | 0         |  |  |
|  |  | Shiraz-46T | 943  | 0.093799 | 0         |  |  |
|  |  | Shiraz-46T | 943  | 0.093799 | 0         |  |  |
|  |  | Shiraz-46T | 943  | 0.093799 | 0         |  |  |
|  |  | Shiraz-9T  | 1325 | 0.221899 | 0         |  |  |
|  |  | Shiraz-9T  | 1325 | 0.221899 | 0         |  |  |
|  |  | Shiraz-9T  | 1325 | 0.221899 | 0         |  |  |
|  |  | Shiraz-18T | 1434 | 0.244465 | 0         |  |  |
|  |  | Shiraz-18T | 1434 | 0.244465 | 0         |  |  |
|  |  | Shiraz-18T | 1434 | 0.244465 | 0         |  |  |
|  |  | Shiraz-22T | 1555 | 0.427999 | 0         |  |  |
|  |  | Shiraz-22T | 1555 | 0.427999 | 0         |  |  |
|  |  | Shiraz-25T | 1698 | 0.21835  | 0         |  |  |
|  |  | Shiraz-25T | 1698 | 0.21835  | 0         |  |  |
|  |  | Shiraz-25T | 1698 | 0.21835  | 0         |  |  |
|  |  | Shiraz-28T | 1735 | 0.350744 | 0         |  |  |
|  |  | Shiraz-28T | 1735 | 0.350744 | 0         |  |  |
|  |  | Shiraz-28T | 1735 | 0.350744 | 0         |  |  |
|  |  | Shiraz-29T | 1778 | 0.120767 | 0         |  |  |
|  |  | Shiraz-29T | 1778 | 0.120767 | 0         |  |  |
|  |  | Shiraz-29T | 1778 | 0.120767 | 0         |  |  |
|  |  | Shiraz-32T | 1833 | 0.551336 | 0         |  |  |
|  |  | Shiraz-32T | 1833 | 0.551336 | 0         |  |  |
|  |  | Shiraz-32T | 1833 | 0.551336 | 0         |  |  |
|  |  | Shiraz-38T | 1951 | 0.250891 | 0         |  |  |
|  |  | Shiraz-38T | 1951 | 0.250891 | 0         |  |  |
|  |  | Shiraz-38T | 1951 | 0.250891 | 0         |  |  |
|  |  | Shiraz-38T | 1952 | 0        | -0.163211 |  |  |
|  |  | Shiraz-38T | 1952 | 0        | -0.163211 |  |  |
|  |  | Shiraz-38T | 1952 | 0        | -0.163211 |  |  |
|  |  | Shiraz-53T | 2078 | 0.287202 | 0         |  |  |
|  |  | Shiraz-53T | 2078 | 0.287202 | 0         |  |  |
|  |  | Shiraz-53T | 2078 | 0.287202 | 0         |  |  |
|  |  | Shiraz-58T | 2162 | 0.221505 | 0         |  |  |
|  |  | Shiraz-58T | 2162 | 0.221505 | 0         |  |  |
|  |  | Shiraz-58T | 2162 | 0.221505 | 0         |  |  |
|  |  | Shiraz-71T | 2238 | 0.603631 | 0         |  |  |
|  |  | Shiraz-71T | 2238 | 0.603631 | 0         |  |  |
|  |  | Shiraz-71T | 2238 | 0.603631 | 0         |  |  |
|  |  | Shiraz-3T  | 90   | 0.219276 | 0         |  |  |
|  |  | Shiraz-3T  | 90   | 0.219276 | 0         |  |  |
|  |  | Shiraz-3T  | 90   | 0.219276 | 0         |  |  |
|  |  | Shiraz-3T  | 99   | 0.454766 | 0         |  |  |
|  |  | Shiraz-3T  | 99   | 0.454766 | 0         |  |  |
|  |  | Shiraz-3T  | 99   | 0.454766 | 0         |  |  |
|  |  | Shiraz-4T  | 253  | 0.372918 | 0         |  |  |
|  |  | Shiraz-4T  | 253  | 0.372918 | 0         |  |  |

|  |  |            |      |          |           |  |  |
|--|--|------------|------|----------|-----------|--|--|
|  |  | Shiraz-4T  | 253  | 0.372918 | 0         |  |  |
|  |  | Shiraz-36T | 378  | 0.179558 | 0         |  |  |
|  |  | Shiraz-36T | 378  | 0.179558 | 0         |  |  |
|  |  | Shiraz-36T | 378  | 0.179558 | 0         |  |  |
|  |  | Shiraz-44T | 646  | 0.471276 | 0         |  |  |
|  |  | Shiraz-44T | 646  | 0.471276 | 0         |  |  |
|  |  | Shiraz-44T | 646  | 0.471276 | 0         |  |  |
|  |  | Shiraz-44T | 647  | 1.496173 | 0         |  |  |
|  |  | Shiraz-44T | 647  | 1.496173 | 0         |  |  |
|  |  | Shiraz-44T | 647  | 1.496173 | 0         |  |  |
|  |  | Shiraz-46T | 943  | 0.093799 | 0         |  |  |
|  |  | Shiraz-46T | 943  | 0.093799 | 0         |  |  |
|  |  | Shiraz-46T | 943  | 0.093799 | 0         |  |  |
|  |  | Shiraz-9T  | 1325 | 0.221899 | 0         |  |  |
|  |  | Shiraz-9T  | 1325 | 0.221899 | 0         |  |  |
|  |  | Shiraz-9T  | 1325 | 0.221899 | 0         |  |  |
|  |  | Shiraz-18T | 1434 | 0.244465 | 0         |  |  |
|  |  | Shiraz-18T | 1434 | 0.244465 | 0         |  |  |
|  |  | Shiraz-18T | 1434 | 0.244465 | 0         |  |  |
|  |  | Shiraz-22T | 1555 | 0.427999 | 0         |  |  |
|  |  | Shiraz-22T | 1555 | 0.427999 | 0         |  |  |
|  |  | Shiraz-25T | 1698 | 0.21835  | 0         |  |  |
|  |  | Shiraz-25T | 1698 | 0.21835  | 0         |  |  |
|  |  | Shiraz-25T | 1698 | 0.21835  | 0         |  |  |
|  |  | Shiraz-28T | 1735 | 0.350744 | 0         |  |  |
|  |  | Shiraz-28T | 1735 | 0.350744 | 0         |  |  |
|  |  | Shiraz-28T | 1735 | 0.350744 | 0         |  |  |
|  |  | Shiraz-29T | 1778 | 0.120767 | 0         |  |  |
|  |  | Shiraz-29T | 1778 | 0.120767 | 0         |  |  |
|  |  | Shiraz-29T | 1778 | 0.120767 | 0         |  |  |
|  |  | Shiraz-32T | 1833 | 0.551336 | 0         |  |  |
|  |  | Shiraz-32T | 1833 | 0.551336 | 0         |  |  |
|  |  | Shiraz-32T | 1833 | 0.551336 | 0         |  |  |
|  |  | Shiraz-38T | 1951 | 0.250891 | 0         |  |  |
|  |  | Shiraz-38T | 1951 | 0.250891 | 0         |  |  |
|  |  | Shiraz-38T | 1951 | 0.250891 | 0         |  |  |
|  |  | Shiraz-38T | 1952 | 0        | -0.163211 |  |  |
|  |  | Shiraz-38T | 1952 | 0        | -0.163211 |  |  |
|  |  | Shiraz-38T | 1952 | 0        | -0.163211 |  |  |
|  |  | Shiraz-53T | 2078 | 0.287202 | 0         |  |  |
|  |  | Shiraz-53T | 2078 | 0.287202 | 0         |  |  |
|  |  | Shiraz-53T | 2078 | 0.287202 | 0         |  |  |
|  |  | Shiraz-58T | 2162 | 0.221505 | 0         |  |  |
|  |  | Shiraz-58T | 2162 | 0.221505 | 0         |  |  |
|  |  | Shiraz-58T | 2162 | 0.221505 | 0         |  |  |
|  |  | Shiraz-71T | 2238 | 0.603631 | 0         |  |  |
|  |  | Shiraz-71T | 2238 | 0.603631 | 0         |  |  |

|  |            |      |          |           |  |
|--|------------|------|----------|-----------|--|
|  | Shiraz-71T | 2238 | 0.603631 | 0         |  |
|  | Shiraz-3T  | 90   | 0.219276 | 0         |  |
|  | Shiraz-3T  | 90   | 0.219276 | 0         |  |
|  | Shiraz-3T  | 90   | 0.219276 | 0         |  |
|  | Shiraz-3T  | 99   | 0.454766 | 0         |  |
|  | Shiraz-3T  | 99   | 0.454766 | 0         |  |
|  | Shiraz-3T  | 99   | 0.454766 | 0         |  |
|  | Shiraz-4T  | 253  | 0.372918 | 0         |  |
|  | Shiraz-4T  | 253  | 0.372918 | 0         |  |
|  | Shiraz-4T  | 253  | 0.372918 | 0         |  |
|  | Shiraz-36T | 378  | 0.179558 | 0         |  |
|  | Shiraz-36T | 378  | 0.179558 | 0         |  |
|  | Shiraz-36T | 378  | 0.179558 | 0         |  |
|  | Shiraz-44T | 646  | 0.471276 | 0         |  |
|  | Shiraz-44T | 646  | 0.471276 | 0         |  |
|  | Shiraz-44T | 646  | 0.471276 | 0         |  |
|  | Shiraz-44T | 647  | 1.496173 | 0         |  |
|  | Shiraz-44T | 647  | 1.496173 | 0         |  |
|  | Shiraz-44T | 647  | 1.496173 | 0         |  |
|  | Shiraz-46T | 943  | 0.093799 | 0         |  |
|  | Shiraz-46T | 943  | 0.093799 | 0         |  |
|  | Shiraz-46T | 943  | 0.093799 | 0         |  |
|  | Shiraz-9T  | 1325 | 0.221899 | 0         |  |
|  | Shiraz-9T  | 1325 | 0.221899 | 0         |  |
|  | Shiraz-9T  | 1325 | 0.221899 | 0         |  |
|  | Shiraz-18T | 1434 | 0.244465 | 0         |  |
|  | Shiraz-18T | 1434 | 0.244465 | 0         |  |
|  | Shiraz-18T | 1434 | 0.244465 | 0         |  |
|  | Shiraz-22T | 1555 | 0.427999 | 0         |  |
|  | Shiraz-22T | 1555 | 0.427999 | 0         |  |
|  | Shiraz-25T | 1698 | 0.21835  | 0         |  |
|  | Shiraz-25T | 1698 | 0.21835  | 0         |  |
|  | Shiraz-25T | 1698 | 0.21835  | 0         |  |
|  | Shiraz-28T | 1735 | 0.350744 | 0         |  |
|  | Shiraz-28T | 1735 | 0.350744 | 0         |  |
|  | Shiraz-28T | 1735 | 0.350744 | 0         |  |
|  | Shiraz-29T | 1778 | 0.120767 | 0         |  |
|  | Shiraz-29T | 1778 | 0.120767 | 0         |  |
|  | Shiraz-29T | 1778 | 0.120767 | 0         |  |
|  | Shiraz-32T | 1833 | 0.551336 | 0         |  |
|  | Shiraz-32T | 1833 | 0.551336 | 0         |  |
|  | Shiraz-32T | 1833 | 0.551336 | 0         |  |
|  | Shiraz-38T | 1951 | 0.250891 | 0         |  |
|  | Shiraz-38T | 1951 | 0.250891 | 0         |  |
|  | Shiraz-38T | 1951 | 0.250891 | 0         |  |
|  | Shiraz-38T | 1952 | 0        | -0.163211 |  |
|  | Shiraz-38T | 1952 | 0        | -0.163211 |  |



|     |      |            |      |          |           |  |
|-----|------|------------|------|----------|-----------|--|
|     |      | Shiraz-38T | 1952 | 0        | -0.163211 |  |
|     |      | Shiraz-53T | 2078 | 0.287202 | 0         |  |
|     |      | Shiraz-53T | 2078 | 0.287202 | 0         |  |
|     |      | Shiraz-53T | 2078 | 0.287202 | 0         |  |
|     |      | Shiraz-58T | 2162 | 0.221505 | 0         |  |
|     |      | Shiraz-58T | 2162 | 0.221505 | 0         |  |
|     |      | Shiraz-58T | 2162 | 0.221505 | 0         |  |
|     |      | Shiraz-71T | 2238 | 0.603631 | 0         |  |
|     |      | Shiraz-71T | 2238 | 0.603631 | 0         |  |
|     |      | Shiraz-71T | 2238 | 0.603631 | 0         |  |
| KCP | chr7 | Shiraz-3T  | 90   | 0.219276 | 0         |  |
|     |      | Shiraz-3T  | 90   | 0.219276 | 0         |  |
|     |      | Shiraz-3T  | 96   | 0.428308 | 0         |  |
|     |      | Shiraz-3T  | 96   | 0.428308 | 0         |  |
|     |      | Shiraz-4T  | 253  | 0.372918 | 0         |  |
|     |      | Shiraz-4T  | 253  | 0.372918 | 0         |  |
|     |      | Shiraz-31T | 317  | 0.204382 | 0         |  |
|     |      | Shiraz-31T | 317  | 0.204382 | 0         |  |
|     |      | Shiraz-36T | 378  | 0.179558 | 0         |  |
|     |      | Shiraz-36T | 378  | 0.179558 | 0         |  |
|     |      | Shiraz-44T | 642  | 0.408617 | 0         |  |
|     |      | Shiraz-44T | 642  | 0.408617 | 0         |  |
|     |      | Shiraz-46T | 943  | 0.093799 | 0         |  |
|     |      | Shiraz-46T | 943  | 0.093799 | 0         |  |
|     |      | Shiraz-47T | 1032 | 0.171484 | 0         |  |
|     |      | Shiraz-47T | 1032 | 0.171484 | 0         |  |
|     |      | Shiraz-77T | 1225 | 0        | -0.117922 |  |
|     |      | Shiraz-77T | 1225 | 0        | -0.117922 |  |
|     |      | Shiraz-77T | 1229 | 0.051661 | 0         |  |
|     |      | Shiraz-77T | 1229 | 0.051661 | 0         |  |
|     |      | Shiraz-9T  | 1325 | 0.221899 | 0         |  |
|     |      | Shiraz-9T  | 1325 | 0.221899 | 0         |  |
|     |      | Shiraz-18T | 1434 | 0.244465 | 0         |  |
|     |      | Shiraz-18T | 1434 | 0.244465 | 0         |  |
|     |      | Shiraz-25T | 1698 | 0.21835  | 0         |  |
|     |      | Shiraz-25T | 1698 | 0.21835  | 0         |  |
|     |      | Shiraz-28T | 1735 | 0.350744 | 0         |  |
|     |      | Shiraz-28T | 1735 | 0.350744 | 0         |  |
|     |      | Shiraz-29T | 1778 | 0.120767 | 0         |  |
|     |      | Shiraz-29T | 1778 | 0.120767 | 0         |  |
|     |      | Shiraz-32T | 1833 | 0.551336 | 0         |  |
|     |      | Shiraz-32T | 1833 | 0.551336 | 0         |  |
|     |      | Shiraz-38T | 1951 | 0.250891 | 0         |  |
|     |      | Shiraz-38T | 1951 | 0.250891 | 0         |  |
|     |      | Shiraz-53T | 2078 | 0.287202 | 0         |  |
|     |      | Shiraz-53T | 2078 | 0.287202 | 0         |  |
|     |      | Shiraz-71T | 2238 | 0.603631 | 0         |  |

|  |  |            |      |          |           |  |  |
|--|--|------------|------|----------|-----------|--|--|
|  |  | Shiraz-71T | 2238 | 0.603631 | 0         |  |  |
|  |  | Shiraz-3T  | 90   | 0.219276 | 0         |  |  |
|  |  | Shiraz-3T  | 90   | 0.219276 | 0         |  |  |
|  |  | Shiraz-3T  | 96   | 0.428308 | 0         |  |  |
|  |  | Shiraz-3T  | 96   | 0.428308 | 0         |  |  |
|  |  | Shiraz-4T  | 253  | 0.372918 | 0         |  |  |
|  |  | Shiraz-4T  | 253  | 0.372918 | 0         |  |  |
|  |  | Shiraz-31T | 317  | 0.204382 | 0         |  |  |
|  |  | Shiraz-31T | 317  | 0.204382 | 0         |  |  |
|  |  | Shiraz-36T | 378  | 0.179558 | 0         |  |  |
|  |  | Shiraz-36T | 378  | 0.179558 | 0         |  |  |
|  |  | Shiraz-44T | 642  | 0.408617 | 0         |  |  |
|  |  | Shiraz-44T | 642  | 0.408617 | 0         |  |  |
|  |  | Shiraz-46T | 943  | 0.093799 | 0         |  |  |
|  |  | Shiraz-46T | 943  | 0.093799 | 0         |  |  |
|  |  | Shiraz-47T | 1032 | 0.171484 | 0         |  |  |
|  |  | Shiraz-47T | 1032 | 0.171484 | 0         |  |  |
|  |  | Shiraz-77T | 1225 | 0        | -0.117922 |  |  |
|  |  | Shiraz-77T | 1225 | 0        | -0.117922 |  |  |
|  |  | Shiraz-77T | 1229 | 0.051661 | 0         |  |  |
|  |  | Shiraz-77T | 1229 | 0.051661 | 0         |  |  |
|  |  | Shiraz-9T  | 1325 | 0.221899 | 0         |  |  |
|  |  | Shiraz-9T  | 1325 | 0.221899 | 0         |  |  |
|  |  | Shiraz-18T | 1434 | 0.244465 | 0         |  |  |
|  |  | Shiraz-18T | 1434 | 0.244465 | 0         |  |  |
|  |  | Shiraz-25T | 1698 | 0.21835  | 0         |  |  |
|  |  | Shiraz-25T | 1698 | 0.21835  | 0         |  |  |
|  |  | Shiraz-28T | 1735 | 0.350744 | 0         |  |  |
|  |  | Shiraz-28T | 1735 | 0.350744 | 0         |  |  |
|  |  | Shiraz-29T | 1778 | 0.120767 | 0         |  |  |
|  |  | Shiraz-29T | 1778 | 0.120767 | 0         |  |  |
|  |  | Shiraz-32T | 1833 | 0.551336 | 0         |  |  |
|  |  | Shiraz-32T | 1833 | 0.551336 | 0         |  |  |
|  |  | Shiraz-38T | 1951 | 0.250891 | 0         |  |  |
|  |  | Shiraz-38T | 1951 | 0.250891 | 0         |  |  |
|  |  | Shiraz-53T | 2078 | 0.287202 | 0         |  |  |
|  |  | Shiraz-53T | 2078 | 0.287202 | 0         |  |  |
|  |  | Shiraz-71T | 2238 | 0.603631 | 0         |  |  |
|  |  | Shiraz-71T | 2238 | 0.603631 | 0         |  |  |
|  |  | Shiraz-3T  | 90   | 0.219276 | 0         |  |  |
|  |  | Shiraz-3T  | 90   | 0.219276 | 0         |  |  |
|  |  | Shiraz-3T  | 96   | 0.428308 | 0         |  |  |
|  |  | Shiraz-3T  | 96   | 0.428308 | 0         |  |  |
|  |  | Shiraz-4T  | 253  | 0.372918 | 0         |  |  |
|  |  | Shiraz-4T  | 253  | 0.372918 | 0         |  |  |
|  |  | Shiraz-31T | 317  | 0.204382 | 0         |  |  |
|  |  | Shiraz-31T | 317  | 0.204382 | 0         |  |  |

|       |      |            |      |          |           |  |
|-------|------|------------|------|----------|-----------|--|
|       |      | Shiraz-36T | 378  | 0.179558 | 0         |  |
|       |      | Shiraz-36T | 378  | 0.179558 | 0         |  |
|       |      | Shiraz-44T | 642  | 0.408617 | 0         |  |
|       |      | Shiraz-44T | 642  | 0.408617 | 0         |  |
|       |      | Shiraz-46T | 943  | 0.093799 | 0         |  |
|       |      | Shiraz-46T | 943  | 0.093799 | 0         |  |
|       |      | Shiraz-47T | 1032 | 0.171484 | 0         |  |
|       |      | Shiraz-47T | 1032 | 0.171484 | 0         |  |
|       |      | Shiraz-77T | 1225 | 0        | -0.117922 |  |
|       |      | Shiraz-77T | 1225 | 0        | -0.117922 |  |
|       |      | Shiraz-77T | 1229 | 0.051661 | 0         |  |
|       |      | Shiraz-77T | 1229 | 0.051661 | 0         |  |
|       |      | Shiraz-9T  | 1325 | 0.221899 | 0         |  |
|       |      | Shiraz-9T  | 1325 | 0.221899 | 0         |  |
|       |      | Shiraz-18T | 1434 | 0.244465 | 0         |  |
|       |      | Shiraz-18T | 1434 | 0.244465 | 0         |  |
|       |      | Shiraz-25T | 1698 | 0.21835  | 0         |  |
|       |      | Shiraz-25T | 1698 | 0.21835  | 0         |  |
|       |      | Shiraz-28T | 1735 | 0.350744 | 0         |  |
|       |      | Shiraz-28T | 1735 | 0.350744 | 0         |  |
|       |      | Shiraz-29T | 1778 | 0.120767 | 0         |  |
|       |      | Shiraz-29T | 1778 | 0.120767 | 0         |  |
|       |      | Shiraz-32T | 1833 | 0.551336 | 0         |  |
|       |      | Shiraz-32T | 1833 | 0.551336 | 0         |  |
|       |      | Shiraz-38T | 1951 | 0.250891 | 0         |  |
|       |      | Shiraz-38T | 1951 | 0.250891 | 0         |  |
|       |      | Shiraz-53T | 2078 | 0.287202 | 0         |  |
|       |      | Shiraz-53T | 2078 | 0.287202 | 0         |  |
|       |      | Shiraz-71T | 2238 | 0.603631 | 0         |  |
|       |      | Shiraz-71T | 2238 | 0.603631 | 0         |  |
| KDM5C | chrX | Shiraz-4T  | 260  | 0        | -0.324128 |  |
|       |      | Shiraz-16T | 294  | 0.655804 | 0         |  |
|       |      | Shiraz-31T | 345  | 0.103301 | 0         |  |
|       |      | Shiraz-36T | 431  | 0        | -0.78035  |  |
|       |      | Shiraz-36T | 432  | 0        | -0.6692   |  |
|       |      | Shiraz-44T | 891  | 0        | -0.954044 |  |
|       |      | Shiraz-44T | 898  | 0        | -0.515218 |  |
|       |      | Shiraz-49T | 1166 | 0        | -0.917235 |  |
|       |      | Shiraz-77T | 1282 | 0.213849 | 0         |  |
|       |      | Shiraz-9T  | 1368 | 0.199713 | 0         |  |
|       |      | Shiraz-18T | 1456 | 0.608534 | 0         |  |
|       |      | Shiraz-22T | 1669 | 0.695915 | 0         |  |
|       |      | Shiraz-25T | 1717 | 0.420447 | 0         |  |
|       |      | Shiraz-28T | 1760 | 0.538181 | 0         |  |
|       |      | Shiraz-29T | 1800 | 0.672527 | 0         |  |
|       |      | Shiraz-32T | 1869 | 0.776805 | 0         |  |
|       |      | Shiraz-35T | 1932 | 0.507141 | 0         |  |

|       |      |            |      |          |           |  |
|-------|------|------------|------|----------|-----------|--|
|       |      | Shiraz-58T | 2221 | 0.871948 | 0         |  |
|       |      | Shiraz-71T | 2260 | 0.68394  | 0         |  |
|       |      | Shiraz-71T | 2262 | 0.986748 | 0         |  |
|       |      | Shiraz-4T  | 260  | 0        | -0.324128 |  |
|       |      | Shiraz-16T | 294  | 0.655804 | 0         |  |
|       |      | Shiraz-31T | 345  | 0.103301 | 0         |  |
|       |      | Shiraz-36T | 431  | 0        | -0.78035  |  |
|       |      | Shiraz-36T | 432  | 0        | -0.6692   |  |
|       |      | Shiraz-44T | 891  | 0        | -0.954044 |  |
|       |      | Shiraz-44T | 898  | 0        | -0.515218 |  |
|       |      | Shiraz-49T | 1166 | 0        | -0.917235 |  |
|       |      | Shiraz-77T | 1282 | 0.213849 | 0         |  |
|       |      | Shiraz-9T  | 1368 | 0.199713 | 0         |  |
|       |      | Shiraz-18T | 1456 | 0.608534 | 0         |  |
|       |      | Shiraz-22T | 1669 | 0.695915 | 0         |  |
|       |      | Shiraz-25T | 1717 | 0.420447 | 0         |  |
|       |      | Shiraz-28T | 1760 | 0.538181 | 0         |  |
|       |      | Shiraz-29T | 1800 | 0.672527 | 0         |  |
|       |      | Shiraz-32T | 1869 | 0.776805 | 0         |  |
|       |      | Shiraz-35T | 1932 | 0.507141 | 0         |  |
|       |      | Shiraz-58T | 2221 | 0.871948 | 0         |  |
|       |      | Shiraz-71T | 2260 | 0.68394  | 0         |  |
|       |      | Shiraz-71T | 2262 | 0.986748 | 0         |  |
|       |      | Shiraz-4T  | 260  | 0        | -0.324128 |  |
|       |      | Shiraz-16T | 294  | 0.655804 | 0         |  |
|       |      | Shiraz-31T | 345  | 0.103301 | 0         |  |
|       |      | Shiraz-36T | 431  | 0        | -0.78035  |  |
|       |      | Shiraz-36T | 432  | 0        | -0.6692   |  |
|       |      | Shiraz-44T | 891  | 0        | -0.954044 |  |
|       |      | Shiraz-44T | 898  | 0        | -0.515218 |  |
|       |      | Shiraz-49T | 1166 | 0        | -0.917235 |  |
|       |      | Shiraz-77T | 1282 | 0.213849 | 0         |  |
|       |      | Shiraz-9T  | 1368 | 0.199713 | 0         |  |
|       |      | Shiraz-18T | 1456 | 0.608534 | 0         |  |
|       |      | Shiraz-22T | 1669 | 0.695915 | 0         |  |
|       |      | Shiraz-25T | 1717 | 0.420447 | 0         |  |
|       |      | Shiraz-28T | 1760 | 0.538181 | 0         |  |
|       |      | Shiraz-29T | 1800 | 0.672527 | 0         |  |
|       |      | Shiraz-32T | 1869 | 0.776805 | 0         |  |
|       |      | Shiraz-35T | 1932 | 0.507141 | 0         |  |
|       |      | Shiraz-58T | 2221 | 0.871948 | 0         |  |
|       |      | Shiraz-71T | 2260 | 0.68394  | 0         |  |
|       |      | Shiraz-71T | 2262 | 0.986748 | 0         |  |
| KDM6A | chrX | Shiraz-3T  | 235  | 0        | -0.28401  |  |
|       |      | Shiraz-4T  | 260  | 0        | -0.324128 |  |
|       |      | Shiraz-16T | 294  | 0.655804 | 0         |  |
|       |      | Shiraz-31T | 345  | 0.103301 | 0         |  |

|  |            |      |          |           |  |
|--|------------|------|----------|-----------|--|
|  | Shiraz-36T | 431  | 0        | -0.78035  |  |
|  | Shiraz-36T | 432  | 0        | -0.6692   |  |
|  | Shiraz-44T | 891  | 0        | -0.954044 |  |
|  | Shiraz-46T | 991  | 0.139564 | 0         |  |
|  | Shiraz-49T | 1166 | 0        | -0.917235 |  |
|  | Shiraz-9T  | 1368 | 0.199713 | 0         |  |
|  | Shiraz-18T | 1455 | 0        | -0.186773 |  |
|  | Shiraz-22T | 1669 | 0.695915 | 0         |  |
|  | Shiraz-25T | 1717 | 0.420447 | 0         |  |
|  | Shiraz-28T | 1760 | 0.538181 | 0         |  |
|  | Shiraz-29T | 1800 | 0.672527 | 0         |  |
|  | Shiraz-32T | 1869 | 0.776805 | 0         |  |
|  | Shiraz-35T | 1932 | 0.507141 | 0         |  |
|  | Shiraz-40T | 2051 | 0.098506 | 0         |  |
|  | Shiraz-58T | 2221 | 0.871948 | 0         |  |
|  | Shiraz-71T | 2260 | 0.68394  | 0         |  |
|  | Shiraz-71T | 2262 | 0.986748 | 0         |  |
|  | Shiraz-3T  | 235  | 0        | -0.28401  |  |
|  | Shiraz-4T  | 260  | 0        | -0.324128 |  |
|  | Shiraz-16T | 294  | 0.655804 | 0         |  |
|  | Shiraz-31T | 345  | 0.103301 | 0         |  |
|  | Shiraz-36T | 431  | 0        | -0.78035  |  |
|  | Shiraz-36T | 432  | 0        | -0.6692   |  |
|  | Shiraz-44T | 891  | 0        | -0.954044 |  |
|  | Shiraz-46T | 991  | 0.139564 | 0         |  |
|  | Shiraz-49T | 1166 | 0        | -0.917235 |  |
|  | Shiraz-9T  | 1368 | 0.199713 | 0         |  |
|  | Shiraz-18T | 1455 | 0        | -0.186773 |  |
|  | Shiraz-22T | 1669 | 0.695915 | 0         |  |
|  | Shiraz-25T | 1717 | 0.420447 | 0         |  |
|  | Shiraz-28T | 1760 | 0.538181 | 0         |  |
|  | Shiraz-29T | 1800 | 0.672527 | 0         |  |
|  | Shiraz-32T | 1869 | 0.776805 | 0         |  |
|  | Shiraz-35T | 1932 | 0.507141 | 0         |  |
|  | Shiraz-40T | 2051 | 0.098506 | 0         |  |
|  | Shiraz-58T | 2221 | 0.871948 | 0         |  |
|  | Shiraz-71T | 2260 | 0.68394  | 0         |  |
|  | Shiraz-71T | 2262 | 0.986748 | 0         |  |
|  | Shiraz-3T  | 235  | 0        | -0.28401  |  |
|  | Shiraz-4T  | 260  | 0        | -0.324128 |  |
|  | Shiraz-16T | 294  | 0.655804 | 0         |  |
|  | Shiraz-31T | 345  | 0.103301 | 0         |  |
|  | Shiraz-36T | 431  | 0        | -0.78035  |  |
|  | Shiraz-36T | 432  | 0        | -0.6692   |  |
|  | Shiraz-44T | 891  | 0        | -0.954044 |  |
|  | Shiraz-46T | 991  | 0.139564 | 0         |  |
|  | Shiraz-49T | 1166 | 0        | -0.917235 |  |

|     |      |            |      |          |           |  |
|-----|------|------------|------|----------|-----------|--|
|     |      | Shiraz-9T  | 1368 | 0.199713 | 0         |  |
|     |      | Shiraz-18T | 1455 | 0        | -0.186773 |  |
|     |      | Shiraz-22T | 1669 | 0.695915 | 0         |  |
|     |      | Shiraz-25T | 1717 | 0.420447 | 0         |  |
|     |      | Shiraz-28T | 1760 | 0.538181 | 0         |  |
|     |      | Shiraz-29T | 1800 | 0.672527 | 0         |  |
|     |      | Shiraz-32T | 1869 | 0.776805 | 0         |  |
|     |      | Shiraz-35T | 1932 | 0.507141 | 0         |  |
|     |      | Shiraz-40T | 2051 | 0.098506 | 0         |  |
|     |      | Shiraz-58T | 2221 | 0.871948 | 0         |  |
|     |      | Shiraz-71T | 2260 | 0.68394  | 0         |  |
|     |      | Shiraz-71T | 2262 | 0.986748 | 0         |  |
| KEL | chr7 | Shiraz-3T  | 90   | 0.219276 | 0         |  |
|     |      | Shiraz-4T  | 253  | 0.372918 | 0         |  |
|     |      | Shiraz-36T | 378  | 0.179558 | 0         |  |
|     |      | Shiraz-46T | 943  | 0.093799 | 0         |  |
|     |      | Shiraz-77T | 1225 | 0        | -0.117922 |  |
|     |      | Shiraz-9T  | 1325 | 0.221899 | 0         |  |
|     |      | Shiraz-18T | 1434 | 0.244465 | 0         |  |
|     |      | Shiraz-25T | 1698 | 0.21835  | 0         |  |
|     |      | Shiraz-28T | 1735 | 0.350744 | 0         |  |
|     |      | Shiraz-29T | 1778 | 0.120767 | 0         |  |
|     |      | Shiraz-32T | 1833 | 0.551336 | 0         |  |
|     |      | Shiraz-38T | 1951 | 0.250891 | 0         |  |
|     |      | Shiraz-53T | 2078 | 0.287202 | 0         |  |
|     |      | Shiraz-58T | 2162 | 0.221505 | 0         |  |
|     |      | Shiraz-71T | 2238 | 0.603631 | 0         |  |
|     |      | Shiraz-3T  | 90   | 0.219276 | 0         |  |
|     |      | Shiraz-4T  | 253  | 0.372918 | 0         |  |
|     |      | Shiraz-36T | 378  | 0.179558 | 0         |  |
|     |      | Shiraz-46T | 943  | 0.093799 | 0         |  |
|     |      | Shiraz-77T | 1225 | 0        | -0.117922 |  |
|     |      | Shiraz-9T  | 1325 | 0.221899 | 0         |  |
|     |      | Shiraz-18T | 1434 | 0.244465 | 0         |  |
|     |      | Shiraz-25T | 1698 | 0.21835  | 0         |  |
|     |      | Shiraz-28T | 1735 | 0.350744 | 0         |  |
|     |      | Shiraz-29T | 1778 | 0.120767 | 0         |  |
|     |      | Shiraz-32T | 1833 | 0.551336 | 0         |  |
|     |      | Shiraz-38T | 1951 | 0.250891 | 0         |  |
|     |      | Shiraz-53T | 2078 | 0.287202 | 0         |  |
|     |      | Shiraz-58T | 2162 | 0.221505 | 0         |  |
|     |      | Shiraz-71T | 2238 | 0.603631 | 0         |  |
|     |      | Shiraz-3T  | 90   | 0.219276 | 0         |  |
|     |      | Shiraz-4T  | 253  | 0.372918 | 0         |  |
|     |      | Shiraz-36T | 378  | 0.179558 | 0         |  |
|     |      | Shiraz-46T | 943  | 0.093799 | 0         |  |
|     |      | Shiraz-77T | 1225 | 0        | -0.117922 |  |

|          |      |            |      |          |   |  |  |
|----------|------|------------|------|----------|---|--|--|
|          |      | Shiraz-9T  | 1325 | 0.221899 | 0 |  |  |
|          |      | Shiraz-18T | 1434 | 0.244465 | 0 |  |  |
|          |      | Shiraz-25T | 1698 | 0.21835  | 0 |  |  |
|          |      | Shiraz-28T | 1735 | 0.350744 | 0 |  |  |
|          |      | Shiraz-29T | 1778 | 0.120767 | 0 |  |  |
|          |      | Shiraz-32T | 1833 | 0.551336 | 0 |  |  |
|          |      | Shiraz-38T | 1951 | 0.250891 | 0 |  |  |
|          |      | Shiraz-53T | 2078 | 0.287202 | 0 |  |  |
|          |      | Shiraz-58T | 2162 | 0.221505 | 0 |  |  |
|          |      | Shiraz-71T | 2238 | 0.603631 | 0 |  |  |
| KIAA0087 | chr7 | Shiraz-3T  | 87   | 0.198593 | 0 |  |  |
|          |      | Shiraz-4T  | 252  | 0.192083 | 0 |  |  |
|          |      | Shiraz-36T | 376  | 0.159952 | 0 |  |  |
|          |      | Shiraz-46T | 942  | 0.069143 | 0 |  |  |
|          |      | Shiraz-18T | 1433 | 0.250973 | 0 |  |  |
|          |      | Shiraz-25T | 1697 | 0.21945  | 0 |  |  |
|          |      | Shiraz-28T | 1734 | 0.362882 | 0 |  |  |
|          |      | Shiraz-29T | 1777 | 0.156747 | 0 |  |  |
|          |      | Shiraz-38T | 1950 | 0.265916 | 0 |  |  |
|          |      | Shiraz-71T | 2236 | 0.320072 | 0 |  |  |
|          |      | Shiraz-3T  | 87   | 0.198593 | 0 |  |  |
|          |      | Shiraz-4T  | 252  | 0.192083 | 0 |  |  |
|          |      | Shiraz-36T | 376  | 0.159952 | 0 |  |  |
|          |      | Shiraz-46T | 942  | 0.069143 | 0 |  |  |
|          |      | Shiraz-18T | 1433 | 0.250973 | 0 |  |  |
|          |      | Shiraz-25T | 1697 | 0.21945  | 0 |  |  |
|          |      | Shiraz-28T | 1734 | 0.362882 | 0 |  |  |
|          |      | Shiraz-29T | 1777 | 0.156747 | 0 |  |  |
|          |      | Shiraz-38T | 1950 | 0.265916 | 0 |  |  |
|          |      | Shiraz-71T | 2236 | 0.320072 | 0 |  |  |
|          |      | Shiraz-3T  | 87   | 0.198593 | 0 |  |  |
|          |      | Shiraz-4T  | 252  | 0.192083 | 0 |  |  |
|          |      | Shiraz-36T | 376  | 0.159952 | 0 |  |  |
|          |      | Shiraz-46T | 942  | 0.069143 | 0 |  |  |
|          |      | Shiraz-18T | 1433 | 0.250973 | 0 |  |  |
|          |      | Shiraz-25T | 1697 | 0.21945  | 0 |  |  |
|          |      | Shiraz-28T | 1734 | 0.362882 | 0 |  |  |
|          |      | Shiraz-29T | 1777 | 0.156747 | 0 |  |  |
|          |      | Shiraz-38T | 1950 | 0.265916 | 0 |  |  |
|          |      | Shiraz-71T | 2236 | 0.320072 | 0 |  |  |
| KIAA0644 | chr7 | Shiraz-3T  | 87   | 0.198593 | 0 |  |  |
|          |      | Shiraz-4T  | 252  | 0.192083 | 0 |  |  |
|          |      | Shiraz-36T | 376  | 0.159952 | 0 |  |  |
|          |      | Shiraz-46T | 942  | 0.069143 | 0 |  |  |
|          |      | Shiraz-18T | 1433 | 0.250973 | 0 |  |  |
|          |      | Shiraz-25T | 1697 | 0.21945  | 0 |  |  |
|          |      | Shiraz-28T | 1734 | 0.362882 | 0 |  |  |

|          |      |            |      |          |           |  |
|----------|------|------------|------|----------|-----------|--|
|          |      | Shiraz-29T | 1777 | 0.156747 | 0         |  |
|          |      | Shiraz-38T | 1950 | 0.265916 | 0         |  |
|          |      | Shiraz-71T | 2236 | 0.320072 | 0         |  |
|          |      | Shiraz-3T  | 87   | 0.198593 | 0         |  |
|          |      | Shiraz-4T  | 252  | 0.192083 | 0         |  |
|          |      | Shiraz-36T | 376  | 0.159952 | 0         |  |
|          |      | Shiraz-46T | 942  | 0.069143 | 0         |  |
|          |      | Shiraz-18T | 1433 | 0.250973 | 0         |  |
|          |      | Shiraz-25T | 1697 | 0.21945  | 0         |  |
|          |      | Shiraz-28T | 1734 | 0.362882 | 0         |  |
|          |      | Shiraz-29T | 1777 | 0.156747 | 0         |  |
|          |      | Shiraz-38T | 1950 | 0.265916 | 0         |  |
|          |      | Shiraz-71T | 2236 | 0.320072 | 0         |  |
|          |      | Shiraz-3T  | 87   | 0.198593 | 0         |  |
|          |      | Shiraz-4T  | 252  | 0.192083 | 0         |  |
|          |      | Shiraz-36T | 376  | 0.159952 | 0         |  |
|          |      | Shiraz-46T | 942  | 0.069143 | 0         |  |
|          |      | Shiraz-18T | 1433 | 0.250973 | 0         |  |
|          |      | Shiraz-25T | 1697 | 0.21945  | 0         |  |
|          |      | Shiraz-28T | 1734 | 0.362882 | 0         |  |
|          |      | Shiraz-29T | 1777 | 0.156747 | 0         |  |
|          |      | Shiraz-38T | 1950 | 0.265916 | 0         |  |
|          |      | Shiraz-71T | 2236 | 0.320072 | 0         |  |
| KIAA0895 | chr7 | Shiraz-3T  | 87   | 0.198593 | 0         |  |
|          |      | Shiraz-3T  | 87   | 0.198593 | 0         |  |
|          |      | Shiraz-4T  | 252  | 0.192083 | 0         |  |
|          |      | Shiraz-4T  | 252  | 0.192083 | 0         |  |
|          |      | Shiraz-36T | 376  | 0.159952 | 0         |  |
|          |      | Shiraz-36T | 376  | 0.159952 | 0         |  |
|          |      | Shiraz-44T | 631  | 0        | -0.180312 |  |
|          |      | Shiraz-44T | 631  | 0        | -0.180312 |  |
|          |      | Shiraz-46T | 942  | 0.069143 | 0         |  |
|          |      | Shiraz-46T | 942  | 0.069143 | 0         |  |
|          |      | Shiraz-18T | 1433 | 0.250973 | 0         |  |
|          |      | Shiraz-18T | 1433 | 0.250973 | 0         |  |
|          |      | Shiraz-22T | 1544 | 0        | -0.193579 |  |
|          |      | Shiraz-22T | 1544 | 0        | -0.193579 |  |
|          |      | Shiraz-25T | 1697 | 0.21945  | 0         |  |
|          |      | Shiraz-25T | 1697 | 0.21945  | 0         |  |
|          |      | Shiraz-28T | 1734 | 0.362882 | 0         |  |
|          |      | Shiraz-28T | 1734 | 0.362882 | 0         |  |
|          |      | Shiraz-29T | 1777 | 0.156747 | 0         |  |
|          |      | Shiraz-29T | 1777 | 0.156747 | 0         |  |
|          |      | Shiraz-38T | 1950 | 0.265916 | 0         |  |
|          |      | Shiraz-38T | 1950 | 0.265916 | 0         |  |
|          |      | Shiraz-71T | 2236 | 0.320072 | 0         |  |
|          |      | Shiraz-71T | 2236 | 0.320072 | 0         |  |



|  |            |      |          |           |  |
|--|------------|------|----------|-----------|--|
|  | Shiraz-72T | 2277 | 0        | -0.398869 |  |
|  | Shiraz-72T | 2277 | 0        | -0.398869 |  |
|  | Shiraz-3T  | 87   | 0.198593 | 0         |  |
|  | Shiraz-3T  | 87   | 0.198593 | 0         |  |
|  | Shiraz-4T  | 252  | 0.192083 | 0         |  |
|  | Shiraz-4T  | 252  | 0.192083 | 0         |  |
|  | Shiraz-36T | 376  | 0.159952 | 0         |  |
|  | Shiraz-36T | 376  | 0.159952 | 0         |  |
|  | Shiraz-44T | 631  | 0        | -0.180312 |  |
|  | Shiraz-44T | 631  | 0        | -0.180312 |  |
|  | Shiraz-46T | 942  | 0.069143 | 0         |  |
|  | Shiraz-46T | 942  | 0.069143 | 0         |  |
|  | Shiraz-18T | 1433 | 0.250973 | 0         |  |
|  | Shiraz-18T | 1433 | 0.250973 | 0         |  |
|  | Shiraz-22T | 1544 | 0        | -0.193579 |  |
|  | Shiraz-22T | 1544 | 0        | -0.193579 |  |
|  | Shiraz-25T | 1697 | 0.21945  | 0         |  |
|  | Shiraz-25T | 1697 | 0.21945  | 0         |  |
|  | Shiraz-28T | 1734 | 0.362882 | 0         |  |
|  | Shiraz-28T | 1734 | 0.362882 | 0         |  |
|  | Shiraz-29T | 1777 | 0.156747 | 0         |  |
|  | Shiraz-29T | 1777 | 0.156747 | 0         |  |
|  | Shiraz-38T | 1950 | 0.265916 | 0         |  |
|  | Shiraz-38T | 1950 | 0.265916 | 0         |  |
|  | Shiraz-71T | 2236 | 0.320072 | 0         |  |
|  | Shiraz-71T | 2236 | 0.320072 | 0         |  |
|  | Shiraz-72T | 2277 | 0        | -0.398869 |  |
|  | Shiraz-72T | 2277 | 0        | -0.398869 |  |
|  | Shiraz-3T  | 87   | 0.198593 | 0         |  |
|  | Shiraz-3T  | 87   | 0.198593 | 0         |  |
|  | Shiraz-4T  | 252  | 0.192083 | 0         |  |
|  | Shiraz-4T  | 252  | 0.192083 | 0         |  |
|  | Shiraz-36T | 376  | 0.159952 | 0         |  |
|  | Shiraz-36T | 376  | 0.159952 | 0         |  |
|  | Shiraz-44T | 631  | 0        | -0.180312 |  |
|  | Shiraz-44T | 631  | 0        | -0.180312 |  |
|  | Shiraz-46T | 942  | 0.069143 | 0         |  |
|  | Shiraz-46T | 942  | 0.069143 | 0         |  |
|  | Shiraz-18T | 1433 | 0.250973 | 0         |  |
|  | Shiraz-18T | 1433 | 0.250973 | 0         |  |
|  | Shiraz-22T | 1544 | 0        | -0.193579 |  |
|  | Shiraz-22T | 1544 | 0        | -0.193579 |  |
|  | Shiraz-25T | 1697 | 0.21945  | 0         |  |
|  | Shiraz-25T | 1697 | 0.21945  | 0         |  |
|  | Shiraz-28T | 1734 | 0.362882 | 0         |  |
|  | Shiraz-28T | 1734 | 0.362882 | 0         |  |
|  | Shiraz-29T | 1777 | 0.156747 | 0         |  |

|          |      |            |      |          |           |  |
|----------|------|------------|------|----------|-----------|--|
|          |      | Shiraz-29T | 1777 | 0.156747 | 0         |  |
|          |      | Shiraz-38T | 1950 | 0.265916 | 0         |  |
|          |      | Shiraz-38T | 1950 | 0.265916 | 0         |  |
|          |      | Shiraz-71T | 2236 | 0.320072 | 0         |  |
|          |      | Shiraz-71T | 2236 | 0.320072 | 0         |  |
|          |      | Shiraz-72T | 2277 | 0        | -0.398869 |  |
|          |      | Shiraz-72T | 2277 | 0        | -0.398869 |  |
| KIAA1147 | chr7 | Shiraz-3T  | 90   | 0.219276 | 0         |  |
|          |      | Shiraz-4T  | 253  | 0.372918 | 0         |  |
|          |      | Shiraz-36T | 378  | 0.179558 | 0         |  |
|          |      | Shiraz-46T | 943  | 0.093799 | 0         |  |
|          |      | Shiraz-77T | 1225 | 0        | -0.117922 |  |
|          |      | Shiraz-9T  | 1325 | 0.221899 | 0         |  |
|          |      | Shiraz-18T | 1434 | 0.244465 | 0         |  |
|          |      | Shiraz-25T | 1698 | 0.21835  | 0         |  |
|          |      | Shiraz-28T | 1735 | 0.350744 | 0         |  |
|          |      | Shiraz-29T | 1778 | 0.120767 | 0         |  |
|          |      | Shiraz-32T | 1833 | 0.551336 | 0         |  |
|          |      | Shiraz-38T | 1951 | 0.250891 | 0         |  |
|          |      | Shiraz-53T | 2078 | 0.287202 | 0         |  |
|          |      | Shiraz-58T | 2162 | 0.221505 | 0         |  |
|          |      | Shiraz-71T | 2238 | 0.603631 | 0         |  |
|          |      | Shiraz-3T  | 90   | 0.219276 | 0         |  |
|          |      | Shiraz-4T  | 253  | 0.372918 | 0         |  |
|          |      | Shiraz-36T | 378  | 0.179558 | 0         |  |
|          |      | Shiraz-46T | 943  | 0.093799 | 0         |  |
|          |      | Shiraz-77T | 1225 | 0        | -0.117922 |  |
|          |      | Shiraz-9T  | 1325 | 0.221899 | 0         |  |
|          |      | Shiraz-18T | 1434 | 0.244465 | 0         |  |
|          |      | Shiraz-25T | 1698 | 0.21835  | 0         |  |
|          |      | Shiraz-28T | 1735 | 0.350744 | 0         |  |
|          |      | Shiraz-29T | 1778 | 0.120767 | 0         |  |
|          |      | Shiraz-32T | 1833 | 0.551336 | 0         |  |
|          |      | Shiraz-38T | 1951 | 0.250891 | 0         |  |
|          |      | Shiraz-53T | 2078 | 0.287202 | 0         |  |
|          |      | Shiraz-58T | 2162 | 0.221505 | 0         |  |
|          |      | Shiraz-71T | 2238 | 0.603631 | 0         |  |
|          |      | Shiraz-3T  | 90   | 0.219276 | 0         |  |
|          |      | Shiraz-4T  | 253  | 0.372918 | 0         |  |
|          |      | Shiraz-36T | 378  | 0.179558 | 0         |  |
|          |      | Shiraz-46T | 943  | 0.093799 | 0         |  |
|          |      | Shiraz-77T | 1225 | 0        | -0.117922 |  |
|          |      | Shiraz-9T  | 1325 | 0.221899 | 0         |  |
|          |      | Shiraz-18T | 1434 | 0.244465 | 0         |  |
|          |      | Shiraz-25T | 1698 | 0.21835  | 0         |  |
|          |      | Shiraz-28T | 1735 | 0.350744 | 0         |  |
|          |      | Shiraz-29T | 1778 | 0.120767 | 0         |  |

|          |      |            |      |          |           |  |  |
|----------|------|------------|------|----------|-----------|--|--|
|          |      | Shiraz-32T | 1833 | 0.551336 | 0         |  |  |
|          |      | Shiraz-38T | 1951 | 0.250891 | 0         |  |  |
|          |      | Shiraz-53T | 2078 | 0.287202 | 0         |  |  |
|          |      | Shiraz-58T | 2162 | 0.221505 | 0         |  |  |
|          |      | Shiraz-71T | 2238 | 0.603631 | 0         |  |  |
| KIAA1210 | chrX | Shiraz-3T  | 242  | 0        | -0.336434 |  |  |
|          |      | Shiraz-3T  | 244  | 0        | -0.023749 |  |  |
|          |      | Shiraz-4T  | 261  | 0        | -0.336249 |  |  |
|          |      | Shiraz-16T | 295  | 0.591657 | 0         |  |  |
|          |      | Shiraz-36T | 433  | 0        | -0.803961 |  |  |
|          |      | Shiraz-44T | 899  | 0        | -1.09697  |  |  |
|          |      | Shiraz-44T | 904  | 0        | -0.625526 |  |  |
|          |      | Shiraz-49T | 1170 | 0        | -0.967436 |  |  |
|          |      | Shiraz-18T | 1457 | 0.643204 | 0         |  |  |
|          |      | Shiraz-22T | 1673 | 0.611783 | 0         |  |  |
|          |      | Shiraz-25T | 1719 | 0.472955 | 0         |  |  |
|          |      | Shiraz-28T | 1762 | 0.562311 | 0         |  |  |
|          |      | Shiraz-29T | 1801 | 0.815343 | 0         |  |  |
|          |      | Shiraz-32T | 1870 | 0.729766 | 0         |  |  |
|          |      | Shiraz-35T | 1933 | 0.488535 | 0         |  |  |
|          |      | Shiraz-58T | 2223 | 0.833364 | 0         |  |  |
|          |      | Shiraz-71T | 2263 | 0.975531 | 0         |  |  |
|          |      | Shiraz-3T  | 242  | 0        | -0.336434 |  |  |
|          |      | Shiraz-3T  | 244  | 0        | -0.023749 |  |  |
|          |      | Shiraz-4T  | 261  | 0        | -0.336249 |  |  |
|          |      | Shiraz-16T | 295  | 0.591657 | 0         |  |  |
|          |      | Shiraz-36T | 433  | 0        | -0.803961 |  |  |
|          |      | Shiraz-44T | 899  | 0        | -1.09697  |  |  |
|          |      | Shiraz-44T | 904  | 0        | -0.625526 |  |  |
|          |      | Shiraz-49T | 1170 | 0        | -0.967436 |  |  |
|          |      | Shiraz-18T | 1457 | 0.643204 | 0         |  |  |
|          |      | Shiraz-22T | 1673 | 0.611783 | 0         |  |  |
|          |      | Shiraz-25T | 1719 | 0.472955 | 0         |  |  |
|          |      | Shiraz-28T | 1762 | 0.562311 | 0         |  |  |
|          |      | Shiraz-29T | 1801 | 0.815343 | 0         |  |  |
|          |      | Shiraz-32T | 1870 | 0.729766 | 0         |  |  |
|          |      | Shiraz-35T | 1933 | 0.488535 | 0         |  |  |
|          |      | Shiraz-58T | 2223 | 0.833364 | 0         |  |  |
|          |      | Shiraz-71T | 2263 | 0.975531 | 0         |  |  |
|          |      | Shiraz-3T  | 242  | 0        | -0.336434 |  |  |
|          |      | Shiraz-3T  | 244  | 0        | -0.023749 |  |  |
|          |      | Shiraz-4T  | 261  | 0        | -0.336249 |  |  |
|          |      | Shiraz-16T | 295  | 0.591657 | 0         |  |  |
|          |      | Shiraz-36T | 433  | 0        | -0.803961 |  |  |
|          |      | Shiraz-44T | 899  | 0        | -1.09697  |  |  |
|          |      | Shiraz-44T | 904  | 0        | -0.625526 |  |  |
|          |      | Shiraz-49T | 1170 | 0        | -0.967436 |  |  |

|           |      |            |      |          |           |  |
|-----------|------|------------|------|----------|-----------|--|
|           |      | Shiraz-18T | 1457 | 0.643204 | 0         |  |
|           |      | Shiraz-22T | 1673 | 0.611783 | 0         |  |
|           |      | Shiraz-25T | 1719 | 0.472955 | 0         |  |
|           |      | Shiraz-28T | 1762 | 0.562311 | 0         |  |
|           |      | Shiraz-29T | 1801 | 0.815343 | 0         |  |
|           |      | Shiraz-32T | 1870 | 0.729766 | 0         |  |
|           |      | Shiraz-35T | 1933 | 0.488535 | 0         |  |
|           |      | Shiraz-58T | 2223 | 0.833364 | 0         |  |
|           |      | Shiraz-71T | 2263 | 0.975531 | 0         |  |
| KIAA1324L | chr7 | Shiraz-3T  | 90   | 0.219276 | 0         |  |
|           |      | Shiraz-3T  | 90   | 0.219276 | 0         |  |
|           |      | Shiraz-3T  | 93   | 0        | -0.058023 |  |
|           |      | Shiraz-3T  | 93   | 0        | -0.058023 |  |
|           |      | Shiraz-4T  | 253  | 0.372918 | 0         |  |
|           |      | Shiraz-4T  | 253  | 0.372918 | 0         |  |
|           |      | Shiraz-36T | 378  | 0.179558 | 0         |  |
|           |      | Shiraz-36T | 378  | 0.179558 | 0         |  |
|           |      | Shiraz-36T | 380  | 0.083883 | 0         |  |
|           |      | Shiraz-36T | 380  | 0.083883 | 0         |  |
|           |      | Shiraz-44T | 638  | 0        | -0.433476 |  |
|           |      | Shiraz-44T | 638  | 0        | -0.433476 |  |
|           |      | Shiraz-46T | 943  | 0.093799 | 0         |  |
|           |      | Shiraz-46T | 943  | 0.093799 | 0         |  |
|           |      | Shiraz-46T | 945  | 0        | -0.014838 |  |
|           |      | Shiraz-46T | 945  | 0        | -0.014838 |  |
|           |      | Shiraz-47T | 1029 | 0        | -0.096586 |  |
|           |      | Shiraz-47T | 1029 | 0        | -0.096586 |  |
|           |      | Shiraz-49T | 1119 | 0        | -0.157331 |  |
|           |      | Shiraz-49T | 1119 | 0        | -0.157331 |  |
|           |      | Shiraz-77T | 1225 | 0        | -0.117922 |  |
|           |      | Shiraz-77T | 1225 | 0        | -0.117922 |  |
|           |      | Shiraz-77T | 1226 | 0        | -0.233724 |  |
|           |      | Shiraz-77T | 1226 | 0        | -0.233724 |  |
|           |      | Shiraz-12T | 1390 | 0        | -0.237897 |  |
|           |      | Shiraz-12T | 1390 | 0        | -0.237897 |  |
|           |      | Shiraz-18T | 1434 | 0.244465 | 0         |  |
|           |      | Shiraz-18T | 1434 | 0.244465 | 0         |  |
|           |      | Shiraz-22T | 1549 | 0        | -0.319623 |  |
|           |      | Shiraz-22T | 1549 | 0        | -0.319623 |  |
|           |      | Shiraz-22T | 1550 | 0        | -0.577052 |  |
|           |      | Shiraz-22T | 1550 | 0        | -0.577052 |  |
|           |      | Shiraz-25T | 1698 | 0.21835  | 0         |  |
|           |      | Shiraz-25T | 1698 | 0.21835  | 0         |  |
|           |      | Shiraz-28T | 1735 | 0.350744 | 0         |  |
|           |      | Shiraz-28T | 1735 | 0.350744 | 0         |  |
|           |      | Shiraz-29T | 1778 | 0.120767 | 0         |  |
|           |      | Shiraz-29T | 1778 | 0.120767 | 0         |  |

|  |            |      |          |           |  |
|--|------------|------|----------|-----------|--|
|  | Shiraz-38T | 1951 | 0.250891 | 0         |  |
|  | Shiraz-38T | 1951 | 0.250891 | 0         |  |
|  | Shiraz-53T | 2078 | 0.287202 | 0         |  |
|  | Shiraz-53T | 2078 | 0.287202 | 0         |  |
|  | Shiraz-58T | 2159 | 0        | -0.219521 |  |
|  | Shiraz-58T | 2159 | 0        | -0.219521 |  |
|  | Shiraz-71T | 2238 | 0.603631 | 0         |  |
|  | Shiraz-71T | 2238 | 0.603631 | 0         |  |
|  | Shiraz-3T  | 90   | 0.219276 | 0         |  |
|  | Shiraz-3T  | 90   | 0.219276 | 0         |  |
|  | Shiraz-3T  | 93   | 0        | -0.058023 |  |
|  | Shiraz-3T  | 93   | 0        | -0.058023 |  |
|  | Shiraz-4T  | 253  | 0.372918 | 0         |  |
|  | Shiraz-4T  | 253  | 0.372918 | 0         |  |
|  | Shiraz-36T | 378  | 0.179558 | 0         |  |
|  | Shiraz-36T | 378  | 0.179558 | 0         |  |
|  | Shiraz-36T | 380  | 0.083883 | 0         |  |
|  | Shiraz-36T | 380  | 0.083883 | 0         |  |
|  | Shiraz-44T | 638  | 0        | -0.433476 |  |
|  | Shiraz-44T | 638  | 0        | -0.433476 |  |
|  | Shiraz-46T | 943  | 0.093799 | 0         |  |
|  | Shiraz-46T | 943  | 0.093799 | 0         |  |
|  | Shiraz-46T | 945  | 0        | -0.014838 |  |
|  | Shiraz-46T | 945  | 0        | -0.014838 |  |
|  | Shiraz-47T | 1029 | 0        | -0.096586 |  |
|  | Shiraz-47T | 1029 | 0        | -0.096586 |  |
|  | Shiraz-49T | 1119 | 0        | -0.157331 |  |
|  | Shiraz-49T | 1119 | 0        | -0.157331 |  |
|  | Shiraz-77T | 1225 | 0        | -0.117922 |  |
|  | Shiraz-77T | 1225 | 0        | -0.117922 |  |
|  | Shiraz-77T | 1226 | 0        | -0.233724 |  |
|  | Shiraz-77T | 1226 | 0        | -0.233724 |  |
|  | Shiraz-12T | 1390 | 0        | -0.237897 |  |
|  | Shiraz-12T | 1390 | 0        | -0.237897 |  |
|  | Shiraz-18T | 1434 | 0.244465 | 0         |  |
|  | Shiraz-18T | 1434 | 0.244465 | 0         |  |
|  | Shiraz-22T | 1549 | 0        | -0.319623 |  |
|  | Shiraz-22T | 1549 | 0        | -0.319623 |  |
|  | Shiraz-22T | 1550 | 0        | -0.577052 |  |
|  | Shiraz-22T | 1550 | 0        | -0.577052 |  |
|  | Shiraz-25T | 1698 | 0.21835  | 0         |  |
|  | Shiraz-25T | 1698 | 0.21835  | 0         |  |
|  | Shiraz-28T | 1735 | 0.350744 | 0         |  |
|  | Shiraz-28T | 1735 | 0.350744 | 0         |  |
|  | Shiraz-29T | 1778 | 0.120767 | 0         |  |
|  | Shiraz-29T | 1778 | 0.120767 | 0         |  |
|  | Shiraz-38T | 1951 | 0.250891 | 0         |  |

|  |  |            |      |          |           |  |  |
|--|--|------------|------|----------|-----------|--|--|
|  |  | Shiraz-38T | 1951 | 0.250891 | 0         |  |  |
|  |  | Shiraz-53T | 2078 | 0.287202 | 0         |  |  |
|  |  | Shiraz-53T | 2078 | 0.287202 | 0         |  |  |
|  |  | Shiraz-58T | 2159 | 0        | -0.219521 |  |  |
|  |  | Shiraz-58T | 2159 | 0        | -0.219521 |  |  |
|  |  | Shiraz-71T | 2238 | 0.603631 | 0         |  |  |
|  |  | Shiraz-71T | 2238 | 0.603631 | 0         |  |  |
|  |  | Shiraz-3T  | 90   | 0.219276 | 0         |  |  |
|  |  | Shiraz-3T  | 90   | 0.219276 | 0         |  |  |
|  |  | Shiraz-3T  | 93   | 0        | -0.058023 |  |  |
|  |  | Shiraz-3T  | 93   | 0        | -0.058023 |  |  |
|  |  | Shiraz-4T  | 253  | 0.372918 | 0         |  |  |
|  |  | Shiraz-4T  | 253  | 0.372918 | 0         |  |  |
|  |  | Shiraz-36T | 378  | 0.179558 | 0         |  |  |
|  |  | Shiraz-36T | 378  | 0.179558 | 0         |  |  |
|  |  | Shiraz-36T | 380  | 0.083883 | 0         |  |  |
|  |  | Shiraz-36T | 380  | 0.083883 | 0         |  |  |
|  |  | Shiraz-44T | 638  | 0        | -0.433476 |  |  |
|  |  | Shiraz-44T | 638  | 0        | -0.433476 |  |  |
|  |  | Shiraz-46T | 943  | 0.093799 | 0         |  |  |
|  |  | Shiraz-46T | 943  | 0.093799 | 0         |  |  |
|  |  | Shiraz-46T | 945  | 0        | -0.014838 |  |  |
|  |  | Shiraz-46T | 945  | 0        | -0.014838 |  |  |
|  |  | Shiraz-47T | 1029 | 0        | -0.096586 |  |  |
|  |  | Shiraz-47T | 1029 | 0        | -0.096586 |  |  |
|  |  | Shiraz-49T | 1119 | 0        | -0.157331 |  |  |
|  |  | Shiraz-49T | 1119 | 0        | -0.157331 |  |  |
|  |  | Shiraz-77T | 1225 | 0        | -0.117922 |  |  |
|  |  | Shiraz-77T | 1225 | 0        | -0.117922 |  |  |
|  |  | Shiraz-77T | 1226 | 0        | -0.233724 |  |  |
|  |  | Shiraz-77T | 1226 | 0        | -0.233724 |  |  |
|  |  | Shiraz-12T | 1390 | 0        | -0.237897 |  |  |
|  |  | Shiraz-12T | 1390 | 0        | -0.237897 |  |  |
|  |  | Shiraz-18T | 1434 | 0.244465 | 0         |  |  |
|  |  | Shiraz-18T | 1434 | 0.244465 | 0         |  |  |
|  |  | Shiraz-22T | 1549 | 0        | -0.319623 |  |  |
|  |  | Shiraz-22T | 1549 | 0        | -0.319623 |  |  |
|  |  | Shiraz-22T | 1550 | 0        | -0.577052 |  |  |
|  |  | Shiraz-22T | 1550 | 0        | -0.577052 |  |  |
|  |  | Shiraz-25T | 1698 | 0.21835  | 0         |  |  |
|  |  | Shiraz-25T | 1698 | 0.21835  | 0         |  |  |
|  |  | Shiraz-28T | 1735 | 0.350744 | 0         |  |  |
|  |  | Shiraz-28T | 1735 | 0.350744 | 0         |  |  |
|  |  | Shiraz-29T | 1778 | 0.120767 | 0         |  |  |
|  |  | Shiraz-29T | 1778 | 0.120767 | 0         |  |  |
|  |  | Shiraz-38T | 1951 | 0.250891 | 0         |  |  |
|  |  | Shiraz-38T | 1951 | 0.250891 | 0         |  |  |

|          |      |            |      |          |           |  |
|----------|------|------------|------|----------|-----------|--|
|          |      | Shiraz-53T | 2078 | 0.287202 | 0         |  |
|          |      | Shiraz-53T | 2078 | 0.287202 | 0         |  |
|          |      | Shiraz-58T | 2159 | 0        | -0.219521 |  |
|          |      | Shiraz-58T | 2159 | 0        | -0.219521 |  |
|          |      | Shiraz-71T | 2238 | 0.603631 | 0         |  |
|          |      | Shiraz-71T | 2238 | 0.603631 | 0         |  |
| KIAA1549 | chr7 | Shiraz-3T  | 90   | 0.219276 | 0         |  |
|          |      | Shiraz-3T  | 97   | 0.496001 | 0         |  |
|          |      | Shiraz-4T  | 253  | 0.372918 | 0         |  |
|          |      | Shiraz-31T | 318  | 0.254373 | 0         |  |
|          |      | Shiraz-36T | 378  | 0.179558 | 0         |  |
|          |      | Shiraz-36T | 383  | 0.374586 | 0         |  |
|          |      | Shiraz-44T | 644  | 0.496536 | 0         |  |
|          |      | Shiraz-46T | 943  | 0.093799 | 0         |  |
|          |      | Shiraz-47T | 1033 | 0.220267 | 0         |  |
|          |      | Shiraz-77T | 1225 | 0        | -0.117922 |  |
|          |      | Shiraz-77T | 1230 | 0.149651 | 0         |  |
|          |      | Shiraz-9T  | 1325 | 0.221899 | 0         |  |
|          |      | Shiraz-18T | 1434 | 0.244465 | 0         |  |
|          |      | Shiraz-25T | 1698 | 0.21835  | 0         |  |
|          |      | Shiraz-28T | 1735 | 0.350744 | 0         |  |
|          |      | Shiraz-29T | 1778 | 0.120767 | 0         |  |
|          |      | Shiraz-32T | 1833 | 0.551336 | 0         |  |
|          |      | Shiraz-38T | 1951 | 0.250891 | 0         |  |
|          |      | Shiraz-53T | 2078 | 0.287202 | 0         |  |
|          |      | Shiraz-58T | 2162 | 0.221505 | 0         |  |
|          |      | Shiraz-71T | 2238 | 0.603631 | 0         |  |
|          |      | Shiraz-3T  | 90   | 0.219276 | 0         |  |
|          |      | Shiraz-3T  | 97   | 0.496001 | 0         |  |
|          |      | Shiraz-4T  | 253  | 0.372918 | 0         |  |
|          |      | Shiraz-31T | 318  | 0.254373 | 0         |  |
|          |      | Shiraz-36T | 378  | 0.179558 | 0         |  |
|          |      | Shiraz-36T | 383  | 0.374586 | 0         |  |
|          |      | Shiraz-44T | 644  | 0.496536 | 0         |  |
|          |      | Shiraz-46T | 943  | 0.093799 | 0         |  |
|          |      | Shiraz-47T | 1033 | 0.220267 | 0         |  |
|          |      | Shiraz-77T | 1225 | 0        | -0.117922 |  |
|          |      | Shiraz-77T | 1230 | 0.149651 | 0         |  |
|          |      | Shiraz-9T  | 1325 | 0.221899 | 0         |  |
|          |      | Shiraz-18T | 1434 | 0.244465 | 0         |  |
|          |      | Shiraz-25T | 1698 | 0.21835  | 0         |  |
|          |      | Shiraz-28T | 1735 | 0.350744 | 0         |  |
|          |      | Shiraz-29T | 1778 | 0.120767 | 0         |  |
|          |      | Shiraz-32T | 1833 | 0.551336 | 0         |  |
|          |      | Shiraz-38T | 1951 | 0.250891 | 0         |  |
|          |      | Shiraz-53T | 2078 | 0.287202 | 0         |  |
|          |      | Shiraz-58T | 2162 | 0.221505 | 0         |  |

|          |      |            |      |          |           |  |  |
|----------|------|------------|------|----------|-----------|--|--|
|          |      | Shiraz-71T | 2238 | 0.603631 | 0         |  |  |
|          |      | Shiraz-3T  | 90   | 0.219276 | 0         |  |  |
|          |      | Shiraz-3T  | 97   | 0.496001 | 0         |  |  |
|          |      | Shiraz-4T  | 253  | 0.372918 | 0         |  |  |
|          |      | Shiraz-31T | 318  | 0.254373 | 0         |  |  |
|          |      | Shiraz-36T | 378  | 0.179558 | 0         |  |  |
|          |      | Shiraz-36T | 383  | 0.374586 | 0         |  |  |
|          |      | Shiraz-44T | 644  | 0.496536 | 0         |  |  |
|          |      | Shiraz-46T | 943  | 0.093799 | 0         |  |  |
|          |      | Shiraz-47T | 1033 | 0.220267 | 0         |  |  |
|          |      | Shiraz-77T | 1225 | 0        | -0.117922 |  |  |
|          |      | Shiraz-77T | 1230 | 0.149651 | 0         |  |  |
|          |      | Shiraz-9T  | 1325 | 0.221899 | 0         |  |  |
|          |      | Shiraz-18T | 1434 | 0.244465 | 0         |  |  |
|          |      | Shiraz-25T | 1698 | 0.21835  | 0         |  |  |
|          |      | Shiraz-28T | 1735 | 0.350744 | 0         |  |  |
|          |      | Shiraz-29T | 1778 | 0.120767 | 0         |  |  |
|          |      | Shiraz-32T | 1833 | 0.551336 | 0         |  |  |
|          |      | Shiraz-38T | 1951 | 0.250891 | 0         |  |  |
|          |      | Shiraz-53T | 2078 | 0.287202 | 0         |  |  |
|          |      | Shiraz-58T | 2162 | 0.221505 | 0         |  |  |
|          |      | Shiraz-71T | 2238 | 0.603631 | 0         |  |  |
| KIAA1680 | chr4 | Shiraz-3T  | 59   | 0        | -0.408206 |  |  |
|          |      | Shiraz-3T  | 59   | 0        | -0.408206 |  |  |
|          |      | Shiraz-16T | 264  | 0        | -0.096722 |  |  |
|          |      | Shiraz-16T | 264  | 0        | -0.096722 |  |  |
|          |      | Shiraz-31T | 307  | 0        | -0.059856 |  |  |
|          |      | Shiraz-31T | 307  | 0        | -0.059856 |  |  |
|          |      | Shiraz-44T | 578  | 0        | -0.740466 |  |  |
|          |      | Shiraz-44T | 578  | 0        | -0.740466 |  |  |
|          |      | Shiraz-44T | 582  | 0        | -1.041462 |  |  |
|          |      | Shiraz-44T | 582  | 0        | -1.041462 |  |  |
|          |      | Shiraz-47T | 1016 | 0        | -0.087003 |  |  |
|          |      | Shiraz-47T | 1016 | 0        | -0.087003 |  |  |
|          |      | Shiraz-49T | 1106 | 0        | -0.120646 |  |  |
|          |      | Shiraz-49T | 1106 | 0        | -0.120646 |  |  |
|          |      | Shiraz-77T | 1212 | 0        | -0.160375 |  |  |
|          |      | Shiraz-77T | 1212 | 0        | -0.160375 |  |  |
|          |      | Shiraz-9T  | 1318 | 0        | -0.432026 |  |  |
|          |      | Shiraz-9T  | 1318 | 0        | -0.432026 |  |  |
|          |      | Shiraz-12T | 1382 | 0        | -0.116858 |  |  |
|          |      | Shiraz-12T | 1382 | 0        | -0.116858 |  |  |
|          |      | Shiraz-18T | 1428 | 0        | -0.277503 |  |  |
|          |      | Shiraz-18T | 1428 | 0        | -0.277503 |  |  |
|          |      | Shiraz-22T | 1513 | 0        | -0.453076 |  |  |
|          |      | Shiraz-22T | 1513 | 0        | -0.453076 |  |  |
|          |      | Shiraz-22T | 1516 | 0        | -0.806655 |  |  |



|  |  |            |      |   |           |  |  |
|--|--|------------|------|---|-----------|--|--|
|  |  | Shiraz-22T | 1516 | 0 | -0.806655 |  |  |
|  |  | Shiraz-25T | 1693 | 0 | -0.123879 |  |  |
|  |  | Shiraz-25T | 1693 | 0 | -0.123879 |  |  |
|  |  | Shiraz-28T | 1730 | 0 | -0.106099 |  |  |
|  |  | Shiraz-28T | 1730 | 0 | -0.106099 |  |  |
|  |  | Shiraz-29T | 1772 | 0 | -0.173275 |  |  |
|  |  | Shiraz-29T | 1772 | 0 | -0.173275 |  |  |
|  |  | Shiraz-32T | 1829 | 0 | -0.169881 |  |  |
|  |  | Shiraz-32T | 1829 | 0 | -0.169881 |  |  |
|  |  | Shiraz-35T | 1881 | 0 | -0.104589 |  |  |
|  |  | Shiraz-35T | 1881 | 0 | -0.104589 |  |  |
|  |  | Shiraz-53T | 2067 | 0 | -0.418072 |  |  |
|  |  | Shiraz-53T | 2067 | 0 | -0.418072 |  |  |
|  |  | Shiraz-58T | 2139 | 0 | -0.272484 |  |  |
|  |  | Shiraz-58T | 2139 | 0 | -0.272484 |  |  |
|  |  | Shiraz-58T | 2140 | 0 | -0.372685 |  |  |
|  |  | Shiraz-58T | 2140 | 0 | -0.372685 |  |  |
|  |  | Shiraz-72T | 2274 | 0 | -0.089449 |  |  |
|  |  | Shiraz-72T | 2274 | 0 | -0.089449 |  |  |
|  |  | Shiraz-3T  | 59   | 0 | -0.408206 |  |  |
|  |  | Shiraz-3T  | 59   | 0 | -0.408206 |  |  |
|  |  | Shiraz-16T | 264  | 0 | -0.096722 |  |  |
|  |  | Shiraz-16T | 264  | 0 | -0.096722 |  |  |
|  |  | Shiraz-31T | 307  | 0 | -0.059856 |  |  |
|  |  | Shiraz-31T | 307  | 0 | -0.059856 |  |  |
|  |  | Shiraz-44T | 578  | 0 | -0.740466 |  |  |
|  |  | Shiraz-44T | 578  | 0 | -0.740466 |  |  |
|  |  | Shiraz-44T | 582  | 0 | -1.041462 |  |  |
|  |  | Shiraz-44T | 582  | 0 | -1.041462 |  |  |
|  |  | Shiraz-47T | 1016 | 0 | -0.087003 |  |  |
|  |  | Shiraz-47T | 1016 | 0 | -0.087003 |  |  |
|  |  | Shiraz-49T | 1106 | 0 | -0.120646 |  |  |
|  |  | Shiraz-49T | 1106 | 0 | -0.120646 |  |  |
|  |  | Shiraz-77T | 1212 | 0 | -0.160375 |  |  |
|  |  | Shiraz-77T | 1212 | 0 | -0.160375 |  |  |
|  |  | Shiraz-9T  | 1318 | 0 | -0.432026 |  |  |
|  |  | Shiraz-9T  | 1318 | 0 | -0.432026 |  |  |
|  |  | Shiraz-12T | 1382 | 0 | -0.116858 |  |  |
|  |  | Shiraz-12T | 1382 | 0 | -0.116858 |  |  |
|  |  | Shiraz-18T | 1428 | 0 | -0.277503 |  |  |
|  |  | Shiraz-18T | 1428 | 0 | -0.277503 |  |  |
|  |  | Shiraz-22T | 1513 | 0 | -0.453076 |  |  |
|  |  | Shiraz-22T | 1513 | 0 | -0.453076 |  |  |
|  |  | Shiraz-22T | 1516 | 0 | -0.806655 |  |  |
|  |  | Shiraz-22T | 1516 | 0 | -0.806655 |  |  |
|  |  | Shiraz-25T | 1693 | 0 | -0.123879 |  |  |
|  |  | Shiraz-25T | 1693 | 0 | -0.123879 |  |  |

|  |            |      |   |           |  |
|--|------------|------|---|-----------|--|
|  | Shiraz-28T | 1730 | 0 | -0.106099 |  |
|  | Shiraz-28T | 1730 | 0 | -0.106099 |  |
|  | Shiraz-29T | 1772 | 0 | -0.173275 |  |
|  | Shiraz-29T | 1772 | 0 | -0.173275 |  |
|  | Shiraz-32T | 1829 | 0 | -0.169881 |  |
|  | Shiraz-32T | 1829 | 0 | -0.169881 |  |
|  | Shiraz-35T | 1881 | 0 | -0.104589 |  |
|  | Shiraz-35T | 1881 | 0 | -0.104589 |  |
|  | Shiraz-53T | 2067 | 0 | -0.418072 |  |
|  | Shiraz-53T | 2067 | 0 | -0.418072 |  |
|  | Shiraz-58T | 2139 | 0 | -0.272484 |  |
|  | Shiraz-58T | 2139 | 0 | -0.272484 |  |
|  | Shiraz-58T | 2140 | 0 | -0.372685 |  |
|  | Shiraz-58T | 2140 | 0 | -0.372685 |  |
|  | Shiraz-72T | 2274 | 0 | -0.089449 |  |
|  | Shiraz-72T | 2274 | 0 | -0.089449 |  |
|  | Shiraz-3T  | 59   | 0 | -0.408206 |  |
|  | Shiraz-3T  | 59   | 0 | -0.408206 |  |
|  | Shiraz-16T | 264  | 0 | -0.096722 |  |
|  | Shiraz-16T | 264  | 0 | -0.096722 |  |
|  | Shiraz-31T | 307  | 0 | -0.059856 |  |
|  | Shiraz-31T | 307  | 0 | -0.059856 |  |
|  | Shiraz-44T | 578  | 0 | -0.740466 |  |
|  | Shiraz-44T | 578  | 0 | -0.740466 |  |
|  | Shiraz-44T | 582  | 0 | -1.041462 |  |
|  | Shiraz-44T | 582  | 0 | -1.041462 |  |
|  | Shiraz-47T | 1016 | 0 | -0.087003 |  |
|  | Shiraz-47T | 1016 | 0 | -0.087003 |  |
|  | Shiraz-49T | 1106 | 0 | -0.120646 |  |
|  | Shiraz-49T | 1106 | 0 | -0.120646 |  |
|  | Shiraz-77T | 1212 | 0 | -0.160375 |  |
|  | Shiraz-77T | 1212 | 0 | -0.160375 |  |
|  | Shiraz-9T  | 1318 | 0 | -0.432026 |  |
|  | Shiraz-9T  | 1318 | 0 | -0.432026 |  |
|  | Shiraz-12T | 1382 | 0 | -0.116858 |  |
|  | Shiraz-12T | 1382 | 0 | -0.116858 |  |
|  | Shiraz-18T | 1428 | 0 | -0.277503 |  |
|  | Shiraz-18T | 1428 | 0 | -0.277503 |  |
|  | Shiraz-22T | 1513 | 0 | -0.453076 |  |
|  | Shiraz-22T | 1513 | 0 | -0.453076 |  |
|  | Shiraz-22T | 1516 | 0 | -0.806655 |  |
|  | Shiraz-22T | 1516 | 0 | -0.806655 |  |
|  | Shiraz-25T | 1693 | 0 | -0.123879 |  |
|  | Shiraz-25T | 1693 | 0 | -0.123879 |  |
|  | Shiraz-28T | 1730 | 0 | -0.106099 |  |
|  | Shiraz-28T | 1730 | 0 | -0.106099 |  |
|  | Shiraz-29T | 1772 | 0 | -0.173275 |  |

|          |      |            |      |          |           |  |  |
|----------|------|------------|------|----------|-----------|--|--|
|          |      | Shiraz-29T | 1772 | 0        | -0.173275 |  |  |
|          |      | Shiraz-32T | 1829 | 0        | -0.169881 |  |  |
|          |      | Shiraz-32T | 1829 | 0        | -0.169881 |  |  |
|          |      | Shiraz-35T | 1881 | 0        | -0.104589 |  |  |
|          |      | Shiraz-35T | 1881 | 0        | -0.104589 |  |  |
|          |      | Shiraz-53T | 2067 | 0        | -0.418072 |  |  |
|          |      | Shiraz-53T | 2067 | 0        | -0.418072 |  |  |
|          |      | Shiraz-58T | 2139 | 0        | -0.272484 |  |  |
|          |      | Shiraz-58T | 2139 | 0        | -0.272484 |  |  |
|          |      | Shiraz-58T | 2140 | 0        | -0.372685 |  |  |
|          |      | Shiraz-58T | 2140 | 0        | -0.372685 |  |  |
|          |      | Shiraz-72T | 2274 | 0        | -0.089449 |  |  |
|          |      | Shiraz-72T | 2274 | 0        | -0.089449 |  |  |
| KIAA2022 | chrX | Shiraz-3T  | 242  | 0        | -0.336434 |  |  |
|          |      | Shiraz-4T  | 261  | 0        | -0.336249 |  |  |
|          |      | Shiraz-16T | 295  | 0.591657 | 0         |  |  |
|          |      | Shiraz-36T | 433  | 0        | -0.803961 |  |  |
|          |      | Shiraz-44T | 899  | 0        | -1.09697  |  |  |
|          |      | Shiraz-49T | 1170 | 0        | -0.967436 |  |  |
|          |      | Shiraz-18T | 1457 | 0.643204 | 0         |  |  |
|          |      | Shiraz-22T | 1673 | 0.611783 | 0         |  |  |
|          |      | Shiraz-25T | 1719 | 0.472955 | 0         |  |  |
|          |      | Shiraz-28T | 1762 | 0.562311 | 0         |  |  |
|          |      | Shiraz-29T | 1801 | 0.815343 | 0         |  |  |
|          |      | Shiraz-32T | 1870 | 0.729766 | 0         |  |  |
|          |      | Shiraz-35T | 1933 | 0.488535 | 0         |  |  |
|          |      | Shiraz-58T | 2223 | 0.833364 | 0         |  |  |
|          |      | Shiraz-71T | 2263 | 0.975531 | 0         |  |  |
|          |      | Shiraz-3T  | 242  | 0        | -0.336434 |  |  |
|          |      | Shiraz-4T  | 261  | 0        | -0.336249 |  |  |
|          |      | Shiraz-16T | 295  | 0.591657 | 0         |  |  |
|          |      | Shiraz-36T | 433  | 0        | -0.803961 |  |  |
|          |      | Shiraz-44T | 899  | 0        | -1.09697  |  |  |
|          |      | Shiraz-49T | 1170 | 0        | -0.967436 |  |  |
|          |      | Shiraz-18T | 1457 | 0.643204 | 0         |  |  |
|          |      | Shiraz-22T | 1673 | 0.611783 | 0         |  |  |
|          |      | Shiraz-25T | 1719 | 0.472955 | 0         |  |  |
|          |      | Shiraz-28T | 1762 | 0.562311 | 0         |  |  |
|          |      | Shiraz-29T | 1801 | 0.815343 | 0         |  |  |
|          |      | Shiraz-32T | 1870 | 0.729766 | 0         |  |  |
|          |      | Shiraz-35T | 1933 | 0.488535 | 0         |  |  |
|          |      | Shiraz-58T | 2223 | 0.833364 | 0         |  |  |
|          |      | Shiraz-71T | 2263 | 0.975531 | 0         |  |  |
|          |      | Shiraz-3T  | 242  | 0        | -0.336434 |  |  |
|          |      | Shiraz-4T  | 261  | 0        | -0.336249 |  |  |
|          |      | Shiraz-16T | 295  | 0.591657 | 0         |  |  |
|          |      | Shiraz-36T | 433  | 0        | -0.803961 |  |  |

|       |      |            |      |          |           |  |  |
|-------|------|------------|------|----------|-----------|--|--|
|       |      | Shiraz-44T | 899  | 0        | -1.09697  |  |  |
|       |      | Shiraz-49T | 1170 | 0        | -0.967436 |  |  |
|       |      | Shiraz-18T | 1457 | 0.643204 | 0         |  |  |
|       |      | Shiraz-22T | 1673 | 0.611783 | 0         |  |  |
|       |      | Shiraz-25T | 1719 | 0.472955 | 0         |  |  |
|       |      | Shiraz-28T | 1762 | 0.562311 | 0         |  |  |
|       |      | Shiraz-29T | 1801 | 0.815343 | 0         |  |  |
|       |      | Shiraz-32T | 1870 | 0.729766 | 0         |  |  |
|       |      | Shiraz-35T | 1933 | 0.488535 | 0         |  |  |
|       |      | Shiraz-58T | 2223 | 0.833364 | 0         |  |  |
|       |      | Shiraz-71T | 2263 | 0.975531 | 0         |  |  |
| KIF4A | chrX | Shiraz-4T  | 261  | 0        | -0.336249 |  |  |
|       |      | Shiraz-16T | 295  | 0.591657 | 0         |  |  |
|       |      | Shiraz-36T | 433  | 0        | -0.803961 |  |  |
|       |      | Shiraz-44T | 899  | 0        | -1.09697  |  |  |
|       |      | Shiraz-44T | 900  | 0        | -0.584284 |  |  |
|       |      | Shiraz-44T | 901  | 0        | -1.000082 |  |  |
|       |      | Shiraz-49T | 1170 | 0        | -0.967436 |  |  |
|       |      | Shiraz-18T | 1457 | 0.643204 | 0         |  |  |
|       |      | Shiraz-22T | 1673 | 0.611783 | 0         |  |  |
|       |      | Shiraz-22T | 1674 | 0.887899 | 0         |  |  |
|       |      | Shiraz-25T | 1719 | 0.472955 | 0         |  |  |
|       |      | Shiraz-28T | 1762 | 0.562311 | 0         |  |  |
|       |      | Shiraz-29T | 1801 | 0.815343 | 0         |  |  |
|       |      | Shiraz-32T | 1870 | 0.729766 | 0         |  |  |
|       |      | Shiraz-35T | 1933 | 0.488535 | 0         |  |  |
|       |      | Shiraz-58T | 2223 | 0.833364 | 0         |  |  |
|       |      | Shiraz-58T | 2224 | 1.076575 | 0         |  |  |
|       |      | Shiraz-71T | 2263 | 0.975531 | 0         |  |  |
|       |      | Shiraz-4T  | 261  | 0        | -0.336249 |  |  |
|       |      | Shiraz-16T | 295  | 0.591657 | 0         |  |  |
|       |      | Shiraz-36T | 433  | 0        | -0.803961 |  |  |
|       |      | Shiraz-44T | 899  | 0        | -1.09697  |  |  |
|       |      | Shiraz-44T | 900  | 0        | -0.584284 |  |  |
|       |      | Shiraz-44T | 901  | 0        | -1.000082 |  |  |
|       |      | Shiraz-49T | 1170 | 0        | -0.967436 |  |  |
|       |      | Shiraz-18T | 1457 | 0.643204 | 0         |  |  |
|       |      | Shiraz-22T | 1673 | 0.611783 | 0         |  |  |
|       |      | Shiraz-22T | 1674 | 0.887899 | 0         |  |  |
|       |      | Shiraz-25T | 1719 | 0.472955 | 0         |  |  |
|       |      | Shiraz-28T | 1762 | 0.562311 | 0         |  |  |
|       |      | Shiraz-29T | 1801 | 0.815343 | 0         |  |  |
|       |      | Shiraz-32T | 1870 | 0.729766 | 0         |  |  |
|       |      | Shiraz-35T | 1933 | 0.488535 | 0         |  |  |
|       |      | Shiraz-58T | 2223 | 0.833364 | 0         |  |  |
|       |      | Shiraz-58T | 2224 | 1.076575 | 0         |  |  |
|       |      | Shiraz-71T | 2263 | 0.975531 | 0         |  |  |

|       |      |            |      |          |           |  |  |
|-------|------|------------|------|----------|-----------|--|--|
|       |      | Shiraz-4T  | 261  | 0        | -0.336249 |  |  |
|       |      | Shiraz-16T | 295  | 0.591657 | 0         |  |  |
|       |      | Shiraz-36T | 433  | 0        | -0.803961 |  |  |
|       |      | Shiraz-44T | 899  | 0        | -1.09697  |  |  |
|       |      | Shiraz-44T | 900  | 0        | -0.584284 |  |  |
|       |      | Shiraz-44T | 901  | 0        | -1.000082 |  |  |
|       |      | Shiraz-49T | 1170 | 0        | -0.967436 |  |  |
|       |      | Shiraz-18T | 1457 | 0.643204 | 0         |  |  |
|       |      | Shiraz-22T | 1673 | 0.611783 | 0         |  |  |
|       |      | Shiraz-22T | 1674 | 0.887899 | 0         |  |  |
|       |      | Shiraz-25T | 1719 | 0.472955 | 0         |  |  |
|       |      | Shiraz-28T | 1762 | 0.562311 | 0         |  |  |
|       |      | Shiraz-29T | 1801 | 0.815343 | 0         |  |  |
|       |      | Shiraz-32T | 1870 | 0.729766 | 0         |  |  |
|       |      | Shiraz-35T | 1933 | 0.488535 | 0         |  |  |
|       |      | Shiraz-58T | 2223 | 0.833364 | 0         |  |  |
|       |      | Shiraz-58T | 2224 | 1.076575 | 0         |  |  |
|       |      | Shiraz-71T | 2263 | 0.975531 | 0         |  |  |
| KLF14 | chr7 | Shiraz-3T  | 90   | 0.219276 | 0         |  |  |
|       |      | Shiraz-3T  | 96   | 0.428308 | 0         |  |  |
|       |      | Shiraz-4T  | 253  | 0.372918 | 0         |  |  |
|       |      | Shiraz-36T | 378  | 0.179558 | 0         |  |  |
|       |      | Shiraz-44T | 642  | 0.408617 | 0         |  |  |
|       |      | Shiraz-46T | 943  | 0.093799 | 0         |  |  |
|       |      | Shiraz-47T | 1032 | 0.171484 | 0         |  |  |
|       |      | Shiraz-77T | 1225 | 0        | -0.117922 |  |  |
|       |      | Shiraz-77T | 1229 | 0.051661 | 0         |  |  |
|       |      | Shiraz-9T  | 1325 | 0.221899 | 0         |  |  |
|       |      | Shiraz-18T | 1434 | 0.244465 | 0         |  |  |
|       |      | Shiraz-25T | 1698 | 0.21835  | 0         |  |  |
|       |      | Shiraz-28T | 1735 | 0.350744 | 0         |  |  |
|       |      | Shiraz-29T | 1778 | 0.120767 | 0         |  |  |
|       |      | Shiraz-32T | 1833 | 0.551336 | 0         |  |  |
|       |      | Shiraz-38T | 1951 | 0.250891 | 0         |  |  |
|       |      | Shiraz-53T | 2078 | 0.287202 | 0         |  |  |
|       |      | Shiraz-71T | 2238 | 0.603631 | 0         |  |  |
|       |      | Shiraz-3T  | 90   | 0.219276 | 0         |  |  |
|       |      | Shiraz-3T  | 96   | 0.428308 | 0         |  |  |
|       |      | Shiraz-4T  | 253  | 0.372918 | 0         |  |  |
|       |      | Shiraz-36T | 378  | 0.179558 | 0         |  |  |
|       |      | Shiraz-44T | 642  | 0.408617 | 0         |  |  |
|       |      | Shiraz-46T | 943  | 0.093799 | 0         |  |  |
|       |      | Shiraz-47T | 1032 | 0.171484 | 0         |  |  |
|       |      | Shiraz-77T | 1225 | 0        | -0.117922 |  |  |
|       |      | Shiraz-77T | 1229 | 0.051661 | 0         |  |  |
|       |      | Shiraz-9T  | 1325 | 0.221899 | 0         |  |  |
|       |      | Shiraz-18T | 1434 | 0.244465 | 0         |  |  |

|      |      |            |      |          |           |  |  |
|------|------|------------|------|----------|-----------|--|--|
|      |      | Shiraz-25T | 1698 | 0.21835  | 0         |  |  |
|      |      | Shiraz-28T | 1735 | 0.350744 | 0         |  |  |
|      |      | Shiraz-29T | 1778 | 0.120767 | 0         |  |  |
|      |      | Shiraz-32T | 1833 | 0.551336 | 0         |  |  |
|      |      | Shiraz-38T | 1951 | 0.250891 | 0         |  |  |
|      |      | Shiraz-53T | 2078 | 0.287202 | 0         |  |  |
|      |      | Shiraz-71T | 2238 | 0.603631 | 0         |  |  |
|      |      | Shiraz-3T  | 90   | 0.219276 | 0         |  |  |
|      |      | Shiraz-3T  | 96   | 0.428308 | 0         |  |  |
|      |      | Shiraz-4T  | 253  | 0.372918 | 0         |  |  |
|      |      | Shiraz-36T | 378  | 0.179558 | 0         |  |  |
|      |      | Shiraz-44T | 642  | 0.408617 | 0         |  |  |
|      |      | Shiraz-46T | 943  | 0.093799 | 0         |  |  |
|      |      | Shiraz-47T | 1032 | 0.171484 | 0         |  |  |
|      |      | Shiraz-77T | 1225 | 0        | -0.117922 |  |  |
|      |      | Shiraz-77T | 1229 | 0.051661 | 0         |  |  |
|      |      | Shiraz-9T  | 1325 | 0.221899 | 0         |  |  |
|      |      | Shiraz-18T | 1434 | 0.244465 | 0         |  |  |
|      |      | Shiraz-25T | 1698 | 0.21835  | 0         |  |  |
|      |      | Shiraz-28T | 1735 | 0.350744 | 0         |  |  |
|      |      | Shiraz-29T | 1778 | 0.120767 | 0         |  |  |
|      |      | Shiraz-32T | 1833 | 0.551336 | 0         |  |  |
|      |      | Shiraz-38T | 1951 | 0.250891 | 0         |  |  |
|      |      | Shiraz-53T | 2078 | 0.287202 | 0         |  |  |
|      |      | Shiraz-71T | 2238 | 0.603631 | 0         |  |  |
| KLF8 | chrX | Shiraz-3T  | 240  | 0        | -0.346245 |  |  |
|      |      | Shiraz-3T  | 240  | 0        | -0.346245 |  |  |
|      |      | Shiraz-4T  | 260  | 0        | -0.324128 |  |  |
|      |      | Shiraz-4T  | 260  | 0        | -0.324128 |  |  |
|      |      | Shiraz-16T | 294  | 0.655804 | 0         |  |  |
|      |      | Shiraz-16T | 294  | 0.655804 | 0         |  |  |
|      |      | Shiraz-36T | 431  | 0        | -0.78035  |  |  |
|      |      | Shiraz-36T | 431  | 0        | -0.78035  |  |  |
|      |      | Shiraz-44T | 891  | 0        | -0.954044 |  |  |
|      |      | Shiraz-44T | 891  | 0        | -0.954044 |  |  |
|      |      | Shiraz-49T | 1166 | 0        | -0.917235 |  |  |
|      |      | Shiraz-49T | 1166 | 0        | -0.917235 |  |  |
|      |      | Shiraz-18T | 1456 | 0.608534 | 0         |  |  |
|      |      | Shiraz-18T | 1456 | 0.608534 | 0         |  |  |
|      |      | Shiraz-22T | 1669 | 0.695915 | 0         |  |  |
|      |      | Shiraz-22T | 1669 | 0.695915 | 0         |  |  |
|      |      | Shiraz-25T | 1717 | 0.420447 | 0         |  |  |
|      |      | Shiraz-25T | 1717 | 0.420447 | 0         |  |  |
|      |      | Shiraz-28T | 1760 | 0.538181 | 0         |  |  |
|      |      | Shiraz-28T | 1760 | 0.538181 | 0         |  |  |
|      |      | Shiraz-29T | 1800 | 0.672527 | 0         |  |  |
|      |      | Shiraz-29T | 1800 | 0.672527 | 0         |  |  |

|  |  |            |      |          |           |  |  |
|--|--|------------|------|----------|-----------|--|--|
|  |  | Shiraz-32T | 1869 | 0.776805 | 0         |  |  |
|  |  | Shiraz-32T | 1869 | 0.776805 | 0         |  |  |
|  |  | Shiraz-35T | 1932 | 0.507141 | 0         |  |  |
|  |  | Shiraz-35T | 1932 | 0.507141 | 0         |  |  |
|  |  | Shiraz-58T | 2221 | 0.871948 | 0         |  |  |
|  |  | Shiraz-58T | 2221 | 0.871948 | 0         |  |  |
|  |  | Shiraz-71T | 2260 | 0.68394  | 0         |  |  |
|  |  | Shiraz-71T | 2260 | 0.68394  | 0         |  |  |
|  |  | Shiraz-71T | 2262 | 0.986748 | 0         |  |  |
|  |  | Shiraz-71T | 2262 | 0.986748 | 0         |  |  |
|  |  | Shiraz-3T  | 240  | 0        | -0.346245 |  |  |
|  |  | Shiraz-3T  | 240  | 0        | -0.346245 |  |  |
|  |  | Shiraz-4T  | 260  | 0        | -0.324128 |  |  |
|  |  | Shiraz-4T  | 260  | 0        | -0.324128 |  |  |
|  |  | Shiraz-16T | 294  | 0.655804 | 0         |  |  |
|  |  | Shiraz-16T | 294  | 0.655804 | 0         |  |  |
|  |  | Shiraz-36T | 431  | 0        | -0.78035  |  |  |
|  |  | Shiraz-36T | 431  | 0        | -0.78035  |  |  |
|  |  | Shiraz-44T | 891  | 0        | -0.954044 |  |  |
|  |  | Shiraz-44T | 891  | 0        | -0.954044 |  |  |
|  |  | Shiraz-49T | 1166 | 0        | -0.917235 |  |  |
|  |  | Shiraz-49T | 1166 | 0        | -0.917235 |  |  |
|  |  | Shiraz-18T | 1456 | 0.608534 | 0         |  |  |
|  |  | Shiraz-18T | 1456 | 0.608534 | 0         |  |  |
|  |  | Shiraz-22T | 1669 | 0.695915 | 0         |  |  |
|  |  | Shiraz-22T | 1669 | 0.695915 | 0         |  |  |
|  |  | Shiraz-25T | 1717 | 0.420447 | 0         |  |  |
|  |  | Shiraz-25T | 1717 | 0.420447 | 0         |  |  |
|  |  | Shiraz-28T | 1760 | 0.538181 | 0         |  |  |
|  |  | Shiraz-28T | 1760 | 0.538181 | 0         |  |  |
|  |  | Shiraz-29T | 1800 | 0.672527 | 0         |  |  |
|  |  | Shiraz-29T | 1800 | 0.672527 | 0         |  |  |
|  |  | Shiraz-32T | 1869 | 0.776805 | 0         |  |  |
|  |  | Shiraz-32T | 1869 | 0.776805 | 0         |  |  |
|  |  | Shiraz-35T | 1932 | 0.507141 | 0         |  |  |
|  |  | Shiraz-35T | 1932 | 0.507141 | 0         |  |  |
|  |  | Shiraz-58T | 2221 | 0.871948 | 0         |  |  |
|  |  | Shiraz-58T | 2221 | 0.871948 | 0         |  |  |
|  |  | Shiraz-71T | 2260 | 0.68394  | 0         |  |  |
|  |  | Shiraz-71T | 2260 | 0.68394  | 0         |  |  |
|  |  | Shiraz-71T | 2262 | 0.986748 | 0         |  |  |
|  |  | Shiraz-71T | 2262 | 0.986748 | 0         |  |  |
|  |  | Shiraz-3T  | 240  | 0        | -0.346245 |  |  |
|  |  | Shiraz-3T  | 240  | 0        | -0.346245 |  |  |
|  |  | Shiraz-4T  | 260  | 0        | -0.324128 |  |  |
|  |  | Shiraz-4T  | 260  | 0        | -0.324128 |  |  |
|  |  | Shiraz-16T | 294  | 0.655804 | 0         |  |  |

|         |      |            |      |          |           |  |  |
|---------|------|------------|------|----------|-----------|--|--|
|         |      | Shiraz-16T | 294  | 0.655804 | 0         |  |  |
|         |      | Shiraz-36T | 431  | 0        | -0.78035  |  |  |
|         |      | Shiraz-36T | 431  | 0        | -0.78035  |  |  |
|         |      | Shiraz-44T | 891  | 0        | -0.954044 |  |  |
|         |      | Shiraz-44T | 891  | 0        | -0.954044 |  |  |
|         |      | Shiraz-49T | 1166 | 0        | -0.917235 |  |  |
|         |      | Shiraz-49T | 1166 | 0        | -0.917235 |  |  |
|         |      | Shiraz-18T | 1456 | 0.608534 | 0         |  |  |
|         |      | Shiraz-18T | 1456 | 0.608534 | 0         |  |  |
|         |      | Shiraz-22T | 1669 | 0.695915 | 0         |  |  |
|         |      | Shiraz-22T | 1669 | 0.695915 | 0         |  |  |
|         |      | Shiraz-25T | 1717 | 0.420447 | 0         |  |  |
|         |      | Shiraz-25T | 1717 | 0.420447 | 0         |  |  |
|         |      | Shiraz-28T | 1760 | 0.538181 | 0         |  |  |
|         |      | Shiraz-28T | 1760 | 0.538181 | 0         |  |  |
|         |      | Shiraz-29T | 1800 | 0.672527 | 0         |  |  |
|         |      | Shiraz-29T | 1800 | 0.672527 | 0         |  |  |
|         |      | Shiraz-32T | 1869 | 0.776805 | 0         |  |  |
|         |      | Shiraz-32T | 1869 | 0.776805 | 0         |  |  |
|         |      | Shiraz-35T | 1932 | 0.507141 | 0         |  |  |
|         |      | Shiraz-35T | 1932 | 0.507141 | 0         |  |  |
|         |      | Shiraz-58T | 2221 | 0.871948 | 0         |  |  |
|         |      | Shiraz-58T | 2221 | 0.871948 | 0         |  |  |
|         |      | Shiraz-71T | 2260 | 0.68394  | 0         |  |  |
|         |      | Shiraz-71T | 2260 | 0.68394  | 0         |  |  |
|         |      | Shiraz-71T | 2262 | 0.986748 | 0         |  |  |
|         |      | Shiraz-71T | 2262 | 0.986748 | 0         |  |  |
| KLHDC10 | chr7 | Shiraz-3T  | 90   | 0.219276 | 0         |  |  |
|         |      | Shiraz-3T  | 96   | 0.428308 | 0         |  |  |
|         |      | Shiraz-4T  | 253  | 0.372918 | 0         |  |  |
|         |      | Shiraz-31T | 317  | 0.204382 | 0         |  |  |
|         |      | Shiraz-36T | 378  | 0.179558 | 0         |  |  |
|         |      | Shiraz-44T | 642  | 0.408617 | 0         |  |  |
|         |      | Shiraz-46T | 943  | 0.093799 | 0         |  |  |
|         |      | Shiraz-47T | 1032 | 0.171484 | 0         |  |  |
|         |      | Shiraz-77T | 1225 | 0        | -0.117922 |  |  |
|         |      | Shiraz-77T | 1229 | 0.051661 | 0         |  |  |
|         |      | Shiraz-9T  | 1325 | 0.221899 | 0         |  |  |
|         |      | Shiraz-18T | 1434 | 0.244465 | 0         |  |  |
|         |      | Shiraz-25T | 1698 | 0.21835  | 0         |  |  |
|         |      | Shiraz-28T | 1735 | 0.350744 | 0         |  |  |
|         |      | Shiraz-29T | 1778 | 0.120767 | 0         |  |  |
|         |      | Shiraz-32T | 1833 | 0.551336 | 0         |  |  |
|         |      | Shiraz-38T | 1951 | 0.250891 | 0         |  |  |
|         |      | Shiraz-53T | 2078 | 0.287202 | 0         |  |  |
|         |      | Shiraz-71T | 2238 | 0.603631 | 0         |  |  |
|         |      | Shiraz-3T  | 90   | 0.219276 | 0         |  |  |



|        |      |            |      |          |           |  |
|--------|------|------------|------|----------|-----------|--|
|        |      | Shiraz-3T  | 96   | 0.428308 | 0         |  |
|        |      | Shiraz-4T  | 253  | 0.372918 | 0         |  |
|        |      | Shiraz-31T | 317  | 0.204382 | 0         |  |
|        |      | Shiraz-36T | 378  | 0.179558 | 0         |  |
|        |      | Shiraz-44T | 642  | 0.408617 | 0         |  |
|        |      | Shiraz-46T | 943  | 0.093799 | 0         |  |
|        |      | Shiraz-47T | 1032 | 0.171484 | 0         |  |
|        |      | Shiraz-77T | 1225 | 0        | -0.117922 |  |
|        |      | Shiraz-77T | 1229 | 0.051661 | 0         |  |
|        |      | Shiraz-9T  | 1325 | 0.221899 | 0         |  |
|        |      | Shiraz-18T | 1434 | 0.244465 | 0         |  |
|        |      | Shiraz-25T | 1698 | 0.21835  | 0         |  |
|        |      | Shiraz-28T | 1735 | 0.350744 | 0         |  |
|        |      | Shiraz-29T | 1778 | 0.120767 | 0         |  |
|        |      | Shiraz-32T | 1833 | 0.551336 | 0         |  |
|        |      | Shiraz-38T | 1951 | 0.250891 | 0         |  |
|        |      | Shiraz-53T | 2078 | 0.287202 | 0         |  |
|        |      | Shiraz-71T | 2238 | 0.603631 | 0         |  |
|        |      | Shiraz-3T  | 90   | 0.219276 | 0         |  |
|        |      | Shiraz-3T  | 96   | 0.428308 | 0         |  |
|        |      | Shiraz-4T  | 253  | 0.372918 | 0         |  |
|        |      | Shiraz-31T | 317  | 0.204382 | 0         |  |
|        |      | Shiraz-36T | 378  | 0.179558 | 0         |  |
|        |      | Shiraz-44T | 642  | 0.408617 | 0         |  |
|        |      | Shiraz-46T | 943  | 0.093799 | 0         |  |
|        |      | Shiraz-47T | 1032 | 0.171484 | 0         |  |
|        |      | Shiraz-77T | 1225 | 0        | -0.117922 |  |
|        |      | Shiraz-77T | 1229 | 0.051661 | 0         |  |
|        |      | Shiraz-9T  | 1325 | 0.221899 | 0         |  |
|        |      | Shiraz-18T | 1434 | 0.244465 | 0         |  |
|        |      | Shiraz-25T | 1698 | 0.21835  | 0         |  |
|        |      | Shiraz-28T | 1735 | 0.350744 | 0         |  |
|        |      | Shiraz-29T | 1778 | 0.120767 | 0         |  |
|        |      | Shiraz-32T | 1833 | 0.551336 | 0         |  |
|        |      | Shiraz-38T | 1951 | 0.250891 | 0         |  |
|        |      | Shiraz-53T | 2078 | 0.287202 | 0         |  |
|        |      | Shiraz-71T | 2238 | 0.603631 | 0         |  |
| KLHL13 | chrX | Shiraz-3T  | 242  | 0        | -0.336434 |  |
|        |      | Shiraz-4T  | 261  | 0        | -0.336249 |  |
|        |      | Shiraz-16T | 295  | 0.591657 | 0         |  |
|        |      | Shiraz-36T | 433  | 0        | -0.803961 |  |
|        |      | Shiraz-44T | 899  | 0        | -1.09697  |  |
|        |      | Shiraz-49T | 1170 | 0        | -0.967436 |  |
|        |      | Shiraz-18T | 1457 | 0.643204 | 0         |  |
|        |      | Shiraz-22T | 1673 | 0.611783 | 0         |  |
|        |      | Shiraz-25T | 1719 | 0.472955 | 0         |  |
|        |      | Shiraz-28T | 1762 | 0.562311 | 0         |  |

|        |      |            |      |          |           |  |  |
|--------|------|------------|------|----------|-----------|--|--|
|        |      | Shiraz-29T | 1801 | 0.815343 | 0         |  |  |
|        |      | Shiraz-32T | 1870 | 0.729766 | 0         |  |  |
|        |      | Shiraz-35T | 1933 | 0.488535 | 0         |  |  |
|        |      | Shiraz-58T | 2223 | 0.833364 | 0         |  |  |
|        |      | Shiraz-71T | 2263 | 0.975531 | 0         |  |  |
|        |      | Shiraz-3T  | 242  | 0        | -0.336434 |  |  |
|        |      | Shiraz-4T  | 261  | 0        | -0.336249 |  |  |
|        |      | Shiraz-16T | 295  | 0.591657 | 0         |  |  |
|        |      | Shiraz-36T | 433  | 0        | -0.803961 |  |  |
|        |      | Shiraz-44T | 899  | 0        | -1.09697  |  |  |
|        |      | Shiraz-49T | 1170 | 0        | -0.967436 |  |  |
|        |      | Shiraz-18T | 1457 | 0.643204 | 0         |  |  |
|        |      | Shiraz-22T | 1673 | 0.611783 | 0         |  |  |
|        |      | Shiraz-25T | 1719 | 0.472955 | 0         |  |  |
|        |      | Shiraz-28T | 1762 | 0.562311 | 0         |  |  |
|        |      | Shiraz-29T | 1801 | 0.815343 | 0         |  |  |
|        |      | Shiraz-32T | 1870 | 0.729766 | 0         |  |  |
|        |      | Shiraz-35T | 1933 | 0.488535 | 0         |  |  |
|        |      | Shiraz-58T | 2223 | 0.833364 | 0         |  |  |
|        |      | Shiraz-71T | 2263 | 0.975531 | 0         |  |  |
|        |      | Shiraz-3T  | 242  | 0        | -0.336434 |  |  |
|        |      | Shiraz-4T  | 261  | 0        | -0.336249 |  |  |
|        |      | Shiraz-16T | 295  | 0.591657 | 0         |  |  |
|        |      | Shiraz-36T | 433  | 0        | -0.803961 |  |  |
|        |      | Shiraz-44T | 899  | 0        | -1.09697  |  |  |
|        |      | Shiraz-49T | 1170 | 0        | -0.967436 |  |  |
|        |      | Shiraz-18T | 1457 | 0.643204 | 0         |  |  |
|        |      | Shiraz-22T | 1673 | 0.611783 | 0         |  |  |
|        |      | Shiraz-25T | 1719 | 0.472955 | 0         |  |  |
|        |      | Shiraz-28T | 1762 | 0.562311 | 0         |  |  |
|        |      | Shiraz-29T | 1801 | 0.815343 | 0         |  |  |
|        |      | Shiraz-32T | 1870 | 0.729766 | 0         |  |  |
|        |      | Shiraz-35T | 1933 | 0.488535 | 0         |  |  |
|        |      | Shiraz-58T | 2223 | 0.833364 | 0         |  |  |
|        |      | Shiraz-71T | 2263 | 0.975531 | 0         |  |  |
| KLHL15 | chrX | Shiraz-3T  | 235  | 0        | -0.28401  |  |  |
|        |      | Shiraz-4T  | 260  | 0        | -0.324128 |  |  |
|        |      | Shiraz-16T | 294  | 0.655804 | 0         |  |  |
|        |      | Shiraz-36T | 431  | 0        | -0.78035  |  |  |
|        |      | Shiraz-44T | 891  | 0        | -0.954044 |  |  |
|        |      | Shiraz-49T | 1166 | 0        | -0.917235 |  |  |
|        |      | Shiraz-77T | 1281 | 0.136627 | 0         |  |  |
|        |      | Shiraz-9T  | 1368 | 0.199713 | 0         |  |  |
|        |      | Shiraz-18T | 1455 | 0        | -0.186773 |  |  |
|        |      | Shiraz-22T | 1669 | 0.695915 | 0         |  |  |
|        |      | Shiraz-25T | 1717 | 0.420447 | 0         |  |  |
|        |      | Shiraz-28T | 1760 | 0.538181 | 0         |  |  |

|        |      |            |      |          |           |  |
|--------|------|------------|------|----------|-----------|--|
|        |      | Shiraz-29T | 1800 | 0.672527 | 0         |  |
|        |      | Shiraz-32T | 1869 | 0.776805 | 0         |  |
|        |      | Shiraz-35T | 1932 | 0.507141 | 0         |  |
|        |      | Shiraz-40T | 2051 | 0.098506 | 0         |  |
|        |      | Shiraz-58T | 2221 | 0.871948 | 0         |  |
|        |      | Shiraz-71T | 2260 | 0.68394  | 0         |  |
|        |      | Shiraz-71T | 2261 | 0.508399 | 0         |  |
|        |      | Shiraz-3T  | 235  | 0        | -0.28401  |  |
|        |      | Shiraz-4T  | 260  | 0        | -0.324128 |  |
|        |      | Shiraz-16T | 294  | 0.655804 | 0         |  |
|        |      | Shiraz-36T | 431  | 0        | -0.78035  |  |
|        |      | Shiraz-44T | 891  | 0        | -0.954044 |  |
|        |      | Shiraz-49T | 1166 | 0        | -0.917235 |  |
|        |      | Shiraz-77T | 1281 | 0.136627 | 0         |  |
|        |      | Shiraz-9T  | 1368 | 0.199713 | 0         |  |
|        |      | Shiraz-18T | 1455 | 0        | -0.186773 |  |
|        |      | Shiraz-22T | 1669 | 0.695915 | 0         |  |
|        |      | Shiraz-25T | 1717 | 0.420447 | 0         |  |
|        |      | Shiraz-28T | 1760 | 0.538181 | 0         |  |
|        |      | Shiraz-29T | 1800 | 0.672527 | 0         |  |
|        |      | Shiraz-32T | 1869 | 0.776805 | 0         |  |
|        |      | Shiraz-35T | 1932 | 0.507141 | 0         |  |
|        |      | Shiraz-40T | 2051 | 0.098506 | 0         |  |
|        |      | Shiraz-58T | 2221 | 0.871948 | 0         |  |
|        |      | Shiraz-71T | 2260 | 0.68394  | 0         |  |
|        |      | Shiraz-71T | 2261 | 0.508399 | 0         |  |
|        |      | Shiraz-3T  | 235  | 0        | -0.28401  |  |
|        |      | Shiraz-4T  | 260  | 0        | -0.324128 |  |
|        |      | Shiraz-16T | 294  | 0.655804 | 0         |  |
|        |      | Shiraz-36T | 431  | 0        | -0.78035  |  |
|        |      | Shiraz-44T | 891  | 0        | -0.954044 |  |
|        |      | Shiraz-49T | 1166 | 0        | -0.917235 |  |
|        |      | Shiraz-77T | 1281 | 0.136627 | 0         |  |
|        |      | Shiraz-9T  | 1368 | 0.199713 | 0         |  |
|        |      | Shiraz-18T | 1455 | 0        | -0.186773 |  |
|        |      | Shiraz-22T | 1669 | 0.695915 | 0         |  |
|        |      | Shiraz-25T | 1717 | 0.420447 | 0         |  |
|        |      | Shiraz-28T | 1760 | 0.538181 | 0         |  |
|        |      | Shiraz-29T | 1800 | 0.672527 | 0         |  |
|        |      | Shiraz-32T | 1869 | 0.776805 | 0         |  |
|        |      | Shiraz-35T | 1932 | 0.507141 | 0         |  |
|        |      | Shiraz-40T | 2051 | 0.098506 | 0         |  |
|        |      | Shiraz-58T | 2221 | 0.871948 | 0         |  |
|        |      | Shiraz-71T | 2260 | 0.68394  | 0         |  |
|        |      | Shiraz-71T | 2261 | 0.508399 | 0         |  |
| KLHL34 | chrX | Shiraz-3T  | 235  | 0        | -0.28401  |  |
|        |      | Shiraz-4T  | 260  | 0        | -0.324128 |  |

|  |            |      |          |           |  |
|--|------------|------|----------|-----------|--|
|  | Shiraz-16T | 294  | 0.655804 | 0         |  |
|  | Shiraz-36T | 431  | 0        | -0.78035  |  |
|  | Shiraz-44T | 891  | 0        | -0.954044 |  |
|  | Shiraz-49T | 1166 | 0        | -0.917235 |  |
|  | Shiraz-77T | 1281 | 0.136627 | 0         |  |
|  | Shiraz-9T  | 1368 | 0.199713 | 0         |  |
|  | Shiraz-18T | 1455 | 0        | -0.186773 |  |
|  | Shiraz-22T | 1669 | 0.695915 | 0         |  |
|  | Shiraz-25T | 1717 | 0.420447 | 0         |  |
|  | Shiraz-28T | 1760 | 0.538181 | 0         |  |
|  | Shiraz-29T | 1800 | 0.672527 | 0         |  |
|  | Shiraz-32T | 1869 | 0.776805 | 0         |  |
|  | Shiraz-35T | 1932 | 0.507141 | 0         |  |
|  | Shiraz-40T | 2051 | 0.098506 | 0         |  |
|  | Shiraz-58T | 2221 | 0.871948 | 0         |  |
|  | Shiraz-71T | 2260 | 0.68394  | 0         |  |
|  | Shiraz-71T | 2261 | 0.508399 | 0         |  |
|  | Shiraz-3T  | 235  | 0        | -0.28401  |  |
|  | Shiraz-4T  | 260  | 0        | -0.324128 |  |
|  | Shiraz-16T | 294  | 0.655804 | 0         |  |
|  | Shiraz-36T | 431  | 0        | -0.78035  |  |
|  | Shiraz-44T | 891  | 0        | -0.954044 |  |
|  | Shiraz-49T | 1166 | 0        | -0.917235 |  |
|  | Shiraz-77T | 1281 | 0.136627 | 0         |  |
|  | Shiraz-9T  | 1368 | 0.199713 | 0         |  |
|  | Shiraz-18T | 1455 | 0        | -0.186773 |  |
|  | Shiraz-22T | 1669 | 0.695915 | 0         |  |
|  | Shiraz-25T | 1717 | 0.420447 | 0         |  |
|  | Shiraz-28T | 1760 | 0.538181 | 0         |  |
|  | Shiraz-29T | 1800 | 0.672527 | 0         |  |
|  | Shiraz-32T | 1869 | 0.776805 | 0         |  |
|  | Shiraz-35T | 1932 | 0.507141 | 0         |  |
|  | Shiraz-40T | 2051 | 0.098506 | 0         |  |
|  | Shiraz-58T | 2221 | 0.871948 | 0         |  |
|  | Shiraz-71T | 2260 | 0.68394  | 0         |  |
|  | Shiraz-71T | 2261 | 0.508399 | 0         |  |
|  | Shiraz-3T  | 235  | 0        | -0.28401  |  |
|  | Shiraz-4T  | 260  | 0        | -0.324128 |  |
|  | Shiraz-16T | 294  | 0.655804 | 0         |  |
|  | Shiraz-36T | 431  | 0        | -0.78035  |  |
|  | Shiraz-44T | 891  | 0        | -0.954044 |  |
|  | Shiraz-49T | 1166 | 0        | -0.917235 |  |
|  | Shiraz-77T | 1281 | 0.136627 | 0         |  |
|  | Shiraz-9T  | 1368 | 0.199713 | 0         |  |
|  | Shiraz-18T | 1455 | 0        | -0.186773 |  |
|  | Shiraz-22T | 1669 | 0.695915 | 0         |  |
|  | Shiraz-25T | 1717 | 0.420447 | 0         |  |

|       |      |            |      |          |           |  |
|-------|------|------------|------|----------|-----------|--|
|       |      | Shiraz-28T | 1760 | 0.538181 | 0         |  |
|       |      | Shiraz-29T | 1800 | 0.672527 | 0         |  |
|       |      | Shiraz-32T | 1869 | 0.776805 | 0         |  |
|       |      | Shiraz-35T | 1932 | 0.507141 | 0         |  |
|       |      | Shiraz-40T | 2051 | 0.098506 | 0         |  |
|       |      | Shiraz-58T | 2221 | 0.871948 | 0         |  |
|       |      | Shiraz-71T | 2260 | 0.68394  | 0         |  |
|       |      | Shiraz-71T | 2261 | 0.508399 | 0         |  |
| KLHL4 | chrX | Shiraz-3T  | 242  | 0        | -0.336434 |  |
|       |      | Shiraz-3T  | 242  | 0        | -0.336434 |  |
|       |      | Shiraz-3T  | 243  | 0        | -0.549129 |  |
|       |      | Shiraz-3T  | 243  | 0        | -0.549129 |  |
|       |      | Shiraz-4T  | 261  | 0        | -0.336249 |  |
|       |      | Shiraz-4T  | 261  | 0        | -0.336249 |  |
|       |      | Shiraz-16T | 295  | 0.591657 | 0         |  |
|       |      | Shiraz-16T | 295  | 0.591657 | 0         |  |
|       |      | Shiraz-31T | 346  | 0        | -0.1527   |  |
|       |      | Shiraz-31T | 346  | 0        | -0.1527   |  |
|       |      | Shiraz-36T | 433  | 0        | -0.803961 |  |
|       |      | Shiraz-36T | 433  | 0        | -0.803961 |  |
|       |      | Shiraz-44T | 899  | 0        | -1.09697  |  |
|       |      | Shiraz-44T | 899  | 0        | -1.09697  |  |
|       |      | Shiraz-44T | 902  | 0        | -1.449824 |  |
|       |      | Shiraz-44T | 902  | 0        | -1.449824 |  |
|       |      | Shiraz-47T | 1085 | 0        | -0.130811 |  |
|       |      | Shiraz-47T | 1085 | 0        | -0.130811 |  |
|       |      | Shiraz-49T | 1170 | 0        | -0.967436 |  |
|       |      | Shiraz-49T | 1170 | 0        | -0.967436 |  |
|       |      | Shiraz-49T | 1172 | 0        | -1.123219 |  |
|       |      | Shiraz-49T | 1172 | 0        | -1.123219 |  |
|       |      | Shiraz-18T | 1457 | 0.643204 | 0         |  |
|       |      | Shiraz-18T | 1457 | 0.643204 | 0         |  |
|       |      | Shiraz-22T | 1673 | 0.611783 | 0         |  |
|       |      | Shiraz-22T | 1673 | 0.611783 | 0         |  |
|       |      | Shiraz-22T | 1675 | 0.279253 | 0         |  |
|       |      | Shiraz-22T | 1675 | 0.279253 | 0         |  |
|       |      | Shiraz-25T | 1719 | 0.472955 | 0         |  |
|       |      | Shiraz-25T | 1719 | 0.472955 | 0         |  |
|       |      | Shiraz-28T | 1762 | 0.562311 | 0         |  |
|       |      | Shiraz-28T | 1762 | 0.562311 | 0         |  |
|       |      | Shiraz-29T | 1801 | 0.815343 | 0         |  |
|       |      | Shiraz-29T | 1801 | 0.815343 | 0         |  |
|       |      | Shiraz-32T | 1870 | 0.729766 | 0         |  |
|       |      | Shiraz-32T | 1870 | 0.729766 | 0         |  |
|       |      | Shiraz-32T | 1871 | 0.292679 | 0         |  |
|       |      | Shiraz-32T | 1871 | 0.292679 | 0         |  |
|       |      | Shiraz-35T | 1933 | 0.488535 | 0         |  |

|  |            |      |          |           |  |
|--|------------|------|----------|-----------|--|
|  | Shiraz-35T | 1933 | 0.488535 | 0         |  |
|  | Shiraz-58T | 2223 | 0.833364 | 0         |  |
|  | Shiraz-58T | 2223 | 0.833364 | 0         |  |
|  | Shiraz-58T | 2225 | 0.595784 | 0         |  |
|  | Shiraz-58T | 2225 | 0.595784 | 0         |  |
|  | Shiraz-71T | 2263 | 0.975531 | 0         |  |
|  | Shiraz-71T | 2263 | 0.975531 | 0         |  |
|  | Shiraz-3T  | 242  | 0        | -0.336434 |  |
|  | Shiraz-3T  | 242  | 0        | -0.336434 |  |
|  | Shiraz-3T  | 243  | 0        | -0.549129 |  |
|  | Shiraz-3T  | 243  | 0        | -0.549129 |  |
|  | Shiraz-4T  | 261  | 0        | -0.336249 |  |
|  | Shiraz-4T  | 261  | 0        | -0.336249 |  |
|  | Shiraz-16T | 295  | 0.591657 | 0         |  |
|  | Shiraz-16T | 295  | 0.591657 | 0         |  |
|  | Shiraz-31T | 346  | 0        | -0.1527   |  |
|  | Shiraz-31T | 346  | 0        | -0.1527   |  |
|  | Shiraz-36T | 433  | 0        | -0.803961 |  |
|  | Shiraz-36T | 433  | 0        | -0.803961 |  |
|  | Shiraz-44T | 899  | 0        | -1.09697  |  |
|  | Shiraz-44T | 899  | 0        | -1.09697  |  |
|  | Shiraz-44T | 902  | 0        | -1.449824 |  |
|  | Shiraz-44T | 902  | 0        | -1.449824 |  |
|  | Shiraz-47T | 1085 | 0        | -0.130811 |  |
|  | Shiraz-47T | 1085 | 0        | -0.130811 |  |
|  | Shiraz-49T | 1170 | 0        | -0.967436 |  |
|  | Shiraz-49T | 1170 | 0        | -0.967436 |  |
|  | Shiraz-49T | 1172 | 0        | -1.123219 |  |
|  | Shiraz-49T | 1172 | 0        | -1.123219 |  |
|  | Shiraz-18T | 1457 | 0.643204 | 0         |  |
|  | Shiraz-18T | 1457 | 0.643204 | 0         |  |
|  | Shiraz-22T | 1673 | 0.611783 | 0         |  |
|  | Shiraz-22T | 1673 | 0.611783 | 0         |  |
|  | Shiraz-22T | 1675 | 0.279253 | 0         |  |
|  | Shiraz-22T | 1675 | 0.279253 | 0         |  |
|  | Shiraz-25T | 1719 | 0.472955 | 0         |  |
|  | Shiraz-25T | 1719 | 0.472955 | 0         |  |
|  | Shiraz-28T | 1762 | 0.562311 | 0         |  |
|  | Shiraz-28T | 1762 | 0.562311 | 0         |  |
|  | Shiraz-29T | 1801 | 0.815343 | 0         |  |
|  | Shiraz-29T | 1801 | 0.815343 | 0         |  |
|  | Shiraz-32T | 1870 | 0.729766 | 0         |  |
|  | Shiraz-32T | 1870 | 0.729766 | 0         |  |
|  | Shiraz-32T | 1871 | 0.292679 | 0         |  |
|  | Shiraz-32T | 1871 | 0.292679 | 0         |  |
|  | Shiraz-35T | 1933 | 0.488535 | 0         |  |
|  | Shiraz-35T | 1933 | 0.488535 | 0         |  |

|  |            |      |          |           |  |
|--|------------|------|----------|-----------|--|
|  | Shiraz-58T | 2223 | 0.833364 | 0         |  |
|  | Shiraz-58T | 2223 | 0.833364 | 0         |  |
|  | Shiraz-58T | 2225 | 0.595784 | 0         |  |
|  | Shiraz-58T | 2225 | 0.595784 | 0         |  |
|  | Shiraz-71T | 2263 | 0.975531 | 0         |  |
|  | Shiraz-71T | 2263 | 0.975531 | 0         |  |
|  | Shiraz-3T  | 242  | 0        | -0.336434 |  |
|  | Shiraz-3T  | 242  | 0        | -0.336434 |  |
|  | Shiraz-3T  | 243  | 0        | -0.549129 |  |
|  | Shiraz-3T  | 243  | 0        | -0.549129 |  |
|  | Shiraz-4T  | 261  | 0        | -0.336249 |  |
|  | Shiraz-4T  | 261  | 0        | -0.336249 |  |
|  | Shiraz-16T | 295  | 0.591657 | 0         |  |
|  | Shiraz-16T | 295  | 0.591657 | 0         |  |
|  | Shiraz-31T | 346  | 0        | -0.1527   |  |
|  | Shiraz-31T | 346  | 0        | -0.1527   |  |
|  | Shiraz-36T | 433  | 0        | -0.803961 |  |
|  | Shiraz-36T | 433  | 0        | -0.803961 |  |
|  | Shiraz-44T | 899  | 0        | -1.09697  |  |
|  | Shiraz-44T | 899  | 0        | -1.09697  |  |
|  | Shiraz-44T | 902  | 0        | -1.449824 |  |
|  | Shiraz-44T | 902  | 0        | -1.449824 |  |
|  | Shiraz-47T | 1085 | 0        | -0.130811 |  |
|  | Shiraz-47T | 1085 | 0        | -0.130811 |  |
|  | Shiraz-49T | 1170 | 0        | -0.967436 |  |
|  | Shiraz-49T | 1170 | 0        | -0.967436 |  |
|  | Shiraz-49T | 1172 | 0        | -1.123219 |  |
|  | Shiraz-49T | 1172 | 0        | -1.123219 |  |
|  | Shiraz-18T | 1457 | 0.643204 | 0         |  |
|  | Shiraz-18T | 1457 | 0.643204 | 0         |  |
|  | Shiraz-22T | 1673 | 0.611783 | 0         |  |
|  | Shiraz-22T | 1673 | 0.611783 | 0         |  |
|  | Shiraz-22T | 1675 | 0.279253 | 0         |  |
|  | Shiraz-22T | 1675 | 0.279253 | 0         |  |
|  | Shiraz-25T | 1719 | 0.472955 | 0         |  |
|  | Shiraz-25T | 1719 | 0.472955 | 0         |  |
|  | Shiraz-28T | 1762 | 0.562311 | 0         |  |
|  | Shiraz-28T | 1762 | 0.562311 | 0         |  |
|  | Shiraz-29T | 1801 | 0.815343 | 0         |  |
|  | Shiraz-29T | 1801 | 0.815343 | 0         |  |
|  | Shiraz-32T | 1870 | 0.729766 | 0         |  |
|  | Shiraz-32T | 1870 | 0.729766 | 0         |  |
|  | Shiraz-32T | 1871 | 0.292679 | 0         |  |
|  | Shiraz-32T | 1871 | 0.292679 | 0         |  |
|  | Shiraz-35T | 1933 | 0.488535 | 0         |  |
|  | Shiraz-35T | 1933 | 0.488535 | 0         |  |
|  | Shiraz-58T | 2223 | 0.833364 | 0         |  |

|       |      |            |      |          |           |  |
|-------|------|------------|------|----------|-----------|--|
|       |      | Shiraz-58T | 2223 | 0.833364 | 0         |  |
|       |      | Shiraz-58T | 2225 | 0.595784 | 0         |  |
|       |      | Shiraz-58T | 2225 | 0.595784 | 0         |  |
|       |      | Shiraz-71T | 2263 | 0.975531 | 0         |  |
|       |      | Shiraz-71T | 2263 | 0.975531 | 0         |  |
| KLHL7 | chr7 | Shiraz-3T  | 87   | 0.198593 | 0         |  |
|       |      | Shiraz-4T  | 252  | 0.192083 | 0         |  |
|       |      | Shiraz-36T | 376  | 0.159952 | 0         |  |
|       |      | Shiraz-46T | 942  | 0.069143 | 0         |  |
|       |      | Shiraz-18T | 1433 | 0.250973 | 0         |  |
|       |      | Shiraz-25T | 1697 | 0.21945  | 0         |  |
|       |      | Shiraz-28T | 1734 | 0.362882 | 0         |  |
|       |      | Shiraz-29T | 1777 | 0.156747 | 0         |  |
|       |      | Shiraz-38T | 1950 | 0.265916 | 0         |  |
|       |      | Shiraz-71T | 2236 | 0.320072 | 0         |  |
|       |      | Shiraz-3T  | 87   | 0.198593 | 0         |  |
|       |      | Shiraz-4T  | 252  | 0.192083 | 0         |  |
|       |      | Shiraz-36T | 376  | 0.159952 | 0         |  |
|       |      | Shiraz-46T | 942  | 0.069143 | 0         |  |
|       |      | Shiraz-18T | 1433 | 0.250973 | 0         |  |
|       |      | Shiraz-25T | 1697 | 0.21945  | 0         |  |
|       |      | Shiraz-28T | 1734 | 0.362882 | 0         |  |
|       |      | Shiraz-29T | 1777 | 0.156747 | 0         |  |
|       |      | Shiraz-38T | 1950 | 0.265916 | 0         |  |
|       |      | Shiraz-71T | 2236 | 0.320072 | 0         |  |
|       |      | Shiraz-3T  | 87   | 0.198593 | 0         |  |
|       |      | Shiraz-4T  | 252  | 0.192083 | 0         |  |
|       |      | Shiraz-36T | 376  | 0.159952 | 0         |  |
|       |      | Shiraz-46T | 942  | 0.069143 | 0         |  |
|       |      | Shiraz-18T | 1433 | 0.250973 | 0         |  |
|       |      | Shiraz-25T | 1697 | 0.21945  | 0         |  |
|       |      | Shiraz-28T | 1734 | 0.362882 | 0         |  |
|       |      | Shiraz-29T | 1777 | 0.156747 | 0         |  |
|       |      | Shiraz-38T | 1950 | 0.265916 | 0         |  |
|       |      | Shiraz-71T | 2236 | 0.320072 | 0         |  |
| KLRG2 | chr7 | Shiraz-3T  | 90   | 0.219276 | 0         |  |
|       |      | Shiraz-3T  | 97   | 0.496001 | 0         |  |
|       |      | Shiraz-4T  | 253  | 0.372918 | 0         |  |
|       |      | Shiraz-31T | 318  | 0.254373 | 0         |  |
|       |      | Shiraz-36T | 378  | 0.179558 | 0         |  |
|       |      | Shiraz-36T | 383  | 0.374586 | 0         |  |
|       |      | Shiraz-44T | 644  | 0.496536 | 0         |  |
|       |      | Shiraz-46T | 943  | 0.093799 | 0         |  |
|       |      | Shiraz-47T | 1033 | 0.220267 | 0         |  |
|       |      | Shiraz-77T | 1225 | 0        | -0.117922 |  |
|       |      | Shiraz-77T | 1230 | 0.149651 | 0         |  |
|       |      | Shiraz-9T  | 1325 | 0.221899 | 0         |  |



|  |  |            |      |          |           |  |
|--|--|------------|------|----------|-----------|--|
|  |  | Shiraz-18T | 1434 | 0.244465 | 0         |  |
|  |  | Shiraz-25T | 1698 | 0.21835  | 0         |  |
|  |  | Shiraz-28T | 1735 | 0.350744 | 0         |  |
|  |  | Shiraz-29T | 1778 | 0.120767 | 0         |  |
|  |  | Shiraz-32T | 1833 | 0.551336 | 0         |  |
|  |  | Shiraz-38T | 1951 | 0.250891 | 0         |  |
|  |  | Shiraz-53T | 2078 | 0.287202 | 0         |  |
|  |  | Shiraz-58T | 2162 | 0.221505 | 0         |  |
|  |  | Shiraz-71T | 2238 | 0.603631 | 0         |  |
|  |  | Shiraz-3T  | 90   | 0.219276 | 0         |  |
|  |  | Shiraz-3T  | 97   | 0.496001 | 0         |  |
|  |  | Shiraz-4T  | 253  | 0.372918 | 0         |  |
|  |  | Shiraz-31T | 318  | 0.254373 | 0         |  |
|  |  | Shiraz-36T | 378  | 0.179558 | 0         |  |
|  |  | Shiraz-36T | 383  | 0.374586 | 0         |  |
|  |  | Shiraz-44T | 644  | 0.496536 | 0         |  |
|  |  | Shiraz-46T | 943  | 0.093799 | 0         |  |
|  |  | Shiraz-47T | 1033 | 0.220267 | 0         |  |
|  |  | Shiraz-77T | 1225 | 0        | -0.117922 |  |
|  |  | Shiraz-77T | 1230 | 0.149651 | 0         |  |
|  |  | Shiraz-9T  | 1325 | 0.221899 | 0         |  |
|  |  | Shiraz-18T | 1434 | 0.244465 | 0         |  |
|  |  | Shiraz-25T | 1698 | 0.21835  | 0         |  |
|  |  | Shiraz-28T | 1735 | 0.350744 | 0         |  |
|  |  | Shiraz-29T | 1778 | 0.120767 | 0         |  |
|  |  | Shiraz-32T | 1833 | 0.551336 | 0         |  |
|  |  | Shiraz-38T | 1951 | 0.250891 | 0         |  |
|  |  | Shiraz-53T | 2078 | 0.287202 | 0         |  |
|  |  | Shiraz-58T | 2162 | 0.221505 | 0         |  |
|  |  | Shiraz-71T | 2238 | 0.603631 | 0         |  |
|  |  | Shiraz-3T  | 90   | 0.219276 | 0         |  |
|  |  | Shiraz-3T  | 97   | 0.496001 | 0         |  |
|  |  | Shiraz-4T  | 253  | 0.372918 | 0         |  |
|  |  | Shiraz-31T | 318  | 0.254373 | 0         |  |
|  |  | Shiraz-36T | 378  | 0.179558 | 0         |  |
|  |  | Shiraz-36T | 383  | 0.374586 | 0         |  |
|  |  | Shiraz-44T | 644  | 0.496536 | 0         |  |
|  |  | Shiraz-46T | 943  | 0.093799 | 0         |  |
|  |  | Shiraz-47T | 1033 | 0.220267 | 0         |  |
|  |  | Shiraz-77T | 1225 | 0        | -0.117922 |  |
|  |  | Shiraz-77T | 1230 | 0.149651 | 0         |  |
|  |  | Shiraz-9T  | 1325 | 0.221899 | 0         |  |
|  |  | Shiraz-18T | 1434 | 0.244465 | 0         |  |
|  |  | Shiraz-25T | 1698 | 0.21835  | 0         |  |
|  |  | Shiraz-28T | 1735 | 0.350744 | 0         |  |
|  |  | Shiraz-29T | 1778 | 0.120767 | 0         |  |
|  |  | Shiraz-32T | 1833 | 0.551336 | 0         |  |

|       |      |            |      |          |           |  |
|-------|------|------------|------|----------|-----------|--|
|       |      | Shiraz-38T | 1951 | 0.250891 | 0         |  |
|       |      | Shiraz-53T | 2078 | 0.287202 | 0         |  |
|       |      | Shiraz-58T | 2162 | 0.221505 | 0         |  |
|       |      | Shiraz-71T | 2238 | 0.603631 | 0         |  |
| KPNA7 | chr7 | Shiraz-3T  | 90   | 0.219276 | 0         |  |
|       |      | Shiraz-3T  | 94   | 0.74735  | 0         |  |
|       |      | Shiraz-4T  | 253  | 0.372918 | 0         |  |
|       |      | Shiraz-31T | 316  | 0.219196 | 0         |  |
|       |      | Shiraz-36T | 378  | 0.179558 | 0         |  |
|       |      | Shiraz-36T | 381  | 0.332628 | 0         |  |
|       |      | Shiraz-44T | 639  | 1.035032 | 0         |  |
|       |      | Shiraz-46T | 943  | 0.093799 | 0         |  |
|       |      | Shiraz-46T | 946  | 0.299835 | 0         |  |
|       |      | Shiraz-47T | 1030 | 0.257728 | 0         |  |
|       |      | Shiraz-49T | 1120 | 0.281656 | 0         |  |
|       |      | Shiraz-77T | 1225 | 0        | -0.117922 |  |
|       |      | Shiraz-77T | 1227 | 0.196445 | 0         |  |
|       |      | Shiraz-9T  | 1324 | 0.679266 | 0         |  |
|       |      | Shiraz-18T | 1434 | 0.244465 | 0         |  |
|       |      | Shiraz-22T | 1549 | 0        | -0.319623 |  |
|       |      | Shiraz-22T | 1551 | 0.324011 | 0         |  |
|       |      | Shiraz-25T | 1698 | 0.21835  | 0         |  |
|       |      | Shiraz-28T | 1735 | 0.350744 | 0         |  |
|       |      | Shiraz-29T | 1778 | 0.120767 | 0         |  |
|       |      | Shiraz-32T | 1833 | 0.551336 | 0         |  |
|       |      | Shiraz-38T | 1951 | 0.250891 | 0         |  |
|       |      | Shiraz-53T | 2078 | 0.287202 | 0         |  |
|       |      | Shiraz-71T | 2238 | 0.603631 | 0         |  |
|       |      | Shiraz-3T  | 90   | 0.219276 | 0         |  |
|       |      | Shiraz-3T  | 94   | 0.74735  | 0         |  |
|       |      | Shiraz-4T  | 253  | 0.372918 | 0         |  |
|       |      | Shiraz-31T | 316  | 0.219196 | 0         |  |
|       |      | Shiraz-36T | 378  | 0.179558 | 0         |  |
|       |      | Shiraz-36T | 381  | 0.332628 | 0         |  |
|       |      | Shiraz-44T | 639  | 1.035032 | 0         |  |
|       |      | Shiraz-46T | 943  | 0.093799 | 0         |  |
|       |      | Shiraz-46T | 946  | 0.299835 | 0         |  |
|       |      | Shiraz-47T | 1030 | 0.257728 | 0         |  |
|       |      | Shiraz-49T | 1120 | 0.281656 | 0         |  |
|       |      | Shiraz-77T | 1225 | 0        | -0.117922 |  |
|       |      | Shiraz-77T | 1227 | 0.196445 | 0         |  |
|       |      | Shiraz-9T  | 1324 | 0.679266 | 0         |  |
|       |      | Shiraz-18T | 1434 | 0.244465 | 0         |  |
|       |      | Shiraz-22T | 1549 | 0        | -0.319623 |  |
|       |      | Shiraz-22T | 1551 | 0.324011 | 0         |  |
|       |      | Shiraz-25T | 1698 | 0.21835  | 0         |  |
|       |      | Shiraz-28T | 1735 | 0.350744 | 0         |  |

|       |      |            |      |          |           |  |  |
|-------|------|------------|------|----------|-----------|--|--|
|       |      | Shiraz-29T | 1778 | 0.120767 | 0         |  |  |
|       |      | Shiraz-32T | 1833 | 0.551336 | 0         |  |  |
|       |      | Shiraz-38T | 1951 | 0.250891 | 0         |  |  |
|       |      | Shiraz-53T | 2078 | 0.287202 | 0         |  |  |
|       |      | Shiraz-71T | 2238 | 0.603631 | 0         |  |  |
|       |      | Shiraz-3T  | 90   | 0.219276 | 0         |  |  |
|       |      | Shiraz-3T  | 94   | 0.74735  | 0         |  |  |
|       |      | Shiraz-4T  | 253  | 0.372918 | 0         |  |  |
|       |      | Shiraz-31T | 316  | 0.219196 | 0         |  |  |
|       |      | Shiraz-36T | 378  | 0.179558 | 0         |  |  |
|       |      | Shiraz-36T | 381  | 0.332628 | 0         |  |  |
|       |      | Shiraz-44T | 639  | 1.035032 | 0         |  |  |
|       |      | Shiraz-46T | 943  | 0.093799 | 0         |  |  |
|       |      | Shiraz-46T | 946  | 0.299835 | 0         |  |  |
|       |      | Shiraz-47T | 1030 | 0.257728 | 0         |  |  |
|       |      | Shiraz-49T | 1120 | 0.281656 | 0         |  |  |
|       |      | Shiraz-77T | 1225 | 0        | -0.117922 |  |  |
|       |      | Shiraz-77T | 1227 | 0.196445 | 0         |  |  |
|       |      | Shiraz-9T  | 1324 | 0.679266 | 0         |  |  |
|       |      | Shiraz-18T | 1434 | 0.244465 | 0         |  |  |
|       |      | Shiraz-22T | 1549 | 0        | -0.319623 |  |  |
|       |      | Shiraz-22T | 1551 | 0.324011 | 0         |  |  |
|       |      | Shiraz-25T | 1698 | 0.21835  | 0         |  |  |
|       |      | Shiraz-28T | 1735 | 0.350744 | 0         |  |  |
|       |      | Shiraz-29T | 1778 | 0.120767 | 0         |  |  |
|       |      | Shiraz-32T | 1833 | 0.551336 | 0         |  |  |
|       |      | Shiraz-38T | 1951 | 0.250891 | 0         |  |  |
|       |      | Shiraz-53T | 2078 | 0.287202 | 0         |  |  |
|       |      | Shiraz-71T | 2238 | 0.603631 | 0         |  |  |
| KRBA1 | chr7 | Shiraz-3T  | 90   | 0.219276 | 0         |  |  |
|       |      | Shiraz-3T  | 99   | 0.454766 | 0         |  |  |
|       |      | Shiraz-4T  | 253  | 0.372918 | 0         |  |  |
|       |      | Shiraz-36T | 378  | 0.179558 | 0         |  |  |
|       |      | Shiraz-44T | 646  | 0.471276 | 0         |  |  |
|       |      | Shiraz-46T | 943  | 0.093799 | 0         |  |  |
|       |      | Shiraz-9T  | 1325 | 0.221899 | 0         |  |  |
|       |      | Shiraz-18T | 1434 | 0.244465 | 0         |  |  |
|       |      | Shiraz-25T | 1698 | 0.21835  | 0         |  |  |
|       |      | Shiraz-28T | 1735 | 0.350744 | 0         |  |  |
|       |      | Shiraz-29T | 1778 | 0.120767 | 0         |  |  |
|       |      | Shiraz-32T | 1833 | 0.551336 | 0         |  |  |
|       |      | Shiraz-38T | 1951 | 0.250891 | 0         |  |  |
|       |      | Shiraz-53T | 2078 | 0.287202 | 0         |  |  |
|       |      | Shiraz-58T | 2162 | 0.221505 | 0         |  |  |
|       |      | Shiraz-71T | 2238 | 0.603631 | 0         |  |  |
|       |      | Shiraz-3T  | 90   | 0.219276 | 0         |  |  |
|       |      | Shiraz-3T  | 99   | 0.454766 | 0         |  |  |

|       |      |            |      |          |           |  |
|-------|------|------------|------|----------|-----------|--|
|       |      | Shiraz-4T  | 253  | 0.372918 | 0         |  |
|       |      | Shiraz-36T | 378  | 0.179558 | 0         |  |
|       |      | Shiraz-44T | 646  | 0.471276 | 0         |  |
|       |      | Shiraz-46T | 943  | 0.093799 | 0         |  |
|       |      | Shiraz-9T  | 1325 | 0.221899 | 0         |  |
|       |      | Shiraz-18T | 1434 | 0.244465 | 0         |  |
|       |      | Shiraz-25T | 1698 | 0.21835  | 0         |  |
|       |      | Shiraz-28T | 1735 | 0.350744 | 0         |  |
|       |      | Shiraz-29T | 1778 | 0.120767 | 0         |  |
|       |      | Shiraz-32T | 1833 | 0.551336 | 0         |  |
|       |      | Shiraz-38T | 1951 | 0.250891 | 0         |  |
|       |      | Shiraz-53T | 2078 | 0.287202 | 0         |  |
|       |      | Shiraz-58T | 2162 | 0.221505 | 0         |  |
|       |      | Shiraz-71T | 2238 | 0.603631 | 0         |  |
|       |      | Shiraz-3T  | 90   | 0.219276 | 0         |  |
|       |      | Shiraz-3T  | 99   | 0.454766 | 0         |  |
|       |      | Shiraz-4T  | 253  | 0.372918 | 0         |  |
|       |      | Shiraz-36T | 378  | 0.179558 | 0         |  |
|       |      | Shiraz-44T | 646  | 0.471276 | 0         |  |
|       |      | Shiraz-46T | 943  | 0.093799 | 0         |  |
|       |      | Shiraz-9T  | 1325 | 0.221899 | 0         |  |
|       |      | Shiraz-18T | 1434 | 0.244465 | 0         |  |
|       |      | Shiraz-25T | 1698 | 0.21835  | 0         |  |
|       |      | Shiraz-28T | 1735 | 0.350744 | 0         |  |
|       |      | Shiraz-29T | 1778 | 0.120767 | 0         |  |
|       |      | Shiraz-32T | 1833 | 0.551336 | 0         |  |
|       |      | Shiraz-38T | 1951 | 0.250891 | 0         |  |
|       |      | Shiraz-53T | 2078 | 0.287202 | 0         |  |
|       |      | Shiraz-58T | 2162 | 0.221505 | 0         |  |
|       |      | Shiraz-71T | 2238 | 0.603631 | 0         |  |
| KRIT1 | chr7 | Shiraz-3T  | 90   | 0.219276 | 0         |  |
|       |      | Shiraz-3T  | 90   | 0.219276 | 0         |  |
|       |      | Shiraz-3T  | 90   | 0.219276 | 0         |  |
|       |      | Shiraz-3T  | 93   | 0        | -0.058023 |  |
|       |      | Shiraz-3T  | 93   | 0        | -0.058023 |  |
|       |      | Shiraz-3T  | 93   | 0        | -0.058023 |  |
|       |      | Shiraz-4T  | 253  | 0.372918 | 0         |  |
|       |      | Shiraz-4T  | 253  | 0.372918 | 0         |  |
|       |      | Shiraz-4T  | 253  | 0.372918 | 0         |  |
|       |      | Shiraz-36T | 378  | 0.179558 | 0         |  |
|       |      | Shiraz-36T | 378  | 0.179558 | 0         |  |
|       |      | Shiraz-36T | 378  | 0.179558 | 0         |  |
|       |      | Shiraz-36T | 380  | 0.083883 | 0         |  |
|       |      | Shiraz-36T | 380  | 0.083883 | 0         |  |
|       |      | Shiraz-36T | 380  | 0.083883 | 0         |  |
|       |      | Shiraz-44T | 638  | 0        | -0.433476 |  |
|       |      | Shiraz-44T | 638  | 0        | -0.433476 |  |

|  |  |            |      |          |           |  |  |
|--|--|------------|------|----------|-----------|--|--|
|  |  | Shiraz-44T | 638  | 0        | -0.433476 |  |  |
|  |  | Shiraz-46T | 943  | 0.093799 | 0         |  |  |
|  |  | Shiraz-46T | 943  | 0.093799 | 0         |  |  |
|  |  | Shiraz-46T | 943  | 0.093799 | 0         |  |  |
|  |  | Shiraz-46T | 945  | 0        | -0.014838 |  |  |
|  |  | Shiraz-46T | 945  | 0        | -0.014838 |  |  |
|  |  | Shiraz-46T | 945  | 0        | -0.014838 |  |  |
|  |  | Shiraz-47T | 1029 | 0        | -0.096586 |  |  |
|  |  | Shiraz-47T | 1029 | 0        | -0.096586 |  |  |
|  |  | Shiraz-47T | 1029 | 0        | -0.096586 |  |  |
|  |  | Shiraz-49T | 1119 | 0        | -0.157331 |  |  |
|  |  | Shiraz-49T | 1119 | 0        | -0.157331 |  |  |
|  |  | Shiraz-49T | 1119 | 0        | -0.157331 |  |  |
|  |  | Shiraz-77T | 1225 | 0        | -0.117922 |  |  |
|  |  | Shiraz-77T | 1225 | 0        | -0.117922 |  |  |
|  |  | Shiraz-77T | 1225 | 0        | -0.117922 |  |  |
|  |  | Shiraz-18T | 1434 | 0.244465 | 0         |  |  |
|  |  | Shiraz-18T | 1434 | 0.244465 | 0         |  |  |
|  |  | Shiraz-18T | 1434 | 0.244465 | 0         |  |  |
|  |  | Shiraz-22T | 1549 | 0        | -0.319623 |  |  |
|  |  | Shiraz-22T | 1549 | 0        | -0.319623 |  |  |
|  |  | Shiraz-22T | 1549 | 0        | -0.319623 |  |  |
|  |  | Shiraz-25T | 1698 | 0.21835  | 0         |  |  |
|  |  | Shiraz-25T | 1698 | 0.21835  | 0         |  |  |
|  |  | Shiraz-25T | 1698 | 0.21835  | 0         |  |  |
|  |  | Shiraz-28T | 1735 | 0.350744 | 0         |  |  |
|  |  | Shiraz-28T | 1735 | 0.350744 | 0         |  |  |
|  |  | Shiraz-28T | 1735 | 0.350744 | 0         |  |  |
|  |  | Shiraz-29T | 1778 | 0.120767 | 0         |  |  |
|  |  | Shiraz-29T | 1778 | 0.120767 | 0         |  |  |
|  |  | Shiraz-29T | 1778 | 0.120767 | 0         |  |  |
|  |  | Shiraz-32T | 1833 | 0.551336 | 0         |  |  |
|  |  | Shiraz-32T | 1833 | 0.551336 | 0         |  |  |
|  |  | Shiraz-32T | 1833 | 0.551336 | 0         |  |  |
|  |  | Shiraz-38T | 1951 | 0.250891 | 0         |  |  |
|  |  | Shiraz-38T | 1951 | 0.250891 | 0         |  |  |
|  |  | Shiraz-38T | 1951 | 0.250891 | 0         |  |  |
|  |  | Shiraz-53T | 2078 | 0.287202 | 0         |  |  |
|  |  | Shiraz-53T | 2078 | 0.287202 | 0         |  |  |
|  |  | Shiraz-53T | 2078 | 0.287202 | 0         |  |  |
|  |  | Shiraz-58T | 2159 | 0        | -0.219521 |  |  |
|  |  | Shiraz-58T | 2159 | 0        | -0.219521 |  |  |
|  |  | Shiraz-58T | 2159 | 0        | -0.219521 |  |  |
|  |  | Shiraz-71T | 2238 | 0.603631 | 0         |  |  |
|  |  | Shiraz-71T | 2238 | 0.603631 | 0         |  |  |
|  |  | Shiraz-71T | 2238 | 0.603631 | 0         |  |  |
|  |  | Shiraz-3T  | 90   | 0.219276 | 0         |  |  |

|  |            |      |          |           |  |
|--|------------|------|----------|-----------|--|
|  | Shiraz-3T  | 90   | 0.219276 | 0         |  |
|  | Shiraz-3T  | 90   | 0.219276 | 0         |  |
|  | Shiraz-3T  | 93   | 0        | -0.058023 |  |
|  | Shiraz-3T  | 93   | 0        | -0.058023 |  |
|  | Shiraz-3T  | 93   | 0        | -0.058023 |  |
|  | Shiraz-4T  | 253  | 0.372918 | 0         |  |
|  | Shiraz-4T  | 253  | 0.372918 | 0         |  |
|  | Shiraz-4T  | 253  | 0.372918 | 0         |  |
|  | Shiraz-36T | 378  | 0.179558 | 0         |  |
|  | Shiraz-36T | 378  | 0.179558 | 0         |  |
|  | Shiraz-36T | 378  | 0.179558 | 0         |  |
|  | Shiraz-36T | 380  | 0.083883 | 0         |  |
|  | Shiraz-36T | 380  | 0.083883 | 0         |  |
|  | Shiraz-36T | 380  | 0.083883 | 0         |  |
|  | Shiraz-44T | 638  | 0        | -0.433476 |  |
|  | Shiraz-44T | 638  | 0        | -0.433476 |  |
|  | Shiraz-44T | 638  | 0        | -0.433476 |  |
|  | Shiraz-46T | 943  | 0.093799 | 0         |  |
|  | Shiraz-46T | 943  | 0.093799 | 0         |  |
|  | Shiraz-46T | 943  | 0.093799 | 0         |  |
|  | Shiraz-46T | 945  | 0        | -0.014838 |  |
|  | Shiraz-46T | 945  | 0        | -0.014838 |  |
|  | Shiraz-46T | 945  | 0        | -0.014838 |  |
|  | Shiraz-47T | 1029 | 0        | -0.096586 |  |
|  | Shiraz-47T | 1029 | 0        | -0.096586 |  |
|  | Shiraz-47T | 1029 | 0        | -0.096586 |  |
|  | Shiraz-49T | 1119 | 0        | -0.157331 |  |
|  | Shiraz-49T | 1119 | 0        | -0.157331 |  |
|  | Shiraz-49T | 1119 | 0        | -0.157331 |  |
|  | Shiraz-77T | 1225 | 0        | -0.117922 |  |
|  | Shiraz-77T | 1225 | 0        | -0.117922 |  |
|  | Shiraz-77T | 1225 | 0        | -0.117922 |  |
|  | Shiraz-18T | 1434 | 0.244465 | 0         |  |
|  | Shiraz-18T | 1434 | 0.244465 | 0         |  |
|  | Shiraz-18T | 1434 | 0.244465 | 0         |  |
|  | Shiraz-22T | 1549 | 0        | -0.319623 |  |
|  | Shiraz-22T | 1549 | 0        | -0.319623 |  |
|  | Shiraz-22T | 1549 | 0        | -0.319623 |  |
|  | Shiraz-25T | 1698 | 0.21835  | 0         |  |
|  | Shiraz-25T | 1698 | 0.21835  | 0         |  |
|  | Shiraz-25T | 1698 | 0.21835  | 0         |  |
|  | Shiraz-28T | 1735 | 0.350744 | 0         |  |
|  | Shiraz-28T | 1735 | 0.350744 | 0         |  |
|  | Shiraz-28T | 1735 | 0.350744 | 0         |  |
|  | Shiraz-29T | 1778 | 0.120767 | 0         |  |
|  | Shiraz-29T | 1778 | 0.120767 | 0         |  |
|  | Shiraz-29T | 1778 | 0.120767 | 0         |  |

|  |            |      |          |           |  |
|--|------------|------|----------|-----------|--|
|  | Shiraz-32T | 1833 | 0.551336 | 0         |  |
|  | Shiraz-32T | 1833 | 0.551336 | 0         |  |
|  | Shiraz-32T | 1833 | 0.551336 | 0         |  |
|  | Shiraz-38T | 1951 | 0.250891 | 0         |  |
|  | Shiraz-38T | 1951 | 0.250891 | 0         |  |
|  | Shiraz-38T | 1951 | 0.250891 | 0         |  |
|  | Shiraz-53T | 2078 | 0.287202 | 0         |  |
|  | Shiraz-53T | 2078 | 0.287202 | 0         |  |
|  | Shiraz-53T | 2078 | 0.287202 | 0         |  |
|  | Shiraz-58T | 2159 | 0        | -0.219521 |  |
|  | Shiraz-58T | 2159 | 0        | -0.219521 |  |
|  | Shiraz-58T | 2159 | 0        | -0.219521 |  |
|  | Shiraz-71T | 2238 | 0.603631 | 0         |  |
|  | Shiraz-71T | 2238 | 0.603631 | 0         |  |
|  | Shiraz-71T | 2238 | 0.603631 | 0         |  |
|  | Shiraz-3T  | 90   | 0.219276 | 0         |  |
|  | Shiraz-3T  | 90   | 0.219276 | 0         |  |
|  | Shiraz-3T  | 90   | 0.219276 | 0         |  |
|  | Shiraz-3T  | 93   | 0        | -0.058023 |  |
|  | Shiraz-3T  | 93   | 0        | -0.058023 |  |
|  | Shiraz-3T  | 93   | 0        | -0.058023 |  |
|  | Shiraz-4T  | 253  | 0.372918 | 0         |  |
|  | Shiraz-4T  | 253  | 0.372918 | 0         |  |
|  | Shiraz-4T  | 253  | 0.372918 | 0         |  |
|  | Shiraz-36T | 378  | 0.179558 | 0         |  |
|  | Shiraz-36T | 378  | 0.179558 | 0         |  |
|  | Shiraz-36T | 378  | 0.179558 | 0         |  |
|  | Shiraz-36T | 380  | 0.083883 | 0         |  |
|  | Shiraz-36T | 380  | 0.083883 | 0         |  |
|  | Shiraz-36T | 380  | 0.083883 | 0         |  |
|  | Shiraz-44T | 638  | 0        | -0.433476 |  |
|  | Shiraz-44T | 638  | 0        | -0.433476 |  |
|  | Shiraz-44T | 638  | 0        | -0.433476 |  |
|  | Shiraz-46T | 943  | 0.093799 | 0         |  |
|  | Shiraz-46T | 943  | 0.093799 | 0         |  |
|  | Shiraz-46T | 943  | 0.093799 | 0         |  |
|  | Shiraz-46T | 945  | 0        | -0.014838 |  |
|  | Shiraz-46T | 945  | 0        | -0.014838 |  |
|  | Shiraz-46T | 945  | 0        | -0.014838 |  |
|  | Shiraz-47T | 1029 | 0        | -0.096586 |  |
|  | Shiraz-47T | 1029 | 0        | -0.096586 |  |
|  | Shiraz-47T | 1029 | 0        | -0.096586 |  |
|  | Shiraz-49T | 1119 | 0        | -0.157331 |  |
|  | Shiraz-49T | 1119 | 0        | -0.157331 |  |
|  | Shiraz-49T | 1119 | 0        | -0.157331 |  |
|  | Shiraz-77T | 1225 | 0        | -0.117922 |  |
|  | Shiraz-77T | 1225 | 0        | -0.117922 |  |

|       |      |            |      |          |           |  |  |
|-------|------|------------|------|----------|-----------|--|--|
|       |      | Shiraz-77T | 1225 | 0        | -0.117922 |  |  |
|       |      | Shiraz-18T | 1434 | 0.244465 | 0         |  |  |
|       |      | Shiraz-18T | 1434 | 0.244465 | 0         |  |  |
|       |      | Shiraz-18T | 1434 | 0.244465 | 0         |  |  |
|       |      | Shiraz-22T | 1549 | 0        | -0.319623 |  |  |
|       |      | Shiraz-22T | 1549 | 0        | -0.319623 |  |  |
|       |      | Shiraz-22T | 1549 | 0        | -0.319623 |  |  |
|       |      | Shiraz-25T | 1698 | 0.21835  | 0         |  |  |
|       |      | Shiraz-25T | 1698 | 0.21835  | 0         |  |  |
|       |      | Shiraz-25T | 1698 | 0.21835  | 0         |  |  |
|       |      | Shiraz-28T | 1735 | 0.350744 | 0         |  |  |
|       |      | Shiraz-28T | 1735 | 0.350744 | 0         |  |  |
|       |      | Shiraz-28T | 1735 | 0.350744 | 0         |  |  |
|       |      | Shiraz-29T | 1778 | 0.120767 | 0         |  |  |
|       |      | Shiraz-29T | 1778 | 0.120767 | 0         |  |  |
|       |      | Shiraz-29T | 1778 | 0.120767 | 0         |  |  |
|       |      | Shiraz-32T | 1833 | 0.551336 | 0         |  |  |
|       |      | Shiraz-32T | 1833 | 0.551336 | 0         |  |  |
|       |      | Shiraz-32T | 1833 | 0.551336 | 0         |  |  |
|       |      | Shiraz-38T | 1951 | 0.250891 | 0         |  |  |
|       |      | Shiraz-38T | 1951 | 0.250891 | 0         |  |  |
|       |      | Shiraz-38T | 1951 | 0.250891 | 0         |  |  |
|       |      | Shiraz-53T | 2078 | 0.287202 | 0         |  |  |
|       |      | Shiraz-53T | 2078 | 0.287202 | 0         |  |  |
|       |      | Shiraz-53T | 2078 | 0.287202 | 0         |  |  |
|       |      | Shiraz-58T | 2159 | 0        | -0.219521 |  |  |
|       |      | Shiraz-58T | 2159 | 0        | -0.219521 |  |  |
|       |      | Shiraz-58T | 2159 | 0        | -0.219521 |  |  |
|       |      | Shiraz-71T | 2238 | 0.603631 | 0         |  |  |
|       |      | Shiraz-71T | 2238 | 0.603631 | 0         |  |  |
|       |      | Shiraz-71T | 2238 | 0.603631 | 0         |  |  |
| L1CAM | chrX | Shiraz-3T  | 246  | 0.531858 | 0         |  |  |
|       |      | Shiraz-4T  | 261  | 0        | -0.336249 |  |  |
|       |      | Shiraz-16T | 295  | 0.591657 | 0         |  |  |
|       |      | Shiraz-36T | 433  | 0        | -0.803961 |  |  |
|       |      | Shiraz-42T | 480  | 0        | -0.232915 |  |  |
|       |      | Shiraz-44T | 908  | 0.466743 | 0         |  |  |
|       |      | Shiraz-49T | 1170 | 0        | -0.967436 |  |  |
|       |      | Shiraz-49T | 1173 | 0        | -0.704439 |  |  |
|       |      | Shiraz-9T  | 1370 | 0.690073 | 0         |  |  |
|       |      | Shiraz-9T  | 1371 | 1.292392 | 0         |  |  |
|       |      | Shiraz-18T | 1457 | 0.643204 | 0         |  |  |
|       |      | Shiraz-22T | 1673 | 0.611783 | 0         |  |  |
|       |      | Shiraz-22T | 1678 | 0.911625 | 0         |  |  |
|       |      | Shiraz-25T | 1719 | 0.472955 | 0         |  |  |
|       |      | Shiraz-28T | 1762 | 0.562311 | 0         |  |  |
|       |      | Shiraz-29T | 1801 | 0.815343 | 0         |  |  |



|  |            |      |          |           |  |
|--|------------|------|----------|-----------|--|
|  | Shiraz-32T | 1870 | 0.729766 | 0         |  |
|  | Shiraz-32T | 1872 | 1.504553 | 0         |  |
|  | Shiraz-35T | 1933 | 0.488535 | 0         |  |
|  | Shiraz-38T | 2011 | 0        | -0.406024 |  |
|  | Shiraz-53T | 2115 | 0.427728 | 0         |  |
|  | Shiraz-58T | 2223 | 0.833364 | 0         |  |
|  | Shiraz-58T | 2226 | 1.074663 | 0         |  |
|  | Shiraz-71T | 2263 | 0.975531 | 0         |  |
|  | Shiraz-3T  | 246  | 0.531858 | 0         |  |
|  | Shiraz-4T  | 261  | 0        | -0.336249 |  |
|  | Shiraz-16T | 295  | 0.591657 | 0         |  |
|  | Shiraz-36T | 433  | 0        | -0.803961 |  |
|  | Shiraz-42T | 480  | 0        | -0.232915 |  |
|  | Shiraz-44T | 908  | 0.466743 | 0         |  |
|  | Shiraz-49T | 1170 | 0        | -0.967436 |  |
|  | Shiraz-49T | 1173 | 0        | -0.704439 |  |
|  | Shiraz-9T  | 1370 | 0.690073 | 0         |  |
|  | Shiraz-9T  | 1371 | 1.292392 | 0         |  |
|  | Shiraz-18T | 1457 | 0.643204 | 0         |  |
|  | Shiraz-22T | 1673 | 0.611783 | 0         |  |
|  | Shiraz-22T | 1678 | 0.911625 | 0         |  |
|  | Shiraz-25T | 1719 | 0.472955 | 0         |  |
|  | Shiraz-28T | 1762 | 0.562311 | 0         |  |
|  | Shiraz-29T | 1801 | 0.815343 | 0         |  |
|  | Shiraz-32T | 1870 | 0.729766 | 0         |  |
|  | Shiraz-32T | 1872 | 1.504553 | 0         |  |
|  | Shiraz-35T | 1933 | 0.488535 | 0         |  |
|  | Shiraz-38T | 2011 | 0        | -0.406024 |  |
|  | Shiraz-53T | 2115 | 0.427728 | 0         |  |
|  | Shiraz-58T | 2223 | 0.833364 | 0         |  |
|  | Shiraz-58T | 2226 | 1.074663 | 0         |  |
|  | Shiraz-71T | 2263 | 0.975531 | 0         |  |
|  | Shiraz-3T  | 246  | 0.531858 | 0         |  |
|  | Shiraz-4T  | 261  | 0        | -0.336249 |  |
|  | Shiraz-16T | 295  | 0.591657 | 0         |  |
|  | Shiraz-36T | 433  | 0        | -0.803961 |  |
|  | Shiraz-42T | 480  | 0        | -0.232915 |  |
|  | Shiraz-44T | 908  | 0.466743 | 0         |  |
|  | Shiraz-49T | 1170 | 0        | -0.967436 |  |
|  | Shiraz-49T | 1173 | 0        | -0.704439 |  |
|  | Shiraz-9T  | 1370 | 0.690073 | 0         |  |
|  | Shiraz-9T  | 1371 | 1.292392 | 0         |  |
|  | Shiraz-18T | 1457 | 0.643204 | 0         |  |
|  | Shiraz-22T | 1673 | 0.611783 | 0         |  |
|  | Shiraz-22T | 1678 | 0.911625 | 0         |  |
|  | Shiraz-25T | 1719 | 0.472955 | 0         |  |
|  | Shiraz-28T | 1762 | 0.562311 | 0         |  |

|       |      |            |      |          |           |  |  |
|-------|------|------------|------|----------|-----------|--|--|
|       |      | Shiraz-29T | 1801 | 0.815343 | 0         |  |  |
|       |      | Shiraz-32T | 1870 | 0.729766 | 0         |  |  |
|       |      | Shiraz-32T | 1872 | 1.504553 | 0         |  |  |
|       |      | Shiraz-35T | 1933 | 0.488535 | 0         |  |  |
|       |      | Shiraz-38T | 2011 | 0        | -0.406024 |  |  |
|       |      | Shiraz-53T | 2115 | 0.427728 | 0         |  |  |
|       |      | Shiraz-58T | 2223 | 0.833364 | 0         |  |  |
|       |      | Shiraz-58T | 2226 | 1.074663 | 0         |  |  |
|       |      | Shiraz-71T | 2263 | 0.975531 | 0         |  |  |
| LAGE3 | chrX | Shiraz-3T  | 246  | 0.531858 | 0         |  |  |
|       |      | Shiraz-4T  | 261  | 0        | -0.336249 |  |  |
|       |      | Shiraz-16T | 295  | 0.591657 | 0         |  |  |
|       |      | Shiraz-36T | 433  | 0        | -0.803961 |  |  |
|       |      | Shiraz-42T | 480  | 0        | -0.232915 |  |  |
|       |      | Shiraz-44T | 908  | 0.466743 | 0         |  |  |
|       |      | Shiraz-49T | 1170 | 0        | -0.967436 |  |  |
|       |      | Shiraz-49T | 1173 | 0        | -0.704439 |  |  |
|       |      | Shiraz-9T  | 1370 | 0.690073 | 0         |  |  |
|       |      | Shiraz-9T  | 1371 | 1.292392 | 0         |  |  |
|       |      | Shiraz-18T | 1457 | 0.643204 | 0         |  |  |
|       |      | Shiraz-22T | 1673 | 0.611783 | 0         |  |  |
|       |      | Shiraz-22T | 1678 | 0.911625 | 0         |  |  |
|       |      | Shiraz-25T | 1719 | 0.472955 | 0         |  |  |
|       |      | Shiraz-28T | 1762 | 0.562311 | 0         |  |  |
|       |      | Shiraz-29T | 1801 | 0.815343 | 0         |  |  |
|       |      | Shiraz-32T | 1870 | 0.729766 | 0         |  |  |
|       |      | Shiraz-32T | 1872 | 1.504553 | 0         |  |  |
|       |      | Shiraz-35T | 1933 | 0.488535 | 0         |  |  |
|       |      | Shiraz-38T | 2011 | 0        | -0.406024 |  |  |
|       |      | Shiraz-53T | 2115 | 0.427728 | 0         |  |  |
|       |      | Shiraz-58T | 2223 | 0.833364 | 0         |  |  |
|       |      | Shiraz-58T | 2226 | 1.074663 | 0         |  |  |
|       |      | Shiraz-71T | 2263 | 0.975531 | 0         |  |  |
|       |      | Shiraz-3T  | 246  | 0.531858 | 0         |  |  |
|       |      | Shiraz-4T  | 261  | 0        | -0.336249 |  |  |
|       |      | Shiraz-16T | 295  | 0.591657 | 0         |  |  |
|       |      | Shiraz-36T | 433  | 0        | -0.803961 |  |  |
|       |      | Shiraz-42T | 480  | 0        | -0.232915 |  |  |
|       |      | Shiraz-44T | 908  | 0.466743 | 0         |  |  |
|       |      | Shiraz-49T | 1170 | 0        | -0.967436 |  |  |
|       |      | Shiraz-49T | 1173 | 0        | -0.704439 |  |  |
|       |      | Shiraz-9T  | 1370 | 0.690073 | 0         |  |  |
|       |      | Shiraz-9T  | 1371 | 1.292392 | 0         |  |  |
|       |      | Shiraz-18T | 1457 | 0.643204 | 0         |  |  |
|       |      | Shiraz-22T | 1673 | 0.611783 | 0         |  |  |
|       |      | Shiraz-22T | 1678 | 0.911625 | 0         |  |  |
|       |      | Shiraz-25T | 1719 | 0.472955 | 0         |  |  |

|       |      |            |      |          |           |  |
|-------|------|------------|------|----------|-----------|--|
|       |      | Shiraz-28T | 1762 | 0.562311 | 0         |  |
|       |      | Shiraz-29T | 1801 | 0.815343 | 0         |  |
|       |      | Shiraz-32T | 1870 | 0.729766 | 0         |  |
|       |      | Shiraz-32T | 1872 | 1.504553 | 0         |  |
|       |      | Shiraz-35T | 1933 | 0.488535 | 0         |  |
|       |      | Shiraz-38T | 2011 | 0        | -0.406024 |  |
|       |      | Shiraz-53T | 2115 | 0.427728 | 0         |  |
|       |      | Shiraz-58T | 2223 | 0.833364 | 0         |  |
|       |      | Shiraz-58T | 2226 | 1.074663 | 0         |  |
|       |      | Shiraz-71T | 2263 | 0.975531 | 0         |  |
|       |      | Shiraz-3T  | 246  | 0.531858 | 0         |  |
|       |      | Shiraz-4T  | 261  | 0        | -0.336249 |  |
|       |      | Shiraz-16T | 295  | 0.591657 | 0         |  |
|       |      | Shiraz-36T | 433  | 0        | -0.803961 |  |
|       |      | Shiraz-42T | 480  | 0        | -0.232915 |  |
|       |      | Shiraz-44T | 908  | 0.466743 | 0         |  |
|       |      | Shiraz-49T | 1170 | 0        | -0.967436 |  |
|       |      | Shiraz-49T | 1173 | 0        | -0.704439 |  |
|       |      | Shiraz-9T  | 1370 | 0.690073 | 0         |  |
|       |      | Shiraz-9T  | 1371 | 1.292392 | 0         |  |
|       |      | Shiraz-18T | 1457 | 0.643204 | 0         |  |
|       |      | Shiraz-22T | 1673 | 0.611783 | 0         |  |
|       |      | Shiraz-22T | 1678 | 0.911625 | 0         |  |
|       |      | Shiraz-25T | 1719 | 0.472955 | 0         |  |
|       |      | Shiraz-28T | 1762 | 0.562311 | 0         |  |
|       |      | Shiraz-29T | 1801 | 0.815343 | 0         |  |
|       |      | Shiraz-32T | 1870 | 0.729766 | 0         |  |
|       |      | Shiraz-32T | 1872 | 1.504553 | 0         |  |
|       |      | Shiraz-35T | 1933 | 0.488535 | 0         |  |
|       |      | Shiraz-38T | 2011 | 0        | -0.406024 |  |
|       |      | Shiraz-53T | 2115 | 0.427728 | 0         |  |
|       |      | Shiraz-58T | 2223 | 0.833364 | 0         |  |
|       |      | Shiraz-58T | 2226 | 1.074663 | 0         |  |
|       |      | Shiraz-71T | 2263 | 0.975531 | 0         |  |
| LAMB1 | chr7 | Shiraz-3T  | 90   | 0.219276 | 0         |  |
|       |      | Shiraz-4T  | 253  | 0.372918 | 0         |  |
|       |      | Shiraz-36T | 378  | 0.179558 | 0         |  |
|       |      | Shiraz-46T | 943  | 0.093799 | 0         |  |
|       |      | Shiraz-49T | 1121 | 0        | -0.138569 |  |
|       |      | Shiraz-77T | 1225 | 0        | -0.117922 |  |
|       |      | Shiraz-18T | 1434 | 0.244465 | 0         |  |
|       |      | Shiraz-22T | 1549 | 0        | -0.319623 |  |
|       |      | Shiraz-25T | 1698 | 0.21835  | 0         |  |
|       |      | Shiraz-28T | 1735 | 0.350744 | 0         |  |
|       |      | Shiraz-29T | 1778 | 0.120767 | 0         |  |
|       |      | Shiraz-32T | 1833 | 0.551336 | 0         |  |
|       |      | Shiraz-38T | 1951 | 0.250891 | 0         |  |

|       |      |            |      |          |           |  |  |
|-------|------|------------|------|----------|-----------|--|--|
|       |      | Shiraz-53T | 2078 | 0.287202 | 0         |  |  |
|       |      | Shiraz-58T | 2161 | 0        | -0.187744 |  |  |
|       |      | Shiraz-71T | 2238 | 0.603631 | 0         |  |  |
|       |      | Shiraz-3T  | 90   | 0.219276 | 0         |  |  |
|       |      | Shiraz-4T  | 253  | 0.372918 | 0         |  |  |
|       |      | Shiraz-36T | 378  | 0.179558 | 0         |  |  |
|       |      | Shiraz-46T | 943  | 0.093799 | 0         |  |  |
|       |      | Shiraz-49T | 1121 | 0        | -0.138569 |  |  |
|       |      | Shiraz-77T | 1225 | 0        | -0.117922 |  |  |
|       |      | Shiraz-18T | 1434 | 0.244465 | 0         |  |  |
|       |      | Shiraz-22T | 1549 | 0        | -0.319623 |  |  |
|       |      | Shiraz-25T | 1698 | 0.21835  | 0         |  |  |
|       |      | Shiraz-28T | 1735 | 0.350744 | 0         |  |  |
|       |      | Shiraz-29T | 1778 | 0.120767 | 0         |  |  |
|       |      | Shiraz-32T | 1833 | 0.551336 | 0         |  |  |
|       |      | Shiraz-38T | 1951 | 0.250891 | 0         |  |  |
|       |      | Shiraz-53T | 2078 | 0.287202 | 0         |  |  |
|       |      | Shiraz-58T | 2161 | 0        | -0.187744 |  |  |
|       |      | Shiraz-71T | 2238 | 0.603631 | 0         |  |  |
|       |      | Shiraz-3T  | 90   | 0.219276 | 0         |  |  |
|       |      | Shiraz-4T  | 253  | 0.372918 | 0         |  |  |
|       |      | Shiraz-36T | 378  | 0.179558 | 0         |  |  |
|       |      | Shiraz-46T | 943  | 0.093799 | 0         |  |  |
|       |      | Shiraz-49T | 1121 | 0        | -0.138569 |  |  |
|       |      | Shiraz-77T | 1225 | 0        | -0.117922 |  |  |
|       |      | Shiraz-18T | 1434 | 0.244465 | 0         |  |  |
|       |      | Shiraz-22T | 1549 | 0        | -0.319623 |  |  |
|       |      | Shiraz-25T | 1698 | 0.21835  | 0         |  |  |
|       |      | Shiraz-28T | 1735 | 0.350744 | 0         |  |  |
|       |      | Shiraz-29T | 1778 | 0.120767 | 0         |  |  |
|       |      | Shiraz-32T | 1833 | 0.551336 | 0         |  |  |
|       |      | Shiraz-38T | 1951 | 0.250891 | 0         |  |  |
|       |      | Shiraz-53T | 2078 | 0.287202 | 0         |  |  |
|       |      | Shiraz-58T | 2161 | 0        | -0.187744 |  |  |
|       |      | Shiraz-71T | 2238 | 0.603631 | 0         |  |  |
| LAMB4 | chr7 | Shiraz-3T  | 90   | 0.219276 | 0         |  |  |
|       |      | Shiraz-4T  | 253  | 0.372918 | 0         |  |  |
|       |      | Shiraz-36T | 378  | 0.179558 | 0         |  |  |
|       |      | Shiraz-46T | 943  | 0.093799 | 0         |  |  |
|       |      | Shiraz-49T | 1121 | 0        | -0.138569 |  |  |
|       |      | Shiraz-77T | 1225 | 0        | -0.117922 |  |  |
|       |      | Shiraz-18T | 1434 | 0.244465 | 0         |  |  |
|       |      | Shiraz-22T | 1549 | 0        | -0.319623 |  |  |
|       |      | Shiraz-25T | 1698 | 0.21835  | 0         |  |  |
|       |      | Shiraz-28T | 1735 | 0.350744 | 0         |  |  |
|       |      | Shiraz-29T | 1778 | 0.120767 | 0         |  |  |
|       |      | Shiraz-32T | 1833 | 0.551336 | 0         |  |  |

|       |      |            |      |          |           |  |  |
|-------|------|------------|------|----------|-----------|--|--|
|       |      | Shiraz-38T | 1951 | 0.250891 | 0         |  |  |
|       |      | Shiraz-53T | 2078 | 0.287202 | 0         |  |  |
|       |      | Shiraz-58T | 2161 | 0        | -0.187744 |  |  |
|       |      | Shiraz-71T | 2238 | 0.603631 | 0         |  |  |
|       |      | Shiraz-3T  | 90   | 0.219276 | 0         |  |  |
|       |      | Shiraz-4T  | 253  | 0.372918 | 0         |  |  |
|       |      | Shiraz-36T | 378  | 0.179558 | 0         |  |  |
|       |      | Shiraz-46T | 943  | 0.093799 | 0         |  |  |
|       |      | Shiraz-49T | 1121 | 0        | -0.138569 |  |  |
|       |      | Shiraz-77T | 1225 | 0        | -0.117922 |  |  |
|       |      | Shiraz-18T | 1434 | 0.244465 | 0         |  |  |
|       |      | Shiraz-22T | 1549 | 0        | -0.319623 |  |  |
|       |      | Shiraz-25T | 1698 | 0.21835  | 0         |  |  |
|       |      | Shiraz-28T | 1735 | 0.350744 | 0         |  |  |
|       |      | Shiraz-29T | 1778 | 0.120767 | 0         |  |  |
|       |      | Shiraz-32T | 1833 | 0.551336 | 0         |  |  |
|       |      | Shiraz-38T | 1951 | 0.250891 | 0         |  |  |
|       |      | Shiraz-53T | 2078 | 0.287202 | 0         |  |  |
|       |      | Shiraz-58T | 2161 | 0        | -0.187744 |  |  |
|       |      | Shiraz-71T | 2238 | 0.603631 | 0         |  |  |
|       |      | Shiraz-3T  | 90   | 0.219276 | 0         |  |  |
|       |      | Shiraz-4T  | 253  | 0.372918 | 0         |  |  |
|       |      | Shiraz-36T | 378  | 0.179558 | 0         |  |  |
|       |      | Shiraz-46T | 943  | 0.093799 | 0         |  |  |
|       |      | Shiraz-49T | 1121 | 0        | -0.138569 |  |  |
|       |      | Shiraz-77T | 1225 | 0        | -0.117922 |  |  |
|       |      | Shiraz-18T | 1434 | 0.244465 | 0         |  |  |
|       |      | Shiraz-22T | 1549 | 0        | -0.319623 |  |  |
|       |      | Shiraz-25T | 1698 | 0.21835  | 0         |  |  |
|       |      | Shiraz-28T | 1735 | 0.350744 | 0         |  |  |
|       |      | Shiraz-29T | 1778 | 0.120767 | 0         |  |  |
|       |      | Shiraz-32T | 1833 | 0.551336 | 0         |  |  |
|       |      | Shiraz-38T | 1951 | 0.250891 | 0         |  |  |
|       |      | Shiraz-53T | 2078 | 0.287202 | 0         |  |  |
|       |      | Shiraz-58T | 2161 | 0        | -0.187744 |  |  |
|       |      | Shiraz-71T | 2238 | 0.603631 | 0         |  |  |
| LAMP2 | chrX | Shiraz-3T  | 242  | 0        | -0.336434 |  |  |
|       |      | Shiraz-3T  | 242  | 0        | -0.336434 |  |  |
|       |      | Shiraz-3T  | 244  | 0        | -0.023749 |  |  |
|       |      | Shiraz-3T  | 244  | 0        | -0.023749 |  |  |
|       |      | Shiraz-4T  | 261  | 0        | -0.336249 |  |  |
|       |      | Shiraz-4T  | 261  | 0        | -0.336249 |  |  |
|       |      | Shiraz-16T | 295  | 0.591657 | 0         |  |  |
|       |      | Shiraz-16T | 295  | 0.591657 | 0         |  |  |
|       |      | Shiraz-36T | 433  | 0        | -0.803961 |  |  |
|       |      | Shiraz-36T | 433  | 0        | -0.803961 |  |  |
|       |      | Shiraz-44T | 899  | 0        | -1.09697  |  |  |

|  |            |      |          |           |  |
|--|------------|------|----------|-----------|--|
|  | Shiraz-44T | 899  | 0        | -1.09697  |  |
|  | Shiraz-44T | 904  | 0        | -0.625526 |  |
|  | Shiraz-44T | 904  | 0        | -0.625526 |  |
|  | Shiraz-49T | 1170 | 0        | -0.967436 |  |
|  | Shiraz-49T | 1170 | 0        | -0.967436 |  |
|  | Shiraz-9T  | 1370 | 0.690073 | 0         |  |
|  | Shiraz-9T  | 1370 | 0.690073 | 0         |  |
|  | Shiraz-18T | 1457 | 0.643204 | 0         |  |
|  | Shiraz-18T | 1457 | 0.643204 | 0         |  |
|  | Shiraz-22T | 1673 | 0.611783 | 0         |  |
|  | Shiraz-22T | 1673 | 0.611783 | 0         |  |
|  | Shiraz-25T | 1719 | 0.472955 | 0         |  |
|  | Shiraz-25T | 1719 | 0.472955 | 0         |  |
|  | Shiraz-28T | 1762 | 0.562311 | 0         |  |
|  | Shiraz-28T | 1762 | 0.562311 | 0         |  |
|  | Shiraz-29T | 1801 | 0.815343 | 0         |  |
|  | Shiraz-29T | 1801 | 0.815343 | 0         |  |
|  | Shiraz-32T | 1870 | 0.729766 | 0         |  |
|  | Shiraz-32T | 1870 | 0.729766 | 0         |  |
|  | Shiraz-35T | 1933 | 0.488535 | 0         |  |
|  | Shiraz-35T | 1933 | 0.488535 | 0         |  |
|  | Shiraz-58T | 2223 | 0.833364 | 0         |  |
|  | Shiraz-58T | 2223 | 0.833364 | 0         |  |
|  | Shiraz-71T | 2263 | 0.975531 | 0         |  |
|  | Shiraz-71T | 2263 | 0.975531 | 0         |  |
|  | Shiraz-3T  | 242  | 0        | -0.336434 |  |
|  | Shiraz-3T  | 242  | 0        | -0.336434 |  |
|  | Shiraz-3T  | 244  | 0        | -0.023749 |  |
|  | Shiraz-3T  | 244  | 0        | -0.023749 |  |
|  | Shiraz-4T  | 261  | 0        | -0.336249 |  |
|  | Shiraz-4T  | 261  | 0        | -0.336249 |  |
|  | Shiraz-16T | 295  | 0.591657 | 0         |  |
|  | Shiraz-16T | 295  | 0.591657 | 0         |  |
|  | Shiraz-36T | 433  | 0        | -0.803961 |  |
|  | Shiraz-36T | 433  | 0        | -0.803961 |  |
|  | Shiraz-44T | 899  | 0        | -1.09697  |  |
|  | Shiraz-44T | 899  | 0        | -1.09697  |  |
|  | Shiraz-44T | 904  | 0        | -0.625526 |  |
|  | Shiraz-44T | 904  | 0        | -0.625526 |  |
|  | Shiraz-49T | 1170 | 0        | -0.967436 |  |
|  | Shiraz-49T | 1170 | 0        | -0.967436 |  |
|  | Shiraz-9T  | 1370 | 0.690073 | 0         |  |
|  | Shiraz-9T  | 1370 | 0.690073 | 0         |  |
|  | Shiraz-18T | 1457 | 0.643204 | 0         |  |
|  | Shiraz-18T | 1457 | 0.643204 | 0         |  |
|  | Shiraz-22T | 1673 | 0.611783 | 0         |  |
|  | Shiraz-22T | 1673 | 0.611783 | 0         |  |

|  |  |            |      |          |           |  |  |
|--|--|------------|------|----------|-----------|--|--|
|  |  | Shiraz-25T | 1719 | 0.472955 | 0         |  |  |
|  |  | Shiraz-25T | 1719 | 0.472955 | 0         |  |  |
|  |  | Shiraz-28T | 1762 | 0.562311 | 0         |  |  |
|  |  | Shiraz-28T | 1762 | 0.562311 | 0         |  |  |
|  |  | Shiraz-29T | 1801 | 0.815343 | 0         |  |  |
|  |  | Shiraz-29T | 1801 | 0.815343 | 0         |  |  |
|  |  | Shiraz-32T | 1870 | 0.729766 | 0         |  |  |
|  |  | Shiraz-32T | 1870 | 0.729766 | 0         |  |  |
|  |  | Shiraz-35T | 1933 | 0.488535 | 0         |  |  |
|  |  | Shiraz-35T | 1933 | 0.488535 | 0         |  |  |
|  |  | Shiraz-58T | 2223 | 0.833364 | 0         |  |  |
|  |  | Shiraz-58T | 2223 | 0.833364 | 0         |  |  |
|  |  | Shiraz-71T | 2263 | 0.975531 | 0         |  |  |
|  |  | Shiraz-71T | 2263 | 0.975531 | 0         |  |  |
|  |  | Shiraz-3T  | 242  | 0        | -0.336434 |  |  |
|  |  | Shiraz-3T  | 242  | 0        | -0.336434 |  |  |
|  |  | Shiraz-3T  | 244  | 0        | -0.023749 |  |  |
|  |  | Shiraz-3T  | 244  | 0        | -0.023749 |  |  |
|  |  | Shiraz-4T  | 261  | 0        | -0.336249 |  |  |
|  |  | Shiraz-4T  | 261  | 0        | -0.336249 |  |  |
|  |  | Shiraz-16T | 295  | 0.591657 | 0         |  |  |
|  |  | Shiraz-16T | 295  | 0.591657 | 0         |  |  |
|  |  | Shiraz-36T | 433  | 0        | -0.803961 |  |  |
|  |  | Shiraz-36T | 433  | 0        | -0.803961 |  |  |
|  |  | Shiraz-44T | 899  | 0        | -1.09697  |  |  |
|  |  | Shiraz-44T | 899  | 0        | -1.09697  |  |  |
|  |  | Shiraz-44T | 904  | 0        | -0.625526 |  |  |
|  |  | Shiraz-44T | 904  | 0        | -0.625526 |  |  |
|  |  | Shiraz-49T | 1170 | 0        | -0.967436 |  |  |
|  |  | Shiraz-49T | 1170 | 0        | -0.967436 |  |  |
|  |  | Shiraz-9T  | 1370 | 0.690073 | 0         |  |  |
|  |  | Shiraz-9T  | 1370 | 0.690073 | 0         |  |  |
|  |  | Shiraz-18T | 1457 | 0.643204 | 0         |  |  |
|  |  | Shiraz-18T | 1457 | 0.643204 | 0         |  |  |
|  |  | Shiraz-22T | 1673 | 0.611783 | 0         |  |  |
|  |  | Shiraz-22T | 1673 | 0.611783 | 0         |  |  |
|  |  | Shiraz-25T | 1719 | 0.472955 | 0         |  |  |
|  |  | Shiraz-25T | 1719 | 0.472955 | 0         |  |  |
|  |  | Shiraz-28T | 1762 | 0.562311 | 0         |  |  |
|  |  | Shiraz-28T | 1762 | 0.562311 | 0         |  |  |
|  |  | Shiraz-29T | 1801 | 0.815343 | 0         |  |  |
|  |  | Shiraz-29T | 1801 | 0.815343 | 0         |  |  |
|  |  | Shiraz-32T | 1870 | 0.729766 | 0         |  |  |
|  |  | Shiraz-32T | 1870 | 0.729766 | 0         |  |  |
|  |  | Shiraz-35T | 1933 | 0.488535 | 0         |  |  |
|  |  | Shiraz-35T | 1933 | 0.488535 | 0         |  |  |
|  |  | Shiraz-58T | 2223 | 0.833364 | 0         |  |  |

|        |      |            |      |          |           |  |
|--------|------|------------|------|----------|-----------|--|
|        |      | Shiraz-58T | 2223 | 0.833364 | 0         |  |
|        |      | Shiraz-71T | 2263 | 0.975531 | 0         |  |
|        |      | Shiraz-71T | 2263 | 0.975531 | 0         |  |
| LANCL2 | chr7 | Shiraz-3T  | 87   | 0.198593 | 0         |  |
|        |      | Shiraz-4T  | 252  | 0.192083 | 0         |  |
|        |      | Shiraz-36T | 376  | 0.159952 | 0         |  |
|        |      | Shiraz-46T | 942  | 0.069143 | 0         |  |
|        |      | Shiraz-18T | 1433 | 0.250973 | 0         |  |
|        |      | Shiraz-25T | 1697 | 0.21945  | 0         |  |
|        |      | Shiraz-28T | 1734 | 0.362882 | 0         |  |
|        |      | Shiraz-29T | 1777 | 0.156747 | 0         |  |
|        |      | Shiraz-38T | 1950 | 0.265916 | 0         |  |
|        |      | Shiraz-71T | 2236 | 0.320072 | 0         |  |
|        |      | Shiraz-3T  | 87   | 0.198593 | 0         |  |
|        |      | Shiraz-4T  | 252  | 0.192083 | 0         |  |
|        |      | Shiraz-36T | 376  | 0.159952 | 0         |  |
|        |      | Shiraz-46T | 942  | 0.069143 | 0         |  |
|        |      | Shiraz-18T | 1433 | 0.250973 | 0         |  |
|        |      | Shiraz-25T | 1697 | 0.21945  | 0         |  |
|        |      | Shiraz-28T | 1734 | 0.362882 | 0         |  |
|        |      | Shiraz-29T | 1777 | 0.156747 | 0         |  |
|        |      | Shiraz-38T | 1950 | 0.265916 | 0         |  |
|        |      | Shiraz-71T | 2236 | 0.320072 | 0         |  |
|        |      | Shiraz-3T  | 87   | 0.198593 | 0         |  |
|        |      | Shiraz-4T  | 252  | 0.192083 | 0         |  |
|        |      | Shiraz-36T | 376  | 0.159952 | 0         |  |
|        |      | Shiraz-46T | 942  | 0.069143 | 0         |  |
|        |      | Shiraz-18T | 1433 | 0.250973 | 0         |  |
|        |      | Shiraz-25T | 1697 | 0.21945  | 0         |  |
|        |      | Shiraz-28T | 1734 | 0.362882 | 0         |  |
|        |      | Shiraz-29T | 1777 | 0.156747 | 0         |  |
|        |      | Shiraz-38T | 1950 | 0.265916 | 0         |  |
|        |      | Shiraz-71T | 2236 | 0.320072 | 0         |  |
| LANCL3 | chrX | Shiraz-3T  | 235  | 0        | -0.28401  |  |
|        |      | Shiraz-4T  | 260  | 0        | -0.324128 |  |
|        |      | Shiraz-16T | 294  | 0.655804 | 0         |  |
|        |      | Shiraz-36T | 431  | 0        | -0.78035  |  |
|        |      | Shiraz-44T | 891  | 0        | -0.954044 |  |
|        |      | Shiraz-49T | 1166 | 0        | -0.917235 |  |
|        |      | Shiraz-49T | 1168 | 0        | -1.073859 |  |
|        |      | Shiraz-9T  | 1368 | 0.199713 | 0         |  |
|        |      | Shiraz-18T | 1455 | 0        | -0.186773 |  |
|        |      | Shiraz-22T | 1669 | 0.695915 | 0         |  |
|        |      | Shiraz-25T | 1717 | 0.420447 | 0         |  |
|        |      | Shiraz-28T | 1760 | 0.538181 | 0         |  |
|        |      | Shiraz-29T | 1800 | 0.672527 | 0         |  |
|        |      | Shiraz-32T | 1869 | 0.776805 | 0         |  |



|       |      |            |      |          |           |  |  |
|-------|------|------------|------|----------|-----------|--|--|
|       |      | Shiraz-35T | 1932 | 0.507141 | 0         |  |  |
|       |      | Shiraz-40T | 2051 | 0.098506 | 0         |  |  |
|       |      | Shiraz-58T | 2221 | 0.871948 | 0         |  |  |
|       |      | Shiraz-71T | 2260 | 0.68394  | 0         |  |  |
|       |      | Shiraz-71T | 2261 | 0.508399 | 0         |  |  |
|       |      | Shiraz-3T  | 235  | 0        | -0.28401  |  |  |
|       |      | Shiraz-4T  | 260  | 0        | -0.324128 |  |  |
|       |      | Shiraz-16T | 294  | 0.655804 | 0         |  |  |
|       |      | Shiraz-36T | 431  | 0        | -0.78035  |  |  |
|       |      | Shiraz-44T | 891  | 0        | -0.954044 |  |  |
|       |      | Shiraz-49T | 1166 | 0        | -0.917235 |  |  |
|       |      | Shiraz-49T | 1168 | 0        | -1.073859 |  |  |
|       |      | Shiraz-9T  | 1368 | 0.199713 | 0         |  |  |
|       |      | Shiraz-18T | 1455 | 0        | -0.186773 |  |  |
|       |      | Shiraz-22T | 1669 | 0.695915 | 0         |  |  |
|       |      | Shiraz-25T | 1717 | 0.420447 | 0         |  |  |
|       |      | Shiraz-28T | 1760 | 0.538181 | 0         |  |  |
|       |      | Shiraz-29T | 1800 | 0.672527 | 0         |  |  |
|       |      | Shiraz-32T | 1869 | 0.776805 | 0         |  |  |
|       |      | Shiraz-35T | 1932 | 0.507141 | 0         |  |  |
|       |      | Shiraz-40T | 2051 | 0.098506 | 0         |  |  |
|       |      | Shiraz-58T | 2221 | 0.871948 | 0         |  |  |
|       |      | Shiraz-71T | 2260 | 0.68394  | 0         |  |  |
|       |      | Shiraz-71T | 2261 | 0.508399 | 0         |  |  |
|       |      | Shiraz-3T  | 235  | 0        | -0.28401  |  |  |
|       |      | Shiraz-4T  | 260  | 0        | -0.324128 |  |  |
|       |      | Shiraz-16T | 294  | 0.655804 | 0         |  |  |
|       |      | Shiraz-36T | 431  | 0        | -0.78035  |  |  |
|       |      | Shiraz-44T | 891  | 0        | -0.954044 |  |  |
|       |      | Shiraz-49T | 1166 | 0        | -0.917235 |  |  |
|       |      | Shiraz-49T | 1168 | 0        | -1.073859 |  |  |
|       |      | Shiraz-9T  | 1368 | 0.199713 | 0         |  |  |
|       |      | Shiraz-18T | 1455 | 0        | -0.186773 |  |  |
|       |      | Shiraz-22T | 1669 | 0.695915 | 0         |  |  |
|       |      | Shiraz-25T | 1717 | 0.420447 | 0         |  |  |
|       |      | Shiraz-28T | 1760 | 0.538181 | 0         |  |  |
|       |      | Shiraz-29T | 1800 | 0.672527 | 0         |  |  |
|       |      | Shiraz-32T | 1869 | 0.776805 | 0         |  |  |
|       |      | Shiraz-35T | 1932 | 0.507141 | 0         |  |  |
|       |      | Shiraz-40T | 2051 | 0.098506 | 0         |  |  |
|       |      | Shiraz-58T | 2221 | 0.871948 | 0         |  |  |
|       |      | Shiraz-71T | 2260 | 0.68394  | 0         |  |  |
|       |      | Shiraz-71T | 2261 | 0.508399 | 0         |  |  |
| LAS1L | chrX | Shiraz-3T  | 241  | 0        | -0.230501 |  |  |
|       |      | Shiraz-4T  | 261  | 0        | -0.336249 |  |  |
|       |      | Shiraz-16T | 295  | 0.591657 | 0         |  |  |
|       |      | Shiraz-36T | 433  | 0        | -0.803961 |  |  |

|      |      |            |      |          |           |  |  |
|------|------|------------|------|----------|-----------|--|--|
|      |      | Shiraz-44T | 899  | 0        | -1.09697  |  |  |
|      |      | Shiraz-49T | 1170 | 0        | -0.967436 |  |  |
|      |      | Shiraz-18T | 1457 | 0.643204 | 0         |  |  |
|      |      | Shiraz-22T | 1673 | 0.611783 | 0         |  |  |
|      |      | Shiraz-25T | 1719 | 0.472955 | 0         |  |  |
|      |      | Shiraz-28T | 1762 | 0.562311 | 0         |  |  |
|      |      | Shiraz-29T | 1801 | 0.815343 | 0         |  |  |
|      |      | Shiraz-32T | 1870 | 0.729766 | 0         |  |  |
|      |      | Shiraz-35T | 1933 | 0.488535 | 0         |  |  |
|      |      | Shiraz-58T | 2223 | 0.833364 | 0         |  |  |
|      |      | Shiraz-71T | 2263 | 0.975531 | 0         |  |  |
|      |      | Shiraz-3T  | 241  | 0        | -0.230501 |  |  |
|      |      | Shiraz-4T  | 261  | 0        | -0.336249 |  |  |
|      |      | Shiraz-16T | 295  | 0.591657 | 0         |  |  |
|      |      | Shiraz-36T | 433  | 0        | -0.803961 |  |  |
|      |      | Shiraz-44T | 899  | 0        | -1.09697  |  |  |
|      |      | Shiraz-49T | 1170 | 0        | -0.967436 |  |  |
|      |      | Shiraz-18T | 1457 | 0.643204 | 0         |  |  |
|      |      | Shiraz-22T | 1673 | 0.611783 | 0         |  |  |
|      |      | Shiraz-25T | 1719 | 0.472955 | 0         |  |  |
|      |      | Shiraz-28T | 1762 | 0.562311 | 0         |  |  |
|      |      | Shiraz-29T | 1801 | 0.815343 | 0         |  |  |
|      |      | Shiraz-32T | 1870 | 0.729766 | 0         |  |  |
|      |      | Shiraz-35T | 1933 | 0.488535 | 0         |  |  |
|      |      | Shiraz-58T | 2223 | 0.833364 | 0         |  |  |
|      |      | Shiraz-71T | 2263 | 0.975531 | 0         |  |  |
|      |      | Shiraz-3T  | 241  | 0        | -0.230501 |  |  |
|      |      | Shiraz-4T  | 261  | 0        | -0.336249 |  |  |
|      |      | Shiraz-16T | 295  | 0.591657 | 0         |  |  |
|      |      | Shiraz-36T | 433  | 0        | -0.803961 |  |  |
|      |      | Shiraz-44T | 899  | 0        | -1.09697  |  |  |
|      |      | Shiraz-49T | 1170 | 0        | -0.967436 |  |  |
|      |      | Shiraz-18T | 1457 | 0.643204 | 0         |  |  |
|      |      | Shiraz-22T | 1673 | 0.611783 | 0         |  |  |
|      |      | Shiraz-25T | 1719 | 0.472955 | 0         |  |  |
|      |      | Shiraz-28T | 1762 | 0.562311 | 0         |  |  |
|      |      | Shiraz-29T | 1801 | 0.815343 | 0         |  |  |
|      |      | Shiraz-32T | 1870 | 0.729766 | 0         |  |  |
|      |      | Shiraz-35T | 1933 | 0.488535 | 0         |  |  |
|      |      | Shiraz-58T | 2223 | 0.833364 | 0         |  |  |
|      |      | Shiraz-71T | 2263 | 0.975531 | 0         |  |  |
| LCAP | chrX | Shiraz-3T  | 246  | 0.531858 | 0         |  |  |
|      |      | Shiraz-4T  | 261  | 0        | -0.336249 |  |  |
|      |      | Shiraz-16T | 295  | 0.591657 | 0         |  |  |
|      |      | Shiraz-36T | 433  | 0        | -0.803961 |  |  |
|      |      | Shiraz-42T | 480  | 0        | -0.232915 |  |  |
|      |      | Shiraz-44T | 908  | 0.466743 | 0         |  |  |

|  |            |      |          |           |  |
|--|------------|------|----------|-----------|--|
|  | Shiraz-49T | 1170 | 0        | -0.967436 |  |
|  | Shiraz-49T | 1173 | 0        | -0.704439 |  |
|  | Shiraz-9T  | 1370 | 0.690073 | 0         |  |
|  | Shiraz-9T  | 1371 | 1.292392 | 0         |  |
|  | Shiraz-18T | 1457 | 0.643204 | 0         |  |
|  | Shiraz-22T | 1673 | 0.611783 | 0         |  |
|  | Shiraz-22T | 1678 | 0.911625 | 0         |  |
|  | Shiraz-25T | 1719 | 0.472955 | 0         |  |
|  | Shiraz-28T | 1762 | 0.562311 | 0         |  |
|  | Shiraz-29T | 1801 | 0.815343 | 0         |  |
|  | Shiraz-32T | 1870 | 0.729766 | 0         |  |
|  | Shiraz-32T | 1872 | 1.504553 | 0         |  |
|  | Shiraz-35T | 1933 | 0.488535 | 0         |  |
|  | Shiraz-38T | 2011 | 0        | -0.406024 |  |
|  | Shiraz-53T | 2115 | 0.427728 | 0         |  |
|  | Shiraz-58T | 2223 | 0.833364 | 0         |  |
|  | Shiraz-58T | 2226 | 1.074663 | 0         |  |
|  | Shiraz-71T | 2263 | 0.975531 | 0         |  |
|  | Shiraz-3T  | 246  | 0.531858 | 0         |  |
|  | Shiraz-4T  | 261  | 0        | -0.336249 |  |
|  | Shiraz-16T | 295  | 0.591657 | 0         |  |
|  | Shiraz-36T | 433  | 0        | -0.803961 |  |
|  | Shiraz-42T | 480  | 0        | -0.232915 |  |
|  | Shiraz-44T | 908  | 0.466743 | 0         |  |
|  | Shiraz-49T | 1170 | 0        | -0.967436 |  |
|  | Shiraz-49T | 1173 | 0        | -0.704439 |  |
|  | Shiraz-9T  | 1370 | 0.690073 | 0         |  |
|  | Shiraz-9T  | 1371 | 1.292392 | 0         |  |
|  | Shiraz-18T | 1457 | 0.643204 | 0         |  |
|  | Shiraz-22T | 1673 | 0.611783 | 0         |  |
|  | Shiraz-22T | 1678 | 0.911625 | 0         |  |
|  | Shiraz-25T | 1719 | 0.472955 | 0         |  |
|  | Shiraz-28T | 1762 | 0.562311 | 0         |  |
|  | Shiraz-29T | 1801 | 0.815343 | 0         |  |
|  | Shiraz-32T | 1870 | 0.729766 | 0         |  |
|  | Shiraz-32T | 1872 | 1.504553 | 0         |  |
|  | Shiraz-35T | 1933 | 0.488535 | 0         |  |
|  | Shiraz-38T | 2011 | 0        | -0.406024 |  |
|  | Shiraz-53T | 2115 | 0.427728 | 0         |  |
|  | Shiraz-58T | 2223 | 0.833364 | 0         |  |
|  | Shiraz-58T | 2226 | 1.074663 | 0         |  |
|  | Shiraz-71T | 2263 | 0.975531 | 0         |  |
|  | Shiraz-3T  | 246  | 0.531858 | 0         |  |
|  | Shiraz-4T  | 261  | 0        | -0.336249 |  |
|  | Shiraz-16T | 295  | 0.591657 | 0         |  |
|  | Shiraz-36T | 433  | 0        | -0.803961 |  |
|  | Shiraz-42T | 480  | 0        | -0.232915 |  |

|       |      |            |      |          |           |  |  |
|-------|------|------------|------|----------|-----------|--|--|
|       |      | Shiraz-44T | 908  | 0.466743 | 0         |  |  |
|       |      | Shiraz-49T | 1170 | 0        | -0.967436 |  |  |
|       |      | Shiraz-49T | 1173 | 0        | -0.704439 |  |  |
|       |      | Shiraz-9T  | 1370 | 0.690073 | 0         |  |  |
|       |      | Shiraz-9T  | 1371 | 1.292392 | 0         |  |  |
|       |      | Shiraz-18T | 1457 | 0.643204 | 0         |  |  |
|       |      | Shiraz-22T | 1673 | 0.611783 | 0         |  |  |
|       |      | Shiraz-22T | 1678 | 0.911625 | 0         |  |  |
|       |      | Shiraz-25T | 1719 | 0.472955 | 0         |  |  |
|       |      | Shiraz-28T | 1762 | 0.562311 | 0         |  |  |
|       |      | Shiraz-29T | 1801 | 0.815343 | 0         |  |  |
|       |      | Shiraz-32T | 1870 | 0.729766 | 0         |  |  |
|       |      | Shiraz-32T | 1872 | 1.504553 | 0         |  |  |
|       |      | Shiraz-35T | 1933 | 0.488535 | 0         |  |  |
|       |      | Shiraz-38T | 2011 | 0        | -0.406024 |  |  |
|       |      | Shiraz-53T | 2115 | 0.427728 | 0         |  |  |
|       |      | Shiraz-58T | 2223 | 0.833364 | 0         |  |  |
|       |      | Shiraz-58T | 2226 | 1.074663 | 0         |  |  |
|       |      | Shiraz-71T | 2263 | 0.975531 | 0         |  |  |
| LDOC1 | chrX | Shiraz-3T  | 242  | 0        | -0.336434 |  |  |
|       |      | Shiraz-4T  | 261  | 0        | -0.336249 |  |  |
|       |      | Shiraz-16T | 295  | 0.591657 | 0         |  |  |
|       |      | Shiraz-36T | 433  | 0        | -0.803961 |  |  |
|       |      | Shiraz-44T | 899  | 0        | -1.09697  |  |  |
|       |      | Shiraz-44T | 907  | 0        | -1.370847 |  |  |
|       |      | Shiraz-49T | 1170 | 0        | -0.967436 |  |  |
|       |      | Shiraz-9T  | 1370 | 0.690073 | 0         |  |  |
|       |      | Shiraz-18T | 1457 | 0.643204 | 0         |  |  |
|       |      | Shiraz-22T | 1673 | 0.611783 | 0         |  |  |
|       |      | Shiraz-25T | 1719 | 0.472955 | 0         |  |  |
|       |      | Shiraz-28T | 1762 | 0.562311 | 0         |  |  |
|       |      | Shiraz-29T | 1801 | 0.815343 | 0         |  |  |
|       |      | Shiraz-32T | 1870 | 0.729766 | 0         |  |  |
|       |      | Shiraz-35T | 1933 | 0.488535 | 0         |  |  |
|       |      | Shiraz-58T | 2223 | 0.833364 | 0         |  |  |
|       |      | Shiraz-71T | 2263 | 0.975531 | 0         |  |  |
|       |      | Shiraz-3T  | 242  | 0        | -0.336434 |  |  |
|       |      | Shiraz-4T  | 261  | 0        | -0.336249 |  |  |
|       |      | Shiraz-16T | 295  | 0.591657 | 0         |  |  |
|       |      | Shiraz-36T | 433  | 0        | -0.803961 |  |  |
|       |      | Shiraz-44T | 899  | 0        | -1.09697  |  |  |
|       |      | Shiraz-44T | 907  | 0        | -1.370847 |  |  |
|       |      | Shiraz-49T | 1170 | 0        | -0.967436 |  |  |
|       |      | Shiraz-9T  | 1370 | 0.690073 | 0         |  |  |
|       |      | Shiraz-18T | 1457 | 0.643204 | 0         |  |  |
|       |      | Shiraz-22T | 1673 | 0.611783 | 0         |  |  |
|       |      | Shiraz-25T | 1719 | 0.472955 | 0         |  |  |

|     |      |            |      |          |           |  |  |
|-----|------|------------|------|----------|-----------|--|--|
|     |      | Shiraz-28T | 1762 | 0.562311 | 0         |  |  |
|     |      | Shiraz-29T | 1801 | 0.815343 | 0         |  |  |
|     |      | Shiraz-32T | 1870 | 0.729766 | 0         |  |  |
|     |      | Shiraz-35T | 1933 | 0.488535 | 0         |  |  |
|     |      | Shiraz-58T | 2223 | 0.833364 | 0         |  |  |
|     |      | Shiraz-71T | 2263 | 0.975531 | 0         |  |  |
|     |      | Shiraz-3T  | 242  | 0        | -0.336434 |  |  |
|     |      | Shiraz-4T  | 261  | 0        | -0.336249 |  |  |
|     |      | Shiraz-16T | 295  | 0.591657 | 0         |  |  |
|     |      | Shiraz-36T | 433  | 0        | -0.803961 |  |  |
|     |      | Shiraz-44T | 899  | 0        | -1.09697  |  |  |
|     |      | Shiraz-44T | 907  | 0        | -1.370847 |  |  |
|     |      | Shiraz-49T | 1170 | 0        | -0.967436 |  |  |
|     |      | Shiraz-9T  | 1370 | 0.690073 | 0         |  |  |
|     |      | Shiraz-18T | 1457 | 0.643204 | 0         |  |  |
|     |      | Shiraz-22T | 1673 | 0.611783 | 0         |  |  |
|     |      | Shiraz-25T | 1719 | 0.472955 | 0         |  |  |
|     |      | Shiraz-28T | 1762 | 0.562311 | 0         |  |  |
|     |      | Shiraz-29T | 1801 | 0.815343 | 0         |  |  |
|     |      | Shiraz-32T | 1870 | 0.729766 | 0         |  |  |
|     |      | Shiraz-35T | 1933 | 0.488535 | 0         |  |  |
|     |      | Shiraz-58T | 2223 | 0.833364 | 0         |  |  |
|     |      | Shiraz-71T | 2263 | 0.975531 | 0         |  |  |
| LEP | chr7 | Shiraz-3T  | 90   | 0.219276 | 0         |  |  |
|     |      | Shiraz-3T  | 96   | 0.428308 | 0         |  |  |
|     |      | Shiraz-4T  | 253  | 0.372918 | 0         |  |  |
|     |      | Shiraz-31T | 317  | 0.204382 | 0         |  |  |
|     |      | Shiraz-36T | 378  | 0.179558 | 0         |  |  |
|     |      | Shiraz-44T | 642  | 0.408617 | 0         |  |  |
|     |      | Shiraz-46T | 943  | 0.093799 | 0         |  |  |
|     |      | Shiraz-47T | 1032 | 0.171484 | 0         |  |  |
|     |      | Shiraz-77T | 1225 | 0        | -0.117922 |  |  |
|     |      | Shiraz-77T | 1229 | 0.051661 | 0         |  |  |
|     |      | Shiraz-9T  | 1325 | 0.221899 | 0         |  |  |
|     |      | Shiraz-18T | 1434 | 0.244465 | 0         |  |  |
|     |      | Shiraz-25T | 1698 | 0.21835  | 0         |  |  |
|     |      | Shiraz-28T | 1735 | 0.350744 | 0         |  |  |
|     |      | Shiraz-29T | 1778 | 0.120767 | 0         |  |  |
|     |      | Shiraz-32T | 1833 | 0.551336 | 0         |  |  |
|     |      | Shiraz-38T | 1951 | 0.250891 | 0         |  |  |
|     |      | Shiraz-53T | 2078 | 0.287202 | 0         |  |  |
|     |      | Shiraz-71T | 2238 | 0.603631 | 0         |  |  |
|     |      | Shiraz-3T  | 90   | 0.219276 | 0         |  |  |
|     |      | Shiraz-3T  | 96   | 0.428308 | 0         |  |  |
|     |      | Shiraz-4T  | 253  | 0.372918 | 0         |  |  |
|     |      | Shiraz-31T | 317  | 0.204382 | 0         |  |  |
|     |      | Shiraz-36T | 378  | 0.179558 | 0         |  |  |

|        |      |            |      |          |           |  |
|--------|------|------------|------|----------|-----------|--|
|        |      | Shiraz-44T | 642  | 0.408617 | 0         |  |
|        |      | Shiraz-46T | 943  | 0.093799 | 0         |  |
|        |      | Shiraz-47T | 1032 | 0.171484 | 0         |  |
|        |      | Shiraz-77T | 1225 | 0        | -0.117922 |  |
|        |      | Shiraz-77T | 1229 | 0.051661 | 0         |  |
|        |      | Shiraz-9T  | 1325 | 0.221899 | 0         |  |
|        |      | Shiraz-18T | 1434 | 0.244465 | 0         |  |
|        |      | Shiraz-25T | 1698 | 0.21835  | 0         |  |
|        |      | Shiraz-28T | 1735 | 0.350744 | 0         |  |
|        |      | Shiraz-29T | 1778 | 0.120767 | 0         |  |
|        |      | Shiraz-32T | 1833 | 0.551336 | 0         |  |
|        |      | Shiraz-38T | 1951 | 0.250891 | 0         |  |
|        |      | Shiraz-53T | 2078 | 0.287202 | 0         |  |
|        |      | Shiraz-71T | 2238 | 0.603631 | 0         |  |
|        |      | Shiraz-3T  | 90   | 0.219276 | 0         |  |
|        |      | Shiraz-3T  | 96   | 0.428308 | 0         |  |
|        |      | Shiraz-4T  | 253  | 0.372918 | 0         |  |
|        |      | Shiraz-31T | 317  | 0.204382 | 0         |  |
|        |      | Shiraz-36T | 378  | 0.179558 | 0         |  |
|        |      | Shiraz-44T | 642  | 0.408617 | 0         |  |
|        |      | Shiraz-46T | 943  | 0.093799 | 0         |  |
|        |      | Shiraz-47T | 1032 | 0.171484 | 0         |  |
|        |      | Shiraz-77T | 1225 | 0        | -0.117922 |  |
|        |      | Shiraz-77T | 1229 | 0.051661 | 0         |  |
|        |      | Shiraz-9T  | 1325 | 0.221899 | 0         |  |
|        |      | Shiraz-18T | 1434 | 0.244465 | 0         |  |
|        |      | Shiraz-25T | 1698 | 0.21835  | 0         |  |
|        |      | Shiraz-28T | 1735 | 0.350744 | 0         |  |
|        |      | Shiraz-29T | 1778 | 0.120767 | 0         |  |
|        |      | Shiraz-32T | 1833 | 0.551336 | 0         |  |
|        |      | Shiraz-38T | 1951 | 0.250891 | 0         |  |
|        |      | Shiraz-53T | 2078 | 0.287202 | 0         |  |
|        |      | Shiraz-71T | 2238 | 0.603631 | 0         |  |
| LHFPL1 | chrX | Shiraz-3T  | 242  | 0        | -0.336434 |  |
|        |      | Shiraz-4T  | 261  | 0        | -0.336249 |  |
|        |      | Shiraz-16T | 295  | 0.591657 | 0         |  |
|        |      | Shiraz-36T | 433  | 0        | -0.803961 |  |
|        |      | Shiraz-44T | 899  | 0        | -1.09697  |  |
|        |      | Shiraz-49T | 1170 | 0        | -0.967436 |  |
|        |      | Shiraz-18T | 1457 | 0.643204 | 0         |  |
|        |      | Shiraz-22T | 1673 | 0.611783 | 0         |  |
|        |      | Shiraz-25T | 1719 | 0.472955 | 0         |  |
|        |      | Shiraz-28T | 1762 | 0.562311 | 0         |  |
|        |      | Shiraz-29T | 1801 | 0.815343 | 0         |  |
|        |      | Shiraz-32T | 1870 | 0.729766 | 0         |  |
|        |      | Shiraz-35T | 1933 | 0.488535 | 0         |  |
|        |      | Shiraz-58T | 2223 | 0.833364 | 0         |  |

|        |      |            |      |          |           |  |  |
|--------|------|------------|------|----------|-----------|--|--|
|        |      | Shiraz-71T | 2263 | 0.975531 | 0         |  |  |
|        |      | Shiraz-3T  | 242  | 0        | -0.336434 |  |  |
|        |      | Shiraz-4T  | 261  | 0        | -0.336249 |  |  |
|        |      | Shiraz-16T | 295  | 0.591657 | 0         |  |  |
|        |      | Shiraz-36T | 433  | 0        | -0.803961 |  |  |
|        |      | Shiraz-44T | 899  | 0        | -1.09697  |  |  |
|        |      | Shiraz-49T | 1170 | 0        | -0.967436 |  |  |
|        |      | Shiraz-18T | 1457 | 0.643204 | 0         |  |  |
|        |      | Shiraz-22T | 1673 | 0.611783 | 0         |  |  |
|        |      | Shiraz-25T | 1719 | 0.472955 | 0         |  |  |
|        |      | Shiraz-28T | 1762 | 0.562311 | 0         |  |  |
|        |      | Shiraz-29T | 1801 | 0.815343 | 0         |  |  |
|        |      | Shiraz-32T | 1870 | 0.729766 | 0         |  |  |
|        |      | Shiraz-35T | 1933 | 0.488535 | 0         |  |  |
|        |      | Shiraz-58T | 2223 | 0.833364 | 0         |  |  |
|        |      | Shiraz-71T | 2263 | 0.975531 | 0         |  |  |
|        |      | Shiraz-3T  | 242  | 0        | -0.336434 |  |  |
|        |      | Shiraz-4T  | 261  | 0        | -0.336249 |  |  |
|        |      | Shiraz-16T | 295  | 0.591657 | 0         |  |  |
|        |      | Shiraz-36T | 433  | 0        | -0.803961 |  |  |
|        |      | Shiraz-44T | 899  | 0        | -1.09697  |  |  |
|        |      | Shiraz-49T | 1170 | 0        | -0.967436 |  |  |
|        |      | Shiraz-18T | 1457 | 0.643204 | 0         |  |  |
|        |      | Shiraz-22T | 1673 | 0.611783 | 0         |  |  |
|        |      | Shiraz-25T | 1719 | 0.472955 | 0         |  |  |
|        |      | Shiraz-28T | 1762 | 0.562311 | 0         |  |  |
|        |      | Shiraz-29T | 1801 | 0.815343 | 0         |  |  |
|        |      | Shiraz-32T | 1870 | 0.729766 | 0         |  |  |
|        |      | Shiraz-35T | 1933 | 0.488535 | 0         |  |  |
|        |      | Shiraz-58T | 2223 | 0.833364 | 0         |  |  |
|        |      | Shiraz-71T | 2263 | 0.975531 | 0         |  |  |
| LHFPL3 | chr7 | Shiraz-3T  | 90   | 0.219276 | 0         |  |  |
|        |      | Shiraz-4T  | 253  | 0.372918 | 0         |  |  |
|        |      | Shiraz-36T | 378  | 0.179558 | 0         |  |  |
|        |      | Shiraz-46T | 943  | 0.093799 | 0         |  |  |
|        |      | Shiraz-77T | 1225 | 0        | -0.117922 |  |  |
|        |      | Shiraz-18T | 1434 | 0.244465 | 0         |  |  |
|        |      | Shiraz-22T | 1549 | 0        | -0.319623 |  |  |
|        |      | Shiraz-25T | 1698 | 0.21835  | 0         |  |  |
|        |      | Shiraz-28T | 1735 | 0.350744 | 0         |  |  |
|        |      | Shiraz-29T | 1778 | 0.120767 | 0         |  |  |
|        |      | Shiraz-32T | 1833 | 0.551336 | 0         |  |  |
|        |      | Shiraz-38T | 1951 | 0.250891 | 0         |  |  |
|        |      | Shiraz-53T | 2078 | 0.287202 | 0         |  |  |
|        |      | Shiraz-71T | 2238 | 0.603631 | 0         |  |  |
|        |      | Shiraz-3T  | 90   | 0.219276 | 0         |  |  |
|        |      | Shiraz-4T  | 253  | 0.372918 | 0         |  |  |

|      |      |            |      |          |           |  |  |
|------|------|------------|------|----------|-----------|--|--|
|      |      | Shiraz-36T | 378  | 0.179558 | 0         |  |  |
|      |      | Shiraz-46T | 943  | 0.093799 | 0         |  |  |
|      |      | Shiraz-77T | 1225 | 0        | -0.117922 |  |  |
|      |      | Shiraz-18T | 1434 | 0.244465 | 0         |  |  |
|      |      | Shiraz-22T | 1549 | 0        | -0.319623 |  |  |
|      |      | Shiraz-25T | 1698 | 0.21835  | 0         |  |  |
|      |      | Shiraz-28T | 1735 | 0.350744 | 0         |  |  |
|      |      | Shiraz-29T | 1778 | 0.120767 | 0         |  |  |
|      |      | Shiraz-32T | 1833 | 0.551336 | 0         |  |  |
|      |      | Shiraz-38T | 1951 | 0.250891 | 0         |  |  |
|      |      | Shiraz-53T | 2078 | 0.287202 | 0         |  |  |
|      |      | Shiraz-71T | 2238 | 0.603631 | 0         |  |  |
|      |      | Shiraz-3T  | 90   | 0.219276 | 0         |  |  |
|      |      | Shiraz-4T  | 253  | 0.372918 | 0         |  |  |
|      |      | Shiraz-36T | 378  | 0.179558 | 0         |  |  |
|      |      | Shiraz-46T | 943  | 0.093799 | 0         |  |  |
|      |      | Shiraz-77T | 1225 | 0        | -0.117922 |  |  |
|      |      | Shiraz-18T | 1434 | 0.244465 | 0         |  |  |
|      |      | Shiraz-22T | 1549 | 0        | -0.319623 |  |  |
|      |      | Shiraz-25T | 1698 | 0.21835  | 0         |  |  |
|      |      | Shiraz-28T | 1735 | 0.350744 | 0         |  |  |
|      |      | Shiraz-29T | 1778 | 0.120767 | 0         |  |  |
|      |      | Shiraz-32T | 1833 | 0.551336 | 0         |  |  |
|      |      | Shiraz-38T | 1951 | 0.250891 | 0         |  |  |
|      |      | Shiraz-53T | 2078 | 0.287202 | 0         |  |  |
|      |      | Shiraz-71T | 2238 | 0.603631 | 0         |  |  |
| LIFR | chr5 | Shiraz-4T  | 250  | 0.262252 | 0         |  |  |
|      |      | Shiraz-4T  | 250  | 0.262252 | 0         |  |  |
|      |      | Shiraz-16T | 266  | 0.321724 | 0         |  |  |
|      |      | Shiraz-16T | 266  | 0.321724 | 0         |  |  |
|      |      | Shiraz-44T | 591  | 0        | -0.233934 |  |  |
|      |      | Shiraz-44T | 591  | 0        | -0.233934 |  |  |
|      |      | Shiraz-18T | 1429 | 0        | -0.314125 |  |  |
|      |      | Shiraz-18T | 1429 | 0        | -0.314125 |  |  |
|      |      | Shiraz-22T | 1522 | 0        | -0.322688 |  |  |
|      |      | Shiraz-22T | 1522 | 0        | -0.322688 |  |  |
|      |      | Shiraz-25T | 1694 | 0.201602 | 0         |  |  |
|      |      | Shiraz-25T | 1694 | 0.201602 | 0         |  |  |
|      |      | Shiraz-28T | 1731 | 0.295447 | 0         |  |  |
|      |      | Shiraz-28T | 1731 | 0.295447 | 0         |  |  |
|      |      | Shiraz-29T | 1773 | 0.090981 | 0         |  |  |
|      |      | Shiraz-29T | 1773 | 0.090981 | 0         |  |  |
|      |      | Shiraz-40T | 2016 | 0.376634 | 0         |  |  |
|      |      | Shiraz-40T | 2016 | 0.376634 | 0         |  |  |
|      |      | Shiraz-4T  | 250  | 0.262252 | 0         |  |  |
|      |      | Shiraz-4T  | 250  | 0.262252 | 0         |  |  |
|      |      | Shiraz-16T | 266  | 0.321724 | 0         |  |  |



|        |      |            |      |          |           |  |  |
|--------|------|------------|------|----------|-----------|--|--|
|        |      | Shiraz-16T | 266  | 0.321724 | 0         |  |  |
|        |      | Shiraz-44T | 591  | 0        | -0.233934 |  |  |
|        |      | Shiraz-44T | 591  | 0        | -0.233934 |  |  |
|        |      | Shiraz-18T | 1429 | 0        | -0.314125 |  |  |
|        |      | Shiraz-18T | 1429 | 0        | -0.314125 |  |  |
|        |      | Shiraz-22T | 1522 | 0        | -0.322688 |  |  |
|        |      | Shiraz-22T | 1522 | 0        | -0.322688 |  |  |
|        |      | Shiraz-25T | 1694 | 0.201602 | 0         |  |  |
|        |      | Shiraz-25T | 1694 | 0.201602 | 0         |  |  |
|        |      | Shiraz-28T | 1731 | 0.295447 | 0         |  |  |
|        |      | Shiraz-28T | 1731 | 0.295447 | 0         |  |  |
|        |      | Shiraz-29T | 1773 | 0.090981 | 0         |  |  |
|        |      | Shiraz-29T | 1773 | 0.090981 | 0         |  |  |
|        |      | Shiraz-40T | 2016 | 0.376634 | 0         |  |  |
|        |      | Shiraz-40T | 2016 | 0.376634 | 0         |  |  |
|        |      | Shiraz-4T  | 250  | 0.262252 | 0         |  |  |
|        |      | Shiraz-4T  | 250  | 0.262252 | 0         |  |  |
|        |      | Shiraz-16T | 266  | 0.321724 | 0         |  |  |
|        |      | Shiraz-16T | 266  | 0.321724 | 0         |  |  |
|        |      | Shiraz-44T | 591  | 0        | -0.233934 |  |  |
|        |      | Shiraz-44T | 591  | 0        | -0.233934 |  |  |
|        |      | Shiraz-18T | 1429 | 0        | -0.314125 |  |  |
|        |      | Shiraz-18T | 1429 | 0        | -0.314125 |  |  |
|        |      | Shiraz-22T | 1522 | 0        | -0.322688 |  |  |
|        |      | Shiraz-22T | 1522 | 0        | -0.322688 |  |  |
|        |      | Shiraz-25T | 1694 | 0.201602 | 0         |  |  |
|        |      | Shiraz-25T | 1694 | 0.201602 | 0         |  |  |
|        |      | Shiraz-28T | 1731 | 0.295447 | 0         |  |  |
|        |      | Shiraz-28T | 1731 | 0.295447 | 0         |  |  |
|        |      | Shiraz-29T | 1773 | 0.090981 | 0         |  |  |
|        |      | Shiraz-29T | 1773 | 0.090981 | 0         |  |  |
|        |      | Shiraz-40T | 2016 | 0.376634 | 0         |  |  |
|        |      | Shiraz-40T | 2016 | 0.376634 | 0         |  |  |
| LMBRD2 | chr5 | Shiraz-4T  | 250  | 0.262252 | 0         |  |  |
|        |      | Shiraz-16T | 266  | 0.321724 | 0         |  |  |
|        |      | Shiraz-44T | 591  | 0        | -0.233934 |  |  |
|        |      | Shiraz-18T | 1429 | 0        | -0.314125 |  |  |
|        |      | Shiraz-22T | 1522 | 0        | -0.322688 |  |  |
|        |      | Shiraz-25T | 1694 | 0.201602 | 0         |  |  |
|        |      | Shiraz-28T | 1731 | 0.295447 | 0         |  |  |
|        |      | Shiraz-29T | 1773 | 0.090981 | 0         |  |  |
|        |      | Shiraz-40T | 2016 | 0.376634 | 0         |  |  |
|        |      | Shiraz-4T  | 250  | 0.262252 | 0         |  |  |
|        |      | Shiraz-16T | 266  | 0.321724 | 0         |  |  |
|        |      | Shiraz-44T | 591  | 0        | -0.233934 |  |  |
|        |      | Shiraz-18T | 1429 | 0        | -0.314125 |  |  |
|        |      | Shiraz-22T | 1522 | 0        | -0.322688 |  |  |

|       |      |            |      |          |           |  |  |
|-------|------|------------|------|----------|-----------|--|--|
|       |      | Shiraz-25T | 1694 | 0.201602 | 0         |  |  |
|       |      | Shiraz-28T | 1731 | 0.295447 | 0         |  |  |
|       |      | Shiraz-29T | 1773 | 0.090981 | 0         |  |  |
|       |      | Shiraz-40T | 2016 | 0.376634 | 0         |  |  |
|       |      | Shiraz-4T  | 250  | 0.262252 | 0         |  |  |
|       |      | Shiraz-16T | 266  | 0.321724 | 0         |  |  |
|       |      | Shiraz-44T | 591  | 0        | -0.233934 |  |  |
|       |      | Shiraz-18T | 1429 | 0        | -0.314125 |  |  |
|       |      | Shiraz-22T | 1522 | 0        | -0.322688 |  |  |
|       |      | Shiraz-25T | 1694 | 0.201602 | 0         |  |  |
|       |      | Shiraz-28T | 1731 | 0.295447 | 0         |  |  |
|       |      | Shiraz-29T | 1773 | 0.090981 | 0         |  |  |
|       |      | Shiraz-40T | 2016 | 0.376634 | 0         |  |  |
| LMOD2 | chr7 | Shiraz-3T  | 90   | 0.219276 | 0         |  |  |
|       |      | Shiraz-3T  | 95   | 0        | -0.077623 |  |  |
|       |      | Shiraz-4T  | 253  | 0.372918 | 0         |  |  |
|       |      | Shiraz-36T | 378  | 0.179558 | 0         |  |  |
|       |      | Shiraz-36T | 382  | 0.081739 | 0         |  |  |
|       |      | Shiraz-44T | 641  | 0        | -0.477846 |  |  |
|       |      | Shiraz-46T | 943  | 0.093799 | 0         |  |  |
|       |      | Shiraz-46T | 947  | 0        | -0.010843 |  |  |
|       |      | Shiraz-47T | 1031 | 0        | -0.117529 |  |  |
|       |      | Shiraz-49T | 1121 | 0        | -0.138569 |  |  |
|       |      | Shiraz-77T | 1225 | 0        | -0.117922 |  |  |
|       |      | Shiraz-77T | 1228 | 0        | -0.238084 |  |  |
|       |      | Shiraz-18T | 1434 | 0.244465 | 0         |  |  |
|       |      | Shiraz-22T | 1549 | 0        | -0.319623 |  |  |
|       |      | Shiraz-22T | 1552 | 0        | -0.50686  |  |  |
|       |      | Shiraz-25T | 1698 | 0.21835  | 0         |  |  |
|       |      | Shiraz-28T | 1735 | 0.350744 | 0         |  |  |
|       |      | Shiraz-29T | 1778 | 0.120767 | 0         |  |  |
|       |      | Shiraz-32T | 1833 | 0.551336 | 0         |  |  |
|       |      | Shiraz-32T | 1835 | 0.092727 | 0         |  |  |
|       |      | Shiraz-38T | 1951 | 0.250891 | 0         |  |  |
|       |      | Shiraz-53T | 2078 | 0.287202 | 0         |  |  |
|       |      | Shiraz-58T | 2161 | 0        | -0.187744 |  |  |
|       |      | Shiraz-71T | 2238 | 0.603631 | 0         |  |  |
|       |      | Shiraz-3T  | 90   | 0.219276 | 0         |  |  |
|       |      | Shiraz-3T  | 95   | 0        | -0.077623 |  |  |
|       |      | Shiraz-4T  | 253  | 0.372918 | 0         |  |  |
|       |      | Shiraz-36T | 378  | 0.179558 | 0         |  |  |
|       |      | Shiraz-36T | 382  | 0.081739 | 0         |  |  |
|       |      | Shiraz-44T | 641  | 0        | -0.477846 |  |  |
|       |      | Shiraz-46T | 943  | 0.093799 | 0         |  |  |
|       |      | Shiraz-46T | 947  | 0        | -0.010843 |  |  |
|       |      | Shiraz-47T | 1031 | 0        | -0.117529 |  |  |
|       |      | Shiraz-49T | 1121 | 0        | -0.138569 |  |  |

|       |      |            |      |          |           |  |  |
|-------|------|------------|------|----------|-----------|--|--|
|       |      | Shiraz-77T | 1225 | 0        | -0.117922 |  |  |
|       |      | Shiraz-77T | 1228 | 0        | -0.238084 |  |  |
|       |      | Shiraz-18T | 1434 | 0.244465 | 0         |  |  |
|       |      | Shiraz-22T | 1549 | 0        | -0.319623 |  |  |
|       |      | Shiraz-22T | 1552 | 0        | -0.50686  |  |  |
|       |      | Shiraz-25T | 1698 | 0.21835  | 0         |  |  |
|       |      | Shiraz-28T | 1735 | 0.350744 | 0         |  |  |
|       |      | Shiraz-29T | 1778 | 0.120767 | 0         |  |  |
|       |      | Shiraz-32T | 1833 | 0.551336 | 0         |  |  |
|       |      | Shiraz-32T | 1835 | 0.092727 | 0         |  |  |
|       |      | Shiraz-38T | 1951 | 0.250891 | 0         |  |  |
|       |      | Shiraz-53T | 2078 | 0.287202 | 0         |  |  |
|       |      | Shiraz-58T | 2161 | 0        | -0.187744 |  |  |
|       |      | Shiraz-71T | 2238 | 0.603631 | 0         |  |  |
|       |      | Shiraz-3T  | 90   | 0.219276 | 0         |  |  |
|       |      | Shiraz-3T  | 95   | 0        | -0.077623 |  |  |
|       |      | Shiraz-4T  | 253  | 0.372918 | 0         |  |  |
|       |      | Shiraz-36T | 378  | 0.179558 | 0         |  |  |
|       |      | Shiraz-36T | 382  | 0.081739 | 0         |  |  |
|       |      | Shiraz-44T | 641  | 0        | -0.477846 |  |  |
|       |      | Shiraz-46T | 943  | 0.093799 | 0         |  |  |
|       |      | Shiraz-46T | 947  | 0        | -0.010843 |  |  |
|       |      | Shiraz-47T | 1031 | 0        | -0.117529 |  |  |
|       |      | Shiraz-49T | 1121 | 0        | -0.138569 |  |  |
|       |      | Shiraz-77T | 1225 | 0        | -0.117922 |  |  |
|       |      | Shiraz-77T | 1228 | 0        | -0.238084 |  |  |
|       |      | Shiraz-18T | 1434 | 0.244465 | 0         |  |  |
|       |      | Shiraz-22T | 1549 | 0        | -0.319623 |  |  |
|       |      | Shiraz-22T | 1552 | 0        | -0.50686  |  |  |
|       |      | Shiraz-25T | 1698 | 0.21835  | 0         |  |  |
|       |      | Shiraz-28T | 1735 | 0.350744 | 0         |  |  |
|       |      | Shiraz-29T | 1778 | 0.120767 | 0         |  |  |
|       |      | Shiraz-32T | 1833 | 0.551336 | 0         |  |  |
|       |      | Shiraz-32T | 1835 | 0.092727 | 0         |  |  |
|       |      | Shiraz-38T | 1951 | 0.250891 | 0         |  |  |
|       |      | Shiraz-53T | 2078 | 0.287202 | 0         |  |  |
|       |      | Shiraz-58T | 2161 | 0        | -0.187744 |  |  |
|       |      | Shiraz-71T | 2238 | 0.603631 | 0         |  |  |
| LMTK2 | chr7 | Shiraz-3T  | 90   | 0.219276 | 0         |  |  |
|       |      | Shiraz-3T  | 94   | 0.74735  | 0         |  |  |
|       |      | Shiraz-4T  | 253  | 0.372918 | 0         |  |  |
|       |      | Shiraz-31T | 316  | 0.219196 | 0         |  |  |
|       |      | Shiraz-36T | 378  | 0.179558 | 0         |  |  |
|       |      | Shiraz-36T | 381  | 0.332628 | 0         |  |  |
|       |      | Shiraz-44T | 639  | 1.035032 | 0         |  |  |
|       |      | Shiraz-46T | 943  | 0.093799 | 0         |  |  |
|       |      | Shiraz-46T | 946  | 0.299835 | 0         |  |  |

|  |            |      |          |           |  |
|--|------------|------|----------|-----------|--|
|  | Shiraz-47T | 1030 | 0.257728 | 0         |  |
|  | Shiraz-49T | 1120 | 0.281656 | 0         |  |
|  | Shiraz-77T | 1225 | 0        | -0.117922 |  |
|  | Shiraz-77T | 1227 | 0.196445 | 0         |  |
|  | Shiraz-9T  | 1324 | 0.679266 | 0         |  |
|  | Shiraz-18T | 1434 | 0.244465 | 0         |  |
|  | Shiraz-22T | 1549 | 0        | -0.319623 |  |
|  | Shiraz-22T | 1551 | 0.324011 | 0         |  |
|  | Shiraz-25T | 1698 | 0.21835  | 0         |  |
|  | Shiraz-28T | 1735 | 0.350744 | 0         |  |
|  | Shiraz-29T | 1778 | 0.120767 | 0         |  |
|  | Shiraz-32T | 1833 | 0.551336 | 0         |  |
|  | Shiraz-38T | 1951 | 0.250891 | 0         |  |
|  | Shiraz-53T | 2078 | 0.287202 | 0         |  |
|  | Shiraz-71T | 2238 | 0.603631 | 0         |  |
|  | Shiraz-3T  | 90   | 0.219276 | 0         |  |
|  | Shiraz-3T  | 94   | 0.74735  | 0         |  |
|  | Shiraz-4T  | 253  | 0.372918 | 0         |  |
|  | Shiraz-31T | 316  | 0.219196 | 0         |  |
|  | Shiraz-36T | 378  | 0.179558 | 0         |  |
|  | Shiraz-36T | 381  | 0.332628 | 0         |  |
|  | Shiraz-44T | 639  | 1.035032 | 0         |  |
|  | Shiraz-46T | 943  | 0.093799 | 0         |  |
|  | Shiraz-46T | 946  | 0.299835 | 0         |  |
|  | Shiraz-47T | 1030 | 0.257728 | 0         |  |
|  | Shiraz-49T | 1120 | 0.281656 | 0         |  |
|  | Shiraz-77T | 1225 | 0        | -0.117922 |  |
|  | Shiraz-77T | 1227 | 0.196445 | 0         |  |
|  | Shiraz-9T  | 1324 | 0.679266 | 0         |  |
|  | Shiraz-18T | 1434 | 0.244465 | 0         |  |
|  | Shiraz-22T | 1549 | 0        | -0.319623 |  |
|  | Shiraz-22T | 1551 | 0.324011 | 0         |  |
|  | Shiraz-25T | 1698 | 0.21835  | 0         |  |
|  | Shiraz-28T | 1735 | 0.350744 | 0         |  |
|  | Shiraz-29T | 1778 | 0.120767 | 0         |  |
|  | Shiraz-32T | 1833 | 0.551336 | 0         |  |
|  | Shiraz-38T | 1951 | 0.250891 | 0         |  |
|  | Shiraz-53T | 2078 | 0.287202 | 0         |  |
|  | Shiraz-71T | 2238 | 0.603631 | 0         |  |
|  | Shiraz-3T  | 90   | 0.219276 | 0         |  |
|  | Shiraz-3T  | 94   | 0.74735  | 0         |  |
|  | Shiraz-4T  | 253  | 0.372918 | 0         |  |
|  | Shiraz-31T | 316  | 0.219196 | 0         |  |
|  | Shiraz-36T | 378  | 0.179558 | 0         |  |
|  | Shiraz-36T | 381  | 0.332628 | 0         |  |
|  | Shiraz-44T | 639  | 1.035032 | 0         |  |
|  | Shiraz-46T | 943  | 0.093799 | 0         |  |

|              |      |            |      |          |           |  |
|--------------|------|------------|------|----------|-----------|--|
|              |      | Shiraz-46T | 946  | 0.299835 | 0         |  |
|              |      | Shiraz-47T | 1030 | 0.257728 | 0         |  |
|              |      | Shiraz-49T | 1120 | 0.281656 | 0         |  |
|              |      | Shiraz-77T | 1225 | 0        | -0.117922 |  |
|              |      | Shiraz-77T | 1227 | 0.196445 | 0         |  |
|              |      | Shiraz-9T  | 1324 | 0.679266 | 0         |  |
|              |      | Shiraz-18T | 1434 | 0.244465 | 0         |  |
|              |      | Shiraz-22T | 1549 | 0        | -0.319623 |  |
|              |      | Shiraz-22T | 1551 | 0.324011 | 0         |  |
|              |      | Shiraz-25T | 1698 | 0.21835  | 0         |  |
|              |      | Shiraz-28T | 1735 | 0.350744 | 0         |  |
|              |      | Shiraz-29T | 1778 | 0.120767 | 0         |  |
|              |      | Shiraz-32T | 1833 | 0.551336 | 0         |  |
|              |      | Shiraz-38T | 1951 | 0.250891 | 0         |  |
|              |      | Shiraz-53T | 2078 | 0.287202 | 0         |  |
|              |      | Shiraz-71T | 2238 | 0.603631 | 0         |  |
| LOC100124692 | chr7 | Shiraz-3T  | 90   | 0.219276 | 0         |  |
|              |      | Shiraz-4T  | 253  | 0.372918 | 0         |  |
|              |      | Shiraz-36T | 378  | 0.179558 | 0         |  |
|              |      | Shiraz-46T | 943  | 0.093799 | 0         |  |
|              |      | Shiraz-77T | 1225 | 0        | -0.117922 |  |
|              |      | Shiraz-9T  | 1325 | 0.221899 | 0         |  |
|              |      | Shiraz-18T | 1434 | 0.244465 | 0         |  |
|              |      | Shiraz-25T | 1698 | 0.21835  | 0         |  |
|              |      | Shiraz-28T | 1735 | 0.350744 | 0         |  |
|              |      | Shiraz-29T | 1778 | 0.120767 | 0         |  |
|              |      | Shiraz-32T | 1833 | 0.551336 | 0         |  |
|              |      | Shiraz-38T | 1951 | 0.250891 | 0         |  |
|              |      | Shiraz-53T | 2078 | 0.287202 | 0         |  |
|              |      | Shiraz-58T | 2162 | 0.221505 | 0         |  |
|              |      | Shiraz-71T | 2238 | 0.603631 | 0         |  |
|              |      | Shiraz-3T  | 90   | 0.219276 | 0         |  |
|              |      | Shiraz-4T  | 253  | 0.372918 | 0         |  |
|              |      | Shiraz-36T | 378  | 0.179558 | 0         |  |
|              |      | Shiraz-46T | 943  | 0.093799 | 0         |  |
|              |      | Shiraz-77T | 1225 | 0        | -0.117922 |  |
|              |      | Shiraz-9T  | 1325 | 0.221899 | 0         |  |
|              |      | Shiraz-18T | 1434 | 0.244465 | 0         |  |
|              |      | Shiraz-25T | 1698 | 0.21835  | 0         |  |
|              |      | Shiraz-28T | 1735 | 0.350744 | 0         |  |
|              |      | Shiraz-29T | 1778 | 0.120767 | 0         |  |
|              |      | Shiraz-32T | 1833 | 0.551336 | 0         |  |
|              |      | Shiraz-38T | 1951 | 0.250891 | 0         |  |
|              |      | Shiraz-53T | 2078 | 0.287202 | 0         |  |
|              |      | Shiraz-58T | 2162 | 0.221505 | 0         |  |
|              |      | Shiraz-71T | 2238 | 0.603631 | 0         |  |
|              |      | Shiraz-3T  | 90   | 0.219276 | 0         |  |

|              |      |            |      |          |           |  |
|--------------|------|------------|------|----------|-----------|--|
|              |      | Shiraz-4T  | 253  | 0.372918 | 0         |  |
|              |      | Shiraz-36T | 378  | 0.179558 | 0         |  |
|              |      | Shiraz-46T | 943  | 0.093799 | 0         |  |
|              |      | Shiraz-77T | 1225 | 0        | -0.117922 |  |
|              |      | Shiraz-9T  | 1325 | 0.221899 | 0         |  |
|              |      | Shiraz-18T | 1434 | 0.244465 | 0         |  |
|              |      | Shiraz-25T | 1698 | 0.21835  | 0         |  |
|              |      | Shiraz-28T | 1735 | 0.350744 | 0         |  |
|              |      | Shiraz-29T | 1778 | 0.120767 | 0         |  |
|              |      | Shiraz-32T | 1833 | 0.551336 | 0         |  |
|              |      | Shiraz-38T | 1951 | 0.250891 | 0         |  |
|              |      | Shiraz-53T | 2078 | 0.287202 | 0         |  |
|              |      | Shiraz-58T | 2162 | 0.221505 | 0         |  |
|              |      | Shiraz-71T | 2238 | 0.603631 | 0         |  |
| LOC100128822 | chr7 | Shiraz-3T  | 90   | 0.219276 | 0         |  |
|              |      | Shiraz-3T  | 99   | 0.454766 | 0         |  |
|              |      | Shiraz-4T  | 253  | 0.372918 | 0         |  |
|              |      | Shiraz-36T | 378  | 0.179558 | 0         |  |
|              |      | Shiraz-44T | 646  | 0.471276 | 0         |  |
|              |      | Shiraz-44T | 648  | 0.017909 | 0         |  |
|              |      | Shiraz-46T | 943  | 0.093799 | 0         |  |
|              |      | Shiraz-9T  | 1325 | 0.221899 | 0         |  |
|              |      | Shiraz-18T | 1434 | 0.244465 | 0         |  |
|              |      | Shiraz-25T | 1698 | 0.21835  | 0         |  |
|              |      | Shiraz-28T | 1735 | 0.350744 | 0         |  |
|              |      | Shiraz-29T | 1778 | 0.120767 | 0         |  |
|              |      | Shiraz-32T | 1833 | 0.551336 | 0         |  |
|              |      | Shiraz-38T | 1951 | 0.250891 | 0         |  |
|              |      | Shiraz-58T | 2162 | 0.221505 | 0         |  |
|              |      | Shiraz-71T | 2238 | 0.603631 | 0         |  |
|              |      | Shiraz-3T  | 90   | 0.219276 | 0         |  |
|              |      | Shiraz-3T  | 99   | 0.454766 | 0         |  |
|              |      | Shiraz-4T  | 253  | 0.372918 | 0         |  |
|              |      | Shiraz-36T | 378  | 0.179558 | 0         |  |
|              |      | Shiraz-44T | 646  | 0.471276 | 0         |  |
|              |      | Shiraz-44T | 648  | 0.017909 | 0         |  |
|              |      | Shiraz-46T | 943  | 0.093799 | 0         |  |
|              |      | Shiraz-9T  | 1325 | 0.221899 | 0         |  |
|              |      | Shiraz-18T | 1434 | 0.244465 | 0         |  |
|              |      | Shiraz-25T | 1698 | 0.21835  | 0         |  |
|              |      | Shiraz-28T | 1735 | 0.350744 | 0         |  |
|              |      | Shiraz-29T | 1778 | 0.120767 | 0         |  |
|              |      | Shiraz-32T | 1833 | 0.551336 | 0         |  |
|              |      | Shiraz-38T | 1951 | 0.250891 | 0         |  |
|              |      | Shiraz-58T | 2162 | 0.221505 | 0         |  |
|              |      | Shiraz-71T | 2238 | 0.603631 | 0         |  |
|              |      | Shiraz-3T  | 90   | 0.219276 | 0         |  |

|              |      |            |      |          |           |  |  |
|--------------|------|------------|------|----------|-----------|--|--|
|              |      | Shiraz-3T  | 99   | 0.454766 | 0         |  |  |
|              |      | Shiraz-4T  | 253  | 0.372918 | 0         |  |  |
|              |      | Shiraz-36T | 378  | 0.179558 | 0         |  |  |
|              |      | Shiraz-44T | 646  | 0.471276 | 0         |  |  |
|              |      | Shiraz-44T | 648  | 0.017909 | 0         |  |  |
|              |      | Shiraz-46T | 943  | 0.093799 | 0         |  |  |
|              |      | Shiraz-9T  | 1325 | 0.221899 | 0         |  |  |
|              |      | Shiraz-18T | 1434 | 0.244465 | 0         |  |  |
|              |      | Shiraz-25T | 1698 | 0.21835  | 0         |  |  |
|              |      | Shiraz-28T | 1735 | 0.350744 | 0         |  |  |
|              |      | Shiraz-29T | 1778 | 0.120767 | 0         |  |  |
|              |      | Shiraz-32T | 1833 | 0.551336 | 0         |  |  |
|              |      | Shiraz-38T | 1951 | 0.250891 | 0         |  |  |
|              |      | Shiraz-58T | 2162 | 0.221505 | 0         |  |  |
|              |      | Shiraz-71T | 2238 | 0.603631 | 0         |  |  |
| LOC100131434 | chrX | Shiraz-3T  | 242  | 0        | -0.336434 |  |  |
|              |      | Shiraz-4T  | 261  | 0        | -0.336249 |  |  |
|              |      | Shiraz-16T | 295  | 0.591657 | 0         |  |  |
|              |      | Shiraz-36T | 433  | 0        | -0.803961 |  |  |
|              |      | Shiraz-42T | 480  | 0        | -0.232915 |  |  |
|              |      | Shiraz-44T | 899  | 0        | -1.09697  |  |  |
|              |      | Shiraz-49T | 1170 | 0        | -0.967436 |  |  |
|              |      | Shiraz-9T  | 1370 | 0.690073 | 0         |  |  |
|              |      | Shiraz-18T | 1457 | 0.643204 | 0         |  |  |
|              |      | Shiraz-22T | 1673 | 0.611783 | 0         |  |  |
|              |      | Shiraz-22T | 1678 | 0.911625 | 0         |  |  |
|              |      | Shiraz-25T | 1719 | 0.472955 | 0         |  |  |
|              |      | Shiraz-28T | 1762 | 0.562311 | 0         |  |  |
|              |      | Shiraz-29T | 1801 | 0.815343 | 0         |  |  |
|              |      | Shiraz-32T | 1870 | 0.729766 | 0         |  |  |
|              |      | Shiraz-35T | 1933 | 0.488535 | 0         |  |  |
|              |      | Shiraz-58T | 2223 | 0.833364 | 0         |  |  |
|              |      | Shiraz-58T | 2226 | 1.074663 | 0         |  |  |
|              |      | Shiraz-71T | 2263 | 0.975531 | 0         |  |  |
|              |      | Shiraz-3T  | 242  | 0        | -0.336434 |  |  |
|              |      | Shiraz-4T  | 261  | 0        | -0.336249 |  |  |
|              |      | Shiraz-16T | 295  | 0.591657 | 0         |  |  |
|              |      | Shiraz-36T | 433  | 0        | -0.803961 |  |  |
|              |      | Shiraz-42T | 480  | 0        | -0.232915 |  |  |
|              |      | Shiraz-44T | 899  | 0        | -1.09697  |  |  |
|              |      | Shiraz-49T | 1170 | 0        | -0.967436 |  |  |
|              |      | Shiraz-9T  | 1370 | 0.690073 | 0         |  |  |
|              |      | Shiraz-18T | 1457 | 0.643204 | 0         |  |  |
|              |      | Shiraz-22T | 1673 | 0.611783 | 0         |  |  |
|              |      | Shiraz-22T | 1678 | 0.911625 | 0         |  |  |
|              |      | Shiraz-25T | 1719 | 0.472955 | 0         |  |  |
|              |      | Shiraz-28T | 1762 | 0.562311 | 0         |  |  |

|              |      |            |      |          |           |  |  |
|--------------|------|------------|------|----------|-----------|--|--|
|              |      | Shiraz-29T | 1801 | 0.815343 | 0         |  |  |
|              |      | Shiraz-32T | 1870 | 0.729766 | 0         |  |  |
|              |      | Shiraz-35T | 1933 | 0.488535 | 0         |  |  |
|              |      | Shiraz-58T | 2223 | 0.833364 | 0         |  |  |
|              |      | Shiraz-58T | 2226 | 1.074663 | 0         |  |  |
|              |      | Shiraz-71T | 2263 | 0.975531 | 0         |  |  |
|              |      | Shiraz-3T  | 242  | 0        | -0.336434 |  |  |
|              |      | Shiraz-4T  | 261  | 0        | -0.336249 |  |  |
|              |      | Shiraz-16T | 295  | 0.591657 | 0         |  |  |
|              |      | Shiraz-36T | 433  | 0        | -0.803961 |  |  |
|              |      | Shiraz-42T | 480  | 0        | -0.232915 |  |  |
|              |      | Shiraz-44T | 899  | 0        | -1.09697  |  |  |
|              |      | Shiraz-49T | 1170 | 0        | -0.967436 |  |  |
|              |      | Shiraz-9T  | 1370 | 0.690073 | 0         |  |  |
|              |      | Shiraz-18T | 1457 | 0.643204 | 0         |  |  |
|              |      | Shiraz-22T | 1673 | 0.611783 | 0         |  |  |
|              |      | Shiraz-22T | 1678 | 0.911625 | 0         |  |  |
|              |      | Shiraz-25T | 1719 | 0.472955 | 0         |  |  |
|              |      | Shiraz-28T | 1762 | 0.562311 | 0         |  |  |
|              |      | Shiraz-29T | 1801 | 0.815343 | 0         |  |  |
|              |      | Shiraz-32T | 1870 | 0.729766 | 0         |  |  |
|              |      | Shiraz-35T | 1933 | 0.488535 | 0         |  |  |
|              |      | Shiraz-58T | 2223 | 0.833364 | 0         |  |  |
|              |      | Shiraz-58T | 2226 | 1.074663 | 0         |  |  |
|              |      | Shiraz-71T | 2263 | 0.975531 | 0         |  |  |
| LOC100132707 | chr7 | Shiraz-3T  | 90   | 0.219276 | 0         |  |  |
|              |      | Shiraz-3T  | 90   | 0.219276 | 0         |  |  |
|              |      | Shiraz-3T  | 99   | 0.454766 | 0         |  |  |
|              |      | Shiraz-3T  | 99   | 0.454766 | 0         |  |  |
|              |      | Shiraz-4T  | 253  | 0.372918 | 0         |  |  |
|              |      | Shiraz-4T  | 253  | 0.372918 | 0         |  |  |
|              |      | Shiraz-36T | 378  | 0.179558 | 0         |  |  |
|              |      | Shiraz-36T | 378  | 0.179558 | 0         |  |  |
|              |      | Shiraz-44T | 646  | 0.471276 | 0         |  |  |
|              |      | Shiraz-44T | 646  | 0.471276 | 0         |  |  |
|              |      | Shiraz-46T | 943  | 0.093799 | 0         |  |  |
|              |      | Shiraz-46T | 943  | 0.093799 | 0         |  |  |
|              |      | Shiraz-9T  | 1325 | 0.221899 | 0         |  |  |
|              |      | Shiraz-9T  | 1325 | 0.221899 | 0         |  |  |
|              |      | Shiraz-18T | 1434 | 0.244465 | 0         |  |  |
|              |      | Shiraz-18T | 1434 | 0.244465 | 0         |  |  |
|              |      | Shiraz-25T | 1698 | 0.21835  | 0         |  |  |
|              |      | Shiraz-25T | 1698 | 0.21835  | 0         |  |  |
|              |      | Shiraz-28T | 1735 | 0.350744 | 0         |  |  |
|              |      | Shiraz-28T | 1735 | 0.350744 | 0         |  |  |
|              |      | Shiraz-29T | 1778 | 0.120767 | 0         |  |  |
|              |      | Shiraz-29T | 1778 | 0.120767 | 0         |  |  |



|  |  |            |      |          |   |  |  |
|--|--|------------|------|----------|---|--|--|
|  |  | Shiraz-32T | 1833 | 0.551336 | 0 |  |  |
|  |  | Shiraz-32T | 1833 | 0.551336 | 0 |  |  |
|  |  | Shiraz-38T | 1951 | 0.250891 | 0 |  |  |
|  |  | Shiraz-38T | 1951 | 0.250891 | 0 |  |  |
|  |  | Shiraz-58T | 2162 | 0.221505 | 0 |  |  |
|  |  | Shiraz-58T | 2162 | 0.221505 | 0 |  |  |
|  |  | Shiraz-71T | 2238 | 0.603631 | 0 |  |  |
|  |  | Shiraz-71T | 2238 | 0.603631 | 0 |  |  |
|  |  | Shiraz-3T  | 90   | 0.219276 | 0 |  |  |
|  |  | Shiraz-3T  | 90   | 0.219276 | 0 |  |  |
|  |  | Shiraz-3T  | 99   | 0.454766 | 0 |  |  |
|  |  | Shiraz-3T  | 99   | 0.454766 | 0 |  |  |
|  |  | Shiraz-4T  | 253  | 0.372918 | 0 |  |  |
|  |  | Shiraz-4T  | 253  | 0.372918 | 0 |  |  |
|  |  | Shiraz-36T | 378  | 0.179558 | 0 |  |  |
|  |  | Shiraz-36T | 378  | 0.179558 | 0 |  |  |
|  |  | Shiraz-44T | 646  | 0.471276 | 0 |  |  |
|  |  | Shiraz-44T | 646  | 0.471276 | 0 |  |  |
|  |  | Shiraz-46T | 943  | 0.093799 | 0 |  |  |
|  |  | Shiraz-46T | 943  | 0.093799 | 0 |  |  |
|  |  | Shiraz-9T  | 1325 | 0.221899 | 0 |  |  |
|  |  | Shiraz-9T  | 1325 | 0.221899 | 0 |  |  |
|  |  | Shiraz-18T | 1434 | 0.244465 | 0 |  |  |
|  |  | Shiraz-18T | 1434 | 0.244465 | 0 |  |  |
|  |  | Shiraz-25T | 1698 | 0.21835  | 0 |  |  |
|  |  | Shiraz-25T | 1698 | 0.21835  | 0 |  |  |
|  |  | Shiraz-28T | 1735 | 0.350744 | 0 |  |  |
|  |  | Shiraz-28T | 1735 | 0.350744 | 0 |  |  |
|  |  | Shiraz-29T | 1778 | 0.120767 | 0 |  |  |
|  |  | Shiraz-29T | 1778 | 0.120767 | 0 |  |  |
|  |  | Shiraz-32T | 1833 | 0.551336 | 0 |  |  |
|  |  | Shiraz-32T | 1833 | 0.551336 | 0 |  |  |
|  |  | Shiraz-38T | 1951 | 0.250891 | 0 |  |  |
|  |  | Shiraz-38T | 1951 | 0.250891 | 0 |  |  |
|  |  | Shiraz-58T | 2162 | 0.221505 | 0 |  |  |
|  |  | Shiraz-58T | 2162 | 0.221505 | 0 |  |  |
|  |  | Shiraz-71T | 2238 | 0.603631 | 0 |  |  |
|  |  | Shiraz-71T | 2238 | 0.603631 | 0 |  |  |
|  |  | Shiraz-3T  | 90   | 0.219276 | 0 |  |  |
|  |  | Shiraz-3T  | 90   | 0.219276 | 0 |  |  |
|  |  | Shiraz-3T  | 99   | 0.454766 | 0 |  |  |
|  |  | Shiraz-3T  | 99   | 0.454766 | 0 |  |  |
|  |  | Shiraz-4T  | 253  | 0.372918 | 0 |  |  |
|  |  | Shiraz-4T  | 253  | 0.372918 | 0 |  |  |
|  |  | Shiraz-36T | 378  | 0.179558 | 0 |  |  |
|  |  | Shiraz-36T | 378  | 0.179558 | 0 |  |  |
|  |  | Shiraz-44T | 646  | 0.471276 | 0 |  |  |

|              |      |            |      |          |           |  |
|--------------|------|------------|------|----------|-----------|--|
|              |      | Shiraz-44T | 646  | 0.471276 | 0         |  |
|              |      | Shiraz-46T | 943  | 0.093799 | 0         |  |
|              |      | Shiraz-46T | 943  | 0.093799 | 0         |  |
|              |      | Shiraz-9T  | 1325 | 0.221899 | 0         |  |
|              |      | Shiraz-9T  | 1325 | 0.221899 | 0         |  |
|              |      | Shiraz-18T | 1434 | 0.244465 | 0         |  |
|              |      | Shiraz-18T | 1434 | 0.244465 | 0         |  |
|              |      | Shiraz-25T | 1698 | 0.21835  | 0         |  |
|              |      | Shiraz-25T | 1698 | 0.21835  | 0         |  |
|              |      | Shiraz-28T | 1735 | 0.350744 | 0         |  |
|              |      | Shiraz-28T | 1735 | 0.350744 | 0         |  |
|              |      | Shiraz-29T | 1778 | 0.120767 | 0         |  |
|              |      | Shiraz-29T | 1778 | 0.120767 | 0         |  |
|              |      | Shiraz-32T | 1833 | 0.551336 | 0         |  |
|              |      | Shiraz-32T | 1833 | 0.551336 | 0         |  |
|              |      | Shiraz-38T | 1951 | 0.250891 | 0         |  |
|              |      | Shiraz-38T | 1951 | 0.250891 | 0         |  |
|              |      | Shiraz-58T | 2162 | 0.221505 | 0         |  |
|              |      | Shiraz-58T | 2162 | 0.221505 | 0         |  |
|              |      | Shiraz-71T | 2238 | 0.603631 | 0         |  |
|              |      | Shiraz-71T | 2238 | 0.603631 | 0         |  |
| LOC100132832 | chr7 | Shiraz-3T  | 90   | 0.219276 | 0         |  |
|              |      | Shiraz-4T  | 253  | 0.372918 | 0         |  |
|              |      | Shiraz-31T | 315  | 0.194054 | 0         |  |
|              |      | Shiraz-36T | 378  | 0.179558 | 0         |  |
|              |      | Shiraz-36T | 379  | 0.322028 | 0         |  |
|              |      | Shiraz-42T | 454  | 0.145717 | 0         |  |
|              |      | Shiraz-46T | 943  | 0.093799 | 0         |  |
|              |      | Shiraz-46T | 944  | 0.256008 | 0         |  |
|              |      | Shiraz-18T | 1434 | 0.244465 | 0         |  |
|              |      | Shiraz-22T | 1549 | 0        | -0.319623 |  |
|              |      | Shiraz-25T | 1698 | 0.21835  | 0         |  |
|              |      | Shiraz-28T | 1735 | 0.350744 | 0         |  |
|              |      | Shiraz-29T | 1778 | 0.120767 | 0         |  |
|              |      | Shiraz-38T | 1951 | 0.250891 | 0         |  |
|              |      | Shiraz-53T | 2078 | 0.287202 | 0         |  |
|              |      | Shiraz-71T | 2238 | 0.603631 | 0         |  |
|              |      | Shiraz-71T | 2239 | 0.310785 | 0         |  |
|              |      | Shiraz-3T  | 90   | 0.219276 | 0         |  |
|              |      | Shiraz-4T  | 253  | 0.372918 | 0         |  |
|              |      | Shiraz-31T | 315  | 0.194054 | 0         |  |
|              |      | Shiraz-36T | 378  | 0.179558 | 0         |  |
|              |      | Shiraz-36T | 379  | 0.322028 | 0         |  |
|              |      | Shiraz-42T | 454  | 0.145717 | 0         |  |
|              |      | Shiraz-46T | 943  | 0.093799 | 0         |  |
|              |      | Shiraz-46T | 944  | 0.256008 | 0         |  |
|              |      | Shiraz-18T | 1434 | 0.244465 | 0         |  |

|              |      |            |      |          |           |  |  |
|--------------|------|------------|------|----------|-----------|--|--|
|              |      | Shiraz-22T | 1549 | 0        | -0.319623 |  |  |
|              |      | Shiraz-25T | 1698 | 0.21835  | 0         |  |  |
|              |      | Shiraz-28T | 1735 | 0.350744 | 0         |  |  |
|              |      | Shiraz-29T | 1778 | 0.120767 | 0         |  |  |
|              |      | Shiraz-38T | 1951 | 0.250891 | 0         |  |  |
|              |      | Shiraz-53T | 2078 | 0.287202 | 0         |  |  |
|              |      | Shiraz-71T | 2238 | 0.603631 | 0         |  |  |
|              |      | Shiraz-71T | 2239 | 0.310785 | 0         |  |  |
|              |      | Shiraz-3T  | 90   | 0.219276 | 0         |  |  |
|              |      | Shiraz-4T  | 253  | 0.372918 | 0         |  |  |
|              |      | Shiraz-31T | 315  | 0.194054 | 0         |  |  |
|              |      | Shiraz-36T | 378  | 0.179558 | 0         |  |  |
|              |      | Shiraz-36T | 379  | 0.322028 | 0         |  |  |
|              |      | Shiraz-42T | 454  | 0.145717 | 0         |  |  |
|              |      | Shiraz-46T | 943  | 0.093799 | 0         |  |  |
|              |      | Shiraz-46T | 944  | 0.256008 | 0         |  |  |
|              |      | Shiraz-18T | 1434 | 0.244465 | 0         |  |  |
|              |      | Shiraz-22T | 1549 | 0        | -0.319623 |  |  |
|              |      | Shiraz-25T | 1698 | 0.21835  | 0         |  |  |
|              |      | Shiraz-28T | 1735 | 0.350744 | 0         |  |  |
|              |      | Shiraz-29T | 1778 | 0.120767 | 0         |  |  |
|              |      | Shiraz-38T | 1951 | 0.250891 | 0         |  |  |
|              |      | Shiraz-53T | 2078 | 0.287202 | 0         |  |  |
|              |      | Shiraz-71T | 2238 | 0.603631 | 0         |  |  |
|              |      | Shiraz-71T | 2239 | 0.310785 | 0         |  |  |
| LOC100133957 | chrX | Shiraz-4T  | 260  | 0        | -0.324128 |  |  |
|              |      | Shiraz-16T | 294  | 0.655804 | 0         |  |  |
|              |      | Shiraz-31T | 345  | 0.103301 | 0         |  |  |
|              |      | Shiraz-36T | 431  | 0        | -0.78035  |  |  |
|              |      | Shiraz-36T | 432  | 0        | -0.6692   |  |  |
|              |      | Shiraz-44T | 891  | 0        | -0.954044 |  |  |
|              |      | Shiraz-44T | 896  | 0        | -0.109108 |  |  |
|              |      | Shiraz-46T | 991  | 0.139564 | 0         |  |  |
|              |      | Shiraz-47T | 1084 | 0.24185  | 0         |  |  |
|              |      | Shiraz-49T | 1166 | 0        | -0.917235 |  |  |
|              |      | Shiraz-49T | 1169 | 0        | -0.583529 |  |  |
|              |      | Shiraz-77T | 1282 | 0.213849 | 0         |  |  |
|              |      | Shiraz-9T  | 1368 | 0.199713 | 0         |  |  |
|              |      | Shiraz-9T  | 1369 | 0.703374 | 0         |  |  |
|              |      | Shiraz-18T | 1455 | 0        | -0.186773 |  |  |
|              |      | Shiraz-22T | 1669 | 0.695915 | 0         |  |  |
|              |      | Shiraz-22T | 1672 | 1.01678  | 0         |  |  |
|              |      | Shiraz-25T | 1717 | 0.420447 | 0         |  |  |
|              |      | Shiraz-28T | 1760 | 0.538181 | 0         |  |  |
|              |      | Shiraz-29T | 1800 | 0.672527 | 0         |  |  |
|              |      | Shiraz-32T | 1869 | 0.776805 | 0         |  |  |
|              |      | Shiraz-35T | 1932 | 0.507141 | 0         |  |  |

|  |            |      |          |           |  |
|--|------------|------|----------|-----------|--|
|  | Shiraz-58T | 2221 | 0.871948 | 0         |  |
|  | Shiraz-71T | 2260 | 0.68394  | 0         |  |
|  | Shiraz-71T | 2262 | 0.986748 | 0         |  |
|  | Shiraz-4T  | 260  | 0        | -0.324128 |  |
|  | Shiraz-16T | 294  | 0.655804 | 0         |  |
|  | Shiraz-31T | 345  | 0.103301 | 0         |  |
|  | Shiraz-36T | 431  | 0        | -0.78035  |  |
|  | Shiraz-36T | 432  | 0        | -0.6692   |  |
|  | Shiraz-44T | 891  | 0        | -0.954044 |  |
|  | Shiraz-44T | 896  | 0        | -0.109108 |  |
|  | Shiraz-46T | 991  | 0.139564 | 0         |  |
|  | Shiraz-47T | 1084 | 0.24185  | 0         |  |
|  | Shiraz-49T | 1166 | 0        | -0.917235 |  |
|  | Shiraz-49T | 1169 | 0        | -0.583529 |  |
|  | Shiraz-77T | 1282 | 0.213849 | 0         |  |
|  | Shiraz-9T  | 1368 | 0.199713 | 0         |  |
|  | Shiraz-9T  | 1369 | 0.703374 | 0         |  |
|  | Shiraz-18T | 1455 | 0        | -0.186773 |  |
|  | Shiraz-22T | 1669 | 0.695915 | 0         |  |
|  | Shiraz-22T | 1672 | 1.01678  | 0         |  |
|  | Shiraz-25T | 1717 | 0.420447 | 0         |  |
|  | Shiraz-28T | 1760 | 0.538181 | 0         |  |
|  | Shiraz-29T | 1800 | 0.672527 | 0         |  |
|  | Shiraz-32T | 1869 | 0.776805 | 0         |  |
|  | Shiraz-35T | 1932 | 0.507141 | 0         |  |
|  | Shiraz-58T | 2221 | 0.871948 | 0         |  |
|  | Shiraz-71T | 2260 | 0.68394  | 0         |  |
|  | Shiraz-71T | 2262 | 0.986748 | 0         |  |
|  | Shiraz-4T  | 260  | 0        | -0.324128 |  |
|  | Shiraz-16T | 294  | 0.655804 | 0         |  |
|  | Shiraz-31T | 345  | 0.103301 | 0         |  |
|  | Shiraz-36T | 431  | 0        | -0.78035  |  |
|  | Shiraz-36T | 432  | 0        | -0.6692   |  |
|  | Shiraz-44T | 891  | 0        | -0.954044 |  |
|  | Shiraz-44T | 896  | 0        | -0.109108 |  |
|  | Shiraz-46T | 991  | 0.139564 | 0         |  |
|  | Shiraz-47T | 1084 | 0.24185  | 0         |  |
|  | Shiraz-49T | 1166 | 0        | -0.917235 |  |
|  | Shiraz-49T | 1169 | 0        | -0.583529 |  |
|  | Shiraz-77T | 1282 | 0.213849 | 0         |  |
|  | Shiraz-9T  | 1368 | 0.199713 | 0         |  |
|  | Shiraz-9T  | 1369 | 0.703374 | 0         |  |
|  | Shiraz-18T | 1455 | 0        | -0.186773 |  |
|  | Shiraz-22T | 1669 | 0.695915 | 0         |  |
|  | Shiraz-22T | 1672 | 1.01678  | 0         |  |
|  | Shiraz-25T | 1717 | 0.420447 | 0         |  |
|  | Shiraz-28T | 1760 | 0.538181 | 0         |  |

|              |      |            |      |          |           |  |
|--------------|------|------------|------|----------|-----------|--|
|              |      | Shiraz-29T | 1800 | 0.672527 | 0         |  |
|              |      | Shiraz-32T | 1869 | 0.776805 | 0         |  |
|              |      | Shiraz-35T | 1932 | 0.507141 | 0         |  |
|              |      | Shiraz-58T | 2221 | 0.871948 | 0         |  |
|              |      | Shiraz-71T | 2260 | 0.68394  | 0         |  |
|              |      | Shiraz-71T | 2262 | 0.986748 | 0         |  |
| LOC100134229 | chr7 | Shiraz-3T  | 90   | 0.219276 | 0         |  |
|              |      | Shiraz-3T  | 97   | 0.496001 | 0         |  |
|              |      | Shiraz-4T  | 253  | 0.372918 | 0         |  |
|              |      | Shiraz-31T | 318  | 0.254373 | 0         |  |
|              |      | Shiraz-36T | 378  | 0.179558 | 0         |  |
|              |      | Shiraz-36T | 383  | 0.374586 | 0         |  |
|              |      | Shiraz-44T | 644  | 0.496536 | 0         |  |
|              |      | Shiraz-46T | 943  | 0.093799 | 0         |  |
|              |      | Shiraz-47T | 1033 | 0.220267 | 0         |  |
|              |      | Shiraz-77T | 1225 | 0        | -0.117922 |  |
|              |      | Shiraz-77T | 1230 | 0.149651 | 0         |  |
|              |      | Shiraz-9T  | 1325 | 0.221899 | 0         |  |
|              |      | Shiraz-18T | 1434 | 0.244465 | 0         |  |
|              |      | Shiraz-25T | 1698 | 0.21835  | 0         |  |
|              |      | Shiraz-28T | 1735 | 0.350744 | 0         |  |
|              |      | Shiraz-29T | 1778 | 0.120767 | 0         |  |
|              |      | Shiraz-32T | 1833 | 0.551336 | 0         |  |
|              |      | Shiraz-38T | 1951 | 0.250891 | 0         |  |
|              |      | Shiraz-53T | 2078 | 0.287202 | 0         |  |
|              |      | Shiraz-58T | 2162 | 0.221505 | 0         |  |
|              |      | Shiraz-71T | 2238 | 0.603631 | 0         |  |
|              |      | Shiraz-3T  | 90   | 0.219276 | 0         |  |
|              |      | Shiraz-3T  | 97   | 0.496001 | 0         |  |
|              |      | Shiraz-4T  | 253  | 0.372918 | 0         |  |
|              |      | Shiraz-31T | 318  | 0.254373 | 0         |  |
|              |      | Shiraz-36T | 378  | 0.179558 | 0         |  |
|              |      | Shiraz-36T | 383  | 0.374586 | 0         |  |
|              |      | Shiraz-44T | 644  | 0.496536 | 0         |  |
|              |      | Shiraz-46T | 943  | 0.093799 | 0         |  |
|              |      | Shiraz-47T | 1033 | 0.220267 | 0         |  |
|              |      | Shiraz-77T | 1225 | 0        | -0.117922 |  |
|              |      | Shiraz-77T | 1230 | 0.149651 | 0         |  |
|              |      | Shiraz-9T  | 1325 | 0.221899 | 0         |  |
|              |      | Shiraz-18T | 1434 | 0.244465 | 0         |  |
|              |      | Shiraz-25T | 1698 | 0.21835  | 0         |  |
|              |      | Shiraz-28T | 1735 | 0.350744 | 0         |  |
|              |      | Shiraz-29T | 1778 | 0.120767 | 0         |  |
|              |      | Shiraz-32T | 1833 | 0.551336 | 0         |  |
|              |      | Shiraz-38T | 1951 | 0.250891 | 0         |  |
|              |      | Shiraz-53T | 2078 | 0.287202 | 0         |  |
|              |      | Shiraz-58T | 2162 | 0.221505 | 0         |  |

|              |      |            |      |          |           |  |
|--------------|------|------------|------|----------|-----------|--|
|              |      | Shiraz-71T | 2238 | 0.603631 | 0         |  |
|              |      | Shiraz-3T  | 90   | 0.219276 | 0         |  |
|              |      | Shiraz-3T  | 97   | 0.496001 | 0         |  |
|              |      | Shiraz-4T  | 253  | 0.372918 | 0         |  |
|              |      | Shiraz-31T | 318  | 0.254373 | 0         |  |
|              |      | Shiraz-36T | 378  | 0.179558 | 0         |  |
|              |      | Shiraz-36T | 383  | 0.374586 | 0         |  |
|              |      | Shiraz-44T | 644  | 0.496536 | 0         |  |
|              |      | Shiraz-46T | 943  | 0.093799 | 0         |  |
|              |      | Shiraz-47T | 1033 | 0.220267 | 0         |  |
|              |      | Shiraz-77T | 1225 | 0        | -0.117922 |  |
|              |      | Shiraz-77T | 1230 | 0.149651 | 0         |  |
|              |      | Shiraz-9T  | 1325 | 0.221899 | 0         |  |
|              |      | Shiraz-18T | 1434 | 0.244465 | 0         |  |
|              |      | Shiraz-25T | 1698 | 0.21835  | 0         |  |
|              |      | Shiraz-28T | 1735 | 0.350744 | 0         |  |
|              |      | Shiraz-29T | 1778 | 0.120767 | 0         |  |
|              |      | Shiraz-32T | 1833 | 0.551336 | 0         |  |
|              |      | Shiraz-38T | 1951 | 0.250891 | 0         |  |
|              |      | Shiraz-53T | 2078 | 0.287202 | 0         |  |
|              |      | Shiraz-58T | 2162 | 0.221505 | 0         |  |
|              |      | Shiraz-71T | 2238 | 0.603631 | 0         |  |
| LOC100134713 | chr7 | Shiraz-3T  | 90   | 0.219276 | 0         |  |
|              |      | Shiraz-3T  | 97   | 0.496001 | 0         |  |
|              |      | Shiraz-4T  | 253  | 0.372918 | 0         |  |
|              |      | Shiraz-31T | 318  | 0.254373 | 0         |  |
|              |      | Shiraz-36T | 378  | 0.179558 | 0         |  |
|              |      | Shiraz-36T | 383  | 0.374586 | 0         |  |
|              |      | Shiraz-44T | 644  | 0.496536 | 0         |  |
|              |      | Shiraz-46T | 943  | 0.093799 | 0         |  |
|              |      | Shiraz-47T | 1033 | 0.220267 | 0         |  |
|              |      | Shiraz-77T | 1225 | 0        | -0.117922 |  |
|              |      | Shiraz-77T | 1230 | 0.149651 | 0         |  |
|              |      | Shiraz-9T  | 1325 | 0.221899 | 0         |  |
|              |      | Shiraz-18T | 1434 | 0.244465 | 0         |  |
|              |      | Shiraz-25T | 1698 | 0.21835  | 0         |  |
|              |      | Shiraz-28T | 1735 | 0.350744 | 0         |  |
|              |      | Shiraz-29T | 1778 | 0.120767 | 0         |  |
|              |      | Shiraz-32T | 1833 | 0.551336 | 0         |  |
|              |      | Shiraz-38T | 1951 | 0.250891 | 0         |  |
|              |      | Shiraz-53T | 2078 | 0.287202 | 0         |  |
|              |      | Shiraz-58T | 2162 | 0.221505 | 0         |  |
|              |      | Shiraz-71T | 2238 | 0.603631 | 0         |  |
|              |      | Shiraz-3T  | 90   | 0.219276 | 0         |  |
|              |      | Shiraz-3T  | 97   | 0.496001 | 0         |  |
|              |      | Shiraz-4T  | 253  | 0.372918 | 0         |  |
|              |      | Shiraz-31T | 318  | 0.254373 | 0         |  |

|              |      |            |      |          |           |  |
|--------------|------|------------|------|----------|-----------|--|
|              |      | Shiraz-36T | 378  | 0.179558 | 0         |  |
|              |      | Shiraz-36T | 383  | 0.374586 | 0         |  |
|              |      | Shiraz-44T | 644  | 0.496536 | 0         |  |
|              |      | Shiraz-46T | 943  | 0.093799 | 0         |  |
|              |      | Shiraz-47T | 1033 | 0.220267 | 0         |  |
|              |      | Shiraz-77T | 1225 | 0        | -0.117922 |  |
|              |      | Shiraz-77T | 1230 | 0.149651 | 0         |  |
|              |      | Shiraz-9T  | 1325 | 0.221899 | 0         |  |
|              |      | Shiraz-18T | 1434 | 0.244465 | 0         |  |
|              |      | Shiraz-25T | 1698 | 0.21835  | 0         |  |
|              |      | Shiraz-28T | 1735 | 0.350744 | 0         |  |
|              |      | Shiraz-29T | 1778 | 0.120767 | 0         |  |
|              |      | Shiraz-32T | 1833 | 0.551336 | 0         |  |
|              |      | Shiraz-38T | 1951 | 0.250891 | 0         |  |
|              |      | Shiraz-53T | 2078 | 0.287202 | 0         |  |
|              |      | Shiraz-58T | 2162 | 0.221505 | 0         |  |
|              |      | Shiraz-71T | 2238 | 0.603631 | 0         |  |
|              |      | Shiraz-3T  | 90   | 0.219276 | 0         |  |
|              |      | Shiraz-3T  | 97   | 0.496001 | 0         |  |
|              |      | Shiraz-4T  | 253  | 0.372918 | 0         |  |
|              |      | Shiraz-31T | 318  | 0.254373 | 0         |  |
|              |      | Shiraz-36T | 378  | 0.179558 | 0         |  |
|              |      | Shiraz-36T | 383  | 0.374586 | 0         |  |
|              |      | Shiraz-44T | 644  | 0.496536 | 0         |  |
|              |      | Shiraz-46T | 943  | 0.093799 | 0         |  |
|              |      | Shiraz-47T | 1033 | 0.220267 | 0         |  |
|              |      | Shiraz-77T | 1225 | 0        | -0.117922 |  |
|              |      | Shiraz-77T | 1230 | 0.149651 | 0         |  |
|              |      | Shiraz-9T  | 1325 | 0.221899 | 0         |  |
|              |      | Shiraz-18T | 1434 | 0.244465 | 0         |  |
|              |      | Shiraz-25T | 1698 | 0.21835  | 0         |  |
|              |      | Shiraz-28T | 1735 | 0.350744 | 0         |  |
|              |      | Shiraz-29T | 1778 | 0.120767 | 0         |  |
|              |      | Shiraz-32T | 1833 | 0.551336 | 0         |  |
|              |      | Shiraz-38T | 1951 | 0.250891 | 0         |  |
|              |      | Shiraz-53T | 2078 | 0.287202 | 0         |  |
|              |      | Shiraz-58T | 2162 | 0.221505 | 0         |  |
|              |      | Shiraz-71T | 2238 | 0.603631 | 0         |  |
| LOC100216545 | chr7 | Shiraz-3T  | 90   | 0.219276 | 0         |  |
|              |      | Shiraz-4T  | 253  | 0.372918 | 0         |  |
|              |      | Shiraz-36T | 378  | 0.179558 | 0         |  |
|              |      | Shiraz-46T | 943  | 0.093799 | 0         |  |
|              |      | Shiraz-77T | 1225 | 0        | -0.117922 |  |
|              |      | Shiraz-18T | 1434 | 0.244465 | 0         |  |
|              |      | Shiraz-22T | 1549 | 0        | -0.319623 |  |
|              |      | Shiraz-25T | 1698 | 0.21835  | 0         |  |
|              |      | Shiraz-28T | 1735 | 0.350744 | 0         |  |

|              |      |            |      |          |           |  |
|--------------|------|------------|------|----------|-----------|--|
|              |      | Shiraz-29T | 1778 | 0.120767 | 0         |  |
|              |      | Shiraz-32T | 1833 | 0.551336 | 0         |  |
|              |      | Shiraz-38T | 1951 | 0.250891 | 0         |  |
|              |      | Shiraz-53T | 2078 | 0.287202 | 0         |  |
|              |      | Shiraz-71T | 2238 | 0.603631 | 0         |  |
|              |      | Shiraz-3T  | 90   | 0.219276 | 0         |  |
|              |      | Shiraz-4T  | 253  | 0.372918 | 0         |  |
|              |      | Shiraz-36T | 378  | 0.179558 | 0         |  |
|              |      | Shiraz-46T | 943  | 0.093799 | 0         |  |
|              |      | Shiraz-77T | 1225 | 0        | -0.117922 |  |
|              |      | Shiraz-18T | 1434 | 0.244465 | 0         |  |
|              |      | Shiraz-22T | 1549 | 0        | -0.319623 |  |
|              |      | Shiraz-25T | 1698 | 0.21835  | 0         |  |
|              |      | Shiraz-28T | 1735 | 0.350744 | 0         |  |
|              |      | Shiraz-29T | 1778 | 0.120767 | 0         |  |
|              |      | Shiraz-32T | 1833 | 0.551336 | 0         |  |
|              |      | Shiraz-38T | 1951 | 0.250891 | 0         |  |
|              |      | Shiraz-53T | 2078 | 0.287202 | 0         |  |
|              |      | Shiraz-71T | 2238 | 0.603631 | 0         |  |
|              |      | Shiraz-3T  | 90   | 0.219276 | 0         |  |
|              |      | Shiraz-4T  | 253  | 0.372918 | 0         |  |
|              |      | Shiraz-36T | 378  | 0.179558 | 0         |  |
|              |      | Shiraz-46T | 943  | 0.093799 | 0         |  |
|              |      | Shiraz-77T | 1225 | 0        | -0.117922 |  |
|              |      | Shiraz-18T | 1434 | 0.244465 | 0         |  |
|              |      | Shiraz-22T | 1549 | 0        | -0.319623 |  |
|              |      | Shiraz-25T | 1698 | 0.21835  | 0         |  |
|              |      | Shiraz-28T | 1735 | 0.350744 | 0         |  |
|              |      | Shiraz-29T | 1778 | 0.120767 | 0         |  |
|              |      | Shiraz-32T | 1833 | 0.551336 | 0         |  |
|              |      | Shiraz-38T | 1951 | 0.250891 | 0         |  |
|              |      | Shiraz-53T | 2078 | 0.287202 | 0         |  |
|              |      | Shiraz-71T | 2238 | 0.603631 | 0         |  |
| LOC100272228 | chrX | Shiraz-3T  | 242  | 0        | -0.336434 |  |
|              |      | Shiraz-4T  | 261  | 0        | -0.336249 |  |
|              |      | Shiraz-16T | 295  | 0.591657 | 0         |  |
|              |      | Shiraz-36T | 433  | 0        | -0.803961 |  |
|              |      | Shiraz-42T | 480  | 0        | -0.232915 |  |
|              |      | Shiraz-44T | 899  | 0        | -1.09697  |  |
|              |      | Shiraz-49T | 1170 | 0        | -0.967436 |  |
|              |      | Shiraz-9T  | 1370 | 0.690073 | 0         |  |
|              |      | Shiraz-18T | 1457 | 0.643204 | 0         |  |
|              |      | Shiraz-22T | 1673 | 0.611783 | 0         |  |
|              |      | Shiraz-22T | 1678 | 0.911625 | 0         |  |
|              |      | Shiraz-25T | 1719 | 0.472955 | 0         |  |
|              |      | Shiraz-28T | 1762 | 0.562311 | 0         |  |
|              |      | Shiraz-29T | 1801 | 0.815343 | 0         |  |



|           |      |            |      |          |           |  |
|-----------|------|------------|------|----------|-----------|--|
|           |      | Shiraz-32T | 1870 | 0.729766 | 0         |  |
|           |      | Shiraz-35T | 1933 | 0.488535 | 0         |  |
|           |      | Shiraz-58T | 2223 | 0.833364 | 0         |  |
|           |      | Shiraz-58T | 2226 | 1.074663 | 0         |  |
|           |      | Shiraz-71T | 2263 | 0.975531 | 0         |  |
|           |      | Shiraz-3T  | 242  | 0        | -0.336434 |  |
|           |      | Shiraz-4T  | 261  | 0        | -0.336249 |  |
|           |      | Shiraz-16T | 295  | 0.591657 | 0         |  |
|           |      | Shiraz-36T | 433  | 0        | -0.803961 |  |
|           |      | Shiraz-42T | 480  | 0        | -0.232915 |  |
|           |      | Shiraz-44T | 899  | 0        | -1.09697  |  |
|           |      | Shiraz-49T | 1170 | 0        | -0.967436 |  |
|           |      | Shiraz-9T  | 1370 | 0.690073 | 0         |  |
|           |      | Shiraz-18T | 1457 | 0.643204 | 0         |  |
|           |      | Shiraz-22T | 1673 | 0.611783 | 0         |  |
|           |      | Shiraz-22T | 1678 | 0.911625 | 0         |  |
|           |      | Shiraz-25T | 1719 | 0.472955 | 0         |  |
|           |      | Shiraz-28T | 1762 | 0.562311 | 0         |  |
|           |      | Shiraz-29T | 1801 | 0.815343 | 0         |  |
|           |      | Shiraz-32T | 1870 | 0.729766 | 0         |  |
|           |      | Shiraz-35T | 1933 | 0.488535 | 0         |  |
|           |      | Shiraz-58T | 2223 | 0.833364 | 0         |  |
|           |      | Shiraz-58T | 2226 | 1.074663 | 0         |  |
|           |      | Shiraz-71T | 2263 | 0.975531 | 0         |  |
|           |      | Shiraz-3T  | 242  | 0        | -0.336434 |  |
|           |      | Shiraz-4T  | 261  | 0        | -0.336249 |  |
|           |      | Shiraz-16T | 295  | 0.591657 | 0         |  |
|           |      | Shiraz-36T | 433  | 0        | -0.803961 |  |
|           |      | Shiraz-42T | 480  | 0        | -0.232915 |  |
|           |      | Shiraz-44T | 899  | 0        | -1.09697  |  |
|           |      | Shiraz-49T | 1170 | 0        | -0.967436 |  |
|           |      | Shiraz-9T  | 1370 | 0.690073 | 0         |  |
|           |      | Shiraz-18T | 1457 | 0.643204 | 0         |  |
|           |      | Shiraz-22T | 1673 | 0.611783 | 0         |  |
|           |      | Shiraz-22T | 1678 | 0.911625 | 0         |  |
|           |      | Shiraz-25T | 1719 | 0.472955 | 0         |  |
|           |      | Shiraz-28T | 1762 | 0.562311 | 0         |  |
|           |      | Shiraz-29T | 1801 | 0.815343 | 0         |  |
|           |      | Shiraz-32T | 1870 | 0.729766 | 0         |  |
|           |      | Shiraz-35T | 1933 | 0.488535 | 0         |  |
|           |      | Shiraz-58T | 2223 | 0.833364 | 0         |  |
|           |      | Shiraz-58T | 2226 | 1.074663 | 0         |  |
|           |      | Shiraz-71T | 2263 | 0.975531 | 0         |  |
| LOC136157 | chr7 | Shiraz-3T  | 90   | 0.219276 | 0         |  |
|           |      | Shiraz-3T  | 95   | 0        | -0.077623 |  |
|           |      | Shiraz-4T  | 253  | 0.372918 | 0         |  |
|           |      | Shiraz-36T | 378  | 0.179558 | 0         |  |

|  |            |      |          |           |  |
|--|------------|------|----------|-----------|--|
|  | Shiraz-36T | 382  | 0.081739 | 0         |  |
|  | Shiraz-44T | 641  | 0        | -0.477846 |  |
|  | Shiraz-46T | 943  | 0.093799 | 0         |  |
|  | Shiraz-46T | 947  | 0        | -0.010843 |  |
|  | Shiraz-47T | 1031 | 0        | -0.117529 |  |
|  | Shiraz-49T | 1121 | 0        | -0.138569 |  |
|  | Shiraz-77T | 1225 | 0        | -0.117922 |  |
|  | Shiraz-77T | 1228 | 0        | -0.238084 |  |
|  | Shiraz-18T | 1434 | 0.244465 | 0         |  |
|  | Shiraz-22T | 1549 | 0        | -0.319623 |  |
|  | Shiraz-22T | 1552 | 0        | -0.50686  |  |
|  | Shiraz-25T | 1698 | 0.21835  | 0         |  |
|  | Shiraz-28T | 1735 | 0.350744 | 0         |  |
|  | Shiraz-29T | 1778 | 0.120767 | 0         |  |
|  | Shiraz-32T | 1833 | 0.551336 | 0         |  |
|  | Shiraz-32T | 1835 | 0.092727 | 0         |  |
|  | Shiraz-38T | 1951 | 0.250891 | 0         |  |
|  | Shiraz-53T | 2078 | 0.287202 | 0         |  |
|  | Shiraz-58T | 2161 | 0        | -0.187744 |  |
|  | Shiraz-71T | 2238 | 0.603631 | 0         |  |
|  | Shiraz-3T  | 90   | 0.219276 | 0         |  |
|  | Shiraz-3T  | 95   | 0        | -0.077623 |  |
|  | Shiraz-4T  | 253  | 0.372918 | 0         |  |
|  | Shiraz-36T | 378  | 0.179558 | 0         |  |
|  | Shiraz-36T | 382  | 0.081739 | 0         |  |
|  | Shiraz-44T | 641  | 0        | -0.477846 |  |
|  | Shiraz-46T | 943  | 0.093799 | 0         |  |
|  | Shiraz-46T | 947  | 0        | -0.010843 |  |
|  | Shiraz-47T | 1031 | 0        | -0.117529 |  |
|  | Shiraz-49T | 1121 | 0        | -0.138569 |  |
|  | Shiraz-77T | 1225 | 0        | -0.117922 |  |
|  | Shiraz-77T | 1228 | 0        | -0.238084 |  |
|  | Shiraz-18T | 1434 | 0.244465 | 0         |  |
|  | Shiraz-22T | 1549 | 0        | -0.319623 |  |
|  | Shiraz-22T | 1552 | 0        | -0.50686  |  |
|  | Shiraz-25T | 1698 | 0.21835  | 0         |  |
|  | Shiraz-28T | 1735 | 0.350744 | 0         |  |
|  | Shiraz-29T | 1778 | 0.120767 | 0         |  |
|  | Shiraz-32T | 1833 | 0.551336 | 0         |  |
|  | Shiraz-32T | 1835 | 0.092727 | 0         |  |
|  | Shiraz-38T | 1951 | 0.250891 | 0         |  |
|  | Shiraz-53T | 2078 | 0.287202 | 0         |  |
|  | Shiraz-58T | 2161 | 0        | -0.187744 |  |
|  | Shiraz-71T | 2238 | 0.603631 | 0         |  |
|  | Shiraz-3T  | 90   | 0.219276 | 0         |  |
|  | Shiraz-3T  | 95   | 0        | -0.077623 |  |
|  | Shiraz-4T  | 253  | 0.372918 | 0         |  |

|           |      |            |      |          |           |  |
|-----------|------|------------|------|----------|-----------|--|
|           |      | Shiraz-36T | 378  | 0.179558 | 0         |  |
|           |      | Shiraz-36T | 382  | 0.081739 | 0         |  |
|           |      | Shiraz-44T | 641  | 0        | -0.477846 |  |
|           |      | Shiraz-46T | 943  | 0.093799 | 0         |  |
|           |      | Shiraz-46T | 947  | 0        | -0.010843 |  |
|           |      | Shiraz-47T | 1031 | 0        | -0.117529 |  |
|           |      | Shiraz-49T | 1121 | 0        | -0.138569 |  |
|           |      | Shiraz-77T | 1225 | 0        | -0.117922 |  |
|           |      | Shiraz-77T | 1228 | 0        | -0.238084 |  |
|           |      | Shiraz-18T | 1434 | 0.244465 | 0         |  |
|           |      | Shiraz-22T | 1549 | 0        | -0.319623 |  |
|           |      | Shiraz-22T | 1552 | 0        | -0.50686  |  |
|           |      | Shiraz-25T | 1698 | 0.21835  | 0         |  |
|           |      | Shiraz-28T | 1735 | 0.350744 | 0         |  |
|           |      | Shiraz-29T | 1778 | 0.120767 | 0         |  |
|           |      | Shiraz-32T | 1833 | 0.551336 | 0         |  |
|           |      | Shiraz-32T | 1835 | 0.092727 | 0         |  |
|           |      | Shiraz-38T | 1951 | 0.250891 | 0         |  |
|           |      | Shiraz-53T | 2078 | 0.287202 | 0         |  |
|           |      | Shiraz-58T | 2161 | 0        | -0.187744 |  |
|           |      | Shiraz-71T | 2238 | 0.603631 | 0         |  |
| LOC136242 | chr7 | Shiraz-3T  | 90   | 0.219276 | 0         |  |
|           |      | Shiraz-4T  | 253  | 0.372918 | 0         |  |
|           |      | Shiraz-36T | 378  | 0.179558 | 0         |  |
|           |      | Shiraz-46T | 943  | 0.093799 | 0         |  |
|           |      | Shiraz-77T | 1225 | 0        | -0.117922 |  |
|           |      | Shiraz-9T  | 1325 | 0.221899 | 0         |  |
|           |      | Shiraz-18T | 1434 | 0.244465 | 0         |  |
|           |      | Shiraz-25T | 1698 | 0.21835  | 0         |  |
|           |      | Shiraz-28T | 1735 | 0.350744 | 0         |  |
|           |      | Shiraz-29T | 1778 | 0.120767 | 0         |  |
|           |      | Shiraz-32T | 1833 | 0.551336 | 0         |  |
|           |      | Shiraz-38T | 1951 | 0.250891 | 0         |  |
|           |      | Shiraz-53T | 2078 | 0.287202 | 0         |  |
|           |      | Shiraz-58T | 2162 | 0.221505 | 0         |  |
|           |      | Shiraz-71T | 2238 | 0.603631 | 0         |  |
|           |      | Shiraz-3T  | 90   | 0.219276 | 0         |  |
|           |      | Shiraz-4T  | 253  | 0.372918 | 0         |  |
|           |      | Shiraz-36T | 378  | 0.179558 | 0         |  |
|           |      | Shiraz-46T | 943  | 0.093799 | 0         |  |
|           |      | Shiraz-77T | 1225 | 0        | -0.117922 |  |
|           |      | Shiraz-9T  | 1325 | 0.221899 | 0         |  |
|           |      | Shiraz-18T | 1434 | 0.244465 | 0         |  |
|           |      | Shiraz-25T | 1698 | 0.21835  | 0         |  |
|           |      | Shiraz-28T | 1735 | 0.350744 | 0         |  |
|           |      | Shiraz-29T | 1778 | 0.120767 | 0         |  |
|           |      | Shiraz-32T | 1833 | 0.551336 | 0         |  |

|           |      |            |      |          |           |  |
|-----------|------|------------|------|----------|-----------|--|
|           |      | Shiraz-38T | 1951 | 0.250891 | 0         |  |
|           |      | Shiraz-53T | 2078 | 0.287202 | 0         |  |
|           |      | Shiraz-58T | 2162 | 0.221505 | 0         |  |
|           |      | Shiraz-71T | 2238 | 0.603631 | 0         |  |
|           |      | Shiraz-3T  | 90   | 0.219276 | 0         |  |
|           |      | Shiraz-4T  | 253  | 0.372918 | 0         |  |
|           |      | Shiraz-36T | 378  | 0.179558 | 0         |  |
|           |      | Shiraz-46T | 943  | 0.093799 | 0         |  |
|           |      | Shiraz-77T | 1225 | 0        | -0.117922 |  |
|           |      | Shiraz-9T  | 1325 | 0.221899 | 0         |  |
|           |      | Shiraz-18T | 1434 | 0.244465 | 0         |  |
|           |      | Shiraz-25T | 1698 | 0.21835  | 0         |  |
|           |      | Shiraz-28T | 1735 | 0.350744 | 0         |  |
|           |      | Shiraz-29T | 1778 | 0.120767 | 0         |  |
|           |      | Shiraz-32T | 1833 | 0.551336 | 0         |  |
|           |      | Shiraz-38T | 1951 | 0.250891 | 0         |  |
|           |      | Shiraz-53T | 2078 | 0.287202 | 0         |  |
|           |      | Shiraz-58T | 2162 | 0.221505 | 0         |  |
|           |      | Shiraz-71T | 2238 | 0.603631 | 0         |  |
| LOC153684 | chr5 | Shiraz-4T  | 250  | 0.262252 | 0         |  |
|           |      | Shiraz-16T | 266  | 0.321724 | 0         |  |
|           |      | Shiraz-44T | 591  | 0        | -0.233934 |  |
|           |      | Shiraz-18T | 1429 | 0        | -0.314125 |  |
|           |      | Shiraz-22T | 1522 | 0        | -0.322688 |  |
|           |      | Shiraz-25T | 1694 | 0.201602 | 0         |  |
|           |      | Shiraz-28T | 1731 | 0.295447 | 0         |  |
|           |      | Shiraz-29T | 1773 | 0.090981 | 0         |  |
|           |      | Shiraz-40T | 2016 | 0.376634 | 0         |  |
|           |      | Shiraz-4T  | 250  | 0.262252 | 0         |  |
|           |      | Shiraz-16T | 266  | 0.321724 | 0         |  |
|           |      | Shiraz-44T | 591  | 0        | -0.233934 |  |
|           |      | Shiraz-18T | 1429 | 0        | -0.314125 |  |
|           |      | Shiraz-22T | 1522 | 0        | -0.322688 |  |
|           |      | Shiraz-25T | 1694 | 0.201602 | 0         |  |
|           |      | Shiraz-28T | 1731 | 0.295447 | 0         |  |
|           |      | Shiraz-29T | 1773 | 0.090981 | 0         |  |
|           |      | Shiraz-40T | 2016 | 0.376634 | 0         |  |
|           |      | Shiraz-4T  | 250  | 0.262252 | 0         |  |
|           |      | Shiraz-16T | 266  | 0.321724 | 0         |  |
|           |      | Shiraz-44T | 591  | 0        | -0.233934 |  |
|           |      | Shiraz-18T | 1429 | 0        | -0.314125 |  |
|           |      | Shiraz-22T | 1522 | 0        | -0.322688 |  |
|           |      | Shiraz-25T | 1694 | 0.201602 | 0         |  |
|           |      | Shiraz-28T | 1731 | 0.295447 | 0         |  |
|           |      | Shiraz-29T | 1773 | 0.090981 | 0         |  |
|           |      | Shiraz-40T | 2016 | 0.376634 | 0         |  |
| LOC154761 | chr7 | Shiraz-3T  | 90   | 0.219276 | 0         |  |

|           |      |            |      |          |           |  |
|-----------|------|------------|------|----------|-----------|--|
|           |      | Shiraz-4T  | 253  | 0.372918 | 0         |  |
|           |      | Shiraz-36T | 378  | 0.179558 | 0         |  |
|           |      | Shiraz-46T | 943  | 0.093799 | 0         |  |
|           |      | Shiraz-77T | 1225 | 0        | -0.117922 |  |
|           |      | Shiraz-9T  | 1325 | 0.221899 | 0         |  |
|           |      | Shiraz-18T | 1434 | 0.244465 | 0         |  |
|           |      | Shiraz-25T | 1698 | 0.21835  | 0         |  |
|           |      | Shiraz-28T | 1735 | 0.350744 | 0         |  |
|           |      | Shiraz-29T | 1778 | 0.120767 | 0         |  |
|           |      | Shiraz-32T | 1833 | 0.551336 | 0         |  |
|           |      | Shiraz-38T | 1951 | 0.250891 | 0         |  |
|           |      | Shiraz-53T | 2078 | 0.287202 | 0         |  |
|           |      | Shiraz-58T | 2162 | 0.221505 | 0         |  |
|           |      | Shiraz-71T | 2238 | 0.603631 | 0         |  |
|           |      | Shiraz-3T  | 90   | 0.219276 | 0         |  |
|           |      | Shiraz-4T  | 253  | 0.372918 | 0         |  |
|           |      | Shiraz-36T | 378  | 0.179558 | 0         |  |
|           |      | Shiraz-46T | 943  | 0.093799 | 0         |  |
|           |      | Shiraz-77T | 1225 | 0        | -0.117922 |  |
|           |      | Shiraz-9T  | 1325 | 0.221899 | 0         |  |
|           |      | Shiraz-18T | 1434 | 0.244465 | 0         |  |
|           |      | Shiraz-25T | 1698 | 0.21835  | 0         |  |
|           |      | Shiraz-28T | 1735 | 0.350744 | 0         |  |
|           |      | Shiraz-29T | 1778 | 0.120767 | 0         |  |
|           |      | Shiraz-32T | 1833 | 0.551336 | 0         |  |
|           |      | Shiraz-38T | 1951 | 0.250891 | 0         |  |
|           |      | Shiraz-53T | 2078 | 0.287202 | 0         |  |
|           |      | Shiraz-58T | 2162 | 0.221505 | 0         |  |
|           |      | Shiraz-71T | 2238 | 0.603631 | 0         |  |
|           |      | Shiraz-3T  | 90   | 0.219276 | 0         |  |
|           |      | Shiraz-4T  | 253  | 0.372918 | 0         |  |
|           |      | Shiraz-36T | 378  | 0.179558 | 0         |  |
|           |      | Shiraz-46T | 943  | 0.093799 | 0         |  |
|           |      | Shiraz-77T | 1225 | 0        | -0.117922 |  |
|           |      | Shiraz-9T  | 1325 | 0.221899 | 0         |  |
|           |      | Shiraz-18T | 1434 | 0.244465 | 0         |  |
|           |      | Shiraz-25T | 1698 | 0.21835  | 0         |  |
|           |      | Shiraz-28T | 1735 | 0.350744 | 0         |  |
|           |      | Shiraz-29T | 1778 | 0.120767 | 0         |  |
|           |      | Shiraz-32T | 1833 | 0.551336 | 0         |  |
|           |      | Shiraz-38T | 1951 | 0.250891 | 0         |  |
|           |      | Shiraz-53T | 2078 | 0.287202 | 0         |  |
|           |      | Shiraz-58T | 2162 | 0.221505 | 0         |  |
|           |      | Shiraz-71T | 2238 | 0.603631 | 0         |  |
| LOC158572 | chrX | Shiraz-4T  | 260  | 0        | -0.324128 |  |
|           |      | Shiraz-16T | 294  | 0.655804 | 0         |  |
|           |      | Shiraz-31T | 345  | 0.103301 | 0         |  |

|  |            |      |          |           |  |
|--|------------|------|----------|-----------|--|
|  | Shiraz-36T | 431  | 0        | -0.78035  |  |
|  | Shiraz-36T | 432  | 0        | -0.6692   |  |
|  | Shiraz-44T | 891  | 0        | -0.954044 |  |
|  | Shiraz-49T | 1166 | 0        | -0.917235 |  |
|  | Shiraz-77T | 1282 | 0.213849 | 0         |  |
|  | Shiraz-9T  | 1368 | 0.199713 | 0         |  |
|  | Shiraz-18T | 1455 | 0        | -0.186773 |  |
|  | Shiraz-22T | 1669 | 0.695915 | 0         |  |
|  | Shiraz-25T | 1717 | 0.420447 | 0         |  |
|  | Shiraz-28T | 1760 | 0.538181 | 0         |  |
|  | Shiraz-29T | 1800 | 0.672527 | 0         |  |
|  | Shiraz-32T | 1869 | 0.776805 | 0         |  |
|  | Shiraz-35T | 1932 | 0.507141 | 0         |  |
|  | Shiraz-58T | 2221 | 0.871948 | 0         |  |
|  | Shiraz-71T | 2260 | 0.68394  | 0         |  |
|  | Shiraz-71T | 2262 | 0.986748 | 0         |  |
|  | Shiraz-4T  | 260  | 0        | -0.324128 |  |
|  | Shiraz-16T | 294  | 0.655804 | 0         |  |
|  | Shiraz-31T | 345  | 0.103301 | 0         |  |
|  | Shiraz-36T | 431  | 0        | -0.78035  |  |
|  | Shiraz-36T | 432  | 0        | -0.6692   |  |
|  | Shiraz-44T | 891  | 0        | -0.954044 |  |
|  | Shiraz-49T | 1166 | 0        | -0.917235 |  |
|  | Shiraz-77T | 1282 | 0.213849 | 0         |  |
|  | Shiraz-9T  | 1368 | 0.199713 | 0         |  |
|  | Shiraz-18T | 1455 | 0        | -0.186773 |  |
|  | Shiraz-22T | 1669 | 0.695915 | 0         |  |
|  | Shiraz-25T | 1717 | 0.420447 | 0         |  |
|  | Shiraz-28T | 1760 | 0.538181 | 0         |  |
|  | Shiraz-29T | 1800 | 0.672527 | 0         |  |
|  | Shiraz-32T | 1869 | 0.776805 | 0         |  |
|  | Shiraz-35T | 1932 | 0.507141 | 0         |  |
|  | Shiraz-58T | 2221 | 0.871948 | 0         |  |
|  | Shiraz-71T | 2260 | 0.68394  | 0         |  |
|  | Shiraz-71T | 2262 | 0.986748 | 0         |  |
|  | Shiraz-4T  | 260  | 0        | -0.324128 |  |
|  | Shiraz-16T | 294  | 0.655804 | 0         |  |
|  | Shiraz-31T | 345  | 0.103301 | 0         |  |
|  | Shiraz-36T | 431  | 0        | -0.78035  |  |
|  | Shiraz-36T | 432  | 0        | -0.6692   |  |
|  | Shiraz-44T | 891  | 0        | -0.954044 |  |
|  | Shiraz-49T | 1166 | 0        | -0.917235 |  |
|  | Shiraz-77T | 1282 | 0.213849 | 0         |  |
|  | Shiraz-9T  | 1368 | 0.199713 | 0         |  |
|  | Shiraz-18T | 1455 | 0        | -0.186773 |  |
|  | Shiraz-22T | 1669 | 0.695915 | 0         |  |
|  | Shiraz-25T | 1717 | 0.420447 | 0         |  |

|           |      |            |      |          |           |  |
|-----------|------|------------|------|----------|-----------|--|
|           |      | Shiraz-28T | 1760 | 0.538181 | 0         |  |
|           |      | Shiraz-29T | 1800 | 0.672527 | 0         |  |
|           |      | Shiraz-32T | 1869 | 0.776805 | 0         |  |
|           |      | Shiraz-35T | 1932 | 0.507141 | 0         |  |
|           |      | Shiraz-58T | 2221 | 0.871948 | 0         |  |
|           |      | Shiraz-71T | 2260 | 0.68394  | 0         |  |
|           |      | Shiraz-71T | 2262 | 0.986748 | 0         |  |
| LOC158696 | chrX | Shiraz-3T  | 242  | 0        | -0.336434 |  |
|           |      | Shiraz-4T  | 261  | 0        | -0.336249 |  |
|           |      | Shiraz-16T | 295  | 0.591657 | 0         |  |
|           |      | Shiraz-36T | 433  | 0        | -0.803961 |  |
|           |      | Shiraz-44T | 899  | 0        | -1.09697  |  |
|           |      | Shiraz-49T | 1170 | 0        | -0.967436 |  |
|           |      | Shiraz-9T  | 1370 | 0.690073 | 0         |  |
|           |      | Shiraz-18T | 1457 | 0.643204 | 0         |  |
|           |      | Shiraz-22T | 1673 | 0.611783 | 0         |  |
|           |      | Shiraz-25T | 1719 | 0.472955 | 0         |  |
|           |      | Shiraz-28T | 1762 | 0.562311 | 0         |  |
|           |      | Shiraz-29T | 1801 | 0.815343 | 0         |  |
|           |      | Shiraz-32T | 1870 | 0.729766 | 0         |  |
|           |      | Shiraz-35T | 1933 | 0.488535 | 0         |  |
|           |      | Shiraz-58T | 2223 | 0.833364 | 0         |  |
|           |      | Shiraz-71T | 2263 | 0.975531 | 0         |  |
|           |      | Shiraz-3T  | 242  | 0        | -0.336434 |  |
|           |      | Shiraz-4T  | 261  | 0        | -0.336249 |  |
|           |      | Shiraz-16T | 295  | 0.591657 | 0         |  |
|           |      | Shiraz-36T | 433  | 0        | -0.803961 |  |
|           |      | Shiraz-44T | 899  | 0        | -1.09697  |  |
|           |      | Shiraz-49T | 1170 | 0        | -0.967436 |  |
|           |      | Shiraz-9T  | 1370 | 0.690073 | 0         |  |
|           |      | Shiraz-18T | 1457 | 0.643204 | 0         |  |
|           |      | Shiraz-22T | 1673 | 0.611783 | 0         |  |
|           |      | Shiraz-25T | 1719 | 0.472955 | 0         |  |
|           |      | Shiraz-28T | 1762 | 0.562311 | 0         |  |
|           |      | Shiraz-29T | 1801 | 0.815343 | 0         |  |
|           |      | Shiraz-32T | 1870 | 0.729766 | 0         |  |
|           |      | Shiraz-35T | 1933 | 0.488535 | 0         |  |
|           |      | Shiraz-58T | 2223 | 0.833364 | 0         |  |
|           |      | Shiraz-71T | 2263 | 0.975531 | 0         |  |
|           |      | Shiraz-3T  | 242  | 0        | -0.336434 |  |
|           |      | Shiraz-4T  | 261  | 0        | -0.336249 |  |
|           |      | Shiraz-16T | 295  | 0.591657 | 0         |  |
|           |      | Shiraz-36T | 433  | 0        | -0.803961 |  |
|           |      | Shiraz-44T | 899  | 0        | -1.09697  |  |
|           |      | Shiraz-49T | 1170 | 0        | -0.967436 |  |
|           |      | Shiraz-9T  | 1370 | 0.690073 | 0         |  |
|           |      | Shiraz-18T | 1457 | 0.643204 | 0         |  |

|           |      |            |      |          |           |  |
|-----------|------|------------|------|----------|-----------|--|
|           |      | Shiraz-22T | 1673 | 0.611783 | 0         |  |
|           |      | Shiraz-25T | 1719 | 0.472955 | 0         |  |
|           |      | Shiraz-28T | 1762 | 0.562311 | 0         |  |
|           |      | Shiraz-29T | 1801 | 0.815343 | 0         |  |
|           |      | Shiraz-32T | 1870 | 0.729766 | 0         |  |
|           |      | Shiraz-35T | 1933 | 0.488535 | 0         |  |
|           |      | Shiraz-58T | 2223 | 0.833364 | 0         |  |
|           |      | Shiraz-71T | 2263 | 0.975531 | 0         |  |
| LOC285941 | chr7 | Shiraz-3T  | 87   | 0.198593 | 0         |  |
|           |      | Shiraz-4T  | 252  | 0.192083 | 0         |  |
|           |      | Shiraz-36T | 376  | 0.159952 | 0         |  |
|           |      | Shiraz-46T | 942  | 0.069143 | 0         |  |
|           |      | Shiraz-18T | 1433 | 0.250973 | 0         |  |
|           |      | Shiraz-25T | 1697 | 0.21945  | 0         |  |
|           |      | Shiraz-28T | 1734 | 0.362882 | 0         |  |
|           |      | Shiraz-29T | 1777 | 0.156747 | 0         |  |
|           |      | Shiraz-38T | 1950 | 0.265916 | 0         |  |
|           |      | Shiraz-71T | 2236 | 0.320072 | 0         |  |
|           |      | Shiraz-3T  | 87   | 0.198593 | 0         |  |
|           |      | Shiraz-4T  | 252  | 0.192083 | 0         |  |
|           |      | Shiraz-36T | 376  | 0.159952 | 0         |  |
|           |      | Shiraz-46T | 942  | 0.069143 | 0         |  |
|           |      | Shiraz-18T | 1433 | 0.250973 | 0         |  |
|           |      | Shiraz-25T | 1697 | 0.21945  | 0         |  |
|           |      | Shiraz-28T | 1734 | 0.362882 | 0         |  |
|           |      | Shiraz-29T | 1777 | 0.156747 | 0         |  |
|           |      | Shiraz-38T | 1950 | 0.265916 | 0         |  |
|           |      | Shiraz-71T | 2236 | 0.320072 | 0         |  |
|           |      | Shiraz-3T  | 87   | 0.198593 | 0         |  |
|           |      | Shiraz-4T  | 252  | 0.192083 | 0         |  |
|           |      | Shiraz-36T | 376  | 0.159952 | 0         |  |
|           |      | Shiraz-46T | 942  | 0.069143 | 0         |  |
|           |      | Shiraz-18T | 1433 | 0.250973 | 0         |  |
|           |      | Shiraz-25T | 1697 | 0.21945  | 0         |  |
|           |      | Shiraz-28T | 1734 | 0.362882 | 0         |  |
|           |      | Shiraz-29T | 1777 | 0.156747 | 0         |  |
|           |      | Shiraz-38T | 1950 | 0.265916 | 0         |  |
|           |      | Shiraz-71T | 2236 | 0.320072 | 0         |  |
| LOC285954 | chr7 | Shiraz-3T  | 87   | 0.198593 | 0         |  |
|           |      | Shiraz-3T  | 87   | 0.198593 | 0         |  |
|           |      | Shiraz-4T  | 252  | 0.192083 | 0         |  |
|           |      | Shiraz-4T  | 252  | 0.192083 | 0         |  |
|           |      | Shiraz-36T | 376  | 0.159952 | 0         |  |
|           |      | Shiraz-36T | 376  | 0.159952 | 0         |  |
|           |      | Shiraz-44T | 631  | 0        | -0.180312 |  |
|           |      | Shiraz-44T | 631  | 0        | -0.180312 |  |
|           |      | Shiraz-46T | 942  | 0.069143 | 0         |  |



|  |  |            |      |          |           |  |  |
|--|--|------------|------|----------|-----------|--|--|
|  |  | Shiraz-46T | 942  | 0.069143 | 0         |  |  |
|  |  | Shiraz-18T | 1433 | 0.250973 | 0         |  |  |
|  |  | Shiraz-18T | 1433 | 0.250973 | 0         |  |  |
|  |  | Shiraz-25T | 1697 | 0.21945  | 0         |  |  |
|  |  | Shiraz-25T | 1697 | 0.21945  | 0         |  |  |
|  |  | Shiraz-28T | 1734 | 0.362882 | 0         |  |  |
|  |  | Shiraz-28T | 1734 | 0.362882 | 0         |  |  |
|  |  | Shiraz-29T | 1777 | 0.156747 | 0         |  |  |
|  |  | Shiraz-29T | 1777 | 0.156747 | 0         |  |  |
|  |  | Shiraz-38T | 1950 | 0.265916 | 0         |  |  |
|  |  | Shiraz-38T | 1950 | 0.265916 | 0         |  |  |
|  |  | Shiraz-71T | 2236 | 0.320072 | 0         |  |  |
|  |  | Shiraz-71T | 2236 | 0.320072 | 0         |  |  |
|  |  | Shiraz-72T | 2277 | 0        | -0.398869 |  |  |
|  |  | Shiraz-72T | 2277 | 0        | -0.398869 |  |  |
|  |  | Shiraz-3T  | 87   | 0.198593 | 0         |  |  |
|  |  | Shiraz-3T  | 87   | 0.198593 | 0         |  |  |
|  |  | Shiraz-4T  | 252  | 0.192083 | 0         |  |  |
|  |  | Shiraz-4T  | 252  | 0.192083 | 0         |  |  |
|  |  | Shiraz-36T | 376  | 0.159952 | 0         |  |  |
|  |  | Shiraz-36T | 376  | 0.159952 | 0         |  |  |
|  |  | Shiraz-44T | 631  | 0        | -0.180312 |  |  |
|  |  | Shiraz-44T | 631  | 0        | -0.180312 |  |  |
|  |  | Shiraz-46T | 942  | 0.069143 | 0         |  |  |
|  |  | Shiraz-46T | 942  | 0.069143 | 0         |  |  |
|  |  | Shiraz-18T | 1433 | 0.250973 | 0         |  |  |
|  |  | Shiraz-18T | 1433 | 0.250973 | 0         |  |  |
|  |  | Shiraz-25T | 1697 | 0.21945  | 0         |  |  |
|  |  | Shiraz-25T | 1697 | 0.21945  | 0         |  |  |
|  |  | Shiraz-28T | 1734 | 0.362882 | 0         |  |  |
|  |  | Shiraz-28T | 1734 | 0.362882 | 0         |  |  |
|  |  | Shiraz-29T | 1777 | 0.156747 | 0         |  |  |
|  |  | Shiraz-29T | 1777 | 0.156747 | 0         |  |  |
|  |  | Shiraz-38T | 1950 | 0.265916 | 0         |  |  |
|  |  | Shiraz-38T | 1950 | 0.265916 | 0         |  |  |
|  |  | Shiraz-71T | 2236 | 0.320072 | 0         |  |  |
|  |  | Shiraz-71T | 2236 | 0.320072 | 0         |  |  |
|  |  | Shiraz-72T | 2277 | 0        | -0.398869 |  |  |
|  |  | Shiraz-72T | 2277 | 0        | -0.398869 |  |  |
|  |  | Shiraz-3T  | 87   | 0.198593 | 0         |  |  |
|  |  | Shiraz-3T  | 87   | 0.198593 | 0         |  |  |
|  |  | Shiraz-4T  | 252  | 0.192083 | 0         |  |  |
|  |  | Shiraz-4T  | 252  | 0.192083 | 0         |  |  |
|  |  | Shiraz-36T | 376  | 0.159952 | 0         |  |  |
|  |  | Shiraz-36T | 376  | 0.159952 | 0         |  |  |
|  |  | Shiraz-44T | 631  | 0        | -0.180312 |  |  |
|  |  | Shiraz-44T | 631  | 0        | -0.180312 |  |  |

|           |      |            |      |          |           |  |
|-----------|------|------------|------|----------|-----------|--|
|           |      | Shiraz-46T | 942  | 0.069143 | 0         |  |
|           |      | Shiraz-46T | 942  | 0.069143 | 0         |  |
|           |      | Shiraz-18T | 1433 | 0.250973 | 0         |  |
|           |      | Shiraz-18T | 1433 | 0.250973 | 0         |  |
|           |      | Shiraz-25T | 1697 | 0.21945  | 0         |  |
|           |      | Shiraz-25T | 1697 | 0.21945  | 0         |  |
|           |      | Shiraz-28T | 1734 | 0.362882 | 0         |  |
|           |      | Shiraz-28T | 1734 | 0.362882 | 0         |  |
|           |      | Shiraz-29T | 1777 | 0.156747 | 0         |  |
|           |      | Shiraz-29T | 1777 | 0.156747 | 0         |  |
|           |      | Shiraz-38T | 1950 | 0.265916 | 0         |  |
|           |      | Shiraz-38T | 1950 | 0.265916 | 0         |  |
|           |      | Shiraz-71T | 2236 | 0.320072 | 0         |  |
|           |      | Shiraz-71T | 2236 | 0.320072 | 0         |  |
|           |      | Shiraz-72T | 2277 | 0        | -0.398869 |  |
|           |      | Shiraz-72T | 2277 | 0        | -0.398869 |  |
| LOC286016 | chr7 | Shiraz-3T  | 90   | 0.219276 | 0         |  |
|           |      | Shiraz-3T  | 96   | 0.428308 | 0         |  |
|           |      | Shiraz-4T  | 253  | 0.372918 | 0         |  |
|           |      | Shiraz-31T | 317  | 0.204382 | 0         |  |
|           |      | Shiraz-36T | 378  | 0.179558 | 0         |  |
|           |      | Shiraz-44T | 642  | 0.408617 | 0         |  |
|           |      | Shiraz-46T | 943  | 0.093799 | 0         |  |
|           |      | Shiraz-47T | 1032 | 0.171484 | 0         |  |
|           |      | Shiraz-77T | 1225 | 0        | -0.117922 |  |
|           |      | Shiraz-77T | 1229 | 0.051661 | 0         |  |
|           |      | Shiraz-9T  | 1325 | 0.221899 | 0         |  |
|           |      | Shiraz-18T | 1434 | 0.244465 | 0         |  |
|           |      | Shiraz-25T | 1698 | 0.21835  | 0         |  |
|           |      | Shiraz-28T | 1735 | 0.350744 | 0         |  |
|           |      | Shiraz-29T | 1778 | 0.120767 | 0         |  |
|           |      | Shiraz-32T | 1833 | 0.551336 | 0         |  |
|           |      | Shiraz-38T | 1951 | 0.250891 | 0         |  |
|           |      | Shiraz-53T | 2078 | 0.287202 | 0         |  |
|           |      | Shiraz-71T | 2238 | 0.603631 | 0         |  |
|           |      | Shiraz-3T  | 90   | 0.219276 | 0         |  |
|           |      | Shiraz-3T  | 96   | 0.428308 | 0         |  |
|           |      | Shiraz-4T  | 253  | 0.372918 | 0         |  |
|           |      | Shiraz-31T | 317  | 0.204382 | 0         |  |
|           |      | Shiraz-36T | 378  | 0.179558 | 0         |  |
|           |      | Shiraz-44T | 642  | 0.408617 | 0         |  |
|           |      | Shiraz-46T | 943  | 0.093799 | 0         |  |
|           |      | Shiraz-47T | 1032 | 0.171484 | 0         |  |
|           |      | Shiraz-77T | 1225 | 0        | -0.117922 |  |
|           |      | Shiraz-77T | 1229 | 0.051661 | 0         |  |
|           |      | Shiraz-9T  | 1325 | 0.221899 | 0         |  |
|           |      | Shiraz-18T | 1434 | 0.244465 | 0         |  |

|           |      |            |      |          |           |  |
|-----------|------|------------|------|----------|-----------|--|
|           |      | Shiraz-25T | 1698 | 0.21835  | 0         |  |
|           |      | Shiraz-28T | 1735 | 0.350744 | 0         |  |
|           |      | Shiraz-29T | 1778 | 0.120767 | 0         |  |
|           |      | Shiraz-32T | 1833 | 0.551336 | 0         |  |
|           |      | Shiraz-38T | 1951 | 0.250891 | 0         |  |
|           |      | Shiraz-53T | 2078 | 0.287202 | 0         |  |
|           |      | Shiraz-71T | 2238 | 0.603631 | 0         |  |
|           |      | Shiraz-3T  | 90   | 0.219276 | 0         |  |
|           |      | Shiraz-3T  | 96   | 0.428308 | 0         |  |
|           |      | Shiraz-4T  | 253  | 0.372918 | 0         |  |
|           |      | Shiraz-31T | 317  | 0.204382 | 0         |  |
|           |      | Shiraz-36T | 378  | 0.179558 | 0         |  |
|           |      | Shiraz-44T | 642  | 0.408617 | 0         |  |
|           |      | Shiraz-46T | 943  | 0.093799 | 0         |  |
|           |      | Shiraz-47T | 1032 | 0.171484 | 0         |  |
|           |      | Shiraz-77T | 1225 | 0        | -0.117922 |  |
|           |      | Shiraz-77T | 1229 | 0.051661 | 0         |  |
|           |      | Shiraz-9T  | 1325 | 0.221899 | 0         |  |
|           |      | Shiraz-18T | 1434 | 0.244465 | 0         |  |
|           |      | Shiraz-25T | 1698 | 0.21835  | 0         |  |
|           |      | Shiraz-28T | 1735 | 0.350744 | 0         |  |
|           |      | Shiraz-29T | 1778 | 0.120767 | 0         |  |
|           |      | Shiraz-32T | 1833 | 0.551336 | 0         |  |
|           |      | Shiraz-38T | 1951 | 0.250891 | 0         |  |
|           |      | Shiraz-53T | 2078 | 0.287202 | 0         |  |
|           |      | Shiraz-71T | 2238 | 0.603631 | 0         |  |
| LOC286467 | chrX | Shiraz-3T  | 242  | 0        | -0.336434 |  |
|           |      | Shiraz-4T  | 261  | 0        | -0.336249 |  |
|           |      | Shiraz-16T | 295  | 0.591657 | 0         |  |
|           |      | Shiraz-36T | 433  | 0        | -0.803961 |  |
|           |      | Shiraz-44T | 899  | 0        | -1.09697  |  |
|           |      | Shiraz-49T | 1170 | 0        | -0.967436 |  |
|           |      | Shiraz-9T  | 1370 | 0.690073 | 0         |  |
|           |      | Shiraz-18T | 1457 | 0.643204 | 0         |  |
|           |      | Shiraz-22T | 1673 | 0.611783 | 0         |  |
|           |      | Shiraz-22T | 1677 | 0.789711 | 0         |  |
|           |      | Shiraz-25T | 1719 | 0.472955 | 0         |  |
|           |      | Shiraz-28T | 1762 | 0.562311 | 0         |  |
|           |      | Shiraz-29T | 1801 | 0.815343 | 0         |  |
|           |      | Shiraz-32T | 1870 | 0.729766 | 0         |  |
|           |      | Shiraz-35T | 1933 | 0.488535 | 0         |  |
|           |      | Shiraz-58T | 2223 | 0.833364 | 0         |  |
|           |      | Shiraz-71T | 2263 | 0.975531 | 0         |  |
|           |      | Shiraz-3T  | 242  | 0        | -0.336434 |  |
|           |      | Shiraz-4T  | 261  | 0        | -0.336249 |  |
|           |      | Shiraz-16T | 295  | 0.591657 | 0         |  |
|           |      | Shiraz-36T | 433  | 0        | -0.803961 |  |

|           |      |            |      |          |           |  |  |
|-----------|------|------------|------|----------|-----------|--|--|
|           |      | Shiraz-44T | 899  | 0        | -1.09697  |  |  |
|           |      | Shiraz-49T | 1170 | 0        | -0.967436 |  |  |
|           |      | Shiraz-9T  | 1370 | 0.690073 | 0         |  |  |
|           |      | Shiraz-18T | 1457 | 0.643204 | 0         |  |  |
|           |      | Shiraz-22T | 1673 | 0.611783 | 0         |  |  |
|           |      | Shiraz-22T | 1677 | 0.789711 | 0         |  |  |
|           |      | Shiraz-25T | 1719 | 0.472955 | 0         |  |  |
|           |      | Shiraz-28T | 1762 | 0.562311 | 0         |  |  |
|           |      | Shiraz-29T | 1801 | 0.815343 | 0         |  |  |
|           |      | Shiraz-32T | 1870 | 0.729766 | 0         |  |  |
|           |      | Shiraz-35T | 1933 | 0.488535 | 0         |  |  |
|           |      | Shiraz-58T | 2223 | 0.833364 | 0         |  |  |
|           |      | Shiraz-71T | 2263 | 0.975531 | 0         |  |  |
|           |      | Shiraz-3T  | 242  | 0        | -0.336434 |  |  |
|           |      | Shiraz-4T  | 261  | 0        | -0.336249 |  |  |
|           |      | Shiraz-16T | 295  | 0.591657 | 0         |  |  |
|           |      | Shiraz-36T | 433  | 0        | -0.803961 |  |  |
|           |      | Shiraz-44T | 899  | 0        | -1.09697  |  |  |
|           |      | Shiraz-49T | 1170 | 0        | -0.967436 |  |  |
|           |      | Shiraz-9T  | 1370 | 0.690073 | 0         |  |  |
|           |      | Shiraz-18T | 1457 | 0.643204 | 0         |  |  |
|           |      | Shiraz-22T | 1673 | 0.611783 | 0         |  |  |
|           |      | Shiraz-22T | 1677 | 0.789711 | 0         |  |  |
|           |      | Shiraz-25T | 1719 | 0.472955 | 0         |  |  |
|           |      | Shiraz-28T | 1762 | 0.562311 | 0         |  |  |
|           |      | Shiraz-29T | 1801 | 0.815343 | 0         |  |  |
|           |      | Shiraz-32T | 1870 | 0.729766 | 0         |  |  |
|           |      | Shiraz-35T | 1933 | 0.488535 | 0         |  |  |
|           |      | Shiraz-58T | 2223 | 0.833364 | 0         |  |  |
|           |      | Shiraz-71T | 2263 | 0.975531 | 0         |  |  |
| LOC347475 | chrX | Shiraz-3T  | 242  | 0        | -0.336434 |  |  |
|           |      | Shiraz-4T  | 261  | 0        | -0.336249 |  |  |
|           |      | Shiraz-16T | 295  | 0.591657 | 0         |  |  |
|           |      | Shiraz-36T | 433  | 0        | -0.803961 |  |  |
|           |      | Shiraz-44T | 899  | 0        | -1.09697  |  |  |
|           |      | Shiraz-49T | 1170 | 0        | -0.967436 |  |  |
|           |      | Shiraz-9T  | 1370 | 0.690073 | 0         |  |  |
|           |      | Shiraz-18T | 1457 | 0.643204 | 0         |  |  |
|           |      | Shiraz-22T | 1673 | 0.611783 | 0         |  |  |
|           |      | Shiraz-22T | 1677 | 0.789711 | 0         |  |  |
|           |      | Shiraz-25T | 1719 | 0.472955 | 0         |  |  |
|           |      | Shiraz-28T | 1762 | 0.562311 | 0         |  |  |
|           |      | Shiraz-29T | 1801 | 0.815343 | 0         |  |  |
|           |      | Shiraz-32T | 1870 | 0.729766 | 0         |  |  |
|           |      | Shiraz-35T | 1933 | 0.488535 | 0         |  |  |
|           |      | Shiraz-58T | 2223 | 0.833364 | 0         |  |  |
|           |      | Shiraz-71T | 2263 | 0.975531 | 0         |  |  |

|           |      |            |      |          |           |  |  |
|-----------|------|------------|------|----------|-----------|--|--|
|           |      | Shiraz-3T  | 242  | 0        | -0.336434 |  |  |
|           |      | Shiraz-4T  | 261  | 0        | -0.336249 |  |  |
|           |      | Shiraz-16T | 295  | 0.591657 | 0         |  |  |
|           |      | Shiraz-36T | 433  | 0        | -0.803961 |  |  |
|           |      | Shiraz-44T | 899  | 0        | -1.09697  |  |  |
|           |      | Shiraz-49T | 1170 | 0        | -0.967436 |  |  |
|           |      | Shiraz-9T  | 1370 | 0.690073 | 0         |  |  |
|           |      | Shiraz-18T | 1457 | 0.643204 | 0         |  |  |
|           |      | Shiraz-22T | 1673 | 0.611783 | 0         |  |  |
|           |      | Shiraz-22T | 1677 | 0.789711 | 0         |  |  |
|           |      | Shiraz-25T | 1719 | 0.472955 | 0         |  |  |
|           |      | Shiraz-28T | 1762 | 0.562311 | 0         |  |  |
|           |      | Shiraz-29T | 1801 | 0.815343 | 0         |  |  |
|           |      | Shiraz-32T | 1870 | 0.729766 | 0         |  |  |
|           |      | Shiraz-35T | 1933 | 0.488535 | 0         |  |  |
|           |      | Shiraz-58T | 2223 | 0.833364 | 0         |  |  |
|           |      | Shiraz-71T | 2263 | 0.975531 | 0         |  |  |
|           |      | Shiraz-3T  | 242  | 0        | -0.336434 |  |  |
|           |      | Shiraz-4T  | 261  | 0        | -0.336249 |  |  |
|           |      | Shiraz-16T | 295  | 0.591657 | 0         |  |  |
|           |      | Shiraz-36T | 433  | 0        | -0.803961 |  |  |
|           |      | Shiraz-44T | 899  | 0        | -1.09697  |  |  |
|           |      | Shiraz-49T | 1170 | 0        | -0.967436 |  |  |
|           |      | Shiraz-9T  | 1370 | 0.690073 | 0         |  |  |
|           |      | Shiraz-18T | 1457 | 0.643204 | 0         |  |  |
|           |      | Shiraz-22T | 1673 | 0.611783 | 0         |  |  |
|           |      | Shiraz-22T | 1677 | 0.789711 | 0         |  |  |
|           |      | Shiraz-25T | 1719 | 0.472955 | 0         |  |  |
|           |      | Shiraz-28T | 1762 | 0.562311 | 0         |  |  |
|           |      | Shiraz-29T | 1801 | 0.815343 | 0         |  |  |
|           |      | Shiraz-32T | 1870 | 0.729766 | 0         |  |  |
|           |      | Shiraz-35T | 1933 | 0.488535 | 0         |  |  |
|           |      | Shiraz-58T | 2223 | 0.833364 | 0         |  |  |
|           |      | Shiraz-71T | 2263 | 0.975531 | 0         |  |  |
| LOC349114 | chr7 | Shiraz-3T  | 87   | 0.198593 | 0         |  |  |
|           |      | Shiraz-4T  | 252  | 0.192083 | 0         |  |  |
|           |      | Shiraz-36T | 376  | 0.159952 | 0         |  |  |
|           |      | Shiraz-44T | 631  | 0        | -0.180312 |  |  |
|           |      | Shiraz-46T | 942  | 0.069143 | 0         |  |  |
|           |      | Shiraz-18T | 1433 | 0.250973 | 0         |  |  |
|           |      | Shiraz-22T | 1544 | 0        | -0.193579 |  |  |
|           |      | Shiraz-25T | 1697 | 0.21945  | 0         |  |  |
|           |      | Shiraz-28T | 1734 | 0.362882 | 0         |  |  |
|           |      | Shiraz-29T | 1777 | 0.156747 | 0         |  |  |
|           |      | Shiraz-38T | 1950 | 0.265916 | 0         |  |  |
|           |      | Shiraz-71T | 2236 | 0.320072 | 0         |  |  |
|           |      | Shiraz-72T | 2277 | 0        | -0.398869 |  |  |

|           |      |            |      |          |           |  |  |
|-----------|------|------------|------|----------|-----------|--|--|
|           |      | Shiraz-3T  | 87   | 0.198593 | 0         |  |  |
|           |      | Shiraz-4T  | 252  | 0.192083 | 0         |  |  |
|           |      | Shiraz-36T | 376  | 0.159952 | 0         |  |  |
|           |      | Shiraz-44T | 631  | 0        | -0.180312 |  |  |
|           |      | Shiraz-46T | 942  | 0.069143 | 0         |  |  |
|           |      | Shiraz-18T | 1433 | 0.250973 | 0         |  |  |
|           |      | Shiraz-22T | 1544 | 0        | -0.193579 |  |  |
|           |      | Shiraz-25T | 1697 | 0.21945  | 0         |  |  |
|           |      | Shiraz-28T | 1734 | 0.362882 | 0         |  |  |
|           |      | Shiraz-29T | 1777 | 0.156747 | 0         |  |  |
|           |      | Shiraz-38T | 1950 | 0.265916 | 0         |  |  |
|           |      | Shiraz-71T | 2236 | 0.320072 | 0         |  |  |
|           |      | Shiraz-72T | 2277 | 0        | -0.398869 |  |  |
|           |      | Shiraz-3T  | 87   | 0.198593 | 0         |  |  |
|           |      | Shiraz-4T  | 252  | 0.192083 | 0         |  |  |
|           |      | Shiraz-36T | 376  | 0.159952 | 0         |  |  |
|           |      | Shiraz-44T | 631  | 0        | -0.180312 |  |  |
|           |      | Shiraz-46T | 942  | 0.069143 | 0         |  |  |
|           |      | Shiraz-18T | 1433 | 0.250973 | 0         |  |  |
|           |      | Shiraz-22T | 1544 | 0        | -0.193579 |  |  |
|           |      | Shiraz-25T | 1697 | 0.21945  | 0         |  |  |
|           |      | Shiraz-28T | 1734 | 0.362882 | 0         |  |  |
|           |      | Shiraz-29T | 1777 | 0.156747 | 0         |  |  |
|           |      | Shiraz-38T | 1950 | 0.265916 | 0         |  |  |
|           |      | Shiraz-71T | 2236 | 0.320072 | 0         |  |  |
|           |      | Shiraz-72T | 2277 | 0        | -0.398869 |  |  |
| LOC392145 | chr7 | Shiraz-3T  | 90   | 0.219276 | 0         |  |  |
|           |      | Shiraz-4T  | 253  | 0.372918 | 0         |  |  |
|           |      | Shiraz-36T | 378  | 0.179558 | 0         |  |  |
|           |      | Shiraz-46T | 943  | 0.093799 | 0         |  |  |
|           |      | Shiraz-9T  | 1325 | 0.221899 | 0         |  |  |
|           |      | Shiraz-18T | 1434 | 0.244465 | 0         |  |  |
|           |      | Shiraz-25T | 1698 | 0.21835  | 0         |  |  |
|           |      | Shiraz-28T | 1735 | 0.350744 | 0         |  |  |
|           |      | Shiraz-29T | 1778 | 0.120767 | 0         |  |  |
|           |      | Shiraz-32T | 1833 | 0.551336 | 0         |  |  |
|           |      | Shiraz-38T | 1951 | 0.250891 | 0         |  |  |
|           |      | Shiraz-53T | 2078 | 0.287202 | 0         |  |  |
|           |      | Shiraz-58T | 2162 | 0.221505 | 0         |  |  |
|           |      | Shiraz-71T | 2238 | 0.603631 | 0         |  |  |
|           |      | Shiraz-3T  | 90   | 0.219276 | 0         |  |  |
|           |      | Shiraz-4T  | 253  | 0.372918 | 0         |  |  |
|           |      | Shiraz-36T | 378  | 0.179558 | 0         |  |  |
|           |      | Shiraz-46T | 943  | 0.093799 | 0         |  |  |
|           |      | Shiraz-9T  | 1325 | 0.221899 | 0         |  |  |
|           |      | Shiraz-18T | 1434 | 0.244465 | 0         |  |  |
|           |      | Shiraz-25T | 1698 | 0.21835  | 0         |  |  |

|           |      |            |      |          |           |  |
|-----------|------|------------|------|----------|-----------|--|
|           |      | Shiraz-28T | 1735 | 0.350744 | 0         |  |
|           |      | Shiraz-29T | 1778 | 0.120767 | 0         |  |
|           |      | Shiraz-32T | 1833 | 0.551336 | 0         |  |
|           |      | Shiraz-38T | 1951 | 0.250891 | 0         |  |
|           |      | Shiraz-53T | 2078 | 0.287202 | 0         |  |
|           |      | Shiraz-58T | 2162 | 0.221505 | 0         |  |
|           |      | Shiraz-71T | 2238 | 0.603631 | 0         |  |
|           |      | Shiraz-3T  | 90   | 0.219276 | 0         |  |
|           |      | Shiraz-4T  | 253  | 0.372918 | 0         |  |
|           |      | Shiraz-36T | 378  | 0.179558 | 0         |  |
|           |      | Shiraz-46T | 943  | 0.093799 | 0         |  |
|           |      | Shiraz-9T  | 1325 | 0.221899 | 0         |  |
|           |      | Shiraz-18T | 1434 | 0.244465 | 0         |  |
|           |      | Shiraz-25T | 1698 | 0.21835  | 0         |  |
|           |      | Shiraz-28T | 1735 | 0.350744 | 0         |  |
|           |      | Shiraz-29T | 1778 | 0.120767 | 0         |  |
|           |      | Shiraz-32T | 1833 | 0.551336 | 0         |  |
|           |      | Shiraz-38T | 1951 | 0.250891 | 0         |  |
|           |      | Shiraz-53T | 2078 | 0.287202 | 0         |  |
|           |      | Shiraz-58T | 2162 | 0.221505 | 0         |  |
|           |      | Shiraz-71T | 2238 | 0.603631 | 0         |  |
| LOC401397 | chr7 | Shiraz-3T  | 90   | 0.219276 | 0         |  |
|           |      | Shiraz-3T  | 95   | 0        | -0.077623 |  |
|           |      | Shiraz-4T  | 253  | 0.372918 | 0         |  |
|           |      | Shiraz-36T | 378  | 0.179558 | 0         |  |
|           |      | Shiraz-36T | 382  | 0.081739 | 0         |  |
|           |      | Shiraz-44T | 641  | 0        | -0.477846 |  |
|           |      | Shiraz-46T | 943  | 0.093799 | 0         |  |
|           |      | Shiraz-46T | 947  | 0        | -0.010843 |  |
|           |      | Shiraz-47T | 1031 | 0        | -0.117529 |  |
|           |      | Shiraz-49T | 1121 | 0        | -0.138569 |  |
|           |      | Shiraz-77T | 1225 | 0        | -0.117922 |  |
|           |      | Shiraz-77T | 1228 | 0        | -0.238084 |  |
|           |      | Shiraz-18T | 1434 | 0.244465 | 0         |  |
|           |      | Shiraz-22T | 1549 | 0        | -0.319623 |  |
|           |      | Shiraz-22T | 1552 | 0        | -0.50686  |  |
|           |      | Shiraz-25T | 1698 | 0.21835  | 0         |  |
|           |      | Shiraz-28T | 1735 | 0.350744 | 0         |  |
|           |      | Shiraz-29T | 1778 | 0.120767 | 0         |  |
|           |      | Shiraz-32T | 1833 | 0.551336 | 0         |  |
|           |      | Shiraz-32T | 1835 | 0.092727 | 0         |  |
|           |      | Shiraz-38T | 1951 | 0.250891 | 0         |  |
|           |      | Shiraz-53T | 2078 | 0.287202 | 0         |  |
|           |      | Shiraz-58T | 2161 | 0        | -0.187744 |  |
|           |      | Shiraz-71T | 2238 | 0.603631 | 0         |  |
|           |      | Shiraz-3T  | 90   | 0.219276 | 0         |  |
|           |      | Shiraz-3T  | 95   | 0        | -0.077623 |  |

|           |      |            |      |          |           |  |
|-----------|------|------------|------|----------|-----------|--|
|           |      | Shiraz-4T  | 253  | 0.372918 | 0         |  |
|           |      | Shiraz-36T | 378  | 0.179558 | 0         |  |
|           |      | Shiraz-36T | 382  | 0.081739 | 0         |  |
|           |      | Shiraz-44T | 641  | 0        | -0.477846 |  |
|           |      | Shiraz-46T | 943  | 0.093799 | 0         |  |
|           |      | Shiraz-46T | 947  | 0        | -0.010843 |  |
|           |      | Shiraz-47T | 1031 | 0        | -0.117529 |  |
|           |      | Shiraz-49T | 1121 | 0        | -0.138569 |  |
|           |      | Shiraz-77T | 1225 | 0        | -0.117922 |  |
|           |      | Shiraz-77T | 1228 | 0        | -0.238084 |  |
|           |      | Shiraz-18T | 1434 | 0.244465 | 0         |  |
|           |      | Shiraz-22T | 1549 | 0        | -0.319623 |  |
|           |      | Shiraz-22T | 1552 | 0        | -0.50686  |  |
|           |      | Shiraz-25T | 1698 | 0.21835  | 0         |  |
|           |      | Shiraz-28T | 1735 | 0.350744 | 0         |  |
|           |      | Shiraz-29T | 1778 | 0.120767 | 0         |  |
|           |      | Shiraz-32T | 1833 | 0.551336 | 0         |  |
|           |      | Shiraz-32T | 1835 | 0.092727 | 0         |  |
|           |      | Shiraz-38T | 1951 | 0.250891 | 0         |  |
|           |      | Shiraz-53T | 2078 | 0.287202 | 0         |  |
|           |      | Shiraz-58T | 2161 | 0        | -0.187744 |  |
|           |      | Shiraz-71T | 2238 | 0.603631 | 0         |  |
|           |      | Shiraz-3T  | 90   | 0.219276 | 0         |  |
|           |      | Shiraz-3T  | 95   | 0        | -0.077623 |  |
|           |      | Shiraz-4T  | 253  | 0.372918 | 0         |  |
|           |      | Shiraz-36T | 378  | 0.179558 | 0         |  |
|           |      | Shiraz-36T | 382  | 0.081739 | 0         |  |
|           |      | Shiraz-44T | 641  | 0        | -0.477846 |  |
|           |      | Shiraz-46T | 943  | 0.093799 | 0         |  |
|           |      | Shiraz-46T | 947  | 0        | -0.010843 |  |
|           |      | Shiraz-47T | 1031 | 0        | -0.117529 |  |
|           |      | Shiraz-49T | 1121 | 0        | -0.138569 |  |
|           |      | Shiraz-77T | 1225 | 0        | -0.117922 |  |
|           |      | Shiraz-77T | 1228 | 0        | -0.238084 |  |
|           |      | Shiraz-18T | 1434 | 0.244465 | 0         |  |
|           |      | Shiraz-22T | 1549 | 0        | -0.319623 |  |
|           |      | Shiraz-22T | 1552 | 0        | -0.50686  |  |
|           |      | Shiraz-25T | 1698 | 0.21835  | 0         |  |
|           |      | Shiraz-28T | 1735 | 0.350744 | 0         |  |
|           |      | Shiraz-29T | 1778 | 0.120767 | 0         |  |
|           |      | Shiraz-32T | 1833 | 0.551336 | 0         |  |
|           |      | Shiraz-32T | 1835 | 0.092727 | 0         |  |
|           |      | Shiraz-38T | 1951 | 0.250891 | 0         |  |
|           |      | Shiraz-53T | 2078 | 0.287202 | 0         |  |
|           |      | Shiraz-58T | 2161 | 0        | -0.187744 |  |
|           |      | Shiraz-71T | 2238 | 0.603631 | 0         |  |
| LOC401399 | chr7 | Shiraz-3T  | 90   | 0.219276 | 0         |  |



|  |            |      |          |           |  |
|--|------------|------|----------|-----------|--|
|  | Shiraz-3T  | 96   | 0.428308 | 0         |  |
|  | Shiraz-4T  | 253  | 0.372918 | 0         |  |
|  | Shiraz-31T | 317  | 0.204382 | 0         |  |
|  | Shiraz-36T | 378  | 0.179558 | 0         |  |
|  | Shiraz-44T | 642  | 0.408617 | 0         |  |
|  | Shiraz-46T | 943  | 0.093799 | 0         |  |
|  | Shiraz-47T | 1032 | 0.171484 | 0         |  |
|  | Shiraz-77T | 1225 | 0        | -0.117922 |  |
|  | Shiraz-77T | 1229 | 0.051661 | 0         |  |
|  | Shiraz-9T  | 1325 | 0.221899 | 0         |  |
|  | Shiraz-18T | 1434 | 0.244465 | 0         |  |
|  | Shiraz-25T | 1698 | 0.21835  | 0         |  |
|  | Shiraz-28T | 1735 | 0.350744 | 0         |  |
|  | Shiraz-29T | 1778 | 0.120767 | 0         |  |
|  | Shiraz-32T | 1833 | 0.551336 | 0         |  |
|  | Shiraz-38T | 1951 | 0.250891 | 0         |  |
|  | Shiraz-53T | 2078 | 0.287202 | 0         |  |
|  | Shiraz-71T | 2238 | 0.603631 | 0         |  |
|  | Shiraz-3T  | 90   | 0.219276 | 0         |  |
|  | Shiraz-3T  | 96   | 0.428308 | 0         |  |
|  | Shiraz-4T  | 253  | 0.372918 | 0         |  |
|  | Shiraz-31T | 317  | 0.204382 | 0         |  |
|  | Shiraz-36T | 378  | 0.179558 | 0         |  |
|  | Shiraz-44T | 642  | 0.408617 | 0         |  |
|  | Shiraz-46T | 943  | 0.093799 | 0         |  |
|  | Shiraz-47T | 1032 | 0.171484 | 0         |  |
|  | Shiraz-77T | 1225 | 0        | -0.117922 |  |
|  | Shiraz-77T | 1229 | 0.051661 | 0         |  |
|  | Shiraz-9T  | 1325 | 0.221899 | 0         |  |
|  | Shiraz-18T | 1434 | 0.244465 | 0         |  |
|  | Shiraz-25T | 1698 | 0.21835  | 0         |  |
|  | Shiraz-28T | 1735 | 0.350744 | 0         |  |
|  | Shiraz-29T | 1778 | 0.120767 | 0         |  |
|  | Shiraz-32T | 1833 | 0.551336 | 0         |  |
|  | Shiraz-38T | 1951 | 0.250891 | 0         |  |
|  | Shiraz-53T | 2078 | 0.287202 | 0         |  |
|  | Shiraz-71T | 2238 | 0.603631 | 0         |  |
|  | Shiraz-3T  | 90   | 0.219276 | 0         |  |
|  | Shiraz-3T  | 96   | 0.428308 | 0         |  |
|  | Shiraz-4T  | 253  | 0.372918 | 0         |  |
|  | Shiraz-31T | 317  | 0.204382 | 0         |  |
|  | Shiraz-36T | 378  | 0.179558 | 0         |  |
|  | Shiraz-44T | 642  | 0.408617 | 0         |  |
|  | Shiraz-46T | 943  | 0.093799 | 0         |  |
|  | Shiraz-47T | 1032 | 0.171484 | 0         |  |
|  | Shiraz-77T | 1225 | 0        | -0.117922 |  |
|  | Shiraz-77T | 1229 | 0.051661 | 0         |  |

|           |      |            |      |          |   |  |
|-----------|------|------------|------|----------|---|--|
|           |      | Shiraz-9T  | 1325 | 0.221899 | 0 |  |
|           |      | Shiraz-18T | 1434 | 0.244465 | 0 |  |
|           |      | Shiraz-25T | 1698 | 0.21835  | 0 |  |
|           |      | Shiraz-28T | 1735 | 0.350744 | 0 |  |
|           |      | Shiraz-29T | 1778 | 0.120767 | 0 |  |
|           |      | Shiraz-32T | 1833 | 0.551336 | 0 |  |
|           |      | Shiraz-38T | 1951 | 0.250891 | 0 |  |
|           |      | Shiraz-53T | 2078 | 0.287202 | 0 |  |
|           |      | Shiraz-71T | 2238 | 0.603631 | 0 |  |
| LOC401431 | chr7 | Shiraz-3T  | 90   | 0.219276 | 0 |  |
|           |      | Shiraz-3T  | 99   | 0.454766 | 0 |  |
|           |      | Shiraz-4T  | 253  | 0.372918 | 0 |  |
|           |      | Shiraz-36T | 378  | 0.179558 | 0 |  |
|           |      | Shiraz-44T | 646  | 0.471276 | 0 |  |
|           |      | Shiraz-46T | 943  | 0.093799 | 0 |  |
|           |      | Shiraz-9T  | 1325 | 0.221899 | 0 |  |
|           |      | Shiraz-18T | 1434 | 0.244465 | 0 |  |
|           |      | Shiraz-25T | 1698 | 0.21835  | 0 |  |
|           |      | Shiraz-28T | 1735 | 0.350744 | 0 |  |
|           |      | Shiraz-29T | 1778 | 0.120767 | 0 |  |
|           |      | Shiraz-32T | 1833 | 0.551336 | 0 |  |
|           |      | Shiraz-38T | 1951 | 0.250891 | 0 |  |
|           |      | Shiraz-53T | 2078 | 0.287202 | 0 |  |
|           |      | Shiraz-58T | 2162 | 0.221505 | 0 |  |
|           |      | Shiraz-71T | 2238 | 0.603631 | 0 |  |
|           |      | Shiraz-3T  | 90   | 0.219276 | 0 |  |
|           |      | Shiraz-3T  | 99   | 0.454766 | 0 |  |
|           |      | Shiraz-4T  | 253  | 0.372918 | 0 |  |
|           |      | Shiraz-36T | 378  | 0.179558 | 0 |  |
|           |      | Shiraz-44T | 646  | 0.471276 | 0 |  |
|           |      | Shiraz-46T | 943  | 0.093799 | 0 |  |
|           |      | Shiraz-9T  | 1325 | 0.221899 | 0 |  |
|           |      | Shiraz-18T | 1434 | 0.244465 | 0 |  |
|           |      | Shiraz-25T | 1698 | 0.21835  | 0 |  |
|           |      | Shiraz-28T | 1735 | 0.350744 | 0 |  |
|           |      | Shiraz-29T | 1778 | 0.120767 | 0 |  |
|           |      | Shiraz-32T | 1833 | 0.551336 | 0 |  |
|           |      | Shiraz-38T | 1951 | 0.250891 | 0 |  |
|           |      | Shiraz-53T | 2078 | 0.287202 | 0 |  |
|           |      | Shiraz-58T | 2162 | 0.221505 | 0 |  |
|           |      | Shiraz-71T | 2238 | 0.603631 | 0 |  |
|           |      | Shiraz-3T  | 90   | 0.219276 | 0 |  |
|           |      | Shiraz-3T  | 99   | 0.454766 | 0 |  |
|           |      | Shiraz-4T  | 253  | 0.372918 | 0 |  |
|           |      | Shiraz-36T | 378  | 0.179558 | 0 |  |
|           |      | Shiraz-44T | 646  | 0.471276 | 0 |  |
|           |      | Shiraz-46T | 943  | 0.093799 | 0 |  |

|           |      |            |      |          |           |  |
|-----------|------|------------|------|----------|-----------|--|
|           |      | Shiraz-9T  | 1325 | 0.221899 | 0         |  |
|           |      | Shiraz-18T | 1434 | 0.244465 | 0         |  |
|           |      | Shiraz-25T | 1698 | 0.21835  | 0         |  |
|           |      | Shiraz-28T | 1735 | 0.350744 | 0         |  |
|           |      | Shiraz-29T | 1778 | 0.120767 | 0         |  |
|           |      | Shiraz-32T | 1833 | 0.551336 | 0         |  |
|           |      | Shiraz-38T | 1951 | 0.250891 | 0         |  |
|           |      | Shiraz-53T | 2078 | 0.287202 | 0         |  |
|           |      | Shiraz-58T | 2162 | 0.221505 | 0         |  |
|           |      | Shiraz-71T | 2238 | 0.603631 | 0         |  |
| LOC401588 | chrX | Shiraz-3T  | 235  | 0        | -0.28401  |  |
|           |      | Shiraz-4T  | 260  | 0        | -0.324128 |  |
|           |      | Shiraz-16T | 294  | 0.655804 | 0         |  |
|           |      | Shiraz-31T | 345  | 0.103301 | 0         |  |
|           |      | Shiraz-36T | 431  | 0        | -0.78035  |  |
|           |      | Shiraz-36T | 432  | 0        | -0.6692   |  |
|           |      | Shiraz-44T | 891  | 0        | -0.954044 |  |
|           |      | Shiraz-46T | 991  | 0.139564 | 0         |  |
|           |      | Shiraz-49T | 1166 | 0        | -0.917235 |  |
|           |      | Shiraz-77T | 1282 | 0.213849 | 0         |  |
|           |      | Shiraz-9T  | 1368 | 0.199713 | 0         |  |
|           |      | Shiraz-18T | 1455 | 0        | -0.186773 |  |
|           |      | Shiraz-22T | 1669 | 0.695915 | 0         |  |
|           |      | Shiraz-25T | 1717 | 0.420447 | 0         |  |
|           |      | Shiraz-28T | 1760 | 0.538181 | 0         |  |
|           |      | Shiraz-29T | 1800 | 0.672527 | 0         |  |
|           |      | Shiraz-32T | 1869 | 0.776805 | 0         |  |
|           |      | Shiraz-35T | 1932 | 0.507141 | 0         |  |
|           |      | Shiraz-40T | 2051 | 0.098506 | 0         |  |
|           |      | Shiraz-58T | 2221 | 0.871948 | 0         |  |
|           |      | Shiraz-71T | 2260 | 0.68394  | 0         |  |
|           |      | Shiraz-71T | 2262 | 0.986748 | 0         |  |
|           |      | Shiraz-3T  | 235  | 0        | -0.28401  |  |
|           |      | Shiraz-4T  | 260  | 0        | -0.324128 |  |
|           |      | Shiraz-16T | 294  | 0.655804 | 0         |  |
|           |      | Shiraz-31T | 345  | 0.103301 | 0         |  |
|           |      | Shiraz-36T | 431  | 0        | -0.78035  |  |
|           |      | Shiraz-36T | 432  | 0        | -0.6692   |  |
|           |      | Shiraz-44T | 891  | 0        | -0.954044 |  |
|           |      | Shiraz-46T | 991  | 0.139564 | 0         |  |
|           |      | Shiraz-49T | 1166 | 0        | -0.917235 |  |
|           |      | Shiraz-77T | 1282 | 0.213849 | 0         |  |
|           |      | Shiraz-9T  | 1368 | 0.199713 | 0         |  |
|           |      | Shiraz-18T | 1455 | 0        | -0.186773 |  |
|           |      | Shiraz-22T | 1669 | 0.695915 | 0         |  |
|           |      | Shiraz-25T | 1717 | 0.420447 | 0         |  |
|           |      | Shiraz-28T | 1760 | 0.538181 | 0         |  |

|           |      |            |      |          |           |  |
|-----------|------|------------|------|----------|-----------|--|
|           |      | Shiraz-29T | 1800 | 0.672527 | 0         |  |
|           |      | Shiraz-32T | 1869 | 0.776805 | 0         |  |
|           |      | Shiraz-35T | 1932 | 0.507141 | 0         |  |
|           |      | Shiraz-40T | 2051 | 0.098506 | 0         |  |
|           |      | Shiraz-58T | 2221 | 0.871948 | 0         |  |
|           |      | Shiraz-71T | 2260 | 0.68394  | 0         |  |
|           |      | Shiraz-71T | 2262 | 0.986748 | 0         |  |
|           |      | Shiraz-3T  | 235  | 0        | -0.28401  |  |
|           |      | Shiraz-4T  | 260  | 0        | -0.324128 |  |
|           |      | Shiraz-16T | 294  | 0.655804 | 0         |  |
|           |      | Shiraz-31T | 345  | 0.103301 | 0         |  |
|           |      | Shiraz-36T | 431  | 0        | -0.78035  |  |
|           |      | Shiraz-36T | 432  | 0        | -0.6692   |  |
|           |      | Shiraz-44T | 891  | 0        | -0.954044 |  |
|           |      | Shiraz-46T | 991  | 0.139564 | 0         |  |
|           |      | Shiraz-49T | 1166 | 0        | -0.917235 |  |
|           |      | Shiraz-77T | 1282 | 0.213849 | 0         |  |
|           |      | Shiraz-9T  | 1368 | 0.199713 | 0         |  |
|           |      | Shiraz-18T | 1455 | 0        | -0.186773 |  |
|           |      | Shiraz-22T | 1669 | 0.695915 | 0         |  |
|           |      | Shiraz-25T | 1717 | 0.420447 | 0         |  |
|           |      | Shiraz-28T | 1760 | 0.538181 | 0         |  |
|           |      | Shiraz-29T | 1800 | 0.672527 | 0         |  |
|           |      | Shiraz-32T | 1869 | 0.776805 | 0         |  |
|           |      | Shiraz-35T | 1932 | 0.507141 | 0         |  |
|           |      | Shiraz-40T | 2051 | 0.098506 | 0         |  |
|           |      | Shiraz-58T | 2221 | 0.871948 | 0         |  |
|           |      | Shiraz-71T | 2260 | 0.68394  | 0         |  |
|           |      | Shiraz-71T | 2262 | 0.986748 | 0         |  |
| LOC402573 | chr7 | Shiraz-3T  | 90   | 0.219276 | 0         |  |
|           |      | Shiraz-3T  | 94   | 0.74735  | 0         |  |
|           |      | Shiraz-4T  | 253  | 0.372918 | 0         |  |
|           |      | Shiraz-31T | 316  | 0.219196 | 0         |  |
|           |      | Shiraz-36T | 378  | 0.179558 | 0         |  |
|           |      | Shiraz-36T | 381  | 0.332628 | 0         |  |
|           |      | Shiraz-44T | 639  | 1.035032 | 0         |  |
|           |      | Shiraz-46T | 943  | 0.093799 | 0         |  |
|           |      | Shiraz-46T | 946  | 0.299835 | 0         |  |
|           |      | Shiraz-47T | 1030 | 0.257728 | 0         |  |
|           |      | Shiraz-49T | 1120 | 0.281656 | 0         |  |
|           |      | Shiraz-77T | 1225 | 0        | -0.117922 |  |
|           |      | Shiraz-77T | 1227 | 0.196445 | 0         |  |
|           |      | Shiraz-9T  | 1324 | 0.679266 | 0         |  |
|           |      | Shiraz-18T | 1434 | 0.244465 | 0         |  |
|           |      | Shiraz-22T | 1549 | 0        | -0.319623 |  |
|           |      | Shiraz-22T | 1551 | 0.324011 | 0         |  |
|           |      | Shiraz-25T | 1698 | 0.21835  | 0         |  |

|  |            |      |          |           |  |
|--|------------|------|----------|-----------|--|
|  | Shiraz-28T | 1735 | 0.350744 | 0         |  |
|  | Shiraz-29T | 1778 | 0.120767 | 0         |  |
|  | Shiraz-32T | 1833 | 0.551336 | 0         |  |
|  | Shiraz-32T | 1834 | 1.485392 | 0         |  |
|  | Shiraz-38T | 1951 | 0.250891 | 0         |  |
|  | Shiraz-53T | 2078 | 0.287202 | 0         |  |
|  | Shiraz-58T | 2160 | 0.399007 | 0         |  |
|  | Shiraz-71T | 2238 | 0.603631 | 0         |  |
|  | Shiraz-3T  | 90   | 0.219276 | 0         |  |
|  | Shiraz-3T  | 94   | 0.74735  | 0         |  |
|  | Shiraz-4T  | 253  | 0.372918 | 0         |  |
|  | Shiraz-31T | 316  | 0.219196 | 0         |  |
|  | Shiraz-36T | 378  | 0.179558 | 0         |  |
|  | Shiraz-36T | 381  | 0.332628 | 0         |  |
|  | Shiraz-44T | 639  | 1.035032 | 0         |  |
|  | Shiraz-46T | 943  | 0.093799 | 0         |  |
|  | Shiraz-46T | 946  | 0.299835 | 0         |  |
|  | Shiraz-47T | 1030 | 0.257728 | 0         |  |
|  | Shiraz-49T | 1120 | 0.281656 | 0         |  |
|  | Shiraz-77T | 1225 | 0        | -0.117922 |  |
|  | Shiraz-77T | 1227 | 0.196445 | 0         |  |
|  | Shiraz-9T  | 1324 | 0.679266 | 0         |  |
|  | Shiraz-18T | 1434 | 0.244465 | 0         |  |
|  | Shiraz-22T | 1549 | 0        | -0.319623 |  |
|  | Shiraz-22T | 1551 | 0.324011 | 0         |  |
|  | Shiraz-25T | 1698 | 0.21835  | 0         |  |
|  | Shiraz-28T | 1735 | 0.350744 | 0         |  |
|  | Shiraz-29T | 1778 | 0.120767 | 0         |  |
|  | Shiraz-32T | 1833 | 0.551336 | 0         |  |
|  | Shiraz-32T | 1834 | 1.485392 | 0         |  |
|  | Shiraz-38T | 1951 | 0.250891 | 0         |  |
|  | Shiraz-53T | 2078 | 0.287202 | 0         |  |
|  | Shiraz-58T | 2160 | 0.399007 | 0         |  |
|  | Shiraz-71T | 2238 | 0.603631 | 0         |  |
|  | Shiraz-3T  | 90   | 0.219276 | 0         |  |
|  | Shiraz-3T  | 94   | 0.74735  | 0         |  |
|  | Shiraz-4T  | 253  | 0.372918 | 0         |  |
|  | Shiraz-31T | 316  | 0.219196 | 0         |  |
|  | Shiraz-36T | 378  | 0.179558 | 0         |  |
|  | Shiraz-36T | 381  | 0.332628 | 0         |  |
|  | Shiraz-44T | 639  | 1.035032 | 0         |  |
|  | Shiraz-46T | 943  | 0.093799 | 0         |  |
|  | Shiraz-46T | 946  | 0.299835 | 0         |  |
|  | Shiraz-47T | 1030 | 0.257728 | 0         |  |
|  | Shiraz-49T | 1120 | 0.281656 | 0         |  |
|  | Shiraz-77T | 1225 | 0        | -0.117922 |  |
|  | Shiraz-77T | 1227 | 0.196445 | 0         |  |

|           |      |            |      |          |           |  |  |
|-----------|------|------------|------|----------|-----------|--|--|
|           |      | Shiraz-9T  | 1324 | 0.679266 | 0         |  |  |
|           |      | Shiraz-18T | 1434 | 0.244465 | 0         |  |  |
|           |      | Shiraz-22T | 1549 | 0        | -0.319623 |  |  |
|           |      | Shiraz-22T | 1551 | 0.324011 | 0         |  |  |
|           |      | Shiraz-25T | 1698 | 0.21835  | 0         |  |  |
|           |      | Shiraz-28T | 1735 | 0.350744 | 0         |  |  |
|           |      | Shiraz-29T | 1778 | 0.120767 | 0         |  |  |
|           |      | Shiraz-32T | 1833 | 0.551336 | 0         |  |  |
|           |      | Shiraz-32T | 1834 | 1.485392 | 0         |  |  |
|           |      | Shiraz-38T | 1951 | 0.250891 | 0         |  |  |
|           |      | Shiraz-53T | 2078 | 0.287202 | 0         |  |  |
|           |      | Shiraz-58T | 2160 | 0.399007 | 0         |  |  |
|           |      | Shiraz-71T | 2238 | 0.603631 | 0         |  |  |
| LOC402644 | chr7 | Shiraz-3T  | 87   | 0.198593 | 0         |  |  |
|           |      | Shiraz-4T  | 252  | 0.192083 | 0         |  |  |
|           |      | Shiraz-36T | 376  | 0.159952 | 0         |  |  |
|           |      | Shiraz-46T | 942  | 0.069143 | 0         |  |  |
|           |      | Shiraz-18T | 1433 | 0.250973 | 0         |  |  |
|           |      | Shiraz-25T | 1697 | 0.21945  | 0         |  |  |
|           |      | Shiraz-28T | 1734 | 0.362882 | 0         |  |  |
|           |      | Shiraz-29T | 1777 | 0.156747 | 0         |  |  |
|           |      | Shiraz-38T | 1950 | 0.265916 | 0         |  |  |
|           |      | Shiraz-71T | 2236 | 0.320072 | 0         |  |  |
|           |      | Shiraz-3T  | 87   | 0.198593 | 0         |  |  |
|           |      | Shiraz-4T  | 252  | 0.192083 | 0         |  |  |
|           |      | Shiraz-36T | 376  | 0.159952 | 0         |  |  |
|           |      | Shiraz-46T | 942  | 0.069143 | 0         |  |  |
|           |      | Shiraz-18T | 1433 | 0.250973 | 0         |  |  |
|           |      | Shiraz-25T | 1697 | 0.21945  | 0         |  |  |
|           |      | Shiraz-28T | 1734 | 0.362882 | 0         |  |  |
|           |      | Shiraz-29T | 1777 | 0.156747 | 0         |  |  |
|           |      | Shiraz-38T | 1950 | 0.265916 | 0         |  |  |
|           |      | Shiraz-71T | 2236 | 0.320072 | 0         |  |  |
|           |      | Shiraz-3T  | 87   | 0.198593 | 0         |  |  |
|           |      | Shiraz-4T  | 252  | 0.192083 | 0         |  |  |
|           |      | Shiraz-36T | 376  | 0.159952 | 0         |  |  |
|           |      | Shiraz-46T | 942  | 0.069143 | 0         |  |  |
|           |      | Shiraz-18T | 1433 | 0.250973 | 0         |  |  |
|           |      | Shiraz-25T | 1697 | 0.21945  | 0         |  |  |
|           |      | Shiraz-28T | 1734 | 0.362882 | 0         |  |  |
|           |      | Shiraz-29T | 1777 | 0.156747 | 0         |  |  |
|           |      | Shiraz-38T | 1950 | 0.265916 | 0         |  |  |
|           |      | Shiraz-71T | 2236 | 0.320072 | 0         |  |  |
| LOC407835 | chr7 | Shiraz-3T  | 90   | 0.219276 | 0         |  |  |
|           |      | Shiraz-3T  | 96   | 0.428308 | 0         |  |  |
|           |      | Shiraz-4T  | 253  | 0.372918 | 0         |  |  |
|           |      | Shiraz-31T | 317  | 0.204382 | 0         |  |  |

|  |            |      |          |           |  |
|--|------------|------|----------|-----------|--|
|  | Shiraz-36T | 378  | 0.179558 | 0         |  |
|  | Shiraz-44T | 642  | 0.408617 | 0         |  |
|  | Shiraz-46T | 943  | 0.093799 | 0         |  |
|  | Shiraz-47T | 1032 | 0.171484 | 0         |  |
|  | Shiraz-77T | 1225 | 0        | -0.117922 |  |
|  | Shiraz-77T | 1229 | 0.051661 | 0         |  |
|  | Shiraz-9T  | 1325 | 0.221899 | 0         |  |
|  | Shiraz-18T | 1434 | 0.244465 | 0         |  |
|  | Shiraz-25T | 1698 | 0.21835  | 0         |  |
|  | Shiraz-28T | 1735 | 0.350744 | 0         |  |
|  | Shiraz-29T | 1778 | 0.120767 | 0         |  |
|  | Shiraz-32T | 1833 | 0.551336 | 0         |  |
|  | Shiraz-38T | 1951 | 0.250891 | 0         |  |
|  | Shiraz-53T | 2078 | 0.287202 | 0         |  |
|  | Shiraz-71T | 2238 | 0.603631 | 0         |  |
|  | Shiraz-3T  | 90   | 0.219276 | 0         |  |
|  | Shiraz-3T  | 96   | 0.428308 | 0         |  |
|  | Shiraz-4T  | 253  | 0.372918 | 0         |  |
|  | Shiraz-31T | 317  | 0.204382 | 0         |  |
|  | Shiraz-36T | 378  | 0.179558 | 0         |  |
|  | Shiraz-44T | 642  | 0.408617 | 0         |  |
|  | Shiraz-46T | 943  | 0.093799 | 0         |  |
|  | Shiraz-47T | 1032 | 0.171484 | 0         |  |
|  | Shiraz-77T | 1225 | 0        | -0.117922 |  |
|  | Shiraz-77T | 1229 | 0.051661 | 0         |  |
|  | Shiraz-9T  | 1325 | 0.221899 | 0         |  |
|  | Shiraz-18T | 1434 | 0.244465 | 0         |  |
|  | Shiraz-25T | 1698 | 0.21835  | 0         |  |
|  | Shiraz-28T | 1735 | 0.350744 | 0         |  |
|  | Shiraz-29T | 1778 | 0.120767 | 0         |  |
|  | Shiraz-32T | 1833 | 0.551336 | 0         |  |
|  | Shiraz-38T | 1951 | 0.250891 | 0         |  |
|  | Shiraz-53T | 2078 | 0.287202 | 0         |  |
|  | Shiraz-71T | 2238 | 0.603631 | 0         |  |
|  | Shiraz-3T  | 90   | 0.219276 | 0         |  |
|  | Shiraz-3T  | 96   | 0.428308 | 0         |  |
|  | Shiraz-4T  | 253  | 0.372918 | 0         |  |
|  | Shiraz-31T | 317  | 0.204382 | 0         |  |
|  | Shiraz-36T | 378  | 0.179558 | 0         |  |
|  | Shiraz-44T | 642  | 0.408617 | 0         |  |
|  | Shiraz-46T | 943  | 0.093799 | 0         |  |
|  | Shiraz-47T | 1032 | 0.171484 | 0         |  |
|  | Shiraz-77T | 1225 | 0        | -0.117922 |  |
|  | Shiraz-77T | 1229 | 0.051661 | 0         |  |
|  | Shiraz-9T  | 1325 | 0.221899 | 0         |  |
|  | Shiraz-18T | 1434 | 0.244465 | 0         |  |
|  | Shiraz-25T | 1698 | 0.21835  | 0         |  |

|           |      |            |      |          |           |  |
|-----------|------|------------|------|----------|-----------|--|
|           |      | Shiraz-28T | 1735 | 0.350744 | 0         |  |
|           |      | Shiraz-29T | 1778 | 0.120767 | 0         |  |
|           |      | Shiraz-32T | 1833 | 0.551336 | 0         |  |
|           |      | Shiraz-38T | 1951 | 0.250891 | 0         |  |
|           |      | Shiraz-53T | 2078 | 0.287202 | 0         |  |
|           |      | Shiraz-71T | 2238 | 0.603631 | 0         |  |
| LOC441204 | chr7 | Shiraz-3T  | 87   | 0.198593 | 0         |  |
|           |      | Shiraz-4T  | 252  | 0.192083 | 0         |  |
|           |      | Shiraz-36T | 376  | 0.159952 | 0         |  |
|           |      | Shiraz-46T | 942  | 0.069143 | 0         |  |
|           |      | Shiraz-18T | 1433 | 0.250973 | 0         |  |
|           |      | Shiraz-25T | 1697 | 0.21945  | 0         |  |
|           |      | Shiraz-28T | 1734 | 0.362882 | 0         |  |
|           |      | Shiraz-29T | 1777 | 0.156747 | 0         |  |
|           |      | Shiraz-38T | 1950 | 0.265916 | 0         |  |
|           |      | Shiraz-71T | 2236 | 0.320072 | 0         |  |
|           |      | Shiraz-3T  | 87   | 0.198593 | 0         |  |
|           |      | Shiraz-4T  | 252  | 0.192083 | 0         |  |
|           |      | Shiraz-36T | 376  | 0.159952 | 0         |  |
|           |      | Shiraz-46T | 942  | 0.069143 | 0         |  |
|           |      | Shiraz-18T | 1433 | 0.250973 | 0         |  |
|           |      | Shiraz-25T | 1697 | 0.21945  | 0         |  |
|           |      | Shiraz-28T | 1734 | 0.362882 | 0         |  |
|           |      | Shiraz-29T | 1777 | 0.156747 | 0         |  |
|           |      | Shiraz-38T | 1950 | 0.265916 | 0         |  |
|           |      | Shiraz-71T | 2236 | 0.320072 | 0         |  |
|           |      | Shiraz-3T  | 87   | 0.198593 | 0         |  |
|           |      | Shiraz-4T  | 252  | 0.192083 | 0         |  |
|           |      | Shiraz-36T | 376  | 0.159952 | 0         |  |
|           |      | Shiraz-46T | 942  | 0.069143 | 0         |  |
|           |      | Shiraz-18T | 1433 | 0.250973 | 0         |  |
|           |      | Shiraz-25T | 1697 | 0.21945  | 0         |  |
|           |      | Shiraz-28T | 1734 | 0.362882 | 0         |  |
|           |      | Shiraz-29T | 1777 | 0.156747 | 0         |  |
|           |      | Shiraz-38T | 1950 | 0.265916 | 0         |  |
|           |      | Shiraz-71T | 2236 | 0.320072 | 0         |  |
| LOC441208 | chr7 | Shiraz-3T  | 87   | 0.198593 | 0         |  |
|           |      | Shiraz-4T  | 252  | 0.192083 | 0         |  |
|           |      | Shiraz-36T | 376  | 0.159952 | 0         |  |
|           |      | Shiraz-44T | 631  | 0        | -0.180312 |  |
|           |      | Shiraz-46T | 942  | 0.069143 | 0         |  |
|           |      | Shiraz-18T | 1433 | 0.250973 | 0         |  |
|           |      | Shiraz-22T | 1544 | 0        | -0.193579 |  |
|           |      | Shiraz-25T | 1697 | 0.21945  | 0         |  |
|           |      | Shiraz-28T | 1734 | 0.362882 | 0         |  |
|           |      | Shiraz-29T | 1777 | 0.156747 | 0         |  |
|           |      | Shiraz-38T | 1950 | 0.265916 | 0         |  |



|           |      |            |      |          |           |  |
|-----------|------|------------|------|----------|-----------|--|
|           |      | Shiraz-71T | 2236 | 0.320072 | 0         |  |
|           |      | Shiraz-3T  | 87   | 0.198593 | 0         |  |
|           |      | Shiraz-4T  | 252  | 0.192083 | 0         |  |
|           |      | Shiraz-36T | 376  | 0.159952 | 0         |  |
|           |      | Shiraz-44T | 631  | 0        | -0.180312 |  |
|           |      | Shiraz-46T | 942  | 0.069143 | 0         |  |
|           |      | Shiraz-18T | 1433 | 0.250973 | 0         |  |
|           |      | Shiraz-22T | 1544 | 0        | -0.193579 |  |
|           |      | Shiraz-25T | 1697 | 0.21945  | 0         |  |
|           |      | Shiraz-28T | 1734 | 0.362882 | 0         |  |
|           |      | Shiraz-29T | 1777 | 0.156747 | 0         |  |
|           |      | Shiraz-38T | 1950 | 0.265916 | 0         |  |
|           |      | Shiraz-71T | 2236 | 0.320072 | 0         |  |
|           |      | Shiraz-3T  | 87   | 0.198593 | 0         |  |
|           |      | Shiraz-4T  | 252  | 0.192083 | 0         |  |
|           |      | Shiraz-36T | 376  | 0.159952 | 0         |  |
|           |      | Shiraz-44T | 631  | 0        | -0.180312 |  |
|           |      | Shiraz-46T | 942  | 0.069143 | 0         |  |
|           |      | Shiraz-18T | 1433 | 0.250973 | 0         |  |
|           |      | Shiraz-22T | 1544 | 0        | -0.193579 |  |
|           |      | Shiraz-25T | 1697 | 0.21945  | 0         |  |
|           |      | Shiraz-28T | 1734 | 0.362882 | 0         |  |
|           |      | Shiraz-29T | 1777 | 0.156747 | 0         |  |
|           |      | Shiraz-38T | 1950 | 0.265916 | 0         |  |
|           |      | Shiraz-71T | 2236 | 0.320072 | 0         |  |
| LOC441294 | chr7 | Shiraz-3T  | 90   | 0.219276 | 0         |  |
|           |      | Shiraz-4T  | 253  | 0.372918 | 0         |  |
|           |      | Shiraz-36T | 378  | 0.179558 | 0         |  |
|           |      | Shiraz-46T | 943  | 0.093799 | 0         |  |
|           |      | Shiraz-77T | 1225 | 0        | -0.117922 |  |
|           |      | Shiraz-9T  | 1325 | 0.221899 | 0         |  |
|           |      | Shiraz-18T | 1434 | 0.244465 | 0         |  |
|           |      | Shiraz-25T | 1698 | 0.21835  | 0         |  |
|           |      | Shiraz-28T | 1735 | 0.350744 | 0         |  |
|           |      | Shiraz-29T | 1778 | 0.120767 | 0         |  |
|           |      | Shiraz-32T | 1833 | 0.551336 | 0         |  |
|           |      | Shiraz-38T | 1951 | 0.250891 | 0         |  |
|           |      | Shiraz-53T | 2078 | 0.287202 | 0         |  |
|           |      | Shiraz-58T | 2162 | 0.221505 | 0         |  |
|           |      | Shiraz-71T | 2238 | 0.603631 | 0         |  |
|           |      | Shiraz-3T  | 90   | 0.219276 | 0         |  |
|           |      | Shiraz-4T  | 253  | 0.372918 | 0         |  |
|           |      | Shiraz-36T | 378  | 0.179558 | 0         |  |
|           |      | Shiraz-46T | 943  | 0.093799 | 0         |  |
|           |      | Shiraz-77T | 1225 | 0        | -0.117922 |  |
|           |      | Shiraz-9T  | 1325 | 0.221899 | 0         |  |
|           |      | Shiraz-18T | 1434 | 0.244465 | 0         |  |

|           |      |            |      |          |           |  |
|-----------|------|------------|------|----------|-----------|--|
|           |      | Shiraz-25T | 1698 | 0.21835  | 0         |  |
|           |      | Shiraz-28T | 1735 | 0.350744 | 0         |  |
|           |      | Shiraz-29T | 1778 | 0.120767 | 0         |  |
|           |      | Shiraz-32T | 1833 | 0.551336 | 0         |  |
|           |      | Shiraz-38T | 1951 | 0.250891 | 0         |  |
|           |      | Shiraz-53T | 2078 | 0.287202 | 0         |  |
|           |      | Shiraz-58T | 2162 | 0.221505 | 0         |  |
|           |      | Shiraz-71T | 2238 | 0.603631 | 0         |  |
|           |      | Shiraz-3T  | 90   | 0.219276 | 0         |  |
|           |      | Shiraz-4T  | 253  | 0.372918 | 0         |  |
|           |      | Shiraz-36T | 378  | 0.179558 | 0         |  |
|           |      | Shiraz-46T | 943  | 0.093799 | 0         |  |
|           |      | Shiraz-77T | 1225 | 0        | -0.117922 |  |
|           |      | Shiraz-9T  | 1325 | 0.221899 | 0         |  |
|           |      | Shiraz-18T | 1434 | 0.244465 | 0         |  |
|           |      | Shiraz-25T | 1698 | 0.21835  | 0         |  |
|           |      | Shiraz-28T | 1735 | 0.350744 | 0         |  |
|           |      | Shiraz-29T | 1778 | 0.120767 | 0         |  |
|           |      | Shiraz-32T | 1833 | 0.551336 | 0         |  |
|           |      | Shiraz-38T | 1951 | 0.250891 | 0         |  |
|           |      | Shiraz-53T | 2078 | 0.287202 | 0         |  |
|           |      | Shiraz-58T | 2162 | 0.221505 | 0         |  |
|           |      | Shiraz-71T | 2238 | 0.603631 | 0         |  |
| LOC442454 | chrX | Shiraz-3T  | 240  | 0        | -0.346245 |  |
|           |      | Shiraz-4T  | 260  | 0        | -0.324128 |  |
|           |      | Shiraz-16T | 294  | 0.655804 | 0         |  |
|           |      | Shiraz-36T | 431  | 0        | -0.78035  |  |
|           |      | Shiraz-44T | 891  | 0        | -0.954044 |  |
|           |      | Shiraz-49T | 1166 | 0        | -0.917235 |  |
|           |      | Shiraz-18T | 1456 | 0.608534 | 0         |  |
|           |      | Shiraz-22T | 1669 | 0.695915 | 0         |  |
|           |      | Shiraz-25T | 1717 | 0.420447 | 0         |  |
|           |      | Shiraz-28T | 1760 | 0.538181 | 0         |  |
|           |      | Shiraz-29T | 1800 | 0.672527 | 0         |  |
|           |      | Shiraz-32T | 1869 | 0.776805 | 0         |  |
|           |      | Shiraz-35T | 1932 | 0.507141 | 0         |  |
|           |      | Shiraz-58T | 2221 | 0.871948 | 0         |  |
|           |      | Shiraz-71T | 2260 | 0.68394  | 0         |  |
|           |      | Shiraz-71T | 2262 | 0.986748 | 0         |  |
|           |      | Shiraz-3T  | 240  | 0        | -0.346245 |  |
|           |      | Shiraz-4T  | 260  | 0        | -0.324128 |  |
|           |      | Shiraz-16T | 294  | 0.655804 | 0         |  |
|           |      | Shiraz-36T | 431  | 0        | -0.78035  |  |
|           |      | Shiraz-44T | 891  | 0        | -0.954044 |  |
|           |      | Shiraz-49T | 1166 | 0        | -0.917235 |  |
|           |      | Shiraz-18T | 1456 | 0.608534 | 0         |  |
|           |      | Shiraz-22T | 1669 | 0.695915 | 0         |  |

|           |      |            |      |          |           |  |  |
|-----------|------|------------|------|----------|-----------|--|--|
|           |      | Shiraz-25T | 1717 | 0.420447 | 0         |  |  |
|           |      | Shiraz-28T | 1760 | 0.538181 | 0         |  |  |
|           |      | Shiraz-29T | 1800 | 0.672527 | 0         |  |  |
|           |      | Shiraz-32T | 1869 | 0.776805 | 0         |  |  |
|           |      | Shiraz-35T | 1932 | 0.507141 | 0         |  |  |
|           |      | Shiraz-58T | 2221 | 0.871948 | 0         |  |  |
|           |      | Shiraz-71T | 2260 | 0.68394  | 0         |  |  |
|           |      | Shiraz-71T | 2262 | 0.986748 | 0         |  |  |
|           |      | Shiraz-3T  | 240  | 0        | -0.346245 |  |  |
|           |      | Shiraz-4T  | 260  | 0        | -0.324128 |  |  |
|           |      | Shiraz-16T | 294  | 0.655804 | 0         |  |  |
|           |      | Shiraz-36T | 431  | 0        | -0.78035  |  |  |
|           |      | Shiraz-44T | 891  | 0        | -0.954044 |  |  |
|           |      | Shiraz-49T | 1166 | 0        | -0.917235 |  |  |
|           |      | Shiraz-18T | 1456 | 0.608534 | 0         |  |  |
|           |      | Shiraz-22T | 1669 | 0.695915 | 0         |  |  |
|           |      | Shiraz-25T | 1717 | 0.420447 | 0         |  |  |
|           |      | Shiraz-28T | 1760 | 0.538181 | 0         |  |  |
|           |      | Shiraz-29T | 1800 | 0.672527 | 0         |  |  |
|           |      | Shiraz-32T | 1869 | 0.776805 | 0         |  |  |
|           |      | Shiraz-35T | 1932 | 0.507141 | 0         |  |  |
|           |      | Shiraz-58T | 2221 | 0.871948 | 0         |  |  |
|           |      | Shiraz-71T | 2260 | 0.68394  | 0         |  |  |
|           |      | Shiraz-71T | 2262 | 0.986748 | 0         |  |  |
| LOC442459 | chrX | Shiraz-3T  | 242  | 0        | -0.336434 |  |  |
|           |      | Shiraz-4T  | 261  | 0        | -0.336249 |  |  |
|           |      | Shiraz-16T | 295  | 0.591657 | 0         |  |  |
|           |      | Shiraz-36T | 433  | 0        | -0.803961 |  |  |
|           |      | Shiraz-44T | 899  | 0        | -1.09697  |  |  |
|           |      | Shiraz-44T | 902  | 0        | -1.449824 |  |  |
|           |      | Shiraz-47T | 1085 | 0        | -0.130811 |  |  |
|           |      | Shiraz-49T | 1170 | 0        | -0.967436 |  |  |
|           |      | Shiraz-49T | 1172 | 0        | -1.123219 |  |  |
|           |      | Shiraz-18T | 1457 | 0.643204 | 0         |  |  |
|           |      | Shiraz-22T | 1673 | 0.611783 | 0         |  |  |
|           |      | Shiraz-22T | 1675 | 0.279253 | 0         |  |  |
|           |      | Shiraz-25T | 1719 | 0.472955 | 0         |  |  |
|           |      | Shiraz-28T | 1762 | 0.562311 | 0         |  |  |
|           |      | Shiraz-29T | 1801 | 0.815343 | 0         |  |  |
|           |      | Shiraz-32T | 1870 | 0.729766 | 0         |  |  |
|           |      | Shiraz-32T | 1871 | 0.292679 | 0         |  |  |
|           |      | Shiraz-35T | 1933 | 0.488535 | 0         |  |  |
|           |      | Shiraz-58T | 2223 | 0.833364 | 0         |  |  |
|           |      | Shiraz-58T | 2225 | 0.595784 | 0         |  |  |
|           |      | Shiraz-71T | 2263 | 0.975531 | 0         |  |  |
|           |      | Shiraz-3T  | 242  | 0        | -0.336434 |  |  |
|           |      | Shiraz-4T  | 261  | 0        | -0.336249 |  |  |

|           |      |            |      |          |           |  |  |
|-----------|------|------------|------|----------|-----------|--|--|
|           |      | Shiraz-16T | 295  | 0.591657 | 0         |  |  |
|           |      | Shiraz-36T | 433  | 0        | -0.803961 |  |  |
|           |      | Shiraz-44T | 899  | 0        | -1.09697  |  |  |
|           |      | Shiraz-44T | 902  | 0        | -1.449824 |  |  |
|           |      | Shiraz-47T | 1085 | 0        | -0.130811 |  |  |
|           |      | Shiraz-49T | 1170 | 0        | -0.967436 |  |  |
|           |      | Shiraz-49T | 1172 | 0        | -1.123219 |  |  |
|           |      | Shiraz-18T | 1457 | 0.643204 | 0         |  |  |
|           |      | Shiraz-22T | 1673 | 0.611783 | 0         |  |  |
|           |      | Shiraz-22T | 1675 | 0.279253 | 0         |  |  |
|           |      | Shiraz-25T | 1719 | 0.472955 | 0         |  |  |
|           |      | Shiraz-28T | 1762 | 0.562311 | 0         |  |  |
|           |      | Shiraz-29T | 1801 | 0.815343 | 0         |  |  |
|           |      | Shiraz-32T | 1870 | 0.729766 | 0         |  |  |
|           |      | Shiraz-32T | 1871 | 0.292679 | 0         |  |  |
|           |      | Shiraz-35T | 1933 | 0.488535 | 0         |  |  |
|           |      | Shiraz-58T | 2223 | 0.833364 | 0         |  |  |
|           |      | Shiraz-58T | 2225 | 0.595784 | 0         |  |  |
|           |      | Shiraz-71T | 2263 | 0.975531 | 0         |  |  |
|           |      | Shiraz-3T  | 242  | 0        | -0.336434 |  |  |
|           |      | Shiraz-4T  | 261  | 0        | -0.336249 |  |  |
|           |      | Shiraz-16T | 295  | 0.591657 | 0         |  |  |
|           |      | Shiraz-36T | 433  | 0        | -0.803961 |  |  |
|           |      | Shiraz-44T | 899  | 0        | -1.09697  |  |  |
|           |      | Shiraz-44T | 902  | 0        | -1.449824 |  |  |
|           |      | Shiraz-47T | 1085 | 0        | -0.130811 |  |  |
|           |      | Shiraz-49T | 1170 | 0        | -0.967436 |  |  |
|           |      | Shiraz-49T | 1172 | 0        | -1.123219 |  |  |
|           |      | Shiraz-18T | 1457 | 0.643204 | 0         |  |  |
|           |      | Shiraz-22T | 1673 | 0.611783 | 0         |  |  |
|           |      | Shiraz-22T | 1675 | 0.279253 | 0         |  |  |
|           |      | Shiraz-25T | 1719 | 0.472955 | 0         |  |  |
|           |      | Shiraz-28T | 1762 | 0.562311 | 0         |  |  |
|           |      | Shiraz-29T | 1801 | 0.815343 | 0         |  |  |
|           |      | Shiraz-32T | 1870 | 0.729766 | 0         |  |  |
|           |      | Shiraz-32T | 1871 | 0.292679 | 0         |  |  |
|           |      | Shiraz-35T | 1933 | 0.488535 | 0         |  |  |
|           |      | Shiraz-58T | 2223 | 0.833364 | 0         |  |  |
|           |      | Shiraz-58T | 2225 | 0.595784 | 0         |  |  |
|           |      | Shiraz-71T | 2263 | 0.975531 | 0         |  |  |
| LOC550643 | chrX | Shiraz-3T  | 240  | 0        | -0.346245 |  |  |
|           |      | Shiraz-4T  | 260  | 0        | -0.324128 |  |  |
|           |      | Shiraz-16T | 294  | 0.655804 | 0         |  |  |
|           |      | Shiraz-36T | 431  | 0        | -0.78035  |  |  |
|           |      | Shiraz-44T | 891  | 0        | -0.954044 |  |  |
|           |      | Shiraz-49T | 1166 | 0        | -0.917235 |  |  |
|           |      | Shiraz-18T | 1456 | 0.608534 | 0         |  |  |

|           |      |            |      |          |           |  |  |
|-----------|------|------------|------|----------|-----------|--|--|
|           |      | Shiraz-22T | 1669 | 0.695915 | 0         |  |  |
|           |      | Shiraz-25T | 1717 | 0.420447 | 0         |  |  |
|           |      | Shiraz-28T | 1760 | 0.538181 | 0         |  |  |
|           |      | Shiraz-29T | 1800 | 0.672527 | 0         |  |  |
|           |      | Shiraz-32T | 1869 | 0.776805 | 0         |  |  |
|           |      | Shiraz-35T | 1932 | 0.507141 | 0         |  |  |
|           |      | Shiraz-58T | 2221 | 0.871948 | 0         |  |  |
|           |      | Shiraz-71T | 2260 | 0.68394  | 0         |  |  |
|           |      | Shiraz-71T | 2262 | 0.986748 | 0         |  |  |
|           |      | Shiraz-3T  | 240  | 0        | -0.346245 |  |  |
|           |      | Shiraz-4T  | 260  | 0        | -0.324128 |  |  |
|           |      | Shiraz-16T | 294  | 0.655804 | 0         |  |  |
|           |      | Shiraz-36T | 431  | 0        | -0.78035  |  |  |
|           |      | Shiraz-44T | 891  | 0        | -0.954044 |  |  |
|           |      | Shiraz-49T | 1166 | 0        | -0.917235 |  |  |
|           |      | Shiraz-18T | 1456 | 0.608534 | 0         |  |  |
|           |      | Shiraz-22T | 1669 | 0.695915 | 0         |  |  |
|           |      | Shiraz-25T | 1717 | 0.420447 | 0         |  |  |
|           |      | Shiraz-28T | 1760 | 0.538181 | 0         |  |  |
|           |      | Shiraz-29T | 1800 | 0.672527 | 0         |  |  |
|           |      | Shiraz-32T | 1869 | 0.776805 | 0         |  |  |
|           |      | Shiraz-35T | 1932 | 0.507141 | 0         |  |  |
|           |      | Shiraz-58T | 2221 | 0.871948 | 0         |  |  |
|           |      | Shiraz-71T | 2260 | 0.68394  | 0         |  |  |
|           |      | Shiraz-71T | 2262 | 0.986748 | 0         |  |  |
|           |      | Shiraz-3T  | 240  | 0        | -0.346245 |  |  |
|           |      | Shiraz-4T  | 260  | 0        | -0.324128 |  |  |
|           |      | Shiraz-16T | 294  | 0.655804 | 0         |  |  |
|           |      | Shiraz-36T | 431  | 0        | -0.78035  |  |  |
|           |      | Shiraz-44T | 891  | 0        | -0.954044 |  |  |
|           |      | Shiraz-49T | 1166 | 0        | -0.917235 |  |  |
|           |      | Shiraz-18T | 1456 | 0.608534 | 0         |  |  |
|           |      | Shiraz-22T | 1669 | 0.695915 | 0         |  |  |
|           |      | Shiraz-25T | 1717 | 0.420447 | 0         |  |  |
|           |      | Shiraz-28T | 1760 | 0.538181 | 0         |  |  |
|           |      | Shiraz-29T | 1800 | 0.672527 | 0         |  |  |
|           |      | Shiraz-32T | 1869 | 0.776805 | 0         |  |  |
|           |      | Shiraz-35T | 1932 | 0.507141 | 0         |  |  |
|           |      | Shiraz-58T | 2221 | 0.871948 | 0         |  |  |
|           |      | Shiraz-71T | 2260 | 0.68394  | 0         |  |  |
|           |      | Shiraz-71T | 2262 | 0.986748 | 0         |  |  |
| LOC554203 | chrX | Shiraz-3T  | 242  | 0        | -0.336434 |  |  |
|           |      | Shiraz-4T  | 261  | 0        | -0.336249 |  |  |
|           |      | Shiraz-16T | 295  | 0.591657 | 0         |  |  |
|           |      | Shiraz-36T | 433  | 0        | -0.803961 |  |  |
|           |      | Shiraz-44T | 899  | 0        | -1.09697  |  |  |
|           |      | Shiraz-49T | 1170 | 0        | -0.967436 |  |  |

|           |      |            |      |          |           |  |  |
|-----------|------|------------|------|----------|-----------|--|--|
|           |      | Shiraz-18T | 1457 | 0.643204 | 0         |  |  |
|           |      | Shiraz-22T | 1673 | 0.611783 | 0         |  |  |
|           |      | Shiraz-25T | 1719 | 0.472955 | 0         |  |  |
|           |      | Shiraz-28T | 1762 | 0.562311 | 0         |  |  |
|           |      | Shiraz-29T | 1801 | 0.815343 | 0         |  |  |
|           |      | Shiraz-32T | 1870 | 0.729766 | 0         |  |  |
|           |      | Shiraz-35T | 1933 | 0.488535 | 0         |  |  |
|           |      | Shiraz-58T | 2223 | 0.833364 | 0         |  |  |
|           |      | Shiraz-71T | 2263 | 0.975531 | 0         |  |  |
|           |      | Shiraz-3T  | 242  | 0        | -0.336434 |  |  |
|           |      | Shiraz-4T  | 261  | 0        | -0.336249 |  |  |
|           |      | Shiraz-16T | 295  | 0.591657 | 0         |  |  |
|           |      | Shiraz-36T | 433  | 0        | -0.803961 |  |  |
|           |      | Shiraz-44T | 899  | 0        | -1.09697  |  |  |
|           |      | Shiraz-49T | 1170 | 0        | -0.967436 |  |  |
|           |      | Shiraz-18T | 1457 | 0.643204 | 0         |  |  |
|           |      | Shiraz-22T | 1673 | 0.611783 | 0         |  |  |
|           |      | Shiraz-25T | 1719 | 0.472955 | 0         |  |  |
|           |      | Shiraz-28T | 1762 | 0.562311 | 0         |  |  |
|           |      | Shiraz-29T | 1801 | 0.815343 | 0         |  |  |
|           |      | Shiraz-32T | 1870 | 0.729766 | 0         |  |  |
|           |      | Shiraz-35T | 1933 | 0.488535 | 0         |  |  |
|           |      | Shiraz-58T | 2223 | 0.833364 | 0         |  |  |
|           |      | Shiraz-71T | 2263 | 0.975531 | 0         |  |  |
|           |      | Shiraz-3T  | 242  | 0        | -0.336434 |  |  |
|           |      | Shiraz-4T  | 261  | 0        | -0.336249 |  |  |
|           |      | Shiraz-16T | 295  | 0.591657 | 0         |  |  |
|           |      | Shiraz-36T | 433  | 0        | -0.803961 |  |  |
|           |      | Shiraz-44T | 899  | 0        | -1.09697  |  |  |
|           |      | Shiraz-49T | 1170 | 0        | -0.967436 |  |  |
|           |      | Shiraz-18T | 1457 | 0.643204 | 0         |  |  |
|           |      | Shiraz-22T | 1673 | 0.611783 | 0         |  |  |
|           |      | Shiraz-25T | 1719 | 0.472955 | 0         |  |  |
|           |      | Shiraz-28T | 1762 | 0.562311 | 0         |  |  |
|           |      | Shiraz-29T | 1801 | 0.815343 | 0         |  |  |
|           |      | Shiraz-32T | 1870 | 0.729766 | 0         |  |  |
|           |      | Shiraz-35T | 1933 | 0.488535 | 0         |  |  |
|           |      | Shiraz-58T | 2223 | 0.833364 | 0         |  |  |
|           |      | Shiraz-71T | 2263 | 0.975531 | 0         |  |  |
| LOC643486 | chrX | Shiraz-3T  | 242  | 0        | -0.336434 |  |  |
|           |      | Shiraz-4T  | 261  | 0        | -0.336249 |  |  |
|           |      | Shiraz-16T | 295  | 0.591657 | 0         |  |  |
|           |      | Shiraz-31T | 346  | 0        | -0.1527   |  |  |
|           |      | Shiraz-36T | 433  | 0        | -0.803961 |  |  |
|           |      | Shiraz-44T | 899  | 0        | -1.09697  |  |  |
|           |      | Shiraz-44T | 902  | 0        | -1.449824 |  |  |
|           |      | Shiraz-47T | 1085 | 0        | -0.130811 |  |  |

|  |            |      |          |           |  |
|--|------------|------|----------|-----------|--|
|  | Shiraz-49T | 1170 | 0        | -0.967436 |  |
|  | Shiraz-49T | 1172 | 0        | -1.123219 |  |
|  | Shiraz-18T | 1457 | 0.643204 | 0         |  |
|  | Shiraz-22T | 1673 | 0.611783 | 0         |  |
|  | Shiraz-22T | 1675 | 0.279253 | 0         |  |
|  | Shiraz-25T | 1719 | 0.472955 | 0         |  |
|  | Shiraz-28T | 1762 | 0.562311 | 0         |  |
|  | Shiraz-29T | 1801 | 0.815343 | 0         |  |
|  | Shiraz-32T | 1870 | 0.729766 | 0         |  |
|  | Shiraz-32T | 1871 | 0.292679 | 0         |  |
|  | Shiraz-35T | 1933 | 0.488535 | 0         |  |
|  | Shiraz-58T | 2223 | 0.833364 | 0         |  |
|  | Shiraz-58T | 2225 | 0.595784 | 0         |  |
|  | Shiraz-71T | 2263 | 0.975531 | 0         |  |
|  | Shiraz-3T  | 242  | 0        | -0.336434 |  |
|  | Shiraz-4T  | 261  | 0        | -0.336249 |  |
|  | Shiraz-16T | 295  | 0.591657 | 0         |  |
|  | Shiraz-31T | 346  | 0        | -0.1527   |  |
|  | Shiraz-36T | 433  | 0        | -0.803961 |  |
|  | Shiraz-44T | 899  | 0        | -1.09697  |  |
|  | Shiraz-44T | 902  | 0        | -1.449824 |  |
|  | Shiraz-47T | 1085 | 0        | -0.130811 |  |
|  | Shiraz-49T | 1170 | 0        | -0.967436 |  |
|  | Shiraz-49T | 1172 | 0        | -1.123219 |  |
|  | Shiraz-18T | 1457 | 0.643204 | 0         |  |
|  | Shiraz-22T | 1673 | 0.611783 | 0         |  |
|  | Shiraz-22T | 1675 | 0.279253 | 0         |  |
|  | Shiraz-25T | 1719 | 0.472955 | 0         |  |
|  | Shiraz-28T | 1762 | 0.562311 | 0         |  |
|  | Shiraz-29T | 1801 | 0.815343 | 0         |  |
|  | Shiraz-32T | 1870 | 0.729766 | 0         |  |
|  | Shiraz-32T | 1871 | 0.292679 | 0         |  |
|  | Shiraz-35T | 1933 | 0.488535 | 0         |  |
|  | Shiraz-58T | 2223 | 0.833364 | 0         |  |
|  | Shiraz-58T | 2225 | 0.595784 | 0         |  |
|  | Shiraz-71T | 2263 | 0.975531 | 0         |  |
|  | Shiraz-3T  | 242  | 0        | -0.336434 |  |
|  | Shiraz-4T  | 261  | 0        | -0.336249 |  |
|  | Shiraz-16T | 295  | 0.591657 | 0         |  |
|  | Shiraz-31T | 346  | 0        | -0.1527   |  |
|  | Shiraz-36T | 433  | 0        | -0.803961 |  |
|  | Shiraz-44T | 899  | 0        | -1.09697  |  |
|  | Shiraz-44T | 902  | 0        | -1.449824 |  |
|  | Shiraz-47T | 1085 | 0        | -0.130811 |  |
|  | Shiraz-49T | 1170 | 0        | -0.967436 |  |
|  | Shiraz-49T | 1172 | 0        | -1.123219 |  |
|  | Shiraz-18T | 1457 | 0.643204 | 0         |  |

|           |      |            |      |          |           |  |
|-----------|------|------------|------|----------|-----------|--|
|           |      | Shiraz-22T | 1673 | 0.611783 | 0         |  |
|           |      | Shiraz-22T | 1675 | 0.279253 | 0         |  |
|           |      | Shiraz-25T | 1719 | 0.472955 | 0         |  |
|           |      | Shiraz-28T | 1762 | 0.562311 | 0         |  |
|           |      | Shiraz-29T | 1801 | 0.815343 | 0         |  |
|           |      | Shiraz-32T | 1870 | 0.729766 | 0         |  |
|           |      | Shiraz-32T | 1871 | 0.292679 | 0         |  |
|           |      | Shiraz-35T | 1933 | 0.488535 | 0         |  |
|           |      | Shiraz-58T | 2223 | 0.833364 | 0         |  |
|           |      | Shiraz-58T | 2225 | 0.595784 | 0         |  |
|           |      | Shiraz-71T | 2263 | 0.975531 | 0         |  |
| LOC646762 | chr7 | Shiraz-3T  | 87   | 0.198593 | 0         |  |
|           |      | Shiraz-4T  | 252  | 0.192083 | 0         |  |
|           |      | Shiraz-36T | 376  | 0.159952 | 0         |  |
|           |      | Shiraz-46T | 942  | 0.069143 | 0         |  |
|           |      | Shiraz-18T | 1433 | 0.250973 | 0         |  |
|           |      | Shiraz-25T | 1697 | 0.21945  | 0         |  |
|           |      | Shiraz-28T | 1734 | 0.362882 | 0         |  |
|           |      | Shiraz-29T | 1777 | 0.156747 | 0         |  |
|           |      | Shiraz-38T | 1950 | 0.265916 | 0         |  |
|           |      | Shiraz-71T | 2236 | 0.320072 | 0         |  |
|           |      | Shiraz-3T  | 87   | 0.198593 | 0         |  |
|           |      | Shiraz-4T  | 252  | 0.192083 | 0         |  |
|           |      | Shiraz-36T | 376  | 0.159952 | 0         |  |
|           |      | Shiraz-46T | 942  | 0.069143 | 0         |  |
|           |      | Shiraz-18T | 1433 | 0.250973 | 0         |  |
|           |      | Shiraz-25T | 1697 | 0.21945  | 0         |  |
|           |      | Shiraz-28T | 1734 | 0.362882 | 0         |  |
|           |      | Shiraz-29T | 1777 | 0.156747 | 0         |  |
|           |      | Shiraz-38T | 1950 | 0.265916 | 0         |  |
|           |      | Shiraz-71T | 2236 | 0.320072 | 0         |  |
|           |      | Shiraz-3T  | 87   | 0.198593 | 0         |  |
|           |      | Shiraz-4T  | 252  | 0.192083 | 0         |  |
|           |      | Shiraz-36T | 376  | 0.159952 | 0         |  |
|           |      | Shiraz-46T | 942  | 0.069143 | 0         |  |
|           |      | Shiraz-18T | 1433 | 0.250973 | 0         |  |
|           |      | Shiraz-25T | 1697 | 0.21945  | 0         |  |
|           |      | Shiraz-28T | 1734 | 0.362882 | 0         |  |
|           |      | Shiraz-29T | 1777 | 0.156747 | 0         |  |
|           |      | Shiraz-38T | 1950 | 0.265916 | 0         |  |
|           |      | Shiraz-71T | 2236 | 0.320072 | 0         |  |
| LOC646999 | chr7 | Shiraz-3T  | 87   | 0.198593 | 0         |  |
|           |      | Shiraz-4T  | 252  | 0.192083 | 0         |  |
|           |      | Shiraz-36T | 376  | 0.159952 | 0         |  |
|           |      | Shiraz-44T | 631  | 0        | -0.180312 |  |
|           |      | Shiraz-46T | 942  | 0.069143 | 0         |  |
|           |      | Shiraz-18T | 1433 | 0.250973 | 0         |  |



|           |      |            |      |          |           |  |  |
|-----------|------|------------|------|----------|-----------|--|--|
|           |      | Shiraz-22T | 1544 | 0        | -0.193579 |  |  |
|           |      | Shiraz-25T | 1697 | 0.21945  | 0         |  |  |
|           |      | Shiraz-28T | 1734 | 0.362882 | 0         |  |  |
|           |      | Shiraz-29T | 1777 | 0.156747 | 0         |  |  |
|           |      | Shiraz-38T | 1950 | 0.265916 | 0         |  |  |
|           |      | Shiraz-71T | 2236 | 0.320072 | 0         |  |  |
|           |      | Shiraz-72T | 2277 | 0        | -0.398869 |  |  |
|           |      | Shiraz-3T  | 87   | 0.198593 | 0         |  |  |
|           |      | Shiraz-4T  | 252  | 0.192083 | 0         |  |  |
|           |      | Shiraz-36T | 376  | 0.159952 | 0         |  |  |
|           |      | Shiraz-44T | 631  | 0        | -0.180312 |  |  |
|           |      | Shiraz-46T | 942  | 0.069143 | 0         |  |  |
|           |      | Shiraz-18T | 1433 | 0.250973 | 0         |  |  |
|           |      | Shiraz-22T | 1544 | 0        | -0.193579 |  |  |
|           |      | Shiraz-25T | 1697 | 0.21945  | 0         |  |  |
|           |      | Shiraz-28T | 1734 | 0.362882 | 0         |  |  |
|           |      | Shiraz-29T | 1777 | 0.156747 | 0         |  |  |
|           |      | Shiraz-38T | 1950 | 0.265916 | 0         |  |  |
|           |      | Shiraz-71T | 2236 | 0.320072 | 0         |  |  |
|           |      | Shiraz-72T | 2277 | 0        | -0.398869 |  |  |
|           |      | Shiraz-3T  | 87   | 0.198593 | 0         |  |  |
|           |      | Shiraz-4T  | 252  | 0.192083 | 0         |  |  |
|           |      | Shiraz-36T | 376  | 0.159952 | 0         |  |  |
|           |      | Shiraz-44T | 631  | 0        | -0.180312 |  |  |
|           |      | Shiraz-46T | 942  | 0.069143 | 0         |  |  |
|           |      | Shiraz-18T | 1433 | 0.250973 | 0         |  |  |
|           |      | Shiraz-22T | 1544 | 0        | -0.193579 |  |  |
|           |      | Shiraz-25T | 1697 | 0.21945  | 0         |  |  |
|           |      | Shiraz-28T | 1734 | 0.362882 | 0         |  |  |
|           |      | Shiraz-29T | 1777 | 0.156747 | 0         |  |  |
|           |      | Shiraz-38T | 1950 | 0.265916 | 0         |  |  |
|           |      | Shiraz-71T | 2236 | 0.320072 | 0         |  |  |
|           |      | Shiraz-72T | 2277 | 0        | -0.398869 |  |  |
| LOC723809 | chr7 | Shiraz-3T  | 90   | 0.219276 | 0         |  |  |
|           |      | Shiraz-4T  | 253  | 0.372918 | 0         |  |  |
|           |      | Shiraz-36T | 378  | 0.179558 | 0         |  |  |
|           |      | Shiraz-46T | 943  | 0.093799 | 0         |  |  |
|           |      | Shiraz-77T | 1225 | 0        | -0.117922 |  |  |
|           |      | Shiraz-18T | 1434 | 0.244465 | 0         |  |  |
|           |      | Shiraz-22T | 1549 | 0        | -0.319623 |  |  |
|           |      | Shiraz-25T | 1698 | 0.21835  | 0         |  |  |
|           |      | Shiraz-28T | 1735 | 0.350744 | 0         |  |  |
|           |      | Shiraz-29T | 1778 | 0.120767 | 0         |  |  |
|           |      | Shiraz-32T | 1833 | 0.551336 | 0         |  |  |
|           |      | Shiraz-38T | 1951 | 0.250891 | 0         |  |  |
|           |      | Shiraz-53T | 2078 | 0.287202 | 0         |  |  |
|           |      | Shiraz-71T | 2238 | 0.603631 | 0         |  |  |

|           |      |            |      |          |           |  |  |
|-----------|------|------------|------|----------|-----------|--|--|
|           |      | Shiraz-3T  | 90   | 0.219276 | 0         |  |  |
|           |      | Shiraz-4T  | 253  | 0.372918 | 0         |  |  |
|           |      | Shiraz-36T | 378  | 0.179558 | 0         |  |  |
|           |      | Shiraz-46T | 943  | 0.093799 | 0         |  |  |
|           |      | Shiraz-77T | 1225 | 0        | -0.117922 |  |  |
|           |      | Shiraz-18T | 1434 | 0.244465 | 0         |  |  |
|           |      | Shiraz-22T | 1549 | 0        | -0.319623 |  |  |
|           |      | Shiraz-25T | 1698 | 0.21835  | 0         |  |  |
|           |      | Shiraz-28T | 1735 | 0.350744 | 0         |  |  |
|           |      | Shiraz-29T | 1778 | 0.120767 | 0         |  |  |
|           |      | Shiraz-32T | 1833 | 0.551336 | 0         |  |  |
|           |      | Shiraz-38T | 1951 | 0.250891 | 0         |  |  |
|           |      | Shiraz-53T | 2078 | 0.287202 | 0         |  |  |
|           |      | Shiraz-71T | 2238 | 0.603631 | 0         |  |  |
|           |      | Shiraz-3T  | 90   | 0.219276 | 0         |  |  |
|           |      | Shiraz-4T  | 253  | 0.372918 | 0         |  |  |
|           |      | Shiraz-36T | 378  | 0.179558 | 0         |  |  |
|           |      | Shiraz-46T | 943  | 0.093799 | 0         |  |  |
|           |      | Shiraz-77T | 1225 | 0        | -0.117922 |  |  |
|           |      | Shiraz-18T | 1434 | 0.244465 | 0         |  |  |
|           |      | Shiraz-22T | 1549 | 0        | -0.319623 |  |  |
|           |      | Shiraz-25T | 1698 | 0.21835  | 0         |  |  |
|           |      | Shiraz-28T | 1735 | 0.350744 | 0         |  |  |
|           |      | Shiraz-29T | 1778 | 0.120767 | 0         |  |  |
|           |      | Shiraz-32T | 1833 | 0.551336 | 0         |  |  |
|           |      | Shiraz-38T | 1951 | 0.250891 | 0         |  |  |
|           |      | Shiraz-53T | 2078 | 0.287202 | 0         |  |  |
|           |      | Shiraz-71T | 2238 | 0.603631 | 0         |  |  |
| LOC728743 | chr7 | Shiraz-3T  | 90   | 0.219276 | 0         |  |  |
|           |      | Shiraz-3T  | 99   | 0.454766 | 0         |  |  |
|           |      | Shiraz-4T  | 253  | 0.372918 | 0         |  |  |
|           |      | Shiraz-36T | 378  | 0.179558 | 0         |  |  |
|           |      | Shiraz-44T | 646  | 0.471276 | 0         |  |  |
|           |      | Shiraz-46T | 943  | 0.093799 | 0         |  |  |
|           |      | Shiraz-9T  | 1325 | 0.221899 | 0         |  |  |
|           |      | Shiraz-18T | 1434 | 0.244465 | 0         |  |  |
|           |      | Shiraz-25T | 1698 | 0.21835  | 0         |  |  |
|           |      | Shiraz-28T | 1735 | 0.350744 | 0         |  |  |
|           |      | Shiraz-29T | 1778 | 0.120767 | 0         |  |  |
|           |      | Shiraz-32T | 1833 | 0.551336 | 0         |  |  |
|           |      | Shiraz-38T | 1951 | 0.250891 | 0         |  |  |
|           |      | Shiraz-53T | 2078 | 0.287202 | 0         |  |  |
|           |      | Shiraz-58T | 2162 | 0.221505 | 0         |  |  |
|           |      | Shiraz-71T | 2238 | 0.603631 | 0         |  |  |
|           |      | Shiraz-3T  | 90   | 0.219276 | 0         |  |  |
|           |      | Shiraz-3T  | 99   | 0.454766 | 0         |  |  |
|           |      | Shiraz-4T  | 253  | 0.372918 | 0         |  |  |

|           |      |            |      |          |           |  |
|-----------|------|------------|------|----------|-----------|--|
|           |      | Shiraz-36T | 378  | 0.179558 | 0         |  |
|           |      | Shiraz-44T | 646  | 0.471276 | 0         |  |
|           |      | Shiraz-46T | 943  | 0.093799 | 0         |  |
|           |      | Shiraz-9T  | 1325 | 0.221899 | 0         |  |
|           |      | Shiraz-18T | 1434 | 0.244465 | 0         |  |
|           |      | Shiraz-25T | 1698 | 0.21835  | 0         |  |
|           |      | Shiraz-28T | 1735 | 0.350744 | 0         |  |
|           |      | Shiraz-29T | 1778 | 0.120767 | 0         |  |
|           |      | Shiraz-32T | 1833 | 0.551336 | 0         |  |
|           |      | Shiraz-38T | 1951 | 0.250891 | 0         |  |
|           |      | Shiraz-53T | 2078 | 0.287202 | 0         |  |
|           |      | Shiraz-58T | 2162 | 0.221505 | 0         |  |
|           |      | Shiraz-71T | 2238 | 0.603631 | 0         |  |
|           |      | Shiraz-3T  | 90   | 0.219276 | 0         |  |
|           |      | Shiraz-3T  | 99   | 0.454766 | 0         |  |
|           |      | Shiraz-4T  | 253  | 0.372918 | 0         |  |
|           |      | Shiraz-36T | 378  | 0.179558 | 0         |  |
|           |      | Shiraz-44T | 646  | 0.471276 | 0         |  |
|           |      | Shiraz-46T | 943  | 0.093799 | 0         |  |
|           |      | Shiraz-9T  | 1325 | 0.221899 | 0         |  |
|           |      | Shiraz-18T | 1434 | 0.244465 | 0         |  |
|           |      | Shiraz-25T | 1698 | 0.21835  | 0         |  |
|           |      | Shiraz-28T | 1735 | 0.350744 | 0         |  |
|           |      | Shiraz-29T | 1778 | 0.120767 | 0         |  |
|           |      | Shiraz-32T | 1833 | 0.551336 | 0         |  |
|           |      | Shiraz-38T | 1951 | 0.250891 | 0         |  |
|           |      | Shiraz-53T | 2078 | 0.287202 | 0         |  |
|           |      | Shiraz-58T | 2162 | 0.221505 | 0         |  |
|           |      | Shiraz-71T | 2238 | 0.603631 | 0         |  |
| LOC729609 | chrX | Shiraz-3T  | 235  | 0        | -0.28401  |  |
|           |      | Shiraz-4T  | 260  | 0        | -0.324128 |  |
|           |      | Shiraz-16T | 294  | 0.655804 | 0         |  |
|           |      | Shiraz-36T | 431  | 0        | -0.78035  |  |
|           |      | Shiraz-44T | 891  | 0        | -0.954044 |  |
|           |      | Shiraz-49T | 1166 | 0        | -0.917235 |  |
|           |      | Shiraz-77T | 1281 | 0.136627 | 0         |  |
|           |      | Shiraz-9T  | 1368 | 0.199713 | 0         |  |
|           |      | Shiraz-18T | 1455 | 0        | -0.186773 |  |
|           |      | Shiraz-22T | 1669 | 0.695915 | 0         |  |
|           |      | Shiraz-25T | 1717 | 0.420447 | 0         |  |
|           |      | Shiraz-28T | 1760 | 0.538181 | 0         |  |
|           |      | Shiraz-29T | 1800 | 0.672527 | 0         |  |
|           |      | Shiraz-32T | 1869 | 0.776805 | 0         |  |
|           |      | Shiraz-35T | 1932 | 0.507141 | 0         |  |
|           |      | Shiraz-40T | 2051 | 0.098506 | 0         |  |
|           |      | Shiraz-58T | 2221 | 0.871948 | 0         |  |
|           |      | Shiraz-71T | 2260 | 0.68394  | 0         |  |

|           |      |            |      |          |           |  |  |
|-----------|------|------------|------|----------|-----------|--|--|
|           |      | Shiraz-71T | 2261 | 0.508399 | 0         |  |  |
|           |      | Shiraz-3T  | 235  | 0        | -0.28401  |  |  |
|           |      | Shiraz-4T  | 260  | 0        | -0.324128 |  |  |
|           |      | Shiraz-16T | 294  | 0.655804 | 0         |  |  |
|           |      | Shiraz-36T | 431  | 0        | -0.78035  |  |  |
|           |      | Shiraz-44T | 891  | 0        | -0.954044 |  |  |
|           |      | Shiraz-49T | 1166 | 0        | -0.917235 |  |  |
|           |      | Shiraz-77T | 1281 | 0.136627 | 0         |  |  |
|           |      | Shiraz-9T  | 1368 | 0.199713 | 0         |  |  |
|           |      | Shiraz-18T | 1455 | 0        | -0.186773 |  |  |
|           |      | Shiraz-22T | 1669 | 0.695915 | 0         |  |  |
|           |      | Shiraz-25T | 1717 | 0.420447 | 0         |  |  |
|           |      | Shiraz-28T | 1760 | 0.538181 | 0         |  |  |
|           |      | Shiraz-29T | 1800 | 0.672527 | 0         |  |  |
|           |      | Shiraz-32T | 1869 | 0.776805 | 0         |  |  |
|           |      | Shiraz-35T | 1932 | 0.507141 | 0         |  |  |
|           |      | Shiraz-40T | 2051 | 0.098506 | 0         |  |  |
|           |      | Shiraz-58T | 2221 | 0.871948 | 0         |  |  |
|           |      | Shiraz-71T | 2260 | 0.68394  | 0         |  |  |
|           |      | Shiraz-71T | 2261 | 0.508399 | 0         |  |  |
|           |      | Shiraz-3T  | 235  | 0        | -0.28401  |  |  |
|           |      | Shiraz-4T  | 260  | 0        | -0.324128 |  |  |
|           |      | Shiraz-16T | 294  | 0.655804 | 0         |  |  |
|           |      | Shiraz-36T | 431  | 0        | -0.78035  |  |  |
|           |      | Shiraz-44T | 891  | 0        | -0.954044 |  |  |
|           |      | Shiraz-49T | 1166 | 0        | -0.917235 |  |  |
|           |      | Shiraz-77T | 1281 | 0.136627 | 0         |  |  |
|           |      | Shiraz-9T  | 1368 | 0.199713 | 0         |  |  |
|           |      | Shiraz-18T | 1455 | 0        | -0.186773 |  |  |
|           |      | Shiraz-22T | 1669 | 0.695915 | 0         |  |  |
|           |      | Shiraz-25T | 1717 | 0.420447 | 0         |  |  |
|           |      | Shiraz-28T | 1760 | 0.538181 | 0         |  |  |
|           |      | Shiraz-29T | 1800 | 0.672527 | 0         |  |  |
|           |      | Shiraz-32T | 1869 | 0.776805 | 0         |  |  |
|           |      | Shiraz-35T | 1932 | 0.507141 | 0         |  |  |
|           |      | Shiraz-40T | 2051 | 0.098506 | 0         |  |  |
|           |      | Shiraz-58T | 2221 | 0.871948 | 0         |  |  |
|           |      | Shiraz-71T | 2260 | 0.68394  | 0         |  |  |
|           |      | Shiraz-71T | 2261 | 0.508399 | 0         |  |  |
| LOC729920 | chr7 | Shiraz-4T  | 252  | 0.192083 | 0         |  |  |
|           |      | Shiraz-36T | 376  | 0.159952 | 0         |  |  |
|           |      | Shiraz-44T | 628  | 0        | -0.444379 |  |  |
|           |      | Shiraz-47T | 1027 | 0        | -0.117848 |  |  |
|           |      | Shiraz-49T | 1117 | 0        | -0.168296 |  |  |
|           |      | Shiraz-77T | 1222 | 0        | -0.113002 |  |  |
|           |      | Shiraz-18T | 1433 | 0.250973 | 0         |  |  |
|           |      | Shiraz-22T | 1543 | 0        | -0.513696 |  |  |

|           |      |            |      |          |           |  |
|-----------|------|------------|------|----------|-----------|--|
|           |      | Shiraz-25T | 1697 | 0.21945  | 0         |  |
|           |      | Shiraz-28T | 1734 | 0.362882 | 0         |  |
|           |      | Shiraz-29T | 1777 | 0.156747 | 0         |  |
|           |      | Shiraz-38T | 1950 | 0.265916 | 0         |  |
|           |      | Shiraz-58T | 2157 | 0        | -0.213872 |  |
|           |      | Shiraz-71T | 2236 | 0.320072 | 0         |  |
|           |      | Shiraz-4T  | 252  | 0.192083 | 0         |  |
|           |      | Shiraz-36T | 376  | 0.159952 | 0         |  |
|           |      | Shiraz-44T | 628  | 0        | -0.444379 |  |
|           |      | Shiraz-47T | 1027 | 0        | -0.117848 |  |
|           |      | Shiraz-49T | 1117 | 0        | -0.168296 |  |
|           |      | Shiraz-77T | 1222 | 0        | -0.113002 |  |
|           |      | Shiraz-18T | 1433 | 0.250973 | 0         |  |
|           |      | Shiraz-22T | 1543 | 0        | -0.513696 |  |
|           |      | Shiraz-25T | 1697 | 0.21945  | 0         |  |
|           |      | Shiraz-28T | 1734 | 0.362882 | 0         |  |
|           |      | Shiraz-29T | 1777 | 0.156747 | 0         |  |
|           |      | Shiraz-38T | 1950 | 0.265916 | 0         |  |
|           |      | Shiraz-58T | 2157 | 0        | -0.213872 |  |
|           |      | Shiraz-71T | 2236 | 0.320072 | 0         |  |
|           |      | Shiraz-4T  | 252  | 0.192083 | 0         |  |
|           |      | Shiraz-36T | 376  | 0.159952 | 0         |  |
|           |      | Shiraz-44T | 628  | 0        | -0.444379 |  |
|           |      | Shiraz-47T | 1027 | 0        | -0.117848 |  |
|           |      | Shiraz-49T | 1117 | 0        | -0.168296 |  |
|           |      | Shiraz-77T | 1222 | 0        | -0.113002 |  |
|           |      | Shiraz-18T | 1433 | 0.250973 | 0         |  |
|           |      | Shiraz-22T | 1543 | 0        | -0.513696 |  |
|           |      | Shiraz-25T | 1697 | 0.21945  | 0         |  |
|           |      | Shiraz-28T | 1734 | 0.362882 | 0         |  |
|           |      | Shiraz-29T | 1777 | 0.156747 | 0         |  |
|           |      | Shiraz-38T | 1950 | 0.265916 | 0         |  |
|           |      | Shiraz-58T | 2157 | 0        | -0.213872 |  |
|           |      | Shiraz-71T | 2236 | 0.320072 | 0         |  |
| LOC730130 | chr7 | Shiraz-3T  | 90   | 0.219276 | 0         |  |
|           |      | Shiraz-3T  | 95   | 0        | -0.077623 |  |
|           |      | Shiraz-4T  | 253  | 0.372918 | 0         |  |
|           |      | Shiraz-36T | 378  | 0.179558 | 0         |  |
|           |      | Shiraz-36T | 382  | 0.081739 | 0         |  |
|           |      | Shiraz-44T | 641  | 0        | -0.477846 |  |
|           |      | Shiraz-46T | 943  | 0.093799 | 0         |  |
|           |      | Shiraz-46T | 947  | 0        | -0.010843 |  |
|           |      | Shiraz-47T | 1031 | 0        | -0.117529 |  |
|           |      | Shiraz-49T | 1121 | 0        | -0.138569 |  |
|           |      | Shiraz-77T | 1225 | 0        | -0.117922 |  |
|           |      | Shiraz-77T | 1228 | 0        | -0.238084 |  |
|           |      | Shiraz-18T | 1434 | 0.244465 | 0         |  |

|  |            |      |          |           |  |
|--|------------|------|----------|-----------|--|
|  | Shiraz-22T | 1549 | 0        | -0.319623 |  |
|  | Shiraz-22T | 1552 | 0        | -0.50686  |  |
|  | Shiraz-25T | 1698 | 0.21835  | 0         |  |
|  | Shiraz-28T | 1735 | 0.350744 | 0         |  |
|  | Shiraz-29T | 1778 | 0.120767 | 0         |  |
|  | Shiraz-32T | 1833 | 0.551336 | 0         |  |
|  | Shiraz-32T | 1835 | 0.092727 | 0         |  |
|  | Shiraz-38T | 1951 | 0.250891 | 0         |  |
|  | Shiraz-53T | 2078 | 0.287202 | 0         |  |
|  | Shiraz-58T | 2161 | 0        | -0.187744 |  |
|  | Shiraz-71T | 2238 | 0.603631 | 0         |  |
|  | Shiraz-3T  | 90   | 0.219276 | 0         |  |
|  | Shiraz-3T  | 95   | 0        | -0.077623 |  |
|  | Shiraz-4T  | 253  | 0.372918 | 0         |  |
|  | Shiraz-36T | 378  | 0.179558 | 0         |  |
|  | Shiraz-36T | 382  | 0.081739 | 0         |  |
|  | Shiraz-44T | 641  | 0        | -0.477846 |  |
|  | Shiraz-46T | 943  | 0.093799 | 0         |  |
|  | Shiraz-46T | 947  | 0        | -0.010843 |  |
|  | Shiraz-47T | 1031 | 0        | -0.117529 |  |
|  | Shiraz-49T | 1121 | 0        | -0.138569 |  |
|  | Shiraz-77T | 1225 | 0        | -0.117922 |  |
|  | Shiraz-77T | 1228 | 0        | -0.238084 |  |
|  | Shiraz-18T | 1434 | 0.244465 | 0         |  |
|  | Shiraz-22T | 1549 | 0        | -0.319623 |  |
|  | Shiraz-22T | 1552 | 0        | -0.50686  |  |
|  | Shiraz-25T | 1698 | 0.21835  | 0         |  |
|  | Shiraz-28T | 1735 | 0.350744 | 0         |  |
|  | Shiraz-29T | 1778 | 0.120767 | 0         |  |
|  | Shiraz-32T | 1833 | 0.551336 | 0         |  |
|  | Shiraz-32T | 1835 | 0.092727 | 0         |  |
|  | Shiraz-38T | 1951 | 0.250891 | 0         |  |
|  | Shiraz-53T | 2078 | 0.287202 | 0         |  |
|  | Shiraz-58T | 2161 | 0        | -0.187744 |  |
|  | Shiraz-71T | 2238 | 0.603631 | 0         |  |
|  | Shiraz-3T  | 90   | 0.219276 | 0         |  |
|  | Shiraz-3T  | 95   | 0        | -0.077623 |  |
|  | Shiraz-4T  | 253  | 0.372918 | 0         |  |
|  | Shiraz-36T | 378  | 0.179558 | 0         |  |
|  | Shiraz-36T | 382  | 0.081739 | 0         |  |
|  | Shiraz-44T | 641  | 0        | -0.477846 |  |
|  | Shiraz-46T | 943  | 0.093799 | 0         |  |
|  | Shiraz-46T | 947  | 0        | -0.010843 |  |
|  | Shiraz-47T | 1031 | 0        | -0.117529 |  |
|  | Shiraz-49T | 1121 | 0        | -0.138569 |  |
|  | Shiraz-77T | 1225 | 0        | -0.117922 |  |
|  | Shiraz-77T | 1228 | 0        | -0.238084 |  |

|          |      |            |      |          |           |  |  |
|----------|------|------------|------|----------|-----------|--|--|
|          |      | Shiraz-18T | 1434 | 0.244465 | 0         |  |  |
|          |      | Shiraz-22T | 1549 | 0        | -0.319623 |  |  |
|          |      | Shiraz-22T | 1552 | 0        | -0.50686  |  |  |
|          |      | Shiraz-25T | 1698 | 0.21835  | 0         |  |  |
|          |      | Shiraz-28T | 1735 | 0.350744 | 0         |  |  |
|          |      | Shiraz-29T | 1778 | 0.120767 | 0         |  |  |
|          |      | Shiraz-32T | 1833 | 0.551336 | 0         |  |  |
|          |      | Shiraz-32T | 1835 | 0.092727 | 0         |  |  |
|          |      | Shiraz-38T | 1951 | 0.250891 | 0         |  |  |
|          |      | Shiraz-53T | 2078 | 0.287202 | 0         |  |  |
|          |      | Shiraz-58T | 2161 | 0        | -0.187744 |  |  |
|          |      | Shiraz-71T | 2238 | 0.603631 | 0         |  |  |
| LOC92249 | chrX | Shiraz-3T  | 241  | 0        | -0.230501 |  |  |
|          |      | Shiraz-4T  | 261  | 0        | -0.336249 |  |  |
|          |      | Shiraz-16T | 295  | 0.591657 | 0         |  |  |
|          |      | Shiraz-36T | 433  | 0        | -0.803961 |  |  |
|          |      | Shiraz-44T | 899  | 0        | -1.09697  |  |  |
|          |      | Shiraz-49T | 1170 | 0        | -0.967436 |  |  |
|          |      | Shiraz-18T | 1457 | 0.643204 | 0         |  |  |
|          |      | Shiraz-22T | 1673 | 0.611783 | 0         |  |  |
|          |      | Shiraz-25T | 1719 | 0.472955 | 0         |  |  |
|          |      | Shiraz-28T | 1762 | 0.562311 | 0         |  |  |
|          |      | Shiraz-29T | 1801 | 0.815343 | 0         |  |  |
|          |      | Shiraz-32T | 1870 | 0.729766 | 0         |  |  |
|          |      | Shiraz-35T | 1933 | 0.488535 | 0         |  |  |
|          |      | Shiraz-58T | 2223 | 0.833364 | 0         |  |  |
|          |      | Shiraz-71T | 2263 | 0.975531 | 0         |  |  |
|          |      | Shiraz-3T  | 241  | 0        | -0.230501 |  |  |
|          |      | Shiraz-4T  | 261  | 0        | -0.336249 |  |  |
|          |      | Shiraz-16T | 295  | 0.591657 | 0         |  |  |
|          |      | Shiraz-36T | 433  | 0        | -0.803961 |  |  |
|          |      | Shiraz-44T | 899  | 0        | -1.09697  |  |  |
|          |      | Shiraz-49T | 1170 | 0        | -0.967436 |  |  |
|          |      | Shiraz-18T | 1457 | 0.643204 | 0         |  |  |
|          |      | Shiraz-22T | 1673 | 0.611783 | 0         |  |  |
|          |      | Shiraz-25T | 1719 | 0.472955 | 0         |  |  |
|          |      | Shiraz-28T | 1762 | 0.562311 | 0         |  |  |
|          |      | Shiraz-29T | 1801 | 0.815343 | 0         |  |  |
|          |      | Shiraz-32T | 1870 | 0.729766 | 0         |  |  |
|          |      | Shiraz-35T | 1933 | 0.488535 | 0         |  |  |
|          |      | Shiraz-58T | 2223 | 0.833364 | 0         |  |  |
|          |      | Shiraz-71T | 2263 | 0.975531 | 0         |  |  |
|          |      | Shiraz-3T  | 241  | 0        | -0.230501 |  |  |
|          |      | Shiraz-4T  | 261  | 0        | -0.336249 |  |  |
|          |      | Shiraz-16T | 295  | 0.591657 | 0         |  |  |
|          |      | Shiraz-36T | 433  | 0        | -0.803961 |  |  |
|          |      | Shiraz-44T | 899  | 0        | -1.09697  |  |  |

|          |      |            |      |          |           |  |
|----------|------|------------|------|----------|-----------|--|
|          |      | Shiraz-49T | 1170 | 0        | -0.967436 |  |
|          |      | Shiraz-18T | 1457 | 0.643204 | 0         |  |
|          |      | Shiraz-22T | 1673 | 0.611783 | 0         |  |
|          |      | Shiraz-25T | 1719 | 0.472955 | 0         |  |
|          |      | Shiraz-28T | 1762 | 0.562311 | 0         |  |
|          |      | Shiraz-29T | 1801 | 0.815343 | 0         |  |
|          |      | Shiraz-32T | 1870 | 0.729766 | 0         |  |
|          |      | Shiraz-35T | 1933 | 0.488535 | 0         |  |
|          |      | Shiraz-58T | 2223 | 0.833364 | 0         |  |
|          |      | Shiraz-71T | 2263 | 0.975531 | 0         |  |
| LOC93432 | chr7 | Shiraz-3T  | 90   | 0.219276 | 0         |  |
|          |      | Shiraz-4T  | 253  | 0.372918 | 0         |  |
|          |      | Shiraz-36T | 378  | 0.179558 | 0         |  |
|          |      | Shiraz-46T | 943  | 0.093799 | 0         |  |
|          |      | Shiraz-77T | 1225 | 0        | -0.117922 |  |
|          |      | Shiraz-9T  | 1325 | 0.221899 | 0         |  |
|          |      | Shiraz-18T | 1434 | 0.244465 | 0         |  |
|          |      | Shiraz-25T | 1698 | 0.21835  | 0         |  |
|          |      | Shiraz-28T | 1735 | 0.350744 | 0         |  |
|          |      | Shiraz-29T | 1778 | 0.120767 | 0         |  |
|          |      | Shiraz-32T | 1833 | 0.551336 | 0         |  |
|          |      | Shiraz-38T | 1951 | 0.250891 | 0         |  |
|          |      | Shiraz-53T | 2078 | 0.287202 | 0         |  |
|          |      | Shiraz-58T | 2162 | 0.221505 | 0         |  |
|          |      | Shiraz-71T | 2238 | 0.603631 | 0         |  |
|          |      | Shiraz-3T  | 90   | 0.219276 | 0         |  |
|          |      | Shiraz-4T  | 253  | 0.372918 | 0         |  |
|          |      | Shiraz-36T | 378  | 0.179558 | 0         |  |
|          |      | Shiraz-46T | 943  | 0.093799 | 0         |  |
|          |      | Shiraz-77T | 1225 | 0        | -0.117922 |  |
|          |      | Shiraz-9T  | 1325 | 0.221899 | 0         |  |
|          |      | Shiraz-18T | 1434 | 0.244465 | 0         |  |
|          |      | Shiraz-25T | 1698 | 0.21835  | 0         |  |
|          |      | Shiraz-28T | 1735 | 0.350744 | 0         |  |
|          |      | Shiraz-29T | 1778 | 0.120767 | 0         |  |
|          |      | Shiraz-32T | 1833 | 0.551336 | 0         |  |
|          |      | Shiraz-38T | 1951 | 0.250891 | 0         |  |
|          |      | Shiraz-53T | 2078 | 0.287202 | 0         |  |
|          |      | Shiraz-58T | 2162 | 0.221505 | 0         |  |
|          |      | Shiraz-71T | 2238 | 0.603631 | 0         |  |
|          |      | Shiraz-3T  | 90   | 0.219276 | 0         |  |
|          |      | Shiraz-4T  | 253  | 0.372918 | 0         |  |
|          |      | Shiraz-36T | 378  | 0.179558 | 0         |  |
|          |      | Shiraz-46T | 943  | 0.093799 | 0         |  |
|          |      | Shiraz-77T | 1225 | 0        | -0.117922 |  |
|          |      | Shiraz-9T  | 1325 | 0.221899 | 0         |  |
|          |      | Shiraz-18T | 1434 | 0.244465 | 0         |  |



|        |      |            |      |          |           |  |
|--------|------|------------|------|----------|-----------|--|
|        |      | Shiraz-25T | 1698 | 0.21835  | 0         |  |
|        |      | Shiraz-28T | 1735 | 0.350744 | 0         |  |
|        |      | Shiraz-29T | 1778 | 0.120767 | 0         |  |
|        |      | Shiraz-32T | 1833 | 0.551336 | 0         |  |
|        |      | Shiraz-38T | 1951 | 0.250891 | 0         |  |
|        |      | Shiraz-53T | 2078 | 0.287202 | 0         |  |
|        |      | Shiraz-58T | 2162 | 0.221505 | 0         |  |
|        |      | Shiraz-71T | 2238 | 0.603631 | 0         |  |
| LONRF3 | chrX | Shiraz-3T  | 242  | 0        | -0.336434 |  |
|        |      | Shiraz-3T  | 244  | 0        | -0.023749 |  |
|        |      | Shiraz-4T  | 261  | 0        | -0.336249 |  |
|        |      | Shiraz-16T | 295  | 0.591657 | 0         |  |
|        |      | Shiraz-36T | 433  | 0        | -0.803961 |  |
|        |      | Shiraz-44T | 899  | 0        | -1.09697  |  |
|        |      | Shiraz-44T | 904  | 0        | -0.625526 |  |
|        |      | Shiraz-49T | 1170 | 0        | -0.967436 |  |
|        |      | Shiraz-18T | 1457 | 0.643204 | 0         |  |
|        |      | Shiraz-22T | 1673 | 0.611783 | 0         |  |
|        |      | Shiraz-25T | 1719 | 0.472955 | 0         |  |
|        |      | Shiraz-28T | 1762 | 0.562311 | 0         |  |
|        |      | Shiraz-29T | 1801 | 0.815343 | 0         |  |
|        |      | Shiraz-32T | 1870 | 0.729766 | 0         |  |
|        |      | Shiraz-35T | 1933 | 0.488535 | 0         |  |
|        |      | Shiraz-58T | 2223 | 0.833364 | 0         |  |
|        |      | Shiraz-71T | 2263 | 0.975531 | 0         |  |
|        |      | Shiraz-3T  | 242  | 0        | -0.336434 |  |
|        |      | Shiraz-3T  | 244  | 0        | -0.023749 |  |
|        |      | Shiraz-4T  | 261  | 0        | -0.336249 |  |
|        |      | Shiraz-16T | 295  | 0.591657 | 0         |  |
|        |      | Shiraz-36T | 433  | 0        | -0.803961 |  |
|        |      | Shiraz-44T | 899  | 0        | -1.09697  |  |
|        |      | Shiraz-44T | 904  | 0        | -0.625526 |  |
|        |      | Shiraz-49T | 1170 | 0        | -0.967436 |  |
|        |      | Shiraz-18T | 1457 | 0.643204 | 0         |  |
|        |      | Shiraz-22T | 1673 | 0.611783 | 0         |  |
|        |      | Shiraz-25T | 1719 | 0.472955 | 0         |  |
|        |      | Shiraz-28T | 1762 | 0.562311 | 0         |  |
|        |      | Shiraz-29T | 1801 | 0.815343 | 0         |  |
|        |      | Shiraz-32T | 1870 | 0.729766 | 0         |  |
|        |      | Shiraz-35T | 1933 | 0.488535 | 0         |  |
|        |      | Shiraz-58T | 2223 | 0.833364 | 0         |  |
|        |      | Shiraz-71T | 2263 | 0.975531 | 0         |  |
|        |      | Shiraz-3T  | 242  | 0        | -0.336434 |  |
|        |      | Shiraz-3T  | 244  | 0        | -0.023749 |  |
|        |      | Shiraz-4T  | 261  | 0        | -0.336249 |  |
|        |      | Shiraz-16T | 295  | 0.591657 | 0         |  |
|        |      | Shiraz-36T | 433  | 0        | -0.803961 |  |

|       |      |            |      |          |           |  |  |
|-------|------|------------|------|----------|-----------|--|--|
|       |      | Shiraz-44T | 899  | 0        | -1.09697  |  |  |
|       |      | Shiraz-44T | 904  | 0        | -0.625526 |  |  |
|       |      | Shiraz-49T | 1170 | 0        | -0.967436 |  |  |
|       |      | Shiraz-18T | 1457 | 0.643204 | 0         |  |  |
|       |      | Shiraz-22T | 1673 | 0.611783 | 0         |  |  |
|       |      | Shiraz-25T | 1719 | 0.472955 | 0         |  |  |
|       |      | Shiraz-28T | 1762 | 0.562311 | 0         |  |  |
|       |      | Shiraz-29T | 1801 | 0.815343 | 0         |  |  |
|       |      | Shiraz-32T | 1870 | 0.729766 | 0         |  |  |
|       |      | Shiraz-35T | 1933 | 0.488535 | 0         |  |  |
|       |      | Shiraz-58T | 2223 | 0.833364 | 0         |  |  |
|       |      | Shiraz-71T | 2263 | 0.975531 | 0         |  |  |
| LPAR4 | chrX | Shiraz-3T  | 242  | 0        | -0.336434 |  |  |
|       |      | Shiraz-4T  | 261  | 0        | -0.336249 |  |  |
|       |      | Shiraz-16T | 295  | 0.591657 | 0         |  |  |
|       |      | Shiraz-36T | 433  | 0        | -0.803961 |  |  |
|       |      | Shiraz-44T | 899  | 0        | -1.09697  |  |  |
|       |      | Shiraz-49T | 1170 | 0        | -0.967436 |  |  |
|       |      | Shiraz-18T | 1457 | 0.643204 | 0         |  |  |
|       |      | Shiraz-22T | 1673 | 0.611783 | 0         |  |  |
|       |      | Shiraz-25T | 1719 | 0.472955 | 0         |  |  |
|       |      | Shiraz-28T | 1762 | 0.562311 | 0         |  |  |
|       |      | Shiraz-29T | 1801 | 0.815343 | 0         |  |  |
|       |      | Shiraz-32T | 1870 | 0.729766 | 0         |  |  |
|       |      | Shiraz-35T | 1933 | 0.488535 | 0         |  |  |
|       |      | Shiraz-58T | 2223 | 0.833364 | 0         |  |  |
|       |      | Shiraz-71T | 2263 | 0.975531 | 0         |  |  |
|       |      | Shiraz-3T  | 242  | 0        | -0.336434 |  |  |
|       |      | Shiraz-4T  | 261  | 0        | -0.336249 |  |  |
|       |      | Shiraz-16T | 295  | 0.591657 | 0         |  |  |
|       |      | Shiraz-36T | 433  | 0        | -0.803961 |  |  |
|       |      | Shiraz-44T | 899  | 0        | -1.09697  |  |  |
|       |      | Shiraz-49T | 1170 | 0        | -0.967436 |  |  |
|       |      | Shiraz-18T | 1457 | 0.643204 | 0         |  |  |
|       |      | Shiraz-22T | 1673 | 0.611783 | 0         |  |  |
|       |      | Shiraz-25T | 1719 | 0.472955 | 0         |  |  |
|       |      | Shiraz-28T | 1762 | 0.562311 | 0         |  |  |
|       |      | Shiraz-29T | 1801 | 0.815343 | 0         |  |  |
|       |      | Shiraz-32T | 1870 | 0.729766 | 0         |  |  |
|       |      | Shiraz-35T | 1933 | 0.488535 | 0         |  |  |
|       |      | Shiraz-58T | 2223 | 0.833364 | 0         |  |  |
|       |      | Shiraz-71T | 2263 | 0.975531 | 0         |  |  |
|       |      | Shiraz-3T  | 242  | 0        | -0.336434 |  |  |
|       |      | Shiraz-4T  | 261  | 0        | -0.336249 |  |  |
|       |      | Shiraz-16T | 295  | 0.591657 | 0         |  |  |
|       |      | Shiraz-36T | 433  | 0        | -0.803961 |  |  |
|       |      | Shiraz-44T | 899  | 0        | -1.09697  |  |  |

|       |      |            |      |          |           |  |  |
|-------|------|------------|------|----------|-----------|--|--|
|       |      | Shiraz-49T | 1170 | 0        | -0.967436 |  |  |
|       |      | Shiraz-18T | 1457 | 0.643204 | 0         |  |  |
|       |      | Shiraz-22T | 1673 | 0.611783 | 0         |  |  |
|       |      | Shiraz-25T | 1719 | 0.472955 | 0         |  |  |
|       |      | Shiraz-28T | 1762 | 0.562311 | 0         |  |  |
|       |      | Shiraz-29T | 1801 | 0.815343 | 0         |  |  |
|       |      | Shiraz-32T | 1870 | 0.729766 | 0         |  |  |
|       |      | Shiraz-35T | 1933 | 0.488535 | 0         |  |  |
|       |      | Shiraz-58T | 2223 | 0.833364 | 0         |  |  |
|       |      | Shiraz-71T | 2263 | 0.975531 | 0         |  |  |
| LRCH2 | chrX | Shiraz-3T  | 242  | 0        | -0.336434 |  |  |
|       |      | Shiraz-4T  | 261  | 0        | -0.336249 |  |  |
|       |      | Shiraz-16T | 295  | 0.591657 | 0         |  |  |
|       |      | Shiraz-36T | 433  | 0        | -0.803961 |  |  |
|       |      | Shiraz-44T | 899  | 0        | -1.09697  |  |  |
|       |      | Shiraz-49T | 1170 | 0        | -0.967436 |  |  |
|       |      | Shiraz-18T | 1457 | 0.643204 | 0         |  |  |
|       |      | Shiraz-22T | 1673 | 0.611783 | 0         |  |  |
|       |      | Shiraz-25T | 1719 | 0.472955 | 0         |  |  |
|       |      | Shiraz-28T | 1762 | 0.562311 | 0         |  |  |
|       |      | Shiraz-29T | 1801 | 0.815343 | 0         |  |  |
|       |      | Shiraz-32T | 1870 | 0.729766 | 0         |  |  |
|       |      | Shiraz-35T | 1933 | 0.488535 | 0         |  |  |
|       |      | Shiraz-58T | 2223 | 0.833364 | 0         |  |  |
|       |      | Shiraz-71T | 2263 | 0.975531 | 0         |  |  |
|       |      | Shiraz-3T  | 242  | 0        | -0.336434 |  |  |
|       |      | Shiraz-4T  | 261  | 0        | -0.336249 |  |  |
|       |      | Shiraz-16T | 295  | 0.591657 | 0         |  |  |
|       |      | Shiraz-36T | 433  | 0        | -0.803961 |  |  |
|       |      | Shiraz-44T | 899  | 0        | -1.09697  |  |  |
|       |      | Shiraz-49T | 1170 | 0        | -0.967436 |  |  |
|       |      | Shiraz-18T | 1457 | 0.643204 | 0         |  |  |
|       |      | Shiraz-22T | 1673 | 0.611783 | 0         |  |  |
|       |      | Shiraz-25T | 1719 | 0.472955 | 0         |  |  |
|       |      | Shiraz-28T | 1762 | 0.562311 | 0         |  |  |
|       |      | Shiraz-29T | 1801 | 0.815343 | 0         |  |  |
|       |      | Shiraz-32T | 1870 | 0.729766 | 0         |  |  |
|       |      | Shiraz-35T | 1933 | 0.488535 | 0         |  |  |
|       |      | Shiraz-58T | 2223 | 0.833364 | 0         |  |  |
|       |      | Shiraz-71T | 2263 | 0.975531 | 0         |  |  |
|       |      | Shiraz-3T  | 242  | 0        | -0.336434 |  |  |
|       |      | Shiraz-4T  | 261  | 0        | -0.336249 |  |  |
|       |      | Shiraz-16T | 295  | 0.591657 | 0         |  |  |
|       |      | Shiraz-36T | 433  | 0        | -0.803961 |  |  |
|       |      | Shiraz-44T | 899  | 0        | -1.09697  |  |  |
|       |      | Shiraz-49T | 1170 | 0        | -0.967436 |  |  |
|       |      | Shiraz-18T | 1457 | 0.643204 | 0         |  |  |

|       |      |            |      |          |           |  |
|-------|------|------------|------|----------|-----------|--|
|       |      | Shiraz-22T | 1673 | 0.611783 | 0         |  |
|       |      | Shiraz-25T | 1719 | 0.472955 | 0         |  |
|       |      | Shiraz-28T | 1762 | 0.562311 | 0         |  |
|       |      | Shiraz-29T | 1801 | 0.815343 | 0         |  |
|       |      | Shiraz-32T | 1870 | 0.729766 | 0         |  |
|       |      | Shiraz-35T | 1933 | 0.488535 | 0         |  |
|       |      | Shiraz-58T | 2223 | 0.833364 | 0         |  |
|       |      | Shiraz-71T | 2263 | 0.975531 | 0         |  |
| LRCH4 | chr7 | Shiraz-3T  | 90   | 0.219276 | 0         |  |
|       |      | Shiraz-3T  | 94   | 0.74735  | 0         |  |
|       |      | Shiraz-4T  | 253  | 0.372918 | 0         |  |
|       |      | Shiraz-31T | 316  | 0.219196 | 0         |  |
|       |      | Shiraz-36T | 378  | 0.179558 | 0         |  |
|       |      | Shiraz-36T | 381  | 0.332628 | 0         |  |
|       |      | Shiraz-44T | 639  | 1.035032 | 0         |  |
|       |      | Shiraz-46T | 943  | 0.093799 | 0         |  |
|       |      | Shiraz-46T | 946  | 0.299835 | 0         |  |
|       |      | Shiraz-47T | 1030 | 0.257728 | 0         |  |
|       |      | Shiraz-49T | 1120 | 0.281656 | 0         |  |
|       |      | Shiraz-77T | 1225 | 0        | -0.117922 |  |
|       |      | Shiraz-77T | 1227 | 0.196445 | 0         |  |
|       |      | Shiraz-9T  | 1324 | 0.679266 | 0         |  |
|       |      | Shiraz-18T | 1434 | 0.244465 | 0         |  |
|       |      | Shiraz-22T | 1549 | 0        | -0.319623 |  |
|       |      | Shiraz-22T | 1551 | 0.324011 | 0         |  |
|       |      | Shiraz-25T | 1698 | 0.21835  | 0         |  |
|       |      | Shiraz-28T | 1735 | 0.350744 | 0         |  |
|       |      | Shiraz-29T | 1778 | 0.120767 | 0         |  |
|       |      | Shiraz-32T | 1833 | 0.551336 | 0         |  |
|       |      | Shiraz-32T | 1834 | 1.485392 | 0         |  |
|       |      | Shiraz-38T | 1951 | 0.250891 | 0         |  |
|       |      | Shiraz-53T | 2078 | 0.287202 | 0         |  |
|       |      | Shiraz-58T | 2160 | 0.399007 | 0         |  |
|       |      | Shiraz-71T | 2238 | 0.603631 | 0         |  |
|       |      | Shiraz-3T  | 90   | 0.219276 | 0         |  |
|       |      | Shiraz-3T  | 94   | 0.74735  | 0         |  |
|       |      | Shiraz-4T  | 253  | 0.372918 | 0         |  |
|       |      | Shiraz-31T | 316  | 0.219196 | 0         |  |
|       |      | Shiraz-36T | 378  | 0.179558 | 0         |  |
|       |      | Shiraz-36T | 381  | 0.332628 | 0         |  |
|       |      | Shiraz-44T | 639  | 1.035032 | 0         |  |
|       |      | Shiraz-46T | 943  | 0.093799 | 0         |  |
|       |      | Shiraz-46T | 946  | 0.299835 | 0         |  |
|       |      | Shiraz-47T | 1030 | 0.257728 | 0         |  |
|       |      | Shiraz-49T | 1120 | 0.281656 | 0         |  |
|       |      | Shiraz-77T | 1225 | 0        | -0.117922 |  |
|       |      | Shiraz-77T | 1227 | 0.196445 | 0         |  |

|       |      |            |      |          |           |  |  |
|-------|------|------------|------|----------|-----------|--|--|
|       |      | Shiraz-9T  | 1324 | 0.679266 | 0         |  |  |
|       |      | Shiraz-18T | 1434 | 0.244465 | 0         |  |  |
|       |      | Shiraz-22T | 1549 | 0        | -0.319623 |  |  |
|       |      | Shiraz-22T | 1551 | 0.324011 | 0         |  |  |
|       |      | Shiraz-25T | 1698 | 0.21835  | 0         |  |  |
|       |      | Shiraz-28T | 1735 | 0.350744 | 0         |  |  |
|       |      | Shiraz-29T | 1778 | 0.120767 | 0         |  |  |
|       |      | Shiraz-32T | 1833 | 0.551336 | 0         |  |  |
|       |      | Shiraz-32T | 1834 | 1.485392 | 0         |  |  |
|       |      | Shiraz-38T | 1951 | 0.250891 | 0         |  |  |
|       |      | Shiraz-53T | 2078 | 0.287202 | 0         |  |  |
|       |      | Shiraz-58T | 2160 | 0.399007 | 0         |  |  |
|       |      | Shiraz-71T | 2238 | 0.603631 | 0         |  |  |
|       |      | Shiraz-3T  | 90   | 0.219276 | 0         |  |  |
|       |      | Shiraz-3T  | 94   | 0.74735  | 0         |  |  |
|       |      | Shiraz-4T  | 253  | 0.372918 | 0         |  |  |
|       |      | Shiraz-31T | 316  | 0.219196 | 0         |  |  |
|       |      | Shiraz-36T | 378  | 0.179558 | 0         |  |  |
|       |      | Shiraz-36T | 381  | 0.332628 | 0         |  |  |
|       |      | Shiraz-44T | 639  | 1.035032 | 0         |  |  |
|       |      | Shiraz-46T | 943  | 0.093799 | 0         |  |  |
|       |      | Shiraz-46T | 946  | 0.299835 | 0         |  |  |
|       |      | Shiraz-47T | 1030 | 0.257728 | 0         |  |  |
|       |      | Shiraz-49T | 1120 | 0.281656 | 0         |  |  |
|       |      | Shiraz-77T | 1225 | 0        | -0.117922 |  |  |
|       |      | Shiraz-77T | 1227 | 0.196445 | 0         |  |  |
|       |      | Shiraz-9T  | 1324 | 0.679266 | 0         |  |  |
|       |      | Shiraz-18T | 1434 | 0.244465 | 0         |  |  |
|       |      | Shiraz-22T | 1549 | 0        | -0.319623 |  |  |
|       |      | Shiraz-22T | 1551 | 0.324011 | 0         |  |  |
|       |      | Shiraz-25T | 1698 | 0.21835  | 0         |  |  |
|       |      | Shiraz-28T | 1735 | 0.350744 | 0         |  |  |
|       |      | Shiraz-29T | 1778 | 0.120767 | 0         |  |  |
|       |      | Shiraz-32T | 1833 | 0.551336 | 0         |  |  |
|       |      | Shiraz-32T | 1834 | 1.485392 | 0         |  |  |
|       |      | Shiraz-38T | 1951 | 0.250891 | 0         |  |  |
|       |      | Shiraz-53T | 2078 | 0.287202 | 0         |  |  |
|       |      | Shiraz-58T | 2160 | 0.399007 | 0         |  |  |
|       |      | Shiraz-71T | 2238 | 0.603631 | 0         |  |  |
| LRGUK | chr7 | Shiraz-3T  | 90   | 0.219276 | 0         |  |  |
|       |      | Shiraz-4T  | 253  | 0.372918 | 0         |  |  |
|       |      | Shiraz-36T | 378  | 0.179558 | 0         |  |  |
|       |      | Shiraz-46T | 943  | 0.093799 | 0         |  |  |
|       |      | Shiraz-77T | 1225 | 0        | -0.117922 |  |  |
|       |      | Shiraz-9T  | 1325 | 0.221899 | 0         |  |  |
|       |      | Shiraz-18T | 1434 | 0.244465 | 0         |  |  |
|       |      | Shiraz-22T | 1553 | 0        | -0.213234 |  |  |

|        |      |            |      |          |           |  |  |
|--------|------|------------|------|----------|-----------|--|--|
|        |      | Shiraz-25T | 1698 | 0.21835  | 0         |  |  |
|        |      | Shiraz-28T | 1735 | 0.350744 | 0         |  |  |
|        |      | Shiraz-29T | 1778 | 0.120767 | 0         |  |  |
|        |      | Shiraz-32T | 1833 | 0.551336 | 0         |  |  |
|        |      | Shiraz-38T | 1951 | 0.250891 | 0         |  |  |
|        |      | Shiraz-53T | 2078 | 0.287202 | 0         |  |  |
|        |      | Shiraz-71T | 2238 | 0.603631 | 0         |  |  |
|        |      | Shiraz-3T  | 90   | 0.219276 | 0         |  |  |
|        |      | Shiraz-4T  | 253  | 0.372918 | 0         |  |  |
|        |      | Shiraz-36T | 378  | 0.179558 | 0         |  |  |
|        |      | Shiraz-46T | 943  | 0.093799 | 0         |  |  |
|        |      | Shiraz-77T | 1225 | 0        | -0.117922 |  |  |
|        |      | Shiraz-9T  | 1325 | 0.221899 | 0         |  |  |
|        |      | Shiraz-18T | 1434 | 0.244465 | 0         |  |  |
|        |      | Shiraz-22T | 1553 | 0        | -0.213234 |  |  |
|        |      | Shiraz-25T | 1698 | 0.21835  | 0         |  |  |
|        |      | Shiraz-28T | 1735 | 0.350744 | 0         |  |  |
|        |      | Shiraz-29T | 1778 | 0.120767 | 0         |  |  |
|        |      | Shiraz-32T | 1833 | 0.551336 | 0         |  |  |
|        |      | Shiraz-38T | 1951 | 0.250891 | 0         |  |  |
|        |      | Shiraz-53T | 2078 | 0.287202 | 0         |  |  |
|        |      | Shiraz-71T | 2238 | 0.603631 | 0         |  |  |
|        |      | Shiraz-3T  | 90   | 0.219276 | 0         |  |  |
|        |      | Shiraz-4T  | 253  | 0.372918 | 0         |  |  |
|        |      | Shiraz-36T | 378  | 0.179558 | 0         |  |  |
|        |      | Shiraz-46T | 943  | 0.093799 | 0         |  |  |
|        |      | Shiraz-77T | 1225 | 0        | -0.117922 |  |  |
|        |      | Shiraz-9T  | 1325 | 0.221899 | 0         |  |  |
|        |      | Shiraz-18T | 1434 | 0.244465 | 0         |  |  |
|        |      | Shiraz-22T | 1553 | 0        | -0.213234 |  |  |
|        |      | Shiraz-25T | 1698 | 0.21835  | 0         |  |  |
|        |      | Shiraz-28T | 1735 | 0.350744 | 0         |  |  |
|        |      | Shiraz-29T | 1778 | 0.120767 | 0         |  |  |
|        |      | Shiraz-32T | 1833 | 0.551336 | 0         |  |  |
|        |      | Shiraz-38T | 1951 | 0.250891 | 0         |  |  |
|        |      | Shiraz-53T | 2078 | 0.287202 | 0         |  |  |
|        |      | Shiraz-71T | 2238 | 0.603631 | 0         |  |  |
| LRRC17 | chr7 | Shiraz-3T  | 90   | 0.219276 | 0         |  |  |
|        |      | Shiraz-3T  | 90   | 0.219276 | 0         |  |  |
|        |      | Shiraz-4T  | 253  | 0.372918 | 0         |  |  |
|        |      | Shiraz-4T  | 253  | 0.372918 | 0         |  |  |
|        |      | Shiraz-36T | 378  | 0.179558 | 0         |  |  |
|        |      | Shiraz-36T | 378  | 0.179558 | 0         |  |  |
|        |      | Shiraz-46T | 943  | 0.093799 | 0         |  |  |
|        |      | Shiraz-46T | 943  | 0.093799 | 0         |  |  |
|        |      | Shiraz-77T | 1225 | 0        | -0.117922 |  |  |
|        |      | Shiraz-77T | 1225 | 0        | -0.117922 |  |  |

|  |  |            |      |          |           |  |  |
|--|--|------------|------|----------|-----------|--|--|
|  |  | Shiraz-18T | 1434 | 0.244465 | 0         |  |  |
|  |  | Shiraz-18T | 1434 | 0.244465 | 0         |  |  |
|  |  | Shiraz-22T | 1549 | 0        | -0.319623 |  |  |
|  |  | Shiraz-22T | 1549 | 0        | -0.319623 |  |  |
|  |  | Shiraz-25T | 1698 | 0.21835  | 0         |  |  |
|  |  | Shiraz-25T | 1698 | 0.21835  | 0         |  |  |
|  |  | Shiraz-28T | 1735 | 0.350744 | 0         |  |  |
|  |  | Shiraz-28T | 1735 | 0.350744 | 0         |  |  |
|  |  | Shiraz-29T | 1778 | 0.120767 | 0         |  |  |
|  |  | Shiraz-29T | 1778 | 0.120767 | 0         |  |  |
|  |  | Shiraz-32T | 1833 | 0.551336 | 0         |  |  |
|  |  | Shiraz-32T | 1833 | 0.551336 | 0         |  |  |
|  |  | Shiraz-38T | 1951 | 0.250891 | 0         |  |  |
|  |  | Shiraz-38T | 1951 | 0.250891 | 0         |  |  |
|  |  | Shiraz-53T | 2078 | 0.287202 | 0         |  |  |
|  |  | Shiraz-53T | 2078 | 0.287202 | 0         |  |  |
|  |  | Shiraz-71T | 2238 | 0.603631 | 0         |  |  |
|  |  | Shiraz-71T | 2238 | 0.603631 | 0         |  |  |
|  |  | Shiraz-3T  | 90   | 0.219276 | 0         |  |  |
|  |  | Shiraz-3T  | 90   | 0.219276 | 0         |  |  |
|  |  | Shiraz-4T  | 253  | 0.372918 | 0         |  |  |
|  |  | Shiraz-4T  | 253  | 0.372918 | 0         |  |  |
|  |  | Shiraz-36T | 378  | 0.179558 | 0         |  |  |
|  |  | Shiraz-36T | 378  | 0.179558 | 0         |  |  |
|  |  | Shiraz-46T | 943  | 0.093799 | 0         |  |  |
|  |  | Shiraz-46T | 943  | 0.093799 | 0         |  |  |
|  |  | Shiraz-77T | 1225 | 0        | -0.117922 |  |  |
|  |  | Shiraz-77T | 1225 | 0        | -0.117922 |  |  |
|  |  | Shiraz-18T | 1434 | 0.244465 | 0         |  |  |
|  |  | Shiraz-18T | 1434 | 0.244465 | 0         |  |  |
|  |  | Shiraz-22T | 1549 | 0        | -0.319623 |  |  |
|  |  | Shiraz-22T | 1549 | 0        | -0.319623 |  |  |
|  |  | Shiraz-25T | 1698 | 0.21835  | 0         |  |  |
|  |  | Shiraz-25T | 1698 | 0.21835  | 0         |  |  |
|  |  | Shiraz-28T | 1735 | 0.350744 | 0         |  |  |
|  |  | Shiraz-28T | 1735 | 0.350744 | 0         |  |  |
|  |  | Shiraz-29T | 1778 | 0.120767 | 0         |  |  |
|  |  | Shiraz-29T | 1778 | 0.120767 | 0         |  |  |
|  |  | Shiraz-32T | 1833 | 0.551336 | 0         |  |  |
|  |  | Shiraz-32T | 1833 | 0.551336 | 0         |  |  |
|  |  | Shiraz-38T | 1951 | 0.250891 | 0         |  |  |
|  |  | Shiraz-38T | 1951 | 0.250891 | 0         |  |  |
|  |  | Shiraz-53T | 2078 | 0.287202 | 0         |  |  |
|  |  | Shiraz-53T | 2078 | 0.287202 | 0         |  |  |
|  |  | Shiraz-71T | 2238 | 0.603631 | 0         |  |  |
|  |  | Shiraz-71T | 2238 | 0.603631 | 0         |  |  |
|  |  | Shiraz-3T  | 90   | 0.219276 | 0         |  |  |

|      |      |            |      |          |           |  |
|------|------|------------|------|----------|-----------|--|
|      |      | Shiraz-3T  | 90   | 0.219276 | 0         |  |
|      |      | Shiraz-4T  | 253  | 0.372918 | 0         |  |
|      |      | Shiraz-4T  | 253  | 0.372918 | 0         |  |
|      |      | Shiraz-36T | 378  | 0.179558 | 0         |  |
|      |      | Shiraz-36T | 378  | 0.179558 | 0         |  |
|      |      | Shiraz-46T | 943  | 0.093799 | 0         |  |
|      |      | Shiraz-46T | 943  | 0.093799 | 0         |  |
|      |      | Shiraz-77T | 1225 | 0        | -0.117922 |  |
|      |      | Shiraz-77T | 1225 | 0        | -0.117922 |  |
|      |      | Shiraz-18T | 1434 | 0.244465 | 0         |  |
|      |      | Shiraz-18T | 1434 | 0.244465 | 0         |  |
|      |      | Shiraz-22T | 1549 | 0        | -0.319623 |  |
|      |      | Shiraz-22T | 1549 | 0        | -0.319623 |  |
|      |      | Shiraz-25T | 1698 | 0.21835  | 0         |  |
|      |      | Shiraz-25T | 1698 | 0.21835  | 0         |  |
|      |      | Shiraz-28T | 1735 | 0.350744 | 0         |  |
|      |      | Shiraz-28T | 1735 | 0.350744 | 0         |  |
|      |      | Shiraz-29T | 1778 | 0.120767 | 0         |  |
|      |      | Shiraz-29T | 1778 | 0.120767 | 0         |  |
|      |      | Shiraz-32T | 1833 | 0.551336 | 0         |  |
|      |      | Shiraz-32T | 1833 | 0.551336 | 0         |  |
|      |      | Shiraz-38T | 1951 | 0.250891 | 0         |  |
|      |      | Shiraz-38T | 1951 | 0.250891 | 0         |  |
|      |      | Shiraz-53T | 2078 | 0.287202 | 0         |  |
|      |      | Shiraz-53T | 2078 | 0.287202 | 0         |  |
|      |      | Shiraz-71T | 2238 | 0.603631 | 0         |  |
|      |      | Shiraz-71T | 2238 | 0.603631 | 0         |  |
| LRR4 | chr7 | Shiraz-3T  | 90   | 0.219276 | 0         |  |
|      |      | Shiraz-3T  | 96   | 0.428308 | 0         |  |
|      |      | Shiraz-4T  | 253  | 0.372918 | 0         |  |
|      |      | Shiraz-36T | 378  | 0.179558 | 0         |  |
|      |      | Shiraz-44T | 642  | 0.408617 | 0         |  |
|      |      | Shiraz-46T | 943  | 0.093799 | 0         |  |
|      |      | Shiraz-77T | 1225 | 0        | -0.117922 |  |
|      |      | Shiraz-77T | 1229 | 0.051661 | 0         |  |
|      |      | Shiraz-9T  | 1325 | 0.221899 | 0         |  |
|      |      | Shiraz-18T | 1434 | 0.244465 | 0         |  |
|      |      | Shiraz-25T | 1698 | 0.21835  | 0         |  |
|      |      | Shiraz-28T | 1735 | 0.350744 | 0         |  |
|      |      | Shiraz-29T | 1778 | 0.120767 | 0         |  |
|      |      | Shiraz-32T | 1833 | 0.551336 | 0         |  |
|      |      | Shiraz-38T | 1951 | 0.250891 | 0         |  |
|      |      | Shiraz-53T | 2078 | 0.287202 | 0         |  |
|      |      | Shiraz-71T | 2238 | 0.603631 | 0         |  |
|      |      | Shiraz-3T  | 90   | 0.219276 | 0         |  |
|      |      | Shiraz-3T  | 96   | 0.428308 | 0         |  |
|      |      | Shiraz-4T  | 253  | 0.372918 | 0         |  |



|        |      |            |      |          |           |  |
|--------|------|------------|------|----------|-----------|--|
|        |      | Shiraz-36T | 378  | 0.179558 | 0         |  |
|        |      | Shiraz-44T | 642  | 0.408617 | 0         |  |
|        |      | Shiraz-46T | 943  | 0.093799 | 0         |  |
|        |      | Shiraz-77T | 1225 | 0        | -0.117922 |  |
|        |      | Shiraz-77T | 1229 | 0.051661 | 0         |  |
|        |      | Shiraz-9T  | 1325 | 0.221899 | 0         |  |
|        |      | Shiraz-18T | 1434 | 0.244465 | 0         |  |
|        |      | Shiraz-25T | 1698 | 0.21835  | 0         |  |
|        |      | Shiraz-28T | 1735 | 0.350744 | 0         |  |
|        |      | Shiraz-29T | 1778 | 0.120767 | 0         |  |
|        |      | Shiraz-32T | 1833 | 0.551336 | 0         |  |
|        |      | Shiraz-38T | 1951 | 0.250891 | 0         |  |
|        |      | Shiraz-53T | 2078 | 0.287202 | 0         |  |
|        |      | Shiraz-71T | 2238 | 0.603631 | 0         |  |
|        |      | Shiraz-3T  | 90   | 0.219276 | 0         |  |
|        |      | Shiraz-3T  | 96   | 0.428308 | 0         |  |
|        |      | Shiraz-4T  | 253  | 0.372918 | 0         |  |
|        |      | Shiraz-36T | 378  | 0.179558 | 0         |  |
|        |      | Shiraz-44T | 642  | 0.408617 | 0         |  |
|        |      | Shiraz-46T | 943  | 0.093799 | 0         |  |
|        |      | Shiraz-77T | 1225 | 0        | -0.117922 |  |
|        |      | Shiraz-77T | 1229 | 0.051661 | 0         |  |
|        |      | Shiraz-9T  | 1325 | 0.221899 | 0         |  |
|        |      | Shiraz-18T | 1434 | 0.244465 | 0         |  |
|        |      | Shiraz-25T | 1698 | 0.21835  | 0         |  |
|        |      | Shiraz-28T | 1735 | 0.350744 | 0         |  |
|        |      | Shiraz-29T | 1778 | 0.120767 | 0         |  |
|        |      | Shiraz-32T | 1833 | 0.551336 | 0         |  |
|        |      | Shiraz-38T | 1951 | 0.250891 | 0         |  |
|        |      | Shiraz-53T | 2078 | 0.287202 | 0         |  |
|        |      | Shiraz-71T | 2238 | 0.603631 | 0         |  |
| LRRC61 | chr7 | Shiraz-3T  | 90   | 0.219276 | 0         |  |
|        |      | Shiraz-3T  | 99   | 0.454766 | 0         |  |
|        |      | Shiraz-4T  | 253  | 0.372918 | 0         |  |
|        |      | Shiraz-36T | 378  | 0.179558 | 0         |  |
|        |      | Shiraz-44T | 646  | 0.471276 | 0         |  |
|        |      | Shiraz-46T | 943  | 0.093799 | 0         |  |
|        |      | Shiraz-9T  | 1325 | 0.221899 | 0         |  |
|        |      | Shiraz-18T | 1434 | 0.244465 | 0         |  |
|        |      | Shiraz-25T | 1698 | 0.21835  | 0         |  |
|        |      | Shiraz-28T | 1735 | 0.350744 | 0         |  |
|        |      | Shiraz-29T | 1778 | 0.120767 | 0         |  |
|        |      | Shiraz-32T | 1833 | 0.551336 | 0         |  |
|        |      | Shiraz-38T | 1951 | 0.250891 | 0         |  |
|        |      | Shiraz-53T | 2078 | 0.287202 | 0         |  |
|        |      | Shiraz-58T | 2162 | 0.221505 | 0         |  |
|        |      | Shiraz-71T | 2238 | 0.603631 | 0         |  |

|       |      |            |      |          |           |  |
|-------|------|------------|------|----------|-----------|--|
|       |      | Shiraz-3T  | 90   | 0.219276 | 0         |  |
|       |      | Shiraz-3T  | 99   | 0.454766 | 0         |  |
|       |      | Shiraz-4T  | 253  | 0.372918 | 0         |  |
|       |      | Shiraz-36T | 378  | 0.179558 | 0         |  |
|       |      | Shiraz-44T | 646  | 0.471276 | 0         |  |
|       |      | Shiraz-46T | 943  | 0.093799 | 0         |  |
|       |      | Shiraz-9T  | 1325 | 0.221899 | 0         |  |
|       |      | Shiraz-18T | 1434 | 0.244465 | 0         |  |
|       |      | Shiraz-25T | 1698 | 0.21835  | 0         |  |
|       |      | Shiraz-28T | 1735 | 0.350744 | 0         |  |
|       |      | Shiraz-29T | 1778 | 0.120767 | 0         |  |
|       |      | Shiraz-32T | 1833 | 0.551336 | 0         |  |
|       |      | Shiraz-38T | 1951 | 0.250891 | 0         |  |
|       |      | Shiraz-53T | 2078 | 0.287202 | 0         |  |
|       |      | Shiraz-58T | 2162 | 0.221505 | 0         |  |
|       |      | Shiraz-71T | 2238 | 0.603631 | 0         |  |
|       |      | Shiraz-3T  | 90   | 0.219276 | 0         |  |
|       |      | Shiraz-3T  | 99   | 0.454766 | 0         |  |
|       |      | Shiraz-4T  | 253  | 0.372918 | 0         |  |
|       |      | Shiraz-36T | 378  | 0.179558 | 0         |  |
|       |      | Shiraz-44T | 646  | 0.471276 | 0         |  |
|       |      | Shiraz-46T | 943  | 0.093799 | 0         |  |
|       |      | Shiraz-9T  | 1325 | 0.221899 | 0         |  |
|       |      | Shiraz-18T | 1434 | 0.244465 | 0         |  |
|       |      | Shiraz-25T | 1698 | 0.21835  | 0         |  |
|       |      | Shiraz-28T | 1735 | 0.350744 | 0         |  |
|       |      | Shiraz-29T | 1778 | 0.120767 | 0         |  |
|       |      | Shiraz-32T | 1833 | 0.551336 | 0         |  |
|       |      | Shiraz-38T | 1951 | 0.250891 | 0         |  |
|       |      | Shiraz-53T | 2078 | 0.287202 | 0         |  |
|       |      | Shiraz-58T | 2162 | 0.221505 | 0         |  |
|       |      | Shiraz-71T | 2238 | 0.603631 | 0         |  |
| LRRN3 | chr7 | Shiraz-3T  | 90   | 0.219276 | 0         |  |
|       |      | Shiraz-3T  | 95   | 0        | -0.077623 |  |
|       |      | Shiraz-4T  | 253  | 0.372918 | 0         |  |
|       |      | Shiraz-36T | 378  | 0.179558 | 0         |  |
|       |      | Shiraz-36T | 382  | 0.081739 | 0         |  |
|       |      | Shiraz-44T | 641  | 0        | -0.477846 |  |
|       |      | Shiraz-46T | 943  | 0.093799 | 0         |  |
|       |      | Shiraz-46T | 947  | 0        | -0.010843 |  |
|       |      | Shiraz-47T | 1031 | 0        | -0.117529 |  |
|       |      | Shiraz-49T | 1121 | 0        | -0.138569 |  |
|       |      | Shiraz-77T | 1225 | 0        | -0.117922 |  |
|       |      | Shiraz-77T | 1228 | 0        | -0.238084 |  |
|       |      | Shiraz-18T | 1434 | 0.244465 | 0         |  |
|       |      | Shiraz-22T | 1549 | 0        | -0.319623 |  |
|       |      | Shiraz-25T | 1698 | 0.21835  | 0         |  |

|  |            |      |          |           |  |
|--|------------|------|----------|-----------|--|
|  | Shiraz-28T | 1735 | 0.350744 | 0         |  |
|  | Shiraz-29T | 1778 | 0.120767 | 0         |  |
|  | Shiraz-32T | 1833 | 0.551336 | 0         |  |
|  | Shiraz-38T | 1951 | 0.250891 | 0         |  |
|  | Shiraz-53T | 2078 | 0.287202 | 0         |  |
|  | Shiraz-58T | 2161 | 0        | -0.187744 |  |
|  | Shiraz-71T | 2238 | 0.603631 | 0         |  |
|  | Shiraz-3T  | 90   | 0.219276 | 0         |  |
|  | Shiraz-3T  | 95   | 0        | -0.077623 |  |
|  | Shiraz-4T  | 253  | 0.372918 | 0         |  |
|  | Shiraz-36T | 378  | 0.179558 | 0         |  |
|  | Shiraz-36T | 382  | 0.081739 | 0         |  |
|  | Shiraz-44T | 641  | 0        | -0.477846 |  |
|  | Shiraz-46T | 943  | 0.093799 | 0         |  |
|  | Shiraz-46T | 947  | 0        | -0.010843 |  |
|  | Shiraz-47T | 1031 | 0        | -0.117529 |  |
|  | Shiraz-49T | 1121 | 0        | -0.138569 |  |
|  | Shiraz-77T | 1225 | 0        | -0.117922 |  |
|  | Shiraz-77T | 1228 | 0        | -0.238084 |  |
|  | Shiraz-18T | 1434 | 0.244465 | 0         |  |
|  | Shiraz-22T | 1549 | 0        | -0.319623 |  |
|  | Shiraz-25T | 1698 | 0.21835  | 0         |  |
|  | Shiraz-28T | 1735 | 0.350744 | 0         |  |
|  | Shiraz-29T | 1778 | 0.120767 | 0         |  |
|  | Shiraz-32T | 1833 | 0.551336 | 0         |  |
|  | Shiraz-38T | 1951 | 0.250891 | 0         |  |
|  | Shiraz-53T | 2078 | 0.287202 | 0         |  |
|  | Shiraz-58T | 2161 | 0        | -0.187744 |  |
|  | Shiraz-71T | 2238 | 0.603631 | 0         |  |
|  | Shiraz-3T  | 90   | 0.219276 | 0         |  |
|  | Shiraz-3T  | 95   | 0        | -0.077623 |  |
|  | Shiraz-4T  | 253  | 0.372918 | 0         |  |
|  | Shiraz-36T | 378  | 0.179558 | 0         |  |
|  | Shiraz-36T | 382  | 0.081739 | 0         |  |
|  | Shiraz-44T | 641  | 0        | -0.477846 |  |
|  | Shiraz-46T | 943  | 0.093799 | 0         |  |
|  | Shiraz-46T | 947  | 0        | -0.010843 |  |
|  | Shiraz-47T | 1031 | 0        | -0.117529 |  |
|  | Shiraz-49T | 1121 | 0        | -0.138569 |  |
|  | Shiraz-77T | 1225 | 0        | -0.117922 |  |
|  | Shiraz-77T | 1228 | 0        | -0.238084 |  |
|  | Shiraz-18T | 1434 | 0.244465 | 0         |  |
|  | Shiraz-22T | 1549 | 0        | -0.319623 |  |
|  | Shiraz-25T | 1698 | 0.21835  | 0         |  |
|  | Shiraz-28T | 1735 | 0.350744 | 0         |  |
|  | Shiraz-29T | 1778 | 0.120767 | 0         |  |
|  | Shiraz-32T | 1833 | 0.551336 | 0         |  |

|       |      |            |      |          |           |  |
|-------|------|------------|------|----------|-----------|--|
|       |      | Shiraz-38T | 1951 | 0.250891 | 0         |  |
|       |      | Shiraz-53T | 2078 | 0.287202 | 0         |  |
|       |      | Shiraz-58T | 2161 | 0        | -0.187744 |  |
|       |      | Shiraz-71T | 2238 | 0.603631 | 0         |  |
| LRWD1 | chr7 | Shiraz-3T  | 90   | 0.219276 | 0         |  |
|       |      | Shiraz-3T  | 94   | 0.74735  | 0         |  |
|       |      | Shiraz-4T  | 253  | 0.372918 | 0         |  |
|       |      | Shiraz-31T | 316  | 0.219196 | 0         |  |
|       |      | Shiraz-36T | 378  | 0.179558 | 0         |  |
|       |      | Shiraz-36T | 381  | 0.332628 | 0         |  |
|       |      | Shiraz-44T | 639  | 1.035032 | 0         |  |
|       |      | Shiraz-46T | 943  | 0.093799 | 0         |  |
|       |      | Shiraz-46T | 946  | 0.299835 | 0         |  |
|       |      | Shiraz-47T | 1030 | 0.257728 | 0         |  |
|       |      | Shiraz-49T | 1120 | 0.281656 | 0         |  |
|       |      | Shiraz-77T | 1225 | 0        | -0.117922 |  |
|       |      | Shiraz-77T | 1227 | 0.196445 | 0         |  |
|       |      | Shiraz-9T  | 1324 | 0.679266 | 0         |  |
|       |      | Shiraz-18T | 1434 | 0.244465 | 0         |  |
|       |      | Shiraz-22T | 1549 | 0        | -0.319623 |  |
|       |      | Shiraz-22T | 1551 | 0.324011 | 0         |  |
|       |      | Shiraz-25T | 1698 | 0.21835  | 0         |  |
|       |      | Shiraz-28T | 1735 | 0.350744 | 0         |  |
|       |      | Shiraz-29T | 1778 | 0.120767 | 0         |  |
|       |      | Shiraz-32T | 1833 | 0.551336 | 0         |  |
|       |      | Shiraz-38T | 1951 | 0.250891 | 0         |  |
|       |      | Shiraz-53T | 2078 | 0.287202 | 0         |  |
|       |      | Shiraz-58T | 2160 | 0.399007 | 0         |  |
|       |      | Shiraz-71T | 2238 | 0.603631 | 0         |  |
|       |      | Shiraz-3T  | 90   | 0.219276 | 0         |  |
|       |      | Shiraz-3T  | 94   | 0.74735  | 0         |  |
|       |      | Shiraz-4T  | 253  | 0.372918 | 0         |  |
|       |      | Shiraz-31T | 316  | 0.219196 | 0         |  |
|       |      | Shiraz-36T | 378  | 0.179558 | 0         |  |
|       |      | Shiraz-36T | 381  | 0.332628 | 0         |  |
|       |      | Shiraz-44T | 639  | 1.035032 | 0         |  |
|       |      | Shiraz-46T | 943  | 0.093799 | 0         |  |
|       |      | Shiraz-46T | 946  | 0.299835 | 0         |  |
|       |      | Shiraz-47T | 1030 | 0.257728 | 0         |  |
|       |      | Shiraz-49T | 1120 | 0.281656 | 0         |  |
|       |      | Shiraz-77T | 1225 | 0        | -0.117922 |  |
|       |      | Shiraz-77T | 1227 | 0.196445 | 0         |  |
|       |      | Shiraz-9T  | 1324 | 0.679266 | 0         |  |
|       |      | Shiraz-18T | 1434 | 0.244465 | 0         |  |
|       |      | Shiraz-22T | 1549 | 0        | -0.319623 |  |
|       |      | Shiraz-22T | 1551 | 0.324011 | 0         |  |
|       |      | Shiraz-25T | 1698 | 0.21835  | 0         |  |

|      |      |            |      |          |           |  |
|------|------|------------|------|----------|-----------|--|
|      |      | Shiraz-28T | 1735 | 0.350744 | 0         |  |
|      |      | Shiraz-29T | 1778 | 0.120767 | 0         |  |
|      |      | Shiraz-32T | 1833 | 0.551336 | 0         |  |
|      |      | Shiraz-38T | 1951 | 0.250891 | 0         |  |
|      |      | Shiraz-53T | 2078 | 0.287202 | 0         |  |
|      |      | Shiraz-58T | 2160 | 0.399007 | 0         |  |
|      |      | Shiraz-71T | 2238 | 0.603631 | 0         |  |
|      |      | Shiraz-3T  | 90   | 0.219276 | 0         |  |
|      |      | Shiraz-3T  | 94   | 0.74735  | 0         |  |
|      |      | Shiraz-4T  | 253  | 0.372918 | 0         |  |
|      |      | Shiraz-31T | 316  | 0.219196 | 0         |  |
|      |      | Shiraz-36T | 378  | 0.179558 | 0         |  |
|      |      | Shiraz-36T | 381  | 0.332628 | 0         |  |
|      |      | Shiraz-44T | 639  | 1.035032 | 0         |  |
|      |      | Shiraz-46T | 943  | 0.093799 | 0         |  |
|      |      | Shiraz-46T | 946  | 0.299835 | 0         |  |
|      |      | Shiraz-47T | 1030 | 0.257728 | 0         |  |
|      |      | Shiraz-49T | 1120 | 0.281656 | 0         |  |
|      |      | Shiraz-77T | 1225 | 0        | -0.117922 |  |
|      |      | Shiraz-77T | 1227 | 0.196445 | 0         |  |
|      |      | Shiraz-9T  | 1324 | 0.679266 | 0         |  |
|      |      | Shiraz-18T | 1434 | 0.244465 | 0         |  |
|      |      | Shiraz-22T | 1549 | 0        | -0.319623 |  |
|      |      | Shiraz-22T | 1551 | 0.324011 | 0         |  |
|      |      | Shiraz-25T | 1698 | 0.21835  | 0         |  |
|      |      | Shiraz-28T | 1735 | 0.350744 | 0         |  |
|      |      | Shiraz-29T | 1778 | 0.120767 | 0         |  |
|      |      | Shiraz-32T | 1833 | 0.551336 | 0         |  |
|      |      | Shiraz-38T | 1951 | 0.250891 | 0         |  |
|      |      | Shiraz-53T | 2078 | 0.287202 | 0         |  |
|      |      | Shiraz-58T | 2160 | 0.399007 | 0         |  |
|      |      | Shiraz-71T | 2238 | 0.603631 | 0         |  |
| LSM5 | chr7 | Shiraz-3T  | 87   | 0.198593 | 0         |  |
|      |      | Shiraz-3T  | 87   | 0.198593 | 0         |  |
|      |      | Shiraz-3T  | 87   | 0.198593 | 0         |  |
|      |      | Shiraz-3T  | 87   | 0.198593 | 0         |  |
|      |      | Shiraz-4T  | 252  | 0.192083 | 0         |  |
|      |      | Shiraz-4T  | 252  | 0.192083 | 0         |  |
|      |      | Shiraz-4T  | 252  | 0.192083 | 0         |  |
|      |      | Shiraz-4T  | 252  | 0.192083 | 0         |  |
|      |      | Shiraz-36T | 376  | 0.159952 | 0         |  |
|      |      | Shiraz-36T | 376  | 0.159952 | 0         |  |
|      |      | Shiraz-36T | 376  | 0.159952 | 0         |  |
|      |      | Shiraz-36T | 376  | 0.159952 | 0         |  |
|      |      | Shiraz-44T | 631  | 0        | -0.180312 |  |
|      |      | Shiraz-44T | 631  | 0        | -0.180312 |  |
|      |      | Shiraz-44T | 631  | 0        | -0.180312 |  |

|  |            |      |          |           |  |
|--|------------|------|----------|-----------|--|
|  | Shiraz-44T | 631  | 0        | -0.180312 |  |
|  | Shiraz-46T | 942  | 0.069143 | 0         |  |
|  | Shiraz-46T | 942  | 0.069143 | 0         |  |
|  | Shiraz-46T | 942  | 0.069143 | 0         |  |
|  | Shiraz-46T | 942  | 0.069143 | 0         |  |
|  | Shiraz-18T | 1433 | 0.250973 | 0         |  |
|  | Shiraz-18T | 1433 | 0.250973 | 0         |  |
|  | Shiraz-18T | 1433 | 0.250973 | 0         |  |
|  | Shiraz-18T | 1433 | 0.250973 | 0         |  |
|  | Shiraz-22T | 1544 | 0        | -0.193579 |  |
|  | Shiraz-22T | 1544 | 0        | -0.193579 |  |
|  | Shiraz-22T | 1544 | 0        | -0.193579 |  |
|  | Shiraz-22T | 1544 | 0        | -0.193579 |  |
|  | Shiraz-25T | 1697 | 0.21945  | 0         |  |
|  | Shiraz-25T | 1697 | 0.21945  | 0         |  |
|  | Shiraz-25T | 1697 | 0.21945  | 0         |  |
|  | Shiraz-25T | 1697 | 0.21945  | 0         |  |
|  | Shiraz-28T | 1734 | 0.362882 | 0         |  |
|  | Shiraz-28T | 1734 | 0.362882 | 0         |  |
|  | Shiraz-28T | 1734 | 0.362882 | 0         |  |
|  | Shiraz-28T | 1734 | 0.362882 | 0         |  |
|  | Shiraz-29T | 1777 | 0.156747 | 0         |  |
|  | Shiraz-29T | 1777 | 0.156747 | 0         |  |
|  | Shiraz-29T | 1777 | 0.156747 | 0         |  |
|  | Shiraz-29T | 1777 | 0.156747 | 0         |  |
|  | Shiraz-38T | 1950 | 0.265916 | 0         |  |
|  | Shiraz-38T | 1950 | 0.265916 | 0         |  |
|  | Shiraz-38T | 1950 | 0.265916 | 0         |  |
|  | Shiraz-38T | 1950 | 0.265916 | 0         |  |
|  | Shiraz-71T | 2236 | 0.320072 | 0         |  |
|  | Shiraz-71T | 2236 | 0.320072 | 0         |  |
|  | Shiraz-71T | 2236 | 0.320072 | 0         |  |
|  | Shiraz-71T | 2236 | 0.320072 | 0         |  |
|  | Shiraz-3T  | 87   | 0.198593 | 0         |  |
|  | Shiraz-3T  | 87   | 0.198593 | 0         |  |
|  | Shiraz-3T  | 87   | 0.198593 | 0         |  |
|  | Shiraz-3T  | 87   | 0.198593 | 0         |  |
|  | Shiraz-4T  | 252  | 0.192083 | 0         |  |
|  | Shiraz-4T  | 252  | 0.192083 | 0         |  |
|  | Shiraz-4T  | 252  | 0.192083 | 0         |  |
|  | Shiraz-4T  | 252  | 0.192083 | 0         |  |
|  | Shiraz-36T | 376  | 0.159952 | 0         |  |
|  | Shiraz-36T | 376  | 0.159952 | 0         |  |
|  | Shiraz-36T | 376  | 0.159952 | 0         |  |
|  | Shiraz-36T | 376  | 0.159952 | 0         |  |
|  | Shiraz-44T | 631  | 0        | -0.180312 |  |
|  | Shiraz-44T | 631  | 0        | -0.180312 |  |

|  |            |      |          |           |  |
|--|------------|------|----------|-----------|--|
|  | Shiraz-44T | 631  | 0        | -0.180312 |  |
|  | Shiraz-44T | 631  | 0        | -0.180312 |  |
|  | Shiraz-46T | 942  | 0.069143 | 0         |  |
|  | Shiraz-46T | 942  | 0.069143 | 0         |  |
|  | Shiraz-46T | 942  | 0.069143 | 0         |  |
|  | Shiraz-46T | 942  | 0.069143 | 0         |  |
|  | Shiraz-18T | 1433 | 0.250973 | 0         |  |
|  | Shiraz-18T | 1433 | 0.250973 | 0         |  |
|  | Shiraz-18T | 1433 | 0.250973 | 0         |  |
|  | Shiraz-18T | 1433 | 0.250973 | 0         |  |
|  | Shiraz-22T | 1544 | 0        | -0.193579 |  |
|  | Shiraz-22T | 1544 | 0        | -0.193579 |  |
|  | Shiraz-22T | 1544 | 0        | -0.193579 |  |
|  | Shiraz-22T | 1544 | 0        | -0.193579 |  |
|  | Shiraz-25T | 1697 | 0.21945  | 0         |  |
|  | Shiraz-25T | 1697 | 0.21945  | 0         |  |
|  | Shiraz-25T | 1697 | 0.21945  | 0         |  |
|  | Shiraz-25T | 1697 | 0.21945  | 0         |  |
|  | Shiraz-28T | 1734 | 0.362882 | 0         |  |
|  | Shiraz-28T | 1734 | 0.362882 | 0         |  |
|  | Shiraz-28T | 1734 | 0.362882 | 0         |  |
|  | Shiraz-28T | 1734 | 0.362882 | 0         |  |
|  | Shiraz-29T | 1777 | 0.156747 | 0         |  |
|  | Shiraz-29T | 1777 | 0.156747 | 0         |  |
|  | Shiraz-29T | 1777 | 0.156747 | 0         |  |
|  | Shiraz-29T | 1777 | 0.156747 | 0         |  |
|  | Shiraz-38T | 1950 | 0.265916 | 0         |  |
|  | Shiraz-38T | 1950 | 0.265916 | 0         |  |
|  | Shiraz-38T | 1950 | 0.265916 | 0         |  |
|  | Shiraz-38T | 1950 | 0.265916 | 0         |  |
|  | Shiraz-71T | 2236 | 0.320072 | 0         |  |
|  | Shiraz-71T | 2236 | 0.320072 | 0         |  |
|  | Shiraz-71T | 2236 | 0.320072 | 0         |  |
|  | Shiraz-71T | 2236 | 0.320072 | 0         |  |
|  | Shiraz-3T  | 87   | 0.198593 | 0         |  |
|  | Shiraz-3T  | 87   | 0.198593 | 0         |  |
|  | Shiraz-3T  | 87   | 0.198593 | 0         |  |
|  | Shiraz-3T  | 87   | 0.198593 | 0         |  |
|  | Shiraz-4T  | 252  | 0.192083 | 0         |  |
|  | Shiraz-4T  | 252  | 0.192083 | 0         |  |
|  | Shiraz-4T  | 252  | 0.192083 | 0         |  |
|  | Shiraz-4T  | 252  | 0.192083 | 0         |  |
|  | Shiraz-36T | 376  | 0.159952 | 0         |  |
|  | Shiraz-36T | 376  | 0.159952 | 0         |  |
|  | Shiraz-36T | 376  | 0.159952 | 0         |  |
|  | Shiraz-36T | 376  | 0.159952 | 0         |  |
|  | Shiraz-44T | 631  | 0        | -0.180312 |  |

|      |      |            |      |          |           |  |  |
|------|------|------------|------|----------|-----------|--|--|
|      |      | Shiraz-44T | 631  | 0        | -0.180312 |  |  |
|      |      | Shiraz-44T | 631  | 0        | -0.180312 |  |  |
|      |      | Shiraz-44T | 631  | 0        | -0.180312 |  |  |
|      |      | Shiraz-46T | 942  | 0.069143 | 0         |  |  |
|      |      | Shiraz-46T | 942  | 0.069143 | 0         |  |  |
|      |      | Shiraz-46T | 942  | 0.069143 | 0         |  |  |
|      |      | Shiraz-46T | 942  | 0.069143 | 0         |  |  |
|      |      | Shiraz-18T | 1433 | 0.250973 | 0         |  |  |
|      |      | Shiraz-18T | 1433 | 0.250973 | 0         |  |  |
|      |      | Shiraz-18T | 1433 | 0.250973 | 0         |  |  |
|      |      | Shiraz-18T | 1433 | 0.250973 | 0         |  |  |
|      |      | Shiraz-22T | 1544 | 0        | -0.193579 |  |  |
|      |      | Shiraz-22T | 1544 | 0        | -0.193579 |  |  |
|      |      | Shiraz-22T | 1544 | 0        | -0.193579 |  |  |
|      |      | Shiraz-22T | 1544 | 0        | -0.193579 |  |  |
|      |      | Shiraz-25T | 1697 | 0.21945  | 0         |  |  |
|      |      | Shiraz-25T | 1697 | 0.21945  | 0         |  |  |
|      |      | Shiraz-25T | 1697 | 0.21945  | 0         |  |  |
|      |      | Shiraz-25T | 1697 | 0.21945  | 0         |  |  |
|      |      | Shiraz-28T | 1734 | 0.362882 | 0         |  |  |
|      |      | Shiraz-28T | 1734 | 0.362882 | 0         |  |  |
|      |      | Shiraz-28T | 1734 | 0.362882 | 0         |  |  |
|      |      | Shiraz-28T | 1734 | 0.362882 | 0         |  |  |
|      |      | Shiraz-29T | 1777 | 0.156747 | 0         |  |  |
|      |      | Shiraz-29T | 1777 | 0.156747 | 0         |  |  |
|      |      | Shiraz-29T | 1777 | 0.156747 | 0         |  |  |
|      |      | Shiraz-29T | 1777 | 0.156747 | 0         |  |  |
|      |      | Shiraz-38T | 1950 | 0.265916 | 0         |  |  |
|      |      | Shiraz-38T | 1950 | 0.265916 | 0         |  |  |
|      |      | Shiraz-38T | 1950 | 0.265916 | 0         |  |  |
|      |      | Shiraz-38T | 1950 | 0.265916 | 0         |  |  |
|      |      | Shiraz-71T | 2236 | 0.320072 | 0         |  |  |
|      |      | Shiraz-71T | 2236 | 0.320072 | 0         |  |  |
|      |      | Shiraz-71T | 2236 | 0.320072 | 0         |  |  |
|      |      | Shiraz-71T | 2236 | 0.320072 | 0         |  |  |
| LSM8 | chr7 | Shiraz-3T  | 90   | 0.219276 | 0         |  |  |
|      |      | Shiraz-3T  | 95   | 0        | -0.077623 |  |  |
|      |      | Shiraz-4T  | 253  | 0.372918 | 0         |  |  |
|      |      | Shiraz-36T | 378  | 0.179558 | 0         |  |  |
|      |      | Shiraz-36T | 382  | 0.081739 | 0         |  |  |
|      |      | Shiraz-44T | 641  | 0        | -0.477846 |  |  |
|      |      | Shiraz-46T | 943  | 0.093799 | 0         |  |  |
|      |      | Shiraz-46T | 947  | 0        | -0.010843 |  |  |
|      |      | Shiraz-47T | 1031 | 0        | -0.117529 |  |  |
|      |      | Shiraz-49T | 1121 | 0        | -0.138569 |  |  |
|      |      | Shiraz-77T | 1225 | 0        | -0.117922 |  |  |
|      |      | Shiraz-77T | 1228 | 0        | -0.238084 |  |  |



|  |            |      |          |           |  |
|--|------------|------|----------|-----------|--|
|  | Shiraz-18T | 1434 | 0.244465 | 0         |  |
|  | Shiraz-22T | 1549 | 0        | -0.319623 |  |
|  | Shiraz-22T | 1552 | 0        | -0.50686  |  |
|  | Shiraz-25T | 1698 | 0.21835  | 0         |  |
|  | Shiraz-28T | 1735 | 0.350744 | 0         |  |
|  | Shiraz-29T | 1778 | 0.120767 | 0         |  |
|  | Shiraz-32T | 1833 | 0.551336 | 0         |  |
|  | Shiraz-32T | 1835 | 0.092727 | 0         |  |
|  | Shiraz-38T | 1951 | 0.250891 | 0         |  |
|  | Shiraz-53T | 2078 | 0.287202 | 0         |  |
|  | Shiraz-58T | 2161 | 0        | -0.187744 |  |
|  | Shiraz-71T | 2238 | 0.603631 | 0         |  |
|  | Shiraz-3T  | 90   | 0.219276 | 0         |  |
|  | Shiraz-3T  | 95   | 0        | -0.077623 |  |
|  | Shiraz-4T  | 253  | 0.372918 | 0         |  |
|  | Shiraz-36T | 378  | 0.179558 | 0         |  |
|  | Shiraz-36T | 382  | 0.081739 | 0         |  |
|  | Shiraz-44T | 641  | 0        | -0.477846 |  |
|  | Shiraz-46T | 943  | 0.093799 | 0         |  |
|  | Shiraz-46T | 947  | 0        | -0.010843 |  |
|  | Shiraz-47T | 1031 | 0        | -0.117529 |  |
|  | Shiraz-49T | 1121 | 0        | -0.138569 |  |
|  | Shiraz-77T | 1225 | 0        | -0.117922 |  |
|  | Shiraz-77T | 1228 | 0        | -0.238084 |  |
|  | Shiraz-18T | 1434 | 0.244465 | 0         |  |
|  | Shiraz-22T | 1549 | 0        | -0.319623 |  |
|  | Shiraz-22T | 1552 | 0        | -0.50686  |  |
|  | Shiraz-25T | 1698 | 0.21835  | 0         |  |
|  | Shiraz-28T | 1735 | 0.350744 | 0         |  |
|  | Shiraz-29T | 1778 | 0.120767 | 0         |  |
|  | Shiraz-32T | 1833 | 0.551336 | 0         |  |
|  | Shiraz-32T | 1835 | 0.092727 | 0         |  |
|  | Shiraz-38T | 1951 | 0.250891 | 0         |  |
|  | Shiraz-53T | 2078 | 0.287202 | 0         |  |
|  | Shiraz-58T | 2161 | 0        | -0.187744 |  |
|  | Shiraz-71T | 2238 | 0.603631 | 0         |  |
|  | Shiraz-3T  | 90   | 0.219276 | 0         |  |
|  | Shiraz-3T  | 95   | 0        | -0.077623 |  |
|  | Shiraz-4T  | 253  | 0.372918 | 0         |  |
|  | Shiraz-36T | 378  | 0.179558 | 0         |  |
|  | Shiraz-36T | 382  | 0.081739 | 0         |  |
|  | Shiraz-44T | 641  | 0        | -0.477846 |  |
|  | Shiraz-46T | 943  | 0.093799 | 0         |  |
|  | Shiraz-46T | 947  | 0        | -0.010843 |  |
|  | Shiraz-47T | 1031 | 0        | -0.117529 |  |
|  | Shiraz-49T | 1121 | 0        | -0.138569 |  |
|  | Shiraz-77T | 1225 | 0        | -0.117922 |  |

|        |      |            |      |          |           |  |  |
|--------|------|------------|------|----------|-----------|--|--|
|        |      | Shiraz-77T | 1228 | 0        | -0.238084 |  |  |
|        |      | Shiraz-18T | 1434 | 0.244465 | 0         |  |  |
|        |      | Shiraz-22T | 1549 | 0        | -0.319623 |  |  |
|        |      | Shiraz-22T | 1552 | 0        | -0.50686  |  |  |
|        |      | Shiraz-25T | 1698 | 0.21835  | 0         |  |  |
|        |      | Shiraz-28T | 1735 | 0.350744 | 0         |  |  |
|        |      | Shiraz-29T | 1778 | 0.120767 | 0         |  |  |
|        |      | Shiraz-32T | 1833 | 0.551336 | 0         |  |  |
|        |      | Shiraz-32T | 1835 | 0.092727 | 0         |  |  |
|        |      | Shiraz-38T | 1951 | 0.250891 | 0         |  |  |
|        |      | Shiraz-53T | 2078 | 0.287202 | 0         |  |  |
|        |      | Shiraz-58T | 2161 | 0        | -0.187744 |  |  |
|        |      | Shiraz-71T | 2238 | 0.603631 | 0         |  |  |
| LUC7L2 | chr7 | Shiraz-3T  | 90   | 0.219276 | 0         |  |  |
|        |      | Shiraz-3T  | 97   | 0.496001 | 0         |  |  |
|        |      | Shiraz-4T  | 253  | 0.372918 | 0         |  |  |
|        |      | Shiraz-31T | 318  | 0.254373 | 0         |  |  |
|        |      | Shiraz-36T | 378  | 0.179558 | 0         |  |  |
|        |      | Shiraz-36T | 383  | 0.374586 | 0         |  |  |
|        |      | Shiraz-44T | 644  | 0.496536 | 0         |  |  |
|        |      | Shiraz-46T | 943  | 0.093799 | 0         |  |  |
|        |      | Shiraz-47T | 1033 | 0.220267 | 0         |  |  |
|        |      | Shiraz-77T | 1225 | 0        | -0.117922 |  |  |
|        |      | Shiraz-77T | 1230 | 0.149651 | 0         |  |  |
|        |      | Shiraz-9T  | 1325 | 0.221899 | 0         |  |  |
|        |      | Shiraz-18T | 1434 | 0.244465 | 0         |  |  |
|        |      | Shiraz-25T | 1698 | 0.21835  | 0         |  |  |
|        |      | Shiraz-28T | 1735 | 0.350744 | 0         |  |  |
|        |      | Shiraz-29T | 1778 | 0.120767 | 0         |  |  |
|        |      | Shiraz-32T | 1833 | 0.551336 | 0         |  |  |
|        |      | Shiraz-38T | 1951 | 0.250891 | 0         |  |  |
|        |      | Shiraz-53T | 2078 | 0.287202 | 0         |  |  |
|        |      | Shiraz-58T | 2162 | 0.221505 | 0         |  |  |
|        |      | Shiraz-71T | 2238 | 0.603631 | 0         |  |  |
|        |      | Shiraz-3T  | 90   | 0.219276 | 0         |  |  |
|        |      | Shiraz-3T  | 97   | 0.496001 | 0         |  |  |
|        |      | Shiraz-4T  | 253  | 0.372918 | 0         |  |  |
|        |      | Shiraz-31T | 318  | 0.254373 | 0         |  |  |
|        |      | Shiraz-36T | 378  | 0.179558 | 0         |  |  |
|        |      | Shiraz-36T | 383  | 0.374586 | 0         |  |  |
|        |      | Shiraz-44T | 644  | 0.496536 | 0         |  |  |
|        |      | Shiraz-46T | 943  | 0.093799 | 0         |  |  |
|        |      | Shiraz-47T | 1033 | 0.220267 | 0         |  |  |
|        |      | Shiraz-77T | 1225 | 0        | -0.117922 |  |  |
|        |      | Shiraz-77T | 1230 | 0.149651 | 0         |  |  |
|        |      | Shiraz-9T  | 1325 | 0.221899 | 0         |  |  |
|        |      | Shiraz-18T | 1434 | 0.244465 | 0         |  |  |

|       |      |            |      |          |           |  |
|-------|------|------------|------|----------|-----------|--|
|       |      | Shiraz-25T | 1698 | 0.21835  | 0         |  |
|       |      | Shiraz-28T | 1735 | 0.350744 | 0         |  |
|       |      | Shiraz-29T | 1778 | 0.120767 | 0         |  |
|       |      | Shiraz-32T | 1833 | 0.551336 | 0         |  |
|       |      | Shiraz-38T | 1951 | 0.250891 | 0         |  |
|       |      | Shiraz-53T | 2078 | 0.287202 | 0         |  |
|       |      | Shiraz-58T | 2162 | 0.221505 | 0         |  |
|       |      | Shiraz-71T | 2238 | 0.603631 | 0         |  |
|       |      | Shiraz-3T  | 90   | 0.219276 | 0         |  |
|       |      | Shiraz-3T  | 97   | 0.496001 | 0         |  |
|       |      | Shiraz-4T  | 253  | 0.372918 | 0         |  |
|       |      | Shiraz-31T | 318  | 0.254373 | 0         |  |
|       |      | Shiraz-36T | 378  | 0.179558 | 0         |  |
|       |      | Shiraz-36T | 383  | 0.374586 | 0         |  |
|       |      | Shiraz-44T | 644  | 0.496536 | 0         |  |
|       |      | Shiraz-46T | 943  | 0.093799 | 0         |  |
|       |      | Shiraz-47T | 1033 | 0.220267 | 0         |  |
|       |      | Shiraz-77T | 1225 | 0        | -0.117922 |  |
|       |      | Shiraz-77T | 1230 | 0.149651 | 0         |  |
|       |      | Shiraz-9T  | 1325 | 0.221899 | 0         |  |
|       |      | Shiraz-18T | 1434 | 0.244465 | 0         |  |
|       |      | Shiraz-25T | 1698 | 0.21835  | 0         |  |
|       |      | Shiraz-28T | 1735 | 0.350744 | 0         |  |
|       |      | Shiraz-29T | 1778 | 0.120767 | 0         |  |
|       |      | Shiraz-32T | 1833 | 0.551336 | 0         |  |
|       |      | Shiraz-38T | 1951 | 0.250891 | 0         |  |
|       |      | Shiraz-53T | 2078 | 0.287202 | 0         |  |
|       |      | Shiraz-58T | 2162 | 0.221505 | 0         |  |
|       |      | Shiraz-71T | 2238 | 0.603631 | 0         |  |
| LUZP4 | chrX | Shiraz-3T  | 242  | 0        | -0.336434 |  |
|       |      | Shiraz-4T  | 261  | 0        | -0.336249 |  |
|       |      | Shiraz-16T | 295  | 0.591657 | 0         |  |
|       |      | Shiraz-36T | 433  | 0        | -0.803961 |  |
|       |      | Shiraz-44T | 899  | 0        | -1.09697  |  |
|       |      | Shiraz-49T | 1170 | 0        | -0.967436 |  |
|       |      | Shiraz-18T | 1457 | 0.643204 | 0         |  |
|       |      | Shiraz-22T | 1673 | 0.611783 | 0         |  |
|       |      | Shiraz-25T | 1719 | 0.472955 | 0         |  |
|       |      | Shiraz-28T | 1762 | 0.562311 | 0         |  |
|       |      | Shiraz-29T | 1801 | 0.815343 | 0         |  |
|       |      | Shiraz-32T | 1870 | 0.729766 | 0         |  |
|       |      | Shiraz-35T | 1933 | 0.488535 | 0         |  |
|       |      | Shiraz-58T | 2223 | 0.833364 | 0         |  |
|       |      | Shiraz-71T | 2263 | 0.975531 | 0         |  |
|       |      | Shiraz-3T  | 242  | 0        | -0.336434 |  |
|       |      | Shiraz-4T  | 261  | 0        | -0.336249 |  |
|       |      | Shiraz-16T | 295  | 0.591657 | 0         |  |

|       |      |            |      |          |           |  |  |
|-------|------|------------|------|----------|-----------|--|--|
|       |      | Shiraz-36T | 433  | 0        | -0.803961 |  |  |
|       |      | Shiraz-44T | 899  | 0        | -1.09697  |  |  |
|       |      | Shiraz-49T | 1170 | 0        | -0.967436 |  |  |
|       |      | Shiraz-18T | 1457 | 0.643204 | 0         |  |  |
|       |      | Shiraz-22T | 1673 | 0.611783 | 0         |  |  |
|       |      | Shiraz-25T | 1719 | 0.472955 | 0         |  |  |
|       |      | Shiraz-28T | 1762 | 0.562311 | 0         |  |  |
|       |      | Shiraz-29T | 1801 | 0.815343 | 0         |  |  |
|       |      | Shiraz-32T | 1870 | 0.729766 | 0         |  |  |
|       |      | Shiraz-35T | 1933 | 0.488535 | 0         |  |  |
|       |      | Shiraz-58T | 2223 | 0.833364 | 0         |  |  |
|       |      | Shiraz-71T | 2263 | 0.975531 | 0         |  |  |
|       |      | Shiraz-3T  | 242  | 0        | -0.336434 |  |  |
|       |      | Shiraz-4T  | 261  | 0        | -0.336249 |  |  |
|       |      | Shiraz-16T | 295  | 0.591657 | 0         |  |  |
|       |      | Shiraz-36T | 433  | 0        | -0.803961 |  |  |
|       |      | Shiraz-44T | 899  | 0        | -1.09697  |  |  |
|       |      | Shiraz-49T | 1170 | 0        | -0.967436 |  |  |
|       |      | Shiraz-18T | 1457 | 0.643204 | 0         |  |  |
|       |      | Shiraz-22T | 1673 | 0.611783 | 0         |  |  |
|       |      | Shiraz-25T | 1719 | 0.472955 | 0         |  |  |
|       |      | Shiraz-28T | 1762 | 0.562311 | 0         |  |  |
|       |      | Shiraz-29T | 1801 | 0.815343 | 0         |  |  |
|       |      | Shiraz-32T | 1870 | 0.729766 | 0         |  |  |
|       |      | Shiraz-35T | 1933 | 0.488535 | 0         |  |  |
|       |      | Shiraz-58T | 2223 | 0.833364 | 0         |  |  |
|       |      | Shiraz-71T | 2263 | 0.975531 | 0         |  |  |
| LUZP6 | chr7 | Shiraz-3T  | 90   | 0.219276 | 0         |  |  |
|       |      | Shiraz-4T  | 253  | 0.372918 | 0         |  |  |
|       |      | Shiraz-36T | 378  | 0.179558 | 0         |  |  |
|       |      | Shiraz-46T | 943  | 0.093799 | 0         |  |  |
|       |      | Shiraz-77T | 1225 | 0        | -0.117922 |  |  |
|       |      | Shiraz-9T  | 1325 | 0.221899 | 0         |  |  |
|       |      | Shiraz-18T | 1434 | 0.244465 | 0         |  |  |
|       |      | Shiraz-22T | 1553 | 0        | -0.213234 |  |  |
|       |      | Shiraz-25T | 1698 | 0.21835  | 0         |  |  |
|       |      | Shiraz-28T | 1735 | 0.350744 | 0         |  |  |
|       |      | Shiraz-29T | 1778 | 0.120767 | 0         |  |  |
|       |      | Shiraz-32T | 1833 | 0.551336 | 0         |  |  |
|       |      | Shiraz-38T | 1951 | 0.250891 | 0         |  |  |
|       |      | Shiraz-53T | 2078 | 0.287202 | 0         |  |  |
|       |      | Shiraz-58T | 2162 | 0.221505 | 0         |  |  |
|       |      | Shiraz-71T | 2238 | 0.603631 | 0         |  |  |
|       |      | Shiraz-3T  | 90   | 0.219276 | 0         |  |  |
|       |      | Shiraz-4T  | 253  | 0.372918 | 0         |  |  |
|       |      | Shiraz-36T | 378  | 0.179558 | 0         |  |  |
|       |      | Shiraz-46T | 943  | 0.093799 | 0         |  |  |

|       |      |            |      |          |           |  |  |
|-------|------|------------|------|----------|-----------|--|--|
|       |      | Shiraz-77T | 1225 | 0        | -0.117922 |  |  |
|       |      | Shiraz-9T  | 1325 | 0.221899 | 0         |  |  |
|       |      | Shiraz-18T | 1434 | 0.244465 | 0         |  |  |
|       |      | Shiraz-22T | 1553 | 0        | -0.213234 |  |  |
|       |      | Shiraz-25T | 1698 | 0.21835  | 0         |  |  |
|       |      | Shiraz-28T | 1735 | 0.350744 | 0         |  |  |
|       |      | Shiraz-29T | 1778 | 0.120767 | 0         |  |  |
|       |      | Shiraz-32T | 1833 | 0.551336 | 0         |  |  |
|       |      | Shiraz-38T | 1951 | 0.250891 | 0         |  |  |
|       |      | Shiraz-53T | 2078 | 0.287202 | 0         |  |  |
|       |      | Shiraz-58T | 2162 | 0.221505 | 0         |  |  |
|       |      | Shiraz-71T | 2238 | 0.603631 | 0         |  |  |
|       |      | Shiraz-3T  | 90   | 0.219276 | 0         |  |  |
|       |      | Shiraz-4T  | 253  | 0.372918 | 0         |  |  |
|       |      | Shiraz-36T | 378  | 0.179558 | 0         |  |  |
|       |      | Shiraz-46T | 943  | 0.093799 | 0         |  |  |
|       |      | Shiraz-77T | 1225 | 0        | -0.117922 |  |  |
|       |      | Shiraz-9T  | 1325 | 0.221899 | 0         |  |  |
|       |      | Shiraz-18T | 1434 | 0.244465 | 0         |  |  |
|       |      | Shiraz-22T | 1553 | 0        | -0.213234 |  |  |
|       |      | Shiraz-25T | 1698 | 0.21835  | 0         |  |  |
|       |      | Shiraz-28T | 1735 | 0.350744 | 0         |  |  |
|       |      | Shiraz-29T | 1778 | 0.120767 | 0         |  |  |
|       |      | Shiraz-32T | 1833 | 0.551336 | 0         |  |  |
|       |      | Shiraz-38T | 1951 | 0.250891 | 0         |  |  |
|       |      | Shiraz-53T | 2078 | 0.287202 | 0         |  |  |
|       |      | Shiraz-58T | 2162 | 0.221505 | 0         |  |  |
|       |      | Shiraz-71T | 2238 | 0.603631 | 0         |  |  |
| MACC1 | chr7 | Shiraz-4T  | 252  | 0.192083 | 0         |  |  |
|       |      | Shiraz-36T | 376  | 0.159952 | 0         |  |  |
|       |      | Shiraz-44T | 628  | 0        | -0.444379 |  |  |
|       |      | Shiraz-47T | 1027 | 0        | -0.117848 |  |  |
|       |      | Shiraz-49T | 1117 | 0        | -0.168296 |  |  |
|       |      | Shiraz-77T | 1222 | 0        | -0.113002 |  |  |
|       |      | Shiraz-18T | 1433 | 0.250973 | 0         |  |  |
|       |      | Shiraz-22T | 1543 | 0        | -0.513696 |  |  |
|       |      | Shiraz-25T | 1697 | 0.21945  | 0         |  |  |
|       |      | Shiraz-28T | 1734 | 0.362882 | 0         |  |  |
|       |      | Shiraz-29T | 1777 | 0.156747 | 0         |  |  |
|       |      | Shiraz-38T | 1950 | 0.265916 | 0         |  |  |
|       |      | Shiraz-58T | 2157 | 0        | -0.213872 |  |  |
|       |      | Shiraz-71T | 2236 | 0.320072 | 0         |  |  |
|       |      | Shiraz-4T  | 252  | 0.192083 | 0         |  |  |
|       |      | Shiraz-36T | 376  | 0.159952 | 0         |  |  |
|       |      | Shiraz-44T | 628  | 0        | -0.444379 |  |  |
|       |      | Shiraz-47T | 1027 | 0        | -0.117848 |  |  |
|       |      | Shiraz-49T | 1117 | 0        | -0.168296 |  |  |

|        |      |            |      |          |           |  |  |
|--------|------|------------|------|----------|-----------|--|--|
|        |      | Shiraz-77T | 1222 | 0        | -0.113002 |  |  |
|        |      | Shiraz-18T | 1433 | 0.250973 | 0         |  |  |
|        |      | Shiraz-22T | 1543 | 0        | -0.513696 |  |  |
|        |      | Shiraz-25T | 1697 | 0.21945  | 0         |  |  |
|        |      | Shiraz-28T | 1734 | 0.362882 | 0         |  |  |
|        |      | Shiraz-29T | 1777 | 0.156747 | 0         |  |  |
|        |      | Shiraz-38T | 1950 | 0.265916 | 0         |  |  |
|        |      | Shiraz-58T | 2157 | 0        | -0.213872 |  |  |
|        |      | Shiraz-71T | 2236 | 0.320072 | 0         |  |  |
|        |      | Shiraz-4T  | 252  | 0.192083 | 0         |  |  |
|        |      | Shiraz-36T | 376  | 0.159952 | 0         |  |  |
|        |      | Shiraz-44T | 628  | 0        | -0.444379 |  |  |
|        |      | Shiraz-47T | 1027 | 0        | -0.117848 |  |  |
|        |      | Shiraz-49T | 1117 | 0        | -0.168296 |  |  |
|        |      | Shiraz-77T | 1222 | 0        | -0.113002 |  |  |
|        |      | Shiraz-18T | 1433 | 0.250973 | 0         |  |  |
|        |      | Shiraz-22T | 1543 | 0        | -0.513696 |  |  |
|        |      | Shiraz-25T | 1697 | 0.21945  | 0         |  |  |
|        |      | Shiraz-28T | 1734 | 0.362882 | 0         |  |  |
|        |      | Shiraz-29T | 1777 | 0.156747 | 0         |  |  |
|        |      | Shiraz-38T | 1950 | 0.265916 | 0         |  |  |
|        |      | Shiraz-58T | 2157 | 0        | -0.213872 |  |  |
|        |      | Shiraz-71T | 2236 | 0.320072 | 0         |  |  |
| MAGEA1 | chrX | Shiraz-4T  | 261  | 0        | -0.336249 |  |  |
|        |      | Shiraz-16T | 295  | 0.591657 | 0         |  |  |
|        |      | Shiraz-36T | 433  | 0        | -0.803961 |  |  |
|        |      | Shiraz-42T | 480  | 0        | -0.232915 |  |  |
|        |      | Shiraz-49T | 1170 | 0        | -0.967436 |  |  |
|        |      | Shiraz-49T | 1173 | 0        | -0.704439 |  |  |
|        |      | Shiraz-9T  | 1370 | 0.690073 | 0         |  |  |
|        |      | Shiraz-9T  | 1371 | 1.292392 | 0         |  |  |
|        |      | Shiraz-18T | 1457 | 0.643204 | 0         |  |  |
|        |      | Shiraz-22T | 1673 | 0.611783 | 0         |  |  |
|        |      | Shiraz-22T | 1678 | 0.911625 | 0         |  |  |
|        |      | Shiraz-25T | 1719 | 0.472955 | 0         |  |  |
|        |      | Shiraz-28T | 1762 | 0.562311 | 0         |  |  |
|        |      | Shiraz-29T | 1801 | 0.815343 | 0         |  |  |
|        |      | Shiraz-32T | 1870 | 0.729766 | 0         |  |  |
|        |      | Shiraz-32T | 1872 | 1.504553 | 0         |  |  |
|        |      | Shiraz-35T | 1933 | 0.488535 | 0         |  |  |
|        |      | Shiraz-53T | 2115 | 0.427728 | 0         |  |  |
|        |      | Shiraz-58T | 2223 | 0.833364 | 0         |  |  |
|        |      | Shiraz-58T | 2226 | 1.074663 | 0         |  |  |
|        |      | Shiraz-71T | 2263 | 0.975531 | 0         |  |  |
|        |      | Shiraz-4T  | 261  | 0        | -0.336249 |  |  |
|        |      | Shiraz-16T | 295  | 0.591657 | 0         |  |  |
|        |      | Shiraz-36T | 433  | 0        | -0.803961 |  |  |

|         |      |            |      |          |           |  |  |
|---------|------|------------|------|----------|-----------|--|--|
|         |      | Shiraz-42T | 480  | 0        | -0.232915 |  |  |
|         |      | Shiraz-49T | 1170 | 0        | -0.967436 |  |  |
|         |      | Shiraz-49T | 1173 | 0        | -0.704439 |  |  |
|         |      | Shiraz-9T  | 1370 | 0.690073 | 0         |  |  |
|         |      | Shiraz-9T  | 1371 | 1.292392 | 0         |  |  |
|         |      | Shiraz-18T | 1457 | 0.643204 | 0         |  |  |
|         |      | Shiraz-22T | 1673 | 0.611783 | 0         |  |  |
|         |      | Shiraz-22T | 1678 | 0.911625 | 0         |  |  |
|         |      | Shiraz-25T | 1719 | 0.472955 | 0         |  |  |
|         |      | Shiraz-28T | 1762 | 0.562311 | 0         |  |  |
|         |      | Shiraz-29T | 1801 | 0.815343 | 0         |  |  |
|         |      | Shiraz-32T | 1870 | 0.729766 | 0         |  |  |
|         |      | Shiraz-32T | 1872 | 1.504553 | 0         |  |  |
|         |      | Shiraz-35T | 1933 | 0.488535 | 0         |  |  |
|         |      | Shiraz-53T | 2115 | 0.427728 | 0         |  |  |
|         |      | Shiraz-58T | 2223 | 0.833364 | 0         |  |  |
|         |      | Shiraz-58T | 2226 | 1.074663 | 0         |  |  |
|         |      | Shiraz-71T | 2263 | 0.975531 | 0         |  |  |
|         |      | Shiraz-4T  | 261  | 0        | -0.336249 |  |  |
|         |      | Shiraz-16T | 295  | 0.591657 | 0         |  |  |
|         |      | Shiraz-36T | 433  | 0        | -0.803961 |  |  |
|         |      | Shiraz-42T | 480  | 0        | -0.232915 |  |  |
|         |      | Shiraz-49T | 1170 | 0        | -0.967436 |  |  |
|         |      | Shiraz-49T | 1173 | 0        | -0.704439 |  |  |
|         |      | Shiraz-9T  | 1370 | 0.690073 | 0         |  |  |
|         |      | Shiraz-9T  | 1371 | 1.292392 | 0         |  |  |
|         |      | Shiraz-18T | 1457 | 0.643204 | 0         |  |  |
|         |      | Shiraz-22T | 1673 | 0.611783 | 0         |  |  |
|         |      | Shiraz-22T | 1678 | 0.911625 | 0         |  |  |
|         |      | Shiraz-25T | 1719 | 0.472955 | 0         |  |  |
|         |      | Shiraz-28T | 1762 | 0.562311 | 0         |  |  |
|         |      | Shiraz-29T | 1801 | 0.815343 | 0         |  |  |
|         |      | Shiraz-32T | 1870 | 0.729766 | 0         |  |  |
|         |      | Shiraz-32T | 1872 | 1.504553 | 0         |  |  |
|         |      | Shiraz-35T | 1933 | 0.488535 | 0         |  |  |
|         |      | Shiraz-53T | 2115 | 0.427728 | 0         |  |  |
|         |      | Shiraz-58T | 2223 | 0.833364 | 0         |  |  |
|         |      | Shiraz-58T | 2226 | 1.074663 | 0         |  |  |
|         |      | Shiraz-71T | 2263 | 0.975531 | 0         |  |  |
| MAGEA10 | chrX | Shiraz-3T  | 242  | 0        | -0.336434 |  |  |
|         |      | Shiraz-4T  | 261  | 0        | -0.336249 |  |  |
|         |      | Shiraz-16T | 295  | 0.591657 | 0         |  |  |
|         |      | Shiraz-36T | 433  | 0        | -0.803961 |  |  |
|         |      | Shiraz-42T | 480  | 0        | -0.232915 |  |  |
|         |      | Shiraz-44T | 899  | 0        | -1.09697  |  |  |
|         |      | Shiraz-49T | 1170 | 0        | -0.967436 |  |  |
|         |      | Shiraz-9T  | 1370 | 0.690073 | 0         |  |  |

|  |            |      |          |           |  |
|--|------------|------|----------|-----------|--|
|  | Shiraz-18T | 1457 | 0.643204 | 0         |  |
|  | Shiraz-22T | 1673 | 0.611783 | 0         |  |
|  | Shiraz-22T | 1678 | 0.911625 | 0         |  |
|  | Shiraz-25T | 1719 | 0.472955 | 0         |  |
|  | Shiraz-28T | 1762 | 0.562311 | 0         |  |
|  | Shiraz-29T | 1801 | 0.815343 | 0         |  |
|  | Shiraz-32T | 1870 | 0.729766 | 0         |  |
|  | Shiraz-35T | 1933 | 0.488535 | 0         |  |
|  | Shiraz-58T | 2223 | 0.833364 | 0         |  |
|  | Shiraz-58T | 2226 | 1.074663 | 0         |  |
|  | Shiraz-71T | 2263 | 0.975531 | 0         |  |
|  | Shiraz-3T  | 242  | 0        | -0.336434 |  |
|  | Shiraz-4T  | 261  | 0        | -0.336249 |  |
|  | Shiraz-16T | 295  | 0.591657 | 0         |  |
|  | Shiraz-36T | 433  | 0        | -0.803961 |  |
|  | Shiraz-42T | 480  | 0        | -0.232915 |  |
|  | Shiraz-44T | 899  | 0        | -1.09697  |  |
|  | Shiraz-49T | 1170 | 0        | -0.967436 |  |
|  | Shiraz-9T  | 1370 | 0.690073 | 0         |  |
|  | Shiraz-18T | 1457 | 0.643204 | 0         |  |
|  | Shiraz-22T | 1673 | 0.611783 | 0         |  |
|  | Shiraz-22T | 1678 | 0.911625 | 0         |  |
|  | Shiraz-25T | 1719 | 0.472955 | 0         |  |
|  | Shiraz-28T | 1762 | 0.562311 | 0         |  |
|  | Shiraz-29T | 1801 | 0.815343 | 0         |  |
|  | Shiraz-32T | 1870 | 0.729766 | 0         |  |
|  | Shiraz-35T | 1933 | 0.488535 | 0         |  |
|  | Shiraz-58T | 2223 | 0.833364 | 0         |  |
|  | Shiraz-58T | 2226 | 1.074663 | 0         |  |
|  | Shiraz-71T | 2263 | 0.975531 | 0         |  |
|  | Shiraz-3T  | 242  | 0        | -0.336434 |  |
|  | Shiraz-4T  | 261  | 0        | -0.336249 |  |
|  | Shiraz-16T | 295  | 0.591657 | 0         |  |
|  | Shiraz-36T | 433  | 0        | -0.803961 |  |
|  | Shiraz-42T | 480  | 0        | -0.232915 |  |
|  | Shiraz-44T | 899  | 0        | -1.09697  |  |
|  | Shiraz-49T | 1170 | 0        | -0.967436 |  |
|  | Shiraz-9T  | 1370 | 0.690073 | 0         |  |
|  | Shiraz-18T | 1457 | 0.643204 | 0         |  |
|  | Shiraz-22T | 1673 | 0.611783 | 0         |  |
|  | Shiraz-22T | 1678 | 0.911625 | 0         |  |
|  | Shiraz-25T | 1719 | 0.472955 | 0         |  |
|  | Shiraz-28T | 1762 | 0.562311 | 0         |  |
|  | Shiraz-29T | 1801 | 0.815343 | 0         |  |
|  | Shiraz-32T | 1870 | 0.729766 | 0         |  |
|  | Shiraz-35T | 1933 | 0.488535 | 0         |  |
|  | Shiraz-58T | 2223 | 0.833364 | 0         |  |



|         |      |            |      |          |           |  |
|---------|------|------------|------|----------|-----------|--|
|         |      | Shiraz-58T | 2226 | 1.074663 | 0         |  |
|         |      | Shiraz-71T | 2263 | 0.975531 | 0         |  |
| MAGEA11 | chrX | Shiraz-3T  | 242  | 0        | -0.336434 |  |
|         |      | Shiraz-3T  | 242  | 0        | -0.336434 |  |
|         |      | Shiraz-4T  | 261  | 0        | -0.336249 |  |
|         |      | Shiraz-4T  | 261  | 0        | -0.336249 |  |
|         |      | Shiraz-16T | 295  | 0.591657 | 0         |  |
|         |      | Shiraz-16T | 295  | 0.591657 | 0         |  |
|         |      | Shiraz-36T | 433  | 0        | -0.803961 |  |
|         |      | Shiraz-36T | 433  | 0        | -0.803961 |  |
|         |      | Shiraz-42T | 480  | 0        | -0.232915 |  |
|         |      | Shiraz-42T | 480  | 0        | -0.232915 |  |
|         |      | Shiraz-44T | 899  | 0        | -1.09697  |  |
|         |      | Shiraz-44T | 899  | 0        | -1.09697  |  |
|         |      | Shiraz-49T | 1170 | 0        | -0.967436 |  |
|         |      | Shiraz-49T | 1170 | 0        | -0.967436 |  |
|         |      | Shiraz-9T  | 1370 | 0.690073 | 0         |  |
|         |      | Shiraz-9T  | 1370 | 0.690073 | 0         |  |
|         |      | Shiraz-18T | 1457 | 0.643204 | 0         |  |
|         |      | Shiraz-18T | 1457 | 0.643204 | 0         |  |
|         |      | Shiraz-22T | 1673 | 0.611783 | 0         |  |
|         |      | Shiraz-22T | 1673 | 0.611783 | 0         |  |
|         |      | Shiraz-22T | 1678 | 0.911625 | 0         |  |
|         |      | Shiraz-22T | 1678 | 0.911625 | 0         |  |
|         |      | Shiraz-25T | 1719 | 0.472955 | 0         |  |
|         |      | Shiraz-25T | 1719 | 0.472955 | 0         |  |
|         |      | Shiraz-28T | 1762 | 0.562311 | 0         |  |
|         |      | Shiraz-28T | 1762 | 0.562311 | 0         |  |
|         |      | Shiraz-29T | 1801 | 0.815343 | 0         |  |
|         |      | Shiraz-29T | 1801 | 0.815343 | 0         |  |
|         |      | Shiraz-32T | 1870 | 0.729766 | 0         |  |
|         |      | Shiraz-32T | 1870 | 0.729766 | 0         |  |
|         |      | Shiraz-35T | 1933 | 0.488535 | 0         |  |
|         |      | Shiraz-35T | 1933 | 0.488535 | 0         |  |
|         |      | Shiraz-58T | 2223 | 0.833364 | 0         |  |
|         |      | Shiraz-58T | 2223 | 0.833364 | 0         |  |
|         |      | Shiraz-58T | 2226 | 1.074663 | 0         |  |
|         |      | Shiraz-58T | 2226 | 1.074663 | 0         |  |
|         |      | Shiraz-71T | 2263 | 0.975531 | 0         |  |
|         |      | Shiraz-71T | 2263 | 0.975531 | 0         |  |
|         |      | Shiraz-3T  | 242  | 0        | -0.336434 |  |
|         |      | Shiraz-3T  | 242  | 0        | -0.336434 |  |
|         |      | Shiraz-4T  | 261  | 0        | -0.336249 |  |
|         |      | Shiraz-4T  | 261  | 0        | -0.336249 |  |
|         |      | Shiraz-16T | 295  | 0.591657 | 0         |  |
|         |      | Shiraz-16T | 295  | 0.591657 | 0         |  |
|         |      | Shiraz-36T | 433  | 0        | -0.803961 |  |

|  |            |      |          |           |  |
|--|------------|------|----------|-----------|--|
|  | Shiraz-36T | 433  | 0        | -0.803961 |  |
|  | Shiraz-42T | 480  | 0        | -0.232915 |  |
|  | Shiraz-42T | 480  | 0        | -0.232915 |  |
|  | Shiraz-44T | 899  | 0        | -1.09697  |  |
|  | Shiraz-44T | 899  | 0        | -1.09697  |  |
|  | Shiraz-49T | 1170 | 0        | -0.967436 |  |
|  | Shiraz-49T | 1170 | 0        | -0.967436 |  |
|  | Shiraz-9T  | 1370 | 0.690073 | 0         |  |
|  | Shiraz-9T  | 1370 | 0.690073 | 0         |  |
|  | Shiraz-18T | 1457 | 0.643204 | 0         |  |
|  | Shiraz-18T | 1457 | 0.643204 | 0         |  |
|  | Shiraz-22T | 1673 | 0.611783 | 0         |  |
|  | Shiraz-22T | 1673 | 0.611783 | 0         |  |
|  | Shiraz-22T | 1678 | 0.911625 | 0         |  |
|  | Shiraz-22T | 1678 | 0.911625 | 0         |  |
|  | Shiraz-25T | 1719 | 0.472955 | 0         |  |
|  | Shiraz-25T | 1719 | 0.472955 | 0         |  |
|  | Shiraz-28T | 1762 | 0.562311 | 0         |  |
|  | Shiraz-28T | 1762 | 0.562311 | 0         |  |
|  | Shiraz-29T | 1801 | 0.815343 | 0         |  |
|  | Shiraz-29T | 1801 | 0.815343 | 0         |  |
|  | Shiraz-32T | 1870 | 0.729766 | 0         |  |
|  | Shiraz-32T | 1870 | 0.729766 | 0         |  |
|  | Shiraz-35T | 1933 | 0.488535 | 0         |  |
|  | Shiraz-35T | 1933 | 0.488535 | 0         |  |
|  | Shiraz-58T | 2223 | 0.833364 | 0         |  |
|  | Shiraz-58T | 2223 | 0.833364 | 0         |  |
|  | Shiraz-58T | 2226 | 1.074663 | 0         |  |
|  | Shiraz-58T | 2226 | 1.074663 | 0         |  |
|  | Shiraz-71T | 2263 | 0.975531 | 0         |  |
|  | Shiraz-71T | 2263 | 0.975531 | 0         |  |
|  | Shiraz-3T  | 242  | 0        | -0.336434 |  |
|  | Shiraz-3T  | 242  | 0        | -0.336434 |  |
|  | Shiraz-4T  | 261  | 0        | -0.336249 |  |
|  | Shiraz-4T  | 261  | 0        | -0.336249 |  |
|  | Shiraz-16T | 295  | 0.591657 | 0         |  |
|  | Shiraz-16T | 295  | 0.591657 | 0         |  |
|  | Shiraz-36T | 433  | 0        | -0.803961 |  |
|  | Shiraz-36T | 433  | 0        | -0.803961 |  |
|  | Shiraz-42T | 480  | 0        | -0.232915 |  |
|  | Shiraz-42T | 480  | 0        | -0.232915 |  |
|  | Shiraz-44T | 899  | 0        | -1.09697  |  |
|  | Shiraz-44T | 899  | 0        | -1.09697  |  |
|  | Shiraz-49T | 1170 | 0        | -0.967436 |  |
|  | Shiraz-49T | 1170 | 0        | -0.967436 |  |
|  | Shiraz-9T  | 1370 | 0.690073 | 0         |  |
|  | Shiraz-9T  | 1370 | 0.690073 | 0         |  |

|         |      |            |      |          |           |  |
|---------|------|------------|------|----------|-----------|--|
|         |      | Shiraz-18T | 1457 | 0.643204 | 0         |  |
|         |      | Shiraz-18T | 1457 | 0.643204 | 0         |  |
|         |      | Shiraz-22T | 1673 | 0.611783 | 0         |  |
|         |      | Shiraz-22T | 1673 | 0.611783 | 0         |  |
|         |      | Shiraz-22T | 1678 | 0.911625 | 0         |  |
|         |      | Shiraz-22T | 1678 | 0.911625 | 0         |  |
|         |      | Shiraz-25T | 1719 | 0.472955 | 0         |  |
|         |      | Shiraz-25T | 1719 | 0.472955 | 0         |  |
|         |      | Shiraz-28T | 1762 | 0.562311 | 0         |  |
|         |      | Shiraz-28T | 1762 | 0.562311 | 0         |  |
|         |      | Shiraz-29T | 1801 | 0.815343 | 0         |  |
|         |      | Shiraz-29T | 1801 | 0.815343 | 0         |  |
|         |      | Shiraz-32T | 1870 | 0.729766 | 0         |  |
|         |      | Shiraz-32T | 1870 | 0.729766 | 0         |  |
|         |      | Shiraz-35T | 1933 | 0.488535 | 0         |  |
|         |      | Shiraz-35T | 1933 | 0.488535 | 0         |  |
|         |      | Shiraz-58T | 2223 | 0.833364 | 0         |  |
|         |      | Shiraz-58T | 2223 | 0.833364 | 0         |  |
|         |      | Shiraz-58T | 2226 | 1.074663 | 0         |  |
|         |      | Shiraz-58T | 2226 | 1.074663 | 0         |  |
|         |      | Shiraz-71T | 2263 | 0.975531 | 0         |  |
|         |      | Shiraz-71T | 2263 | 0.975531 | 0         |  |
| MAGEA12 | chrX | Shiraz-4T  | 261  | 0        | -0.336249 |  |
|         |      | Shiraz-16T | 295  | 0.591657 | 0         |  |
|         |      | Shiraz-36T | 433  | 0        | -0.803961 |  |
|         |      | Shiraz-42T | 480  | 0        | -0.232915 |  |
|         |      | Shiraz-44T | 899  | 0        | -1.09697  |  |
|         |      | Shiraz-49T | 1170 | 0        | -0.967436 |  |
|         |      | Shiraz-9T  | 1370 | 0.690073 | 0         |  |
|         |      | Shiraz-9T  | 1371 | 1.292392 | 0         |  |
|         |      | Shiraz-18T | 1457 | 0.643204 | 0         |  |
|         |      | Shiraz-22T | 1673 | 0.611783 | 0         |  |
|         |      | Shiraz-22T | 1678 | 0.911625 | 0         |  |
|         |      | Shiraz-25T | 1719 | 0.472955 | 0         |  |
|         |      | Shiraz-28T | 1762 | 0.562311 | 0         |  |
|         |      | Shiraz-29T | 1801 | 0.815343 | 0         |  |
|         |      | Shiraz-32T | 1870 | 0.729766 | 0         |  |
|         |      | Shiraz-32T | 1872 | 1.504553 | 0         |  |
|         |      | Shiraz-35T | 1933 | 0.488535 | 0         |  |
|         |      | Shiraz-53T | 2115 | 0.427728 | 0         |  |
|         |      | Shiraz-58T | 2223 | 0.833364 | 0         |  |
|         |      | Shiraz-58T | 2226 | 1.074663 | 0         |  |
|         |      | Shiraz-71T | 2263 | 0.975531 | 0         |  |
|         |      | Shiraz-4T  | 261  | 0        | -0.336249 |  |
|         |      | Shiraz-16T | 295  | 0.591657 | 0         |  |
|         |      | Shiraz-36T | 433  | 0        | -0.803961 |  |
|         |      | Shiraz-42T | 480  | 0        | -0.232915 |  |

|        |      |            |      |          |           |  |  |
|--------|------|------------|------|----------|-----------|--|--|
|        |      | Shiraz-44T | 899  | 0        | -1.09697  |  |  |
|        |      | Shiraz-49T | 1170 | 0        | -0.967436 |  |  |
|        |      | Shiraz-9T  | 1370 | 0.690073 | 0         |  |  |
|        |      | Shiraz-9T  | 1371 | 1.292392 | 0         |  |  |
|        |      | Shiraz-18T | 1457 | 0.643204 | 0         |  |  |
|        |      | Shiraz-22T | 1673 | 0.611783 | 0         |  |  |
|        |      | Shiraz-22T | 1678 | 0.911625 | 0         |  |  |
|        |      | Shiraz-25T | 1719 | 0.472955 | 0         |  |  |
|        |      | Shiraz-28T | 1762 | 0.562311 | 0         |  |  |
|        |      | Shiraz-29T | 1801 | 0.815343 | 0         |  |  |
|        |      | Shiraz-32T | 1870 | 0.729766 | 0         |  |  |
|        |      | Shiraz-32T | 1872 | 1.504553 | 0         |  |  |
|        |      | Shiraz-35T | 1933 | 0.488535 | 0         |  |  |
|        |      | Shiraz-53T | 2115 | 0.427728 | 0         |  |  |
|        |      | Shiraz-58T | 2223 | 0.833364 | 0         |  |  |
|        |      | Shiraz-58T | 2226 | 1.074663 | 0         |  |  |
|        |      | Shiraz-71T | 2263 | 0.975531 | 0         |  |  |
|        |      | Shiraz-4T  | 261  | 0        | -0.336249 |  |  |
|        |      | Shiraz-16T | 295  | 0.591657 | 0         |  |  |
|        |      | Shiraz-36T | 433  | 0        | -0.803961 |  |  |
|        |      | Shiraz-42T | 480  | 0        | -0.232915 |  |  |
|        |      | Shiraz-44T | 899  | 0        | -1.09697  |  |  |
|        |      | Shiraz-49T | 1170 | 0        | -0.967436 |  |  |
|        |      | Shiraz-9T  | 1370 | 0.690073 | 0         |  |  |
|        |      | Shiraz-9T  | 1371 | 1.292392 | 0         |  |  |
|        |      | Shiraz-18T | 1457 | 0.643204 | 0         |  |  |
|        |      | Shiraz-22T | 1673 | 0.611783 | 0         |  |  |
|        |      | Shiraz-22T | 1678 | 0.911625 | 0         |  |  |
|        |      | Shiraz-25T | 1719 | 0.472955 | 0         |  |  |
|        |      | Shiraz-28T | 1762 | 0.562311 | 0         |  |  |
|        |      | Shiraz-29T | 1801 | 0.815343 | 0         |  |  |
|        |      | Shiraz-32T | 1870 | 0.729766 | 0         |  |  |
|        |      | Shiraz-32T | 1872 | 1.504553 | 0         |  |  |
|        |      | Shiraz-35T | 1933 | 0.488535 | 0         |  |  |
|        |      | Shiraz-53T | 2115 | 0.427728 | 0         |  |  |
|        |      | Shiraz-58T | 2223 | 0.833364 | 0         |  |  |
|        |      | Shiraz-58T | 2226 | 1.074663 | 0         |  |  |
|        |      | Shiraz-71T | 2263 | 0.975531 | 0         |  |  |
| MAGEA2 | chrX | Shiraz-4T  | 261  | 0        | -0.336249 |  |  |
|        |      | Shiraz-4T  | 261  | 0        | -0.336249 |  |  |
|        |      | Shiraz-16T | 295  | 0.591657 | 0         |  |  |
|        |      | Shiraz-16T | 295  | 0.591657 | 0         |  |  |
|        |      | Shiraz-36T | 433  | 0        | -0.803961 |  |  |
|        |      | Shiraz-36T | 433  | 0        | -0.803961 |  |  |
|        |      | Shiraz-42T | 480  | 0        | -0.232915 |  |  |
|        |      | Shiraz-42T | 480  | 0        | -0.232915 |  |  |
|        |      | Shiraz-44T | 899  | 0        | -1.09697  |  |  |

|  |            |      |          |           |  |
|--|------------|------|----------|-----------|--|
|  | Shiraz-44T | 899  | 0        | -1.09697  |  |
|  | Shiraz-49T | 1170 | 0        | -0.967436 |  |
|  | Shiraz-49T | 1170 | 0        | -0.967436 |  |
|  | Shiraz-9T  | 1370 | 0.690073 | 0         |  |
|  | Shiraz-9T  | 1370 | 0.690073 | 0         |  |
|  | Shiraz-9T  | 1371 | 1.292392 | 0         |  |
|  | Shiraz-9T  | 1371 | 1.292392 | 0         |  |
|  | Shiraz-18T | 1457 | 0.643204 | 0         |  |
|  | Shiraz-18T | 1457 | 0.643204 | 0         |  |
|  | Shiraz-22T | 1673 | 0.611783 | 0         |  |
|  | Shiraz-22T | 1673 | 0.611783 | 0         |  |
|  | Shiraz-22T | 1678 | 0.911625 | 0         |  |
|  | Shiraz-22T | 1678 | 0.911625 | 0         |  |
|  | Shiraz-25T | 1719 | 0.472955 | 0         |  |
|  | Shiraz-25T | 1719 | 0.472955 | 0         |  |
|  | Shiraz-28T | 1762 | 0.562311 | 0         |  |
|  | Shiraz-28T | 1762 | 0.562311 | 0         |  |
|  | Shiraz-29T | 1801 | 0.815343 | 0         |  |
|  | Shiraz-29T | 1801 | 0.815343 | 0         |  |
|  | Shiraz-32T | 1870 | 0.729766 | 0         |  |
|  | Shiraz-32T | 1870 | 0.729766 | 0         |  |
|  | Shiraz-32T | 1872 | 1.504553 | 0         |  |
|  | Shiraz-32T | 1872 | 1.504553 | 0         |  |
|  | Shiraz-35T | 1933 | 0.488535 | 0         |  |
|  | Shiraz-35T | 1933 | 0.488535 | 0         |  |
|  | Shiraz-53T | 2115 | 0.427728 | 0         |  |
|  | Shiraz-53T | 2115 | 0.427728 | 0         |  |
|  | Shiraz-58T | 2223 | 0.833364 | 0         |  |
|  | Shiraz-58T | 2223 | 0.833364 | 0         |  |
|  | Shiraz-58T | 2226 | 1.074663 | 0         |  |
|  | Shiraz-58T | 2226 | 1.074663 | 0         |  |
|  | Shiraz-71T | 2263 | 0.975531 | 0         |  |
|  | Shiraz-71T | 2263 | 0.975531 | 0         |  |
|  | Shiraz-4T  | 261  | 0        | -0.336249 |  |
|  | Shiraz-4T  | 261  | 0        | -0.336249 |  |
|  | Shiraz-16T | 295  | 0.591657 | 0         |  |
|  | Shiraz-16T | 295  | 0.591657 | 0         |  |
|  | Shiraz-36T | 433  | 0        | -0.803961 |  |
|  | Shiraz-36T | 433  | 0        | -0.803961 |  |
|  | Shiraz-42T | 480  | 0        | -0.232915 |  |
|  | Shiraz-42T | 480  | 0        | -0.232915 |  |
|  | Shiraz-44T | 899  | 0        | -1.09697  |  |
|  | Shiraz-44T | 899  | 0        | -1.09697  |  |
|  | Shiraz-49T | 1170 | 0        | -0.967436 |  |
|  | Shiraz-49T | 1170 | 0        | -0.967436 |  |
|  | Shiraz-9T  | 1370 | 0.690073 | 0         |  |
|  | Shiraz-9T  | 1370 | 0.690073 | 0         |  |

|  |  |            |      |          |           |  |
|--|--|------------|------|----------|-----------|--|
|  |  | Shiraz-9T  | 1371 | 1.292392 | 0         |  |
|  |  | Shiraz-9T  | 1371 | 1.292392 | 0         |  |
|  |  | Shiraz-18T | 1457 | 0.643204 | 0         |  |
|  |  | Shiraz-18T | 1457 | 0.643204 | 0         |  |
|  |  | Shiraz-22T | 1673 | 0.611783 | 0         |  |
|  |  | Shiraz-22T | 1673 | 0.611783 | 0         |  |
|  |  | Shiraz-22T | 1678 | 0.911625 | 0         |  |
|  |  | Shiraz-22T | 1678 | 0.911625 | 0         |  |
|  |  | Shiraz-25T | 1719 | 0.472955 | 0         |  |
|  |  | Shiraz-25T | 1719 | 0.472955 | 0         |  |
|  |  | Shiraz-28T | 1762 | 0.562311 | 0         |  |
|  |  | Shiraz-28T | 1762 | 0.562311 | 0         |  |
|  |  | Shiraz-29T | 1801 | 0.815343 | 0         |  |
|  |  | Shiraz-29T | 1801 | 0.815343 | 0         |  |
|  |  | Shiraz-32T | 1870 | 0.729766 | 0         |  |
|  |  | Shiraz-32T | 1870 | 0.729766 | 0         |  |
|  |  | Shiraz-32T | 1872 | 1.504553 | 0         |  |
|  |  | Shiraz-32T | 1872 | 1.504553 | 0         |  |
|  |  | Shiraz-35T | 1933 | 0.488535 | 0         |  |
|  |  | Shiraz-35T | 1933 | 0.488535 | 0         |  |
|  |  | Shiraz-53T | 2115 | 0.427728 | 0         |  |
|  |  | Shiraz-53T | 2115 | 0.427728 | 0         |  |
|  |  | Shiraz-58T | 2223 | 0.833364 | 0         |  |
|  |  | Shiraz-58T | 2223 | 0.833364 | 0         |  |
|  |  | Shiraz-58T | 2226 | 1.074663 | 0         |  |
|  |  | Shiraz-58T | 2226 | 1.074663 | 0         |  |
|  |  | Shiraz-71T | 2263 | 0.975531 | 0         |  |
|  |  | Shiraz-71T | 2263 | 0.975531 | 0         |  |
|  |  | Shiraz-4T  | 261  | 0        | -0.336249 |  |
|  |  | Shiraz-4T  | 261  | 0        | -0.336249 |  |
|  |  | Shiraz-16T | 295  | 0.591657 | 0         |  |
|  |  | Shiraz-16T | 295  | 0.591657 | 0         |  |
|  |  | Shiraz-36T | 433  | 0        | -0.803961 |  |
|  |  | Shiraz-36T | 433  | 0        | -0.803961 |  |
|  |  | Shiraz-42T | 480  | 0        | -0.232915 |  |
|  |  | Shiraz-42T | 480  | 0        | -0.232915 |  |
|  |  | Shiraz-44T | 899  | 0        | -1.09697  |  |
|  |  | Shiraz-44T | 899  | 0        | -1.09697  |  |
|  |  | Shiraz-49T | 1170 | 0        | -0.967436 |  |
|  |  | Shiraz-49T | 1170 | 0        | -0.967436 |  |
|  |  | Shiraz-9T  | 1370 | 0.690073 | 0         |  |
|  |  | Shiraz-9T  | 1370 | 0.690073 | 0         |  |
|  |  | Shiraz-9T  | 1371 | 1.292392 | 0         |  |
|  |  | Shiraz-9T  | 1371 | 1.292392 | 0         |  |
|  |  | Shiraz-18T | 1457 | 0.643204 | 0         |  |
|  |  | Shiraz-18T | 1457 | 0.643204 | 0         |  |
|  |  | Shiraz-22T | 1673 | 0.611783 | 0         |  |

|         |      |            |      |          |           |  |  |
|---------|------|------------|------|----------|-----------|--|--|
|         |      | Shiraz-22T | 1673 | 0.611783 | 0         |  |  |
|         |      | Shiraz-22T | 1678 | 0.911625 | 0         |  |  |
|         |      | Shiraz-22T | 1678 | 0.911625 | 0         |  |  |
|         |      | Shiraz-25T | 1719 | 0.472955 | 0         |  |  |
|         |      | Shiraz-25T | 1719 | 0.472955 | 0         |  |  |
|         |      | Shiraz-28T | 1762 | 0.562311 | 0         |  |  |
|         |      | Shiraz-28T | 1762 | 0.562311 | 0         |  |  |
|         |      | Shiraz-29T | 1801 | 0.815343 | 0         |  |  |
|         |      | Shiraz-29T | 1801 | 0.815343 | 0         |  |  |
|         |      | Shiraz-32T | 1870 | 0.729766 | 0         |  |  |
|         |      | Shiraz-32T | 1870 | 0.729766 | 0         |  |  |
|         |      | Shiraz-32T | 1872 | 1.504553 | 0         |  |  |
|         |      | Shiraz-32T | 1872 | 1.504553 | 0         |  |  |
|         |      | Shiraz-35T | 1933 | 0.488535 | 0         |  |  |
|         |      | Shiraz-35T | 1933 | 0.488535 | 0         |  |  |
|         |      | Shiraz-53T | 2115 | 0.427728 | 0         |  |  |
|         |      | Shiraz-53T | 2115 | 0.427728 | 0         |  |  |
|         |      | Shiraz-58T | 2223 | 0.833364 | 0         |  |  |
|         |      | Shiraz-58T | 2223 | 0.833364 | 0         |  |  |
|         |      | Shiraz-58T | 2226 | 1.074663 | 0         |  |  |
|         |      | Shiraz-58T | 2226 | 1.074663 | 0         |  |  |
|         |      | Shiraz-71T | 2263 | 0.975531 | 0         |  |  |
|         |      | Shiraz-71T | 2263 | 0.975531 | 0         |  |  |
| MAGEA2B | chrX | Shiraz-4T  | 261  | 0        | -0.336249 |  |  |
|         |      | Shiraz-4T  | 261  | 0        | -0.336249 |  |  |
|         |      | Shiraz-16T | 295  | 0.591657 | 0         |  |  |
|         |      | Shiraz-16T | 295  | 0.591657 | 0         |  |  |
|         |      | Shiraz-36T | 433  | 0        | -0.803961 |  |  |
|         |      | Shiraz-36T | 433  | 0        | -0.803961 |  |  |
|         |      | Shiraz-42T | 480  | 0        | -0.232915 |  |  |
|         |      | Shiraz-42T | 480  | 0        | -0.232915 |  |  |
|         |      | Shiraz-44T | 899  | 0        | -1.09697  |  |  |
|         |      | Shiraz-44T | 899  | 0        | -1.09697  |  |  |
|         |      | Shiraz-49T | 1170 | 0        | -0.967436 |  |  |
|         |      | Shiraz-49T | 1170 | 0        | -0.967436 |  |  |
|         |      | Shiraz-9T  | 1370 | 0.690073 | 0         |  |  |
|         |      | Shiraz-9T  | 1370 | 0.690073 | 0         |  |  |
|         |      | Shiraz-9T  | 1371 | 1.292392 | 0         |  |  |
|         |      | Shiraz-9T  | 1371 | 1.292392 | 0         |  |  |
|         |      | Shiraz-18T | 1457 | 0.643204 | 0         |  |  |
|         |      | Shiraz-18T | 1457 | 0.643204 | 0         |  |  |
|         |      | Shiraz-22T | 1673 | 0.611783 | 0         |  |  |
|         |      | Shiraz-22T | 1673 | 0.611783 | 0         |  |  |
|         |      | Shiraz-22T | 1678 | 0.911625 | 0         |  |  |
|         |      | Shiraz-22T | 1678 | 0.911625 | 0         |  |  |
|         |      | Shiraz-25T | 1719 | 0.472955 | 0         |  |  |
|         |      | Shiraz-25T | 1719 | 0.472955 | 0         |  |  |

|  |  |            |      |          |           |  |  |
|--|--|------------|------|----------|-----------|--|--|
|  |  | Shiraz-28T | 1762 | 0.562311 | 0         |  |  |
|  |  | Shiraz-28T | 1762 | 0.562311 | 0         |  |  |
|  |  | Shiraz-29T | 1801 | 0.815343 | 0         |  |  |
|  |  | Shiraz-29T | 1801 | 0.815343 | 0         |  |  |
|  |  | Shiraz-32T | 1870 | 0.729766 | 0         |  |  |
|  |  | Shiraz-32T | 1870 | 0.729766 | 0         |  |  |
|  |  | Shiraz-32T | 1872 | 1.504553 | 0         |  |  |
|  |  | Shiraz-32T | 1872 | 1.504553 | 0         |  |  |
|  |  | Shiraz-35T | 1933 | 0.488535 | 0         |  |  |
|  |  | Shiraz-35T | 1933 | 0.488535 | 0         |  |  |
|  |  | Shiraz-53T | 2115 | 0.427728 | 0         |  |  |
|  |  | Shiraz-53T | 2115 | 0.427728 | 0         |  |  |
|  |  | Shiraz-58T | 2223 | 0.833364 | 0         |  |  |
|  |  | Shiraz-58T | 2223 | 0.833364 | 0         |  |  |
|  |  | Shiraz-58T | 2226 | 1.074663 | 0         |  |  |
|  |  | Shiraz-58T | 2226 | 1.074663 | 0         |  |  |
|  |  | Shiraz-71T | 2263 | 0.975531 | 0         |  |  |
|  |  | Shiraz-71T | 2263 | 0.975531 | 0         |  |  |
|  |  | Shiraz-4T  | 261  | 0        | -0.336249 |  |  |
|  |  | Shiraz-4T  | 261  | 0        | -0.336249 |  |  |
|  |  | Shiraz-16T | 295  | 0.591657 | 0         |  |  |
|  |  | Shiraz-16T | 295  | 0.591657 | 0         |  |  |
|  |  | Shiraz-36T | 433  | 0        | -0.803961 |  |  |
|  |  | Shiraz-36T | 433  | 0        | -0.803961 |  |  |
|  |  | Shiraz-42T | 480  | 0        | -0.232915 |  |  |
|  |  | Shiraz-42T | 480  | 0        | -0.232915 |  |  |
|  |  | Shiraz-44T | 899  | 0        | -1.09697  |  |  |
|  |  | Shiraz-44T | 899  | 0        | -1.09697  |  |  |
|  |  | Shiraz-49T | 1170 | 0        | -0.967436 |  |  |
|  |  | Shiraz-49T | 1170 | 0        | -0.967436 |  |  |
|  |  | Shiraz-9T  | 1370 | 0.690073 | 0         |  |  |
|  |  | Shiraz-9T  | 1370 | 0.690073 | 0         |  |  |
|  |  | Shiraz-9T  | 1371 | 1.292392 | 0         |  |  |
|  |  | Shiraz-9T  | 1371 | 1.292392 | 0         |  |  |
|  |  | Shiraz-18T | 1457 | 0.643204 | 0         |  |  |
|  |  | Shiraz-18T | 1457 | 0.643204 | 0         |  |  |
|  |  | Shiraz-22T | 1673 | 0.611783 | 0         |  |  |
|  |  | Shiraz-22T | 1673 | 0.611783 | 0         |  |  |
|  |  | Shiraz-22T | 1678 | 0.911625 | 0         |  |  |
|  |  | Shiraz-22T | 1678 | 0.911625 | 0         |  |  |
|  |  | Shiraz-25T | 1719 | 0.472955 | 0         |  |  |
|  |  | Shiraz-25T | 1719 | 0.472955 | 0         |  |  |
|  |  | Shiraz-28T | 1762 | 0.562311 | 0         |  |  |
|  |  | Shiraz-28T | 1762 | 0.562311 | 0         |  |  |
|  |  | Shiraz-29T | 1801 | 0.815343 | 0         |  |  |
|  |  | Shiraz-29T | 1801 | 0.815343 | 0         |  |  |
|  |  | Shiraz-32T | 1870 | 0.729766 | 0         |  |  |



|  |            |      |          |           |  |
|--|------------|------|----------|-----------|--|
|  | Shiraz-32T | 1870 | 0.729766 | 0         |  |
|  | Shiraz-32T | 1872 | 1.504553 | 0         |  |
|  | Shiraz-32T | 1872 | 1.504553 | 0         |  |
|  | Shiraz-35T | 1933 | 0.488535 | 0         |  |
|  | Shiraz-35T | 1933 | 0.488535 | 0         |  |
|  | Shiraz-53T | 2115 | 0.427728 | 0         |  |
|  | Shiraz-53T | 2115 | 0.427728 | 0         |  |
|  | Shiraz-58T | 2223 | 0.833364 | 0         |  |
|  | Shiraz-58T | 2223 | 0.833364 | 0         |  |
|  | Shiraz-58T | 2226 | 1.074663 | 0         |  |
|  | Shiraz-58T | 2226 | 1.074663 | 0         |  |
|  | Shiraz-71T | 2263 | 0.975531 | 0         |  |
|  | Shiraz-71T | 2263 | 0.975531 | 0         |  |
|  | Shiraz-4T  | 261  | 0        | -0.336249 |  |
|  | Shiraz-4T  | 261  | 0        | -0.336249 |  |
|  | Shiraz-16T | 295  | 0.591657 | 0         |  |
|  | Shiraz-16T | 295  | 0.591657 | 0         |  |
|  | Shiraz-36T | 433  | 0        | -0.803961 |  |
|  | Shiraz-36T | 433  | 0        | -0.803961 |  |
|  | Shiraz-42T | 480  | 0        | -0.232915 |  |
|  | Shiraz-42T | 480  | 0        | -0.232915 |  |
|  | Shiraz-44T | 899  | 0        | -1.09697  |  |
|  | Shiraz-44T | 899  | 0        | -1.09697  |  |
|  | Shiraz-49T | 1170 | 0        | -0.967436 |  |
|  | Shiraz-49T | 1170 | 0        | -0.967436 |  |
|  | Shiraz-9T  | 1370 | 0.690073 | 0         |  |
|  | Shiraz-9T  | 1370 | 0.690073 | 0         |  |
|  | Shiraz-9T  | 1371 | 1.292392 | 0         |  |
|  | Shiraz-9T  | 1371 | 1.292392 | 0         |  |
|  | Shiraz-18T | 1457 | 0.643204 | 0         |  |
|  | Shiraz-18T | 1457 | 0.643204 | 0         |  |
|  | Shiraz-22T | 1673 | 0.611783 | 0         |  |
|  | Shiraz-22T | 1673 | 0.611783 | 0         |  |
|  | Shiraz-22T | 1678 | 0.911625 | 0         |  |
|  | Shiraz-22T | 1678 | 0.911625 | 0         |  |
|  | Shiraz-25T | 1719 | 0.472955 | 0         |  |
|  | Shiraz-25T | 1719 | 0.472955 | 0         |  |
|  | Shiraz-28T | 1762 | 0.562311 | 0         |  |
|  | Shiraz-28T | 1762 | 0.562311 | 0         |  |
|  | Shiraz-29T | 1801 | 0.815343 | 0         |  |
|  | Shiraz-29T | 1801 | 0.815343 | 0         |  |
|  | Shiraz-32T | 1870 | 0.729766 | 0         |  |
|  | Shiraz-32T | 1870 | 0.729766 | 0         |  |
|  | Shiraz-32T | 1872 | 1.504553 | 0         |  |
|  | Shiraz-32T | 1872 | 1.504553 | 0         |  |
|  | Shiraz-35T | 1933 | 0.488535 | 0         |  |
|  | Shiraz-35T | 1933 | 0.488535 | 0         |  |

|        |      |            |      |          |           |  |
|--------|------|------------|------|----------|-----------|--|
|        |      | Shiraz-53T | 2115 | 0.427728 | 0         |  |
|        |      | Shiraz-53T | 2115 | 0.427728 | 0         |  |
|        |      | Shiraz-58T | 2223 | 0.833364 | 0         |  |
|        |      | Shiraz-58T | 2223 | 0.833364 | 0         |  |
|        |      | Shiraz-58T | 2226 | 1.074663 | 0         |  |
|        |      | Shiraz-58T | 2226 | 1.074663 | 0         |  |
|        |      | Shiraz-71T | 2263 | 0.975531 | 0         |  |
|        |      | Shiraz-71T | 2263 | 0.975531 | 0         |  |
| MAGEA3 | chrX | Shiraz-4T  | 261  | 0        | -0.336249 |  |
|        |      | Shiraz-16T | 295  | 0.591657 | 0         |  |
|        |      | Shiraz-36T | 433  | 0        | -0.803961 |  |
|        |      | Shiraz-42T | 480  | 0        | -0.232915 |  |
|        |      | Shiraz-44T | 899  | 0        | -1.09697  |  |
|        |      | Shiraz-49T | 1170 | 0        | -0.967436 |  |
|        |      | Shiraz-9T  | 1370 | 0.690073 | 0         |  |
|        |      | Shiraz-9T  | 1371 | 1.292392 | 0         |  |
|        |      | Shiraz-18T | 1457 | 0.643204 | 0         |  |
|        |      | Shiraz-22T | 1673 | 0.611783 | 0         |  |
|        |      | Shiraz-22T | 1678 | 0.911625 | 0         |  |
|        |      | Shiraz-25T | 1719 | 0.472955 | 0         |  |
|        |      | Shiraz-28T | 1762 | 0.562311 | 0         |  |
|        |      | Shiraz-29T | 1801 | 0.815343 | 0         |  |
|        |      | Shiraz-32T | 1870 | 0.729766 | 0         |  |
|        |      | Shiraz-32T | 1872 | 1.504553 | 0         |  |
|        |      | Shiraz-35T | 1933 | 0.488535 | 0         |  |
|        |      | Shiraz-53T | 2115 | 0.427728 | 0         |  |
|        |      | Shiraz-58T | 2223 | 0.833364 | 0         |  |
|        |      | Shiraz-58T | 2226 | 1.074663 | 0         |  |
|        |      | Shiraz-71T | 2263 | 0.975531 | 0         |  |
|        |      | Shiraz-4T  | 261  | 0        | -0.336249 |  |
|        |      | Shiraz-16T | 295  | 0.591657 | 0         |  |
|        |      | Shiraz-36T | 433  | 0        | -0.803961 |  |
|        |      | Shiraz-42T | 480  | 0        | -0.232915 |  |
|        |      | Shiraz-44T | 899  | 0        | -1.09697  |  |
|        |      | Shiraz-49T | 1170 | 0        | -0.967436 |  |
|        |      | Shiraz-9T  | 1370 | 0.690073 | 0         |  |
|        |      | Shiraz-9T  | 1371 | 1.292392 | 0         |  |
|        |      | Shiraz-18T | 1457 | 0.643204 | 0         |  |
|        |      | Shiraz-22T | 1673 | 0.611783 | 0         |  |
|        |      | Shiraz-22T | 1678 | 0.911625 | 0         |  |
|        |      | Shiraz-25T | 1719 | 0.472955 | 0         |  |
|        |      | Shiraz-28T | 1762 | 0.562311 | 0         |  |
|        |      | Shiraz-29T | 1801 | 0.815343 | 0         |  |
|        |      | Shiraz-32T | 1870 | 0.729766 | 0         |  |
|        |      | Shiraz-32T | 1872 | 1.504553 | 0         |  |
|        |      | Shiraz-35T | 1933 | 0.488535 | 0         |  |
|        |      | Shiraz-53T | 2115 | 0.427728 | 0         |  |

|        |      |            |      |          |           |  |  |
|--------|------|------------|------|----------|-----------|--|--|
|        |      | Shiraz-58T | 2223 | 0.833364 | 0         |  |  |
|        |      | Shiraz-58T | 2226 | 1.074663 | 0         |  |  |
|        |      | Shiraz-71T | 2263 | 0.975531 | 0         |  |  |
|        |      | Shiraz-4T  | 261  | 0        | -0.336249 |  |  |
|        |      | Shiraz-16T | 295  | 0.591657 | 0         |  |  |
|        |      | Shiraz-36T | 433  | 0        | -0.803961 |  |  |
|        |      | Shiraz-42T | 480  | 0        | -0.232915 |  |  |
|        |      | Shiraz-44T | 899  | 0        | -1.09697  |  |  |
|        |      | Shiraz-49T | 1170 | 0        | -0.967436 |  |  |
|        |      | Shiraz-9T  | 1370 | 0.690073 | 0         |  |  |
|        |      | Shiraz-9T  | 1371 | 1.292392 | 0         |  |  |
|        |      | Shiraz-18T | 1457 | 0.643204 | 0         |  |  |
|        |      | Shiraz-22T | 1673 | 0.611783 | 0         |  |  |
|        |      | Shiraz-22T | 1678 | 0.911625 | 0         |  |  |
|        |      | Shiraz-25T | 1719 | 0.472955 | 0         |  |  |
|        |      | Shiraz-28T | 1762 | 0.562311 | 0         |  |  |
|        |      | Shiraz-29T | 1801 | 0.815343 | 0         |  |  |
|        |      | Shiraz-32T | 1870 | 0.729766 | 0         |  |  |
|        |      | Shiraz-32T | 1872 | 1.504553 | 0         |  |  |
|        |      | Shiraz-35T | 1933 | 0.488535 | 0         |  |  |
|        |      | Shiraz-53T | 2115 | 0.427728 | 0         |  |  |
|        |      | Shiraz-58T | 2223 | 0.833364 | 0         |  |  |
|        |      | Shiraz-58T | 2226 | 1.074663 | 0         |  |  |
|        |      | Shiraz-71T | 2263 | 0.975531 | 0         |  |  |
| MAGEA4 | chrX | Shiraz-3T  | 242  | 0        | -0.336434 |  |  |
|        |      | Shiraz-3T  | 242  | 0        | -0.336434 |  |  |
|        |      | Shiraz-3T  | 242  | 0        | -0.336434 |  |  |
|        |      | Shiraz-3T  | 242  | 0        | -0.336434 |  |  |
|        |      | Shiraz-4T  | 261  | 0        | -0.336249 |  |  |
|        |      | Shiraz-4T  | 261  | 0        | -0.336249 |  |  |
|        |      | Shiraz-4T  | 261  | 0        | -0.336249 |  |  |
|        |      | Shiraz-4T  | 261  | 0        | -0.336249 |  |  |
|        |      | Shiraz-16T | 295  | 0.591657 | 0         |  |  |
|        |      | Shiraz-16T | 295  | 0.591657 | 0         |  |  |
|        |      | Shiraz-16T | 295  | 0.591657 | 0         |  |  |
|        |      | Shiraz-16T | 295  | 0.591657 | 0         |  |  |
|        |      | Shiraz-36T | 433  | 0        | -0.803961 |  |  |
|        |      | Shiraz-36T | 433  | 0        | -0.803961 |  |  |
|        |      | Shiraz-36T | 433  | 0        | -0.803961 |  |  |
|        |      | Shiraz-36T | 433  | 0        | -0.803961 |  |  |
|        |      | Shiraz-42T | 480  | 0        | -0.232915 |  |  |
|        |      | Shiraz-42T | 480  | 0        | -0.232915 |  |  |
|        |      | Shiraz-42T | 480  | 0        | -0.232915 |  |  |
|        |      | Shiraz-42T | 480  | 0        | -0.232915 |  |  |
|        |      | Shiraz-44T | 899  | 0        | -1.09697  |  |  |
|        |      | Shiraz-44T | 899  | 0        | -1.09697  |  |  |
|        |      | Shiraz-44T | 899  | 0        | -1.09697  |  |  |

|  |            |      |          |           |  |
|--|------------|------|----------|-----------|--|
|  | Shiraz-44T | 899  | 0        | -1.09697  |  |
|  | Shiraz-49T | 1170 | 0        | -0.967436 |  |
|  | Shiraz-49T | 1170 | 0        | -0.967436 |  |
|  | Shiraz-49T | 1170 | 0        | -0.967436 |  |
|  | Shiraz-49T | 1170 | 0        | -0.967436 |  |
|  | Shiraz-9T  | 1370 | 0.690073 | 0         |  |
|  | Shiraz-9T  | 1370 | 0.690073 | 0         |  |
|  | Shiraz-9T  | 1370 | 0.690073 | 0         |  |
|  | Shiraz-9T  | 1370 | 0.690073 | 0         |  |
|  | Shiraz-18T | 1457 | 0.643204 | 0         |  |
|  | Shiraz-18T | 1457 | 0.643204 | 0         |  |
|  | Shiraz-18T | 1457 | 0.643204 | 0         |  |
|  | Shiraz-18T | 1457 | 0.643204 | 0         |  |
|  | Shiraz-22T | 1673 | 0.611783 | 0         |  |
|  | Shiraz-22T | 1673 | 0.611783 | 0         |  |
|  | Shiraz-22T | 1673 | 0.611783 | 0         |  |
|  | Shiraz-22T | 1673 | 0.611783 | 0         |  |
|  | Shiraz-22T | 1678 | 0.911625 | 0         |  |
|  | Shiraz-22T | 1678 | 0.911625 | 0         |  |
|  | Shiraz-22T | 1678 | 0.911625 | 0         |  |
|  | Shiraz-22T | 1678 | 0.911625 | 0         |  |
|  | Shiraz-25T | 1719 | 0.472955 | 0         |  |
|  | Shiraz-25T | 1719 | 0.472955 | 0         |  |
|  | Shiraz-25T | 1719 | 0.472955 | 0         |  |
|  | Shiraz-25T | 1719 | 0.472955 | 0         |  |
|  | Shiraz-28T | 1762 | 0.562311 | 0         |  |
|  | Shiraz-28T | 1762 | 0.562311 | 0         |  |
|  | Shiraz-28T | 1762 | 0.562311 | 0         |  |
|  | Shiraz-28T | 1762 | 0.562311 | 0         |  |
|  | Shiraz-29T | 1801 | 0.815343 | 0         |  |
|  | Shiraz-29T | 1801 | 0.815343 | 0         |  |
|  | Shiraz-29T | 1801 | 0.815343 | 0         |  |
|  | Shiraz-29T | 1801 | 0.815343 | 0         |  |
|  | Shiraz-32T | 1870 | 0.729766 | 0         |  |
|  | Shiraz-32T | 1870 | 0.729766 | 0         |  |
|  | Shiraz-32T | 1870 | 0.729766 | 0         |  |
|  | Shiraz-32T | 1870 | 0.729766 | 0         |  |
|  | Shiraz-35T | 1933 | 0.488535 | 0         |  |
|  | Shiraz-35T | 1933 | 0.488535 | 0         |  |
|  | Shiraz-35T | 1933 | 0.488535 | 0         |  |
|  | Shiraz-35T | 1933 | 0.488535 | 0         |  |
|  | Shiraz-58T | 2223 | 0.833364 | 0         |  |
|  | Shiraz-58T | 2223 | 0.833364 | 0         |  |
|  | Shiraz-58T | 2223 | 0.833364 | 0         |  |
|  | Shiraz-58T | 2223 | 0.833364 | 0         |  |
|  | Shiraz-58T | 2226 | 1.074663 | 0         |  |
|  | Shiraz-58T | 2226 | 1.074663 | 0         |  |

|  |  |            |      |          |           |  |  |
|--|--|------------|------|----------|-----------|--|--|
|  |  | Shiraz-58T | 2226 | 1.074663 | 0         |  |  |
|  |  | Shiraz-58T | 2226 | 1.074663 | 0         |  |  |
|  |  | Shiraz-71T | 2263 | 0.975531 | 0         |  |  |
|  |  | Shiraz-71T | 2263 | 0.975531 | 0         |  |  |
|  |  | Shiraz-71T | 2263 | 0.975531 | 0         |  |  |
|  |  | Shiraz-71T | 2263 | 0.975531 | 0         |  |  |
|  |  | Shiraz-3T  | 242  | 0        | -0.336434 |  |  |
|  |  | Shiraz-3T  | 242  | 0        | -0.336434 |  |  |
|  |  | Shiraz-3T  | 242  | 0        | -0.336434 |  |  |
|  |  | Shiraz-3T  | 242  | 0        | -0.336434 |  |  |
|  |  | Shiraz-4T  | 261  | 0        | -0.336249 |  |  |
|  |  | Shiraz-4T  | 261  | 0        | -0.336249 |  |  |
|  |  | Shiraz-4T  | 261  | 0        | -0.336249 |  |  |
|  |  | Shiraz-4T  | 261  | 0        | -0.336249 |  |  |
|  |  | Shiraz-16T | 295  | 0.591657 | 0         |  |  |
|  |  | Shiraz-16T | 295  | 0.591657 | 0         |  |  |
|  |  | Shiraz-16T | 295  | 0.591657 | 0         |  |  |
|  |  | Shiraz-16T | 295  | 0.591657 | 0         |  |  |
|  |  | Shiraz-36T | 433  | 0        | -0.803961 |  |  |
|  |  | Shiraz-36T | 433  | 0        | -0.803961 |  |  |
|  |  | Shiraz-36T | 433  | 0        | -0.803961 |  |  |
|  |  | Shiraz-36T | 433  | 0        | -0.803961 |  |  |
|  |  | Shiraz-42T | 480  | 0        | -0.232915 |  |  |
|  |  | Shiraz-42T | 480  | 0        | -0.232915 |  |  |
|  |  | Shiraz-42T | 480  | 0        | -0.232915 |  |  |
|  |  | Shiraz-42T | 480  | 0        | -0.232915 |  |  |
|  |  | Shiraz-44T | 899  | 0        | -1.09697  |  |  |
|  |  | Shiraz-44T | 899  | 0        | -1.09697  |  |  |
|  |  | Shiraz-44T | 899  | 0        | -1.09697  |  |  |
|  |  | Shiraz-44T | 899  | 0        | -1.09697  |  |  |
|  |  | Shiraz-49T | 1170 | 0        | -0.967436 |  |  |
|  |  | Shiraz-49T | 1170 | 0        | -0.967436 |  |  |
|  |  | Shiraz-49T | 1170 | 0        | -0.967436 |  |  |
|  |  | Shiraz-49T | 1170 | 0        | -0.967436 |  |  |
|  |  | Shiraz-9T  | 1370 | 0.690073 | 0         |  |  |
|  |  | Shiraz-9T  | 1370 | 0.690073 | 0         |  |  |
|  |  | Shiraz-9T  | 1370 | 0.690073 | 0         |  |  |
|  |  | Shiraz-9T  | 1370 | 0.690073 | 0         |  |  |
|  |  | Shiraz-18T | 1457 | 0.643204 | 0         |  |  |
|  |  | Shiraz-18T | 1457 | 0.643204 | 0         |  |  |
|  |  | Shiraz-18T | 1457 | 0.643204 | 0         |  |  |
|  |  | Shiraz-18T | 1457 | 0.643204 | 0         |  |  |
|  |  | Shiraz-22T | 1673 | 0.611783 | 0         |  |  |
|  |  | Shiraz-22T | 1673 | 0.611783 | 0         |  |  |
|  |  | Shiraz-22T | 1673 | 0.611783 | 0         |  |  |
|  |  | Shiraz-22T | 1673 | 0.611783 | 0         |  |  |
|  |  | Shiraz-22T | 1678 | 0.911625 | 0         |  |  |

|  |  |            |      |          |           |  |  |
|--|--|------------|------|----------|-----------|--|--|
|  |  | Shiraz-22T | 1678 | 0.911625 | 0         |  |  |
|  |  | Shiraz-22T | 1678 | 0.911625 | 0         |  |  |
|  |  | Shiraz-22T | 1678 | 0.911625 | 0         |  |  |
|  |  | Shiraz-25T | 1719 | 0.472955 | 0         |  |  |
|  |  | Shiraz-25T | 1719 | 0.472955 | 0         |  |  |
|  |  | Shiraz-25T | 1719 | 0.472955 | 0         |  |  |
|  |  | Shiraz-25T | 1719 | 0.472955 | 0         |  |  |
|  |  | Shiraz-28T | 1762 | 0.562311 | 0         |  |  |
|  |  | Shiraz-28T | 1762 | 0.562311 | 0         |  |  |
|  |  | Shiraz-28T | 1762 | 0.562311 | 0         |  |  |
|  |  | Shiraz-28T | 1762 | 0.562311 | 0         |  |  |
|  |  | Shiraz-29T | 1801 | 0.815343 | 0         |  |  |
|  |  | Shiraz-29T | 1801 | 0.815343 | 0         |  |  |
|  |  | Shiraz-29T | 1801 | 0.815343 | 0         |  |  |
|  |  | Shiraz-29T | 1801 | 0.815343 | 0         |  |  |
|  |  | Shiraz-32T | 1870 | 0.729766 | 0         |  |  |
|  |  | Shiraz-32T | 1870 | 0.729766 | 0         |  |  |
|  |  | Shiraz-32T | 1870 | 0.729766 | 0         |  |  |
|  |  | Shiraz-32T | 1870 | 0.729766 | 0         |  |  |
|  |  | Shiraz-35T | 1933 | 0.488535 | 0         |  |  |
|  |  | Shiraz-35T | 1933 | 0.488535 | 0         |  |  |
|  |  | Shiraz-35T | 1933 | 0.488535 | 0         |  |  |
|  |  | Shiraz-35T | 1933 | 0.488535 | 0         |  |  |
|  |  | Shiraz-58T | 2223 | 0.833364 | 0         |  |  |
|  |  | Shiraz-58T | 2223 | 0.833364 | 0         |  |  |
|  |  | Shiraz-58T | 2223 | 0.833364 | 0         |  |  |
|  |  | Shiraz-58T | 2223 | 0.833364 | 0         |  |  |
|  |  | Shiraz-58T | 2226 | 1.074663 | 0         |  |  |
|  |  | Shiraz-58T | 2226 | 1.074663 | 0         |  |  |
|  |  | Shiraz-58T | 2226 | 1.074663 | 0         |  |  |
|  |  | Shiraz-58T | 2226 | 1.074663 | 0         |  |  |
|  |  | Shiraz-71T | 2263 | 0.975531 | 0         |  |  |
|  |  | Shiraz-71T | 2263 | 0.975531 | 0         |  |  |
|  |  | Shiraz-71T | 2263 | 0.975531 | 0         |  |  |
|  |  | Shiraz-71T | 2263 | 0.975531 | 0         |  |  |
|  |  | Shiraz-3T  | 242  | 0        | -0.336434 |  |  |
|  |  | Shiraz-3T  | 242  | 0        | -0.336434 |  |  |
|  |  | Shiraz-3T  | 242  | 0        | -0.336434 |  |  |
|  |  | Shiraz-3T  | 242  | 0        | -0.336434 |  |  |
|  |  | Shiraz-4T  | 261  | 0        | -0.336249 |  |  |
|  |  | Shiraz-4T  | 261  | 0        | -0.336249 |  |  |
|  |  | Shiraz-4T  | 261  | 0        | -0.336249 |  |  |
|  |  | Shiraz-4T  | 261  | 0        | -0.336249 |  |  |
|  |  | Shiraz-16T | 295  | 0.591657 | 0         |  |  |
|  |  | Shiraz-16T | 295  | 0.591657 | 0         |  |  |
|  |  | Shiraz-16T | 295  | 0.591657 | 0         |  |  |
|  |  | Shiraz-16T | 295  | 0.591657 | 0         |  |  |

|  |  |            |      |          |           |  |  |
|--|--|------------|------|----------|-----------|--|--|
|  |  | Shiraz-36T | 433  | 0        | -0.803961 |  |  |
|  |  | Shiraz-36T | 433  | 0        | -0.803961 |  |  |
|  |  | Shiraz-36T | 433  | 0        | -0.803961 |  |  |
|  |  | Shiraz-36T | 433  | 0        | -0.803961 |  |  |
|  |  | Shiraz-42T | 480  | 0        | -0.232915 |  |  |
|  |  | Shiraz-42T | 480  | 0        | -0.232915 |  |  |
|  |  | Shiraz-42T | 480  | 0        | -0.232915 |  |  |
|  |  | Shiraz-42T | 480  | 0        | -0.232915 |  |  |
|  |  | Shiraz-44T | 899  | 0        | -1.09697  |  |  |
|  |  | Shiraz-44T | 899  | 0        | -1.09697  |  |  |
|  |  | Shiraz-44T | 899  | 0        | -1.09697  |  |  |
|  |  | Shiraz-44T | 899  | 0        | -1.09697  |  |  |
|  |  | Shiraz-49T | 1170 | 0        | -0.967436 |  |  |
|  |  | Shiraz-49T | 1170 | 0        | -0.967436 |  |  |
|  |  | Shiraz-49T | 1170 | 0        | -0.967436 |  |  |
|  |  | Shiraz-49T | 1170 | 0        | -0.967436 |  |  |
|  |  | Shiraz-9T  | 1370 | 0.690073 | 0         |  |  |
|  |  | Shiraz-9T  | 1370 | 0.690073 | 0         |  |  |
|  |  | Shiraz-9T  | 1370 | 0.690073 | 0         |  |  |
|  |  | Shiraz-9T  | 1370 | 0.690073 | 0         |  |  |
|  |  | Shiraz-18T | 1457 | 0.643204 | 0         |  |  |
|  |  | Shiraz-18T | 1457 | 0.643204 | 0         |  |  |
|  |  | Shiraz-18T | 1457 | 0.643204 | 0         |  |  |
|  |  | Shiraz-18T | 1457 | 0.643204 | 0         |  |  |
|  |  | Shiraz-22T | 1673 | 0.611783 | 0         |  |  |
|  |  | Shiraz-22T | 1673 | 0.611783 | 0         |  |  |
|  |  | Shiraz-22T | 1673 | 0.611783 | 0         |  |  |
|  |  | Shiraz-22T | 1673 | 0.611783 | 0         |  |  |
|  |  | Shiraz-22T | 1678 | 0.911625 | 0         |  |  |
|  |  | Shiraz-22T | 1678 | 0.911625 | 0         |  |  |
|  |  | Shiraz-22T | 1678 | 0.911625 | 0         |  |  |
|  |  | Shiraz-22T | 1678 | 0.911625 | 0         |  |  |
|  |  | Shiraz-25T | 1719 | 0.472955 | 0         |  |  |
|  |  | Shiraz-25T | 1719 | 0.472955 | 0         |  |  |
|  |  | Shiraz-25T | 1719 | 0.472955 | 0         |  |  |
|  |  | Shiraz-25T | 1719 | 0.472955 | 0         |  |  |
|  |  | Shiraz-28T | 1762 | 0.562311 | 0         |  |  |
|  |  | Shiraz-28T | 1762 | 0.562311 | 0         |  |  |
|  |  | Shiraz-28T | 1762 | 0.562311 | 0         |  |  |
|  |  | Shiraz-28T | 1762 | 0.562311 | 0         |  |  |
|  |  | Shiraz-29T | 1801 | 0.815343 | 0         |  |  |
|  |  | Shiraz-29T | 1801 | 0.815343 | 0         |  |  |
|  |  | Shiraz-29T | 1801 | 0.815343 | 0         |  |  |
|  |  | Shiraz-29T | 1801 | 0.815343 | 0         |  |  |
|  |  | Shiraz-32T | 1870 | 0.729766 | 0         |  |  |
|  |  | Shiraz-32T | 1870 | 0.729766 | 0         |  |  |
|  |  | Shiraz-32T | 1870 | 0.729766 | 0         |  |  |

|        |      |            |      |          |           |  |  |
|--------|------|------------|------|----------|-----------|--|--|
|        |      | Shiraz-32T | 1870 | 0.729766 | 0         |  |  |
|        |      | Shiraz-35T | 1933 | 0.488535 | 0         |  |  |
|        |      | Shiraz-35T | 1933 | 0.488535 | 0         |  |  |
|        |      | Shiraz-35T | 1933 | 0.488535 | 0         |  |  |
|        |      | Shiraz-35T | 1933 | 0.488535 | 0         |  |  |
|        |      | Shiraz-58T | 2223 | 0.833364 | 0         |  |  |
|        |      | Shiraz-58T | 2223 | 0.833364 | 0         |  |  |
|        |      | Shiraz-58T | 2223 | 0.833364 | 0         |  |  |
|        |      | Shiraz-58T | 2223 | 0.833364 | 0         |  |  |
|        |      | Shiraz-58T | 2226 | 1.074663 | 0         |  |  |
|        |      | Shiraz-58T | 2226 | 1.074663 | 0         |  |  |
|        |      | Shiraz-58T | 2226 | 1.074663 | 0         |  |  |
|        |      | Shiraz-58T | 2226 | 1.074663 | 0         |  |  |
|        |      | Shiraz-71T | 2263 | 0.975531 | 0         |  |  |
|        |      | Shiraz-71T | 2263 | 0.975531 | 0         |  |  |
|        |      | Shiraz-71T | 2263 | 0.975531 | 0         |  |  |
|        |      | Shiraz-71T | 2263 | 0.975531 | 0         |  |  |
| MAGEA5 | chrX | Shiraz-3T  | 242  | 0        | -0.336434 |  |  |
|        |      | Shiraz-4T  | 261  | 0        | -0.336249 |  |  |
|        |      | Shiraz-16T | 295  | 0.591657 | 0         |  |  |
|        |      | Shiraz-36T | 433  | 0        | -0.803961 |  |  |
|        |      | Shiraz-42T | 480  | 0        | -0.232915 |  |  |
|        |      | Shiraz-44T | 899  | 0        | -1.09697  |  |  |
|        |      | Shiraz-49T | 1170 | 0        | -0.967436 |  |  |
|        |      | Shiraz-9T  | 1370 | 0.690073 | 0         |  |  |
|        |      | Shiraz-18T | 1457 | 0.643204 | 0         |  |  |
|        |      | Shiraz-22T | 1673 | 0.611783 | 0         |  |  |
|        |      | Shiraz-22T | 1678 | 0.911625 | 0         |  |  |
|        |      | Shiraz-25T | 1719 | 0.472955 | 0         |  |  |
|        |      | Shiraz-28T | 1762 | 0.562311 | 0         |  |  |
|        |      | Shiraz-29T | 1801 | 0.815343 | 0         |  |  |
|        |      | Shiraz-32T | 1870 | 0.729766 | 0         |  |  |
|        |      | Shiraz-35T | 1933 | 0.488535 | 0         |  |  |
|        |      | Shiraz-58T | 2223 | 0.833364 | 0         |  |  |
|        |      | Shiraz-58T | 2226 | 1.074663 | 0         |  |  |
|        |      | Shiraz-71T | 2263 | 0.975531 | 0         |  |  |
|        |      | Shiraz-3T  | 242  | 0        | -0.336434 |  |  |
|        |      | Shiraz-4T  | 261  | 0        | -0.336249 |  |  |
|        |      | Shiraz-16T | 295  | 0.591657 | 0         |  |  |
|        |      | Shiraz-36T | 433  | 0        | -0.803961 |  |  |
|        |      | Shiraz-42T | 480  | 0        | -0.232915 |  |  |
|        |      | Shiraz-44T | 899  | 0        | -1.09697  |  |  |
|        |      | Shiraz-49T | 1170 | 0        | -0.967436 |  |  |
|        |      | Shiraz-9T  | 1370 | 0.690073 | 0         |  |  |
|        |      | Shiraz-18T | 1457 | 0.643204 | 0         |  |  |
|        |      | Shiraz-22T | 1673 | 0.611783 | 0         |  |  |
|        |      | Shiraz-22T | 1678 | 0.911625 | 0         |  |  |



|        |      |            |      |          |           |  |  |
|--------|------|------------|------|----------|-----------|--|--|
|        |      | Shiraz-25T | 1719 | 0.472955 | 0         |  |  |
|        |      | Shiraz-28T | 1762 | 0.562311 | 0         |  |  |
|        |      | Shiraz-29T | 1801 | 0.815343 | 0         |  |  |
|        |      | Shiraz-32T | 1870 | 0.729766 | 0         |  |  |
|        |      | Shiraz-35T | 1933 | 0.488535 | 0         |  |  |
|        |      | Shiraz-58T | 2223 | 0.833364 | 0         |  |  |
|        |      | Shiraz-58T | 2226 | 1.074663 | 0         |  |  |
|        |      | Shiraz-71T | 2263 | 0.975531 | 0         |  |  |
|        |      | Shiraz-3T  | 242  | 0        | -0.336434 |  |  |
|        |      | Shiraz-4T  | 261  | 0        | -0.336249 |  |  |
|        |      | Shiraz-16T | 295  | 0.591657 | 0         |  |  |
|        |      | Shiraz-36T | 433  | 0        | -0.803961 |  |  |
|        |      | Shiraz-42T | 480  | 0        | -0.232915 |  |  |
|        |      | Shiraz-44T | 899  | 0        | -1.09697  |  |  |
|        |      | Shiraz-49T | 1170 | 0        | -0.967436 |  |  |
|        |      | Shiraz-9T  | 1370 | 0.690073 | 0         |  |  |
|        |      | Shiraz-18T | 1457 | 0.643204 | 0         |  |  |
|        |      | Shiraz-22T | 1673 | 0.611783 | 0         |  |  |
|        |      | Shiraz-22T | 1678 | 0.911625 | 0         |  |  |
|        |      | Shiraz-25T | 1719 | 0.472955 | 0         |  |  |
|        |      | Shiraz-28T | 1762 | 0.562311 | 0         |  |  |
|        |      | Shiraz-29T | 1801 | 0.815343 | 0         |  |  |
|        |      | Shiraz-32T | 1870 | 0.729766 | 0         |  |  |
|        |      | Shiraz-35T | 1933 | 0.488535 | 0         |  |  |
|        |      | Shiraz-58T | 2223 | 0.833364 | 0         |  |  |
|        |      | Shiraz-58T | 2226 | 1.074663 | 0         |  |  |
|        |      | Shiraz-71T | 2263 | 0.975531 | 0         |  |  |
| MAGEA6 | chrX | Shiraz-4T  | 261  | 0        | -0.336249 |  |  |
|        |      | Shiraz-16T | 295  | 0.591657 | 0         |  |  |
|        |      | Shiraz-36T | 433  | 0        | -0.803961 |  |  |
|        |      | Shiraz-42T | 480  | 0        | -0.232915 |  |  |
|        |      | Shiraz-44T | 899  | 0        | -1.09697  |  |  |
|        |      | Shiraz-49T | 1170 | 0        | -0.967436 |  |  |
|        |      | Shiraz-9T  | 1370 | 0.690073 | 0         |  |  |
|        |      | Shiraz-9T  | 1371 | 1.292392 | 0         |  |  |
|        |      | Shiraz-18T | 1457 | 0.643204 | 0         |  |  |
|        |      | Shiraz-22T | 1673 | 0.611783 | 0         |  |  |
|        |      | Shiraz-22T | 1678 | 0.911625 | 0         |  |  |
|        |      | Shiraz-25T | 1719 | 0.472955 | 0         |  |  |
|        |      | Shiraz-28T | 1762 | 0.562311 | 0         |  |  |
|        |      | Shiraz-29T | 1801 | 0.815343 | 0         |  |  |
|        |      | Shiraz-32T | 1870 | 0.729766 | 0         |  |  |
|        |      | Shiraz-32T | 1872 | 1.504553 | 0         |  |  |
|        |      | Shiraz-35T | 1933 | 0.488535 | 0         |  |  |
|        |      | Shiraz-53T | 2115 | 0.427728 | 0         |  |  |
|        |      | Shiraz-58T | 2223 | 0.833364 | 0         |  |  |
|        |      | Shiraz-58T | 2226 | 1.074663 | 0         |  |  |

|        |      |            |      |          |           |  |  |
|--------|------|------------|------|----------|-----------|--|--|
|        |      | Shiraz-71T | 2263 | 0.975531 | 0         |  |  |
|        |      | Shiraz-4T  | 261  | 0        | -0.336249 |  |  |
|        |      | Shiraz-16T | 295  | 0.591657 | 0         |  |  |
|        |      | Shiraz-36T | 433  | 0        | -0.803961 |  |  |
|        |      | Shiraz-42T | 480  | 0        | -0.232915 |  |  |
|        |      | Shiraz-44T | 899  | 0        | -1.09697  |  |  |
|        |      | Shiraz-49T | 1170 | 0        | -0.967436 |  |  |
|        |      | Shiraz-9T  | 1370 | 0.690073 | 0         |  |  |
|        |      | Shiraz-9T  | 1371 | 1.292392 | 0         |  |  |
|        |      | Shiraz-18T | 1457 | 0.643204 | 0         |  |  |
|        |      | Shiraz-22T | 1673 | 0.611783 | 0         |  |  |
|        |      | Shiraz-22T | 1678 | 0.911625 | 0         |  |  |
|        |      | Shiraz-25T | 1719 | 0.472955 | 0         |  |  |
|        |      | Shiraz-28T | 1762 | 0.562311 | 0         |  |  |
|        |      | Shiraz-29T | 1801 | 0.815343 | 0         |  |  |
|        |      | Shiraz-32T | 1870 | 0.729766 | 0         |  |  |
|        |      | Shiraz-32T | 1872 | 1.504553 | 0         |  |  |
|        |      | Shiraz-35T | 1933 | 0.488535 | 0         |  |  |
|        |      | Shiraz-53T | 2115 | 0.427728 | 0         |  |  |
|        |      | Shiraz-58T | 2223 | 0.833364 | 0         |  |  |
|        |      | Shiraz-58T | 2226 | 1.074663 | 0         |  |  |
|        |      | Shiraz-71T | 2263 | 0.975531 | 0         |  |  |
|        |      | Shiraz-4T  | 261  | 0        | -0.336249 |  |  |
|        |      | Shiraz-16T | 295  | 0.591657 | 0         |  |  |
|        |      | Shiraz-36T | 433  | 0        | -0.803961 |  |  |
|        |      | Shiraz-42T | 480  | 0        | -0.232915 |  |  |
|        |      | Shiraz-44T | 899  | 0        | -1.09697  |  |  |
|        |      | Shiraz-49T | 1170 | 0        | -0.967436 |  |  |
|        |      | Shiraz-9T  | 1370 | 0.690073 | 0         |  |  |
|        |      | Shiraz-9T  | 1371 | 1.292392 | 0         |  |  |
|        |      | Shiraz-18T | 1457 | 0.643204 | 0         |  |  |
|        |      | Shiraz-22T | 1673 | 0.611783 | 0         |  |  |
|        |      | Shiraz-22T | 1678 | 0.911625 | 0         |  |  |
|        |      | Shiraz-25T | 1719 | 0.472955 | 0         |  |  |
|        |      | Shiraz-28T | 1762 | 0.562311 | 0         |  |  |
|        |      | Shiraz-29T | 1801 | 0.815343 | 0         |  |  |
|        |      | Shiraz-32T | 1870 | 0.729766 | 0         |  |  |
|        |      | Shiraz-32T | 1872 | 1.504553 | 0         |  |  |
|        |      | Shiraz-35T | 1933 | 0.488535 | 0         |  |  |
|        |      | Shiraz-53T | 2115 | 0.427728 | 0         |  |  |
|        |      | Shiraz-58T | 2223 | 0.833364 | 0         |  |  |
|        |      | Shiraz-58T | 2226 | 1.074663 | 0         |  |  |
|        |      | Shiraz-71T | 2263 | 0.975531 | 0         |  |  |
| MAGEA8 | chrX | Shiraz-3T  | 242  | 0        | -0.336434 |  |  |
|        |      | Shiraz-4T  | 261  | 0        | -0.336249 |  |  |
|        |      | Shiraz-16T | 295  | 0.591657 | 0         |  |  |
|        |      | Shiraz-36T | 433  | 0        | -0.803961 |  |  |

|  |            |      |          |           |  |
|--|------------|------|----------|-----------|--|
|  | Shiraz-42T | 480  | 0        | -0.232915 |  |
|  | Shiraz-44T | 899  | 0        | -1.09697  |  |
|  | Shiraz-49T | 1170 | 0        | -0.967436 |  |
|  | Shiraz-9T  | 1370 | 0.690073 | 0         |  |
|  | Shiraz-18T | 1457 | 0.643204 | 0         |  |
|  | Shiraz-22T | 1673 | 0.611783 | 0         |  |
|  | Shiraz-22T | 1678 | 0.911625 | 0         |  |
|  | Shiraz-25T | 1719 | 0.472955 | 0         |  |
|  | Shiraz-28T | 1762 | 0.562311 | 0         |  |
|  | Shiraz-29T | 1801 | 0.815343 | 0         |  |
|  | Shiraz-32T | 1870 | 0.729766 | 0         |  |
|  | Shiraz-35T | 1933 | 0.488535 | 0         |  |
|  | Shiraz-58T | 2223 | 0.833364 | 0         |  |
|  | Shiraz-58T | 2226 | 1.074663 | 0         |  |
|  | Shiraz-71T | 2263 | 0.975531 | 0         |  |
|  | Shiraz-3T  | 242  | 0        | -0.336434 |  |
|  | Shiraz-4T  | 261  | 0        | -0.336249 |  |
|  | Shiraz-16T | 295  | 0.591657 | 0         |  |
|  | Shiraz-36T | 433  | 0        | -0.803961 |  |
|  | Shiraz-42T | 480  | 0        | -0.232915 |  |
|  | Shiraz-44T | 899  | 0        | -1.09697  |  |
|  | Shiraz-49T | 1170 | 0        | -0.967436 |  |
|  | Shiraz-9T  | 1370 | 0.690073 | 0         |  |
|  | Shiraz-18T | 1457 | 0.643204 | 0         |  |
|  | Shiraz-22T | 1673 | 0.611783 | 0         |  |
|  | Shiraz-22T | 1678 | 0.911625 | 0         |  |
|  | Shiraz-25T | 1719 | 0.472955 | 0         |  |
|  | Shiraz-28T | 1762 | 0.562311 | 0         |  |
|  | Shiraz-29T | 1801 | 0.815343 | 0         |  |
|  | Shiraz-32T | 1870 | 0.729766 | 0         |  |
|  | Shiraz-35T | 1933 | 0.488535 | 0         |  |
|  | Shiraz-58T | 2223 | 0.833364 | 0         |  |
|  | Shiraz-58T | 2226 | 1.074663 | 0         |  |
|  | Shiraz-71T | 2263 | 0.975531 | 0         |  |
|  | Shiraz-3T  | 242  | 0        | -0.336434 |  |
|  | Shiraz-4T  | 261  | 0        | -0.336249 |  |
|  | Shiraz-16T | 295  | 0.591657 | 0         |  |
|  | Shiraz-36T | 433  | 0        | -0.803961 |  |
|  | Shiraz-42T | 480  | 0        | -0.232915 |  |
|  | Shiraz-44T | 899  | 0        | -1.09697  |  |
|  | Shiraz-49T | 1170 | 0        | -0.967436 |  |
|  | Shiraz-9T  | 1370 | 0.690073 | 0         |  |
|  | Shiraz-18T | 1457 | 0.643204 | 0         |  |
|  | Shiraz-22T | 1673 | 0.611783 | 0         |  |
|  | Shiraz-22T | 1678 | 0.911625 | 0         |  |
|  | Shiraz-25T | 1719 | 0.472955 | 0         |  |
|  | Shiraz-28T | 1762 | 0.562311 | 0         |  |

|        |      |            |      |          |           |  |  |
|--------|------|------------|------|----------|-----------|--|--|
|        |      | Shiraz-29T | 1801 | 0.815343 | 0         |  |  |
|        |      | Shiraz-32T | 1870 | 0.729766 | 0         |  |  |
|        |      | Shiraz-35T | 1933 | 0.488535 | 0         |  |  |
|        |      | Shiraz-58T | 2223 | 0.833364 | 0         |  |  |
|        |      | Shiraz-58T | 2226 | 1.074663 | 0         |  |  |
|        |      | Shiraz-71T | 2263 | 0.975531 | 0         |  |  |
| MAGEA9 | chrX | Shiraz-3T  | 242  | 0        | -0.336434 |  |  |
|        |      | Shiraz-3T  | 242  | 0        | -0.336434 |  |  |
|        |      | Shiraz-4T  | 261  | 0        | -0.336249 |  |  |
|        |      | Shiraz-4T  | 261  | 0        | -0.336249 |  |  |
|        |      | Shiraz-16T | 295  | 0.591657 | 0         |  |  |
|        |      | Shiraz-16T | 295  | 0.591657 | 0         |  |  |
|        |      | Shiraz-36T | 433  | 0        | -0.803961 |  |  |
|        |      | Shiraz-36T | 433  | 0        | -0.803961 |  |  |
|        |      | Shiraz-42T | 480  | 0        | -0.232915 |  |  |
|        |      | Shiraz-42T | 480  | 0        | -0.232915 |  |  |
|        |      | Shiraz-44T | 899  | 0        | -1.09697  |  |  |
|        |      | Shiraz-44T | 899  | 0        | -1.09697  |  |  |
|        |      | Shiraz-49T | 1170 | 0        | -0.967436 |  |  |
|        |      | Shiraz-49T | 1170 | 0        | -0.967436 |  |  |
|        |      | Shiraz-9T  | 1370 | 0.690073 | 0         |  |  |
|        |      | Shiraz-9T  | 1370 | 0.690073 | 0         |  |  |
|        |      | Shiraz-18T | 1457 | 0.643204 | 0         |  |  |
|        |      | Shiraz-18T | 1457 | 0.643204 | 0         |  |  |
|        |      | Shiraz-22T | 1673 | 0.611783 | 0         |  |  |
|        |      | Shiraz-22T | 1673 | 0.611783 | 0         |  |  |
|        |      | Shiraz-22T | 1678 | 0.911625 | 0         |  |  |
|        |      | Shiraz-22T | 1678 | 0.911625 | 0         |  |  |
|        |      | Shiraz-25T | 1719 | 0.472955 | 0         |  |  |
|        |      | Shiraz-25T | 1719 | 0.472955 | 0         |  |  |
|        |      | Shiraz-28T | 1762 | 0.562311 | 0         |  |  |
|        |      | Shiraz-28T | 1762 | 0.562311 | 0         |  |  |
|        |      | Shiraz-29T | 1801 | 0.815343 | 0         |  |  |
|        |      | Shiraz-29T | 1801 | 0.815343 | 0         |  |  |
|        |      | Shiraz-32T | 1870 | 0.729766 | 0         |  |  |
|        |      | Shiraz-32T | 1870 | 0.729766 | 0         |  |  |
|        |      | Shiraz-35T | 1933 | 0.488535 | 0         |  |  |
|        |      | Shiraz-35T | 1933 | 0.488535 | 0         |  |  |
|        |      | Shiraz-58T | 2223 | 0.833364 | 0         |  |  |
|        |      | Shiraz-58T | 2223 | 0.833364 | 0         |  |  |
|        |      | Shiraz-58T | 2226 | 1.074663 | 0         |  |  |
|        |      | Shiraz-58T | 2226 | 1.074663 | 0         |  |  |
|        |      | Shiraz-71T | 2263 | 0.975531 | 0         |  |  |
|        |      | Shiraz-71T | 2263 | 0.975531 | 0         |  |  |
|        |      | Shiraz-3T  | 242  | 0        | -0.336434 |  |  |
|        |      | Shiraz-3T  | 242  | 0        | -0.336434 |  |  |
|        |      | Shiraz-4T  | 261  | 0        | -0.336249 |  |  |

|  |            |      |          |           |  |
|--|------------|------|----------|-----------|--|
|  | Shiraz-4T  | 261  | 0        | -0.336249 |  |
|  | Shiraz-16T | 295  | 0.591657 | 0         |  |
|  | Shiraz-16T | 295  | 0.591657 | 0         |  |
|  | Shiraz-36T | 433  | 0        | -0.803961 |  |
|  | Shiraz-36T | 433  | 0        | -0.803961 |  |
|  | Shiraz-42T | 480  | 0        | -0.232915 |  |
|  | Shiraz-42T | 480  | 0        | -0.232915 |  |
|  | Shiraz-44T | 899  | 0        | -1.09697  |  |
|  | Shiraz-44T | 899  | 0        | -1.09697  |  |
|  | Shiraz-49T | 1170 | 0        | -0.967436 |  |
|  | Shiraz-49T | 1170 | 0        | -0.967436 |  |
|  | Shiraz-9T  | 1370 | 0.690073 | 0         |  |
|  | Shiraz-9T  | 1370 | 0.690073 | 0         |  |
|  | Shiraz-18T | 1457 | 0.643204 | 0         |  |
|  | Shiraz-18T | 1457 | 0.643204 | 0         |  |
|  | Shiraz-22T | 1673 | 0.611783 | 0         |  |
|  | Shiraz-22T | 1673 | 0.611783 | 0         |  |
|  | Shiraz-22T | 1678 | 0.911625 | 0         |  |
|  | Shiraz-22T | 1678 | 0.911625 | 0         |  |
|  | Shiraz-25T | 1719 | 0.472955 | 0         |  |
|  | Shiraz-25T | 1719 | 0.472955 | 0         |  |
|  | Shiraz-28T | 1762 | 0.562311 | 0         |  |
|  | Shiraz-28T | 1762 | 0.562311 | 0         |  |
|  | Shiraz-29T | 1801 | 0.815343 | 0         |  |
|  | Shiraz-29T | 1801 | 0.815343 | 0         |  |
|  | Shiraz-32T | 1870 | 0.729766 | 0         |  |
|  | Shiraz-32T | 1870 | 0.729766 | 0         |  |
|  | Shiraz-35T | 1933 | 0.488535 | 0         |  |
|  | Shiraz-35T | 1933 | 0.488535 | 0         |  |
|  | Shiraz-58T | 2223 | 0.833364 | 0         |  |
|  | Shiraz-58T | 2223 | 0.833364 | 0         |  |
|  | Shiraz-58T | 2226 | 1.074663 | 0         |  |
|  | Shiraz-58T | 2226 | 1.074663 | 0         |  |
|  | Shiraz-71T | 2263 | 0.975531 | 0         |  |
|  | Shiraz-71T | 2263 | 0.975531 | 0         |  |
|  | Shiraz-3T  | 242  | 0        | -0.336434 |  |
|  | Shiraz-3T  | 242  | 0        | -0.336434 |  |
|  | Shiraz-4T  | 261  | 0        | -0.336249 |  |
|  | Shiraz-4T  | 261  | 0        | -0.336249 |  |
|  | Shiraz-16T | 295  | 0.591657 | 0         |  |
|  | Shiraz-16T | 295  | 0.591657 | 0         |  |
|  | Shiraz-36T | 433  | 0        | -0.803961 |  |
|  | Shiraz-36T | 433  | 0        | -0.803961 |  |
|  | Shiraz-42T | 480  | 0        | -0.232915 |  |
|  | Shiraz-42T | 480  | 0        | -0.232915 |  |
|  | Shiraz-44T | 899  | 0        | -1.09697  |  |
|  | Shiraz-44T | 899  | 0        | -1.09697  |  |

|         |      |            |      |          |           |  |  |
|---------|------|------------|------|----------|-----------|--|--|
|         |      | Shiraz-49T | 1170 | 0        | -0.967436 |  |  |
|         |      | Shiraz-49T | 1170 | 0        | -0.967436 |  |  |
|         |      | Shiraz-9T  | 1370 | 0.690073 | 0         |  |  |
|         |      | Shiraz-9T  | 1370 | 0.690073 | 0         |  |  |
|         |      | Shiraz-18T | 1457 | 0.643204 | 0         |  |  |
|         |      | Shiraz-18T | 1457 | 0.643204 | 0         |  |  |
|         |      | Shiraz-22T | 1673 | 0.611783 | 0         |  |  |
|         |      | Shiraz-22T | 1673 | 0.611783 | 0         |  |  |
|         |      | Shiraz-22T | 1678 | 0.911625 | 0         |  |  |
|         |      | Shiraz-22T | 1678 | 0.911625 | 0         |  |  |
|         |      | Shiraz-25T | 1719 | 0.472955 | 0         |  |  |
|         |      | Shiraz-25T | 1719 | 0.472955 | 0         |  |  |
|         |      | Shiraz-28T | 1762 | 0.562311 | 0         |  |  |
|         |      | Shiraz-28T | 1762 | 0.562311 | 0         |  |  |
|         |      | Shiraz-29T | 1801 | 0.815343 | 0         |  |  |
|         |      | Shiraz-29T | 1801 | 0.815343 | 0         |  |  |
|         |      | Shiraz-32T | 1870 | 0.729766 | 0         |  |  |
|         |      | Shiraz-32T | 1870 | 0.729766 | 0         |  |  |
|         |      | Shiraz-35T | 1933 | 0.488535 | 0         |  |  |
|         |      | Shiraz-35T | 1933 | 0.488535 | 0         |  |  |
|         |      | Shiraz-58T | 2223 | 0.833364 | 0         |  |  |
|         |      | Shiraz-58T | 2223 | 0.833364 | 0         |  |  |
|         |      | Shiraz-58T | 2226 | 1.074663 | 0         |  |  |
|         |      | Shiraz-58T | 2226 | 1.074663 | 0         |  |  |
|         |      | Shiraz-71T | 2263 | 0.975531 | 0         |  |  |
|         |      | Shiraz-71T | 2263 | 0.975531 | 0         |  |  |
| MAGEA9B | chrX | Shiraz-3T  | 242  | 0        | -0.336434 |  |  |
|         |      | Shiraz-3T  | 242  | 0        | -0.336434 |  |  |
|         |      | Shiraz-4T  | 261  | 0        | -0.336249 |  |  |
|         |      | Shiraz-4T  | 261  | 0        | -0.336249 |  |  |
|         |      | Shiraz-16T | 295  | 0.591657 | 0         |  |  |
|         |      | Shiraz-16T | 295  | 0.591657 | 0         |  |  |
|         |      | Shiraz-36T | 433  | 0        | -0.803961 |  |  |
|         |      | Shiraz-36T | 433  | 0        | -0.803961 |  |  |
|         |      | Shiraz-42T | 480  | 0        | -0.232915 |  |  |
|         |      | Shiraz-42T | 480  | 0        | -0.232915 |  |  |
|         |      | Shiraz-44T | 899  | 0        | -1.09697  |  |  |
|         |      | Shiraz-44T | 899  | 0        | -1.09697  |  |  |
|         |      | Shiraz-49T | 1170 | 0        | -0.967436 |  |  |
|         |      | Shiraz-49T | 1170 | 0        | -0.967436 |  |  |
|         |      | Shiraz-9T  | 1370 | 0.690073 | 0         |  |  |
|         |      | Shiraz-9T  | 1370 | 0.690073 | 0         |  |  |
|         |      | Shiraz-18T | 1457 | 0.643204 | 0         |  |  |
|         |      | Shiraz-18T | 1457 | 0.643204 | 0         |  |  |
|         |      | Shiraz-22T | 1673 | 0.611783 | 0         |  |  |
|         |      | Shiraz-22T | 1673 | 0.611783 | 0         |  |  |
|         |      | Shiraz-22T | 1678 | 0.911625 | 0         |  |  |

|  |  |            |      |          |           |  |  |
|--|--|------------|------|----------|-----------|--|--|
|  |  | Shiraz-22T | 1678 | 0.911625 | 0         |  |  |
|  |  | Shiraz-25T | 1719 | 0.472955 | 0         |  |  |
|  |  | Shiraz-25T | 1719 | 0.472955 | 0         |  |  |
|  |  | Shiraz-28T | 1762 | 0.562311 | 0         |  |  |
|  |  | Shiraz-28T | 1762 | 0.562311 | 0         |  |  |
|  |  | Shiraz-29T | 1801 | 0.815343 | 0         |  |  |
|  |  | Shiraz-29T | 1801 | 0.815343 | 0         |  |  |
|  |  | Shiraz-32T | 1870 | 0.729766 | 0         |  |  |
|  |  | Shiraz-32T | 1870 | 0.729766 | 0         |  |  |
|  |  | Shiraz-35T | 1933 | 0.488535 | 0         |  |  |
|  |  | Shiraz-35T | 1933 | 0.488535 | 0         |  |  |
|  |  | Shiraz-58T | 2223 | 0.833364 | 0         |  |  |
|  |  | Shiraz-58T | 2223 | 0.833364 | 0         |  |  |
|  |  | Shiraz-58T | 2226 | 1.074663 | 0         |  |  |
|  |  | Shiraz-58T | 2226 | 1.074663 | 0         |  |  |
|  |  | Shiraz-71T | 2263 | 0.975531 | 0         |  |  |
|  |  | Shiraz-71T | 2263 | 0.975531 | 0         |  |  |
|  |  | Shiraz-3T  | 242  | 0        | -0.336434 |  |  |
|  |  | Shiraz-3T  | 242  | 0        | -0.336434 |  |  |
|  |  | Shiraz-4T  | 261  | 0        | -0.336249 |  |  |
|  |  | Shiraz-4T  | 261  | 0        | -0.336249 |  |  |
|  |  | Shiraz-16T | 295  | 0.591657 | 0         |  |  |
|  |  | Shiraz-16T | 295  | 0.591657 | 0         |  |  |
|  |  | Shiraz-36T | 433  | 0        | -0.803961 |  |  |
|  |  | Shiraz-36T | 433  | 0        | -0.803961 |  |  |
|  |  | Shiraz-42T | 480  | 0        | -0.232915 |  |  |
|  |  | Shiraz-42T | 480  | 0        | -0.232915 |  |  |
|  |  | Shiraz-44T | 899  | 0        | -1.09697  |  |  |
|  |  | Shiraz-44T | 899  | 0        | -1.09697  |  |  |
|  |  | Shiraz-49T | 1170 | 0        | -0.967436 |  |  |
|  |  | Shiraz-49T | 1170 | 0        | -0.967436 |  |  |
|  |  | Shiraz-9T  | 1370 | 0.690073 | 0         |  |  |
|  |  | Shiraz-9T  | 1370 | 0.690073 | 0         |  |  |
|  |  | Shiraz-18T | 1457 | 0.643204 | 0         |  |  |
|  |  | Shiraz-18T | 1457 | 0.643204 | 0         |  |  |
|  |  | Shiraz-22T | 1673 | 0.611783 | 0         |  |  |
|  |  | Shiraz-22T | 1673 | 0.611783 | 0         |  |  |
|  |  | Shiraz-22T | 1678 | 0.911625 | 0         |  |  |
|  |  | Shiraz-22T | 1678 | 0.911625 | 0         |  |  |
|  |  | Shiraz-25T | 1719 | 0.472955 | 0         |  |  |
|  |  | Shiraz-25T | 1719 | 0.472955 | 0         |  |  |
|  |  | Shiraz-28T | 1762 | 0.562311 | 0         |  |  |
|  |  | Shiraz-28T | 1762 | 0.562311 | 0         |  |  |
|  |  | Shiraz-29T | 1801 | 0.815343 | 0         |  |  |
|  |  | Shiraz-29T | 1801 | 0.815343 | 0         |  |  |
|  |  | Shiraz-32T | 1870 | 0.729766 | 0         |  |  |
|  |  | Shiraz-32T | 1870 | 0.729766 | 0         |  |  |

|        |      |            |      |          |           |  |  |
|--------|------|------------|------|----------|-----------|--|--|
|        |      | Shiraz-35T | 1933 | 0.488535 | 0         |  |  |
|        |      | Shiraz-35T | 1933 | 0.488535 | 0         |  |  |
|        |      | Shiraz-58T | 2223 | 0.833364 | 0         |  |  |
|        |      | Shiraz-58T | 2223 | 0.833364 | 0         |  |  |
|        |      | Shiraz-58T | 2226 | 1.074663 | 0         |  |  |
|        |      | Shiraz-58T | 2226 | 1.074663 | 0         |  |  |
|        |      | Shiraz-71T | 2263 | 0.975531 | 0         |  |  |
|        |      | Shiraz-71T | 2263 | 0.975531 | 0         |  |  |
|        |      | Shiraz-3T  | 242  | 0        | -0.336434 |  |  |
|        |      | Shiraz-3T  | 242  | 0        | -0.336434 |  |  |
|        |      | Shiraz-4T  | 261  | 0        | -0.336249 |  |  |
|        |      | Shiraz-4T  | 261  | 0        | -0.336249 |  |  |
|        |      | Shiraz-16T | 295  | 0.591657 | 0         |  |  |
|        |      | Shiraz-16T | 295  | 0.591657 | 0         |  |  |
|        |      | Shiraz-36T | 433  | 0        | -0.803961 |  |  |
|        |      | Shiraz-36T | 433  | 0        | -0.803961 |  |  |
|        |      | Shiraz-42T | 480  | 0        | -0.232915 |  |  |
|        |      | Shiraz-42T | 480  | 0        | -0.232915 |  |  |
|        |      | Shiraz-44T | 899  | 0        | -1.09697  |  |  |
|        |      | Shiraz-44T | 899  | 0        | -1.09697  |  |  |
|        |      | Shiraz-49T | 1170 | 0        | -0.967436 |  |  |
|        |      | Shiraz-49T | 1170 | 0        | -0.967436 |  |  |
|        |      | Shiraz-9T  | 1370 | 0.690073 | 0         |  |  |
|        |      | Shiraz-9T  | 1370 | 0.690073 | 0         |  |  |
|        |      | Shiraz-18T | 1457 | 0.643204 | 0         |  |  |
|        |      | Shiraz-18T | 1457 | 0.643204 | 0         |  |  |
|        |      | Shiraz-22T | 1673 | 0.611783 | 0         |  |  |
|        |      | Shiraz-22T | 1673 | 0.611783 | 0         |  |  |
|        |      | Shiraz-22T | 1678 | 0.911625 | 0         |  |  |
|        |      | Shiraz-22T | 1678 | 0.911625 | 0         |  |  |
|        |      | Shiraz-25T | 1719 | 0.472955 | 0         |  |  |
|        |      | Shiraz-25T | 1719 | 0.472955 | 0         |  |  |
|        |      | Shiraz-28T | 1762 | 0.562311 | 0         |  |  |
|        |      | Shiraz-28T | 1762 | 0.562311 | 0         |  |  |
|        |      | Shiraz-29T | 1801 | 0.815343 | 0         |  |  |
|        |      | Shiraz-29T | 1801 | 0.815343 | 0         |  |  |
|        |      | Shiraz-32T | 1870 | 0.729766 | 0         |  |  |
|        |      | Shiraz-32T | 1870 | 0.729766 | 0         |  |  |
|        |      | Shiraz-35T | 1933 | 0.488535 | 0         |  |  |
|        |      | Shiraz-35T | 1933 | 0.488535 | 0         |  |  |
|        |      | Shiraz-58T | 2223 | 0.833364 | 0         |  |  |
|        |      | Shiraz-58T | 2223 | 0.833364 | 0         |  |  |
|        |      | Shiraz-58T | 2226 | 1.074663 | 0         |  |  |
|        |      | Shiraz-58T | 2226 | 1.074663 | 0         |  |  |
|        |      | Shiraz-71T | 2263 | 0.975531 | 0         |  |  |
|        |      | Shiraz-71T | 2263 | 0.975531 | 0         |  |  |
| MAGEB1 | chrX | Shiraz-3T  | 235  | 0        | -0.28401  |  |  |



|  |            |      |          |           |  |
|--|------------|------|----------|-----------|--|
|  | Shiraz-3T  | 235  | 0        | -0.28401  |  |
|  | Shiraz-3T  | 236  | 0        | -0.435445 |  |
|  | Shiraz-3T  | 236  | 0        | -0.435445 |  |
|  | Shiraz-4T  | 260  | 0        | -0.324128 |  |
|  | Shiraz-4T  | 260  | 0        | -0.324128 |  |
|  | Shiraz-16T | 294  | 0.655804 | 0         |  |
|  | Shiraz-16T | 294  | 0.655804 | 0         |  |
|  | Shiraz-36T | 431  | 0        | -0.78035  |  |
|  | Shiraz-36T | 431  | 0        | -0.78035  |  |
|  | Shiraz-44T | 891  | 0        | -0.954044 |  |
|  | Shiraz-44T | 891  | 0        | -0.954044 |  |
|  | Shiraz-44T | 893  | 0        | -1.364406 |  |
|  | Shiraz-44T | 893  | 0        | -1.364406 |  |
|  | Shiraz-44T | 894  | 0        | -0.776734 |  |
|  | Shiraz-44T | 894  | 0        | -0.776734 |  |
|  | Shiraz-47T | 1083 | 0        | -0.103285 |  |
|  | Shiraz-47T | 1083 | 0        | -0.103285 |  |
|  | Shiraz-49T | 1166 | 0        | -0.917235 |  |
|  | Shiraz-49T | 1166 | 0        | -0.917235 |  |
|  | Shiraz-49T | 1168 | 0        | -1.073859 |  |
|  | Shiraz-49T | 1168 | 0        | -1.073859 |  |
|  | Shiraz-9T  | 1368 | 0.199713 | 0         |  |
|  | Shiraz-9T  | 1368 | 0.199713 | 0         |  |
|  | Shiraz-18T | 1455 | 0        | -0.186773 |  |
|  | Shiraz-18T | 1455 | 0        | -0.186773 |  |
|  | Shiraz-22T | 1669 | 0.695915 | 0         |  |
|  | Shiraz-22T | 1669 | 0.695915 | 0         |  |
|  | Shiraz-22T | 1671 | 0.369309 | 0         |  |
|  | Shiraz-22T | 1671 | 0.369309 | 0         |  |
|  | Shiraz-25T | 1717 | 0.420447 | 0         |  |
|  | Shiraz-25T | 1717 | 0.420447 | 0         |  |
|  | Shiraz-25T | 1718 | 0        | -0.452703 |  |
|  | Shiraz-25T | 1718 | 0        | -0.452703 |  |
|  | Shiraz-28T | 1760 | 0.538181 | 0         |  |
|  | Shiraz-28T | 1760 | 0.538181 | 0         |  |
|  | Shiraz-28T | 1761 | 0        | -0.695601 |  |
|  | Shiraz-28T | 1761 | 0        | -0.695601 |  |
|  | Shiraz-29T | 1800 | 0.672527 | 0         |  |
|  | Shiraz-29T | 1800 | 0.672527 | 0         |  |
|  | Shiraz-32T | 1869 | 0.776805 | 0         |  |
|  | Shiraz-32T | 1869 | 0.776805 | 0         |  |
|  | Shiraz-35T | 1932 | 0.507141 | 0         |  |
|  | Shiraz-35T | 1932 | 0.507141 | 0         |  |
|  | Shiraz-40T | 2051 | 0.098506 | 0         |  |
|  | Shiraz-40T | 2051 | 0.098506 | 0         |  |
|  | Shiraz-58T | 2221 | 0.871948 | 0         |  |
|  | Shiraz-58T | 2221 | 0.871948 | 0         |  |

|  |  |            |      |          |           |  |  |
|--|--|------------|------|----------|-----------|--|--|
|  |  | Shiraz-58T | 2222 | 0.679664 | 0         |  |  |
|  |  | Shiraz-58T | 2222 | 0.679664 | 0         |  |  |
|  |  | Shiraz-71T | 2260 | 0.68394  | 0         |  |  |
|  |  | Shiraz-71T | 2260 | 0.68394  | 0         |  |  |
|  |  | Shiraz-71T | 2261 | 0.508399 | 0         |  |  |
|  |  | Shiraz-71T | 2261 | 0.508399 | 0         |  |  |
|  |  | Shiraz-3T  | 235  | 0        | -0.28401  |  |  |
|  |  | Shiraz-3T  | 235  | 0        | -0.28401  |  |  |
|  |  | Shiraz-3T  | 236  | 0        | -0.435445 |  |  |
|  |  | Shiraz-3T  | 236  | 0        | -0.435445 |  |  |
|  |  | Shiraz-4T  | 260  | 0        | -0.324128 |  |  |
|  |  | Shiraz-4T  | 260  | 0        | -0.324128 |  |  |
|  |  | Shiraz-16T | 294  | 0.655804 | 0         |  |  |
|  |  | Shiraz-16T | 294  | 0.655804 | 0         |  |  |
|  |  | Shiraz-36T | 431  | 0        | -0.78035  |  |  |
|  |  | Shiraz-36T | 431  | 0        | -0.78035  |  |  |
|  |  | Shiraz-44T | 891  | 0        | -0.954044 |  |  |
|  |  | Shiraz-44T | 891  | 0        | -0.954044 |  |  |
|  |  | Shiraz-44T | 893  | 0        | -1.364406 |  |  |
|  |  | Shiraz-44T | 893  | 0        | -1.364406 |  |  |
|  |  | Shiraz-44T | 894  | 0        | -0.776734 |  |  |
|  |  | Shiraz-44T | 894  | 0        | -0.776734 |  |  |
|  |  | Shiraz-47T | 1083 | 0        | -0.103285 |  |  |
|  |  | Shiraz-47T | 1083 | 0        | -0.103285 |  |  |
|  |  | Shiraz-49T | 1166 | 0        | -0.917235 |  |  |
|  |  | Shiraz-49T | 1166 | 0        | -0.917235 |  |  |
|  |  | Shiraz-49T | 1168 | 0        | -1.073859 |  |  |
|  |  | Shiraz-49T | 1168 | 0        | -1.073859 |  |  |
|  |  | Shiraz-9T  | 1368 | 0.199713 | 0         |  |  |
|  |  | Shiraz-9T  | 1368 | 0.199713 | 0         |  |  |
|  |  | Shiraz-18T | 1455 | 0        | -0.186773 |  |  |
|  |  | Shiraz-18T | 1455 | 0        | -0.186773 |  |  |
|  |  | Shiraz-22T | 1669 | 0.695915 | 0         |  |  |
|  |  | Shiraz-22T | 1669 | 0.695915 | 0         |  |  |
|  |  | Shiraz-22T | 1671 | 0.369309 | 0         |  |  |
|  |  | Shiraz-22T | 1671 | 0.369309 | 0         |  |  |
|  |  | Shiraz-25T | 1717 | 0.420447 | 0         |  |  |
|  |  | Shiraz-25T | 1717 | 0.420447 | 0         |  |  |
|  |  | Shiraz-25T | 1718 | 0        | -0.452703 |  |  |
|  |  | Shiraz-25T | 1718 | 0        | -0.452703 |  |  |
|  |  | Shiraz-28T | 1760 | 0.538181 | 0         |  |  |
|  |  | Shiraz-28T | 1760 | 0.538181 | 0         |  |  |
|  |  | Shiraz-28T | 1761 | 0        | -0.695601 |  |  |
|  |  | Shiraz-28T | 1761 | 0        | -0.695601 |  |  |
|  |  | Shiraz-29T | 1800 | 0.672527 | 0         |  |  |
|  |  | Shiraz-29T | 1800 | 0.672527 | 0         |  |  |
|  |  | Shiraz-32T | 1869 | 0.776805 | 0         |  |  |

|  |  |            |      |          |           |  |  |
|--|--|------------|------|----------|-----------|--|--|
|  |  | Shiraz-32T | 1869 | 0.776805 | 0         |  |  |
|  |  | Shiraz-35T | 1932 | 0.507141 | 0         |  |  |
|  |  | Shiraz-35T | 1932 | 0.507141 | 0         |  |  |
|  |  | Shiraz-40T | 2051 | 0.098506 | 0         |  |  |
|  |  | Shiraz-40T | 2051 | 0.098506 | 0         |  |  |
|  |  | Shiraz-58T | 2221 | 0.871948 | 0         |  |  |
|  |  | Shiraz-58T | 2221 | 0.871948 | 0         |  |  |
|  |  | Shiraz-58T | 2222 | 0.679664 | 0         |  |  |
|  |  | Shiraz-58T | 2222 | 0.679664 | 0         |  |  |
|  |  | Shiraz-71T | 2260 | 0.68394  | 0         |  |  |
|  |  | Shiraz-71T | 2260 | 0.68394  | 0         |  |  |
|  |  | Shiraz-71T | 2261 | 0.508399 | 0         |  |  |
|  |  | Shiraz-71T | 2261 | 0.508399 | 0         |  |  |
|  |  | Shiraz-3T  | 235  | 0        | -0.28401  |  |  |
|  |  | Shiraz-3T  | 235  | 0        | -0.28401  |  |  |
|  |  | Shiraz-3T  | 236  | 0        | -0.435445 |  |  |
|  |  | Shiraz-3T  | 236  | 0        | -0.435445 |  |  |
|  |  | Shiraz-4T  | 260  | 0        | -0.324128 |  |  |
|  |  | Shiraz-4T  | 260  | 0        | -0.324128 |  |  |
|  |  | Shiraz-16T | 294  | 0.655804 | 0         |  |  |
|  |  | Shiraz-16T | 294  | 0.655804 | 0         |  |  |
|  |  | Shiraz-36T | 431  | 0        | -0.78035  |  |  |
|  |  | Shiraz-36T | 431  | 0        | -0.78035  |  |  |
|  |  | Shiraz-44T | 891  | 0        | -0.954044 |  |  |
|  |  | Shiraz-44T | 891  | 0        | -0.954044 |  |  |
|  |  | Shiraz-44T | 893  | 0        | -1.364406 |  |  |
|  |  | Shiraz-44T | 893  | 0        | -1.364406 |  |  |
|  |  | Shiraz-44T | 894  | 0        | -0.776734 |  |  |
|  |  | Shiraz-44T | 894  | 0        | -0.776734 |  |  |
|  |  | Shiraz-47T | 1083 | 0        | -0.103285 |  |  |
|  |  | Shiraz-47T | 1083 | 0        | -0.103285 |  |  |
|  |  | Shiraz-49T | 1166 | 0        | -0.917235 |  |  |
|  |  | Shiraz-49T | 1166 | 0        | -0.917235 |  |  |
|  |  | Shiraz-49T | 1168 | 0        | -1.073859 |  |  |
|  |  | Shiraz-49T | 1168 | 0        | -1.073859 |  |  |
|  |  | Shiraz-9T  | 1368 | 0.199713 | 0         |  |  |
|  |  | Shiraz-9T  | 1368 | 0.199713 | 0         |  |  |
|  |  | Shiraz-18T | 1455 | 0        | -0.186773 |  |  |
|  |  | Shiraz-18T | 1455 | 0        | -0.186773 |  |  |
|  |  | Shiraz-22T | 1669 | 0.695915 | 0         |  |  |
|  |  | Shiraz-22T | 1669 | 0.695915 | 0         |  |  |
|  |  | Shiraz-22T | 1671 | 0.369309 | 0         |  |  |
|  |  | Shiraz-22T | 1671 | 0.369309 | 0         |  |  |
|  |  | Shiraz-25T | 1717 | 0.420447 | 0         |  |  |
|  |  | Shiraz-25T | 1717 | 0.420447 | 0         |  |  |
|  |  | Shiraz-25T | 1718 | 0        | -0.452703 |  |  |
|  |  | Shiraz-25T | 1718 | 0        | -0.452703 |  |  |

|         |      |            |      |          |           |  |
|---------|------|------------|------|----------|-----------|--|
|         |      | Shiraz-28T | 1760 | 0.538181 | 0         |  |
|         |      | Shiraz-28T | 1760 | 0.538181 | 0         |  |
|         |      | Shiraz-28T | 1761 | 0        | -0.695601 |  |
|         |      | Shiraz-28T | 1761 | 0        | -0.695601 |  |
|         |      | Shiraz-29T | 1800 | 0.672527 | 0         |  |
|         |      | Shiraz-29T | 1800 | 0.672527 | 0         |  |
|         |      | Shiraz-32T | 1869 | 0.776805 | 0         |  |
|         |      | Shiraz-32T | 1869 | 0.776805 | 0         |  |
|         |      | Shiraz-35T | 1932 | 0.507141 | 0         |  |
|         |      | Shiraz-35T | 1932 | 0.507141 | 0         |  |
|         |      | Shiraz-40T | 2051 | 0.098506 | 0         |  |
|         |      | Shiraz-40T | 2051 | 0.098506 | 0         |  |
|         |      | Shiraz-58T | 2221 | 0.871948 | 0         |  |
|         |      | Shiraz-58T | 2221 | 0.871948 | 0         |  |
|         |      | Shiraz-58T | 2222 | 0.679664 | 0         |  |
|         |      | Shiraz-58T | 2222 | 0.679664 | 0         |  |
|         |      | Shiraz-71T | 2260 | 0.68394  | 0         |  |
|         |      | Shiraz-71T | 2260 | 0.68394  | 0         |  |
|         |      | Shiraz-71T | 2261 | 0.508399 | 0         |  |
|         |      | Shiraz-71T | 2261 | 0.508399 | 0         |  |
| MAGEB10 | chrX | Shiraz-3T  | 235  | 0        | -0.28401  |  |
|         |      | Shiraz-3T  | 236  | 0        | -0.435445 |  |
|         |      | Shiraz-4T  | 260  | 0        | -0.324128 |  |
|         |      | Shiraz-16T | 294  | 0.655804 | 0         |  |
|         |      | Shiraz-36T | 431  | 0        | -0.78035  |  |
|         |      | Shiraz-44T | 891  | 0        | -0.954044 |  |
|         |      | Shiraz-44T | 893  | 0        | -1.364406 |  |
|         |      | Shiraz-47T | 1083 | 0        | -0.103285 |  |
|         |      | Shiraz-49T | 1166 | 0        | -0.917235 |  |
|         |      | Shiraz-49T | 1168 | 0        | -1.073859 |  |
|         |      | Shiraz-9T  | 1368 | 0.199713 | 0         |  |
|         |      | Shiraz-18T | 1455 | 0        | -0.186773 |  |
|         |      | Shiraz-22T | 1669 | 0.695915 | 0         |  |
|         |      | Shiraz-22T | 1671 | 0.369309 | 0         |  |
|         |      | Shiraz-25T | 1717 | 0.420447 | 0         |  |
|         |      | Shiraz-28T | 1760 | 0.538181 | 0         |  |
|         |      | Shiraz-29T | 1800 | 0.672527 | 0         |  |
|         |      | Shiraz-32T | 1869 | 0.776805 | 0         |  |
|         |      | Shiraz-35T | 1932 | 0.507141 | 0         |  |
|         |      | Shiraz-40T | 2051 | 0.098506 | 0         |  |
|         |      | Shiraz-58T | 2221 | 0.871948 | 0         |  |
|         |      | Shiraz-58T | 2222 | 0.679664 | 0         |  |
|         |      | Shiraz-71T | 2260 | 0.68394  | 0         |  |
|         |      | Shiraz-71T | 2261 | 0.508399 | 0         |  |
|         |      | Shiraz-3T  | 235  | 0        | -0.28401  |  |
|         |      | Shiraz-3T  | 236  | 0        | -0.435445 |  |
|         |      | Shiraz-4T  | 260  | 0        | -0.324128 |  |

|         |      |            |      |          |           |  |  |
|---------|------|------------|------|----------|-----------|--|--|
|         |      | Shiraz-16T | 294  | 0.655804 | 0         |  |  |
|         |      | Shiraz-36T | 431  | 0        | -0.78035  |  |  |
|         |      | Shiraz-44T | 891  | 0        | -0.954044 |  |  |
|         |      | Shiraz-44T | 893  | 0        | -1.364406 |  |  |
|         |      | Shiraz-47T | 1083 | 0        | -0.103285 |  |  |
|         |      | Shiraz-49T | 1166 | 0        | -0.917235 |  |  |
|         |      | Shiraz-49T | 1168 | 0        | -1.073859 |  |  |
|         |      | Shiraz-9T  | 1368 | 0.199713 | 0         |  |  |
|         |      | Shiraz-18T | 1455 | 0        | -0.186773 |  |  |
|         |      | Shiraz-22T | 1669 | 0.695915 | 0         |  |  |
|         |      | Shiraz-22T | 1671 | 0.369309 | 0         |  |  |
|         |      | Shiraz-25T | 1717 | 0.420447 | 0         |  |  |
|         |      | Shiraz-28T | 1760 | 0.538181 | 0         |  |  |
|         |      | Shiraz-29T | 1800 | 0.672527 | 0         |  |  |
|         |      | Shiraz-32T | 1869 | 0.776805 | 0         |  |  |
|         |      | Shiraz-35T | 1932 | 0.507141 | 0         |  |  |
|         |      | Shiraz-40T | 2051 | 0.098506 | 0         |  |  |
|         |      | Shiraz-58T | 2221 | 0.871948 | 0         |  |  |
|         |      | Shiraz-58T | 2222 | 0.679664 | 0         |  |  |
|         |      | Shiraz-71T | 2260 | 0.68394  | 0         |  |  |
|         |      | Shiraz-71T | 2261 | 0.508399 | 0         |  |  |
|         |      | Shiraz-3T  | 235  | 0        | -0.28401  |  |  |
|         |      | Shiraz-3T  | 236  | 0        | -0.435445 |  |  |
|         |      | Shiraz-4T  | 260  | 0        | -0.324128 |  |  |
|         |      | Shiraz-16T | 294  | 0.655804 | 0         |  |  |
|         |      | Shiraz-36T | 431  | 0        | -0.78035  |  |  |
|         |      | Shiraz-44T | 891  | 0        | -0.954044 |  |  |
|         |      | Shiraz-44T | 893  | 0        | -1.364406 |  |  |
|         |      | Shiraz-47T | 1083 | 0        | -0.103285 |  |  |
|         |      | Shiraz-49T | 1166 | 0        | -0.917235 |  |  |
|         |      | Shiraz-49T | 1168 | 0        | -1.073859 |  |  |
|         |      | Shiraz-9T  | 1368 | 0.199713 | 0         |  |  |
|         |      | Shiraz-18T | 1455 | 0        | -0.186773 |  |  |
|         |      | Shiraz-22T | 1669 | 0.695915 | 0         |  |  |
|         |      | Shiraz-22T | 1671 | 0.369309 | 0         |  |  |
|         |      | Shiraz-25T | 1717 | 0.420447 | 0         |  |  |
|         |      | Shiraz-28T | 1760 | 0.538181 | 0         |  |  |
|         |      | Shiraz-29T | 1800 | 0.672527 | 0         |  |  |
|         |      | Shiraz-32T | 1869 | 0.776805 | 0         |  |  |
|         |      | Shiraz-35T | 1932 | 0.507141 | 0         |  |  |
|         |      | Shiraz-40T | 2051 | 0.098506 | 0         |  |  |
|         |      | Shiraz-58T | 2221 | 0.871948 | 0         |  |  |
|         |      | Shiraz-58T | 2222 | 0.679664 | 0         |  |  |
|         |      | Shiraz-71T | 2260 | 0.68394  | 0         |  |  |
|         |      | Shiraz-71T | 2261 | 0.508399 | 0         |  |  |
| MAGEB16 | chrX | Shiraz-3T  | 235  | 0        | -0.28401  |  |  |
|         |      | Shiraz-3T  | 236  | 0        | -0.435445 |  |  |

|  |            |      |          |           |  |
|--|------------|------|----------|-----------|--|
|  | Shiraz-4T  | 260  | 0        | -0.324128 |  |
|  | Shiraz-16T | 294  | 0.655804 | 0         |  |
|  | Shiraz-36T | 431  | 0        | -0.78035  |  |
|  | Shiraz-44T | 891  | 0        | -0.954044 |  |
|  | Shiraz-44T | 893  | 0        | -1.364406 |  |
|  | Shiraz-47T | 1083 | 0        | -0.103285 |  |
|  | Shiraz-49T | 1166 | 0        | -0.917235 |  |
|  | Shiraz-49T | 1168 | 0        | -1.073859 |  |
|  | Shiraz-9T  | 1368 | 0.199713 | 0         |  |
|  | Shiraz-18T | 1455 | 0        | -0.186773 |  |
|  | Shiraz-22T | 1669 | 0.695915 | 0         |  |
|  | Shiraz-22T | 1671 | 0.369309 | 0         |  |
|  | Shiraz-25T | 1717 | 0.420447 | 0         |  |
|  | Shiraz-28T | 1760 | 0.538181 | 0         |  |
|  | Shiraz-29T | 1800 | 0.672527 | 0         |  |
|  | Shiraz-32T | 1869 | 0.776805 | 0         |  |
|  | Shiraz-35T | 1932 | 0.507141 | 0         |  |
|  | Shiraz-40T | 2051 | 0.098506 | 0         |  |
|  | Shiraz-58T | 2221 | 0.871948 | 0         |  |
|  | Shiraz-58T | 2222 | 0.679664 | 0         |  |
|  | Shiraz-71T | 2260 | 0.68394  | 0         |  |
|  | Shiraz-71T | 2261 | 0.508399 | 0         |  |
|  | Shiraz-3T  | 235  | 0        | -0.28401  |  |
|  | Shiraz-3T  | 236  | 0        | -0.435445 |  |
|  | Shiraz-4T  | 260  | 0        | -0.324128 |  |
|  | Shiraz-16T | 294  | 0.655804 | 0         |  |
|  | Shiraz-36T | 431  | 0        | -0.78035  |  |
|  | Shiraz-44T | 891  | 0        | -0.954044 |  |
|  | Shiraz-44T | 893  | 0        | -1.364406 |  |
|  | Shiraz-47T | 1083 | 0        | -0.103285 |  |
|  | Shiraz-49T | 1166 | 0        | -0.917235 |  |
|  | Shiraz-49T | 1168 | 0        | -1.073859 |  |
|  | Shiraz-9T  | 1368 | 0.199713 | 0         |  |
|  | Shiraz-18T | 1455 | 0        | -0.186773 |  |
|  | Shiraz-22T | 1669 | 0.695915 | 0         |  |
|  | Shiraz-22T | 1671 | 0.369309 | 0         |  |
|  | Shiraz-25T | 1717 | 0.420447 | 0         |  |
|  | Shiraz-28T | 1760 | 0.538181 | 0         |  |
|  | Shiraz-29T | 1800 | 0.672527 | 0         |  |
|  | Shiraz-32T | 1869 | 0.776805 | 0         |  |
|  | Shiraz-35T | 1932 | 0.507141 | 0         |  |
|  | Shiraz-40T | 2051 | 0.098506 | 0         |  |
|  | Shiraz-58T | 2221 | 0.871948 | 0         |  |
|  | Shiraz-58T | 2222 | 0.679664 | 0         |  |
|  | Shiraz-71T | 2260 | 0.68394  | 0         |  |
|  | Shiraz-71T | 2261 | 0.508399 | 0         |  |
|  | Shiraz-3T  | 235  | 0        | -0.28401  |  |

|         |      |            |      |          |           |  |  |
|---------|------|------------|------|----------|-----------|--|--|
|         |      | Shiraz-3T  | 236  | 0        | -0.435445 |  |  |
|         |      | Shiraz-4T  | 260  | 0        | -0.324128 |  |  |
|         |      | Shiraz-16T | 294  | 0.655804 | 0         |  |  |
|         |      | Shiraz-36T | 431  | 0        | -0.78035  |  |  |
|         |      | Shiraz-44T | 891  | 0        | -0.954044 |  |  |
|         |      | Shiraz-44T | 893  | 0        | -1.364406 |  |  |
|         |      | Shiraz-47T | 1083 | 0        | -0.103285 |  |  |
|         |      | Shiraz-49T | 1166 | 0        | -0.917235 |  |  |
|         |      | Shiraz-49T | 1168 | 0        | -1.073859 |  |  |
|         |      | Shiraz-9T  | 1368 | 0.199713 | 0         |  |  |
|         |      | Shiraz-18T | 1455 | 0        | -0.186773 |  |  |
|         |      | Shiraz-22T | 1669 | 0.695915 | 0         |  |  |
|         |      | Shiraz-22T | 1671 | 0.369309 | 0         |  |  |
|         |      | Shiraz-25T | 1717 | 0.420447 | 0         |  |  |
|         |      | Shiraz-28T | 1760 | 0.538181 | 0         |  |  |
|         |      | Shiraz-29T | 1800 | 0.672527 | 0         |  |  |
|         |      | Shiraz-32T | 1869 | 0.776805 | 0         |  |  |
|         |      | Shiraz-35T | 1932 | 0.507141 | 0         |  |  |
|         |      | Shiraz-40T | 2051 | 0.098506 | 0         |  |  |
|         |      | Shiraz-58T | 2221 | 0.871948 | 0         |  |  |
|         |      | Shiraz-58T | 2222 | 0.679664 | 0         |  |  |
|         |      | Shiraz-71T | 2260 | 0.68394  | 0         |  |  |
|         |      | Shiraz-71T | 2261 | 0.508399 | 0         |  |  |
| MAGEB18 | chrX | Shiraz-3T  | 235  | 0        | -0.28401  |  |  |
|         |      | Shiraz-3T  | 236  | 0        | -0.435445 |  |  |
|         |      | Shiraz-4T  | 260  | 0        | -0.324128 |  |  |
|         |      | Shiraz-16T | 294  | 0.655804 | 0         |  |  |
|         |      | Shiraz-36T | 431  | 0        | -0.78035  |  |  |
|         |      | Shiraz-44T | 891  | 0        | -0.954044 |  |  |
|         |      | Shiraz-44T | 893  | 0        | -1.364406 |  |  |
|         |      | Shiraz-47T | 1083 | 0        | -0.103285 |  |  |
|         |      | Shiraz-49T | 1166 | 0        | -0.917235 |  |  |
|         |      | Shiraz-49T | 1168 | 0        | -1.073859 |  |  |
|         |      | Shiraz-9T  | 1368 | 0.199713 | 0         |  |  |
|         |      | Shiraz-18T | 1455 | 0        | -0.186773 |  |  |
|         |      | Shiraz-22T | 1669 | 0.695915 | 0         |  |  |
|         |      | Shiraz-22T | 1671 | 0.369309 | 0         |  |  |
|         |      | Shiraz-25T | 1717 | 0.420447 | 0         |  |  |
|         |      | Shiraz-28T | 1760 | 0.538181 | 0         |  |  |
|         |      | Shiraz-29T | 1800 | 0.672527 | 0         |  |  |
|         |      | Shiraz-32T | 1869 | 0.776805 | 0         |  |  |
|         |      | Shiraz-35T | 1932 | 0.507141 | 0         |  |  |
|         |      | Shiraz-40T | 2051 | 0.098506 | 0         |  |  |
|         |      | Shiraz-58T | 2221 | 0.871948 | 0         |  |  |
|         |      | Shiraz-58T | 2222 | 0.679664 | 0         |  |  |
|         |      | Shiraz-71T | 2260 | 0.68394  | 0         |  |  |
|         |      | Shiraz-71T | 2261 | 0.508399 | 0         |  |  |

|  |            |      |          |           |  |
|--|------------|------|----------|-----------|--|
|  | Shiraz-3T  | 235  | 0        | -0.28401  |  |
|  | Shiraz-3T  | 236  | 0        | -0.435445 |  |
|  | Shiraz-4T  | 260  | 0        | -0.324128 |  |
|  | Shiraz-16T | 294  | 0.655804 | 0         |  |
|  | Shiraz-36T | 431  | 0        | -0.78035  |  |
|  | Shiraz-44T | 891  | 0        | -0.954044 |  |
|  | Shiraz-44T | 893  | 0        | -1.364406 |  |
|  | Shiraz-47T | 1083 | 0        | -0.103285 |  |
|  | Shiraz-49T | 1166 | 0        | -0.917235 |  |
|  | Shiraz-49T | 1168 | 0        | -1.073859 |  |
|  | Shiraz-9T  | 1368 | 0.199713 | 0         |  |
|  | Shiraz-18T | 1455 | 0        | -0.186773 |  |
|  | Shiraz-22T | 1669 | 0.695915 | 0         |  |
|  | Shiraz-22T | 1671 | 0.369309 | 0         |  |
|  | Shiraz-25T | 1717 | 0.420447 | 0         |  |
|  | Shiraz-28T | 1760 | 0.538181 | 0         |  |
|  | Shiraz-29T | 1800 | 0.672527 | 0         |  |
|  | Shiraz-32T | 1869 | 0.776805 | 0         |  |
|  | Shiraz-35T | 1932 | 0.507141 | 0         |  |
|  | Shiraz-40T | 2051 | 0.098506 | 0         |  |
|  | Shiraz-58T | 2221 | 0.871948 | 0         |  |
|  | Shiraz-58T | 2222 | 0.679664 | 0         |  |
|  | Shiraz-71T | 2260 | 0.68394  | 0         |  |
|  | Shiraz-71T | 2261 | 0.508399 | 0         |  |
|  | Shiraz-3T  | 235  | 0        | -0.28401  |  |
|  | Shiraz-3T  | 236  | 0        | -0.435445 |  |
|  | Shiraz-4T  | 260  | 0        | -0.324128 |  |
|  | Shiraz-16T | 294  | 0.655804 | 0         |  |
|  | Shiraz-36T | 431  | 0        | -0.78035  |  |
|  | Shiraz-44T | 891  | 0        | -0.954044 |  |
|  | Shiraz-44T | 893  | 0        | -1.364406 |  |
|  | Shiraz-47T | 1083 | 0        | -0.103285 |  |
|  | Shiraz-49T | 1166 | 0        | -0.917235 |  |
|  | Shiraz-49T | 1168 | 0        | -1.073859 |  |
|  | Shiraz-9T  | 1368 | 0.199713 | 0         |  |
|  | Shiraz-18T | 1455 | 0        | -0.186773 |  |
|  | Shiraz-22T | 1669 | 0.695915 | 0         |  |
|  | Shiraz-22T | 1671 | 0.369309 | 0         |  |
|  | Shiraz-25T | 1717 | 0.420447 | 0         |  |
|  | Shiraz-28T | 1760 | 0.538181 | 0         |  |
|  | Shiraz-29T | 1800 | 0.672527 | 0         |  |
|  | Shiraz-32T | 1869 | 0.776805 | 0         |  |
|  | Shiraz-35T | 1932 | 0.507141 | 0         |  |
|  | Shiraz-40T | 2051 | 0.098506 | 0         |  |
|  | Shiraz-58T | 2221 | 0.871948 | 0         |  |
|  | Shiraz-58T | 2222 | 0.679664 | 0         |  |
|  | Shiraz-71T | 2260 | 0.68394  | 0         |  |



|        |      |            |      |          |           |  |  |
|--------|------|------------|------|----------|-----------|--|--|
|        |      | Shiraz-71T | 2261 | 0.508399 | 0         |  |  |
| MAGEB2 | chrX | Shiraz-3T  | 235  | 0        | -0.28401  |  |  |
|        |      | Shiraz-3T  | 236  | 0        | -0.435445 |  |  |
|        |      | Shiraz-4T  | 260  | 0        | -0.324128 |  |  |
|        |      | Shiraz-16T | 294  | 0.655804 | 0         |  |  |
|        |      | Shiraz-36T | 431  | 0        | -0.78035  |  |  |
|        |      | Shiraz-44T | 891  | 0        | -0.954044 |  |  |
|        |      | Shiraz-44T | 893  | 0        | -1.364406 |  |  |
|        |      | Shiraz-44T | 894  | 0        | -0.776734 |  |  |
|        |      | Shiraz-47T | 1083 | 0        | -0.103285 |  |  |
|        |      | Shiraz-49T | 1166 | 0        | -0.917235 |  |  |
|        |      | Shiraz-49T | 1168 | 0        | -1.073859 |  |  |
|        |      | Shiraz-9T  | 1368 | 0.199713 | 0         |  |  |
|        |      | Shiraz-18T | 1455 | 0        | -0.186773 |  |  |
|        |      | Shiraz-22T | 1669 | 0.695915 | 0         |  |  |
|        |      | Shiraz-22T | 1671 | 0.369309 | 0         |  |  |
|        |      | Shiraz-25T | 1717 | 0.420447 | 0         |  |  |
|        |      | Shiraz-25T | 1718 | 0        | -0.452703 |  |  |
|        |      | Shiraz-28T | 1760 | 0.538181 | 0         |  |  |
|        |      | Shiraz-28T | 1761 | 0        | -0.695601 |  |  |
|        |      | Shiraz-29T | 1800 | 0.672527 | 0         |  |  |
|        |      | Shiraz-32T | 1869 | 0.776805 | 0         |  |  |
|        |      | Shiraz-35T | 1932 | 0.507141 | 0         |  |  |
|        |      | Shiraz-40T | 2051 | 0.098506 | 0         |  |  |
|        |      | Shiraz-58T | 2221 | 0.871948 | 0         |  |  |
|        |      | Shiraz-58T | 2222 | 0.679664 | 0         |  |  |
|        |      | Shiraz-71T | 2260 | 0.68394  | 0         |  |  |
|        |      | Shiraz-71T | 2261 | 0.508399 | 0         |  |  |
|        |      | Shiraz-3T  | 235  | 0        | -0.28401  |  |  |
|        |      | Shiraz-3T  | 236  | 0        | -0.435445 |  |  |
|        |      | Shiraz-4T  | 260  | 0        | -0.324128 |  |  |
|        |      | Shiraz-16T | 294  | 0.655804 | 0         |  |  |
|        |      | Shiraz-36T | 431  | 0        | -0.78035  |  |  |
|        |      | Shiraz-44T | 891  | 0        | -0.954044 |  |  |
|        |      | Shiraz-44T | 893  | 0        | -1.364406 |  |  |
|        |      | Shiraz-44T | 894  | 0        | -0.776734 |  |  |
|        |      | Shiraz-47T | 1083 | 0        | -0.103285 |  |  |
|        |      | Shiraz-49T | 1166 | 0        | -0.917235 |  |  |
|        |      | Shiraz-49T | 1168 | 0        | -1.073859 |  |  |
|        |      | Shiraz-9T  | 1368 | 0.199713 | 0         |  |  |
|        |      | Shiraz-18T | 1455 | 0        | -0.186773 |  |  |
|        |      | Shiraz-22T | 1669 | 0.695915 | 0         |  |  |
|        |      | Shiraz-22T | 1671 | 0.369309 | 0         |  |  |
|        |      | Shiraz-25T | 1717 | 0.420447 | 0         |  |  |
|        |      | Shiraz-25T | 1718 | 0        | -0.452703 |  |  |
|        |      | Shiraz-28T | 1760 | 0.538181 | 0         |  |  |
|        |      | Shiraz-28T | 1761 | 0        | -0.695601 |  |  |

|        |      |            |      |          |           |  |
|--------|------|------------|------|----------|-----------|--|
|        |      | Shiraz-29T | 1800 | 0.672527 | 0         |  |
|        |      | Shiraz-32T | 1869 | 0.776805 | 0         |  |
|        |      | Shiraz-35T | 1932 | 0.507141 | 0         |  |
|        |      | Shiraz-40T | 2051 | 0.098506 | 0         |  |
|        |      | Shiraz-58T | 2221 | 0.871948 | 0         |  |
|        |      | Shiraz-58T | 2222 | 0.679664 | 0         |  |
|        |      | Shiraz-71T | 2260 | 0.68394  | 0         |  |
|        |      | Shiraz-71T | 2261 | 0.508399 | 0         |  |
|        |      | Shiraz-3T  | 235  | 0        | -0.28401  |  |
|        |      | Shiraz-3T  | 236  | 0        | -0.435445 |  |
|        |      | Shiraz-4T  | 260  | 0        | -0.324128 |  |
|        |      | Shiraz-16T | 294  | 0.655804 | 0         |  |
|        |      | Shiraz-36T | 431  | 0        | -0.78035  |  |
|        |      | Shiraz-44T | 891  | 0        | -0.954044 |  |
|        |      | Shiraz-44T | 893  | 0        | -1.364406 |  |
|        |      | Shiraz-44T | 894  | 0        | -0.776734 |  |
|        |      | Shiraz-47T | 1083 | 0        | -0.103285 |  |
|        |      | Shiraz-49T | 1166 | 0        | -0.917235 |  |
|        |      | Shiraz-49T | 1168 | 0        | -1.073859 |  |
|        |      | Shiraz-9T  | 1368 | 0.199713 | 0         |  |
|        |      | Shiraz-18T | 1455 | 0        | -0.186773 |  |
|        |      | Shiraz-22T | 1669 | 0.695915 | 0         |  |
|        |      | Shiraz-22T | 1671 | 0.369309 | 0         |  |
|        |      | Shiraz-25T | 1717 | 0.420447 | 0         |  |
|        |      | Shiraz-25T | 1718 | 0        | -0.452703 |  |
|        |      | Shiraz-28T | 1760 | 0.538181 | 0         |  |
|        |      | Shiraz-28T | 1761 | 0        | -0.695601 |  |
|        |      | Shiraz-29T | 1800 | 0.672527 | 0         |  |
|        |      | Shiraz-32T | 1869 | 0.776805 | 0         |  |
|        |      | Shiraz-35T | 1932 | 0.507141 | 0         |  |
|        |      | Shiraz-40T | 2051 | 0.098506 | 0         |  |
|        |      | Shiraz-58T | 2221 | 0.871948 | 0         |  |
|        |      | Shiraz-58T | 2222 | 0.679664 | 0         |  |
|        |      | Shiraz-71T | 2260 | 0.68394  | 0         |  |
|        |      | Shiraz-71T | 2261 | 0.508399 | 0         |  |
| MAGEB3 | chrX | Shiraz-3T  | 235  | 0        | -0.28401  |  |
|        |      | Shiraz-3T  | 236  | 0        | -0.435445 |  |
|        |      | Shiraz-4T  | 260  | 0        | -0.324128 |  |
|        |      | Shiraz-16T | 294  | 0.655804 | 0         |  |
|        |      | Shiraz-36T | 431  | 0        | -0.78035  |  |
|        |      | Shiraz-44T | 891  | 0        | -0.954044 |  |
|        |      | Shiraz-44T | 893  | 0        | -1.364406 |  |
|        |      | Shiraz-44T | 894  | 0        | -0.776734 |  |
|        |      | Shiraz-47T | 1083 | 0        | -0.103285 |  |
|        |      | Shiraz-49T | 1166 | 0        | -0.917235 |  |
|        |      | Shiraz-49T | 1168 | 0        | -1.073859 |  |
|        |      | Shiraz-9T  | 1368 | 0.199713 | 0         |  |

|  |            |      |          |           |  |
|--|------------|------|----------|-----------|--|
|  | Shiraz-18T | 1455 | 0        | -0.186773 |  |
|  | Shiraz-22T | 1669 | 0.695915 | 0         |  |
|  | Shiraz-22T | 1671 | 0.369309 | 0         |  |
|  | Shiraz-25T | 1717 | 0.420447 | 0         |  |
|  | Shiraz-25T | 1718 | 0        | -0.452703 |  |
|  | Shiraz-28T | 1760 | 0.538181 | 0         |  |
|  | Shiraz-28T | 1761 | 0        | -0.695601 |  |
|  | Shiraz-29T | 1800 | 0.672527 | 0         |  |
|  | Shiraz-32T | 1869 | 0.776805 | 0         |  |
|  | Shiraz-35T | 1932 | 0.507141 | 0         |  |
|  | Shiraz-40T | 2051 | 0.098506 | 0         |  |
|  | Shiraz-58T | 2221 | 0.871948 | 0         |  |
|  | Shiraz-58T | 2222 | 0.679664 | 0         |  |
|  | Shiraz-71T | 2260 | 0.68394  | 0         |  |
|  | Shiraz-71T | 2261 | 0.508399 | 0         |  |
|  | Shiraz-3T  | 235  | 0        | -0.28401  |  |
|  | Shiraz-3T  | 236  | 0        | -0.435445 |  |
|  | Shiraz-4T  | 260  | 0        | -0.324128 |  |
|  | Shiraz-16T | 294  | 0.655804 | 0         |  |
|  | Shiraz-36T | 431  | 0        | -0.78035  |  |
|  | Shiraz-44T | 891  | 0        | -0.954044 |  |
|  | Shiraz-44T | 893  | 0        | -1.364406 |  |
|  | Shiraz-44T | 894  | 0        | -0.776734 |  |
|  | Shiraz-47T | 1083 | 0        | -0.103285 |  |
|  | Shiraz-49T | 1166 | 0        | -0.917235 |  |
|  | Shiraz-49T | 1168 | 0        | -1.073859 |  |
|  | Shiraz-9T  | 1368 | 0.199713 | 0         |  |
|  | Shiraz-18T | 1455 | 0        | -0.186773 |  |
|  | Shiraz-22T | 1669 | 0.695915 | 0         |  |
|  | Shiraz-22T | 1671 | 0.369309 | 0         |  |
|  | Shiraz-25T | 1717 | 0.420447 | 0         |  |
|  | Shiraz-25T | 1718 | 0        | -0.452703 |  |
|  | Shiraz-28T | 1760 | 0.538181 | 0         |  |
|  | Shiraz-28T | 1761 | 0        | -0.695601 |  |
|  | Shiraz-29T | 1800 | 0.672527 | 0         |  |
|  | Shiraz-32T | 1869 | 0.776805 | 0         |  |
|  | Shiraz-35T | 1932 | 0.507141 | 0         |  |
|  | Shiraz-40T | 2051 | 0.098506 | 0         |  |
|  | Shiraz-58T | 2221 | 0.871948 | 0         |  |
|  | Shiraz-58T | 2222 | 0.679664 | 0         |  |
|  | Shiraz-71T | 2260 | 0.68394  | 0         |  |
|  | Shiraz-71T | 2261 | 0.508399 | 0         |  |
|  | Shiraz-3T  | 235  | 0        | -0.28401  |  |
|  | Shiraz-3T  | 236  | 0        | -0.435445 |  |
|  | Shiraz-4T  | 260  | 0        | -0.324128 |  |
|  | Shiraz-16T | 294  | 0.655804 | 0         |  |
|  | Shiraz-36T | 431  | 0        | -0.78035  |  |

|        |      |            |      |          |           |  |  |
|--------|------|------------|------|----------|-----------|--|--|
|        |      | Shiraz-44T | 891  | 0        | -0.954044 |  |  |
|        |      | Shiraz-44T | 893  | 0        | -1.364406 |  |  |
|        |      | Shiraz-44T | 894  | 0        | -0.776734 |  |  |
|        |      | Shiraz-47T | 1083 | 0        | -0.103285 |  |  |
|        |      | Shiraz-49T | 1166 | 0        | -0.917235 |  |  |
|        |      | Shiraz-49T | 1168 | 0        | -1.073859 |  |  |
|        |      | Shiraz-9T  | 1368 | 0.199713 | 0         |  |  |
|        |      | Shiraz-18T | 1455 | 0        | -0.186773 |  |  |
|        |      | Shiraz-22T | 1669 | 0.695915 | 0         |  |  |
|        |      | Shiraz-22T | 1671 | 0.369309 | 0         |  |  |
|        |      | Shiraz-25T | 1717 | 0.420447 | 0         |  |  |
|        |      | Shiraz-25T | 1718 | 0        | -0.452703 |  |  |
|        |      | Shiraz-28T | 1760 | 0.538181 | 0         |  |  |
|        |      | Shiraz-28T | 1761 | 0        | -0.695601 |  |  |
|        |      | Shiraz-29T | 1800 | 0.672527 | 0         |  |  |
|        |      | Shiraz-32T | 1869 | 0.776805 | 0         |  |  |
|        |      | Shiraz-35T | 1932 | 0.507141 | 0         |  |  |
|        |      | Shiraz-40T | 2051 | 0.098506 | 0         |  |  |
|        |      | Shiraz-58T | 2221 | 0.871948 | 0         |  |  |
|        |      | Shiraz-58T | 2222 | 0.679664 | 0         |  |  |
|        |      | Shiraz-71T | 2260 | 0.68394  | 0         |  |  |
|        |      | Shiraz-71T | 2261 | 0.508399 | 0         |  |  |
| MAGEB4 | chrX | Shiraz-3T  | 235  | 0        | -0.28401  |  |  |
|        |      | Shiraz-3T  | 236  | 0        | -0.435445 |  |  |
|        |      | Shiraz-4T  | 260  | 0        | -0.324128 |  |  |
|        |      | Shiraz-16T | 294  | 0.655804 | 0         |  |  |
|        |      | Shiraz-36T | 431  | 0        | -0.78035  |  |  |
|        |      | Shiraz-44T | 891  | 0        | -0.954044 |  |  |
|        |      | Shiraz-44T | 893  | 0        | -1.364406 |  |  |
|        |      | Shiraz-44T | 894  | 0        | -0.776734 |  |  |
|        |      | Shiraz-47T | 1083 | 0        | -0.103285 |  |  |
|        |      | Shiraz-49T | 1166 | 0        | -0.917235 |  |  |
|        |      | Shiraz-49T | 1168 | 0        | -1.073859 |  |  |
|        |      | Shiraz-9T  | 1368 | 0.199713 | 0         |  |  |
|        |      | Shiraz-18T | 1455 | 0        | -0.186773 |  |  |
|        |      | Shiraz-22T | 1669 | 0.695915 | 0         |  |  |
|        |      | Shiraz-22T | 1671 | 0.369309 | 0         |  |  |
|        |      | Shiraz-25T | 1717 | 0.420447 | 0         |  |  |
|        |      | Shiraz-25T | 1718 | 0        | -0.452703 |  |  |
|        |      | Shiraz-28T | 1760 | 0.538181 | 0         |  |  |
|        |      | Shiraz-28T | 1761 | 0        | -0.695601 |  |  |
|        |      | Shiraz-29T | 1800 | 0.672527 | 0         |  |  |
|        |      | Shiraz-32T | 1869 | 0.776805 | 0         |  |  |
|        |      | Shiraz-35T | 1932 | 0.507141 | 0         |  |  |
|        |      | Shiraz-40T | 2051 | 0.098506 | 0         |  |  |
|        |      | Shiraz-58T | 2221 | 0.871948 | 0         |  |  |
|        |      | Shiraz-58T | 2222 | 0.679664 | 0         |  |  |

|  |            |      |          |           |  |
|--|------------|------|----------|-----------|--|
|  | Shiraz-71T | 2260 | 0.68394  | 0         |  |
|  | Shiraz-71T | 2261 | 0.508399 | 0         |  |
|  | Shiraz-3T  | 235  | 0        | -0.28401  |  |
|  | Shiraz-3T  | 236  | 0        | -0.435445 |  |
|  | Shiraz-4T  | 260  | 0        | -0.324128 |  |
|  | Shiraz-16T | 294  | 0.655804 | 0         |  |
|  | Shiraz-36T | 431  | 0        | -0.78035  |  |
|  | Shiraz-44T | 891  | 0        | -0.954044 |  |
|  | Shiraz-44T | 893  | 0        | -1.364406 |  |
|  | Shiraz-44T | 894  | 0        | -0.776734 |  |
|  | Shiraz-47T | 1083 | 0        | -0.103285 |  |
|  | Shiraz-49T | 1166 | 0        | -0.917235 |  |
|  | Shiraz-49T | 1168 | 0        | -1.073859 |  |
|  | Shiraz-9T  | 1368 | 0.199713 | 0         |  |
|  | Shiraz-18T | 1455 | 0        | -0.186773 |  |
|  | Shiraz-22T | 1669 | 0.695915 | 0         |  |
|  | Shiraz-22T | 1671 | 0.369309 | 0         |  |
|  | Shiraz-25T | 1717 | 0.420447 | 0         |  |
|  | Shiraz-25T | 1718 | 0        | -0.452703 |  |
|  | Shiraz-28T | 1760 | 0.538181 | 0         |  |
|  | Shiraz-28T | 1761 | 0        | -0.695601 |  |
|  | Shiraz-29T | 1800 | 0.672527 | 0         |  |
|  | Shiraz-32T | 1869 | 0.776805 | 0         |  |
|  | Shiraz-35T | 1932 | 0.507141 | 0         |  |
|  | Shiraz-40T | 2051 | 0.098506 | 0         |  |
|  | Shiraz-58T | 2221 | 0.871948 | 0         |  |
|  | Shiraz-58T | 2222 | 0.679664 | 0         |  |
|  | Shiraz-71T | 2260 | 0.68394  | 0         |  |
|  | Shiraz-71T | 2261 | 0.508399 | 0         |  |
|  | Shiraz-3T  | 235  | 0        | -0.28401  |  |
|  | Shiraz-3T  | 236  | 0        | -0.435445 |  |
|  | Shiraz-4T  | 260  | 0        | -0.324128 |  |
|  | Shiraz-16T | 294  | 0.655804 | 0         |  |
|  | Shiraz-36T | 431  | 0        | -0.78035  |  |
|  | Shiraz-44T | 891  | 0        | -0.954044 |  |
|  | Shiraz-44T | 893  | 0        | -1.364406 |  |
|  | Shiraz-44T | 894  | 0        | -0.776734 |  |
|  | Shiraz-47T | 1083 | 0        | -0.103285 |  |
|  | Shiraz-49T | 1166 | 0        | -0.917235 |  |
|  | Shiraz-49T | 1168 | 0        | -1.073859 |  |
|  | Shiraz-9T  | 1368 | 0.199713 | 0         |  |
|  | Shiraz-18T | 1455 | 0        | -0.186773 |  |
|  | Shiraz-22T | 1669 | 0.695915 | 0         |  |
|  | Shiraz-22T | 1671 | 0.369309 | 0         |  |
|  | Shiraz-25T | 1717 | 0.420447 | 0         |  |
|  | Shiraz-25T | 1718 | 0        | -0.452703 |  |
|  | Shiraz-28T | 1760 | 0.538181 | 0         |  |

|        |      |            |      |          |           |  |  |
|--------|------|------------|------|----------|-----------|--|--|
|        |      | Shiraz-28T | 1761 | 0        | -0.695601 |  |  |
|        |      | Shiraz-29T | 1800 | 0.672527 | 0         |  |  |
|        |      | Shiraz-32T | 1869 | 0.776805 | 0         |  |  |
|        |      | Shiraz-35T | 1932 | 0.507141 | 0         |  |  |
|        |      | Shiraz-40T | 2051 | 0.098506 | 0         |  |  |
|        |      | Shiraz-58T | 2221 | 0.871948 | 0         |  |  |
|        |      | Shiraz-58T | 2222 | 0.679664 | 0         |  |  |
|        |      | Shiraz-71T | 2260 | 0.68394  | 0         |  |  |
|        |      | Shiraz-71T | 2261 | 0.508399 | 0         |  |  |
| MAGEB6 | chrX | Shiraz-3T  | 235  | 0        | -0.28401  |  |  |
|        |      | Shiraz-3T  | 236  | 0        | -0.435445 |  |  |
|        |      | Shiraz-4T  | 260  | 0        | -0.324128 |  |  |
|        |      | Shiraz-16T | 294  | 0.655804 | 0         |  |  |
|        |      | Shiraz-36T | 431  | 0        | -0.78035  |  |  |
|        |      | Shiraz-44T | 891  | 0        | -0.954044 |  |  |
|        |      | Shiraz-44T | 893  | 0        | -1.364406 |  |  |
|        |      | Shiraz-47T | 1083 | 0        | -0.103285 |  |  |
|        |      | Shiraz-49T | 1166 | 0        | -0.917235 |  |  |
|        |      | Shiraz-49T | 1168 | 0        | -1.073859 |  |  |
|        |      | Shiraz-9T  | 1368 | 0.199713 | 0         |  |  |
|        |      | Shiraz-18T | 1455 | 0        | -0.186773 |  |  |
|        |      | Shiraz-22T | 1669 | 0.695915 | 0         |  |  |
|        |      | Shiraz-22T | 1671 | 0.369309 | 0         |  |  |
|        |      | Shiraz-25T | 1717 | 0.420447 | 0         |  |  |
|        |      | Shiraz-28T | 1760 | 0.538181 | 0         |  |  |
|        |      | Shiraz-29T | 1800 | 0.672527 | 0         |  |  |
|        |      | Shiraz-32T | 1869 | 0.776805 | 0         |  |  |
|        |      | Shiraz-35T | 1932 | 0.507141 | 0         |  |  |
|        |      | Shiraz-40T | 2051 | 0.098506 | 0         |  |  |
|        |      | Shiraz-58T | 2221 | 0.871948 | 0         |  |  |
|        |      | Shiraz-58T | 2222 | 0.679664 | 0         |  |  |
|        |      | Shiraz-71T | 2260 | 0.68394  | 0         |  |  |
|        |      | Shiraz-71T | 2261 | 0.508399 | 0         |  |  |
|        |      | Shiraz-3T  | 235  | 0        | -0.28401  |  |  |
|        |      | Shiraz-3T  | 236  | 0        | -0.435445 |  |  |
|        |      | Shiraz-4T  | 260  | 0        | -0.324128 |  |  |
|        |      | Shiraz-16T | 294  | 0.655804 | 0         |  |  |
|        |      | Shiraz-36T | 431  | 0        | -0.78035  |  |  |
|        |      | Shiraz-44T | 891  | 0        | -0.954044 |  |  |
|        |      | Shiraz-44T | 893  | 0        | -1.364406 |  |  |
|        |      | Shiraz-47T | 1083 | 0        | -0.103285 |  |  |
|        |      | Shiraz-49T | 1166 | 0        | -0.917235 |  |  |
|        |      | Shiraz-49T | 1168 | 0        | -1.073859 |  |  |
|        |      | Shiraz-9T  | 1368 | 0.199713 | 0         |  |  |
|        |      | Shiraz-18T | 1455 | 0        | -0.186773 |  |  |
|        |      | Shiraz-22T | 1669 | 0.695915 | 0         |  |  |
|        |      | Shiraz-22T | 1671 | 0.369309 | 0         |  |  |

|        |      |            |      |          |           |  |  |
|--------|------|------------|------|----------|-----------|--|--|
|        |      | Shiraz-25T | 1717 | 0.420447 | 0         |  |  |
|        |      | Shiraz-28T | 1760 | 0.538181 | 0         |  |  |
|        |      | Shiraz-29T | 1800 | 0.672527 | 0         |  |  |
|        |      | Shiraz-32T | 1869 | 0.776805 | 0         |  |  |
|        |      | Shiraz-35T | 1932 | 0.507141 | 0         |  |  |
|        |      | Shiraz-40T | 2051 | 0.098506 | 0         |  |  |
|        |      | Shiraz-58T | 2221 | 0.871948 | 0         |  |  |
|        |      | Shiraz-58T | 2222 | 0.679664 | 0         |  |  |
|        |      | Shiraz-71T | 2260 | 0.68394  | 0         |  |  |
|        |      | Shiraz-71T | 2261 | 0.508399 | 0         |  |  |
|        |      | Shiraz-3T  | 235  | 0        | -0.28401  |  |  |
|        |      | Shiraz-3T  | 236  | 0        | -0.435445 |  |  |
|        |      | Shiraz-4T  | 260  | 0        | -0.324128 |  |  |
|        |      | Shiraz-16T | 294  | 0.655804 | 0         |  |  |
|        |      | Shiraz-36T | 431  | 0        | -0.78035  |  |  |
|        |      | Shiraz-44T | 891  | 0        | -0.954044 |  |  |
|        |      | Shiraz-44T | 893  | 0        | -1.364406 |  |  |
|        |      | Shiraz-47T | 1083 | 0        | -0.103285 |  |  |
|        |      | Shiraz-49T | 1166 | 0        | -0.917235 |  |  |
|        |      | Shiraz-49T | 1168 | 0        | -1.073859 |  |  |
|        |      | Shiraz-9T  | 1368 | 0.199713 | 0         |  |  |
|        |      | Shiraz-18T | 1455 | 0        | -0.186773 |  |  |
|        |      | Shiraz-22T | 1669 | 0.695915 | 0         |  |  |
|        |      | Shiraz-22T | 1671 | 0.369309 | 0         |  |  |
|        |      | Shiraz-25T | 1717 | 0.420447 | 0         |  |  |
|        |      | Shiraz-28T | 1760 | 0.538181 | 0         |  |  |
|        |      | Shiraz-29T | 1800 | 0.672527 | 0         |  |  |
|        |      | Shiraz-32T | 1869 | 0.776805 | 0         |  |  |
|        |      | Shiraz-35T | 1932 | 0.507141 | 0         |  |  |
|        |      | Shiraz-40T | 2051 | 0.098506 | 0         |  |  |
|        |      | Shiraz-58T | 2221 | 0.871948 | 0         |  |  |
|        |      | Shiraz-58T | 2222 | 0.679664 | 0         |  |  |
|        |      | Shiraz-71T | 2260 | 0.68394  | 0         |  |  |
|        |      | Shiraz-71T | 2261 | 0.508399 | 0         |  |  |
| MAGEC1 | chrX | Shiraz-3T  | 242  | 0        | -0.336434 |  |  |
|        |      | Shiraz-4T  | 261  | 0        | -0.336249 |  |  |
|        |      | Shiraz-16T | 295  | 0.591657 | 0         |  |  |
|        |      | Shiraz-36T | 433  | 0        | -0.803961 |  |  |
|        |      | Shiraz-44T | 899  | 0        | -1.09697  |  |  |
|        |      | Shiraz-44T | 907  | 0        | -1.370847 |  |  |
|        |      | Shiraz-49T | 1170 | 0        | -0.967436 |  |  |
|        |      | Shiraz-9T  | 1370 | 0.690073 | 0         |  |  |
|        |      | Shiraz-18T | 1457 | 0.643204 | 0         |  |  |
|        |      | Shiraz-22T | 1673 | 0.611783 | 0         |  |  |
|        |      | Shiraz-25T | 1719 | 0.472955 | 0         |  |  |
|        |      | Shiraz-28T | 1762 | 0.562311 | 0         |  |  |
|        |      | Shiraz-29T | 1801 | 0.815343 | 0         |  |  |

|        |      |            |      |          |           |  |
|--------|------|------------|------|----------|-----------|--|
|        |      | Shiraz-32T | 1870 | 0.729766 | 0         |  |
|        |      | Shiraz-35T | 1933 | 0.488535 | 0         |  |
|        |      | Shiraz-58T | 2223 | 0.833364 | 0         |  |
|        |      | Shiraz-71T | 2263 | 0.975531 | 0         |  |
|        |      | Shiraz-3T  | 242  | 0        | -0.336434 |  |
|        |      | Shiraz-4T  | 261  | 0        | -0.336249 |  |
|        |      | Shiraz-16T | 295  | 0.591657 | 0         |  |
|        |      | Shiraz-36T | 433  | 0        | -0.803961 |  |
|        |      | Shiraz-44T | 899  | 0        | -1.09697  |  |
|        |      | Shiraz-44T | 907  | 0        | -1.370847 |  |
|        |      | Shiraz-49T | 1170 | 0        | -0.967436 |  |
|        |      | Shiraz-9T  | 1370 | 0.690073 | 0         |  |
|        |      | Shiraz-18T | 1457 | 0.643204 | 0         |  |
|        |      | Shiraz-22T | 1673 | 0.611783 | 0         |  |
|        |      | Shiraz-25T | 1719 | 0.472955 | 0         |  |
|        |      | Shiraz-28T | 1762 | 0.562311 | 0         |  |
|        |      | Shiraz-29T | 1801 | 0.815343 | 0         |  |
|        |      | Shiraz-32T | 1870 | 0.729766 | 0         |  |
|        |      | Shiraz-35T | 1933 | 0.488535 | 0         |  |
|        |      | Shiraz-58T | 2223 | 0.833364 | 0         |  |
|        |      | Shiraz-71T | 2263 | 0.975531 | 0         |  |
|        |      | Shiraz-3T  | 242  | 0        | -0.336434 |  |
|        |      | Shiraz-4T  | 261  | 0        | -0.336249 |  |
|        |      | Shiraz-16T | 295  | 0.591657 | 0         |  |
|        |      | Shiraz-36T | 433  | 0        | -0.803961 |  |
|        |      | Shiraz-44T | 899  | 0        | -1.09697  |  |
|        |      | Shiraz-44T | 907  | 0        | -1.370847 |  |
|        |      | Shiraz-49T | 1170 | 0        | -0.967436 |  |
|        |      | Shiraz-9T  | 1370 | 0.690073 | 0         |  |
|        |      | Shiraz-18T | 1457 | 0.643204 | 0         |  |
|        |      | Shiraz-22T | 1673 | 0.611783 | 0         |  |
|        |      | Shiraz-25T | 1719 | 0.472955 | 0         |  |
|        |      | Shiraz-28T | 1762 | 0.562311 | 0         |  |
|        |      | Shiraz-29T | 1801 | 0.815343 | 0         |  |
|        |      | Shiraz-32T | 1870 | 0.729766 | 0         |  |
|        |      | Shiraz-35T | 1933 | 0.488535 | 0         |  |
|        |      | Shiraz-58T | 2223 | 0.833364 | 0         |  |
|        |      | Shiraz-71T | 2263 | 0.975531 | 0         |  |
| MAGEC2 | chrX | Shiraz-3T  | 242  | 0        | -0.336434 |  |
|        |      | Shiraz-4T  | 261  | 0        | -0.336249 |  |
|        |      | Shiraz-16T | 295  | 0.591657 | 0         |  |
|        |      | Shiraz-36T | 433  | 0        | -0.803961 |  |
|        |      | Shiraz-44T | 899  | 0        | -1.09697  |  |
|        |      | Shiraz-44T | 907  | 0        | -1.370847 |  |
|        |      | Shiraz-49T | 1170 | 0        | -0.967436 |  |
|        |      | Shiraz-9T  | 1370 | 0.690073 | 0         |  |
|        |      | Shiraz-18T | 1457 | 0.643204 | 0         |  |



|        |      |            |      |          |           |  |  |
|--------|------|------------|------|----------|-----------|--|--|
|        |      | Shiraz-22T | 1673 | 0.611783 | 0         |  |  |
|        |      | Shiraz-25T | 1719 | 0.472955 | 0         |  |  |
|        |      | Shiraz-28T | 1762 | 0.562311 | 0         |  |  |
|        |      | Shiraz-29T | 1801 | 0.815343 | 0         |  |  |
|        |      | Shiraz-32T | 1870 | 0.729766 | 0         |  |  |
|        |      | Shiraz-35T | 1933 | 0.488535 | 0         |  |  |
|        |      | Shiraz-58T | 2223 | 0.833364 | 0         |  |  |
|        |      | Shiraz-71T | 2263 | 0.975531 | 0         |  |  |
|        |      | Shiraz-3T  | 242  | 0        | -0.336434 |  |  |
|        |      | Shiraz-4T  | 261  | 0        | -0.336249 |  |  |
|        |      | Shiraz-16T | 295  | 0.591657 | 0         |  |  |
|        |      | Shiraz-36T | 433  | 0        | -0.803961 |  |  |
|        |      | Shiraz-44T | 899  | 0        | -1.09697  |  |  |
|        |      | Shiraz-44T | 907  | 0        | -1.370847 |  |  |
|        |      | Shiraz-49T | 1170 | 0        | -0.967436 |  |  |
|        |      | Shiraz-9T  | 1370 | 0.690073 | 0         |  |  |
|        |      | Shiraz-18T | 1457 | 0.643204 | 0         |  |  |
|        |      | Shiraz-22T | 1673 | 0.611783 | 0         |  |  |
|        |      | Shiraz-25T | 1719 | 0.472955 | 0         |  |  |
|        |      | Shiraz-28T | 1762 | 0.562311 | 0         |  |  |
|        |      | Shiraz-29T | 1801 | 0.815343 | 0         |  |  |
|        |      | Shiraz-32T | 1870 | 0.729766 | 0         |  |  |
|        |      | Shiraz-35T | 1933 | 0.488535 | 0         |  |  |
|        |      | Shiraz-58T | 2223 | 0.833364 | 0         |  |  |
|        |      | Shiraz-71T | 2263 | 0.975531 | 0         |  |  |
|        |      | Shiraz-3T  | 242  | 0        | -0.336434 |  |  |
|        |      | Shiraz-4T  | 261  | 0        | -0.336249 |  |  |
|        |      | Shiraz-16T | 295  | 0.591657 | 0         |  |  |
|        |      | Shiraz-36T | 433  | 0        | -0.803961 |  |  |
|        |      | Shiraz-44T | 899  | 0        | -1.09697  |  |  |
|        |      | Shiraz-44T | 907  | 0        | -1.370847 |  |  |
|        |      | Shiraz-49T | 1170 | 0        | -0.967436 |  |  |
|        |      | Shiraz-9T  | 1370 | 0.690073 | 0         |  |  |
|        |      | Shiraz-18T | 1457 | 0.643204 | 0         |  |  |
|        |      | Shiraz-22T | 1673 | 0.611783 | 0         |  |  |
|        |      | Shiraz-25T | 1719 | 0.472955 | 0         |  |  |
|        |      | Shiraz-28T | 1762 | 0.562311 | 0         |  |  |
|        |      | Shiraz-29T | 1801 | 0.815343 | 0         |  |  |
|        |      | Shiraz-32T | 1870 | 0.729766 | 0         |  |  |
|        |      | Shiraz-35T | 1933 | 0.488535 | 0         |  |  |
|        |      | Shiraz-58T | 2223 | 0.833364 | 0         |  |  |
|        |      | Shiraz-71T | 2263 | 0.975531 | 0         |  |  |
| MAGEC3 | chrX | Shiraz-3T  | 242  | 0        | -0.336434 |  |  |
|        |      | Shiraz-3T  | 242  | 0        | -0.336434 |  |  |
|        |      | Shiraz-4T  | 261  | 0        | -0.336249 |  |  |
|        |      | Shiraz-4T  | 261  | 0        | -0.336249 |  |  |
|        |      | Shiraz-16T | 295  | 0.591657 | 0         |  |  |

|  |  |            |      |          |           |  |  |
|--|--|------------|------|----------|-----------|--|--|
|  |  | Shiraz-16T | 295  | 0.591657 | 0         |  |  |
|  |  | Shiraz-36T | 433  | 0        | -0.803961 |  |  |
|  |  | Shiraz-36T | 433  | 0        | -0.803961 |  |  |
|  |  | Shiraz-44T | 899  | 0        | -1.09697  |  |  |
|  |  | Shiraz-44T | 899  | 0        | -1.09697  |  |  |
|  |  | Shiraz-44T | 907  | 0        | -1.370847 |  |  |
|  |  | Shiraz-44T | 907  | 0        | -1.370847 |  |  |
|  |  | Shiraz-49T | 1170 | 0        | -0.967436 |  |  |
|  |  | Shiraz-49T | 1170 | 0        | -0.967436 |  |  |
|  |  | Shiraz-9T  | 1370 | 0.690073 | 0         |  |  |
|  |  | Shiraz-9T  | 1370 | 0.690073 | 0         |  |  |
|  |  | Shiraz-18T | 1457 | 0.643204 | 0         |  |  |
|  |  | Shiraz-18T | 1457 | 0.643204 | 0         |  |  |
|  |  | Shiraz-22T | 1673 | 0.611783 | 0         |  |  |
|  |  | Shiraz-22T | 1673 | 0.611783 | 0         |  |  |
|  |  | Shiraz-25T | 1719 | 0.472955 | 0         |  |  |
|  |  | Shiraz-25T | 1719 | 0.472955 | 0         |  |  |
|  |  | Shiraz-28T | 1762 | 0.562311 | 0         |  |  |
|  |  | Shiraz-28T | 1762 | 0.562311 | 0         |  |  |
|  |  | Shiraz-29T | 1801 | 0.815343 | 0         |  |  |
|  |  | Shiraz-29T | 1801 | 0.815343 | 0         |  |  |
|  |  | Shiraz-32T | 1870 | 0.729766 | 0         |  |  |
|  |  | Shiraz-32T | 1870 | 0.729766 | 0         |  |  |
|  |  | Shiraz-35T | 1933 | 0.488535 | 0         |  |  |
|  |  | Shiraz-35T | 1933 | 0.488535 | 0         |  |  |
|  |  | Shiraz-58T | 2223 | 0.833364 | 0         |  |  |
|  |  | Shiraz-58T | 2223 | 0.833364 | 0         |  |  |
|  |  | Shiraz-71T | 2263 | 0.975531 | 0         |  |  |
|  |  | Shiraz-71T | 2263 | 0.975531 | 0         |  |  |
|  |  | Shiraz-3T  | 242  | 0        | -0.336434 |  |  |
|  |  | Shiraz-3T  | 242  | 0        | -0.336434 |  |  |
|  |  | Shiraz-4T  | 261  | 0        | -0.336249 |  |  |
|  |  | Shiraz-4T  | 261  | 0        | -0.336249 |  |  |
|  |  | Shiraz-16T | 295  | 0.591657 | 0         |  |  |
|  |  | Shiraz-16T | 295  | 0.591657 | 0         |  |  |
|  |  | Shiraz-36T | 433  | 0        | -0.803961 |  |  |
|  |  | Shiraz-36T | 433  | 0        | -0.803961 |  |  |
|  |  | Shiraz-44T | 899  | 0        | -1.09697  |  |  |
|  |  | Shiraz-44T | 899  | 0        | -1.09697  |  |  |
|  |  | Shiraz-44T | 907  | 0        | -1.370847 |  |  |
|  |  | Shiraz-44T | 907  | 0        | -1.370847 |  |  |
|  |  | Shiraz-49T | 1170 | 0        | -0.967436 |  |  |
|  |  | Shiraz-49T | 1170 | 0        | -0.967436 |  |  |
|  |  | Shiraz-9T  | 1370 | 0.690073 | 0         |  |  |
|  |  | Shiraz-9T  | 1370 | 0.690073 | 0         |  |  |
|  |  | Shiraz-18T | 1457 | 0.643204 | 0         |  |  |
|  |  | Shiraz-18T | 1457 | 0.643204 | 0         |  |  |

|  |  |            |      |          |           |  |  |
|--|--|------------|------|----------|-----------|--|--|
|  |  | Shiraz-22T | 1673 | 0.611783 | 0         |  |  |
|  |  | Shiraz-22T | 1673 | 0.611783 | 0         |  |  |
|  |  | Shiraz-25T | 1719 | 0.472955 | 0         |  |  |
|  |  | Shiraz-25T | 1719 | 0.472955 | 0         |  |  |
|  |  | Shiraz-28T | 1762 | 0.562311 | 0         |  |  |
|  |  | Shiraz-28T | 1762 | 0.562311 | 0         |  |  |
|  |  | Shiraz-29T | 1801 | 0.815343 | 0         |  |  |
|  |  | Shiraz-29T | 1801 | 0.815343 | 0         |  |  |
|  |  | Shiraz-32T | 1870 | 0.729766 | 0         |  |  |
|  |  | Shiraz-32T | 1870 | 0.729766 | 0         |  |  |
|  |  | Shiraz-35T | 1933 | 0.488535 | 0         |  |  |
|  |  | Shiraz-35T | 1933 | 0.488535 | 0         |  |  |
|  |  | Shiraz-58T | 2223 | 0.833364 | 0         |  |  |
|  |  | Shiraz-58T | 2223 | 0.833364 | 0         |  |  |
|  |  | Shiraz-71T | 2263 | 0.975531 | 0         |  |  |
|  |  | Shiraz-71T | 2263 | 0.975531 | 0         |  |  |
|  |  | Shiraz-3T  | 242  | 0        | -0.336434 |  |  |
|  |  | Shiraz-3T  | 242  | 0        | -0.336434 |  |  |
|  |  | Shiraz-4T  | 261  | 0        | -0.336249 |  |  |
|  |  | Shiraz-4T  | 261  | 0        | -0.336249 |  |  |
|  |  | Shiraz-16T | 295  | 0.591657 | 0         |  |  |
|  |  | Shiraz-16T | 295  | 0.591657 | 0         |  |  |
|  |  | Shiraz-36T | 433  | 0        | -0.803961 |  |  |
|  |  | Shiraz-36T | 433  | 0        | -0.803961 |  |  |
|  |  | Shiraz-44T | 899  | 0        | -1.09697  |  |  |
|  |  | Shiraz-44T | 899  | 0        | -1.09697  |  |  |
|  |  | Shiraz-44T | 907  | 0        | -1.370847 |  |  |
|  |  | Shiraz-44T | 907  | 0        | -1.370847 |  |  |
|  |  | Shiraz-49T | 1170 | 0        | -0.967436 |  |  |
|  |  | Shiraz-49T | 1170 | 0        | -0.967436 |  |  |
|  |  | Shiraz-9T  | 1370 | 0.690073 | 0         |  |  |
|  |  | Shiraz-9T  | 1370 | 0.690073 | 0         |  |  |
|  |  | Shiraz-18T | 1457 | 0.643204 | 0         |  |  |
|  |  | Shiraz-18T | 1457 | 0.643204 | 0         |  |  |
|  |  | Shiraz-22T | 1673 | 0.611783 | 0         |  |  |
|  |  | Shiraz-22T | 1673 | 0.611783 | 0         |  |  |
|  |  | Shiraz-25T | 1719 | 0.472955 | 0         |  |  |
|  |  | Shiraz-25T | 1719 | 0.472955 | 0         |  |  |
|  |  | Shiraz-28T | 1762 | 0.562311 | 0         |  |  |
|  |  | Shiraz-28T | 1762 | 0.562311 | 0         |  |  |
|  |  | Shiraz-29T | 1801 | 0.815343 | 0         |  |  |
|  |  | Shiraz-29T | 1801 | 0.815343 | 0         |  |  |
|  |  | Shiraz-32T | 1870 | 0.729766 | 0         |  |  |
|  |  | Shiraz-32T | 1870 | 0.729766 | 0         |  |  |
|  |  | Shiraz-35T | 1933 | 0.488535 | 0         |  |  |
|  |  | Shiraz-35T | 1933 | 0.488535 | 0         |  |  |
|  |  | Shiraz-58T | 2223 | 0.833364 | 0         |  |  |

|        |      |            |      |          |           |  |
|--------|------|------------|------|----------|-----------|--|
|        |      | Shiraz-58T | 2223 | 0.833364 | 0         |  |
|        |      | Shiraz-71T | 2263 | 0.975531 | 0         |  |
|        |      | Shiraz-71T | 2263 | 0.975531 | 0         |  |
| MAGED1 | chrX | Shiraz-3T  | 239  | 0        | -0.28395  |  |
|        |      | Shiraz-3T  | 239  | 0        | -0.28395  |  |
|        |      | Shiraz-4T  | 260  | 0        | -0.324128 |  |
|        |      | Shiraz-4T  | 260  | 0        | -0.324128 |  |
|        |      | Shiraz-16T | 294  | 0.655804 | 0         |  |
|        |      | Shiraz-16T | 294  | 0.655804 | 0         |  |
|        |      | Shiraz-31T | 345  | 0.103301 | 0         |  |
|        |      | Shiraz-31T | 345  | 0.103301 | 0         |  |
|        |      | Shiraz-36T | 431  | 0        | -0.78035  |  |
|        |      | Shiraz-36T | 431  | 0        | -0.78035  |  |
|        |      | Shiraz-36T | 432  | 0        | -0.6692   |  |
|        |      | Shiraz-36T | 432  | 0        | -0.6692   |  |
|        |      | Shiraz-44T | 891  | 0        | -0.954044 |  |
|        |      | Shiraz-44T | 891  | 0        | -0.954044 |  |
|        |      | Shiraz-49T | 1166 | 0        | -0.917235 |  |
|        |      | Shiraz-49T | 1166 | 0        | -0.917235 |  |
|        |      | Shiraz-77T | 1282 | 0.213849 | 0         |  |
|        |      | Shiraz-77T | 1282 | 0.213849 | 0         |  |
|        |      | Shiraz-9T  | 1368 | 0.199713 | 0         |  |
|        |      | Shiraz-9T  | 1368 | 0.199713 | 0         |  |
|        |      | Shiraz-18T | 1456 | 0.608534 | 0         |  |
|        |      | Shiraz-18T | 1456 | 0.608534 | 0         |  |
|        |      | Shiraz-22T | 1669 | 0.695915 | 0         |  |
|        |      | Shiraz-22T | 1669 | 0.695915 | 0         |  |
|        |      | Shiraz-25T | 1717 | 0.420447 | 0         |  |
|        |      | Shiraz-25T | 1717 | 0.420447 | 0         |  |
|        |      | Shiraz-28T | 1760 | 0.538181 | 0         |  |
|        |      | Shiraz-28T | 1760 | 0.538181 | 0         |  |
|        |      | Shiraz-29T | 1800 | 0.672527 | 0         |  |
|        |      | Shiraz-29T | 1800 | 0.672527 | 0         |  |
|        |      | Shiraz-32T | 1869 | 0.776805 | 0         |  |
|        |      | Shiraz-32T | 1869 | 0.776805 | 0         |  |
|        |      | Shiraz-35T | 1932 | 0.507141 | 0         |  |
|        |      | Shiraz-35T | 1932 | 0.507141 | 0         |  |
|        |      | Shiraz-58T | 2221 | 0.871948 | 0         |  |
|        |      | Shiraz-58T | 2221 | 0.871948 | 0         |  |
|        |      | Shiraz-71T | 2260 | 0.68394  | 0         |  |
|        |      | Shiraz-71T | 2260 | 0.68394  | 0         |  |
|        |      | Shiraz-71T | 2262 | 0.986748 | 0         |  |
|        |      | Shiraz-71T | 2262 | 0.986748 | 0         |  |
|        |      | Shiraz-3T  | 239  | 0        | -0.28395  |  |
|        |      | Shiraz-3T  | 239  | 0        | -0.28395  |  |
|        |      | Shiraz-4T  | 260  | 0        | -0.324128 |  |
|        |      | Shiraz-4T  | 260  | 0        | -0.324128 |  |

|  |            |      |          |           |  |
|--|------------|------|----------|-----------|--|
|  | Shiraz-16T | 294  | 0.655804 | 0         |  |
|  | Shiraz-16T | 294  | 0.655804 | 0         |  |
|  | Shiraz-31T | 345  | 0.103301 | 0         |  |
|  | Shiraz-31T | 345  | 0.103301 | 0         |  |
|  | Shiraz-36T | 431  | 0        | -0.78035  |  |
|  | Shiraz-36T | 431  | 0        | -0.78035  |  |
|  | Shiraz-36T | 432  | 0        | -0.6692   |  |
|  | Shiraz-36T | 432  | 0        | -0.6692   |  |
|  | Shiraz-44T | 891  | 0        | -0.954044 |  |
|  | Shiraz-44T | 891  | 0        | -0.954044 |  |
|  | Shiraz-49T | 1166 | 0        | -0.917235 |  |
|  | Shiraz-49T | 1166 | 0        | -0.917235 |  |
|  | Shiraz-77T | 1282 | 0.213849 | 0         |  |
|  | Shiraz-77T | 1282 | 0.213849 | 0         |  |
|  | Shiraz-9T  | 1368 | 0.199713 | 0         |  |
|  | Shiraz-9T  | 1368 | 0.199713 | 0         |  |
|  | Shiraz-18T | 1456 | 0.608534 | 0         |  |
|  | Shiraz-18T | 1456 | 0.608534 | 0         |  |
|  | Shiraz-22T | 1669 | 0.695915 | 0         |  |
|  | Shiraz-22T | 1669 | 0.695915 | 0         |  |
|  | Shiraz-25T | 1717 | 0.420447 | 0         |  |
|  | Shiraz-25T | 1717 | 0.420447 | 0         |  |
|  | Shiraz-28T | 1760 | 0.538181 | 0         |  |
|  | Shiraz-28T | 1760 | 0.538181 | 0         |  |
|  | Shiraz-29T | 1800 | 0.672527 | 0         |  |
|  | Shiraz-29T | 1800 | 0.672527 | 0         |  |
|  | Shiraz-32T | 1869 | 0.776805 | 0         |  |
|  | Shiraz-32T | 1869 | 0.776805 | 0         |  |
|  | Shiraz-35T | 1932 | 0.507141 | 0         |  |
|  | Shiraz-35T | 1932 | 0.507141 | 0         |  |
|  | Shiraz-58T | 2221 | 0.871948 | 0         |  |
|  | Shiraz-58T | 2221 | 0.871948 | 0         |  |
|  | Shiraz-71T | 2260 | 0.68394  | 0         |  |
|  | Shiraz-71T | 2260 | 0.68394  | 0         |  |
|  | Shiraz-71T | 2262 | 0.986748 | 0         |  |
|  | Shiraz-71T | 2262 | 0.986748 | 0         |  |
|  | Shiraz-3T  | 239  | 0        | -0.28395  |  |
|  | Shiraz-3T  | 239  | 0        | -0.28395  |  |
|  | Shiraz-4T  | 260  | 0        | -0.324128 |  |
|  | Shiraz-4T  | 260  | 0        | -0.324128 |  |
|  | Shiraz-16T | 294  | 0.655804 | 0         |  |
|  | Shiraz-16T | 294  | 0.655804 | 0         |  |
|  | Shiraz-31T | 345  | 0.103301 | 0         |  |
|  | Shiraz-31T | 345  | 0.103301 | 0         |  |
|  | Shiraz-36T | 431  | 0        | -0.78035  |  |
|  | Shiraz-36T | 431  | 0        | -0.78035  |  |
|  | Shiraz-36T | 432  | 0        | -0.6692   |  |

|        |      |            |      |          |           |  |  |
|--------|------|------------|------|----------|-----------|--|--|
|        |      | Shiraz-36T | 432  | 0        | -0.6692   |  |  |
|        |      | Shiraz-44T | 891  | 0        | -0.954044 |  |  |
|        |      | Shiraz-44T | 891  | 0        | -0.954044 |  |  |
|        |      | Shiraz-49T | 1166 | 0        | -0.917235 |  |  |
|        |      | Shiraz-49T | 1166 | 0        | -0.917235 |  |  |
|        |      | Shiraz-77T | 1282 | 0.213849 | 0         |  |  |
|        |      | Shiraz-77T | 1282 | 0.213849 | 0         |  |  |
|        |      | Shiraz-9T  | 1368 | 0.199713 | 0         |  |  |
|        |      | Shiraz-9T  | 1368 | 0.199713 | 0         |  |  |
|        |      | Shiraz-18T | 1456 | 0.608534 | 0         |  |  |
|        |      | Shiraz-18T | 1456 | 0.608534 | 0         |  |  |
|        |      | Shiraz-22T | 1669 | 0.695915 | 0         |  |  |
|        |      | Shiraz-22T | 1669 | 0.695915 | 0         |  |  |
|        |      | Shiraz-25T | 1717 | 0.420447 | 0         |  |  |
|        |      | Shiraz-25T | 1717 | 0.420447 | 0         |  |  |
|        |      | Shiraz-28T | 1760 | 0.538181 | 0         |  |  |
|        |      | Shiraz-28T | 1760 | 0.538181 | 0         |  |  |
|        |      | Shiraz-29T | 1800 | 0.672527 | 0         |  |  |
|        |      | Shiraz-29T | 1800 | 0.672527 | 0         |  |  |
|        |      | Shiraz-32T | 1869 | 0.776805 | 0         |  |  |
|        |      | Shiraz-32T | 1869 | 0.776805 | 0         |  |  |
|        |      | Shiraz-35T | 1932 | 0.507141 | 0         |  |  |
|        |      | Shiraz-35T | 1932 | 0.507141 | 0         |  |  |
|        |      | Shiraz-58T | 2221 | 0.871948 | 0         |  |  |
|        |      | Shiraz-58T | 2221 | 0.871948 | 0         |  |  |
|        |      | Shiraz-71T | 2260 | 0.68394  | 0         |  |  |
|        |      | Shiraz-71T | 2260 | 0.68394  | 0         |  |  |
|        |      | Shiraz-71T | 2262 | 0.986748 | 0         |  |  |
|        |      | Shiraz-71T | 2262 | 0.986748 | 0         |  |  |
| MAGED2 | chrX | Shiraz-4T  | 260  | 0        | -0.324128 |  |  |
|        |      | Shiraz-4T  | 260  | 0        | -0.324128 |  |  |
|        |      | Shiraz-4T  | 260  | 0        | -0.324128 |  |  |
|        |      | Shiraz-16T | 294  | 0.655804 | 0         |  |  |
|        |      | Shiraz-16T | 294  | 0.655804 | 0         |  |  |
|        |      | Shiraz-16T | 294  | 0.655804 | 0         |  |  |
|        |      | Shiraz-36T | 431  | 0        | -0.78035  |  |  |
|        |      | Shiraz-36T | 431  | 0        | -0.78035  |  |  |
|        |      | Shiraz-36T | 431  | 0        | -0.78035  |  |  |
|        |      | Shiraz-44T | 891  | 0        | -0.954044 |  |  |
|        |      | Shiraz-44T | 891  | 0        | -0.954044 |  |  |
|        |      | Shiraz-44T | 891  | 0        | -0.954044 |  |  |
|        |      | Shiraz-44T | 898  | 0        | -0.515218 |  |  |
|        |      | Shiraz-44T | 898  | 0        | -0.515218 |  |  |
|        |      | Shiraz-44T | 898  | 0        | -0.515218 |  |  |
|        |      | Shiraz-49T | 1166 | 0        | -0.917235 |  |  |
|        |      | Shiraz-49T | 1166 | 0        | -0.917235 |  |  |
|        |      | Shiraz-49T | 1166 | 0        | -0.917235 |  |  |

|  |  |            |      |          |           |  |  |
|--|--|------------|------|----------|-----------|--|--|
|  |  | Shiraz-77T | 1282 | 0.213849 | 0         |  |  |
|  |  | Shiraz-77T | 1282 | 0.213849 | 0         |  |  |
|  |  | Shiraz-77T | 1282 | 0.213849 | 0         |  |  |
|  |  | Shiraz-9T  | 1368 | 0.199713 | 0         |  |  |
|  |  | Shiraz-9T  | 1368 | 0.199713 | 0         |  |  |
|  |  | Shiraz-9T  | 1368 | 0.199713 | 0         |  |  |
|  |  | Shiraz-18T | 1456 | 0.608534 | 0         |  |  |
|  |  | Shiraz-18T | 1456 | 0.608534 | 0         |  |  |
|  |  | Shiraz-18T | 1456 | 0.608534 | 0         |  |  |
|  |  | Shiraz-22T | 1669 | 0.695915 | 0         |  |  |
|  |  | Shiraz-22T | 1669 | 0.695915 | 0         |  |  |
|  |  | Shiraz-22T | 1669 | 0.695915 | 0         |  |  |
|  |  | Shiraz-25T | 1717 | 0.420447 | 0         |  |  |
|  |  | Shiraz-25T | 1717 | 0.420447 | 0         |  |  |
|  |  | Shiraz-25T | 1717 | 0.420447 | 0         |  |  |
|  |  | Shiraz-28T | 1760 | 0.538181 | 0         |  |  |
|  |  | Shiraz-28T | 1760 | 0.538181 | 0         |  |  |
|  |  | Shiraz-28T | 1760 | 0.538181 | 0         |  |  |
|  |  | Shiraz-29T | 1800 | 0.672527 | 0         |  |  |
|  |  | Shiraz-29T | 1800 | 0.672527 | 0         |  |  |
|  |  | Shiraz-29T | 1800 | 0.672527 | 0         |  |  |
|  |  | Shiraz-32T | 1869 | 0.776805 | 0         |  |  |
|  |  | Shiraz-32T | 1869 | 0.776805 | 0         |  |  |
|  |  | Shiraz-32T | 1869 | 0.776805 | 0         |  |  |
|  |  | Shiraz-35T | 1932 | 0.507141 | 0         |  |  |
|  |  | Shiraz-35T | 1932 | 0.507141 | 0         |  |  |
|  |  | Shiraz-35T | 1932 | 0.507141 | 0         |  |  |
|  |  | Shiraz-58T | 2221 | 0.871948 | 0         |  |  |
|  |  | Shiraz-58T | 2221 | 0.871948 | 0         |  |  |
|  |  | Shiraz-58T | 2221 | 0.871948 | 0         |  |  |
|  |  | Shiraz-71T | 2260 | 0.68394  | 0         |  |  |
|  |  | Shiraz-71T | 2260 | 0.68394  | 0         |  |  |
|  |  | Shiraz-71T | 2260 | 0.68394  | 0         |  |  |
|  |  | Shiraz-71T | 2262 | 0.986748 | 0         |  |  |
|  |  | Shiraz-71T | 2262 | 0.986748 | 0         |  |  |
|  |  | Shiraz-71T | 2262 | 0.986748 | 0         |  |  |
|  |  | Shiraz-4T  | 260  | 0        | -0.324128 |  |  |
|  |  | Shiraz-4T  | 260  | 0        | -0.324128 |  |  |
|  |  | Shiraz-4T  | 260  | 0        | -0.324128 |  |  |
|  |  | Shiraz-16T | 294  | 0.655804 | 0         |  |  |
|  |  | Shiraz-16T | 294  | 0.655804 | 0         |  |  |
|  |  | Shiraz-16T | 294  | 0.655804 | 0         |  |  |
|  |  | Shiraz-36T | 431  | 0        | -0.78035  |  |  |
|  |  | Shiraz-36T | 431  | 0        | -0.78035  |  |  |
|  |  | Shiraz-36T | 431  | 0        | -0.78035  |  |  |
|  |  | Shiraz-44T | 891  | 0        | -0.954044 |  |  |
|  |  | Shiraz-44T | 891  | 0        | -0.954044 |  |  |

|  |            |      |          |           |  |
|--|------------|------|----------|-----------|--|
|  | Shiraz-44T | 891  | 0        | -0.954044 |  |
|  | Shiraz-44T | 898  | 0        | -0.515218 |  |
|  | Shiraz-44T | 898  | 0        | -0.515218 |  |
|  | Shiraz-44T | 898  | 0        | -0.515218 |  |
|  | Shiraz-49T | 1166 | 0        | -0.917235 |  |
|  | Shiraz-49T | 1166 | 0        | -0.917235 |  |
|  | Shiraz-49T | 1166 | 0        | -0.917235 |  |
|  | Shiraz-77T | 1282 | 0.213849 | 0         |  |
|  | Shiraz-77T | 1282 | 0.213849 | 0         |  |
|  | Shiraz-77T | 1282 | 0.213849 | 0         |  |
|  | Shiraz-9T  | 1368 | 0.199713 | 0         |  |
|  | Shiraz-9T  | 1368 | 0.199713 | 0         |  |
|  | Shiraz-9T  | 1368 | 0.199713 | 0         |  |
|  | Shiraz-18T | 1456 | 0.608534 | 0         |  |
|  | Shiraz-18T | 1456 | 0.608534 | 0         |  |
|  | Shiraz-18T | 1456 | 0.608534 | 0         |  |
|  | Shiraz-22T | 1669 | 0.695915 | 0         |  |
|  | Shiraz-22T | 1669 | 0.695915 | 0         |  |
|  | Shiraz-22T | 1669 | 0.695915 | 0         |  |
|  | Shiraz-25T | 1717 | 0.420447 | 0         |  |
|  | Shiraz-25T | 1717 | 0.420447 | 0         |  |
|  | Shiraz-25T | 1717 | 0.420447 | 0         |  |
|  | Shiraz-28T | 1760 | 0.538181 | 0         |  |
|  | Shiraz-28T | 1760 | 0.538181 | 0         |  |
|  | Shiraz-28T | 1760 | 0.538181 | 0         |  |
|  | Shiraz-29T | 1800 | 0.672527 | 0         |  |
|  | Shiraz-29T | 1800 | 0.672527 | 0         |  |
|  | Shiraz-29T | 1800 | 0.672527 | 0         |  |
|  | Shiraz-32T | 1869 | 0.776805 | 0         |  |
|  | Shiraz-32T | 1869 | 0.776805 | 0         |  |
|  | Shiraz-32T | 1869 | 0.776805 | 0         |  |
|  | Shiraz-35T | 1932 | 0.507141 | 0         |  |
|  | Shiraz-35T | 1932 | 0.507141 | 0         |  |
|  | Shiraz-35T | 1932 | 0.507141 | 0         |  |
|  | Shiraz-58T | 2221 | 0.871948 | 0         |  |
|  | Shiraz-58T | 2221 | 0.871948 | 0         |  |
|  | Shiraz-58T | 2221 | 0.871948 | 0         |  |
|  | Shiraz-71T | 2260 | 0.68394  | 0         |  |
|  | Shiraz-71T | 2260 | 0.68394  | 0         |  |
|  | Shiraz-71T | 2260 | 0.68394  | 0         |  |
|  | Shiraz-71T | 2262 | 0.986748 | 0         |  |
|  | Shiraz-71T | 2262 | 0.986748 | 0         |  |
|  | Shiraz-71T | 2262 | 0.986748 | 0         |  |
|  | Shiraz-4T  | 260  | 0        | -0.324128 |  |
|  | Shiraz-4T  | 260  | 0        | -0.324128 |  |
|  | Shiraz-4T  | 260  | 0        | -0.324128 |  |
|  | Shiraz-16T | 294  | 0.655804 | 0         |  |



|  |  |            |      |          |           |  |  |
|--|--|------------|------|----------|-----------|--|--|
|  |  | Shiraz-16T | 294  | 0.655804 | 0         |  |  |
|  |  | Shiraz-16T | 294  | 0.655804 | 0         |  |  |
|  |  | Shiraz-36T | 431  | 0        | -0.78035  |  |  |
|  |  | Shiraz-36T | 431  | 0        | -0.78035  |  |  |
|  |  | Shiraz-36T | 431  | 0        | -0.78035  |  |  |
|  |  | Shiraz-44T | 891  | 0        | -0.954044 |  |  |
|  |  | Shiraz-44T | 891  | 0        | -0.954044 |  |  |
|  |  | Shiraz-44T | 891  | 0        | -0.954044 |  |  |
|  |  | Shiraz-44T | 898  | 0        | -0.515218 |  |  |
|  |  | Shiraz-44T | 898  | 0        | -0.515218 |  |  |
|  |  | Shiraz-44T | 898  | 0        | -0.515218 |  |  |
|  |  | Shiraz-49T | 1166 | 0        | -0.917235 |  |  |
|  |  | Shiraz-49T | 1166 | 0        | -0.917235 |  |  |
|  |  | Shiraz-49T | 1166 | 0        | -0.917235 |  |  |
|  |  | Shiraz-77T | 1282 | 0.213849 | 0         |  |  |
|  |  | Shiraz-77T | 1282 | 0.213849 | 0         |  |  |
|  |  | Shiraz-77T | 1282 | 0.213849 | 0         |  |  |
|  |  | Shiraz-9T  | 1368 | 0.199713 | 0         |  |  |
|  |  | Shiraz-9T  | 1368 | 0.199713 | 0         |  |  |
|  |  | Shiraz-9T  | 1368 | 0.199713 | 0         |  |  |
|  |  | Shiraz-18T | 1456 | 0.608534 | 0         |  |  |
|  |  | Shiraz-18T | 1456 | 0.608534 | 0         |  |  |
|  |  | Shiraz-18T | 1456 | 0.608534 | 0         |  |  |
|  |  | Shiraz-22T | 1669 | 0.695915 | 0         |  |  |
|  |  | Shiraz-22T | 1669 | 0.695915 | 0         |  |  |
|  |  | Shiraz-22T | 1669 | 0.695915 | 0         |  |  |
|  |  | Shiraz-25T | 1717 | 0.420447 | 0         |  |  |
|  |  | Shiraz-25T | 1717 | 0.420447 | 0         |  |  |
|  |  | Shiraz-25T | 1717 | 0.420447 | 0         |  |  |
|  |  | Shiraz-28T | 1760 | 0.538181 | 0         |  |  |
|  |  | Shiraz-28T | 1760 | 0.538181 | 0         |  |  |
|  |  | Shiraz-28T | 1760 | 0.538181 | 0         |  |  |
|  |  | Shiraz-29T | 1800 | 0.672527 | 0         |  |  |
|  |  | Shiraz-29T | 1800 | 0.672527 | 0         |  |  |
|  |  | Shiraz-29T | 1800 | 0.672527 | 0         |  |  |
|  |  | Shiraz-32T | 1869 | 0.776805 | 0         |  |  |
|  |  | Shiraz-32T | 1869 | 0.776805 | 0         |  |  |
|  |  | Shiraz-32T | 1869 | 0.776805 | 0         |  |  |
|  |  | Shiraz-35T | 1932 | 0.507141 | 0         |  |  |
|  |  | Shiraz-35T | 1932 | 0.507141 | 0         |  |  |
|  |  | Shiraz-35T | 1932 | 0.507141 | 0         |  |  |
|  |  | Shiraz-58T | 2221 | 0.871948 | 0         |  |  |
|  |  | Shiraz-58T | 2221 | 0.871948 | 0         |  |  |
|  |  | Shiraz-58T | 2221 | 0.871948 | 0         |  |  |
|  |  | Shiraz-71T | 2260 | 0.68394  | 0         |  |  |
|  |  | Shiraz-71T | 2260 | 0.68394  | 0         |  |  |
|  |  | Shiraz-71T | 2260 | 0.68394  | 0         |  |  |

|        |      |            |      |          |           |  |
|--------|------|------------|------|----------|-----------|--|
|        |      | Shiraz-71T | 2262 | 0.986748 | 0         |  |
|        |      | Shiraz-71T | 2262 | 0.986748 | 0         |  |
|        |      | Shiraz-71T | 2262 | 0.986748 | 0         |  |
| MAGED4 | chrX | Shiraz-3T  | 239  | 0        | -0.28395  |  |
|        |      | Shiraz-3T  | 239  | 0        | -0.28395  |  |
|        |      | Shiraz-4T  | 260  | 0        | -0.324128 |  |
|        |      | Shiraz-4T  | 260  | 0        | -0.324128 |  |
|        |      | Shiraz-16T | 294  | 0.655804 | 0         |  |
|        |      | Shiraz-16T | 294  | 0.655804 | 0         |  |
|        |      | Shiraz-31T | 345  | 0.103301 | 0         |  |
|        |      | Shiraz-31T | 345  | 0.103301 | 0         |  |
|        |      | Shiraz-36T | 431  | 0        | -0.78035  |  |
|        |      | Shiraz-36T | 431  | 0        | -0.78035  |  |
|        |      | Shiraz-36T | 432  | 0        | -0.6692   |  |
|        |      | Shiraz-36T | 432  | 0        | -0.6692   |  |
|        |      | Shiraz-44T | 891  | 0        | -0.954044 |  |
|        |      | Shiraz-44T | 891  | 0        | -0.954044 |  |
|        |      | Shiraz-49T | 1166 | 0        | -0.917235 |  |
|        |      | Shiraz-49T | 1166 | 0        | -0.917235 |  |
|        |      | Shiraz-77T | 1282 | 0.213849 | 0         |  |
|        |      | Shiraz-77T | 1282 | 0.213849 | 0         |  |
|        |      | Shiraz-9T  | 1368 | 0.199713 | 0         |  |
|        |      | Shiraz-9T  | 1368 | 0.199713 | 0         |  |
|        |      | Shiraz-18T | 1456 | 0.608534 | 0         |  |
|        |      | Shiraz-18T | 1456 | 0.608534 | 0         |  |
|        |      | Shiraz-22T | 1669 | 0.695915 | 0         |  |
|        |      | Shiraz-22T | 1669 | 0.695915 | 0         |  |
|        |      | Shiraz-25T | 1717 | 0.420447 | 0         |  |
|        |      | Shiraz-25T | 1717 | 0.420447 | 0         |  |
|        |      | Shiraz-28T | 1760 | 0.538181 | 0         |  |
|        |      | Shiraz-28T | 1760 | 0.538181 | 0         |  |
|        |      | Shiraz-29T | 1800 | 0.672527 | 0         |  |
|        |      | Shiraz-29T | 1800 | 0.672527 | 0         |  |
|        |      | Shiraz-32T | 1869 | 0.776805 | 0         |  |
|        |      | Shiraz-32T | 1869 | 0.776805 | 0         |  |
|        |      | Shiraz-35T | 1932 | 0.507141 | 0         |  |
|        |      | Shiraz-35T | 1932 | 0.507141 | 0         |  |
|        |      | Shiraz-58T | 2221 | 0.871948 | 0         |  |
|        |      | Shiraz-58T | 2221 | 0.871948 | 0         |  |
|        |      | Shiraz-71T | 2260 | 0.68394  | 0         |  |
|        |      | Shiraz-71T | 2260 | 0.68394  | 0         |  |
|        |      | Shiraz-71T | 2262 | 0.986748 | 0         |  |
|        |      | Shiraz-71T | 2262 | 0.986748 | 0         |  |
|        |      | Shiraz-3T  | 239  | 0        | -0.28395  |  |
|        |      | Shiraz-3T  | 239  | 0        | -0.28395  |  |
|        |      | Shiraz-4T  | 260  | 0        | -0.324128 |  |
|        |      | Shiraz-4T  | 260  | 0        | -0.324128 |  |

|  |            |      |          |           |  |
|--|------------|------|----------|-----------|--|
|  | Shiraz-16T | 294  | 0.655804 | 0         |  |
|  | Shiraz-16T | 294  | 0.655804 | 0         |  |
|  | Shiraz-31T | 345  | 0.103301 | 0         |  |
|  | Shiraz-31T | 345  | 0.103301 | 0         |  |
|  | Shiraz-36T | 431  | 0        | -0.78035  |  |
|  | Shiraz-36T | 431  | 0        | -0.78035  |  |
|  | Shiraz-36T | 432  | 0        | -0.6692   |  |
|  | Shiraz-36T | 432  | 0        | -0.6692   |  |
|  | Shiraz-44T | 891  | 0        | -0.954044 |  |
|  | Shiraz-44T | 891  | 0        | -0.954044 |  |
|  | Shiraz-49T | 1166 | 0        | -0.917235 |  |
|  | Shiraz-49T | 1166 | 0        | -0.917235 |  |
|  | Shiraz-77T | 1282 | 0.213849 | 0         |  |
|  | Shiraz-77T | 1282 | 0.213849 | 0         |  |
|  | Shiraz-9T  | 1368 | 0.199713 | 0         |  |
|  | Shiraz-9T  | 1368 | 0.199713 | 0         |  |
|  | Shiraz-18T | 1456 | 0.608534 | 0         |  |
|  | Shiraz-18T | 1456 | 0.608534 | 0         |  |
|  | Shiraz-22T | 1669 | 0.695915 | 0         |  |
|  | Shiraz-22T | 1669 | 0.695915 | 0         |  |
|  | Shiraz-25T | 1717 | 0.420447 | 0         |  |
|  | Shiraz-25T | 1717 | 0.420447 | 0         |  |
|  | Shiraz-28T | 1760 | 0.538181 | 0         |  |
|  | Shiraz-28T | 1760 | 0.538181 | 0         |  |
|  | Shiraz-29T | 1800 | 0.672527 | 0         |  |
|  | Shiraz-29T | 1800 | 0.672527 | 0         |  |
|  | Shiraz-32T | 1869 | 0.776805 | 0         |  |
|  | Shiraz-32T | 1869 | 0.776805 | 0         |  |
|  | Shiraz-35T | 1932 | 0.507141 | 0         |  |
|  | Shiraz-35T | 1932 | 0.507141 | 0         |  |
|  | Shiraz-58T | 2221 | 0.871948 | 0         |  |
|  | Shiraz-58T | 2221 | 0.871948 | 0         |  |
|  | Shiraz-71T | 2260 | 0.68394  | 0         |  |
|  | Shiraz-71T | 2260 | 0.68394  | 0         |  |
|  | Shiraz-71T | 2262 | 0.986748 | 0         |  |
|  | Shiraz-71T | 2262 | 0.986748 | 0         |  |
|  | Shiraz-3T  | 239  | 0        | -0.28395  |  |
|  | Shiraz-3T  | 239  | 0        | -0.28395  |  |
|  | Shiraz-4T  | 260  | 0        | -0.324128 |  |
|  | Shiraz-4T  | 260  | 0        | -0.324128 |  |
|  | Shiraz-16T | 294  | 0.655804 | 0         |  |
|  | Shiraz-16T | 294  | 0.655804 | 0         |  |
|  | Shiraz-31T | 345  | 0.103301 | 0         |  |
|  | Shiraz-31T | 345  | 0.103301 | 0         |  |
|  | Shiraz-36T | 431  | 0        | -0.78035  |  |
|  | Shiraz-36T | 431  | 0        | -0.78035  |  |
|  | Shiraz-36T | 432  | 0        | -0.6692   |  |

|         |      |            |      |          |           |  |  |
|---------|------|------------|------|----------|-----------|--|--|
|         |      | Shiraz-36T | 432  | 0        | -0.6692   |  |  |
|         |      | Shiraz-44T | 891  | 0        | -0.954044 |  |  |
|         |      | Shiraz-44T | 891  | 0        | -0.954044 |  |  |
|         |      | Shiraz-49T | 1166 | 0        | -0.917235 |  |  |
|         |      | Shiraz-49T | 1166 | 0        | -0.917235 |  |  |
|         |      | Shiraz-77T | 1282 | 0.213849 | 0         |  |  |
|         |      | Shiraz-77T | 1282 | 0.213849 | 0         |  |  |
|         |      | Shiraz-9T  | 1368 | 0.199713 | 0         |  |  |
|         |      | Shiraz-9T  | 1368 | 0.199713 | 0         |  |  |
|         |      | Shiraz-18T | 1456 | 0.608534 | 0         |  |  |
|         |      | Shiraz-18T | 1456 | 0.608534 | 0         |  |  |
|         |      | Shiraz-22T | 1669 | 0.695915 | 0         |  |  |
|         |      | Shiraz-22T | 1669 | 0.695915 | 0         |  |  |
|         |      | Shiraz-25T | 1717 | 0.420447 | 0         |  |  |
|         |      | Shiraz-25T | 1717 | 0.420447 | 0         |  |  |
|         |      | Shiraz-28T | 1760 | 0.538181 | 0         |  |  |
|         |      | Shiraz-28T | 1760 | 0.538181 | 0         |  |  |
|         |      | Shiraz-29T | 1800 | 0.672527 | 0         |  |  |
|         |      | Shiraz-29T | 1800 | 0.672527 | 0         |  |  |
|         |      | Shiraz-32T | 1869 | 0.776805 | 0         |  |  |
|         |      | Shiraz-32T | 1869 | 0.776805 | 0         |  |  |
|         |      | Shiraz-35T | 1932 | 0.507141 | 0         |  |  |
|         |      | Shiraz-35T | 1932 | 0.507141 | 0         |  |  |
|         |      | Shiraz-58T | 2221 | 0.871948 | 0         |  |  |
|         |      | Shiraz-58T | 2221 | 0.871948 | 0         |  |  |
|         |      | Shiraz-71T | 2260 | 0.68394  | 0         |  |  |
|         |      | Shiraz-71T | 2260 | 0.68394  | 0         |  |  |
|         |      | Shiraz-71T | 2262 | 0.986748 | 0         |  |  |
|         |      | Shiraz-71T | 2262 | 0.986748 | 0         |  |  |
| MAGED4B | chrX | Shiraz-3T  | 239  | 0        | -0.28395  |  |  |
|         |      | Shiraz-3T  | 239  | 0        | -0.28395  |  |  |
|         |      | Shiraz-4T  | 260  | 0        | -0.324128 |  |  |
|         |      | Shiraz-4T  | 260  | 0        | -0.324128 |  |  |
|         |      | Shiraz-16T | 294  | 0.655804 | 0         |  |  |
|         |      | Shiraz-16T | 294  | 0.655804 | 0         |  |  |
|         |      | Shiraz-31T | 345  | 0.103301 | 0         |  |  |
|         |      | Shiraz-31T | 345  | 0.103301 | 0         |  |  |
|         |      | Shiraz-36T | 431  | 0        | -0.78035  |  |  |
|         |      | Shiraz-36T | 431  | 0        | -0.78035  |  |  |
|         |      | Shiraz-36T | 432  | 0        | -0.6692   |  |  |
|         |      | Shiraz-36T | 432  | 0        | -0.6692   |  |  |
|         |      | Shiraz-44T | 891  | 0        | -0.954044 |  |  |
|         |      | Shiraz-44T | 891  | 0        | -0.954044 |  |  |
|         |      | Shiraz-49T | 1166 | 0        | -0.917235 |  |  |
|         |      | Shiraz-49T | 1166 | 0        | -0.917235 |  |  |
|         |      | Shiraz-77T | 1282 | 0.213849 | 0         |  |  |
|         |      | Shiraz-77T | 1282 | 0.213849 | 0         |  |  |

|  |            |      |          |           |  |
|--|------------|------|----------|-----------|--|
|  | Shiraz-9T  | 1368 | 0.199713 | 0         |  |
|  | Shiraz-9T  | 1368 | 0.199713 | 0         |  |
|  | Shiraz-18T | 1456 | 0.608534 | 0         |  |
|  | Shiraz-18T | 1456 | 0.608534 | 0         |  |
|  | Shiraz-22T | 1669 | 0.695915 | 0         |  |
|  | Shiraz-22T | 1669 | 0.695915 | 0         |  |
|  | Shiraz-25T | 1717 | 0.420447 | 0         |  |
|  | Shiraz-25T | 1717 | 0.420447 | 0         |  |
|  | Shiraz-28T | 1760 | 0.538181 | 0         |  |
|  | Shiraz-28T | 1760 | 0.538181 | 0         |  |
|  | Shiraz-29T | 1800 | 0.672527 | 0         |  |
|  | Shiraz-29T | 1800 | 0.672527 | 0         |  |
|  | Shiraz-32T | 1869 | 0.776805 | 0         |  |
|  | Shiraz-32T | 1869 | 0.776805 | 0         |  |
|  | Shiraz-35T | 1932 | 0.507141 | 0         |  |
|  | Shiraz-35T | 1932 | 0.507141 | 0         |  |
|  | Shiraz-58T | 2221 | 0.871948 | 0         |  |
|  | Shiraz-58T | 2221 | 0.871948 | 0         |  |
|  | Shiraz-71T | 2260 | 0.68394  | 0         |  |
|  | Shiraz-71T | 2260 | 0.68394  | 0         |  |
|  | Shiraz-71T | 2262 | 0.986748 | 0         |  |
|  | Shiraz-71T | 2262 | 0.986748 | 0         |  |
|  | Shiraz-3T  | 239  | 0        | -0.28395  |  |
|  | Shiraz-3T  | 239  | 0        | -0.28395  |  |
|  | Shiraz-4T  | 260  | 0        | -0.324128 |  |
|  | Shiraz-4T  | 260  | 0        | -0.324128 |  |
|  | Shiraz-16T | 294  | 0.655804 | 0         |  |
|  | Shiraz-16T | 294  | 0.655804 | 0         |  |
|  | Shiraz-31T | 345  | 0.103301 | 0         |  |
|  | Shiraz-31T | 345  | 0.103301 | 0         |  |
|  | Shiraz-36T | 431  | 0        | -0.78035  |  |
|  | Shiraz-36T | 431  | 0        | -0.78035  |  |
|  | Shiraz-36T | 432  | 0        | -0.6692   |  |
|  | Shiraz-36T | 432  | 0        | -0.6692   |  |
|  | Shiraz-44T | 891  | 0        | -0.954044 |  |
|  | Shiraz-44T | 891  | 0        | -0.954044 |  |
|  | Shiraz-49T | 1166 | 0        | -0.917235 |  |
|  | Shiraz-49T | 1166 | 0        | -0.917235 |  |
|  | Shiraz-77T | 1282 | 0.213849 | 0         |  |
|  | Shiraz-77T | 1282 | 0.213849 | 0         |  |
|  | Shiraz-9T  | 1368 | 0.199713 | 0         |  |
|  | Shiraz-9T  | 1368 | 0.199713 | 0         |  |
|  | Shiraz-18T | 1456 | 0.608534 | 0         |  |
|  | Shiraz-18T | 1456 | 0.608534 | 0         |  |
|  | Shiraz-22T | 1669 | 0.695915 | 0         |  |
|  | Shiraz-22T | 1669 | 0.695915 | 0         |  |
|  | Shiraz-25T | 1717 | 0.420447 | 0         |  |

|  |  |            |      |          |           |  |  |
|--|--|------------|------|----------|-----------|--|--|
|  |  | Shiraz-25T | 1717 | 0.420447 | 0         |  |  |
|  |  | Shiraz-28T | 1760 | 0.538181 | 0         |  |  |
|  |  | Shiraz-28T | 1760 | 0.538181 | 0         |  |  |
|  |  | Shiraz-29T | 1800 | 0.672527 | 0         |  |  |
|  |  | Shiraz-29T | 1800 | 0.672527 | 0         |  |  |
|  |  | Shiraz-32T | 1869 | 0.776805 | 0         |  |  |
|  |  | Shiraz-32T | 1869 | 0.776805 | 0         |  |  |
|  |  | Shiraz-35T | 1932 | 0.507141 | 0         |  |  |
|  |  | Shiraz-35T | 1932 | 0.507141 | 0         |  |  |
|  |  | Shiraz-58T | 2221 | 0.871948 | 0         |  |  |
|  |  | Shiraz-58T | 2221 | 0.871948 | 0         |  |  |
|  |  | Shiraz-71T | 2260 | 0.68394  | 0         |  |  |
|  |  | Shiraz-71T | 2260 | 0.68394  | 0         |  |  |
|  |  | Shiraz-71T | 2262 | 0.986748 | 0         |  |  |
|  |  | Shiraz-71T | 2262 | 0.986748 | 0         |  |  |
|  |  | Shiraz-3T  | 239  | 0        | -0.28395  |  |  |
|  |  | Shiraz-3T  | 239  | 0        | -0.28395  |  |  |
|  |  | Shiraz-4T  | 260  | 0        | -0.324128 |  |  |
|  |  | Shiraz-4T  | 260  | 0        | -0.324128 |  |  |
|  |  | Shiraz-16T | 294  | 0.655804 | 0         |  |  |
|  |  | Shiraz-16T | 294  | 0.655804 | 0         |  |  |
|  |  | Shiraz-31T | 345  | 0.103301 | 0         |  |  |
|  |  | Shiraz-31T | 345  | 0.103301 | 0         |  |  |
|  |  | Shiraz-36T | 431  | 0        | -0.78035  |  |  |
|  |  | Shiraz-36T | 431  | 0        | -0.78035  |  |  |
|  |  | Shiraz-36T | 432  | 0        | -0.6692   |  |  |
|  |  | Shiraz-36T | 432  | 0        | -0.6692   |  |  |
|  |  | Shiraz-44T | 891  | 0        | -0.954044 |  |  |
|  |  | Shiraz-44T | 891  | 0        | -0.954044 |  |  |
|  |  | Shiraz-49T | 1166 | 0        | -0.917235 |  |  |
|  |  | Shiraz-49T | 1166 | 0        | -0.917235 |  |  |
|  |  | Shiraz-77T | 1282 | 0.213849 | 0         |  |  |
|  |  | Shiraz-77T | 1282 | 0.213849 | 0         |  |  |
|  |  | Shiraz-9T  | 1368 | 0.199713 | 0         |  |  |
|  |  | Shiraz-9T  | 1368 | 0.199713 | 0         |  |  |
|  |  | Shiraz-18T | 1456 | 0.608534 | 0         |  |  |
|  |  | Shiraz-18T | 1456 | 0.608534 | 0         |  |  |
|  |  | Shiraz-22T | 1669 | 0.695915 | 0         |  |  |
|  |  | Shiraz-22T | 1669 | 0.695915 | 0         |  |  |
|  |  | Shiraz-25T | 1717 | 0.420447 | 0         |  |  |
|  |  | Shiraz-25T | 1717 | 0.420447 | 0         |  |  |
|  |  | Shiraz-28T | 1760 | 0.538181 | 0         |  |  |
|  |  | Shiraz-28T | 1760 | 0.538181 | 0         |  |  |
|  |  | Shiraz-29T | 1800 | 0.672527 | 0         |  |  |
|  |  | Shiraz-29T | 1800 | 0.672527 | 0         |  |  |
|  |  | Shiraz-32T | 1869 | 0.776805 | 0         |  |  |
|  |  | Shiraz-32T | 1869 | 0.776805 | 0         |  |  |

|        |      |            |      |          |           |  |
|--------|------|------------|------|----------|-----------|--|
|        |      | Shiraz-35T | 1932 | 0.507141 | 0         |  |
|        |      | Shiraz-35T | 1932 | 0.507141 | 0         |  |
|        |      | Shiraz-58T | 2221 | 0.871948 | 0         |  |
|        |      | Shiraz-58T | 2221 | 0.871948 | 0         |  |
|        |      | Shiraz-71T | 2260 | 0.68394  | 0         |  |
|        |      | Shiraz-71T | 2260 | 0.68394  | 0         |  |
|        |      | Shiraz-71T | 2262 | 0.986748 | 0         |  |
|        |      | Shiraz-71T | 2262 | 0.986748 | 0         |  |
| MAGEE1 | chrX | Shiraz-3T  | 242  | 0        | -0.336434 |  |
|        |      | Shiraz-4T  | 261  | 0        | -0.336249 |  |
|        |      | Shiraz-16T | 295  | 0.591657 | 0         |  |
|        |      | Shiraz-36T | 433  | 0        | -0.803961 |  |
|        |      | Shiraz-44T | 899  | 0        | -1.09697  |  |
|        |      | Shiraz-49T | 1170 | 0        | -0.967436 |  |
|        |      | Shiraz-18T | 1457 | 0.643204 | 0         |  |
|        |      | Shiraz-22T | 1673 | 0.611783 | 0         |  |
|        |      | Shiraz-25T | 1719 | 0.472955 | 0         |  |
|        |      | Shiraz-28T | 1762 | 0.562311 | 0         |  |
|        |      | Shiraz-29T | 1801 | 0.815343 | 0         |  |
|        |      | Shiraz-32T | 1870 | 0.729766 | 0         |  |
|        |      | Shiraz-35T | 1933 | 0.488535 | 0         |  |
|        |      | Shiraz-58T | 2223 | 0.833364 | 0         |  |
|        |      | Shiraz-71T | 2263 | 0.975531 | 0         |  |
|        |      | Shiraz-3T  | 242  | 0        | -0.336434 |  |
|        |      | Shiraz-4T  | 261  | 0        | -0.336249 |  |
|        |      | Shiraz-16T | 295  | 0.591657 | 0         |  |
|        |      | Shiraz-36T | 433  | 0        | -0.803961 |  |
|        |      | Shiraz-44T | 899  | 0        | -1.09697  |  |
|        |      | Shiraz-49T | 1170 | 0        | -0.967436 |  |
|        |      | Shiraz-18T | 1457 | 0.643204 | 0         |  |
|        |      | Shiraz-22T | 1673 | 0.611783 | 0         |  |
|        |      | Shiraz-25T | 1719 | 0.472955 | 0         |  |
|        |      | Shiraz-28T | 1762 | 0.562311 | 0         |  |
|        |      | Shiraz-29T | 1801 | 0.815343 | 0         |  |
|        |      | Shiraz-32T | 1870 | 0.729766 | 0         |  |
|        |      | Shiraz-35T | 1933 | 0.488535 | 0         |  |
|        |      | Shiraz-58T | 2223 | 0.833364 | 0         |  |
|        |      | Shiraz-71T | 2263 | 0.975531 | 0         |  |
|        |      | Shiraz-3T  | 242  | 0        | -0.336434 |  |
|        |      | Shiraz-4T  | 261  | 0        | -0.336249 |  |
|        |      | Shiraz-16T | 295  | 0.591657 | 0         |  |
|        |      | Shiraz-36T | 433  | 0        | -0.803961 |  |
|        |      | Shiraz-44T | 899  | 0        | -1.09697  |  |
|        |      | Shiraz-49T | 1170 | 0        | -0.967436 |  |
|        |      | Shiraz-18T | 1457 | 0.643204 | 0         |  |
|        |      | Shiraz-22T | 1673 | 0.611783 | 0         |  |
|        |      | Shiraz-25T | 1719 | 0.472955 | 0         |  |

|        |      |            |      |          |           |  |  |
|--------|------|------------|------|----------|-----------|--|--|
|        |      | Shiraz-28T | 1762 | 0.562311 | 0         |  |  |
|        |      | Shiraz-29T | 1801 | 0.815343 | 0         |  |  |
|        |      | Shiraz-32T | 1870 | 0.729766 | 0         |  |  |
|        |      | Shiraz-35T | 1933 | 0.488535 | 0         |  |  |
|        |      | Shiraz-58T | 2223 | 0.833364 | 0         |  |  |
|        |      | Shiraz-71T | 2263 | 0.975531 | 0         |  |  |
| MAGEE2 | chrX | Shiraz-3T  | 242  | 0        | -0.336434 |  |  |
|        |      | Shiraz-4T  | 261  | 0        | -0.336249 |  |  |
|        |      | Shiraz-16T | 295  | 0.591657 | 0         |  |  |
|        |      | Shiraz-36T | 433  | 0        | -0.803961 |  |  |
|        |      | Shiraz-44T | 899  | 0        | -1.09697  |  |  |
|        |      | Shiraz-49T | 1170 | 0        | -0.967436 |  |  |
|        |      | Shiraz-18T | 1457 | 0.643204 | 0         |  |  |
|        |      | Shiraz-22T | 1673 | 0.611783 | 0         |  |  |
|        |      | Shiraz-25T | 1719 | 0.472955 | 0         |  |  |
|        |      | Shiraz-28T | 1762 | 0.562311 | 0         |  |  |
|        |      | Shiraz-29T | 1801 | 0.815343 | 0         |  |  |
|        |      | Shiraz-32T | 1870 | 0.729766 | 0         |  |  |
|        |      | Shiraz-35T | 1933 | 0.488535 | 0         |  |  |
|        |      | Shiraz-58T | 2223 | 0.833364 | 0         |  |  |
|        |      | Shiraz-71T | 2263 | 0.975531 | 0         |  |  |
|        |      | Shiraz-3T  | 242  | 0        | -0.336434 |  |  |
|        |      | Shiraz-4T  | 261  | 0        | -0.336249 |  |  |
|        |      | Shiraz-16T | 295  | 0.591657 | 0         |  |  |
|        |      | Shiraz-36T | 433  | 0        | -0.803961 |  |  |
|        |      | Shiraz-44T | 899  | 0        | -1.09697  |  |  |
|        |      | Shiraz-49T | 1170 | 0        | -0.967436 |  |  |
|        |      | Shiraz-18T | 1457 | 0.643204 | 0         |  |  |
|        |      | Shiraz-22T | 1673 | 0.611783 | 0         |  |  |
|        |      | Shiraz-25T | 1719 | 0.472955 | 0         |  |  |
|        |      | Shiraz-28T | 1762 | 0.562311 | 0         |  |  |
|        |      | Shiraz-29T | 1801 | 0.815343 | 0         |  |  |
|        |      | Shiraz-32T | 1870 | 0.729766 | 0         |  |  |
|        |      | Shiraz-35T | 1933 | 0.488535 | 0         |  |  |
|        |      | Shiraz-58T | 2223 | 0.833364 | 0         |  |  |
|        |      | Shiraz-71T | 2263 | 0.975531 | 0         |  |  |
|        |      | Shiraz-3T  | 242  | 0        | -0.336434 |  |  |
|        |      | Shiraz-4T  | 261  | 0        | -0.336249 |  |  |
|        |      | Shiraz-16T | 295  | 0.591657 | 0         |  |  |
|        |      | Shiraz-36T | 433  | 0        | -0.803961 |  |  |
|        |      | Shiraz-44T | 899  | 0        | -1.09697  |  |  |
|        |      | Shiraz-49T | 1170 | 0        | -0.967436 |  |  |
|        |      | Shiraz-18T | 1457 | 0.643204 | 0         |  |  |
|        |      | Shiraz-22T | 1673 | 0.611783 | 0         |  |  |
|        |      | Shiraz-25T | 1719 | 0.472955 | 0         |  |  |
|        |      | Shiraz-28T | 1762 | 0.562311 | 0         |  |  |
|        |      | Shiraz-29T | 1801 | 0.815343 | 0         |  |  |



|        |      |            |      |          |           |  |
|--------|------|------------|------|----------|-----------|--|
|        |      | Shiraz-32T | 1870 | 0.729766 | 0         |  |
|        |      | Shiraz-35T | 1933 | 0.488535 | 0         |  |
|        |      | Shiraz-58T | 2223 | 0.833364 | 0         |  |
|        |      | Shiraz-71T | 2263 | 0.975531 | 0         |  |
| MAGEH1 | chrX | Shiraz-3T  | 240  | 0        | -0.346245 |  |
|        |      | Shiraz-4T  | 260  | 0        | -0.324128 |  |
|        |      | Shiraz-16T | 294  | 0.655804 | 0         |  |
|        |      | Shiraz-36T | 431  | 0        | -0.78035  |  |
|        |      | Shiraz-44T | 891  | 0        | -0.954044 |  |
|        |      | Shiraz-49T | 1166 | 0        | -0.917235 |  |
|        |      | Shiraz-9T  | 1368 | 0.199713 | 0         |  |
|        |      | Shiraz-18T | 1456 | 0.608534 | 0         |  |
|        |      | Shiraz-22T | 1669 | 0.695915 | 0         |  |
|        |      | Shiraz-25T | 1717 | 0.420447 | 0         |  |
|        |      | Shiraz-28T | 1760 | 0.538181 | 0         |  |
|        |      | Shiraz-29T | 1800 | 0.672527 | 0         |  |
|        |      | Shiraz-32T | 1869 | 0.776805 | 0         |  |
|        |      | Shiraz-35T | 1932 | 0.507141 | 0         |  |
|        |      | Shiraz-58T | 2221 | 0.871948 | 0         |  |
|        |      | Shiraz-71T | 2260 | 0.68394  | 0         |  |
|        |      | Shiraz-71T | 2262 | 0.986748 | 0         |  |
|        |      | Shiraz-3T  | 240  | 0        | -0.346245 |  |
|        |      | Shiraz-4T  | 260  | 0        | -0.324128 |  |
|        |      | Shiraz-16T | 294  | 0.655804 | 0         |  |
|        |      | Shiraz-36T | 431  | 0        | -0.78035  |  |
|        |      | Shiraz-44T | 891  | 0        | -0.954044 |  |
|        |      | Shiraz-49T | 1166 | 0        | -0.917235 |  |
|        |      | Shiraz-9T  | 1368 | 0.199713 | 0         |  |
|        |      | Shiraz-18T | 1456 | 0.608534 | 0         |  |
|        |      | Shiraz-22T | 1669 | 0.695915 | 0         |  |
|        |      | Shiraz-25T | 1717 | 0.420447 | 0         |  |
|        |      | Shiraz-28T | 1760 | 0.538181 | 0         |  |
|        |      | Shiraz-29T | 1800 | 0.672527 | 0         |  |
|        |      | Shiraz-32T | 1869 | 0.776805 | 0         |  |
|        |      | Shiraz-35T | 1932 | 0.507141 | 0         |  |
|        |      | Shiraz-58T | 2221 | 0.871948 | 0         |  |
|        |      | Shiraz-71T | 2260 | 0.68394  | 0         |  |
|        |      | Shiraz-71T | 2262 | 0.986748 | 0         |  |
|        |      | Shiraz-3T  | 240  | 0        | -0.346245 |  |
|        |      | Shiraz-4T  | 260  | 0        | -0.324128 |  |
|        |      | Shiraz-16T | 294  | 0.655804 | 0         |  |
|        |      | Shiraz-36T | 431  | 0        | -0.78035  |  |
|        |      | Shiraz-44T | 891  | 0        | -0.954044 |  |
|        |      | Shiraz-49T | 1166 | 0        | -0.917235 |  |
|        |      | Shiraz-9T  | 1368 | 0.199713 | 0         |  |
|        |      | Shiraz-18T | 1456 | 0.608534 | 0         |  |
|        |      | Shiraz-22T | 1669 | 0.695915 | 0         |  |

|       |      |            |      |          |           |  |  |
|-------|------|------------|------|----------|-----------|--|--|
|       |      | Shiraz-25T | 1717 | 0.420447 | 0         |  |  |
|       |      | Shiraz-28T | 1760 | 0.538181 | 0         |  |  |
|       |      | Shiraz-29T | 1800 | 0.672527 | 0         |  |  |
|       |      | Shiraz-32T | 1869 | 0.776805 | 0         |  |  |
|       |      | Shiraz-35T | 1932 | 0.507141 | 0         |  |  |
|       |      | Shiraz-58T | 2221 | 0.871948 | 0         |  |  |
|       |      | Shiraz-71T | 2260 | 0.68394  | 0         |  |  |
|       |      | Shiraz-71T | 2262 | 0.986748 | 0         |  |  |
| MAGI2 | chr7 | Shiraz-3T  | 90   | 0.219276 | 0         |  |  |
|       |      | Shiraz-3T  | 93   | 0        | -0.058023 |  |  |
|       |      | Shiraz-4T  | 253  | 0.372918 | 0         |  |  |
|       |      | Shiraz-36T | 378  | 0.179558 | 0         |  |  |
|       |      | Shiraz-36T | 380  | 0.083883 | 0         |  |  |
|       |      | Shiraz-42T | 454  | 0.145717 | 0         |  |  |
|       |      | Shiraz-44T | 638  | 0        | -0.433476 |  |  |
|       |      | Shiraz-46T | 943  | 0.093799 | 0         |  |  |
|       |      | Shiraz-46T | 945  | 0        | -0.014838 |  |  |
|       |      | Shiraz-47T | 1029 | 0        | -0.096586 |  |  |
|       |      | Shiraz-49T | 1119 | 0        | -0.157331 |  |  |
|       |      | Shiraz-77T | 1225 | 0        | -0.117922 |  |  |
|       |      | Shiraz-77T | 1226 | 0        | -0.233724 |  |  |
|       |      | Shiraz-12T | 1390 | 0        | -0.237897 |  |  |
|       |      | Shiraz-18T | 1434 | 0.244465 | 0         |  |  |
|       |      | Shiraz-22T | 1549 | 0        | -0.319623 |  |  |
|       |      | Shiraz-22T | 1550 | 0        | -0.577052 |  |  |
|       |      | Shiraz-25T | 1698 | 0.21835  | 0         |  |  |
|       |      | Shiraz-28T | 1735 | 0.350744 | 0         |  |  |
|       |      | Shiraz-29T | 1778 | 0.120767 | 0         |  |  |
|       |      | Shiraz-38T | 1951 | 0.250891 | 0         |  |  |
|       |      | Shiraz-53T | 2078 | 0.287202 | 0         |  |  |
|       |      | Shiraz-58T | 2159 | 0        | -0.219521 |  |  |
|       |      | Shiraz-71T | 2238 | 0.603631 | 0         |  |  |
|       |      | Shiraz-71T | 2239 | 0.310785 | 0         |  |  |
|       |      | Shiraz-3T  | 90   | 0.219276 | 0         |  |  |
|       |      | Shiraz-3T  | 93   | 0        | -0.058023 |  |  |
|       |      | Shiraz-4T  | 253  | 0.372918 | 0         |  |  |
|       |      | Shiraz-36T | 378  | 0.179558 | 0         |  |  |
|       |      | Shiraz-36T | 380  | 0.083883 | 0         |  |  |
|       |      | Shiraz-42T | 454  | 0.145717 | 0         |  |  |
|       |      | Shiraz-44T | 638  | 0        | -0.433476 |  |  |
|       |      | Shiraz-46T | 943  | 0.093799 | 0         |  |  |
|       |      | Shiraz-46T | 945  | 0        | -0.014838 |  |  |
|       |      | Shiraz-47T | 1029 | 0        | -0.096586 |  |  |
|       |      | Shiraz-49T | 1119 | 0        | -0.157331 |  |  |
|       |      | Shiraz-77T | 1225 | 0        | -0.117922 |  |  |
|       |      | Shiraz-77T | 1226 | 0        | -0.233724 |  |  |
|       |      | Shiraz-12T | 1390 | 0        | -0.237897 |  |  |

|       |      |            |      |          |           |  |  |
|-------|------|------------|------|----------|-----------|--|--|
|       |      | Shiraz-18T | 1434 | 0.244465 | 0         |  |  |
|       |      | Shiraz-22T | 1549 | 0        | -0.319623 |  |  |
|       |      | Shiraz-22T | 1550 | 0        | -0.577052 |  |  |
|       |      | Shiraz-25T | 1698 | 0.21835  | 0         |  |  |
|       |      | Shiraz-28T | 1735 | 0.350744 | 0         |  |  |
|       |      | Shiraz-29T | 1778 | 0.120767 | 0         |  |  |
|       |      | Shiraz-38T | 1951 | 0.250891 | 0         |  |  |
|       |      | Shiraz-53T | 2078 | 0.287202 | 0         |  |  |
|       |      | Shiraz-58T | 2159 | 0        | -0.219521 |  |  |
|       |      | Shiraz-71T | 2238 | 0.603631 | 0         |  |  |
|       |      | Shiraz-71T | 2239 | 0.310785 | 0         |  |  |
|       |      | Shiraz-3T  | 90   | 0.219276 | 0         |  |  |
|       |      | Shiraz-3T  | 93   | 0        | -0.058023 |  |  |
|       |      | Shiraz-4T  | 253  | 0.372918 | 0         |  |  |
|       |      | Shiraz-36T | 378  | 0.179558 | 0         |  |  |
|       |      | Shiraz-36T | 380  | 0.083883 | 0         |  |  |
|       |      | Shiraz-42T | 454  | 0.145717 | 0         |  |  |
|       |      | Shiraz-44T | 638  | 0        | -0.433476 |  |  |
|       |      | Shiraz-46T | 943  | 0.093799 | 0         |  |  |
|       |      | Shiraz-46T | 945  | 0        | -0.014838 |  |  |
|       |      | Shiraz-47T | 1029 | 0        | -0.096586 |  |  |
|       |      | Shiraz-49T | 1119 | 0        | -0.157331 |  |  |
|       |      | Shiraz-77T | 1225 | 0        | -0.117922 |  |  |
|       |      | Shiraz-77T | 1226 | 0        | -0.233724 |  |  |
|       |      | Shiraz-12T | 1390 | 0        | -0.237897 |  |  |
|       |      | Shiraz-18T | 1434 | 0.244465 | 0         |  |  |
|       |      | Shiraz-22T | 1549 | 0        | -0.319623 |  |  |
|       |      | Shiraz-22T | 1550 | 0        | -0.577052 |  |  |
|       |      | Shiraz-25T | 1698 | 0.21835  | 0         |  |  |
|       |      | Shiraz-28T | 1735 | 0.350744 | 0         |  |  |
|       |      | Shiraz-29T | 1778 | 0.120767 | 0         |  |  |
|       |      | Shiraz-38T | 1951 | 0.250891 | 0         |  |  |
|       |      | Shiraz-53T | 2078 | 0.287202 | 0         |  |  |
|       |      | Shiraz-58T | 2159 | 0        | -0.219521 |  |  |
|       |      | Shiraz-71T | 2238 | 0.603631 | 0         |  |  |
|       |      | Shiraz-71T | 2239 | 0.310785 | 0         |  |  |
| MAGIX | chrX | Shiraz-3T  | 238  | 0.472087 | 0         |  |  |
|       |      | Shiraz-3T  | 238  | 0.472087 | 0         |  |  |
|       |      | Shiraz-4T  | 260  | 0        | -0.324128 |  |  |
|       |      | Shiraz-4T  | 260  | 0        | -0.324128 |  |  |
|       |      | Shiraz-16T | 294  | 0.655804 | 0         |  |  |
|       |      | Shiraz-16T | 294  | 0.655804 | 0         |  |  |
|       |      | Shiraz-31T | 345  | 0.103301 | 0         |  |  |
|       |      | Shiraz-31T | 345  | 0.103301 | 0         |  |  |
|       |      | Shiraz-36T | 431  | 0        | -0.78035  |  |  |
|       |      | Shiraz-36T | 431  | 0        | -0.78035  |  |  |
|       |      | Shiraz-36T | 432  | 0        | -0.6692   |  |  |

|  |            |      |          |           |  |
|--|------------|------|----------|-----------|--|
|  | Shiraz-36T | 432  | 0        | -0.6692   |  |
|  | Shiraz-44T | 891  | 0        | -0.954044 |  |
|  | Shiraz-44T | 891  | 0        | -0.954044 |  |
|  | Shiraz-44T | 896  | 0        | -0.109108 |  |
|  | Shiraz-44T | 896  | 0        | -0.109108 |  |
|  | Shiraz-44T | 897  | 0.486937 | 0         |  |
|  | Shiraz-44T | 897  | 0.486937 | 0         |  |
|  | Shiraz-46T | 991  | 0.139564 | 0         |  |
|  | Shiraz-46T | 991  | 0.139564 | 0         |  |
|  | Shiraz-47T | 1084 | 0.24185  | 0         |  |
|  | Shiraz-47T | 1084 | 0.24185  | 0         |  |
|  | Shiraz-49T | 1166 | 0        | -0.917235 |  |
|  | Shiraz-49T | 1166 | 0        | -0.917235 |  |
|  | Shiraz-49T | 1169 | 0        | -0.583529 |  |
|  | Shiraz-49T | 1169 | 0        | -0.583529 |  |
|  | Shiraz-77T | 1282 | 0.213849 | 0         |  |
|  | Shiraz-77T | 1282 | 0.213849 | 0         |  |
|  | Shiraz-9T  | 1368 | 0.199713 | 0         |  |
|  | Shiraz-9T  | 1368 | 0.199713 | 0         |  |
|  | Shiraz-9T  | 1369 | 0.703374 | 0         |  |
|  | Shiraz-9T  | 1369 | 0.703374 | 0         |  |
|  | Shiraz-18T | 1455 | 0        | -0.186773 |  |
|  | Shiraz-18T | 1455 | 0        | -0.186773 |  |
|  | Shiraz-22T | 1669 | 0.695915 | 0         |  |
|  | Shiraz-22T | 1669 | 0.695915 | 0         |  |
|  | Shiraz-22T | 1672 | 1.01678  | 0         |  |
|  | Shiraz-22T | 1672 | 1.01678  | 0         |  |
|  | Shiraz-25T | 1717 | 0.420447 | 0         |  |
|  | Shiraz-25T | 1717 | 0.420447 | 0         |  |
|  | Shiraz-28T | 1760 | 0.538181 | 0         |  |
|  | Shiraz-28T | 1760 | 0.538181 | 0         |  |
|  | Shiraz-29T | 1800 | 0.672527 | 0         |  |
|  | Shiraz-29T | 1800 | 0.672527 | 0         |  |
|  | Shiraz-32T | 1869 | 0.776805 | 0         |  |
|  | Shiraz-32T | 1869 | 0.776805 | 0         |  |
|  | Shiraz-35T | 1932 | 0.507141 | 0         |  |
|  | Shiraz-35T | 1932 | 0.507141 | 0         |  |
|  | Shiraz-58T | 2221 | 0.871948 | 0         |  |
|  | Shiraz-58T | 2221 | 0.871948 | 0         |  |
|  | Shiraz-71T | 2260 | 0.68394  | 0         |  |
|  | Shiraz-71T | 2260 | 0.68394  | 0         |  |
|  | Shiraz-71T | 2262 | 0.986748 | 0         |  |
|  | Shiraz-71T | 2262 | 0.986748 | 0         |  |
|  | Shiraz-3T  | 238  | 0.472087 | 0         |  |
|  | Shiraz-3T  | 238  | 0.472087 | 0         |  |
|  | Shiraz-4T  | 260  | 0        | -0.324128 |  |
|  | Shiraz-4T  | 260  | 0        | -0.324128 |  |

|  |  |            |      |          |           |  |  |
|--|--|------------|------|----------|-----------|--|--|
|  |  | Shiraz-16T | 294  | 0.655804 | 0         |  |  |
|  |  | Shiraz-16T | 294  | 0.655804 | 0         |  |  |
|  |  | Shiraz-31T | 345  | 0.103301 | 0         |  |  |
|  |  | Shiraz-31T | 345  | 0.103301 | 0         |  |  |
|  |  | Shiraz-36T | 431  | 0        | -0.78035  |  |  |
|  |  | Shiraz-36T | 431  | 0        | -0.78035  |  |  |
|  |  | Shiraz-36T | 432  | 0        | -0.6692   |  |  |
|  |  | Shiraz-36T | 432  | 0        | -0.6692   |  |  |
|  |  | Shiraz-44T | 891  | 0        | -0.954044 |  |  |
|  |  | Shiraz-44T | 891  | 0        | -0.954044 |  |  |
|  |  | Shiraz-44T | 896  | 0        | -0.109108 |  |  |
|  |  | Shiraz-44T | 896  | 0        | -0.109108 |  |  |
|  |  | Shiraz-44T | 897  | 0.486937 | 0         |  |  |
|  |  | Shiraz-44T | 897  | 0.486937 | 0         |  |  |
|  |  | Shiraz-46T | 991  | 0.139564 | 0         |  |  |
|  |  | Shiraz-46T | 991  | 0.139564 | 0         |  |  |
|  |  | Shiraz-47T | 1084 | 0.24185  | 0         |  |  |
|  |  | Shiraz-47T | 1084 | 0.24185  | 0         |  |  |
|  |  | Shiraz-49T | 1166 | 0        | -0.917235 |  |  |
|  |  | Shiraz-49T | 1166 | 0        | -0.917235 |  |  |
|  |  | Shiraz-49T | 1169 | 0        | -0.583529 |  |  |
|  |  | Shiraz-49T | 1169 | 0        | -0.583529 |  |  |
|  |  | Shiraz-77T | 1282 | 0.213849 | 0         |  |  |
|  |  | Shiraz-77T | 1282 | 0.213849 | 0         |  |  |
|  |  | Shiraz-9T  | 1368 | 0.199713 | 0         |  |  |
|  |  | Shiraz-9T  | 1368 | 0.199713 | 0         |  |  |
|  |  | Shiraz-9T  | 1369 | 0.703374 | 0         |  |  |
|  |  | Shiraz-9T  | 1369 | 0.703374 | 0         |  |  |
|  |  | Shiraz-18T | 1455 | 0        | -0.186773 |  |  |
|  |  | Shiraz-18T | 1455 | 0        | -0.186773 |  |  |
|  |  | Shiraz-22T | 1669 | 0.695915 | 0         |  |  |
|  |  | Shiraz-22T | 1669 | 0.695915 | 0         |  |  |
|  |  | Shiraz-22T | 1672 | 1.01678  | 0         |  |  |
|  |  | Shiraz-22T | 1672 | 1.01678  | 0         |  |  |
|  |  | Shiraz-25T | 1717 | 0.420447 | 0         |  |  |
|  |  | Shiraz-25T | 1717 | 0.420447 | 0         |  |  |
|  |  | Shiraz-28T | 1760 | 0.538181 | 0         |  |  |
|  |  | Shiraz-28T | 1760 | 0.538181 | 0         |  |  |
|  |  | Shiraz-29T | 1800 | 0.672527 | 0         |  |  |
|  |  | Shiraz-29T | 1800 | 0.672527 | 0         |  |  |
|  |  | Shiraz-32T | 1869 | 0.776805 | 0         |  |  |
|  |  | Shiraz-32T | 1869 | 0.776805 | 0         |  |  |
|  |  | Shiraz-35T | 1932 | 0.507141 | 0         |  |  |
|  |  | Shiraz-35T | 1932 | 0.507141 | 0         |  |  |
|  |  | Shiraz-58T | 2221 | 0.871948 | 0         |  |  |
|  |  | Shiraz-58T | 2221 | 0.871948 | 0         |  |  |
|  |  | Shiraz-71T | 2260 | 0.68394  | 0         |  |  |

|  |  |            |      |          |           |  |
|--|--|------------|------|----------|-----------|--|
|  |  | Shiraz-71T | 2260 | 0.68394  | 0         |  |
|  |  | Shiraz-71T | 2262 | 0.986748 | 0         |  |
|  |  | Shiraz-71T | 2262 | 0.986748 | 0         |  |
|  |  | Shiraz-3T  | 238  | 0.472087 | 0         |  |
|  |  | Shiraz-3T  | 238  | 0.472087 | 0         |  |
|  |  | Shiraz-4T  | 260  | 0        | -0.324128 |  |
|  |  | Shiraz-4T  | 260  | 0        | -0.324128 |  |
|  |  | Shiraz-16T | 294  | 0.655804 | 0         |  |
|  |  | Shiraz-16T | 294  | 0.655804 | 0         |  |
|  |  | Shiraz-31T | 345  | 0.103301 | 0         |  |
|  |  | Shiraz-31T | 345  | 0.103301 | 0         |  |
|  |  | Shiraz-36T | 431  | 0        | -0.78035  |  |
|  |  | Shiraz-36T | 431  | 0        | -0.78035  |  |
|  |  | Shiraz-36T | 432  | 0        | -0.6692   |  |
|  |  | Shiraz-36T | 432  | 0        | -0.6692   |  |
|  |  | Shiraz-44T | 891  | 0        | -0.954044 |  |
|  |  | Shiraz-44T | 891  | 0        | -0.954044 |  |
|  |  | Shiraz-44T | 896  | 0        | -0.109108 |  |
|  |  | Shiraz-44T | 896  | 0        | -0.109108 |  |
|  |  | Shiraz-44T | 897  | 0.486937 | 0         |  |
|  |  | Shiraz-44T | 897  | 0.486937 | 0         |  |
|  |  | Shiraz-46T | 991  | 0.139564 | 0         |  |
|  |  | Shiraz-46T | 991  | 0.139564 | 0         |  |
|  |  | Shiraz-47T | 1084 | 0.24185  | 0         |  |
|  |  | Shiraz-47T | 1084 | 0.24185  | 0         |  |
|  |  | Shiraz-49T | 1166 | 0        | -0.917235 |  |
|  |  | Shiraz-49T | 1166 | 0        | -0.917235 |  |
|  |  | Shiraz-49T | 1169 | 0        | -0.583529 |  |
|  |  | Shiraz-49T | 1169 | 0        | -0.583529 |  |
|  |  | Shiraz-77T | 1282 | 0.213849 | 0         |  |
|  |  | Shiraz-77T | 1282 | 0.213849 | 0         |  |
|  |  | Shiraz-9T  | 1368 | 0.199713 | 0         |  |
|  |  | Shiraz-9T  | 1368 | 0.199713 | 0         |  |
|  |  | Shiraz-9T  | 1369 | 0.703374 | 0         |  |
|  |  | Shiraz-9T  | 1369 | 0.703374 | 0         |  |
|  |  | Shiraz-18T | 1455 | 0        | -0.186773 |  |
|  |  | Shiraz-18T | 1455 | 0        | -0.186773 |  |
|  |  | Shiraz-22T | 1669 | 0.695915 | 0         |  |
|  |  | Shiraz-22T | 1669 | 0.695915 | 0         |  |
|  |  | Shiraz-22T | 1672 | 1.01678  | 0         |  |
|  |  | Shiraz-22T | 1672 | 1.01678  | 0         |  |
|  |  | Shiraz-25T | 1717 | 0.420447 | 0         |  |
|  |  | Shiraz-25T | 1717 | 0.420447 | 0         |  |
|  |  | Shiraz-28T | 1760 | 0.538181 | 0         |  |
|  |  | Shiraz-28T | 1760 | 0.538181 | 0         |  |
|  |  | Shiraz-29T | 1800 | 0.672527 | 0         |  |
|  |  | Shiraz-29T | 1800 | 0.672527 | 0         |  |

|       |      |            |      |          |           |  |  |
|-------|------|------------|------|----------|-----------|--|--|
|       |      | Shiraz-32T | 1869 | 0.776805 | 0         |  |  |
|       |      | Shiraz-32T | 1869 | 0.776805 | 0         |  |  |
|       |      | Shiraz-35T | 1932 | 0.507141 | 0         |  |  |
|       |      | Shiraz-35T | 1932 | 0.507141 | 0         |  |  |
|       |      | Shiraz-58T | 2221 | 0.871948 | 0         |  |  |
|       |      | Shiraz-58T | 2221 | 0.871948 | 0         |  |  |
|       |      | Shiraz-71T | 2260 | 0.68394  | 0         |  |  |
|       |      | Shiraz-71T | 2260 | 0.68394  | 0         |  |  |
|       |      | Shiraz-71T | 2262 | 0.986748 | 0         |  |  |
|       |      | Shiraz-71T | 2262 | 0.986748 | 0         |  |  |
| MAGT1 | chrX | Shiraz-3T  | 242  | 0        | -0.336434 |  |  |
|       |      | Shiraz-4T  | 261  | 0        | -0.336249 |  |  |
|       |      | Shiraz-16T | 295  | 0.591657 | 0         |  |  |
|       |      | Shiraz-36T | 433  | 0        | -0.803961 |  |  |
|       |      | Shiraz-44T | 899  | 0        | -1.09697  |  |  |
|       |      | Shiraz-49T | 1170 | 0        | -0.967436 |  |  |
|       |      | Shiraz-18T | 1457 | 0.643204 | 0         |  |  |
|       |      | Shiraz-22T | 1673 | 0.611783 | 0         |  |  |
|       |      | Shiraz-25T | 1719 | 0.472955 | 0         |  |  |
|       |      | Shiraz-28T | 1762 | 0.562311 | 0         |  |  |
|       |      | Shiraz-29T | 1801 | 0.815343 | 0         |  |  |
|       |      | Shiraz-32T | 1870 | 0.729766 | 0         |  |  |
|       |      | Shiraz-35T | 1933 | 0.488535 | 0         |  |  |
|       |      | Shiraz-58T | 2223 | 0.833364 | 0         |  |  |
|       |      | Shiraz-71T | 2263 | 0.975531 | 0         |  |  |
|       |      | Shiraz-3T  | 242  | 0        | -0.336434 |  |  |
|       |      | Shiraz-4T  | 261  | 0        | -0.336249 |  |  |
|       |      | Shiraz-16T | 295  | 0.591657 | 0         |  |  |
|       |      | Shiraz-36T | 433  | 0        | -0.803961 |  |  |
|       |      | Shiraz-44T | 899  | 0        | -1.09697  |  |  |
|       |      | Shiraz-49T | 1170 | 0        | -0.967436 |  |  |
|       |      | Shiraz-18T | 1457 | 0.643204 | 0         |  |  |
|       |      | Shiraz-22T | 1673 | 0.611783 | 0         |  |  |
|       |      | Shiraz-25T | 1719 | 0.472955 | 0         |  |  |
|       |      | Shiraz-28T | 1762 | 0.562311 | 0         |  |  |
|       |      | Shiraz-29T | 1801 | 0.815343 | 0         |  |  |
|       |      | Shiraz-32T | 1870 | 0.729766 | 0         |  |  |
|       |      | Shiraz-35T | 1933 | 0.488535 | 0         |  |  |
|       |      | Shiraz-58T | 2223 | 0.833364 | 0         |  |  |
|       |      | Shiraz-71T | 2263 | 0.975531 | 0         |  |  |
|       |      | Shiraz-3T  | 242  | 0        | -0.336434 |  |  |
|       |      | Shiraz-4T  | 261  | 0        | -0.336249 |  |  |
|       |      | Shiraz-16T | 295  | 0.591657 | 0         |  |  |
|       |      | Shiraz-36T | 433  | 0        | -0.803961 |  |  |
|       |      | Shiraz-44T | 899  | 0        | -1.09697  |  |  |
|       |      | Shiraz-49T | 1170 | 0        | -0.967436 |  |  |
|       |      | Shiraz-18T | 1457 | 0.643204 | 0         |  |  |

|        |      |            |      |          |           |  |
|--------|------|------------|------|----------|-----------|--|
|        |      | Shiraz-22T | 1673 | 0.611783 | 0         |  |
|        |      | Shiraz-25T | 1719 | 0.472955 | 0         |  |
|        |      | Shiraz-28T | 1762 | 0.562311 | 0         |  |
|        |      | Shiraz-29T | 1801 | 0.815343 | 0         |  |
|        |      | Shiraz-32T | 1870 | 0.729766 | 0         |  |
|        |      | Shiraz-35T | 1933 | 0.488535 | 0         |  |
|        |      | Shiraz-58T | 2223 | 0.833364 | 0         |  |
|        |      | Shiraz-71T | 2263 | 0.975531 | 0         |  |
| MAMLD1 | chrX | Shiraz-3T  | 242  | 0        | -0.336434 |  |
|        |      | Shiraz-4T  | 261  | 0        | -0.336249 |  |
|        |      | Shiraz-16T | 295  | 0.591657 | 0         |  |
|        |      | Shiraz-36T | 433  | 0        | -0.803961 |  |
|        |      | Shiraz-42T | 480  | 0        | -0.232915 |  |
|        |      | Shiraz-44T | 899  | 0        | -1.09697  |  |
|        |      | Shiraz-49T | 1170 | 0        | -0.967436 |  |
|        |      | Shiraz-9T  | 1370 | 0.690073 | 0         |  |
|        |      | Shiraz-18T | 1457 | 0.643204 | 0         |  |
|        |      | Shiraz-22T | 1673 | 0.611783 | 0         |  |
|        |      | Shiraz-22T | 1678 | 0.911625 | 0         |  |
|        |      | Shiraz-25T | 1719 | 0.472955 | 0         |  |
|        |      | Shiraz-28T | 1762 | 0.562311 | 0         |  |
|        |      | Shiraz-29T | 1801 | 0.815343 | 0         |  |
|        |      | Shiraz-32T | 1870 | 0.729766 | 0         |  |
|        |      | Shiraz-35T | 1933 | 0.488535 | 0         |  |
|        |      | Shiraz-58T | 2223 | 0.833364 | 0         |  |
|        |      | Shiraz-58T | 2226 | 1.074663 | 0         |  |
|        |      | Shiraz-71T | 2263 | 0.975531 | 0         |  |
|        |      | Shiraz-3T  | 242  | 0        | -0.336434 |  |
|        |      | Shiraz-4T  | 261  | 0        | -0.336249 |  |
|        |      | Shiraz-16T | 295  | 0.591657 | 0         |  |
|        |      | Shiraz-36T | 433  | 0        | -0.803961 |  |
|        |      | Shiraz-42T | 480  | 0        | -0.232915 |  |
|        |      | Shiraz-44T | 899  | 0        | -1.09697  |  |
|        |      | Shiraz-49T | 1170 | 0        | -0.967436 |  |
|        |      | Shiraz-9T  | 1370 | 0.690073 | 0         |  |
|        |      | Shiraz-18T | 1457 | 0.643204 | 0         |  |
|        |      | Shiraz-22T | 1673 | 0.611783 | 0         |  |
|        |      | Shiraz-22T | 1678 | 0.911625 | 0         |  |
|        |      | Shiraz-25T | 1719 | 0.472955 | 0         |  |
|        |      | Shiraz-28T | 1762 | 0.562311 | 0         |  |
|        |      | Shiraz-29T | 1801 | 0.815343 | 0         |  |
|        |      | Shiraz-32T | 1870 | 0.729766 | 0         |  |
|        |      | Shiraz-35T | 1933 | 0.488535 | 0         |  |
|        |      | Shiraz-58T | 2223 | 0.833364 | 0         |  |
|        |      | Shiraz-58T | 2226 | 1.074663 | 0         |  |
|        |      | Shiraz-71T | 2263 | 0.975531 | 0         |  |
|        |      | Shiraz-3T  | 242  | 0        | -0.336434 |  |



|      |      |            |      |          |           |  |  |
|------|------|------------|------|----------|-----------|--|--|
|      |      | Shiraz-4T  | 261  | 0        | -0.336249 |  |  |
|      |      | Shiraz-16T | 295  | 0.591657 | 0         |  |  |
|      |      | Shiraz-36T | 433  | 0        | -0.803961 |  |  |
|      |      | Shiraz-42T | 480  | 0        | -0.232915 |  |  |
|      |      | Shiraz-44T | 899  | 0        | -1.09697  |  |  |
|      |      | Shiraz-49T | 1170 | 0        | -0.967436 |  |  |
|      |      | Shiraz-9T  | 1370 | 0.690073 | 0         |  |  |
|      |      | Shiraz-18T | 1457 | 0.643204 | 0         |  |  |
|      |      | Shiraz-22T | 1673 | 0.611783 | 0         |  |  |
|      |      | Shiraz-22T | 1678 | 0.911625 | 0         |  |  |
|      |      | Shiraz-25T | 1719 | 0.472955 | 0         |  |  |
|      |      | Shiraz-28T | 1762 | 0.562311 | 0         |  |  |
|      |      | Shiraz-29T | 1801 | 0.815343 | 0         |  |  |
|      |      | Shiraz-32T | 1870 | 0.729766 | 0         |  |  |
|      |      | Shiraz-35T | 1933 | 0.488535 | 0         |  |  |
|      |      | Shiraz-58T | 2223 | 0.833364 | 0         |  |  |
|      |      | Shiraz-58T | 2226 | 1.074663 | 0         |  |  |
|      |      | Shiraz-71T | 2263 | 0.975531 | 0         |  |  |
| MAOA | chrX | Shiraz-3T  | 235  | 0        | -0.28401  |  |  |
|      |      | Shiraz-4T  | 260  | 0        | -0.324128 |  |  |
|      |      | Shiraz-16T | 294  | 0.655804 | 0         |  |  |
|      |      | Shiraz-31T | 345  | 0.103301 | 0         |  |  |
|      |      | Shiraz-36T | 431  | 0        | -0.78035  |  |  |
|      |      | Shiraz-36T | 432  | 0        | -0.6692   |  |  |
|      |      | Shiraz-44T | 891  | 0        | -0.954044 |  |  |
|      |      | Shiraz-46T | 991  | 0.139564 | 0         |  |  |
|      |      | Shiraz-49T | 1166 | 0        | -0.917235 |  |  |
|      |      | Shiraz-9T  | 1368 | 0.199713 | 0         |  |  |
|      |      | Shiraz-18T | 1455 | 0        | -0.186773 |  |  |
|      |      | Shiraz-22T | 1669 | 0.695915 | 0         |  |  |
|      |      | Shiraz-25T | 1717 | 0.420447 | 0         |  |  |
|      |      | Shiraz-28T | 1760 | 0.538181 | 0         |  |  |
|      |      | Shiraz-29T | 1800 | 0.672527 | 0         |  |  |
|      |      | Shiraz-32T | 1869 | 0.776805 | 0         |  |  |
|      |      | Shiraz-35T | 1932 | 0.507141 | 0         |  |  |
|      |      | Shiraz-40T | 2051 | 0.098506 | 0         |  |  |
|      |      | Shiraz-58T | 2221 | 0.871948 | 0         |  |  |
|      |      | Shiraz-71T | 2260 | 0.68394  | 0         |  |  |
|      |      | Shiraz-71T | 2262 | 0.986748 | 0         |  |  |
|      |      | Shiraz-3T  | 235  | 0        | -0.28401  |  |  |
|      |      | Shiraz-4T  | 260  | 0        | -0.324128 |  |  |
|      |      | Shiraz-16T | 294  | 0.655804 | 0         |  |  |
|      |      | Shiraz-31T | 345  | 0.103301 | 0         |  |  |
|      |      | Shiraz-36T | 431  | 0        | -0.78035  |  |  |
|      |      | Shiraz-36T | 432  | 0        | -0.6692   |  |  |
|      |      | Shiraz-44T | 891  | 0        | -0.954044 |  |  |
|      |      | Shiraz-46T | 991  | 0.139564 | 0         |  |  |

|      |      |            |      |          |           |  |  |
|------|------|------------|------|----------|-----------|--|--|
|      |      | Shiraz-49T | 1166 | 0        | -0.917235 |  |  |
|      |      | Shiraz-9T  | 1368 | 0.199713 | 0         |  |  |
|      |      | Shiraz-18T | 1455 | 0        | -0.186773 |  |  |
|      |      | Shiraz-22T | 1669 | 0.695915 | 0         |  |  |
|      |      | Shiraz-25T | 1717 | 0.420447 | 0         |  |  |
|      |      | Shiraz-28T | 1760 | 0.538181 | 0         |  |  |
|      |      | Shiraz-29T | 1800 | 0.672527 | 0         |  |  |
|      |      | Shiraz-32T | 1869 | 0.776805 | 0         |  |  |
|      |      | Shiraz-35T | 1932 | 0.507141 | 0         |  |  |
|      |      | Shiraz-40T | 2051 | 0.098506 | 0         |  |  |
|      |      | Shiraz-58T | 2221 | 0.871948 | 0         |  |  |
|      |      | Shiraz-71T | 2260 | 0.68394  | 0         |  |  |
|      |      | Shiraz-71T | 2262 | 0.986748 | 0         |  |  |
|      |      | Shiraz-3T  | 235  | 0        | -0.28401  |  |  |
|      |      | Shiraz-4T  | 260  | 0        | -0.324128 |  |  |
|      |      | Shiraz-16T | 294  | 0.655804 | 0         |  |  |
|      |      | Shiraz-31T | 345  | 0.103301 | 0         |  |  |
|      |      | Shiraz-36T | 431  | 0        | -0.78035  |  |  |
|      |      | Shiraz-36T | 432  | 0        | -0.6692   |  |  |
|      |      | Shiraz-44T | 891  | 0        | -0.954044 |  |  |
|      |      | Shiraz-46T | 991  | 0.139564 | 0         |  |  |
|      |      | Shiraz-49T | 1166 | 0        | -0.917235 |  |  |
|      |      | Shiraz-9T  | 1368 | 0.199713 | 0         |  |  |
|      |      | Shiraz-18T | 1455 | 0        | -0.186773 |  |  |
|      |      | Shiraz-22T | 1669 | 0.695915 | 0         |  |  |
|      |      | Shiraz-25T | 1717 | 0.420447 | 0         |  |  |
|      |      | Shiraz-28T | 1760 | 0.538181 | 0         |  |  |
|      |      | Shiraz-29T | 1800 | 0.672527 | 0         |  |  |
|      |      | Shiraz-32T | 1869 | 0.776805 | 0         |  |  |
|      |      | Shiraz-35T | 1932 | 0.507141 | 0         |  |  |
|      |      | Shiraz-40T | 2051 | 0.098506 | 0         |  |  |
|      |      | Shiraz-58T | 2221 | 0.871948 | 0         |  |  |
|      |      | Shiraz-71T | 2260 | 0.68394  | 0         |  |  |
|      |      | Shiraz-71T | 2262 | 0.986748 | 0         |  |  |
| MAOB | chrX | Shiraz-3T  | 235  | 0        | -0.28401  |  |  |
|      |      | Shiraz-4T  | 260  | 0        | -0.324128 |  |  |
|      |      | Shiraz-16T | 294  | 0.655804 | 0         |  |  |
|      |      | Shiraz-31T | 345  | 0.103301 | 0         |  |  |
|      |      | Shiraz-36T | 431  | 0        | -0.78035  |  |  |
|      |      | Shiraz-36T | 432  | 0        | -0.6692   |  |  |
|      |      | Shiraz-44T | 891  | 0        | -0.954044 |  |  |
|      |      | Shiraz-46T | 991  | 0.139564 | 0         |  |  |
|      |      | Shiraz-49T | 1166 | 0        | -0.917235 |  |  |
|      |      | Shiraz-9T  | 1368 | 0.199713 | 0         |  |  |
|      |      | Shiraz-18T | 1455 | 0        | -0.186773 |  |  |
|      |      | Shiraz-22T | 1669 | 0.695915 | 0         |  |  |
|      |      | Shiraz-25T | 1717 | 0.420447 | 0         |  |  |

|  |  |            |      |          |           |  |  |
|--|--|------------|------|----------|-----------|--|--|
|  |  | Shiraz-28T | 1760 | 0.538181 | 0         |  |  |
|  |  | Shiraz-29T | 1800 | 0.672527 | 0         |  |  |
|  |  | Shiraz-32T | 1869 | 0.776805 | 0         |  |  |
|  |  | Shiraz-35T | 1932 | 0.507141 | 0         |  |  |
|  |  | Shiraz-40T | 2051 | 0.098506 | 0         |  |  |
|  |  | Shiraz-58T | 2221 | 0.871948 | 0         |  |  |
|  |  | Shiraz-71T | 2260 | 0.68394  | 0         |  |  |
|  |  | Shiraz-71T | 2262 | 0.986748 | 0         |  |  |
|  |  | Shiraz-3T  | 235  | 0        | -0.28401  |  |  |
|  |  | Shiraz-4T  | 260  | 0        | -0.324128 |  |  |
|  |  | Shiraz-16T | 294  | 0.655804 | 0         |  |  |
|  |  | Shiraz-31T | 345  | 0.103301 | 0         |  |  |
|  |  | Shiraz-36T | 431  | 0        | -0.78035  |  |  |
|  |  | Shiraz-36T | 432  | 0        | -0.6692   |  |  |
|  |  | Shiraz-44T | 891  | 0        | -0.954044 |  |  |
|  |  | Shiraz-46T | 991  | 0.139564 | 0         |  |  |
|  |  | Shiraz-49T | 1166 | 0        | -0.917235 |  |  |
|  |  | Shiraz-9T  | 1368 | 0.199713 | 0         |  |  |
|  |  | Shiraz-18T | 1455 | 0        | -0.186773 |  |  |
|  |  | Shiraz-22T | 1669 | 0.695915 | 0         |  |  |
|  |  | Shiraz-25T | 1717 | 0.420447 | 0         |  |  |
|  |  | Shiraz-28T | 1760 | 0.538181 | 0         |  |  |
|  |  | Shiraz-29T | 1800 | 0.672527 | 0         |  |  |
|  |  | Shiraz-32T | 1869 | 0.776805 | 0         |  |  |
|  |  | Shiraz-35T | 1932 | 0.507141 | 0         |  |  |
|  |  | Shiraz-40T | 2051 | 0.098506 | 0         |  |  |
|  |  | Shiraz-58T | 2221 | 0.871948 | 0         |  |  |
|  |  | Shiraz-71T | 2260 | 0.68394  | 0         |  |  |
|  |  | Shiraz-71T | 2262 | 0.986748 | 0         |  |  |
|  |  | Shiraz-3T  | 235  | 0        | -0.28401  |  |  |
|  |  | Shiraz-4T  | 260  | 0        | -0.324128 |  |  |
|  |  | Shiraz-16T | 294  | 0.655804 | 0         |  |  |
|  |  | Shiraz-31T | 345  | 0.103301 | 0         |  |  |
|  |  | Shiraz-36T | 431  | 0        | -0.78035  |  |  |
|  |  | Shiraz-36T | 432  | 0        | -0.6692   |  |  |
|  |  | Shiraz-44T | 891  | 0        | -0.954044 |  |  |
|  |  | Shiraz-46T | 991  | 0.139564 | 0         |  |  |
|  |  | Shiraz-49T | 1166 | 0        | -0.917235 |  |  |
|  |  | Shiraz-9T  | 1368 | 0.199713 | 0         |  |  |
|  |  | Shiraz-18T | 1455 | 0        | -0.186773 |  |  |
|  |  | Shiraz-22T | 1669 | 0.695915 | 0         |  |  |
|  |  | Shiraz-25T | 1717 | 0.420447 | 0         |  |  |
|  |  | Shiraz-28T | 1760 | 0.538181 | 0         |  |  |
|  |  | Shiraz-29T | 1800 | 0.672527 | 0         |  |  |
|  |  | Shiraz-32T | 1869 | 0.776805 | 0         |  |  |
|  |  | Shiraz-35T | 1932 | 0.507141 | 0         |  |  |
|  |  | Shiraz-40T | 2051 | 0.098506 | 0         |  |  |

|         |      |            |      |          |           |  |
|---------|------|------------|------|----------|-----------|--|
|         |      | Shiraz-58T | 2221 | 0.871948 | 0         |  |
|         |      | Shiraz-71T | 2260 | 0.68394  | 0         |  |
|         |      | Shiraz-71T | 2262 | 0.986748 | 0         |  |
| MAP3K15 | chrX | Shiraz-3T  | 235  | 0        | -0.28401  |  |
|         |      | Shiraz-4T  | 260  | 0        | -0.324128 |  |
|         |      | Shiraz-16T | 294  | 0.655804 | 0         |  |
|         |      | Shiraz-36T | 431  | 0        | -0.78035  |  |
|         |      | Shiraz-44T | 891  | 0        | -0.954044 |  |
|         |      | Shiraz-49T | 1166 | 0        | -0.917235 |  |
|         |      | Shiraz-77T | 1281 | 0.136627 | 0         |  |
|         |      | Shiraz-9T  | 1368 | 0.199713 | 0         |  |
|         |      | Shiraz-18T | 1455 | 0        | -0.186773 |  |
|         |      | Shiraz-22T | 1669 | 0.695915 | 0         |  |
|         |      | Shiraz-25T | 1717 | 0.420447 | 0         |  |
|         |      | Shiraz-28T | 1760 | 0.538181 | 0         |  |
|         |      | Shiraz-29T | 1800 | 0.672527 | 0         |  |
|         |      | Shiraz-32T | 1869 | 0.776805 | 0         |  |
|         |      | Shiraz-35T | 1932 | 0.507141 | 0         |  |
|         |      | Shiraz-40T | 2051 | 0.098506 | 0         |  |
|         |      | Shiraz-58T | 2221 | 0.871948 | 0         |  |
|         |      | Shiraz-71T | 2260 | 0.68394  | 0         |  |
|         |      | Shiraz-71T | 2261 | 0.508399 | 0         |  |
|         |      | Shiraz-3T  | 235  | 0        | -0.28401  |  |
|         |      | Shiraz-4T  | 260  | 0        | -0.324128 |  |
|         |      | Shiraz-16T | 294  | 0.655804 | 0         |  |
|         |      | Shiraz-36T | 431  | 0        | -0.78035  |  |
|         |      | Shiraz-44T | 891  | 0        | -0.954044 |  |
|         |      | Shiraz-49T | 1166 | 0        | -0.917235 |  |
|         |      | Shiraz-77T | 1281 | 0.136627 | 0         |  |
|         |      | Shiraz-9T  | 1368 | 0.199713 | 0         |  |
|         |      | Shiraz-18T | 1455 | 0        | -0.186773 |  |
|         |      | Shiraz-22T | 1669 | 0.695915 | 0         |  |
|         |      | Shiraz-25T | 1717 | 0.420447 | 0         |  |
|         |      | Shiraz-28T | 1760 | 0.538181 | 0         |  |
|         |      | Shiraz-29T | 1800 | 0.672527 | 0         |  |
|         |      | Shiraz-32T | 1869 | 0.776805 | 0         |  |
|         |      | Shiraz-35T | 1932 | 0.507141 | 0         |  |
|         |      | Shiraz-40T | 2051 | 0.098506 | 0         |  |
|         |      | Shiraz-58T | 2221 | 0.871948 | 0         |  |
|         |      | Shiraz-71T | 2260 | 0.68394  | 0         |  |
|         |      | Shiraz-71T | 2261 | 0.508399 | 0         |  |
|         |      | Shiraz-3T  | 235  | 0        | -0.28401  |  |
|         |      | Shiraz-4T  | 260  | 0        | -0.324128 |  |
|         |      | Shiraz-16T | 294  | 0.655804 | 0         |  |
|         |      | Shiraz-36T | 431  | 0        | -0.78035  |  |
|         |      | Shiraz-44T | 891  | 0        | -0.954044 |  |
|         |      | Shiraz-49T | 1166 | 0        | -0.917235 |  |

|           |      |            |      |          |           |  |
|-----------|------|------------|------|----------|-----------|--|
|           |      | Shiraz-77T | 1281 | 0.136627 | 0         |  |
|           |      | Shiraz-9T  | 1368 | 0.199713 | 0         |  |
|           |      | Shiraz-18T | 1455 | 0        | -0.186773 |  |
|           |      | Shiraz-22T | 1669 | 0.695915 | 0         |  |
|           |      | Shiraz-25T | 1717 | 0.420447 | 0         |  |
|           |      | Shiraz-28T | 1760 | 0.538181 | 0         |  |
|           |      | Shiraz-29T | 1800 | 0.672527 | 0         |  |
|           |      | Shiraz-32T | 1869 | 0.776805 | 0         |  |
|           |      | Shiraz-35T | 1932 | 0.507141 | 0         |  |
|           |      | Shiraz-40T | 2051 | 0.098506 | 0         |  |
|           |      | Shiraz-58T | 2221 | 0.871948 | 0         |  |
|           |      | Shiraz-71T | 2260 | 0.68394  | 0         |  |
|           |      | Shiraz-71T | 2261 | 0.508399 | 0         |  |
| MAP3K7IP3 | chrX | Shiraz-3T  | 235  | 0        | -0.28401  |  |
|           |      | Shiraz-3T  | 236  | 0        | -0.435445 |  |
|           |      | Shiraz-4T  | 260  | 0        | -0.324128 |  |
|           |      | Shiraz-16T | 294  | 0.655804 | 0         |  |
|           |      | Shiraz-36T | 431  | 0        | -0.78035  |  |
|           |      | Shiraz-44T | 891  | 0        | -0.954044 |  |
|           |      | Shiraz-44T | 893  | 0        | -1.364406 |  |
|           |      | Shiraz-44T | 894  | 0        | -0.776734 |  |
|           |      | Shiraz-47T | 1083 | 0        | -0.103285 |  |
|           |      | Shiraz-49T | 1166 | 0        | -0.917235 |  |
|           |      | Shiraz-49T | 1168 | 0        | -1.073859 |  |
|           |      | Shiraz-9T  | 1368 | 0.199713 | 0         |  |
|           |      | Shiraz-18T | 1455 | 0        | -0.186773 |  |
|           |      | Shiraz-22T | 1669 | 0.695915 | 0         |  |
|           |      | Shiraz-22T | 1671 | 0.369309 | 0         |  |
|           |      | Shiraz-25T | 1717 | 0.420447 | 0         |  |
|           |      | Shiraz-25T | 1718 | 0        | -0.452703 |  |
|           |      | Shiraz-28T | 1760 | 0.538181 | 0         |  |
|           |      | Shiraz-28T | 1761 | 0        | -0.695601 |  |
|           |      | Shiraz-29T | 1800 | 0.672527 | 0         |  |
|           |      | Shiraz-32T | 1869 | 0.776805 | 0         |  |
|           |      | Shiraz-35T | 1932 | 0.507141 | 0         |  |
|           |      | Shiraz-40T | 2051 | 0.098506 | 0         |  |
|           |      | Shiraz-58T | 2221 | 0.871948 | 0         |  |
|           |      | Shiraz-58T | 2222 | 0.679664 | 0         |  |
|           |      | Shiraz-71T | 2260 | 0.68394  | 0         |  |
|           |      | Shiraz-71T | 2261 | 0.508399 | 0         |  |
|           |      | Shiraz-3T  | 235  | 0        | -0.28401  |  |
|           |      | Shiraz-3T  | 236  | 0        | -0.435445 |  |
|           |      | Shiraz-4T  | 260  | 0        | -0.324128 |  |
|           |      | Shiraz-16T | 294  | 0.655804 | 0         |  |
|           |      | Shiraz-36T | 431  | 0        | -0.78035  |  |
|           |      | Shiraz-44T | 891  | 0        | -0.954044 |  |
|           |      | Shiraz-44T | 893  | 0        | -1.364406 |  |

|  |            |      |          |           |  |
|--|------------|------|----------|-----------|--|
|  | Shiraz-44T | 894  | 0        | -0.776734 |  |
|  | Shiraz-47T | 1083 | 0        | -0.103285 |  |
|  | Shiraz-49T | 1166 | 0        | -0.917235 |  |
|  | Shiraz-49T | 1168 | 0        | -1.073859 |  |
|  | Shiraz-9T  | 1368 | 0.199713 | 0         |  |
|  | Shiraz-18T | 1455 | 0        | -0.186773 |  |
|  | Shiraz-22T | 1669 | 0.695915 | 0         |  |
|  | Shiraz-22T | 1671 | 0.369309 | 0         |  |
|  | Shiraz-25T | 1717 | 0.420447 | 0         |  |
|  | Shiraz-25T | 1718 | 0        | -0.452703 |  |
|  | Shiraz-28T | 1760 | 0.538181 | 0         |  |
|  | Shiraz-28T | 1761 | 0        | -0.695601 |  |
|  | Shiraz-29T | 1800 | 0.672527 | 0         |  |
|  | Shiraz-32T | 1869 | 0.776805 | 0         |  |
|  | Shiraz-35T | 1932 | 0.507141 | 0         |  |
|  | Shiraz-40T | 2051 | 0.098506 | 0         |  |
|  | Shiraz-58T | 2221 | 0.871948 | 0         |  |
|  | Shiraz-58T | 2222 | 0.679664 | 0         |  |
|  | Shiraz-71T | 2260 | 0.68394  | 0         |  |
|  | Shiraz-71T | 2261 | 0.508399 | 0         |  |
|  | Shiraz-3T  | 235  | 0        | -0.28401  |  |
|  | Shiraz-3T  | 236  | 0        | -0.435445 |  |
|  | Shiraz-4T  | 260  | 0        | -0.324128 |  |
|  | Shiraz-16T | 294  | 0.655804 | 0         |  |
|  | Shiraz-36T | 431  | 0        | -0.78035  |  |
|  | Shiraz-44T | 891  | 0        | -0.954044 |  |
|  | Shiraz-44T | 893  | 0        | -1.364406 |  |
|  | Shiraz-44T | 894  | 0        | -0.776734 |  |
|  | Shiraz-47T | 1083 | 0        | -0.103285 |  |
|  | Shiraz-49T | 1166 | 0        | -0.917235 |  |
|  | Shiraz-49T | 1168 | 0        | -1.073859 |  |
|  | Shiraz-9T  | 1368 | 0.199713 | 0         |  |
|  | Shiraz-18T | 1455 | 0        | -0.186773 |  |
|  | Shiraz-22T | 1669 | 0.695915 | 0         |  |
|  | Shiraz-22T | 1671 | 0.369309 | 0         |  |
|  | Shiraz-25T | 1717 | 0.420447 | 0         |  |
|  | Shiraz-25T | 1718 | 0        | -0.452703 |  |
|  | Shiraz-28T | 1760 | 0.538181 | 0         |  |
|  | Shiraz-28T | 1761 | 0        | -0.695601 |  |
|  | Shiraz-29T | 1800 | 0.672527 | 0         |  |
|  | Shiraz-32T | 1869 | 0.776805 | 0         |  |
|  | Shiraz-35T | 1932 | 0.507141 | 0         |  |
|  | Shiraz-40T | 2051 | 0.098506 | 0         |  |
|  | Shiraz-58T | 2221 | 0.871948 | 0         |  |
|  | Shiraz-58T | 2222 | 0.679664 | 0         |  |
|  | Shiraz-71T | 2260 | 0.68394  | 0         |  |
|  | Shiraz-71T | 2261 | 0.508399 | 0         |  |

|        |      |            |      |          |           |  |  |
|--------|------|------------|------|----------|-----------|--|--|
| MAP7D2 | chrX | Shiraz-3T  | 235  | 0        | -0.28401  |  |  |
|        |      | Shiraz-4T  | 260  | 0        | -0.324128 |  |  |
|        |      | Shiraz-16T | 294  | 0.655804 | 0         |  |  |
|        |      | Shiraz-36T | 431  | 0        | -0.78035  |  |  |
|        |      | Shiraz-44T | 891  | 0        | -0.954044 |  |  |
|        |      | Shiraz-49T | 1166 | 0        | -0.917235 |  |  |
|        |      | Shiraz-77T | 1281 | 0.136627 | 0         |  |  |
|        |      | Shiraz-9T  | 1368 | 0.199713 | 0         |  |  |
|        |      | Shiraz-18T | 1455 | 0        | -0.186773 |  |  |
|        |      | Shiraz-22T | 1669 | 0.695915 | 0         |  |  |
|        |      | Shiraz-25T | 1717 | 0.420447 | 0         |  |  |
|        |      | Shiraz-28T | 1760 | 0.538181 | 0         |  |  |
|        |      | Shiraz-29T | 1800 | 0.672527 | 0         |  |  |
|        |      | Shiraz-32T | 1869 | 0.776805 | 0         |  |  |
|        |      | Shiraz-35T | 1932 | 0.507141 | 0         |  |  |
|        |      | Shiraz-40T | 2051 | 0.098506 | 0         |  |  |
|        |      | Shiraz-58T | 2221 | 0.871948 | 0         |  |  |
|        |      | Shiraz-71T | 2260 | 0.68394  | 0         |  |  |
|        |      | Shiraz-71T | 2261 | 0.508399 | 0         |  |  |
|        |      | Shiraz-3T  | 235  | 0        | -0.28401  |  |  |
|        |      | Shiraz-4T  | 260  | 0        | -0.324128 |  |  |
|        |      | Shiraz-16T | 294  | 0.655804 | 0         |  |  |
|        |      | Shiraz-36T | 431  | 0        | -0.78035  |  |  |
|        |      | Shiraz-44T | 891  | 0        | -0.954044 |  |  |
|        |      | Shiraz-49T | 1166 | 0        | -0.917235 |  |  |
|        |      | Shiraz-77T | 1281 | 0.136627 | 0         |  |  |
|        |      | Shiraz-9T  | 1368 | 0.199713 | 0         |  |  |
|        |      | Shiraz-18T | 1455 | 0        | -0.186773 |  |  |
|        |      | Shiraz-22T | 1669 | 0.695915 | 0         |  |  |
|        |      | Shiraz-25T | 1717 | 0.420447 | 0         |  |  |
|        |      | Shiraz-28T | 1760 | 0.538181 | 0         |  |  |
|        |      | Shiraz-29T | 1800 | 0.672527 | 0         |  |  |
|        |      | Shiraz-32T | 1869 | 0.776805 | 0         |  |  |
|        |      | Shiraz-35T | 1932 | 0.507141 | 0         |  |  |
|        |      | Shiraz-40T | 2051 | 0.098506 | 0         |  |  |
|        |      | Shiraz-58T | 2221 | 0.871948 | 0         |  |  |
|        |      | Shiraz-71T | 2260 | 0.68394  | 0         |  |  |
|        |      | Shiraz-71T | 2261 | 0.508399 | 0         |  |  |
|        |      | Shiraz-3T  | 235  | 0        | -0.28401  |  |  |
|        |      | Shiraz-4T  | 260  | 0        | -0.324128 |  |  |
|        |      | Shiraz-16T | 294  | 0.655804 | 0         |  |  |
|        |      | Shiraz-36T | 431  | 0        | -0.78035  |  |  |
|        |      | Shiraz-44T | 891  | 0        | -0.954044 |  |  |
|        |      | Shiraz-49T | 1166 | 0        | -0.917235 |  |  |
|        |      | Shiraz-77T | 1281 | 0.136627 | 0         |  |  |
|        |      | Shiraz-9T  | 1368 | 0.199713 | 0         |  |  |
|        |      | Shiraz-18T | 1455 | 0        | -0.186773 |  |  |

|        |      |            |      |          |           |  |
|--------|------|------------|------|----------|-----------|--|
|        |      | Shiraz-22T | 1669 | 0.695915 | 0         |  |
|        |      | Shiraz-25T | 1717 | 0.420447 | 0         |  |
|        |      | Shiraz-28T | 1760 | 0.538181 | 0         |  |
|        |      | Shiraz-29T | 1800 | 0.672527 | 0         |  |
|        |      | Shiraz-32T | 1869 | 0.776805 | 0         |  |
|        |      | Shiraz-35T | 1932 | 0.507141 | 0         |  |
|        |      | Shiraz-40T | 2051 | 0.098506 | 0         |  |
|        |      | Shiraz-58T | 2221 | 0.871948 | 0         |  |
|        |      | Shiraz-71T | 2260 | 0.68394  | 0         |  |
|        |      | Shiraz-71T | 2261 | 0.508399 | 0         |  |
| MAP7D3 | chrX | Shiraz-3T  | 242  | 0        | -0.336434 |  |
|        |      | Shiraz-4T  | 261  | 0        | -0.336249 |  |
|        |      | Shiraz-16T | 295  | 0.591657 | 0         |  |
|        |      | Shiraz-36T | 433  | 0        | -0.803961 |  |
|        |      | Shiraz-44T | 899  | 0        | -1.09697  |  |
|        |      | Shiraz-49T | 1170 | 0        | -0.967436 |  |
|        |      | Shiraz-9T  | 1370 | 0.690073 | 0         |  |
|        |      | Shiraz-18T | 1457 | 0.643204 | 0         |  |
|        |      | Shiraz-22T | 1673 | 0.611783 | 0         |  |
|        |      | Shiraz-22T | 1677 | 0.789711 | 0         |  |
|        |      | Shiraz-25T | 1719 | 0.472955 | 0         |  |
|        |      | Shiraz-28T | 1762 | 0.562311 | 0         |  |
|        |      | Shiraz-29T | 1801 | 0.815343 | 0         |  |
|        |      | Shiraz-32T | 1870 | 0.729766 | 0         |  |
|        |      | Shiraz-35T | 1933 | 0.488535 | 0         |  |
|        |      | Shiraz-58T | 2223 | 0.833364 | 0         |  |
|        |      | Shiraz-71T | 2263 | 0.975531 | 0         |  |
|        |      | Shiraz-3T  | 242  | 0        | -0.336434 |  |
|        |      | Shiraz-4T  | 261  | 0        | -0.336249 |  |
|        |      | Shiraz-16T | 295  | 0.591657 | 0         |  |
|        |      | Shiraz-36T | 433  | 0        | -0.803961 |  |
|        |      | Shiraz-44T | 899  | 0        | -1.09697  |  |
|        |      | Shiraz-49T | 1170 | 0        | -0.967436 |  |
|        |      | Shiraz-9T  | 1370 | 0.690073 | 0         |  |
|        |      | Shiraz-18T | 1457 | 0.643204 | 0         |  |
|        |      | Shiraz-22T | 1673 | 0.611783 | 0         |  |
|        |      | Shiraz-22T | 1677 | 0.789711 | 0         |  |
|        |      | Shiraz-25T | 1719 | 0.472955 | 0         |  |
|        |      | Shiraz-28T | 1762 | 0.562311 | 0         |  |
|        |      | Shiraz-29T | 1801 | 0.815343 | 0         |  |
|        |      | Shiraz-32T | 1870 | 0.729766 | 0         |  |
|        |      | Shiraz-35T | 1933 | 0.488535 | 0         |  |
|        |      | Shiraz-58T | 2223 | 0.833364 | 0         |  |
|        |      | Shiraz-71T | 2263 | 0.975531 | 0         |  |
|        |      | Shiraz-3T  | 242  | 0        | -0.336434 |  |
|        |      | Shiraz-4T  | 261  | 0        | -0.336249 |  |
|        |      | Shiraz-16T | 295  | 0.591657 | 0         |  |



|        |      |            |      |          |           |  |  |
|--------|------|------------|------|----------|-----------|--|--|
|        |      | Shiraz-36T | 433  | 0        | -0.803961 |  |  |
|        |      | Shiraz-44T | 899  | 0        | -1.09697  |  |  |
|        |      | Shiraz-49T | 1170 | 0        | -0.967436 |  |  |
|        |      | Shiraz-9T  | 1370 | 0.690073 | 0         |  |  |
|        |      | Shiraz-18T | 1457 | 0.643204 | 0         |  |  |
|        |      | Shiraz-22T | 1673 | 0.611783 | 0         |  |  |
|        |      | Shiraz-22T | 1677 | 0.789711 | 0         |  |  |
|        |      | Shiraz-25T | 1719 | 0.472955 | 0         |  |  |
|        |      | Shiraz-28T | 1762 | 0.562311 | 0         |  |  |
|        |      | Shiraz-29T | 1801 | 0.815343 | 0         |  |  |
|        |      | Shiraz-32T | 1870 | 0.729766 | 0         |  |  |
|        |      | Shiraz-35T | 1933 | 0.488535 | 0         |  |  |
|        |      | Shiraz-58T | 2223 | 0.833364 | 0         |  |  |
|        |      | Shiraz-71T | 2263 | 0.975531 | 0         |  |  |
| MBLAC1 | chr7 | Shiraz-3T  | 90   | 0.219276 | 0         |  |  |
|        |      | Shiraz-3T  | 94   | 0.74735  | 0         |  |  |
|        |      | Shiraz-4T  | 253  | 0.372918 | 0         |  |  |
|        |      | Shiraz-31T | 316  | 0.219196 | 0         |  |  |
|        |      | Shiraz-36T | 378  | 0.179558 | 0         |  |  |
|        |      | Shiraz-36T | 381  | 0.332628 | 0         |  |  |
|        |      | Shiraz-44T | 639  | 1.035032 | 0         |  |  |
|        |      | Shiraz-46T | 943  | 0.093799 | 0         |  |  |
|        |      | Shiraz-46T | 946  | 0.299835 | 0         |  |  |
|        |      | Shiraz-47T | 1030 | 0.257728 | 0         |  |  |
|        |      | Shiraz-49T | 1120 | 0.281656 | 0         |  |  |
|        |      | Shiraz-77T | 1225 | 0        | -0.117922 |  |  |
|        |      | Shiraz-77T | 1227 | 0.196445 | 0         |  |  |
|        |      | Shiraz-9T  | 1324 | 0.679266 | 0         |  |  |
|        |      | Shiraz-18T | 1434 | 0.244465 | 0         |  |  |
|        |      | Shiraz-22T | 1549 | 0        | -0.319623 |  |  |
|        |      | Shiraz-22T | 1551 | 0.324011 | 0         |  |  |
|        |      | Shiraz-25T | 1698 | 0.21835  | 0         |  |  |
|        |      | Shiraz-28T | 1735 | 0.350744 | 0         |  |  |
|        |      | Shiraz-29T | 1778 | 0.120767 | 0         |  |  |
|        |      | Shiraz-32T | 1833 | 0.551336 | 0         |  |  |
|        |      | Shiraz-32T | 1834 | 1.485392 | 0         |  |  |
|        |      | Shiraz-38T | 1951 | 0.250891 | 0         |  |  |
|        |      | Shiraz-53T | 2078 | 0.287202 | 0         |  |  |
|        |      | Shiraz-58T | 2160 | 0.399007 | 0         |  |  |
|        |      | Shiraz-71T | 2238 | 0.603631 | 0         |  |  |
|        |      | Shiraz-3T  | 90   | 0.219276 | 0         |  |  |
|        |      | Shiraz-3T  | 94   | 0.74735  | 0         |  |  |
|        |      | Shiraz-4T  | 253  | 0.372918 | 0         |  |  |
|        |      | Shiraz-31T | 316  | 0.219196 | 0         |  |  |
|        |      | Shiraz-36T | 378  | 0.179558 | 0         |  |  |
|        |      | Shiraz-36T | 381  | 0.332628 | 0         |  |  |
|        |      | Shiraz-44T | 639  | 1.035032 | 0         |  |  |

|       |      |            |      |          |           |  |  |
|-------|------|------------|------|----------|-----------|--|--|
|       |      | Shiraz-46T | 943  | 0.093799 | 0         |  |  |
|       |      | Shiraz-46T | 946  | 0.299835 | 0         |  |  |
|       |      | Shiraz-47T | 1030 | 0.257728 | 0         |  |  |
|       |      | Shiraz-49T | 1120 | 0.281656 | 0         |  |  |
|       |      | Shiraz-77T | 1225 | 0        | -0.117922 |  |  |
|       |      | Shiraz-77T | 1227 | 0.196445 | 0         |  |  |
|       |      | Shiraz-9T  | 1324 | 0.679266 | 0         |  |  |
|       |      | Shiraz-18T | 1434 | 0.244465 | 0         |  |  |
|       |      | Shiraz-22T | 1549 | 0        | -0.319623 |  |  |
|       |      | Shiraz-22T | 1551 | 0.324011 | 0         |  |  |
|       |      | Shiraz-25T | 1698 | 0.21835  | 0         |  |  |
|       |      | Shiraz-28T | 1735 | 0.350744 | 0         |  |  |
|       |      | Shiraz-29T | 1778 | 0.120767 | 0         |  |  |
|       |      | Shiraz-32T | 1833 | 0.551336 | 0         |  |  |
|       |      | Shiraz-32T | 1834 | 1.485392 | 0         |  |  |
|       |      | Shiraz-38T | 1951 | 0.250891 | 0         |  |  |
|       |      | Shiraz-53T | 2078 | 0.287202 | 0         |  |  |
|       |      | Shiraz-58T | 2160 | 0.399007 | 0         |  |  |
|       |      | Shiraz-71T | 2238 | 0.603631 | 0         |  |  |
|       |      | Shiraz-3T  | 90   | 0.219276 | 0         |  |  |
|       |      | Shiraz-3T  | 94   | 0.74735  | 0         |  |  |
|       |      | Shiraz-4T  | 253  | 0.372918 | 0         |  |  |
|       |      | Shiraz-31T | 316  | 0.219196 | 0         |  |  |
|       |      | Shiraz-36T | 378  | 0.179558 | 0         |  |  |
|       |      | Shiraz-36T | 381  | 0.332628 | 0         |  |  |
|       |      | Shiraz-44T | 639  | 1.035032 | 0         |  |  |
|       |      | Shiraz-46T | 943  | 0.093799 | 0         |  |  |
|       |      | Shiraz-46T | 946  | 0.299835 | 0         |  |  |
|       |      | Shiraz-47T | 1030 | 0.257728 | 0         |  |  |
|       |      | Shiraz-49T | 1120 | 0.281656 | 0         |  |  |
|       |      | Shiraz-77T | 1225 | 0        | -0.117922 |  |  |
|       |      | Shiraz-77T | 1227 | 0.196445 | 0         |  |  |
|       |      | Shiraz-9T  | 1324 | 0.679266 | 0         |  |  |
|       |      | Shiraz-18T | 1434 | 0.244465 | 0         |  |  |
|       |      | Shiraz-22T | 1549 | 0        | -0.319623 |  |  |
|       |      | Shiraz-22T | 1551 | 0.324011 | 0         |  |  |
|       |      | Shiraz-25T | 1698 | 0.21835  | 0         |  |  |
|       |      | Shiraz-28T | 1735 | 0.350744 | 0         |  |  |
|       |      | Shiraz-29T | 1778 | 0.120767 | 0         |  |  |
|       |      | Shiraz-32T | 1833 | 0.551336 | 0         |  |  |
|       |      | Shiraz-32T | 1834 | 1.485392 | 0         |  |  |
|       |      | Shiraz-38T | 1951 | 0.250891 | 0         |  |  |
|       |      | Shiraz-53T | 2078 | 0.287202 | 0         |  |  |
|       |      | Shiraz-58T | 2160 | 0.399007 | 0         |  |  |
|       |      | Shiraz-71T | 2238 | 0.603631 | 0         |  |  |
| MBNL3 | chrX | Shiraz-3T  | 242  | 0        | -0.336434 |  |  |
|       |      | Shiraz-3T  | 242  | 0        | -0.336434 |  |  |

|  |            |      |          |           |  |
|--|------------|------|----------|-----------|--|
|  | Shiraz-4T  | 261  | 0        | -0.336249 |  |
|  | Shiraz-4T  | 261  | 0        | -0.336249 |  |
|  | Shiraz-16T | 295  | 0.591657 | 0         |  |
|  | Shiraz-16T | 295  | 0.591657 | 0         |  |
|  | Shiraz-36T | 433  | 0        | -0.803961 |  |
|  | Shiraz-36T | 433  | 0        | -0.803961 |  |
|  | Shiraz-44T | 899  | 0        | -1.09697  |  |
|  | Shiraz-44T | 899  | 0        | -1.09697  |  |
|  | Shiraz-49T | 1170 | 0        | -0.967436 |  |
|  | Shiraz-49T | 1170 | 0        | -0.967436 |  |
|  | Shiraz-9T  | 1370 | 0.690073 | 0         |  |
|  | Shiraz-9T  | 1370 | 0.690073 | 0         |  |
|  | Shiraz-18T | 1457 | 0.643204 | 0         |  |
|  | Shiraz-18T | 1457 | 0.643204 | 0         |  |
|  | Shiraz-22T | 1673 | 0.611783 | 0         |  |
|  | Shiraz-22T | 1673 | 0.611783 | 0         |  |
|  | Shiraz-22T | 1677 | 0.789711 | 0         |  |
|  | Shiraz-22T | 1677 | 0.789711 | 0         |  |
|  | Shiraz-25T | 1719 | 0.472955 | 0         |  |
|  | Shiraz-25T | 1719 | 0.472955 | 0         |  |
|  | Shiraz-28T | 1762 | 0.562311 | 0         |  |
|  | Shiraz-28T | 1762 | 0.562311 | 0         |  |
|  | Shiraz-29T | 1801 | 0.815343 | 0         |  |
|  | Shiraz-29T | 1801 | 0.815343 | 0         |  |
|  | Shiraz-32T | 1870 | 0.729766 | 0         |  |
|  | Shiraz-32T | 1870 | 0.729766 | 0         |  |
|  | Shiraz-35T | 1933 | 0.488535 | 0         |  |
|  | Shiraz-35T | 1933 | 0.488535 | 0         |  |
|  | Shiraz-58T | 2223 | 0.833364 | 0         |  |
|  | Shiraz-58T | 2223 | 0.833364 | 0         |  |
|  | Shiraz-71T | 2263 | 0.975531 | 0         |  |
|  | Shiraz-71T | 2263 | 0.975531 | 0         |  |
|  | Shiraz-3T  | 242  | 0        | -0.336434 |  |
|  | Shiraz-3T  | 242  | 0        | -0.336434 |  |
|  | Shiraz-4T  | 261  | 0        | -0.336249 |  |
|  | Shiraz-4T  | 261  | 0        | -0.336249 |  |
|  | Shiraz-16T | 295  | 0.591657 | 0         |  |
|  | Shiraz-16T | 295  | 0.591657 | 0         |  |
|  | Shiraz-36T | 433  | 0        | -0.803961 |  |
|  | Shiraz-36T | 433  | 0        | -0.803961 |  |
|  | Shiraz-44T | 899  | 0        | -1.09697  |  |
|  | Shiraz-44T | 899  | 0        | -1.09697  |  |
|  | Shiraz-49T | 1170 | 0        | -0.967436 |  |
|  | Shiraz-49T | 1170 | 0        | -0.967436 |  |
|  | Shiraz-9T  | 1370 | 0.690073 | 0         |  |
|  | Shiraz-9T  | 1370 | 0.690073 | 0         |  |
|  | Shiraz-18T | 1457 | 0.643204 | 0         |  |

|  |  |            |      |          |           |  |  |
|--|--|------------|------|----------|-----------|--|--|
|  |  | Shiraz-18T | 1457 | 0.643204 | 0         |  |  |
|  |  | Shiraz-22T | 1673 | 0.611783 | 0         |  |  |
|  |  | Shiraz-22T | 1673 | 0.611783 | 0         |  |  |
|  |  | Shiraz-22T | 1677 | 0.789711 | 0         |  |  |
|  |  | Shiraz-22T | 1677 | 0.789711 | 0         |  |  |
|  |  | Shiraz-25T | 1719 | 0.472955 | 0         |  |  |
|  |  | Shiraz-25T | 1719 | 0.472955 | 0         |  |  |
|  |  | Shiraz-28T | 1762 | 0.562311 | 0         |  |  |
|  |  | Shiraz-28T | 1762 | 0.562311 | 0         |  |  |
|  |  | Shiraz-29T | 1801 | 0.815343 | 0         |  |  |
|  |  | Shiraz-29T | 1801 | 0.815343 | 0         |  |  |
|  |  | Shiraz-32T | 1870 | 0.729766 | 0         |  |  |
|  |  | Shiraz-32T | 1870 | 0.729766 | 0         |  |  |
|  |  | Shiraz-35T | 1933 | 0.488535 | 0         |  |  |
|  |  | Shiraz-35T | 1933 | 0.488535 | 0         |  |  |
|  |  | Shiraz-58T | 2223 | 0.833364 | 0         |  |  |
|  |  | Shiraz-58T | 2223 | 0.833364 | 0         |  |  |
|  |  | Shiraz-71T | 2263 | 0.975531 | 0         |  |  |
|  |  | Shiraz-71T | 2263 | 0.975531 | 0         |  |  |
|  |  | Shiraz-3T  | 242  | 0        | -0.336434 |  |  |
|  |  | Shiraz-3T  | 242  | 0        | -0.336434 |  |  |
|  |  | Shiraz-4T  | 261  | 0        | -0.336249 |  |  |
|  |  | Shiraz-4T  | 261  | 0        | -0.336249 |  |  |
|  |  | Shiraz-16T | 295  | 0.591657 | 0         |  |  |
|  |  | Shiraz-16T | 295  | 0.591657 | 0         |  |  |
|  |  | Shiraz-36T | 433  | 0        | -0.803961 |  |  |
|  |  | Shiraz-36T | 433  | 0        | -0.803961 |  |  |
|  |  | Shiraz-44T | 899  | 0        | -1.09697  |  |  |
|  |  | Shiraz-44T | 899  | 0        | -1.09697  |  |  |
|  |  | Shiraz-49T | 1170 | 0        | -0.967436 |  |  |
|  |  | Shiraz-49T | 1170 | 0        | -0.967436 |  |  |
|  |  | Shiraz-9T  | 1370 | 0.690073 | 0         |  |  |
|  |  | Shiraz-9T  | 1370 | 0.690073 | 0         |  |  |
|  |  | Shiraz-18T | 1457 | 0.643204 | 0         |  |  |
|  |  | Shiraz-18T | 1457 | 0.643204 | 0         |  |  |
|  |  | Shiraz-22T | 1673 | 0.611783 | 0         |  |  |
|  |  | Shiraz-22T | 1673 | 0.611783 | 0         |  |  |
|  |  | Shiraz-22T | 1677 | 0.789711 | 0         |  |  |
|  |  | Shiraz-22T | 1677 | 0.789711 | 0         |  |  |
|  |  | Shiraz-25T | 1719 | 0.472955 | 0         |  |  |
|  |  | Shiraz-25T | 1719 | 0.472955 | 0         |  |  |
|  |  | Shiraz-28T | 1762 | 0.562311 | 0         |  |  |
|  |  | Shiraz-28T | 1762 | 0.562311 | 0         |  |  |
|  |  | Shiraz-29T | 1801 | 0.815343 | 0         |  |  |
|  |  | Shiraz-29T | 1801 | 0.815343 | 0         |  |  |
|  |  | Shiraz-32T | 1870 | 0.729766 | 0         |  |  |
|  |  | Shiraz-32T | 1870 | 0.729766 | 0         |  |  |

|        |      |            |      |          |           |  |
|--------|------|------------|------|----------|-----------|--|
|        |      | Shiraz-35T | 1933 | 0.488535 | 0         |  |
|        |      | Shiraz-35T | 1933 | 0.488535 | 0         |  |
|        |      | Shiraz-58T | 2223 | 0.833364 | 0         |  |
|        |      | Shiraz-58T | 2223 | 0.833364 | 0         |  |
|        |      | Shiraz-71T | 2263 | 0.975531 | 0         |  |
|        |      | Shiraz-71T | 2263 | 0.975531 | 0         |  |
| MBTPS2 | chrX | Shiraz-3T  | 235  | 0        | -0.28401  |  |
|        |      | Shiraz-4T  | 260  | 0        | -0.324128 |  |
|        |      | Shiraz-16T | 294  | 0.655804 | 0         |  |
|        |      | Shiraz-36T | 431  | 0        | -0.78035  |  |
|        |      | Shiraz-44T | 891  | 0        | -0.954044 |  |
|        |      | Shiraz-49T | 1166 | 0        | -0.917235 |  |
|        |      | Shiraz-77T | 1281 | 0.136627 | 0         |  |
|        |      | Shiraz-9T  | 1368 | 0.199713 | 0         |  |
|        |      | Shiraz-18T | 1455 | 0        | -0.186773 |  |
|        |      | Shiraz-22T | 1669 | 0.695915 | 0         |  |
|        |      | Shiraz-25T | 1717 | 0.420447 | 0         |  |
|        |      | Shiraz-28T | 1760 | 0.538181 | 0         |  |
|        |      | Shiraz-29T | 1800 | 0.672527 | 0         |  |
|        |      | Shiraz-32T | 1869 | 0.776805 | 0         |  |
|        |      | Shiraz-35T | 1932 | 0.507141 | 0         |  |
|        |      | Shiraz-40T | 2051 | 0.098506 | 0         |  |
|        |      | Shiraz-58T | 2221 | 0.871948 | 0         |  |
|        |      | Shiraz-71T | 2260 | 0.68394  | 0         |  |
|        |      | Shiraz-71T | 2261 | 0.508399 | 0         |  |
|        |      | Shiraz-3T  | 235  | 0        | -0.28401  |  |
|        |      | Shiraz-4T  | 260  | 0        | -0.324128 |  |
|        |      | Shiraz-16T | 294  | 0.655804 | 0         |  |
|        |      | Shiraz-36T | 431  | 0        | -0.78035  |  |
|        |      | Shiraz-44T | 891  | 0        | -0.954044 |  |
|        |      | Shiraz-49T | 1166 | 0        | -0.917235 |  |
|        |      | Shiraz-77T | 1281 | 0.136627 | 0         |  |
|        |      | Shiraz-9T  | 1368 | 0.199713 | 0         |  |
|        |      | Shiraz-18T | 1455 | 0        | -0.186773 |  |
|        |      | Shiraz-22T | 1669 | 0.695915 | 0         |  |
|        |      | Shiraz-25T | 1717 | 0.420447 | 0         |  |
|        |      | Shiraz-28T | 1760 | 0.538181 | 0         |  |
|        |      | Shiraz-29T | 1800 | 0.672527 | 0         |  |
|        |      | Shiraz-32T | 1869 | 0.776805 | 0         |  |
|        |      | Shiraz-35T | 1932 | 0.507141 | 0         |  |
|        |      | Shiraz-40T | 2051 | 0.098506 | 0         |  |
|        |      | Shiraz-58T | 2221 | 0.871948 | 0         |  |
|        |      | Shiraz-71T | 2260 | 0.68394  | 0         |  |
|        |      | Shiraz-71T | 2261 | 0.508399 | 0         |  |
|        |      | Shiraz-3T  | 235  | 0        | -0.28401  |  |
|        |      | Shiraz-4T  | 260  | 0        | -0.324128 |  |
|        |      | Shiraz-16T | 294  | 0.655804 | 0         |  |

|        |      |            |      |          |           |  |  |
|--------|------|------------|------|----------|-----------|--|--|
|        |      | Shiraz-36T | 431  | 0        | -0.78035  |  |  |
|        |      | Shiraz-44T | 891  | 0        | -0.954044 |  |  |
|        |      | Shiraz-49T | 1166 | 0        | -0.917235 |  |  |
|        |      | Shiraz-77T | 1281 | 0.136627 | 0         |  |  |
|        |      | Shiraz-9T  | 1368 | 0.199713 | 0         |  |  |
|        |      | Shiraz-18T | 1455 | 0        | -0.186773 |  |  |
|        |      | Shiraz-22T | 1669 | 0.695915 | 0         |  |  |
|        |      | Shiraz-25T | 1717 | 0.420447 | 0         |  |  |
|        |      | Shiraz-28T | 1760 | 0.538181 | 0         |  |  |
|        |      | Shiraz-29T | 1800 | 0.672527 | 0         |  |  |
|        |      | Shiraz-32T | 1869 | 0.776805 | 0         |  |  |
|        |      | Shiraz-35T | 1932 | 0.507141 | 0         |  |  |
|        |      | Shiraz-40T | 2051 | 0.098506 | 0         |  |  |
|        |      | Shiraz-58T | 2221 | 0.871948 | 0         |  |  |
|        |      | Shiraz-71T | 2260 | 0.68394  | 0         |  |  |
|        |      | Shiraz-71T | 2261 | 0.508399 | 0         |  |  |
| MCART6 | chrX | Shiraz-3T  | 242  | 0        | -0.336434 |  |  |
|        |      | Shiraz-4T  | 261  | 0        | -0.336249 |  |  |
|        |      | Shiraz-16T | 295  | 0.591657 | 0         |  |  |
|        |      | Shiraz-36T | 433  | 0        | -0.803961 |  |  |
|        |      | Shiraz-44T | 899  | 0        | -1.09697  |  |  |
|        |      | Shiraz-49T | 1170 | 0        | -0.967436 |  |  |
|        |      | Shiraz-18T | 1457 | 0.643204 | 0         |  |  |
|        |      | Shiraz-22T | 1673 | 0.611783 | 0         |  |  |
|        |      | Shiraz-25T | 1719 | 0.472955 | 0         |  |  |
|        |      | Shiraz-28T | 1762 | 0.562311 | 0         |  |  |
|        |      | Shiraz-29T | 1801 | 0.815343 | 0         |  |  |
|        |      | Shiraz-32T | 1870 | 0.729766 | 0         |  |  |
|        |      | Shiraz-35T | 1933 | 0.488535 | 0         |  |  |
|        |      | Shiraz-58T | 2223 | 0.833364 | 0         |  |  |
|        |      | Shiraz-71T | 2263 | 0.975531 | 0         |  |  |
|        |      | Shiraz-3T  | 242  | 0        | -0.336434 |  |  |
|        |      | Shiraz-4T  | 261  | 0        | -0.336249 |  |  |
|        |      | Shiraz-16T | 295  | 0.591657 | 0         |  |  |
|        |      | Shiraz-36T | 433  | 0        | -0.803961 |  |  |
|        |      | Shiraz-44T | 899  | 0        | -1.09697  |  |  |
|        |      | Shiraz-49T | 1170 | 0        | -0.967436 |  |  |
|        |      | Shiraz-18T | 1457 | 0.643204 | 0         |  |  |
|        |      | Shiraz-22T | 1673 | 0.611783 | 0         |  |  |
|        |      | Shiraz-25T | 1719 | 0.472955 | 0         |  |  |
|        |      | Shiraz-28T | 1762 | 0.562311 | 0         |  |  |
|        |      | Shiraz-29T | 1801 | 0.815343 | 0         |  |  |
|        |      | Shiraz-32T | 1870 | 0.729766 | 0         |  |  |
|        |      | Shiraz-35T | 1933 | 0.488535 | 0         |  |  |
|        |      | Shiraz-58T | 2223 | 0.833364 | 0         |  |  |
|        |      | Shiraz-71T | 2263 | 0.975531 | 0         |  |  |
|        |      | Shiraz-3T  | 242  | 0        | -0.336434 |  |  |

|      |      |            |      |          |           |  |  |
|------|------|------------|------|----------|-----------|--|--|
|      |      | Shiraz-4T  | 261  | 0        | -0.336249 |  |  |
|      |      | Shiraz-16T | 295  | 0.591657 | 0         |  |  |
|      |      | Shiraz-36T | 433  | 0        | -0.803961 |  |  |
|      |      | Shiraz-44T | 899  | 0        | -1.09697  |  |  |
|      |      | Shiraz-49T | 1170 | 0        | -0.967436 |  |  |
|      |      | Shiraz-18T | 1457 | 0.643204 | 0         |  |  |
|      |      | Shiraz-22T | 1673 | 0.611783 | 0         |  |  |
|      |      | Shiraz-25T | 1719 | 0.472955 | 0         |  |  |
|      |      | Shiraz-28T | 1762 | 0.562311 | 0         |  |  |
|      |      | Shiraz-29T | 1801 | 0.815343 | 0         |  |  |
|      |      | Shiraz-32T | 1870 | 0.729766 | 0         |  |  |
|      |      | Shiraz-35T | 1933 | 0.488535 | 0         |  |  |
|      |      | Shiraz-58T | 2223 | 0.833364 | 0         |  |  |
|      |      | Shiraz-71T | 2263 | 0.975531 | 0         |  |  |
| MCF2 | chrX | Shiraz-3T  | 242  | 0        | -0.336434 |  |  |
|      |      | Shiraz-3T  | 242  | 0        | -0.336434 |  |  |
|      |      | Shiraz-4T  | 261  | 0        | -0.336249 |  |  |
|      |      | Shiraz-4T  | 261  | 0        | -0.336249 |  |  |
|      |      | Shiraz-16T | 295  | 0.591657 | 0         |  |  |
|      |      | Shiraz-16T | 295  | 0.591657 | 0         |  |  |
|      |      | Shiraz-36T | 433  | 0        | -0.803961 |  |  |
|      |      | Shiraz-36T | 433  | 0        | -0.803961 |  |  |
|      |      | Shiraz-44T | 899  | 0        | -1.09697  |  |  |
|      |      | Shiraz-44T | 899  | 0        | -1.09697  |  |  |
|      |      | Shiraz-49T | 1170 | 0        | -0.967436 |  |  |
|      |      | Shiraz-49T | 1170 | 0        | -0.967436 |  |  |
|      |      | Shiraz-9T  | 1370 | 0.690073 | 0         |  |  |
|      |      | Shiraz-9T  | 1370 | 0.690073 | 0         |  |  |
|      |      | Shiraz-18T | 1457 | 0.643204 | 0         |  |  |
|      |      | Shiraz-18T | 1457 | 0.643204 | 0         |  |  |
|      |      | Shiraz-22T | 1673 | 0.611783 | 0         |  |  |
|      |      | Shiraz-22T | 1673 | 0.611783 | 0         |  |  |
|      |      | Shiraz-25T | 1719 | 0.472955 | 0         |  |  |
|      |      | Shiraz-25T | 1719 | 0.472955 | 0         |  |  |
|      |      | Shiraz-28T | 1762 | 0.562311 | 0         |  |  |
|      |      | Shiraz-28T | 1762 | 0.562311 | 0         |  |  |
|      |      | Shiraz-29T | 1801 | 0.815343 | 0         |  |  |
|      |      | Shiraz-29T | 1801 | 0.815343 | 0         |  |  |
|      |      | Shiraz-32T | 1870 | 0.729766 | 0         |  |  |
|      |      | Shiraz-32T | 1870 | 0.729766 | 0         |  |  |
|      |      | Shiraz-35T | 1933 | 0.488535 | 0         |  |  |
|      |      | Shiraz-35T | 1933 | 0.488535 | 0         |  |  |
|      |      | Shiraz-58T | 2223 | 0.833364 | 0         |  |  |
|      |      | Shiraz-58T | 2223 | 0.833364 | 0         |  |  |
|      |      | Shiraz-71T | 2263 | 0.975531 | 0         |  |  |
|      |      | Shiraz-71T | 2263 | 0.975531 | 0         |  |  |
|      |      | Shiraz-3T  | 242  | 0        | -0.336434 |  |  |

|  |            |      |          |           |  |
|--|------------|------|----------|-----------|--|
|  | Shiraz-3T  | 242  | 0        | -0.336434 |  |
|  | Shiraz-4T  | 261  | 0        | -0.336249 |  |
|  | Shiraz-4T  | 261  | 0        | -0.336249 |  |
|  | Shiraz-16T | 295  | 0.591657 | 0         |  |
|  | Shiraz-16T | 295  | 0.591657 | 0         |  |
|  | Shiraz-36T | 433  | 0        | -0.803961 |  |
|  | Shiraz-36T | 433  | 0        | -0.803961 |  |
|  | Shiraz-44T | 899  | 0        | -1.09697  |  |
|  | Shiraz-44T | 899  | 0        | -1.09697  |  |
|  | Shiraz-49T | 1170 | 0        | -0.967436 |  |
|  | Shiraz-49T | 1170 | 0        | -0.967436 |  |
|  | Shiraz-9T  | 1370 | 0.690073 | 0         |  |
|  | Shiraz-9T  | 1370 | 0.690073 | 0         |  |
|  | Shiraz-18T | 1457 | 0.643204 | 0         |  |
|  | Shiraz-18T | 1457 | 0.643204 | 0         |  |
|  | Shiraz-22T | 1673 | 0.611783 | 0         |  |
|  | Shiraz-22T | 1673 | 0.611783 | 0         |  |
|  | Shiraz-25T | 1719 | 0.472955 | 0         |  |
|  | Shiraz-25T | 1719 | 0.472955 | 0         |  |
|  | Shiraz-28T | 1762 | 0.562311 | 0         |  |
|  | Shiraz-28T | 1762 | 0.562311 | 0         |  |
|  | Shiraz-29T | 1801 | 0.815343 | 0         |  |
|  | Shiraz-29T | 1801 | 0.815343 | 0         |  |
|  | Shiraz-32T | 1870 | 0.729766 | 0         |  |
|  | Shiraz-32T | 1870 | 0.729766 | 0         |  |
|  | Shiraz-35T | 1933 | 0.488535 | 0         |  |
|  | Shiraz-35T | 1933 | 0.488535 | 0         |  |
|  | Shiraz-58T | 2223 | 0.833364 | 0         |  |
|  | Shiraz-58T | 2223 | 0.833364 | 0         |  |
|  | Shiraz-71T | 2263 | 0.975531 | 0         |  |
|  | Shiraz-71T | 2263 | 0.975531 | 0         |  |
|  | Shiraz-3T  | 242  | 0        | -0.336434 |  |
|  | Shiraz-3T  | 242  | 0        | -0.336434 |  |
|  | Shiraz-4T  | 261  | 0        | -0.336249 |  |
|  | Shiraz-4T  | 261  | 0        | -0.336249 |  |
|  | Shiraz-16T | 295  | 0.591657 | 0         |  |
|  | Shiraz-16T | 295  | 0.591657 | 0         |  |
|  | Shiraz-36T | 433  | 0        | -0.803961 |  |
|  | Shiraz-36T | 433  | 0        | -0.803961 |  |
|  | Shiraz-44T | 899  | 0        | -1.09697  |  |
|  | Shiraz-44T | 899  | 0        | -1.09697  |  |
|  | Shiraz-49T | 1170 | 0        | -0.967436 |  |
|  | Shiraz-49T | 1170 | 0        | -0.967436 |  |
|  | Shiraz-9T  | 1370 | 0.690073 | 0         |  |
|  | Shiraz-9T  | 1370 | 0.690073 | 0         |  |
|  | Shiraz-18T | 1457 | 0.643204 | 0         |  |
|  | Shiraz-18T | 1457 | 0.643204 | 0         |  |



|      |      |            |      |          |           |  |
|------|------|------------|------|----------|-----------|--|
|      |      | Shiraz-22T | 1673 | 0.611783 | 0         |  |
|      |      | Shiraz-22T | 1673 | 0.611783 | 0         |  |
|      |      | Shiraz-25T | 1719 | 0.472955 | 0         |  |
|      |      | Shiraz-25T | 1719 | 0.472955 | 0         |  |
|      |      | Shiraz-28T | 1762 | 0.562311 | 0         |  |
|      |      | Shiraz-28T | 1762 | 0.562311 | 0         |  |
|      |      | Shiraz-29T | 1801 | 0.815343 | 0         |  |
|      |      | Shiraz-29T | 1801 | 0.815343 | 0         |  |
|      |      | Shiraz-32T | 1870 | 0.729766 | 0         |  |
|      |      | Shiraz-32T | 1870 | 0.729766 | 0         |  |
|      |      | Shiraz-35T | 1933 | 0.488535 | 0         |  |
|      |      | Shiraz-35T | 1933 | 0.488535 | 0         |  |
|      |      | Shiraz-58T | 2223 | 0.833364 | 0         |  |
|      |      | Shiraz-58T | 2223 | 0.833364 | 0         |  |
|      |      | Shiraz-71T | 2263 | 0.975531 | 0         |  |
|      |      | Shiraz-71T | 2263 | 0.975531 | 0         |  |
| MCM7 | chr7 | Shiraz-3T  | 90   | 0.219276 | 0         |  |
|      |      | Shiraz-3T  | 90   | 0.219276 | 0         |  |
|      |      | Shiraz-3T  | 94   | 0.74735  | 0         |  |
|      |      | Shiraz-3T  | 94   | 0.74735  | 0         |  |
|      |      | Shiraz-4T  | 253  | 0.372918 | 0         |  |
|      |      | Shiraz-4T  | 253  | 0.372918 | 0         |  |
|      |      | Shiraz-31T | 316  | 0.219196 | 0         |  |
|      |      | Shiraz-31T | 316  | 0.219196 | 0         |  |
|      |      | Shiraz-36T | 378  | 0.179558 | 0         |  |
|      |      | Shiraz-36T | 378  | 0.179558 | 0         |  |
|      |      | Shiraz-36T | 381  | 0.332628 | 0         |  |
|      |      | Shiraz-36T | 381  | 0.332628 | 0         |  |
|      |      | Shiraz-44T | 639  | 1.035032 | 0         |  |
|      |      | Shiraz-44T | 639  | 1.035032 | 0         |  |
|      |      | Shiraz-46T | 943  | 0.093799 | 0         |  |
|      |      | Shiraz-46T | 943  | 0.093799 | 0         |  |
|      |      | Shiraz-46T | 946  | 0.299835 | 0         |  |
|      |      | Shiraz-46T | 946  | 0.299835 | 0         |  |
|      |      | Shiraz-47T | 1030 | 0.257728 | 0         |  |
|      |      | Shiraz-47T | 1030 | 0.257728 | 0         |  |
|      |      | Shiraz-49T | 1120 | 0.281656 | 0         |  |
|      |      | Shiraz-49T | 1120 | 0.281656 | 0         |  |
|      |      | Shiraz-77T | 1225 | 0        | -0.117922 |  |
|      |      | Shiraz-77T | 1225 | 0        | -0.117922 |  |
|      |      | Shiraz-77T | 1227 | 0.196445 | 0         |  |
|      |      | Shiraz-77T | 1227 | 0.196445 | 0         |  |
|      |      | Shiraz-9T  | 1324 | 0.679266 | 0         |  |
|      |      | Shiraz-9T  | 1324 | 0.679266 | 0         |  |
|      |      | Shiraz-18T | 1434 | 0.244465 | 0         |  |
|      |      | Shiraz-18T | 1434 | 0.244465 | 0         |  |
|      |      | Shiraz-22T | 1549 | 0        | -0.319623 |  |

|  |            |      |          |           |  |
|--|------------|------|----------|-----------|--|
|  | Shiraz-22T | 1549 | 0        | -0.319623 |  |
|  | Shiraz-22T | 1551 | 0.324011 | 0         |  |
|  | Shiraz-22T | 1551 | 0.324011 | 0         |  |
|  | Shiraz-25T | 1698 | 0.21835  | 0         |  |
|  | Shiraz-25T | 1698 | 0.21835  | 0         |  |
|  | Shiraz-28T | 1735 | 0.350744 | 0         |  |
|  | Shiraz-28T | 1735 | 0.350744 | 0         |  |
|  | Shiraz-29T | 1778 | 0.120767 | 0         |  |
|  | Shiraz-29T | 1778 | 0.120767 | 0         |  |
|  | Shiraz-32T | 1833 | 0.551336 | 0         |  |
|  | Shiraz-32T | 1833 | 0.551336 | 0         |  |
|  | Shiraz-32T | 1834 | 1.485392 | 0         |  |
|  | Shiraz-32T | 1834 | 1.485392 | 0         |  |
|  | Shiraz-38T | 1951 | 0.250891 | 0         |  |
|  | Shiraz-38T | 1951 | 0.250891 | 0         |  |
|  | Shiraz-53T | 2078 | 0.287202 | 0         |  |
|  | Shiraz-53T | 2078 | 0.287202 | 0         |  |
|  | Shiraz-58T | 2160 | 0.399007 | 0         |  |
|  | Shiraz-58T | 2160 | 0.399007 | 0         |  |
|  | Shiraz-71T | 2238 | 0.603631 | 0         |  |
|  | Shiraz-71T | 2238 | 0.603631 | 0         |  |
|  | Shiraz-3T  | 90   | 0.219276 | 0         |  |
|  | Shiraz-3T  | 90   | 0.219276 | 0         |  |
|  | Shiraz-3T  | 94   | 0.74735  | 0         |  |
|  | Shiraz-3T  | 94   | 0.74735  | 0         |  |
|  | Shiraz-4T  | 253  | 0.372918 | 0         |  |
|  | Shiraz-4T  | 253  | 0.372918 | 0         |  |
|  | Shiraz-31T | 316  | 0.219196 | 0         |  |
|  | Shiraz-31T | 316  | 0.219196 | 0         |  |
|  | Shiraz-36T | 378  | 0.179558 | 0         |  |
|  | Shiraz-36T | 378  | 0.179558 | 0         |  |
|  | Shiraz-36T | 381  | 0.332628 | 0         |  |
|  | Shiraz-36T | 381  | 0.332628 | 0         |  |
|  | Shiraz-44T | 639  | 1.035032 | 0         |  |
|  | Shiraz-44T | 639  | 1.035032 | 0         |  |
|  | Shiraz-46T | 943  | 0.093799 | 0         |  |
|  | Shiraz-46T | 943  | 0.093799 | 0         |  |
|  | Shiraz-46T | 946  | 0.299835 | 0         |  |
|  | Shiraz-46T | 946  | 0.299835 | 0         |  |
|  | Shiraz-47T | 1030 | 0.257728 | 0         |  |
|  | Shiraz-47T | 1030 | 0.257728 | 0         |  |
|  | Shiraz-49T | 1120 | 0.281656 | 0         |  |
|  | Shiraz-49T | 1120 | 0.281656 | 0         |  |
|  | Shiraz-77T | 1225 | 0        | -0.117922 |  |
|  | Shiraz-77T | 1225 | 0        | -0.117922 |  |
|  | Shiraz-77T | 1227 | 0.196445 | 0         |  |
|  | Shiraz-77T | 1227 | 0.196445 | 0         |  |

|  |            |      |          |           |  |
|--|------------|------|----------|-----------|--|
|  | Shiraz-9T  | 1324 | 0.679266 | 0         |  |
|  | Shiraz-9T  | 1324 | 0.679266 | 0         |  |
|  | Shiraz-18T | 1434 | 0.244465 | 0         |  |
|  | Shiraz-18T | 1434 | 0.244465 | 0         |  |
|  | Shiraz-22T | 1549 | 0        | -0.319623 |  |
|  | Shiraz-22T | 1549 | 0        | -0.319623 |  |
|  | Shiraz-22T | 1551 | 0.324011 | 0         |  |
|  | Shiraz-22T | 1551 | 0.324011 | 0         |  |
|  | Shiraz-25T | 1698 | 0.21835  | 0         |  |
|  | Shiraz-25T | 1698 | 0.21835  | 0         |  |
|  | Shiraz-28T | 1735 | 0.350744 | 0         |  |
|  | Shiraz-28T | 1735 | 0.350744 | 0         |  |
|  | Shiraz-29T | 1778 | 0.120767 | 0         |  |
|  | Shiraz-29T | 1778 | 0.120767 | 0         |  |
|  | Shiraz-32T | 1833 | 0.551336 | 0         |  |
|  | Shiraz-32T | 1833 | 0.551336 | 0         |  |
|  | Shiraz-32T | 1834 | 1.485392 | 0         |  |
|  | Shiraz-32T | 1834 | 1.485392 | 0         |  |
|  | Shiraz-38T | 1951 | 0.250891 | 0         |  |
|  | Shiraz-38T | 1951 | 0.250891 | 0         |  |
|  | Shiraz-53T | 2078 | 0.287202 | 0         |  |
|  | Shiraz-53T | 2078 | 0.287202 | 0         |  |
|  | Shiraz-58T | 2160 | 0.399007 | 0         |  |
|  | Shiraz-58T | 2160 | 0.399007 | 0         |  |
|  | Shiraz-71T | 2238 | 0.603631 | 0         |  |
|  | Shiraz-71T | 2238 | 0.603631 | 0         |  |
|  | Shiraz-3T  | 90   | 0.219276 | 0         |  |
|  | Shiraz-3T  | 90   | 0.219276 | 0         |  |
|  | Shiraz-3T  | 94   | 0.74735  | 0         |  |
|  | Shiraz-3T  | 94   | 0.74735  | 0         |  |
|  | Shiraz-4T  | 253  | 0.372918 | 0         |  |
|  | Shiraz-4T  | 253  | 0.372918 | 0         |  |
|  | Shiraz-31T | 316  | 0.219196 | 0         |  |
|  | Shiraz-31T | 316  | 0.219196 | 0         |  |
|  | Shiraz-36T | 378  | 0.179558 | 0         |  |
|  | Shiraz-36T | 378  | 0.179558 | 0         |  |
|  | Shiraz-36T | 381  | 0.332628 | 0         |  |
|  | Shiraz-36T | 381  | 0.332628 | 0         |  |
|  | Shiraz-44T | 639  | 1.035032 | 0         |  |
|  | Shiraz-44T | 639  | 1.035032 | 0         |  |
|  | Shiraz-46T | 943  | 0.093799 | 0         |  |
|  | Shiraz-46T | 943  | 0.093799 | 0         |  |
|  | Shiraz-46T | 946  | 0.299835 | 0         |  |
|  | Shiraz-46T | 946  | 0.299835 | 0         |  |
|  | Shiraz-47T | 1030 | 0.257728 | 0         |  |
|  | Shiraz-47T | 1030 | 0.257728 | 0         |  |
|  | Shiraz-49T | 1120 | 0.281656 | 0         |  |

|       |      |            |      |          |           |  |  |
|-------|------|------------|------|----------|-----------|--|--|
|       |      | Shiraz-49T | 1120 | 0.281656 | 0         |  |  |
|       |      | Shiraz-77T | 1225 | 0        | -0.117922 |  |  |
|       |      | Shiraz-77T | 1225 | 0        | -0.117922 |  |  |
|       |      | Shiraz-77T | 1227 | 0.196445 | 0         |  |  |
|       |      | Shiraz-77T | 1227 | 0.196445 | 0         |  |  |
|       |      | Shiraz-9T  | 1324 | 0.679266 | 0         |  |  |
|       |      | Shiraz-9T  | 1324 | 0.679266 | 0         |  |  |
|       |      | Shiraz-18T | 1434 | 0.244465 | 0         |  |  |
|       |      | Shiraz-18T | 1434 | 0.244465 | 0         |  |  |
|       |      | Shiraz-22T | 1549 | 0        | -0.319623 |  |  |
|       |      | Shiraz-22T | 1549 | 0        | -0.319623 |  |  |
|       |      | Shiraz-22T | 1551 | 0.324011 | 0         |  |  |
|       |      | Shiraz-22T | 1551 | 0.324011 | 0         |  |  |
|       |      | Shiraz-25T | 1698 | 0.21835  | 0         |  |  |
|       |      | Shiraz-25T | 1698 | 0.21835  | 0         |  |  |
|       |      | Shiraz-28T | 1735 | 0.350744 | 0         |  |  |
|       |      | Shiraz-28T | 1735 | 0.350744 | 0         |  |  |
|       |      | Shiraz-29T | 1778 | 0.120767 | 0         |  |  |
|       |      | Shiraz-29T | 1778 | 0.120767 | 0         |  |  |
|       |      | Shiraz-32T | 1833 | 0.551336 | 0         |  |  |
|       |      | Shiraz-32T | 1833 | 0.551336 | 0         |  |  |
|       |      | Shiraz-32T | 1834 | 1.485392 | 0         |  |  |
|       |      | Shiraz-32T | 1834 | 1.485392 | 0         |  |  |
|       |      | Shiraz-38T | 1951 | 0.250891 | 0         |  |  |
|       |      | Shiraz-38T | 1951 | 0.250891 | 0         |  |  |
|       |      | Shiraz-53T | 2078 | 0.287202 | 0         |  |  |
|       |      | Shiraz-53T | 2078 | 0.287202 | 0         |  |  |
|       |      | Shiraz-58T | 2160 | 0.399007 | 0         |  |  |
|       |      | Shiraz-58T | 2160 | 0.399007 | 0         |  |  |
|       |      | Shiraz-71T | 2238 | 0.603631 | 0         |  |  |
|       |      | Shiraz-71T | 2238 | 0.603631 | 0         |  |  |
| MCTS1 | chrX | Shiraz-3T  | 242  | 0        | -0.336434 |  |  |
|       |      | Shiraz-3T  | 242  | 0        | -0.336434 |  |  |
|       |      | Shiraz-3T  | 244  | 0        | -0.023749 |  |  |
|       |      | Shiraz-3T  | 244  | 0        | -0.023749 |  |  |
|       |      | Shiraz-4T  | 261  | 0        | -0.336249 |  |  |
|       |      | Shiraz-4T  | 261  | 0        | -0.336249 |  |  |
|       |      | Shiraz-16T | 295  | 0.591657 | 0         |  |  |
|       |      | Shiraz-16T | 295  | 0.591657 | 0         |  |  |
|       |      | Shiraz-36T | 433  | 0        | -0.803961 |  |  |
|       |      | Shiraz-36T | 433  | 0        | -0.803961 |  |  |
|       |      | Shiraz-44T | 899  | 0        | -1.09697  |  |  |
|       |      | Shiraz-44T | 899  | 0        | -1.09697  |  |  |
|       |      | Shiraz-44T | 904  | 0        | -0.625526 |  |  |
|       |      | Shiraz-44T | 904  | 0        | -0.625526 |  |  |
|       |      | Shiraz-49T | 1170 | 0        | -0.967436 |  |  |
|       |      | Shiraz-49T | 1170 | 0        | -0.967436 |  |  |

|  |  |            |      |          |           |  |  |
|--|--|------------|------|----------|-----------|--|--|
|  |  | Shiraz-9T  | 1370 | 0.690073 | 0         |  |  |
|  |  | Shiraz-9T  | 1370 | 0.690073 | 0         |  |  |
|  |  | Shiraz-18T | 1457 | 0.643204 | 0         |  |  |
|  |  | Shiraz-18T | 1457 | 0.643204 | 0         |  |  |
|  |  | Shiraz-22T | 1673 | 0.611783 | 0         |  |  |
|  |  | Shiraz-22T | 1673 | 0.611783 | 0         |  |  |
|  |  | Shiraz-25T | 1719 | 0.472955 | 0         |  |  |
|  |  | Shiraz-25T | 1719 | 0.472955 | 0         |  |  |
|  |  | Shiraz-28T | 1762 | 0.562311 | 0         |  |  |
|  |  | Shiraz-28T | 1762 | 0.562311 | 0         |  |  |
|  |  | Shiraz-29T | 1801 | 0.815343 | 0         |  |  |
|  |  | Shiraz-29T | 1801 | 0.815343 | 0         |  |  |
|  |  | Shiraz-32T | 1870 | 0.729766 | 0         |  |  |
|  |  | Shiraz-32T | 1870 | 0.729766 | 0         |  |  |
|  |  | Shiraz-35T | 1933 | 0.488535 | 0         |  |  |
|  |  | Shiraz-35T | 1933 | 0.488535 | 0         |  |  |
|  |  | Shiraz-58T | 2223 | 0.833364 | 0         |  |  |
|  |  | Shiraz-58T | 2223 | 0.833364 | 0         |  |  |
|  |  | Shiraz-71T | 2263 | 0.975531 | 0         |  |  |
|  |  | Shiraz-71T | 2263 | 0.975531 | 0         |  |  |
|  |  | Shiraz-3T  | 242  | 0        | -0.336434 |  |  |
|  |  | Shiraz-3T  | 242  | 0        | -0.336434 |  |  |
|  |  | Shiraz-3T  | 244  | 0        | -0.023749 |  |  |
|  |  | Shiraz-3T  | 244  | 0        | -0.023749 |  |  |
|  |  | Shiraz-4T  | 261  | 0        | -0.336249 |  |  |
|  |  | Shiraz-4T  | 261  | 0        | -0.336249 |  |  |
|  |  | Shiraz-16T | 295  | 0.591657 | 0         |  |  |
|  |  | Shiraz-16T | 295  | 0.591657 | 0         |  |  |
|  |  | Shiraz-36T | 433  | 0        | -0.803961 |  |  |
|  |  | Shiraz-36T | 433  | 0        | -0.803961 |  |  |
|  |  | Shiraz-44T | 899  | 0        | -1.09697  |  |  |
|  |  | Shiraz-44T | 899  | 0        | -1.09697  |  |  |
|  |  | Shiraz-44T | 904  | 0        | -0.625526 |  |  |
|  |  | Shiraz-44T | 904  | 0        | -0.625526 |  |  |
|  |  | Shiraz-49T | 1170 | 0        | -0.967436 |  |  |
|  |  | Shiraz-49T | 1170 | 0        | -0.967436 |  |  |
|  |  | Shiraz-9T  | 1370 | 0.690073 | 0         |  |  |
|  |  | Shiraz-9T  | 1370 | 0.690073 | 0         |  |  |
|  |  | Shiraz-18T | 1457 | 0.643204 | 0         |  |  |
|  |  | Shiraz-18T | 1457 | 0.643204 | 0         |  |  |
|  |  | Shiraz-22T | 1673 | 0.611783 | 0         |  |  |
|  |  | Shiraz-22T | 1673 | 0.611783 | 0         |  |  |
|  |  | Shiraz-25T | 1719 | 0.472955 | 0         |  |  |
|  |  | Shiraz-25T | 1719 | 0.472955 | 0         |  |  |
|  |  | Shiraz-28T | 1762 | 0.562311 | 0         |  |  |
|  |  | Shiraz-28T | 1762 | 0.562311 | 0         |  |  |
|  |  | Shiraz-29T | 1801 | 0.815343 | 0         |  |  |

|       |      |            |      |          |           |  |  |
|-------|------|------------|------|----------|-----------|--|--|
|       |      | Shiraz-29T | 1801 | 0.815343 | 0         |  |  |
|       |      | Shiraz-32T | 1870 | 0.729766 | 0         |  |  |
|       |      | Shiraz-32T | 1870 | 0.729766 | 0         |  |  |
|       |      | Shiraz-35T | 1933 | 0.488535 | 0         |  |  |
|       |      | Shiraz-35T | 1933 | 0.488535 | 0         |  |  |
|       |      | Shiraz-58T | 2223 | 0.833364 | 0         |  |  |
|       |      | Shiraz-58T | 2223 | 0.833364 | 0         |  |  |
|       |      | Shiraz-71T | 2263 | 0.975531 | 0         |  |  |
|       |      | Shiraz-71T | 2263 | 0.975531 | 0         |  |  |
|       |      | Shiraz-3T  | 242  | 0        | -0.336434 |  |  |
|       |      | Shiraz-3T  | 242  | 0        | -0.336434 |  |  |
|       |      | Shiraz-3T  | 244  | 0        | -0.023749 |  |  |
|       |      | Shiraz-3T  | 244  | 0        | -0.023749 |  |  |
|       |      | Shiraz-4T  | 261  | 0        | -0.336249 |  |  |
|       |      | Shiraz-4T  | 261  | 0        | -0.336249 |  |  |
|       |      | Shiraz-16T | 295  | 0.591657 | 0         |  |  |
|       |      | Shiraz-16T | 295  | 0.591657 | 0         |  |  |
|       |      | Shiraz-36T | 433  | 0        | -0.803961 |  |  |
|       |      | Shiraz-36T | 433  | 0        | -0.803961 |  |  |
|       |      | Shiraz-44T | 899  | 0        | -1.09697  |  |  |
|       |      | Shiraz-44T | 899  | 0        | -1.09697  |  |  |
|       |      | Shiraz-44T | 904  | 0        | -0.625526 |  |  |
|       |      | Shiraz-44T | 904  | 0        | -0.625526 |  |  |
|       |      | Shiraz-49T | 1170 | 0        | -0.967436 |  |  |
|       |      | Shiraz-49T | 1170 | 0        | -0.967436 |  |  |
|       |      | Shiraz-9T  | 1370 | 0.690073 | 0         |  |  |
|       |      | Shiraz-9T  | 1370 | 0.690073 | 0         |  |  |
|       |      | Shiraz-18T | 1457 | 0.643204 | 0         |  |  |
|       |      | Shiraz-18T | 1457 | 0.643204 | 0         |  |  |
|       |      | Shiraz-22T | 1673 | 0.611783 | 0         |  |  |
|       |      | Shiraz-22T | 1673 | 0.611783 | 0         |  |  |
|       |      | Shiraz-25T | 1719 | 0.472955 | 0         |  |  |
|       |      | Shiraz-25T | 1719 | 0.472955 | 0         |  |  |
|       |      | Shiraz-28T | 1762 | 0.562311 | 0         |  |  |
|       |      | Shiraz-28T | 1762 | 0.562311 | 0         |  |  |
|       |      | Shiraz-29T | 1801 | 0.815343 | 0         |  |  |
|       |      | Shiraz-29T | 1801 | 0.815343 | 0         |  |  |
|       |      | Shiraz-32T | 1870 | 0.729766 | 0         |  |  |
|       |      | Shiraz-32T | 1870 | 0.729766 | 0         |  |  |
|       |      | Shiraz-35T | 1933 | 0.488535 | 0         |  |  |
|       |      | Shiraz-35T | 1933 | 0.488535 | 0         |  |  |
|       |      | Shiraz-58T | 2223 | 0.833364 | 0         |  |  |
|       |      | Shiraz-58T | 2223 | 0.833364 | 0         |  |  |
|       |      | Shiraz-71T | 2263 | 0.975531 | 0         |  |  |
|       |      | Shiraz-71T | 2263 | 0.975531 | 0         |  |  |
| MDFIC | chr7 | Shiraz-3T  | 90   | 0.219276 | 0         |  |  |
|       |      | Shiraz-3T  | 95   | 0        | -0.077623 |  |  |

|  |            |      |          |           |  |
|--|------------|------|----------|-----------|--|
|  | Shiraz-4T  | 253  | 0.372918 | 0         |  |
|  | Shiraz-36T | 378  | 0.179558 | 0         |  |
|  | Shiraz-36T | 382  | 0.081739 | 0         |  |
|  | Shiraz-44T | 641  | 0        | -0.477846 |  |
|  | Shiraz-46T | 943  | 0.093799 | 0         |  |
|  | Shiraz-46T | 947  | 0        | -0.010843 |  |
|  | Shiraz-47T | 1031 | 0        | -0.117529 |  |
|  | Shiraz-49T | 1121 | 0        | -0.138569 |  |
|  | Shiraz-77T | 1225 | 0        | -0.117922 |  |
|  | Shiraz-77T | 1228 | 0        | -0.238084 |  |
|  | Shiraz-18T | 1434 | 0.244465 | 0         |  |
|  | Shiraz-22T | 1549 | 0        | -0.319623 |  |
|  | Shiraz-22T | 1552 | 0        | -0.50686  |  |
|  | Shiraz-25T | 1698 | 0.21835  | 0         |  |
|  | Shiraz-28T | 1735 | 0.350744 | 0         |  |
|  | Shiraz-29T | 1778 | 0.120767 | 0         |  |
|  | Shiraz-32T | 1833 | 0.551336 | 0         |  |
|  | Shiraz-32T | 1835 | 0.092727 | 0         |  |
|  | Shiraz-38T | 1951 | 0.250891 | 0         |  |
|  | Shiraz-53T | 2078 | 0.287202 | 0         |  |
|  | Shiraz-58T | 2161 | 0        | -0.187744 |  |
|  | Shiraz-71T | 2238 | 0.603631 | 0         |  |
|  | Shiraz-3T  | 90   | 0.219276 | 0         |  |
|  | Shiraz-3T  | 95   | 0        | -0.077623 |  |
|  | Shiraz-4T  | 253  | 0.372918 | 0         |  |
|  | Shiraz-36T | 378  | 0.179558 | 0         |  |
|  | Shiraz-36T | 382  | 0.081739 | 0         |  |
|  | Shiraz-44T | 641  | 0        | -0.477846 |  |
|  | Shiraz-46T | 943  | 0.093799 | 0         |  |
|  | Shiraz-46T | 947  | 0        | -0.010843 |  |
|  | Shiraz-47T | 1031 | 0        | -0.117529 |  |
|  | Shiraz-49T | 1121 | 0        | -0.138569 |  |
|  | Shiraz-77T | 1225 | 0        | -0.117922 |  |
|  | Shiraz-77T | 1228 | 0        | -0.238084 |  |
|  | Shiraz-18T | 1434 | 0.244465 | 0         |  |
|  | Shiraz-22T | 1549 | 0        | -0.319623 |  |
|  | Shiraz-22T | 1552 | 0        | -0.50686  |  |
|  | Shiraz-25T | 1698 | 0.21835  | 0         |  |
|  | Shiraz-28T | 1735 | 0.350744 | 0         |  |
|  | Shiraz-29T | 1778 | 0.120767 | 0         |  |
|  | Shiraz-32T | 1833 | 0.551336 | 0         |  |
|  | Shiraz-32T | 1835 | 0.092727 | 0         |  |
|  | Shiraz-38T | 1951 | 0.250891 | 0         |  |
|  | Shiraz-53T | 2078 | 0.287202 | 0         |  |
|  | Shiraz-58T | 2161 | 0        | -0.187744 |  |
|  | Shiraz-71T | 2238 | 0.603631 | 0         |  |
|  | Shiraz-3T  | 90   | 0.219276 | 0         |  |

|       |      |            |      |          |           |  |  |
|-------|------|------------|------|----------|-----------|--|--|
|       |      | Shiraz-3T  | 95   | 0        | -0.077623 |  |  |
|       |      | Shiraz-4T  | 253  | 0.372918 | 0         |  |  |
|       |      | Shiraz-36T | 378  | 0.179558 | 0         |  |  |
|       |      | Shiraz-36T | 382  | 0.081739 | 0         |  |  |
|       |      | Shiraz-44T | 641  | 0        | -0.477846 |  |  |
|       |      | Shiraz-46T | 943  | 0.093799 | 0         |  |  |
|       |      | Shiraz-46T | 947  | 0        | -0.010843 |  |  |
|       |      | Shiraz-47T | 1031 | 0        | -0.117529 |  |  |
|       |      | Shiraz-49T | 1121 | 0        | -0.138569 |  |  |
|       |      | Shiraz-77T | 1225 | 0        | -0.117922 |  |  |
|       |      | Shiraz-77T | 1228 | 0        | -0.238084 |  |  |
|       |      | Shiraz-18T | 1434 | 0.244465 | 0         |  |  |
|       |      | Shiraz-22T | 1549 | 0        | -0.319623 |  |  |
|       |      | Shiraz-22T | 1552 | 0        | -0.50686  |  |  |
|       |      | Shiraz-25T | 1698 | 0.21835  | 0         |  |  |
|       |      | Shiraz-28T | 1735 | 0.350744 | 0         |  |  |
|       |      | Shiraz-29T | 1778 | 0.120767 | 0         |  |  |
|       |      | Shiraz-32T | 1833 | 0.551336 | 0         |  |  |
|       |      | Shiraz-32T | 1835 | 0.092727 | 0         |  |  |
|       |      | Shiraz-38T | 1951 | 0.250891 | 0         |  |  |
|       |      | Shiraz-53T | 2078 | 0.287202 | 0         |  |  |
|       |      | Shiraz-58T | 2161 | 0        | -0.187744 |  |  |
|       |      | Shiraz-71T | 2238 | 0.603631 | 0         |  |  |
| MECP2 | chrX | Shiraz-3T  | 246  | 0.531858 | 0         |  |  |
|       |      | Shiraz-3T  | 246  | 0.531858 | 0         |  |  |
|       |      | Shiraz-4T  | 261  | 0        | -0.336249 |  |  |
|       |      | Shiraz-4T  | 261  | 0        | -0.336249 |  |  |
|       |      | Shiraz-16T | 295  | 0.591657 | 0         |  |  |
|       |      | Shiraz-16T | 295  | 0.591657 | 0         |  |  |
|       |      | Shiraz-36T | 433  | 0        | -0.803961 |  |  |
|       |      | Shiraz-36T | 433  | 0        | -0.803961 |  |  |
|       |      | Shiraz-42T | 480  | 0        | -0.232915 |  |  |
|       |      | Shiraz-42T | 480  | 0        | -0.232915 |  |  |
|       |      | Shiraz-44T | 908  | 0.466743 | 0         |  |  |
|       |      | Shiraz-44T | 908  | 0.466743 | 0         |  |  |
|       |      | Shiraz-49T | 1170 | 0        | -0.967436 |  |  |
|       |      | Shiraz-49T | 1170 | 0        | -0.967436 |  |  |
|       |      | Shiraz-49T | 1173 | 0        | -0.704439 |  |  |
|       |      | Shiraz-49T | 1173 | 0        | -0.704439 |  |  |
|       |      | Shiraz-9T  | 1370 | 0.690073 | 0         |  |  |
|       |      | Shiraz-9T  | 1370 | 0.690073 | 0         |  |  |
|       |      | Shiraz-9T  | 1371 | 1.292392 | 0         |  |  |
|       |      | Shiraz-9T  | 1371 | 1.292392 | 0         |  |  |
|       |      | Shiraz-18T | 1457 | 0.643204 | 0         |  |  |
|       |      | Shiraz-18T | 1457 | 0.643204 | 0         |  |  |
|       |      | Shiraz-22T | 1673 | 0.611783 | 0         |  |  |
|       |      | Shiraz-22T | 1673 | 0.611783 | 0         |  |  |



|  |  |            |      |          |           |  |  |
|--|--|------------|------|----------|-----------|--|--|
|  |  | Shiraz-22T | 1678 | 0.911625 | 0         |  |  |
|  |  | Shiraz-22T | 1678 | 0.911625 | 0         |  |  |
|  |  | Shiraz-25T | 1719 | 0.472955 | 0         |  |  |
|  |  | Shiraz-25T | 1719 | 0.472955 | 0         |  |  |
|  |  | Shiraz-28T | 1762 | 0.562311 | 0         |  |  |
|  |  | Shiraz-28T | 1762 | 0.562311 | 0         |  |  |
|  |  | Shiraz-29T | 1801 | 0.815343 | 0         |  |  |
|  |  | Shiraz-29T | 1801 | 0.815343 | 0         |  |  |
|  |  | Shiraz-32T | 1870 | 0.729766 | 0         |  |  |
|  |  | Shiraz-32T | 1870 | 0.729766 | 0         |  |  |
|  |  | Shiraz-32T | 1872 | 1.504553 | 0         |  |  |
|  |  | Shiraz-32T | 1872 | 1.504553 | 0         |  |  |
|  |  | Shiraz-35T | 1933 | 0.488535 | 0         |  |  |
|  |  | Shiraz-35T | 1933 | 0.488535 | 0         |  |  |
|  |  | Shiraz-38T | 2011 | 0        | -0.406024 |  |  |
|  |  | Shiraz-38T | 2011 | 0        | -0.406024 |  |  |
|  |  | Shiraz-53T | 2115 | 0.427728 | 0         |  |  |
|  |  | Shiraz-53T | 2115 | 0.427728 | 0         |  |  |
|  |  | Shiraz-58T | 2223 | 0.833364 | 0         |  |  |
|  |  | Shiraz-58T | 2223 | 0.833364 | 0         |  |  |
|  |  | Shiraz-58T | 2226 | 1.074663 | 0         |  |  |
|  |  | Shiraz-58T | 2226 | 1.074663 | 0         |  |  |
|  |  | Shiraz-71T | 2263 | 0.975531 | 0         |  |  |
|  |  | Shiraz-71T | 2263 | 0.975531 | 0         |  |  |
|  |  | Shiraz-3T  | 246  | 0.531858 | 0         |  |  |
|  |  | Shiraz-3T  | 246  | 0.531858 | 0         |  |  |
|  |  | Shiraz-4T  | 261  | 0        | -0.336249 |  |  |
|  |  | Shiraz-4T  | 261  | 0        | -0.336249 |  |  |
|  |  | Shiraz-16T | 295  | 0.591657 | 0         |  |  |
|  |  | Shiraz-16T | 295  | 0.591657 | 0         |  |  |
|  |  | Shiraz-36T | 433  | 0        | -0.803961 |  |  |
|  |  | Shiraz-36T | 433  | 0        | -0.803961 |  |  |
|  |  | Shiraz-42T | 480  | 0        | -0.232915 |  |  |
|  |  | Shiraz-42T | 480  | 0        | -0.232915 |  |  |
|  |  | Shiraz-44T | 908  | 0.466743 | 0         |  |  |
|  |  | Shiraz-44T | 908  | 0.466743 | 0         |  |  |
|  |  | Shiraz-49T | 1170 | 0        | -0.967436 |  |  |
|  |  | Shiraz-49T | 1170 | 0        | -0.967436 |  |  |
|  |  | Shiraz-49T | 1173 | 0        | -0.704439 |  |  |
|  |  | Shiraz-49T | 1173 | 0        | -0.704439 |  |  |
|  |  | Shiraz-9T  | 1370 | 0.690073 | 0         |  |  |
|  |  | Shiraz-9T  | 1370 | 0.690073 | 0         |  |  |
|  |  | Shiraz-9T  | 1371 | 1.292392 | 0         |  |  |
|  |  | Shiraz-9T  | 1371 | 1.292392 | 0         |  |  |
|  |  | Shiraz-18T | 1457 | 0.643204 | 0         |  |  |
|  |  | Shiraz-18T | 1457 | 0.643204 | 0         |  |  |
|  |  | Shiraz-22T | 1673 | 0.611783 | 0         |  |  |

|  |  |            |      |          |           |  |  |
|--|--|------------|------|----------|-----------|--|--|
|  |  | Shiraz-22T | 1673 | 0.611783 | 0         |  |  |
|  |  | Shiraz-22T | 1678 | 0.911625 | 0         |  |  |
|  |  | Shiraz-22T | 1678 | 0.911625 | 0         |  |  |
|  |  | Shiraz-25T | 1719 | 0.472955 | 0         |  |  |
|  |  | Shiraz-25T | 1719 | 0.472955 | 0         |  |  |
|  |  | Shiraz-28T | 1762 | 0.562311 | 0         |  |  |
|  |  | Shiraz-28T | 1762 | 0.562311 | 0         |  |  |
|  |  | Shiraz-29T | 1801 | 0.815343 | 0         |  |  |
|  |  | Shiraz-29T | 1801 | 0.815343 | 0         |  |  |
|  |  | Shiraz-32T | 1870 | 0.729766 | 0         |  |  |
|  |  | Shiraz-32T | 1870 | 0.729766 | 0         |  |  |
|  |  | Shiraz-32T | 1872 | 1.504553 | 0         |  |  |
|  |  | Shiraz-32T | 1872 | 1.504553 | 0         |  |  |
|  |  | Shiraz-35T | 1933 | 0.488535 | 0         |  |  |
|  |  | Shiraz-35T | 1933 | 0.488535 | 0         |  |  |
|  |  | Shiraz-38T | 2011 | 0        | -0.406024 |  |  |
|  |  | Shiraz-38T | 2011 | 0        | -0.406024 |  |  |
|  |  | Shiraz-53T | 2115 | 0.427728 | 0         |  |  |
|  |  | Shiraz-53T | 2115 | 0.427728 | 0         |  |  |
|  |  | Shiraz-58T | 2223 | 0.833364 | 0         |  |  |
|  |  | Shiraz-58T | 2223 | 0.833364 | 0         |  |  |
|  |  | Shiraz-58T | 2226 | 1.074663 | 0         |  |  |
|  |  | Shiraz-58T | 2226 | 1.074663 | 0         |  |  |
|  |  | Shiraz-71T | 2263 | 0.975531 | 0         |  |  |
|  |  | Shiraz-71T | 2263 | 0.975531 | 0         |  |  |
|  |  | Shiraz-3T  | 246  | 0.531858 | 0         |  |  |
|  |  | Shiraz-3T  | 246  | 0.531858 | 0         |  |  |
|  |  | Shiraz-4T  | 261  | 0        | -0.336249 |  |  |
|  |  | Shiraz-4T  | 261  | 0        | -0.336249 |  |  |
|  |  | Shiraz-16T | 295  | 0.591657 | 0         |  |  |
|  |  | Shiraz-16T | 295  | 0.591657 | 0         |  |  |
|  |  | Shiraz-36T | 433  | 0        | -0.803961 |  |  |
|  |  | Shiraz-36T | 433  | 0        | -0.803961 |  |  |
|  |  | Shiraz-42T | 480  | 0        | -0.232915 |  |  |
|  |  | Shiraz-42T | 480  | 0        | -0.232915 |  |  |
|  |  | Shiraz-44T | 908  | 0.466743 | 0         |  |  |
|  |  | Shiraz-44T | 908  | 0.466743 | 0         |  |  |
|  |  | Shiraz-49T | 1170 | 0        | -0.967436 |  |  |
|  |  | Shiraz-49T | 1170 | 0        | -0.967436 |  |  |
|  |  | Shiraz-49T | 1173 | 0        | -0.704439 |  |  |
|  |  | Shiraz-49T | 1173 | 0        | -0.704439 |  |  |
|  |  | Shiraz-9T  | 1370 | 0.690073 | 0         |  |  |
|  |  | Shiraz-9T  | 1370 | 0.690073 | 0         |  |  |
|  |  | Shiraz-9T  | 1371 | 1.292392 | 0         |  |  |
|  |  | Shiraz-9T  | 1371 | 1.292392 | 0         |  |  |
|  |  | Shiraz-18T | 1457 | 0.643204 | 0         |  |  |
|  |  | Shiraz-18T | 1457 | 0.643204 | 0         |  |  |

|       |      |            |      |          |           |  |  |
|-------|------|------------|------|----------|-----------|--|--|
|       |      | Shiraz-22T | 1673 | 0.611783 | 0         |  |  |
|       |      | Shiraz-22T | 1673 | 0.611783 | 0         |  |  |
|       |      | Shiraz-22T | 1678 | 0.911625 | 0         |  |  |
|       |      | Shiraz-22T | 1678 | 0.911625 | 0         |  |  |
|       |      | Shiraz-25T | 1719 | 0.472955 | 0         |  |  |
|       |      | Shiraz-25T | 1719 | 0.472955 | 0         |  |  |
|       |      | Shiraz-28T | 1762 | 0.562311 | 0         |  |  |
|       |      | Shiraz-28T | 1762 | 0.562311 | 0         |  |  |
|       |      | Shiraz-29T | 1801 | 0.815343 | 0         |  |  |
|       |      | Shiraz-29T | 1801 | 0.815343 | 0         |  |  |
|       |      | Shiraz-32T | 1870 | 0.729766 | 0         |  |  |
|       |      | Shiraz-32T | 1870 | 0.729766 | 0         |  |  |
|       |      | Shiraz-32T | 1872 | 1.504553 | 0         |  |  |
|       |      | Shiraz-32T | 1872 | 1.504553 | 0         |  |  |
|       |      | Shiraz-35T | 1933 | 0.488535 | 0         |  |  |
|       |      | Shiraz-35T | 1933 | 0.488535 | 0         |  |  |
|       |      | Shiraz-38T | 2011 | 0        | -0.406024 |  |  |
|       |      | Shiraz-38T | 2011 | 0        | -0.406024 |  |  |
|       |      | Shiraz-53T | 2115 | 0.427728 | 0         |  |  |
|       |      | Shiraz-53T | 2115 | 0.427728 | 0         |  |  |
|       |      | Shiraz-58T | 2223 | 0.833364 | 0         |  |  |
|       |      | Shiraz-58T | 2223 | 0.833364 | 0         |  |  |
|       |      | Shiraz-58T | 2226 | 1.074663 | 0         |  |  |
|       |      | Shiraz-58T | 2226 | 1.074663 | 0         |  |  |
|       |      | Shiraz-71T | 2263 | 0.975531 | 0         |  |  |
|       |      | Shiraz-71T | 2263 | 0.975531 | 0         |  |  |
| MED12 | chrX | Shiraz-4T  | 261  | 0        | -0.336249 |  |  |
|       |      | Shiraz-16T | 295  | 0.591657 | 0         |  |  |
|       |      | Shiraz-36T | 433  | 0        | -0.803961 |  |  |
|       |      | Shiraz-44T | 899  | 0        | -1.09697  |  |  |
|       |      | Shiraz-44T | 900  | 0        | -0.584284 |  |  |
|       |      | Shiraz-49T | 1170 | 0        | -0.967436 |  |  |
|       |      | Shiraz-49T | 1171 | 0        | -0.612379 |  |  |
|       |      | Shiraz-77T | 1283 | 0.296555 | 0         |  |  |
|       |      | Shiraz-18T | 1457 | 0.643204 | 0         |  |  |
|       |      | Shiraz-22T | 1673 | 0.611783 | 0         |  |  |
|       |      | Shiraz-22T | 1674 | 0.887899 | 0         |  |  |
|       |      | Shiraz-25T | 1719 | 0.472955 | 0         |  |  |
|       |      | Shiraz-28T | 1762 | 0.562311 | 0         |  |  |
|       |      | Shiraz-29T | 1801 | 0.815343 | 0         |  |  |
|       |      | Shiraz-32T | 1870 | 0.729766 | 0         |  |  |
|       |      | Shiraz-35T | 1933 | 0.488535 | 0         |  |  |
|       |      | Shiraz-58T | 2223 | 0.833364 | 0         |  |  |
|       |      | Shiraz-58T | 2224 | 1.076575 | 0         |  |  |
|       |      | Shiraz-71T | 2263 | 0.975531 | 0         |  |  |
|       |      | Shiraz-4T  | 261  | 0        | -0.336249 |  |  |
|       |      | Shiraz-16T | 295  | 0.591657 | 0         |  |  |

|       |      |            |      |          |           |  |  |
|-------|------|------------|------|----------|-----------|--|--|
|       |      | Shiraz-36T | 433  | 0        | -0.803961 |  |  |
|       |      | Shiraz-44T | 899  | 0        | -1.09697  |  |  |
|       |      | Shiraz-44T | 900  | 0        | -0.584284 |  |  |
|       |      | Shiraz-49T | 1170 | 0        | -0.967436 |  |  |
|       |      | Shiraz-49T | 1171 | 0        | -0.612379 |  |  |
|       |      | Shiraz-77T | 1283 | 0.296555 | 0         |  |  |
|       |      | Shiraz-18T | 1457 | 0.643204 | 0         |  |  |
|       |      | Shiraz-22T | 1673 | 0.611783 | 0         |  |  |
|       |      | Shiraz-22T | 1674 | 0.887899 | 0         |  |  |
|       |      | Shiraz-25T | 1719 | 0.472955 | 0         |  |  |
|       |      | Shiraz-28T | 1762 | 0.562311 | 0         |  |  |
|       |      | Shiraz-29T | 1801 | 0.815343 | 0         |  |  |
|       |      | Shiraz-32T | 1870 | 0.729766 | 0         |  |  |
|       |      | Shiraz-35T | 1933 | 0.488535 | 0         |  |  |
|       |      | Shiraz-58T | 2223 | 0.833364 | 0         |  |  |
|       |      | Shiraz-58T | 2224 | 1.076575 | 0         |  |  |
|       |      | Shiraz-71T | 2263 | 0.975531 | 0         |  |  |
|       |      | Shiraz-4T  | 261  | 0        | -0.336249 |  |  |
|       |      | Shiraz-16T | 295  | 0.591657 | 0         |  |  |
|       |      | Shiraz-36T | 433  | 0        | -0.803961 |  |  |
|       |      | Shiraz-44T | 899  | 0        | -1.09697  |  |  |
|       |      | Shiraz-44T | 900  | 0        | -0.584284 |  |  |
|       |      | Shiraz-49T | 1170 | 0        | -0.967436 |  |  |
|       |      | Shiraz-49T | 1171 | 0        | -0.612379 |  |  |
|       |      | Shiraz-77T | 1283 | 0.296555 | 0         |  |  |
|       |      | Shiraz-18T | 1457 | 0.643204 | 0         |  |  |
|       |      | Shiraz-22T | 1673 | 0.611783 | 0         |  |  |
|       |      | Shiraz-22T | 1674 | 0.887899 | 0         |  |  |
|       |      | Shiraz-25T | 1719 | 0.472955 | 0         |  |  |
|       |      | Shiraz-28T | 1762 | 0.562311 | 0         |  |  |
|       |      | Shiraz-29T | 1801 | 0.815343 | 0         |  |  |
|       |      | Shiraz-32T | 1870 | 0.729766 | 0         |  |  |
|       |      | Shiraz-35T | 1933 | 0.488535 | 0         |  |  |
|       |      | Shiraz-58T | 2223 | 0.833364 | 0         |  |  |
|       |      | Shiraz-58T | 2224 | 1.076575 | 0         |  |  |
|       |      | Shiraz-71T | 2263 | 0.975531 | 0         |  |  |
| MED14 | chrX | Shiraz-3T  | 235  | 0        | -0.28401  |  |  |
|       |      | Shiraz-3T  | 237  | 0.082458 | 0         |  |  |
|       |      | Shiraz-4T  | 260  | 0        | -0.324128 |  |  |
|       |      | Shiraz-16T | 294  | 0.655804 | 0         |  |  |
|       |      | Shiraz-31T | 345  | 0.103301 | 0         |  |  |
|       |      | Shiraz-36T | 431  | 0        | -0.78035  |  |  |
|       |      | Shiraz-36T | 432  | 0        | -0.6692   |  |  |
|       |      | Shiraz-44T | 891  | 0        | -0.954044 |  |  |
|       |      | Shiraz-46T | 991  | 0.139564 | 0         |  |  |
|       |      | Shiraz-49T | 1166 | 0        | -0.917235 |  |  |
|       |      | Shiraz-9T  | 1368 | 0.199713 | 0         |  |  |

|  |            |      |          |           |  |
|--|------------|------|----------|-----------|--|
|  | Shiraz-18T | 1455 | 0        | -0.186773 |  |
|  | Shiraz-22T | 1669 | 0.695915 | 0         |  |
|  | Shiraz-25T | 1717 | 0.420447 | 0         |  |
|  | Shiraz-28T | 1760 | 0.538181 | 0         |  |
|  | Shiraz-29T | 1800 | 0.672527 | 0         |  |
|  | Shiraz-32T | 1869 | 0.776805 | 0         |  |
|  | Shiraz-35T | 1932 | 0.507141 | 0         |  |
|  | Shiraz-40T | 2051 | 0.098506 | 0         |  |
|  | Shiraz-58T | 2221 | 0.871948 | 0         |  |
|  | Shiraz-71T | 2260 | 0.68394  | 0         |  |
|  | Shiraz-71T | 2262 | 0.986748 | 0         |  |
|  | Shiraz-3T  | 235  | 0        | -0.28401  |  |
|  | Shiraz-3T  | 237  | 0.082458 | 0         |  |
|  | Shiraz-4T  | 260  | 0        | -0.324128 |  |
|  | Shiraz-16T | 294  | 0.655804 | 0         |  |
|  | Shiraz-31T | 345  | 0.103301 | 0         |  |
|  | Shiraz-36T | 431  | 0        | -0.78035  |  |
|  | Shiraz-36T | 432  | 0        | -0.6692   |  |
|  | Shiraz-44T | 891  | 0        | -0.954044 |  |
|  | Shiraz-46T | 991  | 0.139564 | 0         |  |
|  | Shiraz-49T | 1166 | 0        | -0.917235 |  |
|  | Shiraz-9T  | 1368 | 0.199713 | 0         |  |
|  | Shiraz-18T | 1455 | 0        | -0.186773 |  |
|  | Shiraz-22T | 1669 | 0.695915 | 0         |  |
|  | Shiraz-25T | 1717 | 0.420447 | 0         |  |
|  | Shiraz-28T | 1760 | 0.538181 | 0         |  |
|  | Shiraz-29T | 1800 | 0.672527 | 0         |  |
|  | Shiraz-32T | 1869 | 0.776805 | 0         |  |
|  | Shiraz-35T | 1932 | 0.507141 | 0         |  |
|  | Shiraz-40T | 2051 | 0.098506 | 0         |  |
|  | Shiraz-58T | 2221 | 0.871948 | 0         |  |
|  | Shiraz-71T | 2260 | 0.68394  | 0         |  |
|  | Shiraz-71T | 2262 | 0.986748 | 0         |  |
|  | Shiraz-3T  | 235  | 0        | -0.28401  |  |
|  | Shiraz-3T  | 237  | 0.082458 | 0         |  |
|  | Shiraz-4T  | 260  | 0        | -0.324128 |  |
|  | Shiraz-16T | 294  | 0.655804 | 0         |  |
|  | Shiraz-31T | 345  | 0.103301 | 0         |  |
|  | Shiraz-36T | 431  | 0        | -0.78035  |  |
|  | Shiraz-36T | 432  | 0        | -0.6692   |  |
|  | Shiraz-44T | 891  | 0        | -0.954044 |  |
|  | Shiraz-46T | 991  | 0.139564 | 0         |  |
|  | Shiraz-49T | 1166 | 0        | -0.917235 |  |
|  | Shiraz-9T  | 1368 | 0.199713 | 0         |  |
|  | Shiraz-18T | 1455 | 0        | -0.186773 |  |
|  | Shiraz-22T | 1669 | 0.695915 | 0         |  |
|  | Shiraz-25T | 1717 | 0.420447 | 0         |  |

|       |      |            |      |          |           |  |  |
|-------|------|------------|------|----------|-----------|--|--|
|       |      | Shiraz-28T | 1760 | 0.538181 | 0         |  |  |
|       |      | Shiraz-29T | 1800 | 0.672527 | 0         |  |  |
|       |      | Shiraz-32T | 1869 | 0.776805 | 0         |  |  |
|       |      | Shiraz-35T | 1932 | 0.507141 | 0         |  |  |
|       |      | Shiraz-40T | 2051 | 0.098506 | 0         |  |  |
|       |      | Shiraz-58T | 2221 | 0.871948 | 0         |  |  |
|       |      | Shiraz-71T | 2260 | 0.68394  | 0         |  |  |
|       |      | Shiraz-71T | 2262 | 0.986748 | 0         |  |  |
| MEOX2 | chr7 | Shiraz-4T  | 252  | 0.192083 | 0         |  |  |
|       |      | Shiraz-36T | 376  | 0.159952 | 0         |  |  |
|       |      | Shiraz-44T | 628  | 0        | -0.444379 |  |  |
|       |      | Shiraz-47T | 1027 | 0        | -0.117848 |  |  |
|       |      | Shiraz-49T | 1117 | 0        | -0.168296 |  |  |
|       |      | Shiraz-77T | 1222 | 0        | -0.113002 |  |  |
|       |      | Shiraz-18T | 1433 | 0.250973 | 0         |  |  |
|       |      | Shiraz-22T | 1543 | 0        | -0.513696 |  |  |
|       |      | Shiraz-25T | 1697 | 0.21945  | 0         |  |  |
|       |      | Shiraz-28T | 1734 | 0.362882 | 0         |  |  |
|       |      | Shiraz-29T | 1777 | 0.156747 | 0         |  |  |
|       |      | Shiraz-38T | 1950 | 0.265916 | 0         |  |  |
|       |      | Shiraz-58T | 2157 | 0        | -0.213872 |  |  |
|       |      | Shiraz-71T | 2236 | 0.320072 | 0         |  |  |
|       |      | Shiraz-4T  | 252  | 0.192083 | 0         |  |  |
|       |      | Shiraz-36T | 376  | 0.159952 | 0         |  |  |
|       |      | Shiraz-44T | 628  | 0        | -0.444379 |  |  |
|       |      | Shiraz-47T | 1027 | 0        | -0.117848 |  |  |
|       |      | Shiraz-49T | 1117 | 0        | -0.168296 |  |  |
|       |      | Shiraz-77T | 1222 | 0        | -0.113002 |  |  |
|       |      | Shiraz-18T | 1433 | 0.250973 | 0         |  |  |
|       |      | Shiraz-22T | 1543 | 0        | -0.513696 |  |  |
|       |      | Shiraz-25T | 1697 | 0.21945  | 0         |  |  |
|       |      | Shiraz-28T | 1734 | 0.362882 | 0         |  |  |
|       |      | Shiraz-29T | 1777 | 0.156747 | 0         |  |  |
|       |      | Shiraz-38T | 1950 | 0.265916 | 0         |  |  |
|       |      | Shiraz-58T | 2157 | 0        | -0.213872 |  |  |
|       |      | Shiraz-71T | 2236 | 0.320072 | 0         |  |  |
|       |      | Shiraz-4T  | 252  | 0.192083 | 0         |  |  |
|       |      | Shiraz-36T | 376  | 0.159952 | 0         |  |  |
|       |      | Shiraz-44T | 628  | 0        | -0.444379 |  |  |
|       |      | Shiraz-47T | 1027 | 0        | -0.117848 |  |  |
|       |      | Shiraz-49T | 1117 | 0        | -0.168296 |  |  |
|       |      | Shiraz-77T | 1222 | 0        | -0.113002 |  |  |
|       |      | Shiraz-18T | 1433 | 0.250973 | 0         |  |  |
|       |      | Shiraz-22T | 1543 | 0        | -0.513696 |  |  |
|       |      | Shiraz-25T | 1697 | 0.21945  | 0         |  |  |
|       |      | Shiraz-28T | 1734 | 0.362882 | 0         |  |  |
|       |      | Shiraz-29T | 1777 | 0.156747 | 0         |  |  |

|       |      |            |      |          |           |  |
|-------|------|------------|------|----------|-----------|--|
|       |      | Shiraz-38T | 1950 | 0.265916 | 0         |  |
|       |      | Shiraz-58T | 2157 | 0        | -0.213872 |  |
|       |      | Shiraz-71T | 2236 | 0.320072 | 0         |  |
| MEPCE | chr7 | Shiraz-3T  | 90   | 0.219276 | 0         |  |
|       |      | Shiraz-3T  | 94   | 0.74735  | 0         |  |
|       |      | Shiraz-4T  | 253  | 0.372918 | 0         |  |
|       |      | Shiraz-31T | 316  | 0.219196 | 0         |  |
|       |      | Shiraz-36T | 378  | 0.179558 | 0         |  |
|       |      | Shiraz-36T | 381  | 0.332628 | 0         |  |
|       |      | Shiraz-44T | 639  | 1.035032 | 0         |  |
|       |      | Shiraz-46T | 943  | 0.093799 | 0         |  |
|       |      | Shiraz-46T | 946  | 0.299835 | 0         |  |
|       |      | Shiraz-47T | 1030 | 0.257728 | 0         |  |
|       |      | Shiraz-49T | 1120 | 0.281656 | 0         |  |
|       |      | Shiraz-77T | 1225 | 0        | -0.117922 |  |
|       |      | Shiraz-77T | 1227 | 0.196445 | 0         |  |
|       |      | Shiraz-9T  | 1324 | 0.679266 | 0         |  |
|       |      | Shiraz-18T | 1434 | 0.244465 | 0         |  |
|       |      | Shiraz-22T | 1549 | 0        | -0.319623 |  |
|       |      | Shiraz-22T | 1551 | 0.324011 | 0         |  |
|       |      | Shiraz-25T | 1698 | 0.21835  | 0         |  |
|       |      | Shiraz-28T | 1735 | 0.350744 | 0         |  |
|       |      | Shiraz-29T | 1778 | 0.120767 | 0         |  |
|       |      | Shiraz-32T | 1833 | 0.551336 | 0         |  |
|       |      | Shiraz-32T | 1834 | 1.485392 | 0         |  |
|       |      | Shiraz-38T | 1951 | 0.250891 | 0         |  |
|       |      | Shiraz-53T | 2078 | 0.287202 | 0         |  |
|       |      | Shiraz-58T | 2160 | 0.399007 | 0         |  |
|       |      | Shiraz-71T | 2238 | 0.603631 | 0         |  |
|       |      | Shiraz-3T  | 90   | 0.219276 | 0         |  |
|       |      | Shiraz-3T  | 94   | 0.74735  | 0         |  |
|       |      | Shiraz-4T  | 253  | 0.372918 | 0         |  |
|       |      | Shiraz-31T | 316  | 0.219196 | 0         |  |
|       |      | Shiraz-36T | 378  | 0.179558 | 0         |  |
|       |      | Shiraz-36T | 381  | 0.332628 | 0         |  |
|       |      | Shiraz-44T | 639  | 1.035032 | 0         |  |
|       |      | Shiraz-46T | 943  | 0.093799 | 0         |  |
|       |      | Shiraz-46T | 946  | 0.299835 | 0         |  |
|       |      | Shiraz-47T | 1030 | 0.257728 | 0         |  |
|       |      | Shiraz-49T | 1120 | 0.281656 | 0         |  |
|       |      | Shiraz-77T | 1225 | 0        | -0.117922 |  |
|       |      | Shiraz-77T | 1227 | 0.196445 | 0         |  |
|       |      | Shiraz-9T  | 1324 | 0.679266 | 0         |  |
|       |      | Shiraz-18T | 1434 | 0.244465 | 0         |  |
|       |      | Shiraz-22T | 1549 | 0        | -0.319623 |  |
|       |      | Shiraz-22T | 1551 | 0.324011 | 0         |  |
|       |      | Shiraz-25T | 1698 | 0.21835  | 0         |  |

|      |      |            |      |          |           |  |
|------|------|------------|------|----------|-----------|--|
|      |      | Shiraz-28T | 1735 | 0.350744 | 0         |  |
|      |      | Shiraz-29T | 1778 | 0.120767 | 0         |  |
|      |      | Shiraz-32T | 1833 | 0.551336 | 0         |  |
|      |      | Shiraz-32T | 1834 | 1.485392 | 0         |  |
|      |      | Shiraz-38T | 1951 | 0.250891 | 0         |  |
|      |      | Shiraz-53T | 2078 | 0.287202 | 0         |  |
|      |      | Shiraz-58T | 2160 | 0.399007 | 0         |  |
|      |      | Shiraz-71T | 2238 | 0.603631 | 0         |  |
|      |      | Shiraz-3T  | 90   | 0.219276 | 0         |  |
|      |      | Shiraz-3T  | 94   | 0.74735  | 0         |  |
|      |      | Shiraz-4T  | 253  | 0.372918 | 0         |  |
|      |      | Shiraz-31T | 316  | 0.219196 | 0         |  |
|      |      | Shiraz-36T | 378  | 0.179558 | 0         |  |
|      |      | Shiraz-36T | 381  | 0.332628 | 0         |  |
|      |      | Shiraz-44T | 639  | 1.035032 | 0         |  |
|      |      | Shiraz-46T | 943  | 0.093799 | 0         |  |
|      |      | Shiraz-46T | 946  | 0.299835 | 0         |  |
|      |      | Shiraz-47T | 1030 | 0.257728 | 0         |  |
|      |      | Shiraz-49T | 1120 | 0.281656 | 0         |  |
|      |      | Shiraz-77T | 1225 | 0        | -0.117922 |  |
|      |      | Shiraz-77T | 1227 | 0.196445 | 0         |  |
|      |      | Shiraz-9T  | 1324 | 0.679266 | 0         |  |
|      |      | Shiraz-18T | 1434 | 0.244465 | 0         |  |
|      |      | Shiraz-22T | 1549 | 0        | -0.319623 |  |
|      |      | Shiraz-22T | 1551 | 0.324011 | 0         |  |
|      |      | Shiraz-25T | 1698 | 0.21835  | 0         |  |
|      |      | Shiraz-28T | 1735 | 0.350744 | 0         |  |
|      |      | Shiraz-29T | 1778 | 0.120767 | 0         |  |
|      |      | Shiraz-32T | 1833 | 0.551336 | 0         |  |
|      |      | Shiraz-32T | 1834 | 1.485392 | 0         |  |
|      |      | Shiraz-38T | 1951 | 0.250891 | 0         |  |
|      |      | Shiraz-53T | 2078 | 0.287202 | 0         |  |
|      |      | Shiraz-58T | 2160 | 0.399007 | 0         |  |
|      |      | Shiraz-71T | 2238 | 0.603631 | 0         |  |
| MEST | chr7 | Shiraz-3T  | 90   | 0.219276 | 0         |  |
|      |      | Shiraz-3T  | 90   | 0.219276 | 0         |  |
|      |      | Shiraz-3T  | 90   | 0.219276 | 0         |  |
|      |      | Shiraz-3T  | 96   | 0.428308 | 0         |  |
|      |      | Shiraz-3T  | 96   | 0.428308 | 0         |  |
|      |      | Shiraz-3T  | 96   | 0.428308 | 0         |  |
|      |      | Shiraz-4T  | 253  | 0.372918 | 0         |  |
|      |      | Shiraz-4T  | 253  | 0.372918 | 0         |  |
|      |      | Shiraz-4T  | 253  | 0.372918 | 0         |  |
|      |      | Shiraz-31T | 317  | 0.204382 | 0         |  |
|      |      | Shiraz-31T | 317  | 0.204382 | 0         |  |
|      |      | Shiraz-31T | 317  | 0.204382 | 0         |  |
|      |      | Shiraz-36T | 378  | 0.179558 | 0         |  |



|  |  |            |      |          |           |  |  |
|--|--|------------|------|----------|-----------|--|--|
|  |  | Shiraz-36T | 378  | 0.179558 | 0         |  |  |
|  |  | Shiraz-36T | 378  | 0.179558 | 0         |  |  |
|  |  | Shiraz-44T | 642  | 0.408617 | 0         |  |  |
|  |  | Shiraz-44T | 642  | 0.408617 | 0         |  |  |
|  |  | Shiraz-44T | 642  | 0.408617 | 0         |  |  |
|  |  | Shiraz-46T | 943  | 0.093799 | 0         |  |  |
|  |  | Shiraz-46T | 943  | 0.093799 | 0         |  |  |
|  |  | Shiraz-46T | 943  | 0.093799 | 0         |  |  |
|  |  | Shiraz-47T | 1032 | 0.171484 | 0         |  |  |
|  |  | Shiraz-47T | 1032 | 0.171484 | 0         |  |  |
|  |  | Shiraz-47T | 1032 | 0.171484 | 0         |  |  |
|  |  | Shiraz-77T | 1225 | 0        | -0.117922 |  |  |
|  |  | Shiraz-77T | 1225 | 0        | -0.117922 |  |  |
|  |  | Shiraz-77T | 1225 | 0        | -0.117922 |  |  |
|  |  | Shiraz-77T | 1229 | 0.051661 | 0         |  |  |
|  |  | Shiraz-77T | 1229 | 0.051661 | 0         |  |  |
|  |  | Shiraz-77T | 1229 | 0.051661 | 0         |  |  |
|  |  | Shiraz-9T  | 1325 | 0.221899 | 0         |  |  |
|  |  | Shiraz-9T  | 1325 | 0.221899 | 0         |  |  |
|  |  | Shiraz-9T  | 1325 | 0.221899 | 0         |  |  |
|  |  | Shiraz-18T | 1434 | 0.244465 | 0         |  |  |
|  |  | Shiraz-18T | 1434 | 0.244465 | 0         |  |  |
|  |  | Shiraz-18T | 1434 | 0.244465 | 0         |  |  |
|  |  | Shiraz-25T | 1698 | 0.21835  | 0         |  |  |
|  |  | Shiraz-25T | 1698 | 0.21835  | 0         |  |  |
|  |  | Shiraz-25T | 1698 | 0.21835  | 0         |  |  |
|  |  | Shiraz-28T | 1735 | 0.350744 | 0         |  |  |
|  |  | Shiraz-28T | 1735 | 0.350744 | 0         |  |  |
|  |  | Shiraz-28T | 1735 | 0.350744 | 0         |  |  |
|  |  | Shiraz-29T | 1778 | 0.120767 | 0         |  |  |
|  |  | Shiraz-29T | 1778 | 0.120767 | 0         |  |  |
|  |  | Shiraz-29T | 1778 | 0.120767 | 0         |  |  |
|  |  | Shiraz-32T | 1833 | 0.551336 | 0         |  |  |
|  |  | Shiraz-32T | 1833 | 0.551336 | 0         |  |  |
|  |  | Shiraz-32T | 1833 | 0.551336 | 0         |  |  |
|  |  | Shiraz-38T | 1951 | 0.250891 | 0         |  |  |
|  |  | Shiraz-38T | 1951 | 0.250891 | 0         |  |  |
|  |  | Shiraz-38T | 1951 | 0.250891 | 0         |  |  |
|  |  | Shiraz-53T | 2078 | 0.287202 | 0         |  |  |
|  |  | Shiraz-53T | 2078 | 0.287202 | 0         |  |  |
|  |  | Shiraz-53T | 2078 | 0.287202 | 0         |  |  |
|  |  | Shiraz-71T | 2238 | 0.603631 | 0         |  |  |
|  |  | Shiraz-71T | 2238 | 0.603631 | 0         |  |  |
|  |  | Shiraz-71T | 2238 | 0.603631 | 0         |  |  |
|  |  | Shiraz-3T  | 90   | 0.219276 | 0         |  |  |
|  |  | Shiraz-3T  | 90   | 0.219276 | 0         |  |  |
|  |  | Shiraz-3T  | 90   | 0.219276 | 0         |  |  |

|  |            |      |          |           |  |
|--|------------|------|----------|-----------|--|
|  | Shiraz-3T  | 96   | 0.428308 | 0         |  |
|  | Shiraz-3T  | 96   | 0.428308 | 0         |  |
|  | Shiraz-3T  | 96   | 0.428308 | 0         |  |
|  | Shiraz-4T  | 253  | 0.372918 | 0         |  |
|  | Shiraz-4T  | 253  | 0.372918 | 0         |  |
|  | Shiraz-4T  | 253  | 0.372918 | 0         |  |
|  | Shiraz-31T | 317  | 0.204382 | 0         |  |
|  | Shiraz-31T | 317  | 0.204382 | 0         |  |
|  | Shiraz-31T | 317  | 0.204382 | 0         |  |
|  | Shiraz-36T | 378  | 0.179558 | 0         |  |
|  | Shiraz-36T | 378  | 0.179558 | 0         |  |
|  | Shiraz-36T | 378  | 0.179558 | 0         |  |
|  | Shiraz-44T | 642  | 0.408617 | 0         |  |
|  | Shiraz-44T | 642  | 0.408617 | 0         |  |
|  | Shiraz-44T | 642  | 0.408617 | 0         |  |
|  | Shiraz-46T | 943  | 0.093799 | 0         |  |
|  | Shiraz-46T | 943  | 0.093799 | 0         |  |
|  | Shiraz-46T | 943  | 0.093799 | 0         |  |
|  | Shiraz-47T | 1032 | 0.171484 | 0         |  |
|  | Shiraz-47T | 1032 | 0.171484 | 0         |  |
|  | Shiraz-47T | 1032 | 0.171484 | 0         |  |
|  | Shiraz-77T | 1225 | 0        | -0.117922 |  |
|  | Shiraz-77T | 1225 | 0        | -0.117922 |  |
|  | Shiraz-77T | 1225 | 0        | -0.117922 |  |
|  | Shiraz-77T | 1229 | 0.051661 | 0         |  |
|  | Shiraz-77T | 1229 | 0.051661 | 0         |  |
|  | Shiraz-77T | 1229 | 0.051661 | 0         |  |
|  | Shiraz-9T  | 1325 | 0.221899 | 0         |  |
|  | Shiraz-9T  | 1325 | 0.221899 | 0         |  |
|  | Shiraz-9T  | 1325 | 0.221899 | 0         |  |
|  | Shiraz-18T | 1434 | 0.244465 | 0         |  |
|  | Shiraz-18T | 1434 | 0.244465 | 0         |  |
|  | Shiraz-18T | 1434 | 0.244465 | 0         |  |
|  | Shiraz-25T | 1698 | 0.21835  | 0         |  |
|  | Shiraz-25T | 1698 | 0.21835  | 0         |  |
|  | Shiraz-25T | 1698 | 0.21835  | 0         |  |
|  | Shiraz-28T | 1735 | 0.350744 | 0         |  |
|  | Shiraz-28T | 1735 | 0.350744 | 0         |  |
|  | Shiraz-28T | 1735 | 0.350744 | 0         |  |
|  | Shiraz-29T | 1778 | 0.120767 | 0         |  |
|  | Shiraz-29T | 1778 | 0.120767 | 0         |  |
|  | Shiraz-29T | 1778 | 0.120767 | 0         |  |
|  | Shiraz-32T | 1833 | 0.551336 | 0         |  |
|  | Shiraz-32T | 1833 | 0.551336 | 0         |  |
|  | Shiraz-32T | 1833 | 0.551336 | 0         |  |
|  | Shiraz-38T | 1951 | 0.250891 | 0         |  |
|  | Shiraz-38T | 1951 | 0.250891 | 0         |  |

|  |  |            |      |          |           |  |  |
|--|--|------------|------|----------|-----------|--|--|
|  |  | Shiraz-38T | 1951 | 0.250891 | 0         |  |  |
|  |  | Shiraz-53T | 2078 | 0.287202 | 0         |  |  |
|  |  | Shiraz-53T | 2078 | 0.287202 | 0         |  |  |
|  |  | Shiraz-53T | 2078 | 0.287202 | 0         |  |  |
|  |  | Shiraz-71T | 2238 | 0.603631 | 0         |  |  |
|  |  | Shiraz-71T | 2238 | 0.603631 | 0         |  |  |
|  |  | Shiraz-71T | 2238 | 0.603631 | 0         |  |  |
|  |  | Shiraz-3T  | 90   | 0.219276 | 0         |  |  |
|  |  | Shiraz-3T  | 90   | 0.219276 | 0         |  |  |
|  |  | Shiraz-3T  | 90   | 0.219276 | 0         |  |  |
|  |  | Shiraz-3T  | 96   | 0.428308 | 0         |  |  |
|  |  | Shiraz-3T  | 96   | 0.428308 | 0         |  |  |
|  |  | Shiraz-3T  | 96   | 0.428308 | 0         |  |  |
|  |  | Shiraz-4T  | 253  | 0.372918 | 0         |  |  |
|  |  | Shiraz-4T  | 253  | 0.372918 | 0         |  |  |
|  |  | Shiraz-4T  | 253  | 0.372918 | 0         |  |  |
|  |  | Shiraz-31T | 317  | 0.204382 | 0         |  |  |
|  |  | Shiraz-31T | 317  | 0.204382 | 0         |  |  |
|  |  | Shiraz-31T | 317  | 0.204382 | 0         |  |  |
|  |  | Shiraz-36T | 378  | 0.179558 | 0         |  |  |
|  |  | Shiraz-36T | 378  | 0.179558 | 0         |  |  |
|  |  | Shiraz-36T | 378  | 0.179558 | 0         |  |  |
|  |  | Shiraz-44T | 642  | 0.408617 | 0         |  |  |
|  |  | Shiraz-44T | 642  | 0.408617 | 0         |  |  |
|  |  | Shiraz-44T | 642  | 0.408617 | 0         |  |  |
|  |  | Shiraz-46T | 943  | 0.093799 | 0         |  |  |
|  |  | Shiraz-46T | 943  | 0.093799 | 0         |  |  |
|  |  | Shiraz-46T | 943  | 0.093799 | 0         |  |  |
|  |  | Shiraz-47T | 1032 | 0.171484 | 0         |  |  |
|  |  | Shiraz-47T | 1032 | 0.171484 | 0         |  |  |
|  |  | Shiraz-47T | 1032 | 0.171484 | 0         |  |  |
|  |  | Shiraz-77T | 1225 | 0        | -0.117922 |  |  |
|  |  | Shiraz-77T | 1225 | 0        | -0.117922 |  |  |
|  |  | Shiraz-77T | 1225 | 0        | -0.117922 |  |  |
|  |  | Shiraz-77T | 1229 | 0.051661 | 0         |  |  |
|  |  | Shiraz-77T | 1229 | 0.051661 | 0         |  |  |
|  |  | Shiraz-77T | 1229 | 0.051661 | 0         |  |  |
|  |  | Shiraz-9T  | 1325 | 0.221899 | 0         |  |  |
|  |  | Shiraz-9T  | 1325 | 0.221899 | 0         |  |  |
|  |  | Shiraz-9T  | 1325 | 0.221899 | 0         |  |  |
|  |  | Shiraz-18T | 1434 | 0.244465 | 0         |  |  |
|  |  | Shiraz-18T | 1434 | 0.244465 | 0         |  |  |
|  |  | Shiraz-18T | 1434 | 0.244465 | 0         |  |  |
|  |  | Shiraz-25T | 1698 | 0.21835  | 0         |  |  |
|  |  | Shiraz-25T | 1698 | 0.21835  | 0         |  |  |
|  |  | Shiraz-25T | 1698 | 0.21835  | 0         |  |  |
|  |  | Shiraz-28T | 1735 | 0.350744 | 0         |  |  |

|         |      |            |      |          |           |  |
|---------|------|------------|------|----------|-----------|--|
|         |      | Shiraz-28T | 1735 | 0.350744 | 0         |  |
|         |      | Shiraz-28T | 1735 | 0.350744 | 0         |  |
|         |      | Shiraz-29T | 1778 | 0.120767 | 0         |  |
|         |      | Shiraz-29T | 1778 | 0.120767 | 0         |  |
|         |      | Shiraz-29T | 1778 | 0.120767 | 0         |  |
|         |      | Shiraz-32T | 1833 | 0.551336 | 0         |  |
|         |      | Shiraz-32T | 1833 | 0.551336 | 0         |  |
|         |      | Shiraz-32T | 1833 | 0.551336 | 0         |  |
|         |      | Shiraz-38T | 1951 | 0.250891 | 0         |  |
|         |      | Shiraz-38T | 1951 | 0.250891 | 0         |  |
|         |      | Shiraz-38T | 1951 | 0.250891 | 0         |  |
|         |      | Shiraz-53T | 2078 | 0.287202 | 0         |  |
|         |      | Shiraz-53T | 2078 | 0.287202 | 0         |  |
|         |      | Shiraz-53T | 2078 | 0.287202 | 0         |  |
|         |      | Shiraz-71T | 2238 | 0.603631 | 0         |  |
|         |      | Shiraz-71T | 2238 | 0.603631 | 0         |  |
|         |      | Shiraz-71T | 2238 | 0.603631 | 0         |  |
| MESTIT1 | chr7 | Shiraz-3T  | 90   | 0.219276 | 0         |  |
|         |      | Shiraz-3T  | 96   | 0.428308 | 0         |  |
|         |      | Shiraz-4T  | 253  | 0.372918 | 0         |  |
|         |      | Shiraz-31T | 317  | 0.204382 | 0         |  |
|         |      | Shiraz-36T | 378  | 0.179558 | 0         |  |
|         |      | Shiraz-44T | 642  | 0.408617 | 0         |  |
|         |      | Shiraz-46T | 943  | 0.093799 | 0         |  |
|         |      | Shiraz-47T | 1032 | 0.171484 | 0         |  |
|         |      | Shiraz-77T | 1225 | 0        | -0.117922 |  |
|         |      | Shiraz-77T | 1229 | 0.051661 | 0         |  |
|         |      | Shiraz-9T  | 1325 | 0.221899 | 0         |  |
|         |      | Shiraz-18T | 1434 | 0.244465 | 0         |  |
|         |      | Shiraz-25T | 1698 | 0.21835  | 0         |  |
|         |      | Shiraz-28T | 1735 | 0.350744 | 0         |  |
|         |      | Shiraz-29T | 1778 | 0.120767 | 0         |  |
|         |      | Shiraz-32T | 1833 | 0.551336 | 0         |  |
|         |      | Shiraz-38T | 1951 | 0.250891 | 0         |  |
|         |      | Shiraz-53T | 2078 | 0.287202 | 0         |  |
|         |      | Shiraz-71T | 2238 | 0.603631 | 0         |  |
|         |      | Shiraz-3T  | 90   | 0.219276 | 0         |  |
|         |      | Shiraz-3T  | 96   | 0.428308 | 0         |  |
|         |      | Shiraz-4T  | 253  | 0.372918 | 0         |  |
|         |      | Shiraz-31T | 317  | 0.204382 | 0         |  |
|         |      | Shiraz-36T | 378  | 0.179558 | 0         |  |
|         |      | Shiraz-44T | 642  | 0.408617 | 0         |  |
|         |      | Shiraz-46T | 943  | 0.093799 | 0         |  |
|         |      | Shiraz-47T | 1032 | 0.171484 | 0         |  |
|         |      | Shiraz-77T | 1225 | 0        | -0.117922 |  |
|         |      | Shiraz-77T | 1229 | 0.051661 | 0         |  |
|         |      | Shiraz-9T  | 1325 | 0.221899 | 0         |  |

|     |      |            |      |          |           |  |  |
|-----|------|------------|------|----------|-----------|--|--|
|     |      | Shiraz-18T | 1434 | 0.244465 | 0         |  |  |
|     |      | Shiraz-25T | 1698 | 0.21835  | 0         |  |  |
|     |      | Shiraz-28T | 1735 | 0.350744 | 0         |  |  |
|     |      | Shiraz-29T | 1778 | 0.120767 | 0         |  |  |
|     |      | Shiraz-32T | 1833 | 0.551336 | 0         |  |  |
|     |      | Shiraz-38T | 1951 | 0.250891 | 0         |  |  |
|     |      | Shiraz-53T | 2078 | 0.287202 | 0         |  |  |
|     |      | Shiraz-71T | 2238 | 0.603631 | 0         |  |  |
|     |      | Shiraz-3T  | 90   | 0.219276 | 0         |  |  |
|     |      | Shiraz-3T  | 96   | 0.428308 | 0         |  |  |
|     |      | Shiraz-4T  | 253  | 0.372918 | 0         |  |  |
|     |      | Shiraz-31T | 317  | 0.204382 | 0         |  |  |
|     |      | Shiraz-36T | 378  | 0.179558 | 0         |  |  |
|     |      | Shiraz-44T | 642  | 0.408617 | 0         |  |  |
|     |      | Shiraz-46T | 943  | 0.093799 | 0         |  |  |
|     |      | Shiraz-47T | 1032 | 0.171484 | 0         |  |  |
|     |      | Shiraz-77T | 1225 | 0        | -0.117922 |  |  |
|     |      | Shiraz-77T | 1229 | 0.051661 | 0         |  |  |
|     |      | Shiraz-9T  | 1325 | 0.221899 | 0         |  |  |
|     |      | Shiraz-18T | 1434 | 0.244465 | 0         |  |  |
|     |      | Shiraz-25T | 1698 | 0.21835  | 0         |  |  |
|     |      | Shiraz-28T | 1735 | 0.350744 | 0         |  |  |
|     |      | Shiraz-29T | 1778 | 0.120767 | 0         |  |  |
|     |      | Shiraz-32T | 1833 | 0.551336 | 0         |  |  |
|     |      | Shiraz-38T | 1951 | 0.250891 | 0         |  |  |
|     |      | Shiraz-53T | 2078 | 0.287202 | 0         |  |  |
|     |      | Shiraz-71T | 2238 | 0.603631 | 0         |  |  |
| MET | chr7 | Shiraz-3T  | 90   | 0.219276 | 0         |  |  |
|     |      | Shiraz-3T  | 90   | 0.219276 | 0         |  |  |
|     |      | Shiraz-3T  | 95   | 0        | -0.077623 |  |  |
|     |      | Shiraz-3T  | 95   | 0        | -0.077623 |  |  |
|     |      | Shiraz-4T  | 253  | 0.372918 | 0         |  |  |
|     |      | Shiraz-4T  | 253  | 0.372918 | 0         |  |  |
|     |      | Shiraz-36T | 378  | 0.179558 | 0         |  |  |
|     |      | Shiraz-36T | 378  | 0.179558 | 0         |  |  |
|     |      | Shiraz-36T | 382  | 0.081739 | 0         |  |  |
|     |      | Shiraz-36T | 382  | 0.081739 | 0         |  |  |
|     |      | Shiraz-44T | 641  | 0        | -0.477846 |  |  |
|     |      | Shiraz-44T | 641  | 0        | -0.477846 |  |  |
|     |      | Shiraz-46T | 943  | 0.093799 | 0         |  |  |
|     |      | Shiraz-46T | 943  | 0.093799 | 0         |  |  |
|     |      | Shiraz-46T | 947  | 0        | -0.010843 |  |  |
|     |      | Shiraz-46T | 947  | 0        | -0.010843 |  |  |
|     |      | Shiraz-47T | 1031 | 0        | -0.117529 |  |  |
|     |      | Shiraz-47T | 1031 | 0        | -0.117529 |  |  |
|     |      | Shiraz-49T | 1121 | 0        | -0.138569 |  |  |
|     |      | Shiraz-49T | 1121 | 0        | -0.138569 |  |  |

|  |            |      |          |           |  |
|--|------------|------|----------|-----------|--|
|  | Shiraz-77T | 1225 | 0        | -0.117922 |  |
|  | Shiraz-77T | 1225 | 0        | -0.117922 |  |
|  | Shiraz-77T | 1228 | 0        | -0.238084 |  |
|  | Shiraz-77T | 1228 | 0        | -0.238084 |  |
|  | Shiraz-18T | 1434 | 0.244465 | 0         |  |
|  | Shiraz-18T | 1434 | 0.244465 | 0         |  |
|  | Shiraz-22T | 1549 | 0        | -0.319623 |  |
|  | Shiraz-22T | 1549 | 0        | -0.319623 |  |
|  | Shiraz-22T | 1552 | 0        | -0.50686  |  |
|  | Shiraz-22T | 1552 | 0        | -0.50686  |  |
|  | Shiraz-25T | 1698 | 0.21835  | 0         |  |
|  | Shiraz-25T | 1698 | 0.21835  | 0         |  |
|  | Shiraz-28T | 1735 | 0.350744 | 0         |  |
|  | Shiraz-28T | 1735 | 0.350744 | 0         |  |
|  | Shiraz-29T | 1778 | 0.120767 | 0         |  |
|  | Shiraz-29T | 1778 | 0.120767 | 0         |  |
|  | Shiraz-32T | 1833 | 0.551336 | 0         |  |
|  | Shiraz-32T | 1833 | 0.551336 | 0         |  |
|  | Shiraz-32T | 1835 | 0.092727 | 0         |  |
|  | Shiraz-32T | 1835 | 0.092727 | 0         |  |
|  | Shiraz-38T | 1951 | 0.250891 | 0         |  |
|  | Shiraz-38T | 1951 | 0.250891 | 0         |  |
|  | Shiraz-53T | 2078 | 0.287202 | 0         |  |
|  | Shiraz-53T | 2078 | 0.287202 | 0         |  |
|  | Shiraz-58T | 2161 | 0        | -0.187744 |  |
|  | Shiraz-58T | 2161 | 0        | -0.187744 |  |
|  | Shiraz-71T | 2238 | 0.603631 | 0         |  |
|  | Shiraz-71T | 2238 | 0.603631 | 0         |  |
|  | Shiraz-3T  | 90   | 0.219276 | 0         |  |
|  | Shiraz-3T  | 90   | 0.219276 | 0         |  |
|  | Shiraz-3T  | 95   | 0        | -0.077623 |  |
|  | Shiraz-3T  | 95   | 0        | -0.077623 |  |
|  | Shiraz-4T  | 253  | 0.372918 | 0         |  |
|  | Shiraz-4T  | 253  | 0.372918 | 0         |  |
|  | Shiraz-36T | 378  | 0.179558 | 0         |  |
|  | Shiraz-36T | 378  | 0.179558 | 0         |  |
|  | Shiraz-36T | 382  | 0.081739 | 0         |  |
|  | Shiraz-36T | 382  | 0.081739 | 0         |  |
|  | Shiraz-44T | 641  | 0        | -0.477846 |  |
|  | Shiraz-44T | 641  | 0        | -0.477846 |  |
|  | Shiraz-46T | 943  | 0.093799 | 0         |  |
|  | Shiraz-46T | 943  | 0.093799 | 0         |  |
|  | Shiraz-46T | 947  | 0        | -0.010843 |  |
|  | Shiraz-46T | 947  | 0        | -0.010843 |  |
|  | Shiraz-47T | 1031 | 0        | -0.117529 |  |
|  | Shiraz-47T | 1031 | 0        | -0.117529 |  |
|  | Shiraz-49T | 1121 | 0        | -0.138569 |  |

|  |            |      |          |           |  |
|--|------------|------|----------|-----------|--|
|  | Shiraz-49T | 1121 | 0        | -0.138569 |  |
|  | Shiraz-77T | 1225 | 0        | -0.117922 |  |
|  | Shiraz-77T | 1225 | 0        | -0.117922 |  |
|  | Shiraz-77T | 1228 | 0        | -0.238084 |  |
|  | Shiraz-77T | 1228 | 0        | -0.238084 |  |
|  | Shiraz-18T | 1434 | 0.244465 | 0         |  |
|  | Shiraz-18T | 1434 | 0.244465 | 0         |  |
|  | Shiraz-22T | 1549 | 0        | -0.319623 |  |
|  | Shiraz-22T | 1549 | 0        | -0.319623 |  |
|  | Shiraz-22T | 1552 | 0        | -0.50686  |  |
|  | Shiraz-22T | 1552 | 0        | -0.50686  |  |
|  | Shiraz-25T | 1698 | 0.21835  | 0         |  |
|  | Shiraz-25T | 1698 | 0.21835  | 0         |  |
|  | Shiraz-28T | 1735 | 0.350744 | 0         |  |
|  | Shiraz-28T | 1735 | 0.350744 | 0         |  |
|  | Shiraz-29T | 1778 | 0.120767 | 0         |  |
|  | Shiraz-29T | 1778 | 0.120767 | 0         |  |
|  | Shiraz-32T | 1833 | 0.551336 | 0         |  |
|  | Shiraz-32T | 1833 | 0.551336 | 0         |  |
|  | Shiraz-32T | 1835 | 0.092727 | 0         |  |
|  | Shiraz-32T | 1835 | 0.092727 | 0         |  |
|  | Shiraz-38T | 1951 | 0.250891 | 0         |  |
|  | Shiraz-38T | 1951 | 0.250891 | 0         |  |
|  | Shiraz-53T | 2078 | 0.287202 | 0         |  |
|  | Shiraz-53T | 2078 | 0.287202 | 0         |  |
|  | Shiraz-58T | 2161 | 0        | -0.187744 |  |
|  | Shiraz-58T | 2161 | 0        | -0.187744 |  |
|  | Shiraz-71T | 2238 | 0.603631 | 0         |  |
|  | Shiraz-71T | 2238 | 0.603631 | 0         |  |
|  | Shiraz-3T  | 90   | 0.219276 | 0         |  |
|  | Shiraz-3T  | 90   | 0.219276 | 0         |  |
|  | Shiraz-3T  | 95   | 0        | -0.077623 |  |
|  | Shiraz-3T  | 95   | 0        | -0.077623 |  |
|  | Shiraz-4T  | 253  | 0.372918 | 0         |  |
|  | Shiraz-4T  | 253  | 0.372918 | 0         |  |
|  | Shiraz-36T | 378  | 0.179558 | 0         |  |
|  | Shiraz-36T | 378  | 0.179558 | 0         |  |
|  | Shiraz-36T | 382  | 0.081739 | 0         |  |
|  | Shiraz-36T | 382  | 0.081739 | 0         |  |
|  | Shiraz-44T | 641  | 0        | -0.477846 |  |
|  | Shiraz-44T | 641  | 0        | -0.477846 |  |
|  | Shiraz-46T | 943  | 0.093799 | 0         |  |
|  | Shiraz-46T | 943  | 0.093799 | 0         |  |
|  | Shiraz-46T | 947  | 0        | -0.010843 |  |
|  | Shiraz-46T | 947  | 0        | -0.010843 |  |
|  | Shiraz-47T | 1031 | 0        | -0.117529 |  |
|  | Shiraz-47T | 1031 | 0        | -0.117529 |  |

|         |      |            |      |          |           |  |  |
|---------|------|------------|------|----------|-----------|--|--|
|         |      | Shiraz-49T | 1121 | 0        | -0.138569 |  |  |
|         |      | Shiraz-49T | 1121 | 0        | -0.138569 |  |  |
|         |      | Shiraz-77T | 1225 | 0        | -0.117922 |  |  |
|         |      | Shiraz-77T | 1225 | 0        | -0.117922 |  |  |
|         |      | Shiraz-77T | 1228 | 0        | -0.238084 |  |  |
|         |      | Shiraz-77T | 1228 | 0        | -0.238084 |  |  |
|         |      | Shiraz-18T | 1434 | 0.244465 | 0         |  |  |
|         |      | Shiraz-18T | 1434 | 0.244465 | 0         |  |  |
|         |      | Shiraz-22T | 1549 | 0        | -0.319623 |  |  |
|         |      | Shiraz-22T | 1549 | 0        | -0.319623 |  |  |
|         |      | Shiraz-22T | 1552 | 0        | -0.50686  |  |  |
|         |      | Shiraz-22T | 1552 | 0        | -0.50686  |  |  |
|         |      | Shiraz-25T | 1698 | 0.21835  | 0         |  |  |
|         |      | Shiraz-25T | 1698 | 0.21835  | 0         |  |  |
|         |      | Shiraz-28T | 1735 | 0.350744 | 0         |  |  |
|         |      | Shiraz-28T | 1735 | 0.350744 | 0         |  |  |
|         |      | Shiraz-29T | 1778 | 0.120767 | 0         |  |  |
|         |      | Shiraz-29T | 1778 | 0.120767 | 0         |  |  |
|         |      | Shiraz-32T | 1833 | 0.551336 | 0         |  |  |
|         |      | Shiraz-32T | 1833 | 0.551336 | 0         |  |  |
|         |      | Shiraz-32T | 1835 | 0.092727 | 0         |  |  |
|         |      | Shiraz-32T | 1835 | 0.092727 | 0         |  |  |
|         |      | Shiraz-38T | 1951 | 0.250891 | 0         |  |  |
|         |      | Shiraz-38T | 1951 | 0.250891 | 0         |  |  |
|         |      | Shiraz-53T | 2078 | 0.287202 | 0         |  |  |
|         |      | Shiraz-53T | 2078 | 0.287202 | 0         |  |  |
|         |      | Shiraz-58T | 2161 | 0        | -0.187744 |  |  |
|         |      | Shiraz-58T | 2161 | 0        | -0.187744 |  |  |
|         |      | Shiraz-71T | 2238 | 0.603631 | 0         |  |  |
|         |      | Shiraz-71T | 2238 | 0.603631 | 0         |  |  |
| METTL2B | chr7 | Shiraz-3T  | 90   | 0.219276 | 0         |  |  |
|         |      | Shiraz-3T  | 96   | 0.428308 | 0         |  |  |
|         |      | Shiraz-4T  | 253  | 0.372918 | 0         |  |  |
|         |      | Shiraz-31T | 317  | 0.204382 | 0         |  |  |
|         |      | Shiraz-36T | 378  | 0.179558 | 0         |  |  |
|         |      | Shiraz-44T | 642  | 0.408617 | 0         |  |  |
|         |      | Shiraz-46T | 943  | 0.093799 | 0         |  |  |
|         |      | Shiraz-47T | 1032 | 0.171484 | 0         |  |  |
|         |      | Shiraz-77T | 1225 | 0        | -0.117922 |  |  |
|         |      | Shiraz-77T | 1229 | 0.051661 | 0         |  |  |
|         |      | Shiraz-9T  | 1325 | 0.221899 | 0         |  |  |
|         |      | Shiraz-18T | 1434 | 0.244465 | 0         |  |  |
|         |      | Shiraz-25T | 1698 | 0.21835  | 0         |  |  |
|         |      | Shiraz-28T | 1735 | 0.350744 | 0         |  |  |
|         |      | Shiraz-29T | 1778 | 0.120767 | 0         |  |  |
|         |      | Shiraz-32T | 1833 | 0.551336 | 0         |  |  |
|         |      | Shiraz-38T | 1951 | 0.250891 | 0         |  |  |



|      |      |            |      |          |           |  |
|------|------|------------|------|----------|-----------|--|
|      |      | Shiraz-53T | 2078 | 0.287202 | 0         |  |
|      |      | Shiraz-71T | 2238 | 0.603631 | 0         |  |
|      |      | Shiraz-3T  | 90   | 0.219276 | 0         |  |
|      |      | Shiraz-3T  | 96   | 0.428308 | 0         |  |
|      |      | Shiraz-4T  | 253  | 0.372918 | 0         |  |
|      |      | Shiraz-31T | 317  | 0.204382 | 0         |  |
|      |      | Shiraz-36T | 378  | 0.179558 | 0         |  |
|      |      | Shiraz-44T | 642  | 0.408617 | 0         |  |
|      |      | Shiraz-46T | 943  | 0.093799 | 0         |  |
|      |      | Shiraz-47T | 1032 | 0.171484 | 0         |  |
|      |      | Shiraz-77T | 1225 | 0        | -0.117922 |  |
|      |      | Shiraz-77T | 1229 | 0.051661 | 0         |  |
|      |      | Shiraz-9T  | 1325 | 0.221899 | 0         |  |
|      |      | Shiraz-18T | 1434 | 0.244465 | 0         |  |
|      |      | Shiraz-25T | 1698 | 0.21835  | 0         |  |
|      |      | Shiraz-28T | 1735 | 0.350744 | 0         |  |
|      |      | Shiraz-29T | 1778 | 0.120767 | 0         |  |
|      |      | Shiraz-32T | 1833 | 0.551336 | 0         |  |
|      |      | Shiraz-38T | 1951 | 0.250891 | 0         |  |
|      |      | Shiraz-53T | 2078 | 0.287202 | 0         |  |
|      |      | Shiraz-71T | 2238 | 0.603631 | 0         |  |
|      |      | Shiraz-3T  | 90   | 0.219276 | 0         |  |
|      |      | Shiraz-3T  | 96   | 0.428308 | 0         |  |
|      |      | Shiraz-4T  | 253  | 0.372918 | 0         |  |
|      |      | Shiraz-31T | 317  | 0.204382 | 0         |  |
|      |      | Shiraz-36T | 378  | 0.179558 | 0         |  |
|      |      | Shiraz-44T | 642  | 0.408617 | 0         |  |
|      |      | Shiraz-46T | 943  | 0.093799 | 0         |  |
|      |      | Shiraz-47T | 1032 | 0.171484 | 0         |  |
|      |      | Shiraz-77T | 1225 | 0        | -0.117922 |  |
|      |      | Shiraz-77T | 1229 | 0.051661 | 0         |  |
|      |      | Shiraz-9T  | 1325 | 0.221899 | 0         |  |
|      |      | Shiraz-18T | 1434 | 0.244465 | 0         |  |
|      |      | Shiraz-25T | 1698 | 0.21835  | 0         |  |
|      |      | Shiraz-28T | 1735 | 0.350744 | 0         |  |
|      |      | Shiraz-29T | 1778 | 0.120767 | 0         |  |
|      |      | Shiraz-32T | 1833 | 0.551336 | 0         |  |
|      |      | Shiraz-38T | 1951 | 0.250891 | 0         |  |
|      |      | Shiraz-53T | 2078 | 0.287202 | 0         |  |
|      |      | Shiraz-71T | 2238 | 0.603631 | 0         |  |
| MGAM | chr7 | Shiraz-3T  | 90   | 0.219276 | 0         |  |
|      |      | Shiraz-4T  | 253  | 0.372918 | 0         |  |
|      |      | Shiraz-36T | 378  | 0.179558 | 0         |  |
|      |      | Shiraz-46T | 943  | 0.093799 | 0         |  |
|      |      | Shiraz-77T | 1225 | 0        | -0.117922 |  |
|      |      | Shiraz-9T  | 1325 | 0.221899 | 0         |  |
|      |      | Shiraz-18T | 1434 | 0.244465 | 0         |  |

|          |      |            |      |          |           |  |
|----------|------|------------|------|----------|-----------|--|
|          |      | Shiraz-25T | 1698 | 0.21835  | 0         |  |
|          |      | Shiraz-28T | 1735 | 0.350744 | 0         |  |
|          |      | Shiraz-29T | 1778 | 0.120767 | 0         |  |
|          |      | Shiraz-32T | 1833 | 0.551336 | 0         |  |
|          |      | Shiraz-38T | 1951 | 0.250891 | 0         |  |
|          |      | Shiraz-53T | 2078 | 0.287202 | 0         |  |
|          |      | Shiraz-58T | 2162 | 0.221505 | 0         |  |
|          |      | Shiraz-71T | 2238 | 0.603631 | 0         |  |
|          |      | Shiraz-3T  | 90   | 0.219276 | 0         |  |
|          |      | Shiraz-4T  | 253  | 0.372918 | 0         |  |
|          |      | Shiraz-36T | 378  | 0.179558 | 0         |  |
|          |      | Shiraz-46T | 943  | 0.093799 | 0         |  |
|          |      | Shiraz-77T | 1225 | 0        | -0.117922 |  |
|          |      | Shiraz-9T  | 1325 | 0.221899 | 0         |  |
|          |      | Shiraz-18T | 1434 | 0.244465 | 0         |  |
|          |      | Shiraz-25T | 1698 | 0.21835  | 0         |  |
|          |      | Shiraz-28T | 1735 | 0.350744 | 0         |  |
|          |      | Shiraz-29T | 1778 | 0.120767 | 0         |  |
|          |      | Shiraz-32T | 1833 | 0.551336 | 0         |  |
|          |      | Shiraz-38T | 1951 | 0.250891 | 0         |  |
|          |      | Shiraz-53T | 2078 | 0.287202 | 0         |  |
|          |      | Shiraz-58T | 2162 | 0.221505 | 0         |  |
|          |      | Shiraz-71T | 2238 | 0.603631 | 0         |  |
|          |      | Shiraz-3T  | 90   | 0.219276 | 0         |  |
|          |      | Shiraz-4T  | 253  | 0.372918 | 0         |  |
|          |      | Shiraz-36T | 378  | 0.179558 | 0         |  |
|          |      | Shiraz-46T | 943  | 0.093799 | 0         |  |
|          |      | Shiraz-77T | 1225 | 0        | -0.117922 |  |
|          |      | Shiraz-9T  | 1325 | 0.221899 | 0         |  |
|          |      | Shiraz-18T | 1434 | 0.244465 | 0         |  |
|          |      | Shiraz-25T | 1698 | 0.21835  | 0         |  |
|          |      | Shiraz-28T | 1735 | 0.350744 | 0         |  |
|          |      | Shiraz-29T | 1778 | 0.120767 | 0         |  |
|          |      | Shiraz-32T | 1833 | 0.551336 | 0         |  |
|          |      | Shiraz-38T | 1951 | 0.250891 | 0         |  |
|          |      | Shiraz-53T | 2078 | 0.287202 | 0         |  |
|          |      | Shiraz-58T | 2162 | 0.221505 | 0         |  |
|          |      | Shiraz-71T | 2238 | 0.603631 | 0         |  |
| MGC16121 | chrX | Shiraz-3T  | 242  | 0        | -0.336434 |  |
|          |      | Shiraz-4T  | 261  | 0        | -0.336249 |  |
|          |      | Shiraz-16T | 295  | 0.591657 | 0         |  |
|          |      | Shiraz-36T | 433  | 0        | -0.803961 |  |
|          |      | Shiraz-44T | 899  | 0        | -1.09697  |  |
|          |      | Shiraz-49T | 1170 | 0        | -0.967436 |  |
|          |      | Shiraz-9T  | 1370 | 0.690073 | 0         |  |
|          |      | Shiraz-18T | 1457 | 0.643204 | 0         |  |
|          |      | Shiraz-22T | 1673 | 0.611783 | 0         |  |

|          |      |            |      |          |           |  |
|----------|------|------------|------|----------|-----------|--|
|          |      | Shiraz-22T | 1677 | 0.789711 | 0         |  |
|          |      | Shiraz-25T | 1719 | 0.472955 | 0         |  |
|          |      | Shiraz-28T | 1762 | 0.562311 | 0         |  |
|          |      | Shiraz-29T | 1801 | 0.815343 | 0         |  |
|          |      | Shiraz-32T | 1870 | 0.729766 | 0         |  |
|          |      | Shiraz-35T | 1933 | 0.488535 | 0         |  |
|          |      | Shiraz-58T | 2223 | 0.833364 | 0         |  |
|          |      | Shiraz-71T | 2263 | 0.975531 | 0         |  |
|          |      | Shiraz-3T  | 242  | 0        | -0.336434 |  |
|          |      | Shiraz-4T  | 261  | 0        | -0.336249 |  |
|          |      | Shiraz-16T | 295  | 0.591657 | 0         |  |
|          |      | Shiraz-36T | 433  | 0        | -0.803961 |  |
|          |      | Shiraz-44T | 899  | 0        | -1.09697  |  |
|          |      | Shiraz-49T | 1170 | 0        | -0.967436 |  |
|          |      | Shiraz-9T  | 1370 | 0.690073 | 0         |  |
|          |      | Shiraz-18T | 1457 | 0.643204 | 0         |  |
|          |      | Shiraz-22T | 1673 | 0.611783 | 0         |  |
|          |      | Shiraz-22T | 1677 | 0.789711 | 0         |  |
|          |      | Shiraz-25T | 1719 | 0.472955 | 0         |  |
|          |      | Shiraz-28T | 1762 | 0.562311 | 0         |  |
|          |      | Shiraz-29T | 1801 | 0.815343 | 0         |  |
|          |      | Shiraz-32T | 1870 | 0.729766 | 0         |  |
|          |      | Shiraz-35T | 1933 | 0.488535 | 0         |  |
|          |      | Shiraz-58T | 2223 | 0.833364 | 0         |  |
|          |      | Shiraz-71T | 2263 | 0.975531 | 0         |  |
|          |      | Shiraz-3T  | 242  | 0        | -0.336434 |  |
|          |      | Shiraz-4T  | 261  | 0        | -0.336249 |  |
|          |      | Shiraz-16T | 295  | 0.591657 | 0         |  |
|          |      | Shiraz-36T | 433  | 0        | -0.803961 |  |
|          |      | Shiraz-44T | 899  | 0        | -1.09697  |  |
|          |      | Shiraz-49T | 1170 | 0        | -0.967436 |  |
|          |      | Shiraz-9T  | 1370 | 0.690073 | 0         |  |
|          |      | Shiraz-18T | 1457 | 0.643204 | 0         |  |
|          |      | Shiraz-22T | 1673 | 0.611783 | 0         |  |
|          |      | Shiraz-22T | 1677 | 0.789711 | 0         |  |
|          |      | Shiraz-25T | 1719 | 0.472955 | 0         |  |
|          |      | Shiraz-28T | 1762 | 0.562311 | 0         |  |
|          |      | Shiraz-29T | 1801 | 0.815343 | 0         |  |
|          |      | Shiraz-32T | 1870 | 0.729766 | 0         |  |
|          |      | Shiraz-35T | 1933 | 0.488535 | 0         |  |
|          |      | Shiraz-58T | 2223 | 0.833364 | 0         |  |
|          |      | Shiraz-71T | 2263 | 0.975531 | 0         |  |
| MGC16142 | chr7 | Shiraz-3T  | 90   | 0.219276 | 0         |  |
|          |      | Shiraz-3T  | 93   | 0        | -0.058023 |  |
|          |      | Shiraz-4T  | 253  | 0.372918 | 0         |  |
|          |      | Shiraz-36T | 378  | 0.179558 | 0         |  |
|          |      | Shiraz-36T | 380  | 0.083883 | 0         |  |

|  |            |      |          |           |  |
|--|------------|------|----------|-----------|--|
|  | Shiraz-44T | 638  | 0        | -0.433476 |  |
|  | Shiraz-46T | 943  | 0.093799 | 0         |  |
|  | Shiraz-46T | 945  | 0        | -0.014838 |  |
|  | Shiraz-47T | 1029 | 0        | -0.096586 |  |
|  | Shiraz-49T | 1119 | 0        | -0.157331 |  |
|  | Shiraz-77T | 1225 | 0        | -0.117922 |  |
|  | Shiraz-18T | 1434 | 0.244465 | 0         |  |
|  | Shiraz-22T | 1549 | 0        | -0.319623 |  |
|  | Shiraz-25T | 1698 | 0.21835  | 0         |  |
|  | Shiraz-28T | 1735 | 0.350744 | 0         |  |
|  | Shiraz-29T | 1778 | 0.120767 | 0         |  |
|  | Shiraz-32T | 1833 | 0.551336 | 0         |  |
|  | Shiraz-38T | 1951 | 0.250891 | 0         |  |
|  | Shiraz-53T | 2078 | 0.287202 | 0         |  |
|  | Shiraz-58T | 2159 | 0        | -0.219521 |  |
|  | Shiraz-71T | 2238 | 0.603631 | 0         |  |
|  | Shiraz-3T  | 90   | 0.219276 | 0         |  |
|  | Shiraz-3T  | 93   | 0        | -0.058023 |  |
|  | Shiraz-4T  | 253  | 0.372918 | 0         |  |
|  | Shiraz-36T | 378  | 0.179558 | 0         |  |
|  | Shiraz-36T | 380  | 0.083883 | 0         |  |
|  | Shiraz-44T | 638  | 0        | -0.433476 |  |
|  | Shiraz-46T | 943  | 0.093799 | 0         |  |
|  | Shiraz-46T | 945  | 0        | -0.014838 |  |
|  | Shiraz-47T | 1029 | 0        | -0.096586 |  |
|  | Shiraz-49T | 1119 | 0        | -0.157331 |  |
|  | Shiraz-77T | 1225 | 0        | -0.117922 |  |
|  | Shiraz-18T | 1434 | 0.244465 | 0         |  |
|  | Shiraz-22T | 1549 | 0        | -0.319623 |  |
|  | Shiraz-25T | 1698 | 0.21835  | 0         |  |
|  | Shiraz-28T | 1735 | 0.350744 | 0         |  |
|  | Shiraz-29T | 1778 | 0.120767 | 0         |  |
|  | Shiraz-32T | 1833 | 0.551336 | 0         |  |
|  | Shiraz-38T | 1951 | 0.250891 | 0         |  |
|  | Shiraz-53T | 2078 | 0.287202 | 0         |  |
|  | Shiraz-58T | 2159 | 0        | -0.219521 |  |
|  | Shiraz-71T | 2238 | 0.603631 | 0         |  |
|  | Shiraz-3T  | 90   | 0.219276 | 0         |  |
|  | Shiraz-3T  | 93   | 0        | -0.058023 |  |
|  | Shiraz-4T  | 253  | 0.372918 | 0         |  |
|  | Shiraz-36T | 378  | 0.179558 | 0         |  |
|  | Shiraz-36T | 380  | 0.083883 | 0         |  |
|  | Shiraz-44T | 638  | 0        | -0.433476 |  |
|  | Shiraz-46T | 943  | 0.093799 | 0         |  |
|  | Shiraz-46T | 945  | 0        | -0.014838 |  |
|  | Shiraz-47T | 1029 | 0        | -0.096586 |  |
|  | Shiraz-49T | 1119 | 0        | -0.157331 |  |

|          |      |            |      |          |           |  |  |
|----------|------|------------|------|----------|-----------|--|--|
|          |      | Shiraz-77T | 1225 | 0        | -0.117922 |  |  |
|          |      | Shiraz-18T | 1434 | 0.244465 | 0         |  |  |
|          |      | Shiraz-22T | 1549 | 0        | -0.319623 |  |  |
|          |      | Shiraz-25T | 1698 | 0.21835  | 0         |  |  |
|          |      | Shiraz-28T | 1735 | 0.350744 | 0         |  |  |
|          |      | Shiraz-29T | 1778 | 0.120767 | 0         |  |  |
|          |      | Shiraz-32T | 1833 | 0.551336 | 0         |  |  |
|          |      | Shiraz-38T | 1951 | 0.250891 | 0         |  |  |
|          |      | Shiraz-53T | 2078 | 0.287202 | 0         |  |  |
|          |      | Shiraz-58T | 2159 | 0        | -0.219521 |  |  |
|          |      | Shiraz-71T | 2238 | 0.603631 | 0         |  |  |
| MGC26647 | chr7 | Shiraz-3T  | 90   | 0.219276 | 0         |  |  |
|          |      | Shiraz-3T  | 93   | 0        | -0.058023 |  |  |
|          |      | Shiraz-4T  | 253  | 0.372918 | 0         |  |  |
|          |      | Shiraz-36T | 378  | 0.179558 | 0         |  |  |
|          |      | Shiraz-36T | 380  | 0.083883 | 0         |  |  |
|          |      | Shiraz-44T | 638  | 0        | -0.433476 |  |  |
|          |      | Shiraz-46T | 943  | 0.093799 | 0         |  |  |
|          |      | Shiraz-46T | 945  | 0        | -0.014838 |  |  |
|          |      | Shiraz-47T | 1029 | 0        | -0.096586 |  |  |
|          |      | Shiraz-49T | 1119 | 0        | -0.157331 |  |  |
|          |      | Shiraz-77T | 1225 | 0        | -0.117922 |  |  |
|          |      | Shiraz-77T | 1226 | 0        | -0.233724 |  |  |
|          |      | Shiraz-18T | 1434 | 0.244465 | 0         |  |  |
|          |      | Shiraz-22T | 1549 | 0        | -0.319623 |  |  |
|          |      | Shiraz-22T | 1550 | 0        | -0.577052 |  |  |
|          |      | Shiraz-25T | 1698 | 0.21835  | 0         |  |  |
|          |      | Shiraz-28T | 1735 | 0.350744 | 0         |  |  |
|          |      | Shiraz-29T | 1778 | 0.120767 | 0         |  |  |
|          |      | Shiraz-38T | 1951 | 0.250891 | 0         |  |  |
|          |      | Shiraz-53T | 2078 | 0.287202 | 0         |  |  |
|          |      | Shiraz-58T | 2159 | 0        | -0.219521 |  |  |
|          |      | Shiraz-71T | 2238 | 0.603631 | 0         |  |  |
|          |      | Shiraz-3T  | 90   | 0.219276 | 0         |  |  |
|          |      | Shiraz-3T  | 93   | 0        | -0.058023 |  |  |
|          |      | Shiraz-4T  | 253  | 0.372918 | 0         |  |  |
|          |      | Shiraz-36T | 378  | 0.179558 | 0         |  |  |
|          |      | Shiraz-36T | 380  | 0.083883 | 0         |  |  |
|          |      | Shiraz-44T | 638  | 0        | -0.433476 |  |  |
|          |      | Shiraz-46T | 943  | 0.093799 | 0         |  |  |
|          |      | Shiraz-46T | 945  | 0        | -0.014838 |  |  |
|          |      | Shiraz-47T | 1029 | 0        | -0.096586 |  |  |
|          |      | Shiraz-49T | 1119 | 0        | -0.157331 |  |  |
|          |      | Shiraz-77T | 1225 | 0        | -0.117922 |  |  |
|          |      | Shiraz-77T | 1226 | 0        | -0.233724 |  |  |
|          |      | Shiraz-18T | 1434 | 0.244465 | 0         |  |  |
|          |      | Shiraz-22T | 1549 | 0        | -0.319623 |  |  |

|          |      |            |      |          |           |  |  |
|----------|------|------------|------|----------|-----------|--|--|
|          |      | Shiraz-22T | 1550 | 0        | -0.577052 |  |  |
|          |      | Shiraz-25T | 1698 | 0.21835  | 0         |  |  |
|          |      | Shiraz-28T | 1735 | 0.350744 | 0         |  |  |
|          |      | Shiraz-29T | 1778 | 0.120767 | 0         |  |  |
|          |      | Shiraz-38T | 1951 | 0.250891 | 0         |  |  |
|          |      | Shiraz-53T | 2078 | 0.287202 | 0         |  |  |
|          |      | Shiraz-58T | 2159 | 0        | -0.219521 |  |  |
|          |      | Shiraz-71T | 2238 | 0.603631 | 0         |  |  |
|          |      | Shiraz-3T  | 90   | 0.219276 | 0         |  |  |
|          |      | Shiraz-3T  | 93   | 0        | -0.058023 |  |  |
|          |      | Shiraz-4T  | 253  | 0.372918 | 0         |  |  |
|          |      | Shiraz-36T | 378  | 0.179558 | 0         |  |  |
|          |      | Shiraz-36T | 380  | 0.083883 | 0         |  |  |
|          |      | Shiraz-44T | 638  | 0        | -0.433476 |  |  |
|          |      | Shiraz-46T | 943  | 0.093799 | 0         |  |  |
|          |      | Shiraz-46T | 945  | 0        | -0.014838 |  |  |
|          |      | Shiraz-47T | 1029 | 0        | -0.096586 |  |  |
|          |      | Shiraz-49T | 1119 | 0        | -0.157331 |  |  |
|          |      | Shiraz-77T | 1225 | 0        | -0.117922 |  |  |
|          |      | Shiraz-77T | 1226 | 0        | -0.233724 |  |  |
|          |      | Shiraz-18T | 1434 | 0.244465 | 0         |  |  |
|          |      | Shiraz-22T | 1549 | 0        | -0.319623 |  |  |
|          |      | Shiraz-22T | 1550 | 0        | -0.577052 |  |  |
|          |      | Shiraz-25T | 1698 | 0.21835  | 0         |  |  |
|          |      | Shiraz-28T | 1735 | 0.350744 | 0         |  |  |
|          |      | Shiraz-29T | 1778 | 0.120767 | 0         |  |  |
|          |      | Shiraz-38T | 1951 | 0.250891 | 0         |  |  |
|          |      | Shiraz-53T | 2078 | 0.287202 | 0         |  |  |
|          |      | Shiraz-58T | 2159 | 0        | -0.219521 |  |  |
|          |      | Shiraz-71T | 2238 | 0.603631 | 0         |  |  |
| MGC42105 | chr5 | Shiraz-4T  | 250  | 0.262252 | 0         |  |  |
|          |      | Shiraz-16T | 266  | 0.321724 | 0         |  |  |
|          |      | Shiraz-44T | 591  | 0        | -0.233934 |  |  |
|          |      | Shiraz-18T | 1429 | 0        | -0.314125 |  |  |
|          |      | Shiraz-22T | 1522 | 0        | -0.322688 |  |  |
|          |      | Shiraz-25T | 1694 | 0.201602 | 0         |  |  |
|          |      | Shiraz-28T | 1731 | 0.295447 | 0         |  |  |
|          |      | Shiraz-29T | 1773 | 0.090981 | 0         |  |  |
|          |      | Shiraz-40T | 2016 | 0.376634 | 0         |  |  |
|          |      | Shiraz-4T  | 250  | 0.262252 | 0         |  |  |
|          |      | Shiraz-16T | 266  | 0.321724 | 0         |  |  |
|          |      | Shiraz-44T | 591  | 0        | -0.233934 |  |  |
|          |      | Shiraz-18T | 1429 | 0        | -0.314125 |  |  |
|          |      | Shiraz-22T | 1522 | 0        | -0.322688 |  |  |
|          |      | Shiraz-25T | 1694 | 0.201602 | 0         |  |  |
|          |      | Shiraz-28T | 1731 | 0.295447 | 0         |  |  |
|          |      | Shiraz-29T | 1773 | 0.090981 | 0         |  |  |

|          |      |            |      |          |           |  |
|----------|------|------------|------|----------|-----------|--|
|          |      | Shiraz-40T | 2016 | 0.376634 | 0         |  |
|          |      | Shiraz-4T  | 250  | 0.262252 | 0         |  |
|          |      | Shiraz-16T | 266  | 0.321724 | 0         |  |
|          |      | Shiraz-44T | 591  | 0        | -0.233934 |  |
|          |      | Shiraz-18T | 1429 | 0        | -0.314125 |  |
|          |      | Shiraz-22T | 1522 | 0        | -0.322688 |  |
|          |      | Shiraz-25T | 1694 | 0.201602 | 0         |  |
|          |      | Shiraz-28T | 1731 | 0.295447 | 0         |  |
|          |      | Shiraz-29T | 1773 | 0.090981 | 0         |  |
|          |      | Shiraz-40T | 2016 | 0.376634 | 0         |  |
| MGC72080 | chr7 | Shiraz-3T  | 90   | 0.219276 | 0         |  |
|          |      | Shiraz-3T  | 94   | 0.74735  | 0         |  |
|          |      | Shiraz-4T  | 253  | 0.372918 | 0         |  |
|          |      | Shiraz-31T | 316  | 0.219196 | 0         |  |
|          |      | Shiraz-36T | 378  | 0.179558 | 0         |  |
|          |      | Shiraz-36T | 381  | 0.332628 | 0         |  |
|          |      | Shiraz-46T | 943  | 0.093799 | 0         |  |
|          |      | Shiraz-46T | 946  | 0.299835 | 0         |  |
|          |      | Shiraz-49T | 1120 | 0.281656 | 0         |  |
|          |      | Shiraz-77T | 1225 | 0        | -0.117922 |  |
|          |      | Shiraz-77T | 1227 | 0.196445 | 0         |  |
|          |      | Shiraz-9T  | 1324 | 0.679266 | 0         |  |
|          |      | Shiraz-18T | 1434 | 0.244465 | 0         |  |
|          |      | Shiraz-22T | 1549 | 0        | -0.319623 |  |
|          |      | Shiraz-22T | 1551 | 0.324011 | 0         |  |
|          |      | Shiraz-25T | 1698 | 0.21835  | 0         |  |
|          |      | Shiraz-28T | 1735 | 0.350744 | 0         |  |
|          |      | Shiraz-29T | 1778 | 0.120767 | 0         |  |
|          |      | Shiraz-32T | 1833 | 0.551336 | 0         |  |
|          |      | Shiraz-38T | 1951 | 0.250891 | 0         |  |
|          |      | Shiraz-53T | 2078 | 0.287202 | 0         |  |
|          |      | Shiraz-71T | 2238 | 0.603631 | 0         |  |
|          |      | Shiraz-3T  | 90   | 0.219276 | 0         |  |
|          |      | Shiraz-3T  | 94   | 0.74735  | 0         |  |
|          |      | Shiraz-4T  | 253  | 0.372918 | 0         |  |
|          |      | Shiraz-31T | 316  | 0.219196 | 0         |  |
|          |      | Shiraz-36T | 378  | 0.179558 | 0         |  |
|          |      | Shiraz-36T | 381  | 0.332628 | 0         |  |
|          |      | Shiraz-46T | 943  | 0.093799 | 0         |  |
|          |      | Shiraz-46T | 946  | 0.299835 | 0         |  |
|          |      | Shiraz-49T | 1120 | 0.281656 | 0         |  |
|          |      | Shiraz-77T | 1225 | 0        | -0.117922 |  |
|          |      | Shiraz-77T | 1227 | 0.196445 | 0         |  |
|          |      | Shiraz-9T  | 1324 | 0.679266 | 0         |  |
|          |      | Shiraz-18T | 1434 | 0.244465 | 0         |  |
|          |      | Shiraz-22T | 1549 | 0        | -0.319623 |  |
|          |      | Shiraz-22T | 1551 | 0.324011 | 0         |  |

|      |      |            |      |          |           |  |  |
|------|------|------------|------|----------|-----------|--|--|
|      |      | Shiraz-25T | 1698 | 0.21835  | 0         |  |  |
|      |      | Shiraz-28T | 1735 | 0.350744 | 0         |  |  |
|      |      | Shiraz-29T | 1778 | 0.120767 | 0         |  |  |
|      |      | Shiraz-32T | 1833 | 0.551336 | 0         |  |  |
|      |      | Shiraz-38T | 1951 | 0.250891 | 0         |  |  |
|      |      | Shiraz-53T | 2078 | 0.287202 | 0         |  |  |
|      |      | Shiraz-71T | 2238 | 0.603631 | 0         |  |  |
|      |      | Shiraz-3T  | 90   | 0.219276 | 0         |  |  |
|      |      | Shiraz-3T  | 94   | 0.74735  | 0         |  |  |
|      |      | Shiraz-4T  | 253  | 0.372918 | 0         |  |  |
|      |      | Shiraz-31T | 316  | 0.219196 | 0         |  |  |
|      |      | Shiraz-36T | 378  | 0.179558 | 0         |  |  |
|      |      | Shiraz-36T | 381  | 0.332628 | 0         |  |  |
|      |      | Shiraz-46T | 943  | 0.093799 | 0         |  |  |
|      |      | Shiraz-46T | 946  | 0.299835 | 0         |  |  |
|      |      | Shiraz-49T | 1120 | 0.281656 | 0         |  |  |
|      |      | Shiraz-77T | 1225 | 0        | -0.117922 |  |  |
|      |      | Shiraz-77T | 1227 | 0.196445 | 0         |  |  |
|      |      | Shiraz-9T  | 1324 | 0.679266 | 0         |  |  |
|      |      | Shiraz-18T | 1434 | 0.244465 | 0         |  |  |
|      |      | Shiraz-22T | 1549 | 0        | -0.319623 |  |  |
|      |      | Shiraz-22T | 1551 | 0.324011 | 0         |  |  |
|      |      | Shiraz-25T | 1698 | 0.21835  | 0         |  |  |
|      |      | Shiraz-28T | 1735 | 0.350744 | 0         |  |  |
|      |      | Shiraz-29T | 1778 | 0.120767 | 0         |  |  |
|      |      | Shiraz-32T | 1833 | 0.551336 | 0         |  |  |
|      |      | Shiraz-38T | 1951 | 0.250891 | 0         |  |  |
|      |      | Shiraz-53T | 2078 | 0.287202 | 0         |  |  |
|      |      | Shiraz-71T | 2238 | 0.603631 | 0         |  |  |
| MID1 | chrX | Shiraz-3T  | 235  | 0        | -0.28401  |  |  |
|      |      | Shiraz-3T  | 235  | 0        | -0.28401  |  |  |
|      |      | Shiraz-3T  | 235  | 0        | -0.28401  |  |  |
|      |      | Shiraz-4T  | 260  | 0        | -0.324128 |  |  |
|      |      | Shiraz-4T  | 260  | 0        | -0.324128 |  |  |
|      |      | Shiraz-4T  | 260  | 0        | -0.324128 |  |  |
|      |      | Shiraz-16T | 294  | 0.655804 | 0         |  |  |
|      |      | Shiraz-16T | 294  | 0.655804 | 0         |  |  |
|      |      | Shiraz-16T | 294  | 0.655804 | 0         |  |  |
|      |      | Shiraz-36T | 431  | 0        | -0.78035  |  |  |
|      |      | Shiraz-36T | 431  | 0        | -0.78035  |  |  |
|      |      | Shiraz-36T | 431  | 0        | -0.78035  |  |  |
|      |      | Shiraz-44T | 891  | 0        | -0.954044 |  |  |
|      |      | Shiraz-44T | 891  | 0        | -0.954044 |  |  |
|      |      | Shiraz-44T | 891  | 0        | -0.954044 |  |  |
|      |      | Shiraz-49T | 1166 | 0        | -0.917235 |  |  |
|      |      | Shiraz-49T | 1166 | 0        | -0.917235 |  |  |
|      |      | Shiraz-49T | 1166 | 0        | -0.917235 |  |  |



|  |            |      |          |           |  |
|--|------------|------|----------|-----------|--|
|  | Shiraz-49T | 1167 | 0        | -0.249329 |  |
|  | Shiraz-9T  | 1368 | 0.199713 | 0         |  |
|  | Shiraz-9T  | 1368 | 0.199713 | 0         |  |
|  | Shiraz-9T  | 1368 | 0.199713 | 0         |  |
|  | Shiraz-18T | 1455 | 0        | -0.186773 |  |
|  | Shiraz-18T | 1455 | 0        | -0.186773 |  |
|  | Shiraz-18T | 1455 | 0        | -0.186773 |  |
|  | Shiraz-22T | 1669 | 0.695915 | 0         |  |
|  | Shiraz-22T | 1669 | 0.695915 | 0         |  |
|  | Shiraz-22T | 1669 | 0.695915 | 0         |  |
|  | Shiraz-22T | 1670 | 1.188333 | 0         |  |
|  | Shiraz-22T | 1670 | 1.188333 | 0         |  |
|  | Shiraz-22T | 1670 | 1.188333 | 0         |  |
|  | Shiraz-25T | 1717 | 0.420447 | 0         |  |
|  | Shiraz-25T | 1717 | 0.420447 | 0         |  |
|  | Shiraz-25T | 1717 | 0.420447 | 0         |  |
|  | Shiraz-28T | 1760 | 0.538181 | 0         |  |
|  | Shiraz-28T | 1760 | 0.538181 | 0         |  |
|  | Shiraz-28T | 1760 | 0.538181 | 0         |  |
|  | Shiraz-29T | 1800 | 0.672527 | 0         |  |
|  | Shiraz-29T | 1800 | 0.672527 | 0         |  |
|  | Shiraz-29T | 1800 | 0.672527 | 0         |  |
|  | Shiraz-32T | 1869 | 0.776805 | 0         |  |
|  | Shiraz-32T | 1869 | 0.776805 | 0         |  |
|  | Shiraz-32T | 1869 | 0.776805 | 0         |  |
|  | Shiraz-35T | 1932 | 0.507141 | 0         |  |
|  | Shiraz-35T | 1932 | 0.507141 | 0         |  |
|  | Shiraz-35T | 1932 | 0.507141 | 0         |  |
|  | Shiraz-40T | 2051 | 0.098506 | 0         |  |
|  | Shiraz-40T | 2051 | 0.098506 | 0         |  |
|  | Shiraz-40T | 2051 | 0.098506 | 0         |  |
|  | Shiraz-58T | 2221 | 0.871948 | 0         |  |
|  | Shiraz-58T | 2221 | 0.871948 | 0         |  |
|  | Shiraz-58T | 2221 | 0.871948 | 0         |  |
|  | Shiraz-71T | 2260 | 0.68394  | 0         |  |
|  | Shiraz-71T | 2260 | 0.68394  | 0         |  |
|  | Shiraz-71T | 2260 | 0.68394  | 0         |  |
|  | Shiraz-71T | 2261 | 0.508399 | 0         |  |
|  | Shiraz-71T | 2261 | 0.508399 | 0         |  |
|  | Shiraz-71T | 2261 | 0.508399 | 0         |  |
|  | Shiraz-3T  | 235  | 0        | -0.28401  |  |
|  | Shiraz-3T  | 235  | 0        | -0.28401  |  |
|  | Shiraz-3T  | 235  | 0        | -0.28401  |  |
|  | Shiraz-4T  | 260  | 0        | -0.324128 |  |
|  | Shiraz-4T  | 260  | 0        | -0.324128 |  |
|  | Shiraz-4T  | 260  | 0        | -0.324128 |  |
|  | Shiraz-16T | 294  | 0.655804 | 0         |  |

|  |  |            |      |          |           |  |  |
|--|--|------------|------|----------|-----------|--|--|
|  |  | Shiraz-16T | 294  | 0.655804 | 0         |  |  |
|  |  | Shiraz-16T | 294  | 0.655804 | 0         |  |  |
|  |  | Shiraz-36T | 431  | 0        | -0.78035  |  |  |
|  |  | Shiraz-36T | 431  | 0        | -0.78035  |  |  |
|  |  | Shiraz-36T | 431  | 0        | -0.78035  |  |  |
|  |  | Shiraz-44T | 891  | 0        | -0.954044 |  |  |
|  |  | Shiraz-44T | 891  | 0        | -0.954044 |  |  |
|  |  | Shiraz-44T | 891  | 0        | -0.954044 |  |  |
|  |  | Shiraz-49T | 1166 | 0        | -0.917235 |  |  |
|  |  | Shiraz-49T | 1166 | 0        | -0.917235 |  |  |
|  |  | Shiraz-49T | 1166 | 0        | -0.917235 |  |  |
|  |  | Shiraz-49T | 1167 | 0        | -0.249329 |  |  |
|  |  | Shiraz-9T  | 1368 | 0.199713 | 0         |  |  |
|  |  | Shiraz-9T  | 1368 | 0.199713 | 0         |  |  |
|  |  | Shiraz-9T  | 1368 | 0.199713 | 0         |  |  |
|  |  | Shiraz-18T | 1455 | 0        | -0.186773 |  |  |
|  |  | Shiraz-18T | 1455 | 0        | -0.186773 |  |  |
|  |  | Shiraz-18T | 1455 | 0        | -0.186773 |  |  |
|  |  | Shiraz-22T | 1669 | 0.695915 | 0         |  |  |
|  |  | Shiraz-22T | 1669 | 0.695915 | 0         |  |  |
|  |  | Shiraz-22T | 1669 | 0.695915 | 0         |  |  |
|  |  | Shiraz-22T | 1670 | 1.188333 | 0         |  |  |
|  |  | Shiraz-22T | 1670 | 1.188333 | 0         |  |  |
|  |  | Shiraz-22T | 1670 | 1.188333 | 0         |  |  |
|  |  | Shiraz-25T | 1717 | 0.420447 | 0         |  |  |
|  |  | Shiraz-25T | 1717 | 0.420447 | 0         |  |  |
|  |  | Shiraz-25T | 1717 | 0.420447 | 0         |  |  |
|  |  | Shiraz-28T | 1760 | 0.538181 | 0         |  |  |
|  |  | Shiraz-28T | 1760 | 0.538181 | 0         |  |  |
|  |  | Shiraz-28T | 1760 | 0.538181 | 0         |  |  |
|  |  | Shiraz-29T | 1800 | 0.672527 | 0         |  |  |
|  |  | Shiraz-29T | 1800 | 0.672527 | 0         |  |  |
|  |  | Shiraz-29T | 1800 | 0.672527 | 0         |  |  |
|  |  | Shiraz-32T | 1869 | 0.776805 | 0         |  |  |
|  |  | Shiraz-32T | 1869 | 0.776805 | 0         |  |  |
|  |  | Shiraz-32T | 1869 | 0.776805 | 0         |  |  |
|  |  | Shiraz-35T | 1932 | 0.507141 | 0         |  |  |
|  |  | Shiraz-35T | 1932 | 0.507141 | 0         |  |  |
|  |  | Shiraz-35T | 1932 | 0.507141 | 0         |  |  |
|  |  | Shiraz-40T | 2051 | 0.098506 | 0         |  |  |
|  |  | Shiraz-40T | 2051 | 0.098506 | 0         |  |  |
|  |  | Shiraz-40T | 2051 | 0.098506 | 0         |  |  |
|  |  | Shiraz-58T | 2221 | 0.871948 | 0         |  |  |
|  |  | Shiraz-58T | 2221 | 0.871948 | 0         |  |  |
|  |  | Shiraz-58T | 2221 | 0.871948 | 0         |  |  |
|  |  | Shiraz-71T | 2260 | 0.68394  | 0         |  |  |
|  |  | Shiraz-71T | 2260 | 0.68394  | 0         |  |  |

|  |            |      |          |           |  |
|--|------------|------|----------|-----------|--|
|  | Shiraz-71T | 2260 | 0.68394  | 0         |  |
|  | Shiraz-71T | 2261 | 0.508399 | 0         |  |
|  | Shiraz-71T | 2261 | 0.508399 | 0         |  |
|  | Shiraz-71T | 2261 | 0.508399 | 0         |  |
|  | Shiraz-3T  | 235  | 0        | -0.28401  |  |
|  | Shiraz-3T  | 235  | 0        | -0.28401  |  |
|  | Shiraz-3T  | 235  | 0        | -0.28401  |  |
|  | Shiraz-4T  | 260  | 0        | -0.324128 |  |
|  | Shiraz-4T  | 260  | 0        | -0.324128 |  |
|  | Shiraz-4T  | 260  | 0        | -0.324128 |  |
|  | Shiraz-16T | 294  | 0.655804 | 0         |  |
|  | Shiraz-16T | 294  | 0.655804 | 0         |  |
|  | Shiraz-16T | 294  | 0.655804 | 0         |  |
|  | Shiraz-36T | 431  | 0        | -0.78035  |  |
|  | Shiraz-36T | 431  | 0        | -0.78035  |  |
|  | Shiraz-36T | 431  | 0        | -0.78035  |  |
|  | Shiraz-44T | 891  | 0        | -0.954044 |  |
|  | Shiraz-44T | 891  | 0        | -0.954044 |  |
|  | Shiraz-44T | 891  | 0        | -0.954044 |  |
|  | Shiraz-49T | 1166 | 0        | -0.917235 |  |
|  | Shiraz-49T | 1166 | 0        | -0.917235 |  |
|  | Shiraz-49T | 1166 | 0        | -0.917235 |  |
|  | Shiraz-49T | 1167 | 0        | -0.249329 |  |
|  | Shiraz-9T  | 1368 | 0.199713 | 0         |  |
|  | Shiraz-9T  | 1368 | 0.199713 | 0         |  |
|  | Shiraz-9T  | 1368 | 0.199713 | 0         |  |
|  | Shiraz-18T | 1455 | 0        | -0.186773 |  |
|  | Shiraz-18T | 1455 | 0        | -0.186773 |  |
|  | Shiraz-18T | 1455 | 0        | -0.186773 |  |
|  | Shiraz-22T | 1669 | 0.695915 | 0         |  |
|  | Shiraz-22T | 1669 | 0.695915 | 0         |  |
|  | Shiraz-22T | 1669 | 0.695915 | 0         |  |
|  | Shiraz-22T | 1670 | 1.188333 | 0         |  |
|  | Shiraz-22T | 1670 | 1.188333 | 0         |  |
|  | Shiraz-22T | 1670 | 1.188333 | 0         |  |
|  | Shiraz-25T | 1717 | 0.420447 | 0         |  |
|  | Shiraz-25T | 1717 | 0.420447 | 0         |  |
|  | Shiraz-25T | 1717 | 0.420447 | 0         |  |
|  | Shiraz-28T | 1760 | 0.538181 | 0         |  |
|  | Shiraz-28T | 1760 | 0.538181 | 0         |  |
|  | Shiraz-28T | 1760 | 0.538181 | 0         |  |
|  | Shiraz-29T | 1800 | 0.672527 | 0         |  |
|  | Shiraz-29T | 1800 | 0.672527 | 0         |  |
|  | Shiraz-29T | 1800 | 0.672527 | 0         |  |
|  | Shiraz-32T | 1869 | 0.776805 | 0         |  |
|  | Shiraz-32T | 1869 | 0.776805 | 0         |  |
|  | Shiraz-32T | 1869 | 0.776805 | 0         |  |

|         |      |            |      |          |           |  |  |
|---------|------|------------|------|----------|-----------|--|--|
|         |      | Shiraz-35T | 1932 | 0.507141 | 0         |  |  |
|         |      | Shiraz-35T | 1932 | 0.507141 | 0         |  |  |
|         |      | Shiraz-35T | 1932 | 0.507141 | 0         |  |  |
|         |      | Shiraz-40T | 2051 | 0.098506 | 0         |  |  |
|         |      | Shiraz-40T | 2051 | 0.098506 | 0         |  |  |
|         |      | Shiraz-40T | 2051 | 0.098506 | 0         |  |  |
|         |      | Shiraz-58T | 2221 | 0.871948 | 0         |  |  |
|         |      | Shiraz-58T | 2221 | 0.871948 | 0         |  |  |
|         |      | Shiraz-58T | 2221 | 0.871948 | 0         |  |  |
|         |      | Shiraz-71T | 2260 | 0.68394  | 0         |  |  |
|         |      | Shiraz-71T | 2260 | 0.68394  | 0         |  |  |
|         |      | Shiraz-71T | 2260 | 0.68394  | 0         |  |  |
|         |      | Shiraz-71T | 2261 | 0.508399 | 0         |  |  |
|         |      | Shiraz-71T | 2261 | 0.508399 | 0         |  |  |
|         |      | Shiraz-71T | 2261 | 0.508399 | 0         |  |  |
| MID1IP1 | chrX | Shiraz-3T  | 235  | 0        | -0.28401  |  |  |
|         |      | Shiraz-3T  | 235  | 0        | -0.28401  |  |  |
|         |      | Shiraz-4T  | 260  | 0        | -0.324128 |  |  |
|         |      | Shiraz-4T  | 260  | 0        | -0.324128 |  |  |
|         |      | Shiraz-16T | 294  | 0.655804 | 0         |  |  |
|         |      | Shiraz-16T | 294  | 0.655804 | 0         |  |  |
|         |      | Shiraz-36T | 431  | 0        | -0.78035  |  |  |
|         |      | Shiraz-36T | 431  | 0        | -0.78035  |  |  |
|         |      | Shiraz-44T | 891  | 0        | -0.954044 |  |  |
|         |      | Shiraz-44T | 891  | 0        | -0.954044 |  |  |
|         |      | Shiraz-49T | 1166 | 0        | -0.917235 |  |  |
|         |      | Shiraz-49T | 1166 | 0        | -0.917235 |  |  |
|         |      | Shiraz-9T  | 1368 | 0.199713 | 0         |  |  |
|         |      | Shiraz-9T  | 1368 | 0.199713 | 0         |  |  |
|         |      | Shiraz-18T | 1455 | 0        | -0.186773 |  |  |
|         |      | Shiraz-18T | 1455 | 0        | -0.186773 |  |  |
|         |      | Shiraz-22T | 1669 | 0.695915 | 0         |  |  |
|         |      | Shiraz-22T | 1669 | 0.695915 | 0         |  |  |
|         |      | Shiraz-25T | 1717 | 0.420447 | 0         |  |  |
|         |      | Shiraz-25T | 1717 | 0.420447 | 0         |  |  |
|         |      | Shiraz-28T | 1760 | 0.538181 | 0         |  |  |
|         |      | Shiraz-28T | 1760 | 0.538181 | 0         |  |  |
|         |      | Shiraz-29T | 1800 | 0.672527 | 0         |  |  |
|         |      | Shiraz-29T | 1800 | 0.672527 | 0         |  |  |
|         |      | Shiraz-32T | 1869 | 0.776805 | 0         |  |  |
|         |      | Shiraz-32T | 1869 | 0.776805 | 0         |  |  |
|         |      | Shiraz-35T | 1932 | 0.507141 | 0         |  |  |
|         |      | Shiraz-35T | 1932 | 0.507141 | 0         |  |  |
|         |      | Shiraz-40T | 2051 | 0.098506 | 0         |  |  |
|         |      | Shiraz-40T | 2051 | 0.098506 | 0         |  |  |
|         |      | Shiraz-58T | 2221 | 0.871948 | 0         |  |  |
|         |      | Shiraz-58T | 2221 | 0.871948 | 0         |  |  |

|  |  |            |      |          |           |  |  |
|--|--|------------|------|----------|-----------|--|--|
|  |  | Shiraz-71T | 2260 | 0.68394  | 0         |  |  |
|  |  | Shiraz-71T | 2260 | 0.68394  | 0         |  |  |
|  |  | Shiraz-3T  | 235  | 0        | -0.28401  |  |  |
|  |  | Shiraz-3T  | 235  | 0        | -0.28401  |  |  |
|  |  | Shiraz-4T  | 260  | 0        | -0.324128 |  |  |
|  |  | Shiraz-4T  | 260  | 0        | -0.324128 |  |  |
|  |  | Shiraz-16T | 294  | 0.655804 | 0         |  |  |
|  |  | Shiraz-16T | 294  | 0.655804 | 0         |  |  |
|  |  | Shiraz-36T | 431  | 0        | -0.78035  |  |  |
|  |  | Shiraz-36T | 431  | 0        | -0.78035  |  |  |
|  |  | Shiraz-44T | 891  | 0        | -0.954044 |  |  |
|  |  | Shiraz-44T | 891  | 0        | -0.954044 |  |  |
|  |  | Shiraz-49T | 1166 | 0        | -0.917235 |  |  |
|  |  | Shiraz-49T | 1166 | 0        | -0.917235 |  |  |
|  |  | Shiraz-9T  | 1368 | 0.199713 | 0         |  |  |
|  |  | Shiraz-9T  | 1368 | 0.199713 | 0         |  |  |
|  |  | Shiraz-18T | 1455 | 0        | -0.186773 |  |  |
|  |  | Shiraz-18T | 1455 | 0        | -0.186773 |  |  |
|  |  | Shiraz-22T | 1669 | 0.695915 | 0         |  |  |
|  |  | Shiraz-22T | 1669 | 0.695915 | 0         |  |  |
|  |  | Shiraz-25T | 1717 | 0.420447 | 0         |  |  |
|  |  | Shiraz-25T | 1717 | 0.420447 | 0         |  |  |
|  |  | Shiraz-28T | 1760 | 0.538181 | 0         |  |  |
|  |  | Shiraz-28T | 1760 | 0.538181 | 0         |  |  |
|  |  | Shiraz-29T | 1800 | 0.672527 | 0         |  |  |
|  |  | Shiraz-29T | 1800 | 0.672527 | 0         |  |  |
|  |  | Shiraz-32T | 1869 | 0.776805 | 0         |  |  |
|  |  | Shiraz-32T | 1869 | 0.776805 | 0         |  |  |
|  |  | Shiraz-35T | 1932 | 0.507141 | 0         |  |  |
|  |  | Shiraz-35T | 1932 | 0.507141 | 0         |  |  |
|  |  | Shiraz-40T | 2051 | 0.098506 | 0         |  |  |
|  |  | Shiraz-40T | 2051 | 0.098506 | 0         |  |  |
|  |  | Shiraz-58T | 2221 | 0.871948 | 0         |  |  |
|  |  | Shiraz-58T | 2221 | 0.871948 | 0         |  |  |
|  |  | Shiraz-71T | 2260 | 0.68394  | 0         |  |  |
|  |  | Shiraz-71T | 2260 | 0.68394  | 0         |  |  |
|  |  | Shiraz-3T  | 235  | 0        | -0.28401  |  |  |
|  |  | Shiraz-3T  | 235  | 0        | -0.28401  |  |  |
|  |  | Shiraz-4T  | 260  | 0        | -0.324128 |  |  |
|  |  | Shiraz-4T  | 260  | 0        | -0.324128 |  |  |
|  |  | Shiraz-16T | 294  | 0.655804 | 0         |  |  |
|  |  | Shiraz-16T | 294  | 0.655804 | 0         |  |  |
|  |  | Shiraz-36T | 431  | 0        | -0.78035  |  |  |
|  |  | Shiraz-36T | 431  | 0        | -0.78035  |  |  |
|  |  | Shiraz-44T | 891  | 0        | -0.954044 |  |  |
|  |  | Shiraz-44T | 891  | 0        | -0.954044 |  |  |
|  |  | Shiraz-49T | 1166 | 0        | -0.917235 |  |  |

|      |      |            |      |          |           |  |  |
|------|------|------------|------|----------|-----------|--|--|
|      |      | Shiraz-49T | 1166 | 0        | -0.917235 |  |  |
|      |      | Shiraz-9T  | 1368 | 0.199713 | 0         |  |  |
|      |      | Shiraz-9T  | 1368 | 0.199713 | 0         |  |  |
|      |      | Shiraz-18T | 1455 | 0        | -0.186773 |  |  |
|      |      | Shiraz-18T | 1455 | 0        | -0.186773 |  |  |
|      |      | Shiraz-22T | 1669 | 0.695915 | 0         |  |  |
|      |      | Shiraz-22T | 1669 | 0.695915 | 0         |  |  |
|      |      | Shiraz-25T | 1717 | 0.420447 | 0         |  |  |
|      |      | Shiraz-25T | 1717 | 0.420447 | 0         |  |  |
|      |      | Shiraz-28T | 1760 | 0.538181 | 0         |  |  |
|      |      | Shiraz-28T | 1760 | 0.538181 | 0         |  |  |
|      |      | Shiraz-29T | 1800 | 0.672527 | 0         |  |  |
|      |      | Shiraz-29T | 1800 | 0.672527 | 0         |  |  |
|      |      | Shiraz-32T | 1869 | 0.776805 | 0         |  |  |
|      |      | Shiraz-32T | 1869 | 0.776805 | 0         |  |  |
|      |      | Shiraz-35T | 1932 | 0.507141 | 0         |  |  |
|      |      | Shiraz-35T | 1932 | 0.507141 | 0         |  |  |
|      |      | Shiraz-40T | 2051 | 0.098506 | 0         |  |  |
|      |      | Shiraz-40T | 2051 | 0.098506 | 0         |  |  |
|      |      | Shiraz-58T | 2221 | 0.871948 | 0         |  |  |
|      |      | Shiraz-58T | 2221 | 0.871948 | 0         |  |  |
|      |      | Shiraz-71T | 2260 | 0.68394  | 0         |  |  |
|      |      | Shiraz-71T | 2260 | 0.68394  | 0         |  |  |
| MID2 | chrX | Shiraz-3T  | 242  | 0        | -0.336434 |  |  |
|      |      | Shiraz-4T  | 261  | 0        | -0.336249 |  |  |
|      |      | Shiraz-16T | 295  | 0.591657 | 0         |  |  |
|      |      | Shiraz-36T | 433  | 0        | -0.803961 |  |  |
|      |      | Shiraz-44T | 899  | 0        | -1.09697  |  |  |
|      |      | Shiraz-49T | 1170 | 0        | -0.967436 |  |  |
|      |      | Shiraz-18T | 1457 | 0.643204 | 0         |  |  |
|      |      | Shiraz-22T | 1673 | 0.611783 | 0         |  |  |
|      |      | Shiraz-25T | 1719 | 0.472955 | 0         |  |  |
|      |      | Shiraz-28T | 1762 | 0.562311 | 0         |  |  |
|      |      | Shiraz-29T | 1801 | 0.815343 | 0         |  |  |
|      |      | Shiraz-32T | 1870 | 0.729766 | 0         |  |  |
|      |      | Shiraz-35T | 1933 | 0.488535 | 0         |  |  |
|      |      | Shiraz-58T | 2223 | 0.833364 | 0         |  |  |
|      |      | Shiraz-71T | 2263 | 0.975531 | 0         |  |  |
|      |      | Shiraz-3T  | 242  | 0        | -0.336434 |  |  |
|      |      | Shiraz-4T  | 261  | 0        | -0.336249 |  |  |
|      |      | Shiraz-16T | 295  | 0.591657 | 0         |  |  |
|      |      | Shiraz-36T | 433  | 0        | -0.803961 |  |  |
|      |      | Shiraz-44T | 899  | 0        | -1.09697  |  |  |
|      |      | Shiraz-49T | 1170 | 0        | -0.967436 |  |  |
|      |      | Shiraz-18T | 1457 | 0.643204 | 0         |  |  |
|      |      | Shiraz-22T | 1673 | 0.611783 | 0         |  |  |
|      |      | Shiraz-25T | 1719 | 0.472955 | 0         |  |  |

|      |      |            |      |          |           |  |
|------|------|------------|------|----------|-----------|--|
|      |      | Shiraz-28T | 1762 | 0.562311 | 0         |  |
|      |      | Shiraz-29T | 1801 | 0.815343 | 0         |  |
|      |      | Shiraz-32T | 1870 | 0.729766 | 0         |  |
|      |      | Shiraz-35T | 1933 | 0.488535 | 0         |  |
|      |      | Shiraz-58T | 2223 | 0.833364 | 0         |  |
|      |      | Shiraz-71T | 2263 | 0.975531 | 0         |  |
|      |      | Shiraz-3T  | 242  | 0        | -0.336434 |  |
|      |      | Shiraz-4T  | 261  | 0        | -0.336249 |  |
|      |      | Shiraz-16T | 295  | 0.591657 | 0         |  |
|      |      | Shiraz-36T | 433  | 0        | -0.803961 |  |
|      |      | Shiraz-44T | 899  | 0        | -1.09697  |  |
|      |      | Shiraz-49T | 1170 | 0        | -0.967436 |  |
|      |      | Shiraz-18T | 1457 | 0.643204 | 0         |  |
|      |      | Shiraz-22T | 1673 | 0.611783 | 0         |  |
|      |      | Shiraz-25T | 1719 | 0.472955 | 0         |  |
|      |      | Shiraz-28T | 1762 | 0.562311 | 0         |  |
|      |      | Shiraz-29T | 1801 | 0.815343 | 0         |  |
|      |      | Shiraz-32T | 1870 | 0.729766 | 0         |  |
|      |      | Shiraz-35T | 1933 | 0.488535 | 0         |  |
|      |      | Shiraz-58T | 2223 | 0.833364 | 0         |  |
|      |      | Shiraz-71T | 2263 | 0.975531 | 0         |  |
| MIOS | chr7 | Shiraz-4T  | 252  | 0.192083 | 0         |  |
|      |      | Shiraz-36T | 376  | 0.159952 | 0         |  |
|      |      | Shiraz-44T | 628  | 0        | -0.444379 |  |
|      |      | Shiraz-47T | 1027 | 0        | -0.117848 |  |
|      |      | Shiraz-49T | 1117 | 0        | -0.168296 |  |
|      |      | Shiraz-77T | 1222 | 0        | -0.113002 |  |
|      |      | Shiraz-18T | 1433 | 0.250973 | 0         |  |
|      |      | Shiraz-22T | 1543 | 0        | -0.513696 |  |
|      |      | Shiraz-25T | 1697 | 0.21945  | 0         |  |
|      |      | Shiraz-28T | 1734 | 0.362882 | 0         |  |
|      |      | Shiraz-29T | 1777 | 0.156747 | 0         |  |
|      |      | Shiraz-38T | 1950 | 0.265916 | 0         |  |
|      |      | Shiraz-53T | 2077 | 0.444626 | 0         |  |
|      |      | Shiraz-58T | 2157 | 0        | -0.213872 |  |
|      |      | Shiraz-71T | 2236 | 0.320072 | 0         |  |
|      |      | Shiraz-4T  | 252  | 0.192083 | 0         |  |
|      |      | Shiraz-36T | 376  | 0.159952 | 0         |  |
|      |      | Shiraz-44T | 628  | 0        | -0.444379 |  |
|      |      | Shiraz-47T | 1027 | 0        | -0.117848 |  |
|      |      | Shiraz-49T | 1117 | 0        | -0.168296 |  |
|      |      | Shiraz-77T | 1222 | 0        | -0.113002 |  |
|      |      | Shiraz-18T | 1433 | 0.250973 | 0         |  |
|      |      | Shiraz-22T | 1543 | 0        | -0.513696 |  |
|      |      | Shiraz-25T | 1697 | 0.21945  | 0         |  |
|      |      | Shiraz-28T | 1734 | 0.362882 | 0         |  |
|      |      | Shiraz-29T | 1777 | 0.156747 | 0         |  |

|       |      |            |      |          |           |  |
|-------|------|------------|------|----------|-----------|--|
|       |      | Shiraz-38T | 1950 | 0.265916 | 0         |  |
|       |      | Shiraz-53T | 2077 | 0.444626 | 0         |  |
|       |      | Shiraz-58T | 2157 | 0        | -0.213872 |  |
|       |      | Shiraz-71T | 2236 | 0.320072 | 0         |  |
|       |      | Shiraz-4T  | 252  | 0.192083 | 0         |  |
|       |      | Shiraz-36T | 376  | 0.159952 | 0         |  |
|       |      | Shiraz-44T | 628  | 0        | -0.444379 |  |
|       |      | Shiraz-47T | 1027 | 0        | -0.117848 |  |
|       |      | Shiraz-49T | 1117 | 0        | -0.168296 |  |
|       |      | Shiraz-77T | 1222 | 0        | -0.113002 |  |
|       |      | Shiraz-18T | 1433 | 0.250973 | 0         |  |
|       |      | Shiraz-22T | 1543 | 0        | -0.513696 |  |
|       |      | Shiraz-25T | 1697 | 0.21945  | 0         |  |
|       |      | Shiraz-28T | 1734 | 0.362882 | 0         |  |
|       |      | Shiraz-29T | 1777 | 0.156747 | 0         |  |
|       |      | Shiraz-38T | 1950 | 0.265916 | 0         |  |
|       |      | Shiraz-53T | 2077 | 0.444626 | 0         |  |
|       |      | Shiraz-58T | 2157 | 0        | -0.213872 |  |
|       |      | Shiraz-71T | 2236 | 0.320072 | 0         |  |
| MKLN1 | chr7 | Shiraz-3T  | 90   | 0.219276 | 0         |  |
|       |      | Shiraz-3T  | 90   | 0.219276 | 0         |  |
|       |      | Shiraz-3T  | 96   | 0.428308 | 0         |  |
|       |      | Shiraz-3T  | 96   | 0.428308 | 0         |  |
|       |      | Shiraz-4T  | 253  | 0.372918 | 0         |  |
|       |      | Shiraz-4T  | 253  | 0.372918 | 0         |  |
|       |      | Shiraz-36T | 378  | 0.179558 | 0         |  |
|       |      | Shiraz-36T | 378  | 0.179558 | 0         |  |
|       |      | Shiraz-44T | 642  | 0.408617 | 0         |  |
|       |      | Shiraz-44T | 642  | 0.408617 | 0         |  |
|       |      | Shiraz-46T | 943  | 0.093799 | 0         |  |
|       |      | Shiraz-46T | 943  | 0.093799 | 0         |  |
|       |      | Shiraz-77T | 1225 | 0        | -0.117922 |  |
|       |      | Shiraz-77T | 1225 | 0        | -0.117922 |  |
|       |      | Shiraz-9T  | 1325 | 0.221899 | 0         |  |
|       |      | Shiraz-9T  | 1325 | 0.221899 | 0         |  |
|       |      | Shiraz-18T | 1434 | 0.244465 | 0         |  |
|       |      | Shiraz-18T | 1434 | 0.244465 | 0         |  |
|       |      | Shiraz-25T | 1698 | 0.21835  | 0         |  |
|       |      | Shiraz-25T | 1698 | 0.21835  | 0         |  |
|       |      | Shiraz-28T | 1735 | 0.350744 | 0         |  |
|       |      | Shiraz-28T | 1735 | 0.350744 | 0         |  |
|       |      | Shiraz-29T | 1778 | 0.120767 | 0         |  |
|       |      | Shiraz-29T | 1778 | 0.120767 | 0         |  |
|       |      | Shiraz-32T | 1833 | 0.551336 | 0         |  |
|       |      | Shiraz-32T | 1833 | 0.551336 | 0         |  |
|       |      | Shiraz-38T | 1951 | 0.250891 | 0         |  |
|       |      | Shiraz-38T | 1951 | 0.250891 | 0         |  |



|  |  |            |      |          |           |  |  |
|--|--|------------|------|----------|-----------|--|--|
|  |  | Shiraz-53T | 2078 | 0.287202 | 0         |  |  |
|  |  | Shiraz-53T | 2078 | 0.287202 | 0         |  |  |
|  |  | Shiraz-71T | 2238 | 0.603631 | 0         |  |  |
|  |  | Shiraz-71T | 2238 | 0.603631 | 0         |  |  |
|  |  | Shiraz-3T  | 90   | 0.219276 | 0         |  |  |
|  |  | Shiraz-3T  | 90   | 0.219276 | 0         |  |  |
|  |  | Shiraz-3T  | 96   | 0.428308 | 0         |  |  |
|  |  | Shiraz-3T  | 96   | 0.428308 | 0         |  |  |
|  |  | Shiraz-4T  | 253  | 0.372918 | 0         |  |  |
|  |  | Shiraz-4T  | 253  | 0.372918 | 0         |  |  |
|  |  | Shiraz-36T | 378  | 0.179558 | 0         |  |  |
|  |  | Shiraz-36T | 378  | 0.179558 | 0         |  |  |
|  |  | Shiraz-44T | 642  | 0.408617 | 0         |  |  |
|  |  | Shiraz-44T | 642  | 0.408617 | 0         |  |  |
|  |  | Shiraz-46T | 943  | 0.093799 | 0         |  |  |
|  |  | Shiraz-46T | 943  | 0.093799 | 0         |  |  |
|  |  | Shiraz-77T | 1225 | 0        | -0.117922 |  |  |
|  |  | Shiraz-77T | 1225 | 0        | -0.117922 |  |  |
|  |  | Shiraz-9T  | 1325 | 0.221899 | 0         |  |  |
|  |  | Shiraz-9T  | 1325 | 0.221899 | 0         |  |  |
|  |  | Shiraz-18T | 1434 | 0.244465 | 0         |  |  |
|  |  | Shiraz-18T | 1434 | 0.244465 | 0         |  |  |
|  |  | Shiraz-25T | 1698 | 0.21835  | 0         |  |  |
|  |  | Shiraz-25T | 1698 | 0.21835  | 0         |  |  |
|  |  | Shiraz-28T | 1735 | 0.350744 | 0         |  |  |
|  |  | Shiraz-28T | 1735 | 0.350744 | 0         |  |  |
|  |  | Shiraz-29T | 1778 | 0.120767 | 0         |  |  |
|  |  | Shiraz-29T | 1778 | 0.120767 | 0         |  |  |
|  |  | Shiraz-32T | 1833 | 0.551336 | 0         |  |  |
|  |  | Shiraz-32T | 1833 | 0.551336 | 0         |  |  |
|  |  | Shiraz-38T | 1951 | 0.250891 | 0         |  |  |
|  |  | Shiraz-38T | 1951 | 0.250891 | 0         |  |  |
|  |  | Shiraz-53T | 2078 | 0.287202 | 0         |  |  |
|  |  | Shiraz-53T | 2078 | 0.287202 | 0         |  |  |
|  |  | Shiraz-71T | 2238 | 0.603631 | 0         |  |  |
|  |  | Shiraz-71T | 2238 | 0.603631 | 0         |  |  |
|  |  | Shiraz-3T  | 90   | 0.219276 | 0         |  |  |
|  |  | Shiraz-3T  | 90   | 0.219276 | 0         |  |  |
|  |  | Shiraz-3T  | 96   | 0.428308 | 0         |  |  |
|  |  | Shiraz-3T  | 96   | 0.428308 | 0         |  |  |
|  |  | Shiraz-4T  | 253  | 0.372918 | 0         |  |  |
|  |  | Shiraz-4T  | 253  | 0.372918 | 0         |  |  |
|  |  | Shiraz-36T | 378  | 0.179558 | 0         |  |  |
|  |  | Shiraz-36T | 378  | 0.179558 | 0         |  |  |
|  |  | Shiraz-44T | 642  | 0.408617 | 0         |  |  |
|  |  | Shiraz-44T | 642  | 0.408617 | 0         |  |  |
|  |  | Shiraz-46T | 943  | 0.093799 | 0         |  |  |

|       |      |            |      |          |           |  |  |
|-------|------|------------|------|----------|-----------|--|--|
|       |      | Shiraz-46T | 943  | 0.093799 | 0         |  |  |
|       |      | Shiraz-77T | 1225 | 0        | -0.117922 |  |  |
|       |      | Shiraz-77T | 1225 | 0        | -0.117922 |  |  |
|       |      | Shiraz-9T  | 1325 | 0.221899 | 0         |  |  |
|       |      | Shiraz-9T  | 1325 | 0.221899 | 0         |  |  |
|       |      | Shiraz-18T | 1434 | 0.244465 | 0         |  |  |
|       |      | Shiraz-18T | 1434 | 0.244465 | 0         |  |  |
|       |      | Shiraz-25T | 1698 | 0.21835  | 0         |  |  |
|       |      | Shiraz-25T | 1698 | 0.21835  | 0         |  |  |
|       |      | Shiraz-28T | 1735 | 0.350744 | 0         |  |  |
|       |      | Shiraz-28T | 1735 | 0.350744 | 0         |  |  |
|       |      | Shiraz-29T | 1778 | 0.120767 | 0         |  |  |
|       |      | Shiraz-29T | 1778 | 0.120767 | 0         |  |  |
|       |      | Shiraz-32T | 1833 | 0.551336 | 0         |  |  |
|       |      | Shiraz-32T | 1833 | 0.551336 | 0         |  |  |
|       |      | Shiraz-38T | 1951 | 0.250891 | 0         |  |  |
|       |      | Shiraz-38T | 1951 | 0.250891 | 0         |  |  |
|       |      | Shiraz-53T | 2078 | 0.287202 | 0         |  |  |
|       |      | Shiraz-53T | 2078 | 0.287202 | 0         |  |  |
|       |      | Shiraz-71T | 2238 | 0.603631 | 0         |  |  |
|       |      | Shiraz-71T | 2238 | 0.603631 | 0         |  |  |
| MKRN1 | chr7 | Shiraz-3T  | 90   | 0.219276 | 0         |  |  |
|       |      | Shiraz-3T  | 90   | 0.219276 | 0         |  |  |
|       |      | Shiraz-3T  | 97   | 0.496001 | 0         |  |  |
|       |      | Shiraz-3T  | 97   | 0.496001 | 0         |  |  |
|       |      | Shiraz-4T  | 253  | 0.372918 | 0         |  |  |
|       |      | Shiraz-4T  | 253  | 0.372918 | 0         |  |  |
|       |      | Shiraz-31T | 318  | 0.254373 | 0         |  |  |
|       |      | Shiraz-31T | 318  | 0.254373 | 0         |  |  |
|       |      | Shiraz-36T | 378  | 0.179558 | 0         |  |  |
|       |      | Shiraz-36T | 378  | 0.179558 | 0         |  |  |
|       |      | Shiraz-36T | 383  | 0.374586 | 0         |  |  |
|       |      | Shiraz-36T | 383  | 0.374586 | 0         |  |  |
|       |      | Shiraz-44T | 644  | 0.496536 | 0         |  |  |
|       |      | Shiraz-44T | 644  | 0.496536 | 0         |  |  |
|       |      | Shiraz-46T | 943  | 0.093799 | 0         |  |  |
|       |      | Shiraz-46T | 943  | 0.093799 | 0         |  |  |
|       |      | Shiraz-47T | 1033 | 0.220267 | 0         |  |  |
|       |      | Shiraz-47T | 1033 | 0.220267 | 0         |  |  |
|       |      | Shiraz-77T | 1225 | 0        | -0.117922 |  |  |
|       |      | Shiraz-77T | 1225 | 0        | -0.117922 |  |  |
|       |      | Shiraz-77T | 1230 | 0.149651 | 0         |  |  |
|       |      | Shiraz-77T | 1230 | 0.149651 | 0         |  |  |
|       |      | Shiraz-9T  | 1325 | 0.221899 | 0         |  |  |
|       |      | Shiraz-9T  | 1325 | 0.221899 | 0         |  |  |
|       |      | Shiraz-18T | 1434 | 0.244465 | 0         |  |  |
|       |      | Shiraz-18T | 1434 | 0.244465 | 0         |  |  |

|  |            |      |          |           |  |
|--|------------|------|----------|-----------|--|
|  | Shiraz-25T | 1698 | 0.21835  | 0         |  |
|  | Shiraz-25T | 1698 | 0.21835  | 0         |  |
|  | Shiraz-28T | 1735 | 0.350744 | 0         |  |
|  | Shiraz-28T | 1735 | 0.350744 | 0         |  |
|  | Shiraz-29T | 1778 | 0.120767 | 0         |  |
|  | Shiraz-29T | 1778 | 0.120767 | 0         |  |
|  | Shiraz-32T | 1833 | 0.551336 | 0         |  |
|  | Shiraz-32T | 1833 | 0.551336 | 0         |  |
|  | Shiraz-38T | 1951 | 0.250891 | 0         |  |
|  | Shiraz-38T | 1951 | 0.250891 | 0         |  |
|  | Shiraz-53T | 2078 | 0.287202 | 0         |  |
|  | Shiraz-53T | 2078 | 0.287202 | 0         |  |
|  | Shiraz-58T | 2162 | 0.221505 | 0         |  |
|  | Shiraz-58T | 2162 | 0.221505 | 0         |  |
|  | Shiraz-71T | 2238 | 0.603631 | 0         |  |
|  | Shiraz-71T | 2238 | 0.603631 | 0         |  |
|  | Shiraz-3T  | 90   | 0.219276 | 0         |  |
|  | Shiraz-3T  | 90   | 0.219276 | 0         |  |
|  | Shiraz-3T  | 97   | 0.496001 | 0         |  |
|  | Shiraz-3T  | 97   | 0.496001 | 0         |  |
|  | Shiraz-4T  | 253  | 0.372918 | 0         |  |
|  | Shiraz-4T  | 253  | 0.372918 | 0         |  |
|  | Shiraz-31T | 318  | 0.254373 | 0         |  |
|  | Shiraz-31T | 318  | 0.254373 | 0         |  |
|  | Shiraz-36T | 378  | 0.179558 | 0         |  |
|  | Shiraz-36T | 378  | 0.179558 | 0         |  |
|  | Shiraz-36T | 383  | 0.374586 | 0         |  |
|  | Shiraz-36T | 383  | 0.374586 | 0         |  |
|  | Shiraz-44T | 644  | 0.496536 | 0         |  |
|  | Shiraz-44T | 644  | 0.496536 | 0         |  |
|  | Shiraz-46T | 943  | 0.093799 | 0         |  |
|  | Shiraz-46T | 943  | 0.093799 | 0         |  |
|  | Shiraz-47T | 1033 | 0.220267 | 0         |  |
|  | Shiraz-47T | 1033 | 0.220267 | 0         |  |
|  | Shiraz-77T | 1225 | 0        | -0.117922 |  |
|  | Shiraz-77T | 1225 | 0        | -0.117922 |  |
|  | Shiraz-77T | 1230 | 0.149651 | 0         |  |
|  | Shiraz-77T | 1230 | 0.149651 | 0         |  |
|  | Shiraz-9T  | 1325 | 0.221899 | 0         |  |
|  | Shiraz-9T  | 1325 | 0.221899 | 0         |  |
|  | Shiraz-18T | 1434 | 0.244465 | 0         |  |
|  | Shiraz-18T | 1434 | 0.244465 | 0         |  |
|  | Shiraz-25T | 1698 | 0.21835  | 0         |  |
|  | Shiraz-25T | 1698 | 0.21835  | 0         |  |
|  | Shiraz-28T | 1735 | 0.350744 | 0         |  |
|  | Shiraz-28T | 1735 | 0.350744 | 0         |  |
|  | Shiraz-29T | 1778 | 0.120767 | 0         |  |

|  |            |      |          |           |  |
|--|------------|------|----------|-----------|--|
|  | Shiraz-29T | 1778 | 0.120767 | 0         |  |
|  | Shiraz-32T | 1833 | 0.551336 | 0         |  |
|  | Shiraz-32T | 1833 | 0.551336 | 0         |  |
|  | Shiraz-38T | 1951 | 0.250891 | 0         |  |
|  | Shiraz-38T | 1951 | 0.250891 | 0         |  |
|  | Shiraz-53T | 2078 | 0.287202 | 0         |  |
|  | Shiraz-53T | 2078 | 0.287202 | 0         |  |
|  | Shiraz-58T | 2162 | 0.221505 | 0         |  |
|  | Shiraz-58T | 2162 | 0.221505 | 0         |  |
|  | Shiraz-71T | 2238 | 0.603631 | 0         |  |
|  | Shiraz-71T | 2238 | 0.603631 | 0         |  |
|  | Shiraz-3T  | 90   | 0.219276 | 0         |  |
|  | Shiraz-3T  | 90   | 0.219276 | 0         |  |
|  | Shiraz-3T  | 97   | 0.496001 | 0         |  |
|  | Shiraz-3T  | 97   | 0.496001 | 0         |  |
|  | Shiraz-4T  | 253  | 0.372918 | 0         |  |
|  | Shiraz-4T  | 253  | 0.372918 | 0         |  |
|  | Shiraz-31T | 318  | 0.254373 | 0         |  |
|  | Shiraz-31T | 318  | 0.254373 | 0         |  |
|  | Shiraz-36T | 378  | 0.179558 | 0         |  |
|  | Shiraz-36T | 378  | 0.179558 | 0         |  |
|  | Shiraz-36T | 383  | 0.374586 | 0         |  |
|  | Shiraz-36T | 383  | 0.374586 | 0         |  |
|  | Shiraz-44T | 644  | 0.496536 | 0         |  |
|  | Shiraz-44T | 644  | 0.496536 | 0         |  |
|  | Shiraz-46T | 943  | 0.093799 | 0         |  |
|  | Shiraz-46T | 943  | 0.093799 | 0         |  |
|  | Shiraz-47T | 1033 | 0.220267 | 0         |  |
|  | Shiraz-47T | 1033 | 0.220267 | 0         |  |
|  | Shiraz-77T | 1225 | 0        | -0.117922 |  |
|  | Shiraz-77T | 1225 | 0        | -0.117922 |  |
|  | Shiraz-77T | 1230 | 0.149651 | 0         |  |
|  | Shiraz-77T | 1230 | 0.149651 | 0         |  |
|  | Shiraz-9T  | 1325 | 0.221899 | 0         |  |
|  | Shiraz-9T  | 1325 | 0.221899 | 0         |  |
|  | Shiraz-18T | 1434 | 0.244465 | 0         |  |
|  | Shiraz-18T | 1434 | 0.244465 | 0         |  |
|  | Shiraz-25T | 1698 | 0.21835  | 0         |  |
|  | Shiraz-25T | 1698 | 0.21835  | 0         |  |
|  | Shiraz-28T | 1735 | 0.350744 | 0         |  |
|  | Shiraz-28T | 1735 | 0.350744 | 0         |  |
|  | Shiraz-29T | 1778 | 0.120767 | 0         |  |
|  | Shiraz-29T | 1778 | 0.120767 | 0         |  |
|  | Shiraz-32T | 1833 | 0.551336 | 0         |  |
|  | Shiraz-32T | 1833 | 0.551336 | 0         |  |
|  | Shiraz-38T | 1951 | 0.250891 | 0         |  |
|  | Shiraz-38T | 1951 | 0.250891 | 0         |  |

|      |      |            |      |          |   |  |
|------|------|------------|------|----------|---|--|
|      |      | Shiraz-53T | 2078 | 0.287202 | 0 |  |
|      |      | Shiraz-53T | 2078 | 0.287202 | 0 |  |
|      |      | Shiraz-58T | 2162 | 0.221505 | 0 |  |
|      |      | Shiraz-58T | 2162 | 0.221505 | 0 |  |
|      |      | Shiraz-71T | 2238 | 0.603631 | 0 |  |
|      |      | Shiraz-71T | 2238 | 0.603631 | 0 |  |
| MLL3 | chr7 | Shiraz-3T  | 90   | 0.219276 | 0 |  |
|      |      | Shiraz-3T  | 99   | 0.454766 | 0 |  |
|      |      | Shiraz-4T  | 253  | 0.372918 | 0 |  |
|      |      | Shiraz-36T | 378  | 0.179558 | 0 |  |
|      |      | Shiraz-44T | 646  | 0.471276 | 0 |  |
|      |      | Shiraz-44T | 648  | 0.017909 | 0 |  |
|      |      | Shiraz-46T | 943  | 0.093799 | 0 |  |
|      |      | Shiraz-9T  | 1325 | 0.221899 | 0 |  |
|      |      | Shiraz-18T | 1434 | 0.244465 | 0 |  |
|      |      | Shiraz-25T | 1698 | 0.21835  | 0 |  |
|      |      | Shiraz-28T | 1735 | 0.350744 | 0 |  |
|      |      | Shiraz-29T | 1778 | 0.120767 | 0 |  |
|      |      | Shiraz-32T | 1833 | 0.551336 | 0 |  |
|      |      | Shiraz-38T | 1951 | 0.250891 | 0 |  |
|      |      | Shiraz-58T | 2162 | 0.221505 | 0 |  |
|      |      | Shiraz-71T | 2238 | 0.603631 | 0 |  |
|      |      | Shiraz-3T  | 90   | 0.219276 | 0 |  |
|      |      | Shiraz-3T  | 99   | 0.454766 | 0 |  |
|      |      | Shiraz-4T  | 253  | 0.372918 | 0 |  |
|      |      | Shiraz-36T | 378  | 0.179558 | 0 |  |
|      |      | Shiraz-44T | 646  | 0.471276 | 0 |  |
|      |      | Shiraz-44T | 648  | 0.017909 | 0 |  |
|      |      | Shiraz-46T | 943  | 0.093799 | 0 |  |
|      |      | Shiraz-9T  | 1325 | 0.221899 | 0 |  |
|      |      | Shiraz-18T | 1434 | 0.244465 | 0 |  |
|      |      | Shiraz-25T | 1698 | 0.21835  | 0 |  |
|      |      | Shiraz-28T | 1735 | 0.350744 | 0 |  |
|      |      | Shiraz-29T | 1778 | 0.120767 | 0 |  |
|      |      | Shiraz-32T | 1833 | 0.551336 | 0 |  |
|      |      | Shiraz-38T | 1951 | 0.250891 | 0 |  |
|      |      | Shiraz-58T | 2162 | 0.221505 | 0 |  |
|      |      | Shiraz-71T | 2238 | 0.603631 | 0 |  |
|      |      | Shiraz-3T  | 90   | 0.219276 | 0 |  |
|      |      | Shiraz-3T  | 99   | 0.454766 | 0 |  |
|      |      | Shiraz-4T  | 253  | 0.372918 | 0 |  |
|      |      | Shiraz-36T | 378  | 0.179558 | 0 |  |
|      |      | Shiraz-44T | 646  | 0.471276 | 0 |  |
|      |      | Shiraz-44T | 648  | 0.017909 | 0 |  |
|      |      | Shiraz-46T | 943  | 0.093799 | 0 |  |
|      |      | Shiraz-9T  | 1325 | 0.221899 | 0 |  |
|      |      | Shiraz-18T | 1434 | 0.244465 | 0 |  |

|      |      |            |      |          |           |  |
|------|------|------------|------|----------|-----------|--|
|      |      | Shiraz-25T | 1698 | 0.21835  | 0         |  |
|      |      | Shiraz-28T | 1735 | 0.350744 | 0         |  |
|      |      | Shiraz-29T | 1778 | 0.120767 | 0         |  |
|      |      | Shiraz-32T | 1833 | 0.551336 | 0         |  |
|      |      | Shiraz-38T | 1951 | 0.250891 | 0         |  |
|      |      | Shiraz-58T | 2162 | 0.221505 | 0         |  |
|      |      | Shiraz-71T | 2238 | 0.603631 | 0         |  |
| MLL5 | chr7 | Shiraz-3T  | 90   | 0.219276 | 0         |  |
|      |      | Shiraz-4T  | 253  | 0.372918 | 0         |  |
|      |      | Shiraz-36T | 378  | 0.179558 | 0         |  |
|      |      | Shiraz-46T | 943  | 0.093799 | 0         |  |
|      |      | Shiraz-77T | 1225 | 0        | -0.117922 |  |
|      |      | Shiraz-18T | 1434 | 0.244465 | 0         |  |
|      |      | Shiraz-22T | 1549 | 0        | -0.319623 |  |
|      |      | Shiraz-25T | 1698 | 0.21835  | 0         |  |
|      |      | Shiraz-28T | 1735 | 0.350744 | 0         |  |
|      |      | Shiraz-29T | 1778 | 0.120767 | 0         |  |
|      |      | Shiraz-32T | 1833 | 0.551336 | 0         |  |
|      |      | Shiraz-38T | 1951 | 0.250891 | 0         |  |
|      |      | Shiraz-53T | 2078 | 0.287202 | 0         |  |
|      |      | Shiraz-71T | 2238 | 0.603631 | 0         |  |
|      |      | Shiraz-3T  | 90   | 0.219276 | 0         |  |
|      |      | Shiraz-4T  | 253  | 0.372918 | 0         |  |
|      |      | Shiraz-36T | 378  | 0.179558 | 0         |  |
|      |      | Shiraz-46T | 943  | 0.093799 | 0         |  |
|      |      | Shiraz-77T | 1225 | 0        | -0.117922 |  |
|      |      | Shiraz-18T | 1434 | 0.244465 | 0         |  |
|      |      | Shiraz-22T | 1549 | 0        | -0.319623 |  |
|      |      | Shiraz-25T | 1698 | 0.21835  | 0         |  |
|      |      | Shiraz-28T | 1735 | 0.350744 | 0         |  |
|      |      | Shiraz-29T | 1778 | 0.120767 | 0         |  |
|      |      | Shiraz-32T | 1833 | 0.551336 | 0         |  |
|      |      | Shiraz-38T | 1951 | 0.250891 | 0         |  |
|      |      | Shiraz-53T | 2078 | 0.287202 | 0         |  |
|      |      | Shiraz-71T | 2238 | 0.603631 | 0         |  |
|      |      | Shiraz-3T  | 90   | 0.219276 | 0         |  |
|      |      | Shiraz-4T  | 253  | 0.372918 | 0         |  |
|      |      | Shiraz-36T | 378  | 0.179558 | 0         |  |
|      |      | Shiraz-46T | 943  | 0.093799 | 0         |  |
|      |      | Shiraz-77T | 1225 | 0        | -0.117922 |  |
|      |      | Shiraz-18T | 1434 | 0.244465 | 0         |  |
|      |      | Shiraz-22T | 1549 | 0        | -0.319623 |  |
|      |      | Shiraz-25T | 1698 | 0.21835  | 0         |  |
|      |      | Shiraz-28T | 1735 | 0.350744 | 0         |  |
|      |      | Shiraz-29T | 1778 | 0.120767 | 0         |  |
|      |      | Shiraz-32T | 1833 | 0.551336 | 0         |  |
|      |      | Shiraz-38T | 1951 | 0.250891 | 0         |  |

|       |      |            |      |          |           |  |
|-------|------|------------|------|----------|-----------|--|
|       |      | Shiraz-53T | 2078 | 0.287202 | 0         |  |
|       |      | Shiraz-71T | 2238 | 0.603631 | 0         |  |
| MMGT1 | chrX | Shiraz-3T  | 242  | 0        | -0.336434 |  |
|       |      | Shiraz-4T  | 261  | 0        | -0.336249 |  |
|       |      | Shiraz-16T | 295  | 0.591657 | 0         |  |
|       |      | Shiraz-36T | 433  | 0        | -0.803961 |  |
|       |      | Shiraz-44T | 899  | 0        | -1.09697  |  |
|       |      | Shiraz-49T | 1170 | 0        | -0.967436 |  |
|       |      | Shiraz-9T  | 1370 | 0.690073 | 0         |  |
|       |      | Shiraz-18T | 1457 | 0.643204 | 0         |  |
|       |      | Shiraz-22T | 1673 | 0.611783 | 0         |  |
|       |      | Shiraz-22T | 1677 | 0.789711 | 0         |  |
|       |      | Shiraz-25T | 1719 | 0.472955 | 0         |  |
|       |      | Shiraz-28T | 1762 | 0.562311 | 0         |  |
|       |      | Shiraz-29T | 1801 | 0.815343 | 0         |  |
|       |      | Shiraz-32T | 1870 | 0.729766 | 0         |  |
|       |      | Shiraz-35T | 1933 | 0.488535 | 0         |  |
|       |      | Shiraz-58T | 2223 | 0.833364 | 0         |  |
|       |      | Shiraz-71T | 2263 | 0.975531 | 0         |  |
|       |      | Shiraz-3T  | 242  | 0        | -0.336434 |  |
|       |      | Shiraz-4T  | 261  | 0        | -0.336249 |  |
|       |      | Shiraz-16T | 295  | 0.591657 | 0         |  |
|       |      | Shiraz-36T | 433  | 0        | -0.803961 |  |
|       |      | Shiraz-44T | 899  | 0        | -1.09697  |  |
|       |      | Shiraz-49T | 1170 | 0        | -0.967436 |  |
|       |      | Shiraz-9T  | 1370 | 0.690073 | 0         |  |
|       |      | Shiraz-18T | 1457 | 0.643204 | 0         |  |
|       |      | Shiraz-22T | 1673 | 0.611783 | 0         |  |
|       |      | Shiraz-22T | 1677 | 0.789711 | 0         |  |
|       |      | Shiraz-25T | 1719 | 0.472955 | 0         |  |
|       |      | Shiraz-28T | 1762 | 0.562311 | 0         |  |
|       |      | Shiraz-29T | 1801 | 0.815343 | 0         |  |
|       |      | Shiraz-32T | 1870 | 0.729766 | 0         |  |
|       |      | Shiraz-35T | 1933 | 0.488535 | 0         |  |
|       |      | Shiraz-58T | 2223 | 0.833364 | 0         |  |
|       |      | Shiraz-71T | 2263 | 0.975531 | 0         |  |
|       |      | Shiraz-3T  | 242  | 0        | -0.336434 |  |
|       |      | Shiraz-4T  | 261  | 0        | -0.336249 |  |
|       |      | Shiraz-16T | 295  | 0.591657 | 0         |  |
|       |      | Shiraz-36T | 433  | 0        | -0.803961 |  |
|       |      | Shiraz-44T | 899  | 0        | -1.09697  |  |
|       |      | Shiraz-49T | 1170 | 0        | -0.967436 |  |
|       |      | Shiraz-9T  | 1370 | 0.690073 | 0         |  |
|       |      | Shiraz-18T | 1457 | 0.643204 | 0         |  |
|       |      | Shiraz-22T | 1673 | 0.611783 | 0         |  |
|       |      | Shiraz-22T | 1677 | 0.789711 | 0         |  |
|       |      | Shiraz-25T | 1719 | 0.472955 | 0         |  |

|        |      |            |      |          |           |  |
|--------|------|------------|------|----------|-----------|--|
|        |      | Shiraz-28T | 1762 | 0.562311 | 0         |  |
|        |      | Shiraz-29T | 1801 | 0.815343 | 0         |  |
|        |      | Shiraz-32T | 1870 | 0.729766 | 0         |  |
|        |      | Shiraz-35T | 1933 | 0.488535 | 0         |  |
|        |      | Shiraz-58T | 2223 | 0.833364 | 0         |  |
|        |      | Shiraz-71T | 2263 | 0.975531 | 0         |  |
| MOGAT3 | chr7 | Shiraz-3T  | 90   | 0.219276 | 0         |  |
|        |      | Shiraz-3T  | 94   | 0.74735  | 0         |  |
|        |      | Shiraz-4T  | 253  | 0.372918 | 0         |  |
|        |      | Shiraz-31T | 316  | 0.219196 | 0         |  |
|        |      | Shiraz-36T | 378  | 0.179558 | 0         |  |
|        |      | Shiraz-36T | 381  | 0.332628 | 0         |  |
|        |      | Shiraz-44T | 639  | 1.035032 | 0         |  |
|        |      | Shiraz-46T | 943  | 0.093799 | 0         |  |
|        |      | Shiraz-46T | 946  | 0.299835 | 0         |  |
|        |      | Shiraz-47T | 1030 | 0.257728 | 0         |  |
|        |      | Shiraz-49T | 1120 | 0.281656 | 0         |  |
|        |      | Shiraz-77T | 1225 | 0        | -0.117922 |  |
|        |      | Shiraz-77T | 1227 | 0.196445 | 0         |  |
|        |      | Shiraz-9T  | 1324 | 0.679266 | 0         |  |
|        |      | Shiraz-18T | 1434 | 0.244465 | 0         |  |
|        |      | Shiraz-22T | 1549 | 0        | -0.319623 |  |
|        |      | Shiraz-22T | 1551 | 0.324011 | 0         |  |
|        |      | Shiraz-25T | 1698 | 0.21835  | 0         |  |
|        |      | Shiraz-28T | 1735 | 0.350744 | 0         |  |
|        |      | Shiraz-29T | 1778 | 0.120767 | 0         |  |
|        |      | Shiraz-32T | 1833 | 0.551336 | 0         |  |
|        |      | Shiraz-32T | 1834 | 1.485392 | 0         |  |
|        |      | Shiraz-38T | 1951 | 0.250891 | 0         |  |
|        |      | Shiraz-53T | 2078 | 0.287202 | 0         |  |
|        |      | Shiraz-58T | 2160 | 0.399007 | 0         |  |
|        |      | Shiraz-71T | 2238 | 0.603631 | 0         |  |
|        |      | Shiraz-3T  | 90   | 0.219276 | 0         |  |
|        |      | Shiraz-3T  | 94   | 0.74735  | 0         |  |
|        |      | Shiraz-4T  | 253  | 0.372918 | 0         |  |
|        |      | Shiraz-31T | 316  | 0.219196 | 0         |  |
|        |      | Shiraz-36T | 378  | 0.179558 | 0         |  |
|        |      | Shiraz-36T | 381  | 0.332628 | 0         |  |
|        |      | Shiraz-44T | 639  | 1.035032 | 0         |  |
|        |      | Shiraz-46T | 943  | 0.093799 | 0         |  |
|        |      | Shiraz-46T | 946  | 0.299835 | 0         |  |
|        |      | Shiraz-47T | 1030 | 0.257728 | 0         |  |
|        |      | Shiraz-49T | 1120 | 0.281656 | 0         |  |
|        |      | Shiraz-77T | 1225 | 0        | -0.117922 |  |
|        |      | Shiraz-77T | 1227 | 0.196445 | 0         |  |
|        |      | Shiraz-9T  | 1324 | 0.679266 | 0         |  |
|        |      | Shiraz-18T | 1434 | 0.244465 | 0         |  |



|       |      |            |      |          |           |  |  |
|-------|------|------------|------|----------|-----------|--|--|
|       |      | Shiraz-22T | 1549 | 0        | -0.319623 |  |  |
|       |      | Shiraz-22T | 1551 | 0.324011 | 0         |  |  |
|       |      | Shiraz-25T | 1698 | 0.21835  | 0         |  |  |
|       |      | Shiraz-28T | 1735 | 0.350744 | 0         |  |  |
|       |      | Shiraz-29T | 1778 | 0.120767 | 0         |  |  |
|       |      | Shiraz-32T | 1833 | 0.551336 | 0         |  |  |
|       |      | Shiraz-32T | 1834 | 1.485392 | 0         |  |  |
|       |      | Shiraz-38T | 1951 | 0.250891 | 0         |  |  |
|       |      | Shiraz-53T | 2078 | 0.287202 | 0         |  |  |
|       |      | Shiraz-58T | 2160 | 0.399007 | 0         |  |  |
|       |      | Shiraz-71T | 2238 | 0.603631 | 0         |  |  |
|       |      | Shiraz-3T  | 90   | 0.219276 | 0         |  |  |
|       |      | Shiraz-3T  | 94   | 0.74735  | 0         |  |  |
|       |      | Shiraz-4T  | 253  | 0.372918 | 0         |  |  |
|       |      | Shiraz-31T | 316  | 0.219196 | 0         |  |  |
|       |      | Shiraz-36T | 378  | 0.179558 | 0         |  |  |
|       |      | Shiraz-36T | 381  | 0.332628 | 0         |  |  |
|       |      | Shiraz-44T | 639  | 1.035032 | 0         |  |  |
|       |      | Shiraz-46T | 943  | 0.093799 | 0         |  |  |
|       |      | Shiraz-46T | 946  | 0.299835 | 0         |  |  |
|       |      | Shiraz-47T | 1030 | 0.257728 | 0         |  |  |
|       |      | Shiraz-49T | 1120 | 0.281656 | 0         |  |  |
|       |      | Shiraz-77T | 1225 | 0        | -0.117922 |  |  |
|       |      | Shiraz-77T | 1227 | 0.196445 | 0         |  |  |
|       |      | Shiraz-9T  | 1324 | 0.679266 | 0         |  |  |
|       |      | Shiraz-18T | 1434 | 0.244465 | 0         |  |  |
|       |      | Shiraz-22T | 1549 | 0        | -0.319623 |  |  |
|       |      | Shiraz-22T | 1551 | 0.324011 | 0         |  |  |
|       |      | Shiraz-25T | 1698 | 0.21835  | 0         |  |  |
|       |      | Shiraz-28T | 1735 | 0.350744 | 0         |  |  |
|       |      | Shiraz-29T | 1778 | 0.120767 | 0         |  |  |
|       |      | Shiraz-32T | 1833 | 0.551336 | 0         |  |  |
|       |      | Shiraz-32T | 1834 | 1.485392 | 0         |  |  |
|       |      | Shiraz-38T | 1951 | 0.250891 | 0         |  |  |
|       |      | Shiraz-53T | 2078 | 0.287202 | 0         |  |  |
|       |      | Shiraz-58T | 2160 | 0.399007 | 0         |  |  |
|       |      | Shiraz-71T | 2238 | 0.603631 | 0         |  |  |
| MORC4 | chrX | Shiraz-3T  | 242  | 0        | -0.336434 |  |  |
|       |      | Shiraz-4T  | 261  | 0        | -0.336249 |  |  |
|       |      | Shiraz-16T | 295  | 0.591657 | 0         |  |  |
|       |      | Shiraz-36T | 433  | 0        | -0.803961 |  |  |
|       |      | Shiraz-44T | 899  | 0        | -1.09697  |  |  |
|       |      | Shiraz-49T | 1170 | 0        | -0.967436 |  |  |
|       |      | Shiraz-18T | 1457 | 0.643204 | 0         |  |  |
|       |      | Shiraz-22T | 1673 | 0.611783 | 0         |  |  |
|       |      | Shiraz-25T | 1719 | 0.472955 | 0         |  |  |
|       |      | Shiraz-28T | 1762 | 0.562311 | 0         |  |  |



|  |            |      |          |           |  |
|--|------------|------|----------|-----------|--|
|  | Shiraz-4T  | 261  | 0        | -0.336249 |  |
|  | Shiraz-4T  | 261  | 0        | -0.336249 |  |
|  | Shiraz-16T | 295  | 0.591657 | 0         |  |
|  | Shiraz-16T | 295  | 0.591657 | 0         |  |
|  | Shiraz-16T | 295  | 0.591657 | 0         |  |
|  | Shiraz-16T | 295  | 0.591657 | 0         |  |
|  | Shiraz-16T | 295  | 0.591657 | 0         |  |
|  | Shiraz-16T | 295  | 0.591657 | 0         |  |
|  | Shiraz-16T | 295  | 0.591657 | 0         |  |
|  | Shiraz-36T | 433  | 0        | -0.803961 |  |
|  | Shiraz-36T | 433  | 0        | -0.803961 |  |
|  | Shiraz-36T | 433  | 0        | -0.803961 |  |
|  | Shiraz-36T | 433  | 0        | -0.803961 |  |
|  | Shiraz-36T | 433  | 0        | -0.803961 |  |
|  | Shiraz-36T | 433  | 0        | -0.803961 |  |
|  | Shiraz-36T | 433  | 0        | -0.803961 |  |
|  | Shiraz-44T | 899  | 0        | -1.09697  |  |
|  | Shiraz-44T | 899  | 0        | -1.09697  |  |
|  | Shiraz-44T | 899  | 0        | -1.09697  |  |
|  | Shiraz-44T | 899  | 0        | -1.09697  |  |
|  | Shiraz-44T | 899  | 0        | -1.09697  |  |
|  | Shiraz-44T | 899  | 0        | -1.09697  |  |
|  | Shiraz-44T | 899  | 0        | -1.09697  |  |
|  | Shiraz-49T | 1170 | 0        | -0.967436 |  |
|  | Shiraz-49T | 1170 | 0        | -0.967436 |  |
|  | Shiraz-49T | 1170 | 0        | -0.967436 |  |
|  | Shiraz-49T | 1170 | 0        | -0.967436 |  |
|  | Shiraz-49T | 1170 | 0        | -0.967436 |  |
|  | Shiraz-49T | 1170 | 0        | -0.967436 |  |
|  | Shiraz-18T | 1457 | 0.643204 | 0         |  |
|  | Shiraz-18T | 1457 | 0.643204 | 0         |  |
|  | Shiraz-18T | 1457 | 0.643204 | 0         |  |
|  | Shiraz-18T | 1457 | 0.643204 | 0         |  |
|  | Shiraz-18T | 1457 | 0.643204 | 0         |  |
|  | Shiraz-18T | 1457 | 0.643204 | 0         |  |
|  | Shiraz-18T | 1457 | 0.643204 | 0         |  |
|  | Shiraz-22T | 1673 | 0.611783 | 0         |  |
|  | Shiraz-22T | 1673 | 0.611783 | 0         |  |
|  | Shiraz-22T | 1673 | 0.611783 | 0         |  |
|  | Shiraz-22T | 1673 | 0.611783 | 0         |  |
|  | Shiraz-22T | 1673 | 0.611783 | 0         |  |
|  | Shiraz-22T | 1673 | 0.611783 | 0         |  |
|  | Shiraz-22T | 1673 | 0.611783 | 0         |  |
|  | Shiraz-25T | 1719 | 0.472955 | 0         |  |
|  | Shiraz-25T | 1719 | 0.472955 | 0         |  |
|  | Shiraz-25T | 1719 | 0.472955 | 0         |  |

|  |  |            |      |          |           |  |  |
|--|--|------------|------|----------|-----------|--|--|
|  |  | Shiraz-25T | 1719 | 0.472955 | 0         |  |  |
|  |  | Shiraz-25T | 1719 | 0.472955 | 0         |  |  |
|  |  | Shiraz-25T | 1719 | 0.472955 | 0         |  |  |
|  |  | Shiraz-25T | 1719 | 0.472955 | 0         |  |  |
|  |  | Shiraz-28T | 1762 | 0.562311 | 0         |  |  |
|  |  | Shiraz-28T | 1762 | 0.562311 | 0         |  |  |
|  |  | Shiraz-28T | 1762 | 0.562311 | 0         |  |  |
|  |  | Shiraz-28T | 1762 | 0.562311 | 0         |  |  |
|  |  | Shiraz-28T | 1762 | 0.562311 | 0         |  |  |
|  |  | Shiraz-28T | 1762 | 0.562311 | 0         |  |  |
|  |  | Shiraz-28T | 1762 | 0.562311 | 0         |  |  |
|  |  | Shiraz-29T | 1801 | 0.815343 | 0         |  |  |
|  |  | Shiraz-29T | 1801 | 0.815343 | 0         |  |  |
|  |  | Shiraz-29T | 1801 | 0.815343 | 0         |  |  |
|  |  | Shiraz-29T | 1801 | 0.815343 | 0         |  |  |
|  |  | Shiraz-29T | 1801 | 0.815343 | 0         |  |  |
|  |  | Shiraz-29T | 1801 | 0.815343 | 0         |  |  |
|  |  | Shiraz-29T | 1801 | 0.815343 | 0         |  |  |
|  |  | Shiraz-32T | 1870 | 0.729766 | 0         |  |  |
|  |  | Shiraz-32T | 1870 | 0.729766 | 0         |  |  |
|  |  | Shiraz-32T | 1870 | 0.729766 | 0         |  |  |
|  |  | Shiraz-32T | 1870 | 0.729766 | 0         |  |  |
|  |  | Shiraz-32T | 1870 | 0.729766 | 0         |  |  |
|  |  | Shiraz-32T | 1870 | 0.729766 | 0         |  |  |
|  |  | Shiraz-32T | 1870 | 0.729766 | 0         |  |  |
|  |  | Shiraz-35T | 1933 | 0.488535 | 0         |  |  |
|  |  | Shiraz-35T | 1933 | 0.488535 | 0         |  |  |
|  |  | Shiraz-35T | 1933 | 0.488535 | 0         |  |  |
|  |  | Shiraz-35T | 1933 | 0.488535 | 0         |  |  |
|  |  | Shiraz-35T | 1933 | 0.488535 | 0         |  |  |
|  |  | Shiraz-35T | 1933 | 0.488535 | 0         |  |  |
|  |  | Shiraz-35T | 1933 | 0.488535 | 0         |  |  |
|  |  | Shiraz-58T | 2223 | 0.833364 | 0         |  |  |
|  |  | Shiraz-58T | 2223 | 0.833364 | 0         |  |  |
|  |  | Shiraz-58T | 2223 | 0.833364 | 0         |  |  |
|  |  | Shiraz-58T | 2223 | 0.833364 | 0         |  |  |
|  |  | Shiraz-58T | 2223 | 0.833364 | 0         |  |  |
|  |  | Shiraz-58T | 2223 | 0.833364 | 0         |  |  |
|  |  | Shiraz-71T | 2263 | 0.975531 | 0         |  |  |
|  |  | Shiraz-71T | 2263 | 0.975531 | 0         |  |  |
|  |  | Shiraz-71T | 2263 | 0.975531 | 0         |  |  |
|  |  | Shiraz-71T | 2263 | 0.975531 | 0         |  |  |
|  |  | Shiraz-71T | 2263 | 0.975531 | 0         |  |  |
|  |  | Shiraz-71T | 2263 | 0.975531 | 0         |  |  |
|  |  | Shiraz-71T | 2263 | 0.975531 | 0         |  |  |
|  |  | Shiraz-3T  | 242  | 0        | -0.336434 |  |  |



|  |  |            |      |          |   |  |  |
|--|--|------------|------|----------|---|--|--|
|  |  | Shiraz-18T | 1457 | 0.643204 | 0 |  |  |
|  |  | Shiraz-22T | 1673 | 0.611783 | 0 |  |  |
|  |  | Shiraz-22T | 1673 | 0.611783 | 0 |  |  |
|  |  | Shiraz-22T | 1673 | 0.611783 | 0 |  |  |
|  |  | Shiraz-22T | 1673 | 0.611783 | 0 |  |  |
|  |  | Shiraz-22T | 1673 | 0.611783 | 0 |  |  |
|  |  | Shiraz-22T | 1673 | 0.611783 | 0 |  |  |
|  |  | Shiraz-22T | 1673 | 0.611783 | 0 |  |  |
|  |  | Shiraz-25T | 1719 | 0.472955 | 0 |  |  |
|  |  | Shiraz-25T | 1719 | 0.472955 | 0 |  |  |
|  |  | Shiraz-25T | 1719 | 0.472955 | 0 |  |  |
|  |  | Shiraz-25T | 1719 | 0.472955 | 0 |  |  |
|  |  | Shiraz-25T | 1719 | 0.472955 | 0 |  |  |
|  |  | Shiraz-25T | 1719 | 0.472955 | 0 |  |  |
|  |  | Shiraz-25T | 1719 | 0.472955 | 0 |  |  |
|  |  | Shiraz-28T | 1762 | 0.562311 | 0 |  |  |
|  |  | Shiraz-28T | 1762 | 0.562311 | 0 |  |  |
|  |  | Shiraz-28T | 1762 | 0.562311 | 0 |  |  |
|  |  | Shiraz-28T | 1762 | 0.562311 | 0 |  |  |
|  |  | Shiraz-28T | 1762 | 0.562311 | 0 |  |  |
|  |  | Shiraz-28T | 1762 | 0.562311 | 0 |  |  |
|  |  | Shiraz-28T | 1762 | 0.562311 | 0 |  |  |
|  |  | Shiraz-29T | 1801 | 0.815343 | 0 |  |  |
|  |  | Shiraz-29T | 1801 | 0.815343 | 0 |  |  |
|  |  | Shiraz-29T | 1801 | 0.815343 | 0 |  |  |
|  |  | Shiraz-29T | 1801 | 0.815343 | 0 |  |  |
|  |  | Shiraz-29T | 1801 | 0.815343 | 0 |  |  |
|  |  | Shiraz-29T | 1801 | 0.815343 | 0 |  |  |
|  |  | Shiraz-29T | 1801 | 0.815343 | 0 |  |  |
|  |  | Shiraz-32T | 1870 | 0.729766 | 0 |  |  |
|  |  | Shiraz-32T | 1870 | 0.729766 | 0 |  |  |
|  |  | Shiraz-32T | 1870 | 0.729766 | 0 |  |  |
|  |  | Shiraz-32T | 1870 | 0.729766 | 0 |  |  |
|  |  | Shiraz-32T | 1870 | 0.729766 | 0 |  |  |
|  |  | Shiraz-32T | 1870 | 0.729766 | 0 |  |  |
|  |  | Shiraz-35T | 1933 | 0.488535 | 0 |  |  |
|  |  | Shiraz-35T | 1933 | 0.488535 | 0 |  |  |
|  |  | Shiraz-35T | 1933 | 0.488535 | 0 |  |  |
|  |  | Shiraz-35T | 1933 | 0.488535 | 0 |  |  |
|  |  | Shiraz-35T | 1933 | 0.488535 | 0 |  |  |
|  |  | Shiraz-35T | 1933 | 0.488535 | 0 |  |  |
|  |  | Shiraz-58T | 2223 | 0.833364 | 0 |  |  |
|  |  | Shiraz-58T | 2223 | 0.833364 | 0 |  |  |
|  |  | Shiraz-58T | 2223 | 0.833364 | 0 |  |  |
|  |  | Shiraz-58T | 2223 | 0.833364 | 0 |  |  |

|  |            |      |          |           |  |
|--|------------|------|----------|-----------|--|
|  | Shiraz-58T | 2223 | 0.833364 | 0         |  |
|  | Shiraz-58T | 2223 | 0.833364 | 0         |  |
|  | Shiraz-58T | 2223 | 0.833364 | 0         |  |
|  | Shiraz-71T | 2263 | 0.975531 | 0         |  |
|  | Shiraz-71T | 2263 | 0.975531 | 0         |  |
|  | Shiraz-71T | 2263 | 0.975531 | 0         |  |
|  | Shiraz-71T | 2263 | 0.975531 | 0         |  |
|  | Shiraz-71T | 2263 | 0.975531 | 0         |  |
|  | Shiraz-71T | 2263 | 0.975531 | 0         |  |
|  | Shiraz-3T  | 242  | 0        | -0.336434 |  |
|  | Shiraz-3T  | 242  | 0        | -0.336434 |  |
|  | Shiraz-3T  | 242  | 0        | -0.336434 |  |
|  | Shiraz-3T  | 242  | 0        | -0.336434 |  |
|  | Shiraz-3T  | 242  | 0        | -0.336434 |  |
|  | Shiraz-3T  | 242  | 0        | -0.336434 |  |
|  | Shiraz-3T  | 242  | 0        | -0.336434 |  |
|  | Shiraz-4T  | 261  | 0        | -0.336249 |  |
|  | Shiraz-4T  | 261  | 0        | -0.336249 |  |
|  | Shiraz-4T  | 261  | 0        | -0.336249 |  |
|  | Shiraz-4T  | 261  | 0        | -0.336249 |  |
|  | Shiraz-4T  | 261  | 0        | -0.336249 |  |
|  | Shiraz-4T  | 261  | 0        | -0.336249 |  |
|  | Shiraz-4T  | 261  | 0        | -0.336249 |  |
|  | Shiraz-16T | 295  | 0.591657 | 0         |  |
|  | Shiraz-16T | 295  | 0.591657 | 0         |  |
|  | Shiraz-16T | 295  | 0.591657 | 0         |  |
|  | Shiraz-16T | 295  | 0.591657 | 0         |  |
|  | Shiraz-16T | 295  | 0.591657 | 0         |  |
|  | Shiraz-16T | 295  | 0.591657 | 0         |  |
|  | Shiraz-16T | 295  | 0.591657 | 0         |  |
|  | Shiraz-36T | 433  | 0        | -0.803961 |  |
|  | Shiraz-36T | 433  | 0        | -0.803961 |  |
|  | Shiraz-36T | 433  | 0        | -0.803961 |  |
|  | Shiraz-36T | 433  | 0        | -0.803961 |  |
|  | Shiraz-36T | 433  | 0        | -0.803961 |  |
|  | Shiraz-36T | 433  | 0        | -0.803961 |  |
|  | Shiraz-36T | 433  | 0        | -0.803961 |  |
|  | Shiraz-44T | 899  | 0        | -1.09697  |  |
|  | Shiraz-44T | 899  | 0        | -1.09697  |  |
|  | Shiraz-44T | 899  | 0        | -1.09697  |  |
|  | Shiraz-44T | 899  | 0        | -1.09697  |  |
|  | Shiraz-44T | 899  | 0        | -1.09697  |  |
|  | Shiraz-44T | 899  | 0        | -1.09697  |  |
|  | Shiraz-44T | 899  | 0        | -1.09697  |  |
|  | Shiraz-49T | 1170 | 0        | -0.967436 |  |
|  | Shiraz-49T | 1170 | 0        | -0.967436 |  |





|        |      |            |      |          |           |  |  |
|--------|------|------------|------|----------|-----------|--|--|
|        |      | Shiraz-35T | 1933 | 0.488535 | 0         |  |  |
|        |      | Shiraz-35T | 1933 | 0.488535 | 0         |  |  |
|        |      | Shiraz-35T | 1933 | 0.488535 | 0         |  |  |
|        |      | Shiraz-35T | 1933 | 0.488535 | 0         |  |  |
|        |      | Shiraz-35T | 1933 | 0.488535 | 0         |  |  |
|        |      | Shiraz-35T | 1933 | 0.488535 | 0         |  |  |
|        |      | Shiraz-35T | 1933 | 0.488535 | 0         |  |  |
|        |      | Shiraz-58T | 2223 | 0.833364 | 0         |  |  |
|        |      | Shiraz-58T | 2223 | 0.833364 | 0         |  |  |
|        |      | Shiraz-58T | 2223 | 0.833364 | 0         |  |  |
|        |      | Shiraz-58T | 2223 | 0.833364 | 0         |  |  |
|        |      | Shiraz-58T | 2223 | 0.833364 | 0         |  |  |
|        |      | Shiraz-58T | 2223 | 0.833364 | 0         |  |  |
|        |      | Shiraz-58T | 2223 | 0.833364 | 0         |  |  |
|        |      | Shiraz-71T | 2263 | 0.975531 | 0         |  |  |
|        |      | Shiraz-71T | 2263 | 0.975531 | 0         |  |  |
|        |      | Shiraz-71T | 2263 | 0.975531 | 0         |  |  |
|        |      | Shiraz-71T | 2263 | 0.975531 | 0         |  |  |
|        |      | Shiraz-71T | 2263 | 0.975531 | 0         |  |  |
|        |      | Shiraz-71T | 2263 | 0.975531 | 0         |  |  |
| MOSPD1 | chrX | Shiraz-3T  | 242  | 0        | -0.336434 |  |  |
|        |      | Shiraz-4T  | 261  | 0        | -0.336249 |  |  |
|        |      | Shiraz-16T | 295  | 0.591657 | 0         |  |  |
|        |      | Shiraz-36T | 433  | 0        | -0.803961 |  |  |
|        |      | Shiraz-44T | 899  | 0        | -1.09697  |  |  |
|        |      | Shiraz-49T | 1170 | 0        | -0.967436 |  |  |
|        |      | Shiraz-9T  | 1370 | 0.690073 | 0         |  |  |
|        |      | Shiraz-18T | 1457 | 0.643204 | 0         |  |  |
|        |      | Shiraz-22T | 1673 | 0.611783 | 0         |  |  |
|        |      | Shiraz-22T | 1677 | 0.789711 | 0         |  |  |
|        |      | Shiraz-25T | 1719 | 0.472955 | 0         |  |  |
|        |      | Shiraz-28T | 1762 | 0.562311 | 0         |  |  |
|        |      | Shiraz-29T | 1801 | 0.815343 | 0         |  |  |
|        |      | Shiraz-32T | 1870 | 0.729766 | 0         |  |  |
|        |      | Shiraz-35T | 1933 | 0.488535 | 0         |  |  |
|        |      | Shiraz-58T | 2223 | 0.833364 | 0         |  |  |
|        |      | Shiraz-71T | 2263 | 0.975531 | 0         |  |  |
|        |      | Shiraz-3T  | 242  | 0        | -0.336434 |  |  |
|        |      | Shiraz-4T  | 261  | 0        | -0.336249 |  |  |
|        |      | Shiraz-16T | 295  | 0.591657 | 0         |  |  |
|        |      | Shiraz-36T | 433  | 0        | -0.803961 |  |  |
|        |      | Shiraz-44T | 899  | 0        | -1.09697  |  |  |
|        |      | Shiraz-49T | 1170 | 0        | -0.967436 |  |  |
|        |      | Shiraz-9T  | 1370 | 0.690073 | 0         |  |  |
|        |      | Shiraz-18T | 1457 | 0.643204 | 0         |  |  |
|        |      | Shiraz-22T | 1673 | 0.611783 | 0         |  |  |

|        |      |            |      |          |           |  |
|--------|------|------------|------|----------|-----------|--|
|        |      | Shiraz-22T | 1677 | 0.789711 | 0         |  |
|        |      | Shiraz-25T | 1719 | 0.472955 | 0         |  |
|        |      | Shiraz-28T | 1762 | 0.562311 | 0         |  |
|        |      | Shiraz-29T | 1801 | 0.815343 | 0         |  |
|        |      | Shiraz-32T | 1870 | 0.729766 | 0         |  |
|        |      | Shiraz-35T | 1933 | 0.488535 | 0         |  |
|        |      | Shiraz-58T | 2223 | 0.833364 | 0         |  |
|        |      | Shiraz-71T | 2263 | 0.975531 | 0         |  |
|        |      | Shiraz-3T  | 242  | 0        | -0.336434 |  |
|        |      | Shiraz-4T  | 261  | 0        | -0.336249 |  |
|        |      | Shiraz-16T | 295  | 0.591657 | 0         |  |
|        |      | Shiraz-36T | 433  | 0        | -0.803961 |  |
|        |      | Shiraz-44T | 899  | 0        | -1.09697  |  |
|        |      | Shiraz-49T | 1170 | 0        | -0.967436 |  |
|        |      | Shiraz-9T  | 1370 | 0.690073 | 0         |  |
|        |      | Shiraz-18T | 1457 | 0.643204 | 0         |  |
|        |      | Shiraz-22T | 1673 | 0.611783 | 0         |  |
|        |      | Shiraz-22T | 1677 | 0.789711 | 0         |  |
|        |      | Shiraz-25T | 1719 | 0.472955 | 0         |  |
|        |      | Shiraz-28T | 1762 | 0.562311 | 0         |  |
|        |      | Shiraz-29T | 1801 | 0.815343 | 0         |  |
|        |      | Shiraz-32T | 1870 | 0.729766 | 0         |  |
|        |      | Shiraz-35T | 1933 | 0.488535 | 0         |  |
|        |      | Shiraz-58T | 2223 | 0.833364 | 0         |  |
|        |      | Shiraz-71T | 2263 | 0.975531 | 0         |  |
| MOSPD2 | chrX | Shiraz-3T  | 235  | 0        | -0.28401  |  |
|        |      | Shiraz-4T  | 260  | 0        | -0.324128 |  |
|        |      | Shiraz-16T | 294  | 0.655804 | 0         |  |
|        |      | Shiraz-36T | 431  | 0        | -0.78035  |  |
|        |      | Shiraz-44T | 891  | 0        | -0.954044 |  |
|        |      | Shiraz-49T | 1166 | 0        | -0.917235 |  |
|        |      | Shiraz-9T  | 1368 | 0.199713 | 0         |  |
|        |      | Shiraz-18T | 1455 | 0        | -0.186773 |  |
|        |      | Shiraz-22T | 1669 | 0.695915 | 0         |  |
|        |      | Shiraz-25T | 1717 | 0.420447 | 0         |  |
|        |      | Shiraz-28T | 1760 | 0.538181 | 0         |  |
|        |      | Shiraz-29T | 1800 | 0.672527 | 0         |  |
|        |      | Shiraz-32T | 1869 | 0.776805 | 0         |  |
|        |      | Shiraz-35T | 1932 | 0.507141 | 0         |  |
|        |      | Shiraz-40T | 2051 | 0.098506 | 0         |  |
|        |      | Shiraz-58T | 2221 | 0.871948 | 0         |  |
|        |      | Shiraz-71T | 2260 | 0.68394  | 0         |  |
|        |      | Shiraz-71T | 2261 | 0.508399 | 0         |  |
|        |      | Shiraz-3T  | 235  | 0        | -0.28401  |  |
|        |      | Shiraz-4T  | 260  | 0        | -0.324128 |  |
|        |      | Shiraz-16T | 294  | 0.655804 | 0         |  |
|        |      | Shiraz-36T | 431  | 0        | -0.78035  |  |

|        |      |            |      |          |           |  |  |
|--------|------|------------|------|----------|-----------|--|--|
|        |      | Shiraz-44T | 891  | 0        | -0.954044 |  |  |
|        |      | Shiraz-49T | 1166 | 0        | -0.917235 |  |  |
|        |      | Shiraz-9T  | 1368 | 0.199713 | 0         |  |  |
|        |      | Shiraz-18T | 1455 | 0        | -0.186773 |  |  |
|        |      | Shiraz-22T | 1669 | 0.695915 | 0         |  |  |
|        |      | Shiraz-25T | 1717 | 0.420447 | 0         |  |  |
|        |      | Shiraz-28T | 1760 | 0.538181 | 0         |  |  |
|        |      | Shiraz-29T | 1800 | 0.672527 | 0         |  |  |
|        |      | Shiraz-32T | 1869 | 0.776805 | 0         |  |  |
|        |      | Shiraz-35T | 1932 | 0.507141 | 0         |  |  |
|        |      | Shiraz-40T | 2051 | 0.098506 | 0         |  |  |
|        |      | Shiraz-58T | 2221 | 0.871948 | 0         |  |  |
|        |      | Shiraz-71T | 2260 | 0.68394  | 0         |  |  |
|        |      | Shiraz-71T | 2261 | 0.508399 | 0         |  |  |
|        |      | Shiraz-3T  | 235  | 0        | -0.28401  |  |  |
|        |      | Shiraz-4T  | 260  | 0        | -0.324128 |  |  |
|        |      | Shiraz-16T | 294  | 0.655804 | 0         |  |  |
|        |      | Shiraz-36T | 431  | 0        | -0.78035  |  |  |
|        |      | Shiraz-44T | 891  | 0        | -0.954044 |  |  |
|        |      | Shiraz-49T | 1166 | 0        | -0.917235 |  |  |
|        |      | Shiraz-9T  | 1368 | 0.199713 | 0         |  |  |
|        |      | Shiraz-18T | 1455 | 0        | -0.186773 |  |  |
|        |      | Shiraz-22T | 1669 | 0.695915 | 0         |  |  |
|        |      | Shiraz-25T | 1717 | 0.420447 | 0         |  |  |
|        |      | Shiraz-28T | 1760 | 0.538181 | 0         |  |  |
|        |      | Shiraz-29T | 1800 | 0.672527 | 0         |  |  |
|        |      | Shiraz-32T | 1869 | 0.776805 | 0         |  |  |
|        |      | Shiraz-35T | 1932 | 0.507141 | 0         |  |  |
|        |      | Shiraz-40T | 2051 | 0.098506 | 0         |  |  |
|        |      | Shiraz-58T | 2221 | 0.871948 | 0         |  |  |
|        |      | Shiraz-71T | 2260 | 0.68394  | 0         |  |  |
|        |      | Shiraz-71T | 2261 | 0.508399 | 0         |  |  |
| MOSPD3 | chr7 | Shiraz-3T  | 90   | 0.219276 | 0         |  |  |
|        |      | Shiraz-3T  | 90   | 0.219276 | 0         |  |  |
|        |      | Shiraz-3T  | 90   | 0.219276 | 0         |  |  |
|        |      | Shiraz-3T  | 94   | 0.74735  | 0         |  |  |
|        |      | Shiraz-3T  | 94   | 0.74735  | 0         |  |  |
|        |      | Shiraz-3T  | 94   | 0.74735  | 0         |  |  |
|        |      | Shiraz-4T  | 253  | 0.372918 | 0         |  |  |
|        |      | Shiraz-4T  | 253  | 0.372918 | 0         |  |  |
|        |      | Shiraz-4T  | 253  | 0.372918 | 0         |  |  |
|        |      | Shiraz-31T | 316  | 0.219196 | 0         |  |  |
|        |      | Shiraz-31T | 316  | 0.219196 | 0         |  |  |
|        |      | Shiraz-31T | 316  | 0.219196 | 0         |  |  |
|        |      | Shiraz-36T | 378  | 0.179558 | 0         |  |  |
|        |      | Shiraz-36T | 378  | 0.179558 | 0         |  |  |
|        |      | Shiraz-36T | 378  | 0.179558 | 0         |  |  |

|  |  |            |      |          |           |  |
|--|--|------------|------|----------|-----------|--|
|  |  | Shiraz-36T | 381  | 0.332628 | 0         |  |
|  |  | Shiraz-36T | 381  | 0.332628 | 0         |  |
|  |  | Shiraz-36T | 381  | 0.332628 | 0         |  |
|  |  | Shiraz-44T | 639  | 1.035032 | 0         |  |
|  |  | Shiraz-44T | 639  | 1.035032 | 0         |  |
|  |  | Shiraz-44T | 639  | 1.035032 | 0         |  |
|  |  | Shiraz-46T | 943  | 0.093799 | 0         |  |
|  |  | Shiraz-46T | 943  | 0.093799 | 0         |  |
|  |  | Shiraz-46T | 943  | 0.093799 | 0         |  |
|  |  | Shiraz-46T | 946  | 0.299835 | 0         |  |
|  |  | Shiraz-46T | 946  | 0.299835 | 0         |  |
|  |  | Shiraz-46T | 946  | 0.299835 | 0         |  |
|  |  | Shiraz-47T | 1030 | 0.257728 | 0         |  |
|  |  | Shiraz-47T | 1030 | 0.257728 | 0         |  |
|  |  | Shiraz-47T | 1030 | 0.257728 | 0         |  |
|  |  | Shiraz-49T | 1120 | 0.281656 | 0         |  |
|  |  | Shiraz-49T | 1120 | 0.281656 | 0         |  |
|  |  | Shiraz-49T | 1120 | 0.281656 | 0         |  |
|  |  | Shiraz-77T | 1225 | 0        | -0.117922 |  |
|  |  | Shiraz-77T | 1225 | 0        | -0.117922 |  |
|  |  | Shiraz-77T | 1225 | 0        | -0.117922 |  |
|  |  | Shiraz-77T | 1227 | 0.196445 | 0         |  |
|  |  | Shiraz-77T | 1227 | 0.196445 | 0         |  |
|  |  | Shiraz-77T | 1227 | 0.196445 | 0         |  |
|  |  | Shiraz-9T  | 1324 | 0.679266 | 0         |  |
|  |  | Shiraz-9T  | 1324 | 0.679266 | 0         |  |
|  |  | Shiraz-9T  | 1324 | 0.679266 | 0         |  |
|  |  | Shiraz-18T | 1434 | 0.244465 | 0         |  |
|  |  | Shiraz-18T | 1434 | 0.244465 | 0         |  |
|  |  | Shiraz-18T | 1434 | 0.244465 | 0         |  |
|  |  | Shiraz-22T | 1549 | 0        | -0.319623 |  |
|  |  | Shiraz-22T | 1549 | 0        | -0.319623 |  |
|  |  | Shiraz-22T | 1549 | 0        | -0.319623 |  |
|  |  | Shiraz-22T | 1551 | 0.324011 | 0         |  |
|  |  | Shiraz-22T | 1551 | 0.324011 | 0         |  |
|  |  | Shiraz-22T | 1551 | 0.324011 | 0         |  |
|  |  | Shiraz-25T | 1698 | 0.21835  | 0         |  |
|  |  | Shiraz-25T | 1698 | 0.21835  | 0         |  |
|  |  | Shiraz-25T | 1698 | 0.21835  | 0         |  |
|  |  | Shiraz-28T | 1735 | 0.350744 | 0         |  |
|  |  | Shiraz-28T | 1735 | 0.350744 | 0         |  |
|  |  | Shiraz-28T | 1735 | 0.350744 | 0         |  |
|  |  | Shiraz-29T | 1778 | 0.120767 | 0         |  |
|  |  | Shiraz-29T | 1778 | 0.120767 | 0         |  |
|  |  | Shiraz-29T | 1778 | 0.120767 | 0         |  |
|  |  | Shiraz-32T | 1833 | 0.551336 | 0         |  |
|  |  | Shiraz-32T | 1833 | 0.551336 | 0         |  |

|  |  |            |      |          |   |  |  |
|--|--|------------|------|----------|---|--|--|
|  |  | Shiraz-32T | 1833 | 0.551336 | 0 |  |  |
|  |  | Shiraz-32T | 1834 | 1.485392 | 0 |  |  |
|  |  | Shiraz-32T | 1834 | 1.485392 | 0 |  |  |
|  |  | Shiraz-32T | 1834 | 1.485392 | 0 |  |  |
|  |  | Shiraz-38T | 1951 | 0.250891 | 0 |  |  |
|  |  | Shiraz-38T | 1951 | 0.250891 | 0 |  |  |
|  |  | Shiraz-38T | 1951 | 0.250891 | 0 |  |  |
|  |  | Shiraz-53T | 2078 | 0.287202 | 0 |  |  |
|  |  | Shiraz-53T | 2078 | 0.287202 | 0 |  |  |
|  |  | Shiraz-53T | 2078 | 0.287202 | 0 |  |  |
|  |  | Shiraz-58T | 2160 | 0.399007 | 0 |  |  |
|  |  | Shiraz-58T | 2160 | 0.399007 | 0 |  |  |
|  |  | Shiraz-58T | 2160 | 0.399007 | 0 |  |  |
|  |  | Shiraz-71T | 2238 | 0.603631 | 0 |  |  |
|  |  | Shiraz-71T | 2238 | 0.603631 | 0 |  |  |
|  |  | Shiraz-71T | 2238 | 0.603631 | 0 |  |  |
|  |  | Shiraz-3T  | 90   | 0.219276 | 0 |  |  |
|  |  | Shiraz-3T  | 90   | 0.219276 | 0 |  |  |
|  |  | Shiraz-3T  | 90   | 0.219276 | 0 |  |  |
|  |  | Shiraz-3T  | 94   | 0.74735  | 0 |  |  |
|  |  | Shiraz-3T  | 94   | 0.74735  | 0 |  |  |
|  |  | Shiraz-3T  | 94   | 0.74735  | 0 |  |  |
|  |  | Shiraz-4T  | 253  | 0.372918 | 0 |  |  |
|  |  | Shiraz-4T  | 253  | 0.372918 | 0 |  |  |
|  |  | Shiraz-4T  | 253  | 0.372918 | 0 |  |  |
|  |  | Shiraz-31T | 316  | 0.219196 | 0 |  |  |
|  |  | Shiraz-31T | 316  | 0.219196 | 0 |  |  |
|  |  | Shiraz-31T | 316  | 0.219196 | 0 |  |  |
|  |  | Shiraz-36T | 378  | 0.179558 | 0 |  |  |
|  |  | Shiraz-36T | 378  | 0.179558 | 0 |  |  |
|  |  | Shiraz-36T | 378  | 0.179558 | 0 |  |  |
|  |  | Shiraz-36T | 381  | 0.332628 | 0 |  |  |
|  |  | Shiraz-36T | 381  | 0.332628 | 0 |  |  |
|  |  | Shiraz-36T | 381  | 0.332628 | 0 |  |  |
|  |  | Shiraz-44T | 639  | 1.035032 | 0 |  |  |
|  |  | Shiraz-44T | 639  | 1.035032 | 0 |  |  |
|  |  | Shiraz-44T | 639  | 1.035032 | 0 |  |  |
|  |  | Shiraz-46T | 943  | 0.093799 | 0 |  |  |
|  |  | Shiraz-46T | 943  | 0.093799 | 0 |  |  |
|  |  | Shiraz-46T | 943  | 0.093799 | 0 |  |  |
|  |  | Shiraz-46T | 946  | 0.299835 | 0 |  |  |
|  |  | Shiraz-46T | 946  | 0.299835 | 0 |  |  |
|  |  | Shiraz-46T | 946  | 0.299835 | 0 |  |  |
|  |  | Shiraz-47T | 1030 | 0.257728 | 0 |  |  |
|  |  | Shiraz-47T | 1030 | 0.257728 | 0 |  |  |
|  |  | Shiraz-47T | 1030 | 0.257728 | 0 |  |  |
|  |  | Shiraz-49T | 1120 | 0.281656 | 0 |  |  |

|  |  |            |      |          |           |  |  |
|--|--|------------|------|----------|-----------|--|--|
|  |  | Shiraz-49T | 1120 | 0.281656 | 0         |  |  |
|  |  | Shiraz-49T | 1120 | 0.281656 | 0         |  |  |
|  |  | Shiraz-77T | 1225 | 0        | -0.117922 |  |  |
|  |  | Shiraz-77T | 1225 | 0        | -0.117922 |  |  |
|  |  | Shiraz-77T | 1225 | 0        | -0.117922 |  |  |
|  |  | Shiraz-77T | 1227 | 0.196445 | 0         |  |  |
|  |  | Shiraz-77T | 1227 | 0.196445 | 0         |  |  |
|  |  | Shiraz-77T | 1227 | 0.196445 | 0         |  |  |
|  |  | Shiraz-9T  | 1324 | 0.679266 | 0         |  |  |
|  |  | Shiraz-9T  | 1324 | 0.679266 | 0         |  |  |
|  |  | Shiraz-9T  | 1324 | 0.679266 | 0         |  |  |
|  |  | Shiraz-18T | 1434 | 0.244465 | 0         |  |  |
|  |  | Shiraz-18T | 1434 | 0.244465 | 0         |  |  |
|  |  | Shiraz-18T | 1434 | 0.244465 | 0         |  |  |
|  |  | Shiraz-22T | 1549 | 0        | -0.319623 |  |  |
|  |  | Shiraz-22T | 1549 | 0        | -0.319623 |  |  |
|  |  | Shiraz-22T | 1549 | 0        | -0.319623 |  |  |
|  |  | Shiraz-22T | 1551 | 0.324011 | 0         |  |  |
|  |  | Shiraz-22T | 1551 | 0.324011 | 0         |  |  |
|  |  | Shiraz-22T | 1551 | 0.324011 | 0         |  |  |
|  |  | Shiraz-25T | 1698 | 0.21835  | 0         |  |  |
|  |  | Shiraz-25T | 1698 | 0.21835  | 0         |  |  |
|  |  | Shiraz-25T | 1698 | 0.21835  | 0         |  |  |
|  |  | Shiraz-28T | 1735 | 0.350744 | 0         |  |  |
|  |  | Shiraz-28T | 1735 | 0.350744 | 0         |  |  |
|  |  | Shiraz-28T | 1735 | 0.350744 | 0         |  |  |
|  |  | Shiraz-29T | 1778 | 0.120767 | 0         |  |  |
|  |  | Shiraz-29T | 1778 | 0.120767 | 0         |  |  |
|  |  | Shiraz-29T | 1778 | 0.120767 | 0         |  |  |
|  |  | Shiraz-32T | 1833 | 0.551336 | 0         |  |  |
|  |  | Shiraz-32T | 1833 | 0.551336 | 0         |  |  |
|  |  | Shiraz-32T | 1833 | 0.551336 | 0         |  |  |
|  |  | Shiraz-32T | 1834 | 1.485392 | 0         |  |  |
|  |  | Shiraz-32T | 1834 | 1.485392 | 0         |  |  |
|  |  | Shiraz-32T | 1834 | 1.485392 | 0         |  |  |
|  |  | Shiraz-38T | 1951 | 0.250891 | 0         |  |  |
|  |  | Shiraz-38T | 1951 | 0.250891 | 0         |  |  |
|  |  | Shiraz-38T | 1951 | 0.250891 | 0         |  |  |
|  |  | Shiraz-53T | 2078 | 0.287202 | 0         |  |  |
|  |  | Shiraz-53T | 2078 | 0.287202 | 0         |  |  |
|  |  | Shiraz-53T | 2078 | 0.287202 | 0         |  |  |
|  |  | Shiraz-58T | 2160 | 0.399007 | 0         |  |  |
|  |  | Shiraz-58T | 2160 | 0.399007 | 0         |  |  |
|  |  | Shiraz-58T | 2160 | 0.399007 | 0         |  |  |
|  |  | Shiraz-71T | 2238 | 0.603631 | 0         |  |  |
|  |  | Shiraz-71T | 2238 | 0.603631 | 0         |  |  |
|  |  | Shiraz-71T | 2238 | 0.603631 | 0         |  |  |

|  |  |            |      |          |           |  |
|--|--|------------|------|----------|-----------|--|
|  |  | Shiraz-3T  | 90   | 0.219276 | 0         |  |
|  |  | Shiraz-3T  | 90   | 0.219276 | 0         |  |
|  |  | Shiraz-3T  | 90   | 0.219276 | 0         |  |
|  |  | Shiraz-3T  | 94   | 0.74735  | 0         |  |
|  |  | Shiraz-3T  | 94   | 0.74735  | 0         |  |
|  |  | Shiraz-3T  | 94   | 0.74735  | 0         |  |
|  |  | Shiraz-4T  | 253  | 0.372918 | 0         |  |
|  |  | Shiraz-4T  | 253  | 0.372918 | 0         |  |
|  |  | Shiraz-4T  | 253  | 0.372918 | 0         |  |
|  |  | Shiraz-31T | 316  | 0.219196 | 0         |  |
|  |  | Shiraz-31T | 316  | 0.219196 | 0         |  |
|  |  | Shiraz-31T | 316  | 0.219196 | 0         |  |
|  |  | Shiraz-36T | 378  | 0.179558 | 0         |  |
|  |  | Shiraz-36T | 378  | 0.179558 | 0         |  |
|  |  | Shiraz-36T | 378  | 0.179558 | 0         |  |
|  |  | Shiraz-36T | 381  | 0.332628 | 0         |  |
|  |  | Shiraz-36T | 381  | 0.332628 | 0         |  |
|  |  | Shiraz-36T | 381  | 0.332628 | 0         |  |
|  |  | Shiraz-44T | 639  | 1.035032 | 0         |  |
|  |  | Shiraz-44T | 639  | 1.035032 | 0         |  |
|  |  | Shiraz-44T | 639  | 1.035032 | 0         |  |
|  |  | Shiraz-46T | 943  | 0.093799 | 0         |  |
|  |  | Shiraz-46T | 943  | 0.093799 | 0         |  |
|  |  | Shiraz-46T | 943  | 0.093799 | 0         |  |
|  |  | Shiraz-46T | 946  | 0.299835 | 0         |  |
|  |  | Shiraz-46T | 946  | 0.299835 | 0         |  |
|  |  | Shiraz-46T | 946  | 0.299835 | 0         |  |
|  |  | Shiraz-47T | 1030 | 0.257728 | 0         |  |
|  |  | Shiraz-47T | 1030 | 0.257728 | 0         |  |
|  |  | Shiraz-47T | 1030 | 0.257728 | 0         |  |
|  |  | Shiraz-49T | 1120 | 0.281656 | 0         |  |
|  |  | Shiraz-49T | 1120 | 0.281656 | 0         |  |
|  |  | Shiraz-49T | 1120 | 0.281656 | 0         |  |
|  |  | Shiraz-77T | 1225 | 0        | -0.117922 |  |
|  |  | Shiraz-77T | 1225 | 0        | -0.117922 |  |
|  |  | Shiraz-77T | 1225 | 0        | -0.117922 |  |
|  |  | Shiraz-77T | 1227 | 0.196445 | 0         |  |
|  |  | Shiraz-77T | 1227 | 0.196445 | 0         |  |
|  |  | Shiraz-77T | 1227 | 0.196445 | 0         |  |
|  |  | Shiraz-9T  | 1324 | 0.679266 | 0         |  |
|  |  | Shiraz-9T  | 1324 | 0.679266 | 0         |  |
|  |  | Shiraz-9T  | 1324 | 0.679266 | 0         |  |
|  |  | Shiraz-18T | 1434 | 0.244465 | 0         |  |
|  |  | Shiraz-18T | 1434 | 0.244465 | 0         |  |
|  |  | Shiraz-18T | 1434 | 0.244465 | 0         |  |
|  |  | Shiraz-22T | 1549 | 0        | -0.319623 |  |
|  |  | Shiraz-22T | 1549 | 0        | -0.319623 |  |

|       |      |            |      |          |           |  |  |
|-------|------|------------|------|----------|-----------|--|--|
|       |      | Shiraz-22T | 1549 | 0        | -0.319623 |  |  |
|       |      | Shiraz-22T | 1551 | 0.324011 | 0         |  |  |
|       |      | Shiraz-22T | 1551 | 0.324011 | 0         |  |  |
|       |      | Shiraz-22T | 1551 | 0.324011 | 0         |  |  |
|       |      | Shiraz-25T | 1698 | 0.21835  | 0         |  |  |
|       |      | Shiraz-25T | 1698 | 0.21835  | 0         |  |  |
|       |      | Shiraz-25T | 1698 | 0.21835  | 0         |  |  |
|       |      | Shiraz-28T | 1735 | 0.350744 | 0         |  |  |
|       |      | Shiraz-28T | 1735 | 0.350744 | 0         |  |  |
|       |      | Shiraz-28T | 1735 | 0.350744 | 0         |  |  |
|       |      | Shiraz-29T | 1778 | 0.120767 | 0         |  |  |
|       |      | Shiraz-29T | 1778 | 0.120767 | 0         |  |  |
|       |      | Shiraz-29T | 1778 | 0.120767 | 0         |  |  |
|       |      | Shiraz-32T | 1833 | 0.551336 | 0         |  |  |
|       |      | Shiraz-32T | 1833 | 0.551336 | 0         |  |  |
|       |      | Shiraz-32T | 1833 | 0.551336 | 0         |  |  |
|       |      | Shiraz-32T | 1834 | 1.485392 | 0         |  |  |
|       |      | Shiraz-32T | 1834 | 1.485392 | 0         |  |  |
|       |      | Shiraz-32T | 1834 | 1.485392 | 0         |  |  |
|       |      | Shiraz-38T | 1951 | 0.250891 | 0         |  |  |
|       |      | Shiraz-38T | 1951 | 0.250891 | 0         |  |  |
|       |      | Shiraz-38T | 1951 | 0.250891 | 0         |  |  |
|       |      | Shiraz-53T | 2078 | 0.287202 | 0         |  |  |
|       |      | Shiraz-53T | 2078 | 0.287202 | 0         |  |  |
|       |      | Shiraz-53T | 2078 | 0.287202 | 0         |  |  |
|       |      | Shiraz-58T | 2160 | 0.399007 | 0         |  |  |
|       |      | Shiraz-58T | 2160 | 0.399007 | 0         |  |  |
|       |      | Shiraz-58T | 2160 | 0.399007 | 0         |  |  |
|       |      | Shiraz-71T | 2238 | 0.603631 | 0         |  |  |
|       |      | Shiraz-71T | 2238 | 0.603631 | 0         |  |  |
|       |      | Shiraz-71T | 2238 | 0.603631 | 0         |  |  |
| MOXD2 | chr7 | Shiraz-3T  | 90   | 0.219276 | 0         |  |  |
|       |      | Shiraz-4T  | 253  | 0.372918 | 0         |  |  |
|       |      | Shiraz-36T | 378  | 0.179558 | 0         |  |  |
|       |      | Shiraz-46T | 943  | 0.093799 | 0         |  |  |
|       |      | Shiraz-77T | 1225 | 0        | -0.117922 |  |  |
|       |      | Shiraz-9T  | 1325 | 0.221899 | 0         |  |  |
|       |      | Shiraz-18T | 1434 | 0.244465 | 0         |  |  |
|       |      | Shiraz-25T | 1698 | 0.21835  | 0         |  |  |
|       |      | Shiraz-28T | 1735 | 0.350744 | 0         |  |  |
|       |      | Shiraz-29T | 1778 | 0.120767 | 0         |  |  |
|       |      | Shiraz-32T | 1833 | 0.551336 | 0         |  |  |
|       |      | Shiraz-38T | 1951 | 0.250891 | 0         |  |  |
|       |      | Shiraz-53T | 2078 | 0.287202 | 0         |  |  |
|       |      | Shiraz-58T | 2162 | 0.221505 | 0         |  |  |
|       |      | Shiraz-71T | 2238 | 0.603631 | 0         |  |  |
|       |      | Shiraz-3T  | 90   | 0.219276 | 0         |  |  |



|      |      |            |      |          |           |  |
|------|------|------------|------|----------|-----------|--|
|      |      | Shiraz-4T  | 253  | 0.372918 | 0         |  |
|      |      | Shiraz-36T | 378  | 0.179558 | 0         |  |
|      |      | Shiraz-46T | 943  | 0.093799 | 0         |  |
|      |      | Shiraz-77T | 1225 | 0        | -0.117922 |  |
|      |      | Shiraz-9T  | 1325 | 0.221899 | 0         |  |
|      |      | Shiraz-18T | 1434 | 0.244465 | 0         |  |
|      |      | Shiraz-25T | 1698 | 0.21835  | 0         |  |
|      |      | Shiraz-28T | 1735 | 0.350744 | 0         |  |
|      |      | Shiraz-29T | 1778 | 0.120767 | 0         |  |
|      |      | Shiraz-32T | 1833 | 0.551336 | 0         |  |
|      |      | Shiraz-38T | 1951 | 0.250891 | 0         |  |
|      |      | Shiraz-53T | 2078 | 0.287202 | 0         |  |
|      |      | Shiraz-58T | 2162 | 0.221505 | 0         |  |
|      |      | Shiraz-71T | 2238 | 0.603631 | 0         |  |
|      |      | Shiraz-3T  | 90   | 0.219276 | 0         |  |
|      |      | Shiraz-4T  | 253  | 0.372918 | 0         |  |
|      |      | Shiraz-36T | 378  | 0.179558 | 0         |  |
|      |      | Shiraz-46T | 943  | 0.093799 | 0         |  |
|      |      | Shiraz-77T | 1225 | 0        | -0.117922 |  |
|      |      | Shiraz-9T  | 1325 | 0.221899 | 0         |  |
|      |      | Shiraz-18T | 1434 | 0.244465 | 0         |  |
|      |      | Shiraz-25T | 1698 | 0.21835  | 0         |  |
|      |      | Shiraz-28T | 1735 | 0.350744 | 0         |  |
|      |      | Shiraz-29T | 1778 | 0.120767 | 0         |  |
|      |      | Shiraz-32T | 1833 | 0.551336 | 0         |  |
|      |      | Shiraz-38T | 1951 | 0.250891 | 0         |  |
|      |      | Shiraz-53T | 2078 | 0.287202 | 0         |  |
|      |      | Shiraz-58T | 2162 | 0.221505 | 0         |  |
|      |      | Shiraz-71T | 2238 | 0.603631 | 0         |  |
| MPP6 | chr7 | Shiraz-3T  | 87   | 0.198593 | 0         |  |
|      |      | Shiraz-4T  | 252  | 0.192083 | 0         |  |
|      |      | Shiraz-36T | 376  | 0.159952 | 0         |  |
|      |      | Shiraz-46T | 942  | 0.069143 | 0         |  |
|      |      | Shiraz-18T | 1433 | 0.250973 | 0         |  |
|      |      | Shiraz-25T | 1697 | 0.21945  | 0         |  |
|      |      | Shiraz-28T | 1734 | 0.362882 | 0         |  |
|      |      | Shiraz-29T | 1777 | 0.156747 | 0         |  |
|      |      | Shiraz-38T | 1950 | 0.265916 | 0         |  |
|      |      | Shiraz-71T | 2236 | 0.320072 | 0         |  |
|      |      | Shiraz-3T  | 87   | 0.198593 | 0         |  |
|      |      | Shiraz-4T  | 252  | 0.192083 | 0         |  |
|      |      | Shiraz-36T | 376  | 0.159952 | 0         |  |
|      |      | Shiraz-46T | 942  | 0.069143 | 0         |  |
|      |      | Shiraz-18T | 1433 | 0.250973 | 0         |  |
|      |      | Shiraz-25T | 1697 | 0.21945  | 0         |  |
|      |      | Shiraz-28T | 1734 | 0.362882 | 0         |  |
|      |      | Shiraz-29T | 1777 | 0.156747 | 0         |  |

|        |      |            |      |          |   |  |
|--------|------|------------|------|----------|---|--|
|        |      | Shiraz-38T | 1950 | 0.265916 | 0 |  |
|        |      | Shiraz-71T | 2236 | 0.320072 | 0 |  |
|        |      | Shiraz-3T  | 87   | 0.198593 | 0 |  |
|        |      | Shiraz-4T  | 252  | 0.192083 | 0 |  |
|        |      | Shiraz-36T | 376  | 0.159952 | 0 |  |
|        |      | Shiraz-46T | 942  | 0.069143 | 0 |  |
|        |      | Shiraz-18T | 1433 | 0.250973 | 0 |  |
|        |      | Shiraz-25T | 1697 | 0.21945  | 0 |  |
|        |      | Shiraz-28T | 1734 | 0.362882 | 0 |  |
|        |      | Shiraz-29T | 1777 | 0.156747 | 0 |  |
|        |      | Shiraz-38T | 1950 | 0.265916 | 0 |  |
|        |      | Shiraz-71T | 2236 | 0.320072 | 0 |  |
| MRPL32 | chr7 | Shiraz-3T  | 87   | 0.198593 | 0 |  |
|        |      | Shiraz-4T  | 252  | 0.192083 | 0 |  |
|        |      | Shiraz-36T | 376  | 0.159952 | 0 |  |
|        |      | Shiraz-46T | 942  | 0.069143 | 0 |  |
|        |      | Shiraz-18T | 1433 | 0.250973 | 0 |  |
|        |      | Shiraz-25T | 1697 | 0.21945  | 0 |  |
|        |      | Shiraz-28T | 1734 | 0.362882 | 0 |  |
|        |      | Shiraz-29T | 1777 | 0.156747 | 0 |  |
|        |      | Shiraz-38T | 1950 | 0.265916 | 0 |  |
|        |      | Shiraz-71T | 2236 | 0.320072 | 0 |  |
|        |      | Shiraz-3T  | 87   | 0.198593 | 0 |  |
|        |      | Shiraz-4T  | 252  | 0.192083 | 0 |  |
|        |      | Shiraz-36T | 376  | 0.159952 | 0 |  |
|        |      | Shiraz-46T | 942  | 0.069143 | 0 |  |
|        |      | Shiraz-18T | 1433 | 0.250973 | 0 |  |
|        |      | Shiraz-25T | 1697 | 0.21945  | 0 |  |
|        |      | Shiraz-28T | 1734 | 0.362882 | 0 |  |
|        |      | Shiraz-29T | 1777 | 0.156747 | 0 |  |
|        |      | Shiraz-38T | 1950 | 0.265916 | 0 |  |
|        |      | Shiraz-71T | 2236 | 0.320072 | 0 |  |
|        |      | Shiraz-3T  | 87   | 0.198593 | 0 |  |
|        |      | Shiraz-4T  | 252  | 0.192083 | 0 |  |
|        |      | Shiraz-36T | 376  | 0.159952 | 0 |  |
|        |      | Shiraz-46T | 942  | 0.069143 | 0 |  |
|        |      | Shiraz-18T | 1433 | 0.250973 | 0 |  |
|        |      | Shiraz-25T | 1697 | 0.21945  | 0 |  |
|        |      | Shiraz-28T | 1734 | 0.362882 | 0 |  |
|        |      | Shiraz-29T | 1777 | 0.156747 | 0 |  |
|        |      | Shiraz-38T | 1950 | 0.265916 | 0 |  |
|        |      | Shiraz-71T | 2236 | 0.320072 | 0 |  |
| MRPS24 | chr7 | Shiraz-3T  | 87   | 0.198593 | 0 |  |
|        |      | Shiraz-4T  | 252  | 0.192083 | 0 |  |
|        |      | Shiraz-36T | 376  | 0.159952 | 0 |  |
|        |      | Shiraz-44T | 632  | 0.902944 | 0 |  |
|        |      | Shiraz-46T | 942  | 0.069143 | 0 |  |

|        |      |            |      |          |           |  |
|--------|------|------------|------|----------|-----------|--|
|        |      | Shiraz-77T | 1223 | 0.215647 | 0         |  |
|        |      | Shiraz-18T | 1433 | 0.250973 | 0         |  |
|        |      | Shiraz-25T | 1697 | 0.21945  | 0         |  |
|        |      | Shiraz-28T | 1734 | 0.362882 | 0         |  |
|        |      | Shiraz-29T | 1777 | 0.156747 | 0         |  |
|        |      | Shiraz-38T | 1950 | 0.265916 | 0         |  |
|        |      | Shiraz-71T | 2236 | 0.320072 | 0         |  |
|        |      | Shiraz-3T  | 87   | 0.198593 | 0         |  |
|        |      | Shiraz-4T  | 252  | 0.192083 | 0         |  |
|        |      | Shiraz-36T | 376  | 0.159952 | 0         |  |
|        |      | Shiraz-44T | 632  | 0.902944 | 0         |  |
|        |      | Shiraz-46T | 942  | 0.069143 | 0         |  |
|        |      | Shiraz-77T | 1223 | 0.215647 | 0         |  |
|        |      | Shiraz-18T | 1433 | 0.250973 | 0         |  |
|        |      | Shiraz-25T | 1697 | 0.21945  | 0         |  |
|        |      | Shiraz-28T | 1734 | 0.362882 | 0         |  |
|        |      | Shiraz-29T | 1777 | 0.156747 | 0         |  |
|        |      | Shiraz-38T | 1950 | 0.265916 | 0         |  |
|        |      | Shiraz-71T | 2236 | 0.320072 | 0         |  |
|        |      | Shiraz-3T  | 87   | 0.198593 | 0         |  |
|        |      | Shiraz-4T  | 252  | 0.192083 | 0         |  |
|        |      | Shiraz-36T | 376  | 0.159952 | 0         |  |
|        |      | Shiraz-44T | 632  | 0.902944 | 0         |  |
|        |      | Shiraz-46T | 942  | 0.069143 | 0         |  |
|        |      | Shiraz-77T | 1223 | 0.215647 | 0         |  |
|        |      | Shiraz-18T | 1433 | 0.250973 | 0         |  |
|        |      | Shiraz-25T | 1697 | 0.21945  | 0         |  |
|        |      | Shiraz-28T | 1734 | 0.362882 | 0         |  |
|        |      | Shiraz-29T | 1777 | 0.156747 | 0         |  |
|        |      | Shiraz-38T | 1950 | 0.265916 | 0         |  |
|        |      | Shiraz-71T | 2236 | 0.320072 | 0         |  |
| MRPS30 | chr5 | Shiraz-4T  | 250  | 0.262252 | 0         |  |
|        |      | Shiraz-16T | 266  | 0.321724 | 0         |  |
|        |      | Shiraz-44T | 591  | 0        | -0.233934 |  |
|        |      | Shiraz-22T | 1522 | 0        | -0.322688 |  |
|        |      | Shiraz-25T | 1694 | 0.201602 | 0         |  |
|        |      | Shiraz-28T | 1731 | 0.295447 | 0         |  |
|        |      | Shiraz-29T | 1773 | 0.090981 | 0         |  |
|        |      | Shiraz-40T | 2016 | 0.376634 | 0         |  |
|        |      | Shiraz-4T  | 250  | 0.262252 | 0         |  |
|        |      | Shiraz-16T | 266  | 0.321724 | 0         |  |
|        |      | Shiraz-44T | 591  | 0        | -0.233934 |  |
|        |      | Shiraz-22T | 1522 | 0        | -0.322688 |  |
|        |      | Shiraz-25T | 1694 | 0.201602 | 0         |  |
|        |      | Shiraz-28T | 1731 | 0.295447 | 0         |  |
|        |      | Shiraz-29T | 1773 | 0.090981 | 0         |  |
|        |      | Shiraz-40T | 2016 | 0.376634 | 0         |  |

|        |      |            |      |          |           |  |
|--------|------|------------|------|----------|-----------|--|
|        |      | Shiraz-4T  | 250  | 0.262252 | 0         |  |
|        |      | Shiraz-16T | 266  | 0.321724 | 0         |  |
|        |      | Shiraz-44T | 591  | 0        | -0.233934 |  |
|        |      | Shiraz-22T | 1522 | 0        | -0.322688 |  |
|        |      | Shiraz-25T | 1694 | 0.201602 | 0         |  |
|        |      | Shiraz-28T | 1731 | 0.295447 | 0         |  |
|        |      | Shiraz-29T | 1773 | 0.090981 | 0         |  |
|        |      | Shiraz-40T | 2016 | 0.376634 | 0         |  |
| MRPS33 | chr7 | Shiraz-3T  | 90   | 0.219276 | 0         |  |
|        |      | Shiraz-3T  | 90   | 0.219276 | 0         |  |
|        |      | Shiraz-4T  | 253  | 0.372918 | 0         |  |
|        |      | Shiraz-4T  | 253  | 0.372918 | 0         |  |
|        |      | Shiraz-36T | 378  | 0.179558 | 0         |  |
|        |      | Shiraz-36T | 378  | 0.179558 | 0         |  |
|        |      | Shiraz-46T | 943  | 0.093799 | 0         |  |
|        |      | Shiraz-46T | 943  | 0.093799 | 0         |  |
|        |      | Shiraz-77T | 1225 | 0        | -0.117922 |  |
|        |      | Shiraz-77T | 1225 | 0        | -0.117922 |  |
|        |      | Shiraz-9T  | 1325 | 0.221899 | 0         |  |
|        |      | Shiraz-9T  | 1325 | 0.221899 | 0         |  |
|        |      | Shiraz-18T | 1434 | 0.244465 | 0         |  |
|        |      | Shiraz-18T | 1434 | 0.244465 | 0         |  |
|        |      | Shiraz-25T | 1698 | 0.21835  | 0         |  |
|        |      | Shiraz-25T | 1698 | 0.21835  | 0         |  |
|        |      | Shiraz-28T | 1735 | 0.350744 | 0         |  |
|        |      | Shiraz-28T | 1735 | 0.350744 | 0         |  |
|        |      | Shiraz-29T | 1778 | 0.120767 | 0         |  |
|        |      | Shiraz-29T | 1778 | 0.120767 | 0         |  |
|        |      | Shiraz-32T | 1833 | 0.551336 | 0         |  |
|        |      | Shiraz-32T | 1833 | 0.551336 | 0         |  |
|        |      | Shiraz-38T | 1951 | 0.250891 | 0         |  |
|        |      | Shiraz-38T | 1951 | 0.250891 | 0         |  |
|        |      | Shiraz-53T | 2078 | 0.287202 | 0         |  |
|        |      | Shiraz-53T | 2078 | 0.287202 | 0         |  |
|        |      | Shiraz-58T | 2162 | 0.221505 | 0         |  |
|        |      | Shiraz-58T | 2162 | 0.221505 | 0         |  |
|        |      | Shiraz-71T | 2238 | 0.603631 | 0         |  |
|        |      | Shiraz-71T | 2238 | 0.603631 | 0         |  |
|        |      | Shiraz-3T  | 90   | 0.219276 | 0         |  |
|        |      | Shiraz-3T  | 90   | 0.219276 | 0         |  |
|        |      | Shiraz-4T  | 253  | 0.372918 | 0         |  |
|        |      | Shiraz-4T  | 253  | 0.372918 | 0         |  |
|        |      | Shiraz-36T | 378  | 0.179558 | 0         |  |
|        |      | Shiraz-36T | 378  | 0.179558 | 0         |  |
|        |      | Shiraz-46T | 943  | 0.093799 | 0         |  |
|        |      | Shiraz-46T | 943  | 0.093799 | 0         |  |
|        |      | Shiraz-77T | 1225 | 0        | -0.117922 |  |

|  |            |      |          |           |  |
|--|------------|------|----------|-----------|--|
|  | Shiraz-77T | 1225 | 0        | -0.117922 |  |
|  | Shiraz-9T  | 1325 | 0.221899 | 0         |  |
|  | Shiraz-9T  | 1325 | 0.221899 | 0         |  |
|  | Shiraz-18T | 1434 | 0.244465 | 0         |  |
|  | Shiraz-18T | 1434 | 0.244465 | 0         |  |
|  | Shiraz-25T | 1698 | 0.21835  | 0         |  |
|  | Shiraz-25T | 1698 | 0.21835  | 0         |  |
|  | Shiraz-28T | 1735 | 0.350744 | 0         |  |
|  | Shiraz-28T | 1735 | 0.350744 | 0         |  |
|  | Shiraz-29T | 1778 | 0.120767 | 0         |  |
|  | Shiraz-29T | 1778 | 0.120767 | 0         |  |
|  | Shiraz-32T | 1833 | 0.551336 | 0         |  |
|  | Shiraz-32T | 1833 | 0.551336 | 0         |  |
|  | Shiraz-38T | 1951 | 0.250891 | 0         |  |
|  | Shiraz-38T | 1951 | 0.250891 | 0         |  |
|  | Shiraz-53T | 2078 | 0.287202 | 0         |  |
|  | Shiraz-53T | 2078 | 0.287202 | 0         |  |
|  | Shiraz-58T | 2162 | 0.221505 | 0         |  |
|  | Shiraz-58T | 2162 | 0.221505 | 0         |  |
|  | Shiraz-71T | 2238 | 0.603631 | 0         |  |
|  | Shiraz-71T | 2238 | 0.603631 | 0         |  |
|  | Shiraz-3T  | 90   | 0.219276 | 0         |  |
|  | Shiraz-3T  | 90   | 0.219276 | 0         |  |
|  | Shiraz-4T  | 253  | 0.372918 | 0         |  |
|  | Shiraz-4T  | 253  | 0.372918 | 0         |  |
|  | Shiraz-36T | 378  | 0.179558 | 0         |  |
|  | Shiraz-36T | 378  | 0.179558 | 0         |  |
|  | Shiraz-46T | 943  | 0.093799 | 0         |  |
|  | Shiraz-46T | 943  | 0.093799 | 0         |  |
|  | Shiraz-77T | 1225 | 0        | -0.117922 |  |
|  | Shiraz-77T | 1225 | 0        | -0.117922 |  |
|  | Shiraz-9T  | 1325 | 0.221899 | 0         |  |
|  | Shiraz-9T  | 1325 | 0.221899 | 0         |  |
|  | Shiraz-18T | 1434 | 0.244465 | 0         |  |
|  | Shiraz-18T | 1434 | 0.244465 | 0         |  |
|  | Shiraz-25T | 1698 | 0.21835  | 0         |  |
|  | Shiraz-25T | 1698 | 0.21835  | 0         |  |
|  | Shiraz-28T | 1735 | 0.350744 | 0         |  |
|  | Shiraz-28T | 1735 | 0.350744 | 0         |  |
|  | Shiraz-29T | 1778 | 0.120767 | 0         |  |
|  | Shiraz-29T | 1778 | 0.120767 | 0         |  |
|  | Shiraz-32T | 1833 | 0.551336 | 0         |  |
|  | Shiraz-32T | 1833 | 0.551336 | 0         |  |
|  | Shiraz-38T | 1951 | 0.250891 | 0         |  |
|  | Shiraz-38T | 1951 | 0.250891 | 0         |  |
|  | Shiraz-53T | 2078 | 0.287202 | 0         |  |
|  | Shiraz-53T | 2078 | 0.287202 | 0         |  |

|      |      |            |      |          |           |  |
|------|------|------------|------|----------|-----------|--|
|      |      | Shiraz-58T | 2162 | 0.221505 | 0         |  |
|      |      | Shiraz-58T | 2162 | 0.221505 | 0         |  |
|      |      | Shiraz-71T | 2238 | 0.603631 | 0         |  |
|      |      | Shiraz-71T | 2238 | 0.603631 | 0         |  |
| MSL3 | chrX | Shiraz-3T  | 235  | 0        | -0.28401  |  |
|      |      | Shiraz-3T  | 235  | 0        | -0.28401  |  |
|      |      | Shiraz-3T  | 235  | 0        | -0.28401  |  |
|      |      | Shiraz-4T  | 260  | 0        | -0.324128 |  |
|      |      | Shiraz-4T  | 260  | 0        | -0.324128 |  |
|      |      | Shiraz-4T  | 260  | 0        | -0.324128 |  |
|      |      | Shiraz-16T | 294  | 0.655804 | 0         |  |
|      |      | Shiraz-16T | 294  | 0.655804 | 0         |  |
|      |      | Shiraz-16T | 294  | 0.655804 | 0         |  |
|      |      | Shiraz-36T | 431  | 0        | -0.78035  |  |
|      |      | Shiraz-36T | 431  | 0        | -0.78035  |  |
|      |      | Shiraz-36T | 431  | 0        | -0.78035  |  |
|      |      | Shiraz-44T | 891  | 0        | -0.954044 |  |
|      |      | Shiraz-44T | 891  | 0        | -0.954044 |  |
|      |      | Shiraz-44T | 891  | 0        | -0.954044 |  |
|      |      | Shiraz-49T | 1166 | 0        | -0.917235 |  |
|      |      | Shiraz-49T | 1166 | 0        | -0.917235 |  |
|      |      | Shiraz-49T | 1166 | 0        | -0.917235 |  |
|      |      | Shiraz-9T  | 1368 | 0.199713 | 0         |  |
|      |      | Shiraz-9T  | 1368 | 0.199713 | 0         |  |
|      |      | Shiraz-9T  | 1368 | 0.199713 | 0         |  |
|      |      | Shiraz-18T | 1455 | 0        | -0.186773 |  |
|      |      | Shiraz-18T | 1455 | 0        | -0.186773 |  |
|      |      | Shiraz-18T | 1455 | 0        | -0.186773 |  |
|      |      | Shiraz-22T | 1669 | 0.695915 | 0         |  |
|      |      | Shiraz-22T | 1669 | 0.695915 | 0         |  |
|      |      | Shiraz-22T | 1669 | 0.695915 | 0         |  |
|      |      | Shiraz-25T | 1717 | 0.420447 | 0         |  |
|      |      | Shiraz-25T | 1717 | 0.420447 | 0         |  |
|      |      | Shiraz-25T | 1717 | 0.420447 | 0         |  |
|      |      | Shiraz-28T | 1760 | 0.538181 | 0         |  |
|      |      | Shiraz-28T | 1760 | 0.538181 | 0         |  |
|      |      | Shiraz-28T | 1760 | 0.538181 | 0         |  |
|      |      | Shiraz-29T | 1800 | 0.672527 | 0         |  |
|      |      | Shiraz-29T | 1800 | 0.672527 | 0         |  |
|      |      | Shiraz-29T | 1800 | 0.672527 | 0         |  |
|      |      | Shiraz-32T | 1869 | 0.776805 | 0         |  |
|      |      | Shiraz-32T | 1869 | 0.776805 | 0         |  |
|      |      | Shiraz-32T | 1869 | 0.776805 | 0         |  |
|      |      | Shiraz-35T | 1932 | 0.507141 | 0         |  |
|      |      | Shiraz-35T | 1932 | 0.507141 | 0         |  |
|      |      | Shiraz-35T | 1932 | 0.507141 | 0         |  |
|      |      | Shiraz-40T | 2051 | 0.098506 | 0         |  |

|  |  |            |      |          |           |  |  |
|--|--|------------|------|----------|-----------|--|--|
|  |  | Shiraz-40T | 2051 | 0.098506 | 0         |  |  |
|  |  | Shiraz-40T | 2051 | 0.098506 | 0         |  |  |
|  |  | Shiraz-58T | 2221 | 0.871948 | 0         |  |  |
|  |  | Shiraz-58T | 2221 | 0.871948 | 0         |  |  |
|  |  | Shiraz-58T | 2221 | 0.871948 | 0         |  |  |
|  |  | Shiraz-71T | 2260 | 0.68394  | 0         |  |  |
|  |  | Shiraz-71T | 2260 | 0.68394  | 0         |  |  |
|  |  | Shiraz-71T | 2260 | 0.68394  | 0         |  |  |
|  |  | Shiraz-71T | 2261 | 0.508399 | 0         |  |  |
|  |  | Shiraz-71T | 2261 | 0.508399 | 0         |  |  |
|  |  | Shiraz-71T | 2261 | 0.508399 | 0         |  |  |
|  |  | Shiraz-3T  | 235  | 0        | -0.28401  |  |  |
|  |  | Shiraz-3T  | 235  | 0        | -0.28401  |  |  |
|  |  | Shiraz-3T  | 235  | 0        | -0.28401  |  |  |
|  |  | Shiraz-4T  | 260  | 0        | -0.324128 |  |  |
|  |  | Shiraz-4T  | 260  | 0        | -0.324128 |  |  |
|  |  | Shiraz-4T  | 260  | 0        | -0.324128 |  |  |
|  |  | Shiraz-16T | 294  | 0.655804 | 0         |  |  |
|  |  | Shiraz-16T | 294  | 0.655804 | 0         |  |  |
|  |  | Shiraz-16T | 294  | 0.655804 | 0         |  |  |
|  |  | Shiraz-36T | 431  | 0        | -0.78035  |  |  |
|  |  | Shiraz-36T | 431  | 0        | -0.78035  |  |  |
|  |  | Shiraz-36T | 431  | 0        | -0.78035  |  |  |
|  |  | Shiraz-44T | 891  | 0        | -0.954044 |  |  |
|  |  | Shiraz-44T | 891  | 0        | -0.954044 |  |  |
|  |  | Shiraz-44T | 891  | 0        | -0.954044 |  |  |
|  |  | Shiraz-49T | 1166 | 0        | -0.917235 |  |  |
|  |  | Shiraz-49T | 1166 | 0        | -0.917235 |  |  |
|  |  | Shiraz-49T | 1166 | 0        | -0.917235 |  |  |
|  |  | Shiraz-9T  | 1368 | 0.199713 | 0         |  |  |
|  |  | Shiraz-9T  | 1368 | 0.199713 | 0         |  |  |
|  |  | Shiraz-9T  | 1368 | 0.199713 | 0         |  |  |
|  |  | Shiraz-18T | 1455 | 0        | -0.186773 |  |  |
|  |  | Shiraz-18T | 1455 | 0        | -0.186773 |  |  |
|  |  | Shiraz-18T | 1455 | 0        | -0.186773 |  |  |
|  |  | Shiraz-22T | 1669 | 0.695915 | 0         |  |  |
|  |  | Shiraz-22T | 1669 | 0.695915 | 0         |  |  |
|  |  | Shiraz-22T | 1669 | 0.695915 | 0         |  |  |
|  |  | Shiraz-25T | 1717 | 0.420447 | 0         |  |  |
|  |  | Shiraz-25T | 1717 | 0.420447 | 0         |  |  |
|  |  | Shiraz-25T | 1717 | 0.420447 | 0         |  |  |
|  |  | Shiraz-28T | 1760 | 0.538181 | 0         |  |  |
|  |  | Shiraz-28T | 1760 | 0.538181 | 0         |  |  |
|  |  | Shiraz-28T | 1760 | 0.538181 | 0         |  |  |
|  |  | Shiraz-29T | 1800 | 0.672527 | 0         |  |  |
|  |  | Shiraz-29T | 1800 | 0.672527 | 0         |  |  |
|  |  | Shiraz-29T | 1800 | 0.672527 | 0         |  |  |

|  |  |            |      |          |           |  |  |
|--|--|------------|------|----------|-----------|--|--|
|  |  | Shiraz-32T | 1869 | 0.776805 | 0         |  |  |
|  |  | Shiraz-32T | 1869 | 0.776805 | 0         |  |  |
|  |  | Shiraz-32T | 1869 | 0.776805 | 0         |  |  |
|  |  | Shiraz-35T | 1932 | 0.507141 | 0         |  |  |
|  |  | Shiraz-35T | 1932 | 0.507141 | 0         |  |  |
|  |  | Shiraz-35T | 1932 | 0.507141 | 0         |  |  |
|  |  | Shiraz-40T | 2051 | 0.098506 | 0         |  |  |
|  |  | Shiraz-40T | 2051 | 0.098506 | 0         |  |  |
|  |  | Shiraz-40T | 2051 | 0.098506 | 0         |  |  |
|  |  | Shiraz-58T | 2221 | 0.871948 | 0         |  |  |
|  |  | Shiraz-58T | 2221 | 0.871948 | 0         |  |  |
|  |  | Shiraz-58T | 2221 | 0.871948 | 0         |  |  |
|  |  | Shiraz-71T | 2260 | 0.68394  | 0         |  |  |
|  |  | Shiraz-71T | 2260 | 0.68394  | 0         |  |  |
|  |  | Shiraz-71T | 2260 | 0.68394  | 0         |  |  |
|  |  | Shiraz-71T | 2261 | 0.508399 | 0         |  |  |
|  |  | Shiraz-71T | 2261 | 0.508399 | 0         |  |  |
|  |  | Shiraz-71T | 2261 | 0.508399 | 0         |  |  |
|  |  | Shiraz-3T  | 235  | 0        | -0.28401  |  |  |
|  |  | Shiraz-3T  | 235  | 0        | -0.28401  |  |  |
|  |  | Shiraz-3T  | 235  | 0        | -0.28401  |  |  |
|  |  | Shiraz-4T  | 260  | 0        | -0.324128 |  |  |
|  |  | Shiraz-4T  | 260  | 0        | -0.324128 |  |  |
|  |  | Shiraz-4T  | 260  | 0        | -0.324128 |  |  |
|  |  | Shiraz-16T | 294  | 0.655804 | 0         |  |  |
|  |  | Shiraz-16T | 294  | 0.655804 | 0         |  |  |
|  |  | Shiraz-16T | 294  | 0.655804 | 0         |  |  |
|  |  | Shiraz-36T | 431  | 0        | -0.78035  |  |  |
|  |  | Shiraz-36T | 431  | 0        | -0.78035  |  |  |
|  |  | Shiraz-36T | 431  | 0        | -0.78035  |  |  |
|  |  | Shiraz-44T | 891  | 0        | -0.954044 |  |  |
|  |  | Shiraz-44T | 891  | 0        | -0.954044 |  |  |
|  |  | Shiraz-44T | 891  | 0        | -0.954044 |  |  |
|  |  | Shiraz-49T | 1166 | 0        | -0.917235 |  |  |
|  |  | Shiraz-49T | 1166 | 0        | -0.917235 |  |  |
|  |  | Shiraz-49T | 1166 | 0        | -0.917235 |  |  |
|  |  | Shiraz-9T  | 1368 | 0.199713 | 0         |  |  |
|  |  | Shiraz-9T  | 1368 | 0.199713 | 0         |  |  |
|  |  | Shiraz-9T  | 1368 | 0.199713 | 0         |  |  |
|  |  | Shiraz-18T | 1455 | 0        | -0.186773 |  |  |
|  |  | Shiraz-18T | 1455 | 0        | -0.186773 |  |  |
|  |  | Shiraz-18T | 1455 | 0        | -0.186773 |  |  |
|  |  | Shiraz-22T | 1669 | 0.695915 | 0         |  |  |
|  |  | Shiraz-22T | 1669 | 0.695915 | 0         |  |  |
|  |  | Shiraz-22T | 1669 | 0.695915 | 0         |  |  |
|  |  | Shiraz-25T | 1717 | 0.420447 | 0         |  |  |
|  |  | Shiraz-25T | 1717 | 0.420447 | 0         |  |  |



|     |      |            |      |          |           |  |
|-----|------|------------|------|----------|-----------|--|
|     |      | Shiraz-25T | 1717 | 0.420447 | 0         |  |
|     |      | Shiraz-28T | 1760 | 0.538181 | 0         |  |
|     |      | Shiraz-28T | 1760 | 0.538181 | 0         |  |
|     |      | Shiraz-28T | 1760 | 0.538181 | 0         |  |
|     |      | Shiraz-29T | 1800 | 0.672527 | 0         |  |
|     |      | Shiraz-29T | 1800 | 0.672527 | 0         |  |
|     |      | Shiraz-29T | 1800 | 0.672527 | 0         |  |
|     |      | Shiraz-32T | 1869 | 0.776805 | 0         |  |
|     |      | Shiraz-32T | 1869 | 0.776805 | 0         |  |
|     |      | Shiraz-32T | 1869 | 0.776805 | 0         |  |
|     |      | Shiraz-35T | 1932 | 0.507141 | 0         |  |
|     |      | Shiraz-35T | 1932 | 0.507141 | 0         |  |
|     |      | Shiraz-35T | 1932 | 0.507141 | 0         |  |
|     |      | Shiraz-40T | 2051 | 0.098506 | 0         |  |
|     |      | Shiraz-40T | 2051 | 0.098506 | 0         |  |
|     |      | Shiraz-40T | 2051 | 0.098506 | 0         |  |
|     |      | Shiraz-58T | 2221 | 0.871948 | 0         |  |
|     |      | Shiraz-58T | 2221 | 0.871948 | 0         |  |
|     |      | Shiraz-58T | 2221 | 0.871948 | 0         |  |
|     |      | Shiraz-71T | 2260 | 0.68394  | 0         |  |
|     |      | Shiraz-71T | 2260 | 0.68394  | 0         |  |
|     |      | Shiraz-71T | 2260 | 0.68394  | 0         |  |
|     |      | Shiraz-71T | 2261 | 0.508399 | 0         |  |
|     |      | Shiraz-71T | 2261 | 0.508399 | 0         |  |
|     |      | Shiraz-71T | 2261 | 0.508399 | 0         |  |
| MSN | chrX | Shiraz-3T  | 241  | 0        | -0.230501 |  |
|     |      | Shiraz-4T  | 261  | 0        | -0.336249 |  |
|     |      | Shiraz-16T | 295  | 0.591657 | 0         |  |
|     |      | Shiraz-36T | 433  | 0        | -0.803961 |  |
|     |      | Shiraz-44T | 899  | 0        | -1.09697  |  |
|     |      | Shiraz-49T | 1170 | 0        | -0.967436 |  |
|     |      | Shiraz-18T | 1457 | 0.643204 | 0         |  |
|     |      | Shiraz-22T | 1673 | 0.611783 | 0         |  |
|     |      | Shiraz-25T | 1719 | 0.472955 | 0         |  |
|     |      | Shiraz-28T | 1762 | 0.562311 | 0         |  |
|     |      | Shiraz-29T | 1801 | 0.815343 | 0         |  |
|     |      | Shiraz-32T | 1870 | 0.729766 | 0         |  |
|     |      | Shiraz-35T | 1933 | 0.488535 | 0         |  |
|     |      | Shiraz-58T | 2223 | 0.833364 | 0         |  |
|     |      | Shiraz-71T | 2263 | 0.975531 | 0         |  |
|     |      | Shiraz-3T  | 241  | 0        | -0.230501 |  |
|     |      | Shiraz-4T  | 261  | 0        | -0.336249 |  |
|     |      | Shiraz-16T | 295  | 0.591657 | 0         |  |
|     |      | Shiraz-36T | 433  | 0        | -0.803961 |  |
|     |      | Shiraz-44T | 899  | 0        | -1.09697  |  |
|     |      | Shiraz-49T | 1170 | 0        | -0.967436 |  |
|     |      | Shiraz-18T | 1457 | 0.643204 | 0         |  |

|      |      |            |      |          |           |  |  |
|------|------|------------|------|----------|-----------|--|--|
|      |      | Shiraz-22T | 1673 | 0.611783 | 0         |  |  |
|      |      | Shiraz-25T | 1719 | 0.472955 | 0         |  |  |
|      |      | Shiraz-28T | 1762 | 0.562311 | 0         |  |  |
|      |      | Shiraz-29T | 1801 | 0.815343 | 0         |  |  |
|      |      | Shiraz-32T | 1870 | 0.729766 | 0         |  |  |
|      |      | Shiraz-35T | 1933 | 0.488535 | 0         |  |  |
|      |      | Shiraz-58T | 2223 | 0.833364 | 0         |  |  |
|      |      | Shiraz-71T | 2263 | 0.975531 | 0         |  |  |
|      |      | Shiraz-3T  | 241  | 0        | -0.230501 |  |  |
|      |      | Shiraz-4T  | 261  | 0        | -0.336249 |  |  |
|      |      | Shiraz-16T | 295  | 0.591657 | 0         |  |  |
|      |      | Shiraz-36T | 433  | 0        | -0.803961 |  |  |
|      |      | Shiraz-44T | 899  | 0        | -1.09697  |  |  |
|      |      | Shiraz-49T | 1170 | 0        | -0.967436 |  |  |
|      |      | Shiraz-18T | 1457 | 0.643204 | 0         |  |  |
|      |      | Shiraz-22T | 1673 | 0.611783 | 0         |  |  |
|      |      | Shiraz-25T | 1719 | 0.472955 | 0         |  |  |
|      |      | Shiraz-28T | 1762 | 0.562311 | 0         |  |  |
|      |      | Shiraz-29T | 1801 | 0.815343 | 0         |  |  |
|      |      | Shiraz-32T | 1870 | 0.729766 | 0         |  |  |
|      |      | Shiraz-35T | 1933 | 0.488535 | 0         |  |  |
|      |      | Shiraz-58T | 2223 | 0.833364 | 0         |  |  |
|      |      | Shiraz-71T | 2263 | 0.975531 | 0         |  |  |
| MST4 | chrX | Shiraz-3T  | 242  | 0        | -0.336434 |  |  |
|      |      | Shiraz-3T  | 242  | 0        | -0.336434 |  |  |
|      |      | Shiraz-4T  | 261  | 0        | -0.336249 |  |  |
|      |      | Shiraz-4T  | 261  | 0        | -0.336249 |  |  |
|      |      | Shiraz-16T | 295  | 0.591657 | 0         |  |  |
|      |      | Shiraz-16T | 295  | 0.591657 | 0         |  |  |
|      |      | Shiraz-36T | 433  | 0        | -0.803961 |  |  |
|      |      | Shiraz-36T | 433  | 0        | -0.803961 |  |  |
|      |      | Shiraz-44T | 899  | 0        | -1.09697  |  |  |
|      |      | Shiraz-44T | 899  | 0        | -1.09697  |  |  |
|      |      | Shiraz-49T | 1170 | 0        | -0.967436 |  |  |
|      |      | Shiraz-49T | 1170 | 0        | -0.967436 |  |  |
|      |      | Shiraz-9T  | 1370 | 0.690073 | 0         |  |  |
|      |      | Shiraz-9T  | 1370 | 0.690073 | 0         |  |  |
|      |      | Shiraz-18T | 1457 | 0.643204 | 0         |  |  |
|      |      | Shiraz-18T | 1457 | 0.643204 | 0         |  |  |
|      |      | Shiraz-22T | 1673 | 0.611783 | 0         |  |  |
|      |      | Shiraz-22T | 1673 | 0.611783 | 0         |  |  |
|      |      | Shiraz-22T | 1677 | 0.789711 | 0         |  |  |
|      |      | Shiraz-22T | 1677 | 0.789711 | 0         |  |  |
|      |      | Shiraz-25T | 1719 | 0.472955 | 0         |  |  |
|      |      | Shiraz-25T | 1719 | 0.472955 | 0         |  |  |
|      |      | Shiraz-28T | 1762 | 0.562311 | 0         |  |  |
|      |      | Shiraz-28T | 1762 | 0.562311 | 0         |  |  |

|  |  |            |      |          |           |  |  |
|--|--|------------|------|----------|-----------|--|--|
|  |  | Shiraz-29T | 1801 | 0.815343 | 0         |  |  |
|  |  | Shiraz-29T | 1801 | 0.815343 | 0         |  |  |
|  |  | Shiraz-32T | 1870 | 0.729766 | 0         |  |  |
|  |  | Shiraz-32T | 1870 | 0.729766 | 0         |  |  |
|  |  | Shiraz-35T | 1933 | 0.488535 | 0         |  |  |
|  |  | Shiraz-35T | 1933 | 0.488535 | 0         |  |  |
|  |  | Shiraz-58T | 2223 | 0.833364 | 0         |  |  |
|  |  | Shiraz-58T | 2223 | 0.833364 | 0         |  |  |
|  |  | Shiraz-71T | 2263 | 0.975531 | 0         |  |  |
|  |  | Shiraz-71T | 2263 | 0.975531 | 0         |  |  |
|  |  | Shiraz-3T  | 242  | 0        | -0.336434 |  |  |
|  |  | Shiraz-3T  | 242  | 0        | -0.336434 |  |  |
|  |  | Shiraz-4T  | 261  | 0        | -0.336249 |  |  |
|  |  | Shiraz-4T  | 261  | 0        | -0.336249 |  |  |
|  |  | Shiraz-16T | 295  | 0.591657 | 0         |  |  |
|  |  | Shiraz-16T | 295  | 0.591657 | 0         |  |  |
|  |  | Shiraz-36T | 433  | 0        | -0.803961 |  |  |
|  |  | Shiraz-36T | 433  | 0        | -0.803961 |  |  |
|  |  | Shiraz-44T | 899  | 0        | -1.09697  |  |  |
|  |  | Shiraz-44T | 899  | 0        | -1.09697  |  |  |
|  |  | Shiraz-49T | 1170 | 0        | -0.967436 |  |  |
|  |  | Shiraz-49T | 1170 | 0        | -0.967436 |  |  |
|  |  | Shiraz-9T  | 1370 | 0.690073 | 0         |  |  |
|  |  | Shiraz-9T  | 1370 | 0.690073 | 0         |  |  |
|  |  | Shiraz-18T | 1457 | 0.643204 | 0         |  |  |
|  |  | Shiraz-18T | 1457 | 0.643204 | 0         |  |  |
|  |  | Shiraz-22T | 1673 | 0.611783 | 0         |  |  |
|  |  | Shiraz-22T | 1673 | 0.611783 | 0         |  |  |
|  |  | Shiraz-22T | 1677 | 0.789711 | 0         |  |  |
|  |  | Shiraz-22T | 1677 | 0.789711 | 0         |  |  |
|  |  | Shiraz-25T | 1719 | 0.472955 | 0         |  |  |
|  |  | Shiraz-25T | 1719 | 0.472955 | 0         |  |  |
|  |  | Shiraz-28T | 1762 | 0.562311 | 0         |  |  |
|  |  | Shiraz-28T | 1762 | 0.562311 | 0         |  |  |
|  |  | Shiraz-29T | 1801 | 0.815343 | 0         |  |  |
|  |  | Shiraz-29T | 1801 | 0.815343 | 0         |  |  |
|  |  | Shiraz-32T | 1870 | 0.729766 | 0         |  |  |
|  |  | Shiraz-32T | 1870 | 0.729766 | 0         |  |  |
|  |  | Shiraz-35T | 1933 | 0.488535 | 0         |  |  |
|  |  | Shiraz-35T | 1933 | 0.488535 | 0         |  |  |
|  |  | Shiraz-58T | 2223 | 0.833364 | 0         |  |  |
|  |  | Shiraz-58T | 2223 | 0.833364 | 0         |  |  |
|  |  | Shiraz-71T | 2263 | 0.975531 | 0         |  |  |
|  |  | Shiraz-71T | 2263 | 0.975531 | 0         |  |  |
|  |  | Shiraz-3T  | 242  | 0        | -0.336434 |  |  |
|  |  | Shiraz-3T  | 242  | 0        | -0.336434 |  |  |
|  |  | Shiraz-4T  | 261  | 0        | -0.336249 |  |  |

|       |      |            |      |          |           |  |  |
|-------|------|------------|------|----------|-----------|--|--|
|       |      | Shiraz-4T  | 261  | 0        | -0.336249 |  |  |
|       |      | Shiraz-16T | 295  | 0.591657 | 0         |  |  |
|       |      | Shiraz-16T | 295  | 0.591657 | 0         |  |  |
|       |      | Shiraz-36T | 433  | 0        | -0.803961 |  |  |
|       |      | Shiraz-36T | 433  | 0        | -0.803961 |  |  |
|       |      | Shiraz-44T | 899  | 0        | -1.09697  |  |  |
|       |      | Shiraz-44T | 899  | 0        | -1.09697  |  |  |
|       |      | Shiraz-49T | 1170 | 0        | -0.967436 |  |  |
|       |      | Shiraz-49T | 1170 | 0        | -0.967436 |  |  |
|       |      | Shiraz-9T  | 1370 | 0.690073 | 0         |  |  |
|       |      | Shiraz-9T  | 1370 | 0.690073 | 0         |  |  |
|       |      | Shiraz-18T | 1457 | 0.643204 | 0         |  |  |
|       |      | Shiraz-18T | 1457 | 0.643204 | 0         |  |  |
|       |      | Shiraz-22T | 1673 | 0.611783 | 0         |  |  |
|       |      | Shiraz-22T | 1673 | 0.611783 | 0         |  |  |
|       |      | Shiraz-22T | 1677 | 0.789711 | 0         |  |  |
|       |      | Shiraz-22T | 1677 | 0.789711 | 0         |  |  |
|       |      | Shiraz-25T | 1719 | 0.472955 | 0         |  |  |
|       |      | Shiraz-25T | 1719 | 0.472955 | 0         |  |  |
|       |      | Shiraz-28T | 1762 | 0.562311 | 0         |  |  |
|       |      | Shiraz-28T | 1762 | 0.562311 | 0         |  |  |
|       |      | Shiraz-29T | 1801 | 0.815343 | 0         |  |  |
|       |      | Shiraz-29T | 1801 | 0.815343 | 0         |  |  |
|       |      | Shiraz-32T | 1870 | 0.729766 | 0         |  |  |
|       |      | Shiraz-32T | 1870 | 0.729766 | 0         |  |  |
|       |      | Shiraz-35T | 1933 | 0.488535 | 0         |  |  |
|       |      | Shiraz-35T | 1933 | 0.488535 | 0         |  |  |
|       |      | Shiraz-58T | 2223 | 0.833364 | 0         |  |  |
|       |      | Shiraz-58T | 2223 | 0.833364 | 0         |  |  |
|       |      | Shiraz-71T | 2263 | 0.975531 | 0         |  |  |
|       |      | Shiraz-71T | 2263 | 0.975531 | 0         |  |  |
| MTCP1 | chrX | Shiraz-3T  | 247  | 0        | -0.421316 |  |  |
|       |      | Shiraz-3T  | 247  | 0        | -0.421316 |  |  |
|       |      | Shiraz-4T  | 261  | 0        | -0.336249 |  |  |
|       |      | Shiraz-4T  | 261  | 0        | -0.336249 |  |  |
|       |      | Shiraz-16T | 295  | 0.591657 | 0         |  |  |
|       |      | Shiraz-16T | 295  | 0.591657 | 0         |  |  |
|       |      | Shiraz-36T | 433  | 0        | -0.803961 |  |  |
|       |      | Shiraz-36T | 433  | 0        | -0.803961 |  |  |
|       |      | Shiraz-44T | 909  | 0        | -1.067051 |  |  |
|       |      | Shiraz-44T | 909  | 0        | -1.067051 |  |  |
|       |      | Shiraz-49T | 1170 | 0        | -0.967436 |  |  |
|       |      | Shiraz-49T | 1170 | 0        | -0.967436 |  |  |
|       |      | Shiraz-9T  | 1370 | 0.690073 | 0         |  |  |
|       |      | Shiraz-9T  | 1370 | 0.690073 | 0         |  |  |
|       |      | Shiraz-18T | 1457 | 0.643204 | 0         |  |  |
|       |      | Shiraz-18T | 1457 | 0.643204 | 0         |  |  |

|  |  |            |      |          |           |  |  |
|--|--|------------|------|----------|-----------|--|--|
|  |  | Shiraz-22T | 1673 | 0.611783 | 0         |  |  |
|  |  | Shiraz-22T | 1673 | 0.611783 | 0         |  |  |
|  |  | Shiraz-25T | 1719 | 0.472955 | 0         |  |  |
|  |  | Shiraz-25T | 1719 | 0.472955 | 0         |  |  |
|  |  | Shiraz-28T | 1762 | 0.562311 | 0         |  |  |
|  |  | Shiraz-28T | 1762 | 0.562311 | 0         |  |  |
|  |  | Shiraz-29T | 1801 | 0.815343 | 0         |  |  |
|  |  | Shiraz-29T | 1801 | 0.815343 | 0         |  |  |
|  |  | Shiraz-32T | 1870 | 0.729766 | 0         |  |  |
|  |  | Shiraz-32T | 1870 | 0.729766 | 0         |  |  |
|  |  | Shiraz-35T | 1933 | 0.488535 | 0         |  |  |
|  |  | Shiraz-35T | 1933 | 0.488535 | 0         |  |  |
|  |  | Shiraz-53T | 2115 | 0.427728 | 0         |  |  |
|  |  | Shiraz-58T | 2223 | 0.833364 | 0         |  |  |
|  |  | Shiraz-58T | 2223 | 0.833364 | 0         |  |  |
|  |  | Shiraz-71T | 2263 | 0.975531 | 0         |  |  |
|  |  | Shiraz-71T | 2263 | 0.975531 | 0         |  |  |
|  |  | Shiraz-3T  | 247  | 0        | -0.421316 |  |  |
|  |  | Shiraz-3T  | 247  | 0        | -0.421316 |  |  |
|  |  | Shiraz-4T  | 261  | 0        | -0.336249 |  |  |
|  |  | Shiraz-4T  | 261  | 0        | -0.336249 |  |  |
|  |  | Shiraz-16T | 295  | 0.591657 | 0         |  |  |
|  |  | Shiraz-16T | 295  | 0.591657 | 0         |  |  |
|  |  | Shiraz-36T | 433  | 0        | -0.803961 |  |  |
|  |  | Shiraz-36T | 433  | 0        | -0.803961 |  |  |
|  |  | Shiraz-44T | 909  | 0        | -1.067051 |  |  |
|  |  | Shiraz-44T | 909  | 0        | -1.067051 |  |  |
|  |  | Shiraz-49T | 1170 | 0        | -0.967436 |  |  |
|  |  | Shiraz-49T | 1170 | 0        | -0.967436 |  |  |
|  |  | Shiraz-9T  | 1370 | 0.690073 | 0         |  |  |
|  |  | Shiraz-9T  | 1370 | 0.690073 | 0         |  |  |
|  |  | Shiraz-18T | 1457 | 0.643204 | 0         |  |  |
|  |  | Shiraz-18T | 1457 | 0.643204 | 0         |  |  |
|  |  | Shiraz-22T | 1673 | 0.611783 | 0         |  |  |
|  |  | Shiraz-22T | 1673 | 0.611783 | 0         |  |  |
|  |  | Shiraz-25T | 1719 | 0.472955 | 0         |  |  |
|  |  | Shiraz-25T | 1719 | 0.472955 | 0         |  |  |
|  |  | Shiraz-28T | 1762 | 0.562311 | 0         |  |  |
|  |  | Shiraz-28T | 1762 | 0.562311 | 0         |  |  |
|  |  | Shiraz-29T | 1801 | 0.815343 | 0         |  |  |
|  |  | Shiraz-29T | 1801 | 0.815343 | 0         |  |  |
|  |  | Shiraz-32T | 1870 | 0.729766 | 0         |  |  |
|  |  | Shiraz-32T | 1870 | 0.729766 | 0         |  |  |
|  |  | Shiraz-35T | 1933 | 0.488535 | 0         |  |  |
|  |  | Shiraz-35T | 1933 | 0.488535 | 0         |  |  |
|  |  | Shiraz-53T | 2115 | 0.427728 | 0         |  |  |
|  |  | Shiraz-58T | 2223 | 0.833364 | 0         |  |  |

|         |      |            |      |          |           |  |  |
|---------|------|------------|------|----------|-----------|--|--|
|         |      | Shiraz-58T | 2223 | 0.833364 | 0         |  |  |
|         |      | Shiraz-71T | 2263 | 0.975531 | 0         |  |  |
|         |      | Shiraz-71T | 2263 | 0.975531 | 0         |  |  |
|         |      | Shiraz-3T  | 247  | 0        | -0.421316 |  |  |
|         |      | Shiraz-3T  | 247  | 0        | -0.421316 |  |  |
|         |      | Shiraz-4T  | 261  | 0        | -0.336249 |  |  |
|         |      | Shiraz-4T  | 261  | 0        | -0.336249 |  |  |
|         |      | Shiraz-16T | 295  | 0.591657 | 0         |  |  |
|         |      | Shiraz-16T | 295  | 0.591657 | 0         |  |  |
|         |      | Shiraz-36T | 433  | 0        | -0.803961 |  |  |
|         |      | Shiraz-36T | 433  | 0        | -0.803961 |  |  |
|         |      | Shiraz-44T | 909  | 0        | -1.067051 |  |  |
|         |      | Shiraz-44T | 909  | 0        | -1.067051 |  |  |
|         |      | Shiraz-49T | 1170 | 0        | -0.967436 |  |  |
|         |      | Shiraz-49T | 1170 | 0        | -0.967436 |  |  |
|         |      | Shiraz-9T  | 1370 | 0.690073 | 0         |  |  |
|         |      | Shiraz-9T  | 1370 | 0.690073 | 0         |  |  |
|         |      | Shiraz-18T | 1457 | 0.643204 | 0         |  |  |
|         |      | Shiraz-18T | 1457 | 0.643204 | 0         |  |  |
|         |      | Shiraz-22T | 1673 | 0.611783 | 0         |  |  |
|         |      | Shiraz-22T | 1673 | 0.611783 | 0         |  |  |
|         |      | Shiraz-25T | 1719 | 0.472955 | 0         |  |  |
|         |      | Shiraz-25T | 1719 | 0.472955 | 0         |  |  |
|         |      | Shiraz-28T | 1762 | 0.562311 | 0         |  |  |
|         |      | Shiraz-28T | 1762 | 0.562311 | 0         |  |  |
|         |      | Shiraz-29T | 1801 | 0.815343 | 0         |  |  |
|         |      | Shiraz-29T | 1801 | 0.815343 | 0         |  |  |
|         |      | Shiraz-32T | 1870 | 0.729766 | 0         |  |  |
|         |      | Shiraz-32T | 1870 | 0.729766 | 0         |  |  |
|         |      | Shiraz-35T | 1933 | 0.488535 | 0         |  |  |
|         |      | Shiraz-35T | 1933 | 0.488535 | 0         |  |  |
|         |      | Shiraz-53T | 2115 | 0.427728 | 0         |  |  |
|         |      | Shiraz-58T | 2223 | 0.833364 | 0         |  |  |
|         |      | Shiraz-58T | 2223 | 0.833364 | 0         |  |  |
|         |      | Shiraz-71T | 2263 | 0.975531 | 0         |  |  |
|         |      | Shiraz-71T | 2263 | 0.975531 | 0         |  |  |
| MTCP1NB | chrX | Shiraz-3T  | 247  | 0        | -0.421316 |  |  |
|         |      | Shiraz-4T  | 261  | 0        | -0.336249 |  |  |
|         |      | Shiraz-16T | 295  | 0.591657 | 0         |  |  |
|         |      | Shiraz-36T | 433  | 0        | -0.803961 |  |  |
|         |      | Shiraz-44T | 909  | 0        | -1.067051 |  |  |
|         |      | Shiraz-49T | 1170 | 0        | -0.967436 |  |  |
|         |      | Shiraz-9T  | 1370 | 0.690073 | 0         |  |  |
|         |      | Shiraz-18T | 1457 | 0.643204 | 0         |  |  |
|         |      | Shiraz-22T | 1673 | 0.611783 | 0         |  |  |
|         |      | Shiraz-25T | 1719 | 0.472955 | 0         |  |  |
|         |      | Shiraz-28T | 1762 | 0.562311 | 0         |  |  |

|       |      |            |      |          |           |  |  |
|-------|------|------------|------|----------|-----------|--|--|
|       |      | Shiraz-29T | 1801 | 0.815343 | 0         |  |  |
|       |      | Shiraz-32T | 1870 | 0.729766 | 0         |  |  |
|       |      | Shiraz-35T | 1933 | 0.488535 | 0         |  |  |
|       |      | Shiraz-53T | 2115 | 0.427728 | 0         |  |  |
|       |      | Shiraz-58T | 2223 | 0.833364 | 0         |  |  |
|       |      | Shiraz-71T | 2263 | 0.975531 | 0         |  |  |
|       |      | Shiraz-3T  | 247  | 0        | -0.421316 |  |  |
|       |      | Shiraz-4T  | 261  | 0        | -0.336249 |  |  |
|       |      | Shiraz-16T | 295  | 0.591657 | 0         |  |  |
|       |      | Shiraz-36T | 433  | 0        | -0.803961 |  |  |
|       |      | Shiraz-44T | 909  | 0        | -1.067051 |  |  |
|       |      | Shiraz-49T | 1170 | 0        | -0.967436 |  |  |
|       |      | Shiraz-9T  | 1370 | 0.690073 | 0         |  |  |
|       |      | Shiraz-18T | 1457 | 0.643204 | 0         |  |  |
|       |      | Shiraz-22T | 1673 | 0.611783 | 0         |  |  |
|       |      | Shiraz-25T | 1719 | 0.472955 | 0         |  |  |
|       |      | Shiraz-28T | 1762 | 0.562311 | 0         |  |  |
|       |      | Shiraz-29T | 1801 | 0.815343 | 0         |  |  |
|       |      | Shiraz-32T | 1870 | 0.729766 | 0         |  |  |
|       |      | Shiraz-35T | 1933 | 0.488535 | 0         |  |  |
|       |      | Shiraz-53T | 2115 | 0.427728 | 0         |  |  |
|       |      | Shiraz-58T | 2223 | 0.833364 | 0         |  |  |
|       |      | Shiraz-71T | 2263 | 0.975531 | 0         |  |  |
|       |      | Shiraz-3T  | 247  | 0        | -0.421316 |  |  |
|       |      | Shiraz-4T  | 261  | 0        | -0.336249 |  |  |
|       |      | Shiraz-16T | 295  | 0.591657 | 0         |  |  |
|       |      | Shiraz-36T | 433  | 0        | -0.803961 |  |  |
|       |      | Shiraz-44T | 909  | 0        | -1.067051 |  |  |
|       |      | Shiraz-49T | 1170 | 0        | -0.967436 |  |  |
|       |      | Shiraz-9T  | 1370 | 0.690073 | 0         |  |  |
|       |      | Shiraz-18T | 1457 | 0.643204 | 0         |  |  |
|       |      | Shiraz-22T | 1673 | 0.611783 | 0         |  |  |
|       |      | Shiraz-25T | 1719 | 0.472955 | 0         |  |  |
|       |      | Shiraz-28T | 1762 | 0.562311 | 0         |  |  |
|       |      | Shiraz-29T | 1801 | 0.815343 | 0         |  |  |
|       |      | Shiraz-32T | 1870 | 0.729766 | 0         |  |  |
|       |      | Shiraz-35T | 1933 | 0.488535 | 0         |  |  |
|       |      | Shiraz-53T | 2115 | 0.427728 | 0         |  |  |
|       |      | Shiraz-58T | 2223 | 0.833364 | 0         |  |  |
|       |      | Shiraz-71T | 2263 | 0.975531 | 0         |  |  |
| MTERF | chr7 | Shiraz-3T  | 90   | 0.219276 | 0         |  |  |
|       |      | Shiraz-3T  | 93   | 0        | -0.058023 |  |  |
|       |      | Shiraz-4T  | 253  | 0.372918 | 0         |  |  |
|       |      | Shiraz-36T | 378  | 0.179558 | 0         |  |  |
|       |      | Shiraz-36T | 380  | 0.083883 | 0         |  |  |
|       |      | Shiraz-44T | 638  | 0        | -0.433476 |  |  |
|       |      | Shiraz-46T | 943  | 0.093799 | 0         |  |  |

|  |            |      |          |           |  |
|--|------------|------|----------|-----------|--|
|  | Shiraz-46T | 945  | 0        | -0.014838 |  |
|  | Shiraz-47T | 1029 | 0        | -0.096586 |  |
|  | Shiraz-49T | 1119 | 0        | -0.157331 |  |
|  | Shiraz-77T | 1225 | 0        | -0.117922 |  |
|  | Shiraz-18T | 1434 | 0.244465 | 0         |  |
|  | Shiraz-22T | 1549 | 0        | -0.319623 |  |
|  | Shiraz-25T | 1698 | 0.21835  | 0         |  |
|  | Shiraz-28T | 1735 | 0.350744 | 0         |  |
|  | Shiraz-29T | 1778 | 0.120767 | 0         |  |
|  | Shiraz-32T | 1833 | 0.551336 | 0         |  |
|  | Shiraz-38T | 1951 | 0.250891 | 0         |  |
|  | Shiraz-53T | 2078 | 0.287202 | 0         |  |
|  | Shiraz-58T | 2159 | 0        | -0.219521 |  |
|  | Shiraz-71T | 2238 | 0.603631 | 0         |  |
|  | Shiraz-3T  | 90   | 0.219276 | 0         |  |
|  | Shiraz-3T  | 93   | 0        | -0.058023 |  |
|  | Shiraz-4T  | 253  | 0.372918 | 0         |  |
|  | Shiraz-36T | 378  | 0.179558 | 0         |  |
|  | Shiraz-36T | 380  | 0.083883 | 0         |  |
|  | Shiraz-44T | 638  | 0        | -0.433476 |  |
|  | Shiraz-46T | 943  | 0.093799 | 0         |  |
|  | Shiraz-46T | 945  | 0        | -0.014838 |  |
|  | Shiraz-47T | 1029 | 0        | -0.096586 |  |
|  | Shiraz-49T | 1119 | 0        | -0.157331 |  |
|  | Shiraz-77T | 1225 | 0        | -0.117922 |  |
|  | Shiraz-18T | 1434 | 0.244465 | 0         |  |
|  | Shiraz-22T | 1549 | 0        | -0.319623 |  |
|  | Shiraz-25T | 1698 | 0.21835  | 0         |  |
|  | Shiraz-28T | 1735 | 0.350744 | 0         |  |
|  | Shiraz-29T | 1778 | 0.120767 | 0         |  |
|  | Shiraz-32T | 1833 | 0.551336 | 0         |  |
|  | Shiraz-38T | 1951 | 0.250891 | 0         |  |
|  | Shiraz-53T | 2078 | 0.287202 | 0         |  |
|  | Shiraz-58T | 2159 | 0        | -0.219521 |  |
|  | Shiraz-71T | 2238 | 0.603631 | 0         |  |
|  | Shiraz-3T  | 90   | 0.219276 | 0         |  |
|  | Shiraz-3T  | 93   | 0        | -0.058023 |  |
|  | Shiraz-4T  | 253  | 0.372918 | 0         |  |
|  | Shiraz-36T | 378  | 0.179558 | 0         |  |
|  | Shiraz-36T | 380  | 0.083883 | 0         |  |
|  | Shiraz-44T | 638  | 0        | -0.433476 |  |
|  | Shiraz-46T | 943  | 0.093799 | 0         |  |
|  | Shiraz-46T | 945  | 0        | -0.014838 |  |
|  | Shiraz-47T | 1029 | 0        | -0.096586 |  |
|  | Shiraz-49T | 1119 | 0        | -0.157331 |  |
|  | Shiraz-77T | 1225 | 0        | -0.117922 |  |
|  | Shiraz-18T | 1434 | 0.244465 | 0         |  |



|      |      |            |      |          |           |  |  |
|------|------|------------|------|----------|-----------|--|--|
|      |      | Shiraz-22T | 1549 | 0        | -0.319623 |  |  |
|      |      | Shiraz-25T | 1698 | 0.21835  | 0         |  |  |
|      |      | Shiraz-28T | 1735 | 0.350744 | 0         |  |  |
|      |      | Shiraz-29T | 1778 | 0.120767 | 0         |  |  |
|      |      | Shiraz-32T | 1833 | 0.551336 | 0         |  |  |
|      |      | Shiraz-38T | 1951 | 0.250891 | 0         |  |  |
|      |      | Shiraz-53T | 2078 | 0.287202 | 0         |  |  |
|      |      | Shiraz-58T | 2159 | 0        | -0.219521 |  |  |
|      |      | Shiraz-71T | 2238 | 0.603631 | 0         |  |  |
| MTM1 | chrX | Shiraz-3T  | 242  | 0        | -0.336434 |  |  |
|      |      | Shiraz-4T  | 261  | 0        | -0.336249 |  |  |
|      |      | Shiraz-16T | 295  | 0.591657 | 0         |  |  |
|      |      | Shiraz-36T | 433  | 0        | -0.803961 |  |  |
|      |      | Shiraz-42T | 480  | 0        | -0.232915 |  |  |
|      |      | Shiraz-44T | 899  | 0        | -1.09697  |  |  |
|      |      | Shiraz-49T | 1170 | 0        | -0.967436 |  |  |
|      |      | Shiraz-9T  | 1370 | 0.690073 | 0         |  |  |
|      |      | Shiraz-18T | 1457 | 0.643204 | 0         |  |  |
|      |      | Shiraz-22T | 1673 | 0.611783 | 0         |  |  |
|      |      | Shiraz-22T | 1678 | 0.911625 | 0         |  |  |
|      |      | Shiraz-25T | 1719 | 0.472955 | 0         |  |  |
|      |      | Shiraz-28T | 1762 | 0.562311 | 0         |  |  |
|      |      | Shiraz-29T | 1801 | 0.815343 | 0         |  |  |
|      |      | Shiraz-32T | 1870 | 0.729766 | 0         |  |  |
|      |      | Shiraz-35T | 1933 | 0.488535 | 0         |  |  |
|      |      | Shiraz-58T | 2223 | 0.833364 | 0         |  |  |
|      |      | Shiraz-58T | 2226 | 1.074663 | 0         |  |  |
|      |      | Shiraz-71T | 2263 | 0.975531 | 0         |  |  |
|      |      | Shiraz-3T  | 242  | 0        | -0.336434 |  |  |
|      |      | Shiraz-4T  | 261  | 0        | -0.336249 |  |  |
|      |      | Shiraz-16T | 295  | 0.591657 | 0         |  |  |
|      |      | Shiraz-36T | 433  | 0        | -0.803961 |  |  |
|      |      | Shiraz-42T | 480  | 0        | -0.232915 |  |  |
|      |      | Shiraz-44T | 899  | 0        | -1.09697  |  |  |
|      |      | Shiraz-49T | 1170 | 0        | -0.967436 |  |  |
|      |      | Shiraz-9T  | 1370 | 0.690073 | 0         |  |  |
|      |      | Shiraz-18T | 1457 | 0.643204 | 0         |  |  |
|      |      | Shiraz-22T | 1673 | 0.611783 | 0         |  |  |
|      |      | Shiraz-22T | 1678 | 0.911625 | 0         |  |  |
|      |      | Shiraz-25T | 1719 | 0.472955 | 0         |  |  |
|      |      | Shiraz-28T | 1762 | 0.562311 | 0         |  |  |
|      |      | Shiraz-29T | 1801 | 0.815343 | 0         |  |  |
|      |      | Shiraz-32T | 1870 | 0.729766 | 0         |  |  |
|      |      | Shiraz-35T | 1933 | 0.488535 | 0         |  |  |
|      |      | Shiraz-58T | 2223 | 0.833364 | 0         |  |  |
|      |      | Shiraz-58T | 2226 | 1.074663 | 0         |  |  |
|      |      | Shiraz-71T | 2263 | 0.975531 | 0         |  |  |

|       |      |            |      |          |           |  |  |
|-------|------|------------|------|----------|-----------|--|--|
|       |      | Shiraz-3T  | 242  | 0        | -0.336434 |  |  |
|       |      | Shiraz-4T  | 261  | 0        | -0.336249 |  |  |
|       |      | Shiraz-16T | 295  | 0.591657 | 0         |  |  |
|       |      | Shiraz-36T | 433  | 0        | -0.803961 |  |  |
|       |      | Shiraz-42T | 480  | 0        | -0.232915 |  |  |
|       |      | Shiraz-44T | 899  | 0        | -1.09697  |  |  |
|       |      | Shiraz-49T | 1170 | 0        | -0.967436 |  |  |
|       |      | Shiraz-9T  | 1370 | 0.690073 | 0         |  |  |
|       |      | Shiraz-18T | 1457 | 0.643204 | 0         |  |  |
|       |      | Shiraz-22T | 1673 | 0.611783 | 0         |  |  |
|       |      | Shiraz-22T | 1678 | 0.911625 | 0         |  |  |
|       |      | Shiraz-25T | 1719 | 0.472955 | 0         |  |  |
|       |      | Shiraz-28T | 1762 | 0.562311 | 0         |  |  |
|       |      | Shiraz-29T | 1801 | 0.815343 | 0         |  |  |
|       |      | Shiraz-32T | 1870 | 0.729766 | 0         |  |  |
|       |      | Shiraz-35T | 1933 | 0.488535 | 0         |  |  |
|       |      | Shiraz-58T | 2223 | 0.833364 | 0         |  |  |
|       |      | Shiraz-58T | 2226 | 1.074663 | 0         |  |  |
|       |      | Shiraz-71T | 2263 | 0.975531 | 0         |  |  |
| MTMR1 | chrX | Shiraz-3T  | 242  | 0        | -0.336434 |  |  |
|       |      | Shiraz-4T  | 261  | 0        | -0.336249 |  |  |
|       |      | Shiraz-16T | 295  | 0.591657 | 0         |  |  |
|       |      | Shiraz-36T | 433  | 0        | -0.803961 |  |  |
|       |      | Shiraz-42T | 480  | 0        | -0.232915 |  |  |
|       |      | Shiraz-44T | 899  | 0        | -1.09697  |  |  |
|       |      | Shiraz-49T | 1170 | 0        | -0.967436 |  |  |
|       |      | Shiraz-9T  | 1370 | 0.690073 | 0         |  |  |
|       |      | Shiraz-18T | 1457 | 0.643204 | 0         |  |  |
|       |      | Shiraz-22T | 1673 | 0.611783 | 0         |  |  |
|       |      | Shiraz-22T | 1678 | 0.911625 | 0         |  |  |
|       |      | Shiraz-25T | 1719 | 0.472955 | 0         |  |  |
|       |      | Shiraz-28T | 1762 | 0.562311 | 0         |  |  |
|       |      | Shiraz-29T | 1801 | 0.815343 | 0         |  |  |
|       |      | Shiraz-32T | 1870 | 0.729766 | 0         |  |  |
|       |      | Shiraz-35T | 1933 | 0.488535 | 0         |  |  |
|       |      | Shiraz-58T | 2223 | 0.833364 | 0         |  |  |
|       |      | Shiraz-58T | 2226 | 1.074663 | 0         |  |  |
|       |      | Shiraz-71T | 2263 | 0.975531 | 0         |  |  |
|       |      | Shiraz-3T  | 242  | 0        | -0.336434 |  |  |
|       |      | Shiraz-4T  | 261  | 0        | -0.336249 |  |  |
|       |      | Shiraz-16T | 295  | 0.591657 | 0         |  |  |
|       |      | Shiraz-36T | 433  | 0        | -0.803961 |  |  |
|       |      | Shiraz-42T | 480  | 0        | -0.232915 |  |  |
|       |      | Shiraz-44T | 899  | 0        | -1.09697  |  |  |
|       |      | Shiraz-49T | 1170 | 0        | -0.967436 |  |  |
|       |      | Shiraz-9T  | 1370 | 0.690073 | 0         |  |  |
|       |      | Shiraz-18T | 1457 | 0.643204 | 0         |  |  |

|        |      |            |      |          |           |  |  |
|--------|------|------------|------|----------|-----------|--|--|
|        |      | Shiraz-22T | 1673 | 0.611783 | 0         |  |  |
|        |      | Shiraz-22T | 1678 | 0.911625 | 0         |  |  |
|        |      | Shiraz-25T | 1719 | 0.472955 | 0         |  |  |
|        |      | Shiraz-28T | 1762 | 0.562311 | 0         |  |  |
|        |      | Shiraz-29T | 1801 | 0.815343 | 0         |  |  |
|        |      | Shiraz-32T | 1870 | 0.729766 | 0         |  |  |
|        |      | Shiraz-35T | 1933 | 0.488535 | 0         |  |  |
|        |      | Shiraz-58T | 2223 | 0.833364 | 0         |  |  |
|        |      | Shiraz-58T | 2226 | 1.074663 | 0         |  |  |
|        |      | Shiraz-71T | 2263 | 0.975531 | 0         |  |  |
|        |      | Shiraz-3T  | 242  | 0        | -0.336434 |  |  |
|        |      | Shiraz-4T  | 261  | 0        | -0.336249 |  |  |
|        |      | Shiraz-16T | 295  | 0.591657 | 0         |  |  |
|        |      | Shiraz-36T | 433  | 0        | -0.803961 |  |  |
|        |      | Shiraz-42T | 480  | 0        | -0.232915 |  |  |
|        |      | Shiraz-44T | 899  | 0        | -1.09697  |  |  |
|        |      | Shiraz-49T | 1170 | 0        | -0.967436 |  |  |
|        |      | Shiraz-9T  | 1370 | 0.690073 | 0         |  |  |
|        |      | Shiraz-18T | 1457 | 0.643204 | 0         |  |  |
|        |      | Shiraz-22T | 1673 | 0.611783 | 0         |  |  |
|        |      | Shiraz-22T | 1678 | 0.911625 | 0         |  |  |
|        |      | Shiraz-25T | 1719 | 0.472955 | 0         |  |  |
|        |      | Shiraz-28T | 1762 | 0.562311 | 0         |  |  |
|        |      | Shiraz-29T | 1801 | 0.815343 | 0         |  |  |
|        |      | Shiraz-32T | 1870 | 0.729766 | 0         |  |  |
|        |      | Shiraz-35T | 1933 | 0.488535 | 0         |  |  |
|        |      | Shiraz-58T | 2223 | 0.833364 | 0         |  |  |
|        |      | Shiraz-58T | 2226 | 1.074663 | 0         |  |  |
|        |      | Shiraz-71T | 2263 | 0.975531 | 0         |  |  |
| MTMR12 | chr5 | Shiraz-4T  | 250  | 0.262252 | 0         |  |  |
|        |      | Shiraz-16T | 266  | 0.321724 | 0         |  |  |
|        |      | Shiraz-18T | 1429 | 0        | -0.314125 |  |  |
|        |      | Shiraz-25T | 1694 | 0.201602 | 0         |  |  |
|        |      | Shiraz-28T | 1731 | 0.295447 | 0         |  |  |
|        |      | Shiraz-29T | 1773 | 0.090981 | 0         |  |  |
|        |      | Shiraz-40T | 2016 | 0.376634 | 0         |  |  |
|        |      | Shiraz-53T | 2070 | 0        | -0.42189  |  |  |
|        |      | Shiraz-4T  | 250  | 0.262252 | 0         |  |  |
|        |      | Shiraz-16T | 266  | 0.321724 | 0         |  |  |
|        |      | Shiraz-18T | 1429 | 0        | -0.314125 |  |  |
|        |      | Shiraz-25T | 1694 | 0.201602 | 0         |  |  |
|        |      | Shiraz-28T | 1731 | 0.295447 | 0         |  |  |
|        |      | Shiraz-29T | 1773 | 0.090981 | 0         |  |  |
|        |      | Shiraz-40T | 2016 | 0.376634 | 0         |  |  |
|        |      | Shiraz-53T | 2070 | 0        | -0.42189  |  |  |
|        |      | Shiraz-4T  | 250  | 0.262252 | 0         |  |  |
|        |      | Shiraz-16T | 266  | 0.321724 | 0         |  |  |

|       |      |            |      |          |           |  |  |
|-------|------|------------|------|----------|-----------|--|--|
|       |      | Shiraz-18T | 1429 | 0        | -0.314125 |  |  |
|       |      | Shiraz-25T | 1694 | 0.201602 | 0         |  |  |
|       |      | Shiraz-28T | 1731 | 0.295447 | 0         |  |  |
|       |      | Shiraz-29T | 1773 | 0.090981 | 0         |  |  |
|       |      | Shiraz-40T | 2016 | 0.376634 | 0         |  |  |
|       |      | Shiraz-53T | 2070 | 0        | -0.42189  |  |  |
| MTMR8 | chrX | Shiraz-3T  | 241  | 0        | -0.230501 |  |  |
|       |      | Shiraz-4T  | 261  | 0        | -0.336249 |  |  |
|       |      | Shiraz-16T | 295  | 0.591657 | 0         |  |  |
|       |      | Shiraz-36T | 433  | 0        | -0.803961 |  |  |
|       |      | Shiraz-44T | 899  | 0        | -1.09697  |  |  |
|       |      | Shiraz-49T | 1170 | 0        | -0.967436 |  |  |
|       |      | Shiraz-18T | 1457 | 0.643204 | 0         |  |  |
|       |      | Shiraz-22T | 1673 | 0.611783 | 0         |  |  |
|       |      | Shiraz-25T | 1719 | 0.472955 | 0         |  |  |
|       |      | Shiraz-28T | 1762 | 0.562311 | 0         |  |  |
|       |      | Shiraz-29T | 1801 | 0.815343 | 0         |  |  |
|       |      | Shiraz-32T | 1870 | 0.729766 | 0         |  |  |
|       |      | Shiraz-35T | 1933 | 0.488535 | 0         |  |  |
|       |      | Shiraz-58T | 2223 | 0.833364 | 0         |  |  |
|       |      | Shiraz-71T | 2263 | 0.975531 | 0         |  |  |
|       |      | Shiraz-3T  | 241  | 0        | -0.230501 |  |  |
|       |      | Shiraz-4T  | 261  | 0        | -0.336249 |  |  |
|       |      | Shiraz-16T | 295  | 0.591657 | 0         |  |  |
|       |      | Shiraz-36T | 433  | 0        | -0.803961 |  |  |
|       |      | Shiraz-44T | 899  | 0        | -1.09697  |  |  |
|       |      | Shiraz-49T | 1170 | 0        | -0.967436 |  |  |
|       |      | Shiraz-18T | 1457 | 0.643204 | 0         |  |  |
|       |      | Shiraz-22T | 1673 | 0.611783 | 0         |  |  |
|       |      | Shiraz-25T | 1719 | 0.472955 | 0         |  |  |
|       |      | Shiraz-28T | 1762 | 0.562311 | 0         |  |  |
|       |      | Shiraz-29T | 1801 | 0.815343 | 0         |  |  |
|       |      | Shiraz-32T | 1870 | 0.729766 | 0         |  |  |
|       |      | Shiraz-35T | 1933 | 0.488535 | 0         |  |  |
|       |      | Shiraz-58T | 2223 | 0.833364 | 0         |  |  |
|       |      | Shiraz-71T | 2263 | 0.975531 | 0         |  |  |
|       |      | Shiraz-3T  | 241  | 0        | -0.230501 |  |  |
|       |      | Shiraz-4T  | 261  | 0        | -0.336249 |  |  |
|       |      | Shiraz-16T | 295  | 0.591657 | 0         |  |  |
|       |      | Shiraz-36T | 433  | 0        | -0.803961 |  |  |
|       |      | Shiraz-44T | 899  | 0        | -1.09697  |  |  |
|       |      | Shiraz-49T | 1170 | 0        | -0.967436 |  |  |
|       |      | Shiraz-18T | 1457 | 0.643204 | 0         |  |  |
|       |      | Shiraz-22T | 1673 | 0.611783 | 0         |  |  |
|       |      | Shiraz-25T | 1719 | 0.472955 | 0         |  |  |
|       |      | Shiraz-28T | 1762 | 0.562311 | 0         |  |  |
|       |      | Shiraz-29T | 1801 | 0.815343 | 0         |  |  |

|      |      |            |      |          |           |  |
|------|------|------------|------|----------|-----------|--|
|      |      | Shiraz-32T | 1870 | 0.729766 | 0         |  |
|      |      | Shiraz-35T | 1933 | 0.488535 | 0         |  |
|      |      | Shiraz-58T | 2223 | 0.833364 | 0         |  |
|      |      | Shiraz-71T | 2263 | 0.975531 | 0         |  |
| MTPN | chr7 | Shiraz-3T  | 90   | 0.219276 | 0         |  |
|      |      | Shiraz-4T  | 253  | 0.372918 | 0         |  |
|      |      | Shiraz-36T | 378  | 0.179558 | 0         |  |
|      |      | Shiraz-46T | 943  | 0.093799 | 0         |  |
|      |      | Shiraz-77T | 1225 | 0        | -0.117922 |  |
|      |      | Shiraz-9T  | 1325 | 0.221899 | 0         |  |
|      |      | Shiraz-18T | 1434 | 0.244465 | 0         |  |
|      |      | Shiraz-22T | 1553 | 0        | -0.213234 |  |
|      |      | Shiraz-25T | 1698 | 0.21835  | 0         |  |
|      |      | Shiraz-28T | 1735 | 0.350744 | 0         |  |
|      |      | Shiraz-29T | 1778 | 0.120767 | 0         |  |
|      |      | Shiraz-32T | 1833 | 0.551336 | 0         |  |
|      |      | Shiraz-38T | 1951 | 0.250891 | 0         |  |
|      |      | Shiraz-53T | 2078 | 0.287202 | 0         |  |
|      |      | Shiraz-58T | 2162 | 0.221505 | 0         |  |
|      |      | Shiraz-71T | 2238 | 0.603631 | 0         |  |
|      |      | Shiraz-3T  | 90   | 0.219276 | 0         |  |
|      |      | Shiraz-4T  | 253  | 0.372918 | 0         |  |
|      |      | Shiraz-36T | 378  | 0.179558 | 0         |  |
|      |      | Shiraz-46T | 943  | 0.093799 | 0         |  |
|      |      | Shiraz-77T | 1225 | 0        | -0.117922 |  |
|      |      | Shiraz-9T  | 1325 | 0.221899 | 0         |  |
|      |      | Shiraz-18T | 1434 | 0.244465 | 0         |  |
|      |      | Shiraz-22T | 1553 | 0        | -0.213234 |  |
|      |      | Shiraz-25T | 1698 | 0.21835  | 0         |  |
|      |      | Shiraz-28T | 1735 | 0.350744 | 0         |  |
|      |      | Shiraz-29T | 1778 | 0.120767 | 0         |  |
|      |      | Shiraz-32T | 1833 | 0.551336 | 0         |  |
|      |      | Shiraz-38T | 1951 | 0.250891 | 0         |  |
|      |      | Shiraz-53T | 2078 | 0.287202 | 0         |  |
|      |      | Shiraz-58T | 2162 | 0.221505 | 0         |  |
|      |      | Shiraz-71T | 2238 | 0.603631 | 0         |  |
|      |      | Shiraz-3T  | 90   | 0.219276 | 0         |  |
|      |      | Shiraz-4T  | 253  | 0.372918 | 0         |  |
|      |      | Shiraz-36T | 378  | 0.179558 | 0         |  |
|      |      | Shiraz-46T | 943  | 0.093799 | 0         |  |
|      |      | Shiraz-77T | 1225 | 0        | -0.117922 |  |
|      |      | Shiraz-9T  | 1325 | 0.221899 | 0         |  |
|      |      | Shiraz-18T | 1434 | 0.244465 | 0         |  |
|      |      | Shiraz-22T | 1553 | 0        | -0.213234 |  |
|      |      | Shiraz-25T | 1698 | 0.21835  | 0         |  |
|      |      | Shiraz-28T | 1735 | 0.350744 | 0         |  |
|      |      | Shiraz-29T | 1778 | 0.120767 | 0         |  |

|       |      |            |      |          |           |  |
|-------|------|------------|------|----------|-----------|--|
|       |      | Shiraz-32T | 1833 | 0.551336 | 0         |  |
|       |      | Shiraz-38T | 1951 | 0.250891 | 0         |  |
|       |      | Shiraz-53T | 2078 | 0.287202 | 0         |  |
|       |      | Shiraz-58T | 2162 | 0.221505 | 0         |  |
|       |      | Shiraz-71T | 2238 | 0.603631 | 0         |  |
| MUC17 | chr7 | Shiraz-3T  | 90   | 0.219276 | 0         |  |
|       |      | Shiraz-3T  | 94   | 0.74735  | 0         |  |
|       |      | Shiraz-4T  | 253  | 0.372918 | 0         |  |
|       |      | Shiraz-31T | 316  | 0.219196 | 0         |  |
|       |      | Shiraz-36T | 378  | 0.179558 | 0         |  |
|       |      | Shiraz-36T | 381  | 0.332628 | 0         |  |
|       |      | Shiraz-44T | 639  | 1.035032 | 0         |  |
|       |      | Shiraz-46T | 943  | 0.093799 | 0         |  |
|       |      | Shiraz-46T | 946  | 0.299835 | 0         |  |
|       |      | Shiraz-47T | 1030 | 0.257728 | 0         |  |
|       |      | Shiraz-49T | 1120 | 0.281656 | 0         |  |
|       |      | Shiraz-77T | 1225 | 0        | -0.117922 |  |
|       |      | Shiraz-77T | 1227 | 0.196445 | 0         |  |
|       |      | Shiraz-9T  | 1324 | 0.679266 | 0         |  |
|       |      | Shiraz-18T | 1434 | 0.244465 | 0         |  |
|       |      | Shiraz-22T | 1549 | 0        | -0.319623 |  |
|       |      | Shiraz-22T | 1551 | 0.324011 | 0         |  |
|       |      | Shiraz-25T | 1698 | 0.21835  | 0         |  |
|       |      | Shiraz-28T | 1735 | 0.350744 | 0         |  |
|       |      | Shiraz-29T | 1778 | 0.120767 | 0         |  |
|       |      | Shiraz-32T | 1833 | 0.551336 | 0         |  |
|       |      | Shiraz-32T | 1834 | 1.485392 | 0         |  |
|       |      | Shiraz-38T | 1951 | 0.250891 | 0         |  |
|       |      | Shiraz-53T | 2078 | 0.287202 | 0         |  |
|       |      | Shiraz-58T | 2160 | 0.399007 | 0         |  |
|       |      | Shiraz-71T | 2238 | 0.603631 | 0         |  |
|       |      | Shiraz-3T  | 90   | 0.219276 | 0         |  |
|       |      | Shiraz-3T  | 94   | 0.74735  | 0         |  |
|       |      | Shiraz-4T  | 253  | 0.372918 | 0         |  |
|       |      | Shiraz-31T | 316  | 0.219196 | 0         |  |
|       |      | Shiraz-36T | 378  | 0.179558 | 0         |  |
|       |      | Shiraz-36T | 381  | 0.332628 | 0         |  |
|       |      | Shiraz-44T | 639  | 1.035032 | 0         |  |
|       |      | Shiraz-46T | 943  | 0.093799 | 0         |  |
|       |      | Shiraz-46T | 946  | 0.299835 | 0         |  |
|       |      | Shiraz-47T | 1030 | 0.257728 | 0         |  |
|       |      | Shiraz-49T | 1120 | 0.281656 | 0         |  |
|       |      | Shiraz-77T | 1225 | 0        | -0.117922 |  |
|       |      | Shiraz-77T | 1227 | 0.196445 | 0         |  |
|       |      | Shiraz-9T  | 1324 | 0.679266 | 0         |  |
|       |      | Shiraz-18T | 1434 | 0.244465 | 0         |  |
|       |      | Shiraz-22T | 1549 | 0        | -0.319623 |  |

|        |      |            |      |          |           |  |  |
|--------|------|------------|------|----------|-----------|--|--|
|        |      | Shiraz-22T | 1551 | 0.324011 | 0         |  |  |
|        |      | Shiraz-25T | 1698 | 0.21835  | 0         |  |  |
|        |      | Shiraz-28T | 1735 | 0.350744 | 0         |  |  |
|        |      | Shiraz-29T | 1778 | 0.120767 | 0         |  |  |
|        |      | Shiraz-32T | 1833 | 0.551336 | 0         |  |  |
|        |      | Shiraz-32T | 1834 | 1.485392 | 0         |  |  |
|        |      | Shiraz-38T | 1951 | 0.250891 | 0         |  |  |
|        |      | Shiraz-53T | 2078 | 0.287202 | 0         |  |  |
|        |      | Shiraz-58T | 2160 | 0.399007 | 0         |  |  |
|        |      | Shiraz-71T | 2238 | 0.603631 | 0         |  |  |
|        |      | Shiraz-3T  | 90   | 0.219276 | 0         |  |  |
|        |      | Shiraz-3T  | 94   | 0.74735  | 0         |  |  |
|        |      | Shiraz-4T  | 253  | 0.372918 | 0         |  |  |
|        |      | Shiraz-31T | 316  | 0.219196 | 0         |  |  |
|        |      | Shiraz-36T | 378  | 0.179558 | 0         |  |  |
|        |      | Shiraz-36T | 381  | 0.332628 | 0         |  |  |
|        |      | Shiraz-44T | 639  | 1.035032 | 0         |  |  |
|        |      | Shiraz-46T | 943  | 0.093799 | 0         |  |  |
|        |      | Shiraz-46T | 946  | 0.299835 | 0         |  |  |
|        |      | Shiraz-47T | 1030 | 0.257728 | 0         |  |  |
|        |      | Shiraz-49T | 1120 | 0.281656 | 0         |  |  |
|        |      | Shiraz-77T | 1225 | 0        | -0.117922 |  |  |
|        |      | Shiraz-77T | 1227 | 0.196445 | 0         |  |  |
|        |      | Shiraz-9T  | 1324 | 0.679266 | 0         |  |  |
|        |      | Shiraz-18T | 1434 | 0.244465 | 0         |  |  |
|        |      | Shiraz-22T | 1549 | 0        | -0.319623 |  |  |
|        |      | Shiraz-22T | 1551 | 0.324011 | 0         |  |  |
|        |      | Shiraz-25T | 1698 | 0.21835  | 0         |  |  |
|        |      | Shiraz-28T | 1735 | 0.350744 | 0         |  |  |
|        |      | Shiraz-29T | 1778 | 0.120767 | 0         |  |  |
|        |      | Shiraz-32T | 1833 | 0.551336 | 0         |  |  |
|        |      | Shiraz-32T | 1834 | 1.485392 | 0         |  |  |
|        |      | Shiraz-38T | 1951 | 0.250891 | 0         |  |  |
|        |      | Shiraz-53T | 2078 | 0.287202 | 0         |  |  |
|        |      | Shiraz-58T | 2160 | 0.399007 | 0         |  |  |
|        |      | Shiraz-71T | 2238 | 0.603631 | 0         |  |  |
| MUM1L1 | chrX | Shiraz-3T  | 242  | 0        | -0.336434 |  |  |
|        |      | Shiraz-4T  | 261  | 0        | -0.336249 |  |  |
|        |      | Shiraz-16T | 295  | 0.591657 | 0         |  |  |
|        |      | Shiraz-36T | 433  | 0        | -0.803961 |  |  |
|        |      | Shiraz-44T | 899  | 0        | -1.09697  |  |  |
|        |      | Shiraz-49T | 1170 | 0        | -0.967436 |  |  |
|        |      | Shiraz-18T | 1457 | 0.643204 | 0         |  |  |
|        |      | Shiraz-22T | 1673 | 0.611783 | 0         |  |  |
|        |      | Shiraz-25T | 1719 | 0.472955 | 0         |  |  |
|        |      | Shiraz-28T | 1762 | 0.562311 | 0         |  |  |
|        |      | Shiraz-29T | 1801 | 0.815343 | 0         |  |  |

|       |      |            |      |          |           |  |  |
|-------|------|------------|------|----------|-----------|--|--|
|       |      | Shiraz-32T | 1870 | 0.729766 | 0         |  |  |
|       |      | Shiraz-35T | 1933 | 0.488535 | 0         |  |  |
|       |      | Shiraz-58T | 2223 | 0.833364 | 0         |  |  |
|       |      | Shiraz-71T | 2263 | 0.975531 | 0         |  |  |
|       |      | Shiraz-3T  | 242  | 0        | -0.336434 |  |  |
|       |      | Shiraz-4T  | 261  | 0        | -0.336249 |  |  |
|       |      | Shiraz-16T | 295  | 0.591657 | 0         |  |  |
|       |      | Shiraz-36T | 433  | 0        | -0.803961 |  |  |
|       |      | Shiraz-44T | 899  | 0        | -1.09697  |  |  |
|       |      | Shiraz-49T | 1170 | 0        | -0.967436 |  |  |
|       |      | Shiraz-18T | 1457 | 0.643204 | 0         |  |  |
|       |      | Shiraz-22T | 1673 | 0.611783 | 0         |  |  |
|       |      | Shiraz-25T | 1719 | 0.472955 | 0         |  |  |
|       |      | Shiraz-28T | 1762 | 0.562311 | 0         |  |  |
|       |      | Shiraz-29T | 1801 | 0.815343 | 0         |  |  |
|       |      | Shiraz-32T | 1870 | 0.729766 | 0         |  |  |
|       |      | Shiraz-35T | 1933 | 0.488535 | 0         |  |  |
|       |      | Shiraz-58T | 2223 | 0.833364 | 0         |  |  |
|       |      | Shiraz-71T | 2263 | 0.975531 | 0         |  |  |
|       |      | Shiraz-3T  | 242  | 0        | -0.336434 |  |  |
|       |      | Shiraz-4T  | 261  | 0        | -0.336249 |  |  |
|       |      | Shiraz-16T | 295  | 0.591657 | 0         |  |  |
|       |      | Shiraz-36T | 433  | 0        | -0.803961 |  |  |
|       |      | Shiraz-44T | 899  | 0        | -1.09697  |  |  |
|       |      | Shiraz-49T | 1170 | 0        | -0.967436 |  |  |
|       |      | Shiraz-18T | 1457 | 0.643204 | 0         |  |  |
|       |      | Shiraz-22T | 1673 | 0.611783 | 0         |  |  |
|       |      | Shiraz-25T | 1719 | 0.472955 | 0         |  |  |
|       |      | Shiraz-28T | 1762 | 0.562311 | 0         |  |  |
|       |      | Shiraz-29T | 1801 | 0.815343 | 0         |  |  |
|       |      | Shiraz-32T | 1870 | 0.729766 | 0         |  |  |
|       |      | Shiraz-35T | 1933 | 0.488535 | 0         |  |  |
|       |      | Shiraz-58T | 2223 | 0.833364 | 0         |  |  |
|       |      | Shiraz-71T | 2263 | 0.975531 | 0         |  |  |
| MXRA5 | chrX | Shiraz-4T  | 260  | 0        | -0.324128 |  |  |
|       |      | Shiraz-16T | 294  | 0.655804 | 0         |  |  |
|       |      | Shiraz-36T | 431  | 0        | -0.78035  |  |  |
|       |      | Shiraz-44T | 891  | 0        | -0.954044 |  |  |
|       |      | Shiraz-49T | 1166 | 0        | -0.917235 |  |  |
|       |      | Shiraz-9T  | 1368 | 0.199713 | 0         |  |  |
|       |      | Shiraz-22T | 1669 | 0.695915 | 0         |  |  |
|       |      | Shiraz-25T | 1717 | 0.420447 | 0         |  |  |
|       |      | Shiraz-28T | 1760 | 0.538181 | 0         |  |  |
|       |      | Shiraz-29T | 1800 | 0.672527 | 0         |  |  |
|       |      | Shiraz-32T | 1869 | 0.776805 | 0         |  |  |
|       |      | Shiraz-35T | 1932 | 0.507141 | 0         |  |  |
|       |      | Shiraz-58T | 2221 | 0.871948 | 0         |  |  |



|       |      |            |      |          |           |  |  |
|-------|------|------------|------|----------|-----------|--|--|
|       |      | Shiraz-71T | 2260 | 0.68394  | 0         |  |  |
|       |      | Shiraz-4T  | 260  | 0        | -0.324128 |  |  |
|       |      | Shiraz-16T | 294  | 0.655804 | 0         |  |  |
|       |      | Shiraz-36T | 431  | 0        | -0.78035  |  |  |
|       |      | Shiraz-44T | 891  | 0        | -0.954044 |  |  |
|       |      | Shiraz-49T | 1166 | 0        | -0.917235 |  |  |
|       |      | Shiraz-9T  | 1368 | 0.199713 | 0         |  |  |
|       |      | Shiraz-22T | 1669 | 0.695915 | 0         |  |  |
|       |      | Shiraz-25T | 1717 | 0.420447 | 0         |  |  |
|       |      | Shiraz-28T | 1760 | 0.538181 | 0         |  |  |
|       |      | Shiraz-29T | 1800 | 0.672527 | 0         |  |  |
|       |      | Shiraz-32T | 1869 | 0.776805 | 0         |  |  |
|       |      | Shiraz-35T | 1932 | 0.507141 | 0         |  |  |
|       |      | Shiraz-58T | 2221 | 0.871948 | 0         |  |  |
|       |      | Shiraz-71T | 2260 | 0.68394  | 0         |  |  |
|       |      | Shiraz-4T  | 260  | 0        | -0.324128 |  |  |
|       |      | Shiraz-16T | 294  | 0.655804 | 0         |  |  |
|       |      | Shiraz-36T | 431  | 0        | -0.78035  |  |  |
|       |      | Shiraz-44T | 891  | 0        | -0.954044 |  |  |
|       |      | Shiraz-49T | 1166 | 0        | -0.917235 |  |  |
|       |      | Shiraz-9T  | 1368 | 0.199713 | 0         |  |  |
|       |      | Shiraz-22T | 1669 | 0.695915 | 0         |  |  |
|       |      | Shiraz-25T | 1717 | 0.420447 | 0         |  |  |
|       |      | Shiraz-28T | 1760 | 0.538181 | 0         |  |  |
|       |      | Shiraz-29T | 1800 | 0.672527 | 0         |  |  |
|       |      | Shiraz-32T | 1869 | 0.776805 | 0         |  |  |
|       |      | Shiraz-35T | 1932 | 0.507141 | 0         |  |  |
|       |      | Shiraz-58T | 2221 | 0.871948 | 0         |  |  |
|       |      | Shiraz-71T | 2260 | 0.68394  | 0         |  |  |
| MYH16 | chr7 | Shiraz-3T  | 90   | 0.219276 | 0         |  |  |
|       |      | Shiraz-3T  | 94   | 0.74735  | 0         |  |  |
|       |      | Shiraz-4T  | 253  | 0.372918 | 0         |  |  |
|       |      | Shiraz-31T | 316  | 0.219196 | 0         |  |  |
|       |      | Shiraz-36T | 378  | 0.179558 | 0         |  |  |
|       |      | Shiraz-36T | 381  | 0.332628 | 0         |  |  |
|       |      | Shiraz-44T | 639  | 1.035032 | 0         |  |  |
|       |      | Shiraz-46T | 943  | 0.093799 | 0         |  |  |
|       |      | Shiraz-46T | 946  | 0.299835 | 0         |  |  |
|       |      | Shiraz-47T | 1030 | 0.257728 | 0         |  |  |
|       |      | Shiraz-49T | 1120 | 0.281656 | 0         |  |  |
|       |      | Shiraz-77T | 1225 | 0        | -0.117922 |  |  |
|       |      | Shiraz-77T | 1227 | 0.196445 | 0         |  |  |
|       |      | Shiraz-9T  | 1324 | 0.679266 | 0         |  |  |
|       |      | Shiraz-18T | 1434 | 0.244465 | 0         |  |  |
|       |      | Shiraz-22T | 1549 | 0        | -0.319623 |  |  |
|       |      | Shiraz-22T | 1551 | 0.324011 | 0         |  |  |
|       |      | Shiraz-25T | 1698 | 0.21835  | 0         |  |  |

|  |            |      |          |           |  |
|--|------------|------|----------|-----------|--|
|  | Shiraz-28T | 1735 | 0.350744 | 0         |  |
|  | Shiraz-29T | 1778 | 0.120767 | 0         |  |
|  | Shiraz-32T | 1833 | 0.551336 | 0         |  |
|  | Shiraz-38T | 1951 | 0.250891 | 0         |  |
|  | Shiraz-53T | 2078 | 0.287202 | 0         |  |
|  | Shiraz-71T | 2238 | 0.603631 | 0         |  |
|  | Shiraz-3T  | 90   | 0.219276 | 0         |  |
|  | Shiraz-3T  | 94   | 0.74735  | 0         |  |
|  | Shiraz-4T  | 253  | 0.372918 | 0         |  |
|  | Shiraz-31T | 316  | 0.219196 | 0         |  |
|  | Shiraz-36T | 378  | 0.179558 | 0         |  |
|  | Shiraz-36T | 381  | 0.332628 | 0         |  |
|  | Shiraz-44T | 639  | 1.035032 | 0         |  |
|  | Shiraz-46T | 943  | 0.093799 | 0         |  |
|  | Shiraz-46T | 946  | 0.299835 | 0         |  |
|  | Shiraz-47T | 1030 | 0.257728 | 0         |  |
|  | Shiraz-49T | 1120 | 0.281656 | 0         |  |
|  | Shiraz-77T | 1225 | 0        | -0.117922 |  |
|  | Shiraz-77T | 1227 | 0.196445 | 0         |  |
|  | Shiraz-9T  | 1324 | 0.679266 | 0         |  |
|  | Shiraz-18T | 1434 | 0.244465 | 0         |  |
|  | Shiraz-22T | 1549 | 0        | -0.319623 |  |
|  | Shiraz-22T | 1551 | 0.324011 | 0         |  |
|  | Shiraz-25T | 1698 | 0.21835  | 0         |  |
|  | Shiraz-28T | 1735 | 0.350744 | 0         |  |
|  | Shiraz-29T | 1778 | 0.120767 | 0         |  |
|  | Shiraz-32T | 1833 | 0.551336 | 0         |  |
|  | Shiraz-38T | 1951 | 0.250891 | 0         |  |
|  | Shiraz-53T | 2078 | 0.287202 | 0         |  |
|  | Shiraz-71T | 2238 | 0.603631 | 0         |  |
|  | Shiraz-3T  | 90   | 0.219276 | 0         |  |
|  | Shiraz-3T  | 94   | 0.74735  | 0         |  |
|  | Shiraz-4T  | 253  | 0.372918 | 0         |  |
|  | Shiraz-31T | 316  | 0.219196 | 0         |  |
|  | Shiraz-36T | 378  | 0.179558 | 0         |  |
|  | Shiraz-36T | 381  | 0.332628 | 0         |  |
|  | Shiraz-44T | 639  | 1.035032 | 0         |  |
|  | Shiraz-46T | 943  | 0.093799 | 0         |  |
|  | Shiraz-46T | 946  | 0.299835 | 0         |  |
|  | Shiraz-47T | 1030 | 0.257728 | 0         |  |
|  | Shiraz-49T | 1120 | 0.281656 | 0         |  |
|  | Shiraz-77T | 1225 | 0        | -0.117922 |  |
|  | Shiraz-77T | 1227 | 0.196445 | 0         |  |
|  | Shiraz-9T  | 1324 | 0.679266 | 0         |  |
|  | Shiraz-18T | 1434 | 0.244465 | 0         |  |
|  | Shiraz-22T | 1549 | 0        | -0.319623 |  |
|  | Shiraz-22T | 1551 | 0.324011 | 0         |  |

|       |      |            |      |          |           |  |
|-------|------|------------|------|----------|-----------|--|
|       |      | Shiraz-25T | 1698 | 0.21835  | 0         |  |
|       |      | Shiraz-28T | 1735 | 0.350744 | 0         |  |
|       |      | Shiraz-29T | 1778 | 0.120767 | 0         |  |
|       |      | Shiraz-32T | 1833 | 0.551336 | 0         |  |
|       |      | Shiraz-38T | 1951 | 0.250891 | 0         |  |
|       |      | Shiraz-53T | 2078 | 0.287202 | 0         |  |
|       |      | Shiraz-71T | 2238 | 0.603631 | 0         |  |
| MYL10 | chr7 | Shiraz-3T  | 90   | 0.219276 | 0         |  |
|       |      | Shiraz-3T  | 94   | 0.74735  | 0         |  |
|       |      | Shiraz-4T  | 253  | 0.372918 | 0         |  |
|       |      | Shiraz-31T | 316  | 0.219196 | 0         |  |
|       |      | Shiraz-36T | 378  | 0.179558 | 0         |  |
|       |      | Shiraz-36T | 381  | 0.332628 | 0         |  |
|       |      | Shiraz-44T | 639  | 1.035032 | 0         |  |
|       |      | Shiraz-46T | 943  | 0.093799 | 0         |  |
|       |      | Shiraz-46T | 946  | 0.299835 | 0         |  |
|       |      | Shiraz-47T | 1030 | 0.257728 | 0         |  |
|       |      | Shiraz-49T | 1120 | 0.281656 | 0         |  |
|       |      | Shiraz-77T | 1225 | 0        | -0.117922 |  |
|       |      | Shiraz-77T | 1227 | 0.196445 | 0         |  |
|       |      | Shiraz-9T  | 1324 | 0.679266 | 0         |  |
|       |      | Shiraz-18T | 1434 | 0.244465 | 0         |  |
|       |      | Shiraz-22T | 1549 | 0        | -0.319623 |  |
|       |      | Shiraz-22T | 1551 | 0.324011 | 0         |  |
|       |      | Shiraz-25T | 1698 | 0.21835  | 0         |  |
|       |      | Shiraz-28T | 1735 | 0.350744 | 0         |  |
|       |      | Shiraz-29T | 1778 | 0.120767 | 0         |  |
|       |      | Shiraz-32T | 1833 | 0.551336 | 0         |  |
|       |      | Shiraz-38T | 1951 | 0.250891 | 0         |  |
|       |      | Shiraz-53T | 2078 | 0.287202 | 0         |  |
|       |      | Shiraz-58T | 2160 | 0.399007 | 0         |  |
|       |      | Shiraz-71T | 2238 | 0.603631 | 0         |  |
|       |      | Shiraz-3T  | 90   | 0.219276 | 0         |  |
|       |      | Shiraz-3T  | 94   | 0.74735  | 0         |  |
|       |      | Shiraz-4T  | 253  | 0.372918 | 0         |  |
|       |      | Shiraz-31T | 316  | 0.219196 | 0         |  |
|       |      | Shiraz-36T | 378  | 0.179558 | 0         |  |
|       |      | Shiraz-36T | 381  | 0.332628 | 0         |  |
|       |      | Shiraz-44T | 639  | 1.035032 | 0         |  |
|       |      | Shiraz-46T | 943  | 0.093799 | 0         |  |
|       |      | Shiraz-46T | 946  | 0.299835 | 0         |  |
|       |      | Shiraz-47T | 1030 | 0.257728 | 0         |  |
|       |      | Shiraz-49T | 1120 | 0.281656 | 0         |  |
|       |      | Shiraz-77T | 1225 | 0        | -0.117922 |  |
|       |      | Shiraz-77T | 1227 | 0.196445 | 0         |  |
|       |      | Shiraz-9T  | 1324 | 0.679266 | 0         |  |
|       |      | Shiraz-18T | 1434 | 0.244465 | 0         |  |

|      |      |            |      |          |           |  |  |
|------|------|------------|------|----------|-----------|--|--|
|      |      | Shiraz-22T | 1549 | 0        | -0.319623 |  |  |
|      |      | Shiraz-22T | 1551 | 0.324011 | 0         |  |  |
|      |      | Shiraz-25T | 1698 | 0.21835  | 0         |  |  |
|      |      | Shiraz-28T | 1735 | 0.350744 | 0         |  |  |
|      |      | Shiraz-29T | 1778 | 0.120767 | 0         |  |  |
|      |      | Shiraz-32T | 1833 | 0.551336 | 0         |  |  |
|      |      | Shiraz-38T | 1951 | 0.250891 | 0         |  |  |
|      |      | Shiraz-53T | 2078 | 0.287202 | 0         |  |  |
|      |      | Shiraz-58T | 2160 | 0.399007 | 0         |  |  |
|      |      | Shiraz-71T | 2238 | 0.603631 | 0         |  |  |
|      |      | Shiraz-3T  | 90   | 0.219276 | 0         |  |  |
|      |      | Shiraz-3T  | 94   | 0.74735  | 0         |  |  |
|      |      | Shiraz-4T  | 253  | 0.372918 | 0         |  |  |
|      |      | Shiraz-31T | 316  | 0.219196 | 0         |  |  |
|      |      | Shiraz-36T | 378  | 0.179558 | 0         |  |  |
|      |      | Shiraz-36T | 381  | 0.332628 | 0         |  |  |
|      |      | Shiraz-44T | 639  | 1.035032 | 0         |  |  |
|      |      | Shiraz-46T | 943  | 0.093799 | 0         |  |  |
|      |      | Shiraz-46T | 946  | 0.299835 | 0         |  |  |
|      |      | Shiraz-47T | 1030 | 0.257728 | 0         |  |  |
|      |      | Shiraz-49T | 1120 | 0.281656 | 0         |  |  |
|      |      | Shiraz-77T | 1225 | 0        | -0.117922 |  |  |
|      |      | Shiraz-77T | 1227 | 0.196445 | 0         |  |  |
|      |      | Shiraz-9T  | 1324 | 0.679266 | 0         |  |  |
|      |      | Shiraz-18T | 1434 | 0.244465 | 0         |  |  |
|      |      | Shiraz-22T | 1549 | 0        | -0.319623 |  |  |
|      |      | Shiraz-22T | 1551 | 0.324011 | 0         |  |  |
|      |      | Shiraz-25T | 1698 | 0.21835  | 0         |  |  |
|      |      | Shiraz-28T | 1735 | 0.350744 | 0         |  |  |
|      |      | Shiraz-29T | 1778 | 0.120767 | 0         |  |  |
|      |      | Shiraz-32T | 1833 | 0.551336 | 0         |  |  |
|      |      | Shiraz-38T | 1951 | 0.250891 | 0         |  |  |
|      |      | Shiraz-53T | 2078 | 0.287202 | 0         |  |  |
|      |      | Shiraz-58T | 2160 | 0.399007 | 0         |  |  |
|      |      | Shiraz-71T | 2238 | 0.603631 | 0         |  |  |
| MYL7 | chr7 | Shiraz-3T  | 87   | 0.198593 | 0         |  |  |
|      |      | Shiraz-3T  | 89   | 0.678641 | 0         |  |  |
|      |      | Shiraz-4T  | 252  | 0.192083 | 0         |  |  |
|      |      | Shiraz-36T | 376  | 0.159952 | 0         |  |  |
|      |      | Shiraz-44T | 632  | 0.902944 | 0         |  |  |
|      |      | Shiraz-46T | 942  | 0.069143 | 0         |  |  |
|      |      | Shiraz-77T | 1223 | 0.215647 | 0         |  |  |
|      |      | Shiraz-18T | 1433 | 0.250973 | 0         |  |  |
|      |      | Shiraz-25T | 1697 | 0.21945  | 0         |  |  |
|      |      | Shiraz-28T | 1734 | 0.362882 | 0         |  |  |
|      |      | Shiraz-29T | 1777 | 0.156747 | 0         |  |  |
|      |      | Shiraz-38T | 1950 | 0.265916 | 0         |  |  |

|       |      |            |      |          |   |  |
|-------|------|------------|------|----------|---|--|
|       |      | Shiraz-71T | 2236 | 0.320072 | 0 |  |
|       |      | Shiraz-3T  | 87   | 0.198593 | 0 |  |
|       |      | Shiraz-3T  | 89   | 0.678641 | 0 |  |
|       |      | Shiraz-4T  | 252  | 0.192083 | 0 |  |
|       |      | Shiraz-36T | 376  | 0.159952 | 0 |  |
|       |      | Shiraz-44T | 632  | 0.902944 | 0 |  |
|       |      | Shiraz-46T | 942  | 0.069143 | 0 |  |
|       |      | Shiraz-77T | 1223 | 0.215647 | 0 |  |
|       |      | Shiraz-18T | 1433 | 0.250973 | 0 |  |
|       |      | Shiraz-25T | 1697 | 0.21945  | 0 |  |
|       |      | Shiraz-28T | 1734 | 0.362882 | 0 |  |
|       |      | Shiraz-29T | 1777 | 0.156747 | 0 |  |
|       |      | Shiraz-38T | 1950 | 0.265916 | 0 |  |
|       |      | Shiraz-71T | 2236 | 0.320072 | 0 |  |
|       |      | Shiraz-3T  | 87   | 0.198593 | 0 |  |
|       |      | Shiraz-3T  | 89   | 0.678641 | 0 |  |
|       |      | Shiraz-4T  | 252  | 0.192083 | 0 |  |
|       |      | Shiraz-36T | 376  | 0.159952 | 0 |  |
|       |      | Shiraz-44T | 632  | 0.902944 | 0 |  |
|       |      | Shiraz-46T | 942  | 0.069143 | 0 |  |
|       |      | Shiraz-77T | 1223 | 0.215647 | 0 |  |
|       |      | Shiraz-18T | 1433 | 0.250973 | 0 |  |
|       |      | Shiraz-25T | 1697 | 0.21945  | 0 |  |
|       |      | Shiraz-28T | 1734 | 0.362882 | 0 |  |
|       |      | Shiraz-29T | 1777 | 0.156747 | 0 |  |
|       |      | Shiraz-38T | 1950 | 0.265916 | 0 |  |
|       |      | Shiraz-71T | 2236 | 0.320072 | 0 |  |
| MYO1G | chr7 | Shiraz-3T  | 87   | 0.198593 | 0 |  |
|       |      | Shiraz-3T  | 89   | 0.678641 | 0 |  |
|       |      | Shiraz-4T  | 252  | 0.192083 | 0 |  |
|       |      | Shiraz-36T | 376  | 0.159952 | 0 |  |
|       |      | Shiraz-44T | 632  | 0.902944 | 0 |  |
|       |      | Shiraz-46T | 942  | 0.069143 | 0 |  |
|       |      | Shiraz-77T | 1223 | 0.215647 | 0 |  |
|       |      | Shiraz-18T | 1433 | 0.250973 | 0 |  |
|       |      | Shiraz-25T | 1697 | 0.21945  | 0 |  |
|       |      | Shiraz-28T | 1734 | 0.362882 | 0 |  |
|       |      | Shiraz-29T | 1777 | 0.156747 | 0 |  |
|       |      | Shiraz-38T | 1950 | 0.265916 | 0 |  |
|       |      | Shiraz-71T | 2236 | 0.320072 | 0 |  |
|       |      | Shiraz-3T  | 87   | 0.198593 | 0 |  |
|       |      | Shiraz-3T  | 89   | 0.678641 | 0 |  |
|       |      | Shiraz-4T  | 252  | 0.192083 | 0 |  |
|       |      | Shiraz-36T | 376  | 0.159952 | 0 |  |
|       |      | Shiraz-44T | 632  | 0.902944 | 0 |  |
|       |      | Shiraz-46T | 942  | 0.069143 | 0 |  |
|       |      | Shiraz-77T | 1223 | 0.215647 | 0 |  |

|       |      |            |      |          |   |  |  |
|-------|------|------------|------|----------|---|--|--|
|       |      | Shiraz-18T | 1433 | 0.250973 | 0 |  |  |
|       |      | Shiraz-25T | 1697 | 0.21945  | 0 |  |  |
|       |      | Shiraz-28T | 1734 | 0.362882 | 0 |  |  |
|       |      | Shiraz-29T | 1777 | 0.156747 | 0 |  |  |
|       |      | Shiraz-38T | 1950 | 0.265916 | 0 |  |  |
|       |      | Shiraz-71T | 2236 | 0.320072 | 0 |  |  |
|       |      | Shiraz-3T  | 87   | 0.198593 | 0 |  |  |
|       |      | Shiraz-3T  | 89   | 0.678641 | 0 |  |  |
|       |      | Shiraz-4T  | 252  | 0.192083 | 0 |  |  |
|       |      | Shiraz-36T | 376  | 0.159952 | 0 |  |  |
|       |      | Shiraz-44T | 632  | 0.902944 | 0 |  |  |
|       |      | Shiraz-46T | 942  | 0.069143 | 0 |  |  |
|       |      | Shiraz-77T | 1223 | 0.215647 | 0 |  |  |
|       |      | Shiraz-18T | 1433 | 0.250973 | 0 |  |  |
|       |      | Shiraz-25T | 1697 | 0.21945  | 0 |  |  |
|       |      | Shiraz-28T | 1734 | 0.362882 | 0 |  |  |
|       |      | Shiraz-29T | 1777 | 0.156747 | 0 |  |  |
|       |      | Shiraz-38T | 1950 | 0.265916 | 0 |  |  |
|       |      | Shiraz-71T | 2236 | 0.320072 | 0 |  |  |
| NACAD | chr7 | Shiraz-3T  | 87   | 0.198593 | 0 |  |  |
|       |      | Shiraz-3T  | 89   | 0.678641 | 0 |  |  |
|       |      | Shiraz-4T  | 252  | 0.192083 | 0 |  |  |
|       |      | Shiraz-36T | 376  | 0.159952 | 0 |  |  |
|       |      | Shiraz-44T | 632  | 0.902944 | 0 |  |  |
|       |      | Shiraz-46T | 942  | 0.069143 | 0 |  |  |
|       |      | Shiraz-77T | 1223 | 0.215647 | 0 |  |  |
|       |      | Shiraz-18T | 1433 | 0.250973 | 0 |  |  |
|       |      | Shiraz-25T | 1697 | 0.21945  | 0 |  |  |
|       |      | Shiraz-28T | 1734 | 0.362882 | 0 |  |  |
|       |      | Shiraz-29T | 1777 | 0.156747 | 0 |  |  |
|       |      | Shiraz-38T | 1950 | 0.265916 | 0 |  |  |
|       |      | Shiraz-71T | 2236 | 0.320072 | 0 |  |  |
|       |      | Shiraz-3T  | 87   | 0.198593 | 0 |  |  |
|       |      | Shiraz-3T  | 89   | 0.678641 | 0 |  |  |
|       |      | Shiraz-4T  | 252  | 0.192083 | 0 |  |  |
|       |      | Shiraz-36T | 376  | 0.159952 | 0 |  |  |
|       |      | Shiraz-44T | 632  | 0.902944 | 0 |  |  |
|       |      | Shiraz-46T | 942  | 0.069143 | 0 |  |  |
|       |      | Shiraz-77T | 1223 | 0.215647 | 0 |  |  |
|       |      | Shiraz-18T | 1433 | 0.250973 | 0 |  |  |
|       |      | Shiraz-25T | 1697 | 0.21945  | 0 |  |  |
|       |      | Shiraz-28T | 1734 | 0.362882 | 0 |  |  |
|       |      | Shiraz-29T | 1777 | 0.156747 | 0 |  |  |
|       |      | Shiraz-38T | 1950 | 0.265916 | 0 |  |  |
|       |      | Shiraz-71T | 2236 | 0.320072 | 0 |  |  |
|       |      | Shiraz-3T  | 87   | 0.198593 | 0 |  |  |
|       |      | Shiraz-3T  | 89   | 0.678641 | 0 |  |  |

|       |      |            |      |          |           |  |
|-------|------|------------|------|----------|-----------|--|
|       |      | Shiraz-4T  | 252  | 0.192083 | 0         |  |
|       |      | Shiraz-36T | 376  | 0.159952 | 0         |  |
|       |      | Shiraz-44T | 632  | 0.902944 | 0         |  |
|       |      | Shiraz-46T | 942  | 0.069143 | 0         |  |
|       |      | Shiraz-77T | 1223 | 0.215647 | 0         |  |
|       |      | Shiraz-18T | 1433 | 0.250973 | 0         |  |
|       |      | Shiraz-25T | 1697 | 0.21945  | 0         |  |
|       |      | Shiraz-28T | 1734 | 0.362882 | 0         |  |
|       |      | Shiraz-29T | 1777 | 0.156747 | 0         |  |
|       |      | Shiraz-38T | 1950 | 0.265916 | 0         |  |
|       |      | Shiraz-71T | 2236 | 0.320072 | 0         |  |
| NAMPT | chr7 | Shiraz-3T  | 90   | 0.219276 | 0         |  |
|       |      | Shiraz-4T  | 253  | 0.372918 | 0         |  |
|       |      | Shiraz-36T | 378  | 0.179558 | 0         |  |
|       |      | Shiraz-46T | 943  | 0.093799 | 0         |  |
|       |      | Shiraz-77T | 1225 | 0        | -0.117922 |  |
|       |      | Shiraz-18T | 1434 | 0.244465 | 0         |  |
|       |      | Shiraz-22T | 1549 | 0        | -0.319623 |  |
|       |      | Shiraz-25T | 1698 | 0.21835  | 0         |  |
|       |      | Shiraz-28T | 1735 | 0.350744 | 0         |  |
|       |      | Shiraz-29T | 1778 | 0.120767 | 0         |  |
|       |      | Shiraz-32T | 1833 | 0.551336 | 0         |  |
|       |      | Shiraz-38T | 1951 | 0.250891 | 0         |  |
|       |      | Shiraz-53T | 2078 | 0.287202 | 0         |  |
|       |      | Shiraz-71T | 2238 | 0.603631 | 0         |  |
|       |      | Shiraz-3T  | 90   | 0.219276 | 0         |  |
|       |      | Shiraz-4T  | 253  | 0.372918 | 0         |  |
|       |      | Shiraz-36T | 378  | 0.179558 | 0         |  |
|       |      | Shiraz-46T | 943  | 0.093799 | 0         |  |
|       |      | Shiraz-77T | 1225 | 0        | -0.117922 |  |
|       |      | Shiraz-18T | 1434 | 0.244465 | 0         |  |
|       |      | Shiraz-22T | 1549 | 0        | -0.319623 |  |
|       |      | Shiraz-25T | 1698 | 0.21835  | 0         |  |
|       |      | Shiraz-28T | 1735 | 0.350744 | 0         |  |
|       |      | Shiraz-29T | 1778 | 0.120767 | 0         |  |
|       |      | Shiraz-32T | 1833 | 0.551336 | 0         |  |
|       |      | Shiraz-38T | 1951 | 0.250891 | 0         |  |
|       |      | Shiraz-53T | 2078 | 0.287202 | 0         |  |
|       |      | Shiraz-71T | 2238 | 0.603631 | 0         |  |
|       |      | Shiraz-3T  | 90   | 0.219276 | 0         |  |
|       |      | Shiraz-4T  | 253  | 0.372918 | 0         |  |
|       |      | Shiraz-36T | 378  | 0.179558 | 0         |  |
|       |      | Shiraz-46T | 943  | 0.093799 | 0         |  |
|       |      | Shiraz-77T | 1225 | 0        | -0.117922 |  |
|       |      | Shiraz-18T | 1434 | 0.244465 | 0         |  |
|       |      | Shiraz-22T | 1549 | 0        | -0.319623 |  |
|       |      | Shiraz-25T | 1698 | 0.21835  | 0         |  |

|        |      |            |      |          |           |  |
|--------|------|------------|------|----------|-----------|--|
|        |      | Shiraz-28T | 1735 | 0.350744 | 0         |  |
|        |      | Shiraz-29T | 1778 | 0.120767 | 0         |  |
|        |      | Shiraz-32T | 1833 | 0.551336 | 0         |  |
|        |      | Shiraz-38T | 1951 | 0.250891 | 0         |  |
|        |      | Shiraz-53T | 2078 | 0.287202 | 0         |  |
|        |      | Shiraz-71T | 2238 | 0.603631 | 0         |  |
| NAP1L2 | chrX | Shiraz-3T  | 242  | 0        | -0.336434 |  |
|        |      | Shiraz-4T  | 261  | 0        | -0.336249 |  |
|        |      | Shiraz-16T | 295  | 0.591657 | 0         |  |
|        |      | Shiraz-36T | 433  | 0        | -0.803961 |  |
|        |      | Shiraz-44T | 899  | 0        | -1.09697  |  |
|        |      | Shiraz-49T | 1170 | 0        | -0.967436 |  |
|        |      | Shiraz-18T | 1457 | 0.643204 | 0         |  |
|        |      | Shiraz-22T | 1673 | 0.611783 | 0         |  |
|        |      | Shiraz-25T | 1719 | 0.472955 | 0         |  |
|        |      | Shiraz-28T | 1762 | 0.562311 | 0         |  |
|        |      | Shiraz-29T | 1801 | 0.815343 | 0         |  |
|        |      | Shiraz-32T | 1870 | 0.729766 | 0         |  |
|        |      | Shiraz-35T | 1933 | 0.488535 | 0         |  |
|        |      | Shiraz-58T | 2223 | 0.833364 | 0         |  |
|        |      | Shiraz-71T | 2263 | 0.975531 | 0         |  |
|        |      | Shiraz-3T  | 242  | 0        | -0.336434 |  |
|        |      | Shiraz-4T  | 261  | 0        | -0.336249 |  |
|        |      | Shiraz-16T | 295  | 0.591657 | 0         |  |
|        |      | Shiraz-36T | 433  | 0        | -0.803961 |  |
|        |      | Shiraz-44T | 899  | 0        | -1.09697  |  |
|        |      | Shiraz-49T | 1170 | 0        | -0.967436 |  |
|        |      | Shiraz-18T | 1457 | 0.643204 | 0         |  |
|        |      | Shiraz-22T | 1673 | 0.611783 | 0         |  |
|        |      | Shiraz-25T | 1719 | 0.472955 | 0         |  |
|        |      | Shiraz-28T | 1762 | 0.562311 | 0         |  |
|        |      | Shiraz-29T | 1801 | 0.815343 | 0         |  |
|        |      | Shiraz-32T | 1870 | 0.729766 | 0         |  |
|        |      | Shiraz-35T | 1933 | 0.488535 | 0         |  |
|        |      | Shiraz-58T | 2223 | 0.833364 | 0         |  |
|        |      | Shiraz-71T | 2263 | 0.975531 | 0         |  |
|        |      | Shiraz-3T  | 242  | 0        | -0.336434 |  |
|        |      | Shiraz-4T  | 261  | 0        | -0.336249 |  |
|        |      | Shiraz-16T | 295  | 0.591657 | 0         |  |
|        |      | Shiraz-36T | 433  | 0        | -0.803961 |  |
|        |      | Shiraz-44T | 899  | 0        | -1.09697  |  |
|        |      | Shiraz-49T | 1170 | 0        | -0.967436 |  |
|        |      | Shiraz-18T | 1457 | 0.643204 | 0         |  |
|        |      | Shiraz-22T | 1673 | 0.611783 | 0         |  |
|        |      | Shiraz-25T | 1719 | 0.472955 | 0         |  |
|        |      | Shiraz-28T | 1762 | 0.562311 | 0         |  |
|        |      | Shiraz-29T | 1801 | 0.815343 | 0         |  |



|        |      |            |      |          |           |  |
|--------|------|------------|------|----------|-----------|--|
|        |      | Shiraz-32T | 1870 | 0.729766 | 0         |  |
|        |      | Shiraz-35T | 1933 | 0.488535 | 0         |  |
|        |      | Shiraz-58T | 2223 | 0.833364 | 0         |  |
|        |      | Shiraz-71T | 2263 | 0.975531 | 0         |  |
| NAP1L3 | chrX | Shiraz-3T  | 242  | 0        | -0.336434 |  |
|        |      | Shiraz-3T  | 243  | 0        | -0.549129 |  |
|        |      | Shiraz-4T  | 261  | 0        | -0.336249 |  |
|        |      | Shiraz-16T | 295  | 0.591657 | 0         |  |
|        |      | Shiraz-31T | 346  | 0        | -0.1527   |  |
|        |      | Shiraz-36T | 433  | 0        | -0.803961 |  |
|        |      | Shiraz-44T | 899  | 0        | -1.09697  |  |
|        |      | Shiraz-44T | 902  | 0        | -1.449824 |  |
|        |      | Shiraz-47T | 1085 | 0        | -0.130811 |  |
|        |      | Shiraz-49T | 1170 | 0        | -0.967436 |  |
|        |      | Shiraz-49T | 1172 | 0        | -1.123219 |  |
|        |      | Shiraz-18T | 1457 | 0.643204 | 0         |  |
|        |      | Shiraz-22T | 1673 | 0.611783 | 0         |  |
|        |      | Shiraz-22T | 1675 | 0.279253 | 0         |  |
|        |      | Shiraz-25T | 1719 | 0.472955 | 0         |  |
|        |      | Shiraz-28T | 1762 | 0.562311 | 0         |  |
|        |      | Shiraz-29T | 1801 | 0.815343 | 0         |  |
|        |      | Shiraz-32T | 1870 | 0.729766 | 0         |  |
|        |      | Shiraz-32T | 1871 | 0.292679 | 0         |  |
|        |      | Shiraz-35T | 1933 | 0.488535 | 0         |  |
|        |      | Shiraz-58T | 2223 | 0.833364 | 0         |  |
|        |      | Shiraz-58T | 2225 | 0.595784 | 0         |  |
|        |      | Shiraz-71T | 2263 | 0.975531 | 0         |  |
|        |      | Shiraz-3T  | 242  | 0        | -0.336434 |  |
|        |      | Shiraz-3T  | 243  | 0        | -0.549129 |  |
|        |      | Shiraz-4T  | 261  | 0        | -0.336249 |  |
|        |      | Shiraz-16T | 295  | 0.591657 | 0         |  |
|        |      | Shiraz-31T | 346  | 0        | -0.1527   |  |
|        |      | Shiraz-36T | 433  | 0        | -0.803961 |  |
|        |      | Shiraz-44T | 899  | 0        | -1.09697  |  |
|        |      | Shiraz-44T | 902  | 0        | -1.449824 |  |
|        |      | Shiraz-47T | 1085 | 0        | -0.130811 |  |
|        |      | Shiraz-49T | 1170 | 0        | -0.967436 |  |
|        |      | Shiraz-49T | 1172 | 0        | -1.123219 |  |
|        |      | Shiraz-18T | 1457 | 0.643204 | 0         |  |
|        |      | Shiraz-22T | 1673 | 0.611783 | 0         |  |
|        |      | Shiraz-22T | 1675 | 0.279253 | 0         |  |
|        |      | Shiraz-25T | 1719 | 0.472955 | 0         |  |
|        |      | Shiraz-28T | 1762 | 0.562311 | 0         |  |
|        |      | Shiraz-29T | 1801 | 0.815343 | 0         |  |
|        |      | Shiraz-32T | 1870 | 0.729766 | 0         |  |
|        |      | Shiraz-32T | 1871 | 0.292679 | 0         |  |
|        |      | Shiraz-35T | 1933 | 0.488535 | 0         |  |

|        |      |            |      |          |           |  |  |
|--------|------|------------|------|----------|-----------|--|--|
|        |      | Shiraz-58T | 2223 | 0.833364 | 0         |  |  |
|        |      | Shiraz-58T | 2225 | 0.595784 | 0         |  |  |
|        |      | Shiraz-71T | 2263 | 0.975531 | 0         |  |  |
|        |      | Shiraz-3T  | 242  | 0        | -0.336434 |  |  |
|        |      | Shiraz-3T  | 243  | 0        | -0.549129 |  |  |
|        |      | Shiraz-4T  | 261  | 0        | -0.336249 |  |  |
|        |      | Shiraz-16T | 295  | 0.591657 | 0         |  |  |
|        |      | Shiraz-31T | 346  | 0        | -0.1527   |  |  |
|        |      | Shiraz-36T | 433  | 0        | -0.803961 |  |  |
|        |      | Shiraz-44T | 899  | 0        | -1.09697  |  |  |
|        |      | Shiraz-44T | 902  | 0        | -1.449824 |  |  |
|        |      | Shiraz-47T | 1085 | 0        | -0.130811 |  |  |
|        |      | Shiraz-49T | 1170 | 0        | -0.967436 |  |  |
|        |      | Shiraz-49T | 1172 | 0        | -1.123219 |  |  |
|        |      | Shiraz-18T | 1457 | 0.643204 | 0         |  |  |
|        |      | Shiraz-22T | 1673 | 0.611783 | 0         |  |  |
|        |      | Shiraz-22T | 1675 | 0.279253 | 0         |  |  |
|        |      | Shiraz-25T | 1719 | 0.472955 | 0         |  |  |
|        |      | Shiraz-28T | 1762 | 0.562311 | 0         |  |  |
|        |      | Shiraz-29T | 1801 | 0.815343 | 0         |  |  |
|        |      | Shiraz-32T | 1870 | 0.729766 | 0         |  |  |
|        |      | Shiraz-32T | 1871 | 0.292679 | 0         |  |  |
|        |      | Shiraz-35T | 1933 | 0.488535 | 0         |  |  |
|        |      | Shiraz-58T | 2223 | 0.833364 | 0         |  |  |
|        |      | Shiraz-58T | 2225 | 0.595784 | 0         |  |  |
|        |      | Shiraz-71T | 2263 | 0.975531 | 0         |  |  |
| NAP1L6 | chrX | Shiraz-3T  | 242  | 0        | -0.336434 |  |  |
|        |      | Shiraz-4T  | 261  | 0        | -0.336249 |  |  |
|        |      | Shiraz-16T | 295  | 0.591657 | 0         |  |  |
|        |      | Shiraz-36T | 433  | 0        | -0.803961 |  |  |
|        |      | Shiraz-44T | 899  | 0        | -1.09697  |  |  |
|        |      | Shiraz-49T | 1170 | 0        | -0.967436 |  |  |
|        |      | Shiraz-18T | 1457 | 0.643204 | 0         |  |  |
|        |      | Shiraz-22T | 1673 | 0.611783 | 0         |  |  |
|        |      | Shiraz-25T | 1719 | 0.472955 | 0         |  |  |
|        |      | Shiraz-28T | 1762 | 0.562311 | 0         |  |  |
|        |      | Shiraz-29T | 1801 | 0.815343 | 0         |  |  |
|        |      | Shiraz-32T | 1870 | 0.729766 | 0         |  |  |
|        |      | Shiraz-35T | 1933 | 0.488535 | 0         |  |  |
|        |      | Shiraz-58T | 2223 | 0.833364 | 0         |  |  |
|        |      | Shiraz-71T | 2263 | 0.975531 | 0         |  |  |
|        |      | Shiraz-3T  | 242  | 0        | -0.336434 |  |  |
|        |      | Shiraz-4T  | 261  | 0        | -0.336249 |  |  |
|        |      | Shiraz-16T | 295  | 0.591657 | 0         |  |  |
|        |      | Shiraz-36T | 433  | 0        | -0.803961 |  |  |
|        |      | Shiraz-44T | 899  | 0        | -1.09697  |  |  |
|        |      | Shiraz-49T | 1170 | 0        | -0.967436 |  |  |

|         |      |            |      |          |           |  |  |
|---------|------|------------|------|----------|-----------|--|--|
|         |      | Shiraz-18T | 1457 | 0.643204 | 0         |  |  |
|         |      | Shiraz-22T | 1673 | 0.611783 | 0         |  |  |
|         |      | Shiraz-25T | 1719 | 0.472955 | 0         |  |  |
|         |      | Shiraz-28T | 1762 | 0.562311 | 0         |  |  |
|         |      | Shiraz-29T | 1801 | 0.815343 | 0         |  |  |
|         |      | Shiraz-32T | 1870 | 0.729766 | 0         |  |  |
|         |      | Shiraz-35T | 1933 | 0.488535 | 0         |  |  |
|         |      | Shiraz-58T | 2223 | 0.833364 | 0         |  |  |
|         |      | Shiraz-71T | 2263 | 0.975531 | 0         |  |  |
|         |      | Shiraz-3T  | 242  | 0        | -0.336434 |  |  |
|         |      | Shiraz-4T  | 261  | 0        | -0.336249 |  |  |
|         |      | Shiraz-16T | 295  | 0.591657 | 0         |  |  |
|         |      | Shiraz-36T | 433  | 0        | -0.803961 |  |  |
|         |      | Shiraz-44T | 899  | 0        | -1.09697  |  |  |
|         |      | Shiraz-49T | 1170 | 0        | -0.967436 |  |  |
|         |      | Shiraz-18T | 1457 | 0.643204 | 0         |  |  |
|         |      | Shiraz-22T | 1673 | 0.611783 | 0         |  |  |
|         |      | Shiraz-25T | 1719 | 0.472955 | 0         |  |  |
|         |      | Shiraz-28T | 1762 | 0.562311 | 0         |  |  |
|         |      | Shiraz-29T | 1801 | 0.815343 | 0         |  |  |
|         |      | Shiraz-32T | 1870 | 0.729766 | 0         |  |  |
|         |      | Shiraz-35T | 1933 | 0.488535 | 0         |  |  |
|         |      | Shiraz-58T | 2223 | 0.833364 | 0         |  |  |
|         |      | Shiraz-71T | 2263 | 0.975531 | 0         |  |  |
| NAPEPLD | chr7 | Shiraz-3T  | 90   | 0.219276 | 0         |  |  |
|         |      | Shiraz-4T  | 253  | 0.372918 | 0         |  |  |
|         |      | Shiraz-36T | 378  | 0.179558 | 0         |  |  |
|         |      | Shiraz-46T | 943  | 0.093799 | 0         |  |  |
|         |      | Shiraz-77T | 1225 | 0        | -0.117922 |  |  |
|         |      | Shiraz-18T | 1434 | 0.244465 | 0         |  |  |
|         |      | Shiraz-22T | 1549 | 0        | -0.319623 |  |  |
|         |      | Shiraz-25T | 1698 | 0.21835  | 0         |  |  |
|         |      | Shiraz-28T | 1735 | 0.350744 | 0         |  |  |
|         |      | Shiraz-29T | 1778 | 0.120767 | 0         |  |  |
|         |      | Shiraz-32T | 1833 | 0.551336 | 0         |  |  |
|         |      | Shiraz-38T | 1951 | 0.250891 | 0         |  |  |
|         |      | Shiraz-53T | 2078 | 0.287202 | 0         |  |  |
|         |      | Shiraz-71T | 2238 | 0.603631 | 0         |  |  |
|         |      | Shiraz-3T  | 90   | 0.219276 | 0         |  |  |
|         |      | Shiraz-4T  | 253  | 0.372918 | 0         |  |  |
|         |      | Shiraz-36T | 378  | 0.179558 | 0         |  |  |
|         |      | Shiraz-46T | 943  | 0.093799 | 0         |  |  |
|         |      | Shiraz-77T | 1225 | 0        | -0.117922 |  |  |
|         |      | Shiraz-18T | 1434 | 0.244465 | 0         |  |  |
|         |      | Shiraz-22T | 1549 | 0        | -0.319623 |  |  |
|         |      | Shiraz-25T | 1698 | 0.21835  | 0         |  |  |
|         |      | Shiraz-28T | 1735 | 0.350744 | 0         |  |  |

|            |      |            |      |          |           |  |  |
|------------|------|------------|------|----------|-----------|--|--|
|            |      | Shiraz-29T | 1778 | 0.120767 | 0         |  |  |
|            |      | Shiraz-32T | 1833 | 0.551336 | 0         |  |  |
|            |      | Shiraz-38T | 1951 | 0.250891 | 0         |  |  |
|            |      | Shiraz-53T | 2078 | 0.287202 | 0         |  |  |
|            |      | Shiraz-71T | 2238 | 0.603631 | 0         |  |  |
|            |      | Shiraz-3T  | 90   | 0.219276 | 0         |  |  |
|            |      | Shiraz-4T  | 253  | 0.372918 | 0         |  |  |
|            |      | Shiraz-36T | 378  | 0.179558 | 0         |  |  |
|            |      | Shiraz-46T | 943  | 0.093799 | 0         |  |  |
|            |      | Shiraz-77T | 1225 | 0        | -0.117922 |  |  |
|            |      | Shiraz-18T | 1434 | 0.244465 | 0         |  |  |
|            |      | Shiraz-22T | 1549 | 0        | -0.319623 |  |  |
|            |      | Shiraz-25T | 1698 | 0.21835  | 0         |  |  |
|            |      | Shiraz-28T | 1735 | 0.350744 | 0         |  |  |
|            |      | Shiraz-29T | 1778 | 0.120767 | 0         |  |  |
|            |      | Shiraz-32T | 1833 | 0.551336 | 0         |  |  |
|            |      | Shiraz-38T | 1951 | 0.250891 | 0         |  |  |
|            |      | Shiraz-53T | 2078 | 0.287202 | 0         |  |  |
|            |      | Shiraz-71T | 2238 | 0.603631 | 0         |  |  |
| NCRNA00086 | chrX | Shiraz-3T  | 242  | 0        | -0.336434 |  |  |
|            |      | Shiraz-4T  | 261  | 0        | -0.336249 |  |  |
|            |      | Shiraz-16T | 295  | 0.591657 | 0         |  |  |
|            |      | Shiraz-36T | 433  | 0        | -0.803961 |  |  |
|            |      | Shiraz-44T | 899  | 0        | -1.09697  |  |  |
|            |      | Shiraz-49T | 1170 | 0        | -0.967436 |  |  |
|            |      | Shiraz-9T  | 1370 | 0.690073 | 0         |  |  |
|            |      | Shiraz-18T | 1457 | 0.643204 | 0         |  |  |
|            |      | Shiraz-22T | 1673 | 0.611783 | 0         |  |  |
|            |      | Shiraz-22T | 1677 | 0.789711 | 0         |  |  |
|            |      | Shiraz-25T | 1719 | 0.472955 | 0         |  |  |
|            |      | Shiraz-28T | 1762 | 0.562311 | 0         |  |  |
|            |      | Shiraz-29T | 1801 | 0.815343 | 0         |  |  |
|            |      | Shiraz-32T | 1870 | 0.729766 | 0         |  |  |
|            |      | Shiraz-35T | 1933 | 0.488535 | 0         |  |  |
|            |      | Shiraz-58T | 2223 | 0.833364 | 0         |  |  |
|            |      | Shiraz-71T | 2263 | 0.975531 | 0         |  |  |
|            |      | Shiraz-3T  | 242  | 0        | -0.336434 |  |  |
|            |      | Shiraz-4T  | 261  | 0        | -0.336249 |  |  |
|            |      | Shiraz-16T | 295  | 0.591657 | 0         |  |  |
|            |      | Shiraz-36T | 433  | 0        | -0.803961 |  |  |
|            |      | Shiraz-44T | 899  | 0        | -1.09697  |  |  |
|            |      | Shiraz-49T | 1170 | 0        | -0.967436 |  |  |
|            |      | Shiraz-9T  | 1370 | 0.690073 | 0         |  |  |
|            |      | Shiraz-18T | 1457 | 0.643204 | 0         |  |  |
|            |      | Shiraz-22T | 1673 | 0.611783 | 0         |  |  |
|            |      | Shiraz-22T | 1677 | 0.789711 | 0         |  |  |
|            |      | Shiraz-25T | 1719 | 0.472955 | 0         |  |  |

|            |      |            |      |          |           |  |  |
|------------|------|------------|------|----------|-----------|--|--|
|            |      | Shiraz-28T | 1762 | 0.562311 | 0         |  |  |
|            |      | Shiraz-29T | 1801 | 0.815343 | 0         |  |  |
|            |      | Shiraz-32T | 1870 | 0.729766 | 0         |  |  |
|            |      | Shiraz-35T | 1933 | 0.488535 | 0         |  |  |
|            |      | Shiraz-58T | 2223 | 0.833364 | 0         |  |  |
|            |      | Shiraz-71T | 2263 | 0.975531 | 0         |  |  |
|            |      | Shiraz-3T  | 242  | 0        | -0.336434 |  |  |
|            |      | Shiraz-4T  | 261  | 0        | -0.336249 |  |  |
|            |      | Shiraz-16T | 295  | 0.591657 | 0         |  |  |
|            |      | Shiraz-36T | 433  | 0        | -0.803961 |  |  |
|            |      | Shiraz-44T | 899  | 0        | -1.09697  |  |  |
|            |      | Shiraz-49T | 1170 | 0        | -0.967436 |  |  |
|            |      | Shiraz-9T  | 1370 | 0.690073 | 0         |  |  |
|            |      | Shiraz-18T | 1457 | 0.643204 | 0         |  |  |
|            |      | Shiraz-22T | 1673 | 0.611783 | 0         |  |  |
|            |      | Shiraz-22T | 1677 | 0.789711 | 0         |  |  |
|            |      | Shiraz-25T | 1719 | 0.472955 | 0         |  |  |
|            |      | Shiraz-28T | 1762 | 0.562311 | 0         |  |  |
|            |      | Shiraz-29T | 1801 | 0.815343 | 0         |  |  |
|            |      | Shiraz-32T | 1870 | 0.729766 | 0         |  |  |
|            |      | Shiraz-35T | 1933 | 0.488535 | 0         |  |  |
|            |      | Shiraz-58T | 2223 | 0.833364 | 0         |  |  |
|            |      | Shiraz-71T | 2263 | 0.975531 | 0         |  |  |
| NCRNA00087 | chrX | Shiraz-3T  | 242  | 0        | -0.336434 |  |  |
|            |      | Shiraz-4T  | 261  | 0        | -0.336249 |  |  |
|            |      | Shiraz-16T | 295  | 0.591657 | 0         |  |  |
|            |      | Shiraz-36T | 433  | 0        | -0.803961 |  |  |
|            |      | Shiraz-44T | 899  | 0        | -1.09697  |  |  |
|            |      | Shiraz-49T | 1170 | 0        | -0.967436 |  |  |
|            |      | Shiraz-9T  | 1370 | 0.690073 | 0         |  |  |
|            |      | Shiraz-18T | 1457 | 0.643204 | 0         |  |  |
|            |      | Shiraz-22T | 1673 | 0.611783 | 0         |  |  |
|            |      | Shiraz-22T | 1677 | 0.789711 | 0         |  |  |
|            |      | Shiraz-25T | 1719 | 0.472955 | 0         |  |  |
|            |      | Shiraz-28T | 1762 | 0.562311 | 0         |  |  |
|            |      | Shiraz-29T | 1801 | 0.815343 | 0         |  |  |
|            |      | Shiraz-32T | 1870 | 0.729766 | 0         |  |  |
|            |      | Shiraz-35T | 1933 | 0.488535 | 0         |  |  |
|            |      | Shiraz-58T | 2223 | 0.833364 | 0         |  |  |
|            |      | Shiraz-71T | 2263 | 0.975531 | 0         |  |  |
|            |      | Shiraz-3T  | 242  | 0        | -0.336434 |  |  |
|            |      | Shiraz-4T  | 261  | 0        | -0.336249 |  |  |
|            |      | Shiraz-16T | 295  | 0.591657 | 0         |  |  |
|            |      | Shiraz-36T | 433  | 0        | -0.803961 |  |  |
|            |      | Shiraz-44T | 899  | 0        | -1.09697  |  |  |
|            |      | Shiraz-49T | 1170 | 0        | -0.967436 |  |  |
|            |      | Shiraz-9T  | 1370 | 0.690073 | 0         |  |  |

|     |      |            |      |          |           |  |  |
|-----|------|------------|------|----------|-----------|--|--|
|     |      | Shiraz-18T | 1457 | 0.643204 | 0         |  |  |
|     |      | Shiraz-22T | 1673 | 0.611783 | 0         |  |  |
|     |      | Shiraz-22T | 1677 | 0.789711 | 0         |  |  |
|     |      | Shiraz-25T | 1719 | 0.472955 | 0         |  |  |
|     |      | Shiraz-28T | 1762 | 0.562311 | 0         |  |  |
|     |      | Shiraz-29T | 1801 | 0.815343 | 0         |  |  |
|     |      | Shiraz-32T | 1870 | 0.729766 | 0         |  |  |
|     |      | Shiraz-35T | 1933 | 0.488535 | 0         |  |  |
|     |      | Shiraz-58T | 2223 | 0.833364 | 0         |  |  |
|     |      | Shiraz-71T | 2263 | 0.975531 | 0         |  |  |
|     |      | Shiraz-3T  | 242  | 0        | -0.336434 |  |  |
|     |      | Shiraz-4T  | 261  | 0        | -0.336249 |  |  |
|     |      | Shiraz-16T | 295  | 0.591657 | 0         |  |  |
|     |      | Shiraz-36T | 433  | 0        | -0.803961 |  |  |
|     |      | Shiraz-44T | 899  | 0        | -1.09697  |  |  |
|     |      | Shiraz-49T | 1170 | 0        | -0.967436 |  |  |
|     |      | Shiraz-9T  | 1370 | 0.690073 | 0         |  |  |
|     |      | Shiraz-18T | 1457 | 0.643204 | 0         |  |  |
|     |      | Shiraz-22T | 1673 | 0.611783 | 0         |  |  |
|     |      | Shiraz-22T | 1677 | 0.789711 | 0         |  |  |
|     |      | Shiraz-25T | 1719 | 0.472955 | 0         |  |  |
|     |      | Shiraz-28T | 1762 | 0.562311 | 0         |  |  |
|     |      | Shiraz-29T | 1801 | 0.815343 | 0         |  |  |
|     |      | Shiraz-32T | 1870 | 0.729766 | 0         |  |  |
|     |      | Shiraz-35T | 1933 | 0.488535 | 0         |  |  |
|     |      | Shiraz-58T | 2223 | 0.833364 | 0         |  |  |
|     |      | Shiraz-71T | 2263 | 0.975531 | 0         |  |  |
| NDP | chrX | Shiraz-3T  | 235  | 0        | -0.28401  |  |  |
|     |      | Shiraz-4T  | 260  | 0        | -0.324128 |  |  |
|     |      | Shiraz-16T | 294  | 0.655804 | 0         |  |  |
|     |      | Shiraz-31T | 345  | 0.103301 | 0         |  |  |
|     |      | Shiraz-36T | 431  | 0        | -0.78035  |  |  |
|     |      | Shiraz-36T | 432  | 0        | -0.6692   |  |  |
|     |      | Shiraz-44T | 891  | 0        | -0.954044 |  |  |
|     |      | Shiraz-46T | 991  | 0.139564 | 0         |  |  |
|     |      | Shiraz-49T | 1166 | 0        | -0.917235 |  |  |
|     |      | Shiraz-9T  | 1368 | 0.199713 | 0         |  |  |
|     |      | Shiraz-18T | 1455 | 0        | -0.186773 |  |  |
|     |      | Shiraz-22T | 1669 | 0.695915 | 0         |  |  |
|     |      | Shiraz-25T | 1717 | 0.420447 | 0         |  |  |
|     |      | Shiraz-28T | 1760 | 0.538181 | 0         |  |  |
|     |      | Shiraz-29T | 1800 | 0.672527 | 0         |  |  |
|     |      | Shiraz-32T | 1869 | 0.776805 | 0         |  |  |
|     |      | Shiraz-35T | 1932 | 0.507141 | 0         |  |  |
|     |      | Shiraz-40T | 2051 | 0.098506 | 0         |  |  |
|     |      | Shiraz-58T | 2221 | 0.871948 | 0         |  |  |
|     |      | Shiraz-71T | 2260 | 0.68394  | 0         |  |  |

|        |      |            |      |          |           |  |  |
|--------|------|------------|------|----------|-----------|--|--|
|        |      | Shiraz-71T | 2262 | 0.986748 | 0         |  |  |
|        |      | Shiraz-3T  | 235  | 0        | -0.28401  |  |  |
|        |      | Shiraz-4T  | 260  | 0        | -0.324128 |  |  |
|        |      | Shiraz-16T | 294  | 0.655804 | 0         |  |  |
|        |      | Shiraz-31T | 345  | 0.103301 | 0         |  |  |
|        |      | Shiraz-36T | 431  | 0        | -0.78035  |  |  |
|        |      | Shiraz-36T | 432  | 0        | -0.6692   |  |  |
|        |      | Shiraz-44T | 891  | 0        | -0.954044 |  |  |
|        |      | Shiraz-46T | 991  | 0.139564 | 0         |  |  |
|        |      | Shiraz-49T | 1166 | 0        | -0.917235 |  |  |
|        |      | Shiraz-9T  | 1368 | 0.199713 | 0         |  |  |
|        |      | Shiraz-18T | 1455 | 0        | -0.186773 |  |  |
|        |      | Shiraz-22T | 1669 | 0.695915 | 0         |  |  |
|        |      | Shiraz-25T | 1717 | 0.420447 | 0         |  |  |
|        |      | Shiraz-28T | 1760 | 0.538181 | 0         |  |  |
|        |      | Shiraz-29T | 1800 | 0.672527 | 0         |  |  |
|        |      | Shiraz-32T | 1869 | 0.776805 | 0         |  |  |
|        |      | Shiraz-35T | 1932 | 0.507141 | 0         |  |  |
|        |      | Shiraz-40T | 2051 | 0.098506 | 0         |  |  |
|        |      | Shiraz-58T | 2221 | 0.871948 | 0         |  |  |
|        |      | Shiraz-71T | 2260 | 0.68394  | 0         |  |  |
|        |      | Shiraz-71T | 2262 | 0.986748 | 0         |  |  |
|        |      | Shiraz-3T  | 235  | 0        | -0.28401  |  |  |
|        |      | Shiraz-4T  | 260  | 0        | -0.324128 |  |  |
|        |      | Shiraz-16T | 294  | 0.655804 | 0         |  |  |
|        |      | Shiraz-31T | 345  | 0.103301 | 0         |  |  |
|        |      | Shiraz-36T | 431  | 0        | -0.78035  |  |  |
|        |      | Shiraz-36T | 432  | 0        | -0.6692   |  |  |
|        |      | Shiraz-44T | 891  | 0        | -0.954044 |  |  |
|        |      | Shiraz-46T | 991  | 0.139564 | 0         |  |  |
|        |      | Shiraz-49T | 1166 | 0        | -0.917235 |  |  |
|        |      | Shiraz-9T  | 1368 | 0.199713 | 0         |  |  |
|        |      | Shiraz-18T | 1455 | 0        | -0.186773 |  |  |
|        |      | Shiraz-22T | 1669 | 0.695915 | 0         |  |  |
|        |      | Shiraz-25T | 1717 | 0.420447 | 0         |  |  |
|        |      | Shiraz-28T | 1760 | 0.538181 | 0         |  |  |
|        |      | Shiraz-29T | 1800 | 0.672527 | 0         |  |  |
|        |      | Shiraz-32T | 1869 | 0.776805 | 0         |  |  |
|        |      | Shiraz-35T | 1932 | 0.507141 | 0         |  |  |
|        |      | Shiraz-40T | 2051 | 0.098506 | 0         |  |  |
|        |      | Shiraz-58T | 2221 | 0.871948 | 0         |  |  |
|        |      | Shiraz-71T | 2260 | 0.68394  | 0         |  |  |
|        |      | Shiraz-71T | 2262 | 0.986748 | 0         |  |  |
| NDUFA1 | chrX | Shiraz-3T  | 242  | 0        | -0.336434 |  |  |
|        |      | Shiraz-3T  | 244  | 0        | -0.023749 |  |  |
|        |      | Shiraz-4T  | 261  | 0        | -0.336249 |  |  |
|        |      | Shiraz-16T | 295  | 0.591657 | 0         |  |  |

|  |            |      |          |           |  |
|--|------------|------|----------|-----------|--|
|  | Shiraz-36T | 433  | 0        | -0.803961 |  |
|  | Shiraz-44T | 899  | 0        | -1.09697  |  |
|  | Shiraz-44T | 904  | 0        | -0.625526 |  |
|  | Shiraz-49T | 1170 | 0        | -0.967436 |  |
|  | Shiraz-9T  | 1370 | 0.690073 | 0         |  |
|  | Shiraz-18T | 1457 | 0.643204 | 0         |  |
|  | Shiraz-22T | 1673 | 0.611783 | 0         |  |
|  | Shiraz-25T | 1719 | 0.472955 | 0         |  |
|  | Shiraz-28T | 1762 | 0.562311 | 0         |  |
|  | Shiraz-29T | 1801 | 0.815343 | 0         |  |
|  | Shiraz-32T | 1870 | 0.729766 | 0         |  |
|  | Shiraz-35T | 1933 | 0.488535 | 0         |  |
|  | Shiraz-58T | 2223 | 0.833364 | 0         |  |
|  | Shiraz-71T | 2263 | 0.975531 | 0         |  |
|  | Shiraz-3T  | 242  | 0        | -0.336434 |  |
|  | Shiraz-3T  | 244  | 0        | -0.023749 |  |
|  | Shiraz-4T  | 261  | 0        | -0.336249 |  |
|  | Shiraz-16T | 295  | 0.591657 | 0         |  |
|  | Shiraz-36T | 433  | 0        | -0.803961 |  |
|  | Shiraz-44T | 899  | 0        | -1.09697  |  |
|  | Shiraz-44T | 904  | 0        | -0.625526 |  |
|  | Shiraz-49T | 1170 | 0        | -0.967436 |  |
|  | Shiraz-9T  | 1370 | 0.690073 | 0         |  |
|  | Shiraz-18T | 1457 | 0.643204 | 0         |  |
|  | Shiraz-22T | 1673 | 0.611783 | 0         |  |
|  | Shiraz-25T | 1719 | 0.472955 | 0         |  |
|  | Shiraz-28T | 1762 | 0.562311 | 0         |  |
|  | Shiraz-29T | 1801 | 0.815343 | 0         |  |
|  | Shiraz-32T | 1870 | 0.729766 | 0         |  |
|  | Shiraz-35T | 1933 | 0.488535 | 0         |  |
|  | Shiraz-58T | 2223 | 0.833364 | 0         |  |
|  | Shiraz-71T | 2263 | 0.975531 | 0         |  |
|  | Shiraz-3T  | 242  | 0        | -0.336434 |  |
|  | Shiraz-3T  | 244  | 0        | -0.023749 |  |
|  | Shiraz-4T  | 261  | 0        | -0.336249 |  |
|  | Shiraz-16T | 295  | 0.591657 | 0         |  |
|  | Shiraz-36T | 433  | 0        | -0.803961 |  |
|  | Shiraz-44T | 899  | 0        | -1.09697  |  |
|  | Shiraz-44T | 904  | 0        | -0.625526 |  |
|  | Shiraz-49T | 1170 | 0        | -0.967436 |  |
|  | Shiraz-9T  | 1370 | 0.690073 | 0         |  |
|  | Shiraz-18T | 1457 | 0.643204 | 0         |  |
|  | Shiraz-22T | 1673 | 0.611783 | 0         |  |
|  | Shiraz-25T | 1719 | 0.472955 | 0         |  |
|  | Shiraz-28T | 1762 | 0.562311 | 0         |  |
|  | Shiraz-29T | 1801 | 0.815343 | 0         |  |
|  | Shiraz-32T | 1870 | 0.729766 | 0         |  |



|        |      |            |      |          |           |  |
|--------|------|------------|------|----------|-----------|--|
|        |      | Shiraz-35T | 1933 | 0.488535 | 0         |  |
|        |      | Shiraz-58T | 2223 | 0.833364 | 0         |  |
|        |      | Shiraz-71T | 2263 | 0.975531 | 0         |  |
| NDUFA4 | chr7 | Shiraz-4T  | 252  | 0.192083 | 0         |  |
|        |      | Shiraz-36T | 376  | 0.159952 | 0         |  |
|        |      | Shiraz-44T | 628  | 0        | -0.444379 |  |
|        |      | Shiraz-47T | 1027 | 0        | -0.117848 |  |
|        |      | Shiraz-49T | 1117 | 0        | -0.168296 |  |
|        |      | Shiraz-77T | 1222 | 0        | -0.113002 |  |
|        |      | Shiraz-18T | 1433 | 0.250973 | 0         |  |
|        |      | Shiraz-22T | 1543 | 0        | -0.513696 |  |
|        |      | Shiraz-25T | 1697 | 0.21945  | 0         |  |
|        |      | Shiraz-28T | 1734 | 0.362882 | 0         |  |
|        |      | Shiraz-29T | 1777 | 0.156747 | 0         |  |
|        |      | Shiraz-38T | 1950 | 0.265916 | 0         |  |
|        |      | Shiraz-58T | 2157 | 0        | -0.213872 |  |
|        |      | Shiraz-71T | 2236 | 0.320072 | 0         |  |
|        |      | Shiraz-4T  | 252  | 0.192083 | 0         |  |
|        |      | Shiraz-36T | 376  | 0.159952 | 0         |  |
|        |      | Shiraz-44T | 628  | 0        | -0.444379 |  |
|        |      | Shiraz-47T | 1027 | 0        | -0.117848 |  |
|        |      | Shiraz-49T | 1117 | 0        | -0.168296 |  |
|        |      | Shiraz-77T | 1222 | 0        | -0.113002 |  |
|        |      | Shiraz-18T | 1433 | 0.250973 | 0         |  |
|        |      | Shiraz-22T | 1543 | 0        | -0.513696 |  |
|        |      | Shiraz-25T | 1697 | 0.21945  | 0         |  |
|        |      | Shiraz-28T | 1734 | 0.362882 | 0         |  |
|        |      | Shiraz-29T | 1777 | 0.156747 | 0         |  |
|        |      | Shiraz-38T | 1950 | 0.265916 | 0         |  |
|        |      | Shiraz-58T | 2157 | 0        | -0.213872 |  |
|        |      | Shiraz-71T | 2236 | 0.320072 | 0         |  |
|        |      | Shiraz-4T  | 252  | 0.192083 | 0         |  |
|        |      | Shiraz-36T | 376  | 0.159952 | 0         |  |
|        |      | Shiraz-44T | 628  | 0        | -0.444379 |  |
|        |      | Shiraz-47T | 1027 | 0        | -0.117848 |  |
|        |      | Shiraz-49T | 1117 | 0        | -0.168296 |  |
|        |      | Shiraz-77T | 1222 | 0        | -0.113002 |  |
|        |      | Shiraz-18T | 1433 | 0.250973 | 0         |  |
|        |      | Shiraz-22T | 1543 | 0        | -0.513696 |  |
|        |      | Shiraz-25T | 1697 | 0.21945  | 0         |  |
|        |      | Shiraz-28T | 1734 | 0.362882 | 0         |  |
|        |      | Shiraz-29T | 1777 | 0.156747 | 0         |  |
|        |      | Shiraz-38T | 1950 | 0.265916 | 0         |  |
|        |      | Shiraz-58T | 2157 | 0        | -0.213872 |  |
|        |      | Shiraz-71T | 2236 | 0.320072 | 0         |  |
| NDUFA5 | chr7 | Shiraz-3T  | 90   | 0.219276 | 0         |  |
|        |      | Shiraz-3T  | 95   | 0        | -0.077623 |  |

|  |            |      |          |           |  |
|--|------------|------|----------|-----------|--|
|  | Shiraz-4T  | 253  | 0.372918 | 0         |  |
|  | Shiraz-36T | 378  | 0.179558 | 0         |  |
|  | Shiraz-36T | 382  | 0.081739 | 0         |  |
|  | Shiraz-44T | 641  | 0        | -0.477846 |  |
|  | Shiraz-46T | 943  | 0.093799 | 0         |  |
|  | Shiraz-46T | 947  | 0        | -0.010843 |  |
|  | Shiraz-47T | 1031 | 0        | -0.117529 |  |
|  | Shiraz-49T | 1121 | 0        | -0.138569 |  |
|  | Shiraz-77T | 1225 | 0        | -0.117922 |  |
|  | Shiraz-77T | 1228 | 0        | -0.238084 |  |
|  | Shiraz-18T | 1434 | 0.244465 | 0         |  |
|  | Shiraz-22T | 1549 | 0        | -0.319623 |  |
|  | Shiraz-22T | 1552 | 0        | -0.50686  |  |
|  | Shiraz-25T | 1698 | 0.21835  | 0         |  |
|  | Shiraz-28T | 1735 | 0.350744 | 0         |  |
|  | Shiraz-29T | 1778 | 0.120767 | 0         |  |
|  | Shiraz-32T | 1833 | 0.551336 | 0         |  |
|  | Shiraz-32T | 1835 | 0.092727 | 0         |  |
|  | Shiraz-38T | 1951 | 0.250891 | 0         |  |
|  | Shiraz-53T | 2078 | 0.287202 | 0         |  |
|  | Shiraz-58T | 2161 | 0        | -0.187744 |  |
|  | Shiraz-71T | 2238 | 0.603631 | 0         |  |
|  | Shiraz-3T  | 90   | 0.219276 | 0         |  |
|  | Shiraz-3T  | 95   | 0        | -0.077623 |  |
|  | Shiraz-4T  | 253  | 0.372918 | 0         |  |
|  | Shiraz-36T | 378  | 0.179558 | 0         |  |
|  | Shiraz-36T | 382  | 0.081739 | 0         |  |
|  | Shiraz-44T | 641  | 0        | -0.477846 |  |
|  | Shiraz-46T | 943  | 0.093799 | 0         |  |
|  | Shiraz-46T | 947  | 0        | -0.010843 |  |
|  | Shiraz-47T | 1031 | 0        | -0.117529 |  |
|  | Shiraz-49T | 1121 | 0        | -0.138569 |  |
|  | Shiraz-77T | 1225 | 0        | -0.117922 |  |
|  | Shiraz-77T | 1228 | 0        | -0.238084 |  |
|  | Shiraz-18T | 1434 | 0.244465 | 0         |  |
|  | Shiraz-22T | 1549 | 0        | -0.319623 |  |
|  | Shiraz-22T | 1552 | 0        | -0.50686  |  |
|  | Shiraz-25T | 1698 | 0.21835  | 0         |  |
|  | Shiraz-28T | 1735 | 0.350744 | 0         |  |
|  | Shiraz-29T | 1778 | 0.120767 | 0         |  |
|  | Shiraz-32T | 1833 | 0.551336 | 0         |  |
|  | Shiraz-32T | 1835 | 0.092727 | 0         |  |
|  | Shiraz-38T | 1951 | 0.250891 | 0         |  |
|  | Shiraz-53T | 2078 | 0.287202 | 0         |  |
|  | Shiraz-58T | 2161 | 0        | -0.187744 |  |
|  | Shiraz-71T | 2238 | 0.603631 | 0         |  |
|  | Shiraz-3T  | 90   | 0.219276 | 0         |  |

|         |      |            |      |          |           |  |  |
|---------|------|------------|------|----------|-----------|--|--|
|         |      | Shiraz-3T  | 95   | 0        | -0.077623 |  |  |
|         |      | Shiraz-4T  | 253  | 0.372918 | 0         |  |  |
|         |      | Shiraz-36T | 378  | 0.179558 | 0         |  |  |
|         |      | Shiraz-36T | 382  | 0.081739 | 0         |  |  |
|         |      | Shiraz-44T | 641  | 0        | -0.477846 |  |  |
|         |      | Shiraz-46T | 943  | 0.093799 | 0         |  |  |
|         |      | Shiraz-46T | 947  | 0        | -0.010843 |  |  |
|         |      | Shiraz-47T | 1031 | 0        | -0.117529 |  |  |
|         |      | Shiraz-49T | 1121 | 0        | -0.138569 |  |  |
|         |      | Shiraz-77T | 1225 | 0        | -0.117922 |  |  |
|         |      | Shiraz-77T | 1228 | 0        | -0.238084 |  |  |
|         |      | Shiraz-18T | 1434 | 0.244465 | 0         |  |  |
|         |      | Shiraz-22T | 1549 | 0        | -0.319623 |  |  |
|         |      | Shiraz-22T | 1552 | 0        | -0.50686  |  |  |
|         |      | Shiraz-25T | 1698 | 0.21835  | 0         |  |  |
|         |      | Shiraz-28T | 1735 | 0.350744 | 0         |  |  |
|         |      | Shiraz-29T | 1778 | 0.120767 | 0         |  |  |
|         |      | Shiraz-32T | 1833 | 0.551336 | 0         |  |  |
|         |      | Shiraz-32T | 1835 | 0.092727 | 0         |  |  |
|         |      | Shiraz-38T | 1951 | 0.250891 | 0         |  |  |
|         |      | Shiraz-53T | 2078 | 0.287202 | 0         |  |  |
|         |      | Shiraz-58T | 2161 | 0        | -0.187744 |  |  |
|         |      | Shiraz-71T | 2238 | 0.603631 | 0         |  |  |
| NDUFB11 | chrX | Shiraz-4T  | 260  | 0        | -0.324128 |  |  |
|         |      | Shiraz-4T  | 260  | 0        | -0.324128 |  |  |
|         |      | Shiraz-4T  | 260  | 0        | -0.324128 |  |  |
|         |      | Shiraz-4T  | 260  | 0        | -0.324128 |  |  |
|         |      | Shiraz-16T | 294  | 0.655804 | 0         |  |  |
|         |      | Shiraz-16T | 294  | 0.655804 | 0         |  |  |
|         |      | Shiraz-16T | 294  | 0.655804 | 0         |  |  |
|         |      | Shiraz-16T | 294  | 0.655804 | 0         |  |  |
|         |      | Shiraz-31T | 345  | 0.103301 | 0         |  |  |
|         |      | Shiraz-31T | 345  | 0.103301 | 0         |  |  |
|         |      | Shiraz-31T | 345  | 0.103301 | 0         |  |  |
|         |      | Shiraz-31T | 345  | 0.103301 | 0         |  |  |
|         |      | Shiraz-36T | 431  | 0        | -0.78035  |  |  |
|         |      | Shiraz-36T | 431  | 0        | -0.78035  |  |  |
|         |      | Shiraz-36T | 431  | 0        | -0.78035  |  |  |
|         |      | Shiraz-36T | 431  | 0        | -0.78035  |  |  |
|         |      | Shiraz-36T | 432  | 0        | -0.6692   |  |  |
|         |      | Shiraz-36T | 432  | 0        | -0.6692   |  |  |
|         |      | Shiraz-36T | 432  | 0        | -0.6692   |  |  |
|         |      | Shiraz-36T | 432  | 0        | -0.6692   |  |  |
|         |      | Shiraz-44T | 891  | 0        | -0.954044 |  |  |
|         |      | Shiraz-44T | 891  | 0        | -0.954044 |  |  |
|         |      | Shiraz-44T | 891  | 0        | -0.954044 |  |  |
|         |      | Shiraz-44T | 891  | 0        | -0.954044 |  |  |

|  |            |      |          |           |  |
|--|------------|------|----------|-----------|--|
|  | Shiraz-44T | 896  | 0        | -0.109108 |  |
|  | Shiraz-44T | 896  | 0        | -0.109108 |  |
|  | Shiraz-44T | 896  | 0        | -0.109108 |  |
|  | Shiraz-44T | 896  | 0        | -0.109108 |  |
|  | Shiraz-46T | 991  | 0.139564 | 0         |  |
|  | Shiraz-46T | 991  | 0.139564 | 0         |  |
|  | Shiraz-46T | 991  | 0.139564 | 0         |  |
|  | Shiraz-46T | 991  | 0.139564 | 0         |  |
|  | Shiraz-49T | 1166 | 0        | -0.917235 |  |
|  | Shiraz-49T | 1166 | 0        | -0.917235 |  |
|  | Shiraz-49T | 1166 | 0        | -0.917235 |  |
|  | Shiraz-49T | 1166 | 0        | -0.917235 |  |
|  | Shiraz-49T | 1169 | 0        | -0.583529 |  |
|  | Shiraz-49T | 1169 | 0        | -0.583529 |  |
|  | Shiraz-49T | 1169 | 0        | -0.583529 |  |
|  | Shiraz-49T | 1169 | 0        | -0.583529 |  |
|  | Shiraz-77T | 1282 | 0.213849 | 0         |  |
|  | Shiraz-77T | 1282 | 0.213849 | 0         |  |
|  | Shiraz-77T | 1282 | 0.213849 | 0         |  |
|  | Shiraz-77T | 1282 | 0.213849 | 0         |  |
|  | Shiraz-9T  | 1368 | 0.199713 | 0         |  |
|  | Shiraz-9T  | 1368 | 0.199713 | 0         |  |
|  | Shiraz-9T  | 1368 | 0.199713 | 0         |  |
|  | Shiraz-9T  | 1368 | 0.199713 | 0         |  |
|  | Shiraz-9T  | 1369 | 0.703374 | 0         |  |
|  | Shiraz-9T  | 1369 | 0.703374 | 0         |  |
|  | Shiraz-9T  | 1369 | 0.703374 | 0         |  |
|  | Shiraz-9T  | 1369 | 0.703374 | 0         |  |
|  | Shiraz-18T | 1455 | 0        | -0.186773 |  |
|  | Shiraz-18T | 1455 | 0        | -0.186773 |  |
|  | Shiraz-18T | 1455 | 0        | -0.186773 |  |
|  | Shiraz-18T | 1455 | 0        | -0.186773 |  |
|  | Shiraz-22T | 1669 | 0.695915 | 0         |  |
|  | Shiraz-22T | 1669 | 0.695915 | 0         |  |
|  | Shiraz-22T | 1669 | 0.695915 | 0         |  |
|  | Shiraz-22T | 1669 | 0.695915 | 0         |  |
|  | Shiraz-22T | 1672 | 1.01678  | 0         |  |
|  | Shiraz-22T | 1672 | 1.01678  | 0         |  |
|  | Shiraz-22T | 1672 | 1.01678  | 0         |  |
|  | Shiraz-22T | 1672 | 1.01678  | 0         |  |
|  | Shiraz-25T | 1717 | 0.420447 | 0         |  |
|  | Shiraz-25T | 1717 | 0.420447 | 0         |  |
|  | Shiraz-25T | 1717 | 0.420447 | 0         |  |
|  | Shiraz-25T | 1717 | 0.420447 | 0         |  |
|  | Shiraz-28T | 1760 | 0.538181 | 0         |  |
|  | Shiraz-28T | 1760 | 0.538181 | 0         |  |
|  | Shiraz-28T | 1760 | 0.538181 | 0         |  |

|  |  |            |      |          |           |  |
|--|--|------------|------|----------|-----------|--|
|  |  | Shiraz-28T | 1760 | 0.538181 | 0         |  |
|  |  | Shiraz-29T | 1800 | 0.672527 | 0         |  |
|  |  | Shiraz-29T | 1800 | 0.672527 | 0         |  |
|  |  | Shiraz-29T | 1800 | 0.672527 | 0         |  |
|  |  | Shiraz-29T | 1800 | 0.672527 | 0         |  |
|  |  | Shiraz-32T | 1869 | 0.776805 | 0         |  |
|  |  | Shiraz-32T | 1869 | 0.776805 | 0         |  |
|  |  | Shiraz-32T | 1869 | 0.776805 | 0         |  |
|  |  | Shiraz-32T | 1869 | 0.776805 | 0         |  |
|  |  | Shiraz-35T | 1932 | 0.507141 | 0         |  |
|  |  | Shiraz-35T | 1932 | 0.507141 | 0         |  |
|  |  | Shiraz-35T | 1932 | 0.507141 | 0         |  |
|  |  | Shiraz-35T | 1932 | 0.507141 | 0         |  |
|  |  | Shiraz-40T | 2051 | 0.098506 | 0         |  |
|  |  | Shiraz-40T | 2051 | 0.098506 | 0         |  |
|  |  | Shiraz-40T | 2051 | 0.098506 | 0         |  |
|  |  | Shiraz-40T | 2051 | 0.098506 | 0         |  |
|  |  | Shiraz-58T | 2221 | 0.871948 | 0         |  |
|  |  | Shiraz-58T | 2221 | 0.871948 | 0         |  |
|  |  | Shiraz-58T | 2221 | 0.871948 | 0         |  |
|  |  | Shiraz-58T | 2221 | 0.871948 | 0         |  |
|  |  | Shiraz-71T | 2260 | 0.68394  | 0         |  |
|  |  | Shiraz-71T | 2260 | 0.68394  | 0         |  |
|  |  | Shiraz-71T | 2260 | 0.68394  | 0         |  |
|  |  | Shiraz-71T | 2260 | 0.68394  | 0         |  |
|  |  | Shiraz-71T | 2262 | 0.986748 | 0         |  |
|  |  | Shiraz-71T | 2262 | 0.986748 | 0         |  |
|  |  | Shiraz-71T | 2262 | 0.986748 | 0         |  |
|  |  | Shiraz-71T | 2262 | 0.986748 | 0         |  |
|  |  | Shiraz-4T  | 260  | 0        | -0.324128 |  |
|  |  | Shiraz-4T  | 260  | 0        | -0.324128 |  |
|  |  | Shiraz-4T  | 260  | 0        | -0.324128 |  |
|  |  | Shiraz-4T  | 260  | 0        | -0.324128 |  |
|  |  | Shiraz-16T | 294  | 0.655804 | 0         |  |
|  |  | Shiraz-16T | 294  | 0.655804 | 0         |  |
|  |  | Shiraz-16T | 294  | 0.655804 | 0         |  |
|  |  | Shiraz-16T | 294  | 0.655804 | 0         |  |
|  |  | Shiraz-31T | 345  | 0.103301 | 0         |  |
|  |  | Shiraz-31T | 345  | 0.103301 | 0         |  |
|  |  | Shiraz-31T | 345  | 0.103301 | 0         |  |
|  |  | Shiraz-31T | 345  | 0.103301 | 0         |  |
|  |  | Shiraz-36T | 431  | 0        | -0.78035  |  |
|  |  | Shiraz-36T | 431  | 0        | -0.78035  |  |
|  |  | Shiraz-36T | 431  | 0        | -0.78035  |  |
|  |  | Shiraz-36T | 431  | 0        | -0.78035  |  |
|  |  | Shiraz-36T | 432  | 0        | -0.6692   |  |
|  |  | Shiraz-36T | 432  | 0        | -0.6692   |  |

|  |            |      |          |           |  |
|--|------------|------|----------|-----------|--|
|  | Shiraz-36T | 432  | 0        | -0.6692   |  |
|  | Shiraz-36T | 432  | 0        | -0.6692   |  |
|  | Shiraz-44T | 891  | 0        | -0.954044 |  |
|  | Shiraz-44T | 891  | 0        | -0.954044 |  |
|  | Shiraz-44T | 891  | 0        | -0.954044 |  |
|  | Shiraz-44T | 891  | 0        | -0.954044 |  |
|  | Shiraz-44T | 896  | 0        | -0.109108 |  |
|  | Shiraz-44T | 896  | 0        | -0.109108 |  |
|  | Shiraz-44T | 896  | 0        | -0.109108 |  |
|  | Shiraz-44T | 896  | 0        | -0.109108 |  |
|  | Shiraz-46T | 991  | 0.139564 | 0         |  |
|  | Shiraz-46T | 991  | 0.139564 | 0         |  |
|  | Shiraz-46T | 991  | 0.139564 | 0         |  |
|  | Shiraz-46T | 991  | 0.139564 | 0         |  |
|  | Shiraz-49T | 1166 | 0        | -0.917235 |  |
|  | Shiraz-49T | 1166 | 0        | -0.917235 |  |
|  | Shiraz-49T | 1166 | 0        | -0.917235 |  |
|  | Shiraz-49T | 1166 | 0        | -0.917235 |  |
|  | Shiraz-49T | 1169 | 0        | -0.583529 |  |
|  | Shiraz-49T | 1169 | 0        | -0.583529 |  |
|  | Shiraz-49T | 1169 | 0        | -0.583529 |  |
|  | Shiraz-49T | 1169 | 0        | -0.583529 |  |
|  | Shiraz-77T | 1282 | 0.213849 | 0         |  |
|  | Shiraz-77T | 1282 | 0.213849 | 0         |  |
|  | Shiraz-77T | 1282 | 0.213849 | 0         |  |
|  | Shiraz-77T | 1282 | 0.213849 | 0         |  |
|  | Shiraz-9T  | 1368 | 0.199713 | 0         |  |
|  | Shiraz-9T  | 1368 | 0.199713 | 0         |  |
|  | Shiraz-9T  | 1368 | 0.199713 | 0         |  |
|  | Shiraz-9T  | 1368 | 0.199713 | 0         |  |
|  | Shiraz-9T  | 1369 | 0.703374 | 0         |  |
|  | Shiraz-9T  | 1369 | 0.703374 | 0         |  |
|  | Shiraz-9T  | 1369 | 0.703374 | 0         |  |
|  | Shiraz-9T  | 1369 | 0.703374 | 0         |  |
|  | Shiraz-18T | 1455 | 0        | -0.186773 |  |
|  | Shiraz-18T | 1455 | 0        | -0.186773 |  |
|  | Shiraz-18T | 1455 | 0        | -0.186773 |  |
|  | Shiraz-18T | 1455 | 0        | -0.186773 |  |
|  | Shiraz-22T | 1669 | 0.695915 | 0         |  |
|  | Shiraz-22T | 1669 | 0.695915 | 0         |  |
|  | Shiraz-22T | 1669 | 0.695915 | 0         |  |
|  | Shiraz-22T | 1669 | 0.695915 | 0         |  |
|  | Shiraz-22T | 1672 | 1.01678  | 0         |  |
|  | Shiraz-22T | 1672 | 1.01678  | 0         |  |
|  | Shiraz-22T | 1672 | 1.01678  | 0         |  |
|  | Shiraz-22T | 1672 | 1.01678  | 0         |  |
|  | Shiraz-25T | 1717 | 0.420447 | 0         |  |

|  |  |            |      |          |           |  |  |
|--|--|------------|------|----------|-----------|--|--|
|  |  | Shiraz-25T | 1717 | 0.420447 | 0         |  |  |
|  |  | Shiraz-25T | 1717 | 0.420447 | 0         |  |  |
|  |  | Shiraz-25T | 1717 | 0.420447 | 0         |  |  |
|  |  | Shiraz-28T | 1760 | 0.538181 | 0         |  |  |
|  |  | Shiraz-28T | 1760 | 0.538181 | 0         |  |  |
|  |  | Shiraz-28T | 1760 | 0.538181 | 0         |  |  |
|  |  | Shiraz-28T | 1760 | 0.538181 | 0         |  |  |
|  |  | Shiraz-29T | 1800 | 0.672527 | 0         |  |  |
|  |  | Shiraz-29T | 1800 | 0.672527 | 0         |  |  |
|  |  | Shiraz-29T | 1800 | 0.672527 | 0         |  |  |
|  |  | Shiraz-29T | 1800 | 0.672527 | 0         |  |  |
|  |  | Shiraz-32T | 1869 | 0.776805 | 0         |  |  |
|  |  | Shiraz-32T | 1869 | 0.776805 | 0         |  |  |
|  |  | Shiraz-32T | 1869 | 0.776805 | 0         |  |  |
|  |  | Shiraz-32T | 1869 | 0.776805 | 0         |  |  |
|  |  | Shiraz-35T | 1932 | 0.507141 | 0         |  |  |
|  |  | Shiraz-35T | 1932 | 0.507141 | 0         |  |  |
|  |  | Shiraz-35T | 1932 | 0.507141 | 0         |  |  |
|  |  | Shiraz-35T | 1932 | 0.507141 | 0         |  |  |
|  |  | Shiraz-40T | 2051 | 0.098506 | 0         |  |  |
|  |  | Shiraz-40T | 2051 | 0.098506 | 0         |  |  |
|  |  | Shiraz-40T | 2051 | 0.098506 | 0         |  |  |
|  |  | Shiraz-40T | 2051 | 0.098506 | 0         |  |  |
|  |  | Shiraz-58T | 2221 | 0.871948 | 0         |  |  |
|  |  | Shiraz-58T | 2221 | 0.871948 | 0         |  |  |
|  |  | Shiraz-58T | 2221 | 0.871948 | 0         |  |  |
|  |  | Shiraz-58T | 2221 | 0.871948 | 0         |  |  |
|  |  | Shiraz-71T | 2260 | 0.68394  | 0         |  |  |
|  |  | Shiraz-71T | 2260 | 0.68394  | 0         |  |  |
|  |  | Shiraz-71T | 2260 | 0.68394  | 0         |  |  |
|  |  | Shiraz-71T | 2260 | 0.68394  | 0         |  |  |
|  |  | Shiraz-71T | 2262 | 0.986748 | 0         |  |  |
|  |  | Shiraz-71T | 2262 | 0.986748 | 0         |  |  |
|  |  | Shiraz-71T | 2262 | 0.986748 | 0         |  |  |
|  |  | Shiraz-71T | 2262 | 0.986748 | 0         |  |  |
|  |  | Shiraz-4T  | 260  | 0        | -0.324128 |  |  |
|  |  | Shiraz-4T  | 260  | 0        | -0.324128 |  |  |
|  |  | Shiraz-4T  | 260  | 0        | -0.324128 |  |  |
|  |  | Shiraz-4T  | 260  | 0        | -0.324128 |  |  |
|  |  | Shiraz-16T | 294  | 0.655804 | 0         |  |  |
|  |  | Shiraz-16T | 294  | 0.655804 | 0         |  |  |
|  |  | Shiraz-16T | 294  | 0.655804 | 0         |  |  |
|  |  | Shiraz-16T | 294  | 0.655804 | 0         |  |  |
|  |  | Shiraz-31T | 345  | 0.103301 | 0         |  |  |
|  |  | Shiraz-31T | 345  | 0.103301 | 0         |  |  |
|  |  | Shiraz-31T | 345  | 0.103301 | 0         |  |  |
|  |  | Shiraz-31T | 345  | 0.103301 | 0         |  |  |

|  |            |      |          |           |  |
|--|------------|------|----------|-----------|--|
|  | Shiraz-36T | 431  | 0        | -0.78035  |  |
|  | Shiraz-36T | 431  | 0        | -0.78035  |  |
|  | Shiraz-36T | 431  | 0        | -0.78035  |  |
|  | Shiraz-36T | 431  | 0        | -0.78035  |  |
|  | Shiraz-36T | 432  | 0        | -0.6692   |  |
|  | Shiraz-36T | 432  | 0        | -0.6692   |  |
|  | Shiraz-36T | 432  | 0        | -0.6692   |  |
|  | Shiraz-36T | 432  | 0        | -0.6692   |  |
|  | Shiraz-44T | 891  | 0        | -0.954044 |  |
|  | Shiraz-44T | 891  | 0        | -0.954044 |  |
|  | Shiraz-44T | 891  | 0        | -0.954044 |  |
|  | Shiraz-44T | 891  | 0        | -0.954044 |  |
|  | Shiraz-44T | 896  | 0        | -0.109108 |  |
|  | Shiraz-44T | 896  | 0        | -0.109108 |  |
|  | Shiraz-44T | 896  | 0        | -0.109108 |  |
|  | Shiraz-44T | 896  | 0        | -0.109108 |  |
|  | Shiraz-46T | 991  | 0.139564 | 0         |  |
|  | Shiraz-46T | 991  | 0.139564 | 0         |  |
|  | Shiraz-46T | 991  | 0.139564 | 0         |  |
|  | Shiraz-46T | 991  | 0.139564 | 0         |  |
|  | Shiraz-49T | 1166 | 0        | -0.917235 |  |
|  | Shiraz-49T | 1166 | 0        | -0.917235 |  |
|  | Shiraz-49T | 1166 | 0        | -0.917235 |  |
|  | Shiraz-49T | 1166 | 0        | -0.917235 |  |
|  | Shiraz-49T | 1169 | 0        | -0.583529 |  |
|  | Shiraz-49T | 1169 | 0        | -0.583529 |  |
|  | Shiraz-49T | 1169 | 0        | -0.583529 |  |
|  | Shiraz-49T | 1169 | 0        | -0.583529 |  |
|  | Shiraz-77T | 1282 | 0.213849 | 0         |  |
|  | Shiraz-77T | 1282 | 0.213849 | 0         |  |
|  | Shiraz-77T | 1282 | 0.213849 | 0         |  |
|  | Shiraz-77T | 1282 | 0.213849 | 0         |  |
|  | Shiraz-9T  | 1368 | 0.199713 | 0         |  |
|  | Shiraz-9T  | 1368 | 0.199713 | 0         |  |
|  | Shiraz-9T  | 1368 | 0.199713 | 0         |  |
|  | Shiraz-9T  | 1368 | 0.199713 | 0         |  |
|  | Shiraz-9T  | 1369 | 0.703374 | 0         |  |
|  | Shiraz-9T  | 1369 | 0.703374 | 0         |  |
|  | Shiraz-9T  | 1369 | 0.703374 | 0         |  |
|  | Shiraz-9T  | 1369 | 0.703374 | 0         |  |
|  | Shiraz-18T | 1455 | 0        | -0.186773 |  |
|  | Shiraz-18T | 1455 | 0        | -0.186773 |  |
|  | Shiraz-18T | 1455 | 0        | -0.186773 |  |
|  | Shiraz-18T | 1455 | 0        | -0.186773 |  |
|  | Shiraz-22T | 1669 | 0.695915 | 0         |  |
|  | Shiraz-22T | 1669 | 0.695915 | 0         |  |
|  | Shiraz-22T | 1669 | 0.695915 | 0         |  |



|        |      |            |      |          |   |  |
|--------|------|------------|------|----------|---|--|
|        |      | Shiraz-22T | 1669 | 0.695915 | 0 |  |
|        |      | Shiraz-22T | 1672 | 1.01678  | 0 |  |
|        |      | Shiraz-22T | 1672 | 1.01678  | 0 |  |
|        |      | Shiraz-22T | 1672 | 1.01678  | 0 |  |
|        |      | Shiraz-22T | 1672 | 1.01678  | 0 |  |
|        |      | Shiraz-25T | 1717 | 0.420447 | 0 |  |
|        |      | Shiraz-25T | 1717 | 0.420447 | 0 |  |
|        |      | Shiraz-25T | 1717 | 0.420447 | 0 |  |
|        |      | Shiraz-25T | 1717 | 0.420447 | 0 |  |
|        |      | Shiraz-28T | 1760 | 0.538181 | 0 |  |
|        |      | Shiraz-28T | 1760 | 0.538181 | 0 |  |
|        |      | Shiraz-28T | 1760 | 0.538181 | 0 |  |
|        |      | Shiraz-28T | 1760 | 0.538181 | 0 |  |
|        |      | Shiraz-29T | 1800 | 0.672527 | 0 |  |
|        |      | Shiraz-29T | 1800 | 0.672527 | 0 |  |
|        |      | Shiraz-29T | 1800 | 0.672527 | 0 |  |
|        |      | Shiraz-29T | 1800 | 0.672527 | 0 |  |
|        |      | Shiraz-32T | 1869 | 0.776805 | 0 |  |
|        |      | Shiraz-32T | 1869 | 0.776805 | 0 |  |
|        |      | Shiraz-32T | 1869 | 0.776805 | 0 |  |
|        |      | Shiraz-32T | 1869 | 0.776805 | 0 |  |
|        |      | Shiraz-35T | 1932 | 0.507141 | 0 |  |
|        |      | Shiraz-35T | 1932 | 0.507141 | 0 |  |
|        |      | Shiraz-35T | 1932 | 0.507141 | 0 |  |
|        |      | Shiraz-35T | 1932 | 0.507141 | 0 |  |
|        |      | Shiraz-40T | 2051 | 0.098506 | 0 |  |
|        |      | Shiraz-40T | 2051 | 0.098506 | 0 |  |
|        |      | Shiraz-40T | 2051 | 0.098506 | 0 |  |
|        |      | Shiraz-40T | 2051 | 0.098506 | 0 |  |
|        |      | Shiraz-58T | 2221 | 0.871948 | 0 |  |
|        |      | Shiraz-58T | 2221 | 0.871948 | 0 |  |
|        |      | Shiraz-58T | 2221 | 0.871948 | 0 |  |
|        |      | Shiraz-58T | 2221 | 0.871948 | 0 |  |
|        |      | Shiraz-71T | 2260 | 0.68394  | 0 |  |
|        |      | Shiraz-71T | 2260 | 0.68394  | 0 |  |
|        |      | Shiraz-71T | 2260 | 0.68394  | 0 |  |
|        |      | Shiraz-71T | 2260 | 0.68394  | 0 |  |
|        |      | Shiraz-71T | 2262 | 0.986748 | 0 |  |
|        |      | Shiraz-71T | 2262 | 0.986748 | 0 |  |
|        |      | Shiraz-71T | 2262 | 0.986748 | 0 |  |
|        |      | Shiraz-71T | 2262 | 0.986748 | 0 |  |
| NDUFB2 | chr7 | Shiraz-3T  | 90   | 0.219276 | 0 |  |
|        |      | Shiraz-3T  | 97   | 0.496001 | 0 |  |
|        |      | Shiraz-4T  | 253  | 0.372918 | 0 |  |
|        |      | Shiraz-31T | 318  | 0.254373 | 0 |  |
|        |      | Shiraz-36T | 378  | 0.179558 | 0 |  |
|        |      | Shiraz-36T | 383  | 0.374586 | 0 |  |

|  |            |      |          |           |  |
|--|------------|------|----------|-----------|--|
|  | Shiraz-44T | 644  | 0.496536 | 0         |  |
|  | Shiraz-46T | 943  | 0.093799 | 0         |  |
|  | Shiraz-47T | 1033 | 0.220267 | 0         |  |
|  | Shiraz-77T | 1225 | 0        | -0.117922 |  |
|  | Shiraz-77T | 1230 | 0.149651 | 0         |  |
|  | Shiraz-9T  | 1325 | 0.221899 | 0         |  |
|  | Shiraz-18T | 1434 | 0.244465 | 0         |  |
|  | Shiraz-25T | 1698 | 0.21835  | 0         |  |
|  | Shiraz-28T | 1735 | 0.350744 | 0         |  |
|  | Shiraz-29T | 1778 | 0.120767 | 0         |  |
|  | Shiraz-32T | 1833 | 0.551336 | 0         |  |
|  | Shiraz-38T | 1951 | 0.250891 | 0         |  |
|  | Shiraz-53T | 2078 | 0.287202 | 0         |  |
|  | Shiraz-58T | 2162 | 0.221505 | 0         |  |
|  | Shiraz-71T | 2238 | 0.603631 | 0         |  |
|  | Shiraz-3T  | 90   | 0.219276 | 0         |  |
|  | Shiraz-3T  | 97   | 0.496001 | 0         |  |
|  | Shiraz-4T  | 253  | 0.372918 | 0         |  |
|  | Shiraz-31T | 318  | 0.254373 | 0         |  |
|  | Shiraz-36T | 378  | 0.179558 | 0         |  |
|  | Shiraz-36T | 383  | 0.374586 | 0         |  |
|  | Shiraz-44T | 644  | 0.496536 | 0         |  |
|  | Shiraz-46T | 943  | 0.093799 | 0         |  |
|  | Shiraz-47T | 1033 | 0.220267 | 0         |  |
|  | Shiraz-77T | 1225 | 0        | -0.117922 |  |
|  | Shiraz-77T | 1230 | 0.149651 | 0         |  |
|  | Shiraz-9T  | 1325 | 0.221899 | 0         |  |
|  | Shiraz-18T | 1434 | 0.244465 | 0         |  |
|  | Shiraz-25T | 1698 | 0.21835  | 0         |  |
|  | Shiraz-28T | 1735 | 0.350744 | 0         |  |
|  | Shiraz-29T | 1778 | 0.120767 | 0         |  |
|  | Shiraz-32T | 1833 | 0.551336 | 0         |  |
|  | Shiraz-38T | 1951 | 0.250891 | 0         |  |
|  | Shiraz-53T | 2078 | 0.287202 | 0         |  |
|  | Shiraz-58T | 2162 | 0.221505 | 0         |  |
|  | Shiraz-71T | 2238 | 0.603631 | 0         |  |
|  | Shiraz-3T  | 90   | 0.219276 | 0         |  |
|  | Shiraz-3T  | 97   | 0.496001 | 0         |  |
|  | Shiraz-4T  | 253  | 0.372918 | 0         |  |
|  | Shiraz-31T | 318  | 0.254373 | 0         |  |
|  | Shiraz-36T | 378  | 0.179558 | 0         |  |
|  | Shiraz-36T | 383  | 0.374586 | 0         |  |
|  | Shiraz-44T | 644  | 0.496536 | 0         |  |
|  | Shiraz-46T | 943  | 0.093799 | 0         |  |
|  | Shiraz-47T | 1033 | 0.220267 | 0         |  |
|  | Shiraz-77T | 1225 | 0        | -0.117922 |  |
|  | Shiraz-77T | 1230 | 0.149651 | 0         |  |

|         |      |            |      |          |           |  |
|---------|------|------------|------|----------|-----------|--|
|         |      | Shiraz-9T  | 1325 | 0.221899 | 0         |  |
|         |      | Shiraz-18T | 1434 | 0.244465 | 0         |  |
|         |      | Shiraz-25T | 1698 | 0.21835  | 0         |  |
|         |      | Shiraz-28T | 1735 | 0.350744 | 0         |  |
|         |      | Shiraz-29T | 1778 | 0.120767 | 0         |  |
|         |      | Shiraz-32T | 1833 | 0.551336 | 0         |  |
|         |      | Shiraz-38T | 1951 | 0.250891 | 0         |  |
|         |      | Shiraz-53T | 2078 | 0.287202 | 0         |  |
|         |      | Shiraz-58T | 2162 | 0.221505 | 0         |  |
|         |      | Shiraz-71T | 2238 | 0.603631 | 0         |  |
| NEUROD6 | chr7 | Shiraz-3T  | 87   | 0.198593 | 0         |  |
|         |      | Shiraz-4T  | 252  | 0.192083 | 0         |  |
|         |      | Shiraz-36T | 376  | 0.159952 | 0         |  |
|         |      | Shiraz-44T | 631  | 0        | -0.180312 |  |
|         |      | Shiraz-46T | 942  | 0.069143 | 0         |  |
|         |      | Shiraz-18T | 1433 | 0.250973 | 0         |  |
|         |      | Shiraz-25T | 1697 | 0.21945  | 0         |  |
|         |      | Shiraz-28T | 1734 | 0.362882 | 0         |  |
|         |      | Shiraz-29T | 1777 | 0.156747 | 0         |  |
|         |      | Shiraz-38T | 1950 | 0.265916 | 0         |  |
|         |      | Shiraz-71T | 2236 | 0.320072 | 0         |  |
|         |      | Shiraz-3T  | 87   | 0.198593 | 0         |  |
|         |      | Shiraz-4T  | 252  | 0.192083 | 0         |  |
|         |      | Shiraz-36T | 376  | 0.159952 | 0         |  |
|         |      | Shiraz-44T | 631  | 0        | -0.180312 |  |
|         |      | Shiraz-46T | 942  | 0.069143 | 0         |  |
|         |      | Shiraz-18T | 1433 | 0.250973 | 0         |  |
|         |      | Shiraz-25T | 1697 | 0.21945  | 0         |  |
|         |      | Shiraz-28T | 1734 | 0.362882 | 0         |  |
|         |      | Shiraz-29T | 1777 | 0.156747 | 0         |  |
|         |      | Shiraz-38T | 1950 | 0.265916 | 0         |  |
|         |      | Shiraz-71T | 2236 | 0.320072 | 0         |  |
|         |      | Shiraz-3T  | 87   | 0.198593 | 0         |  |
|         |      | Shiraz-4T  | 252  | 0.192083 | 0         |  |
|         |      | Shiraz-36T | 376  | 0.159952 | 0         |  |
|         |      | Shiraz-44T | 631  | 0        | -0.180312 |  |
|         |      | Shiraz-46T | 942  | 0.069143 | 0         |  |
|         |      | Shiraz-18T | 1433 | 0.250973 | 0         |  |
|         |      | Shiraz-25T | 1697 | 0.21945  | 0         |  |
|         |      | Shiraz-28T | 1734 | 0.362882 | 0         |  |
|         |      | Shiraz-29T | 1777 | 0.156747 | 0         |  |
|         |      | Shiraz-38T | 1950 | 0.265916 | 0         |  |
|         |      | Shiraz-71T | 2236 | 0.320072 | 0         |  |
| NFE2L3  | chr7 | Shiraz-3T  | 87   | 0.198593 | 0         |  |
|         |      | Shiraz-4T  | 252  | 0.192083 | 0         |  |
|         |      | Shiraz-36T | 376  | 0.159952 | 0         |  |
|         |      | Shiraz-46T | 942  | 0.069143 | 0         |  |

|         |      |            |      |          |           |  |  |
|---------|------|------------|------|----------|-----------|--|--|
|         |      | Shiraz-18T | 1433 | 0.250973 | 0         |  |  |
|         |      | Shiraz-25T | 1697 | 0.21945  | 0         |  |  |
|         |      | Shiraz-28T | 1734 | 0.362882 | 0         |  |  |
|         |      | Shiraz-29T | 1777 | 0.156747 | 0         |  |  |
|         |      | Shiraz-38T | 1950 | 0.265916 | 0         |  |  |
|         |      | Shiraz-71T | 2236 | 0.320072 | 0         |  |  |
|         |      | Shiraz-3T  | 87   | 0.198593 | 0         |  |  |
|         |      | Shiraz-4T  | 252  | 0.192083 | 0         |  |  |
|         |      | Shiraz-36T | 376  | 0.159952 | 0         |  |  |
|         |      | Shiraz-46T | 942  | 0.069143 | 0         |  |  |
|         |      | Shiraz-18T | 1433 | 0.250973 | 0         |  |  |
|         |      | Shiraz-25T | 1697 | 0.21945  | 0         |  |  |
|         |      | Shiraz-28T | 1734 | 0.362882 | 0         |  |  |
|         |      | Shiraz-29T | 1777 | 0.156747 | 0         |  |  |
|         |      | Shiraz-38T | 1950 | 0.265916 | 0         |  |  |
|         |      | Shiraz-71T | 2236 | 0.320072 | 0         |  |  |
|         |      | Shiraz-3T  | 87   | 0.198593 | 0         |  |  |
|         |      | Shiraz-4T  | 252  | 0.192083 | 0         |  |  |
|         |      | Shiraz-36T | 376  | 0.159952 | 0         |  |  |
|         |      | Shiraz-46T | 942  | 0.069143 | 0         |  |  |
|         |      | Shiraz-18T | 1433 | 0.250973 | 0         |  |  |
|         |      | Shiraz-25T | 1697 | 0.21945  | 0         |  |  |
|         |      | Shiraz-28T | 1734 | 0.362882 | 0         |  |  |
|         |      | Shiraz-29T | 1777 | 0.156747 | 0         |  |  |
|         |      | Shiraz-38T | 1950 | 0.265916 | 0         |  |  |
|         |      | Shiraz-71T | 2236 | 0.320072 | 0         |  |  |
| NGFRAP1 | chrX | Shiraz-3T  | 242  | 0        | -0.336434 |  |  |
|         |      | Shiraz-3T  | 242  | 0        | -0.336434 |  |  |
|         |      | Shiraz-4T  | 261  | 0        | -0.336249 |  |  |
|         |      | Shiraz-4T  | 261  | 0        | -0.336249 |  |  |
|         |      | Shiraz-16T | 295  | 0.591657 | 0         |  |  |
|         |      | Shiraz-16T | 295  | 0.591657 | 0         |  |  |
|         |      | Shiraz-36T | 433  | 0        | -0.803961 |  |  |
|         |      | Shiraz-36T | 433  | 0        | -0.803961 |  |  |
|         |      | Shiraz-44T | 899  | 0        | -1.09697  |  |  |
|         |      | Shiraz-44T | 899  | 0        | -1.09697  |  |  |
|         |      | Shiraz-49T | 1170 | 0        | -0.967436 |  |  |
|         |      | Shiraz-49T | 1170 | 0        | -0.967436 |  |  |
|         |      | Shiraz-18T | 1457 | 0.643204 | 0         |  |  |
|         |      | Shiraz-18T | 1457 | 0.643204 | 0         |  |  |
|         |      | Shiraz-22T | 1673 | 0.611783 | 0         |  |  |
|         |      | Shiraz-22T | 1673 | 0.611783 | 0         |  |  |
|         |      | Shiraz-25T | 1719 | 0.472955 | 0         |  |  |
|         |      | Shiraz-25T | 1719 | 0.472955 | 0         |  |  |
|         |      | Shiraz-28T | 1762 | 0.562311 | 0         |  |  |
|         |      | Shiraz-28T | 1762 | 0.562311 | 0         |  |  |
|         |      | Shiraz-29T | 1801 | 0.815343 | 0         |  |  |

|  |  |            |      |          |           |  |  |
|--|--|------------|------|----------|-----------|--|--|
|  |  | Shiraz-29T | 1801 | 0.815343 | 0         |  |  |
|  |  | Shiraz-32T | 1870 | 0.729766 | 0         |  |  |
|  |  | Shiraz-32T | 1870 | 0.729766 | 0         |  |  |
|  |  | Shiraz-35T | 1933 | 0.488535 | 0         |  |  |
|  |  | Shiraz-35T | 1933 | 0.488535 | 0         |  |  |
|  |  | Shiraz-58T | 2223 | 0.833364 | 0         |  |  |
|  |  | Shiraz-58T | 2223 | 0.833364 | 0         |  |  |
|  |  | Shiraz-71T | 2263 | 0.975531 | 0         |  |  |
|  |  | Shiraz-71T | 2263 | 0.975531 | 0         |  |  |
|  |  | Shiraz-3T  | 242  | 0        | -0.336434 |  |  |
|  |  | Shiraz-3T  | 242  | 0        | -0.336434 |  |  |
|  |  | Shiraz-4T  | 261  | 0        | -0.336249 |  |  |
|  |  | Shiraz-4T  | 261  | 0        | -0.336249 |  |  |
|  |  | Shiraz-16T | 295  | 0.591657 | 0         |  |  |
|  |  | Shiraz-16T | 295  | 0.591657 | 0         |  |  |
|  |  | Shiraz-36T | 433  | 0        | -0.803961 |  |  |
|  |  | Shiraz-36T | 433  | 0        | -0.803961 |  |  |
|  |  | Shiraz-44T | 899  | 0        | -1.09697  |  |  |
|  |  | Shiraz-44T | 899  | 0        | -1.09697  |  |  |
|  |  | Shiraz-49T | 1170 | 0        | -0.967436 |  |  |
|  |  | Shiraz-49T | 1170 | 0        | -0.967436 |  |  |
|  |  | Shiraz-18T | 1457 | 0.643204 | 0         |  |  |
|  |  | Shiraz-18T | 1457 | 0.643204 | 0         |  |  |
|  |  | Shiraz-22T | 1673 | 0.611783 | 0         |  |  |
|  |  | Shiraz-22T | 1673 | 0.611783 | 0         |  |  |
|  |  | Shiraz-25T | 1719 | 0.472955 | 0         |  |  |
|  |  | Shiraz-25T | 1719 | 0.472955 | 0         |  |  |
|  |  | Shiraz-28T | 1762 | 0.562311 | 0         |  |  |
|  |  | Shiraz-28T | 1762 | 0.562311 | 0         |  |  |
|  |  | Shiraz-29T | 1801 | 0.815343 | 0         |  |  |
|  |  | Shiraz-29T | 1801 | 0.815343 | 0         |  |  |
|  |  | Shiraz-32T | 1870 | 0.729766 | 0         |  |  |
|  |  | Shiraz-32T | 1870 | 0.729766 | 0         |  |  |
|  |  | Shiraz-35T | 1933 | 0.488535 | 0         |  |  |
|  |  | Shiraz-35T | 1933 | 0.488535 | 0         |  |  |
|  |  | Shiraz-58T | 2223 | 0.833364 | 0         |  |  |
|  |  | Shiraz-58T | 2223 | 0.833364 | 0         |  |  |
|  |  | Shiraz-71T | 2263 | 0.975531 | 0         |  |  |
|  |  | Shiraz-71T | 2263 | 0.975531 | 0         |  |  |
|  |  | Shiraz-3T  | 242  | 0        | -0.336434 |  |  |
|  |  | Shiraz-3T  | 242  | 0        | -0.336434 |  |  |
|  |  | Shiraz-4T  | 261  | 0        | -0.336249 |  |  |
|  |  | Shiraz-4T  | 261  | 0        | -0.336249 |  |  |
|  |  | Shiraz-16T | 295  | 0.591657 | 0         |  |  |
|  |  | Shiraz-16T | 295  | 0.591657 | 0         |  |  |
|  |  | Shiraz-36T | 433  | 0        | -0.803961 |  |  |
|  |  | Shiraz-36T | 433  | 0        | -0.803961 |  |  |

|     |      |            |      |          |           |  |  |
|-----|------|------------|------|----------|-----------|--|--|
|     |      | Shiraz-44T | 899  | 0        | -1.09697  |  |  |
|     |      | Shiraz-44T | 899  | 0        | -1.09697  |  |  |
|     |      | Shiraz-49T | 1170 | 0        | -0.967436 |  |  |
|     |      | Shiraz-49T | 1170 | 0        | -0.967436 |  |  |
|     |      | Shiraz-18T | 1457 | 0.643204 | 0         |  |  |
|     |      | Shiraz-18T | 1457 | 0.643204 | 0         |  |  |
|     |      | Shiraz-22T | 1673 | 0.611783 | 0         |  |  |
|     |      | Shiraz-22T | 1673 | 0.611783 | 0         |  |  |
|     |      | Shiraz-25T | 1719 | 0.472955 | 0         |  |  |
|     |      | Shiraz-25T | 1719 | 0.472955 | 0         |  |  |
|     |      | Shiraz-28T | 1762 | 0.562311 | 0         |  |  |
|     |      | Shiraz-28T | 1762 | 0.562311 | 0         |  |  |
|     |      | Shiraz-29T | 1801 | 0.815343 | 0         |  |  |
|     |      | Shiraz-29T | 1801 | 0.815343 | 0         |  |  |
|     |      | Shiraz-32T | 1870 | 0.729766 | 0         |  |  |
|     |      | Shiraz-32T | 1870 | 0.729766 | 0         |  |  |
|     |      | Shiraz-35T | 1933 | 0.488535 | 0         |  |  |
|     |      | Shiraz-35T | 1933 | 0.488535 | 0         |  |  |
|     |      | Shiraz-58T | 2223 | 0.833364 | 0         |  |  |
|     |      | Shiraz-58T | 2223 | 0.833364 | 0         |  |  |
|     |      | Shiraz-71T | 2263 | 0.975531 | 0         |  |  |
|     |      | Shiraz-71T | 2263 | 0.975531 | 0         |  |  |
| NHS | chrX | Shiraz-3T  | 235  | 0        | -0.28401  |  |  |
|     |      | Shiraz-3T  | 235  | 0        | -0.28401  |  |  |
|     |      | Shiraz-4T  | 260  | 0        | -0.324128 |  |  |
|     |      | Shiraz-4T  | 260  | 0        | -0.324128 |  |  |
|     |      | Shiraz-16T | 294  | 0.655804 | 0         |  |  |
|     |      | Shiraz-16T | 294  | 0.655804 | 0         |  |  |
|     |      | Shiraz-36T | 431  | 0        | -0.78035  |  |  |
|     |      | Shiraz-36T | 431  | 0        | -0.78035  |  |  |
|     |      | Shiraz-44T | 891  | 0        | -0.954044 |  |  |
|     |      | Shiraz-44T | 891  | 0        | -0.954044 |  |  |
|     |      | Shiraz-49T | 1166 | 0        | -0.917235 |  |  |
|     |      | Shiraz-49T | 1166 | 0        | -0.917235 |  |  |
|     |      | Shiraz-9T  | 1368 | 0.199713 | 0         |  |  |
|     |      | Shiraz-9T  | 1368 | 0.199713 | 0         |  |  |
|     |      | Shiraz-18T | 1455 | 0        | -0.186773 |  |  |
|     |      | Shiraz-18T | 1455 | 0        | -0.186773 |  |  |
|     |      | Shiraz-22T | 1669 | 0.695915 | 0         |  |  |
|     |      | Shiraz-22T | 1669 | 0.695915 | 0         |  |  |
|     |      | Shiraz-25T | 1717 | 0.420447 | 0         |  |  |
|     |      | Shiraz-25T | 1717 | 0.420447 | 0         |  |  |
|     |      | Shiraz-28T | 1760 | 0.538181 | 0         |  |  |
|     |      | Shiraz-28T | 1760 | 0.538181 | 0         |  |  |
|     |      | Shiraz-29T | 1800 | 0.672527 | 0         |  |  |
|     |      | Shiraz-29T | 1800 | 0.672527 | 0         |  |  |
|     |      | Shiraz-32T | 1869 | 0.776805 | 0         |  |  |

|  |  |            |      |          |           |  |  |
|--|--|------------|------|----------|-----------|--|--|
|  |  | Shiraz-32T | 1869 | 0.776805 | 0         |  |  |
|  |  | Shiraz-35T | 1932 | 0.507141 | 0         |  |  |
|  |  | Shiraz-35T | 1932 | 0.507141 | 0         |  |  |
|  |  | Shiraz-40T | 2051 | 0.098506 | 0         |  |  |
|  |  | Shiraz-40T | 2051 | 0.098506 | 0         |  |  |
|  |  | Shiraz-58T | 2221 | 0.871948 | 0         |  |  |
|  |  | Shiraz-58T | 2221 | 0.871948 | 0         |  |  |
|  |  | Shiraz-71T | 2260 | 0.68394  | 0         |  |  |
|  |  | Shiraz-71T | 2260 | 0.68394  | 0         |  |  |
|  |  | Shiraz-71T | 2261 | 0.508399 | 0         |  |  |
|  |  | Shiraz-71T | 2261 | 0.508399 | 0         |  |  |
|  |  | Shiraz-3T  | 235  | 0        | -0.28401  |  |  |
|  |  | Shiraz-3T  | 235  | 0        | -0.28401  |  |  |
|  |  | Shiraz-4T  | 260  | 0        | -0.324128 |  |  |
|  |  | Shiraz-4T  | 260  | 0        | -0.324128 |  |  |
|  |  | Shiraz-16T | 294  | 0.655804 | 0         |  |  |
|  |  | Shiraz-16T | 294  | 0.655804 | 0         |  |  |
|  |  | Shiraz-36T | 431  | 0        | -0.78035  |  |  |
|  |  | Shiraz-36T | 431  | 0        | -0.78035  |  |  |
|  |  | Shiraz-44T | 891  | 0        | -0.954044 |  |  |
|  |  | Shiraz-44T | 891  | 0        | -0.954044 |  |  |
|  |  | Shiraz-49T | 1166 | 0        | -0.917235 |  |  |
|  |  | Shiraz-49T | 1166 | 0        | -0.917235 |  |  |
|  |  | Shiraz-9T  | 1368 | 0.199713 | 0         |  |  |
|  |  | Shiraz-9T  | 1368 | 0.199713 | 0         |  |  |
|  |  | Shiraz-18T | 1455 | 0        | -0.186773 |  |  |
|  |  | Shiraz-18T | 1455 | 0        | -0.186773 |  |  |
|  |  | Shiraz-22T | 1669 | 0.695915 | 0         |  |  |
|  |  | Shiraz-22T | 1669 | 0.695915 | 0         |  |  |
|  |  | Shiraz-25T | 1717 | 0.420447 | 0         |  |  |
|  |  | Shiraz-25T | 1717 | 0.420447 | 0         |  |  |
|  |  | Shiraz-28T | 1760 | 0.538181 | 0         |  |  |
|  |  | Shiraz-28T | 1760 | 0.538181 | 0         |  |  |
|  |  | Shiraz-29T | 1800 | 0.672527 | 0         |  |  |
|  |  | Shiraz-29T | 1800 | 0.672527 | 0         |  |  |
|  |  | Shiraz-32T | 1869 | 0.776805 | 0         |  |  |
|  |  | Shiraz-32T | 1869 | 0.776805 | 0         |  |  |
|  |  | Shiraz-35T | 1932 | 0.507141 | 0         |  |  |
|  |  | Shiraz-35T | 1932 | 0.507141 | 0         |  |  |
|  |  | Shiraz-40T | 2051 | 0.098506 | 0         |  |  |
|  |  | Shiraz-40T | 2051 | 0.098506 | 0         |  |  |
|  |  | Shiraz-58T | 2221 | 0.871948 | 0         |  |  |
|  |  | Shiraz-58T | 2221 | 0.871948 | 0         |  |  |
|  |  | Shiraz-71T | 2260 | 0.68394  | 0         |  |  |
|  |  | Shiraz-71T | 2260 | 0.68394  | 0         |  |  |
|  |  | Shiraz-71T | 2261 | 0.508399 | 0         |  |  |
|  |  | Shiraz-71T | 2261 | 0.508399 | 0         |  |  |

|       |      |            |      |          |           |  |  |
|-------|------|------------|------|----------|-----------|--|--|
|       |      | Shiraz-3T  | 235  | 0        | -0.28401  |  |  |
|       |      | Shiraz-3T  | 235  | 0        | -0.28401  |  |  |
|       |      | Shiraz-4T  | 260  | 0        | -0.324128 |  |  |
|       |      | Shiraz-4T  | 260  | 0        | -0.324128 |  |  |
|       |      | Shiraz-16T | 294  | 0.655804 | 0         |  |  |
|       |      | Shiraz-16T | 294  | 0.655804 | 0         |  |  |
|       |      | Shiraz-36T | 431  | 0        | -0.78035  |  |  |
|       |      | Shiraz-36T | 431  | 0        | -0.78035  |  |  |
|       |      | Shiraz-44T | 891  | 0        | -0.954044 |  |  |
|       |      | Shiraz-44T | 891  | 0        | -0.954044 |  |  |
|       |      | Shiraz-49T | 1166 | 0        | -0.917235 |  |  |
|       |      | Shiraz-49T | 1166 | 0        | -0.917235 |  |  |
|       |      | Shiraz-9T  | 1368 | 0.199713 | 0         |  |  |
|       |      | Shiraz-9T  | 1368 | 0.199713 | 0         |  |  |
|       |      | Shiraz-18T | 1455 | 0        | -0.186773 |  |  |
|       |      | Shiraz-18T | 1455 | 0        | -0.186773 |  |  |
|       |      | Shiraz-22T | 1669 | 0.695915 | 0         |  |  |
|       |      | Shiraz-22T | 1669 | 0.695915 | 0         |  |  |
|       |      | Shiraz-25T | 1717 | 0.420447 | 0         |  |  |
|       |      | Shiraz-25T | 1717 | 0.420447 | 0         |  |  |
|       |      | Shiraz-28T | 1760 | 0.538181 | 0         |  |  |
|       |      | Shiraz-28T | 1760 | 0.538181 | 0         |  |  |
|       |      | Shiraz-29T | 1800 | 0.672527 | 0         |  |  |
|       |      | Shiraz-29T | 1800 | 0.672527 | 0         |  |  |
|       |      | Shiraz-32T | 1869 | 0.776805 | 0         |  |  |
|       |      | Shiraz-32T | 1869 | 0.776805 | 0         |  |  |
|       |      | Shiraz-35T | 1932 | 0.507141 | 0         |  |  |
|       |      | Shiraz-35T | 1932 | 0.507141 | 0         |  |  |
|       |      | Shiraz-40T | 2051 | 0.098506 | 0         |  |  |
|       |      | Shiraz-40T | 2051 | 0.098506 | 0         |  |  |
|       |      | Shiraz-58T | 2221 | 0.871948 | 0         |  |  |
|       |      | Shiraz-58T | 2221 | 0.871948 | 0         |  |  |
|       |      | Shiraz-71T | 2260 | 0.68394  | 0         |  |  |
|       |      | Shiraz-71T | 2260 | 0.68394  | 0         |  |  |
|       |      | Shiraz-71T | 2261 | 0.508399 | 0         |  |  |
|       |      | Shiraz-71T | 2261 | 0.508399 | 0         |  |  |
| NHSL2 | chrX | Shiraz-4T  | 261  | 0        | -0.336249 |  |  |
|       |      | Shiraz-16T | 295  | 0.591657 | 0         |  |  |
|       |      | Shiraz-36T | 433  | 0        | -0.803961 |  |  |
|       |      | Shiraz-44T | 899  | 0        | -1.09697  |  |  |
|       |      | Shiraz-44T | 900  | 0        | -0.584284 |  |  |
|       |      | Shiraz-49T | 1170 | 0        | -0.967436 |  |  |
|       |      | Shiraz-49T | 1171 | 0        | -0.612379 |  |  |
|       |      | Shiraz-77T | 1283 | 0.296555 | 0         |  |  |
|       |      | Shiraz-18T | 1457 | 0.643204 | 0         |  |  |
|       |      | Shiraz-22T | 1673 | 0.611783 | 0         |  |  |
|       |      | Shiraz-22T | 1674 | 0.887899 | 0         |  |  |



|       |      |            |      |          |           |  |  |
|-------|------|------------|------|----------|-----------|--|--|
|       |      | Shiraz-25T | 1719 | 0.472955 | 0         |  |  |
|       |      | Shiraz-28T | 1762 | 0.562311 | 0         |  |  |
|       |      | Shiraz-29T | 1801 | 0.815343 | 0         |  |  |
|       |      | Shiraz-32T | 1870 | 0.729766 | 0         |  |  |
|       |      | Shiraz-35T | 1933 | 0.488535 | 0         |  |  |
|       |      | Shiraz-58T | 2223 | 0.833364 | 0         |  |  |
|       |      | Shiraz-58T | 2224 | 1.076575 | 0         |  |  |
|       |      | Shiraz-71T | 2263 | 0.975531 | 0         |  |  |
|       |      | Shiraz-4T  | 261  | 0        | -0.336249 |  |  |
|       |      | Shiraz-16T | 295  | 0.591657 | 0         |  |  |
|       |      | Shiraz-36T | 433  | 0        | -0.803961 |  |  |
|       |      | Shiraz-44T | 899  | 0        | -1.09697  |  |  |
|       |      | Shiraz-44T | 900  | 0        | -0.584284 |  |  |
|       |      | Shiraz-49T | 1170 | 0        | -0.967436 |  |  |
|       |      | Shiraz-49T | 1171 | 0        | -0.612379 |  |  |
|       |      | Shiraz-77T | 1283 | 0.296555 | 0         |  |  |
|       |      | Shiraz-18T | 1457 | 0.643204 | 0         |  |  |
|       |      | Shiraz-22T | 1673 | 0.611783 | 0         |  |  |
|       |      | Shiraz-22T | 1674 | 0.887899 | 0         |  |  |
|       |      | Shiraz-25T | 1719 | 0.472955 | 0         |  |  |
|       |      | Shiraz-28T | 1762 | 0.562311 | 0         |  |  |
|       |      | Shiraz-29T | 1801 | 0.815343 | 0         |  |  |
|       |      | Shiraz-32T | 1870 | 0.729766 | 0         |  |  |
|       |      | Shiraz-35T | 1933 | 0.488535 | 0         |  |  |
|       |      | Shiraz-58T | 2223 | 0.833364 | 0         |  |  |
|       |      | Shiraz-58T | 2224 | 1.076575 | 0         |  |  |
|       |      | Shiraz-71T | 2263 | 0.975531 | 0         |  |  |
|       |      | Shiraz-4T  | 261  | 0        | -0.336249 |  |  |
|       |      | Shiraz-16T | 295  | 0.591657 | 0         |  |  |
|       |      | Shiraz-36T | 433  | 0        | -0.803961 |  |  |
|       |      | Shiraz-44T | 899  | 0        | -1.09697  |  |  |
|       |      | Shiraz-44T | 900  | 0        | -0.584284 |  |  |
|       |      | Shiraz-49T | 1170 | 0        | -0.967436 |  |  |
|       |      | Shiraz-49T | 1171 | 0        | -0.612379 |  |  |
|       |      | Shiraz-77T | 1283 | 0.296555 | 0         |  |  |
|       |      | Shiraz-18T | 1457 | 0.643204 | 0         |  |  |
|       |      | Shiraz-22T | 1673 | 0.611783 | 0         |  |  |
|       |      | Shiraz-22T | 1674 | 0.887899 | 0         |  |  |
|       |      | Shiraz-25T | 1719 | 0.472955 | 0         |  |  |
|       |      | Shiraz-28T | 1762 | 0.562311 | 0         |  |  |
|       |      | Shiraz-29T | 1801 | 0.815343 | 0         |  |  |
|       |      | Shiraz-32T | 1870 | 0.729766 | 0         |  |  |
|       |      | Shiraz-35T | 1933 | 0.488535 | 0         |  |  |
|       |      | Shiraz-58T | 2223 | 0.833364 | 0         |  |  |
|       |      | Shiraz-58T | 2224 | 1.076575 | 0         |  |  |
|       |      | Shiraz-71T | 2263 | 0.975531 | 0         |  |  |
| NIPBL | chr5 | Shiraz-4T  | 250  | 0.262252 | 0         |  |  |

|      |      |            |      |          |           |  |  |
|------|------|------------|------|----------|-----------|--|--|
|      |      | Shiraz-16T | 266  | 0.321724 | 0         |  |  |
|      |      | Shiraz-44T | 591  | 0        | -0.233934 |  |  |
|      |      | Shiraz-18T | 1429 | 0        | -0.314125 |  |  |
|      |      | Shiraz-22T | 1522 | 0        | -0.322688 |  |  |
|      |      | Shiraz-25T | 1694 | 0.201602 | 0         |  |  |
|      |      | Shiraz-28T | 1731 | 0.295447 | 0         |  |  |
|      |      | Shiraz-29T | 1773 | 0.090981 | 0         |  |  |
|      |      | Shiraz-40T | 2016 | 0.376634 | 0         |  |  |
|      |      | Shiraz-4T  | 250  | 0.262252 | 0         |  |  |
|      |      | Shiraz-16T | 266  | 0.321724 | 0         |  |  |
|      |      | Shiraz-44T | 591  | 0        | -0.233934 |  |  |
|      |      | Shiraz-18T | 1429 | 0        | -0.314125 |  |  |
|      |      | Shiraz-22T | 1522 | 0        | -0.322688 |  |  |
|      |      | Shiraz-25T | 1694 | 0.201602 | 0         |  |  |
|      |      | Shiraz-28T | 1731 | 0.295447 | 0         |  |  |
|      |      | Shiraz-29T | 1773 | 0.090981 | 0         |  |  |
|      |      | Shiraz-40T | 2016 | 0.376634 | 0         |  |  |
|      |      | Shiraz-4T  | 250  | 0.262252 | 0         |  |  |
|      |      | Shiraz-16T | 266  | 0.321724 | 0         |  |  |
|      |      | Shiraz-44T | 591  | 0        | -0.233934 |  |  |
|      |      | Shiraz-18T | 1429 | 0        | -0.314125 |  |  |
|      |      | Shiraz-22T | 1522 | 0        | -0.322688 |  |  |
|      |      | Shiraz-25T | 1694 | 0.201602 | 0         |  |  |
|      |      | Shiraz-28T | 1731 | 0.295447 | 0         |  |  |
|      |      | Shiraz-29T | 1773 | 0.090981 | 0         |  |  |
|      |      | Shiraz-40T | 2016 | 0.376634 | 0         |  |  |
| NKAP | chrX | Shiraz-3T  | 242  | 0        | -0.336434 |  |  |
|      |      | Shiraz-3T  | 244  | 0        | -0.023749 |  |  |
|      |      | Shiraz-4T  | 261  | 0        | -0.336249 |  |  |
|      |      | Shiraz-16T | 295  | 0.591657 | 0         |  |  |
|      |      | Shiraz-36T | 433  | 0        | -0.803961 |  |  |
|      |      | Shiraz-44T | 899  | 0        | -1.09697  |  |  |
|      |      | Shiraz-44T | 904  | 0        | -0.625526 |  |  |
|      |      | Shiraz-49T | 1170 | 0        | -0.967436 |  |  |
|      |      | Shiraz-9T  | 1370 | 0.690073 | 0         |  |  |
|      |      | Shiraz-18T | 1457 | 0.643204 | 0         |  |  |
|      |      | Shiraz-22T | 1673 | 0.611783 | 0         |  |  |
|      |      | Shiraz-25T | 1719 | 0.472955 | 0         |  |  |
|      |      | Shiraz-28T | 1762 | 0.562311 | 0         |  |  |
|      |      | Shiraz-29T | 1801 | 0.815343 | 0         |  |  |
|      |      | Shiraz-32T | 1870 | 0.729766 | 0         |  |  |
|      |      | Shiraz-35T | 1933 | 0.488535 | 0         |  |  |
|      |      | Shiraz-58T | 2223 | 0.833364 | 0         |  |  |
|      |      | Shiraz-71T | 2263 | 0.975531 | 0         |  |  |
|      |      | Shiraz-3T  | 242  | 0        | -0.336434 |  |  |
|      |      | Shiraz-3T  | 244  | 0        | -0.023749 |  |  |
|      |      | Shiraz-4T  | 261  | 0        | -0.336249 |  |  |

|      |      |            |      |          |           |  |  |
|------|------|------------|------|----------|-----------|--|--|
|      |      | Shiraz-16T | 295  | 0.591657 | 0         |  |  |
|      |      | Shiraz-36T | 433  | 0        | -0.803961 |  |  |
|      |      | Shiraz-44T | 899  | 0        | -1.09697  |  |  |
|      |      | Shiraz-44T | 904  | 0        | -0.625526 |  |  |
|      |      | Shiraz-49T | 1170 | 0        | -0.967436 |  |  |
|      |      | Shiraz-9T  | 1370 | 0.690073 | 0         |  |  |
|      |      | Shiraz-18T | 1457 | 0.643204 | 0         |  |  |
|      |      | Shiraz-22T | 1673 | 0.611783 | 0         |  |  |
|      |      | Shiraz-25T | 1719 | 0.472955 | 0         |  |  |
|      |      | Shiraz-28T | 1762 | 0.562311 | 0         |  |  |
|      |      | Shiraz-29T | 1801 | 0.815343 | 0         |  |  |
|      |      | Shiraz-32T | 1870 | 0.729766 | 0         |  |  |
|      |      | Shiraz-35T | 1933 | 0.488535 | 0         |  |  |
|      |      | Shiraz-58T | 2223 | 0.833364 | 0         |  |  |
|      |      | Shiraz-71T | 2263 | 0.975531 | 0         |  |  |
|      |      | Shiraz-3T  | 242  | 0        | -0.336434 |  |  |
|      |      | Shiraz-3T  | 244  | 0        | -0.023749 |  |  |
|      |      | Shiraz-4T  | 261  | 0        | -0.336249 |  |  |
|      |      | Shiraz-16T | 295  | 0.591657 | 0         |  |  |
|      |      | Shiraz-36T | 433  | 0        | -0.803961 |  |  |
|      |      | Shiraz-44T | 899  | 0        | -1.09697  |  |  |
|      |      | Shiraz-44T | 904  | 0        | -0.625526 |  |  |
|      |      | Shiraz-49T | 1170 | 0        | -0.967436 |  |  |
|      |      | Shiraz-9T  | 1370 | 0.690073 | 0         |  |  |
|      |      | Shiraz-18T | 1457 | 0.643204 | 0         |  |  |
|      |      | Shiraz-22T | 1673 | 0.611783 | 0         |  |  |
|      |      | Shiraz-25T | 1719 | 0.472955 | 0         |  |  |
|      |      | Shiraz-28T | 1762 | 0.562311 | 0         |  |  |
|      |      | Shiraz-29T | 1801 | 0.815343 | 0         |  |  |
|      |      | Shiraz-32T | 1870 | 0.729766 | 0         |  |  |
|      |      | Shiraz-35T | 1933 | 0.488535 | 0         |  |  |
|      |      | Shiraz-58T | 2223 | 0.833364 | 0         |  |  |
|      |      | Shiraz-71T | 2263 | 0.975531 | 0         |  |  |
| NKRF | chrX | Shiraz-3T  | 242  | 0        | -0.336434 |  |  |
|      |      | Shiraz-3T  | 244  | 0        | -0.023749 |  |  |
|      |      | Shiraz-4T  | 261  | 0        | -0.336249 |  |  |
|      |      | Shiraz-16T | 295  | 0.591657 | 0         |  |  |
|      |      | Shiraz-36T | 433  | 0        | -0.803961 |  |  |
|      |      | Shiraz-44T | 899  | 0        | -1.09697  |  |  |
|      |      | Shiraz-44T | 904  | 0        | -0.625526 |  |  |
|      |      | Shiraz-49T | 1170 | 0        | -0.967436 |  |  |
|      |      | Shiraz-9T  | 1370 | 0.690073 | 0         |  |  |
|      |      | Shiraz-18T | 1457 | 0.643204 | 0         |  |  |
|      |      | Shiraz-22T | 1673 | 0.611783 | 0         |  |  |
|      |      | Shiraz-25T | 1719 | 0.472955 | 0         |  |  |
|      |      | Shiraz-28T | 1762 | 0.562311 | 0         |  |  |
|      |      | Shiraz-29T | 1801 | 0.815343 | 0         |  |  |

|       |      |            |      |          |           |  |  |
|-------|------|------------|------|----------|-----------|--|--|
|       |      | Shiraz-32T | 1870 | 0.729766 | 0         |  |  |
|       |      | Shiraz-35T | 1933 | 0.488535 | 0         |  |  |
|       |      | Shiraz-58T | 2223 | 0.833364 | 0         |  |  |
|       |      | Shiraz-71T | 2263 | 0.975531 | 0         |  |  |
|       |      | Shiraz-3T  | 242  | 0        | -0.336434 |  |  |
|       |      | Shiraz-3T  | 244  | 0        | -0.023749 |  |  |
|       |      | Shiraz-4T  | 261  | 0        | -0.336249 |  |  |
|       |      | Shiraz-16T | 295  | 0.591657 | 0         |  |  |
|       |      | Shiraz-36T | 433  | 0        | -0.803961 |  |  |
|       |      | Shiraz-44T | 899  | 0        | -1.09697  |  |  |
|       |      | Shiraz-44T | 904  | 0        | -0.625526 |  |  |
|       |      | Shiraz-49T | 1170 | 0        | -0.967436 |  |  |
|       |      | Shiraz-9T  | 1370 | 0.690073 | 0         |  |  |
|       |      | Shiraz-18T | 1457 | 0.643204 | 0         |  |  |
|       |      | Shiraz-22T | 1673 | 0.611783 | 0         |  |  |
|       |      | Shiraz-25T | 1719 | 0.472955 | 0         |  |  |
|       |      | Shiraz-28T | 1762 | 0.562311 | 0         |  |  |
|       |      | Shiraz-29T | 1801 | 0.815343 | 0         |  |  |
|       |      | Shiraz-32T | 1870 | 0.729766 | 0         |  |  |
|       |      | Shiraz-35T | 1933 | 0.488535 | 0         |  |  |
|       |      | Shiraz-58T | 2223 | 0.833364 | 0         |  |  |
|       |      | Shiraz-71T | 2263 | 0.975531 | 0         |  |  |
|       |      | Shiraz-3T  | 242  | 0        | -0.336434 |  |  |
|       |      | Shiraz-3T  | 244  | 0        | -0.023749 |  |  |
|       |      | Shiraz-4T  | 261  | 0        | -0.336249 |  |  |
|       |      | Shiraz-16T | 295  | 0.591657 | 0         |  |  |
|       |      | Shiraz-36T | 433  | 0        | -0.803961 |  |  |
|       |      | Shiraz-44T | 899  | 0        | -1.09697  |  |  |
|       |      | Shiraz-44T | 904  | 0        | -0.625526 |  |  |
|       |      | Shiraz-49T | 1170 | 0        | -0.967436 |  |  |
|       |      | Shiraz-9T  | 1370 | 0.690073 | 0         |  |  |
|       |      | Shiraz-18T | 1457 | 0.643204 | 0         |  |  |
|       |      | Shiraz-22T | 1673 | 0.611783 | 0         |  |  |
|       |      | Shiraz-25T | 1719 | 0.472955 | 0         |  |  |
|       |      | Shiraz-28T | 1762 | 0.562311 | 0         |  |  |
|       |      | Shiraz-29T | 1801 | 0.815343 | 0         |  |  |
|       |      | Shiraz-32T | 1870 | 0.729766 | 0         |  |  |
|       |      | Shiraz-35T | 1933 | 0.488535 | 0         |  |  |
|       |      | Shiraz-58T | 2223 | 0.833364 | 0         |  |  |
|       |      | Shiraz-71T | 2263 | 0.975531 | 0         |  |  |
| NLGN3 | chrX | Shiraz-4T  | 261  | 0        | -0.336249 |  |  |
|       |      | Shiraz-16T | 295  | 0.591657 | 0         |  |  |
|       |      | Shiraz-36T | 433  | 0        | -0.803961 |  |  |
|       |      | Shiraz-44T | 899  | 0        | -1.09697  |  |  |
|       |      | Shiraz-44T | 900  | 0        | -0.584284 |  |  |
|       |      | Shiraz-49T | 1170 | 0        | -0.967436 |  |  |
|       |      | Shiraz-49T | 1171 | 0        | -0.612379 |  |  |

|  |  |            |      |          |           |  |  |
|--|--|------------|------|----------|-----------|--|--|
|  |  | Shiraz-77T | 1283 | 0.296555 | 0         |  |  |
|  |  | Shiraz-18T | 1457 | 0.643204 | 0         |  |  |
|  |  | Shiraz-22T | 1673 | 0.611783 | 0         |  |  |
|  |  | Shiraz-22T | 1674 | 0.887899 | 0         |  |  |
|  |  | Shiraz-25T | 1719 | 0.472955 | 0         |  |  |
|  |  | Shiraz-28T | 1762 | 0.562311 | 0         |  |  |
|  |  | Shiraz-29T | 1801 | 0.815343 | 0         |  |  |
|  |  | Shiraz-32T | 1870 | 0.729766 | 0         |  |  |
|  |  | Shiraz-35T | 1933 | 0.488535 | 0         |  |  |
|  |  | Shiraz-58T | 2223 | 0.833364 | 0         |  |  |
|  |  | Shiraz-58T | 2224 | 1.076575 | 0         |  |  |
|  |  | Shiraz-71T | 2263 | 0.975531 | 0         |  |  |
|  |  | Shiraz-4T  | 261  | 0        | -0.336249 |  |  |
|  |  | Shiraz-16T | 295  | 0.591657 | 0         |  |  |
|  |  | Shiraz-36T | 433  | 0        | -0.803961 |  |  |
|  |  | Shiraz-44T | 899  | 0        | -1.09697  |  |  |
|  |  | Shiraz-44T | 900  | 0        | -0.584284 |  |  |
|  |  | Shiraz-49T | 1170 | 0        | -0.967436 |  |  |
|  |  | Shiraz-49T | 1171 | 0        | -0.612379 |  |  |
|  |  | Shiraz-77T | 1283 | 0.296555 | 0         |  |  |
|  |  | Shiraz-18T | 1457 | 0.643204 | 0         |  |  |
|  |  | Shiraz-22T | 1673 | 0.611783 | 0         |  |  |
|  |  | Shiraz-22T | 1674 | 0.887899 | 0         |  |  |
|  |  | Shiraz-25T | 1719 | 0.472955 | 0         |  |  |
|  |  | Shiraz-28T | 1762 | 0.562311 | 0         |  |  |
|  |  | Shiraz-29T | 1801 | 0.815343 | 0         |  |  |
|  |  | Shiraz-32T | 1870 | 0.729766 | 0         |  |  |
|  |  | Shiraz-35T | 1933 | 0.488535 | 0         |  |  |
|  |  | Shiraz-58T | 2223 | 0.833364 | 0         |  |  |
|  |  | Shiraz-58T | 2224 | 1.076575 | 0         |  |  |
|  |  | Shiraz-71T | 2263 | 0.975531 | 0         |  |  |
|  |  | Shiraz-4T  | 261  | 0        | -0.336249 |  |  |
|  |  | Shiraz-16T | 295  | 0.591657 | 0         |  |  |
|  |  | Shiraz-36T | 433  | 0        | -0.803961 |  |  |
|  |  | Shiraz-44T | 899  | 0        | -1.09697  |  |  |
|  |  | Shiraz-44T | 900  | 0        | -0.584284 |  |  |
|  |  | Shiraz-49T | 1170 | 0        | -0.967436 |  |  |
|  |  | Shiraz-49T | 1171 | 0        | -0.612379 |  |  |
|  |  | Shiraz-77T | 1283 | 0.296555 | 0         |  |  |
|  |  | Shiraz-18T | 1457 | 0.643204 | 0         |  |  |
|  |  | Shiraz-22T | 1673 | 0.611783 | 0         |  |  |
|  |  | Shiraz-22T | 1674 | 0.887899 | 0         |  |  |
|  |  | Shiraz-25T | 1719 | 0.472955 | 0         |  |  |
|  |  | Shiraz-28T | 1762 | 0.562311 | 0         |  |  |
|  |  | Shiraz-29T | 1801 | 0.815343 | 0         |  |  |
|  |  | Shiraz-32T | 1870 | 0.729766 | 0         |  |  |
|  |  | Shiraz-35T | 1933 | 0.488535 | 0         |  |  |

|        |      |            |      |          |           |  |
|--------|------|------------|------|----------|-----------|--|
|        |      | Shiraz-58T | 2223 | 0.833364 | 0         |  |
|        |      | Shiraz-58T | 2224 | 1.076575 | 0         |  |
|        |      | Shiraz-71T | 2263 | 0.975531 | 0         |  |
| NLGN4X | chrX | Shiraz-3T  | 235  | 0        | -0.28401  |  |
|        |      | Shiraz-3T  | 235  | 0        | -0.28401  |  |
|        |      | Shiraz-4T  | 260  | 0        | -0.324128 |  |
|        |      | Shiraz-4T  | 260  | 0        | -0.324128 |  |
|        |      | Shiraz-16T | 294  | 0.655804 | 0         |  |
|        |      | Shiraz-16T | 294  | 0.655804 | 0         |  |
|        |      | Shiraz-36T | 431  | 0        | -0.78035  |  |
|        |      | Shiraz-36T | 431  | 0        | -0.78035  |  |
|        |      | Shiraz-44T | 891  | 0        | -0.954044 |  |
|        |      | Shiraz-44T | 891  | 0        | -0.954044 |  |
|        |      | Shiraz-44T | 892  | 0        | -1.231333 |  |
|        |      | Shiraz-44T | 892  | 0        | -1.231333 |  |
|        |      | Shiraz-49T | 1166 | 0        | -0.917235 |  |
|        |      | Shiraz-49T | 1166 | 0        | -0.917235 |  |
|        |      | Shiraz-9T  | 1368 | 0.199713 | 0         |  |
|        |      | Shiraz-9T  | 1368 | 0.199713 | 0         |  |
|        |      | Shiraz-18T | 1455 | 0        | -0.186773 |  |
|        |      | Shiraz-18T | 1455 | 0        | -0.186773 |  |
|        |      | Shiraz-22T | 1669 | 0.695915 | 0         |  |
|        |      | Shiraz-22T | 1669 | 0.695915 | 0         |  |
|        |      | Shiraz-25T | 1717 | 0.420447 | 0         |  |
|        |      | Shiraz-25T | 1717 | 0.420447 | 0         |  |
|        |      | Shiraz-28T | 1760 | 0.538181 | 0         |  |
|        |      | Shiraz-28T | 1760 | 0.538181 | 0         |  |
|        |      | Shiraz-29T | 1800 | 0.672527 | 0         |  |
|        |      | Shiraz-29T | 1800 | 0.672527 | 0         |  |
|        |      | Shiraz-32T | 1869 | 0.776805 | 0         |  |
|        |      | Shiraz-32T | 1869 | 0.776805 | 0         |  |
|        |      | Shiraz-35T | 1932 | 0.507141 | 0         |  |
|        |      | Shiraz-35T | 1932 | 0.507141 | 0         |  |
|        |      | Shiraz-40T | 2051 | 0.098506 | 0         |  |
|        |      | Shiraz-40T | 2051 | 0.098506 | 0         |  |
|        |      | Shiraz-58T | 2221 | 0.871948 | 0         |  |
|        |      | Shiraz-58T | 2221 | 0.871948 | 0         |  |
|        |      | Shiraz-71T | 2260 | 0.68394  | 0         |  |
|        |      | Shiraz-71T | 2260 | 0.68394  | 0         |  |
|        |      | Shiraz-71T | 2261 | 0.508399 | 0         |  |
|        |      | Shiraz-71T | 2261 | 0.508399 | 0         |  |
|        |      | Shiraz-3T  | 235  | 0        | -0.28401  |  |
|        |      | Shiraz-3T  | 235  | 0        | -0.28401  |  |
|        |      | Shiraz-4T  | 260  | 0        | -0.324128 |  |
|        |      | Shiraz-4T  | 260  | 0        | -0.324128 |  |
|        |      | Shiraz-16T | 294  | 0.655804 | 0         |  |
|        |      | Shiraz-16T | 294  | 0.655804 | 0         |  |

|  |            |      |          |           |  |
|--|------------|------|----------|-----------|--|
|  | Shiraz-36T | 431  | 0        | -0.78035  |  |
|  | Shiraz-36T | 431  | 0        | -0.78035  |  |
|  | Shiraz-44T | 891  | 0        | -0.954044 |  |
|  | Shiraz-44T | 891  | 0        | -0.954044 |  |
|  | Shiraz-44T | 892  | 0        | -1.231333 |  |
|  | Shiraz-44T | 892  | 0        | -1.231333 |  |
|  | Shiraz-49T | 1166 | 0        | -0.917235 |  |
|  | Shiraz-49T | 1166 | 0        | -0.917235 |  |
|  | Shiraz-9T  | 1368 | 0.199713 | 0         |  |
|  | Shiraz-9T  | 1368 | 0.199713 | 0         |  |
|  | Shiraz-18T | 1455 | 0        | -0.186773 |  |
|  | Shiraz-18T | 1455 | 0        | -0.186773 |  |
|  | Shiraz-22T | 1669 | 0.695915 | 0         |  |
|  | Shiraz-22T | 1669 | 0.695915 | 0         |  |
|  | Shiraz-25T | 1717 | 0.420447 | 0         |  |
|  | Shiraz-25T | 1717 | 0.420447 | 0         |  |
|  | Shiraz-28T | 1760 | 0.538181 | 0         |  |
|  | Shiraz-28T | 1760 | 0.538181 | 0         |  |
|  | Shiraz-29T | 1800 | 0.672527 | 0         |  |
|  | Shiraz-29T | 1800 | 0.672527 | 0         |  |
|  | Shiraz-32T | 1869 | 0.776805 | 0         |  |
|  | Shiraz-32T | 1869 | 0.776805 | 0         |  |
|  | Shiraz-35T | 1932 | 0.507141 | 0         |  |
|  | Shiraz-35T | 1932 | 0.507141 | 0         |  |
|  | Shiraz-40T | 2051 | 0.098506 | 0         |  |
|  | Shiraz-40T | 2051 | 0.098506 | 0         |  |
|  | Shiraz-58T | 2221 | 0.871948 | 0         |  |
|  | Shiraz-58T | 2221 | 0.871948 | 0         |  |
|  | Shiraz-71T | 2260 | 0.68394  | 0         |  |
|  | Shiraz-71T | 2260 | 0.68394  | 0         |  |
|  | Shiraz-71T | 2261 | 0.508399 | 0         |  |
|  | Shiraz-71T | 2261 | 0.508399 | 0         |  |
|  | Shiraz-3T  | 235  | 0        | -0.28401  |  |
|  | Shiraz-3T  | 235  | 0        | -0.28401  |  |
|  | Shiraz-4T  | 260  | 0        | -0.324128 |  |
|  | Shiraz-4T  | 260  | 0        | -0.324128 |  |
|  | Shiraz-16T | 294  | 0.655804 | 0         |  |
|  | Shiraz-16T | 294  | 0.655804 | 0         |  |
|  | Shiraz-36T | 431  | 0        | -0.78035  |  |
|  | Shiraz-36T | 431  | 0        | -0.78035  |  |
|  | Shiraz-44T | 891  | 0        | -0.954044 |  |
|  | Shiraz-44T | 891  | 0        | -0.954044 |  |
|  | Shiraz-44T | 892  | 0        | -1.231333 |  |
|  | Shiraz-44T | 892  | 0        | -1.231333 |  |
|  | Shiraz-49T | 1166 | 0        | -0.917235 |  |
|  | Shiraz-49T | 1166 | 0        | -0.917235 |  |
|  | Shiraz-9T  | 1368 | 0.199713 | 0         |  |

|     |      |            |      |          |           |  |  |
|-----|------|------------|------|----------|-----------|--|--|
|     |      | Shiraz-9T  | 1368 | 0.199713 | 0         |  |  |
|     |      | Shiraz-18T | 1455 | 0        | -0.186773 |  |  |
|     |      | Shiraz-18T | 1455 | 0        | -0.186773 |  |  |
|     |      | Shiraz-22T | 1669 | 0.695915 | 0         |  |  |
|     |      | Shiraz-22T | 1669 | 0.695915 | 0         |  |  |
|     |      | Shiraz-25T | 1717 | 0.420447 | 0         |  |  |
|     |      | Shiraz-25T | 1717 | 0.420447 | 0         |  |  |
|     |      | Shiraz-28T | 1760 | 0.538181 | 0         |  |  |
|     |      | Shiraz-28T | 1760 | 0.538181 | 0         |  |  |
|     |      | Shiraz-29T | 1800 | 0.672527 | 0         |  |  |
|     |      | Shiraz-29T | 1800 | 0.672527 | 0         |  |  |
|     |      | Shiraz-32T | 1869 | 0.776805 | 0         |  |  |
|     |      | Shiraz-32T | 1869 | 0.776805 | 0         |  |  |
|     |      | Shiraz-35T | 1932 | 0.507141 | 0         |  |  |
|     |      | Shiraz-35T | 1932 | 0.507141 | 0         |  |  |
|     |      | Shiraz-40T | 2051 | 0.098506 | 0         |  |  |
|     |      | Shiraz-40T | 2051 | 0.098506 | 0         |  |  |
|     |      | Shiraz-58T | 2221 | 0.871948 | 0         |  |  |
|     |      | Shiraz-58T | 2221 | 0.871948 | 0         |  |  |
|     |      | Shiraz-71T | 2260 | 0.68394  | 0         |  |  |
|     |      | Shiraz-71T | 2260 | 0.68394  | 0         |  |  |
|     |      | Shiraz-71T | 2261 | 0.508399 | 0         |  |  |
|     |      | Shiraz-71T | 2261 | 0.508399 | 0         |  |  |
| NNT | chr5 | Shiraz-4T  | 250  | 0.262252 | 0         |  |  |
|     |      | Shiraz-4T  | 250  | 0.262252 | 0         |  |  |
|     |      | Shiraz-16T | 266  | 0.321724 | 0         |  |  |
|     |      | Shiraz-16T | 266  | 0.321724 | 0         |  |  |
|     |      | Shiraz-44T | 591  | 0        | -0.233934 |  |  |
|     |      | Shiraz-44T | 591  | 0        | -0.233934 |  |  |
|     |      | Shiraz-18T | 1429 | 0        | -0.314125 |  |  |
|     |      | Shiraz-18T | 1429 | 0        | -0.314125 |  |  |
|     |      | Shiraz-22T | 1522 | 0        | -0.322688 |  |  |
|     |      | Shiraz-22T | 1522 | 0        | -0.322688 |  |  |
|     |      | Shiraz-25T | 1694 | 0.201602 | 0         |  |  |
|     |      | Shiraz-25T | 1694 | 0.201602 | 0         |  |  |
|     |      | Shiraz-28T | 1731 | 0.295447 | 0         |  |  |
|     |      | Shiraz-28T | 1731 | 0.295447 | 0         |  |  |
|     |      | Shiraz-29T | 1773 | 0.090981 | 0         |  |  |
|     |      | Shiraz-29T | 1773 | 0.090981 | 0         |  |  |
|     |      | Shiraz-40T | 2016 | 0.376634 | 0         |  |  |
|     |      | Shiraz-40T | 2016 | 0.376634 | 0         |  |  |
|     |      | Shiraz-4T  | 250  | 0.262252 | 0         |  |  |
|     |      | Shiraz-4T  | 250  | 0.262252 | 0         |  |  |
|     |      | Shiraz-16T | 266  | 0.321724 | 0         |  |  |
|     |      | Shiraz-16T | 266  | 0.321724 | 0         |  |  |
|     |      | Shiraz-44T | 591  | 0        | -0.233934 |  |  |
|     |      | Shiraz-44T | 591  | 0        | -0.233934 |  |  |



|       |      |            |      |          |           |  |  |
|-------|------|------------|------|----------|-----------|--|--|
|       |      | Shiraz-18T | 1429 | 0        | -0.314125 |  |  |
|       |      | Shiraz-18T | 1429 | 0        | -0.314125 |  |  |
|       |      | Shiraz-22T | 1522 | 0        | -0.322688 |  |  |
|       |      | Shiraz-22T | 1522 | 0        | -0.322688 |  |  |
|       |      | Shiraz-25T | 1694 | 0.201602 | 0         |  |  |
|       |      | Shiraz-25T | 1694 | 0.201602 | 0         |  |  |
|       |      | Shiraz-28T | 1731 | 0.295447 | 0         |  |  |
|       |      | Shiraz-28T | 1731 | 0.295447 | 0         |  |  |
|       |      | Shiraz-29T | 1773 | 0.090981 | 0         |  |  |
|       |      | Shiraz-29T | 1773 | 0.090981 | 0         |  |  |
|       |      | Shiraz-40T | 2016 | 0.376634 | 0         |  |  |
|       |      | Shiraz-40T | 2016 | 0.376634 | 0         |  |  |
|       |      | Shiraz-4T  | 250  | 0.262252 | 0         |  |  |
|       |      | Shiraz-4T  | 250  | 0.262252 | 0         |  |  |
|       |      | Shiraz-16T | 266  | 0.321724 | 0         |  |  |
|       |      | Shiraz-16T | 266  | 0.321724 | 0         |  |  |
|       |      | Shiraz-44T | 591  | 0        | -0.233934 |  |  |
|       |      | Shiraz-44T | 591  | 0        | -0.233934 |  |  |
|       |      | Shiraz-18T | 1429 | 0        | -0.314125 |  |  |
|       |      | Shiraz-18T | 1429 | 0        | -0.314125 |  |  |
|       |      | Shiraz-22T | 1522 | 0        | -0.322688 |  |  |
|       |      | Shiraz-22T | 1522 | 0        | -0.322688 |  |  |
|       |      | Shiraz-25T | 1694 | 0.201602 | 0         |  |  |
|       |      | Shiraz-25T | 1694 | 0.201602 | 0         |  |  |
|       |      | Shiraz-28T | 1731 | 0.295447 | 0         |  |  |
|       |      | Shiraz-28T | 1731 | 0.295447 | 0         |  |  |
|       |      | Shiraz-29T | 1773 | 0.090981 | 0         |  |  |
|       |      | Shiraz-29T | 1773 | 0.090981 | 0         |  |  |
|       |      | Shiraz-40T | 2016 | 0.376634 | 0         |  |  |
|       |      | Shiraz-40T | 2016 | 0.376634 | 0         |  |  |
| NOBOX | chr7 | Shiraz-3T  | 90   | 0.219276 | 0         |  |  |
|       |      | Shiraz-3T  | 98   | 0        | -0.069276 |  |  |
|       |      | Shiraz-4T  | 253  | 0.372918 | 0         |  |  |
|       |      | Shiraz-36T | 378  | 0.179558 | 0         |  |  |
|       |      | Shiraz-44T | 645  | 0        | -0.474857 |  |  |
|       |      | Shiraz-46T | 943  | 0.093799 | 0         |  |  |
|       |      | Shiraz-77T | 1225 | 0        | -0.117922 |  |  |
|       |      | Shiraz-9T  | 1325 | 0.221899 | 0         |  |  |
|       |      | Shiraz-18T | 1434 | 0.244465 | 0         |  |  |
|       |      | Shiraz-22T | 1554 | 0        | -0.502826 |  |  |
|       |      | Shiraz-25T | 1698 | 0.21835  | 0         |  |  |
|       |      | Shiraz-28T | 1735 | 0.350744 | 0         |  |  |
|       |      | Shiraz-29T | 1778 | 0.120767 | 0         |  |  |
|       |      | Shiraz-32T | 1833 | 0.551336 | 0         |  |  |
|       |      | Shiraz-38T | 1951 | 0.250891 | 0         |  |  |
|       |      | Shiraz-53T | 2078 | 0.287202 | 0         |  |  |
|       |      | Shiraz-58T | 2162 | 0.221505 | 0         |  |  |

|      |      |            |      |          |           |  |  |
|------|------|------------|------|----------|-----------|--|--|
|      |      | Shiraz-71T | 2238 | 0.603631 | 0         |  |  |
|      |      | Shiraz-3T  | 90   | 0.219276 | 0         |  |  |
|      |      | Shiraz-3T  | 98   | 0        | -0.069276 |  |  |
|      |      | Shiraz-4T  | 253  | 0.372918 | 0         |  |  |
|      |      | Shiraz-36T | 378  | 0.179558 | 0         |  |  |
|      |      | Shiraz-44T | 645  | 0        | -0.474857 |  |  |
|      |      | Shiraz-46T | 943  | 0.093799 | 0         |  |  |
|      |      | Shiraz-77T | 1225 | 0        | -0.117922 |  |  |
|      |      | Shiraz-9T  | 1325 | 0.221899 | 0         |  |  |
|      |      | Shiraz-18T | 1434 | 0.244465 | 0         |  |  |
|      |      | Shiraz-22T | 1554 | 0        | -0.502826 |  |  |
|      |      | Shiraz-25T | 1698 | 0.21835  | 0         |  |  |
|      |      | Shiraz-28T | 1735 | 0.350744 | 0         |  |  |
|      |      | Shiraz-29T | 1778 | 0.120767 | 0         |  |  |
|      |      | Shiraz-32T | 1833 | 0.551336 | 0         |  |  |
|      |      | Shiraz-38T | 1951 | 0.250891 | 0         |  |  |
|      |      | Shiraz-53T | 2078 | 0.287202 | 0         |  |  |
|      |      | Shiraz-58T | 2162 | 0.221505 | 0         |  |  |
|      |      | Shiraz-71T | 2238 | 0.603631 | 0         |  |  |
|      |      | Shiraz-3T  | 90   | 0.219276 | 0         |  |  |
|      |      | Shiraz-3T  | 98   | 0        | -0.069276 |  |  |
|      |      | Shiraz-4T  | 253  | 0.372918 | 0         |  |  |
|      |      | Shiraz-36T | 378  | 0.179558 | 0         |  |  |
|      |      | Shiraz-44T | 645  | 0        | -0.474857 |  |  |
|      |      | Shiraz-46T | 943  | 0.093799 | 0         |  |  |
|      |      | Shiraz-77T | 1225 | 0        | -0.117922 |  |  |
|      |      | Shiraz-9T  | 1325 | 0.221899 | 0         |  |  |
|      |      | Shiraz-18T | 1434 | 0.244465 | 0         |  |  |
|      |      | Shiraz-22T | 1554 | 0        | -0.502826 |  |  |
|      |      | Shiraz-25T | 1698 | 0.21835  | 0         |  |  |
|      |      | Shiraz-28T | 1735 | 0.350744 | 0         |  |  |
|      |      | Shiraz-29T | 1778 | 0.120767 | 0         |  |  |
|      |      | Shiraz-32T | 1833 | 0.551336 | 0         |  |  |
|      |      | Shiraz-38T | 1951 | 0.250891 | 0         |  |  |
|      |      | Shiraz-53T | 2078 | 0.287202 | 0         |  |  |
|      |      | Shiraz-58T | 2162 | 0.221505 | 0         |  |  |
|      |      | Shiraz-71T | 2238 | 0.603631 | 0         |  |  |
| NOD1 | chr7 | Shiraz-3T  | 87   | 0.198593 | 0         |  |  |
|      |      | Shiraz-4T  | 252  | 0.192083 | 0         |  |  |
|      |      | Shiraz-36T | 376  | 0.159952 | 0         |  |  |
|      |      | Shiraz-46T | 942  | 0.069143 | 0         |  |  |
|      |      | Shiraz-18T | 1433 | 0.250973 | 0         |  |  |
|      |      | Shiraz-25T | 1697 | 0.21945  | 0         |  |  |
|      |      | Shiraz-28T | 1734 | 0.362882 | 0         |  |  |
|      |      | Shiraz-29T | 1777 | 0.156747 | 0         |  |  |
|      |      | Shiraz-38T | 1950 | 0.265916 | 0         |  |  |
|      |      | Shiraz-71T | 2236 | 0.320072 | 0         |  |  |

|      |      |            |      |          |           |  |
|------|------|------------|------|----------|-----------|--|
|      |      | Shiraz-3T  | 87   | 0.198593 | 0         |  |
|      |      | Shiraz-4T  | 252  | 0.192083 | 0         |  |
|      |      | Shiraz-36T | 376  | 0.159952 | 0         |  |
|      |      | Shiraz-46T | 942  | 0.069143 | 0         |  |
|      |      | Shiraz-18T | 1433 | 0.250973 | 0         |  |
|      |      | Shiraz-25T | 1697 | 0.21945  | 0         |  |
|      |      | Shiraz-28T | 1734 | 0.362882 | 0         |  |
|      |      | Shiraz-29T | 1777 | 0.156747 | 0         |  |
|      |      | Shiraz-38T | 1950 | 0.265916 | 0         |  |
|      |      | Shiraz-71T | 2236 | 0.320072 | 0         |  |
|      |      | Shiraz-3T  | 87   | 0.198593 | 0         |  |
|      |      | Shiraz-4T  | 252  | 0.192083 | 0         |  |
|      |      | Shiraz-36T | 376  | 0.159952 | 0         |  |
|      |      | Shiraz-46T | 942  | 0.069143 | 0         |  |
|      |      | Shiraz-18T | 1433 | 0.250973 | 0         |  |
|      |      | Shiraz-25T | 1697 | 0.21945  | 0         |  |
|      |      | Shiraz-28T | 1734 | 0.362882 | 0         |  |
|      |      | Shiraz-29T | 1777 | 0.156747 | 0         |  |
|      |      | Shiraz-38T | 1950 | 0.265916 | 0         |  |
|      |      | Shiraz-71T | 2236 | 0.320072 | 0         |  |
| NONO | chrX | Shiraz-4T  | 261  | 0        | -0.336249 |  |
|      |      | Shiraz-16T | 295  | 0.591657 | 0         |  |
|      |      | Shiraz-36T | 433  | 0        | -0.803961 |  |
|      |      | Shiraz-44T | 899  | 0        | -1.09697  |  |
|      |      | Shiraz-44T | 900  | 0        | -0.584284 |  |
|      |      | Shiraz-49T | 1170 | 0        | -0.967436 |  |
|      |      | Shiraz-49T | 1171 | 0        | -0.612379 |  |
|      |      | Shiraz-77T | 1283 | 0.296555 | 0         |  |
|      |      | Shiraz-18T | 1457 | 0.643204 | 0         |  |
|      |      | Shiraz-22T | 1673 | 0.611783 | 0         |  |
|      |      | Shiraz-22T | 1674 | 0.887899 | 0         |  |
|      |      | Shiraz-25T | 1719 | 0.472955 | 0         |  |
|      |      | Shiraz-28T | 1762 | 0.562311 | 0         |  |
|      |      | Shiraz-29T | 1801 | 0.815343 | 0         |  |
|      |      | Shiraz-32T | 1870 | 0.729766 | 0         |  |
|      |      | Shiraz-35T | 1933 | 0.488535 | 0         |  |
|      |      | Shiraz-58T | 2223 | 0.833364 | 0         |  |
|      |      | Shiraz-58T | 2224 | 1.076575 | 0         |  |
|      |      | Shiraz-71T | 2263 | 0.975531 | 0         |  |
|      |      | Shiraz-4T  | 261  | 0        | -0.336249 |  |
|      |      | Shiraz-16T | 295  | 0.591657 | 0         |  |
|      |      | Shiraz-36T | 433  | 0        | -0.803961 |  |
|      |      | Shiraz-44T | 899  | 0        | -1.09697  |  |
|      |      | Shiraz-44T | 900  | 0        | -0.584284 |  |
|      |      | Shiraz-49T | 1170 | 0        | -0.967436 |  |
|      |      | Shiraz-49T | 1171 | 0        | -0.612379 |  |
|      |      | Shiraz-77T | 1283 | 0.296555 | 0         |  |

|      |      |            |      |          |           |  |
|------|------|------------|------|----------|-----------|--|
|      |      | Shiraz-18T | 1457 | 0.643204 | 0         |  |
|      |      | Shiraz-22T | 1673 | 0.611783 | 0         |  |
|      |      | Shiraz-22T | 1674 | 0.887899 | 0         |  |
|      |      | Shiraz-25T | 1719 | 0.472955 | 0         |  |
|      |      | Shiraz-28T | 1762 | 0.562311 | 0         |  |
|      |      | Shiraz-29T | 1801 | 0.815343 | 0         |  |
|      |      | Shiraz-32T | 1870 | 0.729766 | 0         |  |
|      |      | Shiraz-35T | 1933 | 0.488535 | 0         |  |
|      |      | Shiraz-58T | 2223 | 0.833364 | 0         |  |
|      |      | Shiraz-58T | 2224 | 1.076575 | 0         |  |
|      |      | Shiraz-71T | 2263 | 0.975531 | 0         |  |
|      |      | Shiraz-4T  | 261  | 0        | -0.336249 |  |
|      |      | Shiraz-16T | 295  | 0.591657 | 0         |  |
|      |      | Shiraz-36T | 433  | 0        | -0.803961 |  |
|      |      | Shiraz-44T | 899  | 0        | -1.09697  |  |
|      |      | Shiraz-44T | 900  | 0        | -0.584284 |  |
|      |      | Shiraz-49T | 1170 | 0        | -0.967436 |  |
|      |      | Shiraz-49T | 1171 | 0        | -0.612379 |  |
|      |      | Shiraz-77T | 1283 | 0.296555 | 0         |  |
|      |      | Shiraz-18T | 1457 | 0.643204 | 0         |  |
|      |      | Shiraz-22T | 1673 | 0.611783 | 0         |  |
|      |      | Shiraz-22T | 1674 | 0.887899 | 0         |  |
|      |      | Shiraz-25T | 1719 | 0.472955 | 0         |  |
|      |      | Shiraz-28T | 1762 | 0.562311 | 0         |  |
|      |      | Shiraz-29T | 1801 | 0.815343 | 0         |  |
|      |      | Shiraz-32T | 1870 | 0.729766 | 0         |  |
|      |      | Shiraz-35T | 1933 | 0.488535 | 0         |  |
|      |      | Shiraz-58T | 2223 | 0.833364 | 0         |  |
|      |      | Shiraz-58T | 2224 | 1.076575 | 0         |  |
|      |      | Shiraz-71T | 2263 | 0.975531 | 0         |  |
| NOS3 | chr7 | Shiraz-3T  | 90   | 0.219276 | 0         |  |
|      |      | Shiraz-3T  | 99   | 0.454766 | 0         |  |
|      |      | Shiraz-4T  | 253  | 0.372918 | 0         |  |
|      |      | Shiraz-36T | 378  | 0.179558 | 0         |  |
|      |      | Shiraz-44T | 646  | 0.471276 | 0         |  |
|      |      | Shiraz-44T | 647  | 1.496173 | 0         |  |
|      |      | Shiraz-46T | 943  | 0.093799 | 0         |  |
|      |      | Shiraz-9T  | 1325 | 0.221899 | 0         |  |
|      |      | Shiraz-18T | 1434 | 0.244465 | 0         |  |
|      |      | Shiraz-22T | 1555 | 0.427999 | 0         |  |
|      |      | Shiraz-25T | 1698 | 0.21835  | 0         |  |
|      |      | Shiraz-28T | 1735 | 0.350744 | 0         |  |
|      |      | Shiraz-29T | 1778 | 0.120767 | 0         |  |
|      |      | Shiraz-32T | 1833 | 0.551336 | 0         |  |
|      |      | Shiraz-38T | 1951 | 0.250891 | 0         |  |
|      |      | Shiraz-38T | 1952 | 0        | -0.163211 |  |
|      |      | Shiraz-53T | 2078 | 0.287202 | 0         |  |

|      |      |            |      |          |           |  |  |
|------|------|------------|------|----------|-----------|--|--|
|      |      | Shiraz-58T | 2162 | 0.221505 | 0         |  |  |
|      |      | Shiraz-71T | 2238 | 0.603631 | 0         |  |  |
|      |      | Shiraz-3T  | 90   | 0.219276 | 0         |  |  |
|      |      | Shiraz-3T  | 99   | 0.454766 | 0         |  |  |
|      |      | Shiraz-4T  | 253  | 0.372918 | 0         |  |  |
|      |      | Shiraz-36T | 378  | 0.179558 | 0         |  |  |
|      |      | Shiraz-44T | 646  | 0.471276 | 0         |  |  |
|      |      | Shiraz-44T | 647  | 1.496173 | 0         |  |  |
|      |      | Shiraz-46T | 943  | 0.093799 | 0         |  |  |
|      |      | Shiraz-9T  | 1325 | 0.221899 | 0         |  |  |
|      |      | Shiraz-18T | 1434 | 0.244465 | 0         |  |  |
|      |      | Shiraz-22T | 1555 | 0.427999 | 0         |  |  |
|      |      | Shiraz-25T | 1698 | 0.21835  | 0         |  |  |
|      |      | Shiraz-28T | 1735 | 0.350744 | 0         |  |  |
|      |      | Shiraz-29T | 1778 | 0.120767 | 0         |  |  |
|      |      | Shiraz-32T | 1833 | 0.551336 | 0         |  |  |
|      |      | Shiraz-38T | 1951 | 0.250891 | 0         |  |  |
|      |      | Shiraz-38T | 1952 | 0        | -0.163211 |  |  |
|      |      | Shiraz-53T | 2078 | 0.287202 | 0         |  |  |
|      |      | Shiraz-58T | 2162 | 0.221505 | 0         |  |  |
|      |      | Shiraz-71T | 2238 | 0.603631 | 0         |  |  |
|      |      | Shiraz-3T  | 90   | 0.219276 | 0         |  |  |
|      |      | Shiraz-3T  | 99   | 0.454766 | 0         |  |  |
|      |      | Shiraz-4T  | 253  | 0.372918 | 0         |  |  |
|      |      | Shiraz-36T | 378  | 0.179558 | 0         |  |  |
|      |      | Shiraz-44T | 646  | 0.471276 | 0         |  |  |
|      |      | Shiraz-44T | 647  | 1.496173 | 0         |  |  |
|      |      | Shiraz-46T | 943  | 0.093799 | 0         |  |  |
|      |      | Shiraz-9T  | 1325 | 0.221899 | 0         |  |  |
|      |      | Shiraz-18T | 1434 | 0.244465 | 0         |  |  |
|      |      | Shiraz-22T | 1555 | 0.427999 | 0         |  |  |
|      |      | Shiraz-25T | 1698 | 0.21835  | 0         |  |  |
|      |      | Shiraz-28T | 1735 | 0.350744 | 0         |  |  |
|      |      | Shiraz-29T | 1778 | 0.120767 | 0         |  |  |
|      |      | Shiraz-32T | 1833 | 0.551336 | 0         |  |  |
|      |      | Shiraz-38T | 1951 | 0.250891 | 0         |  |  |
|      |      | Shiraz-38T | 1952 | 0        | -0.163211 |  |  |
|      |      | Shiraz-53T | 2078 | 0.287202 | 0         |  |  |
|      |      | Shiraz-58T | 2162 | 0.221505 | 0         |  |  |
|      |      | Shiraz-71T | 2238 | 0.603631 | 0         |  |  |
| NOX1 | chrX | Shiraz-3T  | 242  | 0        | -0.336434 |  |  |
|      |      | Shiraz-4T  | 261  | 0        | -0.336249 |  |  |
|      |      | Shiraz-16T | 295  | 0.591657 | 0         |  |  |
|      |      | Shiraz-36T | 433  | 0        | -0.803961 |  |  |
|      |      | Shiraz-44T | 899  | 0        | -1.09697  |  |  |
|      |      | Shiraz-49T | 1170 | 0        | -0.967436 |  |  |
|      |      | Shiraz-18T | 1457 | 0.643204 | 0         |  |  |

|        |      |            |      |          |           |  |  |
|--------|------|------------|------|----------|-----------|--|--|
|        |      | Shiraz-22T | 1673 | 0.611783 | 0         |  |  |
|        |      | Shiraz-25T | 1719 | 0.472955 | 0         |  |  |
|        |      | Shiraz-28T | 1762 | 0.562311 | 0         |  |  |
|        |      | Shiraz-29T | 1801 | 0.815343 | 0         |  |  |
|        |      | Shiraz-32T | 1870 | 0.729766 | 0         |  |  |
|        |      | Shiraz-35T | 1933 | 0.488535 | 0         |  |  |
|        |      | Shiraz-58T | 2223 | 0.833364 | 0         |  |  |
|        |      | Shiraz-71T | 2263 | 0.975531 | 0         |  |  |
|        |      | Shiraz-3T  | 242  | 0        | -0.336434 |  |  |
|        |      | Shiraz-4T  | 261  | 0        | -0.336249 |  |  |
|        |      | Shiraz-16T | 295  | 0.591657 | 0         |  |  |
|        |      | Shiraz-36T | 433  | 0        | -0.803961 |  |  |
|        |      | Shiraz-44T | 899  | 0        | -1.09697  |  |  |
|        |      | Shiraz-49T | 1170 | 0        | -0.967436 |  |  |
|        |      | Shiraz-18T | 1457 | 0.643204 | 0         |  |  |
|        |      | Shiraz-22T | 1673 | 0.611783 | 0         |  |  |
|        |      | Shiraz-25T | 1719 | 0.472955 | 0         |  |  |
|        |      | Shiraz-28T | 1762 | 0.562311 | 0         |  |  |
|        |      | Shiraz-29T | 1801 | 0.815343 | 0         |  |  |
|        |      | Shiraz-32T | 1870 | 0.729766 | 0         |  |  |
|        |      | Shiraz-35T | 1933 | 0.488535 | 0         |  |  |
|        |      | Shiraz-58T | 2223 | 0.833364 | 0         |  |  |
|        |      | Shiraz-71T | 2263 | 0.975531 | 0         |  |  |
|        |      | Shiraz-3T  | 242  | 0        | -0.336434 |  |  |
|        |      | Shiraz-4T  | 261  | 0        | -0.336249 |  |  |
|        |      | Shiraz-16T | 295  | 0.591657 | 0         |  |  |
|        |      | Shiraz-36T | 433  | 0        | -0.803961 |  |  |
|        |      | Shiraz-44T | 899  | 0        | -1.09697  |  |  |
|        |      | Shiraz-49T | 1170 | 0        | -0.967436 |  |  |
|        |      | Shiraz-18T | 1457 | 0.643204 | 0         |  |  |
|        |      | Shiraz-22T | 1673 | 0.611783 | 0         |  |  |
|        |      | Shiraz-25T | 1719 | 0.472955 | 0         |  |  |
|        |      | Shiraz-28T | 1762 | 0.562311 | 0         |  |  |
|        |      | Shiraz-29T | 1801 | 0.815343 | 0         |  |  |
|        |      | Shiraz-32T | 1870 | 0.729766 | 0         |  |  |
|        |      | Shiraz-35T | 1933 | 0.488535 | 0         |  |  |
|        |      | Shiraz-58T | 2223 | 0.833364 | 0         |  |  |
|        |      | Shiraz-71T | 2263 | 0.975531 | 0         |  |  |
| NPC1L1 | chr7 | Shiraz-3T  | 87   | 0.198593 | 0         |  |  |
|        |      | Shiraz-3T  | 89   | 0.678641 | 0         |  |  |
|        |      | Shiraz-4T  | 252  | 0.192083 | 0         |  |  |
|        |      | Shiraz-36T | 376  | 0.159952 | 0         |  |  |
|        |      | Shiraz-44T | 632  | 0.902944 | 0         |  |  |
|        |      | Shiraz-46T | 942  | 0.069143 | 0         |  |  |
|        |      | Shiraz-77T | 1223 | 0.215647 | 0         |  |  |
|        |      | Shiraz-18T | 1433 | 0.250973 | 0         |  |  |
|        |      | Shiraz-25T | 1697 | 0.21945  | 0         |  |  |

|      |      |            |      |          |           |  |
|------|------|------------|------|----------|-----------|--|
|      |      | Shiraz-28T | 1734 | 0.362882 | 0         |  |
|      |      | Shiraz-29T | 1777 | 0.156747 | 0         |  |
|      |      | Shiraz-38T | 1950 | 0.265916 | 0         |  |
|      |      | Shiraz-71T | 2236 | 0.320072 | 0         |  |
|      |      | Shiraz-3T  | 87   | 0.198593 | 0         |  |
|      |      | Shiraz-3T  | 89   | 0.678641 | 0         |  |
|      |      | Shiraz-4T  | 252  | 0.192083 | 0         |  |
|      |      | Shiraz-36T | 376  | 0.159952 | 0         |  |
|      |      | Shiraz-44T | 632  | 0.902944 | 0         |  |
|      |      | Shiraz-46T | 942  | 0.069143 | 0         |  |
|      |      | Shiraz-77T | 1223 | 0.215647 | 0         |  |
|      |      | Shiraz-18T | 1433 | 0.250973 | 0         |  |
|      |      | Shiraz-25T | 1697 | 0.21945  | 0         |  |
|      |      | Shiraz-28T | 1734 | 0.362882 | 0         |  |
|      |      | Shiraz-29T | 1777 | 0.156747 | 0         |  |
|      |      | Shiraz-38T | 1950 | 0.265916 | 0         |  |
|      |      | Shiraz-71T | 2236 | 0.320072 | 0         |  |
|      |      | Shiraz-3T  | 87   | 0.198593 | 0         |  |
|      |      | Shiraz-3T  | 89   | 0.678641 | 0         |  |
|      |      | Shiraz-4T  | 252  | 0.192083 | 0         |  |
|      |      | Shiraz-36T | 376  | 0.159952 | 0         |  |
|      |      | Shiraz-44T | 632  | 0.902944 | 0         |  |
|      |      | Shiraz-46T | 942  | 0.069143 | 0         |  |
|      |      | Shiraz-77T | 1223 | 0.215647 | 0         |  |
|      |      | Shiraz-18T | 1433 | 0.250973 | 0         |  |
|      |      | Shiraz-25T | 1697 | 0.21945  | 0         |  |
|      |      | Shiraz-28T | 1734 | 0.362882 | 0         |  |
|      |      | Shiraz-29T | 1777 | 0.156747 | 0         |  |
|      |      | Shiraz-38T | 1950 | 0.265916 | 0         |  |
|      |      | Shiraz-71T | 2236 | 0.320072 | 0         |  |
| NPR3 | chr5 | Shiraz-4T  | 250  | 0.262252 | 0         |  |
|      |      | Shiraz-16T | 266  | 0.321724 | 0         |  |
|      |      | Shiraz-18T | 1429 | 0        | -0.314125 |  |
|      |      | Shiraz-25T | 1694 | 0.201602 | 0         |  |
|      |      | Shiraz-28T | 1731 | 0.295447 | 0         |  |
|      |      | Shiraz-29T | 1773 | 0.090981 | 0         |  |
|      |      | Shiraz-40T | 2016 | 0.376634 | 0         |  |
|      |      | Shiraz-4T  | 250  | 0.262252 | 0         |  |
|      |      | Shiraz-16T | 266  | 0.321724 | 0         |  |
|      |      | Shiraz-18T | 1429 | 0        | -0.314125 |  |
|      |      | Shiraz-25T | 1694 | 0.201602 | 0         |  |
|      |      | Shiraz-28T | 1731 | 0.295447 | 0         |  |
|      |      | Shiraz-29T | 1773 | 0.090981 | 0         |  |
|      |      | Shiraz-40T | 2016 | 0.376634 | 0         |  |
|      |      | Shiraz-4T  | 250  | 0.262252 | 0         |  |
|      |      | Shiraz-16T | 266  | 0.321724 | 0         |  |
|      |      | Shiraz-18T | 1429 | 0        | -0.314125 |  |

|       |      |            |      |          |           |  |
|-------|------|------------|------|----------|-----------|--|
|       |      | Shiraz-25T | 1694 | 0.201602 | 0         |  |
|       |      | Shiraz-28T | 1731 | 0.295447 | 0         |  |
|       |      | Shiraz-29T | 1773 | 0.090981 | 0         |  |
|       |      | Shiraz-40T | 2016 | 0.376634 | 0         |  |
| NPSR1 | chr7 | Shiraz-3T  | 87   | 0.198593 | 0         |  |
|       |      | Shiraz-3T  | 87   | 0.198593 | 0         |  |
|       |      | Shiraz-4T  | 252  | 0.192083 | 0         |  |
|       |      | Shiraz-4T  | 252  | 0.192083 | 0         |  |
|       |      | Shiraz-36T | 376  | 0.159952 | 0         |  |
|       |      | Shiraz-36T | 376  | 0.159952 | 0         |  |
|       |      | Shiraz-44T | 631  | 0        | -0.180312 |  |
|       |      | Shiraz-44T | 631  | 0        | -0.180312 |  |
|       |      | Shiraz-46T | 942  | 0.069143 | 0         |  |
|       |      | Shiraz-46T | 942  | 0.069143 | 0         |  |
|       |      | Shiraz-18T | 1433 | 0.250973 | 0         |  |
|       |      | Shiraz-18T | 1433 | 0.250973 | 0         |  |
|       |      | Shiraz-22T | 1544 | 0        | -0.193579 |  |
|       |      | Shiraz-22T | 1544 | 0        | -0.193579 |  |
|       |      | Shiraz-25T | 1697 | 0.21945  | 0         |  |
|       |      | Shiraz-25T | 1697 | 0.21945  | 0         |  |
|       |      | Shiraz-28T | 1734 | 0.362882 | 0         |  |
|       |      | Shiraz-28T | 1734 | 0.362882 | 0         |  |
|       |      | Shiraz-29T | 1777 | 0.156747 | 0         |  |
|       |      | Shiraz-29T | 1777 | 0.156747 | 0         |  |
|       |      | Shiraz-38T | 1950 | 0.265916 | 0         |  |
|       |      | Shiraz-38T | 1950 | 0.265916 | 0         |  |
|       |      | Shiraz-71T | 2236 | 0.320072 | 0         |  |
|       |      | Shiraz-71T | 2236 | 0.320072 | 0         |  |
|       |      | Shiraz-3T  | 87   | 0.198593 | 0         |  |
|       |      | Shiraz-3T  | 87   | 0.198593 | 0         |  |
|       |      | Shiraz-4T  | 252  | 0.192083 | 0         |  |
|       |      | Shiraz-4T  | 252  | 0.192083 | 0         |  |
|       |      | Shiraz-36T | 376  | 0.159952 | 0         |  |
|       |      | Shiraz-36T | 376  | 0.159952 | 0         |  |
|       |      | Shiraz-44T | 631  | 0        | -0.180312 |  |
|       |      | Shiraz-44T | 631  | 0        | -0.180312 |  |
|       |      | Shiraz-46T | 942  | 0.069143 | 0         |  |
|       |      | Shiraz-46T | 942  | 0.069143 | 0         |  |
|       |      | Shiraz-18T | 1433 | 0.250973 | 0         |  |
|       |      | Shiraz-18T | 1433 | 0.250973 | 0         |  |
|       |      | Shiraz-22T | 1544 | 0        | -0.193579 |  |
|       |      | Shiraz-22T | 1544 | 0        | -0.193579 |  |
|       |      | Shiraz-25T | 1697 | 0.21945  | 0         |  |
|       |      | Shiraz-25T | 1697 | 0.21945  | 0         |  |
|       |      | Shiraz-28T | 1734 | 0.362882 | 0         |  |
|       |      | Shiraz-28T | 1734 | 0.362882 | 0         |  |
|       |      | Shiraz-29T | 1777 | 0.156747 | 0         |  |



|       |      |            |      |          |           |  |
|-------|------|------------|------|----------|-----------|--|
|       |      | Shiraz-29T | 1777 | 0.156747 | 0         |  |
|       |      | Shiraz-38T | 1950 | 0.265916 | 0         |  |
|       |      | Shiraz-38T | 1950 | 0.265916 | 0         |  |
|       |      | Shiraz-71T | 2236 | 0.320072 | 0         |  |
|       |      | Shiraz-71T | 2236 | 0.320072 | 0         |  |
|       |      | Shiraz-3T  | 87   | 0.198593 | 0         |  |
|       |      | Shiraz-3T  | 87   | 0.198593 | 0         |  |
|       |      | Shiraz-4T  | 252  | 0.192083 | 0         |  |
|       |      | Shiraz-4T  | 252  | 0.192083 | 0         |  |
|       |      | Shiraz-36T | 376  | 0.159952 | 0         |  |
|       |      | Shiraz-36T | 376  | 0.159952 | 0         |  |
|       |      | Shiraz-44T | 631  | 0        | -0.180312 |  |
|       |      | Shiraz-44T | 631  | 0        | -0.180312 |  |
|       |      | Shiraz-46T | 942  | 0.069143 | 0         |  |
|       |      | Shiraz-46T | 942  | 0.069143 | 0         |  |
|       |      | Shiraz-18T | 1433 | 0.250973 | 0         |  |
|       |      | Shiraz-18T | 1433 | 0.250973 | 0         |  |
|       |      | Shiraz-22T | 1544 | 0        | -0.193579 |  |
|       |      | Shiraz-22T | 1544 | 0        | -0.193579 |  |
|       |      | Shiraz-25T | 1697 | 0.21945  | 0         |  |
|       |      | Shiraz-25T | 1697 | 0.21945  | 0         |  |
|       |      | Shiraz-28T | 1734 | 0.362882 | 0         |  |
|       |      | Shiraz-28T | 1734 | 0.362882 | 0         |  |
|       |      | Shiraz-29T | 1777 | 0.156747 | 0         |  |
|       |      | Shiraz-29T | 1777 | 0.156747 | 0         |  |
|       |      | Shiraz-38T | 1950 | 0.265916 | 0         |  |
|       |      | Shiraz-38T | 1950 | 0.265916 | 0         |  |
|       |      | Shiraz-71T | 2236 | 0.320072 | 0         |  |
|       |      | Shiraz-71T | 2236 | 0.320072 | 0         |  |
| NPTX2 | chr7 | Shiraz-3T  | 90   | 0.219276 | 0         |  |
|       |      | Shiraz-3T  | 94   | 0.74735  | 0         |  |
|       |      | Shiraz-4T  | 253  | 0.372918 | 0         |  |
|       |      | Shiraz-31T | 316  | 0.219196 | 0         |  |
|       |      | Shiraz-36T | 378  | 0.179558 | 0         |  |
|       |      | Shiraz-36T | 381  | 0.332628 | 0         |  |
|       |      | Shiraz-44T | 639  | 1.035032 | 0         |  |
|       |      | Shiraz-46T | 943  | 0.093799 | 0         |  |
|       |      | Shiraz-46T | 946  | 0.299835 | 0         |  |
|       |      | Shiraz-47T | 1030 | 0.257728 | 0         |  |
|       |      | Shiraz-49T | 1120 | 0.281656 | 0         |  |
|       |      | Shiraz-77T | 1225 | 0        | -0.117922 |  |
|       |      | Shiraz-77T | 1227 | 0.196445 | 0         |  |
|       |      | Shiraz-9T  | 1324 | 0.679266 | 0         |  |
|       |      | Shiraz-18T | 1434 | 0.244465 | 0         |  |
|       |      | Shiraz-22T | 1549 | 0        | -0.319623 |  |
|       |      | Shiraz-22T | 1551 | 0.324011 | 0         |  |
|       |      | Shiraz-25T | 1698 | 0.21835  | 0         |  |

|  |            |      |          |           |  |
|--|------------|------|----------|-----------|--|
|  | Shiraz-28T | 1735 | 0.350744 | 0         |  |
|  | Shiraz-29T | 1778 | 0.120767 | 0         |  |
|  | Shiraz-32T | 1833 | 0.551336 | 0         |  |
|  | Shiraz-38T | 1951 | 0.250891 | 0         |  |
|  | Shiraz-53T | 2078 | 0.287202 | 0         |  |
|  | Shiraz-71T | 2238 | 0.603631 | 0         |  |
|  | Shiraz-3T  | 90   | 0.219276 | 0         |  |
|  | Shiraz-3T  | 94   | 0.74735  | 0         |  |
|  | Shiraz-4T  | 253  | 0.372918 | 0         |  |
|  | Shiraz-31T | 316  | 0.219196 | 0         |  |
|  | Shiraz-36T | 378  | 0.179558 | 0         |  |
|  | Shiraz-36T | 381  | 0.332628 | 0         |  |
|  | Shiraz-44T | 639  | 1.035032 | 0         |  |
|  | Shiraz-46T | 943  | 0.093799 | 0         |  |
|  | Shiraz-46T | 946  | 0.299835 | 0         |  |
|  | Shiraz-47T | 1030 | 0.257728 | 0         |  |
|  | Shiraz-49T | 1120 | 0.281656 | 0         |  |
|  | Shiraz-77T | 1225 | 0        | -0.117922 |  |
|  | Shiraz-77T | 1227 | 0.196445 | 0         |  |
|  | Shiraz-9T  | 1324 | 0.679266 | 0         |  |
|  | Shiraz-18T | 1434 | 0.244465 | 0         |  |
|  | Shiraz-22T | 1549 | 0        | -0.319623 |  |
|  | Shiraz-22T | 1551 | 0.324011 | 0         |  |
|  | Shiraz-25T | 1698 | 0.21835  | 0         |  |
|  | Shiraz-28T | 1735 | 0.350744 | 0         |  |
|  | Shiraz-29T | 1778 | 0.120767 | 0         |  |
|  | Shiraz-32T | 1833 | 0.551336 | 0         |  |
|  | Shiraz-38T | 1951 | 0.250891 | 0         |  |
|  | Shiraz-53T | 2078 | 0.287202 | 0         |  |
|  | Shiraz-71T | 2238 | 0.603631 | 0         |  |
|  | Shiraz-3T  | 90   | 0.219276 | 0         |  |
|  | Shiraz-3T  | 94   | 0.74735  | 0         |  |
|  | Shiraz-4T  | 253  | 0.372918 | 0         |  |
|  | Shiraz-31T | 316  | 0.219196 | 0         |  |
|  | Shiraz-36T | 378  | 0.179558 | 0         |  |
|  | Shiraz-36T | 381  | 0.332628 | 0         |  |
|  | Shiraz-44T | 639  | 1.035032 | 0         |  |
|  | Shiraz-46T | 943  | 0.093799 | 0         |  |
|  | Shiraz-46T | 946  | 0.299835 | 0         |  |
|  | Shiraz-47T | 1030 | 0.257728 | 0         |  |
|  | Shiraz-49T | 1120 | 0.281656 | 0         |  |
|  | Shiraz-77T | 1225 | 0        | -0.117922 |  |
|  | Shiraz-77T | 1227 | 0.196445 | 0         |  |
|  | Shiraz-9T  | 1324 | 0.679266 | 0         |  |
|  | Shiraz-18T | 1434 | 0.244465 | 0         |  |
|  | Shiraz-22T | 1549 | 0        | -0.319623 |  |
|  | Shiraz-22T | 1551 | 0.324011 | 0         |  |

|      |      |            |      |          |   |  |  |
|------|------|------------|------|----------|---|--|--|
|      |      | Shiraz-25T | 1698 | 0.21835  | 0 |  |  |
|      |      | Shiraz-28T | 1735 | 0.350744 | 0 |  |  |
|      |      | Shiraz-29T | 1778 | 0.120767 | 0 |  |  |
|      |      | Shiraz-32T | 1833 | 0.551336 | 0 |  |  |
|      |      | Shiraz-38T | 1951 | 0.250891 | 0 |  |  |
|      |      | Shiraz-53T | 2078 | 0.287202 | 0 |  |  |
|      |      | Shiraz-71T | 2238 | 0.603631 | 0 |  |  |
| NPVF | chr7 | Shiraz-3T  | 87   | 0.198593 | 0 |  |  |
|      |      | Shiraz-4T  | 252  | 0.192083 | 0 |  |  |
|      |      | Shiraz-36T | 376  | 0.159952 | 0 |  |  |
|      |      | Shiraz-46T | 942  | 0.069143 | 0 |  |  |
|      |      | Shiraz-18T | 1433 | 0.250973 | 0 |  |  |
|      |      | Shiraz-25T | 1697 | 0.21945  | 0 |  |  |
|      |      | Shiraz-28T | 1734 | 0.362882 | 0 |  |  |
|      |      | Shiraz-29T | 1777 | 0.156747 | 0 |  |  |
|      |      | Shiraz-38T | 1950 | 0.265916 | 0 |  |  |
|      |      | Shiraz-71T | 2236 | 0.320072 | 0 |  |  |
|      |      | Shiraz-3T  | 87   | 0.198593 | 0 |  |  |
|      |      | Shiraz-4T  | 252  | 0.192083 | 0 |  |  |
|      |      | Shiraz-36T | 376  | 0.159952 | 0 |  |  |
|      |      | Shiraz-46T | 942  | 0.069143 | 0 |  |  |
|      |      | Shiraz-18T | 1433 | 0.250973 | 0 |  |  |
|      |      | Shiraz-25T | 1697 | 0.21945  | 0 |  |  |
|      |      | Shiraz-28T | 1734 | 0.362882 | 0 |  |  |
|      |      | Shiraz-29T | 1777 | 0.156747 | 0 |  |  |
|      |      | Shiraz-38T | 1950 | 0.265916 | 0 |  |  |
|      |      | Shiraz-71T | 2236 | 0.320072 | 0 |  |  |
|      |      | Shiraz-3T  | 87   | 0.198593 | 0 |  |  |
|      |      | Shiraz-4T  | 252  | 0.192083 | 0 |  |  |
|      |      | Shiraz-36T | 376  | 0.159952 | 0 |  |  |
|      |      | Shiraz-46T | 942  | 0.069143 | 0 |  |  |
|      |      | Shiraz-18T | 1433 | 0.250973 | 0 |  |  |
|      |      | Shiraz-25T | 1697 | 0.21945  | 0 |  |  |
|      |      | Shiraz-28T | 1734 | 0.362882 | 0 |  |  |
|      |      | Shiraz-29T | 1777 | 0.156747 | 0 |  |  |
|      |      | Shiraz-38T | 1950 | 0.265916 | 0 |  |  |
|      |      | Shiraz-71T | 2236 | 0.320072 | 0 |  |  |
| NPY  | chr7 | Shiraz-3T  | 87   | 0.198593 | 0 |  |  |
|      |      | Shiraz-4T  | 252  | 0.192083 | 0 |  |  |
|      |      | Shiraz-36T | 376  | 0.159952 | 0 |  |  |
|      |      | Shiraz-46T | 942  | 0.069143 | 0 |  |  |
|      |      | Shiraz-18T | 1433 | 0.250973 | 0 |  |  |
|      |      | Shiraz-25T | 1697 | 0.21945  | 0 |  |  |
|      |      | Shiraz-28T | 1734 | 0.362882 | 0 |  |  |
|      |      | Shiraz-29T | 1777 | 0.156747 | 0 |  |  |
|      |      | Shiraz-38T | 1950 | 0.265916 | 0 |  |  |
|      |      | Shiraz-71T | 2236 | 0.320072 | 0 |  |  |

|       |      |            |      |          |           |  |
|-------|------|------------|------|----------|-----------|--|
|       |      | Shiraz-3T  | 87   | 0.198593 | 0         |  |
|       |      | Shiraz-4T  | 252  | 0.192083 | 0         |  |
|       |      | Shiraz-36T | 376  | 0.159952 | 0         |  |
|       |      | Shiraz-46T | 942  | 0.069143 | 0         |  |
|       |      | Shiraz-18T | 1433 | 0.250973 | 0         |  |
|       |      | Shiraz-25T | 1697 | 0.21945  | 0         |  |
|       |      | Shiraz-28T | 1734 | 0.362882 | 0         |  |
|       |      | Shiraz-29T | 1777 | 0.156747 | 0         |  |
|       |      | Shiraz-38T | 1950 | 0.265916 | 0         |  |
|       |      | Shiraz-71T | 2236 | 0.320072 | 0         |  |
|       |      | Shiraz-3T  | 87   | 0.198593 | 0         |  |
|       |      | Shiraz-4T  | 252  | 0.192083 | 0         |  |
|       |      | Shiraz-36T | 376  | 0.159952 | 0         |  |
|       |      | Shiraz-46T | 942  | 0.069143 | 0         |  |
|       |      | Shiraz-18T | 1433 | 0.250973 | 0         |  |
|       |      | Shiraz-25T | 1697 | 0.21945  | 0         |  |
|       |      | Shiraz-28T | 1734 | 0.362882 | 0         |  |
|       |      | Shiraz-29T | 1777 | 0.156747 | 0         |  |
|       |      | Shiraz-38T | 1950 | 0.265916 | 0         |  |
|       |      | Shiraz-71T | 2236 | 0.320072 | 0         |  |
| NROB1 | chrX | Shiraz-3T  | 235  | 0        | -0.28401  |  |
|       |      | Shiraz-3T  | 236  | 0        | -0.435445 |  |
|       |      | Shiraz-4T  | 260  | 0        | -0.324128 |  |
|       |      | Shiraz-16T | 294  | 0.655804 | 0         |  |
|       |      | Shiraz-36T | 431  | 0        | -0.78035  |  |
|       |      | Shiraz-44T | 891  | 0        | -0.954044 |  |
|       |      | Shiraz-44T | 893  | 0        | -1.364406 |  |
|       |      | Shiraz-44T | 894  | 0        | -0.776734 |  |
|       |      | Shiraz-47T | 1083 | 0        | -0.103285 |  |
|       |      | Shiraz-49T | 1166 | 0        | -0.917235 |  |
|       |      | Shiraz-49T | 1168 | 0        | -1.073859 |  |
|       |      | Shiraz-9T  | 1368 | 0.199713 | 0         |  |
|       |      | Shiraz-18T | 1455 | 0        | -0.186773 |  |
|       |      | Shiraz-22T | 1669 | 0.695915 | 0         |  |
|       |      | Shiraz-22T | 1671 | 0.369309 | 0         |  |
|       |      | Shiraz-25T | 1717 | 0.420447 | 0         |  |
|       |      | Shiraz-25T | 1718 | 0        | -0.452703 |  |
|       |      | Shiraz-28T | 1760 | 0.538181 | 0         |  |
|       |      | Shiraz-28T | 1761 | 0        | -0.695601 |  |
|       |      | Shiraz-29T | 1800 | 0.672527 | 0         |  |
|       |      | Shiraz-32T | 1869 | 0.776805 | 0         |  |
|       |      | Shiraz-35T | 1932 | 0.507141 | 0         |  |
|       |      | Shiraz-40T | 2051 | 0.098506 | 0         |  |
|       |      | Shiraz-58T | 2221 | 0.871948 | 0         |  |
|       |      | Shiraz-58T | 2222 | 0.679664 | 0         |  |
|       |      | Shiraz-71T | 2260 | 0.68394  | 0         |  |
|       |      | Shiraz-71T | 2261 | 0.508399 | 0         |  |

|  |            |      |          |           |  |
|--|------------|------|----------|-----------|--|
|  | Shiraz-3T  | 235  | 0        | -0.28401  |  |
|  | Shiraz-3T  | 236  | 0        | -0.435445 |  |
|  | Shiraz-4T  | 260  | 0        | -0.324128 |  |
|  | Shiraz-16T | 294  | 0.655804 | 0         |  |
|  | Shiraz-36T | 431  | 0        | -0.78035  |  |
|  | Shiraz-44T | 891  | 0        | -0.954044 |  |
|  | Shiraz-44T | 893  | 0        | -1.364406 |  |
|  | Shiraz-44T | 894  | 0        | -0.776734 |  |
|  | Shiraz-47T | 1083 | 0        | -0.103285 |  |
|  | Shiraz-49T | 1166 | 0        | -0.917235 |  |
|  | Shiraz-49T | 1168 | 0        | -1.073859 |  |
|  | Shiraz-9T  | 1368 | 0.199713 | 0         |  |
|  | Shiraz-18T | 1455 | 0        | -0.186773 |  |
|  | Shiraz-22T | 1669 | 0.695915 | 0         |  |
|  | Shiraz-22T | 1671 | 0.369309 | 0         |  |
|  | Shiraz-25T | 1717 | 0.420447 | 0         |  |
|  | Shiraz-25T | 1718 | 0        | -0.452703 |  |
|  | Shiraz-28T | 1760 | 0.538181 | 0         |  |
|  | Shiraz-28T | 1761 | 0        | -0.695601 |  |
|  | Shiraz-29T | 1800 | 0.672527 | 0         |  |
|  | Shiraz-32T | 1869 | 0.776805 | 0         |  |
|  | Shiraz-35T | 1932 | 0.507141 | 0         |  |
|  | Shiraz-40T | 2051 | 0.098506 | 0         |  |
|  | Shiraz-58T | 2221 | 0.871948 | 0         |  |
|  | Shiraz-58T | 2222 | 0.679664 | 0         |  |
|  | Shiraz-71T | 2260 | 0.68394  | 0         |  |
|  | Shiraz-71T | 2261 | 0.508399 | 0         |  |
|  | Shiraz-3T  | 235  | 0        | -0.28401  |  |
|  | Shiraz-3T  | 236  | 0        | -0.435445 |  |
|  | Shiraz-4T  | 260  | 0        | -0.324128 |  |
|  | Shiraz-16T | 294  | 0.655804 | 0         |  |
|  | Shiraz-36T | 431  | 0        | -0.78035  |  |
|  | Shiraz-44T | 891  | 0        | -0.954044 |  |
|  | Shiraz-44T | 893  | 0        | -1.364406 |  |
|  | Shiraz-44T | 894  | 0        | -0.776734 |  |
|  | Shiraz-47T | 1083 | 0        | -0.103285 |  |
|  | Shiraz-49T | 1166 | 0        | -0.917235 |  |
|  | Shiraz-49T | 1168 | 0        | -1.073859 |  |
|  | Shiraz-9T  | 1368 | 0.199713 | 0         |  |
|  | Shiraz-18T | 1455 | 0        | -0.186773 |  |
|  | Shiraz-22T | 1669 | 0.695915 | 0         |  |
|  | Shiraz-22T | 1671 | 0.369309 | 0         |  |
|  | Shiraz-25T | 1717 | 0.420447 | 0         |  |
|  | Shiraz-25T | 1718 | 0        | -0.452703 |  |
|  | Shiraz-28T | 1760 | 0.538181 | 0         |  |
|  | Shiraz-28T | 1761 | 0        | -0.695601 |  |
|  | Shiraz-29T | 1800 | 0.672527 | 0         |  |

|       |      |            |      |          |           |  |
|-------|------|------------|------|----------|-----------|--|
|       |      | Shiraz-32T | 1869 | 0.776805 | 0         |  |
|       |      | Shiraz-35T | 1932 | 0.507141 | 0         |  |
|       |      | Shiraz-40T | 2051 | 0.098506 | 0         |  |
|       |      | Shiraz-58T | 2221 | 0.871948 | 0         |  |
|       |      | Shiraz-58T | 2222 | 0.679664 | 0         |  |
|       |      | Shiraz-71T | 2260 | 0.68394  | 0         |  |
|       |      | Shiraz-71T | 2261 | 0.508399 | 0         |  |
| NRCAM | chr7 | Shiraz-3T  | 90   | 0.219276 | 0         |  |
|       |      | Shiraz-3T  | 90   | 0.219276 | 0         |  |
|       |      | Shiraz-4T  | 253  | 0.372918 | 0         |  |
|       |      | Shiraz-4T  | 253  | 0.372918 | 0         |  |
|       |      | Shiraz-36T | 378  | 0.179558 | 0         |  |
|       |      | Shiraz-36T | 378  | 0.179558 | 0         |  |
|       |      | Shiraz-36T | 382  | 0.081739 | 0         |  |
|       |      | Shiraz-36T | 382  | 0.081739 | 0         |  |
|       |      | Shiraz-44T | 641  | 0        | -0.477846 |  |
|       |      | Shiraz-46T | 943  | 0.093799 | 0         |  |
|       |      | Shiraz-46T | 943  | 0.093799 | 0         |  |
|       |      | Shiraz-46T | 947  | 0        | -0.010843 |  |
|       |      | Shiraz-46T | 947  | 0        | -0.010843 |  |
|       |      | Shiraz-47T | 1031 | 0        | -0.117529 |  |
|       |      | Shiraz-47T | 1031 | 0        | -0.117529 |  |
|       |      | Shiraz-49T | 1121 | 0        | -0.138569 |  |
|       |      | Shiraz-49T | 1121 | 0        | -0.138569 |  |
|       |      | Shiraz-77T | 1225 | 0        | -0.117922 |  |
|       |      | Shiraz-77T | 1225 | 0        | -0.117922 |  |
|       |      | Shiraz-77T | 1228 | 0        | -0.238084 |  |
|       |      | Shiraz-77T | 1228 | 0        | -0.238084 |  |
|       |      | Shiraz-18T | 1434 | 0.244465 | 0         |  |
|       |      | Shiraz-18T | 1434 | 0.244465 | 0         |  |
|       |      | Shiraz-22T | 1549 | 0        | -0.319623 |  |
|       |      | Shiraz-22T | 1549 | 0        | -0.319623 |  |
|       |      | Shiraz-25T | 1698 | 0.21835  | 0         |  |
|       |      | Shiraz-25T | 1698 | 0.21835  | 0         |  |
|       |      | Shiraz-28T | 1735 | 0.350744 | 0         |  |
|       |      | Shiraz-28T | 1735 | 0.350744 | 0         |  |
|       |      | Shiraz-29T | 1778 | 0.120767 | 0         |  |
|       |      | Shiraz-29T | 1778 | 0.120767 | 0         |  |
|       |      | Shiraz-32T | 1833 | 0.551336 | 0         |  |
|       |      | Shiraz-32T | 1833 | 0.551336 | 0         |  |
|       |      | Shiraz-38T | 1951 | 0.250891 | 0         |  |
|       |      | Shiraz-38T | 1951 | 0.250891 | 0         |  |
|       |      | Shiraz-53T | 2078 | 0.287202 | 0         |  |
|       |      | Shiraz-53T | 2078 | 0.287202 | 0         |  |
|       |      | Shiraz-58T | 2161 | 0        | -0.187744 |  |
|       |      | Shiraz-58T | 2161 | 0        | -0.187744 |  |
|       |      | Shiraz-71T | 2238 | 0.603631 | 0         |  |

|  |            |      |          |           |  |
|--|------------|------|----------|-----------|--|
|  | Shiraz-71T | 2238 | 0.603631 | 0         |  |
|  | Shiraz-3T  | 90   | 0.219276 | 0         |  |
|  | Shiraz-3T  | 90   | 0.219276 | 0         |  |
|  | Shiraz-4T  | 253  | 0.372918 | 0         |  |
|  | Shiraz-4T  | 253  | 0.372918 | 0         |  |
|  | Shiraz-36T | 378  | 0.179558 | 0         |  |
|  | Shiraz-36T | 378  | 0.179558 | 0         |  |
|  | Shiraz-36T | 382  | 0.081739 | 0         |  |
|  | Shiraz-36T | 382  | 0.081739 | 0         |  |
|  | Shiraz-44T | 641  | 0        | -0.477846 |  |
|  | Shiraz-46T | 943  | 0.093799 | 0         |  |
|  | Shiraz-46T | 943  | 0.093799 | 0         |  |
|  | Shiraz-46T | 947  | 0        | -0.010843 |  |
|  | Shiraz-46T | 947  | 0        | -0.010843 |  |
|  | Shiraz-47T | 1031 | 0        | -0.117529 |  |
|  | Shiraz-47T | 1031 | 0        | -0.117529 |  |
|  | Shiraz-49T | 1121 | 0        | -0.138569 |  |
|  | Shiraz-49T | 1121 | 0        | -0.138569 |  |
|  | Shiraz-77T | 1225 | 0        | -0.117922 |  |
|  | Shiraz-77T | 1225 | 0        | -0.117922 |  |
|  | Shiraz-77T | 1228 | 0        | -0.238084 |  |
|  | Shiraz-77T | 1228 | 0        | -0.238084 |  |
|  | Shiraz-18T | 1434 | 0.244465 | 0         |  |
|  | Shiraz-18T | 1434 | 0.244465 | 0         |  |
|  | Shiraz-22T | 1549 | 0        | -0.319623 |  |
|  | Shiraz-22T | 1549 | 0        | -0.319623 |  |
|  | Shiraz-25T | 1698 | 0.21835  | 0         |  |
|  | Shiraz-25T | 1698 | 0.21835  | 0         |  |
|  | Shiraz-28T | 1735 | 0.350744 | 0         |  |
|  | Shiraz-28T | 1735 | 0.350744 | 0         |  |
|  | Shiraz-29T | 1778 | 0.120767 | 0         |  |
|  | Shiraz-29T | 1778 | 0.120767 | 0         |  |
|  | Shiraz-32T | 1833 | 0.551336 | 0         |  |
|  | Shiraz-32T | 1833 | 0.551336 | 0         |  |
|  | Shiraz-38T | 1951 | 0.250891 | 0         |  |
|  | Shiraz-38T | 1951 | 0.250891 | 0         |  |
|  | Shiraz-53T | 2078 | 0.287202 | 0         |  |
|  | Shiraz-53T | 2078 | 0.287202 | 0         |  |
|  | Shiraz-58T | 2161 | 0        | -0.187744 |  |
|  | Shiraz-58T | 2161 | 0        | -0.187744 |  |
|  | Shiraz-71T | 2238 | 0.603631 | 0         |  |
|  | Shiraz-71T | 2238 | 0.603631 | 0         |  |
|  | Shiraz-3T  | 90   | 0.219276 | 0         |  |
|  | Shiraz-3T  | 90   | 0.219276 | 0         |  |
|  | Shiraz-4T  | 253  | 0.372918 | 0         |  |
|  | Shiraz-4T  | 253  | 0.372918 | 0         |  |
|  | Shiraz-36T | 378  | 0.179558 | 0         |  |

|      |      |            |      |          |           |  |
|------|------|------------|------|----------|-----------|--|
|      |      | Shiraz-36T | 378  | 0.179558 | 0         |  |
|      |      | Shiraz-36T | 382  | 0.081739 | 0         |  |
|      |      | Shiraz-36T | 382  | 0.081739 | 0         |  |
|      |      | Shiraz-44T | 641  | 0        | -0.477846 |  |
|      |      | Shiraz-46T | 943  | 0.093799 | 0         |  |
|      |      | Shiraz-46T | 943  | 0.093799 | 0         |  |
|      |      | Shiraz-46T | 947  | 0        | -0.010843 |  |
|      |      | Shiraz-46T | 947  | 0        | -0.010843 |  |
|      |      | Shiraz-47T | 1031 | 0        | -0.117529 |  |
|      |      | Shiraz-47T | 1031 | 0        | -0.117529 |  |
|      |      | Shiraz-49T | 1121 | 0        | -0.138569 |  |
|      |      | Shiraz-49T | 1121 | 0        | -0.138569 |  |
|      |      | Shiraz-77T | 1225 | 0        | -0.117922 |  |
|      |      | Shiraz-77T | 1225 | 0        | -0.117922 |  |
|      |      | Shiraz-77T | 1228 | 0        | -0.238084 |  |
|      |      | Shiraz-77T | 1228 | 0        | -0.238084 |  |
|      |      | Shiraz-18T | 1434 | 0.244465 | 0         |  |
|      |      | Shiraz-18T | 1434 | 0.244465 | 0         |  |
|      |      | Shiraz-22T | 1549 | 0        | -0.319623 |  |
|      |      | Shiraz-22T | 1549 | 0        | -0.319623 |  |
|      |      | Shiraz-25T | 1698 | 0.21835  | 0         |  |
|      |      | Shiraz-25T | 1698 | 0.21835  | 0         |  |
|      |      | Shiraz-28T | 1735 | 0.350744 | 0         |  |
|      |      | Shiraz-28T | 1735 | 0.350744 | 0         |  |
|      |      | Shiraz-29T | 1778 | 0.120767 | 0         |  |
|      |      | Shiraz-29T | 1778 | 0.120767 | 0         |  |
|      |      | Shiraz-32T | 1833 | 0.551336 | 0         |  |
|      |      | Shiraz-32T | 1833 | 0.551336 | 0         |  |
|      |      | Shiraz-38T | 1951 | 0.250891 | 0         |  |
|      |      | Shiraz-38T | 1951 | 0.250891 | 0         |  |
|      |      | Shiraz-53T | 2078 | 0.287202 | 0         |  |
|      |      | Shiraz-53T | 2078 | 0.287202 | 0         |  |
|      |      | Shiraz-58T | 2161 | 0        | -0.187744 |  |
|      |      | Shiraz-58T | 2161 | 0        | -0.187744 |  |
|      |      | Shiraz-71T | 2238 | 0.603631 | 0         |  |
|      |      | Shiraz-71T | 2238 | 0.603631 | 0         |  |
| NRF1 | chr7 | Shiraz-3T  | 90   | 0.219276 | 0         |  |
|      |      | Shiraz-3T  | 90   | 0.219276 | 0         |  |
|      |      | Shiraz-3T  | 96   | 0.428308 | 0         |  |
|      |      | Shiraz-3T  | 96   | 0.428308 | 0         |  |
|      |      | Shiraz-4T  | 253  | 0.372918 | 0         |  |
|      |      | Shiraz-4T  | 253  | 0.372918 | 0         |  |
|      |      | Shiraz-31T | 317  | 0.204382 | 0         |  |
|      |      | Shiraz-31T | 317  | 0.204382 | 0         |  |
|      |      | Shiraz-36T | 378  | 0.179558 | 0         |  |
|      |      | Shiraz-36T | 378  | 0.179558 | 0         |  |
|      |      | Shiraz-44T | 642  | 0.408617 | 0         |  |



|  |  |            |      |          |           |  |  |
|--|--|------------|------|----------|-----------|--|--|
|  |  | Shiraz-44T | 642  | 0.408617 | 0         |  |  |
|  |  | Shiraz-46T | 943  | 0.093799 | 0         |  |  |
|  |  | Shiraz-46T | 943  | 0.093799 | 0         |  |  |
|  |  | Shiraz-47T | 1032 | 0.171484 | 0         |  |  |
|  |  | Shiraz-47T | 1032 | 0.171484 | 0         |  |  |
|  |  | Shiraz-77T | 1225 | 0        | -0.117922 |  |  |
|  |  | Shiraz-77T | 1225 | 0        | -0.117922 |  |  |
|  |  | Shiraz-77T | 1229 | 0.051661 | 0         |  |  |
|  |  | Shiraz-77T | 1229 | 0.051661 | 0         |  |  |
|  |  | Shiraz-9T  | 1325 | 0.221899 | 0         |  |  |
|  |  | Shiraz-9T  | 1325 | 0.221899 | 0         |  |  |
|  |  | Shiraz-18T | 1434 | 0.244465 | 0         |  |  |
|  |  | Shiraz-18T | 1434 | 0.244465 | 0         |  |  |
|  |  | Shiraz-25T | 1698 | 0.21835  | 0         |  |  |
|  |  | Shiraz-25T | 1698 | 0.21835  | 0         |  |  |
|  |  | Shiraz-28T | 1735 | 0.350744 | 0         |  |  |
|  |  | Shiraz-28T | 1735 | 0.350744 | 0         |  |  |
|  |  | Shiraz-29T | 1778 | 0.120767 | 0         |  |  |
|  |  | Shiraz-29T | 1778 | 0.120767 | 0         |  |  |
|  |  | Shiraz-32T | 1833 | 0.551336 | 0         |  |  |
|  |  | Shiraz-32T | 1833 | 0.551336 | 0         |  |  |
|  |  | Shiraz-38T | 1951 | 0.250891 | 0         |  |  |
|  |  | Shiraz-38T | 1951 | 0.250891 | 0         |  |  |
|  |  | Shiraz-53T | 2078 | 0.287202 | 0         |  |  |
|  |  | Shiraz-53T | 2078 | 0.287202 | 0         |  |  |
|  |  | Shiraz-71T | 2238 | 0.603631 | 0         |  |  |
|  |  | Shiraz-71T | 2238 | 0.603631 | 0         |  |  |
|  |  | Shiraz-3T  | 90   | 0.219276 | 0         |  |  |
|  |  | Shiraz-3T  | 90   | 0.219276 | 0         |  |  |
|  |  | Shiraz-3T  | 96   | 0.428308 | 0         |  |  |
|  |  | Shiraz-3T  | 96   | 0.428308 | 0         |  |  |
|  |  | Shiraz-4T  | 253  | 0.372918 | 0         |  |  |
|  |  | Shiraz-4T  | 253  | 0.372918 | 0         |  |  |
|  |  | Shiraz-31T | 317  | 0.204382 | 0         |  |  |
|  |  | Shiraz-31T | 317  | 0.204382 | 0         |  |  |
|  |  | Shiraz-36T | 378  | 0.179558 | 0         |  |  |
|  |  | Shiraz-36T | 378  | 0.179558 | 0         |  |  |
|  |  | Shiraz-44T | 642  | 0.408617 | 0         |  |  |
|  |  | Shiraz-44T | 642  | 0.408617 | 0         |  |  |
|  |  | Shiraz-46T | 943  | 0.093799 | 0         |  |  |
|  |  | Shiraz-46T | 943  | 0.093799 | 0         |  |  |
|  |  | Shiraz-47T | 1032 | 0.171484 | 0         |  |  |
|  |  | Shiraz-47T | 1032 | 0.171484 | 0         |  |  |
|  |  | Shiraz-77T | 1225 | 0        | -0.117922 |  |  |
|  |  | Shiraz-77T | 1225 | 0        | -0.117922 |  |  |
|  |  | Shiraz-77T | 1229 | 0.051661 | 0         |  |  |
|  |  | Shiraz-77T | 1229 | 0.051661 | 0         |  |  |

|  |  |            |      |          |           |  |  |
|--|--|------------|------|----------|-----------|--|--|
|  |  | Shiraz-9T  | 1325 | 0.221899 | 0         |  |  |
|  |  | Shiraz-9T  | 1325 | 0.221899 | 0         |  |  |
|  |  | Shiraz-18T | 1434 | 0.244465 | 0         |  |  |
|  |  | Shiraz-18T | 1434 | 0.244465 | 0         |  |  |
|  |  | Shiraz-25T | 1698 | 0.21835  | 0         |  |  |
|  |  | Shiraz-25T | 1698 | 0.21835  | 0         |  |  |
|  |  | Shiraz-28T | 1735 | 0.350744 | 0         |  |  |
|  |  | Shiraz-28T | 1735 | 0.350744 | 0         |  |  |
|  |  | Shiraz-29T | 1778 | 0.120767 | 0         |  |  |
|  |  | Shiraz-29T | 1778 | 0.120767 | 0         |  |  |
|  |  | Shiraz-32T | 1833 | 0.551336 | 0         |  |  |
|  |  | Shiraz-32T | 1833 | 0.551336 | 0         |  |  |
|  |  | Shiraz-38T | 1951 | 0.250891 | 0         |  |  |
|  |  | Shiraz-38T | 1951 | 0.250891 | 0         |  |  |
|  |  | Shiraz-53T | 2078 | 0.287202 | 0         |  |  |
|  |  | Shiraz-53T | 2078 | 0.287202 | 0         |  |  |
|  |  | Shiraz-71T | 2238 | 0.603631 | 0         |  |  |
|  |  | Shiraz-71T | 2238 | 0.603631 | 0         |  |  |
|  |  | Shiraz-3T  | 90   | 0.219276 | 0         |  |  |
|  |  | Shiraz-3T  | 90   | 0.219276 | 0         |  |  |
|  |  | Shiraz-3T  | 96   | 0.428308 | 0         |  |  |
|  |  | Shiraz-3T  | 96   | 0.428308 | 0         |  |  |
|  |  | Shiraz-4T  | 253  | 0.372918 | 0         |  |  |
|  |  | Shiraz-4T  | 253  | 0.372918 | 0         |  |  |
|  |  | Shiraz-31T | 317  | 0.204382 | 0         |  |  |
|  |  | Shiraz-31T | 317  | 0.204382 | 0         |  |  |
|  |  | Shiraz-36T | 378  | 0.179558 | 0         |  |  |
|  |  | Shiraz-36T | 378  | 0.179558 | 0         |  |  |
|  |  | Shiraz-44T | 642  | 0.408617 | 0         |  |  |
|  |  | Shiraz-44T | 642  | 0.408617 | 0         |  |  |
|  |  | Shiraz-46T | 943  | 0.093799 | 0         |  |  |
|  |  | Shiraz-46T | 943  | 0.093799 | 0         |  |  |
|  |  | Shiraz-47T | 1032 | 0.171484 | 0         |  |  |
|  |  | Shiraz-47T | 1032 | 0.171484 | 0         |  |  |
|  |  | Shiraz-77T | 1225 | 0        | -0.117922 |  |  |
|  |  | Shiraz-77T | 1225 | 0        | -0.117922 |  |  |
|  |  | Shiraz-77T | 1229 | 0.051661 | 0         |  |  |
|  |  | Shiraz-77T | 1229 | 0.051661 | 0         |  |  |
|  |  | Shiraz-9T  | 1325 | 0.221899 | 0         |  |  |
|  |  | Shiraz-9T  | 1325 | 0.221899 | 0         |  |  |
|  |  | Shiraz-18T | 1434 | 0.244465 | 0         |  |  |
|  |  | Shiraz-18T | 1434 | 0.244465 | 0         |  |  |
|  |  | Shiraz-25T | 1698 | 0.21835  | 0         |  |  |
|  |  | Shiraz-25T | 1698 | 0.21835  | 0         |  |  |
|  |  | Shiraz-28T | 1735 | 0.350744 | 0         |  |  |
|  |  | Shiraz-28T | 1735 | 0.350744 | 0         |  |  |
|  |  | Shiraz-29T | 1778 | 0.120767 | 0         |  |  |

|     |      |            |      |          |           |  |  |
|-----|------|------------|------|----------|-----------|--|--|
|     |      | Shiraz-29T | 1778 | 0.120767 | 0         |  |  |
|     |      | Shiraz-32T | 1833 | 0.551336 | 0         |  |  |
|     |      | Shiraz-32T | 1833 | 0.551336 | 0         |  |  |
|     |      | Shiraz-38T | 1951 | 0.250891 | 0         |  |  |
|     |      | Shiraz-38T | 1951 | 0.250891 | 0         |  |  |
|     |      | Shiraz-53T | 2078 | 0.287202 | 0         |  |  |
|     |      | Shiraz-53T | 2078 | 0.287202 | 0         |  |  |
|     |      | Shiraz-71T | 2238 | 0.603631 | 0         |  |  |
|     |      | Shiraz-71T | 2238 | 0.603631 | 0         |  |  |
| NRK | chrX | Shiraz-3T  | 242  | 0        | -0.336434 |  |  |
|     |      | Shiraz-4T  | 261  | 0        | -0.336249 |  |  |
|     |      | Shiraz-16T | 295  | 0.591657 | 0         |  |  |
|     |      | Shiraz-36T | 433  | 0        | -0.803961 |  |  |
|     |      | Shiraz-44T | 899  | 0        | -1.09697  |  |  |
|     |      | Shiraz-49T | 1170 | 0        | -0.967436 |  |  |
|     |      | Shiraz-18T | 1457 | 0.643204 | 0         |  |  |
|     |      | Shiraz-22T | 1673 | 0.611783 | 0         |  |  |
|     |      | Shiraz-25T | 1719 | 0.472955 | 0         |  |  |
|     |      | Shiraz-28T | 1762 | 0.562311 | 0         |  |  |
|     |      | Shiraz-29T | 1801 | 0.815343 | 0         |  |  |
|     |      | Shiraz-32T | 1870 | 0.729766 | 0         |  |  |
|     |      | Shiraz-35T | 1933 | 0.488535 | 0         |  |  |
|     |      | Shiraz-58T | 2223 | 0.833364 | 0         |  |  |
|     |      | Shiraz-71T | 2263 | 0.975531 | 0         |  |  |
|     |      | Shiraz-3T  | 242  | 0        | -0.336434 |  |  |
|     |      | Shiraz-4T  | 261  | 0        | -0.336249 |  |  |
|     |      | Shiraz-16T | 295  | 0.591657 | 0         |  |  |
|     |      | Shiraz-36T | 433  | 0        | -0.803961 |  |  |
|     |      | Shiraz-44T | 899  | 0        | -1.09697  |  |  |
|     |      | Shiraz-49T | 1170 | 0        | -0.967436 |  |  |
|     |      | Shiraz-18T | 1457 | 0.643204 | 0         |  |  |
|     |      | Shiraz-22T | 1673 | 0.611783 | 0         |  |  |
|     |      | Shiraz-25T | 1719 | 0.472955 | 0         |  |  |
|     |      | Shiraz-28T | 1762 | 0.562311 | 0         |  |  |
|     |      | Shiraz-29T | 1801 | 0.815343 | 0         |  |  |
|     |      | Shiraz-32T | 1870 | 0.729766 | 0         |  |  |
|     |      | Shiraz-35T | 1933 | 0.488535 | 0         |  |  |
|     |      | Shiraz-58T | 2223 | 0.833364 | 0         |  |  |
|     |      | Shiraz-71T | 2263 | 0.975531 | 0         |  |  |
|     |      | Shiraz-3T  | 242  | 0        | -0.336434 |  |  |
|     |      | Shiraz-4T  | 261  | 0        | -0.336249 |  |  |
|     |      | Shiraz-16T | 295  | 0.591657 | 0         |  |  |
|     |      | Shiraz-36T | 433  | 0        | -0.803961 |  |  |
|     |      | Shiraz-44T | 899  | 0        | -1.09697  |  |  |
|     |      | Shiraz-49T | 1170 | 0        | -0.967436 |  |  |
|     |      | Shiraz-18T | 1457 | 0.643204 | 0         |  |  |
|     |      | Shiraz-22T | 1673 | 0.611783 | 0         |  |  |

|       |      |            |      |          |           |  |
|-------|------|------------|------|----------|-----------|--|
|       |      | Shiraz-25T | 1719 | 0.472955 | 0         |  |
|       |      | Shiraz-28T | 1762 | 0.562311 | 0         |  |
|       |      | Shiraz-29T | 1801 | 0.815343 | 0         |  |
|       |      | Shiraz-32T | 1870 | 0.729766 | 0         |  |
|       |      | Shiraz-35T | 1933 | 0.488535 | 0         |  |
|       |      | Shiraz-58T | 2223 | 0.833364 | 0         |  |
|       |      | Shiraz-71T | 2263 | 0.975531 | 0         |  |
| NSBP1 | chrX | Shiraz-3T  | 242  | 0        | -0.336434 |  |
|       |      | Shiraz-3T  | 243  | 0        | -0.549129 |  |
|       |      | Shiraz-4T  | 261  | 0        | -0.336249 |  |
|       |      | Shiraz-16T | 295  | 0.591657 | 0         |  |
|       |      | Shiraz-36T | 433  | 0        | -0.803961 |  |
|       |      | Shiraz-44T | 899  | 0        | -1.09697  |  |
|       |      | Shiraz-44T | 902  | 0        | -1.449824 |  |
|       |      | Shiraz-47T | 1085 | 0        | -0.130811 |  |
|       |      | Shiraz-49T | 1170 | 0        | -0.967436 |  |
|       |      | Shiraz-49T | 1172 | 0        | -1.123219 |  |
|       |      | Shiraz-18T | 1457 | 0.643204 | 0         |  |
|       |      | Shiraz-22T | 1673 | 0.611783 | 0         |  |
|       |      | Shiraz-22T | 1675 | 0.279253 | 0         |  |
|       |      | Shiraz-25T | 1719 | 0.472955 | 0         |  |
|       |      | Shiraz-28T | 1762 | 0.562311 | 0         |  |
|       |      | Shiraz-29T | 1801 | 0.815343 | 0         |  |
|       |      | Shiraz-32T | 1870 | 0.729766 | 0         |  |
|       |      | Shiraz-32T | 1871 | 0.292679 | 0         |  |
|       |      | Shiraz-35T | 1933 | 0.488535 | 0         |  |
|       |      | Shiraz-58T | 2223 | 0.833364 | 0         |  |
|       |      | Shiraz-71T | 2263 | 0.975531 | 0         |  |
|       |      | Shiraz-3T  | 242  | 0        | -0.336434 |  |
|       |      | Shiraz-3T  | 243  | 0        | -0.549129 |  |
|       |      | Shiraz-4T  | 261  | 0        | -0.336249 |  |
|       |      | Shiraz-16T | 295  | 0.591657 | 0         |  |
|       |      | Shiraz-36T | 433  | 0        | -0.803961 |  |
|       |      | Shiraz-44T | 899  | 0        | -1.09697  |  |
|       |      | Shiraz-44T | 902  | 0        | -1.449824 |  |
|       |      | Shiraz-47T | 1085 | 0        | -0.130811 |  |
|       |      | Shiraz-49T | 1170 | 0        | -0.967436 |  |
|       |      | Shiraz-49T | 1172 | 0        | -1.123219 |  |
|       |      | Shiraz-18T | 1457 | 0.643204 | 0         |  |
|       |      | Shiraz-22T | 1673 | 0.611783 | 0         |  |
|       |      | Shiraz-22T | 1675 | 0.279253 | 0         |  |
|       |      | Shiraz-25T | 1719 | 0.472955 | 0         |  |
|       |      | Shiraz-28T | 1762 | 0.562311 | 0         |  |
|       |      | Shiraz-29T | 1801 | 0.815343 | 0         |  |
|       |      | Shiraz-32T | 1870 | 0.729766 | 0         |  |
|       |      | Shiraz-32T | 1871 | 0.292679 | 0         |  |
|       |      | Shiraz-35T | 1933 | 0.488535 | 0         |  |

|       |      |            |      |          |           |  |  |
|-------|------|------------|------|----------|-----------|--|--|
|       |      | Shiraz-58T | 2223 | 0.833364 | 0         |  |  |
|       |      | Shiraz-71T | 2263 | 0.975531 | 0         |  |  |
|       |      | Shiraz-3T  | 242  | 0        | -0.336434 |  |  |
|       |      | Shiraz-3T  | 243  | 0        | -0.549129 |  |  |
|       |      | Shiraz-4T  | 261  | 0        | -0.336249 |  |  |
|       |      | Shiraz-16T | 295  | 0.591657 | 0         |  |  |
|       |      | Shiraz-36T | 433  | 0        | -0.803961 |  |  |
|       |      | Shiraz-44T | 899  | 0        | -1.09697  |  |  |
|       |      | Shiraz-44T | 902  | 0        | -1.449824 |  |  |
|       |      | Shiraz-47T | 1085 | 0        | -0.130811 |  |  |
|       |      | Shiraz-49T | 1170 | 0        | -0.967436 |  |  |
|       |      | Shiraz-49T | 1172 | 0        | -1.123219 |  |  |
|       |      | Shiraz-18T | 1457 | 0.643204 | 0         |  |  |
|       |      | Shiraz-22T | 1673 | 0.611783 | 0         |  |  |
|       |      | Shiraz-22T | 1675 | 0.279253 | 0         |  |  |
|       |      | Shiraz-25T | 1719 | 0.472955 | 0         |  |  |
|       |      | Shiraz-28T | 1762 | 0.562311 | 0         |  |  |
|       |      | Shiraz-29T | 1801 | 0.815343 | 0         |  |  |
|       |      | Shiraz-32T | 1870 | 0.729766 | 0         |  |  |
|       |      | Shiraz-32T | 1871 | 0.292679 | 0         |  |  |
|       |      | Shiraz-35T | 1933 | 0.488535 | 0         |  |  |
|       |      | Shiraz-58T | 2223 | 0.833364 | 0         |  |  |
|       |      | Shiraz-71T | 2263 | 0.975531 | 0         |  |  |
| NSDHL | chrX | Shiraz-4T  | 261  | 0        | -0.336249 |  |  |
|       |      | Shiraz-16T | 295  | 0.591657 | 0         |  |  |
|       |      | Shiraz-36T | 433  | 0        | -0.803961 |  |  |
|       |      | Shiraz-42T | 480  | 0        | -0.232915 |  |  |
|       |      | Shiraz-49T | 1170 | 0        | -0.967436 |  |  |
|       |      | Shiraz-9T  | 1370 | 0.690073 | 0         |  |  |
|       |      | Shiraz-9T  | 1371 | 1.292392 | 0         |  |  |
|       |      | Shiraz-18T | 1457 | 0.643204 | 0         |  |  |
|       |      | Shiraz-22T | 1673 | 0.611783 | 0         |  |  |
|       |      | Shiraz-22T | 1678 | 0.911625 | 0         |  |  |
|       |      | Shiraz-25T | 1719 | 0.472955 | 0         |  |  |
|       |      | Shiraz-28T | 1762 | 0.562311 | 0         |  |  |
|       |      | Shiraz-29T | 1801 | 0.815343 | 0         |  |  |
|       |      | Shiraz-32T | 1870 | 0.729766 | 0         |  |  |
|       |      | Shiraz-32T | 1872 | 1.504553 | 0         |  |  |
|       |      | Shiraz-35T | 1933 | 0.488535 | 0         |  |  |
|       |      | Shiraz-53T | 2115 | 0.427728 | 0         |  |  |
|       |      | Shiraz-58T | 2223 | 0.833364 | 0         |  |  |
|       |      | Shiraz-58T | 2226 | 1.074663 | 0         |  |  |
|       |      | Shiraz-71T | 2263 | 0.975531 | 0         |  |  |
|       |      | Shiraz-4T  | 261  | 0        | -0.336249 |  |  |
|       |      | Shiraz-16T | 295  | 0.591657 | 0         |  |  |
|       |      | Shiraz-36T | 433  | 0        | -0.803961 |  |  |
|       |      | Shiraz-42T | 480  | 0        | -0.232915 |  |  |

|       |      |            |      |          |           |  |  |
|-------|------|------------|------|----------|-----------|--|--|
|       |      | Shiraz-49T | 1170 | 0        | -0.967436 |  |  |
|       |      | Shiraz-9T  | 1370 | 0.690073 | 0         |  |  |
|       |      | Shiraz-9T  | 1371 | 1.292392 | 0         |  |  |
|       |      | Shiraz-18T | 1457 | 0.643204 | 0         |  |  |
|       |      | Shiraz-22T | 1673 | 0.611783 | 0         |  |  |
|       |      | Shiraz-22T | 1678 | 0.911625 | 0         |  |  |
|       |      | Shiraz-25T | 1719 | 0.472955 | 0         |  |  |
|       |      | Shiraz-28T | 1762 | 0.562311 | 0         |  |  |
|       |      | Shiraz-29T | 1801 | 0.815343 | 0         |  |  |
|       |      | Shiraz-32T | 1870 | 0.729766 | 0         |  |  |
|       |      | Shiraz-32T | 1872 | 1.504553 | 0         |  |  |
|       |      | Shiraz-35T | 1933 | 0.488535 | 0         |  |  |
|       |      | Shiraz-53T | 2115 | 0.427728 | 0         |  |  |
|       |      | Shiraz-58T | 2223 | 0.833364 | 0         |  |  |
|       |      | Shiraz-58T | 2226 | 1.074663 | 0         |  |  |
|       |      | Shiraz-71T | 2263 | 0.975531 | 0         |  |  |
|       |      | Shiraz-4T  | 261  | 0        | -0.336249 |  |  |
|       |      | Shiraz-16T | 295  | 0.591657 | 0         |  |  |
|       |      | Shiraz-36T | 433  | 0        | -0.803961 |  |  |
|       |      | Shiraz-42T | 480  | 0        | -0.232915 |  |  |
|       |      | Shiraz-49T | 1170 | 0        | -0.967436 |  |  |
|       |      | Shiraz-9T  | 1370 | 0.690073 | 0         |  |  |
|       |      | Shiraz-9T  | 1371 | 1.292392 | 0         |  |  |
|       |      | Shiraz-18T | 1457 | 0.643204 | 0         |  |  |
|       |      | Shiraz-22T | 1673 | 0.611783 | 0         |  |  |
|       |      | Shiraz-22T | 1678 | 0.911625 | 0         |  |  |
|       |      | Shiraz-25T | 1719 | 0.472955 | 0         |  |  |
|       |      | Shiraz-28T | 1762 | 0.562311 | 0         |  |  |
|       |      | Shiraz-29T | 1801 | 0.815343 | 0         |  |  |
|       |      | Shiraz-32T | 1870 | 0.729766 | 0         |  |  |
|       |      | Shiraz-32T | 1872 | 1.504553 | 0         |  |  |
|       |      | Shiraz-35T | 1933 | 0.488535 | 0         |  |  |
|       |      | Shiraz-53T | 2115 | 0.427728 | 0         |  |  |
|       |      | Shiraz-58T | 2223 | 0.833364 | 0         |  |  |
|       |      | Shiraz-58T | 2226 | 1.074663 | 0         |  |  |
|       |      | Shiraz-71T | 2263 | 0.975531 | 0         |  |  |
| NT5C3 | chr7 | Shiraz-3T  | 87   | 0.198593 | 0         |  |  |
|       |      | Shiraz-3T  | 87   | 0.198593 | 0         |  |  |
|       |      | Shiraz-4T  | 252  | 0.192083 | 0         |  |  |
|       |      | Shiraz-4T  | 252  | 0.192083 | 0         |  |  |
|       |      | Shiraz-36T | 376  | 0.159952 | 0         |  |  |
|       |      | Shiraz-36T | 376  | 0.159952 | 0         |  |  |
|       |      | Shiraz-44T | 631  | 0        | -0.180312 |  |  |
|       |      | Shiraz-44T | 631  | 0        | -0.180312 |  |  |
|       |      | Shiraz-46T | 942  | 0.069143 | 0         |  |  |
|       |      | Shiraz-46T | 942  | 0.069143 | 0         |  |  |
|       |      | Shiraz-18T | 1433 | 0.250973 | 0         |  |  |

|  |  |            |      |          |           |  |  |
|--|--|------------|------|----------|-----------|--|--|
|  |  | Shiraz-18T | 1433 | 0.250973 | 0         |  |  |
|  |  | Shiraz-22T | 1544 | 0        | -0.193579 |  |  |
|  |  | Shiraz-22T | 1544 | 0        | -0.193579 |  |  |
|  |  | Shiraz-25T | 1697 | 0.21945  | 0         |  |  |
|  |  | Shiraz-25T | 1697 | 0.21945  | 0         |  |  |
|  |  | Shiraz-28T | 1734 | 0.362882 | 0         |  |  |
|  |  | Shiraz-28T | 1734 | 0.362882 | 0         |  |  |
|  |  | Shiraz-29T | 1777 | 0.156747 | 0         |  |  |
|  |  | Shiraz-29T | 1777 | 0.156747 | 0         |  |  |
|  |  | Shiraz-38T | 1950 | 0.265916 | 0         |  |  |
|  |  | Shiraz-38T | 1950 | 0.265916 | 0         |  |  |
|  |  | Shiraz-71T | 2236 | 0.320072 | 0         |  |  |
|  |  | Shiraz-71T | 2236 | 0.320072 | 0         |  |  |
|  |  | Shiraz-3T  | 87   | 0.198593 | 0         |  |  |
|  |  | Shiraz-3T  | 87   | 0.198593 | 0         |  |  |
|  |  | Shiraz-4T  | 252  | 0.192083 | 0         |  |  |
|  |  | Shiraz-4T  | 252  | 0.192083 | 0         |  |  |
|  |  | Shiraz-36T | 376  | 0.159952 | 0         |  |  |
|  |  | Shiraz-36T | 376  | 0.159952 | 0         |  |  |
|  |  | Shiraz-44T | 631  | 0        | -0.180312 |  |  |
|  |  | Shiraz-44T | 631  | 0        | -0.180312 |  |  |
|  |  | Shiraz-46T | 942  | 0.069143 | 0         |  |  |
|  |  | Shiraz-46T | 942  | 0.069143 | 0         |  |  |
|  |  | Shiraz-18T | 1433 | 0.250973 | 0         |  |  |
|  |  | Shiraz-18T | 1433 | 0.250973 | 0         |  |  |
|  |  | Shiraz-22T | 1544 | 0        | -0.193579 |  |  |
|  |  | Shiraz-22T | 1544 | 0        | -0.193579 |  |  |
|  |  | Shiraz-25T | 1697 | 0.21945  | 0         |  |  |
|  |  | Shiraz-25T | 1697 | 0.21945  | 0         |  |  |
|  |  | Shiraz-28T | 1734 | 0.362882 | 0         |  |  |
|  |  | Shiraz-28T | 1734 | 0.362882 | 0         |  |  |
|  |  | Shiraz-29T | 1777 | 0.156747 | 0         |  |  |
|  |  | Shiraz-29T | 1777 | 0.156747 | 0         |  |  |
|  |  | Shiraz-38T | 1950 | 0.265916 | 0         |  |  |
|  |  | Shiraz-38T | 1950 | 0.265916 | 0         |  |  |
|  |  | Shiraz-71T | 2236 | 0.320072 | 0         |  |  |
|  |  | Shiraz-71T | 2236 | 0.320072 | 0         |  |  |
|  |  | Shiraz-3T  | 87   | 0.198593 | 0         |  |  |
|  |  | Shiraz-3T  | 87   | 0.198593 | 0         |  |  |
|  |  | Shiraz-4T  | 252  | 0.192083 | 0         |  |  |
|  |  | Shiraz-4T  | 252  | 0.192083 | 0         |  |  |
|  |  | Shiraz-36T | 376  | 0.159952 | 0         |  |  |
|  |  | Shiraz-36T | 376  | 0.159952 | 0         |  |  |
|  |  | Shiraz-44T | 631  | 0        | -0.180312 |  |  |
|  |  | Shiraz-44T | 631  | 0        | -0.180312 |  |  |
|  |  | Shiraz-46T | 942  | 0.069143 | 0         |  |  |
|  |  | Shiraz-46T | 942  | 0.069143 | 0         |  |  |

|      |      |            |      |          |           |  |  |
|------|------|------------|------|----------|-----------|--|--|
|      |      | Shiraz-18T | 1433 | 0.250973 | 0         |  |  |
|      |      | Shiraz-18T | 1433 | 0.250973 | 0         |  |  |
|      |      | Shiraz-22T | 1544 | 0        | -0.193579 |  |  |
|      |      | Shiraz-22T | 1544 | 0        | -0.193579 |  |  |
|      |      | Shiraz-25T | 1697 | 0.21945  | 0         |  |  |
|      |      | Shiraz-25T | 1697 | 0.21945  | 0         |  |  |
|      |      | Shiraz-28T | 1734 | 0.362882 | 0         |  |  |
|      |      | Shiraz-28T | 1734 | 0.362882 | 0         |  |  |
|      |      | Shiraz-29T | 1777 | 0.156747 | 0         |  |  |
|      |      | Shiraz-29T | 1777 | 0.156747 | 0         |  |  |
|      |      | Shiraz-38T | 1950 | 0.265916 | 0         |  |  |
|      |      | Shiraz-38T | 1950 | 0.265916 | 0         |  |  |
|      |      | Shiraz-71T | 2236 | 0.320072 | 0         |  |  |
|      |      | Shiraz-71T | 2236 | 0.320072 | 0         |  |  |
| NUB1 | chr7 | Shiraz-3T  | 90   | 0.219276 | 0         |  |  |
|      |      | Shiraz-3T  | 99   | 0.454766 | 0         |  |  |
|      |      | Shiraz-4T  | 253  | 0.372918 | 0         |  |  |
|      |      | Shiraz-36T | 378  | 0.179558 | 0         |  |  |
|      |      | Shiraz-44T | 646  | 0.471276 | 0         |  |  |
|      |      | Shiraz-46T | 943  | 0.093799 | 0         |  |  |
|      |      | Shiraz-9T  | 1325 | 0.221899 | 0         |  |  |
|      |      | Shiraz-18T | 1434 | 0.244465 | 0         |  |  |
|      |      | Shiraz-22T | 1555 | 0.427999 | 0         |  |  |
|      |      | Shiraz-25T | 1698 | 0.21835  | 0         |  |  |
|      |      | Shiraz-28T | 1735 | 0.350744 | 0         |  |  |
|      |      | Shiraz-29T | 1778 | 0.120767 | 0         |  |  |
|      |      | Shiraz-32T | 1833 | 0.551336 | 0         |  |  |
|      |      | Shiraz-38T | 1951 | 0.250891 | 0         |  |  |
|      |      | Shiraz-38T | 1952 | 0        | -0.163211 |  |  |
|      |      | Shiraz-53T | 2078 | 0.287202 | 0         |  |  |
|      |      | Shiraz-58T | 2162 | 0.221505 | 0         |  |  |
|      |      | Shiraz-71T | 2238 | 0.603631 | 0         |  |  |
|      |      | Shiraz-3T  | 90   | 0.219276 | 0         |  |  |
|      |      | Shiraz-3T  | 99   | 0.454766 | 0         |  |  |
|      |      | Shiraz-4T  | 253  | 0.372918 | 0         |  |  |
|      |      | Shiraz-36T | 378  | 0.179558 | 0         |  |  |
|      |      | Shiraz-44T | 646  | 0.471276 | 0         |  |  |
|      |      | Shiraz-46T | 943  | 0.093799 | 0         |  |  |
|      |      | Shiraz-9T  | 1325 | 0.221899 | 0         |  |  |
|      |      | Shiraz-18T | 1434 | 0.244465 | 0         |  |  |
|      |      | Shiraz-22T | 1555 | 0.427999 | 0         |  |  |
|      |      | Shiraz-25T | 1698 | 0.21835  | 0         |  |  |
|      |      | Shiraz-28T | 1735 | 0.350744 | 0         |  |  |
|      |      | Shiraz-29T | 1778 | 0.120767 | 0         |  |  |
|      |      | Shiraz-32T | 1833 | 0.551336 | 0         |  |  |
|      |      | Shiraz-38T | 1951 | 0.250891 | 0         |  |  |
|      |      | Shiraz-38T | 1952 | 0        | -0.163211 |  |  |



|        |      |            |      |          |           |  |
|--------|------|------------|------|----------|-----------|--|
|        |      | Shiraz-53T | 2078 | 0.287202 | 0         |  |
|        |      | Shiraz-58T | 2162 | 0.221505 | 0         |  |
|        |      | Shiraz-71T | 2238 | 0.603631 | 0         |  |
|        |      | Shiraz-3T  | 90   | 0.219276 | 0         |  |
|        |      | Shiraz-3T  | 99   | 0.454766 | 0         |  |
|        |      | Shiraz-4T  | 253  | 0.372918 | 0         |  |
|        |      | Shiraz-36T | 378  | 0.179558 | 0         |  |
|        |      | Shiraz-44T | 646  | 0.471276 | 0         |  |
|        |      | Shiraz-46T | 943  | 0.093799 | 0         |  |
|        |      | Shiraz-9T  | 1325 | 0.221899 | 0         |  |
|        |      | Shiraz-18T | 1434 | 0.244465 | 0         |  |
|        |      | Shiraz-22T | 1555 | 0.427999 | 0         |  |
|        |      | Shiraz-25T | 1698 | 0.21835  | 0         |  |
|        |      | Shiraz-28T | 1735 | 0.350744 | 0         |  |
|        |      | Shiraz-29T | 1778 | 0.120767 | 0         |  |
|        |      | Shiraz-32T | 1833 | 0.551336 | 0         |  |
|        |      | Shiraz-38T | 1951 | 0.250891 | 0         |  |
|        |      | Shiraz-38T | 1952 | 0        | -0.163211 |  |
|        |      | Shiraz-53T | 2078 | 0.287202 | 0         |  |
|        |      | Shiraz-58T | 2162 | 0.221505 | 0         |  |
|        |      | Shiraz-71T | 2238 | 0.603631 | 0         |  |
| NUDCD3 | chr7 | Shiraz-3T  | 87   | 0.198593 | 0         |  |
|        |      | Shiraz-3T  | 89   | 0.678641 | 0         |  |
|        |      | Shiraz-4T  | 252  | 0.192083 | 0         |  |
|        |      | Shiraz-36T | 376  | 0.159952 | 0         |  |
|        |      | Shiraz-44T | 632  | 0.902944 | 0         |  |
|        |      | Shiraz-46T | 942  | 0.069143 | 0         |  |
|        |      | Shiraz-77T | 1223 | 0.215647 | 0         |  |
|        |      | Shiraz-18T | 1433 | 0.250973 | 0         |  |
|        |      | Shiraz-25T | 1697 | 0.21945  | 0         |  |
|        |      | Shiraz-28T | 1734 | 0.362882 | 0         |  |
|        |      | Shiraz-29T | 1777 | 0.156747 | 0         |  |
|        |      | Shiraz-38T | 1950 | 0.265916 | 0         |  |
|        |      | Shiraz-71T | 2236 | 0.320072 | 0         |  |
|        |      | Shiraz-3T  | 87   | 0.198593 | 0         |  |
|        |      | Shiraz-3T  | 89   | 0.678641 | 0         |  |
|        |      | Shiraz-4T  | 252  | 0.192083 | 0         |  |
|        |      | Shiraz-36T | 376  | 0.159952 | 0         |  |
|        |      | Shiraz-44T | 632  | 0.902944 | 0         |  |
|        |      | Shiraz-46T | 942  | 0.069143 | 0         |  |
|        |      | Shiraz-77T | 1223 | 0.215647 | 0         |  |
|        |      | Shiraz-18T | 1433 | 0.250973 | 0         |  |
|        |      | Shiraz-25T | 1697 | 0.21945  | 0         |  |
|        |      | Shiraz-28T | 1734 | 0.362882 | 0         |  |
|        |      | Shiraz-29T | 1777 | 0.156747 | 0         |  |
|        |      | Shiraz-38T | 1950 | 0.265916 | 0         |  |
|        |      | Shiraz-71T | 2236 | 0.320072 | 0         |  |

|        |      |            |      |          |           |  |
|--------|------|------------|------|----------|-----------|--|
|        |      | Shiraz-3T  | 87   | 0.198593 | 0         |  |
|        |      | Shiraz-3T  | 89   | 0.678641 | 0         |  |
|        |      | Shiraz-4T  | 252  | 0.192083 | 0         |  |
|        |      | Shiraz-36T | 376  | 0.159952 | 0         |  |
|        |      | Shiraz-44T | 632  | 0.902944 | 0         |  |
|        |      | Shiraz-46T | 942  | 0.069143 | 0         |  |
|        |      | Shiraz-77T | 1223 | 0.215647 | 0         |  |
|        |      | Shiraz-18T | 1433 | 0.250973 | 0         |  |
|        |      | Shiraz-25T | 1697 | 0.21945  | 0         |  |
|        |      | Shiraz-28T | 1734 | 0.362882 | 0         |  |
|        |      | Shiraz-29T | 1777 | 0.156747 | 0         |  |
|        |      | Shiraz-38T | 1950 | 0.265916 | 0         |  |
|        |      | Shiraz-71T | 2236 | 0.320072 | 0         |  |
| NUDT11 | chrX | Shiraz-3T  | 239  | 0        | -0.28395  |  |
|        |      | Shiraz-4T  | 260  | 0        | -0.324128 |  |
|        |      | Shiraz-16T | 294  | 0.655804 | 0         |  |
|        |      | Shiraz-31T | 345  | 0.103301 | 0         |  |
|        |      | Shiraz-36T | 431  | 0        | -0.78035  |  |
|        |      | Shiraz-36T | 432  | 0        | -0.6692   |  |
|        |      | Shiraz-44T | 891  | 0        | -0.954044 |  |
|        |      | Shiraz-49T | 1166 | 0        | -0.917235 |  |
|        |      | Shiraz-77T | 1282 | 0.213849 | 0         |  |
|        |      | Shiraz-9T  | 1368 | 0.199713 | 0         |  |
|        |      | Shiraz-22T | 1669 | 0.695915 | 0         |  |
|        |      | Shiraz-25T | 1717 | 0.420447 | 0         |  |
|        |      | Shiraz-28T | 1760 | 0.538181 | 0         |  |
|        |      | Shiraz-29T | 1800 | 0.672527 | 0         |  |
|        |      | Shiraz-32T | 1869 | 0.776805 | 0         |  |
|        |      | Shiraz-35T | 1932 | 0.507141 | 0         |  |
|        |      | Shiraz-58T | 2221 | 0.871948 | 0         |  |
|        |      | Shiraz-71T | 2260 | 0.68394  | 0         |  |
|        |      | Shiraz-71T | 2262 | 0.986748 | 0         |  |
|        |      | Shiraz-3T  | 239  | 0        | -0.28395  |  |
|        |      | Shiraz-4T  | 260  | 0        | -0.324128 |  |
|        |      | Shiraz-16T | 294  | 0.655804 | 0         |  |
|        |      | Shiraz-31T | 345  | 0.103301 | 0         |  |
|        |      | Shiraz-36T | 431  | 0        | -0.78035  |  |
|        |      | Shiraz-36T | 432  | 0        | -0.6692   |  |
|        |      | Shiraz-44T | 891  | 0        | -0.954044 |  |
|        |      | Shiraz-49T | 1166 | 0        | -0.917235 |  |
|        |      | Shiraz-77T | 1282 | 0.213849 | 0         |  |
|        |      | Shiraz-9T  | 1368 | 0.199713 | 0         |  |
|        |      | Shiraz-22T | 1669 | 0.695915 | 0         |  |
|        |      | Shiraz-25T | 1717 | 0.420447 | 0         |  |
|        |      | Shiraz-28T | 1760 | 0.538181 | 0         |  |
|        |      | Shiraz-29T | 1800 | 0.672527 | 0         |  |
|        |      | Shiraz-32T | 1869 | 0.776805 | 0         |  |

|        |      |            |      |          |           |  |  |
|--------|------|------------|------|----------|-----------|--|--|
|        |      | Shiraz-35T | 1932 | 0.507141 | 0         |  |  |
|        |      | Shiraz-58T | 2221 | 0.871948 | 0         |  |  |
|        |      | Shiraz-71T | 2260 | 0.68394  | 0         |  |  |
|        |      | Shiraz-71T | 2262 | 0.986748 | 0         |  |  |
|        |      | Shiraz-3T  | 239  | 0        | -0.28395  |  |  |
|        |      | Shiraz-4T  | 260  | 0        | -0.324128 |  |  |
|        |      | Shiraz-16T | 294  | 0.655804 | 0         |  |  |
|        |      | Shiraz-31T | 345  | 0.103301 | 0         |  |  |
|        |      | Shiraz-36T | 431  | 0        | -0.78035  |  |  |
|        |      | Shiraz-36T | 432  | 0        | -0.6692   |  |  |
|        |      | Shiraz-44T | 891  | 0        | -0.954044 |  |  |
|        |      | Shiraz-49T | 1166 | 0        | -0.917235 |  |  |
|        |      | Shiraz-77T | 1282 | 0.213849 | 0         |  |  |
|        |      | Shiraz-9T  | 1368 | 0.199713 | 0         |  |  |
|        |      | Shiraz-22T | 1669 | 0.695915 | 0         |  |  |
|        |      | Shiraz-25T | 1717 | 0.420447 | 0         |  |  |
|        |      | Shiraz-28T | 1760 | 0.538181 | 0         |  |  |
|        |      | Shiraz-29T | 1800 | 0.672527 | 0         |  |  |
|        |      | Shiraz-32T | 1869 | 0.776805 | 0         |  |  |
|        |      | Shiraz-35T | 1932 | 0.507141 | 0         |  |  |
|        |      | Shiraz-58T | 2221 | 0.871948 | 0         |  |  |
|        |      | Shiraz-71T | 2260 | 0.68394  | 0         |  |  |
|        |      | Shiraz-71T | 2262 | 0.986748 | 0         |  |  |
| NUP155 | chr5 | Shiraz-4T  | 250  | 0.262252 | 0         |  |  |
|        |      | Shiraz-4T  | 250  | 0.262252 | 0         |  |  |
|        |      | Shiraz-16T | 266  | 0.321724 | 0         |  |  |
|        |      | Shiraz-16T | 266  | 0.321724 | 0         |  |  |
|        |      | Shiraz-44T | 591  | 0        | -0.233934 |  |  |
|        |      | Shiraz-44T | 591  | 0        | -0.233934 |  |  |
|        |      | Shiraz-18T | 1429 | 0        | -0.314125 |  |  |
|        |      | Shiraz-18T | 1429 | 0        | -0.314125 |  |  |
|        |      | Shiraz-22T | 1522 | 0        | -0.322688 |  |  |
|        |      | Shiraz-22T | 1522 | 0        | -0.322688 |  |  |
|        |      | Shiraz-25T | 1694 | 0.201602 | 0         |  |  |
|        |      | Shiraz-25T | 1694 | 0.201602 | 0         |  |  |
|        |      | Shiraz-28T | 1731 | 0.295447 | 0         |  |  |
|        |      | Shiraz-28T | 1731 | 0.295447 | 0         |  |  |
|        |      | Shiraz-29T | 1773 | 0.090981 | 0         |  |  |
|        |      | Shiraz-29T | 1773 | 0.090981 | 0         |  |  |
|        |      | Shiraz-40T | 2016 | 0.376634 | 0         |  |  |
|        |      | Shiraz-40T | 2016 | 0.376634 | 0         |  |  |
|        |      | Shiraz-4T  | 250  | 0.262252 | 0         |  |  |
|        |      | Shiraz-4T  | 250  | 0.262252 | 0         |  |  |
|        |      | Shiraz-16T | 266  | 0.321724 | 0         |  |  |
|        |      | Shiraz-16T | 266  | 0.321724 | 0         |  |  |
|        |      | Shiraz-44T | 591  | 0        | -0.233934 |  |  |
|        |      | Shiraz-44T | 591  | 0        | -0.233934 |  |  |

|        |      |            |      |          |           |  |  |
|--------|------|------------|------|----------|-----------|--|--|
|        |      | Shiraz-18T | 1429 | 0        | -0.314125 |  |  |
|        |      | Shiraz-18T | 1429 | 0        | -0.314125 |  |  |
|        |      | Shiraz-22T | 1522 | 0        | -0.322688 |  |  |
|        |      | Shiraz-22T | 1522 | 0        | -0.322688 |  |  |
|        |      | Shiraz-25T | 1694 | 0.201602 | 0         |  |  |
|        |      | Shiraz-25T | 1694 | 0.201602 | 0         |  |  |
|        |      | Shiraz-28T | 1731 | 0.295447 | 0         |  |  |
|        |      | Shiraz-28T | 1731 | 0.295447 | 0         |  |  |
|        |      | Shiraz-29T | 1773 | 0.090981 | 0         |  |  |
|        |      | Shiraz-29T | 1773 | 0.090981 | 0         |  |  |
|        |      | Shiraz-40T | 2016 | 0.376634 | 0         |  |  |
|        |      | Shiraz-40T | 2016 | 0.376634 | 0         |  |  |
|        |      | Shiraz-4T  | 250  | 0.262252 | 0         |  |  |
|        |      | Shiraz-4T  | 250  | 0.262252 | 0         |  |  |
|        |      | Shiraz-16T | 266  | 0.321724 | 0         |  |  |
|        |      | Shiraz-16T | 266  | 0.321724 | 0         |  |  |
|        |      | Shiraz-44T | 591  | 0        | -0.233934 |  |  |
|        |      | Shiraz-44T | 591  | 0        | -0.233934 |  |  |
|        |      | Shiraz-18T | 1429 | 0        | -0.314125 |  |  |
|        |      | Shiraz-18T | 1429 | 0        | -0.314125 |  |  |
|        |      | Shiraz-22T | 1522 | 0        | -0.322688 |  |  |
|        |      | Shiraz-22T | 1522 | 0        | -0.322688 |  |  |
|        |      | Shiraz-25T | 1694 | 0.201602 | 0         |  |  |
|        |      | Shiraz-25T | 1694 | 0.201602 | 0         |  |  |
|        |      | Shiraz-28T | 1731 | 0.295447 | 0         |  |  |
|        |      | Shiraz-28T | 1731 | 0.295447 | 0         |  |  |
|        |      | Shiraz-29T | 1773 | 0.090981 | 0         |  |  |
|        |      | Shiraz-29T | 1773 | 0.090981 | 0         |  |  |
|        |      | Shiraz-40T | 2016 | 0.376634 | 0         |  |  |
|        |      | Shiraz-40T | 2016 | 0.376634 | 0         |  |  |
| NUP205 | chr7 | Shiraz-3T  | 90   | 0.219276 | 0         |  |  |
|        |      | Shiraz-4T  | 253  | 0.372918 | 0         |  |  |
|        |      | Shiraz-36T | 378  | 0.179558 | 0         |  |  |
|        |      | Shiraz-46T | 943  | 0.093799 | 0         |  |  |
|        |      | Shiraz-77T | 1225 | 0        | -0.117922 |  |  |
|        |      | Shiraz-9T  | 1325 | 0.221899 | 0         |  |  |
|        |      | Shiraz-18T | 1434 | 0.244465 | 0         |  |  |
|        |      | Shiraz-22T | 1553 | 0        | -0.213234 |  |  |
|        |      | Shiraz-25T | 1698 | 0.21835  | 0         |  |  |
|        |      | Shiraz-28T | 1735 | 0.350744 | 0         |  |  |
|        |      | Shiraz-29T | 1778 | 0.120767 | 0         |  |  |
|        |      | Shiraz-32T | 1833 | 0.551336 | 0         |  |  |
|        |      | Shiraz-38T | 1951 | 0.250891 | 0         |  |  |
|        |      | Shiraz-53T | 2078 | 0.287202 | 0         |  |  |
|        |      | Shiraz-58T | 2162 | 0.221505 | 0         |  |  |
|        |      | Shiraz-71T | 2238 | 0.603631 | 0         |  |  |
|        |      | Shiraz-3T  | 90   | 0.219276 | 0         |  |  |

|         |      |            |      |          |           |  |
|---------|------|------------|------|----------|-----------|--|
|         |      | Shiraz-4T  | 253  | 0.372918 | 0         |  |
|         |      | Shiraz-36T | 378  | 0.179558 | 0         |  |
|         |      | Shiraz-46T | 943  | 0.093799 | 0         |  |
|         |      | Shiraz-77T | 1225 | 0        | -0.117922 |  |
|         |      | Shiraz-9T  | 1325 | 0.221899 | 0         |  |
|         |      | Shiraz-18T | 1434 | 0.244465 | 0         |  |
|         |      | Shiraz-22T | 1553 | 0        | -0.213234 |  |
|         |      | Shiraz-25T | 1698 | 0.21835  | 0         |  |
|         |      | Shiraz-28T | 1735 | 0.350744 | 0         |  |
|         |      | Shiraz-29T | 1778 | 0.120767 | 0         |  |
|         |      | Shiraz-32T | 1833 | 0.551336 | 0         |  |
|         |      | Shiraz-38T | 1951 | 0.250891 | 0         |  |
|         |      | Shiraz-53T | 2078 | 0.287202 | 0         |  |
|         |      | Shiraz-58T | 2162 | 0.221505 | 0         |  |
|         |      | Shiraz-71T | 2238 | 0.603631 | 0         |  |
|         |      | Shiraz-3T  | 90   | 0.219276 | 0         |  |
|         |      | Shiraz-4T  | 253  | 0.372918 | 0         |  |
|         |      | Shiraz-36T | 378  | 0.179558 | 0         |  |
|         |      | Shiraz-46T | 943  | 0.093799 | 0         |  |
|         |      | Shiraz-77T | 1225 | 0        | -0.117922 |  |
|         |      | Shiraz-9T  | 1325 | 0.221899 | 0         |  |
|         |      | Shiraz-18T | 1434 | 0.244465 | 0         |  |
|         |      | Shiraz-22T | 1553 | 0        | -0.213234 |  |
|         |      | Shiraz-25T | 1698 | 0.21835  | 0         |  |
|         |      | Shiraz-28T | 1735 | 0.350744 | 0         |  |
|         |      | Shiraz-29T | 1778 | 0.120767 | 0         |  |
|         |      | Shiraz-32T | 1833 | 0.551336 | 0         |  |
|         |      | Shiraz-38T | 1951 | 0.250891 | 0         |  |
|         |      | Shiraz-53T | 2078 | 0.287202 | 0         |  |
|         |      | Shiraz-58T | 2162 | 0.221505 | 0         |  |
|         |      | Shiraz-71T | 2238 | 0.603631 | 0         |  |
| NUP62CL | chrX | Shiraz-3T  | 242  | 0        | -0.336434 |  |
|         |      | Shiraz-4T  | 261  | 0        | -0.336249 |  |
|         |      | Shiraz-16T | 295  | 0.591657 | 0         |  |
|         |      | Shiraz-36T | 433  | 0        | -0.803961 |  |
|         |      | Shiraz-44T | 899  | 0        | -1.09697  |  |
|         |      | Shiraz-49T | 1170 | 0        | -0.967436 |  |
|         |      | Shiraz-18T | 1457 | 0.643204 | 0         |  |
|         |      | Shiraz-22T | 1673 | 0.611783 | 0         |  |
|         |      | Shiraz-25T | 1719 | 0.472955 | 0         |  |
|         |      | Shiraz-28T | 1762 | 0.562311 | 0         |  |
|         |      | Shiraz-29T | 1801 | 0.815343 | 0         |  |
|         |      | Shiraz-32T | 1870 | 0.729766 | 0         |  |
|         |      | Shiraz-35T | 1933 | 0.488535 | 0         |  |
|         |      | Shiraz-58T | 2223 | 0.833364 | 0         |  |
|         |      | Shiraz-71T | 2263 | 0.975531 | 0         |  |
|         |      | Shiraz-3T  | 242  | 0        | -0.336434 |  |

|       |      |            |      |          |           |  |  |
|-------|------|------------|------|----------|-----------|--|--|
|       |      | Shiraz-4T  | 261  | 0        | -0.336249 |  |  |
|       |      | Shiraz-16T | 295  | 0.591657 | 0         |  |  |
|       |      | Shiraz-36T | 433  | 0        | -0.803961 |  |  |
|       |      | Shiraz-44T | 899  | 0        | -1.09697  |  |  |
|       |      | Shiraz-49T | 1170 | 0        | -0.967436 |  |  |
|       |      | Shiraz-18T | 1457 | 0.643204 | 0         |  |  |
|       |      | Shiraz-22T | 1673 | 0.611783 | 0         |  |  |
|       |      | Shiraz-25T | 1719 | 0.472955 | 0         |  |  |
|       |      | Shiraz-28T | 1762 | 0.562311 | 0         |  |  |
|       |      | Shiraz-29T | 1801 | 0.815343 | 0         |  |  |
|       |      | Shiraz-32T | 1870 | 0.729766 | 0         |  |  |
|       |      | Shiraz-35T | 1933 | 0.488535 | 0         |  |  |
|       |      | Shiraz-58T | 2223 | 0.833364 | 0         |  |  |
|       |      | Shiraz-71T | 2263 | 0.975531 | 0         |  |  |
|       |      | Shiraz-3T  | 242  | 0        | -0.336434 |  |  |
|       |      | Shiraz-4T  | 261  | 0        | -0.336249 |  |  |
|       |      | Shiraz-16T | 295  | 0.591657 | 0         |  |  |
|       |      | Shiraz-36T | 433  | 0        | -0.803961 |  |  |
|       |      | Shiraz-44T | 899  | 0        | -1.09697  |  |  |
|       |      | Shiraz-49T | 1170 | 0        | -0.967436 |  |  |
|       |      | Shiraz-18T | 1457 | 0.643204 | 0         |  |  |
|       |      | Shiraz-22T | 1673 | 0.611783 | 0         |  |  |
|       |      | Shiraz-25T | 1719 | 0.472955 | 0         |  |  |
|       |      | Shiraz-28T | 1762 | 0.562311 | 0         |  |  |
|       |      | Shiraz-29T | 1801 | 0.815343 | 0         |  |  |
|       |      | Shiraz-32T | 1870 | 0.729766 | 0         |  |  |
|       |      | Shiraz-35T | 1933 | 0.488535 | 0         |  |  |
|       |      | Shiraz-58T | 2223 | 0.833364 | 0         |  |  |
|       |      | Shiraz-71T | 2263 | 0.975531 | 0         |  |  |
| NUPL2 | chr7 | Shiraz-3T  | 87   | 0.198593 | 0         |  |  |
|       |      | Shiraz-4T  | 252  | 0.192083 | 0         |  |  |
|       |      | Shiraz-36T | 376  | 0.159952 | 0         |  |  |
|       |      | Shiraz-46T | 942  | 0.069143 | 0         |  |  |
|       |      | Shiraz-18T | 1433 | 0.250973 | 0         |  |  |
|       |      | Shiraz-25T | 1697 | 0.21945  | 0         |  |  |
|       |      | Shiraz-28T | 1734 | 0.362882 | 0         |  |  |
|       |      | Shiraz-29T | 1777 | 0.156747 | 0         |  |  |
|       |      | Shiraz-38T | 1950 | 0.265916 | 0         |  |  |
|       |      | Shiraz-71T | 2236 | 0.320072 | 0         |  |  |
|       |      | Shiraz-3T  | 87   | 0.198593 | 0         |  |  |
|       |      | Shiraz-4T  | 252  | 0.192083 | 0         |  |  |
|       |      | Shiraz-36T | 376  | 0.159952 | 0         |  |  |
|       |      | Shiraz-46T | 942  | 0.069143 | 0         |  |  |
|       |      | Shiraz-18T | 1433 | 0.250973 | 0         |  |  |
|       |      | Shiraz-25T | 1697 | 0.21945  | 0         |  |  |
|       |      | Shiraz-28T | 1734 | 0.362882 | 0         |  |  |
|       |      | Shiraz-29T | 1777 | 0.156747 | 0         |  |  |

|      |      |            |      |          |           |  |
|------|------|------------|------|----------|-----------|--|
|      |      | Shiraz-38T | 1950 | 0.265916 | 0         |  |
|      |      | Shiraz-71T | 2236 | 0.320072 | 0         |  |
|      |      | Shiraz-3T  | 87   | 0.198593 | 0         |  |
|      |      | Shiraz-4T  | 252  | 0.192083 | 0         |  |
|      |      | Shiraz-36T | 376  | 0.159952 | 0         |  |
|      |      | Shiraz-46T | 942  | 0.069143 | 0         |  |
|      |      | Shiraz-18T | 1433 | 0.250973 | 0         |  |
|      |      | Shiraz-25T | 1697 | 0.21945  | 0         |  |
|      |      | Shiraz-28T | 1734 | 0.362882 | 0         |  |
|      |      | Shiraz-29T | 1777 | 0.156747 | 0         |  |
|      |      | Shiraz-38T | 1950 | 0.265916 | 0         |  |
|      |      | Shiraz-71T | 2236 | 0.320072 | 0         |  |
| NXF2 | chrX | Shiraz-3T  | 242  | 0        | -0.336434 |  |
|      |      | Shiraz-3T  | 242  | 0        | -0.336434 |  |
|      |      | Shiraz-3T  | 242  | 0        | -0.336434 |  |
|      |      | Shiraz-3T  | 242  | 0        | -0.336434 |  |
|      |      | Shiraz-4T  | 261  | 0        | -0.336249 |  |
|      |      | Shiraz-4T  | 261  | 0        | -0.336249 |  |
|      |      | Shiraz-4T  | 261  | 0        | -0.336249 |  |
|      |      | Shiraz-4T  | 261  | 0        | -0.336249 |  |
|      |      | Shiraz-16T | 295  | 0.591657 | 0         |  |
|      |      | Shiraz-16T | 295  | 0.591657 | 0         |  |
|      |      | Shiraz-16T | 295  | 0.591657 | 0         |  |
|      |      | Shiraz-16T | 295  | 0.591657 | 0         |  |
|      |      | Shiraz-36T | 433  | 0        | -0.803961 |  |
|      |      | Shiraz-36T | 433  | 0        | -0.803961 |  |
|      |      | Shiraz-36T | 433  | 0        | -0.803961 |  |
|      |      | Shiraz-36T | 433  | 0        | -0.803961 |  |
|      |      | Shiraz-44T | 899  | 0        | -1.09697  |  |
|      |      | Shiraz-44T | 899  | 0        | -1.09697  |  |
|      |      | Shiraz-44T | 899  | 0        | -1.09697  |  |
|      |      | Shiraz-44T | 899  | 0        | -1.09697  |  |
|      |      | Shiraz-49T | 1170 | 0        | -0.967436 |  |
|      |      | Shiraz-49T | 1170 | 0        | -0.967436 |  |
|      |      | Shiraz-49T | 1170 | 0        | -0.967436 |  |
|      |      | Shiraz-49T | 1170 | 0        | -0.967436 |  |
|      |      | Shiraz-18T | 1457 | 0.643204 | 0         |  |
|      |      | Shiraz-18T | 1457 | 0.643204 | 0         |  |
|      |      | Shiraz-18T | 1457 | 0.643204 | 0         |  |
|      |      | Shiraz-18T | 1457 | 0.643204 | 0         |  |
|      |      | Shiraz-22T | 1673 | 0.611783 | 0         |  |
|      |      | Shiraz-22T | 1673 | 0.611783 | 0         |  |
|      |      | Shiraz-22T | 1673 | 0.611783 | 0         |  |
|      |      | Shiraz-22T | 1673 | 0.611783 | 0         |  |
|      |      | Shiraz-25T | 1719 | 0.472955 | 0         |  |
|      |      | Shiraz-25T | 1719 | 0.472955 | 0         |  |
|      |      | Shiraz-25T | 1719 | 0.472955 | 0         |  |

|  |  |            |      |          |           |  |  |
|--|--|------------|------|----------|-----------|--|--|
|  |  | Shiraz-25T | 1719 | 0.472955 | 0         |  |  |
|  |  | Shiraz-28T | 1762 | 0.562311 | 0         |  |  |
|  |  | Shiraz-28T | 1762 | 0.562311 | 0         |  |  |
|  |  | Shiraz-28T | 1762 | 0.562311 | 0         |  |  |
|  |  | Shiraz-28T | 1762 | 0.562311 | 0         |  |  |
|  |  | Shiraz-29T | 1801 | 0.815343 | 0         |  |  |
|  |  | Shiraz-29T | 1801 | 0.815343 | 0         |  |  |
|  |  | Shiraz-29T | 1801 | 0.815343 | 0         |  |  |
|  |  | Shiraz-29T | 1801 | 0.815343 | 0         |  |  |
|  |  | Shiraz-32T | 1870 | 0.729766 | 0         |  |  |
|  |  | Shiraz-32T | 1870 | 0.729766 | 0         |  |  |
|  |  | Shiraz-32T | 1870 | 0.729766 | 0         |  |  |
|  |  | Shiraz-32T | 1870 | 0.729766 | 0         |  |  |
|  |  | Shiraz-35T | 1933 | 0.488535 | 0         |  |  |
|  |  | Shiraz-35T | 1933 | 0.488535 | 0         |  |  |
|  |  | Shiraz-35T | 1933 | 0.488535 | 0         |  |  |
|  |  | Shiraz-35T | 1933 | 0.488535 | 0         |  |  |
|  |  | Shiraz-58T | 2223 | 0.833364 | 0         |  |  |
|  |  | Shiraz-58T | 2223 | 0.833364 | 0         |  |  |
|  |  | Shiraz-58T | 2223 | 0.833364 | 0         |  |  |
|  |  | Shiraz-58T | 2223 | 0.833364 | 0         |  |  |
|  |  | Shiraz-71T | 2263 | 0.975531 | 0         |  |  |
|  |  | Shiraz-71T | 2263 | 0.975531 | 0         |  |  |
|  |  | Shiraz-71T | 2263 | 0.975531 | 0         |  |  |
|  |  | Shiraz-71T | 2263 | 0.975531 | 0         |  |  |
|  |  | Shiraz-3T  | 242  | 0        | -0.336434 |  |  |
|  |  | Shiraz-3T  | 242  | 0        | -0.336434 |  |  |
|  |  | Shiraz-3T  | 242  | 0        | -0.336434 |  |  |
|  |  | Shiraz-3T  | 242  | 0        | -0.336434 |  |  |
|  |  | Shiraz-4T  | 261  | 0        | -0.336249 |  |  |
|  |  | Shiraz-4T  | 261  | 0        | -0.336249 |  |  |
|  |  | Shiraz-4T  | 261  | 0        | -0.336249 |  |  |
|  |  | Shiraz-4T  | 261  | 0        | -0.336249 |  |  |
|  |  | Shiraz-16T | 295  | 0.591657 | 0         |  |  |
|  |  | Shiraz-16T | 295  | 0.591657 | 0         |  |  |
|  |  | Shiraz-16T | 295  | 0.591657 | 0         |  |  |
|  |  | Shiraz-16T | 295  | 0.591657 | 0         |  |  |
|  |  | Shiraz-36T | 433  | 0        | -0.803961 |  |  |
|  |  | Shiraz-36T | 433  | 0        | -0.803961 |  |  |
|  |  | Shiraz-36T | 433  | 0        | -0.803961 |  |  |
|  |  | Shiraz-36T | 433  | 0        | -0.803961 |  |  |
|  |  | Shiraz-44T | 899  | 0        | -1.09697  |  |  |
|  |  | Shiraz-44T | 899  | 0        | -1.09697  |  |  |
|  |  | Shiraz-44T | 899  | 0        | -1.09697  |  |  |
|  |  | Shiraz-44T | 899  | 0        | -1.09697  |  |  |
|  |  | Shiraz-49T | 1170 | 0        | -0.967436 |  |  |
|  |  | Shiraz-49T | 1170 | 0        | -0.967436 |  |  |



|  |            |      |          |           |  |
|--|------------|------|----------|-----------|--|
|  | Shiraz-49T | 1170 | 0        | -0.967436 |  |
|  | Shiraz-49T | 1170 | 0        | -0.967436 |  |
|  | Shiraz-18T | 1457 | 0.643204 | 0         |  |
|  | Shiraz-18T | 1457 | 0.643204 | 0         |  |
|  | Shiraz-18T | 1457 | 0.643204 | 0         |  |
|  | Shiraz-18T | 1457 | 0.643204 | 0         |  |
|  | Shiraz-22T | 1673 | 0.611783 | 0         |  |
|  | Shiraz-22T | 1673 | 0.611783 | 0         |  |
|  | Shiraz-22T | 1673 | 0.611783 | 0         |  |
|  | Shiraz-22T | 1673 | 0.611783 | 0         |  |
|  | Shiraz-25T | 1719 | 0.472955 | 0         |  |
|  | Shiraz-25T | 1719 | 0.472955 | 0         |  |
|  | Shiraz-25T | 1719 | 0.472955 | 0         |  |
|  | Shiraz-25T | 1719 | 0.472955 | 0         |  |
|  | Shiraz-28T | 1762 | 0.562311 | 0         |  |
|  | Shiraz-28T | 1762 | 0.562311 | 0         |  |
|  | Shiraz-28T | 1762 | 0.562311 | 0         |  |
|  | Shiraz-28T | 1762 | 0.562311 | 0         |  |
|  | Shiraz-29T | 1801 | 0.815343 | 0         |  |
|  | Shiraz-29T | 1801 | 0.815343 | 0         |  |
|  | Shiraz-29T | 1801 | 0.815343 | 0         |  |
|  | Shiraz-29T | 1801 | 0.815343 | 0         |  |
|  | Shiraz-32T | 1870 | 0.729766 | 0         |  |
|  | Shiraz-32T | 1870 | 0.729766 | 0         |  |
|  | Shiraz-32T | 1870 | 0.729766 | 0         |  |
|  | Shiraz-32T | 1870 | 0.729766 | 0         |  |
|  | Shiraz-35T | 1933 | 0.488535 | 0         |  |
|  | Shiraz-35T | 1933 | 0.488535 | 0         |  |
|  | Shiraz-35T | 1933 | 0.488535 | 0         |  |
|  | Shiraz-35T | 1933 | 0.488535 | 0         |  |
|  | Shiraz-58T | 2223 | 0.833364 | 0         |  |
|  | Shiraz-58T | 2223 | 0.833364 | 0         |  |
|  | Shiraz-58T | 2223 | 0.833364 | 0         |  |
|  | Shiraz-58T | 2223 | 0.833364 | 0         |  |
|  | Shiraz-71T | 2263 | 0.975531 | 0         |  |
|  | Shiraz-71T | 2263 | 0.975531 | 0         |  |
|  | Shiraz-71T | 2263 | 0.975531 | 0         |  |
|  | Shiraz-71T | 2263 | 0.975531 | 0         |  |
|  | Shiraz-3T  | 242  | 0        | -0.336434 |  |
|  | Shiraz-3T  | 242  | 0        | -0.336434 |  |
|  | Shiraz-3T  | 242  | 0        | -0.336434 |  |
|  | Shiraz-3T  | 242  | 0        | -0.336434 |  |
|  | Shiraz-4T  | 261  | 0        | -0.336249 |  |
|  | Shiraz-4T  | 261  | 0        | -0.336249 |  |
|  | Shiraz-4T  | 261  | 0        | -0.336249 |  |
|  | Shiraz-4T  | 261  | 0        | -0.336249 |  |
|  | Shiraz-16T | 295  | 0.591657 | 0         |  |

|  |            |      |          |           |  |
|--|------------|------|----------|-----------|--|
|  | Shiraz-16T | 295  | 0.591657 | 0         |  |
|  | Shiraz-16T | 295  | 0.591657 | 0         |  |
|  | Shiraz-16T | 295  | 0.591657 | 0         |  |
|  | Shiraz-36T | 433  | 0        | -0.803961 |  |
|  | Shiraz-36T | 433  | 0        | -0.803961 |  |
|  | Shiraz-36T | 433  | 0        | -0.803961 |  |
|  | Shiraz-36T | 433  | 0        | -0.803961 |  |
|  | Shiraz-44T | 899  | 0        | -1.09697  |  |
|  | Shiraz-44T | 899  | 0        | -1.09697  |  |
|  | Shiraz-44T | 899  | 0        | -1.09697  |  |
|  | Shiraz-44T | 899  | 0        | -1.09697  |  |
|  | Shiraz-49T | 1170 | 0        | -0.967436 |  |
|  | Shiraz-49T | 1170 | 0        | -0.967436 |  |
|  | Shiraz-49T | 1170 | 0        | -0.967436 |  |
|  | Shiraz-49T | 1170 | 0        | -0.967436 |  |
|  | Shiraz-18T | 1457 | 0.643204 | 0         |  |
|  | Shiraz-18T | 1457 | 0.643204 | 0         |  |
|  | Shiraz-18T | 1457 | 0.643204 | 0         |  |
|  | Shiraz-18T | 1457 | 0.643204 | 0         |  |
|  | Shiraz-22T | 1673 | 0.611783 | 0         |  |
|  | Shiraz-22T | 1673 | 0.611783 | 0         |  |
|  | Shiraz-22T | 1673 | 0.611783 | 0         |  |
|  | Shiraz-22T | 1673 | 0.611783 | 0         |  |
|  | Shiraz-25T | 1719 | 0.472955 | 0         |  |
|  | Shiraz-25T | 1719 | 0.472955 | 0         |  |
|  | Shiraz-25T | 1719 | 0.472955 | 0         |  |
|  | Shiraz-25T | 1719 | 0.472955 | 0         |  |
|  | Shiraz-28T | 1762 | 0.562311 | 0         |  |
|  | Shiraz-28T | 1762 | 0.562311 | 0         |  |
|  | Shiraz-28T | 1762 | 0.562311 | 0         |  |
|  | Shiraz-28T | 1762 | 0.562311 | 0         |  |
|  | Shiraz-29T | 1801 | 0.815343 | 0         |  |
|  | Shiraz-29T | 1801 | 0.815343 | 0         |  |
|  | Shiraz-29T | 1801 | 0.815343 | 0         |  |
|  | Shiraz-29T | 1801 | 0.815343 | 0         |  |
|  | Shiraz-32T | 1870 | 0.729766 | 0         |  |
|  | Shiraz-32T | 1870 | 0.729766 | 0         |  |
|  | Shiraz-32T | 1870 | 0.729766 | 0         |  |
|  | Shiraz-32T | 1870 | 0.729766 | 0         |  |
|  | Shiraz-35T | 1933 | 0.488535 | 0         |  |
|  | Shiraz-35T | 1933 | 0.488535 | 0         |  |
|  | Shiraz-35T | 1933 | 0.488535 | 0         |  |
|  | Shiraz-35T | 1933 | 0.488535 | 0         |  |
|  | Shiraz-58T | 2223 | 0.833364 | 0         |  |
|  | Shiraz-58T | 2223 | 0.833364 | 0         |  |
|  | Shiraz-58T | 2223 | 0.833364 | 0         |  |
|  | Shiraz-58T | 2223 | 0.833364 | 0         |  |

|       |      |            |      |          |           |  |
|-------|------|------------|------|----------|-----------|--|
|       |      | Shiraz-71T | 2263 | 0.975531 | 0         |  |
|       |      | Shiraz-71T | 2263 | 0.975531 | 0         |  |
|       |      | Shiraz-71T | 2263 | 0.975531 | 0         |  |
|       |      | Shiraz-71T | 2263 | 0.975531 | 0         |  |
| NXF2B | chrX | Shiraz-3T  | 242  | 0        | -0.336434 |  |
|       |      | Shiraz-3T  | 242  | 0        | -0.336434 |  |
|       |      | Shiraz-4T  | 261  | 0        | -0.336249 |  |
|       |      | Shiraz-4T  | 261  | 0        | -0.336249 |  |
|       |      | Shiraz-16T | 295  | 0.591657 | 0         |  |
|       |      | Shiraz-16T | 295  | 0.591657 | 0         |  |
|       |      | Shiraz-36T | 433  | 0        | -0.803961 |  |
|       |      | Shiraz-36T | 433  | 0        | -0.803961 |  |
|       |      | Shiraz-44T | 899  | 0        | -1.09697  |  |
|       |      | Shiraz-44T | 899  | 0        | -1.09697  |  |
|       |      | Shiraz-49T | 1170 | 0        | -0.967436 |  |
|       |      | Shiraz-49T | 1170 | 0        | -0.967436 |  |
|       |      | Shiraz-18T | 1457 | 0.643204 | 0         |  |
|       |      | Shiraz-18T | 1457 | 0.643204 | 0         |  |
|       |      | Shiraz-22T | 1673 | 0.611783 | 0         |  |
|       |      | Shiraz-22T | 1673 | 0.611783 | 0         |  |
|       |      | Shiraz-25T | 1719 | 0.472955 | 0         |  |
|       |      | Shiraz-25T | 1719 | 0.472955 | 0         |  |
|       |      | Shiraz-28T | 1762 | 0.562311 | 0         |  |
|       |      | Shiraz-28T | 1762 | 0.562311 | 0         |  |
|       |      | Shiraz-29T | 1801 | 0.815343 | 0         |  |
|       |      | Shiraz-29T | 1801 | 0.815343 | 0         |  |
|       |      | Shiraz-32T | 1870 | 0.729766 | 0         |  |
|       |      | Shiraz-32T | 1870 | 0.729766 | 0         |  |
|       |      | Shiraz-35T | 1933 | 0.488535 | 0         |  |
|       |      | Shiraz-35T | 1933 | 0.488535 | 0         |  |
|       |      | Shiraz-58T | 2223 | 0.833364 | 0         |  |
|       |      | Shiraz-58T | 2223 | 0.833364 | 0         |  |
|       |      | Shiraz-71T | 2263 | 0.975531 | 0         |  |
|       |      | Shiraz-71T | 2263 | 0.975531 | 0         |  |
|       |      | Shiraz-3T  | 242  | 0        | -0.336434 |  |
|       |      | Shiraz-3T  | 242  | 0        | -0.336434 |  |
|       |      | Shiraz-4T  | 261  | 0        | -0.336249 |  |
|       |      | Shiraz-4T  | 261  | 0        | -0.336249 |  |
|       |      | Shiraz-16T | 295  | 0.591657 | 0         |  |
|       |      | Shiraz-16T | 295  | 0.591657 | 0         |  |
|       |      | Shiraz-36T | 433  | 0        | -0.803961 |  |
|       |      | Shiraz-36T | 433  | 0        | -0.803961 |  |
|       |      | Shiraz-44T | 899  | 0        | -1.09697  |  |
|       |      | Shiraz-44T | 899  | 0        | -1.09697  |  |
|       |      | Shiraz-49T | 1170 | 0        | -0.967436 |  |
|       |      | Shiraz-49T | 1170 | 0        | -0.967436 |  |
|       |      | Shiraz-18T | 1457 | 0.643204 | 0         |  |

|  |  |            |      |          |           |  |  |
|--|--|------------|------|----------|-----------|--|--|
|  |  | Shiraz-18T | 1457 | 0.643204 | 0         |  |  |
|  |  | Shiraz-22T | 1673 | 0.611783 | 0         |  |  |
|  |  | Shiraz-22T | 1673 | 0.611783 | 0         |  |  |
|  |  | Shiraz-25T | 1719 | 0.472955 | 0         |  |  |
|  |  | Shiraz-25T | 1719 | 0.472955 | 0         |  |  |
|  |  | Shiraz-28T | 1762 | 0.562311 | 0         |  |  |
|  |  | Shiraz-28T | 1762 | 0.562311 | 0         |  |  |
|  |  | Shiraz-29T | 1801 | 0.815343 | 0         |  |  |
|  |  | Shiraz-29T | 1801 | 0.815343 | 0         |  |  |
|  |  | Shiraz-32T | 1870 | 0.729766 | 0         |  |  |
|  |  | Shiraz-32T | 1870 | 0.729766 | 0         |  |  |
|  |  | Shiraz-35T | 1933 | 0.488535 | 0         |  |  |
|  |  | Shiraz-35T | 1933 | 0.488535 | 0         |  |  |
|  |  | Shiraz-58T | 2223 | 0.833364 | 0         |  |  |
|  |  | Shiraz-58T | 2223 | 0.833364 | 0         |  |  |
|  |  | Shiraz-71T | 2263 | 0.975531 | 0         |  |  |
|  |  | Shiraz-71T | 2263 | 0.975531 | 0         |  |  |
|  |  | Shiraz-3T  | 242  | 0        | -0.336434 |  |  |
|  |  | Shiraz-3T  | 242  | 0        | -0.336434 |  |  |
|  |  | Shiraz-4T  | 261  | 0        | -0.336249 |  |  |
|  |  | Shiraz-4T  | 261  | 0        | -0.336249 |  |  |
|  |  | Shiraz-16T | 295  | 0.591657 | 0         |  |  |
|  |  | Shiraz-16T | 295  | 0.591657 | 0         |  |  |
|  |  | Shiraz-36T | 433  | 0        | -0.803961 |  |  |
|  |  | Shiraz-36T | 433  | 0        | -0.803961 |  |  |
|  |  | Shiraz-44T | 899  | 0        | -1.09697  |  |  |
|  |  | Shiraz-44T | 899  | 0        | -1.09697  |  |  |
|  |  | Shiraz-49T | 1170 | 0        | -0.967436 |  |  |
|  |  | Shiraz-49T | 1170 | 0        | -0.967436 |  |  |
|  |  | Shiraz-18T | 1457 | 0.643204 | 0         |  |  |
|  |  | Shiraz-18T | 1457 | 0.643204 | 0         |  |  |
|  |  | Shiraz-22T | 1673 | 0.611783 | 0         |  |  |
|  |  | Shiraz-22T | 1673 | 0.611783 | 0         |  |  |
|  |  | Shiraz-25T | 1719 | 0.472955 | 0         |  |  |
|  |  | Shiraz-25T | 1719 | 0.472955 | 0         |  |  |
|  |  | Shiraz-28T | 1762 | 0.562311 | 0         |  |  |
|  |  | Shiraz-28T | 1762 | 0.562311 | 0         |  |  |
|  |  | Shiraz-29T | 1801 | 0.815343 | 0         |  |  |
|  |  | Shiraz-29T | 1801 | 0.815343 | 0         |  |  |
|  |  | Shiraz-32T | 1870 | 0.729766 | 0         |  |  |
|  |  | Shiraz-32T | 1870 | 0.729766 | 0         |  |  |
|  |  | Shiraz-35T | 1933 | 0.488535 | 0         |  |  |
|  |  | Shiraz-35T | 1933 | 0.488535 | 0         |  |  |
|  |  | Shiraz-58T | 2223 | 0.833364 | 0         |  |  |
|  |  | Shiraz-58T | 2223 | 0.833364 | 0         |  |  |
|  |  | Shiraz-71T | 2263 | 0.975531 | 0         |  |  |
|  |  | Shiraz-71T | 2263 | 0.975531 | 0         |  |  |

|      |      |            |      |          |           |  |  |
|------|------|------------|------|----------|-----------|--|--|
| NXF3 | chrX | Shiraz-3T  | 242  | 0        | -0.336434 |  |  |
|      |      | Shiraz-4T  | 261  | 0        | -0.336249 |  |  |
|      |      | Shiraz-16T | 295  | 0.591657 | 0         |  |  |
|      |      | Shiraz-36T | 433  | 0        | -0.803961 |  |  |
|      |      | Shiraz-44T | 899  | 0        | -1.09697  |  |  |
|      |      | Shiraz-49T | 1170 | 0        | -0.967436 |  |  |
|      |      | Shiraz-18T | 1457 | 0.643204 | 0         |  |  |
|      |      | Shiraz-22T | 1673 | 0.611783 | 0         |  |  |
|      |      | Shiraz-25T | 1719 | 0.472955 | 0         |  |  |
|      |      | Shiraz-28T | 1762 | 0.562311 | 0         |  |  |
|      |      | Shiraz-29T | 1801 | 0.815343 | 0         |  |  |
|      |      | Shiraz-32T | 1870 | 0.729766 | 0         |  |  |
|      |      | Shiraz-35T | 1933 | 0.488535 | 0         |  |  |
|      |      | Shiraz-58T | 2223 | 0.833364 | 0         |  |  |
|      |      | Shiraz-71T | 2263 | 0.975531 | 0         |  |  |
|      |      | Shiraz-3T  | 242  | 0        | -0.336434 |  |  |
|      |      | Shiraz-4T  | 261  | 0        | -0.336249 |  |  |
|      |      | Shiraz-16T | 295  | 0.591657 | 0         |  |  |
|      |      | Shiraz-36T | 433  | 0        | -0.803961 |  |  |
|      |      | Shiraz-44T | 899  | 0        | -1.09697  |  |  |
|      |      | Shiraz-49T | 1170 | 0        | -0.967436 |  |  |
|      |      | Shiraz-18T | 1457 | 0.643204 | 0         |  |  |
|      |      | Shiraz-22T | 1673 | 0.611783 | 0         |  |  |
|      |      | Shiraz-25T | 1719 | 0.472955 | 0         |  |  |
|      |      | Shiraz-28T | 1762 | 0.562311 | 0         |  |  |
|      |      | Shiraz-29T | 1801 | 0.815343 | 0         |  |  |
|      |      | Shiraz-32T | 1870 | 0.729766 | 0         |  |  |
|      |      | Shiraz-35T | 1933 | 0.488535 | 0         |  |  |
|      |      | Shiraz-58T | 2223 | 0.833364 | 0         |  |  |
|      |      | Shiraz-71T | 2263 | 0.975531 | 0         |  |  |
|      |      | Shiraz-3T  | 242  | 0        | -0.336434 |  |  |
|      |      | Shiraz-4T  | 261  | 0        | -0.336249 |  |  |
|      |      | Shiraz-16T | 295  | 0.591657 | 0         |  |  |
|      |      | Shiraz-36T | 433  | 0        | -0.803961 |  |  |
|      |      | Shiraz-44T | 899  | 0        | -1.09697  |  |  |
|      |      | Shiraz-49T | 1170 | 0        | -0.967436 |  |  |
|      |      | Shiraz-18T | 1457 | 0.643204 | 0         |  |  |
|      |      | Shiraz-22T | 1673 | 0.611783 | 0         |  |  |
|      |      | Shiraz-25T | 1719 | 0.472955 | 0         |  |  |
|      |      | Shiraz-28T | 1762 | 0.562311 | 0         |  |  |
|      |      | Shiraz-29T | 1801 | 0.815343 | 0         |  |  |
|      |      | Shiraz-32T | 1870 | 0.729766 | 0         |  |  |
|      |      | Shiraz-35T | 1933 | 0.488535 | 0         |  |  |
|      |      | Shiraz-58T | 2223 | 0.833364 | 0         |  |  |
|      |      | Shiraz-71T | 2263 | 0.975531 | 0         |  |  |
| NXF4 | chrX | Shiraz-3T  | 242  | 0        | -0.336434 |  |  |
|      |      | Shiraz-4T  | 261  | 0        | -0.336249 |  |  |

|      |      |            |      |          |           |  |  |
|------|------|------------|------|----------|-----------|--|--|
|      |      | Shiraz-16T | 295  | 0.591657 | 0         |  |  |
|      |      | Shiraz-36T | 433  | 0        | -0.803961 |  |  |
|      |      | Shiraz-44T | 899  | 0        | -1.09697  |  |  |
|      |      | Shiraz-49T | 1170 | 0        | -0.967436 |  |  |
|      |      | Shiraz-18T | 1457 | 0.643204 | 0         |  |  |
|      |      | Shiraz-22T | 1673 | 0.611783 | 0         |  |  |
|      |      | Shiraz-25T | 1719 | 0.472955 | 0         |  |  |
|      |      | Shiraz-28T | 1762 | 0.562311 | 0         |  |  |
|      |      | Shiraz-29T | 1801 | 0.815343 | 0         |  |  |
|      |      | Shiraz-32T | 1870 | 0.729766 | 0         |  |  |
|      |      | Shiraz-35T | 1933 | 0.488535 | 0         |  |  |
|      |      | Shiraz-58T | 2223 | 0.833364 | 0         |  |  |
|      |      | Shiraz-71T | 2263 | 0.975531 | 0         |  |  |
|      |      | Shiraz-3T  | 242  | 0        | -0.336434 |  |  |
|      |      | Shiraz-4T  | 261  | 0        | -0.336249 |  |  |
|      |      | Shiraz-16T | 295  | 0.591657 | 0         |  |  |
|      |      | Shiraz-36T | 433  | 0        | -0.803961 |  |  |
|      |      | Shiraz-44T | 899  | 0        | -1.09697  |  |  |
|      |      | Shiraz-49T | 1170 | 0        | -0.967436 |  |  |
|      |      | Shiraz-18T | 1457 | 0.643204 | 0         |  |  |
|      |      | Shiraz-22T | 1673 | 0.611783 | 0         |  |  |
|      |      | Shiraz-25T | 1719 | 0.472955 | 0         |  |  |
|      |      | Shiraz-28T | 1762 | 0.562311 | 0         |  |  |
|      |      | Shiraz-29T | 1801 | 0.815343 | 0         |  |  |
|      |      | Shiraz-32T | 1870 | 0.729766 | 0         |  |  |
|      |      | Shiraz-35T | 1933 | 0.488535 | 0         |  |  |
|      |      | Shiraz-58T | 2223 | 0.833364 | 0         |  |  |
|      |      | Shiraz-71T | 2263 | 0.975531 | 0         |  |  |
|      |      | Shiraz-3T  | 242  | 0        | -0.336434 |  |  |
|      |      | Shiraz-4T  | 261  | 0        | -0.336249 |  |  |
|      |      | Shiraz-16T | 295  | 0.591657 | 0         |  |  |
|      |      | Shiraz-36T | 433  | 0        | -0.803961 |  |  |
|      |      | Shiraz-44T | 899  | 0        | -1.09697  |  |  |
|      |      | Shiraz-49T | 1170 | 0        | -0.967436 |  |  |
|      |      | Shiraz-18T | 1457 | 0.643204 | 0         |  |  |
|      |      | Shiraz-22T | 1673 | 0.611783 | 0         |  |  |
|      |      | Shiraz-25T | 1719 | 0.472955 | 0         |  |  |
|      |      | Shiraz-28T | 1762 | 0.562311 | 0         |  |  |
|      |      | Shiraz-29T | 1801 | 0.815343 | 0         |  |  |
|      |      | Shiraz-32T | 1870 | 0.729766 | 0         |  |  |
|      |      | Shiraz-35T | 1933 | 0.488535 | 0         |  |  |
|      |      | Shiraz-58T | 2223 | 0.833364 | 0         |  |  |
|      |      | Shiraz-71T | 2263 | 0.975531 | 0         |  |  |
| NXF5 | chrX | Shiraz-3T  | 242  | 0        | -0.336434 |  |  |
|      |      | Shiraz-4T  | 261  | 0        | -0.336249 |  |  |
|      |      | Shiraz-16T | 295  | 0.591657 | 0         |  |  |
|      |      | Shiraz-36T | 433  | 0        | -0.803961 |  |  |

|       |      |            |      |          |           |  |  |
|-------|------|------------|------|----------|-----------|--|--|
|       |      | Shiraz-44T | 899  | 0        | -1.09697  |  |  |
|       |      | Shiraz-49T | 1170 | 0        | -0.967436 |  |  |
|       |      | Shiraz-18T | 1457 | 0.643204 | 0         |  |  |
|       |      | Shiraz-22T | 1673 | 0.611783 | 0         |  |  |
|       |      | Shiraz-25T | 1719 | 0.472955 | 0         |  |  |
|       |      | Shiraz-28T | 1762 | 0.562311 | 0         |  |  |
|       |      | Shiraz-29T | 1801 | 0.815343 | 0         |  |  |
|       |      | Shiraz-32T | 1870 | 0.729766 | 0         |  |  |
|       |      | Shiraz-35T | 1933 | 0.488535 | 0         |  |  |
|       |      | Shiraz-58T | 2223 | 0.833364 | 0         |  |  |
|       |      | Shiraz-71T | 2263 | 0.975531 | 0         |  |  |
|       |      | Shiraz-3T  | 242  | 0        | -0.336434 |  |  |
|       |      | Shiraz-4T  | 261  | 0        | -0.336249 |  |  |
|       |      | Shiraz-16T | 295  | 0.591657 | 0         |  |  |
|       |      | Shiraz-36T | 433  | 0        | -0.803961 |  |  |
|       |      | Shiraz-44T | 899  | 0        | -1.09697  |  |  |
|       |      | Shiraz-49T | 1170 | 0        | -0.967436 |  |  |
|       |      | Shiraz-18T | 1457 | 0.643204 | 0         |  |  |
|       |      | Shiraz-22T | 1673 | 0.611783 | 0         |  |  |
|       |      | Shiraz-25T | 1719 | 0.472955 | 0         |  |  |
|       |      | Shiraz-28T | 1762 | 0.562311 | 0         |  |  |
|       |      | Shiraz-29T | 1801 | 0.815343 | 0         |  |  |
|       |      | Shiraz-32T | 1870 | 0.729766 | 0         |  |  |
|       |      | Shiraz-35T | 1933 | 0.488535 | 0         |  |  |
|       |      | Shiraz-58T | 2223 | 0.833364 | 0         |  |  |
|       |      | Shiraz-71T | 2263 | 0.975531 | 0         |  |  |
|       |      | Shiraz-3T  | 242  | 0        | -0.336434 |  |  |
|       |      | Shiraz-4T  | 261  | 0        | -0.336249 |  |  |
|       |      | Shiraz-16T | 295  | 0.591657 | 0         |  |  |
|       |      | Shiraz-36T | 433  | 0        | -0.803961 |  |  |
|       |      | Shiraz-44T | 899  | 0        | -1.09697  |  |  |
|       |      | Shiraz-49T | 1170 | 0        | -0.967436 |  |  |
|       |      | Shiraz-18T | 1457 | 0.643204 | 0         |  |  |
|       |      | Shiraz-22T | 1673 | 0.611783 | 0         |  |  |
|       |      | Shiraz-25T | 1719 | 0.472955 | 0         |  |  |
|       |      | Shiraz-28T | 1762 | 0.562311 | 0         |  |  |
|       |      | Shiraz-29T | 1801 | 0.815343 | 0         |  |  |
|       |      | Shiraz-32T | 1870 | 0.729766 | 0         |  |  |
|       |      | Shiraz-35T | 1933 | 0.488535 | 0         |  |  |
|       |      | Shiraz-58T | 2223 | 0.833364 | 0         |  |  |
|       |      | Shiraz-71T | 2263 | 0.975531 | 0         |  |  |
| NXPH1 | chr7 | Shiraz-4T  | 252  | 0.192083 | 0         |  |  |
|       |      | Shiraz-36T | 376  | 0.159952 | 0         |  |  |
|       |      | Shiraz-44T | 628  | 0        | -0.444379 |  |  |
|       |      | Shiraz-47T | 1027 | 0        | -0.117848 |  |  |
|       |      | Shiraz-49T | 1117 | 0        | -0.168296 |  |  |
|       |      | Shiraz-77T | 1222 | 0        | -0.113002 |  |  |

|      |      |            |      |          |           |  |  |
|------|------|------------|------|----------|-----------|--|--|
|      |      | Shiraz-18T | 1433 | 0.250973 | 0         |  |  |
|      |      | Shiraz-22T | 1543 | 0        | -0.513696 |  |  |
|      |      | Shiraz-25T | 1697 | 0.21945  | 0         |  |  |
|      |      | Shiraz-28T | 1734 | 0.362882 | 0         |  |  |
|      |      | Shiraz-29T | 1777 | 0.156747 | 0         |  |  |
|      |      | Shiraz-38T | 1950 | 0.265916 | 0         |  |  |
|      |      | Shiraz-53T | 2077 | 0.444626 | 0         |  |  |
|      |      | Shiraz-58T | 2157 | 0        | -0.213872 |  |  |
|      |      | Shiraz-71T | 2236 | 0.320072 | 0         |  |  |
|      |      | Shiraz-4T  | 252  | 0.192083 | 0         |  |  |
|      |      | Shiraz-36T | 376  | 0.159952 | 0         |  |  |
|      |      | Shiraz-44T | 628  | 0        | -0.444379 |  |  |
|      |      | Shiraz-47T | 1027 | 0        | -0.117848 |  |  |
|      |      | Shiraz-49T | 1117 | 0        | -0.168296 |  |  |
|      |      | Shiraz-77T | 1222 | 0        | -0.113002 |  |  |
|      |      | Shiraz-18T | 1433 | 0.250973 | 0         |  |  |
|      |      | Shiraz-22T | 1543 | 0        | -0.513696 |  |  |
|      |      | Shiraz-25T | 1697 | 0.21945  | 0         |  |  |
|      |      | Shiraz-28T | 1734 | 0.362882 | 0         |  |  |
|      |      | Shiraz-29T | 1777 | 0.156747 | 0         |  |  |
|      |      | Shiraz-38T | 1950 | 0.265916 | 0         |  |  |
|      |      | Shiraz-53T | 2077 | 0.444626 | 0         |  |  |
|      |      | Shiraz-58T | 2157 | 0        | -0.213872 |  |  |
|      |      | Shiraz-71T | 2236 | 0.320072 | 0         |  |  |
|      |      | Shiraz-4T  | 252  | 0.192083 | 0         |  |  |
|      |      | Shiraz-36T | 376  | 0.159952 | 0         |  |  |
|      |      | Shiraz-44T | 628  | 0        | -0.444379 |  |  |
|      |      | Shiraz-47T | 1027 | 0        | -0.117848 |  |  |
|      |      | Shiraz-49T | 1117 | 0        | -0.168296 |  |  |
|      |      | Shiraz-77T | 1222 | 0        | -0.113002 |  |  |
|      |      | Shiraz-18T | 1433 | 0.250973 | 0         |  |  |
|      |      | Shiraz-22T | 1543 | 0        | -0.513696 |  |  |
|      |      | Shiraz-25T | 1697 | 0.21945  | 0         |  |  |
|      |      | Shiraz-28T | 1734 | 0.362882 | 0         |  |  |
|      |      | Shiraz-29T | 1777 | 0.156747 | 0         |  |  |
|      |      | Shiraz-38T | 1950 | 0.265916 | 0         |  |  |
|      |      | Shiraz-53T | 2077 | 0.444626 | 0         |  |  |
|      |      | Shiraz-58T | 2157 | 0        | -0.213872 |  |  |
|      |      | Shiraz-71T | 2236 | 0.320072 | 0         |  |  |
| NXT2 | chrX | Shiraz-3T  | 242  | 0        | -0.336434 |  |  |
|      |      | Shiraz-4T  | 261  | 0        | -0.336249 |  |  |
|      |      | Shiraz-16T | 295  | 0.591657 | 0         |  |  |
|      |      | Shiraz-36T | 433  | 0        | -0.803961 |  |  |
|      |      | Shiraz-44T | 899  | 0        | -1.09697  |  |  |
|      |      | Shiraz-49T | 1170 | 0        | -0.967436 |  |  |
|      |      | Shiraz-18T | 1457 | 0.643204 | 0         |  |  |
|      |      | Shiraz-22T | 1673 | 0.611783 | 0         |  |  |



|     |      |            |      |          |           |  |  |
|-----|------|------------|------|----------|-----------|--|--|
|     |      | Shiraz-25T | 1719 | 0.472955 | 0         |  |  |
|     |      | Shiraz-28T | 1762 | 0.562311 | 0         |  |  |
|     |      | Shiraz-29T | 1801 | 0.815343 | 0         |  |  |
|     |      | Shiraz-32T | 1870 | 0.729766 | 0         |  |  |
|     |      | Shiraz-35T | 1933 | 0.488535 | 0         |  |  |
|     |      | Shiraz-58T | 2223 | 0.833364 | 0         |  |  |
|     |      | Shiraz-71T | 2263 | 0.975531 | 0         |  |  |
|     |      | Shiraz-3T  | 242  | 0        | -0.336434 |  |  |
|     |      | Shiraz-4T  | 261  | 0        | -0.336249 |  |  |
|     |      | Shiraz-16T | 295  | 0.591657 | 0         |  |  |
|     |      | Shiraz-36T | 433  | 0        | -0.803961 |  |  |
|     |      | Shiraz-44T | 899  | 0        | -1.09697  |  |  |
|     |      | Shiraz-49T | 1170 | 0        | -0.967436 |  |  |
|     |      | Shiraz-18T | 1457 | 0.643204 | 0         |  |  |
|     |      | Shiraz-22T | 1673 | 0.611783 | 0         |  |  |
|     |      | Shiraz-25T | 1719 | 0.472955 | 0         |  |  |
|     |      | Shiraz-28T | 1762 | 0.562311 | 0         |  |  |
|     |      | Shiraz-29T | 1801 | 0.815343 | 0         |  |  |
|     |      | Shiraz-32T | 1870 | 0.729766 | 0         |  |  |
|     |      | Shiraz-35T | 1933 | 0.488535 | 0         |  |  |
|     |      | Shiraz-58T | 2223 | 0.833364 | 0         |  |  |
|     |      | Shiraz-71T | 2263 | 0.975531 | 0         |  |  |
|     |      | Shiraz-3T  | 242  | 0        | -0.336434 |  |  |
|     |      | Shiraz-4T  | 261  | 0        | -0.336249 |  |  |
|     |      | Shiraz-16T | 295  | 0.591657 | 0         |  |  |
|     |      | Shiraz-36T | 433  | 0        | -0.803961 |  |  |
|     |      | Shiraz-44T | 899  | 0        | -1.09697  |  |  |
|     |      | Shiraz-49T | 1170 | 0        | -0.967436 |  |  |
|     |      | Shiraz-18T | 1457 | 0.643204 | 0         |  |  |
|     |      | Shiraz-22T | 1673 | 0.611783 | 0         |  |  |
|     |      | Shiraz-25T | 1719 | 0.472955 | 0         |  |  |
|     |      | Shiraz-28T | 1762 | 0.562311 | 0         |  |  |
|     |      | Shiraz-29T | 1801 | 0.815343 | 0         |  |  |
|     |      | Shiraz-32T | 1870 | 0.729766 | 0         |  |  |
|     |      | Shiraz-35T | 1933 | 0.488535 | 0         |  |  |
|     |      | Shiraz-58T | 2223 | 0.833364 | 0         |  |  |
|     |      | Shiraz-71T | 2263 | 0.975531 | 0         |  |  |
| NYX | chrX | Shiraz-3T  | 235  | 0        | -0.28401  |  |  |
|     |      | Shiraz-3T  | 237  | 0.082458 | 0         |  |  |
|     |      | Shiraz-4T  | 260  | 0        | -0.324128 |  |  |
|     |      | Shiraz-16T | 294  | 0.655804 | 0         |  |  |
|     |      | Shiraz-31T | 345  | 0.103301 | 0         |  |  |
|     |      | Shiraz-36T | 431  | 0        | -0.78035  |  |  |
|     |      | Shiraz-36T | 432  | 0        | -0.6692   |  |  |
|     |      | Shiraz-44T | 891  | 0        | -0.954044 |  |  |
|     |      | Shiraz-46T | 991  | 0.139564 | 0         |  |  |
|     |      | Shiraz-49T | 1166 | 0        | -0.917235 |  |  |

|  |            |      |          |           |  |
|--|------------|------|----------|-----------|--|
|  | Shiraz-9T  | 1368 | 0.199713 | 0         |  |
|  | Shiraz-18T | 1455 | 0        | -0.186773 |  |
|  | Shiraz-22T | 1669 | 0.695915 | 0         |  |
|  | Shiraz-25T | 1717 | 0.420447 | 0         |  |
|  | Shiraz-28T | 1760 | 0.538181 | 0         |  |
|  | Shiraz-29T | 1800 | 0.672527 | 0         |  |
|  | Shiraz-32T | 1869 | 0.776805 | 0         |  |
|  | Shiraz-35T | 1932 | 0.507141 | 0         |  |
|  | Shiraz-40T | 2051 | 0.098506 | 0         |  |
|  | Shiraz-58T | 2221 | 0.871948 | 0         |  |
|  | Shiraz-71T | 2260 | 0.68394  | 0         |  |
|  | Shiraz-71T | 2262 | 0.986748 | 0         |  |
|  | Shiraz-3T  | 235  | 0        | -0.28401  |  |
|  | Shiraz-3T  | 237  | 0.082458 | 0         |  |
|  | Shiraz-4T  | 260  | 0        | -0.324128 |  |
|  | Shiraz-16T | 294  | 0.655804 | 0         |  |
|  | Shiraz-31T | 345  | 0.103301 | 0         |  |
|  | Shiraz-36T | 431  | 0        | -0.78035  |  |
|  | Shiraz-36T | 432  | 0        | -0.6692   |  |
|  | Shiraz-44T | 891  | 0        | -0.954044 |  |
|  | Shiraz-46T | 991  | 0.139564 | 0         |  |
|  | Shiraz-49T | 1166 | 0        | -0.917235 |  |
|  | Shiraz-9T  | 1368 | 0.199713 | 0         |  |
|  | Shiraz-18T | 1455 | 0        | -0.186773 |  |
|  | Shiraz-22T | 1669 | 0.695915 | 0         |  |
|  | Shiraz-25T | 1717 | 0.420447 | 0         |  |
|  | Shiraz-28T | 1760 | 0.538181 | 0         |  |
|  | Shiraz-29T | 1800 | 0.672527 | 0         |  |
|  | Shiraz-32T | 1869 | 0.776805 | 0         |  |
|  | Shiraz-35T | 1932 | 0.507141 | 0         |  |
|  | Shiraz-40T | 2051 | 0.098506 | 0         |  |
|  | Shiraz-58T | 2221 | 0.871948 | 0         |  |
|  | Shiraz-71T | 2260 | 0.68394  | 0         |  |
|  | Shiraz-71T | 2262 | 0.986748 | 0         |  |
|  | Shiraz-3T  | 235  | 0        | -0.28401  |  |
|  | Shiraz-3T  | 237  | 0.082458 | 0         |  |
|  | Shiraz-4T  | 260  | 0        | -0.324128 |  |
|  | Shiraz-16T | 294  | 0.655804 | 0         |  |
|  | Shiraz-31T | 345  | 0.103301 | 0         |  |
|  | Shiraz-36T | 431  | 0        | -0.78035  |  |
|  | Shiraz-36T | 432  | 0        | -0.6692   |  |
|  | Shiraz-44T | 891  | 0        | -0.954044 |  |
|  | Shiraz-46T | 991  | 0.139564 | 0         |  |
|  | Shiraz-49T | 1166 | 0        | -0.917235 |  |
|  | Shiraz-9T  | 1368 | 0.199713 | 0         |  |
|  | Shiraz-18T | 1455 | 0        | -0.186773 |  |
|  | Shiraz-22T | 1669 | 0.695915 | 0         |  |

|      |      |            |      |          |           |  |
|------|------|------------|------|----------|-----------|--|
|      |      | Shiraz-25T | 1717 | 0.420447 | 0         |  |
|      |      | Shiraz-28T | 1760 | 0.538181 | 0         |  |
|      |      | Shiraz-29T | 1800 | 0.672527 | 0         |  |
|      |      | Shiraz-32T | 1869 | 0.776805 | 0         |  |
|      |      | Shiraz-35T | 1932 | 0.507141 | 0         |  |
|      |      | Shiraz-40T | 2051 | 0.098506 | 0         |  |
|      |      | Shiraz-58T | 2221 | 0.871948 | 0         |  |
|      |      | Shiraz-71T | 2260 | 0.68394  | 0         |  |
|      |      | Shiraz-71T | 2262 | 0.986748 | 0         |  |
| OCM2 | chr7 | Shiraz-3T  | 90   | 0.219276 | 0         |  |
|      |      | Shiraz-3T  | 94   | 0.74735  | 0         |  |
|      |      | Shiraz-4T  | 253  | 0.372918 | 0         |  |
|      |      | Shiraz-31T | 316  | 0.219196 | 0         |  |
|      |      | Shiraz-36T | 378  | 0.179558 | 0         |  |
|      |      | Shiraz-36T | 381  | 0.332628 | 0         |  |
|      |      | Shiraz-46T | 943  | 0.093799 | 0         |  |
|      |      | Shiraz-46T | 946  | 0.299835 | 0         |  |
|      |      | Shiraz-49T | 1120 | 0.281656 | 0         |  |
|      |      | Shiraz-77T | 1225 | 0        | -0.117922 |  |
|      |      | Shiraz-77T | 1227 | 0.196445 | 0         |  |
|      |      | Shiraz-9T  | 1324 | 0.679266 | 0         |  |
|      |      | Shiraz-18T | 1434 | 0.244465 | 0         |  |
|      |      | Shiraz-22T | 1549 | 0        | -0.319623 |  |
|      |      | Shiraz-22T | 1551 | 0.324011 | 0         |  |
|      |      | Shiraz-25T | 1698 | 0.21835  | 0         |  |
|      |      | Shiraz-28T | 1735 | 0.350744 | 0         |  |
|      |      | Shiraz-29T | 1778 | 0.120767 | 0         |  |
|      |      | Shiraz-32T | 1833 | 0.551336 | 0         |  |
|      |      | Shiraz-38T | 1951 | 0.250891 | 0         |  |
|      |      | Shiraz-53T | 2078 | 0.287202 | 0         |  |
|      |      | Shiraz-71T | 2238 | 0.603631 | 0         |  |
|      |      | Shiraz-3T  | 90   | 0.219276 | 0         |  |
|      |      | Shiraz-3T  | 94   | 0.74735  | 0         |  |
|      |      | Shiraz-4T  | 253  | 0.372918 | 0         |  |
|      |      | Shiraz-31T | 316  | 0.219196 | 0         |  |
|      |      | Shiraz-36T | 378  | 0.179558 | 0         |  |
|      |      | Shiraz-36T | 381  | 0.332628 | 0         |  |
|      |      | Shiraz-46T | 943  | 0.093799 | 0         |  |
|      |      | Shiraz-46T | 946  | 0.299835 | 0         |  |
|      |      | Shiraz-49T | 1120 | 0.281656 | 0         |  |
|      |      | Shiraz-77T | 1225 | 0        | -0.117922 |  |
|      |      | Shiraz-77T | 1227 | 0.196445 | 0         |  |
|      |      | Shiraz-9T  | 1324 | 0.679266 | 0         |  |
|      |      | Shiraz-18T | 1434 | 0.244465 | 0         |  |
|      |      | Shiraz-22T | 1549 | 0        | -0.319623 |  |
|      |      | Shiraz-22T | 1551 | 0.324011 | 0         |  |
|      |      | Shiraz-25T | 1698 | 0.21835  | 0         |  |

|      |      |            |      |          |           |  |
|------|------|------------|------|----------|-----------|--|
|      |      | Shiraz-28T | 1735 | 0.350744 | 0         |  |
|      |      | Shiraz-29T | 1778 | 0.120767 | 0         |  |
|      |      | Shiraz-32T | 1833 | 0.551336 | 0         |  |
|      |      | Shiraz-38T | 1951 | 0.250891 | 0         |  |
|      |      | Shiraz-53T | 2078 | 0.287202 | 0         |  |
|      |      | Shiraz-71T | 2238 | 0.603631 | 0         |  |
|      |      | Shiraz-3T  | 90   | 0.219276 | 0         |  |
|      |      | Shiraz-3T  | 94   | 0.74735  | 0         |  |
|      |      | Shiraz-4T  | 253  | 0.372918 | 0         |  |
|      |      | Shiraz-31T | 316  | 0.219196 | 0         |  |
|      |      | Shiraz-36T | 378  | 0.179558 | 0         |  |
|      |      | Shiraz-36T | 381  | 0.332628 | 0         |  |
|      |      | Shiraz-46T | 943  | 0.093799 | 0         |  |
|      |      | Shiraz-46T | 946  | 0.299835 | 0         |  |
|      |      | Shiraz-49T | 1120 | 0.281656 | 0         |  |
|      |      | Shiraz-77T | 1225 | 0        | -0.117922 |  |
|      |      | Shiraz-77T | 1227 | 0.196445 | 0         |  |
|      |      | Shiraz-9T  | 1324 | 0.679266 | 0         |  |
|      |      | Shiraz-18T | 1434 | 0.244465 | 0         |  |
|      |      | Shiraz-22T | 1549 | 0        | -0.319623 |  |
|      |      | Shiraz-22T | 1551 | 0.324011 | 0         |  |
|      |      | Shiraz-25T | 1698 | 0.21835  | 0         |  |
|      |      | Shiraz-28T | 1735 | 0.350744 | 0         |  |
|      |      | Shiraz-29T | 1778 | 0.120767 | 0         |  |
|      |      | Shiraz-32T | 1833 | 0.551336 | 0         |  |
|      |      | Shiraz-38T | 1951 | 0.250891 | 0         |  |
|      |      | Shiraz-53T | 2078 | 0.287202 | 0         |  |
|      |      | Shiraz-71T | 2238 | 0.603631 | 0         |  |
| OCRL | chrX | Shiraz-3T  | 242  | 0        | -0.336434 |  |
|      |      | Shiraz-4T  | 261  | 0        | -0.336249 |  |
|      |      | Shiraz-16T | 295  | 0.591657 | 0         |  |
|      |      | Shiraz-36T | 433  | 0        | -0.803961 |  |
|      |      | Shiraz-44T | 899  | 0        | -1.09697  |  |
|      |      | Shiraz-44T | 906  | 0        | -0.165692 |  |
|      |      | Shiraz-49T | 1170 | 0        | -0.967436 |  |
|      |      | Shiraz-9T  | 1370 | 0.690073 | 0         |  |
|      |      | Shiraz-18T | 1457 | 0.643204 | 0         |  |
|      |      | Shiraz-22T | 1673 | 0.611783 | 0         |  |
|      |      | Shiraz-22T | 1677 | 0.789711 | 0         |  |
|      |      | Shiraz-25T | 1719 | 0.472955 | 0         |  |
|      |      | Shiraz-28T | 1762 | 0.562311 | 0         |  |
|      |      | Shiraz-29T | 1801 | 0.815343 | 0         |  |
|      |      | Shiraz-32T | 1870 | 0.729766 | 0         |  |
|      |      | Shiraz-35T | 1933 | 0.488535 | 0         |  |
|      |      | Shiraz-58T | 2223 | 0.833364 | 0         |  |
|      |      | Shiraz-71T | 2263 | 0.975531 | 0         |  |
|      |      | Shiraz-3T  | 242  | 0        | -0.336434 |  |

|      |      |            |      |          |           |  |  |
|------|------|------------|------|----------|-----------|--|--|
|      |      | Shiraz-4T  | 261  | 0        | -0.336249 |  |  |
|      |      | Shiraz-16T | 295  | 0.591657 | 0         |  |  |
|      |      | Shiraz-36T | 433  | 0        | -0.803961 |  |  |
|      |      | Shiraz-44T | 899  | 0        | -1.09697  |  |  |
|      |      | Shiraz-44T | 906  | 0        | -0.165692 |  |  |
|      |      | Shiraz-49T | 1170 | 0        | -0.967436 |  |  |
|      |      | Shiraz-9T  | 1370 | 0.690073 | 0         |  |  |
|      |      | Shiraz-18T | 1457 | 0.643204 | 0         |  |  |
|      |      | Shiraz-22T | 1673 | 0.611783 | 0         |  |  |
|      |      | Shiraz-22T | 1677 | 0.789711 | 0         |  |  |
|      |      | Shiraz-25T | 1719 | 0.472955 | 0         |  |  |
|      |      | Shiraz-28T | 1762 | 0.562311 | 0         |  |  |
|      |      | Shiraz-29T | 1801 | 0.815343 | 0         |  |  |
|      |      | Shiraz-32T | 1870 | 0.729766 | 0         |  |  |
|      |      | Shiraz-35T | 1933 | 0.488535 | 0         |  |  |
|      |      | Shiraz-58T | 2223 | 0.833364 | 0         |  |  |
|      |      | Shiraz-71T | 2263 | 0.975531 | 0         |  |  |
|      |      | Shiraz-3T  | 242  | 0        | -0.336434 |  |  |
|      |      | Shiraz-4T  | 261  | 0        | -0.336249 |  |  |
|      |      | Shiraz-16T | 295  | 0.591657 | 0         |  |  |
|      |      | Shiraz-36T | 433  | 0        | -0.803961 |  |  |
|      |      | Shiraz-44T | 899  | 0        | -1.09697  |  |  |
|      |      | Shiraz-44T | 906  | 0        | -0.165692 |  |  |
|      |      | Shiraz-49T | 1170 | 0        | -0.967436 |  |  |
|      |      | Shiraz-9T  | 1370 | 0.690073 | 0         |  |  |
|      |      | Shiraz-18T | 1457 | 0.643204 | 0         |  |  |
|      |      | Shiraz-22T | 1673 | 0.611783 | 0         |  |  |
|      |      | Shiraz-22T | 1677 | 0.789711 | 0         |  |  |
|      |      | Shiraz-25T | 1719 | 0.472955 | 0         |  |  |
|      |      | Shiraz-28T | 1762 | 0.562311 | 0         |  |  |
|      |      | Shiraz-29T | 1801 | 0.815343 | 0         |  |  |
|      |      | Shiraz-32T | 1870 | 0.729766 | 0         |  |  |
|      |      | Shiraz-35T | 1933 | 0.488535 | 0         |  |  |
|      |      | Shiraz-58T | 2223 | 0.833364 | 0         |  |  |
|      |      | Shiraz-71T | 2263 | 0.975531 | 0         |  |  |
| ODZ1 | chrX | Shiraz-3T  | 242  | 0        | -0.336434 |  |  |
|      |      | Shiraz-4T  | 261  | 0        | -0.336249 |  |  |
|      |      | Shiraz-16T | 295  | 0.591657 | 0         |  |  |
|      |      | Shiraz-36T | 433  | 0        | -0.803961 |  |  |
|      |      | Shiraz-44T | 899  | 0        | -1.09697  |  |  |
|      |      | Shiraz-44T | 905  | 0        | -1.465843 |  |  |
|      |      | Shiraz-49T | 1170 | 0        | -0.967436 |  |  |
|      |      | Shiraz-9T  | 1370 | 0.690073 | 0         |  |  |
|      |      | Shiraz-18T | 1457 | 0.643204 | 0         |  |  |
|      |      | Shiraz-22T | 1673 | 0.611783 | 0         |  |  |
|      |      | Shiraz-22T | 1676 | 0.259626 | 0         |  |  |
|      |      | Shiraz-25T | 1719 | 0.472955 | 0         |  |  |

|      |      |            |      |          |           |  |  |
|------|------|------------|------|----------|-----------|--|--|
|      |      | Shiraz-28T | 1762 | 0.562311 | 0         |  |  |
|      |      | Shiraz-29T | 1801 | 0.815343 | 0         |  |  |
|      |      | Shiraz-32T | 1870 | 0.729766 | 0         |  |  |
|      |      | Shiraz-35T | 1933 | 0.488535 | 0         |  |  |
|      |      | Shiraz-58T | 2223 | 0.833364 | 0         |  |  |
|      |      | Shiraz-71T | 2263 | 0.975531 | 0         |  |  |
|      |      | Shiraz-3T  | 242  | 0        | -0.336434 |  |  |
|      |      | Shiraz-4T  | 261  | 0        | -0.336249 |  |  |
|      |      | Shiraz-16T | 295  | 0.591657 | 0         |  |  |
|      |      | Shiraz-36T | 433  | 0        | -0.803961 |  |  |
|      |      | Shiraz-44T | 899  | 0        | -1.09697  |  |  |
|      |      | Shiraz-44T | 905  | 0        | -1.465843 |  |  |
|      |      | Shiraz-49T | 1170 | 0        | -0.967436 |  |  |
|      |      | Shiraz-9T  | 1370 | 0.690073 | 0         |  |  |
|      |      | Shiraz-18T | 1457 | 0.643204 | 0         |  |  |
|      |      | Shiraz-22T | 1673 | 0.611783 | 0         |  |  |
|      |      | Shiraz-22T | 1676 | 0.259626 | 0         |  |  |
|      |      | Shiraz-25T | 1719 | 0.472955 | 0         |  |  |
|      |      | Shiraz-28T | 1762 | 0.562311 | 0         |  |  |
|      |      | Shiraz-29T | 1801 | 0.815343 | 0         |  |  |
|      |      | Shiraz-32T | 1870 | 0.729766 | 0         |  |  |
|      |      | Shiraz-35T | 1933 | 0.488535 | 0         |  |  |
|      |      | Shiraz-58T | 2223 | 0.833364 | 0         |  |  |
|      |      | Shiraz-71T | 2263 | 0.975531 | 0         |  |  |
|      |      | Shiraz-3T  | 242  | 0        | -0.336434 |  |  |
|      |      | Shiraz-4T  | 261  | 0        | -0.336249 |  |  |
|      |      | Shiraz-16T | 295  | 0.591657 | 0         |  |  |
|      |      | Shiraz-36T | 433  | 0        | -0.803961 |  |  |
|      |      | Shiraz-44T | 899  | 0        | -1.09697  |  |  |
|      |      | Shiraz-44T | 905  | 0        | -1.465843 |  |  |
|      |      | Shiraz-49T | 1170 | 0        | -0.967436 |  |  |
|      |      | Shiraz-9T  | 1370 | 0.690073 | 0         |  |  |
|      |      | Shiraz-18T | 1457 | 0.643204 | 0         |  |  |
|      |      | Shiraz-22T | 1673 | 0.611783 | 0         |  |  |
|      |      | Shiraz-22T | 1676 | 0.259626 | 0         |  |  |
|      |      | Shiraz-25T | 1719 | 0.472955 | 0         |  |  |
|      |      | Shiraz-28T | 1762 | 0.562311 | 0         |  |  |
|      |      | Shiraz-29T | 1801 | 0.815343 | 0         |  |  |
|      |      | Shiraz-32T | 1870 | 0.729766 | 0         |  |  |
|      |      | Shiraz-35T | 1933 | 0.488535 | 0         |  |  |
|      |      | Shiraz-58T | 2223 | 0.833364 | 0         |  |  |
|      |      | Shiraz-71T | 2263 | 0.975531 | 0         |  |  |
| OFD1 | chrX | Shiraz-3T  | 235  | 0        | -0.28401  |  |  |
|      |      | Shiraz-4T  | 260  | 0        | -0.324128 |  |  |
|      |      | Shiraz-16T | 294  | 0.655804 | 0         |  |  |
|      |      | Shiraz-36T | 431  | 0        | -0.78035  |  |  |
|      |      | Shiraz-44T | 891  | 0        | -0.954044 |  |  |

|  |            |      |          |           |  |
|--|------------|------|----------|-----------|--|
|  | Shiraz-49T | 1166 | 0        | -0.917235 |  |
|  | Shiraz-9T  | 1368 | 0.199713 | 0         |  |
|  | Shiraz-18T | 1455 | 0        | -0.186773 |  |
|  | Shiraz-22T | 1669 | 0.695915 | 0         |  |
|  | Shiraz-25T | 1717 | 0.420447 | 0         |  |
|  | Shiraz-28T | 1760 | 0.538181 | 0         |  |
|  | Shiraz-29T | 1800 | 0.672527 | 0         |  |
|  | Shiraz-32T | 1869 | 0.776805 | 0         |  |
|  | Shiraz-35T | 1932 | 0.507141 | 0         |  |
|  | Shiraz-40T | 2051 | 0.098506 | 0         |  |
|  | Shiraz-58T | 2221 | 0.871948 | 0         |  |
|  | Shiraz-71T | 2260 | 0.68394  | 0         |  |
|  | Shiraz-71T | 2261 | 0.508399 | 0         |  |
|  | Shiraz-3T  | 235  | 0        | -0.28401  |  |
|  | Shiraz-4T  | 260  | 0        | -0.324128 |  |
|  | Shiraz-16T | 294  | 0.655804 | 0         |  |
|  | Shiraz-36T | 431  | 0        | -0.78035  |  |
|  | Shiraz-44T | 891  | 0        | -0.954044 |  |
|  | Shiraz-49T | 1166 | 0        | -0.917235 |  |
|  | Shiraz-9T  | 1368 | 0.199713 | 0         |  |
|  | Shiraz-18T | 1455 | 0        | -0.186773 |  |
|  | Shiraz-22T | 1669 | 0.695915 | 0         |  |
|  | Shiraz-25T | 1717 | 0.420447 | 0         |  |
|  | Shiraz-28T | 1760 | 0.538181 | 0         |  |
|  | Shiraz-29T | 1800 | 0.672527 | 0         |  |
|  | Shiraz-32T | 1869 | 0.776805 | 0         |  |
|  | Shiraz-35T | 1932 | 0.507141 | 0         |  |
|  | Shiraz-40T | 2051 | 0.098506 | 0         |  |
|  | Shiraz-58T | 2221 | 0.871948 | 0         |  |
|  | Shiraz-71T | 2260 | 0.68394  | 0         |  |
|  | Shiraz-71T | 2261 | 0.508399 | 0         |  |
|  | Shiraz-3T  | 235  | 0        | -0.28401  |  |
|  | Shiraz-4T  | 260  | 0        | -0.324128 |  |
|  | Shiraz-16T | 294  | 0.655804 | 0         |  |
|  | Shiraz-36T | 431  | 0        | -0.78035  |  |
|  | Shiraz-44T | 891  | 0        | -0.954044 |  |
|  | Shiraz-49T | 1166 | 0        | -0.917235 |  |
|  | Shiraz-9T  | 1368 | 0.199713 | 0         |  |
|  | Shiraz-18T | 1455 | 0        | -0.186773 |  |
|  | Shiraz-22T | 1669 | 0.695915 | 0         |  |
|  | Shiraz-25T | 1717 | 0.420447 | 0         |  |
|  | Shiraz-28T | 1760 | 0.538181 | 0         |  |
|  | Shiraz-29T | 1800 | 0.672527 | 0         |  |
|  | Shiraz-32T | 1869 | 0.776805 | 0         |  |
|  | Shiraz-35T | 1932 | 0.507141 | 0         |  |
|  | Shiraz-40T | 2051 | 0.098506 | 0         |  |
|  | Shiraz-58T | 2221 | 0.871948 | 0         |  |

|      |      |            |      |          |   |  |
|------|------|------------|------|----------|---|--|
|      |      | Shiraz-71T | 2260 | 0.68394  | 0 |  |
|      |      | Shiraz-71T | 2261 | 0.508399 | 0 |  |
| OGDH | chr7 | Shiraz-3T  | 87   | 0.198593 | 0 |  |
|      |      | Shiraz-3T  | 87   | 0.198593 | 0 |  |
|      |      | Shiraz-3T  | 89   | 0.678641 | 0 |  |
|      |      | Shiraz-3T  | 89   | 0.678641 | 0 |  |
|      |      | Shiraz-4T  | 252  | 0.192083 | 0 |  |
|      |      | Shiraz-4T  | 252  | 0.192083 | 0 |  |
|      |      | Shiraz-36T | 376  | 0.159952 | 0 |  |
|      |      | Shiraz-36T | 376  | 0.159952 | 0 |  |
|      |      | Shiraz-44T | 632  | 0.902944 | 0 |  |
|      |      | Shiraz-44T | 632  | 0.902944 | 0 |  |
|      |      | Shiraz-46T | 942  | 0.069143 | 0 |  |
|      |      | Shiraz-46T | 942  | 0.069143 | 0 |  |
|      |      | Shiraz-77T | 1223 | 0.215647 | 0 |  |
|      |      | Shiraz-77T | 1223 | 0.215647 | 0 |  |
|      |      | Shiraz-18T | 1433 | 0.250973 | 0 |  |
|      |      | Shiraz-18T | 1433 | 0.250973 | 0 |  |
|      |      | Shiraz-25T | 1697 | 0.21945  | 0 |  |
|      |      | Shiraz-25T | 1697 | 0.21945  | 0 |  |
|      |      | Shiraz-28T | 1734 | 0.362882 | 0 |  |
|      |      | Shiraz-28T | 1734 | 0.362882 | 0 |  |
|      |      | Shiraz-29T | 1777 | 0.156747 | 0 |  |
|      |      | Shiraz-29T | 1777 | 0.156747 | 0 |  |
|      |      | Shiraz-38T | 1950 | 0.265916 | 0 |  |
|      |      | Shiraz-38T | 1950 | 0.265916 | 0 |  |
|      |      | Shiraz-71T | 2236 | 0.320072 | 0 |  |
|      |      | Shiraz-71T | 2236 | 0.320072 | 0 |  |
|      |      | Shiraz-3T  | 87   | 0.198593 | 0 |  |
|      |      | Shiraz-3T  | 87   | 0.198593 | 0 |  |
|      |      | Shiraz-3T  | 89   | 0.678641 | 0 |  |
|      |      | Shiraz-3T  | 89   | 0.678641 | 0 |  |
|      |      | Shiraz-4T  | 252  | 0.192083 | 0 |  |
|      |      | Shiraz-4T  | 252  | 0.192083 | 0 |  |
|      |      | Shiraz-36T | 376  | 0.159952 | 0 |  |
|      |      | Shiraz-36T | 376  | 0.159952 | 0 |  |
|      |      | Shiraz-44T | 632  | 0.902944 | 0 |  |
|      |      | Shiraz-44T | 632  | 0.902944 | 0 |  |
|      |      | Shiraz-46T | 942  | 0.069143 | 0 |  |
|      |      | Shiraz-46T | 942  | 0.069143 | 0 |  |
|      |      | Shiraz-77T | 1223 | 0.215647 | 0 |  |
|      |      | Shiraz-77T | 1223 | 0.215647 | 0 |  |
|      |      | Shiraz-18T | 1433 | 0.250973 | 0 |  |
|      |      | Shiraz-18T | 1433 | 0.250973 | 0 |  |
|      |      | Shiraz-25T | 1697 | 0.21945  | 0 |  |
|      |      | Shiraz-25T | 1697 | 0.21945  | 0 |  |
|      |      | Shiraz-28T | 1734 | 0.362882 | 0 |  |



|     |      |            |      |          |           |  |
|-----|------|------------|------|----------|-----------|--|
|     |      | Shiraz-28T | 1734 | 0.362882 | 0         |  |
|     |      | Shiraz-29T | 1777 | 0.156747 | 0         |  |
|     |      | Shiraz-29T | 1777 | 0.156747 | 0         |  |
|     |      | Shiraz-38T | 1950 | 0.265916 | 0         |  |
|     |      | Shiraz-38T | 1950 | 0.265916 | 0         |  |
|     |      | Shiraz-71T | 2236 | 0.320072 | 0         |  |
|     |      | Shiraz-71T | 2236 | 0.320072 | 0         |  |
|     |      | Shiraz-3T  | 87   | 0.198593 | 0         |  |
|     |      | Shiraz-3T  | 87   | 0.198593 | 0         |  |
|     |      | Shiraz-3T  | 89   | 0.678641 | 0         |  |
|     |      | Shiraz-3T  | 89   | 0.678641 | 0         |  |
|     |      | Shiraz-4T  | 252  | 0.192083 | 0         |  |
|     |      | Shiraz-4T  | 252  | 0.192083 | 0         |  |
|     |      | Shiraz-36T | 376  | 0.159952 | 0         |  |
|     |      | Shiraz-36T | 376  | 0.159952 | 0         |  |
|     |      | Shiraz-44T | 632  | 0.902944 | 0         |  |
|     |      | Shiraz-44T | 632  | 0.902944 | 0         |  |
|     |      | Shiraz-46T | 942  | 0.069143 | 0         |  |
|     |      | Shiraz-46T | 942  | 0.069143 | 0         |  |
|     |      | Shiraz-77T | 1223 | 0.215647 | 0         |  |
|     |      | Shiraz-77T | 1223 | 0.215647 | 0         |  |
|     |      | Shiraz-18T | 1433 | 0.250973 | 0         |  |
|     |      | Shiraz-18T | 1433 | 0.250973 | 0         |  |
|     |      | Shiraz-25T | 1697 | 0.21945  | 0         |  |
|     |      | Shiraz-25T | 1697 | 0.21945  | 0         |  |
|     |      | Shiraz-28T | 1734 | 0.362882 | 0         |  |
|     |      | Shiraz-28T | 1734 | 0.362882 | 0         |  |
|     |      | Shiraz-29T | 1777 | 0.156747 | 0         |  |
|     |      | Shiraz-29T | 1777 | 0.156747 | 0         |  |
|     |      | Shiraz-38T | 1950 | 0.265916 | 0         |  |
|     |      | Shiraz-38T | 1950 | 0.265916 | 0         |  |
|     |      | Shiraz-71T | 2236 | 0.320072 | 0         |  |
|     |      | Shiraz-71T | 2236 | 0.320072 | 0         |  |
| OGT | chrX | Shiraz-4T  | 261  | 0        | -0.336249 |  |
|     |      | Shiraz-16T | 295  | 0.591657 | 0         |  |
|     |      | Shiraz-36T | 433  | 0        | -0.803961 |  |
|     |      | Shiraz-44T | 899  | 0        | -1.09697  |  |
|     |      | Shiraz-44T | 900  | 0        | -0.584284 |  |
|     |      | Shiraz-49T | 1170 | 0        | -0.967436 |  |
|     |      | Shiraz-49T | 1171 | 0        | -0.612379 |  |
|     |      | Shiraz-77T | 1283 | 0.296555 | 0         |  |
|     |      | Shiraz-18T | 1457 | 0.643204 | 0         |  |
|     |      | Shiraz-22T | 1673 | 0.611783 | 0         |  |
|     |      | Shiraz-22T | 1674 | 0.887899 | 0         |  |
|     |      | Shiraz-25T | 1719 | 0.472955 | 0         |  |
|     |      | Shiraz-28T | 1762 | 0.562311 | 0         |  |
|     |      | Shiraz-29T | 1801 | 0.815343 | 0         |  |

|       |      |            |      |          |           |  |
|-------|------|------------|------|----------|-----------|--|
|       |      | Shiraz-32T | 1870 | 0.729766 | 0         |  |
|       |      | Shiraz-35T | 1933 | 0.488535 | 0         |  |
|       |      | Shiraz-58T | 2223 | 0.833364 | 0         |  |
|       |      | Shiraz-58T | 2224 | 1.076575 | 0         |  |
|       |      | Shiraz-71T | 2263 | 0.975531 | 0         |  |
|       |      | Shiraz-4T  | 261  | 0        | -0.336249 |  |
|       |      | Shiraz-16T | 295  | 0.591657 | 0         |  |
|       |      | Shiraz-36T | 433  | 0        | -0.803961 |  |
|       |      | Shiraz-44T | 899  | 0        | -1.09697  |  |
|       |      | Shiraz-44T | 900  | 0        | -0.584284 |  |
|       |      | Shiraz-49T | 1170 | 0        | -0.967436 |  |
|       |      | Shiraz-49T | 1171 | 0        | -0.612379 |  |
|       |      | Shiraz-77T | 1283 | 0.296555 | 0         |  |
|       |      | Shiraz-18T | 1457 | 0.643204 | 0         |  |
|       |      | Shiraz-22T | 1673 | 0.611783 | 0         |  |
|       |      | Shiraz-22T | 1674 | 0.887899 | 0         |  |
|       |      | Shiraz-25T | 1719 | 0.472955 | 0         |  |
|       |      | Shiraz-28T | 1762 | 0.562311 | 0         |  |
|       |      | Shiraz-29T | 1801 | 0.815343 | 0         |  |
|       |      | Shiraz-32T | 1870 | 0.729766 | 0         |  |
|       |      | Shiraz-35T | 1933 | 0.488535 | 0         |  |
|       |      | Shiraz-58T | 2223 | 0.833364 | 0         |  |
|       |      | Shiraz-58T | 2224 | 1.076575 | 0         |  |
|       |      | Shiraz-71T | 2263 | 0.975531 | 0         |  |
|       |      | Shiraz-4T  | 261  | 0        | -0.336249 |  |
|       |      | Shiraz-16T | 295  | 0.591657 | 0         |  |
|       |      | Shiraz-36T | 433  | 0        | -0.803961 |  |
|       |      | Shiraz-44T | 899  | 0        | -1.09697  |  |
|       |      | Shiraz-44T | 900  | 0        | -0.584284 |  |
|       |      | Shiraz-49T | 1170 | 0        | -0.967436 |  |
|       |      | Shiraz-49T | 1171 | 0        | -0.612379 |  |
|       |      | Shiraz-77T | 1283 | 0.296555 | 0         |  |
|       |      | Shiraz-18T | 1457 | 0.643204 | 0         |  |
|       |      | Shiraz-22T | 1673 | 0.611783 | 0         |  |
|       |      | Shiraz-22T | 1674 | 0.887899 | 0         |  |
|       |      | Shiraz-25T | 1719 | 0.472955 | 0         |  |
|       |      | Shiraz-28T | 1762 | 0.562311 | 0         |  |
|       |      | Shiraz-29T | 1801 | 0.815343 | 0         |  |
|       |      | Shiraz-32T | 1870 | 0.729766 | 0         |  |
|       |      | Shiraz-35T | 1933 | 0.488535 | 0         |  |
|       |      | Shiraz-58T | 2223 | 0.833364 | 0         |  |
|       |      | Shiraz-58T | 2224 | 1.076575 | 0         |  |
|       |      | Shiraz-71T | 2263 | 0.975531 | 0         |  |
| OPHN1 | chrX | Shiraz-3T  | 241  | 0        | -0.230501 |  |
|       |      | Shiraz-4T  | 261  | 0        | -0.336249 |  |
|       |      | Shiraz-16T | 295  | 0.591657 | 0         |  |
|       |      | Shiraz-36T | 433  | 0        | -0.803961 |  |

|  |            |      |          |           |  |
|--|------------|------|----------|-----------|--|
|  | Shiraz-44T | 899  | 0        | -1.09697  |  |
|  | Shiraz-44T | 900  | 0        | -0.584284 |  |
|  | Shiraz-49T | 1170 | 0        | -0.967436 |  |
|  | Shiraz-18T | 1457 | 0.643204 | 0         |  |
|  | Shiraz-22T | 1673 | 0.611783 | 0         |  |
|  | Shiraz-22T | 1674 | 0.887899 | 0         |  |
|  | Shiraz-25T | 1719 | 0.472955 | 0         |  |
|  | Shiraz-28T | 1762 | 0.562311 | 0         |  |
|  | Shiraz-29T | 1801 | 0.815343 | 0         |  |
|  | Shiraz-32T | 1870 | 0.729766 | 0         |  |
|  | Shiraz-35T | 1933 | 0.488535 | 0         |  |
|  | Shiraz-58T | 2223 | 0.833364 | 0         |  |
|  | Shiraz-71T | 2263 | 0.975531 | 0         |  |
|  | Shiraz-3T  | 241  | 0        | -0.230501 |  |
|  | Shiraz-4T  | 261  | 0        | -0.336249 |  |
|  | Shiraz-16T | 295  | 0.591657 | 0         |  |
|  | Shiraz-36T | 433  | 0        | -0.803961 |  |
|  | Shiraz-44T | 899  | 0        | -1.09697  |  |
|  | Shiraz-44T | 900  | 0        | -0.584284 |  |
|  | Shiraz-49T | 1170 | 0        | -0.967436 |  |
|  | Shiraz-18T | 1457 | 0.643204 | 0         |  |
|  | Shiraz-22T | 1673 | 0.611783 | 0         |  |
|  | Shiraz-22T | 1674 | 0.887899 | 0         |  |
|  | Shiraz-25T | 1719 | 0.472955 | 0         |  |
|  | Shiraz-28T | 1762 | 0.562311 | 0         |  |
|  | Shiraz-29T | 1801 | 0.815343 | 0         |  |
|  | Shiraz-32T | 1870 | 0.729766 | 0         |  |
|  | Shiraz-35T | 1933 | 0.488535 | 0         |  |
|  | Shiraz-58T | 2223 | 0.833364 | 0         |  |
|  | Shiraz-71T | 2263 | 0.975531 | 0         |  |
|  | Shiraz-3T  | 241  | 0        | -0.230501 |  |
|  | Shiraz-4T  | 261  | 0        | -0.336249 |  |
|  | Shiraz-16T | 295  | 0.591657 | 0         |  |
|  | Shiraz-36T | 433  | 0        | -0.803961 |  |
|  | Shiraz-44T | 899  | 0        | -1.09697  |  |
|  | Shiraz-44T | 900  | 0        | -0.584284 |  |
|  | Shiraz-49T | 1170 | 0        | -0.967436 |  |
|  | Shiraz-18T | 1457 | 0.643204 | 0         |  |
|  | Shiraz-22T | 1673 | 0.611783 | 0         |  |
|  | Shiraz-22T | 1674 | 0.887899 | 0         |  |
|  | Shiraz-25T | 1719 | 0.472955 | 0         |  |
|  | Shiraz-28T | 1762 | 0.562311 | 0         |  |
|  | Shiraz-29T | 1801 | 0.815343 | 0         |  |
|  | Shiraz-32T | 1870 | 0.729766 | 0         |  |
|  | Shiraz-35T | 1933 | 0.488535 | 0         |  |
|  | Shiraz-58T | 2223 | 0.833364 | 0         |  |
|  | Shiraz-71T | 2263 | 0.975531 | 0         |  |

|        |      |            |      |          |           |  |  |
|--------|------|------------|------|----------|-----------|--|--|
| OPN1LW | chrX | Shiraz-3T  | 246  | 0.531858 | 0         |  |  |
|        |      | Shiraz-4T  | 261  | 0        | -0.336249 |  |  |
|        |      | Shiraz-16T | 295  | 0.591657 | 0         |  |  |
|        |      | Shiraz-36T | 433  | 0        | -0.803961 |  |  |
|        |      | Shiraz-42T | 480  | 0        | -0.232915 |  |  |
|        |      | Shiraz-44T | 908  | 0.466743 | 0         |  |  |
|        |      | Shiraz-49T | 1170 | 0        | -0.967436 |  |  |
|        |      | Shiraz-49T | 1173 | 0        | -0.704439 |  |  |
|        |      | Shiraz-9T  | 1370 | 0.690073 | 0         |  |  |
|        |      | Shiraz-9T  | 1371 | 1.292392 | 0         |  |  |
|        |      | Shiraz-18T | 1457 | 0.643204 | 0         |  |  |
|        |      | Shiraz-22T | 1673 | 0.611783 | 0         |  |  |
|        |      | Shiraz-22T | 1678 | 0.911625 | 0         |  |  |
|        |      | Shiraz-25T | 1719 | 0.472955 | 0         |  |  |
|        |      | Shiraz-28T | 1762 | 0.562311 | 0         |  |  |
|        |      | Shiraz-29T | 1801 | 0.815343 | 0         |  |  |
|        |      | Shiraz-32T | 1870 | 0.729766 | 0         |  |  |
|        |      | Shiraz-32T | 1872 | 1.504553 | 0         |  |  |
|        |      | Shiraz-35T | 1933 | 0.488535 | 0         |  |  |
|        |      | Shiraz-38T | 2011 | 0        | -0.406024 |  |  |
|        |      | Shiraz-53T | 2115 | 0.427728 | 0         |  |  |
|        |      | Shiraz-58T | 2223 | 0.833364 | 0         |  |  |
|        |      | Shiraz-58T | 2226 | 1.074663 | 0         |  |  |
|        |      | Shiraz-71T | 2263 | 0.975531 | 0         |  |  |
|        |      | Shiraz-3T  | 246  | 0.531858 | 0         |  |  |
|        |      | Shiraz-4T  | 261  | 0        | -0.336249 |  |  |
|        |      | Shiraz-16T | 295  | 0.591657 | 0         |  |  |
|        |      | Shiraz-36T | 433  | 0        | -0.803961 |  |  |
|        |      | Shiraz-42T | 480  | 0        | -0.232915 |  |  |
|        |      | Shiraz-44T | 908  | 0.466743 | 0         |  |  |
|        |      | Shiraz-49T | 1170 | 0        | -0.967436 |  |  |
|        |      | Shiraz-49T | 1173 | 0        | -0.704439 |  |  |
|        |      | Shiraz-9T  | 1370 | 0.690073 | 0         |  |  |
|        |      | Shiraz-9T  | 1371 | 1.292392 | 0         |  |  |
|        |      | Shiraz-18T | 1457 | 0.643204 | 0         |  |  |
|        |      | Shiraz-22T | 1673 | 0.611783 | 0         |  |  |
|        |      | Shiraz-22T | 1678 | 0.911625 | 0         |  |  |
|        |      | Shiraz-25T | 1719 | 0.472955 | 0         |  |  |
|        |      | Shiraz-28T | 1762 | 0.562311 | 0         |  |  |
|        |      | Shiraz-29T | 1801 | 0.815343 | 0         |  |  |
|        |      | Shiraz-32T | 1870 | 0.729766 | 0         |  |  |
|        |      | Shiraz-32T | 1872 | 1.504553 | 0         |  |  |
|        |      | Shiraz-35T | 1933 | 0.488535 | 0         |  |  |
|        |      | Shiraz-38T | 2011 | 0        | -0.406024 |  |  |
|        |      | Shiraz-53T | 2115 | 0.427728 | 0         |  |  |
|        |      | Shiraz-58T | 2223 | 0.833364 | 0         |  |  |
|        |      | Shiraz-58T | 2226 | 1.074663 | 0         |  |  |

|        |      |            |      |          |           |  |  |
|--------|------|------------|------|----------|-----------|--|--|
|        |      | Shiraz-71T | 2263 | 0.975531 | 0         |  |  |
|        |      | Shiraz-3T  | 246  | 0.531858 | 0         |  |  |
|        |      | Shiraz-4T  | 261  | 0        | -0.336249 |  |  |
|        |      | Shiraz-16T | 295  | 0.591657 | 0         |  |  |
|        |      | Shiraz-36T | 433  | 0        | -0.803961 |  |  |
|        |      | Shiraz-42T | 480  | 0        | -0.232915 |  |  |
|        |      | Shiraz-44T | 908  | 0.466743 | 0         |  |  |
|        |      | Shiraz-49T | 1170 | 0        | -0.967436 |  |  |
|        |      | Shiraz-49T | 1173 | 0        | -0.704439 |  |  |
|        |      | Shiraz-9T  | 1370 | 0.690073 | 0         |  |  |
|        |      | Shiraz-9T  | 1371 | 1.292392 | 0         |  |  |
|        |      | Shiraz-18T | 1457 | 0.643204 | 0         |  |  |
|        |      | Shiraz-22T | 1673 | 0.611783 | 0         |  |  |
|        |      | Shiraz-22T | 1678 | 0.911625 | 0         |  |  |
|        |      | Shiraz-25T | 1719 | 0.472955 | 0         |  |  |
|        |      | Shiraz-28T | 1762 | 0.562311 | 0         |  |  |
|        |      | Shiraz-29T | 1801 | 0.815343 | 0         |  |  |
|        |      | Shiraz-32T | 1870 | 0.729766 | 0         |  |  |
|        |      | Shiraz-32T | 1872 | 1.504553 | 0         |  |  |
|        |      | Shiraz-35T | 1933 | 0.488535 | 0         |  |  |
|        |      | Shiraz-38T | 2011 | 0        | -0.406024 |  |  |
|        |      | Shiraz-53T | 2115 | 0.427728 | 0         |  |  |
|        |      | Shiraz-58T | 2223 | 0.833364 | 0         |  |  |
|        |      | Shiraz-58T | 2226 | 1.074663 | 0         |  |  |
|        |      | Shiraz-71T | 2263 | 0.975531 | 0         |  |  |
| OPN1MW | chrX | Shiraz-3T  | 246  | 0.531858 | 0         |  |  |
|        |      | Shiraz-3T  | 246  | 0.531858 | 0         |  |  |
|        |      | Shiraz-4T  | 261  | 0        | -0.336249 |  |  |
|        |      | Shiraz-4T  | 261  | 0        | -0.336249 |  |  |
|        |      | Shiraz-16T | 295  | 0.591657 | 0         |  |  |
|        |      | Shiraz-16T | 295  | 0.591657 | 0         |  |  |
|        |      | Shiraz-36T | 433  | 0        | -0.803961 |  |  |
|        |      | Shiraz-36T | 433  | 0        | -0.803961 |  |  |
|        |      | Shiraz-42T | 480  | 0        | -0.232915 |  |  |
|        |      | Shiraz-42T | 480  | 0        | -0.232915 |  |  |
|        |      | Shiraz-44T | 908  | 0.466743 | 0         |  |  |
|        |      | Shiraz-44T | 908  | 0.466743 | 0         |  |  |
|        |      | Shiraz-49T | 1170 | 0        | -0.967436 |  |  |
|        |      | Shiraz-49T | 1170 | 0        | -0.967436 |  |  |
|        |      | Shiraz-49T | 1173 | 0        | -0.704439 |  |  |
|        |      | Shiraz-49T | 1173 | 0        | -0.704439 |  |  |
|        |      | Shiraz-9T  | 1370 | 0.690073 | 0         |  |  |
|        |      | Shiraz-9T  | 1370 | 0.690073 | 0         |  |  |
|        |      | Shiraz-9T  | 1371 | 1.292392 | 0         |  |  |
|        |      | Shiraz-9T  | 1371 | 1.292392 | 0         |  |  |
|        |      | Shiraz-18T | 1457 | 0.643204 | 0         |  |  |
|        |      | Shiraz-18T | 1457 | 0.643204 | 0         |  |  |

|  |  |            |      |          |           |  |  |
|--|--|------------|------|----------|-----------|--|--|
|  |  | Shiraz-22T | 1673 | 0.611783 | 0         |  |  |
|  |  | Shiraz-22T | 1673 | 0.611783 | 0         |  |  |
|  |  | Shiraz-22T | 1678 | 0.911625 | 0         |  |  |
|  |  | Shiraz-22T | 1678 | 0.911625 | 0         |  |  |
|  |  | Shiraz-25T | 1719 | 0.472955 | 0         |  |  |
|  |  | Shiraz-25T | 1719 | 0.472955 | 0         |  |  |
|  |  | Shiraz-28T | 1762 | 0.562311 | 0         |  |  |
|  |  | Shiraz-28T | 1762 | 0.562311 | 0         |  |  |
|  |  | Shiraz-29T | 1801 | 0.815343 | 0         |  |  |
|  |  | Shiraz-29T | 1801 | 0.815343 | 0         |  |  |
|  |  | Shiraz-32T | 1870 | 0.729766 | 0         |  |  |
|  |  | Shiraz-32T | 1870 | 0.729766 | 0         |  |  |
|  |  | Shiraz-32T | 1872 | 1.504553 | 0         |  |  |
|  |  | Shiraz-32T | 1872 | 1.504553 | 0         |  |  |
|  |  | Shiraz-35T | 1933 | 0.488535 | 0         |  |  |
|  |  | Shiraz-35T | 1933 | 0.488535 | 0         |  |  |
|  |  | Shiraz-38T | 2011 | 0        | -0.406024 |  |  |
|  |  | Shiraz-38T | 2011 | 0        | -0.406024 |  |  |
|  |  | Shiraz-53T | 2115 | 0.427728 | 0         |  |  |
|  |  | Shiraz-53T | 2115 | 0.427728 | 0         |  |  |
|  |  | Shiraz-58T | 2223 | 0.833364 | 0         |  |  |
|  |  | Shiraz-58T | 2223 | 0.833364 | 0         |  |  |
|  |  | Shiraz-58T | 2226 | 1.074663 | 0         |  |  |
|  |  | Shiraz-58T | 2226 | 1.074663 | 0         |  |  |
|  |  | Shiraz-71T | 2263 | 0.975531 | 0         |  |  |
|  |  | Shiraz-71T | 2263 | 0.975531 | 0         |  |  |
|  |  | Shiraz-3T  | 246  | 0.531858 | 0         |  |  |
|  |  | Shiraz-3T  | 246  | 0.531858 | 0         |  |  |
|  |  | Shiraz-4T  | 261  | 0        | -0.336249 |  |  |
|  |  | Shiraz-4T  | 261  | 0        | -0.336249 |  |  |
|  |  | Shiraz-16T | 295  | 0.591657 | 0         |  |  |
|  |  | Shiraz-16T | 295  | 0.591657 | 0         |  |  |
|  |  | Shiraz-36T | 433  | 0        | -0.803961 |  |  |
|  |  | Shiraz-36T | 433  | 0        | -0.803961 |  |  |
|  |  | Shiraz-42T | 480  | 0        | -0.232915 |  |  |
|  |  | Shiraz-42T | 480  | 0        | -0.232915 |  |  |
|  |  | Shiraz-44T | 908  | 0.466743 | 0         |  |  |
|  |  | Shiraz-44T | 908  | 0.466743 | 0         |  |  |
|  |  | Shiraz-49T | 1170 | 0        | -0.967436 |  |  |
|  |  | Shiraz-49T | 1170 | 0        | -0.967436 |  |  |
|  |  | Shiraz-49T | 1173 | 0        | -0.704439 |  |  |
|  |  | Shiraz-49T | 1173 | 0        | -0.704439 |  |  |
|  |  | Shiraz-9T  | 1370 | 0.690073 | 0         |  |  |
|  |  | Shiraz-9T  | 1370 | 0.690073 | 0         |  |  |
|  |  | Shiraz-9T  | 1371 | 1.292392 | 0         |  |  |
|  |  | Shiraz-9T  | 1371 | 1.292392 | 0         |  |  |
|  |  | Shiraz-18T | 1457 | 0.643204 | 0         |  |  |

|  |  |            |      |          |           |  |  |
|--|--|------------|------|----------|-----------|--|--|
|  |  | Shiraz-18T | 1457 | 0.643204 | 0         |  |  |
|  |  | Shiraz-22T | 1673 | 0.611783 | 0         |  |  |
|  |  | Shiraz-22T | 1673 | 0.611783 | 0         |  |  |
|  |  | Shiraz-22T | 1678 | 0.911625 | 0         |  |  |
|  |  | Shiraz-22T | 1678 | 0.911625 | 0         |  |  |
|  |  | Shiraz-25T | 1719 | 0.472955 | 0         |  |  |
|  |  | Shiraz-25T | 1719 | 0.472955 | 0         |  |  |
|  |  | Shiraz-28T | 1762 | 0.562311 | 0         |  |  |
|  |  | Shiraz-28T | 1762 | 0.562311 | 0         |  |  |
|  |  | Shiraz-29T | 1801 | 0.815343 | 0         |  |  |
|  |  | Shiraz-29T | 1801 | 0.815343 | 0         |  |  |
|  |  | Shiraz-32T | 1870 | 0.729766 | 0         |  |  |
|  |  | Shiraz-32T | 1870 | 0.729766 | 0         |  |  |
|  |  | Shiraz-32T | 1872 | 1.504553 | 0         |  |  |
|  |  | Shiraz-32T | 1872 | 1.504553 | 0         |  |  |
|  |  | Shiraz-35T | 1933 | 0.488535 | 0         |  |  |
|  |  | Shiraz-35T | 1933 | 0.488535 | 0         |  |  |
|  |  | Shiraz-38T | 2011 | 0        | -0.406024 |  |  |
|  |  | Shiraz-38T | 2011 | 0        | -0.406024 |  |  |
|  |  | Shiraz-53T | 2115 | 0.427728 | 0         |  |  |
|  |  | Shiraz-53T | 2115 | 0.427728 | 0         |  |  |
|  |  | Shiraz-58T | 2223 | 0.833364 | 0         |  |  |
|  |  | Shiraz-58T | 2223 | 0.833364 | 0         |  |  |
|  |  | Shiraz-58T | 2226 | 1.074663 | 0         |  |  |
|  |  | Shiraz-58T | 2226 | 1.074663 | 0         |  |  |
|  |  | Shiraz-71T | 2263 | 0.975531 | 0         |  |  |
|  |  | Shiraz-71T | 2263 | 0.975531 | 0         |  |  |
|  |  | Shiraz-3T  | 246  | 0.531858 | 0         |  |  |
|  |  | Shiraz-3T  | 246  | 0.531858 | 0         |  |  |
|  |  | Shiraz-4T  | 261  | 0        | -0.336249 |  |  |
|  |  | Shiraz-4T  | 261  | 0        | -0.336249 |  |  |
|  |  | Shiraz-16T | 295  | 0.591657 | 0         |  |  |
|  |  | Shiraz-16T | 295  | 0.591657 | 0         |  |  |
|  |  | Shiraz-36T | 433  | 0        | -0.803961 |  |  |
|  |  | Shiraz-36T | 433  | 0        | -0.803961 |  |  |
|  |  | Shiraz-42T | 480  | 0        | -0.232915 |  |  |
|  |  | Shiraz-42T | 480  | 0        | -0.232915 |  |  |
|  |  | Shiraz-44T | 908  | 0.466743 | 0         |  |  |
|  |  | Shiraz-44T | 908  | 0.466743 | 0         |  |  |
|  |  | Shiraz-49T | 1170 | 0        | -0.967436 |  |  |
|  |  | Shiraz-49T | 1170 | 0        | -0.967436 |  |  |
|  |  | Shiraz-49T | 1173 | 0        | -0.704439 |  |  |
|  |  | Shiraz-49T | 1173 | 0        | -0.704439 |  |  |
|  |  | Shiraz-9T  | 1370 | 0.690073 | 0         |  |  |
|  |  | Shiraz-9T  | 1370 | 0.690073 | 0         |  |  |
|  |  | Shiraz-9T  | 1371 | 1.292392 | 0         |  |  |
|  |  | Shiraz-9T  | 1371 | 1.292392 | 0         |  |  |

|         |      |            |      |          |           |  |
|---------|------|------------|------|----------|-----------|--|
|         |      | Shiraz-18T | 1457 | 0.643204 | 0         |  |
|         |      | Shiraz-18T | 1457 | 0.643204 | 0         |  |
|         |      | Shiraz-22T | 1673 | 0.611783 | 0         |  |
|         |      | Shiraz-22T | 1673 | 0.611783 | 0         |  |
|         |      | Shiraz-22T | 1678 | 0.911625 | 0         |  |
|         |      | Shiraz-22T | 1678 | 0.911625 | 0         |  |
|         |      | Shiraz-25T | 1719 | 0.472955 | 0         |  |
|         |      | Shiraz-25T | 1719 | 0.472955 | 0         |  |
|         |      | Shiraz-28T | 1762 | 0.562311 | 0         |  |
|         |      | Shiraz-28T | 1762 | 0.562311 | 0         |  |
|         |      | Shiraz-29T | 1801 | 0.815343 | 0         |  |
|         |      | Shiraz-29T | 1801 | 0.815343 | 0         |  |
|         |      | Shiraz-32T | 1870 | 0.729766 | 0         |  |
|         |      | Shiraz-32T | 1870 | 0.729766 | 0         |  |
|         |      | Shiraz-32T | 1872 | 1.504553 | 0         |  |
|         |      | Shiraz-32T | 1872 | 1.504553 | 0         |  |
|         |      | Shiraz-35T | 1933 | 0.488535 | 0         |  |
|         |      | Shiraz-35T | 1933 | 0.488535 | 0         |  |
|         |      | Shiraz-38T | 2011 | 0        | -0.406024 |  |
|         |      | Shiraz-38T | 2011 | 0        | -0.406024 |  |
|         |      | Shiraz-53T | 2115 | 0.427728 | 0         |  |
|         |      | Shiraz-53T | 2115 | 0.427728 | 0         |  |
|         |      | Shiraz-58T | 2223 | 0.833364 | 0         |  |
|         |      | Shiraz-58T | 2223 | 0.833364 | 0         |  |
|         |      | Shiraz-58T | 2226 | 1.074663 | 0         |  |
|         |      | Shiraz-58T | 2226 | 1.074663 | 0         |  |
|         |      | Shiraz-71T | 2263 | 0.975531 | 0         |  |
|         |      | Shiraz-71T | 2263 | 0.975531 | 0         |  |
| OPN1MW2 | chrX | Shiraz-3T  | 246  | 0.531858 | 0         |  |
|         |      | Shiraz-3T  | 246  | 0.531858 | 0         |  |
|         |      | Shiraz-4T  | 261  | 0        | -0.336249 |  |
|         |      | Shiraz-4T  | 261  | 0        | -0.336249 |  |
|         |      | Shiraz-16T | 295  | 0.591657 | 0         |  |
|         |      | Shiraz-16T | 295  | 0.591657 | 0         |  |
|         |      | Shiraz-36T | 433  | 0        | -0.803961 |  |
|         |      | Shiraz-36T | 433  | 0        | -0.803961 |  |
|         |      | Shiraz-42T | 480  | 0        | -0.232915 |  |
|         |      | Shiraz-42T | 480  | 0        | -0.232915 |  |
|         |      | Shiraz-44T | 908  | 0.466743 | 0         |  |
|         |      | Shiraz-44T | 908  | 0.466743 | 0         |  |
|         |      | Shiraz-49T | 1170 | 0        | -0.967436 |  |
|         |      | Shiraz-49T | 1170 | 0        | -0.967436 |  |
|         |      | Shiraz-49T | 1173 | 0        | -0.704439 |  |
|         |      | Shiraz-49T | 1173 | 0        | -0.704439 |  |
|         |      | Shiraz-9T  | 1370 | 0.690073 | 0         |  |
|         |      | Shiraz-9T  | 1370 | 0.690073 | 0         |  |
|         |      | Shiraz-9T  | 1371 | 1.292392 | 0         |  |



|  |  |            |      |          |           |  |
|--|--|------------|------|----------|-----------|--|
|  |  | Shiraz-9T  | 1371 | 1.292392 | 0         |  |
|  |  | Shiraz-18T | 1457 | 0.643204 | 0         |  |
|  |  | Shiraz-18T | 1457 | 0.643204 | 0         |  |
|  |  | Shiraz-22T | 1673 | 0.611783 | 0         |  |
|  |  | Shiraz-22T | 1673 | 0.611783 | 0         |  |
|  |  | Shiraz-22T | 1678 | 0.911625 | 0         |  |
|  |  | Shiraz-22T | 1678 | 0.911625 | 0         |  |
|  |  | Shiraz-25T | 1719 | 0.472955 | 0         |  |
|  |  | Shiraz-25T | 1719 | 0.472955 | 0         |  |
|  |  | Shiraz-28T | 1762 | 0.562311 | 0         |  |
|  |  | Shiraz-28T | 1762 | 0.562311 | 0         |  |
|  |  | Shiraz-29T | 1801 | 0.815343 | 0         |  |
|  |  | Shiraz-29T | 1801 | 0.815343 | 0         |  |
|  |  | Shiraz-32T | 1870 | 0.729766 | 0         |  |
|  |  | Shiraz-32T | 1870 | 0.729766 | 0         |  |
|  |  | Shiraz-32T | 1872 | 1.504553 | 0         |  |
|  |  | Shiraz-32T | 1872 | 1.504553 | 0         |  |
|  |  | Shiraz-35T | 1933 | 0.488535 | 0         |  |
|  |  | Shiraz-35T | 1933 | 0.488535 | 0         |  |
|  |  | Shiraz-38T | 2011 | 0        | -0.406024 |  |
|  |  | Shiraz-38T | 2011 | 0        | -0.406024 |  |
|  |  | Shiraz-53T | 2115 | 0.427728 | 0         |  |
|  |  | Shiraz-53T | 2115 | 0.427728 | 0         |  |
|  |  | Shiraz-58T | 2223 | 0.833364 | 0         |  |
|  |  | Shiraz-58T | 2223 | 0.833364 | 0         |  |
|  |  | Shiraz-58T | 2226 | 1.074663 | 0         |  |
|  |  | Shiraz-58T | 2226 | 1.074663 | 0         |  |
|  |  | Shiraz-71T | 2263 | 0.975531 | 0         |  |
|  |  | Shiraz-71T | 2263 | 0.975531 | 0         |  |
|  |  | Shiraz-3T  | 246  | 0.531858 | 0         |  |
|  |  | Shiraz-3T  | 246  | 0.531858 | 0         |  |
|  |  | Shiraz-4T  | 261  | 0        | -0.336249 |  |
|  |  | Shiraz-4T  | 261  | 0        | -0.336249 |  |
|  |  | Shiraz-16T | 295  | 0.591657 | 0         |  |
|  |  | Shiraz-16T | 295  | 0.591657 | 0         |  |
|  |  | Shiraz-36T | 433  | 0        | -0.803961 |  |
|  |  | Shiraz-36T | 433  | 0        | -0.803961 |  |
|  |  | Shiraz-42T | 480  | 0        | -0.232915 |  |
|  |  | Shiraz-42T | 480  | 0        | -0.232915 |  |
|  |  | Shiraz-44T | 908  | 0.466743 | 0         |  |
|  |  | Shiraz-44T | 908  | 0.466743 | 0         |  |
|  |  | Shiraz-49T | 1170 | 0        | -0.967436 |  |
|  |  | Shiraz-49T | 1170 | 0        | -0.967436 |  |
|  |  | Shiraz-49T | 1173 | 0        | -0.704439 |  |
|  |  | Shiraz-49T | 1173 | 0        | -0.704439 |  |
|  |  | Shiraz-9T  | 1370 | 0.690073 | 0         |  |
|  |  | Shiraz-9T  | 1370 | 0.690073 | 0         |  |

|  |  |            |      |          |           |  |
|--|--|------------|------|----------|-----------|--|
|  |  | Shiraz-9T  | 1371 | 1.292392 | 0         |  |
|  |  | Shiraz-9T  | 1371 | 1.292392 | 0         |  |
|  |  | Shiraz-18T | 1457 | 0.643204 | 0         |  |
|  |  | Shiraz-18T | 1457 | 0.643204 | 0         |  |
|  |  | Shiraz-22T | 1673 | 0.611783 | 0         |  |
|  |  | Shiraz-22T | 1673 | 0.611783 | 0         |  |
|  |  | Shiraz-22T | 1678 | 0.911625 | 0         |  |
|  |  | Shiraz-22T | 1678 | 0.911625 | 0         |  |
|  |  | Shiraz-25T | 1719 | 0.472955 | 0         |  |
|  |  | Shiraz-25T | 1719 | 0.472955 | 0         |  |
|  |  | Shiraz-28T | 1762 | 0.562311 | 0         |  |
|  |  | Shiraz-28T | 1762 | 0.562311 | 0         |  |
|  |  | Shiraz-29T | 1801 | 0.815343 | 0         |  |
|  |  | Shiraz-29T | 1801 | 0.815343 | 0         |  |
|  |  | Shiraz-32T | 1870 | 0.729766 | 0         |  |
|  |  | Shiraz-32T | 1870 | 0.729766 | 0         |  |
|  |  | Shiraz-32T | 1872 | 1.504553 | 0         |  |
|  |  | Shiraz-32T | 1872 | 1.504553 | 0         |  |
|  |  | Shiraz-35T | 1933 | 0.488535 | 0         |  |
|  |  | Shiraz-35T | 1933 | 0.488535 | 0         |  |
|  |  | Shiraz-38T | 2011 | 0        | -0.406024 |  |
|  |  | Shiraz-38T | 2011 | 0        | -0.406024 |  |
|  |  | Shiraz-53T | 2115 | 0.427728 | 0         |  |
|  |  | Shiraz-53T | 2115 | 0.427728 | 0         |  |
|  |  | Shiraz-58T | 2223 | 0.833364 | 0         |  |
|  |  | Shiraz-58T | 2223 | 0.833364 | 0         |  |
|  |  | Shiraz-58T | 2226 | 1.074663 | 0         |  |
|  |  | Shiraz-58T | 2226 | 1.074663 | 0         |  |
|  |  | Shiraz-71T | 2263 | 0.975531 | 0         |  |
|  |  | Shiraz-71T | 2263 | 0.975531 | 0         |  |
|  |  | Shiraz-3T  | 246  | 0.531858 | 0         |  |
|  |  | Shiraz-3T  | 246  | 0.531858 | 0         |  |
|  |  | Shiraz-4T  | 261  | 0        | -0.336249 |  |
|  |  | Shiraz-4T  | 261  | 0        | -0.336249 |  |
|  |  | Shiraz-16T | 295  | 0.591657 | 0         |  |
|  |  | Shiraz-16T | 295  | 0.591657 | 0         |  |
|  |  | Shiraz-36T | 433  | 0        | -0.803961 |  |
|  |  | Shiraz-36T | 433  | 0        | -0.803961 |  |
|  |  | Shiraz-42T | 480  | 0        | -0.232915 |  |
|  |  | Shiraz-42T | 480  | 0        | -0.232915 |  |
|  |  | Shiraz-44T | 908  | 0.466743 | 0         |  |
|  |  | Shiraz-44T | 908  | 0.466743 | 0         |  |
|  |  | Shiraz-49T | 1170 | 0        | -0.967436 |  |
|  |  | Shiraz-49T | 1170 | 0        | -0.967436 |  |
|  |  | Shiraz-49T | 1173 | 0        | -0.704439 |  |
|  |  | Shiraz-49T | 1173 | 0        | -0.704439 |  |
|  |  | Shiraz-9T  | 1370 | 0.690073 | 0         |  |

|        |      |            |      |          |           |  |
|--------|------|------------|------|----------|-----------|--|
|        |      | Shiraz-9T  | 1370 | 0.690073 | 0         |  |
|        |      | Shiraz-9T  | 1371 | 1.292392 | 0         |  |
|        |      | Shiraz-9T  | 1371 | 1.292392 | 0         |  |
|        |      | Shiraz-18T | 1457 | 0.643204 | 0         |  |
|        |      | Shiraz-18T | 1457 | 0.643204 | 0         |  |
|        |      | Shiraz-22T | 1673 | 0.611783 | 0         |  |
|        |      | Shiraz-22T | 1673 | 0.611783 | 0         |  |
|        |      | Shiraz-22T | 1678 | 0.911625 | 0         |  |
|        |      | Shiraz-22T | 1678 | 0.911625 | 0         |  |
|        |      | Shiraz-25T | 1719 | 0.472955 | 0         |  |
|        |      | Shiraz-25T | 1719 | 0.472955 | 0         |  |
|        |      | Shiraz-28T | 1762 | 0.562311 | 0         |  |
|        |      | Shiraz-28T | 1762 | 0.562311 | 0         |  |
|        |      | Shiraz-29T | 1801 | 0.815343 | 0         |  |
|        |      | Shiraz-29T | 1801 | 0.815343 | 0         |  |
|        |      | Shiraz-32T | 1870 | 0.729766 | 0         |  |
|        |      | Shiraz-32T | 1870 | 0.729766 | 0         |  |
|        |      | Shiraz-32T | 1872 | 1.504553 | 0         |  |
|        |      | Shiraz-32T | 1872 | 1.504553 | 0         |  |
|        |      | Shiraz-35T | 1933 | 0.488535 | 0         |  |
|        |      | Shiraz-35T | 1933 | 0.488535 | 0         |  |
|        |      | Shiraz-38T | 2011 | 0        | -0.406024 |  |
|        |      | Shiraz-38T | 2011 | 0        | -0.406024 |  |
|        |      | Shiraz-53T | 2115 | 0.427728 | 0         |  |
|        |      | Shiraz-53T | 2115 | 0.427728 | 0         |  |
|        |      | Shiraz-58T | 2223 | 0.833364 | 0         |  |
|        |      | Shiraz-58T | 2223 | 0.833364 | 0         |  |
|        |      | Shiraz-58T | 2226 | 1.074663 | 0         |  |
|        |      | Shiraz-58T | 2226 | 1.074663 | 0         |  |
|        |      | Shiraz-71T | 2263 | 0.975531 | 0         |  |
|        |      | Shiraz-71T | 2263 | 0.975531 | 0         |  |
| OPN1SW | chr7 | Shiraz-3T  | 90   | 0.219276 | 0         |  |
|        |      | Shiraz-3T  | 96   | 0.428308 | 0         |  |
|        |      | Shiraz-4T  | 253  | 0.372918 | 0         |  |
|        |      | Shiraz-31T | 317  | 0.204382 | 0         |  |
|        |      | Shiraz-36T | 378  | 0.179558 | 0         |  |
|        |      | Shiraz-44T | 642  | 0.408617 | 0         |  |
|        |      | Shiraz-46T | 943  | 0.093799 | 0         |  |
|        |      | Shiraz-47T | 1032 | 0.171484 | 0         |  |
|        |      | Shiraz-77T | 1225 | 0        | -0.117922 |  |
|        |      | Shiraz-77T | 1229 | 0.051661 | 0         |  |
|        |      | Shiraz-9T  | 1325 | 0.221899 | 0         |  |
|        |      | Shiraz-18T | 1434 | 0.244465 | 0         |  |
|        |      | Shiraz-25T | 1698 | 0.21835  | 0         |  |
|        |      | Shiraz-28T | 1735 | 0.350744 | 0         |  |
|        |      | Shiraz-29T | 1778 | 0.120767 | 0         |  |
|        |      | Shiraz-32T | 1833 | 0.551336 | 0         |  |

|        |      |            |      |          |           |  |
|--------|------|------------|------|----------|-----------|--|
|        |      | Shiraz-38T | 1951 | 0.250891 | 0         |  |
|        |      | Shiraz-53T | 2078 | 0.287202 | 0         |  |
|        |      | Shiraz-71T | 2238 | 0.603631 | 0         |  |
|        |      | Shiraz-3T  | 90   | 0.219276 | 0         |  |
|        |      | Shiraz-3T  | 96   | 0.428308 | 0         |  |
|        |      | Shiraz-4T  | 253  | 0.372918 | 0         |  |
|        |      | Shiraz-31T | 317  | 0.204382 | 0         |  |
|        |      | Shiraz-36T | 378  | 0.179558 | 0         |  |
|        |      | Shiraz-44T | 642  | 0.408617 | 0         |  |
|        |      | Shiraz-46T | 943  | 0.093799 | 0         |  |
|        |      | Shiraz-47T | 1032 | 0.171484 | 0         |  |
|        |      | Shiraz-77T | 1225 | 0        | -0.117922 |  |
|        |      | Shiraz-77T | 1229 | 0.051661 | 0         |  |
|        |      | Shiraz-9T  | 1325 | 0.221899 | 0         |  |
|        |      | Shiraz-18T | 1434 | 0.244465 | 0         |  |
|        |      | Shiraz-25T | 1698 | 0.21835  | 0         |  |
|        |      | Shiraz-28T | 1735 | 0.350744 | 0         |  |
|        |      | Shiraz-29T | 1778 | 0.120767 | 0         |  |
|        |      | Shiraz-32T | 1833 | 0.551336 | 0         |  |
|        |      | Shiraz-38T | 1951 | 0.250891 | 0         |  |
|        |      | Shiraz-53T | 2078 | 0.287202 | 0         |  |
|        |      | Shiraz-71T | 2238 | 0.603631 | 0         |  |
|        |      | Shiraz-3T  | 90   | 0.219276 | 0         |  |
|        |      | Shiraz-3T  | 96   | 0.428308 | 0         |  |
|        |      | Shiraz-4T  | 253  | 0.372918 | 0         |  |
|        |      | Shiraz-31T | 317  | 0.204382 | 0         |  |
|        |      | Shiraz-36T | 378  | 0.179558 | 0         |  |
|        |      | Shiraz-44T | 642  | 0.408617 | 0         |  |
|        |      | Shiraz-46T | 943  | 0.093799 | 0         |  |
|        |      | Shiraz-47T | 1032 | 0.171484 | 0         |  |
|        |      | Shiraz-77T | 1225 | 0        | -0.117922 |  |
|        |      | Shiraz-77T | 1229 | 0.051661 | 0         |  |
|        |      | Shiraz-9T  | 1325 | 0.221899 | 0         |  |
|        |      | Shiraz-18T | 1434 | 0.244465 | 0         |  |
|        |      | Shiraz-25T | 1698 | 0.21835  | 0         |  |
|        |      | Shiraz-28T | 1735 | 0.350744 | 0         |  |
|        |      | Shiraz-29T | 1778 | 0.120767 | 0         |  |
|        |      | Shiraz-32T | 1833 | 0.551336 | 0         |  |
|        |      | Shiraz-38T | 1951 | 0.250891 | 0         |  |
|        |      | Shiraz-53T | 2078 | 0.287202 | 0         |  |
|        |      | Shiraz-71T | 2238 | 0.603631 | 0         |  |
| OR13H1 | chrX | Shiraz-3T  | 242  | 0        | -0.336434 |  |
|        |      | Shiraz-4T  | 261  | 0        | -0.336249 |  |
|        |      | Shiraz-16T | 295  | 0.591657 | 0         |  |
|        |      | Shiraz-36T | 433  | 0        | -0.803961 |  |
|        |      | Shiraz-44T | 899  | 0        | -1.09697  |  |
|        |      | Shiraz-49T | 1170 | 0        | -0.967436 |  |

|       |      |            |      |          |           |  |  |
|-------|------|------------|------|----------|-----------|--|--|
|       |      | Shiraz-9T  | 1370 | 0.690073 | 0         |  |  |
|       |      | Shiraz-18T | 1457 | 0.643204 | 0         |  |  |
|       |      | Shiraz-22T | 1673 | 0.611783 | 0         |  |  |
|       |      | Shiraz-22T | 1677 | 0.789711 | 0         |  |  |
|       |      | Shiraz-25T | 1719 | 0.472955 | 0         |  |  |
|       |      | Shiraz-28T | 1762 | 0.562311 | 0         |  |  |
|       |      | Shiraz-29T | 1801 | 0.815343 | 0         |  |  |
|       |      | Shiraz-32T | 1870 | 0.729766 | 0         |  |  |
|       |      | Shiraz-35T | 1933 | 0.488535 | 0         |  |  |
|       |      | Shiraz-58T | 2223 | 0.833364 | 0         |  |  |
|       |      | Shiraz-71T | 2263 | 0.975531 | 0         |  |  |
|       |      | Shiraz-3T  | 242  | 0        | -0.336434 |  |  |
|       |      | Shiraz-4T  | 261  | 0        | -0.336249 |  |  |
|       |      | Shiraz-16T | 295  | 0.591657 | 0         |  |  |
|       |      | Shiraz-36T | 433  | 0        | -0.803961 |  |  |
|       |      | Shiraz-44T | 899  | 0        | -1.09697  |  |  |
|       |      | Shiraz-49T | 1170 | 0        | -0.967436 |  |  |
|       |      | Shiraz-9T  | 1370 | 0.690073 | 0         |  |  |
|       |      | Shiraz-18T | 1457 | 0.643204 | 0         |  |  |
|       |      | Shiraz-22T | 1673 | 0.611783 | 0         |  |  |
|       |      | Shiraz-22T | 1677 | 0.789711 | 0         |  |  |
|       |      | Shiraz-25T | 1719 | 0.472955 | 0         |  |  |
|       |      | Shiraz-28T | 1762 | 0.562311 | 0         |  |  |
|       |      | Shiraz-29T | 1801 | 0.815343 | 0         |  |  |
|       |      | Shiraz-32T | 1870 | 0.729766 | 0         |  |  |
|       |      | Shiraz-35T | 1933 | 0.488535 | 0         |  |  |
|       |      | Shiraz-58T | 2223 | 0.833364 | 0         |  |  |
|       |      | Shiraz-71T | 2263 | 0.975531 | 0         |  |  |
|       |      | Shiraz-3T  | 242  | 0        | -0.336434 |  |  |
|       |      | Shiraz-4T  | 261  | 0        | -0.336249 |  |  |
|       |      | Shiraz-16T | 295  | 0.591657 | 0         |  |  |
|       |      | Shiraz-36T | 433  | 0        | -0.803961 |  |  |
|       |      | Shiraz-44T | 899  | 0        | -1.09697  |  |  |
|       |      | Shiraz-49T | 1170 | 0        | -0.967436 |  |  |
|       |      | Shiraz-9T  | 1370 | 0.690073 | 0         |  |  |
|       |      | Shiraz-18T | 1457 | 0.643204 | 0         |  |  |
|       |      | Shiraz-22T | 1673 | 0.611783 | 0         |  |  |
|       |      | Shiraz-22T | 1677 | 0.789711 | 0         |  |  |
|       |      | Shiraz-25T | 1719 | 0.472955 | 0         |  |  |
|       |      | Shiraz-28T | 1762 | 0.562311 | 0         |  |  |
|       |      | Shiraz-29T | 1801 | 0.815343 | 0         |  |  |
|       |      | Shiraz-32T | 1870 | 0.729766 | 0         |  |  |
|       |      | Shiraz-35T | 1933 | 0.488535 | 0         |  |  |
|       |      | Shiraz-58T | 2223 | 0.833364 | 0         |  |  |
|       |      | Shiraz-71T | 2263 | 0.975531 | 0         |  |  |
| OR2A1 | chr7 | Shiraz-3T  | 90   | 0.219276 | 0         |  |  |
|       |      | Shiraz-3T  | 90   | 0.219276 | 0         |  |  |

|  |            |      |          |           |  |
|--|------------|------|----------|-----------|--|
|  | Shiraz-3T  | 98   | 0        | -0.069276 |  |
|  | Shiraz-3T  | 98   | 0        | -0.069276 |  |
|  | Shiraz-4T  | 253  | 0.372918 | 0         |  |
|  | Shiraz-4T  | 253  | 0.372918 | 0         |  |
|  | Shiraz-36T | 378  | 0.179558 | 0         |  |
|  | Shiraz-36T | 378  | 0.179558 | 0         |  |
|  | Shiraz-44T | 645  | 0        | -0.474857 |  |
|  | Shiraz-44T | 645  | 0        | -0.474857 |  |
|  | Shiraz-46T | 943  | 0.093799 | 0         |  |
|  | Shiraz-46T | 943  | 0.093799 | 0         |  |
|  | Shiraz-77T | 1225 | 0        | -0.117922 |  |
|  | Shiraz-77T | 1225 | 0        | -0.117922 |  |
|  | Shiraz-9T  | 1325 | 0.221899 | 0         |  |
|  | Shiraz-9T  | 1325 | 0.221899 | 0         |  |
|  | Shiraz-18T | 1434 | 0.244465 | 0         |  |
|  | Shiraz-18T | 1434 | 0.244465 | 0         |  |
|  | Shiraz-22T | 1554 | 0        | -0.502826 |  |
|  | Shiraz-22T | 1554 | 0        | -0.502826 |  |
|  | Shiraz-25T | 1698 | 0.21835  | 0         |  |
|  | Shiraz-25T | 1698 | 0.21835  | 0         |  |
|  | Shiraz-28T | 1735 | 0.350744 | 0         |  |
|  | Shiraz-28T | 1735 | 0.350744 | 0         |  |
|  | Shiraz-29T | 1778 | 0.120767 | 0         |  |
|  | Shiraz-29T | 1778 | 0.120767 | 0         |  |
|  | Shiraz-32T | 1833 | 0.551336 | 0         |  |
|  | Shiraz-32T | 1833 | 0.551336 | 0         |  |
|  | Shiraz-38T | 1951 | 0.250891 | 0         |  |
|  | Shiraz-38T | 1951 | 0.250891 | 0         |  |
|  | Shiraz-53T | 2078 | 0.287202 | 0         |  |
|  | Shiraz-53T | 2078 | 0.287202 | 0         |  |
|  | Shiraz-58T | 2162 | 0.221505 | 0         |  |
|  | Shiraz-58T | 2162 | 0.221505 | 0         |  |
|  | Shiraz-71T | 2238 | 0.603631 | 0         |  |
|  | Shiraz-71T | 2238 | 0.603631 | 0         |  |
|  | Shiraz-3T  | 90   | 0.219276 | 0         |  |
|  | Shiraz-3T  | 90   | 0.219276 | 0         |  |
|  | Shiraz-3T  | 98   | 0        | -0.069276 |  |
|  | Shiraz-3T  | 98   | 0        | -0.069276 |  |
|  | Shiraz-4T  | 253  | 0.372918 | 0         |  |
|  | Shiraz-4T  | 253  | 0.372918 | 0         |  |
|  | Shiraz-36T | 378  | 0.179558 | 0         |  |
|  | Shiraz-36T | 378  | 0.179558 | 0         |  |
|  | Shiraz-44T | 645  | 0        | -0.474857 |  |
|  | Shiraz-44T | 645  | 0        | -0.474857 |  |
|  | Shiraz-46T | 943  | 0.093799 | 0         |  |
|  | Shiraz-46T | 943  | 0.093799 | 0         |  |
|  | Shiraz-77T | 1225 | 0        | -0.117922 |  |

|  |            |      |          |           |  |
|--|------------|------|----------|-----------|--|
|  | Shiraz-77T | 1225 | 0        | -0.117922 |  |
|  | Shiraz-9T  | 1325 | 0.221899 | 0         |  |
|  | Shiraz-9T  | 1325 | 0.221899 | 0         |  |
|  | Shiraz-18T | 1434 | 0.244465 | 0         |  |
|  | Shiraz-18T | 1434 | 0.244465 | 0         |  |
|  | Shiraz-22T | 1554 | 0        | -0.502826 |  |
|  | Shiraz-22T | 1554 | 0        | -0.502826 |  |
|  | Shiraz-25T | 1698 | 0.21835  | 0         |  |
|  | Shiraz-25T | 1698 | 0.21835  | 0         |  |
|  | Shiraz-28T | 1735 | 0.350744 | 0         |  |
|  | Shiraz-28T | 1735 | 0.350744 | 0         |  |
|  | Shiraz-29T | 1778 | 0.120767 | 0         |  |
|  | Shiraz-29T | 1778 | 0.120767 | 0         |  |
|  | Shiraz-32T | 1833 | 0.551336 | 0         |  |
|  | Shiraz-32T | 1833 | 0.551336 | 0         |  |
|  | Shiraz-38T | 1951 | 0.250891 | 0         |  |
|  | Shiraz-38T | 1951 | 0.250891 | 0         |  |
|  | Shiraz-53T | 2078 | 0.287202 | 0         |  |
|  | Shiraz-53T | 2078 | 0.287202 | 0         |  |
|  | Shiraz-58T | 2162 | 0.221505 | 0         |  |
|  | Shiraz-58T | 2162 | 0.221505 | 0         |  |
|  | Shiraz-71T | 2238 | 0.603631 | 0         |  |
|  | Shiraz-71T | 2238 | 0.603631 | 0         |  |
|  | Shiraz-3T  | 90   | 0.219276 | 0         |  |
|  | Shiraz-3T  | 90   | 0.219276 | 0         |  |
|  | Shiraz-3T  | 98   | 0        | -0.069276 |  |
|  | Shiraz-3T  | 98   | 0        | -0.069276 |  |
|  | Shiraz-4T  | 253  | 0.372918 | 0         |  |
|  | Shiraz-4T  | 253  | 0.372918 | 0         |  |
|  | Shiraz-36T | 378  | 0.179558 | 0         |  |
|  | Shiraz-36T | 378  | 0.179558 | 0         |  |
|  | Shiraz-44T | 645  | 0        | -0.474857 |  |
|  | Shiraz-44T | 645  | 0        | -0.474857 |  |
|  | Shiraz-46T | 943  | 0.093799 | 0         |  |
|  | Shiraz-46T | 943  | 0.093799 | 0         |  |
|  | Shiraz-77T | 1225 | 0        | -0.117922 |  |
|  | Shiraz-77T | 1225 | 0        | -0.117922 |  |
|  | Shiraz-9T  | 1325 | 0.221899 | 0         |  |
|  | Shiraz-9T  | 1325 | 0.221899 | 0         |  |
|  | Shiraz-18T | 1434 | 0.244465 | 0         |  |
|  | Shiraz-18T | 1434 | 0.244465 | 0         |  |
|  | Shiraz-22T | 1554 | 0        | -0.502826 |  |
|  | Shiraz-22T | 1554 | 0        | -0.502826 |  |
|  | Shiraz-25T | 1698 | 0.21835  | 0         |  |
|  | Shiraz-25T | 1698 | 0.21835  | 0         |  |
|  | Shiraz-28T | 1735 | 0.350744 | 0         |  |
|  | Shiraz-28T | 1735 | 0.350744 | 0         |  |

|        |      |            |      |          |           |  |
|--------|------|------------|------|----------|-----------|--|
|        |      | Shiraz-29T | 1778 | 0.120767 | 0         |  |
|        |      | Shiraz-29T | 1778 | 0.120767 | 0         |  |
|        |      | Shiraz-32T | 1833 | 0.551336 | 0         |  |
|        |      | Shiraz-32T | 1833 | 0.551336 | 0         |  |
|        |      | Shiraz-38T | 1951 | 0.250891 | 0         |  |
|        |      | Shiraz-38T | 1951 | 0.250891 | 0         |  |
|        |      | Shiraz-53T | 2078 | 0.287202 | 0         |  |
|        |      | Shiraz-53T | 2078 | 0.287202 | 0         |  |
|        |      | Shiraz-58T | 2162 | 0.221505 | 0         |  |
|        |      | Shiraz-58T | 2162 | 0.221505 | 0         |  |
|        |      | Shiraz-71T | 2238 | 0.603631 | 0         |  |
|        |      | Shiraz-71T | 2238 | 0.603631 | 0         |  |
| OR2A12 | chr7 | Shiraz-3T  | 90   | 0.219276 | 0         |  |
|        |      | Shiraz-3T  | 98   | 0        | -0.069276 |  |
|        |      | Shiraz-4T  | 253  | 0.372918 | 0         |  |
|        |      | Shiraz-36T | 378  | 0.179558 | 0         |  |
|        |      | Shiraz-44T | 645  | 0        | -0.474857 |  |
|        |      | Shiraz-46T | 943  | 0.093799 | 0         |  |
|        |      | Shiraz-77T | 1225 | 0        | -0.117922 |  |
|        |      | Shiraz-9T  | 1325 | 0.221899 | 0         |  |
|        |      | Shiraz-18T | 1434 | 0.244465 | 0         |  |
|        |      | Shiraz-22T | 1554 | 0        | -0.502826 |  |
|        |      | Shiraz-25T | 1698 | 0.21835  | 0         |  |
|        |      | Shiraz-28T | 1735 | 0.350744 | 0         |  |
|        |      | Shiraz-29T | 1778 | 0.120767 | 0         |  |
|        |      | Shiraz-32T | 1833 | 0.551336 | 0         |  |
|        |      | Shiraz-38T | 1951 | 0.250891 | 0         |  |
|        |      | Shiraz-53T | 2078 | 0.287202 | 0         |  |
|        |      | Shiraz-58T | 2162 | 0.221505 | 0         |  |
|        |      | Shiraz-71T | 2238 | 0.603631 | 0         |  |
|        |      | Shiraz-3T  | 90   | 0.219276 | 0         |  |
|        |      | Shiraz-3T  | 98   | 0        | -0.069276 |  |
|        |      | Shiraz-4T  | 253  | 0.372918 | 0         |  |
|        |      | Shiraz-36T | 378  | 0.179558 | 0         |  |
|        |      | Shiraz-44T | 645  | 0        | -0.474857 |  |
|        |      | Shiraz-46T | 943  | 0.093799 | 0         |  |
|        |      | Shiraz-77T | 1225 | 0        | -0.117922 |  |
|        |      | Shiraz-9T  | 1325 | 0.221899 | 0         |  |
|        |      | Shiraz-18T | 1434 | 0.244465 | 0         |  |
|        |      | Shiraz-22T | 1554 | 0        | -0.502826 |  |
|        |      | Shiraz-25T | 1698 | 0.21835  | 0         |  |
|        |      | Shiraz-28T | 1735 | 0.350744 | 0         |  |
|        |      | Shiraz-29T | 1778 | 0.120767 | 0         |  |
|        |      | Shiraz-32T | 1833 | 0.551336 | 0         |  |
|        |      | Shiraz-38T | 1951 | 0.250891 | 0         |  |
|        |      | Shiraz-53T | 2078 | 0.287202 | 0         |  |
|        |      | Shiraz-58T | 2162 | 0.221505 | 0         |  |



|        |      |            |      |          |           |  |
|--------|------|------------|------|----------|-----------|--|
|        |      | Shiraz-71T | 2238 | 0.603631 | 0         |  |
|        |      | Shiraz-3T  | 90   | 0.219276 | 0         |  |
|        |      | Shiraz-3T  | 98   | 0        | -0.069276 |  |
|        |      | Shiraz-4T  | 253  | 0.372918 | 0         |  |
|        |      | Shiraz-36T | 378  | 0.179558 | 0         |  |
|        |      | Shiraz-44T | 645  | 0        | -0.474857 |  |
|        |      | Shiraz-46T | 943  | 0.093799 | 0         |  |
|        |      | Shiraz-77T | 1225 | 0        | -0.117922 |  |
|        |      | Shiraz-9T  | 1325 | 0.221899 | 0         |  |
|        |      | Shiraz-18T | 1434 | 0.244465 | 0         |  |
|        |      | Shiraz-22T | 1554 | 0        | -0.502826 |  |
|        |      | Shiraz-25T | 1698 | 0.21835  | 0         |  |
|        |      | Shiraz-28T | 1735 | 0.350744 | 0         |  |
|        |      | Shiraz-29T | 1778 | 0.120767 | 0         |  |
|        |      | Shiraz-32T | 1833 | 0.551336 | 0         |  |
|        |      | Shiraz-38T | 1951 | 0.250891 | 0         |  |
|        |      | Shiraz-53T | 2078 | 0.287202 | 0         |  |
|        |      | Shiraz-58T | 2162 | 0.221505 | 0         |  |
|        |      | Shiraz-71T | 2238 | 0.603631 | 0         |  |
| OR2A14 | chr7 | Shiraz-3T  | 90   | 0.219276 | 0         |  |
|        |      | Shiraz-3T  | 98   | 0        | -0.069276 |  |
|        |      | Shiraz-4T  | 253  | 0.372918 | 0         |  |
|        |      | Shiraz-36T | 378  | 0.179558 | 0         |  |
|        |      | Shiraz-44T | 645  | 0        | -0.474857 |  |
|        |      | Shiraz-46T | 943  | 0.093799 | 0         |  |
|        |      | Shiraz-77T | 1225 | 0        | -0.117922 |  |
|        |      | Shiraz-9T  | 1325 | 0.221899 | 0         |  |
|        |      | Shiraz-18T | 1434 | 0.244465 | 0         |  |
|        |      | Shiraz-22T | 1554 | 0        | -0.502826 |  |
|        |      | Shiraz-25T | 1698 | 0.21835  | 0         |  |
|        |      | Shiraz-28T | 1735 | 0.350744 | 0         |  |
|        |      | Shiraz-29T | 1778 | 0.120767 | 0         |  |
|        |      | Shiraz-32T | 1833 | 0.551336 | 0         |  |
|        |      | Shiraz-38T | 1951 | 0.250891 | 0         |  |
|        |      | Shiraz-53T | 2078 | 0.287202 | 0         |  |
|        |      | Shiraz-58T | 2162 | 0.221505 | 0         |  |
|        |      | Shiraz-71T | 2238 | 0.603631 | 0         |  |
|        |      | Shiraz-3T  | 90   | 0.219276 | 0         |  |
|        |      | Shiraz-3T  | 98   | 0        | -0.069276 |  |
|        |      | Shiraz-4T  | 253  | 0.372918 | 0         |  |
|        |      | Shiraz-36T | 378  | 0.179558 | 0         |  |
|        |      | Shiraz-44T | 645  | 0        | -0.474857 |  |
|        |      | Shiraz-46T | 943  | 0.093799 | 0         |  |
|        |      | Shiraz-77T | 1225 | 0        | -0.117922 |  |
|        |      | Shiraz-9T  | 1325 | 0.221899 | 0         |  |
|        |      | Shiraz-18T | 1434 | 0.244465 | 0         |  |
|        |      | Shiraz-22T | 1554 | 0        | -0.502826 |  |

|       |      |            |      |          |           |  |  |
|-------|------|------------|------|----------|-----------|--|--|
|       |      | Shiraz-25T | 1698 | 0.21835  | 0         |  |  |
|       |      | Shiraz-28T | 1735 | 0.350744 | 0         |  |  |
|       |      | Shiraz-29T | 1778 | 0.120767 | 0         |  |  |
|       |      | Shiraz-32T | 1833 | 0.551336 | 0         |  |  |
|       |      | Shiraz-38T | 1951 | 0.250891 | 0         |  |  |
|       |      | Shiraz-53T | 2078 | 0.287202 | 0         |  |  |
|       |      | Shiraz-58T | 2162 | 0.221505 | 0         |  |  |
|       |      | Shiraz-71T | 2238 | 0.603631 | 0         |  |  |
|       |      | Shiraz-3T  | 90   | 0.219276 | 0         |  |  |
|       |      | Shiraz-3T  | 98   | 0        | -0.069276 |  |  |
|       |      | Shiraz-4T  | 253  | 0.372918 | 0         |  |  |
|       |      | Shiraz-36T | 378  | 0.179558 | 0         |  |  |
|       |      | Shiraz-44T | 645  | 0        | -0.474857 |  |  |
|       |      | Shiraz-46T | 943  | 0.093799 | 0         |  |  |
|       |      | Shiraz-77T | 1225 | 0        | -0.117922 |  |  |
|       |      | Shiraz-9T  | 1325 | 0.221899 | 0         |  |  |
|       |      | Shiraz-18T | 1434 | 0.244465 | 0         |  |  |
|       |      | Shiraz-22T | 1554 | 0        | -0.502826 |  |  |
|       |      | Shiraz-25T | 1698 | 0.21835  | 0         |  |  |
|       |      | Shiraz-28T | 1735 | 0.350744 | 0         |  |  |
|       |      | Shiraz-29T | 1778 | 0.120767 | 0         |  |  |
|       |      | Shiraz-32T | 1833 | 0.551336 | 0         |  |  |
|       |      | Shiraz-38T | 1951 | 0.250891 | 0         |  |  |
|       |      | Shiraz-53T | 2078 | 0.287202 | 0         |  |  |
|       |      | Shiraz-58T | 2162 | 0.221505 | 0         |  |  |
|       |      | Shiraz-71T | 2238 | 0.603631 | 0         |  |  |
| OR2A2 | chr7 | Shiraz-3T  | 90   | 0.219276 | 0         |  |  |
|       |      | Shiraz-3T  | 98   | 0        | -0.069276 |  |  |
|       |      | Shiraz-4T  | 253  | 0.372918 | 0         |  |  |
|       |      | Shiraz-36T | 378  | 0.179558 | 0         |  |  |
|       |      | Shiraz-44T | 645  | 0        | -0.474857 |  |  |
|       |      | Shiraz-46T | 943  | 0.093799 | 0         |  |  |
|       |      | Shiraz-77T | 1225 | 0        | -0.117922 |  |  |
|       |      | Shiraz-9T  | 1325 | 0.221899 | 0         |  |  |
|       |      | Shiraz-18T | 1434 | 0.244465 | 0         |  |  |
|       |      | Shiraz-22T | 1554 | 0        | -0.502826 |  |  |
|       |      | Shiraz-25T | 1698 | 0.21835  | 0         |  |  |
|       |      | Shiraz-28T | 1735 | 0.350744 | 0         |  |  |
|       |      | Shiraz-29T | 1778 | 0.120767 | 0         |  |  |
|       |      | Shiraz-32T | 1833 | 0.551336 | 0         |  |  |
|       |      | Shiraz-38T | 1951 | 0.250891 | 0         |  |  |
|       |      | Shiraz-53T | 2078 | 0.287202 | 0         |  |  |
|       |      | Shiraz-58T | 2162 | 0.221505 | 0         |  |  |
|       |      | Shiraz-71T | 2238 | 0.603631 | 0         |  |  |
|       |      | Shiraz-3T  | 90   | 0.219276 | 0         |  |  |
|       |      | Shiraz-3T  | 98   | 0        | -0.069276 |  |  |
|       |      | Shiraz-4T  | 253  | 0.372918 | 0         |  |  |

|         |      |            |      |          |           |  |  |
|---------|------|------------|------|----------|-----------|--|--|
|         |      | Shiraz-36T | 378  | 0.179558 | 0         |  |  |
|         |      | Shiraz-44T | 645  | 0        | -0.474857 |  |  |
|         |      | Shiraz-46T | 943  | 0.093799 | 0         |  |  |
|         |      | Shiraz-77T | 1225 | 0        | -0.117922 |  |  |
|         |      | Shiraz-9T  | 1325 | 0.221899 | 0         |  |  |
|         |      | Shiraz-18T | 1434 | 0.244465 | 0         |  |  |
|         |      | Shiraz-22T | 1554 | 0        | -0.502826 |  |  |
|         |      | Shiraz-25T | 1698 | 0.21835  | 0         |  |  |
|         |      | Shiraz-28T | 1735 | 0.350744 | 0         |  |  |
|         |      | Shiraz-29T | 1778 | 0.120767 | 0         |  |  |
|         |      | Shiraz-32T | 1833 | 0.551336 | 0         |  |  |
|         |      | Shiraz-38T | 1951 | 0.250891 | 0         |  |  |
|         |      | Shiraz-53T | 2078 | 0.287202 | 0         |  |  |
|         |      | Shiraz-58T | 2162 | 0.221505 | 0         |  |  |
|         |      | Shiraz-71T | 2238 | 0.603631 | 0         |  |  |
|         |      | Shiraz-3T  | 90   | 0.219276 | 0         |  |  |
|         |      | Shiraz-3T  | 98   | 0        | -0.069276 |  |  |
|         |      | Shiraz-4T  | 253  | 0.372918 | 0         |  |  |
|         |      | Shiraz-36T | 378  | 0.179558 | 0         |  |  |
|         |      | Shiraz-44T | 645  | 0        | -0.474857 |  |  |
|         |      | Shiraz-46T | 943  | 0.093799 | 0         |  |  |
|         |      | Shiraz-77T | 1225 | 0        | -0.117922 |  |  |
|         |      | Shiraz-9T  | 1325 | 0.221899 | 0         |  |  |
|         |      | Shiraz-18T | 1434 | 0.244465 | 0         |  |  |
|         |      | Shiraz-22T | 1554 | 0        | -0.502826 |  |  |
|         |      | Shiraz-25T | 1698 | 0.21835  | 0         |  |  |
|         |      | Shiraz-28T | 1735 | 0.350744 | 0         |  |  |
|         |      | Shiraz-29T | 1778 | 0.120767 | 0         |  |  |
|         |      | Shiraz-32T | 1833 | 0.551336 | 0         |  |  |
|         |      | Shiraz-38T | 1951 | 0.250891 | 0         |  |  |
|         |      | Shiraz-53T | 2078 | 0.287202 | 0         |  |  |
|         |      | Shiraz-58T | 2162 | 0.221505 | 0         |  |  |
|         |      | Shiraz-71T | 2238 | 0.603631 | 0         |  |  |
| OR2A20P | chr7 | Shiraz-3T  | 90   | 0.219276 | 0         |  |  |
|         |      | Shiraz-3T  | 98   | 0        | -0.069276 |  |  |
|         |      | Shiraz-4T  | 253  | 0.372918 | 0         |  |  |
|         |      | Shiraz-36T | 378  | 0.179558 | 0         |  |  |
|         |      | Shiraz-44T | 645  | 0        | -0.474857 |  |  |
|         |      | Shiraz-46T | 943  | 0.093799 | 0         |  |  |
|         |      | Shiraz-77T | 1225 | 0        | -0.117922 |  |  |
|         |      | Shiraz-9T  | 1325 | 0.221899 | 0         |  |  |
|         |      | Shiraz-18T | 1434 | 0.244465 | 0         |  |  |
|         |      | Shiraz-22T | 1554 | 0        | -0.502826 |  |  |
|         |      | Shiraz-25T | 1698 | 0.21835  | 0         |  |  |
|         |      | Shiraz-28T | 1735 | 0.350744 | 0         |  |  |
|         |      | Shiraz-29T | 1778 | 0.120767 | 0         |  |  |
|         |      | Shiraz-32T | 1833 | 0.551336 | 0         |  |  |

|        |      |            |      |          |           |  |  |
|--------|------|------------|------|----------|-----------|--|--|
|        |      | Shiraz-38T | 1951 | 0.250891 | 0         |  |  |
|        |      | Shiraz-53T | 2078 | 0.287202 | 0         |  |  |
|        |      | Shiraz-58T | 2162 | 0.221505 | 0         |  |  |
|        |      | Shiraz-71T | 2238 | 0.603631 | 0         |  |  |
|        |      | Shiraz-3T  | 90   | 0.219276 | 0         |  |  |
|        |      | Shiraz-3T  | 98   | 0        | -0.069276 |  |  |
|        |      | Shiraz-4T  | 253  | 0.372918 | 0         |  |  |
|        |      | Shiraz-36T | 378  | 0.179558 | 0         |  |  |
|        |      | Shiraz-44T | 645  | 0        | -0.474857 |  |  |
|        |      | Shiraz-46T | 943  | 0.093799 | 0         |  |  |
|        |      | Shiraz-77T | 1225 | 0        | -0.117922 |  |  |
|        |      | Shiraz-9T  | 1325 | 0.221899 | 0         |  |  |
|        |      | Shiraz-18T | 1434 | 0.244465 | 0         |  |  |
|        |      | Shiraz-22T | 1554 | 0        | -0.502826 |  |  |
|        |      | Shiraz-25T | 1698 | 0.21835  | 0         |  |  |
|        |      | Shiraz-28T | 1735 | 0.350744 | 0         |  |  |
|        |      | Shiraz-29T | 1778 | 0.120767 | 0         |  |  |
|        |      | Shiraz-32T | 1833 | 0.551336 | 0         |  |  |
|        |      | Shiraz-38T | 1951 | 0.250891 | 0         |  |  |
|        |      | Shiraz-53T | 2078 | 0.287202 | 0         |  |  |
|        |      | Shiraz-58T | 2162 | 0.221505 | 0         |  |  |
|        |      | Shiraz-71T | 2238 | 0.603631 | 0         |  |  |
|        |      | Shiraz-3T  | 90   | 0.219276 | 0         |  |  |
|        |      | Shiraz-3T  | 98   | 0        | -0.069276 |  |  |
|        |      | Shiraz-4T  | 253  | 0.372918 | 0         |  |  |
|        |      | Shiraz-36T | 378  | 0.179558 | 0         |  |  |
|        |      | Shiraz-44T | 645  | 0        | -0.474857 |  |  |
|        |      | Shiraz-46T | 943  | 0.093799 | 0         |  |  |
|        |      | Shiraz-77T | 1225 | 0        | -0.117922 |  |  |
|        |      | Shiraz-9T  | 1325 | 0.221899 | 0         |  |  |
|        |      | Shiraz-18T | 1434 | 0.244465 | 0         |  |  |
|        |      | Shiraz-22T | 1554 | 0        | -0.502826 |  |  |
|        |      | Shiraz-25T | 1698 | 0.21835  | 0         |  |  |
|        |      | Shiraz-28T | 1735 | 0.350744 | 0         |  |  |
|        |      | Shiraz-29T | 1778 | 0.120767 | 0         |  |  |
|        |      | Shiraz-32T | 1833 | 0.551336 | 0         |  |  |
|        |      | Shiraz-38T | 1951 | 0.250891 | 0         |  |  |
|        |      | Shiraz-53T | 2078 | 0.287202 | 0         |  |  |
|        |      | Shiraz-58T | 2162 | 0.221505 | 0         |  |  |
|        |      | Shiraz-71T | 2238 | 0.603631 | 0         |  |  |
| OR2A25 | chr7 | Shiraz-3T  | 90   | 0.219276 | 0         |  |  |
|        |      | Shiraz-3T  | 98   | 0        | -0.069276 |  |  |
|        |      | Shiraz-4T  | 253  | 0.372918 | 0         |  |  |
|        |      | Shiraz-36T | 378  | 0.179558 | 0         |  |  |
|        |      | Shiraz-44T | 645  | 0        | -0.474857 |  |  |
|        |      | Shiraz-46T | 943  | 0.093799 | 0         |  |  |
|        |      | Shiraz-77T | 1225 | 0        | -0.117922 |  |  |

|  |            |      |          |           |  |
|--|------------|------|----------|-----------|--|
|  | Shiraz-9T  | 1325 | 0.221899 | 0         |  |
|  | Shiraz-18T | 1434 | 0.244465 | 0         |  |
|  | Shiraz-22T | 1554 | 0        | -0.502826 |  |
|  | Shiraz-25T | 1698 | 0.21835  | 0         |  |
|  | Shiraz-28T | 1735 | 0.350744 | 0         |  |
|  | Shiraz-29T | 1778 | 0.120767 | 0         |  |
|  | Shiraz-32T | 1833 | 0.551336 | 0         |  |
|  | Shiraz-38T | 1951 | 0.250891 | 0         |  |
|  | Shiraz-53T | 2078 | 0.287202 | 0         |  |
|  | Shiraz-58T | 2162 | 0.221505 | 0         |  |
|  | Shiraz-71T | 2238 | 0.603631 | 0         |  |
|  | Shiraz-3T  | 90   | 0.219276 | 0         |  |
|  | Shiraz-3T  | 98   | 0        | -0.069276 |  |
|  | Shiraz-4T  | 253  | 0.372918 | 0         |  |
|  | Shiraz-36T | 378  | 0.179558 | 0         |  |
|  | Shiraz-44T | 645  | 0        | -0.474857 |  |
|  | Shiraz-46T | 943  | 0.093799 | 0         |  |
|  | Shiraz-77T | 1225 | 0        | -0.117922 |  |
|  | Shiraz-9T  | 1325 | 0.221899 | 0         |  |
|  | Shiraz-18T | 1434 | 0.244465 | 0         |  |
|  | Shiraz-22T | 1554 | 0        | -0.502826 |  |
|  | Shiraz-25T | 1698 | 0.21835  | 0         |  |
|  | Shiraz-28T | 1735 | 0.350744 | 0         |  |
|  | Shiraz-29T | 1778 | 0.120767 | 0         |  |
|  | Shiraz-32T | 1833 | 0.551336 | 0         |  |
|  | Shiraz-38T | 1951 | 0.250891 | 0         |  |
|  | Shiraz-53T | 2078 | 0.287202 | 0         |  |
|  | Shiraz-58T | 2162 | 0.221505 | 0         |  |
|  | Shiraz-71T | 2238 | 0.603631 | 0         |  |
|  | Shiraz-3T  | 90   | 0.219276 | 0         |  |
|  | Shiraz-3T  | 98   | 0        | -0.069276 |  |
|  | Shiraz-4T  | 253  | 0.372918 | 0         |  |
|  | Shiraz-36T | 378  | 0.179558 | 0         |  |
|  | Shiraz-44T | 645  | 0        | -0.474857 |  |
|  | Shiraz-46T | 943  | 0.093799 | 0         |  |
|  | Shiraz-77T | 1225 | 0        | -0.117922 |  |
|  | Shiraz-9T  | 1325 | 0.221899 | 0         |  |
|  | Shiraz-18T | 1434 | 0.244465 | 0         |  |
|  | Shiraz-22T | 1554 | 0        | -0.502826 |  |
|  | Shiraz-25T | 1698 | 0.21835  | 0         |  |
|  | Shiraz-28T | 1735 | 0.350744 | 0         |  |
|  | Shiraz-29T | 1778 | 0.120767 | 0         |  |
|  | Shiraz-32T | 1833 | 0.551336 | 0         |  |
|  | Shiraz-38T | 1951 | 0.250891 | 0         |  |
|  | Shiraz-53T | 2078 | 0.287202 | 0         |  |
|  | Shiraz-58T | 2162 | 0.221505 | 0         |  |
|  | Shiraz-71T | 2238 | 0.603631 | 0         |  |

|        |      |            |      |          |           |  |
|--------|------|------------|------|----------|-----------|--|
| OR2A42 | chr7 | Shiraz-3T  | 90   | 0.219276 | 0         |  |
|        |      | Shiraz-3T  | 90   | 0.219276 | 0         |  |
|        |      | Shiraz-3T  | 98   | 0        | -0.069276 |  |
|        |      | Shiraz-3T  | 98   | 0        | -0.069276 |  |
|        |      | Shiraz-4T  | 253  | 0.372918 | 0         |  |
|        |      | Shiraz-4T  | 253  | 0.372918 | 0         |  |
|        |      | Shiraz-36T | 378  | 0.179558 | 0         |  |
|        |      | Shiraz-36T | 378  | 0.179558 | 0         |  |
|        |      | Shiraz-44T | 645  | 0        | -0.474857 |  |
|        |      | Shiraz-44T | 645  | 0        | -0.474857 |  |
|        |      | Shiraz-46T | 943  | 0.093799 | 0         |  |
|        |      | Shiraz-46T | 943  | 0.093799 | 0         |  |
|        |      | Shiraz-77T | 1225 | 0        | -0.117922 |  |
|        |      | Shiraz-77T | 1225 | 0        | -0.117922 |  |
|        |      | Shiraz-9T  | 1325 | 0.221899 | 0         |  |
|        |      | Shiraz-9T  | 1325 | 0.221899 | 0         |  |
|        |      | Shiraz-18T | 1434 | 0.244465 | 0         |  |
|        |      | Shiraz-18T | 1434 | 0.244465 | 0         |  |
|        |      | Shiraz-22T | 1554 | 0        | -0.502826 |  |
|        |      | Shiraz-22T | 1554 | 0        | -0.502826 |  |
|        |      | Shiraz-25T | 1698 | 0.21835  | 0         |  |
|        |      | Shiraz-25T | 1698 | 0.21835  | 0         |  |
|        |      | Shiraz-28T | 1735 | 0.350744 | 0         |  |
|        |      | Shiraz-28T | 1735 | 0.350744 | 0         |  |
|        |      | Shiraz-29T | 1778 | 0.120767 | 0         |  |
|        |      | Shiraz-29T | 1778 | 0.120767 | 0         |  |
|        |      | Shiraz-32T | 1833 | 0.551336 | 0         |  |
|        |      | Shiraz-32T | 1833 | 0.551336 | 0         |  |
|        |      | Shiraz-38T | 1951 | 0.250891 | 0         |  |
|        |      | Shiraz-38T | 1951 | 0.250891 | 0         |  |
|        |      | Shiraz-53T | 2078 | 0.287202 | 0         |  |
|        |      | Shiraz-53T | 2078 | 0.287202 | 0         |  |
|        |      | Shiraz-58T | 2162 | 0.221505 | 0         |  |
|        |      | Shiraz-58T | 2162 | 0.221505 | 0         |  |
|        |      | Shiraz-71T | 2238 | 0.603631 | 0         |  |
|        |      | Shiraz-71T | 2238 | 0.603631 | 0         |  |
|        |      | Shiraz-3T  | 90   | 0.219276 | 0         |  |
|        |      | Shiraz-3T  | 90   | 0.219276 | 0         |  |
|        |      | Shiraz-3T  | 98   | 0        | -0.069276 |  |
|        |      | Shiraz-3T  | 98   | 0        | -0.069276 |  |
|        |      | Shiraz-4T  | 253  | 0.372918 | 0         |  |
|        |      | Shiraz-4T  | 253  | 0.372918 | 0         |  |
|        |      | Shiraz-36T | 378  | 0.179558 | 0         |  |
|        |      | Shiraz-36T | 378  | 0.179558 | 0         |  |
|        |      | Shiraz-44T | 645  | 0        | -0.474857 |  |
|        |      | Shiraz-44T | 645  | 0        | -0.474857 |  |
|        |      | Shiraz-46T | 943  | 0.093799 | 0         |  |

|  |            |      |          |           |  |
|--|------------|------|----------|-----------|--|
|  | Shiraz-46T | 943  | 0.093799 | 0         |  |
|  | Shiraz-77T | 1225 | 0        | -0.117922 |  |
|  | Shiraz-77T | 1225 | 0        | -0.117922 |  |
|  | Shiraz-9T  | 1325 | 0.221899 | 0         |  |
|  | Shiraz-9T  | 1325 | 0.221899 | 0         |  |
|  | Shiraz-18T | 1434 | 0.244465 | 0         |  |
|  | Shiraz-18T | 1434 | 0.244465 | 0         |  |
|  | Shiraz-22T | 1554 | 0        | -0.502826 |  |
|  | Shiraz-22T | 1554 | 0        | -0.502826 |  |
|  | Shiraz-25T | 1698 | 0.21835  | 0         |  |
|  | Shiraz-25T | 1698 | 0.21835  | 0         |  |
|  | Shiraz-28T | 1735 | 0.350744 | 0         |  |
|  | Shiraz-28T | 1735 | 0.350744 | 0         |  |
|  | Shiraz-29T | 1778 | 0.120767 | 0         |  |
|  | Shiraz-29T | 1778 | 0.120767 | 0         |  |
|  | Shiraz-32T | 1833 | 0.551336 | 0         |  |
|  | Shiraz-32T | 1833 | 0.551336 | 0         |  |
|  | Shiraz-38T | 1951 | 0.250891 | 0         |  |
|  | Shiraz-38T | 1951 | 0.250891 | 0         |  |
|  | Shiraz-53T | 2078 | 0.287202 | 0         |  |
|  | Shiraz-53T | 2078 | 0.287202 | 0         |  |
|  | Shiraz-58T | 2162 | 0.221505 | 0         |  |
|  | Shiraz-58T | 2162 | 0.221505 | 0         |  |
|  | Shiraz-71T | 2238 | 0.603631 | 0         |  |
|  | Shiraz-71T | 2238 | 0.603631 | 0         |  |
|  | Shiraz-3T  | 90   | 0.219276 | 0         |  |
|  | Shiraz-3T  | 90   | 0.219276 | 0         |  |
|  | Shiraz-3T  | 98   | 0        | -0.069276 |  |
|  | Shiraz-3T  | 98   | 0        | -0.069276 |  |
|  | Shiraz-4T  | 253  | 0.372918 | 0         |  |
|  | Shiraz-4T  | 253  | 0.372918 | 0         |  |
|  | Shiraz-36T | 378  | 0.179558 | 0         |  |
|  | Shiraz-36T | 378  | 0.179558 | 0         |  |
|  | Shiraz-44T | 645  | 0        | -0.474857 |  |
|  | Shiraz-44T | 645  | 0        | -0.474857 |  |
|  | Shiraz-46T | 943  | 0.093799 | 0         |  |
|  | Shiraz-46T | 943  | 0.093799 | 0         |  |
|  | Shiraz-77T | 1225 | 0        | -0.117922 |  |
|  | Shiraz-77T | 1225 | 0        | -0.117922 |  |
|  | Shiraz-9T  | 1325 | 0.221899 | 0         |  |
|  | Shiraz-9T  | 1325 | 0.221899 | 0         |  |
|  | Shiraz-18T | 1434 | 0.244465 | 0         |  |
|  | Shiraz-18T | 1434 | 0.244465 | 0         |  |
|  | Shiraz-22T | 1554 | 0        | -0.502826 |  |
|  | Shiraz-22T | 1554 | 0        | -0.502826 |  |
|  | Shiraz-25T | 1698 | 0.21835  | 0         |  |
|  | Shiraz-25T | 1698 | 0.21835  | 0         |  |

|       |      |            |      |          |           |  |  |
|-------|------|------------|------|----------|-----------|--|--|
|       |      | Shiraz-28T | 1735 | 0.350744 | 0         |  |  |
|       |      | Shiraz-28T | 1735 | 0.350744 | 0         |  |  |
|       |      | Shiraz-29T | 1778 | 0.120767 | 0         |  |  |
|       |      | Shiraz-29T | 1778 | 0.120767 | 0         |  |  |
|       |      | Shiraz-32T | 1833 | 0.551336 | 0         |  |  |
|       |      | Shiraz-32T | 1833 | 0.551336 | 0         |  |  |
|       |      | Shiraz-38T | 1951 | 0.250891 | 0         |  |  |
|       |      | Shiraz-38T | 1951 | 0.250891 | 0         |  |  |
|       |      | Shiraz-53T | 2078 | 0.287202 | 0         |  |  |
|       |      | Shiraz-53T | 2078 | 0.287202 | 0         |  |  |
|       |      | Shiraz-58T | 2162 | 0.221505 | 0         |  |  |
|       |      | Shiraz-58T | 2162 | 0.221505 | 0         |  |  |
|       |      | Shiraz-71T | 2238 | 0.603631 | 0         |  |  |
|       |      | Shiraz-71T | 2238 | 0.603631 | 0         |  |  |
| OR2A5 | chr7 | Shiraz-3T  | 90   | 0.219276 | 0         |  |  |
|       |      | Shiraz-3T  | 98   | 0        | -0.069276 |  |  |
|       |      | Shiraz-4T  | 253  | 0.372918 | 0         |  |  |
|       |      | Shiraz-36T | 378  | 0.179558 | 0         |  |  |
|       |      | Shiraz-44T | 645  | 0        | -0.474857 |  |  |
|       |      | Shiraz-46T | 943  | 0.093799 | 0         |  |  |
|       |      | Shiraz-77T | 1225 | 0        | -0.117922 |  |  |
|       |      | Shiraz-9T  | 1325 | 0.221899 | 0         |  |  |
|       |      | Shiraz-18T | 1434 | 0.244465 | 0         |  |  |
|       |      | Shiraz-22T | 1554 | 0        | -0.502826 |  |  |
|       |      | Shiraz-25T | 1698 | 0.21835  | 0         |  |  |
|       |      | Shiraz-28T | 1735 | 0.350744 | 0         |  |  |
|       |      | Shiraz-29T | 1778 | 0.120767 | 0         |  |  |
|       |      | Shiraz-32T | 1833 | 0.551336 | 0         |  |  |
|       |      | Shiraz-38T | 1951 | 0.250891 | 0         |  |  |
|       |      | Shiraz-53T | 2078 | 0.287202 | 0         |  |  |
|       |      | Shiraz-58T | 2162 | 0.221505 | 0         |  |  |
|       |      | Shiraz-71T | 2238 | 0.603631 | 0         |  |  |
|       |      | Shiraz-3T  | 90   | 0.219276 | 0         |  |  |
|       |      | Shiraz-3T  | 98   | 0        | -0.069276 |  |  |
|       |      | Shiraz-4T  | 253  | 0.372918 | 0         |  |  |
|       |      | Shiraz-36T | 378  | 0.179558 | 0         |  |  |
|       |      | Shiraz-44T | 645  | 0        | -0.474857 |  |  |
|       |      | Shiraz-46T | 943  | 0.093799 | 0         |  |  |
|       |      | Shiraz-77T | 1225 | 0        | -0.117922 |  |  |
|       |      | Shiraz-9T  | 1325 | 0.221899 | 0         |  |  |
|       |      | Shiraz-18T | 1434 | 0.244465 | 0         |  |  |
|       |      | Shiraz-22T | 1554 | 0        | -0.502826 |  |  |
|       |      | Shiraz-25T | 1698 | 0.21835  | 0         |  |  |
|       |      | Shiraz-28T | 1735 | 0.350744 | 0         |  |  |
|       |      | Shiraz-29T | 1778 | 0.120767 | 0         |  |  |
|       |      | Shiraz-32T | 1833 | 0.551336 | 0         |  |  |
|       |      | Shiraz-38T | 1951 | 0.250891 | 0         |  |  |



|       |      |            |      |          |           |  |
|-------|------|------------|------|----------|-----------|--|
|       |      | Shiraz-53T | 2078 | 0.287202 | 0         |  |
|       |      | Shiraz-58T | 2162 | 0.221505 | 0         |  |
|       |      | Shiraz-71T | 2238 | 0.603631 | 0         |  |
|       |      | Shiraz-3T  | 90   | 0.219276 | 0         |  |
|       |      | Shiraz-3T  | 98   | 0        | -0.069276 |  |
|       |      | Shiraz-4T  | 253  | 0.372918 | 0         |  |
|       |      | Shiraz-36T | 378  | 0.179558 | 0         |  |
|       |      | Shiraz-44T | 645  | 0        | -0.474857 |  |
|       |      | Shiraz-46T | 943  | 0.093799 | 0         |  |
|       |      | Shiraz-77T | 1225 | 0        | -0.117922 |  |
|       |      | Shiraz-9T  | 1325 | 0.221899 | 0         |  |
|       |      | Shiraz-18T | 1434 | 0.244465 | 0         |  |
|       |      | Shiraz-22T | 1554 | 0        | -0.502826 |  |
|       |      | Shiraz-25T | 1698 | 0.21835  | 0         |  |
|       |      | Shiraz-28T | 1735 | 0.350744 | 0         |  |
|       |      | Shiraz-29T | 1778 | 0.120767 | 0         |  |
|       |      | Shiraz-32T | 1833 | 0.551336 | 0         |  |
|       |      | Shiraz-38T | 1951 | 0.250891 | 0         |  |
|       |      | Shiraz-53T | 2078 | 0.287202 | 0         |  |
|       |      | Shiraz-58T | 2162 | 0.221505 | 0         |  |
|       |      | Shiraz-71T | 2238 | 0.603631 | 0         |  |
| OR2A7 | chr7 | Shiraz-3T  | 90   | 0.219276 | 0         |  |
|       |      | Shiraz-3T  | 98   | 0        | -0.069276 |  |
|       |      | Shiraz-4T  | 253  | 0.372918 | 0         |  |
|       |      | Shiraz-36T | 378  | 0.179558 | 0         |  |
|       |      | Shiraz-44T | 645  | 0        | -0.474857 |  |
|       |      | Shiraz-46T | 943  | 0.093799 | 0         |  |
|       |      | Shiraz-77T | 1225 | 0        | -0.117922 |  |
|       |      | Shiraz-9T  | 1325 | 0.221899 | 0         |  |
|       |      | Shiraz-18T | 1434 | 0.244465 | 0         |  |
|       |      | Shiraz-22T | 1554 | 0        | -0.502826 |  |
|       |      | Shiraz-25T | 1698 | 0.21835  | 0         |  |
|       |      | Shiraz-28T | 1735 | 0.350744 | 0         |  |
|       |      | Shiraz-29T | 1778 | 0.120767 | 0         |  |
|       |      | Shiraz-32T | 1833 | 0.551336 | 0         |  |
|       |      | Shiraz-38T | 1951 | 0.250891 | 0         |  |
|       |      | Shiraz-53T | 2078 | 0.287202 | 0         |  |
|       |      | Shiraz-58T | 2162 | 0.221505 | 0         |  |
|       |      | Shiraz-71T | 2238 | 0.603631 | 0         |  |
|       |      | Shiraz-3T  | 90   | 0.219276 | 0         |  |
|       |      | Shiraz-3T  | 98   | 0        | -0.069276 |  |
|       |      | Shiraz-4T  | 253  | 0.372918 | 0         |  |
|       |      | Shiraz-36T | 378  | 0.179558 | 0         |  |
|       |      | Shiraz-44T | 645  | 0        | -0.474857 |  |
|       |      | Shiraz-46T | 943  | 0.093799 | 0         |  |
|       |      | Shiraz-77T | 1225 | 0        | -0.117922 |  |
|       |      | Shiraz-9T  | 1325 | 0.221899 | 0         |  |

|        |      |            |      |          |           |  |  |
|--------|------|------------|------|----------|-----------|--|--|
|        |      | Shiraz-18T | 1434 | 0.244465 | 0         |  |  |
|        |      | Shiraz-22T | 1554 | 0        | -0.502826 |  |  |
|        |      | Shiraz-25T | 1698 | 0.21835  | 0         |  |  |
|        |      | Shiraz-28T | 1735 | 0.350744 | 0         |  |  |
|        |      | Shiraz-29T | 1778 | 0.120767 | 0         |  |  |
|        |      | Shiraz-32T | 1833 | 0.551336 | 0         |  |  |
|        |      | Shiraz-38T | 1951 | 0.250891 | 0         |  |  |
|        |      | Shiraz-53T | 2078 | 0.287202 | 0         |  |  |
|        |      | Shiraz-58T | 2162 | 0.221505 | 0         |  |  |
|        |      | Shiraz-71T | 2238 | 0.603631 | 0         |  |  |
|        |      | Shiraz-3T  | 90   | 0.219276 | 0         |  |  |
|        |      | Shiraz-3T  | 98   | 0        | -0.069276 |  |  |
|        |      | Shiraz-4T  | 253  | 0.372918 | 0         |  |  |
|        |      | Shiraz-36T | 378  | 0.179558 | 0         |  |  |
|        |      | Shiraz-44T | 645  | 0        | -0.474857 |  |  |
|        |      | Shiraz-46T | 943  | 0.093799 | 0         |  |  |
|        |      | Shiraz-77T | 1225 | 0        | -0.117922 |  |  |
|        |      | Shiraz-9T  | 1325 | 0.221899 | 0         |  |  |
|        |      | Shiraz-18T | 1434 | 0.244465 | 0         |  |  |
|        |      | Shiraz-22T | 1554 | 0        | -0.502826 |  |  |
|        |      | Shiraz-25T | 1698 | 0.21835  | 0         |  |  |
|        |      | Shiraz-28T | 1735 | 0.350744 | 0         |  |  |
|        |      | Shiraz-29T | 1778 | 0.120767 | 0         |  |  |
|        |      | Shiraz-32T | 1833 | 0.551336 | 0         |  |  |
|        |      | Shiraz-38T | 1951 | 0.250891 | 0         |  |  |
|        |      | Shiraz-53T | 2078 | 0.287202 | 0         |  |  |
|        |      | Shiraz-58T | 2162 | 0.221505 | 0         |  |  |
|        |      | Shiraz-71T | 2238 | 0.603631 | 0         |  |  |
| OR2A9P | chr7 | Shiraz-3T  | 90   | 0.219276 | 0         |  |  |
|        |      | Shiraz-3T  | 98   | 0        | -0.069276 |  |  |
|        |      | Shiraz-4T  | 253  | 0.372918 | 0         |  |  |
|        |      | Shiraz-36T | 378  | 0.179558 | 0         |  |  |
|        |      | Shiraz-44T | 645  | 0        | -0.474857 |  |  |
|        |      | Shiraz-46T | 943  | 0.093799 | 0         |  |  |
|        |      | Shiraz-77T | 1225 | 0        | -0.117922 |  |  |
|        |      | Shiraz-9T  | 1325 | 0.221899 | 0         |  |  |
|        |      | Shiraz-18T | 1434 | 0.244465 | 0         |  |  |
|        |      | Shiraz-22T | 1554 | 0        | -0.502826 |  |  |
|        |      | Shiraz-25T | 1698 | 0.21835  | 0         |  |  |
|        |      | Shiraz-28T | 1735 | 0.350744 | 0         |  |  |
|        |      | Shiraz-29T | 1778 | 0.120767 | 0         |  |  |
|        |      | Shiraz-32T | 1833 | 0.551336 | 0         |  |  |
|        |      | Shiraz-38T | 1951 | 0.250891 | 0         |  |  |
|        |      | Shiraz-53T | 2078 | 0.287202 | 0         |  |  |
|        |      | Shiraz-58T | 2162 | 0.221505 | 0         |  |  |
|        |      | Shiraz-71T | 2238 | 0.603631 | 0         |  |  |
|        |      | Shiraz-3T  | 90   | 0.219276 | 0         |  |  |

|        |      |            |      |          |           |  |  |
|--------|------|------------|------|----------|-----------|--|--|
|        |      | Shiraz-3T  | 98   | 0        | -0.069276 |  |  |
|        |      | Shiraz-4T  | 253  | 0.372918 | 0         |  |  |
|        |      | Shiraz-36T | 378  | 0.179558 | 0         |  |  |
|        |      | Shiraz-44T | 645  | 0        | -0.474857 |  |  |
|        |      | Shiraz-46T | 943  | 0.093799 | 0         |  |  |
|        |      | Shiraz-77T | 1225 | 0        | -0.117922 |  |  |
|        |      | Shiraz-9T  | 1325 | 0.221899 | 0         |  |  |
|        |      | Shiraz-18T | 1434 | 0.244465 | 0         |  |  |
|        |      | Shiraz-22T | 1554 | 0        | -0.502826 |  |  |
|        |      | Shiraz-25T | 1698 | 0.21835  | 0         |  |  |
|        |      | Shiraz-28T | 1735 | 0.350744 | 0         |  |  |
|        |      | Shiraz-29T | 1778 | 0.120767 | 0         |  |  |
|        |      | Shiraz-32T | 1833 | 0.551336 | 0         |  |  |
|        |      | Shiraz-38T | 1951 | 0.250891 | 0         |  |  |
|        |      | Shiraz-53T | 2078 | 0.287202 | 0         |  |  |
|        |      | Shiraz-58T | 2162 | 0.221505 | 0         |  |  |
|        |      | Shiraz-71T | 2238 | 0.603631 | 0         |  |  |
|        |      | Shiraz-3T  | 90   | 0.219276 | 0         |  |  |
|        |      | Shiraz-3T  | 98   | 0        | -0.069276 |  |  |
|        |      | Shiraz-4T  | 253  | 0.372918 | 0         |  |  |
|        |      | Shiraz-36T | 378  | 0.179558 | 0         |  |  |
|        |      | Shiraz-44T | 645  | 0        | -0.474857 |  |  |
|        |      | Shiraz-46T | 943  | 0.093799 | 0         |  |  |
|        |      | Shiraz-77T | 1225 | 0        | -0.117922 |  |  |
|        |      | Shiraz-9T  | 1325 | 0.221899 | 0         |  |  |
|        |      | Shiraz-18T | 1434 | 0.244465 | 0         |  |  |
|        |      | Shiraz-22T | 1554 | 0        | -0.502826 |  |  |
|        |      | Shiraz-25T | 1698 | 0.21835  | 0         |  |  |
|        |      | Shiraz-28T | 1735 | 0.350744 | 0         |  |  |
|        |      | Shiraz-29T | 1778 | 0.120767 | 0         |  |  |
|        |      | Shiraz-32T | 1833 | 0.551336 | 0         |  |  |
|        |      | Shiraz-38T | 1951 | 0.250891 | 0         |  |  |
|        |      | Shiraz-53T | 2078 | 0.287202 | 0         |  |  |
|        |      | Shiraz-58T | 2162 | 0.221505 | 0         |  |  |
|        |      | Shiraz-71T | 2238 | 0.603631 | 0         |  |  |
| OR2AE1 | chr7 | Shiraz-3T  | 90   | 0.219276 | 0         |  |  |
|        |      | Shiraz-3T  | 94   | 0.74735  | 0         |  |  |
|        |      | Shiraz-4T  | 253  | 0.372918 | 0         |  |  |
|        |      | Shiraz-31T | 316  | 0.219196 | 0         |  |  |
|        |      | Shiraz-36T | 378  | 0.179558 | 0         |  |  |
|        |      | Shiraz-36T | 381  | 0.332628 | 0         |  |  |
|        |      | Shiraz-44T | 639  | 1.035032 | 0         |  |  |
|        |      | Shiraz-44T | 640  | 0.272608 | 0         |  |  |
|        |      | Shiraz-46T | 943  | 0.093799 | 0         |  |  |
|        |      | Shiraz-46T | 946  | 0.299835 | 0         |  |  |
|        |      | Shiraz-47T | 1030 | 0.257728 | 0         |  |  |
|        |      | Shiraz-49T | 1120 | 0.281656 | 0         |  |  |

|  |            |      |          |           |  |
|--|------------|------|----------|-----------|--|
|  | Shiraz-77T | 1225 | 0        | -0.117922 |  |
|  | Shiraz-77T | 1227 | 0.196445 | 0         |  |
|  | Shiraz-9T  | 1324 | 0.679266 | 0         |  |
|  | Shiraz-18T | 1434 | 0.244465 | 0         |  |
|  | Shiraz-22T | 1549 | 0        | -0.319623 |  |
|  | Shiraz-22T | 1551 | 0.324011 | 0         |  |
|  | Shiraz-25T | 1698 | 0.21835  | 0         |  |
|  | Shiraz-28T | 1735 | 0.350744 | 0         |  |
|  | Shiraz-29T | 1778 | 0.120767 | 0         |  |
|  | Shiraz-32T | 1833 | 0.551336 | 0         |  |
|  | Shiraz-38T | 1951 | 0.250891 | 0         |  |
|  | Shiraz-53T | 2078 | 0.287202 | 0         |  |
|  | Shiraz-71T | 2238 | 0.603631 | 0         |  |
|  | Shiraz-3T  | 90   | 0.219276 | 0         |  |
|  | Shiraz-3T  | 94   | 0.74735  | 0         |  |
|  | Shiraz-4T  | 253  | 0.372918 | 0         |  |
|  | Shiraz-31T | 316  | 0.219196 | 0         |  |
|  | Shiraz-36T | 378  | 0.179558 | 0         |  |
|  | Shiraz-36T | 381  | 0.332628 | 0         |  |
|  | Shiraz-44T | 639  | 1.035032 | 0         |  |
|  | Shiraz-44T | 640  | 0.272608 | 0         |  |
|  | Shiraz-46T | 943  | 0.093799 | 0         |  |
|  | Shiraz-46T | 946  | 0.299835 | 0         |  |
|  | Shiraz-47T | 1030 | 0.257728 | 0         |  |
|  | Shiraz-49T | 1120 | 0.281656 | 0         |  |
|  | Shiraz-77T | 1225 | 0        | -0.117922 |  |
|  | Shiraz-77T | 1227 | 0.196445 | 0         |  |
|  | Shiraz-9T  | 1324 | 0.679266 | 0         |  |
|  | Shiraz-18T | 1434 | 0.244465 | 0         |  |
|  | Shiraz-22T | 1549 | 0        | -0.319623 |  |
|  | Shiraz-22T | 1551 | 0.324011 | 0         |  |
|  | Shiraz-25T | 1698 | 0.21835  | 0         |  |
|  | Shiraz-28T | 1735 | 0.350744 | 0         |  |
|  | Shiraz-29T | 1778 | 0.120767 | 0         |  |
|  | Shiraz-32T | 1833 | 0.551336 | 0         |  |
|  | Shiraz-38T | 1951 | 0.250891 | 0         |  |
|  | Shiraz-53T | 2078 | 0.287202 | 0         |  |
|  | Shiraz-71T | 2238 | 0.603631 | 0         |  |
|  | Shiraz-3T  | 90   | 0.219276 | 0         |  |
|  | Shiraz-3T  | 94   | 0.74735  | 0         |  |
|  | Shiraz-4T  | 253  | 0.372918 | 0         |  |
|  | Shiraz-31T | 316  | 0.219196 | 0         |  |
|  | Shiraz-36T | 378  | 0.179558 | 0         |  |
|  | Shiraz-36T | 381  | 0.332628 | 0         |  |
|  | Shiraz-44T | 639  | 1.035032 | 0         |  |
|  | Shiraz-44T | 640  | 0.272608 | 0         |  |
|  | Shiraz-46T | 943  | 0.093799 | 0         |  |

|       |      |            |      |          |           |  |
|-------|------|------------|------|----------|-----------|--|
|       |      | Shiraz-46T | 946  | 0.299835 | 0         |  |
|       |      | Shiraz-47T | 1030 | 0.257728 | 0         |  |
|       |      | Shiraz-49T | 1120 | 0.281656 | 0         |  |
|       |      | Shiraz-77T | 1225 | 0        | -0.117922 |  |
|       |      | Shiraz-77T | 1227 | 0.196445 | 0         |  |
|       |      | Shiraz-9T  | 1324 | 0.679266 | 0         |  |
|       |      | Shiraz-18T | 1434 | 0.244465 | 0         |  |
|       |      | Shiraz-22T | 1549 | 0        | -0.319623 |  |
|       |      | Shiraz-22T | 1551 | 0.324011 | 0         |  |
|       |      | Shiraz-25T | 1698 | 0.21835  | 0         |  |
|       |      | Shiraz-28T | 1735 | 0.350744 | 0         |  |
|       |      | Shiraz-29T | 1778 | 0.120767 | 0         |  |
|       |      | Shiraz-32T | 1833 | 0.551336 | 0         |  |
|       |      | Shiraz-38T | 1951 | 0.250891 | 0         |  |
|       |      | Shiraz-53T | 2078 | 0.287202 | 0         |  |
|       |      | Shiraz-71T | 2238 | 0.603631 | 0         |  |
| OR2F1 | chr7 | Shiraz-3T  | 90   | 0.219276 | 0         |  |
|       |      | Shiraz-3T  | 98   | 0        | -0.069276 |  |
|       |      | Shiraz-4T  | 253  | 0.372918 | 0         |  |
|       |      | Shiraz-36T | 378  | 0.179558 | 0         |  |
|       |      | Shiraz-44T | 645  | 0        | -0.474857 |  |
|       |      | Shiraz-46T | 943  | 0.093799 | 0         |  |
|       |      | Shiraz-77T | 1225 | 0        | -0.117922 |  |
|       |      | Shiraz-9T  | 1325 | 0.221899 | 0         |  |
|       |      | Shiraz-18T | 1434 | 0.244465 | 0         |  |
|       |      | Shiraz-22T | 1554 | 0        | -0.502826 |  |
|       |      | Shiraz-25T | 1698 | 0.21835  | 0         |  |
|       |      | Shiraz-28T | 1735 | 0.350744 | 0         |  |
|       |      | Shiraz-29T | 1778 | 0.120767 | 0         |  |
|       |      | Shiraz-32T | 1833 | 0.551336 | 0         |  |
|       |      | Shiraz-38T | 1951 | 0.250891 | 0         |  |
|       |      | Shiraz-53T | 2078 | 0.287202 | 0         |  |
|       |      | Shiraz-58T | 2162 | 0.221505 | 0         |  |
|       |      | Shiraz-71T | 2238 | 0.603631 | 0         |  |
|       |      | Shiraz-3T  | 90   | 0.219276 | 0         |  |
|       |      | Shiraz-3T  | 98   | 0        | -0.069276 |  |
|       |      | Shiraz-4T  | 253  | 0.372918 | 0         |  |
|       |      | Shiraz-36T | 378  | 0.179558 | 0         |  |
|       |      | Shiraz-44T | 645  | 0        | -0.474857 |  |
|       |      | Shiraz-46T | 943  | 0.093799 | 0         |  |
|       |      | Shiraz-77T | 1225 | 0        | -0.117922 |  |
|       |      | Shiraz-9T  | 1325 | 0.221899 | 0         |  |
|       |      | Shiraz-18T | 1434 | 0.244465 | 0         |  |
|       |      | Shiraz-22T | 1554 | 0        | -0.502826 |  |
|       |      | Shiraz-25T | 1698 | 0.21835  | 0         |  |
|       |      | Shiraz-28T | 1735 | 0.350744 | 0         |  |
|       |      | Shiraz-29T | 1778 | 0.120767 | 0         |  |

|       |      |            |      |          |           |  |  |
|-------|------|------------|------|----------|-----------|--|--|
|       |      | Shiraz-32T | 1833 | 0.551336 | 0         |  |  |
|       |      | Shiraz-38T | 1951 | 0.250891 | 0         |  |  |
|       |      | Shiraz-53T | 2078 | 0.287202 | 0         |  |  |
|       |      | Shiraz-58T | 2162 | 0.221505 | 0         |  |  |
|       |      | Shiraz-71T | 2238 | 0.603631 | 0         |  |  |
|       |      | Shiraz-3T  | 90   | 0.219276 | 0         |  |  |
|       |      | Shiraz-3T  | 98   | 0        | -0.069276 |  |  |
|       |      | Shiraz-4T  | 253  | 0.372918 | 0         |  |  |
|       |      | Shiraz-36T | 378  | 0.179558 | 0         |  |  |
|       |      | Shiraz-44T | 645  | 0        | -0.474857 |  |  |
|       |      | Shiraz-46T | 943  | 0.093799 | 0         |  |  |
|       |      | Shiraz-77T | 1225 | 0        | -0.117922 |  |  |
|       |      | Shiraz-9T  | 1325 | 0.221899 | 0         |  |  |
|       |      | Shiraz-18T | 1434 | 0.244465 | 0         |  |  |
|       |      | Shiraz-22T | 1554 | 0        | -0.502826 |  |  |
|       |      | Shiraz-25T | 1698 | 0.21835  | 0         |  |  |
|       |      | Shiraz-28T | 1735 | 0.350744 | 0         |  |  |
|       |      | Shiraz-29T | 1778 | 0.120767 | 0         |  |  |
|       |      | Shiraz-32T | 1833 | 0.551336 | 0         |  |  |
|       |      | Shiraz-38T | 1951 | 0.250891 | 0         |  |  |
|       |      | Shiraz-53T | 2078 | 0.287202 | 0         |  |  |
|       |      | Shiraz-58T | 2162 | 0.221505 | 0         |  |  |
|       |      | Shiraz-71T | 2238 | 0.603631 | 0         |  |  |
| OR2F2 | chr7 | Shiraz-3T  | 90   | 0.219276 | 0         |  |  |
|       |      | Shiraz-3T  | 98   | 0        | -0.069276 |  |  |
|       |      | Shiraz-4T  | 253  | 0.372918 | 0         |  |  |
|       |      | Shiraz-36T | 378  | 0.179558 | 0         |  |  |
|       |      | Shiraz-44T | 645  | 0        | -0.474857 |  |  |
|       |      | Shiraz-46T | 943  | 0.093799 | 0         |  |  |
|       |      | Shiraz-77T | 1225 | 0        | -0.117922 |  |  |
|       |      | Shiraz-9T  | 1325 | 0.221899 | 0         |  |  |
|       |      | Shiraz-18T | 1434 | 0.244465 | 0         |  |  |
|       |      | Shiraz-22T | 1554 | 0        | -0.502826 |  |  |
|       |      | Shiraz-25T | 1698 | 0.21835  | 0         |  |  |
|       |      | Shiraz-28T | 1735 | 0.350744 | 0         |  |  |
|       |      | Shiraz-29T | 1778 | 0.120767 | 0         |  |  |
|       |      | Shiraz-32T | 1833 | 0.551336 | 0         |  |  |
|       |      | Shiraz-38T | 1951 | 0.250891 | 0         |  |  |
|       |      | Shiraz-53T | 2078 | 0.287202 | 0         |  |  |
|       |      | Shiraz-58T | 2162 | 0.221505 | 0         |  |  |
|       |      | Shiraz-71T | 2238 | 0.603631 | 0         |  |  |
|       |      | Shiraz-3T  | 90   | 0.219276 | 0         |  |  |
|       |      | Shiraz-3T  | 98   | 0        | -0.069276 |  |  |
|       |      | Shiraz-4T  | 253  | 0.372918 | 0         |  |  |
|       |      | Shiraz-36T | 378  | 0.179558 | 0         |  |  |
|       |      | Shiraz-44T | 645  | 0        | -0.474857 |  |  |
|       |      | Shiraz-46T | 943  | 0.093799 | 0         |  |  |

|       |      |            |      |          |           |  |  |
|-------|------|------------|------|----------|-----------|--|--|
|       |      | Shiraz-77T | 1225 | 0        | -0.117922 |  |  |
|       |      | Shiraz-9T  | 1325 | 0.221899 | 0         |  |  |
|       |      | Shiraz-18T | 1434 | 0.244465 | 0         |  |  |
|       |      | Shiraz-22T | 1554 | 0        | -0.502826 |  |  |
|       |      | Shiraz-25T | 1698 | 0.21835  | 0         |  |  |
|       |      | Shiraz-28T | 1735 | 0.350744 | 0         |  |  |
|       |      | Shiraz-29T | 1778 | 0.120767 | 0         |  |  |
|       |      | Shiraz-32T | 1833 | 0.551336 | 0         |  |  |
|       |      | Shiraz-38T | 1951 | 0.250891 | 0         |  |  |
|       |      | Shiraz-53T | 2078 | 0.287202 | 0         |  |  |
|       |      | Shiraz-58T | 2162 | 0.221505 | 0         |  |  |
|       |      | Shiraz-71T | 2238 | 0.603631 | 0         |  |  |
|       |      | Shiraz-3T  | 90   | 0.219276 | 0         |  |  |
|       |      | Shiraz-3T  | 98   | 0        | -0.069276 |  |  |
|       |      | Shiraz-4T  | 253  | 0.372918 | 0         |  |  |
|       |      | Shiraz-36T | 378  | 0.179558 | 0         |  |  |
|       |      | Shiraz-44T | 645  | 0        | -0.474857 |  |  |
|       |      | Shiraz-46T | 943  | 0.093799 | 0         |  |  |
|       |      | Shiraz-77T | 1225 | 0        | -0.117922 |  |  |
|       |      | Shiraz-9T  | 1325 | 0.221899 | 0         |  |  |
|       |      | Shiraz-18T | 1434 | 0.244465 | 0         |  |  |
|       |      | Shiraz-22T | 1554 | 0        | -0.502826 |  |  |
|       |      | Shiraz-25T | 1698 | 0.21835  | 0         |  |  |
|       |      | Shiraz-28T | 1735 | 0.350744 | 0         |  |  |
|       |      | Shiraz-29T | 1778 | 0.120767 | 0         |  |  |
|       |      | Shiraz-32T | 1833 | 0.551336 | 0         |  |  |
|       |      | Shiraz-38T | 1951 | 0.250891 | 0         |  |  |
|       |      | Shiraz-53T | 2078 | 0.287202 | 0         |  |  |
|       |      | Shiraz-58T | 2162 | 0.221505 | 0         |  |  |
|       |      | Shiraz-71T | 2238 | 0.603631 | 0         |  |  |
| OR6B1 | chr7 | Shiraz-3T  | 90   | 0.219276 | 0         |  |  |
|       |      | Shiraz-3T  | 98   | 0        | -0.069276 |  |  |
|       |      | Shiraz-4T  | 253  | 0.372918 | 0         |  |  |
|       |      | Shiraz-36T | 378  | 0.179558 | 0         |  |  |
|       |      | Shiraz-44T | 645  | 0        | -0.474857 |  |  |
|       |      | Shiraz-46T | 943  | 0.093799 | 0         |  |  |
|       |      | Shiraz-77T | 1225 | 0        | -0.117922 |  |  |
|       |      | Shiraz-9T  | 1325 | 0.221899 | 0         |  |  |
|       |      | Shiraz-18T | 1434 | 0.244465 | 0         |  |  |
|       |      | Shiraz-22T | 1554 | 0        | -0.502826 |  |  |
|       |      | Shiraz-25T | 1698 | 0.21835  | 0         |  |  |
|       |      | Shiraz-28T | 1735 | 0.350744 | 0         |  |  |
|       |      | Shiraz-29T | 1778 | 0.120767 | 0         |  |  |
|       |      | Shiraz-32T | 1833 | 0.551336 | 0         |  |  |
|       |      | Shiraz-38T | 1951 | 0.250891 | 0         |  |  |
|       |      | Shiraz-53T | 2078 | 0.287202 | 0         |  |  |
|       |      | Shiraz-58T | 2162 | 0.221505 | 0         |  |  |

|       |      |            |      |          |           |  |  |
|-------|------|------------|------|----------|-----------|--|--|
|       |      | Shiraz-71T | 2238 | 0.603631 | 0         |  |  |
|       |      | Shiraz-3T  | 90   | 0.219276 | 0         |  |  |
|       |      | Shiraz-3T  | 98   | 0        | -0.069276 |  |  |
|       |      | Shiraz-4T  | 253  | 0.372918 | 0         |  |  |
|       |      | Shiraz-36T | 378  | 0.179558 | 0         |  |  |
|       |      | Shiraz-44T | 645  | 0        | -0.474857 |  |  |
|       |      | Shiraz-46T | 943  | 0.093799 | 0         |  |  |
|       |      | Shiraz-77T | 1225 | 0        | -0.117922 |  |  |
|       |      | Shiraz-9T  | 1325 | 0.221899 | 0         |  |  |
|       |      | Shiraz-18T | 1434 | 0.244465 | 0         |  |  |
|       |      | Shiraz-22T | 1554 | 0        | -0.502826 |  |  |
|       |      | Shiraz-25T | 1698 | 0.21835  | 0         |  |  |
|       |      | Shiraz-28T | 1735 | 0.350744 | 0         |  |  |
|       |      | Shiraz-29T | 1778 | 0.120767 | 0         |  |  |
|       |      | Shiraz-32T | 1833 | 0.551336 | 0         |  |  |
|       |      | Shiraz-38T | 1951 | 0.250891 | 0         |  |  |
|       |      | Shiraz-53T | 2078 | 0.287202 | 0         |  |  |
|       |      | Shiraz-58T | 2162 | 0.221505 | 0         |  |  |
|       |      | Shiraz-71T | 2238 | 0.603631 | 0         |  |  |
|       |      | Shiraz-3T  | 90   | 0.219276 | 0         |  |  |
|       |      | Shiraz-3T  | 98   | 0        | -0.069276 |  |  |
|       |      | Shiraz-4T  | 253  | 0.372918 | 0         |  |  |
|       |      | Shiraz-36T | 378  | 0.179558 | 0         |  |  |
|       |      | Shiraz-44T | 645  | 0        | -0.474857 |  |  |
|       |      | Shiraz-46T | 943  | 0.093799 | 0         |  |  |
|       |      | Shiraz-77T | 1225 | 0        | -0.117922 |  |  |
|       |      | Shiraz-9T  | 1325 | 0.221899 | 0         |  |  |
|       |      | Shiraz-18T | 1434 | 0.244465 | 0         |  |  |
|       |      | Shiraz-22T | 1554 | 0        | -0.502826 |  |  |
|       |      | Shiraz-25T | 1698 | 0.21835  | 0         |  |  |
|       |      | Shiraz-28T | 1735 | 0.350744 | 0         |  |  |
|       |      | Shiraz-29T | 1778 | 0.120767 | 0         |  |  |
|       |      | Shiraz-32T | 1833 | 0.551336 | 0         |  |  |
|       |      | Shiraz-38T | 1951 | 0.250891 | 0         |  |  |
|       |      | Shiraz-53T | 2078 | 0.287202 | 0         |  |  |
|       |      | Shiraz-58T | 2162 | 0.221505 | 0         |  |  |
|       |      | Shiraz-71T | 2238 | 0.603631 | 0         |  |  |
| OR6V1 | chr7 | Shiraz-3T  | 90   | 0.219276 | 0         |  |  |
|       |      | Shiraz-4T  | 253  | 0.372918 | 0         |  |  |
|       |      | Shiraz-36T | 378  | 0.179558 | 0         |  |  |
|       |      | Shiraz-46T | 943  | 0.093799 | 0         |  |  |
|       |      | Shiraz-77T | 1225 | 0        | -0.117922 |  |  |
|       |      | Shiraz-9T  | 1325 | 0.221899 | 0         |  |  |
|       |      | Shiraz-18T | 1434 | 0.244465 | 0         |  |  |
|       |      | Shiraz-25T | 1698 | 0.21835  | 0         |  |  |
|       |      | Shiraz-28T | 1735 | 0.350744 | 0         |  |  |
|       |      | Shiraz-29T | 1778 | 0.120767 | 0         |  |  |



|        |      |            |      |          |           |  |  |
|--------|------|------------|------|----------|-----------|--|--|
|        |      | Shiraz-32T | 1833 | 0.551336 | 0         |  |  |
|        |      | Shiraz-38T | 1951 | 0.250891 | 0         |  |  |
|        |      | Shiraz-53T | 2078 | 0.287202 | 0         |  |  |
|        |      | Shiraz-58T | 2162 | 0.221505 | 0         |  |  |
|        |      | Shiraz-71T | 2238 | 0.603631 | 0         |  |  |
|        |      | Shiraz-3T  | 90   | 0.219276 | 0         |  |  |
|        |      | Shiraz-4T  | 253  | 0.372918 | 0         |  |  |
|        |      | Shiraz-36T | 378  | 0.179558 | 0         |  |  |
|        |      | Shiraz-46T | 943  | 0.093799 | 0         |  |  |
|        |      | Shiraz-77T | 1225 | 0        | -0.117922 |  |  |
|        |      | Shiraz-9T  | 1325 | 0.221899 | 0         |  |  |
|        |      | Shiraz-18T | 1434 | 0.244465 | 0         |  |  |
|        |      | Shiraz-25T | 1698 | 0.21835  | 0         |  |  |
|        |      | Shiraz-28T | 1735 | 0.350744 | 0         |  |  |
|        |      | Shiraz-29T | 1778 | 0.120767 | 0         |  |  |
|        |      | Shiraz-32T | 1833 | 0.551336 | 0         |  |  |
|        |      | Shiraz-38T | 1951 | 0.250891 | 0         |  |  |
|        |      | Shiraz-53T | 2078 | 0.287202 | 0         |  |  |
|        |      | Shiraz-58T | 2162 | 0.221505 | 0         |  |  |
|        |      | Shiraz-71T | 2238 | 0.603631 | 0         |  |  |
|        |      | Shiraz-3T  | 90   | 0.219276 | 0         |  |  |
|        |      | Shiraz-4T  | 253  | 0.372918 | 0         |  |  |
|        |      | Shiraz-36T | 378  | 0.179558 | 0         |  |  |
|        |      | Shiraz-46T | 943  | 0.093799 | 0         |  |  |
|        |      | Shiraz-77T | 1225 | 0        | -0.117922 |  |  |
|        |      | Shiraz-9T  | 1325 | 0.221899 | 0         |  |  |
|        |      | Shiraz-18T | 1434 | 0.244465 | 0         |  |  |
|        |      | Shiraz-25T | 1698 | 0.21835  | 0         |  |  |
|        |      | Shiraz-28T | 1735 | 0.350744 | 0         |  |  |
|        |      | Shiraz-29T | 1778 | 0.120767 | 0         |  |  |
|        |      | Shiraz-32T | 1833 | 0.551336 | 0         |  |  |
|        |      | Shiraz-38T | 1951 | 0.250891 | 0         |  |  |
|        |      | Shiraz-53T | 2078 | 0.287202 | 0         |  |  |
|        |      | Shiraz-58T | 2162 | 0.221505 | 0         |  |  |
|        |      | Shiraz-71T | 2238 | 0.603631 | 0         |  |  |
| OR6W1P | chr7 | Shiraz-3T  | 90   | 0.219276 | 0         |  |  |
|        |      | Shiraz-4T  | 253  | 0.372918 | 0         |  |  |
|        |      | Shiraz-36T | 378  | 0.179558 | 0         |  |  |
|        |      | Shiraz-46T | 943  | 0.093799 | 0         |  |  |
|        |      | Shiraz-77T | 1225 | 0        | -0.117922 |  |  |
|        |      | Shiraz-9T  | 1325 | 0.221899 | 0         |  |  |
|        |      | Shiraz-18T | 1434 | 0.244465 | 0         |  |  |
|        |      | Shiraz-25T | 1698 | 0.21835  | 0         |  |  |
|        |      | Shiraz-28T | 1735 | 0.350744 | 0         |  |  |
|        |      | Shiraz-29T | 1778 | 0.120767 | 0         |  |  |
|        |      | Shiraz-32T | 1833 | 0.551336 | 0         |  |  |
|        |      | Shiraz-38T | 1951 | 0.250891 | 0         |  |  |

|       |      |            |      |          |           |  |
|-------|------|------------|------|----------|-----------|--|
|       |      | Shiraz-53T | 2078 | 0.287202 | 0         |  |
|       |      | Shiraz-58T | 2162 | 0.221505 | 0         |  |
|       |      | Shiraz-71T | 2238 | 0.603631 | 0         |  |
|       |      | Shiraz-3T  | 90   | 0.219276 | 0         |  |
|       |      | Shiraz-4T  | 253  | 0.372918 | 0         |  |
|       |      | Shiraz-36T | 378  | 0.179558 | 0         |  |
|       |      | Shiraz-46T | 943  | 0.093799 | 0         |  |
|       |      | Shiraz-77T | 1225 | 0        | -0.117922 |  |
|       |      | Shiraz-9T  | 1325 | 0.221899 | 0         |  |
|       |      | Shiraz-18T | 1434 | 0.244465 | 0         |  |
|       |      | Shiraz-25T | 1698 | 0.21835  | 0         |  |
|       |      | Shiraz-28T | 1735 | 0.350744 | 0         |  |
|       |      | Shiraz-29T | 1778 | 0.120767 | 0         |  |
|       |      | Shiraz-32T | 1833 | 0.551336 | 0         |  |
|       |      | Shiraz-38T | 1951 | 0.250891 | 0         |  |
|       |      | Shiraz-53T | 2078 | 0.287202 | 0         |  |
|       |      | Shiraz-58T | 2162 | 0.221505 | 0         |  |
|       |      | Shiraz-71T | 2238 | 0.603631 | 0         |  |
|       |      | Shiraz-3T  | 90   | 0.219276 | 0         |  |
|       |      | Shiraz-4T  | 253  | 0.372918 | 0         |  |
|       |      | Shiraz-36T | 378  | 0.179558 | 0         |  |
|       |      | Shiraz-46T | 943  | 0.093799 | 0         |  |
|       |      | Shiraz-77T | 1225 | 0        | -0.117922 |  |
|       |      | Shiraz-9T  | 1325 | 0.221899 | 0         |  |
|       |      | Shiraz-18T | 1434 | 0.244465 | 0         |  |
|       |      | Shiraz-25T | 1698 | 0.21835  | 0         |  |
|       |      | Shiraz-28T | 1735 | 0.350744 | 0         |  |
|       |      | Shiraz-29T | 1778 | 0.120767 | 0         |  |
|       |      | Shiraz-32T | 1833 | 0.551336 | 0         |  |
|       |      | Shiraz-38T | 1951 | 0.250891 | 0         |  |
|       |      | Shiraz-53T | 2078 | 0.287202 | 0         |  |
|       |      | Shiraz-58T | 2162 | 0.221505 | 0         |  |
|       |      | Shiraz-71T | 2238 | 0.603631 | 0         |  |
| OR9A2 | chr7 | Shiraz-3T  | 90   | 0.219276 | 0         |  |
|       |      | Shiraz-4T  | 253  | 0.372918 | 0         |  |
|       |      | Shiraz-36T | 378  | 0.179558 | 0         |  |
|       |      | Shiraz-46T | 943  | 0.093799 | 0         |  |
|       |      | Shiraz-77T | 1225 | 0        | -0.117922 |  |
|       |      | Shiraz-9T  | 1325 | 0.221899 | 0         |  |
|       |      | Shiraz-18T | 1434 | 0.244465 | 0         |  |
|       |      | Shiraz-25T | 1698 | 0.21835  | 0         |  |
|       |      | Shiraz-28T | 1735 | 0.350744 | 0         |  |
|       |      | Shiraz-29T | 1778 | 0.120767 | 0         |  |
|       |      | Shiraz-32T | 1833 | 0.551336 | 0         |  |
|       |      | Shiraz-38T | 1951 | 0.250891 | 0         |  |
|       |      | Shiraz-53T | 2078 | 0.287202 | 0         |  |
|       |      | Shiraz-58T | 2162 | 0.221505 | 0         |  |

|       |      |            |      |          |           |  |  |
|-------|------|------------|------|----------|-----------|--|--|
|       |      | Shiraz-71T | 2238 | 0.603631 | 0         |  |  |
|       |      | Shiraz-3T  | 90   | 0.219276 | 0         |  |  |
|       |      | Shiraz-4T  | 253  | 0.372918 | 0         |  |  |
|       |      | Shiraz-36T | 378  | 0.179558 | 0         |  |  |
|       |      | Shiraz-46T | 943  | 0.093799 | 0         |  |  |
|       |      | Shiraz-77T | 1225 | 0        | -0.117922 |  |  |
|       |      | Shiraz-9T  | 1325 | 0.221899 | 0         |  |  |
|       |      | Shiraz-18T | 1434 | 0.244465 | 0         |  |  |
|       |      | Shiraz-25T | 1698 | 0.21835  | 0         |  |  |
|       |      | Shiraz-28T | 1735 | 0.350744 | 0         |  |  |
|       |      | Shiraz-29T | 1778 | 0.120767 | 0         |  |  |
|       |      | Shiraz-32T | 1833 | 0.551336 | 0         |  |  |
|       |      | Shiraz-38T | 1951 | 0.250891 | 0         |  |  |
|       |      | Shiraz-53T | 2078 | 0.287202 | 0         |  |  |
|       |      | Shiraz-58T | 2162 | 0.221505 | 0         |  |  |
|       |      | Shiraz-71T | 2238 | 0.603631 | 0         |  |  |
|       |      | Shiraz-3T  | 90   | 0.219276 | 0         |  |  |
|       |      | Shiraz-4T  | 253  | 0.372918 | 0         |  |  |
|       |      | Shiraz-36T | 378  | 0.179558 | 0         |  |  |
|       |      | Shiraz-46T | 943  | 0.093799 | 0         |  |  |
|       |      | Shiraz-77T | 1225 | 0        | -0.117922 |  |  |
|       |      | Shiraz-9T  | 1325 | 0.221899 | 0         |  |  |
|       |      | Shiraz-18T | 1434 | 0.244465 | 0         |  |  |
|       |      | Shiraz-25T | 1698 | 0.21835  | 0         |  |  |
|       |      | Shiraz-28T | 1735 | 0.350744 | 0         |  |  |
|       |      | Shiraz-29T | 1778 | 0.120767 | 0         |  |  |
|       |      | Shiraz-32T | 1833 | 0.551336 | 0         |  |  |
|       |      | Shiraz-38T | 1951 | 0.250891 | 0         |  |  |
|       |      | Shiraz-53T | 2078 | 0.287202 | 0         |  |  |
|       |      | Shiraz-58T | 2162 | 0.221505 | 0         |  |  |
|       |      | Shiraz-71T | 2238 | 0.603631 | 0         |  |  |
| OR9A4 | chr7 | Shiraz-3T  | 90   | 0.219276 | 0         |  |  |
|       |      | Shiraz-4T  | 253  | 0.372918 | 0         |  |  |
|       |      | Shiraz-36T | 378  | 0.179558 | 0         |  |  |
|       |      | Shiraz-46T | 943  | 0.093799 | 0         |  |  |
|       |      | Shiraz-77T | 1225 | 0        | -0.117922 |  |  |
|       |      | Shiraz-9T  | 1325 | 0.221899 | 0         |  |  |
|       |      | Shiraz-18T | 1434 | 0.244465 | 0         |  |  |
|       |      | Shiraz-25T | 1698 | 0.21835  | 0         |  |  |
|       |      | Shiraz-28T | 1735 | 0.350744 | 0         |  |  |
|       |      | Shiraz-29T | 1778 | 0.120767 | 0         |  |  |
|       |      | Shiraz-32T | 1833 | 0.551336 | 0         |  |  |
|       |      | Shiraz-38T | 1951 | 0.250891 | 0         |  |  |
|       |      | Shiraz-53T | 2078 | 0.287202 | 0         |  |  |
|       |      | Shiraz-58T | 2162 | 0.221505 | 0         |  |  |
|       |      | Shiraz-71T | 2238 | 0.603631 | 0         |  |  |
|       |      | Shiraz-3T  | 90   | 0.219276 | 0         |  |  |

|       |      |            |      |          |           |  |
|-------|------|------------|------|----------|-----------|--|
|       |      | Shiraz-4T  | 253  | 0.372918 | 0         |  |
|       |      | Shiraz-36T | 378  | 0.179558 | 0         |  |
|       |      | Shiraz-46T | 943  | 0.093799 | 0         |  |
|       |      | Shiraz-77T | 1225 | 0        | -0.117922 |  |
|       |      | Shiraz-9T  | 1325 | 0.221899 | 0         |  |
|       |      | Shiraz-18T | 1434 | 0.244465 | 0         |  |
|       |      | Shiraz-25T | 1698 | 0.21835  | 0         |  |
|       |      | Shiraz-28T | 1735 | 0.350744 | 0         |  |
|       |      | Shiraz-29T | 1778 | 0.120767 | 0         |  |
|       |      | Shiraz-32T | 1833 | 0.551336 | 0         |  |
|       |      | Shiraz-38T | 1951 | 0.250891 | 0         |  |
|       |      | Shiraz-53T | 2078 | 0.287202 | 0         |  |
|       |      | Shiraz-58T | 2162 | 0.221505 | 0         |  |
|       |      | Shiraz-71T | 2238 | 0.603631 | 0         |  |
|       |      | Shiraz-3T  | 90   | 0.219276 | 0         |  |
|       |      | Shiraz-4T  | 253  | 0.372918 | 0         |  |
|       |      | Shiraz-36T | 378  | 0.179558 | 0         |  |
|       |      | Shiraz-46T | 943  | 0.093799 | 0         |  |
|       |      | Shiraz-77T | 1225 | 0        | -0.117922 |  |
|       |      | Shiraz-9T  | 1325 | 0.221899 | 0         |  |
|       |      | Shiraz-18T | 1434 | 0.244465 | 0         |  |
|       |      | Shiraz-25T | 1698 | 0.21835  | 0         |  |
|       |      | Shiraz-28T | 1735 | 0.350744 | 0         |  |
|       |      | Shiraz-29T | 1778 | 0.120767 | 0         |  |
|       |      | Shiraz-32T | 1833 | 0.551336 | 0         |  |
|       |      | Shiraz-38T | 1951 | 0.250891 | 0         |  |
|       |      | Shiraz-53T | 2078 | 0.287202 | 0         |  |
|       |      | Shiraz-58T | 2162 | 0.221505 | 0         |  |
|       |      | Shiraz-71T | 2238 | 0.603631 | 0         |  |
| ORAI2 | chr7 | Shiraz-3T  | 90   | 0.219276 | 0         |  |
|       |      | Shiraz-3T  | 94   | 0.74735  | 0         |  |
|       |      | Shiraz-4T  | 253  | 0.372918 | 0         |  |
|       |      | Shiraz-31T | 316  | 0.219196 | 0         |  |
|       |      | Shiraz-36T | 378  | 0.179558 | 0         |  |
|       |      | Shiraz-36T | 381  | 0.332628 | 0         |  |
|       |      | Shiraz-44T | 639  | 1.035032 | 0         |  |
|       |      | Shiraz-46T | 943  | 0.093799 | 0         |  |
|       |      | Shiraz-46T | 946  | 0.299835 | 0         |  |
|       |      | Shiraz-47T | 1030 | 0.257728 | 0         |  |
|       |      | Shiraz-49T | 1120 | 0.281656 | 0         |  |
|       |      | Shiraz-77T | 1225 | 0        | -0.117922 |  |
|       |      | Shiraz-77T | 1227 | 0.196445 | 0         |  |
|       |      | Shiraz-9T  | 1324 | 0.679266 | 0         |  |
|       |      | Shiraz-18T | 1434 | 0.244465 | 0         |  |
|       |      | Shiraz-22T | 1549 | 0        | -0.319623 |  |
|       |      | Shiraz-22T | 1551 | 0.324011 | 0         |  |
|       |      | Shiraz-25T | 1698 | 0.21835  | 0         |  |

|  |            |      |          |           |  |
|--|------------|------|----------|-----------|--|
|  | Shiraz-28T | 1735 | 0.350744 | 0         |  |
|  | Shiraz-29T | 1778 | 0.120767 | 0         |  |
|  | Shiraz-32T | 1833 | 0.551336 | 0         |  |
|  | Shiraz-38T | 1951 | 0.250891 | 0         |  |
|  | Shiraz-53T | 2078 | 0.287202 | 0         |  |
|  | Shiraz-58T | 2160 | 0.399007 | 0         |  |
|  | Shiraz-71T | 2238 | 0.603631 | 0         |  |
|  | Shiraz-3T  | 90   | 0.219276 | 0         |  |
|  | Shiraz-3T  | 94   | 0.74735  | 0         |  |
|  | Shiraz-4T  | 253  | 0.372918 | 0         |  |
|  | Shiraz-31T | 316  | 0.219196 | 0         |  |
|  | Shiraz-36T | 378  | 0.179558 | 0         |  |
|  | Shiraz-36T | 381  | 0.332628 | 0         |  |
|  | Shiraz-44T | 639  | 1.035032 | 0         |  |
|  | Shiraz-46T | 943  | 0.093799 | 0         |  |
|  | Shiraz-46T | 946  | 0.299835 | 0         |  |
|  | Shiraz-47T | 1030 | 0.257728 | 0         |  |
|  | Shiraz-49T | 1120 | 0.281656 | 0         |  |
|  | Shiraz-77T | 1225 | 0        | -0.117922 |  |
|  | Shiraz-77T | 1227 | 0.196445 | 0         |  |
|  | Shiraz-9T  | 1324 | 0.679266 | 0         |  |
|  | Shiraz-18T | 1434 | 0.244465 | 0         |  |
|  | Shiraz-22T | 1549 | 0        | -0.319623 |  |
|  | Shiraz-22T | 1551 | 0.324011 | 0         |  |
|  | Shiraz-25T | 1698 | 0.21835  | 0         |  |
|  | Shiraz-28T | 1735 | 0.350744 | 0         |  |
|  | Shiraz-29T | 1778 | 0.120767 | 0         |  |
|  | Shiraz-32T | 1833 | 0.551336 | 0         |  |
|  | Shiraz-38T | 1951 | 0.250891 | 0         |  |
|  | Shiraz-53T | 2078 | 0.287202 | 0         |  |
|  | Shiraz-58T | 2160 | 0.399007 | 0         |  |
|  | Shiraz-71T | 2238 | 0.603631 | 0         |  |
|  | Shiraz-3T  | 90   | 0.219276 | 0         |  |
|  | Shiraz-3T  | 94   | 0.74735  | 0         |  |
|  | Shiraz-4T  | 253  | 0.372918 | 0         |  |
|  | Shiraz-31T | 316  | 0.219196 | 0         |  |
|  | Shiraz-36T | 378  | 0.179558 | 0         |  |
|  | Shiraz-36T | 381  | 0.332628 | 0         |  |
|  | Shiraz-44T | 639  | 1.035032 | 0         |  |
|  | Shiraz-46T | 943  | 0.093799 | 0         |  |
|  | Shiraz-46T | 946  | 0.299835 | 0         |  |
|  | Shiraz-47T | 1030 | 0.257728 | 0         |  |
|  | Shiraz-49T | 1120 | 0.281656 | 0         |  |
|  | Shiraz-77T | 1225 | 0        | -0.117922 |  |
|  | Shiraz-77T | 1227 | 0.196445 | 0         |  |
|  | Shiraz-9T  | 1324 | 0.679266 | 0         |  |
|  | Shiraz-18T | 1434 | 0.244465 | 0         |  |

|       |      |            |      |          |           |  |  |
|-------|------|------------|------|----------|-----------|--|--|
|       |      | Shiraz-22T | 1549 | 0        | -0.319623 |  |  |
|       |      | Shiraz-22T | 1551 | 0.324011 | 0         |  |  |
|       |      | Shiraz-25T | 1698 | 0.21835  | 0         |  |  |
|       |      | Shiraz-28T | 1735 | 0.350744 | 0         |  |  |
|       |      | Shiraz-29T | 1778 | 0.120767 | 0         |  |  |
|       |      | Shiraz-32T | 1833 | 0.551336 | 0         |  |  |
|       |      | Shiraz-38T | 1951 | 0.250891 | 0         |  |  |
|       |      | Shiraz-53T | 2078 | 0.287202 | 0         |  |  |
|       |      | Shiraz-58T | 2160 | 0.399007 | 0         |  |  |
|       |      | Shiraz-71T | 2238 | 0.603631 | 0         |  |  |
| ORC5L | chr7 | Shiraz-3T  | 90   | 0.219276 | 0         |  |  |
|       |      | Shiraz-3T  | 90   | 0.219276 | 0         |  |  |
|       |      | Shiraz-4T  | 253  | 0.372918 | 0         |  |  |
|       |      | Shiraz-4T  | 253  | 0.372918 | 0         |  |  |
|       |      | Shiraz-36T | 378  | 0.179558 | 0         |  |  |
|       |      | Shiraz-36T | 378  | 0.179558 | 0         |  |  |
|       |      | Shiraz-46T | 943  | 0.093799 | 0         |  |  |
|       |      | Shiraz-46T | 943  | 0.093799 | 0         |  |  |
|       |      | Shiraz-77T | 1225 | 0        | -0.117922 |  |  |
|       |      | Shiraz-77T | 1225 | 0        | -0.117922 |  |  |
|       |      | Shiraz-18T | 1434 | 0.244465 | 0         |  |  |
|       |      | Shiraz-18T | 1434 | 0.244465 | 0         |  |  |
|       |      | Shiraz-22T | 1549 | 0        | -0.319623 |  |  |
|       |      | Shiraz-22T | 1549 | 0        | -0.319623 |  |  |
|       |      | Shiraz-25T | 1698 | 0.21835  | 0         |  |  |
|       |      | Shiraz-25T | 1698 | 0.21835  | 0         |  |  |
|       |      | Shiraz-28T | 1735 | 0.350744 | 0         |  |  |
|       |      | Shiraz-28T | 1735 | 0.350744 | 0         |  |  |
|       |      | Shiraz-29T | 1778 | 0.120767 | 0         |  |  |
|       |      | Shiraz-29T | 1778 | 0.120767 | 0         |  |  |
|       |      | Shiraz-32T | 1833 | 0.551336 | 0         |  |  |
|       |      | Shiraz-32T | 1833 | 0.551336 | 0         |  |  |
|       |      | Shiraz-38T | 1951 | 0.250891 | 0         |  |  |
|       |      | Shiraz-38T | 1951 | 0.250891 | 0         |  |  |
|       |      | Shiraz-53T | 2078 | 0.287202 | 0         |  |  |
|       |      | Shiraz-53T | 2078 | 0.287202 | 0         |  |  |
|       |      | Shiraz-71T | 2238 | 0.603631 | 0         |  |  |
|       |      | Shiraz-71T | 2238 | 0.603631 | 0         |  |  |
|       |      | Shiraz-3T  | 90   | 0.219276 | 0         |  |  |
|       |      | Shiraz-3T  | 90   | 0.219276 | 0         |  |  |
|       |      | Shiraz-4T  | 253  | 0.372918 | 0         |  |  |
|       |      | Shiraz-4T  | 253  | 0.372918 | 0         |  |  |
|       |      | Shiraz-36T | 378  | 0.179558 | 0         |  |  |
|       |      | Shiraz-36T | 378  | 0.179558 | 0         |  |  |
|       |      | Shiraz-46T | 943  | 0.093799 | 0         |  |  |
|       |      | Shiraz-46T | 943  | 0.093799 | 0         |  |  |
|       |      | Shiraz-77T | 1225 | 0        | -0.117922 |  |  |

|  |            |      |          |           |  |
|--|------------|------|----------|-----------|--|
|  | Shiraz-77T | 1225 | 0        | -0.117922 |  |
|  | Shiraz-18T | 1434 | 0.244465 | 0         |  |
|  | Shiraz-18T | 1434 | 0.244465 | 0         |  |
|  | Shiraz-22T | 1549 | 0        | -0.319623 |  |
|  | Shiraz-22T | 1549 | 0        | -0.319623 |  |
|  | Shiraz-25T | 1698 | 0.21835  | 0         |  |
|  | Shiraz-25T | 1698 | 0.21835  | 0         |  |
|  | Shiraz-28T | 1735 | 0.350744 | 0         |  |
|  | Shiraz-28T | 1735 | 0.350744 | 0         |  |
|  | Shiraz-29T | 1778 | 0.120767 | 0         |  |
|  | Shiraz-29T | 1778 | 0.120767 | 0         |  |
|  | Shiraz-32T | 1833 | 0.551336 | 0         |  |
|  | Shiraz-32T | 1833 | 0.551336 | 0         |  |
|  | Shiraz-38T | 1951 | 0.250891 | 0         |  |
|  | Shiraz-38T | 1951 | 0.250891 | 0         |  |
|  | Shiraz-53T | 2078 | 0.287202 | 0         |  |
|  | Shiraz-53T | 2078 | 0.287202 | 0         |  |
|  | Shiraz-71T | 2238 | 0.603631 | 0         |  |
|  | Shiraz-71T | 2238 | 0.603631 | 0         |  |
|  | Shiraz-3T  | 90   | 0.219276 | 0         |  |
|  | Shiraz-3T  | 90   | 0.219276 | 0         |  |
|  | Shiraz-4T  | 253  | 0.372918 | 0         |  |
|  | Shiraz-4T  | 253  | 0.372918 | 0         |  |
|  | Shiraz-36T | 378  | 0.179558 | 0         |  |
|  | Shiraz-36T | 378  | 0.179558 | 0         |  |
|  | Shiraz-46T | 943  | 0.093799 | 0         |  |
|  | Shiraz-46T | 943  | 0.093799 | 0         |  |
|  | Shiraz-77T | 1225 | 0        | -0.117922 |  |
|  | Shiraz-77T | 1225 | 0        | -0.117922 |  |
|  | Shiraz-18T | 1434 | 0.244465 | 0         |  |
|  | Shiraz-18T | 1434 | 0.244465 | 0         |  |
|  | Shiraz-22T | 1549 | 0        | -0.319623 |  |
|  | Shiraz-22T | 1549 | 0        | -0.319623 |  |
|  | Shiraz-25T | 1698 | 0.21835  | 0         |  |
|  | Shiraz-25T | 1698 | 0.21835  | 0         |  |
|  | Shiraz-28T | 1735 | 0.350744 | 0         |  |
|  | Shiraz-28T | 1735 | 0.350744 | 0         |  |
|  | Shiraz-29T | 1778 | 0.120767 | 0         |  |
|  | Shiraz-29T | 1778 | 0.120767 | 0         |  |
|  | Shiraz-32T | 1833 | 0.551336 | 0         |  |
|  | Shiraz-32T | 1833 | 0.551336 | 0         |  |
|  | Shiraz-38T | 1951 | 0.250891 | 0         |  |
|  | Shiraz-38T | 1951 | 0.250891 | 0         |  |
|  | Shiraz-53T | 2078 | 0.287202 | 0         |  |
|  | Shiraz-53T | 2078 | 0.287202 | 0         |  |
|  | Shiraz-71T | 2238 | 0.603631 | 0         |  |
|  | Shiraz-71T | 2238 | 0.603631 | 0         |  |

|        |      |            |      |          |           |  |
|--------|------|------------|------|----------|-----------|--|
| OSBPL3 | chr7 | Shiraz-3T  | 87   | 0.198593 | 0         |  |
|        |      | Shiraz-4T  | 252  | 0.192083 | 0         |  |
|        |      | Shiraz-36T | 376  | 0.159952 | 0         |  |
|        |      | Shiraz-46T | 942  | 0.069143 | 0         |  |
|        |      | Shiraz-18T | 1433 | 0.250973 | 0         |  |
|        |      | Shiraz-25T | 1697 | 0.21945  | 0         |  |
|        |      | Shiraz-28T | 1734 | 0.362882 | 0         |  |
|        |      | Shiraz-29T | 1777 | 0.156747 | 0         |  |
|        |      | Shiraz-38T | 1950 | 0.265916 | 0         |  |
|        |      | Shiraz-71T | 2236 | 0.320072 | 0         |  |
|        |      | Shiraz-3T  | 87   | 0.198593 | 0         |  |
|        |      | Shiraz-4T  | 252  | 0.192083 | 0         |  |
|        |      | Shiraz-36T | 376  | 0.159952 | 0         |  |
|        |      | Shiraz-46T | 942  | 0.069143 | 0         |  |
|        |      | Shiraz-18T | 1433 | 0.250973 | 0         |  |
|        |      | Shiraz-25T | 1697 | 0.21945  | 0         |  |
|        |      | Shiraz-28T | 1734 | 0.362882 | 0         |  |
|        |      | Shiraz-29T | 1777 | 0.156747 | 0         |  |
|        |      | Shiraz-38T | 1950 | 0.265916 | 0         |  |
|        |      | Shiraz-71T | 2236 | 0.320072 | 0         |  |
|        |      | Shiraz-3T  | 87   | 0.198593 | 0         |  |
|        |      | Shiraz-4T  | 252  | 0.192083 | 0         |  |
|        |      | Shiraz-36T | 376  | 0.159952 | 0         |  |
|        |      | Shiraz-46T | 942  | 0.069143 | 0         |  |
|        |      | Shiraz-18T | 1433 | 0.250973 | 0         |  |
|        |      | Shiraz-25T | 1697 | 0.21945  | 0         |  |
|        |      | Shiraz-28T | 1734 | 0.362882 | 0         |  |
|        |      | Shiraz-29T | 1777 | 0.156747 | 0         |  |
|        |      | Shiraz-38T | 1950 | 0.265916 | 0         |  |
|        |      | Shiraz-71T | 2236 | 0.320072 | 0         |  |
| OSMR   | chr5 | Shiraz-4T  | 250  | 0.262252 | 0         |  |
|        |      | Shiraz-16T | 266  | 0.321724 | 0         |  |
|        |      | Shiraz-44T | 591  | 0        | -0.233934 |  |
|        |      | Shiraz-18T | 1429 | 0        | -0.314125 |  |
|        |      | Shiraz-22T | 1522 | 0        | -0.322688 |  |
|        |      | Shiraz-25T | 1694 | 0.201602 | 0         |  |
|        |      | Shiraz-28T | 1731 | 0.295447 | 0         |  |
|        |      | Shiraz-29T | 1773 | 0.090981 | 0         |  |
|        |      | Shiraz-40T | 2016 | 0.376634 | 0         |  |
|        |      | Shiraz-4T  | 250  | 0.262252 | 0         |  |
|        |      | Shiraz-16T | 266  | 0.321724 | 0         |  |
|        |      | Shiraz-44T | 591  | 0        | -0.233934 |  |
|        |      | Shiraz-18T | 1429 | 0        | -0.314125 |  |
|        |      | Shiraz-22T | 1522 | 0        | -0.322688 |  |
|        |      | Shiraz-25T | 1694 | 0.201602 | 0         |  |
|        |      | Shiraz-28T | 1731 | 0.295447 | 0         |  |
|        |      | Shiraz-29T | 1773 | 0.090981 | 0         |  |



|     |      |            |      |          |           |  |
|-----|------|------------|------|----------|-----------|--|
|     |      | Shiraz-40T | 2016 | 0.376634 | 0         |  |
|     |      | Shiraz-4T  | 250  | 0.262252 | 0         |  |
|     |      | Shiraz-16T | 266  | 0.321724 | 0         |  |
|     |      | Shiraz-44T | 591  | 0        | -0.233934 |  |
|     |      | Shiraz-18T | 1429 | 0        | -0.314125 |  |
|     |      | Shiraz-22T | 1522 | 0        | -0.322688 |  |
|     |      | Shiraz-25T | 1694 | 0.201602 | 0         |  |
|     |      | Shiraz-28T | 1731 | 0.295447 | 0         |  |
|     |      | Shiraz-29T | 1773 | 0.090981 | 0         |  |
|     |      | Shiraz-40T | 2016 | 0.376634 | 0         |  |
| OTC | chrX | Shiraz-3T  | 235  | 0        | -0.28401  |  |
|     |      | Shiraz-4T  | 260  | 0        | -0.324128 |  |
|     |      | Shiraz-16T | 294  | 0.655804 | 0         |  |
|     |      | Shiraz-36T | 431  | 0        | -0.78035  |  |
|     |      | Shiraz-44T | 891  | 0        | -0.954044 |  |
|     |      | Shiraz-49T | 1166 | 0        | -0.917235 |  |
|     |      | Shiraz-49T | 1168 | 0        | -1.073859 |  |
|     |      | Shiraz-9T  | 1368 | 0.199713 | 0         |  |
|     |      | Shiraz-18T | 1455 | 0        | -0.186773 |  |
|     |      | Shiraz-22T | 1669 | 0.695915 | 0         |  |
|     |      | Shiraz-25T | 1717 | 0.420447 | 0         |  |
|     |      | Shiraz-28T | 1760 | 0.538181 | 0         |  |
|     |      | Shiraz-29T | 1800 | 0.672527 | 0         |  |
|     |      | Shiraz-32T | 1869 | 0.776805 | 0         |  |
|     |      | Shiraz-35T | 1932 | 0.507141 | 0         |  |
|     |      | Shiraz-40T | 2051 | 0.098506 | 0         |  |
|     |      | Shiraz-58T | 2221 | 0.871948 | 0         |  |
|     |      | Shiraz-71T | 2260 | 0.68394  | 0         |  |
|     |      | Shiraz-3T  | 235  | 0        | -0.28401  |  |
|     |      | Shiraz-4T  | 260  | 0        | -0.324128 |  |
|     |      | Shiraz-16T | 294  | 0.655804 | 0         |  |
|     |      | Shiraz-36T | 431  | 0        | -0.78035  |  |
|     |      | Shiraz-44T | 891  | 0        | -0.954044 |  |
|     |      | Shiraz-49T | 1166 | 0        | -0.917235 |  |
|     |      | Shiraz-49T | 1168 | 0        | -1.073859 |  |
|     |      | Shiraz-9T  | 1368 | 0.199713 | 0         |  |
|     |      | Shiraz-18T | 1455 | 0        | -0.186773 |  |
|     |      | Shiraz-22T | 1669 | 0.695915 | 0         |  |
|     |      | Shiraz-25T | 1717 | 0.420447 | 0         |  |
|     |      | Shiraz-28T | 1760 | 0.538181 | 0         |  |
|     |      | Shiraz-29T | 1800 | 0.672527 | 0         |  |
|     |      | Shiraz-32T | 1869 | 0.776805 | 0         |  |
|     |      | Shiraz-35T | 1932 | 0.507141 | 0         |  |
|     |      | Shiraz-40T | 2051 | 0.098506 | 0         |  |
|     |      | Shiraz-58T | 2221 | 0.871948 | 0         |  |
|     |      | Shiraz-71T | 2260 | 0.68394  | 0         |  |
|     |      | Shiraz-3T  | 235  | 0        | -0.28401  |  |

|       |      |            |      |          |           |  |  |
|-------|------|------------|------|----------|-----------|--|--|
|       |      | Shiraz-4T  | 260  | 0        | -0.324128 |  |  |
|       |      | Shiraz-16T | 294  | 0.655804 | 0         |  |  |
|       |      | Shiraz-36T | 431  | 0        | -0.78035  |  |  |
|       |      | Shiraz-44T | 891  | 0        | -0.954044 |  |  |
|       |      | Shiraz-49T | 1166 | 0        | -0.917235 |  |  |
|       |      | Shiraz-49T | 1168 | 0        | -1.073859 |  |  |
|       |      | Shiraz-9T  | 1368 | 0.199713 | 0         |  |  |
|       |      | Shiraz-18T | 1455 | 0        | -0.186773 |  |  |
|       |      | Shiraz-22T | 1669 | 0.695915 | 0         |  |  |
|       |      | Shiraz-25T | 1717 | 0.420447 | 0         |  |  |
|       |      | Shiraz-28T | 1760 | 0.538181 | 0         |  |  |
|       |      | Shiraz-29T | 1800 | 0.672527 | 0         |  |  |
|       |      | Shiraz-32T | 1869 | 0.776805 | 0         |  |  |
|       |      | Shiraz-35T | 1932 | 0.507141 | 0         |  |  |
|       |      | Shiraz-40T | 2051 | 0.098506 | 0         |  |  |
|       |      | Shiraz-58T | 2221 | 0.871948 | 0         |  |  |
|       |      | Shiraz-71T | 2260 | 0.68394  | 0         |  |  |
| OTUD5 | chrX | Shiraz-3T  | 238  | 0.472087 | 0         |  |  |
|       |      | Shiraz-3T  | 238  | 0.472087 | 0         |  |  |
|       |      | Shiraz-4T  | 260  | 0        | -0.324128 |  |  |
|       |      | Shiraz-4T  | 260  | 0        | -0.324128 |  |  |
|       |      | Shiraz-16T | 294  | 0.655804 | 0         |  |  |
|       |      | Shiraz-16T | 294  | 0.655804 | 0         |  |  |
|       |      | Shiraz-31T | 345  | 0.103301 | 0         |  |  |
|       |      | Shiraz-31T | 345  | 0.103301 | 0         |  |  |
|       |      | Shiraz-36T | 431  | 0        | -0.78035  |  |  |
|       |      | Shiraz-36T | 431  | 0        | -0.78035  |  |  |
|       |      | Shiraz-36T | 432  | 0        | -0.6692   |  |  |
|       |      | Shiraz-36T | 432  | 0        | -0.6692   |  |  |
|       |      | Shiraz-44T | 891  | 0        | -0.954044 |  |  |
|       |      | Shiraz-44T | 891  | 0        | -0.954044 |  |  |
|       |      | Shiraz-44T | 896  | 0        | -0.109108 |  |  |
|       |      | Shiraz-44T | 896  | 0        | -0.109108 |  |  |
|       |      | Shiraz-44T | 897  | 0.486937 | 0         |  |  |
|       |      | Shiraz-44T | 897  | 0.486937 | 0         |  |  |
|       |      | Shiraz-46T | 991  | 0.139564 | 0         |  |  |
|       |      | Shiraz-46T | 991  | 0.139564 | 0         |  |  |
|       |      | Shiraz-47T | 1084 | 0.24185  | 0         |  |  |
|       |      | Shiraz-47T | 1084 | 0.24185  | 0         |  |  |
|       |      | Shiraz-49T | 1166 | 0        | -0.917235 |  |  |
|       |      | Shiraz-49T | 1166 | 0        | -0.917235 |  |  |
|       |      | Shiraz-49T | 1169 | 0        | -0.583529 |  |  |
|       |      | Shiraz-49T | 1169 | 0        | -0.583529 |  |  |
|       |      | Shiraz-77T | 1282 | 0.213849 | 0         |  |  |
|       |      | Shiraz-77T | 1282 | 0.213849 | 0         |  |  |
|       |      | Shiraz-9T  | 1368 | 0.199713 | 0         |  |  |
|       |      | Shiraz-9T  | 1368 | 0.199713 | 0         |  |  |

|  |  |            |      |          |           |  |  |
|--|--|------------|------|----------|-----------|--|--|
|  |  | Shiraz-9T  | 1369 | 0.703374 | 0         |  |  |
|  |  | Shiraz-9T  | 1369 | 0.703374 | 0         |  |  |
|  |  | Shiraz-18T | 1455 | 0        | -0.186773 |  |  |
|  |  | Shiraz-18T | 1455 | 0        | -0.186773 |  |  |
|  |  | Shiraz-22T | 1669 | 0.695915 | 0         |  |  |
|  |  | Shiraz-22T | 1669 | 0.695915 | 0         |  |  |
|  |  | Shiraz-22T | 1672 | 1.01678  | 0         |  |  |
|  |  | Shiraz-22T | 1672 | 1.01678  | 0         |  |  |
|  |  | Shiraz-25T | 1717 | 0.420447 | 0         |  |  |
|  |  | Shiraz-25T | 1717 | 0.420447 | 0         |  |  |
|  |  | Shiraz-28T | 1760 | 0.538181 | 0         |  |  |
|  |  | Shiraz-28T | 1760 | 0.538181 | 0         |  |  |
|  |  | Shiraz-29T | 1800 | 0.672527 | 0         |  |  |
|  |  | Shiraz-29T | 1800 | 0.672527 | 0         |  |  |
|  |  | Shiraz-32T | 1869 | 0.776805 | 0         |  |  |
|  |  | Shiraz-32T | 1869 | 0.776805 | 0         |  |  |
|  |  | Shiraz-35T | 1932 | 0.507141 | 0         |  |  |
|  |  | Shiraz-35T | 1932 | 0.507141 | 0         |  |  |
|  |  | Shiraz-58T | 2221 | 0.871948 | 0         |  |  |
|  |  | Shiraz-58T | 2221 | 0.871948 | 0         |  |  |
|  |  | Shiraz-71T | 2260 | 0.68394  | 0         |  |  |
|  |  | Shiraz-71T | 2260 | 0.68394  | 0         |  |  |
|  |  | Shiraz-71T | 2262 | 0.986748 | 0         |  |  |
|  |  | Shiraz-71T | 2262 | 0.986748 | 0         |  |  |
|  |  | Shiraz-3T  | 238  | 0.472087 | 0         |  |  |
|  |  | Shiraz-3T  | 238  | 0.472087 | 0         |  |  |
|  |  | Shiraz-4T  | 260  | 0        | -0.324128 |  |  |
|  |  | Shiraz-4T  | 260  | 0        | -0.324128 |  |  |
|  |  | Shiraz-16T | 294  | 0.655804 | 0         |  |  |
|  |  | Shiraz-16T | 294  | 0.655804 | 0         |  |  |
|  |  | Shiraz-31T | 345  | 0.103301 | 0         |  |  |
|  |  | Shiraz-31T | 345  | 0.103301 | 0         |  |  |
|  |  | Shiraz-36T | 431  | 0        | -0.78035  |  |  |
|  |  | Shiraz-36T | 431  | 0        | -0.78035  |  |  |
|  |  | Shiraz-36T | 432  | 0        | -0.6692   |  |  |
|  |  | Shiraz-36T | 432  | 0        | -0.6692   |  |  |
|  |  | Shiraz-44T | 891  | 0        | -0.954044 |  |  |
|  |  | Shiraz-44T | 891  | 0        | -0.954044 |  |  |
|  |  | Shiraz-44T | 896  | 0        | -0.109108 |  |  |
|  |  | Shiraz-44T | 896  | 0        | -0.109108 |  |  |
|  |  | Shiraz-44T | 897  | 0.486937 | 0         |  |  |
|  |  | Shiraz-44T | 897  | 0.486937 | 0         |  |  |
|  |  | Shiraz-46T | 991  | 0.139564 | 0         |  |  |
|  |  | Shiraz-46T | 991  | 0.139564 | 0         |  |  |
|  |  | Shiraz-47T | 1084 | 0.24185  | 0         |  |  |
|  |  | Shiraz-47T | 1084 | 0.24185  | 0         |  |  |
|  |  | Shiraz-49T | 1166 | 0        | -0.917235 |  |  |

|  |            |      |          |           |  |
|--|------------|------|----------|-----------|--|
|  | Shiraz-49T | 1166 | 0        | -0.917235 |  |
|  | Shiraz-49T | 1169 | 0        | -0.583529 |  |
|  | Shiraz-49T | 1169 | 0        | -0.583529 |  |
|  | Shiraz-77T | 1282 | 0.213849 | 0         |  |
|  | Shiraz-77T | 1282 | 0.213849 | 0         |  |
|  | Shiraz-9T  | 1368 | 0.199713 | 0         |  |
|  | Shiraz-9T  | 1368 | 0.199713 | 0         |  |
|  | Shiraz-9T  | 1369 | 0.703374 | 0         |  |
|  | Shiraz-9T  | 1369 | 0.703374 | 0         |  |
|  | Shiraz-18T | 1455 | 0        | -0.186773 |  |
|  | Shiraz-18T | 1455 | 0        | -0.186773 |  |
|  | Shiraz-22T | 1669 | 0.695915 | 0         |  |
|  | Shiraz-22T | 1669 | 0.695915 | 0         |  |
|  | Shiraz-22T | 1672 | 1.01678  | 0         |  |
|  | Shiraz-22T | 1672 | 1.01678  | 0         |  |
|  | Shiraz-25T | 1717 | 0.420447 | 0         |  |
|  | Shiraz-25T | 1717 | 0.420447 | 0         |  |
|  | Shiraz-28T | 1760 | 0.538181 | 0         |  |
|  | Shiraz-28T | 1760 | 0.538181 | 0         |  |
|  | Shiraz-29T | 1800 | 0.672527 | 0         |  |
|  | Shiraz-29T | 1800 | 0.672527 | 0         |  |
|  | Shiraz-32T | 1869 | 0.776805 | 0         |  |
|  | Shiraz-32T | 1869 | 0.776805 | 0         |  |
|  | Shiraz-35T | 1932 | 0.507141 | 0         |  |
|  | Shiraz-35T | 1932 | 0.507141 | 0         |  |
|  | Shiraz-58T | 2221 | 0.871948 | 0         |  |
|  | Shiraz-58T | 2221 | 0.871948 | 0         |  |
|  | Shiraz-71T | 2260 | 0.68394  | 0         |  |
|  | Shiraz-71T | 2260 | 0.68394  | 0         |  |
|  | Shiraz-71T | 2262 | 0.986748 | 0         |  |
|  | Shiraz-71T | 2262 | 0.986748 | 0         |  |
|  | Shiraz-3T  | 238  | 0.472087 | 0         |  |
|  | Shiraz-3T  | 238  | 0.472087 | 0         |  |
|  | Shiraz-4T  | 260  | 0        | -0.324128 |  |
|  | Shiraz-4T  | 260  | 0        | -0.324128 |  |
|  | Shiraz-16T | 294  | 0.655804 | 0         |  |
|  | Shiraz-16T | 294  | 0.655804 | 0         |  |
|  | Shiraz-31T | 345  | 0.103301 | 0         |  |
|  | Shiraz-31T | 345  | 0.103301 | 0         |  |
|  | Shiraz-36T | 431  | 0        | -0.78035  |  |
|  | Shiraz-36T | 431  | 0        | -0.78035  |  |
|  | Shiraz-36T | 432  | 0        | -0.6692   |  |
|  | Shiraz-36T | 432  | 0        | -0.6692   |  |
|  | Shiraz-44T | 891  | 0        | -0.954044 |  |
|  | Shiraz-44T | 891  | 0        | -0.954044 |  |
|  | Shiraz-44T | 896  | 0        | -0.109108 |  |
|  | Shiraz-44T | 896  | 0        | -0.109108 |  |

|        |      |            |      |          |           |  |  |
|--------|------|------------|------|----------|-----------|--|--|
|        |      | Shiraz-44T | 897  | 0.486937 | 0         |  |  |
|        |      | Shiraz-44T | 897  | 0.486937 | 0         |  |  |
|        |      | Shiraz-46T | 991  | 0.139564 | 0         |  |  |
|        |      | Shiraz-46T | 991  | 0.139564 | 0         |  |  |
|        |      | Shiraz-47T | 1084 | 0.24185  | 0         |  |  |
|        |      | Shiraz-47T | 1084 | 0.24185  | 0         |  |  |
|        |      | Shiraz-49T | 1166 | 0        | -0.917235 |  |  |
|        |      | Shiraz-49T | 1166 | 0        | -0.917235 |  |  |
|        |      | Shiraz-49T | 1169 | 0        | -0.583529 |  |  |
|        |      | Shiraz-49T | 1169 | 0        | -0.583529 |  |  |
|        |      | Shiraz-77T | 1282 | 0.213849 | 0         |  |  |
|        |      | Shiraz-77T | 1282 | 0.213849 | 0         |  |  |
|        |      | Shiraz-9T  | 1368 | 0.199713 | 0         |  |  |
|        |      | Shiraz-9T  | 1368 | 0.199713 | 0         |  |  |
|        |      | Shiraz-9T  | 1369 | 0.703374 | 0         |  |  |
|        |      | Shiraz-9T  | 1369 | 0.703374 | 0         |  |  |
|        |      | Shiraz-18T | 1455 | 0        | -0.186773 |  |  |
|        |      | Shiraz-18T | 1455 | 0        | -0.186773 |  |  |
|        |      | Shiraz-22T | 1669 | 0.695915 | 0         |  |  |
|        |      | Shiraz-22T | 1669 | 0.695915 | 0         |  |  |
|        |      | Shiraz-22T | 1672 | 1.01678  | 0         |  |  |
|        |      | Shiraz-22T | 1672 | 1.01678  | 0         |  |  |
|        |      | Shiraz-25T | 1717 | 0.420447 | 0         |  |  |
|        |      | Shiraz-25T | 1717 | 0.420447 | 0         |  |  |
|        |      | Shiraz-28T | 1760 | 0.538181 | 0         |  |  |
|        |      | Shiraz-28T | 1760 | 0.538181 | 0         |  |  |
|        |      | Shiraz-29T | 1800 | 0.672527 | 0         |  |  |
|        |      | Shiraz-29T | 1800 | 0.672527 | 0         |  |  |
|        |      | Shiraz-32T | 1869 | 0.776805 | 0         |  |  |
|        |      | Shiraz-32T | 1869 | 0.776805 | 0         |  |  |
|        |      | Shiraz-35T | 1932 | 0.507141 | 0         |  |  |
|        |      | Shiraz-35T | 1932 | 0.507141 | 0         |  |  |
|        |      | Shiraz-58T | 2221 | 0.871948 | 0         |  |  |
|        |      | Shiraz-58T | 2221 | 0.871948 | 0         |  |  |
|        |      | Shiraz-71T | 2260 | 0.68394  | 0         |  |  |
|        |      | Shiraz-71T | 2260 | 0.68394  | 0         |  |  |
|        |      | Shiraz-71T | 2262 | 0.986748 | 0         |  |  |
|        |      | Shiraz-71T | 2262 | 0.986748 | 0         |  |  |
| OTUD6A | chrX | Shiraz-3T  | 241  | 0        | -0.230501 |  |  |
|        |      | Shiraz-4T  | 261  | 0        | -0.336249 |  |  |
|        |      | Shiraz-16T | 295  | 0.591657 | 0         |  |  |
|        |      | Shiraz-36T | 433  | 0        | -0.803961 |  |  |
|        |      | Shiraz-44T | 899  | 0        | -1.09697  |  |  |
|        |      | Shiraz-44T | 900  | 0        | -0.584284 |  |  |
|        |      | Shiraz-44T | 901  | 0        | -1.000082 |  |  |
|        |      | Shiraz-49T | 1170 | 0        | -0.967436 |  |  |
|        |      | Shiraz-18T | 1457 | 0.643204 | 0         |  |  |

|  |  |            |      |          |           |  |  |
|--|--|------------|------|----------|-----------|--|--|
|  |  | Shiraz-22T | 1673 | 0.611783 | 0         |  |  |
|  |  | Shiraz-22T | 1674 | 0.887899 | 0         |  |  |
|  |  | Shiraz-25T | 1719 | 0.472955 | 0         |  |  |
|  |  | Shiraz-28T | 1762 | 0.562311 | 0         |  |  |
|  |  | Shiraz-29T | 1801 | 0.815343 | 0         |  |  |
|  |  | Shiraz-32T | 1870 | 0.729766 | 0         |  |  |
|  |  | Shiraz-35T | 1933 | 0.488535 | 0         |  |  |
|  |  | Shiraz-58T | 2223 | 0.833364 | 0         |  |  |
|  |  | Shiraz-58T | 2224 | 1.076575 | 0         |  |  |
|  |  | Shiraz-71T | 2263 | 0.975531 | 0         |  |  |
|  |  | Shiraz-3T  | 241  | 0        | -0.230501 |  |  |
|  |  | Shiraz-4T  | 261  | 0        | -0.336249 |  |  |
|  |  | Shiraz-16T | 295  | 0.591657 | 0         |  |  |
|  |  | Shiraz-36T | 433  | 0        | -0.803961 |  |  |
|  |  | Shiraz-44T | 899  | 0        | -1.09697  |  |  |
|  |  | Shiraz-44T | 900  | 0        | -0.584284 |  |  |
|  |  | Shiraz-44T | 901  | 0        | -1.000082 |  |  |
|  |  | Shiraz-49T | 1170 | 0        | -0.967436 |  |  |
|  |  | Shiraz-18T | 1457 | 0.643204 | 0         |  |  |
|  |  | Shiraz-22T | 1673 | 0.611783 | 0         |  |  |
|  |  | Shiraz-22T | 1674 | 0.887899 | 0         |  |  |
|  |  | Shiraz-25T | 1719 | 0.472955 | 0         |  |  |
|  |  | Shiraz-28T | 1762 | 0.562311 | 0         |  |  |
|  |  | Shiraz-29T | 1801 | 0.815343 | 0         |  |  |
|  |  | Shiraz-32T | 1870 | 0.729766 | 0         |  |  |
|  |  | Shiraz-35T | 1933 | 0.488535 | 0         |  |  |
|  |  | Shiraz-58T | 2223 | 0.833364 | 0         |  |  |
|  |  | Shiraz-58T | 2224 | 1.076575 | 0         |  |  |
|  |  | Shiraz-71T | 2263 | 0.975531 | 0         |  |  |
|  |  | Shiraz-3T  | 241  | 0        | -0.230501 |  |  |
|  |  | Shiraz-4T  | 261  | 0        | -0.336249 |  |  |
|  |  | Shiraz-16T | 295  | 0.591657 | 0         |  |  |
|  |  | Shiraz-36T | 433  | 0        | -0.803961 |  |  |
|  |  | Shiraz-44T | 899  | 0        | -1.09697  |  |  |
|  |  | Shiraz-44T | 900  | 0        | -0.584284 |  |  |
|  |  | Shiraz-44T | 901  | 0        | -1.000082 |  |  |
|  |  | Shiraz-49T | 1170 | 0        | -0.967436 |  |  |
|  |  | Shiraz-18T | 1457 | 0.643204 | 0         |  |  |
|  |  | Shiraz-22T | 1673 | 0.611783 | 0         |  |  |
|  |  | Shiraz-22T | 1674 | 0.887899 | 0         |  |  |
|  |  | Shiraz-25T | 1719 | 0.472955 | 0         |  |  |
|  |  | Shiraz-28T | 1762 | 0.562311 | 0         |  |  |
|  |  | Shiraz-29T | 1801 | 0.815343 | 0         |  |  |
|  |  | Shiraz-32T | 1870 | 0.729766 | 0         |  |  |
|  |  | Shiraz-35T | 1933 | 0.488535 | 0         |  |  |
|  |  | Shiraz-58T | 2223 | 0.833364 | 0         |  |  |
|  |  | Shiraz-58T | 2224 | 1.076575 | 0         |  |  |

|        |      |            |      |          |           |  |
|--------|------|------------|------|----------|-----------|--|
|        |      | Shiraz-71T | 2263 | 0.975531 | 0         |  |
| OXCT1  | chr5 | Shiraz-4T  | 250  | 0.262252 | 0         |  |
|        |      | Shiraz-16T | 266  | 0.321724 | 0         |  |
|        |      | Shiraz-44T | 591  | 0        | -0.233934 |  |
|        |      | Shiraz-18T | 1429 | 0        | -0.314125 |  |
|        |      | Shiraz-22T | 1522 | 0        | -0.322688 |  |
|        |      | Shiraz-25T | 1694 | 0.201602 | 0         |  |
|        |      | Shiraz-28T | 1731 | 0.295447 | 0         |  |
|        |      | Shiraz-29T | 1773 | 0.090981 | 0         |  |
|        |      | Shiraz-40T | 2016 | 0.376634 | 0         |  |
|        |      | Shiraz-4T  | 250  | 0.262252 | 0         |  |
|        |      | Shiraz-16T | 266  | 0.321724 | 0         |  |
|        |      | Shiraz-44T | 591  | 0        | -0.233934 |  |
|        |      | Shiraz-18T | 1429 | 0        | -0.314125 |  |
|        |      | Shiraz-22T | 1522 | 0        | -0.322688 |  |
|        |      | Shiraz-25T | 1694 | 0.201602 | 0         |  |
|        |      | Shiraz-28T | 1731 | 0.295447 | 0         |  |
|        |      | Shiraz-29T | 1773 | 0.090981 | 0         |  |
|        |      | Shiraz-40T | 2016 | 0.376634 | 0         |  |
|        |      | Shiraz-4T  | 250  | 0.262252 | 0         |  |
|        |      | Shiraz-16T | 266  | 0.321724 | 0         |  |
|        |      | Shiraz-44T | 591  | 0        | -0.233934 |  |
|        |      | Shiraz-18T | 1429 | 0        | -0.314125 |  |
|        |      | Shiraz-22T | 1522 | 0        | -0.322688 |  |
|        |      | Shiraz-25T | 1694 | 0.201602 | 0         |  |
|        |      | Shiraz-28T | 1731 | 0.295447 | 0         |  |
|        |      | Shiraz-29T | 1773 | 0.090981 | 0         |  |
|        |      | Shiraz-40T | 2016 | 0.376634 | 0         |  |
| P2RY10 | chrX | Shiraz-3T  | 242  | 0        | -0.336434 |  |
|        |      | Shiraz-4T  | 261  | 0        | -0.336249 |  |
|        |      | Shiraz-16T | 295  | 0.591657 | 0         |  |
|        |      | Shiraz-36T | 433  | 0        | -0.803961 |  |
|        |      | Shiraz-44T | 899  | 0        | -1.09697  |  |
|        |      | Shiraz-49T | 1170 | 0        | -0.967436 |  |
|        |      | Shiraz-18T | 1457 | 0.643204 | 0         |  |
|        |      | Shiraz-22T | 1673 | 0.611783 | 0         |  |
|        |      | Shiraz-25T | 1719 | 0.472955 | 0         |  |
|        |      | Shiraz-28T | 1762 | 0.562311 | 0         |  |
|        |      | Shiraz-29T | 1801 | 0.815343 | 0         |  |
|        |      | Shiraz-32T | 1870 | 0.729766 | 0         |  |
|        |      | Shiraz-35T | 1933 | 0.488535 | 0         |  |
|        |      | Shiraz-58T | 2223 | 0.833364 | 0         |  |
|        |      | Shiraz-71T | 2263 | 0.975531 | 0         |  |
|        |      | Shiraz-3T  | 242  | 0        | -0.336434 |  |
|        |      | Shiraz-4T  | 261  | 0        | -0.336249 |  |
|        |      | Shiraz-16T | 295  | 0.591657 | 0         |  |
|        |      | Shiraz-36T | 433  | 0        | -0.803961 |  |

|       |      |            |      |          |           |  |  |
|-------|------|------------|------|----------|-----------|--|--|
|       |      | Shiraz-44T | 899  | 0        | -1.09697  |  |  |
|       |      | Shiraz-49T | 1170 | 0        | -0.967436 |  |  |
|       |      | Shiraz-18T | 1457 | 0.643204 | 0         |  |  |
|       |      | Shiraz-22T | 1673 | 0.611783 | 0         |  |  |
|       |      | Shiraz-25T | 1719 | 0.472955 | 0         |  |  |
|       |      | Shiraz-28T | 1762 | 0.562311 | 0         |  |  |
|       |      | Shiraz-29T | 1801 | 0.815343 | 0         |  |  |
|       |      | Shiraz-32T | 1870 | 0.729766 | 0         |  |  |
|       |      | Shiraz-35T | 1933 | 0.488535 | 0         |  |  |
|       |      | Shiraz-58T | 2223 | 0.833364 | 0         |  |  |
|       |      | Shiraz-71T | 2263 | 0.975531 | 0         |  |  |
|       |      | Shiraz-3T  | 242  | 0        | -0.336434 |  |  |
|       |      | Shiraz-4T  | 261  | 0        | -0.336249 |  |  |
|       |      | Shiraz-16T | 295  | 0.591657 | 0         |  |  |
|       |      | Shiraz-36T | 433  | 0        | -0.803961 |  |  |
|       |      | Shiraz-44T | 899  | 0        | -1.09697  |  |  |
|       |      | Shiraz-49T | 1170 | 0        | -0.967436 |  |  |
|       |      | Shiraz-18T | 1457 | 0.643204 | 0         |  |  |
|       |      | Shiraz-22T | 1673 | 0.611783 | 0         |  |  |
|       |      | Shiraz-25T | 1719 | 0.472955 | 0         |  |  |
|       |      | Shiraz-28T | 1762 | 0.562311 | 0         |  |  |
|       |      | Shiraz-29T | 1801 | 0.815343 | 0         |  |  |
|       |      | Shiraz-32T | 1870 | 0.729766 | 0         |  |  |
|       |      | Shiraz-35T | 1933 | 0.488535 | 0         |  |  |
|       |      | Shiraz-58T | 2223 | 0.833364 | 0         |  |  |
|       |      | Shiraz-71T | 2263 | 0.975531 | 0         |  |  |
| P2RY4 | chrX | Shiraz-4T  | 261  | 0        | -0.336249 |  |  |
|       |      | Shiraz-16T | 295  | 0.591657 | 0         |  |  |
|       |      | Shiraz-36T | 433  | 0        | -0.803961 |  |  |
|       |      | Shiraz-44T | 899  | 0        | -1.09697  |  |  |
|       |      | Shiraz-44T | 900  | 0        | -0.584284 |  |  |
|       |      | Shiraz-44T | 901  | 0        | -1.000082 |  |  |
|       |      | Shiraz-49T | 1170 | 0        | -0.967436 |  |  |
|       |      | Shiraz-18T | 1457 | 0.643204 | 0         |  |  |
|       |      | Shiraz-22T | 1673 | 0.611783 | 0         |  |  |
|       |      | Shiraz-22T | 1674 | 0.887899 | 0         |  |  |
|       |      | Shiraz-25T | 1719 | 0.472955 | 0         |  |  |
|       |      | Shiraz-28T | 1762 | 0.562311 | 0         |  |  |
|       |      | Shiraz-29T | 1801 | 0.815343 | 0         |  |  |
|       |      | Shiraz-32T | 1870 | 0.729766 | 0         |  |  |
|       |      | Shiraz-35T | 1933 | 0.488535 | 0         |  |  |
|       |      | Shiraz-58T | 2223 | 0.833364 | 0         |  |  |
|       |      | Shiraz-58T | 2224 | 1.076575 | 0         |  |  |
|       |      | Shiraz-71T | 2263 | 0.975531 | 0         |  |  |
|       |      | Shiraz-4T  | 261  | 0        | -0.336249 |  |  |
|       |      | Shiraz-16T | 295  | 0.591657 | 0         |  |  |
|       |      | Shiraz-36T | 433  | 0        | -0.803961 |  |  |



|           |      |            |      |          |           |  |  |
|-----------|------|------------|------|----------|-----------|--|--|
|           |      | Shiraz-44T | 899  | 0        | -1.09697  |  |  |
|           |      | Shiraz-44T | 900  | 0        | -0.584284 |  |  |
|           |      | Shiraz-44T | 901  | 0        | -1.000082 |  |  |
|           |      | Shiraz-49T | 1170 | 0        | -0.967436 |  |  |
|           |      | Shiraz-18T | 1457 | 0.643204 | 0         |  |  |
|           |      | Shiraz-22T | 1673 | 0.611783 | 0         |  |  |
|           |      | Shiraz-22T | 1674 | 0.887899 | 0         |  |  |
|           |      | Shiraz-25T | 1719 | 0.472955 | 0         |  |  |
|           |      | Shiraz-28T | 1762 | 0.562311 | 0         |  |  |
|           |      | Shiraz-29T | 1801 | 0.815343 | 0         |  |  |
|           |      | Shiraz-32T | 1870 | 0.729766 | 0         |  |  |
|           |      | Shiraz-35T | 1933 | 0.488535 | 0         |  |  |
|           |      | Shiraz-58T | 2223 | 0.833364 | 0         |  |  |
|           |      | Shiraz-58T | 2224 | 1.076575 | 0         |  |  |
|           |      | Shiraz-71T | 2263 | 0.975531 | 0         |  |  |
|           |      | Shiraz-4T  | 261  | 0        | -0.336249 |  |  |
|           |      | Shiraz-16T | 295  | 0.591657 | 0         |  |  |
|           |      | Shiraz-36T | 433  | 0        | -0.803961 |  |  |
|           |      | Shiraz-44T | 899  | 0        | -1.09697  |  |  |
|           |      | Shiraz-44T | 900  | 0        | -0.584284 |  |  |
|           |      | Shiraz-44T | 901  | 0        | -1.000082 |  |  |
|           |      | Shiraz-49T | 1170 | 0        | -0.967436 |  |  |
|           |      | Shiraz-18T | 1457 | 0.643204 | 0         |  |  |
|           |      | Shiraz-22T | 1673 | 0.611783 | 0         |  |  |
|           |      | Shiraz-22T | 1674 | 0.887899 | 0         |  |  |
|           |      | Shiraz-25T | 1719 | 0.472955 | 0         |  |  |
|           |      | Shiraz-28T | 1762 | 0.562311 | 0         |  |  |
|           |      | Shiraz-29T | 1801 | 0.815343 | 0         |  |  |
|           |      | Shiraz-32T | 1870 | 0.729766 | 0         |  |  |
|           |      | Shiraz-35T | 1933 | 0.488535 | 0         |  |  |
|           |      | Shiraz-58T | 2223 | 0.833364 | 0         |  |  |
|           |      | Shiraz-58T | 2224 | 1.076575 | 0         |  |  |
|           |      | Shiraz-71T | 2263 | 0.975531 | 0         |  |  |
| PABPC1L2A | chrX | Shiraz-3T  | 242  | 0        | -0.336434 |  |  |
|           |      | Shiraz-4T  | 261  | 0        | -0.336249 |  |  |
|           |      | Shiraz-16T | 295  | 0.591657 | 0         |  |  |
|           |      | Shiraz-36T | 433  | 0        | -0.803961 |  |  |
|           |      | Shiraz-44T | 899  | 0        | -1.09697  |  |  |
|           |      | Shiraz-49T | 1170 | 0        | -0.967436 |  |  |
|           |      | Shiraz-18T | 1457 | 0.643204 | 0         |  |  |
|           |      | Shiraz-22T | 1673 | 0.611783 | 0         |  |  |
|           |      | Shiraz-25T | 1719 | 0.472955 | 0         |  |  |
|           |      | Shiraz-28T | 1762 | 0.562311 | 0         |  |  |
|           |      | Shiraz-29T | 1801 | 0.815343 | 0         |  |  |
|           |      | Shiraz-32T | 1870 | 0.729766 | 0         |  |  |
|           |      | Shiraz-35T | 1933 | 0.488535 | 0         |  |  |
|           |      | Shiraz-58T | 2223 | 0.833364 | 0         |  |  |

|           |      |            |      |          |           |  |  |
|-----------|------|------------|------|----------|-----------|--|--|
|           |      | Shiraz-71T | 2263 | 0.975531 | 0         |  |  |
|           |      | Shiraz-3T  | 242  | 0        | -0.336434 |  |  |
|           |      | Shiraz-4T  | 261  | 0        | -0.336249 |  |  |
|           |      | Shiraz-16T | 295  | 0.591657 | 0         |  |  |
|           |      | Shiraz-36T | 433  | 0        | -0.803961 |  |  |
|           |      | Shiraz-44T | 899  | 0        | -1.09697  |  |  |
|           |      | Shiraz-49T | 1170 | 0        | -0.967436 |  |  |
|           |      | Shiraz-18T | 1457 | 0.643204 | 0         |  |  |
|           |      | Shiraz-22T | 1673 | 0.611783 | 0         |  |  |
|           |      | Shiraz-25T | 1719 | 0.472955 | 0         |  |  |
|           |      | Shiraz-28T | 1762 | 0.562311 | 0         |  |  |
|           |      | Shiraz-29T | 1801 | 0.815343 | 0         |  |  |
|           |      | Shiraz-32T | 1870 | 0.729766 | 0         |  |  |
|           |      | Shiraz-35T | 1933 | 0.488535 | 0         |  |  |
|           |      | Shiraz-58T | 2223 | 0.833364 | 0         |  |  |
|           |      | Shiraz-71T | 2263 | 0.975531 | 0         |  |  |
|           |      | Shiraz-3T  | 242  | 0        | -0.336434 |  |  |
|           |      | Shiraz-4T  | 261  | 0        | -0.336249 |  |  |
|           |      | Shiraz-16T | 295  | 0.591657 | 0         |  |  |
|           |      | Shiraz-36T | 433  | 0        | -0.803961 |  |  |
|           |      | Shiraz-44T | 899  | 0        | -1.09697  |  |  |
|           |      | Shiraz-49T | 1170 | 0        | -0.967436 |  |  |
|           |      | Shiraz-18T | 1457 | 0.643204 | 0         |  |  |
|           |      | Shiraz-22T | 1673 | 0.611783 | 0         |  |  |
|           |      | Shiraz-25T | 1719 | 0.472955 | 0         |  |  |
|           |      | Shiraz-28T | 1762 | 0.562311 | 0         |  |  |
|           |      | Shiraz-29T | 1801 | 0.815343 | 0         |  |  |
|           |      | Shiraz-32T | 1870 | 0.729766 | 0         |  |  |
|           |      | Shiraz-35T | 1933 | 0.488535 | 0         |  |  |
|           |      | Shiraz-58T | 2223 | 0.833364 | 0         |  |  |
|           |      | Shiraz-71T | 2263 | 0.975531 | 0         |  |  |
| PABPC1L2B | chrX | Shiraz-3T  | 242  | 0        | -0.336434 |  |  |
|           |      | Shiraz-4T  | 261  | 0        | -0.336249 |  |  |
|           |      | Shiraz-16T | 295  | 0.591657 | 0         |  |  |
|           |      | Shiraz-36T | 433  | 0        | -0.803961 |  |  |
|           |      | Shiraz-44T | 899  | 0        | -1.09697  |  |  |
|           |      | Shiraz-49T | 1170 | 0        | -0.967436 |  |  |
|           |      | Shiraz-18T | 1457 | 0.643204 | 0         |  |  |
|           |      | Shiraz-22T | 1673 | 0.611783 | 0         |  |  |
|           |      | Shiraz-25T | 1719 | 0.472955 | 0         |  |  |
|           |      | Shiraz-28T | 1762 | 0.562311 | 0         |  |  |
|           |      | Shiraz-29T | 1801 | 0.815343 | 0         |  |  |
|           |      | Shiraz-32T | 1870 | 0.729766 | 0         |  |  |
|           |      | Shiraz-35T | 1933 | 0.488535 | 0         |  |  |
|           |      | Shiraz-58T | 2223 | 0.833364 | 0         |  |  |
|           |      | Shiraz-71T | 2263 | 0.975531 | 0         |  |  |
|           |      | Shiraz-3T  | 242  | 0        | -0.336434 |  |  |

|        |      |            |      |          |           |  |  |
|--------|------|------------|------|----------|-----------|--|--|
|        |      | Shiraz-4T  | 261  | 0        | -0.336249 |  |  |
|        |      | Shiraz-16T | 295  | 0.591657 | 0         |  |  |
|        |      | Shiraz-36T | 433  | 0        | -0.803961 |  |  |
|        |      | Shiraz-44T | 899  | 0        | -1.09697  |  |  |
|        |      | Shiraz-49T | 1170 | 0        | -0.967436 |  |  |
|        |      | Shiraz-18T | 1457 | 0.643204 | 0         |  |  |
|        |      | Shiraz-22T | 1673 | 0.611783 | 0         |  |  |
|        |      | Shiraz-25T | 1719 | 0.472955 | 0         |  |  |
|        |      | Shiraz-28T | 1762 | 0.562311 | 0         |  |  |
|        |      | Shiraz-29T | 1801 | 0.815343 | 0         |  |  |
|        |      | Shiraz-32T | 1870 | 0.729766 | 0         |  |  |
|        |      | Shiraz-35T | 1933 | 0.488535 | 0         |  |  |
|        |      | Shiraz-58T | 2223 | 0.833364 | 0         |  |  |
|        |      | Shiraz-71T | 2263 | 0.975531 | 0         |  |  |
|        |      | Shiraz-3T  | 242  | 0        | -0.336434 |  |  |
|        |      | Shiraz-4T  | 261  | 0        | -0.336249 |  |  |
|        |      | Shiraz-16T | 295  | 0.591657 | 0         |  |  |
|        |      | Shiraz-36T | 433  | 0        | -0.803961 |  |  |
|        |      | Shiraz-44T | 899  | 0        | -1.09697  |  |  |
|        |      | Shiraz-49T | 1170 | 0        | -0.967436 |  |  |
|        |      | Shiraz-18T | 1457 | 0.643204 | 0         |  |  |
|        |      | Shiraz-22T | 1673 | 0.611783 | 0         |  |  |
|        |      | Shiraz-25T | 1719 | 0.472955 | 0         |  |  |
|        |      | Shiraz-28T | 1762 | 0.562311 | 0         |  |  |
|        |      | Shiraz-29T | 1801 | 0.815343 | 0         |  |  |
|        |      | Shiraz-32T | 1870 | 0.729766 | 0         |  |  |
|        |      | Shiraz-35T | 1933 | 0.488535 | 0         |  |  |
|        |      | Shiraz-58T | 2223 | 0.833364 | 0         |  |  |
|        |      | Shiraz-71T | 2263 | 0.975531 | 0         |  |  |
| PABPC5 | chrX | Shiraz-3T  | 242  | 0        | -0.336434 |  |  |
|        |      | Shiraz-3T  | 243  | 0        | -0.549129 |  |  |
|        |      | Shiraz-4T  | 261  | 0        | -0.336249 |  |  |
|        |      | Shiraz-16T | 295  | 0.591657 | 0         |  |  |
|        |      | Shiraz-31T | 346  | 0        | -0.1527   |  |  |
|        |      | Shiraz-36T | 433  | 0        | -0.803961 |  |  |
|        |      | Shiraz-44T | 899  | 0        | -1.09697  |  |  |
|        |      | Shiraz-44T | 902  | 0        | -1.449824 |  |  |
|        |      | Shiraz-47T | 1085 | 0        | -0.130811 |  |  |
|        |      | Shiraz-49T | 1170 | 0        | -0.967436 |  |  |
|        |      | Shiraz-49T | 1172 | 0        | -1.123219 |  |  |
|        |      | Shiraz-18T | 1457 | 0.643204 | 0         |  |  |
|        |      | Shiraz-22T | 1673 | 0.611783 | 0         |  |  |
|        |      | Shiraz-22T | 1675 | 0.279253 | 0         |  |  |
|        |      | Shiraz-25T | 1719 | 0.472955 | 0         |  |  |
|        |      | Shiraz-28T | 1762 | 0.562311 | 0         |  |  |
|        |      | Shiraz-29T | 1801 | 0.815343 | 0         |  |  |
|        |      | Shiraz-32T | 1870 | 0.729766 | 0         |  |  |

|  |            |      |          |           |  |
|--|------------|------|----------|-----------|--|
|  | Shiraz-32T | 1871 | 0.292679 | 0         |  |
|  | Shiraz-35T | 1933 | 0.488535 | 0         |  |
|  | Shiraz-58T | 2223 | 0.833364 | 0         |  |
|  | Shiraz-58T | 2225 | 0.595784 | 0         |  |
|  | Shiraz-71T | 2263 | 0.975531 | 0         |  |
|  | Shiraz-3T  | 242  | 0        | -0.336434 |  |
|  | Shiraz-3T  | 243  | 0        | -0.549129 |  |
|  | Shiraz-4T  | 261  | 0        | -0.336249 |  |
|  | Shiraz-16T | 295  | 0.591657 | 0         |  |
|  | Shiraz-31T | 346  | 0        | -0.1527   |  |
|  | Shiraz-36T | 433  | 0        | -0.803961 |  |
|  | Shiraz-44T | 899  | 0        | -1.09697  |  |
|  | Shiraz-44T | 902  | 0        | -1.449824 |  |
|  | Shiraz-47T | 1085 | 0        | -0.130811 |  |
|  | Shiraz-49T | 1170 | 0        | -0.967436 |  |
|  | Shiraz-49T | 1172 | 0        | -1.123219 |  |
|  | Shiraz-18T | 1457 | 0.643204 | 0         |  |
|  | Shiraz-22T | 1673 | 0.611783 | 0         |  |
|  | Shiraz-22T | 1675 | 0.279253 | 0         |  |
|  | Shiraz-25T | 1719 | 0.472955 | 0         |  |
|  | Shiraz-28T | 1762 | 0.562311 | 0         |  |
|  | Shiraz-29T | 1801 | 0.815343 | 0         |  |
|  | Shiraz-32T | 1870 | 0.729766 | 0         |  |
|  | Shiraz-32T | 1871 | 0.292679 | 0         |  |
|  | Shiraz-35T | 1933 | 0.488535 | 0         |  |
|  | Shiraz-58T | 2223 | 0.833364 | 0         |  |
|  | Shiraz-58T | 2225 | 0.595784 | 0         |  |
|  | Shiraz-71T | 2263 | 0.975531 | 0         |  |
|  | Shiraz-3T  | 242  | 0        | -0.336434 |  |
|  | Shiraz-3T  | 243  | 0        | -0.549129 |  |
|  | Shiraz-4T  | 261  | 0        | -0.336249 |  |
|  | Shiraz-16T | 295  | 0.591657 | 0         |  |
|  | Shiraz-31T | 346  | 0        | -0.1527   |  |
|  | Shiraz-36T | 433  | 0        | -0.803961 |  |
|  | Shiraz-44T | 899  | 0        | -1.09697  |  |
|  | Shiraz-44T | 902  | 0        | -1.449824 |  |
|  | Shiraz-47T | 1085 | 0        | -0.130811 |  |
|  | Shiraz-49T | 1170 | 0        | -0.967436 |  |
|  | Shiraz-49T | 1172 | 0        | -1.123219 |  |
|  | Shiraz-18T | 1457 | 0.643204 | 0         |  |
|  | Shiraz-22T | 1673 | 0.611783 | 0         |  |
|  | Shiraz-22T | 1675 | 0.279253 | 0         |  |
|  | Shiraz-25T | 1719 | 0.472955 | 0         |  |
|  | Shiraz-28T | 1762 | 0.562311 | 0         |  |
|  | Shiraz-29T | 1801 | 0.815343 | 0         |  |
|  | Shiraz-32T | 1870 | 0.729766 | 0         |  |
|  | Shiraz-32T | 1871 | 0.292679 | 0         |  |

|       |      |            |      |          |           |  |
|-------|------|------------|------|----------|-----------|--|
|       |      | Shiraz-35T | 1933 | 0.488535 | 0         |  |
|       |      | Shiraz-58T | 2223 | 0.833364 | 0         |  |
|       |      | Shiraz-58T | 2225 | 0.595784 | 0         |  |
|       |      | Shiraz-71T | 2263 | 0.975531 | 0         |  |
| PAGE1 | chrX | Shiraz-4T  | 260  | 0        | -0.324128 |  |
|       |      | Shiraz-16T | 294  | 0.655804 | 0         |  |
|       |      | Shiraz-31T | 345  | 0.103301 | 0         |  |
|       |      | Shiraz-36T | 431  | 0        | -0.78035  |  |
|       |      | Shiraz-36T | 432  | 0        | -0.6692   |  |
|       |      | Shiraz-44T | 891  | 0        | -0.954044 |  |
|       |      | Shiraz-46T | 991  | 0.139564 | 0         |  |
|       |      | Shiraz-47T | 1084 | 0.24185  | 0         |  |
|       |      | Shiraz-49T | 1166 | 0        | -0.917235 |  |
|       |      | Shiraz-77T | 1282 | 0.213849 | 0         |  |
|       |      | Shiraz-9T  | 1368 | 0.199713 | 0         |  |
|       |      | Shiraz-18T | 1455 | 0        | -0.186773 |  |
|       |      | Shiraz-22T | 1669 | 0.695915 | 0         |  |
|       |      | Shiraz-22T | 1672 | 1.01678  | 0         |  |
|       |      | Shiraz-25T | 1717 | 0.420447 | 0         |  |
|       |      | Shiraz-28T | 1760 | 0.538181 | 0         |  |
|       |      | Shiraz-29T | 1800 | 0.672527 | 0         |  |
|       |      | Shiraz-32T | 1869 | 0.776805 | 0         |  |
|       |      | Shiraz-35T | 1932 | 0.507141 | 0         |  |
|       |      | Shiraz-58T | 2221 | 0.871948 | 0         |  |
|       |      | Shiraz-71T | 2260 | 0.68394  | 0         |  |
|       |      | Shiraz-71T | 2262 | 0.986748 | 0         |  |
|       |      | Shiraz-4T  | 260  | 0        | -0.324128 |  |
|       |      | Shiraz-16T | 294  | 0.655804 | 0         |  |
|       |      | Shiraz-31T | 345  | 0.103301 | 0         |  |
|       |      | Shiraz-36T | 431  | 0        | -0.78035  |  |
|       |      | Shiraz-36T | 432  | 0        | -0.6692   |  |
|       |      | Shiraz-44T | 891  | 0        | -0.954044 |  |
|       |      | Shiraz-46T | 991  | 0.139564 | 0         |  |
|       |      | Shiraz-47T | 1084 | 0.24185  | 0         |  |
|       |      | Shiraz-49T | 1166 | 0        | -0.917235 |  |
|       |      | Shiraz-77T | 1282 | 0.213849 | 0         |  |
|       |      | Shiraz-9T  | 1368 | 0.199713 | 0         |  |
|       |      | Shiraz-18T | 1455 | 0        | -0.186773 |  |
|       |      | Shiraz-22T | 1669 | 0.695915 | 0         |  |
|       |      | Shiraz-22T | 1672 | 1.01678  | 0         |  |
|       |      | Shiraz-25T | 1717 | 0.420447 | 0         |  |
|       |      | Shiraz-28T | 1760 | 0.538181 | 0         |  |
|       |      | Shiraz-29T | 1800 | 0.672527 | 0         |  |
|       |      | Shiraz-32T | 1869 | 0.776805 | 0         |  |
|       |      | Shiraz-35T | 1932 | 0.507141 | 0         |  |
|       |      | Shiraz-58T | 2221 | 0.871948 | 0         |  |
|       |      | Shiraz-71T | 2260 | 0.68394  | 0         |  |

|       |      |            |      |          |           |  |  |
|-------|------|------------|------|----------|-----------|--|--|
|       |      | Shiraz-71T | 2262 | 0.986748 | 0         |  |  |
|       |      | Shiraz-4T  | 260  | 0        | -0.324128 |  |  |
|       |      | Shiraz-16T | 294  | 0.655804 | 0         |  |  |
|       |      | Shiraz-31T | 345  | 0.103301 | 0         |  |  |
|       |      | Shiraz-36T | 431  | 0        | -0.78035  |  |  |
|       |      | Shiraz-36T | 432  | 0        | -0.6692   |  |  |
|       |      | Shiraz-44T | 891  | 0        | -0.954044 |  |  |
|       |      | Shiraz-46T | 991  | 0.139564 | 0         |  |  |
|       |      | Shiraz-47T | 1084 | 0.24185  | 0         |  |  |
|       |      | Shiraz-49T | 1166 | 0        | -0.917235 |  |  |
|       |      | Shiraz-77T | 1282 | 0.213849 | 0         |  |  |
|       |      | Shiraz-9T  | 1368 | 0.199713 | 0         |  |  |
|       |      | Shiraz-18T | 1455 | 0        | -0.186773 |  |  |
|       |      | Shiraz-22T | 1669 | 0.695915 | 0         |  |  |
|       |      | Shiraz-22T | 1672 | 1.01678  | 0         |  |  |
|       |      | Shiraz-25T | 1717 | 0.420447 | 0         |  |  |
|       |      | Shiraz-28T | 1760 | 0.538181 | 0         |  |  |
|       |      | Shiraz-29T | 1800 | 0.672527 | 0         |  |  |
|       |      | Shiraz-32T | 1869 | 0.776805 | 0         |  |  |
|       |      | Shiraz-35T | 1932 | 0.507141 | 0         |  |  |
|       |      | Shiraz-58T | 2221 | 0.871948 | 0         |  |  |
|       |      | Shiraz-71T | 2260 | 0.68394  | 0         |  |  |
|       |      | Shiraz-71T | 2262 | 0.986748 | 0         |  |  |
| PAGE2 | chrX | Shiraz-3T  | 240  | 0        | -0.346245 |  |  |
|       |      | Shiraz-4T  | 260  | 0        | -0.324128 |  |  |
|       |      | Shiraz-16T | 294  | 0.655804 | 0         |  |  |
|       |      | Shiraz-36T | 431  | 0        | -0.78035  |  |  |
|       |      | Shiraz-44T | 891  | 0        | -0.954044 |  |  |
|       |      | Shiraz-49T | 1166 | 0        | -0.917235 |  |  |
|       |      | Shiraz-9T  | 1368 | 0.199713 | 0         |  |  |
|       |      | Shiraz-18T | 1456 | 0.608534 | 0         |  |  |
|       |      | Shiraz-22T | 1669 | 0.695915 | 0         |  |  |
|       |      | Shiraz-25T | 1717 | 0.420447 | 0         |  |  |
|       |      | Shiraz-28T | 1760 | 0.538181 | 0         |  |  |
|       |      | Shiraz-29T | 1800 | 0.672527 | 0         |  |  |
|       |      | Shiraz-32T | 1869 | 0.776805 | 0         |  |  |
|       |      | Shiraz-35T | 1932 | 0.507141 | 0         |  |  |
|       |      | Shiraz-58T | 2221 | 0.871948 | 0         |  |  |
|       |      | Shiraz-71T | 2260 | 0.68394  | 0         |  |  |
|       |      | Shiraz-71T | 2262 | 0.986748 | 0         |  |  |
|       |      | Shiraz-3T  | 240  | 0        | -0.346245 |  |  |
|       |      | Shiraz-4T  | 260  | 0        | -0.324128 |  |  |
|       |      | Shiraz-16T | 294  | 0.655804 | 0         |  |  |
|       |      | Shiraz-36T | 431  | 0        | -0.78035  |  |  |
|       |      | Shiraz-44T | 891  | 0        | -0.954044 |  |  |
|       |      | Shiraz-49T | 1166 | 0        | -0.917235 |  |  |
|       |      | Shiraz-9T  | 1368 | 0.199713 | 0         |  |  |

|        |      |            |      |          |           |  |  |
|--------|------|------------|------|----------|-----------|--|--|
|        |      | Shiraz-18T | 1456 | 0.608534 | 0         |  |  |
|        |      | Shiraz-22T | 1669 | 0.695915 | 0         |  |  |
|        |      | Shiraz-25T | 1717 | 0.420447 | 0         |  |  |
|        |      | Shiraz-28T | 1760 | 0.538181 | 0         |  |  |
|        |      | Shiraz-29T | 1800 | 0.672527 | 0         |  |  |
|        |      | Shiraz-32T | 1869 | 0.776805 | 0         |  |  |
|        |      | Shiraz-35T | 1932 | 0.507141 | 0         |  |  |
|        |      | Shiraz-58T | 2221 | 0.871948 | 0         |  |  |
|        |      | Shiraz-71T | 2260 | 0.68394  | 0         |  |  |
|        |      | Shiraz-71T | 2262 | 0.986748 | 0         |  |  |
|        |      | Shiraz-3T  | 240  | 0        | -0.346245 |  |  |
|        |      | Shiraz-4T  | 260  | 0        | -0.324128 |  |  |
|        |      | Shiraz-16T | 294  | 0.655804 | 0         |  |  |
|        |      | Shiraz-36T | 431  | 0        | -0.78035  |  |  |
|        |      | Shiraz-44T | 891  | 0        | -0.954044 |  |  |
|        |      | Shiraz-49T | 1166 | 0        | -0.917235 |  |  |
|        |      | Shiraz-9T  | 1368 | 0.199713 | 0         |  |  |
|        |      | Shiraz-18T | 1456 | 0.608534 | 0         |  |  |
|        |      | Shiraz-22T | 1669 | 0.695915 | 0         |  |  |
|        |      | Shiraz-25T | 1717 | 0.420447 | 0         |  |  |
|        |      | Shiraz-28T | 1760 | 0.538181 | 0         |  |  |
|        |      | Shiraz-29T | 1800 | 0.672527 | 0         |  |  |
|        |      | Shiraz-32T | 1869 | 0.776805 | 0         |  |  |
|        |      | Shiraz-35T | 1932 | 0.507141 | 0         |  |  |
|        |      | Shiraz-58T | 2221 | 0.871948 | 0         |  |  |
|        |      | Shiraz-71T | 2260 | 0.68394  | 0         |  |  |
|        |      | Shiraz-71T | 2262 | 0.986748 | 0         |  |  |
| PAGE2B | chrX | Shiraz-3T  | 240  | 0        | -0.346245 |  |  |
|        |      | Shiraz-4T  | 260  | 0        | -0.324128 |  |  |
|        |      | Shiraz-16T | 294  | 0.655804 | 0         |  |  |
|        |      | Shiraz-36T | 431  | 0        | -0.78035  |  |  |
|        |      | Shiraz-44T | 891  | 0        | -0.954044 |  |  |
|        |      | Shiraz-49T | 1166 | 0        | -0.917235 |  |  |
|        |      | Shiraz-9T  | 1368 | 0.199713 | 0         |  |  |
|        |      | Shiraz-18T | 1456 | 0.608534 | 0         |  |  |
|        |      | Shiraz-22T | 1669 | 0.695915 | 0         |  |  |
|        |      | Shiraz-25T | 1717 | 0.420447 | 0         |  |  |
|        |      | Shiraz-28T | 1760 | 0.538181 | 0         |  |  |
|        |      | Shiraz-29T | 1800 | 0.672527 | 0         |  |  |
|        |      | Shiraz-32T | 1869 | 0.776805 | 0         |  |  |
|        |      | Shiraz-35T | 1932 | 0.507141 | 0         |  |  |
|        |      | Shiraz-58T | 2221 | 0.871948 | 0         |  |  |
|        |      | Shiraz-71T | 2260 | 0.68394  | 0         |  |  |
|        |      | Shiraz-71T | 2262 | 0.986748 | 0         |  |  |
|        |      | Shiraz-3T  | 240  | 0        | -0.346245 |  |  |
|        |      | Shiraz-4T  | 260  | 0        | -0.324128 |  |  |
|        |      | Shiraz-16T | 294  | 0.655804 | 0         |  |  |

|       |      |            |      |          |           |  |  |
|-------|------|------------|------|----------|-----------|--|--|
|       |      | Shiraz-36T | 431  | 0        | -0.78035  |  |  |
|       |      | Shiraz-44T | 891  | 0        | -0.954044 |  |  |
|       |      | Shiraz-49T | 1166 | 0        | -0.917235 |  |  |
|       |      | Shiraz-9T  | 1368 | 0.199713 | 0         |  |  |
|       |      | Shiraz-18T | 1456 | 0.608534 | 0         |  |  |
|       |      | Shiraz-22T | 1669 | 0.695915 | 0         |  |  |
|       |      | Shiraz-25T | 1717 | 0.420447 | 0         |  |  |
|       |      | Shiraz-28T | 1760 | 0.538181 | 0         |  |  |
|       |      | Shiraz-29T | 1800 | 0.672527 | 0         |  |  |
|       |      | Shiraz-32T | 1869 | 0.776805 | 0         |  |  |
|       |      | Shiraz-35T | 1932 | 0.507141 | 0         |  |  |
|       |      | Shiraz-58T | 2221 | 0.871948 | 0         |  |  |
|       |      | Shiraz-71T | 2260 | 0.68394  | 0         |  |  |
|       |      | Shiraz-71T | 2262 | 0.986748 | 0         |  |  |
|       |      | Shiraz-3T  | 240  | 0        | -0.346245 |  |  |
|       |      | Shiraz-4T  | 260  | 0        | -0.324128 |  |  |
|       |      | Shiraz-16T | 294  | 0.655804 | 0         |  |  |
|       |      | Shiraz-36T | 431  | 0        | -0.78035  |  |  |
|       |      | Shiraz-44T | 891  | 0        | -0.954044 |  |  |
|       |      | Shiraz-49T | 1166 | 0        | -0.917235 |  |  |
|       |      | Shiraz-9T  | 1368 | 0.199713 | 0         |  |  |
|       |      | Shiraz-18T | 1456 | 0.608534 | 0         |  |  |
|       |      | Shiraz-22T | 1669 | 0.695915 | 0         |  |  |
|       |      | Shiraz-25T | 1717 | 0.420447 | 0         |  |  |
|       |      | Shiraz-28T | 1760 | 0.538181 | 0         |  |  |
|       |      | Shiraz-29T | 1800 | 0.672527 | 0         |  |  |
|       |      | Shiraz-32T | 1869 | 0.776805 | 0         |  |  |
|       |      | Shiraz-35T | 1932 | 0.507141 | 0         |  |  |
|       |      | Shiraz-58T | 2221 | 0.871948 | 0         |  |  |
|       |      | Shiraz-71T | 2260 | 0.68394  | 0         |  |  |
|       |      | Shiraz-71T | 2262 | 0.986748 | 0         |  |  |
| PAGE3 | chrX | Shiraz-3T  | 240  | 0        | -0.346245 |  |  |
|       |      | Shiraz-4T  | 260  | 0        | -0.324128 |  |  |
|       |      | Shiraz-16T | 294  | 0.655804 | 0         |  |  |
|       |      | Shiraz-36T | 431  | 0        | -0.78035  |  |  |
|       |      | Shiraz-44T | 891  | 0        | -0.954044 |  |  |
|       |      | Shiraz-49T | 1166 | 0        | -0.917235 |  |  |
|       |      | Shiraz-9T  | 1368 | 0.199713 | 0         |  |  |
|       |      | Shiraz-18T | 1456 | 0.608534 | 0         |  |  |
|       |      | Shiraz-22T | 1669 | 0.695915 | 0         |  |  |
|       |      | Shiraz-25T | 1717 | 0.420447 | 0         |  |  |
|       |      | Shiraz-28T | 1760 | 0.538181 | 0         |  |  |
|       |      | Shiraz-29T | 1800 | 0.672527 | 0         |  |  |
|       |      | Shiraz-32T | 1869 | 0.776805 | 0         |  |  |
|       |      | Shiraz-35T | 1932 | 0.507141 | 0         |  |  |
|       |      | Shiraz-58T | 2221 | 0.871948 | 0         |  |  |
|       |      | Shiraz-71T | 2260 | 0.68394  | 0         |  |  |



|       |      |            |      |          |           |  |  |
|-------|------|------------|------|----------|-----------|--|--|
|       |      | Shiraz-71T | 2262 | 0.986748 | 0         |  |  |
|       |      | Shiraz-3T  | 240  | 0        | -0.346245 |  |  |
|       |      | Shiraz-4T  | 260  | 0        | -0.324128 |  |  |
|       |      | Shiraz-16T | 294  | 0.655804 | 0         |  |  |
|       |      | Shiraz-36T | 431  | 0        | -0.78035  |  |  |
|       |      | Shiraz-44T | 891  | 0        | -0.954044 |  |  |
|       |      | Shiraz-49T | 1166 | 0        | -0.917235 |  |  |
|       |      | Shiraz-9T  | 1368 | 0.199713 | 0         |  |  |
|       |      | Shiraz-18T | 1456 | 0.608534 | 0         |  |  |
|       |      | Shiraz-22T | 1669 | 0.695915 | 0         |  |  |
|       |      | Shiraz-25T | 1717 | 0.420447 | 0         |  |  |
|       |      | Shiraz-28T | 1760 | 0.538181 | 0         |  |  |
|       |      | Shiraz-29T | 1800 | 0.672527 | 0         |  |  |
|       |      | Shiraz-32T | 1869 | 0.776805 | 0         |  |  |
|       |      | Shiraz-35T | 1932 | 0.507141 | 0         |  |  |
|       |      | Shiraz-58T | 2221 | 0.871948 | 0         |  |  |
|       |      | Shiraz-71T | 2260 | 0.68394  | 0         |  |  |
|       |      | Shiraz-71T | 2262 | 0.986748 | 0         |  |  |
|       |      | Shiraz-3T  | 240  | 0        | -0.346245 |  |  |
|       |      | Shiraz-4T  | 260  | 0        | -0.324128 |  |  |
|       |      | Shiraz-16T | 294  | 0.655804 | 0         |  |  |
|       |      | Shiraz-36T | 431  | 0        | -0.78035  |  |  |
|       |      | Shiraz-44T | 891  | 0        | -0.954044 |  |  |
|       |      | Shiraz-49T | 1166 | 0        | -0.917235 |  |  |
|       |      | Shiraz-9T  | 1368 | 0.199713 | 0         |  |  |
|       |      | Shiraz-18T | 1456 | 0.608534 | 0         |  |  |
|       |      | Shiraz-22T | 1669 | 0.695915 | 0         |  |  |
|       |      | Shiraz-25T | 1717 | 0.420447 | 0         |  |  |
|       |      | Shiraz-28T | 1760 | 0.538181 | 0         |  |  |
|       |      | Shiraz-29T | 1800 | 0.672527 | 0         |  |  |
|       |      | Shiraz-32T | 1869 | 0.776805 | 0         |  |  |
|       |      | Shiraz-35T | 1932 | 0.507141 | 0         |  |  |
|       |      | Shiraz-58T | 2221 | 0.871948 | 0         |  |  |
|       |      | Shiraz-71T | 2260 | 0.68394  | 0         |  |  |
|       |      | Shiraz-71T | 2262 | 0.986748 | 0         |  |  |
| PAGE4 | chrX | Shiraz-4T  | 260  | 0        | -0.324128 |  |  |
|       |      | Shiraz-16T | 294  | 0.655804 | 0         |  |  |
|       |      | Shiraz-31T | 345  | 0.103301 | 0         |  |  |
|       |      | Shiraz-36T | 431  | 0        | -0.78035  |  |  |
|       |      | Shiraz-36T | 432  | 0        | -0.6692   |  |  |
|       |      | Shiraz-44T | 891  | 0        | -0.954044 |  |  |
|       |      | Shiraz-49T | 1166 | 0        | -0.917235 |  |  |
|       |      | Shiraz-77T | 1282 | 0.213849 | 0         |  |  |
|       |      | Shiraz-9T  | 1368 | 0.199713 | 0         |  |  |
|       |      | Shiraz-18T | 1455 | 0        | -0.186773 |  |  |
|       |      | Shiraz-22T | 1669 | 0.695915 | 0         |  |  |
|       |      | Shiraz-22T | 1672 | 1.01678  | 0         |  |  |

|  |            |      |          |           |  |
|--|------------|------|----------|-----------|--|
|  | Shiraz-25T | 1717 | 0.420447 | 0         |  |
|  | Shiraz-28T | 1760 | 0.538181 | 0         |  |
|  | Shiraz-29T | 1800 | 0.672527 | 0         |  |
|  | Shiraz-32T | 1869 | 0.776805 | 0         |  |
|  | Shiraz-35T | 1932 | 0.507141 | 0         |  |
|  | Shiraz-58T | 2221 | 0.871948 | 0         |  |
|  | Shiraz-71T | 2260 | 0.68394  | 0         |  |
|  | Shiraz-71T | 2262 | 0.986748 | 0         |  |
|  | Shiraz-4T  | 260  | 0        | -0.324128 |  |
|  | Shiraz-16T | 294  | 0.655804 | 0         |  |
|  | Shiraz-31T | 345  | 0.103301 | 0         |  |
|  | Shiraz-36T | 431  | 0        | -0.78035  |  |
|  | Shiraz-36T | 432  | 0        | -0.6692   |  |
|  | Shiraz-44T | 891  | 0        | -0.954044 |  |
|  | Shiraz-49T | 1166 | 0        | -0.917235 |  |
|  | Shiraz-77T | 1282 | 0.213849 | 0         |  |
|  | Shiraz-9T  | 1368 | 0.199713 | 0         |  |
|  | Shiraz-18T | 1455 | 0        | -0.186773 |  |
|  | Shiraz-22T | 1669 | 0.695915 | 0         |  |
|  | Shiraz-22T | 1672 | 1.01678  | 0         |  |
|  | Shiraz-25T | 1717 | 0.420447 | 0         |  |
|  | Shiraz-28T | 1760 | 0.538181 | 0         |  |
|  | Shiraz-29T | 1800 | 0.672527 | 0         |  |
|  | Shiraz-32T | 1869 | 0.776805 | 0         |  |
|  | Shiraz-35T | 1932 | 0.507141 | 0         |  |
|  | Shiraz-58T | 2221 | 0.871948 | 0         |  |
|  | Shiraz-71T | 2260 | 0.68394  | 0         |  |
|  | Shiraz-71T | 2262 | 0.986748 | 0         |  |
|  | Shiraz-4T  | 260  | 0        | -0.324128 |  |
|  | Shiraz-16T | 294  | 0.655804 | 0         |  |
|  | Shiraz-31T | 345  | 0.103301 | 0         |  |
|  | Shiraz-36T | 431  | 0        | -0.78035  |  |
|  | Shiraz-36T | 432  | 0        | -0.6692   |  |
|  | Shiraz-44T | 891  | 0        | -0.954044 |  |
|  | Shiraz-49T | 1166 | 0        | -0.917235 |  |
|  | Shiraz-77T | 1282 | 0.213849 | 0         |  |
|  | Shiraz-9T  | 1368 | 0.199713 | 0         |  |
|  | Shiraz-18T | 1455 | 0        | -0.186773 |  |
|  | Shiraz-22T | 1669 | 0.695915 | 0         |  |
|  | Shiraz-22T | 1672 | 1.01678  | 0         |  |
|  | Shiraz-25T | 1717 | 0.420447 | 0         |  |
|  | Shiraz-28T | 1760 | 0.538181 | 0         |  |
|  | Shiraz-29T | 1800 | 0.672527 | 0         |  |
|  | Shiraz-32T | 1869 | 0.776805 | 0         |  |
|  | Shiraz-35T | 1932 | 0.507141 | 0         |  |
|  | Shiraz-58T | 2221 | 0.871948 | 0         |  |
|  | Shiraz-71T | 2260 | 0.68394  | 0         |  |

|       |      |            |      |          |           |  |  |
|-------|------|------------|------|----------|-----------|--|--|
|       |      | Shiraz-71T | 2262 | 0.986748 | 0         |  |  |
| PAGE5 | chrX | Shiraz-3T  | 240  | 0        | -0.346245 |  |  |
|       |      | Shiraz-3T  | 240  | 0        | -0.346245 |  |  |
|       |      | Shiraz-4T  | 260  | 0        | -0.324128 |  |  |
|       |      | Shiraz-4T  | 260  | 0        | -0.324128 |  |  |
|       |      | Shiraz-16T | 294  | 0.655804 | 0         |  |  |
|       |      | Shiraz-16T | 294  | 0.655804 | 0         |  |  |
|       |      | Shiraz-36T | 431  | 0        | -0.78035  |  |  |
|       |      | Shiraz-36T | 431  | 0        | -0.78035  |  |  |
|       |      | Shiraz-44T | 891  | 0        | -0.954044 |  |  |
|       |      | Shiraz-44T | 891  | 0        | -0.954044 |  |  |
|       |      | Shiraz-49T | 1166 | 0        | -0.917235 |  |  |
|       |      | Shiraz-49T | 1166 | 0        | -0.917235 |  |  |
|       |      | Shiraz-9T  | 1368 | 0.199713 | 0         |  |  |
|       |      | Shiraz-9T  | 1368 | 0.199713 | 0         |  |  |
|       |      | Shiraz-18T | 1456 | 0.608534 | 0         |  |  |
|       |      | Shiraz-18T | 1456 | 0.608534 | 0         |  |  |
|       |      | Shiraz-22T | 1669 | 0.695915 | 0         |  |  |
|       |      | Shiraz-22T | 1669 | 0.695915 | 0         |  |  |
|       |      | Shiraz-25T | 1717 | 0.420447 | 0         |  |  |
|       |      | Shiraz-25T | 1717 | 0.420447 | 0         |  |  |
|       |      | Shiraz-28T | 1760 | 0.538181 | 0         |  |  |
|       |      | Shiraz-28T | 1760 | 0.538181 | 0         |  |  |
|       |      | Shiraz-29T | 1800 | 0.672527 | 0         |  |  |
|       |      | Shiraz-29T | 1800 | 0.672527 | 0         |  |  |
|       |      | Shiraz-32T | 1869 | 0.776805 | 0         |  |  |
|       |      | Shiraz-32T | 1869 | 0.776805 | 0         |  |  |
|       |      | Shiraz-35T | 1932 | 0.507141 | 0         |  |  |
|       |      | Shiraz-35T | 1932 | 0.507141 | 0         |  |  |
|       |      | Shiraz-58T | 2221 | 0.871948 | 0         |  |  |
|       |      | Shiraz-58T | 2221 | 0.871948 | 0         |  |  |
|       |      | Shiraz-71T | 2260 | 0.68394  | 0         |  |  |
|       |      | Shiraz-71T | 2260 | 0.68394  | 0         |  |  |
|       |      | Shiraz-71T | 2262 | 0.986748 | 0         |  |  |
|       |      | Shiraz-71T | 2262 | 0.986748 | 0         |  |  |
|       |      | Shiraz-3T  | 240  | 0        | -0.346245 |  |  |
|       |      | Shiraz-3T  | 240  | 0        | -0.346245 |  |  |
|       |      | Shiraz-4T  | 260  | 0        | -0.324128 |  |  |
|       |      | Shiraz-4T  | 260  | 0        | -0.324128 |  |  |
|       |      | Shiraz-16T | 294  | 0.655804 | 0         |  |  |
|       |      | Shiraz-16T | 294  | 0.655804 | 0         |  |  |
|       |      | Shiraz-36T | 431  | 0        | -0.78035  |  |  |
|       |      | Shiraz-36T | 431  | 0        | -0.78035  |  |  |
|       |      | Shiraz-44T | 891  | 0        | -0.954044 |  |  |
|       |      | Shiraz-44T | 891  | 0        | -0.954044 |  |  |
|       |      | Shiraz-49T | 1166 | 0        | -0.917235 |  |  |
|       |      | Shiraz-49T | 1166 | 0        | -0.917235 |  |  |

|  |  |            |      |          |           |  |  |
|--|--|------------|------|----------|-----------|--|--|
|  |  | Shiraz-9T  | 1368 | 0.199713 | 0         |  |  |
|  |  | Shiraz-9T  | 1368 | 0.199713 | 0         |  |  |
|  |  | Shiraz-18T | 1456 | 0.608534 | 0         |  |  |
|  |  | Shiraz-18T | 1456 | 0.608534 | 0         |  |  |
|  |  | Shiraz-22T | 1669 | 0.695915 | 0         |  |  |
|  |  | Shiraz-22T | 1669 | 0.695915 | 0         |  |  |
|  |  | Shiraz-25T | 1717 | 0.420447 | 0         |  |  |
|  |  | Shiraz-25T | 1717 | 0.420447 | 0         |  |  |
|  |  | Shiraz-28T | 1760 | 0.538181 | 0         |  |  |
|  |  | Shiraz-28T | 1760 | 0.538181 | 0         |  |  |
|  |  | Shiraz-29T | 1800 | 0.672527 | 0         |  |  |
|  |  | Shiraz-29T | 1800 | 0.672527 | 0         |  |  |
|  |  | Shiraz-32T | 1869 | 0.776805 | 0         |  |  |
|  |  | Shiraz-32T | 1869 | 0.776805 | 0         |  |  |
|  |  | Shiraz-35T | 1932 | 0.507141 | 0         |  |  |
|  |  | Shiraz-35T | 1932 | 0.507141 | 0         |  |  |
|  |  | Shiraz-58T | 2221 | 0.871948 | 0         |  |  |
|  |  | Shiraz-58T | 2221 | 0.871948 | 0         |  |  |
|  |  | Shiraz-71T | 2260 | 0.68394  | 0         |  |  |
|  |  | Shiraz-71T | 2260 | 0.68394  | 0         |  |  |
|  |  | Shiraz-71T | 2262 | 0.986748 | 0         |  |  |
|  |  | Shiraz-71T | 2262 | 0.986748 | 0         |  |  |
|  |  | Shiraz-3T  | 240  | 0        | -0.346245 |  |  |
|  |  | Shiraz-3T  | 240  | 0        | -0.346245 |  |  |
|  |  | Shiraz-4T  | 260  | 0        | -0.324128 |  |  |
|  |  | Shiraz-4T  | 260  | 0        | -0.324128 |  |  |
|  |  | Shiraz-16T | 294  | 0.655804 | 0         |  |  |
|  |  | Shiraz-16T | 294  | 0.655804 | 0         |  |  |
|  |  | Shiraz-36T | 431  | 0        | -0.78035  |  |  |
|  |  | Shiraz-36T | 431  | 0        | -0.78035  |  |  |
|  |  | Shiraz-44T | 891  | 0        | -0.954044 |  |  |
|  |  | Shiraz-44T | 891  | 0        | -0.954044 |  |  |
|  |  | Shiraz-49T | 1166 | 0        | -0.917235 |  |  |
|  |  | Shiraz-49T | 1166 | 0        | -0.917235 |  |  |
|  |  | Shiraz-9T  | 1368 | 0.199713 | 0         |  |  |
|  |  | Shiraz-9T  | 1368 | 0.199713 | 0         |  |  |
|  |  | Shiraz-18T | 1456 | 0.608534 | 0         |  |  |
|  |  | Shiraz-18T | 1456 | 0.608534 | 0         |  |  |
|  |  | Shiraz-22T | 1669 | 0.695915 | 0         |  |  |
|  |  | Shiraz-22T | 1669 | 0.695915 | 0         |  |  |
|  |  | Shiraz-25T | 1717 | 0.420447 | 0         |  |  |
|  |  | Shiraz-25T | 1717 | 0.420447 | 0         |  |  |
|  |  | Shiraz-28T | 1760 | 0.538181 | 0         |  |  |
|  |  | Shiraz-28T | 1760 | 0.538181 | 0         |  |  |
|  |  | Shiraz-29T | 1800 | 0.672527 | 0         |  |  |
|  |  | Shiraz-29T | 1800 | 0.672527 | 0         |  |  |
|  |  | Shiraz-32T | 1869 | 0.776805 | 0         |  |  |

|       |      |            |      |          |           |  |
|-------|------|------------|------|----------|-----------|--|
|       |      | Shiraz-32T | 1869 | 0.776805 | 0         |  |
|       |      | Shiraz-35T | 1932 | 0.507141 | 0         |  |
|       |      | Shiraz-35T | 1932 | 0.507141 | 0         |  |
|       |      | Shiraz-58T | 2221 | 0.871948 | 0         |  |
|       |      | Shiraz-58T | 2221 | 0.871948 | 0         |  |
|       |      | Shiraz-71T | 2260 | 0.68394  | 0         |  |
|       |      | Shiraz-71T | 2260 | 0.68394  | 0         |  |
|       |      | Shiraz-71T | 2262 | 0.986748 | 0         |  |
|       |      | Shiraz-71T | 2262 | 0.986748 | 0         |  |
| PAIP1 | chr5 | Shiraz-4T  | 250  | 0.262252 | 0         |  |
|       |      | Shiraz-4T  | 250  | 0.262252 | 0         |  |
|       |      | Shiraz-4T  | 250  | 0.262252 | 0         |  |
|       |      | Shiraz-16T | 266  | 0.321724 | 0         |  |
|       |      | Shiraz-16T | 266  | 0.321724 | 0         |  |
|       |      | Shiraz-16T | 266  | 0.321724 | 0         |  |
|       |      | Shiraz-44T | 591  | 0        | -0.233934 |  |
|       |      | Shiraz-44T | 591  | 0        | -0.233934 |  |
|       |      | Shiraz-44T | 591  | 0        | -0.233934 |  |
|       |      | Shiraz-18T | 1429 | 0        | -0.314125 |  |
|       |      | Shiraz-18T | 1429 | 0        | -0.314125 |  |
|       |      | Shiraz-18T | 1429 | 0        | -0.314125 |  |
|       |      | Shiraz-22T | 1522 | 0        | -0.322688 |  |
|       |      | Shiraz-22T | 1522 | 0        | -0.322688 |  |
|       |      | Shiraz-22T | 1522 | 0        | -0.322688 |  |
|       |      | Shiraz-25T | 1694 | 0.201602 | 0         |  |
|       |      | Shiraz-25T | 1694 | 0.201602 | 0         |  |
|       |      | Shiraz-25T | 1694 | 0.201602 | 0         |  |
|       |      | Shiraz-28T | 1731 | 0.295447 | 0         |  |
|       |      | Shiraz-28T | 1731 | 0.295447 | 0         |  |
|       |      | Shiraz-28T | 1731 | 0.295447 | 0         |  |
|       |      | Shiraz-29T | 1773 | 0.090981 | 0         |  |
|       |      | Shiraz-29T | 1773 | 0.090981 | 0         |  |
|       |      | Shiraz-29T | 1773 | 0.090981 | 0         |  |
|       |      | Shiraz-40T | 2016 | 0.376634 | 0         |  |
|       |      | Shiraz-40T | 2016 | 0.376634 | 0         |  |
|       |      | Shiraz-40T | 2016 | 0.376634 | 0         |  |
|       |      | Shiraz-4T  | 250  | 0.262252 | 0         |  |
|       |      | Shiraz-4T  | 250  | 0.262252 | 0         |  |
|       |      | Shiraz-4T  | 250  | 0.262252 | 0         |  |
|       |      | Shiraz-16T | 266  | 0.321724 | 0         |  |
|       |      | Shiraz-16T | 266  | 0.321724 | 0         |  |
|       |      | Shiraz-16T | 266  | 0.321724 | 0         |  |
|       |      | Shiraz-44T | 591  | 0        | -0.233934 |  |
|       |      | Shiraz-44T | 591  | 0        | -0.233934 |  |
|       |      | Shiraz-44T | 591  | 0        | -0.233934 |  |
|       |      | Shiraz-18T | 1429 | 0        | -0.314125 |  |
|       |      | Shiraz-18T | 1429 | 0        | -0.314125 |  |

|      |      |            |      |          |           |  |  |
|------|------|------------|------|----------|-----------|--|--|
|      |      | Shiraz-18T | 1429 | 0        | -0.314125 |  |  |
|      |      | Shiraz-22T | 1522 | 0        | -0.322688 |  |  |
|      |      | Shiraz-22T | 1522 | 0        | -0.322688 |  |  |
|      |      | Shiraz-22T | 1522 | 0        | -0.322688 |  |  |
|      |      | Shiraz-25T | 1694 | 0.201602 | 0         |  |  |
|      |      | Shiraz-25T | 1694 | 0.201602 | 0         |  |  |
|      |      | Shiraz-25T | 1694 | 0.201602 | 0         |  |  |
|      |      | Shiraz-28T | 1731 | 0.295447 | 0         |  |  |
|      |      | Shiraz-28T | 1731 | 0.295447 | 0         |  |  |
|      |      | Shiraz-28T | 1731 | 0.295447 | 0         |  |  |
|      |      | Shiraz-29T | 1773 | 0.090981 | 0         |  |  |
|      |      | Shiraz-29T | 1773 | 0.090981 | 0         |  |  |
|      |      | Shiraz-29T | 1773 | 0.090981 | 0         |  |  |
|      |      | Shiraz-40T | 2016 | 0.376634 | 0         |  |  |
|      |      | Shiraz-40T | 2016 | 0.376634 | 0         |  |  |
|      |      | Shiraz-40T | 2016 | 0.376634 | 0         |  |  |
|      |      | Shiraz-4T  | 250  | 0.262252 | 0         |  |  |
|      |      | Shiraz-4T  | 250  | 0.262252 | 0         |  |  |
|      |      | Shiraz-4T  | 250  | 0.262252 | 0         |  |  |
|      |      | Shiraz-16T | 266  | 0.321724 | 0         |  |  |
|      |      | Shiraz-16T | 266  | 0.321724 | 0         |  |  |
|      |      | Shiraz-16T | 266  | 0.321724 | 0         |  |  |
|      |      | Shiraz-44T | 591  | 0        | -0.233934 |  |  |
|      |      | Shiraz-44T | 591  | 0        | -0.233934 |  |  |
|      |      | Shiraz-44T | 591  | 0        | -0.233934 |  |  |
|      |      | Shiraz-18T | 1429 | 0        | -0.314125 |  |  |
|      |      | Shiraz-18T | 1429 | 0        | -0.314125 |  |  |
|      |      | Shiraz-18T | 1429 | 0        | -0.314125 |  |  |
|      |      | Shiraz-22T | 1522 | 0        | -0.322688 |  |  |
|      |      | Shiraz-22T | 1522 | 0        | -0.322688 |  |  |
|      |      | Shiraz-22T | 1522 | 0        | -0.322688 |  |  |
|      |      | Shiraz-25T | 1694 | 0.201602 | 0         |  |  |
|      |      | Shiraz-25T | 1694 | 0.201602 | 0         |  |  |
|      |      | Shiraz-25T | 1694 | 0.201602 | 0         |  |  |
|      |      | Shiraz-28T | 1731 | 0.295447 | 0         |  |  |
|      |      | Shiraz-28T | 1731 | 0.295447 | 0         |  |  |
|      |      | Shiraz-28T | 1731 | 0.295447 | 0         |  |  |
|      |      | Shiraz-29T | 1773 | 0.090981 | 0         |  |  |
|      |      | Shiraz-29T | 1773 | 0.090981 | 0         |  |  |
|      |      | Shiraz-29T | 1773 | 0.090981 | 0         |  |  |
|      |      | Shiraz-40T | 2016 | 0.376634 | 0         |  |  |
|      |      | Shiraz-40T | 2016 | 0.376634 | 0         |  |  |
|      |      | Shiraz-40T | 2016 | 0.376634 | 0         |  |  |
| PAK3 | chrX | Shiraz-3T  | 242  | 0        | -0.336434 |  |  |
|      |      | Shiraz-3T  | 242  | 0        | -0.336434 |  |  |
|      |      | Shiraz-3T  | 242  | 0        | -0.336434 |  |  |
|      |      | Shiraz-4T  | 261  | 0        | -0.336249 |  |  |

|  |            |      |          |           |  |
|--|------------|------|----------|-----------|--|
|  | Shiraz-4T  | 261  | 0        | -0.336249 |  |
|  | Shiraz-4T  | 261  | 0        | -0.336249 |  |
|  | Shiraz-16T | 295  | 0.591657 | 0         |  |
|  | Shiraz-16T | 295  | 0.591657 | 0         |  |
|  | Shiraz-16T | 295  | 0.591657 | 0         |  |
|  | Shiraz-36T | 433  | 0        | -0.803961 |  |
|  | Shiraz-36T | 433  | 0        | -0.803961 |  |
|  | Shiraz-36T | 433  | 0        | -0.803961 |  |
|  | Shiraz-44T | 899  | 0        | -1.09697  |  |
|  | Shiraz-44T | 899  | 0        | -1.09697  |  |
|  | Shiraz-44T | 899  | 0        | -1.09697  |  |
|  | Shiraz-49T | 1170 | 0        | -0.967436 |  |
|  | Shiraz-49T | 1170 | 0        | -0.967436 |  |
|  | Shiraz-49T | 1170 | 0        | -0.967436 |  |
|  | Shiraz-18T | 1457 | 0.643204 | 0         |  |
|  | Shiraz-18T | 1457 | 0.643204 | 0         |  |
|  | Shiraz-18T | 1457 | 0.643204 | 0         |  |
|  | Shiraz-22T | 1673 | 0.611783 | 0         |  |
|  | Shiraz-22T | 1673 | 0.611783 | 0         |  |
|  | Shiraz-22T | 1673 | 0.611783 | 0         |  |
|  | Shiraz-25T | 1719 | 0.472955 | 0         |  |
|  | Shiraz-25T | 1719 | 0.472955 | 0         |  |
|  | Shiraz-25T | 1719 | 0.472955 | 0         |  |
|  | Shiraz-28T | 1762 | 0.562311 | 0         |  |
|  | Shiraz-28T | 1762 | 0.562311 | 0         |  |
|  | Shiraz-28T | 1762 | 0.562311 | 0         |  |
|  | Shiraz-29T | 1801 | 0.815343 | 0         |  |
|  | Shiraz-29T | 1801 | 0.815343 | 0         |  |
|  | Shiraz-29T | 1801 | 0.815343 | 0         |  |
|  | Shiraz-32T | 1870 | 0.729766 | 0         |  |
|  | Shiraz-32T | 1870 | 0.729766 | 0         |  |
|  | Shiraz-32T | 1870 | 0.729766 | 0         |  |
|  | Shiraz-35T | 1933 | 0.488535 | 0         |  |
|  | Shiraz-35T | 1933 | 0.488535 | 0         |  |
|  | Shiraz-35T | 1933 | 0.488535 | 0         |  |
|  | Shiraz-58T | 2223 | 0.833364 | 0         |  |
|  | Shiraz-58T | 2223 | 0.833364 | 0         |  |
|  | Shiraz-58T | 2223 | 0.833364 | 0         |  |
|  | Shiraz-71T | 2263 | 0.975531 | 0         |  |
|  | Shiraz-71T | 2263 | 0.975531 | 0         |  |
|  | Shiraz-71T | 2263 | 0.975531 | 0         |  |
|  | Shiraz-3T  | 242  | 0        | -0.336434 |  |
|  | Shiraz-3T  | 242  | 0        | -0.336434 |  |
|  | Shiraz-3T  | 242  | 0        | -0.336434 |  |
|  | Shiraz-4T  | 261  | 0        | -0.336249 |  |
|  | Shiraz-4T  | 261  | 0        | -0.336249 |  |
|  | Shiraz-4T  | 261  | 0        | -0.336249 |  |

|  |  |            |      |          |           |  |  |
|--|--|------------|------|----------|-----------|--|--|
|  |  | Shiraz-16T | 295  | 0.591657 | 0         |  |  |
|  |  | Shiraz-16T | 295  | 0.591657 | 0         |  |  |
|  |  | Shiraz-16T | 295  | 0.591657 | 0         |  |  |
|  |  | Shiraz-36T | 433  | 0        | -0.803961 |  |  |
|  |  | Shiraz-36T | 433  | 0        | -0.803961 |  |  |
|  |  | Shiraz-36T | 433  | 0        | -0.803961 |  |  |
|  |  | Shiraz-44T | 899  | 0        | -1.09697  |  |  |
|  |  | Shiraz-44T | 899  | 0        | -1.09697  |  |  |
|  |  | Shiraz-44T | 899  | 0        | -1.09697  |  |  |
|  |  | Shiraz-49T | 1170 | 0        | -0.967436 |  |  |
|  |  | Shiraz-49T | 1170 | 0        | -0.967436 |  |  |
|  |  | Shiraz-49T | 1170 | 0        | -0.967436 |  |  |
|  |  | Shiraz-18T | 1457 | 0.643204 | 0         |  |  |
|  |  | Shiraz-18T | 1457 | 0.643204 | 0         |  |  |
|  |  | Shiraz-18T | 1457 | 0.643204 | 0         |  |  |
|  |  | Shiraz-22T | 1673 | 0.611783 | 0         |  |  |
|  |  | Shiraz-22T | 1673 | 0.611783 | 0         |  |  |
|  |  | Shiraz-22T | 1673 | 0.611783 | 0         |  |  |
|  |  | Shiraz-25T | 1719 | 0.472955 | 0         |  |  |
|  |  | Shiraz-25T | 1719 | 0.472955 | 0         |  |  |
|  |  | Shiraz-25T | 1719 | 0.472955 | 0         |  |  |
|  |  | Shiraz-28T | 1762 | 0.562311 | 0         |  |  |
|  |  | Shiraz-28T | 1762 | 0.562311 | 0         |  |  |
|  |  | Shiraz-28T | 1762 | 0.562311 | 0         |  |  |
|  |  | Shiraz-29T | 1801 | 0.815343 | 0         |  |  |
|  |  | Shiraz-29T | 1801 | 0.815343 | 0         |  |  |
|  |  | Shiraz-29T | 1801 | 0.815343 | 0         |  |  |
|  |  | Shiraz-32T | 1870 | 0.729766 | 0         |  |  |
|  |  | Shiraz-32T | 1870 | 0.729766 | 0         |  |  |
|  |  | Shiraz-32T | 1870 | 0.729766 | 0         |  |  |
|  |  | Shiraz-35T | 1933 | 0.488535 | 0         |  |  |
|  |  | Shiraz-35T | 1933 | 0.488535 | 0         |  |  |
|  |  | Shiraz-35T | 1933 | 0.488535 | 0         |  |  |
|  |  | Shiraz-58T | 2223 | 0.833364 | 0         |  |  |
|  |  | Shiraz-58T | 2223 | 0.833364 | 0         |  |  |
|  |  | Shiraz-58T | 2223 | 0.833364 | 0         |  |  |
|  |  | Shiraz-71T | 2263 | 0.975531 | 0         |  |  |
|  |  | Shiraz-71T | 2263 | 0.975531 | 0         |  |  |
|  |  | Shiraz-71T | 2263 | 0.975531 | 0         |  |  |
|  |  | Shiraz-3T  | 242  | 0        | -0.336434 |  |  |
|  |  | Shiraz-3T  | 242  | 0        | -0.336434 |  |  |
|  |  | Shiraz-3T  | 242  | 0        | -0.336434 |  |  |
|  |  | Shiraz-4T  | 261  | 0        | -0.336249 |  |  |
|  |  | Shiraz-4T  | 261  | 0        | -0.336249 |  |  |
|  |  | Shiraz-4T  | 261  | 0        | -0.336249 |  |  |
|  |  | Shiraz-16T | 295  | 0.591657 | 0         |  |  |
|  |  | Shiraz-16T | 295  | 0.591657 | 0         |  |  |



|        |      |            |      |          |           |  |  |
|--------|------|------------|------|----------|-----------|--|--|
|        |      | Shiraz-16T | 295  | 0.591657 | 0         |  |  |
|        |      | Shiraz-36T | 433  | 0        | -0.803961 |  |  |
|        |      | Shiraz-36T | 433  | 0        | -0.803961 |  |  |
|        |      | Shiraz-36T | 433  | 0        | -0.803961 |  |  |
|        |      | Shiraz-44T | 899  | 0        | -1.09697  |  |  |
|        |      | Shiraz-44T | 899  | 0        | -1.09697  |  |  |
|        |      | Shiraz-44T | 899  | 0        | -1.09697  |  |  |
|        |      | Shiraz-49T | 1170 | 0        | -0.967436 |  |  |
|        |      | Shiraz-49T | 1170 | 0        | -0.967436 |  |  |
|        |      | Shiraz-49T | 1170 | 0        | -0.967436 |  |  |
|        |      | Shiraz-18T | 1457 | 0.643204 | 0         |  |  |
|        |      | Shiraz-18T | 1457 | 0.643204 | 0         |  |  |
|        |      | Shiraz-18T | 1457 | 0.643204 | 0         |  |  |
|        |      | Shiraz-22T | 1673 | 0.611783 | 0         |  |  |
|        |      | Shiraz-22T | 1673 | 0.611783 | 0         |  |  |
|        |      | Shiraz-22T | 1673 | 0.611783 | 0         |  |  |
|        |      | Shiraz-25T | 1719 | 0.472955 | 0         |  |  |
|        |      | Shiraz-25T | 1719 | 0.472955 | 0         |  |  |
|        |      | Shiraz-25T | 1719 | 0.472955 | 0         |  |  |
|        |      | Shiraz-28T | 1762 | 0.562311 | 0         |  |  |
|        |      | Shiraz-28T | 1762 | 0.562311 | 0         |  |  |
|        |      | Shiraz-28T | 1762 | 0.562311 | 0         |  |  |
|        |      | Shiraz-29T | 1801 | 0.815343 | 0         |  |  |
|        |      | Shiraz-29T | 1801 | 0.815343 | 0         |  |  |
|        |      | Shiraz-29T | 1801 | 0.815343 | 0         |  |  |
|        |      | Shiraz-32T | 1870 | 0.729766 | 0         |  |  |
|        |      | Shiraz-32T | 1870 | 0.729766 | 0         |  |  |
|        |      | Shiraz-32T | 1870 | 0.729766 | 0         |  |  |
|        |      | Shiraz-35T | 1933 | 0.488535 | 0         |  |  |
|        |      | Shiraz-35T | 1933 | 0.488535 | 0         |  |  |
|        |      | Shiraz-35T | 1933 | 0.488535 | 0         |  |  |
|        |      | Shiraz-58T | 2223 | 0.833364 | 0         |  |  |
|        |      | Shiraz-58T | 2223 | 0.833364 | 0         |  |  |
|        |      | Shiraz-58T | 2223 | 0.833364 | 0         |  |  |
|        |      | Shiraz-71T | 2263 | 0.975531 | 0         |  |  |
|        |      | Shiraz-71T | 2263 | 0.975531 | 0         |  |  |
|        |      | Shiraz-71T | 2263 | 0.975531 | 0         |  |  |
| PARP12 | chr7 | Shiraz-3T  | 90   | 0.219276 | 0         |  |  |
|        |      | Shiraz-3T  | 97   | 0.496001 | 0         |  |  |
|        |      | Shiraz-4T  | 253  | 0.372918 | 0         |  |  |
|        |      | Shiraz-31T | 318  | 0.254373 | 0         |  |  |
|        |      | Shiraz-36T | 378  | 0.179558 | 0         |  |  |
|        |      | Shiraz-36T | 383  | 0.374586 | 0         |  |  |
|        |      | Shiraz-44T | 644  | 0.496536 | 0         |  |  |
|        |      | Shiraz-46T | 943  | 0.093799 | 0         |  |  |
|        |      | Shiraz-47T | 1033 | 0.220267 | 0         |  |  |
|        |      | Shiraz-77T | 1225 | 0        | -0.117922 |  |  |

|  |            |      |          |           |  |
|--|------------|------|----------|-----------|--|
|  | Shiraz-77T | 1230 | 0.149651 | 0         |  |
|  | Shiraz-9T  | 1325 | 0.221899 | 0         |  |
|  | Shiraz-18T | 1434 | 0.244465 | 0         |  |
|  | Shiraz-25T | 1698 | 0.21835  | 0         |  |
|  | Shiraz-28T | 1735 | 0.350744 | 0         |  |
|  | Shiraz-29T | 1778 | 0.120767 | 0         |  |
|  | Shiraz-32T | 1833 | 0.551336 | 0         |  |
|  | Shiraz-38T | 1951 | 0.250891 | 0         |  |
|  | Shiraz-53T | 2078 | 0.287202 | 0         |  |
|  | Shiraz-58T | 2162 | 0.221505 | 0         |  |
|  | Shiraz-71T | 2238 | 0.603631 | 0         |  |
|  | Shiraz-3T  | 90   | 0.219276 | 0         |  |
|  | Shiraz-3T  | 97   | 0.496001 | 0         |  |
|  | Shiraz-4T  | 253  | 0.372918 | 0         |  |
|  | Shiraz-31T | 318  | 0.254373 | 0         |  |
|  | Shiraz-36T | 378  | 0.179558 | 0         |  |
|  | Shiraz-36T | 383  | 0.374586 | 0         |  |
|  | Shiraz-44T | 644  | 0.496536 | 0         |  |
|  | Shiraz-46T | 943  | 0.093799 | 0         |  |
|  | Shiraz-47T | 1033 | 0.220267 | 0         |  |
|  | Shiraz-77T | 1225 | 0        | -0.117922 |  |
|  | Shiraz-77T | 1230 | 0.149651 | 0         |  |
|  | Shiraz-9T  | 1325 | 0.221899 | 0         |  |
|  | Shiraz-18T | 1434 | 0.244465 | 0         |  |
|  | Shiraz-25T | 1698 | 0.21835  | 0         |  |
|  | Shiraz-28T | 1735 | 0.350744 | 0         |  |
|  | Shiraz-29T | 1778 | 0.120767 | 0         |  |
|  | Shiraz-32T | 1833 | 0.551336 | 0         |  |
|  | Shiraz-38T | 1951 | 0.250891 | 0         |  |
|  | Shiraz-53T | 2078 | 0.287202 | 0         |  |
|  | Shiraz-58T | 2162 | 0.221505 | 0         |  |
|  | Shiraz-71T | 2238 | 0.603631 | 0         |  |
|  | Shiraz-3T  | 90   | 0.219276 | 0         |  |
|  | Shiraz-3T  | 97   | 0.496001 | 0         |  |
|  | Shiraz-4T  | 253  | 0.372918 | 0         |  |
|  | Shiraz-31T | 318  | 0.254373 | 0         |  |
|  | Shiraz-36T | 378  | 0.179558 | 0         |  |
|  | Shiraz-36T | 383  | 0.374586 | 0         |  |
|  | Shiraz-44T | 644  | 0.496536 | 0         |  |
|  | Shiraz-46T | 943  | 0.093799 | 0         |  |
|  | Shiraz-47T | 1033 | 0.220267 | 0         |  |
|  | Shiraz-77T | 1225 | 0        | -0.117922 |  |
|  | Shiraz-77T | 1230 | 0.149651 | 0         |  |
|  | Shiraz-9T  | 1325 | 0.221899 | 0         |  |
|  | Shiraz-18T | 1434 | 0.244465 | 0         |  |
|  | Shiraz-25T | 1698 | 0.21835  | 0         |  |
|  | Shiraz-28T | 1735 | 0.350744 | 0         |  |

|       |      |            |      |          |           |  |
|-------|------|------------|------|----------|-----------|--|
|       |      | Shiraz-29T | 1778 | 0.120767 | 0         |  |
|       |      | Shiraz-32T | 1833 | 0.551336 | 0         |  |
|       |      | Shiraz-38T | 1951 | 0.250891 | 0         |  |
|       |      | Shiraz-53T | 2078 | 0.287202 | 0         |  |
|       |      | Shiraz-58T | 2162 | 0.221505 | 0         |  |
|       |      | Shiraz-71T | 2238 | 0.603631 | 0         |  |
| PASD1 | chrX | Shiraz-3T  | 242  | 0        | -0.336434 |  |
|       |      | Shiraz-4T  | 261  | 0        | -0.336249 |  |
|       |      | Shiraz-16T | 295  | 0.591657 | 0         |  |
|       |      | Shiraz-36T | 433  | 0        | -0.803961 |  |
|       |      | Shiraz-42T | 480  | 0        | -0.232915 |  |
|       |      | Shiraz-44T | 899  | 0        | -1.09697  |  |
|       |      | Shiraz-49T | 1170 | 0        | -0.967436 |  |
|       |      | Shiraz-9T  | 1370 | 0.690073 | 0         |  |
|       |      | Shiraz-18T | 1457 | 0.643204 | 0         |  |
|       |      | Shiraz-22T | 1673 | 0.611783 | 0         |  |
|       |      | Shiraz-22T | 1678 | 0.911625 | 0         |  |
|       |      | Shiraz-25T | 1719 | 0.472955 | 0         |  |
|       |      | Shiraz-28T | 1762 | 0.562311 | 0         |  |
|       |      | Shiraz-29T | 1801 | 0.815343 | 0         |  |
|       |      | Shiraz-32T | 1870 | 0.729766 | 0         |  |
|       |      | Shiraz-35T | 1933 | 0.488535 | 0         |  |
|       |      | Shiraz-58T | 2223 | 0.833364 | 0         |  |
|       |      | Shiraz-58T | 2226 | 1.074663 | 0         |  |
|       |      | Shiraz-71T | 2263 | 0.975531 | 0         |  |
|       |      | Shiraz-3T  | 242  | 0        | -0.336434 |  |
|       |      | Shiraz-4T  | 261  | 0        | -0.336249 |  |
|       |      | Shiraz-16T | 295  | 0.591657 | 0         |  |
|       |      | Shiraz-36T | 433  | 0        | -0.803961 |  |
|       |      | Shiraz-42T | 480  | 0        | -0.232915 |  |
|       |      | Shiraz-44T | 899  | 0        | -1.09697  |  |
|       |      | Shiraz-49T | 1170 | 0        | -0.967436 |  |
|       |      | Shiraz-9T  | 1370 | 0.690073 | 0         |  |
|       |      | Shiraz-18T | 1457 | 0.643204 | 0         |  |
|       |      | Shiraz-22T | 1673 | 0.611783 | 0         |  |
|       |      | Shiraz-22T | 1678 | 0.911625 | 0         |  |
|       |      | Shiraz-25T | 1719 | 0.472955 | 0         |  |
|       |      | Shiraz-28T | 1762 | 0.562311 | 0         |  |
|       |      | Shiraz-29T | 1801 | 0.815343 | 0         |  |
|       |      | Shiraz-32T | 1870 | 0.729766 | 0         |  |
|       |      | Shiraz-35T | 1933 | 0.488535 | 0         |  |
|       |      | Shiraz-58T | 2223 | 0.833364 | 0         |  |
|       |      | Shiraz-58T | 2226 | 1.074663 | 0         |  |
|       |      | Shiraz-71T | 2263 | 0.975531 | 0         |  |
|       |      | Shiraz-3T  | 242  | 0        | -0.336434 |  |
|       |      | Shiraz-4T  | 261  | 0        | -0.336249 |  |
|       |      | Shiraz-16T | 295  | 0.591657 | 0         |  |

|      |      |            |      |          |           |  |  |
|------|------|------------|------|----------|-----------|--|--|
|      |      | Shiraz-36T | 433  | 0        | -0.803961 |  |  |
|      |      | Shiraz-42T | 480  | 0        | -0.232915 |  |  |
|      |      | Shiraz-44T | 899  | 0        | -1.09697  |  |  |
|      |      | Shiraz-49T | 1170 | 0        | -0.967436 |  |  |
|      |      | Shiraz-9T  | 1370 | 0.690073 | 0         |  |  |
|      |      | Shiraz-18T | 1457 | 0.643204 | 0         |  |  |
|      |      | Shiraz-22T | 1673 | 0.611783 | 0         |  |  |
|      |      | Shiraz-22T | 1678 | 0.911625 | 0         |  |  |
|      |      | Shiraz-25T | 1719 | 0.472955 | 0         |  |  |
|      |      | Shiraz-28T | 1762 | 0.562311 | 0         |  |  |
|      |      | Shiraz-29T | 1801 | 0.815343 | 0         |  |  |
|      |      | Shiraz-32T | 1870 | 0.729766 | 0         |  |  |
|      |      | Shiraz-35T | 1933 | 0.488535 | 0         |  |  |
|      |      | Shiraz-58T | 2223 | 0.833364 | 0         |  |  |
|      |      | Shiraz-58T | 2226 | 1.074663 | 0         |  |  |
|      |      | Shiraz-71T | 2263 | 0.975531 | 0         |  |  |
| PAX4 | chr7 | Shiraz-3T  | 90   | 0.219276 | 0         |  |  |
|      |      | Shiraz-4T  | 253  | 0.372918 | 0         |  |  |
|      |      | Shiraz-36T | 378  | 0.179558 | 0         |  |  |
|      |      | Shiraz-36T | 382  | 0.081739 | 0         |  |  |
|      |      | Shiraz-46T | 943  | 0.093799 | 0         |  |  |
|      |      | Shiraz-46T | 947  | 0        | -0.010843 |  |  |
|      |      | Shiraz-77T | 1225 | 0        | -0.117922 |  |  |
|      |      | Shiraz-9T  | 1325 | 0.221899 | 0         |  |  |
|      |      | Shiraz-18T | 1434 | 0.244465 | 0         |  |  |
|      |      | Shiraz-25T | 1698 | 0.21835  | 0         |  |  |
|      |      | Shiraz-28T | 1735 | 0.350744 | 0         |  |  |
|      |      | Shiraz-29T | 1778 | 0.120767 | 0         |  |  |
|      |      | Shiraz-32T | 1833 | 0.551336 | 0         |  |  |
|      |      | Shiraz-38T | 1951 | 0.250891 | 0         |  |  |
|      |      | Shiraz-53T | 2078 | 0.287202 | 0         |  |  |
|      |      | Shiraz-71T | 2238 | 0.603631 | 0         |  |  |
|      |      | Shiraz-3T  | 90   | 0.219276 | 0         |  |  |
|      |      | Shiraz-4T  | 253  | 0.372918 | 0         |  |  |
|      |      | Shiraz-36T | 378  | 0.179558 | 0         |  |  |
|      |      | Shiraz-36T | 382  | 0.081739 | 0         |  |  |
|      |      | Shiraz-46T | 943  | 0.093799 | 0         |  |  |
|      |      | Shiraz-46T | 947  | 0        | -0.010843 |  |  |
|      |      | Shiraz-77T | 1225 | 0        | -0.117922 |  |  |
|      |      | Shiraz-9T  | 1325 | 0.221899 | 0         |  |  |
|      |      | Shiraz-18T | 1434 | 0.244465 | 0         |  |  |
|      |      | Shiraz-25T | 1698 | 0.21835  | 0         |  |  |
|      |      | Shiraz-28T | 1735 | 0.350744 | 0         |  |  |
|      |      | Shiraz-29T | 1778 | 0.120767 | 0         |  |  |
|      |      | Shiraz-32T | 1833 | 0.551336 | 0         |  |  |
|      |      | Shiraz-38T | 1951 | 0.250891 | 0         |  |  |
|      |      | Shiraz-53T | 2078 | 0.287202 | 0         |  |  |

|        |      |            |      |          |           |  |  |
|--------|------|------------|------|----------|-----------|--|--|
|        |      | Shiraz-71T | 2238 | 0.603631 | 0         |  |  |
|        |      | Shiraz-3T  | 90   | 0.219276 | 0         |  |  |
|        |      | Shiraz-4T  | 253  | 0.372918 | 0         |  |  |
|        |      | Shiraz-36T | 378  | 0.179558 | 0         |  |  |
|        |      | Shiraz-36T | 382  | 0.081739 | 0         |  |  |
|        |      | Shiraz-46T | 943  | 0.093799 | 0         |  |  |
|        |      | Shiraz-46T | 947  | 0        | -0.010843 |  |  |
|        |      | Shiraz-77T | 1225 | 0        | -0.117922 |  |  |
|        |      | Shiraz-9T  | 1325 | 0.221899 | 0         |  |  |
|        |      | Shiraz-18T | 1434 | 0.244465 | 0         |  |  |
|        |      | Shiraz-25T | 1698 | 0.21835  | 0         |  |  |
|        |      | Shiraz-28T | 1735 | 0.350744 | 0         |  |  |
|        |      | Shiraz-29T | 1778 | 0.120767 | 0         |  |  |
|        |      | Shiraz-32T | 1833 | 0.551336 | 0         |  |  |
|        |      | Shiraz-38T | 1951 | 0.250891 | 0         |  |  |
|        |      | Shiraz-53T | 2078 | 0.287202 | 0         |  |  |
|        |      | Shiraz-71T | 2238 | 0.603631 | 0         |  |  |
| PAXIP1 | chr7 | Shiraz-3T  | 90   | 0.219276 | 0         |  |  |
|        |      | Shiraz-3T  | 99   | 0.454766 | 0         |  |  |
|        |      | Shiraz-4T  | 253  | 0.372918 | 0         |  |  |
|        |      | Shiraz-36T | 378  | 0.179558 | 0         |  |  |
|        |      | Shiraz-44T | 646  | 0.471276 | 0         |  |  |
|        |      | Shiraz-46T | 943  | 0.093799 | 0         |  |  |
|        |      | Shiraz-9T  | 1325 | 0.221899 | 0         |  |  |
|        |      | Shiraz-18T | 1434 | 0.244465 | 0         |  |  |
|        |      | Shiraz-25T | 1698 | 0.21835  | 0         |  |  |
|        |      | Shiraz-28T | 1735 | 0.350744 | 0         |  |  |
|        |      | Shiraz-29T | 1778 | 0.120767 | 0         |  |  |
|        |      | Shiraz-32T | 1833 | 0.551336 | 0         |  |  |
|        |      | Shiraz-38T | 1951 | 0.250891 | 0         |  |  |
|        |      | Shiraz-58T | 2162 | 0.221505 | 0         |  |  |
|        |      | Shiraz-71T | 2238 | 0.603631 | 0         |  |  |
|        |      | Shiraz-3T  | 90   | 0.219276 | 0         |  |  |
|        |      | Shiraz-3T  | 99   | 0.454766 | 0         |  |  |
|        |      | Shiraz-4T  | 253  | 0.372918 | 0         |  |  |
|        |      | Shiraz-36T | 378  | 0.179558 | 0         |  |  |
|        |      | Shiraz-44T | 646  | 0.471276 | 0         |  |  |
|        |      | Shiraz-46T | 943  | 0.093799 | 0         |  |  |
|        |      | Shiraz-9T  | 1325 | 0.221899 | 0         |  |  |
|        |      | Shiraz-18T | 1434 | 0.244465 | 0         |  |  |
|        |      | Shiraz-25T | 1698 | 0.21835  | 0         |  |  |
|        |      | Shiraz-28T | 1735 | 0.350744 | 0         |  |  |
|        |      | Shiraz-29T | 1778 | 0.120767 | 0         |  |  |
|        |      | Shiraz-32T | 1833 | 0.551336 | 0         |  |  |
|        |      | Shiraz-38T | 1951 | 0.250891 | 0         |  |  |
|        |      | Shiraz-58T | 2162 | 0.221505 | 0         |  |  |
|        |      | Shiraz-71T | 2238 | 0.603631 | 0         |  |  |

|         |      |            |      |          |           |  |  |
|---------|------|------------|------|----------|-----------|--|--|
|         |      | Shiraz-3T  | 90   | 0.219276 | 0         |  |  |
|         |      | Shiraz-3T  | 99   | 0.454766 | 0         |  |  |
|         |      | Shiraz-4T  | 253  | 0.372918 | 0         |  |  |
|         |      | Shiraz-36T | 378  | 0.179558 | 0         |  |  |
|         |      | Shiraz-44T | 646  | 0.471276 | 0         |  |  |
|         |      | Shiraz-46T | 943  | 0.093799 | 0         |  |  |
|         |      | Shiraz-9T  | 1325 | 0.221899 | 0         |  |  |
|         |      | Shiraz-18T | 1434 | 0.244465 | 0         |  |  |
|         |      | Shiraz-25T | 1698 | 0.21835  | 0         |  |  |
|         |      | Shiraz-28T | 1735 | 0.350744 | 0         |  |  |
|         |      | Shiraz-29T | 1778 | 0.120767 | 0         |  |  |
|         |      | Shiraz-32T | 1833 | 0.551336 | 0         |  |  |
|         |      | Shiraz-38T | 1951 | 0.250891 | 0         |  |  |
|         |      | Shiraz-58T | 2162 | 0.221505 | 0         |  |  |
|         |      | Shiraz-71T | 2238 | 0.603631 | 0         |  |  |
| PCDH11X | chrX | Shiraz-3T  | 242  | 0        | -0.336434 |  |  |
|         |      | Shiraz-3T  | 242  | 0        | -0.336434 |  |  |
|         |      | Shiraz-3T  | 242  | 0        | -0.336434 |  |  |
|         |      | Shiraz-3T  | 243  | 0        | -0.549129 |  |  |
|         |      | Shiraz-3T  | 243  | 0        | -0.549129 |  |  |
|         |      | Shiraz-3T  | 243  | 0        | -0.549129 |  |  |
|         |      | Shiraz-4T  | 261  | 0        | -0.336249 |  |  |
|         |      | Shiraz-4T  | 261  | 0        | -0.336249 |  |  |
|         |      | Shiraz-4T  | 261  | 0        | -0.336249 |  |  |
|         |      | Shiraz-16T | 295  | 0.591657 | 0         |  |  |
|         |      | Shiraz-16T | 295  | 0.591657 | 0         |  |  |
|         |      | Shiraz-16T | 295  | 0.591657 | 0         |  |  |
|         |      | Shiraz-31T | 346  | 0        | -0.1527   |  |  |
|         |      | Shiraz-31T | 346  | 0        | -0.1527   |  |  |
|         |      | Shiraz-31T | 346  | 0        | -0.1527   |  |  |
|         |      | Shiraz-36T | 433  | 0        | -0.803961 |  |  |
|         |      | Shiraz-36T | 433  | 0        | -0.803961 |  |  |
|         |      | Shiraz-36T | 433  | 0        | -0.803961 |  |  |
|         |      | Shiraz-44T | 899  | 0        | -1.09697  |  |  |
|         |      | Shiraz-44T | 899  | 0        | -1.09697  |  |  |
|         |      | Shiraz-44T | 899  | 0        | -1.09697  |  |  |
|         |      | Shiraz-44T | 902  | 0        | -1.449824 |  |  |
|         |      | Shiraz-44T | 902  | 0        | -1.449824 |  |  |
|         |      | Shiraz-44T | 902  | 0        | -1.449824 |  |  |
|         |      | Shiraz-47T | 1085 | 0        | -0.130811 |  |  |
|         |      | Shiraz-47T | 1085 | 0        | -0.130811 |  |  |
|         |      | Shiraz-47T | 1085 | 0        | -0.130811 |  |  |
|         |      | Shiraz-49T | 1170 | 0        | -0.967436 |  |  |
|         |      | Shiraz-49T | 1170 | 0        | -0.967436 |  |  |
|         |      | Shiraz-49T | 1170 | 0        | -0.967436 |  |  |
|         |      | Shiraz-49T | 1172 | 0        | -1.123219 |  |  |
|         |      | Shiraz-49T | 1172 | 0        | -1.123219 |  |  |

|  |            |      |          |           |  |
|--|------------|------|----------|-----------|--|
|  | Shiraz-49T | 1172 | 0        | -1.123219 |  |
|  | Shiraz-18T | 1457 | 0.643204 | 0         |  |
|  | Shiraz-18T | 1457 | 0.643204 | 0         |  |
|  | Shiraz-18T | 1457 | 0.643204 | 0         |  |
|  | Shiraz-22T | 1673 | 0.611783 | 0         |  |
|  | Shiraz-22T | 1673 | 0.611783 | 0         |  |
|  | Shiraz-22T | 1673 | 0.611783 | 0         |  |
|  | Shiraz-22T | 1675 | 0.279253 | 0         |  |
|  | Shiraz-22T | 1675 | 0.279253 | 0         |  |
|  | Shiraz-22T | 1675 | 0.279253 | 0         |  |
|  | Shiraz-25T | 1719 | 0.472955 | 0         |  |
|  | Shiraz-25T | 1719 | 0.472955 | 0         |  |
|  | Shiraz-25T | 1719 | 0.472955 | 0         |  |
|  | Shiraz-28T | 1762 | 0.562311 | 0         |  |
|  | Shiraz-28T | 1762 | 0.562311 | 0         |  |
|  | Shiraz-28T | 1762 | 0.562311 | 0         |  |
|  | Shiraz-29T | 1801 | 0.815343 | 0         |  |
|  | Shiraz-29T | 1801 | 0.815343 | 0         |  |
|  | Shiraz-29T | 1801 | 0.815343 | 0         |  |
|  | Shiraz-32T | 1870 | 0.729766 | 0         |  |
|  | Shiraz-32T | 1870 | 0.729766 | 0         |  |
|  | Shiraz-32T | 1870 | 0.729766 | 0         |  |
|  | Shiraz-32T | 1871 | 0.292679 | 0         |  |
|  | Shiraz-32T | 1871 | 0.292679 | 0         |  |
|  | Shiraz-32T | 1871 | 0.292679 | 0         |  |
|  | Shiraz-35T | 1933 | 0.488535 | 0         |  |
|  | Shiraz-35T | 1933 | 0.488535 | 0         |  |
|  | Shiraz-35T | 1933 | 0.488535 | 0         |  |
|  | Shiraz-58T | 2223 | 0.833364 | 0         |  |
|  | Shiraz-58T | 2223 | 0.833364 | 0         |  |
|  | Shiraz-58T | 2223 | 0.833364 | 0         |  |
|  | Shiraz-58T | 2225 | 0.595784 | 0         |  |
|  | Shiraz-58T | 2225 | 0.595784 | 0         |  |
|  | Shiraz-58T | 2225 | 0.595784 | 0         |  |
|  | Shiraz-71T | 2263 | 0.975531 | 0         |  |
|  | Shiraz-71T | 2263 | 0.975531 | 0         |  |
|  | Shiraz-71T | 2263 | 0.975531 | 0         |  |
|  | Shiraz-3T  | 242  | 0        | -0.336434 |  |
|  | Shiraz-3T  | 242  | 0        | -0.336434 |  |
|  | Shiraz-3T  | 242  | 0        | -0.336434 |  |
|  | Shiraz-3T  | 243  | 0        | -0.549129 |  |
|  | Shiraz-3T  | 243  | 0        | -0.549129 |  |
|  | Shiraz-3T  | 243  | 0        | -0.549129 |  |
|  | Shiraz-4T  | 261  | 0        | -0.336249 |  |
|  | Shiraz-4T  | 261  | 0        | -0.336249 |  |
|  | Shiraz-4T  | 261  | 0        | -0.336249 |  |
|  | Shiraz-16T | 295  | 0.591657 | 0         |  |

|  |            |      |          |           |  |
|--|------------|------|----------|-----------|--|
|  | Shiraz-16T | 295  | 0.591657 | 0         |  |
|  | Shiraz-16T | 295  | 0.591657 | 0         |  |
|  | Shiraz-31T | 346  | 0        | -0.1527   |  |
|  | Shiraz-31T | 346  | 0        | -0.1527   |  |
|  | Shiraz-31T | 346  | 0        | -0.1527   |  |
|  | Shiraz-36T | 433  | 0        | -0.803961 |  |
|  | Shiraz-36T | 433  | 0        | -0.803961 |  |
|  | Shiraz-36T | 433  | 0        | -0.803961 |  |
|  | Shiraz-44T | 899  | 0        | -1.09697  |  |
|  | Shiraz-44T | 899  | 0        | -1.09697  |  |
|  | Shiraz-44T | 899  | 0        | -1.09697  |  |
|  | Shiraz-44T | 902  | 0        | -1.449824 |  |
|  | Shiraz-44T | 902  | 0        | -1.449824 |  |
|  | Shiraz-44T | 902  | 0        | -1.449824 |  |
|  | Shiraz-47T | 1085 | 0        | -0.130811 |  |
|  | Shiraz-47T | 1085 | 0        | -0.130811 |  |
|  | Shiraz-47T | 1085 | 0        | -0.130811 |  |
|  | Shiraz-49T | 1170 | 0        | -0.967436 |  |
|  | Shiraz-49T | 1170 | 0        | -0.967436 |  |
|  | Shiraz-49T | 1170 | 0        | -0.967436 |  |
|  | Shiraz-49T | 1172 | 0        | -1.123219 |  |
|  | Shiraz-49T | 1172 | 0        | -1.123219 |  |
|  | Shiraz-49T | 1172 | 0        | -1.123219 |  |
|  | Shiraz-18T | 1457 | 0.643204 | 0         |  |
|  | Shiraz-18T | 1457 | 0.643204 | 0         |  |
|  | Shiraz-18T | 1457 | 0.643204 | 0         |  |
|  | Shiraz-22T | 1673 | 0.611783 | 0         |  |
|  | Shiraz-22T | 1673 | 0.611783 | 0         |  |
|  | Shiraz-22T | 1673 | 0.611783 | 0         |  |
|  | Shiraz-22T | 1675 | 0.279253 | 0         |  |
|  | Shiraz-22T | 1675 | 0.279253 | 0         |  |
|  | Shiraz-22T | 1675 | 0.279253 | 0         |  |
|  | Shiraz-25T | 1719 | 0.472955 | 0         |  |
|  | Shiraz-25T | 1719 | 0.472955 | 0         |  |
|  | Shiraz-25T | 1719 | 0.472955 | 0         |  |
|  | Shiraz-28T | 1762 | 0.562311 | 0         |  |
|  | Shiraz-28T | 1762 | 0.562311 | 0         |  |
|  | Shiraz-28T | 1762 | 0.562311 | 0         |  |
|  | Shiraz-29T | 1801 | 0.815343 | 0         |  |
|  | Shiraz-29T | 1801 | 0.815343 | 0         |  |
|  | Shiraz-29T | 1801 | 0.815343 | 0         |  |
|  | Shiraz-32T | 1870 | 0.729766 | 0         |  |
|  | Shiraz-32T | 1870 | 0.729766 | 0         |  |
|  | Shiraz-32T | 1870 | 0.729766 | 0         |  |
|  | Shiraz-32T | 1871 | 0.292679 | 0         |  |
|  | Shiraz-32T | 1871 | 0.292679 | 0         |  |
|  | Shiraz-32T | 1871 | 0.292679 | 0         |  |



|  |  |            |      |          |           |  |  |
|--|--|------------|------|----------|-----------|--|--|
|  |  | Shiraz-35T | 1933 | 0.488535 | 0         |  |  |
|  |  | Shiraz-35T | 1933 | 0.488535 | 0         |  |  |
|  |  | Shiraz-35T | 1933 | 0.488535 | 0         |  |  |
|  |  | Shiraz-58T | 2223 | 0.833364 | 0         |  |  |
|  |  | Shiraz-58T | 2223 | 0.833364 | 0         |  |  |
|  |  | Shiraz-58T | 2223 | 0.833364 | 0         |  |  |
|  |  | Shiraz-58T | 2225 | 0.595784 | 0         |  |  |
|  |  | Shiraz-58T | 2225 | 0.595784 | 0         |  |  |
|  |  | Shiraz-58T | 2225 | 0.595784 | 0         |  |  |
|  |  | Shiraz-71T | 2263 | 0.975531 | 0         |  |  |
|  |  | Shiraz-71T | 2263 | 0.975531 | 0         |  |  |
|  |  | Shiraz-71T | 2263 | 0.975531 | 0         |  |  |
|  |  | Shiraz-3T  | 242  | 0        | -0.336434 |  |  |
|  |  | Shiraz-3T  | 242  | 0        | -0.336434 |  |  |
|  |  | Shiraz-3T  | 242  | 0        | -0.336434 |  |  |
|  |  | Shiraz-3T  | 243  | 0        | -0.549129 |  |  |
|  |  | Shiraz-3T  | 243  | 0        | -0.549129 |  |  |
|  |  | Shiraz-3T  | 243  | 0        | -0.549129 |  |  |
|  |  | Shiraz-4T  | 261  | 0        | -0.336249 |  |  |
|  |  | Shiraz-4T  | 261  | 0        | -0.336249 |  |  |
|  |  | Shiraz-4T  | 261  | 0        | -0.336249 |  |  |
|  |  | Shiraz-16T | 295  | 0.591657 | 0         |  |  |
|  |  | Shiraz-16T | 295  | 0.591657 | 0         |  |  |
|  |  | Shiraz-16T | 295  | 0.591657 | 0         |  |  |
|  |  | Shiraz-31T | 346  | 0        | -0.1527   |  |  |
|  |  | Shiraz-31T | 346  | 0        | -0.1527   |  |  |
|  |  | Shiraz-31T | 346  | 0        | -0.1527   |  |  |
|  |  | Shiraz-36T | 433  | 0        | -0.803961 |  |  |
|  |  | Shiraz-36T | 433  | 0        | -0.803961 |  |  |
|  |  | Shiraz-36T | 433  | 0        | -0.803961 |  |  |
|  |  | Shiraz-44T | 899  | 0        | -1.09697  |  |  |
|  |  | Shiraz-44T | 899  | 0        | -1.09697  |  |  |
|  |  | Shiraz-44T | 899  | 0        | -1.09697  |  |  |
|  |  | Shiraz-44T | 902  | 0        | -1.449824 |  |  |
|  |  | Shiraz-44T | 902  | 0        | -1.449824 |  |  |
|  |  | Shiraz-44T | 902  | 0        | -1.449824 |  |  |
|  |  | Shiraz-47T | 1085 | 0        | -0.130811 |  |  |
|  |  | Shiraz-47T | 1085 | 0        | -0.130811 |  |  |
|  |  | Shiraz-47T | 1085 | 0        | -0.130811 |  |  |
|  |  | Shiraz-49T | 1170 | 0        | -0.967436 |  |  |
|  |  | Shiraz-49T | 1170 | 0        | -0.967436 |  |  |
|  |  | Shiraz-49T | 1170 | 0        | -0.967436 |  |  |
|  |  | Shiraz-49T | 1172 | 0        | -1.123219 |  |  |
|  |  | Shiraz-49T | 1172 | 0        | -1.123219 |  |  |
|  |  | Shiraz-49T | 1172 | 0        | -1.123219 |  |  |
|  |  | Shiraz-18T | 1457 | 0.643204 | 0         |  |  |
|  |  | Shiraz-18T | 1457 | 0.643204 | 0         |  |  |

|        |      |            |      |          |           |  |
|--------|------|------------|------|----------|-----------|--|
|        |      | Shiraz-18T | 1457 | 0.643204 | 0         |  |
|        |      | Shiraz-22T | 1673 | 0.611783 | 0         |  |
|        |      | Shiraz-22T | 1673 | 0.611783 | 0         |  |
|        |      | Shiraz-22T | 1673 | 0.611783 | 0         |  |
|        |      | Shiraz-22T | 1675 | 0.279253 | 0         |  |
|        |      | Shiraz-22T | 1675 | 0.279253 | 0         |  |
|        |      | Shiraz-22T | 1675 | 0.279253 | 0         |  |
|        |      | Shiraz-25T | 1719 | 0.472955 | 0         |  |
|        |      | Shiraz-25T | 1719 | 0.472955 | 0         |  |
|        |      | Shiraz-25T | 1719 | 0.472955 | 0         |  |
|        |      | Shiraz-28T | 1762 | 0.562311 | 0         |  |
|        |      | Shiraz-28T | 1762 | 0.562311 | 0         |  |
|        |      | Shiraz-28T | 1762 | 0.562311 | 0         |  |
|        |      | Shiraz-29T | 1801 | 0.815343 | 0         |  |
|        |      | Shiraz-29T | 1801 | 0.815343 | 0         |  |
|        |      | Shiraz-29T | 1801 | 0.815343 | 0         |  |
|        |      | Shiraz-32T | 1870 | 0.729766 | 0         |  |
|        |      | Shiraz-32T | 1870 | 0.729766 | 0         |  |
|        |      | Shiraz-32T | 1870 | 0.729766 | 0         |  |
|        |      | Shiraz-32T | 1871 | 0.292679 | 0         |  |
|        |      | Shiraz-32T | 1871 | 0.292679 | 0         |  |
|        |      | Shiraz-32T | 1871 | 0.292679 | 0         |  |
|        |      | Shiraz-35T | 1933 | 0.488535 | 0         |  |
|        |      | Shiraz-35T | 1933 | 0.488535 | 0         |  |
|        |      | Shiraz-35T | 1933 | 0.488535 | 0         |  |
|        |      | Shiraz-58T | 2223 | 0.833364 | 0         |  |
|        |      | Shiraz-58T | 2223 | 0.833364 | 0         |  |
|        |      | Shiraz-58T | 2223 | 0.833364 | 0         |  |
|        |      | Shiraz-58T | 2225 | 0.595784 | 0         |  |
|        |      | Shiraz-58T | 2225 | 0.595784 | 0         |  |
|        |      | Shiraz-58T | 2225 | 0.595784 | 0         |  |
|        |      | Shiraz-71T | 2263 | 0.975531 | 0         |  |
|        |      | Shiraz-71T | 2263 | 0.975531 | 0         |  |
|        |      | Shiraz-71T | 2263 | 0.975531 | 0         |  |
| PCDH19 | chrX | Shiraz-3T  | 242  | 0        | -0.336434 |  |
|        |      | Shiraz-4T  | 261  | 0        | -0.336249 |  |
|        |      | Shiraz-16T | 295  | 0.591657 | 0         |  |
|        |      | Shiraz-36T | 433  | 0        | -0.803961 |  |
|        |      | Shiraz-44T | 899  | 0        | -1.09697  |  |
|        |      | Shiraz-49T | 1170 | 0        | -0.967436 |  |
|        |      | Shiraz-18T | 1457 | 0.643204 | 0         |  |
|        |      | Shiraz-22T | 1673 | 0.611783 | 0         |  |
|        |      | Shiraz-25T | 1719 | 0.472955 | 0         |  |
|        |      | Shiraz-28T | 1762 | 0.562311 | 0         |  |
|        |      | Shiraz-29T | 1801 | 0.815343 | 0         |  |
|        |      | Shiraz-32T | 1870 | 0.729766 | 0         |  |
|        |      | Shiraz-35T | 1933 | 0.488535 | 0         |  |

|      |      |            |      |          |           |  |
|------|------|------------|------|----------|-----------|--|
|      |      | Shiraz-58T | 2223 | 0.833364 | 0         |  |
|      |      | Shiraz-71T | 2263 | 0.975531 | 0         |  |
|      |      | Shiraz-3T  | 242  | 0        | -0.336434 |  |
|      |      | Shiraz-4T  | 261  | 0        | -0.336249 |  |
|      |      | Shiraz-16T | 295  | 0.591657 | 0         |  |
|      |      | Shiraz-36T | 433  | 0        | -0.803961 |  |
|      |      | Shiraz-44T | 899  | 0        | -1.09697  |  |
|      |      | Shiraz-49T | 1170 | 0        | -0.967436 |  |
|      |      | Shiraz-18T | 1457 | 0.643204 | 0         |  |
|      |      | Shiraz-22T | 1673 | 0.611783 | 0         |  |
|      |      | Shiraz-25T | 1719 | 0.472955 | 0         |  |
|      |      | Shiraz-28T | 1762 | 0.562311 | 0         |  |
|      |      | Shiraz-29T | 1801 | 0.815343 | 0         |  |
|      |      | Shiraz-32T | 1870 | 0.729766 | 0         |  |
|      |      | Shiraz-35T | 1933 | 0.488535 | 0         |  |
|      |      | Shiraz-58T | 2223 | 0.833364 | 0         |  |
|      |      | Shiraz-71T | 2263 | 0.975531 | 0         |  |
|      |      | Shiraz-3T  | 242  | 0        | -0.336434 |  |
|      |      | Shiraz-4T  | 261  | 0        | -0.336249 |  |
|      |      | Shiraz-16T | 295  | 0.591657 | 0         |  |
|      |      | Shiraz-36T | 433  | 0        | -0.803961 |  |
|      |      | Shiraz-44T | 899  | 0        | -1.09697  |  |
|      |      | Shiraz-49T | 1170 | 0        | -0.967436 |  |
|      |      | Shiraz-18T | 1457 | 0.643204 | 0         |  |
|      |      | Shiraz-22T | 1673 | 0.611783 | 0         |  |
|      |      | Shiraz-25T | 1719 | 0.472955 | 0         |  |
|      |      | Shiraz-28T | 1762 | 0.562311 | 0         |  |
|      |      | Shiraz-29T | 1801 | 0.815343 | 0         |  |
|      |      | Shiraz-32T | 1870 | 0.729766 | 0         |  |
|      |      | Shiraz-35T | 1933 | 0.488535 | 0         |  |
|      |      | Shiraz-58T | 2223 | 0.833364 | 0         |  |
|      |      | Shiraz-71T | 2263 | 0.975531 | 0         |  |
| PCLO | chr7 | Shiraz-3T  | 90   | 0.219276 | 0         |  |
|      |      | Shiraz-3T  | 90   | 0.219276 | 0         |  |
|      |      | Shiraz-3T  | 93   | 0        | -0.058023 |  |
|      |      | Shiraz-3T  | 93   | 0        | -0.058023 |  |
|      |      | Shiraz-4T  | 253  | 0.372918 | 0         |  |
|      |      | Shiraz-4T  | 253  | 0.372918 | 0         |  |
|      |      | Shiraz-36T | 378  | 0.179558 | 0         |  |
|      |      | Shiraz-36T | 378  | 0.179558 | 0         |  |
|      |      | Shiraz-36T | 380  | 0.083883 | 0         |  |
|      |      | Shiraz-36T | 380  | 0.083883 | 0         |  |
|      |      | Shiraz-44T | 638  | 0        | -0.433476 |  |
|      |      | Shiraz-44T | 638  | 0        | -0.433476 |  |
|      |      | Shiraz-46T | 943  | 0.093799 | 0         |  |
|      |      | Shiraz-46T | 943  | 0.093799 | 0         |  |
|      |      | Shiraz-46T | 945  | 0        | -0.014838 |  |

|  |            |      |          |           |  |
|--|------------|------|----------|-----------|--|
|  | Shiraz-46T | 945  | 0        | -0.014838 |  |
|  | Shiraz-47T | 1029 | 0        | -0.096586 |  |
|  | Shiraz-47T | 1029 | 0        | -0.096586 |  |
|  | Shiraz-49T | 1119 | 0        | -0.157331 |  |
|  | Shiraz-49T | 1119 | 0        | -0.157331 |  |
|  | Shiraz-77T | 1225 | 0        | -0.117922 |  |
|  | Shiraz-77T | 1225 | 0        | -0.117922 |  |
|  | Shiraz-77T | 1226 | 0        | -0.233724 |  |
|  | Shiraz-77T | 1226 | 0        | -0.233724 |  |
|  | Shiraz-12T | 1390 | 0        | -0.237897 |  |
|  | Shiraz-12T | 1390 | 0        | -0.237897 |  |
|  | Shiraz-18T | 1434 | 0.244465 | 0         |  |
|  | Shiraz-18T | 1434 | 0.244465 | 0         |  |
|  | Shiraz-22T | 1549 | 0        | -0.319623 |  |
|  | Shiraz-22T | 1549 | 0        | -0.319623 |  |
|  | Shiraz-22T | 1550 | 0        | -0.577052 |  |
|  | Shiraz-22T | 1550 | 0        | -0.577052 |  |
|  | Shiraz-25T | 1698 | 0.21835  | 0         |  |
|  | Shiraz-25T | 1698 | 0.21835  | 0         |  |
|  | Shiraz-28T | 1735 | 0.350744 | 0         |  |
|  | Shiraz-28T | 1735 | 0.350744 | 0         |  |
|  | Shiraz-29T | 1778 | 0.120767 | 0         |  |
|  | Shiraz-29T | 1778 | 0.120767 | 0         |  |
|  | Shiraz-38T | 1951 | 0.250891 | 0         |  |
|  | Shiraz-38T | 1951 | 0.250891 | 0         |  |
|  | Shiraz-53T | 2078 | 0.287202 | 0         |  |
|  | Shiraz-53T | 2078 | 0.287202 | 0         |  |
|  | Shiraz-58T | 2159 | 0        | -0.219521 |  |
|  | Shiraz-58T | 2159 | 0        | -0.219521 |  |
|  | Shiraz-71T | 2238 | 0.603631 | 0         |  |
|  | Shiraz-71T | 2238 | 0.603631 | 0         |  |
|  | Shiraz-3T  | 90   | 0.219276 | 0         |  |
|  | Shiraz-3T  | 90   | 0.219276 | 0         |  |
|  | Shiraz-3T  | 93   | 0        | -0.058023 |  |
|  | Shiraz-3T  | 93   | 0        | -0.058023 |  |
|  | Shiraz-4T  | 253  | 0.372918 | 0         |  |
|  | Shiraz-4T  | 253  | 0.372918 | 0         |  |
|  | Shiraz-36T | 378  | 0.179558 | 0         |  |
|  | Shiraz-36T | 378  | 0.179558 | 0         |  |
|  | Shiraz-36T | 380  | 0.083883 | 0         |  |
|  | Shiraz-36T | 380  | 0.083883 | 0         |  |
|  | Shiraz-44T | 638  | 0        | -0.433476 |  |
|  | Shiraz-44T | 638  | 0        | -0.433476 |  |
|  | Shiraz-46T | 943  | 0.093799 | 0         |  |
|  | Shiraz-46T | 943  | 0.093799 | 0         |  |
|  | Shiraz-46T | 945  | 0        | -0.014838 |  |
|  | Shiraz-46T | 945  | 0        | -0.014838 |  |

|  |            |      |          |           |  |
|--|------------|------|----------|-----------|--|
|  | Shiraz-47T | 1029 | 0        | -0.096586 |  |
|  | Shiraz-47T | 1029 | 0        | -0.096586 |  |
|  | Shiraz-49T | 1119 | 0        | -0.157331 |  |
|  | Shiraz-49T | 1119 | 0        | -0.157331 |  |
|  | Shiraz-77T | 1225 | 0        | -0.117922 |  |
|  | Shiraz-77T | 1225 | 0        | -0.117922 |  |
|  | Shiraz-77T | 1226 | 0        | -0.233724 |  |
|  | Shiraz-77T | 1226 | 0        | -0.233724 |  |
|  | Shiraz-12T | 1390 | 0        | -0.237897 |  |
|  | Shiraz-12T | 1390 | 0        | -0.237897 |  |
|  | Shiraz-18T | 1434 | 0.244465 | 0         |  |
|  | Shiraz-18T | 1434 | 0.244465 | 0         |  |
|  | Shiraz-22T | 1549 | 0        | -0.319623 |  |
|  | Shiraz-22T | 1549 | 0        | -0.319623 |  |
|  | Shiraz-22T | 1550 | 0        | -0.577052 |  |
|  | Shiraz-22T | 1550 | 0        | -0.577052 |  |
|  | Shiraz-25T | 1698 | 0.21835  | 0         |  |
|  | Shiraz-25T | 1698 | 0.21835  | 0         |  |
|  | Shiraz-28T | 1735 | 0.350744 | 0         |  |
|  | Shiraz-28T | 1735 | 0.350744 | 0         |  |
|  | Shiraz-29T | 1778 | 0.120767 | 0         |  |
|  | Shiraz-29T | 1778 | 0.120767 | 0         |  |
|  | Shiraz-38T | 1951 | 0.250891 | 0         |  |
|  | Shiraz-38T | 1951 | 0.250891 | 0         |  |
|  | Shiraz-53T | 2078 | 0.287202 | 0         |  |
|  | Shiraz-53T | 2078 | 0.287202 | 0         |  |
|  | Shiraz-58T | 2159 | 0        | -0.219521 |  |
|  | Shiraz-58T | 2159 | 0        | -0.219521 |  |
|  | Shiraz-71T | 2238 | 0.603631 | 0         |  |
|  | Shiraz-71T | 2238 | 0.603631 | 0         |  |
|  | Shiraz-3T  | 90   | 0.219276 | 0         |  |
|  | Shiraz-3T  | 90   | 0.219276 | 0         |  |
|  | Shiraz-3T  | 93   | 0        | -0.058023 |  |
|  | Shiraz-3T  | 93   | 0        | -0.058023 |  |
|  | Shiraz-4T  | 253  | 0.372918 | 0         |  |
|  | Shiraz-4T  | 253  | 0.372918 | 0         |  |
|  | Shiraz-36T | 378  | 0.179558 | 0         |  |
|  | Shiraz-36T | 378  | 0.179558 | 0         |  |
|  | Shiraz-36T | 380  | 0.083883 | 0         |  |
|  | Shiraz-36T | 380  | 0.083883 | 0         |  |
|  | Shiraz-44T | 638  | 0        | -0.433476 |  |
|  | Shiraz-44T | 638  | 0        | -0.433476 |  |
|  | Shiraz-46T | 943  | 0.093799 | 0         |  |
|  | Shiraz-46T | 943  | 0.093799 | 0         |  |
|  | Shiraz-46T | 945  | 0        | -0.014838 |  |
|  | Shiraz-46T | 945  | 0        | -0.014838 |  |
|  | Shiraz-47T | 1029 | 0        | -0.096586 |  |

|        |      |            |      |          |           |  |  |
|--------|------|------------|------|----------|-----------|--|--|
|        |      | Shiraz-47T | 1029 | 0        | -0.096586 |  |  |
|        |      | Shiraz-49T | 1119 | 0        | -0.157331 |  |  |
|        |      | Shiraz-49T | 1119 | 0        | -0.157331 |  |  |
|        |      | Shiraz-77T | 1225 | 0        | -0.117922 |  |  |
|        |      | Shiraz-77T | 1225 | 0        | -0.117922 |  |  |
|        |      | Shiraz-77T | 1226 | 0        | -0.233724 |  |  |
|        |      | Shiraz-77T | 1226 | 0        | -0.233724 |  |  |
|        |      | Shiraz-12T | 1390 | 0        | -0.237897 |  |  |
|        |      | Shiraz-12T | 1390 | 0        | -0.237897 |  |  |
|        |      | Shiraz-18T | 1434 | 0.244465 | 0         |  |  |
|        |      | Shiraz-18T | 1434 | 0.244465 | 0         |  |  |
|        |      | Shiraz-22T | 1549 | 0        | -0.319623 |  |  |
|        |      | Shiraz-22T | 1549 | 0        | -0.319623 |  |  |
|        |      | Shiraz-22T | 1550 | 0        | -0.577052 |  |  |
|        |      | Shiraz-22T | 1550 | 0        | -0.577052 |  |  |
|        |      | Shiraz-25T | 1698 | 0.21835  | 0         |  |  |
|        |      | Shiraz-25T | 1698 | 0.21835  | 0         |  |  |
|        |      | Shiraz-28T | 1735 | 0.350744 | 0         |  |  |
|        |      | Shiraz-28T | 1735 | 0.350744 | 0         |  |  |
|        |      | Shiraz-29T | 1778 | 0.120767 | 0         |  |  |
|        |      | Shiraz-29T | 1778 | 0.120767 | 0         |  |  |
|        |      | Shiraz-38T | 1951 | 0.250891 | 0         |  |  |
|        |      | Shiraz-38T | 1951 | 0.250891 | 0         |  |  |
|        |      | Shiraz-53T | 2078 | 0.287202 | 0         |  |  |
|        |      | Shiraz-53T | 2078 | 0.287202 | 0         |  |  |
|        |      | Shiraz-58T | 2159 | 0        | -0.219521 |  |  |
|        |      | Shiraz-58T | 2159 | 0        | -0.219521 |  |  |
|        |      | Shiraz-71T | 2238 | 0.603631 | 0         |  |  |
|        |      | Shiraz-71T | 2238 | 0.603631 | 0         |  |  |
| PCOLCE | chr7 | Shiraz-3T  | 90   | 0.219276 | 0         |  |  |
|        |      | Shiraz-3T  | 94   | 0.74735  | 0         |  |  |
|        |      | Shiraz-4T  | 253  | 0.372918 | 0         |  |  |
|        |      | Shiraz-31T | 316  | 0.219196 | 0         |  |  |
|        |      | Shiraz-36T | 378  | 0.179558 | 0         |  |  |
|        |      | Shiraz-36T | 381  | 0.332628 | 0         |  |  |
|        |      | Shiraz-44T | 639  | 1.035032 | 0         |  |  |
|        |      | Shiraz-46T | 943  | 0.093799 | 0         |  |  |
|        |      | Shiraz-46T | 946  | 0.299835 | 0         |  |  |
|        |      | Shiraz-47T | 1030 | 0.257728 | 0         |  |  |
|        |      | Shiraz-49T | 1120 | 0.281656 | 0         |  |  |
|        |      | Shiraz-77T | 1225 | 0        | -0.117922 |  |  |
|        |      | Shiraz-77T | 1227 | 0.196445 | 0         |  |  |
|        |      | Shiraz-9T  | 1324 | 0.679266 | 0         |  |  |
|        |      | Shiraz-18T | 1434 | 0.244465 | 0         |  |  |
|        |      | Shiraz-22T | 1549 | 0        | -0.319623 |  |  |
|        |      | Shiraz-22T | 1551 | 0.324011 | 0         |  |  |
|        |      | Shiraz-25T | 1698 | 0.21835  | 0         |  |  |

|  |            |      |          |           |  |
|--|------------|------|----------|-----------|--|
|  | Shiraz-28T | 1735 | 0.350744 | 0         |  |
|  | Shiraz-29T | 1778 | 0.120767 | 0         |  |
|  | Shiraz-32T | 1833 | 0.551336 | 0         |  |
|  | Shiraz-32T | 1834 | 1.485392 | 0         |  |
|  | Shiraz-38T | 1951 | 0.250891 | 0         |  |
|  | Shiraz-53T | 2078 | 0.287202 | 0         |  |
|  | Shiraz-58T | 2160 | 0.399007 | 0         |  |
|  | Shiraz-71T | 2238 | 0.603631 | 0         |  |
|  | Shiraz-3T  | 90   | 0.219276 | 0         |  |
|  | Shiraz-3T  | 94   | 0.74735  | 0         |  |
|  | Shiraz-4T  | 253  | 0.372918 | 0         |  |
|  | Shiraz-31T | 316  | 0.219196 | 0         |  |
|  | Shiraz-36T | 378  | 0.179558 | 0         |  |
|  | Shiraz-36T | 381  | 0.332628 | 0         |  |
|  | Shiraz-44T | 639  | 1.035032 | 0         |  |
|  | Shiraz-46T | 943  | 0.093799 | 0         |  |
|  | Shiraz-46T | 946  | 0.299835 | 0         |  |
|  | Shiraz-47T | 1030 | 0.257728 | 0         |  |
|  | Shiraz-49T | 1120 | 0.281656 | 0         |  |
|  | Shiraz-77T | 1225 | 0        | -0.117922 |  |
|  | Shiraz-77T | 1227 | 0.196445 | 0         |  |
|  | Shiraz-9T  | 1324 | 0.679266 | 0         |  |
|  | Shiraz-18T | 1434 | 0.244465 | 0         |  |
|  | Shiraz-22T | 1549 | 0        | -0.319623 |  |
|  | Shiraz-22T | 1551 | 0.324011 | 0         |  |
|  | Shiraz-25T | 1698 | 0.21835  | 0         |  |
|  | Shiraz-28T | 1735 | 0.350744 | 0         |  |
|  | Shiraz-29T | 1778 | 0.120767 | 0         |  |
|  | Shiraz-32T | 1833 | 0.551336 | 0         |  |
|  | Shiraz-32T | 1834 | 1.485392 | 0         |  |
|  | Shiraz-38T | 1951 | 0.250891 | 0         |  |
|  | Shiraz-53T | 2078 | 0.287202 | 0         |  |
|  | Shiraz-58T | 2160 | 0.399007 | 0         |  |
|  | Shiraz-71T | 2238 | 0.603631 | 0         |  |
|  | Shiraz-3T  | 90   | 0.219276 | 0         |  |
|  | Shiraz-3T  | 94   | 0.74735  | 0         |  |
|  | Shiraz-4T  | 253  | 0.372918 | 0         |  |
|  | Shiraz-31T | 316  | 0.219196 | 0         |  |
|  | Shiraz-36T | 378  | 0.179558 | 0         |  |
|  | Shiraz-36T | 381  | 0.332628 | 0         |  |
|  | Shiraz-44T | 639  | 1.035032 | 0         |  |
|  | Shiraz-46T | 943  | 0.093799 | 0         |  |
|  | Shiraz-46T | 946  | 0.299835 | 0         |  |
|  | Shiraz-47T | 1030 | 0.257728 | 0         |  |
|  | Shiraz-49T | 1120 | 0.281656 | 0         |  |
|  | Shiraz-77T | 1225 | 0        | -0.117922 |  |
|  | Shiraz-77T | 1227 | 0.196445 | 0         |  |

|        |      |            |      |          |           |  |
|--------|------|------------|------|----------|-----------|--|
|        |      | Shiraz-9T  | 1324 | 0.679266 | 0         |  |
|        |      | Shiraz-18T | 1434 | 0.244465 | 0         |  |
|        |      | Shiraz-22T | 1549 | 0        | -0.319623 |  |
|        |      | Shiraz-22T | 1551 | 0.324011 | 0         |  |
|        |      | Shiraz-25T | 1698 | 0.21835  | 0         |  |
|        |      | Shiraz-28T | 1735 | 0.350744 | 0         |  |
|        |      | Shiraz-29T | 1778 | 0.120767 | 0         |  |
|        |      | Shiraz-32T | 1833 | 0.551336 | 0         |  |
|        |      | Shiraz-32T | 1834 | 1.485392 | 0         |  |
|        |      | Shiraz-38T | 1951 | 0.250891 | 0         |  |
|        |      | Shiraz-53T | 2078 | 0.287202 | 0         |  |
|        |      | Shiraz-58T | 2160 | 0.399007 | 0         |  |
|        |      | Shiraz-71T | 2238 | 0.603631 | 0         |  |
| PCSK1N | chrX | Shiraz-3T  | 238  | 0.472087 | 0         |  |
|        |      | Shiraz-4T  | 260  | 0        | -0.324128 |  |
|        |      | Shiraz-16T | 294  | 0.655804 | 0         |  |
|        |      | Shiraz-31T | 345  | 0.103301 | 0         |  |
|        |      | Shiraz-36T | 431  | 0        | -0.78035  |  |
|        |      | Shiraz-36T | 432  | 0        | -0.6692   |  |
|        |      | Shiraz-44T | 891  | 0        | -0.954044 |  |
|        |      | Shiraz-44T | 896  | 0        | -0.109108 |  |
|        |      | Shiraz-46T | 991  | 0.139564 | 0         |  |
|        |      | Shiraz-47T | 1084 | 0.24185  | 0         |  |
|        |      | Shiraz-49T | 1166 | 0        | -0.917235 |  |
|        |      | Shiraz-49T | 1169 | 0        | -0.583529 |  |
|        |      | Shiraz-77T | 1282 | 0.213849 | 0         |  |
|        |      | Shiraz-9T  | 1368 | 0.199713 | 0         |  |
|        |      | Shiraz-9T  | 1369 | 0.703374 | 0         |  |
|        |      | Shiraz-18T | 1455 | 0        | -0.186773 |  |
|        |      | Shiraz-22T | 1669 | 0.695915 | 0         |  |
|        |      | Shiraz-22T | 1672 | 1.01678  | 0         |  |
|        |      | Shiraz-25T | 1717 | 0.420447 | 0         |  |
|        |      | Shiraz-28T | 1760 | 0.538181 | 0         |  |
|        |      | Shiraz-29T | 1800 | 0.672527 | 0         |  |
|        |      | Shiraz-32T | 1869 | 0.776805 | 0         |  |
|        |      | Shiraz-35T | 1932 | 0.507141 | 0         |  |
|        |      | Shiraz-58T | 2221 | 0.871948 | 0         |  |
|        |      | Shiraz-71T | 2260 | 0.68394  | 0         |  |
|        |      | Shiraz-71T | 2262 | 0.986748 | 0         |  |
|        |      | Shiraz-3T  | 238  | 0.472087 | 0         |  |
|        |      | Shiraz-4T  | 260  | 0        | -0.324128 |  |
|        |      | Shiraz-16T | 294  | 0.655804 | 0         |  |
|        |      | Shiraz-31T | 345  | 0.103301 | 0         |  |
|        |      | Shiraz-36T | 431  | 0        | -0.78035  |  |
|        |      | Shiraz-36T | 432  | 0        | -0.6692   |  |
|        |      | Shiraz-44T | 891  | 0        | -0.954044 |  |
|        |      | Shiraz-44T | 896  | 0        | -0.109108 |  |



|       |      |            |      |          |           |  |  |
|-------|------|------------|------|----------|-----------|--|--|
|       |      | Shiraz-46T | 991  | 0.139564 | 0         |  |  |
|       |      | Shiraz-47T | 1084 | 0.24185  | 0         |  |  |
|       |      | Shiraz-49T | 1166 | 0        | -0.917235 |  |  |
|       |      | Shiraz-49T | 1169 | 0        | -0.583529 |  |  |
|       |      | Shiraz-77T | 1282 | 0.213849 | 0         |  |  |
|       |      | Shiraz-9T  | 1368 | 0.199713 | 0         |  |  |
|       |      | Shiraz-9T  | 1369 | 0.703374 | 0         |  |  |
|       |      | Shiraz-18T | 1455 | 0        | -0.186773 |  |  |
|       |      | Shiraz-22T | 1669 | 0.695915 | 0         |  |  |
|       |      | Shiraz-22T | 1672 | 1.01678  | 0         |  |  |
|       |      | Shiraz-25T | 1717 | 0.420447 | 0         |  |  |
|       |      | Shiraz-28T | 1760 | 0.538181 | 0         |  |  |
|       |      | Shiraz-29T | 1800 | 0.672527 | 0         |  |  |
|       |      | Shiraz-32T | 1869 | 0.776805 | 0         |  |  |
|       |      | Shiraz-35T | 1932 | 0.507141 | 0         |  |  |
|       |      | Shiraz-58T | 2221 | 0.871948 | 0         |  |  |
|       |      | Shiraz-71T | 2260 | 0.68394  | 0         |  |  |
|       |      | Shiraz-71T | 2262 | 0.986748 | 0         |  |  |
|       |      | Shiraz-3T  | 238  | 0.472087 | 0         |  |  |
|       |      | Shiraz-4T  | 260  | 0        | -0.324128 |  |  |
|       |      | Shiraz-16T | 294  | 0.655804 | 0         |  |  |
|       |      | Shiraz-31T | 345  | 0.103301 | 0         |  |  |
|       |      | Shiraz-36T | 431  | 0        | -0.78035  |  |  |
|       |      | Shiraz-36T | 432  | 0        | -0.6692   |  |  |
|       |      | Shiraz-44T | 891  | 0        | -0.954044 |  |  |
|       |      | Shiraz-44T | 896  | 0        | -0.109108 |  |  |
|       |      | Shiraz-46T | 991  | 0.139564 | 0         |  |  |
|       |      | Shiraz-47T | 1084 | 0.24185  | 0         |  |  |
|       |      | Shiraz-49T | 1166 | 0        | -0.917235 |  |  |
|       |      | Shiraz-49T | 1169 | 0        | -0.583529 |  |  |
|       |      | Shiraz-77T | 1282 | 0.213849 | 0         |  |  |
|       |      | Shiraz-9T  | 1368 | 0.199713 | 0         |  |  |
|       |      | Shiraz-9T  | 1369 | 0.703374 | 0         |  |  |
|       |      | Shiraz-18T | 1455 | 0        | -0.186773 |  |  |
|       |      | Shiraz-22T | 1669 | 0.695915 | 0         |  |  |
|       |      | Shiraz-22T | 1672 | 1.01678  | 0         |  |  |
|       |      | Shiraz-25T | 1717 | 0.420447 | 0         |  |  |
|       |      | Shiraz-28T | 1760 | 0.538181 | 0         |  |  |
|       |      | Shiraz-29T | 1800 | 0.672527 | 0         |  |  |
|       |      | Shiraz-32T | 1869 | 0.776805 | 0         |  |  |
|       |      | Shiraz-35T | 1932 | 0.507141 | 0         |  |  |
|       |      | Shiraz-58T | 2221 | 0.871948 | 0         |  |  |
|       |      | Shiraz-71T | 2260 | 0.68394  | 0         |  |  |
|       |      | Shiraz-71T | 2262 | 0.986748 | 0         |  |  |
| PCTK1 | chrX | Shiraz-4T  | 260  | 0        | -0.324128 |  |  |
|       |      | Shiraz-4T  | 260  | 0        | -0.324128 |  |  |
|       |      | Shiraz-16T | 294  | 0.655804 | 0         |  |  |

|  |            |      |          |           |  |
|--|------------|------|----------|-----------|--|
|  | Shiraz-16T | 294  | 0.655804 | 0         |  |
|  | Shiraz-31T | 345  | 0.103301 | 0         |  |
|  | Shiraz-31T | 345  | 0.103301 | 0         |  |
|  | Shiraz-36T | 431  | 0        | -0.78035  |  |
|  | Shiraz-36T | 431  | 0        | -0.78035  |  |
|  | Shiraz-36T | 432  | 0        | -0.6692   |  |
|  | Shiraz-36T | 432  | 0        | -0.6692   |  |
|  | Shiraz-44T | 891  | 0        | -0.954044 |  |
|  | Shiraz-44T | 891  | 0        | -0.954044 |  |
|  | Shiraz-44T | 896  | 0        | -0.109108 |  |
|  | Shiraz-44T | 896  | 0        | -0.109108 |  |
|  | Shiraz-46T | 991  | 0.139564 | 0         |  |
|  | Shiraz-46T | 991  | 0.139564 | 0         |  |
|  | Shiraz-47T | 1084 | 0.24185  | 0         |  |
|  | Shiraz-47T | 1084 | 0.24185  | 0         |  |
|  | Shiraz-49T | 1166 | 0        | -0.917235 |  |
|  | Shiraz-49T | 1166 | 0        | -0.917235 |  |
|  | Shiraz-49T | 1169 | 0        | -0.583529 |  |
|  | Shiraz-49T | 1169 | 0        | -0.583529 |  |
|  | Shiraz-77T | 1282 | 0.213849 | 0         |  |
|  | Shiraz-77T | 1282 | 0.213849 | 0         |  |
|  | Shiraz-9T  | 1368 | 0.199713 | 0         |  |
|  | Shiraz-9T  | 1368 | 0.199713 | 0         |  |
|  | Shiraz-9T  | 1369 | 0.703374 | 0         |  |
|  | Shiraz-9T  | 1369 | 0.703374 | 0         |  |
|  | Shiraz-18T | 1455 | 0        | -0.186773 |  |
|  | Shiraz-18T | 1455 | 0        | -0.186773 |  |
|  | Shiraz-22T | 1669 | 0.695915 | 0         |  |
|  | Shiraz-22T | 1669 | 0.695915 | 0         |  |
|  | Shiraz-22T | 1672 | 1.01678  | 0         |  |
|  | Shiraz-22T | 1672 | 1.01678  | 0         |  |
|  | Shiraz-25T | 1717 | 0.420447 | 0         |  |
|  | Shiraz-25T | 1717 | 0.420447 | 0         |  |
|  | Shiraz-28T | 1760 | 0.538181 | 0         |  |
|  | Shiraz-28T | 1760 | 0.538181 | 0         |  |
|  | Shiraz-29T | 1800 | 0.672527 | 0         |  |
|  | Shiraz-29T | 1800 | 0.672527 | 0         |  |
|  | Shiraz-32T | 1869 | 0.776805 | 0         |  |
|  | Shiraz-32T | 1869 | 0.776805 | 0         |  |
|  | Shiraz-35T | 1932 | 0.507141 | 0         |  |
|  | Shiraz-35T | 1932 | 0.507141 | 0         |  |
|  | Shiraz-40T | 2051 | 0.098506 | 0         |  |
|  | Shiraz-40T | 2051 | 0.098506 | 0         |  |
|  | Shiraz-58T | 2221 | 0.871948 | 0         |  |
|  | Shiraz-58T | 2221 | 0.871948 | 0         |  |
|  | Shiraz-71T | 2260 | 0.68394  | 0         |  |
|  | Shiraz-71T | 2260 | 0.68394  | 0         |  |

|  |            |      |          |           |  |
|--|------------|------|----------|-----------|--|
|  | Shiraz-71T | 2262 | 0.986748 | 0         |  |
|  | Shiraz-71T | 2262 | 0.986748 | 0         |  |
|  | Shiraz-4T  | 260  | 0        | -0.324128 |  |
|  | Shiraz-4T  | 260  | 0        | -0.324128 |  |
|  | Shiraz-16T | 294  | 0.655804 | 0         |  |
|  | Shiraz-16T | 294  | 0.655804 | 0         |  |
|  | Shiraz-31T | 345  | 0.103301 | 0         |  |
|  | Shiraz-31T | 345  | 0.103301 | 0         |  |
|  | Shiraz-36T | 431  | 0        | -0.78035  |  |
|  | Shiraz-36T | 431  | 0        | -0.78035  |  |
|  | Shiraz-36T | 432  | 0        | -0.6692   |  |
|  | Shiraz-36T | 432  | 0        | -0.6692   |  |
|  | Shiraz-44T | 891  | 0        | -0.954044 |  |
|  | Shiraz-44T | 891  | 0        | -0.954044 |  |
|  | Shiraz-44T | 896  | 0        | -0.109108 |  |
|  | Shiraz-44T | 896  | 0        | -0.109108 |  |
|  | Shiraz-46T | 991  | 0.139564 | 0         |  |
|  | Shiraz-46T | 991  | 0.139564 | 0         |  |
|  | Shiraz-47T | 1084 | 0.24185  | 0         |  |
|  | Shiraz-47T | 1084 | 0.24185  | 0         |  |
|  | Shiraz-49T | 1166 | 0        | -0.917235 |  |
|  | Shiraz-49T | 1166 | 0        | -0.917235 |  |
|  | Shiraz-49T | 1169 | 0        | -0.583529 |  |
|  | Shiraz-49T | 1169 | 0        | -0.583529 |  |
|  | Shiraz-77T | 1282 | 0.213849 | 0         |  |
|  | Shiraz-77T | 1282 | 0.213849 | 0         |  |
|  | Shiraz-9T  | 1368 | 0.199713 | 0         |  |
|  | Shiraz-9T  | 1368 | 0.199713 | 0         |  |
|  | Shiraz-9T  | 1369 | 0.703374 | 0         |  |
|  | Shiraz-9T  | 1369 | 0.703374 | 0         |  |
|  | Shiraz-18T | 1455 | 0        | -0.186773 |  |
|  | Shiraz-18T | 1455 | 0        | -0.186773 |  |
|  | Shiraz-22T | 1669 | 0.695915 | 0         |  |
|  | Shiraz-22T | 1669 | 0.695915 | 0         |  |
|  | Shiraz-22T | 1672 | 1.01678  | 0         |  |
|  | Shiraz-22T | 1672 | 1.01678  | 0         |  |
|  | Shiraz-25T | 1717 | 0.420447 | 0         |  |
|  | Shiraz-25T | 1717 | 0.420447 | 0         |  |
|  | Shiraz-28T | 1760 | 0.538181 | 0         |  |
|  | Shiraz-28T | 1760 | 0.538181 | 0         |  |
|  | Shiraz-29T | 1800 | 0.672527 | 0         |  |
|  | Shiraz-29T | 1800 | 0.672527 | 0         |  |
|  | Shiraz-32T | 1869 | 0.776805 | 0         |  |
|  | Shiraz-32T | 1869 | 0.776805 | 0         |  |
|  | Shiraz-35T | 1932 | 0.507141 | 0         |  |
|  | Shiraz-35T | 1932 | 0.507141 | 0         |  |
|  | Shiraz-40T | 2051 | 0.098506 | 0         |  |

|  |  |            |      |          |           |  |  |
|--|--|------------|------|----------|-----------|--|--|
|  |  | Shiraz-40T | 2051 | 0.098506 | 0         |  |  |
|  |  | Shiraz-58T | 2221 | 0.871948 | 0         |  |  |
|  |  | Shiraz-58T | 2221 | 0.871948 | 0         |  |  |
|  |  | Shiraz-71T | 2260 | 0.68394  | 0         |  |  |
|  |  | Shiraz-71T | 2260 | 0.68394  | 0         |  |  |
|  |  | Shiraz-71T | 2262 | 0.986748 | 0         |  |  |
|  |  | Shiraz-71T | 2262 | 0.986748 | 0         |  |  |
|  |  | Shiraz-4T  | 260  | 0        | -0.324128 |  |  |
|  |  | Shiraz-4T  | 260  | 0        | -0.324128 |  |  |
|  |  | Shiraz-16T | 294  | 0.655804 | 0         |  |  |
|  |  | Shiraz-16T | 294  | 0.655804 | 0         |  |  |
|  |  | Shiraz-31T | 345  | 0.103301 | 0         |  |  |
|  |  | Shiraz-31T | 345  | 0.103301 | 0         |  |  |
|  |  | Shiraz-36T | 431  | 0        | -0.78035  |  |  |
|  |  | Shiraz-36T | 431  | 0        | -0.78035  |  |  |
|  |  | Shiraz-36T | 432  | 0        | -0.6692   |  |  |
|  |  | Shiraz-36T | 432  | 0        | -0.6692   |  |  |
|  |  | Shiraz-44T | 891  | 0        | -0.954044 |  |  |
|  |  | Shiraz-44T | 891  | 0        | -0.954044 |  |  |
|  |  | Shiraz-44T | 896  | 0        | -0.109108 |  |  |
|  |  | Shiraz-44T | 896  | 0        | -0.109108 |  |  |
|  |  | Shiraz-46T | 991  | 0.139564 | 0         |  |  |
|  |  | Shiraz-46T | 991  | 0.139564 | 0         |  |  |
|  |  | Shiraz-47T | 1084 | 0.24185  | 0         |  |  |
|  |  | Shiraz-47T | 1084 | 0.24185  | 0         |  |  |
|  |  | Shiraz-49T | 1166 | 0        | -0.917235 |  |  |
|  |  | Shiraz-49T | 1166 | 0        | -0.917235 |  |  |
|  |  | Shiraz-49T | 1169 | 0        | -0.583529 |  |  |
|  |  | Shiraz-49T | 1169 | 0        | -0.583529 |  |  |
|  |  | Shiraz-77T | 1282 | 0.213849 | 0         |  |  |
|  |  | Shiraz-77T | 1282 | 0.213849 | 0         |  |  |
|  |  | Shiraz-9T  | 1368 | 0.199713 | 0         |  |  |
|  |  | Shiraz-9T  | 1368 | 0.199713 | 0         |  |  |
|  |  | Shiraz-9T  | 1369 | 0.703374 | 0         |  |  |
|  |  | Shiraz-9T  | 1369 | 0.703374 | 0         |  |  |
|  |  | Shiraz-18T | 1455 | 0        | -0.186773 |  |  |
|  |  | Shiraz-18T | 1455 | 0        | -0.186773 |  |  |
|  |  | Shiraz-22T | 1669 | 0.695915 | 0         |  |  |
|  |  | Shiraz-22T | 1669 | 0.695915 | 0         |  |  |
|  |  | Shiraz-22T | 1672 | 1.01678  | 0         |  |  |
|  |  | Shiraz-22T | 1672 | 1.01678  | 0         |  |  |
|  |  | Shiraz-25T | 1717 | 0.420447 | 0         |  |  |
|  |  | Shiraz-25T | 1717 | 0.420447 | 0         |  |  |
|  |  | Shiraz-28T | 1760 | 0.538181 | 0         |  |  |
|  |  | Shiraz-28T | 1760 | 0.538181 | 0         |  |  |
|  |  | Shiraz-29T | 1800 | 0.672527 | 0         |  |  |
|  |  | Shiraz-29T | 1800 | 0.672527 | 0         |  |  |

|        |      |            |      |          |           |  |
|--------|------|------------|------|----------|-----------|--|
|        |      | Shiraz-32T | 1869 | 0.776805 | 0         |  |
|        |      | Shiraz-32T | 1869 | 0.776805 | 0         |  |
|        |      | Shiraz-35T | 1932 | 0.507141 | 0         |  |
|        |      | Shiraz-35T | 1932 | 0.507141 | 0         |  |
|        |      | Shiraz-40T | 2051 | 0.098506 | 0         |  |
|        |      | Shiraz-40T | 2051 | 0.098506 | 0         |  |
|        |      | Shiraz-58T | 2221 | 0.871948 | 0         |  |
|        |      | Shiraz-58T | 2221 | 0.871948 | 0         |  |
|        |      | Shiraz-71T | 2260 | 0.68394  | 0         |  |
|        |      | Shiraz-71T | 2260 | 0.68394  | 0         |  |
|        |      | Shiraz-71T | 2262 | 0.986748 | 0         |  |
|        |      | Shiraz-71T | 2262 | 0.986748 | 0         |  |
| PCYT1B | chrX | Shiraz-3T  | 235  | 0        | -0.28401  |  |
|        |      | Shiraz-4T  | 260  | 0        | -0.324128 |  |
|        |      | Shiraz-16T | 294  | 0.655804 | 0         |  |
|        |      | Shiraz-36T | 431  | 0        | -0.78035  |  |
|        |      | Shiraz-44T | 891  | 0        | -0.954044 |  |
|        |      | Shiraz-49T | 1166 | 0        | -0.917235 |  |
|        |      | Shiraz-77T | 1281 | 0.136627 | 0         |  |
|        |      | Shiraz-9T  | 1368 | 0.199713 | 0         |  |
|        |      | Shiraz-18T | 1455 | 0        | -0.186773 |  |
|        |      | Shiraz-22T | 1669 | 0.695915 | 0         |  |
|        |      | Shiraz-25T | 1717 | 0.420447 | 0         |  |
|        |      | Shiraz-28T | 1760 | 0.538181 | 0         |  |
|        |      | Shiraz-29T | 1800 | 0.672527 | 0         |  |
|        |      | Shiraz-32T | 1869 | 0.776805 | 0         |  |
|        |      | Shiraz-35T | 1932 | 0.507141 | 0         |  |
|        |      | Shiraz-40T | 2051 | 0.098506 | 0         |  |
|        |      | Shiraz-58T | 2221 | 0.871948 | 0         |  |
|        |      | Shiraz-71T | 2260 | 0.68394  | 0         |  |
|        |      | Shiraz-71T | 2261 | 0.508399 | 0         |  |
|        |      | Shiraz-3T  | 235  | 0        | -0.28401  |  |
|        |      | Shiraz-4T  | 260  | 0        | -0.324128 |  |
|        |      | Shiraz-16T | 294  | 0.655804 | 0         |  |
|        |      | Shiraz-36T | 431  | 0        | -0.78035  |  |
|        |      | Shiraz-44T | 891  | 0        | -0.954044 |  |
|        |      | Shiraz-49T | 1166 | 0        | -0.917235 |  |
|        |      | Shiraz-77T | 1281 | 0.136627 | 0         |  |
|        |      | Shiraz-9T  | 1368 | 0.199713 | 0         |  |
|        |      | Shiraz-18T | 1455 | 0        | -0.186773 |  |
|        |      | Shiraz-22T | 1669 | 0.695915 | 0         |  |
|        |      | Shiraz-25T | 1717 | 0.420447 | 0         |  |
|        |      | Shiraz-28T | 1760 | 0.538181 | 0         |  |
|        |      | Shiraz-29T | 1800 | 0.672527 | 0         |  |
|        |      | Shiraz-32T | 1869 | 0.776805 | 0         |  |
|        |      | Shiraz-35T | 1932 | 0.507141 | 0         |  |
|        |      | Shiraz-40T | 2051 | 0.098506 | 0         |  |

|       |      |            |      |          |           |  |
|-------|------|------------|------|----------|-----------|--|
|       |      | Shiraz-58T | 2221 | 0.871948 | 0         |  |
|       |      | Shiraz-71T | 2260 | 0.68394  | 0         |  |
|       |      | Shiraz-71T | 2261 | 0.508399 | 0         |  |
|       |      | Shiraz-3T  | 235  | 0        | -0.28401  |  |
|       |      | Shiraz-4T  | 260  | 0        | -0.324128 |  |
|       |      | Shiraz-16T | 294  | 0.655804 | 0         |  |
|       |      | Shiraz-36T | 431  | 0        | -0.78035  |  |
|       |      | Shiraz-44T | 891  | 0        | -0.954044 |  |
|       |      | Shiraz-49T | 1166 | 0        | -0.917235 |  |
|       |      | Shiraz-77T | 1281 | 0.136627 | 0         |  |
|       |      | Shiraz-9T  | 1368 | 0.199713 | 0         |  |
|       |      | Shiraz-18T | 1455 | 0        | -0.186773 |  |
|       |      | Shiraz-22T | 1669 | 0.695915 | 0         |  |
|       |      | Shiraz-25T | 1717 | 0.420447 | 0         |  |
|       |      | Shiraz-28T | 1760 | 0.538181 | 0         |  |
|       |      | Shiraz-29T | 1800 | 0.672527 | 0         |  |
|       |      | Shiraz-32T | 1869 | 0.776805 | 0         |  |
|       |      | Shiraz-35T | 1932 | 0.507141 | 0         |  |
|       |      | Shiraz-40T | 2051 | 0.098506 | 0         |  |
|       |      | Shiraz-58T | 2221 | 0.871948 | 0         |  |
|       |      | Shiraz-71T | 2260 | 0.68394  | 0         |  |
|       |      | Shiraz-71T | 2261 | 0.508399 | 0         |  |
| PDAP1 | chr7 | Shiraz-3T  | 90   | 0.219276 | 0         |  |
|       |      | Shiraz-3T  | 94   | 0.74735  | 0         |  |
|       |      | Shiraz-4T  | 253  | 0.372918 | 0         |  |
|       |      | Shiraz-31T | 316  | 0.219196 | 0         |  |
|       |      | Shiraz-36T | 378  | 0.179558 | 0         |  |
|       |      | Shiraz-36T | 381  | 0.332628 | 0         |  |
|       |      | Shiraz-44T | 639  | 1.035032 | 0         |  |
|       |      | Shiraz-46T | 943  | 0.093799 | 0         |  |
|       |      | Shiraz-46T | 946  | 0.299835 | 0         |  |
|       |      | Shiraz-47T | 1030 | 0.257728 | 0         |  |
|       |      | Shiraz-49T | 1120 | 0.281656 | 0         |  |
|       |      | Shiraz-77T | 1225 | 0        | -0.117922 |  |
|       |      | Shiraz-77T | 1227 | 0.196445 | 0         |  |
|       |      | Shiraz-9T  | 1324 | 0.679266 | 0         |  |
|       |      | Shiraz-18T | 1434 | 0.244465 | 0         |  |
|       |      | Shiraz-22T | 1549 | 0        | -0.319623 |  |
|       |      | Shiraz-22T | 1551 | 0.324011 | 0         |  |
|       |      | Shiraz-25T | 1698 | 0.21835  | 0         |  |
|       |      | Shiraz-28T | 1735 | 0.350744 | 0         |  |
|       |      | Shiraz-29T | 1778 | 0.120767 | 0         |  |
|       |      | Shiraz-32T | 1833 | 0.551336 | 0         |  |
|       |      | Shiraz-38T | 1951 | 0.250891 | 0         |  |
|       |      | Shiraz-53T | 2078 | 0.287202 | 0         |  |
|       |      | Shiraz-71T | 2238 | 0.603631 | 0         |  |
|       |      | Shiraz-3T  | 90   | 0.219276 | 0         |  |

|  |            |      |          |           |  |
|--|------------|------|----------|-----------|--|
|  | Shiraz-3T  | 94   | 0.74735  | 0         |  |
|  | Shiraz-4T  | 253  | 0.372918 | 0         |  |
|  | Shiraz-31T | 316  | 0.219196 | 0         |  |
|  | Shiraz-36T | 378  | 0.179558 | 0         |  |
|  | Shiraz-36T | 381  | 0.332628 | 0         |  |
|  | Shiraz-44T | 639  | 1.035032 | 0         |  |
|  | Shiraz-46T | 943  | 0.093799 | 0         |  |
|  | Shiraz-46T | 946  | 0.299835 | 0         |  |
|  | Shiraz-47T | 1030 | 0.257728 | 0         |  |
|  | Shiraz-49T | 1120 | 0.281656 | 0         |  |
|  | Shiraz-77T | 1225 | 0        | -0.117922 |  |
|  | Shiraz-77T | 1227 | 0.196445 | 0         |  |
|  | Shiraz-9T  | 1324 | 0.679266 | 0         |  |
|  | Shiraz-18T | 1434 | 0.244465 | 0         |  |
|  | Shiraz-22T | 1549 | 0        | -0.319623 |  |
|  | Shiraz-22T | 1551 | 0.324011 | 0         |  |
|  | Shiraz-25T | 1698 | 0.21835  | 0         |  |
|  | Shiraz-28T | 1735 | 0.350744 | 0         |  |
|  | Shiraz-29T | 1778 | 0.120767 | 0         |  |
|  | Shiraz-32T | 1833 | 0.551336 | 0         |  |
|  | Shiraz-38T | 1951 | 0.250891 | 0         |  |
|  | Shiraz-53T | 2078 | 0.287202 | 0         |  |
|  | Shiraz-71T | 2238 | 0.603631 | 0         |  |
|  | Shiraz-3T  | 90   | 0.219276 | 0         |  |
|  | Shiraz-3T  | 94   | 0.74735  | 0         |  |
|  | Shiraz-4T  | 253  | 0.372918 | 0         |  |
|  | Shiraz-31T | 316  | 0.219196 | 0         |  |
|  | Shiraz-36T | 378  | 0.179558 | 0         |  |
|  | Shiraz-36T | 381  | 0.332628 | 0         |  |
|  | Shiraz-44T | 639  | 1.035032 | 0         |  |
|  | Shiraz-46T | 943  | 0.093799 | 0         |  |
|  | Shiraz-46T | 946  | 0.299835 | 0         |  |
|  | Shiraz-47T | 1030 | 0.257728 | 0         |  |
|  | Shiraz-49T | 1120 | 0.281656 | 0         |  |
|  | Shiraz-77T | 1225 | 0        | -0.117922 |  |
|  | Shiraz-77T | 1227 | 0.196445 | 0         |  |
|  | Shiraz-9T  | 1324 | 0.679266 | 0         |  |
|  | Shiraz-18T | 1434 | 0.244465 | 0         |  |
|  | Shiraz-22T | 1549 | 0        | -0.319623 |  |
|  | Shiraz-22T | 1551 | 0.324011 | 0         |  |
|  | Shiraz-25T | 1698 | 0.21835  | 0         |  |
|  | Shiraz-28T | 1735 | 0.350744 | 0         |  |
|  | Shiraz-29T | 1778 | 0.120767 | 0         |  |
|  | Shiraz-32T | 1833 | 0.551336 | 0         |  |
|  | Shiraz-38T | 1951 | 0.250891 | 0         |  |
|  | Shiraz-53T | 2078 | 0.287202 | 0         |  |
|  | Shiraz-71T | 2238 | 0.603631 | 0         |  |

|       |      |            |      |          |           |  |
|-------|------|------------|------|----------|-----------|--|
| PDE1C | chr7 | Shiraz-3T  | 87   | 0.198593 | 0         |  |
|       |      | Shiraz-4T  | 252  | 0.192083 | 0         |  |
|       |      | Shiraz-36T | 376  | 0.159952 | 0         |  |
|       |      | Shiraz-44T | 631  | 0        | -0.180312 |  |
|       |      | Shiraz-46T | 942  | 0.069143 | 0         |  |
|       |      | Shiraz-18T | 1433 | 0.250973 | 0         |  |
|       |      | Shiraz-22T | 1544 | 0        | -0.193579 |  |
|       |      | Shiraz-25T | 1697 | 0.21945  | 0         |  |
|       |      | Shiraz-28T | 1734 | 0.362882 | 0         |  |
|       |      | Shiraz-29T | 1777 | 0.156747 | 0         |  |
|       |      | Shiraz-38T | 1950 | 0.265916 | 0         |  |
|       |      | Shiraz-71T | 2236 | 0.320072 | 0         |  |
|       |      | Shiraz-3T  | 87   | 0.198593 | 0         |  |
|       |      | Shiraz-4T  | 252  | 0.192083 | 0         |  |
|       |      | Shiraz-36T | 376  | 0.159952 | 0         |  |
|       |      | Shiraz-44T | 631  | 0        | -0.180312 |  |
|       |      | Shiraz-46T | 942  | 0.069143 | 0         |  |
|       |      | Shiraz-18T | 1433 | 0.250973 | 0         |  |
|       |      | Shiraz-22T | 1544 | 0        | -0.193579 |  |
|       |      | Shiraz-25T | 1697 | 0.21945  | 0         |  |
|       |      | Shiraz-28T | 1734 | 0.362882 | 0         |  |
|       |      | Shiraz-29T | 1777 | 0.156747 | 0         |  |
|       |      | Shiraz-38T | 1950 | 0.265916 | 0         |  |
|       |      | Shiraz-71T | 2236 | 0.320072 | 0         |  |
|       |      | Shiraz-3T  | 87   | 0.198593 | 0         |  |
|       |      | Shiraz-4T  | 252  | 0.192083 | 0         |  |
|       |      | Shiraz-36T | 376  | 0.159952 | 0         |  |
|       |      | Shiraz-44T | 631  | 0        | -0.180312 |  |
|       |      | Shiraz-46T | 942  | 0.069143 | 0         |  |
|       |      | Shiraz-18T | 1433 | 0.250973 | 0         |  |
|       |      | Shiraz-22T | 1544 | 0        | -0.193579 |  |
|       |      | Shiraz-25T | 1697 | 0.21945  | 0         |  |
|       |      | Shiraz-28T | 1734 | 0.362882 | 0         |  |
|       |      | Shiraz-29T | 1777 | 0.156747 | 0         |  |
|       |      | Shiraz-38T | 1950 | 0.265916 | 0         |  |
|       |      | Shiraz-71T | 2236 | 0.320072 | 0         |  |
| PDHA1 | chrX | Shiraz-3T  | 235  | 0        | -0.28401  |  |
|       |      | Shiraz-4T  | 260  | 0        | -0.324128 |  |
|       |      | Shiraz-16T | 294  | 0.655804 | 0         |  |
|       |      | Shiraz-36T | 431  | 0        | -0.78035  |  |
|       |      | Shiraz-44T | 891  | 0        | -0.954044 |  |
|       |      | Shiraz-49T | 1166 | 0        | -0.917235 |  |
|       |      | Shiraz-77T | 1281 | 0.136627 | 0         |  |
|       |      | Shiraz-9T  | 1368 | 0.199713 | 0         |  |
|       |      | Shiraz-18T | 1455 | 0        | -0.186773 |  |
|       |      | Shiraz-22T | 1669 | 0.695915 | 0         |  |
|       |      | Shiraz-25T | 1717 | 0.420447 | 0         |  |



|       |      |            |      |          |           |  |  |
|-------|------|------------|------|----------|-----------|--|--|
|       |      | Shiraz-28T | 1760 | 0.538181 | 0         |  |  |
|       |      | Shiraz-29T | 1800 | 0.672527 | 0         |  |  |
|       |      | Shiraz-32T | 1869 | 0.776805 | 0         |  |  |
|       |      | Shiraz-35T | 1932 | 0.507141 | 0         |  |  |
|       |      | Shiraz-40T | 2051 | 0.098506 | 0         |  |  |
|       |      | Shiraz-58T | 2221 | 0.871948 | 0         |  |  |
|       |      | Shiraz-71T | 2260 | 0.68394  | 0         |  |  |
|       |      | Shiraz-71T | 2261 | 0.508399 | 0         |  |  |
|       |      | Shiraz-3T  | 235  | 0        | -0.28401  |  |  |
|       |      | Shiraz-4T  | 260  | 0        | -0.324128 |  |  |
|       |      | Shiraz-16T | 294  | 0.655804 | 0         |  |  |
|       |      | Shiraz-36T | 431  | 0        | -0.78035  |  |  |
|       |      | Shiraz-44T | 891  | 0        | -0.954044 |  |  |
|       |      | Shiraz-49T | 1166 | 0        | -0.917235 |  |  |
|       |      | Shiraz-77T | 1281 | 0.136627 | 0         |  |  |
|       |      | Shiraz-9T  | 1368 | 0.199713 | 0         |  |  |
|       |      | Shiraz-18T | 1455 | 0        | -0.186773 |  |  |
|       |      | Shiraz-22T | 1669 | 0.695915 | 0         |  |  |
|       |      | Shiraz-25T | 1717 | 0.420447 | 0         |  |  |
|       |      | Shiraz-28T | 1760 | 0.538181 | 0         |  |  |
|       |      | Shiraz-29T | 1800 | 0.672527 | 0         |  |  |
|       |      | Shiraz-32T | 1869 | 0.776805 | 0         |  |  |
|       |      | Shiraz-35T | 1932 | 0.507141 | 0         |  |  |
|       |      | Shiraz-40T | 2051 | 0.098506 | 0         |  |  |
|       |      | Shiraz-58T | 2221 | 0.871948 | 0         |  |  |
|       |      | Shiraz-71T | 2260 | 0.68394  | 0         |  |  |
|       |      | Shiraz-71T | 2261 | 0.508399 | 0         |  |  |
|       |      | Shiraz-3T  | 235  | 0        | -0.28401  |  |  |
|       |      | Shiraz-4T  | 260  | 0        | -0.324128 |  |  |
|       |      | Shiraz-16T | 294  | 0.655804 | 0         |  |  |
|       |      | Shiraz-36T | 431  | 0        | -0.78035  |  |  |
|       |      | Shiraz-44T | 891  | 0        | -0.954044 |  |  |
|       |      | Shiraz-49T | 1166 | 0        | -0.917235 |  |  |
|       |      | Shiraz-77T | 1281 | 0.136627 | 0         |  |  |
|       |      | Shiraz-9T  | 1368 | 0.199713 | 0         |  |  |
|       |      | Shiraz-18T | 1455 | 0        | -0.186773 |  |  |
|       |      | Shiraz-22T | 1669 | 0.695915 | 0         |  |  |
|       |      | Shiraz-25T | 1717 | 0.420447 | 0         |  |  |
|       |      | Shiraz-28T | 1760 | 0.538181 | 0         |  |  |
|       |      | Shiraz-29T | 1800 | 0.672527 | 0         |  |  |
|       |      | Shiraz-32T | 1869 | 0.776805 | 0         |  |  |
|       |      | Shiraz-35T | 1932 | 0.507141 | 0         |  |  |
|       |      | Shiraz-40T | 2051 | 0.098506 | 0         |  |  |
|       |      | Shiraz-58T | 2221 | 0.871948 | 0         |  |  |
|       |      | Shiraz-71T | 2260 | 0.68394  | 0         |  |  |
|       |      | Shiraz-71T | 2261 | 0.508399 | 0         |  |  |
| PDIA4 | chr7 | Shiraz-3T  | 90   | 0.219276 | 0         |  |  |

|  |            |      |          |   |  |
|--|------------|------|----------|---|--|
|  | Shiraz-3T  | 99   | 0.454766 | 0 |  |
|  | Shiraz-4T  | 253  | 0.372918 | 0 |  |
|  | Shiraz-36T | 378  | 0.179558 | 0 |  |
|  | Shiraz-44T | 646  | 0.471276 | 0 |  |
|  | Shiraz-46T | 943  | 0.093799 | 0 |  |
|  | Shiraz-9T  | 1325 | 0.221899 | 0 |  |
|  | Shiraz-18T | 1434 | 0.244465 | 0 |  |
|  | Shiraz-25T | 1698 | 0.21835  | 0 |  |
|  | Shiraz-28T | 1735 | 0.350744 | 0 |  |
|  | Shiraz-29T | 1778 | 0.120767 | 0 |  |
|  | Shiraz-32T | 1833 | 0.551336 | 0 |  |
|  | Shiraz-38T | 1951 | 0.250891 | 0 |  |
|  | Shiraz-53T | 2078 | 0.287202 | 0 |  |
|  | Shiraz-58T | 2162 | 0.221505 | 0 |  |
|  | Shiraz-71T | 2238 | 0.603631 | 0 |  |
|  | Shiraz-3T  | 90   | 0.219276 | 0 |  |
|  | Shiraz-3T  | 99   | 0.454766 | 0 |  |
|  | Shiraz-4T  | 253  | 0.372918 | 0 |  |
|  | Shiraz-36T | 378  | 0.179558 | 0 |  |
|  | Shiraz-44T | 646  | 0.471276 | 0 |  |
|  | Shiraz-46T | 943  | 0.093799 | 0 |  |
|  | Shiraz-9T  | 1325 | 0.221899 | 0 |  |
|  | Shiraz-18T | 1434 | 0.244465 | 0 |  |
|  | Shiraz-25T | 1698 | 0.21835  | 0 |  |
|  | Shiraz-28T | 1735 | 0.350744 | 0 |  |
|  | Shiraz-29T | 1778 | 0.120767 | 0 |  |
|  | Shiraz-32T | 1833 | 0.551336 | 0 |  |
|  | Shiraz-38T | 1951 | 0.250891 | 0 |  |
|  | Shiraz-53T | 2078 | 0.287202 | 0 |  |
|  | Shiraz-58T | 2162 | 0.221505 | 0 |  |
|  | Shiraz-71T | 2238 | 0.603631 | 0 |  |
|  | Shiraz-3T  | 90   | 0.219276 | 0 |  |
|  | Shiraz-3T  | 99   | 0.454766 | 0 |  |
|  | Shiraz-4T  | 253  | 0.372918 | 0 |  |
|  | Shiraz-36T | 378  | 0.179558 | 0 |  |
|  | Shiraz-44T | 646  | 0.471276 | 0 |  |
|  | Shiraz-46T | 943  | 0.093799 | 0 |  |
|  | Shiraz-9T  | 1325 | 0.221899 | 0 |  |
|  | Shiraz-18T | 1434 | 0.244465 | 0 |  |
|  | Shiraz-25T | 1698 | 0.21835  | 0 |  |
|  | Shiraz-28T | 1735 | 0.350744 | 0 |  |
|  | Shiraz-29T | 1778 | 0.120767 | 0 |  |
|  | Shiraz-32T | 1833 | 0.551336 | 0 |  |
|  | Shiraz-38T | 1951 | 0.250891 | 0 |  |
|  | Shiraz-53T | 2078 | 0.287202 | 0 |  |
|  | Shiraz-58T | 2162 | 0.221505 | 0 |  |
|  | Shiraz-71T | 2238 | 0.603631 | 0 |  |

|      |      |            |      |          |           |  |  |
|------|------|------------|------|----------|-----------|--|--|
| PDK3 | chrX | Shiraz-3T  | 235  | 0        | -0.28401  |  |  |
|      |      | Shiraz-3T  | 235  | 0        | -0.28401  |  |  |
|      |      | Shiraz-4T  | 260  | 0        | -0.324128 |  |  |
|      |      | Shiraz-4T  | 260  | 0        | -0.324128 |  |  |
|      |      | Shiraz-16T | 294  | 0.655804 | 0         |  |  |
|      |      | Shiraz-16T | 294  | 0.655804 | 0         |  |  |
|      |      | Shiraz-36T | 431  | 0        | -0.78035  |  |  |
|      |      | Shiraz-36T | 431  | 0        | -0.78035  |  |  |
|      |      | Shiraz-44T | 891  | 0        | -0.954044 |  |  |
|      |      | Shiraz-44T | 891  | 0        | -0.954044 |  |  |
|      |      | Shiraz-49T | 1166 | 0        | -0.917235 |  |  |
|      |      | Shiraz-49T | 1166 | 0        | -0.917235 |  |  |
|      |      | Shiraz-77T | 1281 | 0.136627 | 0         |  |  |
|      |      | Shiraz-77T | 1281 | 0.136627 | 0         |  |  |
|      |      | Shiraz-9T  | 1368 | 0.199713 | 0         |  |  |
|      |      | Shiraz-9T  | 1368 | 0.199713 | 0         |  |  |
|      |      | Shiraz-18T | 1455 | 0        | -0.186773 |  |  |
|      |      | Shiraz-18T | 1455 | 0        | -0.186773 |  |  |
|      |      | Shiraz-22T | 1669 | 0.695915 | 0         |  |  |
|      |      | Shiraz-22T | 1669 | 0.695915 | 0         |  |  |
|      |      | Shiraz-25T | 1717 | 0.420447 | 0         |  |  |
|      |      | Shiraz-25T | 1717 | 0.420447 | 0         |  |  |
|      |      | Shiraz-28T | 1760 | 0.538181 | 0         |  |  |
|      |      | Shiraz-28T | 1760 | 0.538181 | 0         |  |  |
|      |      | Shiraz-29T | 1800 | 0.672527 | 0         |  |  |
|      |      | Shiraz-29T | 1800 | 0.672527 | 0         |  |  |
|      |      | Shiraz-32T | 1869 | 0.776805 | 0         |  |  |
|      |      | Shiraz-32T | 1869 | 0.776805 | 0         |  |  |
|      |      | Shiraz-35T | 1932 | 0.507141 | 0         |  |  |
|      |      | Shiraz-35T | 1932 | 0.507141 | 0         |  |  |
|      |      | Shiraz-40T | 2051 | 0.098506 | 0         |  |  |
|      |      | Shiraz-40T | 2051 | 0.098506 | 0         |  |  |
|      |      | Shiraz-58T | 2221 | 0.871948 | 0         |  |  |
|      |      | Shiraz-58T | 2221 | 0.871948 | 0         |  |  |
|      |      | Shiraz-71T | 2260 | 0.68394  | 0         |  |  |
|      |      | Shiraz-71T | 2260 | 0.68394  | 0         |  |  |
|      |      | Shiraz-71T | 2261 | 0.508399 | 0         |  |  |
|      |      | Shiraz-71T | 2261 | 0.508399 | 0         |  |  |
|      |      | Shiraz-3T  | 235  | 0        | -0.28401  |  |  |
|      |      | Shiraz-3T  | 235  | 0        | -0.28401  |  |  |
|      |      | Shiraz-4T  | 260  | 0        | -0.324128 |  |  |
|      |      | Shiraz-4T  | 260  | 0        | -0.324128 |  |  |
|      |      | Shiraz-16T | 294  | 0.655804 | 0         |  |  |
|      |      | Shiraz-16T | 294  | 0.655804 | 0         |  |  |
|      |      | Shiraz-36T | 431  | 0        | -0.78035  |  |  |
|      |      | Shiraz-36T | 431  | 0        | -0.78035  |  |  |
|      |      | Shiraz-44T | 891  | 0        | -0.954044 |  |  |

|  |            |      |          |           |  |
|--|------------|------|----------|-----------|--|
|  | Shiraz-44T | 891  | 0        | -0.954044 |  |
|  | Shiraz-49T | 1166 | 0        | -0.917235 |  |
|  | Shiraz-49T | 1166 | 0        | -0.917235 |  |
|  | Shiraz-77T | 1281 | 0.136627 | 0         |  |
|  | Shiraz-77T | 1281 | 0.136627 | 0         |  |
|  | Shiraz-9T  | 1368 | 0.199713 | 0         |  |
|  | Shiraz-9T  | 1368 | 0.199713 | 0         |  |
|  | Shiraz-18T | 1455 | 0        | -0.186773 |  |
|  | Shiraz-18T | 1455 | 0        | -0.186773 |  |
|  | Shiraz-22T | 1669 | 0.695915 | 0         |  |
|  | Shiraz-22T | 1669 | 0.695915 | 0         |  |
|  | Shiraz-25T | 1717 | 0.420447 | 0         |  |
|  | Shiraz-25T | 1717 | 0.420447 | 0         |  |
|  | Shiraz-28T | 1760 | 0.538181 | 0         |  |
|  | Shiraz-28T | 1760 | 0.538181 | 0         |  |
|  | Shiraz-29T | 1800 | 0.672527 | 0         |  |
|  | Shiraz-29T | 1800 | 0.672527 | 0         |  |
|  | Shiraz-32T | 1869 | 0.776805 | 0         |  |
|  | Shiraz-32T | 1869 | 0.776805 | 0         |  |
|  | Shiraz-35T | 1932 | 0.507141 | 0         |  |
|  | Shiraz-35T | 1932 | 0.507141 | 0         |  |
|  | Shiraz-40T | 2051 | 0.098506 | 0         |  |
|  | Shiraz-40T | 2051 | 0.098506 | 0         |  |
|  | Shiraz-58T | 2221 | 0.871948 | 0         |  |
|  | Shiraz-58T | 2221 | 0.871948 | 0         |  |
|  | Shiraz-71T | 2260 | 0.68394  | 0         |  |
|  | Shiraz-71T | 2260 | 0.68394  | 0         |  |
|  | Shiraz-71T | 2261 | 0.508399 | 0         |  |
|  | Shiraz-71T | 2261 | 0.508399 | 0         |  |
|  | Shiraz-3T  | 235  | 0        | -0.28401  |  |
|  | Shiraz-3T  | 235  | 0        | -0.28401  |  |
|  | Shiraz-4T  | 260  | 0        | -0.324128 |  |
|  | Shiraz-4T  | 260  | 0        | -0.324128 |  |
|  | Shiraz-16T | 294  | 0.655804 | 0         |  |
|  | Shiraz-16T | 294  | 0.655804 | 0         |  |
|  | Shiraz-36T | 431  | 0        | -0.78035  |  |
|  | Shiraz-36T | 431  | 0        | -0.78035  |  |
|  | Shiraz-44T | 891  | 0        | -0.954044 |  |
|  | Shiraz-44T | 891  | 0        | -0.954044 |  |
|  | Shiraz-49T | 1166 | 0        | -0.917235 |  |
|  | Shiraz-49T | 1166 | 0        | -0.917235 |  |
|  | Shiraz-77T | 1281 | 0.136627 | 0         |  |
|  | Shiraz-77T | 1281 | 0.136627 | 0         |  |
|  | Shiraz-9T  | 1368 | 0.199713 | 0         |  |
|  | Shiraz-9T  | 1368 | 0.199713 | 0         |  |
|  | Shiraz-18T | 1455 | 0        | -0.186773 |  |
|  | Shiraz-18T | 1455 | 0        | -0.186773 |  |

|      |      |            |      |          |           |  |
|------|------|------------|------|----------|-----------|--|
|      |      | Shiraz-22T | 1669 | 0.695915 | 0         |  |
|      |      | Shiraz-22T | 1669 | 0.695915 | 0         |  |
|      |      | Shiraz-25T | 1717 | 0.420447 | 0         |  |
|      |      | Shiraz-25T | 1717 | 0.420447 | 0         |  |
|      |      | Shiraz-28T | 1760 | 0.538181 | 0         |  |
|      |      | Shiraz-28T | 1760 | 0.538181 | 0         |  |
|      |      | Shiraz-29T | 1800 | 0.672527 | 0         |  |
|      |      | Shiraz-29T | 1800 | 0.672527 | 0         |  |
|      |      | Shiraz-32T | 1869 | 0.776805 | 0         |  |
|      |      | Shiraz-32T | 1869 | 0.776805 | 0         |  |
|      |      | Shiraz-35T | 1932 | 0.507141 | 0         |  |
|      |      | Shiraz-35T | 1932 | 0.507141 | 0         |  |
|      |      | Shiraz-40T | 2051 | 0.098506 | 0         |  |
|      |      | Shiraz-40T | 2051 | 0.098506 | 0         |  |
|      |      | Shiraz-58T | 2221 | 0.871948 | 0         |  |
|      |      | Shiraz-58T | 2221 | 0.871948 | 0         |  |
|      |      | Shiraz-71T | 2260 | 0.68394  | 0         |  |
|      |      | Shiraz-71T | 2260 | 0.68394  | 0         |  |
|      |      | Shiraz-71T | 2261 | 0.508399 | 0         |  |
|      |      | Shiraz-71T | 2261 | 0.508399 | 0         |  |
| PDK4 | chr7 | Shiraz-3T  | 90   | 0.219276 | 0         |  |
|      |      | Shiraz-3T  | 93   | 0        | -0.058023 |  |
|      |      | Shiraz-4T  | 253  | 0.372918 | 0         |  |
|      |      | Shiraz-36T | 378  | 0.179558 | 0         |  |
|      |      | Shiraz-36T | 380  | 0.083883 | 0         |  |
|      |      | Shiraz-44T | 638  | 0        | -0.433476 |  |
|      |      | Shiraz-46T | 943  | 0.093799 | 0         |  |
|      |      | Shiraz-46T | 945  | 0        | -0.014838 |  |
|      |      | Shiraz-47T | 1029 | 0        | -0.096586 |  |
|      |      | Shiraz-77T | 1225 | 0        | -0.117922 |  |
|      |      | Shiraz-18T | 1434 | 0.244465 | 0         |  |
|      |      | Shiraz-22T | 1549 | 0        | -0.319623 |  |
|      |      | Shiraz-25T | 1698 | 0.21835  | 0         |  |
|      |      | Shiraz-28T | 1735 | 0.350744 | 0         |  |
|      |      | Shiraz-29T | 1778 | 0.120767 | 0         |  |
|      |      | Shiraz-32T | 1833 | 0.551336 | 0         |  |
|      |      | Shiraz-38T | 1951 | 0.250891 | 0         |  |
|      |      | Shiraz-53T | 2078 | 0.287202 | 0         |  |
|      |      | Shiraz-58T | 2159 | 0        | -0.219521 |  |
|      |      | Shiraz-71T | 2238 | 0.603631 | 0         |  |
|      |      | Shiraz-3T  | 90   | 0.219276 | 0         |  |
|      |      | Shiraz-3T  | 93   | 0        | -0.058023 |  |
|      |      | Shiraz-4T  | 253  | 0.372918 | 0         |  |
|      |      | Shiraz-36T | 378  | 0.179558 | 0         |  |
|      |      | Shiraz-36T | 380  | 0.083883 | 0         |  |
|      |      | Shiraz-44T | 638  | 0        | -0.433476 |  |
|      |      | Shiraz-46T | 943  | 0.093799 | 0         |  |

|        |      |            |      |          |           |  |  |
|--------|------|------------|------|----------|-----------|--|--|
|        |      | Shiraz-46T | 945  | 0        | -0.014838 |  |  |
|        |      | Shiraz-47T | 1029 | 0        | -0.096586 |  |  |
|        |      | Shiraz-77T | 1225 | 0        | -0.117922 |  |  |
|        |      | Shiraz-18T | 1434 | 0.244465 | 0         |  |  |
|        |      | Shiraz-22T | 1549 | 0        | -0.319623 |  |  |
|        |      | Shiraz-25T | 1698 | 0.21835  | 0         |  |  |
|        |      | Shiraz-28T | 1735 | 0.350744 | 0         |  |  |
|        |      | Shiraz-29T | 1778 | 0.120767 | 0         |  |  |
|        |      | Shiraz-32T | 1833 | 0.551336 | 0         |  |  |
|        |      | Shiraz-38T | 1951 | 0.250891 | 0         |  |  |
|        |      | Shiraz-53T | 2078 | 0.287202 | 0         |  |  |
|        |      | Shiraz-58T | 2159 | 0        | -0.219521 |  |  |
|        |      | Shiraz-71T | 2238 | 0.603631 | 0         |  |  |
|        |      | Shiraz-3T  | 90   | 0.219276 | 0         |  |  |
|        |      | Shiraz-3T  | 93   | 0        | -0.058023 |  |  |
|        |      | Shiraz-4T  | 253  | 0.372918 | 0         |  |  |
|        |      | Shiraz-36T | 378  | 0.179558 | 0         |  |  |
|        |      | Shiraz-36T | 380  | 0.083883 | 0         |  |  |
|        |      | Shiraz-44T | 638  | 0        | -0.433476 |  |  |
|        |      | Shiraz-46T | 943  | 0.093799 | 0         |  |  |
|        |      | Shiraz-46T | 945  | 0        | -0.014838 |  |  |
|        |      | Shiraz-47T | 1029 | 0        | -0.096586 |  |  |
|        |      | Shiraz-77T | 1225 | 0        | -0.117922 |  |  |
|        |      | Shiraz-18T | 1434 | 0.244465 | 0         |  |  |
|        |      | Shiraz-22T | 1549 | 0        | -0.319623 |  |  |
|        |      | Shiraz-25T | 1698 | 0.21835  | 0         |  |  |
|        |      | Shiraz-28T | 1735 | 0.350744 | 0         |  |  |
|        |      | Shiraz-29T | 1778 | 0.120767 | 0         |  |  |
|        |      | Shiraz-32T | 1833 | 0.551336 | 0         |  |  |
|        |      | Shiraz-38T | 1951 | 0.250891 | 0         |  |  |
|        |      | Shiraz-53T | 2078 | 0.287202 | 0         |  |  |
|        |      | Shiraz-58T | 2159 | 0        | -0.219521 |  |  |
|        |      | Shiraz-71T | 2238 | 0.603631 | 0         |  |  |
| PDZD11 | chrX | Shiraz-4T  | 261  | 0        | -0.336249 |  |  |
|        |      | Shiraz-16T | 295  | 0.591657 | 0         |  |  |
|        |      | Shiraz-36T | 433  | 0        | -0.803961 |  |  |
|        |      | Shiraz-44T | 899  | 0        | -1.09697  |  |  |
|        |      | Shiraz-44T | 900  | 0        | -0.584284 |  |  |
|        |      | Shiraz-44T | 901  | 0        | -1.000082 |  |  |
|        |      | Shiraz-49T | 1170 | 0        | -0.967436 |  |  |
|        |      | Shiraz-18T | 1457 | 0.643204 | 0         |  |  |
|        |      | Shiraz-22T | 1673 | 0.611783 | 0         |  |  |
|        |      | Shiraz-22T | 1674 | 0.887899 | 0         |  |  |
|        |      | Shiraz-25T | 1719 | 0.472955 | 0         |  |  |
|        |      | Shiraz-28T | 1762 | 0.562311 | 0         |  |  |
|        |      | Shiraz-29T | 1801 | 0.815343 | 0         |  |  |
|        |      | Shiraz-32T | 1870 | 0.729766 | 0         |  |  |

|       |      |            |      |          |           |  |  |
|-------|------|------------|------|----------|-----------|--|--|
|       |      | Shiraz-35T | 1933 | 0.488535 | 0         |  |  |
|       |      | Shiraz-58T | 2223 | 0.833364 | 0         |  |  |
|       |      | Shiraz-58T | 2224 | 1.076575 | 0         |  |  |
|       |      | Shiraz-71T | 2263 | 0.975531 | 0         |  |  |
|       |      | Shiraz-4T  | 261  | 0        | -0.336249 |  |  |
|       |      | Shiraz-16T | 295  | 0.591657 | 0         |  |  |
|       |      | Shiraz-36T | 433  | 0        | -0.803961 |  |  |
|       |      | Shiraz-44T | 899  | 0        | -1.09697  |  |  |
|       |      | Shiraz-44T | 900  | 0        | -0.584284 |  |  |
|       |      | Shiraz-44T | 901  | 0        | -1.000082 |  |  |
|       |      | Shiraz-49T | 1170 | 0        | -0.967436 |  |  |
|       |      | Shiraz-18T | 1457 | 0.643204 | 0         |  |  |
|       |      | Shiraz-22T | 1673 | 0.611783 | 0         |  |  |
|       |      | Shiraz-22T | 1674 | 0.887899 | 0         |  |  |
|       |      | Shiraz-25T | 1719 | 0.472955 | 0         |  |  |
|       |      | Shiraz-28T | 1762 | 0.562311 | 0         |  |  |
|       |      | Shiraz-29T | 1801 | 0.815343 | 0         |  |  |
|       |      | Shiraz-32T | 1870 | 0.729766 | 0         |  |  |
|       |      | Shiraz-35T | 1933 | 0.488535 | 0         |  |  |
|       |      | Shiraz-58T | 2223 | 0.833364 | 0         |  |  |
|       |      | Shiraz-58T | 2224 | 1.076575 | 0         |  |  |
|       |      | Shiraz-71T | 2263 | 0.975531 | 0         |  |  |
|       |      | Shiraz-4T  | 261  | 0        | -0.336249 |  |  |
|       |      | Shiraz-16T | 295  | 0.591657 | 0         |  |  |
|       |      | Shiraz-36T | 433  | 0        | -0.803961 |  |  |
|       |      | Shiraz-44T | 899  | 0        | -1.09697  |  |  |
|       |      | Shiraz-44T | 900  | 0        | -0.584284 |  |  |
|       |      | Shiraz-44T | 901  | 0        | -1.000082 |  |  |
|       |      | Shiraz-49T | 1170 | 0        | -0.967436 |  |  |
|       |      | Shiraz-18T | 1457 | 0.643204 | 0         |  |  |
|       |      | Shiraz-22T | 1673 | 0.611783 | 0         |  |  |
|       |      | Shiraz-22T | 1674 | 0.887899 | 0         |  |  |
|       |      | Shiraz-25T | 1719 | 0.472955 | 0         |  |  |
|       |      | Shiraz-28T | 1762 | 0.562311 | 0         |  |  |
|       |      | Shiraz-29T | 1801 | 0.815343 | 0         |  |  |
|       |      | Shiraz-32T | 1870 | 0.729766 | 0         |  |  |
|       |      | Shiraz-35T | 1933 | 0.488535 | 0         |  |  |
|       |      | Shiraz-58T | 2223 | 0.833364 | 0         |  |  |
|       |      | Shiraz-58T | 2224 | 1.076575 | 0         |  |  |
|       |      | Shiraz-71T | 2263 | 0.975531 | 0         |  |  |
| PDZD2 | chr5 | Shiraz-4T  | 250  | 0.262252 | 0         |  |  |
|       |      | Shiraz-16T | 266  | 0.321724 | 0         |  |  |
|       |      | Shiraz-18T | 1429 | 0        | -0.314125 |  |  |
|       |      | Shiraz-25T | 1694 | 0.201602 | 0         |  |  |
|       |      | Shiraz-28T | 1731 | 0.295447 | 0         |  |  |
|       |      | Shiraz-29T | 1773 | 0.090981 | 0         |  |  |
|       |      | Shiraz-40T | 2016 | 0.376634 | 0         |  |  |

|       |      |            |      |          |           |  |  |
|-------|------|------------|------|----------|-----------|--|--|
|       |      | Shiraz-53T | 2070 | 0        | -0.42189  |  |  |
|       |      | Shiraz-4T  | 250  | 0.262252 | 0         |  |  |
|       |      | Shiraz-16T | 266  | 0.321724 | 0         |  |  |
|       |      | Shiraz-18T | 1429 | 0        | -0.314125 |  |  |
|       |      | Shiraz-25T | 1694 | 0.201602 | 0         |  |  |
|       |      | Shiraz-28T | 1731 | 0.295447 | 0         |  |  |
|       |      | Shiraz-29T | 1773 | 0.090981 | 0         |  |  |
|       |      | Shiraz-40T | 2016 | 0.376634 | 0         |  |  |
|       |      | Shiraz-53T | 2070 | 0        | -0.42189  |  |  |
|       |      | Shiraz-4T  | 250  | 0.262252 | 0         |  |  |
|       |      | Shiraz-16T | 266  | 0.321724 | 0         |  |  |
|       |      | Shiraz-18T | 1429 | 0        | -0.314125 |  |  |
|       |      | Shiraz-25T | 1694 | 0.201602 | 0         |  |  |
|       |      | Shiraz-28T | 1731 | 0.295447 | 0         |  |  |
|       |      | Shiraz-29T | 1773 | 0.090981 | 0         |  |  |
|       |      | Shiraz-40T | 2016 | 0.376634 | 0         |  |  |
|       |      | Shiraz-53T | 2070 | 0        | -0.42189  |  |  |
| PDZD4 | chrX | Shiraz-3T  | 246  | 0.531858 | 0         |  |  |
|       |      | Shiraz-4T  | 261  | 0        | -0.336249 |  |  |
|       |      | Shiraz-16T | 295  | 0.591657 | 0         |  |  |
|       |      | Shiraz-36T | 433  | 0        | -0.803961 |  |  |
|       |      | Shiraz-42T | 480  | 0        | -0.232915 |  |  |
|       |      | Shiraz-44T | 908  | 0.466743 | 0         |  |  |
|       |      | Shiraz-49T | 1170 | 0        | -0.967436 |  |  |
|       |      | Shiraz-49T | 1173 | 0        | -0.704439 |  |  |
|       |      | Shiraz-9T  | 1370 | 0.690073 | 0         |  |  |
|       |      | Shiraz-9T  | 1371 | 1.292392 | 0         |  |  |
|       |      | Shiraz-18T | 1457 | 0.643204 | 0         |  |  |
|       |      | Shiraz-22T | 1673 | 0.611783 | 0         |  |  |
|       |      | Shiraz-22T | 1678 | 0.911625 | 0         |  |  |
|       |      | Shiraz-25T | 1719 | 0.472955 | 0         |  |  |
|       |      | Shiraz-28T | 1762 | 0.562311 | 0         |  |  |
|       |      | Shiraz-29T | 1801 | 0.815343 | 0         |  |  |
|       |      | Shiraz-32T | 1870 | 0.729766 | 0         |  |  |
|       |      | Shiraz-32T | 1872 | 1.504553 | 0         |  |  |
|       |      | Shiraz-35T | 1933 | 0.488535 | 0         |  |  |
|       |      | Shiraz-38T | 2011 | 0        | -0.406024 |  |  |
|       |      | Shiraz-53T | 2115 | 0.427728 | 0         |  |  |
|       |      | Shiraz-58T | 2223 | 0.833364 | 0         |  |  |
|       |      | Shiraz-58T | 2226 | 1.074663 | 0         |  |  |
|       |      | Shiraz-71T | 2263 | 0.975531 | 0         |  |  |
|       |      | Shiraz-3T  | 246  | 0.531858 | 0         |  |  |
|       |      | Shiraz-4T  | 261  | 0        | -0.336249 |  |  |
|       |      | Shiraz-16T | 295  | 0.591657 | 0         |  |  |
|       |      | Shiraz-36T | 433  | 0        | -0.803961 |  |  |
|       |      | Shiraz-42T | 480  | 0        | -0.232915 |  |  |
|       |      | Shiraz-44T | 908  | 0.466743 | 0         |  |  |



|       |      |            |      |          |           |  |  |
|-------|------|------------|------|----------|-----------|--|--|
|       |      | Shiraz-49T | 1170 | 0        | -0.967436 |  |  |
|       |      | Shiraz-49T | 1173 | 0        | -0.704439 |  |  |
|       |      | Shiraz-9T  | 1370 | 0.690073 | 0         |  |  |
|       |      | Shiraz-9T  | 1371 | 1.292392 | 0         |  |  |
|       |      | Shiraz-18T | 1457 | 0.643204 | 0         |  |  |
|       |      | Shiraz-22T | 1673 | 0.611783 | 0         |  |  |
|       |      | Shiraz-22T | 1678 | 0.911625 | 0         |  |  |
|       |      | Shiraz-25T | 1719 | 0.472955 | 0         |  |  |
|       |      | Shiraz-28T | 1762 | 0.562311 | 0         |  |  |
|       |      | Shiraz-29T | 1801 | 0.815343 | 0         |  |  |
|       |      | Shiraz-32T | 1870 | 0.729766 | 0         |  |  |
|       |      | Shiraz-32T | 1872 | 1.504553 | 0         |  |  |
|       |      | Shiraz-35T | 1933 | 0.488535 | 0         |  |  |
|       |      | Shiraz-38T | 2011 | 0        | -0.406024 |  |  |
|       |      | Shiraz-53T | 2115 | 0.427728 | 0         |  |  |
|       |      | Shiraz-58T | 2223 | 0.833364 | 0         |  |  |
|       |      | Shiraz-58T | 2226 | 1.074663 | 0         |  |  |
|       |      | Shiraz-71T | 2263 | 0.975531 | 0         |  |  |
|       |      | Shiraz-3T  | 246  | 0.531858 | 0         |  |  |
|       |      | Shiraz-4T  | 261  | 0        | -0.336249 |  |  |
|       |      | Shiraz-16T | 295  | 0.591657 | 0         |  |  |
|       |      | Shiraz-36T | 433  | 0        | -0.803961 |  |  |
|       |      | Shiraz-42T | 480  | 0        | -0.232915 |  |  |
|       |      | Shiraz-44T | 908  | 0.466743 | 0         |  |  |
|       |      | Shiraz-49T | 1170 | 0        | -0.967436 |  |  |
|       |      | Shiraz-49T | 1173 | 0        | -0.704439 |  |  |
|       |      | Shiraz-9T  | 1370 | 0.690073 | 0         |  |  |
|       |      | Shiraz-9T  | 1371 | 1.292392 | 0         |  |  |
|       |      | Shiraz-18T | 1457 | 0.643204 | 0         |  |  |
|       |      | Shiraz-22T | 1673 | 0.611783 | 0         |  |  |
|       |      | Shiraz-22T | 1678 | 0.911625 | 0         |  |  |
|       |      | Shiraz-25T | 1719 | 0.472955 | 0         |  |  |
|       |      | Shiraz-28T | 1762 | 0.562311 | 0         |  |  |
|       |      | Shiraz-29T | 1801 | 0.815343 | 0         |  |  |
|       |      | Shiraz-32T | 1870 | 0.729766 | 0         |  |  |
|       |      | Shiraz-32T | 1872 | 1.504553 | 0         |  |  |
|       |      | Shiraz-35T | 1933 | 0.488535 | 0         |  |  |
|       |      | Shiraz-38T | 2011 | 0        | -0.406024 |  |  |
|       |      | Shiraz-53T | 2115 | 0.427728 | 0         |  |  |
|       |      | Shiraz-58T | 2223 | 0.833364 | 0         |  |  |
|       |      | Shiraz-58T | 2226 | 1.074663 | 0         |  |  |
|       |      | Shiraz-71T | 2263 | 0.975531 | 0         |  |  |
| PEG10 | chr7 | Shiraz-3T  | 90   | 0.219276 | 0         |  |  |
|       |      | Shiraz-3T  | 93   | 0        | -0.058023 |  |  |
|       |      | Shiraz-4T  | 253  | 0.372918 | 0         |  |  |
|       |      | Shiraz-36T | 378  | 0.179558 | 0         |  |  |
|       |      | Shiraz-36T | 380  | 0.083883 | 0         |  |  |

|  |            |      |          |           |  |
|--|------------|------|----------|-----------|--|
|  | Shiraz-44T | 638  | 0        | -0.433476 |  |
|  | Shiraz-46T | 943  | 0.093799 | 0         |  |
|  | Shiraz-46T | 945  | 0        | -0.014838 |  |
|  | Shiraz-47T | 1029 | 0        | -0.096586 |  |
|  | Shiraz-49T | 1119 | 0        | -0.157331 |  |
|  | Shiraz-77T | 1225 | 0        | -0.117922 |  |
|  | Shiraz-18T | 1434 | 0.244465 | 0         |  |
|  | Shiraz-22T | 1549 | 0        | -0.319623 |  |
|  | Shiraz-25T | 1698 | 0.21835  | 0         |  |
|  | Shiraz-28T | 1735 | 0.350744 | 0         |  |
|  | Shiraz-29T | 1778 | 0.120767 | 0         |  |
|  | Shiraz-32T | 1833 | 0.551336 | 0         |  |
|  | Shiraz-38T | 1951 | 0.250891 | 0         |  |
|  | Shiraz-53T | 2078 | 0.287202 | 0         |  |
|  | Shiraz-58T | 2159 | 0        | -0.219521 |  |
|  | Shiraz-71T | 2238 | 0.603631 | 0         |  |
|  | Shiraz-3T  | 90   | 0.219276 | 0         |  |
|  | Shiraz-3T  | 93   | 0        | -0.058023 |  |
|  | Shiraz-4T  | 253  | 0.372918 | 0         |  |
|  | Shiraz-36T | 378  | 0.179558 | 0         |  |
|  | Shiraz-36T | 380  | 0.083883 | 0         |  |
|  | Shiraz-44T | 638  | 0        | -0.433476 |  |
|  | Shiraz-46T | 943  | 0.093799 | 0         |  |
|  | Shiraz-46T | 945  | 0        | -0.014838 |  |
|  | Shiraz-47T | 1029 | 0        | -0.096586 |  |
|  | Shiraz-49T | 1119 | 0        | -0.157331 |  |
|  | Shiraz-77T | 1225 | 0        | -0.117922 |  |
|  | Shiraz-18T | 1434 | 0.244465 | 0         |  |
|  | Shiraz-22T | 1549 | 0        | -0.319623 |  |
|  | Shiraz-25T | 1698 | 0.21835  | 0         |  |
|  | Shiraz-28T | 1735 | 0.350744 | 0         |  |
|  | Shiraz-29T | 1778 | 0.120767 | 0         |  |
|  | Shiraz-32T | 1833 | 0.551336 | 0         |  |
|  | Shiraz-38T | 1951 | 0.250891 | 0         |  |
|  | Shiraz-53T | 2078 | 0.287202 | 0         |  |
|  | Shiraz-58T | 2159 | 0        | -0.219521 |  |
|  | Shiraz-71T | 2238 | 0.603631 | 0         |  |
|  | Shiraz-3T  | 90   | 0.219276 | 0         |  |
|  | Shiraz-3T  | 93   | 0        | -0.058023 |  |
|  | Shiraz-4T  | 253  | 0.372918 | 0         |  |
|  | Shiraz-36T | 378  | 0.179558 | 0         |  |
|  | Shiraz-36T | 380  | 0.083883 | 0         |  |
|  | Shiraz-44T | 638  | 0        | -0.433476 |  |
|  | Shiraz-46T | 943  | 0.093799 | 0         |  |
|  | Shiraz-46T | 945  | 0        | -0.014838 |  |
|  | Shiraz-47T | 1029 | 0        | -0.096586 |  |
|  | Shiraz-49T | 1119 | 0        | -0.157331 |  |

|      |      |            |      |          |           |  |  |
|------|------|------------|------|----------|-----------|--|--|
|      |      | Shiraz-77T | 1225 | 0        | -0.117922 |  |  |
|      |      | Shiraz-18T | 1434 | 0.244465 | 0         |  |  |
|      |      | Shiraz-22T | 1549 | 0        | -0.319623 |  |  |
|      |      | Shiraz-25T | 1698 | 0.21835  | 0         |  |  |
|      |      | Shiraz-28T | 1735 | 0.350744 | 0         |  |  |
|      |      | Shiraz-29T | 1778 | 0.120767 | 0         |  |  |
|      |      | Shiraz-32T | 1833 | 0.551336 | 0         |  |  |
|      |      | Shiraz-38T | 1951 | 0.250891 | 0         |  |  |
|      |      | Shiraz-53T | 2078 | 0.287202 | 0         |  |  |
|      |      | Shiraz-58T | 2159 | 0        | -0.219521 |  |  |
|      |      | Shiraz-71T | 2238 | 0.603631 | 0         |  |  |
| PER4 | chr7 | Shiraz-4T  | 252  | 0.192083 | 0         |  |  |
|      |      | Shiraz-36T | 376  | 0.159952 | 0         |  |  |
|      |      | Shiraz-44T | 628  | 0        | -0.444379 |  |  |
|      |      | Shiraz-47T | 1027 | 0        | -0.117848 |  |  |
|      |      | Shiraz-49T | 1117 | 0        | -0.168296 |  |  |
|      |      | Shiraz-77T | 1222 | 0        | -0.113002 |  |  |
|      |      | Shiraz-18T | 1433 | 0.250973 | 0         |  |  |
|      |      | Shiraz-22T | 1543 | 0        | -0.513696 |  |  |
|      |      | Shiraz-25T | 1697 | 0.21945  | 0         |  |  |
|      |      | Shiraz-28T | 1734 | 0.362882 | 0         |  |  |
|      |      | Shiraz-29T | 1777 | 0.156747 | 0         |  |  |
|      |      | Shiraz-38T | 1950 | 0.265916 | 0         |  |  |
|      |      | Shiraz-58T | 2157 | 0        | -0.213872 |  |  |
|      |      | Shiraz-71T | 2236 | 0.320072 | 0         |  |  |
|      |      | Shiraz-4T  | 252  | 0.192083 | 0         |  |  |
|      |      | Shiraz-36T | 376  | 0.159952 | 0         |  |  |
|      |      | Shiraz-44T | 628  | 0        | -0.444379 |  |  |
|      |      | Shiraz-47T | 1027 | 0        | -0.117848 |  |  |
|      |      | Shiraz-49T | 1117 | 0        | -0.168296 |  |  |
|      |      | Shiraz-77T | 1222 | 0        | -0.113002 |  |  |
|      |      | Shiraz-18T | 1433 | 0.250973 | 0         |  |  |
|      |      | Shiraz-22T | 1543 | 0        | -0.513696 |  |  |
|      |      | Shiraz-25T | 1697 | 0.21945  | 0         |  |  |
|      |      | Shiraz-28T | 1734 | 0.362882 | 0         |  |  |
|      |      | Shiraz-29T | 1777 | 0.156747 | 0         |  |  |
|      |      | Shiraz-38T | 1950 | 0.265916 | 0         |  |  |
|      |      | Shiraz-58T | 2157 | 0        | -0.213872 |  |  |
|      |      | Shiraz-71T | 2236 | 0.320072 | 0         |  |  |
|      |      | Shiraz-4T  | 252  | 0.192083 | 0         |  |  |
|      |      | Shiraz-36T | 376  | 0.159952 | 0         |  |  |
|      |      | Shiraz-44T | 628  | 0        | -0.444379 |  |  |
|      |      | Shiraz-47T | 1027 | 0        | -0.117848 |  |  |
|      |      | Shiraz-49T | 1117 | 0        | -0.168296 |  |  |
|      |      | Shiraz-77T | 1222 | 0        | -0.113002 |  |  |
|      |      | Shiraz-18T | 1433 | 0.250973 | 0         |  |  |
|      |      | Shiraz-22T | 1543 | 0        | -0.513696 |  |  |

|      |      |            |      |          |           |  |
|------|------|------------|------|----------|-----------|--|
|      |      | Shiraz-25T | 1697 | 0.21945  | 0         |  |
|      |      | Shiraz-28T | 1734 | 0.362882 | 0         |  |
|      |      | Shiraz-29T | 1777 | 0.156747 | 0         |  |
|      |      | Shiraz-38T | 1950 | 0.265916 | 0         |  |
|      |      | Shiraz-58T | 2157 | 0        | -0.213872 |  |
|      |      | Shiraz-71T | 2236 | 0.320072 | 0         |  |
| PEX1 | chr7 | Shiraz-3T  | 90   | 0.219276 | 0         |  |
|      |      | Shiraz-3T  | 93   | 0        | -0.058023 |  |
|      |      | Shiraz-4T  | 253  | 0.372918 | 0         |  |
|      |      | Shiraz-36T | 378  | 0.179558 | 0         |  |
|      |      | Shiraz-36T | 380  | 0.083883 | 0         |  |
|      |      | Shiraz-44T | 638  | 0        | -0.433476 |  |
|      |      | Shiraz-46T | 943  | 0.093799 | 0         |  |
|      |      | Shiraz-46T | 945  | 0        | -0.014838 |  |
|      |      | Shiraz-47T | 1029 | 0        | -0.096586 |  |
|      |      | Shiraz-49T | 1119 | 0        | -0.157331 |  |
|      |      | Shiraz-77T | 1225 | 0        | -0.117922 |  |
|      |      | Shiraz-18T | 1434 | 0.244465 | 0         |  |
|      |      | Shiraz-22T | 1549 | 0        | -0.319623 |  |
|      |      | Shiraz-25T | 1698 | 0.21835  | 0         |  |
|      |      | Shiraz-28T | 1735 | 0.350744 | 0         |  |
|      |      | Shiraz-29T | 1778 | 0.120767 | 0         |  |
|      |      | Shiraz-32T | 1833 | 0.551336 | 0         |  |
|      |      | Shiraz-38T | 1951 | 0.250891 | 0         |  |
|      |      | Shiraz-53T | 2078 | 0.287202 | 0         |  |
|      |      | Shiraz-58T | 2159 | 0        | -0.219521 |  |
|      |      | Shiraz-71T | 2238 | 0.603631 | 0         |  |
|      |      | Shiraz-3T  | 90   | 0.219276 | 0         |  |
|      |      | Shiraz-3T  | 93   | 0        | -0.058023 |  |
|      |      | Shiraz-4T  | 253  | 0.372918 | 0         |  |
|      |      | Shiraz-36T | 378  | 0.179558 | 0         |  |
|      |      | Shiraz-36T | 380  | 0.083883 | 0         |  |
|      |      | Shiraz-44T | 638  | 0        | -0.433476 |  |
|      |      | Shiraz-46T | 943  | 0.093799 | 0         |  |
|      |      | Shiraz-46T | 945  | 0        | -0.014838 |  |
|      |      | Shiraz-47T | 1029 | 0        | -0.096586 |  |
|      |      | Shiraz-49T | 1119 | 0        | -0.157331 |  |
|      |      | Shiraz-77T | 1225 | 0        | -0.117922 |  |
|      |      | Shiraz-18T | 1434 | 0.244465 | 0         |  |
|      |      | Shiraz-22T | 1549 | 0        | -0.319623 |  |
|      |      | Shiraz-25T | 1698 | 0.21835  | 0         |  |
|      |      | Shiraz-28T | 1735 | 0.350744 | 0         |  |
|      |      | Shiraz-29T | 1778 | 0.120767 | 0         |  |
|      |      | Shiraz-32T | 1833 | 0.551336 | 0         |  |
|      |      | Shiraz-38T | 1951 | 0.250891 | 0         |  |
|      |      | Shiraz-53T | 2078 | 0.287202 | 0         |  |
|      |      | Shiraz-58T | 2159 | 0        | -0.219521 |  |

|        |      |            |      |          |           |  |  |
|--------|------|------------|------|----------|-----------|--|--|
|        |      | Shiraz-71T | 2238 | 0.603631 | 0         |  |  |
|        |      | Shiraz-3T  | 90   | 0.219276 | 0         |  |  |
|        |      | Shiraz-3T  | 93   | 0        | -0.058023 |  |  |
|        |      | Shiraz-4T  | 253  | 0.372918 | 0         |  |  |
|        |      | Shiraz-36T | 378  | 0.179558 | 0         |  |  |
|        |      | Shiraz-36T | 380  | 0.083883 | 0         |  |  |
|        |      | Shiraz-44T | 638  | 0        | -0.433476 |  |  |
|        |      | Shiraz-46T | 943  | 0.093799 | 0         |  |  |
|        |      | Shiraz-46T | 945  | 0        | -0.014838 |  |  |
|        |      | Shiraz-47T | 1029 | 0        | -0.096586 |  |  |
|        |      | Shiraz-49T | 1119 | 0        | -0.157331 |  |  |
|        |      | Shiraz-77T | 1225 | 0        | -0.117922 |  |  |
|        |      | Shiraz-18T | 1434 | 0.244465 | 0         |  |  |
|        |      | Shiraz-22T | 1549 | 0        | -0.319623 |  |  |
|        |      | Shiraz-25T | 1698 | 0.21835  | 0         |  |  |
|        |      | Shiraz-28T | 1735 | 0.350744 | 0         |  |  |
|        |      | Shiraz-29T | 1778 | 0.120767 | 0         |  |  |
|        |      | Shiraz-32T | 1833 | 0.551336 | 0         |  |  |
|        |      | Shiraz-38T | 1951 | 0.250891 | 0         |  |  |
|        |      | Shiraz-53T | 2078 | 0.287202 | 0         |  |  |
|        |      | Shiraz-58T | 2159 | 0        | -0.219521 |  |  |
|        |      | Shiraz-71T | 2238 | 0.603631 | 0         |  |  |
| PFKFB1 | chrX | Shiraz-4T  | 260  | 0        | -0.324128 |  |  |
|        |      | Shiraz-16T | 294  | 0.655804 | 0         |  |  |
|        |      | Shiraz-36T | 431  | 0        | -0.78035  |  |  |
|        |      | Shiraz-44T | 891  | 0        | -0.954044 |  |  |
|        |      | Shiraz-44T | 898  | 0        | -0.515218 |  |  |
|        |      | Shiraz-49T | 1166 | 0        | -0.917235 |  |  |
|        |      | Shiraz-77T | 1282 | 0.213849 | 0         |  |  |
|        |      | Shiraz-9T  | 1368 | 0.199713 | 0         |  |  |
|        |      | Shiraz-18T | 1456 | 0.608534 | 0         |  |  |
|        |      | Shiraz-22T | 1669 | 0.695915 | 0         |  |  |
|        |      | Shiraz-25T | 1717 | 0.420447 | 0         |  |  |
|        |      | Shiraz-28T | 1760 | 0.538181 | 0         |  |  |
|        |      | Shiraz-29T | 1800 | 0.672527 | 0         |  |  |
|        |      | Shiraz-32T | 1869 | 0.776805 | 0         |  |  |
|        |      | Shiraz-35T | 1932 | 0.507141 | 0         |  |  |
|        |      | Shiraz-58T | 2221 | 0.871948 | 0         |  |  |
|        |      | Shiraz-71T | 2260 | 0.68394  | 0         |  |  |
|        |      | Shiraz-71T | 2262 | 0.986748 | 0         |  |  |
|        |      | Shiraz-4T  | 260  | 0        | -0.324128 |  |  |
|        |      | Shiraz-16T | 294  | 0.655804 | 0         |  |  |
|        |      | Shiraz-36T | 431  | 0        | -0.78035  |  |  |
|        |      | Shiraz-44T | 891  | 0        | -0.954044 |  |  |
|        |      | Shiraz-44T | 898  | 0        | -0.515218 |  |  |
|        |      | Shiraz-49T | 1166 | 0        | -0.917235 |  |  |
|        |      | Shiraz-77T | 1282 | 0.213849 | 0         |  |  |

|       |      |            |      |          |           |  |
|-------|------|------------|------|----------|-----------|--|
|       |      | Shiraz-9T  | 1368 | 0.199713 | 0         |  |
|       |      | Shiraz-18T | 1456 | 0.608534 | 0         |  |
|       |      | Shiraz-22T | 1669 | 0.695915 | 0         |  |
|       |      | Shiraz-25T | 1717 | 0.420447 | 0         |  |
|       |      | Shiraz-28T | 1760 | 0.538181 | 0         |  |
|       |      | Shiraz-29T | 1800 | 0.672527 | 0         |  |
|       |      | Shiraz-32T | 1869 | 0.776805 | 0         |  |
|       |      | Shiraz-35T | 1932 | 0.507141 | 0         |  |
|       |      | Shiraz-58T | 2221 | 0.871948 | 0         |  |
|       |      | Shiraz-71T | 2260 | 0.68394  | 0         |  |
|       |      | Shiraz-71T | 2262 | 0.986748 | 0         |  |
|       |      | Shiraz-4T  | 260  | 0        | -0.324128 |  |
|       |      | Shiraz-16T | 294  | 0.655804 | 0         |  |
|       |      | Shiraz-36T | 431  | 0        | -0.78035  |  |
|       |      | Shiraz-44T | 891  | 0        | -0.954044 |  |
|       |      | Shiraz-44T | 898  | 0        | -0.515218 |  |
|       |      | Shiraz-49T | 1166 | 0        | -0.917235 |  |
|       |      | Shiraz-77T | 1282 | 0.213849 | 0         |  |
|       |      | Shiraz-9T  | 1368 | 0.199713 | 0         |  |
|       |      | Shiraz-18T | 1456 | 0.608534 | 0         |  |
|       |      | Shiraz-22T | 1669 | 0.695915 | 0         |  |
|       |      | Shiraz-25T | 1717 | 0.420447 | 0         |  |
|       |      | Shiraz-28T | 1760 | 0.538181 | 0         |  |
|       |      | Shiraz-29T | 1800 | 0.672527 | 0         |  |
|       |      | Shiraz-32T | 1869 | 0.776805 | 0         |  |
|       |      | Shiraz-35T | 1932 | 0.507141 | 0         |  |
|       |      | Shiraz-58T | 2221 | 0.871948 | 0         |  |
|       |      | Shiraz-71T | 2260 | 0.68394  | 0         |  |
|       |      | Shiraz-71T | 2262 | 0.986748 | 0         |  |
| PFTK1 | chr7 | Shiraz-3T  | 90   | 0.219276 | 0         |  |
|       |      | Shiraz-3T  | 93   | 0        | -0.058023 |  |
|       |      | Shiraz-4T  | 253  | 0.372918 | 0         |  |
|       |      | Shiraz-36T | 378  | 0.179558 | 0         |  |
|       |      | Shiraz-36T | 380  | 0.083883 | 0         |  |
|       |      | Shiraz-44T | 638  | 0        | -0.433476 |  |
|       |      | Shiraz-46T | 943  | 0.093799 | 0         |  |
|       |      | Shiraz-46T | 945  | 0        | -0.014838 |  |
|       |      | Shiraz-47T | 1029 | 0        | -0.096586 |  |
|       |      | Shiraz-49T | 1119 | 0        | -0.157331 |  |
|       |      | Shiraz-77T | 1225 | 0        | -0.117922 |  |
|       |      | Shiraz-77T | 1226 | 0        | -0.233724 |  |
|       |      | Shiraz-18T | 1434 | 0.244465 | 0         |  |
|       |      | Shiraz-22T | 1549 | 0        | -0.319623 |  |
|       |      | Shiraz-25T | 1698 | 0.21835  | 0         |  |
|       |      | Shiraz-28T | 1735 | 0.350744 | 0         |  |
|       |      | Shiraz-29T | 1778 | 0.120767 | 0         |  |
|       |      | Shiraz-32T | 1833 | 0.551336 | 0         |  |

|  |            |      |          |           |  |
|--|------------|------|----------|-----------|--|
|  | Shiraz-38T | 1951 | 0.250891 | 0         |  |
|  | Shiraz-53T | 2078 | 0.287202 | 0         |  |
|  | Shiraz-58T | 2159 | 0        | -0.219521 |  |
|  | Shiraz-71T | 2238 | 0.603631 | 0         |  |
|  | Shiraz-3T  | 90   | 0.219276 | 0         |  |
|  | Shiraz-3T  | 93   | 0        | -0.058023 |  |
|  | Shiraz-4T  | 253  | 0.372918 | 0         |  |
|  | Shiraz-36T | 378  | 0.179558 | 0         |  |
|  | Shiraz-36T | 380  | 0.083883 | 0         |  |
|  | Shiraz-44T | 638  | 0        | -0.433476 |  |
|  | Shiraz-46T | 943  | 0.093799 | 0         |  |
|  | Shiraz-46T | 945  | 0        | -0.014838 |  |
|  | Shiraz-47T | 1029 | 0        | -0.096586 |  |
|  | Shiraz-49T | 1119 | 0        | -0.157331 |  |
|  | Shiraz-77T | 1225 | 0        | -0.117922 |  |
|  | Shiraz-77T | 1226 | 0        | -0.233724 |  |
|  | Shiraz-18T | 1434 | 0.244465 | 0         |  |
|  | Shiraz-22T | 1549 | 0        | -0.319623 |  |
|  | Shiraz-25T | 1698 | 0.21835  | 0         |  |
|  | Shiraz-28T | 1735 | 0.350744 | 0         |  |
|  | Shiraz-29T | 1778 | 0.120767 | 0         |  |
|  | Shiraz-32T | 1833 | 0.551336 | 0         |  |
|  | Shiraz-38T | 1951 | 0.250891 | 0         |  |
|  | Shiraz-53T | 2078 | 0.287202 | 0         |  |
|  | Shiraz-58T | 2159 | 0        | -0.219521 |  |
|  | Shiraz-71T | 2238 | 0.603631 | 0         |  |
|  | Shiraz-3T  | 90   | 0.219276 | 0         |  |
|  | Shiraz-3T  | 93   | 0        | -0.058023 |  |
|  | Shiraz-4T  | 253  | 0.372918 | 0         |  |
|  | Shiraz-36T | 378  | 0.179558 | 0         |  |
|  | Shiraz-36T | 380  | 0.083883 | 0         |  |
|  | Shiraz-44T | 638  | 0        | -0.433476 |  |
|  | Shiraz-46T | 943  | 0.093799 | 0         |  |
|  | Shiraz-46T | 945  | 0        | -0.014838 |  |
|  | Shiraz-47T | 1029 | 0        | -0.096586 |  |
|  | Shiraz-49T | 1119 | 0        | -0.157331 |  |
|  | Shiraz-77T | 1225 | 0        | -0.117922 |  |
|  | Shiraz-77T | 1226 | 0        | -0.233724 |  |
|  | Shiraz-18T | 1434 | 0.244465 | 0         |  |
|  | Shiraz-22T | 1549 | 0        | -0.319623 |  |
|  | Shiraz-25T | 1698 | 0.21835  | 0         |  |
|  | Shiraz-28T | 1735 | 0.350744 | 0         |  |
|  | Shiraz-29T | 1778 | 0.120767 | 0         |  |
|  | Shiraz-32T | 1833 | 0.551336 | 0         |  |
|  | Shiraz-38T | 1951 | 0.250891 | 0         |  |
|  | Shiraz-53T | 2078 | 0.287202 | 0         |  |
|  | Shiraz-58T | 2159 | 0        | -0.219521 |  |

|       |      |            |      |          |           |  |
|-------|------|------------|------|----------|-----------|--|
|       |      | Shiraz-71T | 2238 | 0.603631 | 0         |  |
| PGAM2 | chr7 | Shiraz-3T  | 87   | 0.198593 | 0         |  |
|       |      | Shiraz-3T  | 89   | 0.678641 | 0         |  |
|       |      | Shiraz-4T  | 252  | 0.192083 | 0         |  |
|       |      | Shiraz-36T | 376  | 0.159952 | 0         |  |
|       |      | Shiraz-44T | 632  | 0.902944 | 0         |  |
|       |      | Shiraz-46T | 942  | 0.069143 | 0         |  |
|       |      | Shiraz-77T | 1223 | 0.215647 | 0         |  |
|       |      | Shiraz-18T | 1433 | 0.250973 | 0         |  |
|       |      | Shiraz-25T | 1697 | 0.21945  | 0         |  |
|       |      | Shiraz-28T | 1734 | 0.362882 | 0         |  |
|       |      | Shiraz-29T | 1777 | 0.156747 | 0         |  |
|       |      | Shiraz-38T | 1950 | 0.265916 | 0         |  |
|       |      | Shiraz-71T | 2236 | 0.320072 | 0         |  |
|       |      | Shiraz-3T  | 87   | 0.198593 | 0         |  |
|       |      | Shiraz-3T  | 89   | 0.678641 | 0         |  |
|       |      | Shiraz-4T  | 252  | 0.192083 | 0         |  |
|       |      | Shiraz-36T | 376  | 0.159952 | 0         |  |
|       |      | Shiraz-44T | 632  | 0.902944 | 0         |  |
|       |      | Shiraz-46T | 942  | 0.069143 | 0         |  |
|       |      | Shiraz-77T | 1223 | 0.215647 | 0         |  |
|       |      | Shiraz-18T | 1433 | 0.250973 | 0         |  |
|       |      | Shiraz-25T | 1697 | 0.21945  | 0         |  |
|       |      | Shiraz-28T | 1734 | 0.362882 | 0         |  |
|       |      | Shiraz-29T | 1777 | 0.156747 | 0         |  |
|       |      | Shiraz-38T | 1950 | 0.265916 | 0         |  |
|       |      | Shiraz-71T | 2236 | 0.320072 | 0         |  |
|       |      | Shiraz-3T  | 87   | 0.198593 | 0         |  |
|       |      | Shiraz-3T  | 89   | 0.678641 | 0         |  |
|       |      | Shiraz-4T  | 252  | 0.192083 | 0         |  |
|       |      | Shiraz-36T | 376  | 0.159952 | 0         |  |
|       |      | Shiraz-44T | 632  | 0.902944 | 0         |  |
|       |      | Shiraz-46T | 942  | 0.069143 | 0         |  |
|       |      | Shiraz-77T | 1223 | 0.215647 | 0         |  |
|       |      | Shiraz-18T | 1433 | 0.250973 | 0         |  |
|       |      | Shiraz-25T | 1697 | 0.21945  | 0         |  |
|       |      | Shiraz-28T | 1734 | 0.362882 | 0         |  |
|       |      | Shiraz-29T | 1777 | 0.156747 | 0         |  |
|       |      | Shiraz-38T | 1950 | 0.265916 | 0         |  |
|       |      | Shiraz-71T | 2236 | 0.320072 | 0         |  |
| PGAM4 | chrX | Shiraz-3T  | 242  | 0        | -0.336434 |  |
|       |      | Shiraz-4T  | 261  | 0        | -0.336249 |  |
|       |      | Shiraz-16T | 295  | 0.591657 | 0         |  |
|       |      | Shiraz-36T | 433  | 0        | -0.803961 |  |
|       |      | Shiraz-44T | 899  | 0        | -1.09697  |  |
|       |      | Shiraz-49T | 1170 | 0        | -0.967436 |  |
|       |      | Shiraz-18T | 1457 | 0.643204 | 0         |  |



|      |      |            |      |          |           |  |  |
|------|------|------------|------|----------|-----------|--|--|
|      |      | Shiraz-22T | 1673 | 0.611783 | 0         |  |  |
|      |      | Shiraz-25T | 1719 | 0.472955 | 0         |  |  |
|      |      | Shiraz-28T | 1762 | 0.562311 | 0         |  |  |
|      |      | Shiraz-29T | 1801 | 0.815343 | 0         |  |  |
|      |      | Shiraz-32T | 1870 | 0.729766 | 0         |  |  |
|      |      | Shiraz-35T | 1933 | 0.488535 | 0         |  |  |
|      |      | Shiraz-58T | 2223 | 0.833364 | 0         |  |  |
|      |      | Shiraz-71T | 2263 | 0.975531 | 0         |  |  |
|      |      | Shiraz-3T  | 242  | 0        | -0.336434 |  |  |
|      |      | Shiraz-4T  | 261  | 0        | -0.336249 |  |  |
|      |      | Shiraz-16T | 295  | 0.591657 | 0         |  |  |
|      |      | Shiraz-36T | 433  | 0        | -0.803961 |  |  |
|      |      | Shiraz-44T | 899  | 0        | -1.09697  |  |  |
|      |      | Shiraz-49T | 1170 | 0        | -0.967436 |  |  |
|      |      | Shiraz-18T | 1457 | 0.643204 | 0         |  |  |
|      |      | Shiraz-22T | 1673 | 0.611783 | 0         |  |  |
|      |      | Shiraz-25T | 1719 | 0.472955 | 0         |  |  |
|      |      | Shiraz-28T | 1762 | 0.562311 | 0         |  |  |
|      |      | Shiraz-29T | 1801 | 0.815343 | 0         |  |  |
|      |      | Shiraz-32T | 1870 | 0.729766 | 0         |  |  |
|      |      | Shiraz-35T | 1933 | 0.488535 | 0         |  |  |
|      |      | Shiraz-58T | 2223 | 0.833364 | 0         |  |  |
|      |      | Shiraz-71T | 2263 | 0.975531 | 0         |  |  |
|      |      | Shiraz-3T  | 242  | 0        | -0.336434 |  |  |
|      |      | Shiraz-4T  | 261  | 0        | -0.336249 |  |  |
|      |      | Shiraz-16T | 295  | 0.591657 | 0         |  |  |
|      |      | Shiraz-36T | 433  | 0        | -0.803961 |  |  |
|      |      | Shiraz-44T | 899  | 0        | -1.09697  |  |  |
|      |      | Shiraz-49T | 1170 | 0        | -0.967436 |  |  |
|      |      | Shiraz-18T | 1457 | 0.643204 | 0         |  |  |
|      |      | Shiraz-22T | 1673 | 0.611783 | 0         |  |  |
|      |      | Shiraz-25T | 1719 | 0.472955 | 0         |  |  |
|      |      | Shiraz-28T | 1762 | 0.562311 | 0         |  |  |
|      |      | Shiraz-29T | 1801 | 0.815343 | 0         |  |  |
|      |      | Shiraz-32T | 1870 | 0.729766 | 0         |  |  |
|      |      | Shiraz-35T | 1933 | 0.488535 | 0         |  |  |
|      |      | Shiraz-58T | 2223 | 0.833364 | 0         |  |  |
|      |      | Shiraz-71T | 2263 | 0.975531 | 0         |  |  |
| PGK1 | chrX | Shiraz-3T  | 242  | 0        | -0.336434 |  |  |
|      |      | Shiraz-4T  | 261  | 0        | -0.336249 |  |  |
|      |      | Shiraz-16T | 295  | 0.591657 | 0         |  |  |
|      |      | Shiraz-36T | 433  | 0        | -0.803961 |  |  |
|      |      | Shiraz-44T | 899  | 0        | -1.09697  |  |  |
|      |      | Shiraz-49T | 1170 | 0        | -0.967436 |  |  |
|      |      | Shiraz-18T | 1457 | 0.643204 | 0         |  |  |
|      |      | Shiraz-22T | 1673 | 0.611783 | 0         |  |  |
|      |      | Shiraz-25T | 1719 | 0.472955 | 0         |  |  |

|        |      |            |      |          |           |  |  |
|--------|------|------------|------|----------|-----------|--|--|
|        |      | Shiraz-28T | 1762 | 0.562311 | 0         |  |  |
|        |      | Shiraz-29T | 1801 | 0.815343 | 0         |  |  |
|        |      | Shiraz-32T | 1870 | 0.729766 | 0         |  |  |
|        |      | Shiraz-35T | 1933 | 0.488535 | 0         |  |  |
|        |      | Shiraz-58T | 2223 | 0.833364 | 0         |  |  |
|        |      | Shiraz-71T | 2263 | 0.975531 | 0         |  |  |
|        |      | Shiraz-3T  | 242  | 0        | -0.336434 |  |  |
|        |      | Shiraz-4T  | 261  | 0        | -0.336249 |  |  |
|        |      | Shiraz-16T | 295  | 0.591657 | 0         |  |  |
|        |      | Shiraz-36T | 433  | 0        | -0.803961 |  |  |
|        |      | Shiraz-44T | 899  | 0        | -1.09697  |  |  |
|        |      | Shiraz-49T | 1170 | 0        | -0.967436 |  |  |
|        |      | Shiraz-18T | 1457 | 0.643204 | 0         |  |  |
|        |      | Shiraz-22T | 1673 | 0.611783 | 0         |  |  |
|        |      | Shiraz-25T | 1719 | 0.472955 | 0         |  |  |
|        |      | Shiraz-28T | 1762 | 0.562311 | 0         |  |  |
|        |      | Shiraz-29T | 1801 | 0.815343 | 0         |  |  |
|        |      | Shiraz-32T | 1870 | 0.729766 | 0         |  |  |
|        |      | Shiraz-35T | 1933 | 0.488535 | 0         |  |  |
|        |      | Shiraz-58T | 2223 | 0.833364 | 0         |  |  |
|        |      | Shiraz-71T | 2263 | 0.975531 | 0         |  |  |
|        |      | Shiraz-3T  | 242  | 0        | -0.336434 |  |  |
|        |      | Shiraz-4T  | 261  | 0        | -0.336249 |  |  |
|        |      | Shiraz-16T | 295  | 0.591657 | 0         |  |  |
|        |      | Shiraz-36T | 433  | 0        | -0.803961 |  |  |
|        |      | Shiraz-44T | 899  | 0        | -1.09697  |  |  |
|        |      | Shiraz-49T | 1170 | 0        | -0.967436 |  |  |
|        |      | Shiraz-18T | 1457 | 0.643204 | 0         |  |  |
|        |      | Shiraz-22T | 1673 | 0.611783 | 0         |  |  |
|        |      | Shiraz-25T | 1719 | 0.472955 | 0         |  |  |
|        |      | Shiraz-28T | 1762 | 0.562311 | 0         |  |  |
|        |      | Shiraz-29T | 1801 | 0.815343 | 0         |  |  |
|        |      | Shiraz-32T | 1870 | 0.729766 | 0         |  |  |
|        |      | Shiraz-35T | 1933 | 0.488535 | 0         |  |  |
|        |      | Shiraz-58T | 2223 | 0.833364 | 0         |  |  |
|        |      | Shiraz-71T | 2263 | 0.975531 | 0         |  |  |
| PGRMC1 | chrX | Shiraz-3T  | 242  | 0        | -0.336434 |  |  |
|        |      | Shiraz-3T  | 244  | 0        | -0.023749 |  |  |
|        |      | Shiraz-4T  | 261  | 0        | -0.336249 |  |  |
|        |      | Shiraz-16T | 295  | 0.591657 | 0         |  |  |
|        |      | Shiraz-36T | 433  | 0        | -0.803961 |  |  |
|        |      | Shiraz-44T | 899  | 0        | -1.09697  |  |  |
|        |      | Shiraz-44T | 904  | 0        | -0.625526 |  |  |
|        |      | Shiraz-49T | 1170 | 0        | -0.967436 |  |  |
|        |      | Shiraz-18T | 1457 | 0.643204 | 0         |  |  |
|        |      | Shiraz-22T | 1673 | 0.611783 | 0         |  |  |
|        |      | Shiraz-25T | 1719 | 0.472955 | 0         |  |  |

|      |      |            |      |          |           |  |  |
|------|------|------------|------|----------|-----------|--|--|
|      |      | Shiraz-28T | 1762 | 0.562311 | 0         |  |  |
|      |      | Shiraz-29T | 1801 | 0.815343 | 0         |  |  |
|      |      | Shiraz-32T | 1870 | 0.729766 | 0         |  |  |
|      |      | Shiraz-35T | 1933 | 0.488535 | 0         |  |  |
|      |      | Shiraz-58T | 2223 | 0.833364 | 0         |  |  |
|      |      | Shiraz-71T | 2263 | 0.975531 | 0         |  |  |
|      |      | Shiraz-3T  | 242  | 0        | -0.336434 |  |  |
|      |      | Shiraz-3T  | 244  | 0        | -0.023749 |  |  |
|      |      | Shiraz-4T  | 261  | 0        | -0.336249 |  |  |
|      |      | Shiraz-16T | 295  | 0.591657 | 0         |  |  |
|      |      | Shiraz-36T | 433  | 0        | -0.803961 |  |  |
|      |      | Shiraz-44T | 899  | 0        | -1.09697  |  |  |
|      |      | Shiraz-44T | 904  | 0        | -0.625526 |  |  |
|      |      | Shiraz-49T | 1170 | 0        | -0.967436 |  |  |
|      |      | Shiraz-18T | 1457 | 0.643204 | 0         |  |  |
|      |      | Shiraz-22T | 1673 | 0.611783 | 0         |  |  |
|      |      | Shiraz-25T | 1719 | 0.472955 | 0         |  |  |
|      |      | Shiraz-28T | 1762 | 0.562311 | 0         |  |  |
|      |      | Shiraz-29T | 1801 | 0.815343 | 0         |  |  |
|      |      | Shiraz-32T | 1870 | 0.729766 | 0         |  |  |
|      |      | Shiraz-35T | 1933 | 0.488535 | 0         |  |  |
|      |      | Shiraz-58T | 2223 | 0.833364 | 0         |  |  |
|      |      | Shiraz-71T | 2263 | 0.975531 | 0         |  |  |
|      |      | Shiraz-3T  | 242  | 0        | -0.336434 |  |  |
|      |      | Shiraz-3T  | 244  | 0        | -0.023749 |  |  |
|      |      | Shiraz-4T  | 261  | 0        | -0.336249 |  |  |
|      |      | Shiraz-16T | 295  | 0.591657 | 0         |  |  |
|      |      | Shiraz-36T | 433  | 0        | -0.803961 |  |  |
|      |      | Shiraz-44T | 899  | 0        | -1.09697  |  |  |
|      |      | Shiraz-44T | 904  | 0        | -0.625526 |  |  |
|      |      | Shiraz-49T | 1170 | 0        | -0.967436 |  |  |
|      |      | Shiraz-18T | 1457 | 0.643204 | 0         |  |  |
|      |      | Shiraz-22T | 1673 | 0.611783 | 0         |  |  |
|      |      | Shiraz-25T | 1719 | 0.472955 | 0         |  |  |
|      |      | Shiraz-28T | 1762 | 0.562311 | 0         |  |  |
|      |      | Shiraz-29T | 1801 | 0.815343 | 0         |  |  |
|      |      | Shiraz-32T | 1870 | 0.729766 | 0         |  |  |
|      |      | Shiraz-35T | 1933 | 0.488535 | 0         |  |  |
|      |      | Shiraz-58T | 2223 | 0.833364 | 0         |  |  |
|      |      | Shiraz-71T | 2263 | 0.975531 | 0         |  |  |
| PHEX | chrX | Shiraz-3T  | 235  | 0        | -0.28401  |  |  |
|      |      | Shiraz-4T  | 260  | 0        | -0.324128 |  |  |
|      |      | Shiraz-16T | 294  | 0.655804 | 0         |  |  |
|      |      | Shiraz-36T | 431  | 0        | -0.78035  |  |  |
|      |      | Shiraz-44T | 891  | 0        | -0.954044 |  |  |
|      |      | Shiraz-49T | 1166 | 0        | -0.917235 |  |  |
|      |      | Shiraz-77T | 1281 | 0.136627 | 0         |  |  |

|  |            |      |          |           |  |
|--|------------|------|----------|-----------|--|
|  | Shiraz-9T  | 1368 | 0.199713 | 0         |  |
|  | Shiraz-18T | 1455 | 0        | -0.186773 |  |
|  | Shiraz-22T | 1669 | 0.695915 | 0         |  |
|  | Shiraz-25T | 1717 | 0.420447 | 0         |  |
|  | Shiraz-28T | 1760 | 0.538181 | 0         |  |
|  | Shiraz-29T | 1800 | 0.672527 | 0         |  |
|  | Shiraz-32T | 1869 | 0.776805 | 0         |  |
|  | Shiraz-35T | 1932 | 0.507141 | 0         |  |
|  | Shiraz-40T | 2051 | 0.098506 | 0         |  |
|  | Shiraz-58T | 2221 | 0.871948 | 0         |  |
|  | Shiraz-71T | 2260 | 0.68394  | 0         |  |
|  | Shiraz-71T | 2261 | 0.508399 | 0         |  |
|  | Shiraz-3T  | 235  | 0        | -0.28401  |  |
|  | Shiraz-4T  | 260  | 0        | -0.324128 |  |
|  | Shiraz-16T | 294  | 0.655804 | 0         |  |
|  | Shiraz-36T | 431  | 0        | -0.78035  |  |
|  | Shiraz-44T | 891  | 0        | -0.954044 |  |
|  | Shiraz-49T | 1166 | 0        | -0.917235 |  |
|  | Shiraz-77T | 1281 | 0.136627 | 0         |  |
|  | Shiraz-9T  | 1368 | 0.199713 | 0         |  |
|  | Shiraz-18T | 1455 | 0        | -0.186773 |  |
|  | Shiraz-22T | 1669 | 0.695915 | 0         |  |
|  | Shiraz-25T | 1717 | 0.420447 | 0         |  |
|  | Shiraz-28T | 1760 | 0.538181 | 0         |  |
|  | Shiraz-29T | 1800 | 0.672527 | 0         |  |
|  | Shiraz-32T | 1869 | 0.776805 | 0         |  |
|  | Shiraz-35T | 1932 | 0.507141 | 0         |  |
|  | Shiraz-40T | 2051 | 0.098506 | 0         |  |
|  | Shiraz-58T | 2221 | 0.871948 | 0         |  |
|  | Shiraz-71T | 2260 | 0.68394  | 0         |  |
|  | Shiraz-71T | 2261 | 0.508399 | 0         |  |
|  | Shiraz-3T  | 235  | 0        | -0.28401  |  |
|  | Shiraz-4T  | 260  | 0        | -0.324128 |  |
|  | Shiraz-16T | 294  | 0.655804 | 0         |  |
|  | Shiraz-36T | 431  | 0        | -0.78035  |  |
|  | Shiraz-44T | 891  | 0        | -0.954044 |  |
|  | Shiraz-49T | 1166 | 0        | -0.917235 |  |
|  | Shiraz-77T | 1281 | 0.136627 | 0         |  |
|  | Shiraz-9T  | 1368 | 0.199713 | 0         |  |
|  | Shiraz-18T | 1455 | 0        | -0.186773 |  |
|  | Shiraz-22T | 1669 | 0.695915 | 0         |  |
|  | Shiraz-25T | 1717 | 0.420447 | 0         |  |
|  | Shiraz-28T | 1760 | 0.538181 | 0         |  |
|  | Shiraz-29T | 1800 | 0.672527 | 0         |  |
|  | Shiraz-32T | 1869 | 0.776805 | 0         |  |
|  | Shiraz-35T | 1932 | 0.507141 | 0         |  |
|  | Shiraz-40T | 2051 | 0.098506 | 0         |  |

|       |      |            |      |          |           |  |
|-------|------|------------|------|----------|-----------|--|
|       |      | Shiraz-58T | 2221 | 0.871948 | 0         |  |
|       |      | Shiraz-71T | 2260 | 0.68394  | 0         |  |
|       |      | Shiraz-71T | 2261 | 0.508399 | 0         |  |
| PHF14 | chr7 | Shiraz-4T  | 252  | 0.192083 | 0         |  |
|       |      | Shiraz-4T  | 252  | 0.192083 | 0         |  |
|       |      | Shiraz-36T | 376  | 0.159952 | 0         |  |
|       |      | Shiraz-36T | 376  | 0.159952 | 0         |  |
|       |      | Shiraz-44T | 628  | 0        | -0.444379 |  |
|       |      | Shiraz-44T | 628  | 0        | -0.444379 |  |
|       |      | Shiraz-47T | 1027 | 0        | -0.117848 |  |
|       |      | Shiraz-47T | 1027 | 0        | -0.117848 |  |
|       |      | Shiraz-49T | 1117 | 0        | -0.168296 |  |
|       |      | Shiraz-49T | 1117 | 0        | -0.168296 |  |
|       |      | Shiraz-77T | 1222 | 0        | -0.113002 |  |
|       |      | Shiraz-77T | 1222 | 0        | -0.113002 |  |
|       |      | Shiraz-18T | 1433 | 0.250973 | 0         |  |
|       |      | Shiraz-18T | 1433 | 0.250973 | 0         |  |
|       |      | Shiraz-22T | 1543 | 0        | -0.513696 |  |
|       |      | Shiraz-22T | 1543 | 0        | -0.513696 |  |
|       |      | Shiraz-25T | 1697 | 0.21945  | 0         |  |
|       |      | Shiraz-25T | 1697 | 0.21945  | 0         |  |
|       |      | Shiraz-28T | 1734 | 0.362882 | 0         |  |
|       |      | Shiraz-28T | 1734 | 0.362882 | 0         |  |
|       |      | Shiraz-29T | 1777 | 0.156747 | 0         |  |
|       |      | Shiraz-29T | 1777 | 0.156747 | 0         |  |
|       |      | Shiraz-38T | 1950 | 0.265916 | 0         |  |
|       |      | Shiraz-38T | 1950 | 0.265916 | 0         |  |
|       |      | Shiraz-58T | 2157 | 0        | -0.213872 |  |
|       |      | Shiraz-58T | 2157 | 0        | -0.213872 |  |
|       |      | Shiraz-71T | 2236 | 0.320072 | 0         |  |
|       |      | Shiraz-71T | 2236 | 0.320072 | 0         |  |
|       |      | Shiraz-4T  | 252  | 0.192083 | 0         |  |
|       |      | Shiraz-4T  | 252  | 0.192083 | 0         |  |
|       |      | Shiraz-36T | 376  | 0.159952 | 0         |  |
|       |      | Shiraz-36T | 376  | 0.159952 | 0         |  |
|       |      | Shiraz-44T | 628  | 0        | -0.444379 |  |
|       |      | Shiraz-44T | 628  | 0        | -0.444379 |  |
|       |      | Shiraz-47T | 1027 | 0        | -0.117848 |  |
|       |      | Shiraz-47T | 1027 | 0        | -0.117848 |  |
|       |      | Shiraz-49T | 1117 | 0        | -0.168296 |  |
|       |      | Shiraz-49T | 1117 | 0        | -0.168296 |  |
|       |      | Shiraz-77T | 1222 | 0        | -0.113002 |  |
|       |      | Shiraz-77T | 1222 | 0        | -0.113002 |  |
|       |      | Shiraz-18T | 1433 | 0.250973 | 0         |  |
|       |      | Shiraz-18T | 1433 | 0.250973 | 0         |  |
|       |      | Shiraz-22T | 1543 | 0        | -0.513696 |  |
|       |      | Shiraz-22T | 1543 | 0        | -0.513696 |  |

|       |      |            |      |          |           |  |  |
|-------|------|------------|------|----------|-----------|--|--|
|       |      | Shiraz-25T | 1697 | 0.21945  | 0         |  |  |
|       |      | Shiraz-25T | 1697 | 0.21945  | 0         |  |  |
|       |      | Shiraz-28T | 1734 | 0.362882 | 0         |  |  |
|       |      | Shiraz-28T | 1734 | 0.362882 | 0         |  |  |
|       |      | Shiraz-29T | 1777 | 0.156747 | 0         |  |  |
|       |      | Shiraz-29T | 1777 | 0.156747 | 0         |  |  |
|       |      | Shiraz-38T | 1950 | 0.265916 | 0         |  |  |
|       |      | Shiraz-38T | 1950 | 0.265916 | 0         |  |  |
|       |      | Shiraz-58T | 2157 | 0        | -0.213872 |  |  |
|       |      | Shiraz-58T | 2157 | 0        | -0.213872 |  |  |
|       |      | Shiraz-71T | 2236 | 0.320072 | 0         |  |  |
|       |      | Shiraz-71T | 2236 | 0.320072 | 0         |  |  |
|       |      | Shiraz-4T  | 252  | 0.192083 | 0         |  |  |
|       |      | Shiraz-4T  | 252  | 0.192083 | 0         |  |  |
|       |      | Shiraz-36T | 376  | 0.159952 | 0         |  |  |
|       |      | Shiraz-36T | 376  | 0.159952 | 0         |  |  |
|       |      | Shiraz-44T | 628  | 0        | -0.444379 |  |  |
|       |      | Shiraz-44T | 628  | 0        | -0.444379 |  |  |
|       |      | Shiraz-47T | 1027 | 0        | -0.117848 |  |  |
|       |      | Shiraz-47T | 1027 | 0        | -0.117848 |  |  |
|       |      | Shiraz-49T | 1117 | 0        | -0.168296 |  |  |
|       |      | Shiraz-49T | 1117 | 0        | -0.168296 |  |  |
|       |      | Shiraz-77T | 1222 | 0        | -0.113002 |  |  |
|       |      | Shiraz-77T | 1222 | 0        | -0.113002 |  |  |
|       |      | Shiraz-18T | 1433 | 0.250973 | 0         |  |  |
|       |      | Shiraz-18T | 1433 | 0.250973 | 0         |  |  |
|       |      | Shiraz-22T | 1543 | 0        | -0.513696 |  |  |
|       |      | Shiraz-22T | 1543 | 0        | -0.513696 |  |  |
|       |      | Shiraz-25T | 1697 | 0.21945  | 0         |  |  |
|       |      | Shiraz-25T | 1697 | 0.21945  | 0         |  |  |
|       |      | Shiraz-28T | 1734 | 0.362882 | 0         |  |  |
|       |      | Shiraz-28T | 1734 | 0.362882 | 0         |  |  |
|       |      | Shiraz-29T | 1777 | 0.156747 | 0         |  |  |
|       |      | Shiraz-29T | 1777 | 0.156747 | 0         |  |  |
|       |      | Shiraz-38T | 1950 | 0.265916 | 0         |  |  |
|       |      | Shiraz-38T | 1950 | 0.265916 | 0         |  |  |
|       |      | Shiraz-58T | 2157 | 0        | -0.213872 |  |  |
|       |      | Shiraz-58T | 2157 | 0        | -0.213872 |  |  |
|       |      | Shiraz-71T | 2236 | 0.320072 | 0         |  |  |
|       |      | Shiraz-71T | 2236 | 0.320072 | 0         |  |  |
| PHF16 | chrX | Shiraz-3T  | 235  | 0        | -0.28401  |  |  |
|       |      | Shiraz-3T  | 235  | 0        | -0.28401  |  |  |
|       |      | Shiraz-4T  | 260  | 0        | -0.324128 |  |  |
|       |      | Shiraz-4T  | 260  | 0        | -0.324128 |  |  |
|       |      | Shiraz-16T | 294  | 0.655804 | 0         |  |  |
|       |      | Shiraz-16T | 294  | 0.655804 | 0         |  |  |
|       |      | Shiraz-31T | 345  | 0.103301 | 0         |  |  |

|  |  |            |      |          |           |  |  |
|--|--|------------|------|----------|-----------|--|--|
|  |  | Shiraz-31T | 345  | 0.103301 | 0         |  |  |
|  |  | Shiraz-36T | 431  | 0        | -0.78035  |  |  |
|  |  | Shiraz-36T | 431  | 0        | -0.78035  |  |  |
|  |  | Shiraz-36T | 432  | 0        | -0.6692   |  |  |
|  |  | Shiraz-36T | 432  | 0        | -0.6692   |  |  |
|  |  | Shiraz-44T | 891  | 0        | -0.954044 |  |  |
|  |  | Shiraz-44T | 891  | 0        | -0.954044 |  |  |
|  |  | Shiraz-46T | 991  | 0.139564 | 0         |  |  |
|  |  | Shiraz-46T | 991  | 0.139564 | 0         |  |  |
|  |  | Shiraz-49T | 1166 | 0        | -0.917235 |  |  |
|  |  | Shiraz-49T | 1166 | 0        | -0.917235 |  |  |
|  |  | Shiraz-77T | 1282 | 0.213849 | 0         |  |  |
|  |  | Shiraz-77T | 1282 | 0.213849 | 0         |  |  |
|  |  | Shiraz-9T  | 1368 | 0.199713 | 0         |  |  |
|  |  | Shiraz-9T  | 1368 | 0.199713 | 0         |  |  |
|  |  | Shiraz-18T | 1455 | 0        | -0.186773 |  |  |
|  |  | Shiraz-18T | 1455 | 0        | -0.186773 |  |  |
|  |  | Shiraz-22T | 1669 | 0.695915 | 0         |  |  |
|  |  | Shiraz-22T | 1669 | 0.695915 | 0         |  |  |
|  |  | Shiraz-25T | 1717 | 0.420447 | 0         |  |  |
|  |  | Shiraz-25T | 1717 | 0.420447 | 0         |  |  |
|  |  | Shiraz-28T | 1760 | 0.538181 | 0         |  |  |
|  |  | Shiraz-28T | 1760 | 0.538181 | 0         |  |  |
|  |  | Shiraz-29T | 1800 | 0.672527 | 0         |  |  |
|  |  | Shiraz-29T | 1800 | 0.672527 | 0         |  |  |
|  |  | Shiraz-32T | 1869 | 0.776805 | 0         |  |  |
|  |  | Shiraz-32T | 1869 | 0.776805 | 0         |  |  |
|  |  | Shiraz-35T | 1932 | 0.507141 | 0         |  |  |
|  |  | Shiraz-35T | 1932 | 0.507141 | 0         |  |  |
|  |  | Shiraz-40T | 2051 | 0.098506 | 0         |  |  |
|  |  | Shiraz-40T | 2051 | 0.098506 | 0         |  |  |
|  |  | Shiraz-58T | 2221 | 0.871948 | 0         |  |  |
|  |  | Shiraz-58T | 2221 | 0.871948 | 0         |  |  |
|  |  | Shiraz-71T | 2260 | 0.68394  | 0         |  |  |
|  |  | Shiraz-71T | 2260 | 0.68394  | 0         |  |  |
|  |  | Shiraz-71T | 2262 | 0.986748 | 0         |  |  |
|  |  | Shiraz-71T | 2262 | 0.986748 | 0         |  |  |
|  |  | Shiraz-3T  | 235  | 0        | -0.28401  |  |  |
|  |  | Shiraz-3T  | 235  | 0        | -0.28401  |  |  |
|  |  | Shiraz-4T  | 260  | 0        | -0.324128 |  |  |
|  |  | Shiraz-4T  | 260  | 0        | -0.324128 |  |  |
|  |  | Shiraz-16T | 294  | 0.655804 | 0         |  |  |
|  |  | Shiraz-16T | 294  | 0.655804 | 0         |  |  |
|  |  | Shiraz-31T | 345  | 0.103301 | 0         |  |  |
|  |  | Shiraz-31T | 345  | 0.103301 | 0         |  |  |
|  |  | Shiraz-36T | 431  | 0        | -0.78035  |  |  |
|  |  | Shiraz-36T | 431  | 0        | -0.78035  |  |  |

|  |            |      |          |           |  |
|--|------------|------|----------|-----------|--|
|  | Shiraz-36T | 432  | 0        | -0.6692   |  |
|  | Shiraz-36T | 432  | 0        | -0.6692   |  |
|  | Shiraz-44T | 891  | 0        | -0.954044 |  |
|  | Shiraz-44T | 891  | 0        | -0.954044 |  |
|  | Shiraz-46T | 991  | 0.139564 | 0         |  |
|  | Shiraz-46T | 991  | 0.139564 | 0         |  |
|  | Shiraz-49T | 1166 | 0        | -0.917235 |  |
|  | Shiraz-49T | 1166 | 0        | -0.917235 |  |
|  | Shiraz-77T | 1282 | 0.213849 | 0         |  |
|  | Shiraz-77T | 1282 | 0.213849 | 0         |  |
|  | Shiraz-9T  | 1368 | 0.199713 | 0         |  |
|  | Shiraz-9T  | 1368 | 0.199713 | 0         |  |
|  | Shiraz-18T | 1455 | 0        | -0.186773 |  |
|  | Shiraz-18T | 1455 | 0        | -0.186773 |  |
|  | Shiraz-22T | 1669 | 0.695915 | 0         |  |
|  | Shiraz-22T | 1669 | 0.695915 | 0         |  |
|  | Shiraz-25T | 1717 | 0.420447 | 0         |  |
|  | Shiraz-25T | 1717 | 0.420447 | 0         |  |
|  | Shiraz-28T | 1760 | 0.538181 | 0         |  |
|  | Shiraz-28T | 1760 | 0.538181 | 0         |  |
|  | Shiraz-29T | 1800 | 0.672527 | 0         |  |
|  | Shiraz-29T | 1800 | 0.672527 | 0         |  |
|  | Shiraz-32T | 1869 | 0.776805 | 0         |  |
|  | Shiraz-32T | 1869 | 0.776805 | 0         |  |
|  | Shiraz-35T | 1932 | 0.507141 | 0         |  |
|  | Shiraz-35T | 1932 | 0.507141 | 0         |  |
|  | Shiraz-40T | 2051 | 0.098506 | 0         |  |
|  | Shiraz-40T | 2051 | 0.098506 | 0         |  |
|  | Shiraz-58T | 2221 | 0.871948 | 0         |  |
|  | Shiraz-58T | 2221 | 0.871948 | 0         |  |
|  | Shiraz-71T | 2260 | 0.68394  | 0         |  |
|  | Shiraz-71T | 2260 | 0.68394  | 0         |  |
|  | Shiraz-71T | 2262 | 0.986748 | 0         |  |
|  | Shiraz-71T | 2262 | 0.986748 | 0         |  |
|  | Shiraz-3T  | 235  | 0        | -0.28401  |  |
|  | Shiraz-3T  | 235  | 0        | -0.28401  |  |
|  | Shiraz-4T  | 260  | 0        | -0.324128 |  |
|  | Shiraz-4T  | 260  | 0        | -0.324128 |  |
|  | Shiraz-16T | 294  | 0.655804 | 0         |  |
|  | Shiraz-16T | 294  | 0.655804 | 0         |  |
|  | Shiraz-31T | 345  | 0.103301 | 0         |  |
|  | Shiraz-31T | 345  | 0.103301 | 0         |  |
|  | Shiraz-36T | 431  | 0        | -0.78035  |  |
|  | Shiraz-36T | 431  | 0        | -0.78035  |  |
|  | Shiraz-36T | 432  | 0        | -0.6692   |  |
|  | Shiraz-36T | 432  | 0        | -0.6692   |  |
|  | Shiraz-44T | 891  | 0        | -0.954044 |  |



|      |      |            |      |          |           |  |  |
|------|------|------------|------|----------|-----------|--|--|
|      |      | Shiraz-44T | 891  | 0        | -0.954044 |  |  |
|      |      | Shiraz-46T | 991  | 0.139564 | 0         |  |  |
|      |      | Shiraz-46T | 991  | 0.139564 | 0         |  |  |
|      |      | Shiraz-49T | 1166 | 0        | -0.917235 |  |  |
|      |      | Shiraz-49T | 1166 | 0        | -0.917235 |  |  |
|      |      | Shiraz-77T | 1282 | 0.213849 | 0         |  |  |
|      |      | Shiraz-77T | 1282 | 0.213849 | 0         |  |  |
|      |      | Shiraz-9T  | 1368 | 0.199713 | 0         |  |  |
|      |      | Shiraz-9T  | 1368 | 0.199713 | 0         |  |  |
|      |      | Shiraz-18T | 1455 | 0        | -0.186773 |  |  |
|      |      | Shiraz-18T | 1455 | 0        | -0.186773 |  |  |
|      |      | Shiraz-22T | 1669 | 0.695915 | 0         |  |  |
|      |      | Shiraz-22T | 1669 | 0.695915 | 0         |  |  |
|      |      | Shiraz-25T | 1717 | 0.420447 | 0         |  |  |
|      |      | Shiraz-25T | 1717 | 0.420447 | 0         |  |  |
|      |      | Shiraz-28T | 1760 | 0.538181 | 0         |  |  |
|      |      | Shiraz-28T | 1760 | 0.538181 | 0         |  |  |
|      |      | Shiraz-29T | 1800 | 0.672527 | 0         |  |  |
|      |      | Shiraz-29T | 1800 | 0.672527 | 0         |  |  |
|      |      | Shiraz-32T | 1869 | 0.776805 | 0         |  |  |
|      |      | Shiraz-32T | 1869 | 0.776805 | 0         |  |  |
|      |      | Shiraz-35T | 1932 | 0.507141 | 0         |  |  |
|      |      | Shiraz-35T | 1932 | 0.507141 | 0         |  |  |
|      |      | Shiraz-40T | 2051 | 0.098506 | 0         |  |  |
|      |      | Shiraz-40T | 2051 | 0.098506 | 0         |  |  |
|      |      | Shiraz-58T | 2221 | 0.871948 | 0         |  |  |
|      |      | Shiraz-58T | 2221 | 0.871948 | 0         |  |  |
|      |      | Shiraz-71T | 2260 | 0.68394  | 0         |  |  |
|      |      | Shiraz-71T | 2260 | 0.68394  | 0         |  |  |
|      |      | Shiraz-71T | 2262 | 0.986748 | 0         |  |  |
|      |      | Shiraz-71T | 2262 | 0.986748 | 0         |  |  |
| PHF6 | chrX | Shiraz-3T  | 242  | 0        | -0.336434 |  |  |
|      |      | Shiraz-3T  | 242  | 0        | -0.336434 |  |  |
|      |      | Shiraz-4T  | 261  | 0        | -0.336249 |  |  |
|      |      | Shiraz-4T  | 261  | 0        | -0.336249 |  |  |
|      |      | Shiraz-16T | 295  | 0.591657 | 0         |  |  |
|      |      | Shiraz-16T | 295  | 0.591657 | 0         |  |  |
|      |      | Shiraz-36T | 433  | 0        | -0.803961 |  |  |
|      |      | Shiraz-36T | 433  | 0        | -0.803961 |  |  |
|      |      | Shiraz-44T | 899  | 0        | -1.09697  |  |  |
|      |      | Shiraz-44T | 899  | 0        | -1.09697  |  |  |
|      |      | Shiraz-49T | 1170 | 0        | -0.967436 |  |  |
|      |      | Shiraz-49T | 1170 | 0        | -0.967436 |  |  |
|      |      | Shiraz-9T  | 1370 | 0.690073 | 0         |  |  |
|      |      | Shiraz-9T  | 1370 | 0.690073 | 0         |  |  |
|      |      | Shiraz-18T | 1457 | 0.643204 | 0         |  |  |
|      |      | Shiraz-18T | 1457 | 0.643204 | 0         |  |  |

|  |  |            |      |          |           |  |  |
|--|--|------------|------|----------|-----------|--|--|
|  |  | Shiraz-22T | 1673 | 0.611783 | 0         |  |  |
|  |  | Shiraz-22T | 1673 | 0.611783 | 0         |  |  |
|  |  | Shiraz-22T | 1677 | 0.789711 | 0         |  |  |
|  |  | Shiraz-22T | 1677 | 0.789711 | 0         |  |  |
|  |  | Shiraz-25T | 1719 | 0.472955 | 0         |  |  |
|  |  | Shiraz-25T | 1719 | 0.472955 | 0         |  |  |
|  |  | Shiraz-28T | 1762 | 0.562311 | 0         |  |  |
|  |  | Shiraz-28T | 1762 | 0.562311 | 0         |  |  |
|  |  | Shiraz-29T | 1801 | 0.815343 | 0         |  |  |
|  |  | Shiraz-29T | 1801 | 0.815343 | 0         |  |  |
|  |  | Shiraz-32T | 1870 | 0.729766 | 0         |  |  |
|  |  | Shiraz-32T | 1870 | 0.729766 | 0         |  |  |
|  |  | Shiraz-35T | 1933 | 0.488535 | 0         |  |  |
|  |  | Shiraz-35T | 1933 | 0.488535 | 0         |  |  |
|  |  | Shiraz-58T | 2223 | 0.833364 | 0         |  |  |
|  |  | Shiraz-58T | 2223 | 0.833364 | 0         |  |  |
|  |  | Shiraz-71T | 2263 | 0.975531 | 0         |  |  |
|  |  | Shiraz-71T | 2263 | 0.975531 | 0         |  |  |
|  |  | Shiraz-3T  | 242  | 0        | -0.336434 |  |  |
|  |  | Shiraz-3T  | 242  | 0        | -0.336434 |  |  |
|  |  | Shiraz-4T  | 261  | 0        | -0.336249 |  |  |
|  |  | Shiraz-4T  | 261  | 0        | -0.336249 |  |  |
|  |  | Shiraz-16T | 295  | 0.591657 | 0         |  |  |
|  |  | Shiraz-16T | 295  | 0.591657 | 0         |  |  |
|  |  | Shiraz-36T | 433  | 0        | -0.803961 |  |  |
|  |  | Shiraz-36T | 433  | 0        | -0.803961 |  |  |
|  |  | Shiraz-44T | 899  | 0        | -1.09697  |  |  |
|  |  | Shiraz-44T | 899  | 0        | -1.09697  |  |  |
|  |  | Shiraz-49T | 1170 | 0        | -0.967436 |  |  |
|  |  | Shiraz-49T | 1170 | 0        | -0.967436 |  |  |
|  |  | Shiraz-9T  | 1370 | 0.690073 | 0         |  |  |
|  |  | Shiraz-9T  | 1370 | 0.690073 | 0         |  |  |
|  |  | Shiraz-18T | 1457 | 0.643204 | 0         |  |  |
|  |  | Shiraz-18T | 1457 | 0.643204 | 0         |  |  |
|  |  | Shiraz-22T | 1673 | 0.611783 | 0         |  |  |
|  |  | Shiraz-22T | 1673 | 0.611783 | 0         |  |  |
|  |  | Shiraz-22T | 1677 | 0.789711 | 0         |  |  |
|  |  | Shiraz-22T | 1677 | 0.789711 | 0         |  |  |
|  |  | Shiraz-25T | 1719 | 0.472955 | 0         |  |  |
|  |  | Shiraz-25T | 1719 | 0.472955 | 0         |  |  |
|  |  | Shiraz-28T | 1762 | 0.562311 | 0         |  |  |
|  |  | Shiraz-28T | 1762 | 0.562311 | 0         |  |  |
|  |  | Shiraz-29T | 1801 | 0.815343 | 0         |  |  |
|  |  | Shiraz-29T | 1801 | 0.815343 | 0         |  |  |
|  |  | Shiraz-32T | 1870 | 0.729766 | 0         |  |  |
|  |  | Shiraz-32T | 1870 | 0.729766 | 0         |  |  |
|  |  | Shiraz-35T | 1933 | 0.488535 | 0         |  |  |

|      |      |            |      |          |           |  |  |
|------|------|------------|------|----------|-----------|--|--|
|      |      | Shiraz-35T | 1933 | 0.488535 | 0         |  |  |
|      |      | Shiraz-58T | 2223 | 0.833364 | 0         |  |  |
|      |      | Shiraz-58T | 2223 | 0.833364 | 0         |  |  |
|      |      | Shiraz-71T | 2263 | 0.975531 | 0         |  |  |
|      |      | Shiraz-71T | 2263 | 0.975531 | 0         |  |  |
|      |      | Shiraz-3T  | 242  | 0        | -0.336434 |  |  |
|      |      | Shiraz-3T  | 242  | 0        | -0.336434 |  |  |
|      |      | Shiraz-4T  | 261  | 0        | -0.336249 |  |  |
|      |      | Shiraz-4T  | 261  | 0        | -0.336249 |  |  |
|      |      | Shiraz-16T | 295  | 0.591657 | 0         |  |  |
|      |      | Shiraz-16T | 295  | 0.591657 | 0         |  |  |
|      |      | Shiraz-36T | 433  | 0        | -0.803961 |  |  |
|      |      | Shiraz-36T | 433  | 0        | -0.803961 |  |  |
|      |      | Shiraz-44T | 899  | 0        | -1.09697  |  |  |
|      |      | Shiraz-44T | 899  | 0        | -1.09697  |  |  |
|      |      | Shiraz-49T | 1170 | 0        | -0.967436 |  |  |
|      |      | Shiraz-49T | 1170 | 0        | -0.967436 |  |  |
|      |      | Shiraz-9T  | 1370 | 0.690073 | 0         |  |  |
|      |      | Shiraz-9T  | 1370 | 0.690073 | 0         |  |  |
|      |      | Shiraz-18T | 1457 | 0.643204 | 0         |  |  |
|      |      | Shiraz-18T | 1457 | 0.643204 | 0         |  |  |
|      |      | Shiraz-22T | 1673 | 0.611783 | 0         |  |  |
|      |      | Shiraz-22T | 1673 | 0.611783 | 0         |  |  |
|      |      | Shiraz-22T | 1677 | 0.789711 | 0         |  |  |
|      |      | Shiraz-22T | 1677 | 0.789711 | 0         |  |  |
|      |      | Shiraz-25T | 1719 | 0.472955 | 0         |  |  |
|      |      | Shiraz-25T | 1719 | 0.472955 | 0         |  |  |
|      |      | Shiraz-28T | 1762 | 0.562311 | 0         |  |  |
|      |      | Shiraz-28T | 1762 | 0.562311 | 0         |  |  |
|      |      | Shiraz-29T | 1801 | 0.815343 | 0         |  |  |
|      |      | Shiraz-29T | 1801 | 0.815343 | 0         |  |  |
|      |      | Shiraz-32T | 1870 | 0.729766 | 0         |  |  |
|      |      | Shiraz-32T | 1870 | 0.729766 | 0         |  |  |
|      |      | Shiraz-35T | 1933 | 0.488535 | 0         |  |  |
|      |      | Shiraz-35T | 1933 | 0.488535 | 0         |  |  |
|      |      | Shiraz-58T | 2223 | 0.833364 | 0         |  |  |
|      |      | Shiraz-58T | 2223 | 0.833364 | 0         |  |  |
|      |      | Shiraz-71T | 2263 | 0.975531 | 0         |  |  |
|      |      | Shiraz-71T | 2263 | 0.975531 | 0         |  |  |
| PHF8 | chrX | Shiraz-4T  | 260  | 0        | -0.324128 |  |  |
|      |      | Shiraz-16T | 294  | 0.655804 | 0         |  |  |
|      |      | Shiraz-31T | 345  | 0.103301 | 0         |  |  |
|      |      | Shiraz-36T | 431  | 0        | -0.78035  |  |  |
|      |      | Shiraz-36T | 432  | 0        | -0.6692   |  |  |
|      |      | Shiraz-44T | 891  | 0        | -0.954044 |  |  |
|      |      | Shiraz-44T | 898  | 0        | -0.515218 |  |  |
|      |      | Shiraz-49T | 1166 | 0        | -0.917235 |  |  |

|  |            |      |          |           |  |
|--|------------|------|----------|-----------|--|
|  | Shiraz-77T | 1282 | 0.213849 | 0         |  |
|  | Shiraz-9T  | 1368 | 0.199713 | 0         |  |
|  | Shiraz-18T | 1456 | 0.608534 | 0         |  |
|  | Shiraz-22T | 1669 | 0.695915 | 0         |  |
|  | Shiraz-25T | 1717 | 0.420447 | 0         |  |
|  | Shiraz-28T | 1760 | 0.538181 | 0         |  |
|  | Shiraz-29T | 1800 | 0.672527 | 0         |  |
|  | Shiraz-32T | 1869 | 0.776805 | 0         |  |
|  | Shiraz-35T | 1932 | 0.507141 | 0         |  |
|  | Shiraz-58T | 2221 | 0.871948 | 0         |  |
|  | Shiraz-71T | 2260 | 0.68394  | 0         |  |
|  | Shiraz-71T | 2262 | 0.986748 | 0         |  |
|  | Shiraz-4T  | 260  | 0        | -0.324128 |  |
|  | Shiraz-16T | 294  | 0.655804 | 0         |  |
|  | Shiraz-31T | 345  | 0.103301 | 0         |  |
|  | Shiraz-36T | 431  | 0        | -0.78035  |  |
|  | Shiraz-36T | 432  | 0        | -0.6692   |  |
|  | Shiraz-44T | 891  | 0        | -0.954044 |  |
|  | Shiraz-44T | 898  | 0        | -0.515218 |  |
|  | Shiraz-49T | 1166 | 0        | -0.917235 |  |
|  | Shiraz-77T | 1282 | 0.213849 | 0         |  |
|  | Shiraz-9T  | 1368 | 0.199713 | 0         |  |
|  | Shiraz-18T | 1456 | 0.608534 | 0         |  |
|  | Shiraz-22T | 1669 | 0.695915 | 0         |  |
|  | Shiraz-25T | 1717 | 0.420447 | 0         |  |
|  | Shiraz-28T | 1760 | 0.538181 | 0         |  |
|  | Shiraz-29T | 1800 | 0.672527 | 0         |  |
|  | Shiraz-32T | 1869 | 0.776805 | 0         |  |
|  | Shiraz-35T | 1932 | 0.507141 | 0         |  |
|  | Shiraz-58T | 2221 | 0.871948 | 0         |  |
|  | Shiraz-71T | 2260 | 0.68394  | 0         |  |
|  | Shiraz-71T | 2262 | 0.986748 | 0         |  |
|  | Shiraz-4T  | 260  | 0        | -0.324128 |  |
|  | Shiraz-16T | 294  | 0.655804 | 0         |  |
|  | Shiraz-31T | 345  | 0.103301 | 0         |  |
|  | Shiraz-36T | 431  | 0        | -0.78035  |  |
|  | Shiraz-36T | 432  | 0        | -0.6692   |  |
|  | Shiraz-44T | 891  | 0        | -0.954044 |  |
|  | Shiraz-44T | 898  | 0        | -0.515218 |  |
|  | Shiraz-49T | 1166 | 0        | -0.917235 |  |
|  | Shiraz-77T | 1282 | 0.213849 | 0         |  |
|  | Shiraz-9T  | 1368 | 0.199713 | 0         |  |
|  | Shiraz-18T | 1456 | 0.608534 | 0         |  |
|  | Shiraz-22T | 1669 | 0.695915 | 0         |  |
|  | Shiraz-25T | 1717 | 0.420447 | 0         |  |
|  | Shiraz-28T | 1760 | 0.538181 | 0         |  |
|  | Shiraz-29T | 1800 | 0.672527 | 0         |  |

|       |      |            |      |          |           |  |  |
|-------|------|------------|------|----------|-----------|--|--|
|       |      | Shiraz-32T | 1869 | 0.776805 | 0         |  |  |
|       |      | Shiraz-35T | 1932 | 0.507141 | 0         |  |  |
|       |      | Shiraz-58T | 2221 | 0.871948 | 0         |  |  |
|       |      | Shiraz-71T | 2260 | 0.68394  | 0         |  |  |
|       |      | Shiraz-71T | 2262 | 0.986748 | 0         |  |  |
| PHKA1 | chrX | Shiraz-3T  | 242  | 0        | -0.336434 |  |  |
|       |      | Shiraz-4T  | 261  | 0        | -0.336249 |  |  |
|       |      | Shiraz-16T | 295  | 0.591657 | 0         |  |  |
|       |      | Shiraz-36T | 433  | 0        | -0.803961 |  |  |
|       |      | Shiraz-44T | 899  | 0        | -1.09697  |  |  |
|       |      | Shiraz-49T | 1170 | 0        | -0.967436 |  |  |
|       |      | Shiraz-18T | 1457 | 0.643204 | 0         |  |  |
|       |      | Shiraz-22T | 1673 | 0.611783 | 0         |  |  |
|       |      | Shiraz-25T | 1719 | 0.472955 | 0         |  |  |
|       |      | Shiraz-28T | 1762 | 0.562311 | 0         |  |  |
|       |      | Shiraz-29T | 1801 | 0.815343 | 0         |  |  |
|       |      | Shiraz-32T | 1870 | 0.729766 | 0         |  |  |
|       |      | Shiraz-35T | 1933 | 0.488535 | 0         |  |  |
|       |      | Shiraz-58T | 2223 | 0.833364 | 0         |  |  |
|       |      | Shiraz-71T | 2263 | 0.975531 | 0         |  |  |
|       |      | Shiraz-3T  | 242  | 0        | -0.336434 |  |  |
|       |      | Shiraz-4T  | 261  | 0        | -0.336249 |  |  |
|       |      | Shiraz-16T | 295  | 0.591657 | 0         |  |  |
|       |      | Shiraz-36T | 433  | 0        | -0.803961 |  |  |
|       |      | Shiraz-44T | 899  | 0        | -1.09697  |  |  |
|       |      | Shiraz-49T | 1170 | 0        | -0.967436 |  |  |
|       |      | Shiraz-18T | 1457 | 0.643204 | 0         |  |  |
|       |      | Shiraz-22T | 1673 | 0.611783 | 0         |  |  |
|       |      | Shiraz-25T | 1719 | 0.472955 | 0         |  |  |
|       |      | Shiraz-28T | 1762 | 0.562311 | 0         |  |  |
|       |      | Shiraz-29T | 1801 | 0.815343 | 0         |  |  |
|       |      | Shiraz-32T | 1870 | 0.729766 | 0         |  |  |
|       |      | Shiraz-35T | 1933 | 0.488535 | 0         |  |  |
|       |      | Shiraz-58T | 2223 | 0.833364 | 0         |  |  |
|       |      | Shiraz-71T | 2263 | 0.975531 | 0         |  |  |
|       |      | Shiraz-3T  | 242  | 0        | -0.336434 |  |  |
|       |      | Shiraz-4T  | 261  | 0        | -0.336249 |  |  |
|       |      | Shiraz-16T | 295  | 0.591657 | 0         |  |  |
|       |      | Shiraz-36T | 433  | 0        | -0.803961 |  |  |
|       |      | Shiraz-44T | 899  | 0        | -1.09697  |  |  |
|       |      | Shiraz-49T | 1170 | 0        | -0.967436 |  |  |
|       |      | Shiraz-18T | 1457 | 0.643204 | 0         |  |  |
|       |      | Shiraz-22T | 1673 | 0.611783 | 0         |  |  |
|       |      | Shiraz-25T | 1719 | 0.472955 | 0         |  |  |
|       |      | Shiraz-28T | 1762 | 0.562311 | 0         |  |  |
|       |      | Shiraz-29T | 1801 | 0.815343 | 0         |  |  |
|       |      | Shiraz-32T | 1870 | 0.729766 | 0         |  |  |

|       |      |            |      |          |           |  |
|-------|------|------------|------|----------|-----------|--|
|       |      | Shiraz-35T | 1933 | 0.488535 | 0         |  |
|       |      | Shiraz-58T | 2223 | 0.833364 | 0         |  |
|       |      | Shiraz-71T | 2263 | 0.975531 | 0         |  |
| PHKA2 | chrX | Shiraz-3T  | 235  | 0        | -0.28401  |  |
|       |      | Shiraz-4T  | 260  | 0        | -0.324128 |  |
|       |      | Shiraz-16T | 294  | 0.655804 | 0         |  |
|       |      | Shiraz-36T | 431  | 0        | -0.78035  |  |
|       |      | Shiraz-44T | 891  | 0        | -0.954044 |  |
|       |      | Shiraz-49T | 1166 | 0        | -0.917235 |  |
|       |      | Shiraz-77T | 1281 | 0.136627 | 0         |  |
|       |      | Shiraz-9T  | 1368 | 0.199713 | 0         |  |
|       |      | Shiraz-18T | 1455 | 0        | -0.186773 |  |
|       |      | Shiraz-22T | 1669 | 0.695915 | 0         |  |
|       |      | Shiraz-25T | 1717 | 0.420447 | 0         |  |
|       |      | Shiraz-28T | 1760 | 0.538181 | 0         |  |
|       |      | Shiraz-29T | 1800 | 0.672527 | 0         |  |
|       |      | Shiraz-32T | 1869 | 0.776805 | 0         |  |
|       |      | Shiraz-35T | 1932 | 0.507141 | 0         |  |
|       |      | Shiraz-40T | 2051 | 0.098506 | 0         |  |
|       |      | Shiraz-58T | 2221 | 0.871948 | 0         |  |
|       |      | Shiraz-71T | 2260 | 0.68394  | 0         |  |
|       |      | Shiraz-71T | 2261 | 0.508399 | 0         |  |
|       |      | Shiraz-3T  | 235  | 0        | -0.28401  |  |
|       |      | Shiraz-4T  | 260  | 0        | -0.324128 |  |
|       |      | Shiraz-16T | 294  | 0.655804 | 0         |  |
|       |      | Shiraz-36T | 431  | 0        | -0.78035  |  |
|       |      | Shiraz-44T | 891  | 0        | -0.954044 |  |
|       |      | Shiraz-49T | 1166 | 0        | -0.917235 |  |
|       |      | Shiraz-77T | 1281 | 0.136627 | 0         |  |
|       |      | Shiraz-9T  | 1368 | 0.199713 | 0         |  |
|       |      | Shiraz-18T | 1455 | 0        | -0.186773 |  |
|       |      | Shiraz-22T | 1669 | 0.695915 | 0         |  |
|       |      | Shiraz-25T | 1717 | 0.420447 | 0         |  |
|       |      | Shiraz-28T | 1760 | 0.538181 | 0         |  |
|       |      | Shiraz-29T | 1800 | 0.672527 | 0         |  |
|       |      | Shiraz-32T | 1869 | 0.776805 | 0         |  |
|       |      | Shiraz-35T | 1932 | 0.507141 | 0         |  |
|       |      | Shiraz-40T | 2051 | 0.098506 | 0         |  |
|       |      | Shiraz-58T | 2221 | 0.871948 | 0         |  |
|       |      | Shiraz-71T | 2260 | 0.68394  | 0         |  |
|       |      | Shiraz-71T | 2261 | 0.508399 | 0         |  |
|       |      | Shiraz-3T  | 235  | 0        | -0.28401  |  |
|       |      | Shiraz-4T  | 260  | 0        | -0.324128 |  |
|       |      | Shiraz-16T | 294  | 0.655804 | 0         |  |
|       |      | Shiraz-36T | 431  | 0        | -0.78035  |  |
|       |      | Shiraz-44T | 891  | 0        | -0.954044 |  |
|       |      | Shiraz-49T | 1166 | 0        | -0.917235 |  |

|       |      |            |      |          |           |  |
|-------|------|------------|------|----------|-----------|--|
|       |      | Shiraz-77T | 1281 | 0.136627 | 0         |  |
|       |      | Shiraz-9T  | 1368 | 0.199713 | 0         |  |
|       |      | Shiraz-18T | 1455 | 0        | -0.186773 |  |
|       |      | Shiraz-22T | 1669 | 0.695915 | 0         |  |
|       |      | Shiraz-25T | 1717 | 0.420447 | 0         |  |
|       |      | Shiraz-28T | 1760 | 0.538181 | 0         |  |
|       |      | Shiraz-29T | 1800 | 0.672527 | 0         |  |
|       |      | Shiraz-32T | 1869 | 0.776805 | 0         |  |
|       |      | Shiraz-35T | 1932 | 0.507141 | 0         |  |
|       |      | Shiraz-40T | 2051 | 0.098506 | 0         |  |
|       |      | Shiraz-58T | 2221 | 0.871948 | 0         |  |
|       |      | Shiraz-71T | 2260 | 0.68394  | 0         |  |
|       |      | Shiraz-71T | 2261 | 0.508399 | 0         |  |
| PHTF2 | chr7 | Shiraz-3T  | 90   | 0.219276 | 0         |  |
|       |      | Shiraz-3T  | 90   | 0.219276 | 0         |  |
|       |      | Shiraz-3T  | 90   | 0.219276 | 0         |  |
|       |      | Shiraz-3T  | 90   | 0.219276 | 0         |  |
|       |      | Shiraz-3T  | 93   | 0        | -0.058023 |  |
|       |      | Shiraz-3T  | 93   | 0        | -0.058023 |  |
|       |      | Shiraz-4T  | 253  | 0.372918 | 0         |  |
|       |      | Shiraz-4T  | 253  | 0.372918 | 0         |  |
|       |      | Shiraz-4T  | 253  | 0.372918 | 0         |  |
|       |      | Shiraz-4T  | 253  | 0.372918 | 0         |  |
|       |      | Shiraz-36T | 378  | 0.179558 | 0         |  |
|       |      | Shiraz-36T | 378  | 0.179558 | 0         |  |
|       |      | Shiraz-36T | 378  | 0.179558 | 0         |  |
|       |      | Shiraz-36T | 378  | 0.179558 | 0         |  |
|       |      | Shiraz-42T | 454  | 0.145717 | 0         |  |
|       |      | Shiraz-42T | 454  | 0.145717 | 0         |  |
|       |      | Shiraz-42T | 454  | 0.145717 | 0         |  |
|       |      | Shiraz-42T | 454  | 0.145717 | 0         |  |
|       |      | Shiraz-44T | 638  | 0        | -0.433476 |  |
|       |      | Shiraz-44T | 638  | 0        | -0.433476 |  |
|       |      | Shiraz-44T | 638  | 0        | -0.433476 |  |
|       |      | Shiraz-44T | 638  | 0        | -0.433476 |  |
|       |      | Shiraz-46T | 943  | 0.093799 | 0         |  |
|       |      | Shiraz-46T | 943  | 0.093799 | 0         |  |
|       |      | Shiraz-46T | 943  | 0.093799 | 0         |  |
|       |      | Shiraz-46T | 943  | 0.093799 | 0         |  |
|       |      | Shiraz-47T | 1029 | 0        | -0.096586 |  |
|       |      | Shiraz-47T | 1029 | 0        | -0.096586 |  |
|       |      | Shiraz-49T | 1119 | 0        | -0.157331 |  |
|       |      | Shiraz-49T | 1119 | 0        | -0.157331 |  |
|       |      | Shiraz-49T | 1119 | 0        | -0.157331 |  |
|       |      | Shiraz-49T | 1119 | 0        | -0.157331 |  |
|       |      | Shiraz-77T | 1225 | 0        | -0.117922 |  |
|       |      | Shiraz-77T | 1225 | 0        | -0.117922 |  |

|  |            |      |          |           |  |
|--|------------|------|----------|-----------|--|
|  | Shiraz-77T | 1225 | 0        | -0.117922 |  |
|  | Shiraz-77T | 1225 | 0        | -0.117922 |  |
|  | Shiraz-18T | 1434 | 0.244465 | 0         |  |
|  | Shiraz-18T | 1434 | 0.244465 | 0         |  |
|  | Shiraz-18T | 1434 | 0.244465 | 0         |  |
|  | Shiraz-18T | 1434 | 0.244465 | 0         |  |
|  | Shiraz-22T | 1549 | 0        | -0.319623 |  |
|  | Shiraz-22T | 1549 | 0        | -0.319623 |  |
|  | Shiraz-22T | 1549 | 0        | -0.319623 |  |
|  | Shiraz-22T | 1549 | 0        | -0.319623 |  |
|  | Shiraz-25T | 1698 | 0.21835  | 0         |  |
|  | Shiraz-25T | 1698 | 0.21835  | 0         |  |
|  | Shiraz-25T | 1698 | 0.21835  | 0         |  |
|  | Shiraz-25T | 1698 | 0.21835  | 0         |  |
|  | Shiraz-28T | 1735 | 0.350744 | 0         |  |
|  | Shiraz-28T | 1735 | 0.350744 | 0         |  |
|  | Shiraz-28T | 1735 | 0.350744 | 0         |  |
|  | Shiraz-28T | 1735 | 0.350744 | 0         |  |
|  | Shiraz-29T | 1778 | 0.120767 | 0         |  |
|  | Shiraz-29T | 1778 | 0.120767 | 0         |  |
|  | Shiraz-29T | 1778 | 0.120767 | 0         |  |
|  | Shiraz-29T | 1778 | 0.120767 | 0         |  |
|  | Shiraz-38T | 1951 | 0.250891 | 0         |  |
|  | Shiraz-38T | 1951 | 0.250891 | 0         |  |
|  | Shiraz-38T | 1951 | 0.250891 | 0         |  |
|  | Shiraz-38T | 1951 | 0.250891 | 0         |  |
|  | Shiraz-53T | 2078 | 0.287202 | 0         |  |
|  | Shiraz-53T | 2078 | 0.287202 | 0         |  |
|  | Shiraz-53T | 2078 | 0.287202 | 0         |  |
|  | Shiraz-53T | 2078 | 0.287202 | 0         |  |
|  | Shiraz-58T | 2159 | 0        | -0.219521 |  |
|  | Shiraz-58T | 2159 | 0        | -0.219521 |  |
|  | Shiraz-58T | 2159 | 0        | -0.219521 |  |
|  | Shiraz-58T | 2159 | 0        | -0.219521 |  |
|  | Shiraz-71T | 2238 | 0.603631 | 0         |  |
|  | Shiraz-71T | 2238 | 0.603631 | 0         |  |
|  | Shiraz-71T | 2238 | 0.603631 | 0         |  |
|  | Shiraz-71T | 2238 | 0.603631 | 0         |  |
|  | Shiraz-71T | 2239 | 0.310785 | 0         |  |
|  | Shiraz-71T | 2239 | 0.310785 | 0         |  |
|  | Shiraz-71T | 2239 | 0.310785 | 0         |  |
|  | Shiraz-71T | 2239 | 0.310785 | 0         |  |
|  | Shiraz-3T  | 90   | 0.219276 | 0         |  |
|  | Shiraz-3T  | 90   | 0.219276 | 0         |  |
|  | Shiraz-3T  | 90   | 0.219276 | 0         |  |
|  | Shiraz-3T  | 90   | 0.219276 | 0         |  |
|  | Shiraz-3T  | 93   | 0        | -0.058023 |  |



|  |            |      |          |           |  |
|--|------------|------|----------|-----------|--|
|  | Shiraz-3T  | 93   | 0        | -0.058023 |  |
|  | Shiraz-4T  | 253  | 0.372918 | 0         |  |
|  | Shiraz-4T  | 253  | 0.372918 | 0         |  |
|  | Shiraz-4T  | 253  | 0.372918 | 0         |  |
|  | Shiraz-4T  | 253  | 0.372918 | 0         |  |
|  | Shiraz-36T | 378  | 0.179558 | 0         |  |
|  | Shiraz-36T | 378  | 0.179558 | 0         |  |
|  | Shiraz-36T | 378  | 0.179558 | 0         |  |
|  | Shiraz-36T | 378  | 0.179558 | 0         |  |
|  | Shiraz-42T | 454  | 0.145717 | 0         |  |
|  | Shiraz-42T | 454  | 0.145717 | 0         |  |
|  | Shiraz-42T | 454  | 0.145717 | 0         |  |
|  | Shiraz-42T | 454  | 0.145717 | 0         |  |
|  | Shiraz-44T | 638  | 0        | -0.433476 |  |
|  | Shiraz-44T | 638  | 0        | -0.433476 |  |
|  | Shiraz-44T | 638  | 0        | -0.433476 |  |
|  | Shiraz-44T | 638  | 0        | -0.433476 |  |
|  | Shiraz-46T | 943  | 0.093799 | 0         |  |
|  | Shiraz-46T | 943  | 0.093799 | 0         |  |
|  | Shiraz-46T | 943  | 0.093799 | 0         |  |
|  | Shiraz-46T | 943  | 0.093799 | 0         |  |
|  | Shiraz-47T | 1029 | 0        | -0.096586 |  |
|  | Shiraz-47T | 1029 | 0        | -0.096586 |  |
|  | Shiraz-49T | 1119 | 0        | -0.157331 |  |
|  | Shiraz-49T | 1119 | 0        | -0.157331 |  |
|  | Shiraz-49T | 1119 | 0        | -0.157331 |  |
|  | Shiraz-49T | 1119 | 0        | -0.157331 |  |
|  | Shiraz-77T | 1225 | 0        | -0.117922 |  |
|  | Shiraz-77T | 1225 | 0        | -0.117922 |  |
|  | Shiraz-77T | 1225 | 0        | -0.117922 |  |
|  | Shiraz-77T | 1225 | 0        | -0.117922 |  |
|  | Shiraz-18T | 1434 | 0.244465 | 0         |  |
|  | Shiraz-18T | 1434 | 0.244465 | 0         |  |
|  | Shiraz-18T | 1434 | 0.244465 | 0         |  |
|  | Shiraz-18T | 1434 | 0.244465 | 0         |  |
|  | Shiraz-22T | 1549 | 0        | -0.319623 |  |
|  | Shiraz-22T | 1549 | 0        | -0.319623 |  |
|  | Shiraz-22T | 1549 | 0        | -0.319623 |  |
|  | Shiraz-22T | 1549 | 0        | -0.319623 |  |
|  | Shiraz-25T | 1698 | 0.21835  | 0         |  |
|  | Shiraz-25T | 1698 | 0.21835  | 0         |  |
|  | Shiraz-25T | 1698 | 0.21835  | 0         |  |
|  | Shiraz-25T | 1698 | 0.21835  | 0         |  |
|  | Shiraz-28T | 1735 | 0.350744 | 0         |  |
|  | Shiraz-28T | 1735 | 0.350744 | 0         |  |
|  | Shiraz-28T | 1735 | 0.350744 | 0         |  |
|  | Shiraz-28T | 1735 | 0.350744 | 0         |  |

|  |  |            |      |          |           |  |  |
|--|--|------------|------|----------|-----------|--|--|
|  |  | Shiraz-29T | 1778 | 0.120767 | 0         |  |  |
|  |  | Shiraz-29T | 1778 | 0.120767 | 0         |  |  |
|  |  | Shiraz-29T | 1778 | 0.120767 | 0         |  |  |
|  |  | Shiraz-29T | 1778 | 0.120767 | 0         |  |  |
|  |  | Shiraz-38T | 1951 | 0.250891 | 0         |  |  |
|  |  | Shiraz-38T | 1951 | 0.250891 | 0         |  |  |
|  |  | Shiraz-38T | 1951 | 0.250891 | 0         |  |  |
|  |  | Shiraz-38T | 1951 | 0.250891 | 0         |  |  |
|  |  | Shiraz-53T | 2078 | 0.287202 | 0         |  |  |
|  |  | Shiraz-53T | 2078 | 0.287202 | 0         |  |  |
|  |  | Shiraz-53T | 2078 | 0.287202 | 0         |  |  |
|  |  | Shiraz-53T | 2078 | 0.287202 | 0         |  |  |
|  |  | Shiraz-58T | 2159 | 0        | -0.219521 |  |  |
|  |  | Shiraz-58T | 2159 | 0        | -0.219521 |  |  |
|  |  | Shiraz-58T | 2159 | 0        | -0.219521 |  |  |
|  |  | Shiraz-58T | 2159 | 0        | -0.219521 |  |  |
|  |  | Shiraz-71T | 2238 | 0.603631 | 0         |  |  |
|  |  | Shiraz-71T | 2238 | 0.603631 | 0         |  |  |
|  |  | Shiraz-71T | 2238 | 0.603631 | 0         |  |  |
|  |  | Shiraz-71T | 2238 | 0.603631 | 0         |  |  |
|  |  | Shiraz-71T | 2239 | 0.310785 | 0         |  |  |
|  |  | Shiraz-71T | 2239 | 0.310785 | 0         |  |  |
|  |  | Shiraz-71T | 2239 | 0.310785 | 0         |  |  |
|  |  | Shiraz-71T | 2239 | 0.310785 | 0         |  |  |
|  |  | Shiraz-3T  | 90   | 0.219276 | 0         |  |  |
|  |  | Shiraz-3T  | 90   | 0.219276 | 0         |  |  |
|  |  | Shiraz-3T  | 90   | 0.219276 | 0         |  |  |
|  |  | Shiraz-3T  | 90   | 0.219276 | 0         |  |  |
|  |  | Shiraz-3T  | 93   | 0        | -0.058023 |  |  |
|  |  | Shiraz-3T  | 93   | 0        | -0.058023 |  |  |
|  |  | Shiraz-4T  | 253  | 0.372918 | 0         |  |  |
|  |  | Shiraz-4T  | 253  | 0.372918 | 0         |  |  |
|  |  | Shiraz-4T  | 253  | 0.372918 | 0         |  |  |
|  |  | Shiraz-4T  | 253  | 0.372918 | 0         |  |  |
|  |  | Shiraz-36T | 378  | 0.179558 | 0         |  |  |
|  |  | Shiraz-36T | 378  | 0.179558 | 0         |  |  |
|  |  | Shiraz-36T | 378  | 0.179558 | 0         |  |  |
|  |  | Shiraz-36T | 378  | 0.179558 | 0         |  |  |
|  |  | Shiraz-42T | 454  | 0.145717 | 0         |  |  |
|  |  | Shiraz-42T | 454  | 0.145717 | 0         |  |  |
|  |  | Shiraz-42T | 454  | 0.145717 | 0         |  |  |
|  |  | Shiraz-42T | 454  | 0.145717 | 0         |  |  |
|  |  | Shiraz-44T | 638  | 0        | -0.433476 |  |  |
|  |  | Shiraz-44T | 638  | 0        | -0.433476 |  |  |
|  |  | Shiraz-44T | 638  | 0        | -0.433476 |  |  |
|  |  | Shiraz-44T | 638  | 0        | -0.433476 |  |  |
|  |  | Shiraz-46T | 943  | 0.093799 | 0         |  |  |

|  |            |      |          |           |  |
|--|------------|------|----------|-----------|--|
|  | Shiraz-46T | 943  | 0.093799 | 0         |  |
|  | Shiraz-46T | 943  | 0.093799 | 0         |  |
|  | Shiraz-46T | 943  | 0.093799 | 0         |  |
|  | Shiraz-47T | 1029 | 0        | -0.096586 |  |
|  | Shiraz-47T | 1029 | 0        | -0.096586 |  |
|  | Shiraz-49T | 1119 | 0        | -0.157331 |  |
|  | Shiraz-49T | 1119 | 0        | -0.157331 |  |
|  | Shiraz-49T | 1119 | 0        | -0.157331 |  |
|  | Shiraz-49T | 1119 | 0        | -0.157331 |  |
|  | Shiraz-77T | 1225 | 0        | -0.117922 |  |
|  | Shiraz-77T | 1225 | 0        | -0.117922 |  |
|  | Shiraz-77T | 1225 | 0        | -0.117922 |  |
|  | Shiraz-77T | 1225 | 0        | -0.117922 |  |
|  | Shiraz-18T | 1434 | 0.244465 | 0         |  |
|  | Shiraz-18T | 1434 | 0.244465 | 0         |  |
|  | Shiraz-18T | 1434 | 0.244465 | 0         |  |
|  | Shiraz-18T | 1434 | 0.244465 | 0         |  |
|  | Shiraz-22T | 1549 | 0        | -0.319623 |  |
|  | Shiraz-22T | 1549 | 0        | -0.319623 |  |
|  | Shiraz-22T | 1549 | 0        | -0.319623 |  |
|  | Shiraz-22T | 1549 | 0        | -0.319623 |  |
|  | Shiraz-25T | 1698 | 0.21835  | 0         |  |
|  | Shiraz-25T | 1698 | 0.21835  | 0         |  |
|  | Shiraz-25T | 1698 | 0.21835  | 0         |  |
|  | Shiraz-25T | 1698 | 0.21835  | 0         |  |
|  | Shiraz-28T | 1735 | 0.350744 | 0         |  |
|  | Shiraz-28T | 1735 | 0.350744 | 0         |  |
|  | Shiraz-28T | 1735 | 0.350744 | 0         |  |
|  | Shiraz-28T | 1735 | 0.350744 | 0         |  |
|  | Shiraz-29T | 1778 | 0.120767 | 0         |  |
|  | Shiraz-29T | 1778 | 0.120767 | 0         |  |
|  | Shiraz-29T | 1778 | 0.120767 | 0         |  |
|  | Shiraz-29T | 1778 | 0.120767 | 0         |  |
|  | Shiraz-38T | 1951 | 0.250891 | 0         |  |
|  | Shiraz-38T | 1951 | 0.250891 | 0         |  |
|  | Shiraz-38T | 1951 | 0.250891 | 0         |  |
|  | Shiraz-38T | 1951 | 0.250891 | 0         |  |
|  | Shiraz-53T | 2078 | 0.287202 | 0         |  |
|  | Shiraz-53T | 2078 | 0.287202 | 0         |  |
|  | Shiraz-53T | 2078 | 0.287202 | 0         |  |
|  | Shiraz-53T | 2078 | 0.287202 | 0         |  |
|  | Shiraz-58T | 2159 | 0        | -0.219521 |  |
|  | Shiraz-58T | 2159 | 0        | -0.219521 |  |
|  | Shiraz-58T | 2159 | 0        | -0.219521 |  |
|  | Shiraz-58T | 2159 | 0        | -0.219521 |  |
|  | Shiraz-71T | 2238 | 0.603631 | 0         |  |
|  | Shiraz-71T | 2238 | 0.603631 | 0         |  |

|      |      |            |      |          |           |  |
|------|------|------------|------|----------|-----------|--|
|      |      | Shiraz-71T | 2238 | 0.603631 | 0         |  |
|      |      | Shiraz-71T | 2238 | 0.603631 | 0         |  |
|      |      | Shiraz-71T | 2239 | 0.310785 | 0         |  |
|      |      | Shiraz-71T | 2239 | 0.310785 | 0         |  |
|      |      | Shiraz-71T | 2239 | 0.310785 | 0         |  |
|      |      | Shiraz-71T | 2239 | 0.310785 | 0         |  |
| PIGA | chrX | Shiraz-3T  | 235  | 0        | -0.28401  |  |
|      |      | Shiraz-4T  | 260  | 0        | -0.324128 |  |
|      |      | Shiraz-16T | 294  | 0.655804 | 0         |  |
|      |      | Shiraz-36T | 431  | 0        | -0.78035  |  |
|      |      | Shiraz-44T | 891  | 0        | -0.954044 |  |
|      |      | Shiraz-49T | 1166 | 0        | -0.917235 |  |
|      |      | Shiraz-9T  | 1368 | 0.199713 | 0         |  |
|      |      | Shiraz-18T | 1455 | 0        | -0.186773 |  |
|      |      | Shiraz-22T | 1669 | 0.695915 | 0         |  |
|      |      | Shiraz-25T | 1717 | 0.420447 | 0         |  |
|      |      | Shiraz-28T | 1760 | 0.538181 | 0         |  |
|      |      | Shiraz-29T | 1800 | 0.672527 | 0         |  |
|      |      | Shiraz-32T | 1869 | 0.776805 | 0         |  |
|      |      | Shiraz-35T | 1932 | 0.507141 | 0         |  |
|      |      | Shiraz-40T | 2051 | 0.098506 | 0         |  |
|      |      | Shiraz-58T | 2221 | 0.871948 | 0         |  |
|      |      | Shiraz-71T | 2260 | 0.68394  | 0         |  |
|      |      | Shiraz-71T | 2261 | 0.508399 | 0         |  |
|      |      | Shiraz-3T  | 235  | 0        | -0.28401  |  |
|      |      | Shiraz-4T  | 260  | 0        | -0.324128 |  |
|      |      | Shiraz-16T | 294  | 0.655804 | 0         |  |
|      |      | Shiraz-36T | 431  | 0        | -0.78035  |  |
|      |      | Shiraz-44T | 891  | 0        | -0.954044 |  |
|      |      | Shiraz-49T | 1166 | 0        | -0.917235 |  |
|      |      | Shiraz-9T  | 1368 | 0.199713 | 0         |  |
|      |      | Shiraz-18T | 1455 | 0        | -0.186773 |  |
|      |      | Shiraz-22T | 1669 | 0.695915 | 0         |  |
|      |      | Shiraz-25T | 1717 | 0.420447 | 0         |  |
|      |      | Shiraz-28T | 1760 | 0.538181 | 0         |  |
|      |      | Shiraz-29T | 1800 | 0.672527 | 0         |  |
|      |      | Shiraz-32T | 1869 | 0.776805 | 0         |  |
|      |      | Shiraz-35T | 1932 | 0.507141 | 0         |  |
|      |      | Shiraz-40T | 2051 | 0.098506 | 0         |  |
|      |      | Shiraz-58T | 2221 | 0.871948 | 0         |  |
|      |      | Shiraz-71T | 2260 | 0.68394  | 0         |  |
|      |      | Shiraz-71T | 2261 | 0.508399 | 0         |  |
|      |      | Shiraz-3T  | 235  | 0        | -0.28401  |  |
|      |      | Shiraz-4T  | 260  | 0        | -0.324128 |  |
|      |      | Shiraz-16T | 294  | 0.655804 | 0         |  |
|      |      | Shiraz-36T | 431  | 0        | -0.78035  |  |
|      |      | Shiraz-44T | 891  | 0        | -0.954044 |  |

|        |      |            |      |          |           |  |  |
|--------|------|------------|------|----------|-----------|--|--|
|        |      | Shiraz-49T | 1166 | 0        | -0.917235 |  |  |
|        |      | Shiraz-9T  | 1368 | 0.199713 | 0         |  |  |
|        |      | Shiraz-18T | 1455 | 0        | -0.186773 |  |  |
|        |      | Shiraz-22T | 1669 | 0.695915 | 0         |  |  |
|        |      | Shiraz-25T | 1717 | 0.420447 | 0         |  |  |
|        |      | Shiraz-28T | 1760 | 0.538181 | 0         |  |  |
|        |      | Shiraz-29T | 1800 | 0.672527 | 0         |  |  |
|        |      | Shiraz-32T | 1869 | 0.776805 | 0         |  |  |
|        |      | Shiraz-35T | 1932 | 0.507141 | 0         |  |  |
|        |      | Shiraz-40T | 2051 | 0.098506 | 0         |  |  |
|        |      | Shiraz-58T | 2221 | 0.871948 | 0         |  |  |
|        |      | Shiraz-71T | 2260 | 0.68394  | 0         |  |  |
|        |      | Shiraz-71T | 2261 | 0.508399 | 0         |  |  |
| PIK3CG | chr7 | Shiraz-3T  | 90   | 0.219276 | 0         |  |  |
|        |      | Shiraz-4T  | 253  | 0.372918 | 0         |  |  |
|        |      | Shiraz-36T | 378  | 0.179558 | 0         |  |  |
|        |      | Shiraz-46T | 943  | 0.093799 | 0         |  |  |
|        |      | Shiraz-77T | 1225 | 0        | -0.117922 |  |  |
|        |      | Shiraz-18T | 1434 | 0.244465 | 0         |  |  |
|        |      | Shiraz-22T | 1549 | 0        | -0.319623 |  |  |
|        |      | Shiraz-25T | 1698 | 0.21835  | 0         |  |  |
|        |      | Shiraz-28T | 1735 | 0.350744 | 0         |  |  |
|        |      | Shiraz-29T | 1778 | 0.120767 | 0         |  |  |
|        |      | Shiraz-32T | 1833 | 0.551336 | 0         |  |  |
|        |      | Shiraz-38T | 1951 | 0.250891 | 0         |  |  |
|        |      | Shiraz-53T | 2078 | 0.287202 | 0         |  |  |
|        |      | Shiraz-71T | 2238 | 0.603631 | 0         |  |  |
|        |      | Shiraz-3T  | 90   | 0.219276 | 0         |  |  |
|        |      | Shiraz-4T  | 253  | 0.372918 | 0         |  |  |
|        |      | Shiraz-36T | 378  | 0.179558 | 0         |  |  |
|        |      | Shiraz-46T | 943  | 0.093799 | 0         |  |  |
|        |      | Shiraz-77T | 1225 | 0        | -0.117922 |  |  |
|        |      | Shiraz-18T | 1434 | 0.244465 | 0         |  |  |
|        |      | Shiraz-22T | 1549 | 0        | -0.319623 |  |  |
|        |      | Shiraz-25T | 1698 | 0.21835  | 0         |  |  |
|        |      | Shiraz-28T | 1735 | 0.350744 | 0         |  |  |
|        |      | Shiraz-29T | 1778 | 0.120767 | 0         |  |  |
|        |      | Shiraz-32T | 1833 | 0.551336 | 0         |  |  |
|        |      | Shiraz-38T | 1951 | 0.250891 | 0         |  |  |
|        |      | Shiraz-53T | 2078 | 0.287202 | 0         |  |  |
|        |      | Shiraz-71T | 2238 | 0.603631 | 0         |  |  |
|        |      | Shiraz-3T  | 90   | 0.219276 | 0         |  |  |
|        |      | Shiraz-4T  | 253  | 0.372918 | 0         |  |  |
|        |      | Shiraz-36T | 378  | 0.179558 | 0         |  |  |
|        |      | Shiraz-46T | 943  | 0.093799 | 0         |  |  |
|        |      | Shiraz-77T | 1225 | 0        | -0.117922 |  |  |
|        |      | Shiraz-18T | 1434 | 0.244465 | 0         |  |  |

|       |      |            |      |          |           |  |  |
|-------|------|------------|------|----------|-----------|--|--|
|       |      | Shiraz-22T | 1549 | 0        | -0.319623 |  |  |
|       |      | Shiraz-25T | 1698 | 0.21835  | 0         |  |  |
|       |      | Shiraz-28T | 1735 | 0.350744 | 0         |  |  |
|       |      | Shiraz-29T | 1778 | 0.120767 | 0         |  |  |
|       |      | Shiraz-32T | 1833 | 0.551336 | 0         |  |  |
|       |      | Shiraz-38T | 1951 | 0.250891 | 0         |  |  |
|       |      | Shiraz-53T | 2078 | 0.287202 | 0         |  |  |
|       |      | Shiraz-71T | 2238 | 0.603631 | 0         |  |  |
| PILRA | chr7 | Shiraz-3T  | 90   | 0.219276 | 0         |  |  |
|       |      | Shiraz-3T  | 94   | 0.74735  | 0         |  |  |
|       |      | Shiraz-4T  | 253  | 0.372918 | 0         |  |  |
|       |      | Shiraz-31T | 316  | 0.219196 | 0         |  |  |
|       |      | Shiraz-36T | 378  | 0.179558 | 0         |  |  |
|       |      | Shiraz-36T | 381  | 0.332628 | 0         |  |  |
|       |      | Shiraz-44T | 639  | 1.035032 | 0         |  |  |
|       |      | Shiraz-46T | 943  | 0.093799 | 0         |  |  |
|       |      | Shiraz-46T | 946  | 0.299835 | 0         |  |  |
|       |      | Shiraz-47T | 1030 | 0.257728 | 0         |  |  |
|       |      | Shiraz-49T | 1120 | 0.281656 | 0         |  |  |
|       |      | Shiraz-77T | 1225 | 0        | -0.117922 |  |  |
|       |      | Shiraz-77T | 1227 | 0.196445 | 0         |  |  |
|       |      | Shiraz-9T  | 1324 | 0.679266 | 0         |  |  |
|       |      | Shiraz-18T | 1434 | 0.244465 | 0         |  |  |
|       |      | Shiraz-22T | 1549 | 0        | -0.319623 |  |  |
|       |      | Shiraz-22T | 1551 | 0.324011 | 0         |  |  |
|       |      | Shiraz-25T | 1698 | 0.21835  | 0         |  |  |
|       |      | Shiraz-28T | 1735 | 0.350744 | 0         |  |  |
|       |      | Shiraz-29T | 1778 | 0.120767 | 0         |  |  |
|       |      | Shiraz-32T | 1833 | 0.551336 | 0         |  |  |
|       |      | Shiraz-32T | 1834 | 1.485392 | 0         |  |  |
|       |      | Shiraz-38T | 1951 | 0.250891 | 0         |  |  |
|       |      | Shiraz-53T | 2078 | 0.287202 | 0         |  |  |
|       |      | Shiraz-58T | 2160 | 0.399007 | 0         |  |  |
|       |      | Shiraz-71T | 2238 | 0.603631 | 0         |  |  |
|       |      | Shiraz-3T  | 90   | 0.219276 | 0         |  |  |
|       |      | Shiraz-3T  | 94   | 0.74735  | 0         |  |  |
|       |      | Shiraz-4T  | 253  | 0.372918 | 0         |  |  |
|       |      | Shiraz-31T | 316  | 0.219196 | 0         |  |  |
|       |      | Shiraz-36T | 378  | 0.179558 | 0         |  |  |
|       |      | Shiraz-36T | 381  | 0.332628 | 0         |  |  |
|       |      | Shiraz-44T | 639  | 1.035032 | 0         |  |  |
|       |      | Shiraz-46T | 943  | 0.093799 | 0         |  |  |
|       |      | Shiraz-46T | 946  | 0.299835 | 0         |  |  |
|       |      | Shiraz-47T | 1030 | 0.257728 | 0         |  |  |
|       |      | Shiraz-49T | 1120 | 0.281656 | 0         |  |  |
|       |      | Shiraz-77T | 1225 | 0        | -0.117922 |  |  |
|       |      | Shiraz-77T | 1227 | 0.196445 | 0         |  |  |

|       |      |            |      |          |           |  |
|-------|------|------------|------|----------|-----------|--|
|       |      | Shiraz-9T  | 1324 | 0.679266 | 0         |  |
|       |      | Shiraz-18T | 1434 | 0.244465 | 0         |  |
|       |      | Shiraz-22T | 1549 | 0        | -0.319623 |  |
|       |      | Shiraz-22T | 1551 | 0.324011 | 0         |  |
|       |      | Shiraz-25T | 1698 | 0.21835  | 0         |  |
|       |      | Shiraz-28T | 1735 | 0.350744 | 0         |  |
|       |      | Shiraz-29T | 1778 | 0.120767 | 0         |  |
|       |      | Shiraz-32T | 1833 | 0.551336 | 0         |  |
|       |      | Shiraz-32T | 1834 | 1.485392 | 0         |  |
|       |      | Shiraz-38T | 1951 | 0.250891 | 0         |  |
|       |      | Shiraz-53T | 2078 | 0.287202 | 0         |  |
|       |      | Shiraz-58T | 2160 | 0.399007 | 0         |  |
|       |      | Shiraz-71T | 2238 | 0.603631 | 0         |  |
|       |      | Shiraz-3T  | 90   | 0.219276 | 0         |  |
|       |      | Shiraz-3T  | 94   | 0.74735  | 0         |  |
|       |      | Shiraz-4T  | 253  | 0.372918 | 0         |  |
|       |      | Shiraz-31T | 316  | 0.219196 | 0         |  |
|       |      | Shiraz-36T | 378  | 0.179558 | 0         |  |
|       |      | Shiraz-36T | 381  | 0.332628 | 0         |  |
|       |      | Shiraz-44T | 639  | 1.035032 | 0         |  |
|       |      | Shiraz-46T | 943  | 0.093799 | 0         |  |
|       |      | Shiraz-46T | 946  | 0.299835 | 0         |  |
|       |      | Shiraz-47T | 1030 | 0.257728 | 0         |  |
|       |      | Shiraz-49T | 1120 | 0.281656 | 0         |  |
|       |      | Shiraz-77T | 1225 | 0        | -0.117922 |  |
|       |      | Shiraz-77T | 1227 | 0.196445 | 0         |  |
|       |      | Shiraz-9T  | 1324 | 0.679266 | 0         |  |
|       |      | Shiraz-18T | 1434 | 0.244465 | 0         |  |
|       |      | Shiraz-22T | 1549 | 0        | -0.319623 |  |
|       |      | Shiraz-22T | 1551 | 0.324011 | 0         |  |
|       |      | Shiraz-25T | 1698 | 0.21835  | 0         |  |
|       |      | Shiraz-28T | 1735 | 0.350744 | 0         |  |
|       |      | Shiraz-29T | 1778 | 0.120767 | 0         |  |
|       |      | Shiraz-32T | 1833 | 0.551336 | 0         |  |
|       |      | Shiraz-32T | 1834 | 1.485392 | 0         |  |
|       |      | Shiraz-38T | 1951 | 0.250891 | 0         |  |
|       |      | Shiraz-53T | 2078 | 0.287202 | 0         |  |
|       |      | Shiraz-58T | 2160 | 0.399007 | 0         |  |
|       |      | Shiraz-71T | 2238 | 0.603631 | 0         |  |
| PILRB | chr7 | Shiraz-3T  | 90   | 0.219276 | 0         |  |
|       |      | Shiraz-3T  | 90   | 0.219276 | 0         |  |
|       |      | Shiraz-3T  | 94   | 0.74735  | 0         |  |
|       |      | Shiraz-3T  | 94   | 0.74735  | 0         |  |
|       |      | Shiraz-4T  | 253  | 0.372918 | 0         |  |
|       |      | Shiraz-4T  | 253  | 0.372918 | 0         |  |
|       |      | Shiraz-31T | 316  | 0.219196 | 0         |  |
|       |      | Shiraz-31T | 316  | 0.219196 | 0         |  |

|  |            |      |          |           |  |
|--|------------|------|----------|-----------|--|
|  | Shiraz-36T | 378  | 0.179558 | 0         |  |
|  | Shiraz-36T | 378  | 0.179558 | 0         |  |
|  | Shiraz-36T | 381  | 0.332628 | 0         |  |
|  | Shiraz-36T | 381  | 0.332628 | 0         |  |
|  | Shiraz-44T | 639  | 1.035032 | 0         |  |
|  | Shiraz-44T | 639  | 1.035032 | 0         |  |
|  | Shiraz-46T | 943  | 0.093799 | 0         |  |
|  | Shiraz-46T | 943  | 0.093799 | 0         |  |
|  | Shiraz-46T | 946  | 0.299835 | 0         |  |
|  | Shiraz-46T | 946  | 0.299835 | 0         |  |
|  | Shiraz-47T | 1030 | 0.257728 | 0         |  |
|  | Shiraz-47T | 1030 | 0.257728 | 0         |  |
|  | Shiraz-49T | 1120 | 0.281656 | 0         |  |
|  | Shiraz-49T | 1120 | 0.281656 | 0         |  |
|  | Shiraz-77T | 1225 | 0        | -0.117922 |  |
|  | Shiraz-77T | 1225 | 0        | -0.117922 |  |
|  | Shiraz-77T | 1227 | 0.196445 | 0         |  |
|  | Shiraz-77T | 1227 | 0.196445 | 0         |  |
|  | Shiraz-9T  | 1324 | 0.679266 | 0         |  |
|  | Shiraz-9T  | 1324 | 0.679266 | 0         |  |
|  | Shiraz-18T | 1434 | 0.244465 | 0         |  |
|  | Shiraz-18T | 1434 | 0.244465 | 0         |  |
|  | Shiraz-22T | 1549 | 0        | -0.319623 |  |
|  | Shiraz-22T | 1549 | 0        | -0.319623 |  |
|  | Shiraz-22T | 1551 | 0.324011 | 0         |  |
|  | Shiraz-22T | 1551 | 0.324011 | 0         |  |
|  | Shiraz-25T | 1698 | 0.21835  | 0         |  |
|  | Shiraz-25T | 1698 | 0.21835  | 0         |  |
|  | Shiraz-28T | 1735 | 0.350744 | 0         |  |
|  | Shiraz-28T | 1735 | 0.350744 | 0         |  |
|  | Shiraz-29T | 1778 | 0.120767 | 0         |  |
|  | Shiraz-29T | 1778 | 0.120767 | 0         |  |
|  | Shiraz-32T | 1833 | 0.551336 | 0         |  |
|  | Shiraz-32T | 1833 | 0.551336 | 0         |  |
|  | Shiraz-32T | 1834 | 1.485392 | 0         |  |
|  | Shiraz-32T | 1834 | 1.485392 | 0         |  |
|  | Shiraz-38T | 1951 | 0.250891 | 0         |  |
|  | Shiraz-38T | 1951 | 0.250891 | 0         |  |
|  | Shiraz-53T | 2078 | 0.287202 | 0         |  |
|  | Shiraz-53T | 2078 | 0.287202 | 0         |  |
|  | Shiraz-58T | 2160 | 0.399007 | 0         |  |
|  | Shiraz-58T | 2160 | 0.399007 | 0         |  |
|  | Shiraz-71T | 2238 | 0.603631 | 0         |  |
|  | Shiraz-71T | 2238 | 0.603631 | 0         |  |
|  | Shiraz-3T  | 90   | 0.219276 | 0         |  |
|  | Shiraz-3T  | 90   | 0.219276 | 0         |  |
|  | Shiraz-3T  | 94   | 0.74735  | 0         |  |



|  |            |      |          |           |  |
|--|------------|------|----------|-----------|--|
|  | Shiraz-3T  | 94   | 0.74735  | 0         |  |
|  | Shiraz-4T  | 253  | 0.372918 | 0         |  |
|  | Shiraz-4T  | 253  | 0.372918 | 0         |  |
|  | Shiraz-31T | 316  | 0.219196 | 0         |  |
|  | Shiraz-31T | 316  | 0.219196 | 0         |  |
|  | Shiraz-36T | 378  | 0.179558 | 0         |  |
|  | Shiraz-36T | 378  | 0.179558 | 0         |  |
|  | Shiraz-36T | 381  | 0.332628 | 0         |  |
|  | Shiraz-36T | 381  | 0.332628 | 0         |  |
|  | Shiraz-44T | 639  | 1.035032 | 0         |  |
|  | Shiraz-44T | 639  | 1.035032 | 0         |  |
|  | Shiraz-46T | 943  | 0.093799 | 0         |  |
|  | Shiraz-46T | 943  | 0.093799 | 0         |  |
|  | Shiraz-46T | 946  | 0.299835 | 0         |  |
|  | Shiraz-46T | 946  | 0.299835 | 0         |  |
|  | Shiraz-47T | 1030 | 0.257728 | 0         |  |
|  | Shiraz-47T | 1030 | 0.257728 | 0         |  |
|  | Shiraz-49T | 1120 | 0.281656 | 0         |  |
|  | Shiraz-49T | 1120 | 0.281656 | 0         |  |
|  | Shiraz-77T | 1225 | 0        | -0.117922 |  |
|  | Shiraz-77T | 1225 | 0        | -0.117922 |  |
|  | Shiraz-77T | 1227 | 0.196445 | 0         |  |
|  | Shiraz-77T | 1227 | 0.196445 | 0         |  |
|  | Shiraz-9T  | 1324 | 0.679266 | 0         |  |
|  | Shiraz-9T  | 1324 | 0.679266 | 0         |  |
|  | Shiraz-18T | 1434 | 0.244465 | 0         |  |
|  | Shiraz-18T | 1434 | 0.244465 | 0         |  |
|  | Shiraz-22T | 1549 | 0        | -0.319623 |  |
|  | Shiraz-22T | 1549 | 0        | -0.319623 |  |
|  | Shiraz-22T | 1551 | 0.324011 | 0         |  |
|  | Shiraz-22T | 1551 | 0.324011 | 0         |  |
|  | Shiraz-25T | 1698 | 0.21835  | 0         |  |
|  | Shiraz-25T | 1698 | 0.21835  | 0         |  |
|  | Shiraz-28T | 1735 | 0.350744 | 0         |  |
|  | Shiraz-28T | 1735 | 0.350744 | 0         |  |
|  | Shiraz-29T | 1778 | 0.120767 | 0         |  |
|  | Shiraz-29T | 1778 | 0.120767 | 0         |  |
|  | Shiraz-32T | 1833 | 0.551336 | 0         |  |
|  | Shiraz-32T | 1833 | 0.551336 | 0         |  |
|  | Shiraz-32T | 1834 | 1.485392 | 0         |  |
|  | Shiraz-32T | 1834 | 1.485392 | 0         |  |
|  | Shiraz-38T | 1951 | 0.250891 | 0         |  |
|  | Shiraz-38T | 1951 | 0.250891 | 0         |  |
|  | Shiraz-53T | 2078 | 0.287202 | 0         |  |
|  | Shiraz-53T | 2078 | 0.287202 | 0         |  |
|  | Shiraz-58T | 2160 | 0.399007 | 0         |  |
|  | Shiraz-58T | 2160 | 0.399007 | 0         |  |

|  |  |            |      |          |           |  |
|--|--|------------|------|----------|-----------|--|
|  |  | Shiraz-71T | 2238 | 0.603631 | 0         |  |
|  |  | Shiraz-71T | 2238 | 0.603631 | 0         |  |
|  |  | Shiraz-3T  | 90   | 0.219276 | 0         |  |
|  |  | Shiraz-3T  | 90   | 0.219276 | 0         |  |
|  |  | Shiraz-3T  | 94   | 0.74735  | 0         |  |
|  |  | Shiraz-3T  | 94   | 0.74735  | 0         |  |
|  |  | Shiraz-4T  | 253  | 0.372918 | 0         |  |
|  |  | Shiraz-4T  | 253  | 0.372918 | 0         |  |
|  |  | Shiraz-31T | 316  | 0.219196 | 0         |  |
|  |  | Shiraz-31T | 316  | 0.219196 | 0         |  |
|  |  | Shiraz-36T | 378  | 0.179558 | 0         |  |
|  |  | Shiraz-36T | 378  | 0.179558 | 0         |  |
|  |  | Shiraz-36T | 381  | 0.332628 | 0         |  |
|  |  | Shiraz-36T | 381  | 0.332628 | 0         |  |
|  |  | Shiraz-44T | 639  | 1.035032 | 0         |  |
|  |  | Shiraz-44T | 639  | 1.035032 | 0         |  |
|  |  | Shiraz-46T | 943  | 0.093799 | 0         |  |
|  |  | Shiraz-46T | 943  | 0.093799 | 0         |  |
|  |  | Shiraz-46T | 946  | 0.299835 | 0         |  |
|  |  | Shiraz-46T | 946  | 0.299835 | 0         |  |
|  |  | Shiraz-47T | 1030 | 0.257728 | 0         |  |
|  |  | Shiraz-47T | 1030 | 0.257728 | 0         |  |
|  |  | Shiraz-49T | 1120 | 0.281656 | 0         |  |
|  |  | Shiraz-49T | 1120 | 0.281656 | 0         |  |
|  |  | Shiraz-77T | 1225 | 0        | -0.117922 |  |
|  |  | Shiraz-77T | 1225 | 0        | -0.117922 |  |
|  |  | Shiraz-77T | 1227 | 0.196445 | 0         |  |
|  |  | Shiraz-77T | 1227 | 0.196445 | 0         |  |
|  |  | Shiraz-9T  | 1324 | 0.679266 | 0         |  |
|  |  | Shiraz-9T  | 1324 | 0.679266 | 0         |  |
|  |  | Shiraz-18T | 1434 | 0.244465 | 0         |  |
|  |  | Shiraz-18T | 1434 | 0.244465 | 0         |  |
|  |  | Shiraz-22T | 1549 | 0        | -0.319623 |  |
|  |  | Shiraz-22T | 1549 | 0        | -0.319623 |  |
|  |  | Shiraz-22T | 1551 | 0.324011 | 0         |  |
|  |  | Shiraz-22T | 1551 | 0.324011 | 0         |  |
|  |  | Shiraz-25T | 1698 | 0.21835  | 0         |  |
|  |  | Shiraz-25T | 1698 | 0.21835  | 0         |  |
|  |  | Shiraz-28T | 1735 | 0.350744 | 0         |  |
|  |  | Shiraz-28T | 1735 | 0.350744 | 0         |  |
|  |  | Shiraz-29T | 1778 | 0.120767 | 0         |  |
|  |  | Shiraz-29T | 1778 | 0.120767 | 0         |  |
|  |  | Shiraz-32T | 1833 | 0.551336 | 0         |  |
|  |  | Shiraz-32T | 1833 | 0.551336 | 0         |  |
|  |  | Shiraz-32T | 1834 | 1.485392 | 0         |  |
|  |  | Shiraz-32T | 1834 | 1.485392 | 0         |  |
|  |  | Shiraz-38T | 1951 | 0.250891 | 0         |  |

|      |      |            |      |          |           |  |
|------|------|------------|------|----------|-----------|--|
|      |      | Shiraz-38T | 1951 | 0.250891 | 0         |  |
|      |      | Shiraz-53T | 2078 | 0.287202 | 0         |  |
|      |      | Shiraz-53T | 2078 | 0.287202 | 0         |  |
|      |      | Shiraz-58T | 2160 | 0.399007 | 0         |  |
|      |      | Shiraz-58T | 2160 | 0.399007 | 0         |  |
|      |      | Shiraz-71T | 2238 | 0.603631 | 0         |  |
|      |      | Shiraz-71T | 2238 | 0.603631 | 0         |  |
| PIM2 | chrX | Shiraz-3T  | 238  | 0.472087 | 0         |  |
|      |      | Shiraz-4T  | 260  | 0        | -0.324128 |  |
|      |      | Shiraz-16T | 294  | 0.655804 | 0         |  |
|      |      | Shiraz-31T | 345  | 0.103301 | 0         |  |
|      |      | Shiraz-36T | 431  | 0        | -0.78035  |  |
|      |      | Shiraz-36T | 432  | 0        | -0.6692   |  |
|      |      | Shiraz-44T | 891  | 0        | -0.954044 |  |
|      |      | Shiraz-44T | 896  | 0        | -0.109108 |  |
|      |      | Shiraz-44T | 897  | 0.486937 | 0         |  |
|      |      | Shiraz-46T | 991  | 0.139564 | 0         |  |
|      |      | Shiraz-47T | 1084 | 0.24185  | 0         |  |
|      |      | Shiraz-49T | 1166 | 0        | -0.917235 |  |
|      |      | Shiraz-49T | 1169 | 0        | -0.583529 |  |
|      |      | Shiraz-77T | 1282 | 0.213849 | 0         |  |
|      |      | Shiraz-9T  | 1368 | 0.199713 | 0         |  |
|      |      | Shiraz-9T  | 1369 | 0.703374 | 0         |  |
|      |      | Shiraz-18T | 1455 | 0        | -0.186773 |  |
|      |      | Shiraz-22T | 1669 | 0.695915 | 0         |  |
|      |      | Shiraz-22T | 1672 | 1.01678  | 0         |  |
|      |      | Shiraz-25T | 1717 | 0.420447 | 0         |  |
|      |      | Shiraz-28T | 1760 | 0.538181 | 0         |  |
|      |      | Shiraz-29T | 1800 | 0.672527 | 0         |  |
|      |      | Shiraz-32T | 1869 | 0.776805 | 0         |  |
|      |      | Shiraz-35T | 1932 | 0.507141 | 0         |  |
|      |      | Shiraz-58T | 2221 | 0.871948 | 0         |  |
|      |      | Shiraz-71T | 2260 | 0.68394  | 0         |  |
|      |      | Shiraz-71T | 2262 | 0.986748 | 0         |  |
|      |      | Shiraz-3T  | 238  | 0.472087 | 0         |  |
|      |      | Shiraz-4T  | 260  | 0        | -0.324128 |  |
|      |      | Shiraz-16T | 294  | 0.655804 | 0         |  |
|      |      | Shiraz-31T | 345  | 0.103301 | 0         |  |
|      |      | Shiraz-36T | 431  | 0        | -0.78035  |  |
|      |      | Shiraz-36T | 432  | 0        | -0.6692   |  |
|      |      | Shiraz-44T | 891  | 0        | -0.954044 |  |
|      |      | Shiraz-44T | 896  | 0        | -0.109108 |  |
|      |      | Shiraz-44T | 897  | 0.486937 | 0         |  |
|      |      | Shiraz-46T | 991  | 0.139564 | 0         |  |
|      |      | Shiraz-47T | 1084 | 0.24185  | 0         |  |
|      |      | Shiraz-49T | 1166 | 0        | -0.917235 |  |
|      |      | Shiraz-49T | 1169 | 0        | -0.583529 |  |

|      |      |            |      |          |           |  |
|------|------|------------|------|----------|-----------|--|
|      |      | Shiraz-77T | 1282 | 0.213849 | 0         |  |
|      |      | Shiraz-9T  | 1368 | 0.199713 | 0         |  |
|      |      | Shiraz-9T  | 1369 | 0.703374 | 0         |  |
|      |      | Shiraz-18T | 1455 | 0        | -0.186773 |  |
|      |      | Shiraz-22T | 1669 | 0.695915 | 0         |  |
|      |      | Shiraz-22T | 1672 | 1.01678  | 0         |  |
|      |      | Shiraz-25T | 1717 | 0.420447 | 0         |  |
|      |      | Shiraz-28T | 1760 | 0.538181 | 0         |  |
|      |      | Shiraz-29T | 1800 | 0.672527 | 0         |  |
|      |      | Shiraz-32T | 1869 | 0.776805 | 0         |  |
|      |      | Shiraz-35T | 1932 | 0.507141 | 0         |  |
|      |      | Shiraz-58T | 2221 | 0.871948 | 0         |  |
|      |      | Shiraz-71T | 2260 | 0.68394  | 0         |  |
|      |      | Shiraz-71T | 2262 | 0.986748 | 0         |  |
|      |      | Shiraz-3T  | 238  | 0.472087 | 0         |  |
|      |      | Shiraz-4T  | 260  | 0        | -0.324128 |  |
|      |      | Shiraz-16T | 294  | 0.655804 | 0         |  |
|      |      | Shiraz-31T | 345  | 0.103301 | 0         |  |
|      |      | Shiraz-36T | 431  | 0        | -0.78035  |  |
|      |      | Shiraz-36T | 432  | 0        | -0.6692   |  |
|      |      | Shiraz-44T | 891  | 0        | -0.954044 |  |
|      |      | Shiraz-44T | 896  | 0        | -0.109108 |  |
|      |      | Shiraz-44T | 897  | 0.486937 | 0         |  |
|      |      | Shiraz-46T | 991  | 0.139564 | 0         |  |
|      |      | Shiraz-47T | 1084 | 0.24185  | 0         |  |
|      |      | Shiraz-49T | 1166 | 0        | -0.917235 |  |
|      |      | Shiraz-49T | 1169 | 0        | -0.583529 |  |
|      |      | Shiraz-77T | 1282 | 0.213849 | 0         |  |
|      |      | Shiraz-9T  | 1368 | 0.199713 | 0         |  |
|      |      | Shiraz-9T  | 1369 | 0.703374 | 0         |  |
|      |      | Shiraz-18T | 1455 | 0        | -0.186773 |  |
|      |      | Shiraz-22T | 1669 | 0.695915 | 0         |  |
|      |      | Shiraz-22T | 1672 | 1.01678  | 0         |  |
|      |      | Shiraz-25T | 1717 | 0.420447 | 0         |  |
|      |      | Shiraz-28T | 1760 | 0.538181 | 0         |  |
|      |      | Shiraz-29T | 1800 | 0.672527 | 0         |  |
|      |      | Shiraz-32T | 1869 | 0.776805 | 0         |  |
|      |      | Shiraz-35T | 1932 | 0.507141 | 0         |  |
|      |      | Shiraz-58T | 2221 | 0.871948 | 0         |  |
|      |      | Shiraz-71T | 2260 | 0.68394  | 0         |  |
|      |      | Shiraz-71T | 2262 | 0.986748 | 0         |  |
| PIN4 | chrX | Shiraz-4T  | 261  | 0        | -0.336249 |  |
|      |      | Shiraz-16T | 295  | 0.591657 | 0         |  |
|      |      | Shiraz-36T | 433  | 0        | -0.803961 |  |
|      |      | Shiraz-44T | 899  | 0        | -1.09697  |  |
|      |      | Shiraz-44T | 900  | 0        | -0.584284 |  |
|      |      | Shiraz-49T | 1170 | 0        | -0.967436 |  |

|  |            |      |          |           |  |
|--|------------|------|----------|-----------|--|
|  | Shiraz-49T | 1171 | 0        | -0.612379 |  |
|  | Shiraz-77T | 1283 | 0.296555 | 0         |  |
|  | Shiraz-18T | 1457 | 0.643204 | 0         |  |
|  | Shiraz-22T | 1673 | 0.611783 | 0         |  |
|  | Shiraz-22T | 1674 | 0.887899 | 0         |  |
|  | Shiraz-25T | 1719 | 0.472955 | 0         |  |
|  | Shiraz-28T | 1762 | 0.562311 | 0         |  |
|  | Shiraz-29T | 1801 | 0.815343 | 0         |  |
|  | Shiraz-32T | 1870 | 0.729766 | 0         |  |
|  | Shiraz-35T | 1933 | 0.488535 | 0         |  |
|  | Shiraz-58T | 2223 | 0.833364 | 0         |  |
|  | Shiraz-58T | 2224 | 1.076575 | 0         |  |
|  | Shiraz-71T | 2263 | 0.975531 | 0         |  |
|  | Shiraz-4T  | 261  | 0        | -0.336249 |  |
|  | Shiraz-16T | 295  | 0.591657 | 0         |  |
|  | Shiraz-36T | 433  | 0        | -0.803961 |  |
|  | Shiraz-44T | 899  | 0        | -1.09697  |  |
|  | Shiraz-44T | 900  | 0        | -0.584284 |  |
|  | Shiraz-49T | 1170 | 0        | -0.967436 |  |
|  | Shiraz-49T | 1171 | 0        | -0.612379 |  |
|  | Shiraz-77T | 1283 | 0.296555 | 0         |  |
|  | Shiraz-18T | 1457 | 0.643204 | 0         |  |
|  | Shiraz-22T | 1673 | 0.611783 | 0         |  |
|  | Shiraz-22T | 1674 | 0.887899 | 0         |  |
|  | Shiraz-25T | 1719 | 0.472955 | 0         |  |
|  | Shiraz-28T | 1762 | 0.562311 | 0         |  |
|  | Shiraz-29T | 1801 | 0.815343 | 0         |  |
|  | Shiraz-32T | 1870 | 0.729766 | 0         |  |
|  | Shiraz-35T | 1933 | 0.488535 | 0         |  |
|  | Shiraz-58T | 2223 | 0.833364 | 0         |  |
|  | Shiraz-58T | 2224 | 1.076575 | 0         |  |
|  | Shiraz-71T | 2263 | 0.975531 | 0         |  |
|  | Shiraz-4T  | 261  | 0        | -0.336249 |  |
|  | Shiraz-16T | 295  | 0.591657 | 0         |  |
|  | Shiraz-36T | 433  | 0        | -0.803961 |  |
|  | Shiraz-44T | 899  | 0        | -1.09697  |  |
|  | Shiraz-44T | 900  | 0        | -0.584284 |  |
|  | Shiraz-49T | 1170 | 0        | -0.967436 |  |
|  | Shiraz-49T | 1171 | 0        | -0.612379 |  |
|  | Shiraz-77T | 1283 | 0.296555 | 0         |  |
|  | Shiraz-18T | 1457 | 0.643204 | 0         |  |
|  | Shiraz-22T | 1673 | 0.611783 | 0         |  |
|  | Shiraz-22T | 1674 | 0.887899 | 0         |  |
|  | Shiraz-25T | 1719 | 0.472955 | 0         |  |
|  | Shiraz-28T | 1762 | 0.562311 | 0         |  |
|  | Shiraz-29T | 1801 | 0.815343 | 0         |  |
|  | Shiraz-32T | 1870 | 0.729766 | 0         |  |

|      |      |            |      |          |           |  |  |
|------|------|------------|------|----------|-----------|--|--|
|      |      | Shiraz-35T | 1933 | 0.488535 | 0         |  |  |
|      |      | Shiraz-58T | 2223 | 0.833364 | 0         |  |  |
|      |      | Shiraz-58T | 2224 | 1.076575 | 0         |  |  |
|      |      | Shiraz-71T | 2263 | 0.975531 | 0         |  |  |
| PION | chr7 | Shiraz-3T  | 90   | 0.219276 | 0         |  |  |
|      |      | Shiraz-4T  | 253  | 0.372918 | 0         |  |  |
|      |      | Shiraz-31T | 315  | 0.194054 | 0         |  |  |
|      |      | Shiraz-36T | 378  | 0.179558 | 0         |  |  |
|      |      | Shiraz-36T | 379  | 0.322028 | 0         |  |  |
|      |      | Shiraz-42T | 454  | 0.145717 | 0         |  |  |
|      |      | Shiraz-46T | 943  | 0.093799 | 0         |  |  |
|      |      | Shiraz-46T | 944  | 0.256008 | 0         |  |  |
|      |      | Shiraz-77T | 1225 | 0        | -0.117922 |  |  |
|      |      | Shiraz-18T | 1434 | 0.244465 | 0         |  |  |
|      |      | Shiraz-22T | 1549 | 0        | -0.319623 |  |  |
|      |      | Shiraz-25T | 1698 | 0.21835  | 0         |  |  |
|      |      | Shiraz-28T | 1735 | 0.350744 | 0         |  |  |
|      |      | Shiraz-29T | 1778 | 0.120767 | 0         |  |  |
|      |      | Shiraz-38T | 1951 | 0.250891 | 0         |  |  |
|      |      | Shiraz-53T | 2078 | 0.287202 | 0         |  |  |
|      |      | Shiraz-58T | 2159 | 0        | -0.219521 |  |  |
|      |      | Shiraz-71T | 2238 | 0.603631 | 0         |  |  |
|      |      | Shiraz-71T | 2239 | 0.310785 | 0         |  |  |
|      |      | Shiraz-3T  | 90   | 0.219276 | 0         |  |  |
|      |      | Shiraz-4T  | 253  | 0.372918 | 0         |  |  |
|      |      | Shiraz-31T | 315  | 0.194054 | 0         |  |  |
|      |      | Shiraz-36T | 378  | 0.179558 | 0         |  |  |
|      |      | Shiraz-36T | 379  | 0.322028 | 0         |  |  |
|      |      | Shiraz-42T | 454  | 0.145717 | 0         |  |  |
|      |      | Shiraz-46T | 943  | 0.093799 | 0         |  |  |
|      |      | Shiraz-46T | 944  | 0.256008 | 0         |  |  |
|      |      | Shiraz-77T | 1225 | 0        | -0.117922 |  |  |
|      |      | Shiraz-18T | 1434 | 0.244465 | 0         |  |  |
|      |      | Shiraz-22T | 1549 | 0        | -0.319623 |  |  |
|      |      | Shiraz-25T | 1698 | 0.21835  | 0         |  |  |
|      |      | Shiraz-28T | 1735 | 0.350744 | 0         |  |  |
|      |      | Shiraz-29T | 1778 | 0.120767 | 0         |  |  |
|      |      | Shiraz-38T | 1951 | 0.250891 | 0         |  |  |
|      |      | Shiraz-53T | 2078 | 0.287202 | 0         |  |  |
|      |      | Shiraz-58T | 2159 | 0        | -0.219521 |  |  |
|      |      | Shiraz-71T | 2238 | 0.603631 | 0         |  |  |
|      |      | Shiraz-71T | 2239 | 0.310785 | 0         |  |  |
|      |      | Shiraz-3T  | 90   | 0.219276 | 0         |  |  |
|      |      | Shiraz-4T  | 253  | 0.372918 | 0         |  |  |
|      |      | Shiraz-31T | 315  | 0.194054 | 0         |  |  |
|      |      | Shiraz-36T | 378  | 0.179558 | 0         |  |  |
|      |      | Shiraz-36T | 379  | 0.322028 | 0         |  |  |

|     |      |            |      |          |           |  |
|-----|------|------------|------|----------|-----------|--|
|     |      | Shiraz-42T | 454  | 0.145717 | 0         |  |
|     |      | Shiraz-46T | 943  | 0.093799 | 0         |  |
|     |      | Shiraz-46T | 944  | 0.256008 | 0         |  |
|     |      | Shiraz-77T | 1225 | 0        | -0.117922 |  |
|     |      | Shiraz-18T | 1434 | 0.244465 | 0         |  |
|     |      | Shiraz-22T | 1549 | 0        | -0.319623 |  |
|     |      | Shiraz-25T | 1698 | 0.21835  | 0         |  |
|     |      | Shiraz-28T | 1735 | 0.350744 | 0         |  |
|     |      | Shiraz-29T | 1778 | 0.120767 | 0         |  |
|     |      | Shiraz-38T | 1951 | 0.250891 | 0         |  |
|     |      | Shiraz-53T | 2078 | 0.287202 | 0         |  |
|     |      | Shiraz-58T | 2159 | 0        | -0.219521 |  |
|     |      | Shiraz-71T | 2238 | 0.603631 | 0         |  |
|     |      | Shiraz-71T | 2239 | 0.310785 | 0         |  |
| PIP | chr7 | Shiraz-3T  | 90   | 0.219276 | 0         |  |
|     |      | Shiraz-4T  | 253  | 0.372918 | 0         |  |
|     |      | Shiraz-36T | 378  | 0.179558 | 0         |  |
|     |      | Shiraz-46T | 943  | 0.093799 | 0         |  |
|     |      | Shiraz-77T | 1225 | 0        | -0.117922 |  |
|     |      | Shiraz-9T  | 1325 | 0.221899 | 0         |  |
|     |      | Shiraz-18T | 1434 | 0.244465 | 0         |  |
|     |      | Shiraz-25T | 1698 | 0.21835  | 0         |  |
|     |      | Shiraz-28T | 1735 | 0.350744 | 0         |  |
|     |      | Shiraz-29T | 1778 | 0.120767 | 0         |  |
|     |      | Shiraz-32T | 1833 | 0.551336 | 0         |  |
|     |      | Shiraz-38T | 1951 | 0.250891 | 0         |  |
|     |      | Shiraz-53T | 2078 | 0.287202 | 0         |  |
|     |      | Shiraz-58T | 2162 | 0.221505 | 0         |  |
|     |      | Shiraz-71T | 2238 | 0.603631 | 0         |  |
|     |      | Shiraz-3T  | 90   | 0.219276 | 0         |  |
|     |      | Shiraz-4T  | 253  | 0.372918 | 0         |  |
|     |      | Shiraz-36T | 378  | 0.179558 | 0         |  |
|     |      | Shiraz-46T | 943  | 0.093799 | 0         |  |
|     |      | Shiraz-77T | 1225 | 0        | -0.117922 |  |
|     |      | Shiraz-9T  | 1325 | 0.221899 | 0         |  |
|     |      | Shiraz-18T | 1434 | 0.244465 | 0         |  |
|     |      | Shiraz-25T | 1698 | 0.21835  | 0         |  |
|     |      | Shiraz-28T | 1735 | 0.350744 | 0         |  |
|     |      | Shiraz-29T | 1778 | 0.120767 | 0         |  |
|     |      | Shiraz-32T | 1833 | 0.551336 | 0         |  |
|     |      | Shiraz-38T | 1951 | 0.250891 | 0         |  |
|     |      | Shiraz-53T | 2078 | 0.287202 | 0         |  |
|     |      | Shiraz-58T | 2162 | 0.221505 | 0         |  |
|     |      | Shiraz-71T | 2238 | 0.603631 | 0         |  |
|     |      | Shiraz-3T  | 90   | 0.219276 | 0         |  |
|     |      | Shiraz-4T  | 253  | 0.372918 | 0         |  |
|     |      | Shiraz-36T | 378  | 0.179558 | 0         |  |

|     |      |            |      |          |           |  |
|-----|------|------------|------|----------|-----------|--|
|     |      | Shiraz-46T | 943  | 0.093799 | 0         |  |
|     |      | Shiraz-77T | 1225 | 0        | -0.117922 |  |
|     |      | Shiraz-9T  | 1325 | 0.221899 | 0         |  |
|     |      | Shiraz-18T | 1434 | 0.244465 | 0         |  |
|     |      | Shiraz-25T | 1698 | 0.21835  | 0         |  |
|     |      | Shiraz-28T | 1735 | 0.350744 | 0         |  |
|     |      | Shiraz-29T | 1778 | 0.120767 | 0         |  |
|     |      | Shiraz-32T | 1833 | 0.551336 | 0         |  |
|     |      | Shiraz-38T | 1951 | 0.250891 | 0         |  |
|     |      | Shiraz-53T | 2078 | 0.287202 | 0         |  |
|     |      | Shiraz-58T | 2162 | 0.221505 | 0         |  |
|     |      | Shiraz-71T | 2238 | 0.603631 | 0         |  |
| PIR | chrX | Shiraz-3T  | 235  | 0        | -0.28401  |  |
|     |      | Shiraz-4T  | 260  | 0        | -0.324128 |  |
|     |      | Shiraz-16T | 294  | 0.655804 | 0         |  |
|     |      | Shiraz-36T | 431  | 0        | -0.78035  |  |
|     |      | Shiraz-44T | 891  | 0        | -0.954044 |  |
|     |      | Shiraz-49T | 1166 | 0        | -0.917235 |  |
|     |      | Shiraz-9T  | 1368 | 0.199713 | 0         |  |
|     |      | Shiraz-18T | 1455 | 0        | -0.186773 |  |
|     |      | Shiraz-22T | 1669 | 0.695915 | 0         |  |
|     |      | Shiraz-25T | 1717 | 0.420447 | 0         |  |
|     |      | Shiraz-28T | 1760 | 0.538181 | 0         |  |
|     |      | Shiraz-29T | 1800 | 0.672527 | 0         |  |
|     |      | Shiraz-32T | 1869 | 0.776805 | 0         |  |
|     |      | Shiraz-35T | 1932 | 0.507141 | 0         |  |
|     |      | Shiraz-40T | 2051 | 0.098506 | 0         |  |
|     |      | Shiraz-58T | 2221 | 0.871948 | 0         |  |
|     |      | Shiraz-71T | 2260 | 0.68394  | 0         |  |
|     |      | Shiraz-71T | 2261 | 0.508399 | 0         |  |
|     |      | Shiraz-3T  | 235  | 0        | -0.28401  |  |
|     |      | Shiraz-4T  | 260  | 0        | -0.324128 |  |
|     |      | Shiraz-16T | 294  | 0.655804 | 0         |  |
|     |      | Shiraz-36T | 431  | 0        | -0.78035  |  |
|     |      | Shiraz-44T | 891  | 0        | -0.954044 |  |
|     |      | Shiraz-49T | 1166 | 0        | -0.917235 |  |
|     |      | Shiraz-9T  | 1368 | 0.199713 | 0         |  |
|     |      | Shiraz-18T | 1455 | 0        | -0.186773 |  |
|     |      | Shiraz-22T | 1669 | 0.695915 | 0         |  |
|     |      | Shiraz-25T | 1717 | 0.420447 | 0         |  |
|     |      | Shiraz-28T | 1760 | 0.538181 | 0         |  |
|     |      | Shiraz-29T | 1800 | 0.672527 | 0         |  |
|     |      | Shiraz-32T | 1869 | 0.776805 | 0         |  |
|     |      | Shiraz-35T | 1932 | 0.507141 | 0         |  |
|     |      | Shiraz-40T | 2051 | 0.098506 | 0         |  |
|     |      | Shiraz-58T | 2221 | 0.871948 | 0         |  |
|     |      | Shiraz-71T | 2260 | 0.68394  | 0         |  |



|      |      |            |      |          |           |  |  |
|------|------|------------|------|----------|-----------|--|--|
|      |      | Shiraz-71T | 2261 | 0.508399 | 0         |  |  |
|      |      | Shiraz-3T  | 235  | 0        | -0.28401  |  |  |
|      |      | Shiraz-4T  | 260  | 0        | -0.324128 |  |  |
|      |      | Shiraz-16T | 294  | 0.655804 | 0         |  |  |
|      |      | Shiraz-36T | 431  | 0        | -0.78035  |  |  |
|      |      | Shiraz-44T | 891  | 0        | -0.954044 |  |  |
|      |      | Shiraz-49T | 1166 | 0        | -0.917235 |  |  |
|      |      | Shiraz-9T  | 1368 | 0.199713 | 0         |  |  |
|      |      | Shiraz-18T | 1455 | 0        | -0.186773 |  |  |
|      |      | Shiraz-22T | 1669 | 0.695915 | 0         |  |  |
|      |      | Shiraz-25T | 1717 | 0.420447 | 0         |  |  |
|      |      | Shiraz-28T | 1760 | 0.538181 | 0         |  |  |
|      |      | Shiraz-29T | 1800 | 0.672527 | 0         |  |  |
|      |      | Shiraz-32T | 1869 | 0.776805 | 0         |  |  |
|      |      | Shiraz-35T | 1932 | 0.507141 | 0         |  |  |
|      |      | Shiraz-40T | 2051 | 0.098506 | 0         |  |  |
|      |      | Shiraz-58T | 2221 | 0.871948 | 0         |  |  |
|      |      | Shiraz-71T | 2260 | 0.68394  | 0         |  |  |
|      |      | Shiraz-71T | 2261 | 0.508399 | 0         |  |  |
| PJA1 | chrX | Shiraz-3T  | 241  | 0        | -0.230501 |  |  |
|      |      | Shiraz-3T  | 241  | 0        | -0.230501 |  |  |
|      |      | Shiraz-4T  | 261  | 0        | -0.336249 |  |  |
|      |      | Shiraz-4T  | 261  | 0        | -0.336249 |  |  |
|      |      | Shiraz-16T | 295  | 0.591657 | 0         |  |  |
|      |      | Shiraz-16T | 295  | 0.591657 | 0         |  |  |
|      |      | Shiraz-36T | 433  | 0        | -0.803961 |  |  |
|      |      | Shiraz-36T | 433  | 0        | -0.803961 |  |  |
|      |      | Shiraz-44T | 899  | 0        | -1.09697  |  |  |
|      |      | Shiraz-44T | 899  | 0        | -1.09697  |  |  |
|      |      | Shiraz-44T | 900  | 0        | -0.584284 |  |  |
|      |      | Shiraz-44T | 900  | 0        | -0.584284 |  |  |
|      |      | Shiraz-49T | 1170 | 0        | -0.967436 |  |  |
|      |      | Shiraz-49T | 1170 | 0        | -0.967436 |  |  |
|      |      | Shiraz-18T | 1457 | 0.643204 | 0         |  |  |
|      |      | Shiraz-18T | 1457 | 0.643204 | 0         |  |  |
|      |      | Shiraz-22T | 1673 | 0.611783 | 0         |  |  |
|      |      | Shiraz-22T | 1673 | 0.611783 | 0         |  |  |
|      |      | Shiraz-22T | 1674 | 0.887899 | 0         |  |  |
|      |      | Shiraz-22T | 1674 | 0.887899 | 0         |  |  |
|      |      | Shiraz-25T | 1719 | 0.472955 | 0         |  |  |
|      |      | Shiraz-25T | 1719 | 0.472955 | 0         |  |  |
|      |      | Shiraz-28T | 1762 | 0.562311 | 0         |  |  |
|      |      | Shiraz-28T | 1762 | 0.562311 | 0         |  |  |
|      |      | Shiraz-29T | 1801 | 0.815343 | 0         |  |  |
|      |      | Shiraz-29T | 1801 | 0.815343 | 0         |  |  |
|      |      | Shiraz-32T | 1870 | 0.729766 | 0         |  |  |
|      |      | Shiraz-32T | 1870 | 0.729766 | 0         |  |  |

|  |  |            |      |          |           |  |  |
|--|--|------------|------|----------|-----------|--|--|
|  |  | Shiraz-35T | 1933 | 0.488535 | 0         |  |  |
|  |  | Shiraz-35T | 1933 | 0.488535 | 0         |  |  |
|  |  | Shiraz-58T | 2223 | 0.833364 | 0         |  |  |
|  |  | Shiraz-58T | 2223 | 0.833364 | 0         |  |  |
|  |  | Shiraz-58T | 2224 | 1.076575 | 0         |  |  |
|  |  | Shiraz-58T | 2224 | 1.076575 | 0         |  |  |
|  |  | Shiraz-71T | 2263 | 0.975531 | 0         |  |  |
|  |  | Shiraz-71T | 2263 | 0.975531 | 0         |  |  |
|  |  | Shiraz-3T  | 241  | 0        | -0.230501 |  |  |
|  |  | Shiraz-3T  | 241  | 0        | -0.230501 |  |  |
|  |  | Shiraz-4T  | 261  | 0        | -0.336249 |  |  |
|  |  | Shiraz-4T  | 261  | 0        | -0.336249 |  |  |
|  |  | Shiraz-16T | 295  | 0.591657 | 0         |  |  |
|  |  | Shiraz-16T | 295  | 0.591657 | 0         |  |  |
|  |  | Shiraz-36T | 433  | 0        | -0.803961 |  |  |
|  |  | Shiraz-36T | 433  | 0        | -0.803961 |  |  |
|  |  | Shiraz-44T | 899  | 0        | -1.09697  |  |  |
|  |  | Shiraz-44T | 899  | 0        | -1.09697  |  |  |
|  |  | Shiraz-44T | 900  | 0        | -0.584284 |  |  |
|  |  | Shiraz-44T | 900  | 0        | -0.584284 |  |  |
|  |  | Shiraz-49T | 1170 | 0        | -0.967436 |  |  |
|  |  | Shiraz-49T | 1170 | 0        | -0.967436 |  |  |
|  |  | Shiraz-18T | 1457 | 0.643204 | 0         |  |  |
|  |  | Shiraz-18T | 1457 | 0.643204 | 0         |  |  |
|  |  | Shiraz-22T | 1673 | 0.611783 | 0         |  |  |
|  |  | Shiraz-22T | 1673 | 0.611783 | 0         |  |  |
|  |  | Shiraz-22T | 1674 | 0.887899 | 0         |  |  |
|  |  | Shiraz-22T | 1674 | 0.887899 | 0         |  |  |
|  |  | Shiraz-25T | 1719 | 0.472955 | 0         |  |  |
|  |  | Shiraz-25T | 1719 | 0.472955 | 0         |  |  |
|  |  | Shiraz-28T | 1762 | 0.562311 | 0         |  |  |
|  |  | Shiraz-28T | 1762 | 0.562311 | 0         |  |  |
|  |  | Shiraz-29T | 1801 | 0.815343 | 0         |  |  |
|  |  | Shiraz-29T | 1801 | 0.815343 | 0         |  |  |
|  |  | Shiraz-32T | 1870 | 0.729766 | 0         |  |  |
|  |  | Shiraz-32T | 1870 | 0.729766 | 0         |  |  |
|  |  | Shiraz-35T | 1933 | 0.488535 | 0         |  |  |
|  |  | Shiraz-35T | 1933 | 0.488535 | 0         |  |  |
|  |  | Shiraz-58T | 2223 | 0.833364 | 0         |  |  |
|  |  | Shiraz-58T | 2223 | 0.833364 | 0         |  |  |
|  |  | Shiraz-58T | 2224 | 1.076575 | 0         |  |  |
|  |  | Shiraz-58T | 2224 | 1.076575 | 0         |  |  |
|  |  | Shiraz-71T | 2263 | 0.975531 | 0         |  |  |
|  |  | Shiraz-71T | 2263 | 0.975531 | 0         |  |  |
|  |  | Shiraz-3T  | 241  | 0        | -0.230501 |  |  |
|  |  | Shiraz-3T  | 241  | 0        | -0.230501 |  |  |
|  |  | Shiraz-4T  | 261  | 0        | -0.336249 |  |  |

|        |      |            |      |          |           |  |  |
|--------|------|------------|------|----------|-----------|--|--|
|        |      | Shiraz-4T  | 261  | 0        | -0.336249 |  |  |
|        |      | Shiraz-16T | 295  | 0.591657 | 0         |  |  |
|        |      | Shiraz-16T | 295  | 0.591657 | 0         |  |  |
|        |      | Shiraz-36T | 433  | 0        | -0.803961 |  |  |
|        |      | Shiraz-36T | 433  | 0        | -0.803961 |  |  |
|        |      | Shiraz-44T | 899  | 0        | -1.09697  |  |  |
|        |      | Shiraz-44T | 899  | 0        | -1.09697  |  |  |
|        |      | Shiraz-44T | 900  | 0        | -0.584284 |  |  |
|        |      | Shiraz-44T | 900  | 0        | -0.584284 |  |  |
|        |      | Shiraz-49T | 1170 | 0        | -0.967436 |  |  |
|        |      | Shiraz-49T | 1170 | 0        | -0.967436 |  |  |
|        |      | Shiraz-18T | 1457 | 0.643204 | 0         |  |  |
|        |      | Shiraz-18T | 1457 | 0.643204 | 0         |  |  |
|        |      | Shiraz-22T | 1673 | 0.611783 | 0         |  |  |
|        |      | Shiraz-22T | 1673 | 0.611783 | 0         |  |  |
|        |      | Shiraz-22T | 1674 | 0.887899 | 0         |  |  |
|        |      | Shiraz-22T | 1674 | 0.887899 | 0         |  |  |
|        |      | Shiraz-25T | 1719 | 0.472955 | 0         |  |  |
|        |      | Shiraz-25T | 1719 | 0.472955 | 0         |  |  |
|        |      | Shiraz-28T | 1762 | 0.562311 | 0         |  |  |
|        |      | Shiraz-28T | 1762 | 0.562311 | 0         |  |  |
|        |      | Shiraz-29T | 1801 | 0.815343 | 0         |  |  |
|        |      | Shiraz-29T | 1801 | 0.815343 | 0         |  |  |
|        |      | Shiraz-32T | 1870 | 0.729766 | 0         |  |  |
|        |      | Shiraz-32T | 1870 | 0.729766 | 0         |  |  |
|        |      | Shiraz-35T | 1933 | 0.488535 | 0         |  |  |
|        |      | Shiraz-35T | 1933 | 0.488535 | 0         |  |  |
|        |      | Shiraz-58T | 2223 | 0.833364 | 0         |  |  |
|        |      | Shiraz-58T | 2223 | 0.833364 | 0         |  |  |
|        |      | Shiraz-58T | 2224 | 1.076575 | 0         |  |  |
|        |      | Shiraz-58T | 2224 | 1.076575 | 0         |  |  |
|        |      | Shiraz-71T | 2263 | 0.975531 | 0         |  |  |
|        |      | Shiraz-71T | 2263 | 0.975531 | 0         |  |  |
| PKD1L1 | chr7 | Shiraz-3T  | 87   | 0.198593 | 0         |  |  |
|        |      | Shiraz-4T  | 252  | 0.192083 | 0         |  |  |
|        |      | Shiraz-36T | 376  | 0.159952 | 0         |  |  |
|        |      | Shiraz-46T | 942  | 0.069143 | 0         |  |  |
|        |      | Shiraz-18T | 1433 | 0.250973 | 0         |  |  |
|        |      | Shiraz-25T | 1697 | 0.21945  | 0         |  |  |
|        |      | Shiraz-28T | 1734 | 0.362882 | 0         |  |  |
|        |      | Shiraz-29T | 1777 | 0.156747 | 0         |  |  |
|        |      | Shiraz-38T | 1950 | 0.265916 | 0         |  |  |
|        |      | Shiraz-71T | 2236 | 0.320072 | 0         |  |  |
|        |      | Shiraz-3T  | 87   | 0.198593 | 0         |  |  |
|        |      | Shiraz-4T  | 252  | 0.192083 | 0         |  |  |
|        |      | Shiraz-36T | 376  | 0.159952 | 0         |  |  |
|        |      | Shiraz-46T | 942  | 0.069143 | 0         |  |  |

|         |      |            |      |          |           |  |
|---------|------|------------|------|----------|-----------|--|
|         |      | Shiraz-18T | 1433 | 0.250973 | 0         |  |
|         |      | Shiraz-25T | 1697 | 0.21945  | 0         |  |
|         |      | Shiraz-28T | 1734 | 0.362882 | 0         |  |
|         |      | Shiraz-29T | 1777 | 0.156747 | 0         |  |
|         |      | Shiraz-38T | 1950 | 0.265916 | 0         |  |
|         |      | Shiraz-71T | 2236 | 0.320072 | 0         |  |
|         |      | Shiraz-3T  | 87   | 0.198593 | 0         |  |
|         |      | Shiraz-4T  | 252  | 0.192083 | 0         |  |
|         |      | Shiraz-36T | 376  | 0.159952 | 0         |  |
|         |      | Shiraz-46T | 942  | 0.069143 | 0         |  |
|         |      | Shiraz-18T | 1433 | 0.250973 | 0         |  |
|         |      | Shiraz-25T | 1697 | 0.21945  | 0         |  |
|         |      | Shiraz-28T | 1734 | 0.362882 | 0         |  |
|         |      | Shiraz-29T | 1777 | 0.156747 | 0         |  |
|         |      | Shiraz-38T | 1950 | 0.265916 | 0         |  |
|         |      | Shiraz-71T | 2236 | 0.320072 | 0         |  |
| PL-5283 | chr7 | Shiraz-3T  | 90   | 0.219276 | 0         |  |
|         |      | Shiraz-4T  | 253  | 0.372918 | 0         |  |
|         |      | Shiraz-36T | 378  | 0.179558 | 0         |  |
|         |      | Shiraz-46T | 943  | 0.093799 | 0         |  |
|         |      | Shiraz-77T | 1225 | 0        | -0.117922 |  |
|         |      | Shiraz-9T  | 1325 | 0.221899 | 0         |  |
|         |      | Shiraz-18T | 1434 | 0.244465 | 0         |  |
|         |      | Shiraz-22T | 1553 | 0        | -0.213234 |  |
|         |      | Shiraz-25T | 1698 | 0.21835  | 0         |  |
|         |      | Shiraz-28T | 1735 | 0.350744 | 0         |  |
|         |      | Shiraz-29T | 1778 | 0.120767 | 0         |  |
|         |      | Shiraz-32T | 1833 | 0.551336 | 0         |  |
|         |      | Shiraz-38T | 1951 | 0.250891 | 0         |  |
|         |      | Shiraz-53T | 2078 | 0.287202 | 0         |  |
|         |      | Shiraz-58T | 2162 | 0.221505 | 0         |  |
|         |      | Shiraz-71T | 2238 | 0.603631 | 0         |  |
|         |      | Shiraz-3T  | 90   | 0.219276 | 0         |  |
|         |      | Shiraz-4T  | 253  | 0.372918 | 0         |  |
|         |      | Shiraz-36T | 378  | 0.179558 | 0         |  |
|         |      | Shiraz-46T | 943  | 0.093799 | 0         |  |
|         |      | Shiraz-77T | 1225 | 0        | -0.117922 |  |
|         |      | Shiraz-9T  | 1325 | 0.221899 | 0         |  |
|         |      | Shiraz-18T | 1434 | 0.244465 | 0         |  |
|         |      | Shiraz-22T | 1553 | 0        | -0.213234 |  |
|         |      | Shiraz-25T | 1698 | 0.21835  | 0         |  |
|         |      | Shiraz-28T | 1735 | 0.350744 | 0         |  |
|         |      | Shiraz-29T | 1778 | 0.120767 | 0         |  |
|         |      | Shiraz-32T | 1833 | 0.551336 | 0         |  |
|         |      | Shiraz-38T | 1951 | 0.250891 | 0         |  |
|         |      | Shiraz-53T | 2078 | 0.287202 | 0         |  |
|         |      | Shiraz-58T | 2162 | 0.221505 | 0         |  |

|       |      |            |      |          |           |  |  |
|-------|------|------------|------|----------|-----------|--|--|
|       |      | Shiraz-71T | 2238 | 0.603631 | 0         |  |  |
|       |      | Shiraz-3T  | 90   | 0.219276 | 0         |  |  |
|       |      | Shiraz-4T  | 253  | 0.372918 | 0         |  |  |
|       |      | Shiraz-36T | 378  | 0.179558 | 0         |  |  |
|       |      | Shiraz-46T | 943  | 0.093799 | 0         |  |  |
|       |      | Shiraz-77T | 1225 | 0        | -0.117922 |  |  |
|       |      | Shiraz-9T  | 1325 | 0.221899 | 0         |  |  |
|       |      | Shiraz-18T | 1434 | 0.244465 | 0         |  |  |
|       |      | Shiraz-22T | 1553 | 0        | -0.213234 |  |  |
|       |      | Shiraz-25T | 1698 | 0.21835  | 0         |  |  |
|       |      | Shiraz-28T | 1735 | 0.350744 | 0         |  |  |
|       |      | Shiraz-29T | 1778 | 0.120767 | 0         |  |  |
|       |      | Shiraz-32T | 1833 | 0.551336 | 0         |  |  |
|       |      | Shiraz-38T | 1951 | 0.250891 | 0         |  |  |
|       |      | Shiraz-53T | 2078 | 0.287202 | 0         |  |  |
|       |      | Shiraz-58T | 2162 | 0.221505 | 0         |  |  |
|       |      | Shiraz-71T | 2238 | 0.603631 | 0         |  |  |
| PLAC1 | chrX | Shiraz-3T  | 242  | 0        | -0.336434 |  |  |
|       |      | Shiraz-4T  | 261  | 0        | -0.336249 |  |  |
|       |      | Shiraz-16T | 295  | 0.591657 | 0         |  |  |
|       |      | Shiraz-36T | 433  | 0        | -0.803961 |  |  |
|       |      | Shiraz-44T | 899  | 0        | -1.09697  |  |  |
|       |      | Shiraz-49T | 1170 | 0        | -0.967436 |  |  |
|       |      | Shiraz-9T  | 1370 | 0.690073 | 0         |  |  |
|       |      | Shiraz-18T | 1457 | 0.643204 | 0         |  |  |
|       |      | Shiraz-22T | 1673 | 0.611783 | 0         |  |  |
|       |      | Shiraz-22T | 1677 | 0.789711 | 0         |  |  |
|       |      | Shiraz-25T | 1719 | 0.472955 | 0         |  |  |
|       |      | Shiraz-28T | 1762 | 0.562311 | 0         |  |  |
|       |      | Shiraz-29T | 1801 | 0.815343 | 0         |  |  |
|       |      | Shiraz-32T | 1870 | 0.729766 | 0         |  |  |
|       |      | Shiraz-35T | 1933 | 0.488535 | 0         |  |  |
|       |      | Shiraz-58T | 2223 | 0.833364 | 0         |  |  |
|       |      | Shiraz-71T | 2263 | 0.975531 | 0         |  |  |
|       |      | Shiraz-3T  | 242  | 0        | -0.336434 |  |  |
|       |      | Shiraz-4T  | 261  | 0        | -0.336249 |  |  |
|       |      | Shiraz-16T | 295  | 0.591657 | 0         |  |  |
|       |      | Shiraz-36T | 433  | 0        | -0.803961 |  |  |
|       |      | Shiraz-44T | 899  | 0        | -1.09697  |  |  |
|       |      | Shiraz-49T | 1170 | 0        | -0.967436 |  |  |
|       |      | Shiraz-9T  | 1370 | 0.690073 | 0         |  |  |
|       |      | Shiraz-18T | 1457 | 0.643204 | 0         |  |  |
|       |      | Shiraz-22T | 1673 | 0.611783 | 0         |  |  |
|       |      | Shiraz-22T | 1677 | 0.789711 | 0         |  |  |
|       |      | Shiraz-25T | 1719 | 0.472955 | 0         |  |  |
|       |      | Shiraz-28T | 1762 | 0.562311 | 0         |  |  |
|       |      | Shiraz-29T | 1801 | 0.815343 | 0         |  |  |

|        |      |            |      |          |           |  |  |
|--------|------|------------|------|----------|-----------|--|--|
|        |      | Shiraz-32T | 1870 | 0.729766 | 0         |  |  |
|        |      | Shiraz-35T | 1933 | 0.488535 | 0         |  |  |
|        |      | Shiraz-58T | 2223 | 0.833364 | 0         |  |  |
|        |      | Shiraz-71T | 2263 | 0.975531 | 0         |  |  |
|        |      | Shiraz-3T  | 242  | 0        | -0.336434 |  |  |
|        |      | Shiraz-4T  | 261  | 0        | -0.336249 |  |  |
|        |      | Shiraz-16T | 295  | 0.591657 | 0         |  |  |
|        |      | Shiraz-36T | 433  | 0        | -0.803961 |  |  |
|        |      | Shiraz-44T | 899  | 0        | -1.09697  |  |  |
|        |      | Shiraz-49T | 1170 | 0        | -0.967436 |  |  |
|        |      | Shiraz-9T  | 1370 | 0.690073 | 0         |  |  |
|        |      | Shiraz-18T | 1457 | 0.643204 | 0         |  |  |
|        |      | Shiraz-22T | 1673 | 0.611783 | 0         |  |  |
|        |      | Shiraz-22T | 1677 | 0.789711 | 0         |  |  |
|        |      | Shiraz-25T | 1719 | 0.472955 | 0         |  |  |
|        |      | Shiraz-28T | 1762 | 0.562311 | 0         |  |  |
|        |      | Shiraz-29T | 1801 | 0.815343 | 0         |  |  |
|        |      | Shiraz-32T | 1870 | 0.729766 | 0         |  |  |
|        |      | Shiraz-35T | 1933 | 0.488535 | 0         |  |  |
|        |      | Shiraz-58T | 2223 | 0.833364 | 0         |  |  |
|        |      | Shiraz-71T | 2263 | 0.975531 | 0         |  |  |
| PLCXD3 | chr5 | Shiraz-4T  | 250  | 0.262252 | 0         |  |  |
|        |      | Shiraz-16T | 266  | 0.321724 | 0         |  |  |
|        |      | Shiraz-44T | 591  | 0        | -0.233934 |  |  |
|        |      | Shiraz-18T | 1429 | 0        | -0.314125 |  |  |
|        |      | Shiraz-22T | 1522 | 0        | -0.322688 |  |  |
|        |      | Shiraz-25T | 1694 | 0.201602 | 0         |  |  |
|        |      | Shiraz-28T | 1731 | 0.295447 | 0         |  |  |
|        |      | Shiraz-29T | 1773 | 0.090981 | 0         |  |  |
|        |      | Shiraz-40T | 2016 | 0.376634 | 0         |  |  |
|        |      | Shiraz-4T  | 250  | 0.262252 | 0         |  |  |
|        |      | Shiraz-16T | 266  | 0.321724 | 0         |  |  |
|        |      | Shiraz-44T | 591  | 0        | -0.233934 |  |  |
|        |      | Shiraz-18T | 1429 | 0        | -0.314125 |  |  |
|        |      | Shiraz-22T | 1522 | 0        | -0.322688 |  |  |
|        |      | Shiraz-25T | 1694 | 0.201602 | 0         |  |  |
|        |      | Shiraz-28T | 1731 | 0.295447 | 0         |  |  |
|        |      | Shiraz-29T | 1773 | 0.090981 | 0         |  |  |
|        |      | Shiraz-40T | 2016 | 0.376634 | 0         |  |  |
|        |      | Shiraz-4T  | 250  | 0.262252 | 0         |  |  |
|        |      | Shiraz-16T | 266  | 0.321724 | 0         |  |  |
|        |      | Shiraz-44T | 591  | 0        | -0.233934 |  |  |
|        |      | Shiraz-18T | 1429 | 0        | -0.314125 |  |  |
|        |      | Shiraz-22T | 1522 | 0        | -0.322688 |  |  |
|        |      | Shiraz-25T | 1694 | 0.201602 | 0         |  |  |
|        |      | Shiraz-28T | 1731 | 0.295447 | 0         |  |  |
|        |      | Shiraz-29T | 1773 | 0.090981 | 0         |  |  |

|         |      |            |      |          |           |  |
|---------|------|------------|------|----------|-----------|--|
|         |      | Shiraz-40T | 2016 | 0.376634 | 0         |  |
| PLEKHA8 | chr7 | Shiraz-3T  | 87   | 0.198593 | 0         |  |
|         |      | Shiraz-4T  | 252  | 0.192083 | 0         |  |
|         |      | Shiraz-36T | 376  | 0.159952 | 0         |  |
|         |      | Shiraz-46T | 942  | 0.069143 | 0         |  |
|         |      | Shiraz-18T | 1433 | 0.250973 | 0         |  |
|         |      | Shiraz-25T | 1697 | 0.21945  | 0         |  |
|         |      | Shiraz-28T | 1734 | 0.362882 | 0         |  |
|         |      | Shiraz-29T | 1777 | 0.156747 | 0         |  |
|         |      | Shiraz-38T | 1950 | 0.265916 | 0         |  |
|         |      | Shiraz-71T | 2236 | 0.320072 | 0         |  |
|         |      | Shiraz-3T  | 87   | 0.198593 | 0         |  |
|         |      | Shiraz-4T  | 252  | 0.192083 | 0         |  |
|         |      | Shiraz-36T | 376  | 0.159952 | 0         |  |
|         |      | Shiraz-46T | 942  | 0.069143 | 0         |  |
|         |      | Shiraz-18T | 1433 | 0.250973 | 0         |  |
|         |      | Shiraz-25T | 1697 | 0.21945  | 0         |  |
|         |      | Shiraz-28T | 1734 | 0.362882 | 0         |  |
|         |      | Shiraz-29T | 1777 | 0.156747 | 0         |  |
|         |      | Shiraz-38T | 1950 | 0.265916 | 0         |  |
|         |      | Shiraz-71T | 2236 | 0.320072 | 0         |  |
|         |      | Shiraz-3T  | 87   | 0.198593 | 0         |  |
|         |      | Shiraz-4T  | 252  | 0.192083 | 0         |  |
|         |      | Shiraz-36T | 376  | 0.159952 | 0         |  |
|         |      | Shiraz-46T | 942  | 0.069143 | 0         |  |
|         |      | Shiraz-18T | 1433 | 0.250973 | 0         |  |
|         |      | Shiraz-25T | 1697 | 0.21945  | 0         |  |
|         |      | Shiraz-28T | 1734 | 0.362882 | 0         |  |
|         |      | Shiraz-29T | 1777 | 0.156747 | 0         |  |
|         |      | Shiraz-38T | 1950 | 0.265916 | 0         |  |
|         |      | Shiraz-71T | 2236 | 0.320072 | 0         |  |
| PLOD3   | chr7 | Shiraz-3T  | 90   | 0.219276 | 0         |  |
|         |      | Shiraz-3T  | 94   | 0.74735  | 0         |  |
|         |      | Shiraz-4T  | 253  | 0.372918 | 0         |  |
|         |      | Shiraz-31T | 316  | 0.219196 | 0         |  |
|         |      | Shiraz-36T | 378  | 0.179558 | 0         |  |
|         |      | Shiraz-36T | 381  | 0.332628 | 0         |  |
|         |      | Shiraz-44T | 639  | 1.035032 | 0         |  |
|         |      | Shiraz-46T | 943  | 0.093799 | 0         |  |
|         |      | Shiraz-46T | 946  | 0.299835 | 0         |  |
|         |      | Shiraz-47T | 1030 | 0.257728 | 0         |  |
|         |      | Shiraz-49T | 1120 | 0.281656 | 0         |  |
|         |      | Shiraz-77T | 1225 | 0        | -0.117922 |  |
|         |      | Shiraz-77T | 1227 | 0.196445 | 0         |  |
|         |      | Shiraz-9T  | 1324 | 0.679266 | 0         |  |
|         |      | Shiraz-18T | 1434 | 0.244465 | 0         |  |
|         |      | Shiraz-22T | 1549 | 0        | -0.319623 |  |

|  |            |      |          |           |  |
|--|------------|------|----------|-----------|--|
|  | Shiraz-22T | 1551 | 0.324011 | 0         |  |
|  | Shiraz-25T | 1698 | 0.21835  | 0         |  |
|  | Shiraz-28T | 1735 | 0.350744 | 0         |  |
|  | Shiraz-29T | 1778 | 0.120767 | 0         |  |
|  | Shiraz-32T | 1833 | 0.551336 | 0         |  |
|  | Shiraz-32T | 1834 | 1.485392 | 0         |  |
|  | Shiraz-38T | 1951 | 0.250891 | 0         |  |
|  | Shiraz-53T | 2078 | 0.287202 | 0         |  |
|  | Shiraz-58T | 2160 | 0.399007 | 0         |  |
|  | Shiraz-71T | 2238 | 0.603631 | 0         |  |
|  | Shiraz-3T  | 90   | 0.219276 | 0         |  |
|  | Shiraz-3T  | 94   | 0.74735  | 0         |  |
|  | Shiraz-4T  | 253  | 0.372918 | 0         |  |
|  | Shiraz-31T | 316  | 0.219196 | 0         |  |
|  | Shiraz-36T | 378  | 0.179558 | 0         |  |
|  | Shiraz-36T | 381  | 0.332628 | 0         |  |
|  | Shiraz-44T | 639  | 1.035032 | 0         |  |
|  | Shiraz-46T | 943  | 0.093799 | 0         |  |
|  | Shiraz-46T | 946  | 0.299835 | 0         |  |
|  | Shiraz-47T | 1030 | 0.257728 | 0         |  |
|  | Shiraz-49T | 1120 | 0.281656 | 0         |  |
|  | Shiraz-77T | 1225 | 0        | -0.117922 |  |
|  | Shiraz-77T | 1227 | 0.196445 | 0         |  |
|  | Shiraz-9T  | 1324 | 0.679266 | 0         |  |
|  | Shiraz-18T | 1434 | 0.244465 | 0         |  |
|  | Shiraz-22T | 1549 | 0        | -0.319623 |  |
|  | Shiraz-22T | 1551 | 0.324011 | 0         |  |
|  | Shiraz-25T | 1698 | 0.21835  | 0         |  |
|  | Shiraz-28T | 1735 | 0.350744 | 0         |  |
|  | Shiraz-29T | 1778 | 0.120767 | 0         |  |
|  | Shiraz-32T | 1833 | 0.551336 | 0         |  |
|  | Shiraz-32T | 1834 | 1.485392 | 0         |  |
|  | Shiraz-38T | 1951 | 0.250891 | 0         |  |
|  | Shiraz-53T | 2078 | 0.287202 | 0         |  |
|  | Shiraz-58T | 2160 | 0.399007 | 0         |  |
|  | Shiraz-71T | 2238 | 0.603631 | 0         |  |
|  | Shiraz-3T  | 90   | 0.219276 | 0         |  |
|  | Shiraz-3T  | 94   | 0.74735  | 0         |  |
|  | Shiraz-4T  | 253  | 0.372918 | 0         |  |
|  | Shiraz-31T | 316  | 0.219196 | 0         |  |
|  | Shiraz-36T | 378  | 0.179558 | 0         |  |
|  | Shiraz-36T | 381  | 0.332628 | 0         |  |
|  | Shiraz-44T | 639  | 1.035032 | 0         |  |
|  | Shiraz-46T | 943  | 0.093799 | 0         |  |
|  | Shiraz-46T | 946  | 0.299835 | 0         |  |
|  | Shiraz-47T | 1030 | 0.257728 | 0         |  |
|  | Shiraz-49T | 1120 | 0.281656 | 0         |  |



|      |      |            |      |          |           |  |  |
|------|------|------------|------|----------|-----------|--|--|
|      |      | Shiraz-77T | 1225 | 0        | -0.117922 |  |  |
|      |      | Shiraz-77T | 1227 | 0.196445 | 0         |  |  |
|      |      | Shiraz-9T  | 1324 | 0.679266 | 0         |  |  |
|      |      | Shiraz-18T | 1434 | 0.244465 | 0         |  |  |
|      |      | Shiraz-22T | 1549 | 0        | -0.319623 |  |  |
|      |      | Shiraz-22T | 1551 | 0.324011 | 0         |  |  |
|      |      | Shiraz-25T | 1698 | 0.21835  | 0         |  |  |
|      |      | Shiraz-28T | 1735 | 0.350744 | 0         |  |  |
|      |      | Shiraz-29T | 1778 | 0.120767 | 0         |  |  |
|      |      | Shiraz-32T | 1833 | 0.551336 | 0         |  |  |
|      |      | Shiraz-32T | 1834 | 1.485392 | 0         |  |  |
|      |      | Shiraz-38T | 1951 | 0.250891 | 0         |  |  |
|      |      | Shiraz-53T | 2078 | 0.287202 | 0         |  |  |
|      |      | Shiraz-58T | 2160 | 0.399007 | 0         |  |  |
|      |      | Shiraz-71T | 2238 | 0.603631 | 0         |  |  |
| PLP1 | chrX | Shiraz-3T  | 242  | 0        | -0.336434 |  |  |
|      |      | Shiraz-3T  | 242  | 0        | -0.336434 |  |  |
|      |      | Shiraz-4T  | 261  | 0        | -0.336249 |  |  |
|      |      | Shiraz-4T  | 261  | 0        | -0.336249 |  |  |
|      |      | Shiraz-16T | 295  | 0.591657 | 0         |  |  |
|      |      | Shiraz-16T | 295  | 0.591657 | 0         |  |  |
|      |      | Shiraz-36T | 433  | 0        | -0.803961 |  |  |
|      |      | Shiraz-36T | 433  | 0        | -0.803961 |  |  |
|      |      | Shiraz-44T | 899  | 0        | -1.09697  |  |  |
|      |      | Shiraz-44T | 899  | 0        | -1.09697  |  |  |
|      |      | Shiraz-49T | 1170 | 0        | -0.967436 |  |  |
|      |      | Shiraz-49T | 1170 | 0        | -0.967436 |  |  |
|      |      | Shiraz-18T | 1457 | 0.643204 | 0         |  |  |
|      |      | Shiraz-18T | 1457 | 0.643204 | 0         |  |  |
|      |      | Shiraz-22T | 1673 | 0.611783 | 0         |  |  |
|      |      | Shiraz-22T | 1673 | 0.611783 | 0         |  |  |
|      |      | Shiraz-25T | 1719 | 0.472955 | 0         |  |  |
|      |      | Shiraz-25T | 1719 | 0.472955 | 0         |  |  |
|      |      | Shiraz-28T | 1762 | 0.562311 | 0         |  |  |
|      |      | Shiraz-28T | 1762 | 0.562311 | 0         |  |  |
|      |      | Shiraz-29T | 1801 | 0.815343 | 0         |  |  |
|      |      | Shiraz-29T | 1801 | 0.815343 | 0         |  |  |
|      |      | Shiraz-32T | 1870 | 0.729766 | 0         |  |  |
|      |      | Shiraz-32T | 1870 | 0.729766 | 0         |  |  |
|      |      | Shiraz-35T | 1933 | 0.488535 | 0         |  |  |
|      |      | Shiraz-35T | 1933 | 0.488535 | 0         |  |  |
|      |      | Shiraz-58T | 2223 | 0.833364 | 0         |  |  |
|      |      | Shiraz-58T | 2223 | 0.833364 | 0         |  |  |
|      |      | Shiraz-71T | 2263 | 0.975531 | 0         |  |  |
|      |      | Shiraz-71T | 2263 | 0.975531 | 0         |  |  |
|      |      | Shiraz-3T  | 242  | 0        | -0.336434 |  |  |
|      |      | Shiraz-3T  | 242  | 0        | -0.336434 |  |  |

|  |            |      |          |           |  |
|--|------------|------|----------|-----------|--|
|  | Shiraz-4T  | 261  | 0        | -0.336249 |  |
|  | Shiraz-4T  | 261  | 0        | -0.336249 |  |
|  | Shiraz-16T | 295  | 0.591657 | 0         |  |
|  | Shiraz-16T | 295  | 0.591657 | 0         |  |
|  | Shiraz-36T | 433  | 0        | -0.803961 |  |
|  | Shiraz-36T | 433  | 0        | -0.803961 |  |
|  | Shiraz-44T | 899  | 0        | -1.09697  |  |
|  | Shiraz-44T | 899  | 0        | -1.09697  |  |
|  | Shiraz-49T | 1170 | 0        | -0.967436 |  |
|  | Shiraz-49T | 1170 | 0        | -0.967436 |  |
|  | Shiraz-18T | 1457 | 0.643204 | 0         |  |
|  | Shiraz-18T | 1457 | 0.643204 | 0         |  |
|  | Shiraz-22T | 1673 | 0.611783 | 0         |  |
|  | Shiraz-22T | 1673 | 0.611783 | 0         |  |
|  | Shiraz-25T | 1719 | 0.472955 | 0         |  |
|  | Shiraz-25T | 1719 | 0.472955 | 0         |  |
|  | Shiraz-28T | 1762 | 0.562311 | 0         |  |
|  | Shiraz-28T | 1762 | 0.562311 | 0         |  |
|  | Shiraz-29T | 1801 | 0.815343 | 0         |  |
|  | Shiraz-29T | 1801 | 0.815343 | 0         |  |
|  | Shiraz-32T | 1870 | 0.729766 | 0         |  |
|  | Shiraz-32T | 1870 | 0.729766 | 0         |  |
|  | Shiraz-35T | 1933 | 0.488535 | 0         |  |
|  | Shiraz-35T | 1933 | 0.488535 | 0         |  |
|  | Shiraz-58T | 2223 | 0.833364 | 0         |  |
|  | Shiraz-58T | 2223 | 0.833364 | 0         |  |
|  | Shiraz-71T | 2263 | 0.975531 | 0         |  |
|  | Shiraz-71T | 2263 | 0.975531 | 0         |  |
|  | Shiraz-3T  | 242  | 0        | -0.336434 |  |
|  | Shiraz-3T  | 242  | 0        | -0.336434 |  |
|  | Shiraz-4T  | 261  | 0        | -0.336249 |  |
|  | Shiraz-4T  | 261  | 0        | -0.336249 |  |
|  | Shiraz-16T | 295  | 0.591657 | 0         |  |
|  | Shiraz-16T | 295  | 0.591657 | 0         |  |
|  | Shiraz-36T | 433  | 0        | -0.803961 |  |
|  | Shiraz-36T | 433  | 0        | -0.803961 |  |
|  | Shiraz-44T | 899  | 0        | -1.09697  |  |
|  | Shiraz-44T | 899  | 0        | -1.09697  |  |
|  | Shiraz-49T | 1170 | 0        | -0.967436 |  |
|  | Shiraz-49T | 1170 | 0        | -0.967436 |  |
|  | Shiraz-18T | 1457 | 0.643204 | 0         |  |
|  | Shiraz-18T | 1457 | 0.643204 | 0         |  |
|  | Shiraz-22T | 1673 | 0.611783 | 0         |  |
|  | Shiraz-22T | 1673 | 0.611783 | 0         |  |
|  | Shiraz-25T | 1719 | 0.472955 | 0         |  |
|  | Shiraz-25T | 1719 | 0.472955 | 0         |  |
|  | Shiraz-28T | 1762 | 0.562311 | 0         |  |

|      |      |            |      |          |           |  |
|------|------|------------|------|----------|-----------|--|
|      |      | Shiraz-28T | 1762 | 0.562311 | 0         |  |
|      |      | Shiraz-29T | 1801 | 0.815343 | 0         |  |
|      |      | Shiraz-29T | 1801 | 0.815343 | 0         |  |
|      |      | Shiraz-32T | 1870 | 0.729766 | 0         |  |
|      |      | Shiraz-32T | 1870 | 0.729766 | 0         |  |
|      |      | Shiraz-35T | 1933 | 0.488535 | 0         |  |
|      |      | Shiraz-35T | 1933 | 0.488535 | 0         |  |
|      |      | Shiraz-58T | 2223 | 0.833364 | 0         |  |
|      |      | Shiraz-58T | 2223 | 0.833364 | 0         |  |
|      |      | Shiraz-71T | 2263 | 0.975531 | 0         |  |
|      |      | Shiraz-71T | 2263 | 0.975531 | 0         |  |
| PLP2 | chrX | Shiraz-3T  | 238  | 0.472087 | 0         |  |
|      |      | Shiraz-4T  | 260  | 0        | -0.324128 |  |
|      |      | Shiraz-16T | 294  | 0.655804 | 0         |  |
|      |      | Shiraz-31T | 345  | 0.103301 | 0         |  |
|      |      | Shiraz-36T | 431  | 0        | -0.78035  |  |
|      |      | Shiraz-36T | 432  | 0        | -0.6692   |  |
|      |      | Shiraz-44T | 891  | 0        | -0.954044 |  |
|      |      | Shiraz-44T | 896  | 0        | -0.109108 |  |
|      |      | Shiraz-44T | 897  | 0.486937 | 0         |  |
|      |      | Shiraz-46T | 991  | 0.139564 | 0         |  |
|      |      | Shiraz-47T | 1084 | 0.24185  | 0         |  |
|      |      | Shiraz-49T | 1166 | 0        | -0.917235 |  |
|      |      | Shiraz-49T | 1169 | 0        | -0.583529 |  |
|      |      | Shiraz-77T | 1282 | 0.213849 | 0         |  |
|      |      | Shiraz-9T  | 1368 | 0.199713 | 0         |  |
|      |      | Shiraz-9T  | 1369 | 0.703374 | 0         |  |
|      |      | Shiraz-18T | 1455 | 0        | -0.186773 |  |
|      |      | Shiraz-22T | 1669 | 0.695915 | 0         |  |
|      |      | Shiraz-22T | 1672 | 1.01678  | 0         |  |
|      |      | Shiraz-25T | 1717 | 0.420447 | 0         |  |
|      |      | Shiraz-28T | 1760 | 0.538181 | 0         |  |
|      |      | Shiraz-29T | 1800 | 0.672527 | 0         |  |
|      |      | Shiraz-32T | 1869 | 0.776805 | 0         |  |
|      |      | Shiraz-35T | 1932 | 0.507141 | 0         |  |
|      |      | Shiraz-58T | 2221 | 0.871948 | 0         |  |
|      |      | Shiraz-71T | 2260 | 0.68394  | 0         |  |
|      |      | Shiraz-71T | 2262 | 0.986748 | 0         |  |
|      |      | Shiraz-3T  | 238  | 0.472087 | 0         |  |
|      |      | Shiraz-4T  | 260  | 0        | -0.324128 |  |
|      |      | Shiraz-16T | 294  | 0.655804 | 0         |  |
|      |      | Shiraz-31T | 345  | 0.103301 | 0         |  |
|      |      | Shiraz-36T | 431  | 0        | -0.78035  |  |
|      |      | Shiraz-36T | 432  | 0        | -0.6692   |  |
|      |      | Shiraz-44T | 891  | 0        | -0.954044 |  |
|      |      | Shiraz-44T | 896  | 0        | -0.109108 |  |
|      |      | Shiraz-44T | 897  | 0.486937 | 0         |  |

|      |      |            |      |          |           |  |  |
|------|------|------------|------|----------|-----------|--|--|
|      |      | Shiraz-46T | 991  | 0.139564 | 0         |  |  |
|      |      | Shiraz-47T | 1084 | 0.24185  | 0         |  |  |
|      |      | Shiraz-49T | 1166 | 0        | -0.917235 |  |  |
|      |      | Shiraz-49T | 1169 | 0        | -0.583529 |  |  |
|      |      | Shiraz-77T | 1282 | 0.213849 | 0         |  |  |
|      |      | Shiraz-9T  | 1368 | 0.199713 | 0         |  |  |
|      |      | Shiraz-9T  | 1369 | 0.703374 | 0         |  |  |
|      |      | Shiraz-18T | 1455 | 0        | -0.186773 |  |  |
|      |      | Shiraz-22T | 1669 | 0.695915 | 0         |  |  |
|      |      | Shiraz-22T | 1672 | 1.01678  | 0         |  |  |
|      |      | Shiraz-25T | 1717 | 0.420447 | 0         |  |  |
|      |      | Shiraz-28T | 1760 | 0.538181 | 0         |  |  |
|      |      | Shiraz-29T | 1800 | 0.672527 | 0         |  |  |
|      |      | Shiraz-32T | 1869 | 0.776805 | 0         |  |  |
|      |      | Shiraz-35T | 1932 | 0.507141 | 0         |  |  |
|      |      | Shiraz-58T | 2221 | 0.871948 | 0         |  |  |
|      |      | Shiraz-71T | 2260 | 0.68394  | 0         |  |  |
|      |      | Shiraz-71T | 2262 | 0.986748 | 0         |  |  |
|      |      | Shiraz-3T  | 238  | 0.472087 | 0         |  |  |
|      |      | Shiraz-4T  | 260  | 0        | -0.324128 |  |  |
|      |      | Shiraz-16T | 294  | 0.655804 | 0         |  |  |
|      |      | Shiraz-31T | 345  | 0.103301 | 0         |  |  |
|      |      | Shiraz-36T | 431  | 0        | -0.78035  |  |  |
|      |      | Shiraz-36T | 432  | 0        | -0.6692   |  |  |
|      |      | Shiraz-44T | 891  | 0        | -0.954044 |  |  |
|      |      | Shiraz-44T | 896  | 0        | -0.109108 |  |  |
|      |      | Shiraz-44T | 897  | 0.486937 | 0         |  |  |
|      |      | Shiraz-46T | 991  | 0.139564 | 0         |  |  |
|      |      | Shiraz-47T | 1084 | 0.24185  | 0         |  |  |
|      |      | Shiraz-49T | 1166 | 0        | -0.917235 |  |  |
|      |      | Shiraz-49T | 1169 | 0        | -0.583529 |  |  |
|      |      | Shiraz-77T | 1282 | 0.213849 | 0         |  |  |
|      |      | Shiraz-9T  | 1368 | 0.199713 | 0         |  |  |
|      |      | Shiraz-9T  | 1369 | 0.703374 | 0         |  |  |
|      |      | Shiraz-18T | 1455 | 0        | -0.186773 |  |  |
|      |      | Shiraz-22T | 1669 | 0.695915 | 0         |  |  |
|      |      | Shiraz-22T | 1672 | 1.01678  | 0         |  |  |
|      |      | Shiraz-25T | 1717 | 0.420447 | 0         |  |  |
|      |      | Shiraz-28T | 1760 | 0.538181 | 0         |  |  |
|      |      | Shiraz-29T | 1800 | 0.672527 | 0         |  |  |
|      |      | Shiraz-32T | 1869 | 0.776805 | 0         |  |  |
|      |      | Shiraz-35T | 1932 | 0.507141 | 0         |  |  |
|      |      | Shiraz-58T | 2221 | 0.871948 | 0         |  |  |
|      |      | Shiraz-71T | 2260 | 0.68394  | 0         |  |  |
|      |      | Shiraz-71T | 2262 | 0.986748 | 0         |  |  |
| PLS3 | chrX | Shiraz-3T  | 242  | 0        | -0.336434 |  |  |
|      |      | Shiraz-3T  | 242  | 0        | -0.336434 |  |  |

|  |            |      |          |           |  |
|--|------------|------|----------|-----------|--|
|  | Shiraz-4T  | 261  | 0        | -0.336249 |  |
|  | Shiraz-4T  | 261  | 0        | -0.336249 |  |
|  | Shiraz-16T | 295  | 0.591657 | 0         |  |
|  | Shiraz-16T | 295  | 0.591657 | 0         |  |
|  | Shiraz-36T | 433  | 0        | -0.803961 |  |
|  | Shiraz-36T | 433  | 0        | -0.803961 |  |
|  | Shiraz-44T | 899  | 0        | -1.09697  |  |
|  | Shiraz-44T | 899  | 0        | -1.09697  |  |
|  | Shiraz-49T | 1170 | 0        | -0.967436 |  |
|  | Shiraz-49T | 1170 | 0        | -0.967436 |  |
|  | Shiraz-18T | 1457 | 0.643204 | 0         |  |
|  | Shiraz-18T | 1457 | 0.643204 | 0         |  |
|  | Shiraz-22T | 1673 | 0.611783 | 0         |  |
|  | Shiraz-22T | 1673 | 0.611783 | 0         |  |
|  | Shiraz-25T | 1719 | 0.472955 | 0         |  |
|  | Shiraz-25T | 1719 | 0.472955 | 0         |  |
|  | Shiraz-28T | 1762 | 0.562311 | 0         |  |
|  | Shiraz-28T | 1762 | 0.562311 | 0         |  |
|  | Shiraz-29T | 1801 | 0.815343 | 0         |  |
|  | Shiraz-29T | 1801 | 0.815343 | 0         |  |
|  | Shiraz-32T | 1870 | 0.729766 | 0         |  |
|  | Shiraz-32T | 1870 | 0.729766 | 0         |  |
|  | Shiraz-35T | 1933 | 0.488535 | 0         |  |
|  | Shiraz-35T | 1933 | 0.488535 | 0         |  |
|  | Shiraz-58T | 2223 | 0.833364 | 0         |  |
|  | Shiraz-58T | 2223 | 0.833364 | 0         |  |
|  | Shiraz-71T | 2263 | 0.975531 | 0         |  |
|  | Shiraz-71T | 2263 | 0.975531 | 0         |  |
|  | Shiraz-3T  | 242  | 0        | -0.336434 |  |
|  | Shiraz-3T  | 242  | 0        | -0.336434 |  |
|  | Shiraz-4T  | 261  | 0        | -0.336249 |  |
|  | Shiraz-4T  | 261  | 0        | -0.336249 |  |
|  | Shiraz-16T | 295  | 0.591657 | 0         |  |
|  | Shiraz-16T | 295  | 0.591657 | 0         |  |
|  | Shiraz-36T | 433  | 0        | -0.803961 |  |
|  | Shiraz-36T | 433  | 0        | -0.803961 |  |
|  | Shiraz-44T | 899  | 0        | -1.09697  |  |
|  | Shiraz-44T | 899  | 0        | -1.09697  |  |
|  | Shiraz-49T | 1170 | 0        | -0.967436 |  |
|  | Shiraz-49T | 1170 | 0        | -0.967436 |  |
|  | Shiraz-18T | 1457 | 0.643204 | 0         |  |
|  | Shiraz-18T | 1457 | 0.643204 | 0         |  |
|  | Shiraz-22T | 1673 | 0.611783 | 0         |  |
|  | Shiraz-22T | 1673 | 0.611783 | 0         |  |
|  | Shiraz-25T | 1719 | 0.472955 | 0         |  |
|  | Shiraz-25T | 1719 | 0.472955 | 0         |  |
|  | Shiraz-28T | 1762 | 0.562311 | 0         |  |

|        |      |            |      |          |           |  |
|--------|------|------------|------|----------|-----------|--|
|        |      | Shiraz-28T | 1762 | 0.562311 | 0         |  |
|        |      | Shiraz-29T | 1801 | 0.815343 | 0         |  |
|        |      | Shiraz-29T | 1801 | 0.815343 | 0         |  |
|        |      | Shiraz-32T | 1870 | 0.729766 | 0         |  |
|        |      | Shiraz-32T | 1870 | 0.729766 | 0         |  |
|        |      | Shiraz-35T | 1933 | 0.488535 | 0         |  |
|        |      | Shiraz-35T | 1933 | 0.488535 | 0         |  |
|        |      | Shiraz-58T | 2223 | 0.833364 | 0         |  |
|        |      | Shiraz-58T | 2223 | 0.833364 | 0         |  |
|        |      | Shiraz-71T | 2263 | 0.975531 | 0         |  |
|        |      | Shiraz-71T | 2263 | 0.975531 | 0         |  |
|        |      | Shiraz-3T  | 242  | 0        | -0.336434 |  |
|        |      | Shiraz-3T  | 242  | 0        | -0.336434 |  |
|        |      | Shiraz-4T  | 261  | 0        | -0.336249 |  |
|        |      | Shiraz-4T  | 261  | 0        | -0.336249 |  |
|        |      | Shiraz-16T | 295  | 0.591657 | 0         |  |
|        |      | Shiraz-16T | 295  | 0.591657 | 0         |  |
|        |      | Shiraz-36T | 433  | 0        | -0.803961 |  |
|        |      | Shiraz-36T | 433  | 0        | -0.803961 |  |
|        |      | Shiraz-44T | 899  | 0        | -1.09697  |  |
|        |      | Shiraz-44T | 899  | 0        | -1.09697  |  |
|        |      | Shiraz-49T | 1170 | 0        | -0.967436 |  |
|        |      | Shiraz-49T | 1170 | 0        | -0.967436 |  |
|        |      | Shiraz-18T | 1457 | 0.643204 | 0         |  |
|        |      | Shiraz-18T | 1457 | 0.643204 | 0         |  |
|        |      | Shiraz-22T | 1673 | 0.611783 | 0         |  |
|        |      | Shiraz-22T | 1673 | 0.611783 | 0         |  |
|        |      | Shiraz-25T | 1719 | 0.472955 | 0         |  |
|        |      | Shiraz-25T | 1719 | 0.472955 | 0         |  |
|        |      | Shiraz-28T | 1762 | 0.562311 | 0         |  |
|        |      | Shiraz-28T | 1762 | 0.562311 | 0         |  |
|        |      | Shiraz-29T | 1801 | 0.815343 | 0         |  |
|        |      | Shiraz-29T | 1801 | 0.815343 | 0         |  |
|        |      | Shiraz-32T | 1870 | 0.729766 | 0         |  |
|        |      | Shiraz-32T | 1870 | 0.729766 | 0         |  |
|        |      | Shiraz-35T | 1933 | 0.488535 | 0         |  |
|        |      | Shiraz-35T | 1933 | 0.488535 | 0         |  |
|        |      | Shiraz-58T | 2223 | 0.833364 | 0         |  |
|        |      | Shiraz-58T | 2223 | 0.833364 | 0         |  |
|        |      | Shiraz-71T | 2263 | 0.975531 | 0         |  |
|        |      | Shiraz-71T | 2263 | 0.975531 | 0         |  |
| PLXNA3 | chrX | Shiraz-3T  | 246  | 0.531858 | 0         |  |
|        |      | Shiraz-4T  | 261  | 0        | -0.336249 |  |
|        |      | Shiraz-16T | 295  | 0.591657 | 0         |  |
|        |      | Shiraz-36T | 433  | 0        | -0.803961 |  |
|        |      | Shiraz-42T | 480  | 0        | -0.232915 |  |
|        |      | Shiraz-44T | 908  | 0.466743 | 0         |  |

|  |            |      |          |           |  |
|--|------------|------|----------|-----------|--|
|  | Shiraz-49T | 1170 | 0        | -0.967436 |  |
|  | Shiraz-49T | 1173 | 0        | -0.704439 |  |
|  | Shiraz-9T  | 1370 | 0.690073 | 0         |  |
|  | Shiraz-9T  | 1371 | 1.292392 | 0         |  |
|  | Shiraz-18T | 1457 | 0.643204 | 0         |  |
|  | Shiraz-22T | 1673 | 0.611783 | 0         |  |
|  | Shiraz-22T | 1678 | 0.911625 | 0         |  |
|  | Shiraz-25T | 1719 | 0.472955 | 0         |  |
|  | Shiraz-28T | 1762 | 0.562311 | 0         |  |
|  | Shiraz-29T | 1801 | 0.815343 | 0         |  |
|  | Shiraz-32T | 1870 | 0.729766 | 0         |  |
|  | Shiraz-32T | 1872 | 1.504553 | 0         |  |
|  | Shiraz-35T | 1933 | 0.488535 | 0         |  |
|  | Shiraz-38T | 2011 | 0        | -0.406024 |  |
|  | Shiraz-53T | 2115 | 0.427728 | 0         |  |
|  | Shiraz-58T | 2223 | 0.833364 | 0         |  |
|  | Shiraz-58T | 2226 | 1.074663 | 0         |  |
|  | Shiraz-71T | 2263 | 0.975531 | 0         |  |
|  | Shiraz-3T  | 246  | 0.531858 | 0         |  |
|  | Shiraz-4T  | 261  | 0        | -0.336249 |  |
|  | Shiraz-16T | 295  | 0.591657 | 0         |  |
|  | Shiraz-36T | 433  | 0        | -0.803961 |  |
|  | Shiraz-42T | 480  | 0        | -0.232915 |  |
|  | Shiraz-44T | 908  | 0.466743 | 0         |  |
|  | Shiraz-49T | 1170 | 0        | -0.967436 |  |
|  | Shiraz-49T | 1173 | 0        | -0.704439 |  |
|  | Shiraz-9T  | 1370 | 0.690073 | 0         |  |
|  | Shiraz-9T  | 1371 | 1.292392 | 0         |  |
|  | Shiraz-18T | 1457 | 0.643204 | 0         |  |
|  | Shiraz-22T | 1673 | 0.611783 | 0         |  |
|  | Shiraz-22T | 1678 | 0.911625 | 0         |  |
|  | Shiraz-25T | 1719 | 0.472955 | 0         |  |
|  | Shiraz-28T | 1762 | 0.562311 | 0         |  |
|  | Shiraz-29T | 1801 | 0.815343 | 0         |  |
|  | Shiraz-32T | 1870 | 0.729766 | 0         |  |
|  | Shiraz-32T | 1872 | 1.504553 | 0         |  |
|  | Shiraz-35T | 1933 | 0.488535 | 0         |  |
|  | Shiraz-38T | 2011 | 0        | -0.406024 |  |
|  | Shiraz-53T | 2115 | 0.427728 | 0         |  |
|  | Shiraz-58T | 2223 | 0.833364 | 0         |  |
|  | Shiraz-58T | 2226 | 1.074663 | 0         |  |
|  | Shiraz-71T | 2263 | 0.975531 | 0         |  |
|  | Shiraz-3T  | 246  | 0.531858 | 0         |  |
|  | Shiraz-4T  | 261  | 0        | -0.336249 |  |
|  | Shiraz-16T | 295  | 0.591657 | 0         |  |
|  | Shiraz-36T | 433  | 0        | -0.803961 |  |
|  | Shiraz-42T | 480  | 0        | -0.232915 |  |

|        |      |            |      |          |           |  |  |
|--------|------|------------|------|----------|-----------|--|--|
|        |      | Shiraz-44T | 908  | 0.466743 | 0         |  |  |
|        |      | Shiraz-49T | 1170 | 0        | -0.967436 |  |  |
|        |      | Shiraz-49T | 1173 | 0        | -0.704439 |  |  |
|        |      | Shiraz-9T  | 1370 | 0.690073 | 0         |  |  |
|        |      | Shiraz-9T  | 1371 | 1.292392 | 0         |  |  |
|        |      | Shiraz-18T | 1457 | 0.643204 | 0         |  |  |
|        |      | Shiraz-22T | 1673 | 0.611783 | 0         |  |  |
|        |      | Shiraz-22T | 1678 | 0.911625 | 0         |  |  |
|        |      | Shiraz-25T | 1719 | 0.472955 | 0         |  |  |
|        |      | Shiraz-28T | 1762 | 0.562311 | 0         |  |  |
|        |      | Shiraz-29T | 1801 | 0.815343 | 0         |  |  |
|        |      | Shiraz-32T | 1870 | 0.729766 | 0         |  |  |
|        |      | Shiraz-32T | 1872 | 1.504553 | 0         |  |  |
|        |      | Shiraz-35T | 1933 | 0.488535 | 0         |  |  |
|        |      | Shiraz-38T | 2011 | 0        | -0.406024 |  |  |
|        |      | Shiraz-53T | 2115 | 0.427728 | 0         |  |  |
|        |      | Shiraz-58T | 2223 | 0.833364 | 0         |  |  |
|        |      | Shiraz-58T | 2226 | 1.074663 | 0         |  |  |
|        |      | Shiraz-71T | 2263 | 0.975531 | 0         |  |  |
| PLXNA4 | chr7 | Shiraz-3T  | 90   | 0.219276 | 0         |  |  |
|        |      | Shiraz-3T  | 90   | 0.219276 | 0         |  |  |
|        |      | Shiraz-3T  | 90   | 0.219276 | 0         |  |  |
|        |      | Shiraz-3T  | 96   | 0.428308 | 0         |  |  |
|        |      | Shiraz-3T  | 96   | 0.428308 | 0         |  |  |
|        |      | Shiraz-3T  | 96   | 0.428308 | 0         |  |  |
|        |      | Shiraz-4T  | 253  | 0.372918 | 0         |  |  |
|        |      | Shiraz-4T  | 253  | 0.372918 | 0         |  |  |
|        |      | Shiraz-4T  | 253  | 0.372918 | 0         |  |  |
|        |      | Shiraz-36T | 378  | 0.179558 | 0         |  |  |
|        |      | Shiraz-36T | 378  | 0.179558 | 0         |  |  |
|        |      | Shiraz-36T | 378  | 0.179558 | 0         |  |  |
|        |      | Shiraz-44T | 642  | 0.408617 | 0         |  |  |
|        |      | Shiraz-44T | 642  | 0.408617 | 0         |  |  |
|        |      | Shiraz-44T | 642  | 0.408617 | 0         |  |  |
|        |      | Shiraz-46T | 943  | 0.093799 | 0         |  |  |
|        |      | Shiraz-46T | 943  | 0.093799 | 0         |  |  |
|        |      | Shiraz-46T | 943  | 0.093799 | 0         |  |  |
|        |      | Shiraz-77T | 1225 | 0        | -0.117922 |  |  |
|        |      | Shiraz-77T | 1225 | 0        | -0.117922 |  |  |
|        |      | Shiraz-77T | 1225 | 0        | -0.117922 |  |  |
|        |      | Shiraz-9T  | 1325 | 0.221899 | 0         |  |  |
|        |      | Shiraz-9T  | 1325 | 0.221899 | 0         |  |  |
|        |      | Shiraz-9T  | 1325 | 0.221899 | 0         |  |  |
|        |      | Shiraz-18T | 1434 | 0.244465 | 0         |  |  |
|        |      | Shiraz-18T | 1434 | 0.244465 | 0         |  |  |
|        |      | Shiraz-18T | 1434 | 0.244465 | 0         |  |  |
|        |      | Shiraz-25T | 1698 | 0.21835  | 0         |  |  |



|  |  |            |      |          |           |  |  |
|--|--|------------|------|----------|-----------|--|--|
|  |  | Shiraz-25T | 1698 | 0.21835  | 0         |  |  |
|  |  | Shiraz-25T | 1698 | 0.21835  | 0         |  |  |
|  |  | Shiraz-28T | 1735 | 0.350744 | 0         |  |  |
|  |  | Shiraz-28T | 1735 | 0.350744 | 0         |  |  |
|  |  | Shiraz-28T | 1735 | 0.350744 | 0         |  |  |
|  |  | Shiraz-29T | 1778 | 0.120767 | 0         |  |  |
|  |  | Shiraz-29T | 1778 | 0.120767 | 0         |  |  |
|  |  | Shiraz-29T | 1778 | 0.120767 | 0         |  |  |
|  |  | Shiraz-32T | 1833 | 0.551336 | 0         |  |  |
|  |  | Shiraz-32T | 1833 | 0.551336 | 0         |  |  |
|  |  | Shiraz-32T | 1833 | 0.551336 | 0         |  |  |
|  |  | Shiraz-38T | 1951 | 0.250891 | 0         |  |  |
|  |  | Shiraz-38T | 1951 | 0.250891 | 0         |  |  |
|  |  | Shiraz-38T | 1951 | 0.250891 | 0         |  |  |
|  |  | Shiraz-53T | 2078 | 0.287202 | 0         |  |  |
|  |  | Shiraz-53T | 2078 | 0.287202 | 0         |  |  |
|  |  | Shiraz-53T | 2078 | 0.287202 | 0         |  |  |
|  |  | Shiraz-71T | 2238 | 0.603631 | 0         |  |  |
|  |  | Shiraz-71T | 2238 | 0.603631 | 0         |  |  |
|  |  | Shiraz-71T | 2238 | 0.603631 | 0         |  |  |
|  |  | Shiraz-3T  | 90   | 0.219276 | 0         |  |  |
|  |  | Shiraz-3T  | 90   | 0.219276 | 0         |  |  |
|  |  | Shiraz-3T  | 90   | 0.219276 | 0         |  |  |
|  |  | Shiraz-3T  | 96   | 0.428308 | 0         |  |  |
|  |  | Shiraz-3T  | 96   | 0.428308 | 0         |  |  |
|  |  | Shiraz-3T  | 96   | 0.428308 | 0         |  |  |
|  |  | Shiraz-4T  | 253  | 0.372918 | 0         |  |  |
|  |  | Shiraz-4T  | 253  | 0.372918 | 0         |  |  |
|  |  | Shiraz-4T  | 253  | 0.372918 | 0         |  |  |
|  |  | Shiraz-36T | 378  | 0.179558 | 0         |  |  |
|  |  | Shiraz-36T | 378  | 0.179558 | 0         |  |  |
|  |  | Shiraz-36T | 378  | 0.179558 | 0         |  |  |
|  |  | Shiraz-44T | 642  | 0.408617 | 0         |  |  |
|  |  | Shiraz-44T | 642  | 0.408617 | 0         |  |  |
|  |  | Shiraz-44T | 642  | 0.408617 | 0         |  |  |
|  |  | Shiraz-46T | 943  | 0.093799 | 0         |  |  |
|  |  | Shiraz-46T | 943  | 0.093799 | 0         |  |  |
|  |  | Shiraz-46T | 943  | 0.093799 | 0         |  |  |
|  |  | Shiraz-77T | 1225 | 0        | -0.117922 |  |  |
|  |  | Shiraz-77T | 1225 | 0        | -0.117922 |  |  |
|  |  | Shiraz-77T | 1225 | 0        | -0.117922 |  |  |
|  |  | Shiraz-9T  | 1325 | 0.221899 | 0         |  |  |
|  |  | Shiraz-9T  | 1325 | 0.221899 | 0         |  |  |
|  |  | Shiraz-9T  | 1325 | 0.221899 | 0         |  |  |
|  |  | Shiraz-18T | 1434 | 0.244465 | 0         |  |  |
|  |  | Shiraz-18T | 1434 | 0.244465 | 0         |  |  |
|  |  | Shiraz-18T | 1434 | 0.244465 | 0         |  |  |

|  |            |      |          |           |  |
|--|------------|------|----------|-----------|--|
|  | Shiraz-25T | 1698 | 0.21835  | 0         |  |
|  | Shiraz-25T | 1698 | 0.21835  | 0         |  |
|  | Shiraz-25T | 1698 | 0.21835  | 0         |  |
|  | Shiraz-28T | 1735 | 0.350744 | 0         |  |
|  | Shiraz-28T | 1735 | 0.350744 | 0         |  |
|  | Shiraz-28T | 1735 | 0.350744 | 0         |  |
|  | Shiraz-29T | 1778 | 0.120767 | 0         |  |
|  | Shiraz-29T | 1778 | 0.120767 | 0         |  |
|  | Shiraz-29T | 1778 | 0.120767 | 0         |  |
|  | Shiraz-32T | 1833 | 0.551336 | 0         |  |
|  | Shiraz-32T | 1833 | 0.551336 | 0         |  |
|  | Shiraz-32T | 1833 | 0.551336 | 0         |  |
|  | Shiraz-38T | 1951 | 0.250891 | 0         |  |
|  | Shiraz-38T | 1951 | 0.250891 | 0         |  |
|  | Shiraz-38T | 1951 | 0.250891 | 0         |  |
|  | Shiraz-53T | 2078 | 0.287202 | 0         |  |
|  | Shiraz-53T | 2078 | 0.287202 | 0         |  |
|  | Shiraz-53T | 2078 | 0.287202 | 0         |  |
|  | Shiraz-71T | 2238 | 0.603631 | 0         |  |
|  | Shiraz-71T | 2238 | 0.603631 | 0         |  |
|  | Shiraz-71T | 2238 | 0.603631 | 0         |  |
|  | Shiraz-3T  | 90   | 0.219276 | 0         |  |
|  | Shiraz-3T  | 90   | 0.219276 | 0         |  |
|  | Shiraz-3T  | 90   | 0.219276 | 0         |  |
|  | Shiraz-3T  | 96   | 0.428308 | 0         |  |
|  | Shiraz-3T  | 96   | 0.428308 | 0         |  |
|  | Shiraz-3T  | 96   | 0.428308 | 0         |  |
|  | Shiraz-4T  | 253  | 0.372918 | 0         |  |
|  | Shiraz-4T  | 253  | 0.372918 | 0         |  |
|  | Shiraz-4T  | 253  | 0.372918 | 0         |  |
|  | Shiraz-36T | 378  | 0.179558 | 0         |  |
|  | Shiraz-36T | 378  | 0.179558 | 0         |  |
|  | Shiraz-36T | 378  | 0.179558 | 0         |  |
|  | Shiraz-44T | 642  | 0.408617 | 0         |  |
|  | Shiraz-44T | 642  | 0.408617 | 0         |  |
|  | Shiraz-44T | 642  | 0.408617 | 0         |  |
|  | Shiraz-46T | 943  | 0.093799 | 0         |  |
|  | Shiraz-46T | 943  | 0.093799 | 0         |  |
|  | Shiraz-46T | 943  | 0.093799 | 0         |  |
|  | Shiraz-77T | 1225 | 0        | -0.117922 |  |
|  | Shiraz-77T | 1225 | 0        | -0.117922 |  |
|  | Shiraz-77T | 1225 | 0        | -0.117922 |  |
|  | Shiraz-9T  | 1325 | 0.221899 | 0         |  |
|  | Shiraz-9T  | 1325 | 0.221899 | 0         |  |
|  | Shiraz-9T  | 1325 | 0.221899 | 0         |  |
|  | Shiraz-18T | 1434 | 0.244465 | 0         |  |
|  | Shiraz-18T | 1434 | 0.244465 | 0         |  |

|        |      |            |      |          |           |  |  |
|--------|------|------------|------|----------|-----------|--|--|
|        |      | Shiraz-18T | 1434 | 0.244465 | 0         |  |  |
|        |      | Shiraz-25T | 1698 | 0.21835  | 0         |  |  |
|        |      | Shiraz-25T | 1698 | 0.21835  | 0         |  |  |
|        |      | Shiraz-25T | 1698 | 0.21835  | 0         |  |  |
|        |      | Shiraz-28T | 1735 | 0.350744 | 0         |  |  |
|        |      | Shiraz-28T | 1735 | 0.350744 | 0         |  |  |
|        |      | Shiraz-28T | 1735 | 0.350744 | 0         |  |  |
|        |      | Shiraz-29T | 1778 | 0.120767 | 0         |  |  |
|        |      | Shiraz-29T | 1778 | 0.120767 | 0         |  |  |
|        |      | Shiraz-29T | 1778 | 0.120767 | 0         |  |  |
|        |      | Shiraz-32T | 1833 | 0.551336 | 0         |  |  |
|        |      | Shiraz-32T | 1833 | 0.551336 | 0         |  |  |
|        |      | Shiraz-32T | 1833 | 0.551336 | 0         |  |  |
|        |      | Shiraz-38T | 1951 | 0.250891 | 0         |  |  |
|        |      | Shiraz-38T | 1951 | 0.250891 | 0         |  |  |
|        |      | Shiraz-38T | 1951 | 0.250891 | 0         |  |  |
|        |      | Shiraz-53T | 2078 | 0.287202 | 0         |  |  |
|        |      | Shiraz-53T | 2078 | 0.287202 | 0         |  |  |
|        |      | Shiraz-53T | 2078 | 0.287202 | 0         |  |  |
|        |      | Shiraz-71T | 2238 | 0.603631 | 0         |  |  |
|        |      | Shiraz-71T | 2238 | 0.603631 | 0         |  |  |
|        |      | Shiraz-71T | 2238 | 0.603631 | 0         |  |  |
| PLXNB3 | chrX | Shiraz-3T  | 246  | 0.531858 | 0         |  |  |
|        |      | Shiraz-4T  | 261  | 0        | -0.336249 |  |  |
|        |      | Shiraz-16T | 295  | 0.591657 | 0         |  |  |
|        |      | Shiraz-36T | 433  | 0        | -0.803961 |  |  |
|        |      | Shiraz-42T | 480  | 0        | -0.232915 |  |  |
|        |      | Shiraz-44T | 908  | 0.466743 | 0         |  |  |
|        |      | Shiraz-49T | 1170 | 0        | -0.967436 |  |  |
|        |      | Shiraz-49T | 1173 | 0        | -0.704439 |  |  |
|        |      | Shiraz-9T  | 1370 | 0.690073 | 0         |  |  |
|        |      | Shiraz-9T  | 1371 | 1.292392 | 0         |  |  |
|        |      | Shiraz-18T | 1457 | 0.643204 | 0         |  |  |
|        |      | Shiraz-22T | 1673 | 0.611783 | 0         |  |  |
|        |      | Shiraz-22T | 1678 | 0.911625 | 0         |  |  |
|        |      | Shiraz-25T | 1719 | 0.472955 | 0         |  |  |
|        |      | Shiraz-28T | 1762 | 0.562311 | 0         |  |  |
|        |      | Shiraz-29T | 1801 | 0.815343 | 0         |  |  |
|        |      | Shiraz-32T | 1870 | 0.729766 | 0         |  |  |
|        |      | Shiraz-32T | 1872 | 1.504553 | 0         |  |  |
|        |      | Shiraz-35T | 1933 | 0.488535 | 0         |  |  |
|        |      | Shiraz-38T | 2011 | 0        | -0.406024 |  |  |
|        |      | Shiraz-53T | 2115 | 0.427728 | 0         |  |  |
|        |      | Shiraz-58T | 2223 | 0.833364 | 0         |  |  |
|        |      | Shiraz-58T | 2226 | 1.074663 | 0         |  |  |
|        |      | Shiraz-71T | 2263 | 0.975531 | 0         |  |  |
|        |      | Shiraz-3T  | 246  | 0.531858 | 0         |  |  |

|  |            |      |          |           |  |
|--|------------|------|----------|-----------|--|
|  | Shiraz-4T  | 261  | 0        | -0.336249 |  |
|  | Shiraz-16T | 295  | 0.591657 | 0         |  |
|  | Shiraz-36T | 433  | 0        | -0.803961 |  |
|  | Shiraz-42T | 480  | 0        | -0.232915 |  |
|  | Shiraz-44T | 908  | 0.466743 | 0         |  |
|  | Shiraz-49T | 1170 | 0        | -0.967436 |  |
|  | Shiraz-49T | 1173 | 0        | -0.704439 |  |
|  | Shiraz-9T  | 1370 | 0.690073 | 0         |  |
|  | Shiraz-9T  | 1371 | 1.292392 | 0         |  |
|  | Shiraz-18T | 1457 | 0.643204 | 0         |  |
|  | Shiraz-22T | 1673 | 0.611783 | 0         |  |
|  | Shiraz-22T | 1678 | 0.911625 | 0         |  |
|  | Shiraz-25T | 1719 | 0.472955 | 0         |  |
|  | Shiraz-28T | 1762 | 0.562311 | 0         |  |
|  | Shiraz-29T | 1801 | 0.815343 | 0         |  |
|  | Shiraz-32T | 1870 | 0.729766 | 0         |  |
|  | Shiraz-32T | 1872 | 1.504553 | 0         |  |
|  | Shiraz-35T | 1933 | 0.488535 | 0         |  |
|  | Shiraz-38T | 2011 | 0        | -0.406024 |  |
|  | Shiraz-53T | 2115 | 0.427728 | 0         |  |
|  | Shiraz-58T | 2223 | 0.833364 | 0         |  |
|  | Shiraz-58T | 2226 | 1.074663 | 0         |  |
|  | Shiraz-71T | 2263 | 0.975531 | 0         |  |
|  | Shiraz-3T  | 246  | 0.531858 | 0         |  |
|  | Shiraz-4T  | 261  | 0        | -0.336249 |  |
|  | Shiraz-16T | 295  | 0.591657 | 0         |  |
|  | Shiraz-36T | 433  | 0        | -0.803961 |  |
|  | Shiraz-42T | 480  | 0        | -0.232915 |  |
|  | Shiraz-44T | 908  | 0.466743 | 0         |  |
|  | Shiraz-49T | 1170 | 0        | -0.967436 |  |
|  | Shiraz-49T | 1173 | 0        | -0.704439 |  |
|  | Shiraz-9T  | 1370 | 0.690073 | 0         |  |
|  | Shiraz-9T  | 1371 | 1.292392 | 0         |  |
|  | Shiraz-18T | 1457 | 0.643204 | 0         |  |
|  | Shiraz-22T | 1673 | 0.611783 | 0         |  |
|  | Shiraz-22T | 1678 | 0.911625 | 0         |  |
|  | Shiraz-25T | 1719 | 0.472955 | 0         |  |
|  | Shiraz-28T | 1762 | 0.562311 | 0         |  |
|  | Shiraz-29T | 1801 | 0.815343 | 0         |  |
|  | Shiraz-32T | 1870 | 0.729766 | 0         |  |
|  | Shiraz-32T | 1872 | 1.504553 | 0         |  |
|  | Shiraz-35T | 1933 | 0.488535 | 0         |  |
|  | Shiraz-38T | 2011 | 0        | -0.406024 |  |
|  | Shiraz-53T | 2115 | 0.427728 | 0         |  |
|  | Shiraz-58T | 2223 | 0.833364 | 0         |  |
|  | Shiraz-58T | 2226 | 1.074663 | 0         |  |
|  | Shiraz-71T | 2263 | 0.975531 | 0         |  |

|            |      |            |           |          |           |  |
|------------|------|------------|-----------|----------|-----------|--|
| PMPCB      | chr7 | Shiraz-3T  | 90        | 0.219276 | 0         |  |
|            |      | Shiraz-4T  | 253       | 0.372918 | 0         |  |
|            |      | Shiraz-36T | 378       | 0.179558 | 0         |  |
|            |      | Shiraz-46T | 943       | 0.093799 | 0         |  |
|            |      | Shiraz-77T | 1225      | 0        | -0.117922 |  |
|            |      | Shiraz-18T | 1434      | 0.244465 | 0         |  |
|            |      | Shiraz-22T | 1549      | 0        | -0.319623 |  |
|            |      | Shiraz-25T | 1698      | 0.21835  | 0         |  |
|            |      | Shiraz-28T | 1735      | 0.350744 | 0         |  |
|            |      | Shiraz-29T | 1778      | 0.120767 | 0         |  |
|            |      | Shiraz-32T | 1833      | 0.551336 | 0         |  |
|            |      | Shiraz-38T | 1951      | 0.250891 | 0         |  |
|            |      | Shiraz-53T | 2078      | 0.287202 | 0         |  |
|            |      | Shiraz-71T | 2238      | 0.603631 | 0         |  |
|            |      | Shiraz-3T  | 90        | 0.219276 | 0         |  |
|            |      | Shiraz-4T  | 253       | 0.372918 | 0         |  |
|            |      | Shiraz-36T | 378       | 0.179558 | 0         |  |
|            |      | Shiraz-46T | 943       | 0.093799 | 0         |  |
|            |      | Shiraz-77T | 1225      | 0        | -0.117922 |  |
|            |      | Shiraz-18T | 1434      | 0.244465 | 0         |  |
|            |      | Shiraz-22T | 1549      | 0        | -0.319623 |  |
| Shiraz-25T | 1698 | 0.21835    | 0         |          |           |  |
| Shiraz-28T | 1735 | 0.350744   | 0         |          |           |  |
| Shiraz-29T | 1778 | 0.120767   | 0         |          |           |  |
| Shiraz-32T | 1833 | 0.551336   | 0         |          |           |  |
| Shiraz-38T | 1951 | 0.250891   | 0         |          |           |  |
| Shiraz-53T | 2078 | 0.287202   | 0         |          |           |  |
| Shiraz-71T | 2238 | 0.603631   | 0         |          |           |  |
| Shiraz-3T  | 90   | 0.219276   | 0         |          |           |  |
| Shiraz-4T  | 253  | 0.372918   | 0         |          |           |  |
| Shiraz-36T | 378  | 0.179558   | 0         |          |           |  |
| Shiraz-46T | 943  | 0.093799   | 0         |          |           |  |
| Shiraz-77T | 1225 | 0          | -0.117922 |          |           |  |
| Shiraz-18T | 1434 | 0.244465   | 0         |          |           |  |
| Shiraz-22T | 1549 | 0          | -0.319623 |          |           |  |
| Shiraz-25T | 1698 | 0.21835    | 0         |          |           |  |
| Shiraz-28T | 1735 | 0.350744   | 0         |          |           |  |
| Shiraz-29T | 1778 | 0.120767   | 0         |          |           |  |
| Shiraz-32T | 1833 | 0.551336   | 0         |          |           |  |
| Shiraz-38T | 1951 | 0.250891   | 0         |          |           |  |
| Shiraz-53T | 2078 | 0.287202   | 0         |          |           |  |
| Shiraz-71T | 2238 | 0.603631   | 0         |          |           |  |
| PMS2L1     | chr7 | Shiraz-3T  | 90        | 0.219276 | 0         |  |
|            |      | Shiraz-3T  | 94        | 0.74735  | 0         |  |
|            |      | Shiraz-4T  | 253       | 0.372918 | 0         |  |
|            |      | Shiraz-31T | 316       | 0.219196 | 0         |  |
|            |      | Shiraz-36T | 378       | 0.179558 | 0         |  |

|  |            |      |          |           |  |
|--|------------|------|----------|-----------|--|
|  | Shiraz-36T | 381  | 0.332628 | 0         |  |
|  | Shiraz-44T | 639  | 1.035032 | 0         |  |
|  | Shiraz-46T | 943  | 0.093799 | 0         |  |
|  | Shiraz-46T | 946  | 0.299835 | 0         |  |
|  | Shiraz-47T | 1030 | 0.257728 | 0         |  |
|  | Shiraz-49T | 1120 | 0.281656 | 0         |  |
|  | Shiraz-77T | 1225 | 0        | -0.117922 |  |
|  | Shiraz-77T | 1227 | 0.196445 | 0         |  |
|  | Shiraz-9T  | 1324 | 0.679266 | 0         |  |
|  | Shiraz-18T | 1434 | 0.244465 | 0         |  |
|  | Shiraz-22T | 1549 | 0        | -0.319623 |  |
|  | Shiraz-22T | 1551 | 0.324011 | 0         |  |
|  | Shiraz-25T | 1698 | 0.21835  | 0         |  |
|  | Shiraz-28T | 1735 | 0.350744 | 0         |  |
|  | Shiraz-29T | 1778 | 0.120767 | 0         |  |
|  | Shiraz-32T | 1833 | 0.551336 | 0         |  |
|  | Shiraz-32T | 1834 | 1.485392 | 0         |  |
|  | Shiraz-38T | 1951 | 0.250891 | 0         |  |
|  | Shiraz-53T | 2078 | 0.287202 | 0         |  |
|  | Shiraz-58T | 2160 | 0.399007 | 0         |  |
|  | Shiraz-71T | 2238 | 0.603631 | 0         |  |
|  | Shiraz-3T  | 90   | 0.219276 | 0         |  |
|  | Shiraz-3T  | 94   | 0.74735  | 0         |  |
|  | Shiraz-4T  | 253  | 0.372918 | 0         |  |
|  | Shiraz-31T | 316  | 0.219196 | 0         |  |
|  | Shiraz-36T | 378  | 0.179558 | 0         |  |
|  | Shiraz-36T | 381  | 0.332628 | 0         |  |
|  | Shiraz-44T | 639  | 1.035032 | 0         |  |
|  | Shiraz-46T | 943  | 0.093799 | 0         |  |
|  | Shiraz-46T | 946  | 0.299835 | 0         |  |
|  | Shiraz-47T | 1030 | 0.257728 | 0         |  |
|  | Shiraz-49T | 1120 | 0.281656 | 0         |  |
|  | Shiraz-77T | 1225 | 0        | -0.117922 |  |
|  | Shiraz-77T | 1227 | 0.196445 | 0         |  |
|  | Shiraz-9T  | 1324 | 0.679266 | 0         |  |
|  | Shiraz-18T | 1434 | 0.244465 | 0         |  |
|  | Shiraz-22T | 1549 | 0        | -0.319623 |  |
|  | Shiraz-22T | 1551 | 0.324011 | 0         |  |
|  | Shiraz-25T | 1698 | 0.21835  | 0         |  |
|  | Shiraz-28T | 1735 | 0.350744 | 0         |  |
|  | Shiraz-29T | 1778 | 0.120767 | 0         |  |
|  | Shiraz-32T | 1833 | 0.551336 | 0         |  |
|  | Shiraz-32T | 1834 | 1.485392 | 0         |  |
|  | Shiraz-38T | 1951 | 0.250891 | 0         |  |
|  | Shiraz-53T | 2078 | 0.287202 | 0         |  |
|  | Shiraz-58T | 2160 | 0.399007 | 0         |  |
|  | Shiraz-71T | 2238 | 0.603631 | 0         |  |

|         |      |            |      |          |           |  |
|---------|------|------------|------|----------|-----------|--|
|         |      | Shiraz-3T  | 90   | 0.219276 | 0         |  |
|         |      | Shiraz-3T  | 94   | 0.74735  | 0         |  |
|         |      | Shiraz-4T  | 253  | 0.372918 | 0         |  |
|         |      | Shiraz-31T | 316  | 0.219196 | 0         |  |
|         |      | Shiraz-36T | 378  | 0.179558 | 0         |  |
|         |      | Shiraz-36T | 381  | 0.332628 | 0         |  |
|         |      | Shiraz-44T | 639  | 1.035032 | 0         |  |
|         |      | Shiraz-46T | 943  | 0.093799 | 0         |  |
|         |      | Shiraz-46T | 946  | 0.299835 | 0         |  |
|         |      | Shiraz-47T | 1030 | 0.257728 | 0         |  |
|         |      | Shiraz-49T | 1120 | 0.281656 | 0         |  |
|         |      | Shiraz-77T | 1225 | 0        | -0.117922 |  |
|         |      | Shiraz-77T | 1227 | 0.196445 | 0         |  |
|         |      | Shiraz-9T  | 1324 | 0.679266 | 0         |  |
|         |      | Shiraz-18T | 1434 | 0.244465 | 0         |  |
|         |      | Shiraz-22T | 1549 | 0        | -0.319623 |  |
|         |      | Shiraz-22T | 1551 | 0.324011 | 0         |  |
|         |      | Shiraz-25T | 1698 | 0.21835  | 0         |  |
|         |      | Shiraz-28T | 1735 | 0.350744 | 0         |  |
|         |      | Shiraz-29T | 1778 | 0.120767 | 0         |  |
|         |      | Shiraz-32T | 1833 | 0.551336 | 0         |  |
|         |      | Shiraz-32T | 1834 | 1.485392 | 0         |  |
|         |      | Shiraz-38T | 1951 | 0.250891 | 0         |  |
|         |      | Shiraz-53T | 2078 | 0.287202 | 0         |  |
|         |      | Shiraz-58T | 2160 | 0.399007 | 0         |  |
|         |      | Shiraz-71T | 2238 | 0.603631 | 0         |  |
| PMS2L11 | chr7 | Shiraz-3T  | 90   | 0.219276 | 0         |  |
|         |      | Shiraz-4T  | 253  | 0.372918 | 0         |  |
|         |      | Shiraz-31T | 315  | 0.194054 | 0         |  |
|         |      | Shiraz-36T | 378  | 0.179558 | 0         |  |
|         |      | Shiraz-36T | 379  | 0.322028 | 0         |  |
|         |      | Shiraz-42T | 454  | 0.145717 | 0         |  |
|         |      | Shiraz-46T | 943  | 0.093799 | 0         |  |
|         |      | Shiraz-46T | 944  | 0.256008 | 0         |  |
|         |      | Shiraz-18T | 1434 | 0.244465 | 0         |  |
|         |      | Shiraz-22T | 1549 | 0        | -0.319623 |  |
|         |      | Shiraz-25T | 1698 | 0.21835  | 0         |  |
|         |      | Shiraz-28T | 1735 | 0.350744 | 0         |  |
|         |      | Shiraz-29T | 1778 | 0.120767 | 0         |  |
|         |      | Shiraz-38T | 1951 | 0.250891 | 0         |  |
|         |      | Shiraz-53T | 2078 | 0.287202 | 0         |  |
|         |      | Shiraz-71T | 2238 | 0.603631 | 0         |  |
|         |      | Shiraz-71T | 2239 | 0.310785 | 0         |  |
|         |      | Shiraz-3T  | 90   | 0.219276 | 0         |  |
|         |      | Shiraz-4T  | 253  | 0.372918 | 0         |  |
|         |      | Shiraz-31T | 315  | 0.194054 | 0         |  |
|         |      | Shiraz-36T | 378  | 0.179558 | 0         |  |

|      |      |            |      |          |           |  |
|------|------|------------|------|----------|-----------|--|
|      |      | Shiraz-36T | 379  | 0.322028 | 0         |  |
|      |      | Shiraz-42T | 454  | 0.145717 | 0         |  |
|      |      | Shiraz-46T | 943  | 0.093799 | 0         |  |
|      |      | Shiraz-46T | 944  | 0.256008 | 0         |  |
|      |      | Shiraz-18T | 1434 | 0.244465 | 0         |  |
|      |      | Shiraz-22T | 1549 | 0        | -0.319623 |  |
|      |      | Shiraz-25T | 1698 | 0.21835  | 0         |  |
|      |      | Shiraz-28T | 1735 | 0.350744 | 0         |  |
|      |      | Shiraz-29T | 1778 | 0.120767 | 0         |  |
|      |      | Shiraz-38T | 1951 | 0.250891 | 0         |  |
|      |      | Shiraz-53T | 2078 | 0.287202 | 0         |  |
|      |      | Shiraz-71T | 2238 | 0.603631 | 0         |  |
|      |      | Shiraz-71T | 2239 | 0.310785 | 0         |  |
|      |      | Shiraz-3T  | 90   | 0.219276 | 0         |  |
|      |      | Shiraz-4T  | 253  | 0.372918 | 0         |  |
|      |      | Shiraz-31T | 315  | 0.194054 | 0         |  |
|      |      | Shiraz-36T | 378  | 0.179558 | 0         |  |
|      |      | Shiraz-36T | 379  | 0.322028 | 0         |  |
|      |      | Shiraz-42T | 454  | 0.145717 | 0         |  |
|      |      | Shiraz-46T | 943  | 0.093799 | 0         |  |
|      |      | Shiraz-46T | 944  | 0.256008 | 0         |  |
|      |      | Shiraz-18T | 1434 | 0.244465 | 0         |  |
|      |      | Shiraz-22T | 1549 | 0        | -0.319623 |  |
|      |      | Shiraz-25T | 1698 | 0.21835  | 0         |  |
|      |      | Shiraz-28T | 1735 | 0.350744 | 0         |  |
|      |      | Shiraz-29T | 1778 | 0.120767 | 0         |  |
|      |      | Shiraz-38T | 1951 | 0.250891 | 0         |  |
|      |      | Shiraz-53T | 2078 | 0.287202 | 0         |  |
|      |      | Shiraz-71T | 2238 | 0.603631 | 0         |  |
|      |      | Shiraz-71T | 2239 | 0.310785 | 0         |  |
| PNCK | chrX | Shiraz-3T  | 246  | 0.531858 | 0         |  |
|      |      | Shiraz-3T  | 246  | 0.531858 | 0         |  |
|      |      | Shiraz-4T  | 261  | 0        | -0.336249 |  |
|      |      | Shiraz-4T  | 261  | 0        | -0.336249 |  |
|      |      | Shiraz-16T | 295  | 0.591657 | 0         |  |
|      |      | Shiraz-16T | 295  | 0.591657 | 0         |  |
|      |      | Shiraz-36T | 433  | 0        | -0.803961 |  |
|      |      | Shiraz-36T | 433  | 0        | -0.803961 |  |
|      |      | Shiraz-42T | 480  | 0        | -0.232915 |  |
|      |      | Shiraz-42T | 480  | 0        | -0.232915 |  |
|      |      | Shiraz-44T | 908  | 0.466743 | 0         |  |
|      |      | Shiraz-44T | 908  | 0.466743 | 0         |  |
|      |      | Shiraz-49T | 1170 | 0        | -0.967436 |  |
|      |      | Shiraz-49T | 1170 | 0        | -0.967436 |  |
|      |      | Shiraz-49T | 1173 | 0        | -0.704439 |  |
|      |      | Shiraz-49T | 1173 | 0        | -0.704439 |  |
|      |      | Shiraz-9T  | 1370 | 0.690073 | 0         |  |



|  |            |      |          |           |  |
|--|------------|------|----------|-----------|--|
|  | Shiraz-9T  | 1370 | 0.690073 | 0         |  |
|  | Shiraz-9T  | 1371 | 1.292392 | 0         |  |
|  | Shiraz-9T  | 1371 | 1.292392 | 0         |  |
|  | Shiraz-18T | 1457 | 0.643204 | 0         |  |
|  | Shiraz-18T | 1457 | 0.643204 | 0         |  |
|  | Shiraz-22T | 1673 | 0.611783 | 0         |  |
|  | Shiraz-22T | 1673 | 0.611783 | 0         |  |
|  | Shiraz-22T | 1678 | 0.911625 | 0         |  |
|  | Shiraz-22T | 1678 | 0.911625 | 0         |  |
|  | Shiraz-25T | 1719 | 0.472955 | 0         |  |
|  | Shiraz-25T | 1719 | 0.472955 | 0         |  |
|  | Shiraz-28T | 1762 | 0.562311 | 0         |  |
|  | Shiraz-28T | 1762 | 0.562311 | 0         |  |
|  | Shiraz-29T | 1801 | 0.815343 | 0         |  |
|  | Shiraz-29T | 1801 | 0.815343 | 0         |  |
|  | Shiraz-32T | 1870 | 0.729766 | 0         |  |
|  | Shiraz-32T | 1870 | 0.729766 | 0         |  |
|  | Shiraz-32T | 1872 | 1.504553 | 0         |  |
|  | Shiraz-32T | 1872 | 1.504553 | 0         |  |
|  | Shiraz-35T | 1933 | 0.488535 | 0         |  |
|  | Shiraz-35T | 1933 | 0.488535 | 0         |  |
|  | Shiraz-38T | 2011 | 0        | -0.406024 |  |
|  | Shiraz-38T | 2011 | 0        | -0.406024 |  |
|  | Shiraz-53T | 2115 | 0.427728 | 0         |  |
|  | Shiraz-53T | 2115 | 0.427728 | 0         |  |
|  | Shiraz-58T | 2223 | 0.833364 | 0         |  |
|  | Shiraz-58T | 2223 | 0.833364 | 0         |  |
|  | Shiraz-58T | 2226 | 1.074663 | 0         |  |
|  | Shiraz-58T | 2226 | 1.074663 | 0         |  |
|  | Shiraz-71T | 2263 | 0.975531 | 0         |  |
|  | Shiraz-71T | 2263 | 0.975531 | 0         |  |
|  | Shiraz-3T  | 246  | 0.531858 | 0         |  |
|  | Shiraz-3T  | 246  | 0.531858 | 0         |  |
|  | Shiraz-4T  | 261  | 0        | -0.336249 |  |
|  | Shiraz-4T  | 261  | 0        | -0.336249 |  |
|  | Shiraz-16T | 295  | 0.591657 | 0         |  |
|  | Shiraz-16T | 295  | 0.591657 | 0         |  |
|  | Shiraz-36T | 433  | 0        | -0.803961 |  |
|  | Shiraz-36T | 433  | 0        | -0.803961 |  |
|  | Shiraz-42T | 480  | 0        | -0.232915 |  |
|  | Shiraz-42T | 480  | 0        | -0.232915 |  |
|  | Shiraz-44T | 908  | 0.466743 | 0         |  |
|  | Shiraz-44T | 908  | 0.466743 | 0         |  |
|  | Shiraz-49T | 1170 | 0        | -0.967436 |  |
|  | Shiraz-49T | 1170 | 0        | -0.967436 |  |
|  | Shiraz-49T | 1173 | 0        | -0.704439 |  |
|  | Shiraz-49T | 1173 | 0        | -0.704439 |  |

|  |  |            |      |          |           |  |  |
|--|--|------------|------|----------|-----------|--|--|
|  |  | Shiraz-9T  | 1370 | 0.690073 | 0         |  |  |
|  |  | Shiraz-9T  | 1370 | 0.690073 | 0         |  |  |
|  |  | Shiraz-9T  | 1371 | 1.292392 | 0         |  |  |
|  |  | Shiraz-9T  | 1371 | 1.292392 | 0         |  |  |
|  |  | Shiraz-18T | 1457 | 0.643204 | 0         |  |  |
|  |  | Shiraz-18T | 1457 | 0.643204 | 0         |  |  |
|  |  | Shiraz-22T | 1673 | 0.611783 | 0         |  |  |
|  |  | Shiraz-22T | 1673 | 0.611783 | 0         |  |  |
|  |  | Shiraz-22T | 1678 | 0.911625 | 0         |  |  |
|  |  | Shiraz-22T | 1678 | 0.911625 | 0         |  |  |
|  |  | Shiraz-25T | 1719 | 0.472955 | 0         |  |  |
|  |  | Shiraz-25T | 1719 | 0.472955 | 0         |  |  |
|  |  | Shiraz-28T | 1762 | 0.562311 | 0         |  |  |
|  |  | Shiraz-28T | 1762 | 0.562311 | 0         |  |  |
|  |  | Shiraz-29T | 1801 | 0.815343 | 0         |  |  |
|  |  | Shiraz-29T | 1801 | 0.815343 | 0         |  |  |
|  |  | Shiraz-32T | 1870 | 0.729766 | 0         |  |  |
|  |  | Shiraz-32T | 1870 | 0.729766 | 0         |  |  |
|  |  | Shiraz-32T | 1872 | 1.504553 | 0         |  |  |
|  |  | Shiraz-32T | 1872 | 1.504553 | 0         |  |  |
|  |  | Shiraz-35T | 1933 | 0.488535 | 0         |  |  |
|  |  | Shiraz-35T | 1933 | 0.488535 | 0         |  |  |
|  |  | Shiraz-38T | 2011 | 0        | -0.406024 |  |  |
|  |  | Shiraz-38T | 2011 | 0        | -0.406024 |  |  |
|  |  | Shiraz-53T | 2115 | 0.427728 | 0         |  |  |
|  |  | Shiraz-53T | 2115 | 0.427728 | 0         |  |  |
|  |  | Shiraz-58T | 2223 | 0.833364 | 0         |  |  |
|  |  | Shiraz-58T | 2223 | 0.833364 | 0         |  |  |
|  |  | Shiraz-58T | 2226 | 1.074663 | 0         |  |  |
|  |  | Shiraz-58T | 2226 | 1.074663 | 0         |  |  |
|  |  | Shiraz-71T | 2263 | 0.975531 | 0         |  |  |
|  |  | Shiraz-71T | 2263 | 0.975531 | 0         |  |  |
|  |  | Shiraz-3T  | 246  | 0.531858 | 0         |  |  |
|  |  | Shiraz-3T  | 246  | 0.531858 | 0         |  |  |
|  |  | Shiraz-4T  | 261  | 0        | -0.336249 |  |  |
|  |  | Shiraz-4T  | 261  | 0        | -0.336249 |  |  |
|  |  | Shiraz-16T | 295  | 0.591657 | 0         |  |  |
|  |  | Shiraz-16T | 295  | 0.591657 | 0         |  |  |
|  |  | Shiraz-36T | 433  | 0        | -0.803961 |  |  |
|  |  | Shiraz-36T | 433  | 0        | -0.803961 |  |  |
|  |  | Shiraz-42T | 480  | 0        | -0.232915 |  |  |
|  |  | Shiraz-42T | 480  | 0        | -0.232915 |  |  |
|  |  | Shiraz-44T | 908  | 0.466743 | 0         |  |  |
|  |  | Shiraz-44T | 908  | 0.466743 | 0         |  |  |
|  |  | Shiraz-49T | 1170 | 0        | -0.967436 |  |  |
|  |  | Shiraz-49T | 1170 | 0        | -0.967436 |  |  |
|  |  | Shiraz-49T | 1173 | 0        | -0.704439 |  |  |

|       |      |            |      |          |           |  |  |
|-------|------|------------|------|----------|-----------|--|--|
|       |      | Shiraz-49T | 1173 | 0        | -0.704439 |  |  |
|       |      | Shiraz-9T  | 1370 | 0.690073 | 0         |  |  |
|       |      | Shiraz-9T  | 1370 | 0.690073 | 0         |  |  |
|       |      | Shiraz-9T  | 1371 | 1.292392 | 0         |  |  |
|       |      | Shiraz-9T  | 1371 | 1.292392 | 0         |  |  |
|       |      | Shiraz-18T | 1457 | 0.643204 | 0         |  |  |
|       |      | Shiraz-18T | 1457 | 0.643204 | 0         |  |  |
|       |      | Shiraz-22T | 1673 | 0.611783 | 0         |  |  |
|       |      | Shiraz-22T | 1673 | 0.611783 | 0         |  |  |
|       |      | Shiraz-22T | 1678 | 0.911625 | 0         |  |  |
|       |      | Shiraz-22T | 1678 | 0.911625 | 0         |  |  |
|       |      | Shiraz-25T | 1719 | 0.472955 | 0         |  |  |
|       |      | Shiraz-25T | 1719 | 0.472955 | 0         |  |  |
|       |      | Shiraz-28T | 1762 | 0.562311 | 0         |  |  |
|       |      | Shiraz-28T | 1762 | 0.562311 | 0         |  |  |
|       |      | Shiraz-29T | 1801 | 0.815343 | 0         |  |  |
|       |      | Shiraz-29T | 1801 | 0.815343 | 0         |  |  |
|       |      | Shiraz-32T | 1870 | 0.729766 | 0         |  |  |
|       |      | Shiraz-32T | 1870 | 0.729766 | 0         |  |  |
|       |      | Shiraz-32T | 1872 | 1.504553 | 0         |  |  |
|       |      | Shiraz-32T | 1872 | 1.504553 | 0         |  |  |
|       |      | Shiraz-35T | 1933 | 0.488535 | 0         |  |  |
|       |      | Shiraz-35T | 1933 | 0.488535 | 0         |  |  |
|       |      | Shiraz-38T | 2011 | 0        | -0.406024 |  |  |
|       |      | Shiraz-38T | 2011 | 0        | -0.406024 |  |  |
|       |      | Shiraz-53T | 2115 | 0.427728 | 0         |  |  |
|       |      | Shiraz-53T | 2115 | 0.427728 | 0         |  |  |
|       |      | Shiraz-58T | 2223 | 0.833364 | 0         |  |  |
|       |      | Shiraz-58T | 2223 | 0.833364 | 0         |  |  |
|       |      | Shiraz-58T | 2226 | 1.074663 | 0         |  |  |
|       |      | Shiraz-58T | 2226 | 1.074663 | 0         |  |  |
|       |      | Shiraz-71T | 2263 | 0.975531 | 0         |  |  |
|       |      | Shiraz-71T | 2263 | 0.975531 | 0         |  |  |
| PNMA3 | chrX | Shiraz-4T  | 261  | 0        | -0.336249 |  |  |
|       |      | Shiraz-16T | 295  | 0.591657 | 0         |  |  |
|       |      | Shiraz-36T | 433  | 0        | -0.803961 |  |  |
|       |      | Shiraz-42T | 480  | 0        | -0.232915 |  |  |
|       |      | Shiraz-49T | 1170 | 0        | -0.967436 |  |  |
|       |      | Shiraz-49T | 1173 | 0        | -0.704439 |  |  |
|       |      | Shiraz-9T  | 1370 | 0.690073 | 0         |  |  |
|       |      | Shiraz-9T  | 1371 | 1.292392 | 0         |  |  |
|       |      | Shiraz-18T | 1457 | 0.643204 | 0         |  |  |
|       |      | Shiraz-22T | 1673 | 0.611783 | 0         |  |  |
|       |      | Shiraz-22T | 1678 | 0.911625 | 0         |  |  |
|       |      | Shiraz-25T | 1719 | 0.472955 | 0         |  |  |
|       |      | Shiraz-28T | 1762 | 0.562311 | 0         |  |  |
|       |      | Shiraz-29T | 1801 | 0.815343 | 0         |  |  |

|  |            |      |          |           |  |
|--|------------|------|----------|-----------|--|
|  | Shiraz-32T | 1870 | 0.729766 | 0         |  |
|  | Shiraz-32T | 1872 | 1.504553 | 0         |  |
|  | Shiraz-35T | 1933 | 0.488535 | 0         |  |
|  | Shiraz-53T | 2115 | 0.427728 | 0         |  |
|  | Shiraz-58T | 2223 | 0.833364 | 0         |  |
|  | Shiraz-58T | 2226 | 1.074663 | 0         |  |
|  | Shiraz-71T | 2263 | 0.975531 | 0         |  |
|  | Shiraz-4T  | 261  | 0        | -0.336249 |  |
|  | Shiraz-16T | 295  | 0.591657 | 0         |  |
|  | Shiraz-36T | 433  | 0        | -0.803961 |  |
|  | Shiraz-42T | 480  | 0        | -0.232915 |  |
|  | Shiraz-49T | 1170 | 0        | -0.967436 |  |
|  | Shiraz-49T | 1173 | 0        | -0.704439 |  |
|  | Shiraz-9T  | 1370 | 0.690073 | 0         |  |
|  | Shiraz-9T  | 1371 | 1.292392 | 0         |  |
|  | Shiraz-18T | 1457 | 0.643204 | 0         |  |
|  | Shiraz-22T | 1673 | 0.611783 | 0         |  |
|  | Shiraz-22T | 1678 | 0.911625 | 0         |  |
|  | Shiraz-25T | 1719 | 0.472955 | 0         |  |
|  | Shiraz-28T | 1762 | 0.562311 | 0         |  |
|  | Shiraz-29T | 1801 | 0.815343 | 0         |  |
|  | Shiraz-32T | 1870 | 0.729766 | 0         |  |
|  | Shiraz-32T | 1872 | 1.504553 | 0         |  |
|  | Shiraz-35T | 1933 | 0.488535 | 0         |  |
|  | Shiraz-53T | 2115 | 0.427728 | 0         |  |
|  | Shiraz-58T | 2223 | 0.833364 | 0         |  |
|  | Shiraz-58T | 2226 | 1.074663 | 0         |  |
|  | Shiraz-71T | 2263 | 0.975531 | 0         |  |
|  | Shiraz-4T  | 261  | 0        | -0.336249 |  |
|  | Shiraz-16T | 295  | 0.591657 | 0         |  |
|  | Shiraz-36T | 433  | 0        | -0.803961 |  |
|  | Shiraz-42T | 480  | 0        | -0.232915 |  |
|  | Shiraz-49T | 1170 | 0        | -0.967436 |  |
|  | Shiraz-49T | 1173 | 0        | -0.704439 |  |
|  | Shiraz-9T  | 1370 | 0.690073 | 0         |  |
|  | Shiraz-9T  | 1371 | 1.292392 | 0         |  |
|  | Shiraz-18T | 1457 | 0.643204 | 0         |  |
|  | Shiraz-22T | 1673 | 0.611783 | 0         |  |
|  | Shiraz-22T | 1678 | 0.911625 | 0         |  |
|  | Shiraz-25T | 1719 | 0.472955 | 0         |  |
|  | Shiraz-28T | 1762 | 0.562311 | 0         |  |
|  | Shiraz-29T | 1801 | 0.815343 | 0         |  |
|  | Shiraz-32T | 1870 | 0.729766 | 0         |  |
|  | Shiraz-32T | 1872 | 1.504553 | 0         |  |
|  | Shiraz-35T | 1933 | 0.488535 | 0         |  |
|  | Shiraz-53T | 2115 | 0.427728 | 0         |  |
|  | Shiraz-58T | 2223 | 0.833364 | 0         |  |

|       |      |            |      |          |           |  |
|-------|------|------------|------|----------|-----------|--|
|       |      | Shiraz-58T | 2226 | 1.074663 | 0         |  |
|       |      | Shiraz-71T | 2263 | 0.975531 | 0         |  |
| PNMA5 | chrX | Shiraz-4T  | 261  | 0        | -0.336249 |  |
|       |      | Shiraz-16T | 295  | 0.591657 | 0         |  |
|       |      | Shiraz-36T | 433  | 0        | -0.803961 |  |
|       |      | Shiraz-42T | 480  | 0        | -0.232915 |  |
|       |      | Shiraz-49T | 1170 | 0        | -0.967436 |  |
|       |      | Shiraz-9T  | 1370 | 0.690073 | 0         |  |
|       |      | Shiraz-9T  | 1371 | 1.292392 | 0         |  |
|       |      | Shiraz-18T | 1457 | 0.643204 | 0         |  |
|       |      | Shiraz-22T | 1673 | 0.611783 | 0         |  |
|       |      | Shiraz-22T | 1678 | 0.911625 | 0         |  |
|       |      | Shiraz-25T | 1719 | 0.472955 | 0         |  |
|       |      | Shiraz-28T | 1762 | 0.562311 | 0         |  |
|       |      | Shiraz-29T | 1801 | 0.815343 | 0         |  |
|       |      | Shiraz-32T | 1870 | 0.729766 | 0         |  |
|       |      | Shiraz-32T | 1872 | 1.504553 | 0         |  |
|       |      | Shiraz-35T | 1933 | 0.488535 | 0         |  |
|       |      | Shiraz-53T | 2115 | 0.427728 | 0         |  |
|       |      | Shiraz-58T | 2223 | 0.833364 | 0         |  |
|       |      | Shiraz-58T | 2226 | 1.074663 | 0         |  |
|       |      | Shiraz-71T | 2263 | 0.975531 | 0         |  |
|       |      | Shiraz-4T  | 261  | 0        | -0.336249 |  |
|       |      | Shiraz-16T | 295  | 0.591657 | 0         |  |
|       |      | Shiraz-36T | 433  | 0        | -0.803961 |  |
|       |      | Shiraz-42T | 480  | 0        | -0.232915 |  |
|       |      | Shiraz-49T | 1170 | 0        | -0.967436 |  |
|       |      | Shiraz-9T  | 1370 | 0.690073 | 0         |  |
|       |      | Shiraz-9T  | 1371 | 1.292392 | 0         |  |
|       |      | Shiraz-18T | 1457 | 0.643204 | 0         |  |
|       |      | Shiraz-22T | 1673 | 0.611783 | 0         |  |
|       |      | Shiraz-22T | 1678 | 0.911625 | 0         |  |
|       |      | Shiraz-25T | 1719 | 0.472955 | 0         |  |
|       |      | Shiraz-28T | 1762 | 0.562311 | 0         |  |
|       |      | Shiraz-29T | 1801 | 0.815343 | 0         |  |
|       |      | Shiraz-32T | 1870 | 0.729766 | 0         |  |
|       |      | Shiraz-32T | 1872 | 1.504553 | 0         |  |
|       |      | Shiraz-35T | 1933 | 0.488535 | 0         |  |
|       |      | Shiraz-53T | 2115 | 0.427728 | 0         |  |
|       |      | Shiraz-58T | 2223 | 0.833364 | 0         |  |
|       |      | Shiraz-58T | 2226 | 1.074663 | 0         |  |
|       |      | Shiraz-71T | 2263 | 0.975531 | 0         |  |
|       |      | Shiraz-4T  | 261  | 0        | -0.336249 |  |
|       |      | Shiraz-16T | 295  | 0.591657 | 0         |  |
|       |      | Shiraz-36T | 433  | 0        | -0.803961 |  |
|       |      | Shiraz-42T | 480  | 0        | -0.232915 |  |
|       |      | Shiraz-49T | 1170 | 0        | -0.967436 |  |

|        |      |            |      |          |           |  |
|--------|------|------------|------|----------|-----------|--|
|        |      | Shiraz-9T  | 1370 | 0.690073 | 0         |  |
|        |      | Shiraz-9T  | 1371 | 1.292392 | 0         |  |
|        |      | Shiraz-18T | 1457 | 0.643204 | 0         |  |
|        |      | Shiraz-22T | 1673 | 0.611783 | 0         |  |
|        |      | Shiraz-22T | 1678 | 0.911625 | 0         |  |
|        |      | Shiraz-25T | 1719 | 0.472955 | 0         |  |
|        |      | Shiraz-28T | 1762 | 0.562311 | 0         |  |
|        |      | Shiraz-29T | 1801 | 0.815343 | 0         |  |
|        |      | Shiraz-32T | 1870 | 0.729766 | 0         |  |
|        |      | Shiraz-32T | 1872 | 1.504553 | 0         |  |
|        |      | Shiraz-35T | 1933 | 0.488535 | 0         |  |
|        |      | Shiraz-53T | 2115 | 0.427728 | 0         |  |
|        |      | Shiraz-58T | 2223 | 0.833364 | 0         |  |
|        |      | Shiraz-58T | 2226 | 1.074663 | 0         |  |
|        |      | Shiraz-71T | 2263 | 0.975531 | 0         |  |
| PNMA6A | chrX | Shiraz-4T  | 261  | 0        | -0.336249 |  |
|        |      | Shiraz-16T | 295  | 0.591657 | 0         |  |
|        |      | Shiraz-36T | 433  | 0        | -0.803961 |  |
|        |      | Shiraz-42T | 480  | 0        | -0.232915 |  |
|        |      | Shiraz-49T | 1170 | 0        | -0.967436 |  |
|        |      | Shiraz-49T | 1173 | 0        | -0.704439 |  |
|        |      | Shiraz-9T  | 1370 | 0.690073 | 0         |  |
|        |      | Shiraz-9T  | 1371 | 1.292392 | 0         |  |
|        |      | Shiraz-18T | 1457 | 0.643204 | 0         |  |
|        |      | Shiraz-22T | 1673 | 0.611783 | 0         |  |
|        |      | Shiraz-22T | 1678 | 0.911625 | 0         |  |
|        |      | Shiraz-25T | 1719 | 0.472955 | 0         |  |
|        |      | Shiraz-28T | 1762 | 0.562311 | 0         |  |
|        |      | Shiraz-29T | 1801 | 0.815343 | 0         |  |
|        |      | Shiraz-32T | 1870 | 0.729766 | 0         |  |
|        |      | Shiraz-32T | 1872 | 1.504553 | 0         |  |
|        |      | Shiraz-35T | 1933 | 0.488535 | 0         |  |
|        |      | Shiraz-53T | 2115 | 0.427728 | 0         |  |
|        |      | Shiraz-58T | 2223 | 0.833364 | 0         |  |
|        |      | Shiraz-58T | 2226 | 1.074663 | 0         |  |
|        |      | Shiraz-71T | 2263 | 0.975531 | 0         |  |
|        |      | Shiraz-4T  | 261  | 0        | -0.336249 |  |
|        |      | Shiraz-16T | 295  | 0.591657 | 0         |  |
|        |      | Shiraz-36T | 433  | 0        | -0.803961 |  |
|        |      | Shiraz-42T | 480  | 0        | -0.232915 |  |
|        |      | Shiraz-49T | 1170 | 0        | -0.967436 |  |
|        |      | Shiraz-49T | 1173 | 0        | -0.704439 |  |
|        |      | Shiraz-9T  | 1370 | 0.690073 | 0         |  |
|        |      | Shiraz-9T  | 1371 | 1.292392 | 0         |  |
|        |      | Shiraz-18T | 1457 | 0.643204 | 0         |  |
|        |      | Shiraz-22T | 1673 | 0.611783 | 0         |  |
|        |      | Shiraz-22T | 1678 | 0.911625 | 0         |  |

|        |      |            |      |          |           |  |  |
|--------|------|------------|------|----------|-----------|--|--|
|        |      | Shiraz-25T | 1719 | 0.472955 | 0         |  |  |
|        |      | Shiraz-28T | 1762 | 0.562311 | 0         |  |  |
|        |      | Shiraz-29T | 1801 | 0.815343 | 0         |  |  |
|        |      | Shiraz-32T | 1870 | 0.729766 | 0         |  |  |
|        |      | Shiraz-32T | 1872 | 1.504553 | 0         |  |  |
|        |      | Shiraz-35T | 1933 | 0.488535 | 0         |  |  |
|        |      | Shiraz-53T | 2115 | 0.427728 | 0         |  |  |
|        |      | Shiraz-58T | 2223 | 0.833364 | 0         |  |  |
|        |      | Shiraz-58T | 2226 | 1.074663 | 0         |  |  |
|        |      | Shiraz-71T | 2263 | 0.975531 | 0         |  |  |
|        |      | Shiraz-4T  | 261  | 0        | -0.336249 |  |  |
|        |      | Shiraz-16T | 295  | 0.591657 | 0         |  |  |
|        |      | Shiraz-36T | 433  | 0        | -0.803961 |  |  |
|        |      | Shiraz-42T | 480  | 0        | -0.232915 |  |  |
|        |      | Shiraz-49T | 1170 | 0        | -0.967436 |  |  |
|        |      | Shiraz-49T | 1173 | 0        | -0.704439 |  |  |
|        |      | Shiraz-9T  | 1370 | 0.690073 | 0         |  |  |
|        |      | Shiraz-9T  | 1371 | 1.292392 | 0         |  |  |
|        |      | Shiraz-18T | 1457 | 0.643204 | 0         |  |  |
|        |      | Shiraz-22T | 1673 | 0.611783 | 0         |  |  |
|        |      | Shiraz-22T | 1678 | 0.911625 | 0         |  |  |
|        |      | Shiraz-25T | 1719 | 0.472955 | 0         |  |  |
|        |      | Shiraz-28T | 1762 | 0.562311 | 0         |  |  |
|        |      | Shiraz-29T | 1801 | 0.815343 | 0         |  |  |
|        |      | Shiraz-32T | 1870 | 0.729766 | 0         |  |  |
|        |      | Shiraz-32T | 1872 | 1.504553 | 0         |  |  |
|        |      | Shiraz-35T | 1933 | 0.488535 | 0         |  |  |
|        |      | Shiraz-53T | 2115 | 0.427728 | 0         |  |  |
|        |      | Shiraz-58T | 2223 | 0.833364 | 0         |  |  |
|        |      | Shiraz-58T | 2226 | 1.074663 | 0         |  |  |
|        |      | Shiraz-71T | 2263 | 0.975531 | 0         |  |  |
| PNPLA4 | chrX | Shiraz-3T  | 235  | 0        | -0.28401  |  |  |
|        |      | Shiraz-3T  | 235  | 0        | -0.28401  |  |  |
|        |      | Shiraz-4T  | 260  | 0        | -0.324128 |  |  |
|        |      | Shiraz-4T  | 260  | 0        | -0.324128 |  |  |
|        |      | Shiraz-16T | 294  | 0.655804 | 0         |  |  |
|        |      | Shiraz-16T | 294  | 0.655804 | 0         |  |  |
|        |      | Shiraz-36T | 431  | 0        | -0.78035  |  |  |
|        |      | Shiraz-36T | 431  | 0        | -0.78035  |  |  |
|        |      | Shiraz-44T | 891  | 0        | -0.954044 |  |  |
|        |      | Shiraz-44T | 891  | 0        | -0.954044 |  |  |
|        |      | Shiraz-44T | 892  | 0        | -1.231333 |  |  |
|        |      | Shiraz-44T | 892  | 0        | -1.231333 |  |  |
|        |      | Shiraz-46T | 990  | 0        | -0.370066 |  |  |
|        |      | Shiraz-46T | 990  | 0        | -0.370066 |  |  |
|        |      | Shiraz-49T | 1166 | 0        | -0.917235 |  |  |
|        |      | Shiraz-49T | 1166 | 0        | -0.917235 |  |  |

|  |  |            |      |          |           |  |  |
|--|--|------------|------|----------|-----------|--|--|
|  |  | Shiraz-9T  | 1368 | 0.199713 | 0         |  |  |
|  |  | Shiraz-9T  | 1368 | 0.199713 | 0         |  |  |
|  |  | Shiraz-18T | 1455 | 0        | -0.186773 |  |  |
|  |  | Shiraz-18T | 1455 | 0        | -0.186773 |  |  |
|  |  | Shiraz-22T | 1669 | 0.695915 | 0         |  |  |
|  |  | Shiraz-22T | 1669 | 0.695915 | 0         |  |  |
|  |  | Shiraz-25T | 1717 | 0.420447 | 0         |  |  |
|  |  | Shiraz-25T | 1717 | 0.420447 | 0         |  |  |
|  |  | Shiraz-28T | 1760 | 0.538181 | 0         |  |  |
|  |  | Shiraz-28T | 1760 | 0.538181 | 0         |  |  |
|  |  | Shiraz-29T | 1800 | 0.672527 | 0         |  |  |
|  |  | Shiraz-29T | 1800 | 0.672527 | 0         |  |  |
|  |  | Shiraz-32T | 1869 | 0.776805 | 0         |  |  |
|  |  | Shiraz-32T | 1869 | 0.776805 | 0         |  |  |
|  |  | Shiraz-35T | 1932 | 0.507141 | 0         |  |  |
|  |  | Shiraz-35T | 1932 | 0.507141 | 0         |  |  |
|  |  | Shiraz-40T | 2051 | 0.098506 | 0         |  |  |
|  |  | Shiraz-40T | 2051 | 0.098506 | 0         |  |  |
|  |  | Shiraz-58T | 2221 | 0.871948 | 0         |  |  |
|  |  | Shiraz-58T | 2221 | 0.871948 | 0         |  |  |
|  |  | Shiraz-71T | 2260 | 0.68394  | 0         |  |  |
|  |  | Shiraz-71T | 2260 | 0.68394  | 0         |  |  |
|  |  | Shiraz-71T | 2261 | 0.508399 | 0         |  |  |
|  |  | Shiraz-71T | 2261 | 0.508399 | 0         |  |  |
|  |  | Shiraz-3T  | 235  | 0        | -0.28401  |  |  |
|  |  | Shiraz-3T  | 235  | 0        | -0.28401  |  |  |
|  |  | Shiraz-4T  | 260  | 0        | -0.324128 |  |  |
|  |  | Shiraz-4T  | 260  | 0        | -0.324128 |  |  |
|  |  | Shiraz-16T | 294  | 0.655804 | 0         |  |  |
|  |  | Shiraz-16T | 294  | 0.655804 | 0         |  |  |
|  |  | Shiraz-36T | 431  | 0        | -0.78035  |  |  |
|  |  | Shiraz-36T | 431  | 0        | -0.78035  |  |  |
|  |  | Shiraz-44T | 891  | 0        | -0.954044 |  |  |
|  |  | Shiraz-44T | 891  | 0        | -0.954044 |  |  |
|  |  | Shiraz-44T | 892  | 0        | -1.231333 |  |  |
|  |  | Shiraz-44T | 892  | 0        | -1.231333 |  |  |
|  |  | Shiraz-46T | 990  | 0        | -0.370066 |  |  |
|  |  | Shiraz-46T | 990  | 0        | -0.370066 |  |  |
|  |  | Shiraz-49T | 1166 | 0        | -0.917235 |  |  |
|  |  | Shiraz-49T | 1166 | 0        | -0.917235 |  |  |
|  |  | Shiraz-9T  | 1368 | 0.199713 | 0         |  |  |
|  |  | Shiraz-9T  | 1368 | 0.199713 | 0         |  |  |
|  |  | Shiraz-18T | 1455 | 0        | -0.186773 |  |  |
|  |  | Shiraz-18T | 1455 | 0        | -0.186773 |  |  |
|  |  | Shiraz-22T | 1669 | 0.695915 | 0         |  |  |
|  |  | Shiraz-22T | 1669 | 0.695915 | 0         |  |  |
|  |  | Shiraz-25T | 1717 | 0.420447 | 0         |  |  |



|  |            |      |          |           |  |
|--|------------|------|----------|-----------|--|
|  | Shiraz-25T | 1717 | 0.420447 | 0         |  |
|  | Shiraz-28T | 1760 | 0.538181 | 0         |  |
|  | Shiraz-28T | 1760 | 0.538181 | 0         |  |
|  | Shiraz-29T | 1800 | 0.672527 | 0         |  |
|  | Shiraz-29T | 1800 | 0.672527 | 0         |  |
|  | Shiraz-32T | 1869 | 0.776805 | 0         |  |
|  | Shiraz-32T | 1869 | 0.776805 | 0         |  |
|  | Shiraz-35T | 1932 | 0.507141 | 0         |  |
|  | Shiraz-35T | 1932 | 0.507141 | 0         |  |
|  | Shiraz-40T | 2051 | 0.098506 | 0         |  |
|  | Shiraz-40T | 2051 | 0.098506 | 0         |  |
|  | Shiraz-58T | 2221 | 0.871948 | 0         |  |
|  | Shiraz-58T | 2221 | 0.871948 | 0         |  |
|  | Shiraz-71T | 2260 | 0.68394  | 0         |  |
|  | Shiraz-71T | 2260 | 0.68394  | 0         |  |
|  | Shiraz-71T | 2261 | 0.508399 | 0         |  |
|  | Shiraz-71T | 2261 | 0.508399 | 0         |  |
|  | Shiraz-3T  | 235  | 0        | -0.28401  |  |
|  | Shiraz-3T  | 235  | 0        | -0.28401  |  |
|  | Shiraz-4T  | 260  | 0        | -0.324128 |  |
|  | Shiraz-4T  | 260  | 0        | -0.324128 |  |
|  | Shiraz-16T | 294  | 0.655804 | 0         |  |
|  | Shiraz-16T | 294  | 0.655804 | 0         |  |
|  | Shiraz-36T | 431  | 0        | -0.78035  |  |
|  | Shiraz-36T | 431  | 0        | -0.78035  |  |
|  | Shiraz-44T | 891  | 0        | -0.954044 |  |
|  | Shiraz-44T | 891  | 0        | -0.954044 |  |
|  | Shiraz-44T | 892  | 0        | -1.231333 |  |
|  | Shiraz-44T | 892  | 0        | -1.231333 |  |
|  | Shiraz-46T | 990  | 0        | -0.370066 |  |
|  | Shiraz-46T | 990  | 0        | -0.370066 |  |
|  | Shiraz-49T | 1166 | 0        | -0.917235 |  |
|  | Shiraz-49T | 1166 | 0        | -0.917235 |  |
|  | Shiraz-9T  | 1368 | 0.199713 | 0         |  |
|  | Shiraz-9T  | 1368 | 0.199713 | 0         |  |
|  | Shiraz-18T | 1455 | 0        | -0.186773 |  |
|  | Shiraz-18T | 1455 | 0        | -0.186773 |  |
|  | Shiraz-22T | 1669 | 0.695915 | 0         |  |
|  | Shiraz-22T | 1669 | 0.695915 | 0         |  |
|  | Shiraz-25T | 1717 | 0.420447 | 0         |  |
|  | Shiraz-25T | 1717 | 0.420447 | 0         |  |
|  | Shiraz-28T | 1760 | 0.538181 | 0         |  |
|  | Shiraz-28T | 1760 | 0.538181 | 0         |  |
|  | Shiraz-29T | 1800 | 0.672527 | 0         |  |
|  | Shiraz-29T | 1800 | 0.672527 | 0         |  |
|  | Shiraz-32T | 1869 | 0.776805 | 0         |  |
|  | Shiraz-32T | 1869 | 0.776805 | 0         |  |

|        |      |            |      |          |           |  |
|--------|------|------------|------|----------|-----------|--|
|        |      | Shiraz-35T | 1932 | 0.507141 | 0         |  |
|        |      | Shiraz-35T | 1932 | 0.507141 | 0         |  |
|        |      | Shiraz-40T | 2051 | 0.098506 | 0         |  |
|        |      | Shiraz-40T | 2051 | 0.098506 | 0         |  |
|        |      | Shiraz-58T | 2221 | 0.871948 | 0         |  |
|        |      | Shiraz-58T | 2221 | 0.871948 | 0         |  |
|        |      | Shiraz-71T | 2260 | 0.68394  | 0         |  |
|        |      | Shiraz-71T | 2260 | 0.68394  | 0         |  |
|        |      | Shiraz-71T | 2261 | 0.508399 | 0         |  |
|        |      | Shiraz-71T | 2261 | 0.508399 | 0         |  |
| PNPLA8 | chr7 | Shiraz-3T  | 90   | 0.219276 | 0         |  |
|        |      | Shiraz-3T  | 95   | 0        | -0.077623 |  |
|        |      | Shiraz-4T  | 253  | 0.372918 | 0         |  |
|        |      | Shiraz-36T | 378  | 0.179558 | 0         |  |
|        |      | Shiraz-36T | 382  | 0.081739 | 0         |  |
|        |      | Shiraz-44T | 641  | 0        | -0.477846 |  |
|        |      | Shiraz-46T | 943  | 0.093799 | 0         |  |
|        |      | Shiraz-46T | 947  | 0        | -0.010843 |  |
|        |      | Shiraz-47T | 1031 | 0        | -0.117529 |  |
|        |      | Shiraz-49T | 1121 | 0        | -0.138569 |  |
|        |      | Shiraz-77T | 1225 | 0        | -0.117922 |  |
|        |      | Shiraz-77T | 1228 | 0        | -0.238084 |  |
|        |      | Shiraz-18T | 1434 | 0.244465 | 0         |  |
|        |      | Shiraz-22T | 1549 | 0        | -0.319623 |  |
|        |      | Shiraz-25T | 1698 | 0.21835  | 0         |  |
|        |      | Shiraz-28T | 1735 | 0.350744 | 0         |  |
|        |      | Shiraz-29T | 1778 | 0.120767 | 0         |  |
|        |      | Shiraz-32T | 1833 | 0.551336 | 0         |  |
|        |      | Shiraz-38T | 1951 | 0.250891 | 0         |  |
|        |      | Shiraz-53T | 2078 | 0.287202 | 0         |  |
|        |      | Shiraz-58T | 2161 | 0        | -0.187744 |  |
|        |      | Shiraz-71T | 2238 | 0.603631 | 0         |  |
|        |      | Shiraz-3T  | 90   | 0.219276 | 0         |  |
|        |      | Shiraz-3T  | 95   | 0        | -0.077623 |  |
|        |      | Shiraz-4T  | 253  | 0.372918 | 0         |  |
|        |      | Shiraz-36T | 378  | 0.179558 | 0         |  |
|        |      | Shiraz-36T | 382  | 0.081739 | 0         |  |
|        |      | Shiraz-44T | 641  | 0        | -0.477846 |  |
|        |      | Shiraz-46T | 943  | 0.093799 | 0         |  |
|        |      | Shiraz-46T | 947  | 0        | -0.010843 |  |
|        |      | Shiraz-47T | 1031 | 0        | -0.117529 |  |
|        |      | Shiraz-49T | 1121 | 0        | -0.138569 |  |
|        |      | Shiraz-77T | 1225 | 0        | -0.117922 |  |
|        |      | Shiraz-77T | 1228 | 0        | -0.238084 |  |
|        |      | Shiraz-18T | 1434 | 0.244465 | 0         |  |
|        |      | Shiraz-22T | 1549 | 0        | -0.319623 |  |
|        |      | Shiraz-25T | 1698 | 0.21835  | 0         |  |

|       |      |            |      |          |           |  |  |
|-------|------|------------|------|----------|-----------|--|--|
|       |      | Shiraz-28T | 1735 | 0.350744 | 0         |  |  |
|       |      | Shiraz-29T | 1778 | 0.120767 | 0         |  |  |
|       |      | Shiraz-32T | 1833 | 0.551336 | 0         |  |  |
|       |      | Shiraz-38T | 1951 | 0.250891 | 0         |  |  |
|       |      | Shiraz-53T | 2078 | 0.287202 | 0         |  |  |
|       |      | Shiraz-58T | 2161 | 0        | -0.187744 |  |  |
|       |      | Shiraz-71T | 2238 | 0.603631 | 0         |  |  |
|       |      | Shiraz-3T  | 90   | 0.219276 | 0         |  |  |
|       |      | Shiraz-3T  | 95   | 0        | -0.077623 |  |  |
|       |      | Shiraz-4T  | 253  | 0.372918 | 0         |  |  |
|       |      | Shiraz-36T | 378  | 0.179558 | 0         |  |  |
|       |      | Shiraz-36T | 382  | 0.081739 | 0         |  |  |
|       |      | Shiraz-44T | 641  | 0        | -0.477846 |  |  |
|       |      | Shiraz-46T | 943  | 0.093799 | 0         |  |  |
|       |      | Shiraz-46T | 947  | 0        | -0.010843 |  |  |
|       |      | Shiraz-47T | 1031 | 0        | -0.117529 |  |  |
|       |      | Shiraz-49T | 1121 | 0        | -0.138569 |  |  |
|       |      | Shiraz-77T | 1225 | 0        | -0.117922 |  |  |
|       |      | Shiraz-77T | 1228 | 0        | -0.238084 |  |  |
|       |      | Shiraz-18T | 1434 | 0.244465 | 0         |  |  |
|       |      | Shiraz-22T | 1549 | 0        | -0.319623 |  |  |
|       |      | Shiraz-25T | 1698 | 0.21835  | 0         |  |  |
|       |      | Shiraz-28T | 1735 | 0.350744 | 0         |  |  |
|       |      | Shiraz-29T | 1778 | 0.120767 | 0         |  |  |
|       |      | Shiraz-32T | 1833 | 0.551336 | 0         |  |  |
|       |      | Shiraz-38T | 1951 | 0.250891 | 0         |  |  |
|       |      | Shiraz-53T | 2078 | 0.287202 | 0         |  |  |
|       |      | Shiraz-58T | 2161 | 0        | -0.187744 |  |  |
|       |      | Shiraz-71T | 2238 | 0.603631 | 0         |  |  |
| PODXL | chr7 | Shiraz-3T  | 90   | 0.219276 | 0         |  |  |
|       |      | Shiraz-3T  | 96   | 0.428308 | 0         |  |  |
|       |      | Shiraz-4T  | 253  | 0.372918 | 0         |  |  |
|       |      | Shiraz-36T | 378  | 0.179558 | 0         |  |  |
|       |      | Shiraz-44T | 642  | 0.408617 | 0         |  |  |
|       |      | Shiraz-46T | 943  | 0.093799 | 0         |  |  |
|       |      | Shiraz-77T | 1225 | 0        | -0.117922 |  |  |
|       |      | Shiraz-9T  | 1325 | 0.221899 | 0         |  |  |
|       |      | Shiraz-18T | 1434 | 0.244465 | 0         |  |  |
|       |      | Shiraz-25T | 1698 | 0.21835  | 0         |  |  |
|       |      | Shiraz-28T | 1735 | 0.350744 | 0         |  |  |
|       |      | Shiraz-29T | 1778 | 0.120767 | 0         |  |  |
|       |      | Shiraz-32T | 1833 | 0.551336 | 0         |  |  |
|       |      | Shiraz-38T | 1951 | 0.250891 | 0         |  |  |
|       |      | Shiraz-53T | 2078 | 0.287202 | 0         |  |  |
|       |      | Shiraz-71T | 2238 | 0.603631 | 0         |  |  |
|       |      | Shiraz-3T  | 90   | 0.219276 | 0         |  |  |
|       |      | Shiraz-3T  | 96   | 0.428308 | 0         |  |  |

|       |      |            |      |          |           |  |  |
|-------|------|------------|------|----------|-----------|--|--|
|       |      | Shiraz-4T  | 253  | 0.372918 | 0         |  |  |
|       |      | Shiraz-36T | 378  | 0.179558 | 0         |  |  |
|       |      | Shiraz-44T | 642  | 0.408617 | 0         |  |  |
|       |      | Shiraz-46T | 943  | 0.093799 | 0         |  |  |
|       |      | Shiraz-77T | 1225 | 0        | -0.117922 |  |  |
|       |      | Shiraz-9T  | 1325 | 0.221899 | 0         |  |  |
|       |      | Shiraz-18T | 1434 | 0.244465 | 0         |  |  |
|       |      | Shiraz-25T | 1698 | 0.21835  | 0         |  |  |
|       |      | Shiraz-28T | 1735 | 0.350744 | 0         |  |  |
|       |      | Shiraz-29T | 1778 | 0.120767 | 0         |  |  |
|       |      | Shiraz-32T | 1833 | 0.551336 | 0         |  |  |
|       |      | Shiraz-38T | 1951 | 0.250891 | 0         |  |  |
|       |      | Shiraz-53T | 2078 | 0.287202 | 0         |  |  |
|       |      | Shiraz-71T | 2238 | 0.603631 | 0         |  |  |
|       |      | Shiraz-3T  | 90   | 0.219276 | 0         |  |  |
|       |      | Shiraz-3T  | 96   | 0.428308 | 0         |  |  |
|       |      | Shiraz-4T  | 253  | 0.372918 | 0         |  |  |
|       |      | Shiraz-36T | 378  | 0.179558 | 0         |  |  |
|       |      | Shiraz-44T | 642  | 0.408617 | 0         |  |  |
|       |      | Shiraz-46T | 943  | 0.093799 | 0         |  |  |
|       |      | Shiraz-77T | 1225 | 0        | -0.117922 |  |  |
|       |      | Shiraz-9T  | 1325 | 0.221899 | 0         |  |  |
|       |      | Shiraz-18T | 1434 | 0.244465 | 0         |  |  |
|       |      | Shiraz-25T | 1698 | 0.21835  | 0         |  |  |
|       |      | Shiraz-28T | 1735 | 0.350744 | 0         |  |  |
|       |      | Shiraz-29T | 1778 | 0.120767 | 0         |  |  |
|       |      | Shiraz-32T | 1833 | 0.551336 | 0         |  |  |
|       |      | Shiraz-38T | 1951 | 0.250891 | 0         |  |  |
|       |      | Shiraz-53T | 2078 | 0.287202 | 0         |  |  |
|       |      | Shiraz-71T | 2238 | 0.603631 | 0         |  |  |
| POF1B | chrX | Shiraz-3T  | 242  | 0        | -0.336434 |  |  |
|       |      | Shiraz-3T  | 243  | 0        | -0.549129 |  |  |
|       |      | Shiraz-4T  | 261  | 0        | -0.336249 |  |  |
|       |      | Shiraz-16T | 295  | 0.591657 | 0         |  |  |
|       |      | Shiraz-31T | 346  | 0        | -0.1527   |  |  |
|       |      | Shiraz-36T | 433  | 0        | -0.803961 |  |  |
|       |      | Shiraz-44T | 899  | 0        | -1.09697  |  |  |
|       |      | Shiraz-44T | 902  | 0        | -1.449824 |  |  |
|       |      | Shiraz-47T | 1085 | 0        | -0.130811 |  |  |
|       |      | Shiraz-49T | 1170 | 0        | -0.967436 |  |  |
|       |      | Shiraz-49T | 1172 | 0        | -1.123219 |  |  |
|       |      | Shiraz-18T | 1457 | 0.643204 | 0         |  |  |
|       |      | Shiraz-22T | 1673 | 0.611783 | 0         |  |  |
|       |      | Shiraz-22T | 1675 | 0.279253 | 0         |  |  |
|       |      | Shiraz-25T | 1719 | 0.472955 | 0         |  |  |
|       |      | Shiraz-28T | 1762 | 0.562311 | 0         |  |  |
|       |      | Shiraz-29T | 1801 | 0.815343 | 0         |  |  |

|  |            |      |          |           |  |
|--|------------|------|----------|-----------|--|
|  | Shiraz-32T | 1870 | 0.729766 | 0         |  |
|  | Shiraz-32T | 1871 | 0.292679 | 0         |  |
|  | Shiraz-35T | 1933 | 0.488535 | 0         |  |
|  | Shiraz-58T | 2223 | 0.833364 | 0         |  |
|  | Shiraz-58T | 2225 | 0.595784 | 0         |  |
|  | Shiraz-71T | 2263 | 0.975531 | 0         |  |
|  | Shiraz-3T  | 242  | 0        | -0.336434 |  |
|  | Shiraz-3T  | 243  | 0        | -0.549129 |  |
|  | Shiraz-4T  | 261  | 0        | -0.336249 |  |
|  | Shiraz-16T | 295  | 0.591657 | 0         |  |
|  | Shiraz-31T | 346  | 0        | -0.1527   |  |
|  | Shiraz-36T | 433  | 0        | -0.803961 |  |
|  | Shiraz-44T | 899  | 0        | -1.09697  |  |
|  | Shiraz-44T | 902  | 0        | -1.449824 |  |
|  | Shiraz-47T | 1085 | 0        | -0.130811 |  |
|  | Shiraz-49T | 1170 | 0        | -0.967436 |  |
|  | Shiraz-49T | 1172 | 0        | -1.123219 |  |
|  | Shiraz-18T | 1457 | 0.643204 | 0         |  |
|  | Shiraz-22T | 1673 | 0.611783 | 0         |  |
|  | Shiraz-22T | 1675 | 0.279253 | 0         |  |
|  | Shiraz-25T | 1719 | 0.472955 | 0         |  |
|  | Shiraz-28T | 1762 | 0.562311 | 0         |  |
|  | Shiraz-29T | 1801 | 0.815343 | 0         |  |
|  | Shiraz-32T | 1870 | 0.729766 | 0         |  |
|  | Shiraz-32T | 1871 | 0.292679 | 0         |  |
|  | Shiraz-35T | 1933 | 0.488535 | 0         |  |
|  | Shiraz-58T | 2223 | 0.833364 | 0         |  |
|  | Shiraz-58T | 2225 | 0.595784 | 0         |  |
|  | Shiraz-71T | 2263 | 0.975531 | 0         |  |
|  | Shiraz-3T  | 242  | 0        | -0.336434 |  |
|  | Shiraz-3T  | 243  | 0        | -0.549129 |  |
|  | Shiraz-4T  | 261  | 0        | -0.336249 |  |
|  | Shiraz-16T | 295  | 0.591657 | 0         |  |
|  | Shiraz-31T | 346  | 0        | -0.1527   |  |
|  | Shiraz-36T | 433  | 0        | -0.803961 |  |
|  | Shiraz-44T | 899  | 0        | -1.09697  |  |
|  | Shiraz-44T | 902  | 0        | -1.449824 |  |
|  | Shiraz-47T | 1085 | 0        | -0.130811 |  |
|  | Shiraz-49T | 1170 | 0        | -0.967436 |  |
|  | Shiraz-49T | 1172 | 0        | -1.123219 |  |
|  | Shiraz-18T | 1457 | 0.643204 | 0         |  |
|  | Shiraz-22T | 1673 | 0.611783 | 0         |  |
|  | Shiraz-22T | 1675 | 0.279253 | 0         |  |
|  | Shiraz-25T | 1719 | 0.472955 | 0         |  |
|  | Shiraz-28T | 1762 | 0.562311 | 0         |  |
|  | Shiraz-29T | 1801 | 0.815343 | 0         |  |
|  | Shiraz-32T | 1870 | 0.729766 | 0         |  |

|       |      |            |      |          |           |  |
|-------|------|------------|------|----------|-----------|--|
|       |      | Shiraz-32T | 1871 | 0.292679 | 0         |  |
|       |      | Shiraz-35T | 1933 | 0.488535 | 0         |  |
|       |      | Shiraz-58T | 2223 | 0.833364 | 0         |  |
|       |      | Shiraz-58T | 2225 | 0.595784 | 0         |  |
|       |      | Shiraz-71T | 2263 | 0.975531 | 0         |  |
| POLA1 | chrX | Shiraz-3T  | 235  | 0        | -0.28401  |  |
|       |      | Shiraz-4T  | 260  | 0        | -0.324128 |  |
|       |      | Shiraz-16T | 294  | 0.655804 | 0         |  |
|       |      | Shiraz-36T | 431  | 0        | -0.78035  |  |
|       |      | Shiraz-44T | 891  | 0        | -0.954044 |  |
|       |      | Shiraz-49T | 1166 | 0        | -0.917235 |  |
|       |      | Shiraz-49T | 1168 | 0        | -1.073859 |  |
|       |      | Shiraz-77T | 1281 | 0.136627 | 0         |  |
|       |      | Shiraz-9T  | 1368 | 0.199713 | 0         |  |
|       |      | Shiraz-18T | 1455 | 0        | -0.186773 |  |
|       |      | Shiraz-22T | 1669 | 0.695915 | 0         |  |
|       |      | Shiraz-25T | 1717 | 0.420447 | 0         |  |
|       |      | Shiraz-28T | 1760 | 0.538181 | 0         |  |
|       |      | Shiraz-29T | 1800 | 0.672527 | 0         |  |
|       |      | Shiraz-32T | 1869 | 0.776805 | 0         |  |
|       |      | Shiraz-35T | 1932 | 0.507141 | 0         |  |
|       |      | Shiraz-40T | 2051 | 0.098506 | 0         |  |
|       |      | Shiraz-58T | 2221 | 0.871948 | 0         |  |
|       |      | Shiraz-58T | 2222 | 0.679664 | 0         |  |
|       |      | Shiraz-71T | 2260 | 0.68394  | 0         |  |
|       |      | Shiraz-71T | 2261 | 0.508399 | 0         |  |
|       |      | Shiraz-3T  | 235  | 0        | -0.28401  |  |
|       |      | Shiraz-4T  | 260  | 0        | -0.324128 |  |
|       |      | Shiraz-16T | 294  | 0.655804 | 0         |  |
|       |      | Shiraz-36T | 431  | 0        | -0.78035  |  |
|       |      | Shiraz-44T | 891  | 0        | -0.954044 |  |
|       |      | Shiraz-49T | 1166 | 0        | -0.917235 |  |
|       |      | Shiraz-49T | 1168 | 0        | -1.073859 |  |
|       |      | Shiraz-77T | 1281 | 0.136627 | 0         |  |
|       |      | Shiraz-9T  | 1368 | 0.199713 | 0         |  |
|       |      | Shiraz-18T | 1455 | 0        | -0.186773 |  |
|       |      | Shiraz-22T | 1669 | 0.695915 | 0         |  |
|       |      | Shiraz-25T | 1717 | 0.420447 | 0         |  |
|       |      | Shiraz-28T | 1760 | 0.538181 | 0         |  |
|       |      | Shiraz-29T | 1800 | 0.672527 | 0         |  |
|       |      | Shiraz-32T | 1869 | 0.776805 | 0         |  |
|       |      | Shiraz-35T | 1932 | 0.507141 | 0         |  |
|       |      | Shiraz-40T | 2051 | 0.098506 | 0         |  |
|       |      | Shiraz-58T | 2221 | 0.871948 | 0         |  |
|       |      | Shiraz-58T | 2222 | 0.679664 | 0         |  |
|       |      | Shiraz-71T | 2260 | 0.68394  | 0         |  |
|       |      | Shiraz-71T | 2261 | 0.508399 | 0         |  |

|       |      |            |      |          |           |  |  |
|-------|------|------------|------|----------|-----------|--|--|
|       |      | Shiraz-3T  | 235  | 0        | -0.28401  |  |  |
|       |      | Shiraz-4T  | 260  | 0        | -0.324128 |  |  |
|       |      | Shiraz-16T | 294  | 0.655804 | 0         |  |  |
|       |      | Shiraz-36T | 431  | 0        | -0.78035  |  |  |
|       |      | Shiraz-44T | 891  | 0        | -0.954044 |  |  |
|       |      | Shiraz-49T | 1166 | 0        | -0.917235 |  |  |
|       |      | Shiraz-49T | 1168 | 0        | -1.073859 |  |  |
|       |      | Shiraz-77T | 1281 | 0.136627 | 0         |  |  |
|       |      | Shiraz-9T  | 1368 | 0.199713 | 0         |  |  |
|       |      | Shiraz-18T | 1455 | 0        | -0.186773 |  |  |
|       |      | Shiraz-22T | 1669 | 0.695915 | 0         |  |  |
|       |      | Shiraz-25T | 1717 | 0.420447 | 0         |  |  |
|       |      | Shiraz-28T | 1760 | 0.538181 | 0         |  |  |
|       |      | Shiraz-29T | 1800 | 0.672527 | 0         |  |  |
|       |      | Shiraz-32T | 1869 | 0.776805 | 0         |  |  |
|       |      | Shiraz-35T | 1932 | 0.507141 | 0         |  |  |
|       |      | Shiraz-40T | 2051 | 0.098506 | 0         |  |  |
|       |      | Shiraz-58T | 2221 | 0.871948 | 0         |  |  |
|       |      | Shiraz-58T | 2222 | 0.679664 | 0         |  |  |
|       |      | Shiraz-71T | 2260 | 0.68394  | 0         |  |  |
|       |      | Shiraz-71T | 2261 | 0.508399 | 0         |  |  |
| POLD2 | chr7 | Shiraz-3T  | 87   | 0.198593 | 0         |  |  |
|       |      | Shiraz-3T  | 89   | 0.678641 | 0         |  |  |
|       |      | Shiraz-4T  | 252  | 0.192083 | 0         |  |  |
|       |      | Shiraz-36T | 376  | 0.159952 | 0         |  |  |
|       |      | Shiraz-44T | 632  | 0.902944 | 0         |  |  |
|       |      | Shiraz-46T | 942  | 0.069143 | 0         |  |  |
|       |      | Shiraz-77T | 1223 | 0.215647 | 0         |  |  |
|       |      | Shiraz-18T | 1433 | 0.250973 | 0         |  |  |
|       |      | Shiraz-25T | 1697 | 0.21945  | 0         |  |  |
|       |      | Shiraz-28T | 1734 | 0.362882 | 0         |  |  |
|       |      | Shiraz-29T | 1777 | 0.156747 | 0         |  |  |
|       |      | Shiraz-38T | 1950 | 0.265916 | 0         |  |  |
|       |      | Shiraz-71T | 2236 | 0.320072 | 0         |  |  |
|       |      | Shiraz-3T  | 87   | 0.198593 | 0         |  |  |
|       |      | Shiraz-3T  | 89   | 0.678641 | 0         |  |  |
|       |      | Shiraz-4T  | 252  | 0.192083 | 0         |  |  |
|       |      | Shiraz-36T | 376  | 0.159952 | 0         |  |  |
|       |      | Shiraz-44T | 632  | 0.902944 | 0         |  |  |
|       |      | Shiraz-46T | 942  | 0.069143 | 0         |  |  |
|       |      | Shiraz-77T | 1223 | 0.215647 | 0         |  |  |
|       |      | Shiraz-18T | 1433 | 0.250973 | 0         |  |  |
|       |      | Shiraz-25T | 1697 | 0.21945  | 0         |  |  |
|       |      | Shiraz-28T | 1734 | 0.362882 | 0         |  |  |
|       |      | Shiraz-29T | 1777 | 0.156747 | 0         |  |  |
|       |      | Shiraz-38T | 1950 | 0.265916 | 0         |  |  |
|       |      | Shiraz-71T | 2236 | 0.320072 | 0         |  |  |

|      |      |            |      |          |   |  |
|------|------|------------|------|----------|---|--|
|      |      | Shiraz-3T  | 87   | 0.198593 | 0 |  |
|      |      | Shiraz-3T  | 89   | 0.678641 | 0 |  |
|      |      | Shiraz-4T  | 252  | 0.192083 | 0 |  |
|      |      | Shiraz-36T | 376  | 0.159952 | 0 |  |
|      |      | Shiraz-44T | 632  | 0.902944 | 0 |  |
|      |      | Shiraz-46T | 942  | 0.069143 | 0 |  |
|      |      | Shiraz-77T | 1223 | 0.215647 | 0 |  |
|      |      | Shiraz-18T | 1433 | 0.250973 | 0 |  |
|      |      | Shiraz-25T | 1697 | 0.21945  | 0 |  |
|      |      | Shiraz-28T | 1734 | 0.362882 | 0 |  |
|      |      | Shiraz-29T | 1777 | 0.156747 | 0 |  |
|      |      | Shiraz-38T | 1950 | 0.265916 | 0 |  |
|      |      | Shiraz-71T | 2236 | 0.320072 | 0 |  |
| POLM | chr7 | Shiraz-3T  | 87   | 0.198593 | 0 |  |
|      |      | Shiraz-3T  | 89   | 0.678641 | 0 |  |
|      |      | Shiraz-4T  | 252  | 0.192083 | 0 |  |
|      |      | Shiraz-36T | 376  | 0.159952 | 0 |  |
|      |      | Shiraz-44T | 632  | 0.902944 | 0 |  |
|      |      | Shiraz-46T | 942  | 0.069143 | 0 |  |
|      |      | Shiraz-77T | 1223 | 0.215647 | 0 |  |
|      |      | Shiraz-18T | 1433 | 0.250973 | 0 |  |
|      |      | Shiraz-25T | 1697 | 0.21945  | 0 |  |
|      |      | Shiraz-28T | 1734 | 0.362882 | 0 |  |
|      |      | Shiraz-29T | 1777 | 0.156747 | 0 |  |
|      |      | Shiraz-38T | 1950 | 0.265916 | 0 |  |
|      |      | Shiraz-71T | 2236 | 0.320072 | 0 |  |
|      |      | Shiraz-3T  | 87   | 0.198593 | 0 |  |
|      |      | Shiraz-3T  | 89   | 0.678641 | 0 |  |
|      |      | Shiraz-4T  | 252  | 0.192083 | 0 |  |
|      |      | Shiraz-36T | 376  | 0.159952 | 0 |  |
|      |      | Shiraz-44T | 632  | 0.902944 | 0 |  |
|      |      | Shiraz-46T | 942  | 0.069143 | 0 |  |
|      |      | Shiraz-77T | 1223 | 0.215647 | 0 |  |
|      |      | Shiraz-18T | 1433 | 0.250973 | 0 |  |
|      |      | Shiraz-25T | 1697 | 0.21945  | 0 |  |
|      |      | Shiraz-28T | 1734 | 0.362882 | 0 |  |
|      |      | Shiraz-29T | 1777 | 0.156747 | 0 |  |
|      |      | Shiraz-38T | 1950 | 0.265916 | 0 |  |
|      |      | Shiraz-71T | 2236 | 0.320072 | 0 |  |
|      |      | Shiraz-3T  | 87   | 0.198593 | 0 |  |
|      |      | Shiraz-3T  | 89   | 0.678641 | 0 |  |
|      |      | Shiraz-4T  | 252  | 0.192083 | 0 |  |
|      |      | Shiraz-36T | 376  | 0.159952 | 0 |  |
|      |      | Shiraz-44T | 632  | 0.902944 | 0 |  |
|      |      | Shiraz-46T | 942  | 0.069143 | 0 |  |
|      |      | Shiraz-77T | 1223 | 0.215647 | 0 |  |
|      |      | Shiraz-18T | 1433 | 0.250973 | 0 |  |



|        |      |            |      |          |           |  |
|--------|------|------------|------|----------|-----------|--|
|        |      | Shiraz-25T | 1697 | 0.21945  | 0         |  |
|        |      | Shiraz-28T | 1734 | 0.362882 | 0         |  |
|        |      | Shiraz-29T | 1777 | 0.156747 | 0         |  |
|        |      | Shiraz-38T | 1950 | 0.265916 | 0         |  |
|        |      | Shiraz-71T | 2236 | 0.320072 | 0         |  |
| POLR2J | chr7 | Shiraz-3T  | 90   | 0.219276 | 0         |  |
|        |      | Shiraz-3T  | 94   | 0.74735  | 0         |  |
|        |      | Shiraz-4T  | 253  | 0.372918 | 0         |  |
|        |      | Shiraz-31T | 316  | 0.219196 | 0         |  |
|        |      | Shiraz-36T | 378  | 0.179558 | 0         |  |
|        |      | Shiraz-44T | 639  | 1.035032 | 0         |  |
|        |      | Shiraz-46T | 943  | 0.093799 | 0         |  |
|        |      | Shiraz-46T | 946  | 0.299835 | 0         |  |
|        |      | Shiraz-47T | 1030 | 0.257728 | 0         |  |
|        |      | Shiraz-49T | 1120 | 0.281656 | 0         |  |
|        |      | Shiraz-77T | 1225 | 0        | -0.117922 |  |
|        |      | Shiraz-77T | 1227 | 0.196445 | 0         |  |
|        |      | Shiraz-9T  | 1324 | 0.679266 | 0         |  |
|        |      | Shiraz-18T | 1434 | 0.244465 | 0         |  |
|        |      | Shiraz-22T | 1549 | 0        | -0.319623 |  |
|        |      | Shiraz-22T | 1551 | 0.324011 | 0         |  |
|        |      | Shiraz-25T | 1698 | 0.21835  | 0         |  |
|        |      | Shiraz-28T | 1735 | 0.350744 | 0         |  |
|        |      | Shiraz-29T | 1778 | 0.120767 | 0         |  |
|        |      | Shiraz-32T | 1833 | 0.551336 | 0         |  |
|        |      | Shiraz-38T | 1951 | 0.250891 | 0         |  |
|        |      | Shiraz-53T | 2078 | 0.287202 | 0         |  |
|        |      | Shiraz-58T | 2160 | 0.399007 | 0         |  |
|        |      | Shiraz-71T | 2238 | 0.603631 | 0         |  |
|        |      | Shiraz-3T  | 90   | 0.219276 | 0         |  |
|        |      | Shiraz-3T  | 94   | 0.74735  | 0         |  |
|        |      | Shiraz-4T  | 253  | 0.372918 | 0         |  |
|        |      | Shiraz-31T | 316  | 0.219196 | 0         |  |
|        |      | Shiraz-36T | 378  | 0.179558 | 0         |  |
|        |      | Shiraz-44T | 639  | 1.035032 | 0         |  |
|        |      | Shiraz-46T | 943  | 0.093799 | 0         |  |
|        |      | Shiraz-46T | 946  | 0.299835 | 0         |  |
|        |      | Shiraz-47T | 1030 | 0.257728 | 0         |  |
|        |      | Shiraz-49T | 1120 | 0.281656 | 0         |  |
|        |      | Shiraz-77T | 1225 | 0        | -0.117922 |  |
|        |      | Shiraz-77T | 1227 | 0.196445 | 0         |  |
|        |      | Shiraz-9T  | 1324 | 0.679266 | 0         |  |
|        |      | Shiraz-18T | 1434 | 0.244465 | 0         |  |
|        |      | Shiraz-22T | 1549 | 0        | -0.319623 |  |
|        |      | Shiraz-22T | 1551 | 0.324011 | 0         |  |
|        |      | Shiraz-25T | 1698 | 0.21835  | 0         |  |
|        |      | Shiraz-28T | 1735 | 0.350744 | 0         |  |

|         |      |            |      |          |           |  |  |
|---------|------|------------|------|----------|-----------|--|--|
|         |      | Shiraz-29T | 1778 | 0.120767 | 0         |  |  |
|         |      | Shiraz-32T | 1833 | 0.551336 | 0         |  |  |
|         |      | Shiraz-38T | 1951 | 0.250891 | 0         |  |  |
|         |      | Shiraz-53T | 2078 | 0.287202 | 0         |  |  |
|         |      | Shiraz-58T | 2160 | 0.399007 | 0         |  |  |
|         |      | Shiraz-71T | 2238 | 0.603631 | 0         |  |  |
|         |      | Shiraz-3T  | 90   | 0.219276 | 0         |  |  |
|         |      | Shiraz-3T  | 94   | 0.74735  | 0         |  |  |
|         |      | Shiraz-4T  | 253  | 0.372918 | 0         |  |  |
|         |      | Shiraz-31T | 316  | 0.219196 | 0         |  |  |
|         |      | Shiraz-36T | 378  | 0.179558 | 0         |  |  |
|         |      | Shiraz-44T | 639  | 1.035032 | 0         |  |  |
|         |      | Shiraz-46T | 943  | 0.093799 | 0         |  |  |
|         |      | Shiraz-46T | 946  | 0.299835 | 0         |  |  |
|         |      | Shiraz-47T | 1030 | 0.257728 | 0         |  |  |
|         |      | Shiraz-49T | 1120 | 0.281656 | 0         |  |  |
|         |      | Shiraz-77T | 1225 | 0        | -0.117922 |  |  |
|         |      | Shiraz-77T | 1227 | 0.196445 | 0         |  |  |
|         |      | Shiraz-9T  | 1324 | 0.679266 | 0         |  |  |
|         |      | Shiraz-18T | 1434 | 0.244465 | 0         |  |  |
|         |      | Shiraz-22T | 1549 | 0        | -0.319623 |  |  |
|         |      | Shiraz-22T | 1551 | 0.324011 | 0         |  |  |
|         |      | Shiraz-25T | 1698 | 0.21835  | 0         |  |  |
|         |      | Shiraz-28T | 1735 | 0.350744 | 0         |  |  |
|         |      | Shiraz-29T | 1778 | 0.120767 | 0         |  |  |
|         |      | Shiraz-32T | 1833 | 0.551336 | 0         |  |  |
|         |      | Shiraz-38T | 1951 | 0.250891 | 0         |  |  |
|         |      | Shiraz-53T | 2078 | 0.287202 | 0         |  |  |
|         |      | Shiraz-58T | 2160 | 0.399007 | 0         |  |  |
|         |      | Shiraz-71T | 2238 | 0.603631 | 0         |  |  |
| POLR2J2 | chr7 | Shiraz-3T  | 90   | 0.219276 | 0         |  |  |
|         |      | Shiraz-4T  | 253  | 0.372918 | 0         |  |  |
|         |      | Shiraz-36T | 378  | 0.179558 | 0         |  |  |
|         |      | Shiraz-46T | 943  | 0.093799 | 0         |  |  |
|         |      | Shiraz-46T | 946  | 0.299835 | 0         |  |  |
|         |      | Shiraz-77T | 1225 | 0        | -0.117922 |  |  |
|         |      | Shiraz-9T  | 1324 | 0.679266 | 0         |  |  |
|         |      | Shiraz-18T | 1434 | 0.244465 | 0         |  |  |
|         |      | Shiraz-22T | 1549 | 0        | -0.319623 |  |  |
|         |      | Shiraz-25T | 1698 | 0.21835  | 0         |  |  |
|         |      | Shiraz-28T | 1735 | 0.350744 | 0         |  |  |
|         |      | Shiraz-29T | 1778 | 0.120767 | 0         |  |  |
|         |      | Shiraz-32T | 1833 | 0.551336 | 0         |  |  |
|         |      | Shiraz-38T | 1951 | 0.250891 | 0         |  |  |
|         |      | Shiraz-53T | 2078 | 0.287202 | 0         |  |  |
|         |      | Shiraz-71T | 2238 | 0.603631 | 0         |  |  |
|         |      | Shiraz-3T  | 90   | 0.219276 | 0         |  |  |

|         |      |            |      |          |           |  |
|---------|------|------------|------|----------|-----------|--|
|         |      | Shiraz-4T  | 253  | 0.372918 | 0         |  |
|         |      | Shiraz-36T | 378  | 0.179558 | 0         |  |
|         |      | Shiraz-46T | 943  | 0.093799 | 0         |  |
|         |      | Shiraz-46T | 946  | 0.299835 | 0         |  |
|         |      | Shiraz-77T | 1225 | 0        | -0.117922 |  |
|         |      | Shiraz-9T  | 1324 | 0.679266 | 0         |  |
|         |      | Shiraz-18T | 1434 | 0.244465 | 0         |  |
|         |      | Shiraz-22T | 1549 | 0        | -0.319623 |  |
|         |      | Shiraz-25T | 1698 | 0.21835  | 0         |  |
|         |      | Shiraz-28T | 1735 | 0.350744 | 0         |  |
|         |      | Shiraz-29T | 1778 | 0.120767 | 0         |  |
|         |      | Shiraz-32T | 1833 | 0.551336 | 0         |  |
|         |      | Shiraz-38T | 1951 | 0.250891 | 0         |  |
|         |      | Shiraz-53T | 2078 | 0.287202 | 0         |  |
|         |      | Shiraz-71T | 2238 | 0.603631 | 0         |  |
|         |      | Shiraz-3T  | 90   | 0.219276 | 0         |  |
|         |      | Shiraz-4T  | 253  | 0.372918 | 0         |  |
|         |      | Shiraz-36T | 378  | 0.179558 | 0         |  |
|         |      | Shiraz-46T | 943  | 0.093799 | 0         |  |
|         |      | Shiraz-46T | 946  | 0.299835 | 0         |  |
|         |      | Shiraz-77T | 1225 | 0        | -0.117922 |  |
|         |      | Shiraz-9T  | 1324 | 0.679266 | 0         |  |
|         |      | Shiraz-18T | 1434 | 0.244465 | 0         |  |
|         |      | Shiraz-22T | 1549 | 0        | -0.319623 |  |
|         |      | Shiraz-25T | 1698 | 0.21835  | 0         |  |
|         |      | Shiraz-28T | 1735 | 0.350744 | 0         |  |
|         |      | Shiraz-29T | 1778 | 0.120767 | 0         |  |
|         |      | Shiraz-32T | 1833 | 0.551336 | 0         |  |
|         |      | Shiraz-38T | 1951 | 0.250891 | 0         |  |
|         |      | Shiraz-53T | 2078 | 0.287202 | 0         |  |
|         |      | Shiraz-71T | 2238 | 0.603631 | 0         |  |
| POLR2J3 | chr7 | Shiraz-3T  | 90   | 0.219276 | 0         |  |
|         |      | Shiraz-4T  | 253  | 0.372918 | 0         |  |
|         |      | Shiraz-36T | 378  | 0.179558 | 0         |  |
|         |      | Shiraz-46T | 943  | 0.093799 | 0         |  |
|         |      | Shiraz-46T | 946  | 0.299835 | 0         |  |
|         |      | Shiraz-77T | 1225 | 0        | -0.117922 |  |
|         |      | Shiraz-9T  | 1324 | 0.679266 | 0         |  |
|         |      | Shiraz-18T | 1434 | 0.244465 | 0         |  |
|         |      | Shiraz-22T | 1549 | 0        | -0.319623 |  |
|         |      | Shiraz-25T | 1698 | 0.21835  | 0         |  |
|         |      | Shiraz-28T | 1735 | 0.350744 | 0         |  |
|         |      | Shiraz-29T | 1778 | 0.120767 | 0         |  |
|         |      | Shiraz-32T | 1833 | 0.551336 | 0         |  |
|         |      | Shiraz-38T | 1951 | 0.250891 | 0         |  |
|         |      | Shiraz-53T | 2078 | 0.287202 | 0         |  |
|         |      | Shiraz-71T | 2238 | 0.603631 | 0         |  |

|         |      |            |      |          |           |  |  |
|---------|------|------------|------|----------|-----------|--|--|
|         |      | Shiraz-3T  | 90   | 0.219276 | 0         |  |  |
|         |      | Shiraz-4T  | 253  | 0.372918 | 0         |  |  |
|         |      | Shiraz-36T | 378  | 0.179558 | 0         |  |  |
|         |      | Shiraz-46T | 943  | 0.093799 | 0         |  |  |
|         |      | Shiraz-46T | 946  | 0.299835 | 0         |  |  |
|         |      | Shiraz-77T | 1225 | 0        | -0.117922 |  |  |
|         |      | Shiraz-9T  | 1324 | 0.679266 | 0         |  |  |
|         |      | Shiraz-18T | 1434 | 0.244465 | 0         |  |  |
|         |      | Shiraz-22T | 1549 | 0        | -0.319623 |  |  |
|         |      | Shiraz-25T | 1698 | 0.21835  | 0         |  |  |
|         |      | Shiraz-28T | 1735 | 0.350744 | 0         |  |  |
|         |      | Shiraz-29T | 1778 | 0.120767 | 0         |  |  |
|         |      | Shiraz-32T | 1833 | 0.551336 | 0         |  |  |
|         |      | Shiraz-38T | 1951 | 0.250891 | 0         |  |  |
|         |      | Shiraz-53T | 2078 | 0.287202 | 0         |  |  |
|         |      | Shiraz-71T | 2238 | 0.603631 | 0         |  |  |
|         |      | Shiraz-3T  | 90   | 0.219276 | 0         |  |  |
|         |      | Shiraz-4T  | 253  | 0.372918 | 0         |  |  |
|         |      | Shiraz-36T | 378  | 0.179558 | 0         |  |  |
|         |      | Shiraz-46T | 943  | 0.093799 | 0         |  |  |
|         |      | Shiraz-46T | 946  | 0.299835 | 0         |  |  |
|         |      | Shiraz-77T | 1225 | 0        | -0.117922 |  |  |
|         |      | Shiraz-9T  | 1324 | 0.679266 | 0         |  |  |
|         |      | Shiraz-18T | 1434 | 0.244465 | 0         |  |  |
|         |      | Shiraz-22T | 1549 | 0        | -0.319623 |  |  |
|         |      | Shiraz-25T | 1698 | 0.21835  | 0         |  |  |
|         |      | Shiraz-28T | 1735 | 0.350744 | 0         |  |  |
|         |      | Shiraz-29T | 1778 | 0.120767 | 0         |  |  |
|         |      | Shiraz-32T | 1833 | 0.551336 | 0         |  |  |
|         |      | Shiraz-38T | 1951 | 0.250891 | 0         |  |  |
|         |      | Shiraz-53T | 2078 | 0.287202 | 0         |  |  |
|         |      | Shiraz-71T | 2238 | 0.603631 | 0         |  |  |
| POLR2J4 | chr7 | Shiraz-3T  | 87   | 0.198593 | 0         |  |  |
|         |      | Shiraz-3T  | 89   | 0.678641 | 0         |  |  |
|         |      | Shiraz-4T  | 252  | 0.192083 | 0         |  |  |
|         |      | Shiraz-36T | 376  | 0.159952 | 0         |  |  |
|         |      | Shiraz-44T | 632  | 0.902944 | 0         |  |  |
|         |      | Shiraz-46T | 942  | 0.069143 | 0         |  |  |
|         |      | Shiraz-77T | 1223 | 0.215647 | 0         |  |  |
|         |      | Shiraz-18T | 1433 | 0.250973 | 0         |  |  |
|         |      | Shiraz-25T | 1697 | 0.21945  | 0         |  |  |
|         |      | Shiraz-28T | 1734 | 0.362882 | 0         |  |  |
|         |      | Shiraz-29T | 1777 | 0.156747 | 0         |  |  |
|         |      | Shiraz-38T | 1950 | 0.265916 | 0         |  |  |
|         |      | Shiraz-71T | 2236 | 0.320072 | 0         |  |  |
|         |      | Shiraz-3T  | 87   | 0.198593 | 0         |  |  |
|         |      | Shiraz-3T  | 89   | 0.678641 | 0         |  |  |

|        |      |            |      |          |   |  |
|--------|------|------------|------|----------|---|--|
|        |      | Shiraz-4T  | 252  | 0.192083 | 0 |  |
|        |      | Shiraz-36T | 376  | 0.159952 | 0 |  |
|        |      | Shiraz-44T | 632  | 0.902944 | 0 |  |
|        |      | Shiraz-46T | 942  | 0.069143 | 0 |  |
|        |      | Shiraz-77T | 1223 | 0.215647 | 0 |  |
|        |      | Shiraz-18T | 1433 | 0.250973 | 0 |  |
|        |      | Shiraz-25T | 1697 | 0.21945  | 0 |  |
|        |      | Shiraz-28T | 1734 | 0.362882 | 0 |  |
|        |      | Shiraz-29T | 1777 | 0.156747 | 0 |  |
|        |      | Shiraz-38T | 1950 | 0.265916 | 0 |  |
|        |      | Shiraz-71T | 2236 | 0.320072 | 0 |  |
|        |      | Shiraz-3T  | 87   | 0.198593 | 0 |  |
|        |      | Shiraz-3T  | 89   | 0.678641 | 0 |  |
|        |      | Shiraz-4T  | 252  | 0.192083 | 0 |  |
|        |      | Shiraz-36T | 376  | 0.159952 | 0 |  |
|        |      | Shiraz-44T | 632  | 0.902944 | 0 |  |
|        |      | Shiraz-46T | 942  | 0.069143 | 0 |  |
|        |      | Shiraz-77T | 1223 | 0.215647 | 0 |  |
|        |      | Shiraz-18T | 1433 | 0.250973 | 0 |  |
|        |      | Shiraz-25T | 1697 | 0.21945  | 0 |  |
|        |      | Shiraz-28T | 1734 | 0.362882 | 0 |  |
|        |      | Shiraz-29T | 1777 | 0.156747 | 0 |  |
|        |      | Shiraz-38T | 1950 | 0.265916 | 0 |  |
|        |      | Shiraz-71T | 2236 | 0.320072 | 0 |  |
| POMZP3 | chr7 | Shiraz-3T  | 90   | 0.219276 | 0 |  |
|        |      | Shiraz-4T  | 253  | 0.372918 | 0 |  |
|        |      | Shiraz-31T | 315  | 0.194054 | 0 |  |
|        |      | Shiraz-36T | 378  | 0.179558 | 0 |  |
|        |      | Shiraz-36T | 379  | 0.322028 | 0 |  |
|        |      | Shiraz-42T | 454  | 0.145717 | 0 |  |
|        |      | Shiraz-44T | 637  | 1.109789 | 0 |  |
|        |      | Shiraz-46T | 943  | 0.093799 | 0 |  |
|        |      | Shiraz-46T | 944  | 0.256008 | 0 |  |
|        |      | Shiraz-47T | 1028 | 0.17896  | 0 |  |
|        |      | Shiraz-49T | 1118 | 0.327789 | 0 |  |
|        |      | Shiraz-9T  | 1323 | 0.655912 | 0 |  |
|        |      | Shiraz-18T | 1434 | 0.244465 | 0 |  |
|        |      | Shiraz-25T | 1698 | 0.21835  | 0 |  |
|        |      | Shiraz-28T | 1735 | 0.350744 | 0 |  |
|        |      | Shiraz-29T | 1778 | 0.120767 | 0 |  |
|        |      | Shiraz-38T | 1951 | 0.250891 | 0 |  |
|        |      | Shiraz-53T | 2078 | 0.287202 | 0 |  |
|        |      | Shiraz-71T | 2238 | 0.603631 | 0 |  |
|        |      | Shiraz-71T | 2239 | 0.310785 | 0 |  |
|        |      | Shiraz-3T  | 90   | 0.219276 | 0 |  |
|        |      | Shiraz-4T  | 253  | 0.372918 | 0 |  |
|        |      | Shiraz-31T | 315  | 0.194054 | 0 |  |

|      |      |            |      |          |           |  |
|------|------|------------|------|----------|-----------|--|
|      |      | Shiraz-36T | 378  | 0.179558 | 0         |  |
|      |      | Shiraz-36T | 379  | 0.322028 | 0         |  |
|      |      | Shiraz-42T | 454  | 0.145717 | 0         |  |
|      |      | Shiraz-44T | 637  | 1.109789 | 0         |  |
|      |      | Shiraz-46T | 943  | 0.093799 | 0         |  |
|      |      | Shiraz-46T | 944  | 0.256008 | 0         |  |
|      |      | Shiraz-47T | 1028 | 0.17896  | 0         |  |
|      |      | Shiraz-49T | 1118 | 0.327789 | 0         |  |
|      |      | Shiraz-9T  | 1323 | 0.655912 | 0         |  |
|      |      | Shiraz-18T | 1434 | 0.244465 | 0         |  |
|      |      | Shiraz-25T | 1698 | 0.21835  | 0         |  |
|      |      | Shiraz-28T | 1735 | 0.350744 | 0         |  |
|      |      | Shiraz-29T | 1778 | 0.120767 | 0         |  |
|      |      | Shiraz-38T | 1951 | 0.250891 | 0         |  |
|      |      | Shiraz-53T | 2078 | 0.287202 | 0         |  |
|      |      | Shiraz-71T | 2238 | 0.603631 | 0         |  |
|      |      | Shiraz-71T | 2239 | 0.310785 | 0         |  |
|      |      | Shiraz-3T  | 90   | 0.219276 | 0         |  |
|      |      | Shiraz-4T  | 253  | 0.372918 | 0         |  |
|      |      | Shiraz-31T | 315  | 0.194054 | 0         |  |
|      |      | Shiraz-36T | 378  | 0.179558 | 0         |  |
|      |      | Shiraz-36T | 379  | 0.322028 | 0         |  |
|      |      | Shiraz-42T | 454  | 0.145717 | 0         |  |
|      |      | Shiraz-44T | 637  | 1.109789 | 0         |  |
|      |      | Shiraz-46T | 943  | 0.093799 | 0         |  |
|      |      | Shiraz-46T | 944  | 0.256008 | 0         |  |
|      |      | Shiraz-47T | 1028 | 0.17896  | 0         |  |
|      |      | Shiraz-49T | 1118 | 0.327789 | 0         |  |
|      |      | Shiraz-9T  | 1323 | 0.655912 | 0         |  |
|      |      | Shiraz-18T | 1434 | 0.244465 | 0         |  |
|      |      | Shiraz-25T | 1698 | 0.21835  | 0         |  |
|      |      | Shiraz-28T | 1735 | 0.350744 | 0         |  |
|      |      | Shiraz-29T | 1778 | 0.120767 | 0         |  |
|      |      | Shiraz-38T | 1951 | 0.250891 | 0         |  |
|      |      | Shiraz-53T | 2078 | 0.287202 | 0         |  |
|      |      | Shiraz-71T | 2238 | 0.603631 | 0         |  |
|      |      | Shiraz-71T | 2239 | 0.310785 | 0         |  |
| PON1 | chr7 | Shiraz-3T  | 90   | 0.219276 | 0         |  |
|      |      | Shiraz-3T  | 93   | 0        | -0.058023 |  |
|      |      | Shiraz-4T  | 253  | 0.372918 | 0         |  |
|      |      | Shiraz-36T | 378  | 0.179558 | 0         |  |
|      |      | Shiraz-36T | 380  | 0.083883 | 0         |  |
|      |      | Shiraz-44T | 638  | 0        | -0.433476 |  |
|      |      | Shiraz-46T | 943  | 0.093799 | 0         |  |
|      |      | Shiraz-46T | 945  | 0        | -0.014838 |  |
|      |      | Shiraz-47T | 1029 | 0        | -0.096586 |  |
|      |      | Shiraz-49T | 1119 | 0        | -0.157331 |  |

|  |            |      |          |           |  |
|--|------------|------|----------|-----------|--|
|  | Shiraz-77T | 1225 | 0        | -0.117922 |  |
|  | Shiraz-18T | 1434 | 0.244465 | 0         |  |
|  | Shiraz-22T | 1549 | 0        | -0.319623 |  |
|  | Shiraz-25T | 1698 | 0.21835  | 0         |  |
|  | Shiraz-28T | 1735 | 0.350744 | 0         |  |
|  | Shiraz-29T | 1778 | 0.120767 | 0         |  |
|  | Shiraz-32T | 1833 | 0.551336 | 0         |  |
|  | Shiraz-38T | 1951 | 0.250891 | 0         |  |
|  | Shiraz-53T | 2078 | 0.287202 | 0         |  |
|  | Shiraz-58T | 2159 | 0        | -0.219521 |  |
|  | Shiraz-71T | 2238 | 0.603631 | 0         |  |
|  | Shiraz-3T  | 90   | 0.219276 | 0         |  |
|  | Shiraz-3T  | 93   | 0        | -0.058023 |  |
|  | Shiraz-4T  | 253  | 0.372918 | 0         |  |
|  | Shiraz-36T | 378  | 0.179558 | 0         |  |
|  | Shiraz-36T | 380  | 0.083883 | 0         |  |
|  | Shiraz-44T | 638  | 0        | -0.433476 |  |
|  | Shiraz-46T | 943  | 0.093799 | 0         |  |
|  | Shiraz-46T | 945  | 0        | -0.014838 |  |
|  | Shiraz-47T | 1029 | 0        | -0.096586 |  |
|  | Shiraz-49T | 1119 | 0        | -0.157331 |  |
|  | Shiraz-77T | 1225 | 0        | -0.117922 |  |
|  | Shiraz-18T | 1434 | 0.244465 | 0         |  |
|  | Shiraz-22T | 1549 | 0        | -0.319623 |  |
|  | Shiraz-25T | 1698 | 0.21835  | 0         |  |
|  | Shiraz-28T | 1735 | 0.350744 | 0         |  |
|  | Shiraz-29T | 1778 | 0.120767 | 0         |  |
|  | Shiraz-32T | 1833 | 0.551336 | 0         |  |
|  | Shiraz-38T | 1951 | 0.250891 | 0         |  |
|  | Shiraz-53T | 2078 | 0.287202 | 0         |  |
|  | Shiraz-58T | 2159 | 0        | -0.219521 |  |
|  | Shiraz-71T | 2238 | 0.603631 | 0         |  |
|  | Shiraz-3T  | 90   | 0.219276 | 0         |  |
|  | Shiraz-3T  | 93   | 0        | -0.058023 |  |
|  | Shiraz-4T  | 253  | 0.372918 | 0         |  |
|  | Shiraz-36T | 378  | 0.179558 | 0         |  |
|  | Shiraz-36T | 380  | 0.083883 | 0         |  |
|  | Shiraz-44T | 638  | 0        | -0.433476 |  |
|  | Shiraz-46T | 943  | 0.093799 | 0         |  |
|  | Shiraz-46T | 945  | 0        | -0.014838 |  |
|  | Shiraz-47T | 1029 | 0        | -0.096586 |  |
|  | Shiraz-49T | 1119 | 0        | -0.157331 |  |
|  | Shiraz-77T | 1225 | 0        | -0.117922 |  |
|  | Shiraz-18T | 1434 | 0.244465 | 0         |  |
|  | Shiraz-22T | 1549 | 0        | -0.319623 |  |
|  | Shiraz-25T | 1698 | 0.21835  | 0         |  |
|  | Shiraz-28T | 1735 | 0.350744 | 0         |  |

|      |      |            |      |          |           |  |
|------|------|------------|------|----------|-----------|--|
|      |      | Shiraz-29T | 1778 | 0.120767 | 0         |  |
|      |      | Shiraz-32T | 1833 | 0.551336 | 0         |  |
|      |      | Shiraz-38T | 1951 | 0.250891 | 0         |  |
|      |      | Shiraz-53T | 2078 | 0.287202 | 0         |  |
|      |      | Shiraz-58T | 2159 | 0        | -0.219521 |  |
|      |      | Shiraz-71T | 2238 | 0.603631 | 0         |  |
| PON2 | chr7 | Shiraz-3T  | 90   | 0.219276 | 0         |  |
|      |      | Shiraz-3T  | 93   | 0        | -0.058023 |  |
|      |      | Shiraz-4T  | 253  | 0.372918 | 0         |  |
|      |      | Shiraz-36T | 378  | 0.179558 | 0         |  |
|      |      | Shiraz-36T | 380  | 0.083883 | 0         |  |
|      |      | Shiraz-44T | 638  | 0        | -0.433476 |  |
|      |      | Shiraz-46T | 943  | 0.093799 | 0         |  |
|      |      | Shiraz-46T | 945  | 0        | -0.014838 |  |
|      |      | Shiraz-47T | 1029 | 0        | -0.096586 |  |
|      |      | Shiraz-49T | 1119 | 0        | -0.157331 |  |
|      |      | Shiraz-77T | 1225 | 0        | -0.117922 |  |
|      |      | Shiraz-18T | 1434 | 0.244465 | 0         |  |
|      |      | Shiraz-22T | 1549 | 0        | -0.319623 |  |
|      |      | Shiraz-25T | 1698 | 0.21835  | 0         |  |
|      |      | Shiraz-28T | 1735 | 0.350744 | 0         |  |
|      |      | Shiraz-29T | 1778 | 0.120767 | 0         |  |
|      |      | Shiraz-32T | 1833 | 0.551336 | 0         |  |
|      |      | Shiraz-38T | 1951 | 0.250891 | 0         |  |
|      |      | Shiraz-53T | 2078 | 0.287202 | 0         |  |
|      |      | Shiraz-58T | 2159 | 0        | -0.219521 |  |
|      |      | Shiraz-71T | 2238 | 0.603631 | 0         |  |
|      |      | Shiraz-3T  | 90   | 0.219276 | 0         |  |
|      |      | Shiraz-3T  | 93   | 0        | -0.058023 |  |
|      |      | Shiraz-4T  | 253  | 0.372918 | 0         |  |
|      |      | Shiraz-36T | 378  | 0.179558 | 0         |  |
|      |      | Shiraz-36T | 380  | 0.083883 | 0         |  |
|      |      | Shiraz-44T | 638  | 0        | -0.433476 |  |
|      |      | Shiraz-46T | 943  | 0.093799 | 0         |  |
|      |      | Shiraz-46T | 945  | 0        | -0.014838 |  |
|      |      | Shiraz-47T | 1029 | 0        | -0.096586 |  |
|      |      | Shiraz-49T | 1119 | 0        | -0.157331 |  |
|      |      | Shiraz-77T | 1225 | 0        | -0.117922 |  |
|      |      | Shiraz-18T | 1434 | 0.244465 | 0         |  |
|      |      | Shiraz-22T | 1549 | 0        | -0.319623 |  |
|      |      | Shiraz-25T | 1698 | 0.21835  | 0         |  |
|      |      | Shiraz-28T | 1735 | 0.350744 | 0         |  |
|      |      | Shiraz-29T | 1778 | 0.120767 | 0         |  |
|      |      | Shiraz-32T | 1833 | 0.551336 | 0         |  |
|      |      | Shiraz-38T | 1951 | 0.250891 | 0         |  |
|      |      | Shiraz-53T | 2078 | 0.287202 | 0         |  |
|      |      | Shiraz-58T | 2159 | 0        | -0.219521 |  |



|      |      |            |      |          |           |  |  |
|------|------|------------|------|----------|-----------|--|--|
|      |      | Shiraz-71T | 2238 | 0.603631 | 0         |  |  |
|      |      | Shiraz-3T  | 90   | 0.219276 | 0         |  |  |
|      |      | Shiraz-3T  | 93   | 0        | -0.058023 |  |  |
|      |      | Shiraz-4T  | 253  | 0.372918 | 0         |  |  |
|      |      | Shiraz-36T | 378  | 0.179558 | 0         |  |  |
|      |      | Shiraz-36T | 380  | 0.083883 | 0         |  |  |
|      |      | Shiraz-44T | 638  | 0        | -0.433476 |  |  |
|      |      | Shiraz-46T | 943  | 0.093799 | 0         |  |  |
|      |      | Shiraz-46T | 945  | 0        | -0.014838 |  |  |
|      |      | Shiraz-47T | 1029 | 0        | -0.096586 |  |  |
|      |      | Shiraz-49T | 1119 | 0        | -0.157331 |  |  |
|      |      | Shiraz-77T | 1225 | 0        | -0.117922 |  |  |
|      |      | Shiraz-18T | 1434 | 0.244465 | 0         |  |  |
|      |      | Shiraz-22T | 1549 | 0        | -0.319623 |  |  |
|      |      | Shiraz-25T | 1698 | 0.21835  | 0         |  |  |
|      |      | Shiraz-28T | 1735 | 0.350744 | 0         |  |  |
|      |      | Shiraz-29T | 1778 | 0.120767 | 0         |  |  |
|      |      | Shiraz-32T | 1833 | 0.551336 | 0         |  |  |
|      |      | Shiraz-38T | 1951 | 0.250891 | 0         |  |  |
|      |      | Shiraz-53T | 2078 | 0.287202 | 0         |  |  |
|      |      | Shiraz-58T | 2159 | 0        | -0.219521 |  |  |
|      |      | Shiraz-71T | 2238 | 0.603631 | 0         |  |  |
| PON3 | chr7 | Shiraz-3T  | 90   | 0.219276 | 0         |  |  |
|      |      | Shiraz-3T  | 93   | 0        | -0.058023 |  |  |
|      |      | Shiraz-4T  | 253  | 0.372918 | 0         |  |  |
|      |      | Shiraz-36T | 378  | 0.179558 | 0         |  |  |
|      |      | Shiraz-36T | 380  | 0.083883 | 0         |  |  |
|      |      | Shiraz-44T | 638  | 0        | -0.433476 |  |  |
|      |      | Shiraz-46T | 943  | 0.093799 | 0         |  |  |
|      |      | Shiraz-46T | 945  | 0        | -0.014838 |  |  |
|      |      | Shiraz-47T | 1029 | 0        | -0.096586 |  |  |
|      |      | Shiraz-49T | 1119 | 0        | -0.157331 |  |  |
|      |      | Shiraz-77T | 1225 | 0        | -0.117922 |  |  |
|      |      | Shiraz-18T | 1434 | 0.244465 | 0         |  |  |
|      |      | Shiraz-22T | 1549 | 0        | -0.319623 |  |  |
|      |      | Shiraz-25T | 1698 | 0.21835  | 0         |  |  |
|      |      | Shiraz-28T | 1735 | 0.350744 | 0         |  |  |
|      |      | Shiraz-29T | 1778 | 0.120767 | 0         |  |  |
|      |      | Shiraz-32T | 1833 | 0.551336 | 0         |  |  |
|      |      | Shiraz-38T | 1951 | 0.250891 | 0         |  |  |
|      |      | Shiraz-53T | 2078 | 0.287202 | 0         |  |  |
|      |      | Shiraz-58T | 2159 | 0        | -0.219521 |  |  |
|      |      | Shiraz-71T | 2238 | 0.603631 | 0         |  |  |
|      |      | Shiraz-3T  | 90   | 0.219276 | 0         |  |  |
|      |      | Shiraz-3T  | 93   | 0        | -0.058023 |  |  |
|      |      | Shiraz-4T  | 253  | 0.372918 | 0         |  |  |
|      |      | Shiraz-36T | 378  | 0.179558 | 0         |  |  |

|      |      |            |      |          |           |  |  |
|------|------|------------|------|----------|-----------|--|--|
|      |      | Shiraz-36T | 380  | 0.083883 | 0         |  |  |
|      |      | Shiraz-44T | 638  | 0        | -0.433476 |  |  |
|      |      | Shiraz-46T | 943  | 0.093799 | 0         |  |  |
|      |      | Shiraz-46T | 945  | 0        | -0.014838 |  |  |
|      |      | Shiraz-47T | 1029 | 0        | -0.096586 |  |  |
|      |      | Shiraz-49T | 1119 | 0        | -0.157331 |  |  |
|      |      | Shiraz-77T | 1225 | 0        | -0.117922 |  |  |
|      |      | Shiraz-18T | 1434 | 0.244465 | 0         |  |  |
|      |      | Shiraz-22T | 1549 | 0        | -0.319623 |  |  |
|      |      | Shiraz-25T | 1698 | 0.21835  | 0         |  |  |
|      |      | Shiraz-28T | 1735 | 0.350744 | 0         |  |  |
|      |      | Shiraz-29T | 1778 | 0.120767 | 0         |  |  |
|      |      | Shiraz-32T | 1833 | 0.551336 | 0         |  |  |
|      |      | Shiraz-38T | 1951 | 0.250891 | 0         |  |  |
|      |      | Shiraz-53T | 2078 | 0.287202 | 0         |  |  |
|      |      | Shiraz-58T | 2159 | 0        | -0.219521 |  |  |
|      |      | Shiraz-71T | 2238 | 0.603631 | 0         |  |  |
|      |      | Shiraz-3T  | 90   | 0.219276 | 0         |  |  |
|      |      | Shiraz-3T  | 93   | 0        | -0.058023 |  |  |
|      |      | Shiraz-4T  | 253  | 0.372918 | 0         |  |  |
|      |      | Shiraz-36T | 378  | 0.179558 | 0         |  |  |
|      |      | Shiraz-36T | 380  | 0.083883 | 0         |  |  |
|      |      | Shiraz-44T | 638  | 0        | -0.433476 |  |  |
|      |      | Shiraz-46T | 943  | 0.093799 | 0         |  |  |
|      |      | Shiraz-46T | 945  | 0        | -0.014838 |  |  |
|      |      | Shiraz-47T | 1029 | 0        | -0.096586 |  |  |
|      |      | Shiraz-49T | 1119 | 0        | -0.157331 |  |  |
|      |      | Shiraz-77T | 1225 | 0        | -0.117922 |  |  |
|      |      | Shiraz-18T | 1434 | 0.244465 | 0         |  |  |
|      |      | Shiraz-22T | 1549 | 0        | -0.319623 |  |  |
|      |      | Shiraz-25T | 1698 | 0.21835  | 0         |  |  |
|      |      | Shiraz-28T | 1735 | 0.350744 | 0         |  |  |
|      |      | Shiraz-29T | 1778 | 0.120767 | 0         |  |  |
|      |      | Shiraz-32T | 1833 | 0.551336 | 0         |  |  |
|      |      | Shiraz-38T | 1951 | 0.250891 | 0         |  |  |
|      |      | Shiraz-53T | 2078 | 0.287202 | 0         |  |  |
|      |      | Shiraz-58T | 2159 | 0        | -0.219521 |  |  |
|      |      | Shiraz-71T | 2238 | 0.603631 | 0         |  |  |
| POP7 | chr7 | Shiraz-3T  | 90   | 0.219276 | 0         |  |  |
|      |      | Shiraz-3T  | 94   | 0.74735  | 0         |  |  |
|      |      | Shiraz-4T  | 253  | 0.372918 | 0         |  |  |
|      |      | Shiraz-31T | 316  | 0.219196 | 0         |  |  |
|      |      | Shiraz-36T | 378  | 0.179558 | 0         |  |  |
|      |      | Shiraz-36T | 381  | 0.332628 | 0         |  |  |
|      |      | Shiraz-44T | 639  | 1.035032 | 0         |  |  |
|      |      | Shiraz-46T | 943  | 0.093799 | 0         |  |  |
|      |      | Shiraz-46T | 946  | 0.299835 | 0         |  |  |

|  |            |      |          |           |  |
|--|------------|------|----------|-----------|--|
|  | Shiraz-47T | 1030 | 0.257728 | 0         |  |
|  | Shiraz-49T | 1120 | 0.281656 | 0         |  |
|  | Shiraz-77T | 1225 | 0        | -0.117922 |  |
|  | Shiraz-77T | 1227 | 0.196445 | 0         |  |
|  | Shiraz-9T  | 1324 | 0.679266 | 0         |  |
|  | Shiraz-18T | 1434 | 0.244465 | 0         |  |
|  | Shiraz-22T | 1549 | 0        | -0.319623 |  |
|  | Shiraz-22T | 1551 | 0.324011 | 0         |  |
|  | Shiraz-25T | 1698 | 0.21835  | 0         |  |
|  | Shiraz-28T | 1735 | 0.350744 | 0         |  |
|  | Shiraz-29T | 1778 | 0.120767 | 0         |  |
|  | Shiraz-32T | 1833 | 0.551336 | 0         |  |
|  | Shiraz-32T | 1834 | 1.485392 | 0         |  |
|  | Shiraz-38T | 1951 | 0.250891 | 0         |  |
|  | Shiraz-53T | 2078 | 0.287202 | 0         |  |
|  | Shiraz-58T | 2160 | 0.399007 | 0         |  |
|  | Shiraz-71T | 2238 | 0.603631 | 0         |  |
|  | Shiraz-3T  | 90   | 0.219276 | 0         |  |
|  | Shiraz-3T  | 94   | 0.74735  | 0         |  |
|  | Shiraz-4T  | 253  | 0.372918 | 0         |  |
|  | Shiraz-31T | 316  | 0.219196 | 0         |  |
|  | Shiraz-36T | 378  | 0.179558 | 0         |  |
|  | Shiraz-36T | 381  | 0.332628 | 0         |  |
|  | Shiraz-44T | 639  | 1.035032 | 0         |  |
|  | Shiraz-46T | 943  | 0.093799 | 0         |  |
|  | Shiraz-46T | 946  | 0.299835 | 0         |  |
|  | Shiraz-47T | 1030 | 0.257728 | 0         |  |
|  | Shiraz-49T | 1120 | 0.281656 | 0         |  |
|  | Shiraz-77T | 1225 | 0        | -0.117922 |  |
|  | Shiraz-77T | 1227 | 0.196445 | 0         |  |
|  | Shiraz-9T  | 1324 | 0.679266 | 0         |  |
|  | Shiraz-18T | 1434 | 0.244465 | 0         |  |
|  | Shiraz-22T | 1549 | 0        | -0.319623 |  |
|  | Shiraz-22T | 1551 | 0.324011 | 0         |  |
|  | Shiraz-25T | 1698 | 0.21835  | 0         |  |
|  | Shiraz-28T | 1735 | 0.350744 | 0         |  |
|  | Shiraz-29T | 1778 | 0.120767 | 0         |  |
|  | Shiraz-32T | 1833 | 0.551336 | 0         |  |
|  | Shiraz-32T | 1834 | 1.485392 | 0         |  |
|  | Shiraz-38T | 1951 | 0.250891 | 0         |  |
|  | Shiraz-53T | 2078 | 0.287202 | 0         |  |
|  | Shiraz-58T | 2160 | 0.399007 | 0         |  |
|  | Shiraz-71T | 2238 | 0.603631 | 0         |  |
|  | Shiraz-3T  | 90   | 0.219276 | 0         |  |
|  | Shiraz-3T  | 94   | 0.74735  | 0         |  |
|  | Shiraz-4T  | 253  | 0.372918 | 0         |  |
|  | Shiraz-31T | 316  | 0.219196 | 0         |  |

|       |      |            |      |          |           |  |
|-------|------|------------|------|----------|-----------|--|
|       |      | Shiraz-36T | 378  | 0.179558 | 0         |  |
|       |      | Shiraz-36T | 381  | 0.332628 | 0         |  |
|       |      | Shiraz-44T | 639  | 1.035032 | 0         |  |
|       |      | Shiraz-46T | 943  | 0.093799 | 0         |  |
|       |      | Shiraz-46T | 946  | 0.299835 | 0         |  |
|       |      | Shiraz-47T | 1030 | 0.257728 | 0         |  |
|       |      | Shiraz-49T | 1120 | 0.281656 | 0         |  |
|       |      | Shiraz-77T | 1225 | 0        | -0.117922 |  |
|       |      | Shiraz-77T | 1227 | 0.196445 | 0         |  |
|       |      | Shiraz-9T  | 1324 | 0.679266 | 0         |  |
|       |      | Shiraz-18T | 1434 | 0.244465 | 0         |  |
|       |      | Shiraz-22T | 1549 | 0        | -0.319623 |  |
|       |      | Shiraz-22T | 1551 | 0.324011 | 0         |  |
|       |      | Shiraz-25T | 1698 | 0.21835  | 0         |  |
|       |      | Shiraz-28T | 1735 | 0.350744 | 0         |  |
|       |      | Shiraz-29T | 1778 | 0.120767 | 0         |  |
|       |      | Shiraz-32T | 1833 | 0.551336 | 0         |  |
|       |      | Shiraz-32T | 1834 | 1.485392 | 0         |  |
|       |      | Shiraz-38T | 1951 | 0.250891 | 0         |  |
|       |      | Shiraz-53T | 2078 | 0.287202 | 0         |  |
|       |      | Shiraz-58T | 2160 | 0.399007 | 0         |  |
|       |      | Shiraz-71T | 2238 | 0.603631 | 0         |  |
| PORCN | chrX | Shiraz-3T  | 238  | 0.472087 | 0         |  |
|       |      | Shiraz-3T  | 238  | 0.472087 | 0         |  |
|       |      | Shiraz-4T  | 260  | 0        | -0.324128 |  |
|       |      | Shiraz-4T  | 260  | 0        | -0.324128 |  |
|       |      | Shiraz-16T | 294  | 0.655804 | 0         |  |
|       |      | Shiraz-16T | 294  | 0.655804 | 0         |  |
|       |      | Shiraz-31T | 345  | 0.103301 | 0         |  |
|       |      | Shiraz-31T | 345  | 0.103301 | 0         |  |
|       |      | Shiraz-36T | 431  | 0        | -0.78035  |  |
|       |      | Shiraz-36T | 431  | 0        | -0.78035  |  |
|       |      | Shiraz-36T | 432  | 0        | -0.6692   |  |
|       |      | Shiraz-36T | 432  | 0        | -0.6692   |  |
|       |      | Shiraz-44T | 891  | 0        | -0.954044 |  |
|       |      | Shiraz-44T | 891  | 0        | -0.954044 |  |
|       |      | Shiraz-44T | 896  | 0        | -0.109108 |  |
|       |      | Shiraz-44T | 896  | 0        | -0.109108 |  |
|       |      | Shiraz-46T | 991  | 0.139564 | 0         |  |
|       |      | Shiraz-46T | 991  | 0.139564 | 0         |  |
|       |      | Shiraz-47T | 1084 | 0.24185  | 0         |  |
|       |      | Shiraz-47T | 1084 | 0.24185  | 0         |  |
|       |      | Shiraz-49T | 1166 | 0        | -0.917235 |  |
|       |      | Shiraz-49T | 1166 | 0        | -0.917235 |  |
|       |      | Shiraz-49T | 1169 | 0        | -0.583529 |  |
|       |      | Shiraz-49T | 1169 | 0        | -0.583529 |  |
|       |      | Shiraz-77T | 1282 | 0.213849 | 0         |  |

|  |  |            |      |          |           |  |
|--|--|------------|------|----------|-----------|--|
|  |  | Shiraz-77T | 1282 | 0.213849 | 0         |  |
|  |  | Shiraz-9T  | 1368 | 0.199713 | 0         |  |
|  |  | Shiraz-9T  | 1368 | 0.199713 | 0         |  |
|  |  | Shiraz-9T  | 1369 | 0.703374 | 0         |  |
|  |  | Shiraz-9T  | 1369 | 0.703374 | 0         |  |
|  |  | Shiraz-18T | 1455 | 0        | -0.186773 |  |
|  |  | Shiraz-18T | 1455 | 0        | -0.186773 |  |
|  |  | Shiraz-22T | 1669 | 0.695915 | 0         |  |
|  |  | Shiraz-22T | 1669 | 0.695915 | 0         |  |
|  |  | Shiraz-22T | 1672 | 1.01678  | 0         |  |
|  |  | Shiraz-22T | 1672 | 1.01678  | 0         |  |
|  |  | Shiraz-25T | 1717 | 0.420447 | 0         |  |
|  |  | Shiraz-25T | 1717 | 0.420447 | 0         |  |
|  |  | Shiraz-28T | 1760 | 0.538181 | 0         |  |
|  |  | Shiraz-28T | 1760 | 0.538181 | 0         |  |
|  |  | Shiraz-29T | 1800 | 0.672527 | 0         |  |
|  |  | Shiraz-29T | 1800 | 0.672527 | 0         |  |
|  |  | Shiraz-32T | 1869 | 0.776805 | 0         |  |
|  |  | Shiraz-32T | 1869 | 0.776805 | 0         |  |
|  |  | Shiraz-35T | 1932 | 0.507141 | 0         |  |
|  |  | Shiraz-35T | 1932 | 0.507141 | 0         |  |
|  |  | Shiraz-58T | 2221 | 0.871948 | 0         |  |
|  |  | Shiraz-58T | 2221 | 0.871948 | 0         |  |
|  |  | Shiraz-71T | 2260 | 0.68394  | 0         |  |
|  |  | Shiraz-71T | 2260 | 0.68394  | 0         |  |
|  |  | Shiraz-71T | 2262 | 0.986748 | 0         |  |
|  |  | Shiraz-71T | 2262 | 0.986748 | 0         |  |
|  |  | Shiraz-3T  | 238  | 0.472087 | 0         |  |
|  |  | Shiraz-3T  | 238  | 0.472087 | 0         |  |
|  |  | Shiraz-4T  | 260  | 0        | -0.324128 |  |
|  |  | Shiraz-4T  | 260  | 0        | -0.324128 |  |
|  |  | Shiraz-16T | 294  | 0.655804 | 0         |  |
|  |  | Shiraz-16T | 294  | 0.655804 | 0         |  |
|  |  | Shiraz-31T | 345  | 0.103301 | 0         |  |
|  |  | Shiraz-31T | 345  | 0.103301 | 0         |  |
|  |  | Shiraz-36T | 431  | 0        | -0.78035  |  |
|  |  | Shiraz-36T | 431  | 0        | -0.78035  |  |
|  |  | Shiraz-36T | 432  | 0        | -0.6692   |  |
|  |  | Shiraz-36T | 432  | 0        | -0.6692   |  |
|  |  | Shiraz-44T | 891  | 0        | -0.954044 |  |
|  |  | Shiraz-44T | 891  | 0        | -0.954044 |  |
|  |  | Shiraz-44T | 896  | 0        | -0.109108 |  |
|  |  | Shiraz-44T | 896  | 0        | -0.109108 |  |
|  |  | Shiraz-46T | 991  | 0.139564 | 0         |  |
|  |  | Shiraz-46T | 991  | 0.139564 | 0         |  |
|  |  | Shiraz-47T | 1084 | 0.24185  | 0         |  |
|  |  | Shiraz-47T | 1084 | 0.24185  | 0         |  |

|  |            |      |          |           |  |
|--|------------|------|----------|-----------|--|
|  | Shiraz-49T | 1166 | 0        | -0.917235 |  |
|  | Shiraz-49T | 1166 | 0        | -0.917235 |  |
|  | Shiraz-49T | 1169 | 0        | -0.583529 |  |
|  | Shiraz-49T | 1169 | 0        | -0.583529 |  |
|  | Shiraz-77T | 1282 | 0.213849 | 0         |  |
|  | Shiraz-77T | 1282 | 0.213849 | 0         |  |
|  | Shiraz-9T  | 1368 | 0.199713 | 0         |  |
|  | Shiraz-9T  | 1368 | 0.199713 | 0         |  |
|  | Shiraz-9T  | 1369 | 0.703374 | 0         |  |
|  | Shiraz-9T  | 1369 | 0.703374 | 0         |  |
|  | Shiraz-18T | 1455 | 0        | -0.186773 |  |
|  | Shiraz-18T | 1455 | 0        | -0.186773 |  |
|  | Shiraz-22T | 1669 | 0.695915 | 0         |  |
|  | Shiraz-22T | 1669 | 0.695915 | 0         |  |
|  | Shiraz-22T | 1672 | 1.01678  | 0         |  |
|  | Shiraz-22T | 1672 | 1.01678  | 0         |  |
|  | Shiraz-25T | 1717 | 0.420447 | 0         |  |
|  | Shiraz-25T | 1717 | 0.420447 | 0         |  |
|  | Shiraz-28T | 1760 | 0.538181 | 0         |  |
|  | Shiraz-28T | 1760 | 0.538181 | 0         |  |
|  | Shiraz-29T | 1800 | 0.672527 | 0         |  |
|  | Shiraz-29T | 1800 | 0.672527 | 0         |  |
|  | Shiraz-32T | 1869 | 0.776805 | 0         |  |
|  | Shiraz-32T | 1869 | 0.776805 | 0         |  |
|  | Shiraz-35T | 1932 | 0.507141 | 0         |  |
|  | Shiraz-35T | 1932 | 0.507141 | 0         |  |
|  | Shiraz-58T | 2221 | 0.871948 | 0         |  |
|  | Shiraz-58T | 2221 | 0.871948 | 0         |  |
|  | Shiraz-71T | 2260 | 0.68394  | 0         |  |
|  | Shiraz-71T | 2260 | 0.68394  | 0         |  |
|  | Shiraz-71T | 2262 | 0.986748 | 0         |  |
|  | Shiraz-71T | 2262 | 0.986748 | 0         |  |
|  | Shiraz-3T  | 238  | 0.472087 | 0         |  |
|  | Shiraz-3T  | 238  | 0.472087 | 0         |  |
|  | Shiraz-4T  | 260  | 0        | -0.324128 |  |
|  | Shiraz-4T  | 260  | 0        | -0.324128 |  |
|  | Shiraz-16T | 294  | 0.655804 | 0         |  |
|  | Shiraz-16T | 294  | 0.655804 | 0         |  |
|  | Shiraz-31T | 345  | 0.103301 | 0         |  |
|  | Shiraz-31T | 345  | 0.103301 | 0         |  |
|  | Shiraz-36T | 431  | 0        | -0.78035  |  |
|  | Shiraz-36T | 431  | 0        | -0.78035  |  |
|  | Shiraz-36T | 432  | 0        | -0.6692   |  |
|  | Shiraz-36T | 432  | 0        | -0.6692   |  |
|  | Shiraz-44T | 891  | 0        | -0.954044 |  |
|  | Shiraz-44T | 891  | 0        | -0.954044 |  |
|  | Shiraz-44T | 896  | 0        | -0.109108 |  |

|      |      |            |      |          |           |  |  |
|------|------|------------|------|----------|-----------|--|--|
|      |      | Shiraz-44T | 896  | 0        | -0.109108 |  |  |
|      |      | Shiraz-46T | 991  | 0.139564 | 0         |  |  |
|      |      | Shiraz-46T | 991  | 0.139564 | 0         |  |  |
|      |      | Shiraz-47T | 1084 | 0.24185  | 0         |  |  |
|      |      | Shiraz-47T | 1084 | 0.24185  | 0         |  |  |
|      |      | Shiraz-49T | 1166 | 0        | -0.917235 |  |  |
|      |      | Shiraz-49T | 1166 | 0        | -0.917235 |  |  |
|      |      | Shiraz-49T | 1169 | 0        | -0.583529 |  |  |
|      |      | Shiraz-49T | 1169 | 0        | -0.583529 |  |  |
|      |      | Shiraz-77T | 1282 | 0.213849 | 0         |  |  |
|      |      | Shiraz-77T | 1282 | 0.213849 | 0         |  |  |
|      |      | Shiraz-9T  | 1368 | 0.199713 | 0         |  |  |
|      |      | Shiraz-9T  | 1368 | 0.199713 | 0         |  |  |
|      |      | Shiraz-9T  | 1369 | 0.703374 | 0         |  |  |
|      |      | Shiraz-9T  | 1369 | 0.703374 | 0         |  |  |
|      |      | Shiraz-18T | 1455 | 0        | -0.186773 |  |  |
|      |      | Shiraz-18T | 1455 | 0        | -0.186773 |  |  |
|      |      | Shiraz-22T | 1669 | 0.695915 | 0         |  |  |
|      |      | Shiraz-22T | 1669 | 0.695915 | 0         |  |  |
|      |      | Shiraz-22T | 1672 | 1.01678  | 0         |  |  |
|      |      | Shiraz-22T | 1672 | 1.01678  | 0         |  |  |
|      |      | Shiraz-25T | 1717 | 0.420447 | 0         |  |  |
|      |      | Shiraz-25T | 1717 | 0.420447 | 0         |  |  |
|      |      | Shiraz-28T | 1760 | 0.538181 | 0         |  |  |
|      |      | Shiraz-28T | 1760 | 0.538181 | 0         |  |  |
|      |      | Shiraz-29T | 1800 | 0.672527 | 0         |  |  |
|      |      | Shiraz-29T | 1800 | 0.672527 | 0         |  |  |
|      |      | Shiraz-32T | 1869 | 0.776805 | 0         |  |  |
|      |      | Shiraz-32T | 1869 | 0.776805 | 0         |  |  |
|      |      | Shiraz-35T | 1932 | 0.507141 | 0         |  |  |
|      |      | Shiraz-35T | 1932 | 0.507141 | 0         |  |  |
|      |      | Shiraz-58T | 2221 | 0.871948 | 0         |  |  |
|      |      | Shiraz-58T | 2221 | 0.871948 | 0         |  |  |
|      |      | Shiraz-71T | 2260 | 0.68394  | 0         |  |  |
|      |      | Shiraz-71T | 2260 | 0.68394  | 0         |  |  |
|      |      | Shiraz-71T | 2262 | 0.986748 | 0         |  |  |
|      |      | Shiraz-71T | 2262 | 0.986748 | 0         |  |  |
| POT1 | chr7 | Shiraz-3T  | 90   | 0.219276 | 0         |  |  |
|      |      | Shiraz-3T  | 90   | 0.219276 | 0         |  |  |
|      |      | Shiraz-3T  | 95   | 0        | -0.077623 |  |  |
|      |      | Shiraz-3T  | 95   | 0        | -0.077623 |  |  |
|      |      | Shiraz-4T  | 253  | 0.372918 | 0         |  |  |
|      |      | Shiraz-4T  | 253  | 0.372918 | 0         |  |  |
|      |      | Shiraz-36T | 378  | 0.179558 | 0         |  |  |
|      |      | Shiraz-36T | 378  | 0.179558 | 0         |  |  |
|      |      | Shiraz-36T | 382  | 0.081739 | 0         |  |  |
|      |      | Shiraz-36T | 382  | 0.081739 | 0         |  |  |

|  |            |      |          |           |  |
|--|------------|------|----------|-----------|--|
|  | Shiraz-44T | 641  | 0        | -0.477846 |  |
|  | Shiraz-44T | 641  | 0        | -0.477846 |  |
|  | Shiraz-46T | 943  | 0.093799 | 0         |  |
|  | Shiraz-46T | 943  | 0.093799 | 0         |  |
|  | Shiraz-46T | 947  | 0        | -0.010843 |  |
|  | Shiraz-46T | 947  | 0        | -0.010843 |  |
|  | Shiraz-47T | 1031 | 0        | -0.117529 |  |
|  | Shiraz-47T | 1031 | 0        | -0.117529 |  |
|  | Shiraz-49T | 1121 | 0        | -0.138569 |  |
|  | Shiraz-49T | 1121 | 0        | -0.138569 |  |
|  | Shiraz-77T | 1225 | 0        | -0.117922 |  |
|  | Shiraz-77T | 1225 | 0        | -0.117922 |  |
|  | Shiraz-77T | 1228 | 0        | -0.238084 |  |
|  | Shiraz-77T | 1228 | 0        | -0.238084 |  |
|  | Shiraz-18T | 1434 | 0.244465 | 0         |  |
|  | Shiraz-18T | 1434 | 0.244465 | 0         |  |
|  | Shiraz-22T | 1549 | 0        | -0.319623 |  |
|  | Shiraz-22T | 1549 | 0        | -0.319623 |  |
|  | Shiraz-22T | 1552 | 0        | -0.50686  |  |
|  | Shiraz-22T | 1552 | 0        | -0.50686  |  |
|  | Shiraz-25T | 1698 | 0.21835  | 0         |  |
|  | Shiraz-25T | 1698 | 0.21835  | 0         |  |
|  | Shiraz-28T | 1735 | 0.350744 | 0         |  |
|  | Shiraz-28T | 1735 | 0.350744 | 0         |  |
|  | Shiraz-29T | 1778 | 0.120767 | 0         |  |
|  | Shiraz-29T | 1778 | 0.120767 | 0         |  |
|  | Shiraz-32T | 1833 | 0.551336 | 0         |  |
|  | Shiraz-32T | 1833 | 0.551336 | 0         |  |
|  | Shiraz-32T | 1835 | 0.092727 | 0         |  |
|  | Shiraz-32T | 1835 | 0.092727 | 0         |  |
|  | Shiraz-38T | 1951 | 0.250891 | 0         |  |
|  | Shiraz-38T | 1951 | 0.250891 | 0         |  |
|  | Shiraz-53T | 2078 | 0.287202 | 0         |  |
|  | Shiraz-53T | 2078 | 0.287202 | 0         |  |
|  | Shiraz-58T | 2161 | 0        | -0.187744 |  |
|  | Shiraz-58T | 2161 | 0        | -0.187744 |  |
|  | Shiraz-71T | 2238 | 0.603631 | 0         |  |
|  | Shiraz-71T | 2238 | 0.603631 | 0         |  |
|  | Shiraz-3T  | 90   | 0.219276 | 0         |  |
|  | Shiraz-3T  | 90   | 0.219276 | 0         |  |
|  | Shiraz-3T  | 95   | 0        | -0.077623 |  |
|  | Shiraz-3T  | 95   | 0        | -0.077623 |  |
|  | Shiraz-4T  | 253  | 0.372918 | 0         |  |
|  | Shiraz-4T  | 253  | 0.372918 | 0         |  |
|  | Shiraz-36T | 378  | 0.179558 | 0         |  |
|  | Shiraz-36T | 378  | 0.179558 | 0         |  |
|  | Shiraz-36T | 382  | 0.081739 | 0         |  |



|  |  |            |      |          |           |  |  |
|--|--|------------|------|----------|-----------|--|--|
|  |  | Shiraz-36T | 382  | 0.081739 | 0         |  |  |
|  |  | Shiraz-44T | 641  | 0        | -0.477846 |  |  |
|  |  | Shiraz-44T | 641  | 0        | -0.477846 |  |  |
|  |  | Shiraz-46T | 943  | 0.093799 | 0         |  |  |
|  |  | Shiraz-46T | 943  | 0.093799 | 0         |  |  |
|  |  | Shiraz-46T | 947  | 0        | -0.010843 |  |  |
|  |  | Shiraz-46T | 947  | 0        | -0.010843 |  |  |
|  |  | Shiraz-47T | 1031 | 0        | -0.117529 |  |  |
|  |  | Shiraz-47T | 1031 | 0        | -0.117529 |  |  |
|  |  | Shiraz-49T | 1121 | 0        | -0.138569 |  |  |
|  |  | Shiraz-49T | 1121 | 0        | -0.138569 |  |  |
|  |  | Shiraz-77T | 1225 | 0        | -0.117922 |  |  |
|  |  | Shiraz-77T | 1225 | 0        | -0.117922 |  |  |
|  |  | Shiraz-77T | 1228 | 0        | -0.238084 |  |  |
|  |  | Shiraz-77T | 1228 | 0        | -0.238084 |  |  |
|  |  | Shiraz-18T | 1434 | 0.244465 | 0         |  |  |
|  |  | Shiraz-18T | 1434 | 0.244465 | 0         |  |  |
|  |  | Shiraz-22T | 1549 | 0        | -0.319623 |  |  |
|  |  | Shiraz-22T | 1549 | 0        | -0.319623 |  |  |
|  |  | Shiraz-22T | 1552 | 0        | -0.50686  |  |  |
|  |  | Shiraz-22T | 1552 | 0        | -0.50686  |  |  |
|  |  | Shiraz-25T | 1698 | 0.21835  | 0         |  |  |
|  |  | Shiraz-25T | 1698 | 0.21835  | 0         |  |  |
|  |  | Shiraz-28T | 1735 | 0.350744 | 0         |  |  |
|  |  | Shiraz-28T | 1735 | 0.350744 | 0         |  |  |
|  |  | Shiraz-29T | 1778 | 0.120767 | 0         |  |  |
|  |  | Shiraz-29T | 1778 | 0.120767 | 0         |  |  |
|  |  | Shiraz-32T | 1833 | 0.551336 | 0         |  |  |
|  |  | Shiraz-32T | 1833 | 0.551336 | 0         |  |  |
|  |  | Shiraz-32T | 1835 | 0.092727 | 0         |  |  |
|  |  | Shiraz-32T | 1835 | 0.092727 | 0         |  |  |
|  |  | Shiraz-38T | 1951 | 0.250891 | 0         |  |  |
|  |  | Shiraz-38T | 1951 | 0.250891 | 0         |  |  |
|  |  | Shiraz-53T | 2078 | 0.287202 | 0         |  |  |
|  |  | Shiraz-53T | 2078 | 0.287202 | 0         |  |  |
|  |  | Shiraz-58T | 2161 | 0        | -0.187744 |  |  |
|  |  | Shiraz-58T | 2161 | 0        | -0.187744 |  |  |
|  |  | Shiraz-71T | 2238 | 0.603631 | 0         |  |  |
|  |  | Shiraz-71T | 2238 | 0.603631 | 0         |  |  |
|  |  | Shiraz-3T  | 90   | 0.219276 | 0         |  |  |
|  |  | Shiraz-3T  | 90   | 0.219276 | 0         |  |  |
|  |  | Shiraz-3T  | 95   | 0        | -0.077623 |  |  |
|  |  | Shiraz-3T  | 95   | 0        | -0.077623 |  |  |
|  |  | Shiraz-4T  | 253  | 0.372918 | 0         |  |  |
|  |  | Shiraz-4T  | 253  | 0.372918 | 0         |  |  |
|  |  | Shiraz-36T | 378  | 0.179558 | 0         |  |  |
|  |  | Shiraz-36T | 378  | 0.179558 | 0         |  |  |

|        |      |            |      |          |           |  |  |
|--------|------|------------|------|----------|-----------|--|--|
|        |      | Shiraz-36T | 382  | 0.081739 | 0         |  |  |
|        |      | Shiraz-36T | 382  | 0.081739 | 0         |  |  |
|        |      | Shiraz-44T | 641  | 0        | -0.477846 |  |  |
|        |      | Shiraz-44T | 641  | 0        | -0.477846 |  |  |
|        |      | Shiraz-46T | 943  | 0.093799 | 0         |  |  |
|        |      | Shiraz-46T | 943  | 0.093799 | 0         |  |  |
|        |      | Shiraz-46T | 947  | 0        | -0.010843 |  |  |
|        |      | Shiraz-46T | 947  | 0        | -0.010843 |  |  |
|        |      | Shiraz-47T | 1031 | 0        | -0.117529 |  |  |
|        |      | Shiraz-47T | 1031 | 0        | -0.117529 |  |  |
|        |      | Shiraz-49T | 1121 | 0        | -0.138569 |  |  |
|        |      | Shiraz-49T | 1121 | 0        | -0.138569 |  |  |
|        |      | Shiraz-77T | 1225 | 0        | -0.117922 |  |  |
|        |      | Shiraz-77T | 1225 | 0        | -0.117922 |  |  |
|        |      | Shiraz-77T | 1228 | 0        | -0.238084 |  |  |
|        |      | Shiraz-77T | 1228 | 0        | -0.238084 |  |  |
|        |      | Shiraz-18T | 1434 | 0.244465 | 0         |  |  |
|        |      | Shiraz-18T | 1434 | 0.244465 | 0         |  |  |
|        |      | Shiraz-22T | 1549 | 0        | -0.319623 |  |  |
|        |      | Shiraz-22T | 1549 | 0        | -0.319623 |  |  |
|        |      | Shiraz-22T | 1552 | 0        | -0.50686  |  |  |
|        |      | Shiraz-22T | 1552 | 0        | -0.50686  |  |  |
|        |      | Shiraz-25T | 1698 | 0.21835  | 0         |  |  |
|        |      | Shiraz-25T | 1698 | 0.21835  | 0         |  |  |
|        |      | Shiraz-28T | 1735 | 0.350744 | 0         |  |  |
|        |      | Shiraz-28T | 1735 | 0.350744 | 0         |  |  |
|        |      | Shiraz-29T | 1778 | 0.120767 | 0         |  |  |
|        |      | Shiraz-29T | 1778 | 0.120767 | 0         |  |  |
|        |      | Shiraz-32T | 1833 | 0.551336 | 0         |  |  |
|        |      | Shiraz-32T | 1833 | 0.551336 | 0         |  |  |
|        |      | Shiraz-32T | 1835 | 0.092727 | 0         |  |  |
|        |      | Shiraz-32T | 1835 | 0.092727 | 0         |  |  |
|        |      | Shiraz-38T | 1951 | 0.250891 | 0         |  |  |
|        |      | Shiraz-38T | 1951 | 0.250891 | 0         |  |  |
|        |      | Shiraz-53T | 2078 | 0.287202 | 0         |  |  |
|        |      | Shiraz-53T | 2078 | 0.287202 | 0         |  |  |
|        |      | Shiraz-58T | 2161 | 0        | -0.187744 |  |  |
|        |      | Shiraz-58T | 2161 | 0        | -0.187744 |  |  |
|        |      | Shiraz-71T | 2238 | 0.603631 | 0         |  |  |
|        |      | Shiraz-71T | 2238 | 0.603631 | 0         |  |  |
| POU3F4 | chrX | Shiraz-3T  | 242  | 0        | -0.336434 |  |  |
|        |      | Shiraz-3T  | 243  | 0        | -0.549129 |  |  |
|        |      | Shiraz-4T  | 261  | 0        | -0.336249 |  |  |
|        |      | Shiraz-16T | 295  | 0.591657 | 0         |  |  |
|        |      | Shiraz-31T | 346  | 0        | -0.1527   |  |  |
|        |      | Shiraz-36T | 433  | 0        | -0.803961 |  |  |
|        |      | Shiraz-44T | 899  | 0        | -1.09697  |  |  |

|  |            |      |          |           |  |
|--|------------|------|----------|-----------|--|
|  | Shiraz-44T | 902  | 0        | -1.449824 |  |
|  | Shiraz-47T | 1085 | 0        | -0.130811 |  |
|  | Shiraz-49T | 1170 | 0        | -0.967436 |  |
|  | Shiraz-49T | 1172 | 0        | -1.123219 |  |
|  | Shiraz-18T | 1457 | 0.643204 | 0         |  |
|  | Shiraz-22T | 1673 | 0.611783 | 0         |  |
|  | Shiraz-22T | 1675 | 0.279253 | 0         |  |
|  | Shiraz-25T | 1719 | 0.472955 | 0         |  |
|  | Shiraz-28T | 1762 | 0.562311 | 0         |  |
|  | Shiraz-29T | 1801 | 0.815343 | 0         |  |
|  | Shiraz-32T | 1870 | 0.729766 | 0         |  |
|  | Shiraz-32T | 1871 | 0.292679 | 0         |  |
|  | Shiraz-35T | 1933 | 0.488535 | 0         |  |
|  | Shiraz-58T | 2223 | 0.833364 | 0         |  |
|  | Shiraz-58T | 2225 | 0.595784 | 0         |  |
|  | Shiraz-71T | 2263 | 0.975531 | 0         |  |
|  | Shiraz-3T  | 242  | 0        | -0.336434 |  |
|  | Shiraz-3T  | 243  | 0        | -0.549129 |  |
|  | Shiraz-4T  | 261  | 0        | -0.336249 |  |
|  | Shiraz-16T | 295  | 0.591657 | 0         |  |
|  | Shiraz-31T | 346  | 0        | -0.1527   |  |
|  | Shiraz-36T | 433  | 0        | -0.803961 |  |
|  | Shiraz-44T | 899  | 0        | -1.09697  |  |
|  | Shiraz-44T | 902  | 0        | -1.449824 |  |
|  | Shiraz-47T | 1085 | 0        | -0.130811 |  |
|  | Shiraz-49T | 1170 | 0        | -0.967436 |  |
|  | Shiraz-49T | 1172 | 0        | -1.123219 |  |
|  | Shiraz-18T | 1457 | 0.643204 | 0         |  |
|  | Shiraz-22T | 1673 | 0.611783 | 0         |  |
|  | Shiraz-22T | 1675 | 0.279253 | 0         |  |
|  | Shiraz-25T | 1719 | 0.472955 | 0         |  |
|  | Shiraz-28T | 1762 | 0.562311 | 0         |  |
|  | Shiraz-29T | 1801 | 0.815343 | 0         |  |
|  | Shiraz-32T | 1870 | 0.729766 | 0         |  |
|  | Shiraz-32T | 1871 | 0.292679 | 0         |  |
|  | Shiraz-35T | 1933 | 0.488535 | 0         |  |
|  | Shiraz-58T | 2223 | 0.833364 | 0         |  |
|  | Shiraz-58T | 2225 | 0.595784 | 0         |  |
|  | Shiraz-71T | 2263 | 0.975531 | 0         |  |
|  | Shiraz-3T  | 242  | 0        | -0.336434 |  |
|  | Shiraz-3T  | 243  | 0        | -0.549129 |  |
|  | Shiraz-4T  | 261  | 0        | -0.336249 |  |
|  | Shiraz-16T | 295  | 0.591657 | 0         |  |
|  | Shiraz-31T | 346  | 0        | -0.1527   |  |
|  | Shiraz-36T | 433  | 0        | -0.803961 |  |
|  | Shiraz-44T | 899  | 0        | -1.09697  |  |
|  | Shiraz-44T | 902  | 0        | -1.449824 |  |

|        |      |            |      |          |           |  |  |
|--------|------|------------|------|----------|-----------|--|--|
|        |      | Shiraz-47T | 1085 | 0        | -0.130811 |  |  |
|        |      | Shiraz-49T | 1170 | 0        | -0.967436 |  |  |
|        |      | Shiraz-49T | 1172 | 0        | -1.123219 |  |  |
|        |      | Shiraz-18T | 1457 | 0.643204 | 0         |  |  |
|        |      | Shiraz-22T | 1673 | 0.611783 | 0         |  |  |
|        |      | Shiraz-22T | 1675 | 0.279253 | 0         |  |  |
|        |      | Shiraz-25T | 1719 | 0.472955 | 0         |  |  |
|        |      | Shiraz-28T | 1762 | 0.562311 | 0         |  |  |
|        |      | Shiraz-29T | 1801 | 0.815343 | 0         |  |  |
|        |      | Shiraz-32T | 1870 | 0.729766 | 0         |  |  |
|        |      | Shiraz-32T | 1871 | 0.292679 | 0         |  |  |
|        |      | Shiraz-35T | 1933 | 0.488535 | 0         |  |  |
|        |      | Shiraz-58T | 2223 | 0.833364 | 0         |  |  |
|        |      | Shiraz-58T | 2225 | 0.595784 | 0         |  |  |
|        |      | Shiraz-71T | 2263 | 0.975531 | 0         |  |  |
| POU6F2 | chr7 | Shiraz-3T  | 87   | 0.198593 | 0         |  |  |
|        |      | Shiraz-4T  | 252  | 0.192083 | 0         |  |  |
|        |      | Shiraz-36T | 376  | 0.159952 | 0         |  |  |
|        |      | Shiraz-44T | 631  | 0        | -0.180312 |  |  |
|        |      | Shiraz-46T | 942  | 0.069143 | 0         |  |  |
|        |      | Shiraz-18T | 1433 | 0.250973 | 0         |  |  |
|        |      | Shiraz-22T | 1544 | 0        | -0.193579 |  |  |
|        |      | Shiraz-25T | 1697 | 0.21945  | 0         |  |  |
|        |      | Shiraz-28T | 1734 | 0.362882 | 0         |  |  |
|        |      | Shiraz-29T | 1777 | 0.156747 | 0         |  |  |
|        |      | Shiraz-38T | 1950 | 0.265916 | 0         |  |  |
|        |      | Shiraz-71T | 2236 | 0.320072 | 0         |  |  |
|        |      | Shiraz-72T | 2277 | 0        | -0.398869 |  |  |
|        |      | Shiraz-3T  | 87   | 0.198593 | 0         |  |  |
|        |      | Shiraz-4T  | 252  | 0.192083 | 0         |  |  |
|        |      | Shiraz-36T | 376  | 0.159952 | 0         |  |  |
|        |      | Shiraz-44T | 631  | 0        | -0.180312 |  |  |
|        |      | Shiraz-46T | 942  | 0.069143 | 0         |  |  |
|        |      | Shiraz-18T | 1433 | 0.250973 | 0         |  |  |
|        |      | Shiraz-22T | 1544 | 0        | -0.193579 |  |  |
|        |      | Shiraz-25T | 1697 | 0.21945  | 0         |  |  |
|        |      | Shiraz-28T | 1734 | 0.362882 | 0         |  |  |
|        |      | Shiraz-29T | 1777 | 0.156747 | 0         |  |  |
|        |      | Shiraz-38T | 1950 | 0.265916 | 0         |  |  |
|        |      | Shiraz-71T | 2236 | 0.320072 | 0         |  |  |
|        |      | Shiraz-72T | 2277 | 0        | -0.398869 |  |  |
|        |      | Shiraz-3T  | 87   | 0.198593 | 0         |  |  |
|        |      | Shiraz-4T  | 252  | 0.192083 | 0         |  |  |
|        |      | Shiraz-36T | 376  | 0.159952 | 0         |  |  |
|        |      | Shiraz-44T | 631  | 0        | -0.180312 |  |  |
|        |      | Shiraz-46T | 942  | 0.069143 | 0         |  |  |
|        |      | Shiraz-18T | 1433 | 0.250973 | 0         |  |  |

|       |      |            |      |          |           |  |  |
|-------|------|------------|------|----------|-----------|--|--|
|       |      | Shiraz-22T | 1544 | 0        | -0.193579 |  |  |
|       |      | Shiraz-25T | 1697 | 0.21945  | 0         |  |  |
|       |      | Shiraz-28T | 1734 | 0.362882 | 0         |  |  |
|       |      | Shiraz-29T | 1777 | 0.156747 | 0         |  |  |
|       |      | Shiraz-38T | 1950 | 0.265916 | 0         |  |  |
|       |      | Shiraz-71T | 2236 | 0.320072 | 0         |  |  |
|       |      | Shiraz-72T | 2277 | 0        | -0.398869 |  |  |
| PPEF1 | chrX | Shiraz-3T  | 235  | 0        | -0.28401  |  |  |
|       |      | Shiraz-4T  | 260  | 0        | -0.324128 |  |  |
|       |      | Shiraz-16T | 294  | 0.655804 | 0         |  |  |
|       |      | Shiraz-36T | 431  | 0        | -0.78035  |  |  |
|       |      | Shiraz-44T | 891  | 0        | -0.954044 |  |  |
|       |      | Shiraz-49T | 1166 | 0        | -0.917235 |  |  |
|       |      | Shiraz-77T | 1281 | 0.136627 | 0         |  |  |
|       |      | Shiraz-9T  | 1368 | 0.199713 | 0         |  |  |
|       |      | Shiraz-18T | 1455 | 0        | -0.186773 |  |  |
|       |      | Shiraz-22T | 1669 | 0.695915 | 0         |  |  |
|       |      | Shiraz-25T | 1717 | 0.420447 | 0         |  |  |
|       |      | Shiraz-28T | 1760 | 0.538181 | 0         |  |  |
|       |      | Shiraz-29T | 1800 | 0.672527 | 0         |  |  |
|       |      | Shiraz-32T | 1869 | 0.776805 | 0         |  |  |
|       |      | Shiraz-35T | 1932 | 0.507141 | 0         |  |  |
|       |      | Shiraz-40T | 2051 | 0.098506 | 0         |  |  |
|       |      | Shiraz-58T | 2221 | 0.871948 | 0         |  |  |
|       |      | Shiraz-71T | 2260 | 0.68394  | 0         |  |  |
|       |      | Shiraz-71T | 2261 | 0.508399 | 0         |  |  |
|       |      | Shiraz-3T  | 235  | 0        | -0.28401  |  |  |
|       |      | Shiraz-4T  | 260  | 0        | -0.324128 |  |  |
|       |      | Shiraz-16T | 294  | 0.655804 | 0         |  |  |
|       |      | Shiraz-36T | 431  | 0        | -0.78035  |  |  |
|       |      | Shiraz-44T | 891  | 0        | -0.954044 |  |  |
|       |      | Shiraz-49T | 1166 | 0        | -0.917235 |  |  |
|       |      | Shiraz-77T | 1281 | 0.136627 | 0         |  |  |
|       |      | Shiraz-9T  | 1368 | 0.199713 | 0         |  |  |
|       |      | Shiraz-18T | 1455 | 0        | -0.186773 |  |  |
|       |      | Shiraz-22T | 1669 | 0.695915 | 0         |  |  |
|       |      | Shiraz-25T | 1717 | 0.420447 | 0         |  |  |
|       |      | Shiraz-28T | 1760 | 0.538181 | 0         |  |  |
|       |      | Shiraz-29T | 1800 | 0.672527 | 0         |  |  |
|       |      | Shiraz-32T | 1869 | 0.776805 | 0         |  |  |
|       |      | Shiraz-35T | 1932 | 0.507141 | 0         |  |  |
|       |      | Shiraz-40T | 2051 | 0.098506 | 0         |  |  |
|       |      | Shiraz-58T | 2221 | 0.871948 | 0         |  |  |
|       |      | Shiraz-71T | 2260 | 0.68394  | 0         |  |  |
|       |      | Shiraz-71T | 2261 | 0.508399 | 0         |  |  |
|       |      | Shiraz-3T  | 235  | 0        | -0.28401  |  |  |
|       |      | Shiraz-4T  | 260  | 0        | -0.324128 |  |  |

|      |      |            |      |          |           |  |  |
|------|------|------------|------|----------|-----------|--|--|
|      |      | Shiraz-16T | 294  | 0.655804 | 0         |  |  |
|      |      | Shiraz-36T | 431  | 0        | -0.78035  |  |  |
|      |      | Shiraz-44T | 891  | 0        | -0.954044 |  |  |
|      |      | Shiraz-49T | 1166 | 0        | -0.917235 |  |  |
|      |      | Shiraz-77T | 1281 | 0.136627 | 0         |  |  |
|      |      | Shiraz-9T  | 1368 | 0.199713 | 0         |  |  |
|      |      | Shiraz-18T | 1455 | 0        | -0.186773 |  |  |
|      |      | Shiraz-22T | 1669 | 0.695915 | 0         |  |  |
|      |      | Shiraz-25T | 1717 | 0.420447 | 0         |  |  |
|      |      | Shiraz-28T | 1760 | 0.538181 | 0         |  |  |
|      |      | Shiraz-29T | 1800 | 0.672527 | 0         |  |  |
|      |      | Shiraz-32T | 1869 | 0.776805 | 0         |  |  |
|      |      | Shiraz-35T | 1932 | 0.507141 | 0         |  |  |
|      |      | Shiraz-40T | 2051 | 0.098506 | 0         |  |  |
|      |      | Shiraz-58T | 2221 | 0.871948 | 0         |  |  |
|      |      | Shiraz-71T | 2260 | 0.68394  | 0         |  |  |
|      |      | Shiraz-71T | 2261 | 0.508399 | 0         |  |  |
| PPIA | chr7 | Shiraz-3T  | 87   | 0.198593 | 0         |  |  |
|      |      | Shiraz-3T  | 89   | 0.678641 | 0         |  |  |
|      |      | Shiraz-4T  | 252  | 0.192083 | 0         |  |  |
|      |      | Shiraz-36T | 376  | 0.159952 | 0         |  |  |
|      |      | Shiraz-44T | 632  | 0.902944 | 0         |  |  |
|      |      | Shiraz-46T | 942  | 0.069143 | 0         |  |  |
|      |      | Shiraz-77T | 1223 | 0.215647 | 0         |  |  |
|      |      | Shiraz-18T | 1433 | 0.250973 | 0         |  |  |
|      |      | Shiraz-25T | 1697 | 0.21945  | 0         |  |  |
|      |      | Shiraz-28T | 1734 | 0.362882 | 0         |  |  |
|      |      | Shiraz-29T | 1777 | 0.156747 | 0         |  |  |
|      |      | Shiraz-38T | 1950 | 0.265916 | 0         |  |  |
|      |      | Shiraz-71T | 2236 | 0.320072 | 0         |  |  |
|      |      | Shiraz-3T  | 87   | 0.198593 | 0         |  |  |
|      |      | Shiraz-3T  | 89   | 0.678641 | 0         |  |  |
|      |      | Shiraz-4T  | 252  | 0.192083 | 0         |  |  |
|      |      | Shiraz-36T | 376  | 0.159952 | 0         |  |  |
|      |      | Shiraz-44T | 632  | 0.902944 | 0         |  |  |
|      |      | Shiraz-46T | 942  | 0.069143 | 0         |  |  |
|      |      | Shiraz-77T | 1223 | 0.215647 | 0         |  |  |
|      |      | Shiraz-18T | 1433 | 0.250973 | 0         |  |  |
|      |      | Shiraz-25T | 1697 | 0.21945  | 0         |  |  |
|      |      | Shiraz-28T | 1734 | 0.362882 | 0         |  |  |
|      |      | Shiraz-29T | 1777 | 0.156747 | 0         |  |  |
|      |      | Shiraz-38T | 1950 | 0.265916 | 0         |  |  |
|      |      | Shiraz-71T | 2236 | 0.320072 | 0         |  |  |
|      |      | Shiraz-3T  | 87   | 0.198593 | 0         |  |  |
|      |      | Shiraz-3T  | 89   | 0.678641 | 0         |  |  |
|      |      | Shiraz-4T  | 252  | 0.192083 | 0         |  |  |
|      |      | Shiraz-36T | 376  | 0.159952 | 0         |  |  |

|          |      |            |      |          |           |  |
|----------|------|------------|------|----------|-----------|--|
|          |      | Shiraz-44T | 632  | 0.902944 | 0         |  |
|          |      | Shiraz-46T | 942  | 0.069143 | 0         |  |
|          |      | Shiraz-77T | 1223 | 0.215647 | 0         |  |
|          |      | Shiraz-18T | 1433 | 0.250973 | 0         |  |
|          |      | Shiraz-25T | 1697 | 0.21945  | 0         |  |
|          |      | Shiraz-28T | 1734 | 0.362882 | 0         |  |
|          |      | Shiraz-29T | 1777 | 0.156747 | 0         |  |
|          |      | Shiraz-38T | 1950 | 0.265916 | 0         |  |
|          |      | Shiraz-71T | 2236 | 0.320072 | 0         |  |
| PPP1R2P9 | chrX | Shiraz-3T  | 235  | 0        | -0.28401  |  |
|          |      | Shiraz-4T  | 260  | 0        | -0.324128 |  |
|          |      | Shiraz-16T | 294  | 0.655804 | 0         |  |
|          |      | Shiraz-31T | 345  | 0.103301 | 0         |  |
|          |      | Shiraz-36T | 431  | 0        | -0.78035  |  |
|          |      | Shiraz-36T | 432  | 0        | -0.6692   |  |
|          |      | Shiraz-44T | 891  | 0        | -0.954044 |  |
|          |      | Shiraz-46T | 991  | 0.139564 | 0         |  |
|          |      | Shiraz-49T | 1166 | 0        | -0.917235 |  |
|          |      | Shiraz-9T  | 1368 | 0.199713 | 0         |  |
|          |      | Shiraz-18T | 1455 | 0        | -0.186773 |  |
|          |      | Shiraz-22T | 1669 | 0.695915 | 0         |  |
|          |      | Shiraz-25T | 1717 | 0.420447 | 0         |  |
|          |      | Shiraz-28T | 1760 | 0.538181 | 0         |  |
|          |      | Shiraz-29T | 1800 | 0.672527 | 0         |  |
|          |      | Shiraz-32T | 1869 | 0.776805 | 0         |  |
|          |      | Shiraz-35T | 1932 | 0.507141 | 0         |  |
|          |      | Shiraz-40T | 2051 | 0.098506 | 0         |  |
|          |      | Shiraz-58T | 2221 | 0.871948 | 0         |  |
|          |      | Shiraz-71T | 2260 | 0.68394  | 0         |  |
|          |      | Shiraz-71T | 2262 | 0.986748 | 0         |  |
|          |      | Shiraz-3T  | 235  | 0        | -0.28401  |  |
|          |      | Shiraz-4T  | 260  | 0        | -0.324128 |  |
|          |      | Shiraz-16T | 294  | 0.655804 | 0         |  |
|          |      | Shiraz-31T | 345  | 0.103301 | 0         |  |
|          |      | Shiraz-36T | 431  | 0        | -0.78035  |  |
|          |      | Shiraz-36T | 432  | 0        | -0.6692   |  |
|          |      | Shiraz-44T | 891  | 0        | -0.954044 |  |
|          |      | Shiraz-46T | 991  | 0.139564 | 0         |  |
|          |      | Shiraz-49T | 1166 | 0        | -0.917235 |  |
|          |      | Shiraz-9T  | 1368 | 0.199713 | 0         |  |
|          |      | Shiraz-18T | 1455 | 0        | -0.186773 |  |
|          |      | Shiraz-22T | 1669 | 0.695915 | 0         |  |
|          |      | Shiraz-25T | 1717 | 0.420447 | 0         |  |
|          |      | Shiraz-28T | 1760 | 0.538181 | 0         |  |
|          |      | Shiraz-29T | 1800 | 0.672527 | 0         |  |
|          |      | Shiraz-32T | 1869 | 0.776805 | 0         |  |
|          |      | Shiraz-35T | 1932 | 0.507141 | 0         |  |

|         |      |            |      |          |           |  |
|---------|------|------------|------|----------|-----------|--|
|         |      | Shiraz-40T | 2051 | 0.098506 | 0         |  |
|         |      | Shiraz-58T | 2221 | 0.871948 | 0         |  |
|         |      | Shiraz-71T | 2260 | 0.68394  | 0         |  |
|         |      | Shiraz-71T | 2262 | 0.986748 | 0         |  |
|         |      | Shiraz-3T  | 235  | 0        | -0.28401  |  |
|         |      | Shiraz-4T  | 260  | 0        | -0.324128 |  |
|         |      | Shiraz-16T | 294  | 0.655804 | 0         |  |
|         |      | Shiraz-31T | 345  | 0.103301 | 0         |  |
|         |      | Shiraz-36T | 431  | 0        | -0.78035  |  |
|         |      | Shiraz-36T | 432  | 0        | -0.6692   |  |
|         |      | Shiraz-44T | 891  | 0        | -0.954044 |  |
|         |      | Shiraz-46T | 991  | 0.139564 | 0         |  |
|         |      | Shiraz-49T | 1166 | 0        | -0.917235 |  |
|         |      | Shiraz-9T  | 1368 | 0.199713 | 0         |  |
|         |      | Shiraz-18T | 1455 | 0        | -0.186773 |  |
|         |      | Shiraz-22T | 1669 | 0.695915 | 0         |  |
|         |      | Shiraz-25T | 1717 | 0.420447 | 0         |  |
|         |      | Shiraz-28T | 1760 | 0.538181 | 0         |  |
|         |      | Shiraz-29T | 1800 | 0.672527 | 0         |  |
|         |      | Shiraz-32T | 1869 | 0.776805 | 0         |  |
|         |      | Shiraz-35T | 1932 | 0.507141 | 0         |  |
|         |      | Shiraz-40T | 2051 | 0.098506 | 0         |  |
|         |      | Shiraz-58T | 2221 | 0.871948 | 0         |  |
|         |      | Shiraz-71T | 2260 | 0.68394  | 0         |  |
|         |      | Shiraz-71T | 2262 | 0.986748 | 0         |  |
| PPP1R3A | chr7 | Shiraz-3T  | 90   | 0.219276 | 0         |  |
|         |      | Shiraz-3T  | 95   | 0        | -0.077623 |  |
|         |      | Shiraz-4T  | 253  | 0.372918 | 0         |  |
|         |      | Shiraz-36T | 378  | 0.179558 | 0         |  |
|         |      | Shiraz-36T | 382  | 0.081739 | 0         |  |
|         |      | Shiraz-44T | 641  | 0        | -0.477846 |  |
|         |      | Shiraz-46T | 943  | 0.093799 | 0         |  |
|         |      | Shiraz-46T | 947  | 0        | -0.010843 |  |
|         |      | Shiraz-47T | 1031 | 0        | -0.117529 |  |
|         |      | Shiraz-49T | 1121 | 0        | -0.138569 |  |
|         |      | Shiraz-77T | 1225 | 0        | -0.117922 |  |
|         |      | Shiraz-77T | 1228 | 0        | -0.238084 |  |
|         |      | Shiraz-18T | 1434 | 0.244465 | 0         |  |
|         |      | Shiraz-22T | 1549 | 0        | -0.319623 |  |
|         |      | Shiraz-22T | 1552 | 0        | -0.50686  |  |
|         |      | Shiraz-25T | 1698 | 0.21835  | 0         |  |
|         |      | Shiraz-28T | 1735 | 0.350744 | 0         |  |
|         |      | Shiraz-29T | 1778 | 0.120767 | 0         |  |
|         |      | Shiraz-32T | 1833 | 0.551336 | 0         |  |
|         |      | Shiraz-32T | 1835 | 0.092727 | 0         |  |
|         |      | Shiraz-38T | 1951 | 0.250891 | 0         |  |
|         |      | Shiraz-53T | 2078 | 0.287202 | 0         |  |



|  |            |      |          |           |  |
|--|------------|------|----------|-----------|--|
|  | Shiraz-58T | 2161 | 0        | -0.187744 |  |
|  | Shiraz-71T | 2238 | 0.603631 | 0         |  |
|  | Shiraz-3T  | 90   | 0.219276 | 0         |  |
|  | Shiraz-3T  | 95   | 0        | -0.077623 |  |
|  | Shiraz-4T  | 253  | 0.372918 | 0         |  |
|  | Shiraz-36T | 378  | 0.179558 | 0         |  |
|  | Shiraz-36T | 382  | 0.081739 | 0         |  |
|  | Shiraz-44T | 641  | 0        | -0.477846 |  |
|  | Shiraz-46T | 943  | 0.093799 | 0         |  |
|  | Shiraz-46T | 947  | 0        | -0.010843 |  |
|  | Shiraz-47T | 1031 | 0        | -0.117529 |  |
|  | Shiraz-49T | 1121 | 0        | -0.138569 |  |
|  | Shiraz-77T | 1225 | 0        | -0.117922 |  |
|  | Shiraz-77T | 1228 | 0        | -0.238084 |  |
|  | Shiraz-18T | 1434 | 0.244465 | 0         |  |
|  | Shiraz-22T | 1549 | 0        | -0.319623 |  |
|  | Shiraz-22T | 1552 | 0        | -0.50686  |  |
|  | Shiraz-25T | 1698 | 0.21835  | 0         |  |
|  | Shiraz-28T | 1735 | 0.350744 | 0         |  |
|  | Shiraz-29T | 1778 | 0.120767 | 0         |  |
|  | Shiraz-32T | 1833 | 0.551336 | 0         |  |
|  | Shiraz-32T | 1835 | 0.092727 | 0         |  |
|  | Shiraz-38T | 1951 | 0.250891 | 0         |  |
|  | Shiraz-53T | 2078 | 0.287202 | 0         |  |
|  | Shiraz-58T | 2161 | 0        | -0.187744 |  |
|  | Shiraz-71T | 2238 | 0.603631 | 0         |  |
|  | Shiraz-3T  | 90   | 0.219276 | 0         |  |
|  | Shiraz-3T  | 95   | 0        | -0.077623 |  |
|  | Shiraz-4T  | 253  | 0.372918 | 0         |  |
|  | Shiraz-36T | 378  | 0.179558 | 0         |  |
|  | Shiraz-36T | 382  | 0.081739 | 0         |  |
|  | Shiraz-44T | 641  | 0        | -0.477846 |  |
|  | Shiraz-46T | 943  | 0.093799 | 0         |  |
|  | Shiraz-46T | 947  | 0        | -0.010843 |  |
|  | Shiraz-47T | 1031 | 0        | -0.117529 |  |
|  | Shiraz-49T | 1121 | 0        | -0.138569 |  |
|  | Shiraz-77T | 1225 | 0        | -0.117922 |  |
|  | Shiraz-77T | 1228 | 0        | -0.238084 |  |
|  | Shiraz-18T | 1434 | 0.244465 | 0         |  |
|  | Shiraz-22T | 1549 | 0        | -0.319623 |  |
|  | Shiraz-22T | 1552 | 0        | -0.50686  |  |
|  | Shiraz-25T | 1698 | 0.21835  | 0         |  |
|  | Shiraz-28T | 1735 | 0.350744 | 0         |  |
|  | Shiraz-29T | 1778 | 0.120767 | 0         |  |
|  | Shiraz-32T | 1833 | 0.551336 | 0         |  |
|  | Shiraz-32T | 1835 | 0.092727 | 0         |  |
|  | Shiraz-38T | 1951 | 0.250891 | 0         |  |

|         |      |            |      |          |           |  |
|---------|------|------------|------|----------|-----------|--|
|         |      | Shiraz-53T | 2078 | 0.287202 | 0         |  |
|         |      | Shiraz-58T | 2161 | 0        | -0.187744 |  |
|         |      | Shiraz-71T | 2238 | 0.603631 | 0         |  |
| PPP1R3F | chrX | Shiraz-3T  | 238  | 0.472087 | 0         |  |
|         |      | Shiraz-4T  | 260  | 0        | -0.324128 |  |
|         |      | Shiraz-16T | 294  | 0.655804 | 0         |  |
|         |      | Shiraz-31T | 345  | 0.103301 | 0         |  |
|         |      | Shiraz-36T | 431  | 0        | -0.78035  |  |
|         |      | Shiraz-36T | 432  | 0        | -0.6692   |  |
|         |      | Shiraz-44T | 891  | 0        | -0.954044 |  |
|         |      | Shiraz-44T | 896  | 0        | -0.109108 |  |
|         |      | Shiraz-44T | 897  | 0.486937 | 0         |  |
|         |      | Shiraz-46T | 991  | 0.139564 | 0         |  |
|         |      | Shiraz-47T | 1084 | 0.24185  | 0         |  |
|         |      | Shiraz-49T | 1166 | 0        | -0.917235 |  |
|         |      | Shiraz-49T | 1169 | 0        | -0.583529 |  |
|         |      | Shiraz-77T | 1282 | 0.213849 | 0         |  |
|         |      | Shiraz-9T  | 1368 | 0.199713 | 0         |  |
|         |      | Shiraz-9T  | 1369 | 0.703374 | 0         |  |
|         |      | Shiraz-18T | 1455 | 0        | -0.186773 |  |
|         |      | Shiraz-22T | 1669 | 0.695915 | 0         |  |
|         |      | Shiraz-22T | 1672 | 1.01678  | 0         |  |
|         |      | Shiraz-25T | 1717 | 0.420447 | 0         |  |
|         |      | Shiraz-28T | 1760 | 0.538181 | 0         |  |
|         |      | Shiraz-29T | 1800 | 0.672527 | 0         |  |
|         |      | Shiraz-32T | 1869 | 0.776805 | 0         |  |
|         |      | Shiraz-35T | 1932 | 0.507141 | 0         |  |
|         |      | Shiraz-58T | 2221 | 0.871948 | 0         |  |
|         |      | Shiraz-71T | 2260 | 0.68394  | 0         |  |
|         |      | Shiraz-71T | 2262 | 0.986748 | 0         |  |
|         |      | Shiraz-3T  | 238  | 0.472087 | 0         |  |
|         |      | Shiraz-4T  | 260  | 0        | -0.324128 |  |
|         |      | Shiraz-16T | 294  | 0.655804 | 0         |  |
|         |      | Shiraz-31T | 345  | 0.103301 | 0         |  |
|         |      | Shiraz-36T | 431  | 0        | -0.78035  |  |
|         |      | Shiraz-36T | 432  | 0        | -0.6692   |  |
|         |      | Shiraz-44T | 891  | 0        | -0.954044 |  |
|         |      | Shiraz-44T | 896  | 0        | -0.109108 |  |
|         |      | Shiraz-44T | 897  | 0.486937 | 0         |  |
|         |      | Shiraz-46T | 991  | 0.139564 | 0         |  |
|         |      | Shiraz-47T | 1084 | 0.24185  | 0         |  |
|         |      | Shiraz-49T | 1166 | 0        | -0.917235 |  |
|         |      | Shiraz-49T | 1169 | 0        | -0.583529 |  |
|         |      | Shiraz-77T | 1282 | 0.213849 | 0         |  |
|         |      | Shiraz-9T  | 1368 | 0.199713 | 0         |  |
|         |      | Shiraz-9T  | 1369 | 0.703374 | 0         |  |
|         |      | Shiraz-18T | 1455 | 0        | -0.186773 |  |

|         |      |            |      |          |           |  |
|---------|------|------------|------|----------|-----------|--|
|         |      | Shiraz-22T | 1669 | 0.695915 | 0         |  |
|         |      | Shiraz-22T | 1672 | 1.01678  | 0         |  |
|         |      | Shiraz-25T | 1717 | 0.420447 | 0         |  |
|         |      | Shiraz-28T | 1760 | 0.538181 | 0         |  |
|         |      | Shiraz-29T | 1800 | 0.672527 | 0         |  |
|         |      | Shiraz-32T | 1869 | 0.776805 | 0         |  |
|         |      | Shiraz-35T | 1932 | 0.507141 | 0         |  |
|         |      | Shiraz-58T | 2221 | 0.871948 | 0         |  |
|         |      | Shiraz-71T | 2260 | 0.68394  | 0         |  |
|         |      | Shiraz-71T | 2262 | 0.986748 | 0         |  |
|         |      | Shiraz-3T  | 238  | 0.472087 | 0         |  |
|         |      | Shiraz-4T  | 260  | 0        | -0.324128 |  |
|         |      | Shiraz-16T | 294  | 0.655804 | 0         |  |
|         |      | Shiraz-31T | 345  | 0.103301 | 0         |  |
|         |      | Shiraz-36T | 431  | 0        | -0.78035  |  |
|         |      | Shiraz-36T | 432  | 0        | -0.6692   |  |
|         |      | Shiraz-44T | 891  | 0        | -0.954044 |  |
|         |      | Shiraz-44T | 896  | 0        | -0.109108 |  |
|         |      | Shiraz-44T | 897  | 0.486937 | 0         |  |
|         |      | Shiraz-46T | 991  | 0.139564 | 0         |  |
|         |      | Shiraz-47T | 1084 | 0.24185  | 0         |  |
|         |      | Shiraz-49T | 1166 | 0        | -0.917235 |  |
|         |      | Shiraz-49T | 1169 | 0        | -0.583529 |  |
|         |      | Shiraz-77T | 1282 | 0.213849 | 0         |  |
|         |      | Shiraz-9T  | 1368 | 0.199713 | 0         |  |
|         |      | Shiraz-9T  | 1369 | 0.703374 | 0         |  |
|         |      | Shiraz-18T | 1455 | 0        | -0.186773 |  |
|         |      | Shiraz-22T | 1669 | 0.695915 | 0         |  |
|         |      | Shiraz-22T | 1672 | 1.01678  | 0         |  |
|         |      | Shiraz-25T | 1717 | 0.420447 | 0         |  |
|         |      | Shiraz-28T | 1760 | 0.538181 | 0         |  |
|         |      | Shiraz-29T | 1800 | 0.672527 | 0         |  |
|         |      | Shiraz-32T | 1869 | 0.776805 | 0         |  |
|         |      | Shiraz-35T | 1932 | 0.507141 | 0         |  |
|         |      | Shiraz-58T | 2221 | 0.871948 | 0         |  |
|         |      | Shiraz-71T | 2260 | 0.68394  | 0         |  |
|         |      | Shiraz-71T | 2262 | 0.986748 | 0         |  |
| PPP1R9A | chr7 | Shiraz-3T  | 90   | 0.219276 | 0         |  |
|         |      | Shiraz-3T  | 93   | 0        | -0.058023 |  |
|         |      | Shiraz-4T  | 253  | 0.372918 | 0         |  |
|         |      | Shiraz-36T | 378  | 0.179558 | 0         |  |
|         |      | Shiraz-36T | 380  | 0.083883 | 0         |  |
|         |      | Shiraz-44T | 638  | 0        | -0.433476 |  |
|         |      | Shiraz-46T | 943  | 0.093799 | 0         |  |
|         |      | Shiraz-46T | 945  | 0        | -0.014838 |  |
|         |      | Shiraz-47T | 1029 | 0        | -0.096586 |  |
|         |      | Shiraz-49T | 1119 | 0        | -0.157331 |  |

|  |            |      |          |           |  |
|--|------------|------|----------|-----------|--|
|  | Shiraz-77T | 1225 | 0        | -0.117922 |  |
|  | Shiraz-18T | 1434 | 0.244465 | 0         |  |
|  | Shiraz-22T | 1549 | 0        | -0.319623 |  |
|  | Shiraz-25T | 1698 | 0.21835  | 0         |  |
|  | Shiraz-28T | 1735 | 0.350744 | 0         |  |
|  | Shiraz-29T | 1778 | 0.120767 | 0         |  |
|  | Shiraz-32T | 1833 | 0.551336 | 0         |  |
|  | Shiraz-38T | 1951 | 0.250891 | 0         |  |
|  | Shiraz-53T | 2078 | 0.287202 | 0         |  |
|  | Shiraz-58T | 2159 | 0        | -0.219521 |  |
|  | Shiraz-71T | 2238 | 0.603631 | 0         |  |
|  | Shiraz-3T  | 90   | 0.219276 | 0         |  |
|  | Shiraz-3T  | 93   | 0        | -0.058023 |  |
|  | Shiraz-4T  | 253  | 0.372918 | 0         |  |
|  | Shiraz-36T | 378  | 0.179558 | 0         |  |
|  | Shiraz-36T | 380  | 0.083883 | 0         |  |
|  | Shiraz-44T | 638  | 0        | -0.433476 |  |
|  | Shiraz-46T | 943  | 0.093799 | 0         |  |
|  | Shiraz-46T | 945  | 0        | -0.014838 |  |
|  | Shiraz-47T | 1029 | 0        | -0.096586 |  |
|  | Shiraz-49T | 1119 | 0        | -0.157331 |  |
|  | Shiraz-77T | 1225 | 0        | -0.117922 |  |
|  | Shiraz-18T | 1434 | 0.244465 | 0         |  |
|  | Shiraz-22T | 1549 | 0        | -0.319623 |  |
|  | Shiraz-25T | 1698 | 0.21835  | 0         |  |
|  | Shiraz-28T | 1735 | 0.350744 | 0         |  |
|  | Shiraz-29T | 1778 | 0.120767 | 0         |  |
|  | Shiraz-32T | 1833 | 0.551336 | 0         |  |
|  | Shiraz-38T | 1951 | 0.250891 | 0         |  |
|  | Shiraz-53T | 2078 | 0.287202 | 0         |  |
|  | Shiraz-58T | 2159 | 0        | -0.219521 |  |
|  | Shiraz-71T | 2238 | 0.603631 | 0         |  |
|  | Shiraz-3T  | 90   | 0.219276 | 0         |  |
|  | Shiraz-3T  | 93   | 0        | -0.058023 |  |
|  | Shiraz-4T  | 253  | 0.372918 | 0         |  |
|  | Shiraz-36T | 378  | 0.179558 | 0         |  |
|  | Shiraz-36T | 380  | 0.083883 | 0         |  |
|  | Shiraz-44T | 638  | 0        | -0.433476 |  |
|  | Shiraz-46T | 943  | 0.093799 | 0         |  |
|  | Shiraz-46T | 945  | 0        | -0.014838 |  |
|  | Shiraz-47T | 1029 | 0        | -0.096586 |  |
|  | Shiraz-49T | 1119 | 0        | -0.157331 |  |
|  | Shiraz-77T | 1225 | 0        | -0.117922 |  |
|  | Shiraz-18T | 1434 | 0.244465 | 0         |  |
|  | Shiraz-22T | 1549 | 0        | -0.319623 |  |
|  | Shiraz-25T | 1698 | 0.21835  | 0         |  |
|  | Shiraz-28T | 1735 | 0.350744 | 0         |  |

|       |      |            |      |          |           |  |
|-------|------|------------|------|----------|-----------|--|
|       |      | Shiraz-29T | 1778 | 0.120767 | 0         |  |
|       |      | Shiraz-32T | 1833 | 0.551336 | 0         |  |
|       |      | Shiraz-38T | 1951 | 0.250891 | 0         |  |
|       |      | Shiraz-53T | 2078 | 0.287202 | 0         |  |
|       |      | Shiraz-58T | 2159 | 0        | -0.219521 |  |
|       |      | Shiraz-71T | 2238 | 0.603631 | 0         |  |
| PQBP1 | chrX | Shiraz-3T  | 238  | 0.472087 | 0         |  |
|       |      | Shiraz-3T  | 238  | 0.472087 | 0         |  |
|       |      | Shiraz-4T  | 260  | 0        | -0.324128 |  |
|       |      | Shiraz-4T  | 260  | 0        | -0.324128 |  |
|       |      | Shiraz-16T | 294  | 0.655804 | 0         |  |
|       |      | Shiraz-16T | 294  | 0.655804 | 0         |  |
|       |      | Shiraz-31T | 345  | 0.103301 | 0         |  |
|       |      | Shiraz-31T | 345  | 0.103301 | 0         |  |
|       |      | Shiraz-36T | 431  | 0        | -0.78035  |  |
|       |      | Shiraz-36T | 431  | 0        | -0.78035  |  |
|       |      | Shiraz-36T | 432  | 0        | -0.6692   |  |
|       |      | Shiraz-36T | 432  | 0        | -0.6692   |  |
|       |      | Shiraz-44T | 891  | 0        | -0.954044 |  |
|       |      | Shiraz-44T | 891  | 0        | -0.954044 |  |
|       |      | Shiraz-44T | 896  | 0        | -0.109108 |  |
|       |      | Shiraz-44T | 896  | 0        | -0.109108 |  |
|       |      | Shiraz-44T | 897  | 0.486937 | 0         |  |
|       |      | Shiraz-44T | 897  | 0.486937 | 0         |  |
|       |      | Shiraz-46T | 991  | 0.139564 | 0         |  |
|       |      | Shiraz-46T | 991  | 0.139564 | 0         |  |
|       |      | Shiraz-47T | 1084 | 0.24185  | 0         |  |
|       |      | Shiraz-47T | 1084 | 0.24185  | 0         |  |
|       |      | Shiraz-49T | 1166 | 0        | -0.917235 |  |
|       |      | Shiraz-49T | 1166 | 0        | -0.917235 |  |
|       |      | Shiraz-49T | 1169 | 0        | -0.583529 |  |
|       |      | Shiraz-49T | 1169 | 0        | -0.583529 |  |
|       |      | Shiraz-77T | 1282 | 0.213849 | 0         |  |
|       |      | Shiraz-77T | 1282 | 0.213849 | 0         |  |
|       |      | Shiraz-9T  | 1368 | 0.199713 | 0         |  |
|       |      | Shiraz-9T  | 1368 | 0.199713 | 0         |  |
|       |      | Shiraz-9T  | 1369 | 0.703374 | 0         |  |
|       |      | Shiraz-9T  | 1369 | 0.703374 | 0         |  |
|       |      | Shiraz-18T | 1455 | 0        | -0.186773 |  |
|       |      | Shiraz-18T | 1455 | 0        | -0.186773 |  |
|       |      | Shiraz-22T | 1669 | 0.695915 | 0         |  |
|       |      | Shiraz-22T | 1669 | 0.695915 | 0         |  |
|       |      | Shiraz-22T | 1672 | 1.01678  | 0         |  |
|       |      | Shiraz-22T | 1672 | 1.01678  | 0         |  |
|       |      | Shiraz-25T | 1717 | 0.420447 | 0         |  |
|       |      | Shiraz-25T | 1717 | 0.420447 | 0         |  |
|       |      | Shiraz-28T | 1760 | 0.538181 | 0         |  |

|  |  |            |      |          |           |  |  |
|--|--|------------|------|----------|-----------|--|--|
|  |  | Shiraz-28T | 1760 | 0.538181 | 0         |  |  |
|  |  | Shiraz-29T | 1800 | 0.672527 | 0         |  |  |
|  |  | Shiraz-29T | 1800 | 0.672527 | 0         |  |  |
|  |  | Shiraz-32T | 1869 | 0.776805 | 0         |  |  |
|  |  | Shiraz-32T | 1869 | 0.776805 | 0         |  |  |
|  |  | Shiraz-35T | 1932 | 0.507141 | 0         |  |  |
|  |  | Shiraz-35T | 1932 | 0.507141 | 0         |  |  |
|  |  | Shiraz-58T | 2221 | 0.871948 | 0         |  |  |
|  |  | Shiraz-58T | 2221 | 0.871948 | 0         |  |  |
|  |  | Shiraz-71T | 2260 | 0.68394  | 0         |  |  |
|  |  | Shiraz-71T | 2260 | 0.68394  | 0         |  |  |
|  |  | Shiraz-71T | 2262 | 0.986748 | 0         |  |  |
|  |  | Shiraz-71T | 2262 | 0.986748 | 0         |  |  |
|  |  | Shiraz-3T  | 238  | 0.472087 | 0         |  |  |
|  |  | Shiraz-3T  | 238  | 0.472087 | 0         |  |  |
|  |  | Shiraz-4T  | 260  | 0        | -0.324128 |  |  |
|  |  | Shiraz-4T  | 260  | 0        | -0.324128 |  |  |
|  |  | Shiraz-16T | 294  | 0.655804 | 0         |  |  |
|  |  | Shiraz-16T | 294  | 0.655804 | 0         |  |  |
|  |  | Shiraz-31T | 345  | 0.103301 | 0         |  |  |
|  |  | Shiraz-31T | 345  | 0.103301 | 0         |  |  |
|  |  | Shiraz-36T | 431  | 0        | -0.78035  |  |  |
|  |  | Shiraz-36T | 431  | 0        | -0.78035  |  |  |
|  |  | Shiraz-36T | 432  | 0        | -0.6692   |  |  |
|  |  | Shiraz-36T | 432  | 0        | -0.6692   |  |  |
|  |  | Shiraz-44T | 891  | 0        | -0.954044 |  |  |
|  |  | Shiraz-44T | 891  | 0        | -0.954044 |  |  |
|  |  | Shiraz-44T | 896  | 0        | -0.109108 |  |  |
|  |  | Shiraz-44T | 896  | 0        | -0.109108 |  |  |
|  |  | Shiraz-44T | 897  | 0.486937 | 0         |  |  |
|  |  | Shiraz-44T | 897  | 0.486937 | 0         |  |  |
|  |  | Shiraz-46T | 991  | 0.139564 | 0         |  |  |
|  |  | Shiraz-46T | 991  | 0.139564 | 0         |  |  |
|  |  | Shiraz-47T | 1084 | 0.24185  | 0         |  |  |
|  |  | Shiraz-47T | 1084 | 0.24185  | 0         |  |  |
|  |  | Shiraz-49T | 1166 | 0        | -0.917235 |  |  |
|  |  | Shiraz-49T | 1166 | 0        | -0.917235 |  |  |
|  |  | Shiraz-49T | 1169 | 0        | -0.583529 |  |  |
|  |  | Shiraz-49T | 1169 | 0        | -0.583529 |  |  |
|  |  | Shiraz-77T | 1282 | 0.213849 | 0         |  |  |
|  |  | Shiraz-77T | 1282 | 0.213849 | 0         |  |  |
|  |  | Shiraz-9T  | 1368 | 0.199713 | 0         |  |  |
|  |  | Shiraz-9T  | 1368 | 0.199713 | 0         |  |  |
|  |  | Shiraz-9T  | 1369 | 0.703374 | 0         |  |  |
|  |  | Shiraz-9T  | 1369 | 0.703374 | 0         |  |  |
|  |  | Shiraz-18T | 1455 | 0        | -0.186773 |  |  |
|  |  | Shiraz-18T | 1455 | 0        | -0.186773 |  |  |

|  |  |            |      |          |           |  |  |
|--|--|------------|------|----------|-----------|--|--|
|  |  | Shiraz-22T | 1669 | 0.695915 | 0         |  |  |
|  |  | Shiraz-22T | 1669 | 0.695915 | 0         |  |  |
|  |  | Shiraz-22T | 1672 | 1.01678  | 0         |  |  |
|  |  | Shiraz-22T | 1672 | 1.01678  | 0         |  |  |
|  |  | Shiraz-25T | 1717 | 0.420447 | 0         |  |  |
|  |  | Shiraz-25T | 1717 | 0.420447 | 0         |  |  |
|  |  | Shiraz-28T | 1760 | 0.538181 | 0         |  |  |
|  |  | Shiraz-28T | 1760 | 0.538181 | 0         |  |  |
|  |  | Shiraz-29T | 1800 | 0.672527 | 0         |  |  |
|  |  | Shiraz-29T | 1800 | 0.672527 | 0         |  |  |
|  |  | Shiraz-32T | 1869 | 0.776805 | 0         |  |  |
|  |  | Shiraz-32T | 1869 | 0.776805 | 0         |  |  |
|  |  | Shiraz-35T | 1932 | 0.507141 | 0         |  |  |
|  |  | Shiraz-35T | 1932 | 0.507141 | 0         |  |  |
|  |  | Shiraz-58T | 2221 | 0.871948 | 0         |  |  |
|  |  | Shiraz-58T | 2221 | 0.871948 | 0         |  |  |
|  |  | Shiraz-71T | 2260 | 0.68394  | 0         |  |  |
|  |  | Shiraz-71T | 2260 | 0.68394  | 0         |  |  |
|  |  | Shiraz-71T | 2262 | 0.986748 | 0         |  |  |
|  |  | Shiraz-71T | 2262 | 0.986748 | 0         |  |  |
|  |  | Shiraz-3T  | 238  | 0.472087 | 0         |  |  |
|  |  | Shiraz-3T  | 238  | 0.472087 | 0         |  |  |
|  |  | Shiraz-4T  | 260  | 0        | -0.324128 |  |  |
|  |  | Shiraz-4T  | 260  | 0        | -0.324128 |  |  |
|  |  | Shiraz-16T | 294  | 0.655804 | 0         |  |  |
|  |  | Shiraz-16T | 294  | 0.655804 | 0         |  |  |
|  |  | Shiraz-31T | 345  | 0.103301 | 0         |  |  |
|  |  | Shiraz-31T | 345  | 0.103301 | 0         |  |  |
|  |  | Shiraz-36T | 431  | 0        | -0.78035  |  |  |
|  |  | Shiraz-36T | 431  | 0        | -0.78035  |  |  |
|  |  | Shiraz-36T | 432  | 0        | -0.6692   |  |  |
|  |  | Shiraz-36T | 432  | 0        | -0.6692   |  |  |
|  |  | Shiraz-44T | 891  | 0        | -0.954044 |  |  |
|  |  | Shiraz-44T | 891  | 0        | -0.954044 |  |  |
|  |  | Shiraz-44T | 896  | 0        | -0.109108 |  |  |
|  |  | Shiraz-44T | 896  | 0        | -0.109108 |  |  |
|  |  | Shiraz-44T | 897  | 0.486937 | 0         |  |  |
|  |  | Shiraz-44T | 897  | 0.486937 | 0         |  |  |
|  |  | Shiraz-46T | 991  | 0.139564 | 0         |  |  |
|  |  | Shiraz-46T | 991  | 0.139564 | 0         |  |  |
|  |  | Shiraz-47T | 1084 | 0.24185  | 0         |  |  |
|  |  | Shiraz-47T | 1084 | 0.24185  | 0         |  |  |
|  |  | Shiraz-49T | 1166 | 0        | -0.917235 |  |  |
|  |  | Shiraz-49T | 1166 | 0        | -0.917235 |  |  |
|  |  | Shiraz-49T | 1169 | 0        | -0.583529 |  |  |
|  |  | Shiraz-49T | 1169 | 0        | -0.583529 |  |  |
|  |  | Shiraz-77T | 1282 | 0.213849 | 0         |  |  |

|       |      |            |      |          |           |  |
|-------|------|------------|------|----------|-----------|--|
|       |      | Shiraz-77T | 1282 | 0.213849 | 0         |  |
|       |      | Shiraz-9T  | 1368 | 0.199713 | 0         |  |
|       |      | Shiraz-9T  | 1368 | 0.199713 | 0         |  |
|       |      | Shiraz-9T  | 1369 | 0.703374 | 0         |  |
|       |      | Shiraz-9T  | 1369 | 0.703374 | 0         |  |
|       |      | Shiraz-18T | 1455 | 0        | -0.186773 |  |
|       |      | Shiraz-18T | 1455 | 0        | -0.186773 |  |
|       |      | Shiraz-22T | 1669 | 0.695915 | 0         |  |
|       |      | Shiraz-22T | 1669 | 0.695915 | 0         |  |
|       |      | Shiraz-22T | 1672 | 1.01678  | 0         |  |
|       |      | Shiraz-22T | 1672 | 1.01678  | 0         |  |
|       |      | Shiraz-25T | 1717 | 0.420447 | 0         |  |
|       |      | Shiraz-25T | 1717 | 0.420447 | 0         |  |
|       |      | Shiraz-28T | 1760 | 0.538181 | 0         |  |
|       |      | Shiraz-28T | 1760 | 0.538181 | 0         |  |
|       |      | Shiraz-29T | 1800 | 0.672527 | 0         |  |
|       |      | Shiraz-29T | 1800 | 0.672527 | 0         |  |
|       |      | Shiraz-32T | 1869 | 0.776805 | 0         |  |
|       |      | Shiraz-32T | 1869 | 0.776805 | 0         |  |
|       |      | Shiraz-35T | 1932 | 0.507141 | 0         |  |
|       |      | Shiraz-35T | 1932 | 0.507141 | 0         |  |
|       |      | Shiraz-58T | 2221 | 0.871948 | 0         |  |
|       |      | Shiraz-58T | 2221 | 0.871948 | 0         |  |
|       |      | Shiraz-71T | 2260 | 0.68394  | 0         |  |
|       |      | Shiraz-71T | 2260 | 0.68394  | 0         |  |
|       |      | Shiraz-71T | 2262 | 0.986748 | 0         |  |
|       |      | Shiraz-71T | 2262 | 0.986748 | 0         |  |
| PRAF2 | chrX | Shiraz-3T  | 238  | 0.472087 | 0         |  |
|       |      | Shiraz-4T  | 260  | 0        | -0.324128 |  |
|       |      | Shiraz-16T | 294  | 0.655804 | 0         |  |
|       |      | Shiraz-31T | 345  | 0.103301 | 0         |  |
|       |      | Shiraz-36T | 431  | 0        | -0.78035  |  |
|       |      | Shiraz-36T | 432  | 0        | -0.6692   |  |
|       |      | Shiraz-44T | 891  | 0        | -0.954044 |  |
|       |      | Shiraz-44T | 896  | 0        | -0.109108 |  |
|       |      | Shiraz-44T | 897  | 0.486937 | 0         |  |
|       |      | Shiraz-46T | 991  | 0.139564 | 0         |  |
|       |      | Shiraz-47T | 1084 | 0.24185  | 0         |  |
|       |      | Shiraz-49T | 1166 | 0        | -0.917235 |  |
|       |      | Shiraz-49T | 1169 | 0        | -0.583529 |  |
|       |      | Shiraz-77T | 1282 | 0.213849 | 0         |  |
|       |      | Shiraz-9T  | 1368 | 0.199713 | 0         |  |
|       |      | Shiraz-9T  | 1369 | 0.703374 | 0         |  |
|       |      | Shiraz-18T | 1455 | 0        | -0.186773 |  |
|       |      | Shiraz-22T | 1669 | 0.695915 | 0         |  |
|       |      | Shiraz-22T | 1672 | 1.01678  | 0         |  |
|       |      | Shiraz-25T | 1717 | 0.420447 | 0         |  |



|  |  |            |      |          |           |  |
|--|--|------------|------|----------|-----------|--|
|  |  | Shiraz-28T | 1760 | 0.538181 | 0         |  |
|  |  | Shiraz-29T | 1800 | 0.672527 | 0         |  |
|  |  | Shiraz-32T | 1869 | 0.776805 | 0         |  |
|  |  | Shiraz-35T | 1932 | 0.507141 | 0         |  |
|  |  | Shiraz-58T | 2221 | 0.871948 | 0         |  |
|  |  | Shiraz-71T | 2260 | 0.68394  | 0         |  |
|  |  | Shiraz-71T | 2262 | 0.986748 | 0         |  |
|  |  | Shiraz-3T  | 238  | 0.472087 | 0         |  |
|  |  | Shiraz-4T  | 260  | 0        | -0.324128 |  |
|  |  | Shiraz-16T | 294  | 0.655804 | 0         |  |
|  |  | Shiraz-31T | 345  | 0.103301 | 0         |  |
|  |  | Shiraz-36T | 431  | 0        | -0.78035  |  |
|  |  | Shiraz-36T | 432  | 0        | -0.6692   |  |
|  |  | Shiraz-44T | 891  | 0        | -0.954044 |  |
|  |  | Shiraz-44T | 896  | 0        | -0.109108 |  |
|  |  | Shiraz-44T | 897  | 0.486937 | 0         |  |
|  |  | Shiraz-46T | 991  | 0.139564 | 0         |  |
|  |  | Shiraz-47T | 1084 | 0.24185  | 0         |  |
|  |  | Shiraz-49T | 1166 | 0        | -0.917235 |  |
|  |  | Shiraz-49T | 1169 | 0        | -0.583529 |  |
|  |  | Shiraz-77T | 1282 | 0.213849 | 0         |  |
|  |  | Shiraz-9T  | 1368 | 0.199713 | 0         |  |
|  |  | Shiraz-9T  | 1369 | 0.703374 | 0         |  |
|  |  | Shiraz-18T | 1455 | 0        | -0.186773 |  |
|  |  | Shiraz-22T | 1669 | 0.695915 | 0         |  |
|  |  | Shiraz-22T | 1672 | 1.01678  | 0         |  |
|  |  | Shiraz-25T | 1717 | 0.420447 | 0         |  |
|  |  | Shiraz-28T | 1760 | 0.538181 | 0         |  |
|  |  | Shiraz-29T | 1800 | 0.672527 | 0         |  |
|  |  | Shiraz-32T | 1869 | 0.776805 | 0         |  |
|  |  | Shiraz-35T | 1932 | 0.507141 | 0         |  |
|  |  | Shiraz-58T | 2221 | 0.871948 | 0         |  |
|  |  | Shiraz-71T | 2260 | 0.68394  | 0         |  |
|  |  | Shiraz-71T | 2262 | 0.986748 | 0         |  |
|  |  | Shiraz-3T  | 238  | 0.472087 | 0         |  |
|  |  | Shiraz-4T  | 260  | 0        | -0.324128 |  |
|  |  | Shiraz-16T | 294  | 0.655804 | 0         |  |
|  |  | Shiraz-31T | 345  | 0.103301 | 0         |  |
|  |  | Shiraz-36T | 431  | 0        | -0.78035  |  |
|  |  | Shiraz-36T | 432  | 0        | -0.6692   |  |
|  |  | Shiraz-44T | 891  | 0        | -0.954044 |  |
|  |  | Shiraz-44T | 896  | 0        | -0.109108 |  |
|  |  | Shiraz-44T | 897  | 0.486937 | 0         |  |
|  |  | Shiraz-46T | 991  | 0.139564 | 0         |  |
|  |  | Shiraz-47T | 1084 | 0.24185  | 0         |  |
|  |  | Shiraz-49T | 1166 | 0        | -0.917235 |  |
|  |  | Shiraz-49T | 1169 | 0        | -0.583529 |  |

|       |      |            |      |          |           |  |
|-------|------|------------|------|----------|-----------|--|
|       |      | Shiraz-77T | 1282 | 0.213849 | 0         |  |
|       |      | Shiraz-9T  | 1368 | 0.199713 | 0         |  |
|       |      | Shiraz-9T  | 1369 | 0.703374 | 0         |  |
|       |      | Shiraz-18T | 1455 | 0        | -0.186773 |  |
|       |      | Shiraz-22T | 1669 | 0.695915 | 0         |  |
|       |      | Shiraz-22T | 1672 | 1.01678  | 0         |  |
|       |      | Shiraz-25T | 1717 | 0.420447 | 0         |  |
|       |      | Shiraz-28T | 1760 | 0.538181 | 0         |  |
|       |      | Shiraz-29T | 1800 | 0.672527 | 0         |  |
|       |      | Shiraz-32T | 1869 | 0.776805 | 0         |  |
|       |      | Shiraz-35T | 1932 | 0.507141 | 0         |  |
|       |      | Shiraz-58T | 2221 | 0.871948 | 0         |  |
|       |      | Shiraz-71T | 2260 | 0.68394  | 0         |  |
|       |      | Shiraz-71T | 2262 | 0.986748 | 0         |  |
| PRDX4 | chrX | Shiraz-3T  | 235  | 0        | -0.28401  |  |
|       |      | Shiraz-4T  | 260  | 0        | -0.324128 |  |
|       |      | Shiraz-16T | 294  | 0.655804 | 0         |  |
|       |      | Shiraz-36T | 431  | 0        | -0.78035  |  |
|       |      | Shiraz-44T | 891  | 0        | -0.954044 |  |
|       |      | Shiraz-49T | 1166 | 0        | -0.917235 |  |
|       |      | Shiraz-77T | 1281 | 0.136627 | 0         |  |
|       |      | Shiraz-9T  | 1368 | 0.199713 | 0         |  |
|       |      | Shiraz-18T | 1455 | 0        | -0.186773 |  |
|       |      | Shiraz-22T | 1669 | 0.695915 | 0         |  |
|       |      | Shiraz-25T | 1717 | 0.420447 | 0         |  |
|       |      | Shiraz-28T | 1760 | 0.538181 | 0         |  |
|       |      | Shiraz-29T | 1800 | 0.672527 | 0         |  |
|       |      | Shiraz-32T | 1869 | 0.776805 | 0         |  |
|       |      | Shiraz-35T | 1932 | 0.507141 | 0         |  |
|       |      | Shiraz-40T | 2051 | 0.098506 | 0         |  |
|       |      | Shiraz-58T | 2221 | 0.871948 | 0         |  |
|       |      | Shiraz-71T | 2260 | 0.68394  | 0         |  |
|       |      | Shiraz-71T | 2261 | 0.508399 | 0         |  |
|       |      | Shiraz-3T  | 235  | 0        | -0.28401  |  |
|       |      | Shiraz-4T  | 260  | 0        | -0.324128 |  |
|       |      | Shiraz-16T | 294  | 0.655804 | 0         |  |
|       |      | Shiraz-36T | 431  | 0        | -0.78035  |  |
|       |      | Shiraz-44T | 891  | 0        | -0.954044 |  |
|       |      | Shiraz-49T | 1166 | 0        | -0.917235 |  |
|       |      | Shiraz-77T | 1281 | 0.136627 | 0         |  |
|       |      | Shiraz-9T  | 1368 | 0.199713 | 0         |  |
|       |      | Shiraz-18T | 1455 | 0        | -0.186773 |  |
|       |      | Shiraz-22T | 1669 | 0.695915 | 0         |  |
|       |      | Shiraz-25T | 1717 | 0.420447 | 0         |  |
|       |      | Shiraz-28T | 1760 | 0.538181 | 0         |  |
|       |      | Shiraz-29T | 1800 | 0.672527 | 0         |  |
|       |      | Shiraz-32T | 1869 | 0.776805 | 0         |  |

|          |      |            |      |          |           |  |  |
|----------|------|------------|------|----------|-----------|--|--|
|          |      | Shiraz-35T | 1932 | 0.507141 | 0         |  |  |
|          |      | Shiraz-40T | 2051 | 0.098506 | 0         |  |  |
|          |      | Shiraz-58T | 2221 | 0.871948 | 0         |  |  |
|          |      | Shiraz-71T | 2260 | 0.68394  | 0         |  |  |
|          |      | Shiraz-71T | 2261 | 0.508399 | 0         |  |  |
|          |      | Shiraz-3T  | 235  | 0        | -0.28401  |  |  |
|          |      | Shiraz-4T  | 260  | 0        | -0.324128 |  |  |
|          |      | Shiraz-16T | 294  | 0.655804 | 0         |  |  |
|          |      | Shiraz-36T | 431  | 0        | -0.78035  |  |  |
|          |      | Shiraz-44T | 891  | 0        | -0.954044 |  |  |
|          |      | Shiraz-49T | 1166 | 0        | -0.917235 |  |  |
|          |      | Shiraz-77T | 1281 | 0.136627 | 0         |  |  |
|          |      | Shiraz-9T  | 1368 | 0.199713 | 0         |  |  |
|          |      | Shiraz-18T | 1455 | 0        | -0.186773 |  |  |
|          |      | Shiraz-22T | 1669 | 0.695915 | 0         |  |  |
|          |      | Shiraz-25T | 1717 | 0.420447 | 0         |  |  |
|          |      | Shiraz-28T | 1760 | 0.538181 | 0         |  |  |
|          |      | Shiraz-29T | 1800 | 0.672527 | 0         |  |  |
|          |      | Shiraz-32T | 1869 | 0.776805 | 0         |  |  |
|          |      | Shiraz-35T | 1932 | 0.507141 | 0         |  |  |
|          |      | Shiraz-40T | 2051 | 0.098506 | 0         |  |  |
|          |      | Shiraz-58T | 2221 | 0.871948 | 0         |  |  |
|          |      | Shiraz-71T | 2260 | 0.68394  | 0         |  |  |
|          |      | Shiraz-71T | 2261 | 0.508399 | 0         |  |  |
| PRICKLE3 | chrX | Shiraz-3T  | 238  | 0.472087 | 0         |  |  |
|          |      | Shiraz-4T  | 260  | 0        | -0.324128 |  |  |
|          |      | Shiraz-16T | 294  | 0.655804 | 0         |  |  |
|          |      | Shiraz-31T | 345  | 0.103301 | 0         |  |  |
|          |      | Shiraz-36T | 431  | 0        | -0.78035  |  |  |
|          |      | Shiraz-36T | 432  | 0        | -0.6692   |  |  |
|          |      | Shiraz-44T | 891  | 0        | -0.954044 |  |  |
|          |      | Shiraz-44T | 896  | 0        | -0.109108 |  |  |
|          |      | Shiraz-44T | 897  | 0.486937 | 0         |  |  |
|          |      | Shiraz-46T | 991  | 0.139564 | 0         |  |  |
|          |      | Shiraz-47T | 1084 | 0.24185  | 0         |  |  |
|          |      | Shiraz-49T | 1166 | 0        | -0.917235 |  |  |
|          |      | Shiraz-49T | 1169 | 0        | -0.583529 |  |  |
|          |      | Shiraz-77T | 1282 | 0.213849 | 0         |  |  |
|          |      | Shiraz-9T  | 1368 | 0.199713 | 0         |  |  |
|          |      | Shiraz-9T  | 1369 | 0.703374 | 0         |  |  |
|          |      | Shiraz-18T | 1455 | 0        | -0.186773 |  |  |
|          |      | Shiraz-22T | 1669 | 0.695915 | 0         |  |  |
|          |      | Shiraz-22T | 1672 | 1.01678  | 0         |  |  |
|          |      | Shiraz-25T | 1717 | 0.420447 | 0         |  |  |
|          |      | Shiraz-28T | 1760 | 0.538181 | 0         |  |  |
|          |      | Shiraz-29T | 1800 | 0.672527 | 0         |  |  |
|          |      | Shiraz-32T | 1869 | 0.776805 | 0         |  |  |

|  |            |      |          |           |  |
|--|------------|------|----------|-----------|--|
|  | Shiraz-35T | 1932 | 0.507141 | 0         |  |
|  | Shiraz-58T | 2221 | 0.871948 | 0         |  |
|  | Shiraz-71T | 2260 | 0.68394  | 0         |  |
|  | Shiraz-71T | 2262 | 0.986748 | 0         |  |
|  | Shiraz-3T  | 238  | 0.472087 | 0         |  |
|  | Shiraz-4T  | 260  | 0        | -0.324128 |  |
|  | Shiraz-16T | 294  | 0.655804 | 0         |  |
|  | Shiraz-31T | 345  | 0.103301 | 0         |  |
|  | Shiraz-36T | 431  | 0        | -0.78035  |  |
|  | Shiraz-36T | 432  | 0        | -0.6692   |  |
|  | Shiraz-44T | 891  | 0        | -0.954044 |  |
|  | Shiraz-44T | 896  | 0        | -0.109108 |  |
|  | Shiraz-44T | 897  | 0.486937 | 0         |  |
|  | Shiraz-46T | 991  | 0.139564 | 0         |  |
|  | Shiraz-47T | 1084 | 0.24185  | 0         |  |
|  | Shiraz-49T | 1166 | 0        | -0.917235 |  |
|  | Shiraz-49T | 1169 | 0        | -0.583529 |  |
|  | Shiraz-77T | 1282 | 0.213849 | 0         |  |
|  | Shiraz-9T  | 1368 | 0.199713 | 0         |  |
|  | Shiraz-9T  | 1369 | 0.703374 | 0         |  |
|  | Shiraz-18T | 1455 | 0        | -0.186773 |  |
|  | Shiraz-22T | 1669 | 0.695915 | 0         |  |
|  | Shiraz-22T | 1672 | 1.01678  | 0         |  |
|  | Shiraz-25T | 1717 | 0.420447 | 0         |  |
|  | Shiraz-28T | 1760 | 0.538181 | 0         |  |
|  | Shiraz-29T | 1800 | 0.672527 | 0         |  |
|  | Shiraz-32T | 1869 | 0.776805 | 0         |  |
|  | Shiraz-35T | 1932 | 0.507141 | 0         |  |
|  | Shiraz-58T | 2221 | 0.871948 | 0         |  |
|  | Shiraz-71T | 2260 | 0.68394  | 0         |  |
|  | Shiraz-71T | 2262 | 0.986748 | 0         |  |
|  | Shiraz-3T  | 238  | 0.472087 | 0         |  |
|  | Shiraz-4T  | 260  | 0        | -0.324128 |  |
|  | Shiraz-16T | 294  | 0.655804 | 0         |  |
|  | Shiraz-31T | 345  | 0.103301 | 0         |  |
|  | Shiraz-36T | 431  | 0        | -0.78035  |  |
|  | Shiraz-36T | 432  | 0        | -0.6692   |  |
|  | Shiraz-44T | 891  | 0        | -0.954044 |  |
|  | Shiraz-44T | 896  | 0        | -0.109108 |  |
|  | Shiraz-44T | 897  | 0.486937 | 0         |  |
|  | Shiraz-46T | 991  | 0.139564 | 0         |  |
|  | Shiraz-47T | 1084 | 0.24185  | 0         |  |
|  | Shiraz-49T | 1166 | 0        | -0.917235 |  |
|  | Shiraz-49T | 1169 | 0        | -0.583529 |  |
|  | Shiraz-77T | 1282 | 0.213849 | 0         |  |
|  | Shiraz-9T  | 1368 | 0.199713 | 0         |  |
|  | Shiraz-9T  | 1369 | 0.703374 | 0         |  |

|        |      |            |      |          |           |  |  |
|--------|------|------------|------|----------|-----------|--|--|
|        |      | Shiraz-18T | 1455 | 0        | -0.186773 |  |  |
|        |      | Shiraz-22T | 1669 | 0.695915 | 0         |  |  |
|        |      | Shiraz-22T | 1672 | 1.01678  | 0         |  |  |
|        |      | Shiraz-25T | 1717 | 0.420447 | 0         |  |  |
|        |      | Shiraz-28T | 1760 | 0.538181 | 0         |  |  |
|        |      | Shiraz-29T | 1800 | 0.672527 | 0         |  |  |
|        |      | Shiraz-32T | 1869 | 0.776805 | 0         |  |  |
|        |      | Shiraz-35T | 1932 | 0.507141 | 0         |  |  |
|        |      | Shiraz-58T | 2221 | 0.871948 | 0         |  |  |
|        |      | Shiraz-71T | 2260 | 0.68394  | 0         |  |  |
|        |      | Shiraz-71T | 2262 | 0.986748 | 0         |  |  |
| PRKAA1 | chr5 | Shiraz-4T  | 250  | 0.262252 | 0         |  |  |
|        |      | Shiraz-16T | 266  | 0.321724 | 0         |  |  |
|        |      | Shiraz-44T | 591  | 0        | -0.233934 |  |  |
|        |      | Shiraz-18T | 1429 | 0        | -0.314125 |  |  |
|        |      | Shiraz-22T | 1522 | 0        | -0.322688 |  |  |
|        |      | Shiraz-25T | 1694 | 0.201602 | 0         |  |  |
|        |      | Shiraz-28T | 1731 | 0.295447 | 0         |  |  |
|        |      | Shiraz-29T | 1773 | 0.090981 | 0         |  |  |
|        |      | Shiraz-40T | 2016 | 0.376634 | 0         |  |  |
|        |      | Shiraz-4T  | 250  | 0.262252 | 0         |  |  |
|        |      | Shiraz-16T | 266  | 0.321724 | 0         |  |  |
|        |      | Shiraz-44T | 591  | 0        | -0.233934 |  |  |
|        |      | Shiraz-18T | 1429 | 0        | -0.314125 |  |  |
|        |      | Shiraz-22T | 1522 | 0        | -0.322688 |  |  |
|        |      | Shiraz-25T | 1694 | 0.201602 | 0         |  |  |
|        |      | Shiraz-28T | 1731 | 0.295447 | 0         |  |  |
|        |      | Shiraz-29T | 1773 | 0.090981 | 0         |  |  |
|        |      | Shiraz-40T | 2016 | 0.376634 | 0         |  |  |
|        |      | Shiraz-4T  | 250  | 0.262252 | 0         |  |  |
|        |      | Shiraz-16T | 266  | 0.321724 | 0         |  |  |
|        |      | Shiraz-44T | 591  | 0        | -0.233934 |  |  |
|        |      | Shiraz-18T | 1429 | 0        | -0.314125 |  |  |
|        |      | Shiraz-22T | 1522 | 0        | -0.322688 |  |  |
|        |      | Shiraz-25T | 1694 | 0.201602 | 0         |  |  |
|        |      | Shiraz-28T | 1731 | 0.295447 | 0         |  |  |
|        |      | Shiraz-29T | 1773 | 0.090981 | 0         |  |  |
|        |      | Shiraz-40T | 2016 | 0.376634 | 0         |  |  |
| PRKAG2 | chr7 | Shiraz-3T  | 90   | 0.219276 | 0         |  |  |
|        |      | Shiraz-3T  | 90   | 0.219276 | 0         |  |  |
|        |      | Shiraz-3T  | 90   | 0.219276 | 0         |  |  |
|        |      | Shiraz-3T  | 99   | 0.454766 | 0         |  |  |
|        |      | Shiraz-3T  | 99   | 0.454766 | 0         |  |  |
|        |      | Shiraz-3T  | 99   | 0.454766 | 0         |  |  |
|        |      | Shiraz-4T  | 253  | 0.372918 | 0         |  |  |
|        |      | Shiraz-4T  | 253  | 0.372918 | 0         |  |  |
|        |      | Shiraz-4T  | 253  | 0.372918 | 0         |  |  |

|  |  |            |      |          |   |  |  |
|--|--|------------|------|----------|---|--|--|
|  |  | Shiraz-36T | 378  | 0.179558 | 0 |  |  |
|  |  | Shiraz-36T | 378  | 0.179558 | 0 |  |  |
|  |  | Shiraz-36T | 378  | 0.179558 | 0 |  |  |
|  |  | Shiraz-44T | 646  | 0.471276 | 0 |  |  |
|  |  | Shiraz-44T | 646  | 0.471276 | 0 |  |  |
|  |  | Shiraz-44T | 646  | 0.471276 | 0 |  |  |
|  |  | Shiraz-46T | 943  | 0.093799 | 0 |  |  |
|  |  | Shiraz-46T | 943  | 0.093799 | 0 |  |  |
|  |  | Shiraz-46T | 943  | 0.093799 | 0 |  |  |
|  |  | Shiraz-9T  | 1325 | 0.221899 | 0 |  |  |
|  |  | Shiraz-9T  | 1325 | 0.221899 | 0 |  |  |
|  |  | Shiraz-9T  | 1325 | 0.221899 | 0 |  |  |
|  |  | Shiraz-18T | 1434 | 0.244465 | 0 |  |  |
|  |  | Shiraz-18T | 1434 | 0.244465 | 0 |  |  |
|  |  | Shiraz-18T | 1434 | 0.244465 | 0 |  |  |
|  |  | Shiraz-22T | 1555 | 0.427999 | 0 |  |  |
|  |  | Shiraz-22T | 1555 | 0.427999 | 0 |  |  |
|  |  | Shiraz-22T | 1555 | 0.427999 | 0 |  |  |
|  |  | Shiraz-25T | 1698 | 0.21835  | 0 |  |  |
|  |  | Shiraz-25T | 1698 | 0.21835  | 0 |  |  |
|  |  | Shiraz-25T | 1698 | 0.21835  | 0 |  |  |
|  |  | Shiraz-28T | 1735 | 0.350744 | 0 |  |  |
|  |  | Shiraz-28T | 1735 | 0.350744 | 0 |  |  |
|  |  | Shiraz-28T | 1735 | 0.350744 | 0 |  |  |
|  |  | Shiraz-29T | 1778 | 0.120767 | 0 |  |  |
|  |  | Shiraz-29T | 1778 | 0.120767 | 0 |  |  |
|  |  | Shiraz-29T | 1778 | 0.120767 | 0 |  |  |
|  |  | Shiraz-32T | 1833 | 0.551336 | 0 |  |  |
|  |  | Shiraz-32T | 1833 | 0.551336 | 0 |  |  |
|  |  | Shiraz-32T | 1833 | 0.551336 | 0 |  |  |
|  |  | Shiraz-38T | 1951 | 0.250891 | 0 |  |  |
|  |  | Shiraz-38T | 1951 | 0.250891 | 0 |  |  |
|  |  | Shiraz-38T | 1951 | 0.250891 | 0 |  |  |
|  |  | Shiraz-53T | 2078 | 0.287202 | 0 |  |  |
|  |  | Shiraz-53T | 2078 | 0.287202 | 0 |  |  |
|  |  | Shiraz-53T | 2078 | 0.287202 | 0 |  |  |
|  |  | Shiraz-58T | 2162 | 0.221505 | 0 |  |  |
|  |  | Shiraz-58T | 2162 | 0.221505 | 0 |  |  |
|  |  | Shiraz-58T | 2162 | 0.221505 | 0 |  |  |
|  |  | Shiraz-71T | 2238 | 0.603631 | 0 |  |  |
|  |  | Shiraz-71T | 2238 | 0.603631 | 0 |  |  |
|  |  | Shiraz-71T | 2238 | 0.603631 | 0 |  |  |
|  |  | Shiraz-3T  | 90   | 0.219276 | 0 |  |  |
|  |  | Shiraz-3T  | 90   | 0.219276 | 0 |  |  |
|  |  | Shiraz-3T  | 90   | 0.219276 | 0 |  |  |
|  |  | Shiraz-3T  | 99   | 0.454766 | 0 |  |  |
|  |  | Shiraz-3T  | 99   | 0.454766 | 0 |  |  |

|  |  |            |      |          |   |  |  |
|--|--|------------|------|----------|---|--|--|
|  |  | Shiraz-3T  | 99   | 0.454766 | 0 |  |  |
|  |  | Shiraz-4T  | 253  | 0.372918 | 0 |  |  |
|  |  | Shiraz-4T  | 253  | 0.372918 | 0 |  |  |
|  |  | Shiraz-4T  | 253  | 0.372918 | 0 |  |  |
|  |  | Shiraz-36T | 378  | 0.179558 | 0 |  |  |
|  |  | Shiraz-36T | 378  | 0.179558 | 0 |  |  |
|  |  | Shiraz-36T | 378  | 0.179558 | 0 |  |  |
|  |  | Shiraz-44T | 646  | 0.471276 | 0 |  |  |
|  |  | Shiraz-44T | 646  | 0.471276 | 0 |  |  |
|  |  | Shiraz-44T | 646  | 0.471276 | 0 |  |  |
|  |  | Shiraz-46T | 943  | 0.093799 | 0 |  |  |
|  |  | Shiraz-46T | 943  | 0.093799 | 0 |  |  |
|  |  | Shiraz-46T | 943  | 0.093799 | 0 |  |  |
|  |  | Shiraz-9T  | 1325 | 0.221899 | 0 |  |  |
|  |  | Shiraz-9T  | 1325 | 0.221899 | 0 |  |  |
|  |  | Shiraz-9T  | 1325 | 0.221899 | 0 |  |  |
|  |  | Shiraz-18T | 1434 | 0.244465 | 0 |  |  |
|  |  | Shiraz-18T | 1434 | 0.244465 | 0 |  |  |
|  |  | Shiraz-18T | 1434 | 0.244465 | 0 |  |  |
|  |  | Shiraz-22T | 1555 | 0.427999 | 0 |  |  |
|  |  | Shiraz-22T | 1555 | 0.427999 | 0 |  |  |
|  |  | Shiraz-22T | 1555 | 0.427999 | 0 |  |  |
|  |  | Shiraz-25T | 1698 | 0.21835  | 0 |  |  |
|  |  | Shiraz-25T | 1698 | 0.21835  | 0 |  |  |
|  |  | Shiraz-25T | 1698 | 0.21835  | 0 |  |  |
|  |  | Shiraz-28T | 1735 | 0.350744 | 0 |  |  |
|  |  | Shiraz-28T | 1735 | 0.350744 | 0 |  |  |
|  |  | Shiraz-28T | 1735 | 0.350744 | 0 |  |  |
|  |  | Shiraz-29T | 1778 | 0.120767 | 0 |  |  |
|  |  | Shiraz-29T | 1778 | 0.120767 | 0 |  |  |
|  |  | Shiraz-29T | 1778 | 0.120767 | 0 |  |  |
|  |  | Shiraz-32T | 1833 | 0.551336 | 0 |  |  |
|  |  | Shiraz-32T | 1833 | 0.551336 | 0 |  |  |
|  |  | Shiraz-32T | 1833 | 0.551336 | 0 |  |  |
|  |  | Shiraz-38T | 1951 | 0.250891 | 0 |  |  |
|  |  | Shiraz-38T | 1951 | 0.250891 | 0 |  |  |
|  |  | Shiraz-38T | 1951 | 0.250891 | 0 |  |  |
|  |  | Shiraz-53T | 2078 | 0.287202 | 0 |  |  |
|  |  | Shiraz-53T | 2078 | 0.287202 | 0 |  |  |
|  |  | Shiraz-53T | 2078 | 0.287202 | 0 |  |  |
|  |  | Shiraz-58T | 2162 | 0.221505 | 0 |  |  |
|  |  | Shiraz-58T | 2162 | 0.221505 | 0 |  |  |
|  |  | Shiraz-58T | 2162 | 0.221505 | 0 |  |  |
|  |  | Shiraz-71T | 2238 | 0.603631 | 0 |  |  |
|  |  | Shiraz-71T | 2238 | 0.603631 | 0 |  |  |
|  |  | Shiraz-71T | 2238 | 0.603631 | 0 |  |  |
|  |  | Shiraz-3T  | 90   | 0.219276 | 0 |  |  |

|  |  |            |      |          |   |  |  |
|--|--|------------|------|----------|---|--|--|
|  |  | Shiraz-3T  | 90   | 0.219276 | 0 |  |  |
|  |  | Shiraz-3T  | 90   | 0.219276 | 0 |  |  |
|  |  | Shiraz-3T  | 99   | 0.454766 | 0 |  |  |
|  |  | Shiraz-3T  | 99   | 0.454766 | 0 |  |  |
|  |  | Shiraz-3T  | 99   | 0.454766 | 0 |  |  |
|  |  | Shiraz-4T  | 253  | 0.372918 | 0 |  |  |
|  |  | Shiraz-4T  | 253  | 0.372918 | 0 |  |  |
|  |  | Shiraz-4T  | 253  | 0.372918 | 0 |  |  |
|  |  | Shiraz-36T | 378  | 0.179558 | 0 |  |  |
|  |  | Shiraz-36T | 378  | 0.179558 | 0 |  |  |
|  |  | Shiraz-36T | 378  | 0.179558 | 0 |  |  |
|  |  | Shiraz-44T | 646  | 0.471276 | 0 |  |  |
|  |  | Shiraz-44T | 646  | 0.471276 | 0 |  |  |
|  |  | Shiraz-44T | 646  | 0.471276 | 0 |  |  |
|  |  | Shiraz-46T | 943  | 0.093799 | 0 |  |  |
|  |  | Shiraz-46T | 943  | 0.093799 | 0 |  |  |
|  |  | Shiraz-46T | 943  | 0.093799 | 0 |  |  |
|  |  | Shiraz-9T  | 1325 | 0.221899 | 0 |  |  |
|  |  | Shiraz-9T  | 1325 | 0.221899 | 0 |  |  |
|  |  | Shiraz-9T  | 1325 | 0.221899 | 0 |  |  |
|  |  | Shiraz-18T | 1434 | 0.244465 | 0 |  |  |
|  |  | Shiraz-18T | 1434 | 0.244465 | 0 |  |  |
|  |  | Shiraz-18T | 1434 | 0.244465 | 0 |  |  |
|  |  | Shiraz-22T | 1555 | 0.427999 | 0 |  |  |
|  |  | Shiraz-22T | 1555 | 0.427999 | 0 |  |  |
|  |  | Shiraz-22T | 1555 | 0.427999 | 0 |  |  |
|  |  | Shiraz-25T | 1698 | 0.21835  | 0 |  |  |
|  |  | Shiraz-25T | 1698 | 0.21835  | 0 |  |  |
|  |  | Shiraz-25T | 1698 | 0.21835  | 0 |  |  |
|  |  | Shiraz-28T | 1735 | 0.350744 | 0 |  |  |
|  |  | Shiraz-28T | 1735 | 0.350744 | 0 |  |  |
|  |  | Shiraz-28T | 1735 | 0.350744 | 0 |  |  |
|  |  | Shiraz-29T | 1778 | 0.120767 | 0 |  |  |
|  |  | Shiraz-29T | 1778 | 0.120767 | 0 |  |  |
|  |  | Shiraz-29T | 1778 | 0.120767 | 0 |  |  |
|  |  | Shiraz-32T | 1833 | 0.551336 | 0 |  |  |
|  |  | Shiraz-32T | 1833 | 0.551336 | 0 |  |  |
|  |  | Shiraz-32T | 1833 | 0.551336 | 0 |  |  |
|  |  | Shiraz-38T | 1951 | 0.250891 | 0 |  |  |
|  |  | Shiraz-38T | 1951 | 0.250891 | 0 |  |  |
|  |  | Shiraz-38T | 1951 | 0.250891 | 0 |  |  |
|  |  | Shiraz-53T | 2078 | 0.287202 | 0 |  |  |
|  |  | Shiraz-53T | 2078 | 0.287202 | 0 |  |  |
|  |  | Shiraz-53T | 2078 | 0.287202 | 0 |  |  |
|  |  | Shiraz-58T | 2162 | 0.221505 | 0 |  |  |
|  |  | Shiraz-58T | 2162 | 0.221505 | 0 |  |  |
|  |  | Shiraz-58T | 2162 | 0.221505 | 0 |  |  |



|         |      |            |      |          |           |  |
|---------|------|------------|------|----------|-----------|--|
|         |      | Shiraz-71T | 2238 | 0.603631 | 0         |  |
|         |      | Shiraz-71T | 2238 | 0.603631 | 0         |  |
|         |      | Shiraz-71T | 2238 | 0.603631 | 0         |  |
| PRKAR2B | chr7 | Shiraz-3T  | 90   | 0.219276 | 0         |  |
|         |      | Shiraz-4T  | 253  | 0.372918 | 0         |  |
|         |      | Shiraz-36T | 378  | 0.179558 | 0         |  |
|         |      | Shiraz-46T | 943  | 0.093799 | 0         |  |
|         |      | Shiraz-77T | 1225 | 0        | -0.117922 |  |
|         |      | Shiraz-18T | 1434 | 0.244465 | 0         |  |
|         |      | Shiraz-22T | 1549 | 0        | -0.319623 |  |
|         |      | Shiraz-25T | 1698 | 0.21835  | 0         |  |
|         |      | Shiraz-28T | 1735 | 0.350744 | 0         |  |
|         |      | Shiraz-29T | 1778 | 0.120767 | 0         |  |
|         |      | Shiraz-32T | 1833 | 0.551336 | 0         |  |
|         |      | Shiraz-38T | 1951 | 0.250891 | 0         |  |
|         |      | Shiraz-53T | 2078 | 0.287202 | 0         |  |
|         |      | Shiraz-71T | 2238 | 0.603631 | 0         |  |
|         |      | Shiraz-3T  | 90   | 0.219276 | 0         |  |
|         |      | Shiraz-4T  | 253  | 0.372918 | 0         |  |
|         |      | Shiraz-36T | 378  | 0.179558 | 0         |  |
|         |      | Shiraz-46T | 943  | 0.093799 | 0         |  |
|         |      | Shiraz-77T | 1225 | 0        | -0.117922 |  |
|         |      | Shiraz-18T | 1434 | 0.244465 | 0         |  |
|         |      | Shiraz-22T | 1549 | 0        | -0.319623 |  |
|         |      | Shiraz-25T | 1698 | 0.21835  | 0         |  |
|         |      | Shiraz-28T | 1735 | 0.350744 | 0         |  |
|         |      | Shiraz-29T | 1778 | 0.120767 | 0         |  |
|         |      | Shiraz-32T | 1833 | 0.551336 | 0         |  |
|         |      | Shiraz-38T | 1951 | 0.250891 | 0         |  |
|         |      | Shiraz-53T | 2078 | 0.287202 | 0         |  |
|         |      | Shiraz-71T | 2238 | 0.603631 | 0         |  |
|         |      | Shiraz-3T  | 90   | 0.219276 | 0         |  |
|         |      | Shiraz-4T  | 253  | 0.372918 | 0         |  |
|         |      | Shiraz-36T | 378  | 0.179558 | 0         |  |
|         |      | Shiraz-46T | 943  | 0.093799 | 0         |  |
|         |      | Shiraz-77T | 1225 | 0        | -0.117922 |  |
|         |      | Shiraz-18T | 1434 | 0.244465 | 0         |  |
|         |      | Shiraz-22T | 1549 | 0        | -0.319623 |  |
|         |      | Shiraz-25T | 1698 | 0.21835  | 0         |  |
|         |      | Shiraz-28T | 1735 | 0.350744 | 0         |  |
|         |      | Shiraz-29T | 1778 | 0.120767 | 0         |  |
|         |      | Shiraz-32T | 1833 | 0.551336 | 0         |  |
|         |      | Shiraz-38T | 1951 | 0.250891 | 0         |  |
|         |      | Shiraz-53T | 2078 | 0.287202 | 0         |  |
|         |      | Shiraz-71T | 2238 | 0.603631 | 0         |  |
| PRKRIP1 | chr7 | Shiraz-3T  | 90   | 0.219276 | 0         |  |
|         |      | Shiraz-3T  | 94   | 0.74735  | 0         |  |

|  |  |            |      |          |           |  |  |
|--|--|------------|------|----------|-----------|--|--|
|  |  | Shiraz-4T  | 253  | 0.372918 | 0         |  |  |
|  |  | Shiraz-31T | 316  | 0.219196 | 0         |  |  |
|  |  | Shiraz-36T | 378  | 0.179558 | 0         |  |  |
|  |  | Shiraz-36T | 381  | 0.332628 | 0         |  |  |
|  |  | Shiraz-44T | 639  | 1.035032 | 0         |  |  |
|  |  | Shiraz-46T | 943  | 0.093799 | 0         |  |  |
|  |  | Shiraz-46T | 946  | 0.299835 | 0         |  |  |
|  |  | Shiraz-47T | 1030 | 0.257728 | 0         |  |  |
|  |  | Shiraz-49T | 1120 | 0.281656 | 0         |  |  |
|  |  | Shiraz-77T | 1225 | 0        | -0.117922 |  |  |
|  |  | Shiraz-77T | 1227 | 0.196445 | 0         |  |  |
|  |  | Shiraz-9T  | 1324 | 0.679266 | 0         |  |  |
|  |  | Shiraz-18T | 1434 | 0.244465 | 0         |  |  |
|  |  | Shiraz-22T | 1549 | 0        | -0.319623 |  |  |
|  |  | Shiraz-22T | 1551 | 0.324011 | 0         |  |  |
|  |  | Shiraz-25T | 1698 | 0.21835  | 0         |  |  |
|  |  | Shiraz-28T | 1735 | 0.350744 | 0         |  |  |
|  |  | Shiraz-29T | 1778 | 0.120767 | 0         |  |  |
|  |  | Shiraz-32T | 1833 | 0.551336 | 0         |  |  |
|  |  | Shiraz-38T | 1951 | 0.250891 | 0         |  |  |
|  |  | Shiraz-53T | 2078 | 0.287202 | 0         |  |  |
|  |  | Shiraz-58T | 2160 | 0.399007 | 0         |  |  |
|  |  | Shiraz-71T | 2238 | 0.603631 | 0         |  |  |
|  |  | Shiraz-3T  | 90   | 0.219276 | 0         |  |  |
|  |  | Shiraz-3T  | 94   | 0.74735  | 0         |  |  |
|  |  | Shiraz-4T  | 253  | 0.372918 | 0         |  |  |
|  |  | Shiraz-31T | 316  | 0.219196 | 0         |  |  |
|  |  | Shiraz-36T | 378  | 0.179558 | 0         |  |  |
|  |  | Shiraz-36T | 381  | 0.332628 | 0         |  |  |
|  |  | Shiraz-44T | 639  | 1.035032 | 0         |  |  |
|  |  | Shiraz-46T | 943  | 0.093799 | 0         |  |  |
|  |  | Shiraz-46T | 946  | 0.299835 | 0         |  |  |
|  |  | Shiraz-47T | 1030 | 0.257728 | 0         |  |  |
|  |  | Shiraz-49T | 1120 | 0.281656 | 0         |  |  |
|  |  | Shiraz-77T | 1225 | 0        | -0.117922 |  |  |
|  |  | Shiraz-77T | 1227 | 0.196445 | 0         |  |  |
|  |  | Shiraz-9T  | 1324 | 0.679266 | 0         |  |  |
|  |  | Shiraz-18T | 1434 | 0.244465 | 0         |  |  |
|  |  | Shiraz-22T | 1549 | 0        | -0.319623 |  |  |
|  |  | Shiraz-22T | 1551 | 0.324011 | 0         |  |  |
|  |  | Shiraz-25T | 1698 | 0.21835  | 0         |  |  |
|  |  | Shiraz-28T | 1735 | 0.350744 | 0         |  |  |
|  |  | Shiraz-29T | 1778 | 0.120767 | 0         |  |  |
|  |  | Shiraz-32T | 1833 | 0.551336 | 0         |  |  |
|  |  | Shiraz-38T | 1951 | 0.250891 | 0         |  |  |
|  |  | Shiraz-53T | 2078 | 0.287202 | 0         |  |  |
|  |  | Shiraz-58T | 2160 | 0.399007 | 0         |  |  |

|      |      |            |      |          |           |  |  |
|------|------|------------|------|----------|-----------|--|--|
|      |      | Shiraz-71T | 2238 | 0.603631 | 0         |  |  |
|      |      | Shiraz-3T  | 90   | 0.219276 | 0         |  |  |
|      |      | Shiraz-3T  | 94   | 0.74735  | 0         |  |  |
|      |      | Shiraz-4T  | 253  | 0.372918 | 0         |  |  |
|      |      | Shiraz-31T | 316  | 0.219196 | 0         |  |  |
|      |      | Shiraz-36T | 378  | 0.179558 | 0         |  |  |
|      |      | Shiraz-36T | 381  | 0.332628 | 0         |  |  |
|      |      | Shiraz-44T | 639  | 1.035032 | 0         |  |  |
|      |      | Shiraz-46T | 943  | 0.093799 | 0         |  |  |
|      |      | Shiraz-46T | 946  | 0.299835 | 0         |  |  |
|      |      | Shiraz-47T | 1030 | 0.257728 | 0         |  |  |
|      |      | Shiraz-49T | 1120 | 0.281656 | 0         |  |  |
|      |      | Shiraz-77T | 1225 | 0        | -0.117922 |  |  |
|      |      | Shiraz-77T | 1227 | 0.196445 | 0         |  |  |
|      |      | Shiraz-9T  | 1324 | 0.679266 | 0         |  |  |
|      |      | Shiraz-18T | 1434 | 0.244465 | 0         |  |  |
|      |      | Shiraz-22T | 1549 | 0        | -0.319623 |  |  |
|      |      | Shiraz-22T | 1551 | 0.324011 | 0         |  |  |
|      |      | Shiraz-25T | 1698 | 0.21835  | 0         |  |  |
|      |      | Shiraz-28T | 1735 | 0.350744 | 0         |  |  |
|      |      | Shiraz-29T | 1778 | 0.120767 | 0         |  |  |
|      |      | Shiraz-32T | 1833 | 0.551336 | 0         |  |  |
|      |      | Shiraz-38T | 1951 | 0.250891 | 0         |  |  |
|      |      | Shiraz-53T | 2078 | 0.287202 | 0         |  |  |
|      |      | Shiraz-58T | 2160 | 0.399007 | 0         |  |  |
|      |      | Shiraz-71T | 2238 | 0.603631 | 0         |  |  |
| PRKX | chrX | Shiraz-4T  | 260  | 0        | -0.324128 |  |  |
|      |      | Shiraz-16T | 294  | 0.655804 | 0         |  |  |
|      |      | Shiraz-36T | 431  | 0        | -0.78035  |  |  |
|      |      | Shiraz-44T | 891  | 0        | -0.954044 |  |  |
|      |      | Shiraz-49T | 1166 | 0        | -0.917235 |  |  |
|      |      | Shiraz-9T  | 1368 | 0.199713 | 0         |  |  |
|      |      | Shiraz-18T | 1455 | 0        | -0.186773 |  |  |
|      |      | Shiraz-22T | 1669 | 0.695915 | 0         |  |  |
|      |      | Shiraz-25T | 1717 | 0.420447 | 0         |  |  |
|      |      | Shiraz-28T | 1760 | 0.538181 | 0         |  |  |
|      |      | Shiraz-29T | 1800 | 0.672527 | 0         |  |  |
|      |      | Shiraz-32T | 1869 | 0.776805 | 0         |  |  |
|      |      | Shiraz-35T | 1932 | 0.507141 | 0         |  |  |
|      |      | Shiraz-58T | 2221 | 0.871948 | 0         |  |  |
|      |      | Shiraz-71T | 2260 | 0.68394  | 0         |  |  |
|      |      | Shiraz-71T | 2261 | 0.508399 | 0         |  |  |
|      |      | Shiraz-4T  | 260  | 0        | -0.324128 |  |  |
|      |      | Shiraz-16T | 294  | 0.655804 | 0         |  |  |
|      |      | Shiraz-36T | 431  | 0        | -0.78035  |  |  |
|      |      | Shiraz-44T | 891  | 0        | -0.954044 |  |  |
|      |      | Shiraz-49T | 1166 | 0        | -0.917235 |  |  |

|      |      |            |      |          |           |  |
|------|------|------------|------|----------|-----------|--|
|      |      | Shiraz-9T  | 1368 | 0.199713 | 0         |  |
|      |      | Shiraz-18T | 1455 | 0        | -0.186773 |  |
|      |      | Shiraz-22T | 1669 | 0.695915 | 0         |  |
|      |      | Shiraz-25T | 1717 | 0.420447 | 0         |  |
|      |      | Shiraz-28T | 1760 | 0.538181 | 0         |  |
|      |      | Shiraz-29T | 1800 | 0.672527 | 0         |  |
|      |      | Shiraz-32T | 1869 | 0.776805 | 0         |  |
|      |      | Shiraz-35T | 1932 | 0.507141 | 0         |  |
|      |      | Shiraz-58T | 2221 | 0.871948 | 0         |  |
|      |      | Shiraz-71T | 2260 | 0.68394  | 0         |  |
|      |      | Shiraz-71T | 2261 | 0.508399 | 0         |  |
|      |      | Shiraz-4T  | 260  | 0        | -0.324128 |  |
|      |      | Shiraz-16T | 294  | 0.655804 | 0         |  |
|      |      | Shiraz-36T | 431  | 0        | -0.78035  |  |
|      |      | Shiraz-44T | 891  | 0        | -0.954044 |  |
|      |      | Shiraz-49T | 1166 | 0        | -0.917235 |  |
|      |      | Shiraz-9T  | 1368 | 0.199713 | 0         |  |
|      |      | Shiraz-18T | 1455 | 0        | -0.186773 |  |
|      |      | Shiraz-22T | 1669 | 0.695915 | 0         |  |
|      |      | Shiraz-25T | 1717 | 0.420447 | 0         |  |
|      |      | Shiraz-28T | 1760 | 0.538181 | 0         |  |
|      |      | Shiraz-29T | 1800 | 0.672527 | 0         |  |
|      |      | Shiraz-32T | 1869 | 0.776805 | 0         |  |
|      |      | Shiraz-35T | 1932 | 0.507141 | 0         |  |
|      |      | Shiraz-58T | 2221 | 0.871948 | 0         |  |
|      |      | Shiraz-71T | 2260 | 0.68394  | 0         |  |
|      |      | Shiraz-71T | 2261 | 0.508399 | 0         |  |
| PRLR | chr5 | Shiraz-4T  | 250  | 0.262252 | 0         |  |
|      |      | Shiraz-16T | 266  | 0.321724 | 0         |  |
|      |      | Shiraz-18T | 1429 | 0        | -0.314125 |  |
|      |      | Shiraz-25T | 1694 | 0.201602 | 0         |  |
|      |      | Shiraz-28T | 1731 | 0.295447 | 0         |  |
|      |      | Shiraz-29T | 1773 | 0.090981 | 0         |  |
|      |      | Shiraz-40T | 2016 | 0.376634 | 0         |  |
|      |      | Shiraz-4T  | 250  | 0.262252 | 0         |  |
|      |      | Shiraz-16T | 266  | 0.321724 | 0         |  |
|      |      | Shiraz-18T | 1429 | 0        | -0.314125 |  |
|      |      | Shiraz-25T | 1694 | 0.201602 | 0         |  |
|      |      | Shiraz-28T | 1731 | 0.295447 | 0         |  |
|      |      | Shiraz-29T | 1773 | 0.090981 | 0         |  |
|      |      | Shiraz-40T | 2016 | 0.376634 | 0         |  |
|      |      | Shiraz-4T  | 250  | 0.262252 | 0         |  |
|      |      | Shiraz-16T | 266  | 0.321724 | 0         |  |
|      |      | Shiraz-18T | 1429 | 0        | -0.314125 |  |
|      |      | Shiraz-25T | 1694 | 0.201602 | 0         |  |
|      |      | Shiraz-28T | 1731 | 0.295447 | 0         |  |
|      |      | Shiraz-29T | 1773 | 0.090981 | 0         |  |

|       |      |            |      |          |           |  |
|-------|------|------------|------|----------|-----------|--|
|       |      | Shiraz-40T | 2016 | 0.376634 | 0         |  |
| PRPS1 | chrX | Shiraz-3T  | 242  | 0        | -0.336434 |  |
|       |      | Shiraz-4T  | 261  | 0        | -0.336249 |  |
|       |      | Shiraz-16T | 295  | 0.591657 | 0         |  |
|       |      | Shiraz-36T | 433  | 0        | -0.803961 |  |
|       |      | Shiraz-44T | 899  | 0        | -1.09697  |  |
|       |      | Shiraz-44T | 903  | 0        | -0.290259 |  |
|       |      | Shiraz-49T | 1170 | 0        | -0.967436 |  |
|       |      | Shiraz-18T | 1457 | 0.643204 | 0         |  |
|       |      | Shiraz-22T | 1673 | 0.611783 | 0         |  |
|       |      | Shiraz-25T | 1719 | 0.472955 | 0         |  |
|       |      | Shiraz-28T | 1762 | 0.562311 | 0         |  |
|       |      | Shiraz-29T | 1801 | 0.815343 | 0         |  |
|       |      | Shiraz-32T | 1870 | 0.729766 | 0         |  |
|       |      | Shiraz-35T | 1933 | 0.488535 | 0         |  |
|       |      | Shiraz-58T | 2223 | 0.833364 | 0         |  |
|       |      | Shiraz-71T | 2263 | 0.975531 | 0         |  |
|       |      | Shiraz-3T  | 242  | 0        | -0.336434 |  |
|       |      | Shiraz-4T  | 261  | 0        | -0.336249 |  |
|       |      | Shiraz-16T | 295  | 0.591657 | 0         |  |
|       |      | Shiraz-36T | 433  | 0        | -0.803961 |  |
|       |      | Shiraz-44T | 899  | 0        | -1.09697  |  |
|       |      | Shiraz-44T | 903  | 0        | -0.290259 |  |
|       |      | Shiraz-49T | 1170 | 0        | -0.967436 |  |
|       |      | Shiraz-18T | 1457 | 0.643204 | 0         |  |
|       |      | Shiraz-22T | 1673 | 0.611783 | 0         |  |
|       |      | Shiraz-25T | 1719 | 0.472955 | 0         |  |
|       |      | Shiraz-28T | 1762 | 0.562311 | 0         |  |
|       |      | Shiraz-29T | 1801 | 0.815343 | 0         |  |
|       |      | Shiraz-32T | 1870 | 0.729766 | 0         |  |
|       |      | Shiraz-35T | 1933 | 0.488535 | 0         |  |
|       |      | Shiraz-58T | 2223 | 0.833364 | 0         |  |
|       |      | Shiraz-71T | 2263 | 0.975531 | 0         |  |
|       |      | Shiraz-3T  | 242  | 0        | -0.336434 |  |
|       |      | Shiraz-4T  | 261  | 0        | -0.336249 |  |
|       |      | Shiraz-16T | 295  | 0.591657 | 0         |  |
|       |      | Shiraz-36T | 433  | 0        | -0.803961 |  |
|       |      | Shiraz-44T | 899  | 0        | -1.09697  |  |
|       |      | Shiraz-44T | 903  | 0        | -0.290259 |  |
|       |      | Shiraz-49T | 1170 | 0        | -0.967436 |  |
|       |      | Shiraz-18T | 1457 | 0.643204 | 0         |  |
|       |      | Shiraz-22T | 1673 | 0.611783 | 0         |  |
|       |      | Shiraz-25T | 1719 | 0.472955 | 0         |  |
|       |      | Shiraz-28T | 1762 | 0.562311 | 0         |  |
|       |      | Shiraz-29T | 1801 | 0.815343 | 0         |  |
|       |      | Shiraz-32T | 1870 | 0.729766 | 0         |  |
|       |      | Shiraz-35T | 1933 | 0.488535 | 0         |  |

|         |      |            |      |          |           |  |  |
|---------|------|------------|------|----------|-----------|--|--|
|         |      | Shiraz-58T | 2223 | 0.833364 | 0         |  |  |
|         |      | Shiraz-71T | 2263 | 0.975531 | 0         |  |  |
| PRPS1L1 | chr7 | Shiraz-4T  | 252  | 0.192083 | 0         |  |  |
|         |      | Shiraz-36T | 376  | 0.159952 | 0         |  |  |
|         |      | Shiraz-44T | 628  | 0        | -0.444379 |  |  |
|         |      | Shiraz-47T | 1027 | 0        | -0.117848 |  |  |
|         |      | Shiraz-49T | 1117 | 0        | -0.168296 |  |  |
|         |      | Shiraz-77T | 1222 | 0        | -0.113002 |  |  |
|         |      | Shiraz-18T | 1433 | 0.250973 | 0         |  |  |
|         |      | Shiraz-22T | 1543 | 0        | -0.513696 |  |  |
|         |      | Shiraz-25T | 1697 | 0.21945  | 0         |  |  |
|         |      | Shiraz-28T | 1734 | 0.362882 | 0         |  |  |
|         |      | Shiraz-29T | 1777 | 0.156747 | 0         |  |  |
|         |      | Shiraz-38T | 1950 | 0.265916 | 0         |  |  |
|         |      | Shiraz-58T | 2157 | 0        | -0.213872 |  |  |
|         |      | Shiraz-71T | 2236 | 0.320072 | 0         |  |  |
|         |      | Shiraz-4T  | 252  | 0.192083 | 0         |  |  |
|         |      | Shiraz-36T | 376  | 0.159952 | 0         |  |  |
|         |      | Shiraz-44T | 628  | 0        | -0.444379 |  |  |
|         |      | Shiraz-47T | 1027 | 0        | -0.117848 |  |  |
|         |      | Shiraz-49T | 1117 | 0        | -0.168296 |  |  |
|         |      | Shiraz-77T | 1222 | 0        | -0.113002 |  |  |
|         |      | Shiraz-18T | 1433 | 0.250973 | 0         |  |  |
|         |      | Shiraz-22T | 1543 | 0        | -0.513696 |  |  |
|         |      | Shiraz-25T | 1697 | 0.21945  | 0         |  |  |
|         |      | Shiraz-28T | 1734 | 0.362882 | 0         |  |  |
|         |      | Shiraz-29T | 1777 | 0.156747 | 0         |  |  |
|         |      | Shiraz-38T | 1950 | 0.265916 | 0         |  |  |
|         |      | Shiraz-58T | 2157 | 0        | -0.213872 |  |  |
|         |      | Shiraz-71T | 2236 | 0.320072 | 0         |  |  |
|         |      | Shiraz-4T  | 252  | 0.192083 | 0         |  |  |
|         |      | Shiraz-36T | 376  | 0.159952 | 0         |  |  |
|         |      | Shiraz-44T | 628  | 0        | -0.444379 |  |  |
|         |      | Shiraz-47T | 1027 | 0        | -0.117848 |  |  |
|         |      | Shiraz-49T | 1117 | 0        | -0.168296 |  |  |
|         |      | Shiraz-77T | 1222 | 0        | -0.113002 |  |  |
|         |      | Shiraz-18T | 1433 | 0.250973 | 0         |  |  |
|         |      | Shiraz-22T | 1543 | 0        | -0.513696 |  |  |
|         |      | Shiraz-25T | 1697 | 0.21945  | 0         |  |  |
|         |      | Shiraz-28T | 1734 | 0.362882 | 0         |  |  |
|         |      | Shiraz-29T | 1777 | 0.156747 | 0         |  |  |
|         |      | Shiraz-38T | 1950 | 0.265916 | 0         |  |  |
|         |      | Shiraz-58T | 2157 | 0        | -0.213872 |  |  |
|         |      | Shiraz-71T | 2236 | 0.320072 | 0         |  |  |
| PRPS2   | chrX | Shiraz-3T  | 235  | 0        | -0.28401  |  |  |
|         |      | Shiraz-4T  | 260  | 0        | -0.324128 |  |  |
|         |      | Shiraz-16T | 294  | 0.655804 | 0         |  |  |

|  |            |      |          |           |  |
|--|------------|------|----------|-----------|--|
|  | Shiraz-36T | 431  | 0        | -0.78035  |  |
|  | Shiraz-44T | 891  | 0        | -0.954044 |  |
|  | Shiraz-49T | 1166 | 0        | -0.917235 |  |
|  | Shiraz-9T  | 1368 | 0.199713 | 0         |  |
|  | Shiraz-18T | 1455 | 0        | -0.186773 |  |
|  | Shiraz-22T | 1669 | 0.695915 | 0         |  |
|  | Shiraz-25T | 1717 | 0.420447 | 0         |  |
|  | Shiraz-28T | 1760 | 0.538181 | 0         |  |
|  | Shiraz-29T | 1800 | 0.672527 | 0         |  |
|  | Shiraz-32T | 1869 | 0.776805 | 0         |  |
|  | Shiraz-35T | 1932 | 0.507141 | 0         |  |
|  | Shiraz-40T | 2051 | 0.098506 | 0         |  |
|  | Shiraz-58T | 2221 | 0.871948 | 0         |  |
|  | Shiraz-71T | 2260 | 0.68394  | 0         |  |
|  | Shiraz-71T | 2261 | 0.508399 | 0         |  |
|  | Shiraz-3T  | 235  | 0        | -0.28401  |  |
|  | Shiraz-4T  | 260  | 0        | -0.324128 |  |
|  | Shiraz-16T | 294  | 0.655804 | 0         |  |
|  | Shiraz-36T | 431  | 0        | -0.78035  |  |
|  | Shiraz-44T | 891  | 0        | -0.954044 |  |
|  | Shiraz-49T | 1166 | 0        | -0.917235 |  |
|  | Shiraz-9T  | 1368 | 0.199713 | 0         |  |
|  | Shiraz-18T | 1455 | 0        | -0.186773 |  |
|  | Shiraz-22T | 1669 | 0.695915 | 0         |  |
|  | Shiraz-25T | 1717 | 0.420447 | 0         |  |
|  | Shiraz-28T | 1760 | 0.538181 | 0         |  |
|  | Shiraz-29T | 1800 | 0.672527 | 0         |  |
|  | Shiraz-32T | 1869 | 0.776805 | 0         |  |
|  | Shiraz-35T | 1932 | 0.507141 | 0         |  |
|  | Shiraz-40T | 2051 | 0.098506 | 0         |  |
|  | Shiraz-58T | 2221 | 0.871948 | 0         |  |
|  | Shiraz-71T | 2260 | 0.68394  | 0         |  |
|  | Shiraz-71T | 2261 | 0.508399 | 0         |  |
|  | Shiraz-3T  | 235  | 0        | -0.28401  |  |
|  | Shiraz-4T  | 260  | 0        | -0.324128 |  |
|  | Shiraz-16T | 294  | 0.655804 | 0         |  |
|  | Shiraz-36T | 431  | 0        | -0.78035  |  |
|  | Shiraz-44T | 891  | 0        | -0.954044 |  |
|  | Shiraz-49T | 1166 | 0        | -0.917235 |  |
|  | Shiraz-9T  | 1368 | 0.199713 | 0         |  |
|  | Shiraz-18T | 1455 | 0        | -0.186773 |  |
|  | Shiraz-22T | 1669 | 0.695915 | 0         |  |
|  | Shiraz-25T | 1717 | 0.420447 | 0         |  |
|  | Shiraz-28T | 1760 | 0.538181 | 0         |  |
|  | Shiraz-29T | 1800 | 0.672527 | 0         |  |
|  | Shiraz-32T | 1869 | 0.776805 | 0         |  |
|  | Shiraz-35T | 1932 | 0.507141 | 0         |  |

|       |      |            |      |          |           |  |
|-------|------|------------|------|----------|-----------|--|
|       |      | Shiraz-40T | 2051 | 0.098506 | 0         |  |
|       |      | Shiraz-58T | 2221 | 0.871948 | 0         |  |
|       |      | Shiraz-71T | 2260 | 0.68394  | 0         |  |
|       |      | Shiraz-71T | 2261 | 0.508399 | 0         |  |
| PRR15 | chr7 | Shiraz-3T  | 87   | 0.198593 | 0         |  |
|       |      | Shiraz-4T  | 252  | 0.192083 | 0         |  |
|       |      | Shiraz-36T | 376  | 0.159952 | 0         |  |
|       |      | Shiraz-46T | 942  | 0.069143 | 0         |  |
|       |      | Shiraz-18T | 1433 | 0.250973 | 0         |  |
|       |      | Shiraz-25T | 1697 | 0.21945  | 0         |  |
|       |      | Shiraz-28T | 1734 | 0.362882 | 0         |  |
|       |      | Shiraz-29T | 1777 | 0.156747 | 0         |  |
|       |      | Shiraz-38T | 1950 | 0.265916 | 0         |  |
|       |      | Shiraz-71T | 2236 | 0.320072 | 0         |  |
|       |      | Shiraz-3T  | 87   | 0.198593 | 0         |  |
|       |      | Shiraz-4T  | 252  | 0.192083 | 0         |  |
|       |      | Shiraz-36T | 376  | 0.159952 | 0         |  |
|       |      | Shiraz-46T | 942  | 0.069143 | 0         |  |
|       |      | Shiraz-18T | 1433 | 0.250973 | 0         |  |
|       |      | Shiraz-25T | 1697 | 0.21945  | 0         |  |
|       |      | Shiraz-28T | 1734 | 0.362882 | 0         |  |
|       |      | Shiraz-29T | 1777 | 0.156747 | 0         |  |
|       |      | Shiraz-38T | 1950 | 0.265916 | 0         |  |
|       |      | Shiraz-71T | 2236 | 0.320072 | 0         |  |
|       |      | Shiraz-3T  | 87   | 0.198593 | 0         |  |
|       |      | Shiraz-4T  | 252  | 0.192083 | 0         |  |
|       |      | Shiraz-36T | 376  | 0.159952 | 0         |  |
|       |      | Shiraz-46T | 942  | 0.069143 | 0         |  |
|       |      | Shiraz-18T | 1433 | 0.250973 | 0         |  |
|       |      | Shiraz-25T | 1697 | 0.21945  | 0         |  |
|       |      | Shiraz-28T | 1734 | 0.362882 | 0         |  |
|       |      | Shiraz-29T | 1777 | 0.156747 | 0         |  |
|       |      | Shiraz-38T | 1950 | 0.265916 | 0         |  |
|       |      | Shiraz-71T | 2236 | 0.320072 | 0         |  |
| PRRG1 | chrX | Shiraz-3T  | 235  | 0        | -0.28401  |  |
|       |      | Shiraz-3T  | 236  | 0        | -0.435445 |  |
|       |      | Shiraz-4T  | 260  | 0        | -0.324128 |  |
|       |      | Shiraz-16T | 294  | 0.655804 | 0         |  |
|       |      | Shiraz-36T | 431  | 0        | -0.78035  |  |
|       |      | Shiraz-44T | 891  | 0        | -0.954044 |  |
|       |      | Shiraz-44T | 893  | 0        | -1.364406 |  |
|       |      | Shiraz-49T | 1166 | 0        | -0.917235 |  |
|       |      | Shiraz-49T | 1168 | 0        | -1.073859 |  |
|       |      | Shiraz-9T  | 1368 | 0.199713 | 0         |  |
|       |      | Shiraz-18T | 1455 | 0        | -0.186773 |  |
|       |      | Shiraz-22T | 1669 | 0.695915 | 0         |  |
|       |      | Shiraz-25T | 1717 | 0.420447 | 0         |  |



|  |  |            |      |          |           |  |  |
|--|--|------------|------|----------|-----------|--|--|
|  |  | Shiraz-28T | 1760 | 0.538181 | 0         |  |  |
|  |  | Shiraz-29T | 1800 | 0.672527 | 0         |  |  |
|  |  | Shiraz-32T | 1869 | 0.776805 | 0         |  |  |
|  |  | Shiraz-35T | 1932 | 0.507141 | 0         |  |  |
|  |  | Shiraz-40T | 2051 | 0.098506 | 0         |  |  |
|  |  | Shiraz-58T | 2221 | 0.871948 | 0         |  |  |
|  |  | Shiraz-58T | 2222 | 0.679664 | 0         |  |  |
|  |  | Shiraz-71T | 2260 | 0.68394  | 0         |  |  |
|  |  | Shiraz-71T | 2261 | 0.508399 | 0         |  |  |
|  |  | Shiraz-3T  | 235  | 0        | -0.28401  |  |  |
|  |  | Shiraz-3T  | 236  | 0        | -0.435445 |  |  |
|  |  | Shiraz-4T  | 260  | 0        | -0.324128 |  |  |
|  |  | Shiraz-16T | 294  | 0.655804 | 0         |  |  |
|  |  | Shiraz-36T | 431  | 0        | -0.78035  |  |  |
|  |  | Shiraz-44T | 891  | 0        | -0.954044 |  |  |
|  |  | Shiraz-44T | 893  | 0        | -1.364406 |  |  |
|  |  | Shiraz-49T | 1166 | 0        | -0.917235 |  |  |
|  |  | Shiraz-49T | 1168 | 0        | -1.073859 |  |  |
|  |  | Shiraz-9T  | 1368 | 0.199713 | 0         |  |  |
|  |  | Shiraz-18T | 1455 | 0        | -0.186773 |  |  |
|  |  | Shiraz-22T | 1669 | 0.695915 | 0         |  |  |
|  |  | Shiraz-25T | 1717 | 0.420447 | 0         |  |  |
|  |  | Shiraz-28T | 1760 | 0.538181 | 0         |  |  |
|  |  | Shiraz-29T | 1800 | 0.672527 | 0         |  |  |
|  |  | Shiraz-32T | 1869 | 0.776805 | 0         |  |  |
|  |  | Shiraz-35T | 1932 | 0.507141 | 0         |  |  |
|  |  | Shiraz-40T | 2051 | 0.098506 | 0         |  |  |
|  |  | Shiraz-58T | 2221 | 0.871948 | 0         |  |  |
|  |  | Shiraz-58T | 2222 | 0.679664 | 0         |  |  |
|  |  | Shiraz-71T | 2260 | 0.68394  | 0         |  |  |
|  |  | Shiraz-71T | 2261 | 0.508399 | 0         |  |  |
|  |  | Shiraz-3T  | 235  | 0        | -0.28401  |  |  |
|  |  | Shiraz-3T  | 236  | 0        | -0.435445 |  |  |
|  |  | Shiraz-4T  | 260  | 0        | -0.324128 |  |  |
|  |  | Shiraz-16T | 294  | 0.655804 | 0         |  |  |
|  |  | Shiraz-36T | 431  | 0        | -0.78035  |  |  |
|  |  | Shiraz-44T | 891  | 0        | -0.954044 |  |  |
|  |  | Shiraz-44T | 893  | 0        | -1.364406 |  |  |
|  |  | Shiraz-49T | 1166 | 0        | -0.917235 |  |  |
|  |  | Shiraz-49T | 1168 | 0        | -1.073859 |  |  |
|  |  | Shiraz-9T  | 1368 | 0.199713 | 0         |  |  |
|  |  | Shiraz-18T | 1455 | 0        | -0.186773 |  |  |
|  |  | Shiraz-22T | 1669 | 0.695915 | 0         |  |  |
|  |  | Shiraz-25T | 1717 | 0.420447 | 0         |  |  |
|  |  | Shiraz-28T | 1760 | 0.538181 | 0         |  |  |
|  |  | Shiraz-29T | 1800 | 0.672527 | 0         |  |  |
|  |  | Shiraz-32T | 1869 | 0.776805 | 0         |  |  |

|       |      |            |      |          |           |  |
|-------|------|------------|------|----------|-----------|--|
|       |      | Shiraz-35T | 1932 | 0.507141 | 0         |  |
|       |      | Shiraz-40T | 2051 | 0.098506 | 0         |  |
|       |      | Shiraz-58T | 2221 | 0.871948 | 0         |  |
|       |      | Shiraz-58T | 2222 | 0.679664 | 0         |  |
|       |      | Shiraz-71T | 2260 | 0.68394  | 0         |  |
|       |      | Shiraz-71T | 2261 | 0.508399 | 0         |  |
| PRRG3 | chrX | Shiraz-3T  | 242  | 0        | -0.336434 |  |
|       |      | Shiraz-4T  | 261  | 0        | -0.336249 |  |
|       |      | Shiraz-16T | 295  | 0.591657 | 0         |  |
|       |      | Shiraz-36T | 433  | 0        | -0.803961 |  |
|       |      | Shiraz-42T | 480  | 0        | -0.232915 |  |
|       |      | Shiraz-44T | 899  | 0        | -1.09697  |  |
|       |      | Shiraz-49T | 1170 | 0        | -0.967436 |  |
|       |      | Shiraz-9T  | 1370 | 0.690073 | 0         |  |
|       |      | Shiraz-18T | 1457 | 0.643204 | 0         |  |
|       |      | Shiraz-22T | 1673 | 0.611783 | 0         |  |
|       |      | Shiraz-22T | 1678 | 0.911625 | 0         |  |
|       |      | Shiraz-25T | 1719 | 0.472955 | 0         |  |
|       |      | Shiraz-28T | 1762 | 0.562311 | 0         |  |
|       |      | Shiraz-29T | 1801 | 0.815343 | 0         |  |
|       |      | Shiraz-32T | 1870 | 0.729766 | 0         |  |
|       |      | Shiraz-35T | 1933 | 0.488535 | 0         |  |
|       |      | Shiraz-58T | 2223 | 0.833364 | 0         |  |
|       |      | Shiraz-58T | 2226 | 1.074663 | 0         |  |
|       |      | Shiraz-71T | 2263 | 0.975531 | 0         |  |
|       |      | Shiraz-3T  | 242  | 0        | -0.336434 |  |
|       |      | Shiraz-4T  | 261  | 0        | -0.336249 |  |
|       |      | Shiraz-16T | 295  | 0.591657 | 0         |  |
|       |      | Shiraz-36T | 433  | 0        | -0.803961 |  |
|       |      | Shiraz-42T | 480  | 0        | -0.232915 |  |
|       |      | Shiraz-44T | 899  | 0        | -1.09697  |  |
|       |      | Shiraz-49T | 1170 | 0        | -0.967436 |  |
|       |      | Shiraz-9T  | 1370 | 0.690073 | 0         |  |
|       |      | Shiraz-18T | 1457 | 0.643204 | 0         |  |
|       |      | Shiraz-22T | 1673 | 0.611783 | 0         |  |
|       |      | Shiraz-22T | 1678 | 0.911625 | 0         |  |
|       |      | Shiraz-25T | 1719 | 0.472955 | 0         |  |
|       |      | Shiraz-28T | 1762 | 0.562311 | 0         |  |
|       |      | Shiraz-29T | 1801 | 0.815343 | 0         |  |
|       |      | Shiraz-32T | 1870 | 0.729766 | 0         |  |
|       |      | Shiraz-35T | 1933 | 0.488535 | 0         |  |
|       |      | Shiraz-58T | 2223 | 0.833364 | 0         |  |
|       |      | Shiraz-58T | 2226 | 1.074663 | 0         |  |
|       |      | Shiraz-71T | 2263 | 0.975531 | 0         |  |
|       |      | Shiraz-3T  | 242  | 0        | -0.336434 |  |
|       |      | Shiraz-4T  | 261  | 0        | -0.336249 |  |
|       |      | Shiraz-16T | 295  | 0.591657 | 0         |  |

|       |      |            |      |          |           |  |  |
|-------|------|------------|------|----------|-----------|--|--|
|       |      | Shiraz-36T | 433  | 0        | -0.803961 |  |  |
|       |      | Shiraz-42T | 480  | 0        | -0.232915 |  |  |
|       |      | Shiraz-44T | 899  | 0        | -1.09697  |  |  |
|       |      | Shiraz-49T | 1170 | 0        | -0.967436 |  |  |
|       |      | Shiraz-9T  | 1370 | 0.690073 | 0         |  |  |
|       |      | Shiraz-18T | 1457 | 0.643204 | 0         |  |  |
|       |      | Shiraz-22T | 1673 | 0.611783 | 0         |  |  |
|       |      | Shiraz-22T | 1678 | 0.911625 | 0         |  |  |
|       |      | Shiraz-25T | 1719 | 0.472955 | 0         |  |  |
|       |      | Shiraz-28T | 1762 | 0.562311 | 0         |  |  |
|       |      | Shiraz-29T | 1801 | 0.815343 | 0         |  |  |
|       |      | Shiraz-32T | 1870 | 0.729766 | 0         |  |  |
|       |      | Shiraz-35T | 1933 | 0.488535 | 0         |  |  |
|       |      | Shiraz-58T | 2223 | 0.833364 | 0         |  |  |
|       |      | Shiraz-58T | 2226 | 1.074663 | 0         |  |  |
|       |      | Shiraz-71T | 2263 | 0.975531 | 0         |  |  |
| PRSS1 | chr7 | Shiraz-3T  | 90   | 0.219276 | 0         |  |  |
|       |      | Shiraz-4T  | 253  | 0.372918 | 0         |  |  |
|       |      | Shiraz-36T | 378  | 0.179558 | 0         |  |  |
|       |      | Shiraz-46T | 943  | 0.093799 | 0         |  |  |
|       |      | Shiraz-77T | 1225 | 0        | -0.117922 |  |  |
|       |      | Shiraz-9T  | 1325 | 0.221899 | 0         |  |  |
|       |      | Shiraz-18T | 1434 | 0.244465 | 0         |  |  |
|       |      | Shiraz-25T | 1698 | 0.21835  | 0         |  |  |
|       |      | Shiraz-28T | 1735 | 0.350744 | 0         |  |  |
|       |      | Shiraz-29T | 1778 | 0.120767 | 0         |  |  |
|       |      | Shiraz-32T | 1833 | 0.551336 | 0         |  |  |
|       |      | Shiraz-38T | 1951 | 0.250891 | 0         |  |  |
|       |      | Shiraz-53T | 2078 | 0.287202 | 0         |  |  |
|       |      | Shiraz-58T | 2162 | 0.221505 | 0         |  |  |
|       |      | Shiraz-71T | 2238 | 0.603631 | 0         |  |  |
|       |      | Shiraz-3T  | 90   | 0.219276 | 0         |  |  |
|       |      | Shiraz-4T  | 253  | 0.372918 | 0         |  |  |
|       |      | Shiraz-36T | 378  | 0.179558 | 0         |  |  |
|       |      | Shiraz-46T | 943  | 0.093799 | 0         |  |  |
|       |      | Shiraz-77T | 1225 | 0        | -0.117922 |  |  |
|       |      | Shiraz-9T  | 1325 | 0.221899 | 0         |  |  |
|       |      | Shiraz-18T | 1434 | 0.244465 | 0         |  |  |
|       |      | Shiraz-25T | 1698 | 0.21835  | 0         |  |  |
|       |      | Shiraz-28T | 1735 | 0.350744 | 0         |  |  |
|       |      | Shiraz-29T | 1778 | 0.120767 | 0         |  |  |
|       |      | Shiraz-32T | 1833 | 0.551336 | 0         |  |  |
|       |      | Shiraz-38T | 1951 | 0.250891 | 0         |  |  |
|       |      | Shiraz-53T | 2078 | 0.287202 | 0         |  |  |
|       |      | Shiraz-58T | 2162 | 0.221505 | 0         |  |  |
|       |      | Shiraz-71T | 2238 | 0.603631 | 0         |  |  |
|       |      | Shiraz-3T  | 90   | 0.219276 | 0         |  |  |

|       |      |            |      |          |           |  |
|-------|------|------------|------|----------|-----------|--|
|       |      | Shiraz-4T  | 253  | 0.372918 | 0         |  |
|       |      | Shiraz-36T | 378  | 0.179558 | 0         |  |
|       |      | Shiraz-46T | 943  | 0.093799 | 0         |  |
|       |      | Shiraz-77T | 1225 | 0        | -0.117922 |  |
|       |      | Shiraz-9T  | 1325 | 0.221899 | 0         |  |
|       |      | Shiraz-18T | 1434 | 0.244465 | 0         |  |
|       |      | Shiraz-25T | 1698 | 0.21835  | 0         |  |
|       |      | Shiraz-28T | 1735 | 0.350744 | 0         |  |
|       |      | Shiraz-29T | 1778 | 0.120767 | 0         |  |
|       |      | Shiraz-32T | 1833 | 0.551336 | 0         |  |
|       |      | Shiraz-38T | 1951 | 0.250891 | 0         |  |
|       |      | Shiraz-53T | 2078 | 0.287202 | 0         |  |
|       |      | Shiraz-58T | 2162 | 0.221505 | 0         |  |
|       |      | Shiraz-71T | 2238 | 0.603631 | 0         |  |
| PRSS2 | chr7 | Shiraz-3T  | 90   | 0.219276 | 0         |  |
|       |      | Shiraz-4T  | 253  | 0.372918 | 0         |  |
|       |      | Shiraz-36T | 378  | 0.179558 | 0         |  |
|       |      | Shiraz-46T | 943  | 0.093799 | 0         |  |
|       |      | Shiraz-77T | 1225 | 0        | -0.117922 |  |
|       |      | Shiraz-9T  | 1325 | 0.221899 | 0         |  |
|       |      | Shiraz-18T | 1434 | 0.244465 | 0         |  |
|       |      | Shiraz-25T | 1698 | 0.21835  | 0         |  |
|       |      | Shiraz-28T | 1735 | 0.350744 | 0         |  |
|       |      | Shiraz-29T | 1778 | 0.120767 | 0         |  |
|       |      | Shiraz-32T | 1833 | 0.551336 | 0         |  |
|       |      | Shiraz-38T | 1951 | 0.250891 | 0         |  |
|       |      | Shiraz-53T | 2078 | 0.287202 | 0         |  |
|       |      | Shiraz-58T | 2162 | 0.221505 | 0         |  |
|       |      | Shiraz-71T | 2238 | 0.603631 | 0         |  |
|       |      | Shiraz-3T  | 90   | 0.219276 | 0         |  |
|       |      | Shiraz-4T  | 253  | 0.372918 | 0         |  |
|       |      | Shiraz-36T | 378  | 0.179558 | 0         |  |
|       |      | Shiraz-46T | 943  | 0.093799 | 0         |  |
|       |      | Shiraz-77T | 1225 | 0        | -0.117922 |  |
|       |      | Shiraz-9T  | 1325 | 0.221899 | 0         |  |
|       |      | Shiraz-18T | 1434 | 0.244465 | 0         |  |
|       |      | Shiraz-25T | 1698 | 0.21835  | 0         |  |
|       |      | Shiraz-28T | 1735 | 0.350744 | 0         |  |
|       |      | Shiraz-29T | 1778 | 0.120767 | 0         |  |
|       |      | Shiraz-32T | 1833 | 0.551336 | 0         |  |
|       |      | Shiraz-38T | 1951 | 0.250891 | 0         |  |
|       |      | Shiraz-53T | 2078 | 0.287202 | 0         |  |
|       |      | Shiraz-58T | 2162 | 0.221505 | 0         |  |
|       |      | Shiraz-71T | 2238 | 0.603631 | 0         |  |
|       |      | Shiraz-3T  | 90   | 0.219276 | 0         |  |
|       |      | Shiraz-4T  | 253  | 0.372918 | 0         |  |
|       |      | Shiraz-36T | 378  | 0.179558 | 0         |  |

|       |      |            |      |          |           |  |  |
|-------|------|------------|------|----------|-----------|--|--|
|       |      | Shiraz-46T | 943  | 0.093799 | 0         |  |  |
|       |      | Shiraz-77T | 1225 | 0        | -0.117922 |  |  |
|       |      | Shiraz-9T  | 1325 | 0.221899 | 0         |  |  |
|       |      | Shiraz-18T | 1434 | 0.244465 | 0         |  |  |
|       |      | Shiraz-25T | 1698 | 0.21835  | 0         |  |  |
|       |      | Shiraz-28T | 1735 | 0.350744 | 0         |  |  |
|       |      | Shiraz-29T | 1778 | 0.120767 | 0         |  |  |
|       |      | Shiraz-32T | 1833 | 0.551336 | 0         |  |  |
|       |      | Shiraz-38T | 1951 | 0.250891 | 0         |  |  |
|       |      | Shiraz-53T | 2078 | 0.287202 | 0         |  |  |
|       |      | Shiraz-58T | 2162 | 0.221505 | 0         |  |  |
|       |      | Shiraz-71T | 2238 | 0.603631 | 0         |  |  |
| PSMA2 | chr7 | Shiraz-3T  | 87   | 0.198593 | 0         |  |  |
|       |      | Shiraz-4T  | 252  | 0.192083 | 0         |  |  |
|       |      | Shiraz-36T | 376  | 0.159952 | 0         |  |  |
|       |      | Shiraz-46T | 942  | 0.069143 | 0         |  |  |
|       |      | Shiraz-18T | 1433 | 0.250973 | 0         |  |  |
|       |      | Shiraz-25T | 1697 | 0.21945  | 0         |  |  |
|       |      | Shiraz-28T | 1734 | 0.362882 | 0         |  |  |
|       |      | Shiraz-29T | 1777 | 0.156747 | 0         |  |  |
|       |      | Shiraz-38T | 1950 | 0.265916 | 0         |  |  |
|       |      | Shiraz-71T | 2236 | 0.320072 | 0         |  |  |
|       |      | Shiraz-3T  | 87   | 0.198593 | 0         |  |  |
|       |      | Shiraz-4T  | 252  | 0.192083 | 0         |  |  |
|       |      | Shiraz-36T | 376  | 0.159952 | 0         |  |  |
|       |      | Shiraz-46T | 942  | 0.069143 | 0         |  |  |
|       |      | Shiraz-18T | 1433 | 0.250973 | 0         |  |  |
|       |      | Shiraz-25T | 1697 | 0.21945  | 0         |  |  |
|       |      | Shiraz-28T | 1734 | 0.362882 | 0         |  |  |
|       |      | Shiraz-29T | 1777 | 0.156747 | 0         |  |  |
|       |      | Shiraz-38T | 1950 | 0.265916 | 0         |  |  |
|       |      | Shiraz-71T | 2236 | 0.320072 | 0         |  |  |
|       |      | Shiraz-3T  | 87   | 0.198593 | 0         |  |  |
|       |      | Shiraz-4T  | 252  | 0.192083 | 0         |  |  |
|       |      | Shiraz-36T | 376  | 0.159952 | 0         |  |  |
|       |      | Shiraz-46T | 942  | 0.069143 | 0         |  |  |
|       |      | Shiraz-18T | 1433 | 0.250973 | 0         |  |  |
|       |      | Shiraz-25T | 1697 | 0.21945  | 0         |  |  |
|       |      | Shiraz-28T | 1734 | 0.362882 | 0         |  |  |
|       |      | Shiraz-29T | 1777 | 0.156747 | 0         |  |  |
|       |      | Shiraz-38T | 1950 | 0.265916 | 0         |  |  |
|       |      | Shiraz-71T | 2236 | 0.320072 | 0         |  |  |
| PSMC2 | chr7 | Shiraz-3T  | 90   | 0.219276 | 0         |  |  |
|       |      | Shiraz-4T  | 253  | 0.372918 | 0         |  |  |
|       |      | Shiraz-36T | 378  | 0.179558 | 0         |  |  |
|       |      | Shiraz-46T | 943  | 0.093799 | 0         |  |  |
|       |      | Shiraz-77T | 1225 | 0        | -0.117922 |  |  |

|        |      |            |      |          |           |  |  |
|--------|------|------------|------|----------|-----------|--|--|
|        |      | Shiraz-18T | 1434 | 0.244465 | 0         |  |  |
|        |      | Shiraz-22T | 1549 | 0        | -0.319623 |  |  |
|        |      | Shiraz-25T | 1698 | 0.21835  | 0         |  |  |
|        |      | Shiraz-28T | 1735 | 0.350744 | 0         |  |  |
|        |      | Shiraz-29T | 1778 | 0.120767 | 0         |  |  |
|        |      | Shiraz-32T | 1833 | 0.551336 | 0         |  |  |
|        |      | Shiraz-38T | 1951 | 0.250891 | 0         |  |  |
|        |      | Shiraz-53T | 2078 | 0.287202 | 0         |  |  |
|        |      | Shiraz-71T | 2238 | 0.603631 | 0         |  |  |
|        |      | Shiraz-3T  | 90   | 0.219276 | 0         |  |  |
|        |      | Shiraz-4T  | 253  | 0.372918 | 0         |  |  |
|        |      | Shiraz-36T | 378  | 0.179558 | 0         |  |  |
|        |      | Shiraz-46T | 943  | 0.093799 | 0         |  |  |
|        |      | Shiraz-77T | 1225 | 0        | -0.117922 |  |  |
|        |      | Shiraz-18T | 1434 | 0.244465 | 0         |  |  |
|        |      | Shiraz-22T | 1549 | 0        | -0.319623 |  |  |
|        |      | Shiraz-25T | 1698 | 0.21835  | 0         |  |  |
|        |      | Shiraz-28T | 1735 | 0.350744 | 0         |  |  |
|        |      | Shiraz-29T | 1778 | 0.120767 | 0         |  |  |
|        |      | Shiraz-32T | 1833 | 0.551336 | 0         |  |  |
|        |      | Shiraz-38T | 1951 | 0.250891 | 0         |  |  |
|        |      | Shiraz-53T | 2078 | 0.287202 | 0         |  |  |
|        |      | Shiraz-71T | 2238 | 0.603631 | 0         |  |  |
|        |      | Shiraz-3T  | 90   | 0.219276 | 0         |  |  |
|        |      | Shiraz-4T  | 253  | 0.372918 | 0         |  |  |
|        |      | Shiraz-36T | 378  | 0.179558 | 0         |  |  |
|        |      | Shiraz-46T | 943  | 0.093799 | 0         |  |  |
|        |      | Shiraz-77T | 1225 | 0        | -0.117922 |  |  |
|        |      | Shiraz-18T | 1434 | 0.244465 | 0         |  |  |
|        |      | Shiraz-22T | 1549 | 0        | -0.319623 |  |  |
|        |      | Shiraz-25T | 1698 | 0.21835  | 0         |  |  |
|        |      | Shiraz-28T | 1735 | 0.350744 | 0         |  |  |
|        |      | Shiraz-29T | 1778 | 0.120767 | 0         |  |  |
|        |      | Shiraz-32T | 1833 | 0.551336 | 0         |  |  |
|        |      | Shiraz-38T | 1951 | 0.250891 | 0         |  |  |
|        |      | Shiraz-53T | 2078 | 0.287202 | 0         |  |  |
|        |      | Shiraz-71T | 2238 | 0.603631 | 0         |  |  |
| PSMD10 | chrX | Shiraz-3T  | 242  | 0        | -0.336434 |  |  |
|        |      | Shiraz-4T  | 261  | 0        | -0.336249 |  |  |
|        |      | Shiraz-16T | 295  | 0.591657 | 0         |  |  |
|        |      | Shiraz-36T | 433  | 0        | -0.803961 |  |  |
|        |      | Shiraz-44T | 899  | 0        | -1.09697  |  |  |
|        |      | Shiraz-49T | 1170 | 0        | -0.967436 |  |  |
|        |      | Shiraz-18T | 1457 | 0.643204 | 0         |  |  |
|        |      | Shiraz-22T | 1673 | 0.611783 | 0         |  |  |
|        |      | Shiraz-25T | 1719 | 0.472955 | 0         |  |  |
|        |      | Shiraz-28T | 1762 | 0.562311 | 0         |  |  |

|       |      |            |      |          |           |  |  |
|-------|------|------------|------|----------|-----------|--|--|
|       |      | Shiraz-29T | 1801 | 0.815343 | 0         |  |  |
|       |      | Shiraz-32T | 1870 | 0.729766 | 0         |  |  |
|       |      | Shiraz-35T | 1933 | 0.488535 | 0         |  |  |
|       |      | Shiraz-58T | 2223 | 0.833364 | 0         |  |  |
|       |      | Shiraz-71T | 2263 | 0.975531 | 0         |  |  |
|       |      | Shiraz-3T  | 242  | 0        | -0.336434 |  |  |
|       |      | Shiraz-4T  | 261  | 0        | -0.336249 |  |  |
|       |      | Shiraz-16T | 295  | 0.591657 | 0         |  |  |
|       |      | Shiraz-36T | 433  | 0        | -0.803961 |  |  |
|       |      | Shiraz-44T | 899  | 0        | -1.09697  |  |  |
|       |      | Shiraz-49T | 1170 | 0        | -0.967436 |  |  |
|       |      | Shiraz-18T | 1457 | 0.643204 | 0         |  |  |
|       |      | Shiraz-22T | 1673 | 0.611783 | 0         |  |  |
|       |      | Shiraz-25T | 1719 | 0.472955 | 0         |  |  |
|       |      | Shiraz-28T | 1762 | 0.562311 | 0         |  |  |
|       |      | Shiraz-29T | 1801 | 0.815343 | 0         |  |  |
|       |      | Shiraz-32T | 1870 | 0.729766 | 0         |  |  |
|       |      | Shiraz-35T | 1933 | 0.488535 | 0         |  |  |
|       |      | Shiraz-58T | 2223 | 0.833364 | 0         |  |  |
|       |      | Shiraz-71T | 2263 | 0.975531 | 0         |  |  |
|       |      | Shiraz-3T  | 242  | 0        | -0.336434 |  |  |
|       |      | Shiraz-4T  | 261  | 0        | -0.336249 |  |  |
|       |      | Shiraz-16T | 295  | 0.591657 | 0         |  |  |
|       |      | Shiraz-36T | 433  | 0        | -0.803961 |  |  |
|       |      | Shiraz-44T | 899  | 0        | -1.09697  |  |  |
|       |      | Shiraz-49T | 1170 | 0        | -0.967436 |  |  |
|       |      | Shiraz-18T | 1457 | 0.643204 | 0         |  |  |
|       |      | Shiraz-22T | 1673 | 0.611783 | 0         |  |  |
|       |      | Shiraz-25T | 1719 | 0.472955 | 0         |  |  |
|       |      | Shiraz-28T | 1762 | 0.562311 | 0         |  |  |
|       |      | Shiraz-29T | 1801 | 0.815343 | 0         |  |  |
|       |      | Shiraz-32T | 1870 | 0.729766 | 0         |  |  |
|       |      | Shiraz-35T | 1933 | 0.488535 | 0         |  |  |
|       |      | Shiraz-58T | 2223 | 0.833364 | 0         |  |  |
|       |      | Shiraz-71T | 2263 | 0.975531 | 0         |  |  |
| PTCD1 | chr7 | Shiraz-3T  | 90   | 0.219276 | 0         |  |  |
|       |      | Shiraz-3T  | 94   | 0.74735  | 0         |  |  |
|       |      | Shiraz-4T  | 253  | 0.372918 | 0         |  |  |
|       |      | Shiraz-31T | 316  | 0.219196 | 0         |  |  |
|       |      | Shiraz-36T | 378  | 0.179558 | 0         |  |  |
|       |      | Shiraz-36T | 381  | 0.332628 | 0         |  |  |
|       |      | Shiraz-44T | 639  | 1.035032 | 0         |  |  |
|       |      | Shiraz-46T | 943  | 0.093799 | 0         |  |  |
|       |      | Shiraz-46T | 946  | 0.299835 | 0         |  |  |
|       |      | Shiraz-47T | 1030 | 0.257728 | 0         |  |  |
|       |      | Shiraz-49T | 1120 | 0.281656 | 0         |  |  |
|       |      | Shiraz-77T | 1225 | 0        | -0.117922 |  |  |

|  |            |      |          |           |  |
|--|------------|------|----------|-----------|--|
|  | Shiraz-77T | 1227 | 0.196445 | 0         |  |
|  | Shiraz-9T  | 1324 | 0.679266 | 0         |  |
|  | Shiraz-18T | 1434 | 0.244465 | 0         |  |
|  | Shiraz-22T | 1549 | 0        | -0.319623 |  |
|  | Shiraz-22T | 1551 | 0.324011 | 0         |  |
|  | Shiraz-25T | 1698 | 0.21835  | 0         |  |
|  | Shiraz-28T | 1735 | 0.350744 | 0         |  |
|  | Shiraz-29T | 1778 | 0.120767 | 0         |  |
|  | Shiraz-32T | 1833 | 0.551336 | 0         |  |
|  | Shiraz-38T | 1951 | 0.250891 | 0         |  |
|  | Shiraz-53T | 2078 | 0.287202 | 0         |  |
|  | Shiraz-71T | 2238 | 0.603631 | 0         |  |
|  | Shiraz-3T  | 90   | 0.219276 | 0         |  |
|  | Shiraz-3T  | 94   | 0.74735  | 0         |  |
|  | Shiraz-4T  | 253  | 0.372918 | 0         |  |
|  | Shiraz-31T | 316  | 0.219196 | 0         |  |
|  | Shiraz-36T | 378  | 0.179558 | 0         |  |
|  | Shiraz-36T | 381  | 0.332628 | 0         |  |
|  | Shiraz-44T | 639  | 1.035032 | 0         |  |
|  | Shiraz-46T | 943  | 0.093799 | 0         |  |
|  | Shiraz-46T | 946  | 0.299835 | 0         |  |
|  | Shiraz-47T | 1030 | 0.257728 | 0         |  |
|  | Shiraz-49T | 1120 | 0.281656 | 0         |  |
|  | Shiraz-77T | 1225 | 0        | -0.117922 |  |
|  | Shiraz-77T | 1227 | 0.196445 | 0         |  |
|  | Shiraz-9T  | 1324 | 0.679266 | 0         |  |
|  | Shiraz-18T | 1434 | 0.244465 | 0         |  |
|  | Shiraz-22T | 1549 | 0        | -0.319623 |  |
|  | Shiraz-22T | 1551 | 0.324011 | 0         |  |
|  | Shiraz-25T | 1698 | 0.21835  | 0         |  |
|  | Shiraz-28T | 1735 | 0.350744 | 0         |  |
|  | Shiraz-29T | 1778 | 0.120767 | 0         |  |
|  | Shiraz-32T | 1833 | 0.551336 | 0         |  |
|  | Shiraz-38T | 1951 | 0.250891 | 0         |  |
|  | Shiraz-53T | 2078 | 0.287202 | 0         |  |
|  | Shiraz-71T | 2238 | 0.603631 | 0         |  |
|  | Shiraz-3T  | 90   | 0.219276 | 0         |  |
|  | Shiraz-3T  | 94   | 0.74735  | 0         |  |
|  | Shiraz-4T  | 253  | 0.372918 | 0         |  |
|  | Shiraz-31T | 316  | 0.219196 | 0         |  |
|  | Shiraz-36T | 378  | 0.179558 | 0         |  |
|  | Shiraz-36T | 381  | 0.332628 | 0         |  |
|  | Shiraz-44T | 639  | 1.035032 | 0         |  |
|  | Shiraz-46T | 943  | 0.093799 | 0         |  |
|  | Shiraz-46T | 946  | 0.299835 | 0         |  |
|  | Shiraz-47T | 1030 | 0.257728 | 0         |  |
|  | Shiraz-49T | 1120 | 0.281656 | 0         |  |



|        |      |            |      |          |           |  |  |
|--------|------|------------|------|----------|-----------|--|--|
|        |      | Shiraz-77T | 1225 | 0        | -0.117922 |  |  |
|        |      | Shiraz-77T | 1227 | 0.196445 | 0         |  |  |
|        |      | Shiraz-9T  | 1324 | 0.679266 | 0         |  |  |
|        |      | Shiraz-18T | 1434 | 0.244465 | 0         |  |  |
|        |      | Shiraz-22T | 1549 | 0        | -0.319623 |  |  |
|        |      | Shiraz-22T | 1551 | 0.324011 | 0         |  |  |
|        |      | Shiraz-25T | 1698 | 0.21835  | 0         |  |  |
|        |      | Shiraz-28T | 1735 | 0.350744 | 0         |  |  |
|        |      | Shiraz-29T | 1778 | 0.120767 | 0         |  |  |
|        |      | Shiraz-32T | 1833 | 0.551336 | 0         |  |  |
|        |      | Shiraz-38T | 1951 | 0.250891 | 0         |  |  |
|        |      | Shiraz-53T | 2078 | 0.287202 | 0         |  |  |
|        |      | Shiraz-71T | 2238 | 0.603631 | 0         |  |  |
| PTCHD1 | chrX | Shiraz-3T  | 235  | 0        | -0.28401  |  |  |
|        |      | Shiraz-4T  | 260  | 0        | -0.324128 |  |  |
|        |      | Shiraz-16T | 294  | 0.655804 | 0         |  |  |
|        |      | Shiraz-36T | 431  | 0        | -0.78035  |  |  |
|        |      | Shiraz-44T | 891  | 0        | -0.954044 |  |  |
|        |      | Shiraz-49T | 1166 | 0        | -0.917235 |  |  |
|        |      | Shiraz-77T | 1281 | 0.136627 | 0         |  |  |
|        |      | Shiraz-9T  | 1368 | 0.199713 | 0         |  |  |
|        |      | Shiraz-18T | 1455 | 0        | -0.186773 |  |  |
|        |      | Shiraz-22T | 1669 | 0.695915 | 0         |  |  |
|        |      | Shiraz-25T | 1717 | 0.420447 | 0         |  |  |
|        |      | Shiraz-28T | 1760 | 0.538181 | 0         |  |  |
|        |      | Shiraz-29T | 1800 | 0.672527 | 0         |  |  |
|        |      | Shiraz-32T | 1869 | 0.776805 | 0         |  |  |
|        |      | Shiraz-35T | 1932 | 0.507141 | 0         |  |  |
|        |      | Shiraz-40T | 2051 | 0.098506 | 0         |  |  |
|        |      | Shiraz-58T | 2221 | 0.871948 | 0         |  |  |
|        |      | Shiraz-71T | 2260 | 0.68394  | 0         |  |  |
|        |      | Shiraz-71T | 2261 | 0.508399 | 0         |  |  |
|        |      | Shiraz-3T  | 235  | 0        | -0.28401  |  |  |
|        |      | Shiraz-4T  | 260  | 0        | -0.324128 |  |  |
|        |      | Shiraz-16T | 294  | 0.655804 | 0         |  |  |
|        |      | Shiraz-36T | 431  | 0        | -0.78035  |  |  |
|        |      | Shiraz-44T | 891  | 0        | -0.954044 |  |  |
|        |      | Shiraz-49T | 1166 | 0        | -0.917235 |  |  |
|        |      | Shiraz-77T | 1281 | 0.136627 | 0         |  |  |
|        |      | Shiraz-9T  | 1368 | 0.199713 | 0         |  |  |
|        |      | Shiraz-18T | 1455 | 0        | -0.186773 |  |  |
|        |      | Shiraz-22T | 1669 | 0.695915 | 0         |  |  |
|        |      | Shiraz-25T | 1717 | 0.420447 | 0         |  |  |
|        |      | Shiraz-28T | 1760 | 0.538181 | 0         |  |  |
|        |      | Shiraz-29T | 1800 | 0.672527 | 0         |  |  |
|        |      | Shiraz-32T | 1869 | 0.776805 | 0         |  |  |
|        |      | Shiraz-35T | 1932 | 0.507141 | 0         |  |  |

|        |      |            |      |          |           |  |
|--------|------|------------|------|----------|-----------|--|
|        |      | Shiraz-40T | 2051 | 0.098506 | 0         |  |
|        |      | Shiraz-58T | 2221 | 0.871948 | 0         |  |
|        |      | Shiraz-71T | 2260 | 0.68394  | 0         |  |
|        |      | Shiraz-71T | 2261 | 0.508399 | 0         |  |
|        |      | Shiraz-3T  | 235  | 0        | -0.28401  |  |
|        |      | Shiraz-4T  | 260  | 0        | -0.324128 |  |
|        |      | Shiraz-16T | 294  | 0.655804 | 0         |  |
|        |      | Shiraz-36T | 431  | 0        | -0.78035  |  |
|        |      | Shiraz-44T | 891  | 0        | -0.954044 |  |
|        |      | Shiraz-49T | 1166 | 0        | -0.917235 |  |
|        |      | Shiraz-77T | 1281 | 0.136627 | 0         |  |
|        |      | Shiraz-9T  | 1368 | 0.199713 | 0         |  |
|        |      | Shiraz-18T | 1455 | 0        | -0.186773 |  |
|        |      | Shiraz-22T | 1669 | 0.695915 | 0         |  |
|        |      | Shiraz-25T | 1717 | 0.420447 | 0         |  |
|        |      | Shiraz-28T | 1760 | 0.538181 | 0         |  |
|        |      | Shiraz-29T | 1800 | 0.672527 | 0         |  |
|        |      | Shiraz-32T | 1869 | 0.776805 | 0         |  |
|        |      | Shiraz-35T | 1932 | 0.507141 | 0         |  |
|        |      | Shiraz-40T | 2051 | 0.098506 | 0         |  |
|        |      | Shiraz-58T | 2221 | 0.871948 | 0         |  |
|        |      | Shiraz-71T | 2260 | 0.68394  | 0         |  |
|        |      | Shiraz-71T | 2261 | 0.508399 | 0         |  |
| PTGER4 | chr5 | Shiraz-4T  | 250  | 0.262252 | 0         |  |
|        |      | Shiraz-16T | 266  | 0.321724 | 0         |  |
|        |      | Shiraz-44T | 591  | 0        | -0.233934 |  |
|        |      | Shiraz-18T | 1429 | 0        | -0.314125 |  |
|        |      | Shiraz-22T | 1522 | 0        | -0.322688 |  |
|        |      | Shiraz-25T | 1694 | 0.201602 | 0         |  |
|        |      | Shiraz-28T | 1731 | 0.295447 | 0         |  |
|        |      | Shiraz-29T | 1773 | 0.090981 | 0         |  |
|        |      | Shiraz-40T | 2016 | 0.376634 | 0         |  |
|        |      | Shiraz-4T  | 250  | 0.262252 | 0         |  |
|        |      | Shiraz-16T | 266  | 0.321724 | 0         |  |
|        |      | Shiraz-44T | 591  | 0        | -0.233934 |  |
|        |      | Shiraz-18T | 1429 | 0        | -0.314125 |  |
|        |      | Shiraz-22T | 1522 | 0        | -0.322688 |  |
|        |      | Shiraz-25T | 1694 | 0.201602 | 0         |  |
|        |      | Shiraz-28T | 1731 | 0.295447 | 0         |  |
|        |      | Shiraz-29T | 1773 | 0.090981 | 0         |  |
|        |      | Shiraz-40T | 2016 | 0.376634 | 0         |  |
|        |      | Shiraz-4T  | 250  | 0.262252 | 0         |  |
|        |      | Shiraz-16T | 266  | 0.321724 | 0         |  |
|        |      | Shiraz-44T | 591  | 0        | -0.233934 |  |
|        |      | Shiraz-18T | 1429 | 0        | -0.314125 |  |
|        |      | Shiraz-22T | 1522 | 0        | -0.322688 |  |
|        |      | Shiraz-25T | 1694 | 0.201602 | 0         |  |

|     |      |            |      |          |           |  |
|-----|------|------------|------|----------|-----------|--|
|     |      | Shiraz-28T | 1731 | 0.295447 | 0         |  |
|     |      | Shiraz-29T | 1773 | 0.090981 | 0         |  |
|     |      | Shiraz-40T | 2016 | 0.376634 | 0         |  |
| PTN | chr7 | Shiraz-3T  | 90   | 0.219276 | 0         |  |
|     |      | Shiraz-4T  | 253  | 0.372918 | 0         |  |
|     |      | Shiraz-36T | 378  | 0.179558 | 0         |  |
|     |      | Shiraz-44T | 643  | 0        | -0.456761 |  |
|     |      | Shiraz-46T | 943  | 0.093799 | 0         |  |
|     |      | Shiraz-77T | 1225 | 0        | -0.117922 |  |
|     |      | Shiraz-9T  | 1325 | 0.221899 | 0         |  |
|     |      | Shiraz-18T | 1434 | 0.244465 | 0         |  |
|     |      | Shiraz-22T | 1553 | 0        | -0.213234 |  |
|     |      | Shiraz-25T | 1698 | 0.21835  | 0         |  |
|     |      | Shiraz-28T | 1735 | 0.350744 | 0         |  |
|     |      | Shiraz-29T | 1778 | 0.120767 | 0         |  |
|     |      | Shiraz-32T | 1833 | 0.551336 | 0         |  |
|     |      | Shiraz-38T | 1951 | 0.250891 | 0         |  |
|     |      | Shiraz-53T | 2078 | 0.287202 | 0         |  |
|     |      | Shiraz-58T | 2162 | 0.221505 | 0         |  |
|     |      | Shiraz-71T | 2238 | 0.603631 | 0         |  |
|     |      | Shiraz-3T  | 90   | 0.219276 | 0         |  |
|     |      | Shiraz-4T  | 253  | 0.372918 | 0         |  |
|     |      | Shiraz-36T | 378  | 0.179558 | 0         |  |
|     |      | Shiraz-44T | 643  | 0        | -0.456761 |  |
|     |      | Shiraz-46T | 943  | 0.093799 | 0         |  |
|     |      | Shiraz-77T | 1225 | 0        | -0.117922 |  |
|     |      | Shiraz-9T  | 1325 | 0.221899 | 0         |  |
|     |      | Shiraz-18T | 1434 | 0.244465 | 0         |  |
|     |      | Shiraz-22T | 1553 | 0        | -0.213234 |  |
|     |      | Shiraz-25T | 1698 | 0.21835  | 0         |  |
|     |      | Shiraz-28T | 1735 | 0.350744 | 0         |  |
|     |      | Shiraz-29T | 1778 | 0.120767 | 0         |  |
|     |      | Shiraz-32T | 1833 | 0.551336 | 0         |  |
|     |      | Shiraz-38T | 1951 | 0.250891 | 0         |  |
|     |      | Shiraz-53T | 2078 | 0.287202 | 0         |  |
|     |      | Shiraz-58T | 2162 | 0.221505 | 0         |  |
|     |      | Shiraz-71T | 2238 | 0.603631 | 0         |  |
|     |      | Shiraz-3T  | 90   | 0.219276 | 0         |  |
|     |      | Shiraz-4T  | 253  | 0.372918 | 0         |  |
|     |      | Shiraz-36T | 378  | 0.179558 | 0         |  |
|     |      | Shiraz-44T | 643  | 0        | -0.456761 |  |
|     |      | Shiraz-46T | 943  | 0.093799 | 0         |  |
|     |      | Shiraz-77T | 1225 | 0        | -0.117922 |  |
|     |      | Shiraz-9T  | 1325 | 0.221899 | 0         |  |
|     |      | Shiraz-18T | 1434 | 0.244465 | 0         |  |
|     |      | Shiraz-22T | 1553 | 0        | -0.213234 |  |
|     |      | Shiraz-25T | 1698 | 0.21835  | 0         |  |

|        |      |            |      |          |           |  |
|--------|------|------------|------|----------|-----------|--|
|        |      | Shiraz-28T | 1735 | 0.350744 | 0         |  |
|        |      | Shiraz-29T | 1778 | 0.120767 | 0         |  |
|        |      | Shiraz-32T | 1833 | 0.551336 | 0         |  |
|        |      | Shiraz-38T | 1951 | 0.250891 | 0         |  |
|        |      | Shiraz-53T | 2078 | 0.287202 | 0         |  |
|        |      | Shiraz-58T | 2162 | 0.221505 | 0         |  |
|        |      | Shiraz-71T | 2238 | 0.603631 | 0         |  |
| PTPN12 | chr7 | Shiraz-3T  | 90   | 0.219276 | 0         |  |
|        |      | Shiraz-3T  | 90   | 0.219276 | 0         |  |
|        |      | Shiraz-4T  | 253  | 0.372918 | 0         |  |
|        |      | Shiraz-4T  | 253  | 0.372918 | 0         |  |
|        |      | Shiraz-31T | 315  | 0.194054 | 0         |  |
|        |      | Shiraz-31T | 315  | 0.194054 | 0         |  |
|        |      | Shiraz-36T | 378  | 0.179558 | 0         |  |
|        |      | Shiraz-36T | 378  | 0.179558 | 0         |  |
|        |      | Shiraz-36T | 379  | 0.322028 | 0         |  |
|        |      | Shiraz-36T | 379  | 0.322028 | 0         |  |
|        |      | Shiraz-42T | 454  | 0.145717 | 0         |  |
|        |      | Shiraz-42T | 454  | 0.145717 | 0         |  |
|        |      | Shiraz-46T | 943  | 0.093799 | 0         |  |
|        |      | Shiraz-46T | 943  | 0.093799 | 0         |  |
|        |      | Shiraz-46T | 944  | 0.256008 | 0         |  |
|        |      | Shiraz-46T | 944  | 0.256008 | 0         |  |
|        |      | Shiraz-77T | 1225 | 0        | -0.117922 |  |
|        |      | Shiraz-77T | 1225 | 0        | -0.117922 |  |
|        |      | Shiraz-18T | 1434 | 0.244465 | 0         |  |
|        |      | Shiraz-18T | 1434 | 0.244465 | 0         |  |
|        |      | Shiraz-22T | 1549 | 0        | -0.319623 |  |
|        |      | Shiraz-22T | 1549 | 0        | -0.319623 |  |
|        |      | Shiraz-25T | 1698 | 0.21835  | 0         |  |
|        |      | Shiraz-25T | 1698 | 0.21835  | 0         |  |
|        |      | Shiraz-28T | 1735 | 0.350744 | 0         |  |
|        |      | Shiraz-28T | 1735 | 0.350744 | 0         |  |
|        |      | Shiraz-29T | 1778 | 0.120767 | 0         |  |
|        |      | Shiraz-29T | 1778 | 0.120767 | 0         |  |
|        |      | Shiraz-38T | 1951 | 0.250891 | 0         |  |
|        |      | Shiraz-38T | 1951 | 0.250891 | 0         |  |
|        |      | Shiraz-53T | 2078 | 0.287202 | 0         |  |
|        |      | Shiraz-53T | 2078 | 0.287202 | 0         |  |
|        |      | Shiraz-58T | 2159 | 0        | -0.219521 |  |
|        |      | Shiraz-58T | 2159 | 0        | -0.219521 |  |
|        |      | Shiraz-71T | 2238 | 0.603631 | 0         |  |
|        |      | Shiraz-71T | 2238 | 0.603631 | 0         |  |
|        |      | Shiraz-71T | 2239 | 0.310785 | 0         |  |
|        |      | Shiraz-71T | 2239 | 0.310785 | 0         |  |
|        |      | Shiraz-3T  | 90   | 0.219276 | 0         |  |
|        |      | Shiraz-3T  | 90   | 0.219276 | 0         |  |

|  |            |      |          |           |  |
|--|------------|------|----------|-----------|--|
|  | Shiraz-4T  | 253  | 0.372918 | 0         |  |
|  | Shiraz-4T  | 253  | 0.372918 | 0         |  |
|  | Shiraz-31T | 315  | 0.194054 | 0         |  |
|  | Shiraz-31T | 315  | 0.194054 | 0         |  |
|  | Shiraz-36T | 378  | 0.179558 | 0         |  |
|  | Shiraz-36T | 378  | 0.179558 | 0         |  |
|  | Shiraz-36T | 379  | 0.322028 | 0         |  |
|  | Shiraz-36T | 379  | 0.322028 | 0         |  |
|  | Shiraz-42T | 454  | 0.145717 | 0         |  |
|  | Shiraz-42T | 454  | 0.145717 | 0         |  |
|  | Shiraz-46T | 943  | 0.093799 | 0         |  |
|  | Shiraz-46T | 943  | 0.093799 | 0         |  |
|  | Shiraz-46T | 944  | 0.256008 | 0         |  |
|  | Shiraz-46T | 944  | 0.256008 | 0         |  |
|  | Shiraz-77T | 1225 | 0        | -0.117922 |  |
|  | Shiraz-77T | 1225 | 0        | -0.117922 |  |
|  | Shiraz-18T | 1434 | 0.244465 | 0         |  |
|  | Shiraz-18T | 1434 | 0.244465 | 0         |  |
|  | Shiraz-22T | 1549 | 0        | -0.319623 |  |
|  | Shiraz-22T | 1549 | 0        | -0.319623 |  |
|  | Shiraz-25T | 1698 | 0.21835  | 0         |  |
|  | Shiraz-25T | 1698 | 0.21835  | 0         |  |
|  | Shiraz-28T | 1735 | 0.350744 | 0         |  |
|  | Shiraz-28T | 1735 | 0.350744 | 0         |  |
|  | Shiraz-29T | 1778 | 0.120767 | 0         |  |
|  | Shiraz-29T | 1778 | 0.120767 | 0         |  |
|  | Shiraz-38T | 1951 | 0.250891 | 0         |  |
|  | Shiraz-38T | 1951 | 0.250891 | 0         |  |
|  | Shiraz-53T | 2078 | 0.287202 | 0         |  |
|  | Shiraz-53T | 2078 | 0.287202 | 0         |  |
|  | Shiraz-58T | 2159 | 0        | -0.219521 |  |
|  | Shiraz-58T | 2159 | 0        | -0.219521 |  |
|  | Shiraz-71T | 2238 | 0.603631 | 0         |  |
|  | Shiraz-71T | 2238 | 0.603631 | 0         |  |
|  | Shiraz-71T | 2239 | 0.310785 | 0         |  |
|  | Shiraz-71T | 2239 | 0.310785 | 0         |  |
|  | Shiraz-3T  | 90   | 0.219276 | 0         |  |
|  | Shiraz-3T  | 90   | 0.219276 | 0         |  |
|  | Shiraz-4T  | 253  | 0.372918 | 0         |  |
|  | Shiraz-4T  | 253  | 0.372918 | 0         |  |
|  | Shiraz-31T | 315  | 0.194054 | 0         |  |
|  | Shiraz-31T | 315  | 0.194054 | 0         |  |
|  | Shiraz-36T | 378  | 0.179558 | 0         |  |
|  | Shiraz-36T | 378  | 0.179558 | 0         |  |
|  | Shiraz-36T | 379  | 0.322028 | 0         |  |
|  | Shiraz-36T | 379  | 0.322028 | 0         |  |
|  | Shiraz-42T | 454  | 0.145717 | 0         |  |

|        |      |            |      |          |           |  |  |
|--------|------|------------|------|----------|-----------|--|--|
|        |      | Shiraz-42T | 454  | 0.145717 | 0         |  |  |
|        |      | Shiraz-46T | 943  | 0.093799 | 0         |  |  |
|        |      | Shiraz-46T | 943  | 0.093799 | 0         |  |  |
|        |      | Shiraz-46T | 944  | 0.256008 | 0         |  |  |
|        |      | Shiraz-46T | 944  | 0.256008 | 0         |  |  |
|        |      | Shiraz-77T | 1225 | 0        | -0.117922 |  |  |
|        |      | Shiraz-77T | 1225 | 0        | -0.117922 |  |  |
|        |      | Shiraz-18T | 1434 | 0.244465 | 0         |  |  |
|        |      | Shiraz-18T | 1434 | 0.244465 | 0         |  |  |
|        |      | Shiraz-22T | 1549 | 0        | -0.319623 |  |  |
|        |      | Shiraz-22T | 1549 | 0        | -0.319623 |  |  |
|        |      | Shiraz-25T | 1698 | 0.21835  | 0         |  |  |
|        |      | Shiraz-25T | 1698 | 0.21835  | 0         |  |  |
|        |      | Shiraz-28T | 1735 | 0.350744 | 0         |  |  |
|        |      | Shiraz-28T | 1735 | 0.350744 | 0         |  |  |
|        |      | Shiraz-29T | 1778 | 0.120767 | 0         |  |  |
|        |      | Shiraz-29T | 1778 | 0.120767 | 0         |  |  |
|        |      | Shiraz-38T | 1951 | 0.250891 | 0         |  |  |
|        |      | Shiraz-38T | 1951 | 0.250891 | 0         |  |  |
|        |      | Shiraz-53T | 2078 | 0.287202 | 0         |  |  |
|        |      | Shiraz-53T | 2078 | 0.287202 | 0         |  |  |
|        |      | Shiraz-58T | 2159 | 0        | -0.219521 |  |  |
|        |      | Shiraz-58T | 2159 | 0        | -0.219521 |  |  |
|        |      | Shiraz-71T | 2238 | 0.603631 | 0         |  |  |
|        |      | Shiraz-71T | 2238 | 0.603631 | 0         |  |  |
|        |      | Shiraz-71T | 2239 | 0.310785 | 0         |  |  |
|        |      | Shiraz-71T | 2239 | 0.310785 | 0         |  |  |
| PTPRZ1 | chr7 | Shiraz-3T  | 90   | 0.219276 | 0         |  |  |
|        |      | Shiraz-3T  | 95   | 0        | -0.077623 |  |  |
|        |      | Shiraz-4T  | 253  | 0.372918 | 0         |  |  |
|        |      | Shiraz-36T | 378  | 0.179558 | 0         |  |  |
|        |      | Shiraz-36T | 382  | 0.081739 | 0         |  |  |
|        |      | Shiraz-44T | 641  | 0        | -0.477846 |  |  |
|        |      | Shiraz-46T | 943  | 0.093799 | 0         |  |  |
|        |      | Shiraz-46T | 947  | 0        | -0.010843 |  |  |
|        |      | Shiraz-47T | 1031 | 0        | -0.117529 |  |  |
|        |      | Shiraz-49T | 1121 | 0        | -0.138569 |  |  |
|        |      | Shiraz-77T | 1225 | 0        | -0.117922 |  |  |
|        |      | Shiraz-77T | 1228 | 0        | -0.238084 |  |  |
|        |      | Shiraz-18T | 1434 | 0.244465 | 0         |  |  |
|        |      | Shiraz-22T | 1549 | 0        | -0.319623 |  |  |
|        |      | Shiraz-22T | 1552 | 0        | -0.50686  |  |  |
|        |      | Shiraz-25T | 1698 | 0.21835  | 0         |  |  |
|        |      | Shiraz-28T | 1735 | 0.350744 | 0         |  |  |
|        |      | Shiraz-29T | 1778 | 0.120767 | 0         |  |  |
|        |      | Shiraz-32T | 1833 | 0.551336 | 0         |  |  |
|        |      | Shiraz-32T | 1835 | 0.092727 | 0         |  |  |

|  |  |            |      |          |           |  |  |
|--|--|------------|------|----------|-----------|--|--|
|  |  | Shiraz-38T | 1951 | 0.250891 | 0         |  |  |
|  |  | Shiraz-53T | 2078 | 0.287202 | 0         |  |  |
|  |  | Shiraz-58T | 2161 | 0        | -0.187744 |  |  |
|  |  | Shiraz-71T | 2238 | 0.603631 | 0         |  |  |
|  |  | Shiraz-3T  | 90   | 0.219276 | 0         |  |  |
|  |  | Shiraz-3T  | 95   | 0        | -0.077623 |  |  |
|  |  | Shiraz-4T  | 253  | 0.372918 | 0         |  |  |
|  |  | Shiraz-36T | 378  | 0.179558 | 0         |  |  |
|  |  | Shiraz-36T | 382  | 0.081739 | 0         |  |  |
|  |  | Shiraz-44T | 641  | 0        | -0.477846 |  |  |
|  |  | Shiraz-46T | 943  | 0.093799 | 0         |  |  |
|  |  | Shiraz-46T | 947  | 0        | -0.010843 |  |  |
|  |  | Shiraz-47T | 1031 | 0        | -0.117529 |  |  |
|  |  | Shiraz-49T | 1121 | 0        | -0.138569 |  |  |
|  |  | Shiraz-77T | 1225 | 0        | -0.117922 |  |  |
|  |  | Shiraz-77T | 1228 | 0        | -0.238084 |  |  |
|  |  | Shiraz-18T | 1434 | 0.244465 | 0         |  |  |
|  |  | Shiraz-22T | 1549 | 0        | -0.319623 |  |  |
|  |  | Shiraz-22T | 1552 | 0        | -0.50686  |  |  |
|  |  | Shiraz-25T | 1698 | 0.21835  | 0         |  |  |
|  |  | Shiraz-28T | 1735 | 0.350744 | 0         |  |  |
|  |  | Shiraz-29T | 1778 | 0.120767 | 0         |  |  |
|  |  | Shiraz-32T | 1833 | 0.551336 | 0         |  |  |
|  |  | Shiraz-32T | 1835 | 0.092727 | 0         |  |  |
|  |  | Shiraz-38T | 1951 | 0.250891 | 0         |  |  |
|  |  | Shiraz-53T | 2078 | 0.287202 | 0         |  |  |
|  |  | Shiraz-58T | 2161 | 0        | -0.187744 |  |  |
|  |  | Shiraz-71T | 2238 | 0.603631 | 0         |  |  |
|  |  | Shiraz-3T  | 90   | 0.219276 | 0         |  |  |
|  |  | Shiraz-3T  | 95   | 0        | -0.077623 |  |  |
|  |  | Shiraz-4T  | 253  | 0.372918 | 0         |  |  |
|  |  | Shiraz-36T | 378  | 0.179558 | 0         |  |  |
|  |  | Shiraz-36T | 382  | 0.081739 | 0         |  |  |
|  |  | Shiraz-44T | 641  | 0        | -0.477846 |  |  |
|  |  | Shiraz-46T | 943  | 0.093799 | 0         |  |  |
|  |  | Shiraz-46T | 947  | 0        | -0.010843 |  |  |
|  |  | Shiraz-47T | 1031 | 0        | -0.117529 |  |  |
|  |  | Shiraz-49T | 1121 | 0        | -0.138569 |  |  |
|  |  | Shiraz-77T | 1225 | 0        | -0.117922 |  |  |
|  |  | Shiraz-77T | 1228 | 0        | -0.238084 |  |  |
|  |  | Shiraz-18T | 1434 | 0.244465 | 0         |  |  |
|  |  | Shiraz-22T | 1549 | 0        | -0.319623 |  |  |
|  |  | Shiraz-22T | 1552 | 0        | -0.50686  |  |  |
|  |  | Shiraz-25T | 1698 | 0.21835  | 0         |  |  |
|  |  | Shiraz-28T | 1735 | 0.350744 | 0         |  |  |
|  |  | Shiraz-29T | 1778 | 0.120767 | 0         |  |  |
|  |  | Shiraz-32T | 1833 | 0.551336 | 0         |  |  |

|      |      |            |      |          |           |  |
|------|------|------------|------|----------|-----------|--|
|      |      | Shiraz-32T | 1835 | 0.092727 | 0         |  |
|      |      | Shiraz-38T | 1951 | 0.250891 | 0         |  |
|      |      | Shiraz-53T | 2078 | 0.287202 | 0         |  |
|      |      | Shiraz-58T | 2161 | 0        | -0.187744 |  |
|      |      | Shiraz-71T | 2238 | 0.603631 | 0         |  |
| PURB | chr7 | Shiraz-3T  | 87   | 0.198593 | 0         |  |
|      |      | Shiraz-3T  | 89   | 0.678641 | 0         |  |
|      |      | Shiraz-4T  | 252  | 0.192083 | 0         |  |
|      |      | Shiraz-36T | 376  | 0.159952 | 0         |  |
|      |      | Shiraz-44T | 632  | 0.902944 | 0         |  |
|      |      | Shiraz-46T | 942  | 0.069143 | 0         |  |
|      |      | Shiraz-77T | 1223 | 0.215647 | 0         |  |
|      |      | Shiraz-18T | 1433 | 0.250973 | 0         |  |
|      |      | Shiraz-25T | 1697 | 0.21945  | 0         |  |
|      |      | Shiraz-28T | 1734 | 0.362882 | 0         |  |
|      |      | Shiraz-29T | 1777 | 0.156747 | 0         |  |
|      |      | Shiraz-38T | 1950 | 0.265916 | 0         |  |
|      |      | Shiraz-71T | 2236 | 0.320072 | 0         |  |
|      |      | Shiraz-3T  | 87   | 0.198593 | 0         |  |
|      |      | Shiraz-3T  | 89   | 0.678641 | 0         |  |
|      |      | Shiraz-4T  | 252  | 0.192083 | 0         |  |
|      |      | Shiraz-36T | 376  | 0.159952 | 0         |  |
|      |      | Shiraz-44T | 632  | 0.902944 | 0         |  |
|      |      | Shiraz-46T | 942  | 0.069143 | 0         |  |
|      |      | Shiraz-77T | 1223 | 0.215647 | 0         |  |
|      |      | Shiraz-18T | 1433 | 0.250973 | 0         |  |
|      |      | Shiraz-25T | 1697 | 0.21945  | 0         |  |
|      |      | Shiraz-28T | 1734 | 0.362882 | 0         |  |
|      |      | Shiraz-29T | 1777 | 0.156747 | 0         |  |
|      |      | Shiraz-38T | 1950 | 0.265916 | 0         |  |
|      |      | Shiraz-71T | 2236 | 0.320072 | 0         |  |
|      |      | Shiraz-3T  | 87   | 0.198593 | 0         |  |
|      |      | Shiraz-3T  | 89   | 0.678641 | 0         |  |
|      |      | Shiraz-4T  | 252  | 0.192083 | 0         |  |
|      |      | Shiraz-36T | 376  | 0.159952 | 0         |  |
|      |      | Shiraz-44T | 632  | 0.902944 | 0         |  |
|      |      | Shiraz-46T | 942  | 0.069143 | 0         |  |
|      |      | Shiraz-77T | 1223 | 0.215647 | 0         |  |
|      |      | Shiraz-18T | 1433 | 0.250973 | 0         |  |
|      |      | Shiraz-25T | 1697 | 0.21945  | 0         |  |
|      |      | Shiraz-28T | 1734 | 0.362882 | 0         |  |
|      |      | Shiraz-29T | 1777 | 0.156747 | 0         |  |
|      |      | Shiraz-38T | 1950 | 0.265916 | 0         |  |
|      |      | Shiraz-71T | 2236 | 0.320072 | 0         |  |
| PUS7 | chr7 | Shiraz-3T  | 90   | 0.219276 | 0         |  |
|      |      | Shiraz-4T  | 253  | 0.372918 | 0         |  |
|      |      | Shiraz-36T | 378  | 0.179558 | 0         |  |



|       |      |            |      |          |           |  |  |
|-------|------|------------|------|----------|-----------|--|--|
|       |      | Shiraz-46T | 943  | 0.093799 | 0         |  |  |
|       |      | Shiraz-77T | 1225 | 0        | -0.117922 |  |  |
|       |      | Shiraz-18T | 1434 | 0.244465 | 0         |  |  |
|       |      | Shiraz-22T | 1549 | 0        | -0.319623 |  |  |
|       |      | Shiraz-25T | 1698 | 0.21835  | 0         |  |  |
|       |      | Shiraz-28T | 1735 | 0.350744 | 0         |  |  |
|       |      | Shiraz-29T | 1778 | 0.120767 | 0         |  |  |
|       |      | Shiraz-32T | 1833 | 0.551336 | 0         |  |  |
|       |      | Shiraz-38T | 1951 | 0.250891 | 0         |  |  |
|       |      | Shiraz-53T | 2078 | 0.287202 | 0         |  |  |
|       |      | Shiraz-71T | 2238 | 0.603631 | 0         |  |  |
|       |      | Shiraz-3T  | 90   | 0.219276 | 0         |  |  |
|       |      | Shiraz-4T  | 253  | 0.372918 | 0         |  |  |
|       |      | Shiraz-36T | 378  | 0.179558 | 0         |  |  |
|       |      | Shiraz-46T | 943  | 0.093799 | 0         |  |  |
|       |      | Shiraz-77T | 1225 | 0        | -0.117922 |  |  |
|       |      | Shiraz-18T | 1434 | 0.244465 | 0         |  |  |
|       |      | Shiraz-22T | 1549 | 0        | -0.319623 |  |  |
|       |      | Shiraz-25T | 1698 | 0.21835  | 0         |  |  |
|       |      | Shiraz-28T | 1735 | 0.350744 | 0         |  |  |
|       |      | Shiraz-29T | 1778 | 0.120767 | 0         |  |  |
|       |      | Shiraz-32T | 1833 | 0.551336 | 0         |  |  |
|       |      | Shiraz-38T | 1951 | 0.250891 | 0         |  |  |
|       |      | Shiraz-53T | 2078 | 0.287202 | 0         |  |  |
|       |      | Shiraz-71T | 2238 | 0.603631 | 0         |  |  |
|       |      | Shiraz-3T  | 90   | 0.219276 | 0         |  |  |
|       |      | Shiraz-4T  | 253  | 0.372918 | 0         |  |  |
|       |      | Shiraz-36T | 378  | 0.179558 | 0         |  |  |
|       |      | Shiraz-46T | 943  | 0.093799 | 0         |  |  |
|       |      | Shiraz-77T | 1225 | 0        | -0.117922 |  |  |
|       |      | Shiraz-18T | 1434 | 0.244465 | 0         |  |  |
|       |      | Shiraz-22T | 1549 | 0        | -0.319623 |  |  |
|       |      | Shiraz-25T | 1698 | 0.21835  | 0         |  |  |
|       |      | Shiraz-28T | 1735 | 0.350744 | 0         |  |  |
|       |      | Shiraz-29T | 1778 | 0.120767 | 0         |  |  |
|       |      | Shiraz-32T | 1833 | 0.551336 | 0         |  |  |
|       |      | Shiraz-38T | 1951 | 0.250891 | 0         |  |  |
|       |      | Shiraz-53T | 2078 | 0.287202 | 0         |  |  |
|       |      | Shiraz-71T | 2238 | 0.603631 | 0         |  |  |
| PVRIG | chr7 | Shiraz-3T  | 90   | 0.219276 | 0         |  |  |
|       |      | Shiraz-3T  | 94   | 0.74735  | 0         |  |  |
|       |      | Shiraz-4T  | 253  | 0.372918 | 0         |  |  |
|       |      | Shiraz-31T | 316  | 0.219196 | 0         |  |  |
|       |      | Shiraz-36T | 378  | 0.179558 | 0         |  |  |
|       |      | Shiraz-36T | 381  | 0.332628 | 0         |  |  |
|       |      | Shiraz-44T | 639  | 1.035032 | 0         |  |  |
|       |      | Shiraz-46T | 943  | 0.093799 | 0         |  |  |

|  |            |      |          |           |  |
|--|------------|------|----------|-----------|--|
|  | Shiraz-46T | 946  | 0.299835 | 0         |  |
|  | Shiraz-47T | 1030 | 0.257728 | 0         |  |
|  | Shiraz-49T | 1120 | 0.281656 | 0         |  |
|  | Shiraz-77T | 1225 | 0        | -0.117922 |  |
|  | Shiraz-77T | 1227 | 0.196445 | 0         |  |
|  | Shiraz-9T  | 1324 | 0.679266 | 0         |  |
|  | Shiraz-18T | 1434 | 0.244465 | 0         |  |
|  | Shiraz-22T | 1549 | 0        | -0.319623 |  |
|  | Shiraz-22T | 1551 | 0.324011 | 0         |  |
|  | Shiraz-25T | 1698 | 0.21835  | 0         |  |
|  | Shiraz-28T | 1735 | 0.350744 | 0         |  |
|  | Shiraz-29T | 1778 | 0.120767 | 0         |  |
|  | Shiraz-32T | 1833 | 0.551336 | 0         |  |
|  | Shiraz-32T | 1834 | 1.485392 | 0         |  |
|  | Shiraz-38T | 1951 | 0.250891 | 0         |  |
|  | Shiraz-53T | 2078 | 0.287202 | 0         |  |
|  | Shiraz-58T | 2160 | 0.399007 | 0         |  |
|  | Shiraz-71T | 2238 | 0.603631 | 0         |  |
|  | Shiraz-3T  | 90   | 0.219276 | 0         |  |
|  | Shiraz-3T  | 94   | 0.74735  | 0         |  |
|  | Shiraz-4T  | 253  | 0.372918 | 0         |  |
|  | Shiraz-31T | 316  | 0.219196 | 0         |  |
|  | Shiraz-36T | 378  | 0.179558 | 0         |  |
|  | Shiraz-36T | 381  | 0.332628 | 0         |  |
|  | Shiraz-44T | 639  | 1.035032 | 0         |  |
|  | Shiraz-46T | 943  | 0.093799 | 0         |  |
|  | Shiraz-46T | 946  | 0.299835 | 0         |  |
|  | Shiraz-47T | 1030 | 0.257728 | 0         |  |
|  | Shiraz-49T | 1120 | 0.281656 | 0         |  |
|  | Shiraz-77T | 1225 | 0        | -0.117922 |  |
|  | Shiraz-77T | 1227 | 0.196445 | 0         |  |
|  | Shiraz-9T  | 1324 | 0.679266 | 0         |  |
|  | Shiraz-18T | 1434 | 0.244465 | 0         |  |
|  | Shiraz-22T | 1549 | 0        | -0.319623 |  |
|  | Shiraz-22T | 1551 | 0.324011 | 0         |  |
|  | Shiraz-25T | 1698 | 0.21835  | 0         |  |
|  | Shiraz-28T | 1735 | 0.350744 | 0         |  |
|  | Shiraz-29T | 1778 | 0.120767 | 0         |  |
|  | Shiraz-32T | 1833 | 0.551336 | 0         |  |
|  | Shiraz-32T | 1834 | 1.485392 | 0         |  |
|  | Shiraz-38T | 1951 | 0.250891 | 0         |  |
|  | Shiraz-53T | 2078 | 0.287202 | 0         |  |
|  | Shiraz-58T | 2160 | 0.399007 | 0         |  |
|  | Shiraz-71T | 2238 | 0.603631 | 0         |  |
|  | Shiraz-3T  | 90   | 0.219276 | 0         |  |
|  | Shiraz-3T  | 94   | 0.74735  | 0         |  |
|  | Shiraz-4T  | 253  | 0.372918 | 0         |  |

|       |      |            |      |          |           |  |
|-------|------|------------|------|----------|-----------|--|
|       |      | Shiraz-31T | 316  | 0.219196 | 0         |  |
|       |      | Shiraz-36T | 378  | 0.179558 | 0         |  |
|       |      | Shiraz-36T | 381  | 0.332628 | 0         |  |
|       |      | Shiraz-44T | 639  | 1.035032 | 0         |  |
|       |      | Shiraz-46T | 943  | 0.093799 | 0         |  |
|       |      | Shiraz-46T | 946  | 0.299835 | 0         |  |
|       |      | Shiraz-47T | 1030 | 0.257728 | 0         |  |
|       |      | Shiraz-49T | 1120 | 0.281656 | 0         |  |
|       |      | Shiraz-77T | 1225 | 0        | -0.117922 |  |
|       |      | Shiraz-77T | 1227 | 0.196445 | 0         |  |
|       |      | Shiraz-9T  | 1324 | 0.679266 | 0         |  |
|       |      | Shiraz-18T | 1434 | 0.244465 | 0         |  |
|       |      | Shiraz-22T | 1549 | 0        | -0.319623 |  |
|       |      | Shiraz-22T | 1551 | 0.324011 | 0         |  |
|       |      | Shiraz-25T | 1698 | 0.21835  | 0         |  |
|       |      | Shiraz-28T | 1735 | 0.350744 | 0         |  |
|       |      | Shiraz-29T | 1778 | 0.120767 | 0         |  |
|       |      | Shiraz-32T | 1833 | 0.551336 | 0         |  |
|       |      | Shiraz-32T | 1834 | 1.485392 | 0         |  |
|       |      | Shiraz-38T | 1951 | 0.250891 | 0         |  |
|       |      | Shiraz-53T | 2078 | 0.287202 | 0         |  |
|       |      | Shiraz-58T | 2160 | 0.399007 | 0         |  |
|       |      | Shiraz-71T | 2238 | 0.603631 | 0         |  |
| RAB19 | chr7 | Shiraz-3T  | 90   | 0.219276 | 0         |  |
|       |      | Shiraz-3T  | 97   | 0.496001 | 0         |  |
|       |      | Shiraz-4T  | 253  | 0.372918 | 0         |  |
|       |      | Shiraz-31T | 318  | 0.254373 | 0         |  |
|       |      | Shiraz-36T | 378  | 0.179558 | 0         |  |
|       |      | Shiraz-36T | 383  | 0.374586 | 0         |  |
|       |      | Shiraz-44T | 644  | 0.496536 | 0         |  |
|       |      | Shiraz-46T | 943  | 0.093799 | 0         |  |
|       |      | Shiraz-47T | 1033 | 0.220267 | 0         |  |
|       |      | Shiraz-77T | 1225 | 0        | -0.117922 |  |
|       |      | Shiraz-77T | 1230 | 0.149651 | 0         |  |
|       |      | Shiraz-9T  | 1325 | 0.221899 | 0         |  |
|       |      | Shiraz-18T | 1434 | 0.244465 | 0         |  |
|       |      | Shiraz-25T | 1698 | 0.21835  | 0         |  |
|       |      | Shiraz-28T | 1735 | 0.350744 | 0         |  |
|       |      | Shiraz-29T | 1778 | 0.120767 | 0         |  |
|       |      | Shiraz-32T | 1833 | 0.551336 | 0         |  |
|       |      | Shiraz-38T | 1951 | 0.250891 | 0         |  |
|       |      | Shiraz-53T | 2078 | 0.287202 | 0         |  |
|       |      | Shiraz-58T | 2162 | 0.221505 | 0         |  |
|       |      | Shiraz-71T | 2238 | 0.603631 | 0         |  |
|       |      | Shiraz-3T  | 90   | 0.219276 | 0         |  |
|       |      | Shiraz-3T  | 97   | 0.496001 | 0         |  |
|       |      | Shiraz-4T  | 253  | 0.372918 | 0         |  |

|        |      |            |      |          |           |  |
|--------|------|------------|------|----------|-----------|--|
|        |      | Shiraz-31T | 318  | 0.254373 | 0         |  |
|        |      | Shiraz-36T | 378  | 0.179558 | 0         |  |
|        |      | Shiraz-36T | 383  | 0.374586 | 0         |  |
|        |      | Shiraz-44T | 644  | 0.496536 | 0         |  |
|        |      | Shiraz-46T | 943  | 0.093799 | 0         |  |
|        |      | Shiraz-47T | 1033 | 0.220267 | 0         |  |
|        |      | Shiraz-77T | 1225 | 0        | -0.117922 |  |
|        |      | Shiraz-77T | 1230 | 0.149651 | 0         |  |
|        |      | Shiraz-9T  | 1325 | 0.221899 | 0         |  |
|        |      | Shiraz-18T | 1434 | 0.244465 | 0         |  |
|        |      | Shiraz-25T | 1698 | 0.21835  | 0         |  |
|        |      | Shiraz-28T | 1735 | 0.350744 | 0         |  |
|        |      | Shiraz-29T | 1778 | 0.120767 | 0         |  |
|        |      | Shiraz-32T | 1833 | 0.551336 | 0         |  |
|        |      | Shiraz-38T | 1951 | 0.250891 | 0         |  |
|        |      | Shiraz-53T | 2078 | 0.287202 | 0         |  |
|        |      | Shiraz-58T | 2162 | 0.221505 | 0         |  |
|        |      | Shiraz-71T | 2238 | 0.603631 | 0         |  |
|        |      | Shiraz-3T  | 90   | 0.219276 | 0         |  |
|        |      | Shiraz-3T  | 97   | 0.496001 | 0         |  |
|        |      | Shiraz-4T  | 253  | 0.372918 | 0         |  |
|        |      | Shiraz-31T | 318  | 0.254373 | 0         |  |
|        |      | Shiraz-36T | 378  | 0.179558 | 0         |  |
|        |      | Shiraz-36T | 383  | 0.374586 | 0         |  |
|        |      | Shiraz-44T | 644  | 0.496536 | 0         |  |
|        |      | Shiraz-46T | 943  | 0.093799 | 0         |  |
|        |      | Shiraz-47T | 1033 | 0.220267 | 0         |  |
|        |      | Shiraz-77T | 1225 | 0        | -0.117922 |  |
|        |      | Shiraz-77T | 1230 | 0.149651 | 0         |  |
|        |      | Shiraz-9T  | 1325 | 0.221899 | 0         |  |
|        |      | Shiraz-18T | 1434 | 0.244465 | 0         |  |
|        |      | Shiraz-25T | 1698 | 0.21835  | 0         |  |
|        |      | Shiraz-28T | 1735 | 0.350744 | 0         |  |
|        |      | Shiraz-29T | 1778 | 0.120767 | 0         |  |
|        |      | Shiraz-32T | 1833 | 0.551336 | 0         |  |
|        |      | Shiraz-38T | 1951 | 0.250891 | 0         |  |
|        |      | Shiraz-53T | 2078 | 0.287202 | 0         |  |
|        |      | Shiraz-58T | 2162 | 0.221505 | 0         |  |
|        |      | Shiraz-71T | 2238 | 0.603631 | 0         |  |
| RAB33A | chrX | Shiraz-3T  | 242  | 0        | -0.336434 |  |
|        |      | Shiraz-3T  | 245  | 0.224144 | 0         |  |
|        |      | Shiraz-4T  | 261  | 0        | -0.336249 |  |
|        |      | Shiraz-16T | 295  | 0.591657 | 0         |  |
|        |      | Shiraz-36T | 433  | 0        | -0.803961 |  |
|        |      | Shiraz-44T | 899  | 0        | -1.09697  |  |
|        |      | Shiraz-44T | 906  | 0        | -0.165692 |  |
|        |      | Shiraz-49T | 1170 | 0        | -0.967436 |  |

|  |            |      |          |           |  |
|--|------------|------|----------|-----------|--|
|  | Shiraz-9T  | 1370 | 0.690073 | 0         |  |
|  | Shiraz-18T | 1457 | 0.643204 | 0         |  |
|  | Shiraz-22T | 1673 | 0.611783 | 0         |  |
|  | Shiraz-22T | 1677 | 0.789711 | 0         |  |
|  | Shiraz-25T | 1719 | 0.472955 | 0         |  |
|  | Shiraz-28T | 1762 | 0.562311 | 0         |  |
|  | Shiraz-29T | 1801 | 0.815343 | 0         |  |
|  | Shiraz-32T | 1870 | 0.729766 | 0         |  |
|  | Shiraz-35T | 1933 | 0.488535 | 0         |  |
|  | Shiraz-58T | 2223 | 0.833364 | 0         |  |
|  | Shiraz-71T | 2263 | 0.975531 | 0         |  |
|  | Shiraz-3T  | 242  | 0        | -0.336434 |  |
|  | Shiraz-3T  | 245  | 0.224144 | 0         |  |
|  | Shiraz-4T  | 261  | 0        | -0.336249 |  |
|  | Shiraz-16T | 295  | 0.591657 | 0         |  |
|  | Shiraz-36T | 433  | 0        | -0.803961 |  |
|  | Shiraz-44T | 899  | 0        | -1.09697  |  |
|  | Shiraz-44T | 906  | 0        | -0.165692 |  |
|  | Shiraz-49T | 1170 | 0        | -0.967436 |  |
|  | Shiraz-9T  | 1370 | 0.690073 | 0         |  |
|  | Shiraz-18T | 1457 | 0.643204 | 0         |  |
|  | Shiraz-22T | 1673 | 0.611783 | 0         |  |
|  | Shiraz-22T | 1677 | 0.789711 | 0         |  |
|  | Shiraz-25T | 1719 | 0.472955 | 0         |  |
|  | Shiraz-28T | 1762 | 0.562311 | 0         |  |
|  | Shiraz-29T | 1801 | 0.815343 | 0         |  |
|  | Shiraz-32T | 1870 | 0.729766 | 0         |  |
|  | Shiraz-35T | 1933 | 0.488535 | 0         |  |
|  | Shiraz-58T | 2223 | 0.833364 | 0         |  |
|  | Shiraz-71T | 2263 | 0.975531 | 0         |  |
|  | Shiraz-3T  | 242  | 0        | -0.336434 |  |
|  | Shiraz-3T  | 245  | 0.224144 | 0         |  |
|  | Shiraz-4T  | 261  | 0        | -0.336249 |  |
|  | Shiraz-16T | 295  | 0.591657 | 0         |  |
|  | Shiraz-36T | 433  | 0        | -0.803961 |  |
|  | Shiraz-44T | 899  | 0        | -1.09697  |  |
|  | Shiraz-44T | 906  | 0        | -0.165692 |  |
|  | Shiraz-49T | 1170 | 0        | -0.967436 |  |
|  | Shiraz-9T  | 1370 | 0.690073 | 0         |  |
|  | Shiraz-18T | 1457 | 0.643204 | 0         |  |
|  | Shiraz-22T | 1673 | 0.611783 | 0         |  |
|  | Shiraz-22T | 1677 | 0.789711 | 0         |  |
|  | Shiraz-25T | 1719 | 0.472955 | 0         |  |
|  | Shiraz-28T | 1762 | 0.562311 | 0         |  |
|  | Shiraz-29T | 1801 | 0.815343 | 0         |  |
|  | Shiraz-32T | 1870 | 0.729766 | 0         |  |
|  | Shiraz-35T | 1933 | 0.488535 | 0         |  |

|        |      |            |      |          |           |  |  |
|--------|------|------------|------|----------|-----------|--|--|
|        |      | Shiraz-58T | 2223 | 0.833364 | 0         |  |  |
|        |      | Shiraz-71T | 2263 | 0.975531 | 0         |  |  |
| RAB39B | chrX | Shiraz-3T  | 247  | 0        | -0.421316 |  |  |
|        |      | Shiraz-4T  | 261  | 0        | -0.336249 |  |  |
|        |      | Shiraz-16T | 295  | 0.591657 | 0         |  |  |
|        |      | Shiraz-36T | 433  | 0        | -0.803961 |  |  |
|        |      | Shiraz-44T | 909  | 0        | -1.067051 |  |  |
|        |      | Shiraz-49T | 1170 | 0        | -0.967436 |  |  |
|        |      | Shiraz-9T  | 1370 | 0.690073 | 0         |  |  |
|        |      | Shiraz-18T | 1457 | 0.643204 | 0         |  |  |
|        |      | Shiraz-22T | 1673 | 0.611783 | 0         |  |  |
|        |      | Shiraz-25T | 1719 | 0.472955 | 0         |  |  |
|        |      | Shiraz-28T | 1762 | 0.562311 | 0         |  |  |
|        |      | Shiraz-29T | 1801 | 0.815343 | 0         |  |  |
|        |      | Shiraz-35T | 1933 | 0.488535 | 0         |  |  |
|        |      | Shiraz-58T | 2223 | 0.833364 | 0         |  |  |
|        |      | Shiraz-71T | 2263 | 0.975531 | 0         |  |  |
|        |      | Shiraz-3T  | 247  | 0        | -0.421316 |  |  |
|        |      | Shiraz-4T  | 261  | 0        | -0.336249 |  |  |
|        |      | Shiraz-16T | 295  | 0.591657 | 0         |  |  |
|        |      | Shiraz-36T | 433  | 0        | -0.803961 |  |  |
|        |      | Shiraz-44T | 909  | 0        | -1.067051 |  |  |
|        |      | Shiraz-49T | 1170 | 0        | -0.967436 |  |  |
|        |      | Shiraz-9T  | 1370 | 0.690073 | 0         |  |  |
|        |      | Shiraz-18T | 1457 | 0.643204 | 0         |  |  |
|        |      | Shiraz-22T | 1673 | 0.611783 | 0         |  |  |
|        |      | Shiraz-25T | 1719 | 0.472955 | 0         |  |  |
|        |      | Shiraz-28T | 1762 | 0.562311 | 0         |  |  |
|        |      | Shiraz-29T | 1801 | 0.815343 | 0         |  |  |
|        |      | Shiraz-35T | 1933 | 0.488535 | 0         |  |  |
|        |      | Shiraz-58T | 2223 | 0.833364 | 0         |  |  |
|        |      | Shiraz-71T | 2263 | 0.975531 | 0         |  |  |
|        |      | Shiraz-3T  | 247  | 0        | -0.421316 |  |  |
|        |      | Shiraz-4T  | 261  | 0        | -0.336249 |  |  |
|        |      | Shiraz-16T | 295  | 0.591657 | 0         |  |  |
|        |      | Shiraz-36T | 433  | 0        | -0.803961 |  |  |
|        |      | Shiraz-44T | 909  | 0        | -1.067051 |  |  |
|        |      | Shiraz-49T | 1170 | 0        | -0.967436 |  |  |
|        |      | Shiraz-9T  | 1370 | 0.690073 | 0         |  |  |
|        |      | Shiraz-18T | 1457 | 0.643204 | 0         |  |  |
|        |      | Shiraz-22T | 1673 | 0.611783 | 0         |  |  |
|        |      | Shiraz-25T | 1719 | 0.472955 | 0         |  |  |
|        |      | Shiraz-28T | 1762 | 0.562311 | 0         |  |  |
|        |      | Shiraz-29T | 1801 | 0.815343 | 0         |  |  |
|        |      | Shiraz-35T | 1933 | 0.488535 | 0         |  |  |
|        |      | Shiraz-58T | 2223 | 0.833364 | 0         |  |  |
|        |      | Shiraz-71T | 2263 | 0.975531 | 0         |  |  |

|         |      |            |      |          |           |  |  |
|---------|------|------------|------|----------|-----------|--|--|
| RAB40A  | chrX | Shiraz-3T  | 242  | 0        | -0.336434 |  |  |
|         |      | Shiraz-4T  | 261  | 0        | -0.336249 |  |  |
|         |      | Shiraz-16T | 295  | 0.591657 | 0         |  |  |
|         |      | Shiraz-36T | 433  | 0        | -0.803961 |  |  |
|         |      | Shiraz-44T | 899  | 0        | -1.09697  |  |  |
|         |      | Shiraz-49T | 1170 | 0        | -0.967436 |  |  |
|         |      | Shiraz-18T | 1457 | 0.643204 | 0         |  |  |
|         |      | Shiraz-22T | 1673 | 0.611783 | 0         |  |  |
|         |      | Shiraz-25T | 1719 | 0.472955 | 0         |  |  |
|         |      | Shiraz-28T | 1762 | 0.562311 | 0         |  |  |
|         |      | Shiraz-29T | 1801 | 0.815343 | 0         |  |  |
|         |      | Shiraz-32T | 1870 | 0.729766 | 0         |  |  |
|         |      | Shiraz-35T | 1933 | 0.488535 | 0         |  |  |
|         |      | Shiraz-58T | 2223 | 0.833364 | 0         |  |  |
|         |      | Shiraz-71T | 2263 | 0.975531 | 0         |  |  |
|         |      | Shiraz-3T  | 242  | 0        | -0.336434 |  |  |
|         |      | Shiraz-4T  | 261  | 0        | -0.336249 |  |  |
|         |      | Shiraz-16T | 295  | 0.591657 | 0         |  |  |
|         |      | Shiraz-36T | 433  | 0        | -0.803961 |  |  |
|         |      | Shiraz-44T | 899  | 0        | -1.09697  |  |  |
|         |      | Shiraz-49T | 1170 | 0        | -0.967436 |  |  |
|         |      | Shiraz-18T | 1457 | 0.643204 | 0         |  |  |
|         |      | Shiraz-22T | 1673 | 0.611783 | 0         |  |  |
|         |      | Shiraz-25T | 1719 | 0.472955 | 0         |  |  |
|         |      | Shiraz-28T | 1762 | 0.562311 | 0         |  |  |
|         |      | Shiraz-29T | 1801 | 0.815343 | 0         |  |  |
|         |      | Shiraz-32T | 1870 | 0.729766 | 0         |  |  |
|         |      | Shiraz-35T | 1933 | 0.488535 | 0         |  |  |
|         |      | Shiraz-58T | 2223 | 0.833364 | 0         |  |  |
|         |      | Shiraz-71T | 2263 | 0.975531 | 0         |  |  |
|         |      | Shiraz-3T  | 242  | 0        | -0.336434 |  |  |
|         |      | Shiraz-4T  | 261  | 0        | -0.336249 |  |  |
|         |      | Shiraz-16T | 295  | 0.591657 | 0         |  |  |
|         |      | Shiraz-36T | 433  | 0        | -0.803961 |  |  |
|         |      | Shiraz-44T | 899  | 0        | -1.09697  |  |  |
|         |      | Shiraz-49T | 1170 | 0        | -0.967436 |  |  |
|         |      | Shiraz-18T | 1457 | 0.643204 | 0         |  |  |
|         |      | Shiraz-22T | 1673 | 0.611783 | 0         |  |  |
|         |      | Shiraz-25T | 1719 | 0.472955 | 0         |  |  |
|         |      | Shiraz-28T | 1762 | 0.562311 | 0         |  |  |
|         |      | Shiraz-29T | 1801 | 0.815343 | 0         |  |  |
|         |      | Shiraz-32T | 1870 | 0.729766 | 0         |  |  |
|         |      | Shiraz-35T | 1933 | 0.488535 | 0         |  |  |
|         |      | Shiraz-58T | 2223 | 0.833364 | 0         |  |  |
|         |      | Shiraz-71T | 2263 | 0.975531 | 0         |  |  |
| RAB40AL | chrX | Shiraz-3T  | 242  | 0        | -0.336434 |  |  |
|         |      | Shiraz-4T  | 261  | 0        | -0.336249 |  |  |

|       |      |            |      |          |           |  |  |
|-------|------|------------|------|----------|-----------|--|--|
|       |      | Shiraz-16T | 295  | 0.591657 | 0         |  |  |
|       |      | Shiraz-36T | 433  | 0        | -0.803961 |  |  |
|       |      | Shiraz-44T | 899  | 0        | -1.09697  |  |  |
|       |      | Shiraz-49T | 1170 | 0        | -0.967436 |  |  |
|       |      | Shiraz-18T | 1457 | 0.643204 | 0         |  |  |
|       |      | Shiraz-22T | 1673 | 0.611783 | 0         |  |  |
|       |      | Shiraz-25T | 1719 | 0.472955 | 0         |  |  |
|       |      | Shiraz-28T | 1762 | 0.562311 | 0         |  |  |
|       |      | Shiraz-29T | 1801 | 0.815343 | 0         |  |  |
|       |      | Shiraz-32T | 1870 | 0.729766 | 0         |  |  |
|       |      | Shiraz-35T | 1933 | 0.488535 | 0         |  |  |
|       |      | Shiraz-58T | 2223 | 0.833364 | 0         |  |  |
|       |      | Shiraz-71T | 2263 | 0.975531 | 0         |  |  |
|       |      | Shiraz-3T  | 242  | 0        | -0.336434 |  |  |
|       |      | Shiraz-4T  | 261  | 0        | -0.336249 |  |  |
|       |      | Shiraz-16T | 295  | 0.591657 | 0         |  |  |
|       |      | Shiraz-36T | 433  | 0        | -0.803961 |  |  |
|       |      | Shiraz-44T | 899  | 0        | -1.09697  |  |  |
|       |      | Shiraz-49T | 1170 | 0        | -0.967436 |  |  |
|       |      | Shiraz-18T | 1457 | 0.643204 | 0         |  |  |
|       |      | Shiraz-22T | 1673 | 0.611783 | 0         |  |  |
|       |      | Shiraz-25T | 1719 | 0.472955 | 0         |  |  |
|       |      | Shiraz-28T | 1762 | 0.562311 | 0         |  |  |
|       |      | Shiraz-29T | 1801 | 0.815343 | 0         |  |  |
|       |      | Shiraz-32T | 1870 | 0.729766 | 0         |  |  |
|       |      | Shiraz-35T | 1933 | 0.488535 | 0         |  |  |
|       |      | Shiraz-58T | 2223 | 0.833364 | 0         |  |  |
|       |      | Shiraz-71T | 2263 | 0.975531 | 0         |  |  |
|       |      | Shiraz-3T  | 242  | 0        | -0.336434 |  |  |
|       |      | Shiraz-4T  | 261  | 0        | -0.336249 |  |  |
|       |      | Shiraz-16T | 295  | 0.591657 | 0         |  |  |
|       |      | Shiraz-36T | 433  | 0        | -0.803961 |  |  |
|       |      | Shiraz-44T | 899  | 0        | -1.09697  |  |  |
|       |      | Shiraz-49T | 1170 | 0        | -0.967436 |  |  |
|       |      | Shiraz-18T | 1457 | 0.643204 | 0         |  |  |
|       |      | Shiraz-22T | 1673 | 0.611783 | 0         |  |  |
|       |      | Shiraz-25T | 1719 | 0.472955 | 0         |  |  |
|       |      | Shiraz-28T | 1762 | 0.562311 | 0         |  |  |
|       |      | Shiraz-29T | 1801 | 0.815343 | 0         |  |  |
|       |      | Shiraz-32T | 1870 | 0.729766 | 0         |  |  |
|       |      | Shiraz-35T | 1933 | 0.488535 | 0         |  |  |
|       |      | Shiraz-58T | 2223 | 0.833364 | 0         |  |  |
|       |      | Shiraz-71T | 2263 | 0.975531 | 0         |  |  |
| RAB41 | chrX | Shiraz-4T  | 261  | 0        | -0.336249 |  |  |
|       |      | Shiraz-16T | 295  | 0.591657 | 0         |  |  |
|       |      | Shiraz-36T | 433  | 0        | -0.803961 |  |  |
|       |      | Shiraz-44T | 899  | 0        | -1.09697  |  |  |



|  |            |      |          |           |  |
|--|------------|------|----------|-----------|--|
|  | Shiraz-44T | 900  | 0        | -0.584284 |  |
|  | Shiraz-44T | 901  | 0        | -1.000082 |  |
|  | Shiraz-49T | 1170 | 0        | -0.967436 |  |
|  | Shiraz-18T | 1457 | 0.643204 | 0         |  |
|  | Shiraz-22T | 1673 | 0.611783 | 0         |  |
|  | Shiraz-22T | 1674 | 0.887899 | 0         |  |
|  | Shiraz-25T | 1719 | 0.472955 | 0         |  |
|  | Shiraz-28T | 1762 | 0.562311 | 0         |  |
|  | Shiraz-29T | 1801 | 0.815343 | 0         |  |
|  | Shiraz-32T | 1870 | 0.729766 | 0         |  |
|  | Shiraz-35T | 1933 | 0.488535 | 0         |  |
|  | Shiraz-58T | 2223 | 0.833364 | 0         |  |
|  | Shiraz-58T | 2224 | 1.076575 | 0         |  |
|  | Shiraz-71T | 2263 | 0.975531 | 0         |  |
|  | Shiraz-4T  | 261  | 0        | -0.336249 |  |
|  | Shiraz-16T | 295  | 0.591657 | 0         |  |
|  | Shiraz-36T | 433  | 0        | -0.803961 |  |
|  | Shiraz-44T | 899  | 0        | -1.09697  |  |
|  | Shiraz-44T | 900  | 0        | -0.584284 |  |
|  | Shiraz-44T | 901  | 0        | -1.000082 |  |
|  | Shiraz-49T | 1170 | 0        | -0.967436 |  |
|  | Shiraz-18T | 1457 | 0.643204 | 0         |  |
|  | Shiraz-22T | 1673 | 0.611783 | 0         |  |
|  | Shiraz-22T | 1674 | 0.887899 | 0         |  |
|  | Shiraz-25T | 1719 | 0.472955 | 0         |  |
|  | Shiraz-28T | 1762 | 0.562311 | 0         |  |
|  | Shiraz-29T | 1801 | 0.815343 | 0         |  |
|  | Shiraz-32T | 1870 | 0.729766 | 0         |  |
|  | Shiraz-35T | 1933 | 0.488535 | 0         |  |
|  | Shiraz-58T | 2223 | 0.833364 | 0         |  |
|  | Shiraz-58T | 2224 | 1.076575 | 0         |  |
|  | Shiraz-71T | 2263 | 0.975531 | 0         |  |
|  | Shiraz-4T  | 261  | 0        | -0.336249 |  |
|  | Shiraz-16T | 295  | 0.591657 | 0         |  |
|  | Shiraz-36T | 433  | 0        | -0.803961 |  |
|  | Shiraz-44T | 899  | 0        | -1.09697  |  |
|  | Shiraz-44T | 900  | 0        | -0.584284 |  |
|  | Shiraz-44T | 901  | 0        | -1.000082 |  |
|  | Shiraz-49T | 1170 | 0        | -0.967436 |  |
|  | Shiraz-18T | 1457 | 0.643204 | 0         |  |
|  | Shiraz-22T | 1673 | 0.611783 | 0         |  |
|  | Shiraz-22T | 1674 | 0.887899 | 0         |  |
|  | Shiraz-25T | 1719 | 0.472955 | 0         |  |
|  | Shiraz-28T | 1762 | 0.562311 | 0         |  |
|  | Shiraz-29T | 1801 | 0.815343 | 0         |  |
|  | Shiraz-32T | 1870 | 0.729766 | 0         |  |
|  | Shiraz-35T | 1933 | 0.488535 | 0         |  |

|       |      |            |      |          |           |  |
|-------|------|------------|------|----------|-----------|--|
|       |      | Shiraz-58T | 2223 | 0.833364 | 0         |  |
|       |      | Shiraz-58T | 2224 | 1.076575 | 0         |  |
|       |      | Shiraz-71T | 2263 | 0.975531 | 0         |  |
| RAB9A | chrX | Shiraz-3T  | 235  | 0        | -0.28401  |  |
|       |      | Shiraz-4T  | 260  | 0        | -0.324128 |  |
|       |      | Shiraz-16T | 294  | 0.655804 | 0         |  |
|       |      | Shiraz-36T | 431  | 0        | -0.78035  |  |
|       |      | Shiraz-44T | 891  | 0        | -0.954044 |  |
|       |      | Shiraz-49T | 1166 | 0        | -0.917235 |  |
|       |      | Shiraz-9T  | 1368 | 0.199713 | 0         |  |
|       |      | Shiraz-18T | 1455 | 0        | -0.186773 |  |
|       |      | Shiraz-22T | 1669 | 0.695915 | 0         |  |
|       |      | Shiraz-25T | 1717 | 0.420447 | 0         |  |
|       |      | Shiraz-28T | 1760 | 0.538181 | 0         |  |
|       |      | Shiraz-29T | 1800 | 0.672527 | 0         |  |
|       |      | Shiraz-32T | 1869 | 0.776805 | 0         |  |
|       |      | Shiraz-35T | 1932 | 0.507141 | 0         |  |
|       |      | Shiraz-40T | 2051 | 0.098506 | 0         |  |
|       |      | Shiraz-58T | 2221 | 0.871948 | 0         |  |
|       |      | Shiraz-71T | 2260 | 0.68394  | 0         |  |
|       |      | Shiraz-71T | 2261 | 0.508399 | 0         |  |
|       |      | Shiraz-3T  | 235  | 0        | -0.28401  |  |
|       |      | Shiraz-4T  | 260  | 0        | -0.324128 |  |
|       |      | Shiraz-16T | 294  | 0.655804 | 0         |  |
|       |      | Shiraz-36T | 431  | 0        | -0.78035  |  |
|       |      | Shiraz-44T | 891  | 0        | -0.954044 |  |
|       |      | Shiraz-49T | 1166 | 0        | -0.917235 |  |
|       |      | Shiraz-9T  | 1368 | 0.199713 | 0         |  |
|       |      | Shiraz-18T | 1455 | 0        | -0.186773 |  |
|       |      | Shiraz-22T | 1669 | 0.695915 | 0         |  |
|       |      | Shiraz-25T | 1717 | 0.420447 | 0         |  |
|       |      | Shiraz-28T | 1760 | 0.538181 | 0         |  |
|       |      | Shiraz-29T | 1800 | 0.672527 | 0         |  |
|       |      | Shiraz-32T | 1869 | 0.776805 | 0         |  |
|       |      | Shiraz-35T | 1932 | 0.507141 | 0         |  |
|       |      | Shiraz-40T | 2051 | 0.098506 | 0         |  |
|       |      | Shiraz-58T | 2221 | 0.871948 | 0         |  |
|       |      | Shiraz-71T | 2260 | 0.68394  | 0         |  |
|       |      | Shiraz-71T | 2261 | 0.508399 | 0         |  |
|       |      | Shiraz-3T  | 235  | 0        | -0.28401  |  |
|       |      | Shiraz-4T  | 260  | 0        | -0.324128 |  |
|       |      | Shiraz-16T | 294  | 0.655804 | 0         |  |
|       |      | Shiraz-36T | 431  | 0        | -0.78035  |  |
|       |      | Shiraz-44T | 891  | 0        | -0.954044 |  |
|       |      | Shiraz-49T | 1166 | 0        | -0.917235 |  |
|       |      | Shiraz-9T  | 1368 | 0.199713 | 0         |  |
|       |      | Shiraz-18T | 1455 | 0        | -0.186773 |  |

|       |      |            |      |          |           |  |  |
|-------|------|------------|------|----------|-----------|--|--|
|       |      | Shiraz-22T | 1669 | 0.695915 | 0         |  |  |
|       |      | Shiraz-25T | 1717 | 0.420447 | 0         |  |  |
|       |      | Shiraz-28T | 1760 | 0.538181 | 0         |  |  |
|       |      | Shiraz-29T | 1800 | 0.672527 | 0         |  |  |
|       |      | Shiraz-32T | 1869 | 0.776805 | 0         |  |  |
|       |      | Shiraz-35T | 1932 | 0.507141 | 0         |  |  |
|       |      | Shiraz-40T | 2051 | 0.098506 | 0         |  |  |
|       |      | Shiraz-58T | 2221 | 0.871948 | 0         |  |  |
|       |      | Shiraz-71T | 2260 | 0.68394  | 0         |  |  |
|       |      | Shiraz-71T | 2261 | 0.508399 | 0         |  |  |
| RAB9B | chrX | Shiraz-3T  | 242  | 0        | -0.336434 |  |  |
|       |      | Shiraz-4T  | 261  | 0        | -0.336249 |  |  |
|       |      | Shiraz-16T | 295  | 0.591657 | 0         |  |  |
|       |      | Shiraz-36T | 433  | 0        | -0.803961 |  |  |
|       |      | Shiraz-44T | 899  | 0        | -1.09697  |  |  |
|       |      | Shiraz-49T | 1170 | 0        | -0.967436 |  |  |
|       |      | Shiraz-18T | 1457 | 0.643204 | 0         |  |  |
|       |      | Shiraz-22T | 1673 | 0.611783 | 0         |  |  |
|       |      | Shiraz-25T | 1719 | 0.472955 | 0         |  |  |
|       |      | Shiraz-28T | 1762 | 0.562311 | 0         |  |  |
|       |      | Shiraz-29T | 1801 | 0.815343 | 0         |  |  |
|       |      | Shiraz-32T | 1870 | 0.729766 | 0         |  |  |
|       |      | Shiraz-35T | 1933 | 0.488535 | 0         |  |  |
|       |      | Shiraz-58T | 2223 | 0.833364 | 0         |  |  |
|       |      | Shiraz-71T | 2263 | 0.975531 | 0         |  |  |
|       |      | Shiraz-3T  | 242  | 0        | -0.336434 |  |  |
|       |      | Shiraz-4T  | 261  | 0        | -0.336249 |  |  |
|       |      | Shiraz-16T | 295  | 0.591657 | 0         |  |  |
|       |      | Shiraz-36T | 433  | 0        | -0.803961 |  |  |
|       |      | Shiraz-44T | 899  | 0        | -1.09697  |  |  |
|       |      | Shiraz-49T | 1170 | 0        | -0.967436 |  |  |
|       |      | Shiraz-18T | 1457 | 0.643204 | 0         |  |  |
|       |      | Shiraz-22T | 1673 | 0.611783 | 0         |  |  |
|       |      | Shiraz-25T | 1719 | 0.472955 | 0         |  |  |
|       |      | Shiraz-28T | 1762 | 0.562311 | 0         |  |  |
|       |      | Shiraz-29T | 1801 | 0.815343 | 0         |  |  |
|       |      | Shiraz-32T | 1870 | 0.729766 | 0         |  |  |
|       |      | Shiraz-35T | 1933 | 0.488535 | 0         |  |  |
|       |      | Shiraz-58T | 2223 | 0.833364 | 0         |  |  |
|       |      | Shiraz-71T | 2263 | 0.975531 | 0         |  |  |
|       |      | Shiraz-3T  | 242  | 0        | -0.336434 |  |  |
|       |      | Shiraz-4T  | 261  | 0        | -0.336249 |  |  |
|       |      | Shiraz-16T | 295  | 0.591657 | 0         |  |  |
|       |      | Shiraz-36T | 433  | 0        | -0.803961 |  |  |
|       |      | Shiraz-44T | 899  | 0        | -1.09697  |  |  |
|       |      | Shiraz-49T | 1170 | 0        | -0.967436 |  |  |
|       |      | Shiraz-18T | 1457 | 0.643204 | 0         |  |  |

|        |       |            |      |          |           |  |
|--------|-------|------------|------|----------|-----------|--|
|        |       | Shiraz-22T | 1673 | 0.611783 | 0         |  |
|        |       | Shiraz-25T | 1719 | 0.472955 | 0         |  |
|        |       | Shiraz-28T | 1762 | 0.562311 | 0         |  |
|        |       | Shiraz-29T | 1801 | 0.815343 | 0         |  |
|        |       | Shiraz-32T | 1870 | 0.729766 | 0         |  |
|        |       | Shiraz-35T | 1933 | 0.488535 | 0         |  |
|        |       | Shiraz-58T | 2223 | 0.833364 | 0         |  |
|        |       | Shiraz-71T | 2263 | 0.975531 | 0         |  |
| RABL2B | chr22 | Shiraz-3T  | 230  | 0.27711  | 0         |  |
|        |       | Shiraz-42T | 478  | 0        | -0.172618 |  |
|        |       | Shiraz-44T | 874  | 0.518545 | 0         |  |
|        |       | Shiraz-44T | 890  | 1.106721 | 0         |  |
|        |       | Shiraz-22T | 1668 | 0.270563 | 0         |  |
|        |       | Shiraz-28T | 1759 | 0.189516 | 0         |  |
|        |       | Shiraz-29T | 1799 | 0.11545  | 0         |  |
|        |       | Shiraz-32T | 1868 | 0.637352 | 0         |  |
|        |       | Shiraz-53T | 2113 | 0.237476 | 0         |  |
|        |       | Shiraz-3T  | 230  | 0.27711  | 0         |  |
|        |       | Shiraz-42T | 478  | 0        | -0.172618 |  |
|        |       | Shiraz-44T | 874  | 0.518545 | 0         |  |
|        |       | Shiraz-44T | 890  | 1.106721 | 0         |  |
|        |       | Shiraz-22T | 1668 | 0.270563 | 0         |  |
|        |       | Shiraz-28T | 1759 | 0.189516 | 0         |  |
|        |       | Shiraz-29T | 1799 | 0.11545  | 0         |  |
|        |       | Shiraz-32T | 1868 | 0.637352 | 0         |  |
|        |       | Shiraz-53T | 2113 | 0.237476 | 0         |  |
|        |       | Shiraz-3T  | 230  | 0.27711  | 0         |  |
|        |       | Shiraz-42T | 478  | 0        | -0.172618 |  |
|        |       | Shiraz-44T | 874  | 0.518545 | 0         |  |
|        |       | Shiraz-44T | 890  | 1.106721 | 0         |  |
|        |       | Shiraz-22T | 1668 | 0.270563 | 0         |  |
|        |       | Shiraz-28T | 1759 | 0.189516 | 0         |  |
|        |       | Shiraz-29T | 1799 | 0.11545  | 0         |  |
|        |       | Shiraz-32T | 1868 | 0.637352 | 0         |  |
|        |       | Shiraz-53T | 2113 | 0.237476 | 0         |  |
| RABL5  | chr7  | Shiraz-3T  | 90   | 0.219276 | 0         |  |
|        |       | Shiraz-3T  | 94   | 0.74735  | 0         |  |
|        |       | Shiraz-4T  | 253  | 0.372918 | 0         |  |
|        |       | Shiraz-31T | 316  | 0.219196 | 0         |  |
|        |       | Shiraz-36T | 378  | 0.179558 | 0         |  |
|        |       | Shiraz-36T | 381  | 0.332628 | 0         |  |
|        |       | Shiraz-44T | 639  | 1.035032 | 0         |  |
|        |       | Shiraz-46T | 943  | 0.093799 | 0         |  |
|        |       | Shiraz-46T | 946  | 0.299835 | 0         |  |
|        |       | Shiraz-47T | 1030 | 0.257728 | 0         |  |
|        |       | Shiraz-49T | 1120 | 0.281656 | 0         |  |
|        |       | Shiraz-77T | 1225 | 0        | -0.117922 |  |

|  |            |      |          |           |  |
|--|------------|------|----------|-----------|--|
|  | Shiraz-77T | 1227 | 0.196445 | 0         |  |
|  | Shiraz-9T  | 1324 | 0.679266 | 0         |  |
|  | Shiraz-18T | 1434 | 0.244465 | 0         |  |
|  | Shiraz-22T | 1549 | 0        | -0.319623 |  |
|  | Shiraz-22T | 1551 | 0.324011 | 0         |  |
|  | Shiraz-25T | 1698 | 0.21835  | 0         |  |
|  | Shiraz-28T | 1735 | 0.350744 | 0         |  |
|  | Shiraz-29T | 1778 | 0.120767 | 0         |  |
|  | Shiraz-32T | 1833 | 0.551336 | 0         |  |
|  | Shiraz-38T | 1951 | 0.250891 | 0         |  |
|  | Shiraz-53T | 2078 | 0.287202 | 0         |  |
|  | Shiraz-58T | 2160 | 0.399007 | 0         |  |
|  | Shiraz-71T | 2238 | 0.603631 | 0         |  |
|  | Shiraz-3T  | 90   | 0.219276 | 0         |  |
|  | Shiraz-3T  | 94   | 0.74735  | 0         |  |
|  | Shiraz-4T  | 253  | 0.372918 | 0         |  |
|  | Shiraz-31T | 316  | 0.219196 | 0         |  |
|  | Shiraz-36T | 378  | 0.179558 | 0         |  |
|  | Shiraz-36T | 381  | 0.332628 | 0         |  |
|  | Shiraz-44T | 639  | 1.035032 | 0         |  |
|  | Shiraz-46T | 943  | 0.093799 | 0         |  |
|  | Shiraz-46T | 946  | 0.299835 | 0         |  |
|  | Shiraz-47T | 1030 | 0.257728 | 0         |  |
|  | Shiraz-49T | 1120 | 0.281656 | 0         |  |
|  | Shiraz-77T | 1225 | 0        | -0.117922 |  |
|  | Shiraz-77T | 1227 | 0.196445 | 0         |  |
|  | Shiraz-9T  | 1324 | 0.679266 | 0         |  |
|  | Shiraz-18T | 1434 | 0.244465 | 0         |  |
|  | Shiraz-22T | 1549 | 0        | -0.319623 |  |
|  | Shiraz-22T | 1551 | 0.324011 | 0         |  |
|  | Shiraz-25T | 1698 | 0.21835  | 0         |  |
|  | Shiraz-28T | 1735 | 0.350744 | 0         |  |
|  | Shiraz-29T | 1778 | 0.120767 | 0         |  |
|  | Shiraz-32T | 1833 | 0.551336 | 0         |  |
|  | Shiraz-38T | 1951 | 0.250891 | 0         |  |
|  | Shiraz-53T | 2078 | 0.287202 | 0         |  |
|  | Shiraz-58T | 2160 | 0.399007 | 0         |  |
|  | Shiraz-71T | 2238 | 0.603631 | 0         |  |
|  | Shiraz-3T  | 90   | 0.219276 | 0         |  |
|  | Shiraz-3T  | 94   | 0.74735  | 0         |  |
|  | Shiraz-4T  | 253  | 0.372918 | 0         |  |
|  | Shiraz-31T | 316  | 0.219196 | 0         |  |
|  | Shiraz-36T | 378  | 0.179558 | 0         |  |
|  | Shiraz-36T | 381  | 0.332628 | 0         |  |
|  | Shiraz-44T | 639  | 1.035032 | 0         |  |
|  | Shiraz-46T | 943  | 0.093799 | 0         |  |
|  | Shiraz-46T | 946  | 0.299835 | 0         |  |

|      |      |            |      |          |           |  |  |
|------|------|------------|------|----------|-----------|--|--|
|      |      | Shiraz-47T | 1030 | 0.257728 | 0         |  |  |
|      |      | Shiraz-49T | 1120 | 0.281656 | 0         |  |  |
|      |      | Shiraz-77T | 1225 | 0        | -0.117922 |  |  |
|      |      | Shiraz-77T | 1227 | 0.196445 | 0         |  |  |
|      |      | Shiraz-9T  | 1324 | 0.679266 | 0         |  |  |
|      |      | Shiraz-18T | 1434 | 0.244465 | 0         |  |  |
|      |      | Shiraz-22T | 1549 | 0        | -0.319623 |  |  |
|      |      | Shiraz-22T | 1551 | 0.324011 | 0         |  |  |
|      |      | Shiraz-25T | 1698 | 0.21835  | 0         |  |  |
|      |      | Shiraz-28T | 1735 | 0.350744 | 0         |  |  |
|      |      | Shiraz-29T | 1778 | 0.120767 | 0         |  |  |
|      |      | Shiraz-32T | 1833 | 0.551336 | 0         |  |  |
|      |      | Shiraz-38T | 1951 | 0.250891 | 0         |  |  |
|      |      | Shiraz-53T | 2078 | 0.287202 | 0         |  |  |
|      |      | Shiraz-58T | 2160 | 0.399007 | 0         |  |  |
|      |      | Shiraz-71T | 2238 | 0.603631 | 0         |  |  |
| RAD1 | chr5 | Shiraz-4T  | 250  | 0.262252 | 0         |  |  |
|      |      | Shiraz-4T  | 250  | 0.262252 | 0         |  |  |
|      |      | Shiraz-16T | 266  | 0.321724 | 0         |  |  |
|      |      | Shiraz-16T | 266  | 0.321724 | 0         |  |  |
|      |      | Shiraz-18T | 1429 | 0        | -0.314125 |  |  |
|      |      | Shiraz-18T | 1429 | 0        | -0.314125 |  |  |
|      |      | Shiraz-25T | 1694 | 0.201602 | 0         |  |  |
|      |      | Shiraz-25T | 1694 | 0.201602 | 0         |  |  |
|      |      | Shiraz-28T | 1731 | 0.295447 | 0         |  |  |
|      |      | Shiraz-28T | 1731 | 0.295447 | 0         |  |  |
|      |      | Shiraz-29T | 1773 | 0.090981 | 0         |  |  |
|      |      | Shiraz-29T | 1773 | 0.090981 | 0         |  |  |
|      |      | Shiraz-40T | 2016 | 0.376634 | 0         |  |  |
|      |      | Shiraz-40T | 2016 | 0.376634 | 0         |  |  |
|      |      | Shiraz-4T  | 250  | 0.262252 | 0         |  |  |
|      |      | Shiraz-4T  | 250  | 0.262252 | 0         |  |  |
|      |      | Shiraz-16T | 266  | 0.321724 | 0         |  |  |
|      |      | Shiraz-16T | 266  | 0.321724 | 0         |  |  |
|      |      | Shiraz-18T | 1429 | 0        | -0.314125 |  |  |
|      |      | Shiraz-18T | 1429 | 0        | -0.314125 |  |  |
|      |      | Shiraz-25T | 1694 | 0.201602 | 0         |  |  |
|      |      | Shiraz-25T | 1694 | 0.201602 | 0         |  |  |
|      |      | Shiraz-28T | 1731 | 0.295447 | 0         |  |  |
|      |      | Shiraz-28T | 1731 | 0.295447 | 0         |  |  |
|      |      | Shiraz-29T | 1773 | 0.090981 | 0         |  |  |
|      |      | Shiraz-29T | 1773 | 0.090981 | 0         |  |  |
|      |      | Shiraz-40T | 2016 | 0.376634 | 0         |  |  |
|      |      | Shiraz-40T | 2016 | 0.376634 | 0         |  |  |
|      |      | Shiraz-4T  | 250  | 0.262252 | 0         |  |  |
|      |      | Shiraz-4T  | 250  | 0.262252 | 0         |  |  |
|      |      | Shiraz-16T | 266  | 0.321724 | 0         |  |  |

|       |      |            |      |          |           |  |  |
|-------|------|------------|------|----------|-----------|--|--|
|       |      | Shiraz-16T | 266  | 0.321724 | 0         |  |  |
|       |      | Shiraz-18T | 1429 | 0        | -0.314125 |  |  |
|       |      | Shiraz-18T | 1429 | 0        | -0.314125 |  |  |
|       |      | Shiraz-25T | 1694 | 0.201602 | 0         |  |  |
|       |      | Shiraz-25T | 1694 | 0.201602 | 0         |  |  |
|       |      | Shiraz-28T | 1731 | 0.295447 | 0         |  |  |
|       |      | Shiraz-28T | 1731 | 0.295447 | 0         |  |  |
|       |      | Shiraz-29T | 1773 | 0.090981 | 0         |  |  |
|       |      | Shiraz-29T | 1773 | 0.090981 | 0         |  |  |
|       |      | Shiraz-40T | 2016 | 0.376634 | 0         |  |  |
|       |      | Shiraz-40T | 2016 | 0.376634 | 0         |  |  |
| RAI14 | chr5 | Shiraz-4T  | 250  | 0.262252 | 0         |  |  |
|       |      | Shiraz-4T  | 250  | 0.262252 | 0         |  |  |
|       |      | Shiraz-4T  | 250  | 0.262252 | 0         |  |  |
|       |      | Shiraz-4T  | 250  | 0.262252 | 0         |  |  |
|       |      | Shiraz-16T | 266  | 0.321724 | 0         |  |  |
|       |      | Shiraz-16T | 266  | 0.321724 | 0         |  |  |
|       |      | Shiraz-16T | 266  | 0.321724 | 0         |  |  |
|       |      | Shiraz-16T | 266  | 0.321724 | 0         |  |  |
|       |      | Shiraz-18T | 1429 | 0        | -0.314125 |  |  |
|       |      | Shiraz-18T | 1429 | 0        | -0.314125 |  |  |
|       |      | Shiraz-18T | 1429 | 0        | -0.314125 |  |  |
|       |      | Shiraz-18T | 1429 | 0        | -0.314125 |  |  |
|       |      | Shiraz-25T | 1694 | 0.201602 | 0         |  |  |
|       |      | Shiraz-25T | 1694 | 0.201602 | 0         |  |  |
|       |      | Shiraz-25T | 1694 | 0.201602 | 0         |  |  |
|       |      | Shiraz-25T | 1694 | 0.201602 | 0         |  |  |
|       |      | Shiraz-28T | 1731 | 0.295447 | 0         |  |  |
|       |      | Shiraz-28T | 1731 | 0.295447 | 0         |  |  |
|       |      | Shiraz-28T | 1731 | 0.295447 | 0         |  |  |
|       |      | Shiraz-28T | 1731 | 0.295447 | 0         |  |  |
|       |      | Shiraz-29T | 1773 | 0.090981 | 0         |  |  |
|       |      | Shiraz-29T | 1773 | 0.090981 | 0         |  |  |
|       |      | Shiraz-29T | 1773 | 0.090981 | 0         |  |  |
|       |      | Shiraz-29T | 1773 | 0.090981 | 0         |  |  |
|       |      | Shiraz-40T | 2016 | 0.376634 | 0         |  |  |
|       |      | Shiraz-40T | 2016 | 0.376634 | 0         |  |  |
|       |      | Shiraz-40T | 2016 | 0.376634 | 0         |  |  |
|       |      | Shiraz-40T | 2016 | 0.376634 | 0         |  |  |
|       |      | Shiraz-4T  | 250  | 0.262252 | 0         |  |  |
|       |      | Shiraz-4T  | 250  | 0.262252 | 0         |  |  |
|       |      | Shiraz-4T  | 250  | 0.262252 | 0         |  |  |
|       |      | Shiraz-4T  | 250  | 0.262252 | 0         |  |  |
|       |      | Shiraz-16T | 266  | 0.321724 | 0         |  |  |
|       |      | Shiraz-16T | 266  | 0.321724 | 0         |  |  |
|       |      | Shiraz-16T | 266  | 0.321724 | 0         |  |  |
|       |      | Shiraz-16T | 266  | 0.321724 | 0         |  |  |

|  |            |      |          |           |  |
|--|------------|------|----------|-----------|--|
|  | Shiraz-18T | 1429 | 0        | -0.314125 |  |
|  | Shiraz-18T | 1429 | 0        | -0.314125 |  |
|  | Shiraz-18T | 1429 | 0        | -0.314125 |  |
|  | Shiraz-18T | 1429 | 0        | -0.314125 |  |
|  | Shiraz-25T | 1694 | 0.201602 | 0         |  |
|  | Shiraz-25T | 1694 | 0.201602 | 0         |  |
|  | Shiraz-25T | 1694 | 0.201602 | 0         |  |
|  | Shiraz-25T | 1694 | 0.201602 | 0         |  |
|  | Shiraz-28T | 1731 | 0.295447 | 0         |  |
|  | Shiraz-28T | 1731 | 0.295447 | 0         |  |
|  | Shiraz-28T | 1731 | 0.295447 | 0         |  |
|  | Shiraz-28T | 1731 | 0.295447 | 0         |  |
|  | Shiraz-29T | 1773 | 0.090981 | 0         |  |
|  | Shiraz-29T | 1773 | 0.090981 | 0         |  |
|  | Shiraz-29T | 1773 | 0.090981 | 0         |  |
|  | Shiraz-29T | 1773 | 0.090981 | 0         |  |
|  | Shiraz-40T | 2016 | 0.376634 | 0         |  |
|  | Shiraz-40T | 2016 | 0.376634 | 0         |  |
|  | Shiraz-40T | 2016 | 0.376634 | 0         |  |
|  | Shiraz-40T | 2016 | 0.376634 | 0         |  |
|  | Shiraz-4T  | 250  | 0.262252 | 0         |  |
|  | Shiraz-4T  | 250  | 0.262252 | 0         |  |
|  | Shiraz-4T  | 250  | 0.262252 | 0         |  |
|  | Shiraz-4T  | 250  | 0.262252 | 0         |  |
|  | Shiraz-16T | 266  | 0.321724 | 0         |  |
|  | Shiraz-16T | 266  | 0.321724 | 0         |  |
|  | Shiraz-16T | 266  | 0.321724 | 0         |  |
|  | Shiraz-16T | 266  | 0.321724 | 0         |  |
|  | Shiraz-18T | 1429 | 0        | -0.314125 |  |
|  | Shiraz-18T | 1429 | 0        | -0.314125 |  |
|  | Shiraz-18T | 1429 | 0        | -0.314125 |  |
|  | Shiraz-18T | 1429 | 0        | -0.314125 |  |
|  | Shiraz-25T | 1694 | 0.201602 | 0         |  |
|  | Shiraz-25T | 1694 | 0.201602 | 0         |  |
|  | Shiraz-25T | 1694 | 0.201602 | 0         |  |
|  | Shiraz-25T | 1694 | 0.201602 | 0         |  |
|  | Shiraz-28T | 1731 | 0.295447 | 0         |  |
|  | Shiraz-28T | 1731 | 0.295447 | 0         |  |
|  | Shiraz-28T | 1731 | 0.295447 | 0         |  |
|  | Shiraz-28T | 1731 | 0.295447 | 0         |  |
|  | Shiraz-29T | 1773 | 0.090981 | 0         |  |
|  | Shiraz-29T | 1773 | 0.090981 | 0         |  |
|  | Shiraz-29T | 1773 | 0.090981 | 0         |  |
|  | Shiraz-29T | 1773 | 0.090981 | 0         |  |
|  | Shiraz-40T | 2016 | 0.376634 | 0         |  |
|  | Shiraz-40T | 2016 | 0.376634 | 0         |  |
|  | Shiraz-40T | 2016 | 0.376634 | 0         |  |



|      |      |            |      |          |           |  |
|------|------|------------|------|----------|-----------|--|
|      |      | Shiraz-40T | 2016 | 0.376634 | 0         |  |
| RAI2 | chrX | Shiraz-3T  | 235  | 0        | -0.28401  |  |
|      |      | Shiraz-4T  | 260  | 0        | -0.324128 |  |
|      |      | Shiraz-16T | 294  | 0.655804 | 0         |  |
|      |      | Shiraz-36T | 431  | 0        | -0.78035  |  |
|      |      | Shiraz-44T | 891  | 0        | -0.954044 |  |
|      |      | Shiraz-49T | 1166 | 0        | -0.917235 |  |
|      |      | Shiraz-9T  | 1368 | 0.199713 | 0         |  |
|      |      | Shiraz-18T | 1455 | 0        | -0.186773 |  |
|      |      | Shiraz-22T | 1669 | 0.695915 | 0         |  |
|      |      | Shiraz-25T | 1717 | 0.420447 | 0         |  |
|      |      | Shiraz-28T | 1760 | 0.538181 | 0         |  |
|      |      | Shiraz-29T | 1800 | 0.672527 | 0         |  |
|      |      | Shiraz-32T | 1869 | 0.776805 | 0         |  |
|      |      | Shiraz-35T | 1932 | 0.507141 | 0         |  |
|      |      | Shiraz-40T | 2051 | 0.098506 | 0         |  |
|      |      | Shiraz-58T | 2221 | 0.871948 | 0         |  |
|      |      | Shiraz-71T | 2260 | 0.68394  | 0         |  |
|      |      | Shiraz-71T | 2261 | 0.508399 | 0         |  |
|      |      | Shiraz-3T  | 235  | 0        | -0.28401  |  |
|      |      | Shiraz-4T  | 260  | 0        | -0.324128 |  |
|      |      | Shiraz-16T | 294  | 0.655804 | 0         |  |
|      |      | Shiraz-36T | 431  | 0        | -0.78035  |  |
|      |      | Shiraz-44T | 891  | 0        | -0.954044 |  |
|      |      | Shiraz-49T | 1166 | 0        | -0.917235 |  |
|      |      | Shiraz-9T  | 1368 | 0.199713 | 0         |  |
|      |      | Shiraz-18T | 1455 | 0        | -0.186773 |  |
|      |      | Shiraz-22T | 1669 | 0.695915 | 0         |  |
|      |      | Shiraz-25T | 1717 | 0.420447 | 0         |  |
|      |      | Shiraz-28T | 1760 | 0.538181 | 0         |  |
|      |      | Shiraz-29T | 1800 | 0.672527 | 0         |  |
|      |      | Shiraz-32T | 1869 | 0.776805 | 0         |  |
|      |      | Shiraz-35T | 1932 | 0.507141 | 0         |  |
|      |      | Shiraz-40T | 2051 | 0.098506 | 0         |  |
|      |      | Shiraz-58T | 2221 | 0.871948 | 0         |  |
|      |      | Shiraz-71T | 2260 | 0.68394  | 0         |  |
|      |      | Shiraz-71T | 2261 | 0.508399 | 0         |  |
|      |      | Shiraz-3T  | 235  | 0        | -0.28401  |  |
|      |      | Shiraz-4T  | 260  | 0        | -0.324128 |  |
|      |      | Shiraz-16T | 294  | 0.655804 | 0         |  |
|      |      | Shiraz-36T | 431  | 0        | -0.78035  |  |
|      |      | Shiraz-44T | 891  | 0        | -0.954044 |  |
|      |      | Shiraz-49T | 1166 | 0        | -0.917235 |  |
|      |      | Shiraz-9T  | 1368 | 0.199713 | 0         |  |
|      |      | Shiraz-18T | 1455 | 0        | -0.186773 |  |
|      |      | Shiraz-22T | 1669 | 0.695915 | 0         |  |
|      |      | Shiraz-25T | 1717 | 0.420447 | 0         |  |

|      |      |            |      |          |           |  |
|------|------|------------|------|----------|-----------|--|
|      |      | Shiraz-28T | 1760 | 0.538181 | 0         |  |
|      |      | Shiraz-29T | 1800 | 0.672527 | 0         |  |
|      |      | Shiraz-32T | 1869 | 0.776805 | 0         |  |
|      |      | Shiraz-35T | 1932 | 0.507141 | 0         |  |
|      |      | Shiraz-40T | 2051 | 0.098506 | 0         |  |
|      |      | Shiraz-58T | 2221 | 0.871948 | 0         |  |
|      |      | Shiraz-71T | 2260 | 0.68394  | 0         |  |
|      |      | Shiraz-71T | 2261 | 0.508399 | 0         |  |
| RALA | chr7 | Shiraz-3T  | 87   | 0.198593 | 0         |  |
|      |      | Shiraz-4T  | 252  | 0.192083 | 0         |  |
|      |      | Shiraz-36T | 376  | 0.159952 | 0         |  |
|      |      | Shiraz-44T | 631  | 0        | -0.180312 |  |
|      |      | Shiraz-46T | 942  | 0.069143 | 0         |  |
|      |      | Shiraz-18T | 1433 | 0.250973 | 0         |  |
|      |      | Shiraz-22T | 1544 | 0        | -0.193579 |  |
|      |      | Shiraz-25T | 1697 | 0.21945  | 0         |  |
|      |      | Shiraz-28T | 1734 | 0.362882 | 0         |  |
|      |      | Shiraz-29T | 1777 | 0.156747 | 0         |  |
|      |      | Shiraz-38T | 1950 | 0.265916 | 0         |  |
|      |      | Shiraz-71T | 2236 | 0.320072 | 0         |  |
|      |      | Shiraz-72T | 2277 | 0        | -0.398869 |  |
|      |      | Shiraz-3T  | 87   | 0.198593 | 0         |  |
|      |      | Shiraz-4T  | 252  | 0.192083 | 0         |  |
|      |      | Shiraz-36T | 376  | 0.159952 | 0         |  |
|      |      | Shiraz-44T | 631  | 0        | -0.180312 |  |
|      |      | Shiraz-46T | 942  | 0.069143 | 0         |  |
|      |      | Shiraz-18T | 1433 | 0.250973 | 0         |  |
|      |      | Shiraz-22T | 1544 | 0        | -0.193579 |  |
|      |      | Shiraz-25T | 1697 | 0.21945  | 0         |  |
|      |      | Shiraz-28T | 1734 | 0.362882 | 0         |  |
|      |      | Shiraz-29T | 1777 | 0.156747 | 0         |  |
|      |      | Shiraz-38T | 1950 | 0.265916 | 0         |  |
|      |      | Shiraz-71T | 2236 | 0.320072 | 0         |  |
|      |      | Shiraz-72T | 2277 | 0        | -0.398869 |  |
|      |      | Shiraz-3T  | 87   | 0.198593 | 0         |  |
|      |      | Shiraz-4T  | 252  | 0.192083 | 0         |  |
|      |      | Shiraz-36T | 376  | 0.159952 | 0         |  |
|      |      | Shiraz-44T | 631  | 0        | -0.180312 |  |
|      |      | Shiraz-46T | 942  | 0.069143 | 0         |  |
|      |      | Shiraz-18T | 1433 | 0.250973 | 0         |  |
|      |      | Shiraz-22T | 1544 | 0        | -0.193579 |  |
|      |      | Shiraz-25T | 1697 | 0.21945  | 0         |  |
|      |      | Shiraz-28T | 1734 | 0.362882 | 0         |  |
|      |      | Shiraz-29T | 1777 | 0.156747 | 0         |  |
|      |      | Shiraz-38T | 1950 | 0.265916 | 0         |  |
|      |      | Shiraz-71T | 2236 | 0.320072 | 0         |  |
|      |      | Shiraz-72T | 2277 | 0        | -0.398869 |  |

|         |      |            |      |          |           |  |
|---------|------|------------|------|----------|-----------|--|
| RAMP3   | chr7 | Shiraz-3T  | 87   | 0.198593 | 0         |  |
|         |      | Shiraz-3T  | 89   | 0.678641 | 0         |  |
|         |      | Shiraz-4T  | 252  | 0.192083 | 0         |  |
|         |      | Shiraz-36T | 376  | 0.159952 | 0         |  |
|         |      | Shiraz-44T | 632  | 0.902944 | 0         |  |
|         |      | Shiraz-46T | 942  | 0.069143 | 0         |  |
|         |      | Shiraz-77T | 1223 | 0.215647 | 0         |  |
|         |      | Shiraz-18T | 1433 | 0.250973 | 0         |  |
|         |      | Shiraz-25T | 1697 | 0.21945  | 0         |  |
|         |      | Shiraz-28T | 1734 | 0.362882 | 0         |  |
|         |      | Shiraz-29T | 1777 | 0.156747 | 0         |  |
|         |      | Shiraz-38T | 1950 | 0.265916 | 0         |  |
|         |      | Shiraz-71T | 2236 | 0.320072 | 0         |  |
|         |      | Shiraz-3T  | 87   | 0.198593 | 0         |  |
|         |      | Shiraz-3T  | 89   | 0.678641 | 0         |  |
|         |      | Shiraz-4T  | 252  | 0.192083 | 0         |  |
|         |      | Shiraz-36T | 376  | 0.159952 | 0         |  |
|         |      | Shiraz-44T | 632  | 0.902944 | 0         |  |
|         |      | Shiraz-46T | 942  | 0.069143 | 0         |  |
|         |      | Shiraz-77T | 1223 | 0.215647 | 0         |  |
|         |      | Shiraz-18T | 1433 | 0.250973 | 0         |  |
|         |      | Shiraz-25T | 1697 | 0.21945  | 0         |  |
|         |      | Shiraz-28T | 1734 | 0.362882 | 0         |  |
|         |      | Shiraz-29T | 1777 | 0.156747 | 0         |  |
|         |      | Shiraz-38T | 1950 | 0.265916 | 0         |  |
|         |      | Shiraz-71T | 2236 | 0.320072 | 0         |  |
|         |      | Shiraz-3T  | 87   | 0.198593 | 0         |  |
|         |      | Shiraz-3T  | 89   | 0.678641 | 0         |  |
|         |      | Shiraz-4T  | 252  | 0.192083 | 0         |  |
|         |      | Shiraz-36T | 376  | 0.159952 | 0         |  |
|         |      | Shiraz-44T | 632  | 0.902944 | 0         |  |
|         |      | Shiraz-46T | 942  | 0.069143 | 0         |  |
|         |      | Shiraz-77T | 1223 | 0.215647 | 0         |  |
|         |      | Shiraz-18T | 1433 | 0.250973 | 0         |  |
|         |      | Shiraz-25T | 1697 | 0.21945  | 0         |  |
|         |      | Shiraz-28T | 1734 | 0.362882 | 0         |  |
|         |      | Shiraz-29T | 1777 | 0.156747 | 0         |  |
|         |      | Shiraz-38T | 1950 | 0.265916 | 0         |  |
|         |      | Shiraz-71T | 2236 | 0.320072 | 0         |  |
| RANBP3L | chr5 | Shiraz-4T  | 250  | 0.262252 | 0         |  |
|         |      | Shiraz-16T | 266  | 0.321724 | 0         |  |
|         |      | Shiraz-44T | 591  | 0        | -0.233934 |  |
|         |      | Shiraz-18T | 1429 | 0        | -0.314125 |  |
|         |      | Shiraz-22T | 1522 | 0        | -0.322688 |  |
|         |      | Shiraz-25T | 1694 | 0.201602 | 0         |  |
|         |      | Shiraz-28T | 1731 | 0.295447 | 0         |  |
|         |      | Shiraz-29T | 1773 | 0.090981 | 0         |  |

|       |      |            |      |          |           |  |  |
|-------|------|------------|------|----------|-----------|--|--|
|       |      | Shiraz-40T | 2016 | 0.376634 | 0         |  |  |
|       |      | Shiraz-4T  | 250  | 0.262252 | 0         |  |  |
|       |      | Shiraz-16T | 266  | 0.321724 | 0         |  |  |
|       |      | Shiraz-44T | 591  | 0        | -0.233934 |  |  |
|       |      | Shiraz-18T | 1429 | 0        | -0.314125 |  |  |
|       |      | Shiraz-22T | 1522 | 0        | -0.322688 |  |  |
|       |      | Shiraz-25T | 1694 | 0.201602 | 0         |  |  |
|       |      | Shiraz-28T | 1731 | 0.295447 | 0         |  |  |
|       |      | Shiraz-29T | 1773 | 0.090981 | 0         |  |  |
|       |      | Shiraz-40T | 2016 | 0.376634 | 0         |  |  |
|       |      | Shiraz-4T  | 250  | 0.262252 | 0         |  |  |
|       |      | Shiraz-16T | 266  | 0.321724 | 0         |  |  |
|       |      | Shiraz-44T | 591  | 0        | -0.233934 |  |  |
|       |      | Shiraz-18T | 1429 | 0        | -0.314125 |  |  |
|       |      | Shiraz-22T | 1522 | 0        | -0.322688 |  |  |
|       |      | Shiraz-25T | 1694 | 0.201602 | 0         |  |  |
|       |      | Shiraz-28T | 1731 | 0.295447 | 0         |  |  |
|       |      | Shiraz-29T | 1773 | 0.090981 | 0         |  |  |
|       |      | Shiraz-40T | 2016 | 0.376634 | 0         |  |  |
| RAP2C | chrX | Shiraz-3T  | 242  | 0        | -0.336434 |  |  |
|       |      | Shiraz-4T  | 261  | 0        | -0.336249 |  |  |
|       |      | Shiraz-16T | 295  | 0.591657 | 0         |  |  |
|       |      | Shiraz-36T | 433  | 0        | -0.803961 |  |  |
|       |      | Shiraz-44T | 899  | 0        | -1.09697  |  |  |
|       |      | Shiraz-49T | 1170 | 0        | -0.967436 |  |  |
|       |      | Shiraz-9T  | 1370 | 0.690073 | 0         |  |  |
|       |      | Shiraz-18T | 1457 | 0.643204 | 0         |  |  |
|       |      | Shiraz-22T | 1673 | 0.611783 | 0         |  |  |
|       |      | Shiraz-22T | 1677 | 0.789711 | 0         |  |  |
|       |      | Shiraz-25T | 1719 | 0.472955 | 0         |  |  |
|       |      | Shiraz-28T | 1762 | 0.562311 | 0         |  |  |
|       |      | Shiraz-29T | 1801 | 0.815343 | 0         |  |  |
|       |      | Shiraz-32T | 1870 | 0.729766 | 0         |  |  |
|       |      | Shiraz-35T | 1933 | 0.488535 | 0         |  |  |
|       |      | Shiraz-58T | 2223 | 0.833364 | 0         |  |  |
|       |      | Shiraz-71T | 2263 | 0.975531 | 0         |  |  |
|       |      | Shiraz-3T  | 242  | 0        | -0.336434 |  |  |
|       |      | Shiraz-4T  | 261  | 0        | -0.336249 |  |  |
|       |      | Shiraz-16T | 295  | 0.591657 | 0         |  |  |
|       |      | Shiraz-36T | 433  | 0        | -0.803961 |  |  |
|       |      | Shiraz-44T | 899  | 0        | -1.09697  |  |  |
|       |      | Shiraz-49T | 1170 | 0        | -0.967436 |  |  |
|       |      | Shiraz-9T  | 1370 | 0.690073 | 0         |  |  |
|       |      | Shiraz-18T | 1457 | 0.643204 | 0         |  |  |
|       |      | Shiraz-22T | 1673 | 0.611783 | 0         |  |  |
|       |      | Shiraz-22T | 1677 | 0.789711 | 0         |  |  |
|       |      | Shiraz-25T | 1719 | 0.472955 | 0         |  |  |

|         |      |            |      |          |           |  |  |
|---------|------|------------|------|----------|-----------|--|--|
|         |      | Shiraz-28T | 1762 | 0.562311 | 0         |  |  |
|         |      | Shiraz-29T | 1801 | 0.815343 | 0         |  |  |
|         |      | Shiraz-32T | 1870 | 0.729766 | 0         |  |  |
|         |      | Shiraz-35T | 1933 | 0.488535 | 0         |  |  |
|         |      | Shiraz-58T | 2223 | 0.833364 | 0         |  |  |
|         |      | Shiraz-71T | 2263 | 0.975531 | 0         |  |  |
|         |      | Shiraz-3T  | 242  | 0        | -0.336434 |  |  |
|         |      | Shiraz-4T  | 261  | 0        | -0.336249 |  |  |
|         |      | Shiraz-16T | 295  | 0.591657 | 0         |  |  |
|         |      | Shiraz-36T | 433  | 0        | -0.803961 |  |  |
|         |      | Shiraz-44T | 899  | 0        | -1.09697  |  |  |
|         |      | Shiraz-49T | 1170 | 0        | -0.967436 |  |  |
|         |      | Shiraz-9T  | 1370 | 0.690073 | 0         |  |  |
|         |      | Shiraz-18T | 1457 | 0.643204 | 0         |  |  |
|         |      | Shiraz-22T | 1673 | 0.611783 | 0         |  |  |
|         |      | Shiraz-22T | 1677 | 0.789711 | 0         |  |  |
|         |      | Shiraz-25T | 1719 | 0.472955 | 0         |  |  |
|         |      | Shiraz-28T | 1762 | 0.562311 | 0         |  |  |
|         |      | Shiraz-29T | 1801 | 0.815343 | 0         |  |  |
|         |      | Shiraz-32T | 1870 | 0.729766 | 0         |  |  |
|         |      | Shiraz-35T | 1933 | 0.488535 | 0         |  |  |
|         |      | Shiraz-58T | 2223 | 0.833364 | 0         |  |  |
|         |      | Shiraz-71T | 2263 | 0.975531 | 0         |  |  |
| RAPGEF5 | chr7 | Shiraz-3T  | 87   | 0.198593 | 0         |  |  |
|         |      | Shiraz-4T  | 252  | 0.192083 | 0         |  |  |
|         |      | Shiraz-36T | 376  | 0.159952 | 0         |  |  |
|         |      | Shiraz-46T | 942  | 0.069143 | 0         |  |  |
|         |      | Shiraz-18T | 1433 | 0.250973 | 0         |  |  |
|         |      | Shiraz-25T | 1697 | 0.21945  | 0         |  |  |
|         |      | Shiraz-28T | 1734 | 0.362882 | 0         |  |  |
|         |      | Shiraz-29T | 1777 | 0.156747 | 0         |  |  |
|         |      | Shiraz-38T | 1950 | 0.265916 | 0         |  |  |
|         |      | Shiraz-71T | 2236 | 0.320072 | 0         |  |  |
|         |      | Shiraz-3T  | 87   | 0.198593 | 0         |  |  |
|         |      | Shiraz-4T  | 252  | 0.192083 | 0         |  |  |
|         |      | Shiraz-36T | 376  | 0.159952 | 0         |  |  |
|         |      | Shiraz-46T | 942  | 0.069143 | 0         |  |  |
|         |      | Shiraz-18T | 1433 | 0.250973 | 0         |  |  |
|         |      | Shiraz-25T | 1697 | 0.21945  | 0         |  |  |
|         |      | Shiraz-28T | 1734 | 0.362882 | 0         |  |  |
|         |      | Shiraz-29T | 1777 | 0.156747 | 0         |  |  |
|         |      | Shiraz-38T | 1950 | 0.265916 | 0         |  |  |
|         |      | Shiraz-71T | 2236 | 0.320072 | 0         |  |  |
|         |      | Shiraz-3T  | 87   | 0.198593 | 0         |  |  |
|         |      | Shiraz-4T  | 252  | 0.192083 | 0         |  |  |
|         |      | Shiraz-36T | 376  | 0.159952 | 0         |  |  |
|         |      | Shiraz-46T | 942  | 0.069143 | 0         |  |  |

|         |      |            |      |          |   |  |
|---------|------|------------|------|----------|---|--|
|         |      | Shiraz-18T | 1433 | 0.250973 | 0 |  |
|         |      | Shiraz-25T | 1697 | 0.21945  | 0 |  |
|         |      | Shiraz-28T | 1734 | 0.362882 | 0 |  |
|         |      | Shiraz-29T | 1777 | 0.156747 | 0 |  |
|         |      | Shiraz-38T | 1950 | 0.265916 | 0 |  |
|         |      | Shiraz-71T | 2236 | 0.320072 | 0 |  |
| RARRES2 | chr7 | Shiraz-3T  | 90   | 0.219276 | 0 |  |
|         |      | Shiraz-3T  | 99   | 0.454766 | 0 |  |
|         |      | Shiraz-4T  | 253  | 0.372918 | 0 |  |
|         |      | Shiraz-36T | 378  | 0.179558 | 0 |  |
|         |      | Shiraz-44T | 646  | 0.471276 | 0 |  |
|         |      | Shiraz-46T | 943  | 0.093799 | 0 |  |
|         |      | Shiraz-9T  | 1325 | 0.221899 | 0 |  |
|         |      | Shiraz-18T | 1434 | 0.244465 | 0 |  |
|         |      | Shiraz-25T | 1698 | 0.21835  | 0 |  |
|         |      | Shiraz-28T | 1735 | 0.350744 | 0 |  |
|         |      | Shiraz-29T | 1778 | 0.120767 | 0 |  |
|         |      | Shiraz-32T | 1833 | 0.551336 | 0 |  |
|         |      | Shiraz-38T | 1951 | 0.250891 | 0 |  |
|         |      | Shiraz-53T | 2078 | 0.287202 | 0 |  |
|         |      | Shiraz-58T | 2162 | 0.221505 | 0 |  |
|         |      | Shiraz-71T | 2238 | 0.603631 | 0 |  |
|         |      | Shiraz-3T  | 90   | 0.219276 | 0 |  |
|         |      | Shiraz-3T  | 99   | 0.454766 | 0 |  |
|         |      | Shiraz-4T  | 253  | 0.372918 | 0 |  |
|         |      | Shiraz-36T | 378  | 0.179558 | 0 |  |
|         |      | Shiraz-44T | 646  | 0.471276 | 0 |  |
|         |      | Shiraz-46T | 943  | 0.093799 | 0 |  |
|         |      | Shiraz-9T  | 1325 | 0.221899 | 0 |  |
|         |      | Shiraz-18T | 1434 | 0.244465 | 0 |  |
|         |      | Shiraz-25T | 1698 | 0.21835  | 0 |  |
|         |      | Shiraz-28T | 1735 | 0.350744 | 0 |  |
|         |      | Shiraz-29T | 1778 | 0.120767 | 0 |  |
|         |      | Shiraz-32T | 1833 | 0.551336 | 0 |  |
|         |      | Shiraz-38T | 1951 | 0.250891 | 0 |  |
|         |      | Shiraz-53T | 2078 | 0.287202 | 0 |  |
|         |      | Shiraz-58T | 2162 | 0.221505 | 0 |  |
|         |      | Shiraz-71T | 2238 | 0.603631 | 0 |  |
|         |      | Shiraz-3T  | 90   | 0.219276 | 0 |  |
|         |      | Shiraz-3T  | 99   | 0.454766 | 0 |  |
|         |      | Shiraz-4T  | 253  | 0.372918 | 0 |  |
|         |      | Shiraz-36T | 378  | 0.179558 | 0 |  |
|         |      | Shiraz-44T | 646  | 0.471276 | 0 |  |
|         |      | Shiraz-46T | 943  | 0.093799 | 0 |  |
|         |      | Shiraz-9T  | 1325 | 0.221899 | 0 |  |
|         |      | Shiraz-18T | 1434 | 0.244465 | 0 |  |
|         |      | Shiraz-25T | 1698 | 0.21835  | 0 |  |

|       |      |            |      |          |           |  |
|-------|------|------------|------|----------|-----------|--|
|       |      | Shiraz-28T | 1735 | 0.350744 | 0         |  |
|       |      | Shiraz-29T | 1778 | 0.120767 | 0         |  |
|       |      | Shiraz-32T | 1833 | 0.551336 | 0         |  |
|       |      | Shiraz-38T | 1951 | 0.250891 | 0         |  |
|       |      | Shiraz-53T | 2078 | 0.287202 | 0         |  |
|       |      | Shiraz-58T | 2162 | 0.221505 | 0         |  |
|       |      | Shiraz-71T | 2238 | 0.603631 | 0         |  |
| RASA4 | chr7 | Shiraz-3T  | 90   | 0.219276 | 0         |  |
|       |      | Shiraz-4T  | 253  | 0.372918 | 0         |  |
|       |      | Shiraz-36T | 378  | 0.179558 | 0         |  |
|       |      | Shiraz-46T | 943  | 0.093799 | 0         |  |
|       |      | Shiraz-46T | 946  | 0.299835 | 0         |  |
|       |      | Shiraz-77T | 1225 | 0        | -0.117922 |  |
|       |      | Shiraz-9T  | 1324 | 0.679266 | 0         |  |
|       |      | Shiraz-18T | 1434 | 0.244465 | 0         |  |
|       |      | Shiraz-22T | 1549 | 0        | -0.319623 |  |
|       |      | Shiraz-25T | 1698 | 0.21835  | 0         |  |
|       |      | Shiraz-28T | 1735 | 0.350744 | 0         |  |
|       |      | Shiraz-29T | 1778 | 0.120767 | 0         |  |
|       |      | Shiraz-32T | 1833 | 0.551336 | 0         |  |
|       |      | Shiraz-38T | 1951 | 0.250891 | 0         |  |
|       |      | Shiraz-53T | 2078 | 0.287202 | 0         |  |
|       |      | Shiraz-71T | 2238 | 0.603631 | 0         |  |
|       |      | Shiraz-3T  | 90   | 0.219276 | 0         |  |
|       |      | Shiraz-4T  | 253  | 0.372918 | 0         |  |
|       |      | Shiraz-36T | 378  | 0.179558 | 0         |  |
|       |      | Shiraz-46T | 943  | 0.093799 | 0         |  |
|       |      | Shiraz-46T | 946  | 0.299835 | 0         |  |
|       |      | Shiraz-77T | 1225 | 0        | -0.117922 |  |
|       |      | Shiraz-9T  | 1324 | 0.679266 | 0         |  |
|       |      | Shiraz-18T | 1434 | 0.244465 | 0         |  |
|       |      | Shiraz-22T | 1549 | 0        | -0.319623 |  |
|       |      | Shiraz-25T | 1698 | 0.21835  | 0         |  |
|       |      | Shiraz-28T | 1735 | 0.350744 | 0         |  |
|       |      | Shiraz-29T | 1778 | 0.120767 | 0         |  |
|       |      | Shiraz-32T | 1833 | 0.551336 | 0         |  |
|       |      | Shiraz-38T | 1951 | 0.250891 | 0         |  |
|       |      | Shiraz-53T | 2078 | 0.287202 | 0         |  |
|       |      | Shiraz-71T | 2238 | 0.603631 | 0         |  |
|       |      | Shiraz-3T  | 90   | 0.219276 | 0         |  |
|       |      | Shiraz-4T  | 253  | 0.372918 | 0         |  |
|       |      | Shiraz-36T | 378  | 0.179558 | 0         |  |
|       |      | Shiraz-46T | 943  | 0.093799 | 0         |  |
|       |      | Shiraz-46T | 946  | 0.299835 | 0         |  |
|       |      | Shiraz-77T | 1225 | 0        | -0.117922 |  |
|       |      | Shiraz-9T  | 1324 | 0.679266 | 0         |  |
|       |      | Shiraz-18T | 1434 | 0.244465 | 0         |  |

|        |      |            |      |          |           |  |
|--------|------|------------|------|----------|-----------|--|
|        |      | Shiraz-22T | 1549 | 0        | -0.319623 |  |
|        |      | Shiraz-25T | 1698 | 0.21835  | 0         |  |
|        |      | Shiraz-28T | 1735 | 0.350744 | 0         |  |
|        |      | Shiraz-29T | 1778 | 0.120767 | 0         |  |
|        |      | Shiraz-32T | 1833 | 0.551336 | 0         |  |
|        |      | Shiraz-38T | 1951 | 0.250891 | 0         |  |
|        |      | Shiraz-53T | 2078 | 0.287202 | 0         |  |
|        |      | Shiraz-71T | 2238 | 0.603631 | 0         |  |
| RASA4P | chr7 | Shiraz-3T  | 87   | 0.198593 | 0         |  |
|        |      | Shiraz-3T  | 89   | 0.678641 | 0         |  |
|        |      | Shiraz-4T  | 252  | 0.192083 | 0         |  |
|        |      | Shiraz-36T | 376  | 0.159952 | 0         |  |
|        |      | Shiraz-44T | 632  | 0.902944 | 0         |  |
|        |      | Shiraz-46T | 942  | 0.069143 | 0         |  |
|        |      | Shiraz-77T | 1223 | 0.215647 | 0         |  |
|        |      | Shiraz-18T | 1433 | 0.250973 | 0         |  |
|        |      | Shiraz-25T | 1697 | 0.21945  | 0         |  |
|        |      | Shiraz-28T | 1734 | 0.362882 | 0         |  |
|        |      | Shiraz-29T | 1777 | 0.156747 | 0         |  |
|        |      | Shiraz-38T | 1950 | 0.265916 | 0         |  |
|        |      | Shiraz-71T | 2236 | 0.320072 | 0         |  |
|        |      | Shiraz-3T  | 87   | 0.198593 | 0         |  |
|        |      | Shiraz-3T  | 89   | 0.678641 | 0         |  |
|        |      | Shiraz-4T  | 252  | 0.192083 | 0         |  |
|        |      | Shiraz-36T | 376  | 0.159952 | 0         |  |
|        |      | Shiraz-44T | 632  | 0.902944 | 0         |  |
|        |      | Shiraz-46T | 942  | 0.069143 | 0         |  |
|        |      | Shiraz-77T | 1223 | 0.215647 | 0         |  |
|        |      | Shiraz-18T | 1433 | 0.250973 | 0         |  |
|        |      | Shiraz-25T | 1697 | 0.21945  | 0         |  |
|        |      | Shiraz-28T | 1734 | 0.362882 | 0         |  |
|        |      | Shiraz-29T | 1777 | 0.156747 | 0         |  |
|        |      | Shiraz-38T | 1950 | 0.265916 | 0         |  |
|        |      | Shiraz-71T | 2236 | 0.320072 | 0         |  |
|        |      | Shiraz-3T  | 87   | 0.198593 | 0         |  |
|        |      | Shiraz-3T  | 89   | 0.678641 | 0         |  |
|        |      | Shiraz-4T  | 252  | 0.192083 | 0         |  |
|        |      | Shiraz-36T | 376  | 0.159952 | 0         |  |
|        |      | Shiraz-44T | 632  | 0.902944 | 0         |  |
|        |      | Shiraz-46T | 942  | 0.069143 | 0         |  |
|        |      | Shiraz-77T | 1223 | 0.215647 | 0         |  |
|        |      | Shiraz-18T | 1433 | 0.250973 | 0         |  |
|        |      | Shiraz-25T | 1697 | 0.21945  | 0         |  |
|        |      | Shiraz-28T | 1734 | 0.362882 | 0         |  |
|        |      | Shiraz-29T | 1777 | 0.156747 | 0         |  |
|        |      | Shiraz-38T | 1950 | 0.265916 | 0         |  |
|        |      | Shiraz-71T | 2236 | 0.320072 | 0         |  |



|       |      |            |      |          |           |  |  |
|-------|------|------------|------|----------|-----------|--|--|
| RBBP7 | chrX | Shiraz-3T  | 235  | 0        | -0.28401  |  |  |
|       |      | Shiraz-4T  | 260  | 0        | -0.324128 |  |  |
|       |      | Shiraz-16T | 294  | 0.655804 | 0         |  |  |
|       |      | Shiraz-36T | 431  | 0        | -0.78035  |  |  |
|       |      | Shiraz-44T | 891  | 0        | -0.954044 |  |  |
|       |      | Shiraz-49T | 1166 | 0        | -0.917235 |  |  |
|       |      | Shiraz-9T  | 1368 | 0.199713 | 0         |  |  |
|       |      | Shiraz-18T | 1455 | 0        | -0.186773 |  |  |
|       |      | Shiraz-22T | 1669 | 0.695915 | 0         |  |  |
|       |      | Shiraz-25T | 1717 | 0.420447 | 0         |  |  |
|       |      | Shiraz-28T | 1760 | 0.538181 | 0         |  |  |
|       |      | Shiraz-29T | 1800 | 0.672527 | 0         |  |  |
|       |      | Shiraz-32T | 1869 | 0.776805 | 0         |  |  |
|       |      | Shiraz-35T | 1932 | 0.507141 | 0         |  |  |
|       |      | Shiraz-40T | 2051 | 0.098506 | 0         |  |  |
|       |      | Shiraz-58T | 2221 | 0.871948 | 0         |  |  |
|       |      | Shiraz-71T | 2260 | 0.68394  | 0         |  |  |
|       |      | Shiraz-71T | 2261 | 0.508399 | 0         |  |  |
|       |      | Shiraz-3T  | 235  | 0        | -0.28401  |  |  |
|       |      | Shiraz-4T  | 260  | 0        | -0.324128 |  |  |
|       |      | Shiraz-16T | 294  | 0.655804 | 0         |  |  |
|       |      | Shiraz-36T | 431  | 0        | -0.78035  |  |  |
|       |      | Shiraz-44T | 891  | 0        | -0.954044 |  |  |
|       |      | Shiraz-49T | 1166 | 0        | -0.917235 |  |  |
|       |      | Shiraz-9T  | 1368 | 0.199713 | 0         |  |  |
|       |      | Shiraz-18T | 1455 | 0        | -0.186773 |  |  |
|       |      | Shiraz-22T | 1669 | 0.695915 | 0         |  |  |
|       |      | Shiraz-25T | 1717 | 0.420447 | 0         |  |  |
|       |      | Shiraz-28T | 1760 | 0.538181 | 0         |  |  |
|       |      | Shiraz-29T | 1800 | 0.672527 | 0         |  |  |
|       |      | Shiraz-32T | 1869 | 0.776805 | 0         |  |  |
|       |      | Shiraz-35T | 1932 | 0.507141 | 0         |  |  |
|       |      | Shiraz-40T | 2051 | 0.098506 | 0         |  |  |
|       |      | Shiraz-58T | 2221 | 0.871948 | 0         |  |  |
|       |      | Shiraz-71T | 2260 | 0.68394  | 0         |  |  |
|       |      | Shiraz-71T | 2261 | 0.508399 | 0         |  |  |
|       |      | Shiraz-3T  | 235  | 0        | -0.28401  |  |  |
|       |      | Shiraz-4T  | 260  | 0        | -0.324128 |  |  |
|       |      | Shiraz-16T | 294  | 0.655804 | 0         |  |  |
|       |      | Shiraz-36T | 431  | 0        | -0.78035  |  |  |
|       |      | Shiraz-44T | 891  | 0        | -0.954044 |  |  |
|       |      | Shiraz-49T | 1166 | 0        | -0.917235 |  |  |
|       |      | Shiraz-9T  | 1368 | 0.199713 | 0         |  |  |
|       |      | Shiraz-18T | 1455 | 0        | -0.186773 |  |  |
|       |      | Shiraz-22T | 1669 | 0.695915 | 0         |  |  |
|       |      | Shiraz-25T | 1717 | 0.420447 | 0         |  |  |
|       |      | Shiraz-28T | 1760 | 0.538181 | 0         |  |  |

|       |      |            |      |          |           |  |
|-------|------|------------|------|----------|-----------|--|
|       |      | Shiraz-29T | 1800 | 0.672527 | 0         |  |
|       |      | Shiraz-32T | 1869 | 0.776805 | 0         |  |
|       |      | Shiraz-35T | 1932 | 0.507141 | 0         |  |
|       |      | Shiraz-40T | 2051 | 0.098506 | 0         |  |
|       |      | Shiraz-58T | 2221 | 0.871948 | 0         |  |
|       |      | Shiraz-71T | 2260 | 0.68394  | 0         |  |
|       |      | Shiraz-71T | 2261 | 0.508399 | 0         |  |
| RBM10 | chrX | Shiraz-4T  | 260  | 0        | -0.324128 |  |
|       |      | Shiraz-4T  | 260  | 0        | -0.324128 |  |
|       |      | Shiraz-16T | 294  | 0.655804 | 0         |  |
|       |      | Shiraz-16T | 294  | 0.655804 | 0         |  |
|       |      | Shiraz-31T | 345  | 0.103301 | 0         |  |
|       |      | Shiraz-31T | 345  | 0.103301 | 0         |  |
|       |      | Shiraz-36T | 431  | 0        | -0.78035  |  |
|       |      | Shiraz-36T | 431  | 0        | -0.78035  |  |
|       |      | Shiraz-36T | 432  | 0        | -0.6692   |  |
|       |      | Shiraz-36T | 432  | 0        | -0.6692   |  |
|       |      | Shiraz-44T | 891  | 0        | -0.954044 |  |
|       |      | Shiraz-44T | 891  | 0        | -0.954044 |  |
|       |      | Shiraz-44T | 896  | 0        | -0.109108 |  |
|       |      | Shiraz-44T | 896  | 0        | -0.109108 |  |
|       |      | Shiraz-46T | 991  | 0.139564 | 0         |  |
|       |      | Shiraz-46T | 991  | 0.139564 | 0         |  |
|       |      | Shiraz-47T | 1084 | 0.24185  | 0         |  |
|       |      | Shiraz-47T | 1084 | 0.24185  | 0         |  |
|       |      | Shiraz-49T | 1166 | 0        | -0.917235 |  |
|       |      | Shiraz-49T | 1166 | 0        | -0.917235 |  |
|       |      | Shiraz-49T | 1169 | 0        | -0.583529 |  |
|       |      | Shiraz-49T | 1169 | 0        | -0.583529 |  |
|       |      | Shiraz-77T | 1282 | 0.213849 | 0         |  |
|       |      | Shiraz-77T | 1282 | 0.213849 | 0         |  |
|       |      | Shiraz-9T  | 1368 | 0.199713 | 0         |  |
|       |      | Shiraz-9T  | 1368 | 0.199713 | 0         |  |
|       |      | Shiraz-9T  | 1369 | 0.703374 | 0         |  |
|       |      | Shiraz-9T  | 1369 | 0.703374 | 0         |  |
|       |      | Shiraz-18T | 1455 | 0        | -0.186773 |  |
|       |      | Shiraz-18T | 1455 | 0        | -0.186773 |  |
|       |      | Shiraz-22T | 1669 | 0.695915 | 0         |  |
|       |      | Shiraz-22T | 1669 | 0.695915 | 0         |  |
|       |      | Shiraz-22T | 1672 | 1.01678  | 0         |  |
|       |      | Shiraz-22T | 1672 | 1.01678  | 0         |  |
|       |      | Shiraz-25T | 1717 | 0.420447 | 0         |  |
|       |      | Shiraz-25T | 1717 | 0.420447 | 0         |  |
|       |      | Shiraz-28T | 1760 | 0.538181 | 0         |  |
|       |      | Shiraz-28T | 1760 | 0.538181 | 0         |  |
|       |      | Shiraz-29T | 1800 | 0.672527 | 0         |  |
|       |      | Shiraz-29T | 1800 | 0.672527 | 0         |  |

|  |  |            |      |          |           |  |  |
|--|--|------------|------|----------|-----------|--|--|
|  |  | Shiraz-32T | 1869 | 0.776805 | 0         |  |  |
|  |  | Shiraz-32T | 1869 | 0.776805 | 0         |  |  |
|  |  | Shiraz-35T | 1932 | 0.507141 | 0         |  |  |
|  |  | Shiraz-35T | 1932 | 0.507141 | 0         |  |  |
|  |  | Shiraz-40T | 2051 | 0.098506 | 0         |  |  |
|  |  | Shiraz-40T | 2051 | 0.098506 | 0         |  |  |
|  |  | Shiraz-58T | 2221 | 0.871948 | 0         |  |  |
|  |  | Shiraz-58T | 2221 | 0.871948 | 0         |  |  |
|  |  | Shiraz-71T | 2260 | 0.68394  | 0         |  |  |
|  |  | Shiraz-71T | 2260 | 0.68394  | 0         |  |  |
|  |  | Shiraz-71T | 2262 | 0.986748 | 0         |  |  |
|  |  | Shiraz-71T | 2262 | 0.986748 | 0         |  |  |
|  |  | Shiraz-4T  | 260  | 0        | -0.324128 |  |  |
|  |  | Shiraz-4T  | 260  | 0        | -0.324128 |  |  |
|  |  | Shiraz-16T | 294  | 0.655804 | 0         |  |  |
|  |  | Shiraz-16T | 294  | 0.655804 | 0         |  |  |
|  |  | Shiraz-31T | 345  | 0.103301 | 0         |  |  |
|  |  | Shiraz-31T | 345  | 0.103301 | 0         |  |  |
|  |  | Shiraz-36T | 431  | 0        | -0.78035  |  |  |
|  |  | Shiraz-36T | 431  | 0        | -0.78035  |  |  |
|  |  | Shiraz-36T | 432  | 0        | -0.6692   |  |  |
|  |  | Shiraz-36T | 432  | 0        | -0.6692   |  |  |
|  |  | Shiraz-44T | 891  | 0        | -0.954044 |  |  |
|  |  | Shiraz-44T | 891  | 0        | -0.954044 |  |  |
|  |  | Shiraz-44T | 896  | 0        | -0.109108 |  |  |
|  |  | Shiraz-44T | 896  | 0        | -0.109108 |  |  |
|  |  | Shiraz-46T | 991  | 0.139564 | 0         |  |  |
|  |  | Shiraz-46T | 991  | 0.139564 | 0         |  |  |
|  |  | Shiraz-47T | 1084 | 0.24185  | 0         |  |  |
|  |  | Shiraz-47T | 1084 | 0.24185  | 0         |  |  |
|  |  | Shiraz-49T | 1166 | 0        | -0.917235 |  |  |
|  |  | Shiraz-49T | 1166 | 0        | -0.917235 |  |  |
|  |  | Shiraz-49T | 1169 | 0        | -0.583529 |  |  |
|  |  | Shiraz-49T | 1169 | 0        | -0.583529 |  |  |
|  |  | Shiraz-77T | 1282 | 0.213849 | 0         |  |  |
|  |  | Shiraz-77T | 1282 | 0.213849 | 0         |  |  |
|  |  | Shiraz-9T  | 1368 | 0.199713 | 0         |  |  |
|  |  | Shiraz-9T  | 1368 | 0.199713 | 0         |  |  |
|  |  | Shiraz-9T  | 1369 | 0.703374 | 0         |  |  |
|  |  | Shiraz-9T  | 1369 | 0.703374 | 0         |  |  |
|  |  | Shiraz-18T | 1455 | 0        | -0.186773 |  |  |
|  |  | Shiraz-18T | 1455 | 0        | -0.186773 |  |  |
|  |  | Shiraz-22T | 1669 | 0.695915 | 0         |  |  |
|  |  | Shiraz-22T | 1669 | 0.695915 | 0         |  |  |
|  |  | Shiraz-22T | 1672 | 1.01678  | 0         |  |  |
|  |  | Shiraz-22T | 1672 | 1.01678  | 0         |  |  |
|  |  | Shiraz-25T | 1717 | 0.420447 | 0         |  |  |

|  |            |      |          |           |  |
|--|------------|------|----------|-----------|--|
|  | Shiraz-25T | 1717 | 0.420447 | 0         |  |
|  | Shiraz-28T | 1760 | 0.538181 | 0         |  |
|  | Shiraz-28T | 1760 | 0.538181 | 0         |  |
|  | Shiraz-29T | 1800 | 0.672527 | 0         |  |
|  | Shiraz-29T | 1800 | 0.672527 | 0         |  |
|  | Shiraz-32T | 1869 | 0.776805 | 0         |  |
|  | Shiraz-32T | 1869 | 0.776805 | 0         |  |
|  | Shiraz-35T | 1932 | 0.507141 | 0         |  |
|  | Shiraz-35T | 1932 | 0.507141 | 0         |  |
|  | Shiraz-40T | 2051 | 0.098506 | 0         |  |
|  | Shiraz-40T | 2051 | 0.098506 | 0         |  |
|  | Shiraz-58T | 2221 | 0.871948 | 0         |  |
|  | Shiraz-58T | 2221 | 0.871948 | 0         |  |
|  | Shiraz-71T | 2260 | 0.68394  | 0         |  |
|  | Shiraz-71T | 2260 | 0.68394  | 0         |  |
|  | Shiraz-71T | 2262 | 0.986748 | 0         |  |
|  | Shiraz-71T | 2262 | 0.986748 | 0         |  |
|  | Shiraz-4T  | 260  | 0        | -0.324128 |  |
|  | Shiraz-4T  | 260  | 0        | -0.324128 |  |
|  | Shiraz-16T | 294  | 0.655804 | 0         |  |
|  | Shiraz-16T | 294  | 0.655804 | 0         |  |
|  | Shiraz-31T | 345  | 0.103301 | 0         |  |
|  | Shiraz-31T | 345  | 0.103301 | 0         |  |
|  | Shiraz-36T | 431  | 0        | -0.78035  |  |
|  | Shiraz-36T | 431  | 0        | -0.78035  |  |
|  | Shiraz-36T | 432  | 0        | -0.6692   |  |
|  | Shiraz-36T | 432  | 0        | -0.6692   |  |
|  | Shiraz-44T | 891  | 0        | -0.954044 |  |
|  | Shiraz-44T | 891  | 0        | -0.954044 |  |
|  | Shiraz-44T | 896  | 0        | -0.109108 |  |
|  | Shiraz-44T | 896  | 0        | -0.109108 |  |
|  | Shiraz-46T | 991  | 0.139564 | 0         |  |
|  | Shiraz-46T | 991  | 0.139564 | 0         |  |
|  | Shiraz-47T | 1084 | 0.24185  | 0         |  |
|  | Shiraz-47T | 1084 | 0.24185  | 0         |  |
|  | Shiraz-49T | 1166 | 0        | -0.917235 |  |
|  | Shiraz-49T | 1166 | 0        | -0.917235 |  |
|  | Shiraz-49T | 1169 | 0        | -0.583529 |  |
|  | Shiraz-49T | 1169 | 0        | -0.583529 |  |
|  | Shiraz-77T | 1282 | 0.213849 | 0         |  |
|  | Shiraz-77T | 1282 | 0.213849 | 0         |  |
|  | Shiraz-9T  | 1368 | 0.199713 | 0         |  |
|  | Shiraz-9T  | 1368 | 0.199713 | 0         |  |
|  | Shiraz-9T  | 1369 | 0.703374 | 0         |  |
|  | Shiraz-9T  | 1369 | 0.703374 | 0         |  |
|  | Shiraz-18T | 1455 | 0        | -0.186773 |  |
|  | Shiraz-18T | 1455 | 0        | -0.186773 |  |

|       |      |            |      |          |           |  |
|-------|------|------------|------|----------|-----------|--|
|       |      | Shiraz-22T | 1669 | 0.695915 | 0         |  |
|       |      | Shiraz-22T | 1669 | 0.695915 | 0         |  |
|       |      | Shiraz-22T | 1672 | 1.01678  | 0         |  |
|       |      | Shiraz-22T | 1672 | 1.01678  | 0         |  |
|       |      | Shiraz-25T | 1717 | 0.420447 | 0         |  |
|       |      | Shiraz-25T | 1717 | 0.420447 | 0         |  |
|       |      | Shiraz-28T | 1760 | 0.538181 | 0         |  |
|       |      | Shiraz-28T | 1760 | 0.538181 | 0         |  |
|       |      | Shiraz-29T | 1800 | 0.672527 | 0         |  |
|       |      | Shiraz-29T | 1800 | 0.672527 | 0         |  |
|       |      | Shiraz-32T | 1869 | 0.776805 | 0         |  |
|       |      | Shiraz-32T | 1869 | 0.776805 | 0         |  |
|       |      | Shiraz-35T | 1932 | 0.507141 | 0         |  |
|       |      | Shiraz-35T | 1932 | 0.507141 | 0         |  |
|       |      | Shiraz-40T | 2051 | 0.098506 | 0         |  |
|       |      | Shiraz-40T | 2051 | 0.098506 | 0         |  |
|       |      | Shiraz-58T | 2221 | 0.871948 | 0         |  |
|       |      | Shiraz-58T | 2221 | 0.871948 | 0         |  |
|       |      | Shiraz-71T | 2260 | 0.68394  | 0         |  |
|       |      | Shiraz-71T | 2260 | 0.68394  | 0         |  |
|       |      | Shiraz-71T | 2262 | 0.986748 | 0         |  |
|       |      | Shiraz-71T | 2262 | 0.986748 | 0         |  |
| RBM28 | chr7 | Shiraz-3T  | 90   | 0.219276 | 0         |  |
|       |      | Shiraz-3T  | 96   | 0.428308 | 0         |  |
|       |      | Shiraz-4T  | 253  | 0.372918 | 0         |  |
|       |      | Shiraz-31T | 317  | 0.204382 | 0         |  |
|       |      | Shiraz-36T | 378  | 0.179558 | 0         |  |
|       |      | Shiraz-44T | 642  | 0.408617 | 0         |  |
|       |      | Shiraz-46T | 943  | 0.093799 | 0         |  |
|       |      | Shiraz-47T | 1032 | 0.171484 | 0         |  |
|       |      | Shiraz-77T | 1225 | 0        | -0.117922 |  |
|       |      | Shiraz-77T | 1229 | 0.051661 | 0         |  |
|       |      | Shiraz-9T  | 1325 | 0.221899 | 0         |  |
|       |      | Shiraz-18T | 1434 | 0.244465 | 0         |  |
|       |      | Shiraz-25T | 1698 | 0.21835  | 0         |  |
|       |      | Shiraz-28T | 1735 | 0.350744 | 0         |  |
|       |      | Shiraz-29T | 1778 | 0.120767 | 0         |  |
|       |      | Shiraz-32T | 1833 | 0.551336 | 0         |  |
|       |      | Shiraz-38T | 1951 | 0.250891 | 0         |  |
|       |      | Shiraz-53T | 2078 | 0.287202 | 0         |  |
|       |      | Shiraz-71T | 2238 | 0.603631 | 0         |  |
|       |      | Shiraz-3T  | 90   | 0.219276 | 0         |  |
|       |      | Shiraz-3T  | 96   | 0.428308 | 0         |  |
|       |      | Shiraz-4T  | 253  | 0.372918 | 0         |  |
|       |      | Shiraz-31T | 317  | 0.204382 | 0         |  |
|       |      | Shiraz-36T | 378  | 0.179558 | 0         |  |
|       |      | Shiraz-44T | 642  | 0.408617 | 0         |  |

|      |      |            |      |          |           |  |  |
|------|------|------------|------|----------|-----------|--|--|
|      |      | Shiraz-46T | 943  | 0.093799 | 0         |  |  |
|      |      | Shiraz-47T | 1032 | 0.171484 | 0         |  |  |
|      |      | Shiraz-77T | 1225 | 0        | -0.117922 |  |  |
|      |      | Shiraz-77T | 1229 | 0.051661 | 0         |  |  |
|      |      | Shiraz-9T  | 1325 | 0.221899 | 0         |  |  |
|      |      | Shiraz-18T | 1434 | 0.244465 | 0         |  |  |
|      |      | Shiraz-25T | 1698 | 0.21835  | 0         |  |  |
|      |      | Shiraz-28T | 1735 | 0.350744 | 0         |  |  |
|      |      | Shiraz-29T | 1778 | 0.120767 | 0         |  |  |
|      |      | Shiraz-32T | 1833 | 0.551336 | 0         |  |  |
|      |      | Shiraz-38T | 1951 | 0.250891 | 0         |  |  |
|      |      | Shiraz-53T | 2078 | 0.287202 | 0         |  |  |
|      |      | Shiraz-71T | 2238 | 0.603631 | 0         |  |  |
|      |      | Shiraz-3T  | 90   | 0.219276 | 0         |  |  |
|      |      | Shiraz-3T  | 96   | 0.428308 | 0         |  |  |
|      |      | Shiraz-4T  | 253  | 0.372918 | 0         |  |  |
|      |      | Shiraz-31T | 317  | 0.204382 | 0         |  |  |
|      |      | Shiraz-36T | 378  | 0.179558 | 0         |  |  |
|      |      | Shiraz-44T | 642  | 0.408617 | 0         |  |  |
|      |      | Shiraz-46T | 943  | 0.093799 | 0         |  |  |
|      |      | Shiraz-47T | 1032 | 0.171484 | 0         |  |  |
|      |      | Shiraz-77T | 1225 | 0        | -0.117922 |  |  |
|      |      | Shiraz-77T | 1229 | 0.051661 | 0         |  |  |
|      |      | Shiraz-9T  | 1325 | 0.221899 | 0         |  |  |
|      |      | Shiraz-18T | 1434 | 0.244465 | 0         |  |  |
|      |      | Shiraz-25T | 1698 | 0.21835  | 0         |  |  |
|      |      | Shiraz-28T | 1735 | 0.350744 | 0         |  |  |
|      |      | Shiraz-29T | 1778 | 0.120767 | 0         |  |  |
|      |      | Shiraz-32T | 1833 | 0.551336 | 0         |  |  |
|      |      | Shiraz-38T | 1951 | 0.250891 | 0         |  |  |
|      |      | Shiraz-53T | 2078 | 0.287202 | 0         |  |  |
|      |      | Shiraz-71T | 2238 | 0.603631 | 0         |  |  |
| RBM3 | chrX | Shiraz-3T  | 238  | 0.472087 | 0         |  |  |
|      |      | Shiraz-4T  | 260  | 0        | -0.324128 |  |  |
|      |      | Shiraz-16T | 294  | 0.655804 | 0         |  |  |
|      |      | Shiraz-31T | 345  | 0.103301 | 0         |  |  |
|      |      | Shiraz-36T | 431  | 0        | -0.78035  |  |  |
|      |      | Shiraz-36T | 432  | 0        | -0.6692   |  |  |
|      |      | Shiraz-44T | 891  | 0        | -0.954044 |  |  |
|      |      | Shiraz-44T | 896  | 0        | -0.109108 |  |  |
|      |      | Shiraz-46T | 991  | 0.139564 | 0         |  |  |
|      |      | Shiraz-47T | 1084 | 0.24185  | 0         |  |  |
|      |      | Shiraz-49T | 1166 | 0        | -0.917235 |  |  |
|      |      | Shiraz-49T | 1169 | 0        | -0.583529 |  |  |
|      |      | Shiraz-77T | 1282 | 0.213849 | 0         |  |  |
|      |      | Shiraz-9T  | 1368 | 0.199713 | 0         |  |  |
|      |      | Shiraz-9T  | 1369 | 0.703374 | 0         |  |  |

|  |            |      |          |           |  |
|--|------------|------|----------|-----------|--|
|  | Shiraz-18T | 1455 | 0        | -0.186773 |  |
|  | Shiraz-22T | 1669 | 0.695915 | 0         |  |
|  | Shiraz-22T | 1672 | 1.01678  | 0         |  |
|  | Shiraz-25T | 1717 | 0.420447 | 0         |  |
|  | Shiraz-28T | 1760 | 0.538181 | 0         |  |
|  | Shiraz-29T | 1800 | 0.672527 | 0         |  |
|  | Shiraz-32T | 1869 | 0.776805 | 0         |  |
|  | Shiraz-35T | 1932 | 0.507141 | 0         |  |
|  | Shiraz-58T | 2221 | 0.871948 | 0         |  |
|  | Shiraz-71T | 2260 | 0.68394  | 0         |  |
|  | Shiraz-71T | 2262 | 0.986748 | 0         |  |
|  | Shiraz-3T  | 238  | 0.472087 | 0         |  |
|  | Shiraz-4T  | 260  | 0        | -0.324128 |  |
|  | Shiraz-16T | 294  | 0.655804 | 0         |  |
|  | Shiraz-31T | 345  | 0.103301 | 0         |  |
|  | Shiraz-36T | 431  | 0        | -0.78035  |  |
|  | Shiraz-36T | 432  | 0        | -0.6692   |  |
|  | Shiraz-44T | 891  | 0        | -0.954044 |  |
|  | Shiraz-44T | 896  | 0        | -0.109108 |  |
|  | Shiraz-46T | 991  | 0.139564 | 0         |  |
|  | Shiraz-47T | 1084 | 0.24185  | 0         |  |
|  | Shiraz-49T | 1166 | 0        | -0.917235 |  |
|  | Shiraz-49T | 1169 | 0        | -0.583529 |  |
|  | Shiraz-77T | 1282 | 0.213849 | 0         |  |
|  | Shiraz-9T  | 1368 | 0.199713 | 0         |  |
|  | Shiraz-9T  | 1369 | 0.703374 | 0         |  |
|  | Shiraz-18T | 1455 | 0        | -0.186773 |  |
|  | Shiraz-22T | 1669 | 0.695915 | 0         |  |
|  | Shiraz-22T | 1672 | 1.01678  | 0         |  |
|  | Shiraz-25T | 1717 | 0.420447 | 0         |  |
|  | Shiraz-28T | 1760 | 0.538181 | 0         |  |
|  | Shiraz-29T | 1800 | 0.672527 | 0         |  |
|  | Shiraz-32T | 1869 | 0.776805 | 0         |  |
|  | Shiraz-35T | 1932 | 0.507141 | 0         |  |
|  | Shiraz-58T | 2221 | 0.871948 | 0         |  |
|  | Shiraz-71T | 2260 | 0.68394  | 0         |  |
|  | Shiraz-71T | 2262 | 0.986748 | 0         |  |
|  | Shiraz-3T  | 238  | 0.472087 | 0         |  |
|  | Shiraz-4T  | 260  | 0        | -0.324128 |  |
|  | Shiraz-16T | 294  | 0.655804 | 0         |  |
|  | Shiraz-31T | 345  | 0.103301 | 0         |  |
|  | Shiraz-36T | 431  | 0        | -0.78035  |  |
|  | Shiraz-36T | 432  | 0        | -0.6692   |  |
|  | Shiraz-44T | 891  | 0        | -0.954044 |  |
|  | Shiraz-44T | 896  | 0        | -0.109108 |  |
|  | Shiraz-46T | 991  | 0.139564 | 0         |  |
|  | Shiraz-47T | 1084 | 0.24185  | 0         |  |

|       |      |            |      |          |           |  |  |
|-------|------|------------|------|----------|-----------|--|--|
|       |      | Shiraz-49T | 1166 | 0        | -0.917235 |  |  |
|       |      | Shiraz-49T | 1169 | 0        | -0.583529 |  |  |
|       |      | Shiraz-77T | 1282 | 0.213849 | 0         |  |  |
|       |      | Shiraz-9T  | 1368 | 0.199713 | 0         |  |  |
|       |      | Shiraz-9T  | 1369 | 0.703374 | 0         |  |  |
|       |      | Shiraz-18T | 1455 | 0        | -0.186773 |  |  |
|       |      | Shiraz-22T | 1669 | 0.695915 | 0         |  |  |
|       |      | Shiraz-22T | 1672 | 1.01678  | 0         |  |  |
|       |      | Shiraz-25T | 1717 | 0.420447 | 0         |  |  |
|       |      | Shiraz-28T | 1760 | 0.538181 | 0         |  |  |
|       |      | Shiraz-29T | 1800 | 0.672527 | 0         |  |  |
|       |      | Shiraz-32T | 1869 | 0.776805 | 0         |  |  |
|       |      | Shiraz-35T | 1932 | 0.507141 | 0         |  |  |
|       |      | Shiraz-58T | 2221 | 0.871948 | 0         |  |  |
|       |      | Shiraz-71T | 2260 | 0.68394  | 0         |  |  |
|       |      | Shiraz-71T | 2262 | 0.986748 | 0         |  |  |
| RBM41 | chrX | Shiraz-3T  | 242  | 0        | -0.336434 |  |  |
|       |      | Shiraz-4T  | 261  | 0        | -0.336249 |  |  |
|       |      | Shiraz-16T | 295  | 0.591657 | 0         |  |  |
|       |      | Shiraz-36T | 433  | 0        | -0.803961 |  |  |
|       |      | Shiraz-44T | 899  | 0        | -1.09697  |  |  |
|       |      | Shiraz-49T | 1170 | 0        | -0.967436 |  |  |
|       |      | Shiraz-18T | 1457 | 0.643204 | 0         |  |  |
|       |      | Shiraz-22T | 1673 | 0.611783 | 0         |  |  |
|       |      | Shiraz-25T | 1719 | 0.472955 | 0         |  |  |
|       |      | Shiraz-28T | 1762 | 0.562311 | 0         |  |  |
|       |      | Shiraz-29T | 1801 | 0.815343 | 0         |  |  |
|       |      | Shiraz-32T | 1870 | 0.729766 | 0         |  |  |
|       |      | Shiraz-35T | 1933 | 0.488535 | 0         |  |  |
|       |      | Shiraz-58T | 2223 | 0.833364 | 0         |  |  |
|       |      | Shiraz-71T | 2263 | 0.975531 | 0         |  |  |
|       |      | Shiraz-3T  | 242  | 0        | -0.336434 |  |  |
|       |      | Shiraz-4T  | 261  | 0        | -0.336249 |  |  |
|       |      | Shiraz-16T | 295  | 0.591657 | 0         |  |  |
|       |      | Shiraz-36T | 433  | 0        | -0.803961 |  |  |
|       |      | Shiraz-44T | 899  | 0        | -1.09697  |  |  |
|       |      | Shiraz-49T | 1170 | 0        | -0.967436 |  |  |
|       |      | Shiraz-18T | 1457 | 0.643204 | 0         |  |  |
|       |      | Shiraz-22T | 1673 | 0.611783 | 0         |  |  |
|       |      | Shiraz-25T | 1719 | 0.472955 | 0         |  |  |
|       |      | Shiraz-28T | 1762 | 0.562311 | 0         |  |  |
|       |      | Shiraz-29T | 1801 | 0.815343 | 0         |  |  |
|       |      | Shiraz-32T | 1870 | 0.729766 | 0         |  |  |
|       |      | Shiraz-35T | 1933 | 0.488535 | 0         |  |  |
|       |      | Shiraz-58T | 2223 | 0.833364 | 0         |  |  |
|       |      | Shiraz-71T | 2263 | 0.975531 | 0         |  |  |
|       |      | Shiraz-3T  | 242  | 0        | -0.336434 |  |  |



|      |      |            |      |          |           |  |  |
|------|------|------------|------|----------|-----------|--|--|
|      |      | Shiraz-4T  | 261  | 0        | -0.336249 |  |  |
|      |      | Shiraz-16T | 295  | 0.591657 | 0         |  |  |
|      |      | Shiraz-36T | 433  | 0        | -0.803961 |  |  |
|      |      | Shiraz-44T | 899  | 0        | -1.09697  |  |  |
|      |      | Shiraz-49T | 1170 | 0        | -0.967436 |  |  |
|      |      | Shiraz-18T | 1457 | 0.643204 | 0         |  |  |
|      |      | Shiraz-22T | 1673 | 0.611783 | 0         |  |  |
|      |      | Shiraz-25T | 1719 | 0.472955 | 0         |  |  |
|      |      | Shiraz-28T | 1762 | 0.562311 | 0         |  |  |
|      |      | Shiraz-29T | 1801 | 0.815343 | 0         |  |  |
|      |      | Shiraz-32T | 1870 | 0.729766 | 0         |  |  |
|      |      | Shiraz-35T | 1933 | 0.488535 | 0         |  |  |
|      |      | Shiraz-58T | 2223 | 0.833364 | 0         |  |  |
|      |      | Shiraz-71T | 2263 | 0.975531 | 0         |  |  |
| RBMX | chrX | Shiraz-3T  | 242  | 0        | -0.336434 |  |  |
|      |      | Shiraz-4T  | 261  | 0        | -0.336249 |  |  |
|      |      | Shiraz-16T | 295  | 0.591657 | 0         |  |  |
|      |      | Shiraz-36T | 433  | 0        | -0.803961 |  |  |
|      |      | Shiraz-44T | 899  | 0        | -1.09697  |  |  |
|      |      | Shiraz-49T | 1170 | 0        | -0.967436 |  |  |
|      |      | Shiraz-9T  | 1370 | 0.690073 | 0         |  |  |
|      |      | Shiraz-18T | 1457 | 0.643204 | 0         |  |  |
|      |      | Shiraz-22T | 1673 | 0.611783 | 0         |  |  |
|      |      | Shiraz-22T | 1677 | 0.789711 | 0         |  |  |
|      |      | Shiraz-25T | 1719 | 0.472955 | 0         |  |  |
|      |      | Shiraz-28T | 1762 | 0.562311 | 0         |  |  |
|      |      | Shiraz-29T | 1801 | 0.815343 | 0         |  |  |
|      |      | Shiraz-32T | 1870 | 0.729766 | 0         |  |  |
|      |      | Shiraz-35T | 1933 | 0.488535 | 0         |  |  |
|      |      | Shiraz-58T | 2223 | 0.833364 | 0         |  |  |
|      |      | Shiraz-71T | 2263 | 0.975531 | 0         |  |  |
|      |      | Shiraz-3T  | 242  | 0        | -0.336434 |  |  |
|      |      | Shiraz-4T  | 261  | 0        | -0.336249 |  |  |
|      |      | Shiraz-16T | 295  | 0.591657 | 0         |  |  |
|      |      | Shiraz-36T | 433  | 0        | -0.803961 |  |  |
|      |      | Shiraz-44T | 899  | 0        | -1.09697  |  |  |
|      |      | Shiraz-49T | 1170 | 0        | -0.967436 |  |  |
|      |      | Shiraz-9T  | 1370 | 0.690073 | 0         |  |  |
|      |      | Shiraz-18T | 1457 | 0.643204 | 0         |  |  |
|      |      | Shiraz-22T | 1673 | 0.611783 | 0         |  |  |
|      |      | Shiraz-22T | 1677 | 0.789711 | 0         |  |  |
|      |      | Shiraz-25T | 1719 | 0.472955 | 0         |  |  |
|      |      | Shiraz-28T | 1762 | 0.562311 | 0         |  |  |
|      |      | Shiraz-29T | 1801 | 0.815343 | 0         |  |  |
|      |      | Shiraz-32T | 1870 | 0.729766 | 0         |  |  |
|      |      | Shiraz-35T | 1933 | 0.488535 | 0         |  |  |
|      |      | Shiraz-58T | 2223 | 0.833364 | 0         |  |  |

|       |      |            |      |          |           |  |  |
|-------|------|------------|------|----------|-----------|--|--|
|       |      | Shiraz-71T | 2263 | 0.975531 | 0         |  |  |
|       |      | Shiraz-3T  | 242  | 0        | -0.336434 |  |  |
|       |      | Shiraz-4T  | 261  | 0        | -0.336249 |  |  |
|       |      | Shiraz-16T | 295  | 0.591657 | 0         |  |  |
|       |      | Shiraz-36T | 433  | 0        | -0.803961 |  |  |
|       |      | Shiraz-44T | 899  | 0        | -1.09697  |  |  |
|       |      | Shiraz-49T | 1170 | 0        | -0.967436 |  |  |
|       |      | Shiraz-9T  | 1370 | 0.690073 | 0         |  |  |
|       |      | Shiraz-18T | 1457 | 0.643204 | 0         |  |  |
|       |      | Shiraz-22T | 1673 | 0.611783 | 0         |  |  |
|       |      | Shiraz-22T | 1677 | 0.789711 | 0         |  |  |
|       |      | Shiraz-25T | 1719 | 0.472955 | 0         |  |  |
|       |      | Shiraz-28T | 1762 | 0.562311 | 0         |  |  |
|       |      | Shiraz-29T | 1801 | 0.815343 | 0         |  |  |
|       |      | Shiraz-32T | 1870 | 0.729766 | 0         |  |  |
|       |      | Shiraz-35T | 1933 | 0.488535 | 0         |  |  |
|       |      | Shiraz-58T | 2223 | 0.833364 | 0         |  |  |
|       |      | Shiraz-71T | 2263 | 0.975531 | 0         |  |  |
| RBMX2 | chrX | Shiraz-3T  | 242  | 0        | -0.336434 |  |  |
|       |      | Shiraz-4T  | 261  | 0        | -0.336249 |  |  |
|       |      | Shiraz-16T | 295  | 0.591657 | 0         |  |  |
|       |      | Shiraz-36T | 433  | 0        | -0.803961 |  |  |
|       |      | Shiraz-44T | 899  | 0        | -1.09697  |  |  |
|       |      | Shiraz-49T | 1170 | 0        | -0.967436 |  |  |
|       |      | Shiraz-9T  | 1370 | 0.690073 | 0         |  |  |
|       |      | Shiraz-18T | 1457 | 0.643204 | 0         |  |  |
|       |      | Shiraz-22T | 1673 | 0.611783 | 0         |  |  |
|       |      | Shiraz-22T | 1677 | 0.789711 | 0         |  |  |
|       |      | Shiraz-25T | 1719 | 0.472955 | 0         |  |  |
|       |      | Shiraz-28T | 1762 | 0.562311 | 0         |  |  |
|       |      | Shiraz-29T | 1801 | 0.815343 | 0         |  |  |
|       |      | Shiraz-32T | 1870 | 0.729766 | 0         |  |  |
|       |      | Shiraz-35T | 1933 | 0.488535 | 0         |  |  |
|       |      | Shiraz-58T | 2223 | 0.833364 | 0         |  |  |
|       |      | Shiraz-71T | 2263 | 0.975531 | 0         |  |  |
|       |      | Shiraz-3T  | 242  | 0        | -0.336434 |  |  |
|       |      | Shiraz-4T  | 261  | 0        | -0.336249 |  |  |
|       |      | Shiraz-16T | 295  | 0.591657 | 0         |  |  |
|       |      | Shiraz-36T | 433  | 0        | -0.803961 |  |  |
|       |      | Shiraz-44T | 899  | 0        | -1.09697  |  |  |
|       |      | Shiraz-49T | 1170 | 0        | -0.967436 |  |  |
|       |      | Shiraz-9T  | 1370 | 0.690073 | 0         |  |  |
|       |      | Shiraz-18T | 1457 | 0.643204 | 0         |  |  |
|       |      | Shiraz-22T | 1673 | 0.611783 | 0         |  |  |
|       |      | Shiraz-22T | 1677 | 0.789711 | 0         |  |  |
|       |      | Shiraz-25T | 1719 | 0.472955 | 0         |  |  |
|       |      | Shiraz-28T | 1762 | 0.562311 | 0         |  |  |

|        |      |            |      |          |           |  |  |
|--------|------|------------|------|----------|-----------|--|--|
|        |      | Shiraz-29T | 1801 | 0.815343 | 0         |  |  |
|        |      | Shiraz-32T | 1870 | 0.729766 | 0         |  |  |
|        |      | Shiraz-35T | 1933 | 0.488535 | 0         |  |  |
|        |      | Shiraz-58T | 2223 | 0.833364 | 0         |  |  |
|        |      | Shiraz-71T | 2263 | 0.975531 | 0         |  |  |
|        |      | Shiraz-3T  | 242  | 0        | -0.336434 |  |  |
|        |      | Shiraz-4T  | 261  | 0        | -0.336249 |  |  |
|        |      | Shiraz-16T | 295  | 0.591657 | 0         |  |  |
|        |      | Shiraz-36T | 433  | 0        | -0.803961 |  |  |
|        |      | Shiraz-44T | 899  | 0        | -1.09697  |  |  |
|        |      | Shiraz-49T | 1170 | 0        | -0.967436 |  |  |
|        |      | Shiraz-9T  | 1370 | 0.690073 | 0         |  |  |
|        |      | Shiraz-18T | 1457 | 0.643204 | 0         |  |  |
|        |      | Shiraz-22T | 1673 | 0.611783 | 0         |  |  |
|        |      | Shiraz-22T | 1677 | 0.789711 | 0         |  |  |
|        |      | Shiraz-25T | 1719 | 0.472955 | 0         |  |  |
|        |      | Shiraz-28T | 1762 | 0.562311 | 0         |  |  |
|        |      | Shiraz-29T | 1801 | 0.815343 | 0         |  |  |
|        |      | Shiraz-32T | 1870 | 0.729766 | 0         |  |  |
|        |      | Shiraz-35T | 1933 | 0.488535 | 0         |  |  |
|        |      | Shiraz-58T | 2223 | 0.833364 | 0         |  |  |
|        |      | Shiraz-71T | 2263 | 0.975531 | 0         |  |  |
| RBMXL3 | chrX | Shiraz-3T  | 242  | 0        | -0.336434 |  |  |
|        |      | Shiraz-4T  | 261  | 0        | -0.336249 |  |  |
|        |      | Shiraz-16T | 295  | 0.591657 | 0         |  |  |
|        |      | Shiraz-36T | 433  | 0        | -0.803961 |  |  |
|        |      | Shiraz-44T | 899  | 0        | -1.09697  |  |  |
|        |      | Shiraz-49T | 1170 | 0        | -0.967436 |  |  |
|        |      | Shiraz-18T | 1457 | 0.643204 | 0         |  |  |
|        |      | Shiraz-22T | 1673 | 0.611783 | 0         |  |  |
|        |      | Shiraz-25T | 1719 | 0.472955 | 0         |  |  |
|        |      | Shiraz-28T | 1762 | 0.562311 | 0         |  |  |
|        |      | Shiraz-29T | 1801 | 0.815343 | 0         |  |  |
|        |      | Shiraz-32T | 1870 | 0.729766 | 0         |  |  |
|        |      | Shiraz-35T | 1933 | 0.488535 | 0         |  |  |
|        |      | Shiraz-58T | 2223 | 0.833364 | 0         |  |  |
|        |      | Shiraz-71T | 2263 | 0.975531 | 0         |  |  |
|        |      | Shiraz-3T  | 242  | 0        | -0.336434 |  |  |
|        |      | Shiraz-4T  | 261  | 0        | -0.336249 |  |  |
|        |      | Shiraz-16T | 295  | 0.591657 | 0         |  |  |
|        |      | Shiraz-36T | 433  | 0        | -0.803961 |  |  |
|        |      | Shiraz-44T | 899  | 0        | -1.09697  |  |  |
|        |      | Shiraz-49T | 1170 | 0        | -0.967436 |  |  |
|        |      | Shiraz-18T | 1457 | 0.643204 | 0         |  |  |
|        |      | Shiraz-22T | 1673 | 0.611783 | 0         |  |  |
|        |      | Shiraz-25T | 1719 | 0.472955 | 0         |  |  |
|        |      | Shiraz-28T | 1762 | 0.562311 | 0         |  |  |

|      |      |            |      |          |           |  |  |
|------|------|------------|------|----------|-----------|--|--|
|      |      | Shiraz-29T | 1801 | 0.815343 | 0         |  |  |
|      |      | Shiraz-32T | 1870 | 0.729766 | 0         |  |  |
|      |      | Shiraz-35T | 1933 | 0.488535 | 0         |  |  |
|      |      | Shiraz-58T | 2223 | 0.833364 | 0         |  |  |
|      |      | Shiraz-71T | 2263 | 0.975531 | 0         |  |  |
|      |      | Shiraz-3T  | 242  | 0        | -0.336434 |  |  |
|      |      | Shiraz-4T  | 261  | 0        | -0.336249 |  |  |
|      |      | Shiraz-16T | 295  | 0.591657 | 0         |  |  |
|      |      | Shiraz-36T | 433  | 0        | -0.803961 |  |  |
|      |      | Shiraz-44T | 899  | 0        | -1.09697  |  |  |
|      |      | Shiraz-49T | 1170 | 0        | -0.967436 |  |  |
|      |      | Shiraz-18T | 1457 | 0.643204 | 0         |  |  |
|      |      | Shiraz-22T | 1673 | 0.611783 | 0         |  |  |
|      |      | Shiraz-25T | 1719 | 0.472955 | 0         |  |  |
|      |      | Shiraz-28T | 1762 | 0.562311 | 0         |  |  |
|      |      | Shiraz-29T | 1801 | 0.815343 | 0         |  |  |
|      |      | Shiraz-32T | 1870 | 0.729766 | 0         |  |  |
|      |      | Shiraz-35T | 1933 | 0.488535 | 0         |  |  |
|      |      | Shiraz-58T | 2223 | 0.833364 | 0         |  |  |
|      |      | Shiraz-71T | 2263 | 0.975531 | 0         |  |  |
| RELN | chr7 | Shiraz-3T  | 90   | 0.219276 | 0         |  |  |
|      |      | Shiraz-4T  | 253  | 0.372918 | 0         |  |  |
|      |      | Shiraz-36T | 378  | 0.179558 | 0         |  |  |
|      |      | Shiraz-46T | 943  | 0.093799 | 0         |  |  |
|      |      | Shiraz-77T | 1225 | 0        | -0.117922 |  |  |
|      |      | Shiraz-18T | 1434 | 0.244465 | 0         |  |  |
|      |      | Shiraz-22T | 1549 | 0        | -0.319623 |  |  |
|      |      | Shiraz-25T | 1698 | 0.21835  | 0         |  |  |
|      |      | Shiraz-28T | 1735 | 0.350744 | 0         |  |  |
|      |      | Shiraz-29T | 1778 | 0.120767 | 0         |  |  |
|      |      | Shiraz-32T | 1833 | 0.551336 | 0         |  |  |
|      |      | Shiraz-38T | 1951 | 0.250891 | 0         |  |  |
|      |      | Shiraz-53T | 2078 | 0.287202 | 0         |  |  |
|      |      | Shiraz-71T | 2238 | 0.603631 | 0         |  |  |
|      |      | Shiraz-3T  | 90   | 0.219276 | 0         |  |  |
|      |      | Shiraz-4T  | 253  | 0.372918 | 0         |  |  |
|      |      | Shiraz-36T | 378  | 0.179558 | 0         |  |  |
|      |      | Shiraz-46T | 943  | 0.093799 | 0         |  |  |
|      |      | Shiraz-77T | 1225 | 0        | -0.117922 |  |  |
|      |      | Shiraz-18T | 1434 | 0.244465 | 0         |  |  |
|      |      | Shiraz-22T | 1549 | 0        | -0.319623 |  |  |
|      |      | Shiraz-25T | 1698 | 0.21835  | 0         |  |  |
|      |      | Shiraz-28T | 1735 | 0.350744 | 0         |  |  |
|      |      | Shiraz-29T | 1778 | 0.120767 | 0         |  |  |
|      |      | Shiraz-32T | 1833 | 0.551336 | 0         |  |  |
|      |      | Shiraz-38T | 1951 | 0.250891 | 0         |  |  |
|      |      | Shiraz-53T | 2078 | 0.287202 | 0         |  |  |

|       |      |            |      |          |           |  |
|-------|------|------------|------|----------|-----------|--|
|       |      | Shiraz-71T | 2238 | 0.603631 | 0         |  |
|       |      | Shiraz-3T  | 90   | 0.219276 | 0         |  |
|       |      | Shiraz-4T  | 253  | 0.372918 | 0         |  |
|       |      | Shiraz-36T | 378  | 0.179558 | 0         |  |
|       |      | Shiraz-46T | 943  | 0.093799 | 0         |  |
|       |      | Shiraz-77T | 1225 | 0        | -0.117922 |  |
|       |      | Shiraz-18T | 1434 | 0.244465 | 0         |  |
|       |      | Shiraz-22T | 1549 | 0        | -0.319623 |  |
|       |      | Shiraz-25T | 1698 | 0.21835  | 0         |  |
|       |      | Shiraz-28T | 1735 | 0.350744 | 0         |  |
|       |      | Shiraz-29T | 1778 | 0.120767 | 0         |  |
|       |      | Shiraz-32T | 1833 | 0.551336 | 0         |  |
|       |      | Shiraz-38T | 1951 | 0.250891 | 0         |  |
|       |      | Shiraz-53T | 2078 | 0.287202 | 0         |  |
|       |      | Shiraz-71T | 2238 | 0.603631 | 0         |  |
| RENBP | chrX | Shiraz-3T  | 246  | 0.531858 | 0         |  |
|       |      | Shiraz-4T  | 261  | 0        | -0.336249 |  |
|       |      | Shiraz-16T | 295  | 0.591657 | 0         |  |
|       |      | Shiraz-36T | 433  | 0        | -0.803961 |  |
|       |      | Shiraz-42T | 480  | 0        | -0.232915 |  |
|       |      | Shiraz-44T | 908  | 0.466743 | 0         |  |
|       |      | Shiraz-49T | 1170 | 0        | -0.967436 |  |
|       |      | Shiraz-49T | 1173 | 0        | -0.704439 |  |
|       |      | Shiraz-9T  | 1370 | 0.690073 | 0         |  |
|       |      | Shiraz-9T  | 1371 | 1.292392 | 0         |  |
|       |      | Shiraz-18T | 1457 | 0.643204 | 0         |  |
|       |      | Shiraz-22T | 1673 | 0.611783 | 0         |  |
|       |      | Shiraz-22T | 1678 | 0.911625 | 0         |  |
|       |      | Shiraz-25T | 1719 | 0.472955 | 0         |  |
|       |      | Shiraz-28T | 1762 | 0.562311 | 0         |  |
|       |      | Shiraz-29T | 1801 | 0.815343 | 0         |  |
|       |      | Shiraz-32T | 1870 | 0.729766 | 0         |  |
|       |      | Shiraz-32T | 1872 | 1.504553 | 0         |  |
|       |      | Shiraz-35T | 1933 | 0.488535 | 0         |  |
|       |      | Shiraz-38T | 2011 | 0        | -0.406024 |  |
|       |      | Shiraz-53T | 2115 | 0.427728 | 0         |  |
|       |      | Shiraz-58T | 2223 | 0.833364 | 0         |  |
|       |      | Shiraz-58T | 2226 | 1.074663 | 0         |  |
|       |      | Shiraz-71T | 2263 | 0.975531 | 0         |  |
|       |      | Shiraz-3T  | 246  | 0.531858 | 0         |  |
|       |      | Shiraz-4T  | 261  | 0        | -0.336249 |  |
|       |      | Shiraz-16T | 295  | 0.591657 | 0         |  |
|       |      | Shiraz-36T | 433  | 0        | -0.803961 |  |
|       |      | Shiraz-42T | 480  | 0        | -0.232915 |  |
|       |      | Shiraz-44T | 908  | 0.466743 | 0         |  |
|       |      | Shiraz-49T | 1170 | 0        | -0.967436 |  |
|       |      | Shiraz-49T | 1173 | 0        | -0.704439 |  |

|        |      |            |      |          |           |  |
|--------|------|------------|------|----------|-----------|--|
|        |      | Shiraz-9T  | 1370 | 0.690073 | 0         |  |
|        |      | Shiraz-9T  | 1371 | 1.292392 | 0         |  |
|        |      | Shiraz-18T | 1457 | 0.643204 | 0         |  |
|        |      | Shiraz-22T | 1673 | 0.611783 | 0         |  |
|        |      | Shiraz-22T | 1678 | 0.911625 | 0         |  |
|        |      | Shiraz-25T | 1719 | 0.472955 | 0         |  |
|        |      | Shiraz-28T | 1762 | 0.562311 | 0         |  |
|        |      | Shiraz-29T | 1801 | 0.815343 | 0         |  |
|        |      | Shiraz-32T | 1870 | 0.729766 | 0         |  |
|        |      | Shiraz-32T | 1872 | 1.504553 | 0         |  |
|        |      | Shiraz-35T | 1933 | 0.488535 | 0         |  |
|        |      | Shiraz-38T | 2011 | 0        | -0.406024 |  |
|        |      | Shiraz-53T | 2115 | 0.427728 | 0         |  |
|        |      | Shiraz-58T | 2223 | 0.833364 | 0         |  |
|        |      | Shiraz-58T | 2226 | 1.074663 | 0         |  |
|        |      | Shiraz-71T | 2263 | 0.975531 | 0         |  |
|        |      | Shiraz-3T  | 246  | 0.531858 | 0         |  |
|        |      | Shiraz-4T  | 261  | 0        | -0.336249 |  |
|        |      | Shiraz-16T | 295  | 0.591657 | 0         |  |
|        |      | Shiraz-36T | 433  | 0        | -0.803961 |  |
|        |      | Shiraz-42T | 480  | 0        | -0.232915 |  |
|        |      | Shiraz-44T | 908  | 0.466743 | 0         |  |
|        |      | Shiraz-49T | 1170 | 0        | -0.967436 |  |
|        |      | Shiraz-49T | 1173 | 0        | -0.704439 |  |
|        |      | Shiraz-9T  | 1370 | 0.690073 | 0         |  |
|        |      | Shiraz-9T  | 1371 | 1.292392 | 0         |  |
|        |      | Shiraz-18T | 1457 | 0.643204 | 0         |  |
|        |      | Shiraz-22T | 1673 | 0.611783 | 0         |  |
|        |      | Shiraz-22T | 1678 | 0.911625 | 0         |  |
|        |      | Shiraz-25T | 1719 | 0.472955 | 0         |  |
|        |      | Shiraz-28T | 1762 | 0.562311 | 0         |  |
|        |      | Shiraz-29T | 1801 | 0.815343 | 0         |  |
|        |      | Shiraz-32T | 1870 | 0.729766 | 0         |  |
|        |      | Shiraz-32T | 1872 | 1.504553 | 0         |  |
|        |      | Shiraz-35T | 1933 | 0.488535 | 0         |  |
|        |      | Shiraz-38T | 2011 | 0        | -0.406024 |  |
|        |      | Shiraz-53T | 2115 | 0.427728 | 0         |  |
|        |      | Shiraz-58T | 2223 | 0.833364 | 0         |  |
|        |      | Shiraz-58T | 2226 | 1.074663 | 0         |  |
|        |      | Shiraz-71T | 2263 | 0.975531 | 0         |  |
| REPIN1 | chr7 | Shiraz-3T  | 90   | 0.219276 | 0         |  |
|        |      | Shiraz-3T  | 90   | 0.219276 | 0         |  |
|        |      | Shiraz-3T  | 99   | 0.454766 | 0         |  |
|        |      | Shiraz-3T  | 99   | 0.454766 | 0         |  |
|        |      | Shiraz-4T  | 253  | 0.372918 | 0         |  |
|        |      | Shiraz-4T  | 253  | 0.372918 | 0         |  |
|        |      | Shiraz-36T | 378  | 0.179558 | 0         |  |

|  |  |            |      |          |   |  |
|--|--|------------|------|----------|---|--|
|  |  | Shiraz-36T | 378  | 0.179558 | 0 |  |
|  |  | Shiraz-44T | 646  | 0.471276 | 0 |  |
|  |  | Shiraz-44T | 646  | 0.471276 | 0 |  |
|  |  | Shiraz-46T | 943  | 0.093799 | 0 |  |
|  |  | Shiraz-46T | 943  | 0.093799 | 0 |  |
|  |  | Shiraz-9T  | 1325 | 0.221899 | 0 |  |
|  |  | Shiraz-9T  | 1325 | 0.221899 | 0 |  |
|  |  | Shiraz-18T | 1434 | 0.244465 | 0 |  |
|  |  | Shiraz-18T | 1434 | 0.244465 | 0 |  |
|  |  | Shiraz-25T | 1698 | 0.21835  | 0 |  |
|  |  | Shiraz-25T | 1698 | 0.21835  | 0 |  |
|  |  | Shiraz-28T | 1735 | 0.350744 | 0 |  |
|  |  | Shiraz-28T | 1735 | 0.350744 | 0 |  |
|  |  | Shiraz-29T | 1778 | 0.120767 | 0 |  |
|  |  | Shiraz-29T | 1778 | 0.120767 | 0 |  |
|  |  | Shiraz-32T | 1833 | 0.551336 | 0 |  |
|  |  | Shiraz-32T | 1833 | 0.551336 | 0 |  |
|  |  | Shiraz-38T | 1951 | 0.250891 | 0 |  |
|  |  | Shiraz-38T | 1951 | 0.250891 | 0 |  |
|  |  | Shiraz-53T | 2078 | 0.287202 | 0 |  |
|  |  | Shiraz-53T | 2078 | 0.287202 | 0 |  |
|  |  | Shiraz-58T | 2162 | 0.221505 | 0 |  |
|  |  | Shiraz-58T | 2162 | 0.221505 | 0 |  |
|  |  | Shiraz-71T | 2238 | 0.603631 | 0 |  |
|  |  | Shiraz-71T | 2238 | 0.603631 | 0 |  |
|  |  | Shiraz-3T  | 90   | 0.219276 | 0 |  |
|  |  | Shiraz-3T  | 90   | 0.219276 | 0 |  |
|  |  | Shiraz-3T  | 99   | 0.454766 | 0 |  |
|  |  | Shiraz-3T  | 99   | 0.454766 | 0 |  |
|  |  | Shiraz-4T  | 253  | 0.372918 | 0 |  |
|  |  | Shiraz-4T  | 253  | 0.372918 | 0 |  |
|  |  | Shiraz-36T | 378  | 0.179558 | 0 |  |
|  |  | Shiraz-36T | 378  | 0.179558 | 0 |  |
|  |  | Shiraz-44T | 646  | 0.471276 | 0 |  |
|  |  | Shiraz-44T | 646  | 0.471276 | 0 |  |
|  |  | Shiraz-46T | 943  | 0.093799 | 0 |  |
|  |  | Shiraz-46T | 943  | 0.093799 | 0 |  |
|  |  | Shiraz-9T  | 1325 | 0.221899 | 0 |  |
|  |  | Shiraz-9T  | 1325 | 0.221899 | 0 |  |
|  |  | Shiraz-18T | 1434 | 0.244465 | 0 |  |
|  |  | Shiraz-18T | 1434 | 0.244465 | 0 |  |
|  |  | Shiraz-25T | 1698 | 0.21835  | 0 |  |
|  |  | Shiraz-25T | 1698 | 0.21835  | 0 |  |
|  |  | Shiraz-28T | 1735 | 0.350744 | 0 |  |
|  |  | Shiraz-28T | 1735 | 0.350744 | 0 |  |
|  |  | Shiraz-29T | 1778 | 0.120767 | 0 |  |
|  |  | Shiraz-29T | 1778 | 0.120767 | 0 |  |

|       |      |            |      |          |           |  |  |
|-------|------|------------|------|----------|-----------|--|--|
|       |      | Shiraz-32T | 1833 | 0.551336 | 0         |  |  |
|       |      | Shiraz-32T | 1833 | 0.551336 | 0         |  |  |
|       |      | Shiraz-38T | 1951 | 0.250891 | 0         |  |  |
|       |      | Shiraz-38T | 1951 | 0.250891 | 0         |  |  |
|       |      | Shiraz-53T | 2078 | 0.287202 | 0         |  |  |
|       |      | Shiraz-53T | 2078 | 0.287202 | 0         |  |  |
|       |      | Shiraz-58T | 2162 | 0.221505 | 0         |  |  |
|       |      | Shiraz-58T | 2162 | 0.221505 | 0         |  |  |
|       |      | Shiraz-71T | 2238 | 0.603631 | 0         |  |  |
|       |      | Shiraz-71T | 2238 | 0.603631 | 0         |  |  |
|       |      | Shiraz-3T  | 90   | 0.219276 | 0         |  |  |
|       |      | Shiraz-3T  | 90   | 0.219276 | 0         |  |  |
|       |      | Shiraz-3T  | 99   | 0.454766 | 0         |  |  |
|       |      | Shiraz-3T  | 99   | 0.454766 | 0         |  |  |
|       |      | Shiraz-4T  | 253  | 0.372918 | 0         |  |  |
|       |      | Shiraz-4T  | 253  | 0.372918 | 0         |  |  |
|       |      | Shiraz-36T | 378  | 0.179558 | 0         |  |  |
|       |      | Shiraz-36T | 378  | 0.179558 | 0         |  |  |
|       |      | Shiraz-44T | 646  | 0.471276 | 0         |  |  |
|       |      | Shiraz-44T | 646  | 0.471276 | 0         |  |  |
|       |      | Shiraz-46T | 943  | 0.093799 | 0         |  |  |
|       |      | Shiraz-46T | 943  | 0.093799 | 0         |  |  |
|       |      | Shiraz-9T  | 1325 | 0.221899 | 0         |  |  |
|       |      | Shiraz-9T  | 1325 | 0.221899 | 0         |  |  |
|       |      | Shiraz-18T | 1434 | 0.244465 | 0         |  |  |
|       |      | Shiraz-18T | 1434 | 0.244465 | 0         |  |  |
|       |      | Shiraz-25T | 1698 | 0.21835  | 0         |  |  |
|       |      | Shiraz-25T | 1698 | 0.21835  | 0         |  |  |
|       |      | Shiraz-28T | 1735 | 0.350744 | 0         |  |  |
|       |      | Shiraz-28T | 1735 | 0.350744 | 0         |  |  |
|       |      | Shiraz-29T | 1778 | 0.120767 | 0         |  |  |
|       |      | Shiraz-29T | 1778 | 0.120767 | 0         |  |  |
|       |      | Shiraz-32T | 1833 | 0.551336 | 0         |  |  |
|       |      | Shiraz-32T | 1833 | 0.551336 | 0         |  |  |
|       |      | Shiraz-38T | 1951 | 0.250891 | 0         |  |  |
|       |      | Shiraz-38T | 1951 | 0.250891 | 0         |  |  |
|       |      | Shiraz-53T | 2078 | 0.287202 | 0         |  |  |
|       |      | Shiraz-53T | 2078 | 0.287202 | 0         |  |  |
|       |      | Shiraz-58T | 2162 | 0.221505 | 0         |  |  |
|       |      | Shiraz-58T | 2162 | 0.221505 | 0         |  |  |
|       |      | Shiraz-71T | 2238 | 0.603631 | 0         |  |  |
|       |      | Shiraz-71T | 2238 | 0.603631 | 0         |  |  |
| REPS2 | chrX | Shiraz-3T  | 235  | 0        | -0.28401  |  |  |
|       |      | Shiraz-4T  | 260  | 0        | -0.324128 |  |  |
|       |      | Shiraz-16T | 294  | 0.655804 | 0         |  |  |
|       |      | Shiraz-36T | 431  | 0        | -0.78035  |  |  |
|       |      | Shiraz-44T | 891  | 0        | -0.954044 |  |  |



|  |            |      |          |           |  |
|--|------------|------|----------|-----------|--|
|  | Shiraz-49T | 1166 | 0        | -0.917235 |  |
|  | Shiraz-9T  | 1368 | 0.199713 | 0         |  |
|  | Shiraz-18T | 1455 | 0        | -0.186773 |  |
|  | Shiraz-22T | 1669 | 0.695915 | 0         |  |
|  | Shiraz-25T | 1717 | 0.420447 | 0         |  |
|  | Shiraz-28T | 1760 | 0.538181 | 0         |  |
|  | Shiraz-29T | 1800 | 0.672527 | 0         |  |
|  | Shiraz-32T | 1869 | 0.776805 | 0         |  |
|  | Shiraz-35T | 1932 | 0.507141 | 0         |  |
|  | Shiraz-40T | 2051 | 0.098506 | 0         |  |
|  | Shiraz-58T | 2221 | 0.871948 | 0         |  |
|  | Shiraz-71T | 2260 | 0.68394  | 0         |  |
|  | Shiraz-71T | 2261 | 0.508399 | 0         |  |
|  | Shiraz-3T  | 235  | 0        | -0.28401  |  |
|  | Shiraz-4T  | 260  | 0        | -0.324128 |  |
|  | Shiraz-16T | 294  | 0.655804 | 0         |  |
|  | Shiraz-36T | 431  | 0        | -0.78035  |  |
|  | Shiraz-44T | 891  | 0        | -0.954044 |  |
|  | Shiraz-49T | 1166 | 0        | -0.917235 |  |
|  | Shiraz-9T  | 1368 | 0.199713 | 0         |  |
|  | Shiraz-18T | 1455 | 0        | -0.186773 |  |
|  | Shiraz-22T | 1669 | 0.695915 | 0         |  |
|  | Shiraz-25T | 1717 | 0.420447 | 0         |  |
|  | Shiraz-28T | 1760 | 0.538181 | 0         |  |
|  | Shiraz-29T | 1800 | 0.672527 | 0         |  |
|  | Shiraz-32T | 1869 | 0.776805 | 0         |  |
|  | Shiraz-35T | 1932 | 0.507141 | 0         |  |
|  | Shiraz-40T | 2051 | 0.098506 | 0         |  |
|  | Shiraz-58T | 2221 | 0.871948 | 0         |  |
|  | Shiraz-71T | 2260 | 0.68394  | 0         |  |
|  | Shiraz-71T | 2261 | 0.508399 | 0         |  |
|  | Shiraz-3T  | 235  | 0        | -0.28401  |  |
|  | Shiraz-4T  | 260  | 0        | -0.324128 |  |
|  | Shiraz-16T | 294  | 0.655804 | 0         |  |
|  | Shiraz-36T | 431  | 0        | -0.78035  |  |
|  | Shiraz-44T | 891  | 0        | -0.954044 |  |
|  | Shiraz-49T | 1166 | 0        | -0.917235 |  |
|  | Shiraz-9T  | 1368 | 0.199713 | 0         |  |
|  | Shiraz-18T | 1455 | 0        | -0.186773 |  |
|  | Shiraz-22T | 1669 | 0.695915 | 0         |  |
|  | Shiraz-25T | 1717 | 0.420447 | 0         |  |
|  | Shiraz-28T | 1760 | 0.538181 | 0         |  |
|  | Shiraz-29T | 1800 | 0.672527 | 0         |  |
|  | Shiraz-32T | 1869 | 0.776805 | 0         |  |
|  | Shiraz-35T | 1932 | 0.507141 | 0         |  |
|  | Shiraz-40T | 2051 | 0.098506 | 0         |  |
|  | Shiraz-58T | 2221 | 0.871948 | 0         |  |

|       |      |            |      |          |           |  |
|-------|------|------------|------|----------|-----------|--|
|       |      | Shiraz-71T | 2260 | 0.68394  | 0         |  |
|       |      | Shiraz-71T | 2261 | 0.508399 | 0         |  |
| RGAG1 | chrX | Shiraz-3T  | 242  | 0        | -0.336434 |  |
|       |      | Shiraz-4T  | 261  | 0        | -0.336249 |  |
|       |      | Shiraz-16T | 295  | 0.591657 | 0         |  |
|       |      | Shiraz-36T | 433  | 0        | -0.803961 |  |
|       |      | Shiraz-44T | 899  | 0        | -1.09697  |  |
|       |      | Shiraz-49T | 1170 | 0        | -0.967436 |  |
|       |      | Shiraz-18T | 1457 | 0.643204 | 0         |  |
|       |      | Shiraz-22T | 1673 | 0.611783 | 0         |  |
|       |      | Shiraz-25T | 1719 | 0.472955 | 0         |  |
|       |      | Shiraz-28T | 1762 | 0.562311 | 0         |  |
|       |      | Shiraz-29T | 1801 | 0.815343 | 0         |  |
|       |      | Shiraz-32T | 1870 | 0.729766 | 0         |  |
|       |      | Shiraz-35T | 1933 | 0.488535 | 0         |  |
|       |      | Shiraz-58T | 2223 | 0.833364 | 0         |  |
|       |      | Shiraz-71T | 2263 | 0.975531 | 0         |  |
|       |      | Shiraz-3T  | 242  | 0        | -0.336434 |  |
|       |      | Shiraz-4T  | 261  | 0        | -0.336249 |  |
|       |      | Shiraz-16T | 295  | 0.591657 | 0         |  |
|       |      | Shiraz-36T | 433  | 0        | -0.803961 |  |
|       |      | Shiraz-44T | 899  | 0        | -1.09697  |  |
|       |      | Shiraz-49T | 1170 | 0        | -0.967436 |  |
|       |      | Shiraz-18T | 1457 | 0.643204 | 0         |  |
|       |      | Shiraz-22T | 1673 | 0.611783 | 0         |  |
|       |      | Shiraz-25T | 1719 | 0.472955 | 0         |  |
|       |      | Shiraz-28T | 1762 | 0.562311 | 0         |  |
|       |      | Shiraz-29T | 1801 | 0.815343 | 0         |  |
|       |      | Shiraz-32T | 1870 | 0.729766 | 0         |  |
|       |      | Shiraz-35T | 1933 | 0.488535 | 0         |  |
|       |      | Shiraz-58T | 2223 | 0.833364 | 0         |  |
|       |      | Shiraz-71T | 2263 | 0.975531 | 0         |  |
|       |      | Shiraz-3T  | 242  | 0        | -0.336434 |  |
|       |      | Shiraz-4T  | 261  | 0        | -0.336249 |  |
|       |      | Shiraz-16T | 295  | 0.591657 | 0         |  |
|       |      | Shiraz-36T | 433  | 0        | -0.803961 |  |
|       |      | Shiraz-44T | 899  | 0        | -1.09697  |  |
|       |      | Shiraz-49T | 1170 | 0        | -0.967436 |  |
|       |      | Shiraz-18T | 1457 | 0.643204 | 0         |  |
|       |      | Shiraz-22T | 1673 | 0.611783 | 0         |  |
|       |      | Shiraz-25T | 1719 | 0.472955 | 0         |  |
|       |      | Shiraz-28T | 1762 | 0.562311 | 0         |  |
|       |      | Shiraz-29T | 1801 | 0.815343 | 0         |  |
|       |      | Shiraz-32T | 1870 | 0.729766 | 0         |  |
|       |      | Shiraz-35T | 1933 | 0.488535 | 0         |  |
|       |      | Shiraz-58T | 2223 | 0.833364 | 0         |  |
|       |      | Shiraz-71T | 2263 | 0.975531 | 0         |  |

|       |      |            |      |          |           |  |  |
|-------|------|------------|------|----------|-----------|--|--|
| RGAG4 | chrX | Shiraz-4T  | 261  | 0        | -0.336249 |  |  |
|       |      | Shiraz-16T | 295  | 0.591657 | 0         |  |  |
|       |      | Shiraz-36T | 433  | 0        | -0.803961 |  |  |
|       |      | Shiraz-44T | 899  | 0        | -1.09697  |  |  |
|       |      | Shiraz-44T | 900  | 0        | -0.584284 |  |  |
|       |      | Shiraz-49T | 1170 | 0        | -0.967436 |  |  |
|       |      | Shiraz-49T | 1171 | 0        | -0.612379 |  |  |
|       |      | Shiraz-77T | 1283 | 0.296555 | 0         |  |  |
|       |      | Shiraz-18T | 1457 | 0.643204 | 0         |  |  |
|       |      | Shiraz-22T | 1673 | 0.611783 | 0         |  |  |
|       |      | Shiraz-22T | 1674 | 0.887899 | 0         |  |  |
|       |      | Shiraz-25T | 1719 | 0.472955 | 0         |  |  |
|       |      | Shiraz-28T | 1762 | 0.562311 | 0         |  |  |
|       |      | Shiraz-29T | 1801 | 0.815343 | 0         |  |  |
|       |      | Shiraz-32T | 1870 | 0.729766 | 0         |  |  |
|       |      | Shiraz-35T | 1933 | 0.488535 | 0         |  |  |
|       |      | Shiraz-58T | 2223 | 0.833364 | 0         |  |  |
|       |      | Shiraz-58T | 2224 | 1.076575 | 0         |  |  |
|       |      | Shiraz-71T | 2263 | 0.975531 | 0         |  |  |
|       |      | Shiraz-4T  | 261  | 0        | -0.336249 |  |  |
|       |      | Shiraz-16T | 295  | 0.591657 | 0         |  |  |
|       |      | Shiraz-36T | 433  | 0        | -0.803961 |  |  |
|       |      | Shiraz-44T | 899  | 0        | -1.09697  |  |  |
|       |      | Shiraz-44T | 900  | 0        | -0.584284 |  |  |
|       |      | Shiraz-49T | 1170 | 0        | -0.967436 |  |  |
|       |      | Shiraz-49T | 1171 | 0        | -0.612379 |  |  |
|       |      | Shiraz-77T | 1283 | 0.296555 | 0         |  |  |
|       |      | Shiraz-18T | 1457 | 0.643204 | 0         |  |  |
|       |      | Shiraz-22T | 1673 | 0.611783 | 0         |  |  |
|       |      | Shiraz-22T | 1674 | 0.887899 | 0         |  |  |
|       |      | Shiraz-25T | 1719 | 0.472955 | 0         |  |  |
|       |      | Shiraz-28T | 1762 | 0.562311 | 0         |  |  |
|       |      | Shiraz-29T | 1801 | 0.815343 | 0         |  |  |
|       |      | Shiraz-32T | 1870 | 0.729766 | 0         |  |  |
|       |      | Shiraz-35T | 1933 | 0.488535 | 0         |  |  |
|       |      | Shiraz-58T | 2223 | 0.833364 | 0         |  |  |
|       |      | Shiraz-58T | 2224 | 1.076575 | 0         |  |  |
|       |      | Shiraz-71T | 2263 | 0.975531 | 0         |  |  |
|       |      | Shiraz-4T  | 261  | 0        | -0.336249 |  |  |
|       |      | Shiraz-16T | 295  | 0.591657 | 0         |  |  |
|       |      | Shiraz-36T | 433  | 0        | -0.803961 |  |  |
|       |      | Shiraz-44T | 899  | 0        | -1.09697  |  |  |
|       |      | Shiraz-44T | 900  | 0        | -0.584284 |  |  |
|       |      | Shiraz-49T | 1170 | 0        | -0.967436 |  |  |
|       |      | Shiraz-49T | 1171 | 0        | -0.612379 |  |  |
|       |      | Shiraz-77T | 1283 | 0.296555 | 0         |  |  |
|       |      | Shiraz-18T | 1457 | 0.643204 | 0         |  |  |

|     |      |            |      |          |           |  |
|-----|------|------------|------|----------|-----------|--|
|     |      | Shiraz-22T | 1673 | 0.611783 | 0         |  |
|     |      | Shiraz-22T | 1674 | 0.887899 | 0         |  |
|     |      | Shiraz-25T | 1719 | 0.472955 | 0         |  |
|     |      | Shiraz-28T | 1762 | 0.562311 | 0         |  |
|     |      | Shiraz-29T | 1801 | 0.815343 | 0         |  |
|     |      | Shiraz-32T | 1870 | 0.729766 | 0         |  |
|     |      | Shiraz-35T | 1933 | 0.488535 | 0         |  |
|     |      | Shiraz-58T | 2223 | 0.833364 | 0         |  |
|     |      | Shiraz-58T | 2224 | 1.076575 | 0         |  |
|     |      | Shiraz-71T | 2263 | 0.975531 | 0         |  |
| RGN | chrX | Shiraz-4T  | 260  | 0        | -0.324128 |  |
|     |      | Shiraz-16T | 294  | 0.655804 | 0         |  |
|     |      | Shiraz-31T | 345  | 0.103301 | 0         |  |
|     |      | Shiraz-36T | 431  | 0        | -0.78035  |  |
|     |      | Shiraz-36T | 432  | 0        | -0.6692   |  |
|     |      | Shiraz-44T | 891  | 0        | -0.954044 |  |
|     |      | Shiraz-46T | 991  | 0.139564 | 0         |  |
|     |      | Shiraz-49T | 1166 | 0        | -0.917235 |  |
|     |      | Shiraz-77T | 1282 | 0.213849 | 0         |  |
|     |      | Shiraz-9T  | 1368 | 0.199713 | 0         |  |
|     |      | Shiraz-9T  | 1369 | 0.703374 | 0         |  |
|     |      | Shiraz-18T | 1455 | 0        | -0.186773 |  |
|     |      | Shiraz-22T | 1669 | 0.695915 | 0         |  |
|     |      | Shiraz-25T | 1717 | 0.420447 | 0         |  |
|     |      | Shiraz-28T | 1760 | 0.538181 | 0         |  |
|     |      | Shiraz-29T | 1800 | 0.672527 | 0         |  |
|     |      | Shiraz-32T | 1869 | 0.776805 | 0         |  |
|     |      | Shiraz-35T | 1932 | 0.507141 | 0         |  |
|     |      | Shiraz-40T | 2051 | 0.098506 | 0         |  |
|     |      | Shiraz-58T | 2221 | 0.871948 | 0         |  |
|     |      | Shiraz-71T | 2260 | 0.68394  | 0         |  |
|     |      | Shiraz-71T | 2262 | 0.986748 | 0         |  |
|     |      | Shiraz-4T  | 260  | 0        | -0.324128 |  |
|     |      | Shiraz-16T | 294  | 0.655804 | 0         |  |
|     |      | Shiraz-31T | 345  | 0.103301 | 0         |  |
|     |      | Shiraz-36T | 431  | 0        | -0.78035  |  |
|     |      | Shiraz-36T | 432  | 0        | -0.6692   |  |
|     |      | Shiraz-44T | 891  | 0        | -0.954044 |  |
|     |      | Shiraz-46T | 991  | 0.139564 | 0         |  |
|     |      | Shiraz-49T | 1166 | 0        | -0.917235 |  |
|     |      | Shiraz-77T | 1282 | 0.213849 | 0         |  |
|     |      | Shiraz-9T  | 1368 | 0.199713 | 0         |  |
|     |      | Shiraz-9T  | 1369 | 0.703374 | 0         |  |
|     |      | Shiraz-18T | 1455 | 0        | -0.186773 |  |
|     |      | Shiraz-22T | 1669 | 0.695915 | 0         |  |
|     |      | Shiraz-25T | 1717 | 0.420447 | 0         |  |
|     |      | Shiraz-28T | 1760 | 0.538181 | 0         |  |

|      |      |            |      |          |           |  |
|------|------|------------|------|----------|-----------|--|
|      |      | Shiraz-29T | 1800 | 0.672527 | 0         |  |
|      |      | Shiraz-32T | 1869 | 0.776805 | 0         |  |
|      |      | Shiraz-35T | 1932 | 0.507141 | 0         |  |
|      |      | Shiraz-40T | 2051 | 0.098506 | 0         |  |
|      |      | Shiraz-58T | 2221 | 0.871948 | 0         |  |
|      |      | Shiraz-71T | 2260 | 0.68394  | 0         |  |
|      |      | Shiraz-71T | 2262 | 0.986748 | 0         |  |
|      |      | Shiraz-4T  | 260  | 0        | -0.324128 |  |
|      |      | Shiraz-16T | 294  | 0.655804 | 0         |  |
|      |      | Shiraz-31T | 345  | 0.103301 | 0         |  |
|      |      | Shiraz-36T | 431  | 0        | -0.78035  |  |
|      |      | Shiraz-36T | 432  | 0        | -0.6692   |  |
|      |      | Shiraz-44T | 891  | 0        | -0.954044 |  |
|      |      | Shiraz-46T | 991  | 0.139564 | 0         |  |
|      |      | Shiraz-49T | 1166 | 0        | -0.917235 |  |
|      |      | Shiraz-77T | 1282 | 0.213849 | 0         |  |
|      |      | Shiraz-9T  | 1368 | 0.199713 | 0         |  |
|      |      | Shiraz-9T  | 1369 | 0.703374 | 0         |  |
|      |      | Shiraz-18T | 1455 | 0        | -0.186773 |  |
|      |      | Shiraz-22T | 1669 | 0.695915 | 0         |  |
|      |      | Shiraz-25T | 1717 | 0.420447 | 0         |  |
|      |      | Shiraz-28T | 1760 | 0.538181 | 0         |  |
|      |      | Shiraz-29T | 1800 | 0.672527 | 0         |  |
|      |      | Shiraz-32T | 1869 | 0.776805 | 0         |  |
|      |      | Shiraz-35T | 1932 | 0.507141 | 0         |  |
|      |      | Shiraz-40T | 2051 | 0.098506 | 0         |  |
|      |      | Shiraz-58T | 2221 | 0.871948 | 0         |  |
|      |      | Shiraz-71T | 2260 | 0.68394  | 0         |  |
|      |      | Shiraz-71T | 2262 | 0.986748 | 0         |  |
| RHEB | chr7 | Shiraz-3T  | 90   | 0.219276 | 0         |  |
|      |      | Shiraz-3T  | 99   | 0.454766 | 0         |  |
|      |      | Shiraz-4T  | 253  | 0.372918 | 0         |  |
|      |      | Shiraz-36T | 378  | 0.179558 | 0         |  |
|      |      | Shiraz-44T | 646  | 0.471276 | 0         |  |
|      |      | Shiraz-46T | 943  | 0.093799 | 0         |  |
|      |      | Shiraz-9T  | 1325 | 0.221899 | 0         |  |
|      |      | Shiraz-18T | 1434 | 0.244465 | 0         |  |
|      |      | Shiraz-22T | 1555 | 0.427999 | 0         |  |
|      |      | Shiraz-25T | 1698 | 0.21835  | 0         |  |
|      |      | Shiraz-28T | 1735 | 0.350744 | 0         |  |
|      |      | Shiraz-29T | 1778 | 0.120767 | 0         |  |
|      |      | Shiraz-32T | 1833 | 0.551336 | 0         |  |
|      |      | Shiraz-38T | 1951 | 0.250891 | 0         |  |
|      |      | Shiraz-53T | 2078 | 0.287202 | 0         |  |
|      |      | Shiraz-58T | 2162 | 0.221505 | 0         |  |
|      |      | Shiraz-71T | 2238 | 0.603631 | 0         |  |
|      |      | Shiraz-3T  | 90   | 0.219276 | 0         |  |

|        |      |            |      |          |           |  |  |
|--------|------|------------|------|----------|-----------|--|--|
|        |      | Shiraz-3T  | 99   | 0.454766 | 0         |  |  |
|        |      | Shiraz-4T  | 253  | 0.372918 | 0         |  |  |
|        |      | Shiraz-36T | 378  | 0.179558 | 0         |  |  |
|        |      | Shiraz-44T | 646  | 0.471276 | 0         |  |  |
|        |      | Shiraz-46T | 943  | 0.093799 | 0         |  |  |
|        |      | Shiraz-9T  | 1325 | 0.221899 | 0         |  |  |
|        |      | Shiraz-18T | 1434 | 0.244465 | 0         |  |  |
|        |      | Shiraz-22T | 1555 | 0.427999 | 0         |  |  |
|        |      | Shiraz-25T | 1698 | 0.21835  | 0         |  |  |
|        |      | Shiraz-28T | 1735 | 0.350744 | 0         |  |  |
|        |      | Shiraz-29T | 1778 | 0.120767 | 0         |  |  |
|        |      | Shiraz-32T | 1833 | 0.551336 | 0         |  |  |
|        |      | Shiraz-38T | 1951 | 0.250891 | 0         |  |  |
|        |      | Shiraz-53T | 2078 | 0.287202 | 0         |  |  |
|        |      | Shiraz-58T | 2162 | 0.221505 | 0         |  |  |
|        |      | Shiraz-71T | 2238 | 0.603631 | 0         |  |  |
|        |      | Shiraz-3T  | 90   | 0.219276 | 0         |  |  |
|        |      | Shiraz-3T  | 99   | 0.454766 | 0         |  |  |
|        |      | Shiraz-4T  | 253  | 0.372918 | 0         |  |  |
|        |      | Shiraz-36T | 378  | 0.179558 | 0         |  |  |
|        |      | Shiraz-44T | 646  | 0.471276 | 0         |  |  |
|        |      | Shiraz-46T | 943  | 0.093799 | 0         |  |  |
|        |      | Shiraz-9T  | 1325 | 0.221899 | 0         |  |  |
|        |      | Shiraz-18T | 1434 | 0.244465 | 0         |  |  |
|        |      | Shiraz-22T | 1555 | 0.427999 | 0         |  |  |
|        |      | Shiraz-25T | 1698 | 0.21835  | 0         |  |  |
|        |      | Shiraz-28T | 1735 | 0.350744 | 0         |  |  |
|        |      | Shiraz-29T | 1778 | 0.120767 | 0         |  |  |
|        |      | Shiraz-32T | 1833 | 0.551336 | 0         |  |  |
|        |      | Shiraz-38T | 1951 | 0.250891 | 0         |  |  |
|        |      | Shiraz-53T | 2078 | 0.287202 | 0         |  |  |
|        |      | Shiraz-58T | 2162 | 0.221505 | 0         |  |  |
|        |      | Shiraz-71T | 2238 | 0.603631 | 0         |  |  |
| RHOXF1 | chrX | Shiraz-3T  | 242  | 0        | -0.336434 |  |  |
|        |      | Shiraz-3T  | 244  | 0        | -0.023749 |  |  |
|        |      | Shiraz-4T  | 261  | 0        | -0.336249 |  |  |
|        |      | Shiraz-16T | 295  | 0.591657 | 0         |  |  |
|        |      | Shiraz-36T | 433  | 0        | -0.803961 |  |  |
|        |      | Shiraz-44T | 899  | 0        | -1.09697  |  |  |
|        |      | Shiraz-44T | 904  | 0        | -0.625526 |  |  |
|        |      | Shiraz-49T | 1170 | 0        | -0.967436 |  |  |
|        |      | Shiraz-9T  | 1370 | 0.690073 | 0         |  |  |
|        |      | Shiraz-18T | 1457 | 0.643204 | 0         |  |  |
|        |      | Shiraz-22T | 1673 | 0.611783 | 0         |  |  |
|        |      | Shiraz-25T | 1719 | 0.472955 | 0         |  |  |
|        |      | Shiraz-28T | 1762 | 0.562311 | 0         |  |  |
|        |      | Shiraz-29T | 1801 | 0.815343 | 0         |  |  |

|        |      |            |      |          |           |  |  |
|--------|------|------------|------|----------|-----------|--|--|
|        |      | Shiraz-32T | 1870 | 0.729766 | 0         |  |  |
|        |      | Shiraz-35T | 1933 | 0.488535 | 0         |  |  |
|        |      | Shiraz-58T | 2223 | 0.833364 | 0         |  |  |
|        |      | Shiraz-71T | 2263 | 0.975531 | 0         |  |  |
|        |      | Shiraz-3T  | 242  | 0        | -0.336434 |  |  |
|        |      | Shiraz-3T  | 244  | 0        | -0.023749 |  |  |
|        |      | Shiraz-4T  | 261  | 0        | -0.336249 |  |  |
|        |      | Shiraz-16T | 295  | 0.591657 | 0         |  |  |
|        |      | Shiraz-36T | 433  | 0        | -0.803961 |  |  |
|        |      | Shiraz-44T | 899  | 0        | -1.09697  |  |  |
|        |      | Shiraz-44T | 904  | 0        | -0.625526 |  |  |
|        |      | Shiraz-49T | 1170 | 0        | -0.967436 |  |  |
|        |      | Shiraz-9T  | 1370 | 0.690073 | 0         |  |  |
|        |      | Shiraz-18T | 1457 | 0.643204 | 0         |  |  |
|        |      | Shiraz-22T | 1673 | 0.611783 | 0         |  |  |
|        |      | Shiraz-25T | 1719 | 0.472955 | 0         |  |  |
|        |      | Shiraz-28T | 1762 | 0.562311 | 0         |  |  |
|        |      | Shiraz-29T | 1801 | 0.815343 | 0         |  |  |
|        |      | Shiraz-32T | 1870 | 0.729766 | 0         |  |  |
|        |      | Shiraz-35T | 1933 | 0.488535 | 0         |  |  |
|        |      | Shiraz-58T | 2223 | 0.833364 | 0         |  |  |
|        |      | Shiraz-71T | 2263 | 0.975531 | 0         |  |  |
|        |      | Shiraz-3T  | 242  | 0        | -0.336434 |  |  |
|        |      | Shiraz-3T  | 244  | 0        | -0.023749 |  |  |
|        |      | Shiraz-4T  | 261  | 0        | -0.336249 |  |  |
|        |      | Shiraz-16T | 295  | 0.591657 | 0         |  |  |
|        |      | Shiraz-36T | 433  | 0        | -0.803961 |  |  |
|        |      | Shiraz-44T | 899  | 0        | -1.09697  |  |  |
|        |      | Shiraz-44T | 904  | 0        | -0.625526 |  |  |
|        |      | Shiraz-49T | 1170 | 0        | -0.967436 |  |  |
|        |      | Shiraz-9T  | 1370 | 0.690073 | 0         |  |  |
|        |      | Shiraz-18T | 1457 | 0.643204 | 0         |  |  |
|        |      | Shiraz-22T | 1673 | 0.611783 | 0         |  |  |
|        |      | Shiraz-25T | 1719 | 0.472955 | 0         |  |  |
|        |      | Shiraz-28T | 1762 | 0.562311 | 0         |  |  |
|        |      | Shiraz-29T | 1801 | 0.815343 | 0         |  |  |
|        |      | Shiraz-32T | 1870 | 0.729766 | 0         |  |  |
|        |      | Shiraz-35T | 1933 | 0.488535 | 0         |  |  |
|        |      | Shiraz-58T | 2223 | 0.833364 | 0         |  |  |
|        |      | Shiraz-71T | 2263 | 0.975531 | 0         |  |  |
| RHOXF2 | chrX | Shiraz-3T  | 242  | 0        | -0.336434 |  |  |
|        |      | Shiraz-3T  | 242  | 0        | -0.336434 |  |  |
|        |      | Shiraz-3T  | 244  | 0        | -0.023749 |  |  |
|        |      | Shiraz-3T  | 244  | 0        | -0.023749 |  |  |
|        |      | Shiraz-4T  | 261  | 0        | -0.336249 |  |  |
|        |      | Shiraz-4T  | 261  | 0        | -0.336249 |  |  |
|        |      | Shiraz-16T | 295  | 0.591657 | 0         |  |  |

|  |  |            |      |          |           |  |  |
|--|--|------------|------|----------|-----------|--|--|
|  |  | Shiraz-16T | 295  | 0.591657 | 0         |  |  |
|  |  | Shiraz-36T | 433  | 0        | -0.803961 |  |  |
|  |  | Shiraz-36T | 433  | 0        | -0.803961 |  |  |
|  |  | Shiraz-44T | 899  | 0        | -1.09697  |  |  |
|  |  | Shiraz-44T | 899  | 0        | -1.09697  |  |  |
|  |  | Shiraz-44T | 904  | 0        | -0.625526 |  |  |
|  |  | Shiraz-44T | 904  | 0        | -0.625526 |  |  |
|  |  | Shiraz-49T | 1170 | 0        | -0.967436 |  |  |
|  |  | Shiraz-49T | 1170 | 0        | -0.967436 |  |  |
|  |  | Shiraz-9T  | 1370 | 0.690073 | 0         |  |  |
|  |  | Shiraz-9T  | 1370 | 0.690073 | 0         |  |  |
|  |  | Shiraz-18T | 1457 | 0.643204 | 0         |  |  |
|  |  | Shiraz-18T | 1457 | 0.643204 | 0         |  |  |
|  |  | Shiraz-22T | 1673 | 0.611783 | 0         |  |  |
|  |  | Shiraz-22T | 1673 | 0.611783 | 0         |  |  |
|  |  | Shiraz-25T | 1719 | 0.472955 | 0         |  |  |
|  |  | Shiraz-25T | 1719 | 0.472955 | 0         |  |  |
|  |  | Shiraz-28T | 1762 | 0.562311 | 0         |  |  |
|  |  | Shiraz-28T | 1762 | 0.562311 | 0         |  |  |
|  |  | Shiraz-29T | 1801 | 0.815343 | 0         |  |  |
|  |  | Shiraz-29T | 1801 | 0.815343 | 0         |  |  |
|  |  | Shiraz-32T | 1870 | 0.729766 | 0         |  |  |
|  |  | Shiraz-32T | 1870 | 0.729766 | 0         |  |  |
|  |  | Shiraz-35T | 1933 | 0.488535 | 0         |  |  |
|  |  | Shiraz-35T | 1933 | 0.488535 | 0         |  |  |
|  |  | Shiraz-58T | 2223 | 0.833364 | 0         |  |  |
|  |  | Shiraz-58T | 2223 | 0.833364 | 0         |  |  |
|  |  | Shiraz-71T | 2263 | 0.975531 | 0         |  |  |
|  |  | Shiraz-71T | 2263 | 0.975531 | 0         |  |  |
|  |  | Shiraz-3T  | 242  | 0        | -0.336434 |  |  |
|  |  | Shiraz-3T  | 242  | 0        | -0.336434 |  |  |
|  |  | Shiraz-3T  | 244  | 0        | -0.023749 |  |  |
|  |  | Shiraz-3T  | 244  | 0        | -0.023749 |  |  |
|  |  | Shiraz-4T  | 261  | 0        | -0.336249 |  |  |
|  |  | Shiraz-4T  | 261  | 0        | -0.336249 |  |  |
|  |  | Shiraz-16T | 295  | 0.591657 | 0         |  |  |
|  |  | Shiraz-16T | 295  | 0.591657 | 0         |  |  |
|  |  | Shiraz-36T | 433  | 0        | -0.803961 |  |  |
|  |  | Shiraz-36T | 433  | 0        | -0.803961 |  |  |
|  |  | Shiraz-44T | 899  | 0        | -1.09697  |  |  |
|  |  | Shiraz-44T | 899  | 0        | -1.09697  |  |  |
|  |  | Shiraz-44T | 904  | 0        | -0.625526 |  |  |
|  |  | Shiraz-44T | 904  | 0        | -0.625526 |  |  |
|  |  | Shiraz-49T | 1170 | 0        | -0.967436 |  |  |
|  |  | Shiraz-49T | 1170 | 0        | -0.967436 |  |  |
|  |  | Shiraz-9T  | 1370 | 0.690073 | 0         |  |  |
|  |  | Shiraz-9T  | 1370 | 0.690073 | 0         |  |  |



|  |  |            |      |          |           |  |  |
|--|--|------------|------|----------|-----------|--|--|
|  |  | Shiraz-18T | 1457 | 0.643204 | 0         |  |  |
|  |  | Shiraz-18T | 1457 | 0.643204 | 0         |  |  |
|  |  | Shiraz-22T | 1673 | 0.611783 | 0         |  |  |
|  |  | Shiraz-22T | 1673 | 0.611783 | 0         |  |  |
|  |  | Shiraz-25T | 1719 | 0.472955 | 0         |  |  |
|  |  | Shiraz-25T | 1719 | 0.472955 | 0         |  |  |
|  |  | Shiraz-28T | 1762 | 0.562311 | 0         |  |  |
|  |  | Shiraz-28T | 1762 | 0.562311 | 0         |  |  |
|  |  | Shiraz-29T | 1801 | 0.815343 | 0         |  |  |
|  |  | Shiraz-29T | 1801 | 0.815343 | 0         |  |  |
|  |  | Shiraz-32T | 1870 | 0.729766 | 0         |  |  |
|  |  | Shiraz-32T | 1870 | 0.729766 | 0         |  |  |
|  |  | Shiraz-35T | 1933 | 0.488535 | 0         |  |  |
|  |  | Shiraz-35T | 1933 | 0.488535 | 0         |  |  |
|  |  | Shiraz-58T | 2223 | 0.833364 | 0         |  |  |
|  |  | Shiraz-58T | 2223 | 0.833364 | 0         |  |  |
|  |  | Shiraz-71T | 2263 | 0.975531 | 0         |  |  |
|  |  | Shiraz-71T | 2263 | 0.975531 | 0         |  |  |
|  |  | Shiraz-3T  | 242  | 0        | -0.336434 |  |  |
|  |  | Shiraz-3T  | 242  | 0        | -0.336434 |  |  |
|  |  | Shiraz-3T  | 244  | 0        | -0.023749 |  |  |
|  |  | Shiraz-3T  | 244  | 0        | -0.023749 |  |  |
|  |  | Shiraz-4T  | 261  | 0        | -0.336249 |  |  |
|  |  | Shiraz-4T  | 261  | 0        | -0.336249 |  |  |
|  |  | Shiraz-16T | 295  | 0.591657 | 0         |  |  |
|  |  | Shiraz-16T | 295  | 0.591657 | 0         |  |  |
|  |  | Shiraz-36T | 433  | 0        | -0.803961 |  |  |
|  |  | Shiraz-36T | 433  | 0        | -0.803961 |  |  |
|  |  | Shiraz-44T | 899  | 0        | -1.09697  |  |  |
|  |  | Shiraz-44T | 899  | 0        | -1.09697  |  |  |
|  |  | Shiraz-44T | 904  | 0        | -0.625526 |  |  |
|  |  | Shiraz-44T | 904  | 0        | -0.625526 |  |  |
|  |  | Shiraz-49T | 1170 | 0        | -0.967436 |  |  |
|  |  | Shiraz-49T | 1170 | 0        | -0.967436 |  |  |
|  |  | Shiraz-9T  | 1370 | 0.690073 | 0         |  |  |
|  |  | Shiraz-9T  | 1370 | 0.690073 | 0         |  |  |
|  |  | Shiraz-18T | 1457 | 0.643204 | 0         |  |  |
|  |  | Shiraz-18T | 1457 | 0.643204 | 0         |  |  |
|  |  | Shiraz-22T | 1673 | 0.611783 | 0         |  |  |
|  |  | Shiraz-22T | 1673 | 0.611783 | 0         |  |  |
|  |  | Shiraz-25T | 1719 | 0.472955 | 0         |  |  |
|  |  | Shiraz-25T | 1719 | 0.472955 | 0         |  |  |
|  |  | Shiraz-28T | 1762 | 0.562311 | 0         |  |  |
|  |  | Shiraz-28T | 1762 | 0.562311 | 0         |  |  |
|  |  | Shiraz-29T | 1801 | 0.815343 | 0         |  |  |
|  |  | Shiraz-29T | 1801 | 0.815343 | 0         |  |  |
|  |  | Shiraz-32T | 1870 | 0.729766 | 0         |  |  |

|         |      |            |      |          |           |  |
|---------|------|------------|------|----------|-----------|--|
|         |      | Shiraz-32T | 1870 | 0.729766 | 0         |  |
|         |      | Shiraz-35T | 1933 | 0.488535 | 0         |  |
|         |      | Shiraz-35T | 1933 | 0.488535 | 0         |  |
|         |      | Shiraz-58T | 2223 | 0.833364 | 0         |  |
|         |      | Shiraz-58T | 2223 | 0.833364 | 0         |  |
|         |      | Shiraz-71T | 2263 | 0.975531 | 0         |  |
|         |      | Shiraz-71T | 2263 | 0.975531 | 0         |  |
| RHOXF2B | chrX | Shiraz-3T  | 242  | 0        | -0.336434 |  |
|         |      | Shiraz-3T  | 242  | 0        | -0.336434 |  |
|         |      | Shiraz-3T  | 244  | 0        | -0.023749 |  |
|         |      | Shiraz-3T  | 244  | 0        | -0.023749 |  |
|         |      | Shiraz-4T  | 261  | 0        | -0.336249 |  |
|         |      | Shiraz-4T  | 261  | 0        | -0.336249 |  |
|         |      | Shiraz-16T | 295  | 0.591657 | 0         |  |
|         |      | Shiraz-16T | 295  | 0.591657 | 0         |  |
|         |      | Shiraz-36T | 433  | 0        | -0.803961 |  |
|         |      | Shiraz-36T | 433  | 0        | -0.803961 |  |
|         |      | Shiraz-44T | 899  | 0        | -1.09697  |  |
|         |      | Shiraz-44T | 899  | 0        | -1.09697  |  |
|         |      | Shiraz-44T | 904  | 0        | -0.625526 |  |
|         |      | Shiraz-44T | 904  | 0        | -0.625526 |  |
|         |      | Shiraz-49T | 1170 | 0        | -0.967436 |  |
|         |      | Shiraz-49T | 1170 | 0        | -0.967436 |  |
|         |      | Shiraz-9T  | 1370 | 0.690073 | 0         |  |
|         |      | Shiraz-9T  | 1370 | 0.690073 | 0         |  |
|         |      | Shiraz-18T | 1457 | 0.643204 | 0         |  |
|         |      | Shiraz-18T | 1457 | 0.643204 | 0         |  |
|         |      | Shiraz-22T | 1673 | 0.611783 | 0         |  |
|         |      | Shiraz-22T | 1673 | 0.611783 | 0         |  |
|         |      | Shiraz-25T | 1719 | 0.472955 | 0         |  |
|         |      | Shiraz-25T | 1719 | 0.472955 | 0         |  |
|         |      | Shiraz-28T | 1762 | 0.562311 | 0         |  |
|         |      | Shiraz-28T | 1762 | 0.562311 | 0         |  |
|         |      | Shiraz-29T | 1801 | 0.815343 | 0         |  |
|         |      | Shiraz-29T | 1801 | 0.815343 | 0         |  |
|         |      | Shiraz-32T | 1870 | 0.729766 | 0         |  |
|         |      | Shiraz-32T | 1870 | 0.729766 | 0         |  |
|         |      | Shiraz-35T | 1933 | 0.488535 | 0         |  |
|         |      | Shiraz-35T | 1933 | 0.488535 | 0         |  |
|         |      | Shiraz-58T | 2223 | 0.833364 | 0         |  |
|         |      | Shiraz-58T | 2223 | 0.833364 | 0         |  |
|         |      | Shiraz-71T | 2263 | 0.975531 | 0         |  |
|         |      | Shiraz-71T | 2263 | 0.975531 | 0         |  |
|         |      | Shiraz-3T  | 242  | 0        | -0.336434 |  |
|         |      | Shiraz-3T  | 242  | 0        | -0.336434 |  |
|         |      | Shiraz-3T  | 244  | 0        | -0.023749 |  |
|         |      | Shiraz-3T  | 244  | 0        | -0.023749 |  |

|  |            |      |          |           |  |
|--|------------|------|----------|-----------|--|
|  | Shiraz-4T  | 261  | 0        | -0.336249 |  |
|  | Shiraz-4T  | 261  | 0        | -0.336249 |  |
|  | Shiraz-16T | 295  | 0.591657 | 0         |  |
|  | Shiraz-16T | 295  | 0.591657 | 0         |  |
|  | Shiraz-36T | 433  | 0        | -0.803961 |  |
|  | Shiraz-36T | 433  | 0        | -0.803961 |  |
|  | Shiraz-44T | 899  | 0        | -1.09697  |  |
|  | Shiraz-44T | 899  | 0        | -1.09697  |  |
|  | Shiraz-44T | 904  | 0        | -0.625526 |  |
|  | Shiraz-44T | 904  | 0        | -0.625526 |  |
|  | Shiraz-49T | 1170 | 0        | -0.967436 |  |
|  | Shiraz-49T | 1170 | 0        | -0.967436 |  |
|  | Shiraz-9T  | 1370 | 0.690073 | 0         |  |
|  | Shiraz-9T  | 1370 | 0.690073 | 0         |  |
|  | Shiraz-18T | 1457 | 0.643204 | 0         |  |
|  | Shiraz-18T | 1457 | 0.643204 | 0         |  |
|  | Shiraz-22T | 1673 | 0.611783 | 0         |  |
|  | Shiraz-22T | 1673 | 0.611783 | 0         |  |
|  | Shiraz-25T | 1719 | 0.472955 | 0         |  |
|  | Shiraz-25T | 1719 | 0.472955 | 0         |  |
|  | Shiraz-28T | 1762 | 0.562311 | 0         |  |
|  | Shiraz-28T | 1762 | 0.562311 | 0         |  |
|  | Shiraz-29T | 1801 | 0.815343 | 0         |  |
|  | Shiraz-29T | 1801 | 0.815343 | 0         |  |
|  | Shiraz-32T | 1870 | 0.729766 | 0         |  |
|  | Shiraz-32T | 1870 | 0.729766 | 0         |  |
|  | Shiraz-35T | 1933 | 0.488535 | 0         |  |
|  | Shiraz-35T | 1933 | 0.488535 | 0         |  |
|  | Shiraz-58T | 2223 | 0.833364 | 0         |  |
|  | Shiraz-58T | 2223 | 0.833364 | 0         |  |
|  | Shiraz-71T | 2263 | 0.975531 | 0         |  |
|  | Shiraz-71T | 2263 | 0.975531 | 0         |  |
|  | Shiraz-3T  | 242  | 0        | -0.336434 |  |
|  | Shiraz-3T  | 242  | 0        | -0.336434 |  |
|  | Shiraz-3T  | 244  | 0        | -0.023749 |  |
|  | Shiraz-3T  | 244  | 0        | -0.023749 |  |
|  | Shiraz-4T  | 261  | 0        | -0.336249 |  |
|  | Shiraz-4T  | 261  | 0        | -0.336249 |  |
|  | Shiraz-16T | 295  | 0.591657 | 0         |  |
|  | Shiraz-16T | 295  | 0.591657 | 0         |  |
|  | Shiraz-36T | 433  | 0        | -0.803961 |  |
|  | Shiraz-36T | 433  | 0        | -0.803961 |  |
|  | Shiraz-44T | 899  | 0        | -1.09697  |  |
|  | Shiraz-44T | 899  | 0        | -1.09697  |  |
|  | Shiraz-44T | 904  | 0        | -0.625526 |  |
|  | Shiraz-44T | 904  | 0        | -0.625526 |  |
|  | Shiraz-49T | 1170 | 0        | -0.967436 |  |

|       |      |            |      |          |           |  |  |
|-------|------|------------|------|----------|-----------|--|--|
|       |      | Shiraz-49T | 1170 | 0        | -0.967436 |  |  |
|       |      | Shiraz-9T  | 1370 | 0.690073 | 0         |  |  |
|       |      | Shiraz-9T  | 1370 | 0.690073 | 0         |  |  |
|       |      | Shiraz-18T | 1457 | 0.643204 | 0         |  |  |
|       |      | Shiraz-18T | 1457 | 0.643204 | 0         |  |  |
|       |      | Shiraz-22T | 1673 | 0.611783 | 0         |  |  |
|       |      | Shiraz-22T | 1673 | 0.611783 | 0         |  |  |
|       |      | Shiraz-25T | 1719 | 0.472955 | 0         |  |  |
|       |      | Shiraz-25T | 1719 | 0.472955 | 0         |  |  |
|       |      | Shiraz-28T | 1762 | 0.562311 | 0         |  |  |
|       |      | Shiraz-28T | 1762 | 0.562311 | 0         |  |  |
|       |      | Shiraz-29T | 1801 | 0.815343 | 0         |  |  |
|       |      | Shiraz-29T | 1801 | 0.815343 | 0         |  |  |
|       |      | Shiraz-32T | 1870 | 0.729766 | 0         |  |  |
|       |      | Shiraz-32T | 1870 | 0.729766 | 0         |  |  |
|       |      | Shiraz-35T | 1933 | 0.488535 | 0         |  |  |
|       |      | Shiraz-35T | 1933 | 0.488535 | 0         |  |  |
|       |      | Shiraz-58T | 2223 | 0.833364 | 0         |  |  |
|       |      | Shiraz-58T | 2223 | 0.833364 | 0         |  |  |
|       |      | Shiraz-71T | 2263 | 0.975531 | 0         |  |  |
|       |      | Shiraz-71T | 2263 | 0.975531 | 0         |  |  |
| RIBC1 | chrX | Shiraz-4T  | 260  | 0        | -0.324128 |  |  |
|       |      | Shiraz-4T  | 260  | 0        | -0.324128 |  |  |
|       |      | Shiraz-16T | 294  | 0.655804 | 0         |  |  |
|       |      | Shiraz-16T | 294  | 0.655804 | 0         |  |  |
|       |      | Shiraz-31T | 345  | 0.103301 | 0         |  |  |
|       |      | Shiraz-31T | 345  | 0.103301 | 0         |  |  |
|       |      | Shiraz-36T | 431  | 0        | -0.78035  |  |  |
|       |      | Shiraz-36T | 431  | 0        | -0.78035  |  |  |
|       |      | Shiraz-36T | 432  | 0        | -0.6692   |  |  |
|       |      | Shiraz-36T | 432  | 0        | -0.6692   |  |  |
|       |      | Shiraz-44T | 891  | 0        | -0.954044 |  |  |
|       |      | Shiraz-44T | 891  | 0        | -0.954044 |  |  |
|       |      | Shiraz-44T | 898  | 0        | -0.515218 |  |  |
|       |      | Shiraz-44T | 898  | 0        | -0.515218 |  |  |
|       |      | Shiraz-49T | 1166 | 0        | -0.917235 |  |  |
|       |      | Shiraz-49T | 1166 | 0        | -0.917235 |  |  |
|       |      | Shiraz-77T | 1282 | 0.213849 | 0         |  |  |
|       |      | Shiraz-77T | 1282 | 0.213849 | 0         |  |  |
|       |      | Shiraz-9T  | 1368 | 0.199713 | 0         |  |  |
|       |      | Shiraz-9T  | 1368 | 0.199713 | 0         |  |  |
|       |      | Shiraz-18T | 1456 | 0.608534 | 0         |  |  |
|       |      | Shiraz-18T | 1456 | 0.608534 | 0         |  |  |
|       |      | Shiraz-22T | 1669 | 0.695915 | 0         |  |  |
|       |      | Shiraz-22T | 1669 | 0.695915 | 0         |  |  |
|       |      | Shiraz-25T | 1717 | 0.420447 | 0         |  |  |
|       |      | Shiraz-25T | 1717 | 0.420447 | 0         |  |  |

|  |  |            |      |          |           |  |  |
|--|--|------------|------|----------|-----------|--|--|
|  |  | Shiraz-28T | 1760 | 0.538181 | 0         |  |  |
|  |  | Shiraz-28T | 1760 | 0.538181 | 0         |  |  |
|  |  | Shiraz-29T | 1800 | 0.672527 | 0         |  |  |
|  |  | Shiraz-29T | 1800 | 0.672527 | 0         |  |  |
|  |  | Shiraz-32T | 1869 | 0.776805 | 0         |  |  |
|  |  | Shiraz-32T | 1869 | 0.776805 | 0         |  |  |
|  |  | Shiraz-35T | 1932 | 0.507141 | 0         |  |  |
|  |  | Shiraz-35T | 1932 | 0.507141 | 0         |  |  |
|  |  | Shiraz-58T | 2221 | 0.871948 | 0         |  |  |
|  |  | Shiraz-58T | 2221 | 0.871948 | 0         |  |  |
|  |  | Shiraz-71T | 2260 | 0.68394  | 0         |  |  |
|  |  | Shiraz-71T | 2260 | 0.68394  | 0         |  |  |
|  |  | Shiraz-71T | 2262 | 0.986748 | 0         |  |  |
|  |  | Shiraz-71T | 2262 | 0.986748 | 0         |  |  |
|  |  | Shiraz-4T  | 260  | 0        | -0.324128 |  |  |
|  |  | Shiraz-4T  | 260  | 0        | -0.324128 |  |  |
|  |  | Shiraz-16T | 294  | 0.655804 | 0         |  |  |
|  |  | Shiraz-16T | 294  | 0.655804 | 0         |  |  |
|  |  | Shiraz-31T | 345  | 0.103301 | 0         |  |  |
|  |  | Shiraz-31T | 345  | 0.103301 | 0         |  |  |
|  |  | Shiraz-36T | 431  | 0        | -0.78035  |  |  |
|  |  | Shiraz-36T | 431  | 0        | -0.78035  |  |  |
|  |  | Shiraz-36T | 432  | 0        | -0.6692   |  |  |
|  |  | Shiraz-36T | 432  | 0        | -0.6692   |  |  |
|  |  | Shiraz-44T | 891  | 0        | -0.954044 |  |  |
|  |  | Shiraz-44T | 891  | 0        | -0.954044 |  |  |
|  |  | Shiraz-44T | 898  | 0        | -0.515218 |  |  |
|  |  | Shiraz-44T | 898  | 0        | -0.515218 |  |  |
|  |  | Shiraz-49T | 1166 | 0        | -0.917235 |  |  |
|  |  | Shiraz-49T | 1166 | 0        | -0.917235 |  |  |
|  |  | Shiraz-77T | 1282 | 0.213849 | 0         |  |  |
|  |  | Shiraz-77T | 1282 | 0.213849 | 0         |  |  |
|  |  | Shiraz-9T  | 1368 | 0.199713 | 0         |  |  |
|  |  | Shiraz-9T  | 1368 | 0.199713 | 0         |  |  |
|  |  | Shiraz-18T | 1456 | 0.608534 | 0         |  |  |
|  |  | Shiraz-18T | 1456 | 0.608534 | 0         |  |  |
|  |  | Shiraz-22T | 1669 | 0.695915 | 0         |  |  |
|  |  | Shiraz-22T | 1669 | 0.695915 | 0         |  |  |
|  |  | Shiraz-25T | 1717 | 0.420447 | 0         |  |  |
|  |  | Shiraz-25T | 1717 | 0.420447 | 0         |  |  |
|  |  | Shiraz-28T | 1760 | 0.538181 | 0         |  |  |
|  |  | Shiraz-28T | 1760 | 0.538181 | 0         |  |  |
|  |  | Shiraz-29T | 1800 | 0.672527 | 0         |  |  |
|  |  | Shiraz-29T | 1800 | 0.672527 | 0         |  |  |
|  |  | Shiraz-32T | 1869 | 0.776805 | 0         |  |  |
|  |  | Shiraz-32T | 1869 | 0.776805 | 0         |  |  |
|  |  | Shiraz-35T | 1932 | 0.507141 | 0         |  |  |

|  |            |      |          |           |  |
|--|------------|------|----------|-----------|--|
|  | Shiraz-35T | 1932 | 0.507141 | 0         |  |
|  | Shiraz-58T | 2221 | 0.871948 | 0         |  |
|  | Shiraz-58T | 2221 | 0.871948 | 0         |  |
|  | Shiraz-71T | 2260 | 0.68394  | 0         |  |
|  | Shiraz-71T | 2260 | 0.68394  | 0         |  |
|  | Shiraz-71T | 2262 | 0.986748 | 0         |  |
|  | Shiraz-71T | 2262 | 0.986748 | 0         |  |
|  | Shiraz-4T  | 260  | 0        | -0.324128 |  |
|  | Shiraz-4T  | 260  | 0        | -0.324128 |  |
|  | Shiraz-16T | 294  | 0.655804 | 0         |  |
|  | Shiraz-16T | 294  | 0.655804 | 0         |  |
|  | Shiraz-31T | 345  | 0.103301 | 0         |  |
|  | Shiraz-31T | 345  | 0.103301 | 0         |  |
|  | Shiraz-36T | 431  | 0        | -0.78035  |  |
|  | Shiraz-36T | 431  | 0        | -0.78035  |  |
|  | Shiraz-36T | 432  | 0        | -0.6692   |  |
|  | Shiraz-36T | 432  | 0        | -0.6692   |  |
|  | Shiraz-44T | 891  | 0        | -0.954044 |  |
|  | Shiraz-44T | 891  | 0        | -0.954044 |  |
|  | Shiraz-44T | 898  | 0        | -0.515218 |  |
|  | Shiraz-44T | 898  | 0        | -0.515218 |  |
|  | Shiraz-49T | 1166 | 0        | -0.917235 |  |
|  | Shiraz-49T | 1166 | 0        | -0.917235 |  |
|  | Shiraz-77T | 1282 | 0.213849 | 0         |  |
|  | Shiraz-77T | 1282 | 0.213849 | 0         |  |
|  | Shiraz-9T  | 1368 | 0.199713 | 0         |  |
|  | Shiraz-9T  | 1368 | 0.199713 | 0         |  |
|  | Shiraz-18T | 1456 | 0.608534 | 0         |  |
|  | Shiraz-18T | 1456 | 0.608534 | 0         |  |
|  | Shiraz-22T | 1669 | 0.695915 | 0         |  |
|  | Shiraz-22T | 1669 | 0.695915 | 0         |  |
|  | Shiraz-25T | 1717 | 0.420447 | 0         |  |
|  | Shiraz-25T | 1717 | 0.420447 | 0         |  |
|  | Shiraz-28T | 1760 | 0.538181 | 0         |  |
|  | Shiraz-28T | 1760 | 0.538181 | 0         |  |
|  | Shiraz-29T | 1800 | 0.672527 | 0         |  |
|  | Shiraz-29T | 1800 | 0.672527 | 0         |  |
|  | Shiraz-32T | 1869 | 0.776805 | 0         |  |
|  | Shiraz-32T | 1869 | 0.776805 | 0         |  |
|  | Shiraz-35T | 1932 | 0.507141 | 0         |  |
|  | Shiraz-35T | 1932 | 0.507141 | 0         |  |
|  | Shiraz-58T | 2221 | 0.871948 | 0         |  |
|  | Shiraz-58T | 2221 | 0.871948 | 0         |  |
|  | Shiraz-71T | 2260 | 0.68394  | 0         |  |
|  | Shiraz-71T | 2260 | 0.68394  | 0         |  |
|  | Shiraz-71T | 2262 | 0.986748 | 0         |  |
|  | Shiraz-71T | 2262 | 0.986748 | 0         |  |

|        |      |            |      |          |           |  |
|--------|------|------------|------|----------|-----------|--|
| RICTOR | chr5 | Shiraz-4T  | 250  | 0.262252 | 0         |  |
|        |      | Shiraz-16T | 266  | 0.321724 | 0         |  |
|        |      | Shiraz-44T | 591  | 0        | -0.233934 |  |
|        |      | Shiraz-18T | 1429 | 0        | -0.314125 |  |
|        |      | Shiraz-22T | 1522 | 0        | -0.322688 |  |
|        |      | Shiraz-25T | 1694 | 0.201602 | 0         |  |
|        |      | Shiraz-28T | 1731 | 0.295447 | 0         |  |
|        |      | Shiraz-29T | 1773 | 0.090981 | 0         |  |
|        |      | Shiraz-40T | 2016 | 0.376634 | 0         |  |
|        |      | Shiraz-4T  | 250  | 0.262252 | 0         |  |
|        |      | Shiraz-16T | 266  | 0.321724 | 0         |  |
|        |      | Shiraz-44T | 591  | 0        | -0.233934 |  |
|        |      | Shiraz-18T | 1429 | 0        | -0.314125 |  |
|        |      | Shiraz-22T | 1522 | 0        | -0.322688 |  |
|        |      | Shiraz-25T | 1694 | 0.201602 | 0         |  |
|        |      | Shiraz-28T | 1731 | 0.295447 | 0         |  |
|        |      | Shiraz-29T | 1773 | 0.090981 | 0         |  |
|        |      | Shiraz-40T | 2016 | 0.376634 | 0         |  |
|        |      | Shiraz-4T  | 250  | 0.262252 | 0         |  |
|        |      | Shiraz-16T | 266  | 0.321724 | 0         |  |
|        |      | Shiraz-44T | 591  | 0        | -0.233934 |  |
|        |      | Shiraz-18T | 1429 | 0        | -0.314125 |  |
|        |      | Shiraz-22T | 1522 | 0        | -0.322688 |  |
|        |      | Shiraz-25T | 1694 | 0.201602 | 0         |  |
|        |      | Shiraz-28T | 1731 | 0.295447 | 0         |  |
|        |      | Shiraz-29T | 1773 | 0.090981 | 0         |  |
|        |      | Shiraz-40T | 2016 | 0.376634 | 0         |  |
| RINT1  | chr7 | Shiraz-3T  | 90   | 0.219276 | 0         |  |
|        |      | Shiraz-4T  | 253  | 0.372918 | 0         |  |
|        |      | Shiraz-36T | 378  | 0.179558 | 0         |  |
|        |      | Shiraz-46T | 943  | 0.093799 | 0         |  |
|        |      | Shiraz-77T | 1225 | 0        | -0.117922 |  |
|        |      | Shiraz-18T | 1434 | 0.244465 | 0         |  |
|        |      | Shiraz-22T | 1549 | 0        | -0.319623 |  |
|        |      | Shiraz-25T | 1698 | 0.21835  | 0         |  |
|        |      | Shiraz-28T | 1735 | 0.350744 | 0         |  |
|        |      | Shiraz-29T | 1778 | 0.120767 | 0         |  |
|        |      | Shiraz-32T | 1833 | 0.551336 | 0         |  |
|        |      | Shiraz-38T | 1951 | 0.250891 | 0         |  |
|        |      | Shiraz-53T | 2078 | 0.287202 | 0         |  |
|        |      | Shiraz-71T | 2238 | 0.603631 | 0         |  |
|        |      | Shiraz-3T  | 90   | 0.219276 | 0         |  |
|        |      | Shiraz-4T  | 253  | 0.372918 | 0         |  |
|        |      | Shiraz-36T | 378  | 0.179558 | 0         |  |
|        |      | Shiraz-46T | 943  | 0.093799 | 0         |  |
|        |      | Shiraz-77T | 1225 | 0        | -0.117922 |  |
|        |      | Shiraz-18T | 1434 | 0.244465 | 0         |  |

|         |      |            |      |          |           |  |  |
|---------|------|------------|------|----------|-----------|--|--|
|         |      | Shiraz-22T | 1549 | 0        | -0.319623 |  |  |
|         |      | Shiraz-25T | 1698 | 0.21835  | 0         |  |  |
|         |      | Shiraz-28T | 1735 | 0.350744 | 0         |  |  |
|         |      | Shiraz-29T | 1778 | 0.120767 | 0         |  |  |
|         |      | Shiraz-32T | 1833 | 0.551336 | 0         |  |  |
|         |      | Shiraz-38T | 1951 | 0.250891 | 0         |  |  |
|         |      | Shiraz-53T | 2078 | 0.287202 | 0         |  |  |
|         |      | Shiraz-71T | 2238 | 0.603631 | 0         |  |  |
|         |      | Shiraz-3T  | 90   | 0.219276 | 0         |  |  |
|         |      | Shiraz-4T  | 253  | 0.372918 | 0         |  |  |
|         |      | Shiraz-36T | 378  | 0.179558 | 0         |  |  |
|         |      | Shiraz-46T | 943  | 0.093799 | 0         |  |  |
|         |      | Shiraz-77T | 1225 | 0        | -0.117922 |  |  |
|         |      | Shiraz-18T | 1434 | 0.244465 | 0         |  |  |
|         |      | Shiraz-22T | 1549 | 0        | -0.319623 |  |  |
|         |      | Shiraz-25T | 1698 | 0.21835  | 0         |  |  |
|         |      | Shiraz-28T | 1735 | 0.350744 | 0         |  |  |
|         |      | Shiraz-29T | 1778 | 0.120767 | 0         |  |  |
|         |      | Shiraz-32T | 1833 | 0.551336 | 0         |  |  |
|         |      | Shiraz-38T | 1951 | 0.250891 | 0         |  |  |
|         |      | Shiraz-53T | 2078 | 0.287202 | 0         |  |  |
|         |      | Shiraz-71T | 2238 | 0.603631 | 0         |  |  |
| RIPPLY1 | chrX | Shiraz-3T  | 242  | 0        | -0.336434 |  |  |
|         |      | Shiraz-4T  | 261  | 0        | -0.336249 |  |  |
|         |      | Shiraz-16T | 295  | 0.591657 | 0         |  |  |
|         |      | Shiraz-36T | 433  | 0        | -0.803961 |  |  |
|         |      | Shiraz-44T | 899  | 0        | -1.09697  |  |  |
|         |      | Shiraz-49T | 1170 | 0        | -0.967436 |  |  |
|         |      | Shiraz-18T | 1457 | 0.643204 | 0         |  |  |
|         |      | Shiraz-22T | 1673 | 0.611783 | 0         |  |  |
|         |      | Shiraz-25T | 1719 | 0.472955 | 0         |  |  |
|         |      | Shiraz-28T | 1762 | 0.562311 | 0         |  |  |
|         |      | Shiraz-29T | 1801 | 0.815343 | 0         |  |  |
|         |      | Shiraz-32T | 1870 | 0.729766 | 0         |  |  |
|         |      | Shiraz-35T | 1933 | 0.488535 | 0         |  |  |
|         |      | Shiraz-58T | 2223 | 0.833364 | 0         |  |  |
|         |      | Shiraz-71T | 2263 | 0.975531 | 0         |  |  |
|         |      | Shiraz-3T  | 242  | 0        | -0.336434 |  |  |
|         |      | Shiraz-4T  | 261  | 0        | -0.336249 |  |  |
|         |      | Shiraz-16T | 295  | 0.591657 | 0         |  |  |
|         |      | Shiraz-36T | 433  | 0        | -0.803961 |  |  |
|         |      | Shiraz-44T | 899  | 0        | -1.09697  |  |  |
|         |      | Shiraz-49T | 1170 | 0        | -0.967436 |  |  |
|         |      | Shiraz-18T | 1457 | 0.643204 | 0         |  |  |
|         |      | Shiraz-22T | 1673 | 0.611783 | 0         |  |  |
|         |      | Shiraz-25T | 1719 | 0.472955 | 0         |  |  |
|         |      | Shiraz-28T | 1762 | 0.562311 | 0         |  |  |



|      |      |            |      |          |           |  |  |
|------|------|------------|------|----------|-----------|--|--|
|      |      | Shiraz-29T | 1801 | 0.815343 | 0         |  |  |
|      |      | Shiraz-32T | 1870 | 0.729766 | 0         |  |  |
|      |      | Shiraz-35T | 1933 | 0.488535 | 0         |  |  |
|      |      | Shiraz-58T | 2223 | 0.833364 | 0         |  |  |
|      |      | Shiraz-71T | 2263 | 0.975531 | 0         |  |  |
|      |      | Shiraz-3T  | 242  | 0        | -0.336434 |  |  |
|      |      | Shiraz-4T  | 261  | 0        | -0.336249 |  |  |
|      |      | Shiraz-16T | 295  | 0.591657 | 0         |  |  |
|      |      | Shiraz-36T | 433  | 0        | -0.803961 |  |  |
|      |      | Shiraz-44T | 899  | 0        | -1.09697  |  |  |
|      |      | Shiraz-49T | 1170 | 0        | -0.967436 |  |  |
|      |      | Shiraz-18T | 1457 | 0.643204 | 0         |  |  |
|      |      | Shiraz-22T | 1673 | 0.611783 | 0         |  |  |
|      |      | Shiraz-25T | 1719 | 0.472955 | 0         |  |  |
|      |      | Shiraz-28T | 1762 | 0.562311 | 0         |  |  |
|      |      | Shiraz-29T | 1801 | 0.815343 | 0         |  |  |
|      |      | Shiraz-32T | 1870 | 0.729766 | 0         |  |  |
|      |      | Shiraz-35T | 1933 | 0.488535 | 0         |  |  |
|      |      | Shiraz-58T | 2223 | 0.833364 | 0         |  |  |
|      |      | Shiraz-71T | 2263 | 0.975531 | 0         |  |  |
| RLIM | chrX | Shiraz-3T  | 242  | 0        | -0.336434 |  |  |
|      |      | Shiraz-4T  | 261  | 0        | -0.336249 |  |  |
|      |      | Shiraz-16T | 295  | 0.591657 | 0         |  |  |
|      |      | Shiraz-36T | 433  | 0        | -0.803961 |  |  |
|      |      | Shiraz-44T | 899  | 0        | -1.09697  |  |  |
|      |      | Shiraz-49T | 1170 | 0        | -0.967436 |  |  |
|      |      | Shiraz-18T | 1457 | 0.643204 | 0         |  |  |
|      |      | Shiraz-22T | 1673 | 0.611783 | 0         |  |  |
|      |      | Shiraz-25T | 1719 | 0.472955 | 0         |  |  |
|      |      | Shiraz-28T | 1762 | 0.562311 | 0         |  |  |
|      |      | Shiraz-29T | 1801 | 0.815343 | 0         |  |  |
|      |      | Shiraz-32T | 1870 | 0.729766 | 0         |  |  |
|      |      | Shiraz-35T | 1933 | 0.488535 | 0         |  |  |
|      |      | Shiraz-58T | 2223 | 0.833364 | 0         |  |  |
|      |      | Shiraz-71T | 2263 | 0.975531 | 0         |  |  |
|      |      | Shiraz-3T  | 242  | 0        | -0.336434 |  |  |
|      |      | Shiraz-4T  | 261  | 0        | -0.336249 |  |  |
|      |      | Shiraz-16T | 295  | 0.591657 | 0         |  |  |
|      |      | Shiraz-36T | 433  | 0        | -0.803961 |  |  |
|      |      | Shiraz-44T | 899  | 0        | -1.09697  |  |  |
|      |      | Shiraz-49T | 1170 | 0        | -0.967436 |  |  |
|      |      | Shiraz-18T | 1457 | 0.643204 | 0         |  |  |
|      |      | Shiraz-22T | 1673 | 0.611783 | 0         |  |  |
|      |      | Shiraz-25T | 1719 | 0.472955 | 0         |  |  |
|      |      | Shiraz-28T | 1762 | 0.562311 | 0         |  |  |
|      |      | Shiraz-29T | 1801 | 0.815343 | 0         |  |  |
|      |      | Shiraz-32T | 1870 | 0.729766 | 0         |  |  |

|         |      |            |      |          |           |  |  |
|---------|------|------------|------|----------|-----------|--|--|
|         |      | Shiraz-35T | 1933 | 0.488535 | 0         |  |  |
|         |      | Shiraz-58T | 2223 | 0.833364 | 0         |  |  |
|         |      | Shiraz-71T | 2263 | 0.975531 | 0         |  |  |
|         |      | Shiraz-3T  | 242  | 0        | -0.336434 |  |  |
|         |      | Shiraz-4T  | 261  | 0        | -0.336249 |  |  |
|         |      | Shiraz-16T | 295  | 0.591657 | 0         |  |  |
|         |      | Shiraz-36T | 433  | 0        | -0.803961 |  |  |
|         |      | Shiraz-44T | 899  | 0        | -1.09697  |  |  |
|         |      | Shiraz-49T | 1170 | 0        | -0.967436 |  |  |
|         |      | Shiraz-18T | 1457 | 0.643204 | 0         |  |  |
|         |      | Shiraz-22T | 1673 | 0.611783 | 0         |  |  |
|         |      | Shiraz-25T | 1719 | 0.472955 | 0         |  |  |
|         |      | Shiraz-28T | 1762 | 0.562311 | 0         |  |  |
|         |      | Shiraz-29T | 1801 | 0.815343 | 0         |  |  |
|         |      | Shiraz-32T | 1870 | 0.729766 | 0         |  |  |
|         |      | Shiraz-35T | 1933 | 0.488535 | 0         |  |  |
|         |      | Shiraz-58T | 2223 | 0.833364 | 0         |  |  |
|         |      | Shiraz-71T | 2263 | 0.975531 | 0         |  |  |
| RNASEN  | chr5 | Shiraz-4T  | 250  | 0.262252 | 0         |  |  |
|         |      | Shiraz-16T | 266  | 0.321724 | 0         |  |  |
|         |      | Shiraz-18T | 1429 | 0        | -0.314125 |  |  |
|         |      | Shiraz-25T | 1694 | 0.201602 | 0         |  |  |
|         |      | Shiraz-28T | 1731 | 0.295447 | 0         |  |  |
|         |      | Shiraz-29T | 1773 | 0.090981 | 0         |  |  |
|         |      | Shiraz-40T | 2016 | 0.376634 | 0         |  |  |
|         |      | Shiraz-53T | 2070 | 0        | -0.42189  |  |  |
|         |      | Shiraz-4T  | 250  | 0.262252 | 0         |  |  |
|         |      | Shiraz-16T | 266  | 0.321724 | 0         |  |  |
|         |      | Shiraz-18T | 1429 | 0        | -0.314125 |  |  |
|         |      | Shiraz-25T | 1694 | 0.201602 | 0         |  |  |
|         |      | Shiraz-28T | 1731 | 0.295447 | 0         |  |  |
|         |      | Shiraz-29T | 1773 | 0.090981 | 0         |  |  |
|         |      | Shiraz-40T | 2016 | 0.376634 | 0         |  |  |
|         |      | Shiraz-53T | 2070 | 0        | -0.42189  |  |  |
|         |      | Shiraz-4T  | 250  | 0.262252 | 0         |  |  |
|         |      | Shiraz-16T | 266  | 0.321724 | 0         |  |  |
|         |      | Shiraz-18T | 1429 | 0        | -0.314125 |  |  |
|         |      | Shiraz-25T | 1694 | 0.201602 | 0         |  |  |
|         |      | Shiraz-28T | 1731 | 0.295447 | 0         |  |  |
|         |      | Shiraz-29T | 1773 | 0.090981 | 0         |  |  |
|         |      | Shiraz-40T | 2016 | 0.376634 | 0         |  |  |
|         |      | Shiraz-53T | 2070 | 0        | -0.42189  |  |  |
| RNF113A | chrX | Shiraz-3T  | 242  | 0        | -0.336434 |  |  |
|         |      | Shiraz-3T  | 244  | 0        | -0.023749 |  |  |
|         |      | Shiraz-4T  | 261  | 0        | -0.336249 |  |  |
|         |      | Shiraz-16T | 295  | 0.591657 | 0         |  |  |
|         |      | Shiraz-36T | 433  | 0        | -0.803961 |  |  |

|  |            |      |          |           |  |
|--|------------|------|----------|-----------|--|
|  | Shiraz-44T | 899  | 0        | -1.09697  |  |
|  | Shiraz-44T | 904  | 0        | -0.625526 |  |
|  | Shiraz-49T | 1170 | 0        | -0.967436 |  |
|  | Shiraz-9T  | 1370 | 0.690073 | 0         |  |
|  | Shiraz-18T | 1457 | 0.643204 | 0         |  |
|  | Shiraz-22T | 1673 | 0.611783 | 0         |  |
|  | Shiraz-25T | 1719 | 0.472955 | 0         |  |
|  | Shiraz-28T | 1762 | 0.562311 | 0         |  |
|  | Shiraz-29T | 1801 | 0.815343 | 0         |  |
|  | Shiraz-32T | 1870 | 0.729766 | 0         |  |
|  | Shiraz-35T | 1933 | 0.488535 | 0         |  |
|  | Shiraz-58T | 2223 | 0.833364 | 0         |  |
|  | Shiraz-71T | 2263 | 0.975531 | 0         |  |
|  | Shiraz-3T  | 242  | 0        | -0.336434 |  |
|  | Shiraz-3T  | 244  | 0        | -0.023749 |  |
|  | Shiraz-4T  | 261  | 0        | -0.336249 |  |
|  | Shiraz-16T | 295  | 0.591657 | 0         |  |
|  | Shiraz-36T | 433  | 0        | -0.803961 |  |
|  | Shiraz-44T | 899  | 0        | -1.09697  |  |
|  | Shiraz-44T | 904  | 0        | -0.625526 |  |
|  | Shiraz-49T | 1170 | 0        | -0.967436 |  |
|  | Shiraz-9T  | 1370 | 0.690073 | 0         |  |
|  | Shiraz-18T | 1457 | 0.643204 | 0         |  |
|  | Shiraz-22T | 1673 | 0.611783 | 0         |  |
|  | Shiraz-25T | 1719 | 0.472955 | 0         |  |
|  | Shiraz-28T | 1762 | 0.562311 | 0         |  |
|  | Shiraz-29T | 1801 | 0.815343 | 0         |  |
|  | Shiraz-32T | 1870 | 0.729766 | 0         |  |
|  | Shiraz-35T | 1933 | 0.488535 | 0         |  |
|  | Shiraz-58T | 2223 | 0.833364 | 0         |  |
|  | Shiraz-71T | 2263 | 0.975531 | 0         |  |
|  | Shiraz-3T  | 242  | 0        | -0.336434 |  |
|  | Shiraz-3T  | 244  | 0        | -0.023749 |  |
|  | Shiraz-4T  | 261  | 0        | -0.336249 |  |
|  | Shiraz-16T | 295  | 0.591657 | 0         |  |
|  | Shiraz-36T | 433  | 0        | -0.803961 |  |
|  | Shiraz-44T | 899  | 0        | -1.09697  |  |
|  | Shiraz-44T | 904  | 0        | -0.625526 |  |
|  | Shiraz-49T | 1170 | 0        | -0.967436 |  |
|  | Shiraz-9T  | 1370 | 0.690073 | 0         |  |
|  | Shiraz-18T | 1457 | 0.643204 | 0         |  |
|  | Shiraz-22T | 1673 | 0.611783 | 0         |  |
|  | Shiraz-25T | 1719 | 0.472955 | 0         |  |
|  | Shiraz-28T | 1762 | 0.562311 | 0         |  |
|  | Shiraz-29T | 1801 | 0.815343 | 0         |  |
|  | Shiraz-32T | 1870 | 0.729766 | 0         |  |
|  | Shiraz-35T | 1933 | 0.488535 | 0         |  |

|        |      |            |      |          |           |  |
|--------|------|------------|------|----------|-----------|--|
|        |      | Shiraz-58T | 2223 | 0.833364 | 0         |  |
|        |      | Shiraz-71T | 2263 | 0.975531 | 0         |  |
| RNF128 | chrX | Shiraz-3T  | 242  | 0        | -0.336434 |  |
|        |      | Shiraz-3T  | 242  | 0        | -0.336434 |  |
|        |      | Shiraz-4T  | 261  | 0        | -0.336249 |  |
|        |      | Shiraz-4T  | 261  | 0        | -0.336249 |  |
|        |      | Shiraz-16T | 295  | 0.591657 | 0         |  |
|        |      | Shiraz-16T | 295  | 0.591657 | 0         |  |
|        |      | Shiraz-36T | 433  | 0        | -0.803961 |  |
|        |      | Shiraz-36T | 433  | 0        | -0.803961 |  |
|        |      | Shiraz-44T | 899  | 0        | -1.09697  |  |
|        |      | Shiraz-44T | 899  | 0        | -1.09697  |  |
|        |      | Shiraz-49T | 1170 | 0        | -0.967436 |  |
|        |      | Shiraz-49T | 1170 | 0        | -0.967436 |  |
|        |      | Shiraz-18T | 1457 | 0.643204 | 0         |  |
|        |      | Shiraz-18T | 1457 | 0.643204 | 0         |  |
|        |      | Shiraz-22T | 1673 | 0.611783 | 0         |  |
|        |      | Shiraz-22T | 1673 | 0.611783 | 0         |  |
|        |      | Shiraz-25T | 1719 | 0.472955 | 0         |  |
|        |      | Shiraz-25T | 1719 | 0.472955 | 0         |  |
|        |      | Shiraz-28T | 1762 | 0.562311 | 0         |  |
|        |      | Shiraz-28T | 1762 | 0.562311 | 0         |  |
|        |      | Shiraz-29T | 1801 | 0.815343 | 0         |  |
|        |      | Shiraz-29T | 1801 | 0.815343 | 0         |  |
|        |      | Shiraz-32T | 1870 | 0.729766 | 0         |  |
|        |      | Shiraz-32T | 1870 | 0.729766 | 0         |  |
|        |      | Shiraz-35T | 1933 | 0.488535 | 0         |  |
|        |      | Shiraz-35T | 1933 | 0.488535 | 0         |  |
|        |      | Shiraz-58T | 2223 | 0.833364 | 0         |  |
|        |      | Shiraz-58T | 2223 | 0.833364 | 0         |  |
|        |      | Shiraz-71T | 2263 | 0.975531 | 0         |  |
|        |      | Shiraz-71T | 2263 | 0.975531 | 0         |  |
|        |      | Shiraz-3T  | 242  | 0        | -0.336434 |  |
|        |      | Shiraz-3T  | 242  | 0        | -0.336434 |  |
|        |      | Shiraz-4T  | 261  | 0        | -0.336249 |  |
|        |      | Shiraz-4T  | 261  | 0        | -0.336249 |  |
|        |      | Shiraz-16T | 295  | 0.591657 | 0         |  |
|        |      | Shiraz-16T | 295  | 0.591657 | 0         |  |
|        |      | Shiraz-36T | 433  | 0        | -0.803961 |  |
|        |      | Shiraz-36T | 433  | 0        | -0.803961 |  |
|        |      | Shiraz-44T | 899  | 0        | -1.09697  |  |
|        |      | Shiraz-44T | 899  | 0        | -1.09697  |  |
|        |      | Shiraz-49T | 1170 | 0        | -0.967436 |  |
|        |      | Shiraz-49T | 1170 | 0        | -0.967436 |  |
|        |      | Shiraz-18T | 1457 | 0.643204 | 0         |  |
|        |      | Shiraz-18T | 1457 | 0.643204 | 0         |  |
|        |      | Shiraz-22T | 1673 | 0.611783 | 0         |  |

|        |      |            |      |          |           |  |  |
|--------|------|------------|------|----------|-----------|--|--|
|        |      | Shiraz-22T | 1673 | 0.611783 | 0         |  |  |
|        |      | Shiraz-25T | 1719 | 0.472955 | 0         |  |  |
|        |      | Shiraz-25T | 1719 | 0.472955 | 0         |  |  |
|        |      | Shiraz-28T | 1762 | 0.562311 | 0         |  |  |
|        |      | Shiraz-28T | 1762 | 0.562311 | 0         |  |  |
|        |      | Shiraz-29T | 1801 | 0.815343 | 0         |  |  |
|        |      | Shiraz-29T | 1801 | 0.815343 | 0         |  |  |
|        |      | Shiraz-32T | 1870 | 0.729766 | 0         |  |  |
|        |      | Shiraz-32T | 1870 | 0.729766 | 0         |  |  |
|        |      | Shiraz-35T | 1933 | 0.488535 | 0         |  |  |
|        |      | Shiraz-35T | 1933 | 0.488535 | 0         |  |  |
|        |      | Shiraz-58T | 2223 | 0.833364 | 0         |  |  |
|        |      | Shiraz-58T | 2223 | 0.833364 | 0         |  |  |
|        |      | Shiraz-71T | 2263 | 0.975531 | 0         |  |  |
|        |      | Shiraz-71T | 2263 | 0.975531 | 0         |  |  |
|        |      | Shiraz-3T  | 242  | 0        | -0.336434 |  |  |
|        |      | Shiraz-3T  | 242  | 0        | -0.336434 |  |  |
|        |      | Shiraz-4T  | 261  | 0        | -0.336249 |  |  |
|        |      | Shiraz-4T  | 261  | 0        | -0.336249 |  |  |
|        |      | Shiraz-16T | 295  | 0.591657 | 0         |  |  |
|        |      | Shiraz-16T | 295  | 0.591657 | 0         |  |  |
|        |      | Shiraz-36T | 433  | 0        | -0.803961 |  |  |
|        |      | Shiraz-36T | 433  | 0        | -0.803961 |  |  |
|        |      | Shiraz-44T | 899  | 0        | -1.09697  |  |  |
|        |      | Shiraz-44T | 899  | 0        | -1.09697  |  |  |
|        |      | Shiraz-49T | 1170 | 0        | -0.967436 |  |  |
|        |      | Shiraz-49T | 1170 | 0        | -0.967436 |  |  |
|        |      | Shiraz-18T | 1457 | 0.643204 | 0         |  |  |
|        |      | Shiraz-18T | 1457 | 0.643204 | 0         |  |  |
|        |      | Shiraz-22T | 1673 | 0.611783 | 0         |  |  |
|        |      | Shiraz-22T | 1673 | 0.611783 | 0         |  |  |
|        |      | Shiraz-25T | 1719 | 0.472955 | 0         |  |  |
|        |      | Shiraz-25T | 1719 | 0.472955 | 0         |  |  |
|        |      | Shiraz-28T | 1762 | 0.562311 | 0         |  |  |
|        |      | Shiraz-28T | 1762 | 0.562311 | 0         |  |  |
|        |      | Shiraz-29T | 1801 | 0.815343 | 0         |  |  |
|        |      | Shiraz-29T | 1801 | 0.815343 | 0         |  |  |
|        |      | Shiraz-32T | 1870 | 0.729766 | 0         |  |  |
|        |      | Shiraz-32T | 1870 | 0.729766 | 0         |  |  |
|        |      | Shiraz-35T | 1933 | 0.488535 | 0         |  |  |
|        |      | Shiraz-35T | 1933 | 0.488535 | 0         |  |  |
|        |      | Shiraz-58T | 2223 | 0.833364 | 0         |  |  |
|        |      | Shiraz-58T | 2223 | 0.833364 | 0         |  |  |
|        |      | Shiraz-71T | 2263 | 0.975531 | 0         |  |  |
|        |      | Shiraz-71T | 2263 | 0.975531 | 0         |  |  |
| RNF133 | chr7 | Shiraz-3T  | 90   | 0.219276 | 0         |  |  |
|        |      | Shiraz-3T  | 95   | 0        | -0.077623 |  |  |

|  |            |      |          |           |  |
|--|------------|------|----------|-----------|--|
|  | Shiraz-4T  | 253  | 0.372918 | 0         |  |
|  | Shiraz-36T | 378  | 0.179558 | 0         |  |
|  | Shiraz-36T | 382  | 0.081739 | 0         |  |
|  | Shiraz-44T | 641  | 0        | -0.477846 |  |
|  | Shiraz-46T | 943  | 0.093799 | 0         |  |
|  | Shiraz-46T | 947  | 0        | -0.010843 |  |
|  | Shiraz-47T | 1031 | 0        | -0.117529 |  |
|  | Shiraz-49T | 1121 | 0        | -0.138569 |  |
|  | Shiraz-77T | 1225 | 0        | -0.117922 |  |
|  | Shiraz-77T | 1228 | 0        | -0.238084 |  |
|  | Shiraz-18T | 1434 | 0.244465 | 0         |  |
|  | Shiraz-22T | 1549 | 0        | -0.319623 |  |
|  | Shiraz-22T | 1552 | 0        | -0.50686  |  |
|  | Shiraz-25T | 1698 | 0.21835  | 0         |  |
|  | Shiraz-28T | 1735 | 0.350744 | 0         |  |
|  | Shiraz-29T | 1778 | 0.120767 | 0         |  |
|  | Shiraz-32T | 1833 | 0.551336 | 0         |  |
|  | Shiraz-32T | 1835 | 0.092727 | 0         |  |
|  | Shiraz-38T | 1951 | 0.250891 | 0         |  |
|  | Shiraz-53T | 2078 | 0.287202 | 0         |  |
|  | Shiraz-58T | 2161 | 0        | -0.187744 |  |
|  | Shiraz-71T | 2238 | 0.603631 | 0         |  |
|  | Shiraz-3T  | 90   | 0.219276 | 0         |  |
|  | Shiraz-3T  | 95   | 0        | -0.077623 |  |
|  | Shiraz-4T  | 253  | 0.372918 | 0         |  |
|  | Shiraz-36T | 378  | 0.179558 | 0         |  |
|  | Shiraz-36T | 382  | 0.081739 | 0         |  |
|  | Shiraz-44T | 641  | 0        | -0.477846 |  |
|  | Shiraz-46T | 943  | 0.093799 | 0         |  |
|  | Shiraz-46T | 947  | 0        | -0.010843 |  |
|  | Shiraz-47T | 1031 | 0        | -0.117529 |  |
|  | Shiraz-49T | 1121 | 0        | -0.138569 |  |
|  | Shiraz-77T | 1225 | 0        | -0.117922 |  |
|  | Shiraz-77T | 1228 | 0        | -0.238084 |  |
|  | Shiraz-18T | 1434 | 0.244465 | 0         |  |
|  | Shiraz-22T | 1549 | 0        | -0.319623 |  |
|  | Shiraz-22T | 1552 | 0        | -0.50686  |  |
|  | Shiraz-25T | 1698 | 0.21835  | 0         |  |
|  | Shiraz-28T | 1735 | 0.350744 | 0         |  |
|  | Shiraz-29T | 1778 | 0.120767 | 0         |  |
|  | Shiraz-32T | 1833 | 0.551336 | 0         |  |
|  | Shiraz-32T | 1835 | 0.092727 | 0         |  |
|  | Shiraz-38T | 1951 | 0.250891 | 0         |  |
|  | Shiraz-53T | 2078 | 0.287202 | 0         |  |
|  | Shiraz-58T | 2161 | 0        | -0.187744 |  |
|  | Shiraz-71T | 2238 | 0.603631 | 0         |  |
|  | Shiraz-3T  | 90   | 0.219276 | 0         |  |

|        |      |            |      |          |           |  |  |
|--------|------|------------|------|----------|-----------|--|--|
|        |      | Shiraz-3T  | 95   | 0        | -0.077623 |  |  |
|        |      | Shiraz-4T  | 253  | 0.372918 | 0         |  |  |
|        |      | Shiraz-36T | 378  | 0.179558 | 0         |  |  |
|        |      | Shiraz-36T | 382  | 0.081739 | 0         |  |  |
|        |      | Shiraz-44T | 641  | 0        | -0.477846 |  |  |
|        |      | Shiraz-46T | 943  | 0.093799 | 0         |  |  |
|        |      | Shiraz-46T | 947  | 0        | -0.010843 |  |  |
|        |      | Shiraz-47T | 1031 | 0        | -0.117529 |  |  |
|        |      | Shiraz-49T | 1121 | 0        | -0.138569 |  |  |
|        |      | Shiraz-77T | 1225 | 0        | -0.117922 |  |  |
|        |      | Shiraz-77T | 1228 | 0        | -0.238084 |  |  |
|        |      | Shiraz-18T | 1434 | 0.244465 | 0         |  |  |
|        |      | Shiraz-22T | 1549 | 0        | -0.319623 |  |  |
|        |      | Shiraz-22T | 1552 | 0        | -0.50686  |  |  |
|        |      | Shiraz-25T | 1698 | 0.21835  | 0         |  |  |
|        |      | Shiraz-28T | 1735 | 0.350744 | 0         |  |  |
|        |      | Shiraz-29T | 1778 | 0.120767 | 0         |  |  |
|        |      | Shiraz-32T | 1833 | 0.551336 | 0         |  |  |
|        |      | Shiraz-32T | 1835 | 0.092727 | 0         |  |  |
|        |      | Shiraz-38T | 1951 | 0.250891 | 0         |  |  |
|        |      | Shiraz-53T | 2078 | 0.287202 | 0         |  |  |
|        |      | Shiraz-58T | 2161 | 0        | -0.187744 |  |  |
|        |      | Shiraz-71T | 2238 | 0.603631 | 0         |  |  |
| RNF148 | chr7 | Shiraz-3T  | 90   | 0.219276 | 0         |  |  |
|        |      | Shiraz-3T  | 95   | 0        | -0.077623 |  |  |
|        |      | Shiraz-4T  | 253  | 0.372918 | 0         |  |  |
|        |      | Shiraz-36T | 378  | 0.179558 | 0         |  |  |
|        |      | Shiraz-36T | 382  | 0.081739 | 0         |  |  |
|        |      | Shiraz-44T | 641  | 0        | -0.477846 |  |  |
|        |      | Shiraz-46T | 943  | 0.093799 | 0         |  |  |
|        |      | Shiraz-46T | 947  | 0        | -0.010843 |  |  |
|        |      | Shiraz-47T | 1031 | 0        | -0.117529 |  |  |
|        |      | Shiraz-49T | 1121 | 0        | -0.138569 |  |  |
|        |      | Shiraz-77T | 1225 | 0        | -0.117922 |  |  |
|        |      | Shiraz-77T | 1228 | 0        | -0.238084 |  |  |
|        |      | Shiraz-18T | 1434 | 0.244465 | 0         |  |  |
|        |      | Shiraz-22T | 1549 | 0        | -0.319623 |  |  |
|        |      | Shiraz-22T | 1552 | 0        | -0.50686  |  |  |
|        |      | Shiraz-25T | 1698 | 0.21835  | 0         |  |  |
|        |      | Shiraz-28T | 1735 | 0.350744 | 0         |  |  |
|        |      | Shiraz-29T | 1778 | 0.120767 | 0         |  |  |
|        |      | Shiraz-32T | 1833 | 0.551336 | 0         |  |  |
|        |      | Shiraz-32T | 1835 | 0.092727 | 0         |  |  |
|        |      | Shiraz-38T | 1951 | 0.250891 | 0         |  |  |
|        |      | Shiraz-53T | 2078 | 0.287202 | 0         |  |  |
|        |      | Shiraz-58T | 2161 | 0        | -0.187744 |  |  |
|        |      | Shiraz-71T | 2238 | 0.603631 | 0         |  |  |

|  |            |      |          |           |  |
|--|------------|------|----------|-----------|--|
|  | Shiraz-3T  | 90   | 0.219276 | 0         |  |
|  | Shiraz-3T  | 95   | 0        | -0.077623 |  |
|  | Shiraz-4T  | 253  | 0.372918 | 0         |  |
|  | Shiraz-36T | 378  | 0.179558 | 0         |  |
|  | Shiraz-36T | 382  | 0.081739 | 0         |  |
|  | Shiraz-44T | 641  | 0        | -0.477846 |  |
|  | Shiraz-46T | 943  | 0.093799 | 0         |  |
|  | Shiraz-46T | 947  | 0        | -0.010843 |  |
|  | Shiraz-47T | 1031 | 0        | -0.117529 |  |
|  | Shiraz-49T | 1121 | 0        | -0.138569 |  |
|  | Shiraz-77T | 1225 | 0        | -0.117922 |  |
|  | Shiraz-77T | 1228 | 0        | -0.238084 |  |
|  | Shiraz-18T | 1434 | 0.244465 | 0         |  |
|  | Shiraz-22T | 1549 | 0        | -0.319623 |  |
|  | Shiraz-22T | 1552 | 0        | -0.50686  |  |
|  | Shiraz-25T | 1698 | 0.21835  | 0         |  |
|  | Shiraz-28T | 1735 | 0.350744 | 0         |  |
|  | Shiraz-29T | 1778 | 0.120767 | 0         |  |
|  | Shiraz-32T | 1833 | 0.551336 | 0         |  |
|  | Shiraz-32T | 1835 | 0.092727 | 0         |  |
|  | Shiraz-38T | 1951 | 0.250891 | 0         |  |
|  | Shiraz-53T | 2078 | 0.287202 | 0         |  |
|  | Shiraz-58T | 2161 | 0        | -0.187744 |  |
|  | Shiraz-71T | 2238 | 0.603631 | 0         |  |
|  | Shiraz-3T  | 90   | 0.219276 | 0         |  |
|  | Shiraz-3T  | 95   | 0        | -0.077623 |  |
|  | Shiraz-4T  | 253  | 0.372918 | 0         |  |
|  | Shiraz-36T | 378  | 0.179558 | 0         |  |
|  | Shiraz-36T | 382  | 0.081739 | 0         |  |
|  | Shiraz-44T | 641  | 0        | -0.477846 |  |
|  | Shiraz-46T | 943  | 0.093799 | 0         |  |
|  | Shiraz-46T | 947  | 0        | -0.010843 |  |
|  | Shiraz-47T | 1031 | 0        | -0.117529 |  |
|  | Shiraz-49T | 1121 | 0        | -0.138569 |  |
|  | Shiraz-77T | 1225 | 0        | -0.117922 |  |
|  | Shiraz-77T | 1228 | 0        | -0.238084 |  |
|  | Shiraz-18T | 1434 | 0.244465 | 0         |  |
|  | Shiraz-22T | 1549 | 0        | -0.319623 |  |
|  | Shiraz-22T | 1552 | 0        | -0.50686  |  |
|  | Shiraz-25T | 1698 | 0.21835  | 0         |  |
|  | Shiraz-28T | 1735 | 0.350744 | 0         |  |
|  | Shiraz-29T | 1778 | 0.120767 | 0         |  |
|  | Shiraz-32T | 1833 | 0.551336 | 0         |  |
|  | Shiraz-32T | 1835 | 0.092727 | 0         |  |
|  | Shiraz-38T | 1951 | 0.250891 | 0         |  |
|  | Shiraz-53T | 2078 | 0.287202 | 0         |  |
|  | Shiraz-58T | 2161 | 0        | -0.187744 |  |



|       |      |            |      |          |           |  |
|-------|------|------------|------|----------|-----------|--|
|       |      | Shiraz-71T | 2238 | 0.603631 | 0         |  |
| RNU12 | chrX | Shiraz-4T  | 260  | 0        | -0.324128 |  |
|       |      | Shiraz-16T | 294  | 0.655804 | 0         |  |
|       |      | Shiraz-31T | 345  | 0.103301 | 0         |  |
|       |      | Shiraz-36T | 431  | 0        | -0.78035  |  |
|       |      | Shiraz-36T | 432  | 0        | -0.6692   |  |
|       |      | Shiraz-44T | 891  | 0        | -0.954044 |  |
|       |      | Shiraz-46T | 991  | 0.139564 | 0         |  |
|       |      | Shiraz-49T | 1166 | 0        | -0.917235 |  |
|       |      | Shiraz-77T | 1282 | 0.213849 | 0         |  |
|       |      | Shiraz-9T  | 1368 | 0.199713 | 0         |  |
|       |      | Shiraz-9T  | 1369 | 0.703374 | 0         |  |
|       |      | Shiraz-18T | 1455 | 0        | -0.186773 |  |
|       |      | Shiraz-22T | 1669 | 0.695915 | 0         |  |
|       |      | Shiraz-22T | 1672 | 1.01678  | 0         |  |
|       |      | Shiraz-25T | 1717 | 0.420447 | 0         |  |
|       |      | Shiraz-28T | 1760 | 0.538181 | 0         |  |
|       |      | Shiraz-29T | 1800 | 0.672527 | 0         |  |
|       |      | Shiraz-32T | 1869 | 0.776805 | 0         |  |
|       |      | Shiraz-35T | 1932 | 0.507141 | 0         |  |
|       |      | Shiraz-40T | 2051 | 0.098506 | 0         |  |
|       |      | Shiraz-58T | 2221 | 0.871948 | 0         |  |
|       |      | Shiraz-71T | 2260 | 0.68394  | 0         |  |
|       |      | Shiraz-71T | 2262 | 0.986748 | 0         |  |
|       |      | Shiraz-4T  | 260  | 0        | -0.324128 |  |
|       |      | Shiraz-16T | 294  | 0.655804 | 0         |  |
|       |      | Shiraz-31T | 345  | 0.103301 | 0         |  |
|       |      | Shiraz-36T | 431  | 0        | -0.78035  |  |
|       |      | Shiraz-36T | 432  | 0        | -0.6692   |  |
|       |      | Shiraz-44T | 891  | 0        | -0.954044 |  |
|       |      | Shiraz-46T | 991  | 0.139564 | 0         |  |
|       |      | Shiraz-49T | 1166 | 0        | -0.917235 |  |
|       |      | Shiraz-77T | 1282 | 0.213849 | 0         |  |
|       |      | Shiraz-9T  | 1368 | 0.199713 | 0         |  |
|       |      | Shiraz-9T  | 1369 | 0.703374 | 0         |  |
|       |      | Shiraz-18T | 1455 | 0        | -0.186773 |  |
|       |      | Shiraz-22T | 1669 | 0.695915 | 0         |  |
|       |      | Shiraz-22T | 1672 | 1.01678  | 0         |  |
|       |      | Shiraz-25T | 1717 | 0.420447 | 0         |  |
|       |      | Shiraz-28T | 1760 | 0.538181 | 0         |  |
|       |      | Shiraz-29T | 1800 | 0.672527 | 0         |  |
|       |      | Shiraz-32T | 1869 | 0.776805 | 0         |  |
|       |      | Shiraz-35T | 1932 | 0.507141 | 0         |  |
|       |      | Shiraz-40T | 2051 | 0.098506 | 0         |  |
|       |      | Shiraz-58T | 2221 | 0.871948 | 0         |  |
|       |      | Shiraz-71T | 2260 | 0.68394  | 0         |  |
|       |      | Shiraz-71T | 2262 | 0.986748 | 0         |  |

|             |      |            |      |          |           |  |  |
|-------------|------|------------|------|----------|-----------|--|--|
|             |      | Shiraz-4T  | 260  | 0        | -0.324128 |  |  |
|             |      | Shiraz-16T | 294  | 0.655804 | 0         |  |  |
|             |      | Shiraz-31T | 345  | 0.103301 | 0         |  |  |
|             |      | Shiraz-36T | 431  | 0        | -0.78035  |  |  |
|             |      | Shiraz-36T | 432  | 0        | -0.6692   |  |  |
|             |      | Shiraz-44T | 891  | 0        | -0.954044 |  |  |
|             |      | Shiraz-46T | 991  | 0.139564 | 0         |  |  |
|             |      | Shiraz-49T | 1166 | 0        | -0.917235 |  |  |
|             |      | Shiraz-77T | 1282 | 0.213849 | 0         |  |  |
|             |      | Shiraz-9T  | 1368 | 0.199713 | 0         |  |  |
|             |      | Shiraz-9T  | 1369 | 0.703374 | 0         |  |  |
|             |      | Shiraz-18T | 1455 | 0        | -0.186773 |  |  |
|             |      | Shiraz-22T | 1669 | 0.695915 | 0         |  |  |
|             |      | Shiraz-22T | 1672 | 1.01678  | 0         |  |  |
|             |      | Shiraz-25T | 1717 | 0.420447 | 0         |  |  |
|             |      | Shiraz-28T | 1760 | 0.538181 | 0         |  |  |
|             |      | Shiraz-29T | 1800 | 0.672527 | 0         |  |  |
|             |      | Shiraz-32T | 1869 | 0.776805 | 0         |  |  |
|             |      | Shiraz-35T | 1932 | 0.507141 | 0         |  |  |
|             |      | Shiraz-40T | 2051 | 0.098506 | 0         |  |  |
|             |      | Shiraz-58T | 2221 | 0.871948 | 0         |  |  |
|             |      | Shiraz-71T | 2260 | 0.68394  | 0         |  |  |
|             |      | Shiraz-71T | 2262 | 0.986748 | 0         |  |  |
| RP1-177G6.2 | chrX | Shiraz-3T  | 242  | 0        | -0.336434 |  |  |
|             |      | Shiraz-4T  | 261  | 0        | -0.336249 |  |  |
|             |      | Shiraz-16T | 295  | 0.591657 | 0         |  |  |
|             |      | Shiraz-36T | 433  | 0        | -0.803961 |  |  |
|             |      | Shiraz-44T | 899  | 0        | -1.09697  |  |  |
|             |      | Shiraz-49T | 1170 | 0        | -0.967436 |  |  |
|             |      | Shiraz-9T  | 1370 | 0.690073 | 0         |  |  |
|             |      | Shiraz-18T | 1457 | 0.643204 | 0         |  |  |
|             |      | Shiraz-22T | 1673 | 0.611783 | 0         |  |  |
|             |      | Shiraz-25T | 1719 | 0.472955 | 0         |  |  |
|             |      | Shiraz-28T | 1762 | 0.562311 | 0         |  |  |
|             |      | Shiraz-29T | 1801 | 0.815343 | 0         |  |  |
|             |      | Shiraz-32T | 1870 | 0.729766 | 0         |  |  |
|             |      | Shiraz-35T | 1933 | 0.488535 | 0         |  |  |
|             |      | Shiraz-58T | 2223 | 0.833364 | 0         |  |  |
|             |      | Shiraz-71T | 2263 | 0.975531 | 0         |  |  |
|             |      | Shiraz-3T  | 242  | 0        | -0.336434 |  |  |
|             |      | Shiraz-4T  | 261  | 0        | -0.336249 |  |  |
|             |      | Shiraz-16T | 295  | 0.591657 | 0         |  |  |
|             |      | Shiraz-36T | 433  | 0        | -0.803961 |  |  |
|             |      | Shiraz-44T | 899  | 0        | -1.09697  |  |  |
|             |      | Shiraz-49T | 1170 | 0        | -0.967436 |  |  |
|             |      | Shiraz-9T  | 1370 | 0.690073 | 0         |  |  |
|             |      | Shiraz-18T | 1457 | 0.643204 | 0         |  |  |

|     |      |            |      |          |           |  |  |
|-----|------|------------|------|----------|-----------|--|--|
|     |      | Shiraz-22T | 1673 | 0.611783 | 0         |  |  |
|     |      | Shiraz-25T | 1719 | 0.472955 | 0         |  |  |
|     |      | Shiraz-28T | 1762 | 0.562311 | 0         |  |  |
|     |      | Shiraz-29T | 1801 | 0.815343 | 0         |  |  |
|     |      | Shiraz-32T | 1870 | 0.729766 | 0         |  |  |
|     |      | Shiraz-35T | 1933 | 0.488535 | 0         |  |  |
|     |      | Shiraz-58T | 2223 | 0.833364 | 0         |  |  |
|     |      | Shiraz-71T | 2263 | 0.975531 | 0         |  |  |
|     |      | Shiraz-3T  | 242  | 0        | -0.336434 |  |  |
|     |      | Shiraz-4T  | 261  | 0        | -0.336249 |  |  |
|     |      | Shiraz-16T | 295  | 0.591657 | 0         |  |  |
|     |      | Shiraz-36T | 433  | 0        | -0.803961 |  |  |
|     |      | Shiraz-44T | 899  | 0        | -1.09697  |  |  |
|     |      | Shiraz-49T | 1170 | 0        | -0.967436 |  |  |
|     |      | Shiraz-9T  | 1370 | 0.690073 | 0         |  |  |
|     |      | Shiraz-18T | 1457 | 0.643204 | 0         |  |  |
|     |      | Shiraz-22T | 1673 | 0.611783 | 0         |  |  |
|     |      | Shiraz-25T | 1719 | 0.472955 | 0         |  |  |
|     |      | Shiraz-28T | 1762 | 0.562311 | 0         |  |  |
|     |      | Shiraz-29T | 1801 | 0.815343 | 0         |  |  |
|     |      | Shiraz-32T | 1870 | 0.729766 | 0         |  |  |
|     |      | Shiraz-35T | 1933 | 0.488535 | 0         |  |  |
|     |      | Shiraz-58T | 2223 | 0.833364 | 0         |  |  |
|     |      | Shiraz-71T | 2263 | 0.975531 | 0         |  |  |
| RP2 | chrX | Shiraz-3T  | 235  | 0        | -0.28401  |  |  |
|     |      | Shiraz-4T  | 260  | 0        | -0.324128 |  |  |
|     |      | Shiraz-16T | 294  | 0.655804 | 0         |  |  |
|     |      | Shiraz-31T | 345  | 0.103301 | 0         |  |  |
|     |      | Shiraz-36T | 431  | 0        | -0.78035  |  |  |
|     |      | Shiraz-36T | 432  | 0        | -0.6692   |  |  |
|     |      | Shiraz-44T | 891  | 0        | -0.954044 |  |  |
|     |      | Shiraz-46T | 991  | 0.139564 | 0         |  |  |
|     |      | Shiraz-49T | 1166 | 0        | -0.917235 |  |  |
|     |      | Shiraz-77T | 1282 | 0.213849 | 0         |  |  |
|     |      | Shiraz-9T  | 1368 | 0.199713 | 0         |  |  |
|     |      | Shiraz-18T | 1455 | 0        | -0.186773 |  |  |
|     |      | Shiraz-22T | 1669 | 0.695915 | 0         |  |  |
|     |      | Shiraz-25T | 1717 | 0.420447 | 0         |  |  |
|     |      | Shiraz-28T | 1760 | 0.538181 | 0         |  |  |
|     |      | Shiraz-29T | 1800 | 0.672527 | 0         |  |  |
|     |      | Shiraz-32T | 1869 | 0.776805 | 0         |  |  |
|     |      | Shiraz-35T | 1932 | 0.507141 | 0         |  |  |
|     |      | Shiraz-40T | 2051 | 0.098506 | 0         |  |  |
|     |      | Shiraz-58T | 2221 | 0.871948 | 0         |  |  |
|     |      | Shiraz-71T | 2260 | 0.68394  | 0         |  |  |
|     |      | Shiraz-71T | 2262 | 0.986748 | 0         |  |  |
|     |      | Shiraz-3T  | 235  | 0        | -0.28401  |  |  |

|     |      |            |      |          |           |  |  |
|-----|------|------------|------|----------|-----------|--|--|
|     |      | Shiraz-4T  | 260  | 0        | -0.324128 |  |  |
|     |      | Shiraz-16T | 294  | 0.655804 | 0         |  |  |
|     |      | Shiraz-31T | 345  | 0.103301 | 0         |  |  |
|     |      | Shiraz-36T | 431  | 0        | -0.78035  |  |  |
|     |      | Shiraz-36T | 432  | 0        | -0.6692   |  |  |
|     |      | Shiraz-44T | 891  | 0        | -0.954044 |  |  |
|     |      | Shiraz-46T | 991  | 0.139564 | 0         |  |  |
|     |      | Shiraz-49T | 1166 | 0        | -0.917235 |  |  |
|     |      | Shiraz-77T | 1282 | 0.213849 | 0         |  |  |
|     |      | Shiraz-9T  | 1368 | 0.199713 | 0         |  |  |
|     |      | Shiraz-18T | 1455 | 0        | -0.186773 |  |  |
|     |      | Shiraz-22T | 1669 | 0.695915 | 0         |  |  |
|     |      | Shiraz-25T | 1717 | 0.420447 | 0         |  |  |
|     |      | Shiraz-28T | 1760 | 0.538181 | 0         |  |  |
|     |      | Shiraz-29T | 1800 | 0.672527 | 0         |  |  |
|     |      | Shiraz-32T | 1869 | 0.776805 | 0         |  |  |
|     |      | Shiraz-35T | 1932 | 0.507141 | 0         |  |  |
|     |      | Shiraz-40T | 2051 | 0.098506 | 0         |  |  |
|     |      | Shiraz-58T | 2221 | 0.871948 | 0         |  |  |
|     |      | Shiraz-71T | 2260 | 0.68394  | 0         |  |  |
|     |      | Shiraz-71T | 2262 | 0.986748 | 0         |  |  |
|     |      | Shiraz-3T  | 235  | 0        | -0.28401  |  |  |
|     |      | Shiraz-4T  | 260  | 0        | -0.324128 |  |  |
|     |      | Shiraz-16T | 294  | 0.655804 | 0         |  |  |
|     |      | Shiraz-31T | 345  | 0.103301 | 0         |  |  |
|     |      | Shiraz-36T | 431  | 0        | -0.78035  |  |  |
|     |      | Shiraz-36T | 432  | 0        | -0.6692   |  |  |
|     |      | Shiraz-44T | 891  | 0        | -0.954044 |  |  |
|     |      | Shiraz-46T | 991  | 0.139564 | 0         |  |  |
|     |      | Shiraz-49T | 1166 | 0        | -0.917235 |  |  |
|     |      | Shiraz-77T | 1282 | 0.213849 | 0         |  |  |
|     |      | Shiraz-9T  | 1368 | 0.199713 | 0         |  |  |
|     |      | Shiraz-18T | 1455 | 0        | -0.186773 |  |  |
|     |      | Shiraz-22T | 1669 | 0.695915 | 0         |  |  |
|     |      | Shiraz-25T | 1717 | 0.420447 | 0         |  |  |
|     |      | Shiraz-28T | 1760 | 0.538181 | 0         |  |  |
|     |      | Shiraz-29T | 1800 | 0.672527 | 0         |  |  |
|     |      | Shiraz-32T | 1869 | 0.776805 | 0         |  |  |
|     |      | Shiraz-35T | 1932 | 0.507141 | 0         |  |  |
|     |      | Shiraz-40T | 2051 | 0.098506 | 0         |  |  |
|     |      | Shiraz-58T | 2221 | 0.871948 | 0         |  |  |
|     |      | Shiraz-71T | 2260 | 0.68394  | 0         |  |  |
|     |      | Shiraz-71T | 2262 | 0.986748 | 0         |  |  |
| RP9 | chr7 | Shiraz-3T  | 87   | 0.198593 | 0         |  |  |
|     |      | Shiraz-4T  | 252  | 0.192083 | 0         |  |  |
|     |      | Shiraz-36T | 376  | 0.159952 | 0         |  |  |
|     |      | Shiraz-44T | 631  | 0        | -0.180312 |  |  |

|      |      |            |      |          |           |  |  |
|------|------|------------|------|----------|-----------|--|--|
|      |      | Shiraz-46T | 942  | 0.069143 | 0         |  |  |
|      |      | Shiraz-18T | 1433 | 0.250973 | 0         |  |  |
|      |      | Shiraz-22T | 1544 | 0        | -0.193579 |  |  |
|      |      | Shiraz-25T | 1697 | 0.21945  | 0         |  |  |
|      |      | Shiraz-28T | 1734 | 0.362882 | 0         |  |  |
|      |      | Shiraz-29T | 1777 | 0.156747 | 0         |  |  |
|      |      | Shiraz-38T | 1950 | 0.265916 | 0         |  |  |
|      |      | Shiraz-71T | 2236 | 0.320072 | 0         |  |  |
|      |      | Shiraz-3T  | 87   | 0.198593 | 0         |  |  |
|      |      | Shiraz-4T  | 252  | 0.192083 | 0         |  |  |
|      |      | Shiraz-36T | 376  | 0.159952 | 0         |  |  |
|      |      | Shiraz-44T | 631  | 0        | -0.180312 |  |  |
|      |      | Shiraz-46T | 942  | 0.069143 | 0         |  |  |
|      |      | Shiraz-18T | 1433 | 0.250973 | 0         |  |  |
|      |      | Shiraz-22T | 1544 | 0        | -0.193579 |  |  |
|      |      | Shiraz-25T | 1697 | 0.21945  | 0         |  |  |
|      |      | Shiraz-28T | 1734 | 0.362882 | 0         |  |  |
|      |      | Shiraz-29T | 1777 | 0.156747 | 0         |  |  |
|      |      | Shiraz-38T | 1950 | 0.265916 | 0         |  |  |
|      |      | Shiraz-71T | 2236 | 0.320072 | 0         |  |  |
|      |      | Shiraz-3T  | 87   | 0.198593 | 0         |  |  |
|      |      | Shiraz-4T  | 252  | 0.192083 | 0         |  |  |
|      |      | Shiraz-36T | 376  | 0.159952 | 0         |  |  |
|      |      | Shiraz-44T | 631  | 0        | -0.180312 |  |  |
|      |      | Shiraz-46T | 942  | 0.069143 | 0         |  |  |
|      |      | Shiraz-18T | 1433 | 0.250973 | 0         |  |  |
|      |      | Shiraz-22T | 1544 | 0        | -0.193579 |  |  |
|      |      | Shiraz-25T | 1697 | 0.21945  | 0         |  |  |
|      |      | Shiraz-28T | 1734 | 0.362882 | 0         |  |  |
|      |      | Shiraz-29T | 1777 | 0.156747 | 0         |  |  |
|      |      | Shiraz-38T | 1950 | 0.265916 | 0         |  |  |
|      |      | Shiraz-71T | 2236 | 0.320072 | 0         |  |  |
| RP9P | chr7 | Shiraz-3T  | 87   | 0.198593 | 0         |  |  |
|      |      | Shiraz-4T  | 252  | 0.192083 | 0         |  |  |
|      |      | Shiraz-36T | 376  | 0.159952 | 0         |  |  |
|      |      | Shiraz-44T | 631  | 0        | -0.180312 |  |  |
|      |      | Shiraz-46T | 942  | 0.069143 | 0         |  |  |
|      |      | Shiraz-18T | 1433 | 0.250973 | 0         |  |  |
|      |      | Shiraz-22T | 1544 | 0        | -0.193579 |  |  |
|      |      | Shiraz-25T | 1697 | 0.21945  | 0         |  |  |
|      |      | Shiraz-28T | 1734 | 0.362882 | 0         |  |  |
|      |      | Shiraz-29T | 1777 | 0.156747 | 0         |  |  |
|      |      | Shiraz-38T | 1950 | 0.265916 | 0         |  |  |
|      |      | Shiraz-71T | 2236 | 0.320072 | 0         |  |  |
|      |      | Shiraz-3T  | 87   | 0.198593 | 0         |  |  |
|      |      | Shiraz-4T  | 252  | 0.192083 | 0         |  |  |
|      |      | Shiraz-36T | 376  | 0.159952 | 0         |  |  |

|      |      |            |      |          |           |  |  |
|------|------|------------|------|----------|-----------|--|--|
|      |      | Shiraz-44T | 631  | 0        | -0.180312 |  |  |
|      |      | Shiraz-46T | 942  | 0.069143 | 0         |  |  |
|      |      | Shiraz-18T | 1433 | 0.250973 | 0         |  |  |
|      |      | Shiraz-22T | 1544 | 0        | -0.193579 |  |  |
|      |      | Shiraz-25T | 1697 | 0.21945  | 0         |  |  |
|      |      | Shiraz-28T | 1734 | 0.362882 | 0         |  |  |
|      |      | Shiraz-29T | 1777 | 0.156747 | 0         |  |  |
|      |      | Shiraz-38T | 1950 | 0.265916 | 0         |  |  |
|      |      | Shiraz-71T | 2236 | 0.320072 | 0         |  |  |
|      |      | Shiraz-3T  | 87   | 0.198593 | 0         |  |  |
|      |      | Shiraz-4T  | 252  | 0.192083 | 0         |  |  |
|      |      | Shiraz-36T | 376  | 0.159952 | 0         |  |  |
|      |      | Shiraz-44T | 631  | 0        | -0.180312 |  |  |
|      |      | Shiraz-46T | 942  | 0.069143 | 0         |  |  |
|      |      | Shiraz-18T | 1433 | 0.250973 | 0         |  |  |
|      |      | Shiraz-22T | 1544 | 0        | -0.193579 |  |  |
|      |      | Shiraz-25T | 1697 | 0.21945  | 0         |  |  |
|      |      | Shiraz-28T | 1734 | 0.362882 | 0         |  |  |
|      |      | Shiraz-29T | 1777 | 0.156747 | 0         |  |  |
|      |      | Shiraz-38T | 1950 | 0.265916 | 0         |  |  |
|      |      | Shiraz-71T | 2236 | 0.320072 | 0         |  |  |
| RPA3 | chr7 | Shiraz-4T  | 252  | 0.192083 | 0         |  |  |
|      |      | Shiraz-36T | 376  | 0.159952 | 0         |  |  |
|      |      | Shiraz-44T | 628  | 0        | -0.444379 |  |  |
|      |      | Shiraz-47T | 1027 | 0        | -0.117848 |  |  |
|      |      | Shiraz-49T | 1117 | 0        | -0.168296 |  |  |
|      |      | Shiraz-77T | 1222 | 0        | -0.113002 |  |  |
|      |      | Shiraz-18T | 1433 | 0.250973 | 0         |  |  |
|      |      | Shiraz-22T | 1543 | 0        | -0.513696 |  |  |
|      |      | Shiraz-25T | 1697 | 0.21945  | 0         |  |  |
|      |      | Shiraz-28T | 1734 | 0.362882 | 0         |  |  |
|      |      | Shiraz-29T | 1777 | 0.156747 | 0         |  |  |
|      |      | Shiraz-38T | 1950 | 0.265916 | 0         |  |  |
|      |      | Shiraz-53T | 2077 | 0.444626 | 0         |  |  |
|      |      | Shiraz-58T | 2157 | 0        | -0.213872 |  |  |
|      |      | Shiraz-71T | 2236 | 0.320072 | 0         |  |  |
|      |      | Shiraz-4T  | 252  | 0.192083 | 0         |  |  |
|      |      | Shiraz-36T | 376  | 0.159952 | 0         |  |  |
|      |      | Shiraz-44T | 628  | 0        | -0.444379 |  |  |
|      |      | Shiraz-47T | 1027 | 0        | -0.117848 |  |  |
|      |      | Shiraz-49T | 1117 | 0        | -0.168296 |  |  |
|      |      | Shiraz-77T | 1222 | 0        | -0.113002 |  |  |
|      |      | Shiraz-18T | 1433 | 0.250973 | 0         |  |  |
|      |      | Shiraz-22T | 1543 | 0        | -0.513696 |  |  |
|      |      | Shiraz-25T | 1697 | 0.21945  | 0         |  |  |
|      |      | Shiraz-28T | 1734 | 0.362882 | 0         |  |  |
|      |      | Shiraz-29T | 1777 | 0.156747 | 0         |  |  |

|      |      |            |      |          |           |  |  |
|------|------|------------|------|----------|-----------|--|--|
|      |      | Shiraz-38T | 1950 | 0.265916 | 0         |  |  |
|      |      | Shiraz-53T | 2077 | 0.444626 | 0         |  |  |
|      |      | Shiraz-58T | 2157 | 0        | -0.213872 |  |  |
|      |      | Shiraz-71T | 2236 | 0.320072 | 0         |  |  |
|      |      | Shiraz-4T  | 252  | 0.192083 | 0         |  |  |
|      |      | Shiraz-36T | 376  | 0.159952 | 0         |  |  |
|      |      | Shiraz-44T | 628  | 0        | -0.444379 |  |  |
|      |      | Shiraz-47T | 1027 | 0        | -0.117848 |  |  |
|      |      | Shiraz-49T | 1117 | 0        | -0.168296 |  |  |
|      |      | Shiraz-77T | 1222 | 0        | -0.113002 |  |  |
|      |      | Shiraz-18T | 1433 | 0.250973 | 0         |  |  |
|      |      | Shiraz-22T | 1543 | 0        | -0.513696 |  |  |
|      |      | Shiraz-25T | 1697 | 0.21945  | 0         |  |  |
|      |      | Shiraz-28T | 1734 | 0.362882 | 0         |  |  |
|      |      | Shiraz-29T | 1777 | 0.156747 | 0         |  |  |
|      |      | Shiraz-38T | 1950 | 0.265916 | 0         |  |  |
|      |      | Shiraz-53T | 2077 | 0.444626 | 0         |  |  |
|      |      | Shiraz-58T | 2157 | 0        | -0.213872 |  |  |
|      |      | Shiraz-71T | 2236 | 0.320072 | 0         |  |  |
| RPA4 | chrX | Shiraz-3T  | 242  | 0        | -0.336434 |  |  |
|      |      | Shiraz-4T  | 261  | 0        | -0.336249 |  |  |
|      |      | Shiraz-16T | 295  | 0.591657 | 0         |  |  |
|      |      | Shiraz-31T | 346  | 0        | -0.1527   |  |  |
|      |      | Shiraz-36T | 433  | 0        | -0.803961 |  |  |
|      |      | Shiraz-44T | 899  | 0        | -1.09697  |  |  |
|      |      | Shiraz-44T | 902  | 0        | -1.449824 |  |  |
|      |      | Shiraz-47T | 1085 | 0        | -0.130811 |  |  |
|      |      | Shiraz-49T | 1170 | 0        | -0.967436 |  |  |
|      |      | Shiraz-49T | 1172 | 0        | -1.123219 |  |  |
|      |      | Shiraz-18T | 1457 | 0.643204 | 0         |  |  |
|      |      | Shiraz-22T | 1673 | 0.611783 | 0         |  |  |
|      |      | Shiraz-22T | 1675 | 0.279253 | 0         |  |  |
|      |      | Shiraz-25T | 1719 | 0.472955 | 0         |  |  |
|      |      | Shiraz-28T | 1762 | 0.562311 | 0         |  |  |
|      |      | Shiraz-29T | 1801 | 0.815343 | 0         |  |  |
|      |      | Shiraz-32T | 1870 | 0.729766 | 0         |  |  |
|      |      | Shiraz-32T | 1871 | 0.292679 | 0         |  |  |
|      |      | Shiraz-35T | 1933 | 0.488535 | 0         |  |  |
|      |      | Shiraz-58T | 2223 | 0.833364 | 0         |  |  |
|      |      | Shiraz-58T | 2225 | 0.595784 | 0         |  |  |
|      |      | Shiraz-71T | 2263 | 0.975531 | 0         |  |  |
|      |      | Shiraz-3T  | 242  | 0        | -0.336434 |  |  |
|      |      | Shiraz-4T  | 261  | 0        | -0.336249 |  |  |
|      |      | Shiraz-16T | 295  | 0.591657 | 0         |  |  |
|      |      | Shiraz-31T | 346  | 0        | -0.1527   |  |  |
|      |      | Shiraz-36T | 433  | 0        | -0.803961 |  |  |
|      |      | Shiraz-44T | 899  | 0        | -1.09697  |  |  |

|      |      |            |      |          |           |  |  |
|------|------|------------|------|----------|-----------|--|--|
|      |      | Shiraz-44T | 902  | 0        | -1.449824 |  |  |
|      |      | Shiraz-47T | 1085 | 0        | -0.130811 |  |  |
|      |      | Shiraz-49T | 1170 | 0        | -0.967436 |  |  |
|      |      | Shiraz-49T | 1172 | 0        | -1.123219 |  |  |
|      |      | Shiraz-18T | 1457 | 0.643204 | 0         |  |  |
|      |      | Shiraz-22T | 1673 | 0.611783 | 0         |  |  |
|      |      | Shiraz-22T | 1675 | 0.279253 | 0         |  |  |
|      |      | Shiraz-25T | 1719 | 0.472955 | 0         |  |  |
|      |      | Shiraz-28T | 1762 | 0.562311 | 0         |  |  |
|      |      | Shiraz-29T | 1801 | 0.815343 | 0         |  |  |
|      |      | Shiraz-32T | 1870 | 0.729766 | 0         |  |  |
|      |      | Shiraz-32T | 1871 | 0.292679 | 0         |  |  |
|      |      | Shiraz-35T | 1933 | 0.488535 | 0         |  |  |
|      |      | Shiraz-58T | 2223 | 0.833364 | 0         |  |  |
|      |      | Shiraz-58T | 2225 | 0.595784 | 0         |  |  |
|      |      | Shiraz-71T | 2263 | 0.975531 | 0         |  |  |
|      |      | Shiraz-3T  | 242  | 0        | -0.336434 |  |  |
|      |      | Shiraz-4T  | 261  | 0        | -0.336249 |  |  |
|      |      | Shiraz-16T | 295  | 0.591657 | 0         |  |  |
|      |      | Shiraz-31T | 346  | 0        | -0.1527   |  |  |
|      |      | Shiraz-36T | 433  | 0        | -0.803961 |  |  |
|      |      | Shiraz-44T | 899  | 0        | -1.09697  |  |  |
|      |      | Shiraz-44T | 902  | 0        | -1.449824 |  |  |
|      |      | Shiraz-47T | 1085 | 0        | -0.130811 |  |  |
|      |      | Shiraz-49T | 1170 | 0        | -0.967436 |  |  |
|      |      | Shiraz-49T | 1172 | 0        | -1.123219 |  |  |
|      |      | Shiraz-18T | 1457 | 0.643204 | 0         |  |  |
|      |      | Shiraz-22T | 1673 | 0.611783 | 0         |  |  |
|      |      | Shiraz-22T | 1675 | 0.279253 | 0         |  |  |
|      |      | Shiraz-25T | 1719 | 0.472955 | 0         |  |  |
|      |      | Shiraz-28T | 1762 | 0.562311 | 0         |  |  |
|      |      | Shiraz-29T | 1801 | 0.815343 | 0         |  |  |
|      |      | Shiraz-32T | 1870 | 0.729766 | 0         |  |  |
|      |      | Shiraz-32T | 1871 | 0.292679 | 0         |  |  |
|      |      | Shiraz-35T | 1933 | 0.488535 | 0         |  |  |
|      |      | Shiraz-58T | 2223 | 0.833364 | 0         |  |  |
|      |      | Shiraz-58T | 2225 | 0.595784 | 0         |  |  |
|      |      | Shiraz-71T | 2263 | 0.975531 | 0         |  |  |
| RPGR | chrX | Shiraz-3T  | 235  | 0        | -0.28401  |  |  |
|      |      | Shiraz-3T  | 235  | 0        | -0.28401  |  |  |
|      |      | Shiraz-4T  | 260  | 0        | -0.324128 |  |  |
|      |      | Shiraz-4T  | 260  | 0        | -0.324128 |  |  |
|      |      | Shiraz-16T | 294  | 0.655804 | 0         |  |  |
|      |      | Shiraz-16T | 294  | 0.655804 | 0         |  |  |
|      |      | Shiraz-36T | 431  | 0        | -0.78035  |  |  |
|      |      | Shiraz-36T | 431  | 0        | -0.78035  |  |  |
|      |      | Shiraz-44T | 891  | 0        | -0.954044 |  |  |



|  |  |            |      |          |           |  |  |
|--|--|------------|------|----------|-----------|--|--|
|  |  | Shiraz-44T | 891  | 0        | -0.954044 |  |  |
|  |  | Shiraz-49T | 1166 | 0        | -0.917235 |  |  |
|  |  | Shiraz-49T | 1166 | 0        | -0.917235 |  |  |
|  |  | Shiraz-49T | 1168 | 0        | -1.073859 |  |  |
|  |  | Shiraz-49T | 1168 | 0        | -1.073859 |  |  |
|  |  | Shiraz-9T  | 1368 | 0.199713 | 0         |  |  |
|  |  | Shiraz-9T  | 1368 | 0.199713 | 0         |  |  |
|  |  | Shiraz-18T | 1455 | 0        | -0.186773 |  |  |
|  |  | Shiraz-18T | 1455 | 0        | -0.186773 |  |  |
|  |  | Shiraz-22T | 1669 | 0.695915 | 0         |  |  |
|  |  | Shiraz-22T | 1669 | 0.695915 | 0         |  |  |
|  |  | Shiraz-25T | 1717 | 0.420447 | 0         |  |  |
|  |  | Shiraz-25T | 1717 | 0.420447 | 0         |  |  |
|  |  | Shiraz-28T | 1760 | 0.538181 | 0         |  |  |
|  |  | Shiraz-28T | 1760 | 0.538181 | 0         |  |  |
|  |  | Shiraz-29T | 1800 | 0.672527 | 0         |  |  |
|  |  | Shiraz-29T | 1800 | 0.672527 | 0         |  |  |
|  |  | Shiraz-32T | 1869 | 0.776805 | 0         |  |  |
|  |  | Shiraz-32T | 1869 | 0.776805 | 0         |  |  |
|  |  | Shiraz-35T | 1932 | 0.507141 | 0         |  |  |
|  |  | Shiraz-35T | 1932 | 0.507141 | 0         |  |  |
|  |  | Shiraz-40T | 2051 | 0.098506 | 0         |  |  |
|  |  | Shiraz-40T | 2051 | 0.098506 | 0         |  |  |
|  |  | Shiraz-58T | 2221 | 0.871948 | 0         |  |  |
|  |  | Shiraz-58T | 2221 | 0.871948 | 0         |  |  |
|  |  | Shiraz-71T | 2260 | 0.68394  | 0         |  |  |
|  |  | Shiraz-71T | 2260 | 0.68394  | 0         |  |  |
|  |  | Shiraz-3T  | 235  | 0        | -0.28401  |  |  |
|  |  | Shiraz-3T  | 235  | 0        | -0.28401  |  |  |
|  |  | Shiraz-4T  | 260  | 0        | -0.324128 |  |  |
|  |  | Shiraz-4T  | 260  | 0        | -0.324128 |  |  |
|  |  | Shiraz-16T | 294  | 0.655804 | 0         |  |  |
|  |  | Shiraz-16T | 294  | 0.655804 | 0         |  |  |
|  |  | Shiraz-36T | 431  | 0        | -0.78035  |  |  |
|  |  | Shiraz-36T | 431  | 0        | -0.78035  |  |  |
|  |  | Shiraz-44T | 891  | 0        | -0.954044 |  |  |
|  |  | Shiraz-44T | 891  | 0        | -0.954044 |  |  |
|  |  | Shiraz-49T | 1166 | 0        | -0.917235 |  |  |
|  |  | Shiraz-49T | 1166 | 0        | -0.917235 |  |  |
|  |  | Shiraz-49T | 1168 | 0        | -1.073859 |  |  |
|  |  | Shiraz-49T | 1168 | 0        | -1.073859 |  |  |
|  |  | Shiraz-9T  | 1368 | 0.199713 | 0         |  |  |
|  |  | Shiraz-9T  | 1368 | 0.199713 | 0         |  |  |
|  |  | Shiraz-18T | 1455 | 0        | -0.186773 |  |  |
|  |  | Shiraz-18T | 1455 | 0        | -0.186773 |  |  |
|  |  | Shiraz-22T | 1669 | 0.695915 | 0         |  |  |
|  |  | Shiraz-22T | 1669 | 0.695915 | 0         |  |  |

|  |  |            |      |          |           |  |  |
|--|--|------------|------|----------|-----------|--|--|
|  |  | Shiraz-25T | 1717 | 0.420447 | 0         |  |  |
|  |  | Shiraz-25T | 1717 | 0.420447 | 0         |  |  |
|  |  | Shiraz-28T | 1760 | 0.538181 | 0         |  |  |
|  |  | Shiraz-28T | 1760 | 0.538181 | 0         |  |  |
|  |  | Shiraz-29T | 1800 | 0.672527 | 0         |  |  |
|  |  | Shiraz-29T | 1800 | 0.672527 | 0         |  |  |
|  |  | Shiraz-32T | 1869 | 0.776805 | 0         |  |  |
|  |  | Shiraz-32T | 1869 | 0.776805 | 0         |  |  |
|  |  | Shiraz-35T | 1932 | 0.507141 | 0         |  |  |
|  |  | Shiraz-35T | 1932 | 0.507141 | 0         |  |  |
|  |  | Shiraz-40T | 2051 | 0.098506 | 0         |  |  |
|  |  | Shiraz-40T | 2051 | 0.098506 | 0         |  |  |
|  |  | Shiraz-58T | 2221 | 0.871948 | 0         |  |  |
|  |  | Shiraz-58T | 2221 | 0.871948 | 0         |  |  |
|  |  | Shiraz-71T | 2260 | 0.68394  | 0         |  |  |
|  |  | Shiraz-71T | 2260 | 0.68394  | 0         |  |  |
|  |  | Shiraz-3T  | 235  | 0        | -0.28401  |  |  |
|  |  | Shiraz-3T  | 235  | 0        | -0.28401  |  |  |
|  |  | Shiraz-4T  | 260  | 0        | -0.324128 |  |  |
|  |  | Shiraz-4T  | 260  | 0        | -0.324128 |  |  |
|  |  | Shiraz-16T | 294  | 0.655804 | 0         |  |  |
|  |  | Shiraz-16T | 294  | 0.655804 | 0         |  |  |
|  |  | Shiraz-36T | 431  | 0        | -0.78035  |  |  |
|  |  | Shiraz-36T | 431  | 0        | -0.78035  |  |  |
|  |  | Shiraz-44T | 891  | 0        | -0.954044 |  |  |
|  |  | Shiraz-44T | 891  | 0        | -0.954044 |  |  |
|  |  | Shiraz-49T | 1166 | 0        | -0.917235 |  |  |
|  |  | Shiraz-49T | 1166 | 0        | -0.917235 |  |  |
|  |  | Shiraz-49T | 1168 | 0        | -1.073859 |  |  |
|  |  | Shiraz-49T | 1168 | 0        | -1.073859 |  |  |
|  |  | Shiraz-9T  | 1368 | 0.199713 | 0         |  |  |
|  |  | Shiraz-9T  | 1368 | 0.199713 | 0         |  |  |
|  |  | Shiraz-18T | 1455 | 0        | -0.186773 |  |  |
|  |  | Shiraz-18T | 1455 | 0        | -0.186773 |  |  |
|  |  | Shiraz-22T | 1669 | 0.695915 | 0         |  |  |
|  |  | Shiraz-22T | 1669 | 0.695915 | 0         |  |  |
|  |  | Shiraz-25T | 1717 | 0.420447 | 0         |  |  |
|  |  | Shiraz-25T | 1717 | 0.420447 | 0         |  |  |
|  |  | Shiraz-28T | 1760 | 0.538181 | 0         |  |  |
|  |  | Shiraz-28T | 1760 | 0.538181 | 0         |  |  |
|  |  | Shiraz-29T | 1800 | 0.672527 | 0         |  |  |
|  |  | Shiraz-29T | 1800 | 0.672527 | 0         |  |  |
|  |  | Shiraz-32T | 1869 | 0.776805 | 0         |  |  |
|  |  | Shiraz-32T | 1869 | 0.776805 | 0         |  |  |
|  |  | Shiraz-35T | 1932 | 0.507141 | 0         |  |  |
|  |  | Shiraz-35T | 1932 | 0.507141 | 0         |  |  |
|  |  | Shiraz-40T | 2051 | 0.098506 | 0         |  |  |

|       |      |            |      |          |           |  |
|-------|------|------------|------|----------|-----------|--|
|       |      | Shiraz-40T | 2051 | 0.098506 | 0         |  |
|       |      | Shiraz-58T | 2221 | 0.871948 | 0         |  |
|       |      | Shiraz-58T | 2221 | 0.871948 | 0         |  |
|       |      | Shiraz-71T | 2260 | 0.68394  | 0         |  |
|       |      | Shiraz-71T | 2260 | 0.68394  | 0         |  |
| RPL10 | chrX | Shiraz-3T  | 246  | 0.531858 | 0         |  |
|       |      | Shiraz-4T  | 261  | 0        | -0.336249 |  |
|       |      | Shiraz-16T | 295  | 0.591657 | 0         |  |
|       |      | Shiraz-36T | 433  | 0        | -0.803961 |  |
|       |      | Shiraz-42T | 480  | 0        | -0.232915 |  |
|       |      | Shiraz-44T | 908  | 0.466743 | 0         |  |
|       |      | Shiraz-49T | 1170 | 0        | -0.967436 |  |
|       |      | Shiraz-49T | 1173 | 0        | -0.704439 |  |
|       |      | Shiraz-9T  | 1370 | 0.690073 | 0         |  |
|       |      | Shiraz-9T  | 1371 | 1.292392 | 0         |  |
|       |      | Shiraz-18T | 1457 | 0.643204 | 0         |  |
|       |      | Shiraz-22T | 1673 | 0.611783 | 0         |  |
|       |      | Shiraz-22T | 1678 | 0.911625 | 0         |  |
|       |      | Shiraz-25T | 1719 | 0.472955 | 0         |  |
|       |      | Shiraz-28T | 1762 | 0.562311 | 0         |  |
|       |      | Shiraz-29T | 1801 | 0.815343 | 0         |  |
|       |      | Shiraz-32T | 1870 | 0.729766 | 0         |  |
|       |      | Shiraz-32T | 1872 | 1.504553 | 0         |  |
|       |      | Shiraz-35T | 1933 | 0.488535 | 0         |  |
|       |      | Shiraz-38T | 2011 | 0        | -0.406024 |  |
|       |      | Shiraz-53T | 2115 | 0.427728 | 0         |  |
|       |      | Shiraz-58T | 2223 | 0.833364 | 0         |  |
|       |      | Shiraz-58T | 2226 | 1.074663 | 0         |  |
|       |      | Shiraz-71T | 2263 | 0.975531 | 0         |  |
|       |      | Shiraz-3T  | 246  | 0.531858 | 0         |  |
|       |      | Shiraz-4T  | 261  | 0        | -0.336249 |  |
|       |      | Shiraz-16T | 295  | 0.591657 | 0         |  |
|       |      | Shiraz-36T | 433  | 0        | -0.803961 |  |
|       |      | Shiraz-42T | 480  | 0        | -0.232915 |  |
|       |      | Shiraz-44T | 908  | 0.466743 | 0         |  |
|       |      | Shiraz-49T | 1170 | 0        | -0.967436 |  |
|       |      | Shiraz-49T | 1173 | 0        | -0.704439 |  |
|       |      | Shiraz-9T  | 1370 | 0.690073 | 0         |  |
|       |      | Shiraz-9T  | 1371 | 1.292392 | 0         |  |
|       |      | Shiraz-18T | 1457 | 0.643204 | 0         |  |
|       |      | Shiraz-22T | 1673 | 0.611783 | 0         |  |
|       |      | Shiraz-22T | 1678 | 0.911625 | 0         |  |
|       |      | Shiraz-25T | 1719 | 0.472955 | 0         |  |
|       |      | Shiraz-28T | 1762 | 0.562311 | 0         |  |
|       |      | Shiraz-29T | 1801 | 0.815343 | 0         |  |
|       |      | Shiraz-32T | 1870 | 0.729766 | 0         |  |
|       |      | Shiraz-32T | 1872 | 1.504553 | 0         |  |

|           |      |            |      |          |           |  |  |
|-----------|------|------------|------|----------|-----------|--|--|
|           |      | Shiraz-35T | 1933 | 0.488535 | 0         |  |  |
|           |      | Shiraz-38T | 2011 | 0        | -0.406024 |  |  |
|           |      | Shiraz-53T | 2115 | 0.427728 | 0         |  |  |
|           |      | Shiraz-58T | 2223 | 0.833364 | 0         |  |  |
|           |      | Shiraz-58T | 2226 | 1.074663 | 0         |  |  |
|           |      | Shiraz-71T | 2263 | 0.975531 | 0         |  |  |
|           |      | Shiraz-3T  | 246  | 0.531858 | 0         |  |  |
|           |      | Shiraz-4T  | 261  | 0        | -0.336249 |  |  |
|           |      | Shiraz-16T | 295  | 0.591657 | 0         |  |  |
|           |      | Shiraz-36T | 433  | 0        | -0.803961 |  |  |
|           |      | Shiraz-42T | 480  | 0        | -0.232915 |  |  |
|           |      | Shiraz-44T | 908  | 0.466743 | 0         |  |  |
|           |      | Shiraz-49T | 1170 | 0        | -0.967436 |  |  |
|           |      | Shiraz-49T | 1173 | 0        | -0.704439 |  |  |
|           |      | Shiraz-9T  | 1370 | 0.690073 | 0         |  |  |
|           |      | Shiraz-9T  | 1371 | 1.292392 | 0         |  |  |
|           |      | Shiraz-18T | 1457 | 0.643204 | 0         |  |  |
|           |      | Shiraz-22T | 1673 | 0.611783 | 0         |  |  |
|           |      | Shiraz-22T | 1678 | 0.911625 | 0         |  |  |
|           |      | Shiraz-25T | 1719 | 0.472955 | 0         |  |  |
|           |      | Shiraz-28T | 1762 | 0.562311 | 0         |  |  |
|           |      | Shiraz-29T | 1801 | 0.815343 | 0         |  |  |
|           |      | Shiraz-32T | 1870 | 0.729766 | 0         |  |  |
|           |      | Shiraz-32T | 1872 | 1.504553 | 0         |  |  |
|           |      | Shiraz-35T | 1933 | 0.488535 | 0         |  |  |
|           |      | Shiraz-38T | 2011 | 0        | -0.406024 |  |  |
|           |      | Shiraz-53T | 2115 | 0.427728 | 0         |  |  |
|           |      | Shiraz-58T | 2223 | 0.833364 | 0         |  |  |
|           |      | Shiraz-58T | 2226 | 1.074663 | 0         |  |  |
|           |      | Shiraz-71T | 2263 | 0.975531 | 0         |  |  |
| RPL13AP17 | chr7 | Shiraz-3T  | 90   | 0.219276 | 0         |  |  |
|           |      | Shiraz-3T  | 93   | 0        | -0.058023 |  |  |
|           |      | Shiraz-4T  | 253  | 0.372918 | 0         |  |  |
|           |      | Shiraz-36T | 378  | 0.179558 | 0         |  |  |
|           |      | Shiraz-36T | 380  | 0.083883 | 0         |  |  |
|           |      | Shiraz-44T | 638  | 0        | -0.433476 |  |  |
|           |      | Shiraz-46T | 943  | 0.093799 | 0         |  |  |
|           |      | Shiraz-46T | 945  | 0        | -0.014838 |  |  |
|           |      | Shiraz-47T | 1029 | 0        | -0.096586 |  |  |
|           |      | Shiraz-49T | 1119 | 0        | -0.157331 |  |  |
|           |      | Shiraz-77T | 1225 | 0        | -0.117922 |  |  |
|           |      | Shiraz-18T | 1434 | 0.244465 | 0         |  |  |
|           |      | Shiraz-22T | 1549 | 0        | -0.319623 |  |  |
|           |      | Shiraz-22T | 1550 | 0        | -0.577052 |  |  |
|           |      | Shiraz-25T | 1698 | 0.21835  | 0         |  |  |
|           |      | Shiraz-28T | 1735 | 0.350744 | 0         |  |  |
|           |      | Shiraz-29T | 1778 | 0.120767 | 0         |  |  |

|  |            |      |          |           |  |
|--|------------|------|----------|-----------|--|
|  | Shiraz-38T | 1951 | 0.250891 | 0         |  |
|  | Shiraz-53T | 2078 | 0.287202 | 0         |  |
|  | Shiraz-58T | 2159 | 0        | -0.219521 |  |
|  | Shiraz-71T | 2238 | 0.603631 | 0         |  |
|  | Shiraz-71T | 2239 | 0.310785 | 0         |  |
|  | Shiraz-3T  | 90   | 0.219276 | 0         |  |
|  | Shiraz-3T  | 93   | 0        | -0.058023 |  |
|  | Shiraz-4T  | 253  | 0.372918 | 0         |  |
|  | Shiraz-36T | 378  | 0.179558 | 0         |  |
|  | Shiraz-36T | 380  | 0.083883 | 0         |  |
|  | Shiraz-44T | 638  | 0        | -0.433476 |  |
|  | Shiraz-46T | 943  | 0.093799 | 0         |  |
|  | Shiraz-46T | 945  | 0        | -0.014838 |  |
|  | Shiraz-47T | 1029 | 0        | -0.096586 |  |
|  | Shiraz-49T | 1119 | 0        | -0.157331 |  |
|  | Shiraz-77T | 1225 | 0        | -0.117922 |  |
|  | Shiraz-18T | 1434 | 0.244465 | 0         |  |
|  | Shiraz-22T | 1549 | 0        | -0.319623 |  |
|  | Shiraz-22T | 1550 | 0        | -0.577052 |  |
|  | Shiraz-25T | 1698 | 0.21835  | 0         |  |
|  | Shiraz-28T | 1735 | 0.350744 | 0         |  |
|  | Shiraz-29T | 1778 | 0.120767 | 0         |  |
|  | Shiraz-38T | 1951 | 0.250891 | 0         |  |
|  | Shiraz-53T | 2078 | 0.287202 | 0         |  |
|  | Shiraz-58T | 2159 | 0        | -0.219521 |  |
|  | Shiraz-71T | 2238 | 0.603631 | 0         |  |
|  | Shiraz-71T | 2239 | 0.310785 | 0         |  |
|  | Shiraz-3T  | 90   | 0.219276 | 0         |  |
|  | Shiraz-3T  | 93   | 0        | -0.058023 |  |
|  | Shiraz-4T  | 253  | 0.372918 | 0         |  |
|  | Shiraz-36T | 378  | 0.179558 | 0         |  |
|  | Shiraz-36T | 380  | 0.083883 | 0         |  |
|  | Shiraz-44T | 638  | 0        | -0.433476 |  |
|  | Shiraz-46T | 943  | 0.093799 | 0         |  |
|  | Shiraz-46T | 945  | 0        | -0.014838 |  |
|  | Shiraz-47T | 1029 | 0        | -0.096586 |  |
|  | Shiraz-49T | 1119 | 0        | -0.157331 |  |
|  | Shiraz-77T | 1225 | 0        | -0.117922 |  |
|  | Shiraz-18T | 1434 | 0.244465 | 0         |  |
|  | Shiraz-22T | 1549 | 0        | -0.319623 |  |
|  | Shiraz-22T | 1550 | 0        | -0.577052 |  |
|  | Shiraz-25T | 1698 | 0.21835  | 0         |  |
|  | Shiraz-28T | 1735 | 0.350744 | 0         |  |
|  | Shiraz-29T | 1778 | 0.120767 | 0         |  |
|  | Shiraz-38T | 1951 | 0.250891 | 0         |  |
|  | Shiraz-53T | 2078 | 0.287202 | 0         |  |
|  | Shiraz-58T | 2159 | 0        | -0.219521 |  |

|          |      |            |      |          |           |  |  |
|----------|------|------------|------|----------|-----------|--|--|
|          |      | Shiraz-71T | 2238 | 0.603631 | 0         |  |  |
|          |      | Shiraz-71T | 2239 | 0.310785 | 0         |  |  |
| RPL19P12 | chr7 | Shiraz-3T  | 90   | 0.219276 | 0         |  |  |
|          |      | Shiraz-4T  | 253  | 0.372918 | 0         |  |  |
|          |      | Shiraz-36T | 378  | 0.179558 | 0         |  |  |
|          |      | Shiraz-46T | 943  | 0.093799 | 0         |  |  |
|          |      | Shiraz-77T | 1225 | 0        | -0.117922 |  |  |
|          |      | Shiraz-18T | 1434 | 0.244465 | 0         |  |  |
|          |      | Shiraz-22T | 1549 | 0        | -0.319623 |  |  |
|          |      | Shiraz-25T | 1698 | 0.21835  | 0         |  |  |
|          |      | Shiraz-28T | 1735 | 0.350744 | 0         |  |  |
|          |      | Shiraz-29T | 1778 | 0.120767 | 0         |  |  |
|          |      | Shiraz-32T | 1833 | 0.551336 | 0         |  |  |
|          |      | Shiraz-38T | 1951 | 0.250891 | 0         |  |  |
|          |      | Shiraz-53T | 2078 | 0.287202 | 0         |  |  |
|          |      | Shiraz-71T | 2238 | 0.603631 | 0         |  |  |
|          |      | Shiraz-3T  | 90   | 0.219276 | 0         |  |  |
|          |      | Shiraz-4T  | 253  | 0.372918 | 0         |  |  |
|          |      | Shiraz-36T | 378  | 0.179558 | 0         |  |  |
|          |      | Shiraz-46T | 943  | 0.093799 | 0         |  |  |
|          |      | Shiraz-77T | 1225 | 0        | -0.117922 |  |  |
|          |      | Shiraz-18T | 1434 | 0.244465 | 0         |  |  |
|          |      | Shiraz-22T | 1549 | 0        | -0.319623 |  |  |
|          |      | Shiraz-25T | 1698 | 0.21835  | 0         |  |  |
|          |      | Shiraz-28T | 1735 | 0.350744 | 0         |  |  |
|          |      | Shiraz-29T | 1778 | 0.120767 | 0         |  |  |
|          |      | Shiraz-32T | 1833 | 0.551336 | 0         |  |  |
|          |      | Shiraz-38T | 1951 | 0.250891 | 0         |  |  |
|          |      | Shiraz-53T | 2078 | 0.287202 | 0         |  |  |
|          |      | Shiraz-71T | 2238 | 0.603631 | 0         |  |  |
|          |      | Shiraz-3T  | 90   | 0.219276 | 0         |  |  |
|          |      | Shiraz-4T  | 253  | 0.372918 | 0         |  |  |
|          |      | Shiraz-36T | 378  | 0.179558 | 0         |  |  |
|          |      | Shiraz-46T | 943  | 0.093799 | 0         |  |  |
|          |      | Shiraz-77T | 1225 | 0        | -0.117922 |  |  |
|          |      | Shiraz-18T | 1434 | 0.244465 | 0         |  |  |
|          |      | Shiraz-22T | 1549 | 0        | -0.319623 |  |  |
|          |      | Shiraz-25T | 1698 | 0.21835  | 0         |  |  |
|          |      | Shiraz-28T | 1735 | 0.350744 | 0         |  |  |
|          |      | Shiraz-29T | 1778 | 0.120767 | 0         |  |  |
|          |      | Shiraz-32T | 1833 | 0.551336 | 0         |  |  |
|          |      | Shiraz-38T | 1951 | 0.250891 | 0         |  |  |
|          |      | Shiraz-53T | 2078 | 0.287202 | 0         |  |  |
|          |      | Shiraz-71T | 2238 | 0.603631 | 0         |  |  |
| RPL23P8  | chr7 | Shiraz-4T  | 252  | 0.192083 | 0         |  |  |
|          |      | Shiraz-36T | 376  | 0.159952 | 0         |  |  |
|          |      | Shiraz-44T | 628  | 0        | -0.444379 |  |  |

|        |      |            |      |          |           |  |  |
|--------|------|------------|------|----------|-----------|--|--|
|        |      | Shiraz-46T | 942  | 0.069143 | 0         |  |  |
|        |      | Shiraz-47T | 1027 | 0        | -0.117848 |  |  |
|        |      | Shiraz-77T | 1222 | 0        | -0.113002 |  |  |
|        |      | Shiraz-18T | 1433 | 0.250973 | 0         |  |  |
|        |      | Shiraz-22T | 1543 | 0        | -0.513696 |  |  |
|        |      | Shiraz-25T | 1697 | 0.21945  | 0         |  |  |
|        |      | Shiraz-28T | 1734 | 0.362882 | 0         |  |  |
|        |      | Shiraz-29T | 1777 | 0.156747 | 0         |  |  |
|        |      | Shiraz-38T | 1950 | 0.265916 | 0         |  |  |
|        |      | Shiraz-58T | 2157 | 0        | -0.213872 |  |  |
|        |      | Shiraz-71T | 2236 | 0.320072 | 0         |  |  |
|        |      | Shiraz-4T  | 252  | 0.192083 | 0         |  |  |
|        |      | Shiraz-36T | 376  | 0.159952 | 0         |  |  |
|        |      | Shiraz-44T | 628  | 0        | -0.444379 |  |  |
|        |      | Shiraz-46T | 942  | 0.069143 | 0         |  |  |
|        |      | Shiraz-47T | 1027 | 0        | -0.117848 |  |  |
|        |      | Shiraz-77T | 1222 | 0        | -0.113002 |  |  |
|        |      | Shiraz-18T | 1433 | 0.250973 | 0         |  |  |
|        |      | Shiraz-22T | 1543 | 0        | -0.513696 |  |  |
|        |      | Shiraz-25T | 1697 | 0.21945  | 0         |  |  |
|        |      | Shiraz-28T | 1734 | 0.362882 | 0         |  |  |
|        |      | Shiraz-29T | 1777 | 0.156747 | 0         |  |  |
|        |      | Shiraz-38T | 1950 | 0.265916 | 0         |  |  |
|        |      | Shiraz-58T | 2157 | 0        | -0.213872 |  |  |
|        |      | Shiraz-71T | 2236 | 0.320072 | 0         |  |  |
|        |      | Shiraz-4T  | 252  | 0.192083 | 0         |  |  |
|        |      | Shiraz-36T | 376  | 0.159952 | 0         |  |  |
|        |      | Shiraz-44T | 628  | 0        | -0.444379 |  |  |
|        |      | Shiraz-46T | 942  | 0.069143 | 0         |  |  |
|        |      | Shiraz-47T | 1027 | 0        | -0.117848 |  |  |
|        |      | Shiraz-77T | 1222 | 0        | -0.113002 |  |  |
|        |      | Shiraz-18T | 1433 | 0.250973 | 0         |  |  |
|        |      | Shiraz-22T | 1543 | 0        | -0.513696 |  |  |
|        |      | Shiraz-25T | 1697 | 0.21945  | 0         |  |  |
|        |      | Shiraz-28T | 1734 | 0.362882 | 0         |  |  |
|        |      | Shiraz-29T | 1777 | 0.156747 | 0         |  |  |
|        |      | Shiraz-38T | 1950 | 0.265916 | 0         |  |  |
|        |      | Shiraz-58T | 2157 | 0        | -0.213872 |  |  |
|        |      | Shiraz-71T | 2236 | 0.320072 | 0         |  |  |
| RPL36A | chrX | Shiraz-3T  | 242  | 0        | -0.336434 |  |  |
|        |      | Shiraz-4T  | 261  | 0        | -0.336249 |  |  |
|        |      | Shiraz-16T | 295  | 0.591657 | 0         |  |  |
|        |      | Shiraz-36T | 433  | 0        | -0.803961 |  |  |
|        |      | Shiraz-44T | 899  | 0        | -1.09697  |  |  |
|        |      | Shiraz-49T | 1170 | 0        | -0.967436 |  |  |
|        |      | Shiraz-18T | 1457 | 0.643204 | 0         |  |  |
|        |      | Shiraz-22T | 1673 | 0.611783 | 0         |  |  |

|       |      |            |      |          |           |  |  |
|-------|------|------------|------|----------|-----------|--|--|
|       |      | Shiraz-25T | 1719 | 0.472955 | 0         |  |  |
|       |      | Shiraz-28T | 1762 | 0.562311 | 0         |  |  |
|       |      | Shiraz-29T | 1801 | 0.815343 | 0         |  |  |
|       |      | Shiraz-32T | 1870 | 0.729766 | 0         |  |  |
|       |      | Shiraz-35T | 1933 | 0.488535 | 0         |  |  |
|       |      | Shiraz-58T | 2223 | 0.833364 | 0         |  |  |
|       |      | Shiraz-71T | 2263 | 0.975531 | 0         |  |  |
|       |      | Shiraz-3T  | 242  | 0        | -0.336434 |  |  |
|       |      | Shiraz-4T  | 261  | 0        | -0.336249 |  |  |
|       |      | Shiraz-16T | 295  | 0.591657 | 0         |  |  |
|       |      | Shiraz-36T | 433  | 0        | -0.803961 |  |  |
|       |      | Shiraz-44T | 899  | 0        | -1.09697  |  |  |
|       |      | Shiraz-49T | 1170 | 0        | -0.967436 |  |  |
|       |      | Shiraz-18T | 1457 | 0.643204 | 0         |  |  |
|       |      | Shiraz-22T | 1673 | 0.611783 | 0         |  |  |
|       |      | Shiraz-25T | 1719 | 0.472955 | 0         |  |  |
|       |      | Shiraz-28T | 1762 | 0.562311 | 0         |  |  |
|       |      | Shiraz-29T | 1801 | 0.815343 | 0         |  |  |
|       |      | Shiraz-32T | 1870 | 0.729766 | 0         |  |  |
|       |      | Shiraz-35T | 1933 | 0.488535 | 0         |  |  |
|       |      | Shiraz-58T | 2223 | 0.833364 | 0         |  |  |
|       |      | Shiraz-71T | 2263 | 0.975531 | 0         |  |  |
|       |      | Shiraz-3T  | 242  | 0        | -0.336434 |  |  |
|       |      | Shiraz-4T  | 261  | 0        | -0.336249 |  |  |
|       |      | Shiraz-16T | 295  | 0.591657 | 0         |  |  |
|       |      | Shiraz-36T | 433  | 0        | -0.803961 |  |  |
|       |      | Shiraz-44T | 899  | 0        | -1.09697  |  |  |
|       |      | Shiraz-49T | 1170 | 0        | -0.967436 |  |  |
|       |      | Shiraz-18T | 1457 | 0.643204 | 0         |  |  |
|       |      | Shiraz-22T | 1673 | 0.611783 | 0         |  |  |
|       |      | Shiraz-25T | 1719 | 0.472955 | 0         |  |  |
|       |      | Shiraz-28T | 1762 | 0.562311 | 0         |  |  |
|       |      | Shiraz-29T | 1801 | 0.815343 | 0         |  |  |
|       |      | Shiraz-32T | 1870 | 0.729766 | 0         |  |  |
|       |      | Shiraz-35T | 1933 | 0.488535 | 0         |  |  |
|       |      | Shiraz-58T | 2223 | 0.833364 | 0         |  |  |
|       |      | Shiraz-71T | 2263 | 0.975531 | 0         |  |  |
| RPL37 | chr5 | Shiraz-4T  | 250  | 0.262252 | 0         |  |  |
|       |      | Shiraz-16T | 266  | 0.321724 | 0         |  |  |
|       |      | Shiraz-44T | 591  | 0        | -0.233934 |  |  |
|       |      | Shiraz-18T | 1429 | 0        | -0.314125 |  |  |
|       |      | Shiraz-22T | 1522 | 0        | -0.322688 |  |  |
|       |      | Shiraz-25T | 1694 | 0.201602 | 0         |  |  |
|       |      | Shiraz-28T | 1731 | 0.295447 | 0         |  |  |
|       |      | Shiraz-29T | 1773 | 0.090981 | 0         |  |  |
|       |      | Shiraz-40T | 2016 | 0.376634 | 0         |  |  |
|       |      | Shiraz-4T  | 250  | 0.262252 | 0         |  |  |



|       |      |            |      |          |           |  |  |
|-------|------|------------|------|----------|-----------|--|--|
|       |      | Shiraz-16T | 266  | 0.321724 | 0         |  |  |
|       |      | Shiraz-44T | 591  | 0        | -0.233934 |  |  |
|       |      | Shiraz-18T | 1429 | 0        | -0.314125 |  |  |
|       |      | Shiraz-22T | 1522 | 0        | -0.322688 |  |  |
|       |      | Shiraz-25T | 1694 | 0.201602 | 0         |  |  |
|       |      | Shiraz-28T | 1731 | 0.295447 | 0         |  |  |
|       |      | Shiraz-29T | 1773 | 0.090981 | 0         |  |  |
|       |      | Shiraz-40T | 2016 | 0.376634 | 0         |  |  |
|       |      | Shiraz-4T  | 250  | 0.262252 | 0         |  |  |
|       |      | Shiraz-16T | 266  | 0.321724 | 0         |  |  |
|       |      | Shiraz-44T | 591  | 0        | -0.233934 |  |  |
|       |      | Shiraz-18T | 1429 | 0        | -0.314125 |  |  |
|       |      | Shiraz-22T | 1522 | 0        | -0.322688 |  |  |
|       |      | Shiraz-25T | 1694 | 0.201602 | 0         |  |  |
|       |      | Shiraz-28T | 1731 | 0.295447 | 0         |  |  |
|       |      | Shiraz-29T | 1773 | 0.090981 | 0         |  |  |
|       |      | Shiraz-40T | 2016 | 0.376634 | 0         |  |  |
| RPL39 | chrX | Shiraz-3T  | 242  | 0        | -0.336434 |  |  |
|       |      | Shiraz-3T  | 244  | 0        | -0.023749 |  |  |
|       |      | Shiraz-4T  | 261  | 0        | -0.336249 |  |  |
|       |      | Shiraz-16T | 295  | 0.591657 | 0         |  |  |
|       |      | Shiraz-36T | 433  | 0        | -0.803961 |  |  |
|       |      | Shiraz-44T | 899  | 0        | -1.09697  |  |  |
|       |      | Shiraz-44T | 904  | 0        | -0.625526 |  |  |
|       |      | Shiraz-49T | 1170 | 0        | -0.967436 |  |  |
|       |      | Shiraz-9T  | 1370 | 0.690073 | 0         |  |  |
|       |      | Shiraz-18T | 1457 | 0.643204 | 0         |  |  |
|       |      | Shiraz-22T | 1673 | 0.611783 | 0         |  |  |
|       |      | Shiraz-25T | 1719 | 0.472955 | 0         |  |  |
|       |      | Shiraz-28T | 1762 | 0.562311 | 0         |  |  |
|       |      | Shiraz-29T | 1801 | 0.815343 | 0         |  |  |
|       |      | Shiraz-32T | 1870 | 0.729766 | 0         |  |  |
|       |      | Shiraz-35T | 1933 | 0.488535 | 0         |  |  |
|       |      | Shiraz-58T | 2223 | 0.833364 | 0         |  |  |
|       |      | Shiraz-71T | 2263 | 0.975531 | 0         |  |  |
|       |      | Shiraz-3T  | 242  | 0        | -0.336434 |  |  |
|       |      | Shiraz-3T  | 244  | 0        | -0.023749 |  |  |
|       |      | Shiraz-4T  | 261  | 0        | -0.336249 |  |  |
|       |      | Shiraz-16T | 295  | 0.591657 | 0         |  |  |
|       |      | Shiraz-36T | 433  | 0        | -0.803961 |  |  |
|       |      | Shiraz-44T | 899  | 0        | -1.09697  |  |  |
|       |      | Shiraz-44T | 904  | 0        | -0.625526 |  |  |
|       |      | Shiraz-49T | 1170 | 0        | -0.967436 |  |  |
|       |      | Shiraz-9T  | 1370 | 0.690073 | 0         |  |  |
|       |      | Shiraz-18T | 1457 | 0.643204 | 0         |  |  |
|       |      | Shiraz-22T | 1673 | 0.611783 | 0         |  |  |
|       |      | Shiraz-25T | 1719 | 0.472955 | 0         |  |  |

|          |      |            |      |          |           |  |  |
|----------|------|------------|------|----------|-----------|--|--|
|          |      | Shiraz-28T | 1762 | 0.562311 | 0         |  |  |
|          |      | Shiraz-29T | 1801 | 0.815343 | 0         |  |  |
|          |      | Shiraz-32T | 1870 | 0.729766 | 0         |  |  |
|          |      | Shiraz-35T | 1933 | 0.488535 | 0         |  |  |
|          |      | Shiraz-58T | 2223 | 0.833364 | 0         |  |  |
|          |      | Shiraz-71T | 2263 | 0.975531 | 0         |  |  |
|          |      | Shiraz-3T  | 242  | 0        | -0.336434 |  |  |
|          |      | Shiraz-3T  | 244  | 0        | -0.023749 |  |  |
|          |      | Shiraz-4T  | 261  | 0        | -0.336249 |  |  |
|          |      | Shiraz-16T | 295  | 0.591657 | 0         |  |  |
|          |      | Shiraz-36T | 433  | 0        | -0.803961 |  |  |
|          |      | Shiraz-44T | 899  | 0        | -1.09697  |  |  |
|          |      | Shiraz-44T | 904  | 0        | -0.625526 |  |  |
|          |      | Shiraz-49T | 1170 | 0        | -0.967436 |  |  |
|          |      | Shiraz-9T  | 1370 | 0.690073 | 0         |  |  |
|          |      | Shiraz-18T | 1457 | 0.643204 | 0         |  |  |
|          |      | Shiraz-22T | 1673 | 0.611783 | 0         |  |  |
|          |      | Shiraz-25T | 1719 | 0.472955 | 0         |  |  |
|          |      | Shiraz-28T | 1762 | 0.562311 | 0         |  |  |
|          |      | Shiraz-29T | 1801 | 0.815343 | 0         |  |  |
|          |      | Shiraz-32T | 1870 | 0.729766 | 0         |  |  |
|          |      | Shiraz-35T | 1933 | 0.488535 | 0         |  |  |
|          |      | Shiraz-58T | 2223 | 0.833364 | 0         |  |  |
|          |      | Shiraz-71T | 2263 | 0.975531 | 0         |  |  |
| RPS26P11 | chrX | Shiraz-4T  | 261  | 0        | -0.336249 |  |  |
|          |      | Shiraz-16T | 295  | 0.591657 | 0         |  |  |
|          |      | Shiraz-36T | 433  | 0        | -0.803961 |  |  |
|          |      | Shiraz-44T | 899  | 0        | -1.09697  |  |  |
|          |      | Shiraz-44T | 900  | 0        | -0.584284 |  |  |
|          |      | Shiraz-49T | 1170 | 0        | -0.967436 |  |  |
|          |      | Shiraz-49T | 1171 | 0        | -0.612379 |  |  |
|          |      | Shiraz-77T | 1283 | 0.296555 | 0         |  |  |
|          |      | Shiraz-18T | 1457 | 0.643204 | 0         |  |  |
|          |      | Shiraz-22T | 1673 | 0.611783 | 0         |  |  |
|          |      | Shiraz-22T | 1674 | 0.887899 | 0         |  |  |
|          |      | Shiraz-25T | 1719 | 0.472955 | 0         |  |  |
|          |      | Shiraz-28T | 1762 | 0.562311 | 0         |  |  |
|          |      | Shiraz-29T | 1801 | 0.815343 | 0         |  |  |
|          |      | Shiraz-32T | 1870 | 0.729766 | 0         |  |  |
|          |      | Shiraz-35T | 1933 | 0.488535 | 0         |  |  |
|          |      | Shiraz-58T | 2223 | 0.833364 | 0         |  |  |
|          |      | Shiraz-58T | 2224 | 1.076575 | 0         |  |  |
|          |      | Shiraz-71T | 2263 | 0.975531 | 0         |  |  |
|          |      | Shiraz-4T  | 261  | 0        | -0.336249 |  |  |
|          |      | Shiraz-16T | 295  | 0.591657 | 0         |  |  |
|          |      | Shiraz-36T | 433  | 0        | -0.803961 |  |  |
|          |      | Shiraz-44T | 899  | 0        | -1.09697  |  |  |

|         |      |            |      |          |           |  |  |
|---------|------|------------|------|----------|-----------|--|--|
|         |      | Shiraz-44T | 900  | 0        | -0.584284 |  |  |
|         |      | Shiraz-49T | 1170 | 0        | -0.967436 |  |  |
|         |      | Shiraz-49T | 1171 | 0        | -0.612379 |  |  |
|         |      | Shiraz-77T | 1283 | 0.296555 | 0         |  |  |
|         |      | Shiraz-18T | 1457 | 0.643204 | 0         |  |  |
|         |      | Shiraz-22T | 1673 | 0.611783 | 0         |  |  |
|         |      | Shiraz-22T | 1674 | 0.887899 | 0         |  |  |
|         |      | Shiraz-25T | 1719 | 0.472955 | 0         |  |  |
|         |      | Shiraz-28T | 1762 | 0.562311 | 0         |  |  |
|         |      | Shiraz-29T | 1801 | 0.815343 | 0         |  |  |
|         |      | Shiraz-32T | 1870 | 0.729766 | 0         |  |  |
|         |      | Shiraz-35T | 1933 | 0.488535 | 0         |  |  |
|         |      | Shiraz-58T | 2223 | 0.833364 | 0         |  |  |
|         |      | Shiraz-58T | 2224 | 1.076575 | 0         |  |  |
|         |      | Shiraz-71T | 2263 | 0.975531 | 0         |  |  |
|         |      | Shiraz-4T  | 261  | 0        | -0.336249 |  |  |
|         |      | Shiraz-16T | 295  | 0.591657 | 0         |  |  |
|         |      | Shiraz-36T | 433  | 0        | -0.803961 |  |  |
|         |      | Shiraz-44T | 899  | 0        | -1.09697  |  |  |
|         |      | Shiraz-44T | 900  | 0        | -0.584284 |  |  |
|         |      | Shiraz-49T | 1170 | 0        | -0.967436 |  |  |
|         |      | Shiraz-49T | 1171 | 0        | -0.612379 |  |  |
|         |      | Shiraz-77T | 1283 | 0.296555 | 0         |  |  |
|         |      | Shiraz-18T | 1457 | 0.643204 | 0         |  |  |
|         |      | Shiraz-22T | 1673 | 0.611783 | 0         |  |  |
|         |      | Shiraz-22T | 1674 | 0.887899 | 0         |  |  |
|         |      | Shiraz-25T | 1719 | 0.472955 | 0         |  |  |
|         |      | Shiraz-28T | 1762 | 0.562311 | 0         |  |  |
|         |      | Shiraz-29T | 1801 | 0.815343 | 0         |  |  |
|         |      | Shiraz-32T | 1870 | 0.729766 | 0         |  |  |
|         |      | Shiraz-35T | 1933 | 0.488535 | 0         |  |  |
|         |      | Shiraz-58T | 2223 | 0.833364 | 0         |  |  |
|         |      | Shiraz-58T | 2224 | 1.076575 | 0         |  |  |
|         |      | Shiraz-71T | 2263 | 0.975531 | 0         |  |  |
| RPS2P32 | chr7 | Shiraz-3T  | 87   | 0.198593 | 0         |  |  |
|         |      | Shiraz-4T  | 252  | 0.192083 | 0         |  |  |
|         |      | Shiraz-36T | 376  | 0.159952 | 0         |  |  |
|         |      | Shiraz-46T | 942  | 0.069143 | 0         |  |  |
|         |      | Shiraz-18T | 1433 | 0.250973 | 0         |  |  |
|         |      | Shiraz-25T | 1697 | 0.21945  | 0         |  |  |
|         |      | Shiraz-28T | 1734 | 0.362882 | 0         |  |  |
|         |      | Shiraz-29T | 1777 | 0.156747 | 0         |  |  |
|         |      | Shiraz-38T | 1950 | 0.265916 | 0         |  |  |
|         |      | Shiraz-71T | 2236 | 0.320072 | 0         |  |  |
|         |      | Shiraz-3T  | 87   | 0.198593 | 0         |  |  |
|         |      | Shiraz-4T  | 252  | 0.192083 | 0         |  |  |
|         |      | Shiraz-36T | 376  | 0.159952 | 0         |  |  |

|       |      |            |      |          |           |  |
|-------|------|------------|------|----------|-----------|--|
|       |      | Shiraz-46T | 942  | 0.069143 | 0         |  |
|       |      | Shiraz-18T | 1433 | 0.250973 | 0         |  |
|       |      | Shiraz-25T | 1697 | 0.21945  | 0         |  |
|       |      | Shiraz-28T | 1734 | 0.362882 | 0         |  |
|       |      | Shiraz-29T | 1777 | 0.156747 | 0         |  |
|       |      | Shiraz-38T | 1950 | 0.265916 | 0         |  |
|       |      | Shiraz-71T | 2236 | 0.320072 | 0         |  |
|       |      | Shiraz-3T  | 87   | 0.198593 | 0         |  |
|       |      | Shiraz-4T  | 252  | 0.192083 | 0         |  |
|       |      | Shiraz-36T | 376  | 0.159952 | 0         |  |
|       |      | Shiraz-46T | 942  | 0.069143 | 0         |  |
|       |      | Shiraz-18T | 1433 | 0.250973 | 0         |  |
|       |      | Shiraz-25T | 1697 | 0.21945  | 0         |  |
|       |      | Shiraz-28T | 1734 | 0.362882 | 0         |  |
|       |      | Shiraz-29T | 1777 | 0.156747 | 0         |  |
|       |      | Shiraz-38T | 1950 | 0.265916 | 0         |  |
|       |      | Shiraz-71T | 2236 | 0.320072 | 0         |  |
| RPS4X | chrX | Shiraz-4T  | 261  | 0        | -0.336249 |  |
|       |      | Shiraz-16T | 295  | 0.591657 | 0         |  |
|       |      | Shiraz-36T | 433  | 0        | -0.803961 |  |
|       |      | Shiraz-44T | 899  | 0        | -1.09697  |  |
|       |      | Shiraz-44T | 900  | 0        | -0.584284 |  |
|       |      | Shiraz-49T | 1170 | 0        | -0.967436 |  |
|       |      | Shiraz-49T | 1171 | 0        | -0.612379 |  |
|       |      | Shiraz-77T | 1283 | 0.296555 | 0         |  |
|       |      | Shiraz-18T | 1457 | 0.643204 | 0         |  |
|       |      | Shiraz-22T | 1673 | 0.611783 | 0         |  |
|       |      | Shiraz-22T | 1674 | 0.887899 | 0         |  |
|       |      | Shiraz-25T | 1719 | 0.472955 | 0         |  |
|       |      | Shiraz-28T | 1762 | 0.562311 | 0         |  |
|       |      | Shiraz-29T | 1801 | 0.815343 | 0         |  |
|       |      | Shiraz-32T | 1870 | 0.729766 | 0         |  |
|       |      | Shiraz-35T | 1933 | 0.488535 | 0         |  |
|       |      | Shiraz-58T | 2223 | 0.833364 | 0         |  |
|       |      | Shiraz-58T | 2224 | 1.076575 | 0         |  |
|       |      | Shiraz-71T | 2263 | 0.975531 | 0         |  |
|       |      | Shiraz-4T  | 261  | 0        | -0.336249 |  |
|       |      | Shiraz-16T | 295  | 0.591657 | 0         |  |
|       |      | Shiraz-36T | 433  | 0        | -0.803961 |  |
|       |      | Shiraz-44T | 899  | 0        | -1.09697  |  |
|       |      | Shiraz-44T | 900  | 0        | -0.584284 |  |
|       |      | Shiraz-49T | 1170 | 0        | -0.967436 |  |
|       |      | Shiraz-49T | 1171 | 0        | -0.612379 |  |
|       |      | Shiraz-77T | 1283 | 0.296555 | 0         |  |
|       |      | Shiraz-18T | 1457 | 0.643204 | 0         |  |
|       |      | Shiraz-22T | 1673 | 0.611783 | 0         |  |
|       |      | Shiraz-22T | 1674 | 0.887899 | 0         |  |

|         |      |            |      |          |           |  |
|---------|------|------------|------|----------|-----------|--|
|         |      | Shiraz-25T | 1719 | 0.472955 | 0         |  |
|         |      | Shiraz-28T | 1762 | 0.562311 | 0         |  |
|         |      | Shiraz-29T | 1801 | 0.815343 | 0         |  |
|         |      | Shiraz-32T | 1870 | 0.729766 | 0         |  |
|         |      | Shiraz-35T | 1933 | 0.488535 | 0         |  |
|         |      | Shiraz-58T | 2223 | 0.833364 | 0         |  |
|         |      | Shiraz-58T | 2224 | 1.076575 | 0         |  |
|         |      | Shiraz-71T | 2263 | 0.975531 | 0         |  |
|         |      | Shiraz-4T  | 261  | 0        | -0.336249 |  |
|         |      | Shiraz-16T | 295  | 0.591657 | 0         |  |
|         |      | Shiraz-36T | 433  | 0        | -0.803961 |  |
|         |      | Shiraz-44T | 899  | 0        | -1.09697  |  |
|         |      | Shiraz-44T | 900  | 0        | -0.584284 |  |
|         |      | Shiraz-49T | 1170 | 0        | -0.967436 |  |
|         |      | Shiraz-49T | 1171 | 0        | -0.612379 |  |
|         |      | Shiraz-77T | 1283 | 0.296555 | 0         |  |
|         |      | Shiraz-18T | 1457 | 0.643204 | 0         |  |
|         |      | Shiraz-22T | 1673 | 0.611783 | 0         |  |
|         |      | Shiraz-22T | 1674 | 0.887899 | 0         |  |
|         |      | Shiraz-25T | 1719 | 0.472955 | 0         |  |
|         |      | Shiraz-28T | 1762 | 0.562311 | 0         |  |
|         |      | Shiraz-29T | 1801 | 0.815343 | 0         |  |
|         |      | Shiraz-32T | 1870 | 0.729766 | 0         |  |
|         |      | Shiraz-35T | 1933 | 0.488535 | 0         |  |
|         |      | Shiraz-58T | 2223 | 0.833364 | 0         |  |
|         |      | Shiraz-58T | 2224 | 1.076575 | 0         |  |
|         |      | Shiraz-71T | 2263 | 0.975531 | 0         |  |
| RPS6KA3 | chrX | Shiraz-3T  | 235  | 0        | -0.28401  |  |
|         |      | Shiraz-4T  | 260  | 0        | -0.324128 |  |
|         |      | Shiraz-16T | 294  | 0.655804 | 0         |  |
|         |      | Shiraz-36T | 431  | 0        | -0.78035  |  |
|         |      | Shiraz-44T | 891  | 0        | -0.954044 |  |
|         |      | Shiraz-49T | 1166 | 0        | -0.917235 |  |
|         |      | Shiraz-77T | 1281 | 0.136627 | 0         |  |
|         |      | Shiraz-9T  | 1368 | 0.199713 | 0         |  |
|         |      | Shiraz-18T | 1455 | 0        | -0.186773 |  |
|         |      | Shiraz-22T | 1669 | 0.695915 | 0         |  |
|         |      | Shiraz-25T | 1717 | 0.420447 | 0         |  |
|         |      | Shiraz-28T | 1760 | 0.538181 | 0         |  |
|         |      | Shiraz-29T | 1800 | 0.672527 | 0         |  |
|         |      | Shiraz-32T | 1869 | 0.776805 | 0         |  |
|         |      | Shiraz-35T | 1932 | 0.507141 | 0         |  |
|         |      | Shiraz-40T | 2051 | 0.098506 | 0         |  |
|         |      | Shiraz-58T | 2221 | 0.871948 | 0         |  |
|         |      | Shiraz-71T | 2260 | 0.68394  | 0         |  |
|         |      | Shiraz-71T | 2261 | 0.508399 | 0         |  |
|         |      | Shiraz-3T  | 235  | 0        | -0.28401  |  |

|         |      |            |      |          |           |  |  |
|---------|------|------------|------|----------|-----------|--|--|
|         |      | Shiraz-4T  | 260  | 0        | -0.324128 |  |  |
|         |      | Shiraz-16T | 294  | 0.655804 | 0         |  |  |
|         |      | Shiraz-36T | 431  | 0        | -0.78035  |  |  |
|         |      | Shiraz-44T | 891  | 0        | -0.954044 |  |  |
|         |      | Shiraz-49T | 1166 | 0        | -0.917235 |  |  |
|         |      | Shiraz-77T | 1281 | 0.136627 | 0         |  |  |
|         |      | Shiraz-9T  | 1368 | 0.199713 | 0         |  |  |
|         |      | Shiraz-18T | 1455 | 0        | -0.186773 |  |  |
|         |      | Shiraz-22T | 1669 | 0.695915 | 0         |  |  |
|         |      | Shiraz-25T | 1717 | 0.420447 | 0         |  |  |
|         |      | Shiraz-28T | 1760 | 0.538181 | 0         |  |  |
|         |      | Shiraz-29T | 1800 | 0.672527 | 0         |  |  |
|         |      | Shiraz-32T | 1869 | 0.776805 | 0         |  |  |
|         |      | Shiraz-35T | 1932 | 0.507141 | 0         |  |  |
|         |      | Shiraz-40T | 2051 | 0.098506 | 0         |  |  |
|         |      | Shiraz-58T | 2221 | 0.871948 | 0         |  |  |
|         |      | Shiraz-71T | 2260 | 0.68394  | 0         |  |  |
|         |      | Shiraz-71T | 2261 | 0.508399 | 0         |  |  |
|         |      | Shiraz-3T  | 235  | 0        | -0.28401  |  |  |
|         |      | Shiraz-4T  | 260  | 0        | -0.324128 |  |  |
|         |      | Shiraz-16T | 294  | 0.655804 | 0         |  |  |
|         |      | Shiraz-36T | 431  | 0        | -0.78035  |  |  |
|         |      | Shiraz-44T | 891  | 0        | -0.954044 |  |  |
|         |      | Shiraz-49T | 1166 | 0        | -0.917235 |  |  |
|         |      | Shiraz-77T | 1281 | 0.136627 | 0         |  |  |
|         |      | Shiraz-9T  | 1368 | 0.199713 | 0         |  |  |
|         |      | Shiraz-18T | 1455 | 0        | -0.186773 |  |  |
|         |      | Shiraz-22T | 1669 | 0.695915 | 0         |  |  |
|         |      | Shiraz-25T | 1717 | 0.420447 | 0         |  |  |
|         |      | Shiraz-28T | 1760 | 0.538181 | 0         |  |  |
|         |      | Shiraz-29T | 1800 | 0.672527 | 0         |  |  |
|         |      | Shiraz-32T | 1869 | 0.776805 | 0         |  |  |
|         |      | Shiraz-35T | 1932 | 0.507141 | 0         |  |  |
|         |      | Shiraz-40T | 2051 | 0.098506 | 0         |  |  |
|         |      | Shiraz-58T | 2221 | 0.871948 | 0         |  |  |
|         |      | Shiraz-71T | 2260 | 0.68394  | 0         |  |  |
|         |      | Shiraz-71T | 2261 | 0.508399 | 0         |  |  |
| RPS6KA6 | chrX | Shiraz-3T  | 242  | 0        | -0.336434 |  |  |
|         |      | Shiraz-3T  | 243  | 0        | -0.549129 |  |  |
|         |      | Shiraz-4T  | 261  | 0        | -0.336249 |  |  |
|         |      | Shiraz-16T | 295  | 0.591657 | 0         |  |  |
|         |      | Shiraz-31T | 346  | 0        | -0.1527   |  |  |
|         |      | Shiraz-36T | 433  | 0        | -0.803961 |  |  |
|         |      | Shiraz-44T | 899  | 0        | -1.09697  |  |  |
|         |      | Shiraz-44T | 902  | 0        | -1.449824 |  |  |
|         |      | Shiraz-47T | 1085 | 0        | -0.130811 |  |  |
|         |      | Shiraz-49T | 1170 | 0        | -0.967436 |  |  |

|  |            |      |          |           |  |
|--|------------|------|----------|-----------|--|
|  | Shiraz-49T | 1172 | 0        | -1.123219 |  |
|  | Shiraz-18T | 1457 | 0.643204 | 0         |  |
|  | Shiraz-22T | 1673 | 0.611783 | 0         |  |
|  | Shiraz-22T | 1675 | 0.279253 | 0         |  |
|  | Shiraz-25T | 1719 | 0.472955 | 0         |  |
|  | Shiraz-28T | 1762 | 0.562311 | 0         |  |
|  | Shiraz-29T | 1801 | 0.815343 | 0         |  |
|  | Shiraz-32T | 1870 | 0.729766 | 0         |  |
|  | Shiraz-32T | 1871 | 0.292679 | 0         |  |
|  | Shiraz-35T | 1933 | 0.488535 | 0         |  |
|  | Shiraz-58T | 2223 | 0.833364 | 0         |  |
|  | Shiraz-58T | 2225 | 0.595784 | 0         |  |
|  | Shiraz-71T | 2263 | 0.975531 | 0         |  |
|  | Shiraz-3T  | 242  | 0        | -0.336434 |  |
|  | Shiraz-3T  | 243  | 0        | -0.549129 |  |
|  | Shiraz-4T  | 261  | 0        | -0.336249 |  |
|  | Shiraz-16T | 295  | 0.591657 | 0         |  |
|  | Shiraz-31T | 346  | 0        | -0.1527   |  |
|  | Shiraz-36T | 433  | 0        | -0.803961 |  |
|  | Shiraz-44T | 899  | 0        | -1.09697  |  |
|  | Shiraz-44T | 902  | 0        | -1.449824 |  |
|  | Shiraz-47T | 1085 | 0        | -0.130811 |  |
|  | Shiraz-49T | 1170 | 0        | -0.967436 |  |
|  | Shiraz-49T | 1172 | 0        | -1.123219 |  |
|  | Shiraz-18T | 1457 | 0.643204 | 0         |  |
|  | Shiraz-22T | 1673 | 0.611783 | 0         |  |
|  | Shiraz-22T | 1675 | 0.279253 | 0         |  |
|  | Shiraz-25T | 1719 | 0.472955 | 0         |  |
|  | Shiraz-28T | 1762 | 0.562311 | 0         |  |
|  | Shiraz-29T | 1801 | 0.815343 | 0         |  |
|  | Shiraz-32T | 1870 | 0.729766 | 0         |  |
|  | Shiraz-32T | 1871 | 0.292679 | 0         |  |
|  | Shiraz-35T | 1933 | 0.488535 | 0         |  |
|  | Shiraz-58T | 2223 | 0.833364 | 0         |  |
|  | Shiraz-58T | 2225 | 0.595784 | 0         |  |
|  | Shiraz-71T | 2263 | 0.975531 | 0         |  |
|  | Shiraz-3T  | 242  | 0        | -0.336434 |  |
|  | Shiraz-3T  | 243  | 0        | -0.549129 |  |
|  | Shiraz-4T  | 261  | 0        | -0.336249 |  |
|  | Shiraz-16T | 295  | 0.591657 | 0         |  |
|  | Shiraz-31T | 346  | 0        | -0.1527   |  |
|  | Shiraz-36T | 433  | 0        | -0.803961 |  |
|  | Shiraz-44T | 899  | 0        | -1.09697  |  |
|  | Shiraz-44T | 902  | 0        | -1.449824 |  |
|  | Shiraz-47T | 1085 | 0        | -0.130811 |  |
|  | Shiraz-49T | 1170 | 0        | -0.967436 |  |
|  | Shiraz-49T | 1172 | 0        | -1.123219 |  |

|       |      |            |      |          |           |  |
|-------|------|------------|------|----------|-----------|--|
|       |      | Shiraz-18T | 1457 | 0.643204 | 0         |  |
|       |      | Shiraz-22T | 1673 | 0.611783 | 0         |  |
|       |      | Shiraz-22T | 1675 | 0.279253 | 0         |  |
|       |      | Shiraz-25T | 1719 | 0.472955 | 0         |  |
|       |      | Shiraz-28T | 1762 | 0.562311 | 0         |  |
|       |      | Shiraz-29T | 1801 | 0.815343 | 0         |  |
|       |      | Shiraz-32T | 1870 | 0.729766 | 0         |  |
|       |      | Shiraz-32T | 1871 | 0.292679 | 0         |  |
|       |      | Shiraz-35T | 1933 | 0.488535 | 0         |  |
|       |      | Shiraz-58T | 2223 | 0.833364 | 0         |  |
|       |      | Shiraz-58T | 2225 | 0.595784 | 0         |  |
|       |      | Shiraz-71T | 2263 | 0.975531 | 0         |  |
| RRAGB | chrX | Shiraz-3T  | 240  | 0        | -0.346245 |  |
|       |      | Shiraz-4T  | 260  | 0        | -0.324128 |  |
|       |      | Shiraz-16T | 294  | 0.655804 | 0         |  |
|       |      | Shiraz-36T | 431  | 0        | -0.78035  |  |
|       |      | Shiraz-44T | 891  | 0        | -0.954044 |  |
|       |      | Shiraz-49T | 1166 | 0        | -0.917235 |  |
|       |      | Shiraz-9T  | 1368 | 0.199713 | 0         |  |
|       |      | Shiraz-18T | 1456 | 0.608534 | 0         |  |
|       |      | Shiraz-22T | 1669 | 0.695915 | 0         |  |
|       |      | Shiraz-25T | 1717 | 0.420447 | 0         |  |
|       |      | Shiraz-28T | 1760 | 0.538181 | 0         |  |
|       |      | Shiraz-29T | 1800 | 0.672527 | 0         |  |
|       |      | Shiraz-32T | 1869 | 0.776805 | 0         |  |
|       |      | Shiraz-35T | 1932 | 0.507141 | 0         |  |
|       |      | Shiraz-58T | 2221 | 0.871948 | 0         |  |
|       |      | Shiraz-71T | 2260 | 0.68394  | 0         |  |
|       |      | Shiraz-71T | 2262 | 0.986748 | 0         |  |
|       |      | Shiraz-3T  | 240  | 0        | -0.346245 |  |
|       |      | Shiraz-4T  | 260  | 0        | -0.324128 |  |
|       |      | Shiraz-16T | 294  | 0.655804 | 0         |  |
|       |      | Shiraz-36T | 431  | 0        | -0.78035  |  |
|       |      | Shiraz-44T | 891  | 0        | -0.954044 |  |
|       |      | Shiraz-49T | 1166 | 0        | -0.917235 |  |
|       |      | Shiraz-9T  | 1368 | 0.199713 | 0         |  |
|       |      | Shiraz-18T | 1456 | 0.608534 | 0         |  |
|       |      | Shiraz-22T | 1669 | 0.695915 | 0         |  |
|       |      | Shiraz-25T | 1717 | 0.420447 | 0         |  |
|       |      | Shiraz-28T | 1760 | 0.538181 | 0         |  |
|       |      | Shiraz-29T | 1800 | 0.672527 | 0         |  |
|       |      | Shiraz-32T | 1869 | 0.776805 | 0         |  |
|       |      | Shiraz-35T | 1932 | 0.507141 | 0         |  |
|       |      | Shiraz-58T | 2221 | 0.871948 | 0         |  |
|       |      | Shiraz-71T | 2260 | 0.68394  | 0         |  |
|       |      | Shiraz-71T | 2262 | 0.986748 | 0         |  |
|       |      | Shiraz-3T  | 240  | 0        | -0.346245 |  |



|     |      |            |      |          |           |  |  |
|-----|------|------------|------|----------|-----------|--|--|
|     |      | Shiraz-4T  | 260  | 0        | -0.324128 |  |  |
|     |      | Shiraz-16T | 294  | 0.655804 | 0         |  |  |
|     |      | Shiraz-36T | 431  | 0        | -0.78035  |  |  |
|     |      | Shiraz-44T | 891  | 0        | -0.954044 |  |  |
|     |      | Shiraz-49T | 1166 | 0        | -0.917235 |  |  |
|     |      | Shiraz-9T  | 1368 | 0.199713 | 0         |  |  |
|     |      | Shiraz-18T | 1456 | 0.608534 | 0         |  |  |
|     |      | Shiraz-22T | 1669 | 0.695915 | 0         |  |  |
|     |      | Shiraz-25T | 1717 | 0.420447 | 0         |  |  |
|     |      | Shiraz-28T | 1760 | 0.538181 | 0         |  |  |
|     |      | Shiraz-29T | 1800 | 0.672527 | 0         |  |  |
|     |      | Shiraz-32T | 1869 | 0.776805 | 0         |  |  |
|     |      | Shiraz-35T | 1932 | 0.507141 | 0         |  |  |
|     |      | Shiraz-58T | 2221 | 0.871948 | 0         |  |  |
|     |      | Shiraz-71T | 2260 | 0.68394  | 0         |  |  |
|     |      | Shiraz-71T | 2262 | 0.986748 | 0         |  |  |
| RS1 | chrX | Shiraz-3T  | 235  | 0        | -0.28401  |  |  |
|     |      | Shiraz-4T  | 260  | 0        | -0.324128 |  |  |
|     |      | Shiraz-16T | 294  | 0.655804 | 0         |  |  |
|     |      | Shiraz-36T | 431  | 0        | -0.78035  |  |  |
|     |      | Shiraz-44T | 891  | 0        | -0.954044 |  |  |
|     |      | Shiraz-49T | 1166 | 0        | -0.917235 |  |  |
|     |      | Shiraz-77T | 1281 | 0.136627 | 0         |  |  |
|     |      | Shiraz-9T  | 1368 | 0.199713 | 0         |  |  |
|     |      | Shiraz-18T | 1455 | 0        | -0.186773 |  |  |
|     |      | Shiraz-22T | 1669 | 0.695915 | 0         |  |  |
|     |      | Shiraz-25T | 1717 | 0.420447 | 0         |  |  |
|     |      | Shiraz-28T | 1760 | 0.538181 | 0         |  |  |
|     |      | Shiraz-29T | 1800 | 0.672527 | 0         |  |  |
|     |      | Shiraz-32T | 1869 | 0.776805 | 0         |  |  |
|     |      | Shiraz-35T | 1932 | 0.507141 | 0         |  |  |
|     |      | Shiraz-40T | 2051 | 0.098506 | 0         |  |  |
|     |      | Shiraz-58T | 2221 | 0.871948 | 0         |  |  |
|     |      | Shiraz-71T | 2260 | 0.68394  | 0         |  |  |
|     |      | Shiraz-71T | 2261 | 0.508399 | 0         |  |  |
|     |      | Shiraz-3T  | 235  | 0        | -0.28401  |  |  |
|     |      | Shiraz-4T  | 260  | 0        | -0.324128 |  |  |
|     |      | Shiraz-16T | 294  | 0.655804 | 0         |  |  |
|     |      | Shiraz-36T | 431  | 0        | -0.78035  |  |  |
|     |      | Shiraz-44T | 891  | 0        | -0.954044 |  |  |
|     |      | Shiraz-49T | 1166 | 0        | -0.917235 |  |  |
|     |      | Shiraz-77T | 1281 | 0.136627 | 0         |  |  |
|     |      | Shiraz-9T  | 1368 | 0.199713 | 0         |  |  |
|     |      | Shiraz-18T | 1455 | 0        | -0.186773 |  |  |
|     |      | Shiraz-22T | 1669 | 0.695915 | 0         |  |  |
|     |      | Shiraz-25T | 1717 | 0.420447 | 0         |  |  |
|     |      | Shiraz-28T | 1760 | 0.538181 | 0         |  |  |

|        |      |            |      |          |           |  |
|--------|------|------------|------|----------|-----------|--|
|        |      | Shiraz-29T | 1800 | 0.672527 | 0         |  |
|        |      | Shiraz-32T | 1869 | 0.776805 | 0         |  |
|        |      | Shiraz-35T | 1932 | 0.507141 | 0         |  |
|        |      | Shiraz-40T | 2051 | 0.098506 | 0         |  |
|        |      | Shiraz-58T | 2221 | 0.871948 | 0         |  |
|        |      | Shiraz-71T | 2260 | 0.68394  | 0         |  |
|        |      | Shiraz-71T | 2261 | 0.508399 | 0         |  |
|        |      | Shiraz-3T  | 235  | 0        | -0.28401  |  |
|        |      | Shiraz-4T  | 260  | 0        | -0.324128 |  |
|        |      | Shiraz-16T | 294  | 0.655804 | 0         |  |
|        |      | Shiraz-36T | 431  | 0        | -0.78035  |  |
|        |      | Shiraz-44T | 891  | 0        | -0.954044 |  |
|        |      | Shiraz-49T | 1166 | 0        | -0.917235 |  |
|        |      | Shiraz-77T | 1281 | 0.136627 | 0         |  |
|        |      | Shiraz-9T  | 1368 | 0.199713 | 0         |  |
|        |      | Shiraz-18T | 1455 | 0        | -0.186773 |  |
|        |      | Shiraz-22T | 1669 | 0.695915 | 0         |  |
|        |      | Shiraz-25T | 1717 | 0.420447 | 0         |  |
|        |      | Shiraz-28T | 1760 | 0.538181 | 0         |  |
|        |      | Shiraz-29T | 1800 | 0.672527 | 0         |  |
|        |      | Shiraz-32T | 1869 | 0.776805 | 0         |  |
|        |      | Shiraz-35T | 1932 | 0.507141 | 0         |  |
|        |      | Shiraz-40T | 2051 | 0.098506 | 0         |  |
|        |      | Shiraz-58T | 2221 | 0.871948 | 0         |  |
|        |      | Shiraz-71T | 2260 | 0.68394  | 0         |  |
|        |      | Shiraz-71T | 2261 | 0.508399 | 0         |  |
| RSBN1L | chr7 | Shiraz-3T  | 90   | 0.219276 | 0         |  |
|        |      | Shiraz-4T  | 253  | 0.372918 | 0         |  |
|        |      | Shiraz-36T | 378  | 0.179558 | 0         |  |
|        |      | Shiraz-36T | 379  | 0.322028 | 0         |  |
|        |      | Shiraz-42T | 454  | 0.145717 | 0         |  |
|        |      | Shiraz-46T | 943  | 0.093799 | 0         |  |
|        |      | Shiraz-46T | 944  | 0.256008 | 0         |  |
|        |      | Shiraz-77T | 1225 | 0        | -0.117922 |  |
|        |      | Shiraz-18T | 1434 | 0.244465 | 0         |  |
|        |      | Shiraz-22T | 1549 | 0        | -0.319623 |  |
|        |      | Shiraz-25T | 1698 | 0.21835  | 0         |  |
|        |      | Shiraz-28T | 1735 | 0.350744 | 0         |  |
|        |      | Shiraz-29T | 1778 | 0.120767 | 0         |  |
|        |      | Shiraz-38T | 1951 | 0.250891 | 0         |  |
|        |      | Shiraz-53T | 2078 | 0.287202 | 0         |  |
|        |      | Shiraz-58T | 2159 | 0        | -0.219521 |  |
|        |      | Shiraz-71T | 2238 | 0.603631 | 0         |  |
|        |      | Shiraz-71T | 2239 | 0.310785 | 0         |  |
|        |      | Shiraz-3T  | 90   | 0.219276 | 0         |  |
|        |      | Shiraz-4T  | 253  | 0.372918 | 0         |  |
|        |      | Shiraz-36T | 378  | 0.179558 | 0         |  |

|         |      |            |      |          |           |  |
|---------|------|------------|------|----------|-----------|--|
|         |      | Shiraz-36T | 379  | 0.322028 | 0         |  |
|         |      | Shiraz-42T | 454  | 0.145717 | 0         |  |
|         |      | Shiraz-46T | 943  | 0.093799 | 0         |  |
|         |      | Shiraz-46T | 944  | 0.256008 | 0         |  |
|         |      | Shiraz-77T | 1225 | 0        | -0.117922 |  |
|         |      | Shiraz-18T | 1434 | 0.244465 | 0         |  |
|         |      | Shiraz-22T | 1549 | 0        | -0.319623 |  |
|         |      | Shiraz-25T | 1698 | 0.21835  | 0         |  |
|         |      | Shiraz-28T | 1735 | 0.350744 | 0         |  |
|         |      | Shiraz-29T | 1778 | 0.120767 | 0         |  |
|         |      | Shiraz-38T | 1951 | 0.250891 | 0         |  |
|         |      | Shiraz-53T | 2078 | 0.287202 | 0         |  |
|         |      | Shiraz-58T | 2159 | 0        | -0.219521 |  |
|         |      | Shiraz-71T | 2238 | 0.603631 | 0         |  |
|         |      | Shiraz-71T | 2239 | 0.310785 | 0         |  |
|         |      | Shiraz-3T  | 90   | 0.219276 | 0         |  |
|         |      | Shiraz-4T  | 253  | 0.372918 | 0         |  |
|         |      | Shiraz-36T | 378  | 0.179558 | 0         |  |
|         |      | Shiraz-36T | 379  | 0.322028 | 0         |  |
|         |      | Shiraz-42T | 454  | 0.145717 | 0         |  |
|         |      | Shiraz-46T | 943  | 0.093799 | 0         |  |
|         |      | Shiraz-46T | 944  | 0.256008 | 0         |  |
|         |      | Shiraz-77T | 1225 | 0        | -0.117922 |  |
|         |      | Shiraz-18T | 1434 | 0.244465 | 0         |  |
|         |      | Shiraz-22T | 1549 | 0        | -0.319623 |  |
|         |      | Shiraz-25T | 1698 | 0.21835  | 0         |  |
|         |      | Shiraz-28T | 1735 | 0.350744 | 0         |  |
|         |      | Shiraz-29T | 1778 | 0.120767 | 0         |  |
|         |      | Shiraz-38T | 1951 | 0.250891 | 0         |  |
|         |      | Shiraz-53T | 2078 | 0.287202 | 0         |  |
|         |      | Shiraz-58T | 2159 | 0        | -0.219521 |  |
|         |      | Shiraz-71T | 2238 | 0.603631 | 0         |  |
|         |      | Shiraz-71T | 2239 | 0.310785 | 0         |  |
| RUNDC3B | chr7 | Shiraz-3T  | 90   | 0.219276 | 0         |  |
|         |      | Shiraz-3T  | 93   | 0        | -0.058023 |  |
|         |      | Shiraz-4T  | 253  | 0.372918 | 0         |  |
|         |      | Shiraz-36T | 378  | 0.179558 | 0         |  |
|         |      | Shiraz-36T | 380  | 0.083883 | 0         |  |
|         |      | Shiraz-44T | 638  | 0        | -0.433476 |  |
|         |      | Shiraz-46T | 943  | 0.093799 | 0         |  |
|         |      | Shiraz-46T | 945  | 0        | -0.014838 |  |
|         |      | Shiraz-47T | 1029 | 0        | -0.096586 |  |
|         |      | Shiraz-49T | 1119 | 0        | -0.157331 |  |
|         |      | Shiraz-77T | 1225 | 0        | -0.117922 |  |
|         |      | Shiraz-77T | 1226 | 0        | -0.233724 |  |
|         |      | Shiraz-18T | 1434 | 0.244465 | 0         |  |
|         |      | Shiraz-22T | 1549 | 0        | -0.319623 |  |

|  |            |      |          |           |  |
|--|------------|------|----------|-----------|--|
|  | Shiraz-22T | 1550 | 0        | -0.577052 |  |
|  | Shiraz-25T | 1698 | 0.21835  | 0         |  |
|  | Shiraz-28T | 1735 | 0.350744 | 0         |  |
|  | Shiraz-29T | 1778 | 0.120767 | 0         |  |
|  | Shiraz-38T | 1951 | 0.250891 | 0         |  |
|  | Shiraz-53T | 2078 | 0.287202 | 0         |  |
|  | Shiraz-58T | 2159 | 0        | -0.219521 |  |
|  | Shiraz-71T | 2238 | 0.603631 | 0         |  |
|  | Shiraz-3T  | 90   | 0.219276 | 0         |  |
|  | Shiraz-3T  | 93   | 0        | -0.058023 |  |
|  | Shiraz-4T  | 253  | 0.372918 | 0         |  |
|  | Shiraz-36T | 378  | 0.179558 | 0         |  |
|  | Shiraz-36T | 380  | 0.083883 | 0         |  |
|  | Shiraz-44T | 638  | 0        | -0.433476 |  |
|  | Shiraz-46T | 943  | 0.093799 | 0         |  |
|  | Shiraz-46T | 945  | 0        | -0.014838 |  |
|  | Shiraz-47T | 1029 | 0        | -0.096586 |  |
|  | Shiraz-49T | 1119 | 0        | -0.157331 |  |
|  | Shiraz-77T | 1225 | 0        | -0.117922 |  |
|  | Shiraz-77T | 1226 | 0        | -0.233724 |  |
|  | Shiraz-18T | 1434 | 0.244465 | 0         |  |
|  | Shiraz-22T | 1549 | 0        | -0.319623 |  |
|  | Shiraz-22T | 1550 | 0        | -0.577052 |  |
|  | Shiraz-25T | 1698 | 0.21835  | 0         |  |
|  | Shiraz-28T | 1735 | 0.350744 | 0         |  |
|  | Shiraz-29T | 1778 | 0.120767 | 0         |  |
|  | Shiraz-38T | 1951 | 0.250891 | 0         |  |
|  | Shiraz-53T | 2078 | 0.287202 | 0         |  |
|  | Shiraz-58T | 2159 | 0        | -0.219521 |  |
|  | Shiraz-71T | 2238 | 0.603631 | 0         |  |
|  | Shiraz-3T  | 90   | 0.219276 | 0         |  |
|  | Shiraz-3T  | 93   | 0        | -0.058023 |  |
|  | Shiraz-4T  | 253  | 0.372918 | 0         |  |
|  | Shiraz-36T | 378  | 0.179558 | 0         |  |
|  | Shiraz-36T | 380  | 0.083883 | 0         |  |
|  | Shiraz-44T | 638  | 0        | -0.433476 |  |
|  | Shiraz-46T | 943  | 0.093799 | 0         |  |
|  | Shiraz-46T | 945  | 0        | -0.014838 |  |
|  | Shiraz-47T | 1029 | 0        | -0.096586 |  |
|  | Shiraz-49T | 1119 | 0        | -0.157331 |  |
|  | Shiraz-77T | 1225 | 0        | -0.117922 |  |
|  | Shiraz-77T | 1226 | 0        | -0.233724 |  |
|  | Shiraz-18T | 1434 | 0.244465 | 0         |  |
|  | Shiraz-22T | 1549 | 0        | -0.319623 |  |
|  | Shiraz-22T | 1550 | 0        | -0.577052 |  |
|  | Shiraz-25T | 1698 | 0.21835  | 0         |  |
|  | Shiraz-28T | 1735 | 0.350744 | 0         |  |

|       |      |            |      |          |           |  |
|-------|------|------------|------|----------|-----------|--|
|       |      | Shiraz-29T | 1778 | 0.120767 | 0         |  |
|       |      | Shiraz-38T | 1951 | 0.250891 | 0         |  |
|       |      | Shiraz-53T | 2078 | 0.287202 | 0         |  |
|       |      | Shiraz-58T | 2159 | 0        | -0.219521 |  |
|       |      | Shiraz-71T | 2238 | 0.603631 | 0         |  |
| RXFP3 | chr5 | Shiraz-4T  | 250  | 0.262252 | 0         |  |
|       |      | Shiraz-16T | 266  | 0.321724 | 0         |  |
|       |      | Shiraz-18T | 1429 | 0        | -0.314125 |  |
|       |      | Shiraz-25T | 1694 | 0.201602 | 0         |  |
|       |      | Shiraz-28T | 1731 | 0.295447 | 0         |  |
|       |      | Shiraz-29T | 1773 | 0.090981 | 0         |  |
|       |      | Shiraz-40T | 2016 | 0.376634 | 0         |  |
|       |      | Shiraz-4T  | 250  | 0.262252 | 0         |  |
|       |      | Shiraz-16T | 266  | 0.321724 | 0         |  |
|       |      | Shiraz-18T | 1429 | 0        | -0.314125 |  |
|       |      | Shiraz-25T | 1694 | 0.201602 | 0         |  |
|       |      | Shiraz-28T | 1731 | 0.295447 | 0         |  |
|       |      | Shiraz-29T | 1773 | 0.090981 | 0         |  |
|       |      | Shiraz-40T | 2016 | 0.376634 | 0         |  |
|       |      | Shiraz-4T  | 250  | 0.262252 | 0         |  |
|       |      | Shiraz-16T | 266  | 0.321724 | 0         |  |
|       |      | Shiraz-18T | 1429 | 0        | -0.314125 |  |
|       |      | Shiraz-25T | 1694 | 0.201602 | 0         |  |
|       |      | Shiraz-28T | 1731 | 0.295447 | 0         |  |
|       |      | Shiraz-29T | 1773 | 0.090981 | 0         |  |
|       |      | Shiraz-40T | 2016 | 0.376634 | 0         |  |
| S100G | chrX | Shiraz-3T  | 235  | 0        | -0.28401  |  |
|       |      | Shiraz-4T  | 260  | 0        | -0.324128 |  |
|       |      | Shiraz-16T | 294  | 0.655804 | 0         |  |
|       |      | Shiraz-36T | 431  | 0        | -0.78035  |  |
|       |      | Shiraz-44T | 891  | 0        | -0.954044 |  |
|       |      | Shiraz-49T | 1166 | 0        | -0.917235 |  |
|       |      | Shiraz-9T  | 1368 | 0.199713 | 0         |  |
|       |      | Shiraz-18T | 1455 | 0        | -0.186773 |  |
|       |      | Shiraz-22T | 1669 | 0.695915 | 0         |  |
|       |      | Shiraz-25T | 1717 | 0.420447 | 0         |  |
|       |      | Shiraz-28T | 1760 | 0.538181 | 0         |  |
|       |      | Shiraz-29T | 1800 | 0.672527 | 0         |  |
|       |      | Shiraz-32T | 1869 | 0.776805 | 0         |  |
|       |      | Shiraz-35T | 1932 | 0.507141 | 0         |  |
|       |      | Shiraz-40T | 2051 | 0.098506 | 0         |  |
|       |      | Shiraz-58T | 2221 | 0.871948 | 0         |  |
|       |      | Shiraz-71T | 2260 | 0.68394  | 0         |  |
|       |      | Shiraz-71T | 2261 | 0.508399 | 0         |  |
|       |      | Shiraz-3T  | 235  | 0        | -0.28401  |  |
|       |      | Shiraz-4T  | 260  | 0        | -0.324128 |  |
|       |      | Shiraz-16T | 294  | 0.655804 | 0         |  |

|       |      |            |      |          |           |  |  |
|-------|------|------------|------|----------|-----------|--|--|
|       |      | Shiraz-36T | 431  | 0        | -0.78035  |  |  |
|       |      | Shiraz-44T | 891  | 0        | -0.954044 |  |  |
|       |      | Shiraz-49T | 1166 | 0        | -0.917235 |  |  |
|       |      | Shiraz-9T  | 1368 | 0.199713 | 0         |  |  |
|       |      | Shiraz-18T | 1455 | 0        | -0.186773 |  |  |
|       |      | Shiraz-22T | 1669 | 0.695915 | 0         |  |  |
|       |      | Shiraz-25T | 1717 | 0.420447 | 0         |  |  |
|       |      | Shiraz-28T | 1760 | 0.538181 | 0         |  |  |
|       |      | Shiraz-29T | 1800 | 0.672527 | 0         |  |  |
|       |      | Shiraz-32T | 1869 | 0.776805 | 0         |  |  |
|       |      | Shiraz-35T | 1932 | 0.507141 | 0         |  |  |
|       |      | Shiraz-40T | 2051 | 0.098506 | 0         |  |  |
|       |      | Shiraz-58T | 2221 | 0.871948 | 0         |  |  |
|       |      | Shiraz-71T | 2260 | 0.68394  | 0         |  |  |
|       |      | Shiraz-71T | 2261 | 0.508399 | 0         |  |  |
|       |      | Shiraz-3T  | 235  | 0        | -0.28401  |  |  |
|       |      | Shiraz-4T  | 260  | 0        | -0.324128 |  |  |
|       |      | Shiraz-16T | 294  | 0.655804 | 0         |  |  |
|       |      | Shiraz-36T | 431  | 0        | -0.78035  |  |  |
|       |      | Shiraz-44T | 891  | 0        | -0.954044 |  |  |
|       |      | Shiraz-49T | 1166 | 0        | -0.917235 |  |  |
|       |      | Shiraz-9T  | 1368 | 0.199713 | 0         |  |  |
|       |      | Shiraz-18T | 1455 | 0        | -0.186773 |  |  |
|       |      | Shiraz-22T | 1669 | 0.695915 | 0         |  |  |
|       |      | Shiraz-25T | 1717 | 0.420447 | 0         |  |  |
|       |      | Shiraz-28T | 1760 | 0.538181 | 0         |  |  |
|       |      | Shiraz-29T | 1800 | 0.672527 | 0         |  |  |
|       |      | Shiraz-32T | 1869 | 0.776805 | 0         |  |  |
|       |      | Shiraz-35T | 1932 | 0.507141 | 0         |  |  |
|       |      | Shiraz-40T | 2051 | 0.098506 | 0         |  |  |
|       |      | Shiraz-58T | 2221 | 0.871948 | 0         |  |  |
|       |      | Shiraz-71T | 2260 | 0.68394  | 0         |  |  |
|       |      | Shiraz-71T | 2261 | 0.508399 | 0         |  |  |
| SAGE1 | chrX | Shiraz-3T  | 242  | 0        | -0.336434 |  |  |
|       |      | Shiraz-4T  | 261  | 0        | -0.336249 |  |  |
|       |      | Shiraz-16T | 295  | 0.591657 | 0         |  |  |
|       |      | Shiraz-36T | 433  | 0        | -0.803961 |  |  |
|       |      | Shiraz-44T | 899  | 0        | -1.09697  |  |  |
|       |      | Shiraz-49T | 1170 | 0        | -0.967436 |  |  |
|       |      | Shiraz-9T  | 1370 | 0.690073 | 0         |  |  |
|       |      | Shiraz-18T | 1457 | 0.643204 | 0         |  |  |
|       |      | Shiraz-22T | 1673 | 0.611783 | 0         |  |  |
|       |      | Shiraz-22T | 1677 | 0.789711 | 0         |  |  |
|       |      | Shiraz-25T | 1719 | 0.472955 | 0         |  |  |
|       |      | Shiraz-28T | 1762 | 0.562311 | 0         |  |  |
|       |      | Shiraz-29T | 1801 | 0.815343 | 0         |  |  |
|       |      | Shiraz-32T | 1870 | 0.729766 | 0         |  |  |

|       |      |            |      |          |           |  |
|-------|------|------------|------|----------|-----------|--|
|       |      | Shiraz-35T | 1933 | 0.488535 | 0         |  |
|       |      | Shiraz-58T | 2223 | 0.833364 | 0         |  |
|       |      | Shiraz-71T | 2263 | 0.975531 | 0         |  |
|       |      | Shiraz-3T  | 242  | 0        | -0.336434 |  |
|       |      | Shiraz-4T  | 261  | 0        | -0.336249 |  |
|       |      | Shiraz-16T | 295  | 0.591657 | 0         |  |
|       |      | Shiraz-36T | 433  | 0        | -0.803961 |  |
|       |      | Shiraz-44T | 899  | 0        | -1.09697  |  |
|       |      | Shiraz-49T | 1170 | 0        | -0.967436 |  |
|       |      | Shiraz-9T  | 1370 | 0.690073 | 0         |  |
|       |      | Shiraz-18T | 1457 | 0.643204 | 0         |  |
|       |      | Shiraz-22T | 1673 | 0.611783 | 0         |  |
|       |      | Shiraz-22T | 1677 | 0.789711 | 0         |  |
|       |      | Shiraz-25T | 1719 | 0.472955 | 0         |  |
|       |      | Shiraz-28T | 1762 | 0.562311 | 0         |  |
|       |      | Shiraz-29T | 1801 | 0.815343 | 0         |  |
|       |      | Shiraz-32T | 1870 | 0.729766 | 0         |  |
|       |      | Shiraz-35T | 1933 | 0.488535 | 0         |  |
|       |      | Shiraz-58T | 2223 | 0.833364 | 0         |  |
|       |      | Shiraz-71T | 2263 | 0.975531 | 0         |  |
|       |      | Shiraz-3T  | 242  | 0        | -0.336434 |  |
|       |      | Shiraz-4T  | 261  | 0        | -0.336249 |  |
|       |      | Shiraz-16T | 295  | 0.591657 | 0         |  |
|       |      | Shiraz-36T | 433  | 0        | -0.803961 |  |
|       |      | Shiraz-44T | 899  | 0        | -1.09697  |  |
|       |      | Shiraz-49T | 1170 | 0        | -0.967436 |  |
|       |      | Shiraz-9T  | 1370 | 0.690073 | 0         |  |
|       |      | Shiraz-18T | 1457 | 0.643204 | 0         |  |
|       |      | Shiraz-22T | 1673 | 0.611783 | 0         |  |
|       |      | Shiraz-22T | 1677 | 0.789711 | 0         |  |
|       |      | Shiraz-25T | 1719 | 0.472955 | 0         |  |
|       |      | Shiraz-28T | 1762 | 0.562311 | 0         |  |
|       |      | Shiraz-29T | 1801 | 0.815343 | 0         |  |
|       |      | Shiraz-32T | 1870 | 0.729766 | 0         |  |
|       |      | Shiraz-35T | 1933 | 0.488535 | 0         |  |
|       |      | Shiraz-58T | 2223 | 0.833364 | 0         |  |
|       |      | Shiraz-71T | 2263 | 0.975531 | 0         |  |
| SAMD9 | chr7 | Shiraz-3T  | 90   | 0.219276 | 0         |  |
|       |      | Shiraz-3T  | 93   | 0        | -0.058023 |  |
|       |      | Shiraz-4T  | 253  | 0.372918 | 0         |  |
|       |      | Shiraz-36T | 378  | 0.179558 | 0         |  |
|       |      | Shiraz-36T | 380  | 0.083883 | 0         |  |
|       |      | Shiraz-44T | 638  | 0        | -0.433476 |  |
|       |      | Shiraz-46T | 943  | 0.093799 | 0         |  |
|       |      | Shiraz-46T | 945  | 0        | -0.014838 |  |
|       |      | Shiraz-47T | 1029 | 0        | -0.096586 |  |
|       |      | Shiraz-49T | 1119 | 0        | -0.157331 |  |

|  |            |      |          |           |  |
|--|------------|------|----------|-----------|--|
|  | Shiraz-77T | 1225 | 0        | -0.117922 |  |
|  | Shiraz-18T | 1434 | 0.244465 | 0         |  |
|  | Shiraz-22T | 1549 | 0        | -0.319623 |  |
|  | Shiraz-25T | 1698 | 0.21835  | 0         |  |
|  | Shiraz-28T | 1735 | 0.350744 | 0         |  |
|  | Shiraz-29T | 1778 | 0.120767 | 0         |  |
|  | Shiraz-32T | 1833 | 0.551336 | 0         |  |
|  | Shiraz-38T | 1951 | 0.250891 | 0         |  |
|  | Shiraz-53T | 2078 | 0.287202 | 0         |  |
|  | Shiraz-58T | 2159 | 0        | -0.219521 |  |
|  | Shiraz-71T | 2238 | 0.603631 | 0         |  |
|  | Shiraz-3T  | 90   | 0.219276 | 0         |  |
|  | Shiraz-3T  | 93   | 0        | -0.058023 |  |
|  | Shiraz-4T  | 253  | 0.372918 | 0         |  |
|  | Shiraz-36T | 378  | 0.179558 | 0         |  |
|  | Shiraz-36T | 380  | 0.083883 | 0         |  |
|  | Shiraz-44T | 638  | 0        | -0.433476 |  |
|  | Shiraz-46T | 943  | 0.093799 | 0         |  |
|  | Shiraz-46T | 945  | 0        | -0.014838 |  |
|  | Shiraz-47T | 1029 | 0        | -0.096586 |  |
|  | Shiraz-49T | 1119 | 0        | -0.157331 |  |
|  | Shiraz-77T | 1225 | 0        | -0.117922 |  |
|  | Shiraz-18T | 1434 | 0.244465 | 0         |  |
|  | Shiraz-22T | 1549 | 0        | -0.319623 |  |
|  | Shiraz-25T | 1698 | 0.21835  | 0         |  |
|  | Shiraz-28T | 1735 | 0.350744 | 0         |  |
|  | Shiraz-29T | 1778 | 0.120767 | 0         |  |
|  | Shiraz-32T | 1833 | 0.551336 | 0         |  |
|  | Shiraz-38T | 1951 | 0.250891 | 0         |  |
|  | Shiraz-53T | 2078 | 0.287202 | 0         |  |
|  | Shiraz-58T | 2159 | 0        | -0.219521 |  |
|  | Shiraz-71T | 2238 | 0.603631 | 0         |  |
|  | Shiraz-3T  | 90   | 0.219276 | 0         |  |
|  | Shiraz-3T  | 93   | 0        | -0.058023 |  |
|  | Shiraz-4T  | 253  | 0.372918 | 0         |  |
|  | Shiraz-36T | 378  | 0.179558 | 0         |  |
|  | Shiraz-36T | 380  | 0.083883 | 0         |  |
|  | Shiraz-44T | 638  | 0        | -0.433476 |  |
|  | Shiraz-46T | 943  | 0.093799 | 0         |  |
|  | Shiraz-46T | 945  | 0        | -0.014838 |  |
|  | Shiraz-47T | 1029 | 0        | -0.096586 |  |
|  | Shiraz-49T | 1119 | 0        | -0.157331 |  |
|  | Shiraz-77T | 1225 | 0        | -0.117922 |  |
|  | Shiraz-18T | 1434 | 0.244465 | 0         |  |
|  | Shiraz-22T | 1549 | 0        | -0.319623 |  |
|  | Shiraz-25T | 1698 | 0.21835  | 0         |  |
|  | Shiraz-28T | 1735 | 0.350744 | 0         |  |



|        |      |            |      |          |           |  |
|--------|------|------------|------|----------|-----------|--|
|        |      | Shiraz-29T | 1778 | 0.120767 | 0         |  |
|        |      | Shiraz-32T | 1833 | 0.551336 | 0         |  |
|        |      | Shiraz-38T | 1951 | 0.250891 | 0         |  |
|        |      | Shiraz-53T | 2078 | 0.287202 | 0         |  |
|        |      | Shiraz-58T | 2159 | 0        | -0.219521 |  |
|        |      | Shiraz-71T | 2238 | 0.603631 | 0         |  |
| SAMD9L | chr7 | Shiraz-3T  | 90   | 0.219276 | 0         |  |
|        |      | Shiraz-3T  | 93   | 0        | -0.058023 |  |
|        |      | Shiraz-4T  | 253  | 0.372918 | 0         |  |
|        |      | Shiraz-36T | 378  | 0.179558 | 0         |  |
|        |      | Shiraz-36T | 380  | 0.083883 | 0         |  |
|        |      | Shiraz-44T | 638  | 0        | -0.433476 |  |
|        |      | Shiraz-46T | 943  | 0.093799 | 0         |  |
|        |      | Shiraz-46T | 945  | 0        | -0.014838 |  |
|        |      | Shiraz-47T | 1029 | 0        | -0.096586 |  |
|        |      | Shiraz-49T | 1119 | 0        | -0.157331 |  |
|        |      | Shiraz-77T | 1225 | 0        | -0.117922 |  |
|        |      | Shiraz-18T | 1434 | 0.244465 | 0         |  |
|        |      | Shiraz-22T | 1549 | 0        | -0.319623 |  |
|        |      | Shiraz-25T | 1698 | 0.21835  | 0         |  |
|        |      | Shiraz-28T | 1735 | 0.350744 | 0         |  |
|        |      | Shiraz-29T | 1778 | 0.120767 | 0         |  |
|        |      | Shiraz-32T | 1833 | 0.551336 | 0         |  |
|        |      | Shiraz-38T | 1951 | 0.250891 | 0         |  |
|        |      | Shiraz-53T | 2078 | 0.287202 | 0         |  |
|        |      | Shiraz-58T | 2159 | 0        | -0.219521 |  |
|        |      | Shiraz-71T | 2238 | 0.603631 | 0         |  |
|        |      | Shiraz-3T  | 90   | 0.219276 | 0         |  |
|        |      | Shiraz-3T  | 93   | 0        | -0.058023 |  |
|        |      | Shiraz-4T  | 253  | 0.372918 | 0         |  |
|        |      | Shiraz-36T | 378  | 0.179558 | 0         |  |
|        |      | Shiraz-36T | 380  | 0.083883 | 0         |  |
|        |      | Shiraz-44T | 638  | 0        | -0.433476 |  |
|        |      | Shiraz-46T | 943  | 0.093799 | 0         |  |
|        |      | Shiraz-46T | 945  | 0        | -0.014838 |  |
|        |      | Shiraz-47T | 1029 | 0        | -0.096586 |  |
|        |      | Shiraz-49T | 1119 | 0        | -0.157331 |  |
|        |      | Shiraz-77T | 1225 | 0        | -0.117922 |  |
|        |      | Shiraz-18T | 1434 | 0.244465 | 0         |  |
|        |      | Shiraz-22T | 1549 | 0        | -0.319623 |  |
|        |      | Shiraz-25T | 1698 | 0.21835  | 0         |  |
|        |      | Shiraz-28T | 1735 | 0.350744 | 0         |  |
|        |      | Shiraz-29T | 1778 | 0.120767 | 0         |  |
|        |      | Shiraz-32T | 1833 | 0.551336 | 0         |  |
|        |      | Shiraz-38T | 1951 | 0.250891 | 0         |  |
|        |      | Shiraz-53T | 2078 | 0.287202 | 0         |  |
|        |      | Shiraz-58T | 2159 | 0        | -0.219521 |  |

|       |      |            |      |          |           |  |  |
|-------|------|------------|------|----------|-----------|--|--|
|       |      | Shiraz-71T | 2238 | 0.603631 | 0         |  |  |
|       |      | Shiraz-3T  | 90   | 0.219276 | 0         |  |  |
|       |      | Shiraz-3T  | 93   | 0        | -0.058023 |  |  |
|       |      | Shiraz-4T  | 253  | 0.372918 | 0         |  |  |
|       |      | Shiraz-36T | 378  | 0.179558 | 0         |  |  |
|       |      | Shiraz-36T | 380  | 0.083883 | 0         |  |  |
|       |      | Shiraz-44T | 638  | 0        | -0.433476 |  |  |
|       |      | Shiraz-46T | 943  | 0.093799 | 0         |  |  |
|       |      | Shiraz-46T | 945  | 0        | -0.014838 |  |  |
|       |      | Shiraz-47T | 1029 | 0        | -0.096586 |  |  |
|       |      | Shiraz-49T | 1119 | 0        | -0.157331 |  |  |
|       |      | Shiraz-77T | 1225 | 0        | -0.117922 |  |  |
|       |      | Shiraz-18T | 1434 | 0.244465 | 0         |  |  |
|       |      | Shiraz-22T | 1549 | 0        | -0.319623 |  |  |
|       |      | Shiraz-25T | 1698 | 0.21835  | 0         |  |  |
|       |      | Shiraz-28T | 1735 | 0.350744 | 0         |  |  |
|       |      | Shiraz-29T | 1778 | 0.120767 | 0         |  |  |
|       |      | Shiraz-32T | 1833 | 0.551336 | 0         |  |  |
|       |      | Shiraz-38T | 1951 | 0.250891 | 0         |  |  |
|       |      | Shiraz-53T | 2078 | 0.287202 | 0         |  |  |
|       |      | Shiraz-58T | 2159 | 0        | -0.219521 |  |  |
|       |      | Shiraz-71T | 2238 | 0.603631 | 0         |  |  |
| SASH3 | chrX | Shiraz-3T  | 242  | 0        | -0.336434 |  |  |
|       |      | Shiraz-3T  | 245  | 0.224144 | 0         |  |  |
|       |      | Shiraz-4T  | 261  | 0        | -0.336249 |  |  |
|       |      | Shiraz-16T | 295  | 0.591657 | 0         |  |  |
|       |      | Shiraz-36T | 433  | 0        | -0.803961 |  |  |
|       |      | Shiraz-44T | 899  | 0        | -1.09697  |  |  |
|       |      | Shiraz-44T | 906  | 0        | -0.165692 |  |  |
|       |      | Shiraz-49T | 1170 | 0        | -0.967436 |  |  |
|       |      | Shiraz-9T  | 1370 | 0.690073 | 0         |  |  |
|       |      | Shiraz-18T | 1457 | 0.643204 | 0         |  |  |
|       |      | Shiraz-22T | 1673 | 0.611783 | 0         |  |  |
|       |      | Shiraz-22T | 1677 | 0.789711 | 0         |  |  |
|       |      | Shiraz-25T | 1719 | 0.472955 | 0         |  |  |
|       |      | Shiraz-28T | 1762 | 0.562311 | 0         |  |  |
|       |      | Shiraz-29T | 1801 | 0.815343 | 0         |  |  |
|       |      | Shiraz-32T | 1870 | 0.729766 | 0         |  |  |
|       |      | Shiraz-35T | 1933 | 0.488535 | 0         |  |  |
|       |      | Shiraz-58T | 2223 | 0.833364 | 0         |  |  |
|       |      | Shiraz-71T | 2263 | 0.975531 | 0         |  |  |
|       |      | Shiraz-3T  | 242  | 0        | -0.336434 |  |  |
|       |      | Shiraz-3T  | 245  | 0.224144 | 0         |  |  |
|       |      | Shiraz-4T  | 261  | 0        | -0.336249 |  |  |
|       |      | Shiraz-16T | 295  | 0.591657 | 0         |  |  |
|       |      | Shiraz-36T | 433  | 0        | -0.803961 |  |  |
|       |      | Shiraz-44T | 899  | 0        | -1.09697  |  |  |

|      |      |            |      |          |           |  |  |
|------|------|------------|------|----------|-----------|--|--|
|      |      | Shiraz-44T | 906  | 0        | -0.165692 |  |  |
|      |      | Shiraz-49T | 1170 | 0        | -0.967436 |  |  |
|      |      | Shiraz-9T  | 1370 | 0.690073 | 0         |  |  |
|      |      | Shiraz-18T | 1457 | 0.643204 | 0         |  |  |
|      |      | Shiraz-22T | 1673 | 0.611783 | 0         |  |  |
|      |      | Shiraz-22T | 1677 | 0.789711 | 0         |  |  |
|      |      | Shiraz-25T | 1719 | 0.472955 | 0         |  |  |
|      |      | Shiraz-28T | 1762 | 0.562311 | 0         |  |  |
|      |      | Shiraz-29T | 1801 | 0.815343 | 0         |  |  |
|      |      | Shiraz-32T | 1870 | 0.729766 | 0         |  |  |
|      |      | Shiraz-35T | 1933 | 0.488535 | 0         |  |  |
|      |      | Shiraz-58T | 2223 | 0.833364 | 0         |  |  |
|      |      | Shiraz-71T | 2263 | 0.975531 | 0         |  |  |
|      |      | Shiraz-3T  | 242  | 0        | -0.336434 |  |  |
|      |      | Shiraz-3T  | 245  | 0.224144 | 0         |  |  |
|      |      | Shiraz-4T  | 261  | 0        | -0.336249 |  |  |
|      |      | Shiraz-16T | 295  | 0.591657 | 0         |  |  |
|      |      | Shiraz-36T | 433  | 0        | -0.803961 |  |  |
|      |      | Shiraz-44T | 899  | 0        | -1.09697  |  |  |
|      |      | Shiraz-44T | 906  | 0        | -0.165692 |  |  |
|      |      | Shiraz-49T | 1170 | 0        | -0.967436 |  |  |
|      |      | Shiraz-9T  | 1370 | 0.690073 | 0         |  |  |
|      |      | Shiraz-18T | 1457 | 0.643204 | 0         |  |  |
|      |      | Shiraz-22T | 1673 | 0.611783 | 0         |  |  |
|      |      | Shiraz-22T | 1677 | 0.789711 | 0         |  |  |
|      |      | Shiraz-25T | 1719 | 0.472955 | 0         |  |  |
|      |      | Shiraz-28T | 1762 | 0.562311 | 0         |  |  |
|      |      | Shiraz-29T | 1801 | 0.815343 | 0         |  |  |
|      |      | Shiraz-32T | 1870 | 0.729766 | 0         |  |  |
|      |      | Shiraz-35T | 1933 | 0.488535 | 0         |  |  |
|      |      | Shiraz-58T | 2223 | 0.833364 | 0         |  |  |
|      |      | Shiraz-71T | 2263 | 0.975531 | 0         |  |  |
| SAT1 | chrX | Shiraz-3T  | 235  | 0        | -0.28401  |  |  |
|      |      | Shiraz-4T  | 260  | 0        | -0.324128 |  |  |
|      |      | Shiraz-16T | 294  | 0.655804 | 0         |  |  |
|      |      | Shiraz-36T | 431  | 0        | -0.78035  |  |  |
|      |      | Shiraz-44T | 891  | 0        | -0.954044 |  |  |
|      |      | Shiraz-49T | 1166 | 0        | -0.917235 |  |  |
|      |      | Shiraz-77T | 1281 | 0.136627 | 0         |  |  |
|      |      | Shiraz-9T  | 1368 | 0.199713 | 0         |  |  |
|      |      | Shiraz-18T | 1455 | 0        | -0.186773 |  |  |
|      |      | Shiraz-22T | 1669 | 0.695915 | 0         |  |  |
|      |      | Shiraz-25T | 1717 | 0.420447 | 0         |  |  |
|      |      | Shiraz-28T | 1760 | 0.538181 | 0         |  |  |
|      |      | Shiraz-29T | 1800 | 0.672527 | 0         |  |  |
|      |      | Shiraz-32T | 1869 | 0.776805 | 0         |  |  |
|      |      | Shiraz-35T | 1932 | 0.507141 | 0         |  |  |

|       |      |            |      |          |           |  |
|-------|------|------------|------|----------|-----------|--|
|       |      | Shiraz-40T | 2051 | 0.098506 | 0         |  |
|       |      | Shiraz-58T | 2221 | 0.871948 | 0         |  |
|       |      | Shiraz-71T | 2260 | 0.68394  | 0         |  |
|       |      | Shiraz-71T | 2261 | 0.508399 | 0         |  |
|       |      | Shiraz-3T  | 235  | 0        | -0.28401  |  |
|       |      | Shiraz-4T  | 260  | 0        | -0.324128 |  |
|       |      | Shiraz-16T | 294  | 0.655804 | 0         |  |
|       |      | Shiraz-36T | 431  | 0        | -0.78035  |  |
|       |      | Shiraz-44T | 891  | 0        | -0.954044 |  |
|       |      | Shiraz-49T | 1166 | 0        | -0.917235 |  |
|       |      | Shiraz-77T | 1281 | 0.136627 | 0         |  |
|       |      | Shiraz-9T  | 1368 | 0.199713 | 0         |  |
|       |      | Shiraz-18T | 1455 | 0        | -0.186773 |  |
|       |      | Shiraz-22T | 1669 | 0.695915 | 0         |  |
|       |      | Shiraz-25T | 1717 | 0.420447 | 0         |  |
|       |      | Shiraz-28T | 1760 | 0.538181 | 0         |  |
|       |      | Shiraz-29T | 1800 | 0.672527 | 0         |  |
|       |      | Shiraz-32T | 1869 | 0.776805 | 0         |  |
|       |      | Shiraz-35T | 1932 | 0.507141 | 0         |  |
|       |      | Shiraz-40T | 2051 | 0.098506 | 0         |  |
|       |      | Shiraz-58T | 2221 | 0.871948 | 0         |  |
|       |      | Shiraz-71T | 2260 | 0.68394  | 0         |  |
|       |      | Shiraz-71T | 2261 | 0.508399 | 0         |  |
|       |      | Shiraz-3T  | 235  | 0        | -0.28401  |  |
|       |      | Shiraz-4T  | 260  | 0        | -0.324128 |  |
|       |      | Shiraz-16T | 294  | 0.655804 | 0         |  |
|       |      | Shiraz-36T | 431  | 0        | -0.78035  |  |
|       |      | Shiraz-44T | 891  | 0        | -0.954044 |  |
|       |      | Shiraz-49T | 1166 | 0        | -0.917235 |  |
|       |      | Shiraz-77T | 1281 | 0.136627 | 0         |  |
|       |      | Shiraz-9T  | 1368 | 0.199713 | 0         |  |
|       |      | Shiraz-18T | 1455 | 0        | -0.186773 |  |
|       |      | Shiraz-22T | 1669 | 0.695915 | 0         |  |
|       |      | Shiraz-25T | 1717 | 0.420447 | 0         |  |
|       |      | Shiraz-28T | 1760 | 0.538181 | 0         |  |
|       |      | Shiraz-29T | 1800 | 0.672527 | 0         |  |
|       |      | Shiraz-32T | 1869 | 0.776805 | 0         |  |
|       |      | Shiraz-35T | 1932 | 0.507141 | 0         |  |
|       |      | Shiraz-40T | 2051 | 0.098506 | 0         |  |
|       |      | Shiraz-58T | 2221 | 0.871948 | 0         |  |
|       |      | Shiraz-71T | 2260 | 0.68394  | 0         |  |
|       |      | Shiraz-71T | 2261 | 0.508399 | 0         |  |
| SATL1 | chrX | Shiraz-3T  | 242  | 0        | -0.336434 |  |
|       |      | Shiraz-3T  | 243  | 0        | -0.549129 |  |
|       |      | Shiraz-4T  | 261  | 0        | -0.336249 |  |
|       |      | Shiraz-16T | 295  | 0.591657 | 0         |  |
|       |      | Shiraz-31T | 346  | 0        | -0.1527   |  |

|  |            |      |          |           |  |
|--|------------|------|----------|-----------|--|
|  | Shiraz-36T | 433  | 0        | -0.803961 |  |
|  | Shiraz-44T | 899  | 0        | -1.09697  |  |
|  | Shiraz-44T | 902  | 0        | -1.449824 |  |
|  | Shiraz-47T | 1085 | 0        | -0.130811 |  |
|  | Shiraz-49T | 1170 | 0        | -0.967436 |  |
|  | Shiraz-49T | 1172 | 0        | -1.123219 |  |
|  | Shiraz-18T | 1457 | 0.643204 | 0         |  |
|  | Shiraz-22T | 1673 | 0.611783 | 0         |  |
|  | Shiraz-22T | 1675 | 0.279253 | 0         |  |
|  | Shiraz-25T | 1719 | 0.472955 | 0         |  |
|  | Shiraz-28T | 1762 | 0.562311 | 0         |  |
|  | Shiraz-29T | 1801 | 0.815343 | 0         |  |
|  | Shiraz-32T | 1870 | 0.729766 | 0         |  |
|  | Shiraz-32T | 1871 | 0.292679 | 0         |  |
|  | Shiraz-35T | 1933 | 0.488535 | 0         |  |
|  | Shiraz-58T | 2223 | 0.833364 | 0         |  |
|  | Shiraz-58T | 2225 | 0.595784 | 0         |  |
|  | Shiraz-71T | 2263 | 0.975531 | 0         |  |
|  | Shiraz-3T  | 242  | 0        | -0.336434 |  |
|  | Shiraz-3T  | 243  | 0        | -0.549129 |  |
|  | Shiraz-4T  | 261  | 0        | -0.336249 |  |
|  | Shiraz-16T | 295  | 0.591657 | 0         |  |
|  | Shiraz-31T | 346  | 0        | -0.1527   |  |
|  | Shiraz-36T | 433  | 0        | -0.803961 |  |
|  | Shiraz-44T | 899  | 0        | -1.09697  |  |
|  | Shiraz-44T | 902  | 0        | -1.449824 |  |
|  | Shiraz-47T | 1085 | 0        | -0.130811 |  |
|  | Shiraz-49T | 1170 | 0        | -0.967436 |  |
|  | Shiraz-49T | 1172 | 0        | -1.123219 |  |
|  | Shiraz-18T | 1457 | 0.643204 | 0         |  |
|  | Shiraz-22T | 1673 | 0.611783 | 0         |  |
|  | Shiraz-22T | 1675 | 0.279253 | 0         |  |
|  | Shiraz-25T | 1719 | 0.472955 | 0         |  |
|  | Shiraz-28T | 1762 | 0.562311 | 0         |  |
|  | Shiraz-29T | 1801 | 0.815343 | 0         |  |
|  | Shiraz-32T | 1870 | 0.729766 | 0         |  |
|  | Shiraz-32T | 1871 | 0.292679 | 0         |  |
|  | Shiraz-35T | 1933 | 0.488535 | 0         |  |
|  | Shiraz-58T | 2223 | 0.833364 | 0         |  |
|  | Shiraz-58T | 2225 | 0.595784 | 0         |  |
|  | Shiraz-71T | 2263 | 0.975531 | 0         |  |
|  | Shiraz-3T  | 242  | 0        | -0.336434 |  |
|  | Shiraz-3T  | 243  | 0        | -0.549129 |  |
|  | Shiraz-4T  | 261  | 0        | -0.336249 |  |
|  | Shiraz-16T | 295  | 0.591657 | 0         |  |
|  | Shiraz-31T | 346  | 0        | -0.1527   |  |
|  | Shiraz-36T | 433  | 0        | -0.803961 |  |

|          |      |            |      |          |           |  |  |
|----------|------|------------|------|----------|-----------|--|--|
|          |      | Shiraz-44T | 899  | 0        | -1.09697  |  |  |
|          |      | Shiraz-44T | 902  | 0        | -1.449824 |  |  |
|          |      | Shiraz-47T | 1085 | 0        | -0.130811 |  |  |
|          |      | Shiraz-49T | 1170 | 0        | -0.967436 |  |  |
|          |      | Shiraz-49T | 1172 | 0        | -1.123219 |  |  |
|          |      | Shiraz-18T | 1457 | 0.643204 | 0         |  |  |
|          |      | Shiraz-22T | 1673 | 0.611783 | 0         |  |  |
|          |      | Shiraz-22T | 1675 | 0.279253 | 0         |  |  |
|          |      | Shiraz-25T | 1719 | 0.472955 | 0         |  |  |
|          |      | Shiraz-28T | 1762 | 0.562311 | 0         |  |  |
|          |      | Shiraz-29T | 1801 | 0.815343 | 0         |  |  |
|          |      | Shiraz-32T | 1870 | 0.729766 | 0         |  |  |
|          |      | Shiraz-32T | 1871 | 0.292679 | 0         |  |  |
|          |      | Shiraz-35T | 1933 | 0.488535 | 0         |  |  |
|          |      | Shiraz-58T | 2223 | 0.833364 | 0         |  |  |
|          |      | Shiraz-58T | 2225 | 0.595784 | 0         |  |  |
|          |      | Shiraz-71T | 2263 | 0.975531 | 0         |  |  |
| SCARNA23 | chrX | Shiraz-3T  | 235  | 0        | -0.28401  |  |  |
|          |      | Shiraz-4T  | 260  | 0        | -0.324128 |  |  |
|          |      | Shiraz-16T | 294  | 0.655804 | 0         |  |  |
|          |      | Shiraz-36T | 431  | 0        | -0.78035  |  |  |
|          |      | Shiraz-44T | 891  | 0        | -0.954044 |  |  |
|          |      | Shiraz-49T | 1166 | 0        | -0.917235 |  |  |
|          |      | Shiraz-77T | 1281 | 0.136627 | 0         |  |  |
|          |      | Shiraz-9T  | 1368 | 0.199713 | 0         |  |  |
|          |      | Shiraz-18T | 1455 | 0        | -0.186773 |  |  |
|          |      | Shiraz-22T | 1669 | 0.695915 | 0         |  |  |
|          |      | Shiraz-25T | 1717 | 0.420447 | 0         |  |  |
|          |      | Shiraz-28T | 1760 | 0.538181 | 0         |  |  |
|          |      | Shiraz-29T | 1800 | 0.672527 | 0         |  |  |
|          |      | Shiraz-32T | 1869 | 0.776805 | 0         |  |  |
|          |      | Shiraz-35T | 1932 | 0.507141 | 0         |  |  |
|          |      | Shiraz-40T | 2051 | 0.098506 | 0         |  |  |
|          |      | Shiraz-58T | 2221 | 0.871948 | 0         |  |  |
|          |      | Shiraz-71T | 2260 | 0.68394  | 0         |  |  |
|          |      | Shiraz-71T | 2261 | 0.508399 | 0         |  |  |
|          |      | Shiraz-3T  | 235  | 0        | -0.28401  |  |  |
|          |      | Shiraz-4T  | 260  | 0        | -0.324128 |  |  |
|          |      | Shiraz-16T | 294  | 0.655804 | 0         |  |  |
|          |      | Shiraz-36T | 431  | 0        | -0.78035  |  |  |
|          |      | Shiraz-44T | 891  | 0        | -0.954044 |  |  |
|          |      | Shiraz-49T | 1166 | 0        | -0.917235 |  |  |
|          |      | Shiraz-77T | 1281 | 0.136627 | 0         |  |  |
|          |      | Shiraz-9T  | 1368 | 0.199713 | 0         |  |  |
|          |      | Shiraz-18T | 1455 | 0        | -0.186773 |  |  |
|          |      | Shiraz-22T | 1669 | 0.695915 | 0         |  |  |
|          |      | Shiraz-25T | 1717 | 0.420447 | 0         |  |  |

|          |      |            |      |          |           |  |  |
|----------|------|------------|------|----------|-----------|--|--|
|          |      | Shiraz-28T | 1760 | 0.538181 | 0         |  |  |
|          |      | Shiraz-29T | 1800 | 0.672527 | 0         |  |  |
|          |      | Shiraz-32T | 1869 | 0.776805 | 0         |  |  |
|          |      | Shiraz-35T | 1932 | 0.507141 | 0         |  |  |
|          |      | Shiraz-40T | 2051 | 0.098506 | 0         |  |  |
|          |      | Shiraz-58T | 2221 | 0.871948 | 0         |  |  |
|          |      | Shiraz-71T | 2260 | 0.68394  | 0         |  |  |
|          |      | Shiraz-71T | 2261 | 0.508399 | 0         |  |  |
|          |      | Shiraz-3T  | 235  | 0        | -0.28401  |  |  |
|          |      | Shiraz-4T  | 260  | 0        | -0.324128 |  |  |
|          |      | Shiraz-16T | 294  | 0.655804 | 0         |  |  |
|          |      | Shiraz-36T | 431  | 0        | -0.78035  |  |  |
|          |      | Shiraz-44T | 891  | 0        | -0.954044 |  |  |
|          |      | Shiraz-49T | 1166 | 0        | -0.917235 |  |  |
|          |      | Shiraz-77T | 1281 | 0.136627 | 0         |  |  |
|          |      | Shiraz-9T  | 1368 | 0.199713 | 0         |  |  |
|          |      | Shiraz-18T | 1455 | 0        | -0.186773 |  |  |
|          |      | Shiraz-22T | 1669 | 0.695915 | 0         |  |  |
|          |      | Shiraz-25T | 1717 | 0.420447 | 0         |  |  |
|          |      | Shiraz-28T | 1760 | 0.538181 | 0         |  |  |
|          |      | Shiraz-29T | 1800 | 0.672527 | 0         |  |  |
|          |      | Shiraz-32T | 1869 | 0.776805 | 0         |  |  |
|          |      | Shiraz-35T | 1932 | 0.507141 | 0         |  |  |
|          |      | Shiraz-40T | 2051 | 0.098506 | 0         |  |  |
|          |      | Shiraz-58T | 2221 | 0.871948 | 0         |  |  |
|          |      | Shiraz-71T | 2260 | 0.68394  | 0         |  |  |
|          |      | Shiraz-71T | 2261 | 0.508399 | 0         |  |  |
| SCARNA9L | chrX | Shiraz-3T  | 235  | 0        | -0.28401  |  |  |
|          |      | Shiraz-4T  | 260  | 0        | -0.324128 |  |  |
|          |      | Shiraz-16T | 294  | 0.655804 | 0         |  |  |
|          |      | Shiraz-36T | 431  | 0        | -0.78035  |  |  |
|          |      | Shiraz-44T | 891  | 0        | -0.954044 |  |  |
|          |      | Shiraz-49T | 1166 | 0        | -0.917235 |  |  |
|          |      | Shiraz-77T | 1281 | 0.136627 | 0         |  |  |
|          |      | Shiraz-9T  | 1368 | 0.199713 | 0         |  |  |
|          |      | Shiraz-18T | 1455 | 0        | -0.186773 |  |  |
|          |      | Shiraz-22T | 1669 | 0.695915 | 0         |  |  |
|          |      | Shiraz-25T | 1717 | 0.420447 | 0         |  |  |
|          |      | Shiraz-28T | 1760 | 0.538181 | 0         |  |  |
|          |      | Shiraz-29T | 1800 | 0.672527 | 0         |  |  |
|          |      | Shiraz-32T | 1869 | 0.776805 | 0         |  |  |
|          |      | Shiraz-35T | 1932 | 0.507141 | 0         |  |  |
|          |      | Shiraz-40T | 2051 | 0.098506 | 0         |  |  |
|          |      | Shiraz-58T | 2221 | 0.871948 | 0         |  |  |
|          |      | Shiraz-71T | 2260 | 0.68394  | 0         |  |  |
|          |      | Shiraz-71T | 2261 | 0.508399 | 0         |  |  |
|          |      | Shiraz-3T  | 235  | 0        | -0.28401  |  |  |

|      |      |            |      |          |           |  |  |
|------|------|------------|------|----------|-----------|--|--|
|      |      | Shiraz-4T  | 260  | 0        | -0.324128 |  |  |
|      |      | Shiraz-16T | 294  | 0.655804 | 0         |  |  |
|      |      | Shiraz-36T | 431  | 0        | -0.78035  |  |  |
|      |      | Shiraz-44T | 891  | 0        | -0.954044 |  |  |
|      |      | Shiraz-49T | 1166 | 0        | -0.917235 |  |  |
|      |      | Shiraz-77T | 1281 | 0.136627 | 0         |  |  |
|      |      | Shiraz-9T  | 1368 | 0.199713 | 0         |  |  |
|      |      | Shiraz-18T | 1455 | 0        | -0.186773 |  |  |
|      |      | Shiraz-22T | 1669 | 0.695915 | 0         |  |  |
|      |      | Shiraz-25T | 1717 | 0.420447 | 0         |  |  |
|      |      | Shiraz-28T | 1760 | 0.538181 | 0         |  |  |
|      |      | Shiraz-29T | 1800 | 0.672527 | 0         |  |  |
|      |      | Shiraz-32T | 1869 | 0.776805 | 0         |  |  |
|      |      | Shiraz-35T | 1932 | 0.507141 | 0         |  |  |
|      |      | Shiraz-40T | 2051 | 0.098506 | 0         |  |  |
|      |      | Shiraz-58T | 2221 | 0.871948 | 0         |  |  |
|      |      | Shiraz-71T | 2260 | 0.68394  | 0         |  |  |
|      |      | Shiraz-71T | 2261 | 0.508399 | 0         |  |  |
|      |      | Shiraz-3T  | 235  | 0        | -0.28401  |  |  |
|      |      | Shiraz-4T  | 260  | 0        | -0.324128 |  |  |
|      |      | Shiraz-16T | 294  | 0.655804 | 0         |  |  |
|      |      | Shiraz-36T | 431  | 0        | -0.78035  |  |  |
|      |      | Shiraz-44T | 891  | 0        | -0.954044 |  |  |
|      |      | Shiraz-49T | 1166 | 0        | -0.917235 |  |  |
|      |      | Shiraz-77T | 1281 | 0.136627 | 0         |  |  |
|      |      | Shiraz-9T  | 1368 | 0.199713 | 0         |  |  |
|      |      | Shiraz-18T | 1455 | 0        | -0.186773 |  |  |
|      |      | Shiraz-22T | 1669 | 0.695915 | 0         |  |  |
|      |      | Shiraz-25T | 1717 | 0.420447 | 0         |  |  |
|      |      | Shiraz-28T | 1760 | 0.538181 | 0         |  |  |
|      |      | Shiraz-29T | 1800 | 0.672527 | 0         |  |  |
|      |      | Shiraz-32T | 1869 | 0.776805 | 0         |  |  |
|      |      | Shiraz-35T | 1932 | 0.507141 | 0         |  |  |
|      |      | Shiraz-40T | 2051 | 0.098506 | 0         |  |  |
|      |      | Shiraz-58T | 2221 | 0.871948 | 0         |  |  |
|      |      | Shiraz-71T | 2260 | 0.68394  | 0         |  |  |
|      |      | Shiraz-71T | 2261 | 0.508399 | 0         |  |  |
| SCIN | chr7 | Shiraz-4T  | 252  | 0.192083 | 0         |  |  |
|      |      | Shiraz-4T  | 252  | 0.192083 | 0         |  |  |
|      |      | Shiraz-36T | 376  | 0.159952 | 0         |  |  |
|      |      | Shiraz-36T | 376  | 0.159952 | 0         |  |  |
|      |      | Shiraz-44T | 628  | 0        | -0.444379 |  |  |
|      |      | Shiraz-44T | 628  | 0        | -0.444379 |  |  |
|      |      | Shiraz-47T | 1027 | 0        | -0.117848 |  |  |
|      |      | Shiraz-47T | 1027 | 0        | -0.117848 |  |  |
|      |      | Shiraz-49T | 1117 | 0        | -0.168296 |  |  |
|      |      | Shiraz-49T | 1117 | 0        | -0.168296 |  |  |



|  |  |            |      |          |           |  |  |
|--|--|------------|------|----------|-----------|--|--|
|  |  | Shiraz-77T | 1222 | 0        | -0.113002 |  |  |
|  |  | Shiraz-77T | 1222 | 0        | -0.113002 |  |  |
|  |  | Shiraz-18T | 1433 | 0.250973 | 0         |  |  |
|  |  | Shiraz-18T | 1433 | 0.250973 | 0         |  |  |
|  |  | Shiraz-22T | 1543 | 0        | -0.513696 |  |  |
|  |  | Shiraz-22T | 1543 | 0        | -0.513696 |  |  |
|  |  | Shiraz-25T | 1697 | 0.21945  | 0         |  |  |
|  |  | Shiraz-25T | 1697 | 0.21945  | 0         |  |  |
|  |  | Shiraz-28T | 1734 | 0.362882 | 0         |  |  |
|  |  | Shiraz-28T | 1734 | 0.362882 | 0         |  |  |
|  |  | Shiraz-29T | 1777 | 0.156747 | 0         |  |  |
|  |  | Shiraz-29T | 1777 | 0.156747 | 0         |  |  |
|  |  | Shiraz-38T | 1950 | 0.265916 | 0         |  |  |
|  |  | Shiraz-38T | 1950 | 0.265916 | 0         |  |  |
|  |  | Shiraz-58T | 2157 | 0        | -0.213872 |  |  |
|  |  | Shiraz-58T | 2157 | 0        | -0.213872 |  |  |
|  |  | Shiraz-71T | 2236 | 0.320072 | 0         |  |  |
|  |  | Shiraz-71T | 2236 | 0.320072 | 0         |  |  |
|  |  | Shiraz-4T  | 252  | 0.192083 | 0         |  |  |
|  |  | Shiraz-4T  | 252  | 0.192083 | 0         |  |  |
|  |  | Shiraz-36T | 376  | 0.159952 | 0         |  |  |
|  |  | Shiraz-36T | 376  | 0.159952 | 0         |  |  |
|  |  | Shiraz-44T | 628  | 0        | -0.444379 |  |  |
|  |  | Shiraz-44T | 628  | 0        | -0.444379 |  |  |
|  |  | Shiraz-47T | 1027 | 0        | -0.117848 |  |  |
|  |  | Shiraz-47T | 1027 | 0        | -0.117848 |  |  |
|  |  | Shiraz-49T | 1117 | 0        | -0.168296 |  |  |
|  |  | Shiraz-49T | 1117 | 0        | -0.168296 |  |  |
|  |  | Shiraz-77T | 1222 | 0        | -0.113002 |  |  |
|  |  | Shiraz-77T | 1222 | 0        | -0.113002 |  |  |
|  |  | Shiraz-18T | 1433 | 0.250973 | 0         |  |  |
|  |  | Shiraz-18T | 1433 | 0.250973 | 0         |  |  |
|  |  | Shiraz-22T | 1543 | 0        | -0.513696 |  |  |
|  |  | Shiraz-22T | 1543 | 0        | -0.513696 |  |  |
|  |  | Shiraz-25T | 1697 | 0.21945  | 0         |  |  |
|  |  | Shiraz-25T | 1697 | 0.21945  | 0         |  |  |
|  |  | Shiraz-28T | 1734 | 0.362882 | 0         |  |  |
|  |  | Shiraz-28T | 1734 | 0.362882 | 0         |  |  |
|  |  | Shiraz-29T | 1777 | 0.156747 | 0         |  |  |
|  |  | Shiraz-29T | 1777 | 0.156747 | 0         |  |  |
|  |  | Shiraz-38T | 1950 | 0.265916 | 0         |  |  |
|  |  | Shiraz-38T | 1950 | 0.265916 | 0         |  |  |
|  |  | Shiraz-58T | 2157 | 0        | -0.213872 |  |  |
|  |  | Shiraz-58T | 2157 | 0        | -0.213872 |  |  |
|  |  | Shiraz-71T | 2236 | 0.320072 | 0         |  |  |
|  |  | Shiraz-71T | 2236 | 0.320072 | 0         |  |  |
|  |  | Shiraz-4T  | 252  | 0.192083 | 0         |  |  |

|       |      |            |      |          |           |  |  |
|-------|------|------------|------|----------|-----------|--|--|
|       |      | Shiraz-4T  | 252  | 0.192083 | 0         |  |  |
|       |      | Shiraz-36T | 376  | 0.159952 | 0         |  |  |
|       |      | Shiraz-36T | 376  | 0.159952 | 0         |  |  |
|       |      | Shiraz-44T | 628  | 0        | -0.444379 |  |  |
|       |      | Shiraz-44T | 628  | 0        | -0.444379 |  |  |
|       |      | Shiraz-47T | 1027 | 0        | -0.117848 |  |  |
|       |      | Shiraz-47T | 1027 | 0        | -0.117848 |  |  |
|       |      | Shiraz-49T | 1117 | 0        | -0.168296 |  |  |
|       |      | Shiraz-49T | 1117 | 0        | -0.168296 |  |  |
|       |      | Shiraz-77T | 1222 | 0        | -0.113002 |  |  |
|       |      | Shiraz-77T | 1222 | 0        | -0.113002 |  |  |
|       |      | Shiraz-18T | 1433 | 0.250973 | 0         |  |  |
|       |      | Shiraz-18T | 1433 | 0.250973 | 0         |  |  |
|       |      | Shiraz-22T | 1543 | 0        | -0.513696 |  |  |
|       |      | Shiraz-22T | 1543 | 0        | -0.513696 |  |  |
|       |      | Shiraz-25T | 1697 | 0.21945  | 0         |  |  |
|       |      | Shiraz-25T | 1697 | 0.21945  | 0         |  |  |
|       |      | Shiraz-28T | 1734 | 0.362882 | 0         |  |  |
|       |      | Shiraz-28T | 1734 | 0.362882 | 0         |  |  |
|       |      | Shiraz-29T | 1777 | 0.156747 | 0         |  |  |
|       |      | Shiraz-29T | 1777 | 0.156747 | 0         |  |  |
|       |      | Shiraz-38T | 1950 | 0.265916 | 0         |  |  |
|       |      | Shiraz-38T | 1950 | 0.265916 | 0         |  |  |
|       |      | Shiraz-58T | 2157 | 0        | -0.213872 |  |  |
|       |      | Shiraz-58T | 2157 | 0        | -0.213872 |  |  |
|       |      | Shiraz-71T | 2236 | 0.320072 | 0         |  |  |
|       |      | Shiraz-71T | 2236 | 0.320072 | 0         |  |  |
| SCML1 | chrX | Shiraz-3T  | 235  | 0        | -0.28401  |  |  |
|       |      | Shiraz-4T  | 260  | 0        | -0.324128 |  |  |
|       |      | Shiraz-16T | 294  | 0.655804 | 0         |  |  |
|       |      | Shiraz-36T | 431  | 0        | -0.78035  |  |  |
|       |      | Shiraz-44T | 891  | 0        | -0.954044 |  |  |
|       |      | Shiraz-49T | 1166 | 0        | -0.917235 |  |  |
|       |      | Shiraz-9T  | 1368 | 0.199713 | 0         |  |  |
|       |      | Shiraz-18T | 1455 | 0        | -0.186773 |  |  |
|       |      | Shiraz-22T | 1669 | 0.695915 | 0         |  |  |
|       |      | Shiraz-25T | 1717 | 0.420447 | 0         |  |  |
|       |      | Shiraz-28T | 1760 | 0.538181 | 0         |  |  |
|       |      | Shiraz-29T | 1800 | 0.672527 | 0         |  |  |
|       |      | Shiraz-32T | 1869 | 0.776805 | 0         |  |  |
|       |      | Shiraz-35T | 1932 | 0.507141 | 0         |  |  |
|       |      | Shiraz-40T | 2051 | 0.098506 | 0         |  |  |
|       |      | Shiraz-58T | 2221 | 0.871948 | 0         |  |  |
|       |      | Shiraz-71T | 2260 | 0.68394  | 0         |  |  |
|       |      | Shiraz-71T | 2261 | 0.508399 | 0         |  |  |
|       |      | Shiraz-3T  | 235  | 0        | -0.28401  |  |  |
|       |      | Shiraz-4T  | 260  | 0        | -0.324128 |  |  |

|       |      |            |      |          |           |  |  |
|-------|------|------------|------|----------|-----------|--|--|
|       |      | Shiraz-16T | 294  | 0.655804 | 0         |  |  |
|       |      | Shiraz-36T | 431  | 0        | -0.78035  |  |  |
|       |      | Shiraz-44T | 891  | 0        | -0.954044 |  |  |
|       |      | Shiraz-49T | 1166 | 0        | -0.917235 |  |  |
|       |      | Shiraz-9T  | 1368 | 0.199713 | 0         |  |  |
|       |      | Shiraz-18T | 1455 | 0        | -0.186773 |  |  |
|       |      | Shiraz-22T | 1669 | 0.695915 | 0         |  |  |
|       |      | Shiraz-25T | 1717 | 0.420447 | 0         |  |  |
|       |      | Shiraz-28T | 1760 | 0.538181 | 0         |  |  |
|       |      | Shiraz-29T | 1800 | 0.672527 | 0         |  |  |
|       |      | Shiraz-32T | 1869 | 0.776805 | 0         |  |  |
|       |      | Shiraz-35T | 1932 | 0.507141 | 0         |  |  |
|       |      | Shiraz-40T | 2051 | 0.098506 | 0         |  |  |
|       |      | Shiraz-58T | 2221 | 0.871948 | 0         |  |  |
|       |      | Shiraz-71T | 2260 | 0.68394  | 0         |  |  |
|       |      | Shiraz-71T | 2261 | 0.508399 | 0         |  |  |
|       |      | Shiraz-3T  | 235  | 0        | -0.28401  |  |  |
|       |      | Shiraz-4T  | 260  | 0        | -0.324128 |  |  |
|       |      | Shiraz-16T | 294  | 0.655804 | 0         |  |  |
|       |      | Shiraz-36T | 431  | 0        | -0.78035  |  |  |
|       |      | Shiraz-44T | 891  | 0        | -0.954044 |  |  |
|       |      | Shiraz-49T | 1166 | 0        | -0.917235 |  |  |
|       |      | Shiraz-9T  | 1368 | 0.199713 | 0         |  |  |
|       |      | Shiraz-18T | 1455 | 0        | -0.186773 |  |  |
|       |      | Shiraz-22T | 1669 | 0.695915 | 0         |  |  |
|       |      | Shiraz-25T | 1717 | 0.420447 | 0         |  |  |
|       |      | Shiraz-28T | 1760 | 0.538181 | 0         |  |  |
|       |      | Shiraz-29T | 1800 | 0.672527 | 0         |  |  |
|       |      | Shiraz-32T | 1869 | 0.776805 | 0         |  |  |
|       |      | Shiraz-35T | 1932 | 0.507141 | 0         |  |  |
|       |      | Shiraz-40T | 2051 | 0.098506 | 0         |  |  |
|       |      | Shiraz-58T | 2221 | 0.871948 | 0         |  |  |
|       |      | Shiraz-71T | 2260 | 0.68394  | 0         |  |  |
|       |      | Shiraz-71T | 2261 | 0.508399 | 0         |  |  |
| SCML2 | chrX | Shiraz-3T  | 235  | 0        | -0.28401  |  |  |
|       |      | Shiraz-4T  | 260  | 0        | -0.324128 |  |  |
|       |      | Shiraz-16T | 294  | 0.655804 | 0         |  |  |
|       |      | Shiraz-36T | 431  | 0        | -0.78035  |  |  |
|       |      | Shiraz-44T | 891  | 0        | -0.954044 |  |  |
|       |      | Shiraz-49T | 1166 | 0        | -0.917235 |  |  |
|       |      | Shiraz-77T | 1281 | 0.136627 | 0         |  |  |
|       |      | Shiraz-9T  | 1368 | 0.199713 | 0         |  |  |
|       |      | Shiraz-18T | 1455 | 0        | -0.186773 |  |  |
|       |      | Shiraz-22T | 1669 | 0.695915 | 0         |  |  |
|       |      | Shiraz-25T | 1717 | 0.420447 | 0         |  |  |
|       |      | Shiraz-28T | 1760 | 0.538181 | 0         |  |  |
|       |      | Shiraz-29T | 1800 | 0.672527 | 0         |  |  |

|       |      |            |      |          |           |  |  |
|-------|------|------------|------|----------|-----------|--|--|
|       |      | Shiraz-32T | 1869 | 0.776805 | 0         |  |  |
|       |      | Shiraz-35T | 1932 | 0.507141 | 0         |  |  |
|       |      | Shiraz-40T | 2051 | 0.098506 | 0         |  |  |
|       |      | Shiraz-58T | 2221 | 0.871948 | 0         |  |  |
|       |      | Shiraz-71T | 2260 | 0.68394  | 0         |  |  |
|       |      | Shiraz-71T | 2261 | 0.508399 | 0         |  |  |
|       |      | Shiraz-3T  | 235  | 0        | -0.28401  |  |  |
|       |      | Shiraz-4T  | 260  | 0        | -0.324128 |  |  |
|       |      | Shiraz-16T | 294  | 0.655804 | 0         |  |  |
|       |      | Shiraz-36T | 431  | 0        | -0.78035  |  |  |
|       |      | Shiraz-44T | 891  | 0        | -0.954044 |  |  |
|       |      | Shiraz-49T | 1166 | 0        | -0.917235 |  |  |
|       |      | Shiraz-77T | 1281 | 0.136627 | 0         |  |  |
|       |      | Shiraz-9T  | 1368 | 0.199713 | 0         |  |  |
|       |      | Shiraz-18T | 1455 | 0        | -0.186773 |  |  |
|       |      | Shiraz-22T | 1669 | 0.695915 | 0         |  |  |
|       |      | Shiraz-25T | 1717 | 0.420447 | 0         |  |  |
|       |      | Shiraz-28T | 1760 | 0.538181 | 0         |  |  |
|       |      | Shiraz-29T | 1800 | 0.672527 | 0         |  |  |
|       |      | Shiraz-32T | 1869 | 0.776805 | 0         |  |  |
|       |      | Shiraz-35T | 1932 | 0.507141 | 0         |  |  |
|       |      | Shiraz-40T | 2051 | 0.098506 | 0         |  |  |
|       |      | Shiraz-58T | 2221 | 0.871948 | 0         |  |  |
|       |      | Shiraz-71T | 2260 | 0.68394  | 0         |  |  |
|       |      | Shiraz-71T | 2261 | 0.508399 | 0         |  |  |
|       |      | Shiraz-3T  | 235  | 0        | -0.28401  |  |  |
|       |      | Shiraz-4T  | 260  | 0        | -0.324128 |  |  |
|       |      | Shiraz-16T | 294  | 0.655804 | 0         |  |  |
|       |      | Shiraz-36T | 431  | 0        | -0.78035  |  |  |
|       |      | Shiraz-44T | 891  | 0        | -0.954044 |  |  |
|       |      | Shiraz-49T | 1166 | 0        | -0.917235 |  |  |
|       |      | Shiraz-77T | 1281 | 0.136627 | 0         |  |  |
|       |      | Shiraz-9T  | 1368 | 0.199713 | 0         |  |  |
|       |      | Shiraz-18T | 1455 | 0        | -0.186773 |  |  |
|       |      | Shiraz-22T | 1669 | 0.695915 | 0         |  |  |
|       |      | Shiraz-25T | 1717 | 0.420447 | 0         |  |  |
|       |      | Shiraz-28T | 1760 | 0.538181 | 0         |  |  |
|       |      | Shiraz-29T | 1800 | 0.672527 | 0         |  |  |
|       |      | Shiraz-32T | 1869 | 0.776805 | 0         |  |  |
|       |      | Shiraz-35T | 1932 | 0.507141 | 0         |  |  |
|       |      | Shiraz-40T | 2051 | 0.098506 | 0         |  |  |
|       |      | Shiraz-58T | 2221 | 0.871948 | 0         |  |  |
|       |      | Shiraz-71T | 2260 | 0.68394  | 0         |  |  |
|       |      | Shiraz-71T | 2261 | 0.508399 | 0         |  |  |
| SCRN1 | chr7 | Shiraz-3T  | 87   | 0.198593 | 0         |  |  |
|       |      | Shiraz-3T  | 87   | 0.198593 | 0         |  |  |
|       |      | Shiraz-3T  | 87   | 0.198593 | 0         |  |  |

|  |  |            |      |          |   |  |  |
|--|--|------------|------|----------|---|--|--|
|  |  | Shiraz-4T  | 252  | 0.192083 | 0 |  |  |
|  |  | Shiraz-4T  | 252  | 0.192083 | 0 |  |  |
|  |  | Shiraz-4T  | 252  | 0.192083 | 0 |  |  |
|  |  | Shiraz-36T | 376  | 0.159952 | 0 |  |  |
|  |  | Shiraz-36T | 376  | 0.159952 | 0 |  |  |
|  |  | Shiraz-36T | 376  | 0.159952 | 0 |  |  |
|  |  | Shiraz-46T | 942  | 0.069143 | 0 |  |  |
|  |  | Shiraz-46T | 942  | 0.069143 | 0 |  |  |
|  |  | Shiraz-46T | 942  | 0.069143 | 0 |  |  |
|  |  | Shiraz-18T | 1433 | 0.250973 | 0 |  |  |
|  |  | Shiraz-18T | 1433 | 0.250973 | 0 |  |  |
|  |  | Shiraz-18T | 1433 | 0.250973 | 0 |  |  |
|  |  | Shiraz-25T | 1697 | 0.21945  | 0 |  |  |
|  |  | Shiraz-25T | 1697 | 0.21945  | 0 |  |  |
|  |  | Shiraz-25T | 1697 | 0.21945  | 0 |  |  |
|  |  | Shiraz-28T | 1734 | 0.362882 | 0 |  |  |
|  |  | Shiraz-28T | 1734 | 0.362882 | 0 |  |  |
|  |  | Shiraz-28T | 1734 | 0.362882 | 0 |  |  |
|  |  | Shiraz-29T | 1777 | 0.156747 | 0 |  |  |
|  |  | Shiraz-29T | 1777 | 0.156747 | 0 |  |  |
|  |  | Shiraz-29T | 1777 | 0.156747 | 0 |  |  |
|  |  | Shiraz-38T | 1950 | 0.265916 | 0 |  |  |
|  |  | Shiraz-38T | 1950 | 0.265916 | 0 |  |  |
|  |  | Shiraz-38T | 1950 | 0.265916 | 0 |  |  |
|  |  | Shiraz-71T | 2236 | 0.320072 | 0 |  |  |
|  |  | Shiraz-71T | 2236 | 0.320072 | 0 |  |  |
|  |  | Shiraz-71T | 2236 | 0.320072 | 0 |  |  |
|  |  | Shiraz-3T  | 87   | 0.198593 | 0 |  |  |
|  |  | Shiraz-3T  | 87   | 0.198593 | 0 |  |  |
|  |  | Shiraz-3T  | 87   | 0.198593 | 0 |  |  |
|  |  | Shiraz-4T  | 252  | 0.192083 | 0 |  |  |
|  |  | Shiraz-4T  | 252  | 0.192083 | 0 |  |  |
|  |  | Shiraz-4T  | 252  | 0.192083 | 0 |  |  |
|  |  | Shiraz-36T | 376  | 0.159952 | 0 |  |  |
|  |  | Shiraz-36T | 376  | 0.159952 | 0 |  |  |
|  |  | Shiraz-36T | 376  | 0.159952 | 0 |  |  |
|  |  | Shiraz-46T | 942  | 0.069143 | 0 |  |  |
|  |  | Shiraz-46T | 942  | 0.069143 | 0 |  |  |
|  |  | Shiraz-46T | 942  | 0.069143 | 0 |  |  |
|  |  | Shiraz-18T | 1433 | 0.250973 | 0 |  |  |
|  |  | Shiraz-18T | 1433 | 0.250973 | 0 |  |  |
|  |  | Shiraz-18T | 1433 | 0.250973 | 0 |  |  |
|  |  | Shiraz-25T | 1697 | 0.21945  | 0 |  |  |
|  |  | Shiraz-25T | 1697 | 0.21945  | 0 |  |  |
|  |  | Shiraz-25T | 1697 | 0.21945  | 0 |  |  |
|  |  | Shiraz-28T | 1734 | 0.362882 | 0 |  |  |
|  |  | Shiraz-28T | 1734 | 0.362882 | 0 |  |  |

|        |      |            |      |          |           |  |  |
|--------|------|------------|------|----------|-----------|--|--|
|        |      | Shiraz-28T | 1734 | 0.362882 | 0         |  |  |
|        |      | Shiraz-29T | 1777 | 0.156747 | 0         |  |  |
|        |      | Shiraz-29T | 1777 | 0.156747 | 0         |  |  |
|        |      | Shiraz-29T | 1777 | 0.156747 | 0         |  |  |
|        |      | Shiraz-38T | 1950 | 0.265916 | 0         |  |  |
|        |      | Shiraz-38T | 1950 | 0.265916 | 0         |  |  |
|        |      | Shiraz-38T | 1950 | 0.265916 | 0         |  |  |
|        |      | Shiraz-71T | 2236 | 0.320072 | 0         |  |  |
|        |      | Shiraz-71T | 2236 | 0.320072 | 0         |  |  |
|        |      | Shiraz-71T | 2236 | 0.320072 | 0         |  |  |
|        |      | Shiraz-3T  | 87   | 0.198593 | 0         |  |  |
|        |      | Shiraz-3T  | 87   | 0.198593 | 0         |  |  |
|        |      | Shiraz-3T  | 87   | 0.198593 | 0         |  |  |
|        |      | Shiraz-4T  | 252  | 0.192083 | 0         |  |  |
|        |      | Shiraz-4T  | 252  | 0.192083 | 0         |  |  |
|        |      | Shiraz-4T  | 252  | 0.192083 | 0         |  |  |
|        |      | Shiraz-36T | 376  | 0.159952 | 0         |  |  |
|        |      | Shiraz-36T | 376  | 0.159952 | 0         |  |  |
|        |      | Shiraz-36T | 376  | 0.159952 | 0         |  |  |
|        |      | Shiraz-46T | 942  | 0.069143 | 0         |  |  |
|        |      | Shiraz-46T | 942  | 0.069143 | 0         |  |  |
|        |      | Shiraz-46T | 942  | 0.069143 | 0         |  |  |
|        |      | Shiraz-18T | 1433 | 0.250973 | 0         |  |  |
|        |      | Shiraz-18T | 1433 | 0.250973 | 0         |  |  |
|        |      | Shiraz-18T | 1433 | 0.250973 | 0         |  |  |
|        |      | Shiraz-25T | 1697 | 0.21945  | 0         |  |  |
|        |      | Shiraz-25T | 1697 | 0.21945  | 0         |  |  |
|        |      | Shiraz-25T | 1697 | 0.21945  | 0         |  |  |
|        |      | Shiraz-28T | 1734 | 0.362882 | 0         |  |  |
|        |      | Shiraz-28T | 1734 | 0.362882 | 0         |  |  |
|        |      | Shiraz-28T | 1734 | 0.362882 | 0         |  |  |
|        |      | Shiraz-29T | 1777 | 0.156747 | 0         |  |  |
|        |      | Shiraz-29T | 1777 | 0.156747 | 0         |  |  |
|        |      | Shiraz-29T | 1777 | 0.156747 | 0         |  |  |
|        |      | Shiraz-38T | 1950 | 0.265916 | 0         |  |  |
|        |      | Shiraz-38T | 1950 | 0.265916 | 0         |  |  |
|        |      | Shiraz-38T | 1950 | 0.265916 | 0         |  |  |
|        |      | Shiraz-71T | 2236 | 0.320072 | 0         |  |  |
|        |      | Shiraz-71T | 2236 | 0.320072 | 0         |  |  |
|        |      | Shiraz-71T | 2236 | 0.320072 | 0         |  |  |
| SEC61G | chr7 | Shiraz-3T  | 87   | 0.198593 | 0         |  |  |
|        |      | Shiraz-4T  | 252  | 0.192083 | 0         |  |  |
|        |      | Shiraz-36T | 376  | 0.159952 | 0         |  |  |
|        |      | Shiraz-46T | 942  | 0.069143 | 0         |  |  |
|        |      | Shiraz-18T | 1433 | 0.250973 | 0         |  |  |
|        |      | Shiraz-22T | 1546 | 0        | -0.458543 |  |  |
|        |      | Shiraz-25T | 1697 | 0.21945  | 0         |  |  |

|        |      |            |      |          |           |  |
|--------|------|------------|------|----------|-----------|--|
|        |      | Shiraz-28T | 1734 | 0.362882 | 0         |  |
|        |      | Shiraz-29T | 1777 | 0.156747 | 0         |  |
|        |      | Shiraz-38T | 1950 | 0.265916 | 0         |  |
|        |      | Shiraz-71T | 2236 | 0.320072 | 0         |  |
|        |      | Shiraz-3T  | 87   | 0.198593 | 0         |  |
|        |      | Shiraz-4T  | 252  | 0.192083 | 0         |  |
|        |      | Shiraz-36T | 376  | 0.159952 | 0         |  |
|        |      | Shiraz-46T | 942  | 0.069143 | 0         |  |
|        |      | Shiraz-18T | 1433 | 0.250973 | 0         |  |
|        |      | Shiraz-22T | 1546 | 0        | -0.458543 |  |
|        |      | Shiraz-25T | 1697 | 0.21945  | 0         |  |
|        |      | Shiraz-28T | 1734 | 0.362882 | 0         |  |
|        |      | Shiraz-29T | 1777 | 0.156747 | 0         |  |
|        |      | Shiraz-38T | 1950 | 0.265916 | 0         |  |
|        |      | Shiraz-71T | 2236 | 0.320072 | 0         |  |
|        |      | Shiraz-3T  | 87   | 0.198593 | 0         |  |
|        |      | Shiraz-4T  | 252  | 0.192083 | 0         |  |
|        |      | Shiraz-36T | 376  | 0.159952 | 0         |  |
|        |      | Shiraz-46T | 942  | 0.069143 | 0         |  |
|        |      | Shiraz-18T | 1433 | 0.250973 | 0         |  |
|        |      | Shiraz-22T | 1546 | 0        | -0.458543 |  |
|        |      | Shiraz-25T | 1697 | 0.21945  | 0         |  |
|        |      | Shiraz-28T | 1734 | 0.362882 | 0         |  |
|        |      | Shiraz-29T | 1777 | 0.156747 | 0         |  |
|        |      | Shiraz-38T | 1950 | 0.265916 | 0         |  |
|        |      | Shiraz-71T | 2236 | 0.320072 | 0         |  |
| SEMA3A | chr7 | Shiraz-3T  | 90   | 0.219276 | 0         |  |
|        |      | Shiraz-3T  | 93   | 0        | -0.058023 |  |
|        |      | Shiraz-4T  | 253  | 0.372918 | 0         |  |
|        |      | Shiraz-36T | 378  | 0.179558 | 0         |  |
|        |      | Shiraz-36T | 380  | 0.083883 | 0         |  |
|        |      | Shiraz-44T | 638  | 0        | -0.433476 |  |
|        |      | Shiraz-46T | 943  | 0.093799 | 0         |  |
|        |      | Shiraz-46T | 945  | 0        | -0.014838 |  |
|        |      | Shiraz-47T | 1029 | 0        | -0.096586 |  |
|        |      | Shiraz-49T | 1119 | 0        | -0.157331 |  |
|        |      | Shiraz-77T | 1225 | 0        | -0.117922 |  |
|        |      | Shiraz-77T | 1226 | 0        | -0.233724 |  |
|        |      | Shiraz-12T | 1390 | 0        | -0.237897 |  |
|        |      | Shiraz-18T | 1434 | 0.244465 | 0         |  |
|        |      | Shiraz-22T | 1549 | 0        | -0.319623 |  |
|        |      | Shiraz-22T | 1550 | 0        | -0.577052 |  |
|        |      | Shiraz-25T | 1698 | 0.21835  | 0         |  |
|        |      | Shiraz-28T | 1735 | 0.350744 | 0         |  |
|        |      | Shiraz-29T | 1778 | 0.120767 | 0         |  |
|        |      | Shiraz-38T | 1951 | 0.250891 | 0         |  |
|        |      | Shiraz-53T | 2078 | 0.287202 | 0         |  |

|  |            |      |          |           |  |
|--|------------|------|----------|-----------|--|
|  | Shiraz-58T | 2159 | 0        | -0.219521 |  |
|  | Shiraz-71T | 2238 | 0.603631 | 0         |  |
|  | Shiraz-3T  | 90   | 0.219276 | 0         |  |
|  | Shiraz-3T  | 93   | 0        | -0.058023 |  |
|  | Shiraz-4T  | 253  | 0.372918 | 0         |  |
|  | Shiraz-36T | 378  | 0.179558 | 0         |  |
|  | Shiraz-36T | 380  | 0.083883 | 0         |  |
|  | Shiraz-44T | 638  | 0        | -0.433476 |  |
|  | Shiraz-46T | 943  | 0.093799 | 0         |  |
|  | Shiraz-46T | 945  | 0        | -0.014838 |  |
|  | Shiraz-47T | 1029 | 0        | -0.096586 |  |
|  | Shiraz-49T | 1119 | 0        | -0.157331 |  |
|  | Shiraz-77T | 1225 | 0        | -0.117922 |  |
|  | Shiraz-77T | 1226 | 0        | -0.233724 |  |
|  | Shiraz-12T | 1390 | 0        | -0.237897 |  |
|  | Shiraz-18T | 1434 | 0.244465 | 0         |  |
|  | Shiraz-22T | 1549 | 0        | -0.319623 |  |
|  | Shiraz-22T | 1550 | 0        | -0.577052 |  |
|  | Shiraz-25T | 1698 | 0.21835  | 0         |  |
|  | Shiraz-28T | 1735 | 0.350744 | 0         |  |
|  | Shiraz-29T | 1778 | 0.120767 | 0         |  |
|  | Shiraz-38T | 1951 | 0.250891 | 0         |  |
|  | Shiraz-53T | 2078 | 0.287202 | 0         |  |
|  | Shiraz-58T | 2159 | 0        | -0.219521 |  |
|  | Shiraz-71T | 2238 | 0.603631 | 0         |  |
|  | Shiraz-3T  | 90   | 0.219276 | 0         |  |
|  | Shiraz-3T  | 93   | 0        | -0.058023 |  |
|  | Shiraz-4T  | 253  | 0.372918 | 0         |  |
|  | Shiraz-36T | 378  | 0.179558 | 0         |  |
|  | Shiraz-36T | 380  | 0.083883 | 0         |  |
|  | Shiraz-44T | 638  | 0        | -0.433476 |  |
|  | Shiraz-46T | 943  | 0.093799 | 0         |  |
|  | Shiraz-46T | 945  | 0        | -0.014838 |  |
|  | Shiraz-47T | 1029 | 0        | -0.096586 |  |
|  | Shiraz-49T | 1119 | 0        | -0.157331 |  |
|  | Shiraz-77T | 1225 | 0        | -0.117922 |  |
|  | Shiraz-77T | 1226 | 0        | -0.233724 |  |
|  | Shiraz-12T | 1390 | 0        | -0.237897 |  |
|  | Shiraz-18T | 1434 | 0.244465 | 0         |  |
|  | Shiraz-22T | 1549 | 0        | -0.319623 |  |
|  | Shiraz-22T | 1550 | 0        | -0.577052 |  |
|  | Shiraz-25T | 1698 | 0.21835  | 0         |  |
|  | Shiraz-28T | 1735 | 0.350744 | 0         |  |
|  | Shiraz-29T | 1778 | 0.120767 | 0         |  |
|  | Shiraz-38T | 1951 | 0.250891 | 0         |  |
|  | Shiraz-53T | 2078 | 0.287202 | 0         |  |
|  | Shiraz-58T | 2159 | 0        | -0.219521 |  |



|        |      |            |      |          |           |  |
|--------|------|------------|------|----------|-----------|--|
|        |      | Shiraz-71T | 2238 | 0.603631 | 0         |  |
| SEMA3C | chr7 | Shiraz-3T  | 90   | 0.219276 | 0         |  |
|        |      | Shiraz-3T  | 93   | 0        | -0.058023 |  |
|        |      | Shiraz-4T  | 253  | 0.372918 | 0         |  |
|        |      | Shiraz-36T | 378  | 0.179558 | 0         |  |
|        |      | Shiraz-36T | 380  | 0.083883 | 0         |  |
|        |      | Shiraz-44T | 638  | 0        | -0.433476 |  |
|        |      | Shiraz-46T | 943  | 0.093799 | 0         |  |
|        |      | Shiraz-46T | 945  | 0        | -0.014838 |  |
|        |      | Shiraz-47T | 1029 | 0        | -0.096586 |  |
|        |      | Shiraz-49T | 1119 | 0        | -0.157331 |  |
|        |      | Shiraz-77T | 1225 | 0        | -0.117922 |  |
|        |      | Shiraz-77T | 1226 | 0        | -0.233724 |  |
|        |      | Shiraz-12T | 1390 | 0        | -0.237897 |  |
|        |      | Shiraz-18T | 1434 | 0.244465 | 0         |  |
|        |      | Shiraz-22T | 1549 | 0        | -0.319623 |  |
|        |      | Shiraz-22T | 1550 | 0        | -0.577052 |  |
|        |      | Shiraz-25T | 1698 | 0.21835  | 0         |  |
|        |      | Shiraz-28T | 1735 | 0.350744 | 0         |  |
|        |      | Shiraz-29T | 1778 | 0.120767 | 0         |  |
|        |      | Shiraz-38T | 1951 | 0.250891 | 0         |  |
|        |      | Shiraz-53T | 2078 | 0.287202 | 0         |  |
|        |      | Shiraz-58T | 2159 | 0        | -0.219521 |  |
|        |      | Shiraz-71T | 2238 | 0.603631 | 0         |  |
|        |      | Shiraz-3T  | 90   | 0.219276 | 0         |  |
|        |      | Shiraz-3T  | 93   | 0        | -0.058023 |  |
|        |      | Shiraz-4T  | 253  | 0.372918 | 0         |  |
|        |      | Shiraz-36T | 378  | 0.179558 | 0         |  |
|        |      | Shiraz-36T | 380  | 0.083883 | 0         |  |
|        |      | Shiraz-44T | 638  | 0        | -0.433476 |  |
|        |      | Shiraz-46T | 943  | 0.093799 | 0         |  |
|        |      | Shiraz-46T | 945  | 0        | -0.014838 |  |
|        |      | Shiraz-47T | 1029 | 0        | -0.096586 |  |
|        |      | Shiraz-49T | 1119 | 0        | -0.157331 |  |
|        |      | Shiraz-77T | 1225 | 0        | -0.117922 |  |
|        |      | Shiraz-77T | 1226 | 0        | -0.233724 |  |
|        |      | Shiraz-12T | 1390 | 0        | -0.237897 |  |
|        |      | Shiraz-18T | 1434 | 0.244465 | 0         |  |
|        |      | Shiraz-22T | 1549 | 0        | -0.319623 |  |
|        |      | Shiraz-22T | 1550 | 0        | -0.577052 |  |
|        |      | Shiraz-25T | 1698 | 0.21835  | 0         |  |
|        |      | Shiraz-28T | 1735 | 0.350744 | 0         |  |
|        |      | Shiraz-29T | 1778 | 0.120767 | 0         |  |
|        |      | Shiraz-38T | 1951 | 0.250891 | 0         |  |
|        |      | Shiraz-53T | 2078 | 0.287202 | 0         |  |
|        |      | Shiraz-58T | 2159 | 0        | -0.219521 |  |
|        |      | Shiraz-71T | 2238 | 0.603631 | 0         |  |

|        |      |            |      |          |           |  |  |
|--------|------|------------|------|----------|-----------|--|--|
|        |      | Shiraz-3T  | 90   | 0.219276 | 0         |  |  |
|        |      | Shiraz-3T  | 93   | 0        | -0.058023 |  |  |
|        |      | Shiraz-4T  | 253  | 0.372918 | 0         |  |  |
|        |      | Shiraz-36T | 378  | 0.179558 | 0         |  |  |
|        |      | Shiraz-36T | 380  | 0.083883 | 0         |  |  |
|        |      | Shiraz-44T | 638  | 0        | -0.433476 |  |  |
|        |      | Shiraz-46T | 943  | 0.093799 | 0         |  |  |
|        |      | Shiraz-46T | 945  | 0        | -0.014838 |  |  |
|        |      | Shiraz-47T | 1029 | 0        | -0.096586 |  |  |
|        |      | Shiraz-49T | 1119 | 0        | -0.157331 |  |  |
|        |      | Shiraz-77T | 1225 | 0        | -0.117922 |  |  |
|        |      | Shiraz-77T | 1226 | 0        | -0.233724 |  |  |
|        |      | Shiraz-12T | 1390 | 0        | -0.237897 |  |  |
|        |      | Shiraz-18T | 1434 | 0.244465 | 0         |  |  |
|        |      | Shiraz-22T | 1549 | 0        | -0.319623 |  |  |
|        |      | Shiraz-22T | 1550 | 0        | -0.577052 |  |  |
|        |      | Shiraz-25T | 1698 | 0.21835  | 0         |  |  |
|        |      | Shiraz-28T | 1735 | 0.350744 | 0         |  |  |
|        |      | Shiraz-29T | 1778 | 0.120767 | 0         |  |  |
|        |      | Shiraz-38T | 1951 | 0.250891 | 0         |  |  |
|        |      | Shiraz-53T | 2078 | 0.287202 | 0         |  |  |
|        |      | Shiraz-58T | 2159 | 0        | -0.219521 |  |  |
|        |      | Shiraz-71T | 2238 | 0.603631 | 0         |  |  |
| SEMA3D | chr7 | Shiraz-3T  | 90   | 0.219276 | 0         |  |  |
|        |      | Shiraz-3T  | 93   | 0        | -0.058023 |  |  |
|        |      | Shiraz-4T  | 253  | 0.372918 | 0         |  |  |
|        |      | Shiraz-36T | 378  | 0.179558 | 0         |  |  |
|        |      | Shiraz-36T | 380  | 0.083883 | 0         |  |  |
|        |      | Shiraz-44T | 638  | 0        | -0.433476 |  |  |
|        |      | Shiraz-46T | 943  | 0.093799 | 0         |  |  |
|        |      | Shiraz-46T | 945  | 0        | -0.014838 |  |  |
|        |      | Shiraz-47T | 1029 | 0        | -0.096586 |  |  |
|        |      | Shiraz-49T | 1119 | 0        | -0.157331 |  |  |
|        |      | Shiraz-77T | 1225 | 0        | -0.117922 |  |  |
|        |      | Shiraz-77T | 1226 | 0        | -0.233724 |  |  |
|        |      | Shiraz-12T | 1390 | 0        | -0.237897 |  |  |
|        |      | Shiraz-18T | 1434 | 0.244465 | 0         |  |  |
|        |      | Shiraz-22T | 1549 | 0        | -0.319623 |  |  |
|        |      | Shiraz-22T | 1550 | 0        | -0.577052 |  |  |
|        |      | Shiraz-25T | 1698 | 0.21835  | 0         |  |  |
|        |      | Shiraz-28T | 1735 | 0.350744 | 0         |  |  |
|        |      | Shiraz-29T | 1778 | 0.120767 | 0         |  |  |
|        |      | Shiraz-38T | 1951 | 0.250891 | 0         |  |  |
|        |      | Shiraz-53T | 2078 | 0.287202 | 0         |  |  |
|        |      | Shiraz-58T | 2159 | 0        | -0.219521 |  |  |
|        |      | Shiraz-71T | 2238 | 0.603631 | 0         |  |  |
|        |      | Shiraz-3T  | 90   | 0.219276 | 0         |  |  |

|        |      |            |      |          |           |  |  |
|--------|------|------------|------|----------|-----------|--|--|
|        |      | Shiraz-3T  | 93   | 0        | -0.058023 |  |  |
|        |      | Shiraz-4T  | 253  | 0.372918 | 0         |  |  |
|        |      | Shiraz-36T | 378  | 0.179558 | 0         |  |  |
|        |      | Shiraz-36T | 380  | 0.083883 | 0         |  |  |
|        |      | Shiraz-44T | 638  | 0        | -0.433476 |  |  |
|        |      | Shiraz-46T | 943  | 0.093799 | 0         |  |  |
|        |      | Shiraz-46T | 945  | 0        | -0.014838 |  |  |
|        |      | Shiraz-47T | 1029 | 0        | -0.096586 |  |  |
|        |      | Shiraz-49T | 1119 | 0        | -0.157331 |  |  |
|        |      | Shiraz-77T | 1225 | 0        | -0.117922 |  |  |
|        |      | Shiraz-77T | 1226 | 0        | -0.233724 |  |  |
|        |      | Shiraz-12T | 1390 | 0        | -0.237897 |  |  |
|        |      | Shiraz-18T | 1434 | 0.244465 | 0         |  |  |
|        |      | Shiraz-22T | 1549 | 0        | -0.319623 |  |  |
|        |      | Shiraz-22T | 1550 | 0        | -0.577052 |  |  |
|        |      | Shiraz-25T | 1698 | 0.21835  | 0         |  |  |
|        |      | Shiraz-28T | 1735 | 0.350744 | 0         |  |  |
|        |      | Shiraz-29T | 1778 | 0.120767 | 0         |  |  |
|        |      | Shiraz-38T | 1951 | 0.250891 | 0         |  |  |
|        |      | Shiraz-53T | 2078 | 0.287202 | 0         |  |  |
|        |      | Shiraz-58T | 2159 | 0        | -0.219521 |  |  |
|        |      | Shiraz-71T | 2238 | 0.603631 | 0         |  |  |
|        |      | Shiraz-3T  | 90   | 0.219276 | 0         |  |  |
|        |      | Shiraz-3T  | 93   | 0        | -0.058023 |  |  |
|        |      | Shiraz-4T  | 253  | 0.372918 | 0         |  |  |
|        |      | Shiraz-36T | 378  | 0.179558 | 0         |  |  |
|        |      | Shiraz-36T | 380  | 0.083883 | 0         |  |  |
|        |      | Shiraz-44T | 638  | 0        | -0.433476 |  |  |
|        |      | Shiraz-46T | 943  | 0.093799 | 0         |  |  |
|        |      | Shiraz-46T | 945  | 0        | -0.014838 |  |  |
|        |      | Shiraz-47T | 1029 | 0        | -0.096586 |  |  |
|        |      | Shiraz-49T | 1119 | 0        | -0.157331 |  |  |
|        |      | Shiraz-77T | 1225 | 0        | -0.117922 |  |  |
|        |      | Shiraz-77T | 1226 | 0        | -0.233724 |  |  |
|        |      | Shiraz-12T | 1390 | 0        | -0.237897 |  |  |
|        |      | Shiraz-18T | 1434 | 0.244465 | 0         |  |  |
|        |      | Shiraz-22T | 1549 | 0        | -0.319623 |  |  |
|        |      | Shiraz-22T | 1550 | 0        | -0.577052 |  |  |
|        |      | Shiraz-25T | 1698 | 0.21835  | 0         |  |  |
|        |      | Shiraz-28T | 1735 | 0.350744 | 0         |  |  |
|        |      | Shiraz-29T | 1778 | 0.120767 | 0         |  |  |
|        |      | Shiraz-38T | 1951 | 0.250891 | 0         |  |  |
|        |      | Shiraz-53T | 2078 | 0.287202 | 0         |  |  |
|        |      | Shiraz-58T | 2159 | 0        | -0.219521 |  |  |
|        |      | Shiraz-71T | 2238 | 0.603631 | 0         |  |  |
| SEMA3E | chr7 | Shiraz-3T  | 90   | 0.219276 | 0         |  |  |
|        |      | Shiraz-3T  | 93   | 0        | -0.058023 |  |  |

|  |            |      |          |           |  |
|--|------------|------|----------|-----------|--|
|  | Shiraz-4T  | 253  | 0.372918 | 0         |  |
|  | Shiraz-36T | 378  | 0.179558 | 0         |  |
|  | Shiraz-36T | 380  | 0.083883 | 0         |  |
|  | Shiraz-44T | 638  | 0        | -0.433476 |  |
|  | Shiraz-46T | 943  | 0.093799 | 0         |  |
|  | Shiraz-46T | 945  | 0        | -0.014838 |  |
|  | Shiraz-47T | 1029 | 0        | -0.096586 |  |
|  | Shiraz-49T | 1119 | 0        | -0.157331 |  |
|  | Shiraz-77T | 1225 | 0        | -0.117922 |  |
|  | Shiraz-77T | 1226 | 0        | -0.233724 |  |
|  | Shiraz-12T | 1390 | 0        | -0.237897 |  |
|  | Shiraz-18T | 1434 | 0.244465 | 0         |  |
|  | Shiraz-22T | 1549 | 0        | -0.319623 |  |
|  | Shiraz-22T | 1550 | 0        | -0.577052 |  |
|  | Shiraz-25T | 1698 | 0.21835  | 0         |  |
|  | Shiraz-28T | 1735 | 0.350744 | 0         |  |
|  | Shiraz-29T | 1778 | 0.120767 | 0         |  |
|  | Shiraz-38T | 1951 | 0.250891 | 0         |  |
|  | Shiraz-53T | 2078 | 0.287202 | 0         |  |
|  | Shiraz-58T | 2159 | 0        | -0.219521 |  |
|  | Shiraz-71T | 2238 | 0.603631 | 0         |  |
|  | Shiraz-3T  | 90   | 0.219276 | 0         |  |
|  | Shiraz-3T  | 93   | 0        | -0.058023 |  |
|  | Shiraz-4T  | 253  | 0.372918 | 0         |  |
|  | Shiraz-36T | 378  | 0.179558 | 0         |  |
|  | Shiraz-36T | 380  | 0.083883 | 0         |  |
|  | Shiraz-44T | 638  | 0        | -0.433476 |  |
|  | Shiraz-46T | 943  | 0.093799 | 0         |  |
|  | Shiraz-46T | 945  | 0        | -0.014838 |  |
|  | Shiraz-47T | 1029 | 0        | -0.096586 |  |
|  | Shiraz-49T | 1119 | 0        | -0.157331 |  |
|  | Shiraz-77T | 1225 | 0        | -0.117922 |  |
|  | Shiraz-77T | 1226 | 0        | -0.233724 |  |
|  | Shiraz-12T | 1390 | 0        | -0.237897 |  |
|  | Shiraz-18T | 1434 | 0.244465 | 0         |  |
|  | Shiraz-22T | 1549 | 0        | -0.319623 |  |
|  | Shiraz-22T | 1550 | 0        | -0.577052 |  |
|  | Shiraz-25T | 1698 | 0.21835  | 0         |  |
|  | Shiraz-28T | 1735 | 0.350744 | 0         |  |
|  | Shiraz-29T | 1778 | 0.120767 | 0         |  |
|  | Shiraz-38T | 1951 | 0.250891 | 0         |  |
|  | Shiraz-53T | 2078 | 0.287202 | 0         |  |
|  | Shiraz-58T | 2159 | 0        | -0.219521 |  |
|  | Shiraz-71T | 2238 | 0.603631 | 0         |  |
|  | Shiraz-3T  | 90   | 0.219276 | 0         |  |
|  | Shiraz-3T  | 93   | 0        | -0.058023 |  |
|  | Shiraz-4T  | 253  | 0.372918 | 0         |  |

|       |      |            |      |          |           |  |
|-------|------|------------|------|----------|-----------|--|
|       |      | Shiraz-36T | 378  | 0.179558 | 0         |  |
|       |      | Shiraz-36T | 380  | 0.083883 | 0         |  |
|       |      | Shiraz-44T | 638  | 0        | -0.433476 |  |
|       |      | Shiraz-46T | 943  | 0.093799 | 0         |  |
|       |      | Shiraz-46T | 945  | 0        | -0.014838 |  |
|       |      | Shiraz-47T | 1029 | 0        | -0.096586 |  |
|       |      | Shiraz-49T | 1119 | 0        | -0.157331 |  |
|       |      | Shiraz-77T | 1225 | 0        | -0.117922 |  |
|       |      | Shiraz-77T | 1226 | 0        | -0.233724 |  |
|       |      | Shiraz-12T | 1390 | 0        | -0.237897 |  |
|       |      | Shiraz-18T | 1434 | 0.244465 | 0         |  |
|       |      | Shiraz-22T | 1549 | 0        | -0.319623 |  |
|       |      | Shiraz-22T | 1550 | 0        | -0.577052 |  |
|       |      | Shiraz-25T | 1698 | 0.21835  | 0         |  |
|       |      | Shiraz-28T | 1735 | 0.350744 | 0         |  |
|       |      | Shiraz-29T | 1778 | 0.120767 | 0         |  |
|       |      | Shiraz-38T | 1951 | 0.250891 | 0         |  |
|       |      | Shiraz-53T | 2078 | 0.287202 | 0         |  |
|       |      | Shiraz-58T | 2159 | 0        | -0.219521 |  |
|       |      | Shiraz-71T | 2238 | 0.603631 | 0         |  |
| SEPP1 | chr5 | Shiraz-4T  | 250  | 0.262252 | 0         |  |
|       |      | Shiraz-4T  | 250  | 0.262252 | 0         |  |
|       |      | Shiraz-16T | 266  | 0.321724 | 0         |  |
|       |      | Shiraz-16T | 266  | 0.321724 | 0         |  |
|       |      | Shiraz-44T | 591  | 0        | -0.233934 |  |
|       |      | Shiraz-44T | 591  | 0        | -0.233934 |  |
|       |      | Shiraz-18T | 1429 | 0        | -0.314125 |  |
|       |      | Shiraz-18T | 1429 | 0        | -0.314125 |  |
|       |      | Shiraz-22T | 1522 | 0        | -0.322688 |  |
|       |      | Shiraz-22T | 1522 | 0        | -0.322688 |  |
|       |      | Shiraz-25T | 1694 | 0.201602 | 0         |  |
|       |      | Shiraz-25T | 1694 | 0.201602 | 0         |  |
|       |      | Shiraz-28T | 1731 | 0.295447 | 0         |  |
|       |      | Shiraz-28T | 1731 | 0.295447 | 0         |  |
|       |      | Shiraz-29T | 1773 | 0.090981 | 0         |  |
|       |      | Shiraz-29T | 1773 | 0.090981 | 0         |  |
|       |      | Shiraz-40T | 2016 | 0.376634 | 0         |  |
|       |      | Shiraz-40T | 2016 | 0.376634 | 0         |  |
|       |      | Shiraz-4T  | 250  | 0.262252 | 0         |  |
|       |      | Shiraz-4T  | 250  | 0.262252 | 0         |  |
|       |      | Shiraz-16T | 266  | 0.321724 | 0         |  |
|       |      | Shiraz-16T | 266  | 0.321724 | 0         |  |
|       |      | Shiraz-44T | 591  | 0        | -0.233934 |  |
|       |      | Shiraz-44T | 591  | 0        | -0.233934 |  |
|       |      | Shiraz-18T | 1429 | 0        | -0.314125 |  |
|       |      | Shiraz-18T | 1429 | 0        | -0.314125 |  |
|       |      | Shiraz-22T | 1522 | 0        | -0.322688 |  |

|        |      |            |      |          |           |  |  |
|--------|------|------------|------|----------|-----------|--|--|
|        |      | Shiraz-22T | 1522 | 0        | -0.322688 |  |  |
|        |      | Shiraz-25T | 1694 | 0.201602 | 0         |  |  |
|        |      | Shiraz-25T | 1694 | 0.201602 | 0         |  |  |
|        |      | Shiraz-28T | 1731 | 0.295447 | 0         |  |  |
|        |      | Shiraz-28T | 1731 | 0.295447 | 0         |  |  |
|        |      | Shiraz-29T | 1773 | 0.090981 | 0         |  |  |
|        |      | Shiraz-29T | 1773 | 0.090981 | 0         |  |  |
|        |      | Shiraz-40T | 2016 | 0.376634 | 0         |  |  |
|        |      | Shiraz-40T | 2016 | 0.376634 | 0         |  |  |
|        |      | Shiraz-4T  | 250  | 0.262252 | 0         |  |  |
|        |      | Shiraz-4T  | 250  | 0.262252 | 0         |  |  |
|        |      | Shiraz-16T | 266  | 0.321724 | 0         |  |  |
|        |      | Shiraz-16T | 266  | 0.321724 | 0         |  |  |
|        |      | Shiraz-44T | 591  | 0        | -0.233934 |  |  |
|        |      | Shiraz-44T | 591  | 0        | -0.233934 |  |  |
|        |      | Shiraz-18T | 1429 | 0        | -0.314125 |  |  |
|        |      | Shiraz-18T | 1429 | 0        | -0.314125 |  |  |
|        |      | Shiraz-22T | 1522 | 0        | -0.322688 |  |  |
|        |      | Shiraz-22T | 1522 | 0        | -0.322688 |  |  |
|        |      | Shiraz-25T | 1694 | 0.201602 | 0         |  |  |
|        |      | Shiraz-25T | 1694 | 0.201602 | 0         |  |  |
|        |      | Shiraz-28T | 1731 | 0.295447 | 0         |  |  |
|        |      | Shiraz-28T | 1731 | 0.295447 | 0         |  |  |
|        |      | Shiraz-29T | 1773 | 0.090981 | 0         |  |  |
|        |      | Shiraz-29T | 1773 | 0.090981 | 0         |  |  |
|        |      | Shiraz-40T | 2016 | 0.376634 | 0         |  |  |
|        |      | Shiraz-40T | 2016 | 0.376634 | 0         |  |  |
| 13-Sep | chr7 | Shiraz-3T  | 87   | 0.198593 | 0         |  |  |
|        |      | Shiraz-3T  | 89   | 0.678641 | 0         |  |  |
|        |      | Shiraz-4T  | 252  | 0.192083 | 0         |  |  |
|        |      | Shiraz-36T | 376  | 0.159952 | 0         |  |  |
|        |      | Shiraz-46T | 942  | 0.069143 | 0         |  |  |
|        |      | Shiraz-18T | 1433 | 0.250973 | 0         |  |  |
|        |      | Shiraz-25T | 1697 | 0.21945  | 0         |  |  |
|        |      | Shiraz-28T | 1734 | 0.362882 | 0         |  |  |
|        |      | Shiraz-29T | 1777 | 0.156747 | 0         |  |  |
|        |      | Shiraz-38T | 1950 | 0.265916 | 0         |  |  |
|        |      | Shiraz-71T | 2236 | 0.320072 | 0         |  |  |
|        |      | Shiraz-3T  | 87   | 0.198593 | 0         |  |  |
|        |      | Shiraz-3T  | 89   | 0.678641 | 0         |  |  |
|        |      | Shiraz-4T  | 252  | 0.192083 | 0         |  |  |
|        |      | Shiraz-36T | 376  | 0.159952 | 0         |  |  |
|        |      | Shiraz-46T | 942  | 0.069143 | 0         |  |  |
|        |      | Shiraz-18T | 1433 | 0.250973 | 0         |  |  |
|        |      | Shiraz-25T | 1697 | 0.21945  | 0         |  |  |
|        |      | Shiraz-28T | 1734 | 0.362882 | 0         |  |  |
|        |      | Shiraz-29T | 1777 | 0.156747 | 0         |  |  |

|       |      |            |      |          |           |  |
|-------|------|------------|------|----------|-----------|--|
|       |      | Shiraz-38T | 1950 | 0.265916 | 0         |  |
|       |      | Shiraz-71T | 2236 | 0.320072 | 0         |  |
| 6-Sep | chrX | Shiraz-3T  | 242  | 0        | -0.336434 |  |
|       |      | Shiraz-3T  | 242  | 0        | -0.336434 |  |
|       |      | Shiraz-3T  | 244  | 0        | -0.023749 |  |
|       |      | Shiraz-3T  | 244  | 0        | -0.023749 |  |
|       |      | Shiraz-4T  | 261  | 0        | -0.336249 |  |
|       |      | Shiraz-4T  | 261  | 0        | -0.336249 |  |
|       |      | Shiraz-16T | 295  | 0.591657 | 0         |  |
|       |      | Shiraz-16T | 295  | 0.591657 | 0         |  |
|       |      | Shiraz-36T | 433  | 0        | -0.803961 |  |
|       |      | Shiraz-36T | 433  | 0        | -0.803961 |  |
|       |      | Shiraz-44T | 899  | 0        | -1.09697  |  |
|       |      | Shiraz-44T | 899  | 0        | -1.09697  |  |
|       |      | Shiraz-44T | 904  | 0        | -0.625526 |  |
|       |      | Shiraz-44T | 904  | 0        | -0.625526 |  |
|       |      | Shiraz-49T | 1170 | 0        | -0.967436 |  |
|       |      | Shiraz-49T | 1170 | 0        | -0.967436 |  |
|       |      | Shiraz-9T  | 1370 | 0.690073 | 0         |  |
|       |      | Shiraz-9T  | 1370 | 0.690073 | 0         |  |
|       |      | Shiraz-18T | 1457 | 0.643204 | 0         |  |
|       |      | Shiraz-18T | 1457 | 0.643204 | 0         |  |
|       |      | Shiraz-22T | 1673 | 0.611783 | 0         |  |
|       |      | Shiraz-22T | 1673 | 0.611783 | 0         |  |
|       |      | Shiraz-25T | 1719 | 0.472955 | 0         |  |
|       |      | Shiraz-25T | 1719 | 0.472955 | 0         |  |
|       |      | Shiraz-28T | 1762 | 0.562311 | 0         |  |
|       |      | Shiraz-28T | 1762 | 0.562311 | 0         |  |
|       |      | Shiraz-29T | 1801 | 0.815343 | 0         |  |
|       |      | Shiraz-29T | 1801 | 0.815343 | 0         |  |
|       |      | Shiraz-32T | 1870 | 0.729766 | 0         |  |
|       |      | Shiraz-32T | 1870 | 0.729766 | 0         |  |
|       |      | Shiraz-35T | 1933 | 0.488535 | 0         |  |
|       |      | Shiraz-35T | 1933 | 0.488535 | 0         |  |
|       |      | Shiraz-58T | 2223 | 0.833364 | 0         |  |
|       |      | Shiraz-58T | 2223 | 0.833364 | 0         |  |
|       |      | Shiraz-71T | 2263 | 0.975531 | 0         |  |
|       |      | Shiraz-71T | 2263 | 0.975531 | 0         |  |
|       |      | Shiraz-3T  | 242  | 0        | -0.336434 |  |
|       |      | Shiraz-3T  | 242  | 0        | -0.336434 |  |
|       |      | Shiraz-3T  | 244  | 0        | -0.023749 |  |
|       |      | Shiraz-3T  | 244  | 0        | -0.023749 |  |
|       |      | Shiraz-4T  | 261  | 0        | -0.336249 |  |
|       |      | Shiraz-4T  | 261  | 0        | -0.336249 |  |
|       |      | Shiraz-16T | 295  | 0.591657 | 0         |  |
|       |      | Shiraz-16T | 295  | 0.591657 | 0         |  |
|       |      | Shiraz-36T | 433  | 0        | -0.803961 |  |

|  |            |      |          |           |  |
|--|------------|------|----------|-----------|--|
|  | Shiraz-36T | 433  | 0        | -0.803961 |  |
|  | Shiraz-44T | 899  | 0        | -1.09697  |  |
|  | Shiraz-44T | 899  | 0        | -1.09697  |  |
|  | Shiraz-44T | 904  | 0        | -0.625526 |  |
|  | Shiraz-44T | 904  | 0        | -0.625526 |  |
|  | Shiraz-49T | 1170 | 0        | -0.967436 |  |
|  | Shiraz-49T | 1170 | 0        | -0.967436 |  |
|  | Shiraz-9T  | 1370 | 0.690073 | 0         |  |
|  | Shiraz-9T  | 1370 | 0.690073 | 0         |  |
|  | Shiraz-18T | 1457 | 0.643204 | 0         |  |
|  | Shiraz-18T | 1457 | 0.643204 | 0         |  |
|  | Shiraz-22T | 1673 | 0.611783 | 0         |  |
|  | Shiraz-22T | 1673 | 0.611783 | 0         |  |
|  | Shiraz-25T | 1719 | 0.472955 | 0         |  |
|  | Shiraz-25T | 1719 | 0.472955 | 0         |  |
|  | Shiraz-28T | 1762 | 0.562311 | 0         |  |
|  | Shiraz-28T | 1762 | 0.562311 | 0         |  |
|  | Shiraz-29T | 1801 | 0.815343 | 0         |  |
|  | Shiraz-29T | 1801 | 0.815343 | 0         |  |
|  | Shiraz-32T | 1870 | 0.729766 | 0         |  |
|  | Shiraz-32T | 1870 | 0.729766 | 0         |  |
|  | Shiraz-35T | 1933 | 0.488535 | 0         |  |
|  | Shiraz-35T | 1933 | 0.488535 | 0         |  |
|  | Shiraz-58T | 2223 | 0.833364 | 0         |  |
|  | Shiraz-58T | 2223 | 0.833364 | 0         |  |
|  | Shiraz-71T | 2263 | 0.975531 | 0         |  |
|  | Shiraz-71T | 2263 | 0.975531 | 0         |  |
|  | Shiraz-3T  | 242  | 0        | -0.336434 |  |
|  | Shiraz-3T  | 242  | 0        | -0.336434 |  |
|  | Shiraz-3T  | 244  | 0        | -0.023749 |  |
|  | Shiraz-3T  | 244  | 0        | -0.023749 |  |
|  | Shiraz-4T  | 261  | 0        | -0.336249 |  |
|  | Shiraz-4T  | 261  | 0        | -0.336249 |  |
|  | Shiraz-16T | 295  | 0.591657 | 0         |  |
|  | Shiraz-16T | 295  | 0.591657 | 0         |  |
|  | Shiraz-36T | 433  | 0        | -0.803961 |  |
|  | Shiraz-36T | 433  | 0        | -0.803961 |  |
|  | Shiraz-44T | 899  | 0        | -1.09697  |  |
|  | Shiraz-44T | 899  | 0        | -1.09697  |  |
|  | Shiraz-44T | 904  | 0        | -0.625526 |  |
|  | Shiraz-44T | 904  | 0        | -0.625526 |  |
|  | Shiraz-49T | 1170 | 0        | -0.967436 |  |
|  | Shiraz-49T | 1170 | 0        | -0.967436 |  |
|  | Shiraz-9T  | 1370 | 0.690073 | 0         |  |
|  | Shiraz-9T  | 1370 | 0.690073 | 0         |  |
|  | Shiraz-18T | 1457 | 0.643204 | 0         |  |
|  | Shiraz-18T | 1457 | 0.643204 | 0         |  |



|       |      |            |      |          |           |  |
|-------|------|------------|------|----------|-----------|--|
|       |      | Shiraz-22T | 1673 | 0.611783 | 0         |  |
|       |      | Shiraz-22T | 1673 | 0.611783 | 0         |  |
|       |      | Shiraz-25T | 1719 | 0.472955 | 0         |  |
|       |      | Shiraz-25T | 1719 | 0.472955 | 0         |  |
|       |      | Shiraz-28T | 1762 | 0.562311 | 0         |  |
|       |      | Shiraz-28T | 1762 | 0.562311 | 0         |  |
|       |      | Shiraz-29T | 1801 | 0.815343 | 0         |  |
|       |      | Shiraz-29T | 1801 | 0.815343 | 0         |  |
|       |      | Shiraz-32T | 1870 | 0.729766 | 0         |  |
|       |      | Shiraz-32T | 1870 | 0.729766 | 0         |  |
|       |      | Shiraz-35T | 1933 | 0.488535 | 0         |  |
|       |      | Shiraz-35T | 1933 | 0.488535 | 0         |  |
|       |      | Shiraz-58T | 2223 | 0.833364 | 0         |  |
|       |      | Shiraz-58T | 2223 | 0.833364 | 0         |  |
|       |      | Shiraz-71T | 2263 | 0.975531 | 0         |  |
|       |      | Shiraz-71T | 2263 | 0.975531 | 0         |  |
| 7-Sep | chr7 | Shiraz-3T  | 87   | 0.198593 | 0         |  |
|       |      | Shiraz-4T  | 252  | 0.192083 | 0         |  |
|       |      | Shiraz-36T | 376  | 0.159952 | 0         |  |
|       |      | Shiraz-44T | 631  | 0        | -0.180312 |  |
|       |      | Shiraz-46T | 942  | 0.069143 | 0         |  |
|       |      | Shiraz-18T | 1433 | 0.250973 | 0         |  |
|       |      | Shiraz-22T | 1544 | 0        | -0.193579 |  |
|       |      | Shiraz-25T | 1697 | 0.21945  | 0         |  |
|       |      | Shiraz-28T | 1734 | 0.362882 | 0         |  |
|       |      | Shiraz-29T | 1777 | 0.156747 | 0         |  |
|       |      | Shiraz-38T | 1950 | 0.265916 | 0         |  |
|       |      | Shiraz-71T | 2236 | 0.320072 | 0         |  |
|       |      | Shiraz-3T  | 87   | 0.198593 | 0         |  |
|       |      | Shiraz-4T  | 252  | 0.192083 | 0         |  |
|       |      | Shiraz-36T | 376  | 0.159952 | 0         |  |
|       |      | Shiraz-44T | 631  | 0        | -0.180312 |  |
|       |      | Shiraz-46T | 942  | 0.069143 | 0         |  |
|       |      | Shiraz-18T | 1433 | 0.250973 | 0         |  |
|       |      | Shiraz-22T | 1544 | 0        | -0.193579 |  |
|       |      | Shiraz-25T | 1697 | 0.21945  | 0         |  |
|       |      | Shiraz-28T | 1734 | 0.362882 | 0         |  |
|       |      | Shiraz-29T | 1777 | 0.156747 | 0         |  |
|       |      | Shiraz-38T | 1950 | 0.265916 | 0         |  |
|       |      | Shiraz-71T | 2236 | 0.320072 | 0         |  |
|       |      | Shiraz-3T  | 87   | 0.198593 | 0         |  |
|       |      | Shiraz-4T  | 252  | 0.192083 | 0         |  |
|       |      | Shiraz-36T | 376  | 0.159952 | 0         |  |
|       |      | Shiraz-44T | 631  | 0        | -0.180312 |  |
|       |      | Shiraz-46T | 942  | 0.069143 | 0         |  |
|       |      | Shiraz-18T | 1433 | 0.250973 | 0         |  |
|       |      | Shiraz-22T | 1544 | 0        | -0.193579 |  |

|          |      |            |      |          |           |  |  |
|----------|------|------------|------|----------|-----------|--|--|
|          |      | Shiraz-25T | 1697 | 0.21945  | 0         |  |  |
|          |      | Shiraz-28T | 1734 | 0.362882 | 0         |  |  |
|          |      | Shiraz-29T | 1777 | 0.156747 | 0         |  |  |
|          |      | Shiraz-38T | 1950 | 0.265916 | 0         |  |  |
|          |      | Shiraz-71T | 2236 | 0.320072 | 0         |  |  |
| SERPINA7 | chrX | Shiraz-3T  | 242  | 0        | -0.336434 |  |  |
|          |      | Shiraz-4T  | 261  | 0        | -0.336249 |  |  |
|          |      | Shiraz-16T | 295  | 0.591657 | 0         |  |  |
|          |      | Shiraz-36T | 433  | 0        | -0.803961 |  |  |
|          |      | Shiraz-44T | 899  | 0        | -1.09697  |  |  |
|          |      | Shiraz-49T | 1170 | 0        | -0.967436 |  |  |
|          |      | Shiraz-18T | 1457 | 0.643204 | 0         |  |  |
|          |      | Shiraz-22T | 1673 | 0.611783 | 0         |  |  |
|          |      | Shiraz-25T | 1719 | 0.472955 | 0         |  |  |
|          |      | Shiraz-28T | 1762 | 0.562311 | 0         |  |  |
|          |      | Shiraz-29T | 1801 | 0.815343 | 0         |  |  |
|          |      | Shiraz-32T | 1870 | 0.729766 | 0         |  |  |
|          |      | Shiraz-35T | 1933 | 0.488535 | 0         |  |  |
|          |      | Shiraz-58T | 2223 | 0.833364 | 0         |  |  |
|          |      | Shiraz-71T | 2263 | 0.975531 | 0         |  |  |
|          |      | Shiraz-3T  | 242  | 0        | -0.336434 |  |  |
|          |      | Shiraz-4T  | 261  | 0        | -0.336249 |  |  |
|          |      | Shiraz-16T | 295  | 0.591657 | 0         |  |  |
|          |      | Shiraz-36T | 433  | 0        | -0.803961 |  |  |
|          |      | Shiraz-44T | 899  | 0        | -1.09697  |  |  |
|          |      | Shiraz-49T | 1170 | 0        | -0.967436 |  |  |
|          |      | Shiraz-18T | 1457 | 0.643204 | 0         |  |  |
|          |      | Shiraz-22T | 1673 | 0.611783 | 0         |  |  |
|          |      | Shiraz-25T | 1719 | 0.472955 | 0         |  |  |
|          |      | Shiraz-28T | 1762 | 0.562311 | 0         |  |  |
|          |      | Shiraz-29T | 1801 | 0.815343 | 0         |  |  |
|          |      | Shiraz-32T | 1870 | 0.729766 | 0         |  |  |
|          |      | Shiraz-35T | 1933 | 0.488535 | 0         |  |  |
|          |      | Shiraz-58T | 2223 | 0.833364 | 0         |  |  |
|          |      | Shiraz-71T | 2263 | 0.975531 | 0         |  |  |
|          |      | Shiraz-3T  | 242  | 0        | -0.336434 |  |  |
|          |      | Shiraz-4T  | 261  | 0        | -0.336249 |  |  |
|          |      | Shiraz-16T | 295  | 0.591657 | 0         |  |  |
|          |      | Shiraz-36T | 433  | 0        | -0.803961 |  |  |
|          |      | Shiraz-44T | 899  | 0        | -1.09697  |  |  |
|          |      | Shiraz-49T | 1170 | 0        | -0.967436 |  |  |
|          |      | Shiraz-18T | 1457 | 0.643204 | 0         |  |  |
|          |      | Shiraz-22T | 1673 | 0.611783 | 0         |  |  |
|          |      | Shiraz-25T | 1719 | 0.472955 | 0         |  |  |
|          |      | Shiraz-28T | 1762 | 0.562311 | 0         |  |  |
|          |      | Shiraz-29T | 1801 | 0.815343 | 0         |  |  |
|          |      | Shiraz-32T | 1870 | 0.729766 | 0         |  |  |

|          |      |            |      |          |           |  |
|----------|------|------------|------|----------|-----------|--|
|          |      | Shiraz-35T | 1933 | 0.488535 | 0         |  |
|          |      | Shiraz-58T | 2223 | 0.833364 | 0         |  |
|          |      | Shiraz-71T | 2263 | 0.975531 | 0         |  |
| SERPINE1 | chr7 | Shiraz-3T  | 90   | 0.219276 | 0         |  |
|          |      | Shiraz-3T  | 94   | 0.74735  | 0         |  |
|          |      | Shiraz-4T  | 253  | 0.372918 | 0         |  |
|          |      | Shiraz-31T | 316  | 0.219196 | 0         |  |
|          |      | Shiraz-36T | 378  | 0.179558 | 0         |  |
|          |      | Shiraz-36T | 381  | 0.332628 | 0         |  |
|          |      | Shiraz-44T | 639  | 1.035032 | 0         |  |
|          |      | Shiraz-46T | 943  | 0.093799 | 0         |  |
|          |      | Shiraz-46T | 946  | 0.299835 | 0         |  |
|          |      | Shiraz-47T | 1030 | 0.257728 | 0         |  |
|          |      | Shiraz-49T | 1120 | 0.281656 | 0         |  |
|          |      | Shiraz-77T | 1225 | 0        | -0.117922 |  |
|          |      | Shiraz-77T | 1227 | 0.196445 | 0         |  |
|          |      | Shiraz-9T  | 1324 | 0.679266 | 0         |  |
|          |      | Shiraz-18T | 1434 | 0.244465 | 0         |  |
|          |      | Shiraz-22T | 1549 | 0        | -0.319623 |  |
|          |      | Shiraz-22T | 1551 | 0.324011 | 0         |  |
|          |      | Shiraz-25T | 1698 | 0.21835  | 0         |  |
|          |      | Shiraz-28T | 1735 | 0.350744 | 0         |  |
|          |      | Shiraz-29T | 1778 | 0.120767 | 0         |  |
|          |      | Shiraz-32T | 1833 | 0.551336 | 0         |  |
|          |      | Shiraz-32T | 1834 | 1.485392 | 0         |  |
|          |      | Shiraz-38T | 1951 | 0.250891 | 0         |  |
|          |      | Shiraz-53T | 2078 | 0.287202 | 0         |  |
|          |      | Shiraz-58T | 2160 | 0.399007 | 0         |  |
|          |      | Shiraz-71T | 2238 | 0.603631 | 0         |  |
|          |      | Shiraz-3T  | 90   | 0.219276 | 0         |  |
|          |      | Shiraz-3T  | 94   | 0.74735  | 0         |  |
|          |      | Shiraz-4T  | 253  | 0.372918 | 0         |  |
|          |      | Shiraz-31T | 316  | 0.219196 | 0         |  |
|          |      | Shiraz-36T | 378  | 0.179558 | 0         |  |
|          |      | Shiraz-36T | 381  | 0.332628 | 0         |  |
|          |      | Shiraz-44T | 639  | 1.035032 | 0         |  |
|          |      | Shiraz-46T | 943  | 0.093799 | 0         |  |
|          |      | Shiraz-46T | 946  | 0.299835 | 0         |  |
|          |      | Shiraz-47T | 1030 | 0.257728 | 0         |  |
|          |      | Shiraz-49T | 1120 | 0.281656 | 0         |  |
|          |      | Shiraz-77T | 1225 | 0        | -0.117922 |  |
|          |      | Shiraz-77T | 1227 | 0.196445 | 0         |  |
|          |      | Shiraz-9T  | 1324 | 0.679266 | 0         |  |
|          |      | Shiraz-18T | 1434 | 0.244465 | 0         |  |
|          |      | Shiraz-22T | 1549 | 0        | -0.319623 |  |
|          |      | Shiraz-22T | 1551 | 0.324011 | 0         |  |
|          |      | Shiraz-25T | 1698 | 0.21835  | 0         |  |

|       |      |            |      |          |           |  |
|-------|------|------------|------|----------|-----------|--|
|       |      | Shiraz-28T | 1735 | 0.350744 | 0         |  |
|       |      | Shiraz-29T | 1778 | 0.120767 | 0         |  |
|       |      | Shiraz-32T | 1833 | 0.551336 | 0         |  |
|       |      | Shiraz-32T | 1834 | 1.485392 | 0         |  |
|       |      | Shiraz-38T | 1951 | 0.250891 | 0         |  |
|       |      | Shiraz-53T | 2078 | 0.287202 | 0         |  |
|       |      | Shiraz-58T | 2160 | 0.399007 | 0         |  |
|       |      | Shiraz-71T | 2238 | 0.603631 | 0         |  |
|       |      | Shiraz-3T  | 90   | 0.219276 | 0         |  |
|       |      | Shiraz-3T  | 94   | 0.74735  | 0         |  |
|       |      | Shiraz-4T  | 253  | 0.372918 | 0         |  |
|       |      | Shiraz-31T | 316  | 0.219196 | 0         |  |
|       |      | Shiraz-36T | 378  | 0.179558 | 0         |  |
|       |      | Shiraz-36T | 381  | 0.332628 | 0         |  |
|       |      | Shiraz-44T | 639  | 1.035032 | 0         |  |
|       |      | Shiraz-46T | 943  | 0.093799 | 0         |  |
|       |      | Shiraz-46T | 946  | 0.299835 | 0         |  |
|       |      | Shiraz-47T | 1030 | 0.257728 | 0         |  |
|       |      | Shiraz-49T | 1120 | 0.281656 | 0         |  |
|       |      | Shiraz-77T | 1225 | 0        | -0.117922 |  |
|       |      | Shiraz-77T | 1227 | 0.196445 | 0         |  |
|       |      | Shiraz-9T  | 1324 | 0.679266 | 0         |  |
|       |      | Shiraz-18T | 1434 | 0.244465 | 0         |  |
|       |      | Shiraz-22T | 1549 | 0        | -0.319623 |  |
|       |      | Shiraz-22T | 1551 | 0.324011 | 0         |  |
|       |      | Shiraz-25T | 1698 | 0.21835  | 0         |  |
|       |      | Shiraz-28T | 1735 | 0.350744 | 0         |  |
|       |      | Shiraz-29T | 1778 | 0.120767 | 0         |  |
|       |      | Shiraz-32T | 1833 | 0.551336 | 0         |  |
|       |      | Shiraz-32T | 1834 | 1.485392 | 0         |  |
|       |      | Shiraz-38T | 1951 | 0.250891 | 0         |  |
|       |      | Shiraz-53T | 2078 | 0.287202 | 0         |  |
|       |      | Shiraz-58T | 2160 | 0.399007 | 0         |  |
|       |      | Shiraz-71T | 2238 | 0.603631 | 0         |  |
| SFRP4 | chr7 | Shiraz-3T  | 87   | 0.198593 | 0         |  |
|       |      | Shiraz-4T  | 252  | 0.192083 | 0         |  |
|       |      | Shiraz-36T | 376  | 0.159952 | 0         |  |
|       |      | Shiraz-44T | 631  | 0        | -0.180312 |  |
|       |      | Shiraz-46T | 942  | 0.069143 | 0         |  |
|       |      | Shiraz-18T | 1433 | 0.250973 | 0         |  |
|       |      | Shiraz-22T | 1544 | 0        | -0.193579 |  |
|       |      | Shiraz-25T | 1697 | 0.21945  | 0         |  |
|       |      | Shiraz-28T | 1734 | 0.362882 | 0         |  |
|       |      | Shiraz-29T | 1777 | 0.156747 | 0         |  |
|       |      | Shiraz-38T | 1950 | 0.265916 | 0         |  |
|       |      | Shiraz-71T | 2236 | 0.320072 | 0         |  |
|       |      | Shiraz-72T | 2277 | 0        | -0.398869 |  |

|      |      |            |      |          |           |  |  |
|------|------|------------|------|----------|-----------|--|--|
|      |      | Shiraz-3T  | 87   | 0.198593 | 0         |  |  |
|      |      | Shiraz-4T  | 252  | 0.192083 | 0         |  |  |
|      |      | Shiraz-36T | 376  | 0.159952 | 0         |  |  |
|      |      | Shiraz-44T | 631  | 0        | -0.180312 |  |  |
|      |      | Shiraz-46T | 942  | 0.069143 | 0         |  |  |
|      |      | Shiraz-18T | 1433 | 0.250973 | 0         |  |  |
|      |      | Shiraz-22T | 1544 | 0        | -0.193579 |  |  |
|      |      | Shiraz-25T | 1697 | 0.21945  | 0         |  |  |
|      |      | Shiraz-28T | 1734 | 0.362882 | 0         |  |  |
|      |      | Shiraz-29T | 1777 | 0.156747 | 0         |  |  |
|      |      | Shiraz-38T | 1950 | 0.265916 | 0         |  |  |
|      |      | Shiraz-71T | 2236 | 0.320072 | 0         |  |  |
|      |      | Shiraz-72T | 2277 | 0        | -0.398869 |  |  |
|      |      | Shiraz-3T  | 87   | 0.198593 | 0         |  |  |
|      |      | Shiraz-4T  | 252  | 0.192083 | 0         |  |  |
|      |      | Shiraz-36T | 376  | 0.159952 | 0         |  |  |
|      |      | Shiraz-44T | 631  | 0        | -0.180312 |  |  |
|      |      | Shiraz-46T | 942  | 0.069143 | 0         |  |  |
|      |      | Shiraz-18T | 1433 | 0.250973 | 0         |  |  |
|      |      | Shiraz-22T | 1544 | 0        | -0.193579 |  |  |
|      |      | Shiraz-25T | 1697 | 0.21945  | 0         |  |  |
|      |      | Shiraz-28T | 1734 | 0.362882 | 0         |  |  |
|      |      | Shiraz-29T | 1777 | 0.156747 | 0         |  |  |
|      |      | Shiraz-38T | 1950 | 0.265916 | 0         |  |  |
|      |      | Shiraz-71T | 2236 | 0.320072 | 0         |  |  |
|      |      | Shiraz-72T | 2277 | 0        | -0.398869 |  |  |
| SGCE | chr7 | Shiraz-3T  | 90   | 0.219276 | 0         |  |  |
|      |      | Shiraz-3T  | 93   | 0        | -0.058023 |  |  |
|      |      | Shiraz-4T  | 253  | 0.372918 | 0         |  |  |
|      |      | Shiraz-36T | 378  | 0.179558 | 0         |  |  |
|      |      | Shiraz-36T | 380  | 0.083883 | 0         |  |  |
|      |      | Shiraz-44T | 638  | 0        | -0.433476 |  |  |
|      |      | Shiraz-46T | 943  | 0.093799 | 0         |  |  |
|      |      | Shiraz-46T | 945  | 0        | -0.014838 |  |  |
|      |      | Shiraz-47T | 1029 | 0        | -0.096586 |  |  |
|      |      | Shiraz-49T | 1119 | 0        | -0.157331 |  |  |
|      |      | Shiraz-77T | 1225 | 0        | -0.117922 |  |  |
|      |      | Shiraz-18T | 1434 | 0.244465 | 0         |  |  |
|      |      | Shiraz-22T | 1549 | 0        | -0.319623 |  |  |
|      |      | Shiraz-25T | 1698 | 0.21835  | 0         |  |  |
|      |      | Shiraz-28T | 1735 | 0.350744 | 0         |  |  |
|      |      | Shiraz-29T | 1778 | 0.120767 | 0         |  |  |
|      |      | Shiraz-32T | 1833 | 0.551336 | 0         |  |  |
|      |      | Shiraz-38T | 1951 | 0.250891 | 0         |  |  |
|      |      | Shiraz-53T | 2078 | 0.287202 | 0         |  |  |
|      |      | Shiraz-58T | 2159 | 0        | -0.219521 |  |  |
|      |      | Shiraz-71T | 2238 | 0.603631 | 0         |  |  |

|       |      |            |      |          |           |  |  |
|-------|------|------------|------|----------|-----------|--|--|
|       |      | Shiraz-3T  | 90   | 0.219276 | 0         |  |  |
|       |      | Shiraz-3T  | 93   | 0        | -0.058023 |  |  |
|       |      | Shiraz-4T  | 253  | 0.372918 | 0         |  |  |
|       |      | Shiraz-36T | 378  | 0.179558 | 0         |  |  |
|       |      | Shiraz-36T | 380  | 0.083883 | 0         |  |  |
|       |      | Shiraz-44T | 638  | 0        | -0.433476 |  |  |
|       |      | Shiraz-46T | 943  | 0.093799 | 0         |  |  |
|       |      | Shiraz-46T | 945  | 0        | -0.014838 |  |  |
|       |      | Shiraz-47T | 1029 | 0        | -0.096586 |  |  |
|       |      | Shiraz-49T | 1119 | 0        | -0.157331 |  |  |
|       |      | Shiraz-77T | 1225 | 0        | -0.117922 |  |  |
|       |      | Shiraz-18T | 1434 | 0.244465 | 0         |  |  |
|       |      | Shiraz-22T | 1549 | 0        | -0.319623 |  |  |
|       |      | Shiraz-25T | 1698 | 0.21835  | 0         |  |  |
|       |      | Shiraz-28T | 1735 | 0.350744 | 0         |  |  |
|       |      | Shiraz-29T | 1778 | 0.120767 | 0         |  |  |
|       |      | Shiraz-32T | 1833 | 0.551336 | 0         |  |  |
|       |      | Shiraz-38T | 1951 | 0.250891 | 0         |  |  |
|       |      | Shiraz-53T | 2078 | 0.287202 | 0         |  |  |
|       |      | Shiraz-58T | 2159 | 0        | -0.219521 |  |  |
|       |      | Shiraz-71T | 2238 | 0.603631 | 0         |  |  |
|       |      | Shiraz-3T  | 90   | 0.219276 | 0         |  |  |
|       |      | Shiraz-3T  | 93   | 0        | -0.058023 |  |  |
|       |      | Shiraz-4T  | 253  | 0.372918 | 0         |  |  |
|       |      | Shiraz-36T | 378  | 0.179558 | 0         |  |  |
|       |      | Shiraz-36T | 380  | 0.083883 | 0         |  |  |
|       |      | Shiraz-44T | 638  | 0        | -0.433476 |  |  |
|       |      | Shiraz-46T | 943  | 0.093799 | 0         |  |  |
|       |      | Shiraz-46T | 945  | 0        | -0.014838 |  |  |
|       |      | Shiraz-47T | 1029 | 0        | -0.096586 |  |  |
|       |      | Shiraz-49T | 1119 | 0        | -0.157331 |  |  |
|       |      | Shiraz-77T | 1225 | 0        | -0.117922 |  |  |
|       |      | Shiraz-18T | 1434 | 0.244465 | 0         |  |  |
|       |      | Shiraz-22T | 1549 | 0        | -0.319623 |  |  |
|       |      | Shiraz-25T | 1698 | 0.21835  | 0         |  |  |
|       |      | Shiraz-28T | 1735 | 0.350744 | 0         |  |  |
|       |      | Shiraz-29T | 1778 | 0.120767 | 0         |  |  |
|       |      | Shiraz-32T | 1833 | 0.551336 | 0         |  |  |
|       |      | Shiraz-38T | 1951 | 0.250891 | 0         |  |  |
|       |      | Shiraz-53T | 2078 | 0.287202 | 0         |  |  |
|       |      | Shiraz-58T | 2159 | 0        | -0.219521 |  |  |
|       |      | Shiraz-71T | 2238 | 0.603631 | 0         |  |  |
| SH2B2 | chr7 | Shiraz-3T  | 90   | 0.219276 | 0         |  |  |
|       |      | Shiraz-3T  | 94   | 0.74735  | 0         |  |  |
|       |      | Shiraz-4T  | 253  | 0.372918 | 0         |  |  |
|       |      | Shiraz-31T | 316  | 0.219196 | 0         |  |  |
|       |      | Shiraz-36T | 378  | 0.179558 | 0         |  |  |

|  |            |      |          |           |  |
|--|------------|------|----------|-----------|--|
|  | Shiraz-36T | 381  | 0.332628 | 0         |  |
|  | Shiraz-44T | 639  | 1.035032 | 0         |  |
|  | Shiraz-46T | 943  | 0.093799 | 0         |  |
|  | Shiraz-46T | 946  | 0.299835 | 0         |  |
|  | Shiraz-47T | 1030 | 0.257728 | 0         |  |
|  | Shiraz-49T | 1120 | 0.281656 | 0         |  |
|  | Shiraz-77T | 1225 | 0        | -0.117922 |  |
|  | Shiraz-77T | 1227 | 0.196445 | 0         |  |
|  | Shiraz-9T  | 1324 | 0.679266 | 0         |  |
|  | Shiraz-18T | 1434 | 0.244465 | 0         |  |
|  | Shiraz-22T | 1549 | 0        | -0.319623 |  |
|  | Shiraz-22T | 1551 | 0.324011 | 0         |  |
|  | Shiraz-25T | 1698 | 0.21835  | 0         |  |
|  | Shiraz-28T | 1735 | 0.350744 | 0         |  |
|  | Shiraz-29T | 1778 | 0.120767 | 0         |  |
|  | Shiraz-32T | 1833 | 0.551336 | 0         |  |
|  | Shiraz-38T | 1951 | 0.250891 | 0         |  |
|  | Shiraz-53T | 2078 | 0.287202 | 0         |  |
|  | Shiraz-58T | 2160 | 0.399007 | 0         |  |
|  | Shiraz-71T | 2238 | 0.603631 | 0         |  |
|  | Shiraz-3T  | 90   | 0.219276 | 0         |  |
|  | Shiraz-3T  | 94   | 0.74735  | 0         |  |
|  | Shiraz-4T  | 253  | 0.372918 | 0         |  |
|  | Shiraz-31T | 316  | 0.219196 | 0         |  |
|  | Shiraz-36T | 378  | 0.179558 | 0         |  |
|  | Shiraz-36T | 381  | 0.332628 | 0         |  |
|  | Shiraz-44T | 639  | 1.035032 | 0         |  |
|  | Shiraz-46T | 943  | 0.093799 | 0         |  |
|  | Shiraz-46T | 946  | 0.299835 | 0         |  |
|  | Shiraz-47T | 1030 | 0.257728 | 0         |  |
|  | Shiraz-49T | 1120 | 0.281656 | 0         |  |
|  | Shiraz-77T | 1225 | 0        | -0.117922 |  |
|  | Shiraz-77T | 1227 | 0.196445 | 0         |  |
|  | Shiraz-9T  | 1324 | 0.679266 | 0         |  |
|  | Shiraz-18T | 1434 | 0.244465 | 0         |  |
|  | Shiraz-22T | 1549 | 0        | -0.319623 |  |
|  | Shiraz-22T | 1551 | 0.324011 | 0         |  |
|  | Shiraz-25T | 1698 | 0.21835  | 0         |  |
|  | Shiraz-28T | 1735 | 0.350744 | 0         |  |
|  | Shiraz-29T | 1778 | 0.120767 | 0         |  |
|  | Shiraz-32T | 1833 | 0.551336 | 0         |  |
|  | Shiraz-38T | 1951 | 0.250891 | 0         |  |
|  | Shiraz-53T | 2078 | 0.287202 | 0         |  |
|  | Shiraz-58T | 2160 | 0.399007 | 0         |  |
|  | Shiraz-71T | 2238 | 0.603631 | 0         |  |
|  | Shiraz-3T  | 90   | 0.219276 | 0         |  |
|  | Shiraz-3T  | 94   | 0.74735  | 0         |  |

|        |      |            |      |          |           |  |
|--------|------|------------|------|----------|-----------|--|
|        |      | Shiraz-4T  | 253  | 0.372918 | 0         |  |
|        |      | Shiraz-31T | 316  | 0.219196 | 0         |  |
|        |      | Shiraz-36T | 378  | 0.179558 | 0         |  |
|        |      | Shiraz-36T | 381  | 0.332628 | 0         |  |
|        |      | Shiraz-44T | 639  | 1.035032 | 0         |  |
|        |      | Shiraz-46T | 943  | 0.093799 | 0         |  |
|        |      | Shiraz-46T | 946  | 0.299835 | 0         |  |
|        |      | Shiraz-47T | 1030 | 0.257728 | 0         |  |
|        |      | Shiraz-49T | 1120 | 0.281656 | 0         |  |
|        |      | Shiraz-77T | 1225 | 0        | -0.117922 |  |
|        |      | Shiraz-77T | 1227 | 0.196445 | 0         |  |
|        |      | Shiraz-9T  | 1324 | 0.679266 | 0         |  |
|        |      | Shiraz-18T | 1434 | 0.244465 | 0         |  |
|        |      | Shiraz-22T | 1549 | 0        | -0.319623 |  |
|        |      | Shiraz-22T | 1551 | 0.324011 | 0         |  |
|        |      | Shiraz-25T | 1698 | 0.21835  | 0         |  |
|        |      | Shiraz-28T | 1735 | 0.350744 | 0         |  |
|        |      | Shiraz-29T | 1778 | 0.120767 | 0         |  |
|        |      | Shiraz-32T | 1833 | 0.551336 | 0         |  |
|        |      | Shiraz-38T | 1951 | 0.250891 | 0         |  |
|        |      | Shiraz-53T | 2078 | 0.287202 | 0         |  |
|        |      | Shiraz-58T | 2160 | 0.399007 | 0         |  |
|        |      | Shiraz-71T | 2238 | 0.603631 | 0         |  |
| SH2D1A | chrX | Shiraz-3T  | 242  | 0        | -0.336434 |  |
|        |      | Shiraz-4T  | 261  | 0        | -0.336249 |  |
|        |      | Shiraz-16T | 295  | 0.591657 | 0         |  |
|        |      | Shiraz-36T | 433  | 0        | -0.803961 |  |
|        |      | Shiraz-44T | 899  | 0        | -1.09697  |  |
|        |      | Shiraz-49T | 1170 | 0        | -0.967436 |  |
|        |      | Shiraz-9T  | 1370 | 0.690073 | 0         |  |
|        |      | Shiraz-18T | 1457 | 0.643204 | 0         |  |
|        |      | Shiraz-22T | 1673 | 0.611783 | 0         |  |
|        |      | Shiraz-25T | 1719 | 0.472955 | 0         |  |
|        |      | Shiraz-28T | 1762 | 0.562311 | 0         |  |
|        |      | Shiraz-29T | 1801 | 0.815343 | 0         |  |
|        |      | Shiraz-32T | 1870 | 0.729766 | 0         |  |
|        |      | Shiraz-35T | 1933 | 0.488535 | 0         |  |
|        |      | Shiraz-58T | 2223 | 0.833364 | 0         |  |
|        |      | Shiraz-71T | 2263 | 0.975531 | 0         |  |
|        |      | Shiraz-3T  | 242  | 0        | -0.336434 |  |
|        |      | Shiraz-4T  | 261  | 0        | -0.336249 |  |
|        |      | Shiraz-16T | 295  | 0.591657 | 0         |  |
|        |      | Shiraz-36T | 433  | 0        | -0.803961 |  |
|        |      | Shiraz-44T | 899  | 0        | -1.09697  |  |
|        |      | Shiraz-49T | 1170 | 0        | -0.967436 |  |
|        |      | Shiraz-9T  | 1370 | 0.690073 | 0         |  |
|        |      | Shiraz-18T | 1457 | 0.643204 | 0         |  |



|         |      |            |      |          |           |  |  |
|---------|------|------------|------|----------|-----------|--|--|
|         |      | Shiraz-22T | 1673 | 0.611783 | 0         |  |  |
|         |      | Shiraz-25T | 1719 | 0.472955 | 0         |  |  |
|         |      | Shiraz-28T | 1762 | 0.562311 | 0         |  |  |
|         |      | Shiraz-29T | 1801 | 0.815343 | 0         |  |  |
|         |      | Shiraz-32T | 1870 | 0.729766 | 0         |  |  |
|         |      | Shiraz-35T | 1933 | 0.488535 | 0         |  |  |
|         |      | Shiraz-58T | 2223 | 0.833364 | 0         |  |  |
|         |      | Shiraz-71T | 2263 | 0.975531 | 0         |  |  |
|         |      | Shiraz-3T  | 242  | 0        | -0.336434 |  |  |
|         |      | Shiraz-4T  | 261  | 0        | -0.336249 |  |  |
|         |      | Shiraz-16T | 295  | 0.591657 | 0         |  |  |
|         |      | Shiraz-36T | 433  | 0        | -0.803961 |  |  |
|         |      | Shiraz-44T | 899  | 0        | -1.09697  |  |  |
|         |      | Shiraz-49T | 1170 | 0        | -0.967436 |  |  |
|         |      | Shiraz-9T  | 1370 | 0.690073 | 0         |  |  |
|         |      | Shiraz-18T | 1457 | 0.643204 | 0         |  |  |
|         |      | Shiraz-22T | 1673 | 0.611783 | 0         |  |  |
|         |      | Shiraz-25T | 1719 | 0.472955 | 0         |  |  |
|         |      | Shiraz-28T | 1762 | 0.562311 | 0         |  |  |
|         |      | Shiraz-29T | 1801 | 0.815343 | 0         |  |  |
|         |      | Shiraz-32T | 1870 | 0.729766 | 0         |  |  |
|         |      | Shiraz-35T | 1933 | 0.488535 | 0         |  |  |
|         |      | Shiraz-58T | 2223 | 0.833364 | 0         |  |  |
|         |      | Shiraz-71T | 2263 | 0.975531 | 0         |  |  |
| SH3BGRL | chrX | Shiraz-3T  | 242  | 0        | -0.336434 |  |  |
|         |      | Shiraz-3T  | 243  | 0        | -0.549129 |  |  |
|         |      | Shiraz-4T  | 261  | 0        | -0.336249 |  |  |
|         |      | Shiraz-16T | 295  | 0.591657 | 0         |  |  |
|         |      | Shiraz-36T | 433  | 0        | -0.803961 |  |  |
|         |      | Shiraz-44T | 899  | 0        | -1.09697  |  |  |
|         |      | Shiraz-44T | 902  | 0        | -1.449824 |  |  |
|         |      | Shiraz-47T | 1085 | 0        | -0.130811 |  |  |
|         |      | Shiraz-49T | 1170 | 0        | -0.967436 |  |  |
|         |      | Shiraz-49T | 1172 | 0        | -1.123219 |  |  |
|         |      | Shiraz-18T | 1457 | 0.643204 | 0         |  |  |
|         |      | Shiraz-22T | 1673 | 0.611783 | 0         |  |  |
|         |      | Shiraz-22T | 1675 | 0.279253 | 0         |  |  |
|         |      | Shiraz-25T | 1719 | 0.472955 | 0         |  |  |
|         |      | Shiraz-28T | 1762 | 0.562311 | 0         |  |  |
|         |      | Shiraz-29T | 1801 | 0.815343 | 0         |  |  |
|         |      | Shiraz-32T | 1870 | 0.729766 | 0         |  |  |
|         |      | Shiraz-32T | 1871 | 0.292679 | 0         |  |  |
|         |      | Shiraz-35T | 1933 | 0.488535 | 0         |  |  |
|         |      | Shiraz-58T | 2223 | 0.833364 | 0         |  |  |
|         |      | Shiraz-71T | 2263 | 0.975531 | 0         |  |  |
|         |      | Shiraz-3T  | 242  | 0        | -0.336434 |  |  |
|         |      | Shiraz-3T  | 243  | 0        | -0.549129 |  |  |

|         |      |            |      |          |           |  |  |
|---------|------|------------|------|----------|-----------|--|--|
|         |      | Shiraz-4T  | 261  | 0        | -0.336249 |  |  |
|         |      | Shiraz-16T | 295  | 0.591657 | 0         |  |  |
|         |      | Shiraz-36T | 433  | 0        | -0.803961 |  |  |
|         |      | Shiraz-44T | 899  | 0        | -1.09697  |  |  |
|         |      | Shiraz-44T | 902  | 0        | -1.449824 |  |  |
|         |      | Shiraz-47T | 1085 | 0        | -0.130811 |  |  |
|         |      | Shiraz-49T | 1170 | 0        | -0.967436 |  |  |
|         |      | Shiraz-49T | 1172 | 0        | -1.123219 |  |  |
|         |      | Shiraz-18T | 1457 | 0.643204 | 0         |  |  |
|         |      | Shiraz-22T | 1673 | 0.611783 | 0         |  |  |
|         |      | Shiraz-22T | 1675 | 0.279253 | 0         |  |  |
|         |      | Shiraz-25T | 1719 | 0.472955 | 0         |  |  |
|         |      | Shiraz-28T | 1762 | 0.562311 | 0         |  |  |
|         |      | Shiraz-29T | 1801 | 0.815343 | 0         |  |  |
|         |      | Shiraz-32T | 1870 | 0.729766 | 0         |  |  |
|         |      | Shiraz-32T | 1871 | 0.292679 | 0         |  |  |
|         |      | Shiraz-35T | 1933 | 0.488535 | 0         |  |  |
|         |      | Shiraz-58T | 2223 | 0.833364 | 0         |  |  |
|         |      | Shiraz-71T | 2263 | 0.975531 | 0         |  |  |
|         |      | Shiraz-3T  | 242  | 0        | -0.336434 |  |  |
|         |      | Shiraz-3T  | 243  | 0        | -0.549129 |  |  |
|         |      | Shiraz-4T  | 261  | 0        | -0.336249 |  |  |
|         |      | Shiraz-16T | 295  | 0.591657 | 0         |  |  |
|         |      | Shiraz-36T | 433  | 0        | -0.803961 |  |  |
|         |      | Shiraz-44T | 899  | 0        | -1.09697  |  |  |
|         |      | Shiraz-44T | 902  | 0        | -1.449824 |  |  |
|         |      | Shiraz-47T | 1085 | 0        | -0.130811 |  |  |
|         |      | Shiraz-49T | 1170 | 0        | -0.967436 |  |  |
|         |      | Shiraz-49T | 1172 | 0        | -1.123219 |  |  |
|         |      | Shiraz-18T | 1457 | 0.643204 | 0         |  |  |
|         |      | Shiraz-22T | 1673 | 0.611783 | 0         |  |  |
|         |      | Shiraz-22T | 1675 | 0.279253 | 0         |  |  |
|         |      | Shiraz-25T | 1719 | 0.472955 | 0         |  |  |
|         |      | Shiraz-28T | 1762 | 0.562311 | 0         |  |  |
|         |      | Shiraz-29T | 1801 | 0.815343 | 0         |  |  |
|         |      | Shiraz-32T | 1870 | 0.729766 | 0         |  |  |
|         |      | Shiraz-32T | 1871 | 0.292679 | 0         |  |  |
|         |      | Shiraz-35T | 1933 | 0.488535 | 0         |  |  |
|         |      | Shiraz-58T | 2223 | 0.833364 | 0         |  |  |
|         |      | Shiraz-71T | 2263 | 0.975531 | 0         |  |  |
| SH3KBP1 | chrX | Shiraz-3T  | 235  | 0        | -0.28401  |  |  |
|         |      | Shiraz-3T  | 235  | 0        | -0.28401  |  |  |
|         |      | Shiraz-4T  | 260  | 0        | -0.324128 |  |  |
|         |      | Shiraz-4T  | 260  | 0        | -0.324128 |  |  |
|         |      | Shiraz-16T | 294  | 0.655804 | 0         |  |  |
|         |      | Shiraz-16T | 294  | 0.655804 | 0         |  |  |
|         |      | Shiraz-36T | 431  | 0        | -0.78035  |  |  |

|  |            |      |          |           |  |
|--|------------|------|----------|-----------|--|
|  | Shiraz-36T | 431  | 0        | -0.78035  |  |
|  | Shiraz-44T | 891  | 0        | -0.954044 |  |
|  | Shiraz-44T | 891  | 0        | -0.954044 |  |
|  | Shiraz-49T | 1166 | 0        | -0.917235 |  |
|  | Shiraz-49T | 1166 | 0        | -0.917235 |  |
|  | Shiraz-77T | 1281 | 0.136627 | 0         |  |
|  | Shiraz-77T | 1281 | 0.136627 | 0         |  |
|  | Shiraz-9T  | 1368 | 0.199713 | 0         |  |
|  | Shiraz-9T  | 1368 | 0.199713 | 0         |  |
|  | Shiraz-18T | 1455 | 0        | -0.186773 |  |
|  | Shiraz-18T | 1455 | 0        | -0.186773 |  |
|  | Shiraz-22T | 1669 | 0.695915 | 0         |  |
|  | Shiraz-22T | 1669 | 0.695915 | 0         |  |
|  | Shiraz-25T | 1717 | 0.420447 | 0         |  |
|  | Shiraz-25T | 1717 | 0.420447 | 0         |  |
|  | Shiraz-28T | 1760 | 0.538181 | 0         |  |
|  | Shiraz-28T | 1760 | 0.538181 | 0         |  |
|  | Shiraz-29T | 1800 | 0.672527 | 0         |  |
|  | Shiraz-29T | 1800 | 0.672527 | 0         |  |
|  | Shiraz-32T | 1869 | 0.776805 | 0         |  |
|  | Shiraz-32T | 1869 | 0.776805 | 0         |  |
|  | Shiraz-35T | 1932 | 0.507141 | 0         |  |
|  | Shiraz-35T | 1932 | 0.507141 | 0         |  |
|  | Shiraz-40T | 2051 | 0.098506 | 0         |  |
|  | Shiraz-40T | 2051 | 0.098506 | 0         |  |
|  | Shiraz-58T | 2221 | 0.871948 | 0         |  |
|  | Shiraz-58T | 2221 | 0.871948 | 0         |  |
|  | Shiraz-71T | 2260 | 0.68394  | 0         |  |
|  | Shiraz-71T | 2260 | 0.68394  | 0         |  |
|  | Shiraz-71T | 2261 | 0.508399 | 0         |  |
|  | Shiraz-71T | 2261 | 0.508399 | 0         |  |
|  | Shiraz-3T  | 235  | 0        | -0.28401  |  |
|  | Shiraz-3T  | 235  | 0        | -0.28401  |  |
|  | Shiraz-4T  | 260  | 0        | -0.324128 |  |
|  | Shiraz-4T  | 260  | 0        | -0.324128 |  |
|  | Shiraz-16T | 294  | 0.655804 | 0         |  |
|  | Shiraz-16T | 294  | 0.655804 | 0         |  |
|  | Shiraz-36T | 431  | 0        | -0.78035  |  |
|  | Shiraz-36T | 431  | 0        | -0.78035  |  |
|  | Shiraz-44T | 891  | 0        | -0.954044 |  |
|  | Shiraz-44T | 891  | 0        | -0.954044 |  |
|  | Shiraz-49T | 1166 | 0        | -0.917235 |  |
|  | Shiraz-49T | 1166 | 0        | -0.917235 |  |
|  | Shiraz-77T | 1281 | 0.136627 | 0         |  |
|  | Shiraz-77T | 1281 | 0.136627 | 0         |  |
|  | Shiraz-9T  | 1368 | 0.199713 | 0         |  |
|  | Shiraz-9T  | 1368 | 0.199713 | 0         |  |

|  |            |      |          |           |  |
|--|------------|------|----------|-----------|--|
|  | Shiraz-18T | 1455 | 0        | -0.186773 |  |
|  | Shiraz-18T | 1455 | 0        | -0.186773 |  |
|  | Shiraz-22T | 1669 | 0.695915 | 0         |  |
|  | Shiraz-22T | 1669 | 0.695915 | 0         |  |
|  | Shiraz-25T | 1717 | 0.420447 | 0         |  |
|  | Shiraz-25T | 1717 | 0.420447 | 0         |  |
|  | Shiraz-28T | 1760 | 0.538181 | 0         |  |
|  | Shiraz-28T | 1760 | 0.538181 | 0         |  |
|  | Shiraz-29T | 1800 | 0.672527 | 0         |  |
|  | Shiraz-29T | 1800 | 0.672527 | 0         |  |
|  | Shiraz-32T | 1869 | 0.776805 | 0         |  |
|  | Shiraz-32T | 1869 | 0.776805 | 0         |  |
|  | Shiraz-35T | 1932 | 0.507141 | 0         |  |
|  | Shiraz-35T | 1932 | 0.507141 | 0         |  |
|  | Shiraz-40T | 2051 | 0.098506 | 0         |  |
|  | Shiraz-40T | 2051 | 0.098506 | 0         |  |
|  | Shiraz-58T | 2221 | 0.871948 | 0         |  |
|  | Shiraz-58T | 2221 | 0.871948 | 0         |  |
|  | Shiraz-71T | 2260 | 0.68394  | 0         |  |
|  | Shiraz-71T | 2260 | 0.68394  | 0         |  |
|  | Shiraz-71T | 2261 | 0.508399 | 0         |  |
|  | Shiraz-71T | 2261 | 0.508399 | 0         |  |
|  | Shiraz-3T  | 235  | 0        | -0.28401  |  |
|  | Shiraz-3T  | 235  | 0        | -0.28401  |  |
|  | Shiraz-4T  | 260  | 0        | -0.324128 |  |
|  | Shiraz-4T  | 260  | 0        | -0.324128 |  |
|  | Shiraz-16T | 294  | 0.655804 | 0         |  |
|  | Shiraz-16T | 294  | 0.655804 | 0         |  |
|  | Shiraz-36T | 431  | 0        | -0.78035  |  |
|  | Shiraz-36T | 431  | 0        | -0.78035  |  |
|  | Shiraz-44T | 891  | 0        | -0.954044 |  |
|  | Shiraz-44T | 891  | 0        | -0.954044 |  |
|  | Shiraz-49T | 1166 | 0        | -0.917235 |  |
|  | Shiraz-49T | 1166 | 0        | -0.917235 |  |
|  | Shiraz-77T | 1281 | 0.136627 | 0         |  |
|  | Shiraz-77T | 1281 | 0.136627 | 0         |  |
|  | Shiraz-9T  | 1368 | 0.199713 | 0         |  |
|  | Shiraz-9T  | 1368 | 0.199713 | 0         |  |
|  | Shiraz-18T | 1455 | 0        | -0.186773 |  |
|  | Shiraz-18T | 1455 | 0        | -0.186773 |  |
|  | Shiraz-22T | 1669 | 0.695915 | 0         |  |
|  | Shiraz-22T | 1669 | 0.695915 | 0         |  |
|  | Shiraz-25T | 1717 | 0.420447 | 0         |  |
|  | Shiraz-25T | 1717 | 0.420447 | 0         |  |
|  | Shiraz-28T | 1760 | 0.538181 | 0         |  |
|  | Shiraz-28T | 1760 | 0.538181 | 0         |  |
|  | Shiraz-29T | 1800 | 0.672527 | 0         |  |

|       |      |            |      |          |           |  |  |
|-------|------|------------|------|----------|-----------|--|--|
|       |      | Shiraz-29T | 1800 | 0.672527 | 0         |  |  |
|       |      | Shiraz-32T | 1869 | 0.776805 | 0         |  |  |
|       |      | Shiraz-32T | 1869 | 0.776805 | 0         |  |  |
|       |      | Shiraz-35T | 1932 | 0.507141 | 0         |  |  |
|       |      | Shiraz-35T | 1932 | 0.507141 | 0         |  |  |
|       |      | Shiraz-40T | 2051 | 0.098506 | 0         |  |  |
|       |      | Shiraz-40T | 2051 | 0.098506 | 0         |  |  |
|       |      | Shiraz-58T | 2221 | 0.871948 | 0         |  |  |
|       |      | Shiraz-58T | 2221 | 0.871948 | 0         |  |  |
|       |      | Shiraz-71T | 2260 | 0.68394  | 0         |  |  |
|       |      | Shiraz-71T | 2260 | 0.68394  | 0         |  |  |
|       |      | Shiraz-71T | 2261 | 0.508399 | 0         |  |  |
|       |      | Shiraz-71T | 2261 | 0.508399 | 0         |  |  |
| SHFM1 | chr7 | Shiraz-3T  | 90   | 0.219276 | 0         |  |  |
|       |      | Shiraz-3T  | 93   | 0        | -0.058023 |  |  |
|       |      | Shiraz-4T  | 253  | 0.372918 | 0         |  |  |
|       |      | Shiraz-36T | 378  | 0.179558 | 0         |  |  |
|       |      | Shiraz-36T | 380  | 0.083883 | 0         |  |  |
|       |      | Shiraz-44T | 638  | 0        | -0.433476 |  |  |
|       |      | Shiraz-46T | 943  | 0.093799 | 0         |  |  |
|       |      | Shiraz-46T | 945  | 0        | -0.014838 |  |  |
|       |      | Shiraz-47T | 1029 | 0        | -0.096586 |  |  |
|       |      | Shiraz-77T | 1225 | 0        | -0.117922 |  |  |
|       |      | Shiraz-18T | 1434 | 0.244465 | 0         |  |  |
|       |      | Shiraz-22T | 1549 | 0        | -0.319623 |  |  |
|       |      | Shiraz-25T | 1698 | 0.21835  | 0         |  |  |
|       |      | Shiraz-28T | 1735 | 0.350744 | 0         |  |  |
|       |      | Shiraz-29T | 1778 | 0.120767 | 0         |  |  |
|       |      | Shiraz-32T | 1833 | 0.551336 | 0         |  |  |
|       |      | Shiraz-38T | 1951 | 0.250891 | 0         |  |  |
|       |      | Shiraz-53T | 2078 | 0.287202 | 0         |  |  |
|       |      | Shiraz-71T | 2238 | 0.603631 | 0         |  |  |
|       |      | Shiraz-3T  | 90   | 0.219276 | 0         |  |  |
|       |      | Shiraz-3T  | 93   | 0        | -0.058023 |  |  |
|       |      | Shiraz-4T  | 253  | 0.372918 | 0         |  |  |
|       |      | Shiraz-36T | 378  | 0.179558 | 0         |  |  |
|       |      | Shiraz-36T | 380  | 0.083883 | 0         |  |  |
|       |      | Shiraz-44T | 638  | 0        | -0.433476 |  |  |
|       |      | Shiraz-46T | 943  | 0.093799 | 0         |  |  |
|       |      | Shiraz-46T | 945  | 0        | -0.014838 |  |  |
|       |      | Shiraz-47T | 1029 | 0        | -0.096586 |  |  |
|       |      | Shiraz-77T | 1225 | 0        | -0.117922 |  |  |
|       |      | Shiraz-18T | 1434 | 0.244465 | 0         |  |  |
|       |      | Shiraz-22T | 1549 | 0        | -0.319623 |  |  |
|       |      | Shiraz-25T | 1698 | 0.21835  | 0         |  |  |
|       |      | Shiraz-28T | 1735 | 0.350744 | 0         |  |  |
|       |      | Shiraz-29T | 1778 | 0.120767 | 0         |  |  |

|         |      |            |      |          |           |  |  |
|---------|------|------------|------|----------|-----------|--|--|
|         |      | Shiraz-32T | 1833 | 0.551336 | 0         |  |  |
|         |      | Shiraz-38T | 1951 | 0.250891 | 0         |  |  |
|         |      | Shiraz-53T | 2078 | 0.287202 | 0         |  |  |
|         |      | Shiraz-71T | 2238 | 0.603631 | 0         |  |  |
|         |      | Shiraz-3T  | 90   | 0.219276 | 0         |  |  |
|         |      | Shiraz-3T  | 93   | 0        | -0.058023 |  |  |
|         |      | Shiraz-4T  | 253  | 0.372918 | 0         |  |  |
|         |      | Shiraz-36T | 378  | 0.179558 | 0         |  |  |
|         |      | Shiraz-36T | 380  | 0.083883 | 0         |  |  |
|         |      | Shiraz-44T | 638  | 0        | -0.433476 |  |  |
|         |      | Shiraz-46T | 943  | 0.093799 | 0         |  |  |
|         |      | Shiraz-46T | 945  | 0        | -0.014838 |  |  |
|         |      | Shiraz-47T | 1029 | 0        | -0.096586 |  |  |
|         |      | Shiraz-77T | 1225 | 0        | -0.117922 |  |  |
|         |      | Shiraz-18T | 1434 | 0.244465 | 0         |  |  |
|         |      | Shiraz-22T | 1549 | 0        | -0.319623 |  |  |
|         |      | Shiraz-25T | 1698 | 0.21835  | 0         |  |  |
|         |      | Shiraz-28T | 1735 | 0.350744 | 0         |  |  |
|         |      | Shiraz-29T | 1778 | 0.120767 | 0         |  |  |
|         |      | Shiraz-32T | 1833 | 0.551336 | 0         |  |  |
|         |      | Shiraz-38T | 1951 | 0.250891 | 0         |  |  |
|         |      | Shiraz-53T | 2078 | 0.287202 | 0         |  |  |
|         |      | Shiraz-71T | 2238 | 0.603631 | 0         |  |  |
| SHROOM2 | chrX | Shiraz-3T  | 235  | 0        | -0.28401  |  |  |
|         |      | Shiraz-4T  | 260  | 0        | -0.324128 |  |  |
|         |      | Shiraz-16T | 294  | 0.655804 | 0         |  |  |
|         |      | Shiraz-36T | 431  | 0        | -0.78035  |  |  |
|         |      | Shiraz-44T | 891  | 0        | -0.954044 |  |  |
|         |      | Shiraz-49T | 1166 | 0        | -0.917235 |  |  |
|         |      | Shiraz-9T  | 1368 | 0.199713 | 0         |  |  |
|         |      | Shiraz-18T | 1455 | 0        | -0.186773 |  |  |
|         |      | Shiraz-22T | 1669 | 0.695915 | 0         |  |  |
|         |      | Shiraz-22T | 1670 | 1.188333 | 0         |  |  |
|         |      | Shiraz-25T | 1717 | 0.420447 | 0         |  |  |
|         |      | Shiraz-28T | 1760 | 0.538181 | 0         |  |  |
|         |      | Shiraz-29T | 1800 | 0.672527 | 0         |  |  |
|         |      | Shiraz-32T | 1869 | 0.776805 | 0         |  |  |
|         |      | Shiraz-35T | 1932 | 0.507141 | 0         |  |  |
|         |      | Shiraz-40T | 2051 | 0.098506 | 0         |  |  |
|         |      | Shiraz-58T | 2221 | 0.871948 | 0         |  |  |
|         |      | Shiraz-71T | 2260 | 0.68394  | 0         |  |  |
|         |      | Shiraz-71T | 2261 | 0.508399 | 0         |  |  |
|         |      | Shiraz-3T  | 235  | 0        | -0.28401  |  |  |
|         |      | Shiraz-4T  | 260  | 0        | -0.324128 |  |  |
|         |      | Shiraz-16T | 294  | 0.655804 | 0         |  |  |
|         |      | Shiraz-36T | 431  | 0        | -0.78035  |  |  |
|         |      | Shiraz-44T | 891  | 0        | -0.954044 |  |  |

|       |      |            |      |          |           |  |  |
|-------|------|------------|------|----------|-----------|--|--|
|       |      | Shiraz-49T | 1166 | 0        | -0.917235 |  |  |
|       |      | Shiraz-9T  | 1368 | 0.199713 | 0         |  |  |
|       |      | Shiraz-18T | 1455 | 0        | -0.186773 |  |  |
|       |      | Shiraz-22T | 1669 | 0.695915 | 0         |  |  |
|       |      | Shiraz-22T | 1670 | 1.188333 | 0         |  |  |
|       |      | Shiraz-25T | 1717 | 0.420447 | 0         |  |  |
|       |      | Shiraz-28T | 1760 | 0.538181 | 0         |  |  |
|       |      | Shiraz-29T | 1800 | 0.672527 | 0         |  |  |
|       |      | Shiraz-32T | 1869 | 0.776805 | 0         |  |  |
|       |      | Shiraz-35T | 1932 | 0.507141 | 0         |  |  |
|       |      | Shiraz-40T | 2051 | 0.098506 | 0         |  |  |
|       |      | Shiraz-58T | 2221 | 0.871948 | 0         |  |  |
|       |      | Shiraz-71T | 2260 | 0.68394  | 0         |  |  |
|       |      | Shiraz-71T | 2261 | 0.508399 | 0         |  |  |
|       |      | Shiraz-3T  | 235  | 0        | -0.28401  |  |  |
|       |      | Shiraz-4T  | 260  | 0        | -0.324128 |  |  |
|       |      | Shiraz-16T | 294  | 0.655804 | 0         |  |  |
|       |      | Shiraz-36T | 431  | 0        | -0.78035  |  |  |
|       |      | Shiraz-44T | 891  | 0        | -0.954044 |  |  |
|       |      | Shiraz-49T | 1166 | 0        | -0.917235 |  |  |
|       |      | Shiraz-9T  | 1368 | 0.199713 | 0         |  |  |
|       |      | Shiraz-18T | 1455 | 0        | -0.186773 |  |  |
|       |      | Shiraz-22T | 1669 | 0.695915 | 0         |  |  |
|       |      | Shiraz-22T | 1670 | 1.188333 | 0         |  |  |
|       |      | Shiraz-25T | 1717 | 0.420447 | 0         |  |  |
|       |      | Shiraz-28T | 1760 | 0.538181 | 0         |  |  |
|       |      | Shiraz-29T | 1800 | 0.672527 | 0         |  |  |
|       |      | Shiraz-32T | 1869 | 0.776805 | 0         |  |  |
|       |      | Shiraz-35T | 1932 | 0.507141 | 0         |  |  |
|       |      | Shiraz-40T | 2051 | 0.098506 | 0         |  |  |
|       |      | Shiraz-58T | 2221 | 0.871948 | 0         |  |  |
|       |      | Shiraz-71T | 2260 | 0.68394  | 0         |  |  |
|       |      | Shiraz-71T | 2261 | 0.508399 | 0         |  |  |
| SKAP2 | chr7 | Shiraz-3T  | 87   | 0.198593 | 0         |  |  |
|       |      | Shiraz-4T  | 252  | 0.192083 | 0         |  |  |
|       |      | Shiraz-36T | 376  | 0.159952 | 0         |  |  |
|       |      | Shiraz-46T | 942  | 0.069143 | 0         |  |  |
|       |      | Shiraz-18T | 1433 | 0.250973 | 0         |  |  |
|       |      | Shiraz-25T | 1697 | 0.21945  | 0         |  |  |
|       |      | Shiraz-28T | 1734 | 0.362882 | 0         |  |  |
|       |      | Shiraz-29T | 1777 | 0.156747 | 0         |  |  |
|       |      | Shiraz-38T | 1950 | 0.265916 | 0         |  |  |
|       |      | Shiraz-71T | 2236 | 0.320072 | 0         |  |  |
|       |      | Shiraz-3T  | 87   | 0.198593 | 0         |  |  |
|       |      | Shiraz-4T  | 252  | 0.192083 | 0         |  |  |
|       |      | Shiraz-36T | 376  | 0.159952 | 0         |  |  |
|       |      | Shiraz-46T | 942  | 0.069143 | 0         |  |  |

|      |      |            |      |          |           |  |
|------|------|------------|------|----------|-----------|--|
|      |      | Shiraz-18T | 1433 | 0.250973 | 0         |  |
|      |      | Shiraz-25T | 1697 | 0.21945  | 0         |  |
|      |      | Shiraz-28T | 1734 | 0.362882 | 0         |  |
|      |      | Shiraz-29T | 1777 | 0.156747 | 0         |  |
|      |      | Shiraz-38T | 1950 | 0.265916 | 0         |  |
|      |      | Shiraz-71T | 2236 | 0.320072 | 0         |  |
|      |      | Shiraz-3T  | 87   | 0.198593 | 0         |  |
|      |      | Shiraz-4T  | 252  | 0.192083 | 0         |  |
|      |      | Shiraz-36T | 376  | 0.159952 | 0         |  |
|      |      | Shiraz-46T | 942  | 0.069143 | 0         |  |
|      |      | Shiraz-18T | 1433 | 0.250973 | 0         |  |
|      |      | Shiraz-25T | 1697 | 0.21945  | 0         |  |
|      |      | Shiraz-28T | 1734 | 0.362882 | 0         |  |
|      |      | Shiraz-29T | 1777 | 0.156747 | 0         |  |
|      |      | Shiraz-38T | 1950 | 0.265916 | 0         |  |
|      |      | Shiraz-71T | 2236 | 0.320072 | 0         |  |
| SKP2 | chr5 | Shiraz-4T  | 250  | 0.262252 | 0         |  |
|      |      | Shiraz-4T  | 250  | 0.262252 | 0         |  |
|      |      | Shiraz-16T | 266  | 0.321724 | 0         |  |
|      |      | Shiraz-16T | 266  | 0.321724 | 0         |  |
|      |      | Shiraz-44T | 591  | 0        | -0.233934 |  |
|      |      | Shiraz-44T | 591  | 0        | -0.233934 |  |
|      |      | Shiraz-18T | 1429 | 0        | -0.314125 |  |
|      |      | Shiraz-18T | 1429 | 0        | -0.314125 |  |
|      |      | Shiraz-22T | 1522 | 0        | -0.322688 |  |
|      |      | Shiraz-22T | 1522 | 0        | -0.322688 |  |
|      |      | Shiraz-25T | 1694 | 0.201602 | 0         |  |
|      |      | Shiraz-25T | 1694 | 0.201602 | 0         |  |
|      |      | Shiraz-28T | 1731 | 0.295447 | 0         |  |
|      |      | Shiraz-28T | 1731 | 0.295447 | 0         |  |
|      |      | Shiraz-29T | 1773 | 0.090981 | 0         |  |
|      |      | Shiraz-29T | 1773 | 0.090981 | 0         |  |
|      |      | Shiraz-40T | 2016 | 0.376634 | 0         |  |
|      |      | Shiraz-40T | 2016 | 0.376634 | 0         |  |
|      |      | Shiraz-4T  | 250  | 0.262252 | 0         |  |
|      |      | Shiraz-4T  | 250  | 0.262252 | 0         |  |
|      |      | Shiraz-16T | 266  | 0.321724 | 0         |  |
|      |      | Shiraz-16T | 266  | 0.321724 | 0         |  |
|      |      | Shiraz-44T | 591  | 0        | -0.233934 |  |
|      |      | Shiraz-44T | 591  | 0        | -0.233934 |  |
|      |      | Shiraz-18T | 1429 | 0        | -0.314125 |  |
|      |      | Shiraz-18T | 1429 | 0        | -0.314125 |  |
|      |      | Shiraz-22T | 1522 | 0        | -0.322688 |  |
|      |      | Shiraz-22T | 1522 | 0        | -0.322688 |  |
|      |      | Shiraz-25T | 1694 | 0.201602 | 0         |  |
|      |      | Shiraz-25T | 1694 | 0.201602 | 0         |  |
|      |      | Shiraz-28T | 1731 | 0.295447 | 0         |  |



|         |      |            |      |          |           |  |
|---------|------|------------|------|----------|-----------|--|
|         |      | Shiraz-28T | 1731 | 0.295447 | 0         |  |
|         |      | Shiraz-29T | 1773 | 0.090981 | 0         |  |
|         |      | Shiraz-29T | 1773 | 0.090981 | 0         |  |
|         |      | Shiraz-40T | 2016 | 0.376634 | 0         |  |
|         |      | Shiraz-40T | 2016 | 0.376634 | 0         |  |
|         |      | Shiraz-4T  | 250  | 0.262252 | 0         |  |
|         |      | Shiraz-4T  | 250  | 0.262252 | 0         |  |
|         |      | Shiraz-16T | 266  | 0.321724 | 0         |  |
|         |      | Shiraz-16T | 266  | 0.321724 | 0         |  |
|         |      | Shiraz-44T | 591  | 0        | -0.233934 |  |
|         |      | Shiraz-44T | 591  | 0        | -0.233934 |  |
|         |      | Shiraz-18T | 1429 | 0        | -0.314125 |  |
|         |      | Shiraz-18T | 1429 | 0        | -0.314125 |  |
|         |      | Shiraz-22T | 1522 | 0        | -0.322688 |  |
|         |      | Shiraz-22T | 1522 | 0        | -0.322688 |  |
|         |      | Shiraz-25T | 1694 | 0.201602 | 0         |  |
|         |      | Shiraz-25T | 1694 | 0.201602 | 0         |  |
|         |      | Shiraz-28T | 1731 | 0.295447 | 0         |  |
|         |      | Shiraz-28T | 1731 | 0.295447 | 0         |  |
|         |      | Shiraz-29T | 1773 | 0.090981 | 0         |  |
|         |      | Shiraz-29T | 1773 | 0.090981 | 0         |  |
|         |      | Shiraz-40T | 2016 | 0.376634 | 0         |  |
|         |      | Shiraz-40T | 2016 | 0.376634 | 0         |  |
| SLC10A3 | chrX | Shiraz-3T  | 246  | 0.531858 | 0         |  |
|         |      | Shiraz-4T  | 261  | 0        | -0.336249 |  |
|         |      | Shiraz-16T | 295  | 0.591657 | 0         |  |
|         |      | Shiraz-36T | 433  | 0        | -0.803961 |  |
|         |      | Shiraz-42T | 480  | 0        | -0.232915 |  |
|         |      | Shiraz-44T | 908  | 0.466743 | 0         |  |
|         |      | Shiraz-49T | 1170 | 0        | -0.967436 |  |
|         |      | Shiraz-49T | 1173 | 0        | -0.704439 |  |
|         |      | Shiraz-9T  | 1370 | 0.690073 | 0         |  |
|         |      | Shiraz-9T  | 1371 | 1.292392 | 0         |  |
|         |      | Shiraz-18T | 1457 | 0.643204 | 0         |  |
|         |      | Shiraz-22T | 1673 | 0.611783 | 0         |  |
|         |      | Shiraz-22T | 1678 | 0.911625 | 0         |  |
|         |      | Shiraz-25T | 1719 | 0.472955 | 0         |  |
|         |      | Shiraz-28T | 1762 | 0.562311 | 0         |  |
|         |      | Shiraz-29T | 1801 | 0.815343 | 0         |  |
|         |      | Shiraz-32T | 1870 | 0.729766 | 0         |  |
|         |      | Shiraz-32T | 1872 | 1.504553 | 0         |  |
|         |      | Shiraz-35T | 1933 | 0.488535 | 0         |  |
|         |      | Shiraz-38T | 2011 | 0        | -0.406024 |  |
|         |      | Shiraz-53T | 2115 | 0.427728 | 0         |  |
|         |      | Shiraz-58T | 2223 | 0.833364 | 0         |  |
|         |      | Shiraz-58T | 2226 | 1.074663 | 0         |  |
|         |      | Shiraz-71T | 2263 | 0.975531 | 0         |  |

|  |            |      |          |           |  |
|--|------------|------|----------|-----------|--|
|  | Shiraz-3T  | 246  | 0.531858 | 0         |  |
|  | Shiraz-4T  | 261  | 0        | -0.336249 |  |
|  | Shiraz-16T | 295  | 0.591657 | 0         |  |
|  | Shiraz-36T | 433  | 0        | -0.803961 |  |
|  | Shiraz-42T | 480  | 0        | -0.232915 |  |
|  | Shiraz-44T | 908  | 0.466743 | 0         |  |
|  | Shiraz-49T | 1170 | 0        | -0.967436 |  |
|  | Shiraz-49T | 1173 | 0        | -0.704439 |  |
|  | Shiraz-9T  | 1370 | 0.690073 | 0         |  |
|  | Shiraz-9T  | 1371 | 1.292392 | 0         |  |
|  | Shiraz-18T | 1457 | 0.643204 | 0         |  |
|  | Shiraz-22T | 1673 | 0.611783 | 0         |  |
|  | Shiraz-22T | 1678 | 0.911625 | 0         |  |
|  | Shiraz-25T | 1719 | 0.472955 | 0         |  |
|  | Shiraz-28T | 1762 | 0.562311 | 0         |  |
|  | Shiraz-29T | 1801 | 0.815343 | 0         |  |
|  | Shiraz-32T | 1870 | 0.729766 | 0         |  |
|  | Shiraz-32T | 1872 | 1.504553 | 0         |  |
|  | Shiraz-35T | 1933 | 0.488535 | 0         |  |
|  | Shiraz-38T | 2011 | 0        | -0.406024 |  |
|  | Shiraz-53T | 2115 | 0.427728 | 0         |  |
|  | Shiraz-58T | 2223 | 0.833364 | 0         |  |
|  | Shiraz-58T | 2226 | 1.074663 | 0         |  |
|  | Shiraz-71T | 2263 | 0.975531 | 0         |  |
|  | Shiraz-3T  | 246  | 0.531858 | 0         |  |
|  | Shiraz-4T  | 261  | 0        | -0.336249 |  |
|  | Shiraz-16T | 295  | 0.591657 | 0         |  |
|  | Shiraz-36T | 433  | 0        | -0.803961 |  |
|  | Shiraz-42T | 480  | 0        | -0.232915 |  |
|  | Shiraz-44T | 908  | 0.466743 | 0         |  |
|  | Shiraz-49T | 1170 | 0        | -0.967436 |  |
|  | Shiraz-49T | 1173 | 0        | -0.704439 |  |
|  | Shiraz-9T  | 1370 | 0.690073 | 0         |  |
|  | Shiraz-9T  | 1371 | 1.292392 | 0         |  |
|  | Shiraz-18T | 1457 | 0.643204 | 0         |  |
|  | Shiraz-22T | 1673 | 0.611783 | 0         |  |
|  | Shiraz-22T | 1678 | 0.911625 | 0         |  |
|  | Shiraz-25T | 1719 | 0.472955 | 0         |  |
|  | Shiraz-28T | 1762 | 0.562311 | 0         |  |
|  | Shiraz-29T | 1801 | 0.815343 | 0         |  |
|  | Shiraz-32T | 1870 | 0.729766 | 0         |  |
|  | Shiraz-32T | 1872 | 1.504553 | 0         |  |
|  | Shiraz-35T | 1933 | 0.488535 | 0         |  |
|  | Shiraz-38T | 2011 | 0        | -0.406024 |  |
|  | Shiraz-53T | 2115 | 0.427728 | 0         |  |
|  | Shiraz-58T | 2223 | 0.833364 | 0         |  |
|  | Shiraz-58T | 2226 | 1.074663 | 0         |  |

|         |      |            |      |          |           |  |
|---------|------|------------|------|----------|-----------|--|
|         |      | Shiraz-71T | 2263 | 0.975531 | 0         |  |
| SLC12A9 | chr7 | Shiraz-3T  | 90   | 0.219276 | 0         |  |
|         |      | Shiraz-3T  | 94   | 0.74735  | 0         |  |
|         |      | Shiraz-4T  | 253  | 0.372918 | 0         |  |
|         |      | Shiraz-31T | 316  | 0.219196 | 0         |  |
|         |      | Shiraz-36T | 378  | 0.179558 | 0         |  |
|         |      | Shiraz-36T | 381  | 0.332628 | 0         |  |
|         |      | Shiraz-44T | 639  | 1.035032 | 0         |  |
|         |      | Shiraz-46T | 943  | 0.093799 | 0         |  |
|         |      | Shiraz-46T | 946  | 0.299835 | 0         |  |
|         |      | Shiraz-47T | 1030 | 0.257728 | 0         |  |
|         |      | Shiraz-49T | 1120 | 0.281656 | 0         |  |
|         |      | Shiraz-77T | 1225 | 0        | -0.117922 |  |
|         |      | Shiraz-77T | 1227 | 0.196445 | 0         |  |
|         |      | Shiraz-9T  | 1324 | 0.679266 | 0         |  |
|         |      | Shiraz-18T | 1434 | 0.244465 | 0         |  |
|         |      | Shiraz-22T | 1549 | 0        | -0.319623 |  |
|         |      | Shiraz-22T | 1551 | 0.324011 | 0         |  |
|         |      | Shiraz-25T | 1698 | 0.21835  | 0         |  |
|         |      | Shiraz-28T | 1735 | 0.350744 | 0         |  |
|         |      | Shiraz-29T | 1778 | 0.120767 | 0         |  |
|         |      | Shiraz-32T | 1833 | 0.551336 | 0         |  |
|         |      | Shiraz-32T | 1834 | 1.485392 | 0         |  |
|         |      | Shiraz-38T | 1951 | 0.250891 | 0         |  |
|         |      | Shiraz-53T | 2078 | 0.287202 | 0         |  |
|         |      | Shiraz-58T | 2160 | 0.399007 | 0         |  |
|         |      | Shiraz-71T | 2238 | 0.603631 | 0         |  |
|         |      | Shiraz-3T  | 90   | 0.219276 | 0         |  |
|         |      | Shiraz-3T  | 94   | 0.74735  | 0         |  |
|         |      | Shiraz-4T  | 253  | 0.372918 | 0         |  |
|         |      | Shiraz-31T | 316  | 0.219196 | 0         |  |
|         |      | Shiraz-36T | 378  | 0.179558 | 0         |  |
|         |      | Shiraz-36T | 381  | 0.332628 | 0         |  |
|         |      | Shiraz-44T | 639  | 1.035032 | 0         |  |
|         |      | Shiraz-46T | 943  | 0.093799 | 0         |  |
|         |      | Shiraz-46T | 946  | 0.299835 | 0         |  |
|         |      | Shiraz-47T | 1030 | 0.257728 | 0         |  |
|         |      | Shiraz-49T | 1120 | 0.281656 | 0         |  |
|         |      | Shiraz-77T | 1225 | 0        | -0.117922 |  |
|         |      | Shiraz-77T | 1227 | 0.196445 | 0         |  |
|         |      | Shiraz-9T  | 1324 | 0.679266 | 0         |  |
|         |      | Shiraz-18T | 1434 | 0.244465 | 0         |  |
|         |      | Shiraz-22T | 1549 | 0        | -0.319623 |  |
|         |      | Shiraz-22T | 1551 | 0.324011 | 0         |  |
|         |      | Shiraz-25T | 1698 | 0.21835  | 0         |  |
|         |      | Shiraz-28T | 1735 | 0.350744 | 0         |  |
|         |      | Shiraz-29T | 1778 | 0.120767 | 0         |  |

|         |      |            |      |          |           |  |  |
|---------|------|------------|------|----------|-----------|--|--|
|         |      | Shiraz-32T | 1833 | 0.551336 | 0         |  |  |
|         |      | Shiraz-32T | 1834 | 1.485392 | 0         |  |  |
|         |      | Shiraz-38T | 1951 | 0.250891 | 0         |  |  |
|         |      | Shiraz-53T | 2078 | 0.287202 | 0         |  |  |
|         |      | Shiraz-58T | 2160 | 0.399007 | 0         |  |  |
|         |      | Shiraz-71T | 2238 | 0.603631 | 0         |  |  |
|         |      | Shiraz-3T  | 90   | 0.219276 | 0         |  |  |
|         |      | Shiraz-3T  | 94   | 0.74735  | 0         |  |  |
|         |      | Shiraz-4T  | 253  | 0.372918 | 0         |  |  |
|         |      | Shiraz-31T | 316  | 0.219196 | 0         |  |  |
|         |      | Shiraz-36T | 378  | 0.179558 | 0         |  |  |
|         |      | Shiraz-36T | 381  | 0.332628 | 0         |  |  |
|         |      | Shiraz-44T | 639  | 1.035032 | 0         |  |  |
|         |      | Shiraz-46T | 943  | 0.093799 | 0         |  |  |
|         |      | Shiraz-46T | 946  | 0.299835 | 0         |  |  |
|         |      | Shiraz-47T | 1030 | 0.257728 | 0         |  |  |
|         |      | Shiraz-49T | 1120 | 0.281656 | 0         |  |  |
|         |      | Shiraz-77T | 1225 | 0        | -0.117922 |  |  |
|         |      | Shiraz-77T | 1227 | 0.196445 | 0         |  |  |
|         |      | Shiraz-9T  | 1324 | 0.679266 | 0         |  |  |
|         |      | Shiraz-18T | 1434 | 0.244465 | 0         |  |  |
|         |      | Shiraz-22T | 1549 | 0        | -0.319623 |  |  |
|         |      | Shiraz-22T | 1551 | 0.324011 | 0         |  |  |
|         |      | Shiraz-25T | 1698 | 0.21835  | 0         |  |  |
|         |      | Shiraz-28T | 1735 | 0.350744 | 0         |  |  |
|         |      | Shiraz-29T | 1778 | 0.120767 | 0         |  |  |
|         |      | Shiraz-32T | 1833 | 0.551336 | 0         |  |  |
|         |      | Shiraz-32T | 1834 | 1.485392 | 0         |  |  |
|         |      | Shiraz-38T | 1951 | 0.250891 | 0         |  |  |
|         |      | Shiraz-53T | 2078 | 0.287202 | 0         |  |  |
|         |      | Shiraz-58T | 2160 | 0.399007 | 0         |  |  |
|         |      | Shiraz-71T | 2238 | 0.603631 | 0         |  |  |
| SLC13A1 | chr7 | Shiraz-3T  | 90   | 0.219276 | 0         |  |  |
|         |      | Shiraz-3T  | 95   | 0        | -0.077623 |  |  |
|         |      | Shiraz-4T  | 253  | 0.372918 | 0         |  |  |
|         |      | Shiraz-36T | 378  | 0.179558 | 0         |  |  |
|         |      | Shiraz-36T | 382  | 0.081739 | 0         |  |  |
|         |      | Shiraz-44T | 641  | 0        | -0.477846 |  |  |
|         |      | Shiraz-46T | 943  | 0.093799 | 0         |  |  |
|         |      | Shiraz-46T | 947  | 0        | -0.010843 |  |  |
|         |      | Shiraz-47T | 1031 | 0        | -0.117529 |  |  |
|         |      | Shiraz-49T | 1121 | 0        | -0.138569 |  |  |
|         |      | Shiraz-77T | 1225 | 0        | -0.117922 |  |  |
|         |      | Shiraz-77T | 1228 | 0        | -0.238084 |  |  |
|         |      | Shiraz-18T | 1434 | 0.244465 | 0         |  |  |
|         |      | Shiraz-22T | 1549 | 0        | -0.319623 |  |  |
|         |      | Shiraz-22T | 1552 | 0        | -0.50686  |  |  |

|  |            |      |          |           |  |
|--|------------|------|----------|-----------|--|
|  | Shiraz-25T | 1698 | 0.21835  | 0         |  |
|  | Shiraz-28T | 1735 | 0.350744 | 0         |  |
|  | Shiraz-29T | 1778 | 0.120767 | 0         |  |
|  | Shiraz-32T | 1833 | 0.551336 | 0         |  |
|  | Shiraz-32T | 1835 | 0.092727 | 0         |  |
|  | Shiraz-38T | 1951 | 0.250891 | 0         |  |
|  | Shiraz-53T | 2078 | 0.287202 | 0         |  |
|  | Shiraz-58T | 2161 | 0        | -0.187744 |  |
|  | Shiraz-71T | 2238 | 0.603631 | 0         |  |
|  | Shiraz-3T  | 90   | 0.219276 | 0         |  |
|  | Shiraz-3T  | 95   | 0        | -0.077623 |  |
|  | Shiraz-4T  | 253  | 0.372918 | 0         |  |
|  | Shiraz-36T | 378  | 0.179558 | 0         |  |
|  | Shiraz-36T | 382  | 0.081739 | 0         |  |
|  | Shiraz-44T | 641  | 0        | -0.477846 |  |
|  | Shiraz-46T | 943  | 0.093799 | 0         |  |
|  | Shiraz-46T | 947  | 0        | -0.010843 |  |
|  | Shiraz-47T | 1031 | 0        | -0.117529 |  |
|  | Shiraz-49T | 1121 | 0        | -0.138569 |  |
|  | Shiraz-77T | 1225 | 0        | -0.117922 |  |
|  | Shiraz-77T | 1228 | 0        | -0.238084 |  |
|  | Shiraz-18T | 1434 | 0.244465 | 0         |  |
|  | Shiraz-22T | 1549 | 0        | -0.319623 |  |
|  | Shiraz-22T | 1552 | 0        | -0.50686  |  |
|  | Shiraz-25T | 1698 | 0.21835  | 0         |  |
|  | Shiraz-28T | 1735 | 0.350744 | 0         |  |
|  | Shiraz-29T | 1778 | 0.120767 | 0         |  |
|  | Shiraz-32T | 1833 | 0.551336 | 0         |  |
|  | Shiraz-32T | 1835 | 0.092727 | 0         |  |
|  | Shiraz-38T | 1951 | 0.250891 | 0         |  |
|  | Shiraz-53T | 2078 | 0.287202 | 0         |  |
|  | Shiraz-58T | 2161 | 0        | -0.187744 |  |
|  | Shiraz-71T | 2238 | 0.603631 | 0         |  |
|  | Shiraz-3T  | 90   | 0.219276 | 0         |  |
|  | Shiraz-3T  | 95   | 0        | -0.077623 |  |
|  | Shiraz-4T  | 253  | 0.372918 | 0         |  |
|  | Shiraz-36T | 378  | 0.179558 | 0         |  |
|  | Shiraz-36T | 382  | 0.081739 | 0         |  |
|  | Shiraz-44T | 641  | 0        | -0.477846 |  |
|  | Shiraz-46T | 943  | 0.093799 | 0         |  |
|  | Shiraz-46T | 947  | 0        | -0.010843 |  |
|  | Shiraz-47T | 1031 | 0        | -0.117529 |  |
|  | Shiraz-49T | 1121 | 0        | -0.138569 |  |
|  | Shiraz-77T | 1225 | 0        | -0.117922 |  |
|  | Shiraz-77T | 1228 | 0        | -0.238084 |  |
|  | Shiraz-18T | 1434 | 0.244465 | 0         |  |
|  | Shiraz-22T | 1549 | 0        | -0.319623 |  |

|         |      |            |      |          |           |  |  |
|---------|------|------------|------|----------|-----------|--|--|
|         |      | Shiraz-22T | 1552 | 0        | -0.50686  |  |  |
|         |      | Shiraz-25T | 1698 | 0.21835  | 0         |  |  |
|         |      | Shiraz-28T | 1735 | 0.350744 | 0         |  |  |
|         |      | Shiraz-29T | 1778 | 0.120767 | 0         |  |  |
|         |      | Shiraz-32T | 1833 | 0.551336 | 0         |  |  |
|         |      | Shiraz-32T | 1835 | 0.092727 | 0         |  |  |
|         |      | Shiraz-38T | 1951 | 0.250891 | 0         |  |  |
|         |      | Shiraz-53T | 2078 | 0.287202 | 0         |  |  |
|         |      | Shiraz-58T | 2161 | 0        | -0.187744 |  |  |
|         |      | Shiraz-71T | 2238 | 0.603631 | 0         |  |  |
| SLC13A4 | chr7 | Shiraz-3T  | 90   | 0.219276 | 0         |  |  |
|         |      | Shiraz-4T  | 253  | 0.372918 | 0         |  |  |
|         |      | Shiraz-36T | 378  | 0.179558 | 0         |  |  |
|         |      | Shiraz-46T | 943  | 0.093799 | 0         |  |  |
|         |      | Shiraz-77T | 1225 | 0        | -0.117922 |  |  |
|         |      | Shiraz-9T  | 1325 | 0.221899 | 0         |  |  |
|         |      | Shiraz-18T | 1434 | 0.244465 | 0         |  |  |
|         |      | Shiraz-22T | 1553 | 0        | -0.213234 |  |  |
|         |      | Shiraz-25T | 1698 | 0.21835  | 0         |  |  |
|         |      | Shiraz-28T | 1735 | 0.350744 | 0         |  |  |
|         |      | Shiraz-29T | 1778 | 0.120767 | 0         |  |  |
|         |      | Shiraz-32T | 1833 | 0.551336 | 0         |  |  |
|         |      | Shiraz-38T | 1951 | 0.250891 | 0         |  |  |
|         |      | Shiraz-53T | 2078 | 0.287202 | 0         |  |  |
|         |      | Shiraz-58T | 2162 | 0.221505 | 0         |  |  |
|         |      | Shiraz-71T | 2238 | 0.603631 | 0         |  |  |
|         |      | Shiraz-3T  | 90   | 0.219276 | 0         |  |  |
|         |      | Shiraz-4T  | 253  | 0.372918 | 0         |  |  |
|         |      | Shiraz-36T | 378  | 0.179558 | 0         |  |  |
|         |      | Shiraz-46T | 943  | 0.093799 | 0         |  |  |
|         |      | Shiraz-77T | 1225 | 0        | -0.117922 |  |  |
|         |      | Shiraz-9T  | 1325 | 0.221899 | 0         |  |  |
|         |      | Shiraz-18T | 1434 | 0.244465 | 0         |  |  |
|         |      | Shiraz-22T | 1553 | 0        | -0.213234 |  |  |
|         |      | Shiraz-25T | 1698 | 0.21835  | 0         |  |  |
|         |      | Shiraz-28T | 1735 | 0.350744 | 0         |  |  |
|         |      | Shiraz-29T | 1778 | 0.120767 | 0         |  |  |
|         |      | Shiraz-32T | 1833 | 0.551336 | 0         |  |  |
|         |      | Shiraz-38T | 1951 | 0.250891 | 0         |  |  |
|         |      | Shiraz-53T | 2078 | 0.287202 | 0         |  |  |
|         |      | Shiraz-58T | 2162 | 0.221505 | 0         |  |  |
|         |      | Shiraz-71T | 2238 | 0.603631 | 0         |  |  |
|         |      | Shiraz-3T  | 90   | 0.219276 | 0         |  |  |
|         |      | Shiraz-4T  | 253  | 0.372918 | 0         |  |  |
|         |      | Shiraz-36T | 378  | 0.179558 | 0         |  |  |
|         |      | Shiraz-46T | 943  | 0.093799 | 0         |  |  |
|         |      | Shiraz-77T | 1225 | 0        | -0.117922 |  |  |

|         |      |            |      |          |           |  |
|---------|------|------------|------|----------|-----------|--|
|         |      | Shiraz-9T  | 1325 | 0.221899 | 0         |  |
|         |      | Shiraz-18T | 1434 | 0.244465 | 0         |  |
|         |      | Shiraz-22T | 1553 | 0        | -0.213234 |  |
|         |      | Shiraz-25T | 1698 | 0.21835  | 0         |  |
|         |      | Shiraz-28T | 1735 | 0.350744 | 0         |  |
|         |      | Shiraz-29T | 1778 | 0.120767 | 0         |  |
|         |      | Shiraz-32T | 1833 | 0.551336 | 0         |  |
|         |      | Shiraz-38T | 1951 | 0.250891 | 0         |  |
|         |      | Shiraz-53T | 2078 | 0.287202 | 0         |  |
|         |      | Shiraz-58T | 2162 | 0.221505 | 0         |  |
|         |      | Shiraz-71T | 2238 | 0.603631 | 0         |  |
| SLC16A2 | chrX | Shiraz-3T  | 242  | 0        | -0.336434 |  |
|         |      | Shiraz-4T  | 261  | 0        | -0.336249 |  |
|         |      | Shiraz-16T | 295  | 0.591657 | 0         |  |
|         |      | Shiraz-36T | 433  | 0        | -0.803961 |  |
|         |      | Shiraz-44T | 899  | 0        | -1.09697  |  |
|         |      | Shiraz-49T | 1170 | 0        | -0.967436 |  |
|         |      | Shiraz-18T | 1457 | 0.643204 | 0         |  |
|         |      | Shiraz-22T | 1673 | 0.611783 | 0         |  |
|         |      | Shiraz-25T | 1719 | 0.472955 | 0         |  |
|         |      | Shiraz-28T | 1762 | 0.562311 | 0         |  |
|         |      | Shiraz-29T | 1801 | 0.815343 | 0         |  |
|         |      | Shiraz-32T | 1870 | 0.729766 | 0         |  |
|         |      | Shiraz-35T | 1933 | 0.488535 | 0         |  |
|         |      | Shiraz-58T | 2223 | 0.833364 | 0         |  |
|         |      | Shiraz-71T | 2263 | 0.975531 | 0         |  |
|         |      | Shiraz-3T  | 242  | 0        | -0.336434 |  |
|         |      | Shiraz-4T  | 261  | 0        | -0.336249 |  |
|         |      | Shiraz-16T | 295  | 0.591657 | 0         |  |
|         |      | Shiraz-36T | 433  | 0        | -0.803961 |  |
|         |      | Shiraz-44T | 899  | 0        | -1.09697  |  |
|         |      | Shiraz-49T | 1170 | 0        | -0.967436 |  |
|         |      | Shiraz-18T | 1457 | 0.643204 | 0         |  |
|         |      | Shiraz-22T | 1673 | 0.611783 | 0         |  |
|         |      | Shiraz-25T | 1719 | 0.472955 | 0         |  |
|         |      | Shiraz-28T | 1762 | 0.562311 | 0         |  |
|         |      | Shiraz-29T | 1801 | 0.815343 | 0         |  |
|         |      | Shiraz-32T | 1870 | 0.729766 | 0         |  |
|         |      | Shiraz-35T | 1933 | 0.488535 | 0         |  |
|         |      | Shiraz-58T | 2223 | 0.833364 | 0         |  |
|         |      | Shiraz-71T | 2263 | 0.975531 | 0         |  |
|         |      | Shiraz-3T  | 242  | 0        | -0.336434 |  |
|         |      | Shiraz-4T  | 261  | 0        | -0.336249 |  |
|         |      | Shiraz-16T | 295  | 0.591657 | 0         |  |
|         |      | Shiraz-36T | 433  | 0        | -0.803961 |  |
|         |      | Shiraz-44T | 899  | 0        | -1.09697  |  |
|         |      | Shiraz-49T | 1170 | 0        | -0.967436 |  |

|          |      |            |      |          |           |  |  |
|----------|------|------------|------|----------|-----------|--|--|
|          |      | Shiraz-18T | 1457 | 0.643204 | 0         |  |  |
|          |      | Shiraz-22T | 1673 | 0.611783 | 0         |  |  |
|          |      | Shiraz-25T | 1719 | 0.472955 | 0         |  |  |
|          |      | Shiraz-28T | 1762 | 0.562311 | 0         |  |  |
|          |      | Shiraz-29T | 1801 | 0.815343 | 0         |  |  |
|          |      | Shiraz-32T | 1870 | 0.729766 | 0         |  |  |
|          |      | Shiraz-35T | 1933 | 0.488535 | 0         |  |  |
|          |      | Shiraz-58T | 2223 | 0.833364 | 0         |  |  |
|          |      | Shiraz-71T | 2263 | 0.975531 | 0         |  |  |
| SLC1A3   | chr5 | Shiraz-4T  | 250  | 0.262252 | 0         |  |  |
|          |      | Shiraz-16T | 266  | 0.321724 | 0         |  |  |
|          |      | Shiraz-44T | 591  | 0        | -0.233934 |  |  |
|          |      | Shiraz-18T | 1429 | 0        | -0.314125 |  |  |
|          |      | Shiraz-22T | 1522 | 0        | -0.322688 |  |  |
|          |      | Shiraz-25T | 1694 | 0.201602 | 0         |  |  |
|          |      | Shiraz-28T | 1731 | 0.295447 | 0         |  |  |
|          |      | Shiraz-29T | 1773 | 0.090981 | 0         |  |  |
|          |      | Shiraz-40T | 2016 | 0.376634 | 0         |  |  |
|          |      | Shiraz-4T  | 250  | 0.262252 | 0         |  |  |
|          |      | Shiraz-16T | 266  | 0.321724 | 0         |  |  |
|          |      | Shiraz-44T | 591  | 0        | -0.233934 |  |  |
|          |      | Shiraz-18T | 1429 | 0        | -0.314125 |  |  |
|          |      | Shiraz-22T | 1522 | 0        | -0.322688 |  |  |
|          |      | Shiraz-25T | 1694 | 0.201602 | 0         |  |  |
|          |      | Shiraz-28T | 1731 | 0.295447 | 0         |  |  |
|          |      | Shiraz-29T | 1773 | 0.090981 | 0         |  |  |
|          |      | Shiraz-40T | 2016 | 0.376634 | 0         |  |  |
|          |      | Shiraz-4T  | 250  | 0.262252 | 0         |  |  |
|          |      | Shiraz-16T | 266  | 0.321724 | 0         |  |  |
|          |      | Shiraz-44T | 591  | 0        | -0.233934 |  |  |
|          |      | Shiraz-18T | 1429 | 0        | -0.314125 |  |  |
|          |      | Shiraz-22T | 1522 | 0        | -0.322688 |  |  |
|          |      | Shiraz-25T | 1694 | 0.201602 | 0         |  |  |
|          |      | Shiraz-28T | 1731 | 0.295447 | 0         |  |  |
|          |      | Shiraz-29T | 1773 | 0.090981 | 0         |  |  |
|          |      | Shiraz-40T | 2016 | 0.376634 | 0         |  |  |
| SLC25A13 | chr7 | Shiraz-3T  | 90   | 0.219276 | 0         |  |  |
|          |      | Shiraz-3T  | 93   | 0        | -0.058023 |  |  |
|          |      | Shiraz-4T  | 253  | 0.372918 | 0         |  |  |
|          |      | Shiraz-36T | 378  | 0.179558 | 0         |  |  |
|          |      | Shiraz-36T | 380  | 0.083883 | 0         |  |  |
|          |      | Shiraz-44T | 638  | 0        | -0.433476 |  |  |
|          |      | Shiraz-46T | 943  | 0.093799 | 0         |  |  |
|          |      | Shiraz-46T | 945  | 0        | -0.014838 |  |  |
|          |      | Shiraz-47T | 1029 | 0        | -0.096586 |  |  |
|          |      | Shiraz-77T | 1225 | 0        | -0.117922 |  |  |
|          |      | Shiraz-18T | 1434 | 0.244465 | 0         |  |  |



|          |      |            |      |          |           |  |  |
|----------|------|------------|------|----------|-----------|--|--|
|          |      | Shiraz-22T | 1549 | 0        | -0.319623 |  |  |
|          |      | Shiraz-25T | 1698 | 0.21835  | 0         |  |  |
|          |      | Shiraz-28T | 1735 | 0.350744 | 0         |  |  |
|          |      | Shiraz-29T | 1778 | 0.120767 | 0         |  |  |
|          |      | Shiraz-32T | 1833 | 0.551336 | 0         |  |  |
|          |      | Shiraz-38T | 1951 | 0.250891 | 0         |  |  |
|          |      | Shiraz-53T | 2078 | 0.287202 | 0         |  |  |
|          |      | Shiraz-71T | 2238 | 0.603631 | 0         |  |  |
|          |      | Shiraz-3T  | 90   | 0.219276 | 0         |  |  |
|          |      | Shiraz-3T  | 93   | 0        | -0.058023 |  |  |
|          |      | Shiraz-4T  | 253  | 0.372918 | 0         |  |  |
|          |      | Shiraz-36T | 378  | 0.179558 | 0         |  |  |
|          |      | Shiraz-36T | 380  | 0.083883 | 0         |  |  |
|          |      | Shiraz-44T | 638  | 0        | -0.433476 |  |  |
|          |      | Shiraz-46T | 943  | 0.093799 | 0         |  |  |
|          |      | Shiraz-46T | 945  | 0        | -0.014838 |  |  |
|          |      | Shiraz-47T | 1029 | 0        | -0.096586 |  |  |
|          |      | Shiraz-77T | 1225 | 0        | -0.117922 |  |  |
|          |      | Shiraz-18T | 1434 | 0.244465 | 0         |  |  |
|          |      | Shiraz-22T | 1549 | 0        | -0.319623 |  |  |
|          |      | Shiraz-25T | 1698 | 0.21835  | 0         |  |  |
|          |      | Shiraz-28T | 1735 | 0.350744 | 0         |  |  |
|          |      | Shiraz-29T | 1778 | 0.120767 | 0         |  |  |
|          |      | Shiraz-32T | 1833 | 0.551336 | 0         |  |  |
|          |      | Shiraz-38T | 1951 | 0.250891 | 0         |  |  |
|          |      | Shiraz-53T | 2078 | 0.287202 | 0         |  |  |
|          |      | Shiraz-71T | 2238 | 0.603631 | 0         |  |  |
|          |      | Shiraz-3T  | 90   | 0.219276 | 0         |  |  |
|          |      | Shiraz-3T  | 93   | 0        | -0.058023 |  |  |
|          |      | Shiraz-4T  | 253  | 0.372918 | 0         |  |  |
|          |      | Shiraz-36T | 378  | 0.179558 | 0         |  |  |
|          |      | Shiraz-36T | 380  | 0.083883 | 0         |  |  |
|          |      | Shiraz-44T | 638  | 0        | -0.433476 |  |  |
|          |      | Shiraz-46T | 943  | 0.093799 | 0         |  |  |
|          |      | Shiraz-46T | 945  | 0        | -0.014838 |  |  |
|          |      | Shiraz-47T | 1029 | 0        | -0.096586 |  |  |
|          |      | Shiraz-77T | 1225 | 0        | -0.117922 |  |  |
|          |      | Shiraz-18T | 1434 | 0.244465 | 0         |  |  |
|          |      | Shiraz-22T | 1549 | 0        | -0.319623 |  |  |
|          |      | Shiraz-25T | 1698 | 0.21835  | 0         |  |  |
|          |      | Shiraz-28T | 1735 | 0.350744 | 0         |  |  |
|          |      | Shiraz-29T | 1778 | 0.120767 | 0         |  |  |
|          |      | Shiraz-32T | 1833 | 0.551336 | 0         |  |  |
|          |      | Shiraz-38T | 1951 | 0.250891 | 0         |  |  |
|          |      | Shiraz-53T | 2078 | 0.287202 | 0         |  |  |
|          |      | Shiraz-71T | 2238 | 0.603631 | 0         |  |  |
| SLC25A14 | chrX | Shiraz-3T  | 242  | 0        | -0.336434 |  |  |

|  |            |      |          |           |  |
|--|------------|------|----------|-----------|--|
|  | Shiraz-4T  | 261  | 0        | -0.336249 |  |
|  | Shiraz-16T | 295  | 0.591657 | 0         |  |
|  | Shiraz-36T | 433  | 0        | -0.803961 |  |
|  | Shiraz-44T | 899  | 0        | -1.09697  |  |
|  | Shiraz-49T | 1170 | 0        | -0.967436 |  |
|  | Shiraz-9T  | 1370 | 0.690073 | 0         |  |
|  | Shiraz-18T | 1457 | 0.643204 | 0         |  |
|  | Shiraz-22T | 1673 | 0.611783 | 0         |  |
|  | Shiraz-22T | 1677 | 0.789711 | 0         |  |
|  | Shiraz-25T | 1719 | 0.472955 | 0         |  |
|  | Shiraz-28T | 1762 | 0.562311 | 0         |  |
|  | Shiraz-29T | 1801 | 0.815343 | 0         |  |
|  | Shiraz-32T | 1870 | 0.729766 | 0         |  |
|  | Shiraz-35T | 1933 | 0.488535 | 0         |  |
|  | Shiraz-58T | 2223 | 0.833364 | 0         |  |
|  | Shiraz-71T | 2263 | 0.975531 | 0         |  |
|  | Shiraz-3T  | 242  | 0        | -0.336434 |  |
|  | Shiraz-4T  | 261  | 0        | -0.336249 |  |
|  | Shiraz-16T | 295  | 0.591657 | 0         |  |
|  | Shiraz-36T | 433  | 0        | -0.803961 |  |
|  | Shiraz-44T | 899  | 0        | -1.09697  |  |
|  | Shiraz-49T | 1170 | 0        | -0.967436 |  |
|  | Shiraz-9T  | 1370 | 0.690073 | 0         |  |
|  | Shiraz-18T | 1457 | 0.643204 | 0         |  |
|  | Shiraz-22T | 1673 | 0.611783 | 0         |  |
|  | Shiraz-22T | 1677 | 0.789711 | 0         |  |
|  | Shiraz-25T | 1719 | 0.472955 | 0         |  |
|  | Shiraz-28T | 1762 | 0.562311 | 0         |  |
|  | Shiraz-29T | 1801 | 0.815343 | 0         |  |
|  | Shiraz-32T | 1870 | 0.729766 | 0         |  |
|  | Shiraz-35T | 1933 | 0.488535 | 0         |  |
|  | Shiraz-58T | 2223 | 0.833364 | 0         |  |
|  | Shiraz-71T | 2263 | 0.975531 | 0         |  |
|  | Shiraz-3T  | 242  | 0        | -0.336434 |  |
|  | Shiraz-4T  | 261  | 0        | -0.336249 |  |
|  | Shiraz-16T | 295  | 0.591657 | 0         |  |
|  | Shiraz-36T | 433  | 0        | -0.803961 |  |
|  | Shiraz-44T | 899  | 0        | -1.09697  |  |
|  | Shiraz-49T | 1170 | 0        | -0.967436 |  |
|  | Shiraz-9T  | 1370 | 0.690073 | 0         |  |
|  | Shiraz-18T | 1457 | 0.643204 | 0         |  |
|  | Shiraz-22T | 1673 | 0.611783 | 0         |  |
|  | Shiraz-22T | 1677 | 0.789711 | 0         |  |
|  | Shiraz-25T | 1719 | 0.472955 | 0         |  |
|  | Shiraz-28T | 1762 | 0.562311 | 0         |  |
|  | Shiraz-29T | 1801 | 0.815343 | 0         |  |
|  | Shiraz-32T | 1870 | 0.729766 | 0         |  |

|          |      |            |      |          |           |  |
|----------|------|------------|------|----------|-----------|--|
|          |      | Shiraz-35T | 1933 | 0.488535 | 0         |  |
|          |      | Shiraz-58T | 2223 | 0.833364 | 0         |  |
|          |      | Shiraz-71T | 2263 | 0.975531 | 0         |  |
| SLC25A40 | chr7 | Shiraz-3T  | 90   | 0.219276 | 0         |  |
|          |      | Shiraz-3T  | 93   | 0        | -0.058023 |  |
|          |      | Shiraz-4T  | 253  | 0.372918 | 0         |  |
|          |      | Shiraz-36T | 378  | 0.179558 | 0         |  |
|          |      | Shiraz-36T | 380  | 0.083883 | 0         |  |
|          |      | Shiraz-44T | 638  | 0        | -0.433476 |  |
|          |      | Shiraz-46T | 943  | 0.093799 | 0         |  |
|          |      | Shiraz-46T | 945  | 0        | -0.014838 |  |
|          |      | Shiraz-47T | 1029 | 0        | -0.096586 |  |
|          |      | Shiraz-49T | 1119 | 0        | -0.157331 |  |
|          |      | Shiraz-77T | 1225 | 0        | -0.117922 |  |
|          |      | Shiraz-77T | 1226 | 0        | -0.233724 |  |
|          |      | Shiraz-18T | 1434 | 0.244465 | 0         |  |
|          |      | Shiraz-22T | 1549 | 0        | -0.319623 |  |
|          |      | Shiraz-22T | 1550 | 0        | -0.577052 |  |
|          |      | Shiraz-25T | 1698 | 0.21835  | 0         |  |
|          |      | Shiraz-28T | 1735 | 0.350744 | 0         |  |
|          |      | Shiraz-29T | 1778 | 0.120767 | 0         |  |
|          |      | Shiraz-38T | 1951 | 0.250891 | 0         |  |
|          |      | Shiraz-53T | 2078 | 0.287202 | 0         |  |
|          |      | Shiraz-58T | 2159 | 0        | -0.219521 |  |
|          |      | Shiraz-71T | 2238 | 0.603631 | 0         |  |
|          |      | Shiraz-3T  | 90   | 0.219276 | 0         |  |
|          |      | Shiraz-3T  | 93   | 0        | -0.058023 |  |
|          |      | Shiraz-4T  | 253  | 0.372918 | 0         |  |
|          |      | Shiraz-36T | 378  | 0.179558 | 0         |  |
|          |      | Shiraz-36T | 380  | 0.083883 | 0         |  |
|          |      | Shiraz-44T | 638  | 0        | -0.433476 |  |
|          |      | Shiraz-46T | 943  | 0.093799 | 0         |  |
|          |      | Shiraz-46T | 945  | 0        | -0.014838 |  |
|          |      | Shiraz-47T | 1029 | 0        | -0.096586 |  |
|          |      | Shiraz-49T | 1119 | 0        | -0.157331 |  |
|          |      | Shiraz-77T | 1225 | 0        | -0.117922 |  |
|          |      | Shiraz-77T | 1226 | 0        | -0.233724 |  |
|          |      | Shiraz-18T | 1434 | 0.244465 | 0         |  |
|          |      | Shiraz-22T | 1549 | 0        | -0.319623 |  |
|          |      | Shiraz-22T | 1550 | 0        | -0.577052 |  |
|          |      | Shiraz-25T | 1698 | 0.21835  | 0         |  |
|          |      | Shiraz-28T | 1735 | 0.350744 | 0         |  |
|          |      | Shiraz-29T | 1778 | 0.120767 | 0         |  |
|          |      | Shiraz-38T | 1951 | 0.250891 | 0         |  |
|          |      | Shiraz-53T | 2078 | 0.287202 | 0         |  |
|          |      | Shiraz-58T | 2159 | 0        | -0.219521 |  |
|          |      | Shiraz-71T | 2238 | 0.603631 | 0         |  |

|          |      |            |      |          |           |  |  |
|----------|------|------------|------|----------|-----------|--|--|
|          |      | Shiraz-3T  | 90   | 0.219276 | 0         |  |  |
|          |      | Shiraz-3T  | 93   | 0        | -0.058023 |  |  |
|          |      | Shiraz-4T  | 253  | 0.372918 | 0         |  |  |
|          |      | Shiraz-36T | 378  | 0.179558 | 0         |  |  |
|          |      | Shiraz-36T | 380  | 0.083883 | 0         |  |  |
|          |      | Shiraz-44T | 638  | 0        | -0.433476 |  |  |
|          |      | Shiraz-46T | 943  | 0.093799 | 0         |  |  |
|          |      | Shiraz-46T | 945  | 0        | -0.014838 |  |  |
|          |      | Shiraz-47T | 1029 | 0        | -0.096586 |  |  |
|          |      | Shiraz-49T | 1119 | 0        | -0.157331 |  |  |
|          |      | Shiraz-77T | 1225 | 0        | -0.117922 |  |  |
|          |      | Shiraz-77T | 1226 | 0        | -0.233724 |  |  |
|          |      | Shiraz-18T | 1434 | 0.244465 | 0         |  |  |
|          |      | Shiraz-22T | 1549 | 0        | -0.319623 |  |  |
|          |      | Shiraz-22T | 1550 | 0        | -0.577052 |  |  |
|          |      | Shiraz-25T | 1698 | 0.21835  | 0         |  |  |
|          |      | Shiraz-28T | 1735 | 0.350744 | 0         |  |  |
|          |      | Shiraz-29T | 1778 | 0.120767 | 0         |  |  |
|          |      | Shiraz-38T | 1951 | 0.250891 | 0         |  |  |
|          |      | Shiraz-53T | 2078 | 0.287202 | 0         |  |  |
|          |      | Shiraz-58T | 2159 | 0        | -0.219521 |  |  |
|          |      | Shiraz-71T | 2238 | 0.603631 | 0         |  |  |
| SLC25A43 | chrX | Shiraz-3T  | 242  | 0        | -0.336434 |  |  |
|          |      | Shiraz-3T  | 244  | 0        | -0.023749 |  |  |
|          |      | Shiraz-4T  | 261  | 0        | -0.336249 |  |  |
|          |      | Shiraz-16T | 295  | 0.591657 | 0         |  |  |
|          |      | Shiraz-36T | 433  | 0        | -0.803961 |  |  |
|          |      | Shiraz-44T | 899  | 0        | -1.09697  |  |  |
|          |      | Shiraz-44T | 904  | 0        | -0.625526 |  |  |
|          |      | Shiraz-49T | 1170 | 0        | -0.967436 |  |  |
|          |      | Shiraz-18T | 1457 | 0.643204 | 0         |  |  |
|          |      | Shiraz-22T | 1673 | 0.611783 | 0         |  |  |
|          |      | Shiraz-25T | 1719 | 0.472955 | 0         |  |  |
|          |      | Shiraz-28T | 1762 | 0.562311 | 0         |  |  |
|          |      | Shiraz-29T | 1801 | 0.815343 | 0         |  |  |
|          |      | Shiraz-32T | 1870 | 0.729766 | 0         |  |  |
|          |      | Shiraz-35T | 1933 | 0.488535 | 0         |  |  |
|          |      | Shiraz-58T | 2223 | 0.833364 | 0         |  |  |
|          |      | Shiraz-71T | 2263 | 0.975531 | 0         |  |  |
|          |      | Shiraz-3T  | 242  | 0        | -0.336434 |  |  |
|          |      | Shiraz-3T  | 244  | 0        | -0.023749 |  |  |
|          |      | Shiraz-4T  | 261  | 0        | -0.336249 |  |  |
|          |      | Shiraz-16T | 295  | 0.591657 | 0         |  |  |
|          |      | Shiraz-36T | 433  | 0        | -0.803961 |  |  |
|          |      | Shiraz-44T | 899  | 0        | -1.09697  |  |  |
|          |      | Shiraz-44T | 904  | 0        | -0.625526 |  |  |
|          |      | Shiraz-49T | 1170 | 0        | -0.967436 |  |  |

|         |      |            |      |          |           |  |
|---------|------|------------|------|----------|-----------|--|
|         |      | Shiraz-18T | 1457 | 0.643204 | 0         |  |
|         |      | Shiraz-22T | 1673 | 0.611783 | 0         |  |
|         |      | Shiraz-25T | 1719 | 0.472955 | 0         |  |
|         |      | Shiraz-28T | 1762 | 0.562311 | 0         |  |
|         |      | Shiraz-29T | 1801 | 0.815343 | 0         |  |
|         |      | Shiraz-32T | 1870 | 0.729766 | 0         |  |
|         |      | Shiraz-35T | 1933 | 0.488535 | 0         |  |
|         |      | Shiraz-58T | 2223 | 0.833364 | 0         |  |
|         |      | Shiraz-71T | 2263 | 0.975531 | 0         |  |
|         |      | Shiraz-3T  | 242  | 0        | -0.336434 |  |
|         |      | Shiraz-3T  | 244  | 0        | -0.023749 |  |
|         |      | Shiraz-4T  | 261  | 0        | -0.336249 |  |
|         |      | Shiraz-16T | 295  | 0.591657 | 0         |  |
|         |      | Shiraz-36T | 433  | 0        | -0.803961 |  |
|         |      | Shiraz-44T | 899  | 0        | -1.09697  |  |
|         |      | Shiraz-44T | 904  | 0        | -0.625526 |  |
|         |      | Shiraz-49T | 1170 | 0        | -0.967436 |  |
|         |      | Shiraz-18T | 1457 | 0.643204 | 0         |  |
|         |      | Shiraz-22T | 1673 | 0.611783 | 0         |  |
|         |      | Shiraz-25T | 1719 | 0.472955 | 0         |  |
|         |      | Shiraz-28T | 1762 | 0.562311 | 0         |  |
|         |      | Shiraz-29T | 1801 | 0.815343 | 0         |  |
|         |      | Shiraz-32T | 1870 | 0.729766 | 0         |  |
|         |      | Shiraz-35T | 1933 | 0.488535 | 0         |  |
|         |      | Shiraz-58T | 2223 | 0.833364 | 0         |  |
|         |      | Shiraz-71T | 2263 | 0.975531 | 0         |  |
| SLC25A5 | chrX | Shiraz-3T  | 242  | 0        | -0.336434 |  |
|         |      | Shiraz-3T  | 244  | 0        | -0.023749 |  |
|         |      | Shiraz-4T  | 261  | 0        | -0.336249 |  |
|         |      | Shiraz-16T | 295  | 0.591657 | 0         |  |
|         |      | Shiraz-36T | 433  | 0        | -0.803961 |  |
|         |      | Shiraz-44T | 899  | 0        | -1.09697  |  |
|         |      | Shiraz-44T | 904  | 0        | -0.625526 |  |
|         |      | Shiraz-49T | 1170 | 0        | -0.967436 |  |
|         |      | Shiraz-18T | 1457 | 0.643204 | 0         |  |
|         |      | Shiraz-22T | 1673 | 0.611783 | 0         |  |
|         |      | Shiraz-25T | 1719 | 0.472955 | 0         |  |
|         |      | Shiraz-28T | 1762 | 0.562311 | 0         |  |
|         |      | Shiraz-29T | 1801 | 0.815343 | 0         |  |
|         |      | Shiraz-32T | 1870 | 0.729766 | 0         |  |
|         |      | Shiraz-35T | 1933 | 0.488535 | 0         |  |
|         |      | Shiraz-58T | 2223 | 0.833364 | 0         |  |
|         |      | Shiraz-71T | 2263 | 0.975531 | 0         |  |
|         |      | Shiraz-3T  | 242  | 0        | -0.336434 |  |
|         |      | Shiraz-3T  | 244  | 0        | -0.023749 |  |
|         |      | Shiraz-4T  | 261  | 0        | -0.336249 |  |
|         |      | Shiraz-16T | 295  | 0.591657 | 0         |  |

|         |      |            |      |          |           |  |  |
|---------|------|------------|------|----------|-----------|--|--|
|         |      | Shiraz-36T | 433  | 0        | -0.803961 |  |  |
|         |      | Shiraz-44T | 899  | 0        | -1.09697  |  |  |
|         |      | Shiraz-44T | 904  | 0        | -0.625526 |  |  |
|         |      | Shiraz-49T | 1170 | 0        | -0.967436 |  |  |
|         |      | Shiraz-18T | 1457 | 0.643204 | 0         |  |  |
|         |      | Shiraz-22T | 1673 | 0.611783 | 0         |  |  |
|         |      | Shiraz-25T | 1719 | 0.472955 | 0         |  |  |
|         |      | Shiraz-28T | 1762 | 0.562311 | 0         |  |  |
|         |      | Shiraz-29T | 1801 | 0.815343 | 0         |  |  |
|         |      | Shiraz-32T | 1870 | 0.729766 | 0         |  |  |
|         |      | Shiraz-35T | 1933 | 0.488535 | 0         |  |  |
|         |      | Shiraz-58T | 2223 | 0.833364 | 0         |  |  |
|         |      | Shiraz-71T | 2263 | 0.975531 | 0         |  |  |
|         |      | Shiraz-3T  | 242  | 0        | -0.336434 |  |  |
|         |      | Shiraz-3T  | 244  | 0        | -0.023749 |  |  |
|         |      | Shiraz-4T  | 261  | 0        | -0.336249 |  |  |
|         |      | Shiraz-16T | 295  | 0.591657 | 0         |  |  |
|         |      | Shiraz-36T | 433  | 0        | -0.803961 |  |  |
|         |      | Shiraz-44T | 899  | 0        | -1.09697  |  |  |
|         |      | Shiraz-44T | 904  | 0        | -0.625526 |  |  |
|         |      | Shiraz-49T | 1170 | 0        | -0.967436 |  |  |
|         |      | Shiraz-18T | 1457 | 0.643204 | 0         |  |  |
|         |      | Shiraz-22T | 1673 | 0.611783 | 0         |  |  |
|         |      | Shiraz-25T | 1719 | 0.472955 | 0         |  |  |
|         |      | Shiraz-28T | 1762 | 0.562311 | 0         |  |  |
|         |      | Shiraz-29T | 1801 | 0.815343 | 0         |  |  |
|         |      | Shiraz-32T | 1870 | 0.729766 | 0         |  |  |
|         |      | Shiraz-35T | 1933 | 0.488535 | 0         |  |  |
|         |      | Shiraz-58T | 2223 | 0.833364 | 0         |  |  |
|         |      | Shiraz-71T | 2263 | 0.975531 | 0         |  |  |
| SLC26A3 | chr7 | Shiraz-3T  | 90   | 0.219276 | 0         |  |  |
|         |      | Shiraz-4T  | 253  | 0.372918 | 0         |  |  |
|         |      | Shiraz-36T | 378  | 0.179558 | 0         |  |  |
|         |      | Shiraz-46T | 943  | 0.093799 | 0         |  |  |
|         |      | Shiraz-77T | 1225 | 0        | -0.117922 |  |  |
|         |      | Shiraz-18T | 1434 | 0.244465 | 0         |  |  |
|         |      | Shiraz-22T | 1549 | 0        | -0.319623 |  |  |
|         |      | Shiraz-25T | 1698 | 0.21835  | 0         |  |  |
|         |      | Shiraz-28T | 1735 | 0.350744 | 0         |  |  |
|         |      | Shiraz-29T | 1778 | 0.120767 | 0         |  |  |
|         |      | Shiraz-32T | 1833 | 0.551336 | 0         |  |  |
|         |      | Shiraz-38T | 1951 | 0.250891 | 0         |  |  |
|         |      | Shiraz-53T | 2078 | 0.287202 | 0         |  |  |
|         |      | Shiraz-58T | 2161 | 0        | -0.187744 |  |  |
|         |      | Shiraz-71T | 2238 | 0.603631 | 0         |  |  |
|         |      | Shiraz-3T  | 90   | 0.219276 | 0         |  |  |
|         |      | Shiraz-4T  | 253  | 0.372918 | 0         |  |  |

|         |      |            |      |          |           |  |  |
|---------|------|------------|------|----------|-----------|--|--|
|         |      | Shiraz-36T | 378  | 0.179558 | 0         |  |  |
|         |      | Shiraz-46T | 943  | 0.093799 | 0         |  |  |
|         |      | Shiraz-77T | 1225 | 0        | -0.117922 |  |  |
|         |      | Shiraz-18T | 1434 | 0.244465 | 0         |  |  |
|         |      | Shiraz-22T | 1549 | 0        | -0.319623 |  |  |
|         |      | Shiraz-25T | 1698 | 0.21835  | 0         |  |  |
|         |      | Shiraz-28T | 1735 | 0.350744 | 0         |  |  |
|         |      | Shiraz-29T | 1778 | 0.120767 | 0         |  |  |
|         |      | Shiraz-32T | 1833 | 0.551336 | 0         |  |  |
|         |      | Shiraz-38T | 1951 | 0.250891 | 0         |  |  |
|         |      | Shiraz-53T | 2078 | 0.287202 | 0         |  |  |
|         |      | Shiraz-58T | 2161 | 0        | -0.187744 |  |  |
|         |      | Shiraz-71T | 2238 | 0.603631 | 0         |  |  |
|         |      | Shiraz-3T  | 90   | 0.219276 | 0         |  |  |
|         |      | Shiraz-4T  | 253  | 0.372918 | 0         |  |  |
|         |      | Shiraz-36T | 378  | 0.179558 | 0         |  |  |
|         |      | Shiraz-46T | 943  | 0.093799 | 0         |  |  |
|         |      | Shiraz-77T | 1225 | 0        | -0.117922 |  |  |
|         |      | Shiraz-18T | 1434 | 0.244465 | 0         |  |  |
|         |      | Shiraz-22T | 1549 | 0        | -0.319623 |  |  |
|         |      | Shiraz-25T | 1698 | 0.21835  | 0         |  |  |
|         |      | Shiraz-28T | 1735 | 0.350744 | 0         |  |  |
|         |      | Shiraz-29T | 1778 | 0.120767 | 0         |  |  |
|         |      | Shiraz-32T | 1833 | 0.551336 | 0         |  |  |
|         |      | Shiraz-38T | 1951 | 0.250891 | 0         |  |  |
|         |      | Shiraz-53T | 2078 | 0.287202 | 0         |  |  |
|         |      | Shiraz-58T | 2161 | 0        | -0.187744 |  |  |
|         |      | Shiraz-71T | 2238 | 0.603631 | 0         |  |  |
| SLC26A4 | chr7 | Shiraz-3T  | 90   | 0.219276 | 0         |  |  |
|         |      | Shiraz-4T  | 253  | 0.372918 | 0         |  |  |
|         |      | Shiraz-36T | 378  | 0.179558 | 0         |  |  |
|         |      | Shiraz-46T | 943  | 0.093799 | 0         |  |  |
|         |      | Shiraz-77T | 1225 | 0        | -0.117922 |  |  |
|         |      | Shiraz-18T | 1434 | 0.244465 | 0         |  |  |
|         |      | Shiraz-22T | 1549 | 0        | -0.319623 |  |  |
|         |      | Shiraz-25T | 1698 | 0.21835  | 0         |  |  |
|         |      | Shiraz-28T | 1735 | 0.350744 | 0         |  |  |
|         |      | Shiraz-29T | 1778 | 0.120767 | 0         |  |  |
|         |      | Shiraz-32T | 1833 | 0.551336 | 0         |  |  |
|         |      | Shiraz-38T | 1951 | 0.250891 | 0         |  |  |
|         |      | Shiraz-53T | 2078 | 0.287202 | 0         |  |  |
|         |      | Shiraz-58T | 2161 | 0        | -0.187744 |  |  |
|         |      | Shiraz-71T | 2238 | 0.603631 | 0         |  |  |
|         |      | Shiraz-3T  | 90   | 0.219276 | 0         |  |  |
|         |      | Shiraz-4T  | 253  | 0.372918 | 0         |  |  |
|         |      | Shiraz-36T | 378  | 0.179558 | 0         |  |  |
|         |      | Shiraz-46T | 943  | 0.093799 | 0         |  |  |

|         |      |            |      |          |           |  |  |
|---------|------|------------|------|----------|-----------|--|--|
|         |      | Shiraz-77T | 1225 | 0        | -0.117922 |  |  |
|         |      | Shiraz-18T | 1434 | 0.244465 | 0         |  |  |
|         |      | Shiraz-22T | 1549 | 0        | -0.319623 |  |  |
|         |      | Shiraz-25T | 1698 | 0.21835  | 0         |  |  |
|         |      | Shiraz-28T | 1735 | 0.350744 | 0         |  |  |
|         |      | Shiraz-29T | 1778 | 0.120767 | 0         |  |  |
|         |      | Shiraz-32T | 1833 | 0.551336 | 0         |  |  |
|         |      | Shiraz-38T | 1951 | 0.250891 | 0         |  |  |
|         |      | Shiraz-53T | 2078 | 0.287202 | 0         |  |  |
|         |      | Shiraz-58T | 2161 | 0        | -0.187744 |  |  |
|         |      | Shiraz-71T | 2238 | 0.603631 | 0         |  |  |
|         |      | Shiraz-3T  | 90   | 0.219276 | 0         |  |  |
|         |      | Shiraz-4T  | 253  | 0.372918 | 0         |  |  |
|         |      | Shiraz-36T | 378  | 0.179558 | 0         |  |  |
|         |      | Shiraz-46T | 943  | 0.093799 | 0         |  |  |
|         |      | Shiraz-77T | 1225 | 0        | -0.117922 |  |  |
|         |      | Shiraz-18T | 1434 | 0.244465 | 0         |  |  |
|         |      | Shiraz-22T | 1549 | 0        | -0.319623 |  |  |
|         |      | Shiraz-25T | 1698 | 0.21835  | 0         |  |  |
|         |      | Shiraz-28T | 1735 | 0.350744 | 0         |  |  |
|         |      | Shiraz-29T | 1778 | 0.120767 | 0         |  |  |
|         |      | Shiraz-32T | 1833 | 0.551336 | 0         |  |  |
|         |      | Shiraz-38T | 1951 | 0.250891 | 0         |  |  |
|         |      | Shiraz-53T | 2078 | 0.287202 | 0         |  |  |
|         |      | Shiraz-58T | 2161 | 0        | -0.187744 |  |  |
|         |      | Shiraz-71T | 2238 | 0.603631 | 0         |  |  |
| SLC26A5 | chr7 | Shiraz-3T  | 90   | 0.219276 | 0         |  |  |
|         |      | Shiraz-3T  | 90   | 0.219276 | 0         |  |  |
|         |      | Shiraz-4T  | 253  | 0.372918 | 0         |  |  |
|         |      | Shiraz-4T  | 253  | 0.372918 | 0         |  |  |
|         |      | Shiraz-36T | 378  | 0.179558 | 0         |  |  |
|         |      | Shiraz-36T | 378  | 0.179558 | 0         |  |  |
|         |      | Shiraz-46T | 943  | 0.093799 | 0         |  |  |
|         |      | Shiraz-46T | 943  | 0.093799 | 0         |  |  |
|         |      | Shiraz-77T | 1225 | 0        | -0.117922 |  |  |
|         |      | Shiraz-77T | 1225 | 0        | -0.117922 |  |  |
|         |      | Shiraz-18T | 1434 | 0.244465 | 0         |  |  |
|         |      | Shiraz-18T | 1434 | 0.244465 | 0         |  |  |
|         |      | Shiraz-22T | 1549 | 0        | -0.319623 |  |  |
|         |      | Shiraz-22T | 1549 | 0        | -0.319623 |  |  |
|         |      | Shiraz-25T | 1698 | 0.21835  | 0         |  |  |
|         |      | Shiraz-25T | 1698 | 0.21835  | 0         |  |  |
|         |      | Shiraz-28T | 1735 | 0.350744 | 0         |  |  |
|         |      | Shiraz-28T | 1735 | 0.350744 | 0         |  |  |
|         |      | Shiraz-29T | 1778 | 0.120767 | 0         |  |  |
|         |      | Shiraz-29T | 1778 | 0.120767 | 0         |  |  |
|         |      | Shiraz-32T | 1833 | 0.551336 | 0         |  |  |



|  |  |            |      |          |           |  |  |
|--|--|------------|------|----------|-----------|--|--|
|  |  | Shiraz-32T | 1833 | 0.551336 | 0         |  |  |
|  |  | Shiraz-38T | 1951 | 0.250891 | 0         |  |  |
|  |  | Shiraz-38T | 1951 | 0.250891 | 0         |  |  |
|  |  | Shiraz-53T | 2078 | 0.287202 | 0         |  |  |
|  |  | Shiraz-53T | 2078 | 0.287202 | 0         |  |  |
|  |  | Shiraz-71T | 2238 | 0.603631 | 0         |  |  |
|  |  | Shiraz-71T | 2238 | 0.603631 | 0         |  |  |
|  |  | Shiraz-3T  | 90   | 0.219276 | 0         |  |  |
|  |  | Shiraz-3T  | 90   | 0.219276 | 0         |  |  |
|  |  | Shiraz-4T  | 253  | 0.372918 | 0         |  |  |
|  |  | Shiraz-4T  | 253  | 0.372918 | 0         |  |  |
|  |  | Shiraz-36T | 378  | 0.179558 | 0         |  |  |
|  |  | Shiraz-36T | 378  | 0.179558 | 0         |  |  |
|  |  | Shiraz-46T | 943  | 0.093799 | 0         |  |  |
|  |  | Shiraz-46T | 943  | 0.093799 | 0         |  |  |
|  |  | Shiraz-77T | 1225 | 0        | -0.117922 |  |  |
|  |  | Shiraz-77T | 1225 | 0        | -0.117922 |  |  |
|  |  | Shiraz-18T | 1434 | 0.244465 | 0         |  |  |
|  |  | Shiraz-18T | 1434 | 0.244465 | 0         |  |  |
|  |  | Shiraz-22T | 1549 | 0        | -0.319623 |  |  |
|  |  | Shiraz-22T | 1549 | 0        | -0.319623 |  |  |
|  |  | Shiraz-25T | 1698 | 0.21835  | 0         |  |  |
|  |  | Shiraz-25T | 1698 | 0.21835  | 0         |  |  |
|  |  | Shiraz-28T | 1735 | 0.350744 | 0         |  |  |
|  |  | Shiraz-28T | 1735 | 0.350744 | 0         |  |  |
|  |  | Shiraz-29T | 1778 | 0.120767 | 0         |  |  |
|  |  | Shiraz-29T | 1778 | 0.120767 | 0         |  |  |
|  |  | Shiraz-32T | 1833 | 0.551336 | 0         |  |  |
|  |  | Shiraz-32T | 1833 | 0.551336 | 0         |  |  |
|  |  | Shiraz-38T | 1951 | 0.250891 | 0         |  |  |
|  |  | Shiraz-38T | 1951 | 0.250891 | 0         |  |  |
|  |  | Shiraz-53T | 2078 | 0.287202 | 0         |  |  |
|  |  | Shiraz-53T | 2078 | 0.287202 | 0         |  |  |
|  |  | Shiraz-71T | 2238 | 0.603631 | 0         |  |  |
|  |  | Shiraz-71T | 2238 | 0.603631 | 0         |  |  |
|  |  | Shiraz-3T  | 90   | 0.219276 | 0         |  |  |
|  |  | Shiraz-3T  | 90   | 0.219276 | 0         |  |  |
|  |  | Shiraz-4T  | 253  | 0.372918 | 0         |  |  |
|  |  | Shiraz-4T  | 253  | 0.372918 | 0         |  |  |
|  |  | Shiraz-36T | 378  | 0.179558 | 0         |  |  |
|  |  | Shiraz-36T | 378  | 0.179558 | 0         |  |  |
|  |  | Shiraz-46T | 943  | 0.093799 | 0         |  |  |
|  |  | Shiraz-46T | 943  | 0.093799 | 0         |  |  |
|  |  | Shiraz-77T | 1225 | 0        | -0.117922 |  |  |
|  |  | Shiraz-77T | 1225 | 0        | -0.117922 |  |  |
|  |  | Shiraz-18T | 1434 | 0.244465 | 0         |  |  |
|  |  | Shiraz-18T | 1434 | 0.244465 | 0         |  |  |

|         |      |            |      |          |           |  |  |
|---------|------|------------|------|----------|-----------|--|--|
|         |      | Shiraz-22T | 1549 | 0        | -0.319623 |  |  |
|         |      | Shiraz-22T | 1549 | 0        | -0.319623 |  |  |
|         |      | Shiraz-25T | 1698 | 0.21835  | 0         |  |  |
|         |      | Shiraz-25T | 1698 | 0.21835  | 0         |  |  |
|         |      | Shiraz-28T | 1735 | 0.350744 | 0         |  |  |
|         |      | Shiraz-28T | 1735 | 0.350744 | 0         |  |  |
|         |      | Shiraz-29T | 1778 | 0.120767 | 0         |  |  |
|         |      | Shiraz-29T | 1778 | 0.120767 | 0         |  |  |
|         |      | Shiraz-32T | 1833 | 0.551336 | 0         |  |  |
|         |      | Shiraz-32T | 1833 | 0.551336 | 0         |  |  |
|         |      | Shiraz-38T | 1951 | 0.250891 | 0         |  |  |
|         |      | Shiraz-38T | 1951 | 0.250891 | 0         |  |  |
|         |      | Shiraz-53T | 2078 | 0.287202 | 0         |  |  |
|         |      | Shiraz-53T | 2078 | 0.287202 | 0         |  |  |
|         |      | Shiraz-71T | 2238 | 0.603631 | 0         |  |  |
|         |      | Shiraz-71T | 2238 | 0.603631 | 0         |  |  |
| SLC35A2 | chrX | Shiraz-3T  | 238  | 0.472087 | 0         |  |  |
|         |      | Shiraz-3T  | 238  | 0.472087 | 0         |  |  |
|         |      | Shiraz-3T  | 238  | 0.472087 | 0         |  |  |
|         |      | Shiraz-4T  | 260  | 0        | -0.324128 |  |  |
|         |      | Shiraz-4T  | 260  | 0        | -0.324128 |  |  |
|         |      | Shiraz-4T  | 260  | 0        | -0.324128 |  |  |
|         |      | Shiraz-16T | 294  | 0.655804 | 0         |  |  |
|         |      | Shiraz-16T | 294  | 0.655804 | 0         |  |  |
|         |      | Shiraz-16T | 294  | 0.655804 | 0         |  |  |
|         |      | Shiraz-31T | 345  | 0.103301 | 0         |  |  |
|         |      | Shiraz-31T | 345  | 0.103301 | 0         |  |  |
|         |      | Shiraz-31T | 345  | 0.103301 | 0         |  |  |
|         |      | Shiraz-36T | 431  | 0        | -0.78035  |  |  |
|         |      | Shiraz-36T | 431  | 0        | -0.78035  |  |  |
|         |      | Shiraz-36T | 431  | 0        | -0.78035  |  |  |
|         |      | Shiraz-36T | 432  | 0        | -0.6692   |  |  |
|         |      | Shiraz-36T | 432  | 0        | -0.6692   |  |  |
|         |      | Shiraz-36T | 432  | 0        | -0.6692   |  |  |
|         |      | Shiraz-44T | 891  | 0        | -0.954044 |  |  |
|         |      | Shiraz-44T | 891  | 0        | -0.954044 |  |  |
|         |      | Shiraz-44T | 891  | 0        | -0.954044 |  |  |
|         |      | Shiraz-44T | 896  | 0        | -0.109108 |  |  |
|         |      | Shiraz-44T | 896  | 0        | -0.109108 |  |  |
|         |      | Shiraz-44T | 896  | 0        | -0.109108 |  |  |
|         |      | Shiraz-44T | 897  | 0.486937 | 0         |  |  |
|         |      | Shiraz-44T | 897  | 0.486937 | 0         |  |  |
|         |      | Shiraz-44T | 897  | 0.486937 | 0         |  |  |
|         |      | Shiraz-46T | 991  | 0.139564 | 0         |  |  |
|         |      | Shiraz-46T | 991  | 0.139564 | 0         |  |  |
|         |      | Shiraz-46T | 991  | 0.139564 | 0         |  |  |
|         |      | Shiraz-47T | 1084 | 0.24185  | 0         |  |  |

|  |  |            |      |          |           |  |  |
|--|--|------------|------|----------|-----------|--|--|
|  |  | Shiraz-47T | 1084 | 0.24185  | 0         |  |  |
|  |  | Shiraz-47T | 1084 | 0.24185  | 0         |  |  |
|  |  | Shiraz-49T | 1166 | 0        | -0.917235 |  |  |
|  |  | Shiraz-49T | 1166 | 0        | -0.917235 |  |  |
|  |  | Shiraz-49T | 1166 | 0        | -0.917235 |  |  |
|  |  | Shiraz-49T | 1169 | 0        | -0.583529 |  |  |
|  |  | Shiraz-49T | 1169 | 0        | -0.583529 |  |  |
|  |  | Shiraz-49T | 1169 | 0        | -0.583529 |  |  |
|  |  | Shiraz-77T | 1282 | 0.213849 | 0         |  |  |
|  |  | Shiraz-77T | 1282 | 0.213849 | 0         |  |  |
|  |  | Shiraz-77T | 1282 | 0.213849 | 0         |  |  |
|  |  | Shiraz-9T  | 1368 | 0.199713 | 0         |  |  |
|  |  | Shiraz-9T  | 1368 | 0.199713 | 0         |  |  |
|  |  | Shiraz-9T  | 1368 | 0.199713 | 0         |  |  |
|  |  | Shiraz-9T  | 1369 | 0.703374 | 0         |  |  |
|  |  | Shiraz-9T  | 1369 | 0.703374 | 0         |  |  |
|  |  | Shiraz-9T  | 1369 | 0.703374 | 0         |  |  |
|  |  | Shiraz-18T | 1455 | 0        | -0.186773 |  |  |
|  |  | Shiraz-18T | 1455 | 0        | -0.186773 |  |  |
|  |  | Shiraz-18T | 1455 | 0        | -0.186773 |  |  |
|  |  | Shiraz-22T | 1669 | 0.695915 | 0         |  |  |
|  |  | Shiraz-22T | 1669 | 0.695915 | 0         |  |  |
|  |  | Shiraz-22T | 1669 | 0.695915 | 0         |  |  |
|  |  | Shiraz-22T | 1672 | 1.01678  | 0         |  |  |
|  |  | Shiraz-22T | 1672 | 1.01678  | 0         |  |  |
|  |  | Shiraz-22T | 1672 | 1.01678  | 0         |  |  |
|  |  | Shiraz-25T | 1717 | 0.420447 | 0         |  |  |
|  |  | Shiraz-25T | 1717 | 0.420447 | 0         |  |  |
|  |  | Shiraz-25T | 1717 | 0.420447 | 0         |  |  |
|  |  | Shiraz-28T | 1760 | 0.538181 | 0         |  |  |
|  |  | Shiraz-28T | 1760 | 0.538181 | 0         |  |  |
|  |  | Shiraz-28T | 1760 | 0.538181 | 0         |  |  |
|  |  | Shiraz-29T | 1800 | 0.672527 | 0         |  |  |
|  |  | Shiraz-29T | 1800 | 0.672527 | 0         |  |  |
|  |  | Shiraz-29T | 1800 | 0.672527 | 0         |  |  |
|  |  | Shiraz-32T | 1869 | 0.776805 | 0         |  |  |
|  |  | Shiraz-32T | 1869 | 0.776805 | 0         |  |  |
|  |  | Shiraz-32T | 1869 | 0.776805 | 0         |  |  |
|  |  | Shiraz-35T | 1932 | 0.507141 | 0         |  |  |
|  |  | Shiraz-35T | 1932 | 0.507141 | 0         |  |  |
|  |  | Shiraz-35T | 1932 | 0.507141 | 0         |  |  |
|  |  | Shiraz-58T | 2221 | 0.871948 | 0         |  |  |
|  |  | Shiraz-58T | 2221 | 0.871948 | 0         |  |  |
|  |  | Shiraz-58T | 2221 | 0.871948 | 0         |  |  |
|  |  | Shiraz-71T | 2260 | 0.68394  | 0         |  |  |
|  |  | Shiraz-71T | 2260 | 0.68394  | 0         |  |  |
|  |  | Shiraz-71T | 2260 | 0.68394  | 0         |  |  |

|  |  |            |      |          |           |  |  |
|--|--|------------|------|----------|-----------|--|--|
|  |  | Shiraz-71T | 2262 | 0.986748 | 0         |  |  |
|  |  | Shiraz-71T | 2262 | 0.986748 | 0         |  |  |
|  |  | Shiraz-71T | 2262 | 0.986748 | 0         |  |  |
|  |  | Shiraz-3T  | 238  | 0.472087 | 0         |  |  |
|  |  | Shiraz-3T  | 238  | 0.472087 | 0         |  |  |
|  |  | Shiraz-3T  | 238  | 0.472087 | 0         |  |  |
|  |  | Shiraz-4T  | 260  | 0        | -0.324128 |  |  |
|  |  | Shiraz-4T  | 260  | 0        | -0.324128 |  |  |
|  |  | Shiraz-4T  | 260  | 0        | -0.324128 |  |  |
|  |  | Shiraz-16T | 294  | 0.655804 | 0         |  |  |
|  |  | Shiraz-16T | 294  | 0.655804 | 0         |  |  |
|  |  | Shiraz-16T | 294  | 0.655804 | 0         |  |  |
|  |  | Shiraz-31T | 345  | 0.103301 | 0         |  |  |
|  |  | Shiraz-31T | 345  | 0.103301 | 0         |  |  |
|  |  | Shiraz-31T | 345  | 0.103301 | 0         |  |  |
|  |  | Shiraz-36T | 431  | 0        | -0.78035  |  |  |
|  |  | Shiraz-36T | 431  | 0        | -0.78035  |  |  |
|  |  | Shiraz-36T | 431  | 0        | -0.78035  |  |  |
|  |  | Shiraz-36T | 432  | 0        | -0.6692   |  |  |
|  |  | Shiraz-36T | 432  | 0        | -0.6692   |  |  |
|  |  | Shiraz-36T | 432  | 0        | -0.6692   |  |  |
|  |  | Shiraz-44T | 891  | 0        | -0.954044 |  |  |
|  |  | Shiraz-44T | 891  | 0        | -0.954044 |  |  |
|  |  | Shiraz-44T | 891  | 0        | -0.954044 |  |  |
|  |  | Shiraz-44T | 896  | 0        | -0.109108 |  |  |
|  |  | Shiraz-44T | 896  | 0        | -0.109108 |  |  |
|  |  | Shiraz-44T | 896  | 0        | -0.109108 |  |  |
|  |  | Shiraz-44T | 897  | 0.486937 | 0         |  |  |
|  |  | Shiraz-44T | 897  | 0.486937 | 0         |  |  |
|  |  | Shiraz-44T | 897  | 0.486937 | 0         |  |  |
|  |  | Shiraz-46T | 991  | 0.139564 | 0         |  |  |
|  |  | Shiraz-46T | 991  | 0.139564 | 0         |  |  |
|  |  | Shiraz-46T | 991  | 0.139564 | 0         |  |  |
|  |  | Shiraz-47T | 1084 | 0.24185  | 0         |  |  |
|  |  | Shiraz-47T | 1084 | 0.24185  | 0         |  |  |
|  |  | Shiraz-47T | 1084 | 0.24185  | 0         |  |  |
|  |  | Shiraz-49T | 1166 | 0        | -0.917235 |  |  |
|  |  | Shiraz-49T | 1166 | 0        | -0.917235 |  |  |
|  |  | Shiraz-49T | 1166 | 0        | -0.917235 |  |  |
|  |  | Shiraz-49T | 1169 | 0        | -0.583529 |  |  |
|  |  | Shiraz-49T | 1169 | 0        | -0.583529 |  |  |
|  |  | Shiraz-49T | 1169 | 0        | -0.583529 |  |  |
|  |  | Shiraz-77T | 1282 | 0.213849 | 0         |  |  |
|  |  | Shiraz-77T | 1282 | 0.213849 | 0         |  |  |
|  |  | Shiraz-77T | 1282 | 0.213849 | 0         |  |  |
|  |  | Shiraz-9T  | 1368 | 0.199713 | 0         |  |  |
|  |  | Shiraz-9T  | 1368 | 0.199713 | 0         |  |  |

|  |  |            |      |          |           |  |  |
|--|--|------------|------|----------|-----------|--|--|
|  |  | Shiraz-9T  | 1368 | 0.199713 | 0         |  |  |
|  |  | Shiraz-9T  | 1369 | 0.703374 | 0         |  |  |
|  |  | Shiraz-9T  | 1369 | 0.703374 | 0         |  |  |
|  |  | Shiraz-9T  | 1369 | 0.703374 | 0         |  |  |
|  |  | Shiraz-18T | 1455 | 0        | -0.186773 |  |  |
|  |  | Shiraz-18T | 1455 | 0        | -0.186773 |  |  |
|  |  | Shiraz-18T | 1455 | 0        | -0.186773 |  |  |
|  |  | Shiraz-22T | 1669 | 0.695915 | 0         |  |  |
|  |  | Shiraz-22T | 1669 | 0.695915 | 0         |  |  |
|  |  | Shiraz-22T | 1669 | 0.695915 | 0         |  |  |
|  |  | Shiraz-22T | 1672 | 1.01678  | 0         |  |  |
|  |  | Shiraz-22T | 1672 | 1.01678  | 0         |  |  |
|  |  | Shiraz-22T | 1672 | 1.01678  | 0         |  |  |
|  |  | Shiraz-25T | 1717 | 0.420447 | 0         |  |  |
|  |  | Shiraz-25T | 1717 | 0.420447 | 0         |  |  |
|  |  | Shiraz-25T | 1717 | 0.420447 | 0         |  |  |
|  |  | Shiraz-28T | 1760 | 0.538181 | 0         |  |  |
|  |  | Shiraz-28T | 1760 | 0.538181 | 0         |  |  |
|  |  | Shiraz-28T | 1760 | 0.538181 | 0         |  |  |
|  |  | Shiraz-29T | 1800 | 0.672527 | 0         |  |  |
|  |  | Shiraz-29T | 1800 | 0.672527 | 0         |  |  |
|  |  | Shiraz-29T | 1800 | 0.672527 | 0         |  |  |
|  |  | Shiraz-32T | 1869 | 0.776805 | 0         |  |  |
|  |  | Shiraz-32T | 1869 | 0.776805 | 0         |  |  |
|  |  | Shiraz-32T | 1869 | 0.776805 | 0         |  |  |
|  |  | Shiraz-35T | 1932 | 0.507141 | 0         |  |  |
|  |  | Shiraz-35T | 1932 | 0.507141 | 0         |  |  |
|  |  | Shiraz-35T | 1932 | 0.507141 | 0         |  |  |
|  |  | Shiraz-58T | 2221 | 0.871948 | 0         |  |  |
|  |  | Shiraz-58T | 2221 | 0.871948 | 0         |  |  |
|  |  | Shiraz-58T | 2221 | 0.871948 | 0         |  |  |
|  |  | Shiraz-71T | 2260 | 0.68394  | 0         |  |  |
|  |  | Shiraz-71T | 2260 | 0.68394  | 0         |  |  |
|  |  | Shiraz-71T | 2260 | 0.68394  | 0         |  |  |
|  |  | Shiraz-71T | 2262 | 0.986748 | 0         |  |  |
|  |  | Shiraz-71T | 2262 | 0.986748 | 0         |  |  |
|  |  | Shiraz-71T | 2262 | 0.986748 | 0         |  |  |
|  |  | Shiraz-3T  | 238  | 0.472087 | 0         |  |  |
|  |  | Shiraz-3T  | 238  | 0.472087 | 0         |  |  |
|  |  | Shiraz-3T  | 238  | 0.472087 | 0         |  |  |
|  |  | Shiraz-4T  | 260  | 0        | -0.324128 |  |  |
|  |  | Shiraz-4T  | 260  | 0        | -0.324128 |  |  |
|  |  | Shiraz-4T  | 260  | 0        | -0.324128 |  |  |
|  |  | Shiraz-16T | 294  | 0.655804 | 0         |  |  |
|  |  | Shiraz-16T | 294  | 0.655804 | 0         |  |  |
|  |  | Shiraz-16T | 294  | 0.655804 | 0         |  |  |
|  |  | Shiraz-31T | 345  | 0.103301 | 0         |  |  |

|  |  |            |      |          |           |  |  |
|--|--|------------|------|----------|-----------|--|--|
|  |  | Shiraz-31T | 345  | 0.103301 | 0         |  |  |
|  |  | Shiraz-31T | 345  | 0.103301 | 0         |  |  |
|  |  | Shiraz-36T | 431  | 0        | -0.78035  |  |  |
|  |  | Shiraz-36T | 431  | 0        | -0.78035  |  |  |
|  |  | Shiraz-36T | 431  | 0        | -0.78035  |  |  |
|  |  | Shiraz-36T | 432  | 0        | -0.6692   |  |  |
|  |  | Shiraz-36T | 432  | 0        | -0.6692   |  |  |
|  |  | Shiraz-36T | 432  | 0        | -0.6692   |  |  |
|  |  | Shiraz-44T | 891  | 0        | -0.954044 |  |  |
|  |  | Shiraz-44T | 891  | 0        | -0.954044 |  |  |
|  |  | Shiraz-44T | 891  | 0        | -0.954044 |  |  |
|  |  | Shiraz-44T | 896  | 0        | -0.109108 |  |  |
|  |  | Shiraz-44T | 896  | 0        | -0.109108 |  |  |
|  |  | Shiraz-44T | 896  | 0        | -0.109108 |  |  |
|  |  | Shiraz-44T | 897  | 0.486937 | 0         |  |  |
|  |  | Shiraz-44T | 897  | 0.486937 | 0         |  |  |
|  |  | Shiraz-44T | 897  | 0.486937 | 0         |  |  |
|  |  | Shiraz-46T | 991  | 0.139564 | 0         |  |  |
|  |  | Shiraz-46T | 991  | 0.139564 | 0         |  |  |
|  |  | Shiraz-46T | 991  | 0.139564 | 0         |  |  |
|  |  | Shiraz-47T | 1084 | 0.24185  | 0         |  |  |
|  |  | Shiraz-47T | 1084 | 0.24185  | 0         |  |  |
|  |  | Shiraz-47T | 1084 | 0.24185  | 0         |  |  |
|  |  | Shiraz-49T | 1166 | 0        | -0.917235 |  |  |
|  |  | Shiraz-49T | 1166 | 0        | -0.917235 |  |  |
|  |  | Shiraz-49T | 1166 | 0        | -0.917235 |  |  |
|  |  | Shiraz-49T | 1169 | 0        | -0.583529 |  |  |
|  |  | Shiraz-49T | 1169 | 0        | -0.583529 |  |  |
|  |  | Shiraz-49T | 1169 | 0        | -0.583529 |  |  |
|  |  | Shiraz-77T | 1282 | 0.213849 | 0         |  |  |
|  |  | Shiraz-77T | 1282 | 0.213849 | 0         |  |  |
|  |  | Shiraz-77T | 1282 | 0.213849 | 0         |  |  |
|  |  | Shiraz-9T  | 1368 | 0.199713 | 0         |  |  |
|  |  | Shiraz-9T  | 1368 | 0.199713 | 0         |  |  |
|  |  | Shiraz-9T  | 1368 | 0.199713 | 0         |  |  |
|  |  | Shiraz-9T  | 1369 | 0.703374 | 0         |  |  |
|  |  | Shiraz-9T  | 1369 | 0.703374 | 0         |  |  |
|  |  | Shiraz-9T  | 1369 | 0.703374 | 0         |  |  |
|  |  | Shiraz-18T | 1455 | 0        | -0.186773 |  |  |
|  |  | Shiraz-18T | 1455 | 0        | -0.186773 |  |  |
|  |  | Shiraz-18T | 1455 | 0        | -0.186773 |  |  |
|  |  | Shiraz-22T | 1669 | 0.695915 | 0         |  |  |
|  |  | Shiraz-22T | 1669 | 0.695915 | 0         |  |  |
|  |  | Shiraz-22T | 1669 | 0.695915 | 0         |  |  |
|  |  | Shiraz-22T | 1672 | 1.01678  | 0         |  |  |
|  |  | Shiraz-22T | 1672 | 1.01678  | 0         |  |  |
|  |  | Shiraz-22T | 1672 | 1.01678  | 0         |  |  |

|         |      |            |      |          |           |  |
|---------|------|------------|------|----------|-----------|--|
|         |      | Shiraz-25T | 1717 | 0.420447 | 0         |  |
|         |      | Shiraz-25T | 1717 | 0.420447 | 0         |  |
|         |      | Shiraz-25T | 1717 | 0.420447 | 0         |  |
|         |      | Shiraz-28T | 1760 | 0.538181 | 0         |  |
|         |      | Shiraz-28T | 1760 | 0.538181 | 0         |  |
|         |      | Shiraz-28T | 1760 | 0.538181 | 0         |  |
|         |      | Shiraz-29T | 1800 | 0.672527 | 0         |  |
|         |      | Shiraz-29T | 1800 | 0.672527 | 0         |  |
|         |      | Shiraz-29T | 1800 | 0.672527 | 0         |  |
|         |      | Shiraz-32T | 1869 | 0.776805 | 0         |  |
|         |      | Shiraz-32T | 1869 | 0.776805 | 0         |  |
|         |      | Shiraz-32T | 1869 | 0.776805 | 0         |  |
|         |      | Shiraz-35T | 1932 | 0.507141 | 0         |  |
|         |      | Shiraz-35T | 1932 | 0.507141 | 0         |  |
|         |      | Shiraz-35T | 1932 | 0.507141 | 0         |  |
|         |      | Shiraz-58T | 2221 | 0.871948 | 0         |  |
|         |      | Shiraz-58T | 2221 | 0.871948 | 0         |  |
|         |      | Shiraz-58T | 2221 | 0.871948 | 0         |  |
|         |      | Shiraz-71T | 2260 | 0.68394  | 0         |  |
|         |      | Shiraz-71T | 2260 | 0.68394  | 0         |  |
|         |      | Shiraz-71T | 2260 | 0.68394  | 0         |  |
|         |      | Shiraz-71T | 2262 | 0.986748 | 0         |  |
|         |      | Shiraz-71T | 2262 | 0.986748 | 0         |  |
|         |      | Shiraz-71T | 2262 | 0.986748 | 0         |  |
| SLC35B4 | chr7 | Shiraz-3T  | 90   | 0.219276 | 0         |  |
|         |      | Shiraz-4T  | 253  | 0.372918 | 0         |  |
|         |      | Shiraz-36T | 378  | 0.179558 | 0         |  |
|         |      | Shiraz-46T | 943  | 0.093799 | 0         |  |
|         |      | Shiraz-77T | 1225 | 0        | -0.117922 |  |
|         |      | Shiraz-9T  | 1325 | 0.221899 | 0         |  |
|         |      | Shiraz-18T | 1434 | 0.244465 | 0         |  |
|         |      | Shiraz-22T | 1553 | 0        | -0.213234 |  |
|         |      | Shiraz-25T | 1698 | 0.21835  | 0         |  |
|         |      | Shiraz-28T | 1735 | 0.350744 | 0         |  |
|         |      | Shiraz-29T | 1778 | 0.120767 | 0         |  |
|         |      | Shiraz-32T | 1833 | 0.551336 | 0         |  |
|         |      | Shiraz-38T | 1951 | 0.250891 | 0         |  |
|         |      | Shiraz-53T | 2078 | 0.287202 | 0         |  |
|         |      | Shiraz-58T | 2162 | 0.221505 | 0         |  |
|         |      | Shiraz-71T | 2238 | 0.603631 | 0         |  |
|         |      | Shiraz-3T  | 90   | 0.219276 | 0         |  |
|         |      | Shiraz-4T  | 253  | 0.372918 | 0         |  |
|         |      | Shiraz-36T | 378  | 0.179558 | 0         |  |
|         |      | Shiraz-46T | 943  | 0.093799 | 0         |  |
|         |      | Shiraz-77T | 1225 | 0        | -0.117922 |  |
|         |      | Shiraz-9T  | 1325 | 0.221899 | 0         |  |
|         |      | Shiraz-18T | 1434 | 0.244465 | 0         |  |

|         |      |            |      |          |           |  |  |
|---------|------|------------|------|----------|-----------|--|--|
|         |      | Shiraz-22T | 1553 | 0        | -0.213234 |  |  |
|         |      | Shiraz-25T | 1698 | 0.21835  | 0         |  |  |
|         |      | Shiraz-28T | 1735 | 0.350744 | 0         |  |  |
|         |      | Shiraz-29T | 1778 | 0.120767 | 0         |  |  |
|         |      | Shiraz-32T | 1833 | 0.551336 | 0         |  |  |
|         |      | Shiraz-38T | 1951 | 0.250891 | 0         |  |  |
|         |      | Shiraz-53T | 2078 | 0.287202 | 0         |  |  |
|         |      | Shiraz-58T | 2162 | 0.221505 | 0         |  |  |
|         |      | Shiraz-71T | 2238 | 0.603631 | 0         |  |  |
|         |      | Shiraz-3T  | 90   | 0.219276 | 0         |  |  |
|         |      | Shiraz-4T  | 253  | 0.372918 | 0         |  |  |
|         |      | Shiraz-36T | 378  | 0.179558 | 0         |  |  |
|         |      | Shiraz-46T | 943  | 0.093799 | 0         |  |  |
|         |      | Shiraz-77T | 1225 | 0        | -0.117922 |  |  |
|         |      | Shiraz-9T  | 1325 | 0.221899 | 0         |  |  |
|         |      | Shiraz-18T | 1434 | 0.244465 | 0         |  |  |
|         |      | Shiraz-22T | 1553 | 0        | -0.213234 |  |  |
|         |      | Shiraz-25T | 1698 | 0.21835  | 0         |  |  |
|         |      | Shiraz-28T | 1735 | 0.350744 | 0         |  |  |
|         |      | Shiraz-29T | 1778 | 0.120767 | 0         |  |  |
|         |      | Shiraz-32T | 1833 | 0.551336 | 0         |  |  |
|         |      | Shiraz-38T | 1951 | 0.250891 | 0         |  |  |
|         |      | Shiraz-53T | 2078 | 0.287202 | 0         |  |  |
|         |      | Shiraz-58T | 2162 | 0.221505 | 0         |  |  |
|         |      | Shiraz-71T | 2238 | 0.603631 | 0         |  |  |
| SLC37A3 | chr7 | Shiraz-3T  | 90   | 0.219276 | 0         |  |  |
|         |      | Shiraz-3T  | 97   | 0.496001 | 0         |  |  |
|         |      | Shiraz-4T  | 253  | 0.372918 | 0         |  |  |
|         |      | Shiraz-31T | 318  | 0.254373 | 0         |  |  |
|         |      | Shiraz-36T | 378  | 0.179558 | 0         |  |  |
|         |      | Shiraz-36T | 383  | 0.374586 | 0         |  |  |
|         |      | Shiraz-44T | 644  | 0.496536 | 0         |  |  |
|         |      | Shiraz-46T | 943  | 0.093799 | 0         |  |  |
|         |      | Shiraz-47T | 1033 | 0.220267 | 0         |  |  |
|         |      | Shiraz-77T | 1225 | 0        | -0.117922 |  |  |
|         |      | Shiraz-77T | 1230 | 0.149651 | 0         |  |  |
|         |      | Shiraz-9T  | 1325 | 0.221899 | 0         |  |  |
|         |      | Shiraz-18T | 1434 | 0.244465 | 0         |  |  |
|         |      | Shiraz-25T | 1698 | 0.21835  | 0         |  |  |
|         |      | Shiraz-28T | 1735 | 0.350744 | 0         |  |  |
|         |      | Shiraz-29T | 1778 | 0.120767 | 0         |  |  |
|         |      | Shiraz-32T | 1833 | 0.551336 | 0         |  |  |
|         |      | Shiraz-38T | 1951 | 0.250891 | 0         |  |  |
|         |      | Shiraz-53T | 2078 | 0.287202 | 0         |  |  |
|         |      | Shiraz-58T | 2162 | 0.221505 | 0         |  |  |
|         |      | Shiraz-71T | 2238 | 0.603631 | 0         |  |  |
|         |      | Shiraz-3T  | 90   | 0.219276 | 0         |  |  |



|         |      |            |      |          |           |  |
|---------|------|------------|------|----------|-----------|--|
|         |      | Shiraz-3T  | 97   | 0.496001 | 0         |  |
|         |      | Shiraz-4T  | 253  | 0.372918 | 0         |  |
|         |      | Shiraz-31T | 318  | 0.254373 | 0         |  |
|         |      | Shiraz-36T | 378  | 0.179558 | 0         |  |
|         |      | Shiraz-36T | 383  | 0.374586 | 0         |  |
|         |      | Shiraz-44T | 644  | 0.496536 | 0         |  |
|         |      | Shiraz-46T | 943  | 0.093799 | 0         |  |
|         |      | Shiraz-47T | 1033 | 0.220267 | 0         |  |
|         |      | Shiraz-77T | 1225 | 0        | -0.117922 |  |
|         |      | Shiraz-77T | 1230 | 0.149651 | 0         |  |
|         |      | Shiraz-9T  | 1325 | 0.221899 | 0         |  |
|         |      | Shiraz-18T | 1434 | 0.244465 | 0         |  |
|         |      | Shiraz-25T | 1698 | 0.21835  | 0         |  |
|         |      | Shiraz-28T | 1735 | 0.350744 | 0         |  |
|         |      | Shiraz-29T | 1778 | 0.120767 | 0         |  |
|         |      | Shiraz-32T | 1833 | 0.551336 | 0         |  |
|         |      | Shiraz-38T | 1951 | 0.250891 | 0         |  |
|         |      | Shiraz-53T | 2078 | 0.287202 | 0         |  |
|         |      | Shiraz-58T | 2162 | 0.221505 | 0         |  |
|         |      | Shiraz-71T | 2238 | 0.603631 | 0         |  |
|         |      | Shiraz-3T  | 90   | 0.219276 | 0         |  |
|         |      | Shiraz-3T  | 97   | 0.496001 | 0         |  |
|         |      | Shiraz-4T  | 253  | 0.372918 | 0         |  |
|         |      | Shiraz-31T | 318  | 0.254373 | 0         |  |
|         |      | Shiraz-36T | 378  | 0.179558 | 0         |  |
|         |      | Shiraz-36T | 383  | 0.374586 | 0         |  |
|         |      | Shiraz-44T | 644  | 0.496536 | 0         |  |
|         |      | Shiraz-46T | 943  | 0.093799 | 0         |  |
|         |      | Shiraz-47T | 1033 | 0.220267 | 0         |  |
|         |      | Shiraz-77T | 1225 | 0        | -0.117922 |  |
|         |      | Shiraz-77T | 1230 | 0.149651 | 0         |  |
|         |      | Shiraz-9T  | 1325 | 0.221899 | 0         |  |
|         |      | Shiraz-18T | 1434 | 0.244465 | 0         |  |
|         |      | Shiraz-25T | 1698 | 0.21835  | 0         |  |
|         |      | Shiraz-28T | 1735 | 0.350744 | 0         |  |
|         |      | Shiraz-29T | 1778 | 0.120767 | 0         |  |
|         |      | Shiraz-32T | 1833 | 0.551336 | 0         |  |
|         |      | Shiraz-38T | 1951 | 0.250891 | 0         |  |
|         |      | Shiraz-53T | 2078 | 0.287202 | 0         |  |
|         |      | Shiraz-58T | 2162 | 0.221505 | 0         |  |
|         |      | Shiraz-71T | 2238 | 0.603631 | 0         |  |
| SLC38A5 | chrX | Shiraz-3T  | 238  | 0.472087 | 0         |  |
|         |      | Shiraz-4T  | 260  | 0        | -0.324128 |  |
|         |      | Shiraz-16T | 294  | 0.655804 | 0         |  |
|         |      | Shiraz-31T | 345  | 0.103301 | 0         |  |
|         |      | Shiraz-36T | 431  | 0        | -0.78035  |  |
|         |      | Shiraz-36T | 432  | 0        | -0.6692   |  |

|  |            |      |          |           |  |
|--|------------|------|----------|-----------|--|
|  | Shiraz-44T | 891  | 0        | -0.954044 |  |
|  | Shiraz-44T | 896  | 0        | -0.109108 |  |
|  | Shiraz-46T | 991  | 0.139564 | 0         |  |
|  | Shiraz-47T | 1084 | 0.24185  | 0         |  |
|  | Shiraz-49T | 1166 | 0        | -0.917235 |  |
|  | Shiraz-49T | 1169 | 0        | -0.583529 |  |
|  | Shiraz-77T | 1282 | 0.213849 | 0         |  |
|  | Shiraz-9T  | 1368 | 0.199713 | 0         |  |
|  | Shiraz-9T  | 1369 | 0.703374 | 0         |  |
|  | Shiraz-18T | 1455 | 0        | -0.186773 |  |
|  | Shiraz-22T | 1669 | 0.695915 | 0         |  |
|  | Shiraz-22T | 1672 | 1.01678  | 0         |  |
|  | Shiraz-25T | 1717 | 0.420447 | 0         |  |
|  | Shiraz-28T | 1760 | 0.538181 | 0         |  |
|  | Shiraz-29T | 1800 | 0.672527 | 0         |  |
|  | Shiraz-32T | 1869 | 0.776805 | 0         |  |
|  | Shiraz-35T | 1932 | 0.507141 | 0         |  |
|  | Shiraz-58T | 2221 | 0.871948 | 0         |  |
|  | Shiraz-71T | 2260 | 0.68394  | 0         |  |
|  | Shiraz-71T | 2262 | 0.986748 | 0         |  |
|  | Shiraz-3T  | 238  | 0.472087 | 0         |  |
|  | Shiraz-4T  | 260  | 0        | -0.324128 |  |
|  | Shiraz-16T | 294  | 0.655804 | 0         |  |
|  | Shiraz-31T | 345  | 0.103301 | 0         |  |
|  | Shiraz-36T | 431  | 0        | -0.78035  |  |
|  | Shiraz-36T | 432  | 0        | -0.6692   |  |
|  | Shiraz-44T | 891  | 0        | -0.954044 |  |
|  | Shiraz-44T | 896  | 0        | -0.109108 |  |
|  | Shiraz-46T | 991  | 0.139564 | 0         |  |
|  | Shiraz-47T | 1084 | 0.24185  | 0         |  |
|  | Shiraz-49T | 1166 | 0        | -0.917235 |  |
|  | Shiraz-49T | 1169 | 0        | -0.583529 |  |
|  | Shiraz-77T | 1282 | 0.213849 | 0         |  |
|  | Shiraz-9T  | 1368 | 0.199713 | 0         |  |
|  | Shiraz-9T  | 1369 | 0.703374 | 0         |  |
|  | Shiraz-18T | 1455 | 0        | -0.186773 |  |
|  | Shiraz-22T | 1669 | 0.695915 | 0         |  |
|  | Shiraz-22T | 1672 | 1.01678  | 0         |  |
|  | Shiraz-25T | 1717 | 0.420447 | 0         |  |
|  | Shiraz-28T | 1760 | 0.538181 | 0         |  |
|  | Shiraz-29T | 1800 | 0.672527 | 0         |  |
|  | Shiraz-32T | 1869 | 0.776805 | 0         |  |
|  | Shiraz-35T | 1932 | 0.507141 | 0         |  |
|  | Shiraz-58T | 2221 | 0.871948 | 0         |  |
|  | Shiraz-71T | 2260 | 0.68394  | 0         |  |
|  | Shiraz-71T | 2262 | 0.986748 | 0         |  |
|  | Shiraz-3T  | 238  | 0.472087 | 0         |  |

|         |      |            |      |          |           |  |  |
|---------|------|------------|------|----------|-----------|--|--|
|         |      | Shiraz-4T  | 260  | 0        | -0.324128 |  |  |
|         |      | Shiraz-16T | 294  | 0.655804 | 0         |  |  |
|         |      | Shiraz-31T | 345  | 0.103301 | 0         |  |  |
|         |      | Shiraz-36T | 431  | 0        | -0.78035  |  |  |
|         |      | Shiraz-36T | 432  | 0        | -0.6692   |  |  |
|         |      | Shiraz-44T | 891  | 0        | -0.954044 |  |  |
|         |      | Shiraz-44T | 896  | 0        | -0.109108 |  |  |
|         |      | Shiraz-46T | 991  | 0.139564 | 0         |  |  |
|         |      | Shiraz-47T | 1084 | 0.24185  | 0         |  |  |
|         |      | Shiraz-49T | 1166 | 0        | -0.917235 |  |  |
|         |      | Shiraz-49T | 1169 | 0        | -0.583529 |  |  |
|         |      | Shiraz-77T | 1282 | 0.213849 | 0         |  |  |
|         |      | Shiraz-9T  | 1368 | 0.199713 | 0         |  |  |
|         |      | Shiraz-9T  | 1369 | 0.703374 | 0         |  |  |
|         |      | Shiraz-18T | 1455 | 0        | -0.186773 |  |  |
|         |      | Shiraz-22T | 1669 | 0.695915 | 0         |  |  |
|         |      | Shiraz-22T | 1672 | 1.01678  | 0         |  |  |
|         |      | Shiraz-25T | 1717 | 0.420447 | 0         |  |  |
|         |      | Shiraz-28T | 1760 | 0.538181 | 0         |  |  |
|         |      | Shiraz-29T | 1800 | 0.672527 | 0         |  |  |
|         |      | Shiraz-32T | 1869 | 0.776805 | 0         |  |  |
|         |      | Shiraz-35T | 1932 | 0.507141 | 0         |  |  |
|         |      | Shiraz-58T | 2221 | 0.871948 | 0         |  |  |
|         |      | Shiraz-71T | 2260 | 0.68394  | 0         |  |  |
|         |      | Shiraz-71T | 2262 | 0.986748 | 0         |  |  |
| SLC45A2 | chr5 | Shiraz-4T  | 250  | 0.262252 | 0         |  |  |
|         |      | Shiraz-4T  | 250  | 0.262252 | 0         |  |  |
|         |      | Shiraz-16T | 266  | 0.321724 | 0         |  |  |
|         |      | Shiraz-16T | 266  | 0.321724 | 0         |  |  |
|         |      | Shiraz-18T | 1429 | 0        | -0.314125 |  |  |
|         |      | Shiraz-18T | 1429 | 0        | -0.314125 |  |  |
|         |      | Shiraz-25T | 1694 | 0.201602 | 0         |  |  |
|         |      | Shiraz-25T | 1694 | 0.201602 | 0         |  |  |
|         |      | Shiraz-28T | 1731 | 0.295447 | 0         |  |  |
|         |      | Shiraz-28T | 1731 | 0.295447 | 0         |  |  |
|         |      | Shiraz-29T | 1773 | 0.090981 | 0         |  |  |
|         |      | Shiraz-29T | 1773 | 0.090981 | 0         |  |  |
|         |      | Shiraz-40T | 2016 | 0.376634 | 0         |  |  |
|         |      | Shiraz-40T | 2016 | 0.376634 | 0         |  |  |
|         |      | Shiraz-4T  | 250  | 0.262252 | 0         |  |  |
|         |      | Shiraz-4T  | 250  | 0.262252 | 0         |  |  |
|         |      | Shiraz-16T | 266  | 0.321724 | 0         |  |  |
|         |      | Shiraz-16T | 266  | 0.321724 | 0         |  |  |
|         |      | Shiraz-18T | 1429 | 0        | -0.314125 |  |  |
|         |      | Shiraz-18T | 1429 | 0        | -0.314125 |  |  |
|         |      | Shiraz-25T | 1694 | 0.201602 | 0         |  |  |
|         |      | Shiraz-25T | 1694 | 0.201602 | 0         |  |  |

|        |      |            |      |          |           |  |
|--------|------|------------|------|----------|-----------|--|
|        |      | Shiraz-28T | 1731 | 0.295447 | 0         |  |
|        |      | Shiraz-28T | 1731 | 0.295447 | 0         |  |
|        |      | Shiraz-29T | 1773 | 0.090981 | 0         |  |
|        |      | Shiraz-29T | 1773 | 0.090981 | 0         |  |
|        |      | Shiraz-40T | 2016 | 0.376634 | 0         |  |
|        |      | Shiraz-40T | 2016 | 0.376634 | 0         |  |
|        |      | Shiraz-4T  | 250  | 0.262252 | 0         |  |
|        |      | Shiraz-4T  | 250  | 0.262252 | 0         |  |
|        |      | Shiraz-16T | 266  | 0.321724 | 0         |  |
|        |      | Shiraz-16T | 266  | 0.321724 | 0         |  |
|        |      | Shiraz-18T | 1429 | 0        | -0.314125 |  |
|        |      | Shiraz-18T | 1429 | 0        | -0.314125 |  |
|        |      | Shiraz-25T | 1694 | 0.201602 | 0         |  |
|        |      | Shiraz-25T | 1694 | 0.201602 | 0         |  |
|        |      | Shiraz-28T | 1731 | 0.295447 | 0         |  |
|        |      | Shiraz-28T | 1731 | 0.295447 | 0         |  |
|        |      | Shiraz-29T | 1773 | 0.090981 | 0         |  |
|        |      | Shiraz-29T | 1773 | 0.090981 | 0         |  |
|        |      | Shiraz-40T | 2016 | 0.376634 | 0         |  |
|        |      | Shiraz-40T | 2016 | 0.376634 | 0         |  |
| SLC4A2 | chr7 | Shiraz-3T  | 90   | 0.219276 | 0         |  |
|        |      | Shiraz-3T  | 99   | 0.454766 | 0         |  |
|        |      | Shiraz-4T  | 253  | 0.372918 | 0         |  |
|        |      | Shiraz-36T | 378  | 0.179558 | 0         |  |
|        |      | Shiraz-44T | 646  | 0.471276 | 0         |  |
|        |      | Shiraz-44T | 647  | 1.496173 | 0         |  |
|        |      | Shiraz-46T | 943  | 0.093799 | 0         |  |
|        |      | Shiraz-9T  | 1325 | 0.221899 | 0         |  |
|        |      | Shiraz-18T | 1434 | 0.244465 | 0         |  |
|        |      | Shiraz-22T | 1555 | 0.427999 | 0         |  |
|        |      | Shiraz-25T | 1698 | 0.21835  | 0         |  |
|        |      | Shiraz-28T | 1735 | 0.350744 | 0         |  |
|        |      | Shiraz-29T | 1778 | 0.120767 | 0         |  |
|        |      | Shiraz-32T | 1833 | 0.551336 | 0         |  |
|        |      | Shiraz-38T | 1951 | 0.250891 | 0         |  |
|        |      | Shiraz-38T | 1952 | 0        | -0.163211 |  |
|        |      | Shiraz-53T | 2078 | 0.287202 | 0         |  |
|        |      | Shiraz-58T | 2162 | 0.221505 | 0         |  |
|        |      | Shiraz-71T | 2238 | 0.603631 | 0         |  |
|        |      | Shiraz-3T  | 90   | 0.219276 | 0         |  |
|        |      | Shiraz-3T  | 99   | 0.454766 | 0         |  |
|        |      | Shiraz-4T  | 253  | 0.372918 | 0         |  |
|        |      | Shiraz-36T | 378  | 0.179558 | 0         |  |
|        |      | Shiraz-44T | 646  | 0.471276 | 0         |  |
|        |      | Shiraz-44T | 647  | 1.496173 | 0         |  |
|        |      | Shiraz-46T | 943  | 0.093799 | 0         |  |
|        |      | Shiraz-9T  | 1325 | 0.221899 | 0         |  |

|         |      |            |      |          |           |  |  |
|---------|------|------------|------|----------|-----------|--|--|
|         |      | Shiraz-18T | 1434 | 0.244465 | 0         |  |  |
|         |      | Shiraz-22T | 1555 | 0.427999 | 0         |  |  |
|         |      | Shiraz-25T | 1698 | 0.21835  | 0         |  |  |
|         |      | Shiraz-28T | 1735 | 0.350744 | 0         |  |  |
|         |      | Shiraz-29T | 1778 | 0.120767 | 0         |  |  |
|         |      | Shiraz-32T | 1833 | 0.551336 | 0         |  |  |
|         |      | Shiraz-38T | 1951 | 0.250891 | 0         |  |  |
|         |      | Shiraz-38T | 1952 | 0        | -0.163211 |  |  |
|         |      | Shiraz-53T | 2078 | 0.287202 | 0         |  |  |
|         |      | Shiraz-58T | 2162 | 0.221505 | 0         |  |  |
|         |      | Shiraz-71T | 2238 | 0.603631 | 0         |  |  |
|         |      | Shiraz-3T  | 90   | 0.219276 | 0         |  |  |
|         |      | Shiraz-3T  | 99   | 0.454766 | 0         |  |  |
|         |      | Shiraz-4T  | 253  | 0.372918 | 0         |  |  |
|         |      | Shiraz-36T | 378  | 0.179558 | 0         |  |  |
|         |      | Shiraz-44T | 646  | 0.471276 | 0         |  |  |
|         |      | Shiraz-44T | 647  | 1.496173 | 0         |  |  |
|         |      | Shiraz-46T | 943  | 0.093799 | 0         |  |  |
|         |      | Shiraz-9T  | 1325 | 0.221899 | 0         |  |  |
|         |      | Shiraz-18T | 1434 | 0.244465 | 0         |  |  |
|         |      | Shiraz-22T | 1555 | 0.427999 | 0         |  |  |
|         |      | Shiraz-25T | 1698 | 0.21835  | 0         |  |  |
|         |      | Shiraz-28T | 1735 | 0.350744 | 0         |  |  |
|         |      | Shiraz-29T | 1778 | 0.120767 | 0         |  |  |
|         |      | Shiraz-32T | 1833 | 0.551336 | 0         |  |  |
|         |      | Shiraz-38T | 1951 | 0.250891 | 0         |  |  |
|         |      | Shiraz-38T | 1952 | 0        | -0.163211 |  |  |
|         |      | Shiraz-53T | 2078 | 0.287202 | 0         |  |  |
|         |      | Shiraz-58T | 2162 | 0.221505 | 0         |  |  |
|         |      | Shiraz-71T | 2238 | 0.603631 | 0         |  |  |
| SLC6A14 | chrX | Shiraz-3T  | 242  | 0        | -0.336434 |  |  |
|         |      | Shiraz-4T  | 261  | 0        | -0.336249 |  |  |
|         |      | Shiraz-16T | 295  | 0.591657 | 0         |  |  |
|         |      | Shiraz-36T | 433  | 0        | -0.803961 |  |  |
|         |      | Shiraz-44T | 899  | 0        | -1.09697  |  |  |
|         |      | Shiraz-49T | 1170 | 0        | -0.967436 |  |  |
|         |      | Shiraz-18T | 1457 | 0.643204 | 0         |  |  |
|         |      | Shiraz-22T | 1673 | 0.611783 | 0         |  |  |
|         |      | Shiraz-25T | 1719 | 0.472955 | 0         |  |  |
|         |      | Shiraz-28T | 1762 | 0.562311 | 0         |  |  |
|         |      | Shiraz-29T | 1801 | 0.815343 | 0         |  |  |
|         |      | Shiraz-32T | 1870 | 0.729766 | 0         |  |  |
|         |      | Shiraz-35T | 1933 | 0.488535 | 0         |  |  |
|         |      | Shiraz-58T | 2223 | 0.833364 | 0         |  |  |
|         |      | Shiraz-71T | 2263 | 0.975531 | 0         |  |  |
|         |      | Shiraz-3T  | 242  | 0        | -0.336434 |  |  |
|         |      | Shiraz-4T  | 261  | 0        | -0.336249 |  |  |

|        |      |            |      |          |           |  |  |
|--------|------|------------|------|----------|-----------|--|--|
|        |      | Shiraz-16T | 295  | 0.591657 | 0         |  |  |
|        |      | Shiraz-36T | 433  | 0        | -0.803961 |  |  |
|        |      | Shiraz-44T | 899  | 0        | -1.09697  |  |  |
|        |      | Shiraz-49T | 1170 | 0        | -0.967436 |  |  |
|        |      | Shiraz-18T | 1457 | 0.643204 | 0         |  |  |
|        |      | Shiraz-22T | 1673 | 0.611783 | 0         |  |  |
|        |      | Shiraz-25T | 1719 | 0.472955 | 0         |  |  |
|        |      | Shiraz-28T | 1762 | 0.562311 | 0         |  |  |
|        |      | Shiraz-29T | 1801 | 0.815343 | 0         |  |  |
|        |      | Shiraz-32T | 1870 | 0.729766 | 0         |  |  |
|        |      | Shiraz-35T | 1933 | 0.488535 | 0         |  |  |
|        |      | Shiraz-58T | 2223 | 0.833364 | 0         |  |  |
|        |      | Shiraz-71T | 2263 | 0.975531 | 0         |  |  |
|        |      | Shiraz-3T  | 242  | 0        | -0.336434 |  |  |
|        |      | Shiraz-4T  | 261  | 0        | -0.336249 |  |  |
|        |      | Shiraz-16T | 295  | 0.591657 | 0         |  |  |
|        |      | Shiraz-36T | 433  | 0        | -0.803961 |  |  |
|        |      | Shiraz-44T | 899  | 0        | -1.09697  |  |  |
|        |      | Shiraz-49T | 1170 | 0        | -0.967436 |  |  |
|        |      | Shiraz-18T | 1457 | 0.643204 | 0         |  |  |
|        |      | Shiraz-22T | 1673 | 0.611783 | 0         |  |  |
|        |      | Shiraz-25T | 1719 | 0.472955 | 0         |  |  |
|        |      | Shiraz-28T | 1762 | 0.562311 | 0         |  |  |
|        |      | Shiraz-29T | 1801 | 0.815343 | 0         |  |  |
|        |      | Shiraz-32T | 1870 | 0.729766 | 0         |  |  |
|        |      | Shiraz-35T | 1933 | 0.488535 | 0         |  |  |
|        |      | Shiraz-58T | 2223 | 0.833364 | 0         |  |  |
|        |      | Shiraz-71T | 2263 | 0.975531 | 0         |  |  |
| SLC6A8 | chrX | Shiraz-3T  | 246  | 0.531858 | 0         |  |  |
|        |      | Shiraz-3T  | 246  | 0.531858 | 0         |  |  |
|        |      | Shiraz-4T  | 261  | 0        | -0.336249 |  |  |
|        |      | Shiraz-4T  | 261  | 0        | -0.336249 |  |  |
|        |      | Shiraz-16T | 295  | 0.591657 | 0         |  |  |
|        |      | Shiraz-16T | 295  | 0.591657 | 0         |  |  |
|        |      | Shiraz-36T | 433  | 0        | -0.803961 |  |  |
|        |      | Shiraz-36T | 433  | 0        | -0.803961 |  |  |
|        |      | Shiraz-42T | 480  | 0        | -0.232915 |  |  |
|        |      | Shiraz-42T | 480  | 0        | -0.232915 |  |  |
|        |      | Shiraz-44T | 908  | 0.466743 | 0         |  |  |
|        |      | Shiraz-44T | 908  | 0.466743 | 0         |  |  |
|        |      | Shiraz-49T | 1170 | 0        | -0.967436 |  |  |
|        |      | Shiraz-49T | 1170 | 0        | -0.967436 |  |  |
|        |      | Shiraz-49T | 1173 | 0        | -0.704439 |  |  |
|        |      | Shiraz-49T | 1173 | 0        | -0.704439 |  |  |
|        |      | Shiraz-9T  | 1370 | 0.690073 | 0         |  |  |
|        |      | Shiraz-9T  | 1370 | 0.690073 | 0         |  |  |
|        |      | Shiraz-9T  | 1371 | 1.292392 | 0         |  |  |

|  |  |            |      |          |           |  |
|--|--|------------|------|----------|-----------|--|
|  |  | Shiraz-9T  | 1371 | 1.292392 | 0         |  |
|  |  | Shiraz-18T | 1457 | 0.643204 | 0         |  |
|  |  | Shiraz-18T | 1457 | 0.643204 | 0         |  |
|  |  | Shiraz-22T | 1673 | 0.611783 | 0         |  |
|  |  | Shiraz-22T | 1673 | 0.611783 | 0         |  |
|  |  | Shiraz-22T | 1678 | 0.911625 | 0         |  |
|  |  | Shiraz-22T | 1678 | 0.911625 | 0         |  |
|  |  | Shiraz-25T | 1719 | 0.472955 | 0         |  |
|  |  | Shiraz-25T | 1719 | 0.472955 | 0         |  |
|  |  | Shiraz-28T | 1762 | 0.562311 | 0         |  |
|  |  | Shiraz-28T | 1762 | 0.562311 | 0         |  |
|  |  | Shiraz-29T | 1801 | 0.815343 | 0         |  |
|  |  | Shiraz-29T | 1801 | 0.815343 | 0         |  |
|  |  | Shiraz-32T | 1870 | 0.729766 | 0         |  |
|  |  | Shiraz-32T | 1870 | 0.729766 | 0         |  |
|  |  | Shiraz-32T | 1872 | 1.504553 | 0         |  |
|  |  | Shiraz-32T | 1872 | 1.504553 | 0         |  |
|  |  | Shiraz-35T | 1933 | 0.488535 | 0         |  |
|  |  | Shiraz-35T | 1933 | 0.488535 | 0         |  |
|  |  | Shiraz-38T | 2011 | 0        | -0.406024 |  |
|  |  | Shiraz-38T | 2011 | 0        | -0.406024 |  |
|  |  | Shiraz-53T | 2115 | 0.427728 | 0         |  |
|  |  | Shiraz-53T | 2115 | 0.427728 | 0         |  |
|  |  | Shiraz-58T | 2223 | 0.833364 | 0         |  |
|  |  | Shiraz-58T | 2223 | 0.833364 | 0         |  |
|  |  | Shiraz-58T | 2226 | 1.074663 | 0         |  |
|  |  | Shiraz-58T | 2226 | 1.074663 | 0         |  |
|  |  | Shiraz-71T | 2263 | 0.975531 | 0         |  |
|  |  | Shiraz-71T | 2263 | 0.975531 | 0         |  |
|  |  | Shiraz-3T  | 246  | 0.531858 | 0         |  |
|  |  | Shiraz-3T  | 246  | 0.531858 | 0         |  |
|  |  | Shiraz-4T  | 261  | 0        | -0.336249 |  |
|  |  | Shiraz-4T  | 261  | 0        | -0.336249 |  |
|  |  | Shiraz-16T | 295  | 0.591657 | 0         |  |
|  |  | Shiraz-16T | 295  | 0.591657 | 0         |  |
|  |  | Shiraz-36T | 433  | 0        | -0.803961 |  |
|  |  | Shiraz-36T | 433  | 0        | -0.803961 |  |
|  |  | Shiraz-42T | 480  | 0        | -0.232915 |  |
|  |  | Shiraz-42T | 480  | 0        | -0.232915 |  |
|  |  | Shiraz-44T | 908  | 0.466743 | 0         |  |
|  |  | Shiraz-44T | 908  | 0.466743 | 0         |  |
|  |  | Shiraz-49T | 1170 | 0        | -0.967436 |  |
|  |  | Shiraz-49T | 1170 | 0        | -0.967436 |  |
|  |  | Shiraz-49T | 1173 | 0        | -0.704439 |  |
|  |  | Shiraz-49T | 1173 | 0        | -0.704439 |  |
|  |  | Shiraz-9T  | 1370 | 0.690073 | 0         |  |
|  |  | Shiraz-9T  | 1370 | 0.690073 | 0         |  |

|  |  |            |      |          |           |  |
|--|--|------------|------|----------|-----------|--|
|  |  | Shiraz-9T  | 1371 | 1.292392 | 0         |  |
|  |  | Shiraz-9T  | 1371 | 1.292392 | 0         |  |
|  |  | Shiraz-18T | 1457 | 0.643204 | 0         |  |
|  |  | Shiraz-18T | 1457 | 0.643204 | 0         |  |
|  |  | Shiraz-22T | 1673 | 0.611783 | 0         |  |
|  |  | Shiraz-22T | 1673 | 0.611783 | 0         |  |
|  |  | Shiraz-22T | 1678 | 0.911625 | 0         |  |
|  |  | Shiraz-22T | 1678 | 0.911625 | 0         |  |
|  |  | Shiraz-25T | 1719 | 0.472955 | 0         |  |
|  |  | Shiraz-25T | 1719 | 0.472955 | 0         |  |
|  |  | Shiraz-28T | 1762 | 0.562311 | 0         |  |
|  |  | Shiraz-28T | 1762 | 0.562311 | 0         |  |
|  |  | Shiraz-29T | 1801 | 0.815343 | 0         |  |
|  |  | Shiraz-29T | 1801 | 0.815343 | 0         |  |
|  |  | Shiraz-32T | 1870 | 0.729766 | 0         |  |
|  |  | Shiraz-32T | 1870 | 0.729766 | 0         |  |
|  |  | Shiraz-32T | 1872 | 1.504553 | 0         |  |
|  |  | Shiraz-32T | 1872 | 1.504553 | 0         |  |
|  |  | Shiraz-35T | 1933 | 0.488535 | 0         |  |
|  |  | Shiraz-35T | 1933 | 0.488535 | 0         |  |
|  |  | Shiraz-38T | 2011 | 0        | -0.406024 |  |
|  |  | Shiraz-38T | 2011 | 0        | -0.406024 |  |
|  |  | Shiraz-53T | 2115 | 0.427728 | 0         |  |
|  |  | Shiraz-53T | 2115 | 0.427728 | 0         |  |
|  |  | Shiraz-58T | 2223 | 0.833364 | 0         |  |
|  |  | Shiraz-58T | 2223 | 0.833364 | 0         |  |
|  |  | Shiraz-58T | 2226 | 1.074663 | 0         |  |
|  |  | Shiraz-58T | 2226 | 1.074663 | 0         |  |
|  |  | Shiraz-71T | 2263 | 0.975531 | 0         |  |
|  |  | Shiraz-71T | 2263 | 0.975531 | 0         |  |
|  |  | Shiraz-3T  | 246  | 0.531858 | 0         |  |
|  |  | Shiraz-3T  | 246  | 0.531858 | 0         |  |
|  |  | Shiraz-4T  | 261  | 0        | -0.336249 |  |
|  |  | Shiraz-4T  | 261  | 0        | -0.336249 |  |
|  |  | Shiraz-16T | 295  | 0.591657 | 0         |  |
|  |  | Shiraz-16T | 295  | 0.591657 | 0         |  |
|  |  | Shiraz-36T | 433  | 0        | -0.803961 |  |
|  |  | Shiraz-36T | 433  | 0        | -0.803961 |  |
|  |  | Shiraz-42T | 480  | 0        | -0.232915 |  |
|  |  | Shiraz-42T | 480  | 0        | -0.232915 |  |
|  |  | Shiraz-44T | 908  | 0.466743 | 0         |  |
|  |  | Shiraz-44T | 908  | 0.466743 | 0         |  |
|  |  | Shiraz-49T | 1170 | 0        | -0.967436 |  |
|  |  | Shiraz-49T | 1170 | 0        | -0.967436 |  |
|  |  | Shiraz-49T | 1173 | 0        | -0.704439 |  |
|  |  | Shiraz-49T | 1173 | 0        | -0.704439 |  |
|  |  | Shiraz-9T  | 1370 | 0.690073 | 0         |  |



|        |      |            |      |          |           |  |  |
|--------|------|------------|------|----------|-----------|--|--|
|        |      | Shiraz-9T  | 1370 | 0.690073 | 0         |  |  |
|        |      | Shiraz-9T  | 1371 | 1.292392 | 0         |  |  |
|        |      | Shiraz-9T  | 1371 | 1.292392 | 0         |  |  |
|        |      | Shiraz-18T | 1457 | 0.643204 | 0         |  |  |
|        |      | Shiraz-18T | 1457 | 0.643204 | 0         |  |  |
|        |      | Shiraz-22T | 1673 | 0.611783 | 0         |  |  |
|        |      | Shiraz-22T | 1673 | 0.611783 | 0         |  |  |
|        |      | Shiraz-22T | 1678 | 0.911625 | 0         |  |  |
|        |      | Shiraz-22T | 1678 | 0.911625 | 0         |  |  |
|        |      | Shiraz-25T | 1719 | 0.472955 | 0         |  |  |
|        |      | Shiraz-25T | 1719 | 0.472955 | 0         |  |  |
|        |      | Shiraz-28T | 1762 | 0.562311 | 0         |  |  |
|        |      | Shiraz-28T | 1762 | 0.562311 | 0         |  |  |
|        |      | Shiraz-29T | 1801 | 0.815343 | 0         |  |  |
|        |      | Shiraz-29T | 1801 | 0.815343 | 0         |  |  |
|        |      | Shiraz-32T | 1870 | 0.729766 | 0         |  |  |
|        |      | Shiraz-32T | 1870 | 0.729766 | 0         |  |  |
|        |      | Shiraz-32T | 1872 | 1.504553 | 0         |  |  |
|        |      | Shiraz-32T | 1872 | 1.504553 | 0         |  |  |
|        |      | Shiraz-35T | 1933 | 0.488535 | 0         |  |  |
|        |      | Shiraz-35T | 1933 | 0.488535 | 0         |  |  |
|        |      | Shiraz-38T | 2011 | 0        | -0.406024 |  |  |
|        |      | Shiraz-38T | 2011 | 0        | -0.406024 |  |  |
|        |      | Shiraz-53T | 2115 | 0.427728 | 0         |  |  |
|        |      | Shiraz-53T | 2115 | 0.427728 | 0         |  |  |
|        |      | Shiraz-58T | 2223 | 0.833364 | 0         |  |  |
|        |      | Shiraz-58T | 2223 | 0.833364 | 0         |  |  |
|        |      | Shiraz-58T | 2226 | 1.074663 | 0         |  |  |
|        |      | Shiraz-58T | 2226 | 1.074663 | 0         |  |  |
|        |      | Shiraz-71T | 2263 | 0.975531 | 0         |  |  |
|        |      | Shiraz-71T | 2263 | 0.975531 | 0         |  |  |
| SLC7A3 | chrX | Shiraz-4T  | 261  | 0        | -0.336249 |  |  |
|        |      | Shiraz-16T | 295  | 0.591657 | 0         |  |  |
|        |      | Shiraz-36T | 433  | 0        | -0.803961 |  |  |
|        |      | Shiraz-44T | 899  | 0        | -1.09697  |  |  |
|        |      | Shiraz-44T | 900  | 0        | -0.584284 |  |  |
|        |      | Shiraz-49T | 1170 | 0        | -0.967436 |  |  |
|        |      | Shiraz-49T | 1171 | 0        | -0.612379 |  |  |
|        |      | Shiraz-77T | 1283 | 0.296555 | 0         |  |  |
|        |      | Shiraz-18T | 1457 | 0.643204 | 0         |  |  |
|        |      | Shiraz-22T | 1673 | 0.611783 | 0         |  |  |
|        |      | Shiraz-22T | 1674 | 0.887899 | 0         |  |  |
|        |      | Shiraz-25T | 1719 | 0.472955 | 0         |  |  |
|        |      | Shiraz-28T | 1762 | 0.562311 | 0         |  |  |
|        |      | Shiraz-29T | 1801 | 0.815343 | 0         |  |  |
|        |      | Shiraz-32T | 1870 | 0.729766 | 0         |  |  |
|        |      | Shiraz-35T | 1933 | 0.488535 | 0         |  |  |

|        |      |            |      |          |           |  |  |
|--------|------|------------|------|----------|-----------|--|--|
|        |      | Shiraz-58T | 2223 | 0.833364 | 0         |  |  |
|        |      | Shiraz-58T | 2224 | 1.076575 | 0         |  |  |
|        |      | Shiraz-71T | 2263 | 0.975531 | 0         |  |  |
|        |      | Shiraz-4T  | 261  | 0        | -0.336249 |  |  |
|        |      | Shiraz-16T | 295  | 0.591657 | 0         |  |  |
|        |      | Shiraz-36T | 433  | 0        | -0.803961 |  |  |
|        |      | Shiraz-44T | 899  | 0        | -1.09697  |  |  |
|        |      | Shiraz-44T | 900  | 0        | -0.584284 |  |  |
|        |      | Shiraz-49T | 1170 | 0        | -0.967436 |  |  |
|        |      | Shiraz-49T | 1171 | 0        | -0.612379 |  |  |
|        |      | Shiraz-77T | 1283 | 0.296555 | 0         |  |  |
|        |      | Shiraz-18T | 1457 | 0.643204 | 0         |  |  |
|        |      | Shiraz-22T | 1673 | 0.611783 | 0         |  |  |
|        |      | Shiraz-22T | 1674 | 0.887899 | 0         |  |  |
|        |      | Shiraz-25T | 1719 | 0.472955 | 0         |  |  |
|        |      | Shiraz-28T | 1762 | 0.562311 | 0         |  |  |
|        |      | Shiraz-29T | 1801 | 0.815343 | 0         |  |  |
|        |      | Shiraz-32T | 1870 | 0.729766 | 0         |  |  |
|        |      | Shiraz-35T | 1933 | 0.488535 | 0         |  |  |
|        |      | Shiraz-58T | 2223 | 0.833364 | 0         |  |  |
|        |      | Shiraz-58T | 2224 | 1.076575 | 0         |  |  |
|        |      | Shiraz-71T | 2263 | 0.975531 | 0         |  |  |
|        |      | Shiraz-4T  | 261  | 0        | -0.336249 |  |  |
|        |      | Shiraz-16T | 295  | 0.591657 | 0         |  |  |
|        |      | Shiraz-36T | 433  | 0        | -0.803961 |  |  |
|        |      | Shiraz-44T | 899  | 0        | -1.09697  |  |  |
|        |      | Shiraz-44T | 900  | 0        | -0.584284 |  |  |
|        |      | Shiraz-49T | 1170 | 0        | -0.967436 |  |  |
|        |      | Shiraz-49T | 1171 | 0        | -0.612379 |  |  |
|        |      | Shiraz-77T | 1283 | 0.296555 | 0         |  |  |
|        |      | Shiraz-18T | 1457 | 0.643204 | 0         |  |  |
|        |      | Shiraz-22T | 1673 | 0.611783 | 0         |  |  |
|        |      | Shiraz-22T | 1674 | 0.887899 | 0         |  |  |
|        |      | Shiraz-25T | 1719 | 0.472955 | 0         |  |  |
|        |      | Shiraz-28T | 1762 | 0.562311 | 0         |  |  |
|        |      | Shiraz-29T | 1801 | 0.815343 | 0         |  |  |
|        |      | Shiraz-32T | 1870 | 0.729766 | 0         |  |  |
|        |      | Shiraz-35T | 1933 | 0.488535 | 0         |  |  |
|        |      | Shiraz-58T | 2223 | 0.833364 | 0         |  |  |
|        |      | Shiraz-58T | 2224 | 1.076575 | 0         |  |  |
|        |      | Shiraz-71T | 2263 | 0.975531 | 0         |  |  |
| SLC9A6 | chrX | Shiraz-3T  | 242  | 0        | -0.336434 |  |  |
|        |      | Shiraz-4T  | 261  | 0        | -0.336249 |  |  |
|        |      | Shiraz-16T | 295  | 0.591657 | 0         |  |  |
|        |      | Shiraz-36T | 433  | 0        | -0.803961 |  |  |
|        |      | Shiraz-44T | 899  | 0        | -1.09697  |  |  |
|        |      | Shiraz-49T | 1170 | 0        | -0.967436 |  |  |

|        |      |            |      |          |           |  |  |
|--------|------|------------|------|----------|-----------|--|--|
|        |      | Shiraz-9T  | 1370 | 0.690073 | 0         |  |  |
|        |      | Shiraz-18T | 1457 | 0.643204 | 0         |  |  |
|        |      | Shiraz-22T | 1673 | 0.611783 | 0         |  |  |
|        |      | Shiraz-22T | 1677 | 0.789711 | 0         |  |  |
|        |      | Shiraz-25T | 1719 | 0.472955 | 0         |  |  |
|        |      | Shiraz-28T | 1762 | 0.562311 | 0         |  |  |
|        |      | Shiraz-29T | 1801 | 0.815343 | 0         |  |  |
|        |      | Shiraz-32T | 1870 | 0.729766 | 0         |  |  |
|        |      | Shiraz-35T | 1933 | 0.488535 | 0         |  |  |
|        |      | Shiraz-58T | 2223 | 0.833364 | 0         |  |  |
|        |      | Shiraz-71T | 2263 | 0.975531 | 0         |  |  |
|        |      | Shiraz-3T  | 242  | 0        | -0.336434 |  |  |
|        |      | Shiraz-4T  | 261  | 0        | -0.336249 |  |  |
|        |      | Shiraz-16T | 295  | 0.591657 | 0         |  |  |
|        |      | Shiraz-36T | 433  | 0        | -0.803961 |  |  |
|        |      | Shiraz-44T | 899  | 0        | -1.09697  |  |  |
|        |      | Shiraz-49T | 1170 | 0        | -0.967436 |  |  |
|        |      | Shiraz-9T  | 1370 | 0.690073 | 0         |  |  |
|        |      | Shiraz-18T | 1457 | 0.643204 | 0         |  |  |
|        |      | Shiraz-22T | 1673 | 0.611783 | 0         |  |  |
|        |      | Shiraz-22T | 1677 | 0.789711 | 0         |  |  |
|        |      | Shiraz-25T | 1719 | 0.472955 | 0         |  |  |
|        |      | Shiraz-28T | 1762 | 0.562311 | 0         |  |  |
|        |      | Shiraz-29T | 1801 | 0.815343 | 0         |  |  |
|        |      | Shiraz-32T | 1870 | 0.729766 | 0         |  |  |
|        |      | Shiraz-35T | 1933 | 0.488535 | 0         |  |  |
|        |      | Shiraz-58T | 2223 | 0.833364 | 0         |  |  |
|        |      | Shiraz-71T | 2263 | 0.975531 | 0         |  |  |
|        |      | Shiraz-3T  | 242  | 0        | -0.336434 |  |  |
|        |      | Shiraz-4T  | 261  | 0        | -0.336249 |  |  |
|        |      | Shiraz-16T | 295  | 0.591657 | 0         |  |  |
|        |      | Shiraz-36T | 433  | 0        | -0.803961 |  |  |
|        |      | Shiraz-44T | 899  | 0        | -1.09697  |  |  |
|        |      | Shiraz-49T | 1170 | 0        | -0.967436 |  |  |
|        |      | Shiraz-9T  | 1370 | 0.690073 | 0         |  |  |
|        |      | Shiraz-18T | 1457 | 0.643204 | 0         |  |  |
|        |      | Shiraz-22T | 1673 | 0.611783 | 0         |  |  |
|        |      | Shiraz-22T | 1677 | 0.789711 | 0         |  |  |
|        |      | Shiraz-25T | 1719 | 0.472955 | 0         |  |  |
|        |      | Shiraz-28T | 1762 | 0.562311 | 0         |  |  |
|        |      | Shiraz-29T | 1801 | 0.815343 | 0         |  |  |
|        |      | Shiraz-32T | 1870 | 0.729766 | 0         |  |  |
|        |      | Shiraz-35T | 1933 | 0.488535 | 0         |  |  |
|        |      | Shiraz-58T | 2223 | 0.833364 | 0         |  |  |
|        |      | Shiraz-71T | 2263 | 0.975531 | 0         |  |  |
| SLC9A7 | chrX | Shiraz-3T  | 235  | 0        | -0.28401  |  |  |
|        |      | Shiraz-4T  | 260  | 0        | -0.324128 |  |  |

|  |            |      |          |           |  |
|--|------------|------|----------|-----------|--|
|  | Shiraz-16T | 294  | 0.655804 | 0         |  |
|  | Shiraz-31T | 345  | 0.103301 | 0         |  |
|  | Shiraz-36T | 431  | 0        | -0.78035  |  |
|  | Shiraz-36T | 432  | 0        | -0.6692   |  |
|  | Shiraz-44T | 891  | 0        | -0.954044 |  |
|  | Shiraz-46T | 991  | 0.139564 | 0         |  |
|  | Shiraz-49T | 1166 | 0        | -0.917235 |  |
|  | Shiraz-77T | 1282 | 0.213849 | 0         |  |
|  | Shiraz-9T  | 1368 | 0.199713 | 0         |  |
|  | Shiraz-18T | 1455 | 0        | -0.186773 |  |
|  | Shiraz-22T | 1669 | 0.695915 | 0         |  |
|  | Shiraz-25T | 1717 | 0.420447 | 0         |  |
|  | Shiraz-28T | 1760 | 0.538181 | 0         |  |
|  | Shiraz-29T | 1800 | 0.672527 | 0         |  |
|  | Shiraz-32T | 1869 | 0.776805 | 0         |  |
|  | Shiraz-35T | 1932 | 0.507141 | 0         |  |
|  | Shiraz-40T | 2051 | 0.098506 | 0         |  |
|  | Shiraz-58T | 2221 | 0.871948 | 0         |  |
|  | Shiraz-71T | 2260 | 0.68394  | 0         |  |
|  | Shiraz-71T | 2262 | 0.986748 | 0         |  |
|  | Shiraz-3T  | 235  | 0        | -0.28401  |  |
|  | Shiraz-4T  | 260  | 0        | -0.324128 |  |
|  | Shiraz-16T | 294  | 0.655804 | 0         |  |
|  | Shiraz-31T | 345  | 0.103301 | 0         |  |
|  | Shiraz-36T | 431  | 0        | -0.78035  |  |
|  | Shiraz-36T | 432  | 0        | -0.6692   |  |
|  | Shiraz-44T | 891  | 0        | -0.954044 |  |
|  | Shiraz-46T | 991  | 0.139564 | 0         |  |
|  | Shiraz-49T | 1166 | 0        | -0.917235 |  |
|  | Shiraz-77T | 1282 | 0.213849 | 0         |  |
|  | Shiraz-9T  | 1368 | 0.199713 | 0         |  |
|  | Shiraz-18T | 1455 | 0        | -0.186773 |  |
|  | Shiraz-22T | 1669 | 0.695915 | 0         |  |
|  | Shiraz-25T | 1717 | 0.420447 | 0         |  |
|  | Shiraz-28T | 1760 | 0.538181 | 0         |  |
|  | Shiraz-29T | 1800 | 0.672527 | 0         |  |
|  | Shiraz-32T | 1869 | 0.776805 | 0         |  |
|  | Shiraz-35T | 1932 | 0.507141 | 0         |  |
|  | Shiraz-40T | 2051 | 0.098506 | 0         |  |
|  | Shiraz-58T | 2221 | 0.871948 | 0         |  |
|  | Shiraz-71T | 2260 | 0.68394  | 0         |  |
|  | Shiraz-71T | 2262 | 0.986748 | 0         |  |
|  | Shiraz-3T  | 235  | 0        | -0.28401  |  |
|  | Shiraz-4T  | 260  | 0        | -0.324128 |  |
|  | Shiraz-16T | 294  | 0.655804 | 0         |  |
|  | Shiraz-31T | 345  | 0.103301 | 0         |  |
|  | Shiraz-36T | 431  | 0        | -0.78035  |  |

|         |      |            |      |          |           |  |  |
|---------|------|------------|------|----------|-----------|--|--|
|         |      | Shiraz-36T | 432  | 0        | -0.6692   |  |  |
|         |      | Shiraz-44T | 891  | 0        | -0.954044 |  |  |
|         |      | Shiraz-46T | 991  | 0.139564 | 0         |  |  |
|         |      | Shiraz-49T | 1166 | 0        | -0.917235 |  |  |
|         |      | Shiraz-77T | 1282 | 0.213849 | 0         |  |  |
|         |      | Shiraz-9T  | 1368 | 0.199713 | 0         |  |  |
|         |      | Shiraz-18T | 1455 | 0        | -0.186773 |  |  |
|         |      | Shiraz-22T | 1669 | 0.695915 | 0         |  |  |
|         |      | Shiraz-25T | 1717 | 0.420447 | 0         |  |  |
|         |      | Shiraz-28T | 1760 | 0.538181 | 0         |  |  |
|         |      | Shiraz-29T | 1800 | 0.672527 | 0         |  |  |
|         |      | Shiraz-32T | 1869 | 0.776805 | 0         |  |  |
|         |      | Shiraz-35T | 1932 | 0.507141 | 0         |  |  |
|         |      | Shiraz-40T | 2051 | 0.098506 | 0         |  |  |
|         |      | Shiraz-58T | 2221 | 0.871948 | 0         |  |  |
|         |      | Shiraz-71T | 2260 | 0.68394  | 0         |  |  |
|         |      | Shiraz-71T | 2262 | 0.986748 | 0         |  |  |
| SLITRK2 | chrX | Shiraz-3T  | 242  | 0        | -0.336434 |  |  |
|         |      | Shiraz-3T  | 242  | 0        | -0.336434 |  |  |
|         |      | Shiraz-4T  | 261  | 0        | -0.336249 |  |  |
|         |      | Shiraz-4T  | 261  | 0        | -0.336249 |  |  |
|         |      | Shiraz-16T | 295  | 0.591657 | 0         |  |  |
|         |      | Shiraz-16T | 295  | 0.591657 | 0         |  |  |
|         |      | Shiraz-36T | 433  | 0        | -0.803961 |  |  |
|         |      | Shiraz-36T | 433  | 0        | -0.803961 |  |  |
|         |      | Shiraz-44T | 899  | 0        | -1.09697  |  |  |
|         |      | Shiraz-44T | 899  | 0        | -1.09697  |  |  |
|         |      | Shiraz-44T | 907  | 0        | -1.370847 |  |  |
|         |      | Shiraz-44T | 907  | 0        | -1.370847 |  |  |
|         |      | Shiraz-49T | 1170 | 0        | -0.967436 |  |  |
|         |      | Shiraz-49T | 1170 | 0        | -0.967436 |  |  |
|         |      | Shiraz-9T  | 1370 | 0.690073 | 0         |  |  |
|         |      | Shiraz-9T  | 1370 | 0.690073 | 0         |  |  |
|         |      | Shiraz-18T | 1457 | 0.643204 | 0         |  |  |
|         |      | Shiraz-18T | 1457 | 0.643204 | 0         |  |  |
|         |      | Shiraz-22T | 1673 | 0.611783 | 0         |  |  |
|         |      | Shiraz-22T | 1673 | 0.611783 | 0         |  |  |
|         |      | Shiraz-25T | 1719 | 0.472955 | 0         |  |  |
|         |      | Shiraz-25T | 1719 | 0.472955 | 0         |  |  |
|         |      | Shiraz-28T | 1762 | 0.562311 | 0         |  |  |
|         |      | Shiraz-28T | 1762 | 0.562311 | 0         |  |  |
|         |      | Shiraz-29T | 1801 | 0.815343 | 0         |  |  |
|         |      | Shiraz-29T | 1801 | 0.815343 | 0         |  |  |
|         |      | Shiraz-32T | 1870 | 0.729766 | 0         |  |  |
|         |      | Shiraz-32T | 1870 | 0.729766 | 0         |  |  |
|         |      | Shiraz-35T | 1933 | 0.488535 | 0         |  |  |
|         |      | Shiraz-35T | 1933 | 0.488535 | 0         |  |  |

|  |            |      |          |           |  |
|--|------------|------|----------|-----------|--|
|  | Shiraz-58T | 2223 | 0.833364 | 0         |  |
|  | Shiraz-58T | 2223 | 0.833364 | 0         |  |
|  | Shiraz-71T | 2263 | 0.975531 | 0         |  |
|  | Shiraz-71T | 2263 | 0.975531 | 0         |  |
|  | Shiraz-3T  | 242  | 0        | -0.336434 |  |
|  | Shiraz-3T  | 242  | 0        | -0.336434 |  |
|  | Shiraz-4T  | 261  | 0        | -0.336249 |  |
|  | Shiraz-4T  | 261  | 0        | -0.336249 |  |
|  | Shiraz-16T | 295  | 0.591657 | 0         |  |
|  | Shiraz-16T | 295  | 0.591657 | 0         |  |
|  | Shiraz-36T | 433  | 0        | -0.803961 |  |
|  | Shiraz-36T | 433  | 0        | -0.803961 |  |
|  | Shiraz-44T | 899  | 0        | -1.09697  |  |
|  | Shiraz-44T | 899  | 0        | -1.09697  |  |
|  | Shiraz-44T | 907  | 0        | -1.370847 |  |
|  | Shiraz-44T | 907  | 0        | -1.370847 |  |
|  | Shiraz-49T | 1170 | 0        | -0.967436 |  |
|  | Shiraz-49T | 1170 | 0        | -0.967436 |  |
|  | Shiraz-9T  | 1370 | 0.690073 | 0         |  |
|  | Shiraz-9T  | 1370 | 0.690073 | 0         |  |
|  | Shiraz-18T | 1457 | 0.643204 | 0         |  |
|  | Shiraz-18T | 1457 | 0.643204 | 0         |  |
|  | Shiraz-22T | 1673 | 0.611783 | 0         |  |
|  | Shiraz-22T | 1673 | 0.611783 | 0         |  |
|  | Shiraz-25T | 1719 | 0.472955 | 0         |  |
|  | Shiraz-25T | 1719 | 0.472955 | 0         |  |
|  | Shiraz-28T | 1762 | 0.562311 | 0         |  |
|  | Shiraz-28T | 1762 | 0.562311 | 0         |  |
|  | Shiraz-29T | 1801 | 0.815343 | 0         |  |
|  | Shiraz-29T | 1801 | 0.815343 | 0         |  |
|  | Shiraz-32T | 1870 | 0.729766 | 0         |  |
|  | Shiraz-32T | 1870 | 0.729766 | 0         |  |
|  | Shiraz-35T | 1933 | 0.488535 | 0         |  |
|  | Shiraz-35T | 1933 | 0.488535 | 0         |  |
|  | Shiraz-58T | 2223 | 0.833364 | 0         |  |
|  | Shiraz-58T | 2223 | 0.833364 | 0         |  |
|  | Shiraz-71T | 2263 | 0.975531 | 0         |  |
|  | Shiraz-71T | 2263 | 0.975531 | 0         |  |
|  | Shiraz-3T  | 242  | 0        | -0.336434 |  |
|  | Shiraz-3T  | 242  | 0        | -0.336434 |  |
|  | Shiraz-4T  | 261  | 0        | -0.336249 |  |
|  | Shiraz-4T  | 261  | 0        | -0.336249 |  |
|  | Shiraz-16T | 295  | 0.591657 | 0         |  |
|  | Shiraz-16T | 295  | 0.591657 | 0         |  |
|  | Shiraz-36T | 433  | 0        | -0.803961 |  |
|  | Shiraz-36T | 433  | 0        | -0.803961 |  |
|  | Shiraz-44T | 899  | 0        | -1.09697  |  |

|         |      |            |      |          |           |  |  |
|---------|------|------------|------|----------|-----------|--|--|
|         |      | Shiraz-44T | 899  | 0        | -1.09697  |  |  |
|         |      | Shiraz-44T | 907  | 0        | -1.370847 |  |  |
|         |      | Shiraz-44T | 907  | 0        | -1.370847 |  |  |
|         |      | Shiraz-49T | 1170 | 0        | -0.967436 |  |  |
|         |      | Shiraz-49T | 1170 | 0        | -0.967436 |  |  |
|         |      | Shiraz-9T  | 1370 | 0.690073 | 0         |  |  |
|         |      | Shiraz-9T  | 1370 | 0.690073 | 0         |  |  |
|         |      | Shiraz-18T | 1457 | 0.643204 | 0         |  |  |
|         |      | Shiraz-18T | 1457 | 0.643204 | 0         |  |  |
|         |      | Shiraz-22T | 1673 | 0.611783 | 0         |  |  |
|         |      | Shiraz-22T | 1673 | 0.611783 | 0         |  |  |
|         |      | Shiraz-25T | 1719 | 0.472955 | 0         |  |  |
|         |      | Shiraz-25T | 1719 | 0.472955 | 0         |  |  |
|         |      | Shiraz-28T | 1762 | 0.562311 | 0         |  |  |
|         |      | Shiraz-28T | 1762 | 0.562311 | 0         |  |  |
|         |      | Shiraz-29T | 1801 | 0.815343 | 0         |  |  |
|         |      | Shiraz-29T | 1801 | 0.815343 | 0         |  |  |
|         |      | Shiraz-32T | 1870 | 0.729766 | 0         |  |  |
|         |      | Shiraz-32T | 1870 | 0.729766 | 0         |  |  |
|         |      | Shiraz-35T | 1933 | 0.488535 | 0         |  |  |
|         |      | Shiraz-35T | 1933 | 0.488535 | 0         |  |  |
|         |      | Shiraz-58T | 2223 | 0.833364 | 0         |  |  |
|         |      | Shiraz-58T | 2223 | 0.833364 | 0         |  |  |
|         |      | Shiraz-71T | 2263 | 0.975531 | 0         |  |  |
|         |      | Shiraz-71T | 2263 | 0.975531 | 0         |  |  |
| SLITRK4 | chrX | Shiraz-3T  | 242  | 0        | -0.336434 |  |  |
|         |      | Shiraz-4T  | 261  | 0        | -0.336249 |  |  |
|         |      | Shiraz-16T | 295  | 0.591657 | 0         |  |  |
|         |      | Shiraz-36T | 433  | 0        | -0.803961 |  |  |
|         |      | Shiraz-44T | 899  | 0        | -1.09697  |  |  |
|         |      | Shiraz-44T | 907  | 0        | -1.370847 |  |  |
|         |      | Shiraz-49T | 1170 | 0        | -0.967436 |  |  |
|         |      | Shiraz-9T  | 1370 | 0.690073 | 0         |  |  |
|         |      | Shiraz-18T | 1457 | 0.643204 | 0         |  |  |
|         |      | Shiraz-22T | 1673 | 0.611783 | 0         |  |  |
|         |      | Shiraz-25T | 1719 | 0.472955 | 0         |  |  |
|         |      | Shiraz-28T | 1762 | 0.562311 | 0         |  |  |
|         |      | Shiraz-29T | 1801 | 0.815343 | 0         |  |  |
|         |      | Shiraz-32T | 1870 | 0.729766 | 0         |  |  |
|         |      | Shiraz-35T | 1933 | 0.488535 | 0         |  |  |
|         |      | Shiraz-58T | 2223 | 0.833364 | 0         |  |  |
|         |      | Shiraz-71T | 2263 | 0.975531 | 0         |  |  |
|         |      | Shiraz-3T  | 242  | 0        | -0.336434 |  |  |
|         |      | Shiraz-4T  | 261  | 0        | -0.336249 |  |  |
|         |      | Shiraz-16T | 295  | 0.591657 | 0         |  |  |
|         |      | Shiraz-36T | 433  | 0        | -0.803961 |  |  |
|         |      | Shiraz-44T | 899  | 0        | -1.09697  |  |  |

|         |      |            |      |          |           |  |  |
|---------|------|------------|------|----------|-----------|--|--|
|         |      | Shiraz-44T | 907  | 0        | -1.370847 |  |  |
|         |      | Shiraz-49T | 1170 | 0        | -0.967436 |  |  |
|         |      | Shiraz-9T  | 1370 | 0.690073 | 0         |  |  |
|         |      | Shiraz-18T | 1457 | 0.643204 | 0         |  |  |
|         |      | Shiraz-22T | 1673 | 0.611783 | 0         |  |  |
|         |      | Shiraz-25T | 1719 | 0.472955 | 0         |  |  |
|         |      | Shiraz-28T | 1762 | 0.562311 | 0         |  |  |
|         |      | Shiraz-29T | 1801 | 0.815343 | 0         |  |  |
|         |      | Shiraz-32T | 1870 | 0.729766 | 0         |  |  |
|         |      | Shiraz-35T | 1933 | 0.488535 | 0         |  |  |
|         |      | Shiraz-58T | 2223 | 0.833364 | 0         |  |  |
|         |      | Shiraz-71T | 2263 | 0.975531 | 0         |  |  |
|         |      | Shiraz-3T  | 242  | 0        | -0.336434 |  |  |
|         |      | Shiraz-4T  | 261  | 0        | -0.336249 |  |  |
|         |      | Shiraz-16T | 295  | 0.591657 | 0         |  |  |
|         |      | Shiraz-36T | 433  | 0        | -0.803961 |  |  |
|         |      | Shiraz-44T | 899  | 0        | -1.09697  |  |  |
|         |      | Shiraz-44T | 907  | 0        | -1.370847 |  |  |
|         |      | Shiraz-49T | 1170 | 0        | -0.967436 |  |  |
|         |      | Shiraz-9T  | 1370 | 0.690073 | 0         |  |  |
|         |      | Shiraz-18T | 1457 | 0.643204 | 0         |  |  |
|         |      | Shiraz-22T | 1673 | 0.611783 | 0         |  |  |
|         |      | Shiraz-25T | 1719 | 0.472955 | 0         |  |  |
|         |      | Shiraz-28T | 1762 | 0.562311 | 0         |  |  |
|         |      | Shiraz-29T | 1801 | 0.815343 | 0         |  |  |
|         |      | Shiraz-32T | 1870 | 0.729766 | 0         |  |  |
|         |      | Shiraz-35T | 1933 | 0.488535 | 0         |  |  |
|         |      | Shiraz-58T | 2223 | 0.833364 | 0         |  |  |
|         |      | Shiraz-71T | 2263 | 0.975531 | 0         |  |  |
| SMARCA1 | chrX | Shiraz-3T  | 242  | 0        | -0.336434 |  |  |
|         |      | Shiraz-4T  | 261  | 0        | -0.336249 |  |  |
|         |      | Shiraz-16T | 295  | 0.591657 | 0         |  |  |
|         |      | Shiraz-36T | 433  | 0        | -0.803961 |  |  |
|         |      | Shiraz-44T | 899  | 0        | -1.09697  |  |  |
|         |      | Shiraz-49T | 1170 | 0        | -0.967436 |  |  |
|         |      | Shiraz-9T  | 1370 | 0.690073 | 0         |  |  |
|         |      | Shiraz-18T | 1457 | 0.643204 | 0         |  |  |
|         |      | Shiraz-22T | 1673 | 0.611783 | 0         |  |  |
|         |      | Shiraz-22T | 1677 | 0.789711 | 0         |  |  |
|         |      | Shiraz-25T | 1719 | 0.472955 | 0         |  |  |
|         |      | Shiraz-28T | 1762 | 0.562311 | 0         |  |  |
|         |      | Shiraz-29T | 1801 | 0.815343 | 0         |  |  |
|         |      | Shiraz-32T | 1870 | 0.729766 | 0         |  |  |
|         |      | Shiraz-35T | 1933 | 0.488535 | 0         |  |  |
|         |      | Shiraz-53T | 2114 | 0        | -0.727152 |  |  |
|         |      | Shiraz-58T | 2223 | 0.833364 | 0         |  |  |
|         |      | Shiraz-71T | 2263 | 0.975531 | 0         |  |  |



|         |      |            |      |          |           |  |  |
|---------|------|------------|------|----------|-----------|--|--|
|         |      | Shiraz-3T  | 242  | 0        | -0.336434 |  |  |
|         |      | Shiraz-4T  | 261  | 0        | -0.336249 |  |  |
|         |      | Shiraz-16T | 295  | 0.591657 | 0         |  |  |
|         |      | Shiraz-36T | 433  | 0        | -0.803961 |  |  |
|         |      | Shiraz-44T | 899  | 0        | -1.09697  |  |  |
|         |      | Shiraz-49T | 1170 | 0        | -0.967436 |  |  |
|         |      | Shiraz-9T  | 1370 | 0.690073 | 0         |  |  |
|         |      | Shiraz-18T | 1457 | 0.643204 | 0         |  |  |
|         |      | Shiraz-22T | 1673 | 0.611783 | 0         |  |  |
|         |      | Shiraz-22T | 1677 | 0.789711 | 0         |  |  |
|         |      | Shiraz-25T | 1719 | 0.472955 | 0         |  |  |
|         |      | Shiraz-28T | 1762 | 0.562311 | 0         |  |  |
|         |      | Shiraz-29T | 1801 | 0.815343 | 0         |  |  |
|         |      | Shiraz-32T | 1870 | 0.729766 | 0         |  |  |
|         |      | Shiraz-35T | 1933 | 0.488535 | 0         |  |  |
|         |      | Shiraz-53T | 2114 | 0        | -0.727152 |  |  |
|         |      | Shiraz-58T | 2223 | 0.833364 | 0         |  |  |
|         |      | Shiraz-71T | 2263 | 0.975531 | 0         |  |  |
|         |      | Shiraz-3T  | 242  | 0        | -0.336434 |  |  |
|         |      | Shiraz-4T  | 261  | 0        | -0.336249 |  |  |
|         |      | Shiraz-16T | 295  | 0.591657 | 0         |  |  |
|         |      | Shiraz-36T | 433  | 0        | -0.803961 |  |  |
|         |      | Shiraz-44T | 899  | 0        | -1.09697  |  |  |
|         |      | Shiraz-49T | 1170 | 0        | -0.967436 |  |  |
|         |      | Shiraz-9T  | 1370 | 0.690073 | 0         |  |  |
|         |      | Shiraz-18T | 1457 | 0.643204 | 0         |  |  |
|         |      | Shiraz-22T | 1673 | 0.611783 | 0         |  |  |
|         |      | Shiraz-22T | 1677 | 0.789711 | 0         |  |  |
|         |      | Shiraz-25T | 1719 | 0.472955 | 0         |  |  |
|         |      | Shiraz-28T | 1762 | 0.562311 | 0         |  |  |
|         |      | Shiraz-29T | 1801 | 0.815343 | 0         |  |  |
|         |      | Shiraz-32T | 1870 | 0.729766 | 0         |  |  |
|         |      | Shiraz-35T | 1933 | 0.488535 | 0         |  |  |
|         |      | Shiraz-53T | 2114 | 0        | -0.727152 |  |  |
|         |      | Shiraz-58T | 2223 | 0.833364 | 0         |  |  |
|         |      | Shiraz-71T | 2263 | 0.975531 | 0         |  |  |
| SMARCD3 | chr7 | Shiraz-3T  | 90   | 0.219276 | 0         |  |  |
|         |      | Shiraz-3T  | 90   | 0.219276 | 0         |  |  |
|         |      | Shiraz-3T  | 90   | 0.219276 | 0         |  |  |
|         |      | Shiraz-3T  | 99   | 0.454766 | 0         |  |  |
|         |      | Shiraz-3T  | 99   | 0.454766 | 0         |  |  |
|         |      | Shiraz-3T  | 99   | 0.454766 | 0         |  |  |
|         |      | Shiraz-4T  | 253  | 0.372918 | 0         |  |  |
|         |      | Shiraz-4T  | 253  | 0.372918 | 0         |  |  |
|         |      | Shiraz-4T  | 253  | 0.372918 | 0         |  |  |
|         |      | Shiraz-36T | 378  | 0.179558 | 0         |  |  |
|         |      | Shiraz-36T | 378  | 0.179558 | 0         |  |  |

|  |            |      |          |           |  |
|--|------------|------|----------|-----------|--|
|  | Shiraz-36T | 378  | 0.179558 | 0         |  |
|  | Shiraz-44T | 646  | 0.471276 | 0         |  |
|  | Shiraz-44T | 646  | 0.471276 | 0         |  |
|  | Shiraz-44T | 646  | 0.471276 | 0         |  |
|  | Shiraz-44T | 647  | 1.496173 | 0         |  |
|  | Shiraz-44T | 647  | 1.496173 | 0         |  |
|  | Shiraz-44T | 647  | 1.496173 | 0         |  |
|  | Shiraz-46T | 943  | 0.093799 | 0         |  |
|  | Shiraz-46T | 943  | 0.093799 | 0         |  |
|  | Shiraz-46T | 943  | 0.093799 | 0         |  |
|  | Shiraz-9T  | 1325 | 0.221899 | 0         |  |
|  | Shiraz-9T  | 1325 | 0.221899 | 0         |  |
|  | Shiraz-9T  | 1325 | 0.221899 | 0         |  |
|  | Shiraz-18T | 1434 | 0.244465 | 0         |  |
|  | Shiraz-18T | 1434 | 0.244465 | 0         |  |
|  | Shiraz-18T | 1434 | 0.244465 | 0         |  |
|  | Shiraz-22T | 1555 | 0.427999 | 0         |  |
|  | Shiraz-22T | 1555 | 0.427999 | 0         |  |
|  | Shiraz-22T | 1555 | 0.427999 | 0         |  |
|  | Shiraz-25T | 1698 | 0.21835  | 0         |  |
|  | Shiraz-25T | 1698 | 0.21835  | 0         |  |
|  | Shiraz-25T | 1698 | 0.21835  | 0         |  |
|  | Shiraz-28T | 1735 | 0.350744 | 0         |  |
|  | Shiraz-28T | 1735 | 0.350744 | 0         |  |
|  | Shiraz-28T | 1735 | 0.350744 | 0         |  |
|  | Shiraz-29T | 1778 | 0.120767 | 0         |  |
|  | Shiraz-29T | 1778 | 0.120767 | 0         |  |
|  | Shiraz-29T | 1778 | 0.120767 | 0         |  |
|  | Shiraz-32T | 1833 | 0.551336 | 0         |  |
|  | Shiraz-32T | 1833 | 0.551336 | 0         |  |
|  | Shiraz-32T | 1833 | 0.551336 | 0         |  |
|  | Shiraz-38T | 1951 | 0.250891 | 0         |  |
|  | Shiraz-38T | 1951 | 0.250891 | 0         |  |
|  | Shiraz-38T | 1951 | 0.250891 | 0         |  |
|  | Shiraz-38T | 1952 | 0        | -0.163211 |  |
|  | Shiraz-38T | 1952 | 0        | -0.163211 |  |
|  | Shiraz-38T | 1952 | 0        | -0.163211 |  |
|  | Shiraz-53T | 2078 | 0.287202 | 0         |  |
|  | Shiraz-53T | 2078 | 0.287202 | 0         |  |
|  | Shiraz-53T | 2078 | 0.287202 | 0         |  |
|  | Shiraz-58T | 2162 | 0.221505 | 0         |  |
|  | Shiraz-58T | 2162 | 0.221505 | 0         |  |
|  | Shiraz-58T | 2162 | 0.221505 | 0         |  |
|  | Shiraz-71T | 2238 | 0.603631 | 0         |  |
|  | Shiraz-71T | 2238 | 0.603631 | 0         |  |
|  | Shiraz-71T | 2238 | 0.603631 | 0         |  |
|  | Shiraz-3T  | 90   | 0.219276 | 0         |  |

|  |  |            |      |          |           |  |  |
|--|--|------------|------|----------|-----------|--|--|
|  |  | Shiraz-3T  | 90   | 0.219276 | 0         |  |  |
|  |  | Shiraz-3T  | 90   | 0.219276 | 0         |  |  |
|  |  | Shiraz-3T  | 99   | 0.454766 | 0         |  |  |
|  |  | Shiraz-3T  | 99   | 0.454766 | 0         |  |  |
|  |  | Shiraz-3T  | 99   | 0.454766 | 0         |  |  |
|  |  | Shiraz-4T  | 253  | 0.372918 | 0         |  |  |
|  |  | Shiraz-4T  | 253  | 0.372918 | 0         |  |  |
|  |  | Shiraz-4T  | 253  | 0.372918 | 0         |  |  |
|  |  | Shiraz-36T | 378  | 0.179558 | 0         |  |  |
|  |  | Shiraz-36T | 378  | 0.179558 | 0         |  |  |
|  |  | Shiraz-36T | 378  | 0.179558 | 0         |  |  |
|  |  | Shiraz-44T | 646  | 0.471276 | 0         |  |  |
|  |  | Shiraz-44T | 646  | 0.471276 | 0         |  |  |
|  |  | Shiraz-44T | 646  | 0.471276 | 0         |  |  |
|  |  | Shiraz-44T | 647  | 1.496173 | 0         |  |  |
|  |  | Shiraz-44T | 647  | 1.496173 | 0         |  |  |
|  |  | Shiraz-44T | 647  | 1.496173 | 0         |  |  |
|  |  | Shiraz-46T | 943  | 0.093799 | 0         |  |  |
|  |  | Shiraz-46T | 943  | 0.093799 | 0         |  |  |
|  |  | Shiraz-46T | 943  | 0.093799 | 0         |  |  |
|  |  | Shiraz-9T  | 1325 | 0.221899 | 0         |  |  |
|  |  | Shiraz-9T  | 1325 | 0.221899 | 0         |  |  |
|  |  | Shiraz-9T  | 1325 | 0.221899 | 0         |  |  |
|  |  | Shiraz-18T | 1434 | 0.244465 | 0         |  |  |
|  |  | Shiraz-18T | 1434 | 0.244465 | 0         |  |  |
|  |  | Shiraz-18T | 1434 | 0.244465 | 0         |  |  |
|  |  | Shiraz-22T | 1555 | 0.427999 | 0         |  |  |
|  |  | Shiraz-22T | 1555 | 0.427999 | 0         |  |  |
|  |  | Shiraz-22T | 1555 | 0.427999 | 0         |  |  |
|  |  | Shiraz-25T | 1698 | 0.21835  | 0         |  |  |
|  |  | Shiraz-25T | 1698 | 0.21835  | 0         |  |  |
|  |  | Shiraz-25T | 1698 | 0.21835  | 0         |  |  |
|  |  | Shiraz-28T | 1735 | 0.350744 | 0         |  |  |
|  |  | Shiraz-28T | 1735 | 0.350744 | 0         |  |  |
|  |  | Shiraz-28T | 1735 | 0.350744 | 0         |  |  |
|  |  | Shiraz-29T | 1778 | 0.120767 | 0         |  |  |
|  |  | Shiraz-29T | 1778 | 0.120767 | 0         |  |  |
|  |  | Shiraz-29T | 1778 | 0.120767 | 0         |  |  |
|  |  | Shiraz-32T | 1833 | 0.551336 | 0         |  |  |
|  |  | Shiraz-32T | 1833 | 0.551336 | 0         |  |  |
|  |  | Shiraz-32T | 1833 | 0.551336 | 0         |  |  |
|  |  | Shiraz-38T | 1951 | 0.250891 | 0         |  |  |
|  |  | Shiraz-38T | 1951 | 0.250891 | 0         |  |  |
|  |  | Shiraz-38T | 1951 | 0.250891 | 0         |  |  |
|  |  | Shiraz-38T | 1952 | 0        | -0.163211 |  |  |
|  |  | Shiraz-38T | 1952 | 0        | -0.163211 |  |  |
|  |  | Shiraz-38T | 1952 | 0        | -0.163211 |  |  |

|  |  |            |      |          |   |  |  |
|--|--|------------|------|----------|---|--|--|
|  |  | Shiraz-53T | 2078 | 0.287202 | 0 |  |  |
|  |  | Shiraz-53T | 2078 | 0.287202 | 0 |  |  |
|  |  | Shiraz-53T | 2078 | 0.287202 | 0 |  |  |
|  |  | Shiraz-58T | 2162 | 0.221505 | 0 |  |  |
|  |  | Shiraz-58T | 2162 | 0.221505 | 0 |  |  |
|  |  | Shiraz-58T | 2162 | 0.221505 | 0 |  |  |
|  |  | Shiraz-71T | 2238 | 0.603631 | 0 |  |  |
|  |  | Shiraz-71T | 2238 | 0.603631 | 0 |  |  |
|  |  | Shiraz-71T | 2238 | 0.603631 | 0 |  |  |
|  |  | Shiraz-3T  | 90   | 0.219276 | 0 |  |  |
|  |  | Shiraz-3T  | 90   | 0.219276 | 0 |  |  |
|  |  | Shiraz-3T  | 90   | 0.219276 | 0 |  |  |
|  |  | Shiraz-3T  | 99   | 0.454766 | 0 |  |  |
|  |  | Shiraz-3T  | 99   | 0.454766 | 0 |  |  |
|  |  | Shiraz-3T  | 99   | 0.454766 | 0 |  |  |
|  |  | Shiraz-4T  | 253  | 0.372918 | 0 |  |  |
|  |  | Shiraz-4T  | 253  | 0.372918 | 0 |  |  |
|  |  | Shiraz-4T  | 253  | 0.372918 | 0 |  |  |
|  |  | Shiraz-36T | 378  | 0.179558 | 0 |  |  |
|  |  | Shiraz-36T | 378  | 0.179558 | 0 |  |  |
|  |  | Shiraz-36T | 378  | 0.179558 | 0 |  |  |
|  |  | Shiraz-44T | 646  | 0.471276 | 0 |  |  |
|  |  | Shiraz-44T | 646  | 0.471276 | 0 |  |  |
|  |  | Shiraz-44T | 646  | 0.471276 | 0 |  |  |
|  |  | Shiraz-44T | 647  | 1.496173 | 0 |  |  |
|  |  | Shiraz-44T | 647  | 1.496173 | 0 |  |  |
|  |  | Shiraz-44T | 647  | 1.496173 | 0 |  |  |
|  |  | Shiraz-46T | 943  | 0.093799 | 0 |  |  |
|  |  | Shiraz-46T | 943  | 0.093799 | 0 |  |  |
|  |  | Shiraz-46T | 943  | 0.093799 | 0 |  |  |
|  |  | Shiraz-9T  | 1325 | 0.221899 | 0 |  |  |
|  |  | Shiraz-9T  | 1325 | 0.221899 | 0 |  |  |
|  |  | Shiraz-9T  | 1325 | 0.221899 | 0 |  |  |
|  |  | Shiraz-18T | 1434 | 0.244465 | 0 |  |  |
|  |  | Shiraz-18T | 1434 | 0.244465 | 0 |  |  |
|  |  | Shiraz-18T | 1434 | 0.244465 | 0 |  |  |
|  |  | Shiraz-22T | 1555 | 0.427999 | 0 |  |  |
|  |  | Shiraz-22T | 1555 | 0.427999 | 0 |  |  |
|  |  | Shiraz-22T | 1555 | 0.427999 | 0 |  |  |
|  |  | Shiraz-25T | 1698 | 0.21835  | 0 |  |  |
|  |  | Shiraz-25T | 1698 | 0.21835  | 0 |  |  |
|  |  | Shiraz-25T | 1698 | 0.21835  | 0 |  |  |
|  |  | Shiraz-28T | 1735 | 0.350744 | 0 |  |  |
|  |  | Shiraz-28T | 1735 | 0.350744 | 0 |  |  |
|  |  | Shiraz-28T | 1735 | 0.350744 | 0 |  |  |
|  |  | Shiraz-29T | 1778 | 0.120767 | 0 |  |  |
|  |  | Shiraz-29T | 1778 | 0.120767 | 0 |  |  |

|       |      |            |      |          |           |  |
|-------|------|------------|------|----------|-----------|--|
|       |      | Shiraz-29T | 1778 | 0.120767 | 0         |  |
|       |      | Shiraz-32T | 1833 | 0.551336 | 0         |  |
|       |      | Shiraz-32T | 1833 | 0.551336 | 0         |  |
|       |      | Shiraz-32T | 1833 | 0.551336 | 0         |  |
|       |      | Shiraz-38T | 1951 | 0.250891 | 0         |  |
|       |      | Shiraz-38T | 1951 | 0.250891 | 0         |  |
|       |      | Shiraz-38T | 1951 | 0.250891 | 0         |  |
|       |      | Shiraz-38T | 1952 | 0        | -0.163211 |  |
|       |      | Shiraz-38T | 1952 | 0        | -0.163211 |  |
|       |      | Shiraz-38T | 1952 | 0        | -0.163211 |  |
|       |      | Shiraz-53T | 2078 | 0.287202 | 0         |  |
|       |      | Shiraz-53T | 2078 | 0.287202 | 0         |  |
|       |      | Shiraz-53T | 2078 | 0.287202 | 0         |  |
|       |      | Shiraz-58T | 2162 | 0.221505 | 0         |  |
|       |      | Shiraz-58T | 2162 | 0.221505 | 0         |  |
|       |      | Shiraz-58T | 2162 | 0.221505 | 0         |  |
|       |      | Shiraz-71T | 2238 | 0.603631 | 0         |  |
|       |      | Shiraz-71T | 2238 | 0.603631 | 0         |  |
|       |      | Shiraz-71T | 2238 | 0.603631 | 0         |  |
| SMC1A | chrX | Shiraz-4T  | 260  | 0        | -0.324128 |  |
|       |      | Shiraz-16T | 294  | 0.655804 | 0         |  |
|       |      | Shiraz-31T | 345  | 0.103301 | 0         |  |
|       |      | Shiraz-36T | 431  | 0        | -0.78035  |  |
|       |      | Shiraz-36T | 432  | 0        | -0.6692   |  |
|       |      | Shiraz-44T | 891  | 0        | -0.954044 |  |
|       |      | Shiraz-44T | 898  | 0        | -0.515218 |  |
|       |      | Shiraz-49T | 1166 | 0        | -0.917235 |  |
|       |      | Shiraz-77T | 1282 | 0.213849 | 0         |  |
|       |      | Shiraz-9T  | 1368 | 0.199713 | 0         |  |
|       |      | Shiraz-18T | 1456 | 0.608534 | 0         |  |
|       |      | Shiraz-22T | 1669 | 0.695915 | 0         |  |
|       |      | Shiraz-25T | 1717 | 0.420447 | 0         |  |
|       |      | Shiraz-28T | 1760 | 0.538181 | 0         |  |
|       |      | Shiraz-29T | 1800 | 0.672527 | 0         |  |
|       |      | Shiraz-32T | 1869 | 0.776805 | 0         |  |
|       |      | Shiraz-35T | 1932 | 0.507141 | 0         |  |
|       |      | Shiraz-58T | 2221 | 0.871948 | 0         |  |
|       |      | Shiraz-71T | 2260 | 0.68394  | 0         |  |
|       |      | Shiraz-71T | 2262 | 0.986748 | 0         |  |
|       |      | Shiraz-4T  | 260  | 0        | -0.324128 |  |
|       |      | Shiraz-16T | 294  | 0.655804 | 0         |  |
|       |      | Shiraz-31T | 345  | 0.103301 | 0         |  |
|       |      | Shiraz-36T | 431  | 0        | -0.78035  |  |
|       |      | Shiraz-36T | 432  | 0        | -0.6692   |  |
|       |      | Shiraz-44T | 891  | 0        | -0.954044 |  |
|       |      | Shiraz-44T | 898  | 0        | -0.515218 |  |
|       |      | Shiraz-49T | 1166 | 0        | -0.917235 |  |

|        |      |            |      |          |           |  |
|--------|------|------------|------|----------|-----------|--|
|        |      | Shiraz-77T | 1282 | 0.213849 | 0         |  |
|        |      | Shiraz-9T  | 1368 | 0.199713 | 0         |  |
|        |      | Shiraz-18T | 1456 | 0.608534 | 0         |  |
|        |      | Shiraz-22T | 1669 | 0.695915 | 0         |  |
|        |      | Shiraz-25T | 1717 | 0.420447 | 0         |  |
|        |      | Shiraz-28T | 1760 | 0.538181 | 0         |  |
|        |      | Shiraz-29T | 1800 | 0.672527 | 0         |  |
|        |      | Shiraz-32T | 1869 | 0.776805 | 0         |  |
|        |      | Shiraz-35T | 1932 | 0.507141 | 0         |  |
|        |      | Shiraz-58T | 2221 | 0.871948 | 0         |  |
|        |      | Shiraz-71T | 2260 | 0.68394  | 0         |  |
|        |      | Shiraz-71T | 2262 | 0.986748 | 0         |  |
|        |      | Shiraz-4T  | 260  | 0        | -0.324128 |  |
|        |      | Shiraz-16T | 294  | 0.655804 | 0         |  |
|        |      | Shiraz-31T | 345  | 0.103301 | 0         |  |
|        |      | Shiraz-36T | 431  | 0        | -0.78035  |  |
|        |      | Shiraz-36T | 432  | 0        | -0.6692   |  |
|        |      | Shiraz-44T | 891  | 0        | -0.954044 |  |
|        |      | Shiraz-44T | 898  | 0        | -0.515218 |  |
|        |      | Shiraz-49T | 1166 | 0        | -0.917235 |  |
|        |      | Shiraz-77T | 1282 | 0.213849 | 0         |  |
|        |      | Shiraz-9T  | 1368 | 0.199713 | 0         |  |
|        |      | Shiraz-18T | 1456 | 0.608534 | 0         |  |
|        |      | Shiraz-22T | 1669 | 0.695915 | 0         |  |
|        |      | Shiraz-25T | 1717 | 0.420447 | 0         |  |
|        |      | Shiraz-28T | 1760 | 0.538181 | 0         |  |
|        |      | Shiraz-29T | 1800 | 0.672527 | 0         |  |
|        |      | Shiraz-32T | 1869 | 0.776805 | 0         |  |
|        |      | Shiraz-35T | 1932 | 0.507141 | 0         |  |
|        |      | Shiraz-58T | 2221 | 0.871948 | 0         |  |
|        |      | Shiraz-71T | 2260 | 0.68394  | 0         |  |
|        |      | Shiraz-71T | 2262 | 0.986748 | 0         |  |
| SMEK3P | chrX | Shiraz-3T  | 235  | 0        | -0.28401  |  |
|        |      | Shiraz-3T  | 236  | 0        | -0.435445 |  |
|        |      | Shiraz-4T  | 260  | 0        | -0.324128 |  |
|        |      | Shiraz-16T | 294  | 0.655804 | 0         |  |
|        |      | Shiraz-36T | 431  | 0        | -0.78035  |  |
|        |      | Shiraz-44T | 891  | 0        | -0.954044 |  |
|        |      | Shiraz-44T | 893  | 0        | -1.364406 |  |
|        |      | Shiraz-47T | 1083 | 0        | -0.103285 |  |
|        |      | Shiraz-49T | 1166 | 0        | -0.917235 |  |
|        |      | Shiraz-49T | 1168 | 0        | -1.073859 |  |
|        |      | Shiraz-9T  | 1368 | 0.199713 | 0         |  |
|        |      | Shiraz-18T | 1455 | 0        | -0.186773 |  |
|        |      | Shiraz-22T | 1669 | 0.695915 | 0         |  |
|        |      | Shiraz-22T | 1671 | 0.369309 | 0         |  |
|        |      | Shiraz-25T | 1717 | 0.420447 | 0         |  |

|  |  |            |      |          |           |  |  |
|--|--|------------|------|----------|-----------|--|--|
|  |  | Shiraz-28T | 1760 | 0.538181 | 0         |  |  |
|  |  | Shiraz-29T | 1800 | 0.672527 | 0         |  |  |
|  |  | Shiraz-32T | 1869 | 0.776805 | 0         |  |  |
|  |  | Shiraz-35T | 1932 | 0.507141 | 0         |  |  |
|  |  | Shiraz-40T | 2051 | 0.098506 | 0         |  |  |
|  |  | Shiraz-58T | 2221 | 0.871948 | 0         |  |  |
|  |  | Shiraz-58T | 2222 | 0.679664 | 0         |  |  |
|  |  | Shiraz-71T | 2260 | 0.68394  | 0         |  |  |
|  |  | Shiraz-71T | 2261 | 0.508399 | 0         |  |  |
|  |  | Shiraz-3T  | 235  | 0        | -0.28401  |  |  |
|  |  | Shiraz-3T  | 236  | 0        | -0.435445 |  |  |
|  |  | Shiraz-4T  | 260  | 0        | -0.324128 |  |  |
|  |  | Shiraz-16T | 294  | 0.655804 | 0         |  |  |
|  |  | Shiraz-36T | 431  | 0        | -0.78035  |  |  |
|  |  | Shiraz-44T | 891  | 0        | -0.954044 |  |  |
|  |  | Shiraz-44T | 893  | 0        | -1.364406 |  |  |
|  |  | Shiraz-47T | 1083 | 0        | -0.103285 |  |  |
|  |  | Shiraz-49T | 1166 | 0        | -0.917235 |  |  |
|  |  | Shiraz-49T | 1168 | 0        | -1.073859 |  |  |
|  |  | Shiraz-9T  | 1368 | 0.199713 | 0         |  |  |
|  |  | Shiraz-18T | 1455 | 0        | -0.186773 |  |  |
|  |  | Shiraz-22T | 1669 | 0.695915 | 0         |  |  |
|  |  | Shiraz-22T | 1671 | 0.369309 | 0         |  |  |
|  |  | Shiraz-25T | 1717 | 0.420447 | 0         |  |  |
|  |  | Shiraz-28T | 1760 | 0.538181 | 0         |  |  |
|  |  | Shiraz-29T | 1800 | 0.672527 | 0         |  |  |
|  |  | Shiraz-32T | 1869 | 0.776805 | 0         |  |  |
|  |  | Shiraz-35T | 1932 | 0.507141 | 0         |  |  |
|  |  | Shiraz-40T | 2051 | 0.098506 | 0         |  |  |
|  |  | Shiraz-58T | 2221 | 0.871948 | 0         |  |  |
|  |  | Shiraz-58T | 2222 | 0.679664 | 0         |  |  |
|  |  | Shiraz-71T | 2260 | 0.68394  | 0         |  |  |
|  |  | Shiraz-71T | 2261 | 0.508399 | 0         |  |  |
|  |  | Shiraz-3T  | 235  | 0        | -0.28401  |  |  |
|  |  | Shiraz-3T  | 236  | 0        | -0.435445 |  |  |
|  |  | Shiraz-4T  | 260  | 0        | -0.324128 |  |  |
|  |  | Shiraz-16T | 294  | 0.655804 | 0         |  |  |
|  |  | Shiraz-36T | 431  | 0        | -0.78035  |  |  |
|  |  | Shiraz-44T | 891  | 0        | -0.954044 |  |  |
|  |  | Shiraz-44T | 893  | 0        | -1.364406 |  |  |
|  |  | Shiraz-47T | 1083 | 0        | -0.103285 |  |  |
|  |  | Shiraz-49T | 1166 | 0        | -0.917235 |  |  |
|  |  | Shiraz-49T | 1168 | 0        | -1.073859 |  |  |
|  |  | Shiraz-9T  | 1368 | 0.199713 | 0         |  |  |
|  |  | Shiraz-18T | 1455 | 0        | -0.186773 |  |  |
|  |  | Shiraz-22T | 1669 | 0.695915 | 0         |  |  |
|  |  | Shiraz-22T | 1671 | 0.369309 | 0         |  |  |

|     |      |            |      |          |           |  |  |
|-----|------|------------|------|----------|-----------|--|--|
|     |      | Shiraz-25T | 1717 | 0.420447 | 0         |  |  |
|     |      | Shiraz-28T | 1760 | 0.538181 | 0         |  |  |
|     |      | Shiraz-29T | 1800 | 0.672527 | 0         |  |  |
|     |      | Shiraz-32T | 1869 | 0.776805 | 0         |  |  |
|     |      | Shiraz-35T | 1932 | 0.507141 | 0         |  |  |
|     |      | Shiraz-40T | 2051 | 0.098506 | 0         |  |  |
|     |      | Shiraz-58T | 2221 | 0.871948 | 0         |  |  |
|     |      | Shiraz-58T | 2222 | 0.679664 | 0         |  |  |
|     |      | Shiraz-71T | 2260 | 0.68394  | 0         |  |  |
|     |      | Shiraz-71T | 2261 | 0.508399 | 0         |  |  |
| SMO | chr7 | Shiraz-3T  | 90   | 0.219276 | 0         |  |  |
|     |      | Shiraz-3T  | 96   | 0.428308 | 0         |  |  |
|     |      | Shiraz-4T  | 253  | 0.372918 | 0         |  |  |
|     |      | Shiraz-31T | 317  | 0.204382 | 0         |  |  |
|     |      | Shiraz-36T | 378  | 0.179558 | 0         |  |  |
|     |      | Shiraz-44T | 642  | 0.408617 | 0         |  |  |
|     |      | Shiraz-46T | 943  | 0.093799 | 0         |  |  |
|     |      | Shiraz-47T | 1032 | 0.171484 | 0         |  |  |
|     |      | Shiraz-77T | 1225 | 0        | -0.117922 |  |  |
|     |      | Shiraz-77T | 1229 | 0.051661 | 0         |  |  |
|     |      | Shiraz-9T  | 1325 | 0.221899 | 0         |  |  |
|     |      | Shiraz-18T | 1434 | 0.244465 | 0         |  |  |
|     |      | Shiraz-25T | 1698 | 0.21835  | 0         |  |  |
|     |      | Shiraz-28T | 1735 | 0.350744 | 0         |  |  |
|     |      | Shiraz-29T | 1778 | 0.120767 | 0         |  |  |
|     |      | Shiraz-32T | 1833 | 0.551336 | 0         |  |  |
|     |      | Shiraz-38T | 1951 | 0.250891 | 0         |  |  |
|     |      | Shiraz-53T | 2078 | 0.287202 | 0         |  |  |
|     |      | Shiraz-71T | 2238 | 0.603631 | 0         |  |  |
|     |      | Shiraz-3T  | 90   | 0.219276 | 0         |  |  |
|     |      | Shiraz-3T  | 96   | 0.428308 | 0         |  |  |
|     |      | Shiraz-4T  | 253  | 0.372918 | 0         |  |  |
|     |      | Shiraz-31T | 317  | 0.204382 | 0         |  |  |
|     |      | Shiraz-36T | 378  | 0.179558 | 0         |  |  |
|     |      | Shiraz-44T | 642  | 0.408617 | 0         |  |  |
|     |      | Shiraz-46T | 943  | 0.093799 | 0         |  |  |
|     |      | Shiraz-47T | 1032 | 0.171484 | 0         |  |  |
|     |      | Shiraz-77T | 1225 | 0        | -0.117922 |  |  |
|     |      | Shiraz-77T | 1229 | 0.051661 | 0         |  |  |
|     |      | Shiraz-9T  | 1325 | 0.221899 | 0         |  |  |
|     |      | Shiraz-18T | 1434 | 0.244465 | 0         |  |  |
|     |      | Shiraz-25T | 1698 | 0.21835  | 0         |  |  |
|     |      | Shiraz-28T | 1735 | 0.350744 | 0         |  |  |
|     |      | Shiraz-29T | 1778 | 0.120767 | 0         |  |  |
|     |      | Shiraz-32T | 1833 | 0.551336 | 0         |  |  |
|     |      | Shiraz-38T | 1951 | 0.250891 | 0         |  |  |
|     |      | Shiraz-53T | 2078 | 0.287202 | 0         |  |  |



|      |      |            |      |          |           |  |
|------|------|------------|------|----------|-----------|--|
|      |      | Shiraz-71T | 2238 | 0.603631 | 0         |  |
|      |      | Shiraz-3T  | 90   | 0.219276 | 0         |  |
|      |      | Shiraz-3T  | 96   | 0.428308 | 0         |  |
|      |      | Shiraz-4T  | 253  | 0.372918 | 0         |  |
|      |      | Shiraz-31T | 317  | 0.204382 | 0         |  |
|      |      | Shiraz-36T | 378  | 0.179558 | 0         |  |
|      |      | Shiraz-44T | 642  | 0.408617 | 0         |  |
|      |      | Shiraz-46T | 943  | 0.093799 | 0         |  |
|      |      | Shiraz-47T | 1032 | 0.171484 | 0         |  |
|      |      | Shiraz-77T | 1225 | 0        | -0.117922 |  |
|      |      | Shiraz-77T | 1229 | 0.051661 | 0         |  |
|      |      | Shiraz-9T  | 1325 | 0.221899 | 0         |  |
|      |      | Shiraz-18T | 1434 | 0.244465 | 0         |  |
|      |      | Shiraz-25T | 1698 | 0.21835  | 0         |  |
|      |      | Shiraz-28T | 1735 | 0.350744 | 0         |  |
|      |      | Shiraz-29T | 1778 | 0.120767 | 0         |  |
|      |      | Shiraz-32T | 1833 | 0.551336 | 0         |  |
|      |      | Shiraz-38T | 1951 | 0.250891 | 0         |  |
|      |      | Shiraz-53T | 2078 | 0.287202 | 0         |  |
|      |      | Shiraz-71T | 2238 | 0.603631 | 0         |  |
| SMPX | chrX | Shiraz-3T  | 235  | 0        | -0.28401  |  |
|      |      | Shiraz-4T  | 260  | 0        | -0.324128 |  |
|      |      | Shiraz-16T | 294  | 0.655804 | 0         |  |
|      |      | Shiraz-36T | 431  | 0        | -0.78035  |  |
|      |      | Shiraz-44T | 891  | 0        | -0.954044 |  |
|      |      | Shiraz-49T | 1166 | 0        | -0.917235 |  |
|      |      | Shiraz-77T | 1281 | 0.136627 | 0         |  |
|      |      | Shiraz-9T  | 1368 | 0.199713 | 0         |  |
|      |      | Shiraz-18T | 1455 | 0        | -0.186773 |  |
|      |      | Shiraz-22T | 1669 | 0.695915 | 0         |  |
|      |      | Shiraz-25T | 1717 | 0.420447 | 0         |  |
|      |      | Shiraz-28T | 1760 | 0.538181 | 0         |  |
|      |      | Shiraz-29T | 1800 | 0.672527 | 0         |  |
|      |      | Shiraz-32T | 1869 | 0.776805 | 0         |  |
|      |      | Shiraz-35T | 1932 | 0.507141 | 0         |  |
|      |      | Shiraz-40T | 2051 | 0.098506 | 0         |  |
|      |      | Shiraz-58T | 2221 | 0.871948 | 0         |  |
|      |      | Shiraz-71T | 2260 | 0.68394  | 0         |  |
|      |      | Shiraz-71T | 2261 | 0.508399 | 0         |  |
|      |      | Shiraz-3T  | 235  | 0        | -0.28401  |  |
|      |      | Shiraz-4T  | 260  | 0        | -0.324128 |  |
|      |      | Shiraz-16T | 294  | 0.655804 | 0         |  |
|      |      | Shiraz-36T | 431  | 0        | -0.78035  |  |
|      |      | Shiraz-44T | 891  | 0        | -0.954044 |  |
|      |      | Shiraz-49T | 1166 | 0        | -0.917235 |  |
|      |      | Shiraz-77T | 1281 | 0.136627 | 0         |  |
|      |      | Shiraz-9T  | 1368 | 0.199713 | 0         |  |

|     |      |            |      |          |           |  |  |
|-----|------|------------|------|----------|-----------|--|--|
|     |      | Shiraz-18T | 1455 | 0        | -0.186773 |  |  |
|     |      | Shiraz-22T | 1669 | 0.695915 | 0         |  |  |
|     |      | Shiraz-25T | 1717 | 0.420447 | 0         |  |  |
|     |      | Shiraz-28T | 1760 | 0.538181 | 0         |  |  |
|     |      | Shiraz-29T | 1800 | 0.672527 | 0         |  |  |
|     |      | Shiraz-32T | 1869 | 0.776805 | 0         |  |  |
|     |      | Shiraz-35T | 1932 | 0.507141 | 0         |  |  |
|     |      | Shiraz-40T | 2051 | 0.098506 | 0         |  |  |
|     |      | Shiraz-58T | 2221 | 0.871948 | 0         |  |  |
|     |      | Shiraz-71T | 2260 | 0.68394  | 0         |  |  |
|     |      | Shiraz-71T | 2261 | 0.508399 | 0         |  |  |
|     |      | Shiraz-3T  | 235  | 0        | -0.28401  |  |  |
|     |      | Shiraz-4T  | 260  | 0        | -0.324128 |  |  |
|     |      | Shiraz-16T | 294  | 0.655804 | 0         |  |  |
|     |      | Shiraz-36T | 431  | 0        | -0.78035  |  |  |
|     |      | Shiraz-44T | 891  | 0        | -0.954044 |  |  |
|     |      | Shiraz-49T | 1166 | 0        | -0.917235 |  |  |
|     |      | Shiraz-77T | 1281 | 0.136627 | 0         |  |  |
|     |      | Shiraz-9T  | 1368 | 0.199713 | 0         |  |  |
|     |      | Shiraz-18T | 1455 | 0        | -0.186773 |  |  |
|     |      | Shiraz-22T | 1669 | 0.695915 | 0         |  |  |
|     |      | Shiraz-25T | 1717 | 0.420447 | 0         |  |  |
|     |      | Shiraz-28T | 1760 | 0.538181 | 0         |  |  |
|     |      | Shiraz-29T | 1800 | 0.672527 | 0         |  |  |
|     |      | Shiraz-32T | 1869 | 0.776805 | 0         |  |  |
|     |      | Shiraz-35T | 1932 | 0.507141 | 0         |  |  |
|     |      | Shiraz-40T | 2051 | 0.098506 | 0         |  |  |
|     |      | Shiraz-58T | 2221 | 0.871948 | 0         |  |  |
|     |      | Shiraz-71T | 2260 | 0.68394  | 0         |  |  |
|     |      | Shiraz-71T | 2261 | 0.508399 | 0         |  |  |
| SMS | chrX | Shiraz-3T  | 235  | 0        | -0.28401  |  |  |
|     |      | Shiraz-4T  | 260  | 0        | -0.324128 |  |  |
|     |      | Shiraz-16T | 294  | 0.655804 | 0         |  |  |
|     |      | Shiraz-36T | 431  | 0        | -0.78035  |  |  |
|     |      | Shiraz-44T | 891  | 0        | -0.954044 |  |  |
|     |      | Shiraz-49T | 1166 | 0        | -0.917235 |  |  |
|     |      | Shiraz-77T | 1281 | 0.136627 | 0         |  |  |
|     |      | Shiraz-9T  | 1368 | 0.199713 | 0         |  |  |
|     |      | Shiraz-18T | 1455 | 0        | -0.186773 |  |  |
|     |      | Shiraz-22T | 1669 | 0.695915 | 0         |  |  |
|     |      | Shiraz-25T | 1717 | 0.420447 | 0         |  |  |
|     |      | Shiraz-28T | 1760 | 0.538181 | 0         |  |  |
|     |      | Shiraz-29T | 1800 | 0.672527 | 0         |  |  |
|     |      | Shiraz-32T | 1869 | 0.776805 | 0         |  |  |
|     |      | Shiraz-35T | 1932 | 0.507141 | 0         |  |  |
|     |      | Shiraz-40T | 2051 | 0.098506 | 0         |  |  |
|     |      | Shiraz-58T | 2221 | 0.871948 | 0         |  |  |

|        |      |            |      |          |           |  |
|--------|------|------------|------|----------|-----------|--|
|        |      | Shiraz-71T | 2260 | 0.68394  | 0         |  |
|        |      | Shiraz-71T | 2261 | 0.508399 | 0         |  |
|        |      | Shiraz-3T  | 235  | 0        | -0.28401  |  |
|        |      | Shiraz-4T  | 260  | 0        | -0.324128 |  |
|        |      | Shiraz-16T | 294  | 0.655804 | 0         |  |
|        |      | Shiraz-36T | 431  | 0        | -0.78035  |  |
|        |      | Shiraz-44T | 891  | 0        | -0.954044 |  |
|        |      | Shiraz-49T | 1166 | 0        | -0.917235 |  |
|        |      | Shiraz-77T | 1281 | 0.136627 | 0         |  |
|        |      | Shiraz-9T  | 1368 | 0.199713 | 0         |  |
|        |      | Shiraz-18T | 1455 | 0        | -0.186773 |  |
|        |      | Shiraz-22T | 1669 | 0.695915 | 0         |  |
|        |      | Shiraz-25T | 1717 | 0.420447 | 0         |  |
|        |      | Shiraz-28T | 1760 | 0.538181 | 0         |  |
|        |      | Shiraz-29T | 1800 | 0.672527 | 0         |  |
|        |      | Shiraz-32T | 1869 | 0.776805 | 0         |  |
|        |      | Shiraz-35T | 1932 | 0.507141 | 0         |  |
|        |      | Shiraz-40T | 2051 | 0.098506 | 0         |  |
|        |      | Shiraz-58T | 2221 | 0.871948 | 0         |  |
|        |      | Shiraz-71T | 2260 | 0.68394  | 0         |  |
|        |      | Shiraz-71T | 2261 | 0.508399 | 0         |  |
|        |      | Shiraz-3T  | 235  | 0        | -0.28401  |  |
|        |      | Shiraz-4T  | 260  | 0        | -0.324128 |  |
|        |      | Shiraz-16T | 294  | 0.655804 | 0         |  |
|        |      | Shiraz-36T | 431  | 0        | -0.78035  |  |
|        |      | Shiraz-44T | 891  | 0        | -0.954044 |  |
|        |      | Shiraz-49T | 1166 | 0        | -0.917235 |  |
|        |      | Shiraz-77T | 1281 | 0.136627 | 0         |  |
|        |      | Shiraz-9T  | 1368 | 0.199713 | 0         |  |
|        |      | Shiraz-18T | 1455 | 0        | -0.186773 |  |
|        |      | Shiraz-22T | 1669 | 0.695915 | 0         |  |
|        |      | Shiraz-25T | 1717 | 0.420447 | 0         |  |
|        |      | Shiraz-28T | 1760 | 0.538181 | 0         |  |
|        |      | Shiraz-29T | 1800 | 0.672527 | 0         |  |
|        |      | Shiraz-32T | 1869 | 0.776805 | 0         |  |
|        |      | Shiraz-35T | 1932 | 0.507141 | 0         |  |
|        |      | Shiraz-40T | 2051 | 0.098506 | 0         |  |
|        |      | Shiraz-58T | 2221 | 0.871948 | 0         |  |
|        |      | Shiraz-71T | 2260 | 0.68394  | 0         |  |
|        |      | Shiraz-71T | 2261 | 0.508399 | 0         |  |
| SMURF1 | chr7 | Shiraz-3T  | 90   | 0.219276 | 0         |  |
|        |      | Shiraz-3T  | 94   | 0.74735  | 0         |  |
|        |      | Shiraz-4T  | 253  | 0.372918 | 0         |  |
|        |      | Shiraz-31T | 316  | 0.219196 | 0         |  |
|        |      | Shiraz-36T | 378  | 0.179558 | 0         |  |
|        |      | Shiraz-36T | 381  | 0.332628 | 0         |  |
|        |      | Shiraz-44T | 639  | 1.035032 | 0         |  |

|  |            |      |          |           |  |
|--|------------|------|----------|-----------|--|
|  | Shiraz-46T | 943  | 0.093799 | 0         |  |
|  | Shiraz-46T | 946  | 0.299835 | 0         |  |
|  | Shiraz-47T | 1030 | 0.257728 | 0         |  |
|  | Shiraz-49T | 1120 | 0.281656 | 0         |  |
|  | Shiraz-77T | 1225 | 0        | -0.117922 |  |
|  | Shiraz-77T | 1227 | 0.196445 | 0         |  |
|  | Shiraz-9T  | 1324 | 0.679266 | 0         |  |
|  | Shiraz-18T | 1434 | 0.244465 | 0         |  |
|  | Shiraz-22T | 1549 | 0        | -0.319623 |  |
|  | Shiraz-22T | 1551 | 0.324011 | 0         |  |
|  | Shiraz-25T | 1698 | 0.21835  | 0         |  |
|  | Shiraz-28T | 1735 | 0.350744 | 0         |  |
|  | Shiraz-29T | 1778 | 0.120767 | 0         |  |
|  | Shiraz-32T | 1833 | 0.551336 | 0         |  |
|  | Shiraz-38T | 1951 | 0.250891 | 0         |  |
|  | Shiraz-53T | 2078 | 0.287202 | 0         |  |
|  | Shiraz-71T | 2238 | 0.603631 | 0         |  |
|  | Shiraz-3T  | 90   | 0.219276 | 0         |  |
|  | Shiraz-3T  | 94   | 0.74735  | 0         |  |
|  | Shiraz-4T  | 253  | 0.372918 | 0         |  |
|  | Shiraz-31T | 316  | 0.219196 | 0         |  |
|  | Shiraz-36T | 378  | 0.179558 | 0         |  |
|  | Shiraz-36T | 381  | 0.332628 | 0         |  |
|  | Shiraz-44T | 639  | 1.035032 | 0         |  |
|  | Shiraz-46T | 943  | 0.093799 | 0         |  |
|  | Shiraz-46T | 946  | 0.299835 | 0         |  |
|  | Shiraz-47T | 1030 | 0.257728 | 0         |  |
|  | Shiraz-49T | 1120 | 0.281656 | 0         |  |
|  | Shiraz-77T | 1225 | 0        | -0.117922 |  |
|  | Shiraz-77T | 1227 | 0.196445 | 0         |  |
|  | Shiraz-9T  | 1324 | 0.679266 | 0         |  |
|  | Shiraz-18T | 1434 | 0.244465 | 0         |  |
|  | Shiraz-22T | 1549 | 0        | -0.319623 |  |
|  | Shiraz-22T | 1551 | 0.324011 | 0         |  |
|  | Shiraz-25T | 1698 | 0.21835  | 0         |  |
|  | Shiraz-28T | 1735 | 0.350744 | 0         |  |
|  | Shiraz-29T | 1778 | 0.120767 | 0         |  |
|  | Shiraz-32T | 1833 | 0.551336 | 0         |  |
|  | Shiraz-38T | 1951 | 0.250891 | 0         |  |
|  | Shiraz-53T | 2078 | 0.287202 | 0         |  |
|  | Shiraz-71T | 2238 | 0.603631 | 0         |  |
|  | Shiraz-3T  | 90   | 0.219276 | 0         |  |
|  | Shiraz-3T  | 94   | 0.74735  | 0         |  |
|  | Shiraz-4T  | 253  | 0.372918 | 0         |  |
|  | Shiraz-31T | 316  | 0.219196 | 0         |  |
|  | Shiraz-36T | 378  | 0.179558 | 0         |  |
|  | Shiraz-36T | 381  | 0.332628 | 0         |  |

|      |      |            |      |          |           |  |
|------|------|------------|------|----------|-----------|--|
|      |      | Shiraz-44T | 639  | 1.035032 | 0         |  |
|      |      | Shiraz-46T | 943  | 0.093799 | 0         |  |
|      |      | Shiraz-46T | 946  | 0.299835 | 0         |  |
|      |      | Shiraz-47T | 1030 | 0.257728 | 0         |  |
|      |      | Shiraz-49T | 1120 | 0.281656 | 0         |  |
|      |      | Shiraz-77T | 1225 | 0        | -0.117922 |  |
|      |      | Shiraz-77T | 1227 | 0.196445 | 0         |  |
|      |      | Shiraz-9T  | 1324 | 0.679266 | 0         |  |
|      |      | Shiraz-18T | 1434 | 0.244465 | 0         |  |
|      |      | Shiraz-22T | 1549 | 0        | -0.319623 |  |
|      |      | Shiraz-22T | 1551 | 0.324011 | 0         |  |
|      |      | Shiraz-25T | 1698 | 0.21835  | 0         |  |
|      |      | Shiraz-28T | 1735 | 0.350744 | 0         |  |
|      |      | Shiraz-29T | 1778 | 0.120767 | 0         |  |
|      |      | Shiraz-32T | 1833 | 0.551336 | 0         |  |
|      |      | Shiraz-38T | 1951 | 0.250891 | 0         |  |
|      |      | Shiraz-53T | 2078 | 0.287202 | 0         |  |
|      |      | Shiraz-71T | 2238 | 0.603631 | 0         |  |
| SND1 | chr7 | Shiraz-3T  | 90   | 0.219276 | 0         |  |
|      |      | Shiraz-3T  | 96   | 0.428308 | 0         |  |
|      |      | Shiraz-4T  | 253  | 0.372918 | 0         |  |
|      |      | Shiraz-36T | 378  | 0.179558 | 0         |  |
|      |      | Shiraz-36T | 382  | 0.081739 | 0         |  |
|      |      | Shiraz-44T | 642  | 0.408617 | 0         |  |
|      |      | Shiraz-46T | 943  | 0.093799 | 0         |  |
|      |      | Shiraz-46T | 947  | 0        | -0.010843 |  |
|      |      | Shiraz-77T | 1225 | 0        | -0.117922 |  |
|      |      | Shiraz-77T | 1229 | 0.051661 | 0         |  |
|      |      | Shiraz-9T  | 1325 | 0.221899 | 0         |  |
|      |      | Shiraz-18T | 1434 | 0.244465 | 0         |  |
|      |      | Shiraz-25T | 1698 | 0.21835  | 0         |  |
|      |      | Shiraz-28T | 1735 | 0.350744 | 0         |  |
|      |      | Shiraz-29T | 1778 | 0.120767 | 0         |  |
|      |      | Shiraz-32T | 1833 | 0.551336 | 0         |  |
|      |      | Shiraz-38T | 1951 | 0.250891 | 0         |  |
|      |      | Shiraz-53T | 2078 | 0.287202 | 0         |  |
|      |      | Shiraz-71T | 2238 | 0.603631 | 0         |  |
|      |      | Shiraz-3T  | 90   | 0.219276 | 0         |  |
|      |      | Shiraz-3T  | 96   | 0.428308 | 0         |  |
|      |      | Shiraz-4T  | 253  | 0.372918 | 0         |  |
|      |      | Shiraz-36T | 378  | 0.179558 | 0         |  |
|      |      | Shiraz-36T | 382  | 0.081739 | 0         |  |
|      |      | Shiraz-44T | 642  | 0.408617 | 0         |  |
|      |      | Shiraz-46T | 943  | 0.093799 | 0         |  |
|      |      | Shiraz-46T | 947  | 0        | -0.010843 |  |
|      |      | Shiraz-77T | 1225 | 0        | -0.117922 |  |
|      |      | Shiraz-77T | 1229 | 0.051661 | 0         |  |

|         |      |            |      |          |           |  |
|---------|------|------------|------|----------|-----------|--|
|         |      | Shiraz-9T  | 1325 | 0.221899 | 0         |  |
|         |      | Shiraz-18T | 1434 | 0.244465 | 0         |  |
|         |      | Shiraz-25T | 1698 | 0.21835  | 0         |  |
|         |      | Shiraz-28T | 1735 | 0.350744 | 0         |  |
|         |      | Shiraz-29T | 1778 | 0.120767 | 0         |  |
|         |      | Shiraz-32T | 1833 | 0.551336 | 0         |  |
|         |      | Shiraz-38T | 1951 | 0.250891 | 0         |  |
|         |      | Shiraz-53T | 2078 | 0.287202 | 0         |  |
|         |      | Shiraz-71T | 2238 | 0.603631 | 0         |  |
|         |      | Shiraz-3T  | 90   | 0.219276 | 0         |  |
|         |      | Shiraz-3T  | 96   | 0.428308 | 0         |  |
|         |      | Shiraz-4T  | 253  | 0.372918 | 0         |  |
|         |      | Shiraz-36T | 378  | 0.179558 | 0         |  |
|         |      | Shiraz-36T | 382  | 0.081739 | 0         |  |
|         |      | Shiraz-44T | 642  | 0.408617 | 0         |  |
|         |      | Shiraz-46T | 943  | 0.093799 | 0         |  |
|         |      | Shiraz-46T | 947  | 0        | -0.010843 |  |
|         |      | Shiraz-77T | 1225 | 0        | -0.117922 |  |
|         |      | Shiraz-77T | 1229 | 0.051661 | 0         |  |
|         |      | Shiraz-9T  | 1325 | 0.221899 | 0         |  |
|         |      | Shiraz-18T | 1434 | 0.244465 | 0         |  |
|         |      | Shiraz-25T | 1698 | 0.21835  | 0         |  |
|         |      | Shiraz-28T | 1735 | 0.350744 | 0         |  |
|         |      | Shiraz-29T | 1778 | 0.120767 | 0         |  |
|         |      | Shiraz-32T | 1833 | 0.551336 | 0         |  |
|         |      | Shiraz-38T | 1951 | 0.250891 | 0         |  |
|         |      | Shiraz-53T | 2078 | 0.287202 | 0         |  |
|         |      | Shiraz-71T | 2238 | 0.603631 | 0         |  |
| SNORA11 | chrX | Shiraz-4T  | 260  | 0        | -0.324128 |  |
|         |      | Shiraz-16T | 294  | 0.655804 | 0         |  |
|         |      | Shiraz-36T | 431  | 0        | -0.78035  |  |
|         |      | Shiraz-44T | 891  | 0        | -0.954044 |  |
|         |      | Shiraz-44T | 898  | 0        | -0.515218 |  |
|         |      | Shiraz-49T | 1166 | 0        | -0.917235 |  |
|         |      | Shiraz-77T | 1282 | 0.213849 | 0         |  |
|         |      | Shiraz-9T  | 1368 | 0.199713 | 0         |  |
|         |      | Shiraz-18T | 1456 | 0.608534 | 0         |  |
|         |      | Shiraz-22T | 1669 | 0.695915 | 0         |  |
|         |      | Shiraz-25T | 1717 | 0.420447 | 0         |  |
|         |      | Shiraz-28T | 1760 | 0.538181 | 0         |  |
|         |      | Shiraz-29T | 1800 | 0.672527 | 0         |  |
|         |      | Shiraz-32T | 1869 | 0.776805 | 0         |  |
|         |      | Shiraz-35T | 1932 | 0.507141 | 0         |  |
|         |      | Shiraz-58T | 2221 | 0.871948 | 0         |  |
|         |      | Shiraz-71T | 2260 | 0.68394  | 0         |  |
|         |      | Shiraz-71T | 2262 | 0.986748 | 0         |  |
|         |      | Shiraz-4T  | 260  | 0        | -0.324128 |  |

|          |      |            |      |          |           |  |  |
|----------|------|------------|------|----------|-----------|--|--|
|          |      | Shiraz-16T | 294  | 0.655804 | 0         |  |  |
|          |      | Shiraz-36T | 431  | 0        | -0.78035  |  |  |
|          |      | Shiraz-44T | 891  | 0        | -0.954044 |  |  |
|          |      | Shiraz-44T | 898  | 0        | -0.515218 |  |  |
|          |      | Shiraz-49T | 1166 | 0        | -0.917235 |  |  |
|          |      | Shiraz-77T | 1282 | 0.213849 | 0         |  |  |
|          |      | Shiraz-9T  | 1368 | 0.199713 | 0         |  |  |
|          |      | Shiraz-18T | 1456 | 0.608534 | 0         |  |  |
|          |      | Shiraz-22T | 1669 | 0.695915 | 0         |  |  |
|          |      | Shiraz-25T | 1717 | 0.420447 | 0         |  |  |
|          |      | Shiraz-28T | 1760 | 0.538181 | 0         |  |  |
|          |      | Shiraz-29T | 1800 | 0.672527 | 0         |  |  |
|          |      | Shiraz-32T | 1869 | 0.776805 | 0         |  |  |
|          |      | Shiraz-35T | 1932 | 0.507141 | 0         |  |  |
|          |      | Shiraz-58T | 2221 | 0.871948 | 0         |  |  |
|          |      | Shiraz-71T | 2260 | 0.68394  | 0         |  |  |
|          |      | Shiraz-71T | 2262 | 0.986748 | 0         |  |  |
|          |      | Shiraz-4T  | 260  | 0        | -0.324128 |  |  |
|          |      | Shiraz-16T | 294  | 0.655804 | 0         |  |  |
|          |      | Shiraz-36T | 431  | 0        | -0.78035  |  |  |
|          |      | Shiraz-44T | 891  | 0        | -0.954044 |  |  |
|          |      | Shiraz-44T | 898  | 0        | -0.515218 |  |  |
|          |      | Shiraz-49T | 1166 | 0        | -0.917235 |  |  |
|          |      | Shiraz-77T | 1282 | 0.213849 | 0         |  |  |
|          |      | Shiraz-9T  | 1368 | 0.199713 | 0         |  |  |
|          |      | Shiraz-18T | 1456 | 0.608534 | 0         |  |  |
|          |      | Shiraz-22T | 1669 | 0.695915 | 0         |  |  |
|          |      | Shiraz-25T | 1717 | 0.420447 | 0         |  |  |
|          |      | Shiraz-28T | 1760 | 0.538181 | 0         |  |  |
|          |      | Shiraz-29T | 1800 | 0.672527 | 0         |  |  |
|          |      | Shiraz-32T | 1869 | 0.776805 | 0         |  |  |
|          |      | Shiraz-35T | 1932 | 0.507141 | 0         |  |  |
|          |      | Shiraz-58T | 2221 | 0.871948 | 0         |  |  |
|          |      | Shiraz-71T | 2260 | 0.68394  | 0         |  |  |
|          |      | Shiraz-71T | 2262 | 0.986748 | 0         |  |  |
| SNORA11C | chrX | Shiraz-4T  | 260  | 0        | -0.324128 |  |  |
|          |      | Shiraz-16T | 294  | 0.655804 | 0         |  |  |
|          |      | Shiraz-31T | 345  | 0.103301 | 0         |  |  |
|          |      | Shiraz-36T | 431  | 0        | -0.78035  |  |  |
|          |      | Shiraz-36T | 432  | 0        | -0.6692   |  |  |
|          |      | Shiraz-44T | 891  | 0        | -0.954044 |  |  |
|          |      | Shiraz-44T | 896  | 0        | -0.109108 |  |  |
|          |      | Shiraz-46T | 991  | 0.139564 | 0         |  |  |
|          |      | Shiraz-47T | 1084 | 0.24185  | 0         |  |  |
|          |      | Shiraz-49T | 1166 | 0        | -0.917235 |  |  |
|          |      | Shiraz-49T | 1169 | 0        | -0.583529 |  |  |
|          |      | Shiraz-77T | 1282 | 0.213849 | 0         |  |  |

|  |            |      |          |           |  |
|--|------------|------|----------|-----------|--|
|  | Shiraz-9T  | 1368 | 0.199713 | 0         |  |
|  | Shiraz-9T  | 1369 | 0.703374 | 0         |  |
|  | Shiraz-18T | 1455 | 0        | -0.186773 |  |
|  | Shiraz-22T | 1669 | 0.695915 | 0         |  |
|  | Shiraz-22T | 1672 | 1.01678  | 0         |  |
|  | Shiraz-25T | 1717 | 0.420447 | 0         |  |
|  | Shiraz-28T | 1760 | 0.538181 | 0         |  |
|  | Shiraz-29T | 1800 | 0.672527 | 0         |  |
|  | Shiraz-32T | 1869 | 0.776805 | 0         |  |
|  | Shiraz-35T | 1932 | 0.507141 | 0         |  |
|  | Shiraz-40T | 2051 | 0.098506 | 0         |  |
|  | Shiraz-58T | 2221 | 0.871948 | 0         |  |
|  | Shiraz-71T | 2260 | 0.68394  | 0         |  |
|  | Shiraz-71T | 2262 | 0.986748 | 0         |  |
|  | Shiraz-4T  | 260  | 0        | -0.324128 |  |
|  | Shiraz-16T | 294  | 0.655804 | 0         |  |
|  | Shiraz-31T | 345  | 0.103301 | 0         |  |
|  | Shiraz-36T | 431  | 0        | -0.78035  |  |
|  | Shiraz-36T | 432  | 0        | -0.6692   |  |
|  | Shiraz-44T | 891  | 0        | -0.954044 |  |
|  | Shiraz-44T | 896  | 0        | -0.109108 |  |
|  | Shiraz-46T | 991  | 0.139564 | 0         |  |
|  | Shiraz-47T | 1084 | 0.24185  | 0         |  |
|  | Shiraz-49T | 1166 | 0        | -0.917235 |  |
|  | Shiraz-49T | 1169 | 0        | -0.583529 |  |
|  | Shiraz-77T | 1282 | 0.213849 | 0         |  |
|  | Shiraz-9T  | 1368 | 0.199713 | 0         |  |
|  | Shiraz-9T  | 1369 | 0.703374 | 0         |  |
|  | Shiraz-18T | 1455 | 0        | -0.186773 |  |
|  | Shiraz-22T | 1669 | 0.695915 | 0         |  |
|  | Shiraz-22T | 1672 | 1.01678  | 0         |  |
|  | Shiraz-25T | 1717 | 0.420447 | 0         |  |
|  | Shiraz-28T | 1760 | 0.538181 | 0         |  |
|  | Shiraz-29T | 1800 | 0.672527 | 0         |  |
|  | Shiraz-32T | 1869 | 0.776805 | 0         |  |
|  | Shiraz-35T | 1932 | 0.507141 | 0         |  |
|  | Shiraz-40T | 2051 | 0.098506 | 0         |  |
|  | Shiraz-58T | 2221 | 0.871948 | 0         |  |
|  | Shiraz-71T | 2260 | 0.68394  | 0         |  |
|  | Shiraz-71T | 2262 | 0.986748 | 0         |  |
|  | Shiraz-4T  | 260  | 0        | -0.324128 |  |
|  | Shiraz-16T | 294  | 0.655804 | 0         |  |
|  | Shiraz-31T | 345  | 0.103301 | 0         |  |
|  | Shiraz-36T | 431  | 0        | -0.78035  |  |
|  | Shiraz-36T | 432  | 0        | -0.6692   |  |
|  | Shiraz-44T | 891  | 0        | -0.954044 |  |
|  | Shiraz-44T | 896  | 0        | -0.109108 |  |



|          |      |            |      |          |           |  |  |
|----------|------|------------|------|----------|-----------|--|--|
|          |      | Shiraz-46T | 991  | 0.139564 | 0         |  |  |
|          |      | Shiraz-47T | 1084 | 0.24185  | 0         |  |  |
|          |      | Shiraz-49T | 1166 | 0        | -0.917235 |  |  |
|          |      | Shiraz-49T | 1169 | 0        | -0.583529 |  |  |
|          |      | Shiraz-77T | 1282 | 0.213849 | 0         |  |  |
|          |      | Shiraz-9T  | 1368 | 0.199713 | 0         |  |  |
|          |      | Shiraz-9T  | 1369 | 0.703374 | 0         |  |  |
|          |      | Shiraz-18T | 1455 | 0        | -0.186773 |  |  |
|          |      | Shiraz-22T | 1669 | 0.695915 | 0         |  |  |
|          |      | Shiraz-22T | 1672 | 1.01678  | 0         |  |  |
|          |      | Shiraz-25T | 1717 | 0.420447 | 0         |  |  |
|          |      | Shiraz-28T | 1760 | 0.538181 | 0         |  |  |
|          |      | Shiraz-29T | 1800 | 0.672527 | 0         |  |  |
|          |      | Shiraz-32T | 1869 | 0.776805 | 0         |  |  |
|          |      | Shiraz-35T | 1932 | 0.507141 | 0         |  |  |
|          |      | Shiraz-40T | 2051 | 0.098506 | 0         |  |  |
|          |      | Shiraz-58T | 2221 | 0.871948 | 0         |  |  |
|          |      | Shiraz-71T | 2260 | 0.68394  | 0         |  |  |
|          |      | Shiraz-71T | 2262 | 0.986748 | 0         |  |  |
| SNORA11D | chrX | Shiraz-3T  | 239  | 0        | -0.28395  |  |  |
|          |      | Shiraz-3T  | 239  | 0        | -0.28395  |  |  |
|          |      | Shiraz-4T  | 260  | 0        | -0.324128 |  |  |
|          |      | Shiraz-4T  | 260  | 0        | -0.324128 |  |  |
|          |      | Shiraz-16T | 294  | 0.655804 | 0         |  |  |
|          |      | Shiraz-16T | 294  | 0.655804 | 0         |  |  |
|          |      | Shiraz-31T | 345  | 0.103301 | 0         |  |  |
|          |      | Shiraz-31T | 345  | 0.103301 | 0         |  |  |
|          |      | Shiraz-36T | 431  | 0        | -0.78035  |  |  |
|          |      | Shiraz-36T | 431  | 0        | -0.78035  |  |  |
|          |      | Shiraz-36T | 432  | 0        | -0.6692   |  |  |
|          |      | Shiraz-36T | 432  | 0        | -0.6692   |  |  |
|          |      | Shiraz-44T | 891  | 0        | -0.954044 |  |  |
|          |      | Shiraz-44T | 891  | 0        | -0.954044 |  |  |
|          |      | Shiraz-49T | 1166 | 0        | -0.917235 |  |  |
|          |      | Shiraz-49T | 1166 | 0        | -0.917235 |  |  |
|          |      | Shiraz-77T | 1282 | 0.213849 | 0         |  |  |
|          |      | Shiraz-77T | 1282 | 0.213849 | 0         |  |  |
|          |      | Shiraz-9T  | 1368 | 0.199713 | 0         |  |  |
|          |      | Shiraz-9T  | 1368 | 0.199713 | 0         |  |  |
|          |      | Shiraz-18T | 1456 | 0.608534 | 0         |  |  |
|          |      | Shiraz-18T | 1456 | 0.608534 | 0         |  |  |
|          |      | Shiraz-22T | 1669 | 0.695915 | 0         |  |  |
|          |      | Shiraz-22T | 1669 | 0.695915 | 0         |  |  |
|          |      | Shiraz-25T | 1717 | 0.420447 | 0         |  |  |
|          |      | Shiraz-25T | 1717 | 0.420447 | 0         |  |  |
|          |      | Shiraz-28T | 1760 | 0.538181 | 0         |  |  |
|          |      | Shiraz-28T | 1760 | 0.538181 | 0         |  |  |

|  |            |      |          |           |  |
|--|------------|------|----------|-----------|--|
|  | Shiraz-29T | 1800 | 0.672527 | 0         |  |
|  | Shiraz-29T | 1800 | 0.672527 | 0         |  |
|  | Shiraz-32T | 1869 | 0.776805 | 0         |  |
|  | Shiraz-32T | 1869 | 0.776805 | 0         |  |
|  | Shiraz-35T | 1932 | 0.507141 | 0         |  |
|  | Shiraz-35T | 1932 | 0.507141 | 0         |  |
|  | Shiraz-58T | 2221 | 0.871948 | 0         |  |
|  | Shiraz-58T | 2221 | 0.871948 | 0         |  |
|  | Shiraz-71T | 2260 | 0.68394  | 0         |  |
|  | Shiraz-71T | 2260 | 0.68394  | 0         |  |
|  | Shiraz-71T | 2262 | 0.986748 | 0         |  |
|  | Shiraz-71T | 2262 | 0.986748 | 0         |  |
|  | Shiraz-3T  | 239  | 0        | -0.28395  |  |
|  | Shiraz-3T  | 239  | 0        | -0.28395  |  |
|  | Shiraz-4T  | 260  | 0        | -0.324128 |  |
|  | Shiraz-4T  | 260  | 0        | -0.324128 |  |
|  | Shiraz-16T | 294  | 0.655804 | 0         |  |
|  | Shiraz-16T | 294  | 0.655804 | 0         |  |
|  | Shiraz-31T | 345  | 0.103301 | 0         |  |
|  | Shiraz-31T | 345  | 0.103301 | 0         |  |
|  | Shiraz-36T | 431  | 0        | -0.78035  |  |
|  | Shiraz-36T | 431  | 0        | -0.78035  |  |
|  | Shiraz-36T | 432  | 0        | -0.6692   |  |
|  | Shiraz-36T | 432  | 0        | -0.6692   |  |
|  | Shiraz-44T | 891  | 0        | -0.954044 |  |
|  | Shiraz-44T | 891  | 0        | -0.954044 |  |
|  | Shiraz-49T | 1166 | 0        | -0.917235 |  |
|  | Shiraz-49T | 1166 | 0        | -0.917235 |  |
|  | Shiraz-77T | 1282 | 0.213849 | 0         |  |
|  | Shiraz-77T | 1282 | 0.213849 | 0         |  |
|  | Shiraz-9T  | 1368 | 0.199713 | 0         |  |
|  | Shiraz-9T  | 1368 | 0.199713 | 0         |  |
|  | Shiraz-18T | 1456 | 0.608534 | 0         |  |
|  | Shiraz-18T | 1456 | 0.608534 | 0         |  |
|  | Shiraz-22T | 1669 | 0.695915 | 0         |  |
|  | Shiraz-22T | 1669 | 0.695915 | 0         |  |
|  | Shiraz-25T | 1717 | 0.420447 | 0         |  |
|  | Shiraz-25T | 1717 | 0.420447 | 0         |  |
|  | Shiraz-28T | 1760 | 0.538181 | 0         |  |
|  | Shiraz-28T | 1760 | 0.538181 | 0         |  |
|  | Shiraz-29T | 1800 | 0.672527 | 0         |  |
|  | Shiraz-29T | 1800 | 0.672527 | 0         |  |
|  | Shiraz-32T | 1869 | 0.776805 | 0         |  |
|  | Shiraz-32T | 1869 | 0.776805 | 0         |  |
|  | Shiraz-35T | 1932 | 0.507141 | 0         |  |
|  | Shiraz-35T | 1932 | 0.507141 | 0         |  |
|  | Shiraz-58T | 2221 | 0.871948 | 0         |  |

|          |      |            |      |          |           |  |  |
|----------|------|------------|------|----------|-----------|--|--|
|          |      | Shiraz-58T | 2221 | 0.871948 | 0         |  |  |
|          |      | Shiraz-71T | 2260 | 0.68394  | 0         |  |  |
|          |      | Shiraz-71T | 2260 | 0.68394  | 0         |  |  |
|          |      | Shiraz-71T | 2262 | 0.986748 | 0         |  |  |
|          |      | Shiraz-71T | 2262 | 0.986748 | 0         |  |  |
|          |      | Shiraz-3T  | 239  | 0        | -0.28395  |  |  |
|          |      | Shiraz-3T  | 239  | 0        | -0.28395  |  |  |
|          |      | Shiraz-4T  | 260  | 0        | -0.324128 |  |  |
|          |      | Shiraz-4T  | 260  | 0        | -0.324128 |  |  |
|          |      | Shiraz-16T | 294  | 0.655804 | 0         |  |  |
|          |      | Shiraz-16T | 294  | 0.655804 | 0         |  |  |
|          |      | Shiraz-31T | 345  | 0.103301 | 0         |  |  |
|          |      | Shiraz-31T | 345  | 0.103301 | 0         |  |  |
|          |      | Shiraz-36T | 431  | 0        | -0.78035  |  |  |
|          |      | Shiraz-36T | 431  | 0        | -0.78035  |  |  |
|          |      | Shiraz-36T | 432  | 0        | -0.6692   |  |  |
|          |      | Shiraz-36T | 432  | 0        | -0.6692   |  |  |
|          |      | Shiraz-44T | 891  | 0        | -0.954044 |  |  |
|          |      | Shiraz-44T | 891  | 0        | -0.954044 |  |  |
|          |      | Shiraz-49T | 1166 | 0        | -0.917235 |  |  |
|          |      | Shiraz-49T | 1166 | 0        | -0.917235 |  |  |
|          |      | Shiraz-77T | 1282 | 0.213849 | 0         |  |  |
|          |      | Shiraz-77T | 1282 | 0.213849 | 0         |  |  |
|          |      | Shiraz-9T  | 1368 | 0.199713 | 0         |  |  |
|          |      | Shiraz-9T  | 1368 | 0.199713 | 0         |  |  |
|          |      | Shiraz-18T | 1456 | 0.608534 | 0         |  |  |
|          |      | Shiraz-18T | 1456 | 0.608534 | 0         |  |  |
|          |      | Shiraz-22T | 1669 | 0.695915 | 0         |  |  |
|          |      | Shiraz-22T | 1669 | 0.695915 | 0         |  |  |
|          |      | Shiraz-25T | 1717 | 0.420447 | 0         |  |  |
|          |      | Shiraz-25T | 1717 | 0.420447 | 0         |  |  |
|          |      | Shiraz-28T | 1760 | 0.538181 | 0         |  |  |
|          |      | Shiraz-28T | 1760 | 0.538181 | 0         |  |  |
|          |      | Shiraz-29T | 1800 | 0.672527 | 0         |  |  |
|          |      | Shiraz-29T | 1800 | 0.672527 | 0         |  |  |
|          |      | Shiraz-32T | 1869 | 0.776805 | 0         |  |  |
|          |      | Shiraz-32T | 1869 | 0.776805 | 0         |  |  |
|          |      | Shiraz-35T | 1932 | 0.507141 | 0         |  |  |
|          |      | Shiraz-35T | 1932 | 0.507141 | 0         |  |  |
|          |      | Shiraz-58T | 2221 | 0.871948 | 0         |  |  |
|          |      | Shiraz-58T | 2221 | 0.871948 | 0         |  |  |
|          |      | Shiraz-71T | 2260 | 0.68394  | 0         |  |  |
|          |      | Shiraz-71T | 2260 | 0.68394  | 0         |  |  |
|          |      | Shiraz-71T | 2262 | 0.986748 | 0         |  |  |
|          |      | Shiraz-71T | 2262 | 0.986748 | 0         |  |  |
| SNORA11E | chrX | Shiraz-3T  | 239  | 0        | -0.28395  |  |  |
|          |      | Shiraz-3T  | 239  | 0        | -0.28395  |  |  |

|  |            |      |          |           |  |
|--|------------|------|----------|-----------|--|
|  | Shiraz-4T  | 260  | 0        | -0.324128 |  |
|  | Shiraz-4T  | 260  | 0        | -0.324128 |  |
|  | Shiraz-16T | 294  | 0.655804 | 0         |  |
|  | Shiraz-16T | 294  | 0.655804 | 0         |  |
|  | Shiraz-31T | 345  | 0.103301 | 0         |  |
|  | Shiraz-31T | 345  | 0.103301 | 0         |  |
|  | Shiraz-36T | 431  | 0        | -0.78035  |  |
|  | Shiraz-36T | 431  | 0        | -0.78035  |  |
|  | Shiraz-36T | 432  | 0        | -0.6692   |  |
|  | Shiraz-36T | 432  | 0        | -0.6692   |  |
|  | Shiraz-44T | 891  | 0        | -0.954044 |  |
|  | Shiraz-44T | 891  | 0        | -0.954044 |  |
|  | Shiraz-49T | 1166 | 0        | -0.917235 |  |
|  | Shiraz-49T | 1166 | 0        | -0.917235 |  |
|  | Shiraz-77T | 1282 | 0.213849 | 0         |  |
|  | Shiraz-77T | 1282 | 0.213849 | 0         |  |
|  | Shiraz-9T  | 1368 | 0.199713 | 0         |  |
|  | Shiraz-9T  | 1368 | 0.199713 | 0         |  |
|  | Shiraz-18T | 1456 | 0.608534 | 0         |  |
|  | Shiraz-18T | 1456 | 0.608534 | 0         |  |
|  | Shiraz-22T | 1669 | 0.695915 | 0         |  |
|  | Shiraz-22T | 1669 | 0.695915 | 0         |  |
|  | Shiraz-25T | 1717 | 0.420447 | 0         |  |
|  | Shiraz-25T | 1717 | 0.420447 | 0         |  |
|  | Shiraz-28T | 1760 | 0.538181 | 0         |  |
|  | Shiraz-28T | 1760 | 0.538181 | 0         |  |
|  | Shiraz-29T | 1800 | 0.672527 | 0         |  |
|  | Shiraz-29T | 1800 | 0.672527 | 0         |  |
|  | Shiraz-32T | 1869 | 0.776805 | 0         |  |
|  | Shiraz-32T | 1869 | 0.776805 | 0         |  |
|  | Shiraz-35T | 1932 | 0.507141 | 0         |  |
|  | Shiraz-35T | 1932 | 0.507141 | 0         |  |
|  | Shiraz-58T | 2221 | 0.871948 | 0         |  |
|  | Shiraz-58T | 2221 | 0.871948 | 0         |  |
|  | Shiraz-71T | 2260 | 0.68394  | 0         |  |
|  | Shiraz-71T | 2260 | 0.68394  | 0         |  |
|  | Shiraz-71T | 2262 | 0.986748 | 0         |  |
|  | Shiraz-71T | 2262 | 0.986748 | 0         |  |
|  | Shiraz-3T  | 239  | 0        | -0.28395  |  |
|  | Shiraz-3T  | 239  | 0        | -0.28395  |  |
|  | Shiraz-4T  | 260  | 0        | -0.324128 |  |
|  | Shiraz-4T  | 260  | 0        | -0.324128 |  |
|  | Shiraz-16T | 294  | 0.655804 | 0         |  |
|  | Shiraz-16T | 294  | 0.655804 | 0         |  |
|  | Shiraz-31T | 345  | 0.103301 | 0         |  |
|  | Shiraz-31T | 345  | 0.103301 | 0         |  |
|  | Shiraz-36T | 431  | 0        | -0.78035  |  |

|  |            |      |          |           |  |
|--|------------|------|----------|-----------|--|
|  | Shiraz-36T | 431  | 0        | -0.78035  |  |
|  | Shiraz-36T | 432  | 0        | -0.6692   |  |
|  | Shiraz-36T | 432  | 0        | -0.6692   |  |
|  | Shiraz-44T | 891  | 0        | -0.954044 |  |
|  | Shiraz-44T | 891  | 0        | -0.954044 |  |
|  | Shiraz-49T | 1166 | 0        | -0.917235 |  |
|  | Shiraz-49T | 1166 | 0        | -0.917235 |  |
|  | Shiraz-77T | 1282 | 0.213849 | 0         |  |
|  | Shiraz-77T | 1282 | 0.213849 | 0         |  |
|  | Shiraz-9T  | 1368 | 0.199713 | 0         |  |
|  | Shiraz-9T  | 1368 | 0.199713 | 0         |  |
|  | Shiraz-18T | 1456 | 0.608534 | 0         |  |
|  | Shiraz-18T | 1456 | 0.608534 | 0         |  |
|  | Shiraz-22T | 1669 | 0.695915 | 0         |  |
|  | Shiraz-22T | 1669 | 0.695915 | 0         |  |
|  | Shiraz-25T | 1717 | 0.420447 | 0         |  |
|  | Shiraz-25T | 1717 | 0.420447 | 0         |  |
|  | Shiraz-28T | 1760 | 0.538181 | 0         |  |
|  | Shiraz-28T | 1760 | 0.538181 | 0         |  |
|  | Shiraz-29T | 1800 | 0.672527 | 0         |  |
|  | Shiraz-29T | 1800 | 0.672527 | 0         |  |
|  | Shiraz-32T | 1869 | 0.776805 | 0         |  |
|  | Shiraz-32T | 1869 | 0.776805 | 0         |  |
|  | Shiraz-35T | 1932 | 0.507141 | 0         |  |
|  | Shiraz-35T | 1932 | 0.507141 | 0         |  |
|  | Shiraz-58T | 2221 | 0.871948 | 0         |  |
|  | Shiraz-58T | 2221 | 0.871948 | 0         |  |
|  | Shiraz-71T | 2260 | 0.68394  | 0         |  |
|  | Shiraz-71T | 2260 | 0.68394  | 0         |  |
|  | Shiraz-71T | 2262 | 0.986748 | 0         |  |
|  | Shiraz-71T | 2262 | 0.986748 | 0         |  |
|  | Shiraz-3T  | 239  | 0        | -0.28395  |  |
|  | Shiraz-3T  | 239  | 0        | -0.28395  |  |
|  | Shiraz-4T  | 260  | 0        | -0.324128 |  |
|  | Shiraz-4T  | 260  | 0        | -0.324128 |  |
|  | Shiraz-16T | 294  | 0.655804 | 0         |  |
|  | Shiraz-16T | 294  | 0.655804 | 0         |  |
|  | Shiraz-31T | 345  | 0.103301 | 0         |  |
|  | Shiraz-31T | 345  | 0.103301 | 0         |  |
|  | Shiraz-36T | 431  | 0        | -0.78035  |  |
|  | Shiraz-36T | 431  | 0        | -0.78035  |  |
|  | Shiraz-36T | 432  | 0        | -0.6692   |  |
|  | Shiraz-36T | 432  | 0        | -0.6692   |  |
|  | Shiraz-44T | 891  | 0        | -0.954044 |  |
|  | Shiraz-44T | 891  | 0        | -0.954044 |  |
|  | Shiraz-49T | 1166 | 0        | -0.917235 |  |
|  | Shiraz-49T | 1166 | 0        | -0.917235 |  |

|         |      |            |      |          |           |  |
|---------|------|------------|------|----------|-----------|--|
|         |      | Shiraz-77T | 1282 | 0.213849 | 0         |  |
|         |      | Shiraz-77T | 1282 | 0.213849 | 0         |  |
|         |      | Shiraz-9T  | 1368 | 0.199713 | 0         |  |
|         |      | Shiraz-9T  | 1368 | 0.199713 | 0         |  |
|         |      | Shiraz-18T | 1456 | 0.608534 | 0         |  |
|         |      | Shiraz-18T | 1456 | 0.608534 | 0         |  |
|         |      | Shiraz-22T | 1669 | 0.695915 | 0         |  |
|         |      | Shiraz-22T | 1669 | 0.695915 | 0         |  |
|         |      | Shiraz-25T | 1717 | 0.420447 | 0         |  |
|         |      | Shiraz-25T | 1717 | 0.420447 | 0         |  |
|         |      | Shiraz-28T | 1760 | 0.538181 | 0         |  |
|         |      | Shiraz-28T | 1760 | 0.538181 | 0         |  |
|         |      | Shiraz-29T | 1800 | 0.672527 | 0         |  |
|         |      | Shiraz-29T | 1800 | 0.672527 | 0         |  |
|         |      | Shiraz-32T | 1869 | 0.776805 | 0         |  |
|         |      | Shiraz-32T | 1869 | 0.776805 | 0         |  |
|         |      | Shiraz-35T | 1932 | 0.507141 | 0         |  |
|         |      | Shiraz-35T | 1932 | 0.507141 | 0         |  |
|         |      | Shiraz-58T | 2221 | 0.871948 | 0         |  |
|         |      | Shiraz-58T | 2221 | 0.871948 | 0         |  |
|         |      | Shiraz-71T | 2260 | 0.68394  | 0         |  |
|         |      | Shiraz-71T | 2260 | 0.68394  | 0         |  |
|         |      | Shiraz-71T | 2262 | 0.986748 | 0         |  |
|         |      | Shiraz-71T | 2262 | 0.986748 | 0         |  |
| SNORA35 | chrX | Shiraz-3T  | 242  | 0        | -0.336434 |  |
|         |      | Shiraz-4T  | 261  | 0        | -0.336249 |  |
|         |      | Shiraz-16T | 295  | 0.591657 | 0         |  |
|         |      | Shiraz-36T | 433  | 0        | -0.803961 |  |
|         |      | Shiraz-44T | 899  | 0        | -1.09697  |  |
|         |      | Shiraz-49T | 1170 | 0        | -0.967436 |  |
|         |      | Shiraz-18T | 1457 | 0.643204 | 0         |  |
|         |      | Shiraz-22T | 1673 | 0.611783 | 0         |  |
|         |      | Shiraz-25T | 1719 | 0.472955 | 0         |  |
|         |      | Shiraz-28T | 1762 | 0.562311 | 0         |  |
|         |      | Shiraz-29T | 1801 | 0.815343 | 0         |  |
|         |      | Shiraz-32T | 1870 | 0.729766 | 0         |  |
|         |      | Shiraz-35T | 1933 | 0.488535 | 0         |  |
|         |      | Shiraz-58T | 2223 | 0.833364 | 0         |  |
|         |      | Shiraz-71T | 2263 | 0.975531 | 0         |  |
|         |      | Shiraz-3T  | 242  | 0        | -0.336434 |  |
|         |      | Shiraz-4T  | 261  | 0        | -0.336249 |  |
|         |      | Shiraz-16T | 295  | 0.591657 | 0         |  |
|         |      | Shiraz-36T | 433  | 0        | -0.803961 |  |
|         |      | Shiraz-44T | 899  | 0        | -1.09697  |  |
|         |      | Shiraz-49T | 1170 | 0        | -0.967436 |  |
|         |      | Shiraz-18T | 1457 | 0.643204 | 0         |  |
|         |      | Shiraz-22T | 1673 | 0.611783 | 0         |  |

|          |      |            |      |          |           |  |  |
|----------|------|------------|------|----------|-----------|--|--|
|          |      | Shiraz-25T | 1719 | 0.472955 | 0         |  |  |
|          |      | Shiraz-28T | 1762 | 0.562311 | 0         |  |  |
|          |      | Shiraz-29T | 1801 | 0.815343 | 0         |  |  |
|          |      | Shiraz-32T | 1870 | 0.729766 | 0         |  |  |
|          |      | Shiraz-35T | 1933 | 0.488535 | 0         |  |  |
|          |      | Shiraz-58T | 2223 | 0.833364 | 0         |  |  |
|          |      | Shiraz-71T | 2263 | 0.975531 | 0         |  |  |
|          |      | Shiraz-3T  | 242  | 0        | -0.336434 |  |  |
|          |      | Shiraz-4T  | 261  | 0        | -0.336249 |  |  |
|          |      | Shiraz-16T | 295  | 0.591657 | 0         |  |  |
|          |      | Shiraz-36T | 433  | 0        | -0.803961 |  |  |
|          |      | Shiraz-44T | 899  | 0        | -1.09697  |  |  |
|          |      | Shiraz-49T | 1170 | 0        | -0.967436 |  |  |
|          |      | Shiraz-18T | 1457 | 0.643204 | 0         |  |  |
|          |      | Shiraz-22T | 1673 | 0.611783 | 0         |  |  |
|          |      | Shiraz-25T | 1719 | 0.472955 | 0         |  |  |
|          |      | Shiraz-28T | 1762 | 0.562311 | 0         |  |  |
|          |      | Shiraz-29T | 1801 | 0.815343 | 0         |  |  |
|          |      | Shiraz-32T | 1870 | 0.729766 | 0         |  |  |
|          |      | Shiraz-35T | 1933 | 0.488535 | 0         |  |  |
|          |      | Shiraz-58T | 2223 | 0.833364 | 0         |  |  |
|          |      | Shiraz-71T | 2263 | 0.975531 | 0         |  |  |
| SNORA36A | chrX | Shiraz-4T  | 261  | 0        | -0.336249 |  |  |
|          |      | Shiraz-16T | 295  | 0.591657 | 0         |  |  |
|          |      | Shiraz-36T | 433  | 0        | -0.803961 |  |  |
|          |      | Shiraz-44T | 909  | 0        | -1.067051 |  |  |
|          |      | Shiraz-49T | 1170 | 0        | -0.967436 |  |  |
|          |      | Shiraz-9T  | 1370 | 0.690073 | 0         |  |  |
|          |      | Shiraz-9T  | 1371 | 1.292392 | 0         |  |  |
|          |      | Shiraz-18T | 1457 | 0.643204 | 0         |  |  |
|          |      | Shiraz-22T | 1673 | 0.611783 | 0         |  |  |
|          |      | Shiraz-22T | 1678 | 0.911625 | 0         |  |  |
|          |      | Shiraz-25T | 1719 | 0.472955 | 0         |  |  |
|          |      | Shiraz-28T | 1762 | 0.562311 | 0         |  |  |
|          |      | Shiraz-29T | 1801 | 0.815343 | 0         |  |  |
|          |      | Shiraz-32T | 1870 | 0.729766 | 0         |  |  |
|          |      | Shiraz-32T | 1872 | 1.504553 | 0         |  |  |
|          |      | Shiraz-35T | 1933 | 0.488535 | 0         |  |  |
|          |      | Shiraz-53T | 2115 | 0.427728 | 0         |  |  |
|          |      | Shiraz-58T | 2223 | 0.833364 | 0         |  |  |
|          |      | Shiraz-58T | 2226 | 1.074663 | 0         |  |  |
|          |      | Shiraz-71T | 2263 | 0.975531 | 0         |  |  |
|          |      | Shiraz-4T  | 261  | 0        | -0.336249 |  |  |
|          |      | Shiraz-16T | 295  | 0.591657 | 0         |  |  |
|          |      | Shiraz-36T | 433  | 0        | -0.803961 |  |  |
|          |      | Shiraz-44T | 909  | 0        | -1.067051 |  |  |
|          |      | Shiraz-49T | 1170 | 0        | -0.967436 |  |  |

|         |      |            |      |          |           |  |  |
|---------|------|------------|------|----------|-----------|--|--|
|         |      | Shiraz-9T  | 1370 | 0.690073 | 0         |  |  |
|         |      | Shiraz-9T  | 1371 | 1.292392 | 0         |  |  |
|         |      | Shiraz-18T | 1457 | 0.643204 | 0         |  |  |
|         |      | Shiraz-22T | 1673 | 0.611783 | 0         |  |  |
|         |      | Shiraz-22T | 1678 | 0.911625 | 0         |  |  |
|         |      | Shiraz-25T | 1719 | 0.472955 | 0         |  |  |
|         |      | Shiraz-28T | 1762 | 0.562311 | 0         |  |  |
|         |      | Shiraz-29T | 1801 | 0.815343 | 0         |  |  |
|         |      | Shiraz-32T | 1870 | 0.729766 | 0         |  |  |
|         |      | Shiraz-32T | 1872 | 1.504553 | 0         |  |  |
|         |      | Shiraz-35T | 1933 | 0.488535 | 0         |  |  |
|         |      | Shiraz-53T | 2115 | 0.427728 | 0         |  |  |
|         |      | Shiraz-58T | 2223 | 0.833364 | 0         |  |  |
|         |      | Shiraz-58T | 2226 | 1.074663 | 0         |  |  |
|         |      | Shiraz-71T | 2263 | 0.975531 | 0         |  |  |
|         |      | Shiraz-4T  | 261  | 0        | -0.336249 |  |  |
|         |      | Shiraz-16T | 295  | 0.591657 | 0         |  |  |
|         |      | Shiraz-36T | 433  | 0        | -0.803961 |  |  |
|         |      | Shiraz-44T | 909  | 0        | -1.067051 |  |  |
|         |      | Shiraz-49T | 1170 | 0        | -0.967436 |  |  |
|         |      | Shiraz-9T  | 1370 | 0.690073 | 0         |  |  |
|         |      | Shiraz-9T  | 1371 | 1.292392 | 0         |  |  |
|         |      | Shiraz-18T | 1457 | 0.643204 | 0         |  |  |
|         |      | Shiraz-22T | 1673 | 0.611783 | 0         |  |  |
|         |      | Shiraz-22T | 1678 | 0.911625 | 0         |  |  |
|         |      | Shiraz-25T | 1719 | 0.472955 | 0         |  |  |
|         |      | Shiraz-28T | 1762 | 0.562311 | 0         |  |  |
|         |      | Shiraz-29T | 1801 | 0.815343 | 0         |  |  |
|         |      | Shiraz-32T | 1870 | 0.729766 | 0         |  |  |
|         |      | Shiraz-32T | 1872 | 1.504553 | 0         |  |  |
|         |      | Shiraz-35T | 1933 | 0.488535 | 0         |  |  |
|         |      | Shiraz-53T | 2115 | 0.427728 | 0         |  |  |
|         |      | Shiraz-58T | 2223 | 0.833364 | 0         |  |  |
|         |      | Shiraz-58T | 2226 | 1.074663 | 0         |  |  |
|         |      | Shiraz-71T | 2263 | 0.975531 | 0         |  |  |
| SNORA56 | chrX | Shiraz-4T  | 261  | 0        | -0.336249 |  |  |
|         |      | Shiraz-16T | 295  | 0.591657 | 0         |  |  |
|         |      | Shiraz-36T | 433  | 0        | -0.803961 |  |  |
|         |      | Shiraz-44T | 909  | 0        | -1.067051 |  |  |
|         |      | Shiraz-49T | 1170 | 0        | -0.967436 |  |  |
|         |      | Shiraz-9T  | 1370 | 0.690073 | 0         |  |  |
|         |      | Shiraz-9T  | 1371 | 1.292392 | 0         |  |  |
|         |      | Shiraz-18T | 1457 | 0.643204 | 0         |  |  |
|         |      | Shiraz-22T | 1673 | 0.611783 | 0         |  |  |
|         |      | Shiraz-25T | 1719 | 0.472955 | 0         |  |  |
|         |      | Shiraz-28T | 1762 | 0.562311 | 0         |  |  |
|         |      | Shiraz-29T | 1801 | 0.815343 | 0         |  |  |



|          |      |            |      |          |           |  |  |
|----------|------|------------|------|----------|-----------|--|--|
|          |      | Shiraz-32T | 1870 | 0.729766 | 0         |  |  |
|          |      | Shiraz-32T | 1872 | 1.504553 | 0         |  |  |
|          |      | Shiraz-35T | 1933 | 0.488535 | 0         |  |  |
|          |      | Shiraz-53T | 2115 | 0.427728 | 0         |  |  |
|          |      | Shiraz-58T | 2223 | 0.833364 | 0         |  |  |
|          |      | Shiraz-58T | 2226 | 1.074663 | 0         |  |  |
|          |      | Shiraz-71T | 2263 | 0.975531 | 0         |  |  |
|          |      | Shiraz-4T  | 261  | 0        | -0.336249 |  |  |
|          |      | Shiraz-16T | 295  | 0.591657 | 0         |  |  |
|          |      | Shiraz-36T | 433  | 0        | -0.803961 |  |  |
|          |      | Shiraz-44T | 909  | 0        | -1.067051 |  |  |
|          |      | Shiraz-49T | 1170 | 0        | -0.967436 |  |  |
|          |      | Shiraz-9T  | 1370 | 0.690073 | 0         |  |  |
|          |      | Shiraz-9T  | 1371 | 1.292392 | 0         |  |  |
|          |      | Shiraz-18T | 1457 | 0.643204 | 0         |  |  |
|          |      | Shiraz-22T | 1673 | 0.611783 | 0         |  |  |
|          |      | Shiraz-25T | 1719 | 0.472955 | 0         |  |  |
|          |      | Shiraz-28T | 1762 | 0.562311 | 0         |  |  |
|          |      | Shiraz-29T | 1801 | 0.815343 | 0         |  |  |
|          |      | Shiraz-32T | 1870 | 0.729766 | 0         |  |  |
|          |      | Shiraz-32T | 1872 | 1.504553 | 0         |  |  |
|          |      | Shiraz-35T | 1933 | 0.488535 | 0         |  |  |
|          |      | Shiraz-53T | 2115 | 0.427728 | 0         |  |  |
|          |      | Shiraz-58T | 2223 | 0.833364 | 0         |  |  |
|          |      | Shiraz-58T | 2226 | 1.074663 | 0         |  |  |
|          |      | Shiraz-71T | 2263 | 0.975531 | 0         |  |  |
|          |      | Shiraz-4T  | 261  | 0        | -0.336249 |  |  |
|          |      | Shiraz-16T | 295  | 0.591657 | 0         |  |  |
|          |      | Shiraz-36T | 433  | 0        | -0.803961 |  |  |
|          |      | Shiraz-44T | 909  | 0        | -1.067051 |  |  |
|          |      | Shiraz-49T | 1170 | 0        | -0.967436 |  |  |
|          |      | Shiraz-9T  | 1370 | 0.690073 | 0         |  |  |
|          |      | Shiraz-9T  | 1371 | 1.292392 | 0         |  |  |
|          |      | Shiraz-18T | 1457 | 0.643204 | 0         |  |  |
|          |      | Shiraz-22T | 1673 | 0.611783 | 0         |  |  |
|          |      | Shiraz-25T | 1719 | 0.472955 | 0         |  |  |
|          |      | Shiraz-28T | 1762 | 0.562311 | 0         |  |  |
|          |      | Shiraz-29T | 1801 | 0.815343 | 0         |  |  |
|          |      | Shiraz-32T | 1870 | 0.729766 | 0         |  |  |
|          |      | Shiraz-32T | 1872 | 1.504553 | 0         |  |  |
|          |      | Shiraz-35T | 1933 | 0.488535 | 0         |  |  |
|          |      | Shiraz-53T | 2115 | 0.427728 | 0         |  |  |
|          |      | Shiraz-58T | 2223 | 0.833364 | 0         |  |  |
|          |      | Shiraz-58T | 2226 | 1.074663 | 0         |  |  |
|          |      | Shiraz-71T | 2263 | 0.975531 | 0         |  |  |
| SNORAS5A | chr7 | Shiraz-3T  | 87   | 0.198593 | 0         |  |  |
|          |      | Shiraz-3T  | 89   | 0.678641 | 0         |  |  |

|         |      |            |      |          |   |  |
|---------|------|------------|------|----------|---|--|
|         |      | Shiraz-4T  | 252  | 0.192083 | 0 |  |
|         |      | Shiraz-36T | 376  | 0.159952 | 0 |  |
|         |      | Shiraz-44T | 632  | 0.902944 | 0 |  |
|         |      | Shiraz-46T | 942  | 0.069143 | 0 |  |
|         |      | Shiraz-77T | 1223 | 0.215647 | 0 |  |
|         |      | Shiraz-18T | 1433 | 0.250973 | 0 |  |
|         |      | Shiraz-25T | 1697 | 0.21945  | 0 |  |
|         |      | Shiraz-28T | 1734 | 0.362882 | 0 |  |
|         |      | Shiraz-29T | 1777 | 0.156747 | 0 |  |
|         |      | Shiraz-38T | 1950 | 0.265916 | 0 |  |
|         |      | Shiraz-71T | 2236 | 0.320072 | 0 |  |
|         |      | Shiraz-3T  | 87   | 0.198593 | 0 |  |
|         |      | Shiraz-3T  | 89   | 0.678641 | 0 |  |
|         |      | Shiraz-4T  | 252  | 0.192083 | 0 |  |
|         |      | Shiraz-36T | 376  | 0.159952 | 0 |  |
|         |      | Shiraz-44T | 632  | 0.902944 | 0 |  |
|         |      | Shiraz-46T | 942  | 0.069143 | 0 |  |
|         |      | Shiraz-77T | 1223 | 0.215647 | 0 |  |
|         |      | Shiraz-18T | 1433 | 0.250973 | 0 |  |
|         |      | Shiraz-25T | 1697 | 0.21945  | 0 |  |
|         |      | Shiraz-28T | 1734 | 0.362882 | 0 |  |
|         |      | Shiraz-29T | 1777 | 0.156747 | 0 |  |
|         |      | Shiraz-38T | 1950 | 0.265916 | 0 |  |
|         |      | Shiraz-71T | 2236 | 0.320072 | 0 |  |
|         |      | Shiraz-3T  | 87   | 0.198593 | 0 |  |
|         |      | Shiraz-3T  | 89   | 0.678641 | 0 |  |
|         |      | Shiraz-4T  | 252  | 0.192083 | 0 |  |
|         |      | Shiraz-36T | 376  | 0.159952 | 0 |  |
|         |      | Shiraz-44T | 632  | 0.902944 | 0 |  |
|         |      | Shiraz-46T | 942  | 0.069143 | 0 |  |
|         |      | Shiraz-77T | 1223 | 0.215647 | 0 |  |
|         |      | Shiraz-18T | 1433 | 0.250973 | 0 |  |
|         |      | Shiraz-25T | 1697 | 0.21945  | 0 |  |
|         |      | Shiraz-28T | 1734 | 0.362882 | 0 |  |
|         |      | Shiraz-29T | 1777 | 0.156747 | 0 |  |
|         |      | Shiraz-38T | 1950 | 0.265916 | 0 |  |
|         |      | Shiraz-71T | 2236 | 0.320072 | 0 |  |
| SNORASB | chr7 | Shiraz-3T  | 87   | 0.198593 | 0 |  |
|         |      | Shiraz-3T  | 89   | 0.678641 | 0 |  |
|         |      | Shiraz-4T  | 252  | 0.192083 | 0 |  |
|         |      | Shiraz-36T | 376  | 0.159952 | 0 |  |
|         |      | Shiraz-44T | 632  | 0.902944 | 0 |  |
|         |      | Shiraz-46T | 942  | 0.069143 | 0 |  |
|         |      | Shiraz-77T | 1223 | 0.215647 | 0 |  |
|         |      | Shiraz-18T | 1433 | 0.250973 | 0 |  |
|         |      | Shiraz-25T | 1697 | 0.21945  | 0 |  |
|         |      | Shiraz-28T | 1734 | 0.362882 | 0 |  |

|         |      |            |      |          |   |  |
|---------|------|------------|------|----------|---|--|
|         |      | Shiraz-29T | 1777 | 0.156747 | 0 |  |
|         |      | Shiraz-38T | 1950 | 0.265916 | 0 |  |
|         |      | Shiraz-71T | 2236 | 0.320072 | 0 |  |
|         |      | Shiraz-3T  | 87   | 0.198593 | 0 |  |
|         |      | Shiraz-3T  | 89   | 0.678641 | 0 |  |
|         |      | Shiraz-4T  | 252  | 0.192083 | 0 |  |
|         |      | Shiraz-36T | 376  | 0.159952 | 0 |  |
|         |      | Shiraz-44T | 632  | 0.902944 | 0 |  |
|         |      | Shiraz-46T | 942  | 0.069143 | 0 |  |
|         |      | Shiraz-77T | 1223 | 0.215647 | 0 |  |
|         |      | Shiraz-18T | 1433 | 0.250973 | 0 |  |
|         |      | Shiraz-25T | 1697 | 0.21945  | 0 |  |
|         |      | Shiraz-28T | 1734 | 0.362882 | 0 |  |
|         |      | Shiraz-29T | 1777 | 0.156747 | 0 |  |
|         |      | Shiraz-38T | 1950 | 0.265916 | 0 |  |
|         |      | Shiraz-71T | 2236 | 0.320072 | 0 |  |
|         |      | Shiraz-3T  | 87   | 0.198593 | 0 |  |
|         |      | Shiraz-3T  | 89   | 0.678641 | 0 |  |
|         |      | Shiraz-4T  | 252  | 0.192083 | 0 |  |
|         |      | Shiraz-36T | 376  | 0.159952 | 0 |  |
|         |      | Shiraz-44T | 632  | 0.902944 | 0 |  |
|         |      | Shiraz-46T | 942  | 0.069143 | 0 |  |
|         |      | Shiraz-77T | 1223 | 0.215647 | 0 |  |
|         |      | Shiraz-18T | 1433 | 0.250973 | 0 |  |
|         |      | Shiraz-25T | 1697 | 0.21945  | 0 |  |
|         |      | Shiraz-28T | 1734 | 0.362882 | 0 |  |
|         |      | Shiraz-29T | 1777 | 0.156747 | 0 |  |
|         |      | Shiraz-38T | 1950 | 0.265916 | 0 |  |
|         |      | Shiraz-71T | 2236 | 0.320072 | 0 |  |
| SNORASC | chr7 | Shiraz-3T  | 87   | 0.198593 | 0 |  |
|         |      | Shiraz-3T  | 89   | 0.678641 | 0 |  |
|         |      | Shiraz-4T  | 252  | 0.192083 | 0 |  |
|         |      | Shiraz-36T | 376  | 0.159952 | 0 |  |
|         |      | Shiraz-44T | 632  | 0.902944 | 0 |  |
|         |      | Shiraz-46T | 942  | 0.069143 | 0 |  |
|         |      | Shiraz-77T | 1223 | 0.215647 | 0 |  |
|         |      | Shiraz-18T | 1433 | 0.250973 | 0 |  |
|         |      | Shiraz-25T | 1697 | 0.21945  | 0 |  |
|         |      | Shiraz-28T | 1734 | 0.362882 | 0 |  |
|         |      | Shiraz-29T | 1777 | 0.156747 | 0 |  |
|         |      | Shiraz-38T | 1950 | 0.265916 | 0 |  |
|         |      | Shiraz-71T | 2236 | 0.320072 | 0 |  |
|         |      | Shiraz-3T  | 87   | 0.198593 | 0 |  |
|         |      | Shiraz-3T  | 89   | 0.678641 | 0 |  |
|         |      | Shiraz-4T  | 252  | 0.192083 | 0 |  |
|         |      | Shiraz-36T | 376  | 0.159952 | 0 |  |
|         |      | Shiraz-44T | 632  | 0.902944 | 0 |  |

|         |      |            |      |          |           |  |  |
|---------|------|------------|------|----------|-----------|--|--|
|         |      | Shiraz-46T | 942  | 0.069143 | 0         |  |  |
|         |      | Shiraz-77T | 1223 | 0.215647 | 0         |  |  |
|         |      | Shiraz-18T | 1433 | 0.250973 | 0         |  |  |
|         |      | Shiraz-25T | 1697 | 0.21945  | 0         |  |  |
|         |      | Shiraz-28T | 1734 | 0.362882 | 0         |  |  |
|         |      | Shiraz-29T | 1777 | 0.156747 | 0         |  |  |
|         |      | Shiraz-38T | 1950 | 0.265916 | 0         |  |  |
|         |      | Shiraz-71T | 2236 | 0.320072 | 0         |  |  |
|         |      | Shiraz-3T  | 87   | 0.198593 | 0         |  |  |
|         |      | Shiraz-3T  | 89   | 0.678641 | 0         |  |  |
|         |      | Shiraz-4T  | 252  | 0.192083 | 0         |  |  |
|         |      | Shiraz-36T | 376  | 0.159952 | 0         |  |  |
|         |      | Shiraz-44T | 632  | 0.902944 | 0         |  |  |
|         |      | Shiraz-46T | 942  | 0.069143 | 0         |  |  |
|         |      | Shiraz-77T | 1223 | 0.215647 | 0         |  |  |
|         |      | Shiraz-18T | 1433 | 0.250973 | 0         |  |  |
|         |      | Shiraz-25T | 1697 | 0.21945  | 0         |  |  |
|         |      | Shiraz-28T | 1734 | 0.362882 | 0         |  |  |
|         |      | Shiraz-29T | 1777 | 0.156747 | 0         |  |  |
|         |      | Shiraz-38T | 1950 | 0.265916 | 0         |  |  |
|         |      | Shiraz-71T | 2236 | 0.320072 | 0         |  |  |
| SNORA69 | chrX | Shiraz-3T  | 242  | 0        | -0.336434 |  |  |
|         |      | Shiraz-3T  | 244  | 0        | -0.023749 |  |  |
|         |      | Shiraz-4T  | 261  | 0        | -0.336249 |  |  |
|         |      | Shiraz-16T | 295  | 0.591657 | 0         |  |  |
|         |      | Shiraz-36T | 433  | 0        | -0.803961 |  |  |
|         |      | Shiraz-44T | 899  | 0        | -1.09697  |  |  |
|         |      | Shiraz-44T | 904  | 0        | -0.625526 |  |  |
|         |      | Shiraz-49T | 1170 | 0        | -0.967436 |  |  |
|         |      | Shiraz-9T  | 1370 | 0.690073 | 0         |  |  |
|         |      | Shiraz-18T | 1457 | 0.643204 | 0         |  |  |
|         |      | Shiraz-22T | 1673 | 0.611783 | 0         |  |  |
|         |      | Shiraz-25T | 1719 | 0.472955 | 0         |  |  |
|         |      | Shiraz-28T | 1762 | 0.562311 | 0         |  |  |
|         |      | Shiraz-29T | 1801 | 0.815343 | 0         |  |  |
|         |      | Shiraz-32T | 1870 | 0.729766 | 0         |  |  |
|         |      | Shiraz-35T | 1933 | 0.488535 | 0         |  |  |
|         |      | Shiraz-58T | 2223 | 0.833364 | 0         |  |  |
|         |      | Shiraz-71T | 2263 | 0.975531 | 0         |  |  |
|         |      | Shiraz-3T  | 242  | 0        | -0.336434 |  |  |
|         |      | Shiraz-3T  | 244  | 0        | -0.023749 |  |  |
|         |      | Shiraz-4T  | 261  | 0        | -0.336249 |  |  |
|         |      | Shiraz-16T | 295  | 0.591657 | 0         |  |  |
|         |      | Shiraz-36T | 433  | 0        | -0.803961 |  |  |
|         |      | Shiraz-44T | 899  | 0        | -1.09697  |  |  |
|         |      | Shiraz-44T | 904  | 0        | -0.625526 |  |  |
|         |      | Shiraz-49T | 1170 | 0        | -0.967436 |  |  |

|         |      |            |      |          |           |  |  |
|---------|------|------------|------|----------|-----------|--|--|
|         |      | Shiraz-9T  | 1370 | 0.690073 | 0         |  |  |
|         |      | Shiraz-18T | 1457 | 0.643204 | 0         |  |  |
|         |      | Shiraz-22T | 1673 | 0.611783 | 0         |  |  |
|         |      | Shiraz-25T | 1719 | 0.472955 | 0         |  |  |
|         |      | Shiraz-28T | 1762 | 0.562311 | 0         |  |  |
|         |      | Shiraz-29T | 1801 | 0.815343 | 0         |  |  |
|         |      | Shiraz-32T | 1870 | 0.729766 | 0         |  |  |
|         |      | Shiraz-35T | 1933 | 0.488535 | 0         |  |  |
|         |      | Shiraz-58T | 2223 | 0.833364 | 0         |  |  |
|         |      | Shiraz-71T | 2263 | 0.975531 | 0         |  |  |
|         |      | Shiraz-3T  | 242  | 0        | -0.336434 |  |  |
|         |      | Shiraz-3T  | 244  | 0        | -0.023749 |  |  |
|         |      | Shiraz-4T  | 261  | 0        | -0.336249 |  |  |
|         |      | Shiraz-16T | 295  | 0.591657 | 0         |  |  |
|         |      | Shiraz-36T | 433  | 0        | -0.803961 |  |  |
|         |      | Shiraz-44T | 899  | 0        | -1.09697  |  |  |
|         |      | Shiraz-44T | 904  | 0        | -0.625526 |  |  |
|         |      | Shiraz-49T | 1170 | 0        | -0.967436 |  |  |
|         |      | Shiraz-9T  | 1370 | 0.690073 | 0         |  |  |
|         |      | Shiraz-18T | 1457 | 0.643204 | 0         |  |  |
|         |      | Shiraz-22T | 1673 | 0.611783 | 0         |  |  |
|         |      | Shiraz-25T | 1719 | 0.472955 | 0         |  |  |
|         |      | Shiraz-28T | 1762 | 0.562311 | 0         |  |  |
|         |      | Shiraz-29T | 1801 | 0.815343 | 0         |  |  |
|         |      | Shiraz-32T | 1870 | 0.729766 | 0         |  |  |
|         |      | Shiraz-35T | 1933 | 0.488535 | 0         |  |  |
|         |      | Shiraz-58T | 2223 | 0.833364 | 0         |  |  |
|         |      | Shiraz-71T | 2263 | 0.975531 | 0         |  |  |
| SNORA70 | chrX | Shiraz-3T  | 246  | 0.531858 | 0         |  |  |
|         |      | Shiraz-4T  | 261  | 0        | -0.336249 |  |  |
|         |      | Shiraz-16T | 295  | 0.591657 | 0         |  |  |
|         |      | Shiraz-36T | 433  | 0        | -0.803961 |  |  |
|         |      | Shiraz-42T | 480  | 0        | -0.232915 |  |  |
|         |      | Shiraz-44T | 908  | 0.466743 | 0         |  |  |
|         |      | Shiraz-49T | 1170 | 0        | -0.967436 |  |  |
|         |      | Shiraz-49T | 1173 | 0        | -0.704439 |  |  |
|         |      | Shiraz-9T  | 1370 | 0.690073 | 0         |  |  |
|         |      | Shiraz-9T  | 1371 | 1.292392 | 0         |  |  |
|         |      | Shiraz-18T | 1457 | 0.643204 | 0         |  |  |
|         |      | Shiraz-22T | 1673 | 0.611783 | 0         |  |  |
|         |      | Shiraz-22T | 1678 | 0.911625 | 0         |  |  |
|         |      | Shiraz-25T | 1719 | 0.472955 | 0         |  |  |
|         |      | Shiraz-28T | 1762 | 0.562311 | 0         |  |  |
|         |      | Shiraz-29T | 1801 | 0.815343 | 0         |  |  |
|         |      | Shiraz-32T | 1870 | 0.729766 | 0         |  |  |
|         |      | Shiraz-32T | 1872 | 1.504553 | 0         |  |  |
|         |      | Shiraz-35T | 1933 | 0.488535 | 0         |  |  |

|  |            |      |          |           |  |
|--|------------|------|----------|-----------|--|
|  | Shiraz-38T | 2011 | 0        | -0.406024 |  |
|  | Shiraz-53T | 2115 | 0.427728 | 0         |  |
|  | Shiraz-58T | 2223 | 0.833364 | 0         |  |
|  | Shiraz-58T | 2226 | 1.074663 | 0         |  |
|  | Shiraz-71T | 2263 | 0.975531 | 0         |  |
|  | Shiraz-3T  | 246  | 0.531858 | 0         |  |
|  | Shiraz-4T  | 261  | 0        | -0.336249 |  |
|  | Shiraz-16T | 295  | 0.591657 | 0         |  |
|  | Shiraz-36T | 433  | 0        | -0.803961 |  |
|  | Shiraz-42T | 480  | 0        | -0.232915 |  |
|  | Shiraz-44T | 908  | 0.466743 | 0         |  |
|  | Shiraz-49T | 1170 | 0        | -0.967436 |  |
|  | Shiraz-49T | 1173 | 0        | -0.704439 |  |
|  | Shiraz-9T  | 1370 | 0.690073 | 0         |  |
|  | Shiraz-9T  | 1371 | 1.292392 | 0         |  |
|  | Shiraz-18T | 1457 | 0.643204 | 0         |  |
|  | Shiraz-22T | 1673 | 0.611783 | 0         |  |
|  | Shiraz-22T | 1678 | 0.911625 | 0         |  |
|  | Shiraz-25T | 1719 | 0.472955 | 0         |  |
|  | Shiraz-28T | 1762 | 0.562311 | 0         |  |
|  | Shiraz-29T | 1801 | 0.815343 | 0         |  |
|  | Shiraz-32T | 1870 | 0.729766 | 0         |  |
|  | Shiraz-32T | 1872 | 1.504553 | 0         |  |
|  | Shiraz-35T | 1933 | 0.488535 | 0         |  |
|  | Shiraz-38T | 2011 | 0        | -0.406024 |  |
|  | Shiraz-53T | 2115 | 0.427728 | 0         |  |
|  | Shiraz-58T | 2223 | 0.833364 | 0         |  |
|  | Shiraz-58T | 2226 | 1.074663 | 0         |  |
|  | Shiraz-71T | 2263 | 0.975531 | 0         |  |
|  | Shiraz-3T  | 246  | 0.531858 | 0         |  |
|  | Shiraz-4T  | 261  | 0        | -0.336249 |  |
|  | Shiraz-16T | 295  | 0.591657 | 0         |  |
|  | Shiraz-36T | 433  | 0        | -0.803961 |  |
|  | Shiraz-42T | 480  | 0        | -0.232915 |  |
|  | Shiraz-44T | 908  | 0.466743 | 0         |  |
|  | Shiraz-49T | 1170 | 0        | -0.967436 |  |
|  | Shiraz-49T | 1173 | 0        | -0.704439 |  |
|  | Shiraz-9T  | 1370 | 0.690073 | 0         |  |
|  | Shiraz-9T  | 1371 | 1.292392 | 0         |  |
|  | Shiraz-18T | 1457 | 0.643204 | 0         |  |
|  | Shiraz-22T | 1673 | 0.611783 | 0         |  |
|  | Shiraz-22T | 1678 | 0.911625 | 0         |  |
|  | Shiraz-25T | 1719 | 0.472955 | 0         |  |
|  | Shiraz-28T | 1762 | 0.562311 | 0         |  |
|  | Shiraz-29T | 1801 | 0.815343 | 0         |  |
|  | Shiraz-32T | 1870 | 0.729766 | 0         |  |
|  | Shiraz-32T | 1872 | 1.504553 | 0         |  |

|         |      |            |      |          |           |  |
|---------|------|------------|------|----------|-----------|--|
|         |      | Shiraz-35T | 1933 | 0.488535 | 0         |  |
|         |      | Shiraz-38T | 2011 | 0        | -0.406024 |  |
|         |      | Shiraz-53T | 2115 | 0.427728 | 0         |  |
|         |      | Shiraz-58T | 2223 | 0.833364 | 0         |  |
|         |      | Shiraz-58T | 2226 | 1.074663 | 0         |  |
|         |      | Shiraz-71T | 2263 | 0.975531 | 0         |  |
| SNORA9  | chr7 | Shiraz-3T  | 87   | 0.198593 | 0         |  |
|         |      | Shiraz-3T  | 89   | 0.678641 | 0         |  |
|         |      | Shiraz-4T  | 252  | 0.192083 | 0         |  |
|         |      | Shiraz-36T | 376  | 0.159952 | 0         |  |
|         |      | Shiraz-44T | 632  | 0.902944 | 0         |  |
|         |      | Shiraz-46T | 942  | 0.069143 | 0         |  |
|         |      | Shiraz-77T | 1223 | 0.215647 | 0         |  |
|         |      | Shiraz-18T | 1433 | 0.250973 | 0         |  |
|         |      | Shiraz-25T | 1697 | 0.21945  | 0         |  |
|         |      | Shiraz-28T | 1734 | 0.362882 | 0         |  |
|         |      | Shiraz-29T | 1777 | 0.156747 | 0         |  |
|         |      | Shiraz-38T | 1950 | 0.265916 | 0         |  |
|         |      | Shiraz-71T | 2236 | 0.320072 | 0         |  |
|         |      | Shiraz-3T  | 87   | 0.198593 | 0         |  |
|         |      | Shiraz-3T  | 89   | 0.678641 | 0         |  |
|         |      | Shiraz-4T  | 252  | 0.192083 | 0         |  |
|         |      | Shiraz-36T | 376  | 0.159952 | 0         |  |
|         |      | Shiraz-44T | 632  | 0.902944 | 0         |  |
|         |      | Shiraz-46T | 942  | 0.069143 | 0         |  |
|         |      | Shiraz-77T | 1223 | 0.215647 | 0         |  |
|         |      | Shiraz-18T | 1433 | 0.250973 | 0         |  |
|         |      | Shiraz-25T | 1697 | 0.21945  | 0         |  |
|         |      | Shiraz-28T | 1734 | 0.362882 | 0         |  |
|         |      | Shiraz-29T | 1777 | 0.156747 | 0         |  |
|         |      | Shiraz-38T | 1950 | 0.265916 | 0         |  |
|         |      | Shiraz-71T | 2236 | 0.320072 | 0         |  |
|         |      | Shiraz-3T  | 87   | 0.198593 | 0         |  |
|         |      | Shiraz-3T  | 89   | 0.678641 | 0         |  |
|         |      | Shiraz-4T  | 252  | 0.192083 | 0         |  |
|         |      | Shiraz-36T | 376  | 0.159952 | 0         |  |
|         |      | Shiraz-44T | 632  | 0.902944 | 0         |  |
|         |      | Shiraz-46T | 942  | 0.069143 | 0         |  |
|         |      | Shiraz-77T | 1223 | 0.215647 | 0         |  |
|         |      | Shiraz-18T | 1433 | 0.250973 | 0         |  |
|         |      | Shiraz-25T | 1697 | 0.21945  | 0         |  |
|         |      | Shiraz-28T | 1734 | 0.362882 | 0         |  |
|         |      | Shiraz-29T | 1777 | 0.156747 | 0         |  |
|         |      | Shiraz-38T | 1950 | 0.265916 | 0         |  |
|         |      | Shiraz-71T | 2236 | 0.320072 | 0         |  |
| SNORD61 | chrX | Shiraz-3T  | 242  | 0        | -0.336434 |  |
|         |      | Shiraz-4T  | 261  | 0        | -0.336249 |  |

|  |            |      |          |           |  |
|--|------------|------|----------|-----------|--|
|  | Shiraz-16T | 295  | 0.591657 | 0         |  |
|  | Shiraz-36T | 433  | 0        | -0.803961 |  |
|  | Shiraz-44T | 899  | 0        | -1.09697  |  |
|  | Shiraz-49T | 1170 | 0        | -0.967436 |  |
|  | Shiraz-9T  | 1370 | 0.690073 | 0         |  |
|  | Shiraz-18T | 1457 | 0.643204 | 0         |  |
|  | Shiraz-22T | 1673 | 0.611783 | 0         |  |
|  | Shiraz-22T | 1677 | 0.789711 | 0         |  |
|  | Shiraz-25T | 1719 | 0.472955 | 0         |  |
|  | Shiraz-28T | 1762 | 0.562311 | 0         |  |
|  | Shiraz-29T | 1801 | 0.815343 | 0         |  |
|  | Shiraz-32T | 1870 | 0.729766 | 0         |  |
|  | Shiraz-35T | 1933 | 0.488535 | 0         |  |
|  | Shiraz-58T | 2223 | 0.833364 | 0         |  |
|  | Shiraz-71T | 2263 | 0.975531 | 0         |  |
|  | Shiraz-3T  | 242  | 0        | -0.336434 |  |
|  | Shiraz-4T  | 261  | 0        | -0.336249 |  |
|  | Shiraz-16T | 295  | 0.591657 | 0         |  |
|  | Shiraz-36T | 433  | 0        | -0.803961 |  |
|  | Shiraz-44T | 899  | 0        | -1.09697  |  |
|  | Shiraz-49T | 1170 | 0        | -0.967436 |  |
|  | Shiraz-9T  | 1370 | 0.690073 | 0         |  |
|  | Shiraz-18T | 1457 | 0.643204 | 0         |  |
|  | Shiraz-22T | 1673 | 0.611783 | 0         |  |
|  | Shiraz-22T | 1677 | 0.789711 | 0         |  |
|  | Shiraz-25T | 1719 | 0.472955 | 0         |  |
|  | Shiraz-28T | 1762 | 0.562311 | 0         |  |
|  | Shiraz-29T | 1801 | 0.815343 | 0         |  |
|  | Shiraz-32T | 1870 | 0.729766 | 0         |  |
|  | Shiraz-35T | 1933 | 0.488535 | 0         |  |
|  | Shiraz-58T | 2223 | 0.833364 | 0         |  |
|  | Shiraz-71T | 2263 | 0.975531 | 0         |  |
|  | Shiraz-3T  | 242  | 0        | -0.336434 |  |
|  | Shiraz-4T  | 261  | 0        | -0.336249 |  |
|  | Shiraz-16T | 295  | 0.591657 | 0         |  |
|  | Shiraz-36T | 433  | 0        | -0.803961 |  |
|  | Shiraz-44T | 899  | 0        | -1.09697  |  |
|  | Shiraz-49T | 1170 | 0        | -0.967436 |  |
|  | Shiraz-9T  | 1370 | 0.690073 | 0         |  |
|  | Shiraz-18T | 1457 | 0.643204 | 0         |  |
|  | Shiraz-22T | 1673 | 0.611783 | 0         |  |
|  | Shiraz-22T | 1677 | 0.789711 | 0         |  |
|  | Shiraz-25T | 1719 | 0.472955 | 0         |  |
|  | Shiraz-28T | 1762 | 0.562311 | 0         |  |
|  | Shiraz-29T | 1801 | 0.815343 | 0         |  |
|  | Shiraz-32T | 1870 | 0.729766 | 0         |  |
|  | Shiraz-35T | 1933 | 0.488535 | 0         |  |



|         |      |            |      |          |           |  |
|---------|------|------------|------|----------|-----------|--|
|         |      | Shiraz-58T | 2223 | 0.833364 | 0         |  |
|         |      | Shiraz-71T | 2263 | 0.975531 | 0         |  |
| SNORD72 | chr5 | Shiraz-4T  | 250  | 0.262252 | 0         |  |
|         |      | Shiraz-16T | 266  | 0.321724 | 0         |  |
|         |      | Shiraz-44T | 591  | 0        | -0.233934 |  |
|         |      | Shiraz-18T | 1429 | 0        | -0.314125 |  |
|         |      | Shiraz-22T | 1522 | 0        | -0.322688 |  |
|         |      | Shiraz-25T | 1694 | 0.201602 | 0         |  |
|         |      | Shiraz-28T | 1731 | 0.295447 | 0         |  |
|         |      | Shiraz-29T | 1773 | 0.090981 | 0         |  |
|         |      | Shiraz-40T | 2016 | 0.376634 | 0         |  |
|         |      | Shiraz-4T  | 250  | 0.262252 | 0         |  |
|         |      | Shiraz-16T | 266  | 0.321724 | 0         |  |
|         |      | Shiraz-44T | 591  | 0        | -0.233934 |  |
|         |      | Shiraz-18T | 1429 | 0        | -0.314125 |  |
|         |      | Shiraz-22T | 1522 | 0        | -0.322688 |  |
|         |      | Shiraz-25T | 1694 | 0.201602 | 0         |  |
|         |      | Shiraz-28T | 1731 | 0.295447 | 0         |  |
|         |      | Shiraz-29T | 1773 | 0.090981 | 0         |  |
|         |      | Shiraz-40T | 2016 | 0.376634 | 0         |  |
|         |      | Shiraz-4T  | 250  | 0.262252 | 0         |  |
|         |      | Shiraz-16T | 266  | 0.321724 | 0         |  |
|         |      | Shiraz-44T | 591  | 0        | -0.233934 |  |
|         |      | Shiraz-18T | 1429 | 0        | -0.314125 |  |
|         |      | Shiraz-22T | 1522 | 0        | -0.322688 |  |
|         |      | Shiraz-25T | 1694 | 0.201602 | 0         |  |
|         |      | Shiraz-28T | 1731 | 0.295447 | 0         |  |
|         |      | Shiraz-29T | 1773 | 0.090981 | 0         |  |
|         |      | Shiraz-40T | 2016 | 0.376634 | 0         |  |
| SNORD93 | chr7 | Shiraz-3T  | 87   | 0.198593 | 0         |  |
|         |      | Shiraz-4T  | 252  | 0.192083 | 0         |  |
|         |      | Shiraz-36T | 376  | 0.159952 | 0         |  |
|         |      | Shiraz-46T | 942  | 0.069143 | 0         |  |
|         |      | Shiraz-18T | 1433 | 0.250973 | 0         |  |
|         |      | Shiraz-25T | 1697 | 0.21945  | 0         |  |
|         |      | Shiraz-28T | 1734 | 0.362882 | 0         |  |
|         |      | Shiraz-29T | 1777 | 0.156747 | 0         |  |
|         |      | Shiraz-38T | 1950 | 0.265916 | 0         |  |
|         |      | Shiraz-71T | 2236 | 0.320072 | 0         |  |
|         |      | Shiraz-3T  | 87   | 0.198593 | 0         |  |
|         |      | Shiraz-4T  | 252  | 0.192083 | 0         |  |
|         |      | Shiraz-36T | 376  | 0.159952 | 0         |  |
|         |      | Shiraz-46T | 942  | 0.069143 | 0         |  |
|         |      | Shiraz-18T | 1433 | 0.250973 | 0         |  |
|         |      | Shiraz-25T | 1697 | 0.21945  | 0         |  |
|         |      | Shiraz-28T | 1734 | 0.362882 | 0         |  |
|         |      | Shiraz-29T | 1777 | 0.156747 | 0         |  |

|          |      |            |      |          |           |  |
|----------|------|------------|------|----------|-----------|--|
|          |      | Shiraz-38T | 1950 | 0.265916 | 0         |  |
|          |      | Shiraz-71T | 2236 | 0.320072 | 0         |  |
|          |      | Shiraz-3T  | 87   | 0.198593 | 0         |  |
|          |      | Shiraz-4T  | 252  | 0.192083 | 0         |  |
|          |      | Shiraz-36T | 376  | 0.159952 | 0         |  |
|          |      | Shiraz-46T | 942  | 0.069143 | 0         |  |
|          |      | Shiraz-18T | 1433 | 0.250973 | 0         |  |
|          |      | Shiraz-25T | 1697 | 0.21945  | 0         |  |
|          |      | Shiraz-28T | 1734 | 0.362882 | 0         |  |
|          |      | Shiraz-29T | 1777 | 0.156747 | 0         |  |
|          |      | Shiraz-38T | 1950 | 0.265916 | 0         |  |
|          |      | Shiraz-71T | 2236 | 0.320072 | 0         |  |
| SNORD96B | chrX | Shiraz-3T  | 242  | 0        | -0.336434 |  |
|          |      | Shiraz-4T  | 261  | 0        | -0.336249 |  |
|          |      | Shiraz-16T | 295  | 0.591657 | 0         |  |
|          |      | Shiraz-36T | 433  | 0        | -0.803961 |  |
|          |      | Shiraz-44T | 899  | 0        | -1.09697  |  |
|          |      | Shiraz-49T | 1170 | 0        | -0.967436 |  |
|          |      | Shiraz-18T | 1457 | 0.643204 | 0         |  |
|          |      | Shiraz-22T | 1673 | 0.611783 | 0         |  |
|          |      | Shiraz-25T | 1719 | 0.472955 | 0         |  |
|          |      | Shiraz-28T | 1762 | 0.562311 | 0         |  |
|          |      | Shiraz-29T | 1801 | 0.815343 | 0         |  |
|          |      | Shiraz-32T | 1870 | 0.729766 | 0         |  |
|          |      | Shiraz-35T | 1933 | 0.488535 | 0         |  |
|          |      | Shiraz-58T | 2223 | 0.833364 | 0         |  |
|          |      | Shiraz-71T | 2263 | 0.975531 | 0         |  |
|          |      | Shiraz-3T  | 242  | 0        | -0.336434 |  |
|          |      | Shiraz-4T  | 261  | 0        | -0.336249 |  |
|          |      | Shiraz-16T | 295  | 0.591657 | 0         |  |
|          |      | Shiraz-36T | 433  | 0        | -0.803961 |  |
|          |      | Shiraz-44T | 899  | 0        | -1.09697  |  |
|          |      | Shiraz-49T | 1170 | 0        | -0.967436 |  |
|          |      | Shiraz-18T | 1457 | 0.643204 | 0         |  |
|          |      | Shiraz-22T | 1673 | 0.611783 | 0         |  |
|          |      | Shiraz-25T | 1719 | 0.472955 | 0         |  |
|          |      | Shiraz-28T | 1762 | 0.562311 | 0         |  |
|          |      | Shiraz-29T | 1801 | 0.815343 | 0         |  |
|          |      | Shiraz-32T | 1870 | 0.729766 | 0         |  |
|          |      | Shiraz-35T | 1933 | 0.488535 | 0         |  |
|          |      | Shiraz-58T | 2223 | 0.833364 | 0         |  |
|          |      | Shiraz-71T | 2263 | 0.975531 | 0         |  |
|          |      | Shiraz-3T  | 242  | 0        | -0.336434 |  |
|          |      | Shiraz-4T  | 261  | 0        | -0.336249 |  |
|          |      | Shiraz-16T | 295  | 0.591657 | 0         |  |
|          |      | Shiraz-36T | 433  | 0        | -0.803961 |  |
|          |      | Shiraz-44T | 899  | 0        | -1.09697  |  |

|       |      |            |      |          |           |  |  |
|-------|------|------------|------|----------|-----------|--|--|
|       |      | Shiraz-49T | 1170 | 0        | -0.967436 |  |  |
|       |      | Shiraz-18T | 1457 | 0.643204 | 0         |  |  |
|       |      | Shiraz-22T | 1673 | 0.611783 | 0         |  |  |
|       |      | Shiraz-25T | 1719 | 0.472955 | 0         |  |  |
|       |      | Shiraz-28T | 1762 | 0.562311 | 0         |  |  |
|       |      | Shiraz-29T | 1801 | 0.815343 | 0         |  |  |
|       |      | Shiraz-32T | 1870 | 0.729766 | 0         |  |  |
|       |      | Shiraz-35T | 1933 | 0.488535 | 0         |  |  |
|       |      | Shiraz-58T | 2223 | 0.833364 | 0         |  |  |
|       |      | Shiraz-71T | 2263 | 0.975531 | 0         |  |  |
| SNX10 | chr7 | Shiraz-3T  | 87   | 0.198593 | 0         |  |  |
|       |      | Shiraz-4T  | 252  | 0.192083 | 0         |  |  |
|       |      | Shiraz-36T | 376  | 0.159952 | 0         |  |  |
|       |      | Shiraz-46T | 942  | 0.069143 | 0         |  |  |
|       |      | Shiraz-18T | 1433 | 0.250973 | 0         |  |  |
|       |      | Shiraz-25T | 1697 | 0.21945  | 0         |  |  |
|       |      | Shiraz-28T | 1734 | 0.362882 | 0         |  |  |
|       |      | Shiraz-29T | 1777 | 0.156747 | 0         |  |  |
|       |      | Shiraz-38T | 1950 | 0.265916 | 0         |  |  |
|       |      | Shiraz-71T | 2236 | 0.320072 | 0         |  |  |
|       |      | Shiraz-3T  | 87   | 0.198593 | 0         |  |  |
|       |      | Shiraz-4T  | 252  | 0.192083 | 0         |  |  |
|       |      | Shiraz-36T | 376  | 0.159952 | 0         |  |  |
|       |      | Shiraz-46T | 942  | 0.069143 | 0         |  |  |
|       |      | Shiraz-18T | 1433 | 0.250973 | 0         |  |  |
|       |      | Shiraz-25T | 1697 | 0.21945  | 0         |  |  |
|       |      | Shiraz-28T | 1734 | 0.362882 | 0         |  |  |
|       |      | Shiraz-29T | 1777 | 0.156747 | 0         |  |  |
|       |      | Shiraz-38T | 1950 | 0.265916 | 0         |  |  |
|       |      | Shiraz-71T | 2236 | 0.320072 | 0         |  |  |
|       |      | Shiraz-3T  | 87   | 0.198593 | 0         |  |  |
|       |      | Shiraz-4T  | 252  | 0.192083 | 0         |  |  |
|       |      | Shiraz-36T | 376  | 0.159952 | 0         |  |  |
|       |      | Shiraz-46T | 942  | 0.069143 | 0         |  |  |
|       |      | Shiraz-18T | 1433 | 0.250973 | 0         |  |  |
|       |      | Shiraz-25T | 1697 | 0.21945  | 0         |  |  |
|       |      | Shiraz-28T | 1734 | 0.362882 | 0         |  |  |
|       |      | Shiraz-29T | 1777 | 0.156747 | 0         |  |  |
|       |      | Shiraz-38T | 1950 | 0.265916 | 0         |  |  |
|       |      | Shiraz-71T | 2236 | 0.320072 | 0         |  |  |
| SNX12 | chrX | Shiraz-4T  | 261  | 0        | -0.336249 |  |  |
|       |      | Shiraz-16T | 295  | 0.591657 | 0         |  |  |
|       |      | Shiraz-36T | 433  | 0        | -0.803961 |  |  |
|       |      | Shiraz-44T | 899  | 0        | -1.09697  |  |  |
|       |      | Shiraz-44T | 900  | 0        | -0.584284 |  |  |
|       |      | Shiraz-49T | 1170 | 0        | -0.967436 |  |  |
|       |      | Shiraz-49T | 1171 | 0        | -0.612379 |  |  |

|  |            |      |          |           |  |
|--|------------|------|----------|-----------|--|
|  | Shiraz-77T | 1283 | 0.296555 | 0         |  |
|  | Shiraz-18T | 1457 | 0.643204 | 0         |  |
|  | Shiraz-22T | 1673 | 0.611783 | 0         |  |
|  | Shiraz-22T | 1674 | 0.887899 | 0         |  |
|  | Shiraz-25T | 1719 | 0.472955 | 0         |  |
|  | Shiraz-28T | 1762 | 0.562311 | 0         |  |
|  | Shiraz-29T | 1801 | 0.815343 | 0         |  |
|  | Shiraz-32T | 1870 | 0.729766 | 0         |  |
|  | Shiraz-35T | 1933 | 0.488535 | 0         |  |
|  | Shiraz-58T | 2223 | 0.833364 | 0         |  |
|  | Shiraz-58T | 2224 | 1.076575 | 0         |  |
|  | Shiraz-71T | 2263 | 0.975531 | 0         |  |
|  | Shiraz-4T  | 261  | 0        | -0.336249 |  |
|  | Shiraz-16T | 295  | 0.591657 | 0         |  |
|  | Shiraz-36T | 433  | 0        | -0.803961 |  |
|  | Shiraz-44T | 899  | 0        | -1.09697  |  |
|  | Shiraz-44T | 900  | 0        | -0.584284 |  |
|  | Shiraz-49T | 1170 | 0        | -0.967436 |  |
|  | Shiraz-49T | 1171 | 0        | -0.612379 |  |
|  | Shiraz-77T | 1283 | 0.296555 | 0         |  |
|  | Shiraz-18T | 1457 | 0.643204 | 0         |  |
|  | Shiraz-22T | 1673 | 0.611783 | 0         |  |
|  | Shiraz-22T | 1674 | 0.887899 | 0         |  |
|  | Shiraz-25T | 1719 | 0.472955 | 0         |  |
|  | Shiraz-28T | 1762 | 0.562311 | 0         |  |
|  | Shiraz-29T | 1801 | 0.815343 | 0         |  |
|  | Shiraz-32T | 1870 | 0.729766 | 0         |  |
|  | Shiraz-35T | 1933 | 0.488535 | 0         |  |
|  | Shiraz-58T | 2223 | 0.833364 | 0         |  |
|  | Shiraz-58T | 2224 | 1.076575 | 0         |  |
|  | Shiraz-71T | 2263 | 0.975531 | 0         |  |
|  | Shiraz-4T  | 261  | 0        | -0.336249 |  |
|  | Shiraz-16T | 295  | 0.591657 | 0         |  |
|  | Shiraz-36T | 433  | 0        | -0.803961 |  |
|  | Shiraz-44T | 899  | 0        | -1.09697  |  |
|  | Shiraz-44T | 900  | 0        | -0.584284 |  |
|  | Shiraz-49T | 1170 | 0        | -0.967436 |  |
|  | Shiraz-49T | 1171 | 0        | -0.612379 |  |
|  | Shiraz-77T | 1283 | 0.296555 | 0         |  |
|  | Shiraz-18T | 1457 | 0.643204 | 0         |  |
|  | Shiraz-22T | 1673 | 0.611783 | 0         |  |
|  | Shiraz-22T | 1674 | 0.887899 | 0         |  |
|  | Shiraz-25T | 1719 | 0.472955 | 0         |  |
|  | Shiraz-28T | 1762 | 0.562311 | 0         |  |
|  | Shiraz-29T | 1801 | 0.815343 | 0         |  |
|  | Shiraz-32T | 1870 | 0.729766 | 0         |  |
|  | Shiraz-35T | 1933 | 0.488535 | 0         |  |

|         |      |            |      |          |           |  |  |
|---------|------|------------|------|----------|-----------|--|--|
|         |      | Shiraz-58T | 2223 | 0.833364 | 0         |  |  |
|         |      | Shiraz-58T | 2224 | 1.076575 | 0         |  |  |
|         |      | Shiraz-71T | 2263 | 0.975531 | 0         |  |  |
| SNX13   | chr7 | Shiraz-4T  | 252  | 0.192083 | 0         |  |  |
|         |      | Shiraz-36T | 376  | 0.159952 | 0         |  |  |
|         |      | Shiraz-44T | 628  | 0        | -0.444379 |  |  |
|         |      | Shiraz-47T | 1027 | 0        | -0.117848 |  |  |
|         |      | Shiraz-49T | 1117 | 0        | -0.168296 |  |  |
|         |      | Shiraz-77T | 1222 | 0        | -0.113002 |  |  |
|         |      | Shiraz-18T | 1433 | 0.250973 | 0         |  |  |
|         |      | Shiraz-22T | 1543 | 0        | -0.513696 |  |  |
|         |      | Shiraz-25T | 1697 | 0.21945  | 0         |  |  |
|         |      | Shiraz-28T | 1734 | 0.362882 | 0         |  |  |
|         |      | Shiraz-29T | 1777 | 0.156747 | 0         |  |  |
|         |      | Shiraz-38T | 1950 | 0.265916 | 0         |  |  |
|         |      | Shiraz-58T | 2157 | 0        | -0.213872 |  |  |
|         |      | Shiraz-71T | 2236 | 0.320072 | 0         |  |  |
|         |      | Shiraz-4T  | 252  | 0.192083 | 0         |  |  |
|         |      | Shiraz-36T | 376  | 0.159952 | 0         |  |  |
|         |      | Shiraz-44T | 628  | 0        | -0.444379 |  |  |
|         |      | Shiraz-47T | 1027 | 0        | -0.117848 |  |  |
|         |      | Shiraz-49T | 1117 | 0        | -0.168296 |  |  |
|         |      | Shiraz-77T | 1222 | 0        | -0.113002 |  |  |
|         |      | Shiraz-18T | 1433 | 0.250973 | 0         |  |  |
|         |      | Shiraz-22T | 1543 | 0        | -0.513696 |  |  |
|         |      | Shiraz-25T | 1697 | 0.21945  | 0         |  |  |
|         |      | Shiraz-28T | 1734 | 0.362882 | 0         |  |  |
|         |      | Shiraz-29T | 1777 | 0.156747 | 0         |  |  |
|         |      | Shiraz-38T | 1950 | 0.265916 | 0         |  |  |
|         |      | Shiraz-58T | 2157 | 0        | -0.213872 |  |  |
|         |      | Shiraz-71T | 2236 | 0.320072 | 0         |  |  |
|         |      | Shiraz-4T  | 252  | 0.192083 | 0         |  |  |
|         |      | Shiraz-36T | 376  | 0.159952 | 0         |  |  |
|         |      | Shiraz-44T | 628  | 0        | -0.444379 |  |  |
|         |      | Shiraz-47T | 1027 | 0        | -0.117848 |  |  |
|         |      | Shiraz-49T | 1117 | 0        | -0.168296 |  |  |
|         |      | Shiraz-77T | 1222 | 0        | -0.113002 |  |  |
|         |      | Shiraz-18T | 1433 | 0.250973 | 0         |  |  |
|         |      | Shiraz-22T | 1543 | 0        | -0.513696 |  |  |
|         |      | Shiraz-25T | 1697 | 0.21945  | 0         |  |  |
|         |      | Shiraz-28T | 1734 | 0.362882 | 0         |  |  |
|         |      | Shiraz-29T | 1777 | 0.156747 | 0         |  |  |
|         |      | Shiraz-38T | 1950 | 0.265916 | 0         |  |  |
|         |      | Shiraz-58T | 2157 | 0        | -0.213872 |  |  |
|         |      | Shiraz-71T | 2236 | 0.320072 | 0         |  |  |
| SOSTDC1 | chr7 | Shiraz-4T  | 252  | 0.192083 | 0         |  |  |
|         |      | Shiraz-36T | 376  | 0.159952 | 0         |  |  |

|      |      |            |      |          |           |  |  |
|------|------|------------|------|----------|-----------|--|--|
|      |      | Shiraz-44T | 628  | 0        | -0.444379 |  |  |
|      |      | Shiraz-47T | 1027 | 0        | -0.117848 |  |  |
|      |      | Shiraz-49T | 1117 | 0        | -0.168296 |  |  |
|      |      | Shiraz-77T | 1222 | 0        | -0.113002 |  |  |
|      |      | Shiraz-18T | 1433 | 0.250973 | 0         |  |  |
|      |      | Shiraz-22T | 1543 | 0        | -0.513696 |  |  |
|      |      | Shiraz-25T | 1697 | 0.21945  | 0         |  |  |
|      |      | Shiraz-28T | 1734 | 0.362882 | 0         |  |  |
|      |      | Shiraz-29T | 1777 | 0.156747 | 0         |  |  |
|      |      | Shiraz-38T | 1950 | 0.265916 | 0         |  |  |
|      |      | Shiraz-58T | 2157 | 0        | -0.213872 |  |  |
|      |      | Shiraz-71T | 2236 | 0.320072 | 0         |  |  |
|      |      | Shiraz-4T  | 252  | 0.192083 | 0         |  |  |
|      |      | Shiraz-36T | 376  | 0.159952 | 0         |  |  |
|      |      | Shiraz-44T | 628  | 0        | -0.444379 |  |  |
|      |      | Shiraz-47T | 1027 | 0        | -0.117848 |  |  |
|      |      | Shiraz-49T | 1117 | 0        | -0.168296 |  |  |
|      |      | Shiraz-77T | 1222 | 0        | -0.113002 |  |  |
|      |      | Shiraz-18T | 1433 | 0.250973 | 0         |  |  |
|      |      | Shiraz-22T | 1543 | 0        | -0.513696 |  |  |
|      |      | Shiraz-25T | 1697 | 0.21945  | 0         |  |  |
|      |      | Shiraz-28T | 1734 | 0.362882 | 0         |  |  |
|      |      | Shiraz-29T | 1777 | 0.156747 | 0         |  |  |
|      |      | Shiraz-38T | 1950 | 0.265916 | 0         |  |  |
|      |      | Shiraz-58T | 2157 | 0        | -0.213872 |  |  |
|      |      | Shiraz-71T | 2236 | 0.320072 | 0         |  |  |
|      |      | Shiraz-4T  | 252  | 0.192083 | 0         |  |  |
|      |      | Shiraz-36T | 376  | 0.159952 | 0         |  |  |
|      |      | Shiraz-44T | 628  | 0        | -0.444379 |  |  |
|      |      | Shiraz-47T | 1027 | 0        | -0.117848 |  |  |
|      |      | Shiraz-49T | 1117 | 0        | -0.168296 |  |  |
|      |      | Shiraz-77T | 1222 | 0        | -0.113002 |  |  |
|      |      | Shiraz-18T | 1433 | 0.250973 | 0         |  |  |
|      |      | Shiraz-22T | 1543 | 0        | -0.513696 |  |  |
|      |      | Shiraz-25T | 1697 | 0.21945  | 0         |  |  |
|      |      | Shiraz-28T | 1734 | 0.362882 | 0         |  |  |
|      |      | Shiraz-29T | 1777 | 0.156747 | 0         |  |  |
|      |      | Shiraz-38T | 1950 | 0.265916 | 0         |  |  |
|      |      | Shiraz-58T | 2157 | 0        | -0.213872 |  |  |
|      |      | Shiraz-71T | 2236 | 0.320072 | 0         |  |  |
|      |      | Shiraz-4T  | 252  | 0.192083 | 0         |  |  |
|      |      | Shiraz-36T | 376  | 0.159952 | 0         |  |  |
|      |      | Shiraz-44T | 628  | 0        | -0.444379 |  |  |
|      |      | Shiraz-47T | 1027 | 0        | -0.117848 |  |  |
|      |      | Shiraz-49T | 1117 | 0        | -0.168296 |  |  |
|      |      | Shiraz-77T | 1222 | 0        | -0.113002 |  |  |
|      |      | Shiraz-18T | 1433 | 0.250973 | 0         |  |  |
|      |      | Shiraz-22T | 1543 | 0        | -0.513696 |  |  |
|      |      | Shiraz-25T | 1697 | 0.21945  | 0         |  |  |
|      |      | Shiraz-28T | 1734 | 0.362882 | 0         |  |  |
|      |      | Shiraz-29T | 1777 | 0.156747 | 0         |  |  |
|      |      | Shiraz-38T | 1950 | 0.265916 | 0         |  |  |
|      |      | Shiraz-58T | 2157 | 0        | -0.213872 |  |  |
|      |      | Shiraz-71T | 2236 | 0.320072 | 0         |  |  |
| SOX3 | chrX | Shiraz-3T  | 242  | 0        | -0.336434 |  |  |
|      |      | Shiraz-4T  | 261  | 0        | -0.336249 |  |  |
|      |      | Shiraz-16T | 295  | 0.591657 | 0         |  |  |
|      |      | Shiraz-36T | 433  | 0        | -0.803961 |  |  |
|      |      | Shiraz-44T | 899  | 0        | -1.09697  |  |  |
|      |      | Shiraz-49T | 1170 | 0        | -0.967436 |  |  |
|      |      | Shiraz-9T  | 1370 | 0.690073 | 0         |  |  |

|     |      |            |      |          |           |  |
|-----|------|------------|------|----------|-----------|--|
|     |      | Shiraz-18T | 1457 | 0.643204 | 0         |  |
|     |      | Shiraz-22T | 1673 | 0.611783 | 0         |  |
|     |      | Shiraz-25T | 1719 | 0.472955 | 0         |  |
|     |      | Shiraz-28T | 1762 | 0.562311 | 0         |  |
|     |      | Shiraz-29T | 1801 | 0.815343 | 0         |  |
|     |      | Shiraz-32T | 1870 | 0.729766 | 0         |  |
|     |      | Shiraz-35T | 1933 | 0.488535 | 0         |  |
|     |      | Shiraz-58T | 2223 | 0.833364 | 0         |  |
|     |      | Shiraz-71T | 2263 | 0.975531 | 0         |  |
|     |      | Shiraz-3T  | 242  | 0        | -0.336434 |  |
|     |      | Shiraz-4T  | 261  | 0        | -0.336249 |  |
|     |      | Shiraz-16T | 295  | 0.591657 | 0         |  |
|     |      | Shiraz-36T | 433  | 0        | -0.803961 |  |
|     |      | Shiraz-44T | 899  | 0        | -1.09697  |  |
|     |      | Shiraz-49T | 1170 | 0        | -0.967436 |  |
|     |      | Shiraz-9T  | 1370 | 0.690073 | 0         |  |
|     |      | Shiraz-18T | 1457 | 0.643204 | 0         |  |
|     |      | Shiraz-22T | 1673 | 0.611783 | 0         |  |
|     |      | Shiraz-25T | 1719 | 0.472955 | 0         |  |
|     |      | Shiraz-28T | 1762 | 0.562311 | 0         |  |
|     |      | Shiraz-29T | 1801 | 0.815343 | 0         |  |
|     |      | Shiraz-32T | 1870 | 0.729766 | 0         |  |
|     |      | Shiraz-35T | 1933 | 0.488535 | 0         |  |
|     |      | Shiraz-58T | 2223 | 0.833364 | 0         |  |
|     |      | Shiraz-71T | 2263 | 0.975531 | 0         |  |
|     |      | Shiraz-3T  | 242  | 0        | -0.336434 |  |
|     |      | Shiraz-4T  | 261  | 0        | -0.336249 |  |
|     |      | Shiraz-16T | 295  | 0.591657 | 0         |  |
|     |      | Shiraz-36T | 433  | 0        | -0.803961 |  |
|     |      | Shiraz-44T | 899  | 0        | -1.09697  |  |
|     |      | Shiraz-49T | 1170 | 0        | -0.967436 |  |
|     |      | Shiraz-9T  | 1370 | 0.690073 | 0         |  |
|     |      | Shiraz-18T | 1457 | 0.643204 | 0         |  |
|     |      | Shiraz-22T | 1673 | 0.611783 | 0         |  |
|     |      | Shiraz-25T | 1719 | 0.472955 | 0         |  |
|     |      | Shiraz-28T | 1762 | 0.562311 | 0         |  |
|     |      | Shiraz-29T | 1801 | 0.815343 | 0         |  |
|     |      | Shiraz-32T | 1870 | 0.729766 | 0         |  |
|     |      | Shiraz-35T | 1933 | 0.488535 | 0         |  |
|     |      | Shiraz-58T | 2223 | 0.833364 | 0         |  |
|     |      | Shiraz-71T | 2263 | 0.975531 | 0         |  |
| SP8 | chr7 | Shiraz-4T  | 252  | 0.192083 | 0         |  |
|     |      | Shiraz-36T | 376  | 0.159952 | 0         |  |
|     |      | Shiraz-44T | 628  | 0        | -0.444379 |  |
|     |      | Shiraz-46T | 942  | 0.069143 | 0         |  |
|     |      | Shiraz-47T | 1027 | 0        | -0.117848 |  |
|     |      | Shiraz-77T | 1222 | 0        | -0.113002 |  |

|        |      |            |      |          |           |  |  |
|--------|------|------------|------|----------|-----------|--|--|
|        |      | Shiraz-18T | 1433 | 0.250973 | 0         |  |  |
|        |      | Shiraz-22T | 1543 | 0        | -0.513696 |  |  |
|        |      | Shiraz-25T | 1697 | 0.21945  | 0         |  |  |
|        |      | Shiraz-28T | 1734 | 0.362882 | 0         |  |  |
|        |      | Shiraz-29T | 1777 | 0.156747 | 0         |  |  |
|        |      | Shiraz-38T | 1950 | 0.265916 | 0         |  |  |
|        |      | Shiraz-58T | 2157 | 0        | -0.213872 |  |  |
|        |      | Shiraz-71T | 2236 | 0.320072 | 0         |  |  |
|        |      | Shiraz-4T  | 252  | 0.192083 | 0         |  |  |
|        |      | Shiraz-36T | 376  | 0.159952 | 0         |  |  |
|        |      | Shiraz-44T | 628  | 0        | -0.444379 |  |  |
|        |      | Shiraz-46T | 942  | 0.069143 | 0         |  |  |
|        |      | Shiraz-47T | 1027 | 0        | -0.117848 |  |  |
|        |      | Shiraz-77T | 1222 | 0        | -0.113002 |  |  |
|        |      | Shiraz-18T | 1433 | 0.250973 | 0         |  |  |
|        |      | Shiraz-22T | 1543 | 0        | -0.513696 |  |  |
|        |      | Shiraz-25T | 1697 | 0.21945  | 0         |  |  |
|        |      | Shiraz-28T | 1734 | 0.362882 | 0         |  |  |
|        |      | Shiraz-29T | 1777 | 0.156747 | 0         |  |  |
|        |      | Shiraz-38T | 1950 | 0.265916 | 0         |  |  |
|        |      | Shiraz-58T | 2157 | 0        | -0.213872 |  |  |
|        |      | Shiraz-71T | 2236 | 0.320072 | 0         |  |  |
|        |      | Shiraz-4T  | 252  | 0.192083 | 0         |  |  |
|        |      | Shiraz-36T | 376  | 0.159952 | 0         |  |  |
|        |      | Shiraz-44T | 628  | 0        | -0.444379 |  |  |
|        |      | Shiraz-46T | 942  | 0.069143 | 0         |  |  |
|        |      | Shiraz-47T | 1027 | 0        | -0.117848 |  |  |
|        |      | Shiraz-77T | 1222 | 0        | -0.113002 |  |  |
|        |      | Shiraz-18T | 1433 | 0.250973 | 0         |  |  |
|        |      | Shiraz-22T | 1543 | 0        | -0.513696 |  |  |
|        |      | Shiraz-25T | 1697 | 0.21945  | 0         |  |  |
|        |      | Shiraz-28T | 1734 | 0.362882 | 0         |  |  |
|        |      | Shiraz-29T | 1777 | 0.156747 | 0         |  |  |
|        |      | Shiraz-38T | 1950 | 0.265916 | 0         |  |  |
|        |      | Shiraz-58T | 2157 | 0        | -0.213872 |  |  |
|        |      | Shiraz-71T | 2236 | 0.320072 | 0         |  |  |
| SPACA5 | chrX | Shiraz-4T  | 260  | 0        | -0.324128 |  |  |
|        |      | Shiraz-4T  | 260  | 0        | -0.324128 |  |  |
|        |      | Shiraz-16T | 294  | 0.655804 | 0         |  |  |
|        |      | Shiraz-16T | 294  | 0.655804 | 0         |  |  |
|        |      | Shiraz-31T | 345  | 0.103301 | 0         |  |  |
|        |      | Shiraz-31T | 345  | 0.103301 | 0         |  |  |
|        |      | Shiraz-36T | 431  | 0        | -0.78035  |  |  |
|        |      | Shiraz-36T | 431  | 0        | -0.78035  |  |  |
|        |      | Shiraz-36T | 432  | 0        | -0.6692   |  |  |
|        |      | Shiraz-36T | 432  | 0        | -0.6692   |  |  |
|        |      | Shiraz-44T | 891  | 0        | -0.954044 |  |  |



|  |            |      |          |           |  |
|--|------------|------|----------|-----------|--|
|  | Shiraz-44T | 891  | 0        | -0.954044 |  |
|  | Shiraz-44T | 896  | 0        | -0.109108 |  |
|  | Shiraz-44T | 896  | 0        | -0.109108 |  |
|  | Shiraz-46T | 991  | 0.139564 | 0         |  |
|  | Shiraz-46T | 991  | 0.139564 | 0         |  |
|  | Shiraz-47T | 1084 | 0.24185  | 0         |  |
|  | Shiraz-47T | 1084 | 0.24185  | 0         |  |
|  | Shiraz-49T | 1166 | 0        | -0.917235 |  |
|  | Shiraz-49T | 1166 | 0        | -0.917235 |  |
|  | Shiraz-49T | 1169 | 0        | -0.583529 |  |
|  | Shiraz-49T | 1169 | 0        | -0.583529 |  |
|  | Shiraz-77T | 1282 | 0.213849 | 0         |  |
|  | Shiraz-77T | 1282 | 0.213849 | 0         |  |
|  | Shiraz-9T  | 1368 | 0.199713 | 0         |  |
|  | Shiraz-9T  | 1368 | 0.199713 | 0         |  |
|  | Shiraz-9T  | 1369 | 0.703374 | 0         |  |
|  | Shiraz-9T  | 1369 | 0.703374 | 0         |  |
|  | Shiraz-18T | 1455 | 0        | -0.186773 |  |
|  | Shiraz-18T | 1455 | 0        | -0.186773 |  |
|  | Shiraz-22T | 1669 | 0.695915 | 0         |  |
|  | Shiraz-22T | 1669 | 0.695915 | 0         |  |
|  | Shiraz-22T | 1672 | 1.01678  | 0         |  |
|  | Shiraz-22T | 1672 | 1.01678  | 0         |  |
|  | Shiraz-25T | 1717 | 0.420447 | 0         |  |
|  | Shiraz-25T | 1717 | 0.420447 | 0         |  |
|  | Shiraz-28T | 1760 | 0.538181 | 0         |  |
|  | Shiraz-28T | 1760 | 0.538181 | 0         |  |
|  | Shiraz-29T | 1800 | 0.672527 | 0         |  |
|  | Shiraz-29T | 1800 | 0.672527 | 0         |  |
|  | Shiraz-32T | 1869 | 0.776805 | 0         |  |
|  | Shiraz-32T | 1869 | 0.776805 | 0         |  |
|  | Shiraz-35T | 1932 | 0.507141 | 0         |  |
|  | Shiraz-35T | 1932 | 0.507141 | 0         |  |
|  | Shiraz-58T | 2221 | 0.871948 | 0         |  |
|  | Shiraz-58T | 2221 | 0.871948 | 0         |  |
|  | Shiraz-71T | 2260 | 0.68394  | 0         |  |
|  | Shiraz-71T | 2260 | 0.68394  | 0         |  |
|  | Shiraz-71T | 2262 | 0.986748 | 0         |  |
|  | Shiraz-71T | 2262 | 0.986748 | 0         |  |
|  | Shiraz-4T  | 260  | 0        | -0.324128 |  |
|  | Shiraz-4T  | 260  | 0        | -0.324128 |  |
|  | Shiraz-16T | 294  | 0.655804 | 0         |  |
|  | Shiraz-16T | 294  | 0.655804 | 0         |  |
|  | Shiraz-31T | 345  | 0.103301 | 0         |  |
|  | Shiraz-31T | 345  | 0.103301 | 0         |  |
|  | Shiraz-36T | 431  | 0        | -0.78035  |  |
|  | Shiraz-36T | 431  | 0        | -0.78035  |  |

|  |  |            |      |          |           |  |  |
|--|--|------------|------|----------|-----------|--|--|
|  |  | Shiraz-36T | 432  | 0        | -0.6692   |  |  |
|  |  | Shiraz-36T | 432  | 0        | -0.6692   |  |  |
|  |  | Shiraz-44T | 891  | 0        | -0.954044 |  |  |
|  |  | Shiraz-44T | 891  | 0        | -0.954044 |  |  |
|  |  | Shiraz-44T | 896  | 0        | -0.109108 |  |  |
|  |  | Shiraz-44T | 896  | 0        | -0.109108 |  |  |
|  |  | Shiraz-46T | 991  | 0.139564 | 0         |  |  |
|  |  | Shiraz-46T | 991  | 0.139564 | 0         |  |  |
|  |  | Shiraz-47T | 1084 | 0.24185  | 0         |  |  |
|  |  | Shiraz-47T | 1084 | 0.24185  | 0         |  |  |
|  |  | Shiraz-49T | 1166 | 0        | -0.917235 |  |  |
|  |  | Shiraz-49T | 1166 | 0        | -0.917235 |  |  |
|  |  | Shiraz-49T | 1169 | 0        | -0.583529 |  |  |
|  |  | Shiraz-49T | 1169 | 0        | -0.583529 |  |  |
|  |  | Shiraz-77T | 1282 | 0.213849 | 0         |  |  |
|  |  | Shiraz-77T | 1282 | 0.213849 | 0         |  |  |
|  |  | Shiraz-9T  | 1368 | 0.199713 | 0         |  |  |
|  |  | Shiraz-9T  | 1368 | 0.199713 | 0         |  |  |
|  |  | Shiraz-9T  | 1369 | 0.703374 | 0         |  |  |
|  |  | Shiraz-9T  | 1369 | 0.703374 | 0         |  |  |
|  |  | Shiraz-18T | 1455 | 0        | -0.186773 |  |  |
|  |  | Shiraz-18T | 1455 | 0        | -0.186773 |  |  |
|  |  | Shiraz-22T | 1669 | 0.695915 | 0         |  |  |
|  |  | Shiraz-22T | 1669 | 0.695915 | 0         |  |  |
|  |  | Shiraz-22T | 1672 | 1.01678  | 0         |  |  |
|  |  | Shiraz-22T | 1672 | 1.01678  | 0         |  |  |
|  |  | Shiraz-25T | 1717 | 0.420447 | 0         |  |  |
|  |  | Shiraz-25T | 1717 | 0.420447 | 0         |  |  |
|  |  | Shiraz-28T | 1760 | 0.538181 | 0         |  |  |
|  |  | Shiraz-28T | 1760 | 0.538181 | 0         |  |  |
|  |  | Shiraz-29T | 1800 | 0.672527 | 0         |  |  |
|  |  | Shiraz-29T | 1800 | 0.672527 | 0         |  |  |
|  |  | Shiraz-32T | 1869 | 0.776805 | 0         |  |  |
|  |  | Shiraz-32T | 1869 | 0.776805 | 0         |  |  |
|  |  | Shiraz-35T | 1932 | 0.507141 | 0         |  |  |
|  |  | Shiraz-35T | 1932 | 0.507141 | 0         |  |  |
|  |  | Shiraz-58T | 2221 | 0.871948 | 0         |  |  |
|  |  | Shiraz-58T | 2221 | 0.871948 | 0         |  |  |
|  |  | Shiraz-71T | 2260 | 0.68394  | 0         |  |  |
|  |  | Shiraz-71T | 2260 | 0.68394  | 0         |  |  |
|  |  | Shiraz-71T | 2262 | 0.986748 | 0         |  |  |
|  |  | Shiraz-71T | 2262 | 0.986748 | 0         |  |  |
|  |  | Shiraz-4T  | 260  | 0        | -0.324128 |  |  |
|  |  | Shiraz-4T  | 260  | 0        | -0.324128 |  |  |
|  |  | Shiraz-16T | 294  | 0.655804 | 0         |  |  |
|  |  | Shiraz-16T | 294  | 0.655804 | 0         |  |  |
|  |  | Shiraz-31T | 345  | 0.103301 | 0         |  |  |

|         |      |            |      |          |           |  |  |
|---------|------|------------|------|----------|-----------|--|--|
|         |      | Shiraz-31T | 345  | 0.103301 | 0         |  |  |
|         |      | Shiraz-36T | 431  | 0        | -0.78035  |  |  |
|         |      | Shiraz-36T | 431  | 0        | -0.78035  |  |  |
|         |      | Shiraz-36T | 432  | 0        | -0.6692   |  |  |
|         |      | Shiraz-36T | 432  | 0        | -0.6692   |  |  |
|         |      | Shiraz-44T | 891  | 0        | -0.954044 |  |  |
|         |      | Shiraz-44T | 891  | 0        | -0.954044 |  |  |
|         |      | Shiraz-44T | 896  | 0        | -0.109108 |  |  |
|         |      | Shiraz-44T | 896  | 0        | -0.109108 |  |  |
|         |      | Shiraz-46T | 991  | 0.139564 | 0         |  |  |
|         |      | Shiraz-46T | 991  | 0.139564 | 0         |  |  |
|         |      | Shiraz-47T | 1084 | 0.24185  | 0         |  |  |
|         |      | Shiraz-47T | 1084 | 0.24185  | 0         |  |  |
|         |      | Shiraz-49T | 1166 | 0        | -0.917235 |  |  |
|         |      | Shiraz-49T | 1166 | 0        | -0.917235 |  |  |
|         |      | Shiraz-49T | 1169 | 0        | -0.583529 |  |  |
|         |      | Shiraz-49T | 1169 | 0        | -0.583529 |  |  |
|         |      | Shiraz-77T | 1282 | 0.213849 | 0         |  |  |
|         |      | Shiraz-77T | 1282 | 0.213849 | 0         |  |  |
|         |      | Shiraz-9T  | 1368 | 0.199713 | 0         |  |  |
|         |      | Shiraz-9T  | 1368 | 0.199713 | 0         |  |  |
|         |      | Shiraz-9T  | 1369 | 0.703374 | 0         |  |  |
|         |      | Shiraz-9T  | 1369 | 0.703374 | 0         |  |  |
|         |      | Shiraz-18T | 1455 | 0        | -0.186773 |  |  |
|         |      | Shiraz-18T | 1455 | 0        | -0.186773 |  |  |
|         |      | Shiraz-22T | 1669 | 0.695915 | 0         |  |  |
|         |      | Shiraz-22T | 1669 | 0.695915 | 0         |  |  |
|         |      | Shiraz-22T | 1672 | 1.01678  | 0         |  |  |
|         |      | Shiraz-22T | 1672 | 1.01678  | 0         |  |  |
|         |      | Shiraz-25T | 1717 | 0.420447 | 0         |  |  |
|         |      | Shiraz-25T | 1717 | 0.420447 | 0         |  |  |
|         |      | Shiraz-28T | 1760 | 0.538181 | 0         |  |  |
|         |      | Shiraz-28T | 1760 | 0.538181 | 0         |  |  |
|         |      | Shiraz-29T | 1800 | 0.672527 | 0         |  |  |
|         |      | Shiraz-29T | 1800 | 0.672527 | 0         |  |  |
|         |      | Shiraz-32T | 1869 | 0.776805 | 0         |  |  |
|         |      | Shiraz-32T | 1869 | 0.776805 | 0         |  |  |
|         |      | Shiraz-35T | 1932 | 0.507141 | 0         |  |  |
|         |      | Shiraz-35T | 1932 | 0.507141 | 0         |  |  |
|         |      | Shiraz-58T | 2221 | 0.871948 | 0         |  |  |
|         |      | Shiraz-58T | 2221 | 0.871948 | 0         |  |  |
|         |      | Shiraz-71T | 2260 | 0.68394  | 0         |  |  |
|         |      | Shiraz-71T | 2260 | 0.68394  | 0         |  |  |
|         |      | Shiraz-71T | 2262 | 0.986748 | 0         |  |  |
|         |      | Shiraz-71T | 2262 | 0.986748 | 0         |  |  |
| SPACA5B | chrX | Shiraz-4T  | 260  | 0        | -0.324128 |  |  |
|         |      | Shiraz-4T  | 260  | 0        | -0.324128 |  |  |

|  |            |      |          |           |  |
|--|------------|------|----------|-----------|--|
|  | Shiraz-16T | 294  | 0.655804 | 0         |  |
|  | Shiraz-16T | 294  | 0.655804 | 0         |  |
|  | Shiraz-31T | 345  | 0.103301 | 0         |  |
|  | Shiraz-31T | 345  | 0.103301 | 0         |  |
|  | Shiraz-36T | 431  | 0        | -0.78035  |  |
|  | Shiraz-36T | 431  | 0        | -0.78035  |  |
|  | Shiraz-36T | 432  | 0        | -0.6692   |  |
|  | Shiraz-36T | 432  | 0        | -0.6692   |  |
|  | Shiraz-44T | 891  | 0        | -0.954044 |  |
|  | Shiraz-44T | 891  | 0        | -0.954044 |  |
|  | Shiraz-44T | 896  | 0        | -0.109108 |  |
|  | Shiraz-44T | 896  | 0        | -0.109108 |  |
|  | Shiraz-46T | 991  | 0.139564 | 0         |  |
|  | Shiraz-46T | 991  | 0.139564 | 0         |  |
|  | Shiraz-47T | 1084 | 0.24185  | 0         |  |
|  | Shiraz-47T | 1084 | 0.24185  | 0         |  |
|  | Shiraz-49T | 1166 | 0        | -0.917235 |  |
|  | Shiraz-49T | 1166 | 0        | -0.917235 |  |
|  | Shiraz-49T | 1169 | 0        | -0.583529 |  |
|  | Shiraz-49T | 1169 | 0        | -0.583529 |  |
|  | Shiraz-77T | 1282 | 0.213849 | 0         |  |
|  | Shiraz-77T | 1282 | 0.213849 | 0         |  |
|  | Shiraz-9T  | 1368 | 0.199713 | 0         |  |
|  | Shiraz-9T  | 1368 | 0.199713 | 0         |  |
|  | Shiraz-9T  | 1369 | 0.703374 | 0         |  |
|  | Shiraz-9T  | 1369 | 0.703374 | 0         |  |
|  | Shiraz-18T | 1455 | 0        | -0.186773 |  |
|  | Shiraz-18T | 1455 | 0        | -0.186773 |  |
|  | Shiraz-22T | 1669 | 0.695915 | 0         |  |
|  | Shiraz-22T | 1669 | 0.695915 | 0         |  |
|  | Shiraz-22T | 1672 | 1.01678  | 0         |  |
|  | Shiraz-22T | 1672 | 1.01678  | 0         |  |
|  | Shiraz-25T | 1717 | 0.420447 | 0         |  |
|  | Shiraz-25T | 1717 | 0.420447 | 0         |  |
|  | Shiraz-28T | 1760 | 0.538181 | 0         |  |
|  | Shiraz-28T | 1760 | 0.538181 | 0         |  |
|  | Shiraz-29T | 1800 | 0.672527 | 0         |  |
|  | Shiraz-29T | 1800 | 0.672527 | 0         |  |
|  | Shiraz-32T | 1869 | 0.776805 | 0         |  |
|  | Shiraz-32T | 1869 | 0.776805 | 0         |  |
|  | Shiraz-35T | 1932 | 0.507141 | 0         |  |
|  | Shiraz-35T | 1932 | 0.507141 | 0         |  |
|  | Shiraz-58T | 2221 | 0.871948 | 0         |  |
|  | Shiraz-58T | 2221 | 0.871948 | 0         |  |
|  | Shiraz-71T | 2260 | 0.68394  | 0         |  |
|  | Shiraz-71T | 2260 | 0.68394  | 0         |  |
|  | Shiraz-71T | 2262 | 0.986748 | 0         |  |

|  |            |      |          |           |  |
|--|------------|------|----------|-----------|--|
|  | Shiraz-71T | 2262 | 0.986748 | 0         |  |
|  | Shiraz-4T  | 260  | 0        | -0.324128 |  |
|  | Shiraz-4T  | 260  | 0        | -0.324128 |  |
|  | Shiraz-16T | 294  | 0.655804 | 0         |  |
|  | Shiraz-16T | 294  | 0.655804 | 0         |  |
|  | Shiraz-31T | 345  | 0.103301 | 0         |  |
|  | Shiraz-31T | 345  | 0.103301 | 0         |  |
|  | Shiraz-36T | 431  | 0        | -0.78035  |  |
|  | Shiraz-36T | 431  | 0        | -0.78035  |  |
|  | Shiraz-36T | 432  | 0        | -0.6692   |  |
|  | Shiraz-36T | 432  | 0        | -0.6692   |  |
|  | Shiraz-44T | 891  | 0        | -0.954044 |  |
|  | Shiraz-44T | 891  | 0        | -0.954044 |  |
|  | Shiraz-44T | 896  | 0        | -0.109108 |  |
|  | Shiraz-44T | 896  | 0        | -0.109108 |  |
|  | Shiraz-46T | 991  | 0.139564 | 0         |  |
|  | Shiraz-46T | 991  | 0.139564 | 0         |  |
|  | Shiraz-47T | 1084 | 0.24185  | 0         |  |
|  | Shiraz-47T | 1084 | 0.24185  | 0         |  |
|  | Shiraz-49T | 1166 | 0        | -0.917235 |  |
|  | Shiraz-49T | 1166 | 0        | -0.917235 |  |
|  | Shiraz-49T | 1169 | 0        | -0.583529 |  |
|  | Shiraz-49T | 1169 | 0        | -0.583529 |  |
|  | Shiraz-77T | 1282 | 0.213849 | 0         |  |
|  | Shiraz-77T | 1282 | 0.213849 | 0         |  |
|  | Shiraz-9T  | 1368 | 0.199713 | 0         |  |
|  | Shiraz-9T  | 1368 | 0.199713 | 0         |  |
|  | Shiraz-9T  | 1369 | 0.703374 | 0         |  |
|  | Shiraz-9T  | 1369 | 0.703374 | 0         |  |
|  | Shiraz-18T | 1455 | 0        | -0.186773 |  |
|  | Shiraz-18T | 1455 | 0        | -0.186773 |  |
|  | Shiraz-22T | 1669 | 0.695915 | 0         |  |
|  | Shiraz-22T | 1669 | 0.695915 | 0         |  |
|  | Shiraz-22T | 1672 | 1.01678  | 0         |  |
|  | Shiraz-22T | 1672 | 1.01678  | 0         |  |
|  | Shiraz-25T | 1717 | 0.420447 | 0         |  |
|  | Shiraz-25T | 1717 | 0.420447 | 0         |  |
|  | Shiraz-28T | 1760 | 0.538181 | 0         |  |
|  | Shiraz-28T | 1760 | 0.538181 | 0         |  |
|  | Shiraz-29T | 1800 | 0.672527 | 0         |  |
|  | Shiraz-29T | 1800 | 0.672527 | 0         |  |
|  | Shiraz-32T | 1869 | 0.776805 | 0         |  |
|  | Shiraz-32T | 1869 | 0.776805 | 0         |  |
|  | Shiraz-35T | 1932 | 0.507141 | 0         |  |
|  | Shiraz-35T | 1932 | 0.507141 | 0         |  |
|  | Shiraz-58T | 2221 | 0.871948 | 0         |  |
|  | Shiraz-58T | 2221 | 0.871948 | 0         |  |

|  |  |            |      |          |           |  |  |
|--|--|------------|------|----------|-----------|--|--|
|  |  | Shiraz-71T | 2260 | 0.68394  | 0         |  |  |
|  |  | Shiraz-71T | 2260 | 0.68394  | 0         |  |  |
|  |  | Shiraz-71T | 2262 | 0.986748 | 0         |  |  |
|  |  | Shiraz-71T | 2262 | 0.986748 | 0         |  |  |
|  |  | Shiraz-4T  | 260  | 0        | -0.324128 |  |  |
|  |  | Shiraz-4T  | 260  | 0        | -0.324128 |  |  |
|  |  | Shiraz-16T | 294  | 0.655804 | 0         |  |  |
|  |  | Shiraz-16T | 294  | 0.655804 | 0         |  |  |
|  |  | Shiraz-31T | 345  | 0.103301 | 0         |  |  |
|  |  | Shiraz-31T | 345  | 0.103301 | 0         |  |  |
|  |  | Shiraz-36T | 431  | 0        | -0.78035  |  |  |
|  |  | Shiraz-36T | 431  | 0        | -0.78035  |  |  |
|  |  | Shiraz-36T | 432  | 0        | -0.6692   |  |  |
|  |  | Shiraz-36T | 432  | 0        | -0.6692   |  |  |
|  |  | Shiraz-44T | 891  | 0        | -0.954044 |  |  |
|  |  | Shiraz-44T | 891  | 0        | -0.954044 |  |  |
|  |  | Shiraz-44T | 896  | 0        | -0.109108 |  |  |
|  |  | Shiraz-44T | 896  | 0        | -0.109108 |  |  |
|  |  | Shiraz-46T | 991  | 0.139564 | 0         |  |  |
|  |  | Shiraz-46T | 991  | 0.139564 | 0         |  |  |
|  |  | Shiraz-47T | 1084 | 0.24185  | 0         |  |  |
|  |  | Shiraz-47T | 1084 | 0.24185  | 0         |  |  |
|  |  | Shiraz-49T | 1166 | 0        | -0.917235 |  |  |
|  |  | Shiraz-49T | 1166 | 0        | -0.917235 |  |  |
|  |  | Shiraz-49T | 1169 | 0        | -0.583529 |  |  |
|  |  | Shiraz-49T | 1169 | 0        | -0.583529 |  |  |
|  |  | Shiraz-77T | 1282 | 0.213849 | 0         |  |  |
|  |  | Shiraz-77T | 1282 | 0.213849 | 0         |  |  |
|  |  | Shiraz-9T  | 1368 | 0.199713 | 0         |  |  |
|  |  | Shiraz-9T  | 1368 | 0.199713 | 0         |  |  |
|  |  | Shiraz-9T  | 1369 | 0.703374 | 0         |  |  |
|  |  | Shiraz-9T  | 1369 | 0.703374 | 0         |  |  |
|  |  | Shiraz-18T | 1455 | 0        | -0.186773 |  |  |
|  |  | Shiraz-18T | 1455 | 0        | -0.186773 |  |  |
|  |  | Shiraz-22T | 1669 | 0.695915 | 0         |  |  |
|  |  | Shiraz-22T | 1669 | 0.695915 | 0         |  |  |
|  |  | Shiraz-22T | 1672 | 1.01678  | 0         |  |  |
|  |  | Shiraz-22T | 1672 | 1.01678  | 0         |  |  |
|  |  | Shiraz-25T | 1717 | 0.420447 | 0         |  |  |
|  |  | Shiraz-25T | 1717 | 0.420447 | 0         |  |  |
|  |  | Shiraz-28T | 1760 | 0.538181 | 0         |  |  |
|  |  | Shiraz-28T | 1760 | 0.538181 | 0         |  |  |
|  |  | Shiraz-29T | 1800 | 0.672527 | 0         |  |  |
|  |  | Shiraz-29T | 1800 | 0.672527 | 0         |  |  |
|  |  | Shiraz-32T | 1869 | 0.776805 | 0         |  |  |
|  |  | Shiraz-32T | 1869 | 0.776805 | 0         |  |  |
|  |  | Shiraz-35T | 1932 | 0.507141 | 0         |  |  |

|       |      |            |      |          |           |  |
|-------|------|------------|------|----------|-----------|--|
|       |      | Shiraz-35T | 1932 | 0.507141 | 0         |  |
|       |      | Shiraz-58T | 2221 | 0.871948 | 0         |  |
|       |      | Shiraz-58T | 2221 | 0.871948 | 0         |  |
|       |      | Shiraz-71T | 2260 | 0.68394  | 0         |  |
|       |      | Shiraz-71T | 2260 | 0.68394  | 0         |  |
|       |      | Shiraz-71T | 2262 | 0.986748 | 0         |  |
|       |      | Shiraz-71T | 2262 | 0.986748 | 0         |  |
| SPAM1 | chr7 | Shiraz-3T  | 90   | 0.219276 | 0         |  |
|       |      | Shiraz-3T  | 90   | 0.219276 | 0         |  |
|       |      | Shiraz-3T  | 95   | 0        | -0.077623 |  |
|       |      | Shiraz-3T  | 95   | 0        | -0.077623 |  |
|       |      | Shiraz-4T  | 253  | 0.372918 | 0         |  |
|       |      | Shiraz-4T  | 253  | 0.372918 | 0         |  |
|       |      | Shiraz-36T | 378  | 0.179558 | 0         |  |
|       |      | Shiraz-36T | 378  | 0.179558 | 0         |  |
|       |      | Shiraz-36T | 382  | 0.081739 | 0         |  |
|       |      | Shiraz-36T | 382  | 0.081739 | 0         |  |
|       |      | Shiraz-44T | 641  | 0        | -0.477846 |  |
|       |      | Shiraz-44T | 641  | 0        | -0.477846 |  |
|       |      | Shiraz-46T | 943  | 0.093799 | 0         |  |
|       |      | Shiraz-46T | 943  | 0.093799 | 0         |  |
|       |      | Shiraz-46T | 947  | 0        | -0.010843 |  |
|       |      | Shiraz-46T | 947  | 0        | -0.010843 |  |
|       |      | Shiraz-47T | 1031 | 0        | -0.117529 |  |
|       |      | Shiraz-47T | 1031 | 0        | -0.117529 |  |
|       |      | Shiraz-49T | 1121 | 0        | -0.138569 |  |
|       |      | Shiraz-49T | 1121 | 0        | -0.138569 |  |
|       |      | Shiraz-77T | 1225 | 0        | -0.117922 |  |
|       |      | Shiraz-77T | 1225 | 0        | -0.117922 |  |
|       |      | Shiraz-77T | 1228 | 0        | -0.238084 |  |
|       |      | Shiraz-77T | 1228 | 0        | -0.238084 |  |
|       |      | Shiraz-18T | 1434 | 0.244465 | 0         |  |
|       |      | Shiraz-18T | 1434 | 0.244465 | 0         |  |
|       |      | Shiraz-22T | 1549 | 0        | -0.319623 |  |
|       |      | Shiraz-22T | 1549 | 0        | -0.319623 |  |
|       |      | Shiraz-22T | 1552 | 0        | -0.50686  |  |
|       |      | Shiraz-22T | 1552 | 0        | -0.50686  |  |
|       |      | Shiraz-25T | 1698 | 0.21835  | 0         |  |
|       |      | Shiraz-25T | 1698 | 0.21835  | 0         |  |
|       |      | Shiraz-28T | 1735 | 0.350744 | 0         |  |
|       |      | Shiraz-28T | 1735 | 0.350744 | 0         |  |
|       |      | Shiraz-29T | 1778 | 0.120767 | 0         |  |
|       |      | Shiraz-29T | 1778 | 0.120767 | 0         |  |
|       |      | Shiraz-32T | 1833 | 0.551336 | 0         |  |
|       |      | Shiraz-32T | 1833 | 0.551336 | 0         |  |
|       |      | Shiraz-32T | 1835 | 0.092727 | 0         |  |
|       |      | Shiraz-32T | 1835 | 0.092727 | 0         |  |

|  |  |            |      |          |           |  |  |
|--|--|------------|------|----------|-----------|--|--|
|  |  | Shiraz-38T | 1951 | 0.250891 | 0         |  |  |
|  |  | Shiraz-38T | 1951 | 0.250891 | 0         |  |  |
|  |  | Shiraz-53T | 2078 | 0.287202 | 0         |  |  |
|  |  | Shiraz-53T | 2078 | 0.287202 | 0         |  |  |
|  |  | Shiraz-58T | 2161 | 0        | -0.187744 |  |  |
|  |  | Shiraz-58T | 2161 | 0        | -0.187744 |  |  |
|  |  | Shiraz-71T | 2238 | 0.603631 | 0         |  |  |
|  |  | Shiraz-71T | 2238 | 0.603631 | 0         |  |  |
|  |  | Shiraz-3T  | 90   | 0.219276 | 0         |  |  |
|  |  | Shiraz-3T  | 90   | 0.219276 | 0         |  |  |
|  |  | Shiraz-3T  | 95   | 0        | -0.077623 |  |  |
|  |  | Shiraz-3T  | 95   | 0        | -0.077623 |  |  |
|  |  | Shiraz-4T  | 253  | 0.372918 | 0         |  |  |
|  |  | Shiraz-4T  | 253  | 0.372918 | 0         |  |  |
|  |  | Shiraz-36T | 378  | 0.179558 | 0         |  |  |
|  |  | Shiraz-36T | 378  | 0.179558 | 0         |  |  |
|  |  | Shiraz-36T | 382  | 0.081739 | 0         |  |  |
|  |  | Shiraz-36T | 382  | 0.081739 | 0         |  |  |
|  |  | Shiraz-44T | 641  | 0        | -0.477846 |  |  |
|  |  | Shiraz-44T | 641  | 0        | -0.477846 |  |  |
|  |  | Shiraz-46T | 943  | 0.093799 | 0         |  |  |
|  |  | Shiraz-46T | 943  | 0.093799 | 0         |  |  |
|  |  | Shiraz-46T | 947  | 0        | -0.010843 |  |  |
|  |  | Shiraz-46T | 947  | 0        | -0.010843 |  |  |
|  |  | Shiraz-47T | 1031 | 0        | -0.117529 |  |  |
|  |  | Shiraz-47T | 1031 | 0        | -0.117529 |  |  |
|  |  | Shiraz-49T | 1121 | 0        | -0.138569 |  |  |
|  |  | Shiraz-49T | 1121 | 0        | -0.138569 |  |  |
|  |  | Shiraz-77T | 1225 | 0        | -0.117922 |  |  |
|  |  | Shiraz-77T | 1225 | 0        | -0.117922 |  |  |
|  |  | Shiraz-77T | 1228 | 0        | -0.238084 |  |  |
|  |  | Shiraz-77T | 1228 | 0        | -0.238084 |  |  |
|  |  | Shiraz-18T | 1434 | 0.244465 | 0         |  |  |
|  |  | Shiraz-18T | 1434 | 0.244465 | 0         |  |  |
|  |  | Shiraz-22T | 1549 | 0        | -0.319623 |  |  |
|  |  | Shiraz-22T | 1549 | 0        | -0.319623 |  |  |
|  |  | Shiraz-22T | 1552 | 0        | -0.50686  |  |  |
|  |  | Shiraz-22T | 1552 | 0        | -0.50686  |  |  |
|  |  | Shiraz-25T | 1698 | 0.21835  | 0         |  |  |
|  |  | Shiraz-25T | 1698 | 0.21835  | 0         |  |  |
|  |  | Shiraz-28T | 1735 | 0.350744 | 0         |  |  |
|  |  | Shiraz-28T | 1735 | 0.350744 | 0         |  |  |
|  |  | Shiraz-29T | 1778 | 0.120767 | 0         |  |  |
|  |  | Shiraz-29T | 1778 | 0.120767 | 0         |  |  |
|  |  | Shiraz-32T | 1833 | 0.551336 | 0         |  |  |
|  |  | Shiraz-32T | 1833 | 0.551336 | 0         |  |  |
|  |  | Shiraz-32T | 1835 | 0.092727 | 0         |  |  |



|  |  |            |      |          |           |  |  |
|--|--|------------|------|----------|-----------|--|--|
|  |  | Shiraz-32T | 1835 | 0.092727 | 0         |  |  |
|  |  | Shiraz-38T | 1951 | 0.250891 | 0         |  |  |
|  |  | Shiraz-38T | 1951 | 0.250891 | 0         |  |  |
|  |  | Shiraz-53T | 2078 | 0.287202 | 0         |  |  |
|  |  | Shiraz-53T | 2078 | 0.287202 | 0         |  |  |
|  |  | Shiraz-58T | 2161 | 0        | -0.187744 |  |  |
|  |  | Shiraz-58T | 2161 | 0        | -0.187744 |  |  |
|  |  | Shiraz-71T | 2238 | 0.603631 | 0         |  |  |
|  |  | Shiraz-71T | 2238 | 0.603631 | 0         |  |  |
|  |  | Shiraz-3T  | 90   | 0.219276 | 0         |  |  |
|  |  | Shiraz-3T  | 90   | 0.219276 | 0         |  |  |
|  |  | Shiraz-3T  | 95   | 0        | -0.077623 |  |  |
|  |  | Shiraz-3T  | 95   | 0        | -0.077623 |  |  |
|  |  | Shiraz-4T  | 253  | 0.372918 | 0         |  |  |
|  |  | Shiraz-4T  | 253  | 0.372918 | 0         |  |  |
|  |  | Shiraz-36T | 378  | 0.179558 | 0         |  |  |
|  |  | Shiraz-36T | 378  | 0.179558 | 0         |  |  |
|  |  | Shiraz-36T | 382  | 0.081739 | 0         |  |  |
|  |  | Shiraz-36T | 382  | 0.081739 | 0         |  |  |
|  |  | Shiraz-44T | 641  | 0        | -0.477846 |  |  |
|  |  | Shiraz-44T | 641  | 0        | -0.477846 |  |  |
|  |  | Shiraz-46T | 943  | 0.093799 | 0         |  |  |
|  |  | Shiraz-46T | 943  | 0.093799 | 0         |  |  |
|  |  | Shiraz-46T | 947  | 0        | -0.010843 |  |  |
|  |  | Shiraz-46T | 947  | 0        | -0.010843 |  |  |
|  |  | Shiraz-47T | 1031 | 0        | -0.117529 |  |  |
|  |  | Shiraz-47T | 1031 | 0        | -0.117529 |  |  |
|  |  | Shiraz-49T | 1121 | 0        | -0.138569 |  |  |
|  |  | Shiraz-49T | 1121 | 0        | -0.138569 |  |  |
|  |  | Shiraz-77T | 1225 | 0        | -0.117922 |  |  |
|  |  | Shiraz-77T | 1225 | 0        | -0.117922 |  |  |
|  |  | Shiraz-77T | 1228 | 0        | -0.238084 |  |  |
|  |  | Shiraz-77T | 1228 | 0        | -0.238084 |  |  |
|  |  | Shiraz-18T | 1434 | 0.244465 | 0         |  |  |
|  |  | Shiraz-18T | 1434 | 0.244465 | 0         |  |  |
|  |  | Shiraz-22T | 1549 | 0        | -0.319623 |  |  |
|  |  | Shiraz-22T | 1549 | 0        | -0.319623 |  |  |
|  |  | Shiraz-22T | 1552 | 0        | -0.50686  |  |  |
|  |  | Shiraz-22T | 1552 | 0        | -0.50686  |  |  |
|  |  | Shiraz-25T | 1698 | 0.21835  | 0         |  |  |
|  |  | Shiraz-25T | 1698 | 0.21835  | 0         |  |  |
|  |  | Shiraz-28T | 1735 | 0.350744 | 0         |  |  |
|  |  | Shiraz-28T | 1735 | 0.350744 | 0         |  |  |
|  |  | Shiraz-29T | 1778 | 0.120767 | 0         |  |  |
|  |  | Shiraz-29T | 1778 | 0.120767 | 0         |  |  |
|  |  | Shiraz-32T | 1833 | 0.551336 | 0         |  |  |
|  |  | Shiraz-32T | 1833 | 0.551336 | 0         |  |  |

|         |      |            |      |          |           |  |  |
|---------|------|------------|------|----------|-----------|--|--|
|         |      | Shiraz-32T | 1835 | 0.092727 | 0         |  |  |
|         |      | Shiraz-32T | 1835 | 0.092727 | 0         |  |  |
|         |      | Shiraz-38T | 1951 | 0.250891 | 0         |  |  |
|         |      | Shiraz-38T | 1951 | 0.250891 | 0         |  |  |
|         |      | Shiraz-53T | 2078 | 0.287202 | 0         |  |  |
|         |      | Shiraz-53T | 2078 | 0.287202 | 0         |  |  |
|         |      | Shiraz-58T | 2161 | 0        | -0.187744 |  |  |
|         |      | Shiraz-58T | 2161 | 0        | -0.187744 |  |  |
|         |      | Shiraz-71T | 2238 | 0.603631 | 0         |  |  |
|         |      | Shiraz-71T | 2238 | 0.603631 | 0         |  |  |
| SPANXA1 | chrX | Shiraz-3T  | 242  | 0        | -0.336434 |  |  |
|         |      | Shiraz-3T  | 242  | 0        | -0.336434 |  |  |
|         |      | Shiraz-4T  | 261  | 0        | -0.336249 |  |  |
|         |      | Shiraz-4T  | 261  | 0        | -0.336249 |  |  |
|         |      | Shiraz-16T | 295  | 0.591657 | 0         |  |  |
|         |      | Shiraz-16T | 295  | 0.591657 | 0         |  |  |
|         |      | Shiraz-36T | 433  | 0        | -0.803961 |  |  |
|         |      | Shiraz-36T | 433  | 0        | -0.803961 |  |  |
|         |      | Shiraz-44T | 899  | 0        | -1.09697  |  |  |
|         |      | Shiraz-44T | 899  | 0        | -1.09697  |  |  |
|         |      | Shiraz-44T | 907  | 0        | -1.370847 |  |  |
|         |      | Shiraz-44T | 907  | 0        | -1.370847 |  |  |
|         |      | Shiraz-49T | 1170 | 0        | -0.967436 |  |  |
|         |      | Shiraz-49T | 1170 | 0        | -0.967436 |  |  |
|         |      | Shiraz-9T  | 1370 | 0.690073 | 0         |  |  |
|         |      | Shiraz-9T  | 1370 | 0.690073 | 0         |  |  |
|         |      | Shiraz-18T | 1457 | 0.643204 | 0         |  |  |
|         |      | Shiraz-18T | 1457 | 0.643204 | 0         |  |  |
|         |      | Shiraz-22T | 1673 | 0.611783 | 0         |  |  |
|         |      | Shiraz-22T | 1673 | 0.611783 | 0         |  |  |
|         |      | Shiraz-25T | 1719 | 0.472955 | 0         |  |  |
|         |      | Shiraz-25T | 1719 | 0.472955 | 0         |  |  |
|         |      | Shiraz-28T | 1762 | 0.562311 | 0         |  |  |
|         |      | Shiraz-28T | 1762 | 0.562311 | 0         |  |  |
|         |      | Shiraz-29T | 1801 | 0.815343 | 0         |  |  |
|         |      | Shiraz-29T | 1801 | 0.815343 | 0         |  |  |
|         |      | Shiraz-32T | 1870 | 0.729766 | 0         |  |  |
|         |      | Shiraz-32T | 1870 | 0.729766 | 0         |  |  |
|         |      | Shiraz-35T | 1933 | 0.488535 | 0         |  |  |
|         |      | Shiraz-35T | 1933 | 0.488535 | 0         |  |  |
|         |      | Shiraz-58T | 2223 | 0.833364 | 0         |  |  |
|         |      | Shiraz-58T | 2223 | 0.833364 | 0         |  |  |
|         |      | Shiraz-71T | 2263 | 0.975531 | 0         |  |  |
|         |      | Shiraz-71T | 2263 | 0.975531 | 0         |  |  |
|         |      | Shiraz-3T  | 242  | 0        | -0.336434 |  |  |
|         |      | Shiraz-3T  | 242  | 0        | -0.336434 |  |  |
|         |      | Shiraz-4T  | 261  | 0        | -0.336249 |  |  |

|  |            |      |          |           |  |
|--|------------|------|----------|-----------|--|
|  | Shiraz-4T  | 261  | 0        | -0.336249 |  |
|  | Shiraz-16T | 295  | 0.591657 | 0         |  |
|  | Shiraz-16T | 295  | 0.591657 | 0         |  |
|  | Shiraz-36T | 433  | 0        | -0.803961 |  |
|  | Shiraz-36T | 433  | 0        | -0.803961 |  |
|  | Shiraz-44T | 899  | 0        | -1.09697  |  |
|  | Shiraz-44T | 899  | 0        | -1.09697  |  |
|  | Shiraz-44T | 907  | 0        | -1.370847 |  |
|  | Shiraz-44T | 907  | 0        | -1.370847 |  |
|  | Shiraz-49T | 1170 | 0        | -0.967436 |  |
|  | Shiraz-49T | 1170 | 0        | -0.967436 |  |
|  | Shiraz-9T  | 1370 | 0.690073 | 0         |  |
|  | Shiraz-9T  | 1370 | 0.690073 | 0         |  |
|  | Shiraz-18T | 1457 | 0.643204 | 0         |  |
|  | Shiraz-18T | 1457 | 0.643204 | 0         |  |
|  | Shiraz-22T | 1673 | 0.611783 | 0         |  |
|  | Shiraz-22T | 1673 | 0.611783 | 0         |  |
|  | Shiraz-25T | 1719 | 0.472955 | 0         |  |
|  | Shiraz-25T | 1719 | 0.472955 | 0         |  |
|  | Shiraz-28T | 1762 | 0.562311 | 0         |  |
|  | Shiraz-28T | 1762 | 0.562311 | 0         |  |
|  | Shiraz-29T | 1801 | 0.815343 | 0         |  |
|  | Shiraz-29T | 1801 | 0.815343 | 0         |  |
|  | Shiraz-32T | 1870 | 0.729766 | 0         |  |
|  | Shiraz-32T | 1870 | 0.729766 | 0         |  |
|  | Shiraz-35T | 1933 | 0.488535 | 0         |  |
|  | Shiraz-35T | 1933 | 0.488535 | 0         |  |
|  | Shiraz-58T | 2223 | 0.833364 | 0         |  |
|  | Shiraz-58T | 2223 | 0.833364 | 0         |  |
|  | Shiraz-71T | 2263 | 0.975531 | 0         |  |
|  | Shiraz-71T | 2263 | 0.975531 | 0         |  |
|  | Shiraz-3T  | 242  | 0        | -0.336434 |  |
|  | Shiraz-3T  | 242  | 0        | -0.336434 |  |
|  | Shiraz-4T  | 261  | 0        | -0.336249 |  |
|  | Shiraz-4T  | 261  | 0        | -0.336249 |  |
|  | Shiraz-16T | 295  | 0.591657 | 0         |  |
|  | Shiraz-16T | 295  | 0.591657 | 0         |  |
|  | Shiraz-36T | 433  | 0        | -0.803961 |  |
|  | Shiraz-36T | 433  | 0        | -0.803961 |  |
|  | Shiraz-44T | 899  | 0        | -1.09697  |  |
|  | Shiraz-44T | 899  | 0        | -1.09697  |  |
|  | Shiraz-44T | 907  | 0        | -1.370847 |  |
|  | Shiraz-44T | 907  | 0        | -1.370847 |  |
|  | Shiraz-49T | 1170 | 0        | -0.967436 |  |
|  | Shiraz-49T | 1170 | 0        | -0.967436 |  |
|  | Shiraz-9T  | 1370 | 0.690073 | 0         |  |
|  | Shiraz-9T  | 1370 | 0.690073 | 0         |  |

|         |      |            |      |          |           |  |
|---------|------|------------|------|----------|-----------|--|
|         |      | Shiraz-18T | 1457 | 0.643204 | 0         |  |
|         |      | Shiraz-18T | 1457 | 0.643204 | 0         |  |
|         |      | Shiraz-22T | 1673 | 0.611783 | 0         |  |
|         |      | Shiraz-22T | 1673 | 0.611783 | 0         |  |
|         |      | Shiraz-25T | 1719 | 0.472955 | 0         |  |
|         |      | Shiraz-25T | 1719 | 0.472955 | 0         |  |
|         |      | Shiraz-28T | 1762 | 0.562311 | 0         |  |
|         |      | Shiraz-28T | 1762 | 0.562311 | 0         |  |
|         |      | Shiraz-29T | 1801 | 0.815343 | 0         |  |
|         |      | Shiraz-29T | 1801 | 0.815343 | 0         |  |
|         |      | Shiraz-32T | 1870 | 0.729766 | 0         |  |
|         |      | Shiraz-32T | 1870 | 0.729766 | 0         |  |
|         |      | Shiraz-35T | 1933 | 0.488535 | 0         |  |
|         |      | Shiraz-35T | 1933 | 0.488535 | 0         |  |
|         |      | Shiraz-58T | 2223 | 0.833364 | 0         |  |
|         |      | Shiraz-58T | 2223 | 0.833364 | 0         |  |
|         |      | Shiraz-71T | 2263 | 0.975531 | 0         |  |
|         |      | Shiraz-71T | 2263 | 0.975531 | 0         |  |
| SPANXA2 | chrX | Shiraz-3T  | 242  | 0        | -0.336434 |  |
|         |      | Shiraz-3T  | 242  | 0        | -0.336434 |  |
|         |      | Shiraz-4T  | 261  | 0        | -0.336249 |  |
|         |      | Shiraz-4T  | 261  | 0        | -0.336249 |  |
|         |      | Shiraz-16T | 295  | 0.591657 | 0         |  |
|         |      | Shiraz-16T | 295  | 0.591657 | 0         |  |
|         |      | Shiraz-36T | 433  | 0        | -0.803961 |  |
|         |      | Shiraz-36T | 433  | 0        | -0.803961 |  |
|         |      | Shiraz-44T | 899  | 0        | -1.09697  |  |
|         |      | Shiraz-44T | 899  | 0        | -1.09697  |  |
|         |      | Shiraz-44T | 907  | 0        | -1.370847 |  |
|         |      | Shiraz-44T | 907  | 0        | -1.370847 |  |
|         |      | Shiraz-49T | 1170 | 0        | -0.967436 |  |
|         |      | Shiraz-49T | 1170 | 0        | -0.967436 |  |
|         |      | Shiraz-9T  | 1370 | 0.690073 | 0         |  |
|         |      | Shiraz-9T  | 1370 | 0.690073 | 0         |  |
|         |      | Shiraz-18T | 1457 | 0.643204 | 0         |  |
|         |      | Shiraz-18T | 1457 | 0.643204 | 0         |  |
|         |      | Shiraz-22T | 1673 | 0.611783 | 0         |  |
|         |      | Shiraz-22T | 1673 | 0.611783 | 0         |  |
|         |      | Shiraz-25T | 1719 | 0.472955 | 0         |  |
|         |      | Shiraz-25T | 1719 | 0.472955 | 0         |  |
|         |      | Shiraz-28T | 1762 | 0.562311 | 0         |  |
|         |      | Shiraz-28T | 1762 | 0.562311 | 0         |  |
|         |      | Shiraz-29T | 1801 | 0.815343 | 0         |  |
|         |      | Shiraz-29T | 1801 | 0.815343 | 0         |  |
|         |      | Shiraz-32T | 1870 | 0.729766 | 0         |  |
|         |      | Shiraz-32T | 1870 | 0.729766 | 0         |  |
|         |      | Shiraz-35T | 1933 | 0.488535 | 0         |  |

|  |  |            |      |          |           |  |  |
|--|--|------------|------|----------|-----------|--|--|
|  |  | Shiraz-35T | 1933 | 0.488535 | 0         |  |  |
|  |  | Shiraz-58T | 2223 | 0.833364 | 0         |  |  |
|  |  | Shiraz-58T | 2223 | 0.833364 | 0         |  |  |
|  |  | Shiraz-71T | 2263 | 0.975531 | 0         |  |  |
|  |  | Shiraz-71T | 2263 | 0.975531 | 0         |  |  |
|  |  | Shiraz-3T  | 242  | 0        | -0.336434 |  |  |
|  |  | Shiraz-3T  | 242  | 0        | -0.336434 |  |  |
|  |  | Shiraz-4T  | 261  | 0        | -0.336249 |  |  |
|  |  | Shiraz-4T  | 261  | 0        | -0.336249 |  |  |
|  |  | Shiraz-16T | 295  | 0.591657 | 0         |  |  |
|  |  | Shiraz-16T | 295  | 0.591657 | 0         |  |  |
|  |  | Shiraz-36T | 433  | 0        | -0.803961 |  |  |
|  |  | Shiraz-36T | 433  | 0        | -0.803961 |  |  |
|  |  | Shiraz-44T | 899  | 0        | -1.09697  |  |  |
|  |  | Shiraz-44T | 899  | 0        | -1.09697  |  |  |
|  |  | Shiraz-44T | 907  | 0        | -1.370847 |  |  |
|  |  | Shiraz-44T | 907  | 0        | -1.370847 |  |  |
|  |  | Shiraz-49T | 1170 | 0        | -0.967436 |  |  |
|  |  | Shiraz-49T | 1170 | 0        | -0.967436 |  |  |
|  |  | Shiraz-9T  | 1370 | 0.690073 | 0         |  |  |
|  |  | Shiraz-9T  | 1370 | 0.690073 | 0         |  |  |
|  |  | Shiraz-18T | 1457 | 0.643204 | 0         |  |  |
|  |  | Shiraz-18T | 1457 | 0.643204 | 0         |  |  |
|  |  | Shiraz-22T | 1673 | 0.611783 | 0         |  |  |
|  |  | Shiraz-22T | 1673 | 0.611783 | 0         |  |  |
|  |  | Shiraz-25T | 1719 | 0.472955 | 0         |  |  |
|  |  | Shiraz-25T | 1719 | 0.472955 | 0         |  |  |
|  |  | Shiraz-28T | 1762 | 0.562311 | 0         |  |  |
|  |  | Shiraz-28T | 1762 | 0.562311 | 0         |  |  |
|  |  | Shiraz-29T | 1801 | 0.815343 | 0         |  |  |
|  |  | Shiraz-29T | 1801 | 0.815343 | 0         |  |  |
|  |  | Shiraz-32T | 1870 | 0.729766 | 0         |  |  |
|  |  | Shiraz-32T | 1870 | 0.729766 | 0         |  |  |
|  |  | Shiraz-35T | 1933 | 0.488535 | 0         |  |  |
|  |  | Shiraz-35T | 1933 | 0.488535 | 0         |  |  |
|  |  | Shiraz-58T | 2223 | 0.833364 | 0         |  |  |
|  |  | Shiraz-58T | 2223 | 0.833364 | 0         |  |  |
|  |  | Shiraz-71T | 2263 | 0.975531 | 0         |  |  |
|  |  | Shiraz-71T | 2263 | 0.975531 | 0         |  |  |
|  |  | Shiraz-3T  | 242  | 0        | -0.336434 |  |  |
|  |  | Shiraz-3T  | 242  | 0        | -0.336434 |  |  |
|  |  | Shiraz-4T  | 261  | 0        | -0.336249 |  |  |
|  |  | Shiraz-4T  | 261  | 0        | -0.336249 |  |  |
|  |  | Shiraz-16T | 295  | 0.591657 | 0         |  |  |
|  |  | Shiraz-16T | 295  | 0.591657 | 0         |  |  |
|  |  | Shiraz-36T | 433  | 0        | -0.803961 |  |  |
|  |  | Shiraz-36T | 433  | 0        | -0.803961 |  |  |

|         |      |            |      |          |           |  |  |
|---------|------|------------|------|----------|-----------|--|--|
|         |      | Shiraz-44T | 899  | 0        | -1.09697  |  |  |
|         |      | Shiraz-44T | 899  | 0        | -1.09697  |  |  |
|         |      | Shiraz-44T | 907  | 0        | -1.370847 |  |  |
|         |      | Shiraz-44T | 907  | 0        | -1.370847 |  |  |
|         |      | Shiraz-49T | 1170 | 0        | -0.967436 |  |  |
|         |      | Shiraz-49T | 1170 | 0        | -0.967436 |  |  |
|         |      | Shiraz-9T  | 1370 | 0.690073 | 0         |  |  |
|         |      | Shiraz-9T  | 1370 | 0.690073 | 0         |  |  |
|         |      | Shiraz-18T | 1457 | 0.643204 | 0         |  |  |
|         |      | Shiraz-18T | 1457 | 0.643204 | 0         |  |  |
|         |      | Shiraz-22T | 1673 | 0.611783 | 0         |  |  |
|         |      | Shiraz-22T | 1673 | 0.611783 | 0         |  |  |
|         |      | Shiraz-25T | 1719 | 0.472955 | 0         |  |  |
|         |      | Shiraz-25T | 1719 | 0.472955 | 0         |  |  |
|         |      | Shiraz-28T | 1762 | 0.562311 | 0         |  |  |
|         |      | Shiraz-28T | 1762 | 0.562311 | 0         |  |  |
|         |      | Shiraz-29T | 1801 | 0.815343 | 0         |  |  |
|         |      | Shiraz-29T | 1801 | 0.815343 | 0         |  |  |
|         |      | Shiraz-32T | 1870 | 0.729766 | 0         |  |  |
|         |      | Shiraz-32T | 1870 | 0.729766 | 0         |  |  |
|         |      | Shiraz-35T | 1933 | 0.488535 | 0         |  |  |
|         |      | Shiraz-35T | 1933 | 0.488535 | 0         |  |  |
|         |      | Shiraz-58T | 2223 | 0.833364 | 0         |  |  |
|         |      | Shiraz-58T | 2223 | 0.833364 | 0         |  |  |
|         |      | Shiraz-71T | 2263 | 0.975531 | 0         |  |  |
|         |      | Shiraz-71T | 2263 | 0.975531 | 0         |  |  |
| SPANXB1 | chrX | Shiraz-3T  | 242  | 0        | -0.336434 |  |  |
|         |      | Shiraz-3T  | 242  | 0        | -0.336434 |  |  |
|         |      | Shiraz-4T  | 261  | 0        | -0.336249 |  |  |
|         |      | Shiraz-4T  | 261  | 0        | -0.336249 |  |  |
|         |      | Shiraz-16T | 295  | 0.591657 | 0         |  |  |
|         |      | Shiraz-16T | 295  | 0.591657 | 0         |  |  |
|         |      | Shiraz-36T | 433  | 0        | -0.803961 |  |  |
|         |      | Shiraz-36T | 433  | 0        | -0.803961 |  |  |
|         |      | Shiraz-44T | 899  | 0        | -1.09697  |  |  |
|         |      | Shiraz-44T | 899  | 0        | -1.09697  |  |  |
|         |      | Shiraz-44T | 907  | 0        | -1.370847 |  |  |
|         |      | Shiraz-44T | 907  | 0        | -1.370847 |  |  |
|         |      | Shiraz-49T | 1170 | 0        | -0.967436 |  |  |
|         |      | Shiraz-49T | 1170 | 0        | -0.967436 |  |  |
|         |      | Shiraz-9T  | 1370 | 0.690073 | 0         |  |  |
|         |      | Shiraz-9T  | 1370 | 0.690073 | 0         |  |  |
|         |      | Shiraz-18T | 1457 | 0.643204 | 0         |  |  |
|         |      | Shiraz-18T | 1457 | 0.643204 | 0         |  |  |
|         |      | Shiraz-22T | 1673 | 0.611783 | 0         |  |  |
|         |      | Shiraz-22T | 1673 | 0.611783 | 0         |  |  |
|         |      | Shiraz-25T | 1719 | 0.472955 | 0         |  |  |

|  |            |      |          |           |  |
|--|------------|------|----------|-----------|--|
|  | Shiraz-25T | 1719 | 0.472955 | 0         |  |
|  | Shiraz-28T | 1762 | 0.562311 | 0         |  |
|  | Shiraz-28T | 1762 | 0.562311 | 0         |  |
|  | Shiraz-29T | 1801 | 0.815343 | 0         |  |
|  | Shiraz-29T | 1801 | 0.815343 | 0         |  |
|  | Shiraz-32T | 1870 | 0.729766 | 0         |  |
|  | Shiraz-32T | 1870 | 0.729766 | 0         |  |
|  | Shiraz-35T | 1933 | 0.488535 | 0         |  |
|  | Shiraz-35T | 1933 | 0.488535 | 0         |  |
|  | Shiraz-58T | 2223 | 0.833364 | 0         |  |
|  | Shiraz-58T | 2223 | 0.833364 | 0         |  |
|  | Shiraz-71T | 2263 | 0.975531 | 0         |  |
|  | Shiraz-71T | 2263 | 0.975531 | 0         |  |
|  | Shiraz-3T  | 242  | 0        | -0.336434 |  |
|  | Shiraz-3T  | 242  | 0        | -0.336434 |  |
|  | Shiraz-4T  | 261  | 0        | -0.336249 |  |
|  | Shiraz-4T  | 261  | 0        | -0.336249 |  |
|  | Shiraz-16T | 295  | 0.591657 | 0         |  |
|  | Shiraz-16T | 295  | 0.591657 | 0         |  |
|  | Shiraz-36T | 433  | 0        | -0.803961 |  |
|  | Shiraz-36T | 433  | 0        | -0.803961 |  |
|  | Shiraz-44T | 899  | 0        | -1.09697  |  |
|  | Shiraz-44T | 899  | 0        | -1.09697  |  |
|  | Shiraz-44T | 907  | 0        | -1.370847 |  |
|  | Shiraz-44T | 907  | 0        | -1.370847 |  |
|  | Shiraz-49T | 1170 | 0        | -0.967436 |  |
|  | Shiraz-49T | 1170 | 0        | -0.967436 |  |
|  | Shiraz-9T  | 1370 | 0.690073 | 0         |  |
|  | Shiraz-9T  | 1370 | 0.690073 | 0         |  |
|  | Shiraz-18T | 1457 | 0.643204 | 0         |  |
|  | Shiraz-18T | 1457 | 0.643204 | 0         |  |
|  | Shiraz-22T | 1673 | 0.611783 | 0         |  |
|  | Shiraz-22T | 1673 | 0.611783 | 0         |  |
|  | Shiraz-25T | 1719 | 0.472955 | 0         |  |
|  | Shiraz-25T | 1719 | 0.472955 | 0         |  |
|  | Shiraz-28T | 1762 | 0.562311 | 0         |  |
|  | Shiraz-28T | 1762 | 0.562311 | 0         |  |
|  | Shiraz-29T | 1801 | 0.815343 | 0         |  |
|  | Shiraz-29T | 1801 | 0.815343 | 0         |  |
|  | Shiraz-32T | 1870 | 0.729766 | 0         |  |
|  | Shiraz-32T | 1870 | 0.729766 | 0         |  |
|  | Shiraz-35T | 1933 | 0.488535 | 0         |  |
|  | Shiraz-35T | 1933 | 0.488535 | 0         |  |
|  | Shiraz-58T | 2223 | 0.833364 | 0         |  |
|  | Shiraz-58T | 2223 | 0.833364 | 0         |  |
|  | Shiraz-71T | 2263 | 0.975531 | 0         |  |
|  | Shiraz-71T | 2263 | 0.975531 | 0         |  |

|         |      |            |      |          |           |  |  |
|---------|------|------------|------|----------|-----------|--|--|
|         |      | Shiraz-3T  | 242  | 0        | -0.336434 |  |  |
|         |      | Shiraz-3T  | 242  | 0        | -0.336434 |  |  |
|         |      | Shiraz-4T  | 261  | 0        | -0.336249 |  |  |
|         |      | Shiraz-4T  | 261  | 0        | -0.336249 |  |  |
|         |      | Shiraz-16T | 295  | 0.591657 | 0         |  |  |
|         |      | Shiraz-16T | 295  | 0.591657 | 0         |  |  |
|         |      | Shiraz-36T | 433  | 0        | -0.803961 |  |  |
|         |      | Shiraz-36T | 433  | 0        | -0.803961 |  |  |
|         |      | Shiraz-44T | 899  | 0        | -1.09697  |  |  |
|         |      | Shiraz-44T | 899  | 0        | -1.09697  |  |  |
|         |      | Shiraz-44T | 907  | 0        | -1.370847 |  |  |
|         |      | Shiraz-44T | 907  | 0        | -1.370847 |  |  |
|         |      | Shiraz-49T | 1170 | 0        | -0.967436 |  |  |
|         |      | Shiraz-49T | 1170 | 0        | -0.967436 |  |  |
|         |      | Shiraz-9T  | 1370 | 0.690073 | 0         |  |  |
|         |      | Shiraz-9T  | 1370 | 0.690073 | 0         |  |  |
|         |      | Shiraz-18T | 1457 | 0.643204 | 0         |  |  |
|         |      | Shiraz-18T | 1457 | 0.643204 | 0         |  |  |
|         |      | Shiraz-22T | 1673 | 0.611783 | 0         |  |  |
|         |      | Shiraz-22T | 1673 | 0.611783 | 0         |  |  |
|         |      | Shiraz-25T | 1719 | 0.472955 | 0         |  |  |
|         |      | Shiraz-25T | 1719 | 0.472955 | 0         |  |  |
|         |      | Shiraz-28T | 1762 | 0.562311 | 0         |  |  |
|         |      | Shiraz-28T | 1762 | 0.562311 | 0         |  |  |
|         |      | Shiraz-29T | 1801 | 0.815343 | 0         |  |  |
|         |      | Shiraz-29T | 1801 | 0.815343 | 0         |  |  |
|         |      | Shiraz-32T | 1870 | 0.729766 | 0         |  |  |
|         |      | Shiraz-32T | 1870 | 0.729766 | 0         |  |  |
|         |      | Shiraz-35T | 1933 | 0.488535 | 0         |  |  |
|         |      | Shiraz-35T | 1933 | 0.488535 | 0         |  |  |
|         |      | Shiraz-58T | 2223 | 0.833364 | 0         |  |  |
|         |      | Shiraz-58T | 2223 | 0.833364 | 0         |  |  |
|         |      | Shiraz-71T | 2263 | 0.975531 | 0         |  |  |
|         |      | Shiraz-71T | 2263 | 0.975531 | 0         |  |  |
| SPANXB2 | chrX | Shiraz-3T  | 242  | 0        | -0.336434 |  |  |
|         |      | Shiraz-3T  | 242  | 0        | -0.336434 |  |  |
|         |      | Shiraz-4T  | 261  | 0        | -0.336249 |  |  |
|         |      | Shiraz-4T  | 261  | 0        | -0.336249 |  |  |
|         |      | Shiraz-16T | 295  | 0.591657 | 0         |  |  |
|         |      | Shiraz-16T | 295  | 0.591657 | 0         |  |  |
|         |      | Shiraz-36T | 433  | 0        | -0.803961 |  |  |
|         |      | Shiraz-36T | 433  | 0        | -0.803961 |  |  |
|         |      | Shiraz-44T | 899  | 0        | -1.09697  |  |  |
|         |      | Shiraz-44T | 899  | 0        | -1.09697  |  |  |
|         |      | Shiraz-44T | 907  | 0        | -1.370847 |  |  |
|         |      | Shiraz-44T | 907  | 0        | -1.370847 |  |  |
|         |      | Shiraz-49T | 1170 | 0        | -0.967436 |  |  |



|  |            |      |          |           |  |
|--|------------|------|----------|-----------|--|
|  | Shiraz-49T | 1170 | 0        | -0.967436 |  |
|  | Shiraz-9T  | 1370 | 0.690073 | 0         |  |
|  | Shiraz-9T  | 1370 | 0.690073 | 0         |  |
|  | Shiraz-18T | 1457 | 0.643204 | 0         |  |
|  | Shiraz-18T | 1457 | 0.643204 | 0         |  |
|  | Shiraz-22T | 1673 | 0.611783 | 0         |  |
|  | Shiraz-22T | 1673 | 0.611783 | 0         |  |
|  | Shiraz-25T | 1719 | 0.472955 | 0         |  |
|  | Shiraz-25T | 1719 | 0.472955 | 0         |  |
|  | Shiraz-28T | 1762 | 0.562311 | 0         |  |
|  | Shiraz-28T | 1762 | 0.562311 | 0         |  |
|  | Shiraz-29T | 1801 | 0.815343 | 0         |  |
|  | Shiraz-29T | 1801 | 0.815343 | 0         |  |
|  | Shiraz-32T | 1870 | 0.729766 | 0         |  |
|  | Shiraz-32T | 1870 | 0.729766 | 0         |  |
|  | Shiraz-35T | 1933 | 0.488535 | 0         |  |
|  | Shiraz-35T | 1933 | 0.488535 | 0         |  |
|  | Shiraz-58T | 2223 | 0.833364 | 0         |  |
|  | Shiraz-58T | 2223 | 0.833364 | 0         |  |
|  | Shiraz-71T | 2263 | 0.975531 | 0         |  |
|  | Shiraz-71T | 2263 | 0.975531 | 0         |  |
|  | Shiraz-3T  | 242  | 0        | -0.336434 |  |
|  | Shiraz-3T  | 242  | 0        | -0.336434 |  |
|  | Shiraz-4T  | 261  | 0        | -0.336249 |  |
|  | Shiraz-4T  | 261  | 0        | -0.336249 |  |
|  | Shiraz-16T | 295  | 0.591657 | 0         |  |
|  | Shiraz-16T | 295  | 0.591657 | 0         |  |
|  | Shiraz-36T | 433  | 0        | -0.803961 |  |
|  | Shiraz-36T | 433  | 0        | -0.803961 |  |
|  | Shiraz-44T | 899  | 0        | -1.09697  |  |
|  | Shiraz-44T | 899  | 0        | -1.09697  |  |
|  | Shiraz-44T | 907  | 0        | -1.370847 |  |
|  | Shiraz-44T | 907  | 0        | -1.370847 |  |
|  | Shiraz-49T | 1170 | 0        | -0.967436 |  |
|  | Shiraz-49T | 1170 | 0        | -0.967436 |  |
|  | Shiraz-9T  | 1370 | 0.690073 | 0         |  |
|  | Shiraz-9T  | 1370 | 0.690073 | 0         |  |
|  | Shiraz-18T | 1457 | 0.643204 | 0         |  |
|  | Shiraz-18T | 1457 | 0.643204 | 0         |  |
|  | Shiraz-22T | 1673 | 0.611783 | 0         |  |
|  | Shiraz-22T | 1673 | 0.611783 | 0         |  |
|  | Shiraz-25T | 1719 | 0.472955 | 0         |  |
|  | Shiraz-25T | 1719 | 0.472955 | 0         |  |
|  | Shiraz-28T | 1762 | 0.562311 | 0         |  |
|  | Shiraz-28T | 1762 | 0.562311 | 0         |  |
|  | Shiraz-29T | 1801 | 0.815343 | 0         |  |
|  | Shiraz-29T | 1801 | 0.815343 | 0         |  |

|        |      |            |      |          |           |  |
|--------|------|------------|------|----------|-----------|--|
|        |      | Shiraz-32T | 1870 | 0.729766 | 0         |  |
|        |      | Shiraz-32T | 1870 | 0.729766 | 0         |  |
|        |      | Shiraz-35T | 1933 | 0.488535 | 0         |  |
|        |      | Shiraz-35T | 1933 | 0.488535 | 0         |  |
|        |      | Shiraz-58T | 2223 | 0.833364 | 0         |  |
|        |      | Shiraz-58T | 2223 | 0.833364 | 0         |  |
|        |      | Shiraz-71T | 2263 | 0.975531 | 0         |  |
|        |      | Shiraz-71T | 2263 | 0.975531 | 0         |  |
|        |      | Shiraz-3T  | 242  | 0        | -0.336434 |  |
|        |      | Shiraz-3T  | 242  | 0        | -0.336434 |  |
|        |      | Shiraz-4T  | 261  | 0        | -0.336249 |  |
|        |      | Shiraz-4T  | 261  | 0        | -0.336249 |  |
|        |      | Shiraz-16T | 295  | 0.591657 | 0         |  |
|        |      | Shiraz-16T | 295  | 0.591657 | 0         |  |
|        |      | Shiraz-36T | 433  | 0        | -0.803961 |  |
|        |      | Shiraz-36T | 433  | 0        | -0.803961 |  |
|        |      | Shiraz-44T | 899  | 0        | -1.09697  |  |
|        |      | Shiraz-44T | 899  | 0        | -1.09697  |  |
|        |      | Shiraz-44T | 907  | 0        | -1.370847 |  |
|        |      | Shiraz-44T | 907  | 0        | -1.370847 |  |
|        |      | Shiraz-49T | 1170 | 0        | -0.967436 |  |
|        |      | Shiraz-49T | 1170 | 0        | -0.967436 |  |
|        |      | Shiraz-9T  | 1370 | 0.690073 | 0         |  |
|        |      | Shiraz-9T  | 1370 | 0.690073 | 0         |  |
|        |      | Shiraz-18T | 1457 | 0.643204 | 0         |  |
|        |      | Shiraz-18T | 1457 | 0.643204 | 0         |  |
|        |      | Shiraz-22T | 1673 | 0.611783 | 0         |  |
|        |      | Shiraz-22T | 1673 | 0.611783 | 0         |  |
|        |      | Shiraz-25T | 1719 | 0.472955 | 0         |  |
|        |      | Shiraz-25T | 1719 | 0.472955 | 0         |  |
|        |      | Shiraz-28T | 1762 | 0.562311 | 0         |  |
|        |      | Shiraz-28T | 1762 | 0.562311 | 0         |  |
|        |      | Shiraz-29T | 1801 | 0.815343 | 0         |  |
|        |      | Shiraz-29T | 1801 | 0.815343 | 0         |  |
|        |      | Shiraz-32T | 1870 | 0.729766 | 0         |  |
|        |      | Shiraz-32T | 1870 | 0.729766 | 0         |  |
|        |      | Shiraz-35T | 1933 | 0.488535 | 0         |  |
|        |      | Shiraz-35T | 1933 | 0.488535 | 0         |  |
|        |      | Shiraz-58T | 2223 | 0.833364 | 0         |  |
|        |      | Shiraz-58T | 2223 | 0.833364 | 0         |  |
|        |      | Shiraz-71T | 2263 | 0.975531 | 0         |  |
|        |      | Shiraz-71T | 2263 | 0.975531 | 0         |  |
| SPANXC | chrX | Shiraz-3T  | 242  | 0        | -0.336434 |  |
|        |      | Shiraz-4T  | 261  | 0        | -0.336249 |  |
|        |      | Shiraz-16T | 295  | 0.591657 | 0         |  |
|        |      | Shiraz-36T | 433  | 0        | -0.803961 |  |
|        |      | Shiraz-44T | 899  | 0        | -1.09697  |  |

|        |      |            |      |          |           |  |  |
|--------|------|------------|------|----------|-----------|--|--|
|        |      | Shiraz-44T | 907  | 0        | -1.370847 |  |  |
|        |      | Shiraz-49T | 1170 | 0        | -0.967436 |  |  |
|        |      | Shiraz-9T  | 1370 | 0.690073 | 0         |  |  |
|        |      | Shiraz-18T | 1457 | 0.643204 | 0         |  |  |
|        |      | Shiraz-22T | 1673 | 0.611783 | 0         |  |  |
|        |      | Shiraz-25T | 1719 | 0.472955 | 0         |  |  |
|        |      | Shiraz-28T | 1762 | 0.562311 | 0         |  |  |
|        |      | Shiraz-29T | 1801 | 0.815343 | 0         |  |  |
|        |      | Shiraz-32T | 1870 | 0.729766 | 0         |  |  |
|        |      | Shiraz-35T | 1933 | 0.488535 | 0         |  |  |
|        |      | Shiraz-58T | 2223 | 0.833364 | 0         |  |  |
|        |      | Shiraz-71T | 2263 | 0.975531 | 0         |  |  |
|        |      | Shiraz-3T  | 242  | 0        | -0.336434 |  |  |
|        |      | Shiraz-4T  | 261  | 0        | -0.336249 |  |  |
|        |      | Shiraz-16T | 295  | 0.591657 | 0         |  |  |
|        |      | Shiraz-36T | 433  | 0        | -0.803961 |  |  |
|        |      | Shiraz-44T | 899  | 0        | -1.09697  |  |  |
|        |      | Shiraz-44T | 907  | 0        | -1.370847 |  |  |
|        |      | Shiraz-49T | 1170 | 0        | -0.967436 |  |  |
|        |      | Shiraz-9T  | 1370 | 0.690073 | 0         |  |  |
|        |      | Shiraz-18T | 1457 | 0.643204 | 0         |  |  |
|        |      | Shiraz-22T | 1673 | 0.611783 | 0         |  |  |
|        |      | Shiraz-25T | 1719 | 0.472955 | 0         |  |  |
|        |      | Shiraz-28T | 1762 | 0.562311 | 0         |  |  |
|        |      | Shiraz-29T | 1801 | 0.815343 | 0         |  |  |
|        |      | Shiraz-32T | 1870 | 0.729766 | 0         |  |  |
|        |      | Shiraz-35T | 1933 | 0.488535 | 0         |  |  |
|        |      | Shiraz-58T | 2223 | 0.833364 | 0         |  |  |
|        |      | Shiraz-71T | 2263 | 0.975531 | 0         |  |  |
|        |      | Shiraz-3T  | 242  | 0        | -0.336434 |  |  |
|        |      | Shiraz-4T  | 261  | 0        | -0.336249 |  |  |
|        |      | Shiraz-16T | 295  | 0.591657 | 0         |  |  |
|        |      | Shiraz-36T | 433  | 0        | -0.803961 |  |  |
|        |      | Shiraz-44T | 899  | 0        | -1.09697  |  |  |
|        |      | Shiraz-44T | 907  | 0        | -1.370847 |  |  |
|        |      | Shiraz-49T | 1170 | 0        | -0.967436 |  |  |
|        |      | Shiraz-9T  | 1370 | 0.690073 | 0         |  |  |
|        |      | Shiraz-18T | 1457 | 0.643204 | 0         |  |  |
|        |      | Shiraz-22T | 1673 | 0.611783 | 0         |  |  |
|        |      | Shiraz-25T | 1719 | 0.472955 | 0         |  |  |
|        |      | Shiraz-28T | 1762 | 0.562311 | 0         |  |  |
|        |      | Shiraz-29T | 1801 | 0.815343 | 0         |  |  |
|        |      | Shiraz-32T | 1870 | 0.729766 | 0         |  |  |
|        |      | Shiraz-35T | 1933 | 0.488535 | 0         |  |  |
|        |      | Shiraz-58T | 2223 | 0.833364 | 0         |  |  |
|        |      | Shiraz-71T | 2263 | 0.975531 | 0         |  |  |
| SPANXD | chrX | Shiraz-3T  | 242  | 0        | -0.336434 |  |  |

|  |            |      |          |           |  |
|--|------------|------|----------|-----------|--|
|  | Shiraz-4T  | 261  | 0        | -0.336249 |  |
|  | Shiraz-16T | 295  | 0.591657 | 0         |  |
|  | Shiraz-36T | 433  | 0        | -0.803961 |  |
|  | Shiraz-44T | 899  | 0        | -1.09697  |  |
|  | Shiraz-44T | 907  | 0        | -1.370847 |  |
|  | Shiraz-49T | 1170 | 0        | -0.967436 |  |
|  | Shiraz-9T  | 1370 | 0.690073 | 0         |  |
|  | Shiraz-18T | 1457 | 0.643204 | 0         |  |
|  | Shiraz-22T | 1673 | 0.611783 | 0         |  |
|  | Shiraz-25T | 1719 | 0.472955 | 0         |  |
|  | Shiraz-28T | 1762 | 0.562311 | 0         |  |
|  | Shiraz-29T | 1801 | 0.815343 | 0         |  |
|  | Shiraz-32T | 1870 | 0.729766 | 0         |  |
|  | Shiraz-35T | 1933 | 0.488535 | 0         |  |
|  | Shiraz-58T | 2223 | 0.833364 | 0         |  |
|  | Shiraz-71T | 2263 | 0.975531 | 0         |  |
|  | Shiraz-3T  | 242  | 0        | -0.336434 |  |
|  | Shiraz-4T  | 261  | 0        | -0.336249 |  |
|  | Shiraz-16T | 295  | 0.591657 | 0         |  |
|  | Shiraz-36T | 433  | 0        | -0.803961 |  |
|  | Shiraz-44T | 899  | 0        | -1.09697  |  |
|  | Shiraz-44T | 907  | 0        | -1.370847 |  |
|  | Shiraz-49T | 1170 | 0        | -0.967436 |  |
|  | Shiraz-9T  | 1370 | 0.690073 | 0         |  |
|  | Shiraz-18T | 1457 | 0.643204 | 0         |  |
|  | Shiraz-22T | 1673 | 0.611783 | 0         |  |
|  | Shiraz-25T | 1719 | 0.472955 | 0         |  |
|  | Shiraz-28T | 1762 | 0.562311 | 0         |  |
|  | Shiraz-29T | 1801 | 0.815343 | 0         |  |
|  | Shiraz-32T | 1870 | 0.729766 | 0         |  |
|  | Shiraz-35T | 1933 | 0.488535 | 0         |  |
|  | Shiraz-58T | 2223 | 0.833364 | 0         |  |
|  | Shiraz-71T | 2263 | 0.975531 | 0         |  |
|  | Shiraz-3T  | 242  | 0        | -0.336434 |  |
|  | Shiraz-4T  | 261  | 0        | -0.336249 |  |
|  | Shiraz-16T | 295  | 0.591657 | 0         |  |
|  | Shiraz-36T | 433  | 0        | -0.803961 |  |
|  | Shiraz-44T | 899  | 0        | -1.09697  |  |
|  | Shiraz-44T | 907  | 0        | -1.370847 |  |
|  | Shiraz-49T | 1170 | 0        | -0.967436 |  |
|  | Shiraz-9T  | 1370 | 0.690073 | 0         |  |
|  | Shiraz-18T | 1457 | 0.643204 | 0         |  |
|  | Shiraz-22T | 1673 | 0.611783 | 0         |  |
|  | Shiraz-25T | 1719 | 0.472955 | 0         |  |
|  | Shiraz-28T | 1762 | 0.562311 | 0         |  |
|  | Shiraz-29T | 1801 | 0.815343 | 0         |  |
|  | Shiraz-32T | 1870 | 0.729766 | 0         |  |

|        |      |            |      |          |           |  |
|--------|------|------------|------|----------|-----------|--|
|        |      | Shiraz-35T | 1933 | 0.488535 | 0         |  |
|        |      | Shiraz-58T | 2223 | 0.833364 | 0         |  |
|        |      | Shiraz-71T | 2263 | 0.975531 | 0         |  |
| SPANXE | chrX | Shiraz-3T  | 242  | 0        | -0.336434 |  |
|        |      | Shiraz-4T  | 261  | 0        | -0.336249 |  |
|        |      | Shiraz-16T | 295  | 0.591657 | 0         |  |
|        |      | Shiraz-36T | 433  | 0        | -0.803961 |  |
|        |      | Shiraz-44T | 899  | 0        | -1.09697  |  |
|        |      | Shiraz-44T | 907  | 0        | -1.370847 |  |
|        |      | Shiraz-49T | 1170 | 0        | -0.967436 |  |
|        |      | Shiraz-9T  | 1370 | 0.690073 | 0         |  |
|        |      | Shiraz-18T | 1457 | 0.643204 | 0         |  |
|        |      | Shiraz-22T | 1673 | 0.611783 | 0         |  |
|        |      | Shiraz-25T | 1719 | 0.472955 | 0         |  |
|        |      | Shiraz-28T | 1762 | 0.562311 | 0         |  |
|        |      | Shiraz-29T | 1801 | 0.815343 | 0         |  |
|        |      | Shiraz-32T | 1870 | 0.729766 | 0         |  |
|        |      | Shiraz-35T | 1933 | 0.488535 | 0         |  |
|        |      | Shiraz-58T | 2223 | 0.833364 | 0         |  |
|        |      | Shiraz-71T | 2263 | 0.975531 | 0         |  |
|        |      | Shiraz-3T  | 242  | 0        | -0.336434 |  |
|        |      | Shiraz-4T  | 261  | 0        | -0.336249 |  |
|        |      | Shiraz-16T | 295  | 0.591657 | 0         |  |
|        |      | Shiraz-36T | 433  | 0        | -0.803961 |  |
|        |      | Shiraz-44T | 899  | 0        | -1.09697  |  |
|        |      | Shiraz-44T | 907  | 0        | -1.370847 |  |
|        |      | Shiraz-49T | 1170 | 0        | -0.967436 |  |
|        |      | Shiraz-9T  | 1370 | 0.690073 | 0         |  |
|        |      | Shiraz-18T | 1457 | 0.643204 | 0         |  |
|        |      | Shiraz-22T | 1673 | 0.611783 | 0         |  |
|        |      | Shiraz-25T | 1719 | 0.472955 | 0         |  |
|        |      | Shiraz-28T | 1762 | 0.562311 | 0         |  |
|        |      | Shiraz-29T | 1801 | 0.815343 | 0         |  |
|        |      | Shiraz-32T | 1870 | 0.729766 | 0         |  |
|        |      | Shiraz-35T | 1933 | 0.488535 | 0         |  |
|        |      | Shiraz-58T | 2223 | 0.833364 | 0         |  |
|        |      | Shiraz-71T | 2263 | 0.975531 | 0         |  |
|        |      | Shiraz-3T  | 242  | 0        | -0.336434 |  |
|        |      | Shiraz-4T  | 261  | 0        | -0.336249 |  |
|        |      | Shiraz-16T | 295  | 0.591657 | 0         |  |
|        |      | Shiraz-36T | 433  | 0        | -0.803961 |  |
|        |      | Shiraz-44T | 899  | 0        | -1.09697  |  |
|        |      | Shiraz-44T | 907  | 0        | -1.370847 |  |
|        |      | Shiraz-49T | 1170 | 0        | -0.967436 |  |
|        |      | Shiraz-9T  | 1370 | 0.690073 | 0         |  |
|        |      | Shiraz-18T | 1457 | 0.643204 | 0         |  |
|        |      | Shiraz-22T | 1673 | 0.611783 | 0         |  |

|         |      |            |      |          |           |  |
|---------|------|------------|------|----------|-----------|--|
|         |      | Shiraz-25T | 1719 | 0.472955 | 0         |  |
|         |      | Shiraz-28T | 1762 | 0.562311 | 0         |  |
|         |      | Shiraz-29T | 1801 | 0.815343 | 0         |  |
|         |      | Shiraz-32T | 1870 | 0.729766 | 0         |  |
|         |      | Shiraz-35T | 1933 | 0.488535 | 0         |  |
|         |      | Shiraz-58T | 2223 | 0.833364 | 0         |  |
|         |      | Shiraz-71T | 2263 | 0.975531 | 0         |  |
| SPANXF1 | chrX | Shiraz-3T  | 242  | 0        | -0.336434 |  |
|         |      | Shiraz-3T  | 242  | 0        | -0.336434 |  |
|         |      | Shiraz-4T  | 261  | 0        | -0.336249 |  |
|         |      | Shiraz-4T  | 261  | 0        | -0.336249 |  |
|         |      | Shiraz-16T | 295  | 0.591657 | 0         |  |
|         |      | Shiraz-16T | 295  | 0.591657 | 0         |  |
|         |      | Shiraz-36T | 433  | 0        | -0.803961 |  |
|         |      | Shiraz-36T | 433  | 0        | -0.803961 |  |
|         |      | Shiraz-44T | 899  | 0        | -1.09697  |  |
|         |      | Shiraz-44T | 899  | 0        | -1.09697  |  |
|         |      | Shiraz-44T | 907  | 0        | -1.370847 |  |
|         |      | Shiraz-44T | 907  | 0        | -1.370847 |  |
|         |      | Shiraz-49T | 1170 | 0        | -0.967436 |  |
|         |      | Shiraz-49T | 1170 | 0        | -0.967436 |  |
|         |      | Shiraz-9T  | 1370 | 0.690073 | 0         |  |
|         |      | Shiraz-9T  | 1370 | 0.690073 | 0         |  |
|         |      | Shiraz-18T | 1457 | 0.643204 | 0         |  |
|         |      | Shiraz-18T | 1457 | 0.643204 | 0         |  |
|         |      | Shiraz-22T | 1673 | 0.611783 | 0         |  |
|         |      | Shiraz-22T | 1673 | 0.611783 | 0         |  |
|         |      | Shiraz-25T | 1719 | 0.472955 | 0         |  |
|         |      | Shiraz-25T | 1719 | 0.472955 | 0         |  |
|         |      | Shiraz-28T | 1762 | 0.562311 | 0         |  |
|         |      | Shiraz-28T | 1762 | 0.562311 | 0         |  |
|         |      | Shiraz-29T | 1801 | 0.815343 | 0         |  |
|         |      | Shiraz-29T | 1801 | 0.815343 | 0         |  |
|         |      | Shiraz-32T | 1870 | 0.729766 | 0         |  |
|         |      | Shiraz-32T | 1870 | 0.729766 | 0         |  |
|         |      | Shiraz-35T | 1933 | 0.488535 | 0         |  |
|         |      | Shiraz-35T | 1933 | 0.488535 | 0         |  |
|         |      | Shiraz-58T | 2223 | 0.833364 | 0         |  |
|         |      | Shiraz-58T | 2223 | 0.833364 | 0         |  |
|         |      | Shiraz-71T | 2263 | 0.975531 | 0         |  |
|         |      | Shiraz-71T | 2263 | 0.975531 | 0         |  |
|         |      | Shiraz-3T  | 242  | 0        | -0.336434 |  |
|         |      | Shiraz-3T  | 242  | 0        | -0.336434 |  |
|         |      | Shiraz-4T  | 261  | 0        | -0.336249 |  |
|         |      | Shiraz-4T  | 261  | 0        | -0.336249 |  |
|         |      | Shiraz-16T | 295  | 0.591657 | 0         |  |
|         |      | Shiraz-16T | 295  | 0.591657 | 0         |  |

|  |            |      |          |           |  |
|--|------------|------|----------|-----------|--|
|  | Shiraz-36T | 433  | 0        | -0.803961 |  |
|  | Shiraz-36T | 433  | 0        | -0.803961 |  |
|  | Shiraz-44T | 899  | 0        | -1.09697  |  |
|  | Shiraz-44T | 899  | 0        | -1.09697  |  |
|  | Shiraz-44T | 907  | 0        | -1.370847 |  |
|  | Shiraz-44T | 907  | 0        | -1.370847 |  |
|  | Shiraz-49T | 1170 | 0        | -0.967436 |  |
|  | Shiraz-49T | 1170 | 0        | -0.967436 |  |
|  | Shiraz-9T  | 1370 | 0.690073 | 0         |  |
|  | Shiraz-9T  | 1370 | 0.690073 | 0         |  |
|  | Shiraz-18T | 1457 | 0.643204 | 0         |  |
|  | Shiraz-18T | 1457 | 0.643204 | 0         |  |
|  | Shiraz-22T | 1673 | 0.611783 | 0         |  |
|  | Shiraz-22T | 1673 | 0.611783 | 0         |  |
|  | Shiraz-25T | 1719 | 0.472955 | 0         |  |
|  | Shiraz-25T | 1719 | 0.472955 | 0         |  |
|  | Shiraz-28T | 1762 | 0.562311 | 0         |  |
|  | Shiraz-28T | 1762 | 0.562311 | 0         |  |
|  | Shiraz-29T | 1801 | 0.815343 | 0         |  |
|  | Shiraz-29T | 1801 | 0.815343 | 0         |  |
|  | Shiraz-32T | 1870 | 0.729766 | 0         |  |
|  | Shiraz-32T | 1870 | 0.729766 | 0         |  |
|  | Shiraz-35T | 1933 | 0.488535 | 0         |  |
|  | Shiraz-35T | 1933 | 0.488535 | 0         |  |
|  | Shiraz-58T | 2223 | 0.833364 | 0         |  |
|  | Shiraz-58T | 2223 | 0.833364 | 0         |  |
|  | Shiraz-71T | 2263 | 0.975531 | 0         |  |
|  | Shiraz-71T | 2263 | 0.975531 | 0         |  |
|  | Shiraz-3T  | 242  | 0        | -0.336434 |  |
|  | Shiraz-3T  | 242  | 0        | -0.336434 |  |
|  | Shiraz-4T  | 261  | 0        | -0.336249 |  |
|  | Shiraz-4T  | 261  | 0        | -0.336249 |  |
|  | Shiraz-16T | 295  | 0.591657 | 0         |  |
|  | Shiraz-16T | 295  | 0.591657 | 0         |  |
|  | Shiraz-36T | 433  | 0        | -0.803961 |  |
|  | Shiraz-36T | 433  | 0        | -0.803961 |  |
|  | Shiraz-44T | 899  | 0        | -1.09697  |  |
|  | Shiraz-44T | 899  | 0        | -1.09697  |  |
|  | Shiraz-44T | 907  | 0        | -1.370847 |  |
|  | Shiraz-44T | 907  | 0        | -1.370847 |  |
|  | Shiraz-49T | 1170 | 0        | -0.967436 |  |
|  | Shiraz-49T | 1170 | 0        | -0.967436 |  |
|  | Shiraz-9T  | 1370 | 0.690073 | 0         |  |
|  | Shiraz-9T  | 1370 | 0.690073 | 0         |  |
|  | Shiraz-18T | 1457 | 0.643204 | 0         |  |
|  | Shiraz-18T | 1457 | 0.643204 | 0         |  |
|  | Shiraz-22T | 1673 | 0.611783 | 0         |  |

|         |      |            |      |          |           |  |  |
|---------|------|------------|------|----------|-----------|--|--|
|         |      | Shiraz-22T | 1673 | 0.611783 | 0         |  |  |
|         |      | Shiraz-25T | 1719 | 0.472955 | 0         |  |  |
|         |      | Shiraz-25T | 1719 | 0.472955 | 0         |  |  |
|         |      | Shiraz-28T | 1762 | 0.562311 | 0         |  |  |
|         |      | Shiraz-28T | 1762 | 0.562311 | 0         |  |  |
|         |      | Shiraz-29T | 1801 | 0.815343 | 0         |  |  |
|         |      | Shiraz-29T | 1801 | 0.815343 | 0         |  |  |
|         |      | Shiraz-32T | 1870 | 0.729766 | 0         |  |  |
|         |      | Shiraz-32T | 1870 | 0.729766 | 0         |  |  |
|         |      | Shiraz-35T | 1933 | 0.488535 | 0         |  |  |
|         |      | Shiraz-35T | 1933 | 0.488535 | 0         |  |  |
|         |      | Shiraz-58T | 2223 | 0.833364 | 0         |  |  |
|         |      | Shiraz-58T | 2223 | 0.833364 | 0         |  |  |
|         |      | Shiraz-71T | 2263 | 0.975531 | 0         |  |  |
|         |      | Shiraz-71T | 2263 | 0.975531 | 0         |  |  |
| SPANXN1 | chrX | Shiraz-3T  | 242  | 0        | -0.336434 |  |  |
|         |      | Shiraz-4T  | 261  | 0        | -0.336249 |  |  |
|         |      | Shiraz-16T | 295  | 0.591657 | 0         |  |  |
|         |      | Shiraz-36T | 433  | 0        | -0.803961 |  |  |
|         |      | Shiraz-44T | 899  | 0        | -1.09697  |  |  |
|         |      | Shiraz-44T | 907  | 0        | -1.370847 |  |  |
|         |      | Shiraz-49T | 1170 | 0        | -0.967436 |  |  |
|         |      | Shiraz-9T  | 1370 | 0.690073 | 0         |  |  |
|         |      | Shiraz-18T | 1457 | 0.643204 | 0         |  |  |
|         |      | Shiraz-22T | 1673 | 0.611783 | 0         |  |  |
|         |      | Shiraz-25T | 1719 | 0.472955 | 0         |  |  |
|         |      | Shiraz-28T | 1762 | 0.562311 | 0         |  |  |
|         |      | Shiraz-29T | 1801 | 0.815343 | 0         |  |  |
|         |      | Shiraz-32T | 1870 | 0.729766 | 0         |  |  |
|         |      | Shiraz-35T | 1933 | 0.488535 | 0         |  |  |
|         |      | Shiraz-58T | 2223 | 0.833364 | 0         |  |  |
|         |      | Shiraz-71T | 2263 | 0.975531 | 0         |  |  |
|         |      | Shiraz-3T  | 242  | 0        | -0.336434 |  |  |
|         |      | Shiraz-4T  | 261  | 0        | -0.336249 |  |  |
|         |      | Shiraz-16T | 295  | 0.591657 | 0         |  |  |
|         |      | Shiraz-36T | 433  | 0        | -0.803961 |  |  |
|         |      | Shiraz-44T | 899  | 0        | -1.09697  |  |  |
|         |      | Shiraz-44T | 907  | 0        | -1.370847 |  |  |
|         |      | Shiraz-49T | 1170 | 0        | -0.967436 |  |  |
|         |      | Shiraz-9T  | 1370 | 0.690073 | 0         |  |  |
|         |      | Shiraz-18T | 1457 | 0.643204 | 0         |  |  |
|         |      | Shiraz-22T | 1673 | 0.611783 | 0         |  |  |
|         |      | Shiraz-25T | 1719 | 0.472955 | 0         |  |  |
|         |      | Shiraz-28T | 1762 | 0.562311 | 0         |  |  |
|         |      | Shiraz-29T | 1801 | 0.815343 | 0         |  |  |
|         |      | Shiraz-32T | 1870 | 0.729766 | 0         |  |  |
|         |      | Shiraz-35T | 1933 | 0.488535 | 0         |  |  |



|         |      |            |      |          |           |  |  |
|---------|------|------------|------|----------|-----------|--|--|
|         |      | Shiraz-58T | 2223 | 0.833364 | 0         |  |  |
|         |      | Shiraz-71T | 2263 | 0.975531 | 0         |  |  |
|         |      | Shiraz-3T  | 242  | 0        | -0.336434 |  |  |
|         |      | Shiraz-4T  | 261  | 0        | -0.336249 |  |  |
|         |      | Shiraz-16T | 295  | 0.591657 | 0         |  |  |
|         |      | Shiraz-36T | 433  | 0        | -0.803961 |  |  |
|         |      | Shiraz-44T | 899  | 0        | -1.09697  |  |  |
|         |      | Shiraz-44T | 907  | 0        | -1.370847 |  |  |
|         |      | Shiraz-49T | 1170 | 0        | -0.967436 |  |  |
|         |      | Shiraz-9T  | 1370 | 0.690073 | 0         |  |  |
|         |      | Shiraz-18T | 1457 | 0.643204 | 0         |  |  |
|         |      | Shiraz-22T | 1673 | 0.611783 | 0         |  |  |
|         |      | Shiraz-25T | 1719 | 0.472955 | 0         |  |  |
|         |      | Shiraz-28T | 1762 | 0.562311 | 0         |  |  |
|         |      | Shiraz-29T | 1801 | 0.815343 | 0         |  |  |
|         |      | Shiraz-32T | 1870 | 0.729766 | 0         |  |  |
|         |      | Shiraz-35T | 1933 | 0.488535 | 0         |  |  |
|         |      | Shiraz-58T | 2223 | 0.833364 | 0         |  |  |
|         |      | Shiraz-71T | 2263 | 0.975531 | 0         |  |  |
| SPANXN2 | chrX | Shiraz-3T  | 242  | 0        | -0.336434 |  |  |
|         |      | Shiraz-4T  | 261  | 0        | -0.336249 |  |  |
|         |      | Shiraz-16T | 295  | 0.591657 | 0         |  |  |
|         |      | Shiraz-36T | 433  | 0        | -0.803961 |  |  |
|         |      | Shiraz-44T | 899  | 0        | -1.09697  |  |  |
|         |      | Shiraz-44T | 907  | 0        | -1.370847 |  |  |
|         |      | Shiraz-49T | 1170 | 0        | -0.967436 |  |  |
|         |      | Shiraz-9T  | 1370 | 0.690073 | 0         |  |  |
|         |      | Shiraz-18T | 1457 | 0.643204 | 0         |  |  |
|         |      | Shiraz-22T | 1673 | 0.611783 | 0         |  |  |
|         |      | Shiraz-25T | 1719 | 0.472955 | 0         |  |  |
|         |      | Shiraz-28T | 1762 | 0.562311 | 0         |  |  |
|         |      | Shiraz-29T | 1801 | 0.815343 | 0         |  |  |
|         |      | Shiraz-32T | 1870 | 0.729766 | 0         |  |  |
|         |      | Shiraz-35T | 1933 | 0.488535 | 0         |  |  |
|         |      | Shiraz-58T | 2223 | 0.833364 | 0         |  |  |
|         |      | Shiraz-71T | 2263 | 0.975531 | 0         |  |  |
|         |      | Shiraz-3T  | 242  | 0        | -0.336434 |  |  |
|         |      | Shiraz-4T  | 261  | 0        | -0.336249 |  |  |
|         |      | Shiraz-16T | 295  | 0.591657 | 0         |  |  |
|         |      | Shiraz-36T | 433  | 0        | -0.803961 |  |  |
|         |      | Shiraz-44T | 899  | 0        | -1.09697  |  |  |
|         |      | Shiraz-44T | 907  | 0        | -1.370847 |  |  |
|         |      | Shiraz-49T | 1170 | 0        | -0.967436 |  |  |
|         |      | Shiraz-9T  | 1370 | 0.690073 | 0         |  |  |
|         |      | Shiraz-18T | 1457 | 0.643204 | 0         |  |  |
|         |      | Shiraz-22T | 1673 | 0.611783 | 0         |  |  |
|         |      | Shiraz-25T | 1719 | 0.472955 | 0         |  |  |

|         |      |            |      |          |           |  |  |
|---------|------|------------|------|----------|-----------|--|--|
|         |      | Shiraz-28T | 1762 | 0.562311 | 0         |  |  |
|         |      | Shiraz-29T | 1801 | 0.815343 | 0         |  |  |
|         |      | Shiraz-32T | 1870 | 0.729766 | 0         |  |  |
|         |      | Shiraz-35T | 1933 | 0.488535 | 0         |  |  |
|         |      | Shiraz-58T | 2223 | 0.833364 | 0         |  |  |
|         |      | Shiraz-71T | 2263 | 0.975531 | 0         |  |  |
|         |      | Shiraz-3T  | 242  | 0        | -0.336434 |  |  |
|         |      | Shiraz-4T  | 261  | 0        | -0.336249 |  |  |
|         |      | Shiraz-16T | 295  | 0.591657 | 0         |  |  |
|         |      | Shiraz-36T | 433  | 0        | -0.803961 |  |  |
|         |      | Shiraz-44T | 899  | 0        | -1.09697  |  |  |
|         |      | Shiraz-44T | 907  | 0        | -1.370847 |  |  |
|         |      | Shiraz-49T | 1170 | 0        | -0.967436 |  |  |
|         |      | Shiraz-9T  | 1370 | 0.690073 | 0         |  |  |
|         |      | Shiraz-18T | 1457 | 0.643204 | 0         |  |  |
|         |      | Shiraz-22T | 1673 | 0.611783 | 0         |  |  |
|         |      | Shiraz-25T | 1719 | 0.472955 | 0         |  |  |
|         |      | Shiraz-28T | 1762 | 0.562311 | 0         |  |  |
|         |      | Shiraz-29T | 1801 | 0.815343 | 0         |  |  |
|         |      | Shiraz-32T | 1870 | 0.729766 | 0         |  |  |
|         |      | Shiraz-35T | 1933 | 0.488535 | 0         |  |  |
|         |      | Shiraz-58T | 2223 | 0.833364 | 0         |  |  |
|         |      | Shiraz-71T | 2263 | 0.975531 | 0         |  |  |
| SPANXN3 | chrX | Shiraz-3T  | 242  | 0        | -0.336434 |  |  |
|         |      | Shiraz-4T  | 261  | 0        | -0.336249 |  |  |
|         |      | Shiraz-16T | 295  | 0.591657 | 0         |  |  |
|         |      | Shiraz-36T | 433  | 0        | -0.803961 |  |  |
|         |      | Shiraz-44T | 899  | 0        | -1.09697  |  |  |
|         |      | Shiraz-44T | 907  | 0        | -1.370847 |  |  |
|         |      | Shiraz-49T | 1170 | 0        | -0.967436 |  |  |
|         |      | Shiraz-9T  | 1370 | 0.690073 | 0         |  |  |
|         |      | Shiraz-18T | 1457 | 0.643204 | 0         |  |  |
|         |      | Shiraz-22T | 1673 | 0.611783 | 0         |  |  |
|         |      | Shiraz-25T | 1719 | 0.472955 | 0         |  |  |
|         |      | Shiraz-28T | 1762 | 0.562311 | 0         |  |  |
|         |      | Shiraz-29T | 1801 | 0.815343 | 0         |  |  |
|         |      | Shiraz-32T | 1870 | 0.729766 | 0         |  |  |
|         |      | Shiraz-35T | 1933 | 0.488535 | 0         |  |  |
|         |      | Shiraz-58T | 2223 | 0.833364 | 0         |  |  |
|         |      | Shiraz-71T | 2263 | 0.975531 | 0         |  |  |
|         |      | Shiraz-3T  | 242  | 0        | -0.336434 |  |  |
|         |      | Shiraz-4T  | 261  | 0        | -0.336249 |  |  |
|         |      | Shiraz-16T | 295  | 0.591657 | 0         |  |  |
|         |      | Shiraz-36T | 433  | 0        | -0.803961 |  |  |
|         |      | Shiraz-44T | 899  | 0        | -1.09697  |  |  |
|         |      | Shiraz-44T | 907  | 0        | -1.370847 |  |  |
|         |      | Shiraz-49T | 1170 | 0        | -0.967436 |  |  |

|         |      |            |      |          |           |  |  |
|---------|------|------------|------|----------|-----------|--|--|
|         |      | Shiraz-9T  | 1370 | 0.690073 | 0         |  |  |
|         |      | Shiraz-18T | 1457 | 0.643204 | 0         |  |  |
|         |      | Shiraz-22T | 1673 | 0.611783 | 0         |  |  |
|         |      | Shiraz-25T | 1719 | 0.472955 | 0         |  |  |
|         |      | Shiraz-28T | 1762 | 0.562311 | 0         |  |  |
|         |      | Shiraz-29T | 1801 | 0.815343 | 0         |  |  |
|         |      | Shiraz-32T | 1870 | 0.729766 | 0         |  |  |
|         |      | Shiraz-35T | 1933 | 0.488535 | 0         |  |  |
|         |      | Shiraz-58T | 2223 | 0.833364 | 0         |  |  |
|         |      | Shiraz-71T | 2263 | 0.975531 | 0         |  |  |
|         |      | Shiraz-3T  | 242  | 0        | -0.336434 |  |  |
|         |      | Shiraz-4T  | 261  | 0        | -0.336249 |  |  |
|         |      | Shiraz-16T | 295  | 0.591657 | 0         |  |  |
|         |      | Shiraz-36T | 433  | 0        | -0.803961 |  |  |
|         |      | Shiraz-44T | 899  | 0        | -1.09697  |  |  |
|         |      | Shiraz-44T | 907  | 0        | -1.370847 |  |  |
|         |      | Shiraz-49T | 1170 | 0        | -0.967436 |  |  |
|         |      | Shiraz-9T  | 1370 | 0.690073 | 0         |  |  |
|         |      | Shiraz-18T | 1457 | 0.643204 | 0         |  |  |
|         |      | Shiraz-22T | 1673 | 0.611783 | 0         |  |  |
|         |      | Shiraz-25T | 1719 | 0.472955 | 0         |  |  |
|         |      | Shiraz-28T | 1762 | 0.562311 | 0         |  |  |
|         |      | Shiraz-29T | 1801 | 0.815343 | 0         |  |  |
|         |      | Shiraz-32T | 1870 | 0.729766 | 0         |  |  |
|         |      | Shiraz-35T | 1933 | 0.488535 | 0         |  |  |
|         |      | Shiraz-58T | 2223 | 0.833364 | 0         |  |  |
|         |      | Shiraz-71T | 2263 | 0.975531 | 0         |  |  |
| SPANXN4 | chrX | Shiraz-3T  | 242  | 0        | -0.336434 |  |  |
|         |      | Shiraz-4T  | 261  | 0        | -0.336249 |  |  |
|         |      | Shiraz-16T | 295  | 0.591657 | 0         |  |  |
|         |      | Shiraz-36T | 433  | 0        | -0.803961 |  |  |
|         |      | Shiraz-44T | 899  | 0        | -1.09697  |  |  |
|         |      | Shiraz-44T | 907  | 0        | -1.370847 |  |  |
|         |      | Shiraz-49T | 1170 | 0        | -0.967436 |  |  |
|         |      | Shiraz-9T  | 1370 | 0.690073 | 0         |  |  |
|         |      | Shiraz-18T | 1457 | 0.643204 | 0         |  |  |
|         |      | Shiraz-22T | 1673 | 0.611783 | 0         |  |  |
|         |      | Shiraz-25T | 1719 | 0.472955 | 0         |  |  |
|         |      | Shiraz-28T | 1762 | 0.562311 | 0         |  |  |
|         |      | Shiraz-29T | 1801 | 0.815343 | 0         |  |  |
|         |      | Shiraz-32T | 1870 | 0.729766 | 0         |  |  |
|         |      | Shiraz-35T | 1933 | 0.488535 | 0         |  |  |
|         |      | Shiraz-58T | 2223 | 0.833364 | 0         |  |  |
|         |      | Shiraz-71T | 2263 | 0.975531 | 0         |  |  |
|         |      | Shiraz-3T  | 242  | 0        | -0.336434 |  |  |
|         |      | Shiraz-4T  | 261  | 0        | -0.336249 |  |  |
|         |      | Shiraz-16T | 295  | 0.591657 | 0         |  |  |

|         |      |            |      |          |           |  |  |
|---------|------|------------|------|----------|-----------|--|--|
|         |      | Shiraz-36T | 433  | 0        | -0.803961 |  |  |
|         |      | Shiraz-44T | 899  | 0        | -1.09697  |  |  |
|         |      | Shiraz-44T | 907  | 0        | -1.370847 |  |  |
|         |      | Shiraz-49T | 1170 | 0        | -0.967436 |  |  |
|         |      | Shiraz-9T  | 1370 | 0.690073 | 0         |  |  |
|         |      | Shiraz-18T | 1457 | 0.643204 | 0         |  |  |
|         |      | Shiraz-22T | 1673 | 0.611783 | 0         |  |  |
|         |      | Shiraz-25T | 1719 | 0.472955 | 0         |  |  |
|         |      | Shiraz-28T | 1762 | 0.562311 | 0         |  |  |
|         |      | Shiraz-29T | 1801 | 0.815343 | 0         |  |  |
|         |      | Shiraz-32T | 1870 | 0.729766 | 0         |  |  |
|         |      | Shiraz-35T | 1933 | 0.488535 | 0         |  |  |
|         |      | Shiraz-58T | 2223 | 0.833364 | 0         |  |  |
|         |      | Shiraz-71T | 2263 | 0.975531 | 0         |  |  |
|         |      | Shiraz-3T  | 242  | 0        | -0.336434 |  |  |
|         |      | Shiraz-4T  | 261  | 0        | -0.336249 |  |  |
|         |      | Shiraz-16T | 295  | 0.591657 | 0         |  |  |
|         |      | Shiraz-36T | 433  | 0        | -0.803961 |  |  |
|         |      | Shiraz-44T | 899  | 0        | -1.09697  |  |  |
|         |      | Shiraz-44T | 907  | 0        | -1.370847 |  |  |
|         |      | Shiraz-49T | 1170 | 0        | -0.967436 |  |  |
|         |      | Shiraz-9T  | 1370 | 0.690073 | 0         |  |  |
|         |      | Shiraz-18T | 1457 | 0.643204 | 0         |  |  |
|         |      | Shiraz-22T | 1673 | 0.611783 | 0         |  |  |
|         |      | Shiraz-25T | 1719 | 0.472955 | 0         |  |  |
|         |      | Shiraz-28T | 1762 | 0.562311 | 0         |  |  |
|         |      | Shiraz-29T | 1801 | 0.815343 | 0         |  |  |
|         |      | Shiraz-32T | 1870 | 0.729766 | 0         |  |  |
|         |      | Shiraz-35T | 1933 | 0.488535 | 0         |  |  |
|         |      | Shiraz-58T | 2223 | 0.833364 | 0         |  |  |
|         |      | Shiraz-71T | 2263 | 0.975531 | 0         |  |  |
| SPANXN5 | chrX | Shiraz-4T  | 260  | 0        | -0.324128 |  |  |
|         |      | Shiraz-16T | 294  | 0.655804 | 0         |  |  |
|         |      | Shiraz-31T | 345  | 0.103301 | 0         |  |  |
|         |      | Shiraz-36T | 431  | 0        | -0.78035  |  |  |
|         |      | Shiraz-36T | 432  | 0        | -0.6692   |  |  |
|         |      | Shiraz-44T | 891  | 0        | -0.954044 |  |  |
|         |      | Shiraz-44T | 898  | 0        | -0.515218 |  |  |
|         |      | Shiraz-49T | 1166 | 0        | -0.917235 |  |  |
|         |      | Shiraz-77T | 1282 | 0.213849 | 0         |  |  |
|         |      | Shiraz-9T  | 1368 | 0.199713 | 0         |  |  |
|         |      | Shiraz-18T | 1456 | 0.608534 | 0         |  |  |
|         |      | Shiraz-22T | 1669 | 0.695915 | 0         |  |  |
|         |      | Shiraz-25T | 1717 | 0.420447 | 0         |  |  |
|         |      | Shiraz-28T | 1760 | 0.538181 | 0         |  |  |
|         |      | Shiraz-29T | 1800 | 0.672527 | 0         |  |  |
|         |      | Shiraz-32T | 1869 | 0.776805 | 0         |  |  |

|        |      |            |      |          |           |  |
|--------|------|------------|------|----------|-----------|--|
|        |      | Shiraz-35T | 1932 | 0.507141 | 0         |  |
|        |      | Shiraz-58T | 2221 | 0.871948 | 0         |  |
|        |      | Shiraz-71T | 2260 | 0.68394  | 0         |  |
|        |      | Shiraz-71T | 2262 | 0.986748 | 0         |  |
|        |      | Shiraz-4T  | 260  | 0        | -0.324128 |  |
|        |      | Shiraz-16T | 294  | 0.655804 | 0         |  |
|        |      | Shiraz-31T | 345  | 0.103301 | 0         |  |
|        |      | Shiraz-36T | 431  | 0        | -0.78035  |  |
|        |      | Shiraz-36T | 432  | 0        | -0.6692   |  |
|        |      | Shiraz-44T | 891  | 0        | -0.954044 |  |
|        |      | Shiraz-44T | 898  | 0        | -0.515218 |  |
|        |      | Shiraz-49T | 1166 | 0        | -0.917235 |  |
|        |      | Shiraz-77T | 1282 | 0.213849 | 0         |  |
|        |      | Shiraz-9T  | 1368 | 0.199713 | 0         |  |
|        |      | Shiraz-18T | 1456 | 0.608534 | 0         |  |
|        |      | Shiraz-22T | 1669 | 0.695915 | 0         |  |
|        |      | Shiraz-25T | 1717 | 0.420447 | 0         |  |
|        |      | Shiraz-28T | 1760 | 0.538181 | 0         |  |
|        |      | Shiraz-29T | 1800 | 0.672527 | 0         |  |
|        |      | Shiraz-32T | 1869 | 0.776805 | 0         |  |
|        |      | Shiraz-35T | 1932 | 0.507141 | 0         |  |
|        |      | Shiraz-58T | 2221 | 0.871948 | 0         |  |
|        |      | Shiraz-71T | 2260 | 0.68394  | 0         |  |
|        |      | Shiraz-71T | 2262 | 0.986748 | 0         |  |
|        |      | Shiraz-4T  | 260  | 0        | -0.324128 |  |
|        |      | Shiraz-16T | 294  | 0.655804 | 0         |  |
|        |      | Shiraz-31T | 345  | 0.103301 | 0         |  |
|        |      | Shiraz-36T | 431  | 0        | -0.78035  |  |
|        |      | Shiraz-36T | 432  | 0        | -0.6692   |  |
|        |      | Shiraz-44T | 891  | 0        | -0.954044 |  |
|        |      | Shiraz-44T | 898  | 0        | -0.515218 |  |
|        |      | Shiraz-49T | 1166 | 0        | -0.917235 |  |
|        |      | Shiraz-77T | 1282 | 0.213849 | 0         |  |
|        |      | Shiraz-9T  | 1368 | 0.199713 | 0         |  |
|        |      | Shiraz-18T | 1456 | 0.608534 | 0         |  |
|        |      | Shiraz-22T | 1669 | 0.695915 | 0         |  |
|        |      | Shiraz-25T | 1717 | 0.420447 | 0         |  |
|        |      | Shiraz-28T | 1760 | 0.538181 | 0         |  |
|        |      | Shiraz-29T | 1800 | 0.672527 | 0         |  |
|        |      | Shiraz-32T | 1869 | 0.776805 | 0         |  |
|        |      | Shiraz-35T | 1932 | 0.507141 | 0         |  |
|        |      | Shiraz-58T | 2221 | 0.871948 | 0         |  |
|        |      | Shiraz-71T | 2260 | 0.68394  | 0         |  |
|        |      | Shiraz-71T | 2262 | 0.986748 | 0         |  |
| SPDYE1 | chr7 | Shiraz-3T  | 87   | 0.198593 | 0         |  |
|        |      | Shiraz-3T  | 89   | 0.678641 | 0         |  |
|        |      | Shiraz-4T  | 252  | 0.192083 | 0         |  |

|        |      |            |      |          |           |  |
|--------|------|------------|------|----------|-----------|--|
|        |      | Shiraz-36T | 376  | 0.159952 | 0         |  |
|        |      | Shiraz-44T | 632  | 0.902944 | 0         |  |
|        |      | Shiraz-46T | 942  | 0.069143 | 0         |  |
|        |      | Shiraz-77T | 1223 | 0.215647 | 0         |  |
|        |      | Shiraz-18T | 1433 | 0.250973 | 0         |  |
|        |      | Shiraz-25T | 1697 | 0.21945  | 0         |  |
|        |      | Shiraz-28T | 1734 | 0.362882 | 0         |  |
|        |      | Shiraz-29T | 1777 | 0.156747 | 0         |  |
|        |      | Shiraz-38T | 1950 | 0.265916 | 0         |  |
|        |      | Shiraz-71T | 2236 | 0.320072 | 0         |  |
|        |      | Shiraz-3T  | 87   | 0.198593 | 0         |  |
|        |      | Shiraz-3T  | 89   | 0.678641 | 0         |  |
|        |      | Shiraz-4T  | 252  | 0.192083 | 0         |  |
|        |      | Shiraz-36T | 376  | 0.159952 | 0         |  |
|        |      | Shiraz-44T | 632  | 0.902944 | 0         |  |
|        |      | Shiraz-46T | 942  | 0.069143 | 0         |  |
|        |      | Shiraz-77T | 1223 | 0.215647 | 0         |  |
|        |      | Shiraz-18T | 1433 | 0.250973 | 0         |  |
|        |      | Shiraz-25T | 1697 | 0.21945  | 0         |  |
|        |      | Shiraz-28T | 1734 | 0.362882 | 0         |  |
|        |      | Shiraz-29T | 1777 | 0.156747 | 0         |  |
|        |      | Shiraz-38T | 1950 | 0.265916 | 0         |  |
|        |      | Shiraz-71T | 2236 | 0.320072 | 0         |  |
|        |      | Shiraz-3T  | 87   | 0.198593 | 0         |  |
|        |      | Shiraz-3T  | 89   | 0.678641 | 0         |  |
|        |      | Shiraz-4T  | 252  | 0.192083 | 0         |  |
|        |      | Shiraz-36T | 376  | 0.159952 | 0         |  |
|        |      | Shiraz-44T | 632  | 0.902944 | 0         |  |
|        |      | Shiraz-46T | 942  | 0.069143 | 0         |  |
|        |      | Shiraz-77T | 1223 | 0.215647 | 0         |  |
|        |      | Shiraz-18T | 1433 | 0.250973 | 0         |  |
|        |      | Shiraz-25T | 1697 | 0.21945  | 0         |  |
|        |      | Shiraz-28T | 1734 | 0.362882 | 0         |  |
|        |      | Shiraz-29T | 1777 | 0.156747 | 0         |  |
|        |      | Shiraz-38T | 1950 | 0.265916 | 0         |  |
|        |      | Shiraz-71T | 2236 | 0.320072 | 0         |  |
| SPDYE2 | chr7 | Shiraz-3T  | 90   | 0.219276 | 0         |  |
|        |      | Shiraz-4T  | 253  | 0.372918 | 0         |  |
|        |      | Shiraz-36T | 378  | 0.179558 | 0         |  |
|        |      | Shiraz-46T | 943  | 0.093799 | 0         |  |
|        |      | Shiraz-46T | 946  | 0.299835 | 0         |  |
|        |      | Shiraz-77T | 1225 | 0        | -0.117922 |  |
|        |      | Shiraz-9T  | 1324 | 0.679266 | 0         |  |
|        |      | Shiraz-18T | 1434 | 0.244465 | 0         |  |
|        |      | Shiraz-22T | 1549 | 0        | -0.319623 |  |
|        |      | Shiraz-25T | 1698 | 0.21835  | 0         |  |
|        |      | Shiraz-28T | 1735 | 0.350744 | 0         |  |

|        |      |            |      |          |           |  |
|--------|------|------------|------|----------|-----------|--|
|        |      | Shiraz-29T | 1778 | 0.120767 | 0         |  |
|        |      | Shiraz-32T | 1833 | 0.551336 | 0         |  |
|        |      | Shiraz-38T | 1951 | 0.250891 | 0         |  |
|        |      | Shiraz-53T | 2078 | 0.287202 | 0         |  |
|        |      | Shiraz-71T | 2238 | 0.603631 | 0         |  |
|        |      | Shiraz-3T  | 90   | 0.219276 | 0         |  |
|        |      | Shiraz-4T  | 253  | 0.372918 | 0         |  |
|        |      | Shiraz-36T | 378  | 0.179558 | 0         |  |
|        |      | Shiraz-46T | 943  | 0.093799 | 0         |  |
|        |      | Shiraz-46T | 946  | 0.299835 | 0         |  |
|        |      | Shiraz-77T | 1225 | 0        | -0.117922 |  |
|        |      | Shiraz-9T  | 1324 | 0.679266 | 0         |  |
|        |      | Shiraz-18T | 1434 | 0.244465 | 0         |  |
|        |      | Shiraz-22T | 1549 | 0        | -0.319623 |  |
|        |      | Shiraz-25T | 1698 | 0.21835  | 0         |  |
|        |      | Shiraz-28T | 1735 | 0.350744 | 0         |  |
|        |      | Shiraz-29T | 1778 | 0.120767 | 0         |  |
|        |      | Shiraz-32T | 1833 | 0.551336 | 0         |  |
|        |      | Shiraz-38T | 1951 | 0.250891 | 0         |  |
|        |      | Shiraz-53T | 2078 | 0.287202 | 0         |  |
|        |      | Shiraz-71T | 2238 | 0.603631 | 0         |  |
|        |      | Shiraz-3T  | 90   | 0.219276 | 0         |  |
|        |      | Shiraz-4T  | 253  | 0.372918 | 0         |  |
|        |      | Shiraz-36T | 378  | 0.179558 | 0         |  |
|        |      | Shiraz-46T | 943  | 0.093799 | 0         |  |
|        |      | Shiraz-46T | 946  | 0.299835 | 0         |  |
|        |      | Shiraz-77T | 1225 | 0        | -0.117922 |  |
|        |      | Shiraz-9T  | 1324 | 0.679266 | 0         |  |
|        |      | Shiraz-18T | 1434 | 0.244465 | 0         |  |
|        |      | Shiraz-22T | 1549 | 0        | -0.319623 |  |
|        |      | Shiraz-25T | 1698 | 0.21835  | 0         |  |
|        |      | Shiraz-28T | 1735 | 0.350744 | 0         |  |
|        |      | Shiraz-29T | 1778 | 0.120767 | 0         |  |
|        |      | Shiraz-32T | 1833 | 0.551336 | 0         |  |
|        |      | Shiraz-38T | 1951 | 0.250891 | 0         |  |
|        |      | Shiraz-53T | 2078 | 0.287202 | 0         |  |
|        |      | Shiraz-71T | 2238 | 0.603631 | 0         |  |
| SPDYE3 | chr7 | Shiraz-3T  | 90   | 0.219276 | 0         |  |
|        |      | Shiraz-3T  | 94   | 0.74735  | 0         |  |
|        |      | Shiraz-4T  | 253  | 0.372918 | 0         |  |
|        |      | Shiraz-31T | 316  | 0.219196 | 0         |  |
|        |      | Shiraz-36T | 378  | 0.179558 | 0         |  |
|        |      | Shiraz-36T | 381  | 0.332628 | 0         |  |
|        |      | Shiraz-44T | 639  | 1.035032 | 0         |  |
|        |      | Shiraz-46T | 943  | 0.093799 | 0         |  |
|        |      | Shiraz-46T | 946  | 0.299835 | 0         |  |
|        |      | Shiraz-47T | 1030 | 0.257728 | 0         |  |

|  |            |      |          |           |  |
|--|------------|------|----------|-----------|--|
|  | Shiraz-49T | 1120 | 0.281656 | 0         |  |
|  | Shiraz-77T | 1225 | 0        | -0.117922 |  |
|  | Shiraz-77T | 1227 | 0.196445 | 0         |  |
|  | Shiraz-9T  | 1324 | 0.679266 | 0         |  |
|  | Shiraz-18T | 1434 | 0.244465 | 0         |  |
|  | Shiraz-22T | 1549 | 0        | -0.319623 |  |
|  | Shiraz-22T | 1551 | 0.324011 | 0         |  |
|  | Shiraz-25T | 1698 | 0.21835  | 0         |  |
|  | Shiraz-28T | 1735 | 0.350744 | 0         |  |
|  | Shiraz-29T | 1778 | 0.120767 | 0         |  |
|  | Shiraz-32T | 1833 | 0.551336 | 0         |  |
|  | Shiraz-32T | 1834 | 1.485392 | 0         |  |
|  | Shiraz-38T | 1951 | 0.250891 | 0         |  |
|  | Shiraz-53T | 2078 | 0.287202 | 0         |  |
|  | Shiraz-58T | 2160 | 0.399007 | 0         |  |
|  | Shiraz-71T | 2238 | 0.603631 | 0         |  |
|  | Shiraz-3T  | 90   | 0.219276 | 0         |  |
|  | Shiraz-3T  | 94   | 0.74735  | 0         |  |
|  | Shiraz-4T  | 253  | 0.372918 | 0         |  |
|  | Shiraz-31T | 316  | 0.219196 | 0         |  |
|  | Shiraz-36T | 378  | 0.179558 | 0         |  |
|  | Shiraz-36T | 381  | 0.332628 | 0         |  |
|  | Shiraz-44T | 639  | 1.035032 | 0         |  |
|  | Shiraz-46T | 943  | 0.093799 | 0         |  |
|  | Shiraz-46T | 946  | 0.299835 | 0         |  |
|  | Shiraz-47T | 1030 | 0.257728 | 0         |  |
|  | Shiraz-49T | 1120 | 0.281656 | 0         |  |
|  | Shiraz-77T | 1225 | 0        | -0.117922 |  |
|  | Shiraz-77T | 1227 | 0.196445 | 0         |  |
|  | Shiraz-9T  | 1324 | 0.679266 | 0         |  |
|  | Shiraz-18T | 1434 | 0.244465 | 0         |  |
|  | Shiraz-22T | 1549 | 0        | -0.319623 |  |
|  | Shiraz-22T | 1551 | 0.324011 | 0         |  |
|  | Shiraz-25T | 1698 | 0.21835  | 0         |  |
|  | Shiraz-28T | 1735 | 0.350744 | 0         |  |
|  | Shiraz-29T | 1778 | 0.120767 | 0         |  |
|  | Shiraz-32T | 1833 | 0.551336 | 0         |  |
|  | Shiraz-32T | 1834 | 1.485392 | 0         |  |
|  | Shiraz-38T | 1951 | 0.250891 | 0         |  |
|  | Shiraz-53T | 2078 | 0.287202 | 0         |  |
|  | Shiraz-58T | 2160 | 0.399007 | 0         |  |
|  | Shiraz-71T | 2238 | 0.603631 | 0         |  |
|  | Shiraz-3T  | 90   | 0.219276 | 0         |  |
|  | Shiraz-3T  | 94   | 0.74735  | 0         |  |
|  | Shiraz-4T  | 253  | 0.372918 | 0         |  |
|  | Shiraz-31T | 316  | 0.219196 | 0         |  |
|  | Shiraz-36T | 378  | 0.179558 | 0         |  |



|        |      |            |      |          |           |  |  |
|--------|------|------------|------|----------|-----------|--|--|
|        |      | Shiraz-36T | 381  | 0.332628 | 0         |  |  |
|        |      | Shiraz-44T | 639  | 1.035032 | 0         |  |  |
|        |      | Shiraz-46T | 943  | 0.093799 | 0         |  |  |
|        |      | Shiraz-46T | 946  | 0.299835 | 0         |  |  |
|        |      | Shiraz-47T | 1030 | 0.257728 | 0         |  |  |
|        |      | Shiraz-49T | 1120 | 0.281656 | 0         |  |  |
|        |      | Shiraz-77T | 1225 | 0        | -0.117922 |  |  |
|        |      | Shiraz-77T | 1227 | 0.196445 | 0         |  |  |
|        |      | Shiraz-9T  | 1324 | 0.679266 | 0         |  |  |
|        |      | Shiraz-18T | 1434 | 0.244465 | 0         |  |  |
|        |      | Shiraz-22T | 1549 | 0        | -0.319623 |  |  |
|        |      | Shiraz-22T | 1551 | 0.324011 | 0         |  |  |
|        |      | Shiraz-25T | 1698 | 0.21835  | 0         |  |  |
|        |      | Shiraz-28T | 1735 | 0.350744 | 0         |  |  |
|        |      | Shiraz-29T | 1778 | 0.120767 | 0         |  |  |
|        |      | Shiraz-32T | 1833 | 0.551336 | 0         |  |  |
|        |      | Shiraz-32T | 1834 | 1.485392 | 0         |  |  |
|        |      | Shiraz-38T | 1951 | 0.250891 | 0         |  |  |
|        |      | Shiraz-53T | 2078 | 0.287202 | 0         |  |  |
|        |      | Shiraz-58T | 2160 | 0.399007 | 0         |  |  |
|        |      | Shiraz-71T | 2238 | 0.603631 | 0         |  |  |
| SPDYE6 | chr7 | Shiraz-3T  | 90   | 0.219276 | 0         |  |  |
|        |      | Shiraz-3T  | 94   | 0.74735  | 0         |  |  |
|        |      | Shiraz-4T  | 253  | 0.372918 | 0         |  |  |
|        |      | Shiraz-31T | 316  | 0.219196 | 0         |  |  |
|        |      | Shiraz-36T | 378  | 0.179558 | 0         |  |  |
|        |      | Shiraz-36T | 381  | 0.332628 | 0         |  |  |
|        |      | Shiraz-44T | 639  | 1.035032 | 0         |  |  |
|        |      | Shiraz-46T | 943  | 0.093799 | 0         |  |  |
|        |      | Shiraz-46T | 946  | 0.299835 | 0         |  |  |
|        |      | Shiraz-47T | 1030 | 0.257728 | 0         |  |  |
|        |      | Shiraz-49T | 1120 | 0.281656 | 0         |  |  |
|        |      | Shiraz-77T | 1225 | 0        | -0.117922 |  |  |
|        |      | Shiraz-77T | 1227 | 0.196445 | 0         |  |  |
|        |      | Shiraz-9T  | 1324 | 0.679266 | 0         |  |  |
|        |      | Shiraz-18T | 1434 | 0.244465 | 0         |  |  |
|        |      | Shiraz-22T | 1549 | 0        | -0.319623 |  |  |
|        |      | Shiraz-22T | 1551 | 0.324011 | 0         |  |  |
|        |      | Shiraz-25T | 1698 | 0.21835  | 0         |  |  |
|        |      | Shiraz-28T | 1735 | 0.350744 | 0         |  |  |
|        |      | Shiraz-29T | 1778 | 0.120767 | 0         |  |  |
|        |      | Shiraz-32T | 1833 | 0.551336 | 0         |  |  |
|        |      | Shiraz-38T | 1951 | 0.250891 | 0         |  |  |
|        |      | Shiraz-53T | 2078 | 0.287202 | 0         |  |  |
|        |      | Shiraz-58T | 2160 | 0.399007 | 0         |  |  |
|        |      | Shiraz-71T | 2238 | 0.603631 | 0         |  |  |
|        |      | Shiraz-3T  | 90   | 0.219276 | 0         |  |  |

|  |            |      |          |           |  |
|--|------------|------|----------|-----------|--|
|  | Shiraz-3T  | 94   | 0.74735  | 0         |  |
|  | Shiraz-4T  | 253  | 0.372918 | 0         |  |
|  | Shiraz-31T | 316  | 0.219196 | 0         |  |
|  | Shiraz-36T | 378  | 0.179558 | 0         |  |
|  | Shiraz-36T | 381  | 0.332628 | 0         |  |
|  | Shiraz-44T | 639  | 1.035032 | 0         |  |
|  | Shiraz-46T | 943  | 0.093799 | 0         |  |
|  | Shiraz-46T | 946  | 0.299835 | 0         |  |
|  | Shiraz-47T | 1030 | 0.257728 | 0         |  |
|  | Shiraz-49T | 1120 | 0.281656 | 0         |  |
|  | Shiraz-77T | 1225 | 0        | -0.117922 |  |
|  | Shiraz-77T | 1227 | 0.196445 | 0         |  |
|  | Shiraz-9T  | 1324 | 0.679266 | 0         |  |
|  | Shiraz-18T | 1434 | 0.244465 | 0         |  |
|  | Shiraz-22T | 1549 | 0        | -0.319623 |  |
|  | Shiraz-22T | 1551 | 0.324011 | 0         |  |
|  | Shiraz-25T | 1698 | 0.21835  | 0         |  |
|  | Shiraz-28T | 1735 | 0.350744 | 0         |  |
|  | Shiraz-29T | 1778 | 0.120767 | 0         |  |
|  | Shiraz-32T | 1833 | 0.551336 | 0         |  |
|  | Shiraz-38T | 1951 | 0.250891 | 0         |  |
|  | Shiraz-53T | 2078 | 0.287202 | 0         |  |
|  | Shiraz-58T | 2160 | 0.399007 | 0         |  |
|  | Shiraz-71T | 2238 | 0.603631 | 0         |  |
|  | Shiraz-3T  | 90   | 0.219276 | 0         |  |
|  | Shiraz-3T  | 94   | 0.74735  | 0         |  |
|  | Shiraz-4T  | 253  | 0.372918 | 0         |  |
|  | Shiraz-31T | 316  | 0.219196 | 0         |  |
|  | Shiraz-36T | 378  | 0.179558 | 0         |  |
|  | Shiraz-36T | 381  | 0.332628 | 0         |  |
|  | Shiraz-44T | 639  | 1.035032 | 0         |  |
|  | Shiraz-46T | 943  | 0.093799 | 0         |  |
|  | Shiraz-46T | 946  | 0.299835 | 0         |  |
|  | Shiraz-47T | 1030 | 0.257728 | 0         |  |
|  | Shiraz-49T | 1120 | 0.281656 | 0         |  |
|  | Shiraz-77T | 1225 | 0        | -0.117922 |  |
|  | Shiraz-77T | 1227 | 0.196445 | 0         |  |
|  | Shiraz-9T  | 1324 | 0.679266 | 0         |  |
|  | Shiraz-18T | 1434 | 0.244465 | 0         |  |
|  | Shiraz-22T | 1549 | 0        | -0.319623 |  |
|  | Shiraz-22T | 1551 | 0.324011 | 0         |  |
|  | Shiraz-25T | 1698 | 0.21835  | 0         |  |
|  | Shiraz-28T | 1735 | 0.350744 | 0         |  |
|  | Shiraz-29T | 1778 | 0.120767 | 0         |  |
|  | Shiraz-32T | 1833 | 0.551336 | 0         |  |
|  | Shiraz-38T | 1951 | 0.250891 | 0         |  |
|  | Shiraz-53T | 2078 | 0.287202 | 0         |  |

|       |      |            |      |          |           |  |
|-------|------|------------|------|----------|-----------|--|
|       |      | Shiraz-58T | 2160 | 0.399007 | 0         |  |
|       |      | Shiraz-71T | 2238 | 0.603631 | 0         |  |
| SPEF2 | chr5 | Shiraz-4T  | 250  | 0.262252 | 0         |  |
|       |      | Shiraz-4T  | 250  | 0.262252 | 0         |  |
|       |      | Shiraz-16T | 266  | 0.321724 | 0         |  |
|       |      | Shiraz-16T | 266  | 0.321724 | 0         |  |
|       |      | Shiraz-44T | 591  | 0        | -0.233934 |  |
|       |      | Shiraz-44T | 591  | 0        | -0.233934 |  |
|       |      | Shiraz-18T | 1429 | 0        | -0.314125 |  |
|       |      | Shiraz-18T | 1429 | 0        | -0.314125 |  |
|       |      | Shiraz-22T | 1522 | 0        | -0.322688 |  |
|       |      | Shiraz-22T | 1522 | 0        | -0.322688 |  |
|       |      | Shiraz-25T | 1694 | 0.201602 | 0         |  |
|       |      | Shiraz-25T | 1694 | 0.201602 | 0         |  |
|       |      | Shiraz-28T | 1731 | 0.295447 | 0         |  |
|       |      | Shiraz-28T | 1731 | 0.295447 | 0         |  |
|       |      | Shiraz-29T | 1773 | 0.090981 | 0         |  |
|       |      | Shiraz-29T | 1773 | 0.090981 | 0         |  |
|       |      | Shiraz-40T | 2016 | 0.376634 | 0         |  |
|       |      | Shiraz-40T | 2016 | 0.376634 | 0         |  |
|       |      | Shiraz-4T  | 250  | 0.262252 | 0         |  |
|       |      | Shiraz-4T  | 250  | 0.262252 | 0         |  |
|       |      | Shiraz-16T | 266  | 0.321724 | 0         |  |
|       |      | Shiraz-16T | 266  | 0.321724 | 0         |  |
|       |      | Shiraz-44T | 591  | 0        | -0.233934 |  |
|       |      | Shiraz-44T | 591  | 0        | -0.233934 |  |
|       |      | Shiraz-18T | 1429 | 0        | -0.314125 |  |
|       |      | Shiraz-18T | 1429 | 0        | -0.314125 |  |
|       |      | Shiraz-22T | 1522 | 0        | -0.322688 |  |
|       |      | Shiraz-22T | 1522 | 0        | -0.322688 |  |
|       |      | Shiraz-25T | 1694 | 0.201602 | 0         |  |
|       |      | Shiraz-25T | 1694 | 0.201602 | 0         |  |
|       |      | Shiraz-28T | 1731 | 0.295447 | 0         |  |
|       |      | Shiraz-28T | 1731 | 0.295447 | 0         |  |
|       |      | Shiraz-29T | 1773 | 0.090981 | 0         |  |
|       |      | Shiraz-29T | 1773 | 0.090981 | 0         |  |
|       |      | Shiraz-40T | 2016 | 0.376634 | 0         |  |
|       |      | Shiraz-40T | 2016 | 0.376634 | 0         |  |
|       |      | Shiraz-4T  | 250  | 0.262252 | 0         |  |
|       |      | Shiraz-4T  | 250  | 0.262252 | 0         |  |
|       |      | Shiraz-16T | 266  | 0.321724 | 0         |  |
|       |      | Shiraz-16T | 266  | 0.321724 | 0         |  |
|       |      | Shiraz-44T | 591  | 0        | -0.233934 |  |
|       |      | Shiraz-44T | 591  | 0        | -0.233934 |  |
|       |      | Shiraz-18T | 1429 | 0        | -0.314125 |  |
|       |      | Shiraz-18T | 1429 | 0        | -0.314125 |  |
|       |      | Shiraz-22T | 1522 | 0        | -0.322688 |  |

|        |      |            |      |          |           |  |  |
|--------|------|------------|------|----------|-----------|--|--|
|        |      | Shiraz-22T | 1522 | 0        | -0.322688 |  |  |
|        |      | Shiraz-25T | 1694 | 0.201602 | 0         |  |  |
|        |      | Shiraz-25T | 1694 | 0.201602 | 0         |  |  |
|        |      | Shiraz-28T | 1731 | 0.295447 | 0         |  |  |
|        |      | Shiraz-28T | 1731 | 0.295447 | 0         |  |  |
|        |      | Shiraz-29T | 1773 | 0.090981 | 0         |  |  |
|        |      | Shiraz-29T | 1773 | 0.090981 | 0         |  |  |
|        |      | Shiraz-40T | 2016 | 0.376634 | 0         |  |  |
|        |      | Shiraz-40T | 2016 | 0.376634 | 0         |  |  |
| SPIN2A | chrX | Shiraz-3T  | 240  | 0        | -0.346245 |  |  |
|        |      | Shiraz-4T  | 260  | 0        | -0.324128 |  |  |
|        |      | Shiraz-16T | 294  | 0.655804 | 0         |  |  |
|        |      | Shiraz-36T | 431  | 0        | -0.78035  |  |  |
|        |      | Shiraz-44T | 891  | 0        | -0.954044 |  |  |
|        |      | Shiraz-49T | 1166 | 0        | -0.917235 |  |  |
|        |      | Shiraz-18T | 1456 | 0.608534 | 0         |  |  |
|        |      | Shiraz-22T | 1669 | 0.695915 | 0         |  |  |
|        |      | Shiraz-25T | 1717 | 0.420447 | 0         |  |  |
|        |      | Shiraz-28T | 1760 | 0.538181 | 0         |  |  |
|        |      | Shiraz-29T | 1800 | 0.672527 | 0         |  |  |
|        |      | Shiraz-32T | 1869 | 0.776805 | 0         |  |  |
|        |      | Shiraz-35T | 1932 | 0.507141 | 0         |  |  |
|        |      | Shiraz-58T | 2221 | 0.871948 | 0         |  |  |
|        |      | Shiraz-71T | 2260 | 0.68394  | 0         |  |  |
|        |      | Shiraz-71T | 2262 | 0.986748 | 0         |  |  |
|        |      | Shiraz-3T  | 240  | 0        | -0.346245 |  |  |
|        |      | Shiraz-4T  | 260  | 0        | -0.324128 |  |  |
|        |      | Shiraz-16T | 294  | 0.655804 | 0         |  |  |
|        |      | Shiraz-36T | 431  | 0        | -0.78035  |  |  |
|        |      | Shiraz-44T | 891  | 0        | -0.954044 |  |  |
|        |      | Shiraz-49T | 1166 | 0        | -0.917235 |  |  |
|        |      | Shiraz-18T | 1456 | 0.608534 | 0         |  |  |
|        |      | Shiraz-22T | 1669 | 0.695915 | 0         |  |  |
|        |      | Shiraz-25T | 1717 | 0.420447 | 0         |  |  |
|        |      | Shiraz-28T | 1760 | 0.538181 | 0         |  |  |
|        |      | Shiraz-29T | 1800 | 0.672527 | 0         |  |  |
|        |      | Shiraz-32T | 1869 | 0.776805 | 0         |  |  |
|        |      | Shiraz-35T | 1932 | 0.507141 | 0         |  |  |
|        |      | Shiraz-58T | 2221 | 0.871948 | 0         |  |  |
|        |      | Shiraz-71T | 2260 | 0.68394  | 0         |  |  |
|        |      | Shiraz-71T | 2262 | 0.986748 | 0         |  |  |
|        |      | Shiraz-3T  | 240  | 0        | -0.346245 |  |  |
|        |      | Shiraz-4T  | 260  | 0        | -0.324128 |  |  |
|        |      | Shiraz-16T | 294  | 0.655804 | 0         |  |  |
|        |      | Shiraz-36T | 431  | 0        | -0.78035  |  |  |
|        |      | Shiraz-44T | 891  | 0        | -0.954044 |  |  |
|        |      | Shiraz-49T | 1166 | 0        | -0.917235 |  |  |

|        |      |            |      |          |           |  |  |
|--------|------|------------|------|----------|-----------|--|--|
|        |      | Shiraz-18T | 1456 | 0.608534 | 0         |  |  |
|        |      | Shiraz-22T | 1669 | 0.695915 | 0         |  |  |
|        |      | Shiraz-25T | 1717 | 0.420447 | 0         |  |  |
|        |      | Shiraz-28T | 1760 | 0.538181 | 0         |  |  |
|        |      | Shiraz-29T | 1800 | 0.672527 | 0         |  |  |
|        |      | Shiraz-32T | 1869 | 0.776805 | 0         |  |  |
|        |      | Shiraz-35T | 1932 | 0.507141 | 0         |  |  |
|        |      | Shiraz-58T | 2221 | 0.871948 | 0         |  |  |
|        |      | Shiraz-71T | 2260 | 0.68394  | 0         |  |  |
|        |      | Shiraz-71T | 2262 | 0.986748 | 0         |  |  |
| SPIN2B | chrX | Shiraz-3T  | 240  | 0        | -0.346245 |  |  |
|        |      | Shiraz-4T  | 260  | 0        | -0.324128 |  |  |
|        |      | Shiraz-16T | 294  | 0.655804 | 0         |  |  |
|        |      | Shiraz-36T | 431  | 0        | -0.78035  |  |  |
|        |      | Shiraz-44T | 891  | 0        | -0.954044 |  |  |
|        |      | Shiraz-49T | 1166 | 0        | -0.917235 |  |  |
|        |      | Shiraz-18T | 1456 | 0.608534 | 0         |  |  |
|        |      | Shiraz-22T | 1669 | 0.695915 | 0         |  |  |
|        |      | Shiraz-25T | 1717 | 0.420447 | 0         |  |  |
|        |      | Shiraz-28T | 1760 | 0.538181 | 0         |  |  |
|        |      | Shiraz-29T | 1800 | 0.672527 | 0         |  |  |
|        |      | Shiraz-32T | 1869 | 0.776805 | 0         |  |  |
|        |      | Shiraz-35T | 1932 | 0.507141 | 0         |  |  |
|        |      | Shiraz-58T | 2221 | 0.871948 | 0         |  |  |
|        |      | Shiraz-71T | 2260 | 0.68394  | 0         |  |  |
|        |      | Shiraz-71T | 2262 | 0.986748 | 0         |  |  |
|        |      | Shiraz-3T  | 240  | 0        | -0.346245 |  |  |
|        |      | Shiraz-4T  | 260  | 0        | -0.324128 |  |  |
|        |      | Shiraz-16T | 294  | 0.655804 | 0         |  |  |
|        |      | Shiraz-36T | 431  | 0        | -0.78035  |  |  |
|        |      | Shiraz-44T | 891  | 0        | -0.954044 |  |  |
|        |      | Shiraz-49T | 1166 | 0        | -0.917235 |  |  |
|        |      | Shiraz-18T | 1456 | 0.608534 | 0         |  |  |
|        |      | Shiraz-22T | 1669 | 0.695915 | 0         |  |  |
|        |      | Shiraz-25T | 1717 | 0.420447 | 0         |  |  |
|        |      | Shiraz-28T | 1760 | 0.538181 | 0         |  |  |
|        |      | Shiraz-29T | 1800 | 0.672527 | 0         |  |  |
|        |      | Shiraz-32T | 1869 | 0.776805 | 0         |  |  |
|        |      | Shiraz-35T | 1932 | 0.507141 | 0         |  |  |
|        |      | Shiraz-58T | 2221 | 0.871948 | 0         |  |  |
|        |      | Shiraz-71T | 2260 | 0.68394  | 0         |  |  |
|        |      | Shiraz-71T | 2262 | 0.986748 | 0         |  |  |
|        |      | Shiraz-3T  | 240  | 0        | -0.346245 |  |  |
|        |      | Shiraz-4T  | 260  | 0        | -0.324128 |  |  |
|        |      | Shiraz-16T | 294  | 0.655804 | 0         |  |  |
|        |      | Shiraz-36T | 431  | 0        | -0.78035  |  |  |
|        |      | Shiraz-44T | 891  | 0        | -0.954044 |  |  |

|       |      |            |      |          |           |  |  |
|-------|------|------------|------|----------|-----------|--|--|
|       |      | Shiraz-49T | 1166 | 0        | -0.917235 |  |  |
|       |      | Shiraz-18T | 1456 | 0.608534 | 0         |  |  |
|       |      | Shiraz-22T | 1669 | 0.695915 | 0         |  |  |
|       |      | Shiraz-25T | 1717 | 0.420447 | 0         |  |  |
|       |      | Shiraz-28T | 1760 | 0.538181 | 0         |  |  |
|       |      | Shiraz-29T | 1800 | 0.672527 | 0         |  |  |
|       |      | Shiraz-32T | 1869 | 0.776805 | 0         |  |  |
|       |      | Shiraz-35T | 1932 | 0.507141 | 0         |  |  |
|       |      | Shiraz-58T | 2221 | 0.871948 | 0         |  |  |
|       |      | Shiraz-71T | 2260 | 0.68394  | 0         |  |  |
|       |      | Shiraz-71T | 2262 | 0.986748 | 0         |  |  |
| SPIN3 | chrX | Shiraz-3T  | 240  | 0        | -0.346245 |  |  |
|       |      | Shiraz-3T  | 240  | 0        | -0.346245 |  |  |
|       |      | Shiraz-4T  | 260  | 0        | -0.324128 |  |  |
|       |      | Shiraz-4T  | 260  | 0        | -0.324128 |  |  |
|       |      | Shiraz-16T | 294  | 0.655804 | 0         |  |  |
|       |      | Shiraz-16T | 294  | 0.655804 | 0         |  |  |
|       |      | Shiraz-36T | 431  | 0        | -0.78035  |  |  |
|       |      | Shiraz-36T | 431  | 0        | -0.78035  |  |  |
|       |      | Shiraz-44T | 891  | 0        | -0.954044 |  |  |
|       |      | Shiraz-44T | 891  | 0        | -0.954044 |  |  |
|       |      | Shiraz-49T | 1166 | 0        | -0.917235 |  |  |
|       |      | Shiraz-49T | 1166 | 0        | -0.917235 |  |  |
|       |      | Shiraz-18T | 1456 | 0.608534 | 0         |  |  |
|       |      | Shiraz-18T | 1456 | 0.608534 | 0         |  |  |
|       |      | Shiraz-22T | 1669 | 0.695915 | 0         |  |  |
|       |      | Shiraz-22T | 1669 | 0.695915 | 0         |  |  |
|       |      | Shiraz-25T | 1717 | 0.420447 | 0         |  |  |
|       |      | Shiraz-25T | 1717 | 0.420447 | 0         |  |  |
|       |      | Shiraz-28T | 1760 | 0.538181 | 0         |  |  |
|       |      | Shiraz-28T | 1760 | 0.538181 | 0         |  |  |
|       |      | Shiraz-29T | 1800 | 0.672527 | 0         |  |  |
|       |      | Shiraz-29T | 1800 | 0.672527 | 0         |  |  |
|       |      | Shiraz-32T | 1869 | 0.776805 | 0         |  |  |
|       |      | Shiraz-32T | 1869 | 0.776805 | 0         |  |  |
|       |      | Shiraz-35T | 1932 | 0.507141 | 0         |  |  |
|       |      | Shiraz-35T | 1932 | 0.507141 | 0         |  |  |
|       |      | Shiraz-58T | 2221 | 0.871948 | 0         |  |  |
|       |      | Shiraz-58T | 2221 | 0.871948 | 0         |  |  |
|       |      | Shiraz-71T | 2260 | 0.68394  | 0         |  |  |
|       |      | Shiraz-71T | 2260 | 0.68394  | 0         |  |  |
|       |      | Shiraz-71T | 2262 | 0.986748 | 0         |  |  |
|       |      | Shiraz-71T | 2262 | 0.986748 | 0         |  |  |
|       |      | Shiraz-3T  | 240  | 0        | -0.346245 |  |  |
|       |      | Shiraz-3T  | 240  | 0        | -0.346245 |  |  |
|       |      | Shiraz-4T  | 260  | 0        | -0.324128 |  |  |
|       |      | Shiraz-4T  | 260  | 0        | -0.324128 |  |  |

|  |  |            |      |          |           |  |  |
|--|--|------------|------|----------|-----------|--|--|
|  |  | Shiraz-16T | 294  | 0.655804 | 0         |  |  |
|  |  | Shiraz-16T | 294  | 0.655804 | 0         |  |  |
|  |  | Shiraz-36T | 431  | 0        | -0.78035  |  |  |
|  |  | Shiraz-36T | 431  | 0        | -0.78035  |  |  |
|  |  | Shiraz-44T | 891  | 0        | -0.954044 |  |  |
|  |  | Shiraz-44T | 891  | 0        | -0.954044 |  |  |
|  |  | Shiraz-49T | 1166 | 0        | -0.917235 |  |  |
|  |  | Shiraz-49T | 1166 | 0        | -0.917235 |  |  |
|  |  | Shiraz-18T | 1456 | 0.608534 | 0         |  |  |
|  |  | Shiraz-18T | 1456 | 0.608534 | 0         |  |  |
|  |  | Shiraz-22T | 1669 | 0.695915 | 0         |  |  |
|  |  | Shiraz-22T | 1669 | 0.695915 | 0         |  |  |
|  |  | Shiraz-25T | 1717 | 0.420447 | 0         |  |  |
|  |  | Shiraz-25T | 1717 | 0.420447 | 0         |  |  |
|  |  | Shiraz-28T | 1760 | 0.538181 | 0         |  |  |
|  |  | Shiraz-28T | 1760 | 0.538181 | 0         |  |  |
|  |  | Shiraz-29T | 1800 | 0.672527 | 0         |  |  |
|  |  | Shiraz-29T | 1800 | 0.672527 | 0         |  |  |
|  |  | Shiraz-32T | 1869 | 0.776805 | 0         |  |  |
|  |  | Shiraz-32T | 1869 | 0.776805 | 0         |  |  |
|  |  | Shiraz-35T | 1932 | 0.507141 | 0         |  |  |
|  |  | Shiraz-35T | 1932 | 0.507141 | 0         |  |  |
|  |  | Shiraz-58T | 2221 | 0.871948 | 0         |  |  |
|  |  | Shiraz-58T | 2221 | 0.871948 | 0         |  |  |
|  |  | Shiraz-71T | 2260 | 0.68394  | 0         |  |  |
|  |  | Shiraz-71T | 2260 | 0.68394  | 0         |  |  |
|  |  | Shiraz-71T | 2262 | 0.986748 | 0         |  |  |
|  |  | Shiraz-71T | 2262 | 0.986748 | 0         |  |  |
|  |  | Shiraz-3T  | 240  | 0        | -0.346245 |  |  |
|  |  | Shiraz-3T  | 240  | 0        | -0.346245 |  |  |
|  |  | Shiraz-4T  | 260  | 0        | -0.324128 |  |  |
|  |  | Shiraz-4T  | 260  | 0        | -0.324128 |  |  |
|  |  | Shiraz-16T | 294  | 0.655804 | 0         |  |  |
|  |  | Shiraz-16T | 294  | 0.655804 | 0         |  |  |
|  |  | Shiraz-36T | 431  | 0        | -0.78035  |  |  |
|  |  | Shiraz-36T | 431  | 0        | -0.78035  |  |  |
|  |  | Shiraz-44T | 891  | 0        | -0.954044 |  |  |
|  |  | Shiraz-44T | 891  | 0        | -0.954044 |  |  |
|  |  | Shiraz-49T | 1166 | 0        | -0.917235 |  |  |
|  |  | Shiraz-49T | 1166 | 0        | -0.917235 |  |  |
|  |  | Shiraz-18T | 1456 | 0.608534 | 0         |  |  |
|  |  | Shiraz-18T | 1456 | 0.608534 | 0         |  |  |
|  |  | Shiraz-22T | 1669 | 0.695915 | 0         |  |  |
|  |  | Shiraz-22T | 1669 | 0.695915 | 0         |  |  |
|  |  | Shiraz-25T | 1717 | 0.420447 | 0         |  |  |
|  |  | Shiraz-25T | 1717 | 0.420447 | 0         |  |  |
|  |  | Shiraz-28T | 1760 | 0.538181 | 0         |  |  |

|       |      |            |      |          |           |  |
|-------|------|------------|------|----------|-----------|--|
|       |      | Shiraz-28T | 1760 | 0.538181 | 0         |  |
|       |      | Shiraz-29T | 1800 | 0.672527 | 0         |  |
|       |      | Shiraz-29T | 1800 | 0.672527 | 0         |  |
|       |      | Shiraz-32T | 1869 | 0.776805 | 0         |  |
|       |      | Shiraz-32T | 1869 | 0.776805 | 0         |  |
|       |      | Shiraz-35T | 1932 | 0.507141 | 0         |  |
|       |      | Shiraz-35T | 1932 | 0.507141 | 0         |  |
|       |      | Shiraz-58T | 2221 | 0.871948 | 0         |  |
|       |      | Shiraz-58T | 2221 | 0.871948 | 0         |  |
|       |      | Shiraz-71T | 2260 | 0.68394  | 0         |  |
|       |      | Shiraz-71T | 2260 | 0.68394  | 0         |  |
|       |      | Shiraz-71T | 2262 | 0.986748 | 0         |  |
|       |      | Shiraz-71T | 2262 | 0.986748 | 0         |  |
| SPIN4 | chrX | Shiraz-3T  | 241  | 0        | -0.230501 |  |
|       |      | Shiraz-4T  | 261  | 0        | -0.336249 |  |
|       |      | Shiraz-16T | 295  | 0.591657 | 0         |  |
|       |      | Shiraz-36T | 433  | 0        | -0.803961 |  |
|       |      | Shiraz-44T | 899  | 0        | -1.09697  |  |
|       |      | Shiraz-49T | 1170 | 0        | -0.967436 |  |
|       |      | Shiraz-18T | 1457 | 0.643204 | 0         |  |
|       |      | Shiraz-22T | 1673 | 0.611783 | 0         |  |
|       |      | Shiraz-25T | 1719 | 0.472955 | 0         |  |
|       |      | Shiraz-28T | 1762 | 0.562311 | 0         |  |
|       |      | Shiraz-29T | 1801 | 0.815343 | 0         |  |
|       |      | Shiraz-32T | 1870 | 0.729766 | 0         |  |
|       |      | Shiraz-35T | 1933 | 0.488535 | 0         |  |
|       |      | Shiraz-58T | 2223 | 0.833364 | 0         |  |
|       |      | Shiraz-71T | 2263 | 0.975531 | 0         |  |
|       |      | Shiraz-3T  | 241  | 0        | -0.230501 |  |
|       |      | Shiraz-4T  | 261  | 0        | -0.336249 |  |
|       |      | Shiraz-16T | 295  | 0.591657 | 0         |  |
|       |      | Shiraz-36T | 433  | 0        | -0.803961 |  |
|       |      | Shiraz-44T | 899  | 0        | -1.09697  |  |
|       |      | Shiraz-49T | 1170 | 0        | -0.967436 |  |
|       |      | Shiraz-18T | 1457 | 0.643204 | 0         |  |
|       |      | Shiraz-22T | 1673 | 0.611783 | 0         |  |
|       |      | Shiraz-25T | 1719 | 0.472955 | 0         |  |
|       |      | Shiraz-28T | 1762 | 0.562311 | 0         |  |
|       |      | Shiraz-29T | 1801 | 0.815343 | 0         |  |
|       |      | Shiraz-32T | 1870 | 0.729766 | 0         |  |
|       |      | Shiraz-35T | 1933 | 0.488535 | 0         |  |
|       |      | Shiraz-58T | 2223 | 0.833364 | 0         |  |
|       |      | Shiraz-71T | 2263 | 0.975531 | 0         |  |
|       |      | Shiraz-3T  | 241  | 0        | -0.230501 |  |
|       |      | Shiraz-4T  | 261  | 0        | -0.336249 |  |
|       |      | Shiraz-16T | 295  | 0.591657 | 0         |  |
|       |      | Shiraz-36T | 433  | 0        | -0.803961 |  |



|         |      |            |      |          |           |  |  |
|---------|------|------------|------|----------|-----------|--|--|
|         |      | Shiraz-44T | 899  | 0        | -1.09697  |  |  |
|         |      | Shiraz-49T | 1170 | 0        | -0.967436 |  |  |
|         |      | Shiraz-18T | 1457 | 0.643204 | 0         |  |  |
|         |      | Shiraz-22T | 1673 | 0.611783 | 0         |  |  |
|         |      | Shiraz-25T | 1719 | 0.472955 | 0         |  |  |
|         |      | Shiraz-28T | 1762 | 0.562311 | 0         |  |  |
|         |      | Shiraz-29T | 1801 | 0.815343 | 0         |  |  |
|         |      | Shiraz-32T | 1870 | 0.729766 | 0         |  |  |
|         |      | Shiraz-35T | 1933 | 0.488535 | 0         |  |  |
|         |      | Shiraz-58T | 2223 | 0.833364 | 0         |  |  |
|         |      | Shiraz-71T | 2263 | 0.975531 | 0         |  |  |
| SRCRB4D | chr7 | Shiraz-3T  | 90   | 0.219276 | 0         |  |  |
|         |      | Shiraz-3T  | 92   | 0.817021 | 0         |  |  |
|         |      | Shiraz-4T  | 253  | 0.372918 | 0         |  |  |
|         |      | Shiraz-31T | 315  | 0.194054 | 0         |  |  |
|         |      | Shiraz-36T | 378  | 0.179558 | 0         |  |  |
|         |      | Shiraz-36T | 379  | 0.322028 | 0         |  |  |
|         |      | Shiraz-42T | 454  | 0.145717 | 0         |  |  |
|         |      | Shiraz-44T | 637  | 1.109789 | 0         |  |  |
|         |      | Shiraz-46T | 943  | 0.093799 | 0         |  |  |
|         |      | Shiraz-46T | 944  | 0.256008 | 0         |  |  |
|         |      | Shiraz-47T | 1028 | 0.17896  | 0         |  |  |
|         |      | Shiraz-49T | 1118 | 0.327789 | 0         |  |  |
|         |      | Shiraz-77T | 1224 | 0.220539 | 0         |  |  |
|         |      | Shiraz-9T  | 1323 | 0.655912 | 0         |  |  |
|         |      | Shiraz-18T | 1434 | 0.244465 | 0         |  |  |
|         |      | Shiraz-22T | 1548 | 0.237572 | 0         |  |  |
|         |      | Shiraz-25T | 1698 | 0.21835  | 0         |  |  |
|         |      | Shiraz-28T | 1735 | 0.350744 | 0         |  |  |
|         |      | Shiraz-29T | 1778 | 0.120767 | 0         |  |  |
|         |      | Shiraz-38T | 1951 | 0.250891 | 0         |  |  |
|         |      | Shiraz-53T | 2078 | 0.287202 | 0         |  |  |
|         |      | Shiraz-58T | 2158 | 0.33934  | 0         |  |  |
|         |      | Shiraz-71T | 2238 | 0.603631 | 0         |  |  |
|         |      | Shiraz-71T | 2239 | 0.310785 | 0         |  |  |
|         |      | Shiraz-3T  | 90   | 0.219276 | 0         |  |  |
|         |      | Shiraz-3T  | 92   | 0.817021 | 0         |  |  |
|         |      | Shiraz-4T  | 253  | 0.372918 | 0         |  |  |
|         |      | Shiraz-31T | 315  | 0.194054 | 0         |  |  |
|         |      | Shiraz-36T | 378  | 0.179558 | 0         |  |  |
|         |      | Shiraz-36T | 379  | 0.322028 | 0         |  |  |
|         |      | Shiraz-42T | 454  | 0.145717 | 0         |  |  |
|         |      | Shiraz-44T | 637  | 1.109789 | 0         |  |  |
|         |      | Shiraz-46T | 943  | 0.093799 | 0         |  |  |
|         |      | Shiraz-46T | 944  | 0.256008 | 0         |  |  |
|         |      | Shiraz-47T | 1028 | 0.17896  | 0         |  |  |
|         |      | Shiraz-49T | 1118 | 0.327789 | 0         |  |  |

|     |      |            |      |          |           |  |
|-----|------|------------|------|----------|-----------|--|
|     |      | Shiraz-77T | 1224 | 0.220539 | 0         |  |
|     |      | Shiraz-9T  | 1323 | 0.655912 | 0         |  |
|     |      | Shiraz-18T | 1434 | 0.244465 | 0         |  |
|     |      | Shiraz-22T | 1548 | 0.237572 | 0         |  |
|     |      | Shiraz-25T | 1698 | 0.21835  | 0         |  |
|     |      | Shiraz-28T | 1735 | 0.350744 | 0         |  |
|     |      | Shiraz-29T | 1778 | 0.120767 | 0         |  |
|     |      | Shiraz-38T | 1951 | 0.250891 | 0         |  |
|     |      | Shiraz-53T | 2078 | 0.287202 | 0         |  |
|     |      | Shiraz-58T | 2158 | 0.33934  | 0         |  |
|     |      | Shiraz-71T | 2238 | 0.603631 | 0         |  |
|     |      | Shiraz-71T | 2239 | 0.310785 | 0         |  |
|     |      | Shiraz-3T  | 90   | 0.219276 | 0         |  |
|     |      | Shiraz-3T  | 92   | 0.817021 | 0         |  |
|     |      | Shiraz-4T  | 253  | 0.372918 | 0         |  |
|     |      | Shiraz-31T | 315  | 0.194054 | 0         |  |
|     |      | Shiraz-36T | 378  | 0.179558 | 0         |  |
|     |      | Shiraz-36T | 379  | 0.322028 | 0         |  |
|     |      | Shiraz-42T | 454  | 0.145717 | 0         |  |
|     |      | Shiraz-44T | 637  | 1.109789 | 0         |  |
|     |      | Shiraz-46T | 943  | 0.093799 | 0         |  |
|     |      | Shiraz-46T | 944  | 0.256008 | 0         |  |
|     |      | Shiraz-47T | 1028 | 0.17896  | 0         |  |
|     |      | Shiraz-49T | 1118 | 0.327789 | 0         |  |
|     |      | Shiraz-77T | 1224 | 0.220539 | 0         |  |
|     |      | Shiraz-9T  | 1323 | 0.655912 | 0         |  |
|     |      | Shiraz-18T | 1434 | 0.244465 | 0         |  |
|     |      | Shiraz-22T | 1548 | 0.237572 | 0         |  |
|     |      | Shiraz-25T | 1698 | 0.21835  | 0         |  |
|     |      | Shiraz-28T | 1735 | 0.350744 | 0         |  |
|     |      | Shiraz-29T | 1778 | 0.120767 | 0         |  |
|     |      | Shiraz-38T | 1951 | 0.250891 | 0         |  |
|     |      | Shiraz-53T | 2078 | 0.287202 | 0         |  |
|     |      | Shiraz-58T | 2158 | 0.33934  | 0         |  |
|     |      | Shiraz-71T | 2238 | 0.603631 | 0         |  |
|     |      | Shiraz-71T | 2239 | 0.310785 | 0         |  |
| SRI | chr7 | Shiraz-3T  | 90   | 0.219276 | 0         |  |
|     |      | Shiraz-3T  | 90   | 0.219276 | 0         |  |
|     |      | Shiraz-3T  | 93   | 0        | -0.058023 |  |
|     |      | Shiraz-3T  | 93   | 0        | -0.058023 |  |
|     |      | Shiraz-4T  | 253  | 0.372918 | 0         |  |
|     |      | Shiraz-4T  | 253  | 0.372918 | 0         |  |
|     |      | Shiraz-36T | 378  | 0.179558 | 0         |  |
|     |      | Shiraz-36T | 378  | 0.179558 | 0         |  |
|     |      | Shiraz-36T | 380  | 0.083883 | 0         |  |
|     |      | Shiraz-36T | 380  | 0.083883 | 0         |  |
|     |      | Shiraz-44T | 638  | 0        | -0.433476 |  |

|  |            |      |          |           |  |
|--|------------|------|----------|-----------|--|
|  | Shiraz-44T | 638  | 0        | -0.433476 |  |
|  | Shiraz-46T | 943  | 0.093799 | 0         |  |
|  | Shiraz-46T | 943  | 0.093799 | 0         |  |
|  | Shiraz-46T | 945  | 0        | -0.014838 |  |
|  | Shiraz-46T | 945  | 0        | -0.014838 |  |
|  | Shiraz-47T | 1029 | 0        | -0.096586 |  |
|  | Shiraz-47T | 1029 | 0        | -0.096586 |  |
|  | Shiraz-49T | 1119 | 0        | -0.157331 |  |
|  | Shiraz-49T | 1119 | 0        | -0.157331 |  |
|  | Shiraz-77T | 1225 | 0        | -0.117922 |  |
|  | Shiraz-77T | 1225 | 0        | -0.117922 |  |
|  | Shiraz-77T | 1226 | 0        | -0.233724 |  |
|  | Shiraz-77T | 1226 | 0        | -0.233724 |  |
|  | Shiraz-18T | 1434 | 0.244465 | 0         |  |
|  | Shiraz-18T | 1434 | 0.244465 | 0         |  |
|  | Shiraz-22T | 1549 | 0        | -0.319623 |  |
|  | Shiraz-22T | 1549 | 0        | -0.319623 |  |
|  | Shiraz-22T | 1550 | 0        | -0.577052 |  |
|  | Shiraz-22T | 1550 | 0        | -0.577052 |  |
|  | Shiraz-25T | 1698 | 0.21835  | 0         |  |
|  | Shiraz-25T | 1698 | 0.21835  | 0         |  |
|  | Shiraz-28T | 1735 | 0.350744 | 0         |  |
|  | Shiraz-28T | 1735 | 0.350744 | 0         |  |
|  | Shiraz-29T | 1778 | 0.120767 | 0         |  |
|  | Shiraz-29T | 1778 | 0.120767 | 0         |  |
|  | Shiraz-38T | 1951 | 0.250891 | 0         |  |
|  | Shiraz-38T | 1951 | 0.250891 | 0         |  |
|  | Shiraz-53T | 2078 | 0.287202 | 0         |  |
|  | Shiraz-53T | 2078 | 0.287202 | 0         |  |
|  | Shiraz-58T | 2159 | 0        | -0.219521 |  |
|  | Shiraz-58T | 2159 | 0        | -0.219521 |  |
|  | Shiraz-71T | 2238 | 0.603631 | 0         |  |
|  | Shiraz-71T | 2238 | 0.603631 | 0         |  |
|  | Shiraz-3T  | 90   | 0.219276 | 0         |  |
|  | Shiraz-3T  | 90   | 0.219276 | 0         |  |
|  | Shiraz-3T  | 93   | 0        | -0.058023 |  |
|  | Shiraz-3T  | 93   | 0        | -0.058023 |  |
|  | Shiraz-4T  | 253  | 0.372918 | 0         |  |
|  | Shiraz-4T  | 253  | 0.372918 | 0         |  |
|  | Shiraz-36T | 378  | 0.179558 | 0         |  |
|  | Shiraz-36T | 378  | 0.179558 | 0         |  |
|  | Shiraz-36T | 380  | 0.083883 | 0         |  |
|  | Shiraz-36T | 380  | 0.083883 | 0         |  |
|  | Shiraz-44T | 638  | 0        | -0.433476 |  |
|  | Shiraz-44T | 638  | 0        | -0.433476 |  |
|  | Shiraz-46T | 943  | 0.093799 | 0         |  |
|  | Shiraz-46T | 943  | 0.093799 | 0         |  |

|  |            |      |          |           |  |
|--|------------|------|----------|-----------|--|
|  | Shiraz-46T | 945  | 0        | -0.014838 |  |
|  | Shiraz-46T | 945  | 0        | -0.014838 |  |
|  | Shiraz-47T | 1029 | 0        | -0.096586 |  |
|  | Shiraz-47T | 1029 | 0        | -0.096586 |  |
|  | Shiraz-49T | 1119 | 0        | -0.157331 |  |
|  | Shiraz-49T | 1119 | 0        | -0.157331 |  |
|  | Shiraz-77T | 1225 | 0        | -0.117922 |  |
|  | Shiraz-77T | 1225 | 0        | -0.117922 |  |
|  | Shiraz-77T | 1226 | 0        | -0.233724 |  |
|  | Shiraz-77T | 1226 | 0        | -0.233724 |  |
|  | Shiraz-18T | 1434 | 0.244465 | 0         |  |
|  | Shiraz-18T | 1434 | 0.244465 | 0         |  |
|  | Shiraz-22T | 1549 | 0        | -0.319623 |  |
|  | Shiraz-22T | 1549 | 0        | -0.319623 |  |
|  | Shiraz-22T | 1550 | 0        | -0.577052 |  |
|  | Shiraz-22T | 1550 | 0        | -0.577052 |  |
|  | Shiraz-25T | 1698 | 0.21835  | 0         |  |
|  | Shiraz-25T | 1698 | 0.21835  | 0         |  |
|  | Shiraz-28T | 1735 | 0.350744 | 0         |  |
|  | Shiraz-28T | 1735 | 0.350744 | 0         |  |
|  | Shiraz-29T | 1778 | 0.120767 | 0         |  |
|  | Shiraz-29T | 1778 | 0.120767 | 0         |  |
|  | Shiraz-38T | 1951 | 0.250891 | 0         |  |
|  | Shiraz-38T | 1951 | 0.250891 | 0         |  |
|  | Shiraz-53T | 2078 | 0.287202 | 0         |  |
|  | Shiraz-53T | 2078 | 0.287202 | 0         |  |
|  | Shiraz-58T | 2159 | 0        | -0.219521 |  |
|  | Shiraz-58T | 2159 | 0        | -0.219521 |  |
|  | Shiraz-71T | 2238 | 0.603631 | 0         |  |
|  | Shiraz-71T | 2238 | 0.603631 | 0         |  |
|  | Shiraz-3T  | 90   | 0.219276 | 0         |  |
|  | Shiraz-3T  | 90   | 0.219276 | 0         |  |
|  | Shiraz-3T  | 93   | 0        | -0.058023 |  |
|  | Shiraz-3T  | 93   | 0        | -0.058023 |  |
|  | Shiraz-4T  | 253  | 0.372918 | 0         |  |
|  | Shiraz-4T  | 253  | 0.372918 | 0         |  |
|  | Shiraz-36T | 378  | 0.179558 | 0         |  |
|  | Shiraz-36T | 378  | 0.179558 | 0         |  |
|  | Shiraz-36T | 380  | 0.083883 | 0         |  |
|  | Shiraz-36T | 380  | 0.083883 | 0         |  |
|  | Shiraz-44T | 638  | 0        | -0.433476 |  |
|  | Shiraz-44T | 638  | 0        | -0.433476 |  |
|  | Shiraz-46T | 943  | 0.093799 | 0         |  |
|  | Shiraz-46T | 943  | 0.093799 | 0         |  |
|  | Shiraz-46T | 945  | 0        | -0.014838 |  |
|  | Shiraz-46T | 945  | 0        | -0.014838 |  |
|  | Shiraz-47T | 1029 | 0        | -0.096586 |  |

|       |      |            |      |          |           |  |  |
|-------|------|------------|------|----------|-----------|--|--|
|       |      | Shiraz-47T | 1029 | 0        | -0.096586 |  |  |
|       |      | Shiraz-49T | 1119 | 0        | -0.157331 |  |  |
|       |      | Shiraz-49T | 1119 | 0        | -0.157331 |  |  |
|       |      | Shiraz-77T | 1225 | 0        | -0.117922 |  |  |
|       |      | Shiraz-77T | 1225 | 0        | -0.117922 |  |  |
|       |      | Shiraz-77T | 1226 | 0        | -0.233724 |  |  |
|       |      | Shiraz-77T | 1226 | 0        | -0.233724 |  |  |
|       |      | Shiraz-18T | 1434 | 0.244465 | 0         |  |  |
|       |      | Shiraz-18T | 1434 | 0.244465 | 0         |  |  |
|       |      | Shiraz-22T | 1549 | 0        | -0.319623 |  |  |
|       |      | Shiraz-22T | 1549 | 0        | -0.319623 |  |  |
|       |      | Shiraz-22T | 1550 | 0        | -0.577052 |  |  |
|       |      | Shiraz-22T | 1550 | 0        | -0.577052 |  |  |
|       |      | Shiraz-25T | 1698 | 0.21835  | 0         |  |  |
|       |      | Shiraz-25T | 1698 | 0.21835  | 0         |  |  |
|       |      | Shiraz-28T | 1735 | 0.350744 | 0         |  |  |
|       |      | Shiraz-28T | 1735 | 0.350744 | 0         |  |  |
|       |      | Shiraz-29T | 1778 | 0.120767 | 0         |  |  |
|       |      | Shiraz-29T | 1778 | 0.120767 | 0         |  |  |
|       |      | Shiraz-38T | 1951 | 0.250891 | 0         |  |  |
|       |      | Shiraz-38T | 1951 | 0.250891 | 0         |  |  |
|       |      | Shiraz-53T | 2078 | 0.287202 | 0         |  |  |
|       |      | Shiraz-53T | 2078 | 0.287202 | 0         |  |  |
|       |      | Shiraz-58T | 2159 | 0        | -0.219521 |  |  |
|       |      | Shiraz-58T | 2159 | 0        | -0.219521 |  |  |
|       |      | Shiraz-71T | 2238 | 0.603631 | 0         |  |  |
|       |      | Shiraz-71T | 2238 | 0.603631 | 0         |  |  |
| SRPK2 | chr7 | Shiraz-3T  | 90   | 0.219276 | 0         |  |  |
|       |      | Shiraz-3T  | 90   | 0.219276 | 0         |  |  |
|       |      | Shiraz-4T  | 253  | 0.372918 | 0         |  |  |
|       |      | Shiraz-4T  | 253  | 0.372918 | 0         |  |  |
|       |      | Shiraz-36T | 378  | 0.179558 | 0         |  |  |
|       |      | Shiraz-36T | 378  | 0.179558 | 0         |  |  |
|       |      | Shiraz-46T | 943  | 0.093799 | 0         |  |  |
|       |      | Shiraz-46T | 943  | 0.093799 | 0         |  |  |
|       |      | Shiraz-77T | 1225 | 0        | -0.117922 |  |  |
|       |      | Shiraz-77T | 1225 | 0        | -0.117922 |  |  |
|       |      | Shiraz-18T | 1434 | 0.244465 | 0         |  |  |
|       |      | Shiraz-18T | 1434 | 0.244465 | 0         |  |  |
|       |      | Shiraz-22T | 1549 | 0        | -0.319623 |  |  |
|       |      | Shiraz-22T | 1549 | 0        | -0.319623 |  |  |
|       |      | Shiraz-25T | 1698 | 0.21835  | 0         |  |  |
|       |      | Shiraz-25T | 1698 | 0.21835  | 0         |  |  |
|       |      | Shiraz-28T | 1735 | 0.350744 | 0         |  |  |
|       |      | Shiraz-28T | 1735 | 0.350744 | 0         |  |  |
|       |      | Shiraz-29T | 1778 | 0.120767 | 0         |  |  |
|       |      | Shiraz-29T | 1778 | 0.120767 | 0         |  |  |

|  |  |            |      |          |           |  |  |
|--|--|------------|------|----------|-----------|--|--|
|  |  | Shiraz-32T | 1833 | 0.551336 | 0         |  |  |
|  |  | Shiraz-32T | 1833 | 0.551336 | 0         |  |  |
|  |  | Shiraz-38T | 1951 | 0.250891 | 0         |  |  |
|  |  | Shiraz-38T | 1951 | 0.250891 | 0         |  |  |
|  |  | Shiraz-53T | 2078 | 0.287202 | 0         |  |  |
|  |  | Shiraz-53T | 2078 | 0.287202 | 0         |  |  |
|  |  | Shiraz-71T | 2238 | 0.603631 | 0         |  |  |
|  |  | Shiraz-71T | 2238 | 0.603631 | 0         |  |  |
|  |  | Shiraz-3T  | 90   | 0.219276 | 0         |  |  |
|  |  | Shiraz-3T  | 90   | 0.219276 | 0         |  |  |
|  |  | Shiraz-4T  | 253  | 0.372918 | 0         |  |  |
|  |  | Shiraz-4T  | 253  | 0.372918 | 0         |  |  |
|  |  | Shiraz-36T | 378  | 0.179558 | 0         |  |  |
|  |  | Shiraz-36T | 378  | 0.179558 | 0         |  |  |
|  |  | Shiraz-46T | 943  | 0.093799 | 0         |  |  |
|  |  | Shiraz-46T | 943  | 0.093799 | 0         |  |  |
|  |  | Shiraz-77T | 1225 | 0        | -0.117922 |  |  |
|  |  | Shiraz-77T | 1225 | 0        | -0.117922 |  |  |
|  |  | Shiraz-18T | 1434 | 0.244465 | 0         |  |  |
|  |  | Shiraz-18T | 1434 | 0.244465 | 0         |  |  |
|  |  | Shiraz-22T | 1549 | 0        | -0.319623 |  |  |
|  |  | Shiraz-22T | 1549 | 0        | -0.319623 |  |  |
|  |  | Shiraz-25T | 1698 | 0.21835  | 0         |  |  |
|  |  | Shiraz-25T | 1698 | 0.21835  | 0         |  |  |
|  |  | Shiraz-28T | 1735 | 0.350744 | 0         |  |  |
|  |  | Shiraz-28T | 1735 | 0.350744 | 0         |  |  |
|  |  | Shiraz-29T | 1778 | 0.120767 | 0         |  |  |
|  |  | Shiraz-29T | 1778 | 0.120767 | 0         |  |  |
|  |  | Shiraz-32T | 1833 | 0.551336 | 0         |  |  |
|  |  | Shiraz-32T | 1833 | 0.551336 | 0         |  |  |
|  |  | Shiraz-38T | 1951 | 0.250891 | 0         |  |  |
|  |  | Shiraz-38T | 1951 | 0.250891 | 0         |  |  |
|  |  | Shiraz-53T | 2078 | 0.287202 | 0         |  |  |
|  |  | Shiraz-53T | 2078 | 0.287202 | 0         |  |  |
|  |  | Shiraz-71T | 2238 | 0.603631 | 0         |  |  |
|  |  | Shiraz-71T | 2238 | 0.603631 | 0         |  |  |
|  |  | Shiraz-3T  | 90   | 0.219276 | 0         |  |  |
|  |  | Shiraz-3T  | 90   | 0.219276 | 0         |  |  |
|  |  | Shiraz-4T  | 253  | 0.372918 | 0         |  |  |
|  |  | Shiraz-4T  | 253  | 0.372918 | 0         |  |  |
|  |  | Shiraz-36T | 378  | 0.179558 | 0         |  |  |
|  |  | Shiraz-36T | 378  | 0.179558 | 0         |  |  |
|  |  | Shiraz-46T | 943  | 0.093799 | 0         |  |  |
|  |  | Shiraz-46T | 943  | 0.093799 | 0         |  |  |
|  |  | Shiraz-77T | 1225 | 0        | -0.117922 |  |  |
|  |  | Shiraz-77T | 1225 | 0        | -0.117922 |  |  |
|  |  | Shiraz-18T | 1434 | 0.244465 | 0         |  |  |

|       |      |            |      |          |           |  |  |
|-------|------|------------|------|----------|-----------|--|--|
|       |      | Shiraz-18T | 1434 | 0.244465 | 0         |  |  |
|       |      | Shiraz-22T | 1549 | 0        | -0.319623 |  |  |
|       |      | Shiraz-22T | 1549 | 0        | -0.319623 |  |  |
|       |      | Shiraz-25T | 1698 | 0.21835  | 0         |  |  |
|       |      | Shiraz-25T | 1698 | 0.21835  | 0         |  |  |
|       |      | Shiraz-28T | 1735 | 0.350744 | 0         |  |  |
|       |      | Shiraz-28T | 1735 | 0.350744 | 0         |  |  |
|       |      | Shiraz-29T | 1778 | 0.120767 | 0         |  |  |
|       |      | Shiraz-29T | 1778 | 0.120767 | 0         |  |  |
|       |      | Shiraz-32T | 1833 | 0.551336 | 0         |  |  |
|       |      | Shiraz-32T | 1833 | 0.551336 | 0         |  |  |
|       |      | Shiraz-38T | 1951 | 0.250891 | 0         |  |  |
|       |      | Shiraz-38T | 1951 | 0.250891 | 0         |  |  |
|       |      | Shiraz-53T | 2078 | 0.287202 | 0         |  |  |
|       |      | Shiraz-53T | 2078 | 0.287202 | 0         |  |  |
|       |      | Shiraz-71T | 2238 | 0.603631 | 0         |  |  |
|       |      | Shiraz-71T | 2238 | 0.603631 | 0         |  |  |
| SRPK3 | chrX | Shiraz-3T  | 246  | 0.531858 | 0         |  |  |
|       |      | Shiraz-4T  | 261  | 0        | -0.336249 |  |  |
|       |      | Shiraz-16T | 295  | 0.591657 | 0         |  |  |
|       |      | Shiraz-36T | 433  | 0        | -0.803961 |  |  |
|       |      | Shiraz-42T | 480  | 0        | -0.232915 |  |  |
|       |      | Shiraz-44T | 908  | 0.466743 | 0         |  |  |
|       |      | Shiraz-49T | 1170 | 0        | -0.967436 |  |  |
|       |      | Shiraz-49T | 1173 | 0        | -0.704439 |  |  |
|       |      | Shiraz-9T  | 1370 | 0.690073 | 0         |  |  |
|       |      | Shiraz-9T  | 1371 | 1.292392 | 0         |  |  |
|       |      | Shiraz-18T | 1457 | 0.643204 | 0         |  |  |
|       |      | Shiraz-22T | 1673 | 0.611783 | 0         |  |  |
|       |      | Shiraz-22T | 1678 | 0.911625 | 0         |  |  |
|       |      | Shiraz-25T | 1719 | 0.472955 | 0         |  |  |
|       |      | Shiraz-28T | 1762 | 0.562311 | 0         |  |  |
|       |      | Shiraz-29T | 1801 | 0.815343 | 0         |  |  |
|       |      | Shiraz-32T | 1870 | 0.729766 | 0         |  |  |
|       |      | Shiraz-32T | 1872 | 1.504553 | 0         |  |  |
|       |      | Shiraz-35T | 1933 | 0.488535 | 0         |  |  |
|       |      | Shiraz-38T | 2011 | 0        | -0.406024 |  |  |
|       |      | Shiraz-53T | 2115 | 0.427728 | 0         |  |  |
|       |      | Shiraz-58T | 2223 | 0.833364 | 0         |  |  |
|       |      | Shiraz-58T | 2226 | 1.074663 | 0         |  |  |
|       |      | Shiraz-71T | 2263 | 0.975531 | 0         |  |  |
|       |      | Shiraz-3T  | 246  | 0.531858 | 0         |  |  |
|       |      | Shiraz-4T  | 261  | 0        | -0.336249 |  |  |
|       |      | Shiraz-16T | 295  | 0.591657 | 0         |  |  |
|       |      | Shiraz-36T | 433  | 0        | -0.803961 |  |  |
|       |      | Shiraz-42T | 480  | 0        | -0.232915 |  |  |
|       |      | Shiraz-44T | 908  | 0.466743 | 0         |  |  |

|      |      |            |      |          |           |  |  |
|------|------|------------|------|----------|-----------|--|--|
|      |      | Shiraz-49T | 1170 | 0        | -0.967436 |  |  |
|      |      | Shiraz-49T | 1173 | 0        | -0.704439 |  |  |
|      |      | Shiraz-9T  | 1370 | 0.690073 | 0         |  |  |
|      |      | Shiraz-9T  | 1371 | 1.292392 | 0         |  |  |
|      |      | Shiraz-18T | 1457 | 0.643204 | 0         |  |  |
|      |      | Shiraz-22T | 1673 | 0.611783 | 0         |  |  |
|      |      | Shiraz-22T | 1678 | 0.911625 | 0         |  |  |
|      |      | Shiraz-25T | 1719 | 0.472955 | 0         |  |  |
|      |      | Shiraz-28T | 1762 | 0.562311 | 0         |  |  |
|      |      | Shiraz-29T | 1801 | 0.815343 | 0         |  |  |
|      |      | Shiraz-32T | 1870 | 0.729766 | 0         |  |  |
|      |      | Shiraz-32T | 1872 | 1.504553 | 0         |  |  |
|      |      | Shiraz-35T | 1933 | 0.488535 | 0         |  |  |
|      |      | Shiraz-38T | 2011 | 0        | -0.406024 |  |  |
|      |      | Shiraz-53T | 2115 | 0.427728 | 0         |  |  |
|      |      | Shiraz-58T | 2223 | 0.833364 | 0         |  |  |
|      |      | Shiraz-58T | 2226 | 1.074663 | 0         |  |  |
|      |      | Shiraz-71T | 2263 | 0.975531 | 0         |  |  |
|      |      | Shiraz-3T  | 246  | 0.531858 | 0         |  |  |
|      |      | Shiraz-4T  | 261  | 0        | -0.336249 |  |  |
|      |      | Shiraz-16T | 295  | 0.591657 | 0         |  |  |
|      |      | Shiraz-36T | 433  | 0        | -0.803961 |  |  |
|      |      | Shiraz-42T | 480  | 0        | -0.232915 |  |  |
|      |      | Shiraz-44T | 908  | 0.466743 | 0         |  |  |
|      |      | Shiraz-49T | 1170 | 0        | -0.967436 |  |  |
|      |      | Shiraz-49T | 1173 | 0        | -0.704439 |  |  |
|      |      | Shiraz-9T  | 1370 | 0.690073 | 0         |  |  |
|      |      | Shiraz-9T  | 1371 | 1.292392 | 0         |  |  |
|      |      | Shiraz-18T | 1457 | 0.643204 | 0         |  |  |
|      |      | Shiraz-22T | 1673 | 0.611783 | 0         |  |  |
|      |      | Shiraz-22T | 1678 | 0.911625 | 0         |  |  |
|      |      | Shiraz-25T | 1719 | 0.472955 | 0         |  |  |
|      |      | Shiraz-28T | 1762 | 0.562311 | 0         |  |  |
|      |      | Shiraz-29T | 1801 | 0.815343 | 0         |  |  |
|      |      | Shiraz-32T | 1870 | 0.729766 | 0         |  |  |
|      |      | Shiraz-32T | 1872 | 1.504553 | 0         |  |  |
|      |      | Shiraz-35T | 1933 | 0.488535 | 0         |  |  |
|      |      | Shiraz-38T | 2011 | 0        | -0.406024 |  |  |
|      |      | Shiraz-53T | 2115 | 0.427728 | 0         |  |  |
|      |      | Shiraz-58T | 2223 | 0.833364 | 0         |  |  |
|      |      | Shiraz-58T | 2226 | 1.074663 | 0         |  |  |
|      |      | Shiraz-71T | 2263 | 0.975531 | 0         |  |  |
| SRPX | chrX | Shiraz-3T  | 235  | 0        | -0.28401  |  |  |
|      |      | Shiraz-4T  | 260  | 0        | -0.324128 |  |  |
|      |      | Shiraz-16T | 294  | 0.655804 | 0         |  |  |
|      |      | Shiraz-36T | 431  | 0        | -0.78035  |  |  |
|      |      | Shiraz-44T | 891  | 0        | -0.954044 |  |  |



|  |            |      |          |           |  |
|--|------------|------|----------|-----------|--|
|  | Shiraz-49T | 1166 | 0        | -0.917235 |  |
|  | Shiraz-49T | 1168 | 0        | -1.073859 |  |
|  | Shiraz-9T  | 1368 | 0.199713 | 0         |  |
|  | Shiraz-18T | 1455 | 0        | -0.186773 |  |
|  | Shiraz-22T | 1669 | 0.695915 | 0         |  |
|  | Shiraz-25T | 1717 | 0.420447 | 0         |  |
|  | Shiraz-28T | 1760 | 0.538181 | 0         |  |
|  | Shiraz-29T | 1800 | 0.672527 | 0         |  |
|  | Shiraz-32T | 1869 | 0.776805 | 0         |  |
|  | Shiraz-35T | 1932 | 0.507141 | 0         |  |
|  | Shiraz-40T | 2051 | 0.098506 | 0         |  |
|  | Shiraz-58T | 2221 | 0.871948 | 0         |  |
|  | Shiraz-71T | 2260 | 0.68394  | 0         |  |
|  | Shiraz-3T  | 235  | 0        | -0.28401  |  |
|  | Shiraz-4T  | 260  | 0        | -0.324128 |  |
|  | Shiraz-16T | 294  | 0.655804 | 0         |  |
|  | Shiraz-36T | 431  | 0        | -0.78035  |  |
|  | Shiraz-44T | 891  | 0        | -0.954044 |  |
|  | Shiraz-49T | 1166 | 0        | -0.917235 |  |
|  | Shiraz-49T | 1168 | 0        | -1.073859 |  |
|  | Shiraz-9T  | 1368 | 0.199713 | 0         |  |
|  | Shiraz-18T | 1455 | 0        | -0.186773 |  |
|  | Shiraz-22T | 1669 | 0.695915 | 0         |  |
|  | Shiraz-25T | 1717 | 0.420447 | 0         |  |
|  | Shiraz-28T | 1760 | 0.538181 | 0         |  |
|  | Shiraz-29T | 1800 | 0.672527 | 0         |  |
|  | Shiraz-32T | 1869 | 0.776805 | 0         |  |
|  | Shiraz-35T | 1932 | 0.507141 | 0         |  |
|  | Shiraz-40T | 2051 | 0.098506 | 0         |  |
|  | Shiraz-58T | 2221 | 0.871948 | 0         |  |
|  | Shiraz-71T | 2260 | 0.68394  | 0         |  |
|  | Shiraz-3T  | 235  | 0        | -0.28401  |  |
|  | Shiraz-4T  | 260  | 0        | -0.324128 |  |
|  | Shiraz-16T | 294  | 0.655804 | 0         |  |
|  | Shiraz-36T | 431  | 0        | -0.78035  |  |
|  | Shiraz-44T | 891  | 0        | -0.954044 |  |
|  | Shiraz-49T | 1166 | 0        | -0.917235 |  |
|  | Shiraz-49T | 1168 | 0        | -1.073859 |  |
|  | Shiraz-9T  | 1368 | 0.199713 | 0         |  |
|  | Shiraz-18T | 1455 | 0        | -0.186773 |  |
|  | Shiraz-22T | 1669 | 0.695915 | 0         |  |
|  | Shiraz-25T | 1717 | 0.420447 | 0         |  |
|  | Shiraz-28T | 1760 | 0.538181 | 0         |  |
|  | Shiraz-29T | 1800 | 0.672527 | 0         |  |
|  | Shiraz-32T | 1869 | 0.776805 | 0         |  |
|  | Shiraz-35T | 1932 | 0.507141 | 0         |  |
|  | Shiraz-40T | 2051 | 0.098506 | 0         |  |

|       |      |            |      |          |           |  |  |
|-------|------|------------|------|----------|-----------|--|--|
|       |      | Shiraz-58T | 2221 | 0.871948 | 0         |  |  |
|       |      | Shiraz-71T | 2260 | 0.68394  | 0         |  |  |
| SRPX2 | chrX | Shiraz-3T  | 242  | 0        | -0.336434 |  |  |
|       |      | Shiraz-4T  | 261  | 0        | -0.336249 |  |  |
|       |      | Shiraz-16T | 295  | 0.591657 | 0         |  |  |
|       |      | Shiraz-36T | 433  | 0        | -0.803961 |  |  |
|       |      | Shiraz-44T | 899  | 0        | -1.09697  |  |  |
|       |      | Shiraz-49T | 1170 | 0        | -0.967436 |  |  |
|       |      | Shiraz-18T | 1457 | 0.643204 | 0         |  |  |
|       |      | Shiraz-22T | 1673 | 0.611783 | 0         |  |  |
|       |      | Shiraz-25T | 1719 | 0.472955 | 0         |  |  |
|       |      | Shiraz-28T | 1762 | 0.562311 | 0         |  |  |
|       |      | Shiraz-29T | 1801 | 0.815343 | 0         |  |  |
|       |      | Shiraz-32T | 1870 | 0.729766 | 0         |  |  |
|       |      | Shiraz-35T | 1933 | 0.488535 | 0         |  |  |
|       |      | Shiraz-58T | 2223 | 0.833364 | 0         |  |  |
|       |      | Shiraz-71T | 2263 | 0.975531 | 0         |  |  |
|       |      | Shiraz-3T  | 242  | 0        | -0.336434 |  |  |
|       |      | Shiraz-4T  | 261  | 0        | -0.336249 |  |  |
|       |      | Shiraz-16T | 295  | 0.591657 | 0         |  |  |
|       |      | Shiraz-36T | 433  | 0        | -0.803961 |  |  |
|       |      | Shiraz-44T | 899  | 0        | -1.09697  |  |  |
|       |      | Shiraz-49T | 1170 | 0        | -0.967436 |  |  |
|       |      | Shiraz-18T | 1457 | 0.643204 | 0         |  |  |
|       |      | Shiraz-22T | 1673 | 0.611783 | 0         |  |  |
|       |      | Shiraz-25T | 1719 | 0.472955 | 0         |  |  |
|       |      | Shiraz-28T | 1762 | 0.562311 | 0         |  |  |
|       |      | Shiraz-29T | 1801 | 0.815343 | 0         |  |  |
|       |      | Shiraz-32T | 1870 | 0.729766 | 0         |  |  |
|       |      | Shiraz-35T | 1933 | 0.488535 | 0         |  |  |
|       |      | Shiraz-58T | 2223 | 0.833364 | 0         |  |  |
|       |      | Shiraz-71T | 2263 | 0.975531 | 0         |  |  |
|       |      | Shiraz-3T  | 242  | 0        | -0.336434 |  |  |
|       |      | Shiraz-4T  | 261  | 0        | -0.336249 |  |  |
|       |      | Shiraz-16T | 295  | 0.591657 | 0         |  |  |
|       |      | Shiraz-36T | 433  | 0        | -0.803961 |  |  |
|       |      | Shiraz-44T | 899  | 0        | -1.09697  |  |  |
|       |      | Shiraz-49T | 1170 | 0        | -0.967436 |  |  |
|       |      | Shiraz-18T | 1457 | 0.643204 | 0         |  |  |
|       |      | Shiraz-22T | 1673 | 0.611783 | 0         |  |  |
|       |      | Shiraz-25T | 1719 | 0.472955 | 0         |  |  |
|       |      | Shiraz-28T | 1762 | 0.562311 | 0         |  |  |
|       |      | Shiraz-29T | 1801 | 0.815343 | 0         |  |  |
|       |      | Shiraz-32T | 1870 | 0.729766 | 0         |  |  |
|       |      | Shiraz-35T | 1933 | 0.488535 | 0         |  |  |
|       |      | Shiraz-58T | 2223 | 0.833364 | 0         |  |  |
|       |      | Shiraz-71T | 2263 | 0.975531 | 0         |  |  |

|      |      |            |      |          |           |  |  |
|------|------|------------|------|----------|-----------|--|--|
| SRRT | chr7 | Shiraz-3T  | 90   | 0.219276 | 0         |  |  |
|      |      | Shiraz-3T  | 94   | 0.74735  | 0         |  |  |
|      |      | Shiraz-4T  | 253  | 0.372918 | 0         |  |  |
|      |      | Shiraz-31T | 316  | 0.219196 | 0         |  |  |
|      |      | Shiraz-36T | 378  | 0.179558 | 0         |  |  |
|      |      | Shiraz-36T | 381  | 0.332628 | 0         |  |  |
|      |      | Shiraz-44T | 639  | 1.035032 | 0         |  |  |
|      |      | Shiraz-46T | 943  | 0.093799 | 0         |  |  |
|      |      | Shiraz-46T | 946  | 0.299835 | 0         |  |  |
|      |      | Shiraz-47T | 1030 | 0.257728 | 0         |  |  |
|      |      | Shiraz-49T | 1120 | 0.281656 | 0         |  |  |
|      |      | Shiraz-77T | 1225 | 0        | -0.117922 |  |  |
|      |      | Shiraz-77T | 1227 | 0.196445 | 0         |  |  |
|      |      | Shiraz-9T  | 1324 | 0.679266 | 0         |  |  |
|      |      | Shiraz-18T | 1434 | 0.244465 | 0         |  |  |
|      |      | Shiraz-22T | 1549 | 0        | -0.319623 |  |  |
|      |      | Shiraz-22T | 1551 | 0.324011 | 0         |  |  |
|      |      | Shiraz-25T | 1698 | 0.21835  | 0         |  |  |
|      |      | Shiraz-28T | 1735 | 0.350744 | 0         |  |  |
|      |      | Shiraz-29T | 1778 | 0.120767 | 0         |  |  |
|      |      | Shiraz-32T | 1833 | 0.551336 | 0         |  |  |
|      |      | Shiraz-32T | 1834 | 1.485392 | 0         |  |  |
|      |      | Shiraz-38T | 1951 | 0.250891 | 0         |  |  |
|      |      | Shiraz-53T | 2078 | 0.287202 | 0         |  |  |
|      |      | Shiraz-58T | 2160 | 0.399007 | 0         |  |  |
|      |      | Shiraz-71T | 2238 | 0.603631 | 0         |  |  |
|      |      | Shiraz-3T  | 90   | 0.219276 | 0         |  |  |
|      |      | Shiraz-3T  | 94   | 0.74735  | 0         |  |  |
|      |      | Shiraz-4T  | 253  | 0.372918 | 0         |  |  |
|      |      | Shiraz-31T | 316  | 0.219196 | 0         |  |  |
|      |      | Shiraz-36T | 378  | 0.179558 | 0         |  |  |
|      |      | Shiraz-36T | 381  | 0.332628 | 0         |  |  |
|      |      | Shiraz-44T | 639  | 1.035032 | 0         |  |  |
|      |      | Shiraz-46T | 943  | 0.093799 | 0         |  |  |
|      |      | Shiraz-46T | 946  | 0.299835 | 0         |  |  |
|      |      | Shiraz-47T | 1030 | 0.257728 | 0         |  |  |
|      |      | Shiraz-49T | 1120 | 0.281656 | 0         |  |  |
|      |      | Shiraz-77T | 1225 | 0        | -0.117922 |  |  |
|      |      | Shiraz-77T | 1227 | 0.196445 | 0         |  |  |
|      |      | Shiraz-9T  | 1324 | 0.679266 | 0         |  |  |
|      |      | Shiraz-18T | 1434 | 0.244465 | 0         |  |  |
|      |      | Shiraz-22T | 1549 | 0        | -0.319623 |  |  |
|      |      | Shiraz-22T | 1551 | 0.324011 | 0         |  |  |
|      |      | Shiraz-25T | 1698 | 0.21835  | 0         |  |  |
|      |      | Shiraz-28T | 1735 | 0.350744 | 0         |  |  |
|      |      | Shiraz-29T | 1778 | 0.120767 | 0         |  |  |
|      |      | Shiraz-32T | 1833 | 0.551336 | 0         |  |  |

|       |      |            |      |          |           |  |
|-------|------|------------|------|----------|-----------|--|
|       |      | Shiraz-32T | 1834 | 1.485392 | 0         |  |
|       |      | Shiraz-38T | 1951 | 0.250891 | 0         |  |
|       |      | Shiraz-53T | 2078 | 0.287202 | 0         |  |
|       |      | Shiraz-58T | 2160 | 0.399007 | 0         |  |
|       |      | Shiraz-71T | 2238 | 0.603631 | 0         |  |
|       |      | Shiraz-3T  | 90   | 0.219276 | 0         |  |
|       |      | Shiraz-3T  | 94   | 0.74735  | 0         |  |
|       |      | Shiraz-4T  | 253  | 0.372918 | 0         |  |
|       |      | Shiraz-31T | 316  | 0.219196 | 0         |  |
|       |      | Shiraz-36T | 378  | 0.179558 | 0         |  |
|       |      | Shiraz-36T | 381  | 0.332628 | 0         |  |
|       |      | Shiraz-44T | 639  | 1.035032 | 0         |  |
|       |      | Shiraz-46T | 943  | 0.093799 | 0         |  |
|       |      | Shiraz-46T | 946  | 0.299835 | 0         |  |
|       |      | Shiraz-47T | 1030 | 0.257728 | 0         |  |
|       |      | Shiraz-49T | 1120 | 0.281656 | 0         |  |
|       |      | Shiraz-77T | 1225 | 0        | -0.117922 |  |
|       |      | Shiraz-77T | 1227 | 0.196445 | 0         |  |
|       |      | Shiraz-9T  | 1324 | 0.679266 | 0         |  |
|       |      | Shiraz-18T | 1434 | 0.244465 | 0         |  |
|       |      | Shiraz-22T | 1549 | 0        | -0.319623 |  |
|       |      | Shiraz-22T | 1551 | 0.324011 | 0         |  |
|       |      | Shiraz-25T | 1698 | 0.21835  | 0         |  |
|       |      | Shiraz-28T | 1735 | 0.350744 | 0         |  |
|       |      | Shiraz-29T | 1778 | 0.120767 | 0         |  |
|       |      | Shiraz-32T | 1833 | 0.551336 | 0         |  |
|       |      | Shiraz-32T | 1834 | 1.485392 | 0         |  |
|       |      | Shiraz-38T | 1951 | 0.250891 | 0         |  |
|       |      | Shiraz-53T | 2078 | 0.287202 | 0         |  |
|       |      | Shiraz-58T | 2160 | 0.399007 | 0         |  |
|       |      | Shiraz-71T | 2238 | 0.603631 | 0         |  |
| SSBP1 | chr7 | Shiraz-3T  | 90   | 0.219276 | 0         |  |
|       |      | Shiraz-4T  | 253  | 0.372918 | 0         |  |
|       |      | Shiraz-36T | 378  | 0.179558 | 0         |  |
|       |      | Shiraz-46T | 943  | 0.093799 | 0         |  |
|       |      | Shiraz-77T | 1225 | 0        | -0.117922 |  |
|       |      | Shiraz-9T  | 1325 | 0.221899 | 0         |  |
|       |      | Shiraz-18T | 1434 | 0.244465 | 0         |  |
|       |      | Shiraz-25T | 1698 | 0.21835  | 0         |  |
|       |      | Shiraz-28T | 1735 | 0.350744 | 0         |  |
|       |      | Shiraz-29T | 1778 | 0.120767 | 0         |  |
|       |      | Shiraz-32T | 1833 | 0.551336 | 0         |  |
|       |      | Shiraz-38T | 1951 | 0.250891 | 0         |  |
|       |      | Shiraz-53T | 2078 | 0.287202 | 0         |  |
|       |      | Shiraz-58T | 2162 | 0.221505 | 0         |  |
|       |      | Shiraz-71T | 2238 | 0.603631 | 0         |  |
|       |      | Shiraz-3T  | 90   | 0.219276 | 0         |  |

|      |      |            |      |          |           |  |
|------|------|------------|------|----------|-----------|--|
|      |      | Shiraz-4T  | 253  | 0.372918 | 0         |  |
|      |      | Shiraz-36T | 378  | 0.179558 | 0         |  |
|      |      | Shiraz-46T | 943  | 0.093799 | 0         |  |
|      |      | Shiraz-77T | 1225 | 0        | -0.117922 |  |
|      |      | Shiraz-9T  | 1325 | 0.221899 | 0         |  |
|      |      | Shiraz-18T | 1434 | 0.244465 | 0         |  |
|      |      | Shiraz-25T | 1698 | 0.21835  | 0         |  |
|      |      | Shiraz-28T | 1735 | 0.350744 | 0         |  |
|      |      | Shiraz-29T | 1778 | 0.120767 | 0         |  |
|      |      | Shiraz-32T | 1833 | 0.551336 | 0         |  |
|      |      | Shiraz-38T | 1951 | 0.250891 | 0         |  |
|      |      | Shiraz-53T | 2078 | 0.287202 | 0         |  |
|      |      | Shiraz-58T | 2162 | 0.221505 | 0         |  |
|      |      | Shiraz-71T | 2238 | 0.603631 | 0         |  |
|      |      | Shiraz-3T  | 90   | 0.219276 | 0         |  |
|      |      | Shiraz-4T  | 253  | 0.372918 | 0         |  |
|      |      | Shiraz-36T | 378  | 0.179558 | 0         |  |
|      |      | Shiraz-46T | 943  | 0.093799 | 0         |  |
|      |      | Shiraz-77T | 1225 | 0        | -0.117922 |  |
|      |      | Shiraz-9T  | 1325 | 0.221899 | 0         |  |
|      |      | Shiraz-18T | 1434 | 0.244465 | 0         |  |
|      |      | Shiraz-25T | 1698 | 0.21835  | 0         |  |
|      |      | Shiraz-28T | 1735 | 0.350744 | 0         |  |
|      |      | Shiraz-29T | 1778 | 0.120767 | 0         |  |
|      |      | Shiraz-32T | 1833 | 0.551336 | 0         |  |
|      |      | Shiraz-38T | 1951 | 0.250891 | 0         |  |
|      |      | Shiraz-53T | 2078 | 0.287202 | 0         |  |
|      |      | Shiraz-58T | 2162 | 0.221505 | 0         |  |
|      |      | Shiraz-71T | 2238 | 0.603631 | 0         |  |
| SSPO | chr7 | Shiraz-3T  | 90   | 0.219276 | 0         |  |
|      |      | Shiraz-3T  | 99   | 0.454766 | 0         |  |
|      |      | Shiraz-4T  | 253  | 0.372918 | 0         |  |
|      |      | Shiraz-36T | 378  | 0.179558 | 0         |  |
|      |      | Shiraz-44T | 646  | 0.471276 | 0         |  |
|      |      | Shiraz-46T | 943  | 0.093799 | 0         |  |
|      |      | Shiraz-9T  | 1325 | 0.221899 | 0         |  |
|      |      | Shiraz-18T | 1434 | 0.244465 | 0         |  |
|      |      | Shiraz-25T | 1698 | 0.21835  | 0         |  |
|      |      | Shiraz-28T | 1735 | 0.350744 | 0         |  |
|      |      | Shiraz-29T | 1778 | 0.120767 | 0         |  |
|      |      | Shiraz-32T | 1833 | 0.551336 | 0         |  |
|      |      | Shiraz-38T | 1951 | 0.250891 | 0         |  |
|      |      | Shiraz-53T | 2078 | 0.287202 | 0         |  |
|      |      | Shiraz-58T | 2162 | 0.221505 | 0         |  |
|      |      | Shiraz-71T | 2238 | 0.603631 | 0         |  |
|      |      | Shiraz-3T  | 90   | 0.219276 | 0         |  |
|      |      | Shiraz-3T  | 99   | 0.454766 | 0         |  |

|      |      |            |      |          |           |  |  |
|------|------|------------|------|----------|-----------|--|--|
|      |      | Shiraz-4T  | 253  | 0.372918 | 0         |  |  |
|      |      | Shiraz-36T | 378  | 0.179558 | 0         |  |  |
|      |      | Shiraz-44T | 646  | 0.471276 | 0         |  |  |
|      |      | Shiraz-46T | 943  | 0.093799 | 0         |  |  |
|      |      | Shiraz-9T  | 1325 | 0.221899 | 0         |  |  |
|      |      | Shiraz-18T | 1434 | 0.244465 | 0         |  |  |
|      |      | Shiraz-25T | 1698 | 0.21835  | 0         |  |  |
|      |      | Shiraz-28T | 1735 | 0.350744 | 0         |  |  |
|      |      | Shiraz-29T | 1778 | 0.120767 | 0         |  |  |
|      |      | Shiraz-32T | 1833 | 0.551336 | 0         |  |  |
|      |      | Shiraz-38T | 1951 | 0.250891 | 0         |  |  |
|      |      | Shiraz-53T | 2078 | 0.287202 | 0         |  |  |
|      |      | Shiraz-58T | 2162 | 0.221505 | 0         |  |  |
|      |      | Shiraz-71T | 2238 | 0.603631 | 0         |  |  |
|      |      | Shiraz-3T  | 90   | 0.219276 | 0         |  |  |
|      |      | Shiraz-3T  | 99   | 0.454766 | 0         |  |  |
|      |      | Shiraz-4T  | 253  | 0.372918 | 0         |  |  |
|      |      | Shiraz-36T | 378  | 0.179558 | 0         |  |  |
|      |      | Shiraz-44T | 646  | 0.471276 | 0         |  |  |
|      |      | Shiraz-46T | 943  | 0.093799 | 0         |  |  |
|      |      | Shiraz-9T  | 1325 | 0.221899 | 0         |  |  |
|      |      | Shiraz-18T | 1434 | 0.244465 | 0         |  |  |
|      |      | Shiraz-25T | 1698 | 0.21835  | 0         |  |  |
|      |      | Shiraz-28T | 1735 | 0.350744 | 0         |  |  |
|      |      | Shiraz-29T | 1778 | 0.120767 | 0         |  |  |
|      |      | Shiraz-32T | 1833 | 0.551336 | 0         |  |  |
|      |      | Shiraz-38T | 1951 | 0.250891 | 0         |  |  |
|      |      | Shiraz-53T | 2078 | 0.287202 | 0         |  |  |
|      |      | Shiraz-58T | 2162 | 0.221505 | 0         |  |  |
|      |      | Shiraz-71T | 2238 | 0.603631 | 0         |  |  |
| SSR4 | chrX | Shiraz-3T  | 246  | 0.531858 | 0         |  |  |
|      |      | Shiraz-4T  | 261  | 0        | -0.336249 |  |  |
|      |      | Shiraz-16T | 295  | 0.591657 | 0         |  |  |
|      |      | Shiraz-36T | 433  | 0        | -0.803961 |  |  |
|      |      | Shiraz-42T | 480  | 0        | -0.232915 |  |  |
|      |      | Shiraz-44T | 908  | 0.466743 | 0         |  |  |
|      |      | Shiraz-49T | 1170 | 0        | -0.967436 |  |  |
|      |      | Shiraz-49T | 1173 | 0        | -0.704439 |  |  |
|      |      | Shiraz-9T  | 1370 | 0.690073 | 0         |  |  |
|      |      | Shiraz-9T  | 1371 | 1.292392 | 0         |  |  |
|      |      | Shiraz-18T | 1457 | 0.643204 | 0         |  |  |
|      |      | Shiraz-22T | 1673 | 0.611783 | 0         |  |  |
|      |      | Shiraz-22T | 1678 | 0.911625 | 0         |  |  |
|      |      | Shiraz-25T | 1719 | 0.472955 | 0         |  |  |
|      |      | Shiraz-28T | 1762 | 0.562311 | 0         |  |  |
|      |      | Shiraz-29T | 1801 | 0.815343 | 0         |  |  |
|      |      | Shiraz-32T | 1870 | 0.729766 | 0         |  |  |

|  |  |            |      |          |           |  |
|--|--|------------|------|----------|-----------|--|
|  |  | Shiraz-32T | 1872 | 1.504553 | 0         |  |
|  |  | Shiraz-35T | 1933 | 0.488535 | 0         |  |
|  |  | Shiraz-38T | 2011 | 0        | -0.406024 |  |
|  |  | Shiraz-53T | 2115 | 0.427728 | 0         |  |
|  |  | Shiraz-58T | 2223 | 0.833364 | 0         |  |
|  |  | Shiraz-58T | 2226 | 1.074663 | 0         |  |
|  |  | Shiraz-71T | 2263 | 0.975531 | 0         |  |
|  |  | Shiraz-3T  | 246  | 0.531858 | 0         |  |
|  |  | Shiraz-4T  | 261  | 0        | -0.336249 |  |
|  |  | Shiraz-16T | 295  | 0.591657 | 0         |  |
|  |  | Shiraz-36T | 433  | 0        | -0.803961 |  |
|  |  | Shiraz-42T | 480  | 0        | -0.232915 |  |
|  |  | Shiraz-44T | 908  | 0.466743 | 0         |  |
|  |  | Shiraz-49T | 1170 | 0        | -0.967436 |  |
|  |  | Shiraz-49T | 1173 | 0        | -0.704439 |  |
|  |  | Shiraz-9T  | 1370 | 0.690073 | 0         |  |
|  |  | Shiraz-9T  | 1371 | 1.292392 | 0         |  |
|  |  | Shiraz-18T | 1457 | 0.643204 | 0         |  |
|  |  | Shiraz-22T | 1673 | 0.611783 | 0         |  |
|  |  | Shiraz-22T | 1678 | 0.911625 | 0         |  |
|  |  | Shiraz-25T | 1719 | 0.472955 | 0         |  |
|  |  | Shiraz-28T | 1762 | 0.562311 | 0         |  |
|  |  | Shiraz-29T | 1801 | 0.815343 | 0         |  |
|  |  | Shiraz-32T | 1870 | 0.729766 | 0         |  |
|  |  | Shiraz-32T | 1872 | 1.504553 | 0         |  |
|  |  | Shiraz-35T | 1933 | 0.488535 | 0         |  |
|  |  | Shiraz-38T | 2011 | 0        | -0.406024 |  |
|  |  | Shiraz-53T | 2115 | 0.427728 | 0         |  |
|  |  | Shiraz-58T | 2223 | 0.833364 | 0         |  |
|  |  | Shiraz-58T | 2226 | 1.074663 | 0         |  |
|  |  | Shiraz-71T | 2263 | 0.975531 | 0         |  |
|  |  | Shiraz-3T  | 246  | 0.531858 | 0         |  |
|  |  | Shiraz-4T  | 261  | 0        | -0.336249 |  |
|  |  | Shiraz-16T | 295  | 0.591657 | 0         |  |
|  |  | Shiraz-36T | 433  | 0        | -0.803961 |  |
|  |  | Shiraz-42T | 480  | 0        | -0.232915 |  |
|  |  | Shiraz-44T | 908  | 0.466743 | 0         |  |
|  |  | Shiraz-49T | 1170 | 0        | -0.967436 |  |
|  |  | Shiraz-49T | 1173 | 0        | -0.704439 |  |
|  |  | Shiraz-9T  | 1370 | 0.690073 | 0         |  |
|  |  | Shiraz-9T  | 1371 | 1.292392 | 0         |  |
|  |  | Shiraz-18T | 1457 | 0.643204 | 0         |  |
|  |  | Shiraz-22T | 1673 | 0.611783 | 0         |  |
|  |  | Shiraz-22T | 1678 | 0.911625 | 0         |  |
|  |  | Shiraz-25T | 1719 | 0.472955 | 0         |  |
|  |  | Shiraz-28T | 1762 | 0.562311 | 0         |  |
|  |  | Shiraz-29T | 1801 | 0.815343 | 0         |  |

|      |      |            |      |          |           |  |
|------|------|------------|------|----------|-----------|--|
|      |      | Shiraz-32T | 1870 | 0.729766 | 0         |  |
|      |      | Shiraz-32T | 1872 | 1.504553 | 0         |  |
|      |      | Shiraz-35T | 1933 | 0.488535 | 0         |  |
|      |      | Shiraz-38T | 2011 | 0        | -0.406024 |  |
|      |      | Shiraz-53T | 2115 | 0.427728 | 0         |  |
|      |      | Shiraz-58T | 2223 | 0.833364 | 0         |  |
|      |      | Shiraz-58T | 2226 | 1.074663 | 0         |  |
|      |      | Shiraz-71T | 2263 | 0.975531 | 0         |  |
| SSX1 | chrX | Shiraz-4T  | 260  | 0        | -0.324128 |  |
|      |      | Shiraz-16T | 294  | 0.655804 | 0         |  |
|      |      | Shiraz-31T | 345  | 0.103301 | 0         |  |
|      |      | Shiraz-36T | 431  | 0        | -0.78035  |  |
|      |      | Shiraz-36T | 432  | 0        | -0.6692   |  |
|      |      | Shiraz-44T | 891  | 0        | -0.954044 |  |
|      |      | Shiraz-44T | 896  | 0        | -0.109108 |  |
|      |      | Shiraz-46T | 991  | 0.139564 | 0         |  |
|      |      | Shiraz-47T | 1084 | 0.24185  | 0         |  |
|      |      | Shiraz-49T | 1166 | 0        | -0.917235 |  |
|      |      | Shiraz-49T | 1169 | 0        | -0.583529 |  |
|      |      | Shiraz-77T | 1282 | 0.213849 | 0         |  |
|      |      | Shiraz-9T  | 1368 | 0.199713 | 0         |  |
|      |      | Shiraz-9T  | 1369 | 0.703374 | 0         |  |
|      |      | Shiraz-18T | 1455 | 0        | -0.186773 |  |
|      |      | Shiraz-22T | 1669 | 0.695915 | 0         |  |
|      |      | Shiraz-22T | 1672 | 1.01678  | 0         |  |
|      |      | Shiraz-25T | 1717 | 0.420447 | 0         |  |
|      |      | Shiraz-28T | 1760 | 0.538181 | 0         |  |
|      |      | Shiraz-29T | 1800 | 0.672527 | 0         |  |
|      |      | Shiraz-32T | 1869 | 0.776805 | 0         |  |
|      |      | Shiraz-35T | 1932 | 0.507141 | 0         |  |
|      |      | Shiraz-58T | 2221 | 0.871948 | 0         |  |
|      |      | Shiraz-71T | 2260 | 0.68394  | 0         |  |
|      |      | Shiraz-71T | 2262 | 0.986748 | 0         |  |
|      |      | Shiraz-4T  | 260  | 0        | -0.324128 |  |
|      |      | Shiraz-16T | 294  | 0.655804 | 0         |  |
|      |      | Shiraz-31T | 345  | 0.103301 | 0         |  |
|      |      | Shiraz-36T | 431  | 0        | -0.78035  |  |
|      |      | Shiraz-36T | 432  | 0        | -0.6692   |  |
|      |      | Shiraz-44T | 891  | 0        | -0.954044 |  |
|      |      | Shiraz-44T | 896  | 0        | -0.109108 |  |
|      |      | Shiraz-46T | 991  | 0.139564 | 0         |  |
|      |      | Shiraz-47T | 1084 | 0.24185  | 0         |  |
|      |      | Shiraz-49T | 1166 | 0        | -0.917235 |  |
|      |      | Shiraz-49T | 1169 | 0        | -0.583529 |  |
|      |      | Shiraz-77T | 1282 | 0.213849 | 0         |  |
|      |      | Shiraz-9T  | 1368 | 0.199713 | 0         |  |
|      |      | Shiraz-9T  | 1369 | 0.703374 | 0         |  |



|      |      |            |      |          |           |  |  |
|------|------|------------|------|----------|-----------|--|--|
|      |      | Shiraz-18T | 1455 | 0        | -0.186773 |  |  |
|      |      | Shiraz-22T | 1669 | 0.695915 | 0         |  |  |
|      |      | Shiraz-22T | 1672 | 1.01678  | 0         |  |  |
|      |      | Shiraz-25T | 1717 | 0.420447 | 0         |  |  |
|      |      | Shiraz-28T | 1760 | 0.538181 | 0         |  |  |
|      |      | Shiraz-29T | 1800 | 0.672527 | 0         |  |  |
|      |      | Shiraz-32T | 1869 | 0.776805 | 0         |  |  |
|      |      | Shiraz-35T | 1932 | 0.507141 | 0         |  |  |
|      |      | Shiraz-58T | 2221 | 0.871948 | 0         |  |  |
|      |      | Shiraz-71T | 2260 | 0.68394  | 0         |  |  |
|      |      | Shiraz-71T | 2262 | 0.986748 | 0         |  |  |
|      |      | Shiraz-4T  | 260  | 0        | -0.324128 |  |  |
|      |      | Shiraz-16T | 294  | 0.655804 | 0         |  |  |
|      |      | Shiraz-31T | 345  | 0.103301 | 0         |  |  |
|      |      | Shiraz-36T | 431  | 0        | -0.78035  |  |  |
|      |      | Shiraz-36T | 432  | 0        | -0.6692   |  |  |
|      |      | Shiraz-44T | 891  | 0        | -0.954044 |  |  |
|      |      | Shiraz-44T | 896  | 0        | -0.109108 |  |  |
|      |      | Shiraz-46T | 991  | 0.139564 | 0         |  |  |
|      |      | Shiraz-47T | 1084 | 0.24185  | 0         |  |  |
|      |      | Shiraz-49T | 1166 | 0        | -0.917235 |  |  |
|      |      | Shiraz-49T | 1169 | 0        | -0.583529 |  |  |
|      |      | Shiraz-77T | 1282 | 0.213849 | 0         |  |  |
|      |      | Shiraz-9T  | 1368 | 0.199713 | 0         |  |  |
|      |      | Shiraz-9T  | 1369 | 0.703374 | 0         |  |  |
|      |      | Shiraz-18T | 1455 | 0        | -0.186773 |  |  |
|      |      | Shiraz-22T | 1669 | 0.695915 | 0         |  |  |
|      |      | Shiraz-22T | 1672 | 1.01678  | 0         |  |  |
|      |      | Shiraz-25T | 1717 | 0.420447 | 0         |  |  |
|      |      | Shiraz-28T | 1760 | 0.538181 | 0         |  |  |
|      |      | Shiraz-29T | 1800 | 0.672527 | 0         |  |  |
|      |      | Shiraz-32T | 1869 | 0.776805 | 0         |  |  |
|      |      | Shiraz-35T | 1932 | 0.507141 | 0         |  |  |
|      |      | Shiraz-58T | 2221 | 0.871948 | 0         |  |  |
|      |      | Shiraz-71T | 2260 | 0.68394  | 0         |  |  |
|      |      | Shiraz-71T | 2262 | 0.986748 | 0         |  |  |
| SSX2 | chrX | Shiraz-4T  | 260  | 0        | -0.324128 |  |  |
|      |      | Shiraz-4T  | 260  | 0        | -0.324128 |  |  |
|      |      | Shiraz-16T | 294  | 0.655804 | 0         |  |  |
|      |      | Shiraz-16T | 294  | 0.655804 | 0         |  |  |
|      |      | Shiraz-31T | 345  | 0.103301 | 0         |  |  |
|      |      | Shiraz-31T | 345  | 0.103301 | 0         |  |  |
|      |      | Shiraz-36T | 431  | 0        | -0.78035  |  |  |
|      |      | Shiraz-36T | 431  | 0        | -0.78035  |  |  |
|      |      | Shiraz-36T | 432  | 0        | -0.6692   |  |  |
|      |      | Shiraz-36T | 432  | 0        | -0.6692   |  |  |
|      |      | Shiraz-44T | 891  | 0        | -0.954044 |  |  |

|  |            |      |          |           |  |
|--|------------|------|----------|-----------|--|
|  | Shiraz-44T | 891  | 0        | -0.954044 |  |
|  | Shiraz-44T | 898  | 0        | -0.515218 |  |
|  | Shiraz-44T | 898  | 0        | -0.515218 |  |
|  | Shiraz-49T | 1166 | 0        | -0.917235 |  |
|  | Shiraz-49T | 1166 | 0        | -0.917235 |  |
|  | Shiraz-77T | 1282 | 0.213849 | 0         |  |
|  | Shiraz-77T | 1282 | 0.213849 | 0         |  |
|  | Shiraz-9T  | 1368 | 0.199713 | 0         |  |
|  | Shiraz-9T  | 1368 | 0.199713 | 0         |  |
|  | Shiraz-18T | 1456 | 0.608534 | 0         |  |
|  | Shiraz-18T | 1456 | 0.608534 | 0         |  |
|  | Shiraz-22T | 1669 | 0.695915 | 0         |  |
|  | Shiraz-22T | 1669 | 0.695915 | 0         |  |
|  | Shiraz-25T | 1717 | 0.420447 | 0         |  |
|  | Shiraz-25T | 1717 | 0.420447 | 0         |  |
|  | Shiraz-28T | 1760 | 0.538181 | 0         |  |
|  | Shiraz-28T | 1760 | 0.538181 | 0         |  |
|  | Shiraz-29T | 1800 | 0.672527 | 0         |  |
|  | Shiraz-29T | 1800 | 0.672527 | 0         |  |
|  | Shiraz-32T | 1869 | 0.776805 | 0         |  |
|  | Shiraz-32T | 1869 | 0.776805 | 0         |  |
|  | Shiraz-35T | 1932 | 0.507141 | 0         |  |
|  | Shiraz-35T | 1932 | 0.507141 | 0         |  |
|  | Shiraz-58T | 2221 | 0.871948 | 0         |  |
|  | Shiraz-58T | 2221 | 0.871948 | 0         |  |
|  | Shiraz-71T | 2260 | 0.68394  | 0         |  |
|  | Shiraz-71T | 2260 | 0.68394  | 0         |  |
|  | Shiraz-71T | 2262 | 0.986748 | 0         |  |
|  | Shiraz-71T | 2262 | 0.986748 | 0         |  |
|  | Shiraz-4T  | 260  | 0        | -0.324128 |  |
|  | Shiraz-4T  | 260  | 0        | -0.324128 |  |
|  | Shiraz-16T | 294  | 0.655804 | 0         |  |
|  | Shiraz-16T | 294  | 0.655804 | 0         |  |
|  | Shiraz-31T | 345  | 0.103301 | 0         |  |
|  | Shiraz-31T | 345  | 0.103301 | 0         |  |
|  | Shiraz-36T | 431  | 0        | -0.78035  |  |
|  | Shiraz-36T | 431  | 0        | -0.78035  |  |
|  | Shiraz-36T | 432  | 0        | -0.6692   |  |
|  | Shiraz-36T | 432  | 0        | -0.6692   |  |
|  | Shiraz-44T | 891  | 0        | -0.954044 |  |
|  | Shiraz-44T | 891  | 0        | -0.954044 |  |
|  | Shiraz-44T | 898  | 0        | -0.515218 |  |
|  | Shiraz-44T | 898  | 0        | -0.515218 |  |
|  | Shiraz-49T | 1166 | 0        | -0.917235 |  |
|  | Shiraz-49T | 1166 | 0        | -0.917235 |  |
|  | Shiraz-77T | 1282 | 0.213849 | 0         |  |
|  | Shiraz-77T | 1282 | 0.213849 | 0         |  |

|  |  |            |      |          |           |  |  |
|--|--|------------|------|----------|-----------|--|--|
|  |  | Shiraz-9T  | 1368 | 0.199713 | 0         |  |  |
|  |  | Shiraz-9T  | 1368 | 0.199713 | 0         |  |  |
|  |  | Shiraz-18T | 1456 | 0.608534 | 0         |  |  |
|  |  | Shiraz-18T | 1456 | 0.608534 | 0         |  |  |
|  |  | Shiraz-22T | 1669 | 0.695915 | 0         |  |  |
|  |  | Shiraz-22T | 1669 | 0.695915 | 0         |  |  |
|  |  | Shiraz-25T | 1717 | 0.420447 | 0         |  |  |
|  |  | Shiraz-25T | 1717 | 0.420447 | 0         |  |  |
|  |  | Shiraz-28T | 1760 | 0.538181 | 0         |  |  |
|  |  | Shiraz-28T | 1760 | 0.538181 | 0         |  |  |
|  |  | Shiraz-29T | 1800 | 0.672527 | 0         |  |  |
|  |  | Shiraz-29T | 1800 | 0.672527 | 0         |  |  |
|  |  | Shiraz-32T | 1869 | 0.776805 | 0         |  |  |
|  |  | Shiraz-32T | 1869 | 0.776805 | 0         |  |  |
|  |  | Shiraz-35T | 1932 | 0.507141 | 0         |  |  |
|  |  | Shiraz-35T | 1932 | 0.507141 | 0         |  |  |
|  |  | Shiraz-58T | 2221 | 0.871948 | 0         |  |  |
|  |  | Shiraz-58T | 2221 | 0.871948 | 0         |  |  |
|  |  | Shiraz-71T | 2260 | 0.68394  | 0         |  |  |
|  |  | Shiraz-71T | 2260 | 0.68394  | 0         |  |  |
|  |  | Shiraz-71T | 2262 | 0.986748 | 0         |  |  |
|  |  | Shiraz-71T | 2262 | 0.986748 | 0         |  |  |
|  |  | Shiraz-4T  | 260  | 0        | -0.324128 |  |  |
|  |  | Shiraz-4T  | 260  | 0        | -0.324128 |  |  |
|  |  | Shiraz-16T | 294  | 0.655804 | 0         |  |  |
|  |  | Shiraz-16T | 294  | 0.655804 | 0         |  |  |
|  |  | Shiraz-31T | 345  | 0.103301 | 0         |  |  |
|  |  | Shiraz-31T | 345  | 0.103301 | 0         |  |  |
|  |  | Shiraz-36T | 431  | 0        | -0.78035  |  |  |
|  |  | Shiraz-36T | 431  | 0        | -0.78035  |  |  |
|  |  | Shiraz-36T | 432  | 0        | -0.6692   |  |  |
|  |  | Shiraz-36T | 432  | 0        | -0.6692   |  |  |
|  |  | Shiraz-44T | 891  | 0        | -0.954044 |  |  |
|  |  | Shiraz-44T | 891  | 0        | -0.954044 |  |  |
|  |  | Shiraz-44T | 898  | 0        | -0.515218 |  |  |
|  |  | Shiraz-44T | 898  | 0        | -0.515218 |  |  |
|  |  | Shiraz-49T | 1166 | 0        | -0.917235 |  |  |
|  |  | Shiraz-49T | 1166 | 0        | -0.917235 |  |  |
|  |  | Shiraz-77T | 1282 | 0.213849 | 0         |  |  |
|  |  | Shiraz-77T | 1282 | 0.213849 | 0         |  |  |
|  |  | Shiraz-9T  | 1368 | 0.199713 | 0         |  |  |
|  |  | Shiraz-9T  | 1368 | 0.199713 | 0         |  |  |
|  |  | Shiraz-18T | 1456 | 0.608534 | 0         |  |  |
|  |  | Shiraz-18T | 1456 | 0.608534 | 0         |  |  |
|  |  | Shiraz-22T | 1669 | 0.695915 | 0         |  |  |
|  |  | Shiraz-22T | 1669 | 0.695915 | 0         |  |  |
|  |  | Shiraz-25T | 1717 | 0.420447 | 0         |  |  |

|      |      |            |      |          |           |  |  |
|------|------|------------|------|----------|-----------|--|--|
|      |      | Shiraz-25T | 1717 | 0.420447 | 0         |  |  |
|      |      | Shiraz-28T | 1760 | 0.538181 | 0         |  |  |
|      |      | Shiraz-28T | 1760 | 0.538181 | 0         |  |  |
|      |      | Shiraz-29T | 1800 | 0.672527 | 0         |  |  |
|      |      | Shiraz-29T | 1800 | 0.672527 | 0         |  |  |
|      |      | Shiraz-32T | 1869 | 0.776805 | 0         |  |  |
|      |      | Shiraz-32T | 1869 | 0.776805 | 0         |  |  |
|      |      | Shiraz-35T | 1932 | 0.507141 | 0         |  |  |
|      |      | Shiraz-35T | 1932 | 0.507141 | 0         |  |  |
|      |      | Shiraz-58T | 2221 | 0.871948 | 0         |  |  |
|      |      | Shiraz-58T | 2221 | 0.871948 | 0         |  |  |
|      |      | Shiraz-71T | 2260 | 0.68394  | 0         |  |  |
|      |      | Shiraz-71T | 2260 | 0.68394  | 0         |  |  |
|      |      | Shiraz-71T | 2262 | 0.986748 | 0         |  |  |
|      |      | Shiraz-71T | 2262 | 0.986748 | 0         |  |  |
| SSX3 | chrX | Shiraz-4T  | 260  | 0        | -0.324128 |  |  |
|      |      | Shiraz-4T  | 260  | 0        | -0.324128 |  |  |
|      |      | Shiraz-16T | 294  | 0.655804 | 0         |  |  |
|      |      | Shiraz-16T | 294  | 0.655804 | 0         |  |  |
|      |      | Shiraz-31T | 345  | 0.103301 | 0         |  |  |
|      |      | Shiraz-31T | 345  | 0.103301 | 0         |  |  |
|      |      | Shiraz-36T | 431  | 0        | -0.78035  |  |  |
|      |      | Shiraz-36T | 431  | 0        | -0.78035  |  |  |
|      |      | Shiraz-36T | 432  | 0        | -0.6692   |  |  |
|      |      | Shiraz-36T | 432  | 0        | -0.6692   |  |  |
|      |      | Shiraz-44T | 891  | 0        | -0.954044 |  |  |
|      |      | Shiraz-44T | 891  | 0        | -0.954044 |  |  |
|      |      | Shiraz-44T | 896  | 0        | -0.109108 |  |  |
|      |      | Shiraz-44T | 896  | 0        | -0.109108 |  |  |
|      |      | Shiraz-46T | 991  | 0.139564 | 0         |  |  |
|      |      | Shiraz-46T | 991  | 0.139564 | 0         |  |  |
|      |      | Shiraz-47T | 1084 | 0.24185  | 0         |  |  |
|      |      | Shiraz-47T | 1084 | 0.24185  | 0         |  |  |
|      |      | Shiraz-49T | 1166 | 0        | -0.917235 |  |  |
|      |      | Shiraz-49T | 1166 | 0        | -0.917235 |  |  |
|      |      | Shiraz-49T | 1169 | 0        | -0.583529 |  |  |
|      |      | Shiraz-49T | 1169 | 0        | -0.583529 |  |  |
|      |      | Shiraz-77T | 1282 | 0.213849 | 0         |  |  |
|      |      | Shiraz-77T | 1282 | 0.213849 | 0         |  |  |
|      |      | Shiraz-9T  | 1368 | 0.199713 | 0         |  |  |
|      |      | Shiraz-9T  | 1368 | 0.199713 | 0         |  |  |
|      |      | Shiraz-9T  | 1369 | 0.703374 | 0         |  |  |
|      |      | Shiraz-9T  | 1369 | 0.703374 | 0         |  |  |
|      |      | Shiraz-18T | 1455 | 0        | -0.186773 |  |  |
|      |      | Shiraz-18T | 1455 | 0        | -0.186773 |  |  |
|      |      | Shiraz-22T | 1669 | 0.695915 | 0         |  |  |
|      |      | Shiraz-22T | 1669 | 0.695915 | 0         |  |  |

|  |  |            |      |          |           |  |  |
|--|--|------------|------|----------|-----------|--|--|
|  |  | Shiraz-22T | 1672 | 1.01678  | 0         |  |  |
|  |  | Shiraz-22T | 1672 | 1.01678  | 0         |  |  |
|  |  | Shiraz-25T | 1717 | 0.420447 | 0         |  |  |
|  |  | Shiraz-25T | 1717 | 0.420447 | 0         |  |  |
|  |  | Shiraz-28T | 1760 | 0.538181 | 0         |  |  |
|  |  | Shiraz-28T | 1760 | 0.538181 | 0         |  |  |
|  |  | Shiraz-29T | 1800 | 0.672527 | 0         |  |  |
|  |  | Shiraz-29T | 1800 | 0.672527 | 0         |  |  |
|  |  | Shiraz-32T | 1869 | 0.776805 | 0         |  |  |
|  |  | Shiraz-32T | 1869 | 0.776805 | 0         |  |  |
|  |  | Shiraz-35T | 1932 | 0.507141 | 0         |  |  |
|  |  | Shiraz-35T | 1932 | 0.507141 | 0         |  |  |
|  |  | Shiraz-58T | 2221 | 0.871948 | 0         |  |  |
|  |  | Shiraz-58T | 2221 | 0.871948 | 0         |  |  |
|  |  | Shiraz-71T | 2260 | 0.68394  | 0         |  |  |
|  |  | Shiraz-71T | 2260 | 0.68394  | 0         |  |  |
|  |  | Shiraz-71T | 2262 | 0.986748 | 0         |  |  |
|  |  | Shiraz-71T | 2262 | 0.986748 | 0         |  |  |
|  |  | Shiraz-4T  | 260  | 0        | -0.324128 |  |  |
|  |  | Shiraz-4T  | 260  | 0        | -0.324128 |  |  |
|  |  | Shiraz-16T | 294  | 0.655804 | 0         |  |  |
|  |  | Shiraz-16T | 294  | 0.655804 | 0         |  |  |
|  |  | Shiraz-31T | 345  | 0.103301 | 0         |  |  |
|  |  | Shiraz-31T | 345  | 0.103301 | 0         |  |  |
|  |  | Shiraz-36T | 431  | 0        | -0.78035  |  |  |
|  |  | Shiraz-36T | 431  | 0        | -0.78035  |  |  |
|  |  | Shiraz-36T | 432  | 0        | -0.6692   |  |  |
|  |  | Shiraz-36T | 432  | 0        | -0.6692   |  |  |
|  |  | Shiraz-44T | 891  | 0        | -0.954044 |  |  |
|  |  | Shiraz-44T | 891  | 0        | -0.954044 |  |  |
|  |  | Shiraz-44T | 896  | 0        | -0.109108 |  |  |
|  |  | Shiraz-44T | 896  | 0        | -0.109108 |  |  |
|  |  | Shiraz-46T | 991  | 0.139564 | 0         |  |  |
|  |  | Shiraz-46T | 991  | 0.139564 | 0         |  |  |
|  |  | Shiraz-47T | 1084 | 0.24185  | 0         |  |  |
|  |  | Shiraz-47T | 1084 | 0.24185  | 0         |  |  |
|  |  | Shiraz-49T | 1166 | 0        | -0.917235 |  |  |
|  |  | Shiraz-49T | 1166 | 0        | -0.917235 |  |  |
|  |  | Shiraz-49T | 1169 | 0        | -0.583529 |  |  |
|  |  | Shiraz-49T | 1169 | 0        | -0.583529 |  |  |
|  |  | Shiraz-77T | 1282 | 0.213849 | 0         |  |  |
|  |  | Shiraz-77T | 1282 | 0.213849 | 0         |  |  |
|  |  | Shiraz-9T  | 1368 | 0.199713 | 0         |  |  |
|  |  | Shiraz-9T  | 1368 | 0.199713 | 0         |  |  |
|  |  | Shiraz-9T  | 1369 | 0.703374 | 0         |  |  |
|  |  | Shiraz-9T  | 1369 | 0.703374 | 0         |  |  |
|  |  | Shiraz-18T | 1455 | 0        | -0.186773 |  |  |

|  |            |      |          |           |  |
|--|------------|------|----------|-----------|--|
|  | Shiraz-18T | 1455 | 0        | -0.186773 |  |
|  | Shiraz-22T | 1669 | 0.695915 | 0         |  |
|  | Shiraz-22T | 1669 | 0.695915 | 0         |  |
|  | Shiraz-22T | 1672 | 1.01678  | 0         |  |
|  | Shiraz-22T | 1672 | 1.01678  | 0         |  |
|  | Shiraz-25T | 1717 | 0.420447 | 0         |  |
|  | Shiraz-25T | 1717 | 0.420447 | 0         |  |
|  | Shiraz-28T | 1760 | 0.538181 | 0         |  |
|  | Shiraz-28T | 1760 | 0.538181 | 0         |  |
|  | Shiraz-29T | 1800 | 0.672527 | 0         |  |
|  | Shiraz-29T | 1800 | 0.672527 | 0         |  |
|  | Shiraz-32T | 1869 | 0.776805 | 0         |  |
|  | Shiraz-32T | 1869 | 0.776805 | 0         |  |
|  | Shiraz-35T | 1932 | 0.507141 | 0         |  |
|  | Shiraz-35T | 1932 | 0.507141 | 0         |  |
|  | Shiraz-58T | 2221 | 0.871948 | 0         |  |
|  | Shiraz-58T | 2221 | 0.871948 | 0         |  |
|  | Shiraz-71T | 2260 | 0.68394  | 0         |  |
|  | Shiraz-71T | 2260 | 0.68394  | 0         |  |
|  | Shiraz-71T | 2262 | 0.986748 | 0         |  |
|  | Shiraz-71T | 2262 | 0.986748 | 0         |  |
|  | Shiraz-4T  | 260  | 0        | -0.324128 |  |
|  | Shiraz-4T  | 260  | 0        | -0.324128 |  |
|  | Shiraz-16T | 294  | 0.655804 | 0         |  |
|  | Shiraz-16T | 294  | 0.655804 | 0         |  |
|  | Shiraz-31T | 345  | 0.103301 | 0         |  |
|  | Shiraz-31T | 345  | 0.103301 | 0         |  |
|  | Shiraz-36T | 431  | 0        | -0.78035  |  |
|  | Shiraz-36T | 431  | 0        | -0.78035  |  |
|  | Shiraz-36T | 432  | 0        | -0.6692   |  |
|  | Shiraz-36T | 432  | 0        | -0.6692   |  |
|  | Shiraz-44T | 891  | 0        | -0.954044 |  |
|  | Shiraz-44T | 891  | 0        | -0.954044 |  |
|  | Shiraz-44T | 896  | 0        | -0.109108 |  |
|  | Shiraz-44T | 896  | 0        | -0.109108 |  |
|  | Shiraz-46T | 991  | 0.139564 | 0         |  |
|  | Shiraz-46T | 991  | 0.139564 | 0         |  |
|  | Shiraz-47T | 1084 | 0.24185  | 0         |  |
|  | Shiraz-47T | 1084 | 0.24185  | 0         |  |
|  | Shiraz-49T | 1166 | 0        | -0.917235 |  |
|  | Shiraz-49T | 1166 | 0        | -0.917235 |  |
|  | Shiraz-49T | 1169 | 0        | -0.583529 |  |
|  | Shiraz-49T | 1169 | 0        | -0.583529 |  |
|  | Shiraz-77T | 1282 | 0.213849 | 0         |  |
|  | Shiraz-77T | 1282 | 0.213849 | 0         |  |
|  | Shiraz-9T  | 1368 | 0.199713 | 0         |  |
|  | Shiraz-9T  | 1368 | 0.199713 | 0         |  |

|      |      |            |      |          |           |  |  |
|------|------|------------|------|----------|-----------|--|--|
|      |      | Shiraz-9T  | 1369 | 0.703374 | 0         |  |  |
|      |      | Shiraz-9T  | 1369 | 0.703374 | 0         |  |  |
|      |      | Shiraz-18T | 1455 | 0        | -0.186773 |  |  |
|      |      | Shiraz-18T | 1455 | 0        | -0.186773 |  |  |
|      |      | Shiraz-22T | 1669 | 0.695915 | 0         |  |  |
|      |      | Shiraz-22T | 1669 | 0.695915 | 0         |  |  |
|      |      | Shiraz-22T | 1672 | 1.01678  | 0         |  |  |
|      |      | Shiraz-22T | 1672 | 1.01678  | 0         |  |  |
|      |      | Shiraz-25T | 1717 | 0.420447 | 0         |  |  |
|      |      | Shiraz-25T | 1717 | 0.420447 | 0         |  |  |
|      |      | Shiraz-28T | 1760 | 0.538181 | 0         |  |  |
|      |      | Shiraz-28T | 1760 | 0.538181 | 0         |  |  |
|      |      | Shiraz-29T | 1800 | 0.672527 | 0         |  |  |
|      |      | Shiraz-29T | 1800 | 0.672527 | 0         |  |  |
|      |      | Shiraz-32T | 1869 | 0.776805 | 0         |  |  |
|      |      | Shiraz-32T | 1869 | 0.776805 | 0         |  |  |
|      |      | Shiraz-35T | 1932 | 0.507141 | 0         |  |  |
|      |      | Shiraz-35T | 1932 | 0.507141 | 0         |  |  |
|      |      | Shiraz-58T | 2221 | 0.871948 | 0         |  |  |
|      |      | Shiraz-58T | 2221 | 0.871948 | 0         |  |  |
|      |      | Shiraz-71T | 2260 | 0.68394  | 0         |  |  |
|      |      | Shiraz-71T | 2260 | 0.68394  | 0         |  |  |
|      |      | Shiraz-71T | 2262 | 0.986748 | 0         |  |  |
|      |      | Shiraz-71T | 2262 | 0.986748 | 0         |  |  |
| SSX4 | chrX | Shiraz-4T  | 260  | 0        | -0.324128 |  |  |
|      |      | Shiraz-4T  | 260  | 0        | -0.324128 |  |  |
|      |      | Shiraz-16T | 294  | 0.655804 | 0         |  |  |
|      |      | Shiraz-16T | 294  | 0.655804 | 0         |  |  |
|      |      | Shiraz-31T | 345  | 0.103301 | 0         |  |  |
|      |      | Shiraz-31T | 345  | 0.103301 | 0         |  |  |
|      |      | Shiraz-36T | 431  | 0        | -0.78035  |  |  |
|      |      | Shiraz-36T | 431  | 0        | -0.78035  |  |  |
|      |      | Shiraz-36T | 432  | 0        | -0.6692   |  |  |
|      |      | Shiraz-36T | 432  | 0        | -0.6692   |  |  |
|      |      | Shiraz-44T | 891  | 0        | -0.954044 |  |  |
|      |      | Shiraz-44T | 891  | 0        | -0.954044 |  |  |
|      |      | Shiraz-44T | 896  | 0        | -0.109108 |  |  |
|      |      | Shiraz-44T | 896  | 0        | -0.109108 |  |  |
|      |      | Shiraz-46T | 991  | 0.139564 | 0         |  |  |
|      |      | Shiraz-46T | 991  | 0.139564 | 0         |  |  |
|      |      | Shiraz-47T | 1084 | 0.24185  | 0         |  |  |
|      |      | Shiraz-47T | 1084 | 0.24185  | 0         |  |  |
|      |      | Shiraz-49T | 1166 | 0        | -0.917235 |  |  |
|      |      | Shiraz-49T | 1166 | 0        | -0.917235 |  |  |
|      |      | Shiraz-49T | 1169 | 0        | -0.583529 |  |  |
|      |      | Shiraz-49T | 1169 | 0        | -0.583529 |  |  |
|      |      | Shiraz-77T | 1282 | 0.213849 | 0         |  |  |

|  |  |            |      |          |           |  |
|--|--|------------|------|----------|-----------|--|
|  |  | Shiraz-77T | 1282 | 0.213849 | 0         |  |
|  |  | Shiraz-9T  | 1368 | 0.199713 | 0         |  |
|  |  | Shiraz-9T  | 1368 | 0.199713 | 0         |  |
|  |  | Shiraz-9T  | 1369 | 0.703374 | 0         |  |
|  |  | Shiraz-9T  | 1369 | 0.703374 | 0         |  |
|  |  | Shiraz-18T | 1455 | 0        | -0.186773 |  |
|  |  | Shiraz-18T | 1455 | 0        | -0.186773 |  |
|  |  | Shiraz-22T | 1669 | 0.695915 | 0         |  |
|  |  | Shiraz-22T | 1669 | 0.695915 | 0         |  |
|  |  | Shiraz-22T | 1672 | 1.01678  | 0         |  |
|  |  | Shiraz-22T | 1672 | 1.01678  | 0         |  |
|  |  | Shiraz-25T | 1717 | 0.420447 | 0         |  |
|  |  | Shiraz-25T | 1717 | 0.420447 | 0         |  |
|  |  | Shiraz-28T | 1760 | 0.538181 | 0         |  |
|  |  | Shiraz-28T | 1760 | 0.538181 | 0         |  |
|  |  | Shiraz-29T | 1800 | 0.672527 | 0         |  |
|  |  | Shiraz-29T | 1800 | 0.672527 | 0         |  |
|  |  | Shiraz-32T | 1869 | 0.776805 | 0         |  |
|  |  | Shiraz-32T | 1869 | 0.776805 | 0         |  |
|  |  | Shiraz-35T | 1932 | 0.507141 | 0         |  |
|  |  | Shiraz-35T | 1932 | 0.507141 | 0         |  |
|  |  | Shiraz-58T | 2221 | 0.871948 | 0         |  |
|  |  | Shiraz-58T | 2221 | 0.871948 | 0         |  |
|  |  | Shiraz-71T | 2260 | 0.68394  | 0         |  |
|  |  | Shiraz-71T | 2260 | 0.68394  | 0         |  |
|  |  | Shiraz-71T | 2262 | 0.986748 | 0         |  |
|  |  | Shiraz-71T | 2262 | 0.986748 | 0         |  |
|  |  | Shiraz-4T  | 260  | 0        | -0.324128 |  |
|  |  | Shiraz-4T  | 260  | 0        | -0.324128 |  |
|  |  | Shiraz-16T | 294  | 0.655804 | 0         |  |
|  |  | Shiraz-16T | 294  | 0.655804 | 0         |  |
|  |  | Shiraz-31T | 345  | 0.103301 | 0         |  |
|  |  | Shiraz-31T | 345  | 0.103301 | 0         |  |
|  |  | Shiraz-36T | 431  | 0        | -0.78035  |  |
|  |  | Shiraz-36T | 431  | 0        | -0.78035  |  |
|  |  | Shiraz-36T | 432  | 0        | -0.6692   |  |
|  |  | Shiraz-36T | 432  | 0        | -0.6692   |  |
|  |  | Shiraz-44T | 891  | 0        | -0.954044 |  |
|  |  | Shiraz-44T | 891  | 0        | -0.954044 |  |
|  |  | Shiraz-44T | 896  | 0        | -0.109108 |  |
|  |  | Shiraz-44T | 896  | 0        | -0.109108 |  |
|  |  | Shiraz-46T | 991  | 0.139564 | 0         |  |
|  |  | Shiraz-46T | 991  | 0.139564 | 0         |  |
|  |  | Shiraz-47T | 1084 | 0.24185  | 0         |  |
|  |  | Shiraz-47T | 1084 | 0.24185  | 0         |  |
|  |  | Shiraz-49T | 1166 | 0        | -0.917235 |  |
|  |  | Shiraz-49T | 1166 | 0        | -0.917235 |  |



|  |            |      |          |           |  |
|--|------------|------|----------|-----------|--|
|  | Shiraz-49T | 1169 | 0        | -0.583529 |  |
|  | Shiraz-49T | 1169 | 0        | -0.583529 |  |
|  | Shiraz-77T | 1282 | 0.213849 | 0         |  |
|  | Shiraz-77T | 1282 | 0.213849 | 0         |  |
|  | Shiraz-9T  | 1368 | 0.199713 | 0         |  |
|  | Shiraz-9T  | 1368 | 0.199713 | 0         |  |
|  | Shiraz-9T  | 1369 | 0.703374 | 0         |  |
|  | Shiraz-9T  | 1369 | 0.703374 | 0         |  |
|  | Shiraz-18T | 1455 | 0        | -0.186773 |  |
|  | Shiraz-18T | 1455 | 0        | -0.186773 |  |
|  | Shiraz-22T | 1669 | 0.695915 | 0         |  |
|  | Shiraz-22T | 1669 | 0.695915 | 0         |  |
|  | Shiraz-22T | 1672 | 1.01678  | 0         |  |
|  | Shiraz-22T | 1672 | 1.01678  | 0         |  |
|  | Shiraz-25T | 1717 | 0.420447 | 0         |  |
|  | Shiraz-25T | 1717 | 0.420447 | 0         |  |
|  | Shiraz-28T | 1760 | 0.538181 | 0         |  |
|  | Shiraz-28T | 1760 | 0.538181 | 0         |  |
|  | Shiraz-29T | 1800 | 0.672527 | 0         |  |
|  | Shiraz-29T | 1800 | 0.672527 | 0         |  |
|  | Shiraz-32T | 1869 | 0.776805 | 0         |  |
|  | Shiraz-32T | 1869 | 0.776805 | 0         |  |
|  | Shiraz-35T | 1932 | 0.507141 | 0         |  |
|  | Shiraz-35T | 1932 | 0.507141 | 0         |  |
|  | Shiraz-58T | 2221 | 0.871948 | 0         |  |
|  | Shiraz-58T | 2221 | 0.871948 | 0         |  |
|  | Shiraz-71T | 2260 | 0.68394  | 0         |  |
|  | Shiraz-71T | 2260 | 0.68394  | 0         |  |
|  | Shiraz-71T | 2262 | 0.986748 | 0         |  |
|  | Shiraz-71T | 2262 | 0.986748 | 0         |  |
|  | Shiraz-4T  | 260  | 0        | -0.324128 |  |
|  | Shiraz-4T  | 260  | 0        | -0.324128 |  |
|  | Shiraz-16T | 294  | 0.655804 | 0         |  |
|  | Shiraz-16T | 294  | 0.655804 | 0         |  |
|  | Shiraz-31T | 345  | 0.103301 | 0         |  |
|  | Shiraz-31T | 345  | 0.103301 | 0         |  |
|  | Shiraz-36T | 431  | 0        | -0.78035  |  |
|  | Shiraz-36T | 431  | 0        | -0.78035  |  |
|  | Shiraz-36T | 432  | 0        | -0.6692   |  |
|  | Shiraz-36T | 432  | 0        | -0.6692   |  |
|  | Shiraz-44T | 891  | 0        | -0.954044 |  |
|  | Shiraz-44T | 891  | 0        | -0.954044 |  |
|  | Shiraz-44T | 896  | 0        | -0.109108 |  |
|  | Shiraz-44T | 896  | 0        | -0.109108 |  |
|  | Shiraz-46T | 991  | 0.139564 | 0         |  |
|  | Shiraz-46T | 991  | 0.139564 | 0         |  |
|  | Shiraz-47T | 1084 | 0.24185  | 0         |  |

|       |      |            |      |          |           |  |  |
|-------|------|------------|------|----------|-----------|--|--|
|       |      | Shiraz-47T | 1084 | 0.24185  | 0         |  |  |
|       |      | Shiraz-49T | 1166 | 0        | -0.917235 |  |  |
|       |      | Shiraz-49T | 1166 | 0        | -0.917235 |  |  |
|       |      | Shiraz-49T | 1169 | 0        | -0.583529 |  |  |
|       |      | Shiraz-49T | 1169 | 0        | -0.583529 |  |  |
|       |      | Shiraz-77T | 1282 | 0.213849 | 0         |  |  |
|       |      | Shiraz-77T | 1282 | 0.213849 | 0         |  |  |
|       |      | Shiraz-9T  | 1368 | 0.199713 | 0         |  |  |
|       |      | Shiraz-9T  | 1368 | 0.199713 | 0         |  |  |
|       |      | Shiraz-9T  | 1369 | 0.703374 | 0         |  |  |
|       |      | Shiraz-9T  | 1369 | 0.703374 | 0         |  |  |
|       |      | Shiraz-18T | 1455 | 0        | -0.186773 |  |  |
|       |      | Shiraz-18T | 1455 | 0        | -0.186773 |  |  |
|       |      | Shiraz-22T | 1669 | 0.695915 | 0         |  |  |
|       |      | Shiraz-22T | 1669 | 0.695915 | 0         |  |  |
|       |      | Shiraz-22T | 1672 | 1.01678  | 0         |  |  |
|       |      | Shiraz-22T | 1672 | 1.01678  | 0         |  |  |
|       |      | Shiraz-25T | 1717 | 0.420447 | 0         |  |  |
|       |      | Shiraz-25T | 1717 | 0.420447 | 0         |  |  |
|       |      | Shiraz-28T | 1760 | 0.538181 | 0         |  |  |
|       |      | Shiraz-28T | 1760 | 0.538181 | 0         |  |  |
|       |      | Shiraz-29T | 1800 | 0.672527 | 0         |  |  |
|       |      | Shiraz-29T | 1800 | 0.672527 | 0         |  |  |
|       |      | Shiraz-32T | 1869 | 0.776805 | 0         |  |  |
|       |      | Shiraz-32T | 1869 | 0.776805 | 0         |  |  |
|       |      | Shiraz-35T | 1932 | 0.507141 | 0         |  |  |
|       |      | Shiraz-35T | 1932 | 0.507141 | 0         |  |  |
|       |      | Shiraz-58T | 2221 | 0.871948 | 0         |  |  |
|       |      | Shiraz-58T | 2221 | 0.871948 | 0         |  |  |
|       |      | Shiraz-71T | 2260 | 0.68394  | 0         |  |  |
|       |      | Shiraz-71T | 2260 | 0.68394  | 0         |  |  |
|       |      | Shiraz-71T | 2262 | 0.986748 | 0         |  |  |
|       |      | Shiraz-71T | 2262 | 0.986748 | 0         |  |  |
| SSX4B | chrX | Shiraz-4T  | 260  | 0        | -0.324128 |  |  |
|       |      | Shiraz-4T  | 260  | 0        | -0.324128 |  |  |
|       |      | Shiraz-16T | 294  | 0.655804 | 0         |  |  |
|       |      | Shiraz-16T | 294  | 0.655804 | 0         |  |  |
|       |      | Shiraz-31T | 345  | 0.103301 | 0         |  |  |
|       |      | Shiraz-31T | 345  | 0.103301 | 0         |  |  |
|       |      | Shiraz-36T | 431  | 0        | -0.78035  |  |  |
|       |      | Shiraz-36T | 431  | 0        | -0.78035  |  |  |
|       |      | Shiraz-36T | 432  | 0        | -0.6692   |  |  |
|       |      | Shiraz-36T | 432  | 0        | -0.6692   |  |  |
|       |      | Shiraz-44T | 891  | 0        | -0.954044 |  |  |
|       |      | Shiraz-44T | 891  | 0        | -0.954044 |  |  |
|       |      | Shiraz-44T | 896  | 0        | -0.109108 |  |  |
|       |      | Shiraz-44T | 896  | 0        | -0.109108 |  |  |

|  |            |      |          |           |  |
|--|------------|------|----------|-----------|--|
|  | Shiraz-46T | 991  | 0.139564 | 0         |  |
|  | Shiraz-46T | 991  | 0.139564 | 0         |  |
|  | Shiraz-47T | 1084 | 0.24185  | 0         |  |
|  | Shiraz-47T | 1084 | 0.24185  | 0         |  |
|  | Shiraz-49T | 1166 | 0        | -0.917235 |  |
|  | Shiraz-49T | 1166 | 0        | -0.917235 |  |
|  | Shiraz-49T | 1169 | 0        | -0.583529 |  |
|  | Shiraz-49T | 1169 | 0        | -0.583529 |  |
|  | Shiraz-77T | 1282 | 0.213849 | 0         |  |
|  | Shiraz-77T | 1282 | 0.213849 | 0         |  |
|  | Shiraz-9T  | 1368 | 0.199713 | 0         |  |
|  | Shiraz-9T  | 1368 | 0.199713 | 0         |  |
|  | Shiraz-9T  | 1369 | 0.703374 | 0         |  |
|  | Shiraz-9T  | 1369 | 0.703374 | 0         |  |
|  | Shiraz-18T | 1455 | 0        | -0.186773 |  |
|  | Shiraz-18T | 1455 | 0        | -0.186773 |  |
|  | Shiraz-22T | 1669 | 0.695915 | 0         |  |
|  | Shiraz-22T | 1669 | 0.695915 | 0         |  |
|  | Shiraz-22T | 1672 | 1.01678  | 0         |  |
|  | Shiraz-22T | 1672 | 1.01678  | 0         |  |
|  | Shiraz-25T | 1717 | 0.420447 | 0         |  |
|  | Shiraz-25T | 1717 | 0.420447 | 0         |  |
|  | Shiraz-28T | 1760 | 0.538181 | 0         |  |
|  | Shiraz-28T | 1760 | 0.538181 | 0         |  |
|  | Shiraz-29T | 1800 | 0.672527 | 0         |  |
|  | Shiraz-29T | 1800 | 0.672527 | 0         |  |
|  | Shiraz-32T | 1869 | 0.776805 | 0         |  |
|  | Shiraz-32T | 1869 | 0.776805 | 0         |  |
|  | Shiraz-35T | 1932 | 0.507141 | 0         |  |
|  | Shiraz-35T | 1932 | 0.507141 | 0         |  |
|  | Shiraz-58T | 2221 | 0.871948 | 0         |  |
|  | Shiraz-58T | 2221 | 0.871948 | 0         |  |
|  | Shiraz-71T | 2260 | 0.68394  | 0         |  |
|  | Shiraz-71T | 2260 | 0.68394  | 0         |  |
|  | Shiraz-71T | 2262 | 0.986748 | 0         |  |
|  | Shiraz-71T | 2262 | 0.986748 | 0         |  |
|  | Shiraz-4T  | 260  | 0        | -0.324128 |  |
|  | Shiraz-4T  | 260  | 0        | -0.324128 |  |
|  | Shiraz-16T | 294  | 0.655804 | 0         |  |
|  | Shiraz-16T | 294  | 0.655804 | 0         |  |
|  | Shiraz-31T | 345  | 0.103301 | 0         |  |
|  | Shiraz-31T | 345  | 0.103301 | 0         |  |
|  | Shiraz-36T | 431  | 0        | -0.78035  |  |
|  | Shiraz-36T | 431  | 0        | -0.78035  |  |
|  | Shiraz-36T | 432  | 0        | -0.6692   |  |
|  | Shiraz-36T | 432  | 0        | -0.6692   |  |
|  | Shiraz-44T | 891  | 0        | -0.954044 |  |

|  |            |      |          |           |  |
|--|------------|------|----------|-----------|--|
|  | Shiraz-44T | 891  | 0        | -0.954044 |  |
|  | Shiraz-44T | 896  | 0        | -0.109108 |  |
|  | Shiraz-44T | 896  | 0        | -0.109108 |  |
|  | Shiraz-46T | 991  | 0.139564 | 0         |  |
|  | Shiraz-46T | 991  | 0.139564 | 0         |  |
|  | Shiraz-47T | 1084 | 0.24185  | 0         |  |
|  | Shiraz-47T | 1084 | 0.24185  | 0         |  |
|  | Shiraz-49T | 1166 | 0        | -0.917235 |  |
|  | Shiraz-49T | 1166 | 0        | -0.917235 |  |
|  | Shiraz-49T | 1169 | 0        | -0.583529 |  |
|  | Shiraz-49T | 1169 | 0        | -0.583529 |  |
|  | Shiraz-77T | 1282 | 0.213849 | 0         |  |
|  | Shiraz-77T | 1282 | 0.213849 | 0         |  |
|  | Shiraz-9T  | 1368 | 0.199713 | 0         |  |
|  | Shiraz-9T  | 1368 | 0.199713 | 0         |  |
|  | Shiraz-9T  | 1369 | 0.703374 | 0         |  |
|  | Shiraz-9T  | 1369 | 0.703374 | 0         |  |
|  | Shiraz-18T | 1455 | 0        | -0.186773 |  |
|  | Shiraz-18T | 1455 | 0        | -0.186773 |  |
|  | Shiraz-22T | 1669 | 0.695915 | 0         |  |
|  | Shiraz-22T | 1669 | 0.695915 | 0         |  |
|  | Shiraz-22T | 1672 | 1.01678  | 0         |  |
|  | Shiraz-22T | 1672 | 1.01678  | 0         |  |
|  | Shiraz-25T | 1717 | 0.420447 | 0         |  |
|  | Shiraz-25T | 1717 | 0.420447 | 0         |  |
|  | Shiraz-28T | 1760 | 0.538181 | 0         |  |
|  | Shiraz-28T | 1760 | 0.538181 | 0         |  |
|  | Shiraz-29T | 1800 | 0.672527 | 0         |  |
|  | Shiraz-29T | 1800 | 0.672527 | 0         |  |
|  | Shiraz-32T | 1869 | 0.776805 | 0         |  |
|  | Shiraz-32T | 1869 | 0.776805 | 0         |  |
|  | Shiraz-35T | 1932 | 0.507141 | 0         |  |
|  | Shiraz-35T | 1932 | 0.507141 | 0         |  |
|  | Shiraz-58T | 2221 | 0.871948 | 0         |  |
|  | Shiraz-58T | 2221 | 0.871948 | 0         |  |
|  | Shiraz-71T | 2260 | 0.68394  | 0         |  |
|  | Shiraz-71T | 2260 | 0.68394  | 0         |  |
|  | Shiraz-71T | 2262 | 0.986748 | 0         |  |
|  | Shiraz-71T | 2262 | 0.986748 | 0         |  |
|  | Shiraz-4T  | 260  | 0        | -0.324128 |  |
|  | Shiraz-4T  | 260  | 0        | -0.324128 |  |
|  | Shiraz-16T | 294  | 0.655804 | 0         |  |
|  | Shiraz-16T | 294  | 0.655804 | 0         |  |
|  | Shiraz-31T | 345  | 0.103301 | 0         |  |
|  | Shiraz-31T | 345  | 0.103301 | 0         |  |
|  | Shiraz-36T | 431  | 0        | -0.78035  |  |
|  | Shiraz-36T | 431  | 0        | -0.78035  |  |

|      |      |            |      |          |           |  |  |
|------|------|------------|------|----------|-----------|--|--|
|      |      | Shiraz-36T | 432  | 0        | -0.6692   |  |  |
|      |      | Shiraz-36T | 432  | 0        | -0.6692   |  |  |
|      |      | Shiraz-44T | 891  | 0        | -0.954044 |  |  |
|      |      | Shiraz-44T | 891  | 0        | -0.954044 |  |  |
|      |      | Shiraz-44T | 896  | 0        | -0.109108 |  |  |
|      |      | Shiraz-44T | 896  | 0        | -0.109108 |  |  |
|      |      | Shiraz-46T | 991  | 0.139564 | 0         |  |  |
|      |      | Shiraz-46T | 991  | 0.139564 | 0         |  |  |
|      |      | Shiraz-47T | 1084 | 0.24185  | 0         |  |  |
|      |      | Shiraz-47T | 1084 | 0.24185  | 0         |  |  |
|      |      | Shiraz-49T | 1166 | 0        | -0.917235 |  |  |
|      |      | Shiraz-49T | 1166 | 0        | -0.917235 |  |  |
|      |      | Shiraz-49T | 1169 | 0        | -0.583529 |  |  |
|      |      | Shiraz-49T | 1169 | 0        | -0.583529 |  |  |
|      |      | Shiraz-77T | 1282 | 0.213849 | 0         |  |  |
|      |      | Shiraz-77T | 1282 | 0.213849 | 0         |  |  |
|      |      | Shiraz-9T  | 1368 | 0.199713 | 0         |  |  |
|      |      | Shiraz-9T  | 1368 | 0.199713 | 0         |  |  |
|      |      | Shiraz-9T  | 1369 | 0.703374 | 0         |  |  |
|      |      | Shiraz-9T  | 1369 | 0.703374 | 0         |  |  |
|      |      | Shiraz-18T | 1455 | 0        | -0.186773 |  |  |
|      |      | Shiraz-18T | 1455 | 0        | -0.186773 |  |  |
|      |      | Shiraz-22T | 1669 | 0.695915 | 0         |  |  |
|      |      | Shiraz-22T | 1669 | 0.695915 | 0         |  |  |
|      |      | Shiraz-22T | 1672 | 1.01678  | 0         |  |  |
|      |      | Shiraz-22T | 1672 | 1.01678  | 0         |  |  |
|      |      | Shiraz-25T | 1717 | 0.420447 | 0         |  |  |
|      |      | Shiraz-25T | 1717 | 0.420447 | 0         |  |  |
|      |      | Shiraz-28T | 1760 | 0.538181 | 0         |  |  |
|      |      | Shiraz-28T | 1760 | 0.538181 | 0         |  |  |
|      |      | Shiraz-29T | 1800 | 0.672527 | 0         |  |  |
|      |      | Shiraz-29T | 1800 | 0.672527 | 0         |  |  |
|      |      | Shiraz-32T | 1869 | 0.776805 | 0         |  |  |
|      |      | Shiraz-32T | 1869 | 0.776805 | 0         |  |  |
|      |      | Shiraz-35T | 1932 | 0.507141 | 0         |  |  |
|      |      | Shiraz-35T | 1932 | 0.507141 | 0         |  |  |
|      |      | Shiraz-58T | 2221 | 0.871948 | 0         |  |  |
|      |      | Shiraz-58T | 2221 | 0.871948 | 0         |  |  |
|      |      | Shiraz-71T | 2260 | 0.68394  | 0         |  |  |
|      |      | Shiraz-71T | 2260 | 0.68394  | 0         |  |  |
|      |      | Shiraz-71T | 2262 | 0.986748 | 0         |  |  |
|      |      | Shiraz-71T | 2262 | 0.986748 | 0         |  |  |
| SSX5 | chrX | Shiraz-4T  | 260  | 0        | -0.324128 |  |  |
|      |      | Shiraz-16T | 294  | 0.655804 | 0         |  |  |
|      |      | Shiraz-31T | 345  | 0.103301 | 0         |  |  |
|      |      | Shiraz-36T | 431  | 0        | -0.78035  |  |  |
|      |      | Shiraz-36T | 432  | 0        | -0.6692   |  |  |

|  |            |      |          |           |  |
|--|------------|------|----------|-----------|--|
|  | Shiraz-44T | 891  | 0        | -0.954044 |  |
|  | Shiraz-44T | 896  | 0        | -0.109108 |  |
|  | Shiraz-46T | 991  | 0.139564 | 0         |  |
|  | Shiraz-47T | 1084 | 0.24185  | 0         |  |
|  | Shiraz-49T | 1166 | 0        | -0.917235 |  |
|  | Shiraz-49T | 1169 | 0        | -0.583529 |  |
|  | Shiraz-77T | 1282 | 0.213849 | 0         |  |
|  | Shiraz-9T  | 1368 | 0.199713 | 0         |  |
|  | Shiraz-9T  | 1369 | 0.703374 | 0         |  |
|  | Shiraz-18T | 1455 | 0        | -0.186773 |  |
|  | Shiraz-22T | 1669 | 0.695915 | 0         |  |
|  | Shiraz-22T | 1672 | 1.01678  | 0         |  |
|  | Shiraz-25T | 1717 | 0.420447 | 0         |  |
|  | Shiraz-28T | 1760 | 0.538181 | 0         |  |
|  | Shiraz-29T | 1800 | 0.672527 | 0         |  |
|  | Shiraz-32T | 1869 | 0.776805 | 0         |  |
|  | Shiraz-35T | 1932 | 0.507141 | 0         |  |
|  | Shiraz-58T | 2221 | 0.871948 | 0         |  |
|  | Shiraz-71T | 2260 | 0.68394  | 0         |  |
|  | Shiraz-71T | 2262 | 0.986748 | 0         |  |
|  | Shiraz-4T  | 260  | 0        | -0.324128 |  |
|  | Shiraz-16T | 294  | 0.655804 | 0         |  |
|  | Shiraz-31T | 345  | 0.103301 | 0         |  |
|  | Shiraz-36T | 431  | 0        | -0.78035  |  |
|  | Shiraz-36T | 432  | 0        | -0.6692   |  |
|  | Shiraz-44T | 891  | 0        | -0.954044 |  |
|  | Shiraz-44T | 896  | 0        | -0.109108 |  |
|  | Shiraz-46T | 991  | 0.139564 | 0         |  |
|  | Shiraz-47T | 1084 | 0.24185  | 0         |  |
|  | Shiraz-49T | 1166 | 0        | -0.917235 |  |
|  | Shiraz-49T | 1169 | 0        | -0.583529 |  |
|  | Shiraz-77T | 1282 | 0.213849 | 0         |  |
|  | Shiraz-9T  | 1368 | 0.199713 | 0         |  |
|  | Shiraz-9T  | 1369 | 0.703374 | 0         |  |
|  | Shiraz-18T | 1455 | 0        | -0.186773 |  |
|  | Shiraz-22T | 1669 | 0.695915 | 0         |  |
|  | Shiraz-22T | 1672 | 1.01678  | 0         |  |
|  | Shiraz-25T | 1717 | 0.420447 | 0         |  |
|  | Shiraz-28T | 1760 | 0.538181 | 0         |  |
|  | Shiraz-29T | 1800 | 0.672527 | 0         |  |
|  | Shiraz-32T | 1869 | 0.776805 | 0         |  |
|  | Shiraz-35T | 1932 | 0.507141 | 0         |  |
|  | Shiraz-58T | 2221 | 0.871948 | 0         |  |
|  | Shiraz-71T | 2260 | 0.68394  | 0         |  |
|  | Shiraz-71T | 2262 | 0.986748 | 0         |  |
|  | Shiraz-4T  | 260  | 0        | -0.324128 |  |
|  | Shiraz-16T | 294  | 0.655804 | 0         |  |

|      |      |            |      |          |           |  |  |
|------|------|------------|------|----------|-----------|--|--|
|      |      | Shiraz-31T | 345  | 0.103301 | 0         |  |  |
|      |      | Shiraz-36T | 431  | 0        | -0.78035  |  |  |
|      |      | Shiraz-36T | 432  | 0        | -0.6692   |  |  |
|      |      | Shiraz-44T | 891  | 0        | -0.954044 |  |  |
|      |      | Shiraz-44T | 896  | 0        | -0.109108 |  |  |
|      |      | Shiraz-46T | 991  | 0.139564 | 0         |  |  |
|      |      | Shiraz-47T | 1084 | 0.24185  | 0         |  |  |
|      |      | Shiraz-49T | 1166 | 0        | -0.917235 |  |  |
|      |      | Shiraz-49T | 1169 | 0        | -0.583529 |  |  |
|      |      | Shiraz-77T | 1282 | 0.213849 | 0         |  |  |
|      |      | Shiraz-9T  | 1368 | 0.199713 | 0         |  |  |
|      |      | Shiraz-9T  | 1369 | 0.703374 | 0         |  |  |
|      |      | Shiraz-18T | 1455 | 0        | -0.186773 |  |  |
|      |      | Shiraz-22T | 1669 | 0.695915 | 0         |  |  |
|      |      | Shiraz-22T | 1672 | 1.01678  | 0         |  |  |
|      |      | Shiraz-25T | 1717 | 0.420447 | 0         |  |  |
|      |      | Shiraz-28T | 1760 | 0.538181 | 0         |  |  |
|      |      | Shiraz-29T | 1800 | 0.672527 | 0         |  |  |
|      |      | Shiraz-32T | 1869 | 0.776805 | 0         |  |  |
|      |      | Shiraz-35T | 1932 | 0.507141 | 0         |  |  |
|      |      | Shiraz-58T | 2221 | 0.871948 | 0         |  |  |
|      |      | Shiraz-71T | 2260 | 0.68394  | 0         |  |  |
|      |      | Shiraz-71T | 2262 | 0.986748 | 0         |  |  |
| SSX6 | chrX | Shiraz-4T  | 260  | 0        | -0.324128 |  |  |
|      |      | Shiraz-16T | 294  | 0.655804 | 0         |  |  |
|      |      | Shiraz-31T | 345  | 0.103301 | 0         |  |  |
|      |      | Shiraz-36T | 431  | 0        | -0.78035  |  |  |
|      |      | Shiraz-36T | 432  | 0        | -0.6692   |  |  |
|      |      | Shiraz-44T | 891  | 0        | -0.954044 |  |  |
|      |      | Shiraz-44T | 896  | 0        | -0.109108 |  |  |
|      |      | Shiraz-46T | 991  | 0.139564 | 0         |  |  |
|      |      | Shiraz-47T | 1084 | 0.24185  | 0         |  |  |
|      |      | Shiraz-49T | 1166 | 0        | -0.917235 |  |  |
|      |      | Shiraz-49T | 1169 | 0        | -0.583529 |  |  |
|      |      | Shiraz-77T | 1282 | 0.213849 | 0         |  |  |
|      |      | Shiraz-9T  | 1368 | 0.199713 | 0         |  |  |
|      |      | Shiraz-9T  | 1369 | 0.703374 | 0         |  |  |
|      |      | Shiraz-18T | 1455 | 0        | -0.186773 |  |  |
|      |      | Shiraz-22T | 1669 | 0.695915 | 0         |  |  |
|      |      | Shiraz-22T | 1672 | 1.01678  | 0         |  |  |
|      |      | Shiraz-25T | 1717 | 0.420447 | 0         |  |  |
|      |      | Shiraz-28T | 1760 | 0.538181 | 0         |  |  |
|      |      | Shiraz-29T | 1800 | 0.672527 | 0         |  |  |
|      |      | Shiraz-32T | 1869 | 0.776805 | 0         |  |  |
|      |      | Shiraz-35T | 1932 | 0.507141 | 0         |  |  |
|      |      | Shiraz-58T | 2221 | 0.871948 | 0         |  |  |
|      |      | Shiraz-71T | 2260 | 0.68394  | 0         |  |  |

|  |            |      |          |           |  |
|--|------------|------|----------|-----------|--|
|  | Shiraz-71T | 2262 | 0.986748 | 0         |  |
|  | Shiraz-4T  | 260  | 0        | -0.324128 |  |
|  | Shiraz-16T | 294  | 0.655804 | 0         |  |
|  | Shiraz-31T | 345  | 0.103301 | 0         |  |
|  | Shiraz-36T | 431  | 0        | -0.78035  |  |
|  | Shiraz-36T | 432  | 0        | -0.6692   |  |
|  | Shiraz-44T | 891  | 0        | -0.954044 |  |
|  | Shiraz-44T | 896  | 0        | -0.109108 |  |
|  | Shiraz-46T | 991  | 0.139564 | 0         |  |
|  | Shiraz-47T | 1084 | 0.24185  | 0         |  |
|  | Shiraz-49T | 1166 | 0        | -0.917235 |  |
|  | Shiraz-49T | 1169 | 0        | -0.583529 |  |
|  | Shiraz-77T | 1282 | 0.213849 | 0         |  |
|  | Shiraz-9T  | 1368 | 0.199713 | 0         |  |
|  | Shiraz-9T  | 1369 | 0.703374 | 0         |  |
|  | Shiraz-18T | 1455 | 0        | -0.186773 |  |
|  | Shiraz-22T | 1669 | 0.695915 | 0         |  |
|  | Shiraz-22T | 1672 | 1.01678  | 0         |  |
|  | Shiraz-25T | 1717 | 0.420447 | 0         |  |
|  | Shiraz-28T | 1760 | 0.538181 | 0         |  |
|  | Shiraz-29T | 1800 | 0.672527 | 0         |  |
|  | Shiraz-32T | 1869 | 0.776805 | 0         |  |
|  | Shiraz-35T | 1932 | 0.507141 | 0         |  |
|  | Shiraz-58T | 2221 | 0.871948 | 0         |  |
|  | Shiraz-71T | 2260 | 0.68394  | 0         |  |
|  | Shiraz-71T | 2262 | 0.986748 | 0         |  |
|  | Shiraz-4T  | 260  | 0        | -0.324128 |  |
|  | Shiraz-16T | 294  | 0.655804 | 0         |  |
|  | Shiraz-31T | 345  | 0.103301 | 0         |  |
|  | Shiraz-36T | 431  | 0        | -0.78035  |  |
|  | Shiraz-36T | 432  | 0        | -0.6692   |  |
|  | Shiraz-44T | 891  | 0        | -0.954044 |  |
|  | Shiraz-44T | 896  | 0        | -0.109108 |  |
|  | Shiraz-46T | 991  | 0.139564 | 0         |  |
|  | Shiraz-47T | 1084 | 0.24185  | 0         |  |
|  | Shiraz-49T | 1166 | 0        | -0.917235 |  |
|  | Shiraz-49T | 1169 | 0        | -0.583529 |  |
|  | Shiraz-77T | 1282 | 0.213849 | 0         |  |
|  | Shiraz-9T  | 1368 | 0.199713 | 0         |  |
|  | Shiraz-9T  | 1369 | 0.703374 | 0         |  |
|  | Shiraz-18T | 1455 | 0        | -0.186773 |  |
|  | Shiraz-22T | 1669 | 0.695915 | 0         |  |
|  | Shiraz-22T | 1672 | 1.01678  | 0         |  |
|  | Shiraz-25T | 1717 | 0.420447 | 0         |  |
|  | Shiraz-28T | 1760 | 0.538181 | 0         |  |
|  | Shiraz-29T | 1800 | 0.672527 | 0         |  |
|  | Shiraz-32T | 1869 | 0.776805 | 0         |  |



|      |      |            |      |          |           |  |
|------|------|------------|------|----------|-----------|--|
|      |      | Shiraz-35T | 1932 | 0.507141 | 0         |  |
|      |      | Shiraz-58T | 2221 | 0.871948 | 0         |  |
|      |      | Shiraz-71T | 2260 | 0.68394  | 0         |  |
|      |      | Shiraz-71T | 2262 | 0.986748 | 0         |  |
| SSX7 | chrX | Shiraz-4T  | 260  | 0        | -0.324128 |  |
|      |      | Shiraz-16T | 294  | 0.655804 | 0         |  |
|      |      | Shiraz-31T | 345  | 0.103301 | 0         |  |
|      |      | Shiraz-36T | 431  | 0        | -0.78035  |  |
|      |      | Shiraz-36T | 432  | 0        | -0.6692   |  |
|      |      | Shiraz-44T | 891  | 0        | -0.954044 |  |
|      |      | Shiraz-44T | 898  | 0        | -0.515218 |  |
|      |      | Shiraz-49T | 1166 | 0        | -0.917235 |  |
|      |      | Shiraz-77T | 1282 | 0.213849 | 0         |  |
|      |      | Shiraz-9T  | 1368 | 0.199713 | 0         |  |
|      |      | Shiraz-18T | 1456 | 0.608534 | 0         |  |
|      |      | Shiraz-22T | 1669 | 0.695915 | 0         |  |
|      |      | Shiraz-25T | 1717 | 0.420447 | 0         |  |
|      |      | Shiraz-28T | 1760 | 0.538181 | 0         |  |
|      |      | Shiraz-29T | 1800 | 0.672527 | 0         |  |
|      |      | Shiraz-32T | 1869 | 0.776805 | 0         |  |
|      |      | Shiraz-35T | 1932 | 0.507141 | 0         |  |
|      |      | Shiraz-58T | 2221 | 0.871948 | 0         |  |
|      |      | Shiraz-71T | 2260 | 0.68394  | 0         |  |
|      |      | Shiraz-71T | 2262 | 0.986748 | 0         |  |
|      |      | Shiraz-4T  | 260  | 0        | -0.324128 |  |
|      |      | Shiraz-16T | 294  | 0.655804 | 0         |  |
|      |      | Shiraz-31T | 345  | 0.103301 | 0         |  |
|      |      | Shiraz-36T | 431  | 0        | -0.78035  |  |
|      |      | Shiraz-36T | 432  | 0        | -0.6692   |  |
|      |      | Shiraz-44T | 891  | 0        | -0.954044 |  |
|      |      | Shiraz-44T | 898  | 0        | -0.515218 |  |
|      |      | Shiraz-49T | 1166 | 0        | -0.917235 |  |
|      |      | Shiraz-77T | 1282 | 0.213849 | 0         |  |
|      |      | Shiraz-9T  | 1368 | 0.199713 | 0         |  |
|      |      | Shiraz-18T | 1456 | 0.608534 | 0         |  |
|      |      | Shiraz-22T | 1669 | 0.695915 | 0         |  |
|      |      | Shiraz-25T | 1717 | 0.420447 | 0         |  |
|      |      | Shiraz-28T | 1760 | 0.538181 | 0         |  |
|      |      | Shiraz-29T | 1800 | 0.672527 | 0         |  |
|      |      | Shiraz-32T | 1869 | 0.776805 | 0         |  |
|      |      | Shiraz-35T | 1932 | 0.507141 | 0         |  |
|      |      | Shiraz-58T | 2221 | 0.871948 | 0         |  |
|      |      | Shiraz-71T | 2260 | 0.68394  | 0         |  |
|      |      | Shiraz-71T | 2262 | 0.986748 | 0         |  |
|      |      | Shiraz-4T  | 260  | 0        | -0.324128 |  |
|      |      | Shiraz-16T | 294  | 0.655804 | 0         |  |
|      |      | Shiraz-31T | 345  | 0.103301 | 0         |  |

|      |      |            |      |          |           |  |  |
|------|------|------------|------|----------|-----------|--|--|
|      |      | Shiraz-36T | 431  | 0        | -0.78035  |  |  |
|      |      | Shiraz-36T | 432  | 0        | -0.6692   |  |  |
|      |      | Shiraz-44T | 891  | 0        | -0.954044 |  |  |
|      |      | Shiraz-44T | 898  | 0        | -0.515218 |  |  |
|      |      | Shiraz-49T | 1166 | 0        | -0.917235 |  |  |
|      |      | Shiraz-77T | 1282 | 0.213849 | 0         |  |  |
|      |      | Shiraz-9T  | 1368 | 0.199713 | 0         |  |  |
|      |      | Shiraz-18T | 1456 | 0.608534 | 0         |  |  |
|      |      | Shiraz-22T | 1669 | 0.695915 | 0         |  |  |
|      |      | Shiraz-25T | 1717 | 0.420447 | 0         |  |  |
|      |      | Shiraz-28T | 1760 | 0.538181 | 0         |  |  |
|      |      | Shiraz-29T | 1800 | 0.672527 | 0         |  |  |
|      |      | Shiraz-32T | 1869 | 0.776805 | 0         |  |  |
|      |      | Shiraz-35T | 1932 | 0.507141 | 0         |  |  |
|      |      | Shiraz-58T | 2221 | 0.871948 | 0         |  |  |
|      |      | Shiraz-71T | 2260 | 0.68394  | 0         |  |  |
|      |      | Shiraz-71T | 2262 | 0.986748 | 0         |  |  |
| SSX8 | chrX | Shiraz-4T  | 260  | 0        | -0.324128 |  |  |
|      |      | Shiraz-16T | 294  | 0.655804 | 0         |  |  |
|      |      | Shiraz-31T | 345  | 0.103301 | 0         |  |  |
|      |      | Shiraz-36T | 431  | 0        | -0.78035  |  |  |
|      |      | Shiraz-36T | 432  | 0        | -0.6692   |  |  |
|      |      | Shiraz-44T | 891  | 0        | -0.954044 |  |  |
|      |      | Shiraz-44T | 898  | 0        | -0.515218 |  |  |
|      |      | Shiraz-49T | 1166 | 0        | -0.917235 |  |  |
|      |      | Shiraz-77T | 1282 | 0.213849 | 0         |  |  |
|      |      | Shiraz-9T  | 1368 | 0.199713 | 0         |  |  |
|      |      | Shiraz-18T | 1456 | 0.608534 | 0         |  |  |
|      |      | Shiraz-22T | 1669 | 0.695915 | 0         |  |  |
|      |      | Shiraz-25T | 1717 | 0.420447 | 0         |  |  |
|      |      | Shiraz-28T | 1760 | 0.538181 | 0         |  |  |
|      |      | Shiraz-29T | 1800 | 0.672527 | 0         |  |  |
|      |      | Shiraz-32T | 1869 | 0.776805 | 0         |  |  |
|      |      | Shiraz-35T | 1932 | 0.507141 | 0         |  |  |
|      |      | Shiraz-58T | 2221 | 0.871948 | 0         |  |  |
|      |      | Shiraz-71T | 2260 | 0.68394  | 0         |  |  |
|      |      | Shiraz-71T | 2262 | 0.986748 | 0         |  |  |
|      |      | Shiraz-4T  | 260  | 0        | -0.324128 |  |  |
|      |      | Shiraz-16T | 294  | 0.655804 | 0         |  |  |
|      |      | Shiraz-31T | 345  | 0.103301 | 0         |  |  |
|      |      | Shiraz-36T | 431  | 0        | -0.78035  |  |  |
|      |      | Shiraz-36T | 432  | 0        | -0.6692   |  |  |
|      |      | Shiraz-44T | 891  | 0        | -0.954044 |  |  |
|      |      | Shiraz-44T | 898  | 0        | -0.515218 |  |  |
|      |      | Shiraz-49T | 1166 | 0        | -0.917235 |  |  |
|      |      | Shiraz-77T | 1282 | 0.213849 | 0         |  |  |
|      |      | Shiraz-9T  | 1368 | 0.199713 | 0         |  |  |

|      |      |            |      |          |           |  |
|------|------|------------|------|----------|-----------|--|
|      |      | Shiraz-18T | 1456 | 0.608534 | 0         |  |
|      |      | Shiraz-22T | 1669 | 0.695915 | 0         |  |
|      |      | Shiraz-25T | 1717 | 0.420447 | 0         |  |
|      |      | Shiraz-28T | 1760 | 0.538181 | 0         |  |
|      |      | Shiraz-29T | 1800 | 0.672527 | 0         |  |
|      |      | Shiraz-32T | 1869 | 0.776805 | 0         |  |
|      |      | Shiraz-35T | 1932 | 0.507141 | 0         |  |
|      |      | Shiraz-58T | 2221 | 0.871948 | 0         |  |
|      |      | Shiraz-71T | 2260 | 0.68394  | 0         |  |
|      |      | Shiraz-71T | 2262 | 0.986748 | 0         |  |
|      |      | Shiraz-4T  | 260  | 0        | -0.324128 |  |
|      |      | Shiraz-16T | 294  | 0.655804 | 0         |  |
|      |      | Shiraz-31T | 345  | 0.103301 | 0         |  |
|      |      | Shiraz-36T | 431  | 0        | -0.78035  |  |
|      |      | Shiraz-36T | 432  | 0        | -0.6692   |  |
|      |      | Shiraz-44T | 891  | 0        | -0.954044 |  |
|      |      | Shiraz-44T | 898  | 0        | -0.515218 |  |
|      |      | Shiraz-49T | 1166 | 0        | -0.917235 |  |
|      |      | Shiraz-77T | 1282 | 0.213849 | 0         |  |
|      |      | Shiraz-9T  | 1368 | 0.199713 | 0         |  |
|      |      | Shiraz-18T | 1456 | 0.608534 | 0         |  |
|      |      | Shiraz-22T | 1669 | 0.695915 | 0         |  |
|      |      | Shiraz-25T | 1717 | 0.420447 | 0         |  |
|      |      | Shiraz-28T | 1760 | 0.538181 | 0         |  |
|      |      | Shiraz-29T | 1800 | 0.672527 | 0         |  |
|      |      | Shiraz-32T | 1869 | 0.776805 | 0         |  |
|      |      | Shiraz-35T | 1932 | 0.507141 | 0         |  |
|      |      | Shiraz-58T | 2221 | 0.871948 | 0         |  |
|      |      | Shiraz-71T | 2260 | 0.68394  | 0         |  |
|      |      | Shiraz-71T | 2262 | 0.986748 | 0         |  |
| SSX9 | chrX | Shiraz-4T  | 260  | 0        | -0.324128 |  |
|      |      | Shiraz-16T | 294  | 0.655804 | 0         |  |
|      |      | Shiraz-31T | 345  | 0.103301 | 0         |  |
|      |      | Shiraz-36T | 431  | 0        | -0.78035  |  |
|      |      | Shiraz-36T | 432  | 0        | -0.6692   |  |
|      |      | Shiraz-44T | 891  | 0        | -0.954044 |  |
|      |      | Shiraz-44T | 896  | 0        | -0.109108 |  |
|      |      | Shiraz-46T | 991  | 0.139564 | 0         |  |
|      |      | Shiraz-47T | 1084 | 0.24185  | 0         |  |
|      |      | Shiraz-49T | 1166 | 0        | -0.917235 |  |
|      |      | Shiraz-49T | 1169 | 0        | -0.583529 |  |
|      |      | Shiraz-77T | 1282 | 0.213849 | 0         |  |
|      |      | Shiraz-9T  | 1368 | 0.199713 | 0         |  |
|      |      | Shiraz-9T  | 1369 | 0.703374 | 0         |  |
|      |      | Shiraz-18T | 1455 | 0        | -0.186773 |  |
|      |      | Shiraz-22T | 1669 | 0.695915 | 0         |  |
|      |      | Shiraz-22T | 1672 | 1.01678  | 0         |  |

|  |            |      |          |           |  |
|--|------------|------|----------|-----------|--|
|  | Shiraz-25T | 1717 | 0.420447 | 0         |  |
|  | Shiraz-28T | 1760 | 0.538181 | 0         |  |
|  | Shiraz-29T | 1800 | 0.672527 | 0         |  |
|  | Shiraz-32T | 1869 | 0.776805 | 0         |  |
|  | Shiraz-35T | 1932 | 0.507141 | 0         |  |
|  | Shiraz-58T | 2221 | 0.871948 | 0         |  |
|  | Shiraz-71T | 2260 | 0.68394  | 0         |  |
|  | Shiraz-71T | 2262 | 0.986748 | 0         |  |
|  | Shiraz-4T  | 260  | 0        | -0.324128 |  |
|  | Shiraz-16T | 294  | 0.655804 | 0         |  |
|  | Shiraz-31T | 345  | 0.103301 | 0         |  |
|  | Shiraz-36T | 431  | 0        | -0.78035  |  |
|  | Shiraz-36T | 432  | 0        | -0.6692   |  |
|  | Shiraz-44T | 891  | 0        | -0.954044 |  |
|  | Shiraz-44T | 896  | 0        | -0.109108 |  |
|  | Shiraz-46T | 991  | 0.139564 | 0         |  |
|  | Shiraz-47T | 1084 | 0.24185  | 0         |  |
|  | Shiraz-49T | 1166 | 0        | -0.917235 |  |
|  | Shiraz-49T | 1169 | 0        | -0.583529 |  |
|  | Shiraz-77T | 1282 | 0.213849 | 0         |  |
|  | Shiraz-9T  | 1368 | 0.199713 | 0         |  |
|  | Shiraz-9T  | 1369 | 0.703374 | 0         |  |
|  | Shiraz-18T | 1455 | 0        | -0.186773 |  |
|  | Shiraz-22T | 1669 | 0.695915 | 0         |  |
|  | Shiraz-22T | 1672 | 1.01678  | 0         |  |
|  | Shiraz-25T | 1717 | 0.420447 | 0         |  |
|  | Shiraz-28T | 1760 | 0.538181 | 0         |  |
|  | Shiraz-29T | 1800 | 0.672527 | 0         |  |
|  | Shiraz-32T | 1869 | 0.776805 | 0         |  |
|  | Shiraz-35T | 1932 | 0.507141 | 0         |  |
|  | Shiraz-58T | 2221 | 0.871948 | 0         |  |
|  | Shiraz-71T | 2260 | 0.68394  | 0         |  |
|  | Shiraz-71T | 2262 | 0.986748 | 0         |  |
|  | Shiraz-4T  | 260  | 0        | -0.324128 |  |
|  | Shiraz-16T | 294  | 0.655804 | 0         |  |
|  | Shiraz-31T | 345  | 0.103301 | 0         |  |
|  | Shiraz-36T | 431  | 0        | -0.78035  |  |
|  | Shiraz-36T | 432  | 0        | -0.6692   |  |
|  | Shiraz-44T | 891  | 0        | -0.954044 |  |
|  | Shiraz-44T | 896  | 0        | -0.109108 |  |
|  | Shiraz-46T | 991  | 0.139564 | 0         |  |
|  | Shiraz-47T | 1084 | 0.24185  | 0         |  |
|  | Shiraz-49T | 1166 | 0        | -0.917235 |  |
|  | Shiraz-49T | 1169 | 0        | -0.583529 |  |
|  | Shiraz-77T | 1282 | 0.213849 | 0         |  |
|  | Shiraz-9T  | 1368 | 0.199713 | 0         |  |
|  | Shiraz-9T  | 1369 | 0.703374 | 0         |  |

|     |      |            |      |          |           |  |  |
|-----|------|------------|------|----------|-----------|--|--|
|     |      | Shiraz-18T | 1455 | 0        | -0.186773 |  |  |
|     |      | Shiraz-22T | 1669 | 0.695915 | 0         |  |  |
|     |      | Shiraz-22T | 1672 | 1.01678  | 0         |  |  |
|     |      | Shiraz-25T | 1717 | 0.420447 | 0         |  |  |
|     |      | Shiraz-28T | 1760 | 0.538181 | 0         |  |  |
|     |      | Shiraz-29T | 1800 | 0.672527 | 0         |  |  |
|     |      | Shiraz-32T | 1869 | 0.776805 | 0         |  |  |
|     |      | Shiraz-35T | 1932 | 0.507141 | 0         |  |  |
|     |      | Shiraz-58T | 2221 | 0.871948 | 0         |  |  |
|     |      | Shiraz-71T | 2260 | 0.68394  | 0         |  |  |
|     |      | Shiraz-71T | 2262 | 0.986748 | 0         |  |  |
| ST7 | chr7 | Shiraz-3T  | 90   | 0.219276 | 0         |  |  |
|     |      | Shiraz-3T  | 90   | 0.219276 | 0         |  |  |
|     |      | Shiraz-3T  | 95   | 0        | -0.077623 |  |  |
|     |      | Shiraz-3T  | 95   | 0        | -0.077623 |  |  |
|     |      | Shiraz-4T  | 253  | 0.372918 | 0         |  |  |
|     |      | Shiraz-4T  | 253  | 0.372918 | 0         |  |  |
|     |      | Shiraz-36T | 378  | 0.179558 | 0         |  |  |
|     |      | Shiraz-36T | 378  | 0.179558 | 0         |  |  |
|     |      | Shiraz-36T | 382  | 0.081739 | 0         |  |  |
|     |      | Shiraz-36T | 382  | 0.081739 | 0         |  |  |
|     |      | Shiraz-44T | 641  | 0        | -0.477846 |  |  |
|     |      | Shiraz-44T | 641  | 0        | -0.477846 |  |  |
|     |      | Shiraz-46T | 943  | 0.093799 | 0         |  |  |
|     |      | Shiraz-46T | 943  | 0.093799 | 0         |  |  |
|     |      | Shiraz-46T | 947  | 0        | -0.010843 |  |  |
|     |      | Shiraz-46T | 947  | 0        | -0.010843 |  |  |
|     |      | Shiraz-47T | 1031 | 0        | -0.117529 |  |  |
|     |      | Shiraz-47T | 1031 | 0        | -0.117529 |  |  |
|     |      | Shiraz-49T | 1121 | 0        | -0.138569 |  |  |
|     |      | Shiraz-49T | 1121 | 0        | -0.138569 |  |  |
|     |      | Shiraz-77T | 1225 | 0        | -0.117922 |  |  |
|     |      | Shiraz-77T | 1225 | 0        | -0.117922 |  |  |
|     |      | Shiraz-77T | 1228 | 0        | -0.238084 |  |  |
|     |      | Shiraz-77T | 1228 | 0        | -0.238084 |  |  |
|     |      | Shiraz-18T | 1434 | 0.244465 | 0         |  |  |
|     |      | Shiraz-18T | 1434 | 0.244465 | 0         |  |  |
|     |      | Shiraz-22T | 1549 | 0        | -0.319623 |  |  |
|     |      | Shiraz-22T | 1549 | 0        | -0.319623 |  |  |
|     |      | Shiraz-22T | 1552 | 0        | -0.50686  |  |  |
|     |      | Shiraz-22T | 1552 | 0        | -0.50686  |  |  |
|     |      | Shiraz-25T | 1698 | 0.21835  | 0         |  |  |
|     |      | Shiraz-25T | 1698 | 0.21835  | 0         |  |  |
|     |      | Shiraz-28T | 1735 | 0.350744 | 0         |  |  |
|     |      | Shiraz-28T | 1735 | 0.350744 | 0         |  |  |
|     |      | Shiraz-29T | 1778 | 0.120767 | 0         |  |  |
|     |      | Shiraz-29T | 1778 | 0.120767 | 0         |  |  |

|  |            |      |          |           |  |
|--|------------|------|----------|-----------|--|
|  | Shiraz-32T | 1833 | 0.551336 | 0         |  |
|  | Shiraz-32T | 1833 | 0.551336 | 0         |  |
|  | Shiraz-32T | 1835 | 0.092727 | 0         |  |
|  | Shiraz-32T | 1835 | 0.092727 | 0         |  |
|  | Shiraz-38T | 1951 | 0.250891 | 0         |  |
|  | Shiraz-38T | 1951 | 0.250891 | 0         |  |
|  | Shiraz-53T | 2078 | 0.287202 | 0         |  |
|  | Shiraz-53T | 2078 | 0.287202 | 0         |  |
|  | Shiraz-58T | 2161 | 0        | -0.187744 |  |
|  | Shiraz-58T | 2161 | 0        | -0.187744 |  |
|  | Shiraz-71T | 2238 | 0.603631 | 0         |  |
|  | Shiraz-71T | 2238 | 0.603631 | 0         |  |
|  | Shiraz-3T  | 90   | 0.219276 | 0         |  |
|  | Shiraz-3T  | 90   | 0.219276 | 0         |  |
|  | Shiraz-3T  | 95   | 0        | -0.077623 |  |
|  | Shiraz-3T  | 95   | 0        | -0.077623 |  |
|  | Shiraz-4T  | 253  | 0.372918 | 0         |  |
|  | Shiraz-4T  | 253  | 0.372918 | 0         |  |
|  | Shiraz-36T | 378  | 0.179558 | 0         |  |
|  | Shiraz-36T | 378  | 0.179558 | 0         |  |
|  | Shiraz-36T | 382  | 0.081739 | 0         |  |
|  | Shiraz-36T | 382  | 0.081739 | 0         |  |
|  | Shiraz-44T | 641  | 0        | -0.477846 |  |
|  | Shiraz-44T | 641  | 0        | -0.477846 |  |
|  | Shiraz-46T | 943  | 0.093799 | 0         |  |
|  | Shiraz-46T | 943  | 0.093799 | 0         |  |
|  | Shiraz-46T | 947  | 0        | -0.010843 |  |
|  | Shiraz-46T | 947  | 0        | -0.010843 |  |
|  | Shiraz-47T | 1031 | 0        | -0.117529 |  |
|  | Shiraz-47T | 1031 | 0        | -0.117529 |  |
|  | Shiraz-49T | 1121 | 0        | -0.138569 |  |
|  | Shiraz-49T | 1121 | 0        | -0.138569 |  |
|  | Shiraz-77T | 1225 | 0        | -0.117922 |  |
|  | Shiraz-77T | 1225 | 0        | -0.117922 |  |
|  | Shiraz-77T | 1228 | 0        | -0.238084 |  |
|  | Shiraz-77T | 1228 | 0        | -0.238084 |  |
|  | Shiraz-18T | 1434 | 0.244465 | 0         |  |
|  | Shiraz-18T | 1434 | 0.244465 | 0         |  |
|  | Shiraz-22T | 1549 | 0        | -0.319623 |  |
|  | Shiraz-22T | 1549 | 0        | -0.319623 |  |
|  | Shiraz-22T | 1552 | 0        | -0.50686  |  |
|  | Shiraz-22T | 1552 | 0        | -0.50686  |  |
|  | Shiraz-25T | 1698 | 0.21835  | 0         |  |
|  | Shiraz-25T | 1698 | 0.21835  | 0         |  |
|  | Shiraz-28T | 1735 | 0.350744 | 0         |  |
|  | Shiraz-28T | 1735 | 0.350744 | 0         |  |
|  | Shiraz-29T | 1778 | 0.120767 | 0         |  |

|  |            |      |          |           |  |
|--|------------|------|----------|-----------|--|
|  | Shiraz-29T | 1778 | 0.120767 | 0         |  |
|  | Shiraz-32T | 1833 | 0.551336 | 0         |  |
|  | Shiraz-32T | 1833 | 0.551336 | 0         |  |
|  | Shiraz-32T | 1835 | 0.092727 | 0         |  |
|  | Shiraz-32T | 1835 | 0.092727 | 0         |  |
|  | Shiraz-38T | 1951 | 0.250891 | 0         |  |
|  | Shiraz-38T | 1951 | 0.250891 | 0         |  |
|  | Shiraz-53T | 2078 | 0.287202 | 0         |  |
|  | Shiraz-53T | 2078 | 0.287202 | 0         |  |
|  | Shiraz-58T | 2161 | 0        | -0.187744 |  |
|  | Shiraz-58T | 2161 | 0        | -0.187744 |  |
|  | Shiraz-71T | 2238 | 0.603631 | 0         |  |
|  | Shiraz-71T | 2238 | 0.603631 | 0         |  |
|  | Shiraz-3T  | 90   | 0.219276 | 0         |  |
|  | Shiraz-3T  | 90   | 0.219276 | 0         |  |
|  | Shiraz-3T  | 95   | 0        | -0.077623 |  |
|  | Shiraz-3T  | 95   | 0        | -0.077623 |  |
|  | Shiraz-4T  | 253  | 0.372918 | 0         |  |
|  | Shiraz-4T  | 253  | 0.372918 | 0         |  |
|  | Shiraz-36T | 378  | 0.179558 | 0         |  |
|  | Shiraz-36T | 378  | 0.179558 | 0         |  |
|  | Shiraz-36T | 382  | 0.081739 | 0         |  |
|  | Shiraz-36T | 382  | 0.081739 | 0         |  |
|  | Shiraz-44T | 641  | 0        | -0.477846 |  |
|  | Shiraz-44T | 641  | 0        | -0.477846 |  |
|  | Shiraz-46T | 943  | 0.093799 | 0         |  |
|  | Shiraz-46T | 943  | 0.093799 | 0         |  |
|  | Shiraz-46T | 947  | 0        | -0.010843 |  |
|  | Shiraz-46T | 947  | 0        | -0.010843 |  |
|  | Shiraz-47T | 1031 | 0        | -0.117529 |  |
|  | Shiraz-47T | 1031 | 0        | -0.117529 |  |
|  | Shiraz-49T | 1121 | 0        | -0.138569 |  |
|  | Shiraz-49T | 1121 | 0        | -0.138569 |  |
|  | Shiraz-77T | 1225 | 0        | -0.117922 |  |
|  | Shiraz-77T | 1225 | 0        | -0.117922 |  |
|  | Shiraz-77T | 1228 | 0        | -0.238084 |  |
|  | Shiraz-77T | 1228 | 0        | -0.238084 |  |
|  | Shiraz-18T | 1434 | 0.244465 | 0         |  |
|  | Shiraz-18T | 1434 | 0.244465 | 0         |  |
|  | Shiraz-22T | 1549 | 0        | -0.319623 |  |
|  | Shiraz-22T | 1549 | 0        | -0.319623 |  |
|  | Shiraz-22T | 1552 | 0        | -0.50686  |  |
|  | Shiraz-22T | 1552 | 0        | -0.50686  |  |
|  | Shiraz-25T | 1698 | 0.21835  | 0         |  |
|  | Shiraz-25T | 1698 | 0.21835  | 0         |  |
|  | Shiraz-28T | 1735 | 0.350744 | 0         |  |
|  | Shiraz-28T | 1735 | 0.350744 | 0         |  |

|        |      |            |      |          |           |  |  |
|--------|------|------------|------|----------|-----------|--|--|
|        |      | Shiraz-29T | 1778 | 0.120767 | 0         |  |  |
|        |      | Shiraz-29T | 1778 | 0.120767 | 0         |  |  |
|        |      | Shiraz-32T | 1833 | 0.551336 | 0         |  |  |
|        |      | Shiraz-32T | 1833 | 0.551336 | 0         |  |  |
|        |      | Shiraz-32T | 1835 | 0.092727 | 0         |  |  |
|        |      | Shiraz-32T | 1835 | 0.092727 | 0         |  |  |
|        |      | Shiraz-38T | 1951 | 0.250891 | 0         |  |  |
|        |      | Shiraz-38T | 1951 | 0.250891 | 0         |  |  |
|        |      | Shiraz-53T | 2078 | 0.287202 | 0         |  |  |
|        |      | Shiraz-53T | 2078 | 0.287202 | 0         |  |  |
|        |      | Shiraz-58T | 2161 | 0        | -0.187744 |  |  |
|        |      | Shiraz-58T | 2161 | 0        | -0.187744 |  |  |
|        |      | Shiraz-71T | 2238 | 0.603631 | 0         |  |  |
|        |      | Shiraz-71T | 2238 | 0.603631 | 0         |  |  |
| ST7OT1 | chr7 | Shiraz-3T  | 90   | 0.219276 | 0         |  |  |
|        |      | Shiraz-3T  | 95   | 0        | -0.077623 |  |  |
|        |      | Shiraz-4T  | 253  | 0.372918 | 0         |  |  |
|        |      | Shiraz-36T | 378  | 0.179558 | 0         |  |  |
|        |      | Shiraz-36T | 382  | 0.081739 | 0         |  |  |
|        |      | Shiraz-44T | 641  | 0        | -0.477846 |  |  |
|        |      | Shiraz-46T | 943  | 0.093799 | 0         |  |  |
|        |      | Shiraz-46T | 947  | 0        | -0.010843 |  |  |
|        |      | Shiraz-47T | 1031 | 0        | -0.117529 |  |  |
|        |      | Shiraz-49T | 1121 | 0        | -0.138569 |  |  |
|        |      | Shiraz-77T | 1225 | 0        | -0.117922 |  |  |
|        |      | Shiraz-77T | 1228 | 0        | -0.238084 |  |  |
|        |      | Shiraz-18T | 1434 | 0.244465 | 0         |  |  |
|        |      | Shiraz-22T | 1549 | 0        | -0.319623 |  |  |
|        |      | Shiraz-22T | 1552 | 0        | -0.50686  |  |  |
|        |      | Shiraz-25T | 1698 | 0.21835  | 0         |  |  |
|        |      | Shiraz-28T | 1735 | 0.350744 | 0         |  |  |
|        |      | Shiraz-29T | 1778 | 0.120767 | 0         |  |  |
|        |      | Shiraz-32T | 1833 | 0.551336 | 0         |  |  |
|        |      | Shiraz-32T | 1835 | 0.092727 | 0         |  |  |
|        |      | Shiraz-38T | 1951 | 0.250891 | 0         |  |  |
|        |      | Shiraz-53T | 2078 | 0.287202 | 0         |  |  |
|        |      | Shiraz-58T | 2161 | 0        | -0.187744 |  |  |
|        |      | Shiraz-71T | 2238 | 0.603631 | 0         |  |  |
|        |      | Shiraz-3T  | 90   | 0.219276 | 0         |  |  |
|        |      | Shiraz-3T  | 95   | 0        | -0.077623 |  |  |
|        |      | Shiraz-4T  | 253  | 0.372918 | 0         |  |  |
|        |      | Shiraz-36T | 378  | 0.179558 | 0         |  |  |
|        |      | Shiraz-36T | 382  | 0.081739 | 0         |  |  |
|        |      | Shiraz-44T | 641  | 0        | -0.477846 |  |  |
|        |      | Shiraz-46T | 943  | 0.093799 | 0         |  |  |
|        |      | Shiraz-46T | 947  | 0        | -0.010843 |  |  |
|        |      | Shiraz-47T | 1031 | 0        | -0.117529 |  |  |



|        |      |            |      |          |           |  |  |
|--------|------|------------|------|----------|-----------|--|--|
|        |      | Shiraz-49T | 1121 | 0        | -0.138569 |  |  |
|        |      | Shiraz-77T | 1225 | 0        | -0.117922 |  |  |
|        |      | Shiraz-77T | 1228 | 0        | -0.238084 |  |  |
|        |      | Shiraz-18T | 1434 | 0.244465 | 0         |  |  |
|        |      | Shiraz-22T | 1549 | 0        | -0.319623 |  |  |
|        |      | Shiraz-22T | 1552 | 0        | -0.50686  |  |  |
|        |      | Shiraz-25T | 1698 | 0.21835  | 0         |  |  |
|        |      | Shiraz-28T | 1735 | 0.350744 | 0         |  |  |
|        |      | Shiraz-29T | 1778 | 0.120767 | 0         |  |  |
|        |      | Shiraz-32T | 1833 | 0.551336 | 0         |  |  |
|        |      | Shiraz-32T | 1835 | 0.092727 | 0         |  |  |
|        |      | Shiraz-38T | 1951 | 0.250891 | 0         |  |  |
|        |      | Shiraz-53T | 2078 | 0.287202 | 0         |  |  |
|        |      | Shiraz-58T | 2161 | 0        | -0.187744 |  |  |
|        |      | Shiraz-71T | 2238 | 0.603631 | 0         |  |  |
|        |      | Shiraz-3T  | 90   | 0.219276 | 0         |  |  |
|        |      | Shiraz-3T  | 95   | 0        | -0.077623 |  |  |
|        |      | Shiraz-4T  | 253  | 0.372918 | 0         |  |  |
|        |      | Shiraz-36T | 378  | 0.179558 | 0         |  |  |
|        |      | Shiraz-36T | 382  | 0.081739 | 0         |  |  |
|        |      | Shiraz-44T | 641  | 0        | -0.477846 |  |  |
|        |      | Shiraz-46T | 943  | 0.093799 | 0         |  |  |
|        |      | Shiraz-46T | 947  | 0        | -0.010843 |  |  |
|        |      | Shiraz-47T | 1031 | 0        | -0.117529 |  |  |
|        |      | Shiraz-49T | 1121 | 0        | -0.138569 |  |  |
|        |      | Shiraz-77T | 1225 | 0        | -0.117922 |  |  |
|        |      | Shiraz-77T | 1228 | 0        | -0.238084 |  |  |
|        |      | Shiraz-18T | 1434 | 0.244465 | 0         |  |  |
|        |      | Shiraz-22T | 1549 | 0        | -0.319623 |  |  |
|        |      | Shiraz-22T | 1552 | 0        | -0.50686  |  |  |
|        |      | Shiraz-25T | 1698 | 0.21835  | 0         |  |  |
|        |      | Shiraz-28T | 1735 | 0.350744 | 0         |  |  |
|        |      | Shiraz-29T | 1778 | 0.120767 | 0         |  |  |
|        |      | Shiraz-32T | 1833 | 0.551336 | 0         |  |  |
|        |      | Shiraz-32T | 1835 | 0.092727 | 0         |  |  |
|        |      | Shiraz-38T | 1951 | 0.250891 | 0         |  |  |
|        |      | Shiraz-53T | 2078 | 0.287202 | 0         |  |  |
|        |      | Shiraz-58T | 2161 | 0        | -0.187744 |  |  |
|        |      | Shiraz-71T | 2238 | 0.603631 | 0         |  |  |
| ST7OT2 | chr7 | Shiraz-3T  | 90   | 0.219276 | 0         |  |  |
|        |      | Shiraz-3T  | 95   | 0        | -0.077623 |  |  |
|        |      | Shiraz-4T  | 253  | 0.372918 | 0         |  |  |
|        |      | Shiraz-36T | 378  | 0.179558 | 0         |  |  |
|        |      | Shiraz-36T | 382  | 0.081739 | 0         |  |  |
|        |      | Shiraz-44T | 641  | 0        | -0.477846 |  |  |
|        |      | Shiraz-46T | 943  | 0.093799 | 0         |  |  |
|        |      | Shiraz-46T | 947  | 0        | -0.010843 |  |  |

|  |            |      |          |           |  |
|--|------------|------|----------|-----------|--|
|  | Shiraz-47T | 1031 | 0        | -0.117529 |  |
|  | Shiraz-49T | 1121 | 0        | -0.138569 |  |
|  | Shiraz-77T | 1225 | 0        | -0.117922 |  |
|  | Shiraz-77T | 1228 | 0        | -0.238084 |  |
|  | Shiraz-18T | 1434 | 0.244465 | 0         |  |
|  | Shiraz-22T | 1549 | 0        | -0.319623 |  |
|  | Shiraz-22T | 1552 | 0        | -0.50686  |  |
|  | Shiraz-25T | 1698 | 0.21835  | 0         |  |
|  | Shiraz-28T | 1735 | 0.350744 | 0         |  |
|  | Shiraz-29T | 1778 | 0.120767 | 0         |  |
|  | Shiraz-32T | 1833 | 0.551336 | 0         |  |
|  | Shiraz-32T | 1835 | 0.092727 | 0         |  |
|  | Shiraz-38T | 1951 | 0.250891 | 0         |  |
|  | Shiraz-53T | 2078 | 0.287202 | 0         |  |
|  | Shiraz-58T | 2161 | 0        | -0.187744 |  |
|  | Shiraz-71T | 2238 | 0.603631 | 0         |  |
|  | Shiraz-3T  | 90   | 0.219276 | 0         |  |
|  | Shiraz-3T  | 95   | 0        | -0.077623 |  |
|  | Shiraz-4T  | 253  | 0.372918 | 0         |  |
|  | Shiraz-36T | 378  | 0.179558 | 0         |  |
|  | Shiraz-36T | 382  | 0.081739 | 0         |  |
|  | Shiraz-44T | 641  | 0        | -0.477846 |  |
|  | Shiraz-46T | 943  | 0.093799 | 0         |  |
|  | Shiraz-46T | 947  | 0        | -0.010843 |  |
|  | Shiraz-47T | 1031 | 0        | -0.117529 |  |
|  | Shiraz-49T | 1121 | 0        | -0.138569 |  |
|  | Shiraz-77T | 1225 | 0        | -0.117922 |  |
|  | Shiraz-77T | 1228 | 0        | -0.238084 |  |
|  | Shiraz-18T | 1434 | 0.244465 | 0         |  |
|  | Shiraz-22T | 1549 | 0        | -0.319623 |  |
|  | Shiraz-22T | 1552 | 0        | -0.50686  |  |
|  | Shiraz-25T | 1698 | 0.21835  | 0         |  |
|  | Shiraz-28T | 1735 | 0.350744 | 0         |  |
|  | Shiraz-29T | 1778 | 0.120767 | 0         |  |
|  | Shiraz-32T | 1833 | 0.551336 | 0         |  |
|  | Shiraz-32T | 1835 | 0.092727 | 0         |  |
|  | Shiraz-38T | 1951 | 0.250891 | 0         |  |
|  | Shiraz-53T | 2078 | 0.287202 | 0         |  |
|  | Shiraz-58T | 2161 | 0        | -0.187744 |  |
|  | Shiraz-71T | 2238 | 0.603631 | 0         |  |
|  | Shiraz-3T  | 90   | 0.219276 | 0         |  |
|  | Shiraz-3T  | 95   | 0        | -0.077623 |  |
|  | Shiraz-4T  | 253  | 0.372918 | 0         |  |
|  | Shiraz-36T | 378  | 0.179558 | 0         |  |
|  | Shiraz-36T | 382  | 0.081739 | 0         |  |
|  | Shiraz-44T | 641  | 0        | -0.477846 |  |
|  | Shiraz-46T | 943  | 0.093799 | 0         |  |

|        |      |            |      |          |           |  |  |
|--------|------|------------|------|----------|-----------|--|--|
|        |      | Shiraz-46T | 947  | 0        | -0.010843 |  |  |
|        |      | Shiraz-47T | 1031 | 0        | -0.117529 |  |  |
|        |      | Shiraz-49T | 1121 | 0        | -0.138569 |  |  |
|        |      | Shiraz-77T | 1225 | 0        | -0.117922 |  |  |
|        |      | Shiraz-77T | 1228 | 0        | -0.238084 |  |  |
|        |      | Shiraz-18T | 1434 | 0.244465 | 0         |  |  |
|        |      | Shiraz-22T | 1549 | 0        | -0.319623 |  |  |
|        |      | Shiraz-22T | 1552 | 0        | -0.50686  |  |  |
|        |      | Shiraz-25T | 1698 | 0.21835  | 0         |  |  |
|        |      | Shiraz-28T | 1735 | 0.350744 | 0         |  |  |
|        |      | Shiraz-29T | 1778 | 0.120767 | 0         |  |  |
|        |      | Shiraz-32T | 1833 | 0.551336 | 0         |  |  |
|        |      | Shiraz-32T | 1835 | 0.092727 | 0         |  |  |
|        |      | Shiraz-38T | 1951 | 0.250891 | 0         |  |  |
|        |      | Shiraz-53T | 2078 | 0.287202 | 0         |  |  |
|        |      | Shiraz-58T | 2161 | 0        | -0.187744 |  |  |
|        |      | Shiraz-71T | 2238 | 0.603631 | 0         |  |  |
| ST7OT3 | chr7 | Shiraz-3T  | 90   | 0.219276 | 0         |  |  |
|        |      | Shiraz-3T  | 95   | 0        | -0.077623 |  |  |
|        |      | Shiraz-4T  | 253  | 0.372918 | 0         |  |  |
|        |      | Shiraz-36T | 378  | 0.179558 | 0         |  |  |
|        |      | Shiraz-36T | 382  | 0.081739 | 0         |  |  |
|        |      | Shiraz-44T | 641  | 0        | -0.477846 |  |  |
|        |      | Shiraz-46T | 943  | 0.093799 | 0         |  |  |
|        |      | Shiraz-46T | 947  | 0        | -0.010843 |  |  |
|        |      | Shiraz-47T | 1031 | 0        | -0.117529 |  |  |
|        |      | Shiraz-49T | 1121 | 0        | -0.138569 |  |  |
|        |      | Shiraz-77T | 1225 | 0        | -0.117922 |  |  |
|        |      | Shiraz-77T | 1228 | 0        | -0.238084 |  |  |
|        |      | Shiraz-18T | 1434 | 0.244465 | 0         |  |  |
|        |      | Shiraz-22T | 1549 | 0        | -0.319623 |  |  |
|        |      | Shiraz-22T | 1552 | 0        | -0.50686  |  |  |
|        |      | Shiraz-25T | 1698 | 0.21835  | 0         |  |  |
|        |      | Shiraz-28T | 1735 | 0.350744 | 0         |  |  |
|        |      | Shiraz-29T | 1778 | 0.120767 | 0         |  |  |
|        |      | Shiraz-32T | 1833 | 0.551336 | 0         |  |  |
|        |      | Shiraz-32T | 1835 | 0.092727 | 0         |  |  |
|        |      | Shiraz-38T | 1951 | 0.250891 | 0         |  |  |
|        |      | Shiraz-53T | 2078 | 0.287202 | 0         |  |  |
|        |      | Shiraz-58T | 2161 | 0        | -0.187744 |  |  |
|        |      | Shiraz-71T | 2238 | 0.603631 | 0         |  |  |
|        |      | Shiraz-3T  | 90   | 0.219276 | 0         |  |  |
|        |      | Shiraz-3T  | 95   | 0        | -0.077623 |  |  |
|        |      | Shiraz-4T  | 253  | 0.372918 | 0         |  |  |
|        |      | Shiraz-36T | 378  | 0.179558 | 0         |  |  |
|        |      | Shiraz-36T | 382  | 0.081739 | 0         |  |  |
|        |      | Shiraz-44T | 641  | 0        | -0.477846 |  |  |

|        |      |            |      |          |           |  |  |
|--------|------|------------|------|----------|-----------|--|--|
|        |      | Shiraz-46T | 943  | 0.093799 | 0         |  |  |
|        |      | Shiraz-46T | 947  | 0        | -0.010843 |  |  |
|        |      | Shiraz-47T | 1031 | 0        | -0.117529 |  |  |
|        |      | Shiraz-49T | 1121 | 0        | -0.138569 |  |  |
|        |      | Shiraz-77T | 1225 | 0        | -0.117922 |  |  |
|        |      | Shiraz-77T | 1228 | 0        | -0.238084 |  |  |
|        |      | Shiraz-18T | 1434 | 0.244465 | 0         |  |  |
|        |      | Shiraz-22T | 1549 | 0        | -0.319623 |  |  |
|        |      | Shiraz-22T | 1552 | 0        | -0.50686  |  |  |
|        |      | Shiraz-25T | 1698 | 0.21835  | 0         |  |  |
|        |      | Shiraz-28T | 1735 | 0.350744 | 0         |  |  |
|        |      | Shiraz-29T | 1778 | 0.120767 | 0         |  |  |
|        |      | Shiraz-32T | 1833 | 0.551336 | 0         |  |  |
|        |      | Shiraz-32T | 1835 | 0.092727 | 0         |  |  |
|        |      | Shiraz-38T | 1951 | 0.250891 | 0         |  |  |
|        |      | Shiraz-53T | 2078 | 0.287202 | 0         |  |  |
|        |      | Shiraz-58T | 2161 | 0        | -0.187744 |  |  |
|        |      | Shiraz-71T | 2238 | 0.603631 | 0         |  |  |
|        |      | Shiraz-3T  | 90   | 0.219276 | 0         |  |  |
|        |      | Shiraz-3T  | 95   | 0        | -0.077623 |  |  |
|        |      | Shiraz-4T  | 253  | 0.372918 | 0         |  |  |
|        |      | Shiraz-36T | 378  | 0.179558 | 0         |  |  |
|        |      | Shiraz-36T | 382  | 0.081739 | 0         |  |  |
|        |      | Shiraz-44T | 641  | 0        | -0.477846 |  |  |
|        |      | Shiraz-46T | 943  | 0.093799 | 0         |  |  |
|        |      | Shiraz-46T | 947  | 0        | -0.010843 |  |  |
|        |      | Shiraz-47T | 1031 | 0        | -0.117529 |  |  |
|        |      | Shiraz-49T | 1121 | 0        | -0.138569 |  |  |
|        |      | Shiraz-77T | 1225 | 0        | -0.117922 |  |  |
|        |      | Shiraz-77T | 1228 | 0        | -0.238084 |  |  |
|        |      | Shiraz-18T | 1434 | 0.244465 | 0         |  |  |
|        |      | Shiraz-22T | 1549 | 0        | -0.319623 |  |  |
|        |      | Shiraz-22T | 1552 | 0        | -0.50686  |  |  |
|        |      | Shiraz-25T | 1698 | 0.21835  | 0         |  |  |
|        |      | Shiraz-28T | 1735 | 0.350744 | 0         |  |  |
|        |      | Shiraz-29T | 1778 | 0.120767 | 0         |  |  |
|        |      | Shiraz-32T | 1833 | 0.551336 | 0         |  |  |
|        |      | Shiraz-32T | 1835 | 0.092727 | 0         |  |  |
|        |      | Shiraz-38T | 1951 | 0.250891 | 0         |  |  |
|        |      | Shiraz-53T | 2078 | 0.287202 | 0         |  |  |
|        |      | Shiraz-58T | 2161 | 0        | -0.187744 |  |  |
|        |      | Shiraz-71T | 2238 | 0.603631 | 0         |  |  |
| ST7OT4 | chr7 | Shiraz-3T  | 90   | 0.219276 | 0         |  |  |
|        |      | Shiraz-3T  | 95   | 0        | -0.077623 |  |  |
|        |      | Shiraz-4T  | 253  | 0.372918 | 0         |  |  |
|        |      | Shiraz-36T | 378  | 0.179558 | 0         |  |  |
|        |      | Shiraz-36T | 382  | 0.081739 | 0         |  |  |

|  |            |      |          |           |  |
|--|------------|------|----------|-----------|--|
|  | Shiraz-44T | 641  | 0        | -0.477846 |  |
|  | Shiraz-46T | 943  | 0.093799 | 0         |  |
|  | Shiraz-46T | 947  | 0        | -0.010843 |  |
|  | Shiraz-47T | 1031 | 0        | -0.117529 |  |
|  | Shiraz-49T | 1121 | 0        | -0.138569 |  |
|  | Shiraz-77T | 1225 | 0        | -0.117922 |  |
|  | Shiraz-77T | 1228 | 0        | -0.238084 |  |
|  | Shiraz-18T | 1434 | 0.244465 | 0         |  |
|  | Shiraz-22T | 1549 | 0        | -0.319623 |  |
|  | Shiraz-22T | 1552 | 0        | -0.50686  |  |
|  | Shiraz-25T | 1698 | 0.21835  | 0         |  |
|  | Shiraz-28T | 1735 | 0.350744 | 0         |  |
|  | Shiraz-29T | 1778 | 0.120767 | 0         |  |
|  | Shiraz-32T | 1833 | 0.551336 | 0         |  |
|  | Shiraz-32T | 1835 | 0.092727 | 0         |  |
|  | Shiraz-38T | 1951 | 0.250891 | 0         |  |
|  | Shiraz-53T | 2078 | 0.287202 | 0         |  |
|  | Shiraz-58T | 2161 | 0        | -0.187744 |  |
|  | Shiraz-71T | 2238 | 0.603631 | 0         |  |
|  | Shiraz-3T  | 90   | 0.219276 | 0         |  |
|  | Shiraz-3T  | 95   | 0        | -0.077623 |  |
|  | Shiraz-4T  | 253  | 0.372918 | 0         |  |
|  | Shiraz-36T | 378  | 0.179558 | 0         |  |
|  | Shiraz-36T | 382  | 0.081739 | 0         |  |
|  | Shiraz-44T | 641  | 0        | -0.477846 |  |
|  | Shiraz-46T | 943  | 0.093799 | 0         |  |
|  | Shiraz-46T | 947  | 0        | -0.010843 |  |
|  | Shiraz-47T | 1031 | 0        | -0.117529 |  |
|  | Shiraz-49T | 1121 | 0        | -0.138569 |  |
|  | Shiraz-77T | 1225 | 0        | -0.117922 |  |
|  | Shiraz-77T | 1228 | 0        | -0.238084 |  |
|  | Shiraz-18T | 1434 | 0.244465 | 0         |  |
|  | Shiraz-22T | 1549 | 0        | -0.319623 |  |
|  | Shiraz-22T | 1552 | 0        | -0.50686  |  |
|  | Shiraz-25T | 1698 | 0.21835  | 0         |  |
|  | Shiraz-28T | 1735 | 0.350744 | 0         |  |
|  | Shiraz-29T | 1778 | 0.120767 | 0         |  |
|  | Shiraz-32T | 1833 | 0.551336 | 0         |  |
|  | Shiraz-32T | 1835 | 0.092727 | 0         |  |
|  | Shiraz-38T | 1951 | 0.250891 | 0         |  |
|  | Shiraz-53T | 2078 | 0.287202 | 0         |  |
|  | Shiraz-58T | 2161 | 0        | -0.187744 |  |
|  | Shiraz-71T | 2238 | 0.603631 | 0         |  |
|  | Shiraz-3T  | 90   | 0.219276 | 0         |  |
|  | Shiraz-3T  | 95   | 0        | -0.077623 |  |
|  | Shiraz-4T  | 253  | 0.372918 | 0         |  |
|  | Shiraz-36T | 378  | 0.179558 | 0         |  |

|       |      |            |      |          |           |  |  |
|-------|------|------------|------|----------|-----------|--|--|
|       |      | Shiraz-36T | 382  | 0.081739 | 0         |  |  |
|       |      | Shiraz-44T | 641  | 0        | -0.477846 |  |  |
|       |      | Shiraz-46T | 943  | 0.093799 | 0         |  |  |
|       |      | Shiraz-46T | 947  | 0        | -0.010843 |  |  |
|       |      | Shiraz-47T | 1031 | 0        | -0.117529 |  |  |
|       |      | Shiraz-49T | 1121 | 0        | -0.138569 |  |  |
|       |      | Shiraz-77T | 1225 | 0        | -0.117922 |  |  |
|       |      | Shiraz-77T | 1228 | 0        | -0.238084 |  |  |
|       |      | Shiraz-18T | 1434 | 0.244465 | 0         |  |  |
|       |      | Shiraz-22T | 1549 | 0        | -0.319623 |  |  |
|       |      | Shiraz-22T | 1552 | 0        | -0.50686  |  |  |
|       |      | Shiraz-25T | 1698 | 0.21835  | 0         |  |  |
|       |      | Shiraz-28T | 1735 | 0.350744 | 0         |  |  |
|       |      | Shiraz-29T | 1778 | 0.120767 | 0         |  |  |
|       |      | Shiraz-32T | 1833 | 0.551336 | 0         |  |  |
|       |      | Shiraz-32T | 1835 | 0.092727 | 0         |  |  |
|       |      | Shiraz-38T | 1951 | 0.250891 | 0         |  |  |
|       |      | Shiraz-53T | 2078 | 0.287202 | 0         |  |  |
|       |      | Shiraz-58T | 2161 | 0        | -0.187744 |  |  |
|       |      | Shiraz-71T | 2238 | 0.603631 | 0         |  |  |
| STAG2 | chrX | Shiraz-3T  | 242  | 0        | -0.336434 |  |  |
|       |      | Shiraz-3T  | 242  | 0        | -0.336434 |  |  |
|       |      | Shiraz-4T  | 261  | 0        | -0.336249 |  |  |
|       |      | Shiraz-4T  | 261  | 0        | -0.336249 |  |  |
|       |      | Shiraz-16T | 295  | 0.591657 | 0         |  |  |
|       |      | Shiraz-16T | 295  | 0.591657 | 0         |  |  |
|       |      | Shiraz-36T | 433  | 0        | -0.803961 |  |  |
|       |      | Shiraz-36T | 433  | 0        | -0.803961 |  |  |
|       |      | Shiraz-44T | 899  | 0        | -1.09697  |  |  |
|       |      | Shiraz-44T | 899  | 0        | -1.09697  |  |  |
|       |      | Shiraz-49T | 1170 | 0        | -0.967436 |  |  |
|       |      | Shiraz-49T | 1170 | 0        | -0.967436 |  |  |
|       |      | Shiraz-9T  | 1370 | 0.690073 | 0         |  |  |
|       |      | Shiraz-9T  | 1370 | 0.690073 | 0         |  |  |
|       |      | Shiraz-18T | 1457 | 0.643204 | 0         |  |  |
|       |      | Shiraz-18T | 1457 | 0.643204 | 0         |  |  |
|       |      | Shiraz-22T | 1673 | 0.611783 | 0         |  |  |
|       |      | Shiraz-22T | 1673 | 0.611783 | 0         |  |  |
|       |      | Shiraz-25T | 1719 | 0.472955 | 0         |  |  |
|       |      | Shiraz-25T | 1719 | 0.472955 | 0         |  |  |
|       |      | Shiraz-28T | 1762 | 0.562311 | 0         |  |  |
|       |      | Shiraz-28T | 1762 | 0.562311 | 0         |  |  |
|       |      | Shiraz-29T | 1801 | 0.815343 | 0         |  |  |
|       |      | Shiraz-29T | 1801 | 0.815343 | 0         |  |  |
|       |      | Shiraz-32T | 1870 | 0.729766 | 0         |  |  |
|       |      | Shiraz-32T | 1870 | 0.729766 | 0         |  |  |
|       |      | Shiraz-35T | 1933 | 0.488535 | 0         |  |  |

|  |            |      |          |           |  |
|--|------------|------|----------|-----------|--|
|  | Shiraz-35T | 1933 | 0.488535 | 0         |  |
|  | Shiraz-58T | 2223 | 0.833364 | 0         |  |
|  | Shiraz-58T | 2223 | 0.833364 | 0         |  |
|  | Shiraz-71T | 2263 | 0.975531 | 0         |  |
|  | Shiraz-71T | 2263 | 0.975531 | 0         |  |
|  | Shiraz-3T  | 242  | 0        | -0.336434 |  |
|  | Shiraz-3T  | 242  | 0        | -0.336434 |  |
|  | Shiraz-4T  | 261  | 0        | -0.336249 |  |
|  | Shiraz-4T  | 261  | 0        | -0.336249 |  |
|  | Shiraz-16T | 295  | 0.591657 | 0         |  |
|  | Shiraz-16T | 295  | 0.591657 | 0         |  |
|  | Shiraz-36T | 433  | 0        | -0.803961 |  |
|  | Shiraz-36T | 433  | 0        | -0.803961 |  |
|  | Shiraz-44T | 899  | 0        | -1.09697  |  |
|  | Shiraz-44T | 899  | 0        | -1.09697  |  |
|  | Shiraz-49T | 1170 | 0        | -0.967436 |  |
|  | Shiraz-49T | 1170 | 0        | -0.967436 |  |
|  | Shiraz-9T  | 1370 | 0.690073 | 0         |  |
|  | Shiraz-9T  | 1370 | 0.690073 | 0         |  |
|  | Shiraz-18T | 1457 | 0.643204 | 0         |  |
|  | Shiraz-18T | 1457 | 0.643204 | 0         |  |
|  | Shiraz-22T | 1673 | 0.611783 | 0         |  |
|  | Shiraz-22T | 1673 | 0.611783 | 0         |  |
|  | Shiraz-25T | 1719 | 0.472955 | 0         |  |
|  | Shiraz-25T | 1719 | 0.472955 | 0         |  |
|  | Shiraz-28T | 1762 | 0.562311 | 0         |  |
|  | Shiraz-28T | 1762 | 0.562311 | 0         |  |
|  | Shiraz-29T | 1801 | 0.815343 | 0         |  |
|  | Shiraz-29T | 1801 | 0.815343 | 0         |  |
|  | Shiraz-32T | 1870 | 0.729766 | 0         |  |
|  | Shiraz-32T | 1870 | 0.729766 | 0         |  |
|  | Shiraz-35T | 1933 | 0.488535 | 0         |  |
|  | Shiraz-35T | 1933 | 0.488535 | 0         |  |
|  | Shiraz-58T | 2223 | 0.833364 | 0         |  |
|  | Shiraz-58T | 2223 | 0.833364 | 0         |  |
|  | Shiraz-71T | 2263 | 0.975531 | 0         |  |
|  | Shiraz-71T | 2263 | 0.975531 | 0         |  |
|  | Shiraz-3T  | 242  | 0        | -0.336434 |  |
|  | Shiraz-3T  | 242  | 0        | -0.336434 |  |
|  | Shiraz-4T  | 261  | 0        | -0.336249 |  |
|  | Shiraz-4T  | 261  | 0        | -0.336249 |  |
|  | Shiraz-16T | 295  | 0.591657 | 0         |  |
|  | Shiraz-16T | 295  | 0.591657 | 0         |  |
|  | Shiraz-36T | 433  | 0        | -0.803961 |  |
|  | Shiraz-36T | 433  | 0        | -0.803961 |  |
|  | Shiraz-44T | 899  | 0        | -1.09697  |  |
|  | Shiraz-44T | 899  | 0        | -1.09697  |  |

|       |      |            |      |          |           |  |  |
|-------|------|------------|------|----------|-----------|--|--|
|       |      | Shiraz-49T | 1170 | 0        | -0.967436 |  |  |
|       |      | Shiraz-49T | 1170 | 0        | -0.967436 |  |  |
|       |      | Shiraz-9T  | 1370 | 0.690073 | 0         |  |  |
|       |      | Shiraz-9T  | 1370 | 0.690073 | 0         |  |  |
|       |      | Shiraz-18T | 1457 | 0.643204 | 0         |  |  |
|       |      | Shiraz-18T | 1457 | 0.643204 | 0         |  |  |
|       |      | Shiraz-22T | 1673 | 0.611783 | 0         |  |  |
|       |      | Shiraz-22T | 1673 | 0.611783 | 0         |  |  |
|       |      | Shiraz-25T | 1719 | 0.472955 | 0         |  |  |
|       |      | Shiraz-25T | 1719 | 0.472955 | 0         |  |  |
|       |      | Shiraz-28T | 1762 | 0.562311 | 0         |  |  |
|       |      | Shiraz-28T | 1762 | 0.562311 | 0         |  |  |
|       |      | Shiraz-29T | 1801 | 0.815343 | 0         |  |  |
|       |      | Shiraz-29T | 1801 | 0.815343 | 0         |  |  |
|       |      | Shiraz-32T | 1870 | 0.729766 | 0         |  |  |
|       |      | Shiraz-32T | 1870 | 0.729766 | 0         |  |  |
|       |      | Shiraz-35T | 1933 | 0.488535 | 0         |  |  |
|       |      | Shiraz-35T | 1933 | 0.488535 | 0         |  |  |
|       |      | Shiraz-58T | 2223 | 0.833364 | 0         |  |  |
|       |      | Shiraz-58T | 2223 | 0.833364 | 0         |  |  |
|       |      | Shiraz-71T | 2263 | 0.975531 | 0         |  |  |
|       |      | Shiraz-71T | 2263 | 0.975531 | 0         |  |  |
| STAG3 | chr7 | Shiraz-3T  | 90   | 0.219276 | 0         |  |  |
|       |      | Shiraz-3T  | 94   | 0.74735  | 0         |  |  |
|       |      | Shiraz-4T  | 253  | 0.372918 | 0         |  |  |
|       |      | Shiraz-31T | 316  | 0.219196 | 0         |  |  |
|       |      | Shiraz-36T | 378  | 0.179558 | 0         |  |  |
|       |      | Shiraz-36T | 381  | 0.332628 | 0         |  |  |
|       |      | Shiraz-44T | 639  | 1.035032 | 0         |  |  |
|       |      | Shiraz-46T | 943  | 0.093799 | 0         |  |  |
|       |      | Shiraz-46T | 946  | 0.299835 | 0         |  |  |
|       |      | Shiraz-47T | 1030 | 0.257728 | 0         |  |  |
|       |      | Shiraz-49T | 1120 | 0.281656 | 0         |  |  |
|       |      | Shiraz-77T | 1225 | 0        | -0.117922 |  |  |
|       |      | Shiraz-77T | 1227 | 0.196445 | 0         |  |  |
|       |      | Shiraz-9T  | 1324 | 0.679266 | 0         |  |  |
|       |      | Shiraz-18T | 1434 | 0.244465 | 0         |  |  |
|       |      | Shiraz-22T | 1549 | 0        | -0.319623 |  |  |
|       |      | Shiraz-22T | 1551 | 0.324011 | 0         |  |  |
|       |      | Shiraz-25T | 1698 | 0.21835  | 0         |  |  |
|       |      | Shiraz-28T | 1735 | 0.350744 | 0         |  |  |
|       |      | Shiraz-29T | 1778 | 0.120767 | 0         |  |  |
|       |      | Shiraz-32T | 1833 | 0.551336 | 0         |  |  |
|       |      | Shiraz-32T | 1834 | 1.485392 | 0         |  |  |
|       |      | Shiraz-38T | 1951 | 0.250891 | 0         |  |  |
|       |      | Shiraz-53T | 2078 | 0.287202 | 0         |  |  |
|       |      | Shiraz-58T | 2160 | 0.399007 | 0         |  |  |



|  |            |      |          |           |  |
|--|------------|------|----------|-----------|--|
|  | Shiraz-71T | 2238 | 0.603631 | 0         |  |
|  | Shiraz-3T  | 90   | 0.219276 | 0         |  |
|  | Shiraz-3T  | 94   | 0.74735  | 0         |  |
|  | Shiraz-4T  | 253  | 0.372918 | 0         |  |
|  | Shiraz-31T | 316  | 0.219196 | 0         |  |
|  | Shiraz-36T | 378  | 0.179558 | 0         |  |
|  | Shiraz-36T | 381  | 0.332628 | 0         |  |
|  | Shiraz-44T | 639  | 1.035032 | 0         |  |
|  | Shiraz-46T | 943  | 0.093799 | 0         |  |
|  | Shiraz-46T | 946  | 0.299835 | 0         |  |
|  | Shiraz-47T | 1030 | 0.257728 | 0         |  |
|  | Shiraz-49T | 1120 | 0.281656 | 0         |  |
|  | Shiraz-77T | 1225 | 0        | -0.117922 |  |
|  | Shiraz-77T | 1227 | 0.196445 | 0         |  |
|  | Shiraz-9T  | 1324 | 0.679266 | 0         |  |
|  | Shiraz-18T | 1434 | 0.244465 | 0         |  |
|  | Shiraz-22T | 1549 | 0        | -0.319623 |  |
|  | Shiraz-22T | 1551 | 0.324011 | 0         |  |
|  | Shiraz-25T | 1698 | 0.21835  | 0         |  |
|  | Shiraz-28T | 1735 | 0.350744 | 0         |  |
|  | Shiraz-29T | 1778 | 0.120767 | 0         |  |
|  | Shiraz-32T | 1833 | 0.551336 | 0         |  |
|  | Shiraz-32T | 1834 | 1.485392 | 0         |  |
|  | Shiraz-38T | 1951 | 0.250891 | 0         |  |
|  | Shiraz-53T | 2078 | 0.287202 | 0         |  |
|  | Shiraz-58T | 2160 | 0.399007 | 0         |  |
|  | Shiraz-71T | 2238 | 0.603631 | 0         |  |
|  | Shiraz-3T  | 90   | 0.219276 | 0         |  |
|  | Shiraz-3T  | 94   | 0.74735  | 0         |  |
|  | Shiraz-4T  | 253  | 0.372918 | 0         |  |
|  | Shiraz-31T | 316  | 0.219196 | 0         |  |
|  | Shiraz-36T | 378  | 0.179558 | 0         |  |
|  | Shiraz-36T | 381  | 0.332628 | 0         |  |
|  | Shiraz-44T | 639  | 1.035032 | 0         |  |
|  | Shiraz-46T | 943  | 0.093799 | 0         |  |
|  | Shiraz-46T | 946  | 0.299835 | 0         |  |
|  | Shiraz-47T | 1030 | 0.257728 | 0         |  |
|  | Shiraz-49T | 1120 | 0.281656 | 0         |  |
|  | Shiraz-77T | 1225 | 0        | -0.117922 |  |
|  | Shiraz-77T | 1227 | 0.196445 | 0         |  |
|  | Shiraz-9T  | 1324 | 0.679266 | 0         |  |
|  | Shiraz-18T | 1434 | 0.244465 | 0         |  |
|  | Shiraz-22T | 1549 | 0        | -0.319623 |  |
|  | Shiraz-22T | 1551 | 0.324011 | 0         |  |
|  | Shiraz-25T | 1698 | 0.21835  | 0         |  |
|  | Shiraz-28T | 1735 | 0.350744 | 0         |  |
|  | Shiraz-29T | 1778 | 0.120767 | 0         |  |

|          |      |            |      |          |           |  |  |
|----------|------|------------|------|----------|-----------|--|--|
|          |      | Shiraz-32T | 1833 | 0.551336 | 0         |  |  |
|          |      | Shiraz-32T | 1834 | 1.485392 | 0         |  |  |
|          |      | Shiraz-38T | 1951 | 0.250891 | 0         |  |  |
|          |      | Shiraz-53T | 2078 | 0.287202 | 0         |  |  |
|          |      | Shiraz-58T | 2160 | 0.399007 | 0         |  |  |
|          |      | Shiraz-71T | 2238 | 0.603631 | 0         |  |  |
| STARD3NL | chr7 | Shiraz-3T  | 87   | 0.198593 | 0         |  |  |
|          |      | Shiraz-4T  | 252  | 0.192083 | 0         |  |  |
|          |      | Shiraz-36T | 376  | 0.159952 | 0         |  |  |
|          |      | Shiraz-44T | 631  | 0        | -0.180312 |  |  |
|          |      | Shiraz-46T | 942  | 0.069143 | 0         |  |  |
|          |      | Shiraz-18T | 1433 | 0.250973 | 0         |  |  |
|          |      | Shiraz-22T | 1544 | 0        | -0.193579 |  |  |
|          |      | Shiraz-25T | 1697 | 0.21945  | 0         |  |  |
|          |      | Shiraz-28T | 1734 | 0.362882 | 0         |  |  |
|          |      | Shiraz-29T | 1777 | 0.156747 | 0         |  |  |
|          |      | Shiraz-38T | 1950 | 0.265916 | 0         |  |  |
|          |      | Shiraz-71T | 2236 | 0.320072 | 0         |  |  |
|          |      | Shiraz-72T | 2277 | 0        | -0.398869 |  |  |
|          |      | Shiraz-3T  | 87   | 0.198593 | 0         |  |  |
|          |      | Shiraz-4T  | 252  | 0.192083 | 0         |  |  |
|          |      | Shiraz-36T | 376  | 0.159952 | 0         |  |  |
|          |      | Shiraz-44T | 631  | 0        | -0.180312 |  |  |
|          |      | Shiraz-46T | 942  | 0.069143 | 0         |  |  |
|          |      | Shiraz-18T | 1433 | 0.250973 | 0         |  |  |
|          |      | Shiraz-22T | 1544 | 0        | -0.193579 |  |  |
|          |      | Shiraz-25T | 1697 | 0.21945  | 0         |  |  |
|          |      | Shiraz-28T | 1734 | 0.362882 | 0         |  |  |
|          |      | Shiraz-29T | 1777 | 0.156747 | 0         |  |  |
|          |      | Shiraz-38T | 1950 | 0.265916 | 0         |  |  |
|          |      | Shiraz-71T | 2236 | 0.320072 | 0         |  |  |
|          |      | Shiraz-72T | 2277 | 0        | -0.398869 |  |  |
|          |      | Shiraz-3T  | 87   | 0.198593 | 0         |  |  |
|          |      | Shiraz-4T  | 252  | 0.192083 | 0         |  |  |
|          |      | Shiraz-36T | 376  | 0.159952 | 0         |  |  |
|          |      | Shiraz-44T | 631  | 0        | -0.180312 |  |  |
|          |      | Shiraz-46T | 942  | 0.069143 | 0         |  |  |
|          |      | Shiraz-18T | 1433 | 0.250973 | 0         |  |  |
|          |      | Shiraz-22T | 1544 | 0        | -0.193579 |  |  |
|          |      | Shiraz-25T | 1697 | 0.21945  | 0         |  |  |
|          |      | Shiraz-28T | 1734 | 0.362882 | 0         |  |  |
|          |      | Shiraz-29T | 1777 | 0.156747 | 0         |  |  |
|          |      | Shiraz-38T | 1950 | 0.265916 | 0         |  |  |
|          |      | Shiraz-71T | 2236 | 0.320072 | 0         |  |  |
|          |      | Shiraz-72T | 2277 | 0        | -0.398869 |  |  |
| STARD8   | chrX | Shiraz-3T  | 241  | 0        | -0.230501 |  |  |
|          |      | Shiraz-3T  | 241  | 0        | -0.230501 |  |  |

|  |            |      |          |           |  |
|--|------------|------|----------|-----------|--|
|  | Shiraz-4T  | 261  | 0        | -0.336249 |  |
|  | Shiraz-4T  | 261  | 0        | -0.336249 |  |
|  | Shiraz-16T | 295  | 0.591657 | 0         |  |
|  | Shiraz-16T | 295  | 0.591657 | 0         |  |
|  | Shiraz-36T | 433  | 0        | -0.803961 |  |
|  | Shiraz-36T | 433  | 0        | -0.803961 |  |
|  | Shiraz-44T | 899  | 0        | -1.09697  |  |
|  | Shiraz-44T | 899  | 0        | -1.09697  |  |
|  | Shiraz-44T | 900  | 0        | -0.584284 |  |
|  | Shiraz-44T | 900  | 0        | -0.584284 |  |
|  | Shiraz-49T | 1170 | 0        | -0.967436 |  |
|  | Shiraz-49T | 1170 | 0        | -0.967436 |  |
|  | Shiraz-18T | 1457 | 0.643204 | 0         |  |
|  | Shiraz-18T | 1457 | 0.643204 | 0         |  |
|  | Shiraz-22T | 1673 | 0.611783 | 0         |  |
|  | Shiraz-22T | 1673 | 0.611783 | 0         |  |
|  | Shiraz-22T | 1674 | 0.887899 | 0         |  |
|  | Shiraz-22T | 1674 | 0.887899 | 0         |  |
|  | Shiraz-25T | 1719 | 0.472955 | 0         |  |
|  | Shiraz-25T | 1719 | 0.472955 | 0         |  |
|  | Shiraz-28T | 1762 | 0.562311 | 0         |  |
|  | Shiraz-28T | 1762 | 0.562311 | 0         |  |
|  | Shiraz-29T | 1801 | 0.815343 | 0         |  |
|  | Shiraz-29T | 1801 | 0.815343 | 0         |  |
|  | Shiraz-32T | 1870 | 0.729766 | 0         |  |
|  | Shiraz-32T | 1870 | 0.729766 | 0         |  |
|  | Shiraz-35T | 1933 | 0.488535 | 0         |  |
|  | Shiraz-35T | 1933 | 0.488535 | 0         |  |
|  | Shiraz-58T | 2223 | 0.833364 | 0         |  |
|  | Shiraz-58T | 2223 | 0.833364 | 0         |  |
|  | Shiraz-58T | 2224 | 1.076575 | 0         |  |
|  | Shiraz-58T | 2224 | 1.076575 | 0         |  |
|  | Shiraz-71T | 2263 | 0.975531 | 0         |  |
|  | Shiraz-71T | 2263 | 0.975531 | 0         |  |
|  | Shiraz-3T  | 241  | 0        | -0.230501 |  |
|  | Shiraz-3T  | 241  | 0        | -0.230501 |  |
|  | Shiraz-4T  | 261  | 0        | -0.336249 |  |
|  | Shiraz-4T  | 261  | 0        | -0.336249 |  |
|  | Shiraz-16T | 295  | 0.591657 | 0         |  |
|  | Shiraz-16T | 295  | 0.591657 | 0         |  |
|  | Shiraz-36T | 433  | 0        | -0.803961 |  |
|  | Shiraz-36T | 433  | 0        | -0.803961 |  |
|  | Shiraz-44T | 899  | 0        | -1.09697  |  |
|  | Shiraz-44T | 899  | 0        | -1.09697  |  |
|  | Shiraz-44T | 900  | 0        | -0.584284 |  |
|  | Shiraz-44T | 900  | 0        | -0.584284 |  |
|  | Shiraz-49T | 1170 | 0        | -0.967436 |  |

|  |            |      |          |           |  |
|--|------------|------|----------|-----------|--|
|  | Shiraz-49T | 1170 | 0        | -0.967436 |  |
|  | Shiraz-18T | 1457 | 0.643204 | 0         |  |
|  | Shiraz-18T | 1457 | 0.643204 | 0         |  |
|  | Shiraz-22T | 1673 | 0.611783 | 0         |  |
|  | Shiraz-22T | 1673 | 0.611783 | 0         |  |
|  | Shiraz-22T | 1674 | 0.887899 | 0         |  |
|  | Shiraz-22T | 1674 | 0.887899 | 0         |  |
|  | Shiraz-25T | 1719 | 0.472955 | 0         |  |
|  | Shiraz-25T | 1719 | 0.472955 | 0         |  |
|  | Shiraz-28T | 1762 | 0.562311 | 0         |  |
|  | Shiraz-28T | 1762 | 0.562311 | 0         |  |
|  | Shiraz-29T | 1801 | 0.815343 | 0         |  |
|  | Shiraz-29T | 1801 | 0.815343 | 0         |  |
|  | Shiraz-32T | 1870 | 0.729766 | 0         |  |
|  | Shiraz-32T | 1870 | 0.729766 | 0         |  |
|  | Shiraz-35T | 1933 | 0.488535 | 0         |  |
|  | Shiraz-35T | 1933 | 0.488535 | 0         |  |
|  | Shiraz-58T | 2223 | 0.833364 | 0         |  |
|  | Shiraz-58T | 2223 | 0.833364 | 0         |  |
|  | Shiraz-58T | 2224 | 1.076575 | 0         |  |
|  | Shiraz-58T | 2224 | 1.076575 | 0         |  |
|  | Shiraz-71T | 2263 | 0.975531 | 0         |  |
|  | Shiraz-71T | 2263 | 0.975531 | 0         |  |
|  | Shiraz-3T  | 241  | 0        | -0.230501 |  |
|  | Shiraz-3T  | 241  | 0        | -0.230501 |  |
|  | Shiraz-4T  | 261  | 0        | -0.336249 |  |
|  | Shiraz-4T  | 261  | 0        | -0.336249 |  |
|  | Shiraz-16T | 295  | 0.591657 | 0         |  |
|  | Shiraz-16T | 295  | 0.591657 | 0         |  |
|  | Shiraz-36T | 433  | 0        | -0.803961 |  |
|  | Shiraz-36T | 433  | 0        | -0.803961 |  |
|  | Shiraz-44T | 899  | 0        | -1.09697  |  |
|  | Shiraz-44T | 899  | 0        | -1.09697  |  |
|  | Shiraz-44T | 900  | 0        | -0.584284 |  |
|  | Shiraz-44T | 900  | 0        | -0.584284 |  |
|  | Shiraz-49T | 1170 | 0        | -0.967436 |  |
|  | Shiraz-49T | 1170 | 0        | -0.967436 |  |
|  | Shiraz-18T | 1457 | 0.643204 | 0         |  |
|  | Shiraz-18T | 1457 | 0.643204 | 0         |  |
|  | Shiraz-22T | 1673 | 0.611783 | 0         |  |
|  | Shiraz-22T | 1673 | 0.611783 | 0         |  |
|  | Shiraz-22T | 1674 | 0.887899 | 0         |  |
|  | Shiraz-22T | 1674 | 0.887899 | 0         |  |
|  | Shiraz-25T | 1719 | 0.472955 | 0         |  |
|  | Shiraz-25T | 1719 | 0.472955 | 0         |  |
|  | Shiraz-28T | 1762 | 0.562311 | 0         |  |
|  | Shiraz-28T | 1762 | 0.562311 | 0         |  |

|        |      |            |      |          |           |  |  |
|--------|------|------------|------|----------|-----------|--|--|
|        |      | Shiraz-29T | 1801 | 0.815343 | 0         |  |  |
|        |      | Shiraz-29T | 1801 | 0.815343 | 0         |  |  |
|        |      | Shiraz-32T | 1870 | 0.729766 | 0         |  |  |
|        |      | Shiraz-32T | 1870 | 0.729766 | 0         |  |  |
|        |      | Shiraz-35T | 1933 | 0.488535 | 0         |  |  |
|        |      | Shiraz-35T | 1933 | 0.488535 | 0         |  |  |
|        |      | Shiraz-58T | 2223 | 0.833364 | 0         |  |  |
|        |      | Shiraz-58T | 2223 | 0.833364 | 0         |  |  |
|        |      | Shiraz-58T | 2224 | 1.076575 | 0         |  |  |
|        |      | Shiraz-58T | 2224 | 1.076575 | 0         |  |  |
|        |      | Shiraz-71T | 2263 | 0.975531 | 0         |  |  |
|        |      | Shiraz-71T | 2263 | 0.975531 | 0         |  |  |
| STEAP1 | chr7 | Shiraz-3T  | 90   | 0.219276 | 0         |  |  |
|        |      | Shiraz-3T  | 93   | 0        | -0.058023 |  |  |
|        |      | Shiraz-4T  | 253  | 0.372918 | 0         |  |  |
|        |      | Shiraz-36T | 378  | 0.179558 | 0         |  |  |
|        |      | Shiraz-36T | 380  | 0.083883 | 0         |  |  |
|        |      | Shiraz-44T | 638  | 0        | -0.433476 |  |  |
|        |      | Shiraz-46T | 943  | 0.093799 | 0         |  |  |
|        |      | Shiraz-46T | 945  | 0        | -0.014838 |  |  |
|        |      | Shiraz-47T | 1029 | 0        | -0.096586 |  |  |
|        |      | Shiraz-49T | 1119 | 0        | -0.157331 |  |  |
|        |      | Shiraz-77T | 1225 | 0        | -0.117922 |  |  |
|        |      | Shiraz-77T | 1226 | 0        | -0.233724 |  |  |
|        |      | Shiraz-18T | 1434 | 0.244465 | 0         |  |  |
|        |      | Shiraz-22T | 1549 | 0        | -0.319623 |  |  |
|        |      | Shiraz-25T | 1698 | 0.21835  | 0         |  |  |
|        |      | Shiraz-28T | 1735 | 0.350744 | 0         |  |  |
|        |      | Shiraz-29T | 1778 | 0.120767 | 0         |  |  |
|        |      | Shiraz-32T | 1833 | 0.551336 | 0         |  |  |
|        |      | Shiraz-38T | 1951 | 0.250891 | 0         |  |  |
|        |      | Shiraz-53T | 2078 | 0.287202 | 0         |  |  |
|        |      | Shiraz-58T | 2159 | 0        | -0.219521 |  |  |
|        |      | Shiraz-71T | 2238 | 0.603631 | 0         |  |  |
|        |      | Shiraz-3T  | 90   | 0.219276 | 0         |  |  |
|        |      | Shiraz-3T  | 93   | 0        | -0.058023 |  |  |
|        |      | Shiraz-4T  | 253  | 0.372918 | 0         |  |  |
|        |      | Shiraz-36T | 378  | 0.179558 | 0         |  |  |
|        |      | Shiraz-36T | 380  | 0.083883 | 0         |  |  |
|        |      | Shiraz-44T | 638  | 0        | -0.433476 |  |  |
|        |      | Shiraz-46T | 943  | 0.093799 | 0         |  |  |
|        |      | Shiraz-46T | 945  | 0        | -0.014838 |  |  |
|        |      | Shiraz-47T | 1029 | 0        | -0.096586 |  |  |
|        |      | Shiraz-49T | 1119 | 0        | -0.157331 |  |  |
|        |      | Shiraz-77T | 1225 | 0        | -0.117922 |  |  |
|        |      | Shiraz-77T | 1226 | 0        | -0.233724 |  |  |
|        |      | Shiraz-18T | 1434 | 0.244465 | 0         |  |  |

|        |      |            |      |          |           |  |  |
|--------|------|------------|------|----------|-----------|--|--|
|        |      | Shiraz-22T | 1549 | 0        | -0.319623 |  |  |
|        |      | Shiraz-25T | 1698 | 0.21835  | 0         |  |  |
|        |      | Shiraz-28T | 1735 | 0.350744 | 0         |  |  |
|        |      | Shiraz-29T | 1778 | 0.120767 | 0         |  |  |
|        |      | Shiraz-32T | 1833 | 0.551336 | 0         |  |  |
|        |      | Shiraz-38T | 1951 | 0.250891 | 0         |  |  |
|        |      | Shiraz-53T | 2078 | 0.287202 | 0         |  |  |
|        |      | Shiraz-58T | 2159 | 0        | -0.219521 |  |  |
|        |      | Shiraz-71T | 2238 | 0.603631 | 0         |  |  |
|        |      | Shiraz-3T  | 90   | 0.219276 | 0         |  |  |
|        |      | Shiraz-3T  | 93   | 0        | -0.058023 |  |  |
|        |      | Shiraz-4T  | 253  | 0.372918 | 0         |  |  |
|        |      | Shiraz-36T | 378  | 0.179558 | 0         |  |  |
|        |      | Shiraz-36T | 380  | 0.083883 | 0         |  |  |
|        |      | Shiraz-44T | 638  | 0        | -0.433476 |  |  |
|        |      | Shiraz-46T | 943  | 0.093799 | 0         |  |  |
|        |      | Shiraz-46T | 945  | 0        | -0.014838 |  |  |
|        |      | Shiraz-47T | 1029 | 0        | -0.096586 |  |  |
|        |      | Shiraz-49T | 1119 | 0        | -0.157331 |  |  |
|        |      | Shiraz-77T | 1225 | 0        | -0.117922 |  |  |
|        |      | Shiraz-77T | 1226 | 0        | -0.233724 |  |  |
|        |      | Shiraz-18T | 1434 | 0.244465 | 0         |  |  |
|        |      | Shiraz-22T | 1549 | 0        | -0.319623 |  |  |
|        |      | Shiraz-25T | 1698 | 0.21835  | 0         |  |  |
|        |      | Shiraz-28T | 1735 | 0.350744 | 0         |  |  |
|        |      | Shiraz-29T | 1778 | 0.120767 | 0         |  |  |
|        |      | Shiraz-32T | 1833 | 0.551336 | 0         |  |  |
|        |      | Shiraz-38T | 1951 | 0.250891 | 0         |  |  |
|        |      | Shiraz-53T | 2078 | 0.287202 | 0         |  |  |
|        |      | Shiraz-58T | 2159 | 0        | -0.219521 |  |  |
|        |      | Shiraz-71T | 2238 | 0.603631 | 0         |  |  |
| STEAP2 | chr7 | Shiraz-3T  | 90   | 0.219276 | 0         |  |  |
|        |      | Shiraz-3T  | 90   | 0.219276 | 0         |  |  |
|        |      | Shiraz-3T  | 90   | 0.219276 | 0         |  |  |
|        |      | Shiraz-3T  | 93   | 0        | -0.058023 |  |  |
|        |      | Shiraz-3T  | 93   | 0        | -0.058023 |  |  |
|        |      | Shiraz-3T  | 93   | 0        | -0.058023 |  |  |
|        |      | Shiraz-4T  | 253  | 0.372918 | 0         |  |  |
|        |      | Shiraz-4T  | 253  | 0.372918 | 0         |  |  |
|        |      | Shiraz-4T  | 253  | 0.372918 | 0         |  |  |
|        |      | Shiraz-36T | 378  | 0.179558 | 0         |  |  |
|        |      | Shiraz-36T | 378  | 0.179558 | 0         |  |  |
|        |      | Shiraz-36T | 378  | 0.179558 | 0         |  |  |
|        |      | Shiraz-36T | 380  | 0.083883 | 0         |  |  |
|        |      | Shiraz-36T | 380  | 0.083883 | 0         |  |  |
|        |      | Shiraz-36T | 380  | 0.083883 | 0         |  |  |
|        |      | Shiraz-44T | 638  | 0        | -0.433476 |  |  |

|  |            |      |          |           |  |
|--|------------|------|----------|-----------|--|
|  | Shiraz-44T | 638  | 0        | -0.433476 |  |
|  | Shiraz-44T | 638  | 0        | -0.433476 |  |
|  | Shiraz-46T | 943  | 0.093799 | 0         |  |
|  | Shiraz-46T | 943  | 0.093799 | 0         |  |
|  | Shiraz-46T | 943  | 0.093799 | 0         |  |
|  | Shiraz-46T | 945  | 0        | -0.014838 |  |
|  | Shiraz-46T | 945  | 0        | -0.014838 |  |
|  | Shiraz-46T | 945  | 0        | -0.014838 |  |
|  | Shiraz-47T | 1029 | 0        | -0.096586 |  |
|  | Shiraz-47T | 1029 | 0        | -0.096586 |  |
|  | Shiraz-47T | 1029 | 0        | -0.096586 |  |
|  | Shiraz-49T | 1119 | 0        | -0.157331 |  |
|  | Shiraz-49T | 1119 | 0        | -0.157331 |  |
|  | Shiraz-49T | 1119 | 0        | -0.157331 |  |
|  | Shiraz-77T | 1225 | 0        | -0.117922 |  |
|  | Shiraz-77T | 1225 | 0        | -0.117922 |  |
|  | Shiraz-77T | 1225 | 0        | -0.117922 |  |
|  | Shiraz-77T | 1226 | 0        | -0.233724 |  |
|  | Shiraz-77T | 1226 | 0        | -0.233724 |  |
|  | Shiraz-77T | 1226 | 0        | -0.233724 |  |
|  | Shiraz-18T | 1434 | 0.244465 | 0         |  |
|  | Shiraz-18T | 1434 | 0.244465 | 0         |  |
|  | Shiraz-18T | 1434 | 0.244465 | 0         |  |
|  | Shiraz-22T | 1549 | 0        | -0.319623 |  |
|  | Shiraz-22T | 1549 | 0        | -0.319623 |  |
|  | Shiraz-22T | 1549 | 0        | -0.319623 |  |
|  | Shiraz-25T | 1698 | 0.21835  | 0         |  |
|  | Shiraz-25T | 1698 | 0.21835  | 0         |  |
|  | Shiraz-25T | 1698 | 0.21835  | 0         |  |
|  | Shiraz-28T | 1735 | 0.350744 | 0         |  |
|  | Shiraz-28T | 1735 | 0.350744 | 0         |  |
|  | Shiraz-28T | 1735 | 0.350744 | 0         |  |
|  | Shiraz-29T | 1778 | 0.120767 | 0         |  |
|  | Shiraz-29T | 1778 | 0.120767 | 0         |  |
|  | Shiraz-29T | 1778 | 0.120767 | 0         |  |
|  | Shiraz-32T | 1833 | 0.551336 | 0         |  |
|  | Shiraz-32T | 1833 | 0.551336 | 0         |  |
|  | Shiraz-32T | 1833 | 0.551336 | 0         |  |
|  | Shiraz-38T | 1951 | 0.250891 | 0         |  |
|  | Shiraz-38T | 1951 | 0.250891 | 0         |  |
|  | Shiraz-38T | 1951 | 0.250891 | 0         |  |
|  | Shiraz-53T | 2078 | 0.287202 | 0         |  |
|  | Shiraz-53T | 2078 | 0.287202 | 0         |  |
|  | Shiraz-53T | 2078 | 0.287202 | 0         |  |
|  | Shiraz-58T | 2159 | 0        | -0.219521 |  |
|  | Shiraz-58T | 2159 | 0        | -0.219521 |  |
|  | Shiraz-58T | 2159 | 0        | -0.219521 |  |

|  |            |      |          |           |  |
|--|------------|------|----------|-----------|--|
|  | Shiraz-71T | 2238 | 0.603631 | 0         |  |
|  | Shiraz-71T | 2238 | 0.603631 | 0         |  |
|  | Shiraz-71T | 2238 | 0.603631 | 0         |  |
|  | Shiraz-3T  | 90   | 0.219276 | 0         |  |
|  | Shiraz-3T  | 90   | 0.219276 | 0         |  |
|  | Shiraz-3T  | 90   | 0.219276 | 0         |  |
|  | Shiraz-3T  | 93   | 0        | -0.058023 |  |
|  | Shiraz-3T  | 93   | 0        | -0.058023 |  |
|  | Shiraz-3T  | 93   | 0        | -0.058023 |  |
|  | Shiraz-4T  | 253  | 0.372918 | 0         |  |
|  | Shiraz-4T  | 253  | 0.372918 | 0         |  |
|  | Shiraz-4T  | 253  | 0.372918 | 0         |  |
|  | Shiraz-36T | 378  | 0.179558 | 0         |  |
|  | Shiraz-36T | 378  | 0.179558 | 0         |  |
|  | Shiraz-36T | 378  | 0.179558 | 0         |  |
|  | Shiraz-36T | 380  | 0.083883 | 0         |  |
|  | Shiraz-36T | 380  | 0.083883 | 0         |  |
|  | Shiraz-36T | 380  | 0.083883 | 0         |  |
|  | Shiraz-44T | 638  | 0        | -0.433476 |  |
|  | Shiraz-44T | 638  | 0        | -0.433476 |  |
|  | Shiraz-44T | 638  | 0        | -0.433476 |  |
|  | Shiraz-46T | 943  | 0.093799 | 0         |  |
|  | Shiraz-46T | 943  | 0.093799 | 0         |  |
|  | Shiraz-46T | 943  | 0.093799 | 0         |  |
|  | Shiraz-46T | 945  | 0        | -0.014838 |  |
|  | Shiraz-46T | 945  | 0        | -0.014838 |  |
|  | Shiraz-46T | 945  | 0        | -0.014838 |  |
|  | Shiraz-47T | 1029 | 0        | -0.096586 |  |
|  | Shiraz-47T | 1029 | 0        | -0.096586 |  |
|  | Shiraz-47T | 1029 | 0        | -0.096586 |  |
|  | Shiraz-49T | 1119 | 0        | -0.157331 |  |
|  | Shiraz-49T | 1119 | 0        | -0.157331 |  |
|  | Shiraz-49T | 1119 | 0        | -0.157331 |  |
|  | Shiraz-77T | 1225 | 0        | -0.117922 |  |
|  | Shiraz-77T | 1225 | 0        | -0.117922 |  |
|  | Shiraz-77T | 1225 | 0        | -0.117922 |  |
|  | Shiraz-77T | 1226 | 0        | -0.233724 |  |
|  | Shiraz-77T | 1226 | 0        | -0.233724 |  |
|  | Shiraz-77T | 1226 | 0        | -0.233724 |  |
|  | Shiraz-18T | 1434 | 0.244465 | 0         |  |
|  | Shiraz-18T | 1434 | 0.244465 | 0         |  |
|  | Shiraz-18T | 1434 | 0.244465 | 0         |  |
|  | Shiraz-22T | 1549 | 0        | -0.319623 |  |
|  | Shiraz-22T | 1549 | 0        | -0.319623 |  |
|  | Shiraz-22T | 1549 | 0        | -0.319623 |  |
|  | Shiraz-25T | 1698 | 0.21835  | 0         |  |
|  | Shiraz-25T | 1698 | 0.21835  | 0         |  |



|  |  |            |      |          |           |  |  |
|--|--|------------|------|----------|-----------|--|--|
|  |  | Shiraz-25T | 1698 | 0.21835  | 0         |  |  |
|  |  | Shiraz-28T | 1735 | 0.350744 | 0         |  |  |
|  |  | Shiraz-28T | 1735 | 0.350744 | 0         |  |  |
|  |  | Shiraz-28T | 1735 | 0.350744 | 0         |  |  |
|  |  | Shiraz-29T | 1778 | 0.120767 | 0         |  |  |
|  |  | Shiraz-29T | 1778 | 0.120767 | 0         |  |  |
|  |  | Shiraz-29T | 1778 | 0.120767 | 0         |  |  |
|  |  | Shiraz-32T | 1833 | 0.551336 | 0         |  |  |
|  |  | Shiraz-32T | 1833 | 0.551336 | 0         |  |  |
|  |  | Shiraz-32T | 1833 | 0.551336 | 0         |  |  |
|  |  | Shiraz-38T | 1951 | 0.250891 | 0         |  |  |
|  |  | Shiraz-38T | 1951 | 0.250891 | 0         |  |  |
|  |  | Shiraz-38T | 1951 | 0.250891 | 0         |  |  |
|  |  | Shiraz-53T | 2078 | 0.287202 | 0         |  |  |
|  |  | Shiraz-53T | 2078 | 0.287202 | 0         |  |  |
|  |  | Shiraz-53T | 2078 | 0.287202 | 0         |  |  |
|  |  | Shiraz-58T | 2159 | 0        | -0.219521 |  |  |
|  |  | Shiraz-58T | 2159 | 0        | -0.219521 |  |  |
|  |  | Shiraz-58T | 2159 | 0        | -0.219521 |  |  |
|  |  | Shiraz-71T | 2238 | 0.603631 | 0         |  |  |
|  |  | Shiraz-71T | 2238 | 0.603631 | 0         |  |  |
|  |  | Shiraz-71T | 2238 | 0.603631 | 0         |  |  |
|  |  | Shiraz-3T  | 90   | 0.219276 | 0         |  |  |
|  |  | Shiraz-3T  | 90   | 0.219276 | 0         |  |  |
|  |  | Shiraz-3T  | 90   | 0.219276 | 0         |  |  |
|  |  | Shiraz-3T  | 93   | 0        | -0.058023 |  |  |
|  |  | Shiraz-3T  | 93   | 0        | -0.058023 |  |  |
|  |  | Shiraz-3T  | 93   | 0        | -0.058023 |  |  |
|  |  | Shiraz-4T  | 253  | 0.372918 | 0         |  |  |
|  |  | Shiraz-4T  | 253  | 0.372918 | 0         |  |  |
|  |  | Shiraz-4T  | 253  | 0.372918 | 0         |  |  |
|  |  | Shiraz-36T | 378  | 0.179558 | 0         |  |  |
|  |  | Shiraz-36T | 378  | 0.179558 | 0         |  |  |
|  |  | Shiraz-36T | 378  | 0.179558 | 0         |  |  |
|  |  | Shiraz-36T | 380  | 0.083883 | 0         |  |  |
|  |  | Shiraz-36T | 380  | 0.083883 | 0         |  |  |
|  |  | Shiraz-36T | 380  | 0.083883 | 0         |  |  |
|  |  | Shiraz-44T | 638  | 0        | -0.433476 |  |  |
|  |  | Shiraz-44T | 638  | 0        | -0.433476 |  |  |
|  |  | Shiraz-44T | 638  | 0        | -0.433476 |  |  |
|  |  | Shiraz-46T | 943  | 0.093799 | 0         |  |  |
|  |  | Shiraz-46T | 943  | 0.093799 | 0         |  |  |
|  |  | Shiraz-46T | 943  | 0.093799 | 0         |  |  |
|  |  | Shiraz-46T | 945  | 0        | -0.014838 |  |  |
|  |  | Shiraz-46T | 945  | 0        | -0.014838 |  |  |
|  |  | Shiraz-46T | 945  | 0        | -0.014838 |  |  |
|  |  | Shiraz-47T | 1029 | 0        | -0.096586 |  |  |

|        |      |            |      |          |           |  |  |
|--------|------|------------|------|----------|-----------|--|--|
|        |      | Shiraz-47T | 1029 | 0        | -0.096586 |  |  |
|        |      | Shiraz-47T | 1029 | 0        | -0.096586 |  |  |
|        |      | Shiraz-49T | 1119 | 0        | -0.157331 |  |  |
|        |      | Shiraz-49T | 1119 | 0        | -0.157331 |  |  |
|        |      | Shiraz-49T | 1119 | 0        | -0.157331 |  |  |
|        |      | Shiraz-77T | 1225 | 0        | -0.117922 |  |  |
|        |      | Shiraz-77T | 1225 | 0        | -0.117922 |  |  |
|        |      | Shiraz-77T | 1225 | 0        | -0.117922 |  |  |
|        |      | Shiraz-77T | 1226 | 0        | -0.233724 |  |  |
|        |      | Shiraz-77T | 1226 | 0        | -0.233724 |  |  |
|        |      | Shiraz-77T | 1226 | 0        | -0.233724 |  |  |
|        |      | Shiraz-18T | 1434 | 0.244465 | 0         |  |  |
|        |      | Shiraz-18T | 1434 | 0.244465 | 0         |  |  |
|        |      | Shiraz-18T | 1434 | 0.244465 | 0         |  |  |
|        |      | Shiraz-22T | 1549 | 0        | -0.319623 |  |  |
|        |      | Shiraz-22T | 1549 | 0        | -0.319623 |  |  |
|        |      | Shiraz-22T | 1549 | 0        | -0.319623 |  |  |
|        |      | Shiraz-25T | 1698 | 0.21835  | 0         |  |  |
|        |      | Shiraz-25T | 1698 | 0.21835  | 0         |  |  |
|        |      | Shiraz-25T | 1698 | 0.21835  | 0         |  |  |
|        |      | Shiraz-28T | 1735 | 0.350744 | 0         |  |  |
|        |      | Shiraz-28T | 1735 | 0.350744 | 0         |  |  |
|        |      | Shiraz-28T | 1735 | 0.350744 | 0         |  |  |
|        |      | Shiraz-29T | 1778 | 0.120767 | 0         |  |  |
|        |      | Shiraz-29T | 1778 | 0.120767 | 0         |  |  |
|        |      | Shiraz-29T | 1778 | 0.120767 | 0         |  |  |
|        |      | Shiraz-32T | 1833 | 0.551336 | 0         |  |  |
|        |      | Shiraz-32T | 1833 | 0.551336 | 0         |  |  |
|        |      | Shiraz-32T | 1833 | 0.551336 | 0         |  |  |
|        |      | Shiraz-38T | 1951 | 0.250891 | 0         |  |  |
|        |      | Shiraz-38T | 1951 | 0.250891 | 0         |  |  |
|        |      | Shiraz-38T | 1951 | 0.250891 | 0         |  |  |
|        |      | Shiraz-53T | 2078 | 0.287202 | 0         |  |  |
|        |      | Shiraz-53T | 2078 | 0.287202 | 0         |  |  |
|        |      | Shiraz-53T | 2078 | 0.287202 | 0         |  |  |
|        |      | Shiraz-58T | 2159 | 0        | -0.219521 |  |  |
|        |      | Shiraz-58T | 2159 | 0        | -0.219521 |  |  |
|        |      | Shiraz-58T | 2159 | 0        | -0.219521 |  |  |
|        |      | Shiraz-71T | 2238 | 0.603631 | 0         |  |  |
|        |      | Shiraz-71T | 2238 | 0.603631 | 0         |  |  |
|        |      | Shiraz-71T | 2238 | 0.603631 | 0         |  |  |
| STEAP4 | chr7 | Shiraz-3T  | 90   | 0.219276 | 0         |  |  |
|        |      | Shiraz-3T  | 93   | 0        | -0.058023 |  |  |
|        |      | Shiraz-4T  | 253  | 0.372918 | 0         |  |  |
|        |      | Shiraz-36T | 378  | 0.179558 | 0         |  |  |
|        |      | Shiraz-36T | 380  | 0.083883 | 0         |  |  |
|        |      | Shiraz-44T | 638  | 0        | -0.433476 |  |  |

|  |  |            |      |          |           |  |  |
|--|--|------------|------|----------|-----------|--|--|
|  |  | Shiraz-46T | 943  | 0.093799 | 0         |  |  |
|  |  | Shiraz-46T | 945  | 0        | -0.014838 |  |  |
|  |  | Shiraz-47T | 1029 | 0        | -0.096586 |  |  |
|  |  | Shiraz-49T | 1119 | 0        | -0.157331 |  |  |
|  |  | Shiraz-77T | 1225 | 0        | -0.117922 |  |  |
|  |  | Shiraz-77T | 1226 | 0        | -0.233724 |  |  |
|  |  | Shiraz-18T | 1434 | 0.244465 | 0         |  |  |
|  |  | Shiraz-22T | 1549 | 0        | -0.319623 |  |  |
|  |  | Shiraz-22T | 1550 | 0        | -0.577052 |  |  |
|  |  | Shiraz-25T | 1698 | 0.21835  | 0         |  |  |
|  |  | Shiraz-28T | 1735 | 0.350744 | 0         |  |  |
|  |  | Shiraz-29T | 1778 | 0.120767 | 0         |  |  |
|  |  | Shiraz-38T | 1951 | 0.250891 | 0         |  |  |
|  |  | Shiraz-53T | 2078 | 0.287202 | 0         |  |  |
|  |  | Shiraz-58T | 2159 | 0        | -0.219521 |  |  |
|  |  | Shiraz-71T | 2238 | 0.603631 | 0         |  |  |
|  |  | Shiraz-3T  | 90   | 0.219276 | 0         |  |  |
|  |  | Shiraz-3T  | 93   | 0        | -0.058023 |  |  |
|  |  | Shiraz-4T  | 253  | 0.372918 | 0         |  |  |
|  |  | Shiraz-36T | 378  | 0.179558 | 0         |  |  |
|  |  | Shiraz-36T | 380  | 0.083883 | 0         |  |  |
|  |  | Shiraz-44T | 638  | 0        | -0.433476 |  |  |
|  |  | Shiraz-46T | 943  | 0.093799 | 0         |  |  |
|  |  | Shiraz-46T | 945  | 0        | -0.014838 |  |  |
|  |  | Shiraz-47T | 1029 | 0        | -0.096586 |  |  |
|  |  | Shiraz-49T | 1119 | 0        | -0.157331 |  |  |
|  |  | Shiraz-77T | 1225 | 0        | -0.117922 |  |  |
|  |  | Shiraz-77T | 1226 | 0        | -0.233724 |  |  |
|  |  | Shiraz-18T | 1434 | 0.244465 | 0         |  |  |
|  |  | Shiraz-22T | 1549 | 0        | -0.319623 |  |  |
|  |  | Shiraz-22T | 1550 | 0        | -0.577052 |  |  |
|  |  | Shiraz-25T | 1698 | 0.21835  | 0         |  |  |
|  |  | Shiraz-28T | 1735 | 0.350744 | 0         |  |  |
|  |  | Shiraz-29T | 1778 | 0.120767 | 0         |  |  |
|  |  | Shiraz-38T | 1951 | 0.250891 | 0         |  |  |
|  |  | Shiraz-53T | 2078 | 0.287202 | 0         |  |  |
|  |  | Shiraz-58T | 2159 | 0        | -0.219521 |  |  |
|  |  | Shiraz-71T | 2238 | 0.603631 | 0         |  |  |
|  |  | Shiraz-3T  | 90   | 0.219276 | 0         |  |  |
|  |  | Shiraz-3T  | 93   | 0        | -0.058023 |  |  |
|  |  | Shiraz-4T  | 253  | 0.372918 | 0         |  |  |
|  |  | Shiraz-36T | 378  | 0.179558 | 0         |  |  |
|  |  | Shiraz-36T | 380  | 0.083883 | 0         |  |  |
|  |  | Shiraz-44T | 638  | 0        | -0.433476 |  |  |
|  |  | Shiraz-46T | 943  | 0.093799 | 0         |  |  |
|  |  | Shiraz-46T | 945  | 0        | -0.014838 |  |  |
|  |  | Shiraz-47T | 1029 | 0        | -0.096586 |  |  |

|        |      |            |      |          |           |  |  |
|--------|------|------------|------|----------|-----------|--|--|
|        |      | Shiraz-49T | 1119 | 0        | -0.157331 |  |  |
|        |      | Shiraz-77T | 1225 | 0        | -0.117922 |  |  |
|        |      | Shiraz-77T | 1226 | 0        | -0.233724 |  |  |
|        |      | Shiraz-18T | 1434 | 0.244465 | 0         |  |  |
|        |      | Shiraz-22T | 1549 | 0        | -0.319623 |  |  |
|        |      | Shiraz-22T | 1550 | 0        | -0.577052 |  |  |
|        |      | Shiraz-25T | 1698 | 0.21835  | 0         |  |  |
|        |      | Shiraz-28T | 1735 | 0.350744 | 0         |  |  |
|        |      | Shiraz-29T | 1778 | 0.120767 | 0         |  |  |
|        |      | Shiraz-38T | 1951 | 0.250891 | 0         |  |  |
|        |      | Shiraz-53T | 2078 | 0.287202 | 0         |  |  |
|        |      | Shiraz-58T | 2159 | 0        | -0.219521 |  |  |
|        |      | Shiraz-71T | 2238 | 0.603631 | 0         |  |  |
| STK17A | chr7 | Shiraz-3T  | 87   | 0.198593 | 0         |  |  |
|        |      | Shiraz-4T  | 252  | 0.192083 | 0         |  |  |
|        |      | Shiraz-36T | 376  | 0.159952 | 0         |  |  |
|        |      | Shiraz-46T | 942  | 0.069143 | 0         |  |  |
|        |      | Shiraz-18T | 1433 | 0.250973 | 0         |  |  |
|        |      | Shiraz-25T | 1697 | 0.21945  | 0         |  |  |
|        |      | Shiraz-28T | 1734 | 0.362882 | 0         |  |  |
|        |      | Shiraz-29T | 1777 | 0.156747 | 0         |  |  |
|        |      | Shiraz-38T | 1950 | 0.265916 | 0         |  |  |
|        |      | Shiraz-71T | 2236 | 0.320072 | 0         |  |  |
|        |      | Shiraz-3T  | 87   | 0.198593 | 0         |  |  |
|        |      | Shiraz-4T  | 252  | 0.192083 | 0         |  |  |
|        |      | Shiraz-36T | 376  | 0.159952 | 0         |  |  |
|        |      | Shiraz-46T | 942  | 0.069143 | 0         |  |  |
|        |      | Shiraz-18T | 1433 | 0.250973 | 0         |  |  |
|        |      | Shiraz-25T | 1697 | 0.21945  | 0         |  |  |
|        |      | Shiraz-28T | 1734 | 0.362882 | 0         |  |  |
|        |      | Shiraz-29T | 1777 | 0.156747 | 0         |  |  |
|        |      | Shiraz-38T | 1950 | 0.265916 | 0         |  |  |
|        |      | Shiraz-71T | 2236 | 0.320072 | 0         |  |  |
|        |      | Shiraz-3T  | 87   | 0.198593 | 0         |  |  |
|        |      | Shiraz-4T  | 252  | 0.192083 | 0         |  |  |
|        |      | Shiraz-36T | 376  | 0.159952 | 0         |  |  |
|        |      | Shiraz-46T | 942  | 0.069143 | 0         |  |  |
|        |      | Shiraz-18T | 1433 | 0.250973 | 0         |  |  |
|        |      | Shiraz-25T | 1697 | 0.21945  | 0         |  |  |
|        |      | Shiraz-28T | 1734 | 0.362882 | 0         |  |  |
|        |      | Shiraz-29T | 1777 | 0.156747 | 0         |  |  |
|        |      | Shiraz-38T | 1950 | 0.265916 | 0         |  |  |
|        |      | Shiraz-71T | 2236 | 0.320072 | 0         |  |  |
| STK31  | chr7 | Shiraz-3T  | 87   | 0.198593 | 0         |  |  |
|        |      | Shiraz-3T  | 87   | 0.198593 | 0         |  |  |
|        |      | Shiraz-4T  | 252  | 0.192083 | 0         |  |  |
|        |      | Shiraz-4T  | 252  | 0.192083 | 0         |  |  |

|  |  |            |      |          |   |  |  |
|--|--|------------|------|----------|---|--|--|
|  |  | Shiraz-36T | 376  | 0.159952 | 0 |  |  |
|  |  | Shiraz-36T | 376  | 0.159952 | 0 |  |  |
|  |  | Shiraz-46T | 942  | 0.069143 | 0 |  |  |
|  |  | Shiraz-46T | 942  | 0.069143 | 0 |  |  |
|  |  | Shiraz-18T | 1433 | 0.250973 | 0 |  |  |
|  |  | Shiraz-18T | 1433 | 0.250973 | 0 |  |  |
|  |  | Shiraz-25T | 1697 | 0.21945  | 0 |  |  |
|  |  | Shiraz-25T | 1697 | 0.21945  | 0 |  |  |
|  |  | Shiraz-28T | 1734 | 0.362882 | 0 |  |  |
|  |  | Shiraz-28T | 1734 | 0.362882 | 0 |  |  |
|  |  | Shiraz-29T | 1777 | 0.156747 | 0 |  |  |
|  |  | Shiraz-29T | 1777 | 0.156747 | 0 |  |  |
|  |  | Shiraz-38T | 1950 | 0.265916 | 0 |  |  |
|  |  | Shiraz-38T | 1950 | 0.265916 | 0 |  |  |
|  |  | Shiraz-71T | 2236 | 0.320072 | 0 |  |  |
|  |  | Shiraz-71T | 2236 | 0.320072 | 0 |  |  |
|  |  | Shiraz-3T  | 87   | 0.198593 | 0 |  |  |
|  |  | Shiraz-3T  | 87   | 0.198593 | 0 |  |  |
|  |  | Shiraz-4T  | 252  | 0.192083 | 0 |  |  |
|  |  | Shiraz-4T  | 252  | 0.192083 | 0 |  |  |
|  |  | Shiraz-36T | 376  | 0.159952 | 0 |  |  |
|  |  | Shiraz-36T | 376  | 0.159952 | 0 |  |  |
|  |  | Shiraz-46T | 942  | 0.069143 | 0 |  |  |
|  |  | Shiraz-46T | 942  | 0.069143 | 0 |  |  |
|  |  | Shiraz-18T | 1433 | 0.250973 | 0 |  |  |
|  |  | Shiraz-18T | 1433 | 0.250973 | 0 |  |  |
|  |  | Shiraz-25T | 1697 | 0.21945  | 0 |  |  |
|  |  | Shiraz-25T | 1697 | 0.21945  | 0 |  |  |
|  |  | Shiraz-28T | 1734 | 0.362882 | 0 |  |  |
|  |  | Shiraz-28T | 1734 | 0.362882 | 0 |  |  |
|  |  | Shiraz-29T | 1777 | 0.156747 | 0 |  |  |
|  |  | Shiraz-29T | 1777 | 0.156747 | 0 |  |  |
|  |  | Shiraz-38T | 1950 | 0.265916 | 0 |  |  |
|  |  | Shiraz-38T | 1950 | 0.265916 | 0 |  |  |
|  |  | Shiraz-71T | 2236 | 0.320072 | 0 |  |  |
|  |  | Shiraz-71T | 2236 | 0.320072 | 0 |  |  |
|  |  | Shiraz-3T  | 87   | 0.198593 | 0 |  |  |
|  |  | Shiraz-3T  | 87   | 0.198593 | 0 |  |  |
|  |  | Shiraz-4T  | 252  | 0.192083 | 0 |  |  |
|  |  | Shiraz-4T  | 252  | 0.192083 | 0 |  |  |
|  |  | Shiraz-36T | 376  | 0.159952 | 0 |  |  |
|  |  | Shiraz-36T | 376  | 0.159952 | 0 |  |  |
|  |  | Shiraz-46T | 942  | 0.069143 | 0 |  |  |
|  |  | Shiraz-46T | 942  | 0.069143 | 0 |  |  |
|  |  | Shiraz-18T | 1433 | 0.250973 | 0 |  |  |
|  |  | Shiraz-18T | 1433 | 0.250973 | 0 |  |  |
|  |  | Shiraz-25T | 1697 | 0.21945  | 0 |  |  |

|       |      |            |      |          |           |  |
|-------|------|------------|------|----------|-----------|--|
|       |      | Shiraz-25T | 1697 | 0.21945  | 0         |  |
|       |      | Shiraz-28T | 1734 | 0.362882 | 0         |  |
|       |      | Shiraz-28T | 1734 | 0.362882 | 0         |  |
|       |      | Shiraz-29T | 1777 | 0.156747 | 0         |  |
|       |      | Shiraz-29T | 1777 | 0.156747 | 0         |  |
|       |      | Shiraz-38T | 1950 | 0.265916 | 0         |  |
|       |      | Shiraz-38T | 1950 | 0.265916 | 0         |  |
|       |      | Shiraz-71T | 2236 | 0.320072 | 0         |  |
|       |      | Shiraz-71T | 2236 | 0.320072 | 0         |  |
| STRA8 | chr7 | Shiraz-3T  | 90   | 0.219276 | 0         |  |
|       |      | Shiraz-4T  | 253  | 0.372918 | 0         |  |
|       |      | Shiraz-36T | 378  | 0.179558 | 0         |  |
|       |      | Shiraz-46T | 943  | 0.093799 | 0         |  |
|       |      | Shiraz-77T | 1225 | 0        | -0.117922 |  |
|       |      | Shiraz-9T  | 1325 | 0.221899 | 0         |  |
|       |      | Shiraz-18T | 1434 | 0.244465 | 0         |  |
|       |      | Shiraz-22T | 1553 | 0        | -0.213234 |  |
|       |      | Shiraz-25T | 1698 | 0.21835  | 0         |  |
|       |      | Shiraz-28T | 1735 | 0.350744 | 0         |  |
|       |      | Shiraz-29T | 1778 | 0.120767 | 0         |  |
|       |      | Shiraz-32T | 1833 | 0.551336 | 0         |  |
|       |      | Shiraz-38T | 1951 | 0.250891 | 0         |  |
|       |      | Shiraz-53T | 2078 | 0.287202 | 0         |  |
|       |      | Shiraz-58T | 2162 | 0.221505 | 0         |  |
|       |      | Shiraz-71T | 2238 | 0.603631 | 0         |  |
|       |      | Shiraz-3T  | 90   | 0.219276 | 0         |  |
|       |      | Shiraz-4T  | 253  | 0.372918 | 0         |  |
|       |      | Shiraz-36T | 378  | 0.179558 | 0         |  |
|       |      | Shiraz-46T | 943  | 0.093799 | 0         |  |
|       |      | Shiraz-77T | 1225 | 0        | -0.117922 |  |
|       |      | Shiraz-9T  | 1325 | 0.221899 | 0         |  |
|       |      | Shiraz-18T | 1434 | 0.244465 | 0         |  |
|       |      | Shiraz-22T | 1553 | 0        | -0.213234 |  |
|       |      | Shiraz-25T | 1698 | 0.21835  | 0         |  |
|       |      | Shiraz-28T | 1735 | 0.350744 | 0         |  |
|       |      | Shiraz-29T | 1778 | 0.120767 | 0         |  |
|       |      | Shiraz-32T | 1833 | 0.551336 | 0         |  |
|       |      | Shiraz-38T | 1951 | 0.250891 | 0         |  |
|       |      | Shiraz-53T | 2078 | 0.287202 | 0         |  |
|       |      | Shiraz-58T | 2162 | 0.221505 | 0         |  |
|       |      | Shiraz-71T | 2238 | 0.603631 | 0         |  |
|       |      | Shiraz-3T  | 90   | 0.219276 | 0         |  |
|       |      | Shiraz-4T  | 253  | 0.372918 | 0         |  |
|       |      | Shiraz-36T | 378  | 0.179558 | 0         |  |
|       |      | Shiraz-46T | 943  | 0.093799 | 0         |  |
|       |      | Shiraz-77T | 1225 | 0        | -0.117922 |  |
|       |      | Shiraz-9T  | 1325 | 0.221899 | 0         |  |

|     |      |            |      |          |           |  |  |
|-----|------|------------|------|----------|-----------|--|--|
|     |      | Shiraz-18T | 1434 | 0.244465 | 0         |  |  |
|     |      | Shiraz-22T | 1553 | 0        | -0.213234 |  |  |
|     |      | Shiraz-25T | 1698 | 0.21835  | 0         |  |  |
|     |      | Shiraz-28T | 1735 | 0.350744 | 0         |  |  |
|     |      | Shiraz-29T | 1778 | 0.120767 | 0         |  |  |
|     |      | Shiraz-32T | 1833 | 0.551336 | 0         |  |  |
|     |      | Shiraz-38T | 1951 | 0.250891 | 0         |  |  |
|     |      | Shiraz-53T | 2078 | 0.287202 | 0         |  |  |
|     |      | Shiraz-58T | 2162 | 0.221505 | 0         |  |  |
|     |      | Shiraz-71T | 2238 | 0.603631 | 0         |  |  |
| STS | chrX | Shiraz-3T  | 235  | 0        | -0.28401  |  |  |
|     |      | Shiraz-4T  | 260  | 0        | -0.324128 |  |  |
|     |      | Shiraz-16T | 294  | 0.655804 | 0         |  |  |
|     |      | Shiraz-36T | 431  | 0        | -0.78035  |  |  |
|     |      | Shiraz-44T | 891  | 0        | -0.954044 |  |  |
|     |      | Shiraz-44T | 892  | 0        | -1.231333 |  |  |
|     |      | Shiraz-46T | 990  | 0        | -0.370066 |  |  |
|     |      | Shiraz-49T | 1166 | 0        | -0.917235 |  |  |
|     |      | Shiraz-9T  | 1368 | 0.199713 | 0         |  |  |
|     |      | Shiraz-18T | 1455 | 0        | -0.186773 |  |  |
|     |      | Shiraz-22T | 1669 | 0.695915 | 0         |  |  |
|     |      | Shiraz-25T | 1717 | 0.420447 | 0         |  |  |
|     |      | Shiraz-28T | 1760 | 0.538181 | 0         |  |  |
|     |      | Shiraz-29T | 1800 | 0.672527 | 0         |  |  |
|     |      | Shiraz-32T | 1869 | 0.776805 | 0         |  |  |
|     |      | Shiraz-35T | 1932 | 0.507141 | 0         |  |  |
|     |      | Shiraz-40T | 2051 | 0.098506 | 0         |  |  |
|     |      | Shiraz-58T | 2221 | 0.871948 | 0         |  |  |
|     |      | Shiraz-71T | 2260 | 0.68394  | 0         |  |  |
|     |      | Shiraz-71T | 2261 | 0.508399 | 0         |  |  |
|     |      | Shiraz-3T  | 235  | 0        | -0.28401  |  |  |
|     |      | Shiraz-4T  | 260  | 0        | -0.324128 |  |  |
|     |      | Shiraz-16T | 294  | 0.655804 | 0         |  |  |
|     |      | Shiraz-36T | 431  | 0        | -0.78035  |  |  |
|     |      | Shiraz-44T | 891  | 0        | -0.954044 |  |  |
|     |      | Shiraz-44T | 892  | 0        | -1.231333 |  |  |
|     |      | Shiraz-46T | 990  | 0        | -0.370066 |  |  |
|     |      | Shiraz-49T | 1166 | 0        | -0.917235 |  |  |
|     |      | Shiraz-9T  | 1368 | 0.199713 | 0         |  |  |
|     |      | Shiraz-18T | 1455 | 0        | -0.186773 |  |  |
|     |      | Shiraz-22T | 1669 | 0.695915 | 0         |  |  |
|     |      | Shiraz-25T | 1717 | 0.420447 | 0         |  |  |
|     |      | Shiraz-28T | 1760 | 0.538181 | 0         |  |  |
|     |      | Shiraz-29T | 1800 | 0.672527 | 0         |  |  |
|     |      | Shiraz-32T | 1869 | 0.776805 | 0         |  |  |
|     |      | Shiraz-35T | 1932 | 0.507141 | 0         |  |  |
|     |      | Shiraz-40T | 2051 | 0.098506 | 0         |  |  |

|       |      |            |      |          |           |  |
|-------|------|------------|------|----------|-----------|--|
|       |      | Shiraz-58T | 2221 | 0.871948 | 0         |  |
|       |      | Shiraz-71T | 2260 | 0.68394  | 0         |  |
|       |      | Shiraz-71T | 2261 | 0.508399 | 0         |  |
|       |      | Shiraz-3T  | 235  | 0        | -0.28401  |  |
|       |      | Shiraz-4T  | 260  | 0        | -0.324128 |  |
|       |      | Shiraz-16T | 294  | 0.655804 | 0         |  |
|       |      | Shiraz-36T | 431  | 0        | -0.78035  |  |
|       |      | Shiraz-44T | 891  | 0        | -0.954044 |  |
|       |      | Shiraz-44T | 892  | 0        | -1.231333 |  |
|       |      | Shiraz-46T | 990  | 0        | -0.370066 |  |
|       |      | Shiraz-49T | 1166 | 0        | -0.917235 |  |
|       |      | Shiraz-9T  | 1368 | 0.199713 | 0         |  |
|       |      | Shiraz-18T | 1455 | 0        | -0.186773 |  |
|       |      | Shiraz-22T | 1669 | 0.695915 | 0         |  |
|       |      | Shiraz-25T | 1717 | 0.420447 | 0         |  |
|       |      | Shiraz-28T | 1760 | 0.538181 | 0         |  |
|       |      | Shiraz-29T | 1800 | 0.672527 | 0         |  |
|       |      | Shiraz-32T | 1869 | 0.776805 | 0         |  |
|       |      | Shiraz-35T | 1932 | 0.507141 | 0         |  |
|       |      | Shiraz-40T | 2051 | 0.098506 | 0         |  |
|       |      | Shiraz-58T | 2221 | 0.871948 | 0         |  |
|       |      | Shiraz-71T | 2260 | 0.68394  | 0         |  |
|       |      | Shiraz-71T | 2261 | 0.508399 | 0         |  |
| SUB1  | chr5 | Shiraz-4T  | 250  | 0.262252 | 0         |  |
|       |      | Shiraz-16T | 266  | 0.321724 | 0         |  |
|       |      | Shiraz-18T | 1429 | 0        | -0.314125 |  |
|       |      | Shiraz-25T | 1694 | 0.201602 | 0         |  |
|       |      | Shiraz-28T | 1731 | 0.295447 | 0         |  |
|       |      | Shiraz-29T | 1773 | 0.090981 | 0         |  |
|       |      | Shiraz-40T | 2016 | 0.376634 | 0         |  |
|       |      | Shiraz-4T  | 250  | 0.262252 | 0         |  |
|       |      | Shiraz-16T | 266  | 0.321724 | 0         |  |
|       |      | Shiraz-18T | 1429 | 0        | -0.314125 |  |
|       |      | Shiraz-25T | 1694 | 0.201602 | 0         |  |
|       |      | Shiraz-28T | 1731 | 0.295447 | 0         |  |
|       |      | Shiraz-29T | 1773 | 0.090981 | 0         |  |
|       |      | Shiraz-40T | 2016 | 0.376634 | 0         |  |
|       |      | Shiraz-4T  | 250  | 0.262252 | 0         |  |
|       |      | Shiraz-16T | 266  | 0.321724 | 0         |  |
|       |      | Shiraz-18T | 1429 | 0        | -0.314125 |  |
|       |      | Shiraz-25T | 1694 | 0.201602 | 0         |  |
|       |      | Shiraz-28T | 1731 | 0.295447 | 0         |  |
|       |      | Shiraz-29T | 1773 | 0.090981 | 0         |  |
|       |      | Shiraz-40T | 2016 | 0.376634 | 0         |  |
| SUNC1 | chr7 | Shiraz-3T  | 87   | 0.198593 | 0         |  |
|       |      | Shiraz-4T  | 252  | 0.192083 | 0         |  |
|       |      | Shiraz-36T | 376  | 0.159952 | 0         |  |



|         |      |            |      |          |           |  |
|---------|------|------------|------|----------|-----------|--|
|         |      | Shiraz-46T | 942  | 0.069143 | 0         |  |
|         |      | Shiraz-18T | 1433 | 0.250973 | 0         |  |
|         |      | Shiraz-25T | 1697 | 0.21945  | 0         |  |
|         |      | Shiraz-28T | 1734 | 0.362882 | 0         |  |
|         |      | Shiraz-29T | 1777 | 0.156747 | 0         |  |
|         |      | Shiraz-38T | 1950 | 0.265916 | 0         |  |
|         |      | Shiraz-71T | 2236 | 0.320072 | 0         |  |
|         |      | Shiraz-3T  | 87   | 0.198593 | 0         |  |
|         |      | Shiraz-4T  | 252  | 0.192083 | 0         |  |
|         |      | Shiraz-36T | 376  | 0.159952 | 0         |  |
|         |      | Shiraz-46T | 942  | 0.069143 | 0         |  |
|         |      | Shiraz-18T | 1433 | 0.250973 | 0         |  |
|         |      | Shiraz-25T | 1697 | 0.21945  | 0         |  |
|         |      | Shiraz-28T | 1734 | 0.362882 | 0         |  |
|         |      | Shiraz-29T | 1777 | 0.156747 | 0         |  |
|         |      | Shiraz-38T | 1950 | 0.265916 | 0         |  |
|         |      | Shiraz-71T | 2236 | 0.320072 | 0         |  |
|         |      | Shiraz-3T  | 87   | 0.198593 | 0         |  |
|         |      | Shiraz-4T  | 252  | 0.192083 | 0         |  |
|         |      | Shiraz-36T | 376  | 0.159952 | 0         |  |
|         |      | Shiraz-46T | 942  | 0.069143 | 0         |  |
|         |      | Shiraz-18T | 1433 | 0.250973 | 0         |  |
|         |      | Shiraz-25T | 1697 | 0.21945  | 0         |  |
|         |      | Shiraz-28T | 1734 | 0.362882 | 0         |  |
|         |      | Shiraz-29T | 1777 | 0.156747 | 0         |  |
|         |      | Shiraz-38T | 1950 | 0.265916 | 0         |  |
|         |      | Shiraz-71T | 2236 | 0.320072 | 0         |  |
| SUV39H1 | chrX | Shiraz-3T  | 238  | 0.472087 | 0         |  |
|         |      | Shiraz-4T  | 260  | 0        | -0.324128 |  |
|         |      | Shiraz-16T | 294  | 0.655804 | 0         |  |
|         |      | Shiraz-31T | 345  | 0.103301 | 0         |  |
|         |      | Shiraz-36T | 431  | 0        | -0.78035  |  |
|         |      | Shiraz-36T | 432  | 0        | -0.6692   |  |
|         |      | Shiraz-44T | 891  | 0        | -0.954044 |  |
|         |      | Shiraz-44T | 896  | 0        | -0.109108 |  |
|         |      | Shiraz-46T | 991  | 0.139564 | 0         |  |
|         |      | Shiraz-47T | 1084 | 0.24185  | 0         |  |
|         |      | Shiraz-49T | 1166 | 0        | -0.917235 |  |
|         |      | Shiraz-49T | 1169 | 0        | -0.583529 |  |
|         |      | Shiraz-77T | 1282 | 0.213849 | 0         |  |
|         |      | Shiraz-9T  | 1368 | 0.199713 | 0         |  |
|         |      | Shiraz-9T  | 1369 | 0.703374 | 0         |  |
|         |      | Shiraz-18T | 1455 | 0        | -0.186773 |  |
|         |      | Shiraz-22T | 1669 | 0.695915 | 0         |  |
|         |      | Shiraz-22T | 1672 | 1.01678  | 0         |  |
|         |      | Shiraz-25T | 1717 | 0.420447 | 0         |  |
|         |      | Shiraz-28T | 1760 | 0.538181 | 0         |  |

|  |            |      |          |           |  |
|--|------------|------|----------|-----------|--|
|  | Shiraz-29T | 1800 | 0.672527 | 0         |  |
|  | Shiraz-32T | 1869 | 0.776805 | 0         |  |
|  | Shiraz-35T | 1932 | 0.507141 | 0         |  |
|  | Shiraz-58T | 2221 | 0.871948 | 0         |  |
|  | Shiraz-71T | 2260 | 0.68394  | 0         |  |
|  | Shiraz-71T | 2262 | 0.986748 | 0         |  |
|  | Shiraz-3T  | 238  | 0.472087 | 0         |  |
|  | Shiraz-4T  | 260  | 0        | -0.324128 |  |
|  | Shiraz-16T | 294  | 0.655804 | 0         |  |
|  | Shiraz-31T | 345  | 0.103301 | 0         |  |
|  | Shiraz-36T | 431  | 0        | -0.78035  |  |
|  | Shiraz-36T | 432  | 0        | -0.6692   |  |
|  | Shiraz-44T | 891  | 0        | -0.954044 |  |
|  | Shiraz-44T | 896  | 0        | -0.109108 |  |
|  | Shiraz-46T | 991  | 0.139564 | 0         |  |
|  | Shiraz-47T | 1084 | 0.24185  | 0         |  |
|  | Shiraz-49T | 1166 | 0        | -0.917235 |  |
|  | Shiraz-49T | 1169 | 0        | -0.583529 |  |
|  | Shiraz-77T | 1282 | 0.213849 | 0         |  |
|  | Shiraz-9T  | 1368 | 0.199713 | 0         |  |
|  | Shiraz-9T  | 1369 | 0.703374 | 0         |  |
|  | Shiraz-18T | 1455 | 0        | -0.186773 |  |
|  | Shiraz-22T | 1669 | 0.695915 | 0         |  |
|  | Shiraz-22T | 1672 | 1.01678  | 0         |  |
|  | Shiraz-25T | 1717 | 0.420447 | 0         |  |
|  | Shiraz-28T | 1760 | 0.538181 | 0         |  |
|  | Shiraz-29T | 1800 | 0.672527 | 0         |  |
|  | Shiraz-32T | 1869 | 0.776805 | 0         |  |
|  | Shiraz-35T | 1932 | 0.507141 | 0         |  |
|  | Shiraz-58T | 2221 | 0.871948 | 0         |  |
|  | Shiraz-71T | 2260 | 0.68394  | 0         |  |
|  | Shiraz-71T | 2262 | 0.986748 | 0         |  |
|  | Shiraz-3T  | 238  | 0.472087 | 0         |  |
|  | Shiraz-4T  | 260  | 0        | -0.324128 |  |
|  | Shiraz-16T | 294  | 0.655804 | 0         |  |
|  | Shiraz-31T | 345  | 0.103301 | 0         |  |
|  | Shiraz-36T | 431  | 0        | -0.78035  |  |
|  | Shiraz-36T | 432  | 0        | -0.6692   |  |
|  | Shiraz-44T | 891  | 0        | -0.954044 |  |
|  | Shiraz-44T | 896  | 0        | -0.109108 |  |
|  | Shiraz-46T | 991  | 0.139564 | 0         |  |
|  | Shiraz-47T | 1084 | 0.24185  | 0         |  |
|  | Shiraz-49T | 1166 | 0        | -0.917235 |  |
|  | Shiraz-49T | 1169 | 0        | -0.583529 |  |
|  | Shiraz-77T | 1282 | 0.213849 | 0         |  |
|  | Shiraz-9T  | 1368 | 0.199713 | 0         |  |
|  | Shiraz-9T  | 1369 | 0.703374 | 0         |  |

|       |      |            |      |          |           |  |  |
|-------|------|------------|------|----------|-----------|--|--|
|       |      | Shiraz-18T | 1455 | 0        | -0.186773 |  |  |
|       |      | Shiraz-22T | 1669 | 0.695915 | 0         |  |  |
|       |      | Shiraz-22T | 1672 | 1.01678  | 0         |  |  |
|       |      | Shiraz-25T | 1717 | 0.420447 | 0         |  |  |
|       |      | Shiraz-28T | 1760 | 0.538181 | 0         |  |  |
|       |      | Shiraz-29T | 1800 | 0.672527 | 0         |  |  |
|       |      | Shiraz-32T | 1869 | 0.776805 | 0         |  |  |
|       |      | Shiraz-35T | 1932 | 0.507141 | 0         |  |  |
|       |      | Shiraz-58T | 2221 | 0.871948 | 0         |  |  |
|       |      | Shiraz-71T | 2260 | 0.68394  | 0         |  |  |
|       |      | Shiraz-71T | 2262 | 0.986748 | 0         |  |  |
| SVOPL | chr7 | Shiraz-3T  | 90   | 0.219276 | 0         |  |  |
|       |      | Shiraz-3T  | 90   | 0.219276 | 0         |  |  |
|       |      | Shiraz-3T  | 97   | 0.496001 | 0         |  |  |
|       |      | Shiraz-3T  | 97   | 0.496001 | 0         |  |  |
|       |      | Shiraz-4T  | 253  | 0.372918 | 0         |  |  |
|       |      | Shiraz-4T  | 253  | 0.372918 | 0         |  |  |
|       |      | Shiraz-31T | 318  | 0.254373 | 0         |  |  |
|       |      | Shiraz-31T | 318  | 0.254373 | 0         |  |  |
|       |      | Shiraz-36T | 378  | 0.179558 | 0         |  |  |
|       |      | Shiraz-36T | 378  | 0.179558 | 0         |  |  |
|       |      | Shiraz-36T | 383  | 0.374586 | 0         |  |  |
|       |      | Shiraz-36T | 383  | 0.374586 | 0         |  |  |
|       |      | Shiraz-44T | 644  | 0.496536 | 0         |  |  |
|       |      | Shiraz-44T | 644  | 0.496536 | 0         |  |  |
|       |      | Shiraz-46T | 943  | 0.093799 | 0         |  |  |
|       |      | Shiraz-46T | 943  | 0.093799 | 0         |  |  |
|       |      | Shiraz-47T | 1033 | 0.220267 | 0         |  |  |
|       |      | Shiraz-47T | 1033 | 0.220267 | 0         |  |  |
|       |      | Shiraz-77T | 1225 | 0        | -0.117922 |  |  |
|       |      | Shiraz-77T | 1225 | 0        | -0.117922 |  |  |
|       |      | Shiraz-77T | 1230 | 0.149651 | 0         |  |  |
|       |      | Shiraz-77T | 1230 | 0.149651 | 0         |  |  |
|       |      | Shiraz-9T  | 1325 | 0.221899 | 0         |  |  |
|       |      | Shiraz-9T  | 1325 | 0.221899 | 0         |  |  |
|       |      | Shiraz-18T | 1434 | 0.244465 | 0         |  |  |
|       |      | Shiraz-18T | 1434 | 0.244465 | 0         |  |  |
|       |      | Shiraz-25T | 1698 | 0.21835  | 0         |  |  |
|       |      | Shiraz-25T | 1698 | 0.21835  | 0         |  |  |
|       |      | Shiraz-28T | 1735 | 0.350744 | 0         |  |  |
|       |      | Shiraz-28T | 1735 | 0.350744 | 0         |  |  |
|       |      | Shiraz-29T | 1778 | 0.120767 | 0         |  |  |
|       |      | Shiraz-29T | 1778 | 0.120767 | 0         |  |  |
|       |      | Shiraz-32T | 1833 | 0.551336 | 0         |  |  |
|       |      | Shiraz-32T | 1833 | 0.551336 | 0         |  |  |
|       |      | Shiraz-38T | 1951 | 0.250891 | 0         |  |  |
|       |      | Shiraz-38T | 1951 | 0.250891 | 0         |  |  |

|  |            |      |          |           |  |
|--|------------|------|----------|-----------|--|
|  | Shiraz-53T | 2078 | 0.287202 | 0         |  |
|  | Shiraz-53T | 2078 | 0.287202 | 0         |  |
|  | Shiraz-58T | 2162 | 0.221505 | 0         |  |
|  | Shiraz-58T | 2162 | 0.221505 | 0         |  |
|  | Shiraz-71T | 2238 | 0.603631 | 0         |  |
|  | Shiraz-71T | 2238 | 0.603631 | 0         |  |
|  | Shiraz-3T  | 90   | 0.219276 | 0         |  |
|  | Shiraz-3T  | 90   | 0.219276 | 0         |  |
|  | Shiraz-3T  | 97   | 0.496001 | 0         |  |
|  | Shiraz-3T  | 97   | 0.496001 | 0         |  |
|  | Shiraz-4T  | 253  | 0.372918 | 0         |  |
|  | Shiraz-4T  | 253  | 0.372918 | 0         |  |
|  | Shiraz-31T | 318  | 0.254373 | 0         |  |
|  | Shiraz-31T | 318  | 0.254373 | 0         |  |
|  | Shiraz-36T | 378  | 0.179558 | 0         |  |
|  | Shiraz-36T | 378  | 0.179558 | 0         |  |
|  | Shiraz-36T | 383  | 0.374586 | 0         |  |
|  | Shiraz-36T | 383  | 0.374586 | 0         |  |
|  | Shiraz-44T | 644  | 0.496536 | 0         |  |
|  | Shiraz-44T | 644  | 0.496536 | 0         |  |
|  | Shiraz-46T | 943  | 0.093799 | 0         |  |
|  | Shiraz-46T | 943  | 0.093799 | 0         |  |
|  | Shiraz-47T | 1033 | 0.220267 | 0         |  |
|  | Shiraz-47T | 1033 | 0.220267 | 0         |  |
|  | Shiraz-77T | 1225 | 0        | -0.117922 |  |
|  | Shiraz-77T | 1225 | 0        | -0.117922 |  |
|  | Shiraz-77T | 1230 | 0.149651 | 0         |  |
|  | Shiraz-77T | 1230 | 0.149651 | 0         |  |
|  | Shiraz-9T  | 1325 | 0.221899 | 0         |  |
|  | Shiraz-9T  | 1325 | 0.221899 | 0         |  |
|  | Shiraz-18T | 1434 | 0.244465 | 0         |  |
|  | Shiraz-18T | 1434 | 0.244465 | 0         |  |
|  | Shiraz-25T | 1698 | 0.21835  | 0         |  |
|  | Shiraz-25T | 1698 | 0.21835  | 0         |  |
|  | Shiraz-28T | 1735 | 0.350744 | 0         |  |
|  | Shiraz-28T | 1735 | 0.350744 | 0         |  |
|  | Shiraz-29T | 1778 | 0.120767 | 0         |  |
|  | Shiraz-29T | 1778 | 0.120767 | 0         |  |
|  | Shiraz-32T | 1833 | 0.551336 | 0         |  |
|  | Shiraz-32T | 1833 | 0.551336 | 0         |  |
|  | Shiraz-38T | 1951 | 0.250891 | 0         |  |
|  | Shiraz-38T | 1951 | 0.250891 | 0         |  |
|  | Shiraz-53T | 2078 | 0.287202 | 0         |  |
|  | Shiraz-53T | 2078 | 0.287202 | 0         |  |
|  | Shiraz-58T | 2162 | 0.221505 | 0         |  |
|  | Shiraz-58T | 2162 | 0.221505 | 0         |  |
|  | Shiraz-71T | 2238 | 0.603631 | 0         |  |

|       |      |            |      |          |           |  |
|-------|------|------------|------|----------|-----------|--|
|       |      | Shiraz-71T | 2238 | 0.603631 | 0         |  |
|       |      | Shiraz-3T  | 90   | 0.219276 | 0         |  |
|       |      | Shiraz-3T  | 90   | 0.219276 | 0         |  |
|       |      | Shiraz-3T  | 97   | 0.496001 | 0         |  |
|       |      | Shiraz-3T  | 97   | 0.496001 | 0         |  |
|       |      | Shiraz-4T  | 253  | 0.372918 | 0         |  |
|       |      | Shiraz-4T  | 253  | 0.372918 | 0         |  |
|       |      | Shiraz-31T | 318  | 0.254373 | 0         |  |
|       |      | Shiraz-31T | 318  | 0.254373 | 0         |  |
|       |      | Shiraz-36T | 378  | 0.179558 | 0         |  |
|       |      | Shiraz-36T | 378  | 0.179558 | 0         |  |
|       |      | Shiraz-36T | 383  | 0.374586 | 0         |  |
|       |      | Shiraz-36T | 383  | 0.374586 | 0         |  |
|       |      | Shiraz-44T | 644  | 0.496536 | 0         |  |
|       |      | Shiraz-44T | 644  | 0.496536 | 0         |  |
|       |      | Shiraz-46T | 943  | 0.093799 | 0         |  |
|       |      | Shiraz-46T | 943  | 0.093799 | 0         |  |
|       |      | Shiraz-47T | 1033 | 0.220267 | 0         |  |
|       |      | Shiraz-47T | 1033 | 0.220267 | 0         |  |
|       |      | Shiraz-77T | 1225 | 0        | -0.117922 |  |
|       |      | Shiraz-77T | 1225 | 0        | -0.117922 |  |
|       |      | Shiraz-77T | 1230 | 0.149651 | 0         |  |
|       |      | Shiraz-77T | 1230 | 0.149651 | 0         |  |
|       |      | Shiraz-9T  | 1325 | 0.221899 | 0         |  |
|       |      | Shiraz-9T  | 1325 | 0.221899 | 0         |  |
|       |      | Shiraz-18T | 1434 | 0.244465 | 0         |  |
|       |      | Shiraz-18T | 1434 | 0.244465 | 0         |  |
|       |      | Shiraz-25T | 1698 | 0.21835  | 0         |  |
|       |      | Shiraz-25T | 1698 | 0.21835  | 0         |  |
|       |      | Shiraz-28T | 1735 | 0.350744 | 0         |  |
|       |      | Shiraz-28T | 1735 | 0.350744 | 0         |  |
|       |      | Shiraz-29T | 1778 | 0.120767 | 0         |  |
|       |      | Shiraz-29T | 1778 | 0.120767 | 0         |  |
|       |      | Shiraz-32T | 1833 | 0.551336 | 0         |  |
|       |      | Shiraz-32T | 1833 | 0.551336 | 0         |  |
|       |      | Shiraz-38T | 1951 | 0.250891 | 0         |  |
|       |      | Shiraz-38T | 1951 | 0.250891 | 0         |  |
|       |      | Shiraz-53T | 2078 | 0.287202 | 0         |  |
|       |      | Shiraz-53T | 2078 | 0.287202 | 0         |  |
|       |      | Shiraz-58T | 2162 | 0.221505 | 0         |  |
|       |      | Shiraz-58T | 2162 | 0.221505 | 0         |  |
|       |      | Shiraz-71T | 2238 | 0.603631 | 0         |  |
|       |      | Shiraz-71T | 2238 | 0.603631 | 0         |  |
| SYAP1 | chrX | Shiraz-3T  | 235  | 0        | -0.28401  |  |
|       |      | Shiraz-4T  | 260  | 0        | -0.324128 |  |
|       |      | Shiraz-16T | 294  | 0.655804 | 0         |  |
|       |      | Shiraz-36T | 431  | 0        | -0.78035  |  |

|  |            |      |          |           |  |
|--|------------|------|----------|-----------|--|
|  | Shiraz-44T | 891  | 0        | -0.954044 |  |
|  | Shiraz-49T | 1166 | 0        | -0.917235 |  |
|  | Shiraz-9T  | 1368 | 0.199713 | 0         |  |
|  | Shiraz-18T | 1455 | 0        | -0.186773 |  |
|  | Shiraz-22T | 1669 | 0.695915 | 0         |  |
|  | Shiraz-25T | 1717 | 0.420447 | 0         |  |
|  | Shiraz-28T | 1760 | 0.538181 | 0         |  |
|  | Shiraz-29T | 1800 | 0.672527 | 0         |  |
|  | Shiraz-32T | 1869 | 0.776805 | 0         |  |
|  | Shiraz-35T | 1932 | 0.507141 | 0         |  |
|  | Shiraz-40T | 2051 | 0.098506 | 0         |  |
|  | Shiraz-58T | 2221 | 0.871948 | 0         |  |
|  | Shiraz-71T | 2260 | 0.68394  | 0         |  |
|  | Shiraz-71T | 2261 | 0.508399 | 0         |  |
|  | Shiraz-3T  | 235  | 0        | -0.28401  |  |
|  | Shiraz-4T  | 260  | 0        | -0.324128 |  |
|  | Shiraz-16T | 294  | 0.655804 | 0         |  |
|  | Shiraz-36T | 431  | 0        | -0.78035  |  |
|  | Shiraz-44T | 891  | 0        | -0.954044 |  |
|  | Shiraz-49T | 1166 | 0        | -0.917235 |  |
|  | Shiraz-9T  | 1368 | 0.199713 | 0         |  |
|  | Shiraz-18T | 1455 | 0        | -0.186773 |  |
|  | Shiraz-22T | 1669 | 0.695915 | 0         |  |
|  | Shiraz-25T | 1717 | 0.420447 | 0         |  |
|  | Shiraz-28T | 1760 | 0.538181 | 0         |  |
|  | Shiraz-29T | 1800 | 0.672527 | 0         |  |
|  | Shiraz-32T | 1869 | 0.776805 | 0         |  |
|  | Shiraz-35T | 1932 | 0.507141 | 0         |  |
|  | Shiraz-40T | 2051 | 0.098506 | 0         |  |
|  | Shiraz-58T | 2221 | 0.871948 | 0         |  |
|  | Shiraz-71T | 2260 | 0.68394  | 0         |  |
|  | Shiraz-71T | 2261 | 0.508399 | 0         |  |
|  | Shiraz-3T  | 235  | 0        | -0.28401  |  |
|  | Shiraz-4T  | 260  | 0        | -0.324128 |  |
|  | Shiraz-16T | 294  | 0.655804 | 0         |  |
|  | Shiraz-36T | 431  | 0        | -0.78035  |  |
|  | Shiraz-44T | 891  | 0        | -0.954044 |  |
|  | Shiraz-49T | 1166 | 0        | -0.917235 |  |
|  | Shiraz-9T  | 1368 | 0.199713 | 0         |  |
|  | Shiraz-18T | 1455 | 0        | -0.186773 |  |
|  | Shiraz-22T | 1669 | 0.695915 | 0         |  |
|  | Shiraz-25T | 1717 | 0.420447 | 0         |  |
|  | Shiraz-28T | 1760 | 0.538181 | 0         |  |
|  | Shiraz-29T | 1800 | 0.672527 | 0         |  |
|  | Shiraz-32T | 1869 | 0.776805 | 0         |  |
|  | Shiraz-35T | 1932 | 0.507141 | 0         |  |
|  | Shiraz-40T | 2051 | 0.098506 | 0         |  |

|      |      |            |      |          |           |  |
|------|------|------------|------|----------|-----------|--|
|      |      | Shiraz-58T | 2221 | 0.871948 | 0         |  |
|      |      | Shiraz-71T | 2260 | 0.68394  | 0         |  |
|      |      | Shiraz-71T | 2261 | 0.508399 | 0         |  |
| SYN1 | chrX | Shiraz-4T  | 260  | 0        | -0.324128 |  |
|      |      | Shiraz-16T | 294  | 0.655804 | 0         |  |
|      |      | Shiraz-31T | 345  | 0.103301 | 0         |  |
|      |      | Shiraz-36T | 431  | 0        | -0.78035  |  |
|      |      | Shiraz-36T | 432  | 0        | -0.6692   |  |
|      |      | Shiraz-44T | 891  | 0        | -0.954044 |  |
|      |      | Shiraz-44T | 896  | 0        | -0.109108 |  |
|      |      | Shiraz-46T | 991  | 0.139564 | 0         |  |
|      |      | Shiraz-47T | 1084 | 0.24185  | 0         |  |
|      |      | Shiraz-49T | 1166 | 0        | -0.917235 |  |
|      |      | Shiraz-49T | 1169 | 0        | -0.583529 |  |
|      |      | Shiraz-77T | 1282 | 0.213849 | 0         |  |
|      |      | Shiraz-9T  | 1368 | 0.199713 | 0         |  |
|      |      | Shiraz-9T  | 1369 | 0.703374 | 0         |  |
|      |      | Shiraz-18T | 1455 | 0        | -0.186773 |  |
|      |      | Shiraz-22T | 1669 | 0.695915 | 0         |  |
|      |      | Shiraz-22T | 1672 | 1.01678  | 0         |  |
|      |      | Shiraz-25T | 1717 | 0.420447 | 0         |  |
|      |      | Shiraz-28T | 1760 | 0.538181 | 0         |  |
|      |      | Shiraz-29T | 1800 | 0.672527 | 0         |  |
|      |      | Shiraz-32T | 1869 | 0.776805 | 0         |  |
|      |      | Shiraz-35T | 1932 | 0.507141 | 0         |  |
|      |      | Shiraz-40T | 2051 | 0.098506 | 0         |  |
|      |      | Shiraz-58T | 2221 | 0.871948 | 0         |  |
|      |      | Shiraz-71T | 2260 | 0.68394  | 0         |  |
|      |      | Shiraz-71T | 2262 | 0.986748 | 0         |  |
|      |      | Shiraz-4T  | 260  | 0        | -0.324128 |  |
|      |      | Shiraz-16T | 294  | 0.655804 | 0         |  |
|      |      | Shiraz-31T | 345  | 0.103301 | 0         |  |
|      |      | Shiraz-36T | 431  | 0        | -0.78035  |  |
|      |      | Shiraz-36T | 432  | 0        | -0.6692   |  |
|      |      | Shiraz-44T | 891  | 0        | -0.954044 |  |
|      |      | Shiraz-44T | 896  | 0        | -0.109108 |  |
|      |      | Shiraz-46T | 991  | 0.139564 | 0         |  |
|      |      | Shiraz-47T | 1084 | 0.24185  | 0         |  |
|      |      | Shiraz-49T | 1166 | 0        | -0.917235 |  |
|      |      | Shiraz-49T | 1169 | 0        | -0.583529 |  |
|      |      | Shiraz-77T | 1282 | 0.213849 | 0         |  |
|      |      | Shiraz-9T  | 1368 | 0.199713 | 0         |  |
|      |      | Shiraz-9T  | 1369 | 0.703374 | 0         |  |
|      |      | Shiraz-18T | 1455 | 0        | -0.186773 |  |
|      |      | Shiraz-22T | 1669 | 0.695915 | 0         |  |
|      |      | Shiraz-22T | 1672 | 1.01678  | 0         |  |
|      |      | Shiraz-25T | 1717 | 0.420447 | 0         |  |

|     |      |            |      |          |           |  |
|-----|------|------------|------|----------|-----------|--|
|     |      | Shiraz-28T | 1760 | 0.538181 | 0         |  |
|     |      | Shiraz-29T | 1800 | 0.672527 | 0         |  |
|     |      | Shiraz-32T | 1869 | 0.776805 | 0         |  |
|     |      | Shiraz-35T | 1932 | 0.507141 | 0         |  |
|     |      | Shiraz-40T | 2051 | 0.098506 | 0         |  |
|     |      | Shiraz-58T | 2221 | 0.871948 | 0         |  |
|     |      | Shiraz-71T | 2260 | 0.68394  | 0         |  |
|     |      | Shiraz-71T | 2262 | 0.986748 | 0         |  |
|     |      | Shiraz-4T  | 260  | 0        | -0.324128 |  |
|     |      | Shiraz-16T | 294  | 0.655804 | 0         |  |
|     |      | Shiraz-31T | 345  | 0.103301 | 0         |  |
|     |      | Shiraz-36T | 431  | 0        | -0.78035  |  |
|     |      | Shiraz-36T | 432  | 0        | -0.6692   |  |
|     |      | Shiraz-44T | 891  | 0        | -0.954044 |  |
|     |      | Shiraz-44T | 896  | 0        | -0.109108 |  |
|     |      | Shiraz-46T | 991  | 0.139564 | 0         |  |
|     |      | Shiraz-47T | 1084 | 0.24185  | 0         |  |
|     |      | Shiraz-49T | 1166 | 0        | -0.917235 |  |
|     |      | Shiraz-49T | 1169 | 0        | -0.583529 |  |
|     |      | Shiraz-77T | 1282 | 0.213849 | 0         |  |
|     |      | Shiraz-9T  | 1368 | 0.199713 | 0         |  |
|     |      | Shiraz-9T  | 1369 | 0.703374 | 0         |  |
|     |      | Shiraz-18T | 1455 | 0        | -0.186773 |  |
|     |      | Shiraz-22T | 1669 | 0.695915 | 0         |  |
|     |      | Shiraz-22T | 1672 | 1.01678  | 0         |  |
|     |      | Shiraz-25T | 1717 | 0.420447 | 0         |  |
|     |      | Shiraz-28T | 1760 | 0.538181 | 0         |  |
|     |      | Shiraz-29T | 1800 | 0.672527 | 0         |  |
|     |      | Shiraz-32T | 1869 | 0.776805 | 0         |  |
|     |      | Shiraz-35T | 1932 | 0.507141 | 0         |  |
|     |      | Shiraz-40T | 2051 | 0.098506 | 0         |  |
|     |      | Shiraz-58T | 2221 | 0.871948 | 0         |  |
|     |      | Shiraz-71T | 2260 | 0.68394  | 0         |  |
|     |      | Shiraz-71T | 2262 | 0.986748 | 0         |  |
| SYP | chrX | Shiraz-3T  | 238  | 0.472087 | 0         |  |
|     |      | Shiraz-4T  | 260  | 0        | -0.324128 |  |
|     |      | Shiraz-16T | 294  | 0.655804 | 0         |  |
|     |      | Shiraz-31T | 345  | 0.103301 | 0         |  |
|     |      | Shiraz-36T | 431  | 0        | -0.78035  |  |
|     |      | Shiraz-36T | 432  | 0        | -0.6692   |  |
|     |      | Shiraz-44T | 891  | 0        | -0.954044 |  |
|     |      | Shiraz-44T | 896  | 0        | -0.109108 |  |
|     |      | Shiraz-44T | 897  | 0.486937 | 0         |  |
|     |      | Shiraz-46T | 991  | 0.139564 | 0         |  |
|     |      | Shiraz-47T | 1084 | 0.24185  | 0         |  |
|     |      | Shiraz-49T | 1166 | 0        | -0.917235 |  |
|     |      | Shiraz-49T | 1169 | 0        | -0.583529 |  |



|  |            |      |          |           |  |
|--|------------|------|----------|-----------|--|
|  | Shiraz-77T | 1282 | 0.213849 | 0         |  |
|  | Shiraz-9T  | 1368 | 0.199713 | 0         |  |
|  | Shiraz-9T  | 1369 | 0.703374 | 0         |  |
|  | Shiraz-18T | 1455 | 0        | -0.186773 |  |
|  | Shiraz-22T | 1669 | 0.695915 | 0         |  |
|  | Shiraz-22T | 1672 | 1.01678  | 0         |  |
|  | Shiraz-25T | 1717 | 0.420447 | 0         |  |
|  | Shiraz-28T | 1760 | 0.538181 | 0         |  |
|  | Shiraz-29T | 1800 | 0.672527 | 0         |  |
|  | Shiraz-32T | 1869 | 0.776805 | 0         |  |
|  | Shiraz-35T | 1932 | 0.507141 | 0         |  |
|  | Shiraz-58T | 2221 | 0.871948 | 0         |  |
|  | Shiraz-71T | 2260 | 0.68394  | 0         |  |
|  | Shiraz-71T | 2262 | 0.986748 | 0         |  |
|  | Shiraz-3T  | 238  | 0.472087 | 0         |  |
|  | Shiraz-4T  | 260  | 0        | -0.324128 |  |
|  | Shiraz-16T | 294  | 0.655804 | 0         |  |
|  | Shiraz-31T | 345  | 0.103301 | 0         |  |
|  | Shiraz-36T | 431  | 0        | -0.78035  |  |
|  | Shiraz-36T | 432  | 0        | -0.6692   |  |
|  | Shiraz-44T | 891  | 0        | -0.954044 |  |
|  | Shiraz-44T | 896  | 0        | -0.109108 |  |
|  | Shiraz-44T | 897  | 0.486937 | 0         |  |
|  | Shiraz-46T | 991  | 0.139564 | 0         |  |
|  | Shiraz-47T | 1084 | 0.24185  | 0         |  |
|  | Shiraz-49T | 1166 | 0        | -0.917235 |  |
|  | Shiraz-49T | 1169 | 0        | -0.583529 |  |
|  | Shiraz-77T | 1282 | 0.213849 | 0         |  |
|  | Shiraz-9T  | 1368 | 0.199713 | 0         |  |
|  | Shiraz-9T  | 1369 | 0.703374 | 0         |  |
|  | Shiraz-18T | 1455 | 0        | -0.186773 |  |
|  | Shiraz-22T | 1669 | 0.695915 | 0         |  |
|  | Shiraz-22T | 1672 | 1.01678  | 0         |  |
|  | Shiraz-25T | 1717 | 0.420447 | 0         |  |
|  | Shiraz-28T | 1760 | 0.538181 | 0         |  |
|  | Shiraz-29T | 1800 | 0.672527 | 0         |  |
|  | Shiraz-32T | 1869 | 0.776805 | 0         |  |
|  | Shiraz-35T | 1932 | 0.507141 | 0         |  |
|  | Shiraz-58T | 2221 | 0.871948 | 0         |  |
|  | Shiraz-71T | 2260 | 0.68394  | 0         |  |
|  | Shiraz-71T | 2262 | 0.986748 | 0         |  |
|  | Shiraz-3T  | 238  | 0.472087 | 0         |  |
|  | Shiraz-4T  | 260  | 0        | -0.324128 |  |
|  | Shiraz-16T | 294  | 0.655804 | 0         |  |
|  | Shiraz-31T | 345  | 0.103301 | 0         |  |
|  | Shiraz-36T | 431  | 0        | -0.78035  |  |
|  | Shiraz-36T | 432  | 0        | -0.6692   |  |

|       |      |            |      |          |           |  |  |
|-------|------|------------|------|----------|-----------|--|--|
|       |      | Shiraz-44T | 891  | 0        | -0.954044 |  |  |
|       |      | Shiraz-44T | 896  | 0        | -0.109108 |  |  |
|       |      | Shiraz-44T | 897  | 0.486937 | 0         |  |  |
|       |      | Shiraz-46T | 991  | 0.139564 | 0         |  |  |
|       |      | Shiraz-47T | 1084 | 0.24185  | 0         |  |  |
|       |      | Shiraz-49T | 1166 | 0        | -0.917235 |  |  |
|       |      | Shiraz-49T | 1169 | 0        | -0.583529 |  |  |
|       |      | Shiraz-77T | 1282 | 0.213849 | 0         |  |  |
|       |      | Shiraz-9T  | 1368 | 0.199713 | 0         |  |  |
|       |      | Shiraz-9T  | 1369 | 0.703374 | 0         |  |  |
|       |      | Shiraz-18T | 1455 | 0        | -0.186773 |  |  |
|       |      | Shiraz-22T | 1669 | 0.695915 | 0         |  |  |
|       |      | Shiraz-22T | 1672 | 1.01678  | 0         |  |  |
|       |      | Shiraz-25T | 1717 | 0.420447 | 0         |  |  |
|       |      | Shiraz-28T | 1760 | 0.538181 | 0         |  |  |
|       |      | Shiraz-29T | 1800 | 0.672527 | 0         |  |  |
|       |      | Shiraz-32T | 1869 | 0.776805 | 0         |  |  |
|       |      | Shiraz-35T | 1932 | 0.507141 | 0         |  |  |
|       |      | Shiraz-58T | 2221 | 0.871948 | 0         |  |  |
|       |      | Shiraz-71T | 2260 | 0.68394  | 0         |  |  |
|       |      | Shiraz-71T | 2262 | 0.986748 | 0         |  |  |
| SYPL1 | chr7 | Shiraz-3T  | 90   | 0.219276 | 0         |  |  |
|       |      | Shiraz-3T  | 90   | 0.219276 | 0         |  |  |
|       |      | Shiraz-4T  | 253  | 0.372918 | 0         |  |  |
|       |      | Shiraz-4T  | 253  | 0.372918 | 0         |  |  |
|       |      | Shiraz-36T | 378  | 0.179558 | 0         |  |  |
|       |      | Shiraz-36T | 378  | 0.179558 | 0         |  |  |
|       |      | Shiraz-46T | 943  | 0.093799 | 0         |  |  |
|       |      | Shiraz-46T | 943  | 0.093799 | 0         |  |  |
|       |      | Shiraz-77T | 1225 | 0        | -0.117922 |  |  |
|       |      | Shiraz-77T | 1225 | 0        | -0.117922 |  |  |
|       |      | Shiraz-18T | 1434 | 0.244465 | 0         |  |  |
|       |      | Shiraz-18T | 1434 | 0.244465 | 0         |  |  |
|       |      | Shiraz-22T | 1549 | 0        | -0.319623 |  |  |
|       |      | Shiraz-22T | 1549 | 0        | -0.319623 |  |  |
|       |      | Shiraz-25T | 1698 | 0.21835  | 0         |  |  |
|       |      | Shiraz-25T | 1698 | 0.21835  | 0         |  |  |
|       |      | Shiraz-28T | 1735 | 0.350744 | 0         |  |  |
|       |      | Shiraz-28T | 1735 | 0.350744 | 0         |  |  |
|       |      | Shiraz-29T | 1778 | 0.120767 | 0         |  |  |
|       |      | Shiraz-29T | 1778 | 0.120767 | 0         |  |  |
|       |      | Shiraz-32T | 1833 | 0.551336 | 0         |  |  |
|       |      | Shiraz-32T | 1833 | 0.551336 | 0         |  |  |
|       |      | Shiraz-38T | 1951 | 0.250891 | 0         |  |  |
|       |      | Shiraz-38T | 1951 | 0.250891 | 0         |  |  |
|       |      | Shiraz-53T | 2078 | 0.287202 | 0         |  |  |
|       |      | Shiraz-53T | 2078 | 0.287202 | 0         |  |  |

|  |            |      |          |           |  |
|--|------------|------|----------|-----------|--|
|  | Shiraz-71T | 2238 | 0.603631 | 0         |  |
|  | Shiraz-71T | 2238 | 0.603631 | 0         |  |
|  | Shiraz-3T  | 90   | 0.219276 | 0         |  |
|  | Shiraz-3T  | 90   | 0.219276 | 0         |  |
|  | Shiraz-4T  | 253  | 0.372918 | 0         |  |
|  | Shiraz-4T  | 253  | 0.372918 | 0         |  |
|  | Shiraz-36T | 378  | 0.179558 | 0         |  |
|  | Shiraz-36T | 378  | 0.179558 | 0         |  |
|  | Shiraz-46T | 943  | 0.093799 | 0         |  |
|  | Shiraz-46T | 943  | 0.093799 | 0         |  |
|  | Shiraz-77T | 1225 | 0        | -0.117922 |  |
|  | Shiraz-77T | 1225 | 0        | -0.117922 |  |
|  | Shiraz-18T | 1434 | 0.244465 | 0         |  |
|  | Shiraz-18T | 1434 | 0.244465 | 0         |  |
|  | Shiraz-22T | 1549 | 0        | -0.319623 |  |
|  | Shiraz-22T | 1549 | 0        | -0.319623 |  |
|  | Shiraz-25T | 1698 | 0.21835  | 0         |  |
|  | Shiraz-25T | 1698 | 0.21835  | 0         |  |
|  | Shiraz-28T | 1735 | 0.350744 | 0         |  |
|  | Shiraz-28T | 1735 | 0.350744 | 0         |  |
|  | Shiraz-29T | 1778 | 0.120767 | 0         |  |
|  | Shiraz-29T | 1778 | 0.120767 | 0         |  |
|  | Shiraz-32T | 1833 | 0.551336 | 0         |  |
|  | Shiraz-32T | 1833 | 0.551336 | 0         |  |
|  | Shiraz-38T | 1951 | 0.250891 | 0         |  |
|  | Shiraz-38T | 1951 | 0.250891 | 0         |  |
|  | Shiraz-53T | 2078 | 0.287202 | 0         |  |
|  | Shiraz-53T | 2078 | 0.287202 | 0         |  |
|  | Shiraz-71T | 2238 | 0.603631 | 0         |  |
|  | Shiraz-71T | 2238 | 0.603631 | 0         |  |
|  | Shiraz-3T  | 90   | 0.219276 | 0         |  |
|  | Shiraz-3T  | 90   | 0.219276 | 0         |  |
|  | Shiraz-4T  | 253  | 0.372918 | 0         |  |
|  | Shiraz-4T  | 253  | 0.372918 | 0         |  |
|  | Shiraz-36T | 378  | 0.179558 | 0         |  |
|  | Shiraz-36T | 378  | 0.179558 | 0         |  |
|  | Shiraz-46T | 943  | 0.093799 | 0         |  |
|  | Shiraz-46T | 943  | 0.093799 | 0         |  |
|  | Shiraz-77T | 1225 | 0        | -0.117922 |  |
|  | Shiraz-77T | 1225 | 0        | -0.117922 |  |
|  | Shiraz-18T | 1434 | 0.244465 | 0         |  |
|  | Shiraz-18T | 1434 | 0.244465 | 0         |  |
|  | Shiraz-22T | 1549 | 0        | -0.319623 |  |
|  | Shiraz-22T | 1549 | 0        | -0.319623 |  |
|  | Shiraz-25T | 1698 | 0.21835  | 0         |  |
|  | Shiraz-25T | 1698 | 0.21835  | 0         |  |
|  | Shiraz-28T | 1735 | 0.350744 | 0         |  |

|       |      |            |      |          |           |  |
|-------|------|------------|------|----------|-----------|--|
|       |      | Shiraz-28T | 1735 | 0.350744 | 0         |  |
|       |      | Shiraz-29T | 1778 | 0.120767 | 0         |  |
|       |      | Shiraz-29T | 1778 | 0.120767 | 0         |  |
|       |      | Shiraz-32T | 1833 | 0.551336 | 0         |  |
|       |      | Shiraz-32T | 1833 | 0.551336 | 0         |  |
|       |      | Shiraz-38T | 1951 | 0.250891 | 0         |  |
|       |      | Shiraz-38T | 1951 | 0.250891 | 0         |  |
|       |      | Shiraz-53T | 2078 | 0.287202 | 0         |  |
|       |      | Shiraz-53T | 2078 | 0.287202 | 0         |  |
|       |      | Shiraz-71T | 2238 | 0.603631 | 0         |  |
|       |      | Shiraz-71T | 2238 | 0.603631 | 0         |  |
| SYTL4 | chrX | Shiraz-3T  | 242  | 0        | -0.336434 |  |
|       |      | Shiraz-3T  | 242  | 0        | -0.336434 |  |
|       |      | Shiraz-4T  | 261  | 0        | -0.336249 |  |
|       |      | Shiraz-4T  | 261  | 0        | -0.336249 |  |
|       |      | Shiraz-16T | 295  | 0.591657 | 0         |  |
|       |      | Shiraz-16T | 295  | 0.591657 | 0         |  |
|       |      | Shiraz-36T | 433  | 0        | -0.803961 |  |
|       |      | Shiraz-36T | 433  | 0        | -0.803961 |  |
|       |      | Shiraz-44T | 899  | 0        | -1.09697  |  |
|       |      | Shiraz-44T | 899  | 0        | -1.09697  |  |
|       |      | Shiraz-49T | 1170 | 0        | -0.967436 |  |
|       |      | Shiraz-49T | 1170 | 0        | -0.967436 |  |
|       |      | Shiraz-18T | 1457 | 0.643204 | 0         |  |
|       |      | Shiraz-18T | 1457 | 0.643204 | 0         |  |
|       |      | Shiraz-22T | 1673 | 0.611783 | 0         |  |
|       |      | Shiraz-22T | 1673 | 0.611783 | 0         |  |
|       |      | Shiraz-25T | 1719 | 0.472955 | 0         |  |
|       |      | Shiraz-25T | 1719 | 0.472955 | 0         |  |
|       |      | Shiraz-28T | 1762 | 0.562311 | 0         |  |
|       |      | Shiraz-28T | 1762 | 0.562311 | 0         |  |
|       |      | Shiraz-29T | 1801 | 0.815343 | 0         |  |
|       |      | Shiraz-29T | 1801 | 0.815343 | 0         |  |
|       |      | Shiraz-32T | 1870 | 0.729766 | 0         |  |
|       |      | Shiraz-32T | 1870 | 0.729766 | 0         |  |
|       |      | Shiraz-35T | 1933 | 0.488535 | 0         |  |
|       |      | Shiraz-35T | 1933 | 0.488535 | 0         |  |
|       |      | Shiraz-58T | 2223 | 0.833364 | 0         |  |
|       |      | Shiraz-58T | 2223 | 0.833364 | 0         |  |
|       |      | Shiraz-71T | 2263 | 0.975531 | 0         |  |
|       |      | Shiraz-71T | 2263 | 0.975531 | 0         |  |
|       |      | Shiraz-3T  | 242  | 0        | -0.336434 |  |
|       |      | Shiraz-3T  | 242  | 0        | -0.336434 |  |
|       |      | Shiraz-4T  | 261  | 0        | -0.336249 |  |
|       |      | Shiraz-4T  | 261  | 0        | -0.336249 |  |
|       |      | Shiraz-16T | 295  | 0.591657 | 0         |  |
|       |      | Shiraz-16T | 295  | 0.591657 | 0         |  |

|  |            |      |          |           |  |
|--|------------|------|----------|-----------|--|
|  | Shiraz-36T | 433  | 0        | -0.803961 |  |
|  | Shiraz-36T | 433  | 0        | -0.803961 |  |
|  | Shiraz-44T | 899  | 0        | -1.09697  |  |
|  | Shiraz-44T | 899  | 0        | -1.09697  |  |
|  | Shiraz-49T | 1170 | 0        | -0.967436 |  |
|  | Shiraz-49T | 1170 | 0        | -0.967436 |  |
|  | Shiraz-18T | 1457 | 0.643204 | 0         |  |
|  | Shiraz-18T | 1457 | 0.643204 | 0         |  |
|  | Shiraz-22T | 1673 | 0.611783 | 0         |  |
|  | Shiraz-22T | 1673 | 0.611783 | 0         |  |
|  | Shiraz-25T | 1719 | 0.472955 | 0         |  |
|  | Shiraz-25T | 1719 | 0.472955 | 0         |  |
|  | Shiraz-28T | 1762 | 0.562311 | 0         |  |
|  | Shiraz-28T | 1762 | 0.562311 | 0         |  |
|  | Shiraz-29T | 1801 | 0.815343 | 0         |  |
|  | Shiraz-29T | 1801 | 0.815343 | 0         |  |
|  | Shiraz-32T | 1870 | 0.729766 | 0         |  |
|  | Shiraz-32T | 1870 | 0.729766 | 0         |  |
|  | Shiraz-35T | 1933 | 0.488535 | 0         |  |
|  | Shiraz-35T | 1933 | 0.488535 | 0         |  |
|  | Shiraz-58T | 2223 | 0.833364 | 0         |  |
|  | Shiraz-58T | 2223 | 0.833364 | 0         |  |
|  | Shiraz-71T | 2263 | 0.975531 | 0         |  |
|  | Shiraz-71T | 2263 | 0.975531 | 0         |  |
|  | Shiraz-3T  | 242  | 0        | -0.336434 |  |
|  | Shiraz-3T  | 242  | 0        | -0.336434 |  |
|  | Shiraz-4T  | 261  | 0        | -0.336249 |  |
|  | Shiraz-4T  | 261  | 0        | -0.336249 |  |
|  | Shiraz-16T | 295  | 0.591657 | 0         |  |
|  | Shiraz-16T | 295  | 0.591657 | 0         |  |
|  | Shiraz-36T | 433  | 0        | -0.803961 |  |
|  | Shiraz-36T | 433  | 0        | -0.803961 |  |
|  | Shiraz-44T | 899  | 0        | -1.09697  |  |
|  | Shiraz-44T | 899  | 0        | -1.09697  |  |
|  | Shiraz-49T | 1170 | 0        | -0.967436 |  |
|  | Shiraz-49T | 1170 | 0        | -0.967436 |  |
|  | Shiraz-18T | 1457 | 0.643204 | 0         |  |
|  | Shiraz-18T | 1457 | 0.643204 | 0         |  |
|  | Shiraz-22T | 1673 | 0.611783 | 0         |  |
|  | Shiraz-22T | 1673 | 0.611783 | 0         |  |
|  | Shiraz-25T | 1719 | 0.472955 | 0         |  |
|  | Shiraz-25T | 1719 | 0.472955 | 0         |  |
|  | Shiraz-28T | 1762 | 0.562311 | 0         |  |
|  | Shiraz-28T | 1762 | 0.562311 | 0         |  |
|  | Shiraz-29T | 1801 | 0.815343 | 0         |  |
|  | Shiraz-29T | 1801 | 0.815343 | 0         |  |
|  | Shiraz-32T | 1870 | 0.729766 | 0         |  |

|       |      |            |      |          |           |  |
|-------|------|------------|------|----------|-----------|--|
|       |      | Shiraz-32T | 1870 | 0.729766 | 0         |  |
|       |      | Shiraz-35T | 1933 | 0.488535 | 0         |  |
|       |      | Shiraz-35T | 1933 | 0.488535 | 0         |  |
|       |      | Shiraz-58T | 2223 | 0.833364 | 0         |  |
|       |      | Shiraz-58T | 2223 | 0.833364 | 0         |  |
|       |      | Shiraz-71T | 2263 | 0.975531 | 0         |  |
|       |      | Shiraz-71T | 2263 | 0.975531 | 0         |  |
| SYTL5 | chrX | Shiraz-3T  | 235  | 0        | -0.28401  |  |
|       |      | Shiraz-4T  | 260  | 0        | -0.324128 |  |
|       |      | Shiraz-16T | 294  | 0.655804 | 0         |  |
|       |      | Shiraz-36T | 431  | 0        | -0.78035  |  |
|       |      | Shiraz-44T | 891  | 0        | -0.954044 |  |
|       |      | Shiraz-49T | 1166 | 0        | -0.917235 |  |
|       |      | Shiraz-49T | 1168 | 0        | -1.073859 |  |
|       |      | Shiraz-9T  | 1368 | 0.199713 | 0         |  |
|       |      | Shiraz-18T | 1455 | 0        | -0.186773 |  |
|       |      | Shiraz-22T | 1669 | 0.695915 | 0         |  |
|       |      | Shiraz-25T | 1717 | 0.420447 | 0         |  |
|       |      | Shiraz-28T | 1760 | 0.538181 | 0         |  |
|       |      | Shiraz-29T | 1800 | 0.672527 | 0         |  |
|       |      | Shiraz-32T | 1869 | 0.776805 | 0         |  |
|       |      | Shiraz-35T | 1932 | 0.507141 | 0         |  |
|       |      | Shiraz-40T | 2051 | 0.098506 | 0         |  |
|       |      | Shiraz-58T | 2221 | 0.871948 | 0         |  |
|       |      | Shiraz-71T | 2260 | 0.68394  | 0         |  |
|       |      | Shiraz-3T  | 235  | 0        | -0.28401  |  |
|       |      | Shiraz-4T  | 260  | 0        | -0.324128 |  |
|       |      | Shiraz-16T | 294  | 0.655804 | 0         |  |
|       |      | Shiraz-36T | 431  | 0        | -0.78035  |  |
|       |      | Shiraz-44T | 891  | 0        | -0.954044 |  |
|       |      | Shiraz-49T | 1166 | 0        | -0.917235 |  |
|       |      | Shiraz-49T | 1168 | 0        | -1.073859 |  |
|       |      | Shiraz-9T  | 1368 | 0.199713 | 0         |  |
|       |      | Shiraz-18T | 1455 | 0        | -0.186773 |  |
|       |      | Shiraz-22T | 1669 | 0.695915 | 0         |  |
|       |      | Shiraz-25T | 1717 | 0.420447 | 0         |  |
|       |      | Shiraz-28T | 1760 | 0.538181 | 0         |  |
|       |      | Shiraz-29T | 1800 | 0.672527 | 0         |  |
|       |      | Shiraz-32T | 1869 | 0.776805 | 0         |  |
|       |      | Shiraz-35T | 1932 | 0.507141 | 0         |  |
|       |      | Shiraz-40T | 2051 | 0.098506 | 0         |  |
|       |      | Shiraz-58T | 2221 | 0.871948 | 0         |  |
|       |      | Shiraz-71T | 2260 | 0.68394  | 0         |  |
|       |      | Shiraz-3T  | 235  | 0        | -0.28401  |  |
|       |      | Shiraz-4T  | 260  | 0        | -0.324128 |  |
|       |      | Shiraz-16T | 294  | 0.655804 | 0         |  |
|       |      | Shiraz-36T | 431  | 0        | -0.78035  |  |

|      |      |            |      |          |           |  |  |
|------|------|------------|------|----------|-----------|--|--|
|      |      | Shiraz-44T | 891  | 0        | -0.954044 |  |  |
|      |      | Shiraz-49T | 1166 | 0        | -0.917235 |  |  |
|      |      | Shiraz-49T | 1168 | 0        | -1.073859 |  |  |
|      |      | Shiraz-9T  | 1368 | 0.199713 | 0         |  |  |
|      |      | Shiraz-18T | 1455 | 0        | -0.186773 |  |  |
|      |      | Shiraz-22T | 1669 | 0.695915 | 0         |  |  |
|      |      | Shiraz-25T | 1717 | 0.420447 | 0         |  |  |
|      |      | Shiraz-28T | 1760 | 0.538181 | 0         |  |  |
|      |      | Shiraz-29T | 1800 | 0.672527 | 0         |  |  |
|      |      | Shiraz-32T | 1869 | 0.776805 | 0         |  |  |
|      |      | Shiraz-35T | 1932 | 0.507141 | 0         |  |  |
|      |      | Shiraz-40T | 2051 | 0.098506 | 0         |  |  |
|      |      | Shiraz-58T | 2221 | 0.871948 | 0         |  |  |
|      |      | Shiraz-71T | 2260 | 0.68394  | 0         |  |  |
| TAC1 | chr7 | Shiraz-3T  | 90   | 0.219276 | 0         |  |  |
|      |      | Shiraz-4T  | 253  | 0.372918 | 0         |  |  |
|      |      | Shiraz-36T | 378  | 0.179558 | 0         |  |  |
|      |      | Shiraz-36T | 381  | 0.332628 | 0         |  |  |
|      |      | Shiraz-46T | 943  | 0.093799 | 0         |  |  |
|      |      | Shiraz-77T | 1225 | 0        | -0.117922 |  |  |
|      |      | Shiraz-18T | 1434 | 0.244465 | 0         |  |  |
|      |      | Shiraz-22T | 1549 | 0        | -0.319623 |  |  |
|      |      | Shiraz-25T | 1698 | 0.21835  | 0         |  |  |
|      |      | Shiraz-28T | 1735 | 0.350744 | 0         |  |  |
|      |      | Shiraz-29T | 1778 | 0.120767 | 0         |  |  |
|      |      | Shiraz-32T | 1833 | 0.551336 | 0         |  |  |
|      |      | Shiraz-38T | 1951 | 0.250891 | 0         |  |  |
|      |      | Shiraz-53T | 2078 | 0.287202 | 0         |  |  |
|      |      | Shiraz-71T | 2238 | 0.603631 | 0         |  |  |
|      |      | Shiraz-3T  | 90   | 0.219276 | 0         |  |  |
|      |      | Shiraz-4T  | 253  | 0.372918 | 0         |  |  |
|      |      | Shiraz-36T | 378  | 0.179558 | 0         |  |  |
|      |      | Shiraz-36T | 381  | 0.332628 | 0         |  |  |
|      |      | Shiraz-46T | 943  | 0.093799 | 0         |  |  |
|      |      | Shiraz-77T | 1225 | 0        | -0.117922 |  |  |
|      |      | Shiraz-18T | 1434 | 0.244465 | 0         |  |  |
|      |      | Shiraz-22T | 1549 | 0        | -0.319623 |  |  |
|      |      | Shiraz-25T | 1698 | 0.21835  | 0         |  |  |
|      |      | Shiraz-28T | 1735 | 0.350744 | 0         |  |  |
|      |      | Shiraz-29T | 1778 | 0.120767 | 0         |  |  |
|      |      | Shiraz-32T | 1833 | 0.551336 | 0         |  |  |
|      |      | Shiraz-38T | 1951 | 0.250891 | 0         |  |  |
|      |      | Shiraz-53T | 2078 | 0.287202 | 0         |  |  |
|      |      | Shiraz-71T | 2238 | 0.603631 | 0         |  |  |
|      |      | Shiraz-3T  | 90   | 0.219276 | 0         |  |  |
|      |      | Shiraz-4T  | 253  | 0.372918 | 0         |  |  |
|      |      | Shiraz-36T | 378  | 0.179558 | 0         |  |  |

|      |      |            |      |          |           |  |
|------|------|------------|------|----------|-----------|--|
|      |      | Shiraz-36T | 381  | 0.332628 | 0         |  |
|      |      | Shiraz-46T | 943  | 0.093799 | 0         |  |
|      |      | Shiraz-77T | 1225 | 0        | -0.117922 |  |
|      |      | Shiraz-18T | 1434 | 0.244465 | 0         |  |
|      |      | Shiraz-22T | 1549 | 0        | -0.319623 |  |
|      |      | Shiraz-25T | 1698 | 0.21835  | 0         |  |
|      |      | Shiraz-28T | 1735 | 0.350744 | 0         |  |
|      |      | Shiraz-29T | 1778 | 0.120767 | 0         |  |
|      |      | Shiraz-32T | 1833 | 0.551336 | 0         |  |
|      |      | Shiraz-38T | 1951 | 0.250891 | 0         |  |
|      |      | Shiraz-53T | 2078 | 0.287202 | 0         |  |
|      |      | Shiraz-71T | 2238 | 0.603631 | 0         |  |
| TAF1 | chrX | Shiraz-4T  | 261  | 0        | -0.336249 |  |
|      |      | Shiraz-16T | 295  | 0.591657 | 0         |  |
|      |      | Shiraz-36T | 433  | 0        | -0.803961 |  |
|      |      | Shiraz-44T | 899  | 0        | -1.09697  |  |
|      |      | Shiraz-44T | 900  | 0        | -0.584284 |  |
|      |      | Shiraz-49T | 1170 | 0        | -0.967436 |  |
|      |      | Shiraz-49T | 1171 | 0        | -0.612379 |  |
|      |      | Shiraz-77T | 1283 | 0.296555 | 0         |  |
|      |      | Shiraz-18T | 1457 | 0.643204 | 0         |  |
|      |      | Shiraz-22T | 1673 | 0.611783 | 0         |  |
|      |      | Shiraz-22T | 1674 | 0.887899 | 0         |  |
|      |      | Shiraz-25T | 1719 | 0.472955 | 0         |  |
|      |      | Shiraz-28T | 1762 | 0.562311 | 0         |  |
|      |      | Shiraz-29T | 1801 | 0.815343 | 0         |  |
|      |      | Shiraz-32T | 1870 | 0.729766 | 0         |  |
|      |      | Shiraz-35T | 1933 | 0.488535 | 0         |  |
|      |      | Shiraz-58T | 2223 | 0.833364 | 0         |  |
|      |      | Shiraz-58T | 2224 | 1.076575 | 0         |  |
|      |      | Shiraz-71T | 2263 | 0.975531 | 0         |  |
|      |      | Shiraz-4T  | 261  | 0        | -0.336249 |  |
|      |      | Shiraz-16T | 295  | 0.591657 | 0         |  |
|      |      | Shiraz-36T | 433  | 0        | -0.803961 |  |
|      |      | Shiraz-44T | 899  | 0        | -1.09697  |  |
|      |      | Shiraz-44T | 900  | 0        | -0.584284 |  |
|      |      | Shiraz-49T | 1170 | 0        | -0.967436 |  |
|      |      | Shiraz-49T | 1171 | 0        | -0.612379 |  |
|      |      | Shiraz-77T | 1283 | 0.296555 | 0         |  |
|      |      | Shiraz-18T | 1457 | 0.643204 | 0         |  |
|      |      | Shiraz-22T | 1673 | 0.611783 | 0         |  |
|      |      | Shiraz-22T | 1674 | 0.887899 | 0         |  |
|      |      | Shiraz-25T | 1719 | 0.472955 | 0         |  |
|      |      | Shiraz-28T | 1762 | 0.562311 | 0         |  |
|      |      | Shiraz-29T | 1801 | 0.815343 | 0         |  |
|      |      | Shiraz-32T | 1870 | 0.729766 | 0         |  |
|      |      | Shiraz-35T | 1933 | 0.488535 | 0         |  |



|      |      |            |      |          |           |  |
|------|------|------------|------|----------|-----------|--|
|      |      | Shiraz-58T | 2223 | 0.833364 | 0         |  |
|      |      | Shiraz-58T | 2224 | 1.076575 | 0         |  |
|      |      | Shiraz-71T | 2263 | 0.975531 | 0         |  |
|      |      | Shiraz-4T  | 261  | 0        | -0.336249 |  |
|      |      | Shiraz-16T | 295  | 0.591657 | 0         |  |
|      |      | Shiraz-36T | 433  | 0        | -0.803961 |  |
|      |      | Shiraz-44T | 899  | 0        | -1.09697  |  |
|      |      | Shiraz-44T | 900  | 0        | -0.584284 |  |
|      |      | Shiraz-49T | 1170 | 0        | -0.967436 |  |
|      |      | Shiraz-49T | 1171 | 0        | -0.612379 |  |
|      |      | Shiraz-77T | 1283 | 0.296555 | 0         |  |
|      |      | Shiraz-18T | 1457 | 0.643204 | 0         |  |
|      |      | Shiraz-22T | 1673 | 0.611783 | 0         |  |
|      |      | Shiraz-22T | 1674 | 0.887899 | 0         |  |
|      |      | Shiraz-25T | 1719 | 0.472955 | 0         |  |
|      |      | Shiraz-28T | 1762 | 0.562311 | 0         |  |
|      |      | Shiraz-29T | 1801 | 0.815343 | 0         |  |
|      |      | Shiraz-32T | 1870 | 0.729766 | 0         |  |
|      |      | Shiraz-35T | 1933 | 0.488535 | 0         |  |
|      |      | Shiraz-58T | 2223 | 0.833364 | 0         |  |
|      |      | Shiraz-58T | 2224 | 1.076575 | 0         |  |
|      |      | Shiraz-71T | 2263 | 0.975531 | 0         |  |
| TAF6 | chr7 | Shiraz-3T  | 90   | 0.219276 | 0         |  |
|      |      | Shiraz-3T  | 90   | 0.219276 | 0         |  |
|      |      | Shiraz-3T  | 94   | 0.74735  | 0         |  |
|      |      | Shiraz-3T  | 94   | 0.74735  | 0         |  |
|      |      | Shiraz-4T  | 253  | 0.372918 | 0         |  |
|      |      | Shiraz-4T  | 253  | 0.372918 | 0         |  |
|      |      | Shiraz-31T | 316  | 0.219196 | 0         |  |
|      |      | Shiraz-31T | 316  | 0.219196 | 0         |  |
|      |      | Shiraz-36T | 378  | 0.179558 | 0         |  |
|      |      | Shiraz-36T | 378  | 0.179558 | 0         |  |
|      |      | Shiraz-36T | 381  | 0.332628 | 0         |  |
|      |      | Shiraz-36T | 381  | 0.332628 | 0         |  |
|      |      | Shiraz-44T | 639  | 1.035032 | 0         |  |
|      |      | Shiraz-44T | 639  | 1.035032 | 0         |  |
|      |      | Shiraz-46T | 943  | 0.093799 | 0         |  |
|      |      | Shiraz-46T | 943  | 0.093799 | 0         |  |
|      |      | Shiraz-46T | 946  | 0.299835 | 0         |  |
|      |      | Shiraz-46T | 946  | 0.299835 | 0         |  |
|      |      | Shiraz-47T | 1030 | 0.257728 | 0         |  |
|      |      | Shiraz-47T | 1030 | 0.257728 | 0         |  |
|      |      | Shiraz-49T | 1120 | 0.281656 | 0         |  |
|      |      | Shiraz-49T | 1120 | 0.281656 | 0         |  |
|      |      | Shiraz-77T | 1225 | 0        | -0.117922 |  |
|      |      | Shiraz-77T | 1225 | 0        | -0.117922 |  |
|      |      | Shiraz-77T | 1227 | 0.196445 | 0         |  |

|  |  |            |      |          |           |  |  |
|--|--|------------|------|----------|-----------|--|--|
|  |  | Shiraz-77T | 1227 | 0.196445 | 0         |  |  |
|  |  | Shiraz-9T  | 1324 | 0.679266 | 0         |  |  |
|  |  | Shiraz-9T  | 1324 | 0.679266 | 0         |  |  |
|  |  | Shiraz-18T | 1434 | 0.244465 | 0         |  |  |
|  |  | Shiraz-18T | 1434 | 0.244465 | 0         |  |  |
|  |  | Shiraz-22T | 1549 | 0        | -0.319623 |  |  |
|  |  | Shiraz-22T | 1549 | 0        | -0.319623 |  |  |
|  |  | Shiraz-22T | 1551 | 0.324011 | 0         |  |  |
|  |  | Shiraz-22T | 1551 | 0.324011 | 0         |  |  |
|  |  | Shiraz-25T | 1698 | 0.21835  | 0         |  |  |
|  |  | Shiraz-25T | 1698 | 0.21835  | 0         |  |  |
|  |  | Shiraz-28T | 1735 | 0.350744 | 0         |  |  |
|  |  | Shiraz-28T | 1735 | 0.350744 | 0         |  |  |
|  |  | Shiraz-29T | 1778 | 0.120767 | 0         |  |  |
|  |  | Shiraz-29T | 1778 | 0.120767 | 0         |  |  |
|  |  | Shiraz-32T | 1833 | 0.551336 | 0         |  |  |
|  |  | Shiraz-32T | 1833 | 0.551336 | 0         |  |  |
|  |  | Shiraz-32T | 1834 | 1.485392 | 0         |  |  |
|  |  | Shiraz-32T | 1834 | 1.485392 | 0         |  |  |
|  |  | Shiraz-38T | 1951 | 0.250891 | 0         |  |  |
|  |  | Shiraz-38T | 1951 | 0.250891 | 0         |  |  |
|  |  | Shiraz-53T | 2078 | 0.287202 | 0         |  |  |
|  |  | Shiraz-53T | 2078 | 0.287202 | 0         |  |  |
|  |  | Shiraz-58T | 2160 | 0.399007 | 0         |  |  |
|  |  | Shiraz-58T | 2160 | 0.399007 | 0         |  |  |
|  |  | Shiraz-71T | 2238 | 0.603631 | 0         |  |  |
|  |  | Shiraz-71T | 2238 | 0.603631 | 0         |  |  |
|  |  | Shiraz-3T  | 90   | 0.219276 | 0         |  |  |
|  |  | Shiraz-3T  | 90   | 0.219276 | 0         |  |  |
|  |  | Shiraz-3T  | 94   | 0.74735  | 0         |  |  |
|  |  | Shiraz-3T  | 94   | 0.74735  | 0         |  |  |
|  |  | Shiraz-4T  | 253  | 0.372918 | 0         |  |  |
|  |  | Shiraz-4T  | 253  | 0.372918 | 0         |  |  |
|  |  | Shiraz-31T | 316  | 0.219196 | 0         |  |  |
|  |  | Shiraz-31T | 316  | 0.219196 | 0         |  |  |
|  |  | Shiraz-36T | 378  | 0.179558 | 0         |  |  |
|  |  | Shiraz-36T | 378  | 0.179558 | 0         |  |  |
|  |  | Shiraz-36T | 381  | 0.332628 | 0         |  |  |
|  |  | Shiraz-36T | 381  | 0.332628 | 0         |  |  |
|  |  | Shiraz-44T | 639  | 1.035032 | 0         |  |  |
|  |  | Shiraz-44T | 639  | 1.035032 | 0         |  |  |
|  |  | Shiraz-46T | 943  | 0.093799 | 0         |  |  |
|  |  | Shiraz-46T | 943  | 0.093799 | 0         |  |  |
|  |  | Shiraz-46T | 946  | 0.299835 | 0         |  |  |
|  |  | Shiraz-46T | 946  | 0.299835 | 0         |  |  |
|  |  | Shiraz-47T | 1030 | 0.257728 | 0         |  |  |
|  |  | Shiraz-47T | 1030 | 0.257728 | 0         |  |  |

|  |            |      |          |           |  |
|--|------------|------|----------|-----------|--|
|  | Shiraz-49T | 1120 | 0.281656 | 0         |  |
|  | Shiraz-49T | 1120 | 0.281656 | 0         |  |
|  | Shiraz-77T | 1225 | 0        | -0.117922 |  |
|  | Shiraz-77T | 1225 | 0        | -0.117922 |  |
|  | Shiraz-77T | 1227 | 0.196445 | 0         |  |
|  | Shiraz-77T | 1227 | 0.196445 | 0         |  |
|  | Shiraz-9T  | 1324 | 0.679266 | 0         |  |
|  | Shiraz-9T  | 1324 | 0.679266 | 0         |  |
|  | Shiraz-18T | 1434 | 0.244465 | 0         |  |
|  | Shiraz-18T | 1434 | 0.244465 | 0         |  |
|  | Shiraz-22T | 1549 | 0        | -0.319623 |  |
|  | Shiraz-22T | 1549 | 0        | -0.319623 |  |
|  | Shiraz-22T | 1551 | 0.324011 | 0         |  |
|  | Shiraz-22T | 1551 | 0.324011 | 0         |  |
|  | Shiraz-25T | 1698 | 0.21835  | 0         |  |
|  | Shiraz-25T | 1698 | 0.21835  | 0         |  |
|  | Shiraz-28T | 1735 | 0.350744 | 0         |  |
|  | Shiraz-28T | 1735 | 0.350744 | 0         |  |
|  | Shiraz-29T | 1778 | 0.120767 | 0         |  |
|  | Shiraz-29T | 1778 | 0.120767 | 0         |  |
|  | Shiraz-32T | 1833 | 0.551336 | 0         |  |
|  | Shiraz-32T | 1833 | 0.551336 | 0         |  |
|  | Shiraz-32T | 1834 | 1.485392 | 0         |  |
|  | Shiraz-32T | 1834 | 1.485392 | 0         |  |
|  | Shiraz-38T | 1951 | 0.250891 | 0         |  |
|  | Shiraz-38T | 1951 | 0.250891 | 0         |  |
|  | Shiraz-53T | 2078 | 0.287202 | 0         |  |
|  | Shiraz-53T | 2078 | 0.287202 | 0         |  |
|  | Shiraz-58T | 2160 | 0.399007 | 0         |  |
|  | Shiraz-58T | 2160 | 0.399007 | 0         |  |
|  | Shiraz-71T | 2238 | 0.603631 | 0         |  |
|  | Shiraz-71T | 2238 | 0.603631 | 0         |  |
|  | Shiraz-3T  | 90   | 0.219276 | 0         |  |
|  | Shiraz-3T  | 90   | 0.219276 | 0         |  |
|  | Shiraz-3T  | 94   | 0.74735  | 0         |  |
|  | Shiraz-3T  | 94   | 0.74735  | 0         |  |
|  | Shiraz-4T  | 253  | 0.372918 | 0         |  |
|  | Shiraz-4T  | 253  | 0.372918 | 0         |  |
|  | Shiraz-31T | 316  | 0.219196 | 0         |  |
|  | Shiraz-31T | 316  | 0.219196 | 0         |  |
|  | Shiraz-36T | 378  | 0.179558 | 0         |  |
|  | Shiraz-36T | 378  | 0.179558 | 0         |  |
|  | Shiraz-36T | 381  | 0.332628 | 0         |  |
|  | Shiraz-36T | 381  | 0.332628 | 0         |  |
|  | Shiraz-44T | 639  | 1.035032 | 0         |  |
|  | Shiraz-44T | 639  | 1.035032 | 0         |  |
|  | Shiraz-46T | 943  | 0.093799 | 0         |  |

|       |      |            |      |          |           |  |  |
|-------|------|------------|------|----------|-----------|--|--|
|       |      | Shiraz-46T | 943  | 0.093799 | 0         |  |  |
|       |      | Shiraz-46T | 946  | 0.299835 | 0         |  |  |
|       |      | Shiraz-46T | 946  | 0.299835 | 0         |  |  |
|       |      | Shiraz-47T | 1030 | 0.257728 | 0         |  |  |
|       |      | Shiraz-47T | 1030 | 0.257728 | 0         |  |  |
|       |      | Shiraz-49T | 1120 | 0.281656 | 0         |  |  |
|       |      | Shiraz-49T | 1120 | 0.281656 | 0         |  |  |
|       |      | Shiraz-77T | 1225 | 0        | -0.117922 |  |  |
|       |      | Shiraz-77T | 1225 | 0        | -0.117922 |  |  |
|       |      | Shiraz-77T | 1227 | 0.196445 | 0         |  |  |
|       |      | Shiraz-77T | 1227 | 0.196445 | 0         |  |  |
|       |      | Shiraz-9T  | 1324 | 0.679266 | 0         |  |  |
|       |      | Shiraz-9T  | 1324 | 0.679266 | 0         |  |  |
|       |      | Shiraz-18T | 1434 | 0.244465 | 0         |  |  |
|       |      | Shiraz-18T | 1434 | 0.244465 | 0         |  |  |
|       |      | Shiraz-22T | 1549 | 0        | -0.319623 |  |  |
|       |      | Shiraz-22T | 1549 | 0        | -0.319623 |  |  |
|       |      | Shiraz-22T | 1551 | 0.324011 | 0         |  |  |
|       |      | Shiraz-22T | 1551 | 0.324011 | 0         |  |  |
|       |      | Shiraz-25T | 1698 | 0.21835  | 0         |  |  |
|       |      | Shiraz-25T | 1698 | 0.21835  | 0         |  |  |
|       |      | Shiraz-28T | 1735 | 0.350744 | 0         |  |  |
|       |      | Shiraz-28T | 1735 | 0.350744 | 0         |  |  |
|       |      | Shiraz-29T | 1778 | 0.120767 | 0         |  |  |
|       |      | Shiraz-29T | 1778 | 0.120767 | 0         |  |  |
|       |      | Shiraz-32T | 1833 | 0.551336 | 0         |  |  |
|       |      | Shiraz-32T | 1833 | 0.551336 | 0         |  |  |
|       |      | Shiraz-32T | 1834 | 1.485392 | 0         |  |  |
|       |      | Shiraz-32T | 1834 | 1.485392 | 0         |  |  |
|       |      | Shiraz-38T | 1951 | 0.250891 | 0         |  |  |
|       |      | Shiraz-38T | 1951 | 0.250891 | 0         |  |  |
|       |      | Shiraz-53T | 2078 | 0.287202 | 0         |  |  |
|       |      | Shiraz-53T | 2078 | 0.287202 | 0         |  |  |
|       |      | Shiraz-58T | 2160 | 0.399007 | 0         |  |  |
|       |      | Shiraz-58T | 2160 | 0.399007 | 0         |  |  |
|       |      | Shiraz-71T | 2238 | 0.603631 | 0         |  |  |
|       |      | Shiraz-71T | 2238 | 0.603631 | 0         |  |  |
| TAF7L | chrX | Shiraz-3T  | 242  | 0        | -0.336434 |  |  |
|       |      | Shiraz-4T  | 261  | 0        | -0.336249 |  |  |
|       |      | Shiraz-16T | 295  | 0.591657 | 0         |  |  |
|       |      | Shiraz-36T | 433  | 0        | -0.803961 |  |  |
|       |      | Shiraz-44T | 899  | 0        | -1.09697  |  |  |
|       |      | Shiraz-49T | 1170 | 0        | -0.967436 |  |  |
|       |      | Shiraz-18T | 1457 | 0.643204 | 0         |  |  |
|       |      | Shiraz-22T | 1673 | 0.611783 | 0         |  |  |
|       |      | Shiraz-25T | 1719 | 0.472955 | 0         |  |  |
|       |      | Shiraz-28T | 1762 | 0.562311 | 0         |  |  |

|       |      |            |      |          |           |  |  |
|-------|------|------------|------|----------|-----------|--|--|
|       |      | Shiraz-29T | 1801 | 0.815343 | 0         |  |  |
|       |      | Shiraz-32T | 1870 | 0.729766 | 0         |  |  |
|       |      | Shiraz-35T | 1933 | 0.488535 | 0         |  |  |
|       |      | Shiraz-58T | 2223 | 0.833364 | 0         |  |  |
|       |      | Shiraz-71T | 2263 | 0.975531 | 0         |  |  |
|       |      | Shiraz-3T  | 242  | 0        | -0.336434 |  |  |
|       |      | Shiraz-4T  | 261  | 0        | -0.336249 |  |  |
|       |      | Shiraz-16T | 295  | 0.591657 | 0         |  |  |
|       |      | Shiraz-36T | 433  | 0        | -0.803961 |  |  |
|       |      | Shiraz-44T | 899  | 0        | -1.09697  |  |  |
|       |      | Shiraz-49T | 1170 | 0        | -0.967436 |  |  |
|       |      | Shiraz-18T | 1457 | 0.643204 | 0         |  |  |
|       |      | Shiraz-22T | 1673 | 0.611783 | 0         |  |  |
|       |      | Shiraz-25T | 1719 | 0.472955 | 0         |  |  |
|       |      | Shiraz-28T | 1762 | 0.562311 | 0         |  |  |
|       |      | Shiraz-29T | 1801 | 0.815343 | 0         |  |  |
|       |      | Shiraz-32T | 1870 | 0.729766 | 0         |  |  |
|       |      | Shiraz-35T | 1933 | 0.488535 | 0         |  |  |
|       |      | Shiraz-58T | 2223 | 0.833364 | 0         |  |  |
|       |      | Shiraz-71T | 2263 | 0.975531 | 0         |  |  |
|       |      | Shiraz-3T  | 242  | 0        | -0.336434 |  |  |
|       |      | Shiraz-4T  | 261  | 0        | -0.336249 |  |  |
|       |      | Shiraz-16T | 295  | 0.591657 | 0         |  |  |
|       |      | Shiraz-36T | 433  | 0        | -0.803961 |  |  |
|       |      | Shiraz-44T | 899  | 0        | -1.09697  |  |  |
|       |      | Shiraz-49T | 1170 | 0        | -0.967436 |  |  |
|       |      | Shiraz-18T | 1457 | 0.643204 | 0         |  |  |
|       |      | Shiraz-22T | 1673 | 0.611783 | 0         |  |  |
|       |      | Shiraz-25T | 1719 | 0.472955 | 0         |  |  |
|       |      | Shiraz-28T | 1762 | 0.562311 | 0         |  |  |
|       |      | Shiraz-29T | 1801 | 0.815343 | 0         |  |  |
|       |      | Shiraz-32T | 1870 | 0.729766 | 0         |  |  |
|       |      | Shiraz-35T | 1933 | 0.488535 | 0         |  |  |
|       |      | Shiraz-58T | 2223 | 0.833364 | 0         |  |  |
|       |      | Shiraz-71T | 2263 | 0.975531 | 0         |  |  |
| TAF9B | chrX | Shiraz-3T  | 242  | 0        | -0.336434 |  |  |
|       |      | Shiraz-4T  | 261  | 0        | -0.336249 |  |  |
|       |      | Shiraz-16T | 295  | 0.591657 | 0         |  |  |
|       |      | Shiraz-36T | 433  | 0        | -0.803961 |  |  |
|       |      | Shiraz-44T | 899  | 0        | -1.09697  |  |  |
|       |      | Shiraz-49T | 1170 | 0        | -0.967436 |  |  |
|       |      | Shiraz-18T | 1457 | 0.643204 | 0         |  |  |
|       |      | Shiraz-22T | 1673 | 0.611783 | 0         |  |  |
|       |      | Shiraz-25T | 1719 | 0.472955 | 0         |  |  |
|       |      | Shiraz-28T | 1762 | 0.562311 | 0         |  |  |
|       |      | Shiraz-29T | 1801 | 0.815343 | 0         |  |  |
|       |      | Shiraz-32T | 1870 | 0.729766 | 0         |  |  |

|      |      |            |      |          |           |  |
|------|------|------------|------|----------|-----------|--|
|      |      | Shiraz-35T | 1933 | 0.488535 | 0         |  |
|      |      | Shiraz-58T | 2223 | 0.833364 | 0         |  |
|      |      | Shiraz-71T | 2263 | 0.975531 | 0         |  |
|      |      | Shiraz-3T  | 242  | 0        | -0.336434 |  |
|      |      | Shiraz-4T  | 261  | 0        | -0.336249 |  |
|      |      | Shiraz-16T | 295  | 0.591657 | 0         |  |
|      |      | Shiraz-36T | 433  | 0        | -0.803961 |  |
|      |      | Shiraz-44T | 899  | 0        | -1.09697  |  |
|      |      | Shiraz-49T | 1170 | 0        | -0.967436 |  |
|      |      | Shiraz-18T | 1457 | 0.643204 | 0         |  |
|      |      | Shiraz-22T | 1673 | 0.611783 | 0         |  |
|      |      | Shiraz-25T | 1719 | 0.472955 | 0         |  |
|      |      | Shiraz-28T | 1762 | 0.562311 | 0         |  |
|      |      | Shiraz-29T | 1801 | 0.815343 | 0         |  |
|      |      | Shiraz-32T | 1870 | 0.729766 | 0         |  |
|      |      | Shiraz-35T | 1933 | 0.488535 | 0         |  |
|      |      | Shiraz-58T | 2223 | 0.833364 | 0         |  |
|      |      | Shiraz-71T | 2263 | 0.975531 | 0         |  |
|      |      | Shiraz-3T  | 242  | 0        | -0.336434 |  |
|      |      | Shiraz-4T  | 261  | 0        | -0.336249 |  |
|      |      | Shiraz-16T | 295  | 0.591657 | 0         |  |
|      |      | Shiraz-36T | 433  | 0        | -0.803961 |  |
|      |      | Shiraz-44T | 899  | 0        | -1.09697  |  |
|      |      | Shiraz-49T | 1170 | 0        | -0.967436 |  |
|      |      | Shiraz-18T | 1457 | 0.643204 | 0         |  |
|      |      | Shiraz-22T | 1673 | 0.611783 | 0         |  |
|      |      | Shiraz-25T | 1719 | 0.472955 | 0         |  |
|      |      | Shiraz-28T | 1762 | 0.562311 | 0         |  |
|      |      | Shiraz-29T | 1801 | 0.815343 | 0         |  |
|      |      | Shiraz-32T | 1870 | 0.729766 | 0         |  |
|      |      | Shiraz-35T | 1933 | 0.488535 | 0         |  |
|      |      | Shiraz-58T | 2223 | 0.833364 | 0         |  |
|      |      | Shiraz-71T | 2263 | 0.975531 | 0         |  |
| TARP | chr7 | Shiraz-3T  | 87   | 0.198593 | 0         |  |
|      |      | Shiraz-4T  | 252  | 0.192083 | 0         |  |
|      |      | Shiraz-36T | 376  | 0.159952 | 0         |  |
|      |      | Shiraz-44T | 631  | 0        | -0.180312 |  |
|      |      | Shiraz-46T | 942  | 0.069143 | 0         |  |
|      |      | Shiraz-18T | 1433 | 0.250973 | 0         |  |
|      |      | Shiraz-22T | 1544 | 0        | -0.193579 |  |
|      |      | Shiraz-25T | 1697 | 0.21945  | 0         |  |
|      |      | Shiraz-28T | 1734 | 0.362882 | 0         |  |
|      |      | Shiraz-29T | 1777 | 0.156747 | 0         |  |
|      |      | Shiraz-38T | 1950 | 0.265916 | 0         |  |
|      |      | Shiraz-71T | 2236 | 0.320072 | 0         |  |
|      |      | Shiraz-72T | 2277 | 0        | -0.398869 |  |
|      |      | Shiraz-3T  | 87   | 0.198593 | 0         |  |

|         |      |            |      |          |           |  |  |
|---------|------|------------|------|----------|-----------|--|--|
|         |      | Shiraz-4T  | 252  | 0.192083 | 0         |  |  |
|         |      | Shiraz-36T | 376  | 0.159952 | 0         |  |  |
|         |      | Shiraz-44T | 631  | 0        | -0.180312 |  |  |
|         |      | Shiraz-46T | 942  | 0.069143 | 0         |  |  |
|         |      | Shiraz-18T | 1433 | 0.250973 | 0         |  |  |
|         |      | Shiraz-22T | 1544 | 0        | -0.193579 |  |  |
|         |      | Shiraz-25T | 1697 | 0.21945  | 0         |  |  |
|         |      | Shiraz-28T | 1734 | 0.362882 | 0         |  |  |
|         |      | Shiraz-29T | 1777 | 0.156747 | 0         |  |  |
|         |      | Shiraz-38T | 1950 | 0.265916 | 0         |  |  |
|         |      | Shiraz-71T | 2236 | 0.320072 | 0         |  |  |
|         |      | Shiraz-72T | 2277 | 0        | -0.398869 |  |  |
|         |      | Shiraz-3T  | 87   | 0.198593 | 0         |  |  |
|         |      | Shiraz-4T  | 252  | 0.192083 | 0         |  |  |
|         |      | Shiraz-36T | 376  | 0.159952 | 0         |  |  |
|         |      | Shiraz-44T | 631  | 0        | -0.180312 |  |  |
|         |      | Shiraz-46T | 942  | 0.069143 | 0         |  |  |
|         |      | Shiraz-18T | 1433 | 0.250973 | 0         |  |  |
|         |      | Shiraz-22T | 1544 | 0        | -0.193579 |  |  |
|         |      | Shiraz-25T | 1697 | 0.21945  | 0         |  |  |
|         |      | Shiraz-28T | 1734 | 0.362882 | 0         |  |  |
|         |      | Shiraz-29T | 1777 | 0.156747 | 0         |  |  |
|         |      | Shiraz-38T | 1950 | 0.265916 | 0         |  |  |
|         |      | Shiraz-71T | 2236 | 0.320072 | 0         |  |  |
|         |      | Shiraz-72T | 2277 | 0        | -0.398869 |  |  |
| TARS    | chr5 | Shiraz-4T  | 250  | 0.262252 | 0         |  |  |
|         |      | Shiraz-16T | 266  | 0.321724 | 0         |  |  |
|         |      | Shiraz-18T | 1429 | 0        | -0.314125 |  |  |
|         |      | Shiraz-25T | 1694 | 0.201602 | 0         |  |  |
|         |      | Shiraz-28T | 1731 | 0.295447 | 0         |  |  |
|         |      | Shiraz-29T | 1773 | 0.090981 | 0         |  |  |
|         |      | Shiraz-40T | 2016 | 0.376634 | 0         |  |  |
|         |      | Shiraz-4T  | 250  | 0.262252 | 0         |  |  |
|         |      | Shiraz-16T | 266  | 0.321724 | 0         |  |  |
|         |      | Shiraz-18T | 1429 | 0        | -0.314125 |  |  |
|         |      | Shiraz-25T | 1694 | 0.201602 | 0         |  |  |
|         |      | Shiraz-28T | 1731 | 0.295447 | 0         |  |  |
|         |      | Shiraz-29T | 1773 | 0.090981 | 0         |  |  |
|         |      | Shiraz-40T | 2016 | 0.376634 | 0         |  |  |
|         |      | Shiraz-4T  | 250  | 0.262252 | 0         |  |  |
|         |      | Shiraz-16T | 266  | 0.321724 | 0         |  |  |
|         |      | Shiraz-18T | 1429 | 0        | -0.314125 |  |  |
|         |      | Shiraz-25T | 1694 | 0.201602 | 0         |  |  |
|         |      | Shiraz-28T | 1731 | 0.295447 | 0         |  |  |
|         |      | Shiraz-29T | 1773 | 0.090981 | 0         |  |  |
|         |      | Shiraz-40T | 2016 | 0.376634 | 0         |  |  |
| TAS2R16 | chr7 | Shiraz-3T  | 90   | 0.219276 | 0         |  |  |

|  |            |      |          |           |  |
|--|------------|------|----------|-----------|--|
|  | Shiraz-3T  | 95   | 0        | -0.077623 |  |
|  | Shiraz-4T  | 253  | 0.372918 | 0         |  |
|  | Shiraz-36T | 378  | 0.179558 | 0         |  |
|  | Shiraz-36T | 382  | 0.081739 | 0         |  |
|  | Shiraz-44T | 641  | 0        | -0.477846 |  |
|  | Shiraz-46T | 943  | 0.093799 | 0         |  |
|  | Shiraz-46T | 947  | 0        | -0.010843 |  |
|  | Shiraz-47T | 1031 | 0        | -0.117529 |  |
|  | Shiraz-49T | 1121 | 0        | -0.138569 |  |
|  | Shiraz-77T | 1225 | 0        | -0.117922 |  |
|  | Shiraz-77T | 1228 | 0        | -0.238084 |  |
|  | Shiraz-18T | 1434 | 0.244465 | 0         |  |
|  | Shiraz-22T | 1549 | 0        | -0.319623 |  |
|  | Shiraz-22T | 1552 | 0        | -0.50686  |  |
|  | Shiraz-25T | 1698 | 0.21835  | 0         |  |
|  | Shiraz-28T | 1735 | 0.350744 | 0         |  |
|  | Shiraz-29T | 1778 | 0.120767 | 0         |  |
|  | Shiraz-32T | 1833 | 0.551336 | 0         |  |
|  | Shiraz-32T | 1835 | 0.092727 | 0         |  |
|  | Shiraz-38T | 1951 | 0.250891 | 0         |  |
|  | Shiraz-53T | 2078 | 0.287202 | 0         |  |
|  | Shiraz-58T | 2161 | 0        | -0.187744 |  |
|  | Shiraz-71T | 2238 | 0.603631 | 0         |  |
|  | Shiraz-3T  | 90   | 0.219276 | 0         |  |
|  | Shiraz-3T  | 95   | 0        | -0.077623 |  |
|  | Shiraz-4T  | 253  | 0.372918 | 0         |  |
|  | Shiraz-36T | 378  | 0.179558 | 0         |  |
|  | Shiraz-36T | 382  | 0.081739 | 0         |  |
|  | Shiraz-44T | 641  | 0        | -0.477846 |  |
|  | Shiraz-46T | 943  | 0.093799 | 0         |  |
|  | Shiraz-46T | 947  | 0        | -0.010843 |  |
|  | Shiraz-47T | 1031 | 0        | -0.117529 |  |
|  | Shiraz-49T | 1121 | 0        | -0.138569 |  |
|  | Shiraz-77T | 1225 | 0        | -0.117922 |  |
|  | Shiraz-77T | 1228 | 0        | -0.238084 |  |
|  | Shiraz-18T | 1434 | 0.244465 | 0         |  |
|  | Shiraz-22T | 1549 | 0        | -0.319623 |  |
|  | Shiraz-22T | 1552 | 0        | -0.50686  |  |
|  | Shiraz-25T | 1698 | 0.21835  | 0         |  |
|  | Shiraz-28T | 1735 | 0.350744 | 0         |  |
|  | Shiraz-29T | 1778 | 0.120767 | 0         |  |
|  | Shiraz-32T | 1833 | 0.551336 | 0         |  |
|  | Shiraz-32T | 1835 | 0.092727 | 0         |  |
|  | Shiraz-38T | 1951 | 0.250891 | 0         |  |
|  | Shiraz-53T | 2078 | 0.287202 | 0         |  |
|  | Shiraz-58T | 2161 | 0        | -0.187744 |  |
|  | Shiraz-71T | 2238 | 0.603631 | 0         |  |



|        |      |            |      |          |           |  |  |
|--------|------|------------|------|----------|-----------|--|--|
|        |      | Shiraz-3T  | 90   | 0.219276 | 0         |  |  |
|        |      | Shiraz-3T  | 95   | 0        | -0.077623 |  |  |
|        |      | Shiraz-4T  | 253  | 0.372918 | 0         |  |  |
|        |      | Shiraz-36T | 378  | 0.179558 | 0         |  |  |
|        |      | Shiraz-36T | 382  | 0.081739 | 0         |  |  |
|        |      | Shiraz-44T | 641  | 0        | -0.477846 |  |  |
|        |      | Shiraz-46T | 943  | 0.093799 | 0         |  |  |
|        |      | Shiraz-46T | 947  | 0        | -0.010843 |  |  |
|        |      | Shiraz-47T | 1031 | 0        | -0.117529 |  |  |
|        |      | Shiraz-49T | 1121 | 0        | -0.138569 |  |  |
|        |      | Shiraz-77T | 1225 | 0        | -0.117922 |  |  |
|        |      | Shiraz-77T | 1228 | 0        | -0.238084 |  |  |
|        |      | Shiraz-18T | 1434 | 0.244465 | 0         |  |  |
|        |      | Shiraz-22T | 1549 | 0        | -0.319623 |  |  |
|        |      | Shiraz-22T | 1552 | 0        | -0.50686  |  |  |
|        |      | Shiraz-25T | 1698 | 0.21835  | 0         |  |  |
|        |      | Shiraz-28T | 1735 | 0.350744 | 0         |  |  |
|        |      | Shiraz-29T | 1778 | 0.120767 | 0         |  |  |
|        |      | Shiraz-32T | 1833 | 0.551336 | 0         |  |  |
|        |      | Shiraz-32T | 1835 | 0.092727 | 0         |  |  |
|        |      | Shiraz-38T | 1951 | 0.250891 | 0         |  |  |
|        |      | Shiraz-53T | 2078 | 0.287202 | 0         |  |  |
|        |      | Shiraz-58T | 2161 | 0        | -0.187744 |  |  |
|        |      | Shiraz-71T | 2238 | 0.603631 | 0         |  |  |
| TAS2R3 | chr7 | Shiraz-3T  | 90   | 0.219276 | 0         |  |  |
|        |      | Shiraz-4T  | 253  | 0.372918 | 0         |  |  |
|        |      | Shiraz-36T | 378  | 0.179558 | 0         |  |  |
|        |      | Shiraz-46T | 943  | 0.093799 | 0         |  |  |
|        |      | Shiraz-77T | 1225 | 0        | -0.117922 |  |  |
|        |      | Shiraz-9T  | 1325 | 0.221899 | 0         |  |  |
|        |      | Shiraz-18T | 1434 | 0.244465 | 0         |  |  |
|        |      | Shiraz-25T | 1698 | 0.21835  | 0         |  |  |
|        |      | Shiraz-28T | 1735 | 0.350744 | 0         |  |  |
|        |      | Shiraz-29T | 1778 | 0.120767 | 0         |  |  |
|        |      | Shiraz-32T | 1833 | 0.551336 | 0         |  |  |
|        |      | Shiraz-38T | 1951 | 0.250891 | 0         |  |  |
|        |      | Shiraz-53T | 2078 | 0.287202 | 0         |  |  |
|        |      | Shiraz-58T | 2162 | 0.221505 | 0         |  |  |
|        |      | Shiraz-71T | 2238 | 0.603631 | 0         |  |  |
|        |      | Shiraz-3T  | 90   | 0.219276 | 0         |  |  |
|        |      | Shiraz-4T  | 253  | 0.372918 | 0         |  |  |
|        |      | Shiraz-36T | 378  | 0.179558 | 0         |  |  |
|        |      | Shiraz-46T | 943  | 0.093799 | 0         |  |  |
|        |      | Shiraz-77T | 1225 | 0        | -0.117922 |  |  |
|        |      | Shiraz-9T  | 1325 | 0.221899 | 0         |  |  |
|        |      | Shiraz-18T | 1434 | 0.244465 | 0         |  |  |
|        |      | Shiraz-25T | 1698 | 0.21835  | 0         |  |  |

|         |      |            |      |          |           |  |
|---------|------|------------|------|----------|-----------|--|
|         |      | Shiraz-28T | 1735 | 0.350744 | 0         |  |
|         |      | Shiraz-29T | 1778 | 0.120767 | 0         |  |
|         |      | Shiraz-32T | 1833 | 0.551336 | 0         |  |
|         |      | Shiraz-38T | 1951 | 0.250891 | 0         |  |
|         |      | Shiraz-53T | 2078 | 0.287202 | 0         |  |
|         |      | Shiraz-58T | 2162 | 0.221505 | 0         |  |
|         |      | Shiraz-71T | 2238 | 0.603631 | 0         |  |
|         |      | Shiraz-3T  | 90   | 0.219276 | 0         |  |
|         |      | Shiraz-4T  | 253  | 0.372918 | 0         |  |
|         |      | Shiraz-36T | 378  | 0.179558 | 0         |  |
|         |      | Shiraz-46T | 943  | 0.093799 | 0         |  |
|         |      | Shiraz-77T | 1225 | 0        | -0.117922 |  |
|         |      | Shiraz-9T  | 1325 | 0.221899 | 0         |  |
|         |      | Shiraz-18T | 1434 | 0.244465 | 0         |  |
|         |      | Shiraz-25T | 1698 | 0.21835  | 0         |  |
|         |      | Shiraz-28T | 1735 | 0.350744 | 0         |  |
|         |      | Shiraz-29T | 1778 | 0.120767 | 0         |  |
|         |      | Shiraz-32T | 1833 | 0.551336 | 0         |  |
|         |      | Shiraz-38T | 1951 | 0.250891 | 0         |  |
|         |      | Shiraz-53T | 2078 | 0.287202 | 0         |  |
|         |      | Shiraz-58T | 2162 | 0.221505 | 0         |  |
|         |      | Shiraz-71T | 2238 | 0.603631 | 0         |  |
| TAS2R38 | chr7 | Shiraz-3T  | 90   | 0.219276 | 0         |  |
|         |      | Shiraz-4T  | 253  | 0.372918 | 0         |  |
|         |      | Shiraz-36T | 378  | 0.179558 | 0         |  |
|         |      | Shiraz-46T | 943  | 0.093799 | 0         |  |
|         |      | Shiraz-77T | 1225 | 0        | -0.117922 |  |
|         |      | Shiraz-9T  | 1325 | 0.221899 | 0         |  |
|         |      | Shiraz-18T | 1434 | 0.244465 | 0         |  |
|         |      | Shiraz-25T | 1698 | 0.21835  | 0         |  |
|         |      | Shiraz-28T | 1735 | 0.350744 | 0         |  |
|         |      | Shiraz-29T | 1778 | 0.120767 | 0         |  |
|         |      | Shiraz-32T | 1833 | 0.551336 | 0         |  |
|         |      | Shiraz-38T | 1951 | 0.250891 | 0         |  |
|         |      | Shiraz-53T | 2078 | 0.287202 | 0         |  |
|         |      | Shiraz-58T | 2162 | 0.221505 | 0         |  |
|         |      | Shiraz-71T | 2238 | 0.603631 | 0         |  |
|         |      | Shiraz-3T  | 90   | 0.219276 | 0         |  |
|         |      | Shiraz-4T  | 253  | 0.372918 | 0         |  |
|         |      | Shiraz-36T | 378  | 0.179558 | 0         |  |
|         |      | Shiraz-46T | 943  | 0.093799 | 0         |  |
|         |      | Shiraz-77T | 1225 | 0        | -0.117922 |  |
|         |      | Shiraz-9T  | 1325 | 0.221899 | 0         |  |
|         |      | Shiraz-18T | 1434 | 0.244465 | 0         |  |
|         |      | Shiraz-25T | 1698 | 0.21835  | 0         |  |
|         |      | Shiraz-28T | 1735 | 0.350744 | 0         |  |
|         |      | Shiraz-29T | 1778 | 0.120767 | 0         |  |

|         |      |            |      |          |           |  |  |
|---------|------|------------|------|----------|-----------|--|--|
|         |      | Shiraz-32T | 1833 | 0.551336 | 0         |  |  |
|         |      | Shiraz-38T | 1951 | 0.250891 | 0         |  |  |
|         |      | Shiraz-53T | 2078 | 0.287202 | 0         |  |  |
|         |      | Shiraz-58T | 2162 | 0.221505 | 0         |  |  |
|         |      | Shiraz-71T | 2238 | 0.603631 | 0         |  |  |
|         |      | Shiraz-3T  | 90   | 0.219276 | 0         |  |  |
|         |      | Shiraz-4T  | 253  | 0.372918 | 0         |  |  |
|         |      | Shiraz-36T | 378  | 0.179558 | 0         |  |  |
|         |      | Shiraz-46T | 943  | 0.093799 | 0         |  |  |
|         |      | Shiraz-77T | 1225 | 0        | -0.117922 |  |  |
|         |      | Shiraz-9T  | 1325 | 0.221899 | 0         |  |  |
|         |      | Shiraz-18T | 1434 | 0.244465 | 0         |  |  |
|         |      | Shiraz-25T | 1698 | 0.21835  | 0         |  |  |
|         |      | Shiraz-28T | 1735 | 0.350744 | 0         |  |  |
|         |      | Shiraz-29T | 1778 | 0.120767 | 0         |  |  |
|         |      | Shiraz-32T | 1833 | 0.551336 | 0         |  |  |
|         |      | Shiraz-38T | 1951 | 0.250891 | 0         |  |  |
|         |      | Shiraz-53T | 2078 | 0.287202 | 0         |  |  |
|         |      | Shiraz-58T | 2162 | 0.221505 | 0         |  |  |
|         |      | Shiraz-71T | 2238 | 0.603631 | 0         |  |  |
| TAS2R39 | chr7 | Shiraz-3T  | 90   | 0.219276 | 0         |  |  |
|         |      | Shiraz-4T  | 253  | 0.372918 | 0         |  |  |
|         |      | Shiraz-36T | 378  | 0.179558 | 0         |  |  |
|         |      | Shiraz-46T | 943  | 0.093799 | 0         |  |  |
|         |      | Shiraz-77T | 1225 | 0        | -0.117922 |  |  |
|         |      | Shiraz-9T  | 1325 | 0.221899 | 0         |  |  |
|         |      | Shiraz-18T | 1434 | 0.244465 | 0         |  |  |
|         |      | Shiraz-25T | 1698 | 0.21835  | 0         |  |  |
|         |      | Shiraz-28T | 1735 | 0.350744 | 0         |  |  |
|         |      | Shiraz-29T | 1778 | 0.120767 | 0         |  |  |
|         |      | Shiraz-32T | 1833 | 0.551336 | 0         |  |  |
|         |      | Shiraz-38T | 1951 | 0.250891 | 0         |  |  |
|         |      | Shiraz-53T | 2078 | 0.287202 | 0         |  |  |
|         |      | Shiraz-58T | 2162 | 0.221505 | 0         |  |  |
|         |      | Shiraz-71T | 2238 | 0.603631 | 0         |  |  |
|         |      | Shiraz-3T  | 90   | 0.219276 | 0         |  |  |
|         |      | Shiraz-4T  | 253  | 0.372918 | 0         |  |  |
|         |      | Shiraz-36T | 378  | 0.179558 | 0         |  |  |
|         |      | Shiraz-46T | 943  | 0.093799 | 0         |  |  |
|         |      | Shiraz-77T | 1225 | 0        | -0.117922 |  |  |
|         |      | Shiraz-9T  | 1325 | 0.221899 | 0         |  |  |
|         |      | Shiraz-18T | 1434 | 0.244465 | 0         |  |  |
|         |      | Shiraz-25T | 1698 | 0.21835  | 0         |  |  |
|         |      | Shiraz-28T | 1735 | 0.350744 | 0         |  |  |
|         |      | Shiraz-29T | 1778 | 0.120767 | 0         |  |  |
|         |      | Shiraz-32T | 1833 | 0.551336 | 0         |  |  |
|         |      | Shiraz-38T | 1951 | 0.250891 | 0         |  |  |

|        |      |            |      |          |           |  |
|--------|------|------------|------|----------|-----------|--|
|        |      | Shiraz-53T | 2078 | 0.287202 | 0         |  |
|        |      | Shiraz-58T | 2162 | 0.221505 | 0         |  |
|        |      | Shiraz-71T | 2238 | 0.603631 | 0         |  |
|        |      | Shiraz-3T  | 90   | 0.219276 | 0         |  |
|        |      | Shiraz-4T  | 253  | 0.372918 | 0         |  |
|        |      | Shiraz-36T | 378  | 0.179558 | 0         |  |
|        |      | Shiraz-46T | 943  | 0.093799 | 0         |  |
|        |      | Shiraz-77T | 1225 | 0        | -0.117922 |  |
|        |      | Shiraz-9T  | 1325 | 0.221899 | 0         |  |
|        |      | Shiraz-18T | 1434 | 0.244465 | 0         |  |
|        |      | Shiraz-25T | 1698 | 0.21835  | 0         |  |
|        |      | Shiraz-28T | 1735 | 0.350744 | 0         |  |
|        |      | Shiraz-29T | 1778 | 0.120767 | 0         |  |
|        |      | Shiraz-32T | 1833 | 0.551336 | 0         |  |
|        |      | Shiraz-38T | 1951 | 0.250891 | 0         |  |
|        |      | Shiraz-53T | 2078 | 0.287202 | 0         |  |
|        |      | Shiraz-58T | 2162 | 0.221505 | 0         |  |
|        |      | Shiraz-71T | 2238 | 0.603631 | 0         |  |
| TAS2R4 | chr7 | Shiraz-3T  | 90   | 0.219276 | 0         |  |
|        |      | Shiraz-4T  | 253  | 0.372918 | 0         |  |
|        |      | Shiraz-36T | 378  | 0.179558 | 0         |  |
|        |      | Shiraz-46T | 943  | 0.093799 | 0         |  |
|        |      | Shiraz-77T | 1225 | 0        | -0.117922 |  |
|        |      | Shiraz-9T  | 1325 | 0.221899 | 0         |  |
|        |      | Shiraz-18T | 1434 | 0.244465 | 0         |  |
|        |      | Shiraz-25T | 1698 | 0.21835  | 0         |  |
|        |      | Shiraz-28T | 1735 | 0.350744 | 0         |  |
|        |      | Shiraz-29T | 1778 | 0.120767 | 0         |  |
|        |      | Shiraz-32T | 1833 | 0.551336 | 0         |  |
|        |      | Shiraz-38T | 1951 | 0.250891 | 0         |  |
|        |      | Shiraz-53T | 2078 | 0.287202 | 0         |  |
|        |      | Shiraz-58T | 2162 | 0.221505 | 0         |  |
|        |      | Shiraz-71T | 2238 | 0.603631 | 0         |  |
|        |      | Shiraz-3T  | 90   | 0.219276 | 0         |  |
|        |      | Shiraz-4T  | 253  | 0.372918 | 0         |  |
|        |      | Shiraz-36T | 378  | 0.179558 | 0         |  |
|        |      | Shiraz-46T | 943  | 0.093799 | 0         |  |
|        |      | Shiraz-77T | 1225 | 0        | -0.117922 |  |
|        |      | Shiraz-9T  | 1325 | 0.221899 | 0         |  |
|        |      | Shiraz-18T | 1434 | 0.244465 | 0         |  |
|        |      | Shiraz-25T | 1698 | 0.21835  | 0         |  |
|        |      | Shiraz-28T | 1735 | 0.350744 | 0         |  |
|        |      | Shiraz-29T | 1778 | 0.120767 | 0         |  |
|        |      | Shiraz-32T | 1833 | 0.551336 | 0         |  |
|        |      | Shiraz-38T | 1951 | 0.250891 | 0         |  |
|        |      | Shiraz-53T | 2078 | 0.287202 | 0         |  |
|        |      | Shiraz-58T | 2162 | 0.221505 | 0         |  |

|         |      |            |      |          |           |  |  |
|---------|------|------------|------|----------|-----------|--|--|
|         |      | Shiraz-71T | 2238 | 0.603631 | 0         |  |  |
|         |      | Shiraz-3T  | 90   | 0.219276 | 0         |  |  |
|         |      | Shiraz-4T  | 253  | 0.372918 | 0         |  |  |
|         |      | Shiraz-36T | 378  | 0.179558 | 0         |  |  |
|         |      | Shiraz-46T | 943  | 0.093799 | 0         |  |  |
|         |      | Shiraz-77T | 1225 | 0        | -0.117922 |  |  |
|         |      | Shiraz-9T  | 1325 | 0.221899 | 0         |  |  |
|         |      | Shiraz-18T | 1434 | 0.244465 | 0         |  |  |
|         |      | Shiraz-25T | 1698 | 0.21835  | 0         |  |  |
|         |      | Shiraz-28T | 1735 | 0.350744 | 0         |  |  |
|         |      | Shiraz-29T | 1778 | 0.120767 | 0         |  |  |
|         |      | Shiraz-32T | 1833 | 0.551336 | 0         |  |  |
|         |      | Shiraz-38T | 1951 | 0.250891 | 0         |  |  |
|         |      | Shiraz-53T | 2078 | 0.287202 | 0         |  |  |
|         |      | Shiraz-58T | 2162 | 0.221505 | 0         |  |  |
|         |      | Shiraz-71T | 2238 | 0.603631 | 0         |  |  |
| TAS2R40 | chr7 | Shiraz-3T  | 90   | 0.219276 | 0         |  |  |
|         |      | Shiraz-4T  | 253  | 0.372918 | 0         |  |  |
|         |      | Shiraz-36T | 378  | 0.179558 | 0         |  |  |
|         |      | Shiraz-46T | 943  | 0.093799 | 0         |  |  |
|         |      | Shiraz-77T | 1225 | 0        | -0.117922 |  |  |
|         |      | Shiraz-9T  | 1325 | 0.221899 | 0         |  |  |
|         |      | Shiraz-18T | 1434 | 0.244465 | 0         |  |  |
|         |      | Shiraz-25T | 1698 | 0.21835  | 0         |  |  |
|         |      | Shiraz-28T | 1735 | 0.350744 | 0         |  |  |
|         |      | Shiraz-29T | 1778 | 0.120767 | 0         |  |  |
|         |      | Shiraz-32T | 1833 | 0.551336 | 0         |  |  |
|         |      | Shiraz-38T | 1951 | 0.250891 | 0         |  |  |
|         |      | Shiraz-53T | 2078 | 0.287202 | 0         |  |  |
|         |      | Shiraz-58T | 2162 | 0.221505 | 0         |  |  |
|         |      | Shiraz-71T | 2238 | 0.603631 | 0         |  |  |
|         |      | Shiraz-3T  | 90   | 0.219276 | 0         |  |  |
|         |      | Shiraz-4T  | 253  | 0.372918 | 0         |  |  |
|         |      | Shiraz-36T | 378  | 0.179558 | 0         |  |  |
|         |      | Shiraz-46T | 943  | 0.093799 | 0         |  |  |
|         |      | Shiraz-77T | 1225 | 0        | -0.117922 |  |  |
|         |      | Shiraz-9T  | 1325 | 0.221899 | 0         |  |  |
|         |      | Shiraz-18T | 1434 | 0.244465 | 0         |  |  |
|         |      | Shiraz-25T | 1698 | 0.21835  | 0         |  |  |
|         |      | Shiraz-28T | 1735 | 0.350744 | 0         |  |  |
|         |      | Shiraz-29T | 1778 | 0.120767 | 0         |  |  |
|         |      | Shiraz-32T | 1833 | 0.551336 | 0         |  |  |
|         |      | Shiraz-38T | 1951 | 0.250891 | 0         |  |  |
|         |      | Shiraz-53T | 2078 | 0.287202 | 0         |  |  |
|         |      | Shiraz-58T | 2162 | 0.221505 | 0         |  |  |
|         |      | Shiraz-71T | 2238 | 0.603631 | 0         |  |  |
|         |      | Shiraz-3T  | 90   | 0.219276 | 0         |  |  |

|         |      |            |      |          |           |  |
|---------|------|------------|------|----------|-----------|--|
|         |      | Shiraz-4T  | 253  | 0.372918 | 0         |  |
|         |      | Shiraz-36T | 378  | 0.179558 | 0         |  |
|         |      | Shiraz-46T | 943  | 0.093799 | 0         |  |
|         |      | Shiraz-77T | 1225 | 0        | -0.117922 |  |
|         |      | Shiraz-9T  | 1325 | 0.221899 | 0         |  |
|         |      | Shiraz-18T | 1434 | 0.244465 | 0         |  |
|         |      | Shiraz-25T | 1698 | 0.21835  | 0         |  |
|         |      | Shiraz-28T | 1735 | 0.350744 | 0         |  |
|         |      | Shiraz-29T | 1778 | 0.120767 | 0         |  |
|         |      | Shiraz-32T | 1833 | 0.551336 | 0         |  |
|         |      | Shiraz-38T | 1951 | 0.250891 | 0         |  |
|         |      | Shiraz-53T | 2078 | 0.287202 | 0         |  |
|         |      | Shiraz-58T | 2162 | 0.221505 | 0         |  |
|         |      | Shiraz-71T | 2238 | 0.603631 | 0         |  |
| TAS2R41 | chr7 | Shiraz-3T  | 90   | 0.219276 | 0         |  |
|         |      | Shiraz-4T  | 253  | 0.372918 | 0         |  |
|         |      | Shiraz-36T | 378  | 0.179558 | 0         |  |
|         |      | Shiraz-46T | 943  | 0.093799 | 0         |  |
|         |      | Shiraz-77T | 1225 | 0        | -0.117922 |  |
|         |      | Shiraz-9T  | 1325 | 0.221899 | 0         |  |
|         |      | Shiraz-18T | 1434 | 0.244465 | 0         |  |
|         |      | Shiraz-25T | 1698 | 0.21835  | 0         |  |
|         |      | Shiraz-28T | 1735 | 0.350744 | 0         |  |
|         |      | Shiraz-29T | 1778 | 0.120767 | 0         |  |
|         |      | Shiraz-32T | 1833 | 0.551336 | 0         |  |
|         |      | Shiraz-38T | 1951 | 0.250891 | 0         |  |
|         |      | Shiraz-53T | 2078 | 0.287202 | 0         |  |
|         |      | Shiraz-58T | 2162 | 0.221505 | 0         |  |
|         |      | Shiraz-71T | 2238 | 0.603631 | 0         |  |
|         |      | Shiraz-3T  | 90   | 0.219276 | 0         |  |
|         |      | Shiraz-4T  | 253  | 0.372918 | 0         |  |
|         |      | Shiraz-36T | 378  | 0.179558 | 0         |  |
|         |      | Shiraz-46T | 943  | 0.093799 | 0         |  |
|         |      | Shiraz-77T | 1225 | 0        | -0.117922 |  |
|         |      | Shiraz-9T  | 1325 | 0.221899 | 0         |  |
|         |      | Shiraz-18T | 1434 | 0.244465 | 0         |  |
|         |      | Shiraz-25T | 1698 | 0.21835  | 0         |  |
|         |      | Shiraz-28T | 1735 | 0.350744 | 0         |  |
|         |      | Shiraz-29T | 1778 | 0.120767 | 0         |  |
|         |      | Shiraz-32T | 1833 | 0.551336 | 0         |  |
|         |      | Shiraz-38T | 1951 | 0.250891 | 0         |  |
|         |      | Shiraz-53T | 2078 | 0.287202 | 0         |  |
|         |      | Shiraz-58T | 2162 | 0.221505 | 0         |  |
|         |      | Shiraz-71T | 2238 | 0.603631 | 0         |  |
|         |      | Shiraz-3T  | 90   | 0.219276 | 0         |  |
|         |      | Shiraz-4T  | 253  | 0.372918 | 0         |  |
|         |      | Shiraz-36T | 378  | 0.179558 | 0         |  |

|        |      |            |      |          |           |  |  |
|--------|------|------------|------|----------|-----------|--|--|
|        |      | Shiraz-46T | 943  | 0.093799 | 0         |  |  |
|        |      | Shiraz-77T | 1225 | 0        | -0.117922 |  |  |
|        |      | Shiraz-9T  | 1325 | 0.221899 | 0         |  |  |
|        |      | Shiraz-18T | 1434 | 0.244465 | 0         |  |  |
|        |      | Shiraz-25T | 1698 | 0.21835  | 0         |  |  |
|        |      | Shiraz-28T | 1735 | 0.350744 | 0         |  |  |
|        |      | Shiraz-29T | 1778 | 0.120767 | 0         |  |  |
|        |      | Shiraz-32T | 1833 | 0.551336 | 0         |  |  |
|        |      | Shiraz-38T | 1951 | 0.250891 | 0         |  |  |
|        |      | Shiraz-53T | 2078 | 0.287202 | 0         |  |  |
|        |      | Shiraz-58T | 2162 | 0.221505 | 0         |  |  |
|        |      | Shiraz-71T | 2238 | 0.603631 | 0         |  |  |
| TAS2R5 | chr7 | Shiraz-3T  | 90   | 0.219276 | 0         |  |  |
|        |      | Shiraz-4T  | 253  | 0.372918 | 0         |  |  |
|        |      | Shiraz-36T | 378  | 0.179558 | 0         |  |  |
|        |      | Shiraz-46T | 943  | 0.093799 | 0         |  |  |
|        |      | Shiraz-77T | 1225 | 0        | -0.117922 |  |  |
|        |      | Shiraz-9T  | 1325 | 0.221899 | 0         |  |  |
|        |      | Shiraz-18T | 1434 | 0.244465 | 0         |  |  |
|        |      | Shiraz-25T | 1698 | 0.21835  | 0         |  |  |
|        |      | Shiraz-28T | 1735 | 0.350744 | 0         |  |  |
|        |      | Shiraz-29T | 1778 | 0.120767 | 0         |  |  |
|        |      | Shiraz-32T | 1833 | 0.551336 | 0         |  |  |
|        |      | Shiraz-38T | 1951 | 0.250891 | 0         |  |  |
|        |      | Shiraz-53T | 2078 | 0.287202 | 0         |  |  |
|        |      | Shiraz-58T | 2162 | 0.221505 | 0         |  |  |
|        |      | Shiraz-71T | 2238 | 0.603631 | 0         |  |  |
|        |      | Shiraz-3T  | 90   | 0.219276 | 0         |  |  |
|        |      | Shiraz-4T  | 253  | 0.372918 | 0         |  |  |
|        |      | Shiraz-36T | 378  | 0.179558 | 0         |  |  |
|        |      | Shiraz-46T | 943  | 0.093799 | 0         |  |  |
|        |      | Shiraz-77T | 1225 | 0        | -0.117922 |  |  |
|        |      | Shiraz-9T  | 1325 | 0.221899 | 0         |  |  |
|        |      | Shiraz-18T | 1434 | 0.244465 | 0         |  |  |
|        |      | Shiraz-25T | 1698 | 0.21835  | 0         |  |  |
|        |      | Shiraz-28T | 1735 | 0.350744 | 0         |  |  |
|        |      | Shiraz-29T | 1778 | 0.120767 | 0         |  |  |
|        |      | Shiraz-32T | 1833 | 0.551336 | 0         |  |  |
|        |      | Shiraz-38T | 1951 | 0.250891 | 0         |  |  |
|        |      | Shiraz-53T | 2078 | 0.287202 | 0         |  |  |
|        |      | Shiraz-58T | 2162 | 0.221505 | 0         |  |  |
|        |      | Shiraz-71T | 2238 | 0.603631 | 0         |  |  |
|        |      | Shiraz-3T  | 90   | 0.219276 | 0         |  |  |
|        |      | Shiraz-4T  | 253  | 0.372918 | 0         |  |  |
|        |      | Shiraz-36T | 378  | 0.179558 | 0         |  |  |
|        |      | Shiraz-46T | 943  | 0.093799 | 0         |  |  |
|        |      | Shiraz-77T | 1225 | 0        | -0.117922 |  |  |

|         |      |            |      |          |           |  |  |
|---------|------|------------|------|----------|-----------|--|--|
|         |      | Shiraz-9T  | 1325 | 0.221899 | 0         |  |  |
|         |      | Shiraz-18T | 1434 | 0.244465 | 0         |  |  |
|         |      | Shiraz-25T | 1698 | 0.21835  | 0         |  |  |
|         |      | Shiraz-28T | 1735 | 0.350744 | 0         |  |  |
|         |      | Shiraz-29T | 1778 | 0.120767 | 0         |  |  |
|         |      | Shiraz-32T | 1833 | 0.551336 | 0         |  |  |
|         |      | Shiraz-38T | 1951 | 0.250891 | 0         |  |  |
|         |      | Shiraz-53T | 2078 | 0.287202 | 0         |  |  |
|         |      | Shiraz-58T | 2162 | 0.221505 | 0         |  |  |
|         |      | Shiraz-71T | 2238 | 0.603631 | 0         |  |  |
| TAS2R60 | chr7 | Shiraz-3T  | 90   | 0.219276 | 0         |  |  |
|         |      | Shiraz-4T  | 253  | 0.372918 | 0         |  |  |
|         |      | Shiraz-36T | 378  | 0.179558 | 0         |  |  |
|         |      | Shiraz-46T | 943  | 0.093799 | 0         |  |  |
|         |      | Shiraz-77T | 1225 | 0        | -0.117922 |  |  |
|         |      | Shiraz-9T  | 1325 | 0.221899 | 0         |  |  |
|         |      | Shiraz-18T | 1434 | 0.244465 | 0         |  |  |
|         |      | Shiraz-25T | 1698 | 0.21835  | 0         |  |  |
|         |      | Shiraz-28T | 1735 | 0.350744 | 0         |  |  |
|         |      | Shiraz-29T | 1778 | 0.120767 | 0         |  |  |
|         |      | Shiraz-32T | 1833 | 0.551336 | 0         |  |  |
|         |      | Shiraz-38T | 1951 | 0.250891 | 0         |  |  |
|         |      | Shiraz-53T | 2078 | 0.287202 | 0         |  |  |
|         |      | Shiraz-58T | 2162 | 0.221505 | 0         |  |  |
|         |      | Shiraz-71T | 2238 | 0.603631 | 0         |  |  |
|         |      | Shiraz-3T  | 90   | 0.219276 | 0         |  |  |
|         |      | Shiraz-4T  | 253  | 0.372918 | 0         |  |  |
|         |      | Shiraz-36T | 378  | 0.179558 | 0         |  |  |
|         |      | Shiraz-46T | 943  | 0.093799 | 0         |  |  |
|         |      | Shiraz-77T | 1225 | 0        | -0.117922 |  |  |
|         |      | Shiraz-9T  | 1325 | 0.221899 | 0         |  |  |
|         |      | Shiraz-18T | 1434 | 0.244465 | 0         |  |  |
|         |      | Shiraz-25T | 1698 | 0.21835  | 0         |  |  |
|         |      | Shiraz-28T | 1735 | 0.350744 | 0         |  |  |
|         |      | Shiraz-29T | 1778 | 0.120767 | 0         |  |  |
|         |      | Shiraz-32T | 1833 | 0.551336 | 0         |  |  |
|         |      | Shiraz-38T | 1951 | 0.250891 | 0         |  |  |
|         |      | Shiraz-53T | 2078 | 0.287202 | 0         |  |  |
|         |      | Shiraz-58T | 2162 | 0.221505 | 0         |  |  |
|         |      | Shiraz-71T | 2238 | 0.603631 | 0         |  |  |
|         |      | Shiraz-3T  | 90   | 0.219276 | 0         |  |  |
|         |      | Shiraz-4T  | 253  | 0.372918 | 0         |  |  |
|         |      | Shiraz-36T | 378  | 0.179558 | 0         |  |  |
|         |      | Shiraz-46T | 943  | 0.093799 | 0         |  |  |
|         |      | Shiraz-77T | 1225 | 0        | -0.117922 |  |  |
|         |      | Shiraz-9T  | 1325 | 0.221899 | 0         |  |  |
|         |      | Shiraz-18T | 1434 | 0.244465 | 0         |  |  |



|         |      |            |      |          |           |  |
|---------|------|------------|------|----------|-----------|--|
|         |      | Shiraz-25T | 1698 | 0.21835  | 0         |  |
|         |      | Shiraz-28T | 1735 | 0.350744 | 0         |  |
|         |      | Shiraz-29T | 1778 | 0.120767 | 0         |  |
|         |      | Shiraz-32T | 1833 | 0.551336 | 0         |  |
|         |      | Shiraz-38T | 1951 | 0.250891 | 0         |  |
|         |      | Shiraz-53T | 2078 | 0.287202 | 0         |  |
|         |      | Shiraz-58T | 2162 | 0.221505 | 0         |  |
|         |      | Shiraz-71T | 2238 | 0.603631 | 0         |  |
| TAX1BP1 | chr7 | Shiraz-3T  | 87   | 0.198593 | 0         |  |
|         |      | Shiraz-4T  | 252  | 0.192083 | 0         |  |
|         |      | Shiraz-36T | 376  | 0.159952 | 0         |  |
|         |      | Shiraz-46T | 942  | 0.069143 | 0         |  |
|         |      | Shiraz-18T | 1433 | 0.250973 | 0         |  |
|         |      | Shiraz-25T | 1697 | 0.21945  | 0         |  |
|         |      | Shiraz-28T | 1734 | 0.362882 | 0         |  |
|         |      | Shiraz-29T | 1777 | 0.156747 | 0         |  |
|         |      | Shiraz-38T | 1950 | 0.265916 | 0         |  |
|         |      | Shiraz-71T | 2236 | 0.320072 | 0         |  |
|         |      | Shiraz-3T  | 87   | 0.198593 | 0         |  |
|         |      | Shiraz-4T  | 252  | 0.192083 | 0         |  |
|         |      | Shiraz-36T | 376  | 0.159952 | 0         |  |
|         |      | Shiraz-46T | 942  | 0.069143 | 0         |  |
|         |      | Shiraz-18T | 1433 | 0.250973 | 0         |  |
|         |      | Shiraz-25T | 1697 | 0.21945  | 0         |  |
|         |      | Shiraz-28T | 1734 | 0.362882 | 0         |  |
|         |      | Shiraz-29T | 1777 | 0.156747 | 0         |  |
|         |      | Shiraz-38T | 1950 | 0.265916 | 0         |  |
|         |      | Shiraz-71T | 2236 | 0.320072 | 0         |  |
|         |      | Shiraz-3T  | 87   | 0.198593 | 0         |  |
|         |      | Shiraz-4T  | 252  | 0.192083 | 0         |  |
|         |      | Shiraz-36T | 376  | 0.159952 | 0         |  |
|         |      | Shiraz-46T | 942  | 0.069143 | 0         |  |
|         |      | Shiraz-18T | 1433 | 0.250973 | 0         |  |
|         |      | Shiraz-25T | 1697 | 0.21945  | 0         |  |
|         |      | Shiraz-28T | 1734 | 0.362882 | 0         |  |
|         |      | Shiraz-29T | 1777 | 0.156747 | 0         |  |
|         |      | Shiraz-38T | 1950 | 0.265916 | 0         |  |
|         |      | Shiraz-71T | 2236 | 0.320072 | 0         |  |
| TAZ     | chrX | Shiraz-3T  | 246  | 0.531858 | 0         |  |
|         |      | Shiraz-4T  | 261  | 0        | -0.336249 |  |
|         |      | Shiraz-16T | 295  | 0.591657 | 0         |  |
|         |      | Shiraz-36T | 433  | 0        | -0.803961 |  |
|         |      | Shiraz-42T | 480  | 0        | -0.232915 |  |
|         |      | Shiraz-44T | 908  | 0.466743 | 0         |  |
|         |      | Shiraz-49T | 1170 | 0        | -0.967436 |  |
|         |      | Shiraz-49T | 1173 | 0        | -0.704439 |  |
|         |      | Shiraz-9T  | 1370 | 0.690073 | 0         |  |

|  |  |            |      |          |           |  |
|--|--|------------|------|----------|-----------|--|
|  |  | Shiraz-9T  | 1371 | 1.292392 | 0         |  |
|  |  | Shiraz-18T | 1457 | 0.643204 | 0         |  |
|  |  | Shiraz-22T | 1673 | 0.611783 | 0         |  |
|  |  | Shiraz-22T | 1678 | 0.911625 | 0         |  |
|  |  | Shiraz-25T | 1719 | 0.472955 | 0         |  |
|  |  | Shiraz-28T | 1762 | 0.562311 | 0         |  |
|  |  | Shiraz-29T | 1801 | 0.815343 | 0         |  |
|  |  | Shiraz-32T | 1870 | 0.729766 | 0         |  |
|  |  | Shiraz-32T | 1872 | 1.504553 | 0         |  |
|  |  | Shiraz-35T | 1933 | 0.488535 | 0         |  |
|  |  | Shiraz-38T | 2011 | 0        | -0.406024 |  |
|  |  | Shiraz-53T | 2115 | 0.427728 | 0         |  |
|  |  | Shiraz-58T | 2223 | 0.833364 | 0         |  |
|  |  | Shiraz-58T | 2226 | 1.074663 | 0         |  |
|  |  | Shiraz-71T | 2263 | 0.975531 | 0         |  |
|  |  | Shiraz-3T  | 246  | 0.531858 | 0         |  |
|  |  | Shiraz-4T  | 261  | 0        | -0.336249 |  |
|  |  | Shiraz-16T | 295  | 0.591657 | 0         |  |
|  |  | Shiraz-36T | 433  | 0        | -0.803961 |  |
|  |  | Shiraz-42T | 480  | 0        | -0.232915 |  |
|  |  | Shiraz-44T | 908  | 0.466743 | 0         |  |
|  |  | Shiraz-49T | 1170 | 0        | -0.967436 |  |
|  |  | Shiraz-49T | 1173 | 0        | -0.704439 |  |
|  |  | Shiraz-9T  | 1370 | 0.690073 | 0         |  |
|  |  | Shiraz-9T  | 1371 | 1.292392 | 0         |  |
|  |  | Shiraz-18T | 1457 | 0.643204 | 0         |  |
|  |  | Shiraz-22T | 1673 | 0.611783 | 0         |  |
|  |  | Shiraz-22T | 1678 | 0.911625 | 0         |  |
|  |  | Shiraz-25T | 1719 | 0.472955 | 0         |  |
|  |  | Shiraz-28T | 1762 | 0.562311 | 0         |  |
|  |  | Shiraz-29T | 1801 | 0.815343 | 0         |  |
|  |  | Shiraz-32T | 1870 | 0.729766 | 0         |  |
|  |  | Shiraz-32T | 1872 | 1.504553 | 0         |  |
|  |  | Shiraz-35T | 1933 | 0.488535 | 0         |  |
|  |  | Shiraz-38T | 2011 | 0        | -0.406024 |  |
|  |  | Shiraz-53T | 2115 | 0.427728 | 0         |  |
|  |  | Shiraz-58T | 2223 | 0.833364 | 0         |  |
|  |  | Shiraz-58T | 2226 | 1.074663 | 0         |  |
|  |  | Shiraz-71T | 2263 | 0.975531 | 0         |  |
|  |  | Shiraz-3T  | 246  | 0.531858 | 0         |  |
|  |  | Shiraz-4T  | 261  | 0        | -0.336249 |  |
|  |  | Shiraz-16T | 295  | 0.591657 | 0         |  |
|  |  | Shiraz-36T | 433  | 0        | -0.803961 |  |
|  |  | Shiraz-42T | 480  | 0        | -0.232915 |  |
|  |  | Shiraz-44T | 908  | 0.466743 | 0         |  |
|  |  | Shiraz-49T | 1170 | 0        | -0.967436 |  |
|  |  | Shiraz-49T | 1173 | 0        | -0.704439 |  |

|         |      |            |      |          |           |  |
|---------|------|------------|------|----------|-----------|--|
|         |      | Shiraz-9T  | 1370 | 0.690073 | 0         |  |
|         |      | Shiraz-9T  | 1371 | 1.292392 | 0         |  |
|         |      | Shiraz-18T | 1457 | 0.643204 | 0         |  |
|         |      | Shiraz-22T | 1673 | 0.611783 | 0         |  |
|         |      | Shiraz-22T | 1678 | 0.911625 | 0         |  |
|         |      | Shiraz-25T | 1719 | 0.472955 | 0         |  |
|         |      | Shiraz-28T | 1762 | 0.562311 | 0         |  |
|         |      | Shiraz-29T | 1801 | 0.815343 | 0         |  |
|         |      | Shiraz-32T | 1870 | 0.729766 | 0         |  |
|         |      | Shiraz-32T | 1872 | 1.504553 | 0         |  |
|         |      | Shiraz-35T | 1933 | 0.488535 | 0         |  |
|         |      | Shiraz-38T | 2011 | 0        | -0.406024 |  |
|         |      | Shiraz-53T | 2115 | 0.427728 | 0         |  |
|         |      | Shiraz-58T | 2223 | 0.833364 | 0         |  |
|         |      | Shiraz-58T | 2226 | 1.074663 | 0         |  |
|         |      | Shiraz-71T | 2263 | 0.975531 | 0         |  |
| TBC1D25 | chrX | Shiraz-3T  | 238  | 0.472087 | 0         |  |
|         |      | Shiraz-4T  | 260  | 0        | -0.324128 |  |
|         |      | Shiraz-16T | 294  | 0.655804 | 0         |  |
|         |      | Shiraz-31T | 345  | 0.103301 | 0         |  |
|         |      | Shiraz-36T | 431  | 0        | -0.78035  |  |
|         |      | Shiraz-36T | 432  | 0        | -0.6692   |  |
|         |      | Shiraz-44T | 891  | 0        | -0.954044 |  |
|         |      | Shiraz-44T | 896  | 0        | -0.109108 |  |
|         |      | Shiraz-46T | 991  | 0.139564 | 0         |  |
|         |      | Shiraz-47T | 1084 | 0.24185  | 0         |  |
|         |      | Shiraz-49T | 1166 | 0        | -0.917235 |  |
|         |      | Shiraz-49T | 1169 | 0        | -0.583529 |  |
|         |      | Shiraz-77T | 1282 | 0.213849 | 0         |  |
|         |      | Shiraz-9T  | 1368 | 0.199713 | 0         |  |
|         |      | Shiraz-9T  | 1369 | 0.703374 | 0         |  |
|         |      | Shiraz-18T | 1455 | 0        | -0.186773 |  |
|         |      | Shiraz-22T | 1669 | 0.695915 | 0         |  |
|         |      | Shiraz-22T | 1672 | 1.01678  | 0         |  |
|         |      | Shiraz-25T | 1717 | 0.420447 | 0         |  |
|         |      | Shiraz-28T | 1760 | 0.538181 | 0         |  |
|         |      | Shiraz-29T | 1800 | 0.672527 | 0         |  |
|         |      | Shiraz-32T | 1869 | 0.776805 | 0         |  |
|         |      | Shiraz-35T | 1932 | 0.507141 | 0         |  |
|         |      | Shiraz-58T | 2221 | 0.871948 | 0         |  |
|         |      | Shiraz-71T | 2260 | 0.68394  | 0         |  |
|         |      | Shiraz-71T | 2262 | 0.986748 | 0         |  |
|         |      | Shiraz-3T  | 238  | 0.472087 | 0         |  |
|         |      | Shiraz-4T  | 260  | 0        | -0.324128 |  |
|         |      | Shiraz-16T | 294  | 0.655804 | 0         |  |
|         |      | Shiraz-31T | 345  | 0.103301 | 0         |  |
|         |      | Shiraz-36T | 431  | 0        | -0.78035  |  |

|  |            |      |          |           |  |
|--|------------|------|----------|-----------|--|
|  | Shiraz-36T | 432  | 0        | -0.6692   |  |
|  | Shiraz-44T | 891  | 0        | -0.954044 |  |
|  | Shiraz-44T | 896  | 0        | -0.109108 |  |
|  | Shiraz-46T | 991  | 0.139564 | 0         |  |
|  | Shiraz-47T | 1084 | 0.24185  | 0         |  |
|  | Shiraz-49T | 1166 | 0        | -0.917235 |  |
|  | Shiraz-49T | 1169 | 0        | -0.583529 |  |
|  | Shiraz-77T | 1282 | 0.213849 | 0         |  |
|  | Shiraz-9T  | 1368 | 0.199713 | 0         |  |
|  | Shiraz-9T  | 1369 | 0.703374 | 0         |  |
|  | Shiraz-18T | 1455 | 0        | -0.186773 |  |
|  | Shiraz-22T | 1669 | 0.695915 | 0         |  |
|  | Shiraz-22T | 1672 | 1.01678  | 0         |  |
|  | Shiraz-25T | 1717 | 0.420447 | 0         |  |
|  | Shiraz-28T | 1760 | 0.538181 | 0         |  |
|  | Shiraz-29T | 1800 | 0.672527 | 0         |  |
|  | Shiraz-32T | 1869 | 0.776805 | 0         |  |
|  | Shiraz-35T | 1932 | 0.507141 | 0         |  |
|  | Shiraz-58T | 2221 | 0.871948 | 0         |  |
|  | Shiraz-71T | 2260 | 0.68394  | 0         |  |
|  | Shiraz-71T | 2262 | 0.986748 | 0         |  |
|  | Shiraz-3T  | 238  | 0.472087 | 0         |  |
|  | Shiraz-4T  | 260  | 0        | -0.324128 |  |
|  | Shiraz-16T | 294  | 0.655804 | 0         |  |
|  | Shiraz-31T | 345  | 0.103301 | 0         |  |
|  | Shiraz-36T | 431  | 0        | -0.78035  |  |
|  | Shiraz-36T | 432  | 0        | -0.6692   |  |
|  | Shiraz-44T | 891  | 0        | -0.954044 |  |
|  | Shiraz-44T | 896  | 0        | -0.109108 |  |
|  | Shiraz-46T | 991  | 0.139564 | 0         |  |
|  | Shiraz-47T | 1084 | 0.24185  | 0         |  |
|  | Shiraz-49T | 1166 | 0        | -0.917235 |  |
|  | Shiraz-49T | 1169 | 0        | -0.583529 |  |
|  | Shiraz-77T | 1282 | 0.213849 | 0         |  |
|  | Shiraz-9T  | 1368 | 0.199713 | 0         |  |
|  | Shiraz-9T  | 1369 | 0.703374 | 0         |  |
|  | Shiraz-18T | 1455 | 0        | -0.186773 |  |
|  | Shiraz-22T | 1669 | 0.695915 | 0         |  |
|  | Shiraz-22T | 1672 | 1.01678  | 0         |  |
|  | Shiraz-25T | 1717 | 0.420447 | 0         |  |
|  | Shiraz-28T | 1760 | 0.538181 | 0         |  |
|  | Shiraz-29T | 1800 | 0.672527 | 0         |  |
|  | Shiraz-32T | 1869 | 0.776805 | 0         |  |
|  | Shiraz-35T | 1932 | 0.507141 | 0         |  |
|  | Shiraz-58T | 2221 | 0.871948 | 0         |  |
|  | Shiraz-71T | 2260 | 0.68394  | 0         |  |
|  | Shiraz-71T | 2262 | 0.986748 | 0         |  |

|         |      |            |      |          |           |  |  |
|---------|------|------------|------|----------|-----------|--|--|
| TBC1D8B | chrX | Shiraz-3T  | 242  | 0        | -0.336434 |  |  |
|         |      | Shiraz-3T  | 242  | 0        | -0.336434 |  |  |
|         |      | Shiraz-4T  | 261  | 0        | -0.336249 |  |  |
|         |      | Shiraz-4T  | 261  | 0        | -0.336249 |  |  |
|         |      | Shiraz-16T | 295  | 0.591657 | 0         |  |  |
|         |      | Shiraz-16T | 295  | 0.591657 | 0         |  |  |
|         |      | Shiraz-36T | 433  | 0        | -0.803961 |  |  |
|         |      | Shiraz-36T | 433  | 0        | -0.803961 |  |  |
|         |      | Shiraz-44T | 899  | 0        | -1.09697  |  |  |
|         |      | Shiraz-44T | 899  | 0        | -1.09697  |  |  |
|         |      | Shiraz-49T | 1170 | 0        | -0.967436 |  |  |
|         |      | Shiraz-49T | 1170 | 0        | -0.967436 |  |  |
|         |      | Shiraz-18T | 1457 | 0.643204 | 0         |  |  |
|         |      | Shiraz-18T | 1457 | 0.643204 | 0         |  |  |
|         |      | Shiraz-22T | 1673 | 0.611783 | 0         |  |  |
|         |      | Shiraz-22T | 1673 | 0.611783 | 0         |  |  |
|         |      | Shiraz-25T | 1719 | 0.472955 | 0         |  |  |
|         |      | Shiraz-25T | 1719 | 0.472955 | 0         |  |  |
|         |      | Shiraz-28T | 1762 | 0.562311 | 0         |  |  |
|         |      | Shiraz-28T | 1762 | 0.562311 | 0         |  |  |
|         |      | Shiraz-29T | 1801 | 0.815343 | 0         |  |  |
|         |      | Shiraz-29T | 1801 | 0.815343 | 0         |  |  |
|         |      | Shiraz-32T | 1870 | 0.729766 | 0         |  |  |
|         |      | Shiraz-32T | 1870 | 0.729766 | 0         |  |  |
|         |      | Shiraz-35T | 1933 | 0.488535 | 0         |  |  |
|         |      | Shiraz-35T | 1933 | 0.488535 | 0         |  |  |
|         |      | Shiraz-58T | 2223 | 0.833364 | 0         |  |  |
|         |      | Shiraz-58T | 2223 | 0.833364 | 0         |  |  |
|         |      | Shiraz-71T | 2263 | 0.975531 | 0         |  |  |
|         |      | Shiraz-71T | 2263 | 0.975531 | 0         |  |  |
|         |      | Shiraz-3T  | 242  | 0        | -0.336434 |  |  |
|         |      | Shiraz-3T  | 242  | 0        | -0.336434 |  |  |
|         |      | Shiraz-4T  | 261  | 0        | -0.336249 |  |  |
|         |      | Shiraz-4T  | 261  | 0        | -0.336249 |  |  |
|         |      | Shiraz-16T | 295  | 0.591657 | 0         |  |  |
|         |      | Shiraz-16T | 295  | 0.591657 | 0         |  |  |
|         |      | Shiraz-36T | 433  | 0        | -0.803961 |  |  |
|         |      | Shiraz-36T | 433  | 0        | -0.803961 |  |  |
|         |      | Shiraz-44T | 899  | 0        | -1.09697  |  |  |
|         |      | Shiraz-44T | 899  | 0        | -1.09697  |  |  |
|         |      | Shiraz-49T | 1170 | 0        | -0.967436 |  |  |
|         |      | Shiraz-49T | 1170 | 0        | -0.967436 |  |  |
|         |      | Shiraz-18T | 1457 | 0.643204 | 0         |  |  |
|         |      | Shiraz-18T | 1457 | 0.643204 | 0         |  |  |
|         |      | Shiraz-22T | 1673 | 0.611783 | 0         |  |  |
|         |      | Shiraz-22T | 1673 | 0.611783 | 0         |  |  |
|         |      | Shiraz-25T | 1719 | 0.472955 | 0         |  |  |

|       |      |            |      |          |           |  |
|-------|------|------------|------|----------|-----------|--|
|       |      | Shiraz-25T | 1719 | 0.472955 | 0         |  |
|       |      | Shiraz-28T | 1762 | 0.562311 | 0         |  |
|       |      | Shiraz-28T | 1762 | 0.562311 | 0         |  |
|       |      | Shiraz-29T | 1801 | 0.815343 | 0         |  |
|       |      | Shiraz-29T | 1801 | 0.815343 | 0         |  |
|       |      | Shiraz-32T | 1870 | 0.729766 | 0         |  |
|       |      | Shiraz-32T | 1870 | 0.729766 | 0         |  |
|       |      | Shiraz-35T | 1933 | 0.488535 | 0         |  |
|       |      | Shiraz-35T | 1933 | 0.488535 | 0         |  |
|       |      | Shiraz-58T | 2223 | 0.833364 | 0         |  |
|       |      | Shiraz-58T | 2223 | 0.833364 | 0         |  |
|       |      | Shiraz-71T | 2263 | 0.975531 | 0         |  |
|       |      | Shiraz-71T | 2263 | 0.975531 | 0         |  |
|       |      | Shiraz-3T  | 242  | 0        | -0.336434 |  |
|       |      | Shiraz-3T  | 242  | 0        | -0.336434 |  |
|       |      | Shiraz-4T  | 261  | 0        | -0.336249 |  |
|       |      | Shiraz-4T  | 261  | 0        | -0.336249 |  |
|       |      | Shiraz-16T | 295  | 0.591657 | 0         |  |
|       |      | Shiraz-16T | 295  | 0.591657 | 0         |  |
|       |      | Shiraz-36T | 433  | 0        | -0.803961 |  |
|       |      | Shiraz-36T | 433  | 0        | -0.803961 |  |
|       |      | Shiraz-44T | 899  | 0        | -1.09697  |  |
|       |      | Shiraz-44T | 899  | 0        | -1.09697  |  |
|       |      | Shiraz-49T | 1170 | 0        | -0.967436 |  |
|       |      | Shiraz-49T | 1170 | 0        | -0.967436 |  |
|       |      | Shiraz-18T | 1457 | 0.643204 | 0         |  |
|       |      | Shiraz-18T | 1457 | 0.643204 | 0         |  |
|       |      | Shiraz-22T | 1673 | 0.611783 | 0         |  |
|       |      | Shiraz-22T | 1673 | 0.611783 | 0         |  |
|       |      | Shiraz-25T | 1719 | 0.472955 | 0         |  |
|       |      | Shiraz-25T | 1719 | 0.472955 | 0         |  |
|       |      | Shiraz-28T | 1762 | 0.562311 | 0         |  |
|       |      | Shiraz-28T | 1762 | 0.562311 | 0         |  |
|       |      | Shiraz-29T | 1801 | 0.815343 | 0         |  |
|       |      | Shiraz-29T | 1801 | 0.815343 | 0         |  |
|       |      | Shiraz-32T | 1870 | 0.729766 | 0         |  |
|       |      | Shiraz-32T | 1870 | 0.729766 | 0         |  |
|       |      | Shiraz-35T | 1933 | 0.488535 | 0         |  |
|       |      | Shiraz-35T | 1933 | 0.488535 | 0         |  |
|       |      | Shiraz-58T | 2223 | 0.833364 | 0         |  |
|       |      | Shiraz-58T | 2223 | 0.833364 | 0         |  |
|       |      | Shiraz-71T | 2263 | 0.975531 | 0         |  |
|       |      | Shiraz-71T | 2263 | 0.975531 | 0         |  |
| TBL1X | chrX | Shiraz-3T  | 235  | 0        | -0.28401  |  |
|       |      | Shiraz-3T  | 235  | 0        | -0.28401  |  |
|       |      | Shiraz-4T  | 260  | 0        | -0.324128 |  |
|       |      | Shiraz-4T  | 260  | 0        | -0.324128 |  |

|  |            |      |          |           |  |
|--|------------|------|----------|-----------|--|
|  | Shiraz-16T | 294  | 0.655804 | 0         |  |
|  | Shiraz-16T | 294  | 0.655804 | 0         |  |
|  | Shiraz-36T | 431  | 0        | -0.78035  |  |
|  | Shiraz-36T | 431  | 0        | -0.78035  |  |
|  | Shiraz-44T | 891  | 0        | -0.954044 |  |
|  | Shiraz-44T | 891  | 0        | -0.954044 |  |
|  | Shiraz-49T | 1166 | 0        | -0.917235 |  |
|  | Shiraz-49T | 1166 | 0        | -0.917235 |  |
|  | Shiraz-9T  | 1368 | 0.199713 | 0         |  |
|  | Shiraz-9T  | 1368 | 0.199713 | 0         |  |
|  | Shiraz-18T | 1455 | 0        | -0.186773 |  |
|  | Shiraz-18T | 1455 | 0        | -0.186773 |  |
|  | Shiraz-22T | 1669 | 0.695915 | 0         |  |
|  | Shiraz-22T | 1669 | 0.695915 | 0         |  |
|  | Shiraz-22T | 1670 | 1.188333 | 0         |  |
|  | Shiraz-22T | 1670 | 1.188333 | 0         |  |
|  | Shiraz-25T | 1717 | 0.420447 | 0         |  |
|  | Shiraz-25T | 1717 | 0.420447 | 0         |  |
|  | Shiraz-28T | 1760 | 0.538181 | 0         |  |
|  | Shiraz-28T | 1760 | 0.538181 | 0         |  |
|  | Shiraz-29T | 1800 | 0.672527 | 0         |  |
|  | Shiraz-29T | 1800 | 0.672527 | 0         |  |
|  | Shiraz-32T | 1869 | 0.776805 | 0         |  |
|  | Shiraz-32T | 1869 | 0.776805 | 0         |  |
|  | Shiraz-35T | 1932 | 0.507141 | 0         |  |
|  | Shiraz-35T | 1932 | 0.507141 | 0         |  |
|  | Shiraz-40T | 2051 | 0.098506 | 0         |  |
|  | Shiraz-40T | 2051 | 0.098506 | 0         |  |
|  | Shiraz-58T | 2221 | 0.871948 | 0         |  |
|  | Shiraz-58T | 2221 | 0.871948 | 0         |  |
|  | Shiraz-71T | 2260 | 0.68394  | 0         |  |
|  | Shiraz-71T | 2260 | 0.68394  | 0         |  |
|  | Shiraz-71T | 2261 | 0.508399 | 0         |  |
|  | Shiraz-71T | 2261 | 0.508399 | 0         |  |
|  | Shiraz-3T  | 235  | 0        | -0.28401  |  |
|  | Shiraz-3T  | 235  | 0        | -0.28401  |  |
|  | Shiraz-4T  | 260  | 0        | -0.324128 |  |
|  | Shiraz-4T  | 260  | 0        | -0.324128 |  |
|  | Shiraz-16T | 294  | 0.655804 | 0         |  |
|  | Shiraz-16T | 294  | 0.655804 | 0         |  |
|  | Shiraz-36T | 431  | 0        | -0.78035  |  |
|  | Shiraz-36T | 431  | 0        | -0.78035  |  |
|  | Shiraz-44T | 891  | 0        | -0.954044 |  |
|  | Shiraz-44T | 891  | 0        | -0.954044 |  |
|  | Shiraz-49T | 1166 | 0        | -0.917235 |  |
|  | Shiraz-49T | 1166 | 0        | -0.917235 |  |
|  | Shiraz-9T  | 1368 | 0.199713 | 0         |  |

|  |            |      |          |           |  |
|--|------------|------|----------|-----------|--|
|  | Shiraz-9T  | 1368 | 0.199713 | 0         |  |
|  | Shiraz-18T | 1455 | 0        | -0.186773 |  |
|  | Shiraz-18T | 1455 | 0        | -0.186773 |  |
|  | Shiraz-22T | 1669 | 0.695915 | 0         |  |
|  | Shiraz-22T | 1669 | 0.695915 | 0         |  |
|  | Shiraz-22T | 1670 | 1.188333 | 0         |  |
|  | Shiraz-22T | 1670 | 1.188333 | 0         |  |
|  | Shiraz-25T | 1717 | 0.420447 | 0         |  |
|  | Shiraz-25T | 1717 | 0.420447 | 0         |  |
|  | Shiraz-28T | 1760 | 0.538181 | 0         |  |
|  | Shiraz-28T | 1760 | 0.538181 | 0         |  |
|  | Shiraz-29T | 1800 | 0.672527 | 0         |  |
|  | Shiraz-29T | 1800 | 0.672527 | 0         |  |
|  | Shiraz-32T | 1869 | 0.776805 | 0         |  |
|  | Shiraz-32T | 1869 | 0.776805 | 0         |  |
|  | Shiraz-35T | 1932 | 0.507141 | 0         |  |
|  | Shiraz-35T | 1932 | 0.507141 | 0         |  |
|  | Shiraz-40T | 2051 | 0.098506 | 0         |  |
|  | Shiraz-40T | 2051 | 0.098506 | 0         |  |
|  | Shiraz-58T | 2221 | 0.871948 | 0         |  |
|  | Shiraz-58T | 2221 | 0.871948 | 0         |  |
|  | Shiraz-71T | 2260 | 0.68394  | 0         |  |
|  | Shiraz-71T | 2260 | 0.68394  | 0         |  |
|  | Shiraz-71T | 2261 | 0.508399 | 0         |  |
|  | Shiraz-71T | 2261 | 0.508399 | 0         |  |
|  | Shiraz-3T  | 235  | 0        | -0.28401  |  |
|  | Shiraz-3T  | 235  | 0        | -0.28401  |  |
|  | Shiraz-4T  | 260  | 0        | -0.324128 |  |
|  | Shiraz-4T  | 260  | 0        | -0.324128 |  |
|  | Shiraz-16T | 294  | 0.655804 | 0         |  |
|  | Shiraz-16T | 294  | 0.655804 | 0         |  |
|  | Shiraz-36T | 431  | 0        | -0.78035  |  |
|  | Shiraz-36T | 431  | 0        | -0.78035  |  |
|  | Shiraz-44T | 891  | 0        | -0.954044 |  |
|  | Shiraz-44T | 891  | 0        | -0.954044 |  |
|  | Shiraz-49T | 1166 | 0        | -0.917235 |  |
|  | Shiraz-49T | 1166 | 0        | -0.917235 |  |
|  | Shiraz-9T  | 1368 | 0.199713 | 0         |  |
|  | Shiraz-9T  | 1368 | 0.199713 | 0         |  |
|  | Shiraz-18T | 1455 | 0        | -0.186773 |  |
|  | Shiraz-18T | 1455 | 0        | -0.186773 |  |
|  | Shiraz-22T | 1669 | 0.695915 | 0         |  |
|  | Shiraz-22T | 1669 | 0.695915 | 0         |  |
|  | Shiraz-22T | 1670 | 1.188333 | 0         |  |
|  | Shiraz-22T | 1670 | 1.188333 | 0         |  |
|  | Shiraz-25T | 1717 | 0.420447 | 0         |  |
|  | Shiraz-25T | 1717 | 0.420447 | 0         |  |



|       |      |            |      |          |   |  |
|-------|------|------------|------|----------|---|--|
|       |      | Shiraz-28T | 1760 | 0.538181 | 0 |  |
|       |      | Shiraz-28T | 1760 | 0.538181 | 0 |  |
|       |      | Shiraz-29T | 1800 | 0.672527 | 0 |  |
|       |      | Shiraz-29T | 1800 | 0.672527 | 0 |  |
|       |      | Shiraz-32T | 1869 | 0.776805 | 0 |  |
|       |      | Shiraz-32T | 1869 | 0.776805 | 0 |  |
|       |      | Shiraz-35T | 1932 | 0.507141 | 0 |  |
|       |      | Shiraz-35T | 1932 | 0.507141 | 0 |  |
|       |      | Shiraz-40T | 2051 | 0.098506 | 0 |  |
|       |      | Shiraz-40T | 2051 | 0.098506 | 0 |  |
|       |      | Shiraz-58T | 2221 | 0.871948 | 0 |  |
|       |      | Shiraz-58T | 2221 | 0.871948 | 0 |  |
|       |      | Shiraz-71T | 2260 | 0.68394  | 0 |  |
|       |      | Shiraz-71T | 2260 | 0.68394  | 0 |  |
|       |      | Shiraz-71T | 2261 | 0.508399 | 0 |  |
|       |      | Shiraz-71T | 2261 | 0.508399 | 0 |  |
| TBRG4 | chr7 | Shiraz-3T  | 87   | 0.198593 | 0 |  |
|       |      | Shiraz-3T  | 89   | 0.678641 | 0 |  |
|       |      | Shiraz-4T  | 252  | 0.192083 | 0 |  |
|       |      | Shiraz-36T | 376  | 0.159952 | 0 |  |
|       |      | Shiraz-44T | 632  | 0.902944 | 0 |  |
|       |      | Shiraz-46T | 942  | 0.069143 | 0 |  |
|       |      | Shiraz-77T | 1223 | 0.215647 | 0 |  |
|       |      | Shiraz-18T | 1433 | 0.250973 | 0 |  |
|       |      | Shiraz-25T | 1697 | 0.21945  | 0 |  |
|       |      | Shiraz-28T | 1734 | 0.362882 | 0 |  |
|       |      | Shiraz-29T | 1777 | 0.156747 | 0 |  |
|       |      | Shiraz-38T | 1950 | 0.265916 | 0 |  |
|       |      | Shiraz-71T | 2236 | 0.320072 | 0 |  |
|       |      | Shiraz-3T  | 87   | 0.198593 | 0 |  |
|       |      | Shiraz-3T  | 89   | 0.678641 | 0 |  |
|       |      | Shiraz-4T  | 252  | 0.192083 | 0 |  |
|       |      | Shiraz-36T | 376  | 0.159952 | 0 |  |
|       |      | Shiraz-44T | 632  | 0.902944 | 0 |  |
|       |      | Shiraz-46T | 942  | 0.069143 | 0 |  |
|       |      | Shiraz-77T | 1223 | 0.215647 | 0 |  |
|       |      | Shiraz-18T | 1433 | 0.250973 | 0 |  |
|       |      | Shiraz-25T | 1697 | 0.21945  | 0 |  |
|       |      | Shiraz-28T | 1734 | 0.362882 | 0 |  |
|       |      | Shiraz-29T | 1777 | 0.156747 | 0 |  |
|       |      | Shiraz-38T | 1950 | 0.265916 | 0 |  |
|       |      | Shiraz-71T | 2236 | 0.320072 | 0 |  |
|       |      | Shiraz-3T  | 87   | 0.198593 | 0 |  |
|       |      | Shiraz-3T  | 89   | 0.678641 | 0 |  |
|       |      | Shiraz-4T  | 252  | 0.192083 | 0 |  |
|       |      | Shiraz-36T | 376  | 0.159952 | 0 |  |
|       |      | Shiraz-44T | 632  | 0.902944 | 0 |  |

|       |      |            |      |          |           |  |
|-------|------|------------|------|----------|-----------|--|
|       |      | Shiraz-46T | 942  | 0.069143 | 0         |  |
|       |      | Shiraz-77T | 1223 | 0.215647 | 0         |  |
|       |      | Shiraz-18T | 1433 | 0.250973 | 0         |  |
|       |      | Shiraz-25T | 1697 | 0.21945  | 0         |  |
|       |      | Shiraz-28T | 1734 | 0.362882 | 0         |  |
|       |      | Shiraz-29T | 1777 | 0.156747 | 0         |  |
|       |      | Shiraz-38T | 1950 | 0.265916 | 0         |  |
|       |      | Shiraz-71T | 2236 | 0.320072 | 0         |  |
| TBX20 | chr7 | Shiraz-3T  | 87   | 0.198593 | 0         |  |
|       |      | Shiraz-3T  | 87   | 0.198593 | 0         |  |
|       |      | Shiraz-4T  | 252  | 0.192083 | 0         |  |
|       |      | Shiraz-4T  | 252  | 0.192083 | 0         |  |
|       |      | Shiraz-36T | 376  | 0.159952 | 0         |  |
|       |      | Shiraz-36T | 376  | 0.159952 | 0         |  |
|       |      | Shiraz-44T | 631  | 0        | -0.180312 |  |
|       |      | Shiraz-44T | 631  | 0        | -0.180312 |  |
|       |      | Shiraz-46T | 942  | 0.069143 | 0         |  |
|       |      | Shiraz-46T | 942  | 0.069143 | 0         |  |
|       |      | Shiraz-18T | 1433 | 0.250973 | 0         |  |
|       |      | Shiraz-18T | 1433 | 0.250973 | 0         |  |
|       |      | Shiraz-22T | 1544 | 0        | -0.193579 |  |
|       |      | Shiraz-22T | 1544 | 0        | -0.193579 |  |
|       |      | Shiraz-25T | 1697 | 0.21945  | 0         |  |
|       |      | Shiraz-25T | 1697 | 0.21945  | 0         |  |
|       |      | Shiraz-28T | 1734 | 0.362882 | 0         |  |
|       |      | Shiraz-28T | 1734 | 0.362882 | 0         |  |
|       |      | Shiraz-29T | 1777 | 0.156747 | 0         |  |
|       |      | Shiraz-29T | 1777 | 0.156747 | 0         |  |
|       |      | Shiraz-38T | 1950 | 0.265916 | 0         |  |
|       |      | Shiraz-38T | 1950 | 0.265916 | 0         |  |
|       |      | Shiraz-71T | 2236 | 0.320072 | 0         |  |
|       |      | Shiraz-71T | 2236 | 0.320072 | 0         |  |
|       |      | Shiraz-3T  | 87   | 0.198593 | 0         |  |
|       |      | Shiraz-3T  | 87   | 0.198593 | 0         |  |
|       |      | Shiraz-4T  | 252  | 0.192083 | 0         |  |
|       |      | Shiraz-4T  | 252  | 0.192083 | 0         |  |
|       |      | Shiraz-36T | 376  | 0.159952 | 0         |  |
|       |      | Shiraz-36T | 376  | 0.159952 | 0         |  |
|       |      | Shiraz-44T | 631  | 0        | -0.180312 |  |
|       |      | Shiraz-44T | 631  | 0        | -0.180312 |  |
|       |      | Shiraz-46T | 942  | 0.069143 | 0         |  |
|       |      | Shiraz-46T | 942  | 0.069143 | 0         |  |
|       |      | Shiraz-18T | 1433 | 0.250973 | 0         |  |
|       |      | Shiraz-18T | 1433 | 0.250973 | 0         |  |
|       |      | Shiraz-22T | 1544 | 0        | -0.193579 |  |
|       |      | Shiraz-22T | 1544 | 0        | -0.193579 |  |
|       |      | Shiraz-25T | 1697 | 0.21945  | 0         |  |

|       |      |            |      |          |           |  |
|-------|------|------------|------|----------|-----------|--|
|       |      | Shiraz-25T | 1697 | 0.21945  | 0         |  |
|       |      | Shiraz-28T | 1734 | 0.362882 | 0         |  |
|       |      | Shiraz-28T | 1734 | 0.362882 | 0         |  |
|       |      | Shiraz-29T | 1777 | 0.156747 | 0         |  |
|       |      | Shiraz-29T | 1777 | 0.156747 | 0         |  |
|       |      | Shiraz-38T | 1950 | 0.265916 | 0         |  |
|       |      | Shiraz-38T | 1950 | 0.265916 | 0         |  |
|       |      | Shiraz-71T | 2236 | 0.320072 | 0         |  |
|       |      | Shiraz-71T | 2236 | 0.320072 | 0         |  |
|       |      | Shiraz-3T  | 87   | 0.198593 | 0         |  |
|       |      | Shiraz-3T  | 87   | 0.198593 | 0         |  |
|       |      | Shiraz-4T  | 252  | 0.192083 | 0         |  |
|       |      | Shiraz-4T  | 252  | 0.192083 | 0         |  |
|       |      | Shiraz-36T | 376  | 0.159952 | 0         |  |
|       |      | Shiraz-36T | 376  | 0.159952 | 0         |  |
|       |      | Shiraz-44T | 631  | 0        | -0.180312 |  |
|       |      | Shiraz-44T | 631  | 0        | -0.180312 |  |
|       |      | Shiraz-46T | 942  | 0.069143 | 0         |  |
|       |      | Shiraz-46T | 942  | 0.069143 | 0         |  |
|       |      | Shiraz-18T | 1433 | 0.250973 | 0         |  |
|       |      | Shiraz-18T | 1433 | 0.250973 | 0         |  |
|       |      | Shiraz-22T | 1544 | 0        | -0.193579 |  |
|       |      | Shiraz-22T | 1544 | 0        | -0.193579 |  |
|       |      | Shiraz-25T | 1697 | 0.21945  | 0         |  |
|       |      | Shiraz-25T | 1697 | 0.21945  | 0         |  |
|       |      | Shiraz-28T | 1734 | 0.362882 | 0         |  |
|       |      | Shiraz-28T | 1734 | 0.362882 | 0         |  |
|       |      | Shiraz-29T | 1777 | 0.156747 | 0         |  |
|       |      | Shiraz-29T | 1777 | 0.156747 | 0         |  |
|       |      | Shiraz-38T | 1950 | 0.265916 | 0         |  |
|       |      | Shiraz-38T | 1950 | 0.265916 | 0         |  |
|       |      | Shiraz-71T | 2236 | 0.320072 | 0         |  |
|       |      | Shiraz-71T | 2236 | 0.320072 | 0         |  |
| TBX22 | chrX | Shiraz-3T  | 242  | 0        | -0.336434 |  |
|       |      | Shiraz-3T  | 242  | 0        | -0.336434 |  |
|       |      | Shiraz-4T  | 261  | 0        | -0.336249 |  |
|       |      | Shiraz-4T  | 261  | 0        | -0.336249 |  |
|       |      | Shiraz-16T | 295  | 0.591657 | 0         |  |
|       |      | Shiraz-16T | 295  | 0.591657 | 0         |  |
|       |      | Shiraz-36T | 433  | 0        | -0.803961 |  |
|       |      | Shiraz-36T | 433  | 0        | -0.803961 |  |
|       |      | Shiraz-44T | 899  | 0        | -1.09697  |  |
|       |      | Shiraz-44T | 899  | 0        | -1.09697  |  |
|       |      | Shiraz-44T | 902  | 0        | -1.449824 |  |
|       |      | Shiraz-44T | 902  | 0        | -1.449824 |  |
|       |      | Shiraz-47T | 1085 | 0        | -0.130811 |  |
|       |      | Shiraz-47T | 1085 | 0        | -0.130811 |  |

|  |            |      |          |           |  |
|--|------------|------|----------|-----------|--|
|  | Shiraz-49T | 1170 | 0        | -0.967436 |  |
|  | Shiraz-49T | 1170 | 0        | -0.967436 |  |
|  | Shiraz-49T | 1172 | 0        | -1.123219 |  |
|  | Shiraz-49T | 1172 | 0        | -1.123219 |  |
|  | Shiraz-18T | 1457 | 0.643204 | 0         |  |
|  | Shiraz-18T | 1457 | 0.643204 | 0         |  |
|  | Shiraz-22T | 1673 | 0.611783 | 0         |  |
|  | Shiraz-22T | 1673 | 0.611783 | 0         |  |
|  | Shiraz-22T | 1675 | 0.279253 | 0         |  |
|  | Shiraz-22T | 1675 | 0.279253 | 0         |  |
|  | Shiraz-25T | 1719 | 0.472955 | 0         |  |
|  | Shiraz-25T | 1719 | 0.472955 | 0         |  |
|  | Shiraz-28T | 1762 | 0.562311 | 0         |  |
|  | Shiraz-28T | 1762 | 0.562311 | 0         |  |
|  | Shiraz-29T | 1801 | 0.815343 | 0         |  |
|  | Shiraz-29T | 1801 | 0.815343 | 0         |  |
|  | Shiraz-32T | 1870 | 0.729766 | 0         |  |
|  | Shiraz-32T | 1870 | 0.729766 | 0         |  |
|  | Shiraz-35T | 1933 | 0.488535 | 0         |  |
|  | Shiraz-35T | 1933 | 0.488535 | 0         |  |
|  | Shiraz-58T | 2223 | 0.833364 | 0         |  |
|  | Shiraz-58T | 2223 | 0.833364 | 0         |  |
|  | Shiraz-71T | 2263 | 0.975531 | 0         |  |
|  | Shiraz-71T | 2263 | 0.975531 | 0         |  |
|  | Shiraz-3T  | 242  | 0        | -0.336434 |  |
|  | Shiraz-3T  | 242  | 0        | -0.336434 |  |
|  | Shiraz-4T  | 261  | 0        | -0.336249 |  |
|  | Shiraz-4T  | 261  | 0        | -0.336249 |  |
|  | Shiraz-16T | 295  | 0.591657 | 0         |  |
|  | Shiraz-16T | 295  | 0.591657 | 0         |  |
|  | Shiraz-36T | 433  | 0        | -0.803961 |  |
|  | Shiraz-36T | 433  | 0        | -0.803961 |  |
|  | Shiraz-44T | 899  | 0        | -1.09697  |  |
|  | Shiraz-44T | 899  | 0        | -1.09697  |  |
|  | Shiraz-44T | 902  | 0        | -1.449824 |  |
|  | Shiraz-44T | 902  | 0        | -1.449824 |  |
|  | Shiraz-47T | 1085 | 0        | -0.130811 |  |
|  | Shiraz-47T | 1085 | 0        | -0.130811 |  |
|  | Shiraz-49T | 1170 | 0        | -0.967436 |  |
|  | Shiraz-49T | 1170 | 0        | -0.967436 |  |
|  | Shiraz-49T | 1172 | 0        | -1.123219 |  |
|  | Shiraz-49T | 1172 | 0        | -1.123219 |  |
|  | Shiraz-18T | 1457 | 0.643204 | 0         |  |
|  | Shiraz-18T | 1457 | 0.643204 | 0         |  |
|  | Shiraz-22T | 1673 | 0.611783 | 0         |  |
|  | Shiraz-22T | 1673 | 0.611783 | 0         |  |
|  | Shiraz-22T | 1675 | 0.279253 | 0         |  |

|  |  |            |      |          |           |  |  |
|--|--|------------|------|----------|-----------|--|--|
|  |  | Shiraz-22T | 1675 | 0.279253 | 0         |  |  |
|  |  | Shiraz-25T | 1719 | 0.472955 | 0         |  |  |
|  |  | Shiraz-25T | 1719 | 0.472955 | 0         |  |  |
|  |  | Shiraz-28T | 1762 | 0.562311 | 0         |  |  |
|  |  | Shiraz-28T | 1762 | 0.562311 | 0         |  |  |
|  |  | Shiraz-29T | 1801 | 0.815343 | 0         |  |  |
|  |  | Shiraz-29T | 1801 | 0.815343 | 0         |  |  |
|  |  | Shiraz-32T | 1870 | 0.729766 | 0         |  |  |
|  |  | Shiraz-32T | 1870 | 0.729766 | 0         |  |  |
|  |  | Shiraz-35T | 1933 | 0.488535 | 0         |  |  |
|  |  | Shiraz-35T | 1933 | 0.488535 | 0         |  |  |
|  |  | Shiraz-58T | 2223 | 0.833364 | 0         |  |  |
|  |  | Shiraz-58T | 2223 | 0.833364 | 0         |  |  |
|  |  | Shiraz-71T | 2263 | 0.975531 | 0         |  |  |
|  |  | Shiraz-71T | 2263 | 0.975531 | 0         |  |  |
|  |  | Shiraz-3T  | 242  | 0        | -0.336434 |  |  |
|  |  | Shiraz-3T  | 242  | 0        | -0.336434 |  |  |
|  |  | Shiraz-4T  | 261  | 0        | -0.336249 |  |  |
|  |  | Shiraz-4T  | 261  | 0        | -0.336249 |  |  |
|  |  | Shiraz-16T | 295  | 0.591657 | 0         |  |  |
|  |  | Shiraz-16T | 295  | 0.591657 | 0         |  |  |
|  |  | Shiraz-36T | 433  | 0        | -0.803961 |  |  |
|  |  | Shiraz-36T | 433  | 0        | -0.803961 |  |  |
|  |  | Shiraz-44T | 899  | 0        | -1.09697  |  |  |
|  |  | Shiraz-44T | 899  | 0        | -1.09697  |  |  |
|  |  | Shiraz-44T | 902  | 0        | -1.449824 |  |  |
|  |  | Shiraz-44T | 902  | 0        | -1.449824 |  |  |
|  |  | Shiraz-47T | 1085 | 0        | -0.130811 |  |  |
|  |  | Shiraz-47T | 1085 | 0        | -0.130811 |  |  |
|  |  | Shiraz-49T | 1170 | 0        | -0.967436 |  |  |
|  |  | Shiraz-49T | 1170 | 0        | -0.967436 |  |  |
|  |  | Shiraz-49T | 1172 | 0        | -1.123219 |  |  |
|  |  | Shiraz-49T | 1172 | 0        | -1.123219 |  |  |
|  |  | Shiraz-18T | 1457 | 0.643204 | 0         |  |  |
|  |  | Shiraz-18T | 1457 | 0.643204 | 0         |  |  |
|  |  | Shiraz-22T | 1673 | 0.611783 | 0         |  |  |
|  |  | Shiraz-22T | 1673 | 0.611783 | 0         |  |  |
|  |  | Shiraz-22T | 1675 | 0.279253 | 0         |  |  |
|  |  | Shiraz-22T | 1675 | 0.279253 | 0         |  |  |
|  |  | Shiraz-25T | 1719 | 0.472955 | 0         |  |  |
|  |  | Shiraz-25T | 1719 | 0.472955 | 0         |  |  |
|  |  | Shiraz-28T | 1762 | 0.562311 | 0         |  |  |
|  |  | Shiraz-28T | 1762 | 0.562311 | 0         |  |  |
|  |  | Shiraz-29T | 1801 | 0.815343 | 0         |  |  |
|  |  | Shiraz-29T | 1801 | 0.815343 | 0         |  |  |
|  |  | Shiraz-32T | 1870 | 0.729766 | 0         |  |  |
|  |  | Shiraz-32T | 1870 | 0.729766 | 0         |  |  |

|        |      |            |      |          |           |  |
|--------|------|------------|------|----------|-----------|--|
|        |      | Shiraz-35T | 1933 | 0.488535 | 0         |  |
|        |      | Shiraz-35T | 1933 | 0.488535 | 0         |  |
|        |      | Shiraz-58T | 2223 | 0.833364 | 0         |  |
|        |      | Shiraz-58T | 2223 | 0.833364 | 0         |  |
|        |      | Shiraz-71T | 2263 | 0.975531 | 0         |  |
|        |      | Shiraz-71T | 2263 | 0.975531 | 0         |  |
| TBXAS1 | chr7 | Shiraz-3T  | 90   | 0.219276 | 0         |  |
|        |      | Shiraz-3T  | 90   | 0.219276 | 0         |  |
|        |      | Shiraz-3T  | 97   | 0.496001 | 0         |  |
|        |      | Shiraz-3T  | 97   | 0.496001 | 0         |  |
|        |      | Shiraz-4T  | 253  | 0.372918 | 0         |  |
|        |      | Shiraz-4T  | 253  | 0.372918 | 0         |  |
|        |      | Shiraz-31T | 318  | 0.254373 | 0         |  |
|        |      | Shiraz-31T | 318  | 0.254373 | 0         |  |
|        |      | Shiraz-36T | 378  | 0.179558 | 0         |  |
|        |      | Shiraz-36T | 378  | 0.179558 | 0         |  |
|        |      | Shiraz-36T | 383  | 0.374586 | 0         |  |
|        |      | Shiraz-36T | 383  | 0.374586 | 0         |  |
|        |      | Shiraz-44T | 644  | 0.496536 | 0         |  |
|        |      | Shiraz-44T | 644  | 0.496536 | 0         |  |
|        |      | Shiraz-46T | 943  | 0.093799 | 0         |  |
|        |      | Shiraz-46T | 943  | 0.093799 | 0         |  |
|        |      | Shiraz-47T | 1033 | 0.220267 | 0         |  |
|        |      | Shiraz-47T | 1033 | 0.220267 | 0         |  |
|        |      | Shiraz-77T | 1225 | 0        | -0.117922 |  |
|        |      | Shiraz-77T | 1225 | 0        | -0.117922 |  |
|        |      | Shiraz-77T | 1230 | 0.149651 | 0         |  |
|        |      | Shiraz-77T | 1230 | 0.149651 | 0         |  |
|        |      | Shiraz-9T  | 1325 | 0.221899 | 0         |  |
|        |      | Shiraz-9T  | 1325 | 0.221899 | 0         |  |
|        |      | Shiraz-18T | 1434 | 0.244465 | 0         |  |
|        |      | Shiraz-18T | 1434 | 0.244465 | 0         |  |
|        |      | Shiraz-25T | 1698 | 0.21835  | 0         |  |
|        |      | Shiraz-25T | 1698 | 0.21835  | 0         |  |
|        |      | Shiraz-28T | 1735 | 0.350744 | 0         |  |
|        |      | Shiraz-28T | 1735 | 0.350744 | 0         |  |
|        |      | Shiraz-29T | 1778 | 0.120767 | 0         |  |
|        |      | Shiraz-29T | 1778 | 0.120767 | 0         |  |
|        |      | Shiraz-32T | 1833 | 0.551336 | 0         |  |
|        |      | Shiraz-32T | 1833 | 0.551336 | 0         |  |
|        |      | Shiraz-38T | 1951 | 0.250891 | 0         |  |
|        |      | Shiraz-38T | 1951 | 0.250891 | 0         |  |
|        |      | Shiraz-53T | 2078 | 0.287202 | 0         |  |
|        |      | Shiraz-53T | 2078 | 0.287202 | 0         |  |
|        |      | Shiraz-58T | 2162 | 0.221505 | 0         |  |
|        |      | Shiraz-58T | 2162 | 0.221505 | 0         |  |
|        |      | Shiraz-71T | 2238 | 0.603631 | 0         |  |

|  |            |      |          |           |  |
|--|------------|------|----------|-----------|--|
|  | Shiraz-71T | 2238 | 0.603631 | 0         |  |
|  | Shiraz-3T  | 90   | 0.219276 | 0         |  |
|  | Shiraz-3T  | 90   | 0.219276 | 0         |  |
|  | Shiraz-3T  | 97   | 0.496001 | 0         |  |
|  | Shiraz-3T  | 97   | 0.496001 | 0         |  |
|  | Shiraz-4T  | 253  | 0.372918 | 0         |  |
|  | Shiraz-4T  | 253  | 0.372918 | 0         |  |
|  | Shiraz-31T | 318  | 0.254373 | 0         |  |
|  | Shiraz-31T | 318  | 0.254373 | 0         |  |
|  | Shiraz-36T | 378  | 0.179558 | 0         |  |
|  | Shiraz-36T | 378  | 0.179558 | 0         |  |
|  | Shiraz-36T | 383  | 0.374586 | 0         |  |
|  | Shiraz-36T | 383  | 0.374586 | 0         |  |
|  | Shiraz-44T | 644  | 0.496536 | 0         |  |
|  | Shiraz-44T | 644  | 0.496536 | 0         |  |
|  | Shiraz-46T | 943  | 0.093799 | 0         |  |
|  | Shiraz-46T | 943  | 0.093799 | 0         |  |
|  | Shiraz-47T | 1033 | 0.220267 | 0         |  |
|  | Shiraz-47T | 1033 | 0.220267 | 0         |  |
|  | Shiraz-77T | 1225 | 0        | -0.117922 |  |
|  | Shiraz-77T | 1225 | 0        | -0.117922 |  |
|  | Shiraz-77T | 1230 | 0.149651 | 0         |  |
|  | Shiraz-77T | 1230 | 0.149651 | 0         |  |
|  | Shiraz-9T  | 1325 | 0.221899 | 0         |  |
|  | Shiraz-9T  | 1325 | 0.221899 | 0         |  |
|  | Shiraz-18T | 1434 | 0.244465 | 0         |  |
|  | Shiraz-18T | 1434 | 0.244465 | 0         |  |
|  | Shiraz-25T | 1698 | 0.21835  | 0         |  |
|  | Shiraz-25T | 1698 | 0.21835  | 0         |  |
|  | Shiraz-28T | 1735 | 0.350744 | 0         |  |
|  | Shiraz-28T | 1735 | 0.350744 | 0         |  |
|  | Shiraz-29T | 1778 | 0.120767 | 0         |  |
|  | Shiraz-29T | 1778 | 0.120767 | 0         |  |
|  | Shiraz-32T | 1833 | 0.551336 | 0         |  |
|  | Shiraz-32T | 1833 | 0.551336 | 0         |  |
|  | Shiraz-38T | 1951 | 0.250891 | 0         |  |
|  | Shiraz-38T | 1951 | 0.250891 | 0         |  |
|  | Shiraz-53T | 2078 | 0.287202 | 0         |  |
|  | Shiraz-53T | 2078 | 0.287202 | 0         |  |
|  | Shiraz-58T | 2162 | 0.221505 | 0         |  |
|  | Shiraz-58T | 2162 | 0.221505 | 0         |  |
|  | Shiraz-71T | 2238 | 0.603631 | 0         |  |
|  | Shiraz-71T | 2238 | 0.603631 | 0         |  |
|  | Shiraz-3T  | 90   | 0.219276 | 0         |  |
|  | Shiraz-3T  | 90   | 0.219276 | 0         |  |
|  | Shiraz-3T  | 97   | 0.496001 | 0         |  |
|  | Shiraz-3T  | 97   | 0.496001 | 0         |  |

|        |      |            |      |          |           |  |  |
|--------|------|------------|------|----------|-----------|--|--|
|        |      | Shiraz-4T  | 253  | 0.372918 | 0         |  |  |
|        |      | Shiraz-4T  | 253  | 0.372918 | 0         |  |  |
|        |      | Shiraz-31T | 318  | 0.254373 | 0         |  |  |
|        |      | Shiraz-31T | 318  | 0.254373 | 0         |  |  |
|        |      | Shiraz-36T | 378  | 0.179558 | 0         |  |  |
|        |      | Shiraz-36T | 378  | 0.179558 | 0         |  |  |
|        |      | Shiraz-36T | 383  | 0.374586 | 0         |  |  |
|        |      | Shiraz-36T | 383  | 0.374586 | 0         |  |  |
|        |      | Shiraz-44T | 644  | 0.496536 | 0         |  |  |
|        |      | Shiraz-44T | 644  | 0.496536 | 0         |  |  |
|        |      | Shiraz-46T | 943  | 0.093799 | 0         |  |  |
|        |      | Shiraz-46T | 943  | 0.093799 | 0         |  |  |
|        |      | Shiraz-47T | 1033 | 0.220267 | 0         |  |  |
|        |      | Shiraz-47T | 1033 | 0.220267 | 0         |  |  |
|        |      | Shiraz-77T | 1225 | 0        | -0.117922 |  |  |
|        |      | Shiraz-77T | 1225 | 0        | -0.117922 |  |  |
|        |      | Shiraz-77T | 1230 | 0.149651 | 0         |  |  |
|        |      | Shiraz-77T | 1230 | 0.149651 | 0         |  |  |
|        |      | Shiraz-9T  | 1325 | 0.221899 | 0         |  |  |
|        |      | Shiraz-9T  | 1325 | 0.221899 | 0         |  |  |
|        |      | Shiraz-18T | 1434 | 0.244465 | 0         |  |  |
|        |      | Shiraz-18T | 1434 | 0.244465 | 0         |  |  |
|        |      | Shiraz-25T | 1698 | 0.21835  | 0         |  |  |
|        |      | Shiraz-25T | 1698 | 0.21835  | 0         |  |  |
|        |      | Shiraz-28T | 1735 | 0.350744 | 0         |  |  |
|        |      | Shiraz-28T | 1735 | 0.350744 | 0         |  |  |
|        |      | Shiraz-29T | 1778 | 0.120767 | 0         |  |  |
|        |      | Shiraz-29T | 1778 | 0.120767 | 0         |  |  |
|        |      | Shiraz-32T | 1833 | 0.551336 | 0         |  |  |
|        |      | Shiraz-32T | 1833 | 0.551336 | 0         |  |  |
|        |      | Shiraz-38T | 1951 | 0.250891 | 0         |  |  |
|        |      | Shiraz-38T | 1951 | 0.250891 | 0         |  |  |
|        |      | Shiraz-53T | 2078 | 0.287202 | 0         |  |  |
|        |      | Shiraz-53T | 2078 | 0.287202 | 0         |  |  |
|        |      | Shiraz-58T | 2162 | 0.221505 | 0         |  |  |
|        |      | Shiraz-58T | 2162 | 0.221505 | 0         |  |  |
|        |      | Shiraz-71T | 2238 | 0.603631 | 0         |  |  |
|        |      | Shiraz-71T | 2238 | 0.603631 | 0         |  |  |
| TCEAL1 | chrX | Shiraz-3T  | 242  | 0        | -0.336434 |  |  |
|        |      | Shiraz-3T  | 242  | 0        | -0.336434 |  |  |
|        |      | Shiraz-4T  | 261  | 0        | -0.336249 |  |  |
|        |      | Shiraz-4T  | 261  | 0        | -0.336249 |  |  |
|        |      | Shiraz-16T | 295  | 0.591657 | 0         |  |  |
|        |      | Shiraz-16T | 295  | 0.591657 | 0         |  |  |
|        |      | Shiraz-36T | 433  | 0        | -0.803961 |  |  |
|        |      | Shiraz-36T | 433  | 0        | -0.803961 |  |  |
|        |      | Shiraz-44T | 899  | 0        | -1.09697  |  |  |



|  |            |      |          |           |  |
|--|------------|------|----------|-----------|--|
|  | Shiraz-44T | 899  | 0        | -1.09697  |  |
|  | Shiraz-49T | 1170 | 0        | -0.967436 |  |
|  | Shiraz-49T | 1170 | 0        | -0.967436 |  |
|  | Shiraz-18T | 1457 | 0.643204 | 0         |  |
|  | Shiraz-18T | 1457 | 0.643204 | 0         |  |
|  | Shiraz-22T | 1673 | 0.611783 | 0         |  |
|  | Shiraz-22T | 1673 | 0.611783 | 0         |  |
|  | Shiraz-25T | 1719 | 0.472955 | 0         |  |
|  | Shiraz-25T | 1719 | 0.472955 | 0         |  |
|  | Shiraz-28T | 1762 | 0.562311 | 0         |  |
|  | Shiraz-28T | 1762 | 0.562311 | 0         |  |
|  | Shiraz-29T | 1801 | 0.815343 | 0         |  |
|  | Shiraz-29T | 1801 | 0.815343 | 0         |  |
|  | Shiraz-32T | 1870 | 0.729766 | 0         |  |
|  | Shiraz-32T | 1870 | 0.729766 | 0         |  |
|  | Shiraz-35T | 1933 | 0.488535 | 0         |  |
|  | Shiraz-35T | 1933 | 0.488535 | 0         |  |
|  | Shiraz-58T | 2223 | 0.833364 | 0         |  |
|  | Shiraz-58T | 2223 | 0.833364 | 0         |  |
|  | Shiraz-71T | 2263 | 0.975531 | 0         |  |
|  | Shiraz-71T | 2263 | 0.975531 | 0         |  |
|  | Shiraz-3T  | 242  | 0        | -0.336434 |  |
|  | Shiraz-3T  | 242  | 0        | -0.336434 |  |
|  | Shiraz-4T  | 261  | 0        | -0.336249 |  |
|  | Shiraz-4T  | 261  | 0        | -0.336249 |  |
|  | Shiraz-16T | 295  | 0.591657 | 0         |  |
|  | Shiraz-16T | 295  | 0.591657 | 0         |  |
|  | Shiraz-36T | 433  | 0        | -0.803961 |  |
|  | Shiraz-36T | 433  | 0        | -0.803961 |  |
|  | Shiraz-44T | 899  | 0        | -1.09697  |  |
|  | Shiraz-44T | 899  | 0        | -1.09697  |  |
|  | Shiraz-49T | 1170 | 0        | -0.967436 |  |
|  | Shiraz-49T | 1170 | 0        | -0.967436 |  |
|  | Shiraz-18T | 1457 | 0.643204 | 0         |  |
|  | Shiraz-18T | 1457 | 0.643204 | 0         |  |
|  | Shiraz-22T | 1673 | 0.611783 | 0         |  |
|  | Shiraz-22T | 1673 | 0.611783 | 0         |  |
|  | Shiraz-25T | 1719 | 0.472955 | 0         |  |
|  | Shiraz-25T | 1719 | 0.472955 | 0         |  |
|  | Shiraz-28T | 1762 | 0.562311 | 0         |  |
|  | Shiraz-28T | 1762 | 0.562311 | 0         |  |
|  | Shiraz-29T | 1801 | 0.815343 | 0         |  |
|  | Shiraz-29T | 1801 | 0.815343 | 0         |  |
|  | Shiraz-32T | 1870 | 0.729766 | 0         |  |
|  | Shiraz-32T | 1870 | 0.729766 | 0         |  |
|  | Shiraz-35T | 1933 | 0.488535 | 0         |  |
|  | Shiraz-35T | 1933 | 0.488535 | 0         |  |

|        |      |            |      |          |           |  |  |
|--------|------|------------|------|----------|-----------|--|--|
|        |      | Shiraz-58T | 2223 | 0.833364 | 0         |  |  |
|        |      | Shiraz-58T | 2223 | 0.833364 | 0         |  |  |
|        |      | Shiraz-71T | 2263 | 0.975531 | 0         |  |  |
|        |      | Shiraz-71T | 2263 | 0.975531 | 0         |  |  |
|        |      | Shiraz-3T  | 242  | 0        | -0.336434 |  |  |
|        |      | Shiraz-3T  | 242  | 0        | -0.336434 |  |  |
|        |      | Shiraz-4T  | 261  | 0        | -0.336249 |  |  |
|        |      | Shiraz-4T  | 261  | 0        | -0.336249 |  |  |
|        |      | Shiraz-16T | 295  | 0.591657 | 0         |  |  |
|        |      | Shiraz-16T | 295  | 0.591657 | 0         |  |  |
|        |      | Shiraz-36T | 433  | 0        | -0.803961 |  |  |
|        |      | Shiraz-36T | 433  | 0        | -0.803961 |  |  |
|        |      | Shiraz-44T | 899  | 0        | -1.09697  |  |  |
|        |      | Shiraz-44T | 899  | 0        | -1.09697  |  |  |
|        |      | Shiraz-49T | 1170 | 0        | -0.967436 |  |  |
|        |      | Shiraz-49T | 1170 | 0        | -0.967436 |  |  |
|        |      | Shiraz-18T | 1457 | 0.643204 | 0         |  |  |
|        |      | Shiraz-18T | 1457 | 0.643204 | 0         |  |  |
|        |      | Shiraz-22T | 1673 | 0.611783 | 0         |  |  |
|        |      | Shiraz-22T | 1673 | 0.611783 | 0         |  |  |
|        |      | Shiraz-25T | 1719 | 0.472955 | 0         |  |  |
|        |      | Shiraz-25T | 1719 | 0.472955 | 0         |  |  |
|        |      | Shiraz-28T | 1762 | 0.562311 | 0         |  |  |
|        |      | Shiraz-28T | 1762 | 0.562311 | 0         |  |  |
|        |      | Shiraz-29T | 1801 | 0.815343 | 0         |  |  |
|        |      | Shiraz-29T | 1801 | 0.815343 | 0         |  |  |
|        |      | Shiraz-32T | 1870 | 0.729766 | 0         |  |  |
|        |      | Shiraz-32T | 1870 | 0.729766 | 0         |  |  |
|        |      | Shiraz-35T | 1933 | 0.488535 | 0         |  |  |
|        |      | Shiraz-35T | 1933 | 0.488535 | 0         |  |  |
|        |      | Shiraz-58T | 2223 | 0.833364 | 0         |  |  |
|        |      | Shiraz-58T | 2223 | 0.833364 | 0         |  |  |
|        |      | Shiraz-71T | 2263 | 0.975531 | 0         |  |  |
|        |      | Shiraz-71T | 2263 | 0.975531 | 0         |  |  |
| TCEAL2 | chrX | Shiraz-3T  | 242  | 0        | -0.336434 |  |  |
|        |      | Shiraz-4T  | 261  | 0        | -0.336249 |  |  |
|        |      | Shiraz-16T | 295  | 0.591657 | 0         |  |  |
|        |      | Shiraz-36T | 433  | 0        | -0.803961 |  |  |
|        |      | Shiraz-44T | 899  | 0        | -1.09697  |  |  |
|        |      | Shiraz-49T | 1170 | 0        | -0.967436 |  |  |
|        |      | Shiraz-18T | 1457 | 0.643204 | 0         |  |  |
|        |      | Shiraz-22T | 1673 | 0.611783 | 0         |  |  |
|        |      | Shiraz-25T | 1719 | 0.472955 | 0         |  |  |
|        |      | Shiraz-28T | 1762 | 0.562311 | 0         |  |  |
|        |      | Shiraz-29T | 1801 | 0.815343 | 0         |  |  |
|        |      | Shiraz-32T | 1870 | 0.729766 | 0         |  |  |
|        |      | Shiraz-35T | 1933 | 0.488535 | 0         |  |  |

|        |      |            |      |          |           |  |  |
|--------|------|------------|------|----------|-----------|--|--|
|        |      | Shiraz-58T | 2223 | 0.833364 | 0         |  |  |
|        |      | Shiraz-71T | 2263 | 0.975531 | 0         |  |  |
|        |      | Shiraz-3T  | 242  | 0        | -0.336434 |  |  |
|        |      | Shiraz-4T  | 261  | 0        | -0.336249 |  |  |
|        |      | Shiraz-16T | 295  | 0.591657 | 0         |  |  |
|        |      | Shiraz-36T | 433  | 0        | -0.803961 |  |  |
|        |      | Shiraz-44T | 899  | 0        | -1.09697  |  |  |
|        |      | Shiraz-49T | 1170 | 0        | -0.967436 |  |  |
|        |      | Shiraz-18T | 1457 | 0.643204 | 0         |  |  |
|        |      | Shiraz-22T | 1673 | 0.611783 | 0         |  |  |
|        |      | Shiraz-25T | 1719 | 0.472955 | 0         |  |  |
|        |      | Shiraz-28T | 1762 | 0.562311 | 0         |  |  |
|        |      | Shiraz-29T | 1801 | 0.815343 | 0         |  |  |
|        |      | Shiraz-32T | 1870 | 0.729766 | 0         |  |  |
|        |      | Shiraz-35T | 1933 | 0.488535 | 0         |  |  |
|        |      | Shiraz-58T | 2223 | 0.833364 | 0         |  |  |
|        |      | Shiraz-71T | 2263 | 0.975531 | 0         |  |  |
|        |      | Shiraz-3T  | 242  | 0        | -0.336434 |  |  |
|        |      | Shiraz-4T  | 261  | 0        | -0.336249 |  |  |
|        |      | Shiraz-16T | 295  | 0.591657 | 0         |  |  |
|        |      | Shiraz-36T | 433  | 0        | -0.803961 |  |  |
|        |      | Shiraz-44T | 899  | 0        | -1.09697  |  |  |
|        |      | Shiraz-49T | 1170 | 0        | -0.967436 |  |  |
|        |      | Shiraz-18T | 1457 | 0.643204 | 0         |  |  |
|        |      | Shiraz-22T | 1673 | 0.611783 | 0         |  |  |
|        |      | Shiraz-25T | 1719 | 0.472955 | 0         |  |  |
|        |      | Shiraz-28T | 1762 | 0.562311 | 0         |  |  |
|        |      | Shiraz-29T | 1801 | 0.815343 | 0         |  |  |
|        |      | Shiraz-32T | 1870 | 0.729766 | 0         |  |  |
|        |      | Shiraz-35T | 1933 | 0.488535 | 0         |  |  |
|        |      | Shiraz-58T | 2223 | 0.833364 | 0         |  |  |
|        |      | Shiraz-71T | 2263 | 0.975531 | 0         |  |  |
| TCEAL3 | chrX | Shiraz-3T  | 242  | 0        | -0.336434 |  |  |
|        |      | Shiraz-4T  | 261  | 0        | -0.336249 |  |  |
|        |      | Shiraz-16T | 295  | 0.591657 | 0         |  |  |
|        |      | Shiraz-36T | 433  | 0        | -0.803961 |  |  |
|        |      | Shiraz-44T | 899  | 0        | -1.09697  |  |  |
|        |      | Shiraz-49T | 1170 | 0        | -0.967436 |  |  |
|        |      | Shiraz-18T | 1457 | 0.643204 | 0         |  |  |
|        |      | Shiraz-22T | 1673 | 0.611783 | 0         |  |  |
|        |      | Shiraz-25T | 1719 | 0.472955 | 0         |  |  |
|        |      | Shiraz-28T | 1762 | 0.562311 | 0         |  |  |
|        |      | Shiraz-29T | 1801 | 0.815343 | 0         |  |  |
|        |      | Shiraz-32T | 1870 | 0.729766 | 0         |  |  |
|        |      | Shiraz-35T | 1933 | 0.488535 | 0         |  |  |
|        |      | Shiraz-58T | 2223 | 0.833364 | 0         |  |  |
|        |      | Shiraz-71T | 2263 | 0.975531 | 0         |  |  |

|        |      |            |      |          |           |  |  |
|--------|------|------------|------|----------|-----------|--|--|
|        |      | Shiraz-3T  | 242  | 0        | -0.336434 |  |  |
|        |      | Shiraz-4T  | 261  | 0        | -0.336249 |  |  |
|        |      | Shiraz-16T | 295  | 0.591657 | 0         |  |  |
|        |      | Shiraz-36T | 433  | 0        | -0.803961 |  |  |
|        |      | Shiraz-44T | 899  | 0        | -1.09697  |  |  |
|        |      | Shiraz-49T | 1170 | 0        | -0.967436 |  |  |
|        |      | Shiraz-18T | 1457 | 0.643204 | 0         |  |  |
|        |      | Shiraz-22T | 1673 | 0.611783 | 0         |  |  |
|        |      | Shiraz-25T | 1719 | 0.472955 | 0         |  |  |
|        |      | Shiraz-28T | 1762 | 0.562311 | 0         |  |  |
|        |      | Shiraz-29T | 1801 | 0.815343 | 0         |  |  |
|        |      | Shiraz-32T | 1870 | 0.729766 | 0         |  |  |
|        |      | Shiraz-35T | 1933 | 0.488535 | 0         |  |  |
|        |      | Shiraz-58T | 2223 | 0.833364 | 0         |  |  |
|        |      | Shiraz-71T | 2263 | 0.975531 | 0         |  |  |
|        |      | Shiraz-3T  | 242  | 0        | -0.336434 |  |  |
|        |      | Shiraz-4T  | 261  | 0        | -0.336249 |  |  |
|        |      | Shiraz-16T | 295  | 0.591657 | 0         |  |  |
|        |      | Shiraz-36T | 433  | 0        | -0.803961 |  |  |
|        |      | Shiraz-44T | 899  | 0        | -1.09697  |  |  |
|        |      | Shiraz-49T | 1170 | 0        | -0.967436 |  |  |
|        |      | Shiraz-18T | 1457 | 0.643204 | 0         |  |  |
|        |      | Shiraz-22T | 1673 | 0.611783 | 0         |  |  |
|        |      | Shiraz-25T | 1719 | 0.472955 | 0         |  |  |
|        |      | Shiraz-28T | 1762 | 0.562311 | 0         |  |  |
|        |      | Shiraz-29T | 1801 | 0.815343 | 0         |  |  |
|        |      | Shiraz-32T | 1870 | 0.729766 | 0         |  |  |
|        |      | Shiraz-35T | 1933 | 0.488535 | 0         |  |  |
|        |      | Shiraz-58T | 2223 | 0.833364 | 0         |  |  |
|        |      | Shiraz-71T | 2263 | 0.975531 | 0         |  |  |
| TCEAL4 | chrX | Shiraz-3T  | 242  | 0        | -0.336434 |  |  |
|        |      | Shiraz-4T  | 261  | 0        | -0.336249 |  |  |
|        |      | Shiraz-16T | 295  | 0.591657 | 0         |  |  |
|        |      | Shiraz-36T | 433  | 0        | -0.803961 |  |  |
|        |      | Shiraz-44T | 899  | 0        | -1.09697  |  |  |
|        |      | Shiraz-49T | 1170 | 0        | -0.967436 |  |  |
|        |      | Shiraz-18T | 1457 | 0.643204 | 0         |  |  |
|        |      | Shiraz-22T | 1673 | 0.611783 | 0         |  |  |
|        |      | Shiraz-25T | 1719 | 0.472955 | 0         |  |  |
|        |      | Shiraz-28T | 1762 | 0.562311 | 0         |  |  |
|        |      | Shiraz-29T | 1801 | 0.815343 | 0         |  |  |
|        |      | Shiraz-32T | 1870 | 0.729766 | 0         |  |  |
|        |      | Shiraz-35T | 1933 | 0.488535 | 0         |  |  |
|        |      | Shiraz-58T | 2223 | 0.833364 | 0         |  |  |
|        |      | Shiraz-71T | 2263 | 0.975531 | 0         |  |  |
|        |      | Shiraz-3T  | 242  | 0        | -0.336434 |  |  |
|        |      | Shiraz-4T  | 261  | 0        | -0.336249 |  |  |

|        |      |            |      |          |           |  |  |
|--------|------|------------|------|----------|-----------|--|--|
|        |      | Shiraz-16T | 295  | 0.591657 | 0         |  |  |
|        |      | Shiraz-36T | 433  | 0        | -0.803961 |  |  |
|        |      | Shiraz-44T | 899  | 0        | -1.09697  |  |  |
|        |      | Shiraz-49T | 1170 | 0        | -0.967436 |  |  |
|        |      | Shiraz-18T | 1457 | 0.643204 | 0         |  |  |
|        |      | Shiraz-22T | 1673 | 0.611783 | 0         |  |  |
|        |      | Shiraz-25T | 1719 | 0.472955 | 0         |  |  |
|        |      | Shiraz-28T | 1762 | 0.562311 | 0         |  |  |
|        |      | Shiraz-29T | 1801 | 0.815343 | 0         |  |  |
|        |      | Shiraz-32T | 1870 | 0.729766 | 0         |  |  |
|        |      | Shiraz-35T | 1933 | 0.488535 | 0         |  |  |
|        |      | Shiraz-58T | 2223 | 0.833364 | 0         |  |  |
|        |      | Shiraz-71T | 2263 | 0.975531 | 0         |  |  |
|        |      | Shiraz-3T  | 242  | 0        | -0.336434 |  |  |
|        |      | Shiraz-4T  | 261  | 0        | -0.336249 |  |  |
|        |      | Shiraz-16T | 295  | 0.591657 | 0         |  |  |
|        |      | Shiraz-36T | 433  | 0        | -0.803961 |  |  |
|        |      | Shiraz-44T | 899  | 0        | -1.09697  |  |  |
|        |      | Shiraz-49T | 1170 | 0        | -0.967436 |  |  |
|        |      | Shiraz-18T | 1457 | 0.643204 | 0         |  |  |
|        |      | Shiraz-22T | 1673 | 0.611783 | 0         |  |  |
|        |      | Shiraz-25T | 1719 | 0.472955 | 0         |  |  |
|        |      | Shiraz-28T | 1762 | 0.562311 | 0         |  |  |
|        |      | Shiraz-29T | 1801 | 0.815343 | 0         |  |  |
|        |      | Shiraz-32T | 1870 | 0.729766 | 0         |  |  |
|        |      | Shiraz-35T | 1933 | 0.488535 | 0         |  |  |
|        |      | Shiraz-58T | 2223 | 0.833364 | 0         |  |  |
|        |      | Shiraz-71T | 2263 | 0.975531 | 0         |  |  |
| TCEAL5 | chrX | Shiraz-3T  | 242  | 0        | -0.336434 |  |  |
|        |      | Shiraz-4T  | 261  | 0        | -0.336249 |  |  |
|        |      | Shiraz-16T | 295  | 0.591657 | 0         |  |  |
|        |      | Shiraz-36T | 433  | 0        | -0.803961 |  |  |
|        |      | Shiraz-44T | 899  | 0        | -1.09697  |  |  |
|        |      | Shiraz-49T | 1170 | 0        | -0.967436 |  |  |
|        |      | Shiraz-18T | 1457 | 0.643204 | 0         |  |  |
|        |      | Shiraz-22T | 1673 | 0.611783 | 0         |  |  |
|        |      | Shiraz-25T | 1719 | 0.472955 | 0         |  |  |
|        |      | Shiraz-28T | 1762 | 0.562311 | 0         |  |  |
|        |      | Shiraz-29T | 1801 | 0.815343 | 0         |  |  |
|        |      | Shiraz-32T | 1870 | 0.729766 | 0         |  |  |
|        |      | Shiraz-35T | 1933 | 0.488535 | 0         |  |  |
|        |      | Shiraz-58T | 2223 | 0.833364 | 0         |  |  |
|        |      | Shiraz-71T | 2263 | 0.975531 | 0         |  |  |
|        |      | Shiraz-3T  | 242  | 0        | -0.336434 |  |  |
|        |      | Shiraz-4T  | 261  | 0        | -0.336249 |  |  |
|        |      | Shiraz-16T | 295  | 0.591657 | 0         |  |  |
|        |      | Shiraz-36T | 433  | 0        | -0.803961 |  |  |

|        |      |            |      |          |           |  |  |
|--------|------|------------|------|----------|-----------|--|--|
|        |      | Shiraz-44T | 899  | 0        | -1.09697  |  |  |
|        |      | Shiraz-49T | 1170 | 0        | -0.967436 |  |  |
|        |      | Shiraz-18T | 1457 | 0.643204 | 0         |  |  |
|        |      | Shiraz-22T | 1673 | 0.611783 | 0         |  |  |
|        |      | Shiraz-25T | 1719 | 0.472955 | 0         |  |  |
|        |      | Shiraz-28T | 1762 | 0.562311 | 0         |  |  |
|        |      | Shiraz-29T | 1801 | 0.815343 | 0         |  |  |
|        |      | Shiraz-32T | 1870 | 0.729766 | 0         |  |  |
|        |      | Shiraz-35T | 1933 | 0.488535 | 0         |  |  |
|        |      | Shiraz-58T | 2223 | 0.833364 | 0         |  |  |
|        |      | Shiraz-71T | 2263 | 0.975531 | 0         |  |  |
|        |      | Shiraz-3T  | 242  | 0        | -0.336434 |  |  |
|        |      | Shiraz-4T  | 261  | 0        | -0.336249 |  |  |
|        |      | Shiraz-16T | 295  | 0.591657 | 0         |  |  |
|        |      | Shiraz-36T | 433  | 0        | -0.803961 |  |  |
|        |      | Shiraz-44T | 899  | 0        | -1.09697  |  |  |
|        |      | Shiraz-49T | 1170 | 0        | -0.967436 |  |  |
|        |      | Shiraz-18T | 1457 | 0.643204 | 0         |  |  |
|        |      | Shiraz-22T | 1673 | 0.611783 | 0         |  |  |
|        |      | Shiraz-25T | 1719 | 0.472955 | 0         |  |  |
|        |      | Shiraz-28T | 1762 | 0.562311 | 0         |  |  |
|        |      | Shiraz-29T | 1801 | 0.815343 | 0         |  |  |
|        |      | Shiraz-32T | 1870 | 0.729766 | 0         |  |  |
|        |      | Shiraz-35T | 1933 | 0.488535 | 0         |  |  |
|        |      | Shiraz-58T | 2223 | 0.833364 | 0         |  |  |
|        |      | Shiraz-71T | 2263 | 0.975531 | 0         |  |  |
| TCEAL6 | chrX | Shiraz-3T  | 242  | 0        | -0.336434 |  |  |
|        |      | Shiraz-4T  | 261  | 0        | -0.336249 |  |  |
|        |      | Shiraz-16T | 295  | 0.591657 | 0         |  |  |
|        |      | Shiraz-36T | 433  | 0        | -0.803961 |  |  |
|        |      | Shiraz-44T | 899  | 0        | -1.09697  |  |  |
|        |      | Shiraz-49T | 1170 | 0        | -0.967436 |  |  |
|        |      | Shiraz-18T | 1457 | 0.643204 | 0         |  |  |
|        |      | Shiraz-22T | 1673 | 0.611783 | 0         |  |  |
|        |      | Shiraz-25T | 1719 | 0.472955 | 0         |  |  |
|        |      | Shiraz-28T | 1762 | 0.562311 | 0         |  |  |
|        |      | Shiraz-29T | 1801 | 0.815343 | 0         |  |  |
|        |      | Shiraz-32T | 1870 | 0.729766 | 0         |  |  |
|        |      | Shiraz-35T | 1933 | 0.488535 | 0         |  |  |
|        |      | Shiraz-58T | 2223 | 0.833364 | 0         |  |  |
|        |      | Shiraz-71T | 2263 | 0.975531 | 0         |  |  |
|        |      | Shiraz-3T  | 242  | 0        | -0.336434 |  |  |
|        |      | Shiraz-4T  | 261  | 0        | -0.336249 |  |  |
|        |      | Shiraz-16T | 295  | 0.591657 | 0         |  |  |
|        |      | Shiraz-36T | 433  | 0        | -0.803961 |  |  |
|        |      | Shiraz-44T | 899  | 0        | -1.09697  |  |  |
|        |      | Shiraz-49T | 1170 | 0        | -0.967436 |  |  |

|        |      |            |      |          |           |  |  |
|--------|------|------------|------|----------|-----------|--|--|
|        |      | Shiraz-18T | 1457 | 0.643204 | 0         |  |  |
|        |      | Shiraz-22T | 1673 | 0.611783 | 0         |  |  |
|        |      | Shiraz-25T | 1719 | 0.472955 | 0         |  |  |
|        |      | Shiraz-28T | 1762 | 0.562311 | 0         |  |  |
|        |      | Shiraz-29T | 1801 | 0.815343 | 0         |  |  |
|        |      | Shiraz-32T | 1870 | 0.729766 | 0         |  |  |
|        |      | Shiraz-35T | 1933 | 0.488535 | 0         |  |  |
|        |      | Shiraz-58T | 2223 | 0.833364 | 0         |  |  |
|        |      | Shiraz-71T | 2263 | 0.975531 | 0         |  |  |
|        |      | Shiraz-3T  | 242  | 0        | -0.336434 |  |  |
|        |      | Shiraz-4T  | 261  | 0        | -0.336249 |  |  |
|        |      | Shiraz-16T | 295  | 0.591657 | 0         |  |  |
|        |      | Shiraz-36T | 433  | 0        | -0.803961 |  |  |
|        |      | Shiraz-44T | 899  | 0        | -1.09697  |  |  |
|        |      | Shiraz-49T | 1170 | 0        | -0.967436 |  |  |
|        |      | Shiraz-18T | 1457 | 0.643204 | 0         |  |  |
|        |      | Shiraz-22T | 1673 | 0.611783 | 0         |  |  |
|        |      | Shiraz-25T | 1719 | 0.472955 | 0         |  |  |
|        |      | Shiraz-28T | 1762 | 0.562311 | 0         |  |  |
|        |      | Shiraz-29T | 1801 | 0.815343 | 0         |  |  |
|        |      | Shiraz-32T | 1870 | 0.729766 | 0         |  |  |
|        |      | Shiraz-35T | 1933 | 0.488535 | 0         |  |  |
|        |      | Shiraz-58T | 2223 | 0.833364 | 0         |  |  |
|        |      | Shiraz-71T | 2263 | 0.975531 | 0         |  |  |
| TCEAL7 | chrX | Shiraz-3T  | 242  | 0        | -0.336434 |  |  |
|        |      | Shiraz-4T  | 261  | 0        | -0.336249 |  |  |
|        |      | Shiraz-16T | 295  | 0.591657 | 0         |  |  |
|        |      | Shiraz-36T | 433  | 0        | -0.803961 |  |  |
|        |      | Shiraz-44T | 899  | 0        | -1.09697  |  |  |
|        |      | Shiraz-49T | 1170 | 0        | -0.967436 |  |  |
|        |      | Shiraz-18T | 1457 | 0.643204 | 0         |  |  |
|        |      | Shiraz-22T | 1673 | 0.611783 | 0         |  |  |
|        |      | Shiraz-25T | 1719 | 0.472955 | 0         |  |  |
|        |      | Shiraz-28T | 1762 | 0.562311 | 0         |  |  |
|        |      | Shiraz-29T | 1801 | 0.815343 | 0         |  |  |
|        |      | Shiraz-32T | 1870 | 0.729766 | 0         |  |  |
|        |      | Shiraz-35T | 1933 | 0.488535 | 0         |  |  |
|        |      | Shiraz-58T | 2223 | 0.833364 | 0         |  |  |
|        |      | Shiraz-71T | 2263 | 0.975531 | 0         |  |  |
|        |      | Shiraz-3T  | 242  | 0        | -0.336434 |  |  |
|        |      | Shiraz-4T  | 261  | 0        | -0.336249 |  |  |
|        |      | Shiraz-16T | 295  | 0.591657 | 0         |  |  |
|        |      | Shiraz-36T | 433  | 0        | -0.803961 |  |  |
|        |      | Shiraz-44T | 899  | 0        | -1.09697  |  |  |
|        |      | Shiraz-49T | 1170 | 0        | -0.967436 |  |  |
|        |      | Shiraz-18T | 1457 | 0.643204 | 0         |  |  |
|        |      | Shiraz-22T | 1673 | 0.611783 | 0         |  |  |

|        |      |            |      |          |           |  |  |
|--------|------|------------|------|----------|-----------|--|--|
|        |      | Shiraz-25T | 1719 | 0.472955 | 0         |  |  |
|        |      | Shiraz-28T | 1762 | 0.562311 | 0         |  |  |
|        |      | Shiraz-29T | 1801 | 0.815343 | 0         |  |  |
|        |      | Shiraz-32T | 1870 | 0.729766 | 0         |  |  |
|        |      | Shiraz-35T | 1933 | 0.488535 | 0         |  |  |
|        |      | Shiraz-58T | 2223 | 0.833364 | 0         |  |  |
|        |      | Shiraz-71T | 2263 | 0.975531 | 0         |  |  |
|        |      | Shiraz-3T  | 242  | 0        | -0.336434 |  |  |
|        |      | Shiraz-4T  | 261  | 0        | -0.336249 |  |  |
|        |      | Shiraz-16T | 295  | 0.591657 | 0         |  |  |
|        |      | Shiraz-36T | 433  | 0        | -0.803961 |  |  |
|        |      | Shiraz-44T | 899  | 0        | -1.09697  |  |  |
|        |      | Shiraz-49T | 1170 | 0        | -0.967436 |  |  |
|        |      | Shiraz-18T | 1457 | 0.643204 | 0         |  |  |
|        |      | Shiraz-22T | 1673 | 0.611783 | 0         |  |  |
|        |      | Shiraz-25T | 1719 | 0.472955 | 0         |  |  |
|        |      | Shiraz-28T | 1762 | 0.562311 | 0         |  |  |
|        |      | Shiraz-29T | 1801 | 0.815343 | 0         |  |  |
|        |      | Shiraz-32T | 1870 | 0.729766 | 0         |  |  |
|        |      | Shiraz-35T | 1933 | 0.488535 | 0         |  |  |
|        |      | Shiraz-58T | 2223 | 0.833364 | 0         |  |  |
|        |      | Shiraz-71T | 2263 | 0.975531 | 0         |  |  |
| TCEAL8 | chrX | Shiraz-3T  | 242  | 0        | -0.336434 |  |  |
|        |      | Shiraz-4T  | 261  | 0        | -0.336249 |  |  |
|        |      | Shiraz-16T | 295  | 0.591657 | 0         |  |  |
|        |      | Shiraz-36T | 433  | 0        | -0.803961 |  |  |
|        |      | Shiraz-44T | 899  | 0        | -1.09697  |  |  |
|        |      | Shiraz-49T | 1170 | 0        | -0.967436 |  |  |
|        |      | Shiraz-18T | 1457 | 0.643204 | 0         |  |  |
|        |      | Shiraz-22T | 1673 | 0.611783 | 0         |  |  |
|        |      | Shiraz-25T | 1719 | 0.472955 | 0         |  |  |
|        |      | Shiraz-28T | 1762 | 0.562311 | 0         |  |  |
|        |      | Shiraz-29T | 1801 | 0.815343 | 0         |  |  |
|        |      | Shiraz-32T | 1870 | 0.729766 | 0         |  |  |
|        |      | Shiraz-35T | 1933 | 0.488535 | 0         |  |  |
|        |      | Shiraz-58T | 2223 | 0.833364 | 0         |  |  |
|        |      | Shiraz-71T | 2263 | 0.975531 | 0         |  |  |
|        |      | Shiraz-3T  | 242  | 0        | -0.336434 |  |  |
|        |      | Shiraz-4T  | 261  | 0        | -0.336249 |  |  |
|        |      | Shiraz-16T | 295  | 0.591657 | 0         |  |  |
|        |      | Shiraz-36T | 433  | 0        | -0.803961 |  |  |
|        |      | Shiraz-44T | 899  | 0        | -1.09697  |  |  |
|        |      | Shiraz-49T | 1170 | 0        | -0.967436 |  |  |
|        |      | Shiraz-18T | 1457 | 0.643204 | 0         |  |  |
|        |      | Shiraz-22T | 1673 | 0.611783 | 0         |  |  |
|        |      | Shiraz-25T | 1719 | 0.472955 | 0         |  |  |
|        |      | Shiraz-28T | 1762 | 0.562311 | 0         |  |  |



|        |      |            |      |          |           |  |
|--------|------|------------|------|----------|-----------|--|
|        |      | Shiraz-29T | 1801 | 0.815343 | 0         |  |
|        |      | Shiraz-32T | 1870 | 0.729766 | 0         |  |
|        |      | Shiraz-35T | 1933 | 0.488535 | 0         |  |
|        |      | Shiraz-58T | 2223 | 0.833364 | 0         |  |
|        |      | Shiraz-71T | 2263 | 0.975531 | 0         |  |
|        |      | Shiraz-3T  | 242  | 0        | -0.336434 |  |
|        |      | Shiraz-4T  | 261  | 0        | -0.336249 |  |
|        |      | Shiraz-16T | 295  | 0.591657 | 0         |  |
|        |      | Shiraz-36T | 433  | 0        | -0.803961 |  |
|        |      | Shiraz-44T | 899  | 0        | -1.09697  |  |
|        |      | Shiraz-49T | 1170 | 0        | -0.967436 |  |
|        |      | Shiraz-18T | 1457 | 0.643204 | 0         |  |
|        |      | Shiraz-22T | 1673 | 0.611783 | 0         |  |
|        |      | Shiraz-25T | 1719 | 0.472955 | 0         |  |
|        |      | Shiraz-28T | 1762 | 0.562311 | 0         |  |
|        |      | Shiraz-29T | 1801 | 0.815343 | 0         |  |
|        |      | Shiraz-32T | 1870 | 0.729766 | 0         |  |
|        |      | Shiraz-35T | 1933 | 0.488535 | 0         |  |
|        |      | Shiraz-58T | 2223 | 0.833364 | 0         |  |
|        |      | Shiraz-71T | 2263 | 0.975531 | 0         |  |
| TCEANC | chrX | Shiraz-3T  | 235  | 0        | -0.28401  |  |
|        |      | Shiraz-4T  | 260  | 0        | -0.324128 |  |
|        |      | Shiraz-16T | 294  | 0.655804 | 0         |  |
|        |      | Shiraz-36T | 431  | 0        | -0.78035  |  |
|        |      | Shiraz-44T | 891  | 0        | -0.954044 |  |
|        |      | Shiraz-49T | 1166 | 0        | -0.917235 |  |
|        |      | Shiraz-9T  | 1368 | 0.199713 | 0         |  |
|        |      | Shiraz-18T | 1455 | 0        | -0.186773 |  |
|        |      | Shiraz-22T | 1669 | 0.695915 | 0         |  |
|        |      | Shiraz-25T | 1717 | 0.420447 | 0         |  |
|        |      | Shiraz-28T | 1760 | 0.538181 | 0         |  |
|        |      | Shiraz-29T | 1800 | 0.672527 | 0         |  |
|        |      | Shiraz-32T | 1869 | 0.776805 | 0         |  |
|        |      | Shiraz-35T | 1932 | 0.507141 | 0         |  |
|        |      | Shiraz-40T | 2051 | 0.098506 | 0         |  |
|        |      | Shiraz-58T | 2221 | 0.871948 | 0         |  |
|        |      | Shiraz-71T | 2260 | 0.68394  | 0         |  |
|        |      | Shiraz-71T | 2261 | 0.508399 | 0         |  |
|        |      | Shiraz-3T  | 235  | 0        | -0.28401  |  |
|        |      | Shiraz-4T  | 260  | 0        | -0.324128 |  |
|        |      | Shiraz-16T | 294  | 0.655804 | 0         |  |
|        |      | Shiraz-36T | 431  | 0        | -0.78035  |  |
|        |      | Shiraz-44T | 891  | 0        | -0.954044 |  |
|        |      | Shiraz-49T | 1166 | 0        | -0.917235 |  |
|        |      | Shiraz-9T  | 1368 | 0.199713 | 0         |  |
|        |      | Shiraz-18T | 1455 | 0        | -0.186773 |  |
|        |      | Shiraz-22T | 1669 | 0.695915 | 0         |  |

|       |      |            |      |          |           |  |  |
|-------|------|------------|------|----------|-----------|--|--|
|       |      | Shiraz-25T | 1717 | 0.420447 | 0         |  |  |
|       |      | Shiraz-28T | 1760 | 0.538181 | 0         |  |  |
|       |      | Shiraz-29T | 1800 | 0.672527 | 0         |  |  |
|       |      | Shiraz-32T | 1869 | 0.776805 | 0         |  |  |
|       |      | Shiraz-35T | 1932 | 0.507141 | 0         |  |  |
|       |      | Shiraz-40T | 2051 | 0.098506 | 0         |  |  |
|       |      | Shiraz-58T | 2221 | 0.871948 | 0         |  |  |
|       |      | Shiraz-71T | 2260 | 0.68394  | 0         |  |  |
|       |      | Shiraz-71T | 2261 | 0.508399 | 0         |  |  |
|       |      | Shiraz-3T  | 235  | 0        | -0.28401  |  |  |
|       |      | Shiraz-4T  | 260  | 0        | -0.324128 |  |  |
|       |      | Shiraz-16T | 294  | 0.655804 | 0         |  |  |
|       |      | Shiraz-36T | 431  | 0        | -0.78035  |  |  |
|       |      | Shiraz-44T | 891  | 0        | -0.954044 |  |  |
|       |      | Shiraz-49T | 1166 | 0        | -0.917235 |  |  |
|       |      | Shiraz-9T  | 1368 | 0.199713 | 0         |  |  |
|       |      | Shiraz-18T | 1455 | 0        | -0.186773 |  |  |
|       |      | Shiraz-22T | 1669 | 0.695915 | 0         |  |  |
|       |      | Shiraz-25T | 1717 | 0.420447 | 0         |  |  |
|       |      | Shiraz-28T | 1760 | 0.538181 | 0         |  |  |
|       |      | Shiraz-29T | 1800 | 0.672527 | 0         |  |  |
|       |      | Shiraz-32T | 1869 | 0.776805 | 0         |  |  |
|       |      | Shiraz-35T | 1932 | 0.507141 | 0         |  |  |
|       |      | Shiraz-40T | 2051 | 0.098506 | 0         |  |  |
|       |      | Shiraz-58T | 2221 | 0.871948 | 0         |  |  |
|       |      | Shiraz-71T | 2260 | 0.68394  | 0         |  |  |
|       |      | Shiraz-71T | 2261 | 0.508399 | 0         |  |  |
| TDGF3 | chrX | Shiraz-3T  | 242  | 0        | -0.336434 |  |  |
|       |      | Shiraz-4T  | 261  | 0        | -0.336249 |  |  |
|       |      | Shiraz-16T | 295  | 0.591657 | 0         |  |  |
|       |      | Shiraz-36T | 433  | 0        | -0.803961 |  |  |
|       |      | Shiraz-44T | 899  | 0        | -1.09697  |  |  |
|       |      | Shiraz-49T | 1170 | 0        | -0.967436 |  |  |
|       |      | Shiraz-18T | 1457 | 0.643204 | 0         |  |  |
|       |      | Shiraz-22T | 1673 | 0.611783 | 0         |  |  |
|       |      | Shiraz-25T | 1719 | 0.472955 | 0         |  |  |
|       |      | Shiraz-28T | 1762 | 0.562311 | 0         |  |  |
|       |      | Shiraz-29T | 1801 | 0.815343 | 0         |  |  |
|       |      | Shiraz-32T | 1870 | 0.729766 | 0         |  |  |
|       |      | Shiraz-35T | 1933 | 0.488535 | 0         |  |  |
|       |      | Shiraz-58T | 2223 | 0.833364 | 0         |  |  |
|       |      | Shiraz-71T | 2263 | 0.975531 | 0         |  |  |
|       |      | Shiraz-3T  | 242  | 0        | -0.336434 |  |  |
|       |      | Shiraz-4T  | 261  | 0        | -0.336249 |  |  |
|       |      | Shiraz-16T | 295  | 0.591657 | 0         |  |  |
|       |      | Shiraz-36T | 433  | 0        | -0.803961 |  |  |
|       |      | Shiraz-44T | 899  | 0        | -1.09697  |  |  |

|        |      |            |      |          |           |  |  |
|--------|------|------------|------|----------|-----------|--|--|
|        |      | Shiraz-49T | 1170 | 0        | -0.967436 |  |  |
|        |      | Shiraz-18T | 1457 | 0.643204 | 0         |  |  |
|        |      | Shiraz-22T | 1673 | 0.611783 | 0         |  |  |
|        |      | Shiraz-25T | 1719 | 0.472955 | 0         |  |  |
|        |      | Shiraz-28T | 1762 | 0.562311 | 0         |  |  |
|        |      | Shiraz-29T | 1801 | 0.815343 | 0         |  |  |
|        |      | Shiraz-32T | 1870 | 0.729766 | 0         |  |  |
|        |      | Shiraz-35T | 1933 | 0.488535 | 0         |  |  |
|        |      | Shiraz-58T | 2223 | 0.833364 | 0         |  |  |
|        |      | Shiraz-71T | 2263 | 0.975531 | 0         |  |  |
|        |      | Shiraz-3T  | 242  | 0        | -0.336434 |  |  |
|        |      | Shiraz-4T  | 261  | 0        | -0.336249 |  |  |
|        |      | Shiraz-16T | 295  | 0.591657 | 0         |  |  |
|        |      | Shiraz-36T | 433  | 0        | -0.803961 |  |  |
|        |      | Shiraz-44T | 899  | 0        | -1.09697  |  |  |
|        |      | Shiraz-49T | 1170 | 0        | -0.967436 |  |  |
|        |      | Shiraz-18T | 1457 | 0.643204 | 0         |  |  |
|        |      | Shiraz-22T | 1673 | 0.611783 | 0         |  |  |
|        |      | Shiraz-25T | 1719 | 0.472955 | 0         |  |  |
|        |      | Shiraz-28T | 1762 | 0.562311 | 0         |  |  |
|        |      | Shiraz-29T | 1801 | 0.815343 | 0         |  |  |
|        |      | Shiraz-32T | 1870 | 0.729766 | 0         |  |  |
|        |      | Shiraz-35T | 1933 | 0.488535 | 0         |  |  |
|        |      | Shiraz-58T | 2223 | 0.833364 | 0         |  |  |
|        |      | Shiraz-71T | 2263 | 0.975531 | 0         |  |  |
| TECPR1 | chr7 | Shiraz-3T  | 90   | 0.219276 | 0         |  |  |
|        |      | Shiraz-3T  | 94   | 0.74735  | 0         |  |  |
|        |      | Shiraz-4T  | 253  | 0.372918 | 0         |  |  |
|        |      | Shiraz-31T | 316  | 0.219196 | 0         |  |  |
|        |      | Shiraz-36T | 378  | 0.179558 | 0         |  |  |
|        |      | Shiraz-36T | 381  | 0.332628 | 0         |  |  |
|        |      | Shiraz-44T | 639  | 1.035032 | 0         |  |  |
|        |      | Shiraz-46T | 943  | 0.093799 | 0         |  |  |
|        |      | Shiraz-46T | 946  | 0.299835 | 0         |  |  |
|        |      | Shiraz-47T | 1030 | 0.257728 | 0         |  |  |
|        |      | Shiraz-49T | 1120 | 0.281656 | 0         |  |  |
|        |      | Shiraz-77T | 1225 | 0        | -0.117922 |  |  |
|        |      | Shiraz-77T | 1227 | 0.196445 | 0         |  |  |
|        |      | Shiraz-9T  | 1324 | 0.679266 | 0         |  |  |
|        |      | Shiraz-18T | 1434 | 0.244465 | 0         |  |  |
|        |      | Shiraz-22T | 1549 | 0        | -0.319623 |  |  |
|        |      | Shiraz-22T | 1551 | 0.324011 | 0         |  |  |
|        |      | Shiraz-25T | 1698 | 0.21835  | 0         |  |  |
|        |      | Shiraz-28T | 1735 | 0.350744 | 0         |  |  |
|        |      | Shiraz-29T | 1778 | 0.120767 | 0         |  |  |
|        |      | Shiraz-32T | 1833 | 0.551336 | 0         |  |  |
|        |      | Shiraz-38T | 1951 | 0.250891 | 0         |  |  |

|  |            |      |          |           |  |
|--|------------|------|----------|-----------|--|
|  | Shiraz-53T | 2078 | 0.287202 | 0         |  |
|  | Shiraz-71T | 2238 | 0.603631 | 0         |  |
|  | Shiraz-3T  | 90   | 0.219276 | 0         |  |
|  | Shiraz-3T  | 94   | 0.74735  | 0         |  |
|  | Shiraz-4T  | 253  | 0.372918 | 0         |  |
|  | Shiraz-31T | 316  | 0.219196 | 0         |  |
|  | Shiraz-36T | 378  | 0.179558 | 0         |  |
|  | Shiraz-36T | 381  | 0.332628 | 0         |  |
|  | Shiraz-44T | 639  | 1.035032 | 0         |  |
|  | Shiraz-46T | 943  | 0.093799 | 0         |  |
|  | Shiraz-46T | 946  | 0.299835 | 0         |  |
|  | Shiraz-47T | 1030 | 0.257728 | 0         |  |
|  | Shiraz-49T | 1120 | 0.281656 | 0         |  |
|  | Shiraz-77T | 1225 | 0        | -0.117922 |  |
|  | Shiraz-77T | 1227 | 0.196445 | 0         |  |
|  | Shiraz-9T  | 1324 | 0.679266 | 0         |  |
|  | Shiraz-18T | 1434 | 0.244465 | 0         |  |
|  | Shiraz-22T | 1549 | 0        | -0.319623 |  |
|  | Shiraz-22T | 1551 | 0.324011 | 0         |  |
|  | Shiraz-25T | 1698 | 0.21835  | 0         |  |
|  | Shiraz-28T | 1735 | 0.350744 | 0         |  |
|  | Shiraz-29T | 1778 | 0.120767 | 0         |  |
|  | Shiraz-32T | 1833 | 0.551336 | 0         |  |
|  | Shiraz-38T | 1951 | 0.250891 | 0         |  |
|  | Shiraz-53T | 2078 | 0.287202 | 0         |  |
|  | Shiraz-71T | 2238 | 0.603631 | 0         |  |
|  | Shiraz-3T  | 90   | 0.219276 | 0         |  |
|  | Shiraz-3T  | 94   | 0.74735  | 0         |  |
|  | Shiraz-4T  | 253  | 0.372918 | 0         |  |
|  | Shiraz-31T | 316  | 0.219196 | 0         |  |
|  | Shiraz-36T | 378  | 0.179558 | 0         |  |
|  | Shiraz-36T | 381  | 0.332628 | 0         |  |
|  | Shiraz-44T | 639  | 1.035032 | 0         |  |
|  | Shiraz-46T | 943  | 0.093799 | 0         |  |
|  | Shiraz-46T | 946  | 0.299835 | 0         |  |
|  | Shiraz-47T | 1030 | 0.257728 | 0         |  |
|  | Shiraz-49T | 1120 | 0.281656 | 0         |  |
|  | Shiraz-77T | 1225 | 0        | -0.117922 |  |
|  | Shiraz-77T | 1227 | 0.196445 | 0         |  |
|  | Shiraz-9T  | 1324 | 0.679266 | 0         |  |
|  | Shiraz-18T | 1434 | 0.244465 | 0         |  |
|  | Shiraz-22T | 1549 | 0        | -0.319623 |  |
|  | Shiraz-22T | 1551 | 0.324011 | 0         |  |
|  | Shiraz-25T | 1698 | 0.21835  | 0         |  |
|  | Shiraz-28T | 1735 | 0.350744 | 0         |  |
|  | Shiraz-29T | 1778 | 0.120767 | 0         |  |
|  | Shiraz-32T | 1833 | 0.551336 | 0         |  |

|     |      |            |      |          |           |  |  |
|-----|------|------------|------|----------|-----------|--|--|
|     |      | Shiraz-38T | 1951 | 0.250891 | 0         |  |  |
|     |      | Shiraz-53T | 2078 | 0.287202 | 0         |  |  |
|     |      | Shiraz-71T | 2238 | 0.603631 | 0         |  |  |
| TES | chr7 | Shiraz-3T  | 90   | 0.219276 | 0         |  |  |
|     |      | Shiraz-3T  | 90   | 0.219276 | 0         |  |  |
|     |      | Shiraz-3T  | 95   | 0        | -0.077623 |  |  |
|     |      | Shiraz-3T  | 95   | 0        | -0.077623 |  |  |
|     |      | Shiraz-4T  | 253  | 0.372918 | 0         |  |  |
|     |      | Shiraz-4T  | 253  | 0.372918 | 0         |  |  |
|     |      | Shiraz-36T | 378  | 0.179558 | 0         |  |  |
|     |      | Shiraz-36T | 378  | 0.179558 | 0         |  |  |
|     |      | Shiraz-36T | 382  | 0.081739 | 0         |  |  |
|     |      | Shiraz-36T | 382  | 0.081739 | 0         |  |  |
|     |      | Shiraz-44T | 641  | 0        | -0.477846 |  |  |
|     |      | Shiraz-44T | 641  | 0        | -0.477846 |  |  |
|     |      | Shiraz-46T | 943  | 0.093799 | 0         |  |  |
|     |      | Shiraz-46T | 943  | 0.093799 | 0         |  |  |
|     |      | Shiraz-46T | 947  | 0        | -0.010843 |  |  |
|     |      | Shiraz-46T | 947  | 0        | -0.010843 |  |  |
|     |      | Shiraz-47T | 1031 | 0        | -0.117529 |  |  |
|     |      | Shiraz-47T | 1031 | 0        | -0.117529 |  |  |
|     |      | Shiraz-49T | 1121 | 0        | -0.138569 |  |  |
|     |      | Shiraz-49T | 1121 | 0        | -0.138569 |  |  |
|     |      | Shiraz-77T | 1225 | 0        | -0.117922 |  |  |
|     |      | Shiraz-77T | 1225 | 0        | -0.117922 |  |  |
|     |      | Shiraz-77T | 1228 | 0        | -0.238084 |  |  |
|     |      | Shiraz-77T | 1228 | 0        | -0.238084 |  |  |
|     |      | Shiraz-18T | 1434 | 0.244465 | 0         |  |  |
|     |      | Shiraz-18T | 1434 | 0.244465 | 0         |  |  |
|     |      | Shiraz-22T | 1549 | 0        | -0.319623 |  |  |
|     |      | Shiraz-22T | 1549 | 0        | -0.319623 |  |  |
|     |      | Shiraz-22T | 1552 | 0        | -0.50686  |  |  |
|     |      | Shiraz-22T | 1552 | 0        | -0.50686  |  |  |
|     |      | Shiraz-25T | 1698 | 0.21835  | 0         |  |  |
|     |      | Shiraz-25T | 1698 | 0.21835  | 0         |  |  |
|     |      | Shiraz-28T | 1735 | 0.350744 | 0         |  |  |
|     |      | Shiraz-28T | 1735 | 0.350744 | 0         |  |  |
|     |      | Shiraz-29T | 1778 | 0.120767 | 0         |  |  |
|     |      | Shiraz-29T | 1778 | 0.120767 | 0         |  |  |
|     |      | Shiraz-32T | 1833 | 0.551336 | 0         |  |  |
|     |      | Shiraz-32T | 1833 | 0.551336 | 0         |  |  |
|     |      | Shiraz-32T | 1835 | 0.092727 | 0         |  |  |
|     |      | Shiraz-32T | 1835 | 0.092727 | 0         |  |  |
|     |      | Shiraz-38T | 1951 | 0.250891 | 0         |  |  |
|     |      | Shiraz-38T | 1951 | 0.250891 | 0         |  |  |
|     |      | Shiraz-53T | 2078 | 0.287202 | 0         |  |  |
|     |      | Shiraz-53T | 2078 | 0.287202 | 0         |  |  |

|  |            |      |          |           |  |
|--|------------|------|----------|-----------|--|
|  | Shiraz-58T | 2161 | 0        | -0.187744 |  |
|  | Shiraz-58T | 2161 | 0        | -0.187744 |  |
|  | Shiraz-71T | 2238 | 0.603631 | 0         |  |
|  | Shiraz-71T | 2238 | 0.603631 | 0         |  |
|  | Shiraz-3T  | 90   | 0.219276 | 0         |  |
|  | Shiraz-3T  | 90   | 0.219276 | 0         |  |
|  | Shiraz-3T  | 95   | 0        | -0.077623 |  |
|  | Shiraz-3T  | 95   | 0        | -0.077623 |  |
|  | Shiraz-4T  | 253  | 0.372918 | 0         |  |
|  | Shiraz-4T  | 253  | 0.372918 | 0         |  |
|  | Shiraz-36T | 378  | 0.179558 | 0         |  |
|  | Shiraz-36T | 378  | 0.179558 | 0         |  |
|  | Shiraz-36T | 382  | 0.081739 | 0         |  |
|  | Shiraz-36T | 382  | 0.081739 | 0         |  |
|  | Shiraz-44T | 641  | 0        | -0.477846 |  |
|  | Shiraz-44T | 641  | 0        | -0.477846 |  |
|  | Shiraz-46T | 943  | 0.093799 | 0         |  |
|  | Shiraz-46T | 943  | 0.093799 | 0         |  |
|  | Shiraz-46T | 947  | 0        | -0.010843 |  |
|  | Shiraz-46T | 947  | 0        | -0.010843 |  |
|  | Shiraz-47T | 1031 | 0        | -0.117529 |  |
|  | Shiraz-47T | 1031 | 0        | -0.117529 |  |
|  | Shiraz-49T | 1121 | 0        | -0.138569 |  |
|  | Shiraz-49T | 1121 | 0        | -0.138569 |  |
|  | Shiraz-77T | 1225 | 0        | -0.117922 |  |
|  | Shiraz-77T | 1225 | 0        | -0.117922 |  |
|  | Shiraz-77T | 1228 | 0        | -0.238084 |  |
|  | Shiraz-77T | 1228 | 0        | -0.238084 |  |
|  | Shiraz-18T | 1434 | 0.244465 | 0         |  |
|  | Shiraz-18T | 1434 | 0.244465 | 0         |  |
|  | Shiraz-22T | 1549 | 0        | -0.319623 |  |
|  | Shiraz-22T | 1549 | 0        | -0.319623 |  |
|  | Shiraz-22T | 1552 | 0        | -0.50686  |  |
|  | Shiraz-22T | 1552 | 0        | -0.50686  |  |
|  | Shiraz-25T | 1698 | 0.21835  | 0         |  |
|  | Shiraz-25T | 1698 | 0.21835  | 0         |  |
|  | Shiraz-28T | 1735 | 0.350744 | 0         |  |
|  | Shiraz-28T | 1735 | 0.350744 | 0         |  |
|  | Shiraz-29T | 1778 | 0.120767 | 0         |  |
|  | Shiraz-29T | 1778 | 0.120767 | 0         |  |
|  | Shiraz-32T | 1833 | 0.551336 | 0         |  |
|  | Shiraz-32T | 1833 | 0.551336 | 0         |  |
|  | Shiraz-32T | 1835 | 0.092727 | 0         |  |
|  | Shiraz-32T | 1835 | 0.092727 | 0         |  |
|  | Shiraz-38T | 1951 | 0.250891 | 0         |  |
|  | Shiraz-38T | 1951 | 0.250891 | 0         |  |
|  | Shiraz-53T | 2078 | 0.287202 | 0         |  |

|  |            |      |          |           |  |
|--|------------|------|----------|-----------|--|
|  | Shiraz-53T | 2078 | 0.287202 | 0         |  |
|  | Shiraz-58T | 2161 | 0        | -0.187744 |  |
|  | Shiraz-58T | 2161 | 0        | -0.187744 |  |
|  | Shiraz-71T | 2238 | 0.603631 | 0         |  |
|  | Shiraz-71T | 2238 | 0.603631 | 0         |  |
|  | Shiraz-3T  | 90   | 0.219276 | 0         |  |
|  | Shiraz-3T  | 90   | 0.219276 | 0         |  |
|  | Shiraz-3T  | 95   | 0        | -0.077623 |  |
|  | Shiraz-3T  | 95   | 0        | -0.077623 |  |
|  | Shiraz-4T  | 253  | 0.372918 | 0         |  |
|  | Shiraz-4T  | 253  | 0.372918 | 0         |  |
|  | Shiraz-36T | 378  | 0.179558 | 0         |  |
|  | Shiraz-36T | 378  | 0.179558 | 0         |  |
|  | Shiraz-36T | 382  | 0.081739 | 0         |  |
|  | Shiraz-36T | 382  | 0.081739 | 0         |  |
|  | Shiraz-44T | 641  | 0        | -0.477846 |  |
|  | Shiraz-44T | 641  | 0        | -0.477846 |  |
|  | Shiraz-46T | 943  | 0.093799 | 0         |  |
|  | Shiraz-46T | 943  | 0.093799 | 0         |  |
|  | Shiraz-46T | 947  | 0        | -0.010843 |  |
|  | Shiraz-46T | 947  | 0        | -0.010843 |  |
|  | Shiraz-47T | 1031 | 0        | -0.117529 |  |
|  | Shiraz-47T | 1031 | 0        | -0.117529 |  |
|  | Shiraz-49T | 1121 | 0        | -0.138569 |  |
|  | Shiraz-49T | 1121 | 0        | -0.138569 |  |
|  | Shiraz-77T | 1225 | 0        | -0.117922 |  |
|  | Shiraz-77T | 1225 | 0        | -0.117922 |  |
|  | Shiraz-77T | 1228 | 0        | -0.238084 |  |
|  | Shiraz-77T | 1228 | 0        | -0.238084 |  |
|  | Shiraz-18T | 1434 | 0.244465 | 0         |  |
|  | Shiraz-18T | 1434 | 0.244465 | 0         |  |
|  | Shiraz-22T | 1549 | 0        | -0.319623 |  |
|  | Shiraz-22T | 1549 | 0        | -0.319623 |  |
|  | Shiraz-22T | 1552 | 0        | -0.50686  |  |
|  | Shiraz-22T | 1552 | 0        | -0.50686  |  |
|  | Shiraz-25T | 1698 | 0.21835  | 0         |  |
|  | Shiraz-25T | 1698 | 0.21835  | 0         |  |
|  | Shiraz-28T | 1735 | 0.350744 | 0         |  |
|  | Shiraz-28T | 1735 | 0.350744 | 0         |  |
|  | Shiraz-29T | 1778 | 0.120767 | 0         |  |
|  | Shiraz-29T | 1778 | 0.120767 | 0         |  |
|  | Shiraz-32T | 1833 | 0.551336 | 0         |  |
|  | Shiraz-32T | 1833 | 0.551336 | 0         |  |
|  | Shiraz-32T | 1835 | 0.092727 | 0         |  |
|  | Shiraz-32T | 1835 | 0.092727 | 0         |  |
|  | Shiraz-38T | 1951 | 0.250891 | 0         |  |
|  | Shiraz-38T | 1951 | 0.250891 | 0         |  |

|       |      |            |      |          |           |  |
|-------|------|------------|------|----------|-----------|--|
|       |      | Shiraz-53T | 2078 | 0.287202 | 0         |  |
|       |      | Shiraz-53T | 2078 | 0.287202 | 0         |  |
|       |      | Shiraz-58T | 2161 | 0        | -0.187744 |  |
|       |      | Shiraz-58T | 2161 | 0        | -0.187744 |  |
|       |      | Shiraz-71T | 2238 | 0.603631 | 0         |  |
|       |      | Shiraz-71T | 2238 | 0.603631 | 0         |  |
| TEX11 | chrX | Shiraz-4T  | 261  | 0        | -0.336249 |  |
|       |      | Shiraz-16T | 295  | 0.591657 | 0         |  |
|       |      | Shiraz-36T | 433  | 0        | -0.803961 |  |
|       |      | Shiraz-44T | 899  | 0        | -1.09697  |  |
|       |      | Shiraz-44T | 900  | 0        | -0.584284 |  |
|       |      | Shiraz-44T | 901  | 0        | -1.000082 |  |
|       |      | Shiraz-49T | 1170 | 0        | -0.967436 |  |
|       |      | Shiraz-49T | 1171 | 0        | -0.612379 |  |
|       |      | Shiraz-77T | 1283 | 0.296555 | 0         |  |
|       |      | Shiraz-18T | 1457 | 0.643204 | 0         |  |
|       |      | Shiraz-22T | 1673 | 0.611783 | 0         |  |
|       |      | Shiraz-22T | 1674 | 0.887899 | 0         |  |
|       |      | Shiraz-25T | 1719 | 0.472955 | 0         |  |
|       |      | Shiraz-28T | 1762 | 0.562311 | 0         |  |
|       |      | Shiraz-29T | 1801 | 0.815343 | 0         |  |
|       |      | Shiraz-32T | 1870 | 0.729766 | 0         |  |
|       |      | Shiraz-35T | 1933 | 0.488535 | 0         |  |
|       |      | Shiraz-58T | 2223 | 0.833364 | 0         |  |
|       |      | Shiraz-58T | 2224 | 1.076575 | 0         |  |
|       |      | Shiraz-71T | 2263 | 0.975531 | 0         |  |
|       |      | Shiraz-4T  | 261  | 0        | -0.336249 |  |
|       |      | Shiraz-16T | 295  | 0.591657 | 0         |  |
|       |      | Shiraz-36T | 433  | 0        | -0.803961 |  |
|       |      | Shiraz-44T | 899  | 0        | -1.09697  |  |
|       |      | Shiraz-44T | 900  | 0        | -0.584284 |  |
|       |      | Shiraz-44T | 901  | 0        | -1.000082 |  |
|       |      | Shiraz-49T | 1170 | 0        | -0.967436 |  |
|       |      | Shiraz-49T | 1171 | 0        | -0.612379 |  |
|       |      | Shiraz-77T | 1283 | 0.296555 | 0         |  |
|       |      | Shiraz-18T | 1457 | 0.643204 | 0         |  |
|       |      | Shiraz-22T | 1673 | 0.611783 | 0         |  |
|       |      | Shiraz-22T | 1674 | 0.887899 | 0         |  |
|       |      | Shiraz-25T | 1719 | 0.472955 | 0         |  |
|       |      | Shiraz-28T | 1762 | 0.562311 | 0         |  |
|       |      | Shiraz-29T | 1801 | 0.815343 | 0         |  |
|       |      | Shiraz-32T | 1870 | 0.729766 | 0         |  |
|       |      | Shiraz-35T | 1933 | 0.488535 | 0         |  |
|       |      | Shiraz-58T | 2223 | 0.833364 | 0         |  |
|       |      | Shiraz-58T | 2224 | 1.076575 | 0         |  |
|       |      | Shiraz-71T | 2263 | 0.975531 | 0         |  |
|       |      | Shiraz-4T  | 261  | 0        | -0.336249 |  |



|        |      |            |      |          |           |  |  |
|--------|------|------------|------|----------|-----------|--|--|
|        |      | Shiraz-16T | 295  | 0.591657 | 0         |  |  |
|        |      | Shiraz-36T | 433  | 0        | -0.803961 |  |  |
|        |      | Shiraz-44T | 899  | 0        | -1.09697  |  |  |
|        |      | Shiraz-44T | 900  | 0        | -0.584284 |  |  |
|        |      | Shiraz-44T | 901  | 0        | -1.000082 |  |  |
|        |      | Shiraz-49T | 1170 | 0        | -0.967436 |  |  |
|        |      | Shiraz-49T | 1171 | 0        | -0.612379 |  |  |
|        |      | Shiraz-77T | 1283 | 0.296555 | 0         |  |  |
|        |      | Shiraz-18T | 1457 | 0.643204 | 0         |  |  |
|        |      | Shiraz-22T | 1673 | 0.611783 | 0         |  |  |
|        |      | Shiraz-22T | 1674 | 0.887899 | 0         |  |  |
|        |      | Shiraz-25T | 1719 | 0.472955 | 0         |  |  |
|        |      | Shiraz-28T | 1762 | 0.562311 | 0         |  |  |
|        |      | Shiraz-29T | 1801 | 0.815343 | 0         |  |  |
|        |      | Shiraz-32T | 1870 | 0.729766 | 0         |  |  |
|        |      | Shiraz-35T | 1933 | 0.488535 | 0         |  |  |
|        |      | Shiraz-58T | 2223 | 0.833364 | 0         |  |  |
|        |      | Shiraz-58T | 2224 | 1.076575 | 0         |  |  |
|        |      | Shiraz-71T | 2263 | 0.975531 | 0         |  |  |
| TEX13A | chrX | Shiraz-3T  | 242  | 0        | -0.336434 |  |  |
|        |      | Shiraz-4T  | 261  | 0        | -0.336249 |  |  |
|        |      | Shiraz-16T | 295  | 0.591657 | 0         |  |  |
|        |      | Shiraz-36T | 433  | 0        | -0.803961 |  |  |
|        |      | Shiraz-44T | 899  | 0        | -1.09697  |  |  |
|        |      | Shiraz-49T | 1170 | 0        | -0.967436 |  |  |
|        |      | Shiraz-18T | 1457 | 0.643204 | 0         |  |  |
|        |      | Shiraz-22T | 1673 | 0.611783 | 0         |  |  |
|        |      | Shiraz-25T | 1719 | 0.472955 | 0         |  |  |
|        |      | Shiraz-28T | 1762 | 0.562311 | 0         |  |  |
|        |      | Shiraz-29T | 1801 | 0.815343 | 0         |  |  |
|        |      | Shiraz-32T | 1870 | 0.729766 | 0         |  |  |
|        |      | Shiraz-35T | 1933 | 0.488535 | 0         |  |  |
|        |      | Shiraz-58T | 2223 | 0.833364 | 0         |  |  |
|        |      | Shiraz-71T | 2263 | 0.975531 | 0         |  |  |
|        |      | Shiraz-3T  | 242  | 0        | -0.336434 |  |  |
|        |      | Shiraz-4T  | 261  | 0        | -0.336249 |  |  |
|        |      | Shiraz-16T | 295  | 0.591657 | 0         |  |  |
|        |      | Shiraz-36T | 433  | 0        | -0.803961 |  |  |
|        |      | Shiraz-44T | 899  | 0        | -1.09697  |  |  |
|        |      | Shiraz-49T | 1170 | 0        | -0.967436 |  |  |
|        |      | Shiraz-18T | 1457 | 0.643204 | 0         |  |  |
|        |      | Shiraz-22T | 1673 | 0.611783 | 0         |  |  |
|        |      | Shiraz-25T | 1719 | 0.472955 | 0         |  |  |
|        |      | Shiraz-28T | 1762 | 0.562311 | 0         |  |  |
|        |      | Shiraz-29T | 1801 | 0.815343 | 0         |  |  |
|        |      | Shiraz-32T | 1870 | 0.729766 | 0         |  |  |
|        |      | Shiraz-35T | 1933 | 0.488535 | 0         |  |  |

|        |      |            |      |          |           |  |
|--------|------|------------|------|----------|-----------|--|
|        |      | Shiraz-58T | 2223 | 0.833364 | 0         |  |
|        |      | Shiraz-71T | 2263 | 0.975531 | 0         |  |
|        |      | Shiraz-3T  | 242  | 0        | -0.336434 |  |
|        |      | Shiraz-4T  | 261  | 0        | -0.336249 |  |
|        |      | Shiraz-16T | 295  | 0.591657 | 0         |  |
|        |      | Shiraz-36T | 433  | 0        | -0.803961 |  |
|        |      | Shiraz-44T | 899  | 0        | -1.09697  |  |
|        |      | Shiraz-49T | 1170 | 0        | -0.967436 |  |
|        |      | Shiraz-18T | 1457 | 0.643204 | 0         |  |
|        |      | Shiraz-22T | 1673 | 0.611783 | 0         |  |
|        |      | Shiraz-25T | 1719 | 0.472955 | 0         |  |
|        |      | Shiraz-28T | 1762 | 0.562311 | 0         |  |
|        |      | Shiraz-29T | 1801 | 0.815343 | 0         |  |
|        |      | Shiraz-32T | 1870 | 0.729766 | 0         |  |
|        |      | Shiraz-35T | 1933 | 0.488535 | 0         |  |
|        |      | Shiraz-58T | 2223 | 0.833364 | 0         |  |
|        |      | Shiraz-71T | 2263 | 0.975531 | 0         |  |
| TEX13B | chrX | Shiraz-3T  | 242  | 0        | -0.336434 |  |
|        |      | Shiraz-4T  | 261  | 0        | -0.336249 |  |
|        |      | Shiraz-16T | 295  | 0.591657 | 0         |  |
|        |      | Shiraz-36T | 433  | 0        | -0.803961 |  |
|        |      | Shiraz-44T | 899  | 0        | -1.09697  |  |
|        |      | Shiraz-49T | 1170 | 0        | -0.967436 |  |
|        |      | Shiraz-18T | 1457 | 0.643204 | 0         |  |
|        |      | Shiraz-22T | 1673 | 0.611783 | 0         |  |
|        |      | Shiraz-25T | 1719 | 0.472955 | 0         |  |
|        |      | Shiraz-28T | 1762 | 0.562311 | 0         |  |
|        |      | Shiraz-29T | 1801 | 0.815343 | 0         |  |
|        |      | Shiraz-32T | 1870 | 0.729766 | 0         |  |
|        |      | Shiraz-35T | 1933 | 0.488535 | 0         |  |
|        |      | Shiraz-58T | 2223 | 0.833364 | 0         |  |
|        |      | Shiraz-71T | 2263 | 0.975531 | 0         |  |
|        |      | Shiraz-3T  | 242  | 0        | -0.336434 |  |
|        |      | Shiraz-4T  | 261  | 0        | -0.336249 |  |
|        |      | Shiraz-16T | 295  | 0.591657 | 0         |  |
|        |      | Shiraz-36T | 433  | 0        | -0.803961 |  |
|        |      | Shiraz-44T | 899  | 0        | -1.09697  |  |
|        |      | Shiraz-49T | 1170 | 0        | -0.967436 |  |
|        |      | Shiraz-18T | 1457 | 0.643204 | 0         |  |
|        |      | Shiraz-22T | 1673 | 0.611783 | 0         |  |
|        |      | Shiraz-25T | 1719 | 0.472955 | 0         |  |
|        |      | Shiraz-28T | 1762 | 0.562311 | 0         |  |
|        |      | Shiraz-29T | 1801 | 0.815343 | 0         |  |
|        |      | Shiraz-32T | 1870 | 0.729766 | 0         |  |
|        |      | Shiraz-35T | 1933 | 0.488535 | 0         |  |
|        |      | Shiraz-58T | 2223 | 0.833364 | 0         |  |
|        |      | Shiraz-71T | 2263 | 0.975531 | 0         |  |

|       |      |            |      |          |           |  |  |
|-------|------|------------|------|----------|-----------|--|--|
|       |      | Shiraz-3T  | 242  | 0        | -0.336434 |  |  |
|       |      | Shiraz-4T  | 261  | 0        | -0.336249 |  |  |
|       |      | Shiraz-16T | 295  | 0.591657 | 0         |  |  |
|       |      | Shiraz-36T | 433  | 0        | -0.803961 |  |  |
|       |      | Shiraz-44T | 899  | 0        | -1.09697  |  |  |
|       |      | Shiraz-49T | 1170 | 0        | -0.967436 |  |  |
|       |      | Shiraz-18T | 1457 | 0.643204 | 0         |  |  |
|       |      | Shiraz-22T | 1673 | 0.611783 | 0         |  |  |
|       |      | Shiraz-25T | 1719 | 0.472955 | 0         |  |  |
|       |      | Shiraz-28T | 1762 | 0.562311 | 0         |  |  |
|       |      | Shiraz-29T | 1801 | 0.815343 | 0         |  |  |
|       |      | Shiraz-32T | 1870 | 0.729766 | 0         |  |  |
|       |      | Shiraz-35T | 1933 | 0.488535 | 0         |  |  |
|       |      | Shiraz-58T | 2223 | 0.833364 | 0         |  |  |
|       |      | Shiraz-71T | 2263 | 0.975531 | 0         |  |  |
| TEX28 | chrX | Shiraz-3T  | 246  | 0.531858 | 0         |  |  |
|       |      | Shiraz-4T  | 261  | 0        | -0.336249 |  |  |
|       |      | Shiraz-16T | 295  | 0.591657 | 0         |  |  |
|       |      | Shiraz-36T | 433  | 0        | -0.803961 |  |  |
|       |      | Shiraz-42T | 480  | 0        | -0.232915 |  |  |
|       |      | Shiraz-44T | 908  | 0.466743 | 0         |  |  |
|       |      | Shiraz-49T | 1170 | 0        | -0.967436 |  |  |
|       |      | Shiraz-49T | 1173 | 0        | -0.704439 |  |  |
|       |      | Shiraz-9T  | 1370 | 0.690073 | 0         |  |  |
|       |      | Shiraz-9T  | 1371 | 1.292392 | 0         |  |  |
|       |      | Shiraz-18T | 1457 | 0.643204 | 0         |  |  |
|       |      | Shiraz-22T | 1673 | 0.611783 | 0         |  |  |
|       |      | Shiraz-22T | 1678 | 0.911625 | 0         |  |  |
|       |      | Shiraz-25T | 1719 | 0.472955 | 0         |  |  |
|       |      | Shiraz-28T | 1762 | 0.562311 | 0         |  |  |
|       |      | Shiraz-29T | 1801 | 0.815343 | 0         |  |  |
|       |      | Shiraz-32T | 1870 | 0.729766 | 0         |  |  |
|       |      | Shiraz-32T | 1872 | 1.504553 | 0         |  |  |
|       |      | Shiraz-35T | 1933 | 0.488535 | 0         |  |  |
|       |      | Shiraz-38T | 2011 | 0        | -0.406024 |  |  |
|       |      | Shiraz-53T | 2115 | 0.427728 | 0         |  |  |
|       |      | Shiraz-58T | 2223 | 0.833364 | 0         |  |  |
|       |      | Shiraz-58T | 2226 | 1.074663 | 0         |  |  |
|       |      | Shiraz-71T | 2263 | 0.975531 | 0         |  |  |
|       |      | Shiraz-3T  | 246  | 0.531858 | 0         |  |  |
|       |      | Shiraz-4T  | 261  | 0        | -0.336249 |  |  |
|       |      | Shiraz-16T | 295  | 0.591657 | 0         |  |  |
|       |      | Shiraz-36T | 433  | 0        | -0.803961 |  |  |
|       |      | Shiraz-42T | 480  | 0        | -0.232915 |  |  |
|       |      | Shiraz-44T | 908  | 0.466743 | 0         |  |  |
|       |      | Shiraz-49T | 1170 | 0        | -0.967436 |  |  |
|       |      | Shiraz-49T | 1173 | 0        | -0.704439 |  |  |

|       |      |            |      |          |           |  |
|-------|------|------------|------|----------|-----------|--|
|       |      | Shiraz-9T  | 1370 | 0.690073 | 0         |  |
|       |      | Shiraz-9T  | 1371 | 1.292392 | 0         |  |
|       |      | Shiraz-18T | 1457 | 0.643204 | 0         |  |
|       |      | Shiraz-22T | 1673 | 0.611783 | 0         |  |
|       |      | Shiraz-22T | 1678 | 0.911625 | 0         |  |
|       |      | Shiraz-25T | 1719 | 0.472955 | 0         |  |
|       |      | Shiraz-28T | 1762 | 0.562311 | 0         |  |
|       |      | Shiraz-29T | 1801 | 0.815343 | 0         |  |
|       |      | Shiraz-32T | 1870 | 0.729766 | 0         |  |
|       |      | Shiraz-32T | 1872 | 1.504553 | 0         |  |
|       |      | Shiraz-35T | 1933 | 0.488535 | 0         |  |
|       |      | Shiraz-38T | 2011 | 0        | -0.406024 |  |
|       |      | Shiraz-53T | 2115 | 0.427728 | 0         |  |
|       |      | Shiraz-58T | 2223 | 0.833364 | 0         |  |
|       |      | Shiraz-58T | 2226 | 1.074663 | 0         |  |
|       |      | Shiraz-71T | 2263 | 0.975531 | 0         |  |
|       |      | Shiraz-3T  | 246  | 0.531858 | 0         |  |
|       |      | Shiraz-4T  | 261  | 0        | -0.336249 |  |
|       |      | Shiraz-16T | 295  | 0.591657 | 0         |  |
|       |      | Shiraz-36T | 433  | 0        | -0.803961 |  |
|       |      | Shiraz-42T | 480  | 0        | -0.232915 |  |
|       |      | Shiraz-44T | 908  | 0.466743 | 0         |  |
|       |      | Shiraz-49T | 1170 | 0        | -0.967436 |  |
|       |      | Shiraz-49T | 1173 | 0        | -0.704439 |  |
|       |      | Shiraz-9T  | 1370 | 0.690073 | 0         |  |
|       |      | Shiraz-9T  | 1371 | 1.292392 | 0         |  |
|       |      | Shiraz-18T | 1457 | 0.643204 | 0         |  |
|       |      | Shiraz-22T | 1673 | 0.611783 | 0         |  |
|       |      | Shiraz-22T | 1678 | 0.911625 | 0         |  |
|       |      | Shiraz-25T | 1719 | 0.472955 | 0         |  |
|       |      | Shiraz-28T | 1762 | 0.562311 | 0         |  |
|       |      | Shiraz-29T | 1801 | 0.815343 | 0         |  |
|       |      | Shiraz-32T | 1870 | 0.729766 | 0         |  |
|       |      | Shiraz-32T | 1872 | 1.504553 | 0         |  |
|       |      | Shiraz-35T | 1933 | 0.488535 | 0         |  |
|       |      | Shiraz-38T | 2011 | 0        | -0.406024 |  |
|       |      | Shiraz-53T | 2115 | 0.427728 | 0         |  |
|       |      | Shiraz-58T | 2223 | 0.833364 | 0         |  |
|       |      | Shiraz-58T | 2226 | 1.074663 | 0         |  |
|       |      | Shiraz-71T | 2263 | 0.975531 | 0         |  |
| TFDP3 | chrX | Shiraz-3T  | 242  | 0        | -0.336434 |  |
|       |      | Shiraz-4T  | 261  | 0        | -0.336249 |  |
|       |      | Shiraz-16T | 295  | 0.591657 | 0         |  |
|       |      | Shiraz-36T | 433  | 0        | -0.803961 |  |
|       |      | Shiraz-44T | 899  | 0        | -1.09697  |  |
|       |      | Shiraz-49T | 1170 | 0        | -0.967436 |  |
|       |      | Shiraz-9T  | 1370 | 0.690073 | 0         |  |

|      |      |            |      |          |           |  |
|------|------|------------|------|----------|-----------|--|
|      |      | Shiraz-18T | 1457 | 0.643204 | 0         |  |
|      |      | Shiraz-22T | 1673 | 0.611783 | 0         |  |
|      |      | Shiraz-22T | 1677 | 0.789711 | 0         |  |
|      |      | Shiraz-25T | 1719 | 0.472955 | 0         |  |
|      |      | Shiraz-28T | 1762 | 0.562311 | 0         |  |
|      |      | Shiraz-29T | 1801 | 0.815343 | 0         |  |
|      |      | Shiraz-32T | 1870 | 0.729766 | 0         |  |
|      |      | Shiraz-35T | 1933 | 0.488535 | 0         |  |
|      |      | Shiraz-58T | 2223 | 0.833364 | 0         |  |
|      |      | Shiraz-71T | 2263 | 0.975531 | 0         |  |
|      |      | Shiraz-3T  | 242  | 0        | -0.336434 |  |
|      |      | Shiraz-4T  | 261  | 0        | -0.336249 |  |
|      |      | Shiraz-16T | 295  | 0.591657 | 0         |  |
|      |      | Shiraz-36T | 433  | 0        | -0.803961 |  |
|      |      | Shiraz-44T | 899  | 0        | -1.09697  |  |
|      |      | Shiraz-49T | 1170 | 0        | -0.967436 |  |
|      |      | Shiraz-9T  | 1370 | 0.690073 | 0         |  |
|      |      | Shiraz-18T | 1457 | 0.643204 | 0         |  |
|      |      | Shiraz-22T | 1673 | 0.611783 | 0         |  |
|      |      | Shiraz-22T | 1677 | 0.789711 | 0         |  |
|      |      | Shiraz-25T | 1719 | 0.472955 | 0         |  |
|      |      | Shiraz-28T | 1762 | 0.562311 | 0         |  |
|      |      | Shiraz-29T | 1801 | 0.815343 | 0         |  |
|      |      | Shiraz-32T | 1870 | 0.729766 | 0         |  |
|      |      | Shiraz-35T | 1933 | 0.488535 | 0         |  |
|      |      | Shiraz-58T | 2223 | 0.833364 | 0         |  |
|      |      | Shiraz-71T | 2263 | 0.975531 | 0         |  |
|      |      | Shiraz-3T  | 242  | 0        | -0.336434 |  |
|      |      | Shiraz-4T  | 261  | 0        | -0.336249 |  |
|      |      | Shiraz-16T | 295  | 0.591657 | 0         |  |
|      |      | Shiraz-36T | 433  | 0        | -0.803961 |  |
|      |      | Shiraz-44T | 899  | 0        | -1.09697  |  |
|      |      | Shiraz-49T | 1170 | 0        | -0.967436 |  |
|      |      | Shiraz-9T  | 1370 | 0.690073 | 0         |  |
|      |      | Shiraz-18T | 1457 | 0.643204 | 0         |  |
|      |      | Shiraz-22T | 1673 | 0.611783 | 0         |  |
|      |      | Shiraz-22T | 1677 | 0.789711 | 0         |  |
|      |      | Shiraz-25T | 1719 | 0.472955 | 0         |  |
|      |      | Shiraz-28T | 1762 | 0.562311 | 0         |  |
|      |      | Shiraz-29T | 1801 | 0.815343 | 0         |  |
|      |      | Shiraz-32T | 1870 | 0.729766 | 0         |  |
|      |      | Shiraz-35T | 1933 | 0.488535 | 0         |  |
|      |      | Shiraz-58T | 2223 | 0.833364 | 0         |  |
|      |      | Shiraz-71T | 2263 | 0.975531 | 0         |  |
| TFE3 | chrX | Shiraz-3T  | 238  | 0.472087 | 0         |  |
|      |      | Shiraz-4T  | 260  | 0        | -0.324128 |  |
|      |      | Shiraz-16T | 294  | 0.655804 | 0         |  |

|  |            |      |          |           |  |
|--|------------|------|----------|-----------|--|
|  | Shiraz-31T | 345  | 0.103301 | 0         |  |
|  | Shiraz-36T | 431  | 0        | -0.78035  |  |
|  | Shiraz-36T | 432  | 0        | -0.6692   |  |
|  | Shiraz-44T | 891  | 0        | -0.954044 |  |
|  | Shiraz-44T | 896  | 0        | -0.109108 |  |
|  | Shiraz-44T | 897  | 0.486937 | 0         |  |
|  | Shiraz-46T | 991  | 0.139564 | 0         |  |
|  | Shiraz-47T | 1084 | 0.24185  | 0         |  |
|  | Shiraz-49T | 1166 | 0        | -0.917235 |  |
|  | Shiraz-49T | 1169 | 0        | -0.583529 |  |
|  | Shiraz-77T | 1282 | 0.213849 | 0         |  |
|  | Shiraz-9T  | 1368 | 0.199713 | 0         |  |
|  | Shiraz-9T  | 1369 | 0.703374 | 0         |  |
|  | Shiraz-18T | 1455 | 0        | -0.186773 |  |
|  | Shiraz-22T | 1669 | 0.695915 | 0         |  |
|  | Shiraz-22T | 1672 | 1.01678  | 0         |  |
|  | Shiraz-25T | 1717 | 0.420447 | 0         |  |
|  | Shiraz-28T | 1760 | 0.538181 | 0         |  |
|  | Shiraz-29T | 1800 | 0.672527 | 0         |  |
|  | Shiraz-32T | 1869 | 0.776805 | 0         |  |
|  | Shiraz-35T | 1932 | 0.507141 | 0         |  |
|  | Shiraz-58T | 2221 | 0.871948 | 0         |  |
|  | Shiraz-71T | 2260 | 0.68394  | 0         |  |
|  | Shiraz-71T | 2262 | 0.986748 | 0         |  |
|  | Shiraz-3T  | 238  | 0.472087 | 0         |  |
|  | Shiraz-4T  | 260  | 0        | -0.324128 |  |
|  | Shiraz-16T | 294  | 0.655804 | 0         |  |
|  | Shiraz-31T | 345  | 0.103301 | 0         |  |
|  | Shiraz-36T | 431  | 0        | -0.78035  |  |
|  | Shiraz-36T | 432  | 0        | -0.6692   |  |
|  | Shiraz-44T | 891  | 0        | -0.954044 |  |
|  | Shiraz-44T | 896  | 0        | -0.109108 |  |
|  | Shiraz-44T | 897  | 0.486937 | 0         |  |
|  | Shiraz-46T | 991  | 0.139564 | 0         |  |
|  | Shiraz-47T | 1084 | 0.24185  | 0         |  |
|  | Shiraz-49T | 1166 | 0        | -0.917235 |  |
|  | Shiraz-49T | 1169 | 0        | -0.583529 |  |
|  | Shiraz-77T | 1282 | 0.213849 | 0         |  |
|  | Shiraz-9T  | 1368 | 0.199713 | 0         |  |
|  | Shiraz-9T  | 1369 | 0.703374 | 0         |  |
|  | Shiraz-18T | 1455 | 0        | -0.186773 |  |
|  | Shiraz-22T | 1669 | 0.695915 | 0         |  |
|  | Shiraz-22T | 1672 | 1.01678  | 0         |  |
|  | Shiraz-25T | 1717 | 0.420447 | 0         |  |
|  | Shiraz-28T | 1760 | 0.538181 | 0         |  |
|  | Shiraz-29T | 1800 | 0.672527 | 0         |  |
|  | Shiraz-32T | 1869 | 0.776805 | 0         |  |

|      |      |            |      |          |           |  |  |
|------|------|------------|------|----------|-----------|--|--|
|      |      | Shiraz-35T | 1932 | 0.507141 | 0         |  |  |
|      |      | Shiraz-58T | 2221 | 0.871948 | 0         |  |  |
|      |      | Shiraz-71T | 2260 | 0.68394  | 0         |  |  |
|      |      | Shiraz-71T | 2262 | 0.986748 | 0         |  |  |
|      |      | Shiraz-3T  | 238  | 0.472087 | 0         |  |  |
|      |      | Shiraz-4T  | 260  | 0        | -0.324128 |  |  |
|      |      | Shiraz-16T | 294  | 0.655804 | 0         |  |  |
|      |      | Shiraz-31T | 345  | 0.103301 | 0         |  |  |
|      |      | Shiraz-36T | 431  | 0        | -0.78035  |  |  |
|      |      | Shiraz-36T | 432  | 0        | -0.6692   |  |  |
|      |      | Shiraz-44T | 891  | 0        | -0.954044 |  |  |
|      |      | Shiraz-44T | 896  | 0        | -0.109108 |  |  |
|      |      | Shiraz-44T | 897  | 0.486937 | 0         |  |  |
|      |      | Shiraz-46T | 991  | 0.139564 | 0         |  |  |
|      |      | Shiraz-47T | 1084 | 0.24185  | 0         |  |  |
|      |      | Shiraz-49T | 1166 | 0        | -0.917235 |  |  |
|      |      | Shiraz-49T | 1169 | 0        | -0.583529 |  |  |
|      |      | Shiraz-77T | 1282 | 0.213849 | 0         |  |  |
|      |      | Shiraz-9T  | 1368 | 0.199713 | 0         |  |  |
|      |      | Shiraz-9T  | 1369 | 0.703374 | 0         |  |  |
|      |      | Shiraz-18T | 1455 | 0        | -0.186773 |  |  |
|      |      | Shiraz-22T | 1669 | 0.695915 | 0         |  |  |
|      |      | Shiraz-22T | 1672 | 1.01678  | 0         |  |  |
|      |      | Shiraz-25T | 1717 | 0.420447 | 0         |  |  |
|      |      | Shiraz-28T | 1760 | 0.538181 | 0         |  |  |
|      |      | Shiraz-29T | 1800 | 0.672527 | 0         |  |  |
|      |      | Shiraz-32T | 1869 | 0.776805 | 0         |  |  |
|      |      | Shiraz-35T | 1932 | 0.507141 | 0         |  |  |
|      |      | Shiraz-58T | 2221 | 0.871948 | 0         |  |  |
|      |      | Shiraz-71T | 2260 | 0.68394  | 0         |  |  |
|      |      | Shiraz-71T | 2262 | 0.986748 | 0         |  |  |
| TFEC | chr7 | Shiraz-3T  | 90   | 0.219276 | 0         |  |  |
|      |      | Shiraz-3T  | 95   | 0        | -0.077623 |  |  |
|      |      | Shiraz-4T  | 253  | 0.372918 | 0         |  |  |
|      |      | Shiraz-36T | 378  | 0.179558 | 0         |  |  |
|      |      | Shiraz-36T | 382  | 0.081739 | 0         |  |  |
|      |      | Shiraz-44T | 641  | 0        | -0.477846 |  |  |
|      |      | Shiraz-46T | 943  | 0.093799 | 0         |  |  |
|      |      | Shiraz-46T | 947  | 0        | -0.010843 |  |  |
|      |      | Shiraz-47T | 1031 | 0        | -0.117529 |  |  |
|      |      | Shiraz-49T | 1121 | 0        | -0.138569 |  |  |
|      |      | Shiraz-77T | 1225 | 0        | -0.117922 |  |  |
|      |      | Shiraz-77T | 1228 | 0        | -0.238084 |  |  |
|      |      | Shiraz-18T | 1434 | 0.244465 | 0         |  |  |
|      |      | Shiraz-22T | 1549 | 0        | -0.319623 |  |  |
|      |      | Shiraz-22T | 1552 | 0        | -0.50686  |  |  |
|      |      | Shiraz-25T | 1698 | 0.21835  | 0         |  |  |

|  |            |      |          |           |  |
|--|------------|------|----------|-----------|--|
|  | Shiraz-28T | 1735 | 0.350744 | 0         |  |
|  | Shiraz-29T | 1778 | 0.120767 | 0         |  |
|  | Shiraz-32T | 1833 | 0.551336 | 0         |  |
|  | Shiraz-32T | 1835 | 0.092727 | 0         |  |
|  | Shiraz-38T | 1951 | 0.250891 | 0         |  |
|  | Shiraz-53T | 2078 | 0.287202 | 0         |  |
|  | Shiraz-58T | 2161 | 0        | -0.187744 |  |
|  | Shiraz-71T | 2238 | 0.603631 | 0         |  |
|  | Shiraz-3T  | 90   | 0.219276 | 0         |  |
|  | Shiraz-3T  | 95   | 0        | -0.077623 |  |
|  | Shiraz-4T  | 253  | 0.372918 | 0         |  |
|  | Shiraz-36T | 378  | 0.179558 | 0         |  |
|  | Shiraz-36T | 382  | 0.081739 | 0         |  |
|  | Shiraz-44T | 641  | 0        | -0.477846 |  |
|  | Shiraz-46T | 943  | 0.093799 | 0         |  |
|  | Shiraz-46T | 947  | 0        | -0.010843 |  |
|  | Shiraz-47T | 1031 | 0        | -0.117529 |  |
|  | Shiraz-49T | 1121 | 0        | -0.138569 |  |
|  | Shiraz-77T | 1225 | 0        | -0.117922 |  |
|  | Shiraz-77T | 1228 | 0        | -0.238084 |  |
|  | Shiraz-18T | 1434 | 0.244465 | 0         |  |
|  | Shiraz-22T | 1549 | 0        | -0.319623 |  |
|  | Shiraz-22T | 1552 | 0        | -0.50686  |  |
|  | Shiraz-25T | 1698 | 0.21835  | 0         |  |
|  | Shiraz-28T | 1735 | 0.350744 | 0         |  |
|  | Shiraz-29T | 1778 | 0.120767 | 0         |  |
|  | Shiraz-32T | 1833 | 0.551336 | 0         |  |
|  | Shiraz-32T | 1835 | 0.092727 | 0         |  |
|  | Shiraz-38T | 1951 | 0.250891 | 0         |  |
|  | Shiraz-53T | 2078 | 0.287202 | 0         |  |
|  | Shiraz-58T | 2161 | 0        | -0.187744 |  |
|  | Shiraz-71T | 2238 | 0.603631 | 0         |  |
|  | Shiraz-3T  | 90   | 0.219276 | 0         |  |
|  | Shiraz-3T  | 95   | 0        | -0.077623 |  |
|  | Shiraz-4T  | 253  | 0.372918 | 0         |  |
|  | Shiraz-36T | 378  | 0.179558 | 0         |  |
|  | Shiraz-36T | 382  | 0.081739 | 0         |  |
|  | Shiraz-44T | 641  | 0        | -0.477846 |  |
|  | Shiraz-46T | 943  | 0.093799 | 0         |  |
|  | Shiraz-46T | 947  | 0        | -0.010843 |  |
|  | Shiraz-47T | 1031 | 0        | -0.117529 |  |
|  | Shiraz-49T | 1121 | 0        | -0.138569 |  |
|  | Shiraz-77T | 1225 | 0        | -0.117922 |  |
|  | Shiraz-77T | 1228 | 0        | -0.238084 |  |
|  | Shiraz-18T | 1434 | 0.244465 | 0         |  |
|  | Shiraz-22T | 1549 | 0        | -0.319623 |  |
|  | Shiraz-22T | 1552 | 0        | -0.50686  |  |



|       |      |            |      |          |           |  |  |
|-------|------|------------|------|----------|-----------|--|--|
|       |      | Shiraz-25T | 1698 | 0.21835  | 0         |  |  |
|       |      | Shiraz-28T | 1735 | 0.350744 | 0         |  |  |
|       |      | Shiraz-29T | 1778 | 0.120767 | 0         |  |  |
|       |      | Shiraz-32T | 1833 | 0.551336 | 0         |  |  |
|       |      | Shiraz-32T | 1835 | 0.092727 | 0         |  |  |
|       |      | Shiraz-38T | 1951 | 0.250891 | 0         |  |  |
|       |      | Shiraz-53T | 2078 | 0.287202 | 0         |  |  |
|       |      | Shiraz-58T | 2161 | 0        | -0.187744 |  |  |
|       |      | Shiraz-71T | 2238 | 0.603631 | 0         |  |  |
| TFPI2 | chr7 | Shiraz-3T  | 90   | 0.219276 | 0         |  |  |
|       |      | Shiraz-3T  | 93   | 0        | -0.058023 |  |  |
|       |      | Shiraz-4T  | 253  | 0.372918 | 0         |  |  |
|       |      | Shiraz-36T | 378  | 0.179558 | 0         |  |  |
|       |      | Shiraz-36T | 380  | 0.083883 | 0         |  |  |
|       |      | Shiraz-44T | 638  | 0        | -0.433476 |  |  |
|       |      | Shiraz-46T | 943  | 0.093799 | 0         |  |  |
|       |      | Shiraz-46T | 945  | 0        | -0.014838 |  |  |
|       |      | Shiraz-47T | 1029 | 0        | -0.096586 |  |  |
|       |      | Shiraz-49T | 1119 | 0        | -0.157331 |  |  |
|       |      | Shiraz-77T | 1225 | 0        | -0.117922 |  |  |
|       |      | Shiraz-18T | 1434 | 0.244465 | 0         |  |  |
|       |      | Shiraz-22T | 1549 | 0        | -0.319623 |  |  |
|       |      | Shiraz-25T | 1698 | 0.21835  | 0         |  |  |
|       |      | Shiraz-28T | 1735 | 0.350744 | 0         |  |  |
|       |      | Shiraz-29T | 1778 | 0.120767 | 0         |  |  |
|       |      | Shiraz-32T | 1833 | 0.551336 | 0         |  |  |
|       |      | Shiraz-38T | 1951 | 0.250891 | 0         |  |  |
|       |      | Shiraz-53T | 2078 | 0.287202 | 0         |  |  |
|       |      | Shiraz-58T | 2159 | 0        | -0.219521 |  |  |
|       |      | Shiraz-71T | 2238 | 0.603631 | 0         |  |  |
|       |      | Shiraz-3T  | 90   | 0.219276 | 0         |  |  |
|       |      | Shiraz-3T  | 93   | 0        | -0.058023 |  |  |
|       |      | Shiraz-4T  | 253  | 0.372918 | 0         |  |  |
|       |      | Shiraz-36T | 378  | 0.179558 | 0         |  |  |
|       |      | Shiraz-36T | 380  | 0.083883 | 0         |  |  |
|       |      | Shiraz-44T | 638  | 0        | -0.433476 |  |  |
|       |      | Shiraz-46T | 943  | 0.093799 | 0         |  |  |
|       |      | Shiraz-46T | 945  | 0        | -0.014838 |  |  |
|       |      | Shiraz-47T | 1029 | 0        | -0.096586 |  |  |
|       |      | Shiraz-49T | 1119 | 0        | -0.157331 |  |  |
|       |      | Shiraz-77T | 1225 | 0        | -0.117922 |  |  |
|       |      | Shiraz-18T | 1434 | 0.244465 | 0         |  |  |
|       |      | Shiraz-22T | 1549 | 0        | -0.319623 |  |  |
|       |      | Shiraz-25T | 1698 | 0.21835  | 0         |  |  |
|       |      | Shiraz-28T | 1735 | 0.350744 | 0         |  |  |
|       |      | Shiraz-29T | 1778 | 0.120767 | 0         |  |  |
|       |      | Shiraz-32T | 1833 | 0.551336 | 0         |  |  |

|      |      |            |      |          |           |  |  |
|------|------|------------|------|----------|-----------|--|--|
|      |      | Shiraz-38T | 1951 | 0.250891 | 0         |  |  |
|      |      | Shiraz-53T | 2078 | 0.287202 | 0         |  |  |
|      |      | Shiraz-58T | 2159 | 0        | -0.219521 |  |  |
|      |      | Shiraz-71T | 2238 | 0.603631 | 0         |  |  |
|      |      | Shiraz-3T  | 90   | 0.219276 | 0         |  |  |
|      |      | Shiraz-3T  | 93   | 0        | -0.058023 |  |  |
|      |      | Shiraz-4T  | 253  | 0.372918 | 0         |  |  |
|      |      | Shiraz-36T | 378  | 0.179558 | 0         |  |  |
|      |      | Shiraz-36T | 380  | 0.083883 | 0         |  |  |
|      |      | Shiraz-44T | 638  | 0        | -0.433476 |  |  |
|      |      | Shiraz-46T | 943  | 0.093799 | 0         |  |  |
|      |      | Shiraz-46T | 945  | 0        | -0.014838 |  |  |
|      |      | Shiraz-47T | 1029 | 0        | -0.096586 |  |  |
|      |      | Shiraz-49T | 1119 | 0        | -0.157331 |  |  |
|      |      | Shiraz-77T | 1225 | 0        | -0.117922 |  |  |
|      |      | Shiraz-18T | 1434 | 0.244465 | 0         |  |  |
|      |      | Shiraz-22T | 1549 | 0        | -0.319623 |  |  |
|      |      | Shiraz-25T | 1698 | 0.21835  | 0         |  |  |
|      |      | Shiraz-28T | 1735 | 0.350744 | 0         |  |  |
|      |      | Shiraz-29T | 1778 | 0.120767 | 0         |  |  |
|      |      | Shiraz-32T | 1833 | 0.551336 | 0         |  |  |
|      |      | Shiraz-38T | 1951 | 0.250891 | 0         |  |  |
|      |      | Shiraz-53T | 2078 | 0.287202 | 0         |  |  |
|      |      | Shiraz-58T | 2159 | 0        | -0.219521 |  |  |
|      |      | Shiraz-71T | 2238 | 0.603631 | 0         |  |  |
| TFR2 | chr7 | Shiraz-3T  | 90   | 0.219276 | 0         |  |  |
|      |      | Shiraz-3T  | 94   | 0.74735  | 0         |  |  |
|      |      | Shiraz-4T  | 253  | 0.372918 | 0         |  |  |
|      |      | Shiraz-31T | 316  | 0.219196 | 0         |  |  |
|      |      | Shiraz-36T | 378  | 0.179558 | 0         |  |  |
|      |      | Shiraz-36T | 381  | 0.332628 | 0         |  |  |
|      |      | Shiraz-44T | 639  | 1.035032 | 0         |  |  |
|      |      | Shiraz-46T | 943  | 0.093799 | 0         |  |  |
|      |      | Shiraz-46T | 946  | 0.299835 | 0         |  |  |
|      |      | Shiraz-47T | 1030 | 0.257728 | 0         |  |  |
|      |      | Shiraz-49T | 1120 | 0.281656 | 0         |  |  |
|      |      | Shiraz-77T | 1225 | 0        | -0.117922 |  |  |
|      |      | Shiraz-77T | 1227 | 0.196445 | 0         |  |  |
|      |      | Shiraz-9T  | 1324 | 0.679266 | 0         |  |  |
|      |      | Shiraz-18T | 1434 | 0.244465 | 0         |  |  |
|      |      | Shiraz-22T | 1549 | 0        | -0.319623 |  |  |
|      |      | Shiraz-22T | 1551 | 0.324011 | 0         |  |  |
|      |      | Shiraz-25T | 1698 | 0.21835  | 0         |  |  |
|      |      | Shiraz-28T | 1735 | 0.350744 | 0         |  |  |
|      |      | Shiraz-29T | 1778 | 0.120767 | 0         |  |  |
|      |      | Shiraz-32T | 1833 | 0.551336 | 0         |  |  |
|      |      | Shiraz-32T | 1834 | 1.485392 | 0         |  |  |

|  |            |      |          |           |  |
|--|------------|------|----------|-----------|--|
|  | Shiraz-38T | 1951 | 0.250891 | 0         |  |
|  | Shiraz-53T | 2078 | 0.287202 | 0         |  |
|  | Shiraz-58T | 2160 | 0.399007 | 0         |  |
|  | Shiraz-71T | 2238 | 0.603631 | 0         |  |
|  | Shiraz-3T  | 90   | 0.219276 | 0         |  |
|  | Shiraz-3T  | 94   | 0.74735  | 0         |  |
|  | Shiraz-4T  | 253  | 0.372918 | 0         |  |
|  | Shiraz-31T | 316  | 0.219196 | 0         |  |
|  | Shiraz-36T | 378  | 0.179558 | 0         |  |
|  | Shiraz-36T | 381  | 0.332628 | 0         |  |
|  | Shiraz-44T | 639  | 1.035032 | 0         |  |
|  | Shiraz-46T | 943  | 0.093799 | 0         |  |
|  | Shiraz-46T | 946  | 0.299835 | 0         |  |
|  | Shiraz-47T | 1030 | 0.257728 | 0         |  |
|  | Shiraz-49T | 1120 | 0.281656 | 0         |  |
|  | Shiraz-77T | 1225 | 0        | -0.117922 |  |
|  | Shiraz-77T | 1227 | 0.196445 | 0         |  |
|  | Shiraz-9T  | 1324 | 0.679266 | 0         |  |
|  | Shiraz-18T | 1434 | 0.244465 | 0         |  |
|  | Shiraz-22T | 1549 | 0        | -0.319623 |  |
|  | Shiraz-22T | 1551 | 0.324011 | 0         |  |
|  | Shiraz-25T | 1698 | 0.21835  | 0         |  |
|  | Shiraz-28T | 1735 | 0.350744 | 0         |  |
|  | Shiraz-29T | 1778 | 0.120767 | 0         |  |
|  | Shiraz-32T | 1833 | 0.551336 | 0         |  |
|  | Shiraz-32T | 1834 | 1.485392 | 0         |  |
|  | Shiraz-38T | 1951 | 0.250891 | 0         |  |
|  | Shiraz-53T | 2078 | 0.287202 | 0         |  |
|  | Shiraz-58T | 2160 | 0.399007 | 0         |  |
|  | Shiraz-71T | 2238 | 0.603631 | 0         |  |
|  | Shiraz-3T  | 90   | 0.219276 | 0         |  |
|  | Shiraz-3T  | 94   | 0.74735  | 0         |  |
|  | Shiraz-4T  | 253  | 0.372918 | 0         |  |
|  | Shiraz-31T | 316  | 0.219196 | 0         |  |
|  | Shiraz-36T | 378  | 0.179558 | 0         |  |
|  | Shiraz-36T | 381  | 0.332628 | 0         |  |
|  | Shiraz-44T | 639  | 1.035032 | 0         |  |
|  | Shiraz-46T | 943  | 0.093799 | 0         |  |
|  | Shiraz-46T | 946  | 0.299835 | 0         |  |
|  | Shiraz-47T | 1030 | 0.257728 | 0         |  |
|  | Shiraz-49T | 1120 | 0.281656 | 0         |  |
|  | Shiraz-77T | 1225 | 0        | -0.117922 |  |
|  | Shiraz-77T | 1227 | 0.196445 | 0         |  |
|  | Shiraz-9T  | 1324 | 0.679266 | 0         |  |
|  | Shiraz-18T | 1434 | 0.244465 | 0         |  |
|  | Shiraz-22T | 1549 | 0        | -0.319623 |  |
|  | Shiraz-22T | 1551 | 0.324011 | 0         |  |

|         |      |            |      |          |           |  |
|---------|------|------------|------|----------|-----------|--|
|         |      | Shiraz-25T | 1698 | 0.21835  | 0         |  |
|         |      | Shiraz-28T | 1735 | 0.350744 | 0         |  |
|         |      | Shiraz-29T | 1778 | 0.120767 | 0         |  |
|         |      | Shiraz-32T | 1833 | 0.551336 | 0         |  |
|         |      | Shiraz-32T | 1834 | 1.485392 | 0         |  |
|         |      | Shiraz-38T | 1951 | 0.250891 | 0         |  |
|         |      | Shiraz-53T | 2078 | 0.287202 | 0         |  |
|         |      | Shiraz-58T | 2160 | 0.399007 | 0         |  |
|         |      | Shiraz-71T | 2238 | 0.603631 | 0         |  |
| TGIF2LX | chrX | Shiraz-3T  | 242  | 0        | -0.336434 |  |
|         |      | Shiraz-3T  | 243  | 0        | -0.549129 |  |
|         |      | Shiraz-4T  | 261  | 0        | -0.336249 |  |
|         |      | Shiraz-16T | 295  | 0.591657 | 0         |  |
|         |      | Shiraz-31T | 346  | 0        | -0.1527   |  |
|         |      | Shiraz-36T | 433  | 0        | -0.803961 |  |
|         |      | Shiraz-44T | 899  | 0        | -1.09697  |  |
|         |      | Shiraz-44T | 902  | 0        | -1.449824 |  |
|         |      | Shiraz-47T | 1085 | 0        | -0.130811 |  |
|         |      | Shiraz-49T | 1170 | 0        | -0.967436 |  |
|         |      | Shiraz-49T | 1172 | 0        | -1.123219 |  |
|         |      | Shiraz-18T | 1457 | 0.643204 | 0         |  |
|         |      | Shiraz-22T | 1673 | 0.611783 | 0         |  |
|         |      | Shiraz-22T | 1675 | 0.279253 | 0         |  |
|         |      | Shiraz-25T | 1719 | 0.472955 | 0         |  |
|         |      | Shiraz-28T | 1762 | 0.562311 | 0         |  |
|         |      | Shiraz-29T | 1801 | 0.815343 | 0         |  |
|         |      | Shiraz-32T | 1870 | 0.729766 | 0         |  |
|         |      | Shiraz-32T | 1871 | 0.292679 | 0         |  |
|         |      | Shiraz-35T | 1933 | 0.488535 | 0         |  |
|         |      | Shiraz-58T | 2223 | 0.833364 | 0         |  |
|         |      | Shiraz-58T | 2225 | 0.595784 | 0         |  |
|         |      | Shiraz-71T | 2263 | 0.975531 | 0         |  |
|         |      | Shiraz-3T  | 242  | 0        | -0.336434 |  |
|         |      | Shiraz-3T  | 243  | 0        | -0.549129 |  |
|         |      | Shiraz-4T  | 261  | 0        | -0.336249 |  |
|         |      | Shiraz-16T | 295  | 0.591657 | 0         |  |
|         |      | Shiraz-31T | 346  | 0        | -0.1527   |  |
|         |      | Shiraz-36T | 433  | 0        | -0.803961 |  |
|         |      | Shiraz-44T | 899  | 0        | -1.09697  |  |
|         |      | Shiraz-44T | 902  | 0        | -1.449824 |  |
|         |      | Shiraz-47T | 1085 | 0        | -0.130811 |  |
|         |      | Shiraz-49T | 1170 | 0        | -0.967436 |  |
|         |      | Shiraz-49T | 1172 | 0        | -1.123219 |  |
|         |      | Shiraz-18T | 1457 | 0.643204 | 0         |  |
|         |      | Shiraz-22T | 1673 | 0.611783 | 0         |  |
|         |      | Shiraz-22T | 1675 | 0.279253 | 0         |  |
|         |      | Shiraz-25T | 1719 | 0.472955 | 0         |  |

|       |      |            |      |          |           |  |
|-------|------|------------|------|----------|-----------|--|
|       |      | Shiraz-28T | 1762 | 0.562311 | 0         |  |
|       |      | Shiraz-29T | 1801 | 0.815343 | 0         |  |
|       |      | Shiraz-32T | 1870 | 0.729766 | 0         |  |
|       |      | Shiraz-32T | 1871 | 0.292679 | 0         |  |
|       |      | Shiraz-35T | 1933 | 0.488535 | 0         |  |
|       |      | Shiraz-58T | 2223 | 0.833364 | 0         |  |
|       |      | Shiraz-58T | 2225 | 0.595784 | 0         |  |
|       |      | Shiraz-71T | 2263 | 0.975531 | 0         |  |
|       |      | Shiraz-3T  | 242  | 0        | -0.336434 |  |
|       |      | Shiraz-3T  | 243  | 0        | -0.549129 |  |
|       |      | Shiraz-4T  | 261  | 0        | -0.336249 |  |
|       |      | Shiraz-16T | 295  | 0.591657 | 0         |  |
|       |      | Shiraz-31T | 346  | 0        | -0.1527   |  |
|       |      | Shiraz-36T | 433  | 0        | -0.803961 |  |
|       |      | Shiraz-44T | 899  | 0        | -1.09697  |  |
|       |      | Shiraz-44T | 902  | 0        | -1.449824 |  |
|       |      | Shiraz-47T | 1085 | 0        | -0.130811 |  |
|       |      | Shiraz-49T | 1170 | 0        | -0.967436 |  |
|       |      | Shiraz-49T | 1172 | 0        | -1.123219 |  |
|       |      | Shiraz-18T | 1457 | 0.643204 | 0         |  |
|       |      | Shiraz-22T | 1673 | 0.611783 | 0         |  |
|       |      | Shiraz-22T | 1675 | 0.279253 | 0         |  |
|       |      | Shiraz-25T | 1719 | 0.472955 | 0         |  |
|       |      | Shiraz-28T | 1762 | 0.562311 | 0         |  |
|       |      | Shiraz-29T | 1801 | 0.815343 | 0         |  |
|       |      | Shiraz-32T | 1870 | 0.729766 | 0         |  |
|       |      | Shiraz-32T | 1871 | 0.292679 | 0         |  |
|       |      | Shiraz-35T | 1933 | 0.488535 | 0         |  |
|       |      | Shiraz-58T | 2223 | 0.833364 | 0         |  |
|       |      | Shiraz-58T | 2225 | 0.595784 | 0         |  |
|       |      | Shiraz-71T | 2263 | 0.975531 | 0         |  |
| THAP5 | chr7 | Shiraz-3T  | 90   | 0.219276 | 0         |  |
|       |      | Shiraz-3T  | 90   | 0.219276 | 0         |  |
|       |      | Shiraz-3T  | 95   | 0        | -0.077623 |  |
|       |      | Shiraz-3T  | 95   | 0        | -0.077623 |  |
|       |      | Shiraz-4T  | 253  | 0.372918 | 0         |  |
|       |      | Shiraz-4T  | 253  | 0.372918 | 0         |  |
|       |      | Shiraz-36T | 378  | 0.179558 | 0         |  |
|       |      | Shiraz-36T | 378  | 0.179558 | 0         |  |
|       |      | Shiraz-36T | 382  | 0.081739 | 0         |  |
|       |      | Shiraz-36T | 382  | 0.081739 | 0         |  |
|       |      | Shiraz-44T | 641  | 0        | -0.477846 |  |
|       |      | Shiraz-44T | 641  | 0        | -0.477846 |  |
|       |      | Shiraz-46T | 943  | 0.093799 | 0         |  |
|       |      | Shiraz-46T | 943  | 0.093799 | 0         |  |
|       |      | Shiraz-46T | 947  | 0        | -0.010843 |  |
|       |      | Shiraz-46T | 947  | 0        | -0.010843 |  |

|  |            |      |          |           |  |
|--|------------|------|----------|-----------|--|
|  | Shiraz-47T | 1031 | 0        | -0.117529 |  |
|  | Shiraz-47T | 1031 | 0        | -0.117529 |  |
|  | Shiraz-49T | 1121 | 0        | -0.138569 |  |
|  | Shiraz-49T | 1121 | 0        | -0.138569 |  |
|  | Shiraz-77T | 1225 | 0        | -0.117922 |  |
|  | Shiraz-77T | 1225 | 0        | -0.117922 |  |
|  | Shiraz-77T | 1228 | 0        | -0.238084 |  |
|  | Shiraz-77T | 1228 | 0        | -0.238084 |  |
|  | Shiraz-18T | 1434 | 0.244465 | 0         |  |
|  | Shiraz-18T | 1434 | 0.244465 | 0         |  |
|  | Shiraz-22T | 1549 | 0        | -0.319623 |  |
|  | Shiraz-22T | 1549 | 0        | -0.319623 |  |
|  | Shiraz-25T | 1698 | 0.21835  | 0         |  |
|  | Shiraz-25T | 1698 | 0.21835  | 0         |  |
|  | Shiraz-28T | 1735 | 0.350744 | 0         |  |
|  | Shiraz-28T | 1735 | 0.350744 | 0         |  |
|  | Shiraz-29T | 1778 | 0.120767 | 0         |  |
|  | Shiraz-29T | 1778 | 0.120767 | 0         |  |
|  | Shiraz-32T | 1833 | 0.551336 | 0         |  |
|  | Shiraz-32T | 1833 | 0.551336 | 0         |  |
|  | Shiraz-38T | 1951 | 0.250891 | 0         |  |
|  | Shiraz-38T | 1951 | 0.250891 | 0         |  |
|  | Shiraz-53T | 2078 | 0.287202 | 0         |  |
|  | Shiraz-53T | 2078 | 0.287202 | 0         |  |
|  | Shiraz-58T | 2161 | 0        | -0.187744 |  |
|  | Shiraz-58T | 2161 | 0        | -0.187744 |  |
|  | Shiraz-71T | 2238 | 0.603631 | 0         |  |
|  | Shiraz-71T | 2238 | 0.603631 | 0         |  |
|  | Shiraz-3T  | 90   | 0.219276 | 0         |  |
|  | Shiraz-3T  | 90   | 0.219276 | 0         |  |
|  | Shiraz-3T  | 95   | 0        | -0.077623 |  |
|  | Shiraz-3T  | 95   | 0        | -0.077623 |  |
|  | Shiraz-4T  | 253  | 0.372918 | 0         |  |
|  | Shiraz-4T  | 253  | 0.372918 | 0         |  |
|  | Shiraz-36T | 378  | 0.179558 | 0         |  |
|  | Shiraz-36T | 378  | 0.179558 | 0         |  |
|  | Shiraz-36T | 382  | 0.081739 | 0         |  |
|  | Shiraz-36T | 382  | 0.081739 | 0         |  |
|  | Shiraz-44T | 641  | 0        | -0.477846 |  |
|  | Shiraz-44T | 641  | 0        | -0.477846 |  |
|  | Shiraz-46T | 943  | 0.093799 | 0         |  |
|  | Shiraz-46T | 943  | 0.093799 | 0         |  |
|  | Shiraz-46T | 947  | 0        | -0.010843 |  |
|  | Shiraz-46T | 947  | 0        | -0.010843 |  |
|  | Shiraz-47T | 1031 | 0        | -0.117529 |  |
|  | Shiraz-47T | 1031 | 0        | -0.117529 |  |
|  | Shiraz-49T | 1121 | 0        | -0.138569 |  |

|  |            |      |          |           |  |
|--|------------|------|----------|-----------|--|
|  | Shiraz-49T | 1121 | 0        | -0.138569 |  |
|  | Shiraz-77T | 1225 | 0        | -0.117922 |  |
|  | Shiraz-77T | 1225 | 0        | -0.117922 |  |
|  | Shiraz-77T | 1228 | 0        | -0.238084 |  |
|  | Shiraz-77T | 1228 | 0        | -0.238084 |  |
|  | Shiraz-18T | 1434 | 0.244465 | 0         |  |
|  | Shiraz-18T | 1434 | 0.244465 | 0         |  |
|  | Shiraz-22T | 1549 | 0        | -0.319623 |  |
|  | Shiraz-22T | 1549 | 0        | -0.319623 |  |
|  | Shiraz-25T | 1698 | 0.21835  | 0         |  |
|  | Shiraz-25T | 1698 | 0.21835  | 0         |  |
|  | Shiraz-28T | 1735 | 0.350744 | 0         |  |
|  | Shiraz-28T | 1735 | 0.350744 | 0         |  |
|  | Shiraz-29T | 1778 | 0.120767 | 0         |  |
|  | Shiraz-29T | 1778 | 0.120767 | 0         |  |
|  | Shiraz-32T | 1833 | 0.551336 | 0         |  |
|  | Shiraz-32T | 1833 | 0.551336 | 0         |  |
|  | Shiraz-38T | 1951 | 0.250891 | 0         |  |
|  | Shiraz-38T | 1951 | 0.250891 | 0         |  |
|  | Shiraz-53T | 2078 | 0.287202 | 0         |  |
|  | Shiraz-53T | 2078 | 0.287202 | 0         |  |
|  | Shiraz-58T | 2161 | 0        | -0.187744 |  |
|  | Shiraz-58T | 2161 | 0        | -0.187744 |  |
|  | Shiraz-71T | 2238 | 0.603631 | 0         |  |
|  | Shiraz-71T | 2238 | 0.603631 | 0         |  |
|  | Shiraz-3T  | 90   | 0.219276 | 0         |  |
|  | Shiraz-3T  | 90   | 0.219276 | 0         |  |
|  | Shiraz-3T  | 95   | 0        | -0.077623 |  |
|  | Shiraz-3T  | 95   | 0        | -0.077623 |  |
|  | Shiraz-4T  | 253  | 0.372918 | 0         |  |
|  | Shiraz-4T  | 253  | 0.372918 | 0         |  |
|  | Shiraz-36T | 378  | 0.179558 | 0         |  |
|  | Shiraz-36T | 378  | 0.179558 | 0         |  |
|  | Shiraz-36T | 382  | 0.081739 | 0         |  |
|  | Shiraz-36T | 382  | 0.081739 | 0         |  |
|  | Shiraz-44T | 641  | 0        | -0.477846 |  |
|  | Shiraz-44T | 641  | 0        | -0.477846 |  |
|  | Shiraz-46T | 943  | 0.093799 | 0         |  |
|  | Shiraz-46T | 943  | 0.093799 | 0         |  |
|  | Shiraz-46T | 947  | 0        | -0.010843 |  |
|  | Shiraz-46T | 947  | 0        | -0.010843 |  |
|  | Shiraz-47T | 1031 | 0        | -0.117529 |  |
|  | Shiraz-47T | 1031 | 0        | -0.117529 |  |
|  | Shiraz-49T | 1121 | 0        | -0.138569 |  |
|  | Shiraz-49T | 1121 | 0        | -0.138569 |  |
|  | Shiraz-77T | 1225 | 0        | -0.117922 |  |
|  | Shiraz-77T | 1225 | 0        | -0.117922 |  |

|       |      |            |      |          |           |  |  |
|-------|------|------------|------|----------|-----------|--|--|
|       |      | Shiraz-77T | 1228 | 0        | -0.238084 |  |  |
|       |      | Shiraz-77T | 1228 | 0        | -0.238084 |  |  |
|       |      | Shiraz-18T | 1434 | 0.244465 | 0         |  |  |
|       |      | Shiraz-18T | 1434 | 0.244465 | 0         |  |  |
|       |      | Shiraz-22T | 1549 | 0        | -0.319623 |  |  |
|       |      | Shiraz-22T | 1549 | 0        | -0.319623 |  |  |
|       |      | Shiraz-25T | 1698 | 0.21835  | 0         |  |  |
|       |      | Shiraz-25T | 1698 | 0.21835  | 0         |  |  |
|       |      | Shiraz-28T | 1735 | 0.350744 | 0         |  |  |
|       |      | Shiraz-28T | 1735 | 0.350744 | 0         |  |  |
|       |      | Shiraz-29T | 1778 | 0.120767 | 0         |  |  |
|       |      | Shiraz-29T | 1778 | 0.120767 | 0         |  |  |
|       |      | Shiraz-32T | 1833 | 0.551336 | 0         |  |  |
|       |      | Shiraz-32T | 1833 | 0.551336 | 0         |  |  |
|       |      | Shiraz-38T | 1951 | 0.250891 | 0         |  |  |
|       |      | Shiraz-38T | 1951 | 0.250891 | 0         |  |  |
|       |      | Shiraz-53T | 2078 | 0.287202 | 0         |  |  |
|       |      | Shiraz-53T | 2078 | 0.287202 | 0         |  |  |
|       |      | Shiraz-58T | 2161 | 0        | -0.187744 |  |  |
|       |      | Shiraz-58T | 2161 | 0        | -0.187744 |  |  |
|       |      | Shiraz-71T | 2238 | 0.603631 | 0         |  |  |
|       |      | Shiraz-71T | 2238 | 0.603631 | 0         |  |  |
| THOC2 | chrX | Shiraz-3T  | 242  | 0        | -0.336434 |  |  |
|       |      | Shiraz-4T  | 261  | 0        | -0.336249 |  |  |
|       |      | Shiraz-16T | 295  | 0.591657 | 0         |  |  |
|       |      | Shiraz-36T | 433  | 0        | -0.803961 |  |  |
|       |      | Shiraz-44T | 899  | 0        | -1.09697  |  |  |
|       |      | Shiraz-49T | 1170 | 0        | -0.967436 |  |  |
|       |      | Shiraz-9T  | 1370 | 0.690073 | 0         |  |  |
|       |      | Shiraz-18T | 1457 | 0.643204 | 0         |  |  |
|       |      | Shiraz-22T | 1673 | 0.611783 | 0         |  |  |
|       |      | Shiraz-25T | 1719 | 0.472955 | 0         |  |  |
|       |      | Shiraz-28T | 1762 | 0.562311 | 0         |  |  |
|       |      | Shiraz-29T | 1801 | 0.815343 | 0         |  |  |
|       |      | Shiraz-32T | 1870 | 0.729766 | 0         |  |  |
|       |      | Shiraz-35T | 1933 | 0.488535 | 0         |  |  |
|       |      | Shiraz-58T | 2223 | 0.833364 | 0         |  |  |
|       |      | Shiraz-71T | 2263 | 0.975531 | 0         |  |  |
|       |      | Shiraz-3T  | 242  | 0        | -0.336434 |  |  |
|       |      | Shiraz-4T  | 261  | 0        | -0.336249 |  |  |
|       |      | Shiraz-16T | 295  | 0.591657 | 0         |  |  |
|       |      | Shiraz-36T | 433  | 0        | -0.803961 |  |  |
|       |      | Shiraz-44T | 899  | 0        | -1.09697  |  |  |
|       |      | Shiraz-49T | 1170 | 0        | -0.967436 |  |  |
|       |      | Shiraz-9T  | 1370 | 0.690073 | 0         |  |  |
|       |      | Shiraz-18T | 1457 | 0.643204 | 0         |  |  |
|       |      | Shiraz-22T | 1673 | 0.611783 | 0         |  |  |



|        |      |            |      |          |           |  |
|--------|------|------------|------|----------|-----------|--|
|        |      | Shiraz-25T | 1719 | 0.472955 | 0         |  |
|        |      | Shiraz-28T | 1762 | 0.562311 | 0         |  |
|        |      | Shiraz-29T | 1801 | 0.815343 | 0         |  |
|        |      | Shiraz-32T | 1870 | 0.729766 | 0         |  |
|        |      | Shiraz-35T | 1933 | 0.488535 | 0         |  |
|        |      | Shiraz-58T | 2223 | 0.833364 | 0         |  |
|        |      | Shiraz-71T | 2263 | 0.975531 | 0         |  |
|        |      | Shiraz-3T  | 242  | 0        | -0.336434 |  |
|        |      | Shiraz-4T  | 261  | 0        | -0.336249 |  |
|        |      | Shiraz-16T | 295  | 0.591657 | 0         |  |
|        |      | Shiraz-36T | 433  | 0        | -0.803961 |  |
|        |      | Shiraz-44T | 899  | 0        | -1.09697  |  |
|        |      | Shiraz-49T | 1170 | 0        | -0.967436 |  |
|        |      | Shiraz-9T  | 1370 | 0.690073 | 0         |  |
|        |      | Shiraz-18T | 1457 | 0.643204 | 0         |  |
|        |      | Shiraz-22T | 1673 | 0.611783 | 0         |  |
|        |      | Shiraz-25T | 1719 | 0.472955 | 0         |  |
|        |      | Shiraz-28T | 1762 | 0.562311 | 0         |  |
|        |      | Shiraz-29T | 1801 | 0.815343 | 0         |  |
|        |      | Shiraz-32T | 1870 | 0.729766 | 0         |  |
|        |      | Shiraz-35T | 1933 | 0.488535 | 0         |  |
|        |      | Shiraz-58T | 2223 | 0.833364 | 0         |  |
|        |      | Shiraz-71T | 2263 | 0.975531 | 0         |  |
| THSD7A | chr7 | Shiraz-4T  | 252  | 0.192083 | 0         |  |
|        |      | Shiraz-36T | 376  | 0.159952 | 0         |  |
|        |      | Shiraz-44T | 628  | 0        | -0.444379 |  |
|        |      | Shiraz-47T | 1027 | 0        | -0.117848 |  |
|        |      | Shiraz-49T | 1117 | 0        | -0.168296 |  |
|        |      | Shiraz-77T | 1222 | 0        | -0.113002 |  |
|        |      | Shiraz-18T | 1433 | 0.250973 | 0         |  |
|        |      | Shiraz-22T | 1543 | 0        | -0.513696 |  |
|        |      | Shiraz-25T | 1697 | 0.21945  | 0         |  |
|        |      | Shiraz-28T | 1734 | 0.362882 | 0         |  |
|        |      | Shiraz-29T | 1777 | 0.156747 | 0         |  |
|        |      | Shiraz-38T | 1950 | 0.265916 | 0         |  |
|        |      | Shiraz-58T | 2157 | 0        | -0.213872 |  |
|        |      | Shiraz-71T | 2236 | 0.320072 | 0         |  |
|        |      | Shiraz-4T  | 252  | 0.192083 | 0         |  |
|        |      | Shiraz-36T | 376  | 0.159952 | 0         |  |
|        |      | Shiraz-44T | 628  | 0        | -0.444379 |  |
|        |      | Shiraz-47T | 1027 | 0        | -0.117848 |  |
|        |      | Shiraz-49T | 1117 | 0        | -0.168296 |  |
|        |      | Shiraz-77T | 1222 | 0        | -0.113002 |  |
|        |      | Shiraz-18T | 1433 | 0.250973 | 0         |  |
|        |      | Shiraz-22T | 1543 | 0        | -0.513696 |  |
|        |      | Shiraz-25T | 1697 | 0.21945  | 0         |  |
|        |      | Shiraz-28T | 1734 | 0.362882 | 0         |  |

|         |      |            |      |          |           |  |
|---------|------|------------|------|----------|-----------|--|
|         |      | Shiraz-29T | 1777 | 0.156747 | 0         |  |
|         |      | Shiraz-38T | 1950 | 0.265916 | 0         |  |
|         |      | Shiraz-58T | 2157 | 0        | -0.213872 |  |
|         |      | Shiraz-71T | 2236 | 0.320072 | 0         |  |
|         |      | Shiraz-4T  | 252  | 0.192083 | 0         |  |
|         |      | Shiraz-36T | 376  | 0.159952 | 0         |  |
|         |      | Shiraz-44T | 628  | 0        | -0.444379 |  |
|         |      | Shiraz-47T | 1027 | 0        | -0.117848 |  |
|         |      | Shiraz-49T | 1117 | 0        | -0.168296 |  |
|         |      | Shiraz-77T | 1222 | 0        | -0.113002 |  |
|         |      | Shiraz-18T | 1433 | 0.250973 | 0         |  |
|         |      | Shiraz-22T | 1543 | 0        | -0.513696 |  |
|         |      | Shiraz-25T | 1697 | 0.21945  | 0         |  |
|         |      | Shiraz-28T | 1734 | 0.362882 | 0         |  |
|         |      | Shiraz-29T | 1777 | 0.156747 | 0         |  |
|         |      | Shiraz-38T | 1950 | 0.265916 | 0         |  |
|         |      | Shiraz-58T | 2157 | 0        | -0.213872 |  |
|         |      | Shiraz-71T | 2236 | 0.320072 | 0         |  |
| TIMM17B | chrX | Shiraz-3T  | 238  | 0.472087 | 0         |  |
|         |      | Shiraz-4T  | 260  | 0        | -0.324128 |  |
|         |      | Shiraz-16T | 294  | 0.655804 | 0         |  |
|         |      | Shiraz-31T | 345  | 0.103301 | 0         |  |
|         |      | Shiraz-36T | 431  | 0        | -0.78035  |  |
|         |      | Shiraz-36T | 432  | 0        | -0.6692   |  |
|         |      | Shiraz-44T | 891  | 0        | -0.954044 |  |
|         |      | Shiraz-44T | 896  | 0        | -0.109108 |  |
|         |      | Shiraz-44T | 897  | 0.486937 | 0         |  |
|         |      | Shiraz-46T | 991  | 0.139564 | 0         |  |
|         |      | Shiraz-47T | 1084 | 0.24185  | 0         |  |
|         |      | Shiraz-49T | 1166 | 0        | -0.917235 |  |
|         |      | Shiraz-49T | 1169 | 0        | -0.583529 |  |
|         |      | Shiraz-77T | 1282 | 0.213849 | 0         |  |
|         |      | Shiraz-9T  | 1368 | 0.199713 | 0         |  |
|         |      | Shiraz-9T  | 1369 | 0.703374 | 0         |  |
|         |      | Shiraz-18T | 1455 | 0        | -0.186773 |  |
|         |      | Shiraz-22T | 1669 | 0.695915 | 0         |  |
|         |      | Shiraz-22T | 1672 | 1.01678  | 0         |  |
|         |      | Shiraz-25T | 1717 | 0.420447 | 0         |  |
|         |      | Shiraz-28T | 1760 | 0.538181 | 0         |  |
|         |      | Shiraz-29T | 1800 | 0.672527 | 0         |  |
|         |      | Shiraz-32T | 1869 | 0.776805 | 0         |  |
|         |      | Shiraz-35T | 1932 | 0.507141 | 0         |  |
|         |      | Shiraz-58T | 2221 | 0.871948 | 0         |  |
|         |      | Shiraz-71T | 2260 | 0.68394  | 0         |  |
|         |      | Shiraz-71T | 2262 | 0.986748 | 0         |  |
|         |      | Shiraz-3T  | 238  | 0.472087 | 0         |  |
|         |      | Shiraz-4T  | 260  | 0        | -0.324128 |  |

|  |            |      |          |           |  |
|--|------------|------|----------|-----------|--|
|  | Shiraz-16T | 294  | 0.655804 | 0         |  |
|  | Shiraz-31T | 345  | 0.103301 | 0         |  |
|  | Shiraz-36T | 431  | 0        | -0.78035  |  |
|  | Shiraz-36T | 432  | 0        | -0.6692   |  |
|  | Shiraz-44T | 891  | 0        | -0.954044 |  |
|  | Shiraz-44T | 896  | 0        | -0.109108 |  |
|  | Shiraz-44T | 897  | 0.486937 | 0         |  |
|  | Shiraz-46T | 991  | 0.139564 | 0         |  |
|  | Shiraz-47T | 1084 | 0.24185  | 0         |  |
|  | Shiraz-49T | 1166 | 0        | -0.917235 |  |
|  | Shiraz-49T | 1169 | 0        | -0.583529 |  |
|  | Shiraz-77T | 1282 | 0.213849 | 0         |  |
|  | Shiraz-9T  | 1368 | 0.199713 | 0         |  |
|  | Shiraz-9T  | 1369 | 0.703374 | 0         |  |
|  | Shiraz-18T | 1455 | 0        | -0.186773 |  |
|  | Shiraz-22T | 1669 | 0.695915 | 0         |  |
|  | Shiraz-22T | 1672 | 1.01678  | 0         |  |
|  | Shiraz-25T | 1717 | 0.420447 | 0         |  |
|  | Shiraz-28T | 1760 | 0.538181 | 0         |  |
|  | Shiraz-29T | 1800 | 0.672527 | 0         |  |
|  | Shiraz-32T | 1869 | 0.776805 | 0         |  |
|  | Shiraz-35T | 1932 | 0.507141 | 0         |  |
|  | Shiraz-58T | 2221 | 0.871948 | 0         |  |
|  | Shiraz-71T | 2260 | 0.68394  | 0         |  |
|  | Shiraz-71T | 2262 | 0.986748 | 0         |  |
|  | Shiraz-3T  | 238  | 0.472087 | 0         |  |
|  | Shiraz-4T  | 260  | 0        | -0.324128 |  |
|  | Shiraz-16T | 294  | 0.655804 | 0         |  |
|  | Shiraz-31T | 345  | 0.103301 | 0         |  |
|  | Shiraz-36T | 431  | 0        | -0.78035  |  |
|  | Shiraz-36T | 432  | 0        | -0.6692   |  |
|  | Shiraz-44T | 891  | 0        | -0.954044 |  |
|  | Shiraz-44T | 896  | 0        | -0.109108 |  |
|  | Shiraz-44T | 897  | 0.486937 | 0         |  |
|  | Shiraz-46T | 991  | 0.139564 | 0         |  |
|  | Shiraz-47T | 1084 | 0.24185  | 0         |  |
|  | Shiraz-49T | 1166 | 0        | -0.917235 |  |
|  | Shiraz-49T | 1169 | 0        | -0.583529 |  |
|  | Shiraz-77T | 1282 | 0.213849 | 0         |  |
|  | Shiraz-9T  | 1368 | 0.199713 | 0         |  |
|  | Shiraz-9T  | 1369 | 0.703374 | 0         |  |
|  | Shiraz-18T | 1455 | 0        | -0.186773 |  |
|  | Shiraz-22T | 1669 | 0.695915 | 0         |  |
|  | Shiraz-22T | 1672 | 1.01678  | 0         |  |
|  | Shiraz-25T | 1717 | 0.420447 | 0         |  |
|  | Shiraz-28T | 1760 | 0.538181 | 0         |  |
|  | Shiraz-29T | 1800 | 0.672527 | 0         |  |

|        |      |            |      |          |           |  |  |
|--------|------|------------|------|----------|-----------|--|--|
|        |      | Shiraz-32T | 1869 | 0.776805 | 0         |  |  |
|        |      | Shiraz-35T | 1932 | 0.507141 | 0         |  |  |
|        |      | Shiraz-58T | 2221 | 0.871948 | 0         |  |  |
|        |      | Shiraz-71T | 2260 | 0.68394  | 0         |  |  |
|        |      | Shiraz-71T | 2262 | 0.986748 | 0         |  |  |
| TIMM8A | chrX | Shiraz-3T  | 242  | 0        | -0.336434 |  |  |
|        |      | Shiraz-3T  | 242  | 0        | -0.336434 |  |  |
|        |      | Shiraz-4T  | 261  | 0        | -0.336249 |  |  |
|        |      | Shiraz-4T  | 261  | 0        | -0.336249 |  |  |
|        |      | Shiraz-16T | 295  | 0.591657 | 0         |  |  |
|        |      | Shiraz-16T | 295  | 0.591657 | 0         |  |  |
|        |      | Shiraz-36T | 433  | 0        | -0.803961 |  |  |
|        |      | Shiraz-36T | 433  | 0        | -0.803961 |  |  |
|        |      | Shiraz-44T | 899  | 0        | -1.09697  |  |  |
|        |      | Shiraz-44T | 899  | 0        | -1.09697  |  |  |
|        |      | Shiraz-49T | 1170 | 0        | -0.967436 |  |  |
|        |      | Shiraz-49T | 1170 | 0        | -0.967436 |  |  |
|        |      | Shiraz-18T | 1457 | 0.643204 | 0         |  |  |
|        |      | Shiraz-18T | 1457 | 0.643204 | 0         |  |  |
|        |      | Shiraz-22T | 1673 | 0.611783 | 0         |  |  |
|        |      | Shiraz-22T | 1673 | 0.611783 | 0         |  |  |
|        |      | Shiraz-25T | 1719 | 0.472955 | 0         |  |  |
|        |      | Shiraz-25T | 1719 | 0.472955 | 0         |  |  |
|        |      | Shiraz-28T | 1762 | 0.562311 | 0         |  |  |
|        |      | Shiraz-28T | 1762 | 0.562311 | 0         |  |  |
|        |      | Shiraz-29T | 1801 | 0.815343 | 0         |  |  |
|        |      | Shiraz-29T | 1801 | 0.815343 | 0         |  |  |
|        |      | Shiraz-32T | 1870 | 0.729766 | 0         |  |  |
|        |      | Shiraz-32T | 1870 | 0.729766 | 0         |  |  |
|        |      | Shiraz-35T | 1933 | 0.488535 | 0         |  |  |
|        |      | Shiraz-35T | 1933 | 0.488535 | 0         |  |  |
|        |      | Shiraz-58T | 2223 | 0.833364 | 0         |  |  |
|        |      | Shiraz-58T | 2223 | 0.833364 | 0         |  |  |
|        |      | Shiraz-71T | 2263 | 0.975531 | 0         |  |  |
|        |      | Shiraz-71T | 2263 | 0.975531 | 0         |  |  |
|        |      | Shiraz-3T  | 242  | 0        | -0.336434 |  |  |
|        |      | Shiraz-3T  | 242  | 0        | -0.336434 |  |  |
|        |      | Shiraz-4T  | 261  | 0        | -0.336249 |  |  |
|        |      | Shiraz-4T  | 261  | 0        | -0.336249 |  |  |
|        |      | Shiraz-16T | 295  | 0.591657 | 0         |  |  |
|        |      | Shiraz-16T | 295  | 0.591657 | 0         |  |  |
|        |      | Shiraz-36T | 433  | 0        | -0.803961 |  |  |
|        |      | Shiraz-36T | 433  | 0        | -0.803961 |  |  |
|        |      | Shiraz-44T | 899  | 0        | -1.09697  |  |  |
|        |      | Shiraz-44T | 899  | 0        | -1.09697  |  |  |
|        |      | Shiraz-49T | 1170 | 0        | -0.967436 |  |  |
|        |      | Shiraz-49T | 1170 | 0        | -0.967436 |  |  |

|  |  |            |      |          |           |  |  |
|--|--|------------|------|----------|-----------|--|--|
|  |  | Shiraz-18T | 1457 | 0.643204 | 0         |  |  |
|  |  | Shiraz-18T | 1457 | 0.643204 | 0         |  |  |
|  |  | Shiraz-22T | 1673 | 0.611783 | 0         |  |  |
|  |  | Shiraz-22T | 1673 | 0.611783 | 0         |  |  |
|  |  | Shiraz-25T | 1719 | 0.472955 | 0         |  |  |
|  |  | Shiraz-25T | 1719 | 0.472955 | 0         |  |  |
|  |  | Shiraz-28T | 1762 | 0.562311 | 0         |  |  |
|  |  | Shiraz-28T | 1762 | 0.562311 | 0         |  |  |
|  |  | Shiraz-29T | 1801 | 0.815343 | 0         |  |  |
|  |  | Shiraz-29T | 1801 | 0.815343 | 0         |  |  |
|  |  | Shiraz-32T | 1870 | 0.729766 | 0         |  |  |
|  |  | Shiraz-32T | 1870 | 0.729766 | 0         |  |  |
|  |  | Shiraz-35T | 1933 | 0.488535 | 0         |  |  |
|  |  | Shiraz-35T | 1933 | 0.488535 | 0         |  |  |
|  |  | Shiraz-58T | 2223 | 0.833364 | 0         |  |  |
|  |  | Shiraz-58T | 2223 | 0.833364 | 0         |  |  |
|  |  | Shiraz-71T | 2263 | 0.975531 | 0         |  |  |
|  |  | Shiraz-71T | 2263 | 0.975531 | 0         |  |  |
|  |  | Shiraz-3T  | 242  | 0        | -0.336434 |  |  |
|  |  | Shiraz-3T  | 242  | 0        | -0.336434 |  |  |
|  |  | Shiraz-4T  | 261  | 0        | -0.336249 |  |  |
|  |  | Shiraz-4T  | 261  | 0        | -0.336249 |  |  |
|  |  | Shiraz-16T | 295  | 0.591657 | 0         |  |  |
|  |  | Shiraz-16T | 295  | 0.591657 | 0         |  |  |
|  |  | Shiraz-36T | 433  | 0        | -0.803961 |  |  |
|  |  | Shiraz-36T | 433  | 0        | -0.803961 |  |  |
|  |  | Shiraz-44T | 899  | 0        | -1.09697  |  |  |
|  |  | Shiraz-44T | 899  | 0        | -1.09697  |  |  |
|  |  | Shiraz-49T | 1170 | 0        | -0.967436 |  |  |
|  |  | Shiraz-49T | 1170 | 0        | -0.967436 |  |  |
|  |  | Shiraz-18T | 1457 | 0.643204 | 0         |  |  |
|  |  | Shiraz-18T | 1457 | 0.643204 | 0         |  |  |
|  |  | Shiraz-22T | 1673 | 0.611783 | 0         |  |  |
|  |  | Shiraz-22T | 1673 | 0.611783 | 0         |  |  |
|  |  | Shiraz-25T | 1719 | 0.472955 | 0         |  |  |
|  |  | Shiraz-25T | 1719 | 0.472955 | 0         |  |  |
|  |  | Shiraz-28T | 1762 | 0.562311 | 0         |  |  |
|  |  | Shiraz-28T | 1762 | 0.562311 | 0         |  |  |
|  |  | Shiraz-29T | 1801 | 0.815343 | 0         |  |  |
|  |  | Shiraz-29T | 1801 | 0.815343 | 0         |  |  |
|  |  | Shiraz-32T | 1870 | 0.729766 | 0         |  |  |
|  |  | Shiraz-32T | 1870 | 0.729766 | 0         |  |  |
|  |  | Shiraz-35T | 1933 | 0.488535 | 0         |  |  |
|  |  | Shiraz-35T | 1933 | 0.488535 | 0         |  |  |
|  |  | Shiraz-58T | 2223 | 0.833364 | 0         |  |  |
|  |  | Shiraz-58T | 2223 | 0.833364 | 0         |  |  |
|  |  | Shiraz-71T | 2263 | 0.975531 | 0         |  |  |

|       |      |            |      |          |           |  |  |
|-------|------|------------|------|----------|-----------|--|--|
|       |      | Shiraz-71T | 2263 | 0.975531 | 0         |  |  |
| TIMP1 | chrX | Shiraz-4T  | 260  | 0        | -0.324128 |  |  |
|       |      | Shiraz-16T | 294  | 0.655804 | 0         |  |  |
|       |      | Shiraz-31T | 345  | 0.103301 | 0         |  |  |
|       |      | Shiraz-36T | 431  | 0        | -0.78035  |  |  |
|       |      | Shiraz-36T | 432  | 0        | -0.6692   |  |  |
|       |      | Shiraz-44T | 891  | 0        | -0.954044 |  |  |
|       |      | Shiraz-44T | 896  | 0        | -0.109108 |  |  |
|       |      | Shiraz-46T | 991  | 0.139564 | 0         |  |  |
|       |      | Shiraz-47T | 1084 | 0.24185  | 0         |  |  |
|       |      | Shiraz-49T | 1166 | 0        | -0.917235 |  |  |
|       |      | Shiraz-49T | 1169 | 0        | -0.583529 |  |  |
|       |      | Shiraz-77T | 1282 | 0.213849 | 0         |  |  |
|       |      | Shiraz-9T  | 1368 | 0.199713 | 0         |  |  |
|       |      | Shiraz-9T  | 1369 | 0.703374 | 0         |  |  |
|       |      | Shiraz-18T | 1455 | 0        | -0.186773 |  |  |
|       |      | Shiraz-22T | 1669 | 0.695915 | 0         |  |  |
|       |      | Shiraz-22T | 1672 | 1.01678  | 0         |  |  |
|       |      | Shiraz-25T | 1717 | 0.420447 | 0         |  |  |
|       |      | Shiraz-28T | 1760 | 0.538181 | 0         |  |  |
|       |      | Shiraz-29T | 1800 | 0.672527 | 0         |  |  |
|       |      | Shiraz-32T | 1869 | 0.776805 | 0         |  |  |
|       |      | Shiraz-35T | 1932 | 0.507141 | 0         |  |  |
|       |      | Shiraz-40T | 2051 | 0.098506 | 0         |  |  |
|       |      | Shiraz-58T | 2221 | 0.871948 | 0         |  |  |
|       |      | Shiraz-71T | 2260 | 0.68394  | 0         |  |  |
|       |      | Shiraz-71T | 2262 | 0.986748 | 0         |  |  |
|       |      | Shiraz-4T  | 260  | 0        | -0.324128 |  |  |
|       |      | Shiraz-16T | 294  | 0.655804 | 0         |  |  |
|       |      | Shiraz-31T | 345  | 0.103301 | 0         |  |  |
|       |      | Shiraz-36T | 431  | 0        | -0.78035  |  |  |
|       |      | Shiraz-36T | 432  | 0        | -0.6692   |  |  |
|       |      | Shiraz-44T | 891  | 0        | -0.954044 |  |  |
|       |      | Shiraz-44T | 896  | 0        | -0.109108 |  |  |
|       |      | Shiraz-46T | 991  | 0.139564 | 0         |  |  |
|       |      | Shiraz-47T | 1084 | 0.24185  | 0         |  |  |
|       |      | Shiraz-49T | 1166 | 0        | -0.917235 |  |  |
|       |      | Shiraz-49T | 1169 | 0        | -0.583529 |  |  |
|       |      | Shiraz-77T | 1282 | 0.213849 | 0         |  |  |
|       |      | Shiraz-9T  | 1368 | 0.199713 | 0         |  |  |
|       |      | Shiraz-9T  | 1369 | 0.703374 | 0         |  |  |
|       |      | Shiraz-18T | 1455 | 0        | -0.186773 |  |  |
|       |      | Shiraz-22T | 1669 | 0.695915 | 0         |  |  |
|       |      | Shiraz-22T | 1672 | 1.01678  | 0         |  |  |
|       |      | Shiraz-25T | 1717 | 0.420447 | 0         |  |  |
|       |      | Shiraz-28T | 1760 | 0.538181 | 0         |  |  |
|       |      | Shiraz-29T | 1800 | 0.672527 | 0         |  |  |

|       |      |            |      |          |           |  |  |
|-------|------|------------|------|----------|-----------|--|--|
|       |      | Shiraz-32T | 1869 | 0.776805 | 0         |  |  |
|       |      | Shiraz-35T | 1932 | 0.507141 | 0         |  |  |
|       |      | Shiraz-40T | 2051 | 0.098506 | 0         |  |  |
|       |      | Shiraz-58T | 2221 | 0.871948 | 0         |  |  |
|       |      | Shiraz-71T | 2260 | 0.68394  | 0         |  |  |
|       |      | Shiraz-71T | 2262 | 0.986748 | 0         |  |  |
|       |      | Shiraz-4T  | 260  | 0        | -0.324128 |  |  |
|       |      | Shiraz-16T | 294  | 0.655804 | 0         |  |  |
|       |      | Shiraz-31T | 345  | 0.103301 | 0         |  |  |
|       |      | Shiraz-36T | 431  | 0        | -0.78035  |  |  |
|       |      | Shiraz-36T | 432  | 0        | -0.6692   |  |  |
|       |      | Shiraz-44T | 891  | 0        | -0.954044 |  |  |
|       |      | Shiraz-44T | 896  | 0        | -0.109108 |  |  |
|       |      | Shiraz-46T | 991  | 0.139564 | 0         |  |  |
|       |      | Shiraz-47T | 1084 | 0.24185  | 0         |  |  |
|       |      | Shiraz-49T | 1166 | 0        | -0.917235 |  |  |
|       |      | Shiraz-49T | 1169 | 0        | -0.583529 |  |  |
|       |      | Shiraz-77T | 1282 | 0.213849 | 0         |  |  |
|       |      | Shiraz-9T  | 1368 | 0.199713 | 0         |  |  |
|       |      | Shiraz-9T  | 1369 | 0.703374 | 0         |  |  |
|       |      | Shiraz-18T | 1455 | 0        | -0.186773 |  |  |
|       |      | Shiraz-22T | 1669 | 0.695915 | 0         |  |  |
|       |      | Shiraz-22T | 1672 | 1.01678  | 0         |  |  |
|       |      | Shiraz-25T | 1717 | 0.420447 | 0         |  |  |
|       |      | Shiraz-28T | 1760 | 0.538181 | 0         |  |  |
|       |      | Shiraz-29T | 1800 | 0.672527 | 0         |  |  |
|       |      | Shiraz-32T | 1869 | 0.776805 | 0         |  |  |
|       |      | Shiraz-35T | 1932 | 0.507141 | 0         |  |  |
|       |      | Shiraz-40T | 2051 | 0.098506 | 0         |  |  |
|       |      | Shiraz-58T | 2221 | 0.871948 | 0         |  |  |
|       |      | Shiraz-71T | 2260 | 0.68394  | 0         |  |  |
|       |      | Shiraz-71T | 2262 | 0.986748 | 0         |  |  |
| TKTL1 | chrX | Shiraz-3T  | 246  | 0.531858 | 0         |  |  |
|       |      | Shiraz-3T  | 246  | 0.531858 | 0         |  |  |
|       |      | Shiraz-4T  | 261  | 0        | -0.336249 |  |  |
|       |      | Shiraz-4T  | 261  | 0        | -0.336249 |  |  |
|       |      | Shiraz-16T | 295  | 0.591657 | 0         |  |  |
|       |      | Shiraz-16T | 295  | 0.591657 | 0         |  |  |
|       |      | Shiraz-36T | 433  | 0        | -0.803961 |  |  |
|       |      | Shiraz-36T | 433  | 0        | -0.803961 |  |  |
|       |      | Shiraz-42T | 480  | 0        | -0.232915 |  |  |
|       |      | Shiraz-42T | 480  | 0        | -0.232915 |  |  |
|       |      | Shiraz-44T | 908  | 0.466743 | 0         |  |  |
|       |      | Shiraz-44T | 908  | 0.466743 | 0         |  |  |
|       |      | Shiraz-49T | 1170 | 0        | -0.967436 |  |  |
|       |      | Shiraz-49T | 1170 | 0        | -0.967436 |  |  |
|       |      | Shiraz-49T | 1173 | 0        | -0.704439 |  |  |

|  |            |      |          |           |  |
|--|------------|------|----------|-----------|--|
|  | Shiraz-49T | 1173 | 0        | -0.704439 |  |
|  | Shiraz-9T  | 1370 | 0.690073 | 0         |  |
|  | Shiraz-9T  | 1370 | 0.690073 | 0         |  |
|  | Shiraz-9T  | 1371 | 1.292392 | 0         |  |
|  | Shiraz-9T  | 1371 | 1.292392 | 0         |  |
|  | Shiraz-18T | 1457 | 0.643204 | 0         |  |
|  | Shiraz-18T | 1457 | 0.643204 | 0         |  |
|  | Shiraz-22T | 1673 | 0.611783 | 0         |  |
|  | Shiraz-22T | 1673 | 0.611783 | 0         |  |
|  | Shiraz-22T | 1678 | 0.911625 | 0         |  |
|  | Shiraz-22T | 1678 | 0.911625 | 0         |  |
|  | Shiraz-25T | 1719 | 0.472955 | 0         |  |
|  | Shiraz-25T | 1719 | 0.472955 | 0         |  |
|  | Shiraz-28T | 1762 | 0.562311 | 0         |  |
|  | Shiraz-28T | 1762 | 0.562311 | 0         |  |
|  | Shiraz-29T | 1801 | 0.815343 | 0         |  |
|  | Shiraz-29T | 1801 | 0.815343 | 0         |  |
|  | Shiraz-32T | 1870 | 0.729766 | 0         |  |
|  | Shiraz-32T | 1870 | 0.729766 | 0         |  |
|  | Shiraz-32T | 1872 | 1.504553 | 0         |  |
|  | Shiraz-32T | 1872 | 1.504553 | 0         |  |
|  | Shiraz-35T | 1933 | 0.488535 | 0         |  |
|  | Shiraz-35T | 1933 | 0.488535 | 0         |  |
|  | Shiraz-38T | 2011 | 0        | -0.406024 |  |
|  | Shiraz-38T | 2011 | 0        | -0.406024 |  |
|  | Shiraz-53T | 2115 | 0.427728 | 0         |  |
|  | Shiraz-53T | 2115 | 0.427728 | 0         |  |
|  | Shiraz-58T | 2223 | 0.833364 | 0         |  |
|  | Shiraz-58T | 2223 | 0.833364 | 0         |  |
|  | Shiraz-58T | 2226 | 1.074663 | 0         |  |
|  | Shiraz-58T | 2226 | 1.074663 | 0         |  |
|  | Shiraz-71T | 2263 | 0.975531 | 0         |  |
|  | Shiraz-71T | 2263 | 0.975531 | 0         |  |
|  | Shiraz-3T  | 246  | 0.531858 | 0         |  |
|  | Shiraz-3T  | 246  | 0.531858 | 0         |  |
|  | Shiraz-4T  | 261  | 0        | -0.336249 |  |
|  | Shiraz-4T  | 261  | 0        | -0.336249 |  |
|  | Shiraz-16T | 295  | 0.591657 | 0         |  |
|  | Shiraz-16T | 295  | 0.591657 | 0         |  |
|  | Shiraz-36T | 433  | 0        | -0.803961 |  |
|  | Shiraz-36T | 433  | 0        | -0.803961 |  |
|  | Shiraz-42T | 480  | 0        | -0.232915 |  |
|  | Shiraz-42T | 480  | 0        | -0.232915 |  |
|  | Shiraz-44T | 908  | 0.466743 | 0         |  |
|  | Shiraz-44T | 908  | 0.466743 | 0         |  |
|  | Shiraz-49T | 1170 | 0        | -0.967436 |  |
|  | Shiraz-49T | 1170 | 0        | -0.967436 |  |



|  |            |      |          |           |  |
|--|------------|------|----------|-----------|--|
|  | Shiraz-49T | 1173 | 0        | -0.704439 |  |
|  | Shiraz-49T | 1173 | 0        | -0.704439 |  |
|  | Shiraz-9T  | 1370 | 0.690073 | 0         |  |
|  | Shiraz-9T  | 1370 | 0.690073 | 0         |  |
|  | Shiraz-9T  | 1371 | 1.292392 | 0         |  |
|  | Shiraz-9T  | 1371 | 1.292392 | 0         |  |
|  | Shiraz-18T | 1457 | 0.643204 | 0         |  |
|  | Shiraz-18T | 1457 | 0.643204 | 0         |  |
|  | Shiraz-22T | 1673 | 0.611783 | 0         |  |
|  | Shiraz-22T | 1673 | 0.611783 | 0         |  |
|  | Shiraz-22T | 1678 | 0.911625 | 0         |  |
|  | Shiraz-22T | 1678 | 0.911625 | 0         |  |
|  | Shiraz-25T | 1719 | 0.472955 | 0         |  |
|  | Shiraz-25T | 1719 | 0.472955 | 0         |  |
|  | Shiraz-28T | 1762 | 0.562311 | 0         |  |
|  | Shiraz-28T | 1762 | 0.562311 | 0         |  |
|  | Shiraz-29T | 1801 | 0.815343 | 0         |  |
|  | Shiraz-29T | 1801 | 0.815343 | 0         |  |
|  | Shiraz-32T | 1870 | 0.729766 | 0         |  |
|  | Shiraz-32T | 1870 | 0.729766 | 0         |  |
|  | Shiraz-32T | 1872 | 1.504553 | 0         |  |
|  | Shiraz-32T | 1872 | 1.504553 | 0         |  |
|  | Shiraz-35T | 1933 | 0.488535 | 0         |  |
|  | Shiraz-35T | 1933 | 0.488535 | 0         |  |
|  | Shiraz-38T | 2011 | 0        | -0.406024 |  |
|  | Shiraz-38T | 2011 | 0        | -0.406024 |  |
|  | Shiraz-53T | 2115 | 0.427728 | 0         |  |
|  | Shiraz-53T | 2115 | 0.427728 | 0         |  |
|  | Shiraz-58T | 2223 | 0.833364 | 0         |  |
|  | Shiraz-58T | 2223 | 0.833364 | 0         |  |
|  | Shiraz-58T | 2226 | 1.074663 | 0         |  |
|  | Shiraz-58T | 2226 | 1.074663 | 0         |  |
|  | Shiraz-71T | 2263 | 0.975531 | 0         |  |
|  | Shiraz-71T | 2263 | 0.975531 | 0         |  |
|  | Shiraz-3T  | 246  | 0.531858 | 0         |  |
|  | Shiraz-3T  | 246  | 0.531858 | 0         |  |
|  | Shiraz-4T  | 261  | 0        | -0.336249 |  |
|  | Shiraz-4T  | 261  | 0        | -0.336249 |  |
|  | Shiraz-16T | 295  | 0.591657 | 0         |  |
|  | Shiraz-16T | 295  | 0.591657 | 0         |  |
|  | Shiraz-36T | 433  | 0        | -0.803961 |  |
|  | Shiraz-36T | 433  | 0        | -0.803961 |  |
|  | Shiraz-42T | 480  | 0        | -0.232915 |  |
|  | Shiraz-42T | 480  | 0        | -0.232915 |  |
|  | Shiraz-44T | 908  | 0.466743 | 0         |  |
|  | Shiraz-44T | 908  | 0.466743 | 0         |  |
|  | Shiraz-49T | 1170 | 0        | -0.967436 |  |

|      |      |            |      |          |           |  |  |
|------|------|------------|------|----------|-----------|--|--|
|      |      | Shiraz-49T | 1170 | 0        | -0.967436 |  |  |
|      |      | Shiraz-49T | 1173 | 0        | -0.704439 |  |  |
|      |      | Shiraz-49T | 1173 | 0        | -0.704439 |  |  |
|      |      | Shiraz-9T  | 1370 | 0.690073 | 0         |  |  |
|      |      | Shiraz-9T  | 1370 | 0.690073 | 0         |  |  |
|      |      | Shiraz-9T  | 1371 | 1.292392 | 0         |  |  |
|      |      | Shiraz-9T  | 1371 | 1.292392 | 0         |  |  |
|      |      | Shiraz-18T | 1457 | 0.643204 | 0         |  |  |
|      |      | Shiraz-18T | 1457 | 0.643204 | 0         |  |  |
|      |      | Shiraz-22T | 1673 | 0.611783 | 0         |  |  |
|      |      | Shiraz-22T | 1673 | 0.611783 | 0         |  |  |
|      |      | Shiraz-22T | 1678 | 0.911625 | 0         |  |  |
|      |      | Shiraz-22T | 1678 | 0.911625 | 0         |  |  |
|      |      | Shiraz-25T | 1719 | 0.472955 | 0         |  |  |
|      |      | Shiraz-25T | 1719 | 0.472955 | 0         |  |  |
|      |      | Shiraz-28T | 1762 | 0.562311 | 0         |  |  |
|      |      | Shiraz-28T | 1762 | 0.562311 | 0         |  |  |
|      |      | Shiraz-29T | 1801 | 0.815343 | 0         |  |  |
|      |      | Shiraz-29T | 1801 | 0.815343 | 0         |  |  |
|      |      | Shiraz-32T | 1870 | 0.729766 | 0         |  |  |
|      |      | Shiraz-32T | 1870 | 0.729766 | 0         |  |  |
|      |      | Shiraz-32T | 1872 | 1.504553 | 0         |  |  |
|      |      | Shiraz-32T | 1872 | 1.504553 | 0         |  |  |
|      |      | Shiraz-35T | 1933 | 0.488535 | 0         |  |  |
|      |      | Shiraz-35T | 1933 | 0.488535 | 0         |  |  |
|      |      | Shiraz-38T | 2011 | 0        | -0.406024 |  |  |
|      |      | Shiraz-38T | 2011 | 0        | -0.406024 |  |  |
|      |      | Shiraz-53T | 2115 | 0.427728 | 0         |  |  |
|      |      | Shiraz-53T | 2115 | 0.427728 | 0         |  |  |
|      |      | Shiraz-58T | 2223 | 0.833364 | 0         |  |  |
|      |      | Shiraz-58T | 2223 | 0.833364 | 0         |  |  |
|      |      | Shiraz-58T | 2226 | 1.074663 | 0         |  |  |
|      |      | Shiraz-58T | 2226 | 1.074663 | 0         |  |  |
|      |      | Shiraz-71T | 2263 | 0.975531 | 0         |  |  |
|      |      | Shiraz-71T | 2263 | 0.975531 | 0         |  |  |
| TLR7 | chrX | Shiraz-3T  | 235  | 0        | -0.28401  |  |  |
|      |      | Shiraz-4T  | 260  | 0        | -0.324128 |  |  |
|      |      | Shiraz-16T | 294  | 0.655804 | 0         |  |  |
|      |      | Shiraz-36T | 431  | 0        | -0.78035  |  |  |
|      |      | Shiraz-44T | 891  | 0        | -0.954044 |  |  |
|      |      | Shiraz-49T | 1166 | 0        | -0.917235 |  |  |
|      |      | Shiraz-9T  | 1368 | 0.199713 | 0         |  |  |
|      |      | Shiraz-18T | 1455 | 0        | -0.186773 |  |  |
|      |      | Shiraz-22T | 1669 | 0.695915 | 0         |  |  |
|      |      | Shiraz-25T | 1717 | 0.420447 | 0         |  |  |
|      |      | Shiraz-28T | 1760 | 0.538181 | 0         |  |  |
|      |      | Shiraz-29T | 1800 | 0.672527 | 0         |  |  |

|      |      |            |      |          |           |  |  |
|------|------|------------|------|----------|-----------|--|--|
|      |      | Shiraz-32T | 1869 | 0.776805 | 0         |  |  |
|      |      | Shiraz-35T | 1932 | 0.507141 | 0         |  |  |
|      |      | Shiraz-40T | 2051 | 0.098506 | 0         |  |  |
|      |      | Shiraz-58T | 2221 | 0.871948 | 0         |  |  |
|      |      | Shiraz-71T | 2260 | 0.68394  | 0         |  |  |
|      |      | Shiraz-71T | 2261 | 0.508399 | 0         |  |  |
|      |      | Shiraz-3T  | 235  | 0        | -0.28401  |  |  |
|      |      | Shiraz-4T  | 260  | 0        | -0.324128 |  |  |
|      |      | Shiraz-16T | 294  | 0.655804 | 0         |  |  |
|      |      | Shiraz-36T | 431  | 0        | -0.78035  |  |  |
|      |      | Shiraz-44T | 891  | 0        | -0.954044 |  |  |
|      |      | Shiraz-49T | 1166 | 0        | -0.917235 |  |  |
|      |      | Shiraz-9T  | 1368 | 0.199713 | 0         |  |  |
|      |      | Shiraz-18T | 1455 | 0        | -0.186773 |  |  |
|      |      | Shiraz-22T | 1669 | 0.695915 | 0         |  |  |
|      |      | Shiraz-25T | 1717 | 0.420447 | 0         |  |  |
|      |      | Shiraz-28T | 1760 | 0.538181 | 0         |  |  |
|      |      | Shiraz-29T | 1800 | 0.672527 | 0         |  |  |
|      |      | Shiraz-32T | 1869 | 0.776805 | 0         |  |  |
|      |      | Shiraz-35T | 1932 | 0.507141 | 0         |  |  |
|      |      | Shiraz-40T | 2051 | 0.098506 | 0         |  |  |
|      |      | Shiraz-58T | 2221 | 0.871948 | 0         |  |  |
|      |      | Shiraz-71T | 2260 | 0.68394  | 0         |  |  |
|      |      | Shiraz-71T | 2261 | 0.508399 | 0         |  |  |
|      |      | Shiraz-3T  | 235  | 0        | -0.28401  |  |  |
|      |      | Shiraz-4T  | 260  | 0        | -0.324128 |  |  |
|      |      | Shiraz-16T | 294  | 0.655804 | 0         |  |  |
|      |      | Shiraz-36T | 431  | 0        | -0.78035  |  |  |
|      |      | Shiraz-44T | 891  | 0        | -0.954044 |  |  |
|      |      | Shiraz-49T | 1166 | 0        | -0.917235 |  |  |
|      |      | Shiraz-9T  | 1368 | 0.199713 | 0         |  |  |
|      |      | Shiraz-18T | 1455 | 0        | -0.186773 |  |  |
|      |      | Shiraz-22T | 1669 | 0.695915 | 0         |  |  |
|      |      | Shiraz-25T | 1717 | 0.420447 | 0         |  |  |
|      |      | Shiraz-28T | 1760 | 0.538181 | 0         |  |  |
|      |      | Shiraz-29T | 1800 | 0.672527 | 0         |  |  |
|      |      | Shiraz-32T | 1869 | 0.776805 | 0         |  |  |
|      |      | Shiraz-35T | 1932 | 0.507141 | 0         |  |  |
|      |      | Shiraz-40T | 2051 | 0.098506 | 0         |  |  |
|      |      | Shiraz-58T | 2221 | 0.871948 | 0         |  |  |
|      |      | Shiraz-71T | 2260 | 0.68394  | 0         |  |  |
|      |      | Shiraz-71T | 2261 | 0.508399 | 0         |  |  |
| TLR8 | chrX | Shiraz-3T  | 235  | 0        | -0.28401  |  |  |
|      |      | Shiraz-4T  | 260  | 0        | -0.324128 |  |  |
|      |      | Shiraz-16T | 294  | 0.655804 | 0         |  |  |
|      |      | Shiraz-36T | 431  | 0        | -0.78035  |  |  |
|      |      | Shiraz-44T | 891  | 0        | -0.954044 |  |  |

|  |            |      |          |           |  |
|--|------------|------|----------|-----------|--|
|  | Shiraz-49T | 1166 | 0        | -0.917235 |  |
|  | Shiraz-9T  | 1368 | 0.199713 | 0         |  |
|  | Shiraz-18T | 1455 | 0        | -0.186773 |  |
|  | Shiraz-22T | 1669 | 0.695915 | 0         |  |
|  | Shiraz-25T | 1717 | 0.420447 | 0         |  |
|  | Shiraz-28T | 1760 | 0.538181 | 0         |  |
|  | Shiraz-29T | 1800 | 0.672527 | 0         |  |
|  | Shiraz-32T | 1869 | 0.776805 | 0         |  |
|  | Shiraz-35T | 1932 | 0.507141 | 0         |  |
|  | Shiraz-40T | 2051 | 0.098506 | 0         |  |
|  | Shiraz-58T | 2221 | 0.871948 | 0         |  |
|  | Shiraz-71T | 2260 | 0.68394  | 0         |  |
|  | Shiraz-71T | 2261 | 0.508399 | 0         |  |
|  | Shiraz-3T  | 235  | 0        | -0.28401  |  |
|  | Shiraz-4T  | 260  | 0        | -0.324128 |  |
|  | Shiraz-16T | 294  | 0.655804 | 0         |  |
|  | Shiraz-36T | 431  | 0        | -0.78035  |  |
|  | Shiraz-44T | 891  | 0        | -0.954044 |  |
|  | Shiraz-49T | 1166 | 0        | -0.917235 |  |
|  | Shiraz-9T  | 1368 | 0.199713 | 0         |  |
|  | Shiraz-18T | 1455 | 0        | -0.186773 |  |
|  | Shiraz-22T | 1669 | 0.695915 | 0         |  |
|  | Shiraz-25T | 1717 | 0.420447 | 0         |  |
|  | Shiraz-28T | 1760 | 0.538181 | 0         |  |
|  | Shiraz-29T | 1800 | 0.672527 | 0         |  |
|  | Shiraz-32T | 1869 | 0.776805 | 0         |  |
|  | Shiraz-35T | 1932 | 0.507141 | 0         |  |
|  | Shiraz-40T | 2051 | 0.098506 | 0         |  |
|  | Shiraz-58T | 2221 | 0.871948 | 0         |  |
|  | Shiraz-71T | 2260 | 0.68394  | 0         |  |
|  | Shiraz-71T | 2261 | 0.508399 | 0         |  |
|  | Shiraz-3T  | 235  | 0        | -0.28401  |  |
|  | Shiraz-4T  | 260  | 0        | -0.324128 |  |
|  | Shiraz-16T | 294  | 0.655804 | 0         |  |
|  | Shiraz-36T | 431  | 0        | -0.78035  |  |
|  | Shiraz-44T | 891  | 0        | -0.954044 |  |
|  | Shiraz-49T | 1166 | 0        | -0.917235 |  |
|  | Shiraz-9T  | 1368 | 0.199713 | 0         |  |
|  | Shiraz-18T | 1455 | 0        | -0.186773 |  |
|  | Shiraz-22T | 1669 | 0.695915 | 0         |  |
|  | Shiraz-25T | 1717 | 0.420447 | 0         |  |
|  | Shiraz-28T | 1760 | 0.538181 | 0         |  |
|  | Shiraz-29T | 1800 | 0.672527 | 0         |  |
|  | Shiraz-32T | 1869 | 0.776805 | 0         |  |
|  | Shiraz-35T | 1932 | 0.507141 | 0         |  |
|  | Shiraz-40T | 2051 | 0.098506 | 0         |  |
|  | Shiraz-58T | 2221 | 0.871948 | 0         |  |

|          |      |            |      |          |           |  |  |
|----------|------|------------|------|----------|-----------|--|--|
|          |      | Shiraz-71T | 2260 | 0.68394  | 0         |  |  |
|          |      | Shiraz-71T | 2261 | 0.508399 | 0         |  |  |
| TMED4    | chr7 | Shiraz-3T  | 87   | 0.198593 | 0         |  |  |
|          |      | Shiraz-3T  | 89   | 0.678641 | 0         |  |  |
|          |      | Shiraz-4T  | 252  | 0.192083 | 0         |  |  |
|          |      | Shiraz-36T | 376  | 0.159952 | 0         |  |  |
|          |      | Shiraz-44T | 632  | 0.902944 | 0         |  |  |
|          |      | Shiraz-46T | 942  | 0.069143 | 0         |  |  |
|          |      | Shiraz-77T | 1223 | 0.215647 | 0         |  |  |
|          |      | Shiraz-18T | 1433 | 0.250973 | 0         |  |  |
|          |      | Shiraz-25T | 1697 | 0.21945  | 0         |  |  |
|          |      | Shiraz-28T | 1734 | 0.362882 | 0         |  |  |
|          |      | Shiraz-29T | 1777 | 0.156747 | 0         |  |  |
|          |      | Shiraz-38T | 1950 | 0.265916 | 0         |  |  |
|          |      | Shiraz-71T | 2236 | 0.320072 | 0         |  |  |
|          |      | Shiraz-3T  | 87   | 0.198593 | 0         |  |  |
|          |      | Shiraz-3T  | 89   | 0.678641 | 0         |  |  |
|          |      | Shiraz-4T  | 252  | 0.192083 | 0         |  |  |
|          |      | Shiraz-36T | 376  | 0.159952 | 0         |  |  |
|          |      | Shiraz-44T | 632  | 0.902944 | 0         |  |  |
|          |      | Shiraz-46T | 942  | 0.069143 | 0         |  |  |
|          |      | Shiraz-77T | 1223 | 0.215647 | 0         |  |  |
|          |      | Shiraz-18T | 1433 | 0.250973 | 0         |  |  |
|          |      | Shiraz-25T | 1697 | 0.21945  | 0         |  |  |
|          |      | Shiraz-28T | 1734 | 0.362882 | 0         |  |  |
|          |      | Shiraz-29T | 1777 | 0.156747 | 0         |  |  |
|          |      | Shiraz-38T | 1950 | 0.265916 | 0         |  |  |
|          |      | Shiraz-71T | 2236 | 0.320072 | 0         |  |  |
|          |      | Shiraz-3T  | 87   | 0.198593 | 0         |  |  |
|          |      | Shiraz-3T  | 89   | 0.678641 | 0         |  |  |
|          |      | Shiraz-4T  | 252  | 0.192083 | 0         |  |  |
|          |      | Shiraz-36T | 376  | 0.159952 | 0         |  |  |
|          |      | Shiraz-44T | 632  | 0.902944 | 0         |  |  |
|          |      | Shiraz-46T | 942  | 0.069143 | 0         |  |  |
|          |      | Shiraz-77T | 1223 | 0.215647 | 0         |  |  |
|          |      | Shiraz-18T | 1433 | 0.250973 | 0         |  |  |
|          |      | Shiraz-25T | 1697 | 0.21945  | 0         |  |  |
|          |      | Shiraz-28T | 1734 | 0.362882 | 0         |  |  |
|          |      | Shiraz-29T | 1777 | 0.156747 | 0         |  |  |
|          |      | Shiraz-38T | 1950 | 0.265916 | 0         |  |  |
|          |      | Shiraz-71T | 2236 | 0.320072 | 0         |  |  |
| TMEM106B | chr7 | Shiraz-4T  | 252  | 0.192083 | 0         |  |  |
|          |      | Shiraz-36T | 376  | 0.159952 | 0         |  |  |
|          |      | Shiraz-44T | 628  | 0        | -0.444379 |  |  |
|          |      | Shiraz-47T | 1027 | 0        | -0.117848 |  |  |
|          |      | Shiraz-49T | 1117 | 0        | -0.168296 |  |  |
|          |      | Shiraz-77T | 1222 | 0        | -0.113002 |  |  |

|         |      |            |      |          |           |  |  |
|---------|------|------------|------|----------|-----------|--|--|
|         |      | Shiraz-18T | 1433 | 0.250973 | 0         |  |  |
|         |      | Shiraz-22T | 1543 | 0        | -0.513696 |  |  |
|         |      | Shiraz-25T | 1697 | 0.21945  | 0         |  |  |
|         |      | Shiraz-28T | 1734 | 0.362882 | 0         |  |  |
|         |      | Shiraz-29T | 1777 | 0.156747 | 0         |  |  |
|         |      | Shiraz-38T | 1950 | 0.265916 | 0         |  |  |
|         |      | Shiraz-58T | 2157 | 0        | -0.213872 |  |  |
|         |      | Shiraz-71T | 2236 | 0.320072 | 0         |  |  |
|         |      | Shiraz-4T  | 252  | 0.192083 | 0         |  |  |
|         |      | Shiraz-36T | 376  | 0.159952 | 0         |  |  |
|         |      | Shiraz-44T | 628  | 0        | -0.444379 |  |  |
|         |      | Shiraz-47T | 1027 | 0        | -0.117848 |  |  |
|         |      | Shiraz-49T | 1117 | 0        | -0.168296 |  |  |
|         |      | Shiraz-77T | 1222 | 0        | -0.113002 |  |  |
|         |      | Shiraz-18T | 1433 | 0.250973 | 0         |  |  |
|         |      | Shiraz-22T | 1543 | 0        | -0.513696 |  |  |
|         |      | Shiraz-25T | 1697 | 0.21945  | 0         |  |  |
|         |      | Shiraz-28T | 1734 | 0.362882 | 0         |  |  |
|         |      | Shiraz-29T | 1777 | 0.156747 | 0         |  |  |
|         |      | Shiraz-38T | 1950 | 0.265916 | 0         |  |  |
|         |      | Shiraz-58T | 2157 | 0        | -0.213872 |  |  |
|         |      | Shiraz-71T | 2236 | 0.320072 | 0         |  |  |
|         |      | Shiraz-4T  | 252  | 0.192083 | 0         |  |  |
|         |      | Shiraz-36T | 376  | 0.159952 | 0         |  |  |
|         |      | Shiraz-44T | 628  | 0        | -0.444379 |  |  |
|         |      | Shiraz-47T | 1027 | 0        | -0.117848 |  |  |
|         |      | Shiraz-49T | 1117 | 0        | -0.168296 |  |  |
|         |      | Shiraz-77T | 1222 | 0        | -0.113002 |  |  |
|         |      | Shiraz-18T | 1433 | 0.250973 | 0         |  |  |
|         |      | Shiraz-22T | 1543 | 0        | -0.513696 |  |  |
|         |      | Shiraz-25T | 1697 | 0.21945  | 0         |  |  |
|         |      | Shiraz-28T | 1734 | 0.362882 | 0         |  |  |
|         |      | Shiraz-29T | 1777 | 0.156747 | 0         |  |  |
|         |      | Shiraz-38T | 1950 | 0.265916 | 0         |  |  |
|         |      | Shiraz-58T | 2157 | 0        | -0.213872 |  |  |
|         |      | Shiraz-71T | 2236 | 0.320072 | 0         |  |  |
| TMEM130 | chr7 | Shiraz-3T  | 90   | 0.219276 | 0         |  |  |
|         |      | Shiraz-3T  | 94   | 0.74735  | 0         |  |  |
|         |      | Shiraz-4T  | 253  | 0.372918 | 0         |  |  |
|         |      | Shiraz-31T | 316  | 0.219196 | 0         |  |  |
|         |      | Shiraz-36T | 378  | 0.179558 | 0         |  |  |
|         |      | Shiraz-36T | 381  | 0.332628 | 0         |  |  |
|         |      | Shiraz-44T | 639  | 1.035032 | 0         |  |  |
|         |      | Shiraz-46T | 943  | 0.093799 | 0         |  |  |
|         |      | Shiraz-46T | 946  | 0.299835 | 0         |  |  |
|         |      | Shiraz-47T | 1030 | 0.257728 | 0         |  |  |
|         |      | Shiraz-49T | 1120 | 0.281656 | 0         |  |  |

|  |            |      |          |           |  |
|--|------------|------|----------|-----------|--|
|  | Shiraz-77T | 1225 | 0        | -0.117922 |  |
|  | Shiraz-77T | 1227 | 0.196445 | 0         |  |
|  | Shiraz-9T  | 1324 | 0.679266 | 0         |  |
|  | Shiraz-18T | 1434 | 0.244465 | 0         |  |
|  | Shiraz-22T | 1549 | 0        | -0.319623 |  |
|  | Shiraz-22T | 1551 | 0.324011 | 0         |  |
|  | Shiraz-25T | 1698 | 0.21835  | 0         |  |
|  | Shiraz-28T | 1735 | 0.350744 | 0         |  |
|  | Shiraz-29T | 1778 | 0.120767 | 0         |  |
|  | Shiraz-32T | 1833 | 0.551336 | 0         |  |
|  | Shiraz-38T | 1951 | 0.250891 | 0         |  |
|  | Shiraz-53T | 2078 | 0.287202 | 0         |  |
|  | Shiraz-71T | 2238 | 0.603631 | 0         |  |
|  | Shiraz-3T  | 90   | 0.219276 | 0         |  |
|  | Shiraz-3T  | 94   | 0.74735  | 0         |  |
|  | Shiraz-4T  | 253  | 0.372918 | 0         |  |
|  | Shiraz-31T | 316  | 0.219196 | 0         |  |
|  | Shiraz-36T | 378  | 0.179558 | 0         |  |
|  | Shiraz-36T | 381  | 0.332628 | 0         |  |
|  | Shiraz-44T | 639  | 1.035032 | 0         |  |
|  | Shiraz-46T | 943  | 0.093799 | 0         |  |
|  | Shiraz-46T | 946  | 0.299835 | 0         |  |
|  | Shiraz-47T | 1030 | 0.257728 | 0         |  |
|  | Shiraz-49T | 1120 | 0.281656 | 0         |  |
|  | Shiraz-77T | 1225 | 0        | -0.117922 |  |
|  | Shiraz-77T | 1227 | 0.196445 | 0         |  |
|  | Shiraz-9T  | 1324 | 0.679266 | 0         |  |
|  | Shiraz-18T | 1434 | 0.244465 | 0         |  |
|  | Shiraz-22T | 1549 | 0        | -0.319623 |  |
|  | Shiraz-22T | 1551 | 0.324011 | 0         |  |
|  | Shiraz-25T | 1698 | 0.21835  | 0         |  |
|  | Shiraz-28T | 1735 | 0.350744 | 0         |  |
|  | Shiraz-29T | 1778 | 0.120767 | 0         |  |
|  | Shiraz-32T | 1833 | 0.551336 | 0         |  |
|  | Shiraz-38T | 1951 | 0.250891 | 0         |  |
|  | Shiraz-53T | 2078 | 0.287202 | 0         |  |
|  | Shiraz-71T | 2238 | 0.603631 | 0         |  |
|  | Shiraz-3T  | 90   | 0.219276 | 0         |  |
|  | Shiraz-3T  | 94   | 0.74735  | 0         |  |
|  | Shiraz-4T  | 253  | 0.372918 | 0         |  |
|  | Shiraz-31T | 316  | 0.219196 | 0         |  |
|  | Shiraz-36T | 378  | 0.179558 | 0         |  |
|  | Shiraz-36T | 381  | 0.332628 | 0         |  |
|  | Shiraz-44T | 639  | 1.035032 | 0         |  |
|  | Shiraz-46T | 943  | 0.093799 | 0         |  |
|  | Shiraz-46T | 946  | 0.299835 | 0         |  |
|  | Shiraz-47T | 1030 | 0.257728 | 0         |  |

|         |      |            |      |          |           |  |  |
|---------|------|------------|------|----------|-----------|--|--|
|         |      | Shiraz-49T | 1120 | 0.281656 | 0         |  |  |
|         |      | Shiraz-77T | 1225 | 0        | -0.117922 |  |  |
|         |      | Shiraz-77T | 1227 | 0.196445 | 0         |  |  |
|         |      | Shiraz-9T  | 1324 | 0.679266 | 0         |  |  |
|         |      | Shiraz-18T | 1434 | 0.244465 | 0         |  |  |
|         |      | Shiraz-22T | 1549 | 0        | -0.319623 |  |  |
|         |      | Shiraz-22T | 1551 | 0.324011 | 0         |  |  |
|         |      | Shiraz-25T | 1698 | 0.21835  | 0         |  |  |
|         |      | Shiraz-28T | 1735 | 0.350744 | 0         |  |  |
|         |      | Shiraz-29T | 1778 | 0.120767 | 0         |  |  |
|         |      | Shiraz-32T | 1833 | 0.551336 | 0         |  |  |
|         |      | Shiraz-38T | 1951 | 0.250891 | 0         |  |  |
|         |      | Shiraz-53T | 2078 | 0.287202 | 0         |  |  |
|         |      | Shiraz-71T | 2238 | 0.603631 | 0         |  |  |
| TMEM139 | chr7 | Shiraz-3T  | 90   | 0.219276 | 0         |  |  |
|         |      | Shiraz-4T  | 253  | 0.372918 | 0         |  |  |
|         |      | Shiraz-36T | 378  | 0.179558 | 0         |  |  |
|         |      | Shiraz-46T | 943  | 0.093799 | 0         |  |  |
|         |      | Shiraz-77T | 1225 | 0        | -0.117922 |  |  |
|         |      | Shiraz-9T  | 1325 | 0.221899 | 0         |  |  |
|         |      | Shiraz-18T | 1434 | 0.244465 | 0         |  |  |
|         |      | Shiraz-25T | 1698 | 0.21835  | 0         |  |  |
|         |      | Shiraz-28T | 1735 | 0.350744 | 0         |  |  |
|         |      | Shiraz-29T | 1778 | 0.120767 | 0         |  |  |
|         |      | Shiraz-32T | 1833 | 0.551336 | 0         |  |  |
|         |      | Shiraz-38T | 1951 | 0.250891 | 0         |  |  |
|         |      | Shiraz-53T | 2078 | 0.287202 | 0         |  |  |
|         |      | Shiraz-58T | 2162 | 0.221505 | 0         |  |  |
|         |      | Shiraz-71T | 2238 | 0.603631 | 0         |  |  |
|         |      | Shiraz-3T  | 90   | 0.219276 | 0         |  |  |
|         |      | Shiraz-4T  | 253  | 0.372918 | 0         |  |  |
|         |      | Shiraz-36T | 378  | 0.179558 | 0         |  |  |
|         |      | Shiraz-46T | 943  | 0.093799 | 0         |  |  |
|         |      | Shiraz-77T | 1225 | 0        | -0.117922 |  |  |
|         |      | Shiraz-9T  | 1325 | 0.221899 | 0         |  |  |
|         |      | Shiraz-18T | 1434 | 0.244465 | 0         |  |  |
|         |      | Shiraz-25T | 1698 | 0.21835  | 0         |  |  |
|         |      | Shiraz-28T | 1735 | 0.350744 | 0         |  |  |
|         |      | Shiraz-29T | 1778 | 0.120767 | 0         |  |  |
|         |      | Shiraz-32T | 1833 | 0.551336 | 0         |  |  |
|         |      | Shiraz-38T | 1951 | 0.250891 | 0         |  |  |
|         |      | Shiraz-53T | 2078 | 0.287202 | 0         |  |  |
|         |      | Shiraz-58T | 2162 | 0.221505 | 0         |  |  |
|         |      | Shiraz-71T | 2238 | 0.603631 | 0         |  |  |
|         |      | Shiraz-3T  | 90   | 0.219276 | 0         |  |  |
|         |      | Shiraz-4T  | 253  | 0.372918 | 0         |  |  |
|         |      | Shiraz-36T | 378  | 0.179558 | 0         |  |  |



|         |      |            |      |          |           |  |  |
|---------|------|------------|------|----------|-----------|--|--|
|         |      | Shiraz-46T | 943  | 0.093799 | 0         |  |  |
|         |      | Shiraz-77T | 1225 | 0        | -0.117922 |  |  |
|         |      | Shiraz-9T  | 1325 | 0.221899 | 0         |  |  |
|         |      | Shiraz-18T | 1434 | 0.244465 | 0         |  |  |
|         |      | Shiraz-25T | 1698 | 0.21835  | 0         |  |  |
|         |      | Shiraz-28T | 1735 | 0.350744 | 0         |  |  |
|         |      | Shiraz-29T | 1778 | 0.120767 | 0         |  |  |
|         |      | Shiraz-32T | 1833 | 0.551336 | 0         |  |  |
|         |      | Shiraz-38T | 1951 | 0.250891 | 0         |  |  |
|         |      | Shiraz-53T | 2078 | 0.287202 | 0         |  |  |
|         |      | Shiraz-58T | 2162 | 0.221505 | 0         |  |  |
|         |      | Shiraz-71T | 2238 | 0.603631 | 0         |  |  |
| TMEM140 | chr7 | Shiraz-3T  | 90   | 0.219276 | 0         |  |  |
|         |      | Shiraz-4T  | 253  | 0.372918 | 0         |  |  |
|         |      | Shiraz-36T | 378  | 0.179558 | 0         |  |  |
|         |      | Shiraz-46T | 943  | 0.093799 | 0         |  |  |
|         |      | Shiraz-77T | 1225 | 0        | -0.117922 |  |  |
|         |      | Shiraz-9T  | 1325 | 0.221899 | 0         |  |  |
|         |      | Shiraz-18T | 1434 | 0.244465 | 0         |  |  |
|         |      | Shiraz-22T | 1553 | 0        | -0.213234 |  |  |
|         |      | Shiraz-25T | 1698 | 0.21835  | 0         |  |  |
|         |      | Shiraz-28T | 1735 | 0.350744 | 0         |  |  |
|         |      | Shiraz-29T | 1778 | 0.120767 | 0         |  |  |
|         |      | Shiraz-32T | 1833 | 0.551336 | 0         |  |  |
|         |      | Shiraz-38T | 1951 | 0.250891 | 0         |  |  |
|         |      | Shiraz-53T | 2078 | 0.287202 | 0         |  |  |
|         |      | Shiraz-58T | 2162 | 0.221505 | 0         |  |  |
|         |      | Shiraz-71T | 2238 | 0.603631 | 0         |  |  |
|         |      | Shiraz-3T  | 90   | 0.219276 | 0         |  |  |
|         |      | Shiraz-4T  | 253  | 0.372918 | 0         |  |  |
|         |      | Shiraz-36T | 378  | 0.179558 | 0         |  |  |
|         |      | Shiraz-46T | 943  | 0.093799 | 0         |  |  |
|         |      | Shiraz-77T | 1225 | 0        | -0.117922 |  |  |
|         |      | Shiraz-9T  | 1325 | 0.221899 | 0         |  |  |
|         |      | Shiraz-18T | 1434 | 0.244465 | 0         |  |  |
|         |      | Shiraz-22T | 1553 | 0        | -0.213234 |  |  |
|         |      | Shiraz-25T | 1698 | 0.21835  | 0         |  |  |
|         |      | Shiraz-28T | 1735 | 0.350744 | 0         |  |  |
|         |      | Shiraz-29T | 1778 | 0.120767 | 0         |  |  |
|         |      | Shiraz-32T | 1833 | 0.551336 | 0         |  |  |
|         |      | Shiraz-38T | 1951 | 0.250891 | 0         |  |  |
|         |      | Shiraz-53T | 2078 | 0.287202 | 0         |  |  |
|         |      | Shiraz-58T | 2162 | 0.221505 | 0         |  |  |
|         |      | Shiraz-71T | 2238 | 0.603631 | 0         |  |  |
|         |      | Shiraz-3T  | 90   | 0.219276 | 0         |  |  |
|         |      | Shiraz-4T  | 253  | 0.372918 | 0         |  |  |
|         |      | Shiraz-36T | 378  | 0.179558 | 0         |  |  |

|         |      |            |      |          |           |  |  |
|---------|------|------------|------|----------|-----------|--|--|
|         |      | Shiraz-46T | 943  | 0.093799 | 0         |  |  |
|         |      | Shiraz-77T | 1225 | 0        | -0.117922 |  |  |
|         |      | Shiraz-9T  | 1325 | 0.221899 | 0         |  |  |
|         |      | Shiraz-18T | 1434 | 0.244465 | 0         |  |  |
|         |      | Shiraz-22T | 1553 | 0        | -0.213234 |  |  |
|         |      | Shiraz-25T | 1698 | 0.21835  | 0         |  |  |
|         |      | Shiraz-28T | 1735 | 0.350744 | 0         |  |  |
|         |      | Shiraz-29T | 1778 | 0.120767 | 0         |  |  |
|         |      | Shiraz-32T | 1833 | 0.551336 | 0         |  |  |
|         |      | Shiraz-38T | 1951 | 0.250891 | 0         |  |  |
|         |      | Shiraz-53T | 2078 | 0.287202 | 0         |  |  |
|         |      | Shiraz-58T | 2162 | 0.221505 | 0         |  |  |
|         |      | Shiraz-71T | 2238 | 0.603631 | 0         |  |  |
| TMEM164 | chrX | Shiraz-3T  | 242  | 0        | -0.336434 |  |  |
|         |      | Shiraz-4T  | 261  | 0        | -0.336249 |  |  |
|         |      | Shiraz-16T | 295  | 0.591657 | 0         |  |  |
|         |      | Shiraz-36T | 433  | 0        | -0.803961 |  |  |
|         |      | Shiraz-44T | 899  | 0        | -1.09697  |  |  |
|         |      | Shiraz-49T | 1170 | 0        | -0.967436 |  |  |
|         |      | Shiraz-18T | 1457 | 0.643204 | 0         |  |  |
|         |      | Shiraz-22T | 1673 | 0.611783 | 0         |  |  |
|         |      | Shiraz-25T | 1719 | 0.472955 | 0         |  |  |
|         |      | Shiraz-28T | 1762 | 0.562311 | 0         |  |  |
|         |      | Shiraz-29T | 1801 | 0.815343 | 0         |  |  |
|         |      | Shiraz-32T | 1870 | 0.729766 | 0         |  |  |
|         |      | Shiraz-35T | 1933 | 0.488535 | 0         |  |  |
|         |      | Shiraz-58T | 2223 | 0.833364 | 0         |  |  |
|         |      | Shiraz-71T | 2263 | 0.975531 | 0         |  |  |
|         |      | Shiraz-3T  | 242  | 0        | -0.336434 |  |  |
|         |      | Shiraz-4T  | 261  | 0        | -0.336249 |  |  |
|         |      | Shiraz-16T | 295  | 0.591657 | 0         |  |  |
|         |      | Shiraz-36T | 433  | 0        | -0.803961 |  |  |
|         |      | Shiraz-44T | 899  | 0        | -1.09697  |  |  |
|         |      | Shiraz-49T | 1170 | 0        | -0.967436 |  |  |
|         |      | Shiraz-18T | 1457 | 0.643204 | 0         |  |  |
|         |      | Shiraz-22T | 1673 | 0.611783 | 0         |  |  |
|         |      | Shiraz-25T | 1719 | 0.472955 | 0         |  |  |
|         |      | Shiraz-28T | 1762 | 0.562311 | 0         |  |  |
|         |      | Shiraz-29T | 1801 | 0.815343 | 0         |  |  |
|         |      | Shiraz-32T | 1870 | 0.729766 | 0         |  |  |
|         |      | Shiraz-35T | 1933 | 0.488535 | 0         |  |  |
|         |      | Shiraz-58T | 2223 | 0.833364 | 0         |  |  |
|         |      | Shiraz-71T | 2263 | 0.975531 | 0         |  |  |
|         |      | Shiraz-3T  | 242  | 0        | -0.336434 |  |  |
|         |      | Shiraz-4T  | 261  | 0        | -0.336249 |  |  |
|         |      | Shiraz-16T | 295  | 0.591657 | 0         |  |  |
|         |      | Shiraz-36T | 433  | 0        | -0.803961 |  |  |

|         |      |            |      |          |           |  |  |
|---------|------|------------|------|----------|-----------|--|--|
|         |      | Shiraz-44T | 899  | 0        | -1.09697  |  |  |
|         |      | Shiraz-49T | 1170 | 0        | -0.967436 |  |  |
|         |      | Shiraz-18T | 1457 | 0.643204 | 0         |  |  |
|         |      | Shiraz-22T | 1673 | 0.611783 | 0         |  |  |
|         |      | Shiraz-25T | 1719 | 0.472955 | 0         |  |  |
|         |      | Shiraz-28T | 1762 | 0.562311 | 0         |  |  |
|         |      | Shiraz-29T | 1801 | 0.815343 | 0         |  |  |
|         |      | Shiraz-32T | 1870 | 0.729766 | 0         |  |  |
|         |      | Shiraz-35T | 1933 | 0.488535 | 0         |  |  |
|         |      | Shiraz-58T | 2223 | 0.833364 | 0         |  |  |
|         |      | Shiraz-71T | 2263 | 0.975531 | 0         |  |  |
| TMEM168 | chr7 | Shiraz-3T  | 90   | 0.219276 | 0         |  |  |
|         |      | Shiraz-3T  | 95   | 0        | -0.077623 |  |  |
|         |      | Shiraz-4T  | 253  | 0.372918 | 0         |  |  |
|         |      | Shiraz-36T | 378  | 0.179558 | 0         |  |  |
|         |      | Shiraz-36T | 382  | 0.081739 | 0         |  |  |
|         |      | Shiraz-44T | 641  | 0        | -0.477846 |  |  |
|         |      | Shiraz-46T | 943  | 0.093799 | 0         |  |  |
|         |      | Shiraz-46T | 947  | 0        | -0.010843 |  |  |
|         |      | Shiraz-47T | 1031 | 0        | -0.117529 |  |  |
|         |      | Shiraz-49T | 1121 | 0        | -0.138569 |  |  |
|         |      | Shiraz-77T | 1225 | 0        | -0.117922 |  |  |
|         |      | Shiraz-77T | 1228 | 0        | -0.238084 |  |  |
|         |      | Shiraz-18T | 1434 | 0.244465 | 0         |  |  |
|         |      | Shiraz-22T | 1549 | 0        | -0.319623 |  |  |
|         |      | Shiraz-22T | 1552 | 0        | -0.50686  |  |  |
|         |      | Shiraz-25T | 1698 | 0.21835  | 0         |  |  |
|         |      | Shiraz-28T | 1735 | 0.350744 | 0         |  |  |
|         |      | Shiraz-29T | 1778 | 0.120767 | 0         |  |  |
|         |      | Shiraz-32T | 1833 | 0.551336 | 0         |  |  |
|         |      | Shiraz-32T | 1835 | 0.092727 | 0         |  |  |
|         |      | Shiraz-38T | 1951 | 0.250891 | 0         |  |  |
|         |      | Shiraz-53T | 2078 | 0.287202 | 0         |  |  |
|         |      | Shiraz-58T | 2161 | 0        | -0.187744 |  |  |
|         |      | Shiraz-71T | 2238 | 0.603631 | 0         |  |  |
|         |      | Shiraz-3T  | 90   | 0.219276 | 0         |  |  |
|         |      | Shiraz-3T  | 95   | 0        | -0.077623 |  |  |
|         |      | Shiraz-4T  | 253  | 0.372918 | 0         |  |  |
|         |      | Shiraz-36T | 378  | 0.179558 | 0         |  |  |
|         |      | Shiraz-36T | 382  | 0.081739 | 0         |  |  |
|         |      | Shiraz-44T | 641  | 0        | -0.477846 |  |  |
|         |      | Shiraz-46T | 943  | 0.093799 | 0         |  |  |
|         |      | Shiraz-46T | 947  | 0        | -0.010843 |  |  |
|         |      | Shiraz-47T | 1031 | 0        | -0.117529 |  |  |
|         |      | Shiraz-49T | 1121 | 0        | -0.138569 |  |  |
|         |      | Shiraz-77T | 1225 | 0        | -0.117922 |  |  |
|         |      | Shiraz-77T | 1228 | 0        | -0.238084 |  |  |

|          |      |            |      |          |           |  |  |
|----------|------|------------|------|----------|-----------|--|--|
|          |      | Shiraz-18T | 1434 | 0.244465 | 0         |  |  |
|          |      | Shiraz-22T | 1549 | 0        | -0.319623 |  |  |
|          |      | Shiraz-22T | 1552 | 0        | -0.50686  |  |  |
|          |      | Shiraz-25T | 1698 | 0.21835  | 0         |  |  |
|          |      | Shiraz-28T | 1735 | 0.350744 | 0         |  |  |
|          |      | Shiraz-29T | 1778 | 0.120767 | 0         |  |  |
|          |      | Shiraz-32T | 1833 | 0.551336 | 0         |  |  |
|          |      | Shiraz-32T | 1835 | 0.092727 | 0         |  |  |
|          |      | Shiraz-38T | 1951 | 0.250891 | 0         |  |  |
|          |      | Shiraz-53T | 2078 | 0.287202 | 0         |  |  |
|          |      | Shiraz-58T | 2161 | 0        | -0.187744 |  |  |
|          |      | Shiraz-71T | 2238 | 0.603631 | 0         |  |  |
|          |      | Shiraz-3T  | 90   | 0.219276 | 0         |  |  |
|          |      | Shiraz-3T  | 95   | 0        | -0.077623 |  |  |
|          |      | Shiraz-4T  | 253  | 0.372918 | 0         |  |  |
|          |      | Shiraz-36T | 378  | 0.179558 | 0         |  |  |
|          |      | Shiraz-36T | 382  | 0.081739 | 0         |  |  |
|          |      | Shiraz-44T | 641  | 0        | -0.477846 |  |  |
|          |      | Shiraz-46T | 943  | 0.093799 | 0         |  |  |
|          |      | Shiraz-46T | 947  | 0        | -0.010843 |  |  |
|          |      | Shiraz-47T | 1031 | 0        | -0.117529 |  |  |
|          |      | Shiraz-49T | 1121 | 0        | -0.138569 |  |  |
|          |      | Shiraz-77T | 1225 | 0        | -0.117922 |  |  |
|          |      | Shiraz-77T | 1228 | 0        | -0.238084 |  |  |
|          |      | Shiraz-18T | 1434 | 0.244465 | 0         |  |  |
|          |      | Shiraz-22T | 1549 | 0        | -0.319623 |  |  |
|          |      | Shiraz-22T | 1552 | 0        | -0.50686  |  |  |
|          |      | Shiraz-25T | 1698 | 0.21835  | 0         |  |  |
|          |      | Shiraz-28T | 1735 | 0.350744 | 0         |  |  |
|          |      | Shiraz-29T | 1778 | 0.120767 | 0         |  |  |
|          |      | Shiraz-32T | 1833 | 0.551336 | 0         |  |  |
|          |      | Shiraz-32T | 1835 | 0.092727 | 0         |  |  |
|          |      | Shiraz-38T | 1951 | 0.250891 | 0         |  |  |
|          |      | Shiraz-53T | 2078 | 0.287202 | 0         |  |  |
|          |      | Shiraz-58T | 2161 | 0        | -0.187744 |  |  |
|          |      | Shiraz-71T | 2238 | 0.603631 | 0         |  |  |
| TMEM176A | chr7 | Shiraz-3T  | 90   | 0.219276 | 0         |  |  |
|          |      | Shiraz-3T  | 99   | 0.454766 | 0         |  |  |
|          |      | Shiraz-4T  | 253  | 0.372918 | 0         |  |  |
|          |      | Shiraz-36T | 378  | 0.179558 | 0         |  |  |
|          |      | Shiraz-44T | 646  | 0.471276 | 0         |  |  |
|          |      | Shiraz-46T | 943  | 0.093799 | 0         |  |  |
|          |      | Shiraz-9T  | 1325 | 0.221899 | 0         |  |  |
|          |      | Shiraz-18T | 1434 | 0.244465 | 0         |  |  |
|          |      | Shiraz-25T | 1698 | 0.21835  | 0         |  |  |
|          |      | Shiraz-28T | 1735 | 0.350744 | 0         |  |  |
|          |      | Shiraz-29T | 1778 | 0.120767 | 0         |  |  |



|  |  |            |      |          |   |  |  |
|--|--|------------|------|----------|---|--|--|
|  |  | Shiraz-4T  | 253  | 0.372918 | 0 |  |  |
|  |  | Shiraz-4T  | 253  | 0.372918 | 0 |  |  |
|  |  | Shiraz-4T  | 253  | 0.372918 | 0 |  |  |
|  |  | Shiraz-4T  | 253  | 0.372918 | 0 |  |  |
|  |  | Shiraz-4T  | 253  | 0.372918 | 0 |  |  |
|  |  | Shiraz-36T | 378  | 0.179558 | 0 |  |  |
|  |  | Shiraz-36T | 378  | 0.179558 | 0 |  |  |
|  |  | Shiraz-36T | 378  | 0.179558 | 0 |  |  |
|  |  | Shiraz-36T | 378  | 0.179558 | 0 |  |  |
|  |  | Shiraz-36T | 378  | 0.179558 | 0 |  |  |
|  |  | Shiraz-44T | 646  | 0.471276 | 0 |  |  |
|  |  | Shiraz-44T | 646  | 0.471276 | 0 |  |  |
|  |  | Shiraz-44T | 646  | 0.471276 | 0 |  |  |
|  |  | Shiraz-44T | 646  | 0.471276 | 0 |  |  |
|  |  | Shiraz-44T | 646  | 0.471276 | 0 |  |  |
|  |  | Shiraz-46T | 943  | 0.093799 | 0 |  |  |
|  |  | Shiraz-46T | 943  | 0.093799 | 0 |  |  |
|  |  | Shiraz-46T | 943  | 0.093799 | 0 |  |  |
|  |  | Shiraz-46T | 943  | 0.093799 | 0 |  |  |
|  |  | Shiraz-46T | 943  | 0.093799 | 0 |  |  |
|  |  | Shiraz-9T  | 1325 | 0.221899 | 0 |  |  |
|  |  | Shiraz-9T  | 1325 | 0.221899 | 0 |  |  |
|  |  | Shiraz-9T  | 1325 | 0.221899 | 0 |  |  |
|  |  | Shiraz-9T  | 1325 | 0.221899 | 0 |  |  |
|  |  | Shiraz-18T | 1434 | 0.244465 | 0 |  |  |
|  |  | Shiraz-18T | 1434 | 0.244465 | 0 |  |  |
|  |  | Shiraz-18T | 1434 | 0.244465 | 0 |  |  |
|  |  | Shiraz-18T | 1434 | 0.244465 | 0 |  |  |
|  |  | Shiraz-18T | 1434 | 0.244465 | 0 |  |  |
|  |  | Shiraz-25T | 1698 | 0.21835  | 0 |  |  |
|  |  | Shiraz-25T | 1698 | 0.21835  | 0 |  |  |
|  |  | Shiraz-25T | 1698 | 0.21835  | 0 |  |  |
|  |  | Shiraz-25T | 1698 | 0.21835  | 0 |  |  |
|  |  | Shiraz-25T | 1698 | 0.21835  | 0 |  |  |
|  |  | Shiraz-28T | 1735 | 0.350744 | 0 |  |  |
|  |  | Shiraz-28T | 1735 | 0.350744 | 0 |  |  |
|  |  | Shiraz-28T | 1735 | 0.350744 | 0 |  |  |
|  |  | Shiraz-28T | 1735 | 0.350744 | 0 |  |  |
|  |  | Shiraz-28T | 1735 | 0.350744 | 0 |  |  |
|  |  | Shiraz-29T | 1778 | 0.120767 | 0 |  |  |
|  |  | Shiraz-29T | 1778 | 0.120767 | 0 |  |  |
|  |  | Shiraz-29T | 1778 | 0.120767 | 0 |  |  |
|  |  | Shiraz-29T | 1778 | 0.120767 | 0 |  |  |
|  |  | Shiraz-29T | 1778 | 0.120767 | 0 |  |  |
|  |  | Shiraz-32T | 1833 | 0.551336 | 0 |  |  |
|  |  | Shiraz-32T | 1833 | 0.551336 | 0 |  |  |

|  |  |            |      |          |   |  |  |
|--|--|------------|------|----------|---|--|--|
|  |  | Shiraz-32T | 1833 | 0.551336 | 0 |  |  |
|  |  | Shiraz-32T | 1833 | 0.551336 | 0 |  |  |
|  |  | Shiraz-32T | 1833 | 0.551336 | 0 |  |  |
|  |  | Shiraz-38T | 1951 | 0.250891 | 0 |  |  |
|  |  | Shiraz-38T | 1951 | 0.250891 | 0 |  |  |
|  |  | Shiraz-38T | 1951 | 0.250891 | 0 |  |  |
|  |  | Shiraz-38T | 1951 | 0.250891 | 0 |  |  |
|  |  | Shiraz-38T | 1951 | 0.250891 | 0 |  |  |
|  |  | Shiraz-53T | 2078 | 0.287202 | 0 |  |  |
|  |  | Shiraz-53T | 2078 | 0.287202 | 0 |  |  |
|  |  | Shiraz-53T | 2078 | 0.287202 | 0 |  |  |
|  |  | Shiraz-53T | 2078 | 0.287202 | 0 |  |  |
|  |  | Shiraz-53T | 2078 | 0.287202 | 0 |  |  |
|  |  | Shiraz-58T | 2162 | 0.221505 | 0 |  |  |
|  |  | Shiraz-58T | 2162 | 0.221505 | 0 |  |  |
|  |  | Shiraz-58T | 2162 | 0.221505 | 0 |  |  |
|  |  | Shiraz-58T | 2162 | 0.221505 | 0 |  |  |
|  |  | Shiraz-58T | 2162 | 0.221505 | 0 |  |  |
|  |  | Shiraz-71T | 2238 | 0.603631 | 0 |  |  |
|  |  | Shiraz-71T | 2238 | 0.603631 | 0 |  |  |
|  |  | Shiraz-71T | 2238 | 0.603631 | 0 |  |  |
|  |  | Shiraz-71T | 2238 | 0.603631 | 0 |  |  |
|  |  | Shiraz-71T | 2238 | 0.603631 | 0 |  |  |
|  |  | Shiraz-3T  | 90   | 0.219276 | 0 |  |  |
|  |  | Shiraz-3T  | 90   | 0.219276 | 0 |  |  |
|  |  | Shiraz-3T  | 90   | 0.219276 | 0 |  |  |
|  |  | Shiraz-3T  | 90   | 0.219276 | 0 |  |  |
|  |  | Shiraz-3T  | 90   | 0.219276 | 0 |  |  |
|  |  | Shiraz-3T  | 99   | 0.454766 | 0 |  |  |
|  |  | Shiraz-3T  | 99   | 0.454766 | 0 |  |  |
|  |  | Shiraz-3T  | 99   | 0.454766 | 0 |  |  |
|  |  | Shiraz-3T  | 99   | 0.454766 | 0 |  |  |
|  |  | Shiraz-3T  | 99   | 0.454766 | 0 |  |  |
|  |  | Shiraz-4T  | 253  | 0.372918 | 0 |  |  |
|  |  | Shiraz-4T  | 253  | 0.372918 | 0 |  |  |
|  |  | Shiraz-4T  | 253  | 0.372918 | 0 |  |  |
|  |  | Shiraz-4T  | 253  | 0.372918 | 0 |  |  |
|  |  | Shiraz-36T | 378  | 0.179558 | 0 |  |  |
|  |  | Shiraz-36T | 378  | 0.179558 | 0 |  |  |
|  |  | Shiraz-36T | 378  | 0.179558 | 0 |  |  |
|  |  | Shiraz-36T | 378  | 0.179558 | 0 |  |  |
|  |  | Shiraz-44T | 646  | 0.471276 | 0 |  |  |
|  |  | Shiraz-44T | 646  | 0.471276 | 0 |  |  |
|  |  | Shiraz-44T | 646  | 0.471276 | 0 |  |  |
|  |  | Shiraz-44T | 646  | 0.471276 | 0 |  |  |

|  |  |            |      |          |   |  |  |
|--|--|------------|------|----------|---|--|--|
|  |  | Shiraz-44T | 646  | 0.471276 | 0 |  |  |
|  |  | Shiraz-46T | 943  | 0.093799 | 0 |  |  |
|  |  | Shiraz-46T | 943  | 0.093799 | 0 |  |  |
|  |  | Shiraz-46T | 943  | 0.093799 | 0 |  |  |
|  |  | Shiraz-46T | 943  | 0.093799 | 0 |  |  |
|  |  | Shiraz-46T | 943  | 0.093799 | 0 |  |  |
|  |  | Shiraz-9T  | 1325 | 0.221899 | 0 |  |  |
|  |  | Shiraz-9T  | 1325 | 0.221899 | 0 |  |  |
|  |  | Shiraz-9T  | 1325 | 0.221899 | 0 |  |  |
|  |  | Shiraz-9T  | 1325 | 0.221899 | 0 |  |  |
|  |  | Shiraz-9T  | 1325 | 0.221899 | 0 |  |  |
|  |  | Shiraz-18T | 1434 | 0.244465 | 0 |  |  |
|  |  | Shiraz-18T | 1434 | 0.244465 | 0 |  |  |
|  |  | Shiraz-18T | 1434 | 0.244465 | 0 |  |  |
|  |  | Shiraz-18T | 1434 | 0.244465 | 0 |  |  |
|  |  | Shiraz-18T | 1434 | 0.244465 | 0 |  |  |
|  |  | Shiraz-25T | 1698 | 0.21835  | 0 |  |  |
|  |  | Shiraz-25T | 1698 | 0.21835  | 0 |  |  |
|  |  | Shiraz-25T | 1698 | 0.21835  | 0 |  |  |
|  |  | Shiraz-25T | 1698 | 0.21835  | 0 |  |  |
|  |  | Shiraz-25T | 1698 | 0.21835  | 0 |  |  |
|  |  | Shiraz-28T | 1735 | 0.350744 | 0 |  |  |
|  |  | Shiraz-28T | 1735 | 0.350744 | 0 |  |  |
|  |  | Shiraz-28T | 1735 | 0.350744 | 0 |  |  |
|  |  | Shiraz-28T | 1735 | 0.350744 | 0 |  |  |
|  |  | Shiraz-28T | 1735 | 0.350744 | 0 |  |  |
|  |  | Shiraz-29T | 1778 | 0.120767 | 0 |  |  |
|  |  | Shiraz-29T | 1778 | 0.120767 | 0 |  |  |
|  |  | Shiraz-29T | 1778 | 0.120767 | 0 |  |  |
|  |  | Shiraz-29T | 1778 | 0.120767 | 0 |  |  |
|  |  | Shiraz-29T | 1778 | 0.120767 | 0 |  |  |
|  |  | Shiraz-32T | 1833 | 0.551336 | 0 |  |  |
|  |  | Shiraz-32T | 1833 | 0.551336 | 0 |  |  |
|  |  | Shiraz-32T | 1833 | 0.551336 | 0 |  |  |
|  |  | Shiraz-32T | 1833 | 0.551336 | 0 |  |  |
|  |  | Shiraz-32T | 1833 | 0.551336 | 0 |  |  |
|  |  | Shiraz-38T | 1951 | 0.250891 | 0 |  |  |
|  |  | Shiraz-38T | 1951 | 0.250891 | 0 |  |  |
|  |  | Shiraz-38T | 1951 | 0.250891 | 0 |  |  |
|  |  | Shiraz-38T | 1951 | 0.250891 | 0 |  |  |
|  |  | Shiraz-38T | 1951 | 0.250891 | 0 |  |  |
|  |  | Shiraz-53T | 2078 | 0.287202 | 0 |  |  |
|  |  | Shiraz-53T | 2078 | 0.287202 | 0 |  |  |
|  |  | Shiraz-53T | 2078 | 0.287202 | 0 |  |  |
|  |  | Shiraz-53T | 2078 | 0.287202 | 0 |  |  |
|  |  | Shiraz-53T | 2078 | 0.287202 | 0 |  |  |
|  |  | Shiraz-58T | 2162 | 0.221505 | 0 |  |  |



|  |  |            |      |          |   |  |  |
|--|--|------------|------|----------|---|--|--|
|  |  | Shiraz-58T | 2162 | 0.221505 | 0 |  |  |
|  |  | Shiraz-58T | 2162 | 0.221505 | 0 |  |  |
|  |  | Shiraz-58T | 2162 | 0.221505 | 0 |  |  |
|  |  | Shiraz-58T | 2162 | 0.221505 | 0 |  |  |
|  |  | Shiraz-71T | 2238 | 0.603631 | 0 |  |  |
|  |  | Shiraz-71T | 2238 | 0.603631 | 0 |  |  |
|  |  | Shiraz-71T | 2238 | 0.603631 | 0 |  |  |
|  |  | Shiraz-71T | 2238 | 0.603631 | 0 |  |  |
|  |  | Shiraz-71T | 2238 | 0.603631 | 0 |  |  |
|  |  | Shiraz-3T  | 90   | 0.219276 | 0 |  |  |
|  |  | Shiraz-3T  | 90   | 0.219276 | 0 |  |  |
|  |  | Shiraz-3T  | 90   | 0.219276 | 0 |  |  |
|  |  | Shiraz-3T  | 90   | 0.219276 | 0 |  |  |
|  |  | Shiraz-3T  | 90   | 0.219276 | 0 |  |  |
|  |  | Shiraz-3T  | 99   | 0.454766 | 0 |  |  |
|  |  | Shiraz-3T  | 99   | 0.454766 | 0 |  |  |
|  |  | Shiraz-3T  | 99   | 0.454766 | 0 |  |  |
|  |  | Shiraz-3T  | 99   | 0.454766 | 0 |  |  |
|  |  | Shiraz-3T  | 99   | 0.454766 | 0 |  |  |
|  |  | Shiraz-4T  | 253  | 0.372918 | 0 |  |  |
|  |  | Shiraz-4T  | 253  | 0.372918 | 0 |  |  |
|  |  | Shiraz-4T  | 253  | 0.372918 | 0 |  |  |
|  |  | Shiraz-4T  | 253  | 0.372918 | 0 |  |  |
|  |  | Shiraz-36T | 378  | 0.179558 | 0 |  |  |
|  |  | Shiraz-36T | 378  | 0.179558 | 0 |  |  |
|  |  | Shiraz-36T | 378  | 0.179558 | 0 |  |  |
|  |  | Shiraz-36T | 378  | 0.179558 | 0 |  |  |
|  |  | Shiraz-36T | 378  | 0.179558 | 0 |  |  |
|  |  | Shiraz-44T | 646  | 0.471276 | 0 |  |  |
|  |  | Shiraz-44T | 646  | 0.471276 | 0 |  |  |
|  |  | Shiraz-44T | 646  | 0.471276 | 0 |  |  |
|  |  | Shiraz-44T | 646  | 0.471276 | 0 |  |  |
|  |  | Shiraz-44T | 646  | 0.471276 | 0 |  |  |
|  |  | Shiraz-46T | 943  | 0.093799 | 0 |  |  |
|  |  | Shiraz-46T | 943  | 0.093799 | 0 |  |  |
|  |  | Shiraz-46T | 943  | 0.093799 | 0 |  |  |
|  |  | Shiraz-46T | 943  | 0.093799 | 0 |  |  |
|  |  | Shiraz-46T | 943  | 0.093799 | 0 |  |  |
|  |  | Shiraz-9T  | 1325 | 0.221899 | 0 |  |  |
|  |  | Shiraz-9T  | 1325 | 0.221899 | 0 |  |  |
|  |  | Shiraz-9T  | 1325 | 0.221899 | 0 |  |  |
|  |  | Shiraz-9T  | 1325 | 0.221899 | 0 |  |  |
|  |  | Shiraz-9T  | 1325 | 0.221899 | 0 |  |  |
|  |  | Shiraz-18T | 1434 | 0.244465 | 0 |  |  |
|  |  | Shiraz-18T | 1434 | 0.244465 | 0 |  |  |
|  |  | Shiraz-18T | 1434 | 0.244465 | 0 |  |  |

|          |      |            |      |          |           |  |
|----------|------|------------|------|----------|-----------|--|
|          |      | Shiraz-18T | 1434 | 0.244465 | 0         |  |
|          |      | Shiraz-18T | 1434 | 0.244465 | 0         |  |
|          |      | Shiraz-25T | 1698 | 0.21835  | 0         |  |
|          |      | Shiraz-25T | 1698 | 0.21835  | 0         |  |
|          |      | Shiraz-25T | 1698 | 0.21835  | 0         |  |
|          |      | Shiraz-25T | 1698 | 0.21835  | 0         |  |
|          |      | Shiraz-25T | 1698 | 0.21835  | 0         |  |
|          |      | Shiraz-28T | 1735 | 0.350744 | 0         |  |
|          |      | Shiraz-28T | 1735 | 0.350744 | 0         |  |
|          |      | Shiraz-28T | 1735 | 0.350744 | 0         |  |
|          |      | Shiraz-28T | 1735 | 0.350744 | 0         |  |
|          |      | Shiraz-28T | 1735 | 0.350744 | 0         |  |
|          |      | Shiraz-29T | 1778 | 0.120767 | 0         |  |
|          |      | Shiraz-29T | 1778 | 0.120767 | 0         |  |
|          |      | Shiraz-29T | 1778 | 0.120767 | 0         |  |
|          |      | Shiraz-29T | 1778 | 0.120767 | 0         |  |
|          |      | Shiraz-29T | 1778 | 0.120767 | 0         |  |
|          |      | Shiraz-32T | 1833 | 0.551336 | 0         |  |
|          |      | Shiraz-32T | 1833 | 0.551336 | 0         |  |
|          |      | Shiraz-32T | 1833 | 0.551336 | 0         |  |
|          |      | Shiraz-32T | 1833 | 0.551336 | 0         |  |
|          |      | Shiraz-32T | 1833 | 0.551336 | 0         |  |
|          |      | Shiraz-38T | 1951 | 0.250891 | 0         |  |
|          |      | Shiraz-38T | 1951 | 0.250891 | 0         |  |
|          |      | Shiraz-38T | 1951 | 0.250891 | 0         |  |
|          |      | Shiraz-38T | 1951 | 0.250891 | 0         |  |
|          |      | Shiraz-38T | 1951 | 0.250891 | 0         |  |
|          |      | Shiraz-53T | 2078 | 0.287202 | 0         |  |
|          |      | Shiraz-53T | 2078 | 0.287202 | 0         |  |
|          |      | Shiraz-53T | 2078 | 0.287202 | 0         |  |
|          |      | Shiraz-53T | 2078 | 0.287202 | 0         |  |
|          |      | Shiraz-53T | 2078 | 0.287202 | 0         |  |
|          |      | Shiraz-58T | 2162 | 0.221505 | 0         |  |
|          |      | Shiraz-58T | 2162 | 0.221505 | 0         |  |
|          |      | Shiraz-58T | 2162 | 0.221505 | 0         |  |
|          |      | Shiraz-58T | 2162 | 0.221505 | 0         |  |
|          |      | Shiraz-58T | 2162 | 0.221505 | 0         |  |
|          |      | Shiraz-71T | 2238 | 0.603631 | 0         |  |
|          |      | Shiraz-71T | 2238 | 0.603631 | 0         |  |
|          |      | Shiraz-71T | 2238 | 0.603631 | 0         |  |
|          |      | Shiraz-71T | 2238 | 0.603631 | 0         |  |
|          |      | Shiraz-71T | 2238 | 0.603631 | 0         |  |
| TMEM185A | chrX | Shiraz-3T  | 242  | 0        | -0.336434 |  |
|          |      | Shiraz-4T  | 261  | 0        | -0.336249 |  |
|          |      | Shiraz-16T | 295  | 0.591657 | 0         |  |
|          |      | Shiraz-36T | 433  | 0        | -0.803961 |  |
|          |      | Shiraz-42T | 480  | 0        | -0.232915 |  |

|  |            |      |          |           |  |
|--|------------|------|----------|-----------|--|
|  | Shiraz-44T | 899  | 0        | -1.09697  |  |
|  | Shiraz-49T | 1170 | 0        | -0.967436 |  |
|  | Shiraz-9T  | 1370 | 0.690073 | 0         |  |
|  | Shiraz-18T | 1457 | 0.643204 | 0         |  |
|  | Shiraz-22T | 1673 | 0.611783 | 0         |  |
|  | Shiraz-22T | 1678 | 0.911625 | 0         |  |
|  | Shiraz-25T | 1719 | 0.472955 | 0         |  |
|  | Shiraz-28T | 1762 | 0.562311 | 0         |  |
|  | Shiraz-29T | 1801 | 0.815343 | 0         |  |
|  | Shiraz-32T | 1870 | 0.729766 | 0         |  |
|  | Shiraz-35T | 1933 | 0.488535 | 0         |  |
|  | Shiraz-58T | 2223 | 0.833364 | 0         |  |
|  | Shiraz-58T | 2226 | 1.074663 | 0         |  |
|  | Shiraz-71T | 2263 | 0.975531 | 0         |  |
|  | Shiraz-3T  | 242  | 0        | -0.336434 |  |
|  | Shiraz-4T  | 261  | 0        | -0.336249 |  |
|  | Shiraz-16T | 295  | 0.591657 | 0         |  |
|  | Shiraz-36T | 433  | 0        | -0.803961 |  |
|  | Shiraz-42T | 480  | 0        | -0.232915 |  |
|  | Shiraz-44T | 899  | 0        | -1.09697  |  |
|  | Shiraz-49T | 1170 | 0        | -0.967436 |  |
|  | Shiraz-9T  | 1370 | 0.690073 | 0         |  |
|  | Shiraz-18T | 1457 | 0.643204 | 0         |  |
|  | Shiraz-22T | 1673 | 0.611783 | 0         |  |
|  | Shiraz-22T | 1678 | 0.911625 | 0         |  |
|  | Shiraz-25T | 1719 | 0.472955 | 0         |  |
|  | Shiraz-28T | 1762 | 0.562311 | 0         |  |
|  | Shiraz-29T | 1801 | 0.815343 | 0         |  |
|  | Shiraz-32T | 1870 | 0.729766 | 0         |  |
|  | Shiraz-35T | 1933 | 0.488535 | 0         |  |
|  | Shiraz-58T | 2223 | 0.833364 | 0         |  |
|  | Shiraz-58T | 2226 | 1.074663 | 0         |  |
|  | Shiraz-71T | 2263 | 0.975531 | 0         |  |
|  | Shiraz-3T  | 242  | 0        | -0.336434 |  |
|  | Shiraz-4T  | 261  | 0        | -0.336249 |  |
|  | Shiraz-16T | 295  | 0.591657 | 0         |  |
|  | Shiraz-36T | 433  | 0        | -0.803961 |  |
|  | Shiraz-42T | 480  | 0        | -0.232915 |  |
|  | Shiraz-44T | 899  | 0        | -1.09697  |  |
|  | Shiraz-49T | 1170 | 0        | -0.967436 |  |
|  | Shiraz-9T  | 1370 | 0.690073 | 0         |  |
|  | Shiraz-18T | 1457 | 0.643204 | 0         |  |
|  | Shiraz-22T | 1673 | 0.611783 | 0         |  |
|  | Shiraz-22T | 1678 | 0.911625 | 0         |  |
|  | Shiraz-25T | 1719 | 0.472955 | 0         |  |
|  | Shiraz-28T | 1762 | 0.562311 | 0         |  |
|  | Shiraz-29T | 1801 | 0.815343 | 0         |  |

|         |      |            |      |          |           |  |
|---------|------|------------|------|----------|-----------|--|
|         |      | Shiraz-32T | 1870 | 0.729766 | 0         |  |
|         |      | Shiraz-35T | 1933 | 0.488535 | 0         |  |
|         |      | Shiraz-58T | 2223 | 0.833364 | 0         |  |
|         |      | Shiraz-58T | 2226 | 1.074663 | 0         |  |
|         |      | Shiraz-71T | 2263 | 0.975531 | 0         |  |
| TMEM187 | chrX | Shiraz-3T  | 246  | 0.531858 | 0         |  |
|         |      | Shiraz-4T  | 261  | 0        | -0.336249 |  |
|         |      | Shiraz-16T | 295  | 0.591657 | 0         |  |
|         |      | Shiraz-36T | 433  | 0        | -0.803961 |  |
|         |      | Shiraz-42T | 480  | 0        | -0.232915 |  |
|         |      | Shiraz-44T | 908  | 0.466743 | 0         |  |
|         |      | Shiraz-49T | 1170 | 0        | -0.967436 |  |
|         |      | Shiraz-49T | 1173 | 0        | -0.704439 |  |
|         |      | Shiraz-9T  | 1370 | 0.690073 | 0         |  |
|         |      | Shiraz-9T  | 1371 | 1.292392 | 0         |  |
|         |      | Shiraz-18T | 1457 | 0.643204 | 0         |  |
|         |      | Shiraz-22T | 1673 | 0.611783 | 0         |  |
|         |      | Shiraz-22T | 1678 | 0.911625 | 0         |  |
|         |      | Shiraz-25T | 1719 | 0.472955 | 0         |  |
|         |      | Shiraz-28T | 1762 | 0.562311 | 0         |  |
|         |      | Shiraz-29T | 1801 | 0.815343 | 0         |  |
|         |      | Shiraz-32T | 1870 | 0.729766 | 0         |  |
|         |      | Shiraz-32T | 1872 | 1.504553 | 0         |  |
|         |      | Shiraz-35T | 1933 | 0.488535 | 0         |  |
|         |      | Shiraz-38T | 2011 | 0        | -0.406024 |  |
|         |      | Shiraz-53T | 2115 | 0.427728 | 0         |  |
|         |      | Shiraz-58T | 2223 | 0.833364 | 0         |  |
|         |      | Shiraz-58T | 2226 | 1.074663 | 0         |  |
|         |      | Shiraz-71T | 2263 | 0.975531 | 0         |  |
|         |      | Shiraz-3T  | 246  | 0.531858 | 0         |  |
|         |      | Shiraz-4T  | 261  | 0        | -0.336249 |  |
|         |      | Shiraz-16T | 295  | 0.591657 | 0         |  |
|         |      | Shiraz-36T | 433  | 0        | -0.803961 |  |
|         |      | Shiraz-42T | 480  | 0        | -0.232915 |  |
|         |      | Shiraz-44T | 908  | 0.466743 | 0         |  |
|         |      | Shiraz-49T | 1170 | 0        | -0.967436 |  |
|         |      | Shiraz-49T | 1173 | 0        | -0.704439 |  |
|         |      | Shiraz-9T  | 1370 | 0.690073 | 0         |  |
|         |      | Shiraz-9T  | 1371 | 1.292392 | 0         |  |
|         |      | Shiraz-18T | 1457 | 0.643204 | 0         |  |
|         |      | Shiraz-22T | 1673 | 0.611783 | 0         |  |
|         |      | Shiraz-22T | 1678 | 0.911625 | 0         |  |
|         |      | Shiraz-25T | 1719 | 0.472955 | 0         |  |
|         |      | Shiraz-28T | 1762 | 0.562311 | 0         |  |
|         |      | Shiraz-29T | 1801 | 0.815343 | 0         |  |
|         |      | Shiraz-32T | 1870 | 0.729766 | 0         |  |
|         |      | Shiraz-32T | 1872 | 1.504553 | 0         |  |

|         |      |            |      |          |           |  |  |
|---------|------|------------|------|----------|-----------|--|--|
|         |      | Shiraz-35T | 1933 | 0.488535 | 0         |  |  |
|         |      | Shiraz-38T | 2011 | 0        | -0.406024 |  |  |
|         |      | Shiraz-53T | 2115 | 0.427728 | 0         |  |  |
|         |      | Shiraz-58T | 2223 | 0.833364 | 0         |  |  |
|         |      | Shiraz-58T | 2226 | 1.074663 | 0         |  |  |
|         |      | Shiraz-71T | 2263 | 0.975531 | 0         |  |  |
|         |      | Shiraz-3T  | 246  | 0.531858 | 0         |  |  |
|         |      | Shiraz-4T  | 261  | 0        | -0.336249 |  |  |
|         |      | Shiraz-16T | 295  | 0.591657 | 0         |  |  |
|         |      | Shiraz-36T | 433  | 0        | -0.803961 |  |  |
|         |      | Shiraz-42T | 480  | 0        | -0.232915 |  |  |
|         |      | Shiraz-44T | 908  | 0.466743 | 0         |  |  |
|         |      | Shiraz-49T | 1170 | 0        | -0.967436 |  |  |
|         |      | Shiraz-49T | 1173 | 0        | -0.704439 |  |  |
|         |      | Shiraz-9T  | 1370 | 0.690073 | 0         |  |  |
|         |      | Shiraz-9T  | 1371 | 1.292392 | 0         |  |  |
|         |      | Shiraz-18T | 1457 | 0.643204 | 0         |  |  |
|         |      | Shiraz-22T | 1673 | 0.611783 | 0         |  |  |
|         |      | Shiraz-22T | 1678 | 0.911625 | 0         |  |  |
|         |      | Shiraz-25T | 1719 | 0.472955 | 0         |  |  |
|         |      | Shiraz-28T | 1762 | 0.562311 | 0         |  |  |
|         |      | Shiraz-29T | 1801 | 0.815343 | 0         |  |  |
|         |      | Shiraz-32T | 1870 | 0.729766 | 0         |  |  |
|         |      | Shiraz-32T | 1872 | 1.504553 | 0         |  |  |
|         |      | Shiraz-35T | 1933 | 0.488535 | 0         |  |  |
|         |      | Shiraz-38T | 2011 | 0        | -0.406024 |  |  |
|         |      | Shiraz-53T | 2115 | 0.427728 | 0         |  |  |
|         |      | Shiraz-58T | 2223 | 0.833364 | 0         |  |  |
|         |      | Shiraz-58T | 2226 | 1.074663 | 0         |  |  |
|         |      | Shiraz-71T | 2263 | 0.975531 | 0         |  |  |
| TMEM195 | chr7 | Shiraz-4T  | 252  | 0.192083 | 0         |  |  |
|         |      | Shiraz-36T | 376  | 0.159952 | 0         |  |  |
|         |      | Shiraz-44T | 628  | 0        | -0.444379 |  |  |
|         |      | Shiraz-47T | 1027 | 0        | -0.117848 |  |  |
|         |      | Shiraz-49T | 1117 | 0        | -0.168296 |  |  |
|         |      | Shiraz-77T | 1222 | 0        | -0.113002 |  |  |
|         |      | Shiraz-18T | 1433 | 0.250973 | 0         |  |  |
|         |      | Shiraz-22T | 1543 | 0        | -0.513696 |  |  |
|         |      | Shiraz-25T | 1697 | 0.21945  | 0         |  |  |
|         |      | Shiraz-28T | 1734 | 0.362882 | 0         |  |  |
|         |      | Shiraz-29T | 1777 | 0.156747 | 0         |  |  |
|         |      | Shiraz-38T | 1950 | 0.265916 | 0         |  |  |
|         |      | Shiraz-58T | 2157 | 0        | -0.213872 |  |  |
|         |      | Shiraz-71T | 2236 | 0.320072 | 0         |  |  |
|         |      | Shiraz-4T  | 252  | 0.192083 | 0         |  |  |
|         |      | Shiraz-36T | 376  | 0.159952 | 0         |  |  |
|         |      | Shiraz-44T | 628  | 0        | -0.444379 |  |  |

|         |      |            |      |          |           |  |  |
|---------|------|------------|------|----------|-----------|--|--|
|         |      | Shiraz-47T | 1027 | 0        | -0.117848 |  |  |
|         |      | Shiraz-49T | 1117 | 0        | -0.168296 |  |  |
|         |      | Shiraz-77T | 1222 | 0        | -0.113002 |  |  |
|         |      | Shiraz-18T | 1433 | 0.250973 | 0         |  |  |
|         |      | Shiraz-22T | 1543 | 0        | -0.513696 |  |  |
|         |      | Shiraz-25T | 1697 | 0.21945  | 0         |  |  |
|         |      | Shiraz-28T | 1734 | 0.362882 | 0         |  |  |
|         |      | Shiraz-29T | 1777 | 0.156747 | 0         |  |  |
|         |      | Shiraz-38T | 1950 | 0.265916 | 0         |  |  |
|         |      | Shiraz-58T | 2157 | 0        | -0.213872 |  |  |
|         |      | Shiraz-71T | 2236 | 0.320072 | 0         |  |  |
|         |      | Shiraz-4T  | 252  | 0.192083 | 0         |  |  |
|         |      | Shiraz-36T | 376  | 0.159952 | 0         |  |  |
|         |      | Shiraz-44T | 628  | 0        | -0.444379 |  |  |
|         |      | Shiraz-47T | 1027 | 0        | -0.117848 |  |  |
|         |      | Shiraz-49T | 1117 | 0        | -0.168296 |  |  |
|         |      | Shiraz-77T | 1222 | 0        | -0.113002 |  |  |
|         |      | Shiraz-18T | 1433 | 0.250973 | 0         |  |  |
|         |      | Shiraz-22T | 1543 | 0        | -0.513696 |  |  |
|         |      | Shiraz-25T | 1697 | 0.21945  | 0         |  |  |
|         |      | Shiraz-28T | 1734 | 0.362882 | 0         |  |  |
|         |      | Shiraz-29T | 1777 | 0.156747 | 0         |  |  |
|         |      | Shiraz-38T | 1950 | 0.265916 | 0         |  |  |
|         |      | Shiraz-58T | 2157 | 0        | -0.213872 |  |  |
|         |      | Shiraz-71T | 2236 | 0.320072 | 0         |  |  |
| TMEM196 | chr7 | Shiraz-4T  | 252  | 0.192083 | 0         |  |  |
|         |      | Shiraz-36T | 376  | 0.159952 | 0         |  |  |
|         |      | Shiraz-44T | 628  | 0        | -0.444379 |  |  |
|         |      | Shiraz-47T | 1027 | 0        | -0.117848 |  |  |
|         |      | Shiraz-49T | 1117 | 0        | -0.168296 |  |  |
|         |      | Shiraz-77T | 1222 | 0        | -0.113002 |  |  |
|         |      | Shiraz-18T | 1433 | 0.250973 | 0         |  |  |
|         |      | Shiraz-22T | 1543 | 0        | -0.513696 |  |  |
|         |      | Shiraz-25T | 1697 | 0.21945  | 0         |  |  |
|         |      | Shiraz-28T | 1734 | 0.362882 | 0         |  |  |
|         |      | Shiraz-29T | 1777 | 0.156747 | 0         |  |  |
|         |      | Shiraz-38T | 1950 | 0.265916 | 0         |  |  |
|         |      | Shiraz-58T | 2157 | 0        | -0.213872 |  |  |
|         |      | Shiraz-71T | 2236 | 0.320072 | 0         |  |  |
|         |      | Shiraz-4T  | 252  | 0.192083 | 0         |  |  |
|         |      | Shiraz-36T | 376  | 0.159952 | 0         |  |  |
|         |      | Shiraz-44T | 628  | 0        | -0.444379 |  |  |
|         |      | Shiraz-47T | 1027 | 0        | -0.117848 |  |  |
|         |      | Shiraz-49T | 1117 | 0        | -0.168296 |  |  |
|         |      | Shiraz-77T | 1222 | 0        | -0.113002 |  |  |
|         |      | Shiraz-18T | 1433 | 0.250973 | 0         |  |  |
|         |      | Shiraz-22T | 1543 | 0        | -0.513696 |  |  |

|         |      |            |      |          |           |  |  |
|---------|------|------------|------|----------|-----------|--|--|
|         |      | Shiraz-25T | 1697 | 0.21945  | 0         |  |  |
|         |      | Shiraz-28T | 1734 | 0.362882 | 0         |  |  |
|         |      | Shiraz-29T | 1777 | 0.156747 | 0         |  |  |
|         |      | Shiraz-38T | 1950 | 0.265916 | 0         |  |  |
|         |      | Shiraz-58T | 2157 | 0        | -0.213872 |  |  |
|         |      | Shiraz-71T | 2236 | 0.320072 | 0         |  |  |
|         |      | Shiraz-4T  | 252  | 0.192083 | 0         |  |  |
|         |      | Shiraz-36T | 376  | 0.159952 | 0         |  |  |
|         |      | Shiraz-44T | 628  | 0        | -0.444379 |  |  |
|         |      | Shiraz-47T | 1027 | 0        | -0.117848 |  |  |
|         |      | Shiraz-49T | 1117 | 0        | -0.168296 |  |  |
|         |      | Shiraz-77T | 1222 | 0        | -0.113002 |  |  |
|         |      | Shiraz-18T | 1433 | 0.250973 | 0         |  |  |
|         |      | Shiraz-22T | 1543 | 0        | -0.513696 |  |  |
|         |      | Shiraz-25T | 1697 | 0.21945  | 0         |  |  |
|         |      | Shiraz-28T | 1734 | 0.362882 | 0         |  |  |
|         |      | Shiraz-29T | 1777 | 0.156747 | 0         |  |  |
|         |      | Shiraz-38T | 1950 | 0.265916 | 0         |  |  |
|         |      | Shiraz-58T | 2157 | 0        | -0.213872 |  |  |
|         |      | Shiraz-71T | 2236 | 0.320072 | 0         |  |  |
| TMEM209 | chr7 | Shiraz-3T  | 90   | 0.219276 | 0         |  |  |
|         |      | Shiraz-3T  | 96   | 0.428308 | 0         |  |  |
|         |      | Shiraz-4T  | 253  | 0.372918 | 0         |  |  |
|         |      | Shiraz-31T | 317  | 0.204382 | 0         |  |  |
|         |      | Shiraz-36T | 378  | 0.179558 | 0         |  |  |
|         |      | Shiraz-44T | 642  | 0.408617 | 0         |  |  |
|         |      | Shiraz-46T | 943  | 0.093799 | 0         |  |  |
|         |      | Shiraz-47T | 1032 | 0.171484 | 0         |  |  |
|         |      | Shiraz-77T | 1225 | 0        | -0.117922 |  |  |
|         |      | Shiraz-77T | 1229 | 0.051661 | 0         |  |  |
|         |      | Shiraz-9T  | 1325 | 0.221899 | 0         |  |  |
|         |      | Shiraz-18T | 1434 | 0.244465 | 0         |  |  |
|         |      | Shiraz-25T | 1698 | 0.21835  | 0         |  |  |
|         |      | Shiraz-28T | 1735 | 0.350744 | 0         |  |  |
|         |      | Shiraz-29T | 1778 | 0.120767 | 0         |  |  |
|         |      | Shiraz-32T | 1833 | 0.551336 | 0         |  |  |
|         |      | Shiraz-38T | 1951 | 0.250891 | 0         |  |  |
|         |      | Shiraz-53T | 2078 | 0.287202 | 0         |  |  |
|         |      | Shiraz-71T | 2238 | 0.603631 | 0         |  |  |
|         |      | Shiraz-3T  | 90   | 0.219276 | 0         |  |  |
|         |      | Shiraz-3T  | 96   | 0.428308 | 0         |  |  |
|         |      | Shiraz-4T  | 253  | 0.372918 | 0         |  |  |
|         |      | Shiraz-31T | 317  | 0.204382 | 0         |  |  |
|         |      | Shiraz-36T | 378  | 0.179558 | 0         |  |  |
|         |      | Shiraz-44T | 642  | 0.408617 | 0         |  |  |
|         |      | Shiraz-46T | 943  | 0.093799 | 0         |  |  |
|         |      | Shiraz-47T | 1032 | 0.171484 | 0         |  |  |

|         |      |            |      |          |           |  |  |
|---------|------|------------|------|----------|-----------|--|--|
|         |      | Shiraz-77T | 1225 | 0        | -0.117922 |  |  |
|         |      | Shiraz-77T | 1229 | 0.051661 | 0         |  |  |
|         |      | Shiraz-9T  | 1325 | 0.221899 | 0         |  |  |
|         |      | Shiraz-18T | 1434 | 0.244465 | 0         |  |  |
|         |      | Shiraz-25T | 1698 | 0.21835  | 0         |  |  |
|         |      | Shiraz-28T | 1735 | 0.350744 | 0         |  |  |
|         |      | Shiraz-29T | 1778 | 0.120767 | 0         |  |  |
|         |      | Shiraz-32T | 1833 | 0.551336 | 0         |  |  |
|         |      | Shiraz-38T | 1951 | 0.250891 | 0         |  |  |
|         |      | Shiraz-53T | 2078 | 0.287202 | 0         |  |  |
|         |      | Shiraz-71T | 2238 | 0.603631 | 0         |  |  |
|         |      | Shiraz-3T  | 90   | 0.219276 | 0         |  |  |
|         |      | Shiraz-3T  | 96   | 0.428308 | 0         |  |  |
|         |      | Shiraz-4T  | 253  | 0.372918 | 0         |  |  |
|         |      | Shiraz-31T | 317  | 0.204382 | 0         |  |  |
|         |      | Shiraz-36T | 378  | 0.179558 | 0         |  |  |
|         |      | Shiraz-44T | 642  | 0.408617 | 0         |  |  |
|         |      | Shiraz-46T | 943  | 0.093799 | 0         |  |  |
|         |      | Shiraz-47T | 1032 | 0.171484 | 0         |  |  |
|         |      | Shiraz-77T | 1225 | 0        | -0.117922 |  |  |
|         |      | Shiraz-77T | 1229 | 0.051661 | 0         |  |  |
|         |      | Shiraz-9T  | 1325 | 0.221899 | 0         |  |  |
|         |      | Shiraz-18T | 1434 | 0.244465 | 0         |  |  |
|         |      | Shiraz-25T | 1698 | 0.21835  | 0         |  |  |
|         |      | Shiraz-28T | 1735 | 0.350744 | 0         |  |  |
|         |      | Shiraz-29T | 1778 | 0.120767 | 0         |  |  |
|         |      | Shiraz-32T | 1833 | 0.551336 | 0         |  |  |
|         |      | Shiraz-38T | 1951 | 0.250891 | 0         |  |  |
|         |      | Shiraz-53T | 2078 | 0.287202 | 0         |  |  |
|         |      | Shiraz-71T | 2238 | 0.603631 | 0         |  |  |
| TMEM213 | chr7 | Shiraz-3T  | 90   | 0.219276 | 0         |  |  |
|         |      | Shiraz-3T  | 97   | 0.496001 | 0         |  |  |
|         |      | Shiraz-4T  | 253  | 0.372918 | 0         |  |  |
|         |      | Shiraz-31T | 318  | 0.254373 | 0         |  |  |
|         |      | Shiraz-36T | 378  | 0.179558 | 0         |  |  |
|         |      | Shiraz-36T | 383  | 0.374586 | 0         |  |  |
|         |      | Shiraz-44T | 644  | 0.496536 | 0         |  |  |
|         |      | Shiraz-46T | 943  | 0.093799 | 0         |  |  |
|         |      | Shiraz-47T | 1033 | 0.220267 | 0         |  |  |
|         |      | Shiraz-77T | 1225 | 0        | -0.117922 |  |  |
|         |      | Shiraz-77T | 1230 | 0.149651 | 0         |  |  |
|         |      | Shiraz-9T  | 1325 | 0.221899 | 0         |  |  |
|         |      | Shiraz-18T | 1434 | 0.244465 | 0         |  |  |
|         |      | Shiraz-25T | 1698 | 0.21835  | 0         |  |  |
|         |      | Shiraz-28T | 1735 | 0.350744 | 0         |  |  |
|         |      | Shiraz-29T | 1778 | 0.120767 | 0         |  |  |
|         |      | Shiraz-32T | 1833 | 0.551336 | 0         |  |  |



|        |      |            |      |          |           |  |
|--------|------|------------|------|----------|-----------|--|
|        |      | Shiraz-38T | 1951 | 0.250891 | 0         |  |
|        |      | Shiraz-53T | 2078 | 0.287202 | 0         |  |
|        |      | Shiraz-58T | 2162 | 0.221505 | 0         |  |
|        |      | Shiraz-71T | 2238 | 0.603631 | 0         |  |
|        |      | Shiraz-3T  | 90   | 0.219276 | 0         |  |
|        |      | Shiraz-3T  | 97   | 0.496001 | 0         |  |
|        |      | Shiraz-4T  | 253  | 0.372918 | 0         |  |
|        |      | Shiraz-31T | 318  | 0.254373 | 0         |  |
|        |      | Shiraz-36T | 378  | 0.179558 | 0         |  |
|        |      | Shiraz-36T | 383  | 0.374586 | 0         |  |
|        |      | Shiraz-44T | 644  | 0.496536 | 0         |  |
|        |      | Shiraz-46T | 943  | 0.093799 | 0         |  |
|        |      | Shiraz-47T | 1033 | 0.220267 | 0         |  |
|        |      | Shiraz-77T | 1225 | 0        | -0.117922 |  |
|        |      | Shiraz-77T | 1230 | 0.149651 | 0         |  |
|        |      | Shiraz-9T  | 1325 | 0.221899 | 0         |  |
|        |      | Shiraz-18T | 1434 | 0.244465 | 0         |  |
|        |      | Shiraz-25T | 1698 | 0.21835  | 0         |  |
|        |      | Shiraz-28T | 1735 | 0.350744 | 0         |  |
|        |      | Shiraz-29T | 1778 | 0.120767 | 0         |  |
|        |      | Shiraz-32T | 1833 | 0.551336 | 0         |  |
|        |      | Shiraz-38T | 1951 | 0.250891 | 0         |  |
|        |      | Shiraz-53T | 2078 | 0.287202 | 0         |  |
|        |      | Shiraz-58T | 2162 | 0.221505 | 0         |  |
|        |      | Shiraz-71T | 2238 | 0.603631 | 0         |  |
|        |      | Shiraz-3T  | 90   | 0.219276 | 0         |  |
|        |      | Shiraz-3T  | 97   | 0.496001 | 0         |  |
|        |      | Shiraz-4T  | 253  | 0.372918 | 0         |  |
|        |      | Shiraz-31T | 318  | 0.254373 | 0         |  |
|        |      | Shiraz-36T | 378  | 0.179558 | 0         |  |
|        |      | Shiraz-36T | 383  | 0.374586 | 0         |  |
|        |      | Shiraz-44T | 644  | 0.496536 | 0         |  |
|        |      | Shiraz-46T | 943  | 0.093799 | 0         |  |
|        |      | Shiraz-47T | 1033 | 0.220267 | 0         |  |
|        |      | Shiraz-77T | 1225 | 0        | -0.117922 |  |
|        |      | Shiraz-77T | 1230 | 0.149651 | 0         |  |
|        |      | Shiraz-9T  | 1325 | 0.221899 | 0         |  |
|        |      | Shiraz-18T | 1434 | 0.244465 | 0         |  |
|        |      | Shiraz-25T | 1698 | 0.21835  | 0         |  |
|        |      | Shiraz-28T | 1735 | 0.350744 | 0         |  |
|        |      | Shiraz-29T | 1778 | 0.120767 | 0         |  |
|        |      | Shiraz-32T | 1833 | 0.551336 | 0         |  |
|        |      | Shiraz-38T | 1951 | 0.250891 | 0         |  |
|        |      | Shiraz-53T | 2078 | 0.287202 | 0         |  |
|        |      | Shiraz-58T | 2162 | 0.221505 | 0         |  |
|        |      | Shiraz-71T | 2238 | 0.603631 | 0         |  |
| TMEM27 | chrX | Shiraz-3T  | 235  | 0        | -0.28401  |  |

|  |            |      |          |           |  |
|--|------------|------|----------|-----------|--|
|  | Shiraz-4T  | 260  | 0        | -0.324128 |  |
|  | Shiraz-16T | 294  | 0.655804 | 0         |  |
|  | Shiraz-36T | 431  | 0        | -0.78035  |  |
|  | Shiraz-44T | 891  | 0        | -0.954044 |  |
|  | Shiraz-49T | 1166 | 0        | -0.917235 |  |
|  | Shiraz-9T  | 1368 | 0.199713 | 0         |  |
|  | Shiraz-18T | 1455 | 0        | -0.186773 |  |
|  | Shiraz-22T | 1669 | 0.695915 | 0         |  |
|  | Shiraz-25T | 1717 | 0.420447 | 0         |  |
|  | Shiraz-28T | 1760 | 0.538181 | 0         |  |
|  | Shiraz-29T | 1800 | 0.672527 | 0         |  |
|  | Shiraz-32T | 1869 | 0.776805 | 0         |  |
|  | Shiraz-35T | 1932 | 0.507141 | 0         |  |
|  | Shiraz-40T | 2051 | 0.098506 | 0         |  |
|  | Shiraz-58T | 2221 | 0.871948 | 0         |  |
|  | Shiraz-71T | 2260 | 0.68394  | 0         |  |
|  | Shiraz-71T | 2261 | 0.508399 | 0         |  |
|  | Shiraz-3T  | 235  | 0        | -0.28401  |  |
|  | Shiraz-4T  | 260  | 0        | -0.324128 |  |
|  | Shiraz-16T | 294  | 0.655804 | 0         |  |
|  | Shiraz-36T | 431  | 0        | -0.78035  |  |
|  | Shiraz-44T | 891  | 0        | -0.954044 |  |
|  | Shiraz-49T | 1166 | 0        | -0.917235 |  |
|  | Shiraz-9T  | 1368 | 0.199713 | 0         |  |
|  | Shiraz-18T | 1455 | 0        | -0.186773 |  |
|  | Shiraz-22T | 1669 | 0.695915 | 0         |  |
|  | Shiraz-25T | 1717 | 0.420447 | 0         |  |
|  | Shiraz-28T | 1760 | 0.538181 | 0         |  |
|  | Shiraz-29T | 1800 | 0.672527 | 0         |  |
|  | Shiraz-32T | 1869 | 0.776805 | 0         |  |
|  | Shiraz-35T | 1932 | 0.507141 | 0         |  |
|  | Shiraz-40T | 2051 | 0.098506 | 0         |  |
|  | Shiraz-58T | 2221 | 0.871948 | 0         |  |
|  | Shiraz-71T | 2260 | 0.68394  | 0         |  |
|  | Shiraz-71T | 2261 | 0.508399 | 0         |  |
|  | Shiraz-3T  | 235  | 0        | -0.28401  |  |
|  | Shiraz-4T  | 260  | 0        | -0.324128 |  |
|  | Shiraz-16T | 294  | 0.655804 | 0         |  |
|  | Shiraz-36T | 431  | 0        | -0.78035  |  |
|  | Shiraz-44T | 891  | 0        | -0.954044 |  |
|  | Shiraz-49T | 1166 | 0        | -0.917235 |  |
|  | Shiraz-9T  | 1368 | 0.199713 | 0         |  |
|  | Shiraz-18T | 1455 | 0        | -0.186773 |  |
|  | Shiraz-22T | 1669 | 0.695915 | 0         |  |
|  | Shiraz-25T | 1717 | 0.420447 | 0         |  |
|  | Shiraz-28T | 1760 | 0.538181 | 0         |  |
|  | Shiraz-29T | 1800 | 0.672527 | 0         |  |

|        |      |            |      |          |           |  |
|--------|------|------------|------|----------|-----------|--|
|        |      | Shiraz-32T | 1869 | 0.776805 | 0         |  |
|        |      | Shiraz-35T | 1932 | 0.507141 | 0         |  |
|        |      | Shiraz-40T | 2051 | 0.098506 | 0         |  |
|        |      | Shiraz-58T | 2221 | 0.871948 | 0         |  |
|        |      | Shiraz-71T | 2260 | 0.68394  | 0         |  |
|        |      | Shiraz-71T | 2261 | 0.508399 | 0         |  |
| TMEM31 | chrX | Shiraz-3T  | 242  | 0        | -0.336434 |  |
|        |      | Shiraz-4T  | 261  | 0        | -0.336249 |  |
|        |      | Shiraz-16T | 295  | 0.591657 | 0         |  |
|        |      | Shiraz-36T | 433  | 0        | -0.803961 |  |
|        |      | Shiraz-44T | 899  | 0        | -1.09697  |  |
|        |      | Shiraz-49T | 1170 | 0        | -0.967436 |  |
|        |      | Shiraz-18T | 1457 | 0.643204 | 0         |  |
|        |      | Shiraz-22T | 1673 | 0.611783 | 0         |  |
|        |      | Shiraz-25T | 1719 | 0.472955 | 0         |  |
|        |      | Shiraz-28T | 1762 | 0.562311 | 0         |  |
|        |      | Shiraz-29T | 1801 | 0.815343 | 0         |  |
|        |      | Shiraz-32T | 1870 | 0.729766 | 0         |  |
|        |      | Shiraz-35T | 1933 | 0.488535 | 0         |  |
|        |      | Shiraz-58T | 2223 | 0.833364 | 0         |  |
|        |      | Shiraz-71T | 2263 | 0.975531 | 0         |  |
|        |      | Shiraz-3T  | 242  | 0        | -0.336434 |  |
|        |      | Shiraz-4T  | 261  | 0        | -0.336249 |  |
|        |      | Shiraz-16T | 295  | 0.591657 | 0         |  |
|        |      | Shiraz-36T | 433  | 0        | -0.803961 |  |
|        |      | Shiraz-44T | 899  | 0        | -1.09697  |  |
|        |      | Shiraz-49T | 1170 | 0        | -0.967436 |  |
|        |      | Shiraz-18T | 1457 | 0.643204 | 0         |  |
|        |      | Shiraz-22T | 1673 | 0.611783 | 0         |  |
|        |      | Shiraz-25T | 1719 | 0.472955 | 0         |  |
|        |      | Shiraz-28T | 1762 | 0.562311 | 0         |  |
|        |      | Shiraz-29T | 1801 | 0.815343 | 0         |  |
|        |      | Shiraz-32T | 1870 | 0.729766 | 0         |  |
|        |      | Shiraz-35T | 1933 | 0.488535 | 0         |  |
|        |      | Shiraz-58T | 2223 | 0.833364 | 0         |  |
|        |      | Shiraz-71T | 2263 | 0.975531 | 0         |  |
|        |      | Shiraz-3T  | 242  | 0        | -0.336434 |  |
|        |      | Shiraz-4T  | 261  | 0        | -0.336249 |  |
|        |      | Shiraz-16T | 295  | 0.591657 | 0         |  |
|        |      | Shiraz-36T | 433  | 0        | -0.803961 |  |
|        |      | Shiraz-44T | 899  | 0        | -1.09697  |  |
|        |      | Shiraz-49T | 1170 | 0        | -0.967436 |  |
|        |      | Shiraz-18T | 1457 | 0.643204 | 0         |  |
|        |      | Shiraz-22T | 1673 | 0.611783 | 0         |  |
|        |      | Shiraz-25T | 1719 | 0.472955 | 0         |  |
|        |      | Shiraz-28T | 1762 | 0.562311 | 0         |  |
|        |      | Shiraz-29T | 1801 | 0.815343 | 0         |  |

|        |      |            |      |          |           |  |
|--------|------|------------|------|----------|-----------|--|
|        |      | Shiraz-32T | 1870 | 0.729766 | 0         |  |
|        |      | Shiraz-35T | 1933 | 0.488535 | 0         |  |
|        |      | Shiraz-58T | 2223 | 0.833364 | 0         |  |
|        |      | Shiraz-71T | 2263 | 0.975531 | 0         |  |
| TMEM35 | chrX | Shiraz-3T  | 242  | 0        | -0.336434 |  |
|        |      | Shiraz-4T  | 261  | 0        | -0.336249 |  |
|        |      | Shiraz-16T | 295  | 0.591657 | 0         |  |
|        |      | Shiraz-36T | 433  | 0        | -0.803961 |  |
|        |      | Shiraz-44T | 899  | 0        | -1.09697  |  |
|        |      | Shiraz-49T | 1170 | 0        | -0.967436 |  |
|        |      | Shiraz-18T | 1457 | 0.643204 | 0         |  |
|        |      | Shiraz-22T | 1673 | 0.611783 | 0         |  |
|        |      | Shiraz-25T | 1719 | 0.472955 | 0         |  |
|        |      | Shiraz-28T | 1762 | 0.562311 | 0         |  |
|        |      | Shiraz-29T | 1801 | 0.815343 | 0         |  |
|        |      | Shiraz-32T | 1870 | 0.729766 | 0         |  |
|        |      | Shiraz-35T | 1933 | 0.488535 | 0         |  |
|        |      | Shiraz-58T | 2223 | 0.833364 | 0         |  |
|        |      | Shiraz-71T | 2263 | 0.975531 | 0         |  |
|        |      | Shiraz-3T  | 242  | 0        | -0.336434 |  |
|        |      | Shiraz-4T  | 261  | 0        | -0.336249 |  |
|        |      | Shiraz-16T | 295  | 0.591657 | 0         |  |
|        |      | Shiraz-36T | 433  | 0        | -0.803961 |  |
|        |      | Shiraz-44T | 899  | 0        | -1.09697  |  |
|        |      | Shiraz-49T | 1170 | 0        | -0.967436 |  |
|        |      | Shiraz-18T | 1457 | 0.643204 | 0         |  |
|        |      | Shiraz-22T | 1673 | 0.611783 | 0         |  |
|        |      | Shiraz-25T | 1719 | 0.472955 | 0         |  |
|        |      | Shiraz-28T | 1762 | 0.562311 | 0         |  |
|        |      | Shiraz-29T | 1801 | 0.815343 | 0         |  |
|        |      | Shiraz-32T | 1870 | 0.729766 | 0         |  |
|        |      | Shiraz-35T | 1933 | 0.488535 | 0         |  |
|        |      | Shiraz-58T | 2223 | 0.833364 | 0         |  |
|        |      | Shiraz-71T | 2263 | 0.975531 | 0         |  |
|        |      | Shiraz-3T  | 242  | 0        | -0.336434 |  |
|        |      | Shiraz-4T  | 261  | 0        | -0.336249 |  |
|        |      | Shiraz-16T | 295  | 0.591657 | 0         |  |
|        |      | Shiraz-36T | 433  | 0        | -0.803961 |  |
|        |      | Shiraz-44T | 899  | 0        | -1.09697  |  |
|        |      | Shiraz-49T | 1170 | 0        | -0.967436 |  |
|        |      | Shiraz-18T | 1457 | 0.643204 | 0         |  |
|        |      | Shiraz-22T | 1673 | 0.611783 | 0         |  |
|        |      | Shiraz-25T | 1719 | 0.472955 | 0         |  |
|        |      | Shiraz-28T | 1762 | 0.562311 | 0         |  |
|        |      | Shiraz-29T | 1801 | 0.815343 | 0         |  |
|        |      | Shiraz-32T | 1870 | 0.729766 | 0         |  |
|        |      | Shiraz-35T | 1933 | 0.488535 | 0         |  |

|        |      |            |      |          |           |  |
|--------|------|------------|------|----------|-----------|--|
|        |      | Shiraz-58T | 2223 | 0.833364 | 0         |  |
|        |      | Shiraz-71T | 2263 | 0.975531 | 0         |  |
| TMEM47 | chrX | Shiraz-3T  | 235  | 0        | -0.28401  |  |
|        |      | Shiraz-3T  | 236  | 0        | -0.435445 |  |
|        |      | Shiraz-4T  | 260  | 0        | -0.324128 |  |
|        |      | Shiraz-16T | 294  | 0.655804 | 0         |  |
|        |      | Shiraz-36T | 431  | 0        | -0.78035  |  |
|        |      | Shiraz-44T | 891  | 0        | -0.954044 |  |
|        |      | Shiraz-44T | 893  | 0        | -1.364406 |  |
|        |      | Shiraz-47T | 1083 | 0        | -0.103285 |  |
|        |      | Shiraz-49T | 1166 | 0        | -0.917235 |  |
|        |      | Shiraz-49T | 1168 | 0        | -1.073859 |  |
|        |      | Shiraz-9T  | 1368 | 0.199713 | 0         |  |
|        |      | Shiraz-18T | 1455 | 0        | -0.186773 |  |
|        |      | Shiraz-22T | 1669 | 0.695915 | 0         |  |
|        |      | Shiraz-22T | 1671 | 0.369309 | 0         |  |
|        |      | Shiraz-25T | 1717 | 0.420447 | 0         |  |
|        |      | Shiraz-28T | 1760 | 0.538181 | 0         |  |
|        |      | Shiraz-29T | 1800 | 0.672527 | 0         |  |
|        |      | Shiraz-32T | 1869 | 0.776805 | 0         |  |
|        |      | Shiraz-35T | 1932 | 0.507141 | 0         |  |
|        |      | Shiraz-40T | 2051 | 0.098506 | 0         |  |
|        |      | Shiraz-58T | 2221 | 0.871948 | 0         |  |
|        |      | Shiraz-58T | 2222 | 0.679664 | 0         |  |
|        |      | Shiraz-71T | 2260 | 0.68394  | 0         |  |
|        |      | Shiraz-71T | 2261 | 0.508399 | 0         |  |
|        |      | Shiraz-3T  | 235  | 0        | -0.28401  |  |
|        |      | Shiraz-3T  | 236  | 0        | -0.435445 |  |
|        |      | Shiraz-4T  | 260  | 0        | -0.324128 |  |
|        |      | Shiraz-16T | 294  | 0.655804 | 0         |  |
|        |      | Shiraz-36T | 431  | 0        | -0.78035  |  |
|        |      | Shiraz-44T | 891  | 0        | -0.954044 |  |
|        |      | Shiraz-44T | 893  | 0        | -1.364406 |  |
|        |      | Shiraz-47T | 1083 | 0        | -0.103285 |  |
|        |      | Shiraz-49T | 1166 | 0        | -0.917235 |  |
|        |      | Shiraz-49T | 1168 | 0        | -1.073859 |  |
|        |      | Shiraz-9T  | 1368 | 0.199713 | 0         |  |
|        |      | Shiraz-18T | 1455 | 0        | -0.186773 |  |
|        |      | Shiraz-22T | 1669 | 0.695915 | 0         |  |
|        |      | Shiraz-22T | 1671 | 0.369309 | 0         |  |
|        |      | Shiraz-25T | 1717 | 0.420447 | 0         |  |
|        |      | Shiraz-28T | 1760 | 0.538181 | 0         |  |
|        |      | Shiraz-29T | 1800 | 0.672527 | 0         |  |
|        |      | Shiraz-32T | 1869 | 0.776805 | 0         |  |
|        |      | Shiraz-35T | 1932 | 0.507141 | 0         |  |
|        |      | Shiraz-40T | 2051 | 0.098506 | 0         |  |
|        |      | Shiraz-58T | 2221 | 0.871948 | 0         |  |

|        |      |            |      |          |           |  |  |
|--------|------|------------|------|----------|-----------|--|--|
|        |      | Shiraz-58T | 2222 | 0.679664 | 0         |  |  |
|        |      | Shiraz-71T | 2260 | 0.68394  | 0         |  |  |
|        |      | Shiraz-71T | 2261 | 0.508399 | 0         |  |  |
|        |      | Shiraz-3T  | 235  | 0        | -0.28401  |  |  |
|        |      | Shiraz-3T  | 236  | 0        | -0.435445 |  |  |
|        |      | Shiraz-4T  | 260  | 0        | -0.324128 |  |  |
|        |      | Shiraz-16T | 294  | 0.655804 | 0         |  |  |
|        |      | Shiraz-36T | 431  | 0        | -0.78035  |  |  |
|        |      | Shiraz-44T | 891  | 0        | -0.954044 |  |  |
|        |      | Shiraz-44T | 893  | 0        | -1.364406 |  |  |
|        |      | Shiraz-47T | 1083 | 0        | -0.103285 |  |  |
|        |      | Shiraz-49T | 1166 | 0        | -0.917235 |  |  |
|        |      | Shiraz-49T | 1168 | 0        | -1.073859 |  |  |
|        |      | Shiraz-9T  | 1368 | 0.199713 | 0         |  |  |
|        |      | Shiraz-18T | 1455 | 0        | -0.186773 |  |  |
|        |      | Shiraz-22T | 1669 | 0.695915 | 0         |  |  |
|        |      | Shiraz-22T | 1671 | 0.369309 | 0         |  |  |
|        |      | Shiraz-25T | 1717 | 0.420447 | 0         |  |  |
|        |      | Shiraz-28T | 1760 | 0.538181 | 0         |  |  |
|        |      | Shiraz-29T | 1800 | 0.672527 | 0         |  |  |
|        |      | Shiraz-32T | 1869 | 0.776805 | 0         |  |  |
|        |      | Shiraz-35T | 1932 | 0.507141 | 0         |  |  |
|        |      | Shiraz-40T | 2051 | 0.098506 | 0         |  |  |
|        |      | Shiraz-58T | 2221 | 0.871948 | 0         |  |  |
|        |      | Shiraz-58T | 2222 | 0.679664 | 0         |  |  |
|        |      | Shiraz-71T | 2260 | 0.68394  | 0         |  |  |
|        |      | Shiraz-71T | 2261 | 0.508399 | 0         |  |  |
| TMEM60 | chr7 | Shiraz-3T  | 90   | 0.219276 | 0         |  |  |
|        |      | Shiraz-4T  | 253  | 0.372918 | 0         |  |  |
|        |      | Shiraz-36T | 378  | 0.179558 | 0         |  |  |
|        |      | Shiraz-42T | 454  | 0.145717 | 0         |  |  |
|        |      | Shiraz-46T | 943  | 0.093799 | 0         |  |  |
|        |      | Shiraz-77T | 1225 | 0        | -0.117922 |  |  |
|        |      | Shiraz-18T | 1434 | 0.244465 | 0         |  |  |
|        |      | Shiraz-22T | 1549 | 0        | -0.319623 |  |  |
|        |      | Shiraz-25T | 1698 | 0.21835  | 0         |  |  |
|        |      | Shiraz-28T | 1735 | 0.350744 | 0         |  |  |
|        |      | Shiraz-29T | 1778 | 0.120767 | 0         |  |  |
|        |      | Shiraz-38T | 1951 | 0.250891 | 0         |  |  |
|        |      | Shiraz-53T | 2078 | 0.287202 | 0         |  |  |
|        |      | Shiraz-58T | 2159 | 0        | -0.219521 |  |  |
|        |      | Shiraz-71T | 2238 | 0.603631 | 0         |  |  |
|        |      | Shiraz-71T | 2239 | 0.310785 | 0         |  |  |
|        |      | Shiraz-3T  | 90   | 0.219276 | 0         |  |  |
|        |      | Shiraz-4T  | 253  | 0.372918 | 0         |  |  |
|        |      | Shiraz-36T | 378  | 0.179558 | 0         |  |  |
|        |      | Shiraz-42T | 454  | 0.145717 | 0         |  |  |

|         |      |            |      |          |           |  |  |
|---------|------|------------|------|----------|-----------|--|--|
|         |      | Shiraz-46T | 943  | 0.093799 | 0         |  |  |
|         |      | Shiraz-77T | 1225 | 0        | -0.117922 |  |  |
|         |      | Shiraz-18T | 1434 | 0.244465 | 0         |  |  |
|         |      | Shiraz-22T | 1549 | 0        | -0.319623 |  |  |
|         |      | Shiraz-25T | 1698 | 0.21835  | 0         |  |  |
|         |      | Shiraz-28T | 1735 | 0.350744 | 0         |  |  |
|         |      | Shiraz-29T | 1778 | 0.120767 | 0         |  |  |
|         |      | Shiraz-38T | 1951 | 0.250891 | 0         |  |  |
|         |      | Shiraz-53T | 2078 | 0.287202 | 0         |  |  |
|         |      | Shiraz-58T | 2159 | 0        | -0.219521 |  |  |
|         |      | Shiraz-71T | 2238 | 0.603631 | 0         |  |  |
|         |      | Shiraz-71T | 2239 | 0.310785 | 0         |  |  |
|         |      | Shiraz-3T  | 90   | 0.219276 | 0         |  |  |
|         |      | Shiraz-4T  | 253  | 0.372918 | 0         |  |  |
|         |      | Shiraz-36T | 378  | 0.179558 | 0         |  |  |
|         |      | Shiraz-42T | 454  | 0.145717 | 0         |  |  |
|         |      | Shiraz-46T | 943  | 0.093799 | 0         |  |  |
|         |      | Shiraz-77T | 1225 | 0        | -0.117922 |  |  |
|         |      | Shiraz-18T | 1434 | 0.244465 | 0         |  |  |
|         |      | Shiraz-22T | 1549 | 0        | -0.319623 |  |  |
|         |      | Shiraz-25T | 1698 | 0.21835  | 0         |  |  |
|         |      | Shiraz-28T | 1735 | 0.350744 | 0         |  |  |
|         |      | Shiraz-29T | 1778 | 0.120767 | 0         |  |  |
|         |      | Shiraz-38T | 1951 | 0.250891 | 0         |  |  |
|         |      | Shiraz-53T | 2078 | 0.287202 | 0         |  |  |
|         |      | Shiraz-58T | 2159 | 0        | -0.219521 |  |  |
|         |      | Shiraz-71T | 2238 | 0.603631 | 0         |  |  |
|         |      | Shiraz-71T | 2239 | 0.310785 | 0         |  |  |
| TMSB15A | chrX | Shiraz-3T  | 242  | 0        | -0.336434 |  |  |
|         |      | Shiraz-4T  | 261  | 0        | -0.336249 |  |  |
|         |      | Shiraz-16T | 295  | 0.591657 | 0         |  |  |
|         |      | Shiraz-36T | 433  | 0        | -0.803961 |  |  |
|         |      | Shiraz-44T | 899  | 0        | -1.09697  |  |  |
|         |      | Shiraz-49T | 1170 | 0        | -0.967436 |  |  |
|         |      | Shiraz-18T | 1457 | 0.643204 | 0         |  |  |
|         |      | Shiraz-22T | 1673 | 0.611783 | 0         |  |  |
|         |      | Shiraz-25T | 1719 | 0.472955 | 0         |  |  |
|         |      | Shiraz-28T | 1762 | 0.562311 | 0         |  |  |
|         |      | Shiraz-29T | 1801 | 0.815343 | 0         |  |  |
|         |      | Shiraz-32T | 1870 | 0.729766 | 0         |  |  |
|         |      | Shiraz-35T | 1933 | 0.488535 | 0         |  |  |
|         |      | Shiraz-58T | 2223 | 0.833364 | 0         |  |  |
|         |      | Shiraz-71T | 2263 | 0.975531 | 0         |  |  |
|         |      | Shiraz-3T  | 242  | 0        | -0.336434 |  |  |
|         |      | Shiraz-4T  | 261  | 0        | -0.336249 |  |  |
|         |      | Shiraz-16T | 295  | 0.591657 | 0         |  |  |
|         |      | Shiraz-36T | 433  | 0        | -0.803961 |  |  |

|         |      |            |      |          |           |  |  |
|---------|------|------------|------|----------|-----------|--|--|
|         |      | Shiraz-44T | 899  | 0        | -1.09697  |  |  |
|         |      | Shiraz-49T | 1170 | 0        | -0.967436 |  |  |
|         |      | Shiraz-18T | 1457 | 0.643204 | 0         |  |  |
|         |      | Shiraz-22T | 1673 | 0.611783 | 0         |  |  |
|         |      | Shiraz-25T | 1719 | 0.472955 | 0         |  |  |
|         |      | Shiraz-28T | 1762 | 0.562311 | 0         |  |  |
|         |      | Shiraz-29T | 1801 | 0.815343 | 0         |  |  |
|         |      | Shiraz-32T | 1870 | 0.729766 | 0         |  |  |
|         |      | Shiraz-35T | 1933 | 0.488535 | 0         |  |  |
|         |      | Shiraz-58T | 2223 | 0.833364 | 0         |  |  |
|         |      | Shiraz-71T | 2263 | 0.975531 | 0         |  |  |
|         |      | Shiraz-3T  | 242  | 0        | -0.336434 |  |  |
|         |      | Shiraz-4T  | 261  | 0        | -0.336249 |  |  |
|         |      | Shiraz-16T | 295  | 0.591657 | 0         |  |  |
|         |      | Shiraz-36T | 433  | 0        | -0.803961 |  |  |
|         |      | Shiraz-44T | 899  | 0        | -1.09697  |  |  |
|         |      | Shiraz-49T | 1170 | 0        | -0.967436 |  |  |
|         |      | Shiraz-18T | 1457 | 0.643204 | 0         |  |  |
|         |      | Shiraz-22T | 1673 | 0.611783 | 0         |  |  |
|         |      | Shiraz-25T | 1719 | 0.472955 | 0         |  |  |
|         |      | Shiraz-28T | 1762 | 0.562311 | 0         |  |  |
|         |      | Shiraz-29T | 1801 | 0.815343 | 0         |  |  |
|         |      | Shiraz-32T | 1870 | 0.729766 | 0         |  |  |
|         |      | Shiraz-35T | 1933 | 0.488535 | 0         |  |  |
|         |      | Shiraz-58T | 2223 | 0.833364 | 0         |  |  |
|         |      | Shiraz-71T | 2263 | 0.975531 | 0         |  |  |
| TMSB15B | chrX | Shiraz-3T  | 242  | 0        | -0.336434 |  |  |
|         |      | Shiraz-4T  | 261  | 0        | -0.336249 |  |  |
|         |      | Shiraz-16T | 295  | 0.591657 | 0         |  |  |
|         |      | Shiraz-36T | 433  | 0        | -0.803961 |  |  |
|         |      | Shiraz-44T | 899  | 0        | -1.09697  |  |  |
|         |      | Shiraz-49T | 1170 | 0        | -0.967436 |  |  |
|         |      | Shiraz-18T | 1457 | 0.643204 | 0         |  |  |
|         |      | Shiraz-22T | 1673 | 0.611783 | 0         |  |  |
|         |      | Shiraz-25T | 1719 | 0.472955 | 0         |  |  |
|         |      | Shiraz-28T | 1762 | 0.562311 | 0         |  |  |
|         |      | Shiraz-29T | 1801 | 0.815343 | 0         |  |  |
|         |      | Shiraz-32T | 1870 | 0.729766 | 0         |  |  |
|         |      | Shiraz-35T | 1933 | 0.488535 | 0         |  |  |
|         |      | Shiraz-58T | 2223 | 0.833364 | 0         |  |  |
|         |      | Shiraz-71T | 2263 | 0.975531 | 0         |  |  |
|         |      | Shiraz-3T  | 242  | 0        | -0.336434 |  |  |
|         |      | Shiraz-4T  | 261  | 0        | -0.336249 |  |  |
|         |      | Shiraz-16T | 295  | 0.591657 | 0         |  |  |
|         |      | Shiraz-36T | 433  | 0        | -0.803961 |  |  |
|         |      | Shiraz-44T | 899  | 0        | -1.09697  |  |  |
|         |      | Shiraz-49T | 1170 | 0        | -0.967436 |  |  |



|        |      |            |      |          |           |  |  |
|--------|------|------------|------|----------|-----------|--|--|
|        |      | Shiraz-18T | 1457 | 0.643204 | 0         |  |  |
|        |      | Shiraz-22T | 1673 | 0.611783 | 0         |  |  |
|        |      | Shiraz-25T | 1719 | 0.472955 | 0         |  |  |
|        |      | Shiraz-28T | 1762 | 0.562311 | 0         |  |  |
|        |      | Shiraz-29T | 1801 | 0.815343 | 0         |  |  |
|        |      | Shiraz-32T | 1870 | 0.729766 | 0         |  |  |
|        |      | Shiraz-35T | 1933 | 0.488535 | 0         |  |  |
|        |      | Shiraz-58T | 2223 | 0.833364 | 0         |  |  |
|        |      | Shiraz-71T | 2263 | 0.975531 | 0         |  |  |
|        |      | Shiraz-3T  | 242  | 0        | -0.336434 |  |  |
|        |      | Shiraz-4T  | 261  | 0        | -0.336249 |  |  |
|        |      | Shiraz-16T | 295  | 0.591657 | 0         |  |  |
|        |      | Shiraz-36T | 433  | 0        | -0.803961 |  |  |
|        |      | Shiraz-44T | 899  | 0        | -1.09697  |  |  |
|        |      | Shiraz-49T | 1170 | 0        | -0.967436 |  |  |
|        |      | Shiraz-18T | 1457 | 0.643204 | 0         |  |  |
|        |      | Shiraz-22T | 1673 | 0.611783 | 0         |  |  |
|        |      | Shiraz-25T | 1719 | 0.472955 | 0         |  |  |
|        |      | Shiraz-28T | 1762 | 0.562311 | 0         |  |  |
|        |      | Shiraz-29T | 1801 | 0.815343 | 0         |  |  |
|        |      | Shiraz-32T | 1870 | 0.729766 | 0         |  |  |
|        |      | Shiraz-35T | 1933 | 0.488535 | 0         |  |  |
|        |      | Shiraz-58T | 2223 | 0.833364 | 0         |  |  |
|        |      | Shiraz-71T | 2263 | 0.975531 | 0         |  |  |
| TMSB4X | chrX | Shiraz-3T  | 235  | 0        | -0.28401  |  |  |
|        |      | Shiraz-4T  | 260  | 0        | -0.324128 |  |  |
|        |      | Shiraz-16T | 294  | 0.655804 | 0         |  |  |
|        |      | Shiraz-36T | 431  | 0        | -0.78035  |  |  |
|        |      | Shiraz-44T | 891  | 0        | -0.954044 |  |  |
|        |      | Shiraz-49T | 1166 | 0        | -0.917235 |  |  |
|        |      | Shiraz-9T  | 1368 | 0.199713 | 0         |  |  |
|        |      | Shiraz-18T | 1455 | 0        | -0.186773 |  |  |
|        |      | Shiraz-22T | 1669 | 0.695915 | 0         |  |  |
|        |      | Shiraz-25T | 1717 | 0.420447 | 0         |  |  |
|        |      | Shiraz-28T | 1760 | 0.538181 | 0         |  |  |
|        |      | Shiraz-29T | 1800 | 0.672527 | 0         |  |  |
|        |      | Shiraz-32T | 1869 | 0.776805 | 0         |  |  |
|        |      | Shiraz-35T | 1932 | 0.507141 | 0         |  |  |
|        |      | Shiraz-40T | 2051 | 0.098506 | 0         |  |  |
|        |      | Shiraz-58T | 2221 | 0.871948 | 0         |  |  |
|        |      | Shiraz-71T | 2260 | 0.68394  | 0         |  |  |
|        |      | Shiraz-71T | 2261 | 0.508399 | 0         |  |  |
|        |      | Shiraz-3T  | 235  | 0        | -0.28401  |  |  |
|        |      | Shiraz-4T  | 260  | 0        | -0.324128 |  |  |
|        |      | Shiraz-16T | 294  | 0.655804 | 0         |  |  |
|        |      | Shiraz-36T | 431  | 0        | -0.78035  |  |  |
|        |      | Shiraz-44T | 891  | 0        | -0.954044 |  |  |

|       |      |            |      |          |           |  |  |
|-------|------|------------|------|----------|-----------|--|--|
|       |      | Shiraz-49T | 1166 | 0        | -0.917235 |  |  |
|       |      | Shiraz-9T  | 1368 | 0.199713 | 0         |  |  |
|       |      | Shiraz-18T | 1455 | 0        | -0.186773 |  |  |
|       |      | Shiraz-22T | 1669 | 0.695915 | 0         |  |  |
|       |      | Shiraz-25T | 1717 | 0.420447 | 0         |  |  |
|       |      | Shiraz-28T | 1760 | 0.538181 | 0         |  |  |
|       |      | Shiraz-29T | 1800 | 0.672527 | 0         |  |  |
|       |      | Shiraz-32T | 1869 | 0.776805 | 0         |  |  |
|       |      | Shiraz-35T | 1932 | 0.507141 | 0         |  |  |
|       |      | Shiraz-40T | 2051 | 0.098506 | 0         |  |  |
|       |      | Shiraz-58T | 2221 | 0.871948 | 0         |  |  |
|       |      | Shiraz-71T | 2260 | 0.68394  | 0         |  |  |
|       |      | Shiraz-71T | 2261 | 0.508399 | 0         |  |  |
|       |      | Shiraz-3T  | 235  | 0        | -0.28401  |  |  |
|       |      | Shiraz-4T  | 260  | 0        | -0.324128 |  |  |
|       |      | Shiraz-16T | 294  | 0.655804 | 0         |  |  |
|       |      | Shiraz-36T | 431  | 0        | -0.78035  |  |  |
|       |      | Shiraz-44T | 891  | 0        | -0.954044 |  |  |
|       |      | Shiraz-49T | 1166 | 0        | -0.917235 |  |  |
|       |      | Shiraz-9T  | 1368 | 0.199713 | 0         |  |  |
|       |      | Shiraz-18T | 1455 | 0        | -0.186773 |  |  |
|       |      | Shiraz-22T | 1669 | 0.695915 | 0         |  |  |
|       |      | Shiraz-25T | 1717 | 0.420447 | 0         |  |  |
|       |      | Shiraz-28T | 1760 | 0.538181 | 0         |  |  |
|       |      | Shiraz-29T | 1800 | 0.672527 | 0         |  |  |
|       |      | Shiraz-32T | 1869 | 0.776805 | 0         |  |  |
|       |      | Shiraz-35T | 1932 | 0.507141 | 0         |  |  |
|       |      | Shiraz-40T | 2051 | 0.098506 | 0         |  |  |
|       |      | Shiraz-58T | 2221 | 0.871948 | 0         |  |  |
|       |      | Shiraz-71T | 2260 | 0.68394  | 0         |  |  |
|       |      | Shiraz-71T | 2261 | 0.508399 | 0         |  |  |
| TMUB1 | chr7 | Shiraz-3T  | 90   | 0.219276 | 0         |  |  |
|       |      | Shiraz-3T  | 90   | 0.219276 | 0         |  |  |
|       |      | Shiraz-3T  | 99   | 0.454766 | 0         |  |  |
|       |      | Shiraz-3T  | 99   | 0.454766 | 0         |  |  |
|       |      | Shiraz-4T  | 253  | 0.372918 | 0         |  |  |
|       |      | Shiraz-4T  | 253  | 0.372918 | 0         |  |  |
|       |      | Shiraz-36T | 378  | 0.179558 | 0         |  |  |
|       |      | Shiraz-36T | 378  | 0.179558 | 0         |  |  |
|       |      | Shiraz-44T | 646  | 0.471276 | 0         |  |  |
|       |      | Shiraz-44T | 646  | 0.471276 | 0         |  |  |
|       |      | Shiraz-44T | 647  | 1.496173 | 0         |  |  |
|       |      | Shiraz-44T | 647  | 1.496173 | 0         |  |  |
|       |      | Shiraz-46T | 943  | 0.093799 | 0         |  |  |
|       |      | Shiraz-46T | 943  | 0.093799 | 0         |  |  |
|       |      | Shiraz-9T  | 1325 | 0.221899 | 0         |  |  |
|       |      | Shiraz-9T  | 1325 | 0.221899 | 0         |  |  |

|  |  |            |      |          |           |  |  |
|--|--|------------|------|----------|-----------|--|--|
|  |  | Shiraz-18T | 1434 | 0.244465 | 0         |  |  |
|  |  | Shiraz-18T | 1434 | 0.244465 | 0         |  |  |
|  |  | Shiraz-22T | 1555 | 0.427999 | 0         |  |  |
|  |  | Shiraz-22T | 1555 | 0.427999 | 0         |  |  |
|  |  | Shiraz-25T | 1698 | 0.21835  | 0         |  |  |
|  |  | Shiraz-25T | 1698 | 0.21835  | 0         |  |  |
|  |  | Shiraz-28T | 1735 | 0.350744 | 0         |  |  |
|  |  | Shiraz-28T | 1735 | 0.350744 | 0         |  |  |
|  |  | Shiraz-29T | 1778 | 0.120767 | 0         |  |  |
|  |  | Shiraz-29T | 1778 | 0.120767 | 0         |  |  |
|  |  | Shiraz-32T | 1833 | 0.551336 | 0         |  |  |
|  |  | Shiraz-32T | 1833 | 0.551336 | 0         |  |  |
|  |  | Shiraz-38T | 1951 | 0.250891 | 0         |  |  |
|  |  | Shiraz-38T | 1951 | 0.250891 | 0         |  |  |
|  |  | Shiraz-38T | 1952 | 0        | -0.163211 |  |  |
|  |  | Shiraz-38T | 1952 | 0        | -0.163211 |  |  |
|  |  | Shiraz-53T | 2078 | 0.287202 | 0         |  |  |
|  |  | Shiraz-53T | 2078 | 0.287202 | 0         |  |  |
|  |  | Shiraz-58T | 2162 | 0.221505 | 0         |  |  |
|  |  | Shiraz-58T | 2162 | 0.221505 | 0         |  |  |
|  |  | Shiraz-71T | 2238 | 0.603631 | 0         |  |  |
|  |  | Shiraz-71T | 2238 | 0.603631 | 0         |  |  |
|  |  | Shiraz-3T  | 90   | 0.219276 | 0         |  |  |
|  |  | Shiraz-3T  | 90   | 0.219276 | 0         |  |  |
|  |  | Shiraz-3T  | 99   | 0.454766 | 0         |  |  |
|  |  | Shiraz-3T  | 99   | 0.454766 | 0         |  |  |
|  |  | Shiraz-4T  | 253  | 0.372918 | 0         |  |  |
|  |  | Shiraz-4T  | 253  | 0.372918 | 0         |  |  |
|  |  | Shiraz-36T | 378  | 0.179558 | 0         |  |  |
|  |  | Shiraz-36T | 378  | 0.179558 | 0         |  |  |
|  |  | Shiraz-44T | 646  | 0.471276 | 0         |  |  |
|  |  | Shiraz-44T | 646  | 0.471276 | 0         |  |  |
|  |  | Shiraz-44T | 647  | 1.496173 | 0         |  |  |
|  |  | Shiraz-44T | 647  | 1.496173 | 0         |  |  |
|  |  | Shiraz-46T | 943  | 0.093799 | 0         |  |  |
|  |  | Shiraz-46T | 943  | 0.093799 | 0         |  |  |
|  |  | Shiraz-9T  | 1325 | 0.221899 | 0         |  |  |
|  |  | Shiraz-9T  | 1325 | 0.221899 | 0         |  |  |
|  |  | Shiraz-18T | 1434 | 0.244465 | 0         |  |  |
|  |  | Shiraz-18T | 1434 | 0.244465 | 0         |  |  |
|  |  | Shiraz-22T | 1555 | 0.427999 | 0         |  |  |
|  |  | Shiraz-22T | 1555 | 0.427999 | 0         |  |  |
|  |  | Shiraz-25T | 1698 | 0.21835  | 0         |  |  |
|  |  | Shiraz-25T | 1698 | 0.21835  | 0         |  |  |
|  |  | Shiraz-28T | 1735 | 0.350744 | 0         |  |  |
|  |  | Shiraz-28T | 1735 | 0.350744 | 0         |  |  |
|  |  | Shiraz-29T | 1778 | 0.120767 | 0         |  |  |

|  |  |            |      |          |           |  |  |
|--|--|------------|------|----------|-----------|--|--|
|  |  | Shiraz-29T | 1778 | 0.120767 | 0         |  |  |
|  |  | Shiraz-32T | 1833 | 0.551336 | 0         |  |  |
|  |  | Shiraz-32T | 1833 | 0.551336 | 0         |  |  |
|  |  | Shiraz-38T | 1951 | 0.250891 | 0         |  |  |
|  |  | Shiraz-38T | 1951 | 0.250891 | 0         |  |  |
|  |  | Shiraz-38T | 1952 | 0        | -0.163211 |  |  |
|  |  | Shiraz-38T | 1952 | 0        | -0.163211 |  |  |
|  |  | Shiraz-53T | 2078 | 0.287202 | 0         |  |  |
|  |  | Shiraz-53T | 2078 | 0.287202 | 0         |  |  |
|  |  | Shiraz-58T | 2162 | 0.221505 | 0         |  |  |
|  |  | Shiraz-58T | 2162 | 0.221505 | 0         |  |  |
|  |  | Shiraz-71T | 2238 | 0.603631 | 0         |  |  |
|  |  | Shiraz-71T | 2238 | 0.603631 | 0         |  |  |
|  |  | Shiraz-3T  | 90   | 0.219276 | 0         |  |  |
|  |  | Shiraz-3T  | 90   | 0.219276 | 0         |  |  |
|  |  | Shiraz-3T  | 99   | 0.454766 | 0         |  |  |
|  |  | Shiraz-3T  | 99   | 0.454766 | 0         |  |  |
|  |  | Shiraz-4T  | 253  | 0.372918 | 0         |  |  |
|  |  | Shiraz-4T  | 253  | 0.372918 | 0         |  |  |
|  |  | Shiraz-36T | 378  | 0.179558 | 0         |  |  |
|  |  | Shiraz-36T | 378  | 0.179558 | 0         |  |  |
|  |  | Shiraz-44T | 646  | 0.471276 | 0         |  |  |
|  |  | Shiraz-44T | 646  | 0.471276 | 0         |  |  |
|  |  | Shiraz-44T | 647  | 1.496173 | 0         |  |  |
|  |  | Shiraz-44T | 647  | 1.496173 | 0         |  |  |
|  |  | Shiraz-46T | 943  | 0.093799 | 0         |  |  |
|  |  | Shiraz-46T | 943  | 0.093799 | 0         |  |  |
|  |  | Shiraz-9T  | 1325 | 0.221899 | 0         |  |  |
|  |  | Shiraz-9T  | 1325 | 0.221899 | 0         |  |  |
|  |  | Shiraz-18T | 1434 | 0.244465 | 0         |  |  |
|  |  | Shiraz-18T | 1434 | 0.244465 | 0         |  |  |
|  |  | Shiraz-22T | 1555 | 0.427999 | 0         |  |  |
|  |  | Shiraz-22T | 1555 | 0.427999 | 0         |  |  |
|  |  | Shiraz-25T | 1698 | 0.21835  | 0         |  |  |
|  |  | Shiraz-25T | 1698 | 0.21835  | 0         |  |  |
|  |  | Shiraz-28T | 1735 | 0.350744 | 0         |  |  |
|  |  | Shiraz-28T | 1735 | 0.350744 | 0         |  |  |
|  |  | Shiraz-29T | 1778 | 0.120767 | 0         |  |  |
|  |  | Shiraz-29T | 1778 | 0.120767 | 0         |  |  |
|  |  | Shiraz-32T | 1833 | 0.551336 | 0         |  |  |
|  |  | Shiraz-32T | 1833 | 0.551336 | 0         |  |  |
|  |  | Shiraz-38T | 1951 | 0.250891 | 0         |  |  |
|  |  | Shiraz-38T | 1951 | 0.250891 | 0         |  |  |
|  |  | Shiraz-38T | 1952 | 0        | -0.163211 |  |  |
|  |  | Shiraz-38T | 1952 | 0        | -0.163211 |  |  |
|  |  | Shiraz-53T | 2078 | 0.287202 | 0         |  |  |
|  |  | Shiraz-53T | 2078 | 0.287202 | 0         |  |  |

|      |      |            |      |          |           |  |
|------|------|------------|------|----------|-----------|--|
|      |      | Shiraz-58T | 2162 | 0.221505 | 0         |  |
|      |      | Shiraz-58T | 2162 | 0.221505 | 0         |  |
|      |      | Shiraz-71T | 2238 | 0.603631 | 0         |  |
|      |      | Shiraz-71T | 2238 | 0.603631 | 0         |  |
| TNMD | chrX | Shiraz-3T  | 242  | 0        | -0.336434 |  |
|      |      | Shiraz-4T  | 261  | 0        | -0.336249 |  |
|      |      | Shiraz-16T | 295  | 0.591657 | 0         |  |
|      |      | Shiraz-36T | 433  | 0        | -0.803961 |  |
|      |      | Shiraz-44T | 899  | 0        | -1.09697  |  |
|      |      | Shiraz-49T | 1170 | 0        | -0.967436 |  |
|      |      | Shiraz-18T | 1457 | 0.643204 | 0         |  |
|      |      | Shiraz-22T | 1673 | 0.611783 | 0         |  |
|      |      | Shiraz-25T | 1719 | 0.472955 | 0         |  |
|      |      | Shiraz-28T | 1762 | 0.562311 | 0         |  |
|      |      | Shiraz-29T | 1801 | 0.815343 | 0         |  |
|      |      | Shiraz-32T | 1870 | 0.729766 | 0         |  |
|      |      | Shiraz-35T | 1933 | 0.488535 | 0         |  |
|      |      | Shiraz-58T | 2223 | 0.833364 | 0         |  |
|      |      | Shiraz-71T | 2263 | 0.975531 | 0         |  |
|      |      | Shiraz-3T  | 242  | 0        | -0.336434 |  |
|      |      | Shiraz-4T  | 261  | 0        | -0.336249 |  |
|      |      | Shiraz-16T | 295  | 0.591657 | 0         |  |
|      |      | Shiraz-36T | 433  | 0        | -0.803961 |  |
|      |      | Shiraz-44T | 899  | 0        | -1.09697  |  |
|      |      | Shiraz-49T | 1170 | 0        | -0.967436 |  |
|      |      | Shiraz-18T | 1457 | 0.643204 | 0         |  |
|      |      | Shiraz-22T | 1673 | 0.611783 | 0         |  |
|      |      | Shiraz-25T | 1719 | 0.472955 | 0         |  |
|      |      | Shiraz-28T | 1762 | 0.562311 | 0         |  |
|      |      | Shiraz-29T | 1801 | 0.815343 | 0         |  |
|      |      | Shiraz-32T | 1870 | 0.729766 | 0         |  |
|      |      | Shiraz-35T | 1933 | 0.488535 | 0         |  |
|      |      | Shiraz-58T | 2223 | 0.833364 | 0         |  |
|      |      | Shiraz-71T | 2263 | 0.975531 | 0         |  |
|      |      | Shiraz-3T  | 242  | 0        | -0.336434 |  |
|      |      | Shiraz-4T  | 261  | 0        | -0.336249 |  |
|      |      | Shiraz-16T | 295  | 0.591657 | 0         |  |
|      |      | Shiraz-36T | 433  | 0        | -0.803961 |  |
|      |      | Shiraz-44T | 899  | 0        | -1.09697  |  |
|      |      | Shiraz-49T | 1170 | 0        | -0.967436 |  |
|      |      | Shiraz-18T | 1457 | 0.643204 | 0         |  |
|      |      | Shiraz-22T | 1673 | 0.611783 | 0         |  |
|      |      | Shiraz-25T | 1719 | 0.472955 | 0         |  |
|      |      | Shiraz-28T | 1762 | 0.562311 | 0         |  |
|      |      | Shiraz-29T | 1801 | 0.815343 | 0         |  |
|      |      | Shiraz-32T | 1870 | 0.729766 | 0         |  |
|      |      | Shiraz-35T | 1933 | 0.488535 | 0         |  |

|       |      |            |      |          |           |  |
|-------|------|------------|------|----------|-----------|--|
|       |      | Shiraz-58T | 2223 | 0.833364 | 0         |  |
|       |      | Shiraz-71T | 2263 | 0.975531 | 0         |  |
| TNPO3 | chr7 | Shiraz-3T  | 90   | 0.219276 | 0         |  |
|       |      | Shiraz-3T  | 96   | 0.428308 | 0         |  |
|       |      | Shiraz-4T  | 253  | 0.372918 | 0         |  |
|       |      | Shiraz-31T | 317  | 0.204382 | 0         |  |
|       |      | Shiraz-36T | 378  | 0.179558 | 0         |  |
|       |      | Shiraz-44T | 642  | 0.408617 | 0         |  |
|       |      | Shiraz-46T | 943  | 0.093799 | 0         |  |
|       |      | Shiraz-47T | 1032 | 0.171484 | 0         |  |
|       |      | Shiraz-77T | 1225 | 0        | -0.117922 |  |
|       |      | Shiraz-77T | 1229 | 0.051661 | 0         |  |
|       |      | Shiraz-9T  | 1325 | 0.221899 | 0         |  |
|       |      | Shiraz-18T | 1434 | 0.244465 | 0         |  |
|       |      | Shiraz-25T | 1698 | 0.21835  | 0         |  |
|       |      | Shiraz-28T | 1735 | 0.350744 | 0         |  |
|       |      | Shiraz-29T | 1778 | 0.120767 | 0         |  |
|       |      | Shiraz-32T | 1833 | 0.551336 | 0         |  |
|       |      | Shiraz-38T | 1951 | 0.250891 | 0         |  |
|       |      | Shiraz-53T | 2078 | 0.287202 | 0         |  |
|       |      | Shiraz-71T | 2238 | 0.603631 | 0         |  |
|       |      | Shiraz-3T  | 90   | 0.219276 | 0         |  |
|       |      | Shiraz-3T  | 96   | 0.428308 | 0         |  |
|       |      | Shiraz-4T  | 253  | 0.372918 | 0         |  |
|       |      | Shiraz-31T | 317  | 0.204382 | 0         |  |
|       |      | Shiraz-36T | 378  | 0.179558 | 0         |  |
|       |      | Shiraz-44T | 642  | 0.408617 | 0         |  |
|       |      | Shiraz-46T | 943  | 0.093799 | 0         |  |
|       |      | Shiraz-47T | 1032 | 0.171484 | 0         |  |
|       |      | Shiraz-77T | 1225 | 0        | -0.117922 |  |
|       |      | Shiraz-77T | 1229 | 0.051661 | 0         |  |
|       |      | Shiraz-9T  | 1325 | 0.221899 | 0         |  |
|       |      | Shiraz-18T | 1434 | 0.244465 | 0         |  |
|       |      | Shiraz-25T | 1698 | 0.21835  | 0         |  |
|       |      | Shiraz-28T | 1735 | 0.350744 | 0         |  |
|       |      | Shiraz-29T | 1778 | 0.120767 | 0         |  |
|       |      | Shiraz-32T | 1833 | 0.551336 | 0         |  |
|       |      | Shiraz-38T | 1951 | 0.250891 | 0         |  |
|       |      | Shiraz-53T | 2078 | 0.287202 | 0         |  |
|       |      | Shiraz-71T | 2238 | 0.603631 | 0         |  |
|       |      | Shiraz-3T  | 90   | 0.219276 | 0         |  |
|       |      | Shiraz-3T  | 96   | 0.428308 | 0         |  |
|       |      | Shiraz-4T  | 253  | 0.372918 | 0         |  |
|       |      | Shiraz-31T | 317  | 0.204382 | 0         |  |
|       |      | Shiraz-36T | 378  | 0.179558 | 0         |  |
|       |      | Shiraz-44T | 642  | 0.408617 | 0         |  |
|       |      | Shiraz-46T | 943  | 0.093799 | 0         |  |

|       |      |            |      |          |           |  |  |
|-------|------|------------|------|----------|-----------|--|--|
|       |      | Shiraz-47T | 1032 | 0.171484 | 0         |  |  |
|       |      | Shiraz-77T | 1225 | 0        | -0.117922 |  |  |
|       |      | Shiraz-77T | 1229 | 0.051661 | 0         |  |  |
|       |      | Shiraz-9T  | 1325 | 0.221899 | 0         |  |  |
|       |      | Shiraz-18T | 1434 | 0.244465 | 0         |  |  |
|       |      | Shiraz-25T | 1698 | 0.21835  | 0         |  |  |
|       |      | Shiraz-28T | 1735 | 0.350744 | 0         |  |  |
|       |      | Shiraz-29T | 1778 | 0.120767 | 0         |  |  |
|       |      | Shiraz-32T | 1833 | 0.551336 | 0         |  |  |
|       |      | Shiraz-38T | 1951 | 0.250891 | 0         |  |  |
|       |      | Shiraz-53T | 2078 | 0.287202 | 0         |  |  |
|       |      | Shiraz-71T | 2238 | 0.603631 | 0         |  |  |
| TNS3  | chr7 | Shiraz-3T  | 87   | 0.198593 | 0         |  |  |
|       |      | Shiraz-4T  | 252  | 0.192083 | 0         |  |  |
|       |      | Shiraz-36T | 376  | 0.159952 | 0         |  |  |
|       |      | Shiraz-46T | 942  | 0.069143 | 0         |  |  |
|       |      | Shiraz-18T | 1433 | 0.250973 | 0         |  |  |
|       |      | Shiraz-25T | 1697 | 0.21945  | 0         |  |  |
|       |      | Shiraz-28T | 1734 | 0.362882 | 0         |  |  |
|       |      | Shiraz-29T | 1777 | 0.156747 | 0         |  |  |
|       |      | Shiraz-38T | 1950 | 0.265916 | 0         |  |  |
|       |      | Shiraz-71T | 2236 | 0.320072 | 0         |  |  |
|       |      | Shiraz-3T  | 87   | 0.198593 | 0         |  |  |
|       |      | Shiraz-4T  | 252  | 0.192083 | 0         |  |  |
|       |      | Shiraz-36T | 376  | 0.159952 | 0         |  |  |
|       |      | Shiraz-46T | 942  | 0.069143 | 0         |  |  |
|       |      | Shiraz-18T | 1433 | 0.250973 | 0         |  |  |
|       |      | Shiraz-25T | 1697 | 0.21945  | 0         |  |  |
|       |      | Shiraz-28T | 1734 | 0.362882 | 0         |  |  |
|       |      | Shiraz-29T | 1777 | 0.156747 | 0         |  |  |
|       |      | Shiraz-38T | 1950 | 0.265916 | 0         |  |  |
|       |      | Shiraz-71T | 2236 | 0.320072 | 0         |  |  |
|       |      | Shiraz-3T  | 87   | 0.198593 | 0         |  |  |
|       |      | Shiraz-4T  | 252  | 0.192083 | 0         |  |  |
|       |      | Shiraz-36T | 376  | 0.159952 | 0         |  |  |
|       |      | Shiraz-46T | 942  | 0.069143 | 0         |  |  |
|       |      | Shiraz-18T | 1433 | 0.250973 | 0         |  |  |
|       |      | Shiraz-25T | 1697 | 0.21945  | 0         |  |  |
|       |      | Shiraz-28T | 1734 | 0.362882 | 0         |  |  |
|       |      | Shiraz-29T | 1777 | 0.156747 | 0         |  |  |
|       |      | Shiraz-38T | 1950 | 0.265916 | 0         |  |  |
|       |      | Shiraz-71T | 2236 | 0.320072 | 0         |  |  |
| TOMM7 | chr7 | Shiraz-3T  | 87   | 0.198593 | 0         |  |  |
|       |      | Shiraz-4T  | 252  | 0.192083 | 0         |  |  |
|       |      | Shiraz-36T | 376  | 0.159952 | 0         |  |  |
|       |      | Shiraz-46T | 942  | 0.069143 | 0         |  |  |
|       |      | Shiraz-18T | 1433 | 0.250973 | 0         |  |  |

|         |      |            |      |          |           |  |
|---------|------|------------|------|----------|-----------|--|
|         |      | Shiraz-25T | 1697 | 0.21945  | 0         |  |
|         |      | Shiraz-28T | 1734 | 0.362882 | 0         |  |
|         |      | Shiraz-29T | 1777 | 0.156747 | 0         |  |
|         |      | Shiraz-38T | 1950 | 0.265916 | 0         |  |
|         |      | Shiraz-71T | 2236 | 0.320072 | 0         |  |
|         |      | Shiraz-3T  | 87   | 0.198593 | 0         |  |
|         |      | Shiraz-4T  | 252  | 0.192083 | 0         |  |
|         |      | Shiraz-36T | 376  | 0.159952 | 0         |  |
|         |      | Shiraz-46T | 942  | 0.069143 | 0         |  |
|         |      | Shiraz-18T | 1433 | 0.250973 | 0         |  |
|         |      | Shiraz-25T | 1697 | 0.21945  | 0         |  |
|         |      | Shiraz-28T | 1734 | 0.362882 | 0         |  |
|         |      | Shiraz-29T | 1777 | 0.156747 | 0         |  |
|         |      | Shiraz-38T | 1950 | 0.265916 | 0         |  |
|         |      | Shiraz-71T | 2236 | 0.320072 | 0         |  |
|         |      | Shiraz-3T  | 87   | 0.198593 | 0         |  |
|         |      | Shiraz-4T  | 252  | 0.192083 | 0         |  |
|         |      | Shiraz-36T | 376  | 0.159952 | 0         |  |
|         |      | Shiraz-46T | 942  | 0.069143 | 0         |  |
|         |      | Shiraz-18T | 1433 | 0.250973 | 0         |  |
|         |      | Shiraz-25T | 1697 | 0.21945  | 0         |  |
|         |      | Shiraz-28T | 1734 | 0.362882 | 0         |  |
|         |      | Shiraz-29T | 1777 | 0.156747 | 0         |  |
|         |      | Shiraz-38T | 1950 | 0.265916 | 0         |  |
|         |      | Shiraz-71T | 2236 | 0.320072 | 0         |  |
| TP53TG1 | chr7 | Shiraz-3T  | 90   | 0.219276 | 0         |  |
|         |      | Shiraz-3T  | 93   | 0        | -0.058023 |  |
|         |      | Shiraz-4T  | 253  | 0.372918 | 0         |  |
|         |      | Shiraz-36T | 378  | 0.179558 | 0         |  |
|         |      | Shiraz-36T | 380  | 0.083883 | 0         |  |
|         |      | Shiraz-44T | 638  | 0        | -0.433476 |  |
|         |      | Shiraz-46T | 943  | 0.093799 | 0         |  |
|         |      | Shiraz-46T | 945  | 0        | -0.014838 |  |
|         |      | Shiraz-47T | 1029 | 0        | -0.096586 |  |
|         |      | Shiraz-49T | 1119 | 0        | -0.157331 |  |
|         |      | Shiraz-77T | 1225 | 0        | -0.117922 |  |
|         |      | Shiraz-77T | 1226 | 0        | -0.233724 |  |
|         |      | Shiraz-18T | 1434 | 0.244465 | 0         |  |
|         |      | Shiraz-22T | 1549 | 0        | -0.319623 |  |
|         |      | Shiraz-22T | 1550 | 0        | -0.577052 |  |
|         |      | Shiraz-25T | 1698 | 0.21835  | 0         |  |
|         |      | Shiraz-28T | 1735 | 0.350744 | 0         |  |
|         |      | Shiraz-29T | 1778 | 0.120767 | 0         |  |
|         |      | Shiraz-38T | 1951 | 0.250891 | 0         |  |
|         |      | Shiraz-53T | 2078 | 0.287202 | 0         |  |
|         |      | Shiraz-58T | 2159 | 0        | -0.219521 |  |
|         |      | Shiraz-71T | 2238 | 0.603631 | 0         |  |



|      |      |            |      |          |           |  |  |
|------|------|------------|------|----------|-----------|--|--|
|      |      | Shiraz-3T  | 90   | 0.219276 | 0         |  |  |
|      |      | Shiraz-3T  | 93   | 0        | -0.058023 |  |  |
|      |      | Shiraz-4T  | 253  | 0.372918 | 0         |  |  |
|      |      | Shiraz-36T | 378  | 0.179558 | 0         |  |  |
|      |      | Shiraz-36T | 380  | 0.083883 | 0         |  |  |
|      |      | Shiraz-44T | 638  | 0        | -0.433476 |  |  |
|      |      | Shiraz-46T | 943  | 0.093799 | 0         |  |  |
|      |      | Shiraz-46T | 945  | 0        | -0.014838 |  |  |
|      |      | Shiraz-47T | 1029 | 0        | -0.096586 |  |  |
|      |      | Shiraz-49T | 1119 | 0        | -0.157331 |  |  |
|      |      | Shiraz-77T | 1225 | 0        | -0.117922 |  |  |
|      |      | Shiraz-77T | 1226 | 0        | -0.233724 |  |  |
|      |      | Shiraz-18T | 1434 | 0.244465 | 0         |  |  |
|      |      | Shiraz-22T | 1549 | 0        | -0.319623 |  |  |
|      |      | Shiraz-22T | 1550 | 0        | -0.577052 |  |  |
|      |      | Shiraz-25T | 1698 | 0.21835  | 0         |  |  |
|      |      | Shiraz-28T | 1735 | 0.350744 | 0         |  |  |
|      |      | Shiraz-29T | 1778 | 0.120767 | 0         |  |  |
|      |      | Shiraz-38T | 1951 | 0.250891 | 0         |  |  |
|      |      | Shiraz-53T | 2078 | 0.287202 | 0         |  |  |
|      |      | Shiraz-58T | 2159 | 0        | -0.219521 |  |  |
|      |      | Shiraz-71T | 2238 | 0.603631 | 0         |  |  |
|      |      | Shiraz-3T  | 90   | 0.219276 | 0         |  |  |
|      |      | Shiraz-3T  | 93   | 0        | -0.058023 |  |  |
|      |      | Shiraz-4T  | 253  | 0.372918 | 0         |  |  |
|      |      | Shiraz-36T | 378  | 0.179558 | 0         |  |  |
|      |      | Shiraz-36T | 380  | 0.083883 | 0         |  |  |
|      |      | Shiraz-44T | 638  | 0        | -0.433476 |  |  |
|      |      | Shiraz-46T | 943  | 0.093799 | 0         |  |  |
|      |      | Shiraz-46T | 945  | 0        | -0.014838 |  |  |
|      |      | Shiraz-47T | 1029 | 0        | -0.096586 |  |  |
|      |      | Shiraz-49T | 1119 | 0        | -0.157331 |  |  |
|      |      | Shiraz-77T | 1225 | 0        | -0.117922 |  |  |
|      |      | Shiraz-77T | 1226 | 0        | -0.233724 |  |  |
|      |      | Shiraz-18T | 1434 | 0.244465 | 0         |  |  |
|      |      | Shiraz-22T | 1549 | 0        | -0.319623 |  |  |
|      |      | Shiraz-22T | 1550 | 0        | -0.577052 |  |  |
|      |      | Shiraz-25T | 1698 | 0.21835  | 0         |  |  |
|      |      | Shiraz-28T | 1735 | 0.350744 | 0         |  |  |
|      |      | Shiraz-29T | 1778 | 0.120767 | 0         |  |  |
|      |      | Shiraz-38T | 1951 | 0.250891 | 0         |  |  |
|      |      | Shiraz-53T | 2078 | 0.287202 | 0         |  |  |
|      |      | Shiraz-58T | 2159 | 0        | -0.219521 |  |  |
|      |      | Shiraz-71T | 2238 | 0.603631 | 0         |  |  |
| TPK1 | chr7 | Shiraz-3T  | 90   | 0.219276 | 0         |  |  |
|      |      | Shiraz-3T  | 98   | 0        | -0.069276 |  |  |
|      |      | Shiraz-4T  | 253  | 0.372918 | 0         |  |  |

|  |            |      |          |           |  |
|--|------------|------|----------|-----------|--|
|  | Shiraz-36T | 378  | 0.179558 | 0         |  |
|  | Shiraz-44T | 645  | 0        | -0.474857 |  |
|  | Shiraz-46T | 943  | 0.093799 | 0         |  |
|  | Shiraz-77T | 1225 | 0        | -0.117922 |  |
|  | Shiraz-9T  | 1325 | 0.221899 | 0         |  |
|  | Shiraz-18T | 1434 | 0.244465 | 0         |  |
|  | Shiraz-22T | 1554 | 0        | -0.502826 |  |
|  | Shiraz-25T | 1698 | 0.21835  | 0         |  |
|  | Shiraz-28T | 1735 | 0.350744 | 0         |  |
|  | Shiraz-29T | 1778 | 0.120767 | 0         |  |
|  | Shiraz-32T | 1833 | 0.551336 | 0         |  |
|  | Shiraz-38T | 1951 | 0.250891 | 0         |  |
|  | Shiraz-53T | 2078 | 0.287202 | 0         |  |
|  | Shiraz-58T | 2162 | 0.221505 | 0         |  |
|  | Shiraz-71T | 2238 | 0.603631 | 0         |  |
|  | Shiraz-3T  | 90   | 0.219276 | 0         |  |
|  | Shiraz-3T  | 98   | 0        | -0.069276 |  |
|  | Shiraz-4T  | 253  | 0.372918 | 0         |  |
|  | Shiraz-36T | 378  | 0.179558 | 0         |  |
|  | Shiraz-44T | 645  | 0        | -0.474857 |  |
|  | Shiraz-46T | 943  | 0.093799 | 0         |  |
|  | Shiraz-77T | 1225 | 0        | -0.117922 |  |
|  | Shiraz-9T  | 1325 | 0.221899 | 0         |  |
|  | Shiraz-18T | 1434 | 0.244465 | 0         |  |
|  | Shiraz-22T | 1554 | 0        | -0.502826 |  |
|  | Shiraz-25T | 1698 | 0.21835  | 0         |  |
|  | Shiraz-28T | 1735 | 0.350744 | 0         |  |
|  | Shiraz-29T | 1778 | 0.120767 | 0         |  |
|  | Shiraz-32T | 1833 | 0.551336 | 0         |  |
|  | Shiraz-38T | 1951 | 0.250891 | 0         |  |
|  | Shiraz-53T | 2078 | 0.287202 | 0         |  |
|  | Shiraz-58T | 2162 | 0.221505 | 0         |  |
|  | Shiraz-71T | 2238 | 0.603631 | 0         |  |
|  | Shiraz-3T  | 90   | 0.219276 | 0         |  |
|  | Shiraz-3T  | 98   | 0        | -0.069276 |  |
|  | Shiraz-4T  | 253  | 0.372918 | 0         |  |
|  | Shiraz-36T | 378  | 0.179558 | 0         |  |
|  | Shiraz-44T | 645  | 0        | -0.474857 |  |
|  | Shiraz-46T | 943  | 0.093799 | 0         |  |
|  | Shiraz-77T | 1225 | 0        | -0.117922 |  |
|  | Shiraz-9T  | 1325 | 0.221899 | 0         |  |
|  | Shiraz-18T | 1434 | 0.244465 | 0         |  |
|  | Shiraz-22T | 1554 | 0        | -0.502826 |  |
|  | Shiraz-25T | 1698 | 0.21835  | 0         |  |
|  | Shiraz-28T | 1735 | 0.350744 | 0         |  |
|  | Shiraz-29T | 1778 | 0.120767 | 0         |  |
|  | Shiraz-32T | 1833 | 0.551336 | 0         |  |

|         |      |            |      |          |           |  |
|---------|------|------------|------|----------|-----------|--|
|         |      | Shiraz-38T | 1951 | 0.250891 | 0         |  |
|         |      | Shiraz-53T | 2078 | 0.287202 | 0         |  |
|         |      | Shiraz-58T | 2162 | 0.221505 | 0         |  |
|         |      | Shiraz-71T | 2238 | 0.603631 | 0         |  |
| TRA2A   | chr7 | Shiraz-3T  | 87   | 0.198593 | 0         |  |
|         |      | Shiraz-4T  | 252  | 0.192083 | 0         |  |
|         |      | Shiraz-36T | 376  | 0.159952 | 0         |  |
|         |      | Shiraz-46T | 942  | 0.069143 | 0         |  |
|         |      | Shiraz-18T | 1433 | 0.250973 | 0         |  |
|         |      | Shiraz-25T | 1697 | 0.21945  | 0         |  |
|         |      | Shiraz-28T | 1734 | 0.362882 | 0         |  |
|         |      | Shiraz-29T | 1777 | 0.156747 | 0         |  |
|         |      | Shiraz-38T | 1950 | 0.265916 | 0         |  |
|         |      | Shiraz-71T | 2236 | 0.320072 | 0         |  |
|         |      | Shiraz-3T  | 87   | 0.198593 | 0         |  |
|         |      | Shiraz-4T  | 252  | 0.192083 | 0         |  |
|         |      | Shiraz-36T | 376  | 0.159952 | 0         |  |
|         |      | Shiraz-46T | 942  | 0.069143 | 0         |  |
|         |      | Shiraz-18T | 1433 | 0.250973 | 0         |  |
|         |      | Shiraz-25T | 1697 | 0.21945  | 0         |  |
|         |      | Shiraz-28T | 1734 | 0.362882 | 0         |  |
|         |      | Shiraz-29T | 1777 | 0.156747 | 0         |  |
|         |      | Shiraz-38T | 1950 | 0.265916 | 0         |  |
|         |      | Shiraz-71T | 2236 | 0.320072 | 0         |  |
|         |      | Shiraz-3T  | 87   | 0.198593 | 0         |  |
|         |      | Shiraz-4T  | 252  | 0.192083 | 0         |  |
|         |      | Shiraz-36T | 376  | 0.159952 | 0         |  |
|         |      | Shiraz-46T | 942  | 0.069143 | 0         |  |
|         |      | Shiraz-18T | 1433 | 0.250973 | 0         |  |
|         |      | Shiraz-25T | 1697 | 0.21945  | 0         |  |
|         |      | Shiraz-28T | 1734 | 0.362882 | 0         |  |
|         |      | Shiraz-29T | 1777 | 0.156747 | 0         |  |
|         |      | Shiraz-38T | 1950 | 0.265916 | 0         |  |
|         |      | Shiraz-71T | 2236 | 0.320072 | 0         |  |
| TRAPPC2 | chrX | Shiraz-3T  | 235  | 0        | -0.28401  |  |
|         |      | Shiraz-3T  | 235  | 0        | -0.28401  |  |
|         |      | Shiraz-4T  | 260  | 0        | -0.324128 |  |
|         |      | Shiraz-4T  | 260  | 0        | -0.324128 |  |
|         |      | Shiraz-16T | 294  | 0.655804 | 0         |  |
|         |      | Shiraz-16T | 294  | 0.655804 | 0         |  |
|         |      | Shiraz-36T | 431  | 0        | -0.78035  |  |
|         |      | Shiraz-36T | 431  | 0        | -0.78035  |  |
|         |      | Shiraz-44T | 891  | 0        | -0.954044 |  |
|         |      | Shiraz-44T | 891  | 0        | -0.954044 |  |
|         |      | Shiraz-49T | 1166 | 0        | -0.917235 |  |
|         |      | Shiraz-49T | 1166 | 0        | -0.917235 |  |
|         |      | Shiraz-9T  | 1368 | 0.199713 | 0         |  |

|  |            |      |          |           |  |
|--|------------|------|----------|-----------|--|
|  | Shiraz-9T  | 1368 | 0.199713 | 0         |  |
|  | Shiraz-18T | 1455 | 0        | -0.186773 |  |
|  | Shiraz-18T | 1455 | 0        | -0.186773 |  |
|  | Shiraz-22T | 1669 | 0.695915 | 0         |  |
|  | Shiraz-22T | 1669 | 0.695915 | 0         |  |
|  | Shiraz-25T | 1717 | 0.420447 | 0         |  |
|  | Shiraz-25T | 1717 | 0.420447 | 0         |  |
|  | Shiraz-28T | 1760 | 0.538181 | 0         |  |
|  | Shiraz-28T | 1760 | 0.538181 | 0         |  |
|  | Shiraz-29T | 1800 | 0.672527 | 0         |  |
|  | Shiraz-29T | 1800 | 0.672527 | 0         |  |
|  | Shiraz-32T | 1869 | 0.776805 | 0         |  |
|  | Shiraz-32T | 1869 | 0.776805 | 0         |  |
|  | Shiraz-35T | 1932 | 0.507141 | 0         |  |
|  | Shiraz-35T | 1932 | 0.507141 | 0         |  |
|  | Shiraz-40T | 2051 | 0.098506 | 0         |  |
|  | Shiraz-40T | 2051 | 0.098506 | 0         |  |
|  | Shiraz-58T | 2221 | 0.871948 | 0         |  |
|  | Shiraz-58T | 2221 | 0.871948 | 0         |  |
|  | Shiraz-71T | 2260 | 0.68394  | 0         |  |
|  | Shiraz-71T | 2260 | 0.68394  | 0         |  |
|  | Shiraz-71T | 2261 | 0.508399 | 0         |  |
|  | Shiraz-71T | 2261 | 0.508399 | 0         |  |
|  | Shiraz-3T  | 235  | 0        | -0.28401  |  |
|  | Shiraz-3T  | 235  | 0        | -0.28401  |  |
|  | Shiraz-4T  | 260  | 0        | -0.324128 |  |
|  | Shiraz-4T  | 260  | 0        | -0.324128 |  |
|  | Shiraz-16T | 294  | 0.655804 | 0         |  |
|  | Shiraz-16T | 294  | 0.655804 | 0         |  |
|  | Shiraz-36T | 431  | 0        | -0.78035  |  |
|  | Shiraz-36T | 431  | 0        | -0.78035  |  |
|  | Shiraz-44T | 891  | 0        | -0.954044 |  |
|  | Shiraz-44T | 891  | 0        | -0.954044 |  |
|  | Shiraz-49T | 1166 | 0        | -0.917235 |  |
|  | Shiraz-49T | 1166 | 0        | -0.917235 |  |
|  | Shiraz-9T  | 1368 | 0.199713 | 0         |  |
|  | Shiraz-9T  | 1368 | 0.199713 | 0         |  |
|  | Shiraz-18T | 1455 | 0        | -0.186773 |  |
|  | Shiraz-18T | 1455 | 0        | -0.186773 |  |
|  | Shiraz-22T | 1669 | 0.695915 | 0         |  |
|  | Shiraz-22T | 1669 | 0.695915 | 0         |  |
|  | Shiraz-25T | 1717 | 0.420447 | 0         |  |
|  | Shiraz-25T | 1717 | 0.420447 | 0         |  |
|  | Shiraz-28T | 1760 | 0.538181 | 0         |  |
|  | Shiraz-28T | 1760 | 0.538181 | 0         |  |
|  | Shiraz-29T | 1800 | 0.672527 | 0         |  |
|  | Shiraz-29T | 1800 | 0.672527 | 0         |  |

|  |  |            |      |          |           |  |  |
|--|--|------------|------|----------|-----------|--|--|
|  |  | Shiraz-32T | 1869 | 0.776805 | 0         |  |  |
|  |  | Shiraz-32T | 1869 | 0.776805 | 0         |  |  |
|  |  | Shiraz-35T | 1932 | 0.507141 | 0         |  |  |
|  |  | Shiraz-35T | 1932 | 0.507141 | 0         |  |  |
|  |  | Shiraz-40T | 2051 | 0.098506 | 0         |  |  |
|  |  | Shiraz-40T | 2051 | 0.098506 | 0         |  |  |
|  |  | Shiraz-58T | 2221 | 0.871948 | 0         |  |  |
|  |  | Shiraz-58T | 2221 | 0.871948 | 0         |  |  |
|  |  | Shiraz-71T | 2260 | 0.68394  | 0         |  |  |
|  |  | Shiraz-71T | 2260 | 0.68394  | 0         |  |  |
|  |  | Shiraz-71T | 2261 | 0.508399 | 0         |  |  |
|  |  | Shiraz-71T | 2261 | 0.508399 | 0         |  |  |
|  |  | Shiraz-3T  | 235  | 0        | -0.28401  |  |  |
|  |  | Shiraz-3T  | 235  | 0        | -0.28401  |  |  |
|  |  | Shiraz-4T  | 260  | 0        | -0.324128 |  |  |
|  |  | Shiraz-4T  | 260  | 0        | -0.324128 |  |  |
|  |  | Shiraz-16T | 294  | 0.655804 | 0         |  |  |
|  |  | Shiraz-16T | 294  | 0.655804 | 0         |  |  |
|  |  | Shiraz-36T | 431  | 0        | -0.78035  |  |  |
|  |  | Shiraz-36T | 431  | 0        | -0.78035  |  |  |
|  |  | Shiraz-44T | 891  | 0        | -0.954044 |  |  |
|  |  | Shiraz-44T | 891  | 0        | -0.954044 |  |  |
|  |  | Shiraz-49T | 1166 | 0        | -0.917235 |  |  |
|  |  | Shiraz-49T | 1166 | 0        | -0.917235 |  |  |
|  |  | Shiraz-9T  | 1368 | 0.199713 | 0         |  |  |
|  |  | Shiraz-9T  | 1368 | 0.199713 | 0         |  |  |
|  |  | Shiraz-18T | 1455 | 0        | -0.186773 |  |  |
|  |  | Shiraz-18T | 1455 | 0        | -0.186773 |  |  |
|  |  | Shiraz-22T | 1669 | 0.695915 | 0         |  |  |
|  |  | Shiraz-22T | 1669 | 0.695915 | 0         |  |  |
|  |  | Shiraz-25T | 1717 | 0.420447 | 0         |  |  |
|  |  | Shiraz-25T | 1717 | 0.420447 | 0         |  |  |
|  |  | Shiraz-28T | 1760 | 0.538181 | 0         |  |  |
|  |  | Shiraz-28T | 1760 | 0.538181 | 0         |  |  |
|  |  | Shiraz-29T | 1800 | 0.672527 | 0         |  |  |
|  |  | Shiraz-29T | 1800 | 0.672527 | 0         |  |  |
|  |  | Shiraz-32T | 1869 | 0.776805 | 0         |  |  |
|  |  | Shiraz-32T | 1869 | 0.776805 | 0         |  |  |
|  |  | Shiraz-35T | 1932 | 0.507141 | 0         |  |  |
|  |  | Shiraz-35T | 1932 | 0.507141 | 0         |  |  |
|  |  | Shiraz-40T | 2051 | 0.098506 | 0         |  |  |
|  |  | Shiraz-40T | 2051 | 0.098506 | 0         |  |  |
|  |  | Shiraz-58T | 2221 | 0.871948 | 0         |  |  |
|  |  | Shiraz-58T | 2221 | 0.871948 | 0         |  |  |
|  |  | Shiraz-71T | 2260 | 0.68394  | 0         |  |  |
|  |  | Shiraz-71T | 2260 | 0.68394  | 0         |  |  |
|  |  | Shiraz-71T | 2261 | 0.508399 | 0         |  |  |

|       |      |            |      |          |           |  |
|-------|------|------------|------|----------|-----------|--|
|       |      | Shiraz-71T | 2261 | 0.508399 | 0         |  |
| TREX2 | chrX | Shiraz-4T  | 261  | 0        | -0.336249 |  |
|       |      | Shiraz-16T | 295  | 0.591657 | 0         |  |
|       |      | Shiraz-36T | 433  | 0        | -0.803961 |  |
|       |      | Shiraz-42T | 480  | 0        | -0.232915 |  |
|       |      | Shiraz-49T | 1170 | 0        | -0.967436 |  |
|       |      | Shiraz-49T | 1173 | 0        | -0.704439 |  |
|       |      | Shiraz-9T  | 1370 | 0.690073 | 0         |  |
|       |      | Shiraz-9T  | 1371 | 1.292392 | 0         |  |
|       |      | Shiraz-18T | 1457 | 0.643204 | 0         |  |
|       |      | Shiraz-22T | 1673 | 0.611783 | 0         |  |
|       |      | Shiraz-22T | 1678 | 0.911625 | 0         |  |
|       |      | Shiraz-25T | 1719 | 0.472955 | 0         |  |
|       |      | Shiraz-28T | 1762 | 0.562311 | 0         |  |
|       |      | Shiraz-29T | 1801 | 0.815343 | 0         |  |
|       |      | Shiraz-32T | 1870 | 0.729766 | 0         |  |
|       |      | Shiraz-32T | 1872 | 1.504553 | 0         |  |
|       |      | Shiraz-35T | 1933 | 0.488535 | 0         |  |
|       |      | Shiraz-53T | 2115 | 0.427728 | 0         |  |
|       |      | Shiraz-58T | 2223 | 0.833364 | 0         |  |
|       |      | Shiraz-58T | 2226 | 1.074663 | 0         |  |
|       |      | Shiraz-71T | 2263 | 0.975531 | 0         |  |
|       |      | Shiraz-4T  | 261  | 0        | -0.336249 |  |
|       |      | Shiraz-16T | 295  | 0.591657 | 0         |  |
|       |      | Shiraz-36T | 433  | 0        | -0.803961 |  |
|       |      | Shiraz-42T | 480  | 0        | -0.232915 |  |
|       |      | Shiraz-49T | 1170 | 0        | -0.967436 |  |
|       |      | Shiraz-49T | 1173 | 0        | -0.704439 |  |
|       |      | Shiraz-9T  | 1370 | 0.690073 | 0         |  |
|       |      | Shiraz-9T  | 1371 | 1.292392 | 0         |  |
|       |      | Shiraz-18T | 1457 | 0.643204 | 0         |  |
|       |      | Shiraz-22T | 1673 | 0.611783 | 0         |  |
|       |      | Shiraz-22T | 1678 | 0.911625 | 0         |  |
|       |      | Shiraz-25T | 1719 | 0.472955 | 0         |  |
|       |      | Shiraz-28T | 1762 | 0.562311 | 0         |  |
|       |      | Shiraz-29T | 1801 | 0.815343 | 0         |  |
|       |      | Shiraz-32T | 1870 | 0.729766 | 0         |  |
|       |      | Shiraz-32T | 1872 | 1.504553 | 0         |  |
|       |      | Shiraz-35T | 1933 | 0.488535 | 0         |  |
|       |      | Shiraz-53T | 2115 | 0.427728 | 0         |  |
|       |      | Shiraz-58T | 2223 | 0.833364 | 0         |  |
|       |      | Shiraz-58T | 2226 | 1.074663 | 0         |  |
|       |      | Shiraz-71T | 2263 | 0.975531 | 0         |  |
|       |      | Shiraz-4T  | 261  | 0        | -0.336249 |  |
|       |      | Shiraz-16T | 295  | 0.591657 | 0         |  |
|       |      | Shiraz-36T | 433  | 0        | -0.803961 |  |
|       |      | Shiraz-42T | 480  | 0        | -0.232915 |  |

|        |      |            |      |          |           |  |  |
|--------|------|------------|------|----------|-----------|--|--|
|        |      | Shiraz-49T | 1170 | 0        | -0.967436 |  |  |
|        |      | Shiraz-49T | 1173 | 0        | -0.704439 |  |  |
|        |      | Shiraz-9T  | 1370 | 0.690073 | 0         |  |  |
|        |      | Shiraz-9T  | 1371 | 1.292392 | 0         |  |  |
|        |      | Shiraz-18T | 1457 | 0.643204 | 0         |  |  |
|        |      | Shiraz-22T | 1673 | 0.611783 | 0         |  |  |
|        |      | Shiraz-22T | 1678 | 0.911625 | 0         |  |  |
|        |      | Shiraz-25T | 1719 | 0.472955 | 0         |  |  |
|        |      | Shiraz-28T | 1762 | 0.562311 | 0         |  |  |
|        |      | Shiraz-29T | 1801 | 0.815343 | 0         |  |  |
|        |      | Shiraz-32T | 1870 | 0.729766 | 0         |  |  |
|        |      | Shiraz-32T | 1872 | 1.504553 | 0         |  |  |
|        |      | Shiraz-35T | 1933 | 0.488535 | 0         |  |  |
|        |      | Shiraz-53T | 2115 | 0.427728 | 0         |  |  |
|        |      | Shiraz-58T | 2223 | 0.833364 | 0         |  |  |
|        |      | Shiraz-58T | 2226 | 1.074663 | 0         |  |  |
|        |      | Shiraz-71T | 2263 | 0.975531 | 0         |  |  |
| TRIM24 | chr7 | Shiraz-3T  | 90   | 0.219276 | 0         |  |  |
|        |      | Shiraz-4T  | 253  | 0.372918 | 0         |  |  |
|        |      | Shiraz-31T | 318  | 0.254373 | 0         |  |  |
|        |      | Shiraz-36T | 378  | 0.179558 | 0         |  |  |
|        |      | Shiraz-36T | 383  | 0.374586 | 0         |  |  |
|        |      | Shiraz-46T | 943  | 0.093799 | 0         |  |  |
|        |      | Shiraz-77T | 1225 | 0        | -0.117922 |  |  |
|        |      | Shiraz-77T | 1230 | 0.149651 | 0         |  |  |
|        |      | Shiraz-9T  | 1325 | 0.221899 | 0         |  |  |
|        |      | Shiraz-18T | 1434 | 0.244465 | 0         |  |  |
|        |      | Shiraz-25T | 1698 | 0.21835  | 0         |  |  |
|        |      | Shiraz-28T | 1735 | 0.350744 | 0         |  |  |
|        |      | Shiraz-29T | 1778 | 0.120767 | 0         |  |  |
|        |      | Shiraz-32T | 1833 | 0.551336 | 0         |  |  |
|        |      | Shiraz-38T | 1951 | 0.250891 | 0         |  |  |
|        |      | Shiraz-53T | 2078 | 0.287202 | 0         |  |  |
|        |      | Shiraz-58T | 2162 | 0.221505 | 0         |  |  |
|        |      | Shiraz-71T | 2238 | 0.603631 | 0         |  |  |
|        |      | Shiraz-3T  | 90   | 0.219276 | 0         |  |  |
|        |      | Shiraz-4T  | 253  | 0.372918 | 0         |  |  |
|        |      | Shiraz-31T | 318  | 0.254373 | 0         |  |  |
|        |      | Shiraz-36T | 378  | 0.179558 | 0         |  |  |
|        |      | Shiraz-36T | 383  | 0.374586 | 0         |  |  |
|        |      | Shiraz-46T | 943  | 0.093799 | 0         |  |  |
|        |      | Shiraz-77T | 1225 | 0        | -0.117922 |  |  |
|        |      | Shiraz-77T | 1230 | 0.149651 | 0         |  |  |
|        |      | Shiraz-9T  | 1325 | 0.221899 | 0         |  |  |
|        |      | Shiraz-18T | 1434 | 0.244465 | 0         |  |  |
|        |      | Shiraz-25T | 1698 | 0.21835  | 0         |  |  |
|        |      | Shiraz-28T | 1735 | 0.350744 | 0         |  |  |

|       |      |            |      |          |           |  |
|-------|------|------------|------|----------|-----------|--|
|       |      | Shiraz-29T | 1778 | 0.120767 | 0         |  |
|       |      | Shiraz-32T | 1833 | 0.551336 | 0         |  |
|       |      | Shiraz-38T | 1951 | 0.250891 | 0         |  |
|       |      | Shiraz-53T | 2078 | 0.287202 | 0         |  |
|       |      | Shiraz-58T | 2162 | 0.221505 | 0         |  |
|       |      | Shiraz-71T | 2238 | 0.603631 | 0         |  |
|       |      | Shiraz-3T  | 90   | 0.219276 | 0         |  |
|       |      | Shiraz-4T  | 253  | 0.372918 | 0         |  |
|       |      | Shiraz-31T | 318  | 0.254373 | 0         |  |
|       |      | Shiraz-36T | 378  | 0.179558 | 0         |  |
|       |      | Shiraz-36T | 383  | 0.374586 | 0         |  |
|       |      | Shiraz-46T | 943  | 0.093799 | 0         |  |
|       |      | Shiraz-77T | 1225 | 0        | -0.117922 |  |
|       |      | Shiraz-77T | 1230 | 0.149651 | 0         |  |
|       |      | Shiraz-9T  | 1325 | 0.221899 | 0         |  |
|       |      | Shiraz-18T | 1434 | 0.244465 | 0         |  |
|       |      | Shiraz-25T | 1698 | 0.21835  | 0         |  |
|       |      | Shiraz-28T | 1735 | 0.350744 | 0         |  |
|       |      | Shiraz-29T | 1778 | 0.120767 | 0         |  |
|       |      | Shiraz-32T | 1833 | 0.551336 | 0         |  |
|       |      | Shiraz-38T | 1951 | 0.250891 | 0         |  |
|       |      | Shiraz-53T | 2078 | 0.287202 | 0         |  |
|       |      | Shiraz-58T | 2162 | 0.221505 | 0         |  |
|       |      | Shiraz-71T | 2238 | 0.603631 | 0         |  |
| TRIM4 | chr7 | Shiraz-3T  | 90   | 0.219276 | 0         |  |
|       |      | Shiraz-3T  | 94   | 0.74735  | 0         |  |
|       |      | Shiraz-4T  | 253  | 0.372918 | 0         |  |
|       |      | Shiraz-31T | 316  | 0.219196 | 0         |  |
|       |      | Shiraz-36T | 378  | 0.179558 | 0         |  |
|       |      | Shiraz-36T | 381  | 0.332628 | 0         |  |
|       |      | Shiraz-44T | 639  | 1.035032 | 0         |  |
|       |      | Shiraz-44T | 640  | 0.272608 | 0         |  |
|       |      | Shiraz-46T | 943  | 0.093799 | 0         |  |
|       |      | Shiraz-46T | 946  | 0.299835 | 0         |  |
|       |      | Shiraz-47T | 1030 | 0.257728 | 0         |  |
|       |      | Shiraz-49T | 1120 | 0.281656 | 0         |  |
|       |      | Shiraz-77T | 1225 | 0        | -0.117922 |  |
|       |      | Shiraz-77T | 1227 | 0.196445 | 0         |  |
|       |      | Shiraz-9T  | 1324 | 0.679266 | 0         |  |
|       |      | Shiraz-18T | 1434 | 0.244465 | 0         |  |
|       |      | Shiraz-22T | 1549 | 0        | -0.319623 |  |
|       |      | Shiraz-22T | 1551 | 0.324011 | 0         |  |
|       |      | Shiraz-25T | 1698 | 0.21835  | 0         |  |
|       |      | Shiraz-28T | 1735 | 0.350744 | 0         |  |
|       |      | Shiraz-29T | 1778 | 0.120767 | 0         |  |
|       |      | Shiraz-32T | 1833 | 0.551336 | 0         |  |
|       |      | Shiraz-38T | 1951 | 0.250891 | 0         |  |



|  |            |      |          |           |  |
|--|------------|------|----------|-----------|--|
|  | Shiraz-53T | 2078 | 0.287202 | 0         |  |
|  | Shiraz-71T | 2238 | 0.603631 | 0         |  |
|  | Shiraz-3T  | 90   | 0.219276 | 0         |  |
|  | Shiraz-3T  | 94   | 0.74735  | 0         |  |
|  | Shiraz-4T  | 253  | 0.372918 | 0         |  |
|  | Shiraz-31T | 316  | 0.219196 | 0         |  |
|  | Shiraz-36T | 378  | 0.179558 | 0         |  |
|  | Shiraz-36T | 381  | 0.332628 | 0         |  |
|  | Shiraz-44T | 639  | 1.035032 | 0         |  |
|  | Shiraz-44T | 640  | 0.272608 | 0         |  |
|  | Shiraz-46T | 943  | 0.093799 | 0         |  |
|  | Shiraz-46T | 946  | 0.299835 | 0         |  |
|  | Shiraz-47T | 1030 | 0.257728 | 0         |  |
|  | Shiraz-49T | 1120 | 0.281656 | 0         |  |
|  | Shiraz-77T | 1225 | 0        | -0.117922 |  |
|  | Shiraz-77T | 1227 | 0.196445 | 0         |  |
|  | Shiraz-9T  | 1324 | 0.679266 | 0         |  |
|  | Shiraz-18T | 1434 | 0.244465 | 0         |  |
|  | Shiraz-22T | 1549 | 0        | -0.319623 |  |
|  | Shiraz-22T | 1551 | 0.324011 | 0         |  |
|  | Shiraz-25T | 1698 | 0.21835  | 0         |  |
|  | Shiraz-28T | 1735 | 0.350744 | 0         |  |
|  | Shiraz-29T | 1778 | 0.120767 | 0         |  |
|  | Shiraz-32T | 1833 | 0.551336 | 0         |  |
|  | Shiraz-38T | 1951 | 0.250891 | 0         |  |
|  | Shiraz-53T | 2078 | 0.287202 | 0         |  |
|  | Shiraz-71T | 2238 | 0.603631 | 0         |  |
|  | Shiraz-3T  | 90   | 0.219276 | 0         |  |
|  | Shiraz-3T  | 94   | 0.74735  | 0         |  |
|  | Shiraz-4T  | 253  | 0.372918 | 0         |  |
|  | Shiraz-31T | 316  | 0.219196 | 0         |  |
|  | Shiraz-36T | 378  | 0.179558 | 0         |  |
|  | Shiraz-36T | 381  | 0.332628 | 0         |  |
|  | Shiraz-44T | 639  | 1.035032 | 0         |  |
|  | Shiraz-44T | 640  | 0.272608 | 0         |  |
|  | Shiraz-46T | 943  | 0.093799 | 0         |  |
|  | Shiraz-46T | 946  | 0.299835 | 0         |  |
|  | Shiraz-47T | 1030 | 0.257728 | 0         |  |
|  | Shiraz-49T | 1120 | 0.281656 | 0         |  |
|  | Shiraz-77T | 1225 | 0        | -0.117922 |  |
|  | Shiraz-77T | 1227 | 0.196445 | 0         |  |
|  | Shiraz-9T  | 1324 | 0.679266 | 0         |  |
|  | Shiraz-18T | 1434 | 0.244465 | 0         |  |
|  | Shiraz-22T | 1549 | 0        | -0.319623 |  |
|  | Shiraz-22T | 1551 | 0.324011 | 0         |  |
|  | Shiraz-25T | 1698 | 0.21835  | 0         |  |
|  | Shiraz-28T | 1735 | 0.350744 | 0         |  |

|        |      |            |      |          |           |  |
|--------|------|------------|------|----------|-----------|--|
|        |      | Shiraz-29T | 1778 | 0.120767 | 0         |  |
|        |      | Shiraz-32T | 1833 | 0.551336 | 0         |  |
|        |      | Shiraz-38T | 1951 | 0.250891 | 0         |  |
|        |      | Shiraz-53T | 2078 | 0.287202 | 0         |  |
|        |      | Shiraz-71T | 2238 | 0.603631 | 0         |  |
| TRIM56 | chr7 | Shiraz-3T  | 90   | 0.219276 | 0         |  |
|        |      | Shiraz-3T  | 94   | 0.74735  | 0         |  |
|        |      | Shiraz-4T  | 253  | 0.372918 | 0         |  |
|        |      | Shiraz-31T | 316  | 0.219196 | 0         |  |
|        |      | Shiraz-36T | 378  | 0.179558 | 0         |  |
|        |      | Shiraz-36T | 381  | 0.332628 | 0         |  |
|        |      | Shiraz-44T | 639  | 1.035032 | 0         |  |
|        |      | Shiraz-46T | 943  | 0.093799 | 0         |  |
|        |      | Shiraz-46T | 946  | 0.299835 | 0         |  |
|        |      | Shiraz-47T | 1030 | 0.257728 | 0         |  |
|        |      | Shiraz-49T | 1120 | 0.281656 | 0         |  |
|        |      | Shiraz-77T | 1225 | 0        | -0.117922 |  |
|        |      | Shiraz-77T | 1227 | 0.196445 | 0         |  |
|        |      | Shiraz-9T  | 1324 | 0.679266 | 0         |  |
|        |      | Shiraz-18T | 1434 | 0.244465 | 0         |  |
|        |      | Shiraz-22T | 1549 | 0        | -0.319623 |  |
|        |      | Shiraz-22T | 1551 | 0.324011 | 0         |  |
|        |      | Shiraz-25T | 1698 | 0.21835  | 0         |  |
|        |      | Shiraz-28T | 1735 | 0.350744 | 0         |  |
|        |      | Shiraz-29T | 1778 | 0.120767 | 0         |  |
|        |      | Shiraz-32T | 1833 | 0.551336 | 0         |  |
|        |      | Shiraz-32T | 1834 | 1.485392 | 0         |  |
|        |      | Shiraz-38T | 1951 | 0.250891 | 0         |  |
|        |      | Shiraz-53T | 2078 | 0.287202 | 0         |  |
|        |      | Shiraz-58T | 2160 | 0.399007 | 0         |  |
|        |      | Shiraz-71T | 2238 | 0.603631 | 0         |  |
|        |      | Shiraz-3T  | 90   | 0.219276 | 0         |  |
|        |      | Shiraz-3T  | 94   | 0.74735  | 0         |  |
|        |      | Shiraz-4T  | 253  | 0.372918 | 0         |  |
|        |      | Shiraz-31T | 316  | 0.219196 | 0         |  |
|        |      | Shiraz-36T | 378  | 0.179558 | 0         |  |
|        |      | Shiraz-36T | 381  | 0.332628 | 0         |  |
|        |      | Shiraz-44T | 639  | 1.035032 | 0         |  |
|        |      | Shiraz-46T | 943  | 0.093799 | 0         |  |
|        |      | Shiraz-46T | 946  | 0.299835 | 0         |  |
|        |      | Shiraz-47T | 1030 | 0.257728 | 0         |  |
|        |      | Shiraz-49T | 1120 | 0.281656 | 0         |  |
|        |      | Shiraz-77T | 1225 | 0        | -0.117922 |  |
|        |      | Shiraz-77T | 1227 | 0.196445 | 0         |  |
|        |      | Shiraz-9T  | 1324 | 0.679266 | 0         |  |
|        |      | Shiraz-18T | 1434 | 0.244465 | 0         |  |
|        |      | Shiraz-22T | 1549 | 0        | -0.319623 |  |

|       |      |            |      |          |           |  |  |
|-------|------|------------|------|----------|-----------|--|--|
|       |      | Shiraz-22T | 1551 | 0.324011 | 0         |  |  |
|       |      | Shiraz-25T | 1698 | 0.21835  | 0         |  |  |
|       |      | Shiraz-28T | 1735 | 0.350744 | 0         |  |  |
|       |      | Shiraz-29T | 1778 | 0.120767 | 0         |  |  |
|       |      | Shiraz-32T | 1833 | 0.551336 | 0         |  |  |
|       |      | Shiraz-32T | 1834 | 1.485392 | 0         |  |  |
|       |      | Shiraz-38T | 1951 | 0.250891 | 0         |  |  |
|       |      | Shiraz-53T | 2078 | 0.287202 | 0         |  |  |
|       |      | Shiraz-58T | 2160 | 0.399007 | 0         |  |  |
|       |      | Shiraz-71T | 2238 | 0.603631 | 0         |  |  |
|       |      | Shiraz-3T  | 90   | 0.219276 | 0         |  |  |
|       |      | Shiraz-3T  | 94   | 0.74735  | 0         |  |  |
|       |      | Shiraz-4T  | 253  | 0.372918 | 0         |  |  |
|       |      | Shiraz-31T | 316  | 0.219196 | 0         |  |  |
|       |      | Shiraz-36T | 378  | 0.179558 | 0         |  |  |
|       |      | Shiraz-36T | 381  | 0.332628 | 0         |  |  |
|       |      | Shiraz-44T | 639  | 1.035032 | 0         |  |  |
|       |      | Shiraz-46T | 943  | 0.093799 | 0         |  |  |
|       |      | Shiraz-46T | 946  | 0.299835 | 0         |  |  |
|       |      | Shiraz-47T | 1030 | 0.257728 | 0         |  |  |
|       |      | Shiraz-49T | 1120 | 0.281656 | 0         |  |  |
|       |      | Shiraz-77T | 1225 | 0        | -0.117922 |  |  |
|       |      | Shiraz-77T | 1227 | 0.196445 | 0         |  |  |
|       |      | Shiraz-9T  | 1324 | 0.679266 | 0         |  |  |
|       |      | Shiraz-18T | 1434 | 0.244465 | 0         |  |  |
|       |      | Shiraz-22T | 1549 | 0        | -0.319623 |  |  |
|       |      | Shiraz-22T | 1551 | 0.324011 | 0         |  |  |
|       |      | Shiraz-25T | 1698 | 0.21835  | 0         |  |  |
|       |      | Shiraz-28T | 1735 | 0.350744 | 0         |  |  |
|       |      | Shiraz-29T | 1778 | 0.120767 | 0         |  |  |
|       |      | Shiraz-32T | 1833 | 0.551336 | 0         |  |  |
|       |      | Shiraz-32T | 1834 | 1.485392 | 0         |  |  |
|       |      | Shiraz-38T | 1951 | 0.250891 | 0         |  |  |
|       |      | Shiraz-53T | 2078 | 0.287202 | 0         |  |  |
|       |      | Shiraz-58T | 2160 | 0.399007 | 0         |  |  |
|       |      | Shiraz-71T | 2238 | 0.603631 | 0         |  |  |
| TRIP6 | chr7 | Shiraz-3T  | 90   | 0.219276 | 0         |  |  |
|       |      | Shiraz-3T  | 94   | 0.74735  | 0         |  |  |
|       |      | Shiraz-4T  | 253  | 0.372918 | 0         |  |  |
|       |      | Shiraz-31T | 316  | 0.219196 | 0         |  |  |
|       |      | Shiraz-36T | 378  | 0.179558 | 0         |  |  |
|       |      | Shiraz-36T | 381  | 0.332628 | 0         |  |  |
|       |      | Shiraz-44T | 639  | 1.035032 | 0         |  |  |
|       |      | Shiraz-46T | 943  | 0.093799 | 0         |  |  |
|       |      | Shiraz-46T | 946  | 0.299835 | 0         |  |  |
|       |      | Shiraz-47T | 1030 | 0.257728 | 0         |  |  |
|       |      | Shiraz-49T | 1120 | 0.281656 | 0         |  |  |

|  |            |      |          |           |  |
|--|------------|------|----------|-----------|--|
|  | Shiraz-77T | 1225 | 0        | -0.117922 |  |
|  | Shiraz-77T | 1227 | 0.196445 | 0         |  |
|  | Shiraz-9T  | 1324 | 0.679266 | 0         |  |
|  | Shiraz-18T | 1434 | 0.244465 | 0         |  |
|  | Shiraz-22T | 1549 | 0        | -0.319623 |  |
|  | Shiraz-22T | 1551 | 0.324011 | 0         |  |
|  | Shiraz-25T | 1698 | 0.21835  | 0         |  |
|  | Shiraz-28T | 1735 | 0.350744 | 0         |  |
|  | Shiraz-29T | 1778 | 0.120767 | 0         |  |
|  | Shiraz-32T | 1833 | 0.551336 | 0         |  |
|  | Shiraz-32T | 1834 | 1.485392 | 0         |  |
|  | Shiraz-38T | 1951 | 0.250891 | 0         |  |
|  | Shiraz-53T | 2078 | 0.287202 | 0         |  |
|  | Shiraz-58T | 2160 | 0.399007 | 0         |  |
|  | Shiraz-71T | 2238 | 0.603631 | 0         |  |
|  | Shiraz-3T  | 90   | 0.219276 | 0         |  |
|  | Shiraz-3T  | 94   | 0.74735  | 0         |  |
|  | Shiraz-4T  | 253  | 0.372918 | 0         |  |
|  | Shiraz-31T | 316  | 0.219196 | 0         |  |
|  | Shiraz-36T | 378  | 0.179558 | 0         |  |
|  | Shiraz-36T | 381  | 0.332628 | 0         |  |
|  | Shiraz-44T | 639  | 1.035032 | 0         |  |
|  | Shiraz-46T | 943  | 0.093799 | 0         |  |
|  | Shiraz-46T | 946  | 0.299835 | 0         |  |
|  | Shiraz-47T | 1030 | 0.257728 | 0         |  |
|  | Shiraz-49T | 1120 | 0.281656 | 0         |  |
|  | Shiraz-77T | 1225 | 0        | -0.117922 |  |
|  | Shiraz-77T | 1227 | 0.196445 | 0         |  |
|  | Shiraz-9T  | 1324 | 0.679266 | 0         |  |
|  | Shiraz-18T | 1434 | 0.244465 | 0         |  |
|  | Shiraz-22T | 1549 | 0        | -0.319623 |  |
|  | Shiraz-22T | 1551 | 0.324011 | 0         |  |
|  | Shiraz-25T | 1698 | 0.21835  | 0         |  |
|  | Shiraz-28T | 1735 | 0.350744 | 0         |  |
|  | Shiraz-29T | 1778 | 0.120767 | 0         |  |
|  | Shiraz-32T | 1833 | 0.551336 | 0         |  |
|  | Shiraz-32T | 1834 | 1.485392 | 0         |  |
|  | Shiraz-38T | 1951 | 0.250891 | 0         |  |
|  | Shiraz-53T | 2078 | 0.287202 | 0         |  |
|  | Shiraz-58T | 2160 | 0.399007 | 0         |  |
|  | Shiraz-71T | 2238 | 0.603631 | 0         |  |
|  | Shiraz-3T  | 90   | 0.219276 | 0         |  |
|  | Shiraz-3T  | 94   | 0.74735  | 0         |  |
|  | Shiraz-4T  | 253  | 0.372918 | 0         |  |
|  | Shiraz-31T | 316  | 0.219196 | 0         |  |
|  | Shiraz-36T | 378  | 0.179558 | 0         |  |
|  | Shiraz-36T | 381  | 0.332628 | 0         |  |

|        |      |            |      |          |           |  |
|--------|------|------------|------|----------|-----------|--|
|        |      | Shiraz-44T | 639  | 1.035032 | 0         |  |
|        |      | Shiraz-46T | 943  | 0.093799 | 0         |  |
|        |      | Shiraz-46T | 946  | 0.299835 | 0         |  |
|        |      | Shiraz-47T | 1030 | 0.257728 | 0         |  |
|        |      | Shiraz-49T | 1120 | 0.281656 | 0         |  |
|        |      | Shiraz-77T | 1225 | 0        | -0.117922 |  |
|        |      | Shiraz-77T | 1227 | 0.196445 | 0         |  |
|        |      | Shiraz-9T  | 1324 | 0.679266 | 0         |  |
|        |      | Shiraz-18T | 1434 | 0.244465 | 0         |  |
|        |      | Shiraz-22T | 1549 | 0        | -0.319623 |  |
|        |      | Shiraz-22T | 1551 | 0.324011 | 0         |  |
|        |      | Shiraz-25T | 1698 | 0.21835  | 0         |  |
|        |      | Shiraz-28T | 1735 | 0.350744 | 0         |  |
|        |      | Shiraz-29T | 1778 | 0.120767 | 0         |  |
|        |      | Shiraz-32T | 1833 | 0.551336 | 0         |  |
|        |      | Shiraz-32T | 1834 | 1.485392 | 0         |  |
|        |      | Shiraz-38T | 1951 | 0.250891 | 0         |  |
|        |      | Shiraz-53T | 2078 | 0.287202 | 0         |  |
|        |      | Shiraz-58T | 2160 | 0.399007 | 0         |  |
|        |      | Shiraz-71T | 2238 | 0.603631 | 0         |  |
| TRMT2B | chrX | Shiraz-3T  | 242  | 0        | -0.336434 |  |
|        |      | Shiraz-4T  | 261  | 0        | -0.336249 |  |
|        |      | Shiraz-16T | 295  | 0.591657 | 0         |  |
|        |      | Shiraz-36T | 433  | 0        | -0.803961 |  |
|        |      | Shiraz-44T | 899  | 0        | -1.09697  |  |
|        |      | Shiraz-49T | 1170 | 0        | -0.967436 |  |
|        |      | Shiraz-18T | 1457 | 0.643204 | 0         |  |
|        |      | Shiraz-22T | 1673 | 0.611783 | 0         |  |
|        |      | Shiraz-25T | 1719 | 0.472955 | 0         |  |
|        |      | Shiraz-28T | 1762 | 0.562311 | 0         |  |
|        |      | Shiraz-29T | 1801 | 0.815343 | 0         |  |
|        |      | Shiraz-32T | 1870 | 0.729766 | 0         |  |
|        |      | Shiraz-35T | 1933 | 0.488535 | 0         |  |
|        |      | Shiraz-58T | 2223 | 0.833364 | 0         |  |
|        |      | Shiraz-71T | 2263 | 0.975531 | 0         |  |
|        |      | Shiraz-3T  | 242  | 0        | -0.336434 |  |
|        |      | Shiraz-4T  | 261  | 0        | -0.336249 |  |
|        |      | Shiraz-16T | 295  | 0.591657 | 0         |  |
|        |      | Shiraz-36T | 433  | 0        | -0.803961 |  |
|        |      | Shiraz-44T | 899  | 0        | -1.09697  |  |
|        |      | Shiraz-49T | 1170 | 0        | -0.967436 |  |
|        |      | Shiraz-18T | 1457 | 0.643204 | 0         |  |
|        |      | Shiraz-22T | 1673 | 0.611783 | 0         |  |
|        |      | Shiraz-25T | 1719 | 0.472955 | 0         |  |
|        |      | Shiraz-28T | 1762 | 0.562311 | 0         |  |
|        |      | Shiraz-29T | 1801 | 0.815343 | 0         |  |
|        |      | Shiraz-32T | 1870 | 0.729766 | 0         |  |

|     |      |            |      |          |           |  |
|-----|------|------------|------|----------|-----------|--|
|     |      | Shiraz-35T | 1933 | 0.488535 | 0         |  |
|     |      | Shiraz-58T | 2223 | 0.833364 | 0         |  |
|     |      | Shiraz-71T | 2263 | 0.975531 | 0         |  |
|     |      | Shiraz-3T  | 242  | 0        | -0.336434 |  |
|     |      | Shiraz-4T  | 261  | 0        | -0.336249 |  |
|     |      | Shiraz-16T | 295  | 0.591657 | 0         |  |
|     |      | Shiraz-36T | 433  | 0        | -0.803961 |  |
|     |      | Shiraz-44T | 899  | 0        | -1.09697  |  |
|     |      | Shiraz-49T | 1170 | 0        | -0.967436 |  |
|     |      | Shiraz-18T | 1457 | 0.643204 | 0         |  |
|     |      | Shiraz-22T | 1673 | 0.611783 | 0         |  |
|     |      | Shiraz-25T | 1719 | 0.472955 | 0         |  |
|     |      | Shiraz-28T | 1762 | 0.562311 | 0         |  |
|     |      | Shiraz-29T | 1801 | 0.815343 | 0         |  |
|     |      | Shiraz-32T | 1870 | 0.729766 | 0         |  |
|     |      | Shiraz-35T | 1933 | 0.488535 | 0         |  |
|     |      | Shiraz-58T | 2223 | 0.833364 | 0         |  |
|     |      | Shiraz-71T | 2263 | 0.975531 | 0         |  |
| TRO | chrX | Shiraz-4T  | 260  | 0        | -0.324128 |  |
|     |      | Shiraz-4T  | 260  | 0        | -0.324128 |  |
|     |      | Shiraz-16T | 294  | 0.655804 | 0         |  |
|     |      | Shiraz-16T | 294  | 0.655804 | 0         |  |
|     |      | Shiraz-36T | 431  | 0        | -0.78035  |  |
|     |      | Shiraz-36T | 431  | 0        | -0.78035  |  |
|     |      | Shiraz-44T | 891  | 0        | -0.954044 |  |
|     |      | Shiraz-44T | 891  | 0        | -0.954044 |  |
|     |      | Shiraz-44T | 898  | 0        | -0.515218 |  |
|     |      | Shiraz-44T | 898  | 0        | -0.515218 |  |
|     |      | Shiraz-49T | 1166 | 0        | -0.917235 |  |
|     |      | Shiraz-49T | 1166 | 0        | -0.917235 |  |
|     |      | Shiraz-77T | 1282 | 0.213849 | 0         |  |
|     |      | Shiraz-77T | 1282 | 0.213849 | 0         |  |
|     |      | Shiraz-9T  | 1368 | 0.199713 | 0         |  |
|     |      | Shiraz-9T  | 1368 | 0.199713 | 0         |  |
|     |      | Shiraz-18T | 1456 | 0.608534 | 0         |  |
|     |      | Shiraz-18T | 1456 | 0.608534 | 0         |  |
|     |      | Shiraz-22T | 1669 | 0.695915 | 0         |  |
|     |      | Shiraz-22T | 1669 | 0.695915 | 0         |  |
|     |      | Shiraz-25T | 1717 | 0.420447 | 0         |  |
|     |      | Shiraz-25T | 1717 | 0.420447 | 0         |  |
|     |      | Shiraz-28T | 1760 | 0.538181 | 0         |  |
|     |      | Shiraz-28T | 1760 | 0.538181 | 0         |  |
|     |      | Shiraz-29T | 1800 | 0.672527 | 0         |  |
|     |      | Shiraz-29T | 1800 | 0.672527 | 0         |  |
|     |      | Shiraz-32T | 1869 | 0.776805 | 0         |  |
|     |      | Shiraz-32T | 1869 | 0.776805 | 0         |  |
|     |      | Shiraz-35T | 1932 | 0.507141 | 0         |  |

|  |  |            |      |          |           |  |  |
|--|--|------------|------|----------|-----------|--|--|
|  |  | Shiraz-35T | 1932 | 0.507141 | 0         |  |  |
|  |  | Shiraz-58T | 2221 | 0.871948 | 0         |  |  |
|  |  | Shiraz-58T | 2221 | 0.871948 | 0         |  |  |
|  |  | Shiraz-71T | 2260 | 0.68394  | 0         |  |  |
|  |  | Shiraz-71T | 2260 | 0.68394  | 0         |  |  |
|  |  | Shiraz-71T | 2262 | 0.986748 | 0         |  |  |
|  |  | Shiraz-71T | 2262 | 0.986748 | 0         |  |  |
|  |  | Shiraz-4T  | 260  | 0        | -0.324128 |  |  |
|  |  | Shiraz-4T  | 260  | 0        | -0.324128 |  |  |
|  |  | Shiraz-16T | 294  | 0.655804 | 0         |  |  |
|  |  | Shiraz-16T | 294  | 0.655804 | 0         |  |  |
|  |  | Shiraz-36T | 431  | 0        | -0.78035  |  |  |
|  |  | Shiraz-36T | 431  | 0        | -0.78035  |  |  |
|  |  | Shiraz-44T | 891  | 0        | -0.954044 |  |  |
|  |  | Shiraz-44T | 891  | 0        | -0.954044 |  |  |
|  |  | Shiraz-44T | 898  | 0        | -0.515218 |  |  |
|  |  | Shiraz-44T | 898  | 0        | -0.515218 |  |  |
|  |  | Shiraz-49T | 1166 | 0        | -0.917235 |  |  |
|  |  | Shiraz-49T | 1166 | 0        | -0.917235 |  |  |
|  |  | Shiraz-77T | 1282 | 0.213849 | 0         |  |  |
|  |  | Shiraz-77T | 1282 | 0.213849 | 0         |  |  |
|  |  | Shiraz-9T  | 1368 | 0.199713 | 0         |  |  |
|  |  | Shiraz-9T  | 1368 | 0.199713 | 0         |  |  |
|  |  | Shiraz-18T | 1456 | 0.608534 | 0         |  |  |
|  |  | Shiraz-18T | 1456 | 0.608534 | 0         |  |  |
|  |  | Shiraz-22T | 1669 | 0.695915 | 0         |  |  |
|  |  | Shiraz-22T | 1669 | 0.695915 | 0         |  |  |
|  |  | Shiraz-25T | 1717 | 0.420447 | 0         |  |  |
|  |  | Shiraz-25T | 1717 | 0.420447 | 0         |  |  |
|  |  | Shiraz-28T | 1760 | 0.538181 | 0         |  |  |
|  |  | Shiraz-28T | 1760 | 0.538181 | 0         |  |  |
|  |  | Shiraz-29T | 1800 | 0.672527 | 0         |  |  |
|  |  | Shiraz-29T | 1800 | 0.672527 | 0         |  |  |
|  |  | Shiraz-32T | 1869 | 0.776805 | 0         |  |  |
|  |  | Shiraz-32T | 1869 | 0.776805 | 0         |  |  |
|  |  | Shiraz-35T | 1932 | 0.507141 | 0         |  |  |
|  |  | Shiraz-35T | 1932 | 0.507141 | 0         |  |  |
|  |  | Shiraz-58T | 2221 | 0.871948 | 0         |  |  |
|  |  | Shiraz-58T | 2221 | 0.871948 | 0         |  |  |
|  |  | Shiraz-71T | 2260 | 0.68394  | 0         |  |  |
|  |  | Shiraz-71T | 2260 | 0.68394  | 0         |  |  |
|  |  | Shiraz-71T | 2262 | 0.986748 | 0         |  |  |
|  |  | Shiraz-71T | 2262 | 0.986748 | 0         |  |  |
|  |  | Shiraz-4T  | 260  | 0        | -0.324128 |  |  |
|  |  | Shiraz-4T  | 260  | 0        | -0.324128 |  |  |
|  |  | Shiraz-16T | 294  | 0.655804 | 0         |  |  |
|  |  | Shiraz-16T | 294  | 0.655804 | 0         |  |  |

|       |      |            |      |          |           |  |  |
|-------|------|------------|------|----------|-----------|--|--|
|       |      | Shiraz-36T | 431  | 0        | -0.78035  |  |  |
|       |      | Shiraz-36T | 431  | 0        | -0.78035  |  |  |
|       |      | Shiraz-44T | 891  | 0        | -0.954044 |  |  |
|       |      | Shiraz-44T | 891  | 0        | -0.954044 |  |  |
|       |      | Shiraz-44T | 898  | 0        | -0.515218 |  |  |
|       |      | Shiraz-44T | 898  | 0        | -0.515218 |  |  |
|       |      | Shiraz-49T | 1166 | 0        | -0.917235 |  |  |
|       |      | Shiraz-49T | 1166 | 0        | -0.917235 |  |  |
|       |      | Shiraz-77T | 1282 | 0.213849 | 0         |  |  |
|       |      | Shiraz-77T | 1282 | 0.213849 | 0         |  |  |
|       |      | Shiraz-9T  | 1368 | 0.199713 | 0         |  |  |
|       |      | Shiraz-9T  | 1368 | 0.199713 | 0         |  |  |
|       |      | Shiraz-18T | 1456 | 0.608534 | 0         |  |  |
|       |      | Shiraz-18T | 1456 | 0.608534 | 0         |  |  |
|       |      | Shiraz-22T | 1669 | 0.695915 | 0         |  |  |
|       |      | Shiraz-22T | 1669 | 0.695915 | 0         |  |  |
|       |      | Shiraz-25T | 1717 | 0.420447 | 0         |  |  |
|       |      | Shiraz-25T | 1717 | 0.420447 | 0         |  |  |
|       |      | Shiraz-28T | 1760 | 0.538181 | 0         |  |  |
|       |      | Shiraz-28T | 1760 | 0.538181 | 0         |  |  |
|       |      | Shiraz-29T | 1800 | 0.672527 | 0         |  |  |
|       |      | Shiraz-29T | 1800 | 0.672527 | 0         |  |  |
|       |      | Shiraz-32T | 1869 | 0.776805 | 0         |  |  |
|       |      | Shiraz-32T | 1869 | 0.776805 | 0         |  |  |
|       |      | Shiraz-35T | 1932 | 0.507141 | 0         |  |  |
|       |      | Shiraz-35T | 1932 | 0.507141 | 0         |  |  |
|       |      | Shiraz-58T | 2221 | 0.871948 | 0         |  |  |
|       |      | Shiraz-58T | 2221 | 0.871948 | 0         |  |  |
|       |      | Shiraz-71T | 2260 | 0.68394  | 0         |  |  |
|       |      | Shiraz-71T | 2260 | 0.68394  | 0         |  |  |
|       |      | Shiraz-71T | 2262 | 0.986748 | 0         |  |  |
|       |      | Shiraz-71T | 2262 | 0.986748 | 0         |  |  |
| TRPCS | chrX | Shiraz-3T  | 242  | 0        | -0.336434 |  |  |
|       |      | Shiraz-4T  | 261  | 0        | -0.336249 |  |  |
|       |      | Shiraz-16T | 295  | 0.591657 | 0         |  |  |
|       |      | Shiraz-36T | 433  | 0        | -0.803961 |  |  |
|       |      | Shiraz-44T | 899  | 0        | -1.09697  |  |  |
|       |      | Shiraz-49T | 1170 | 0        | -0.967436 |  |  |
|       |      | Shiraz-18T | 1457 | 0.643204 | 0         |  |  |
|       |      | Shiraz-22T | 1673 | 0.611783 | 0         |  |  |
|       |      | Shiraz-25T | 1719 | 0.472955 | 0         |  |  |
|       |      | Shiraz-28T | 1762 | 0.562311 | 0         |  |  |
|       |      | Shiraz-29T | 1801 | 0.815343 | 0         |  |  |
|       |      | Shiraz-32T | 1870 | 0.729766 | 0         |  |  |
|       |      | Shiraz-35T | 1933 | 0.488535 | 0         |  |  |
|       |      | Shiraz-58T | 2223 | 0.833364 | 0         |  |  |
|       |      | Shiraz-71T | 2263 | 0.975531 | 0         |  |  |



|       |      |            |      |          |           |  |  |
|-------|------|------------|------|----------|-----------|--|--|
|       |      | Shiraz-3T  | 242  | 0        | -0.336434 |  |  |
|       |      | Shiraz-4T  | 261  | 0        | -0.336249 |  |  |
|       |      | Shiraz-16T | 295  | 0.591657 | 0         |  |  |
|       |      | Shiraz-36T | 433  | 0        | -0.803961 |  |  |
|       |      | Shiraz-44T | 899  | 0        | -1.09697  |  |  |
|       |      | Shiraz-49T | 1170 | 0        | -0.967436 |  |  |
|       |      | Shiraz-18T | 1457 | 0.643204 | 0         |  |  |
|       |      | Shiraz-22T | 1673 | 0.611783 | 0         |  |  |
|       |      | Shiraz-25T | 1719 | 0.472955 | 0         |  |  |
|       |      | Shiraz-28T | 1762 | 0.562311 | 0         |  |  |
|       |      | Shiraz-29T | 1801 | 0.815343 | 0         |  |  |
|       |      | Shiraz-32T | 1870 | 0.729766 | 0         |  |  |
|       |      | Shiraz-35T | 1933 | 0.488535 | 0         |  |  |
|       |      | Shiraz-58T | 2223 | 0.833364 | 0         |  |  |
|       |      | Shiraz-71T | 2263 | 0.975531 | 0         |  |  |
|       |      | Shiraz-3T  | 242  | 0        | -0.336434 |  |  |
|       |      | Shiraz-4T  | 261  | 0        | -0.336249 |  |  |
|       |      | Shiraz-16T | 295  | 0.591657 | 0         |  |  |
|       |      | Shiraz-36T | 433  | 0        | -0.803961 |  |  |
|       |      | Shiraz-44T | 899  | 0        | -1.09697  |  |  |
|       |      | Shiraz-49T | 1170 | 0        | -0.967436 |  |  |
|       |      | Shiraz-18T | 1457 | 0.643204 | 0         |  |  |
|       |      | Shiraz-22T | 1673 | 0.611783 | 0         |  |  |
|       |      | Shiraz-25T | 1719 | 0.472955 | 0         |  |  |
|       |      | Shiraz-28T | 1762 | 0.562311 | 0         |  |  |
|       |      | Shiraz-29T | 1801 | 0.815343 | 0         |  |  |
|       |      | Shiraz-32T | 1870 | 0.729766 | 0         |  |  |
|       |      | Shiraz-35T | 1933 | 0.488535 | 0         |  |  |
|       |      | Shiraz-58T | 2223 | 0.833364 | 0         |  |  |
|       |      | Shiraz-71T | 2263 | 0.975531 | 0         |  |  |
| TRPV5 | chr7 | Shiraz-3T  | 90   | 0.219276 | 0         |  |  |
|       |      | Shiraz-4T  | 253  | 0.372918 | 0         |  |  |
|       |      | Shiraz-36T | 378  | 0.179558 | 0         |  |  |
|       |      | Shiraz-46T | 943  | 0.093799 | 0         |  |  |
|       |      | Shiraz-77T | 1225 | 0        | -0.117922 |  |  |
|       |      | Shiraz-9T  | 1325 | 0.221899 | 0         |  |  |
|       |      | Shiraz-18T | 1434 | 0.244465 | 0         |  |  |
|       |      | Shiraz-25T | 1698 | 0.21835  | 0         |  |  |
|       |      | Shiraz-28T | 1735 | 0.350744 | 0         |  |  |
|       |      | Shiraz-29T | 1778 | 0.120767 | 0         |  |  |
|       |      | Shiraz-32T | 1833 | 0.551336 | 0         |  |  |
|       |      | Shiraz-38T | 1951 | 0.250891 | 0         |  |  |
|       |      | Shiraz-53T | 2078 | 0.287202 | 0         |  |  |
|       |      | Shiraz-58T | 2162 | 0.221505 | 0         |  |  |
|       |      | Shiraz-71T | 2238 | 0.603631 | 0         |  |  |
|       |      | Shiraz-3T  | 90   | 0.219276 | 0         |  |  |
|       |      | Shiraz-4T  | 253  | 0.372918 | 0         |  |  |

|       |      |            |      |          |           |  |  |
|-------|------|------------|------|----------|-----------|--|--|
|       |      | Shiraz-36T | 378  | 0.179558 | 0         |  |  |
|       |      | Shiraz-46T | 943  | 0.093799 | 0         |  |  |
|       |      | Shiraz-77T | 1225 | 0        | -0.117922 |  |  |
|       |      | Shiraz-9T  | 1325 | 0.221899 | 0         |  |  |
|       |      | Shiraz-18T | 1434 | 0.244465 | 0         |  |  |
|       |      | Shiraz-25T | 1698 | 0.21835  | 0         |  |  |
|       |      | Shiraz-28T | 1735 | 0.350744 | 0         |  |  |
|       |      | Shiraz-29T | 1778 | 0.120767 | 0         |  |  |
|       |      | Shiraz-32T | 1833 | 0.551336 | 0         |  |  |
|       |      | Shiraz-38T | 1951 | 0.250891 | 0         |  |  |
|       |      | Shiraz-53T | 2078 | 0.287202 | 0         |  |  |
|       |      | Shiraz-58T | 2162 | 0.221505 | 0         |  |  |
|       |      | Shiraz-71T | 2238 | 0.603631 | 0         |  |  |
|       |      | Shiraz-3T  | 90   | 0.219276 | 0         |  |  |
|       |      | Shiraz-4T  | 253  | 0.372918 | 0         |  |  |
|       |      | Shiraz-36T | 378  | 0.179558 | 0         |  |  |
|       |      | Shiraz-46T | 943  | 0.093799 | 0         |  |  |
|       |      | Shiraz-77T | 1225 | 0        | -0.117922 |  |  |
|       |      | Shiraz-9T  | 1325 | 0.221899 | 0         |  |  |
|       |      | Shiraz-18T | 1434 | 0.244465 | 0         |  |  |
|       |      | Shiraz-25T | 1698 | 0.21835  | 0         |  |  |
|       |      | Shiraz-28T | 1735 | 0.350744 | 0         |  |  |
|       |      | Shiraz-29T | 1778 | 0.120767 | 0         |  |  |
|       |      | Shiraz-32T | 1833 | 0.551336 | 0         |  |  |
|       |      | Shiraz-38T | 1951 | 0.250891 | 0         |  |  |
|       |      | Shiraz-53T | 2078 | 0.287202 | 0         |  |  |
|       |      | Shiraz-58T | 2162 | 0.221505 | 0         |  |  |
|       |      | Shiraz-71T | 2238 | 0.603631 | 0         |  |  |
| TRPV6 | chr7 | Shiraz-3T  | 90   | 0.219276 | 0         |  |  |
|       |      | Shiraz-4T  | 253  | 0.372918 | 0         |  |  |
|       |      | Shiraz-36T | 378  | 0.179558 | 0         |  |  |
|       |      | Shiraz-46T | 943  | 0.093799 | 0         |  |  |
|       |      | Shiraz-77T | 1225 | 0        | -0.117922 |  |  |
|       |      | Shiraz-9T  | 1325 | 0.221899 | 0         |  |  |
|       |      | Shiraz-18T | 1434 | 0.244465 | 0         |  |  |
|       |      | Shiraz-25T | 1698 | 0.21835  | 0         |  |  |
|       |      | Shiraz-28T | 1735 | 0.350744 | 0         |  |  |
|       |      | Shiraz-29T | 1778 | 0.120767 | 0         |  |  |
|       |      | Shiraz-32T | 1833 | 0.551336 | 0         |  |  |
|       |      | Shiraz-38T | 1951 | 0.250891 | 0         |  |  |
|       |      | Shiraz-53T | 2078 | 0.287202 | 0         |  |  |
|       |      | Shiraz-58T | 2162 | 0.221505 | 0         |  |  |
|       |      | Shiraz-71T | 2238 | 0.603631 | 0         |  |  |
|       |      | Shiraz-3T  | 90   | 0.219276 | 0         |  |  |
|       |      | Shiraz-4T  | 253  | 0.372918 | 0         |  |  |
|       |      | Shiraz-36T | 378  | 0.179558 | 0         |  |  |
|       |      | Shiraz-46T | 943  | 0.093799 | 0         |  |  |

|       |      |            |      |          |           |  |  |
|-------|------|------------|------|----------|-----------|--|--|
|       |      | Shiraz-77T | 1225 | 0        | -0.117922 |  |  |
|       |      | Shiraz-9T  | 1325 | 0.221899 | 0         |  |  |
|       |      | Shiraz-18T | 1434 | 0.244465 | 0         |  |  |
|       |      | Shiraz-25T | 1698 | 0.21835  | 0         |  |  |
|       |      | Shiraz-28T | 1735 | 0.350744 | 0         |  |  |
|       |      | Shiraz-29T | 1778 | 0.120767 | 0         |  |  |
|       |      | Shiraz-32T | 1833 | 0.551336 | 0         |  |  |
|       |      | Shiraz-38T | 1951 | 0.250891 | 0         |  |  |
|       |      | Shiraz-53T | 2078 | 0.287202 | 0         |  |  |
|       |      | Shiraz-58T | 2162 | 0.221505 | 0         |  |  |
|       |      | Shiraz-71T | 2238 | 0.603631 | 0         |  |  |
|       |      | Shiraz-3T  | 90   | 0.219276 | 0         |  |  |
|       |      | Shiraz-4T  | 253  | 0.372918 | 0         |  |  |
|       |      | Shiraz-36T | 378  | 0.179558 | 0         |  |  |
|       |      | Shiraz-46T | 943  | 0.093799 | 0         |  |  |
|       |      | Shiraz-77T | 1225 | 0        | -0.117922 |  |  |
|       |      | Shiraz-9T  | 1325 | 0.221899 | 0         |  |  |
|       |      | Shiraz-18T | 1434 | 0.244465 | 0         |  |  |
|       |      | Shiraz-25T | 1698 | 0.21835  | 0         |  |  |
|       |      | Shiraz-28T | 1735 | 0.350744 | 0         |  |  |
|       |      | Shiraz-29T | 1778 | 0.120767 | 0         |  |  |
|       |      | Shiraz-32T | 1833 | 0.551336 | 0         |  |  |
|       |      | Shiraz-38T | 1951 | 0.250891 | 0         |  |  |
|       |      | Shiraz-53T | 2078 | 0.287202 | 0         |  |  |
|       |      | Shiraz-58T | 2162 | 0.221505 | 0         |  |  |
|       |      | Shiraz-71T | 2238 | 0.603631 | 0         |  |  |
| TRRAP | chr7 | Shiraz-3T  | 90   | 0.219276 | 0         |  |  |
|       |      | Shiraz-3T  | 94   | 0.74735  | 0         |  |  |
|       |      | Shiraz-4T  | 253  | 0.372918 | 0         |  |  |
|       |      | Shiraz-31T | 316  | 0.219196 | 0         |  |  |
|       |      | Shiraz-36T | 378  | 0.179558 | 0         |  |  |
|       |      | Shiraz-36T | 381  | 0.332628 | 0         |  |  |
|       |      | Shiraz-44T | 639  | 1.035032 | 0         |  |  |
|       |      | Shiraz-46T | 943  | 0.093799 | 0         |  |  |
|       |      | Shiraz-46T | 946  | 0.299835 | 0         |  |  |
|       |      | Shiraz-47T | 1030 | 0.257728 | 0         |  |  |
|       |      | Shiraz-49T | 1120 | 0.281656 | 0         |  |  |
|       |      | Shiraz-77T | 1225 | 0        | -0.117922 |  |  |
|       |      | Shiraz-77T | 1227 | 0.196445 | 0         |  |  |
|       |      | Shiraz-9T  | 1324 | 0.679266 | 0         |  |  |
|       |      | Shiraz-18T | 1434 | 0.244465 | 0         |  |  |
|       |      | Shiraz-22T | 1549 | 0        | -0.319623 |  |  |
|       |      | Shiraz-22T | 1551 | 0.324011 | 0         |  |  |
|       |      | Shiraz-25T | 1698 | 0.21835  | 0         |  |  |
|       |      | Shiraz-28T | 1735 | 0.350744 | 0         |  |  |
|       |      | Shiraz-29T | 1778 | 0.120767 | 0         |  |  |
|       |      | Shiraz-32T | 1833 | 0.551336 | 0         |  |  |

|  |            |      |          |           |  |
|--|------------|------|----------|-----------|--|
|  | Shiraz-38T | 1951 | 0.250891 | 0         |  |
|  | Shiraz-53T | 2078 | 0.287202 | 0         |  |
|  | Shiraz-71T | 2238 | 0.603631 | 0         |  |
|  | Shiraz-3T  | 90   | 0.219276 | 0         |  |
|  | Shiraz-3T  | 94   | 0.74735  | 0         |  |
|  | Shiraz-4T  | 253  | 0.372918 | 0         |  |
|  | Shiraz-31T | 316  | 0.219196 | 0         |  |
|  | Shiraz-36T | 378  | 0.179558 | 0         |  |
|  | Shiraz-36T | 381  | 0.332628 | 0         |  |
|  | Shiraz-44T | 639  | 1.035032 | 0         |  |
|  | Shiraz-46T | 943  | 0.093799 | 0         |  |
|  | Shiraz-46T | 946  | 0.299835 | 0         |  |
|  | Shiraz-47T | 1030 | 0.257728 | 0         |  |
|  | Shiraz-49T | 1120 | 0.281656 | 0         |  |
|  | Shiraz-77T | 1225 | 0        | -0.117922 |  |
|  | Shiraz-77T | 1227 | 0.196445 | 0         |  |
|  | Shiraz-9T  | 1324 | 0.679266 | 0         |  |
|  | Shiraz-18T | 1434 | 0.244465 | 0         |  |
|  | Shiraz-22T | 1549 | 0        | -0.319623 |  |
|  | Shiraz-22T | 1551 | 0.324011 | 0         |  |
|  | Shiraz-25T | 1698 | 0.21835  | 0         |  |
|  | Shiraz-28T | 1735 | 0.350744 | 0         |  |
|  | Shiraz-29T | 1778 | 0.120767 | 0         |  |
|  | Shiraz-32T | 1833 | 0.551336 | 0         |  |
|  | Shiraz-38T | 1951 | 0.250891 | 0         |  |
|  | Shiraz-53T | 2078 | 0.287202 | 0         |  |
|  | Shiraz-71T | 2238 | 0.603631 | 0         |  |
|  | Shiraz-3T  | 90   | 0.219276 | 0         |  |
|  | Shiraz-3T  | 94   | 0.74735  | 0         |  |
|  | Shiraz-4T  | 253  | 0.372918 | 0         |  |
|  | Shiraz-31T | 316  | 0.219196 | 0         |  |
|  | Shiraz-36T | 378  | 0.179558 | 0         |  |
|  | Shiraz-36T | 381  | 0.332628 | 0         |  |
|  | Shiraz-44T | 639  | 1.035032 | 0         |  |
|  | Shiraz-46T | 943  | 0.093799 | 0         |  |
|  | Shiraz-46T | 946  | 0.299835 | 0         |  |
|  | Shiraz-47T | 1030 | 0.257728 | 0         |  |
|  | Shiraz-49T | 1120 | 0.281656 | 0         |  |
|  | Shiraz-77T | 1225 | 0        | -0.117922 |  |
|  | Shiraz-77T | 1227 | 0.196445 | 0         |  |
|  | Shiraz-9T  | 1324 | 0.679266 | 0         |  |
|  | Shiraz-18T | 1434 | 0.244465 | 0         |  |
|  | Shiraz-22T | 1549 | 0        | -0.319623 |  |
|  | Shiraz-22T | 1551 | 0.324011 | 0         |  |
|  | Shiraz-25T | 1698 | 0.21835  | 0         |  |
|  | Shiraz-28T | 1735 | 0.350744 | 0         |  |
|  | Shiraz-29T | 1778 | 0.120767 | 0         |  |

|      |      |            |      |          |           |  |
|------|------|------------|------|----------|-----------|--|
|      |      | Shiraz-32T | 1833 | 0.551336 | 0         |  |
|      |      | Shiraz-38T | 1951 | 0.250891 | 0         |  |
|      |      | Shiraz-53T | 2078 | 0.287202 | 0         |  |
|      |      | Shiraz-71T | 2238 | 0.603631 | 0         |  |
| TRY6 | chr7 | Shiraz-3T  | 90   | 0.219276 | 0         |  |
|      |      | Shiraz-4T  | 253  | 0.372918 | 0         |  |
|      |      | Shiraz-36T | 378  | 0.179558 | 0         |  |
|      |      | Shiraz-46T | 943  | 0.093799 | 0         |  |
|      |      | Shiraz-77T | 1225 | 0        | -0.117922 |  |
|      |      | Shiraz-9T  | 1325 | 0.221899 | 0         |  |
|      |      | Shiraz-18T | 1434 | 0.244465 | 0         |  |
|      |      | Shiraz-25T | 1698 | 0.21835  | 0         |  |
|      |      | Shiraz-28T | 1735 | 0.350744 | 0         |  |
|      |      | Shiraz-29T | 1778 | 0.120767 | 0         |  |
|      |      | Shiraz-32T | 1833 | 0.551336 | 0         |  |
|      |      | Shiraz-38T | 1951 | 0.250891 | 0         |  |
|      |      | Shiraz-53T | 2078 | 0.287202 | 0         |  |
|      |      | Shiraz-58T | 2162 | 0.221505 | 0         |  |
|      |      | Shiraz-71T | 2238 | 0.603631 | 0         |  |
|      |      | Shiraz-3T  | 90   | 0.219276 | 0         |  |
|      |      | Shiraz-4T  | 253  | 0.372918 | 0         |  |
|      |      | Shiraz-36T | 378  | 0.179558 | 0         |  |
|      |      | Shiraz-46T | 943  | 0.093799 | 0         |  |
|      |      | Shiraz-77T | 1225 | 0        | -0.117922 |  |
|      |      | Shiraz-9T  | 1325 | 0.221899 | 0         |  |
|      |      | Shiraz-18T | 1434 | 0.244465 | 0         |  |
|      |      | Shiraz-25T | 1698 | 0.21835  | 0         |  |
|      |      | Shiraz-28T | 1735 | 0.350744 | 0         |  |
|      |      | Shiraz-29T | 1778 | 0.120767 | 0         |  |
|      |      | Shiraz-32T | 1833 | 0.551336 | 0         |  |
|      |      | Shiraz-38T | 1951 | 0.250891 | 0         |  |
|      |      | Shiraz-53T | 2078 | 0.287202 | 0         |  |
|      |      | Shiraz-58T | 2162 | 0.221505 | 0         |  |
|      |      | Shiraz-71T | 2238 | 0.603631 | 0         |  |
|      |      | Shiraz-3T  | 90   | 0.219276 | 0         |  |
|      |      | Shiraz-4T  | 253  | 0.372918 | 0         |  |
|      |      | Shiraz-36T | 378  | 0.179558 | 0         |  |
|      |      | Shiraz-46T | 943  | 0.093799 | 0         |  |
|      |      | Shiraz-77T | 1225 | 0        | -0.117922 |  |
|      |      | Shiraz-9T  | 1325 | 0.221899 | 0         |  |
|      |      | Shiraz-18T | 1434 | 0.244465 | 0         |  |
|      |      | Shiraz-25T | 1698 | 0.21835  | 0         |  |
|      |      | Shiraz-28T | 1735 | 0.350744 | 0         |  |
|      |      | Shiraz-29T | 1778 | 0.120767 | 0         |  |
|      |      | Shiraz-32T | 1833 | 0.551336 | 0         |  |
|      |      | Shiraz-38T | 1951 | 0.250891 | 0         |  |
|      |      | Shiraz-53T | 2078 | 0.287202 | 0         |  |

|       |      |            |      |          |           |  |
|-------|------|------------|------|----------|-----------|--|
|       |      | Shiraz-58T | 2162 | 0.221505 | 0         |  |
|       |      | Shiraz-71T | 2238 | 0.603631 | 0         |  |
| TRYX3 | chr7 | Shiraz-3T  | 90   | 0.219276 | 0         |  |
|       |      | Shiraz-4T  | 253  | 0.372918 | 0         |  |
|       |      | Shiraz-36T | 378  | 0.179558 | 0         |  |
|       |      | Shiraz-46T | 943  | 0.093799 | 0         |  |
|       |      | Shiraz-77T | 1225 | 0        | -0.117922 |  |
|       |      | Shiraz-9T  | 1325 | 0.221899 | 0         |  |
|       |      | Shiraz-18T | 1434 | 0.244465 | 0         |  |
|       |      | Shiraz-25T | 1698 | 0.21835  | 0         |  |
|       |      | Shiraz-28T | 1735 | 0.350744 | 0         |  |
|       |      | Shiraz-29T | 1778 | 0.120767 | 0         |  |
|       |      | Shiraz-32T | 1833 | 0.551336 | 0         |  |
|       |      | Shiraz-38T | 1951 | 0.250891 | 0         |  |
|       |      | Shiraz-53T | 2078 | 0.287202 | 0         |  |
|       |      | Shiraz-58T | 2162 | 0.221505 | 0         |  |
|       |      | Shiraz-71T | 2238 | 0.603631 | 0         |  |
|       |      | Shiraz-3T  | 90   | 0.219276 | 0         |  |
|       |      | Shiraz-4T  | 253  | 0.372918 | 0         |  |
|       |      | Shiraz-36T | 378  | 0.179558 | 0         |  |
|       |      | Shiraz-46T | 943  | 0.093799 | 0         |  |
|       |      | Shiraz-77T | 1225 | 0        | -0.117922 |  |
|       |      | Shiraz-9T  | 1325 | 0.221899 | 0         |  |
|       |      | Shiraz-18T | 1434 | 0.244465 | 0         |  |
|       |      | Shiraz-25T | 1698 | 0.21835  | 0         |  |
|       |      | Shiraz-28T | 1735 | 0.350744 | 0         |  |
|       |      | Shiraz-29T | 1778 | 0.120767 | 0         |  |
|       |      | Shiraz-32T | 1833 | 0.551336 | 0         |  |
|       |      | Shiraz-38T | 1951 | 0.250891 | 0         |  |
|       |      | Shiraz-53T | 2078 | 0.287202 | 0         |  |
|       |      | Shiraz-58T | 2162 | 0.221505 | 0         |  |
|       |      | Shiraz-71T | 2238 | 0.603631 | 0         |  |
|       |      | Shiraz-3T  | 90   | 0.219276 | 0         |  |
|       |      | Shiraz-4T  | 253  | 0.372918 | 0         |  |
|       |      | Shiraz-36T | 378  | 0.179558 | 0         |  |
|       |      | Shiraz-46T | 943  | 0.093799 | 0         |  |
|       |      | Shiraz-77T | 1225 | 0        | -0.117922 |  |
|       |      | Shiraz-9T  | 1325 | 0.221899 | 0         |  |
|       |      | Shiraz-18T | 1434 | 0.244465 | 0         |  |
|       |      | Shiraz-25T | 1698 | 0.21835  | 0         |  |
|       |      | Shiraz-28T | 1735 | 0.350744 | 0         |  |
|       |      | Shiraz-29T | 1778 | 0.120767 | 0         |  |
|       |      | Shiraz-32T | 1833 | 0.551336 | 0         |  |
|       |      | Shiraz-38T | 1951 | 0.250891 | 0         |  |
|       |      | Shiraz-53T | 2078 | 0.287202 | 0         |  |
|       |      | Shiraz-58T | 2162 | 0.221505 | 0         |  |
|       |      | Shiraz-71T | 2238 | 0.603631 | 0         |  |

|         |      |            |      |          |           |  |  |
|---------|------|------------|------|----------|-----------|--|--|
| TSC22D3 | chrX | Shiraz-3T  | 242  | 0        | -0.336434 |  |  |
|         |      | Shiraz-3T  | 242  | 0        | -0.336434 |  |  |
|         |      | Shiraz-3T  | 242  | 0        | -0.336434 |  |  |
|         |      | Shiraz-4T  | 261  | 0        | -0.336249 |  |  |
|         |      | Shiraz-4T  | 261  | 0        | -0.336249 |  |  |
|         |      | Shiraz-4T  | 261  | 0        | -0.336249 |  |  |
|         |      | Shiraz-16T | 295  | 0.591657 | 0         |  |  |
|         |      | Shiraz-16T | 295  | 0.591657 | 0         |  |  |
|         |      | Shiraz-16T | 295  | 0.591657 | 0         |  |  |
|         |      | Shiraz-36T | 433  | 0        | -0.803961 |  |  |
|         |      | Shiraz-36T | 433  | 0        | -0.803961 |  |  |
|         |      | Shiraz-36T | 433  | 0        | -0.803961 |  |  |
|         |      | Shiraz-44T | 899  | 0        | -1.09697  |  |  |
|         |      | Shiraz-44T | 899  | 0        | -1.09697  |  |  |
|         |      | Shiraz-44T | 899  | 0        | -1.09697  |  |  |
|         |      | Shiraz-44T | 903  | 0        | -0.290259 |  |  |
|         |      | Shiraz-44T | 903  | 0        | -0.290259 |  |  |
|         |      | Shiraz-44T | 903  | 0        | -0.290259 |  |  |
|         |      | Shiraz-49T | 1170 | 0        | -0.967436 |  |  |
|         |      | Shiraz-49T | 1170 | 0        | -0.967436 |  |  |
|         |      | Shiraz-49T | 1170 | 0        | -0.967436 |  |  |
|         |      | Shiraz-18T | 1457 | 0.643204 | 0         |  |  |
|         |      | Shiraz-18T | 1457 | 0.643204 | 0         |  |  |
|         |      | Shiraz-18T | 1457 | 0.643204 | 0         |  |  |
|         |      | Shiraz-22T | 1673 | 0.611783 | 0         |  |  |
|         |      | Shiraz-22T | 1673 | 0.611783 | 0         |  |  |
|         |      | Shiraz-22T | 1673 | 0.611783 | 0         |  |  |
|         |      | Shiraz-25T | 1719 | 0.472955 | 0         |  |  |
|         |      | Shiraz-25T | 1719 | 0.472955 | 0         |  |  |
|         |      | Shiraz-25T | 1719 | 0.472955 | 0         |  |  |
|         |      | Shiraz-28T | 1762 | 0.562311 | 0         |  |  |
|         |      | Shiraz-28T | 1762 | 0.562311 | 0         |  |  |
|         |      | Shiraz-28T | 1762 | 0.562311 | 0         |  |  |
|         |      | Shiraz-29T | 1801 | 0.815343 | 0         |  |  |
|         |      | Shiraz-29T | 1801 | 0.815343 | 0         |  |  |
|         |      | Shiraz-29T | 1801 | 0.815343 | 0         |  |  |
|         |      | Shiraz-32T | 1870 | 0.729766 | 0         |  |  |
|         |      | Shiraz-32T | 1870 | 0.729766 | 0         |  |  |
|         |      | Shiraz-32T | 1870 | 0.729766 | 0         |  |  |
|         |      | Shiraz-35T | 1933 | 0.488535 | 0         |  |  |
|         |      | Shiraz-35T | 1933 | 0.488535 | 0         |  |  |
|         |      | Shiraz-35T | 1933 | 0.488535 | 0         |  |  |
|         |      | Shiraz-58T | 2223 | 0.833364 | 0         |  |  |
|         |      | Shiraz-58T | 2223 | 0.833364 | 0         |  |  |
|         |      | Shiraz-58T | 2223 | 0.833364 | 0         |  |  |
|         |      | Shiraz-71T | 2263 | 0.975531 | 0         |  |  |
|         |      | Shiraz-71T | 2263 | 0.975531 | 0         |  |  |

|  |  |            |      |          |           |  |  |
|--|--|------------|------|----------|-----------|--|--|
|  |  | Shiraz-71T | 2263 | 0.975531 | 0         |  |  |
|  |  | Shiraz-3T  | 242  | 0        | -0.336434 |  |  |
|  |  | Shiraz-3T  | 242  | 0        | -0.336434 |  |  |
|  |  | Shiraz-3T  | 242  | 0        | -0.336434 |  |  |
|  |  | Shiraz-4T  | 261  | 0        | -0.336249 |  |  |
|  |  | Shiraz-4T  | 261  | 0        | -0.336249 |  |  |
|  |  | Shiraz-4T  | 261  | 0        | -0.336249 |  |  |
|  |  | Shiraz-16T | 295  | 0.591657 | 0         |  |  |
|  |  | Shiraz-16T | 295  | 0.591657 | 0         |  |  |
|  |  | Shiraz-16T | 295  | 0.591657 | 0         |  |  |
|  |  | Shiraz-36T | 433  | 0        | -0.803961 |  |  |
|  |  | Shiraz-36T | 433  | 0        | -0.803961 |  |  |
|  |  | Shiraz-36T | 433  | 0        | -0.803961 |  |  |
|  |  | Shiraz-44T | 899  | 0        | -1.09697  |  |  |
|  |  | Shiraz-44T | 899  | 0        | -1.09697  |  |  |
|  |  | Shiraz-44T | 899  | 0        | -1.09697  |  |  |
|  |  | Shiraz-44T | 903  | 0        | -0.290259 |  |  |
|  |  | Shiraz-44T | 903  | 0        | -0.290259 |  |  |
|  |  | Shiraz-44T | 903  | 0        | -0.290259 |  |  |
|  |  | Shiraz-49T | 1170 | 0        | -0.967436 |  |  |
|  |  | Shiraz-49T | 1170 | 0        | -0.967436 |  |  |
|  |  | Shiraz-49T | 1170 | 0        | -0.967436 |  |  |
|  |  | Shiraz-18T | 1457 | 0.643204 | 0         |  |  |
|  |  | Shiraz-18T | 1457 | 0.643204 | 0         |  |  |
|  |  | Shiraz-18T | 1457 | 0.643204 | 0         |  |  |
|  |  | Shiraz-22T | 1673 | 0.611783 | 0         |  |  |
|  |  | Shiraz-22T | 1673 | 0.611783 | 0         |  |  |
|  |  | Shiraz-22T | 1673 | 0.611783 | 0         |  |  |
|  |  | Shiraz-25T | 1719 | 0.472955 | 0         |  |  |
|  |  | Shiraz-25T | 1719 | 0.472955 | 0         |  |  |
|  |  | Shiraz-25T | 1719 | 0.472955 | 0         |  |  |
|  |  | Shiraz-28T | 1762 | 0.562311 | 0         |  |  |
|  |  | Shiraz-28T | 1762 | 0.562311 | 0         |  |  |
|  |  | Shiraz-28T | 1762 | 0.562311 | 0         |  |  |
|  |  | Shiraz-29T | 1801 | 0.815343 | 0         |  |  |
|  |  | Shiraz-29T | 1801 | 0.815343 | 0         |  |  |
|  |  | Shiraz-29T | 1801 | 0.815343 | 0         |  |  |
|  |  | Shiraz-32T | 1870 | 0.729766 | 0         |  |  |
|  |  | Shiraz-32T | 1870 | 0.729766 | 0         |  |  |
|  |  | Shiraz-32T | 1870 | 0.729766 | 0         |  |  |
|  |  | Shiraz-35T | 1933 | 0.488535 | 0         |  |  |
|  |  | Shiraz-35T | 1933 | 0.488535 | 0         |  |  |
|  |  | Shiraz-35T | 1933 | 0.488535 | 0         |  |  |
|  |  | Shiraz-58T | 2223 | 0.833364 | 0         |  |  |
|  |  | Shiraz-58T | 2223 | 0.833364 | 0         |  |  |
|  |  | Shiraz-58T | 2223 | 0.833364 | 0         |  |  |
|  |  | Shiraz-71T | 2263 | 0.975531 | 0         |  |  |



|  |  |            |      |          |           |  |  |
|--|--|------------|------|----------|-----------|--|--|
|  |  | Shiraz-71T | 2263 | 0.975531 | 0         |  |  |
|  |  | Shiraz-71T | 2263 | 0.975531 | 0         |  |  |
|  |  | Shiraz-3T  | 242  | 0        | -0.336434 |  |  |
|  |  | Shiraz-3T  | 242  | 0        | -0.336434 |  |  |
|  |  | Shiraz-3T  | 242  | 0        | -0.336434 |  |  |
|  |  | Shiraz-4T  | 261  | 0        | -0.336249 |  |  |
|  |  | Shiraz-4T  | 261  | 0        | -0.336249 |  |  |
|  |  | Shiraz-4T  | 261  | 0        | -0.336249 |  |  |
|  |  | Shiraz-16T | 295  | 0.591657 | 0         |  |  |
|  |  | Shiraz-16T | 295  | 0.591657 | 0         |  |  |
|  |  | Shiraz-16T | 295  | 0.591657 | 0         |  |  |
|  |  | Shiraz-36T | 433  | 0        | -0.803961 |  |  |
|  |  | Shiraz-36T | 433  | 0        | -0.803961 |  |  |
|  |  | Shiraz-36T | 433  | 0        | -0.803961 |  |  |
|  |  | Shiraz-44T | 899  | 0        | -1.09697  |  |  |
|  |  | Shiraz-44T | 899  | 0        | -1.09697  |  |  |
|  |  | Shiraz-44T | 899  | 0        | -1.09697  |  |  |
|  |  | Shiraz-44T | 903  | 0        | -0.290259 |  |  |
|  |  | Shiraz-44T | 903  | 0        | -0.290259 |  |  |
|  |  | Shiraz-44T | 903  | 0        | -0.290259 |  |  |
|  |  | Shiraz-49T | 1170 | 0        | -0.967436 |  |  |
|  |  | Shiraz-49T | 1170 | 0        | -0.967436 |  |  |
|  |  | Shiraz-49T | 1170 | 0        | -0.967436 |  |  |
|  |  | Shiraz-18T | 1457 | 0.643204 | 0         |  |  |
|  |  | Shiraz-18T | 1457 | 0.643204 | 0         |  |  |
|  |  | Shiraz-18T | 1457 | 0.643204 | 0         |  |  |
|  |  | Shiraz-22T | 1673 | 0.611783 | 0         |  |  |
|  |  | Shiraz-22T | 1673 | 0.611783 | 0         |  |  |
|  |  | Shiraz-22T | 1673 | 0.611783 | 0         |  |  |
|  |  | Shiraz-25T | 1719 | 0.472955 | 0         |  |  |
|  |  | Shiraz-25T | 1719 | 0.472955 | 0         |  |  |
|  |  | Shiraz-25T | 1719 | 0.472955 | 0         |  |  |
|  |  | Shiraz-28T | 1762 | 0.562311 | 0         |  |  |
|  |  | Shiraz-28T | 1762 | 0.562311 | 0         |  |  |
|  |  | Shiraz-28T | 1762 | 0.562311 | 0         |  |  |
|  |  | Shiraz-29T | 1801 | 0.815343 | 0         |  |  |
|  |  | Shiraz-29T | 1801 | 0.815343 | 0         |  |  |
|  |  | Shiraz-29T | 1801 | 0.815343 | 0         |  |  |
|  |  | Shiraz-32T | 1870 | 0.729766 | 0         |  |  |
|  |  | Shiraz-32T | 1870 | 0.729766 | 0         |  |  |
|  |  | Shiraz-32T | 1870 | 0.729766 | 0         |  |  |
|  |  | Shiraz-35T | 1933 | 0.488535 | 0         |  |  |
|  |  | Shiraz-35T | 1933 | 0.488535 | 0         |  |  |
|  |  | Shiraz-35T | 1933 | 0.488535 | 0         |  |  |
|  |  | Shiraz-58T | 2223 | 0.833364 | 0         |  |  |
|  |  | Shiraz-58T | 2223 | 0.833364 | 0         |  |  |
|  |  | Shiraz-58T | 2223 | 0.833364 | 0         |  |  |

|         |      |            |      |          |           |  |
|---------|------|------------|------|----------|-----------|--|
|         |      | Shiraz-71T | 2263 | 0.975531 | 0         |  |
|         |      | Shiraz-71T | 2263 | 0.975531 | 0         |  |
|         |      | Shiraz-71T | 2263 | 0.975531 | 0         |  |
| TSC22D4 | chr7 | Shiraz-3T  | 90   | 0.219276 | 0         |  |
|         |      | Shiraz-3T  | 94   | 0.74735  | 0         |  |
|         |      | Shiraz-4T  | 253  | 0.372918 | 0         |  |
|         |      | Shiraz-31T | 316  | 0.219196 | 0         |  |
|         |      | Shiraz-36T | 378  | 0.179558 | 0         |  |
|         |      | Shiraz-36T | 381  | 0.332628 | 0         |  |
|         |      | Shiraz-44T | 639  | 1.035032 | 0         |  |
|         |      | Shiraz-46T | 943  | 0.093799 | 0         |  |
|         |      | Shiraz-46T | 946  | 0.299835 | 0         |  |
|         |      | Shiraz-47T | 1030 | 0.257728 | 0         |  |
|         |      | Shiraz-49T | 1120 | 0.281656 | 0         |  |
|         |      | Shiraz-77T | 1225 | 0        | -0.117922 |  |
|         |      | Shiraz-77T | 1227 | 0.196445 | 0         |  |
|         |      | Shiraz-9T  | 1324 | 0.679266 | 0         |  |
|         |      | Shiraz-18T | 1434 | 0.244465 | 0         |  |
|         |      | Shiraz-22T | 1549 | 0        | -0.319623 |  |
|         |      | Shiraz-22T | 1551 | 0.324011 | 0         |  |
|         |      | Shiraz-25T | 1698 | 0.21835  | 0         |  |
|         |      | Shiraz-28T | 1735 | 0.350744 | 0         |  |
|         |      | Shiraz-29T | 1778 | 0.120767 | 0         |  |
|         |      | Shiraz-32T | 1833 | 0.551336 | 0         |  |
|         |      | Shiraz-32T | 1834 | 1.485392 | 0         |  |
|         |      | Shiraz-38T | 1951 | 0.250891 | 0         |  |
|         |      | Shiraz-53T | 2078 | 0.287202 | 0         |  |
|         |      | Shiraz-58T | 2160 | 0.399007 | 0         |  |
|         |      | Shiraz-71T | 2238 | 0.603631 | 0         |  |
|         |      | Shiraz-3T  | 90   | 0.219276 | 0         |  |
|         |      | Shiraz-3T  | 94   | 0.74735  | 0         |  |
|         |      | Shiraz-4T  | 253  | 0.372918 | 0         |  |
|         |      | Shiraz-31T | 316  | 0.219196 | 0         |  |
|         |      | Shiraz-36T | 378  | 0.179558 | 0         |  |
|         |      | Shiraz-36T | 381  | 0.332628 | 0         |  |
|         |      | Shiraz-44T | 639  | 1.035032 | 0         |  |
|         |      | Shiraz-46T | 943  | 0.093799 | 0         |  |
|         |      | Shiraz-46T | 946  | 0.299835 | 0         |  |
|         |      | Shiraz-47T | 1030 | 0.257728 | 0         |  |
|         |      | Shiraz-49T | 1120 | 0.281656 | 0         |  |
|         |      | Shiraz-77T | 1225 | 0        | -0.117922 |  |
|         |      | Shiraz-77T | 1227 | 0.196445 | 0         |  |
|         |      | Shiraz-9T  | 1324 | 0.679266 | 0         |  |
|         |      | Shiraz-18T | 1434 | 0.244465 | 0         |  |
|         |      | Shiraz-22T | 1549 | 0        | -0.319623 |  |
|         |      | Shiraz-22T | 1551 | 0.324011 | 0         |  |
|         |      | Shiraz-25T | 1698 | 0.21835  | 0         |  |

|        |      |            |      |          |           |  |  |
|--------|------|------------|------|----------|-----------|--|--|
|        |      | Shiraz-28T | 1735 | 0.350744 | 0         |  |  |
|        |      | Shiraz-29T | 1778 | 0.120767 | 0         |  |  |
|        |      | Shiraz-32T | 1833 | 0.551336 | 0         |  |  |
|        |      | Shiraz-32T | 1834 | 1.485392 | 0         |  |  |
|        |      | Shiraz-38T | 1951 | 0.250891 | 0         |  |  |
|        |      | Shiraz-53T | 2078 | 0.287202 | 0         |  |  |
|        |      | Shiraz-58T | 2160 | 0.399007 | 0         |  |  |
|        |      | Shiraz-71T | 2238 | 0.603631 | 0         |  |  |
|        |      | Shiraz-3T  | 90   | 0.219276 | 0         |  |  |
|        |      | Shiraz-3T  | 94   | 0.74735  | 0         |  |  |
|        |      | Shiraz-4T  | 253  | 0.372918 | 0         |  |  |
|        |      | Shiraz-31T | 316  | 0.219196 | 0         |  |  |
|        |      | Shiraz-36T | 378  | 0.179558 | 0         |  |  |
|        |      | Shiraz-36T | 381  | 0.332628 | 0         |  |  |
|        |      | Shiraz-44T | 639  | 1.035032 | 0         |  |  |
|        |      | Shiraz-46T | 943  | 0.093799 | 0         |  |  |
|        |      | Shiraz-46T | 946  | 0.299835 | 0         |  |  |
|        |      | Shiraz-47T | 1030 | 0.257728 | 0         |  |  |
|        |      | Shiraz-49T | 1120 | 0.281656 | 0         |  |  |
|        |      | Shiraz-77T | 1225 | 0        | -0.117922 |  |  |
|        |      | Shiraz-77T | 1227 | 0.196445 | 0         |  |  |
|        |      | Shiraz-9T  | 1324 | 0.679266 | 0         |  |  |
|        |      | Shiraz-18T | 1434 | 0.244465 | 0         |  |  |
|        |      | Shiraz-22T | 1549 | 0        | -0.319623 |  |  |
|        |      | Shiraz-22T | 1551 | 0.324011 | 0         |  |  |
|        |      | Shiraz-25T | 1698 | 0.21835  | 0         |  |  |
|        |      | Shiraz-28T | 1735 | 0.350744 | 0         |  |  |
|        |      | Shiraz-29T | 1778 | 0.120767 | 0         |  |  |
|        |      | Shiraz-32T | 1833 | 0.551336 | 0         |  |  |
|        |      | Shiraz-32T | 1834 | 1.485392 | 0         |  |  |
|        |      | Shiraz-38T | 1951 | 0.250891 | 0         |  |  |
|        |      | Shiraz-53T | 2078 | 0.287202 | 0         |  |  |
|        |      | Shiraz-58T | 2160 | 0.399007 | 0         |  |  |
|        |      | Shiraz-71T | 2238 | 0.603631 | 0         |  |  |
| TSGA13 | chr7 | Shiraz-3T  | 90   | 0.219276 | 0         |  |  |
|        |      | Shiraz-3T  | 96   | 0.428308 | 0         |  |  |
|        |      | Shiraz-4T  | 253  | 0.372918 | 0         |  |  |
|        |      | Shiraz-31T | 317  | 0.204382 | 0         |  |  |
|        |      | Shiraz-36T | 378  | 0.179558 | 0         |  |  |
|        |      | Shiraz-44T | 642  | 0.408617 | 0         |  |  |
|        |      | Shiraz-46T | 943  | 0.093799 | 0         |  |  |
|        |      | Shiraz-47T | 1032 | 0.171484 | 0         |  |  |
|        |      | Shiraz-77T | 1225 | 0        | -0.117922 |  |  |
|        |      | Shiraz-77T | 1229 | 0.051661 | 0         |  |  |
|        |      | Shiraz-9T  | 1325 | 0.221899 | 0         |  |  |
|        |      | Shiraz-18T | 1434 | 0.244465 | 0         |  |  |
|        |      | Shiraz-25T | 1698 | 0.21835  | 0         |  |  |

|        |      |            |      |          |           |  |  |
|--------|------|------------|------|----------|-----------|--|--|
|        |      | Shiraz-28T | 1735 | 0.350744 | 0         |  |  |
|        |      | Shiraz-29T | 1778 | 0.120767 | 0         |  |  |
|        |      | Shiraz-32T | 1833 | 0.551336 | 0         |  |  |
|        |      | Shiraz-38T | 1951 | 0.250891 | 0         |  |  |
|        |      | Shiraz-53T | 2078 | 0.287202 | 0         |  |  |
|        |      | Shiraz-71T | 2238 | 0.603631 | 0         |  |  |
|        |      | Shiraz-3T  | 90   | 0.219276 | 0         |  |  |
|        |      | Shiraz-3T  | 96   | 0.428308 | 0         |  |  |
|        |      | Shiraz-4T  | 253  | 0.372918 | 0         |  |  |
|        |      | Shiraz-31T | 317  | 0.204382 | 0         |  |  |
|        |      | Shiraz-36T | 378  | 0.179558 | 0         |  |  |
|        |      | Shiraz-44T | 642  | 0.408617 | 0         |  |  |
|        |      | Shiraz-46T | 943  | 0.093799 | 0         |  |  |
|        |      | Shiraz-47T | 1032 | 0.171484 | 0         |  |  |
|        |      | Shiraz-77T | 1225 | 0        | -0.117922 |  |  |
|        |      | Shiraz-77T | 1229 | 0.051661 | 0         |  |  |
|        |      | Shiraz-9T  | 1325 | 0.221899 | 0         |  |  |
|        |      | Shiraz-18T | 1434 | 0.244465 | 0         |  |  |
|        |      | Shiraz-25T | 1698 | 0.21835  | 0         |  |  |
|        |      | Shiraz-28T | 1735 | 0.350744 | 0         |  |  |
|        |      | Shiraz-29T | 1778 | 0.120767 | 0         |  |  |
|        |      | Shiraz-32T | 1833 | 0.551336 | 0         |  |  |
|        |      | Shiraz-38T | 1951 | 0.250891 | 0         |  |  |
|        |      | Shiraz-53T | 2078 | 0.287202 | 0         |  |  |
|        |      | Shiraz-71T | 2238 | 0.603631 | 0         |  |  |
|        |      | Shiraz-3T  | 90   | 0.219276 | 0         |  |  |
|        |      | Shiraz-3T  | 96   | 0.428308 | 0         |  |  |
|        |      | Shiraz-4T  | 253  | 0.372918 | 0         |  |  |
|        |      | Shiraz-31T | 317  | 0.204382 | 0         |  |  |
|        |      | Shiraz-36T | 378  | 0.179558 | 0         |  |  |
|        |      | Shiraz-44T | 642  | 0.408617 | 0         |  |  |
|        |      | Shiraz-46T | 943  | 0.093799 | 0         |  |  |
|        |      | Shiraz-47T | 1032 | 0.171484 | 0         |  |  |
|        |      | Shiraz-77T | 1225 | 0        | -0.117922 |  |  |
|        |      | Shiraz-77T | 1229 | 0.051661 | 0         |  |  |
|        |      | Shiraz-9T  | 1325 | 0.221899 | 0         |  |  |
|        |      | Shiraz-18T | 1434 | 0.244465 | 0         |  |  |
|        |      | Shiraz-25T | 1698 | 0.21835  | 0         |  |  |
|        |      | Shiraz-28T | 1735 | 0.350744 | 0         |  |  |
|        |      | Shiraz-29T | 1778 | 0.120767 | 0         |  |  |
|        |      | Shiraz-32T | 1833 | 0.551336 | 0         |  |  |
|        |      | Shiraz-38T | 1951 | 0.250891 | 0         |  |  |
|        |      | Shiraz-53T | 2078 | 0.287202 | 0         |  |  |
|        |      | Shiraz-71T | 2238 | 0.603631 | 0         |  |  |
| TSGA14 | chr7 | Shiraz-3T  | 90   | 0.219276 | 0         |  |  |
|        |      | Shiraz-3T  | 96   | 0.428308 | 0         |  |  |
|        |      | Shiraz-4T  | 253  | 0.372918 | 0         |  |  |

|  |            |      |          |           |  |
|--|------------|------|----------|-----------|--|
|  | Shiraz-31T | 317  | 0.204382 | 0         |  |
|  | Shiraz-36T | 378  | 0.179558 | 0         |  |
|  | Shiraz-44T | 642  | 0.408617 | 0         |  |
|  | Shiraz-46T | 943  | 0.093799 | 0         |  |
|  | Shiraz-47T | 1032 | 0.171484 | 0         |  |
|  | Shiraz-77T | 1225 | 0        | -0.117922 |  |
|  | Shiraz-77T | 1229 | 0.051661 | 0         |  |
|  | Shiraz-9T  | 1325 | 0.221899 | 0         |  |
|  | Shiraz-18T | 1434 | 0.244465 | 0         |  |
|  | Shiraz-25T | 1698 | 0.21835  | 0         |  |
|  | Shiraz-28T | 1735 | 0.350744 | 0         |  |
|  | Shiraz-29T | 1778 | 0.120767 | 0         |  |
|  | Shiraz-32T | 1833 | 0.551336 | 0         |  |
|  | Shiraz-38T | 1951 | 0.250891 | 0         |  |
|  | Shiraz-53T | 2078 | 0.287202 | 0         |  |
|  | Shiraz-71T | 2238 | 0.603631 | 0         |  |
|  | Shiraz-3T  | 90   | 0.219276 | 0         |  |
|  | Shiraz-3T  | 96   | 0.428308 | 0         |  |
|  | Shiraz-4T  | 253  | 0.372918 | 0         |  |
|  | Shiraz-31T | 317  | 0.204382 | 0         |  |
|  | Shiraz-36T | 378  | 0.179558 | 0         |  |
|  | Shiraz-44T | 642  | 0.408617 | 0         |  |
|  | Shiraz-46T | 943  | 0.093799 | 0         |  |
|  | Shiraz-47T | 1032 | 0.171484 | 0         |  |
|  | Shiraz-77T | 1225 | 0        | -0.117922 |  |
|  | Shiraz-77T | 1229 | 0.051661 | 0         |  |
|  | Shiraz-9T  | 1325 | 0.221899 | 0         |  |
|  | Shiraz-18T | 1434 | 0.244465 | 0         |  |
|  | Shiraz-25T | 1698 | 0.21835  | 0         |  |
|  | Shiraz-28T | 1735 | 0.350744 | 0         |  |
|  | Shiraz-29T | 1778 | 0.120767 | 0         |  |
|  | Shiraz-32T | 1833 | 0.551336 | 0         |  |
|  | Shiraz-38T | 1951 | 0.250891 | 0         |  |
|  | Shiraz-53T | 2078 | 0.287202 | 0         |  |
|  | Shiraz-71T | 2238 | 0.603631 | 0         |  |
|  | Shiraz-3T  | 90   | 0.219276 | 0         |  |
|  | Shiraz-3T  | 96   | 0.428308 | 0         |  |
|  | Shiraz-4T  | 253  | 0.372918 | 0         |  |
|  | Shiraz-31T | 317  | 0.204382 | 0         |  |
|  | Shiraz-36T | 378  | 0.179558 | 0         |  |
|  | Shiraz-44T | 642  | 0.408617 | 0         |  |
|  | Shiraz-46T | 943  | 0.093799 | 0         |  |
|  | Shiraz-47T | 1032 | 0.171484 | 0         |  |
|  | Shiraz-77T | 1225 | 0        | -0.117922 |  |
|  | Shiraz-77T | 1229 | 0.051661 | 0         |  |
|  | Shiraz-9T  | 1325 | 0.221899 | 0         |  |
|  | Shiraz-18T | 1434 | 0.244465 | 0         |  |

|      |      |            |      |          |           |  |
|------|------|------------|------|----------|-----------|--|
|      |      | Shiraz-25T | 1698 | 0.21835  | 0         |  |
|      |      | Shiraz-28T | 1735 | 0.350744 | 0         |  |
|      |      | Shiraz-29T | 1778 | 0.120767 | 0         |  |
|      |      | Shiraz-32T | 1833 | 0.551336 | 0         |  |
|      |      | Shiraz-38T | 1951 | 0.250891 | 0         |  |
|      |      | Shiraz-53T | 2078 | 0.287202 | 0         |  |
|      |      | Shiraz-71T | 2238 | 0.603631 | 0         |  |
| TSIX | chrX | Shiraz-3T  | 242  | 0        | -0.336434 |  |
|      |      | Shiraz-4T  | 261  | 0        | -0.336249 |  |
|      |      | Shiraz-16T | 295  | 0.591657 | 0         |  |
|      |      | Shiraz-36T | 433  | 0        | -0.803961 |  |
|      |      | Shiraz-44T | 899  | 0        | -1.09697  |  |
|      |      | Shiraz-49T | 1170 | 0        | -0.967436 |  |
|      |      | Shiraz-18T | 1457 | 0.643204 | 0         |  |
|      |      | Shiraz-22T | 1673 | 0.611783 | 0         |  |
|      |      | Shiraz-25T | 1719 | 0.472955 | 0         |  |
|      |      | Shiraz-28T | 1762 | 0.562311 | 0         |  |
|      |      | Shiraz-29T | 1801 | 0.815343 | 0         |  |
|      |      | Shiraz-32T | 1870 | 0.729766 | 0         |  |
|      |      | Shiraz-35T | 1933 | 0.488535 | 0         |  |
|      |      | Shiraz-58T | 2223 | 0.833364 | 0         |  |
|      |      | Shiraz-71T | 2263 | 0.975531 | 0         |  |
|      |      | Shiraz-3T  | 242  | 0        | -0.336434 |  |
|      |      | Shiraz-4T  | 261  | 0        | -0.336249 |  |
|      |      | Shiraz-16T | 295  | 0.591657 | 0         |  |
|      |      | Shiraz-36T | 433  | 0        | -0.803961 |  |
|      |      | Shiraz-44T | 899  | 0        | -1.09697  |  |
|      |      | Shiraz-49T | 1170 | 0        | -0.967436 |  |
|      |      | Shiraz-18T | 1457 | 0.643204 | 0         |  |
|      |      | Shiraz-22T | 1673 | 0.611783 | 0         |  |
|      |      | Shiraz-25T | 1719 | 0.472955 | 0         |  |
|      |      | Shiraz-28T | 1762 | 0.562311 | 0         |  |
|      |      | Shiraz-29T | 1801 | 0.815343 | 0         |  |
|      |      | Shiraz-32T | 1870 | 0.729766 | 0         |  |
|      |      | Shiraz-35T | 1933 | 0.488535 | 0         |  |
|      |      | Shiraz-58T | 2223 | 0.833364 | 0         |  |
|      |      | Shiraz-71T | 2263 | 0.975531 | 0         |  |
|      |      | Shiraz-3T  | 242  | 0        | -0.336434 |  |
|      |      | Shiraz-4T  | 261  | 0        | -0.336249 |  |
|      |      | Shiraz-16T | 295  | 0.591657 | 0         |  |
|      |      | Shiraz-36T | 433  | 0        | -0.803961 |  |
|      |      | Shiraz-44T | 899  | 0        | -1.09697  |  |
|      |      | Shiraz-49T | 1170 | 0        | -0.967436 |  |
|      |      | Shiraz-18T | 1457 | 0.643204 | 0         |  |
|      |      | Shiraz-22T | 1673 | 0.611783 | 0         |  |
|      |      | Shiraz-25T | 1719 | 0.472955 | 0         |  |
|      |      | Shiraz-28T | 1762 | 0.562311 | 0         |  |

|         |      |            |      |          |           |  |
|---------|------|------------|------|----------|-----------|--|
|         |      | Shiraz-29T | 1801 | 0.815343 | 0         |  |
|         |      | Shiraz-32T | 1870 | 0.729766 | 0         |  |
|         |      | Shiraz-35T | 1933 | 0.488535 | 0         |  |
|         |      | Shiraz-58T | 2223 | 0.833364 | 0         |  |
|         |      | Shiraz-71T | 2263 | 0.975531 | 0         |  |
| TSPAN12 | chr7 | Shiraz-3T  | 90   | 0.219276 | 0         |  |
|         |      | Shiraz-3T  | 95   | 0        | -0.077623 |  |
|         |      | Shiraz-4T  | 253  | 0.372918 | 0         |  |
|         |      | Shiraz-36T | 378  | 0.179558 | 0         |  |
|         |      | Shiraz-36T | 382  | 0.081739 | 0         |  |
|         |      | Shiraz-44T | 641  | 0        | -0.477846 |  |
|         |      | Shiraz-46T | 943  | 0.093799 | 0         |  |
|         |      | Shiraz-46T | 947  | 0        | -0.010843 |  |
|         |      | Shiraz-47T | 1031 | 0        | -0.117529 |  |
|         |      | Shiraz-49T | 1121 | 0        | -0.138569 |  |
|         |      | Shiraz-77T | 1225 | 0        | -0.117922 |  |
|         |      | Shiraz-77T | 1228 | 0        | -0.238084 |  |
|         |      | Shiraz-18T | 1434 | 0.244465 | 0         |  |
|         |      | Shiraz-22T | 1549 | 0        | -0.319623 |  |
|         |      | Shiraz-22T | 1552 | 0        | -0.50686  |  |
|         |      | Shiraz-25T | 1698 | 0.21835  | 0         |  |
|         |      | Shiraz-28T | 1735 | 0.350744 | 0         |  |
|         |      | Shiraz-29T | 1778 | 0.120767 | 0         |  |
|         |      | Shiraz-32T | 1833 | 0.551336 | 0         |  |
|         |      | Shiraz-32T | 1835 | 0.092727 | 0         |  |
|         |      | Shiraz-38T | 1951 | 0.250891 | 0         |  |
|         |      | Shiraz-53T | 2078 | 0.287202 | 0         |  |
|         |      | Shiraz-58T | 2161 | 0        | -0.187744 |  |
|         |      | Shiraz-71T | 2238 | 0.603631 | 0         |  |
|         |      | Shiraz-3T  | 90   | 0.219276 | 0         |  |
|         |      | Shiraz-3T  | 95   | 0        | -0.077623 |  |
|         |      | Shiraz-4T  | 253  | 0.372918 | 0         |  |
|         |      | Shiraz-36T | 378  | 0.179558 | 0         |  |
|         |      | Shiraz-36T | 382  | 0.081739 | 0         |  |
|         |      | Shiraz-44T | 641  | 0        | -0.477846 |  |
|         |      | Shiraz-46T | 943  | 0.093799 | 0         |  |
|         |      | Shiraz-46T | 947  | 0        | -0.010843 |  |
|         |      | Shiraz-47T | 1031 | 0        | -0.117529 |  |
|         |      | Shiraz-49T | 1121 | 0        | -0.138569 |  |
|         |      | Shiraz-77T | 1225 | 0        | -0.117922 |  |
|         |      | Shiraz-77T | 1228 | 0        | -0.238084 |  |
|         |      | Shiraz-18T | 1434 | 0.244465 | 0         |  |
|         |      | Shiraz-22T | 1549 | 0        | -0.319623 |  |
|         |      | Shiraz-22T | 1552 | 0        | -0.50686  |  |
|         |      | Shiraz-25T | 1698 | 0.21835  | 0         |  |
|         |      | Shiraz-28T | 1735 | 0.350744 | 0         |  |
|         |      | Shiraz-29T | 1778 | 0.120767 | 0         |  |

|         |      |            |      |          |           |  |  |
|---------|------|------------|------|----------|-----------|--|--|
|         |      | Shiraz-32T | 1833 | 0.551336 | 0         |  |  |
|         |      | Shiraz-32T | 1835 | 0.092727 | 0         |  |  |
|         |      | Shiraz-38T | 1951 | 0.250891 | 0         |  |  |
|         |      | Shiraz-53T | 2078 | 0.287202 | 0         |  |  |
|         |      | Shiraz-58T | 2161 | 0        | -0.187744 |  |  |
|         |      | Shiraz-71T | 2238 | 0.603631 | 0         |  |  |
|         |      | Shiraz-3T  | 90   | 0.219276 | 0         |  |  |
|         |      | Shiraz-3T  | 95   | 0        | -0.077623 |  |  |
|         |      | Shiraz-4T  | 253  | 0.372918 | 0         |  |  |
|         |      | Shiraz-36T | 378  | 0.179558 | 0         |  |  |
|         |      | Shiraz-36T | 382  | 0.081739 | 0         |  |  |
|         |      | Shiraz-44T | 641  | 0        | -0.477846 |  |  |
|         |      | Shiraz-46T | 943  | 0.093799 | 0         |  |  |
|         |      | Shiraz-46T | 947  | 0        | -0.010843 |  |  |
|         |      | Shiraz-47T | 1031 | 0        | -0.117529 |  |  |
|         |      | Shiraz-49T | 1121 | 0        | -0.138569 |  |  |
|         |      | Shiraz-77T | 1225 | 0        | -0.117922 |  |  |
|         |      | Shiraz-77T | 1228 | 0        | -0.238084 |  |  |
|         |      | Shiraz-18T | 1434 | 0.244465 | 0         |  |  |
|         |      | Shiraz-22T | 1549 | 0        | -0.319623 |  |  |
|         |      | Shiraz-22T | 1552 | 0        | -0.50686  |  |  |
|         |      | Shiraz-25T | 1698 | 0.21835  | 0         |  |  |
|         |      | Shiraz-28T | 1735 | 0.350744 | 0         |  |  |
|         |      | Shiraz-29T | 1778 | 0.120767 | 0         |  |  |
|         |      | Shiraz-32T | 1833 | 0.551336 | 0         |  |  |
|         |      | Shiraz-32T | 1835 | 0.092727 | 0         |  |  |
|         |      | Shiraz-38T | 1951 | 0.250891 | 0         |  |  |
|         |      | Shiraz-53T | 2078 | 0.287202 | 0         |  |  |
|         |      | Shiraz-58T | 2161 | 0        | -0.187744 |  |  |
|         |      | Shiraz-71T | 2238 | 0.603631 | 0         |  |  |
| TSPAN13 | chr7 | Shiraz-4T  | 252  | 0.192083 | 0         |  |  |
|         |      | Shiraz-36T | 376  | 0.159952 | 0         |  |  |
|         |      | Shiraz-44T | 628  | 0        | -0.444379 |  |  |
|         |      | Shiraz-47T | 1027 | 0        | -0.117848 |  |  |
|         |      | Shiraz-49T | 1117 | 0        | -0.168296 |  |  |
|         |      | Shiraz-77T | 1222 | 0        | -0.113002 |  |  |
|         |      | Shiraz-18T | 1433 | 0.250973 | 0         |  |  |
|         |      | Shiraz-22T | 1543 | 0        | -0.513696 |  |  |
|         |      | Shiraz-25T | 1697 | 0.21945  | 0         |  |  |
|         |      | Shiraz-28T | 1734 | 0.362882 | 0         |  |  |
|         |      | Shiraz-29T | 1777 | 0.156747 | 0         |  |  |
|         |      | Shiraz-38T | 1950 | 0.265916 | 0         |  |  |
|         |      | Shiraz-58T | 2157 | 0        | -0.213872 |  |  |
|         |      | Shiraz-71T | 2236 | 0.320072 | 0         |  |  |
|         |      | Shiraz-4T  | 252  | 0.192083 | 0         |  |  |
|         |      | Shiraz-36T | 376  | 0.159952 | 0         |  |  |
|         |      | Shiraz-44T | 628  | 0        | -0.444379 |  |  |



|         |      |            |      |          |           |  |  |
|---------|------|------------|------|----------|-----------|--|--|
|         |      | Shiraz-47T | 1027 | 0        | -0.117848 |  |  |
|         |      | Shiraz-49T | 1117 | 0        | -0.168296 |  |  |
|         |      | Shiraz-77T | 1222 | 0        | -0.113002 |  |  |
|         |      | Shiraz-18T | 1433 | 0.250973 | 0         |  |  |
|         |      | Shiraz-22T | 1543 | 0        | -0.513696 |  |  |
|         |      | Shiraz-25T | 1697 | 0.21945  | 0         |  |  |
|         |      | Shiraz-28T | 1734 | 0.362882 | 0         |  |  |
|         |      | Shiraz-29T | 1777 | 0.156747 | 0         |  |  |
|         |      | Shiraz-38T | 1950 | 0.265916 | 0         |  |  |
|         |      | Shiraz-58T | 2157 | 0        | -0.213872 |  |  |
|         |      | Shiraz-71T | 2236 | 0.320072 | 0         |  |  |
|         |      | Shiraz-4T  | 252  | 0.192083 | 0         |  |  |
|         |      | Shiraz-36T | 376  | 0.159952 | 0         |  |  |
|         |      | Shiraz-44T | 628  | 0        | -0.444379 |  |  |
|         |      | Shiraz-47T | 1027 | 0        | -0.117848 |  |  |
|         |      | Shiraz-49T | 1117 | 0        | -0.168296 |  |  |
|         |      | Shiraz-77T | 1222 | 0        | -0.113002 |  |  |
|         |      | Shiraz-18T | 1433 | 0.250973 | 0         |  |  |
|         |      | Shiraz-22T | 1543 | 0        | -0.513696 |  |  |
|         |      | Shiraz-25T | 1697 | 0.21945  | 0         |  |  |
|         |      | Shiraz-28T | 1734 | 0.362882 | 0         |  |  |
|         |      | Shiraz-29T | 1777 | 0.156747 | 0         |  |  |
|         |      | Shiraz-38T | 1950 | 0.265916 | 0         |  |  |
|         |      | Shiraz-58T | 2157 | 0        | -0.213872 |  |  |
|         |      | Shiraz-71T | 2236 | 0.320072 | 0         |  |  |
| TSPAN33 | chr7 | Shiraz-3T  | 90   | 0.219276 | 0         |  |  |
|         |      | Shiraz-3T  | 96   | 0.428308 | 0         |  |  |
|         |      | Shiraz-4T  | 253  | 0.372918 | 0         |  |  |
|         |      | Shiraz-31T | 317  | 0.204382 | 0         |  |  |
|         |      | Shiraz-36T | 378  | 0.179558 | 0         |  |  |
|         |      | Shiraz-44T | 642  | 0.408617 | 0         |  |  |
|         |      | Shiraz-46T | 943  | 0.093799 | 0         |  |  |
|         |      | Shiraz-47T | 1032 | 0.171484 | 0         |  |  |
|         |      | Shiraz-77T | 1225 | 0        | -0.117922 |  |  |
|         |      | Shiraz-77T | 1229 | 0.051661 | 0         |  |  |
|         |      | Shiraz-9T  | 1325 | 0.221899 | 0         |  |  |
|         |      | Shiraz-18T | 1434 | 0.244465 | 0         |  |  |
|         |      | Shiraz-25T | 1698 | 0.21835  | 0         |  |  |
|         |      | Shiraz-28T | 1735 | 0.350744 | 0         |  |  |
|         |      | Shiraz-29T | 1778 | 0.120767 | 0         |  |  |
|         |      | Shiraz-32T | 1833 | 0.551336 | 0         |  |  |
|         |      | Shiraz-38T | 1951 | 0.250891 | 0         |  |  |
|         |      | Shiraz-53T | 2078 | 0.287202 | 0         |  |  |
|         |      | Shiraz-71T | 2238 | 0.603631 | 0         |  |  |
|         |      | Shiraz-3T  | 90   | 0.219276 | 0         |  |  |
|         |      | Shiraz-3T  | 96   | 0.428308 | 0         |  |  |
|         |      | Shiraz-4T  | 253  | 0.372918 | 0         |  |  |

|        |      |            |      |          |           |  |  |
|--------|------|------------|------|----------|-----------|--|--|
|        |      | Shiraz-31T | 317  | 0.204382 | 0         |  |  |
|        |      | Shiraz-36T | 378  | 0.179558 | 0         |  |  |
|        |      | Shiraz-44T | 642  | 0.408617 | 0         |  |  |
|        |      | Shiraz-46T | 943  | 0.093799 | 0         |  |  |
|        |      | Shiraz-47T | 1032 | 0.171484 | 0         |  |  |
|        |      | Shiraz-77T | 1225 | 0        | -0.117922 |  |  |
|        |      | Shiraz-77T | 1229 | 0.051661 | 0         |  |  |
|        |      | Shiraz-9T  | 1325 | 0.221899 | 0         |  |  |
|        |      | Shiraz-18T | 1434 | 0.244465 | 0         |  |  |
|        |      | Shiraz-25T | 1698 | 0.21835  | 0         |  |  |
|        |      | Shiraz-28T | 1735 | 0.350744 | 0         |  |  |
|        |      | Shiraz-29T | 1778 | 0.120767 | 0         |  |  |
|        |      | Shiraz-32T | 1833 | 0.551336 | 0         |  |  |
|        |      | Shiraz-38T | 1951 | 0.250891 | 0         |  |  |
|        |      | Shiraz-53T | 2078 | 0.287202 | 0         |  |  |
|        |      | Shiraz-71T | 2238 | 0.603631 | 0         |  |  |
|        |      | Shiraz-3T  | 90   | 0.219276 | 0         |  |  |
|        |      | Shiraz-3T  | 96   | 0.428308 | 0         |  |  |
|        |      | Shiraz-4T  | 253  | 0.372918 | 0         |  |  |
|        |      | Shiraz-31T | 317  | 0.204382 | 0         |  |  |
|        |      | Shiraz-36T | 378  | 0.179558 | 0         |  |  |
|        |      | Shiraz-44T | 642  | 0.408617 | 0         |  |  |
|        |      | Shiraz-46T | 943  | 0.093799 | 0         |  |  |
|        |      | Shiraz-47T | 1032 | 0.171484 | 0         |  |  |
|        |      | Shiraz-77T | 1225 | 0        | -0.117922 |  |  |
|        |      | Shiraz-77T | 1229 | 0.051661 | 0         |  |  |
|        |      | Shiraz-9T  | 1325 | 0.221899 | 0         |  |  |
|        |      | Shiraz-18T | 1434 | 0.244465 | 0         |  |  |
|        |      | Shiraz-25T | 1698 | 0.21835  | 0         |  |  |
|        |      | Shiraz-28T | 1735 | 0.350744 | 0         |  |  |
|        |      | Shiraz-29T | 1778 | 0.120767 | 0         |  |  |
|        |      | Shiraz-32T | 1833 | 0.551336 | 0         |  |  |
|        |      | Shiraz-38T | 1951 | 0.250891 | 0         |  |  |
|        |      | Shiraz-53T | 2078 | 0.287202 | 0         |  |  |
|        |      | Shiraz-71T | 2238 | 0.603631 | 0         |  |  |
| TSPAN6 | chrX | Shiraz-3T  | 242  | 0        | -0.336434 |  |  |
|        |      | Shiraz-4T  | 261  | 0        | -0.336249 |  |  |
|        |      | Shiraz-16T | 295  | 0.591657 | 0         |  |  |
|        |      | Shiraz-36T | 433  | 0        | -0.803961 |  |  |
|        |      | Shiraz-44T | 899  | 0        | -1.09697  |  |  |
|        |      | Shiraz-49T | 1170 | 0        | -0.967436 |  |  |
|        |      | Shiraz-18T | 1457 | 0.643204 | 0         |  |  |
|        |      | Shiraz-22T | 1673 | 0.611783 | 0         |  |  |
|        |      | Shiraz-25T | 1719 | 0.472955 | 0         |  |  |
|        |      | Shiraz-28T | 1762 | 0.562311 | 0         |  |  |
|        |      | Shiraz-29T | 1801 | 0.815343 | 0         |  |  |
|        |      | Shiraz-32T | 1870 | 0.729766 | 0         |  |  |

|        |      |            |      |          |           |  |  |
|--------|------|------------|------|----------|-----------|--|--|
|        |      | Shiraz-35T | 1933 | 0.488535 | 0         |  |  |
|        |      | Shiraz-58T | 2223 | 0.833364 | 0         |  |  |
|        |      | Shiraz-71T | 2263 | 0.975531 | 0         |  |  |
|        |      | Shiraz-3T  | 242  | 0        | -0.336434 |  |  |
|        |      | Shiraz-4T  | 261  | 0        | -0.336249 |  |  |
|        |      | Shiraz-16T | 295  | 0.591657 | 0         |  |  |
|        |      | Shiraz-36T | 433  | 0        | -0.803961 |  |  |
|        |      | Shiraz-44T | 899  | 0        | -1.09697  |  |  |
|        |      | Shiraz-49T | 1170 | 0        | -0.967436 |  |  |
|        |      | Shiraz-18T | 1457 | 0.643204 | 0         |  |  |
|        |      | Shiraz-22T | 1673 | 0.611783 | 0         |  |  |
|        |      | Shiraz-25T | 1719 | 0.472955 | 0         |  |  |
|        |      | Shiraz-28T | 1762 | 0.562311 | 0         |  |  |
|        |      | Shiraz-29T | 1801 | 0.815343 | 0         |  |  |
|        |      | Shiraz-32T | 1870 | 0.729766 | 0         |  |  |
|        |      | Shiraz-35T | 1933 | 0.488535 | 0         |  |  |
|        |      | Shiraz-58T | 2223 | 0.833364 | 0         |  |  |
|        |      | Shiraz-71T | 2263 | 0.975531 | 0         |  |  |
|        |      | Shiraz-3T  | 242  | 0        | -0.336434 |  |  |
|        |      | Shiraz-4T  | 261  | 0        | -0.336249 |  |  |
|        |      | Shiraz-16T | 295  | 0.591657 | 0         |  |  |
|        |      | Shiraz-36T | 433  | 0        | -0.803961 |  |  |
|        |      | Shiraz-44T | 899  | 0        | -1.09697  |  |  |
|        |      | Shiraz-49T | 1170 | 0        | -0.967436 |  |  |
|        |      | Shiraz-18T | 1457 | 0.643204 | 0         |  |  |
|        |      | Shiraz-22T | 1673 | 0.611783 | 0         |  |  |
|        |      | Shiraz-25T | 1719 | 0.472955 | 0         |  |  |
|        |      | Shiraz-28T | 1762 | 0.562311 | 0         |  |  |
|        |      | Shiraz-29T | 1801 | 0.815343 | 0         |  |  |
|        |      | Shiraz-32T | 1870 | 0.729766 | 0         |  |  |
|        |      | Shiraz-35T | 1933 | 0.488535 | 0         |  |  |
|        |      | Shiraz-58T | 2223 | 0.833364 | 0         |  |  |
|        |      | Shiraz-71T | 2263 | 0.975531 | 0         |  |  |
| TSPAN7 | chrX | Shiraz-3T  | 235  | 0        | -0.28401  |  |  |
|        |      | Shiraz-4T  | 260  | 0        | -0.324128 |  |  |
|        |      | Shiraz-16T | 294  | 0.655804 | 0         |  |  |
|        |      | Shiraz-36T | 431  | 0        | -0.78035  |  |  |
|        |      | Shiraz-44T | 891  | 0        | -0.954044 |  |  |
|        |      | Shiraz-49T | 1166 | 0        | -0.917235 |  |  |
|        |      | Shiraz-49T | 1168 | 0        | -1.073859 |  |  |
|        |      | Shiraz-9T  | 1368 | 0.199713 | 0         |  |  |
|        |      | Shiraz-18T | 1455 | 0        | -0.186773 |  |  |
|        |      | Shiraz-22T | 1669 | 0.695915 | 0         |  |  |
|        |      | Shiraz-25T | 1717 | 0.420447 | 0         |  |  |
|        |      | Shiraz-28T | 1760 | 0.538181 | 0         |  |  |
|        |      | Shiraz-29T | 1800 | 0.672527 | 0         |  |  |
|        |      | Shiraz-32T | 1869 | 0.776805 | 0         |  |  |

|        |      |            |      |          |           |  |  |
|--------|------|------------|------|----------|-----------|--|--|
|        |      | Shiraz-35T | 1932 | 0.507141 | 0         |  |  |
|        |      | Shiraz-40T | 2051 | 0.098506 | 0         |  |  |
|        |      | Shiraz-58T | 2221 | 0.871948 | 0         |  |  |
|        |      | Shiraz-71T | 2260 | 0.68394  | 0         |  |  |
|        |      | Shiraz-3T  | 235  | 0        | -0.28401  |  |  |
|        |      | Shiraz-4T  | 260  | 0        | -0.324128 |  |  |
|        |      | Shiraz-16T | 294  | 0.655804 | 0         |  |  |
|        |      | Shiraz-36T | 431  | 0        | -0.78035  |  |  |
|        |      | Shiraz-44T | 891  | 0        | -0.954044 |  |  |
|        |      | Shiraz-49T | 1166 | 0        | -0.917235 |  |  |
|        |      | Shiraz-49T | 1168 | 0        | -1.073859 |  |  |
|        |      | Shiraz-9T  | 1368 | 0.199713 | 0         |  |  |
|        |      | Shiraz-18T | 1455 | 0        | -0.186773 |  |  |
|        |      | Shiraz-22T | 1669 | 0.695915 | 0         |  |  |
|        |      | Shiraz-25T | 1717 | 0.420447 | 0         |  |  |
|        |      | Shiraz-28T | 1760 | 0.538181 | 0         |  |  |
|        |      | Shiraz-29T | 1800 | 0.672527 | 0         |  |  |
|        |      | Shiraz-32T | 1869 | 0.776805 | 0         |  |  |
|        |      | Shiraz-35T | 1932 | 0.507141 | 0         |  |  |
|        |      | Shiraz-40T | 2051 | 0.098506 | 0         |  |  |
|        |      | Shiraz-58T | 2221 | 0.871948 | 0         |  |  |
|        |      | Shiraz-71T | 2260 | 0.68394  | 0         |  |  |
|        |      | Shiraz-3T  | 235  | 0        | -0.28401  |  |  |
|        |      | Shiraz-4T  | 260  | 0        | -0.324128 |  |  |
|        |      | Shiraz-16T | 294  | 0.655804 | 0         |  |  |
|        |      | Shiraz-36T | 431  | 0        | -0.78035  |  |  |
|        |      | Shiraz-44T | 891  | 0        | -0.954044 |  |  |
|        |      | Shiraz-49T | 1166 | 0        | -0.917235 |  |  |
|        |      | Shiraz-49T | 1168 | 0        | -1.073859 |  |  |
|        |      | Shiraz-9T  | 1368 | 0.199713 | 0         |  |  |
|        |      | Shiraz-18T | 1455 | 0        | -0.186773 |  |  |
|        |      | Shiraz-22T | 1669 | 0.695915 | 0         |  |  |
|        |      | Shiraz-25T | 1717 | 0.420447 | 0         |  |  |
|        |      | Shiraz-28T | 1760 | 0.538181 | 0         |  |  |
|        |      | Shiraz-29T | 1800 | 0.672527 | 0         |  |  |
|        |      | Shiraz-32T | 1869 | 0.776805 | 0         |  |  |
|        |      | Shiraz-35T | 1932 | 0.507141 | 0         |  |  |
|        |      | Shiraz-40T | 2051 | 0.098506 | 0         |  |  |
|        |      | Shiraz-58T | 2221 | 0.871948 | 0         |  |  |
|        |      | Shiraz-71T | 2260 | 0.68394  | 0         |  |  |
| TSPYL2 | chrX | Shiraz-4T  | 260  | 0        | -0.324128 |  |  |
|        |      | Shiraz-16T | 294  | 0.655804 | 0         |  |  |
|        |      | Shiraz-31T | 345  | 0.103301 | 0         |  |  |
|        |      | Shiraz-36T | 431  | 0        | -0.78035  |  |  |
|        |      | Shiraz-36T | 432  | 0        | -0.6692   |  |  |
|        |      | Shiraz-44T | 891  | 0        | -0.954044 |  |  |
|        |      | Shiraz-44T | 898  | 0        | -0.515218 |  |  |

|  |            |      |          |           |  |
|--|------------|------|----------|-----------|--|
|  | Shiraz-49T | 1166 | 0        | -0.917235 |  |
|  | Shiraz-77T | 1282 | 0.213849 | 0         |  |
|  | Shiraz-9T  | 1368 | 0.199713 | 0         |  |
|  | Shiraz-18T | 1456 | 0.608534 | 0         |  |
|  | Shiraz-22T | 1669 | 0.695915 | 0         |  |
|  | Shiraz-25T | 1717 | 0.420447 | 0         |  |
|  | Shiraz-28T | 1760 | 0.538181 | 0         |  |
|  | Shiraz-29T | 1800 | 0.672527 | 0         |  |
|  | Shiraz-32T | 1869 | 0.776805 | 0         |  |
|  | Shiraz-35T | 1932 | 0.507141 | 0         |  |
|  | Shiraz-58T | 2221 | 0.871948 | 0         |  |
|  | Shiraz-71T | 2260 | 0.68394  | 0         |  |
|  | Shiraz-71T | 2262 | 0.986748 | 0         |  |
|  | Shiraz-4T  | 260  | 0        | -0.324128 |  |
|  | Shiraz-16T | 294  | 0.655804 | 0         |  |
|  | Shiraz-31T | 345  | 0.103301 | 0         |  |
|  | Shiraz-36T | 431  | 0        | -0.78035  |  |
|  | Shiraz-36T | 432  | 0        | -0.6692   |  |
|  | Shiraz-44T | 891  | 0        | -0.954044 |  |
|  | Shiraz-44T | 898  | 0        | -0.515218 |  |
|  | Shiraz-49T | 1166 | 0        | -0.917235 |  |
|  | Shiraz-77T | 1282 | 0.213849 | 0         |  |
|  | Shiraz-9T  | 1368 | 0.199713 | 0         |  |
|  | Shiraz-18T | 1456 | 0.608534 | 0         |  |
|  | Shiraz-22T | 1669 | 0.695915 | 0         |  |
|  | Shiraz-25T | 1717 | 0.420447 | 0         |  |
|  | Shiraz-28T | 1760 | 0.538181 | 0         |  |
|  | Shiraz-29T | 1800 | 0.672527 | 0         |  |
|  | Shiraz-32T | 1869 | 0.776805 | 0         |  |
|  | Shiraz-35T | 1932 | 0.507141 | 0         |  |
|  | Shiraz-58T | 2221 | 0.871948 | 0         |  |
|  | Shiraz-71T | 2260 | 0.68394  | 0         |  |
|  | Shiraz-71T | 2262 | 0.986748 | 0         |  |
|  | Shiraz-4T  | 260  | 0        | -0.324128 |  |
|  | Shiraz-16T | 294  | 0.655804 | 0         |  |
|  | Shiraz-31T | 345  | 0.103301 | 0         |  |
|  | Shiraz-36T | 431  | 0        | -0.78035  |  |
|  | Shiraz-36T | 432  | 0        | -0.6692   |  |
|  | Shiraz-44T | 891  | 0        | -0.954044 |  |
|  | Shiraz-44T | 898  | 0        | -0.515218 |  |
|  | Shiraz-49T | 1166 | 0        | -0.917235 |  |
|  | Shiraz-77T | 1282 | 0.213849 | 0         |  |
|  | Shiraz-9T  | 1368 | 0.199713 | 0         |  |
|  | Shiraz-18T | 1456 | 0.608534 | 0         |  |
|  | Shiraz-22T | 1669 | 0.695915 | 0         |  |
|  | Shiraz-25T | 1717 | 0.420447 | 0         |  |
|  | Shiraz-28T | 1760 | 0.538181 | 0         |  |

|      |      |            |      |          |           |  |
|------|------|------------|------|----------|-----------|--|
|      |      | Shiraz-29T | 1800 | 0.672527 | 0         |  |
|      |      | Shiraz-32T | 1869 | 0.776805 | 0         |  |
|      |      | Shiraz-35T | 1932 | 0.507141 | 0         |  |
|      |      | Shiraz-58T | 2221 | 0.871948 | 0         |  |
|      |      | Shiraz-71T | 2260 | 0.68394  | 0         |  |
|      |      | Shiraz-71T | 2262 | 0.986748 | 0         |  |
| TSR2 | chrX | Shiraz-4T  | 260  | 0        | -0.324128 |  |
|      |      | Shiraz-16T | 294  | 0.655804 | 0         |  |
|      |      | Shiraz-31T | 345  | 0.103301 | 0         |  |
|      |      | Shiraz-36T | 431  | 0        | -0.78035  |  |
|      |      | Shiraz-36T | 432  | 0        | -0.6692   |  |
|      |      | Shiraz-44T | 891  | 0        | -0.954044 |  |
|      |      | Shiraz-44T | 898  | 0        | -0.515218 |  |
|      |      | Shiraz-49T | 1166 | 0        | -0.917235 |  |
|      |      | Shiraz-77T | 1282 | 0.213849 | 0         |  |
|      |      | Shiraz-9T  | 1368 | 0.199713 | 0         |  |
|      |      | Shiraz-18T | 1456 | 0.608534 | 0         |  |
|      |      | Shiraz-22T | 1669 | 0.695915 | 0         |  |
|      |      | Shiraz-25T | 1717 | 0.420447 | 0         |  |
|      |      | Shiraz-28T | 1760 | 0.538181 | 0         |  |
|      |      | Shiraz-29T | 1800 | 0.672527 | 0         |  |
|      |      | Shiraz-32T | 1869 | 0.776805 | 0         |  |
|      |      | Shiraz-35T | 1932 | 0.507141 | 0         |  |
|      |      | Shiraz-58T | 2221 | 0.871948 | 0         |  |
|      |      | Shiraz-71T | 2260 | 0.68394  | 0         |  |
|      |      | Shiraz-71T | 2262 | 0.986748 | 0         |  |
|      |      | Shiraz-4T  | 260  | 0        | -0.324128 |  |
|      |      | Shiraz-16T | 294  | 0.655804 | 0         |  |
|      |      | Shiraz-31T | 345  | 0.103301 | 0         |  |
|      |      | Shiraz-36T | 431  | 0        | -0.78035  |  |
|      |      | Shiraz-36T | 432  | 0        | -0.6692   |  |
|      |      | Shiraz-44T | 891  | 0        | -0.954044 |  |
|      |      | Shiraz-44T | 898  | 0        | -0.515218 |  |
|      |      | Shiraz-49T | 1166 | 0        | -0.917235 |  |
|      |      | Shiraz-77T | 1282 | 0.213849 | 0         |  |
|      |      | Shiraz-9T  | 1368 | 0.199713 | 0         |  |
|      |      | Shiraz-18T | 1456 | 0.608534 | 0         |  |
|      |      | Shiraz-22T | 1669 | 0.695915 | 0         |  |
|      |      | Shiraz-25T | 1717 | 0.420447 | 0         |  |
|      |      | Shiraz-28T | 1760 | 0.538181 | 0         |  |
|      |      | Shiraz-29T | 1800 | 0.672527 | 0         |  |
|      |      | Shiraz-32T | 1869 | 0.776805 | 0         |  |
|      |      | Shiraz-35T | 1932 | 0.507141 | 0         |  |
|      |      | Shiraz-58T | 2221 | 0.871948 | 0         |  |
|      |      | Shiraz-71T | 2260 | 0.68394  | 0         |  |
|      |      | Shiraz-71T | 2262 | 0.986748 | 0         |  |
|      |      | Shiraz-4T  | 260  | 0        | -0.324128 |  |

|        |      |            |      |          |           |  |  |
|--------|------|------------|------|----------|-----------|--|--|
|        |      | Shiraz-16T | 294  | 0.655804 | 0         |  |  |
|        |      | Shiraz-31T | 345  | 0.103301 | 0         |  |  |
|        |      | Shiraz-36T | 431  | 0        | -0.78035  |  |  |
|        |      | Shiraz-36T | 432  | 0        | -0.6692   |  |  |
|        |      | Shiraz-44T | 891  | 0        | -0.954044 |  |  |
|        |      | Shiraz-44T | 898  | 0        | -0.515218 |  |  |
|        |      | Shiraz-49T | 1166 | 0        | -0.917235 |  |  |
|        |      | Shiraz-77T | 1282 | 0.213849 | 0         |  |  |
|        |      | Shiraz-9T  | 1368 | 0.199713 | 0         |  |  |
|        |      | Shiraz-18T | 1456 | 0.608534 | 0         |  |  |
|        |      | Shiraz-22T | 1669 | 0.695915 | 0         |  |  |
|        |      | Shiraz-25T | 1717 | 0.420447 | 0         |  |  |
|        |      | Shiraz-28T | 1760 | 0.538181 | 0         |  |  |
|        |      | Shiraz-29T | 1800 | 0.672527 | 0         |  |  |
|        |      | Shiraz-32T | 1869 | 0.776805 | 0         |  |  |
|        |      | Shiraz-35T | 1932 | 0.507141 | 0         |  |  |
|        |      | Shiraz-58T | 2221 | 0.871948 | 0         |  |  |
|        |      | Shiraz-71T | 2260 | 0.68394  | 0         |  |  |
|        |      | Shiraz-71T | 2262 | 0.986748 | 0         |  |  |
| TTC23L | chr5 | Shiraz-4T  | 250  | 0.262252 | 0         |  |  |
|        |      | Shiraz-16T | 266  | 0.321724 | 0         |  |  |
|        |      | Shiraz-18T | 1429 | 0        | -0.314125 |  |  |
|        |      | Shiraz-25T | 1694 | 0.201602 | 0         |  |  |
|        |      | Shiraz-28T | 1731 | 0.295447 | 0         |  |  |
|        |      | Shiraz-29T | 1773 | 0.090981 | 0         |  |  |
|        |      | Shiraz-40T | 2016 | 0.376634 | 0         |  |  |
|        |      | Shiraz-4T  | 250  | 0.262252 | 0         |  |  |
|        |      | Shiraz-16T | 266  | 0.321724 | 0         |  |  |
|        |      | Shiraz-18T | 1429 | 0        | -0.314125 |  |  |
|        |      | Shiraz-25T | 1694 | 0.201602 | 0         |  |  |
|        |      | Shiraz-28T | 1731 | 0.295447 | 0         |  |  |
|        |      | Shiraz-29T | 1773 | 0.090981 | 0         |  |  |
|        |      | Shiraz-40T | 2016 | 0.376634 | 0         |  |  |
|        |      | Shiraz-4T  | 250  | 0.262252 | 0         |  |  |
|        |      | Shiraz-16T | 266  | 0.321724 | 0         |  |  |
|        |      | Shiraz-18T | 1429 | 0        | -0.314125 |  |  |
|        |      | Shiraz-25T | 1694 | 0.201602 | 0         |  |  |
|        |      | Shiraz-28T | 1731 | 0.295447 | 0         |  |  |
|        |      | Shiraz-29T | 1773 | 0.090981 | 0         |  |  |
|        |      | Shiraz-40T | 2016 | 0.376634 | 0         |  |  |
| TTC26  | chr7 | Shiraz-3T  | 90   | 0.219276 | 0         |  |  |
|        |      | Shiraz-3T  | 97   | 0.496001 | 0         |  |  |
|        |      | Shiraz-4T  | 253  | 0.372918 | 0         |  |  |
|        |      | Shiraz-31T | 318  | 0.254373 | 0         |  |  |
|        |      | Shiraz-36T | 378  | 0.179558 | 0         |  |  |
|        |      | Shiraz-36T | 383  | 0.374586 | 0         |  |  |
|        |      | Shiraz-44T | 644  | 0.496536 | 0         |  |  |

|  |  |            |      |          |           |  |  |
|--|--|------------|------|----------|-----------|--|--|
|  |  | Shiraz-46T | 943  | 0.093799 | 0         |  |  |
|  |  | Shiraz-47T | 1033 | 0.220267 | 0         |  |  |
|  |  | Shiraz-77T | 1225 | 0        | -0.117922 |  |  |
|  |  | Shiraz-77T | 1230 | 0.149651 | 0         |  |  |
|  |  | Shiraz-9T  | 1325 | 0.221899 | 0         |  |  |
|  |  | Shiraz-18T | 1434 | 0.244465 | 0         |  |  |
|  |  | Shiraz-25T | 1698 | 0.21835  | 0         |  |  |
|  |  | Shiraz-28T | 1735 | 0.350744 | 0         |  |  |
|  |  | Shiraz-29T | 1778 | 0.120767 | 0         |  |  |
|  |  | Shiraz-32T | 1833 | 0.551336 | 0         |  |  |
|  |  | Shiraz-38T | 1951 | 0.250891 | 0         |  |  |
|  |  | Shiraz-53T | 2078 | 0.287202 | 0         |  |  |
|  |  | Shiraz-58T | 2162 | 0.221505 | 0         |  |  |
|  |  | Shiraz-71T | 2238 | 0.603631 | 0         |  |  |
|  |  | Shiraz-3T  | 90   | 0.219276 | 0         |  |  |
|  |  | Shiraz-3T  | 97   | 0.496001 | 0         |  |  |
|  |  | Shiraz-4T  | 253  | 0.372918 | 0         |  |  |
|  |  | Shiraz-31T | 318  | 0.254373 | 0         |  |  |
|  |  | Shiraz-36T | 378  | 0.179558 | 0         |  |  |
|  |  | Shiraz-36T | 383  | 0.374586 | 0         |  |  |
|  |  | Shiraz-44T | 644  | 0.496536 | 0         |  |  |
|  |  | Shiraz-46T | 943  | 0.093799 | 0         |  |  |
|  |  | Shiraz-47T | 1033 | 0.220267 | 0         |  |  |
|  |  | Shiraz-77T | 1225 | 0        | -0.117922 |  |  |
|  |  | Shiraz-77T | 1230 | 0.149651 | 0         |  |  |
|  |  | Shiraz-9T  | 1325 | 0.221899 | 0         |  |  |
|  |  | Shiraz-18T | 1434 | 0.244465 | 0         |  |  |
|  |  | Shiraz-25T | 1698 | 0.21835  | 0         |  |  |
|  |  | Shiraz-28T | 1735 | 0.350744 | 0         |  |  |
|  |  | Shiraz-29T | 1778 | 0.120767 | 0         |  |  |
|  |  | Shiraz-32T | 1833 | 0.551336 | 0         |  |  |
|  |  | Shiraz-38T | 1951 | 0.250891 | 0         |  |  |
|  |  | Shiraz-53T | 2078 | 0.287202 | 0         |  |  |
|  |  | Shiraz-58T | 2162 | 0.221505 | 0         |  |  |
|  |  | Shiraz-71T | 2238 | 0.603631 | 0         |  |  |
|  |  | Shiraz-3T  | 90   | 0.219276 | 0         |  |  |
|  |  | Shiraz-3T  | 97   | 0.496001 | 0         |  |  |
|  |  | Shiraz-4T  | 253  | 0.372918 | 0         |  |  |
|  |  | Shiraz-31T | 318  | 0.254373 | 0         |  |  |
|  |  | Shiraz-36T | 378  | 0.179558 | 0         |  |  |
|  |  | Shiraz-36T | 383  | 0.374586 | 0         |  |  |
|  |  | Shiraz-44T | 644  | 0.496536 | 0         |  |  |
|  |  | Shiraz-46T | 943  | 0.093799 | 0         |  |  |
|  |  | Shiraz-47T | 1033 | 0.220267 | 0         |  |  |
|  |  | Shiraz-77T | 1225 | 0        | -0.117922 |  |  |
|  |  | Shiraz-77T | 1230 | 0.149651 | 0         |  |  |
|  |  | Shiraz-9T  | 1325 | 0.221899 | 0         |  |  |



|        |      |            |      |          |           |  |  |
|--------|------|------------|------|----------|-----------|--|--|
|        |      | Shiraz-18T | 1434 | 0.244465 | 0         |  |  |
|        |      | Shiraz-25T | 1698 | 0.21835  | 0         |  |  |
|        |      | Shiraz-28T | 1735 | 0.350744 | 0         |  |  |
|        |      | Shiraz-29T | 1778 | 0.120767 | 0         |  |  |
|        |      | Shiraz-32T | 1833 | 0.551336 | 0         |  |  |
|        |      | Shiraz-38T | 1951 | 0.250891 | 0         |  |  |
|        |      | Shiraz-53T | 2078 | 0.287202 | 0         |  |  |
|        |      | Shiraz-58T | 2162 | 0.221505 | 0         |  |  |
|        |      | Shiraz-71T | 2238 | 0.603631 | 0         |  |  |
| TTC33  | chr5 | Shiraz-4T  | 250  | 0.262252 | 0         |  |  |
|        |      | Shiraz-16T | 266  | 0.321724 | 0         |  |  |
|        |      | Shiraz-44T | 591  | 0        | -0.233934 |  |  |
|        |      | Shiraz-18T | 1429 | 0        | -0.314125 |  |  |
|        |      | Shiraz-22T | 1522 | 0        | -0.322688 |  |  |
|        |      | Shiraz-25T | 1694 | 0.201602 | 0         |  |  |
|        |      | Shiraz-28T | 1731 | 0.295447 | 0         |  |  |
|        |      | Shiraz-29T | 1773 | 0.090981 | 0         |  |  |
|        |      | Shiraz-40T | 2016 | 0.376634 | 0         |  |  |
|        |      | Shiraz-4T  | 250  | 0.262252 | 0         |  |  |
|        |      | Shiraz-16T | 266  | 0.321724 | 0         |  |  |
|        |      | Shiraz-44T | 591  | 0        | -0.233934 |  |  |
|        |      | Shiraz-18T | 1429 | 0        | -0.314125 |  |  |
|        |      | Shiraz-22T | 1522 | 0        | -0.322688 |  |  |
|        |      | Shiraz-25T | 1694 | 0.201602 | 0         |  |  |
|        |      | Shiraz-28T | 1731 | 0.295447 | 0         |  |  |
|        |      | Shiraz-29T | 1773 | 0.090981 | 0         |  |  |
|        |      | Shiraz-40T | 2016 | 0.376634 | 0         |  |  |
|        |      | Shiraz-4T  | 250  | 0.262252 | 0         |  |  |
|        |      | Shiraz-16T | 266  | 0.321724 | 0         |  |  |
|        |      | Shiraz-44T | 591  | 0        | -0.233934 |  |  |
|        |      | Shiraz-18T | 1429 | 0        | -0.314125 |  |  |
|        |      | Shiraz-22T | 1522 | 0        | -0.322688 |  |  |
|        |      | Shiraz-25T | 1694 | 0.201602 | 0         |  |  |
|        |      | Shiraz-28T | 1731 | 0.295447 | 0         |  |  |
|        |      | Shiraz-29T | 1773 | 0.090981 | 0         |  |  |
|        |      | Shiraz-40T | 2016 | 0.376634 | 0         |  |  |
| TWIST1 | chr7 | Shiraz-4T  | 252  | 0.192083 | 0         |  |  |
|        |      | Shiraz-36T | 376  | 0.159952 | 0         |  |  |
|        |      | Shiraz-44T | 628  | 0        | -0.444379 |  |  |
|        |      | Shiraz-47T | 1027 | 0        | -0.117848 |  |  |
|        |      | Shiraz-49T | 1117 | 0        | -0.168296 |  |  |
|        |      | Shiraz-77T | 1222 | 0        | -0.113002 |  |  |
|        |      | Shiraz-18T | 1433 | 0.250973 | 0         |  |  |
|        |      | Shiraz-22T | 1543 | 0        | -0.513696 |  |  |
|        |      | Shiraz-25T | 1697 | 0.21945  | 0         |  |  |
|        |      | Shiraz-28T | 1734 | 0.362882 | 0         |  |  |
|        |      | Shiraz-29T | 1777 | 0.156747 | 0         |  |  |

|         |      |            |      |          |           |  |  |
|---------|------|------------|------|----------|-----------|--|--|
|         |      | Shiraz-38T | 1950 | 0.265916 | 0         |  |  |
|         |      | Shiraz-58T | 2157 | 0        | -0.213872 |  |  |
|         |      | Shiraz-71T | 2236 | 0.320072 | 0         |  |  |
|         |      | Shiraz-4T  | 252  | 0.192083 | 0         |  |  |
|         |      | Shiraz-36T | 376  | 0.159952 | 0         |  |  |
|         |      | Shiraz-44T | 628  | 0        | -0.444379 |  |  |
|         |      | Shiraz-47T | 1027 | 0        | -0.117848 |  |  |
|         |      | Shiraz-49T | 1117 | 0        | -0.168296 |  |  |
|         |      | Shiraz-77T | 1222 | 0        | -0.113002 |  |  |
|         |      | Shiraz-18T | 1433 | 0.250973 | 0         |  |  |
|         |      | Shiraz-22T | 1543 | 0        | -0.513696 |  |  |
|         |      | Shiraz-25T | 1697 | 0.21945  | 0         |  |  |
|         |      | Shiraz-28T | 1734 | 0.362882 | 0         |  |  |
|         |      | Shiraz-29T | 1777 | 0.156747 | 0         |  |  |
|         |      | Shiraz-38T | 1950 | 0.265916 | 0         |  |  |
|         |      | Shiraz-58T | 2157 | 0        | -0.213872 |  |  |
|         |      | Shiraz-71T | 2236 | 0.320072 | 0         |  |  |
|         |      | Shiraz-4T  | 252  | 0.192083 | 0         |  |  |
|         |      | Shiraz-36T | 376  | 0.159952 | 0         |  |  |
|         |      | Shiraz-44T | 628  | 0        | -0.444379 |  |  |
|         |      | Shiraz-47T | 1027 | 0        | -0.117848 |  |  |
|         |      | Shiraz-49T | 1117 | 0        | -0.168296 |  |  |
|         |      | Shiraz-77T | 1222 | 0        | -0.113002 |  |  |
|         |      | Shiraz-18T | 1433 | 0.250973 | 0         |  |  |
|         |      | Shiraz-22T | 1543 | 0        | -0.513696 |  |  |
|         |      | Shiraz-25T | 1697 | 0.21945  | 0         |  |  |
|         |      | Shiraz-28T | 1734 | 0.362882 | 0         |  |  |
|         |      | Shiraz-29T | 1777 | 0.156747 | 0         |  |  |
|         |      | Shiraz-38T | 1950 | 0.265916 | 0         |  |  |
|         |      | Shiraz-58T | 2157 | 0        | -0.213872 |  |  |
|         |      | Shiraz-71T | 2236 | 0.320072 | 0         |  |  |
| TWISTNB | chr7 | Shiraz-4T  | 252  | 0.192083 | 0         |  |  |
|         |      | Shiraz-36T | 376  | 0.159952 | 0         |  |  |
|         |      | Shiraz-44T | 628  | 0        | -0.444379 |  |  |
|         |      | Shiraz-47T | 1027 | 0        | -0.117848 |  |  |
|         |      | Shiraz-49T | 1117 | 0        | -0.168296 |  |  |
|         |      | Shiraz-77T | 1222 | 0        | -0.113002 |  |  |
|         |      | Shiraz-18T | 1433 | 0.250973 | 0         |  |  |
|         |      | Shiraz-22T | 1543 | 0        | -0.513696 |  |  |
|         |      | Shiraz-25T | 1697 | 0.21945  | 0         |  |  |
|         |      | Shiraz-28T | 1734 | 0.362882 | 0         |  |  |
|         |      | Shiraz-29T | 1777 | 0.156747 | 0         |  |  |
|         |      | Shiraz-38T | 1950 | 0.265916 | 0         |  |  |
|         |      | Shiraz-58T | 2157 | 0        | -0.213872 |  |  |
|         |      | Shiraz-71T | 2236 | 0.320072 | 0         |  |  |
|         |      | Shiraz-4T  | 252  | 0.192083 | 0         |  |  |
|         |      | Shiraz-36T | 376  | 0.159952 | 0         |  |  |

|        |      |            |      |          |           |  |  |
|--------|------|------------|------|----------|-----------|--|--|
|        |      | Shiraz-44T | 628  | 0        | -0.444379 |  |  |
|        |      | Shiraz-47T | 1027 | 0        | -0.117848 |  |  |
|        |      | Shiraz-49T | 1117 | 0        | -0.168296 |  |  |
|        |      | Shiraz-77T | 1222 | 0        | -0.113002 |  |  |
|        |      | Shiraz-18T | 1433 | 0.250973 | 0         |  |  |
|        |      | Shiraz-22T | 1543 | 0        | -0.513696 |  |  |
|        |      | Shiraz-25T | 1697 | 0.21945  | 0         |  |  |
|        |      | Shiraz-28T | 1734 | 0.362882 | 0         |  |  |
|        |      | Shiraz-29T | 1777 | 0.156747 | 0         |  |  |
|        |      | Shiraz-38T | 1950 | 0.265916 | 0         |  |  |
|        |      | Shiraz-58T | 2157 | 0        | -0.213872 |  |  |
|        |      | Shiraz-71T | 2236 | 0.320072 | 0         |  |  |
|        |      | Shiraz-4T  | 252  | 0.192083 | 0         |  |  |
|        |      | Shiraz-36T | 376  | 0.159952 | 0         |  |  |
|        |      | Shiraz-44T | 628  | 0        | -0.444379 |  |  |
|        |      | Shiraz-47T | 1027 | 0        | -0.117848 |  |  |
|        |      | Shiraz-49T | 1117 | 0        | -0.168296 |  |  |
|        |      | Shiraz-77T | 1222 | 0        | -0.113002 |  |  |
|        |      | Shiraz-18T | 1433 | 0.250973 | 0         |  |  |
|        |      | Shiraz-22T | 1543 | 0        | -0.513696 |  |  |
|        |      | Shiraz-25T | 1697 | 0.21945  | 0         |  |  |
|        |      | Shiraz-28T | 1734 | 0.362882 | 0         |  |  |
|        |      | Shiraz-29T | 1777 | 0.156747 | 0         |  |  |
|        |      | Shiraz-38T | 1950 | 0.265916 | 0         |  |  |
|        |      | Shiraz-58T | 2157 | 0        | -0.213872 |  |  |
|        |      | Shiraz-71T | 2236 | 0.320072 | 0         |  |  |
| TXNDC3 | chr7 | Shiraz-3T  | 87   | 0.198593 | 0         |  |  |
|        |      | Shiraz-4T  | 252  | 0.192083 | 0         |  |  |
|        |      | Shiraz-36T | 376  | 0.159952 | 0         |  |  |
|        |      | Shiraz-44T | 631  | 0        | -0.180312 |  |  |
|        |      | Shiraz-46T | 942  | 0.069143 | 0         |  |  |
|        |      | Shiraz-18T | 1433 | 0.250973 | 0         |  |  |
|        |      | Shiraz-22T | 1544 | 0        | -0.193579 |  |  |
|        |      | Shiraz-25T | 1697 | 0.21945  | 0         |  |  |
|        |      | Shiraz-28T | 1734 | 0.362882 | 0         |  |  |
|        |      | Shiraz-29T | 1777 | 0.156747 | 0         |  |  |
|        |      | Shiraz-38T | 1950 | 0.265916 | 0         |  |  |
|        |      | Shiraz-71T | 2236 | 0.320072 | 0         |  |  |
|        |      | Shiraz-72T | 2277 | 0        | -0.398869 |  |  |
|        |      | Shiraz-3T  | 87   | 0.198593 | 0         |  |  |
|        |      | Shiraz-4T  | 252  | 0.192083 | 0         |  |  |
|        |      | Shiraz-36T | 376  | 0.159952 | 0         |  |  |
|        |      | Shiraz-44T | 631  | 0        | -0.180312 |  |  |
|        |      | Shiraz-46T | 942  | 0.069143 | 0         |  |  |
|        |      | Shiraz-18T | 1433 | 0.250973 | 0         |  |  |
|        |      | Shiraz-22T | 1544 | 0        | -0.193579 |  |  |
|        |      | Shiraz-25T | 1697 | 0.21945  | 0         |  |  |

|      |      |            |      |          |           |  |
|------|------|------------|------|----------|-----------|--|
|      |      | Shiraz-28T | 1734 | 0.362882 | 0         |  |
|      |      | Shiraz-29T | 1777 | 0.156747 | 0         |  |
|      |      | Shiraz-38T | 1950 | 0.265916 | 0         |  |
|      |      | Shiraz-71T | 2236 | 0.320072 | 0         |  |
|      |      | Shiraz-72T | 2277 | 0        | -0.398869 |  |
|      |      | Shiraz-3T  | 87   | 0.198593 | 0         |  |
|      |      | Shiraz-4T  | 252  | 0.192083 | 0         |  |
|      |      | Shiraz-36T | 376  | 0.159952 | 0         |  |
|      |      | Shiraz-44T | 631  | 0        | -0.180312 |  |
|      |      | Shiraz-46T | 942  | 0.069143 | 0         |  |
|      |      | Shiraz-18T | 1433 | 0.250973 | 0         |  |
|      |      | Shiraz-22T | 1544 | 0        | -0.193579 |  |
|      |      | Shiraz-25T | 1697 | 0.21945  | 0         |  |
|      |      | Shiraz-28T | 1734 | 0.362882 | 0         |  |
|      |      | Shiraz-29T | 1777 | 0.156747 | 0         |  |
|      |      | Shiraz-38T | 1950 | 0.265916 | 0         |  |
|      |      | Shiraz-71T | 2236 | 0.320072 | 0         |  |
|      |      | Shiraz-72T | 2277 | 0        | -0.398869 |  |
| UBA1 | chrX | Shiraz-4T  | 260  | 0        | -0.324128 |  |
|      |      | Shiraz-4T  | 260  | 0        | -0.324128 |  |
|      |      | Shiraz-16T | 294  | 0.655804 | 0         |  |
|      |      | Shiraz-16T | 294  | 0.655804 | 0         |  |
|      |      | Shiraz-31T | 345  | 0.103301 | 0         |  |
|      |      | Shiraz-31T | 345  | 0.103301 | 0         |  |
|      |      | Shiraz-36T | 431  | 0        | -0.78035  |  |
|      |      | Shiraz-36T | 431  | 0        | -0.78035  |  |
|      |      | Shiraz-36T | 432  | 0        | -0.6692   |  |
|      |      | Shiraz-36T | 432  | 0        | -0.6692   |  |
|      |      | Shiraz-44T | 891  | 0        | -0.954044 |  |
|      |      | Shiraz-44T | 891  | 0        | -0.954044 |  |
|      |      | Shiraz-44T | 896  | 0        | -0.109108 |  |
|      |      | Shiraz-44T | 896  | 0        | -0.109108 |  |
|      |      | Shiraz-46T | 991  | 0.139564 | 0         |  |
|      |      | Shiraz-46T | 991  | 0.139564 | 0         |  |
|      |      | Shiraz-47T | 1084 | 0.24185  | 0         |  |
|      |      | Shiraz-47T | 1084 | 0.24185  | 0         |  |
|      |      | Shiraz-49T | 1166 | 0        | -0.917235 |  |
|      |      | Shiraz-49T | 1166 | 0        | -0.917235 |  |
|      |      | Shiraz-49T | 1169 | 0        | -0.583529 |  |
|      |      | Shiraz-49T | 1169 | 0        | -0.583529 |  |
|      |      | Shiraz-77T | 1282 | 0.213849 | 0         |  |
|      |      | Shiraz-77T | 1282 | 0.213849 | 0         |  |
|      |      | Shiraz-9T  | 1368 | 0.199713 | 0         |  |
|      |      | Shiraz-9T  | 1368 | 0.199713 | 0         |  |
|      |      | Shiraz-9T  | 1369 | 0.703374 | 0         |  |
|      |      | Shiraz-9T  | 1369 | 0.703374 | 0         |  |
|      |      | Shiraz-18T | 1455 | 0        | -0.186773 |  |

|  |            |      |          |           |  |
|--|------------|------|----------|-----------|--|
|  | Shiraz-18T | 1455 | 0        | -0.186773 |  |
|  | Shiraz-22T | 1669 | 0.695915 | 0         |  |
|  | Shiraz-22T | 1669 | 0.695915 | 0         |  |
|  | Shiraz-22T | 1672 | 1.01678  | 0         |  |
|  | Shiraz-22T | 1672 | 1.01678  | 0         |  |
|  | Shiraz-25T | 1717 | 0.420447 | 0         |  |
|  | Shiraz-25T | 1717 | 0.420447 | 0         |  |
|  | Shiraz-28T | 1760 | 0.538181 | 0         |  |
|  | Shiraz-28T | 1760 | 0.538181 | 0         |  |
|  | Shiraz-29T | 1800 | 0.672527 | 0         |  |
|  | Shiraz-29T | 1800 | 0.672527 | 0         |  |
|  | Shiraz-32T | 1869 | 0.776805 | 0         |  |
|  | Shiraz-32T | 1869 | 0.776805 | 0         |  |
|  | Shiraz-35T | 1932 | 0.507141 | 0         |  |
|  | Shiraz-35T | 1932 | 0.507141 | 0         |  |
|  | Shiraz-40T | 2051 | 0.098506 | 0         |  |
|  | Shiraz-40T | 2051 | 0.098506 | 0         |  |
|  | Shiraz-58T | 2221 | 0.871948 | 0         |  |
|  | Shiraz-58T | 2221 | 0.871948 | 0         |  |
|  | Shiraz-71T | 2260 | 0.68394  | 0         |  |
|  | Shiraz-71T | 2260 | 0.68394  | 0         |  |
|  | Shiraz-71T | 2262 | 0.986748 | 0         |  |
|  | Shiraz-71T | 2262 | 0.986748 | 0         |  |
|  | Shiraz-4T  | 260  | 0        | -0.324128 |  |
|  | Shiraz-4T  | 260  | 0        | -0.324128 |  |
|  | Shiraz-16T | 294  | 0.655804 | 0         |  |
|  | Shiraz-16T | 294  | 0.655804 | 0         |  |
|  | Shiraz-31T | 345  | 0.103301 | 0         |  |
|  | Shiraz-31T | 345  | 0.103301 | 0         |  |
|  | Shiraz-36T | 431  | 0        | -0.78035  |  |
|  | Shiraz-36T | 431  | 0        | -0.78035  |  |
|  | Shiraz-36T | 432  | 0        | -0.6692   |  |
|  | Shiraz-36T | 432  | 0        | -0.6692   |  |
|  | Shiraz-44T | 891  | 0        | -0.954044 |  |
|  | Shiraz-44T | 891  | 0        | -0.954044 |  |
|  | Shiraz-44T | 896  | 0        | -0.109108 |  |
|  | Shiraz-44T | 896  | 0        | -0.109108 |  |
|  | Shiraz-46T | 991  | 0.139564 | 0         |  |
|  | Shiraz-46T | 991  | 0.139564 | 0         |  |
|  | Shiraz-47T | 1084 | 0.24185  | 0         |  |
|  | Shiraz-47T | 1084 | 0.24185  | 0         |  |
|  | Shiraz-49T | 1166 | 0        | -0.917235 |  |
|  | Shiraz-49T | 1166 | 0        | -0.917235 |  |
|  | Shiraz-49T | 1169 | 0        | -0.583529 |  |
|  | Shiraz-49T | 1169 | 0        | -0.583529 |  |
|  | Shiraz-77T | 1282 | 0.213849 | 0         |  |
|  | Shiraz-77T | 1282 | 0.213849 | 0         |  |

|  |  |            |      |          |           |  |  |
|--|--|------------|------|----------|-----------|--|--|
|  |  | Shiraz-9T  | 1368 | 0.199713 | 0         |  |  |
|  |  | Shiraz-9T  | 1368 | 0.199713 | 0         |  |  |
|  |  | Shiraz-9T  | 1369 | 0.703374 | 0         |  |  |
|  |  | Shiraz-9T  | 1369 | 0.703374 | 0         |  |  |
|  |  | Shiraz-18T | 1455 | 0        | -0.186773 |  |  |
|  |  | Shiraz-18T | 1455 | 0        | -0.186773 |  |  |
|  |  | Shiraz-22T | 1669 | 0.695915 | 0         |  |  |
|  |  | Shiraz-22T | 1669 | 0.695915 | 0         |  |  |
|  |  | Shiraz-22T | 1672 | 1.01678  | 0         |  |  |
|  |  | Shiraz-22T | 1672 | 1.01678  | 0         |  |  |
|  |  | Shiraz-25T | 1717 | 0.420447 | 0         |  |  |
|  |  | Shiraz-25T | 1717 | 0.420447 | 0         |  |  |
|  |  | Shiraz-28T | 1760 | 0.538181 | 0         |  |  |
|  |  | Shiraz-28T | 1760 | 0.538181 | 0         |  |  |
|  |  | Shiraz-29T | 1800 | 0.672527 | 0         |  |  |
|  |  | Shiraz-29T | 1800 | 0.672527 | 0         |  |  |
|  |  | Shiraz-32T | 1869 | 0.776805 | 0         |  |  |
|  |  | Shiraz-32T | 1869 | 0.776805 | 0         |  |  |
|  |  | Shiraz-35T | 1932 | 0.507141 | 0         |  |  |
|  |  | Shiraz-35T | 1932 | 0.507141 | 0         |  |  |
|  |  | Shiraz-40T | 2051 | 0.098506 | 0         |  |  |
|  |  | Shiraz-40T | 2051 | 0.098506 | 0         |  |  |
|  |  | Shiraz-58T | 2221 | 0.871948 | 0         |  |  |
|  |  | Shiraz-58T | 2221 | 0.871948 | 0         |  |  |
|  |  | Shiraz-71T | 2260 | 0.68394  | 0         |  |  |
|  |  | Shiraz-71T | 2260 | 0.68394  | 0         |  |  |
|  |  | Shiraz-71T | 2262 | 0.986748 | 0         |  |  |
|  |  | Shiraz-71T | 2262 | 0.986748 | 0         |  |  |
|  |  | Shiraz-4T  | 260  | 0        | -0.324128 |  |  |
|  |  | Shiraz-4T  | 260  | 0        | -0.324128 |  |  |
|  |  | Shiraz-16T | 294  | 0.655804 | 0         |  |  |
|  |  | Shiraz-16T | 294  | 0.655804 | 0         |  |  |
|  |  | Shiraz-31T | 345  | 0.103301 | 0         |  |  |
|  |  | Shiraz-31T | 345  | 0.103301 | 0         |  |  |
|  |  | Shiraz-36T | 431  | 0        | -0.78035  |  |  |
|  |  | Shiraz-36T | 431  | 0        | -0.78035  |  |  |
|  |  | Shiraz-36T | 432  | 0        | -0.6692   |  |  |
|  |  | Shiraz-36T | 432  | 0        | -0.6692   |  |  |
|  |  | Shiraz-44T | 891  | 0        | -0.954044 |  |  |
|  |  | Shiraz-44T | 891  | 0        | -0.954044 |  |  |
|  |  | Shiraz-44T | 896  | 0        | -0.109108 |  |  |
|  |  | Shiraz-44T | 896  | 0        | -0.109108 |  |  |
|  |  | Shiraz-46T | 991  | 0.139564 | 0         |  |  |
|  |  | Shiraz-46T | 991  | 0.139564 | 0         |  |  |
|  |  | Shiraz-47T | 1084 | 0.24185  | 0         |  |  |
|  |  | Shiraz-47T | 1084 | 0.24185  | 0         |  |  |
|  |  | Shiraz-49T | 1166 | 0        | -0.917235 |  |  |

|       |      |            |      |          |           |  |  |
|-------|------|------------|------|----------|-----------|--|--|
|       |      | Shiraz-49T | 1166 | 0        | -0.917235 |  |  |
|       |      | Shiraz-49T | 1169 | 0        | -0.583529 |  |  |
|       |      | Shiraz-49T | 1169 | 0        | -0.583529 |  |  |
|       |      | Shiraz-77T | 1282 | 0.213849 | 0         |  |  |
|       |      | Shiraz-77T | 1282 | 0.213849 | 0         |  |  |
|       |      | Shiraz-9T  | 1368 | 0.199713 | 0         |  |  |
|       |      | Shiraz-9T  | 1368 | 0.199713 | 0         |  |  |
|       |      | Shiraz-9T  | 1369 | 0.703374 | 0         |  |  |
|       |      | Shiraz-9T  | 1369 | 0.703374 | 0         |  |  |
|       |      | Shiraz-18T | 1455 | 0        | -0.186773 |  |  |
|       |      | Shiraz-18T | 1455 | 0        | -0.186773 |  |  |
|       |      | Shiraz-22T | 1669 | 0.695915 | 0         |  |  |
|       |      | Shiraz-22T | 1669 | 0.695915 | 0         |  |  |
|       |      | Shiraz-22T | 1672 | 1.01678  | 0         |  |  |
|       |      | Shiraz-22T | 1672 | 1.01678  | 0         |  |  |
|       |      | Shiraz-25T | 1717 | 0.420447 | 0         |  |  |
|       |      | Shiraz-25T | 1717 | 0.420447 | 0         |  |  |
|       |      | Shiraz-28T | 1760 | 0.538181 | 0         |  |  |
|       |      | Shiraz-28T | 1760 | 0.538181 | 0         |  |  |
|       |      | Shiraz-29T | 1800 | 0.672527 | 0         |  |  |
|       |      | Shiraz-29T | 1800 | 0.672527 | 0         |  |  |
|       |      | Shiraz-32T | 1869 | 0.776805 | 0         |  |  |
|       |      | Shiraz-32T | 1869 | 0.776805 | 0         |  |  |
|       |      | Shiraz-35T | 1932 | 0.507141 | 0         |  |  |
|       |      | Shiraz-35T | 1932 | 0.507141 | 0         |  |  |
|       |      | Shiraz-40T | 2051 | 0.098506 | 0         |  |  |
|       |      | Shiraz-40T | 2051 | 0.098506 | 0         |  |  |
|       |      | Shiraz-58T | 2221 | 0.871948 | 0         |  |  |
|       |      | Shiraz-58T | 2221 | 0.871948 | 0         |  |  |
|       |      | Shiraz-71T | 2260 | 0.68394  | 0         |  |  |
|       |      | Shiraz-71T | 2260 | 0.68394  | 0         |  |  |
|       |      | Shiraz-71T | 2262 | 0.986748 | 0         |  |  |
|       |      | Shiraz-71T | 2262 | 0.986748 | 0         |  |  |
| UBE2A | chrX | Shiraz-3T  | 242  | 0        | -0.336434 |  |  |
|       |      | Shiraz-3T  | 242  | 0        | -0.336434 |  |  |
|       |      | Shiraz-3T  | 244  | 0        | -0.023749 |  |  |
|       |      | Shiraz-3T  | 244  | 0        | -0.023749 |  |  |
|       |      | Shiraz-4T  | 261  | 0        | -0.336249 |  |  |
|       |      | Shiraz-4T  | 261  | 0        | -0.336249 |  |  |
|       |      | Shiraz-16T | 295  | 0.591657 | 0         |  |  |
|       |      | Shiraz-16T | 295  | 0.591657 | 0         |  |  |
|       |      | Shiraz-36T | 433  | 0        | -0.803961 |  |  |
|       |      | Shiraz-36T | 433  | 0        | -0.803961 |  |  |
|       |      | Shiraz-44T | 899  | 0        | -1.09697  |  |  |
|       |      | Shiraz-44T | 899  | 0        | -1.09697  |  |  |
|       |      | Shiraz-44T | 904  | 0        | -0.625526 |  |  |
|       |      | Shiraz-44T | 904  | 0        | -0.625526 |  |  |

|  |            |      |          |           |  |
|--|------------|------|----------|-----------|--|
|  | Shiraz-49T | 1170 | 0        | -0.967436 |  |
|  | Shiraz-49T | 1170 | 0        | -0.967436 |  |
|  | Shiraz-9T  | 1370 | 0.690073 | 0         |  |
|  | Shiraz-9T  | 1370 | 0.690073 | 0         |  |
|  | Shiraz-18T | 1457 | 0.643204 | 0         |  |
|  | Shiraz-18T | 1457 | 0.643204 | 0         |  |
|  | Shiraz-22T | 1673 | 0.611783 | 0         |  |
|  | Shiraz-22T | 1673 | 0.611783 | 0         |  |
|  | Shiraz-25T | 1719 | 0.472955 | 0         |  |
|  | Shiraz-25T | 1719 | 0.472955 | 0         |  |
|  | Shiraz-28T | 1762 | 0.562311 | 0         |  |
|  | Shiraz-28T | 1762 | 0.562311 | 0         |  |
|  | Shiraz-29T | 1801 | 0.815343 | 0         |  |
|  | Shiraz-29T | 1801 | 0.815343 | 0         |  |
|  | Shiraz-32T | 1870 | 0.729766 | 0         |  |
|  | Shiraz-32T | 1870 | 0.729766 | 0         |  |
|  | Shiraz-35T | 1933 | 0.488535 | 0         |  |
|  | Shiraz-35T | 1933 | 0.488535 | 0         |  |
|  | Shiraz-58T | 2223 | 0.833364 | 0         |  |
|  | Shiraz-58T | 2223 | 0.833364 | 0         |  |
|  | Shiraz-71T | 2263 | 0.975531 | 0         |  |
|  | Shiraz-71T | 2263 | 0.975531 | 0         |  |
|  | Shiraz-3T  | 242  | 0        | -0.336434 |  |
|  | Shiraz-3T  | 242  | 0        | -0.336434 |  |
|  | Shiraz-3T  | 244  | 0        | -0.023749 |  |
|  | Shiraz-3T  | 244  | 0        | -0.023749 |  |
|  | Shiraz-4T  | 261  | 0        | -0.336249 |  |
|  | Shiraz-4T  | 261  | 0        | -0.336249 |  |
|  | Shiraz-16T | 295  | 0.591657 | 0         |  |
|  | Shiraz-16T | 295  | 0.591657 | 0         |  |
|  | Shiraz-36T | 433  | 0        | -0.803961 |  |
|  | Shiraz-36T | 433  | 0        | -0.803961 |  |
|  | Shiraz-44T | 899  | 0        | -1.09697  |  |
|  | Shiraz-44T | 899  | 0        | -1.09697  |  |
|  | Shiraz-44T | 904  | 0        | -0.625526 |  |
|  | Shiraz-44T | 904  | 0        | -0.625526 |  |
|  | Shiraz-49T | 1170 | 0        | -0.967436 |  |
|  | Shiraz-49T | 1170 | 0        | -0.967436 |  |
|  | Shiraz-9T  | 1370 | 0.690073 | 0         |  |
|  | Shiraz-9T  | 1370 | 0.690073 | 0         |  |
|  | Shiraz-18T | 1457 | 0.643204 | 0         |  |
|  | Shiraz-18T | 1457 | 0.643204 | 0         |  |
|  | Shiraz-22T | 1673 | 0.611783 | 0         |  |
|  | Shiraz-22T | 1673 | 0.611783 | 0         |  |
|  | Shiraz-25T | 1719 | 0.472955 | 0         |  |
|  | Shiraz-25T | 1719 | 0.472955 | 0         |  |
|  | Shiraz-28T | 1762 | 0.562311 | 0         |  |



|  |  |            |      |          |           |  |  |
|--|--|------------|------|----------|-----------|--|--|
|  |  | Shiraz-28T | 1762 | 0.562311 | 0         |  |  |
|  |  | Shiraz-29T | 1801 | 0.815343 | 0         |  |  |
|  |  | Shiraz-29T | 1801 | 0.815343 | 0         |  |  |
|  |  | Shiraz-32T | 1870 | 0.729766 | 0         |  |  |
|  |  | Shiraz-32T | 1870 | 0.729766 | 0         |  |  |
|  |  | Shiraz-35T | 1933 | 0.488535 | 0         |  |  |
|  |  | Shiraz-35T | 1933 | 0.488535 | 0         |  |  |
|  |  | Shiraz-58T | 2223 | 0.833364 | 0         |  |  |
|  |  | Shiraz-58T | 2223 | 0.833364 | 0         |  |  |
|  |  | Shiraz-71T | 2263 | 0.975531 | 0         |  |  |
|  |  | Shiraz-71T | 2263 | 0.975531 | 0         |  |  |
|  |  | Shiraz-3T  | 242  | 0        | -0.336434 |  |  |
|  |  | Shiraz-3T  | 242  | 0        | -0.336434 |  |  |
|  |  | Shiraz-3T  | 244  | 0        | -0.023749 |  |  |
|  |  | Shiraz-3T  | 244  | 0        | -0.023749 |  |  |
|  |  | Shiraz-4T  | 261  | 0        | -0.336249 |  |  |
|  |  | Shiraz-4T  | 261  | 0        | -0.336249 |  |  |
|  |  | Shiraz-16T | 295  | 0.591657 | 0         |  |  |
|  |  | Shiraz-16T | 295  | 0.591657 | 0         |  |  |
|  |  | Shiraz-36T | 433  | 0        | -0.803961 |  |  |
|  |  | Shiraz-36T | 433  | 0        | -0.803961 |  |  |
|  |  | Shiraz-44T | 899  | 0        | -1.09697  |  |  |
|  |  | Shiraz-44T | 899  | 0        | -1.09697  |  |  |
|  |  | Shiraz-44T | 904  | 0        | -0.625526 |  |  |
|  |  | Shiraz-44T | 904  | 0        | -0.625526 |  |  |
|  |  | Shiraz-49T | 1170 | 0        | -0.967436 |  |  |
|  |  | Shiraz-49T | 1170 | 0        | -0.967436 |  |  |
|  |  | Shiraz-9T  | 1370 | 0.690073 | 0         |  |  |
|  |  | Shiraz-9T  | 1370 | 0.690073 | 0         |  |  |
|  |  | Shiraz-18T | 1457 | 0.643204 | 0         |  |  |
|  |  | Shiraz-18T | 1457 | 0.643204 | 0         |  |  |
|  |  | Shiraz-22T | 1673 | 0.611783 | 0         |  |  |
|  |  | Shiraz-22T | 1673 | 0.611783 | 0         |  |  |
|  |  | Shiraz-25T | 1719 | 0.472955 | 0         |  |  |
|  |  | Shiraz-25T | 1719 | 0.472955 | 0         |  |  |
|  |  | Shiraz-28T | 1762 | 0.562311 | 0         |  |  |
|  |  | Shiraz-28T | 1762 | 0.562311 | 0         |  |  |
|  |  | Shiraz-29T | 1801 | 0.815343 | 0         |  |  |
|  |  | Shiraz-29T | 1801 | 0.815343 | 0         |  |  |
|  |  | Shiraz-32T | 1870 | 0.729766 | 0         |  |  |
|  |  | Shiraz-32T | 1870 | 0.729766 | 0         |  |  |
|  |  | Shiraz-35T | 1933 | 0.488535 | 0         |  |  |
|  |  | Shiraz-35T | 1933 | 0.488535 | 0         |  |  |
|  |  | Shiraz-58T | 2223 | 0.833364 | 0         |  |  |
|  |  | Shiraz-58T | 2223 | 0.833364 | 0         |  |  |
|  |  | Shiraz-71T | 2263 | 0.975531 | 0         |  |  |
|  |  | Shiraz-71T | 2263 | 0.975531 | 0         |  |  |

|         |      |            |      |          |           |  |  |
|---------|------|------------|------|----------|-----------|--|--|
| UBE2D4  | chr7 | Shiraz-3T  | 87   | 0.198593 | 0         |  |  |
|         |      | Shiraz-4T  | 252  | 0.192083 | 0         |  |  |
|         |      | Shiraz-36T | 376  | 0.159952 | 0         |  |  |
|         |      | Shiraz-44T | 632  | 0.902944 | 0         |  |  |
|         |      | Shiraz-46T | 942  | 0.069143 | 0         |  |  |
|         |      | Shiraz-77T | 1223 | 0.215647 | 0         |  |  |
|         |      | Shiraz-18T | 1433 | 0.250973 | 0         |  |  |
|         |      | Shiraz-25T | 1697 | 0.21945  | 0         |  |  |
|         |      | Shiraz-28T | 1734 | 0.362882 | 0         |  |  |
|         |      | Shiraz-29T | 1777 | 0.156747 | 0         |  |  |
|         |      | Shiraz-38T | 1950 | 0.265916 | 0         |  |  |
|         |      | Shiraz-71T | 2236 | 0.320072 | 0         |  |  |
|         |      | Shiraz-3T  | 87   | 0.198593 | 0         |  |  |
|         |      | Shiraz-4T  | 252  | 0.192083 | 0         |  |  |
|         |      | Shiraz-36T | 376  | 0.159952 | 0         |  |  |
|         |      | Shiraz-44T | 632  | 0.902944 | 0         |  |  |
|         |      | Shiraz-46T | 942  | 0.069143 | 0         |  |  |
|         |      | Shiraz-77T | 1223 | 0.215647 | 0         |  |  |
|         |      | Shiraz-18T | 1433 | 0.250973 | 0         |  |  |
|         |      | Shiraz-25T | 1697 | 0.21945  | 0         |  |  |
|         |      | Shiraz-28T | 1734 | 0.362882 | 0         |  |  |
|         |      | Shiraz-29T | 1777 | 0.156747 | 0         |  |  |
|         |      | Shiraz-38T | 1950 | 0.265916 | 0         |  |  |
|         |      | Shiraz-71T | 2236 | 0.320072 | 0         |  |  |
|         |      | Shiraz-3T  | 87   | 0.198593 | 0         |  |  |
|         |      | Shiraz-4T  | 252  | 0.192083 | 0         |  |  |
|         |      | Shiraz-36T | 376  | 0.159952 | 0         |  |  |
|         |      | Shiraz-44T | 632  | 0.902944 | 0         |  |  |
|         |      | Shiraz-46T | 942  | 0.069143 | 0         |  |  |
|         |      | Shiraz-77T | 1223 | 0.215647 | 0         |  |  |
|         |      | Shiraz-18T | 1433 | 0.250973 | 0         |  |  |
|         |      | Shiraz-25T | 1697 | 0.21945  | 0         |  |  |
|         |      | Shiraz-28T | 1734 | 0.362882 | 0         |  |  |
|         |      | Shiraz-29T | 1777 | 0.156747 | 0         |  |  |
|         |      | Shiraz-38T | 1950 | 0.265916 | 0         |  |  |
|         |      | Shiraz-71T | 2236 | 0.320072 | 0         |  |  |
| UBE2DNL | chrX | Shiraz-3T  | 242  | 0        | -0.336434 |  |  |
|         |      | Shiraz-3T  | 243  | 0        | -0.549129 |  |  |
|         |      | Shiraz-4T  | 261  | 0        | -0.336249 |  |  |
|         |      | Shiraz-16T | 295  | 0.591657 | 0         |  |  |
|         |      | Shiraz-31T | 346  | 0        | -0.1527   |  |  |
|         |      | Shiraz-36T | 433  | 0        | -0.803961 |  |  |
|         |      | Shiraz-44T | 899  | 0        | -1.09697  |  |  |
|         |      | Shiraz-44T | 902  | 0        | -1.449824 |  |  |
|         |      | Shiraz-47T | 1085 | 0        | -0.130811 |  |  |
|         |      | Shiraz-49T | 1170 | 0        | -0.967436 |  |  |
|         |      | Shiraz-49T | 1172 | 0        | -1.123219 |  |  |

|  |  |            |      |          |           |  |  |
|--|--|------------|------|----------|-----------|--|--|
|  |  | Shiraz-18T | 1457 | 0.643204 | 0         |  |  |
|  |  | Shiraz-22T | 1673 | 0.611783 | 0         |  |  |
|  |  | Shiraz-22T | 1675 | 0.279253 | 0         |  |  |
|  |  | Shiraz-25T | 1719 | 0.472955 | 0         |  |  |
|  |  | Shiraz-28T | 1762 | 0.562311 | 0         |  |  |
|  |  | Shiraz-29T | 1801 | 0.815343 | 0         |  |  |
|  |  | Shiraz-32T | 1870 | 0.729766 | 0         |  |  |
|  |  | Shiraz-32T | 1871 | 0.292679 | 0         |  |  |
|  |  | Shiraz-35T | 1933 | 0.488535 | 0         |  |  |
|  |  | Shiraz-58T | 2223 | 0.833364 | 0         |  |  |
|  |  | Shiraz-58T | 2225 | 0.595784 | 0         |  |  |
|  |  | Shiraz-71T | 2263 | 0.975531 | 0         |  |  |
|  |  | Shiraz-3T  | 242  | 0        | -0.336434 |  |  |
|  |  | Shiraz-3T  | 243  | 0        | -0.549129 |  |  |
|  |  | Shiraz-4T  | 261  | 0        | -0.336249 |  |  |
|  |  | Shiraz-16T | 295  | 0.591657 | 0         |  |  |
|  |  | Shiraz-31T | 346  | 0        | -0.1527   |  |  |
|  |  | Shiraz-36T | 433  | 0        | -0.803961 |  |  |
|  |  | Shiraz-44T | 899  | 0        | -1.09697  |  |  |
|  |  | Shiraz-44T | 902  | 0        | -1.449824 |  |  |
|  |  | Shiraz-47T | 1085 | 0        | -0.130811 |  |  |
|  |  | Shiraz-49T | 1170 | 0        | -0.967436 |  |  |
|  |  | Shiraz-49T | 1172 | 0        | -1.123219 |  |  |
|  |  | Shiraz-18T | 1457 | 0.643204 | 0         |  |  |
|  |  | Shiraz-22T | 1673 | 0.611783 | 0         |  |  |
|  |  | Shiraz-22T | 1675 | 0.279253 | 0         |  |  |
|  |  | Shiraz-25T | 1719 | 0.472955 | 0         |  |  |
|  |  | Shiraz-28T | 1762 | 0.562311 | 0         |  |  |
|  |  | Shiraz-29T | 1801 | 0.815343 | 0         |  |  |
|  |  | Shiraz-32T | 1870 | 0.729766 | 0         |  |  |
|  |  | Shiraz-32T | 1871 | 0.292679 | 0         |  |  |
|  |  | Shiraz-35T | 1933 | 0.488535 | 0         |  |  |
|  |  | Shiraz-58T | 2223 | 0.833364 | 0         |  |  |
|  |  | Shiraz-58T | 2225 | 0.595784 | 0         |  |  |
|  |  | Shiraz-71T | 2263 | 0.975531 | 0         |  |  |
|  |  | Shiraz-3T  | 242  | 0        | -0.336434 |  |  |
|  |  | Shiraz-3T  | 243  | 0        | -0.549129 |  |  |
|  |  | Shiraz-4T  | 261  | 0        | -0.336249 |  |  |
|  |  | Shiraz-16T | 295  | 0.591657 | 0         |  |  |
|  |  | Shiraz-31T | 346  | 0        | -0.1527   |  |  |
|  |  | Shiraz-36T | 433  | 0        | -0.803961 |  |  |
|  |  | Shiraz-44T | 899  | 0        | -1.09697  |  |  |
|  |  | Shiraz-44T | 902  | 0        | -1.449824 |  |  |
|  |  | Shiraz-47T | 1085 | 0        | -0.130811 |  |  |
|  |  | Shiraz-49T | 1170 | 0        | -0.967436 |  |  |
|  |  | Shiraz-49T | 1172 | 0        | -1.123219 |  |  |
|  |  | Shiraz-18T | 1457 | 0.643204 | 0         |  |  |

|       |      |            |      |          |           |  |
|-------|------|------------|------|----------|-----------|--|
|       |      | Shiraz-22T | 1673 | 0.611783 | 0         |  |
|       |      | Shiraz-22T | 1675 | 0.279253 | 0         |  |
|       |      | Shiraz-25T | 1719 | 0.472955 | 0         |  |
|       |      | Shiraz-28T | 1762 | 0.562311 | 0         |  |
|       |      | Shiraz-29T | 1801 | 0.815343 | 0         |  |
|       |      | Shiraz-32T | 1870 | 0.729766 | 0         |  |
|       |      | Shiraz-32T | 1871 | 0.292679 | 0         |  |
|       |      | Shiraz-35T | 1933 | 0.488535 | 0         |  |
|       |      | Shiraz-58T | 2223 | 0.833364 | 0         |  |
|       |      | Shiraz-58T | 2225 | 0.595784 | 0         |  |
|       |      | Shiraz-71T | 2263 | 0.975531 | 0         |  |
| UBE2H | chr7 | Shiraz-3T  | 90   | 0.219276 | 0         |  |
|       |      | Shiraz-3T  | 96   | 0.428308 | 0         |  |
|       |      | Shiraz-4T  | 253  | 0.372918 | 0         |  |
|       |      | Shiraz-31T | 317  | 0.204382 | 0         |  |
|       |      | Shiraz-36T | 378  | 0.179558 | 0         |  |
|       |      | Shiraz-44T | 642  | 0.408617 | 0         |  |
|       |      | Shiraz-46T | 943  | 0.093799 | 0         |  |
|       |      | Shiraz-47T | 1032 | 0.171484 | 0         |  |
|       |      | Shiraz-77T | 1225 | 0        | -0.117922 |  |
|       |      | Shiraz-77T | 1229 | 0.051661 | 0         |  |
|       |      | Shiraz-9T  | 1325 | 0.221899 | 0         |  |
|       |      | Shiraz-18T | 1434 | 0.244465 | 0         |  |
|       |      | Shiraz-25T | 1698 | 0.21835  | 0         |  |
|       |      | Shiraz-28T | 1735 | 0.350744 | 0         |  |
|       |      | Shiraz-29T | 1778 | 0.120767 | 0         |  |
|       |      | Shiraz-32T | 1833 | 0.551336 | 0         |  |
|       |      | Shiraz-38T | 1951 | 0.250891 | 0         |  |
|       |      | Shiraz-53T | 2078 | 0.287202 | 0         |  |
|       |      | Shiraz-71T | 2238 | 0.603631 | 0         |  |
|       |      | Shiraz-3T  | 90   | 0.219276 | 0         |  |
|       |      | Shiraz-3T  | 96   | 0.428308 | 0         |  |
|       |      | Shiraz-4T  | 253  | 0.372918 | 0         |  |
|       |      | Shiraz-31T | 317  | 0.204382 | 0         |  |
|       |      | Shiraz-36T | 378  | 0.179558 | 0         |  |
|       |      | Shiraz-44T | 642  | 0.408617 | 0         |  |
|       |      | Shiraz-46T | 943  | 0.093799 | 0         |  |
|       |      | Shiraz-47T | 1032 | 0.171484 | 0         |  |
|       |      | Shiraz-77T | 1225 | 0        | -0.117922 |  |
|       |      | Shiraz-77T | 1229 | 0.051661 | 0         |  |
|       |      | Shiraz-9T  | 1325 | 0.221899 | 0         |  |
|       |      | Shiraz-18T | 1434 | 0.244465 | 0         |  |
|       |      | Shiraz-25T | 1698 | 0.21835  | 0         |  |
|       |      | Shiraz-28T | 1735 | 0.350744 | 0         |  |
|       |      | Shiraz-29T | 1778 | 0.120767 | 0         |  |
|       |      | Shiraz-32T | 1833 | 0.551336 | 0         |  |
|       |      | Shiraz-38T | 1951 | 0.250891 | 0         |  |

|        |      |            |      |          |           |  |
|--------|------|------------|------|----------|-----------|--|
|        |      | Shiraz-53T | 2078 | 0.287202 | 0         |  |
|        |      | Shiraz-71T | 2238 | 0.603631 | 0         |  |
|        |      | Shiraz-3T  | 90   | 0.219276 | 0         |  |
|        |      | Shiraz-3T  | 96   | 0.428308 | 0         |  |
|        |      | Shiraz-4T  | 253  | 0.372918 | 0         |  |
|        |      | Shiraz-31T | 317  | 0.204382 | 0         |  |
|        |      | Shiraz-36T | 378  | 0.179558 | 0         |  |
|        |      | Shiraz-44T | 642  | 0.408617 | 0         |  |
|        |      | Shiraz-46T | 943  | 0.093799 | 0         |  |
|        |      | Shiraz-47T | 1032 | 0.171484 | 0         |  |
|        |      | Shiraz-77T | 1225 | 0        | -0.117922 |  |
|        |      | Shiraz-77T | 1229 | 0.051661 | 0         |  |
|        |      | Shiraz-9T  | 1325 | 0.221899 | 0         |  |
|        |      | Shiraz-18T | 1434 | 0.244465 | 0         |  |
|        |      | Shiraz-25T | 1698 | 0.21835  | 0         |  |
|        |      | Shiraz-28T | 1735 | 0.350744 | 0         |  |
|        |      | Shiraz-29T | 1778 | 0.120767 | 0         |  |
|        |      | Shiraz-32T | 1833 | 0.551336 | 0         |  |
|        |      | Shiraz-38T | 1951 | 0.250891 | 0         |  |
|        |      | Shiraz-53T | 2078 | 0.287202 | 0         |  |
|        |      | Shiraz-71T | 2238 | 0.603631 | 0         |  |
| UBE2NL | chrX | Shiraz-3T  | 242  | 0        | -0.336434 |  |
|        |      | Shiraz-4T  | 261  | 0        | -0.336249 |  |
|        |      | Shiraz-16T | 295  | 0.591657 | 0         |  |
|        |      | Shiraz-36T | 433  | 0        | -0.803961 |  |
|        |      | Shiraz-44T | 899  | 0        | -1.09697  |  |
|        |      | Shiraz-44T | 907  | 0        | -1.370847 |  |
|        |      | Shiraz-49T | 1170 | 0        | -0.967436 |  |
|        |      | Shiraz-9T  | 1370 | 0.690073 | 0         |  |
|        |      | Shiraz-18T | 1457 | 0.643204 | 0         |  |
|        |      | Shiraz-22T | 1673 | 0.611783 | 0         |  |
|        |      | Shiraz-25T | 1719 | 0.472955 | 0         |  |
|        |      | Shiraz-28T | 1762 | 0.562311 | 0         |  |
|        |      | Shiraz-29T | 1801 | 0.815343 | 0         |  |
|        |      | Shiraz-32T | 1870 | 0.729766 | 0         |  |
|        |      | Shiraz-35T | 1933 | 0.488535 | 0         |  |
|        |      | Shiraz-58T | 2223 | 0.833364 | 0         |  |
|        |      | Shiraz-71T | 2263 | 0.975531 | 0         |  |
|        |      | Shiraz-3T  | 242  | 0        | -0.336434 |  |
|        |      | Shiraz-4T  | 261  | 0        | -0.336249 |  |
|        |      | Shiraz-16T | 295  | 0.591657 | 0         |  |
|        |      | Shiraz-36T | 433  | 0        | -0.803961 |  |
|        |      | Shiraz-44T | 899  | 0        | -1.09697  |  |
|        |      | Shiraz-44T | 907  | 0        | -1.370847 |  |
|        |      | Shiraz-49T | 1170 | 0        | -0.967436 |  |
|        |      | Shiraz-9T  | 1370 | 0.690073 | 0         |  |
|        |      | Shiraz-18T | 1457 | 0.643204 | 0         |  |

|       |      |            |      |          |           |  |  |
|-------|------|------------|------|----------|-----------|--|--|
|       |      | Shiraz-22T | 1673 | 0.611783 | 0         |  |  |
|       |      | Shiraz-25T | 1719 | 0.472955 | 0         |  |  |
|       |      | Shiraz-28T | 1762 | 0.562311 | 0         |  |  |
|       |      | Shiraz-29T | 1801 | 0.815343 | 0         |  |  |
|       |      | Shiraz-32T | 1870 | 0.729766 | 0         |  |  |
|       |      | Shiraz-35T | 1933 | 0.488535 | 0         |  |  |
|       |      | Shiraz-58T | 2223 | 0.833364 | 0         |  |  |
|       |      | Shiraz-71T | 2263 | 0.975531 | 0         |  |  |
|       |      | Shiraz-3T  | 242  | 0        | -0.336434 |  |  |
|       |      | Shiraz-4T  | 261  | 0        | -0.336249 |  |  |
|       |      | Shiraz-16T | 295  | 0.591657 | 0         |  |  |
|       |      | Shiraz-36T | 433  | 0        | -0.803961 |  |  |
|       |      | Shiraz-44T | 899  | 0        | -1.09697  |  |  |
|       |      | Shiraz-44T | 907  | 0        | -1.370847 |  |  |
|       |      | Shiraz-49T | 1170 | 0        | -0.967436 |  |  |
|       |      | Shiraz-9T  | 1370 | 0.690073 | 0         |  |  |
|       |      | Shiraz-18T | 1457 | 0.643204 | 0         |  |  |
|       |      | Shiraz-22T | 1673 | 0.611783 | 0         |  |  |
|       |      | Shiraz-25T | 1719 | 0.472955 | 0         |  |  |
|       |      | Shiraz-28T | 1762 | 0.562311 | 0         |  |  |
|       |      | Shiraz-29T | 1801 | 0.815343 | 0         |  |  |
|       |      | Shiraz-32T | 1870 | 0.729766 | 0         |  |  |
|       |      | Shiraz-35T | 1933 | 0.488535 | 0         |  |  |
|       |      | Shiraz-58T | 2223 | 0.833364 | 0         |  |  |
|       |      | Shiraz-71T | 2263 | 0.975531 | 0         |  |  |
| UBL4A | chrX | Shiraz-3T  | 246  | 0.531858 | 0         |  |  |
|       |      | Shiraz-4T  | 261  | 0        | -0.336249 |  |  |
|       |      | Shiraz-16T | 295  | 0.591657 | 0         |  |  |
|       |      | Shiraz-36T | 433  | 0        | -0.803961 |  |  |
|       |      | Shiraz-42T | 480  | 0        | -0.232915 |  |  |
|       |      | Shiraz-44T | 908  | 0.466743 | 0         |  |  |
|       |      | Shiraz-49T | 1170 | 0        | -0.967436 |  |  |
|       |      | Shiraz-49T | 1173 | 0        | -0.704439 |  |  |
|       |      | Shiraz-9T  | 1370 | 0.690073 | 0         |  |  |
|       |      | Shiraz-9T  | 1371 | 1.292392 | 0         |  |  |
|       |      | Shiraz-18T | 1457 | 0.643204 | 0         |  |  |
|       |      | Shiraz-22T | 1673 | 0.611783 | 0         |  |  |
|       |      | Shiraz-22T | 1678 | 0.911625 | 0         |  |  |
|       |      | Shiraz-25T | 1719 | 0.472955 | 0         |  |  |
|       |      | Shiraz-28T | 1762 | 0.562311 | 0         |  |  |
|       |      | Shiraz-29T | 1801 | 0.815343 | 0         |  |  |
|       |      | Shiraz-32T | 1870 | 0.729766 | 0         |  |  |
|       |      | Shiraz-32T | 1872 | 1.504553 | 0         |  |  |
|       |      | Shiraz-35T | 1933 | 0.488535 | 0         |  |  |
|       |      | Shiraz-38T | 2011 | 0        | -0.406024 |  |  |
|       |      | Shiraz-53T | 2115 | 0.427728 | 0         |  |  |
|       |      | Shiraz-58T | 2223 | 0.833364 | 0         |  |  |

|  |            |      |          |           |  |
|--|------------|------|----------|-----------|--|
|  | Shiraz-58T | 2226 | 1.074663 | 0         |  |
|  | Shiraz-71T | 2263 | 0.975531 | 0         |  |
|  | Shiraz-3T  | 246  | 0.531858 | 0         |  |
|  | Shiraz-4T  | 261  | 0        | -0.336249 |  |
|  | Shiraz-16T | 295  | 0.591657 | 0         |  |
|  | Shiraz-36T | 433  | 0        | -0.803961 |  |
|  | Shiraz-42T | 480  | 0        | -0.232915 |  |
|  | Shiraz-44T | 908  | 0.466743 | 0         |  |
|  | Shiraz-49T | 1170 | 0        | -0.967436 |  |
|  | Shiraz-49T | 1173 | 0        | -0.704439 |  |
|  | Shiraz-9T  | 1370 | 0.690073 | 0         |  |
|  | Shiraz-9T  | 1371 | 1.292392 | 0         |  |
|  | Shiraz-18T | 1457 | 0.643204 | 0         |  |
|  | Shiraz-22T | 1673 | 0.611783 | 0         |  |
|  | Shiraz-22T | 1678 | 0.911625 | 0         |  |
|  | Shiraz-25T | 1719 | 0.472955 | 0         |  |
|  | Shiraz-28T | 1762 | 0.562311 | 0         |  |
|  | Shiraz-29T | 1801 | 0.815343 | 0         |  |
|  | Shiraz-32T | 1870 | 0.729766 | 0         |  |
|  | Shiraz-32T | 1872 | 1.504553 | 0         |  |
|  | Shiraz-35T | 1933 | 0.488535 | 0         |  |
|  | Shiraz-38T | 2011 | 0        | -0.406024 |  |
|  | Shiraz-53T | 2115 | 0.427728 | 0         |  |
|  | Shiraz-58T | 2223 | 0.833364 | 0         |  |
|  | Shiraz-58T | 2226 | 1.074663 | 0         |  |
|  | Shiraz-71T | 2263 | 0.975531 | 0         |  |
|  | Shiraz-3T  | 246  | 0.531858 | 0         |  |
|  | Shiraz-4T  | 261  | 0        | -0.336249 |  |
|  | Shiraz-16T | 295  | 0.591657 | 0         |  |
|  | Shiraz-36T | 433  | 0        | -0.803961 |  |
|  | Shiraz-42T | 480  | 0        | -0.232915 |  |
|  | Shiraz-44T | 908  | 0.466743 | 0         |  |
|  | Shiraz-49T | 1170 | 0        | -0.967436 |  |
|  | Shiraz-49T | 1173 | 0        | -0.704439 |  |
|  | Shiraz-9T  | 1370 | 0.690073 | 0         |  |
|  | Shiraz-9T  | 1371 | 1.292392 | 0         |  |
|  | Shiraz-18T | 1457 | 0.643204 | 0         |  |
|  | Shiraz-22T | 1673 | 0.611783 | 0         |  |
|  | Shiraz-22T | 1678 | 0.911625 | 0         |  |
|  | Shiraz-25T | 1719 | 0.472955 | 0         |  |
|  | Shiraz-28T | 1762 | 0.562311 | 0         |  |
|  | Shiraz-29T | 1801 | 0.815343 | 0         |  |
|  | Shiraz-32T | 1870 | 0.729766 | 0         |  |
|  | Shiraz-32T | 1872 | 1.504553 | 0         |  |
|  | Shiraz-35T | 1933 | 0.488535 | 0         |  |
|  | Shiraz-38T | 2011 | 0        | -0.406024 |  |
|  | Shiraz-53T | 2115 | 0.427728 | 0         |  |

|      |      |            |      |          |           |  |
|------|------|------------|------|----------|-----------|--|
|      |      | Shiraz-58T | 2223 | 0.833364 | 0         |  |
|      |      | Shiraz-58T | 2226 | 1.074663 | 0         |  |
|      |      | Shiraz-71T | 2263 | 0.975531 | 0         |  |
| UBN2 | chr7 | Shiraz-3T  | 90   | 0.219276 | 0         |  |
|      |      | Shiraz-3T  | 97   | 0.496001 | 0         |  |
|      |      | Shiraz-4T  | 253  | 0.372918 | 0         |  |
|      |      | Shiraz-31T | 318  | 0.254373 | 0         |  |
|      |      | Shiraz-36T | 378  | 0.179558 | 0         |  |
|      |      | Shiraz-36T | 383  | 0.374586 | 0         |  |
|      |      | Shiraz-44T | 644  | 0.496536 | 0         |  |
|      |      | Shiraz-46T | 943  | 0.093799 | 0         |  |
|      |      | Shiraz-47T | 1033 | 0.220267 | 0         |  |
|      |      | Shiraz-77T | 1225 | 0        | -0.117922 |  |
|      |      | Shiraz-77T | 1230 | 0.149651 | 0         |  |
|      |      | Shiraz-9T  | 1325 | 0.221899 | 0         |  |
|      |      | Shiraz-18T | 1434 | 0.244465 | 0         |  |
|      |      | Shiraz-25T | 1698 | 0.21835  | 0         |  |
|      |      | Shiraz-28T | 1735 | 0.350744 | 0         |  |
|      |      | Shiraz-29T | 1778 | 0.120767 | 0         |  |
|      |      | Shiraz-32T | 1833 | 0.551336 | 0         |  |
|      |      | Shiraz-38T | 1951 | 0.250891 | 0         |  |
|      |      | Shiraz-53T | 2078 | 0.287202 | 0         |  |
|      |      | Shiraz-58T | 2162 | 0.221505 | 0         |  |
|      |      | Shiraz-71T | 2238 | 0.603631 | 0         |  |
|      |      | Shiraz-3T  | 90   | 0.219276 | 0         |  |
|      |      | Shiraz-3T  | 97   | 0.496001 | 0         |  |
|      |      | Shiraz-4T  | 253  | 0.372918 | 0         |  |
|      |      | Shiraz-31T | 318  | 0.254373 | 0         |  |
|      |      | Shiraz-36T | 378  | 0.179558 | 0         |  |
|      |      | Shiraz-36T | 383  | 0.374586 | 0         |  |
|      |      | Shiraz-44T | 644  | 0.496536 | 0         |  |
|      |      | Shiraz-46T | 943  | 0.093799 | 0         |  |
|      |      | Shiraz-47T | 1033 | 0.220267 | 0         |  |
|      |      | Shiraz-77T | 1225 | 0        | -0.117922 |  |
|      |      | Shiraz-77T | 1230 | 0.149651 | 0         |  |
|      |      | Shiraz-9T  | 1325 | 0.221899 | 0         |  |
|      |      | Shiraz-18T | 1434 | 0.244465 | 0         |  |
|      |      | Shiraz-25T | 1698 | 0.21835  | 0         |  |
|      |      | Shiraz-28T | 1735 | 0.350744 | 0         |  |
|      |      | Shiraz-29T | 1778 | 0.120767 | 0         |  |
|      |      | Shiraz-32T | 1833 | 0.551336 | 0         |  |
|      |      | Shiraz-38T | 1951 | 0.250891 | 0         |  |
|      |      | Shiraz-53T | 2078 | 0.287202 | 0         |  |
|      |      | Shiraz-58T | 2162 | 0.221505 | 0         |  |
|      |      | Shiraz-71T | 2238 | 0.603631 | 0         |  |
|      |      | Shiraz-3T  | 90   | 0.219276 | 0         |  |
|      |      | Shiraz-3T  | 97   | 0.496001 | 0         |  |



|        |      |            |      |          |           |  |
|--------|------|------------|------|----------|-----------|--|
|        |      | Shiraz-4T  | 253  | 0.372918 | 0         |  |
|        |      | Shiraz-31T | 318  | 0.254373 | 0         |  |
|        |      | Shiraz-36T | 378  | 0.179558 | 0         |  |
|        |      | Shiraz-36T | 383  | 0.374586 | 0         |  |
|        |      | Shiraz-44T | 644  | 0.496536 | 0         |  |
|        |      | Shiraz-46T | 943  | 0.093799 | 0         |  |
|        |      | Shiraz-47T | 1033 | 0.220267 | 0         |  |
|        |      | Shiraz-77T | 1225 | 0        | -0.117922 |  |
|        |      | Shiraz-77T | 1230 | 0.149651 | 0         |  |
|        |      | Shiraz-9T  | 1325 | 0.221899 | 0         |  |
|        |      | Shiraz-18T | 1434 | 0.244465 | 0         |  |
|        |      | Shiraz-25T | 1698 | 0.21835  | 0         |  |
|        |      | Shiraz-28T | 1735 | 0.350744 | 0         |  |
|        |      | Shiraz-29T | 1778 | 0.120767 | 0         |  |
|        |      | Shiraz-32T | 1833 | 0.551336 | 0         |  |
|        |      | Shiraz-38T | 1951 | 0.250891 | 0         |  |
|        |      | Shiraz-53T | 2078 | 0.287202 | 0         |  |
|        |      | Shiraz-58T | 2162 | 0.221505 | 0         |  |
|        |      | Shiraz-71T | 2238 | 0.603631 | 0         |  |
| UBQLN2 | chrX | Shiraz-3T  | 240  | 0        | -0.346245 |  |
|        |      | Shiraz-4T  | 260  | 0        | -0.324128 |  |
|        |      | Shiraz-16T | 294  | 0.655804 | 0         |  |
|        |      | Shiraz-36T | 431  | 0        | -0.78035  |  |
|        |      | Shiraz-44T | 891  | 0        | -0.954044 |  |
|        |      | Shiraz-49T | 1166 | 0        | -0.917235 |  |
|        |      | Shiraz-18T | 1456 | 0.608534 | 0         |  |
|        |      | Shiraz-22T | 1669 | 0.695915 | 0         |  |
|        |      | Shiraz-25T | 1717 | 0.420447 | 0         |  |
|        |      | Shiraz-28T | 1760 | 0.538181 | 0         |  |
|        |      | Shiraz-29T | 1800 | 0.672527 | 0         |  |
|        |      | Shiraz-32T | 1869 | 0.776805 | 0         |  |
|        |      | Shiraz-35T | 1932 | 0.507141 | 0         |  |
|        |      | Shiraz-58T | 2221 | 0.871948 | 0         |  |
|        |      | Shiraz-71T | 2260 | 0.68394  | 0         |  |
|        |      | Shiraz-71T | 2262 | 0.986748 | 0         |  |
|        |      | Shiraz-3T  | 240  | 0        | -0.346245 |  |
|        |      | Shiraz-4T  | 260  | 0        | -0.324128 |  |
|        |      | Shiraz-16T | 294  | 0.655804 | 0         |  |
|        |      | Shiraz-36T | 431  | 0        | -0.78035  |  |
|        |      | Shiraz-44T | 891  | 0        | -0.954044 |  |
|        |      | Shiraz-49T | 1166 | 0        | -0.917235 |  |
|        |      | Shiraz-18T | 1456 | 0.608534 | 0         |  |
|        |      | Shiraz-22T | 1669 | 0.695915 | 0         |  |
|        |      | Shiraz-25T | 1717 | 0.420447 | 0         |  |
|        |      | Shiraz-28T | 1760 | 0.538181 | 0         |  |
|        |      | Shiraz-29T | 1800 | 0.672527 | 0         |  |
|        |      | Shiraz-32T | 1869 | 0.776805 | 0         |  |

|       |      |            |      |          |           |  |
|-------|------|------------|------|----------|-----------|--|
|       |      | Shiraz-35T | 1932 | 0.507141 | 0         |  |
|       |      | Shiraz-58T | 2221 | 0.871948 | 0         |  |
|       |      | Shiraz-71T | 2260 | 0.68394  | 0         |  |
|       |      | Shiraz-71T | 2262 | 0.986748 | 0         |  |
|       |      | Shiraz-3T  | 240  | 0        | -0.346245 |  |
|       |      | Shiraz-4T  | 260  | 0        | -0.324128 |  |
|       |      | Shiraz-16T | 294  | 0.655804 | 0         |  |
|       |      | Shiraz-36T | 431  | 0        | -0.78035  |  |
|       |      | Shiraz-44T | 891  | 0        | -0.954044 |  |
|       |      | Shiraz-49T | 1166 | 0        | -0.917235 |  |
|       |      | Shiraz-18T | 1456 | 0.608534 | 0         |  |
|       |      | Shiraz-22T | 1669 | 0.695915 | 0         |  |
|       |      | Shiraz-25T | 1717 | 0.420447 | 0         |  |
|       |      | Shiraz-28T | 1760 | 0.538181 | 0         |  |
|       |      | Shiraz-29T | 1800 | 0.672527 | 0         |  |
|       |      | Shiraz-32T | 1869 | 0.776805 | 0         |  |
|       |      | Shiraz-35T | 1932 | 0.507141 | 0         |  |
|       |      | Shiraz-58T | 2221 | 0.871948 | 0         |  |
|       |      | Shiraz-71T | 2260 | 0.68394  | 0         |  |
|       |      | Shiraz-71T | 2262 | 0.986748 | 0         |  |
| UFSP1 | chr7 | Shiraz-3T  | 90   | 0.219276 | 0         |  |
|       |      | Shiraz-3T  | 94   | 0.74735  | 0         |  |
|       |      | Shiraz-4T  | 253  | 0.372918 | 0         |  |
|       |      | Shiraz-31T | 316  | 0.219196 | 0         |  |
|       |      | Shiraz-36T | 378  | 0.179558 | 0         |  |
|       |      | Shiraz-36T | 381  | 0.332628 | 0         |  |
|       |      | Shiraz-44T | 639  | 1.035032 | 0         |  |
|       |      | Shiraz-46T | 943  | 0.093799 | 0         |  |
|       |      | Shiraz-46T | 946  | 0.299835 | 0         |  |
|       |      | Shiraz-47T | 1030 | 0.257728 | 0         |  |
|       |      | Shiraz-49T | 1120 | 0.281656 | 0         |  |
|       |      | Shiraz-77T | 1225 | 0        | -0.117922 |  |
|       |      | Shiraz-77T | 1227 | 0.196445 | 0         |  |
|       |      | Shiraz-9T  | 1324 | 0.679266 | 0         |  |
|       |      | Shiraz-18T | 1434 | 0.244465 | 0         |  |
|       |      | Shiraz-22T | 1549 | 0        | -0.319623 |  |
|       |      | Shiraz-22T | 1551 | 0.324011 | 0         |  |
|       |      | Shiraz-25T | 1698 | 0.21835  | 0         |  |
|       |      | Shiraz-28T | 1735 | 0.350744 | 0         |  |
|       |      | Shiraz-29T | 1778 | 0.120767 | 0         |  |
|       |      | Shiraz-32T | 1833 | 0.551336 | 0         |  |
|       |      | Shiraz-32T | 1834 | 1.485392 | 0         |  |
|       |      | Shiraz-38T | 1951 | 0.250891 | 0         |  |
|       |      | Shiraz-53T | 2078 | 0.287202 | 0         |  |
|       |      | Shiraz-58T | 2160 | 0.399007 | 0         |  |
|       |      | Shiraz-71T | 2238 | 0.603631 | 0         |  |
|       |      | Shiraz-3T  | 90   | 0.219276 | 0         |  |

|  |            |      |          |           |  |
|--|------------|------|----------|-----------|--|
|  | Shiraz-3T  | 94   | 0.74735  | 0         |  |
|  | Shiraz-4T  | 253  | 0.372918 | 0         |  |
|  | Shiraz-31T | 316  | 0.219196 | 0         |  |
|  | Shiraz-36T | 378  | 0.179558 | 0         |  |
|  | Shiraz-36T | 381  | 0.332628 | 0         |  |
|  | Shiraz-44T | 639  | 1.035032 | 0         |  |
|  | Shiraz-46T | 943  | 0.093799 | 0         |  |
|  | Shiraz-46T | 946  | 0.299835 | 0         |  |
|  | Shiraz-47T | 1030 | 0.257728 | 0         |  |
|  | Shiraz-49T | 1120 | 0.281656 | 0         |  |
|  | Shiraz-77T | 1225 | 0        | -0.117922 |  |
|  | Shiraz-77T | 1227 | 0.196445 | 0         |  |
|  | Shiraz-9T  | 1324 | 0.679266 | 0         |  |
|  | Shiraz-18T | 1434 | 0.244465 | 0         |  |
|  | Shiraz-22T | 1549 | 0        | -0.319623 |  |
|  | Shiraz-22T | 1551 | 0.324011 | 0         |  |
|  | Shiraz-25T | 1698 | 0.21835  | 0         |  |
|  | Shiraz-28T | 1735 | 0.350744 | 0         |  |
|  | Shiraz-29T | 1778 | 0.120767 | 0         |  |
|  | Shiraz-32T | 1833 | 0.551336 | 0         |  |
|  | Shiraz-32T | 1834 | 1.485392 | 0         |  |
|  | Shiraz-38T | 1951 | 0.250891 | 0         |  |
|  | Shiraz-53T | 2078 | 0.287202 | 0         |  |
|  | Shiraz-58T | 2160 | 0.399007 | 0         |  |
|  | Shiraz-71T | 2238 | 0.603631 | 0         |  |
|  | Shiraz-3T  | 90   | 0.219276 | 0         |  |
|  | Shiraz-3T  | 94   | 0.74735  | 0         |  |
|  | Shiraz-4T  | 253  | 0.372918 | 0         |  |
|  | Shiraz-31T | 316  | 0.219196 | 0         |  |
|  | Shiraz-36T | 378  | 0.179558 | 0         |  |
|  | Shiraz-36T | 381  | 0.332628 | 0         |  |
|  | Shiraz-44T | 639  | 1.035032 | 0         |  |
|  | Shiraz-46T | 943  | 0.093799 | 0         |  |
|  | Shiraz-46T | 946  | 0.299835 | 0         |  |
|  | Shiraz-47T | 1030 | 0.257728 | 0         |  |
|  | Shiraz-49T | 1120 | 0.281656 | 0         |  |
|  | Shiraz-77T | 1225 | 0        | -0.117922 |  |
|  | Shiraz-77T | 1227 | 0.196445 | 0         |  |
|  | Shiraz-9T  | 1324 | 0.679266 | 0         |  |
|  | Shiraz-18T | 1434 | 0.244465 | 0         |  |
|  | Shiraz-22T | 1549 | 0        | -0.319623 |  |
|  | Shiraz-22T | 1551 | 0.324011 | 0         |  |
|  | Shiraz-25T | 1698 | 0.21835  | 0         |  |
|  | Shiraz-28T | 1735 | 0.350744 | 0         |  |
|  | Shiraz-29T | 1778 | 0.120767 | 0         |  |
|  | Shiraz-32T | 1833 | 0.551336 | 0         |  |
|  | Shiraz-32T | 1834 | 1.485392 | 0         |  |

|        |      |            |      |          |           |  |  |
|--------|------|------------|------|----------|-----------|--|--|
|        |      | Shiraz-38T | 1951 | 0.250891 | 0         |  |  |
|        |      | Shiraz-53T | 2078 | 0.287202 | 0         |  |  |
|        |      | Shiraz-58T | 2160 | 0.399007 | 0         |  |  |
|        |      | Shiraz-71T | 2238 | 0.603631 | 0         |  |  |
| UGT3A1 | chr5 | Shiraz-4T  | 250  | 0.262252 | 0         |  |  |
|        |      | Shiraz-16T | 266  | 0.321724 | 0         |  |  |
|        |      | Shiraz-44T | 591  | 0        | -0.233934 |  |  |
|        |      | Shiraz-18T | 1429 | 0        | -0.314125 |  |  |
|        |      | Shiraz-22T | 1522 | 0        | -0.322688 |  |  |
|        |      | Shiraz-25T | 1694 | 0.201602 | 0         |  |  |
|        |      | Shiraz-28T | 1731 | 0.295447 | 0         |  |  |
|        |      | Shiraz-29T | 1773 | 0.090981 | 0         |  |  |
|        |      | Shiraz-40T | 2016 | 0.376634 | 0         |  |  |
|        |      | Shiraz-4T  | 250  | 0.262252 | 0         |  |  |
|        |      | Shiraz-16T | 266  | 0.321724 | 0         |  |  |
|        |      | Shiraz-44T | 591  | 0        | -0.233934 |  |  |
|        |      | Shiraz-18T | 1429 | 0        | -0.314125 |  |  |
|        |      | Shiraz-22T | 1522 | 0        | -0.322688 |  |  |
|        |      | Shiraz-25T | 1694 | 0.201602 | 0         |  |  |
|        |      | Shiraz-28T | 1731 | 0.295447 | 0         |  |  |
|        |      | Shiraz-29T | 1773 | 0.090981 | 0         |  |  |
|        |      | Shiraz-40T | 2016 | 0.376634 | 0         |  |  |
|        |      | Shiraz-4T  | 250  | 0.262252 | 0         |  |  |
|        |      | Shiraz-16T | 266  | 0.321724 | 0         |  |  |
|        |      | Shiraz-44T | 591  | 0        | -0.233934 |  |  |
|        |      | Shiraz-18T | 1429 | 0        | -0.314125 |  |  |
|        |      | Shiraz-22T | 1522 | 0        | -0.322688 |  |  |
|        |      | Shiraz-25T | 1694 | 0.201602 | 0         |  |  |
|        |      | Shiraz-28T | 1731 | 0.295447 | 0         |  |  |
|        |      | Shiraz-29T | 1773 | 0.090981 | 0         |  |  |
|        |      | Shiraz-40T | 2016 | 0.376634 | 0         |  |  |
| UGT3A2 | chr5 | Shiraz-4T  | 250  | 0.262252 | 0         |  |  |
|        |      | Shiraz-16T | 266  | 0.321724 | 0         |  |  |
|        |      | Shiraz-44T | 591  | 0        | -0.233934 |  |  |
|        |      | Shiraz-18T | 1429 | 0        | -0.314125 |  |  |
|        |      | Shiraz-22T | 1522 | 0        | -0.322688 |  |  |
|        |      | Shiraz-25T | 1694 | 0.201602 | 0         |  |  |
|        |      | Shiraz-28T | 1731 | 0.295447 | 0         |  |  |
|        |      | Shiraz-29T | 1773 | 0.090981 | 0         |  |  |
|        |      | Shiraz-40T | 2016 | 0.376634 | 0         |  |  |
|        |      | Shiraz-4T  | 250  | 0.262252 | 0         |  |  |
|        |      | Shiraz-16T | 266  | 0.321724 | 0         |  |  |
|        |      | Shiraz-44T | 591  | 0        | -0.233934 |  |  |
|        |      | Shiraz-18T | 1429 | 0        | -0.314125 |  |  |
|        |      | Shiraz-22T | 1522 | 0        | -0.322688 |  |  |
|        |      | Shiraz-25T | 1694 | 0.201602 | 0         |  |  |
|        |      | Shiraz-28T | 1731 | 0.295447 | 0         |  |  |

|       |      |            |      |          |           |  |  |
|-------|------|------------|------|----------|-----------|--|--|
|       |      | Shiraz-29T | 1773 | 0.090981 | 0         |  |  |
|       |      | Shiraz-40T | 2016 | 0.376634 | 0         |  |  |
|       |      | Shiraz-4T  | 250  | 0.262252 | 0         |  |  |
|       |      | Shiraz-16T | 266  | 0.321724 | 0         |  |  |
|       |      | Shiraz-44T | 591  | 0        | -0.233934 |  |  |
|       |      | Shiraz-18T | 1429 | 0        | -0.314125 |  |  |
|       |      | Shiraz-22T | 1522 | 0        | -0.322688 |  |  |
|       |      | Shiraz-25T | 1694 | 0.201602 | 0         |  |  |
|       |      | Shiraz-28T | 1731 | 0.295447 | 0         |  |  |
|       |      | Shiraz-29T | 1773 | 0.090981 | 0         |  |  |
|       |      | Shiraz-40T | 2016 | 0.376634 | 0         |  |  |
| UPF3B | chrX | Shiraz-3T  | 242  | 0        | -0.336434 |  |  |
|       |      | Shiraz-3T  | 244  | 0        | -0.023749 |  |  |
|       |      | Shiraz-4T  | 261  | 0        | -0.336249 |  |  |
|       |      | Shiraz-16T | 295  | 0.591657 | 0         |  |  |
|       |      | Shiraz-36T | 433  | 0        | -0.803961 |  |  |
|       |      | Shiraz-44T | 899  | 0        | -1.09697  |  |  |
|       |      | Shiraz-44T | 904  | 0        | -0.625526 |  |  |
|       |      | Shiraz-49T | 1170 | 0        | -0.967436 |  |  |
|       |      | Shiraz-9T  | 1370 | 0.690073 | 0         |  |  |
|       |      | Shiraz-18T | 1457 | 0.643204 | 0         |  |  |
|       |      | Shiraz-22T | 1673 | 0.611783 | 0         |  |  |
|       |      | Shiraz-25T | 1719 | 0.472955 | 0         |  |  |
|       |      | Shiraz-28T | 1762 | 0.562311 | 0         |  |  |
|       |      | Shiraz-29T | 1801 | 0.815343 | 0         |  |  |
|       |      | Shiraz-32T | 1870 | 0.729766 | 0         |  |  |
|       |      | Shiraz-35T | 1933 | 0.488535 | 0         |  |  |
|       |      | Shiraz-58T | 2223 | 0.833364 | 0         |  |  |
|       |      | Shiraz-71T | 2263 | 0.975531 | 0         |  |  |
|       |      | Shiraz-3T  | 242  | 0        | -0.336434 |  |  |
|       |      | Shiraz-3T  | 244  | 0        | -0.023749 |  |  |
|       |      | Shiraz-4T  | 261  | 0        | -0.336249 |  |  |
|       |      | Shiraz-16T | 295  | 0.591657 | 0         |  |  |
|       |      | Shiraz-36T | 433  | 0        | -0.803961 |  |  |
|       |      | Shiraz-44T | 899  | 0        | -1.09697  |  |  |
|       |      | Shiraz-44T | 904  | 0        | -0.625526 |  |  |
|       |      | Shiraz-49T | 1170 | 0        | -0.967436 |  |  |
|       |      | Shiraz-9T  | 1370 | 0.690073 | 0         |  |  |
|       |      | Shiraz-18T | 1457 | 0.643204 | 0         |  |  |
|       |      | Shiraz-22T | 1673 | 0.611783 | 0         |  |  |
|       |      | Shiraz-25T | 1719 | 0.472955 | 0         |  |  |
|       |      | Shiraz-28T | 1762 | 0.562311 | 0         |  |  |
|       |      | Shiraz-29T | 1801 | 0.815343 | 0         |  |  |
|       |      | Shiraz-32T | 1870 | 0.729766 | 0         |  |  |
|       |      | Shiraz-35T | 1933 | 0.488535 | 0         |  |  |
|       |      | Shiraz-58T | 2223 | 0.833364 | 0         |  |  |
|       |      | Shiraz-71T | 2263 | 0.975531 | 0         |  |  |

|       |      |            |      |          |           |  |  |
|-------|------|------------|------|----------|-----------|--|--|
|       |      | Shiraz-3T  | 242  | 0        | -0.336434 |  |  |
|       |      | Shiraz-3T  | 244  | 0        | -0.023749 |  |  |
|       |      | Shiraz-4T  | 261  | 0        | -0.336249 |  |  |
|       |      | Shiraz-16T | 295  | 0.591657 | 0         |  |  |
|       |      | Shiraz-36T | 433  | 0        | -0.803961 |  |  |
|       |      | Shiraz-44T | 899  | 0        | -1.09697  |  |  |
|       |      | Shiraz-44T | 904  | 0        | -0.625526 |  |  |
|       |      | Shiraz-49T | 1170 | 0        | -0.967436 |  |  |
|       |      | Shiraz-9T  | 1370 | 0.690073 | 0         |  |  |
|       |      | Shiraz-18T | 1457 | 0.643204 | 0         |  |  |
|       |      | Shiraz-22T | 1673 | 0.611783 | 0         |  |  |
|       |      | Shiraz-25T | 1719 | 0.472955 | 0         |  |  |
|       |      | Shiraz-28T | 1762 | 0.562311 | 0         |  |  |
|       |      | Shiraz-29T | 1801 | 0.815343 | 0         |  |  |
|       |      | Shiraz-32T | 1870 | 0.729766 | 0         |  |  |
|       |      | Shiraz-35T | 1933 | 0.488535 | 0         |  |  |
|       |      | Shiraz-58T | 2223 | 0.833364 | 0         |  |  |
|       |      | Shiraz-71T | 2263 | 0.975531 | 0         |  |  |
| UPK3B | chr7 | Shiraz-3T  | 90   | 0.219276 | 0         |  |  |
|       |      | Shiraz-3T  | 92   | 0.817021 | 0         |  |  |
|       |      | Shiraz-4T  | 253  | 0.372918 | 0         |  |  |
|       |      | Shiraz-31T | 315  | 0.194054 | 0         |  |  |
|       |      | Shiraz-36T | 378  | 0.179558 | 0         |  |  |
|       |      | Shiraz-36T | 379  | 0.322028 | 0         |  |  |
|       |      | Shiraz-42T | 454  | 0.145717 | 0         |  |  |
|       |      | Shiraz-44T | 637  | 1.109789 | 0         |  |  |
|       |      | Shiraz-46T | 943  | 0.093799 | 0         |  |  |
|       |      | Shiraz-46T | 944  | 0.256008 | 0         |  |  |
|       |      | Shiraz-47T | 1028 | 0.17896  | 0         |  |  |
|       |      | Shiraz-49T | 1118 | 0.327789 | 0         |  |  |
|       |      | Shiraz-77T | 1224 | 0.220539 | 0         |  |  |
|       |      | Shiraz-9T  | 1323 | 0.655912 | 0         |  |  |
|       |      | Shiraz-18T | 1434 | 0.244465 | 0         |  |  |
|       |      | Shiraz-22T | 1548 | 0.237572 | 0         |  |  |
|       |      | Shiraz-25T | 1698 | 0.21835  | 0         |  |  |
|       |      | Shiraz-28T | 1735 | 0.350744 | 0         |  |  |
|       |      | Shiraz-29T | 1778 | 0.120767 | 0         |  |  |
|       |      | Shiraz-38T | 1951 | 0.250891 | 0         |  |  |
|       |      | Shiraz-53T | 2078 | 0.287202 | 0         |  |  |
|       |      | Shiraz-58T | 2158 | 0.33934  | 0         |  |  |
|       |      | Shiraz-71T | 2238 | 0.603631 | 0         |  |  |
|       |      | Shiraz-71T | 2239 | 0.310785 | 0         |  |  |
|       |      | Shiraz-3T  | 90   | 0.219276 | 0         |  |  |
|       |      | Shiraz-3T  | 92   | 0.817021 | 0         |  |  |
|       |      | Shiraz-4T  | 253  | 0.372918 | 0         |  |  |
|       |      | Shiraz-31T | 315  | 0.194054 | 0         |  |  |
|       |      | Shiraz-36T | 378  | 0.179558 | 0         |  |  |

|      |      |            |      |          |   |  |
|------|------|------------|------|----------|---|--|
|      |      | Shiraz-36T | 379  | 0.322028 | 0 |  |
|      |      | Shiraz-42T | 454  | 0.145717 | 0 |  |
|      |      | Shiraz-44T | 637  | 1.109789 | 0 |  |
|      |      | Shiraz-46T | 943  | 0.093799 | 0 |  |
|      |      | Shiraz-46T | 944  | 0.256008 | 0 |  |
|      |      | Shiraz-47T | 1028 | 0.17896  | 0 |  |
|      |      | Shiraz-49T | 1118 | 0.327789 | 0 |  |
|      |      | Shiraz-77T | 1224 | 0.220539 | 0 |  |
|      |      | Shiraz-9T  | 1323 | 0.655912 | 0 |  |
|      |      | Shiraz-18T | 1434 | 0.244465 | 0 |  |
|      |      | Shiraz-22T | 1548 | 0.237572 | 0 |  |
|      |      | Shiraz-25T | 1698 | 0.21835  | 0 |  |
|      |      | Shiraz-28T | 1735 | 0.350744 | 0 |  |
|      |      | Shiraz-29T | 1778 | 0.120767 | 0 |  |
|      |      | Shiraz-38T | 1951 | 0.250891 | 0 |  |
|      |      | Shiraz-53T | 2078 | 0.287202 | 0 |  |
|      |      | Shiraz-58T | 2158 | 0.33934  | 0 |  |
|      |      | Shiraz-71T | 2238 | 0.603631 | 0 |  |
|      |      | Shiraz-71T | 2239 | 0.310785 | 0 |  |
|      |      | Shiraz-3T  | 90   | 0.219276 | 0 |  |
|      |      | Shiraz-3T  | 92   | 0.817021 | 0 |  |
|      |      | Shiraz-4T  | 253  | 0.372918 | 0 |  |
|      |      | Shiraz-31T | 315  | 0.194054 | 0 |  |
|      |      | Shiraz-36T | 378  | 0.179558 | 0 |  |
|      |      | Shiraz-36T | 379  | 0.322028 | 0 |  |
|      |      | Shiraz-42T | 454  | 0.145717 | 0 |  |
|      |      | Shiraz-44T | 637  | 1.109789 | 0 |  |
|      |      | Shiraz-46T | 943  | 0.093799 | 0 |  |
|      |      | Shiraz-46T | 944  | 0.256008 | 0 |  |
|      |      | Shiraz-47T | 1028 | 0.17896  | 0 |  |
|      |      | Shiraz-49T | 1118 | 0.327789 | 0 |  |
|      |      | Shiraz-77T | 1224 | 0.220539 | 0 |  |
|      |      | Shiraz-9T  | 1323 | 0.655912 | 0 |  |
|      |      | Shiraz-18T | 1434 | 0.244465 | 0 |  |
|      |      | Shiraz-22T | 1548 | 0.237572 | 0 |  |
|      |      | Shiraz-25T | 1698 | 0.21835  | 0 |  |
|      |      | Shiraz-28T | 1735 | 0.350744 | 0 |  |
|      |      | Shiraz-29T | 1778 | 0.120767 | 0 |  |
|      |      | Shiraz-38T | 1951 | 0.250891 | 0 |  |
|      |      | Shiraz-53T | 2078 | 0.287202 | 0 |  |
|      |      | Shiraz-58T | 2158 | 0.33934  | 0 |  |
|      |      | Shiraz-71T | 2238 | 0.603631 | 0 |  |
|      |      | Shiraz-71T | 2239 | 0.310785 | 0 |  |
| UPLP | chr7 | Shiraz-3T  | 90   | 0.219276 | 0 |  |
|      |      | Shiraz-4T  | 253  | 0.372918 | 0 |  |
|      |      | Shiraz-36T | 378  | 0.179558 | 0 |  |
|      |      | Shiraz-46T | 943  | 0.093799 | 0 |  |

|      |      |            |      |          |           |  |  |
|------|------|------------|------|----------|-----------|--|--|
|      |      | Shiraz-46T | 946  | 0.299835 | 0         |  |  |
|      |      | Shiraz-77T | 1225 | 0        | -0.117922 |  |  |
|      |      | Shiraz-9T  | 1324 | 0.679266 | 0         |  |  |
|      |      | Shiraz-18T | 1434 | 0.244465 | 0         |  |  |
|      |      | Shiraz-22T | 1549 | 0        | -0.319623 |  |  |
|      |      | Shiraz-25T | 1698 | 0.21835  | 0         |  |  |
|      |      | Shiraz-28T | 1735 | 0.350744 | 0         |  |  |
|      |      | Shiraz-29T | 1778 | 0.120767 | 0         |  |  |
|      |      | Shiraz-32T | 1833 | 0.551336 | 0         |  |  |
|      |      | Shiraz-38T | 1951 | 0.250891 | 0         |  |  |
|      |      | Shiraz-53T | 2078 | 0.287202 | 0         |  |  |
|      |      | Shiraz-71T | 2238 | 0.603631 | 0         |  |  |
|      |      | Shiraz-3T  | 90   | 0.219276 | 0         |  |  |
|      |      | Shiraz-4T  | 253  | 0.372918 | 0         |  |  |
|      |      | Shiraz-36T | 378  | 0.179558 | 0         |  |  |
|      |      | Shiraz-46T | 943  | 0.093799 | 0         |  |  |
|      |      | Shiraz-46T | 946  | 0.299835 | 0         |  |  |
|      |      | Shiraz-77T | 1225 | 0        | -0.117922 |  |  |
|      |      | Shiraz-9T  | 1324 | 0.679266 | 0         |  |  |
|      |      | Shiraz-18T | 1434 | 0.244465 | 0         |  |  |
|      |      | Shiraz-22T | 1549 | 0        | -0.319623 |  |  |
|      |      | Shiraz-25T | 1698 | 0.21835  | 0         |  |  |
|      |      | Shiraz-28T | 1735 | 0.350744 | 0         |  |  |
|      |      | Shiraz-29T | 1778 | 0.120767 | 0         |  |  |
|      |      | Shiraz-32T | 1833 | 0.551336 | 0         |  |  |
|      |      | Shiraz-38T | 1951 | 0.250891 | 0         |  |  |
|      |      | Shiraz-53T | 2078 | 0.287202 | 0         |  |  |
|      |      | Shiraz-71T | 2238 | 0.603631 | 0         |  |  |
|      |      | Shiraz-3T  | 90   | 0.219276 | 0         |  |  |
|      |      | Shiraz-4T  | 253  | 0.372918 | 0         |  |  |
|      |      | Shiraz-36T | 378  | 0.179558 | 0         |  |  |
|      |      | Shiraz-46T | 943  | 0.093799 | 0         |  |  |
|      |      | Shiraz-46T | 946  | 0.299835 | 0         |  |  |
|      |      | Shiraz-77T | 1225 | 0        | -0.117922 |  |  |
|      |      | Shiraz-9T  | 1324 | 0.679266 | 0         |  |  |
|      |      | Shiraz-18T | 1434 | 0.244465 | 0         |  |  |
|      |      | Shiraz-22T | 1549 | 0        | -0.319623 |  |  |
|      |      | Shiraz-25T | 1698 | 0.21835  | 0         |  |  |
|      |      | Shiraz-28T | 1735 | 0.350744 | 0         |  |  |
|      |      | Shiraz-29T | 1778 | 0.120767 | 0         |  |  |
|      |      | Shiraz-32T | 1833 | 0.551336 | 0         |  |  |
|      |      | Shiraz-38T | 1951 | 0.250891 | 0         |  |  |
|      |      | Shiraz-53T | 2078 | 0.287202 | 0         |  |  |
|      |      | Shiraz-71T | 2238 | 0.603631 | 0         |  |  |
| UPP1 | chr7 | Shiraz-3T  | 87   | 0.198593 | 0         |  |  |
|      |      | Shiraz-3T  | 87   | 0.198593 | 0         |  |  |
|      |      | Shiraz-4T  | 252  | 0.192083 | 0         |  |  |



|  |  |            |      |          |   |  |  |
|--|--|------------|------|----------|---|--|--|
|  |  | Shiraz-4T  | 252  | 0.192083 | 0 |  |  |
|  |  | Shiraz-36T | 376  | 0.159952 | 0 |  |  |
|  |  | Shiraz-36T | 376  | 0.159952 | 0 |  |  |
|  |  | Shiraz-46T | 942  | 0.069143 | 0 |  |  |
|  |  | Shiraz-46T | 942  | 0.069143 | 0 |  |  |
|  |  | Shiraz-18T | 1433 | 0.250973 | 0 |  |  |
|  |  | Shiraz-18T | 1433 | 0.250973 | 0 |  |  |
|  |  | Shiraz-25T | 1697 | 0.21945  | 0 |  |  |
|  |  | Shiraz-25T | 1697 | 0.21945  | 0 |  |  |
|  |  | Shiraz-28T | 1734 | 0.362882 | 0 |  |  |
|  |  | Shiraz-28T | 1734 | 0.362882 | 0 |  |  |
|  |  | Shiraz-29T | 1777 | 0.156747 | 0 |  |  |
|  |  | Shiraz-29T | 1777 | 0.156747 | 0 |  |  |
|  |  | Shiraz-38T | 1950 | 0.265916 | 0 |  |  |
|  |  | Shiraz-38T | 1950 | 0.265916 | 0 |  |  |
|  |  | Shiraz-71T | 2236 | 0.320072 | 0 |  |  |
|  |  | Shiraz-71T | 2236 | 0.320072 | 0 |  |  |
|  |  | Shiraz-3T  | 87   | 0.198593 | 0 |  |  |
|  |  | Shiraz-3T  | 87   | 0.198593 | 0 |  |  |
|  |  | Shiraz-4T  | 252  | 0.192083 | 0 |  |  |
|  |  | Shiraz-4T  | 252  | 0.192083 | 0 |  |  |
|  |  | Shiraz-36T | 376  | 0.159952 | 0 |  |  |
|  |  | Shiraz-36T | 376  | 0.159952 | 0 |  |  |
|  |  | Shiraz-46T | 942  | 0.069143 | 0 |  |  |
|  |  | Shiraz-46T | 942  | 0.069143 | 0 |  |  |
|  |  | Shiraz-18T | 1433 | 0.250973 | 0 |  |  |
|  |  | Shiraz-18T | 1433 | 0.250973 | 0 |  |  |
|  |  | Shiraz-25T | 1697 | 0.21945  | 0 |  |  |
|  |  | Shiraz-25T | 1697 | 0.21945  | 0 |  |  |
|  |  | Shiraz-28T | 1734 | 0.362882 | 0 |  |  |
|  |  | Shiraz-28T | 1734 | 0.362882 | 0 |  |  |
|  |  | Shiraz-29T | 1777 | 0.156747 | 0 |  |  |
|  |  | Shiraz-29T | 1777 | 0.156747 | 0 |  |  |
|  |  | Shiraz-38T | 1950 | 0.265916 | 0 |  |  |
|  |  | Shiraz-38T | 1950 | 0.265916 | 0 |  |  |
|  |  | Shiraz-71T | 2236 | 0.320072 | 0 |  |  |
|  |  | Shiraz-71T | 2236 | 0.320072 | 0 |  |  |
|  |  | Shiraz-3T  | 87   | 0.198593 | 0 |  |  |
|  |  | Shiraz-3T  | 87   | 0.198593 | 0 |  |  |
|  |  | Shiraz-4T  | 252  | 0.192083 | 0 |  |  |
|  |  | Shiraz-4T  | 252  | 0.192083 | 0 |  |  |
|  |  | Shiraz-36T | 376  | 0.159952 | 0 |  |  |
|  |  | Shiraz-36T | 376  | 0.159952 | 0 |  |  |
|  |  | Shiraz-46T | 942  | 0.069143 | 0 |  |  |
|  |  | Shiraz-46T | 942  | 0.069143 | 0 |  |  |
|  |  | Shiraz-18T | 1433 | 0.250973 | 0 |  |  |
|  |  | Shiraz-18T | 1433 | 0.250973 | 0 |  |  |

|      |      |            |      |          |           |  |  |
|------|------|------------|------|----------|-----------|--|--|
|      |      | Shiraz-25T | 1697 | 0.21945  | 0         |  |  |
|      |      | Shiraz-25T | 1697 | 0.21945  | 0         |  |  |
|      |      | Shiraz-28T | 1734 | 0.362882 | 0         |  |  |
|      |      | Shiraz-28T | 1734 | 0.362882 | 0         |  |  |
|      |      | Shiraz-29T | 1777 | 0.156747 | 0         |  |  |
|      |      | Shiraz-29T | 1777 | 0.156747 | 0         |  |  |
|      |      | Shiraz-38T | 1950 | 0.265916 | 0         |  |  |
|      |      | Shiraz-38T | 1950 | 0.265916 | 0         |  |  |
|      |      | Shiraz-71T | 2236 | 0.320072 | 0         |  |  |
|      |      | Shiraz-71T | 2236 | 0.320072 | 0         |  |  |
| UPRT | chrX | Shiraz-3T  | 242  | 0        | -0.336434 |  |  |
|      |      | Shiraz-4T  | 261  | 0        | -0.336249 |  |  |
|      |      | Shiraz-16T | 295  | 0.591657 | 0         |  |  |
|      |      | Shiraz-36T | 433  | 0        | -0.803961 |  |  |
|      |      | Shiraz-44T | 899  | 0        | -1.09697  |  |  |
|      |      | Shiraz-49T | 1170 | 0        | -0.967436 |  |  |
|      |      | Shiraz-18T | 1457 | 0.643204 | 0         |  |  |
|      |      | Shiraz-22T | 1673 | 0.611783 | 0         |  |  |
|      |      | Shiraz-25T | 1719 | 0.472955 | 0         |  |  |
|      |      | Shiraz-28T | 1762 | 0.562311 | 0         |  |  |
|      |      | Shiraz-29T | 1801 | 0.815343 | 0         |  |  |
|      |      | Shiraz-32T | 1870 | 0.729766 | 0         |  |  |
|      |      | Shiraz-35T | 1933 | 0.488535 | 0         |  |  |
|      |      | Shiraz-58T | 2223 | 0.833364 | 0         |  |  |
|      |      | Shiraz-71T | 2263 | 0.975531 | 0         |  |  |
|      |      | Shiraz-3T  | 242  | 0        | -0.336434 |  |  |
|      |      | Shiraz-4T  | 261  | 0        | -0.336249 |  |  |
|      |      | Shiraz-16T | 295  | 0.591657 | 0         |  |  |
|      |      | Shiraz-36T | 433  | 0        | -0.803961 |  |  |
|      |      | Shiraz-44T | 899  | 0        | -1.09697  |  |  |
|      |      | Shiraz-49T | 1170 | 0        | -0.967436 |  |  |
|      |      | Shiraz-18T | 1457 | 0.643204 | 0         |  |  |
|      |      | Shiraz-22T | 1673 | 0.611783 | 0         |  |  |
|      |      | Shiraz-25T | 1719 | 0.472955 | 0         |  |  |
|      |      | Shiraz-28T | 1762 | 0.562311 | 0         |  |  |
|      |      | Shiraz-29T | 1801 | 0.815343 | 0         |  |  |
|      |      | Shiraz-32T | 1870 | 0.729766 | 0         |  |  |
|      |      | Shiraz-35T | 1933 | 0.488535 | 0         |  |  |
|      |      | Shiraz-58T | 2223 | 0.833364 | 0         |  |  |
|      |      | Shiraz-71T | 2263 | 0.975531 | 0         |  |  |
|      |      | Shiraz-3T  | 242  | 0        | -0.336434 |  |  |
|      |      | Shiraz-4T  | 261  | 0        | -0.336249 |  |  |
|      |      | Shiraz-16T | 295  | 0.591657 | 0         |  |  |
|      |      | Shiraz-36T | 433  | 0        | -0.803961 |  |  |
|      |      | Shiraz-44T | 899  | 0        | -1.09697  |  |  |
|      |      | Shiraz-49T | 1170 | 0        | -0.967436 |  |  |
|      |      | Shiraz-18T | 1457 | 0.643204 | 0         |  |  |

|      |      |            |      |          |   |  |  |
|------|------|------------|------|----------|---|--|--|
|      |      | Shiraz-22T | 1673 | 0.611783 | 0 |  |  |
|      |      | Shiraz-25T | 1719 | 0.472955 | 0 |  |  |
|      |      | Shiraz-28T | 1762 | 0.562311 | 0 |  |  |
|      |      | Shiraz-29T | 1801 | 0.815343 | 0 |  |  |
|      |      | Shiraz-32T | 1870 | 0.729766 | 0 |  |  |
|      |      | Shiraz-35T | 1933 | 0.488535 | 0 |  |  |
|      |      | Shiraz-58T | 2223 | 0.833364 | 0 |  |  |
|      |      | Shiraz-71T | 2263 | 0.975531 | 0 |  |  |
| URG4 | chr7 | Shiraz-3T  | 87   | 0.198593 | 0 |  |  |
|      |      | Shiraz-3T  | 87   | 0.198593 | 0 |  |  |
|      |      | Shiraz-4T  | 252  | 0.192083 | 0 |  |  |
|      |      | Shiraz-4T  | 252  | 0.192083 | 0 |  |  |
|      |      | Shiraz-36T | 376  | 0.159952 | 0 |  |  |
|      |      | Shiraz-36T | 376  | 0.159952 | 0 |  |  |
|      |      | Shiraz-44T | 632  | 0.902944 | 0 |  |  |
|      |      | Shiraz-44T | 632  | 0.902944 | 0 |  |  |
|      |      | Shiraz-46T | 942  | 0.069143 | 0 |  |  |
|      |      | Shiraz-46T | 942  | 0.069143 | 0 |  |  |
|      |      | Shiraz-77T | 1223 | 0.215647 | 0 |  |  |
|      |      | Shiraz-77T | 1223 | 0.215647 | 0 |  |  |
|      |      | Shiraz-18T | 1433 | 0.250973 | 0 |  |  |
|      |      | Shiraz-18T | 1433 | 0.250973 | 0 |  |  |
|      |      | Shiraz-25T | 1697 | 0.21945  | 0 |  |  |
|      |      | Shiraz-25T | 1697 | 0.21945  | 0 |  |  |
|      |      | Shiraz-28T | 1734 | 0.362882 | 0 |  |  |
|      |      | Shiraz-28T | 1734 | 0.362882 | 0 |  |  |
|      |      | Shiraz-29T | 1777 | 0.156747 | 0 |  |  |
|      |      | Shiraz-29T | 1777 | 0.156747 | 0 |  |  |
|      |      | Shiraz-38T | 1950 | 0.265916 | 0 |  |  |
|      |      | Shiraz-38T | 1950 | 0.265916 | 0 |  |  |
|      |      | Shiraz-71T | 2236 | 0.320072 | 0 |  |  |
|      |      | Shiraz-71T | 2236 | 0.320072 | 0 |  |  |
|      |      | Shiraz-3T  | 87   | 0.198593 | 0 |  |  |
|      |      | Shiraz-3T  | 87   | 0.198593 | 0 |  |  |
|      |      | Shiraz-4T  | 252  | 0.192083 | 0 |  |  |
|      |      | Shiraz-4T  | 252  | 0.192083 | 0 |  |  |
|      |      | Shiraz-36T | 376  | 0.159952 | 0 |  |  |
|      |      | Shiraz-36T | 376  | 0.159952 | 0 |  |  |
|      |      | Shiraz-44T | 632  | 0.902944 | 0 |  |  |
|      |      | Shiraz-44T | 632  | 0.902944 | 0 |  |  |
|      |      | Shiraz-46T | 942  | 0.069143 | 0 |  |  |
|      |      | Shiraz-46T | 942  | 0.069143 | 0 |  |  |
|      |      | Shiraz-77T | 1223 | 0.215647 | 0 |  |  |
|      |      | Shiraz-77T | 1223 | 0.215647 | 0 |  |  |
|      |      | Shiraz-18T | 1433 | 0.250973 | 0 |  |  |
|      |      | Shiraz-18T | 1433 | 0.250973 | 0 |  |  |
|      |      | Shiraz-25T | 1697 | 0.21945  | 0 |  |  |

|       |      |            |      |          |           |  |
|-------|------|------------|------|----------|-----------|--|
|       |      | Shiraz-25T | 1697 | 0.21945  | 0         |  |
|       |      | Shiraz-28T | 1734 | 0.362882 | 0         |  |
|       |      | Shiraz-28T | 1734 | 0.362882 | 0         |  |
|       |      | Shiraz-29T | 1777 | 0.156747 | 0         |  |
|       |      | Shiraz-29T | 1777 | 0.156747 | 0         |  |
|       |      | Shiraz-38T | 1950 | 0.265916 | 0         |  |
|       |      | Shiraz-38T | 1950 | 0.265916 | 0         |  |
|       |      | Shiraz-71T | 2236 | 0.320072 | 0         |  |
|       |      | Shiraz-71T | 2236 | 0.320072 | 0         |  |
|       |      | Shiraz-3T  | 87   | 0.198593 | 0         |  |
|       |      | Shiraz-3T  | 87   | 0.198593 | 0         |  |
|       |      | Shiraz-4T  | 252  | 0.192083 | 0         |  |
|       |      | Shiraz-4T  | 252  | 0.192083 | 0         |  |
|       |      | Shiraz-36T | 376  | 0.159952 | 0         |  |
|       |      | Shiraz-36T | 376  | 0.159952 | 0         |  |
|       |      | Shiraz-44T | 632  | 0.902944 | 0         |  |
|       |      | Shiraz-44T | 632  | 0.902944 | 0         |  |
|       |      | Shiraz-46T | 942  | 0.069143 | 0         |  |
|       |      | Shiraz-46T | 942  | 0.069143 | 0         |  |
|       |      | Shiraz-77T | 1223 | 0.215647 | 0         |  |
|       |      | Shiraz-77T | 1223 | 0.215647 | 0         |  |
|       |      | Shiraz-18T | 1433 | 0.250973 | 0         |  |
|       |      | Shiraz-18T | 1433 | 0.250973 | 0         |  |
|       |      | Shiraz-25T | 1697 | 0.21945  | 0         |  |
|       |      | Shiraz-25T | 1697 | 0.21945  | 0         |  |
|       |      | Shiraz-28T | 1734 | 0.362882 | 0         |  |
|       |      | Shiraz-28T | 1734 | 0.362882 | 0         |  |
|       |      | Shiraz-29T | 1777 | 0.156747 | 0         |  |
|       |      | Shiraz-29T | 1777 | 0.156747 | 0         |  |
|       |      | Shiraz-38T | 1950 | 0.265916 | 0         |  |
|       |      | Shiraz-38T | 1950 | 0.265916 | 0         |  |
|       |      | Shiraz-71T | 2236 | 0.320072 | 0         |  |
|       |      | Shiraz-71T | 2236 | 0.320072 | 0         |  |
| USP11 | chrX | Shiraz-4T  | 260  | 0        | -0.324128 |  |
|       |      | Shiraz-16T | 294  | 0.655804 | 0         |  |
|       |      | Shiraz-31T | 345  | 0.103301 | 0         |  |
|       |      | Shiraz-36T | 431  | 0        | -0.78035  |  |
|       |      | Shiraz-36T | 432  | 0        | -0.6692   |  |
|       |      | Shiraz-44T | 891  | 0        | -0.954044 |  |
|       |      | Shiraz-44T | 896  | 0        | -0.109108 |  |
|       |      | Shiraz-46T | 991  | 0.139564 | 0         |  |
|       |      | Shiraz-47T | 1084 | 0.24185  | 0         |  |
|       |      | Shiraz-49T | 1166 | 0        | -0.917235 |  |
|       |      | Shiraz-49T | 1169 | 0        | -0.583529 |  |
|       |      | Shiraz-77T | 1282 | 0.213849 | 0         |  |
|       |      | Shiraz-9T  | 1368 | 0.199713 | 0         |  |
|       |      | Shiraz-9T  | 1369 | 0.703374 | 0         |  |

|  |            |      |          |           |  |
|--|------------|------|----------|-----------|--|
|  | Shiraz-18T | 1455 | 0        | -0.186773 |  |
|  | Shiraz-22T | 1669 | 0.695915 | 0         |  |
|  | Shiraz-22T | 1672 | 1.01678  | 0         |  |
|  | Shiraz-25T | 1717 | 0.420447 | 0         |  |
|  | Shiraz-28T | 1760 | 0.538181 | 0         |  |
|  | Shiraz-29T | 1800 | 0.672527 | 0         |  |
|  | Shiraz-32T | 1869 | 0.776805 | 0         |  |
|  | Shiraz-35T | 1932 | 0.507141 | 0         |  |
|  | Shiraz-40T | 2051 | 0.098506 | 0         |  |
|  | Shiraz-58T | 2221 | 0.871948 | 0         |  |
|  | Shiraz-71T | 2260 | 0.68394  | 0         |  |
|  | Shiraz-71T | 2262 | 0.986748 | 0         |  |
|  | Shiraz-4T  | 260  | 0        | -0.324128 |  |
|  | Shiraz-16T | 294  | 0.655804 | 0         |  |
|  | Shiraz-31T | 345  | 0.103301 | 0         |  |
|  | Shiraz-36T | 431  | 0        | -0.78035  |  |
|  | Shiraz-36T | 432  | 0        | -0.6692   |  |
|  | Shiraz-44T | 891  | 0        | -0.954044 |  |
|  | Shiraz-44T | 896  | 0        | -0.109108 |  |
|  | Shiraz-46T | 991  | 0.139564 | 0         |  |
|  | Shiraz-47T | 1084 | 0.24185  | 0         |  |
|  | Shiraz-49T | 1166 | 0        | -0.917235 |  |
|  | Shiraz-49T | 1169 | 0        | -0.583529 |  |
|  | Shiraz-77T | 1282 | 0.213849 | 0         |  |
|  | Shiraz-9T  | 1368 | 0.199713 | 0         |  |
|  | Shiraz-9T  | 1369 | 0.703374 | 0         |  |
|  | Shiraz-18T | 1455 | 0        | -0.186773 |  |
|  | Shiraz-22T | 1669 | 0.695915 | 0         |  |
|  | Shiraz-22T | 1672 | 1.01678  | 0         |  |
|  | Shiraz-25T | 1717 | 0.420447 | 0         |  |
|  | Shiraz-28T | 1760 | 0.538181 | 0         |  |
|  | Shiraz-29T | 1800 | 0.672527 | 0         |  |
|  | Shiraz-32T | 1869 | 0.776805 | 0         |  |
|  | Shiraz-35T | 1932 | 0.507141 | 0         |  |
|  | Shiraz-40T | 2051 | 0.098506 | 0         |  |
|  | Shiraz-58T | 2221 | 0.871948 | 0         |  |
|  | Shiraz-71T | 2260 | 0.68394  | 0         |  |
|  | Shiraz-71T | 2262 | 0.986748 | 0         |  |
|  | Shiraz-4T  | 260  | 0        | -0.324128 |  |
|  | Shiraz-16T | 294  | 0.655804 | 0         |  |
|  | Shiraz-31T | 345  | 0.103301 | 0         |  |
|  | Shiraz-36T | 431  | 0        | -0.78035  |  |
|  | Shiraz-36T | 432  | 0        | -0.6692   |  |
|  | Shiraz-44T | 891  | 0        | -0.954044 |  |
|  | Shiraz-44T | 896  | 0        | -0.109108 |  |
|  | Shiraz-46T | 991  | 0.139564 | 0         |  |
|  | Shiraz-47T | 1084 | 0.24185  | 0         |  |

|       |      |            |      |          |           |  |  |
|-------|------|------------|------|----------|-----------|--|--|
|       |      | Shiraz-49T | 1166 | 0        | -0.917235 |  |  |
|       |      | Shiraz-49T | 1169 | 0        | -0.583529 |  |  |
|       |      | Shiraz-77T | 1282 | 0.213849 | 0         |  |  |
|       |      | Shiraz-9T  | 1368 | 0.199713 | 0         |  |  |
|       |      | Shiraz-9T  | 1369 | 0.703374 | 0         |  |  |
|       |      | Shiraz-18T | 1455 | 0        | -0.186773 |  |  |
|       |      | Shiraz-22T | 1669 | 0.695915 | 0         |  |  |
|       |      | Shiraz-22T | 1672 | 1.01678  | 0         |  |  |
|       |      | Shiraz-25T | 1717 | 0.420447 | 0         |  |  |
|       |      | Shiraz-28T | 1760 | 0.538181 | 0         |  |  |
|       |      | Shiraz-29T | 1800 | 0.672527 | 0         |  |  |
|       |      | Shiraz-32T | 1869 | 0.776805 | 0         |  |  |
|       |      | Shiraz-35T | 1932 | 0.507141 | 0         |  |  |
|       |      | Shiraz-40T | 2051 | 0.098506 | 0         |  |  |
|       |      | Shiraz-58T | 2221 | 0.871948 | 0         |  |  |
|       |      | Shiraz-71T | 2260 | 0.68394  | 0         |  |  |
|       |      | Shiraz-71T | 2262 | 0.986748 | 0         |  |  |
| USP26 | chrX | Shiraz-3T  | 242  | 0        | -0.336434 |  |  |
|       |      | Shiraz-4T  | 261  | 0        | -0.336249 |  |  |
|       |      | Shiraz-16T | 295  | 0.591657 | 0         |  |  |
|       |      | Shiraz-36T | 433  | 0        | -0.803961 |  |  |
|       |      | Shiraz-44T | 899  | 0        | -1.09697  |  |  |
|       |      | Shiraz-49T | 1170 | 0        | -0.967436 |  |  |
|       |      | Shiraz-9T  | 1370 | 0.690073 | 0         |  |  |
|       |      | Shiraz-18T | 1457 | 0.643204 | 0         |  |  |
|       |      | Shiraz-22T | 1673 | 0.611783 | 0         |  |  |
|       |      | Shiraz-22T | 1677 | 0.789711 | 0         |  |  |
|       |      | Shiraz-25T | 1719 | 0.472955 | 0         |  |  |
|       |      | Shiraz-28T | 1762 | 0.562311 | 0         |  |  |
|       |      | Shiraz-29T | 1801 | 0.815343 | 0         |  |  |
|       |      | Shiraz-32T | 1870 | 0.729766 | 0         |  |  |
|       |      | Shiraz-35T | 1933 | 0.488535 | 0         |  |  |
|       |      | Shiraz-58T | 2223 | 0.833364 | 0         |  |  |
|       |      | Shiraz-71T | 2263 | 0.975531 | 0         |  |  |
|       |      | Shiraz-3T  | 242  | 0        | -0.336434 |  |  |
|       |      | Shiraz-4T  | 261  | 0        | -0.336249 |  |  |
|       |      | Shiraz-16T | 295  | 0.591657 | 0         |  |  |
|       |      | Shiraz-36T | 433  | 0        | -0.803961 |  |  |
|       |      | Shiraz-44T | 899  | 0        | -1.09697  |  |  |
|       |      | Shiraz-49T | 1170 | 0        | -0.967436 |  |  |
|       |      | Shiraz-9T  | 1370 | 0.690073 | 0         |  |  |
|       |      | Shiraz-18T | 1457 | 0.643204 | 0         |  |  |
|       |      | Shiraz-22T | 1673 | 0.611783 | 0         |  |  |
|       |      | Shiraz-22T | 1677 | 0.789711 | 0         |  |  |
|       |      | Shiraz-25T | 1719 | 0.472955 | 0         |  |  |
|       |      | Shiraz-28T | 1762 | 0.562311 | 0         |  |  |
|       |      | Shiraz-29T | 1801 | 0.815343 | 0         |  |  |

|        |      |            |      |          |           |  |
|--------|------|------------|------|----------|-----------|--|
|        |      | Shiraz-32T | 1870 | 0.729766 | 0         |  |
|        |      | Shiraz-35T | 1933 | 0.488535 | 0         |  |
|        |      | Shiraz-58T | 2223 | 0.833364 | 0         |  |
|        |      | Shiraz-71T | 2263 | 0.975531 | 0         |  |
|        |      | Shiraz-3T  | 242  | 0        | -0.336434 |  |
|        |      | Shiraz-4T  | 261  | 0        | -0.336249 |  |
|        |      | Shiraz-16T | 295  | 0.591657 | 0         |  |
|        |      | Shiraz-36T | 433  | 0        | -0.803961 |  |
|        |      | Shiraz-44T | 899  | 0        | -1.09697  |  |
|        |      | Shiraz-49T | 1170 | 0        | -0.967436 |  |
|        |      | Shiraz-9T  | 1370 | 0.690073 | 0         |  |
|        |      | Shiraz-18T | 1457 | 0.643204 | 0         |  |
|        |      | Shiraz-22T | 1673 | 0.611783 | 0         |  |
|        |      | Shiraz-22T | 1677 | 0.789711 | 0         |  |
|        |      | Shiraz-25T | 1719 | 0.472955 | 0         |  |
|        |      | Shiraz-28T | 1762 | 0.562311 | 0         |  |
|        |      | Shiraz-29T | 1801 | 0.815343 | 0         |  |
|        |      | Shiraz-32T | 1870 | 0.729766 | 0         |  |
|        |      | Shiraz-35T | 1933 | 0.488535 | 0         |  |
|        |      | Shiraz-58T | 2223 | 0.833364 | 0         |  |
|        |      | Shiraz-71T | 2263 | 0.975531 | 0         |  |
| USP27X | chrX | Shiraz-4T  | 260  | 0        | -0.324128 |  |
|        |      | Shiraz-16T | 294  | 0.655804 | 0         |  |
|        |      | Shiraz-31T | 345  | 0.103301 | 0         |  |
|        |      | Shiraz-36T | 431  | 0        | -0.78035  |  |
|        |      | Shiraz-36T | 432  | 0        | -0.6692   |  |
|        |      | Shiraz-44T | 891  | 0        | -0.954044 |  |
|        |      | Shiraz-49T | 1166 | 0        | -0.917235 |  |
|        |      | Shiraz-77T | 1282 | 0.213849 | 0         |  |
|        |      | Shiraz-9T  | 1368 | 0.199713 | 0         |  |
|        |      | Shiraz-18T | 1455 | 0        | -0.186773 |  |
|        |      | Shiraz-22T | 1669 | 0.695915 | 0         |  |
|        |      | Shiraz-25T | 1717 | 0.420447 | 0         |  |
|        |      | Shiraz-28T | 1760 | 0.538181 | 0         |  |
|        |      | Shiraz-29T | 1800 | 0.672527 | 0         |  |
|        |      | Shiraz-32T | 1869 | 0.776805 | 0         |  |
|        |      | Shiraz-35T | 1932 | 0.507141 | 0         |  |
|        |      | Shiraz-58T | 2221 | 0.871948 | 0         |  |
|        |      | Shiraz-71T | 2260 | 0.68394  | 0         |  |
|        |      | Shiraz-71T | 2262 | 0.986748 | 0         |  |
|        |      | Shiraz-4T  | 260  | 0        | -0.324128 |  |
|        |      | Shiraz-16T | 294  | 0.655804 | 0         |  |
|        |      | Shiraz-31T | 345  | 0.103301 | 0         |  |
|        |      | Shiraz-36T | 431  | 0        | -0.78035  |  |
|        |      | Shiraz-36T | 432  | 0        | -0.6692   |  |
|        |      | Shiraz-44T | 891  | 0        | -0.954044 |  |
|        |      | Shiraz-49T | 1166 | 0        | -0.917235 |  |

|       |      |            |      |          |           |  |
|-------|------|------------|------|----------|-----------|--|
|       |      | Shiraz-77T | 1282 | 0.213849 | 0         |  |
|       |      | Shiraz-9T  | 1368 | 0.199713 | 0         |  |
|       |      | Shiraz-18T | 1455 | 0        | -0.186773 |  |
|       |      | Shiraz-22T | 1669 | 0.695915 | 0         |  |
|       |      | Shiraz-25T | 1717 | 0.420447 | 0         |  |
|       |      | Shiraz-28T | 1760 | 0.538181 | 0         |  |
|       |      | Shiraz-29T | 1800 | 0.672527 | 0         |  |
|       |      | Shiraz-32T | 1869 | 0.776805 | 0         |  |
|       |      | Shiraz-35T | 1932 | 0.507141 | 0         |  |
|       |      | Shiraz-58T | 2221 | 0.871948 | 0         |  |
|       |      | Shiraz-71T | 2260 | 0.68394  | 0         |  |
|       |      | Shiraz-71T | 2262 | 0.986748 | 0         |  |
|       |      | Shiraz-4T  | 260  | 0        | -0.324128 |  |
|       |      | Shiraz-16T | 294  | 0.655804 | 0         |  |
|       |      | Shiraz-31T | 345  | 0.103301 | 0         |  |
|       |      | Shiraz-36T | 431  | 0        | -0.78035  |  |
|       |      | Shiraz-36T | 432  | 0        | -0.6692   |  |
|       |      | Shiraz-44T | 891  | 0        | -0.954044 |  |
|       |      | Shiraz-49T | 1166 | 0        | -0.917235 |  |
|       |      | Shiraz-77T | 1282 | 0.213849 | 0         |  |
|       |      | Shiraz-9T  | 1368 | 0.199713 | 0         |  |
|       |      | Shiraz-18T | 1455 | 0        | -0.186773 |  |
|       |      | Shiraz-22T | 1669 | 0.695915 | 0         |  |
|       |      | Shiraz-25T | 1717 | 0.420447 | 0         |  |
|       |      | Shiraz-28T | 1760 | 0.538181 | 0         |  |
|       |      | Shiraz-29T | 1800 | 0.672527 | 0         |  |
|       |      | Shiraz-32T | 1869 | 0.776805 | 0         |  |
|       |      | Shiraz-35T | 1932 | 0.507141 | 0         |  |
|       |      | Shiraz-58T | 2221 | 0.871948 | 0         |  |
|       |      | Shiraz-71T | 2260 | 0.68394  | 0         |  |
|       |      | Shiraz-71T | 2262 | 0.986748 | 0         |  |
| USP51 | chrX | Shiraz-3T  | 240  | 0        | -0.346245 |  |
|       |      | Shiraz-4T  | 260  | 0        | -0.324128 |  |
|       |      | Shiraz-16T | 294  | 0.655804 | 0         |  |
|       |      | Shiraz-36T | 431  | 0        | -0.78035  |  |
|       |      | Shiraz-44T | 891  | 0        | -0.954044 |  |
|       |      | Shiraz-49T | 1166 | 0        | -0.917235 |  |
|       |      | Shiraz-9T  | 1368 | 0.199713 | 0         |  |
|       |      | Shiraz-18T | 1456 | 0.608534 | 0         |  |
|       |      | Shiraz-22T | 1669 | 0.695915 | 0         |  |
|       |      | Shiraz-25T | 1717 | 0.420447 | 0         |  |
|       |      | Shiraz-28T | 1760 | 0.538181 | 0         |  |
|       |      | Shiraz-29T | 1800 | 0.672527 | 0         |  |
|       |      | Shiraz-32T | 1869 | 0.776805 | 0         |  |
|       |      | Shiraz-35T | 1932 | 0.507141 | 0         |  |
|       |      | Shiraz-58T | 2221 | 0.871948 | 0         |  |
|       |      | Shiraz-71T | 2260 | 0.68394  | 0         |  |



|       |      |            |      |          |           |  |  |
|-------|------|------------|------|----------|-----------|--|--|
|       |      | Shiraz-71T | 2262 | 0.986748 | 0         |  |  |
|       |      | Shiraz-3T  | 240  | 0        | -0.346245 |  |  |
|       |      | Shiraz-4T  | 260  | 0        | -0.324128 |  |  |
|       |      | Shiraz-16T | 294  | 0.655804 | 0         |  |  |
|       |      | Shiraz-36T | 431  | 0        | -0.78035  |  |  |
|       |      | Shiraz-44T | 891  | 0        | -0.954044 |  |  |
|       |      | Shiraz-49T | 1166 | 0        | -0.917235 |  |  |
|       |      | Shiraz-9T  | 1368 | 0.199713 | 0         |  |  |
|       |      | Shiraz-18T | 1456 | 0.608534 | 0         |  |  |
|       |      | Shiraz-22T | 1669 | 0.695915 | 0         |  |  |
|       |      | Shiraz-25T | 1717 | 0.420447 | 0         |  |  |
|       |      | Shiraz-28T | 1760 | 0.538181 | 0         |  |  |
|       |      | Shiraz-29T | 1800 | 0.672527 | 0         |  |  |
|       |      | Shiraz-32T | 1869 | 0.776805 | 0         |  |  |
|       |      | Shiraz-35T | 1932 | 0.507141 | 0         |  |  |
|       |      | Shiraz-58T | 2221 | 0.871948 | 0         |  |  |
|       |      | Shiraz-71T | 2260 | 0.68394  | 0         |  |  |
|       |      | Shiraz-71T | 2262 | 0.986748 | 0         |  |  |
|       |      | Shiraz-3T  | 240  | 0        | -0.346245 |  |  |
|       |      | Shiraz-4T  | 260  | 0        | -0.324128 |  |  |
|       |      | Shiraz-16T | 294  | 0.655804 | 0         |  |  |
|       |      | Shiraz-36T | 431  | 0        | -0.78035  |  |  |
|       |      | Shiraz-44T | 891  | 0        | -0.954044 |  |  |
|       |      | Shiraz-49T | 1166 | 0        | -0.917235 |  |  |
|       |      | Shiraz-9T  | 1368 | 0.199713 | 0         |  |  |
|       |      | Shiraz-18T | 1456 | 0.608534 | 0         |  |  |
|       |      | Shiraz-22T | 1669 | 0.695915 | 0         |  |  |
|       |      | Shiraz-25T | 1717 | 0.420447 | 0         |  |  |
|       |      | Shiraz-28T | 1760 | 0.538181 | 0         |  |  |
|       |      | Shiraz-29T | 1800 | 0.672527 | 0         |  |  |
|       |      | Shiraz-32T | 1869 | 0.776805 | 0         |  |  |
|       |      | Shiraz-35T | 1932 | 0.507141 | 0         |  |  |
|       |      | Shiraz-58T | 2221 | 0.871948 | 0         |  |  |
|       |      | Shiraz-71T | 2260 | 0.68394  | 0         |  |  |
|       |      | Shiraz-71T | 2262 | 0.986748 | 0         |  |  |
| USP9X | chrX | Shiraz-3T  | 235  | 0        | -0.28401  |  |  |
|       |      | Shiraz-3T  | 237  | 0.082458 | 0         |  |  |
|       |      | Shiraz-4T  | 260  | 0        | -0.324128 |  |  |
|       |      | Shiraz-16T | 294  | 0.655804 | 0         |  |  |
|       |      | Shiraz-31T | 345  | 0.103301 | 0         |  |  |
|       |      | Shiraz-36T | 431  | 0        | -0.78035  |  |  |
|       |      | Shiraz-36T | 432  | 0        | -0.6692   |  |  |
|       |      | Shiraz-44T | 891  | 0        | -0.954044 |  |  |
|       |      | Shiraz-46T | 991  | 0.139564 | 0         |  |  |
|       |      | Shiraz-49T | 1166 | 0        | -0.917235 |  |  |
|       |      | Shiraz-9T  | 1368 | 0.199713 | 0         |  |  |
|       |      | Shiraz-18T | 1455 | 0        | -0.186773 |  |  |

|  |            |      |          |           |  |
|--|------------|------|----------|-----------|--|
|  | Shiraz-22T | 1669 | 0.695915 | 0         |  |
|  | Shiraz-25T | 1717 | 0.420447 | 0         |  |
|  | Shiraz-28T | 1760 | 0.538181 | 0         |  |
|  | Shiraz-29T | 1800 | 0.672527 | 0         |  |
|  | Shiraz-32T | 1869 | 0.776805 | 0         |  |
|  | Shiraz-35T | 1932 | 0.507141 | 0         |  |
|  | Shiraz-40T | 2051 | 0.098506 | 0         |  |
|  | Shiraz-58T | 2221 | 0.871948 | 0         |  |
|  | Shiraz-71T | 2260 | 0.68394  | 0         |  |
|  | Shiraz-71T | 2262 | 0.986748 | 0         |  |
|  | Shiraz-3T  | 235  | 0        | -0.28401  |  |
|  | Shiraz-3T  | 237  | 0.082458 | 0         |  |
|  | Shiraz-4T  | 260  | 0        | -0.324128 |  |
|  | Shiraz-16T | 294  | 0.655804 | 0         |  |
|  | Shiraz-31T | 345  | 0.103301 | 0         |  |
|  | Shiraz-36T | 431  | 0        | -0.78035  |  |
|  | Shiraz-36T | 432  | 0        | -0.6692   |  |
|  | Shiraz-44T | 891  | 0        | -0.954044 |  |
|  | Shiraz-46T | 991  | 0.139564 | 0         |  |
|  | Shiraz-49T | 1166 | 0        | -0.917235 |  |
|  | Shiraz-9T  | 1368 | 0.199713 | 0         |  |
|  | Shiraz-18T | 1455 | 0        | -0.186773 |  |
|  | Shiraz-22T | 1669 | 0.695915 | 0         |  |
|  | Shiraz-25T | 1717 | 0.420447 | 0         |  |
|  | Shiraz-28T | 1760 | 0.538181 | 0         |  |
|  | Shiraz-29T | 1800 | 0.672527 | 0         |  |
|  | Shiraz-32T | 1869 | 0.776805 | 0         |  |
|  | Shiraz-35T | 1932 | 0.507141 | 0         |  |
|  | Shiraz-40T | 2051 | 0.098506 | 0         |  |
|  | Shiraz-58T | 2221 | 0.871948 | 0         |  |
|  | Shiraz-71T | 2260 | 0.68394  | 0         |  |
|  | Shiraz-71T | 2262 | 0.986748 | 0         |  |
|  | Shiraz-3T  | 235  | 0        | -0.28401  |  |
|  | Shiraz-3T  | 237  | 0.082458 | 0         |  |
|  | Shiraz-4T  | 260  | 0        | -0.324128 |  |
|  | Shiraz-16T | 294  | 0.655804 | 0         |  |
|  | Shiraz-31T | 345  | 0.103301 | 0         |  |
|  | Shiraz-36T | 431  | 0        | -0.78035  |  |
|  | Shiraz-36T | 432  | 0        | -0.6692   |  |
|  | Shiraz-44T | 891  | 0        | -0.954044 |  |
|  | Shiraz-46T | 991  | 0.139564 | 0         |  |
|  | Shiraz-49T | 1166 | 0        | -0.917235 |  |
|  | Shiraz-9T  | 1368 | 0.199713 | 0         |  |
|  | Shiraz-18T | 1455 | 0        | -0.186773 |  |
|  | Shiraz-22T | 1669 | 0.695915 | 0         |  |
|  | Shiraz-25T | 1717 | 0.420447 | 0         |  |
|  | Shiraz-28T | 1760 | 0.538181 | 0         |  |

|        |      |            |      |          |           |  |
|--------|------|------------|------|----------|-----------|--|
|        |      | Shiraz-29T | 1800 | 0.672527 | 0         |  |
|        |      | Shiraz-32T | 1869 | 0.776805 | 0         |  |
|        |      | Shiraz-35T | 1932 | 0.507141 | 0         |  |
|        |      | Shiraz-40T | 2051 | 0.098506 | 0         |  |
|        |      | Shiraz-58T | 2221 | 0.871948 | 0         |  |
|        |      | Shiraz-71T | 2260 | 0.68394  | 0         |  |
|        |      | Shiraz-71T | 2262 | 0.986748 | 0         |  |
| UTP14A | chrX | Shiraz-3T  | 242  | 0        | -0.336434 |  |
|        |      | Shiraz-3T  | 245  | 0.224144 | 0         |  |
|        |      | Shiraz-4T  | 261  | 0        | -0.336249 |  |
|        |      | Shiraz-16T | 295  | 0.591657 | 0         |  |
|        |      | Shiraz-36T | 433  | 0        | -0.803961 |  |
|        |      | Shiraz-44T | 899  | 0        | -1.09697  |  |
|        |      | Shiraz-44T | 906  | 0        | -0.165692 |  |
|        |      | Shiraz-49T | 1170 | 0        | -0.967436 |  |
|        |      | Shiraz-9T  | 1370 | 0.690073 | 0         |  |
|        |      | Shiraz-18T | 1457 | 0.643204 | 0         |  |
|        |      | Shiraz-22T | 1673 | 0.611783 | 0         |  |
|        |      | Shiraz-22T | 1677 | 0.789711 | 0         |  |
|        |      | Shiraz-25T | 1719 | 0.472955 | 0         |  |
|        |      | Shiraz-28T | 1762 | 0.562311 | 0         |  |
|        |      | Shiraz-29T | 1801 | 0.815343 | 0         |  |
|        |      | Shiraz-32T | 1870 | 0.729766 | 0         |  |
|        |      | Shiraz-35T | 1933 | 0.488535 | 0         |  |
|        |      | Shiraz-58T | 2223 | 0.833364 | 0         |  |
|        |      | Shiraz-71T | 2263 | 0.975531 | 0         |  |
|        |      | Shiraz-3T  | 242  | 0        | -0.336434 |  |
|        |      | Shiraz-3T  | 245  | 0.224144 | 0         |  |
|        |      | Shiraz-4T  | 261  | 0        | -0.336249 |  |
|        |      | Shiraz-16T | 295  | 0.591657 | 0         |  |
|        |      | Shiraz-36T | 433  | 0        | -0.803961 |  |
|        |      | Shiraz-44T | 899  | 0        | -1.09697  |  |
|        |      | Shiraz-44T | 906  | 0        | -0.165692 |  |
|        |      | Shiraz-49T | 1170 | 0        | -0.967436 |  |
|        |      | Shiraz-9T  | 1370 | 0.690073 | 0         |  |
|        |      | Shiraz-18T | 1457 | 0.643204 | 0         |  |
|        |      | Shiraz-22T | 1673 | 0.611783 | 0         |  |
|        |      | Shiraz-22T | 1677 | 0.789711 | 0         |  |
|        |      | Shiraz-25T | 1719 | 0.472955 | 0         |  |
|        |      | Shiraz-28T | 1762 | 0.562311 | 0         |  |
|        |      | Shiraz-29T | 1801 | 0.815343 | 0         |  |
|        |      | Shiraz-32T | 1870 | 0.729766 | 0         |  |
|        |      | Shiraz-35T | 1933 | 0.488535 | 0         |  |
|        |      | Shiraz-58T | 2223 | 0.833364 | 0         |  |
|        |      | Shiraz-71T | 2263 | 0.975531 | 0         |  |
|        |      | Shiraz-3T  | 242  | 0        | -0.336434 |  |
|        |      | Shiraz-3T  | 245  | 0.224144 | 0         |  |

|     |      |            |      |          |           |  |  |
|-----|------|------------|------|----------|-----------|--|--|
|     |      | Shiraz-4T  | 261  | 0        | -0.336249 |  |  |
|     |      | Shiraz-16T | 295  | 0.591657 | 0         |  |  |
|     |      | Shiraz-36T | 433  | 0        | -0.803961 |  |  |
|     |      | Shiraz-44T | 899  | 0        | -1.09697  |  |  |
|     |      | Shiraz-44T | 906  | 0        | -0.165692 |  |  |
|     |      | Shiraz-49T | 1170 | 0        | -0.967436 |  |  |
|     |      | Shiraz-9T  | 1370 | 0.690073 | 0         |  |  |
|     |      | Shiraz-18T | 1457 | 0.643204 | 0         |  |  |
|     |      | Shiraz-22T | 1673 | 0.611783 | 0         |  |  |
|     |      | Shiraz-22T | 1677 | 0.789711 | 0         |  |  |
|     |      | Shiraz-25T | 1719 | 0.472955 | 0         |  |  |
|     |      | Shiraz-28T | 1762 | 0.562311 | 0         |  |  |
|     |      | Shiraz-29T | 1801 | 0.815343 | 0         |  |  |
|     |      | Shiraz-32T | 1870 | 0.729766 | 0         |  |  |
|     |      | Shiraz-35T | 1933 | 0.488535 | 0         |  |  |
|     |      | Shiraz-58T | 2223 | 0.833364 | 0         |  |  |
|     |      | Shiraz-71T | 2263 | 0.975531 | 0         |  |  |
| UXT | chrX | Shiraz-4T  | 260  | 0        | -0.324128 |  |  |
|     |      | Shiraz-4T  | 260  | 0        | -0.324128 |  |  |
|     |      | Shiraz-16T | 294  | 0.655804 | 0         |  |  |
|     |      | Shiraz-16T | 294  | 0.655804 | 0         |  |  |
|     |      | Shiraz-31T | 345  | 0.103301 | 0         |  |  |
|     |      | Shiraz-31T | 345  | 0.103301 | 0         |  |  |
|     |      | Shiraz-36T | 431  | 0        | -0.78035  |  |  |
|     |      | Shiraz-36T | 431  | 0        | -0.78035  |  |  |
|     |      | Shiraz-36T | 432  | 0        | -0.6692   |  |  |
|     |      | Shiraz-36T | 432  | 0        | -0.6692   |  |  |
|     |      | Shiraz-44T | 891  | 0        | -0.954044 |  |  |
|     |      | Shiraz-44T | 891  | 0        | -0.954044 |  |  |
|     |      | Shiraz-44T | 896  | 0        | -0.109108 |  |  |
|     |      | Shiraz-44T | 896  | 0        | -0.109108 |  |  |
|     |      | Shiraz-46T | 991  | 0.139564 | 0         |  |  |
|     |      | Shiraz-46T | 991  | 0.139564 | 0         |  |  |
|     |      | Shiraz-47T | 1084 | 0.24185  | 0         |  |  |
|     |      | Shiraz-47T | 1084 | 0.24185  | 0         |  |  |
|     |      | Shiraz-49T | 1166 | 0        | -0.917235 |  |  |
|     |      | Shiraz-49T | 1166 | 0        | -0.917235 |  |  |
|     |      | Shiraz-49T | 1169 | 0        | -0.583529 |  |  |
|     |      | Shiraz-49T | 1169 | 0        | -0.583529 |  |  |
|     |      | Shiraz-77T | 1282 | 0.213849 | 0         |  |  |
|     |      | Shiraz-77T | 1282 | 0.213849 | 0         |  |  |
|     |      | Shiraz-9T  | 1368 | 0.199713 | 0         |  |  |
|     |      | Shiraz-9T  | 1368 | 0.199713 | 0         |  |  |
|     |      | Shiraz-9T  | 1369 | 0.703374 | 0         |  |  |
|     |      | Shiraz-9T  | 1369 | 0.703374 | 0         |  |  |
|     |      | Shiraz-18T | 1455 | 0        | -0.186773 |  |  |
|     |      | Shiraz-18T | 1455 | 0        | -0.186773 |  |  |

|  |            |      |          |           |  |
|--|------------|------|----------|-----------|--|
|  | Shiraz-22T | 1669 | 0.695915 | 0         |  |
|  | Shiraz-22T | 1669 | 0.695915 | 0         |  |
|  | Shiraz-22T | 1672 | 1.01678  | 0         |  |
|  | Shiraz-22T | 1672 | 1.01678  | 0         |  |
|  | Shiraz-25T | 1717 | 0.420447 | 0         |  |
|  | Shiraz-25T | 1717 | 0.420447 | 0         |  |
|  | Shiraz-28T | 1760 | 0.538181 | 0         |  |
|  | Shiraz-28T | 1760 | 0.538181 | 0         |  |
|  | Shiraz-29T | 1800 | 0.672527 | 0         |  |
|  | Shiraz-29T | 1800 | 0.672527 | 0         |  |
|  | Shiraz-32T | 1869 | 0.776805 | 0         |  |
|  | Shiraz-32T | 1869 | 0.776805 | 0         |  |
|  | Shiraz-35T | 1932 | 0.507141 | 0         |  |
|  | Shiraz-35T | 1932 | 0.507141 | 0         |  |
|  | Shiraz-58T | 2221 | 0.871948 | 0         |  |
|  | Shiraz-58T | 2221 | 0.871948 | 0         |  |
|  | Shiraz-71T | 2260 | 0.68394  | 0         |  |
|  | Shiraz-71T | 2260 | 0.68394  | 0         |  |
|  | Shiraz-71T | 2262 | 0.986748 | 0         |  |
|  | Shiraz-71T | 2262 | 0.986748 | 0         |  |
|  | Shiraz-4T  | 260  | 0        | -0.324128 |  |
|  | Shiraz-4T  | 260  | 0        | -0.324128 |  |
|  | Shiraz-16T | 294  | 0.655804 | 0         |  |
|  | Shiraz-16T | 294  | 0.655804 | 0         |  |
|  | Shiraz-31T | 345  | 0.103301 | 0         |  |
|  | Shiraz-31T | 345  | 0.103301 | 0         |  |
|  | Shiraz-36T | 431  | 0        | -0.78035  |  |
|  | Shiraz-36T | 431  | 0        | -0.78035  |  |
|  | Shiraz-36T | 432  | 0        | -0.6692   |  |
|  | Shiraz-36T | 432  | 0        | -0.6692   |  |
|  | Shiraz-44T | 891  | 0        | -0.954044 |  |
|  | Shiraz-44T | 891  | 0        | -0.954044 |  |
|  | Shiraz-44T | 896  | 0        | -0.109108 |  |
|  | Shiraz-44T | 896  | 0        | -0.109108 |  |
|  | Shiraz-46T | 991  | 0.139564 | 0         |  |
|  | Shiraz-46T | 991  | 0.139564 | 0         |  |
|  | Shiraz-47T | 1084 | 0.24185  | 0         |  |
|  | Shiraz-47T | 1084 | 0.24185  | 0         |  |
|  | Shiraz-49T | 1166 | 0        | -0.917235 |  |
|  | Shiraz-49T | 1166 | 0        | -0.917235 |  |
|  | Shiraz-49T | 1169 | 0        | -0.583529 |  |
|  | Shiraz-49T | 1169 | 0        | -0.583529 |  |
|  | Shiraz-77T | 1282 | 0.213849 | 0         |  |
|  | Shiraz-77T | 1282 | 0.213849 | 0         |  |
|  | Shiraz-9T  | 1368 | 0.199713 | 0         |  |
|  | Shiraz-9T  | 1368 | 0.199713 | 0         |  |
|  | Shiraz-9T  | 1369 | 0.703374 | 0         |  |

|  |  |            |      |          |           |  |  |
|--|--|------------|------|----------|-----------|--|--|
|  |  | Shiraz-9T  | 1369 | 0.703374 | 0         |  |  |
|  |  | Shiraz-18T | 1455 | 0        | -0.186773 |  |  |
|  |  | Shiraz-18T | 1455 | 0        | -0.186773 |  |  |
|  |  | Shiraz-22T | 1669 | 0.695915 | 0         |  |  |
|  |  | Shiraz-22T | 1669 | 0.695915 | 0         |  |  |
|  |  | Shiraz-22T | 1672 | 1.01678  | 0         |  |  |
|  |  | Shiraz-22T | 1672 | 1.01678  | 0         |  |  |
|  |  | Shiraz-25T | 1717 | 0.420447 | 0         |  |  |
|  |  | Shiraz-25T | 1717 | 0.420447 | 0         |  |  |
|  |  | Shiraz-28T | 1760 | 0.538181 | 0         |  |  |
|  |  | Shiraz-28T | 1760 | 0.538181 | 0         |  |  |
|  |  | Shiraz-29T | 1800 | 0.672527 | 0         |  |  |
|  |  | Shiraz-29T | 1800 | 0.672527 | 0         |  |  |
|  |  | Shiraz-32T | 1869 | 0.776805 | 0         |  |  |
|  |  | Shiraz-32T | 1869 | 0.776805 | 0         |  |  |
|  |  | Shiraz-35T | 1932 | 0.507141 | 0         |  |  |
|  |  | Shiraz-35T | 1932 | 0.507141 | 0         |  |  |
|  |  | Shiraz-58T | 2221 | 0.871948 | 0         |  |  |
|  |  | Shiraz-58T | 2221 | 0.871948 | 0         |  |  |
|  |  | Shiraz-71T | 2260 | 0.68394  | 0         |  |  |
|  |  | Shiraz-71T | 2260 | 0.68394  | 0         |  |  |
|  |  | Shiraz-71T | 2262 | 0.986748 | 0         |  |  |
|  |  | Shiraz-71T | 2262 | 0.986748 | 0         |  |  |
|  |  | Shiraz-4T  | 260  | 0        | -0.324128 |  |  |
|  |  | Shiraz-4T  | 260  | 0        | -0.324128 |  |  |
|  |  | Shiraz-16T | 294  | 0.655804 | 0         |  |  |
|  |  | Shiraz-16T | 294  | 0.655804 | 0         |  |  |
|  |  | Shiraz-31T | 345  | 0.103301 | 0         |  |  |
|  |  | Shiraz-31T | 345  | 0.103301 | 0         |  |  |
|  |  | Shiraz-36T | 431  | 0        | -0.78035  |  |  |
|  |  | Shiraz-36T | 431  | 0        | -0.78035  |  |  |
|  |  | Shiraz-36T | 432  | 0        | -0.6692   |  |  |
|  |  | Shiraz-36T | 432  | 0        | -0.6692   |  |  |
|  |  | Shiraz-44T | 891  | 0        | -0.954044 |  |  |
|  |  | Shiraz-44T | 891  | 0        | -0.954044 |  |  |
|  |  | Shiraz-44T | 896  | 0        | -0.109108 |  |  |
|  |  | Shiraz-44T | 896  | 0        | -0.109108 |  |  |
|  |  | Shiraz-46T | 991  | 0.139564 | 0         |  |  |
|  |  | Shiraz-46T | 991  | 0.139564 | 0         |  |  |
|  |  | Shiraz-47T | 1084 | 0.24185  | 0         |  |  |
|  |  | Shiraz-47T | 1084 | 0.24185  | 0         |  |  |
|  |  | Shiraz-49T | 1166 | 0        | -0.917235 |  |  |
|  |  | Shiraz-49T | 1166 | 0        | -0.917235 |  |  |
|  |  | Shiraz-49T | 1169 | 0        | -0.583529 |  |  |
|  |  | Shiraz-49T | 1169 | 0        | -0.583529 |  |  |
|  |  | Shiraz-77T | 1282 | 0.213849 | 0         |  |  |
|  |  | Shiraz-77T | 1282 | 0.213849 | 0         |  |  |

|      |      |            |      |          |           |  |
|------|------|------------|------|----------|-----------|--|
|      |      | Shiraz-9T  | 1368 | 0.199713 | 0         |  |
|      |      | Shiraz-9T  | 1368 | 0.199713 | 0         |  |
|      |      | Shiraz-9T  | 1369 | 0.703374 | 0         |  |
|      |      | Shiraz-9T  | 1369 | 0.703374 | 0         |  |
|      |      | Shiraz-18T | 1455 | 0        | -0.186773 |  |
|      |      | Shiraz-18T | 1455 | 0        | -0.186773 |  |
|      |      | Shiraz-22T | 1669 | 0.695915 | 0         |  |
|      |      | Shiraz-22T | 1669 | 0.695915 | 0         |  |
|      |      | Shiraz-22T | 1672 | 1.01678  | 0         |  |
|      |      | Shiraz-22T | 1672 | 1.01678  | 0         |  |
|      |      | Shiraz-25T | 1717 | 0.420447 | 0         |  |
|      |      | Shiraz-25T | 1717 | 0.420447 | 0         |  |
|      |      | Shiraz-28T | 1760 | 0.538181 | 0         |  |
|      |      | Shiraz-28T | 1760 | 0.538181 | 0         |  |
|      |      | Shiraz-29T | 1800 | 0.672527 | 0         |  |
|      |      | Shiraz-29T | 1800 | 0.672527 | 0         |  |
|      |      | Shiraz-32T | 1869 | 0.776805 | 0         |  |
|      |      | Shiraz-32T | 1869 | 0.776805 | 0         |  |
|      |      | Shiraz-35T | 1932 | 0.507141 | 0         |  |
|      |      | Shiraz-35T | 1932 | 0.507141 | 0         |  |
|      |      | Shiraz-58T | 2221 | 0.871948 | 0         |  |
|      |      | Shiraz-58T | 2221 | 0.871948 | 0         |  |
|      |      | Shiraz-71T | 2260 | 0.68394  | 0         |  |
|      |      | Shiraz-71T | 2260 | 0.68394  | 0         |  |
|      |      | Shiraz-71T | 2262 | 0.986748 | 0         |  |
|      |      | Shiraz-71T | 2262 | 0.986748 | 0         |  |
| VBP1 | chrX | Shiraz-3T  | 247  | 0        | -0.421316 |  |
|      |      | Shiraz-4T  | 261  | 0        | -0.336249 |  |
|      |      | Shiraz-16T | 295  | 0.591657 | 0         |  |
|      |      | Shiraz-36T | 433  | 0        | -0.803961 |  |
|      |      | Shiraz-44T | 909  | 0        | -1.067051 |  |
|      |      | Shiraz-49T | 1170 | 0        | -0.967436 |  |
|      |      | Shiraz-9T  | 1370 | 0.690073 | 0         |  |
|      |      | Shiraz-18T | 1457 | 0.643204 | 0         |  |
|      |      | Shiraz-22T | 1673 | 0.611783 | 0         |  |
|      |      | Shiraz-25T | 1719 | 0.472955 | 0         |  |
|      |      | Shiraz-28T | 1762 | 0.562311 | 0         |  |
|      |      | Shiraz-29T | 1801 | 0.815343 | 0         |  |
|      |      | Shiraz-35T | 1933 | 0.488535 | 0         |  |
|      |      | Shiraz-58T | 2223 | 0.833364 | 0         |  |
|      |      | Shiraz-71T | 2263 | 0.975531 | 0         |  |
|      |      | Shiraz-3T  | 247  | 0        | -0.421316 |  |
|      |      | Shiraz-4T  | 261  | 0        | -0.336249 |  |
|      |      | Shiraz-16T | 295  | 0.591657 | 0         |  |
|      |      | Shiraz-36T | 433  | 0        | -0.803961 |  |
|      |      | Shiraz-44T | 909  | 0        | -1.067051 |  |
|      |      | Shiraz-49T | 1170 | 0        | -0.967436 |  |

|     |      |            |      |          |           |  |  |
|-----|------|------------|------|----------|-----------|--|--|
|     |      | Shiraz-9T  | 1370 | 0.690073 | 0         |  |  |
|     |      | Shiraz-18T | 1457 | 0.643204 | 0         |  |  |
|     |      | Shiraz-22T | 1673 | 0.611783 | 0         |  |  |
|     |      | Shiraz-25T | 1719 | 0.472955 | 0         |  |  |
|     |      | Shiraz-28T | 1762 | 0.562311 | 0         |  |  |
|     |      | Shiraz-29T | 1801 | 0.815343 | 0         |  |  |
|     |      | Shiraz-35T | 1933 | 0.488535 | 0         |  |  |
|     |      | Shiraz-58T | 2223 | 0.833364 | 0         |  |  |
|     |      | Shiraz-71T | 2263 | 0.975531 | 0         |  |  |
|     |      | Shiraz-3T  | 247  | 0        | -0.421316 |  |  |
|     |      | Shiraz-4T  | 261  | 0        | -0.336249 |  |  |
|     |      | Shiraz-16T | 295  | 0.591657 | 0         |  |  |
|     |      | Shiraz-36T | 433  | 0        | -0.803961 |  |  |
|     |      | Shiraz-44T | 909  | 0        | -1.067051 |  |  |
|     |      | Shiraz-49T | 1170 | 0        | -0.967436 |  |  |
|     |      | Shiraz-9T  | 1370 | 0.690073 | 0         |  |  |
|     |      | Shiraz-18T | 1457 | 0.643204 | 0         |  |  |
|     |      | Shiraz-22T | 1673 | 0.611783 | 0         |  |  |
|     |      | Shiraz-25T | 1719 | 0.472955 | 0         |  |  |
|     |      | Shiraz-28T | 1762 | 0.562311 | 0         |  |  |
|     |      | Shiraz-29T | 1801 | 0.815343 | 0         |  |  |
|     |      | Shiraz-35T | 1933 | 0.488535 | 0         |  |  |
|     |      | Shiraz-58T | 2223 | 0.833364 | 0         |  |  |
|     |      | Shiraz-71T | 2263 | 0.975531 | 0         |  |  |
| VCX | chrX | Shiraz-3T  | 235  | 0        | -0.28401  |  |  |
|     |      | Shiraz-4T  | 260  | 0        | -0.324128 |  |  |
|     |      | Shiraz-16T | 294  | 0.655804 | 0         |  |  |
|     |      | Shiraz-36T | 431  | 0        | -0.78035  |  |  |
|     |      | Shiraz-44T | 891  | 0        | -0.954044 |  |  |
|     |      | Shiraz-44T | 892  | 0        | -1.231333 |  |  |
|     |      | Shiraz-46T | 990  | 0        | -0.370066 |  |  |
|     |      | Shiraz-49T | 1166 | 0        | -0.917235 |  |  |
|     |      | Shiraz-9T  | 1368 | 0.199713 | 0         |  |  |
|     |      | Shiraz-18T | 1455 | 0        | -0.186773 |  |  |
|     |      | Shiraz-22T | 1669 | 0.695915 | 0         |  |  |
|     |      | Shiraz-25T | 1717 | 0.420447 | 0         |  |  |
|     |      | Shiraz-28T | 1760 | 0.538181 | 0         |  |  |
|     |      | Shiraz-29T | 1800 | 0.672527 | 0         |  |  |
|     |      | Shiraz-32T | 1869 | 0.776805 | 0         |  |  |
|     |      | Shiraz-35T | 1932 | 0.507141 | 0         |  |  |
|     |      | Shiraz-40T | 2051 | 0.098506 | 0         |  |  |
|     |      | Shiraz-58T | 2221 | 0.871948 | 0         |  |  |
|     |      | Shiraz-71T | 2260 | 0.68394  | 0         |  |  |
|     |      | Shiraz-71T | 2261 | 0.508399 | 0         |  |  |
|     |      | Shiraz-3T  | 235  | 0        | -0.28401  |  |  |
|     |      | Shiraz-4T  | 260  | 0        | -0.324128 |  |  |
|     |      | Shiraz-16T | 294  | 0.655804 | 0         |  |  |



|      |      |            |      |          |           |  |  |
|------|------|------------|------|----------|-----------|--|--|
|      |      | Shiraz-36T | 431  | 0        | -0.78035  |  |  |
|      |      | Shiraz-44T | 891  | 0        | -0.954044 |  |  |
|      |      | Shiraz-44T | 892  | 0        | -1.231333 |  |  |
|      |      | Shiraz-46T | 990  | 0        | -0.370066 |  |  |
|      |      | Shiraz-49T | 1166 | 0        | -0.917235 |  |  |
|      |      | Shiraz-9T  | 1368 | 0.199713 | 0         |  |  |
|      |      | Shiraz-18T | 1455 | 0        | -0.186773 |  |  |
|      |      | Shiraz-22T | 1669 | 0.695915 | 0         |  |  |
|      |      | Shiraz-25T | 1717 | 0.420447 | 0         |  |  |
|      |      | Shiraz-28T | 1760 | 0.538181 | 0         |  |  |
|      |      | Shiraz-29T | 1800 | 0.672527 | 0         |  |  |
|      |      | Shiraz-32T | 1869 | 0.776805 | 0         |  |  |
|      |      | Shiraz-35T | 1932 | 0.507141 | 0         |  |  |
|      |      | Shiraz-40T | 2051 | 0.098506 | 0         |  |  |
|      |      | Shiraz-58T | 2221 | 0.871948 | 0         |  |  |
|      |      | Shiraz-71T | 2260 | 0.68394  | 0         |  |  |
|      |      | Shiraz-71T | 2261 | 0.508399 | 0         |  |  |
|      |      | Shiraz-3T  | 235  | 0        | -0.28401  |  |  |
|      |      | Shiraz-4T  | 260  | 0        | -0.324128 |  |  |
|      |      | Shiraz-16T | 294  | 0.655804 | 0         |  |  |
|      |      | Shiraz-36T | 431  | 0        | -0.78035  |  |  |
|      |      | Shiraz-44T | 891  | 0        | -0.954044 |  |  |
|      |      | Shiraz-44T | 892  | 0        | -1.231333 |  |  |
|      |      | Shiraz-46T | 990  | 0        | -0.370066 |  |  |
|      |      | Shiraz-49T | 1166 | 0        | -0.917235 |  |  |
|      |      | Shiraz-9T  | 1368 | 0.199713 | 0         |  |  |
|      |      | Shiraz-18T | 1455 | 0        | -0.186773 |  |  |
|      |      | Shiraz-22T | 1669 | 0.695915 | 0         |  |  |
|      |      | Shiraz-25T | 1717 | 0.420447 | 0         |  |  |
|      |      | Shiraz-28T | 1760 | 0.538181 | 0         |  |  |
|      |      | Shiraz-29T | 1800 | 0.672527 | 0         |  |  |
|      |      | Shiraz-32T | 1869 | 0.776805 | 0         |  |  |
|      |      | Shiraz-35T | 1932 | 0.507141 | 0         |  |  |
|      |      | Shiraz-40T | 2051 | 0.098506 | 0         |  |  |
|      |      | Shiraz-58T | 2221 | 0.871948 | 0         |  |  |
|      |      | Shiraz-71T | 2260 | 0.68394  | 0         |  |  |
|      |      | Shiraz-71T | 2261 | 0.508399 | 0         |  |  |
| VCX2 | chrX | Shiraz-3T  | 235  | 0        | -0.28401  |  |  |
|      |      | Shiraz-4T  | 260  | 0        | -0.324128 |  |  |
|      |      | Shiraz-16T | 294  | 0.655804 | 0         |  |  |
|      |      | Shiraz-36T | 431  | 0        | -0.78035  |  |  |
|      |      | Shiraz-44T | 891  | 0        | -0.954044 |  |  |
|      |      | Shiraz-44T | 892  | 0        | -1.231333 |  |  |
|      |      | Shiraz-49T | 1166 | 0        | -0.917235 |  |  |
|      |      | Shiraz-9T  | 1368 | 0.199713 | 0         |  |  |
|      |      | Shiraz-18T | 1455 | 0        | -0.186773 |  |  |
|      |      | Shiraz-22T | 1669 | 0.695915 | 0         |  |  |

|  |  |            |      |          |           |  |  |
|--|--|------------|------|----------|-----------|--|--|
|  |  | Shiraz-25T | 1717 | 0.420447 | 0         |  |  |
|  |  | Shiraz-28T | 1760 | 0.538181 | 0         |  |  |
|  |  | Shiraz-29T | 1800 | 0.672527 | 0         |  |  |
|  |  | Shiraz-32T | 1869 | 0.776805 | 0         |  |  |
|  |  | Shiraz-35T | 1932 | 0.507141 | 0         |  |  |
|  |  | Shiraz-40T | 2051 | 0.098506 | 0         |  |  |
|  |  | Shiraz-58T | 2221 | 0.871948 | 0         |  |  |
|  |  | Shiraz-71T | 2260 | 0.68394  | 0         |  |  |
|  |  | Shiraz-71T | 2261 | 0.508399 | 0         |  |  |
|  |  | Shiraz-3T  | 235  | 0        | -0.28401  |  |  |
|  |  | Shiraz-4T  | 260  | 0        | -0.324128 |  |  |
|  |  | Shiraz-16T | 294  | 0.655804 | 0         |  |  |
|  |  | Shiraz-36T | 431  | 0        | -0.78035  |  |  |
|  |  | Shiraz-44T | 891  | 0        | -0.954044 |  |  |
|  |  | Shiraz-44T | 892  | 0        | -1.231333 |  |  |
|  |  | Shiraz-49T | 1166 | 0        | -0.917235 |  |  |
|  |  | Shiraz-9T  | 1368 | 0.199713 | 0         |  |  |
|  |  | Shiraz-18T | 1455 | 0        | -0.186773 |  |  |
|  |  | Shiraz-22T | 1669 | 0.695915 | 0         |  |  |
|  |  | Shiraz-25T | 1717 | 0.420447 | 0         |  |  |
|  |  | Shiraz-28T | 1760 | 0.538181 | 0         |  |  |
|  |  | Shiraz-29T | 1800 | 0.672527 | 0         |  |  |
|  |  | Shiraz-32T | 1869 | 0.776805 | 0         |  |  |
|  |  | Shiraz-35T | 1932 | 0.507141 | 0         |  |  |
|  |  | Shiraz-40T | 2051 | 0.098506 | 0         |  |  |
|  |  | Shiraz-58T | 2221 | 0.871948 | 0         |  |  |
|  |  | Shiraz-71T | 2260 | 0.68394  | 0         |  |  |
|  |  | Shiraz-71T | 2261 | 0.508399 | 0         |  |  |
|  |  | Shiraz-3T  | 235  | 0        | -0.28401  |  |  |
|  |  | Shiraz-4T  | 260  | 0        | -0.324128 |  |  |
|  |  | Shiraz-16T | 294  | 0.655804 | 0         |  |  |
|  |  | Shiraz-36T | 431  | 0        | -0.78035  |  |  |
|  |  | Shiraz-44T | 891  | 0        | -0.954044 |  |  |
|  |  | Shiraz-44T | 892  | 0        | -1.231333 |  |  |
|  |  | Shiraz-49T | 1166 | 0        | -0.917235 |  |  |
|  |  | Shiraz-9T  | 1368 | 0.199713 | 0         |  |  |
|  |  | Shiraz-18T | 1455 | 0        | -0.186773 |  |  |
|  |  | Shiraz-22T | 1669 | 0.695915 | 0         |  |  |
|  |  | Shiraz-25T | 1717 | 0.420447 | 0         |  |  |
|  |  | Shiraz-28T | 1760 | 0.538181 | 0         |  |  |
|  |  | Shiraz-29T | 1800 | 0.672527 | 0         |  |  |
|  |  | Shiraz-32T | 1869 | 0.776805 | 0         |  |  |
|  |  | Shiraz-35T | 1932 | 0.507141 | 0         |  |  |
|  |  | Shiraz-40T | 2051 | 0.098506 | 0         |  |  |
|  |  | Shiraz-58T | 2221 | 0.871948 | 0         |  |  |
|  |  | Shiraz-71T | 2260 | 0.68394  | 0         |  |  |
|  |  | Shiraz-71T | 2261 | 0.508399 | 0         |  |  |

|       |      |            |      |          |           |  |  |
|-------|------|------------|------|----------|-----------|--|--|
| VCX3A | chrX | Shiraz-3T  | 235  | 0        | -0.28401  |  |  |
|       |      | Shiraz-4T  | 260  | 0        | -0.324128 |  |  |
|       |      | Shiraz-16T | 294  | 0.655804 | 0         |  |  |
|       |      | Shiraz-36T | 431  | 0        | -0.78035  |  |  |
|       |      | Shiraz-44T | 891  | 0        | -0.954044 |  |  |
|       |      | Shiraz-44T | 892  | 0        | -1.231333 |  |  |
|       |      | Shiraz-49T | 1166 | 0        | -0.917235 |  |  |
|       |      | Shiraz-9T  | 1368 | 0.199713 | 0         |  |  |
|       |      | Shiraz-18T | 1455 | 0        | -0.186773 |  |  |
|       |      | Shiraz-22T | 1669 | 0.695915 | 0         |  |  |
|       |      | Shiraz-25T | 1717 | 0.420447 | 0         |  |  |
|       |      | Shiraz-28T | 1760 | 0.538181 | 0         |  |  |
|       |      | Shiraz-29T | 1800 | 0.672527 | 0         |  |  |
|       |      | Shiraz-32T | 1869 | 0.776805 | 0         |  |  |
|       |      | Shiraz-35T | 1932 | 0.507141 | 0         |  |  |
|       |      | Shiraz-40T | 2051 | 0.098506 | 0         |  |  |
|       |      | Shiraz-58T | 2221 | 0.871948 | 0         |  |  |
|       |      | Shiraz-71T | 2260 | 0.68394  | 0         |  |  |
|       |      | Shiraz-71T | 2261 | 0.508399 | 0         |  |  |
|       |      | Shiraz-3T  | 235  | 0        | -0.28401  |  |  |
|       |      | Shiraz-4T  | 260  | 0        | -0.324128 |  |  |
|       |      | Shiraz-16T | 294  | 0.655804 | 0         |  |  |
|       |      | Shiraz-36T | 431  | 0        | -0.78035  |  |  |
|       |      | Shiraz-44T | 891  | 0        | -0.954044 |  |  |
|       |      | Shiraz-44T | 892  | 0        | -1.231333 |  |  |
|       |      | Shiraz-49T | 1166 | 0        | -0.917235 |  |  |
|       |      | Shiraz-9T  | 1368 | 0.199713 | 0         |  |  |
|       |      | Shiraz-18T | 1455 | 0        | -0.186773 |  |  |
|       |      | Shiraz-22T | 1669 | 0.695915 | 0         |  |  |
|       |      | Shiraz-25T | 1717 | 0.420447 | 0         |  |  |
|       |      | Shiraz-28T | 1760 | 0.538181 | 0         |  |  |
|       |      | Shiraz-29T | 1800 | 0.672527 | 0         |  |  |
|       |      | Shiraz-32T | 1869 | 0.776805 | 0         |  |  |
|       |      | Shiraz-35T | 1932 | 0.507141 | 0         |  |  |
|       |      | Shiraz-40T | 2051 | 0.098506 | 0         |  |  |
|       |      | Shiraz-58T | 2221 | 0.871948 | 0         |  |  |
|       |      | Shiraz-71T | 2260 | 0.68394  | 0         |  |  |
|       |      | Shiraz-71T | 2261 | 0.508399 | 0         |  |  |
|       |      | Shiraz-3T  | 235  | 0        | -0.28401  |  |  |
|       |      | Shiraz-4T  | 260  | 0        | -0.324128 |  |  |
|       |      | Shiraz-16T | 294  | 0.655804 | 0         |  |  |
|       |      | Shiraz-36T | 431  | 0        | -0.78035  |  |  |
|       |      | Shiraz-44T | 891  | 0        | -0.954044 |  |  |
|       |      | Shiraz-44T | 892  | 0        | -1.231333 |  |  |
|       |      | Shiraz-49T | 1166 | 0        | -0.917235 |  |  |
|       |      | Shiraz-9T  | 1368 | 0.199713 | 0         |  |  |
|       |      | Shiraz-18T | 1455 | 0        | -0.186773 |  |  |

|       |      |            |      |          |           |  |  |
|-------|------|------------|------|----------|-----------|--|--|
|       |      | Shiraz-22T | 1669 | 0.695915 | 0         |  |  |
|       |      | Shiraz-25T | 1717 | 0.420447 | 0         |  |  |
|       |      | Shiraz-28T | 1760 | 0.538181 | 0         |  |  |
|       |      | Shiraz-29T | 1800 | 0.672527 | 0         |  |  |
|       |      | Shiraz-32T | 1869 | 0.776805 | 0         |  |  |
|       |      | Shiraz-35T | 1932 | 0.507141 | 0         |  |  |
|       |      | Shiraz-40T | 2051 | 0.098506 | 0         |  |  |
|       |      | Shiraz-58T | 2221 | 0.871948 | 0         |  |  |
|       |      | Shiraz-71T | 2260 | 0.68394  | 0         |  |  |
|       |      | Shiraz-71T | 2261 | 0.508399 | 0         |  |  |
| VCX3B | chrX | Shiraz-3T  | 235  | 0        | -0.28401  |  |  |
|       |      | Shiraz-4T  | 260  | 0        | -0.324128 |  |  |
|       |      | Shiraz-16T | 294  | 0.655804 | 0         |  |  |
|       |      | Shiraz-36T | 431  | 0        | -0.78035  |  |  |
|       |      | Shiraz-44T | 891  | 0        | -0.954044 |  |  |
|       |      | Shiraz-44T | 892  | 0        | -1.231333 |  |  |
|       |      | Shiraz-49T | 1166 | 0        | -0.917235 |  |  |
|       |      | Shiraz-9T  | 1368 | 0.199713 | 0         |  |  |
|       |      | Shiraz-18T | 1455 | 0        | -0.186773 |  |  |
|       |      | Shiraz-22T | 1669 | 0.695915 | 0         |  |  |
|       |      | Shiraz-25T | 1717 | 0.420447 | 0         |  |  |
|       |      | Shiraz-28T | 1760 | 0.538181 | 0         |  |  |
|       |      | Shiraz-29T | 1800 | 0.672527 | 0         |  |  |
|       |      | Shiraz-32T | 1869 | 0.776805 | 0         |  |  |
|       |      | Shiraz-35T | 1932 | 0.507141 | 0         |  |  |
|       |      | Shiraz-40T | 2051 | 0.098506 | 0         |  |  |
|       |      | Shiraz-58T | 2221 | 0.871948 | 0         |  |  |
|       |      | Shiraz-71T | 2260 | 0.68394  | 0         |  |  |
|       |      | Shiraz-71T | 2261 | 0.508399 | 0         |  |  |
|       |      | Shiraz-3T  | 235  | 0        | -0.28401  |  |  |
|       |      | Shiraz-4T  | 260  | 0        | -0.324128 |  |  |
|       |      | Shiraz-16T | 294  | 0.655804 | 0         |  |  |
|       |      | Shiraz-36T | 431  | 0        | -0.78035  |  |  |
|       |      | Shiraz-44T | 891  | 0        | -0.954044 |  |  |
|       |      | Shiraz-44T | 892  | 0        | -1.231333 |  |  |
|       |      | Shiraz-49T | 1166 | 0        | -0.917235 |  |  |
|       |      | Shiraz-9T  | 1368 | 0.199713 | 0         |  |  |
|       |      | Shiraz-18T | 1455 | 0        | -0.186773 |  |  |
|       |      | Shiraz-22T | 1669 | 0.695915 | 0         |  |  |
|       |      | Shiraz-25T | 1717 | 0.420447 | 0         |  |  |
|       |      | Shiraz-28T | 1760 | 0.538181 | 0         |  |  |
|       |      | Shiraz-29T | 1800 | 0.672527 | 0         |  |  |
|       |      | Shiraz-32T | 1869 | 0.776805 | 0         |  |  |
|       |      | Shiraz-35T | 1932 | 0.507141 | 0         |  |  |
|       |      | Shiraz-40T | 2051 | 0.098506 | 0         |  |  |
|       |      | Shiraz-58T | 2221 | 0.871948 | 0         |  |  |
|       |      | Shiraz-71T | 2260 | 0.68394  | 0         |  |  |

|         |      |            |      |          |           |  |  |
|---------|------|------------|------|----------|-----------|--|--|
|         |      | Shiraz-71T | 2261 | 0.508399 | 0         |  |  |
|         |      | Shiraz-3T  | 235  | 0        | -0.28401  |  |  |
|         |      | Shiraz-4T  | 260  | 0        | -0.324128 |  |  |
|         |      | Shiraz-16T | 294  | 0.655804 | 0         |  |  |
|         |      | Shiraz-36T | 431  | 0        | -0.78035  |  |  |
|         |      | Shiraz-44T | 891  | 0        | -0.954044 |  |  |
|         |      | Shiraz-44T | 892  | 0        | -1.231333 |  |  |
|         |      | Shiraz-49T | 1166 | 0        | -0.917235 |  |  |
|         |      | Shiraz-9T  | 1368 | 0.199713 | 0         |  |  |
|         |      | Shiraz-18T | 1455 | 0        | -0.186773 |  |  |
|         |      | Shiraz-22T | 1669 | 0.695915 | 0         |  |  |
|         |      | Shiraz-25T | 1717 | 0.420447 | 0         |  |  |
|         |      | Shiraz-28T | 1760 | 0.538181 | 0         |  |  |
|         |      | Shiraz-29T | 1800 | 0.672527 | 0         |  |  |
|         |      | Shiraz-32T | 1869 | 0.776805 | 0         |  |  |
|         |      | Shiraz-35T | 1932 | 0.507141 | 0         |  |  |
|         |      | Shiraz-40T | 2051 | 0.098506 | 0         |  |  |
|         |      | Shiraz-58T | 2221 | 0.871948 | 0         |  |  |
|         |      | Shiraz-71T | 2260 | 0.68394  | 0         |  |  |
|         |      | Shiraz-71T | 2261 | 0.508399 | 0         |  |  |
| VENTXP1 | chrX | Shiraz-3T  | 235  | 0        | -0.28401  |  |  |
|         |      | Shiraz-3T  | 236  | 0        | -0.435445 |  |  |
|         |      | Shiraz-4T  | 260  | 0        | -0.324128 |  |  |
|         |      | Shiraz-16T | 294  | 0.655804 | 0         |  |  |
|         |      | Shiraz-36T | 431  | 0        | -0.78035  |  |  |
|         |      | Shiraz-44T | 891  | 0        | -0.954044 |  |  |
|         |      | Shiraz-44T | 893  | 0        | -1.364406 |  |  |
|         |      | Shiraz-47T | 1083 | 0        | -0.103285 |  |  |
|         |      | Shiraz-49T | 1166 | 0        | -0.917235 |  |  |
|         |      | Shiraz-49T | 1168 | 0        | -1.073859 |  |  |
|         |      | Shiraz-9T  | 1368 | 0.199713 | 0         |  |  |
|         |      | Shiraz-18T | 1455 | 0        | -0.186773 |  |  |
|         |      | Shiraz-22T | 1669 | 0.695915 | 0         |  |  |
|         |      | Shiraz-22T | 1671 | 0.369309 | 0         |  |  |
|         |      | Shiraz-25T | 1717 | 0.420447 | 0         |  |  |
|         |      | Shiraz-28T | 1760 | 0.538181 | 0         |  |  |
|         |      | Shiraz-29T | 1800 | 0.672527 | 0         |  |  |
|         |      | Shiraz-32T | 1869 | 0.776805 | 0         |  |  |
|         |      | Shiraz-35T | 1932 | 0.507141 | 0         |  |  |
|         |      | Shiraz-40T | 2051 | 0.098506 | 0         |  |  |
|         |      | Shiraz-58T | 2221 | 0.871948 | 0         |  |  |
|         |      | Shiraz-58T | 2222 | 0.679664 | 0         |  |  |
|         |      | Shiraz-71T | 2260 | 0.68394  | 0         |  |  |
|         |      | Shiraz-71T | 2261 | 0.508399 | 0         |  |  |
|         |      | Shiraz-3T  | 235  | 0        | -0.28401  |  |  |
|         |      | Shiraz-3T  | 236  | 0        | -0.435445 |  |  |
|         |      | Shiraz-4T  | 260  | 0        | -0.324128 |  |  |

|     |      |            |      |          |           |  |  |
|-----|------|------------|------|----------|-----------|--|--|
|     |      | Shiraz-16T | 294  | 0.655804 | 0         |  |  |
|     |      | Shiraz-36T | 431  | 0        | -0.78035  |  |  |
|     |      | Shiraz-44T | 891  | 0        | -0.954044 |  |  |
|     |      | Shiraz-44T | 893  | 0        | -1.364406 |  |  |
|     |      | Shiraz-47T | 1083 | 0        | -0.103285 |  |  |
|     |      | Shiraz-49T | 1166 | 0        | -0.917235 |  |  |
|     |      | Shiraz-49T | 1168 | 0        | -1.073859 |  |  |
|     |      | Shiraz-9T  | 1368 | 0.199713 | 0         |  |  |
|     |      | Shiraz-18T | 1455 | 0        | -0.186773 |  |  |
|     |      | Shiraz-22T | 1669 | 0.695915 | 0         |  |  |
|     |      | Shiraz-22T | 1671 | 0.369309 | 0         |  |  |
|     |      | Shiraz-25T | 1717 | 0.420447 | 0         |  |  |
|     |      | Shiraz-28T | 1760 | 0.538181 | 0         |  |  |
|     |      | Shiraz-29T | 1800 | 0.672527 | 0         |  |  |
|     |      | Shiraz-32T | 1869 | 0.776805 | 0         |  |  |
|     |      | Shiraz-35T | 1932 | 0.507141 | 0         |  |  |
|     |      | Shiraz-40T | 2051 | 0.098506 | 0         |  |  |
|     |      | Shiraz-58T | 2221 | 0.871948 | 0         |  |  |
|     |      | Shiraz-58T | 2222 | 0.679664 | 0         |  |  |
|     |      | Shiraz-71T | 2260 | 0.68394  | 0         |  |  |
|     |      | Shiraz-71T | 2261 | 0.508399 | 0         |  |  |
|     |      | Shiraz-3T  | 235  | 0        | -0.28401  |  |  |
|     |      | Shiraz-3T  | 236  | 0        | -0.435445 |  |  |
|     |      | Shiraz-4T  | 260  | 0        | -0.324128 |  |  |
|     |      | Shiraz-16T | 294  | 0.655804 | 0         |  |  |
|     |      | Shiraz-36T | 431  | 0        | -0.78035  |  |  |
|     |      | Shiraz-44T | 891  | 0        | -0.954044 |  |  |
|     |      | Shiraz-44T | 893  | 0        | -1.364406 |  |  |
|     |      | Shiraz-47T | 1083 | 0        | -0.103285 |  |  |
|     |      | Shiraz-49T | 1166 | 0        | -0.917235 |  |  |
|     |      | Shiraz-49T | 1168 | 0        | -1.073859 |  |  |
|     |      | Shiraz-9T  | 1368 | 0.199713 | 0         |  |  |
|     |      | Shiraz-18T | 1455 | 0        | -0.186773 |  |  |
|     |      | Shiraz-22T | 1669 | 0.695915 | 0         |  |  |
|     |      | Shiraz-22T | 1671 | 0.369309 | 0         |  |  |
|     |      | Shiraz-25T | 1717 | 0.420447 | 0         |  |  |
|     |      | Shiraz-28T | 1760 | 0.538181 | 0         |  |  |
|     |      | Shiraz-29T | 1800 | 0.672527 | 0         |  |  |
|     |      | Shiraz-32T | 1869 | 0.776805 | 0         |  |  |
|     |      | Shiraz-35T | 1932 | 0.507141 | 0         |  |  |
|     |      | Shiraz-40T | 2051 | 0.098506 | 0         |  |  |
|     |      | Shiraz-58T | 2221 | 0.871948 | 0         |  |  |
|     |      | Shiraz-58T | 2222 | 0.679664 | 0         |  |  |
|     |      | Shiraz-71T | 2260 | 0.68394  | 0         |  |  |
|     |      | Shiraz-71T | 2261 | 0.508399 | 0         |  |  |
| VGF | chr7 | Shiraz-3T  | 90   | 0.219276 | 0         |  |  |
|     |      | Shiraz-3T  | 94   | 0.74735  | 0         |  |  |

|  |  |            |      |          |           |  |  |
|--|--|------------|------|----------|-----------|--|--|
|  |  | Shiraz-4T  | 253  | 0.372918 | 0         |  |  |
|  |  | Shiraz-31T | 316  | 0.219196 | 0         |  |  |
|  |  | Shiraz-36T | 378  | 0.179558 | 0         |  |  |
|  |  | Shiraz-36T | 381  | 0.332628 | 0         |  |  |
|  |  | Shiraz-44T | 639  | 1.035032 | 0         |  |  |
|  |  | Shiraz-46T | 943  | 0.093799 | 0         |  |  |
|  |  | Shiraz-46T | 946  | 0.299835 | 0         |  |  |
|  |  | Shiraz-47T | 1030 | 0.257728 | 0         |  |  |
|  |  | Shiraz-49T | 1120 | 0.281656 | 0         |  |  |
|  |  | Shiraz-77T | 1225 | 0        | -0.117922 |  |  |
|  |  | Shiraz-77T | 1227 | 0.196445 | 0         |  |  |
|  |  | Shiraz-9T  | 1324 | 0.679266 | 0         |  |  |
|  |  | Shiraz-18T | 1434 | 0.244465 | 0         |  |  |
|  |  | Shiraz-22T | 1549 | 0        | -0.319623 |  |  |
|  |  | Shiraz-22T | 1551 | 0.324011 | 0         |  |  |
|  |  | Shiraz-25T | 1698 | 0.21835  | 0         |  |  |
|  |  | Shiraz-28T | 1735 | 0.350744 | 0         |  |  |
|  |  | Shiraz-29T | 1778 | 0.120767 | 0         |  |  |
|  |  | Shiraz-32T | 1833 | 0.551336 | 0         |  |  |
|  |  | Shiraz-32T | 1834 | 1.485392 | 0         |  |  |
|  |  | Shiraz-38T | 1951 | 0.250891 | 0         |  |  |
|  |  | Shiraz-53T | 2078 | 0.287202 | 0         |  |  |
|  |  | Shiraz-58T | 2160 | 0.399007 | 0         |  |  |
|  |  | Shiraz-71T | 2238 | 0.603631 | 0         |  |  |
|  |  | Shiraz-3T  | 90   | 0.219276 | 0         |  |  |
|  |  | Shiraz-3T  | 94   | 0.74735  | 0         |  |  |
|  |  | Shiraz-4T  | 253  | 0.372918 | 0         |  |  |
|  |  | Shiraz-31T | 316  | 0.219196 | 0         |  |  |
|  |  | Shiraz-36T | 378  | 0.179558 | 0         |  |  |
|  |  | Shiraz-36T | 381  | 0.332628 | 0         |  |  |
|  |  | Shiraz-44T | 639  | 1.035032 | 0         |  |  |
|  |  | Shiraz-46T | 943  | 0.093799 | 0         |  |  |
|  |  | Shiraz-46T | 946  | 0.299835 | 0         |  |  |
|  |  | Shiraz-47T | 1030 | 0.257728 | 0         |  |  |
|  |  | Shiraz-49T | 1120 | 0.281656 | 0         |  |  |
|  |  | Shiraz-77T | 1225 | 0        | -0.117922 |  |  |
|  |  | Shiraz-77T | 1227 | 0.196445 | 0         |  |  |
|  |  | Shiraz-9T  | 1324 | 0.679266 | 0         |  |  |
|  |  | Shiraz-18T | 1434 | 0.244465 | 0         |  |  |
|  |  | Shiraz-22T | 1549 | 0        | -0.319623 |  |  |
|  |  | Shiraz-22T | 1551 | 0.324011 | 0         |  |  |
|  |  | Shiraz-25T | 1698 | 0.21835  | 0         |  |  |
|  |  | Shiraz-28T | 1735 | 0.350744 | 0         |  |  |
|  |  | Shiraz-29T | 1778 | 0.120767 | 0         |  |  |
|  |  | Shiraz-32T | 1833 | 0.551336 | 0         |  |  |
|  |  | Shiraz-32T | 1834 | 1.485392 | 0         |  |  |
|  |  | Shiraz-38T | 1951 | 0.250891 | 0         |  |  |

|       |      |            |      |          |           |  |
|-------|------|------------|------|----------|-----------|--|
|       |      | Shiraz-53T | 2078 | 0.287202 | 0         |  |
|       |      | Shiraz-58T | 2160 | 0.399007 | 0         |  |
|       |      | Shiraz-71T | 2238 | 0.603631 | 0         |  |
|       |      | Shiraz-3T  | 90   | 0.219276 | 0         |  |
|       |      | Shiraz-3T  | 94   | 0.74735  | 0         |  |
|       |      | Shiraz-4T  | 253  | 0.372918 | 0         |  |
|       |      | Shiraz-31T | 316  | 0.219196 | 0         |  |
|       |      | Shiraz-36T | 378  | 0.179558 | 0         |  |
|       |      | Shiraz-36T | 381  | 0.332628 | 0         |  |
|       |      | Shiraz-44T | 639  | 1.035032 | 0         |  |
|       |      | Shiraz-46T | 943  | 0.093799 | 0         |  |
|       |      | Shiraz-46T | 946  | 0.299835 | 0         |  |
|       |      | Shiraz-47T | 1030 | 0.257728 | 0         |  |
|       |      | Shiraz-49T | 1120 | 0.281656 | 0         |  |
|       |      | Shiraz-77T | 1225 | 0        | -0.117922 |  |
|       |      | Shiraz-77T | 1227 | 0.196445 | 0         |  |
|       |      | Shiraz-9T  | 1324 | 0.679266 | 0         |  |
|       |      | Shiraz-18T | 1434 | 0.244465 | 0         |  |
|       |      | Shiraz-22T | 1549 | 0        | -0.319623 |  |
|       |      | Shiraz-22T | 1551 | 0.324011 | 0         |  |
|       |      | Shiraz-25T | 1698 | 0.21835  | 0         |  |
|       |      | Shiraz-28T | 1735 | 0.350744 | 0         |  |
|       |      | Shiraz-29T | 1778 | 0.120767 | 0         |  |
|       |      | Shiraz-32T | 1833 | 0.551336 | 0         |  |
|       |      | Shiraz-32T | 1834 | 1.485392 | 0         |  |
|       |      | Shiraz-38T | 1951 | 0.250891 | 0         |  |
|       |      | Shiraz-53T | 2078 | 0.287202 | 0         |  |
|       |      | Shiraz-58T | 2160 | 0.399007 | 0         |  |
|       |      | Shiraz-71T | 2238 | 0.603631 | 0         |  |
| VGLL1 | chrX | Shiraz-3T  | 242  | 0        | -0.336434 |  |
|       |      | Shiraz-4T  | 261  | 0        | -0.336249 |  |
|       |      | Shiraz-16T | 295  | 0.591657 | 0         |  |
|       |      | Shiraz-36T | 433  | 0        | -0.803961 |  |
|       |      | Shiraz-44T | 899  | 0        | -1.09697  |  |
|       |      | Shiraz-49T | 1170 | 0        | -0.967436 |  |
|       |      | Shiraz-9T  | 1370 | 0.690073 | 0         |  |
|       |      | Shiraz-18T | 1457 | 0.643204 | 0         |  |
|       |      | Shiraz-22T | 1673 | 0.611783 | 0         |  |
|       |      | Shiraz-22T | 1677 | 0.789711 | 0         |  |
|       |      | Shiraz-25T | 1719 | 0.472955 | 0         |  |
|       |      | Shiraz-28T | 1762 | 0.562311 | 0         |  |
|       |      | Shiraz-29T | 1801 | 0.815343 | 0         |  |
|       |      | Shiraz-32T | 1870 | 0.729766 | 0         |  |
|       |      | Shiraz-35T | 1933 | 0.488535 | 0         |  |
|       |      | Shiraz-58T | 2223 | 0.833364 | 0         |  |
|       |      | Shiraz-71T | 2263 | 0.975531 | 0         |  |
|       |      | Shiraz-3T  | 242  | 0        | -0.336434 |  |



|       |      |            |      |          |           |  |  |
|-------|------|------------|------|----------|-----------|--|--|
|       |      | Shiraz-4T  | 261  | 0        | -0.336249 |  |  |
|       |      | Shiraz-16T | 295  | 0.591657 | 0         |  |  |
|       |      | Shiraz-36T | 433  | 0        | -0.803961 |  |  |
|       |      | Shiraz-44T | 899  | 0        | -1.09697  |  |  |
|       |      | Shiraz-49T | 1170 | 0        | -0.967436 |  |  |
|       |      | Shiraz-9T  | 1370 | 0.690073 | 0         |  |  |
|       |      | Shiraz-18T | 1457 | 0.643204 | 0         |  |  |
|       |      | Shiraz-22T | 1673 | 0.611783 | 0         |  |  |
|       |      | Shiraz-22T | 1677 | 0.789711 | 0         |  |  |
|       |      | Shiraz-25T | 1719 | 0.472955 | 0         |  |  |
|       |      | Shiraz-28T | 1762 | 0.562311 | 0         |  |  |
|       |      | Shiraz-29T | 1801 | 0.815343 | 0         |  |  |
|       |      | Shiraz-32T | 1870 | 0.729766 | 0         |  |  |
|       |      | Shiraz-35T | 1933 | 0.488535 | 0         |  |  |
|       |      | Shiraz-58T | 2223 | 0.833364 | 0         |  |  |
|       |      | Shiraz-71T | 2263 | 0.975531 | 0         |  |  |
|       |      | Shiraz-3T  | 242  | 0        | -0.336434 |  |  |
|       |      | Shiraz-4T  | 261  | 0        | -0.336249 |  |  |
|       |      | Shiraz-16T | 295  | 0.591657 | 0         |  |  |
|       |      | Shiraz-36T | 433  | 0        | -0.803961 |  |  |
|       |      | Shiraz-44T | 899  | 0        | -1.09697  |  |  |
|       |      | Shiraz-49T | 1170 | 0        | -0.967436 |  |  |
|       |      | Shiraz-9T  | 1370 | 0.690073 | 0         |  |  |
|       |      | Shiraz-18T | 1457 | 0.643204 | 0         |  |  |
|       |      | Shiraz-22T | 1673 | 0.611783 | 0         |  |  |
|       |      | Shiraz-22T | 1677 | 0.789711 | 0         |  |  |
|       |      | Shiraz-25T | 1719 | 0.472955 | 0         |  |  |
|       |      | Shiraz-28T | 1762 | 0.562311 | 0         |  |  |
|       |      | Shiraz-29T | 1801 | 0.815343 | 0         |  |  |
|       |      | Shiraz-32T | 1870 | 0.729766 | 0         |  |  |
|       |      | Shiraz-35T | 1933 | 0.488535 | 0         |  |  |
|       |      | Shiraz-58T | 2223 | 0.833364 | 0         |  |  |
|       |      | Shiraz-71T | 2263 | 0.975531 | 0         |  |  |
| VMA21 | chrX | Shiraz-3T  | 242  | 0        | -0.336434 |  |  |
|       |      | Shiraz-4T  | 261  | 0        | -0.336249 |  |  |
|       |      | Shiraz-16T | 295  | 0.591657 | 0         |  |  |
|       |      | Shiraz-36T | 433  | 0        | -0.803961 |  |  |
|       |      | Shiraz-42T | 480  | 0        | -0.232915 |  |  |
|       |      | Shiraz-44T | 899  | 0        | -1.09697  |  |  |
|       |      | Shiraz-49T | 1170 | 0        | -0.967436 |  |  |
|       |      | Shiraz-9T  | 1370 | 0.690073 | 0         |  |  |
|       |      | Shiraz-18T | 1457 | 0.643204 | 0         |  |  |
|       |      | Shiraz-22T | 1673 | 0.611783 | 0         |  |  |
|       |      | Shiraz-22T | 1678 | 0.911625 | 0         |  |  |
|       |      | Shiraz-25T | 1719 | 0.472955 | 0         |  |  |
|       |      | Shiraz-28T | 1762 | 0.562311 | 0         |  |  |
|       |      | Shiraz-29T | 1801 | 0.815343 | 0         |  |  |

|       |      |            |      |          |           |  |
|-------|------|------------|------|----------|-----------|--|
|       |      | Shiraz-32T | 1870 | 0.729766 | 0         |  |
|       |      | Shiraz-35T | 1933 | 0.488535 | 0         |  |
|       |      | Shiraz-58T | 2223 | 0.833364 | 0         |  |
|       |      | Shiraz-58T | 2226 | 1.074663 | 0         |  |
|       |      | Shiraz-71T | 2263 | 0.975531 | 0         |  |
|       |      | Shiraz-3T  | 242  | 0        | -0.336434 |  |
|       |      | Shiraz-4T  | 261  | 0        | -0.336249 |  |
|       |      | Shiraz-16T | 295  | 0.591657 | 0         |  |
|       |      | Shiraz-36T | 433  | 0        | -0.803961 |  |
|       |      | Shiraz-42T | 480  | 0        | -0.232915 |  |
|       |      | Shiraz-44T | 899  | 0        | -1.09697  |  |
|       |      | Shiraz-49T | 1170 | 0        | -0.967436 |  |
|       |      | Shiraz-9T  | 1370 | 0.690073 | 0         |  |
|       |      | Shiraz-18T | 1457 | 0.643204 | 0         |  |
|       |      | Shiraz-22T | 1673 | 0.611783 | 0         |  |
|       |      | Shiraz-22T | 1678 | 0.911625 | 0         |  |
|       |      | Shiraz-25T | 1719 | 0.472955 | 0         |  |
|       |      | Shiraz-28T | 1762 | 0.562311 | 0         |  |
|       |      | Shiraz-29T | 1801 | 0.815343 | 0         |  |
|       |      | Shiraz-32T | 1870 | 0.729766 | 0         |  |
|       |      | Shiraz-35T | 1933 | 0.488535 | 0         |  |
|       |      | Shiraz-58T | 2223 | 0.833364 | 0         |  |
|       |      | Shiraz-58T | 2226 | 1.074663 | 0         |  |
|       |      | Shiraz-71T | 2263 | 0.975531 | 0         |  |
|       |      | Shiraz-3T  | 242  | 0        | -0.336434 |  |
|       |      | Shiraz-4T  | 261  | 0        | -0.336249 |  |
|       |      | Shiraz-16T | 295  | 0.591657 | 0         |  |
|       |      | Shiraz-36T | 433  | 0        | -0.803961 |  |
|       |      | Shiraz-42T | 480  | 0        | -0.232915 |  |
|       |      | Shiraz-44T | 899  | 0        | -1.09697  |  |
|       |      | Shiraz-49T | 1170 | 0        | -0.967436 |  |
|       |      | Shiraz-9T  | 1370 | 0.690073 | 0         |  |
|       |      | Shiraz-18T | 1457 | 0.643204 | 0         |  |
|       |      | Shiraz-22T | 1673 | 0.611783 | 0         |  |
|       |      | Shiraz-22T | 1678 | 0.911625 | 0         |  |
|       |      | Shiraz-25T | 1719 | 0.472955 | 0         |  |
|       |      | Shiraz-28T | 1762 | 0.562311 | 0         |  |
|       |      | Shiraz-29T | 1801 | 0.815343 | 0         |  |
|       |      | Shiraz-32T | 1870 | 0.729766 | 0         |  |
|       |      | Shiraz-35T | 1933 | 0.488535 | 0         |  |
|       |      | Shiraz-58T | 2223 | 0.833364 | 0         |  |
|       |      | Shiraz-58T | 2226 | 1.074663 | 0         |  |
|       |      | Shiraz-71T | 2263 | 0.975531 | 0         |  |
| VPS41 | chr7 | Shiraz-3T  | 87   | 0.198593 | 0         |  |
|       |      | Shiraz-4T  | 252  | 0.192083 | 0         |  |
|       |      | Shiraz-36T | 376  | 0.159952 | 0         |  |
|       |      | Shiraz-44T | 631  | 0        | -0.180312 |  |

|       |      |            |      |          |           |  |  |
|-------|------|------------|------|----------|-----------|--|--|
|       |      | Shiraz-46T | 942  | 0.069143 | 0         |  |  |
|       |      | Shiraz-18T | 1433 | 0.250973 | 0         |  |  |
|       |      | Shiraz-22T | 1544 | 0        | -0.193579 |  |  |
|       |      | Shiraz-25T | 1697 | 0.21945  | 0         |  |  |
|       |      | Shiraz-28T | 1734 | 0.362882 | 0         |  |  |
|       |      | Shiraz-29T | 1777 | 0.156747 | 0         |  |  |
|       |      | Shiraz-38T | 1950 | 0.265916 | 0         |  |  |
|       |      | Shiraz-71T | 2236 | 0.320072 | 0         |  |  |
|       |      | Shiraz-72T | 2277 | 0        | -0.398869 |  |  |
|       |      | Shiraz-3T  | 87   | 0.198593 | 0         |  |  |
|       |      | Shiraz-4T  | 252  | 0.192083 | 0         |  |  |
|       |      | Shiraz-36T | 376  | 0.159952 | 0         |  |  |
|       |      | Shiraz-44T | 631  | 0        | -0.180312 |  |  |
|       |      | Shiraz-46T | 942  | 0.069143 | 0         |  |  |
|       |      | Shiraz-18T | 1433 | 0.250973 | 0         |  |  |
|       |      | Shiraz-22T | 1544 | 0        | -0.193579 |  |  |
|       |      | Shiraz-25T | 1697 | 0.21945  | 0         |  |  |
|       |      | Shiraz-28T | 1734 | 0.362882 | 0         |  |  |
|       |      | Shiraz-29T | 1777 | 0.156747 | 0         |  |  |
|       |      | Shiraz-38T | 1950 | 0.265916 | 0         |  |  |
|       |      | Shiraz-71T | 2236 | 0.320072 | 0         |  |  |
|       |      | Shiraz-72T | 2277 | 0        | -0.398869 |  |  |
|       |      | Shiraz-3T  | 87   | 0.198593 | 0         |  |  |
|       |      | Shiraz-4T  | 252  | 0.192083 | 0         |  |  |
|       |      | Shiraz-36T | 376  | 0.159952 | 0         |  |  |
|       |      | Shiraz-44T | 631  | 0        | -0.180312 |  |  |
|       |      | Shiraz-46T | 942  | 0.069143 | 0         |  |  |
|       |      | Shiraz-18T | 1433 | 0.250973 | 0         |  |  |
|       |      | Shiraz-22T | 1544 | 0        | -0.193579 |  |  |
|       |      | Shiraz-25T | 1697 | 0.21945  | 0         |  |  |
|       |      | Shiraz-28T | 1734 | 0.362882 | 0         |  |  |
|       |      | Shiraz-29T | 1777 | 0.156747 | 0         |  |  |
|       |      | Shiraz-38T | 1950 | 0.265916 | 0         |  |  |
|       |      | Shiraz-71T | 2236 | 0.320072 | 0         |  |  |
|       |      | Shiraz-72T | 2277 | 0        | -0.398869 |  |  |
| VSIG1 | chrX | Shiraz-3T  | 242  | 0        | -0.336434 |  |  |
|       |      | Shiraz-4T  | 261  | 0        | -0.336249 |  |  |
|       |      | Shiraz-16T | 295  | 0.591657 | 0         |  |  |
|       |      | Shiraz-36T | 433  | 0        | -0.803961 |  |  |
|       |      | Shiraz-44T | 899  | 0        | -1.09697  |  |  |
|       |      | Shiraz-49T | 1170 | 0        | -0.967436 |  |  |
|       |      | Shiraz-18T | 1457 | 0.643204 | 0         |  |  |
|       |      | Shiraz-22T | 1673 | 0.611783 | 0         |  |  |
|       |      | Shiraz-25T | 1719 | 0.472955 | 0         |  |  |
|       |      | Shiraz-28T | 1762 | 0.562311 | 0         |  |  |
|       |      | Shiraz-29T | 1801 | 0.815343 | 0         |  |  |
|       |      | Shiraz-32T | 1870 | 0.729766 | 0         |  |  |

|       |      |            |      |          |           |  |  |
|-------|------|------------|------|----------|-----------|--|--|
|       |      | Shiraz-35T | 1933 | 0.488535 | 0         |  |  |
|       |      | Shiraz-58T | 2223 | 0.833364 | 0         |  |  |
|       |      | Shiraz-71T | 2263 | 0.975531 | 0         |  |  |
|       |      | Shiraz-3T  | 242  | 0        | -0.336434 |  |  |
|       |      | Shiraz-4T  | 261  | 0        | -0.336249 |  |  |
|       |      | Shiraz-16T | 295  | 0.591657 | 0         |  |  |
|       |      | Shiraz-36T | 433  | 0        | -0.803961 |  |  |
|       |      | Shiraz-44T | 899  | 0        | -1.09697  |  |  |
|       |      | Shiraz-49T | 1170 | 0        | -0.967436 |  |  |
|       |      | Shiraz-18T | 1457 | 0.643204 | 0         |  |  |
|       |      | Shiraz-22T | 1673 | 0.611783 | 0         |  |  |
|       |      | Shiraz-25T | 1719 | 0.472955 | 0         |  |  |
|       |      | Shiraz-28T | 1762 | 0.562311 | 0         |  |  |
|       |      | Shiraz-29T | 1801 | 0.815343 | 0         |  |  |
|       |      | Shiraz-32T | 1870 | 0.729766 | 0         |  |  |
|       |      | Shiraz-35T | 1933 | 0.488535 | 0         |  |  |
|       |      | Shiraz-58T | 2223 | 0.833364 | 0         |  |  |
|       |      | Shiraz-71T | 2263 | 0.975531 | 0         |  |  |
|       |      | Shiraz-3T  | 242  | 0        | -0.336434 |  |  |
|       |      | Shiraz-4T  | 261  | 0        | -0.336249 |  |  |
|       |      | Shiraz-16T | 295  | 0.591657 | 0         |  |  |
|       |      | Shiraz-36T | 433  | 0        | -0.803961 |  |  |
|       |      | Shiraz-44T | 899  | 0        | -1.09697  |  |  |
|       |      | Shiraz-49T | 1170 | 0        | -0.967436 |  |  |
|       |      | Shiraz-18T | 1457 | 0.643204 | 0         |  |  |
|       |      | Shiraz-22T | 1673 | 0.611783 | 0         |  |  |
|       |      | Shiraz-25T | 1719 | 0.472955 | 0         |  |  |
|       |      | Shiraz-28T | 1762 | 0.562311 | 0         |  |  |
|       |      | Shiraz-29T | 1801 | 0.815343 | 0         |  |  |
|       |      | Shiraz-32T | 1870 | 0.729766 | 0         |  |  |
|       |      | Shiraz-35T | 1933 | 0.488535 | 0         |  |  |
|       |      | Shiraz-58T | 2223 | 0.833364 | 0         |  |  |
|       |      | Shiraz-71T | 2263 | 0.975531 | 0         |  |  |
| VSIG4 | chrX | Shiraz-3T  | 241  | 0        | -0.230501 |  |  |
|       |      | Shiraz-4T  | 261  | 0        | -0.336249 |  |  |
|       |      | Shiraz-16T | 295  | 0.591657 | 0         |  |  |
|       |      | Shiraz-36T | 433  | 0        | -0.803961 |  |  |
|       |      | Shiraz-44T | 899  | 0        | -1.09697  |  |  |
|       |      | Shiraz-49T | 1170 | 0        | -0.967436 |  |  |
|       |      | Shiraz-18T | 1457 | 0.643204 | 0         |  |  |
|       |      | Shiraz-22T | 1673 | 0.611783 | 0         |  |  |
|       |      | Shiraz-25T | 1719 | 0.472955 | 0         |  |  |
|       |      | Shiraz-28T | 1762 | 0.562311 | 0         |  |  |
|       |      | Shiraz-29T | 1801 | 0.815343 | 0         |  |  |
|       |      | Shiraz-32T | 1870 | 0.729766 | 0         |  |  |
|       |      | Shiraz-35T | 1933 | 0.488535 | 0         |  |  |
|       |      | Shiraz-58T | 2223 | 0.833364 | 0         |  |  |

|        |      |            |      |          |           |  |  |
|--------|------|------------|------|----------|-----------|--|--|
|        |      | Shiraz-71T | 2263 | 0.975531 | 0         |  |  |
|        |      | Shiraz-3T  | 241  | 0        | -0.230501 |  |  |
|        |      | Shiraz-4T  | 261  | 0        | -0.336249 |  |  |
|        |      | Shiraz-16T | 295  | 0.591657 | 0         |  |  |
|        |      | Shiraz-36T | 433  | 0        | -0.803961 |  |  |
|        |      | Shiraz-44T | 899  | 0        | -1.09697  |  |  |
|        |      | Shiraz-49T | 1170 | 0        | -0.967436 |  |  |
|        |      | Shiraz-18T | 1457 | 0.643204 | 0         |  |  |
|        |      | Shiraz-22T | 1673 | 0.611783 | 0         |  |  |
|        |      | Shiraz-25T | 1719 | 0.472955 | 0         |  |  |
|        |      | Shiraz-28T | 1762 | 0.562311 | 0         |  |  |
|        |      | Shiraz-29T | 1801 | 0.815343 | 0         |  |  |
|        |      | Shiraz-32T | 1870 | 0.729766 | 0         |  |  |
|        |      | Shiraz-35T | 1933 | 0.488535 | 0         |  |  |
|        |      | Shiraz-58T | 2223 | 0.833364 | 0         |  |  |
|        |      | Shiraz-71T | 2263 | 0.975531 | 0         |  |  |
|        |      | Shiraz-3T  | 241  | 0        | -0.230501 |  |  |
|        |      | Shiraz-4T  | 261  | 0        | -0.336249 |  |  |
|        |      | Shiraz-16T | 295  | 0.591657 | 0         |  |  |
|        |      | Shiraz-36T | 433  | 0        | -0.803961 |  |  |
|        |      | Shiraz-44T | 899  | 0        | -1.09697  |  |  |
|        |      | Shiraz-49T | 1170 | 0        | -0.967436 |  |  |
|        |      | Shiraz-18T | 1457 | 0.643204 | 0         |  |  |
|        |      | Shiraz-22T | 1673 | 0.611783 | 0         |  |  |
|        |      | Shiraz-25T | 1719 | 0.472955 | 0         |  |  |
|        |      | Shiraz-28T | 1762 | 0.562311 | 0         |  |  |
|        |      | Shiraz-29T | 1801 | 0.815343 | 0         |  |  |
|        |      | Shiraz-32T | 1870 | 0.729766 | 0         |  |  |
|        |      | Shiraz-35T | 1933 | 0.488535 | 0         |  |  |
|        |      | Shiraz-58T | 2223 | 0.833364 | 0         |  |  |
|        |      | Shiraz-71T | 2263 | 0.975531 | 0         |  |  |
| VSTM2A | chr7 | Shiraz-3T  | 87   | 0.198593 | 0         |  |  |
|        |      | Shiraz-4T  | 252  | 0.192083 | 0         |  |  |
|        |      | Shiraz-36T | 376  | 0.159952 | 0         |  |  |
|        |      | Shiraz-44T | 634  | 0        | -0.480272 |  |  |
|        |      | Shiraz-46T | 942  | 0.069143 | 0         |  |  |
|        |      | Shiraz-18T | 1433 | 0.250973 | 0         |  |  |
|        |      | Shiraz-22T | 1546 | 0        | -0.458543 |  |  |
|        |      | Shiraz-25T | 1697 | 0.21945  | 0         |  |  |
|        |      | Shiraz-28T | 1734 | 0.362882 | 0         |  |  |
|        |      | Shiraz-29T | 1777 | 0.156747 | 0         |  |  |
|        |      | Shiraz-38T | 1950 | 0.265916 | 0         |  |  |
|        |      | Shiraz-71T | 2236 | 0.320072 | 0         |  |  |
|        |      | Shiraz-3T  | 87   | 0.198593 | 0         |  |  |
|        |      | Shiraz-4T  | 252  | 0.192083 | 0         |  |  |
|        |      | Shiraz-36T | 376  | 0.159952 | 0         |  |  |
|        |      | Shiraz-44T | 634  | 0        | -0.480272 |  |  |

|      |      |            |      |          |           |  |
|------|------|------------|------|----------|-----------|--|
|      |      | Shiraz-46T | 942  | 0.069143 | 0         |  |
|      |      | Shiraz-18T | 1433 | 0.250973 | 0         |  |
|      |      | Shiraz-22T | 1546 | 0        | -0.458543 |  |
|      |      | Shiraz-25T | 1697 | 0.21945  | 0         |  |
|      |      | Shiraz-28T | 1734 | 0.362882 | 0         |  |
|      |      | Shiraz-29T | 1777 | 0.156747 | 0         |  |
|      |      | Shiraz-38T | 1950 | 0.265916 | 0         |  |
|      |      | Shiraz-71T | 2236 | 0.320072 | 0         |  |
|      |      | Shiraz-3T  | 87   | 0.198593 | 0         |  |
|      |      | Shiraz-4T  | 252  | 0.192083 | 0         |  |
|      |      | Shiraz-36T | 376  | 0.159952 | 0         |  |
|      |      | Shiraz-44T | 634  | 0        | -0.480272 |  |
|      |      | Shiraz-46T | 942  | 0.069143 | 0         |  |
|      |      | Shiraz-18T | 1433 | 0.250973 | 0         |  |
|      |      | Shiraz-22T | 1546 | 0        | -0.458543 |  |
|      |      | Shiraz-25T | 1697 | 0.21945  | 0         |  |
|      |      | Shiraz-28T | 1734 | 0.362882 | 0         |  |
|      |      | Shiraz-29T | 1777 | 0.156747 | 0         |  |
|      |      | Shiraz-38T | 1950 | 0.265916 | 0         |  |
|      |      | Shiraz-71T | 2236 | 0.320072 | 0         |  |
| VWC2 | chr7 | Shiraz-3T  | 87   | 0.198593 | 0         |  |
|      |      | Shiraz-4T  | 252  | 0.192083 | 0         |  |
|      |      | Shiraz-36T | 376  | 0.159952 | 0         |  |
|      |      | Shiraz-44T | 633  | 0        | -0.565095 |  |
|      |      | Shiraz-46T | 942  | 0.069143 | 0         |  |
|      |      | Shiraz-18T | 1433 | 0.250973 | 0         |  |
|      |      | Shiraz-22T | 1545 | 0        | -0.473676 |  |
|      |      | Shiraz-25T | 1697 | 0.21945  | 0         |  |
|      |      | Shiraz-28T | 1734 | 0.362882 | 0         |  |
|      |      | Shiraz-29T | 1777 | 0.156747 | 0         |  |
|      |      | Shiraz-38T | 1950 | 0.265916 | 0         |  |
|      |      | Shiraz-71T | 2236 | 0.320072 | 0         |  |
|      |      | Shiraz-3T  | 87   | 0.198593 | 0         |  |
|      |      | Shiraz-4T  | 252  | 0.192083 | 0         |  |
|      |      | Shiraz-36T | 376  | 0.159952 | 0         |  |
|      |      | Shiraz-44T | 633  | 0        | -0.565095 |  |
|      |      | Shiraz-46T | 942  | 0.069143 | 0         |  |
|      |      | Shiraz-18T | 1433 | 0.250973 | 0         |  |
|      |      | Shiraz-22T | 1545 | 0        | -0.473676 |  |
|      |      | Shiraz-25T | 1697 | 0.21945  | 0         |  |
|      |      | Shiraz-28T | 1734 | 0.362882 | 0         |  |
|      |      | Shiraz-29T | 1777 | 0.156747 | 0         |  |
|      |      | Shiraz-38T | 1950 | 0.265916 | 0         |  |
|      |      | Shiraz-71T | 2236 | 0.320072 | 0         |  |
|      |      | Shiraz-3T  | 87   | 0.198593 | 0         |  |
|      |      | Shiraz-4T  | 252  | 0.192083 | 0         |  |
|      |      | Shiraz-36T | 376  | 0.159952 | 0         |  |

|      |      |            |      |          |           |  |  |
|------|------|------------|------|----------|-----------|--|--|
|      |      | Shiraz-44T | 633  | 0        | -0.565095 |  |  |
|      |      | Shiraz-46T | 942  | 0.069143 | 0         |  |  |
|      |      | Shiraz-18T | 1433 | 0.250973 | 0         |  |  |
|      |      | Shiraz-22T | 1545 | 0        | -0.473676 |  |  |
|      |      | Shiraz-25T | 1697 | 0.21945  | 0         |  |  |
|      |      | Shiraz-28T | 1734 | 0.362882 | 0         |  |  |
|      |      | Shiraz-29T | 1777 | 0.156747 | 0         |  |  |
|      |      | Shiraz-38T | 1950 | 0.265916 | 0         |  |  |
|      |      | Shiraz-71T | 2236 | 0.320072 | 0         |  |  |
| VWDE | chr7 | Shiraz-4T  | 252  | 0.192083 | 0         |  |  |
|      |      | Shiraz-36T | 376  | 0.159952 | 0         |  |  |
|      |      | Shiraz-44T | 628  | 0        | -0.444379 |  |  |
|      |      | Shiraz-47T | 1027 | 0        | -0.117848 |  |  |
|      |      | Shiraz-49T | 1117 | 0        | -0.168296 |  |  |
|      |      | Shiraz-77T | 1222 | 0        | -0.113002 |  |  |
|      |      | Shiraz-18T | 1433 | 0.250973 | 0         |  |  |
|      |      | Shiraz-22T | 1543 | 0        | -0.513696 |  |  |
|      |      | Shiraz-25T | 1697 | 0.21945  | 0         |  |  |
|      |      | Shiraz-28T | 1734 | 0.362882 | 0         |  |  |
|      |      | Shiraz-29T | 1777 | 0.156747 | 0         |  |  |
|      |      | Shiraz-38T | 1950 | 0.265916 | 0         |  |  |
|      |      | Shiraz-58T | 2157 | 0        | -0.213872 |  |  |
|      |      | Shiraz-71T | 2236 | 0.320072 | 0         |  |  |
|      |      | Shiraz-4T  | 252  | 0.192083 | 0         |  |  |
|      |      | Shiraz-36T | 376  | 0.159952 | 0         |  |  |
|      |      | Shiraz-44T | 628  | 0        | -0.444379 |  |  |
|      |      | Shiraz-47T | 1027 | 0        | -0.117848 |  |  |
|      |      | Shiraz-49T | 1117 | 0        | -0.168296 |  |  |
|      |      | Shiraz-77T | 1222 | 0        | -0.113002 |  |  |
|      |      | Shiraz-18T | 1433 | 0.250973 | 0         |  |  |
|      |      | Shiraz-22T | 1543 | 0        | -0.513696 |  |  |
|      |      | Shiraz-25T | 1697 | 0.21945  | 0         |  |  |
|      |      | Shiraz-28T | 1734 | 0.362882 | 0         |  |  |
|      |      | Shiraz-29T | 1777 | 0.156747 | 0         |  |  |
|      |      | Shiraz-38T | 1950 | 0.265916 | 0         |  |  |
|      |      | Shiraz-58T | 2157 | 0        | -0.213872 |  |  |
|      |      | Shiraz-71T | 2236 | 0.320072 | 0         |  |  |
|      |      | Shiraz-4T  | 252  | 0.192083 | 0         |  |  |
|      |      | Shiraz-36T | 376  | 0.159952 | 0         |  |  |
|      |      | Shiraz-44T | 628  | 0        | -0.444379 |  |  |
|      |      | Shiraz-47T | 1027 | 0        | -0.117848 |  |  |
|      |      | Shiraz-49T | 1117 | 0        | -0.168296 |  |  |
|      |      | Shiraz-77T | 1222 | 0        | -0.113002 |  |  |
|      |      | Shiraz-18T | 1433 | 0.250973 | 0         |  |  |
|      |      | Shiraz-22T | 1543 | 0        | -0.513696 |  |  |
|      |      | Shiraz-25T | 1697 | 0.21945  | 0         |  |  |
|      |      | Shiraz-28T | 1734 | 0.362882 | 0         |  |  |

|     |      |            |      |          |           |  |
|-----|------|------------|------|----------|-----------|--|
|     |      | Shiraz-29T | 1777 | 0.156747 | 0         |  |
|     |      | Shiraz-38T | 1950 | 0.265916 | 0         |  |
|     |      | Shiraz-58T | 2157 | 0        | -0.213872 |  |
|     |      | Shiraz-71T | 2236 | 0.320072 | 0         |  |
| WAS | chrX | Shiraz-3T  | 238  | 0.472087 | 0         |  |
|     |      | Shiraz-4T  | 260  | 0        | -0.324128 |  |
|     |      | Shiraz-16T | 294  | 0.655804 | 0         |  |
|     |      | Shiraz-31T | 345  | 0.103301 | 0         |  |
|     |      | Shiraz-36T | 431  | 0        | -0.78035  |  |
|     |      | Shiraz-36T | 432  | 0        | -0.6692   |  |
|     |      | Shiraz-44T | 891  | 0        | -0.954044 |  |
|     |      | Shiraz-44T | 896  | 0        | -0.109108 |  |
|     |      | Shiraz-46T | 991  | 0.139564 | 0         |  |
|     |      | Shiraz-47T | 1084 | 0.24185  | 0         |  |
|     |      | Shiraz-49T | 1166 | 0        | -0.917235 |  |
|     |      | Shiraz-49T | 1169 | 0        | -0.583529 |  |
|     |      | Shiraz-77T | 1282 | 0.213849 | 0         |  |
|     |      | Shiraz-9T  | 1368 | 0.199713 | 0         |  |
|     |      | Shiraz-9T  | 1369 | 0.703374 | 0         |  |
|     |      | Shiraz-18T | 1455 | 0        | -0.186773 |  |
|     |      | Shiraz-22T | 1669 | 0.695915 | 0         |  |
|     |      | Shiraz-22T | 1672 | 1.01678  | 0         |  |
|     |      | Shiraz-25T | 1717 | 0.420447 | 0         |  |
|     |      | Shiraz-28T | 1760 | 0.538181 | 0         |  |
|     |      | Shiraz-29T | 1800 | 0.672527 | 0         |  |
|     |      | Shiraz-32T | 1869 | 0.776805 | 0         |  |
|     |      | Shiraz-35T | 1932 | 0.507141 | 0         |  |
|     |      | Shiraz-58T | 2221 | 0.871948 | 0         |  |
|     |      | Shiraz-71T | 2260 | 0.68394  | 0         |  |
|     |      | Shiraz-71T | 2262 | 0.986748 | 0         |  |
|     |      | Shiraz-3T  | 238  | 0.472087 | 0         |  |
|     |      | Shiraz-4T  | 260  | 0        | -0.324128 |  |
|     |      | Shiraz-16T | 294  | 0.655804 | 0         |  |
|     |      | Shiraz-31T | 345  | 0.103301 | 0         |  |
|     |      | Shiraz-36T | 431  | 0        | -0.78035  |  |
|     |      | Shiraz-36T | 432  | 0        | -0.6692   |  |
|     |      | Shiraz-44T | 891  | 0        | -0.954044 |  |
|     |      | Shiraz-44T | 896  | 0        | -0.109108 |  |
|     |      | Shiraz-46T | 991  | 0.139564 | 0         |  |
|     |      | Shiraz-47T | 1084 | 0.24185  | 0         |  |
|     |      | Shiraz-49T | 1166 | 0        | -0.917235 |  |
|     |      | Shiraz-49T | 1169 | 0        | -0.583529 |  |
|     |      | Shiraz-77T | 1282 | 0.213849 | 0         |  |
|     |      | Shiraz-9T  | 1368 | 0.199713 | 0         |  |
|     |      | Shiraz-9T  | 1369 | 0.703374 | 0         |  |
|     |      | Shiraz-18T | 1455 | 0        | -0.186773 |  |
|     |      | Shiraz-22T | 1669 | 0.695915 | 0         |  |



|      |      |            |      |          |           |  |
|------|------|------------|------|----------|-----------|--|
|      |      | Shiraz-22T | 1672 | 1.01678  | 0         |  |
|      |      | Shiraz-25T | 1717 | 0.420447 | 0         |  |
|      |      | Shiraz-28T | 1760 | 0.538181 | 0         |  |
|      |      | Shiraz-29T | 1800 | 0.672527 | 0         |  |
|      |      | Shiraz-32T | 1869 | 0.776805 | 0         |  |
|      |      | Shiraz-35T | 1932 | 0.507141 | 0         |  |
|      |      | Shiraz-58T | 2221 | 0.871948 | 0         |  |
|      |      | Shiraz-71T | 2260 | 0.68394  | 0         |  |
|      |      | Shiraz-71T | 2262 | 0.986748 | 0         |  |
|      |      | Shiraz-3T  | 238  | 0.472087 | 0         |  |
|      |      | Shiraz-4T  | 260  | 0        | -0.324128 |  |
|      |      | Shiraz-16T | 294  | 0.655804 | 0         |  |
|      |      | Shiraz-31T | 345  | 0.103301 | 0         |  |
|      |      | Shiraz-36T | 431  | 0        | -0.78035  |  |
|      |      | Shiraz-36T | 432  | 0        | -0.6692   |  |
|      |      | Shiraz-44T | 891  | 0        | -0.954044 |  |
|      |      | Shiraz-44T | 896  | 0        | -0.109108 |  |
|      |      | Shiraz-46T | 991  | 0.139564 | 0         |  |
|      |      | Shiraz-47T | 1084 | 0.24185  | 0         |  |
|      |      | Shiraz-49T | 1166 | 0        | -0.917235 |  |
|      |      | Shiraz-49T | 1169 | 0        | -0.583529 |  |
|      |      | Shiraz-77T | 1282 | 0.213849 | 0         |  |
|      |      | Shiraz-9T  | 1368 | 0.199713 | 0         |  |
|      |      | Shiraz-9T  | 1369 | 0.703374 | 0         |  |
|      |      | Shiraz-18T | 1455 | 0        | -0.186773 |  |
|      |      | Shiraz-22T | 1669 | 0.695915 | 0         |  |
|      |      | Shiraz-22T | 1672 | 1.01678  | 0         |  |
|      |      | Shiraz-25T | 1717 | 0.420447 | 0         |  |
|      |      | Shiraz-28T | 1760 | 0.538181 | 0         |  |
|      |      | Shiraz-29T | 1800 | 0.672527 | 0         |  |
|      |      | Shiraz-32T | 1869 | 0.776805 | 0         |  |
|      |      | Shiraz-35T | 1932 | 0.507141 | 0         |  |
|      |      | Shiraz-58T | 2221 | 0.871948 | 0         |  |
|      |      | Shiraz-71T | 2260 | 0.68394  | 0         |  |
|      |      | Shiraz-71T | 2262 | 0.986748 | 0         |  |
| WASL | chr7 | Shiraz-3T  | 90   | 0.219276 | 0         |  |
|      |      | Shiraz-3T  | 95   | 0        | -0.077623 |  |
|      |      | Shiraz-4T  | 253  | 0.372918 | 0         |  |
|      |      | Shiraz-36T | 378  | 0.179558 | 0         |  |
|      |      | Shiraz-36T | 382  | 0.081739 | 0         |  |
|      |      | Shiraz-44T | 641  | 0        | -0.477846 |  |
|      |      | Shiraz-46T | 943  | 0.093799 | 0         |  |
|      |      | Shiraz-46T | 947  | 0        | -0.010843 |  |
|      |      | Shiraz-47T | 1031 | 0        | -0.117529 |  |
|      |      | Shiraz-49T | 1121 | 0        | -0.138569 |  |
|      |      | Shiraz-77T | 1225 | 0        | -0.117922 |  |
|      |      | Shiraz-77T | 1228 | 0        | -0.238084 |  |

|  |            |      |          |           |  |
|--|------------|------|----------|-----------|--|
|  | Shiraz-18T | 1434 | 0.244465 | 0         |  |
|  | Shiraz-22T | 1549 | 0        | -0.319623 |  |
|  | Shiraz-22T | 1552 | 0        | -0.50686  |  |
|  | Shiraz-25T | 1698 | 0.21835  | 0         |  |
|  | Shiraz-28T | 1735 | 0.350744 | 0         |  |
|  | Shiraz-29T | 1778 | 0.120767 | 0         |  |
|  | Shiraz-32T | 1833 | 0.551336 | 0         |  |
|  | Shiraz-32T | 1835 | 0.092727 | 0         |  |
|  | Shiraz-38T | 1951 | 0.250891 | 0         |  |
|  | Shiraz-53T | 2078 | 0.287202 | 0         |  |
|  | Shiraz-58T | 2161 | 0        | -0.187744 |  |
|  | Shiraz-71T | 2238 | 0.603631 | 0         |  |
|  | Shiraz-3T  | 90   | 0.219276 | 0         |  |
|  | Shiraz-3T  | 95   | 0        | -0.077623 |  |
|  | Shiraz-4T  | 253  | 0.372918 | 0         |  |
|  | Shiraz-36T | 378  | 0.179558 | 0         |  |
|  | Shiraz-36T | 382  | 0.081739 | 0         |  |
|  | Shiraz-44T | 641  | 0        | -0.477846 |  |
|  | Shiraz-46T | 943  | 0.093799 | 0         |  |
|  | Shiraz-46T | 947  | 0        | -0.010843 |  |
|  | Shiraz-47T | 1031 | 0        | -0.117529 |  |
|  | Shiraz-49T | 1121 | 0        | -0.138569 |  |
|  | Shiraz-77T | 1225 | 0        | -0.117922 |  |
|  | Shiraz-77T | 1228 | 0        | -0.238084 |  |
|  | Shiraz-18T | 1434 | 0.244465 | 0         |  |
|  | Shiraz-22T | 1549 | 0        | -0.319623 |  |
|  | Shiraz-22T | 1552 | 0        | -0.50686  |  |
|  | Shiraz-25T | 1698 | 0.21835  | 0         |  |
|  | Shiraz-28T | 1735 | 0.350744 | 0         |  |
|  | Shiraz-29T | 1778 | 0.120767 | 0         |  |
|  | Shiraz-32T | 1833 | 0.551336 | 0         |  |
|  | Shiraz-32T | 1835 | 0.092727 | 0         |  |
|  | Shiraz-38T | 1951 | 0.250891 | 0         |  |
|  | Shiraz-53T | 2078 | 0.287202 | 0         |  |
|  | Shiraz-58T | 2161 | 0        | -0.187744 |  |
|  | Shiraz-71T | 2238 | 0.603631 | 0         |  |
|  | Shiraz-3T  | 90   | 0.219276 | 0         |  |
|  | Shiraz-3T  | 95   | 0        | -0.077623 |  |
|  | Shiraz-4T  | 253  | 0.372918 | 0         |  |
|  | Shiraz-36T | 378  | 0.179558 | 0         |  |
|  | Shiraz-36T | 382  | 0.081739 | 0         |  |
|  | Shiraz-44T | 641  | 0        | -0.477846 |  |
|  | Shiraz-46T | 943  | 0.093799 | 0         |  |
|  | Shiraz-46T | 947  | 0        | -0.010843 |  |
|  | Shiraz-47T | 1031 | 0        | -0.117529 |  |
|  | Shiraz-49T | 1121 | 0        | -0.138569 |  |
|  | Shiraz-77T | 1225 | 0        | -0.117922 |  |

|      |      |            |      |          |           |  |  |
|------|------|------------|------|----------|-----------|--|--|
|      |      | Shiraz-77T | 1228 | 0        | -0.238084 |  |  |
|      |      | Shiraz-18T | 1434 | 0.244465 | 0         |  |  |
|      |      | Shiraz-22T | 1549 | 0        | -0.319623 |  |  |
|      |      | Shiraz-22T | 1552 | 0        | -0.50686  |  |  |
|      |      | Shiraz-25T | 1698 | 0.21835  | 0         |  |  |
|      |      | Shiraz-28T | 1735 | 0.350744 | 0         |  |  |
|      |      | Shiraz-29T | 1778 | 0.120767 | 0         |  |  |
|      |      | Shiraz-32T | 1833 | 0.551336 | 0         |  |  |
|      |      | Shiraz-32T | 1835 | 0.092727 | 0         |  |  |
|      |      | Shiraz-38T | 1951 | 0.250891 | 0         |  |  |
|      |      | Shiraz-53T | 2078 | 0.287202 | 0         |  |  |
|      |      | Shiraz-58T | 2161 | 0        | -0.187744 |  |  |
|      |      | Shiraz-71T | 2238 | 0.603631 | 0         |  |  |
| WBP5 | chrX | Shiraz-3T  | 242  | 0        | -0.336434 |  |  |
|      |      | Shiraz-4T  | 261  | 0        | -0.336249 |  |  |
|      |      | Shiraz-16T | 295  | 0.591657 | 0         |  |  |
|      |      | Shiraz-36T | 433  | 0        | -0.803961 |  |  |
|      |      | Shiraz-44T | 899  | 0        | -1.09697  |  |  |
|      |      | Shiraz-49T | 1170 | 0        | -0.967436 |  |  |
|      |      | Shiraz-18T | 1457 | 0.643204 | 0         |  |  |
|      |      | Shiraz-22T | 1673 | 0.611783 | 0         |  |  |
|      |      | Shiraz-25T | 1719 | 0.472955 | 0         |  |  |
|      |      | Shiraz-28T | 1762 | 0.562311 | 0         |  |  |
|      |      | Shiraz-29T | 1801 | 0.815343 | 0         |  |  |
|      |      | Shiraz-32T | 1870 | 0.729766 | 0         |  |  |
|      |      | Shiraz-35T | 1933 | 0.488535 | 0         |  |  |
|      |      | Shiraz-58T | 2223 | 0.833364 | 0         |  |  |
|      |      | Shiraz-71T | 2263 | 0.975531 | 0         |  |  |
|      |      | Shiraz-3T  | 242  | 0        | -0.336434 |  |  |
|      |      | Shiraz-4T  | 261  | 0        | -0.336249 |  |  |
|      |      | Shiraz-16T | 295  | 0.591657 | 0         |  |  |
|      |      | Shiraz-36T | 433  | 0        | -0.803961 |  |  |
|      |      | Shiraz-44T | 899  | 0        | -1.09697  |  |  |
|      |      | Shiraz-49T | 1170 | 0        | -0.967436 |  |  |
|      |      | Shiraz-18T | 1457 | 0.643204 | 0         |  |  |
|      |      | Shiraz-22T | 1673 | 0.611783 | 0         |  |  |
|      |      | Shiraz-25T | 1719 | 0.472955 | 0         |  |  |
|      |      | Shiraz-28T | 1762 | 0.562311 | 0         |  |  |
|      |      | Shiraz-29T | 1801 | 0.815343 | 0         |  |  |
|      |      | Shiraz-32T | 1870 | 0.729766 | 0         |  |  |
|      |      | Shiraz-35T | 1933 | 0.488535 | 0         |  |  |
|      |      | Shiraz-58T | 2223 | 0.833364 | 0         |  |  |
|      |      | Shiraz-71T | 2263 | 0.975531 | 0         |  |  |
|      |      | Shiraz-3T  | 242  | 0        | -0.336434 |  |  |
|      |      | Shiraz-4T  | 261  | 0        | -0.336249 |  |  |
|      |      | Shiraz-16T | 295  | 0.591657 | 0         |  |  |
|      |      | Shiraz-36T | 433  | 0        | -0.803961 |  |  |

|       |      |            |      |          |           |  |  |
|-------|------|------------|------|----------|-----------|--|--|
|       |      | Shiraz-44T | 899  | 0        | -1.09697  |  |  |
|       |      | Shiraz-49T | 1170 | 0        | -0.967436 |  |  |
|       |      | Shiraz-18T | 1457 | 0.643204 | 0         |  |  |
|       |      | Shiraz-22T | 1673 | 0.611783 | 0         |  |  |
|       |      | Shiraz-25T | 1719 | 0.472955 | 0         |  |  |
|       |      | Shiraz-28T | 1762 | 0.562311 | 0         |  |  |
|       |      | Shiraz-29T | 1801 | 0.815343 | 0         |  |  |
|       |      | Shiraz-32T | 1870 | 0.729766 | 0         |  |  |
|       |      | Shiraz-35T | 1933 | 0.488535 | 0         |  |  |
|       |      | Shiraz-58T | 2223 | 0.833364 | 0         |  |  |
|       |      | Shiraz-71T | 2263 | 0.975531 | 0         |  |  |
| WDR13 | chrX | Shiraz-3T  | 238  | 0.472087 | 0         |  |  |
|       |      | Shiraz-4T  | 260  | 0        | -0.324128 |  |  |
|       |      | Shiraz-16T | 294  | 0.655804 | 0         |  |  |
|       |      | Shiraz-31T | 345  | 0.103301 | 0         |  |  |
|       |      | Shiraz-36T | 431  | 0        | -0.78035  |  |  |
|       |      | Shiraz-36T | 432  | 0        | -0.6692   |  |  |
|       |      | Shiraz-44T | 891  | 0        | -0.954044 |  |  |
|       |      | Shiraz-44T | 896  | 0        | -0.109108 |  |  |
|       |      | Shiraz-46T | 991  | 0.139564 | 0         |  |  |
|       |      | Shiraz-47T | 1084 | 0.24185  | 0         |  |  |
|       |      | Shiraz-49T | 1166 | 0        | -0.917235 |  |  |
|       |      | Shiraz-49T | 1169 | 0        | -0.583529 |  |  |
|       |      | Shiraz-77T | 1282 | 0.213849 | 0         |  |  |
|       |      | Shiraz-9T  | 1368 | 0.199713 | 0         |  |  |
|       |      | Shiraz-9T  | 1369 | 0.703374 | 0         |  |  |
|       |      | Shiraz-18T | 1455 | 0        | -0.186773 |  |  |
|       |      | Shiraz-22T | 1669 | 0.695915 | 0         |  |  |
|       |      | Shiraz-22T | 1672 | 1.01678  | 0         |  |  |
|       |      | Shiraz-25T | 1717 | 0.420447 | 0         |  |  |
|       |      | Shiraz-28T | 1760 | 0.538181 | 0         |  |  |
|       |      | Shiraz-29T | 1800 | 0.672527 | 0         |  |  |
|       |      | Shiraz-32T | 1869 | 0.776805 | 0         |  |  |
|       |      | Shiraz-35T | 1932 | 0.507141 | 0         |  |  |
|       |      | Shiraz-58T | 2221 | 0.871948 | 0         |  |  |
|       |      | Shiraz-71T | 2260 | 0.68394  | 0         |  |  |
|       |      | Shiraz-71T | 2262 | 0.986748 | 0         |  |  |
|       |      | Shiraz-3T  | 238  | 0.472087 | 0         |  |  |
|       |      | Shiraz-4T  | 260  | 0        | -0.324128 |  |  |
|       |      | Shiraz-16T | 294  | 0.655804 | 0         |  |  |
|       |      | Shiraz-31T | 345  | 0.103301 | 0         |  |  |
|       |      | Shiraz-36T | 431  | 0        | -0.78035  |  |  |
|       |      | Shiraz-36T | 432  | 0        | -0.6692   |  |  |
|       |      | Shiraz-44T | 891  | 0        | -0.954044 |  |  |
|       |      | Shiraz-44T | 896  | 0        | -0.109108 |  |  |
|       |      | Shiraz-46T | 991  | 0.139564 | 0         |  |  |
|       |      | Shiraz-47T | 1084 | 0.24185  | 0         |  |  |

|        |      |            |      |          |           |  |  |
|--------|------|------------|------|----------|-----------|--|--|
|        |      | Shiraz-49T | 1166 | 0        | -0.917235 |  |  |
|        |      | Shiraz-49T | 1169 | 0        | -0.583529 |  |  |
|        |      | Shiraz-77T | 1282 | 0.213849 | 0         |  |  |
|        |      | Shiraz-9T  | 1368 | 0.199713 | 0         |  |  |
|        |      | Shiraz-9T  | 1369 | 0.703374 | 0         |  |  |
|        |      | Shiraz-18T | 1455 | 0        | -0.186773 |  |  |
|        |      | Shiraz-22T | 1669 | 0.695915 | 0         |  |  |
|        |      | Shiraz-22T | 1672 | 1.01678  | 0         |  |  |
|        |      | Shiraz-25T | 1717 | 0.420447 | 0         |  |  |
|        |      | Shiraz-28T | 1760 | 0.538181 | 0         |  |  |
|        |      | Shiraz-29T | 1800 | 0.672527 | 0         |  |  |
|        |      | Shiraz-32T | 1869 | 0.776805 | 0         |  |  |
|        |      | Shiraz-35T | 1932 | 0.507141 | 0         |  |  |
|        |      | Shiraz-58T | 2221 | 0.871948 | 0         |  |  |
|        |      | Shiraz-71T | 2260 | 0.68394  | 0         |  |  |
|        |      | Shiraz-71T | 2262 | 0.986748 | 0         |  |  |
|        |      | Shiraz-3T  | 238  | 0.472087 | 0         |  |  |
|        |      | Shiraz-4T  | 260  | 0        | -0.324128 |  |  |
|        |      | Shiraz-16T | 294  | 0.655804 | 0         |  |  |
|        |      | Shiraz-31T | 345  | 0.103301 | 0         |  |  |
|        |      | Shiraz-36T | 431  | 0        | -0.78035  |  |  |
|        |      | Shiraz-36T | 432  | 0        | -0.6692   |  |  |
|        |      | Shiraz-44T | 891  | 0        | -0.954044 |  |  |
|        |      | Shiraz-44T | 896  | 0        | -0.109108 |  |  |
|        |      | Shiraz-46T | 991  | 0.139564 | 0         |  |  |
|        |      | Shiraz-47T | 1084 | 0.24185  | 0         |  |  |
|        |      | Shiraz-49T | 1166 | 0        | -0.917235 |  |  |
|        |      | Shiraz-49T | 1169 | 0        | -0.583529 |  |  |
|        |      | Shiraz-77T | 1282 | 0.213849 | 0         |  |  |
|        |      | Shiraz-9T  | 1368 | 0.199713 | 0         |  |  |
|        |      | Shiraz-9T  | 1369 | 0.703374 | 0         |  |  |
|        |      | Shiraz-18T | 1455 | 0        | -0.186773 |  |  |
|        |      | Shiraz-22T | 1669 | 0.695915 | 0         |  |  |
|        |      | Shiraz-22T | 1672 | 1.01678  | 0         |  |  |
|        |      | Shiraz-25T | 1717 | 0.420447 | 0         |  |  |
|        |      | Shiraz-28T | 1760 | 0.538181 | 0         |  |  |
|        |      | Shiraz-29T | 1800 | 0.672527 | 0         |  |  |
|        |      | Shiraz-32T | 1869 | 0.776805 | 0         |  |  |
|        |      | Shiraz-35T | 1932 | 0.507141 | 0         |  |  |
|        |      | Shiraz-58T | 2221 | 0.871948 | 0         |  |  |
|        |      | Shiraz-71T | 2260 | 0.68394  | 0         |  |  |
|        |      | Shiraz-71T | 2262 | 0.986748 | 0         |  |  |
| WDR40B | chrX | Shiraz-3T  | 242  | 0        | -0.336434 |  |  |
|        |      | Shiraz-4T  | 261  | 0        | -0.336249 |  |  |
|        |      | Shiraz-16T | 295  | 0.591657 | 0         |  |  |
|        |      | Shiraz-36T | 433  | 0        | -0.803961 |  |  |
|        |      | Shiraz-44T | 899  | 0        | -1.09697  |  |  |

|  |  |            |      |          |           |  |  |
|--|--|------------|------|----------|-----------|--|--|
|  |  | Shiraz-44T | 905  | 0        | -1.465843 |  |  |
|  |  | Shiraz-49T | 1170 | 0        | -0.967436 |  |  |
|  |  | Shiraz-9T  | 1370 | 0.690073 | 0         |  |  |
|  |  | Shiraz-18T | 1457 | 0.643204 | 0         |  |  |
|  |  | Shiraz-22T | 1673 | 0.611783 | 0         |  |  |
|  |  | Shiraz-22T | 1676 | 0.259626 | 0         |  |  |
|  |  | Shiraz-25T | 1719 | 0.472955 | 0         |  |  |
|  |  | Shiraz-28T | 1762 | 0.562311 | 0         |  |  |
|  |  | Shiraz-29T | 1801 | 0.815343 | 0         |  |  |
|  |  | Shiraz-32T | 1870 | 0.729766 | 0         |  |  |
|  |  | Shiraz-35T | 1933 | 0.488535 | 0         |  |  |
|  |  | Shiraz-53T | 2114 | 0        | -0.727152 |  |  |
|  |  | Shiraz-58T | 2223 | 0.833364 | 0         |  |  |
|  |  | Shiraz-71T | 2263 | 0.975531 | 0         |  |  |
|  |  | Shiraz-3T  | 242  | 0        | -0.336434 |  |  |
|  |  | Shiraz-4T  | 261  | 0        | -0.336249 |  |  |
|  |  | Shiraz-16T | 295  | 0.591657 | 0         |  |  |
|  |  | Shiraz-36T | 433  | 0        | -0.803961 |  |  |
|  |  | Shiraz-44T | 899  | 0        | -1.09697  |  |  |
|  |  | Shiraz-44T | 905  | 0        | -1.465843 |  |  |
|  |  | Shiraz-49T | 1170 | 0        | -0.967436 |  |  |
|  |  | Shiraz-9T  | 1370 | 0.690073 | 0         |  |  |
|  |  | Shiraz-18T | 1457 | 0.643204 | 0         |  |  |
|  |  | Shiraz-22T | 1673 | 0.611783 | 0         |  |  |
|  |  | Shiraz-22T | 1676 | 0.259626 | 0         |  |  |
|  |  | Shiraz-25T | 1719 | 0.472955 | 0         |  |  |
|  |  | Shiraz-28T | 1762 | 0.562311 | 0         |  |  |
|  |  | Shiraz-29T | 1801 | 0.815343 | 0         |  |  |
|  |  | Shiraz-32T | 1870 | 0.729766 | 0         |  |  |
|  |  | Shiraz-35T | 1933 | 0.488535 | 0         |  |  |
|  |  | Shiraz-53T | 2114 | 0        | -0.727152 |  |  |
|  |  | Shiraz-58T | 2223 | 0.833364 | 0         |  |  |
|  |  | Shiraz-71T | 2263 | 0.975531 | 0         |  |  |
|  |  | Shiraz-3T  | 242  | 0        | -0.336434 |  |  |
|  |  | Shiraz-4T  | 261  | 0        | -0.336249 |  |  |
|  |  | Shiraz-16T | 295  | 0.591657 | 0         |  |  |
|  |  | Shiraz-36T | 433  | 0        | -0.803961 |  |  |
|  |  | Shiraz-44T | 899  | 0        | -1.09697  |  |  |
|  |  | Shiraz-44T | 905  | 0        | -1.465843 |  |  |
|  |  | Shiraz-49T | 1170 | 0        | -0.967436 |  |  |
|  |  | Shiraz-9T  | 1370 | 0.690073 | 0         |  |  |
|  |  | Shiraz-18T | 1457 | 0.643204 | 0         |  |  |
|  |  | Shiraz-22T | 1673 | 0.611783 | 0         |  |  |
|  |  | Shiraz-22T | 1676 | 0.259626 | 0         |  |  |
|  |  | Shiraz-25T | 1719 | 0.472955 | 0         |  |  |
|  |  | Shiraz-28T | 1762 | 0.562311 | 0         |  |  |
|  |  | Shiraz-29T | 1801 | 0.815343 | 0         |  |  |

|        |      |            |      |          |           |  |
|--------|------|------------|------|----------|-----------|--|
|        |      | Shiraz-32T | 1870 | 0.729766 | 0         |  |
|        |      | Shiraz-35T | 1933 | 0.488535 | 0         |  |
|        |      | Shiraz-53T | 2114 | 0        | -0.727152 |  |
|        |      | Shiraz-58T | 2223 | 0.833364 | 0         |  |
|        |      | Shiraz-71T | 2263 | 0.975531 | 0         |  |
| WDR40C | chrX | Shiraz-3T  | 242  | 0        | -0.336434 |  |
|        |      | Shiraz-4T  | 261  | 0        | -0.336249 |  |
|        |      | Shiraz-16T | 295  | 0.591657 | 0         |  |
|        |      | Shiraz-36T | 433  | 0        | -0.803961 |  |
|        |      | Shiraz-44T | 899  | 0        | -1.09697  |  |
|        |      | Shiraz-44T | 905  | 0        | -1.465843 |  |
|        |      | Shiraz-49T | 1170 | 0        | -0.967436 |  |
|        |      | Shiraz-9T  | 1370 | 0.690073 | 0         |  |
|        |      | Shiraz-18T | 1457 | 0.643204 | 0         |  |
|        |      | Shiraz-22T | 1673 | 0.611783 | 0         |  |
|        |      | Shiraz-22T | 1676 | 0.259626 | 0         |  |
|        |      | Shiraz-25T | 1719 | 0.472955 | 0         |  |
|        |      | Shiraz-28T | 1762 | 0.562311 | 0         |  |
|        |      | Shiraz-29T | 1801 | 0.815343 | 0         |  |
|        |      | Shiraz-32T | 1870 | 0.729766 | 0         |  |
|        |      | Shiraz-35T | 1933 | 0.488535 | 0         |  |
|        |      | Shiraz-53T | 2114 | 0        | -0.727152 |  |
|        |      | Shiraz-58T | 2223 | 0.833364 | 0         |  |
|        |      | Shiraz-71T | 2263 | 0.975531 | 0         |  |
|        |      | Shiraz-3T  | 242  | 0        | -0.336434 |  |
|        |      | Shiraz-4T  | 261  | 0        | -0.336249 |  |
|        |      | Shiraz-16T | 295  | 0.591657 | 0         |  |
|        |      | Shiraz-36T | 433  | 0        | -0.803961 |  |
|        |      | Shiraz-44T | 899  | 0        | -1.09697  |  |
|        |      | Shiraz-44T | 905  | 0        | -1.465843 |  |
|        |      | Shiraz-49T | 1170 | 0        | -0.967436 |  |
|        |      | Shiraz-9T  | 1370 | 0.690073 | 0         |  |
|        |      | Shiraz-18T | 1457 | 0.643204 | 0         |  |
|        |      | Shiraz-22T | 1673 | 0.611783 | 0         |  |
|        |      | Shiraz-22T | 1676 | 0.259626 | 0         |  |
|        |      | Shiraz-25T | 1719 | 0.472955 | 0         |  |
|        |      | Shiraz-28T | 1762 | 0.562311 | 0         |  |
|        |      | Shiraz-29T | 1801 | 0.815343 | 0         |  |
|        |      | Shiraz-32T | 1870 | 0.729766 | 0         |  |
|        |      | Shiraz-35T | 1933 | 0.488535 | 0         |  |
|        |      | Shiraz-53T | 2114 | 0        | -0.727152 |  |
|        |      | Shiraz-58T | 2223 | 0.833364 | 0         |  |
|        |      | Shiraz-71T | 2263 | 0.975531 | 0         |  |
|        |      | Shiraz-3T  | 242  | 0        | -0.336434 |  |
|        |      | Shiraz-4T  | 261  | 0        | -0.336249 |  |
|        |      | Shiraz-16T | 295  | 0.591657 | 0         |  |
|        |      | Shiraz-36T | 433  | 0        | -0.803961 |  |

|        |      |            |      |          |           |  |  |
|--------|------|------------|------|----------|-----------|--|--|
|        |      | Shiraz-44T | 899  | 0        | -1.09697  |  |  |
|        |      | Shiraz-44T | 905  | 0        | -1.465843 |  |  |
|        |      | Shiraz-49T | 1170 | 0        | -0.967436 |  |  |
|        |      | Shiraz-9T  | 1370 | 0.690073 | 0         |  |  |
|        |      | Shiraz-18T | 1457 | 0.643204 | 0         |  |  |
|        |      | Shiraz-22T | 1673 | 0.611783 | 0         |  |  |
|        |      | Shiraz-22T | 1676 | 0.259626 | 0         |  |  |
|        |      | Shiraz-25T | 1719 | 0.472955 | 0         |  |  |
|        |      | Shiraz-28T | 1762 | 0.562311 | 0         |  |  |
|        |      | Shiraz-29T | 1801 | 0.815343 | 0         |  |  |
|        |      | Shiraz-32T | 1870 | 0.729766 | 0         |  |  |
|        |      | Shiraz-35T | 1933 | 0.488535 | 0         |  |  |
|        |      | Shiraz-53T | 2114 | 0        | -0.727152 |  |  |
|        |      | Shiraz-58T | 2223 | 0.833364 | 0         |  |  |
|        |      | Shiraz-71T | 2263 | 0.975531 | 0         |  |  |
| WDR42B | chrX | Shiraz-3T  | 235  | 0        | -0.28401  |  |  |
|        |      | Shiraz-3T  | 236  | 0        | -0.435445 |  |  |
|        |      | Shiraz-4T  | 260  | 0        | -0.324128 |  |  |
|        |      | Shiraz-16T | 294  | 0.655804 | 0         |  |  |
|        |      | Shiraz-36T | 431  | 0        | -0.78035  |  |  |
|        |      | Shiraz-44T | 891  | 0        | -0.954044 |  |  |
|        |      | Shiraz-44T | 893  | 0        | -1.364406 |  |  |
|        |      | Shiraz-47T | 1083 | 0        | -0.103285 |  |  |
|        |      | Shiraz-49T | 1166 | 0        | -0.917235 |  |  |
|        |      | Shiraz-49T | 1168 | 0        | -1.073859 |  |  |
|        |      | Shiraz-9T  | 1368 | 0.199713 | 0         |  |  |
|        |      | Shiraz-18T | 1455 | 0        | -0.186773 |  |  |
|        |      | Shiraz-22T | 1669 | 0.695915 | 0         |  |  |
|        |      | Shiraz-22T | 1671 | 0.369309 | 0         |  |  |
|        |      | Shiraz-25T | 1717 | 0.420447 | 0         |  |  |
|        |      | Shiraz-28T | 1760 | 0.538181 | 0         |  |  |
|        |      | Shiraz-29T | 1800 | 0.672527 | 0         |  |  |
|        |      | Shiraz-32T | 1869 | 0.776805 | 0         |  |  |
|        |      | Shiraz-35T | 1932 | 0.507141 | 0         |  |  |
|        |      | Shiraz-40T | 2051 | 0.098506 | 0         |  |  |
|        |      | Shiraz-58T | 2221 | 0.871948 | 0         |  |  |
|        |      | Shiraz-58T | 2222 | 0.679664 | 0         |  |  |
|        |      | Shiraz-71T | 2260 | 0.68394  | 0         |  |  |
|        |      | Shiraz-71T | 2261 | 0.508399 | 0         |  |  |
|        |      | Shiraz-3T  | 235  | 0        | -0.28401  |  |  |
|        |      | Shiraz-3T  | 236  | 0        | -0.435445 |  |  |
|        |      | Shiraz-4T  | 260  | 0        | -0.324128 |  |  |
|        |      | Shiraz-16T | 294  | 0.655804 | 0         |  |  |
|        |      | Shiraz-36T | 431  | 0        | -0.78035  |  |  |
|        |      | Shiraz-44T | 891  | 0        | -0.954044 |  |  |
|        |      | Shiraz-44T | 893  | 0        | -1.364406 |  |  |
|        |      | Shiraz-47T | 1083 | 0        | -0.103285 |  |  |



|        |      |            |      |          |           |  |  |
|--------|------|------------|------|----------|-----------|--|--|
|        |      | Shiraz-49T | 1166 | 0        | -0.917235 |  |  |
|        |      | Shiraz-49T | 1168 | 0        | -1.073859 |  |  |
|        |      | Shiraz-9T  | 1368 | 0.199713 | 0         |  |  |
|        |      | Shiraz-18T | 1455 | 0        | -0.186773 |  |  |
|        |      | Shiraz-22T | 1669 | 0.695915 | 0         |  |  |
|        |      | Shiraz-22T | 1671 | 0.369309 | 0         |  |  |
|        |      | Shiraz-25T | 1717 | 0.420447 | 0         |  |  |
|        |      | Shiraz-28T | 1760 | 0.538181 | 0         |  |  |
|        |      | Shiraz-29T | 1800 | 0.672527 | 0         |  |  |
|        |      | Shiraz-32T | 1869 | 0.776805 | 0         |  |  |
|        |      | Shiraz-35T | 1932 | 0.507141 | 0         |  |  |
|        |      | Shiraz-40T | 2051 | 0.098506 | 0         |  |  |
|        |      | Shiraz-58T | 2221 | 0.871948 | 0         |  |  |
|        |      | Shiraz-58T | 2222 | 0.679664 | 0         |  |  |
|        |      | Shiraz-71T | 2260 | 0.68394  | 0         |  |  |
|        |      | Shiraz-71T | 2261 | 0.508399 | 0         |  |  |
|        |      | Shiraz-3T  | 235  | 0        | -0.28401  |  |  |
|        |      | Shiraz-3T  | 236  | 0        | -0.435445 |  |  |
|        |      | Shiraz-4T  | 260  | 0        | -0.324128 |  |  |
|        |      | Shiraz-16T | 294  | 0.655804 | 0         |  |  |
|        |      | Shiraz-36T | 431  | 0        | -0.78035  |  |  |
|        |      | Shiraz-44T | 891  | 0        | -0.954044 |  |  |
|        |      | Shiraz-44T | 893  | 0        | -1.364406 |  |  |
|        |      | Shiraz-47T | 1083 | 0        | -0.103285 |  |  |
|        |      | Shiraz-49T | 1166 | 0        | -0.917235 |  |  |
|        |      | Shiraz-49T | 1168 | 0        | -1.073859 |  |  |
|        |      | Shiraz-9T  | 1368 | 0.199713 | 0         |  |  |
|        |      | Shiraz-18T | 1455 | 0        | -0.186773 |  |  |
|        |      | Shiraz-22T | 1669 | 0.695915 | 0         |  |  |
|        |      | Shiraz-22T | 1671 | 0.369309 | 0         |  |  |
|        |      | Shiraz-25T | 1717 | 0.420447 | 0         |  |  |
|        |      | Shiraz-28T | 1760 | 0.538181 | 0         |  |  |
|        |      | Shiraz-29T | 1800 | 0.672527 | 0         |  |  |
|        |      | Shiraz-32T | 1869 | 0.776805 | 0         |  |  |
|        |      | Shiraz-35T | 1932 | 0.507141 | 0         |  |  |
|        |      | Shiraz-40T | 2051 | 0.098506 | 0         |  |  |
|        |      | Shiraz-58T | 2221 | 0.871948 | 0         |  |  |
|        |      | Shiraz-58T | 2222 | 0.679664 | 0         |  |  |
|        |      | Shiraz-71T | 2260 | 0.68394  | 0         |  |  |
|        |      | Shiraz-71T | 2261 | 0.508399 | 0         |  |  |
| WDR42C | chrX | Shiraz-3T  | 235  | 0        | -0.28401  |  |  |
|        |      | Shiraz-3T  | 236  | 0        | -0.435445 |  |  |
|        |      | Shiraz-4T  | 260  | 0        | -0.324128 |  |  |
|        |      | Shiraz-16T | 294  | 0.655804 | 0         |  |  |
|        |      | Shiraz-36T | 431  | 0        | -0.78035  |  |  |
|        |      | Shiraz-44T | 891  | 0        | -0.954044 |  |  |
|        |      | Shiraz-44T | 893  | 0        | -1.364406 |  |  |

|  |            |      |          |           |  |
|--|------------|------|----------|-----------|--|
|  | Shiraz-47T | 1083 | 0        | -0.103285 |  |
|  | Shiraz-49T | 1166 | 0        | -0.917235 |  |
|  | Shiraz-49T | 1168 | 0        | -1.073859 |  |
|  | Shiraz-9T  | 1368 | 0.199713 | 0         |  |
|  | Shiraz-18T | 1455 | 0        | -0.186773 |  |
|  | Shiraz-22T | 1669 | 0.695915 | 0         |  |
|  | Shiraz-22T | 1671 | 0.369309 | 0         |  |
|  | Shiraz-25T | 1717 | 0.420447 | 0         |  |
|  | Shiraz-28T | 1760 | 0.538181 | 0         |  |
|  | Shiraz-29T | 1800 | 0.672527 | 0         |  |
|  | Shiraz-32T | 1869 | 0.776805 | 0         |  |
|  | Shiraz-35T | 1932 | 0.507141 | 0         |  |
|  | Shiraz-40T | 2051 | 0.098506 | 0         |  |
|  | Shiraz-58T | 2221 | 0.871948 | 0         |  |
|  | Shiraz-58T | 2222 | 0.679664 | 0         |  |
|  | Shiraz-71T | 2260 | 0.68394  | 0         |  |
|  | Shiraz-71T | 2261 | 0.508399 | 0         |  |
|  | Shiraz-3T  | 235  | 0        | -0.28401  |  |
|  | Shiraz-3T  | 236  | 0        | -0.435445 |  |
|  | Shiraz-4T  | 260  | 0        | -0.324128 |  |
|  | Shiraz-16T | 294  | 0.655804 | 0         |  |
|  | Shiraz-36T | 431  | 0        | -0.78035  |  |
|  | Shiraz-44T | 891  | 0        | -0.954044 |  |
|  | Shiraz-44T | 893  | 0        | -1.364406 |  |
|  | Shiraz-47T | 1083 | 0        | -0.103285 |  |
|  | Shiraz-49T | 1166 | 0        | -0.917235 |  |
|  | Shiraz-49T | 1168 | 0        | -1.073859 |  |
|  | Shiraz-9T  | 1368 | 0.199713 | 0         |  |
|  | Shiraz-18T | 1455 | 0        | -0.186773 |  |
|  | Shiraz-22T | 1669 | 0.695915 | 0         |  |
|  | Shiraz-22T | 1671 | 0.369309 | 0         |  |
|  | Shiraz-25T | 1717 | 0.420447 | 0         |  |
|  | Shiraz-28T | 1760 | 0.538181 | 0         |  |
|  | Shiraz-29T | 1800 | 0.672527 | 0         |  |
|  | Shiraz-32T | 1869 | 0.776805 | 0         |  |
|  | Shiraz-35T | 1932 | 0.507141 | 0         |  |
|  | Shiraz-40T | 2051 | 0.098506 | 0         |  |
|  | Shiraz-58T | 2221 | 0.871948 | 0         |  |
|  | Shiraz-58T | 2222 | 0.679664 | 0         |  |
|  | Shiraz-71T | 2260 | 0.68394  | 0         |  |
|  | Shiraz-71T | 2261 | 0.508399 | 0         |  |
|  | Shiraz-3T  | 235  | 0        | -0.28401  |  |
|  | Shiraz-3T  | 236  | 0        | -0.435445 |  |
|  | Shiraz-4T  | 260  | 0        | -0.324128 |  |
|  | Shiraz-16T | 294  | 0.655804 | 0         |  |
|  | Shiraz-36T | 431  | 0        | -0.78035  |  |
|  | Shiraz-44T | 891  | 0        | -0.954044 |  |

|       |      |            |      |          |           |  |  |
|-------|------|------------|------|----------|-----------|--|--|
|       |      | Shiraz-44T | 893  | 0        | -1.364406 |  |  |
|       |      | Shiraz-47T | 1083 | 0        | -0.103285 |  |  |
|       |      | Shiraz-49T | 1166 | 0        | -0.917235 |  |  |
|       |      | Shiraz-49T | 1168 | 0        | -1.073859 |  |  |
|       |      | Shiraz-9T  | 1368 | 0.199713 | 0         |  |  |
|       |      | Shiraz-18T | 1455 | 0        | -0.186773 |  |  |
|       |      | Shiraz-22T | 1669 | 0.695915 | 0         |  |  |
|       |      | Shiraz-22T | 1671 | 0.369309 | 0         |  |  |
|       |      | Shiraz-25T | 1717 | 0.420447 | 0         |  |  |
|       |      | Shiraz-28T | 1760 | 0.538181 | 0         |  |  |
|       |      | Shiraz-29T | 1800 | 0.672527 | 0         |  |  |
|       |      | Shiraz-32T | 1869 | 0.776805 | 0         |  |  |
|       |      | Shiraz-35T | 1932 | 0.507141 | 0         |  |  |
|       |      | Shiraz-40T | 2051 | 0.098506 | 0         |  |  |
|       |      | Shiraz-58T | 2221 | 0.871948 | 0         |  |  |
|       |      | Shiraz-58T | 2222 | 0.679664 | 0         |  |  |
|       |      | Shiraz-71T | 2260 | 0.68394  | 0         |  |  |
|       |      | Shiraz-71T | 2261 | 0.508399 | 0         |  |  |
| WDR44 | chrX | Shiraz-3T  | 242  | 0        | -0.336434 |  |  |
|       |      | Shiraz-4T  | 261  | 0        | -0.336249 |  |  |
|       |      | Shiraz-16T | 295  | 0.591657 | 0         |  |  |
|       |      | Shiraz-36T | 433  | 0        | -0.803961 |  |  |
|       |      | Shiraz-44T | 899  | 0        | -1.09697  |  |  |
|       |      | Shiraz-49T | 1170 | 0        | -0.967436 |  |  |
|       |      | Shiraz-18T | 1457 | 0.643204 | 0         |  |  |
|       |      | Shiraz-22T | 1673 | 0.611783 | 0         |  |  |
|       |      | Shiraz-25T | 1719 | 0.472955 | 0         |  |  |
|       |      | Shiraz-28T | 1762 | 0.562311 | 0         |  |  |
|       |      | Shiraz-29T | 1801 | 0.815343 | 0         |  |  |
|       |      | Shiraz-32T | 1870 | 0.729766 | 0         |  |  |
|       |      | Shiraz-35T | 1933 | 0.488535 | 0         |  |  |
|       |      | Shiraz-58T | 2223 | 0.833364 | 0         |  |  |
|       |      | Shiraz-71T | 2263 | 0.975531 | 0         |  |  |
|       |      | Shiraz-3T  | 242  | 0        | -0.336434 |  |  |
|       |      | Shiraz-4T  | 261  | 0        | -0.336249 |  |  |
|       |      | Shiraz-16T | 295  | 0.591657 | 0         |  |  |
|       |      | Shiraz-36T | 433  | 0        | -0.803961 |  |  |
|       |      | Shiraz-44T | 899  | 0        | -1.09697  |  |  |
|       |      | Shiraz-49T | 1170 | 0        | -0.967436 |  |  |
|       |      | Shiraz-18T | 1457 | 0.643204 | 0         |  |  |
|       |      | Shiraz-22T | 1673 | 0.611783 | 0         |  |  |
|       |      | Shiraz-25T | 1719 | 0.472955 | 0         |  |  |
|       |      | Shiraz-28T | 1762 | 0.562311 | 0         |  |  |
|       |      | Shiraz-29T | 1801 | 0.815343 | 0         |  |  |
|       |      | Shiraz-32T | 1870 | 0.729766 | 0         |  |  |
|       |      | Shiraz-35T | 1933 | 0.488535 | 0         |  |  |
|       |      | Shiraz-58T | 2223 | 0.833364 | 0         |  |  |

|       |      |            |      |          |           |  |  |
|-------|------|------------|------|----------|-----------|--|--|
|       |      | Shiraz-71T | 2263 | 0.975531 | 0         |  |  |
|       |      | Shiraz-3T  | 242  | 0        | -0.336434 |  |  |
|       |      | Shiraz-4T  | 261  | 0        | -0.336249 |  |  |
|       |      | Shiraz-16T | 295  | 0.591657 | 0         |  |  |
|       |      | Shiraz-36T | 433  | 0        | -0.803961 |  |  |
|       |      | Shiraz-44T | 899  | 0        | -1.09697  |  |  |
|       |      | Shiraz-49T | 1170 | 0        | -0.967436 |  |  |
|       |      | Shiraz-18T | 1457 | 0.643204 | 0         |  |  |
|       |      | Shiraz-22T | 1673 | 0.611783 | 0         |  |  |
|       |      | Shiraz-25T | 1719 | 0.472955 | 0         |  |  |
|       |      | Shiraz-28T | 1762 | 0.562311 | 0         |  |  |
|       |      | Shiraz-29T | 1801 | 0.815343 | 0         |  |  |
|       |      | Shiraz-32T | 1870 | 0.729766 | 0         |  |  |
|       |      | Shiraz-35T | 1933 | 0.488535 | 0         |  |  |
|       |      | Shiraz-58T | 2223 | 0.833364 | 0         |  |  |
|       |      | Shiraz-71T | 2263 | 0.975531 | 0         |  |  |
| WDR45 | chrX | Shiraz-3T  | 238  | 0.472087 | 0         |  |  |
|       |      | Shiraz-3T  | 238  | 0.472087 | 0         |  |  |
|       |      | Shiraz-4T  | 260  | 0        | -0.324128 |  |  |
|       |      | Shiraz-4T  | 260  | 0        | -0.324128 |  |  |
|       |      | Shiraz-16T | 294  | 0.655804 | 0         |  |  |
|       |      | Shiraz-16T | 294  | 0.655804 | 0         |  |  |
|       |      | Shiraz-31T | 345  | 0.103301 | 0         |  |  |
|       |      | Shiraz-31T | 345  | 0.103301 | 0         |  |  |
|       |      | Shiraz-36T | 431  | 0        | -0.78035  |  |  |
|       |      | Shiraz-36T | 431  | 0        | -0.78035  |  |  |
|       |      | Shiraz-36T | 432  | 0        | -0.6692   |  |  |
|       |      | Shiraz-36T | 432  | 0        | -0.6692   |  |  |
|       |      | Shiraz-44T | 891  | 0        | -0.954044 |  |  |
|       |      | Shiraz-44T | 891  | 0        | -0.954044 |  |  |
|       |      | Shiraz-44T | 896  | 0        | -0.109108 |  |  |
|       |      | Shiraz-44T | 896  | 0        | -0.109108 |  |  |
|       |      | Shiraz-44T | 897  | 0.486937 | 0         |  |  |
|       |      | Shiraz-44T | 897  | 0.486937 | 0         |  |  |
|       |      | Shiraz-46T | 991  | 0.139564 | 0         |  |  |
|       |      | Shiraz-46T | 991  | 0.139564 | 0         |  |  |
|       |      | Shiraz-47T | 1084 | 0.24185  | 0         |  |  |
|       |      | Shiraz-47T | 1084 | 0.24185  | 0         |  |  |
|       |      | Shiraz-49T | 1166 | 0        | -0.917235 |  |  |
|       |      | Shiraz-49T | 1166 | 0        | -0.917235 |  |  |
|       |      | Shiraz-49T | 1169 | 0        | -0.583529 |  |  |
|       |      | Shiraz-49T | 1169 | 0        | -0.583529 |  |  |
|       |      | Shiraz-77T | 1282 | 0.213849 | 0         |  |  |
|       |      | Shiraz-77T | 1282 | 0.213849 | 0         |  |  |
|       |      | Shiraz-9T  | 1368 | 0.199713 | 0         |  |  |
|       |      | Shiraz-9T  | 1368 | 0.199713 | 0         |  |  |
|       |      | Shiraz-9T  | 1369 | 0.703374 | 0         |  |  |

|  |  |            |      |          |           |  |  |
|--|--|------------|------|----------|-----------|--|--|
|  |  | Shiraz-9T  | 1369 | 0.703374 | 0         |  |  |
|  |  | Shiraz-18T | 1455 | 0        | -0.186773 |  |  |
|  |  | Shiraz-18T | 1455 | 0        | -0.186773 |  |  |
|  |  | Shiraz-22T | 1669 | 0.695915 | 0         |  |  |
|  |  | Shiraz-22T | 1669 | 0.695915 | 0         |  |  |
|  |  | Shiraz-22T | 1672 | 1.01678  | 0         |  |  |
|  |  | Shiraz-22T | 1672 | 1.01678  | 0         |  |  |
|  |  | Shiraz-25T | 1717 | 0.420447 | 0         |  |  |
|  |  | Shiraz-25T | 1717 | 0.420447 | 0         |  |  |
|  |  | Shiraz-28T | 1760 | 0.538181 | 0         |  |  |
|  |  | Shiraz-28T | 1760 | 0.538181 | 0         |  |  |
|  |  | Shiraz-29T | 1800 | 0.672527 | 0         |  |  |
|  |  | Shiraz-29T | 1800 | 0.672527 | 0         |  |  |
|  |  | Shiraz-32T | 1869 | 0.776805 | 0         |  |  |
|  |  | Shiraz-32T | 1869 | 0.776805 | 0         |  |  |
|  |  | Shiraz-35T | 1932 | 0.507141 | 0         |  |  |
|  |  | Shiraz-35T | 1932 | 0.507141 | 0         |  |  |
|  |  | Shiraz-58T | 2221 | 0.871948 | 0         |  |  |
|  |  | Shiraz-58T | 2221 | 0.871948 | 0         |  |  |
|  |  | Shiraz-71T | 2260 | 0.68394  | 0         |  |  |
|  |  | Shiraz-71T | 2260 | 0.68394  | 0         |  |  |
|  |  | Shiraz-71T | 2262 | 0.986748 | 0         |  |  |
|  |  | Shiraz-71T | 2262 | 0.986748 | 0         |  |  |
|  |  | Shiraz-3T  | 238  | 0.472087 | 0         |  |  |
|  |  | Shiraz-3T  | 238  | 0.472087 | 0         |  |  |
|  |  | Shiraz-4T  | 260  | 0        | -0.324128 |  |  |
|  |  | Shiraz-4T  | 260  | 0        | -0.324128 |  |  |
|  |  | Shiraz-16T | 294  | 0.655804 | 0         |  |  |
|  |  | Shiraz-16T | 294  | 0.655804 | 0         |  |  |
|  |  | Shiraz-31T | 345  | 0.103301 | 0         |  |  |
|  |  | Shiraz-31T | 345  | 0.103301 | 0         |  |  |
|  |  | Shiraz-36T | 431  | 0        | -0.78035  |  |  |
|  |  | Shiraz-36T | 431  | 0        | -0.78035  |  |  |
|  |  | Shiraz-36T | 432  | 0        | -0.6692   |  |  |
|  |  | Shiraz-36T | 432  | 0        | -0.6692   |  |  |
|  |  | Shiraz-44T | 891  | 0        | -0.954044 |  |  |
|  |  | Shiraz-44T | 891  | 0        | -0.954044 |  |  |
|  |  | Shiraz-44T | 896  | 0        | -0.109108 |  |  |
|  |  | Shiraz-44T | 896  | 0        | -0.109108 |  |  |
|  |  | Shiraz-44T | 897  | 0.486937 | 0         |  |  |
|  |  | Shiraz-44T | 897  | 0.486937 | 0         |  |  |
|  |  | Shiraz-46T | 991  | 0.139564 | 0         |  |  |
|  |  | Shiraz-46T | 991  | 0.139564 | 0         |  |  |
|  |  | Shiraz-47T | 1084 | 0.24185  | 0         |  |  |
|  |  | Shiraz-47T | 1084 | 0.24185  | 0         |  |  |
|  |  | Shiraz-49T | 1166 | 0        | -0.917235 |  |  |
|  |  | Shiraz-49T | 1166 | 0        | -0.917235 |  |  |

|  |            |      |          |           |  |
|--|------------|------|----------|-----------|--|
|  | Shiraz-49T | 1169 | 0        | -0.583529 |  |
|  | Shiraz-49T | 1169 | 0        | -0.583529 |  |
|  | Shiraz-77T | 1282 | 0.213849 | 0         |  |
|  | Shiraz-77T | 1282 | 0.213849 | 0         |  |
|  | Shiraz-9T  | 1368 | 0.199713 | 0         |  |
|  | Shiraz-9T  | 1368 | 0.199713 | 0         |  |
|  | Shiraz-9T  | 1369 | 0.703374 | 0         |  |
|  | Shiraz-9T  | 1369 | 0.703374 | 0         |  |
|  | Shiraz-18T | 1455 | 0        | -0.186773 |  |
|  | Shiraz-18T | 1455 | 0        | -0.186773 |  |
|  | Shiraz-22T | 1669 | 0.695915 | 0         |  |
|  | Shiraz-22T | 1669 | 0.695915 | 0         |  |
|  | Shiraz-22T | 1672 | 1.01678  | 0         |  |
|  | Shiraz-22T | 1672 | 1.01678  | 0         |  |
|  | Shiraz-25T | 1717 | 0.420447 | 0         |  |
|  | Shiraz-25T | 1717 | 0.420447 | 0         |  |
|  | Shiraz-28T | 1760 | 0.538181 | 0         |  |
|  | Shiraz-28T | 1760 | 0.538181 | 0         |  |
|  | Shiraz-29T | 1800 | 0.672527 | 0         |  |
|  | Shiraz-29T | 1800 | 0.672527 | 0         |  |
|  | Shiraz-32T | 1869 | 0.776805 | 0         |  |
|  | Shiraz-32T | 1869 | 0.776805 | 0         |  |
|  | Shiraz-35T | 1932 | 0.507141 | 0         |  |
|  | Shiraz-35T | 1932 | 0.507141 | 0         |  |
|  | Shiraz-58T | 2221 | 0.871948 | 0         |  |
|  | Shiraz-58T | 2221 | 0.871948 | 0         |  |
|  | Shiraz-71T | 2260 | 0.68394  | 0         |  |
|  | Shiraz-71T | 2260 | 0.68394  | 0         |  |
|  | Shiraz-71T | 2262 | 0.986748 | 0         |  |
|  | Shiraz-71T | 2262 | 0.986748 | 0         |  |
|  | Shiraz-3T  | 238  | 0.472087 | 0         |  |
|  | Shiraz-3T  | 238  | 0.472087 | 0         |  |
|  | Shiraz-4T  | 260  | 0        | -0.324128 |  |
|  | Shiraz-4T  | 260  | 0        | -0.324128 |  |
|  | Shiraz-16T | 294  | 0.655804 | 0         |  |
|  | Shiraz-16T | 294  | 0.655804 | 0         |  |
|  | Shiraz-31T | 345  | 0.103301 | 0         |  |
|  | Shiraz-31T | 345  | 0.103301 | 0         |  |
|  | Shiraz-36T | 431  | 0        | -0.78035  |  |
|  | Shiraz-36T | 431  | 0        | -0.78035  |  |
|  | Shiraz-36T | 432  | 0        | -0.6692   |  |
|  | Shiraz-36T | 432  | 0        | -0.6692   |  |
|  | Shiraz-44T | 891  | 0        | -0.954044 |  |
|  | Shiraz-44T | 891  | 0        | -0.954044 |  |
|  | Shiraz-44T | 896  | 0        | -0.109108 |  |
|  | Shiraz-44T | 896  | 0        | -0.109108 |  |
|  | Shiraz-44T | 897  | 0.486937 | 0         |  |

|       |      |            |      |          |           |  |  |
|-------|------|------------|------|----------|-----------|--|--|
|       |      | Shiraz-44T | 897  | 0.486937 | 0         |  |  |
|       |      | Shiraz-46T | 991  | 0.139564 | 0         |  |  |
|       |      | Shiraz-46T | 991  | 0.139564 | 0         |  |  |
|       |      | Shiraz-47T | 1084 | 0.24185  | 0         |  |  |
|       |      | Shiraz-47T | 1084 | 0.24185  | 0         |  |  |
|       |      | Shiraz-49T | 1166 | 0        | -0.917235 |  |  |
|       |      | Shiraz-49T | 1166 | 0        | -0.917235 |  |  |
|       |      | Shiraz-49T | 1169 | 0        | -0.583529 |  |  |
|       |      | Shiraz-49T | 1169 | 0        | -0.583529 |  |  |
|       |      | Shiraz-77T | 1282 | 0.213849 | 0         |  |  |
|       |      | Shiraz-77T | 1282 | 0.213849 | 0         |  |  |
|       |      | Shiraz-9T  | 1368 | 0.199713 | 0         |  |  |
|       |      | Shiraz-9T  | 1368 | 0.199713 | 0         |  |  |
|       |      | Shiraz-9T  | 1369 | 0.703374 | 0         |  |  |
|       |      | Shiraz-9T  | 1369 | 0.703374 | 0         |  |  |
|       |      | Shiraz-18T | 1455 | 0        | -0.186773 |  |  |
|       |      | Shiraz-18T | 1455 | 0        | -0.186773 |  |  |
|       |      | Shiraz-22T | 1669 | 0.695915 | 0         |  |  |
|       |      | Shiraz-22T | 1669 | 0.695915 | 0         |  |  |
|       |      | Shiraz-22T | 1672 | 1.01678  | 0         |  |  |
|       |      | Shiraz-22T | 1672 | 1.01678  | 0         |  |  |
|       |      | Shiraz-25T | 1717 | 0.420447 | 0         |  |  |
|       |      | Shiraz-25T | 1717 | 0.420447 | 0         |  |  |
|       |      | Shiraz-28T | 1760 | 0.538181 | 0         |  |  |
|       |      | Shiraz-28T | 1760 | 0.538181 | 0         |  |  |
|       |      | Shiraz-29T | 1800 | 0.672527 | 0         |  |  |
|       |      | Shiraz-29T | 1800 | 0.672527 | 0         |  |  |
|       |      | Shiraz-32T | 1869 | 0.776805 | 0         |  |  |
|       |      | Shiraz-32T | 1869 | 0.776805 | 0         |  |  |
|       |      | Shiraz-35T | 1932 | 0.507141 | 0         |  |  |
|       |      | Shiraz-35T | 1932 | 0.507141 | 0         |  |  |
|       |      | Shiraz-58T | 2221 | 0.871948 | 0         |  |  |
|       |      | Shiraz-58T | 2221 | 0.871948 | 0         |  |  |
|       |      | Shiraz-71T | 2260 | 0.68394  | 0         |  |  |
|       |      | Shiraz-71T | 2260 | 0.68394  | 0         |  |  |
|       |      | Shiraz-71T | 2262 | 0.986748 | 0         |  |  |
|       |      | Shiraz-71T | 2262 | 0.986748 | 0         |  |  |
| WDR70 | chr5 | Shiraz-4T  | 250  | 0.262252 | 0         |  |  |
|       |      | Shiraz-16T | 266  | 0.321724 | 0         |  |  |
|       |      | Shiraz-44T | 591  | 0        | -0.233934 |  |  |
|       |      | Shiraz-18T | 1429 | 0        | -0.314125 |  |  |
|       |      | Shiraz-22T | 1522 | 0        | -0.322688 |  |  |
|       |      | Shiraz-25T | 1694 | 0.201602 | 0         |  |  |
|       |      | Shiraz-28T | 1731 | 0.295447 | 0         |  |  |
|       |      | Shiraz-29T | 1773 | 0.090981 | 0         |  |  |
|       |      | Shiraz-40T | 2016 | 0.376634 | 0         |  |  |
|       |      | Shiraz-4T  | 250  | 0.262252 | 0         |  |  |

|       |      |            |      |          |           |  |  |
|-------|------|------------|------|----------|-----------|--|--|
|       |      | Shiraz-16T | 266  | 0.321724 | 0         |  |  |
|       |      | Shiraz-44T | 591  | 0        | -0.233934 |  |  |
|       |      | Shiraz-18T | 1429 | 0        | -0.314125 |  |  |
|       |      | Shiraz-22T | 1522 | 0        | -0.322688 |  |  |
|       |      | Shiraz-25T | 1694 | 0.201602 | 0         |  |  |
|       |      | Shiraz-28T | 1731 | 0.295447 | 0         |  |  |
|       |      | Shiraz-29T | 1773 | 0.090981 | 0         |  |  |
|       |      | Shiraz-40T | 2016 | 0.376634 | 0         |  |  |
|       |      | Shiraz-4T  | 250  | 0.262252 | 0         |  |  |
|       |      | Shiraz-16T | 266  | 0.321724 | 0         |  |  |
|       |      | Shiraz-44T | 591  | 0        | -0.233934 |  |  |
|       |      | Shiraz-18T | 1429 | 0        | -0.314125 |  |  |
|       |      | Shiraz-22T | 1522 | 0        | -0.322688 |  |  |
|       |      | Shiraz-25T | 1694 | 0.201602 | 0         |  |  |
|       |      | Shiraz-28T | 1731 | 0.295447 | 0         |  |  |
|       |      | Shiraz-29T | 1773 | 0.090981 | 0         |  |  |
|       |      | Shiraz-40T | 2016 | 0.376634 | 0         |  |  |
| WDR86 | chr7 | Shiraz-3T  | 90   | 0.219276 | 0         |  |  |
|       |      | Shiraz-3T  | 99   | 0.454766 | 0         |  |  |
|       |      | Shiraz-4T  | 253  | 0.372918 | 0         |  |  |
|       |      | Shiraz-36T | 378  | 0.179558 | 0         |  |  |
|       |      | Shiraz-44T | 646  | 0.471276 | 0         |  |  |
|       |      | Shiraz-46T | 943  | 0.093799 | 0         |  |  |
|       |      | Shiraz-9T  | 1325 | 0.221899 | 0         |  |  |
|       |      | Shiraz-18T | 1434 | 0.244465 | 0         |  |  |
|       |      | Shiraz-22T | 1555 | 0.427999 | 0         |  |  |
|       |      | Shiraz-25T | 1698 | 0.21835  | 0         |  |  |
|       |      | Shiraz-28T | 1735 | 0.350744 | 0         |  |  |
|       |      | Shiraz-29T | 1778 | 0.120767 | 0         |  |  |
|       |      | Shiraz-32T | 1833 | 0.551336 | 0         |  |  |
|       |      | Shiraz-38T | 1951 | 0.250891 | 0         |  |  |
|       |      | Shiraz-38T | 1952 | 0        | -0.163211 |  |  |
|       |      | Shiraz-53T | 2078 | 0.287202 | 0         |  |  |
|       |      | Shiraz-58T | 2162 | 0.221505 | 0         |  |  |
|       |      | Shiraz-71T | 2238 | 0.603631 | 0         |  |  |
|       |      | Shiraz-3T  | 90   | 0.219276 | 0         |  |  |
|       |      | Shiraz-3T  | 99   | 0.454766 | 0         |  |  |
|       |      | Shiraz-4T  | 253  | 0.372918 | 0         |  |  |
|       |      | Shiraz-36T | 378  | 0.179558 | 0         |  |  |
|       |      | Shiraz-44T | 646  | 0.471276 | 0         |  |  |
|       |      | Shiraz-46T | 943  | 0.093799 | 0         |  |  |
|       |      | Shiraz-9T  | 1325 | 0.221899 | 0         |  |  |
|       |      | Shiraz-18T | 1434 | 0.244465 | 0         |  |  |
|       |      | Shiraz-22T | 1555 | 0.427999 | 0         |  |  |
|       |      | Shiraz-25T | 1698 | 0.21835  | 0         |  |  |
|       |      | Shiraz-28T | 1735 | 0.350744 | 0         |  |  |
|       |      | Shiraz-29T | 1778 | 0.120767 | 0         |  |  |



|       |      |            |      |          |           |  |  |
|-------|------|------------|------|----------|-----------|--|--|
|       |      | Shiraz-32T | 1833 | 0.551336 | 0         |  |  |
|       |      | Shiraz-38T | 1951 | 0.250891 | 0         |  |  |
|       |      | Shiraz-38T | 1952 | 0        | -0.163211 |  |  |
|       |      | Shiraz-53T | 2078 | 0.287202 | 0         |  |  |
|       |      | Shiraz-58T | 2162 | 0.221505 | 0         |  |  |
|       |      | Shiraz-71T | 2238 | 0.603631 | 0         |  |  |
|       |      | Shiraz-3T  | 90   | 0.219276 | 0         |  |  |
|       |      | Shiraz-3T  | 99   | 0.454766 | 0         |  |  |
|       |      | Shiraz-4T  | 253  | 0.372918 | 0         |  |  |
|       |      | Shiraz-36T | 378  | 0.179558 | 0         |  |  |
|       |      | Shiraz-44T | 646  | 0.471276 | 0         |  |  |
|       |      | Shiraz-46T | 943  | 0.093799 | 0         |  |  |
|       |      | Shiraz-9T  | 1325 | 0.221899 | 0         |  |  |
|       |      | Shiraz-18T | 1434 | 0.244465 | 0         |  |  |
|       |      | Shiraz-22T | 1555 | 0.427999 | 0         |  |  |
|       |      | Shiraz-25T | 1698 | 0.21835  | 0         |  |  |
|       |      | Shiraz-28T | 1735 | 0.350744 | 0         |  |  |
|       |      | Shiraz-29T | 1778 | 0.120767 | 0         |  |  |
|       |      | Shiraz-32T | 1833 | 0.551336 | 0         |  |  |
|       |      | Shiraz-38T | 1951 | 0.250891 | 0         |  |  |
|       |      | Shiraz-38T | 1952 | 0        | -0.163211 |  |  |
|       |      | Shiraz-53T | 2078 | 0.287202 | 0         |  |  |
|       |      | Shiraz-58T | 2162 | 0.221505 | 0         |  |  |
|       |      | Shiraz-71T | 2238 | 0.603631 | 0         |  |  |
| WDR91 | chr7 | Shiraz-3T  | 90   | 0.219276 | 0         |  |  |
|       |      | Shiraz-4T  | 253  | 0.372918 | 0         |  |  |
|       |      | Shiraz-36T | 378  | 0.179558 | 0         |  |  |
|       |      | Shiraz-46T | 943  | 0.093799 | 0         |  |  |
|       |      | Shiraz-77T | 1225 | 0        | -0.117922 |  |  |
|       |      | Shiraz-9T  | 1325 | 0.221899 | 0         |  |  |
|       |      | Shiraz-18T | 1434 | 0.244465 | 0         |  |  |
|       |      | Shiraz-22T | 1553 | 0        | -0.213234 |  |  |
|       |      | Shiraz-25T | 1698 | 0.21835  | 0         |  |  |
|       |      | Shiraz-28T | 1735 | 0.350744 | 0         |  |  |
|       |      | Shiraz-29T | 1778 | 0.120767 | 0         |  |  |
|       |      | Shiraz-32T | 1833 | 0.551336 | 0         |  |  |
|       |      | Shiraz-38T | 1951 | 0.250891 | 0         |  |  |
|       |      | Shiraz-53T | 2078 | 0.287202 | 0         |  |  |
|       |      | Shiraz-58T | 2162 | 0.221505 | 0         |  |  |
|       |      | Shiraz-71T | 2238 | 0.603631 | 0         |  |  |
|       |      | Shiraz-3T  | 90   | 0.219276 | 0         |  |  |
|       |      | Shiraz-4T  | 253  | 0.372918 | 0         |  |  |
|       |      | Shiraz-36T | 378  | 0.179558 | 0         |  |  |
|       |      | Shiraz-46T | 943  | 0.093799 | 0         |  |  |
|       |      | Shiraz-77T | 1225 | 0        | -0.117922 |  |  |
|       |      | Shiraz-9T  | 1325 | 0.221899 | 0         |  |  |
|       |      | Shiraz-18T | 1434 | 0.244465 | 0         |  |  |

|      |      |            |      |          |           |  |  |
|------|------|------------|------|----------|-----------|--|--|
|      |      | Shiraz-22T | 1553 | 0        | -0.213234 |  |  |
|      |      | Shiraz-25T | 1698 | 0.21835  | 0         |  |  |
|      |      | Shiraz-28T | 1735 | 0.350744 | 0         |  |  |
|      |      | Shiraz-29T | 1778 | 0.120767 | 0         |  |  |
|      |      | Shiraz-32T | 1833 | 0.551336 | 0         |  |  |
|      |      | Shiraz-38T | 1951 | 0.250891 | 0         |  |  |
|      |      | Shiraz-53T | 2078 | 0.287202 | 0         |  |  |
|      |      | Shiraz-58T | 2162 | 0.221505 | 0         |  |  |
|      |      | Shiraz-71T | 2238 | 0.603631 | 0         |  |  |
|      |      | Shiraz-3T  | 90   | 0.219276 | 0         |  |  |
|      |      | Shiraz-4T  | 253  | 0.372918 | 0         |  |  |
|      |      | Shiraz-36T | 378  | 0.179558 | 0         |  |  |
|      |      | Shiraz-46T | 943  | 0.093799 | 0         |  |  |
|      |      | Shiraz-77T | 1225 | 0        | -0.117922 |  |  |
|      |      | Shiraz-9T  | 1325 | 0.221899 | 0         |  |  |
|      |      | Shiraz-18T | 1434 | 0.244465 | 0         |  |  |
|      |      | Shiraz-22T | 1553 | 0        | -0.213234 |  |  |
|      |      | Shiraz-25T | 1698 | 0.21835  | 0         |  |  |
|      |      | Shiraz-28T | 1735 | 0.350744 | 0         |  |  |
|      |      | Shiraz-29T | 1778 | 0.120767 | 0         |  |  |
|      |      | Shiraz-32T | 1833 | 0.551336 | 0         |  |  |
|      |      | Shiraz-38T | 1951 | 0.250891 | 0         |  |  |
|      |      | Shiraz-53T | 2078 | 0.287202 | 0         |  |  |
|      |      | Shiraz-58T | 2162 | 0.221505 | 0         |  |  |
|      |      | Shiraz-71T | 2238 | 0.603631 | 0         |  |  |
| WEE2 | chr7 | Shiraz-3T  | 90   | 0.219276 | 0         |  |  |
|      |      | Shiraz-4T  | 253  | 0.372918 | 0         |  |  |
|      |      | Shiraz-36T | 378  | 0.179558 | 0         |  |  |
|      |      | Shiraz-46T | 943  | 0.093799 | 0         |  |  |
|      |      | Shiraz-77T | 1225 | 0        | -0.117922 |  |  |
|      |      | Shiraz-9T  | 1325 | 0.221899 | 0         |  |  |
|      |      | Shiraz-18T | 1434 | 0.244465 | 0         |  |  |
|      |      | Shiraz-25T | 1698 | 0.21835  | 0         |  |  |
|      |      | Shiraz-28T | 1735 | 0.350744 | 0         |  |  |
|      |      | Shiraz-29T | 1778 | 0.120767 | 0         |  |  |
|      |      | Shiraz-32T | 1833 | 0.551336 | 0         |  |  |
|      |      | Shiraz-38T | 1951 | 0.250891 | 0         |  |  |
|      |      | Shiraz-53T | 2078 | 0.287202 | 0         |  |  |
|      |      | Shiraz-58T | 2162 | 0.221505 | 0         |  |  |
|      |      | Shiraz-71T | 2238 | 0.603631 | 0         |  |  |
|      |      | Shiraz-3T  | 90   | 0.219276 | 0         |  |  |
|      |      | Shiraz-4T  | 253  | 0.372918 | 0         |  |  |
|      |      | Shiraz-36T | 378  | 0.179558 | 0         |  |  |
|      |      | Shiraz-46T | 943  | 0.093799 | 0         |  |  |
|      |      | Shiraz-77T | 1225 | 0        | -0.117922 |  |  |
|      |      | Shiraz-9T  | 1325 | 0.221899 | 0         |  |  |
|      |      | Shiraz-18T | 1434 | 0.244465 | 0         |  |  |

|       |      |            |      |          |           |  |
|-------|------|------------|------|----------|-----------|--|
|       |      | Shiraz-25T | 1698 | 0.21835  | 0         |  |
|       |      | Shiraz-28T | 1735 | 0.350744 | 0         |  |
|       |      | Shiraz-29T | 1778 | 0.120767 | 0         |  |
|       |      | Shiraz-32T | 1833 | 0.551336 | 0         |  |
|       |      | Shiraz-38T | 1951 | 0.250891 | 0         |  |
|       |      | Shiraz-53T | 2078 | 0.287202 | 0         |  |
|       |      | Shiraz-58T | 2162 | 0.221505 | 0         |  |
|       |      | Shiraz-71T | 2238 | 0.603631 | 0         |  |
|       |      | Shiraz-3T  | 90   | 0.219276 | 0         |  |
|       |      | Shiraz-4T  | 253  | 0.372918 | 0         |  |
|       |      | Shiraz-36T | 378  | 0.179558 | 0         |  |
|       |      | Shiraz-46T | 943  | 0.093799 | 0         |  |
|       |      | Shiraz-77T | 1225 | 0        | -0.117922 |  |
|       |      | Shiraz-9T  | 1325 | 0.221899 | 0         |  |
|       |      | Shiraz-18T | 1434 | 0.244465 | 0         |  |
|       |      | Shiraz-25T | 1698 | 0.21835  | 0         |  |
|       |      | Shiraz-28T | 1735 | 0.350744 | 0         |  |
|       |      | Shiraz-29T | 1778 | 0.120767 | 0         |  |
|       |      | Shiraz-32T | 1833 | 0.551336 | 0         |  |
|       |      | Shiraz-38T | 1951 | 0.250891 | 0         |  |
|       |      | Shiraz-53T | 2078 | 0.287202 | 0         |  |
|       |      | Shiraz-58T | 2162 | 0.221505 | 0         |  |
|       |      | Shiraz-71T | 2238 | 0.603631 | 0         |  |
| WIPF3 | chr7 | Shiraz-3T  | 87   | 0.198593 | 0         |  |
|       |      | Shiraz-4T  | 252  | 0.192083 | 0         |  |
|       |      | Shiraz-36T | 376  | 0.159952 | 0         |  |
|       |      | Shiraz-46T | 942  | 0.069143 | 0         |  |
|       |      | Shiraz-18T | 1433 | 0.250973 | 0         |  |
|       |      | Shiraz-25T | 1697 | 0.21945  | 0         |  |
|       |      | Shiraz-28T | 1734 | 0.362882 | 0         |  |
|       |      | Shiraz-29T | 1777 | 0.156747 | 0         |  |
|       |      | Shiraz-38T | 1950 | 0.265916 | 0         |  |
|       |      | Shiraz-71T | 2236 | 0.320072 | 0         |  |
|       |      | Shiraz-3T  | 87   | 0.198593 | 0         |  |
|       |      | Shiraz-4T  | 252  | 0.192083 | 0         |  |
|       |      | Shiraz-36T | 376  | 0.159952 | 0         |  |
|       |      | Shiraz-46T | 942  | 0.069143 | 0         |  |
|       |      | Shiraz-18T | 1433 | 0.250973 | 0         |  |
|       |      | Shiraz-25T | 1697 | 0.21945  | 0         |  |
|       |      | Shiraz-28T | 1734 | 0.362882 | 0         |  |
|       |      | Shiraz-29T | 1777 | 0.156747 | 0         |  |
|       |      | Shiraz-38T | 1950 | 0.265916 | 0         |  |
|       |      | Shiraz-71T | 2236 | 0.320072 | 0         |  |
|       |      | Shiraz-3T  | 87   | 0.198593 | 0         |  |
|       |      | Shiraz-4T  | 252  | 0.192083 | 0         |  |
|       |      | Shiraz-36T | 376  | 0.159952 | 0         |  |
|       |      | Shiraz-46T | 942  | 0.069143 | 0         |  |

|      |      |            |      |          |           |  |
|------|------|------------|------|----------|-----------|--|
|      |      | Shiraz-18T | 1433 | 0.250973 | 0         |  |
|      |      | Shiraz-25T | 1697 | 0.21945  | 0         |  |
|      |      | Shiraz-28T | 1734 | 0.362882 | 0         |  |
|      |      | Shiraz-29T | 1777 | 0.156747 | 0         |  |
|      |      | Shiraz-38T | 1950 | 0.265916 | 0         |  |
|      |      | Shiraz-71T | 2236 | 0.320072 | 0         |  |
| WNK3 | chrX | Shiraz-4T  | 260  | 0        | -0.324128 |  |
|      |      | Shiraz-16T | 294  | 0.655804 | 0         |  |
|      |      | Shiraz-31T | 345  | 0.103301 | 0         |  |
|      |      | Shiraz-36T | 431  | 0        | -0.78035  |  |
|      |      | Shiraz-36T | 432  | 0        | -0.6692   |  |
|      |      | Shiraz-44T | 891  | 0        | -0.954044 |  |
|      |      | Shiraz-44T | 898  | 0        | -0.515218 |  |
|      |      | Shiraz-49T | 1166 | 0        | -0.917235 |  |
|      |      | Shiraz-77T | 1282 | 0.213849 | 0         |  |
|      |      | Shiraz-9T  | 1368 | 0.199713 | 0         |  |
|      |      | Shiraz-18T | 1456 | 0.608534 | 0         |  |
|      |      | Shiraz-22T | 1669 | 0.695915 | 0         |  |
|      |      | Shiraz-25T | 1717 | 0.420447 | 0         |  |
|      |      | Shiraz-28T | 1760 | 0.538181 | 0         |  |
|      |      | Shiraz-29T | 1800 | 0.672527 | 0         |  |
|      |      | Shiraz-32T | 1869 | 0.776805 | 0         |  |
|      |      | Shiraz-35T | 1932 | 0.507141 | 0         |  |
|      |      | Shiraz-58T | 2221 | 0.871948 | 0         |  |
|      |      | Shiraz-71T | 2260 | 0.68394  | 0         |  |
|      |      | Shiraz-71T | 2262 | 0.986748 | 0         |  |
|      |      | Shiraz-4T  | 260  | 0        | -0.324128 |  |
|      |      | Shiraz-16T | 294  | 0.655804 | 0         |  |
|      |      | Shiraz-31T | 345  | 0.103301 | 0         |  |
|      |      | Shiraz-36T | 431  | 0        | -0.78035  |  |
|      |      | Shiraz-36T | 432  | 0        | -0.6692   |  |
|      |      | Shiraz-44T | 891  | 0        | -0.954044 |  |
|      |      | Shiraz-44T | 898  | 0        | -0.515218 |  |
|      |      | Shiraz-49T | 1166 | 0        | -0.917235 |  |
|      |      | Shiraz-77T | 1282 | 0.213849 | 0         |  |
|      |      | Shiraz-9T  | 1368 | 0.199713 | 0         |  |
|      |      | Shiraz-18T | 1456 | 0.608534 | 0         |  |
|      |      | Shiraz-22T | 1669 | 0.695915 | 0         |  |
|      |      | Shiraz-25T | 1717 | 0.420447 | 0         |  |
|      |      | Shiraz-28T | 1760 | 0.538181 | 0         |  |
|      |      | Shiraz-29T | 1800 | 0.672527 | 0         |  |
|      |      | Shiraz-32T | 1869 | 0.776805 | 0         |  |
|      |      | Shiraz-35T | 1932 | 0.507141 | 0         |  |
|      |      | Shiraz-58T | 2221 | 0.871948 | 0         |  |
|      |      | Shiraz-71T | 2260 | 0.68394  | 0         |  |
|      |      | Shiraz-71T | 2262 | 0.986748 | 0         |  |
|      |      | Shiraz-4T  | 260  | 0        | -0.324128 |  |

|       |      |            |      |          |           |  |
|-------|------|------------|------|----------|-----------|--|
|       |      | Shiraz-16T | 294  | 0.655804 | 0         |  |
|       |      | Shiraz-31T | 345  | 0.103301 | 0         |  |
|       |      | Shiraz-36T | 431  | 0        | -0.78035  |  |
|       |      | Shiraz-36T | 432  | 0        | -0.6692   |  |
|       |      | Shiraz-44T | 891  | 0        | -0.954044 |  |
|       |      | Shiraz-44T | 898  | 0        | -0.515218 |  |
|       |      | Shiraz-49T | 1166 | 0        | -0.917235 |  |
|       |      | Shiraz-77T | 1282 | 0.213849 | 0         |  |
|       |      | Shiraz-9T  | 1368 | 0.199713 | 0         |  |
|       |      | Shiraz-18T | 1456 | 0.608534 | 0         |  |
|       |      | Shiraz-22T | 1669 | 0.695915 | 0         |  |
|       |      | Shiraz-25T | 1717 | 0.420447 | 0         |  |
|       |      | Shiraz-28T | 1760 | 0.538181 | 0         |  |
|       |      | Shiraz-29T | 1800 | 0.672527 | 0         |  |
|       |      | Shiraz-32T | 1869 | 0.776805 | 0         |  |
|       |      | Shiraz-35T | 1932 | 0.507141 | 0         |  |
|       |      | Shiraz-58T | 2221 | 0.871948 | 0         |  |
|       |      | Shiraz-71T | 2260 | 0.68394  | 0         |  |
|       |      | Shiraz-71T | 2262 | 0.986748 | 0         |  |
| WNT16 | chr7 | Shiraz-3T  | 90   | 0.219276 | 0         |  |
|       |      | Shiraz-3T  | 90   | 0.219276 | 0         |  |
|       |      | Shiraz-3T  | 95   | 0        | -0.077623 |  |
|       |      | Shiraz-3T  | 95   | 0        | -0.077623 |  |
|       |      | Shiraz-4T  | 253  | 0.372918 | 0         |  |
|       |      | Shiraz-4T  | 253  | 0.372918 | 0         |  |
|       |      | Shiraz-36T | 378  | 0.179558 | 0         |  |
|       |      | Shiraz-36T | 378  | 0.179558 | 0         |  |
|       |      | Shiraz-36T | 382  | 0.081739 | 0         |  |
|       |      | Shiraz-36T | 382  | 0.081739 | 0         |  |
|       |      | Shiraz-44T | 641  | 0        | -0.477846 |  |
|       |      | Shiraz-44T | 641  | 0        | -0.477846 |  |
|       |      | Shiraz-46T | 943  | 0.093799 | 0         |  |
|       |      | Shiraz-46T | 943  | 0.093799 | 0         |  |
|       |      | Shiraz-46T | 947  | 0        | -0.010843 |  |
|       |      | Shiraz-46T | 947  | 0        | -0.010843 |  |
|       |      | Shiraz-47T | 1031 | 0        | -0.117529 |  |
|       |      | Shiraz-47T | 1031 | 0        | -0.117529 |  |
|       |      | Shiraz-49T | 1121 | 0        | -0.138569 |  |
|       |      | Shiraz-49T | 1121 | 0        | -0.138569 |  |
|       |      | Shiraz-77T | 1225 | 0        | -0.117922 |  |
|       |      | Shiraz-77T | 1225 | 0        | -0.117922 |  |
|       |      | Shiraz-77T | 1228 | 0        | -0.238084 |  |
|       |      | Shiraz-77T | 1228 | 0        | -0.238084 |  |
|       |      | Shiraz-18T | 1434 | 0.244465 | 0         |  |
|       |      | Shiraz-18T | 1434 | 0.244465 | 0         |  |
|       |      | Shiraz-22T | 1549 | 0        | -0.319623 |  |
|       |      | Shiraz-22T | 1549 | 0        | -0.319623 |  |

|  |            |      |          |           |  |
|--|------------|------|----------|-----------|--|
|  | Shiraz-22T | 1552 | 0        | -0.50686  |  |
|  | Shiraz-22T | 1552 | 0        | -0.50686  |  |
|  | Shiraz-25T | 1698 | 0.21835  | 0         |  |
|  | Shiraz-25T | 1698 | 0.21835  | 0         |  |
|  | Shiraz-28T | 1735 | 0.350744 | 0         |  |
|  | Shiraz-28T | 1735 | 0.350744 | 0         |  |
|  | Shiraz-29T | 1778 | 0.120767 | 0         |  |
|  | Shiraz-29T | 1778 | 0.120767 | 0         |  |
|  | Shiraz-32T | 1833 | 0.551336 | 0         |  |
|  | Shiraz-32T | 1833 | 0.551336 | 0         |  |
|  | Shiraz-32T | 1835 | 0.092727 | 0         |  |
|  | Shiraz-32T | 1835 | 0.092727 | 0         |  |
|  | Shiraz-38T | 1951 | 0.250891 | 0         |  |
|  | Shiraz-38T | 1951 | 0.250891 | 0         |  |
|  | Shiraz-53T | 2078 | 0.287202 | 0         |  |
|  | Shiraz-53T | 2078 | 0.287202 | 0         |  |
|  | Shiraz-58T | 2161 | 0        | -0.187744 |  |
|  | Shiraz-58T | 2161 | 0        | -0.187744 |  |
|  | Shiraz-71T | 2238 | 0.603631 | 0         |  |
|  | Shiraz-71T | 2238 | 0.603631 | 0         |  |
|  | Shiraz-3T  | 90   | 0.219276 | 0         |  |
|  | Shiraz-3T  | 90   | 0.219276 | 0         |  |
|  | Shiraz-3T  | 95   | 0        | -0.077623 |  |
|  | Shiraz-3T  | 95   | 0        | -0.077623 |  |
|  | Shiraz-4T  | 253  | 0.372918 | 0         |  |
|  | Shiraz-4T  | 253  | 0.372918 | 0         |  |
|  | Shiraz-36T | 378  | 0.179558 | 0         |  |
|  | Shiraz-36T | 378  | 0.179558 | 0         |  |
|  | Shiraz-36T | 382  | 0.081739 | 0         |  |
|  | Shiraz-36T | 382  | 0.081739 | 0         |  |
|  | Shiraz-44T | 641  | 0        | -0.477846 |  |
|  | Shiraz-44T | 641  | 0        | -0.477846 |  |
|  | Shiraz-46T | 943  | 0.093799 | 0         |  |
|  | Shiraz-46T | 943  | 0.093799 | 0         |  |
|  | Shiraz-46T | 947  | 0        | -0.010843 |  |
|  | Shiraz-46T | 947  | 0        | -0.010843 |  |
|  | Shiraz-47T | 1031 | 0        | -0.117529 |  |
|  | Shiraz-47T | 1031 | 0        | -0.117529 |  |
|  | Shiraz-49T | 1121 | 0        | -0.138569 |  |
|  | Shiraz-49T | 1121 | 0        | -0.138569 |  |
|  | Shiraz-77T | 1225 | 0        | -0.117922 |  |
|  | Shiraz-77T | 1225 | 0        | -0.117922 |  |
|  | Shiraz-77T | 1228 | 0        | -0.238084 |  |
|  | Shiraz-77T | 1228 | 0        | -0.238084 |  |
|  | Shiraz-18T | 1434 | 0.244465 | 0         |  |
|  | Shiraz-18T | 1434 | 0.244465 | 0         |  |
|  | Shiraz-22T | 1549 | 0        | -0.319623 |  |

|  |            |      |          |           |  |
|--|------------|------|----------|-----------|--|
|  | Shiraz-22T | 1549 | 0        | -0.319623 |  |
|  | Shiraz-22T | 1552 | 0        | -0.50686  |  |
|  | Shiraz-22T | 1552 | 0        | -0.50686  |  |
|  | Shiraz-25T | 1698 | 0.21835  | 0         |  |
|  | Shiraz-25T | 1698 | 0.21835  | 0         |  |
|  | Shiraz-28T | 1735 | 0.350744 | 0         |  |
|  | Shiraz-28T | 1735 | 0.350744 | 0         |  |
|  | Shiraz-29T | 1778 | 0.120767 | 0         |  |
|  | Shiraz-29T | 1778 | 0.120767 | 0         |  |
|  | Shiraz-32T | 1833 | 0.551336 | 0         |  |
|  | Shiraz-32T | 1833 | 0.551336 | 0         |  |
|  | Shiraz-32T | 1835 | 0.092727 | 0         |  |
|  | Shiraz-32T | 1835 | 0.092727 | 0         |  |
|  | Shiraz-38T | 1951 | 0.250891 | 0         |  |
|  | Shiraz-38T | 1951 | 0.250891 | 0         |  |
|  | Shiraz-53T | 2078 | 0.287202 | 0         |  |
|  | Shiraz-53T | 2078 | 0.287202 | 0         |  |
|  | Shiraz-58T | 2161 | 0        | -0.187744 |  |
|  | Shiraz-58T | 2161 | 0        | -0.187744 |  |
|  | Shiraz-71T | 2238 | 0.603631 | 0         |  |
|  | Shiraz-71T | 2238 | 0.603631 | 0         |  |
|  | Shiraz-3T  | 90   | 0.219276 | 0         |  |
|  | Shiraz-3T  | 90   | 0.219276 | 0         |  |
|  | Shiraz-3T  | 95   | 0        | -0.077623 |  |
|  | Shiraz-3T  | 95   | 0        | -0.077623 |  |
|  | Shiraz-4T  | 253  | 0.372918 | 0         |  |
|  | Shiraz-4T  | 253  | 0.372918 | 0         |  |
|  | Shiraz-36T | 378  | 0.179558 | 0         |  |
|  | Shiraz-36T | 378  | 0.179558 | 0         |  |
|  | Shiraz-36T | 382  | 0.081739 | 0         |  |
|  | Shiraz-36T | 382  | 0.081739 | 0         |  |
|  | Shiraz-44T | 641  | 0        | -0.477846 |  |
|  | Shiraz-44T | 641  | 0        | -0.477846 |  |
|  | Shiraz-46T | 943  | 0.093799 | 0         |  |
|  | Shiraz-46T | 943  | 0.093799 | 0         |  |
|  | Shiraz-46T | 947  | 0        | -0.010843 |  |
|  | Shiraz-46T | 947  | 0        | -0.010843 |  |
|  | Shiraz-47T | 1031 | 0        | -0.117529 |  |
|  | Shiraz-47T | 1031 | 0        | -0.117529 |  |
|  | Shiraz-49T | 1121 | 0        | -0.138569 |  |
|  | Shiraz-49T | 1121 | 0        | -0.138569 |  |
|  | Shiraz-77T | 1225 | 0        | -0.117922 |  |
|  | Shiraz-77T | 1225 | 0        | -0.117922 |  |
|  | Shiraz-77T | 1228 | 0        | -0.238084 |  |
|  | Shiraz-77T | 1228 | 0        | -0.238084 |  |
|  | Shiraz-18T | 1434 | 0.244465 | 0         |  |
|  | Shiraz-18T | 1434 | 0.244465 | 0         |  |

|      |      |            |      |          |           |  |  |
|------|------|------------|------|----------|-----------|--|--|
|      |      | Shiraz-22T | 1549 | 0        | -0.319623 |  |  |
|      |      | Shiraz-22T | 1549 | 0        | -0.319623 |  |  |
|      |      | Shiraz-22T | 1552 | 0        | -0.50686  |  |  |
|      |      | Shiraz-22T | 1552 | 0        | -0.50686  |  |  |
|      |      | Shiraz-25T | 1698 | 0.21835  | 0         |  |  |
|      |      | Shiraz-25T | 1698 | 0.21835  | 0         |  |  |
|      |      | Shiraz-28T | 1735 | 0.350744 | 0         |  |  |
|      |      | Shiraz-28T | 1735 | 0.350744 | 0         |  |  |
|      |      | Shiraz-29T | 1778 | 0.120767 | 0         |  |  |
|      |      | Shiraz-29T | 1778 | 0.120767 | 0         |  |  |
|      |      | Shiraz-32T | 1833 | 0.551336 | 0         |  |  |
|      |      | Shiraz-32T | 1833 | 0.551336 | 0         |  |  |
|      |      | Shiraz-32T | 1835 | 0.092727 | 0         |  |  |
|      |      | Shiraz-32T | 1835 | 0.092727 | 0         |  |  |
|      |      | Shiraz-38T | 1951 | 0.250891 | 0         |  |  |
|      |      | Shiraz-38T | 1951 | 0.250891 | 0         |  |  |
|      |      | Shiraz-53T | 2078 | 0.287202 | 0         |  |  |
|      |      | Shiraz-53T | 2078 | 0.287202 | 0         |  |  |
|      |      | Shiraz-58T | 2161 | 0        | -0.187744 |  |  |
|      |      | Shiraz-58T | 2161 | 0        | -0.187744 |  |  |
|      |      | Shiraz-71T | 2238 | 0.603631 | 0         |  |  |
|      |      | Shiraz-71T | 2238 | 0.603631 | 0         |  |  |
| WNT2 | chr7 | Shiraz-3T  | 90   | 0.219276 | 0         |  |  |
|      |      | Shiraz-3T  | 95   | 0        | -0.077623 |  |  |
|      |      | Shiraz-4T  | 253  | 0.372918 | 0         |  |  |
|      |      | Shiraz-36T | 378  | 0.179558 | 0         |  |  |
|      |      | Shiraz-36T | 382  | 0.081739 | 0         |  |  |
|      |      | Shiraz-44T | 641  | 0        | -0.477846 |  |  |
|      |      | Shiraz-46T | 943  | 0.093799 | 0         |  |  |
|      |      | Shiraz-46T | 947  | 0        | -0.010843 |  |  |
|      |      | Shiraz-47T | 1031 | 0        | -0.117529 |  |  |
|      |      | Shiraz-49T | 1121 | 0        | -0.138569 |  |  |
|      |      | Shiraz-77T | 1225 | 0        | -0.117922 |  |  |
|      |      | Shiraz-77T | 1228 | 0        | -0.238084 |  |  |
|      |      | Shiraz-18T | 1434 | 0.244465 | 0         |  |  |
|      |      | Shiraz-22T | 1549 | 0        | -0.319623 |  |  |
|      |      | Shiraz-22T | 1552 | 0        | -0.50686  |  |  |
|      |      | Shiraz-25T | 1698 | 0.21835  | 0         |  |  |
|      |      | Shiraz-28T | 1735 | 0.350744 | 0         |  |  |
|      |      | Shiraz-29T | 1778 | 0.120767 | 0         |  |  |
|      |      | Shiraz-32T | 1833 | 0.551336 | 0         |  |  |
|      |      | Shiraz-32T | 1835 | 0.092727 | 0         |  |  |
|      |      | Shiraz-38T | 1951 | 0.250891 | 0         |  |  |
|      |      | Shiraz-53T | 2078 | 0.287202 | 0         |  |  |
|      |      | Shiraz-58T | 2161 | 0        | -0.187744 |  |  |
|      |      | Shiraz-71T | 2238 | 0.603631 | 0         |  |  |
|      |      | Shiraz-3T  | 90   | 0.219276 | 0         |  |  |



|  |            |      |          |           |  |
|--|------------|------|----------|-----------|--|
|  | Shiraz-3T  | 95   | 0        | -0.077623 |  |
|  | Shiraz-4T  | 253  | 0.372918 | 0         |  |
|  | Shiraz-36T | 378  | 0.179558 | 0         |  |
|  | Shiraz-36T | 382  | 0.081739 | 0         |  |
|  | Shiraz-44T | 641  | 0        | -0.477846 |  |
|  | Shiraz-46T | 943  | 0.093799 | 0         |  |
|  | Shiraz-46T | 947  | 0        | -0.010843 |  |
|  | Shiraz-47T | 1031 | 0        | -0.117529 |  |
|  | Shiraz-49T | 1121 | 0        | -0.138569 |  |
|  | Shiraz-77T | 1225 | 0        | -0.117922 |  |
|  | Shiraz-77T | 1228 | 0        | -0.238084 |  |
|  | Shiraz-18T | 1434 | 0.244465 | 0         |  |
|  | Shiraz-22T | 1549 | 0        | -0.319623 |  |
|  | Shiraz-22T | 1552 | 0        | -0.50686  |  |
|  | Shiraz-25T | 1698 | 0.21835  | 0         |  |
|  | Shiraz-28T | 1735 | 0.350744 | 0         |  |
|  | Shiraz-29T | 1778 | 0.120767 | 0         |  |
|  | Shiraz-32T | 1833 | 0.551336 | 0         |  |
|  | Shiraz-32T | 1835 | 0.092727 | 0         |  |
|  | Shiraz-38T | 1951 | 0.250891 | 0         |  |
|  | Shiraz-53T | 2078 | 0.287202 | 0         |  |
|  | Shiraz-58T | 2161 | 0        | -0.187744 |  |
|  | Shiraz-71T | 2238 | 0.603631 | 0         |  |
|  | Shiraz-3T  | 90   | 0.219276 | 0         |  |
|  | Shiraz-3T  | 95   | 0        | -0.077623 |  |
|  | Shiraz-4T  | 253  | 0.372918 | 0         |  |
|  | Shiraz-36T | 378  | 0.179558 | 0         |  |
|  | Shiraz-36T | 382  | 0.081739 | 0         |  |
|  | Shiraz-44T | 641  | 0        | -0.477846 |  |
|  | Shiraz-46T | 943  | 0.093799 | 0         |  |
|  | Shiraz-46T | 947  | 0        | -0.010843 |  |
|  | Shiraz-47T | 1031 | 0        | -0.117529 |  |
|  | Shiraz-49T | 1121 | 0        | -0.138569 |  |
|  | Shiraz-77T | 1225 | 0        | -0.117922 |  |
|  | Shiraz-77T | 1228 | 0        | -0.238084 |  |
|  | Shiraz-18T | 1434 | 0.244465 | 0         |  |
|  | Shiraz-22T | 1549 | 0        | -0.319623 |  |
|  | Shiraz-22T | 1552 | 0        | -0.50686  |  |
|  | Shiraz-25T | 1698 | 0.21835  | 0         |  |
|  | Shiraz-28T | 1735 | 0.350744 | 0         |  |
|  | Shiraz-29T | 1778 | 0.120767 | 0         |  |
|  | Shiraz-32T | 1833 | 0.551336 | 0         |  |
|  | Shiraz-32T | 1835 | 0.092727 | 0         |  |
|  | Shiraz-38T | 1951 | 0.250891 | 0         |  |
|  | Shiraz-53T | 2078 | 0.287202 | 0         |  |
|  | Shiraz-58T | 2161 | 0        | -0.187744 |  |
|  | Shiraz-71T | 2238 | 0.603631 | 0         |  |

|      |      |            |      |          |           |  |  |
|------|------|------------|------|----------|-----------|--|--|
| WWC3 | chrX | Shiraz-3T  | 235  | 0        | -0.28401  |  |  |
|      |      | Shiraz-4T  | 260  | 0        | -0.324128 |  |  |
|      |      | Shiraz-16T | 294  | 0.655804 | 0         |  |  |
|      |      | Shiraz-36T | 431  | 0        | -0.78035  |  |  |
|      |      | Shiraz-44T | 891  | 0        | -0.954044 |  |  |
|      |      | Shiraz-49T | 1166 | 0        | -0.917235 |  |  |
|      |      | Shiraz-9T  | 1368 | 0.199713 | 0         |  |  |
|      |      | Shiraz-18T | 1455 | 0        | -0.186773 |  |  |
|      |      | Shiraz-22T | 1669 | 0.695915 | 0         |  |  |
|      |      | Shiraz-22T | 1670 | 1.188333 | 0         |  |  |
|      |      | Shiraz-25T | 1717 | 0.420447 | 0         |  |  |
|      |      | Shiraz-28T | 1760 | 0.538181 | 0         |  |  |
|      |      | Shiraz-29T | 1800 | 0.672527 | 0         |  |  |
|      |      | Shiraz-32T | 1869 | 0.776805 | 0         |  |  |
|      |      | Shiraz-35T | 1932 | 0.507141 | 0         |  |  |
|      |      | Shiraz-40T | 2051 | 0.098506 | 0         |  |  |
|      |      | Shiraz-58T | 2221 | 0.871948 | 0         |  |  |
|      |      | Shiraz-71T | 2260 | 0.68394  | 0         |  |  |
|      |      | Shiraz-71T | 2261 | 0.508399 | 0         |  |  |
|      |      | Shiraz-3T  | 235  | 0        | -0.28401  |  |  |
|      |      | Shiraz-4T  | 260  | 0        | -0.324128 |  |  |
|      |      | Shiraz-16T | 294  | 0.655804 | 0         |  |  |
|      |      | Shiraz-36T | 431  | 0        | -0.78035  |  |  |
|      |      | Shiraz-44T | 891  | 0        | -0.954044 |  |  |
|      |      | Shiraz-49T | 1166 | 0        | -0.917235 |  |  |
|      |      | Shiraz-9T  | 1368 | 0.199713 | 0         |  |  |
|      |      | Shiraz-18T | 1455 | 0        | -0.186773 |  |  |
|      |      | Shiraz-22T | 1669 | 0.695915 | 0         |  |  |
|      |      | Shiraz-22T | 1670 | 1.188333 | 0         |  |  |
|      |      | Shiraz-25T | 1717 | 0.420447 | 0         |  |  |
|      |      | Shiraz-28T | 1760 | 0.538181 | 0         |  |  |
|      |      | Shiraz-29T | 1800 | 0.672527 | 0         |  |  |
|      |      | Shiraz-32T | 1869 | 0.776805 | 0         |  |  |
|      |      | Shiraz-35T | 1932 | 0.507141 | 0         |  |  |
|      |      | Shiraz-40T | 2051 | 0.098506 | 0         |  |  |
|      |      | Shiraz-58T | 2221 | 0.871948 | 0         |  |  |
|      |      | Shiraz-71T | 2260 | 0.68394  | 0         |  |  |
|      |      | Shiraz-71T | 2261 | 0.508399 | 0         |  |  |
|      |      | Shiraz-3T  | 235  | 0        | -0.28401  |  |  |
|      |      | Shiraz-4T  | 260  | 0        | -0.324128 |  |  |
|      |      | Shiraz-16T | 294  | 0.655804 | 0         |  |  |
|      |      | Shiraz-36T | 431  | 0        | -0.78035  |  |  |
|      |      | Shiraz-44T | 891  | 0        | -0.954044 |  |  |
|      |      | Shiraz-49T | 1166 | 0        | -0.917235 |  |  |
|      |      | Shiraz-9T  | 1368 | 0.199713 | 0         |  |  |
|      |      | Shiraz-18T | 1455 | 0        | -0.186773 |  |  |
|      |      | Shiraz-22T | 1669 | 0.695915 | 0         |  |  |

|        |      |            |      |          |           |  |  |
|--------|------|------------|------|----------|-----------|--|--|
|        |      | Shiraz-22T | 1670 | 1.188333 | 0         |  |  |
|        |      | Shiraz-25T | 1717 | 0.420447 | 0         |  |  |
|        |      | Shiraz-28T | 1760 | 0.538181 | 0         |  |  |
|        |      | Shiraz-29T | 1800 | 0.672527 | 0         |  |  |
|        |      | Shiraz-32T | 1869 | 0.776805 | 0         |  |  |
|        |      | Shiraz-35T | 1932 | 0.507141 | 0         |  |  |
|        |      | Shiraz-40T | 2051 | 0.098506 | 0         |  |  |
|        |      | Shiraz-58T | 2221 | 0.871948 | 0         |  |  |
|        |      | Shiraz-71T | 2260 | 0.68394  | 0         |  |  |
|        |      | Shiraz-71T | 2261 | 0.508399 | 0         |  |  |
| XAGE1A | chrX | Shiraz-4T  | 260  | 0        | -0.324128 |  |  |
|        |      | Shiraz-4T  | 260  | 0        | -0.324128 |  |  |
|        |      | Shiraz-4T  | 260  | 0        | -0.324128 |  |  |
|        |      | Shiraz-4T  | 260  | 0        | -0.324128 |  |  |
|        |      | Shiraz-4T  | 260  | 0        | -0.324128 |  |  |
|        |      | Shiraz-4T  | 260  | 0        | -0.324128 |  |  |
|        |      | Shiraz-4T  | 260  | 0        | -0.324128 |  |  |
|        |      | Shiraz-4T  | 260  | 0        | -0.324128 |  |  |
|        |      | Shiraz-4T  | 260  | 0        | -0.324128 |  |  |
|        |      | Shiraz-4T  | 260  | 0        | -0.324128 |  |  |
|        |      | Shiraz-16T | 294  | 0.655804 | 0         |  |  |
|        |      | Shiraz-16T | 294  | 0.655804 | 0         |  |  |
|        |      | Shiraz-16T | 294  | 0.655804 | 0         |  |  |
|        |      | Shiraz-16T | 294  | 0.655804 | 0         |  |  |
|        |      | Shiraz-16T | 294  | 0.655804 | 0         |  |  |
|        |      | Shiraz-16T | 294  | 0.655804 | 0         |  |  |
|        |      | Shiraz-16T | 294  | 0.655804 | 0         |  |  |
|        |      | Shiraz-16T | 294  | 0.655804 | 0         |  |  |
|        |      | Shiraz-16T | 294  | 0.655804 | 0         |  |  |
|        |      | Shiraz-16T | 294  | 0.655804 | 0         |  |  |
|        |      | Shiraz-31T | 345  | 0.103301 | 0         |  |  |
|        |      | Shiraz-31T | 345  | 0.103301 | 0         |  |  |
|        |      | Shiraz-31T | 345  | 0.103301 | 0         |  |  |
|        |      | Shiraz-31T | 345  | 0.103301 | 0         |  |  |
|        |      | Shiraz-31T | 345  | 0.103301 | 0         |  |  |
|        |      | Shiraz-31T | 345  | 0.103301 | 0         |  |  |
|        |      | Shiraz-31T | 345  | 0.103301 | 0         |  |  |
|        |      | Shiraz-31T | 345  | 0.103301 | 0         |  |  |
|        |      | Shiraz-31T | 345  | 0.103301 | 0         |  |  |
|        |      | Shiraz-31T | 345  | 0.103301 | 0         |  |  |
|        |      | Shiraz-36T | 431  | 0        | -0.78035  |  |  |
|        |      | Shiraz-36T | 431  | 0        | -0.78035  |  |  |
|        |      | Shiraz-36T | 431  | 0        | -0.78035  |  |  |
|        |      | Shiraz-36T | 431  | 0        | -0.78035  |  |  |
|        |      | Shiraz-36T | 431  | 0        | -0.78035  |  |  |
|        |      | Shiraz-36T | 431  | 0        | -0.78035  |  |  |
|        |      | Shiraz-36T | 431  | 0        | -0.78035  |  |  |
|        |      | Shiraz-36T | 431  | 0        | -0.78035  |  |  |
|        |      | Shiraz-36T | 431  | 0        | -0.78035  |  |  |
|        |      | Shiraz-36T | 431  | 0        | -0.78035  |  |  |
|        |      | Shiraz-36T | 432  | 0        | -0.6692   |  |  |

|  |            |      |          |           |  |
|--|------------|------|----------|-----------|--|
|  | Shiraz-36T | 432  | 0        | -0.6692   |  |
|  | Shiraz-36T | 432  | 0        | -0.6692   |  |
|  | Shiraz-36T | 432  | 0        | -0.6692   |  |
|  | Shiraz-36T | 432  | 0        | -0.6692   |  |
|  | Shiraz-36T | 432  | 0        | -0.6692   |  |
|  | Shiraz-36T | 432  | 0        | -0.6692   |  |
|  | Shiraz-36T | 432  | 0        | -0.6692   |  |
|  | Shiraz-36T | 432  | 0        | -0.6692   |  |
|  | Shiraz-44T | 891  | 0        | -0.954044 |  |
|  | Shiraz-44T | 891  | 0        | -0.954044 |  |
|  | Shiraz-44T | 891  | 0        | -0.954044 |  |
|  | Shiraz-44T | 891  | 0        | -0.954044 |  |
|  | Shiraz-44T | 891  | 0        | -0.954044 |  |
|  | Shiraz-44T | 891  | 0        | -0.954044 |  |
|  | Shiraz-44T | 891  | 0        | -0.954044 |  |
|  | Shiraz-44T | 891  | 0        | -0.954044 |  |
|  | Shiraz-44T | 891  | 0        | -0.954044 |  |
|  | Shiraz-49T | 1166 | 0        | -0.917235 |  |
|  | Shiraz-49T | 1166 | 0        | -0.917235 |  |
|  | Shiraz-49T | 1166 | 0        | -0.917235 |  |
|  | Shiraz-49T | 1166 | 0        | -0.917235 |  |
|  | Shiraz-49T | 1166 | 0        | -0.917235 |  |
|  | Shiraz-49T | 1166 | 0        | -0.917235 |  |
|  | Shiraz-49T | 1166 | 0        | -0.917235 |  |
|  | Shiraz-49T | 1166 | 0        | -0.917235 |  |
|  | Shiraz-49T | 1166 | 0        | -0.917235 |  |
|  | Shiraz-77T | 1282 | 0.213849 | 0         |  |
|  | Shiraz-77T | 1282 | 0.213849 | 0         |  |
|  | Shiraz-77T | 1282 | 0.213849 | 0         |  |
|  | Shiraz-77T | 1282 | 0.213849 | 0         |  |
|  | Shiraz-77T | 1282 | 0.213849 | 0         |  |
|  | Shiraz-77T | 1282 | 0.213849 | 0         |  |
|  | Shiraz-77T | 1282 | 0.213849 | 0         |  |
|  | Shiraz-77T | 1282 | 0.213849 | 0         |  |
|  | Shiraz-77T | 1282 | 0.213849 | 0         |  |
|  | Shiraz-9T  | 1368 | 0.199713 | 0         |  |
|  | Shiraz-9T  | 1368 | 0.199713 | 0         |  |
|  | Shiraz-9T  | 1368 | 0.199713 | 0         |  |
|  | Shiraz-9T  | 1368 | 0.199713 | 0         |  |
|  | Shiraz-9T  | 1368 | 0.199713 | 0         |  |
|  | Shiraz-9T  | 1368 | 0.199713 | 0         |  |
|  | Shiraz-9T  | 1368 | 0.199713 | 0         |  |
|  | Shiraz-9T  | 1368 | 0.199713 | 0         |  |
|  | Shiraz-9T  | 1368 | 0.199713 | 0         |  |
|  | Shiraz-18T | 1456 | 0.608534 | 0         |  |
|  | Shiraz-18T | 1456 | 0.608534 | 0         |  |
|  | Shiraz-18T | 1456 | 0.608534 | 0         |  |







|  |            |      |          |           |  |
|--|------------|------|----------|-----------|--|
|  | Shiraz-49T | 1166 | 0        | -0.917235 |  |
|  | Shiraz-49T | 1166 | 0        | -0.917235 |  |
|  | Shiraz-49T | 1166 | 0        | -0.917235 |  |
|  | Shiraz-49T | 1166 | 0        | -0.917235 |  |
|  | Shiraz-49T | 1166 | 0        | -0.917235 |  |
|  | Shiraz-49T | 1166 | 0        | -0.917235 |  |
|  | Shiraz-49T | 1166 | 0        | -0.917235 |  |
|  | Shiraz-49T | 1166 | 0        | -0.917235 |  |
|  | Shiraz-49T | 1166 | 0        | -0.917235 |  |
|  | Shiraz-49T | 1166 | 0        | -0.917235 |  |
|  | Shiraz-77T | 1282 | 0.213849 | 0         |  |
|  | Shiraz-77T | 1282 | 0.213849 | 0         |  |
|  | Shiraz-77T | 1282 | 0.213849 | 0         |  |
|  | Shiraz-77T | 1282 | 0.213849 | 0         |  |
|  | Shiraz-77T | 1282 | 0.213849 | 0         |  |
|  | Shiraz-77T | 1282 | 0.213849 | 0         |  |
|  | Shiraz-77T | 1282 | 0.213849 | 0         |  |
|  | Shiraz-77T | 1282 | 0.213849 | 0         |  |
|  | Shiraz-77T | 1282 | 0.213849 | 0         |  |
|  | Shiraz-77T | 1282 | 0.213849 | 0         |  |
|  | Shiraz-9T  | 1368 | 0.199713 | 0         |  |
|  | Shiraz-9T  | 1368 | 0.199713 | 0         |  |
|  | Shiraz-9T  | 1368 | 0.199713 | 0         |  |
|  | Shiraz-9T  | 1368 | 0.199713 | 0         |  |
|  | Shiraz-9T  | 1368 | 0.199713 | 0         |  |
|  | Shiraz-9T  | 1368 | 0.199713 | 0         |  |
|  | Shiraz-9T  | 1368 | 0.199713 | 0         |  |
|  | Shiraz-9T  | 1368 | 0.199713 | 0         |  |
|  | Shiraz-9T  | 1368 | 0.199713 | 0         |  |
|  | Shiraz-9T  | 1368 | 0.199713 | 0         |  |
|  | Shiraz-18T | 1456 | 0.608534 | 0         |  |
|  | Shiraz-18T | 1456 | 0.608534 | 0         |  |
|  | Shiraz-18T | 1456 | 0.608534 | 0         |  |
|  | Shiraz-18T | 1456 | 0.608534 | 0         |  |
|  | Shiraz-18T | 1456 | 0.608534 | 0         |  |
|  | Shiraz-18T | 1456 | 0.608534 | 0         |  |
|  | Shiraz-18T | 1456 | 0.608534 | 0         |  |
|  | Shiraz-18T | 1456 | 0.608534 | 0         |  |
|  | Shiraz-18T | 1456 | 0.608534 | 0         |  |
|  | Shiraz-18T | 1456 | 0.608534 | 0         |  |
|  | Shiraz-22T | 1669 | 0.695915 | 0         |  |
|  | Shiraz-22T | 1669 | 0.695915 | 0         |  |
|  | Shiraz-22T | 1669 | 0.695915 | 0         |  |
|  | Shiraz-22T | 1669 | 0.695915 | 0         |  |
|  | Shiraz-22T | 1669 | 0.695915 | 0         |  |
|  | Shiraz-22T | 1669 | 0.695915 | 0         |  |
|  | Shiraz-22T | 1669 | 0.695915 | 0         |  |
|  | Shiraz-22T | 1669 | 0.695915 | 0         |  |
|  | Shiraz-22T | 1669 | 0.695915 | 0         |  |
|  | Shiraz-22T | 1669 | 0.695915 | 0         |  |
|  | Shiraz-25T | 1717 | 0.420447 | 0         |  |
|  | Shiraz-25T | 1717 | 0.420447 | 0         |  |



|  |  |            |      |          |   |  |  |
|--|--|------------|------|----------|---|--|--|
|  |  | Shiraz-25T | 1717 | 0.420447 | 0 |  |  |
|  |  | Shiraz-25T | 1717 | 0.420447 | 0 |  |  |
|  |  | Shiraz-25T | 1717 | 0.420447 | 0 |  |  |
|  |  | Shiraz-25T | 1717 | 0.420447 | 0 |  |  |
|  |  | Shiraz-25T | 1717 | 0.420447 | 0 |  |  |
|  |  | Shiraz-25T | 1717 | 0.420447 | 0 |  |  |
|  |  | Shiraz-25T | 1717 | 0.420447 | 0 |  |  |
|  |  | Shiraz-28T | 1760 | 0.538181 | 0 |  |  |
|  |  | Shiraz-28T | 1760 | 0.538181 | 0 |  |  |
|  |  | Shiraz-28T | 1760 | 0.538181 | 0 |  |  |
|  |  | Shiraz-28T | 1760 | 0.538181 | 0 |  |  |
|  |  | Shiraz-28T | 1760 | 0.538181 | 0 |  |  |
|  |  | Shiraz-28T | 1760 | 0.538181 | 0 |  |  |
|  |  | Shiraz-28T | 1760 | 0.538181 | 0 |  |  |
|  |  | Shiraz-28T | 1760 | 0.538181 | 0 |  |  |
|  |  | Shiraz-28T | 1760 | 0.538181 | 0 |  |  |
|  |  | Shiraz-28T | 1760 | 0.538181 | 0 |  |  |
|  |  | Shiraz-29T | 1800 | 0.672527 | 0 |  |  |
|  |  | Shiraz-29T | 1800 | 0.672527 | 0 |  |  |
|  |  | Shiraz-29T | 1800 | 0.672527 | 0 |  |  |
|  |  | Shiraz-29T | 1800 | 0.672527 | 0 |  |  |
|  |  | Shiraz-29T | 1800 | 0.672527 | 0 |  |  |
|  |  | Shiraz-29T | 1800 | 0.672527 | 0 |  |  |
|  |  | Shiraz-29T | 1800 | 0.672527 | 0 |  |  |
|  |  | Shiraz-29T | 1800 | 0.672527 | 0 |  |  |
|  |  | Shiraz-29T | 1800 | 0.672527 | 0 |  |  |
|  |  | Shiraz-32T | 1869 | 0.776805 | 0 |  |  |
|  |  | Shiraz-32T | 1869 | 0.776805 | 0 |  |  |
|  |  | Shiraz-32T | 1869 | 0.776805 | 0 |  |  |
|  |  | Shiraz-32T | 1869 | 0.776805 | 0 |  |  |
|  |  | Shiraz-32T | 1869 | 0.776805 | 0 |  |  |
|  |  | Shiraz-32T | 1869 | 0.776805 | 0 |  |  |
|  |  | Shiraz-32T | 1869 | 0.776805 | 0 |  |  |
|  |  | Shiraz-32T | 1869 | 0.776805 | 0 |  |  |
|  |  | Shiraz-32T | 1869 | 0.776805 | 0 |  |  |
|  |  | Shiraz-35T | 1932 | 0.507141 | 0 |  |  |
|  |  | Shiraz-35T | 1932 | 0.507141 | 0 |  |  |
|  |  | Shiraz-35T | 1932 | 0.507141 | 0 |  |  |
|  |  | Shiraz-35T | 1932 | 0.507141 | 0 |  |  |
|  |  | Shiraz-35T | 1932 | 0.507141 | 0 |  |  |
|  |  | Shiraz-35T | 1932 | 0.507141 | 0 |  |  |
|  |  | Shiraz-35T | 1932 | 0.507141 | 0 |  |  |
|  |  | Shiraz-35T | 1932 | 0.507141 | 0 |  |  |
|  |  | Shiraz-35T | 1932 | 0.507141 | 0 |  |  |
|  |  | Shiraz-58T | 2221 | 0.871948 | 0 |  |  |
|  |  | Shiraz-58T | 2221 | 0.871948 | 0 |  |  |
|  |  | Shiraz-58T | 2221 | 0.871948 | 0 |  |  |
|  |  | Shiraz-58T | 2221 | 0.871948 | 0 |  |  |





|  |  |            |      |          |   |  |  |
|--|--|------------|------|----------|---|--|--|
|  |  | Shiraz-77T | 1282 | 0.213849 | 0 |  |  |
|  |  | Shiraz-9T  | 1368 | 0.199713 | 0 |  |  |
|  |  | Shiraz-9T  | 1368 | 0.199713 | 0 |  |  |
|  |  | Shiraz-9T  | 1368 | 0.199713 | 0 |  |  |
|  |  | Shiraz-9T  | 1368 | 0.199713 | 0 |  |  |
|  |  | Shiraz-9T  | 1368 | 0.199713 | 0 |  |  |
|  |  | Shiraz-9T  | 1368 | 0.199713 | 0 |  |  |
|  |  | Shiraz-9T  | 1368 | 0.199713 | 0 |  |  |
|  |  | Shiraz-9T  | 1368 | 0.199713 | 0 |  |  |
|  |  | Shiraz-9T  | 1368 | 0.199713 | 0 |  |  |
|  |  | Shiraz-18T | 1456 | 0.608534 | 0 |  |  |
|  |  | Shiraz-18T | 1456 | 0.608534 | 0 |  |  |
|  |  | Shiraz-18T | 1456 | 0.608534 | 0 |  |  |
|  |  | Shiraz-18T | 1456 | 0.608534 | 0 |  |  |
|  |  | Shiraz-18T | 1456 | 0.608534 | 0 |  |  |
|  |  | Shiraz-18T | 1456 | 0.608534 | 0 |  |  |
|  |  | Shiraz-18T | 1456 | 0.608534 | 0 |  |  |
|  |  | Shiraz-18T | 1456 | 0.608534 | 0 |  |  |
|  |  | Shiraz-18T | 1456 | 0.608534 | 0 |  |  |
|  |  | Shiraz-18T | 1456 | 0.608534 | 0 |  |  |
|  |  | Shiraz-22T | 1669 | 0.695915 | 0 |  |  |
|  |  | Shiraz-22T | 1669 | 0.695915 | 0 |  |  |
|  |  | Shiraz-22T | 1669 | 0.695915 | 0 |  |  |
|  |  | Shiraz-22T | 1669 | 0.695915 | 0 |  |  |
|  |  | Shiraz-22T | 1669 | 0.695915 | 0 |  |  |
|  |  | Shiraz-22T | 1669 | 0.695915 | 0 |  |  |
|  |  | Shiraz-22T | 1669 | 0.695915 | 0 |  |  |
|  |  | Shiraz-22T | 1669 | 0.695915 | 0 |  |  |
|  |  | Shiraz-22T | 1669 | 0.695915 | 0 |  |  |
|  |  | Shiraz-25T | 1717 | 0.420447 | 0 |  |  |
|  |  | Shiraz-25T | 1717 | 0.420447 | 0 |  |  |
|  |  | Shiraz-25T | 1717 | 0.420447 | 0 |  |  |
|  |  | Shiraz-25T | 1717 | 0.420447 | 0 |  |  |
|  |  | Shiraz-25T | 1717 | 0.420447 | 0 |  |  |
|  |  | Shiraz-25T | 1717 | 0.420447 | 0 |  |  |
|  |  | Shiraz-25T | 1717 | 0.420447 | 0 |  |  |
|  |  | Shiraz-25T | 1717 | 0.420447 | 0 |  |  |
|  |  | Shiraz-25T | 1717 | 0.420447 | 0 |  |  |
|  |  | Shiraz-25T | 1717 | 0.420447 | 0 |  |  |
|  |  | Shiraz-28T | 1760 | 0.538181 | 0 |  |  |
|  |  | Shiraz-28T | 1760 | 0.538181 | 0 |  |  |
|  |  | Shiraz-28T | 1760 | 0.538181 | 0 |  |  |
|  |  | Shiraz-28T | 1760 | 0.538181 | 0 |  |  |
|  |  | Shiraz-28T | 1760 | 0.538181 | 0 |  |  |
|  |  | Shiraz-28T | 1760 | 0.538181 | 0 |  |  |
|  |  | Shiraz-28T | 1760 | 0.538181 | 0 |  |  |
|  |  | Shiraz-28T | 1760 | 0.538181 | 0 |  |  |
|  |  | Shiraz-28T | 1760 | 0.538181 | 0 |  |  |
|  |  | Shiraz-28T | 1760 | 0.538181 | 0 |  |  |
|  |  | Shiraz-29T | 1800 | 0.672527 | 0 |  |  |

|  |  |            |      |          |   |  |  |
|--|--|------------|------|----------|---|--|--|
|  |  | Shiraz-29T | 1800 | 0.672527 | 0 |  |  |
|  |  | Shiraz-29T | 1800 | 0.672527 | 0 |  |  |
|  |  | Shiraz-29T | 1800 | 0.672527 | 0 |  |  |
|  |  | Shiraz-29T | 1800 | 0.672527 | 0 |  |  |
|  |  | Shiraz-29T | 1800 | 0.672527 | 0 |  |  |
|  |  | Shiraz-29T | 1800 | 0.672527 | 0 |  |  |
|  |  | Shiraz-29T | 1800 | 0.672527 | 0 |  |  |
|  |  | Shiraz-29T | 1800 | 0.672527 | 0 |  |  |
|  |  | Shiraz-32T | 1869 | 0.776805 | 0 |  |  |
|  |  | Shiraz-32T | 1869 | 0.776805 | 0 |  |  |
|  |  | Shiraz-32T | 1869 | 0.776805 | 0 |  |  |
|  |  | Shiraz-32T | 1869 | 0.776805 | 0 |  |  |
|  |  | Shiraz-32T | 1869 | 0.776805 | 0 |  |  |
|  |  | Shiraz-32T | 1869 | 0.776805 | 0 |  |  |
|  |  | Shiraz-32T | 1869 | 0.776805 | 0 |  |  |
|  |  | Shiraz-32T | 1869 | 0.776805 | 0 |  |  |
|  |  | Shiraz-32T | 1869 | 0.776805 | 0 |  |  |
|  |  | Shiraz-35T | 1932 | 0.507141 | 0 |  |  |
|  |  | Shiraz-35T | 1932 | 0.507141 | 0 |  |  |
|  |  | Shiraz-35T | 1932 | 0.507141 | 0 |  |  |
|  |  | Shiraz-35T | 1932 | 0.507141 | 0 |  |  |
|  |  | Shiraz-35T | 1932 | 0.507141 | 0 |  |  |
|  |  | Shiraz-35T | 1932 | 0.507141 | 0 |  |  |
|  |  | Shiraz-35T | 1932 | 0.507141 | 0 |  |  |
|  |  | Shiraz-35T | 1932 | 0.507141 | 0 |  |  |
|  |  | Shiraz-35T | 1932 | 0.507141 | 0 |  |  |
|  |  | Shiraz-35T | 1932 | 0.507141 | 0 |  |  |
|  |  | Shiraz-58T | 2221 | 0.871948 | 0 |  |  |
|  |  | Shiraz-58T | 2221 | 0.871948 | 0 |  |  |
|  |  | Shiraz-58T | 2221 | 0.871948 | 0 |  |  |
|  |  | Shiraz-58T | 2221 | 0.871948 | 0 |  |  |
|  |  | Shiraz-58T | 2221 | 0.871948 | 0 |  |  |
|  |  | Shiraz-58T | 2221 | 0.871948 | 0 |  |  |
|  |  | Shiraz-58T | 2221 | 0.871948 | 0 |  |  |
|  |  | Shiraz-58T | 2221 | 0.871948 | 0 |  |  |
|  |  | Shiraz-58T | 2221 | 0.871948 | 0 |  |  |
|  |  | Shiraz-71T | 2260 | 0.68394  | 0 |  |  |
|  |  | Shiraz-71T | 2260 | 0.68394  | 0 |  |  |
|  |  | Shiraz-71T | 2260 | 0.68394  | 0 |  |  |
|  |  | Shiraz-71T | 2260 | 0.68394  | 0 |  |  |
|  |  | Shiraz-71T | 2260 | 0.68394  | 0 |  |  |
|  |  | Shiraz-71T | 2260 | 0.68394  | 0 |  |  |
|  |  | Shiraz-71T | 2260 | 0.68394  | 0 |  |  |
|  |  | Shiraz-71T | 2260 | 0.68394  | 0 |  |  |
|  |  | Shiraz-71T | 2260 | 0.68394  | 0 |  |  |
|  |  | Shiraz-71T | 2262 | 0.986748 | 0 |  |  |
|  |  | Shiraz-71T | 2262 | 0.986748 | 0 |  |  |
|  |  | Shiraz-71T | 2262 | 0.986748 | 0 |  |  |

|        |      |            |      |          |           |  |
|--------|------|------------|------|----------|-----------|--|
|        |      | Shiraz-71T | 2262 | 0.986748 | 0         |  |
|        |      | Shiraz-71T | 2262 | 0.986748 | 0         |  |
|        |      | Shiraz-71T | 2262 | 0.986748 | 0         |  |
|        |      | Shiraz-71T | 2262 | 0.986748 | 0         |  |
|        |      | Shiraz-71T | 2262 | 0.986748 | 0         |  |
|        |      | Shiraz-71T | 2262 | 0.986748 | 0         |  |
| XAGE1B | chrX | Shiraz-4T  | 260  | 0        | -0.324128 |  |
|        |      | Shiraz-4T  | 260  | 0        | -0.324128 |  |
|        |      | Shiraz-4T  | 260  | 0        | -0.324128 |  |
|        |      | Shiraz-4T  | 260  | 0        | -0.324128 |  |
|        |      | Shiraz-4T  | 260  | 0        | -0.324128 |  |
|        |      | Shiraz-4T  | 260  | 0        | -0.324128 |  |
|        |      | Shiraz-4T  | 260  | 0        | -0.324128 |  |
|        |      | Shiraz-4T  | 260  | 0        | -0.324128 |  |
|        |      | Shiraz-4T  | 260  | 0        | -0.324128 |  |
|        |      | Shiraz-4T  | 260  | 0        | -0.324128 |  |
|        |      | Shiraz-16T | 294  | 0.655804 | 0         |  |
|        |      | Shiraz-16T | 294  | 0.655804 | 0         |  |
|        |      | Shiraz-16T | 294  | 0.655804 | 0         |  |
|        |      | Shiraz-16T | 294  | 0.655804 | 0         |  |
|        |      | Shiraz-16T | 294  | 0.655804 | 0         |  |
|        |      | Shiraz-16T | 294  | 0.655804 | 0         |  |
|        |      | Shiraz-16T | 294  | 0.655804 | 0         |  |
|        |      | Shiraz-16T | 294  | 0.655804 | 0         |  |
|        |      | Shiraz-16T | 294  | 0.655804 | 0         |  |
|        |      | Shiraz-16T | 294  | 0.655804 | 0         |  |
|        |      | Shiraz-31T | 345  | 0.103301 | 0         |  |
|        |      | Shiraz-31T | 345  | 0.103301 | 0         |  |
|        |      | Shiraz-31T | 345  | 0.103301 | 0         |  |
|        |      | Shiraz-31T | 345  | 0.103301 | 0         |  |
|        |      | Shiraz-31T | 345  | 0.103301 | 0         |  |
|        |      | Shiraz-31T | 345  | 0.103301 | 0         |  |
|        |      | Shiraz-31T | 345  | 0.103301 | 0         |  |
|        |      | Shiraz-31T | 345  | 0.103301 | 0         |  |
|        |      | Shiraz-31T | 345  | 0.103301 | 0         |  |
|        |      | Shiraz-31T | 345  | 0.103301 | 0         |  |
|        |      | Shiraz-36T | 431  | 0        | -0.78035  |  |
|        |      | Shiraz-36T | 431  | 0        | -0.78035  |  |
|        |      | Shiraz-36T | 431  | 0        | -0.78035  |  |
|        |      | Shiraz-36T | 431  | 0        | -0.78035  |  |
|        |      | Shiraz-36T | 431  | 0        | -0.78035  |  |
|        |      | Shiraz-36T | 431  | 0        | -0.78035  |  |
|        |      | Shiraz-36T | 431  | 0        | -0.78035  |  |
|        |      | Shiraz-36T | 431  | 0        | -0.78035  |  |
|        |      | Shiraz-36T | 431  | 0        | -0.78035  |  |
|        |      | Shiraz-36T | 431  | 0        | -0.78035  |  |
|        |      | Shiraz-36T | 432  | 0        | -0.6692   |  |
|        |      | Shiraz-36T | 432  | 0        | -0.6692   |  |
|        |      | Shiraz-36T | 432  | 0        | -0.6692   |  |
|        |      | Shiraz-36T | 432  | 0        | -0.6692   |  |
|        |      | Shiraz-36T | 432  | 0        | -0.6692   |  |







|  |  |            |      |          |           |  |  |
|--|--|------------|------|----------|-----------|--|--|
|  |  | Shiraz-35T | 1932 | 0.507141 | 0         |  |  |
|  |  | Shiraz-35T | 1932 | 0.507141 | 0         |  |  |
|  |  | Shiraz-35T | 1932 | 0.507141 | 0         |  |  |
|  |  | Shiraz-35T | 1932 | 0.507141 | 0         |  |  |
|  |  | Shiraz-35T | 1932 | 0.507141 | 0         |  |  |
|  |  | Shiraz-35T | 1932 | 0.507141 | 0         |  |  |
|  |  | Shiraz-35T | 1932 | 0.507141 | 0         |  |  |
|  |  | Shiraz-35T | 1932 | 0.507141 | 0         |  |  |
|  |  | Shiraz-35T | 1932 | 0.507141 | 0         |  |  |
|  |  | Shiraz-35T | 1932 | 0.507141 | 0         |  |  |
|  |  | Shiraz-58T | 2221 | 0.871948 | 0         |  |  |
|  |  | Shiraz-58T | 2221 | 0.871948 | 0         |  |  |
|  |  | Shiraz-58T | 2221 | 0.871948 | 0         |  |  |
|  |  | Shiraz-58T | 2221 | 0.871948 | 0         |  |  |
|  |  | Shiraz-58T | 2221 | 0.871948 | 0         |  |  |
|  |  | Shiraz-58T | 2221 | 0.871948 | 0         |  |  |
|  |  | Shiraz-58T | 2221 | 0.871948 | 0         |  |  |
|  |  | Shiraz-58T | 2221 | 0.871948 | 0         |  |  |
|  |  | Shiraz-58T | 2221 | 0.871948 | 0         |  |  |
|  |  | Shiraz-58T | 2221 | 0.871948 | 0         |  |  |
|  |  | Shiraz-71T | 2260 | 0.68394  | 0         |  |  |
|  |  | Shiraz-71T | 2260 | 0.68394  | 0         |  |  |
|  |  | Shiraz-71T | 2260 | 0.68394  | 0         |  |  |
|  |  | Shiraz-71T | 2260 | 0.68394  | 0         |  |  |
|  |  | Shiraz-71T | 2260 | 0.68394  | 0         |  |  |
|  |  | Shiraz-71T | 2260 | 0.68394  | 0         |  |  |
|  |  | Shiraz-71T | 2260 | 0.68394  | 0         |  |  |
|  |  | Shiraz-71T | 2260 | 0.68394  | 0         |  |  |
|  |  | Shiraz-71T | 2260 | 0.68394  | 0         |  |  |
|  |  | Shiraz-71T | 2260 | 0.68394  | 0         |  |  |
|  |  | Shiraz-71T | 2260 | 0.68394  | 0         |  |  |
|  |  | Shiraz-71T | 2262 | 0.986748 | 0         |  |  |
|  |  | Shiraz-71T | 2262 | 0.986748 | 0         |  |  |
|  |  | Shiraz-71T | 2262 | 0.986748 | 0         |  |  |
|  |  | Shiraz-71T | 2262 | 0.986748 | 0         |  |  |
|  |  | Shiraz-71T | 2262 | 0.986748 | 0         |  |  |
|  |  | Shiraz-71T | 2262 | 0.986748 | 0         |  |  |
|  |  | Shiraz-71T | 2262 | 0.986748 | 0         |  |  |
|  |  | Shiraz-71T | 2262 | 0.986748 | 0         |  |  |
|  |  | Shiraz-71T | 2262 | 0.986748 | 0         |  |  |
|  |  | Shiraz-4T  | 260  | 0        | -0.324128 |  |  |
|  |  | Shiraz-4T  | 260  | 0        | -0.324128 |  |  |
|  |  | Shiraz-4T  | 260  | 0        | -0.324128 |  |  |
|  |  | Shiraz-4T  | 260  | 0        | -0.324128 |  |  |
|  |  | Shiraz-4T  | 260  | 0        | -0.324128 |  |  |
|  |  | Shiraz-4T  | 260  | 0        | -0.324128 |  |  |
|  |  | Shiraz-4T  | 260  | 0        | -0.324128 |  |  |
|  |  | Shiraz-4T  | 260  | 0        | -0.324128 |  |  |
|  |  | Shiraz-4T  | 260  | 0        | -0.324128 |  |  |
|  |  | Shiraz-4T  | 260  | 0        | -0.324128 |  |  |
|  |  | Shiraz-16T | 294  | 0.655804 | 0         |  |  |
|  |  | Shiraz-16T | 294  | 0.655804 | 0         |  |  |

|  |            |      |          |           |  |
|--|------------|------|----------|-----------|--|
|  | Shiraz-16T | 294  | 0.655804 | 0         |  |
|  | Shiraz-16T | 294  | 0.655804 | 0         |  |
|  | Shiraz-16T | 294  | 0.655804 | 0         |  |
|  | Shiraz-16T | 294  | 0.655804 | 0         |  |
|  | Shiraz-16T | 294  | 0.655804 | 0         |  |
|  | Shiraz-16T | 294  | 0.655804 | 0         |  |
|  | Shiraz-16T | 294  | 0.655804 | 0         |  |
|  | Shiraz-31T | 345  | 0.103301 | 0         |  |
|  | Shiraz-31T | 345  | 0.103301 | 0         |  |
|  | Shiraz-31T | 345  | 0.103301 | 0         |  |
|  | Shiraz-31T | 345  | 0.103301 | 0         |  |
|  | Shiraz-31T | 345  | 0.103301 | 0         |  |
|  | Shiraz-31T | 345  | 0.103301 | 0         |  |
|  | Shiraz-31T | 345  | 0.103301 | 0         |  |
|  | Shiraz-31T | 345  | 0.103301 | 0         |  |
|  | Shiraz-31T | 345  | 0.103301 | 0         |  |
|  | Shiraz-31T | 345  | 0.103301 | 0         |  |
|  | Shiraz-36T | 431  | 0        | -0.78035  |  |
|  | Shiraz-36T | 431  | 0        | -0.78035  |  |
|  | Shiraz-36T | 431  | 0        | -0.78035  |  |
|  | Shiraz-36T | 431  | 0        | -0.78035  |  |
|  | Shiraz-36T | 431  | 0        | -0.78035  |  |
|  | Shiraz-36T | 431  | 0        | -0.78035  |  |
|  | Shiraz-36T | 431  | 0        | -0.78035  |  |
|  | Shiraz-36T | 431  | 0        | -0.78035  |  |
|  | Shiraz-36T | 431  | 0        | -0.78035  |  |
|  | Shiraz-36T | 431  | 0        | -0.78035  |  |
|  | Shiraz-36T | 432  | 0        | -0.6692   |  |
|  | Shiraz-36T | 432  | 0        | -0.6692   |  |
|  | Shiraz-36T | 432  | 0        | -0.6692   |  |
|  | Shiraz-36T | 432  | 0        | -0.6692   |  |
|  | Shiraz-36T | 432  | 0        | -0.6692   |  |
|  | Shiraz-36T | 432  | 0        | -0.6692   |  |
|  | Shiraz-36T | 432  | 0        | -0.6692   |  |
|  | Shiraz-36T | 432  | 0        | -0.6692   |  |
|  | Shiraz-36T | 432  | 0        | -0.6692   |  |
|  | Shiraz-44T | 891  | 0        | -0.954044 |  |
|  | Shiraz-44T | 891  | 0        | -0.954044 |  |
|  | Shiraz-44T | 891  | 0        | -0.954044 |  |
|  | Shiraz-44T | 891  | 0        | -0.954044 |  |
|  | Shiraz-44T | 891  | 0        | -0.954044 |  |
|  | Shiraz-44T | 891  | 0        | -0.954044 |  |
|  | Shiraz-44T | 891  | 0        | -0.954044 |  |
|  | Shiraz-44T | 891  | 0        | -0.954044 |  |
|  | Shiraz-44T | 891  | 0        | -0.954044 |  |
|  | Shiraz-49T | 1166 | 0        | -0.917235 |  |
|  | Shiraz-49T | 1166 | 0        | -0.917235 |  |
|  | Shiraz-49T | 1166 | 0        | -0.917235 |  |
|  | Shiraz-49T | 1166 | 0        | -0.917235 |  |





|  |            |      |          |           |  |
|--|------------|------|----------|-----------|--|
|  | Shiraz-58T | 2221 | 0.871948 | 0         |  |
|  | Shiraz-71T | 2260 | 0.68394  | 0         |  |
|  | Shiraz-71T | 2260 | 0.68394  | 0         |  |
|  | Shiraz-71T | 2260 | 0.68394  | 0         |  |
|  | Shiraz-71T | 2260 | 0.68394  | 0         |  |
|  | Shiraz-71T | 2260 | 0.68394  | 0         |  |
|  | Shiraz-71T | 2260 | 0.68394  | 0         |  |
|  | Shiraz-71T | 2260 | 0.68394  | 0         |  |
|  | Shiraz-71T | 2260 | 0.68394  | 0         |  |
|  | Shiraz-71T | 2262 | 0.986748 | 0         |  |
|  | Shiraz-71T | 2262 | 0.986748 | 0         |  |
|  | Shiraz-71T | 2262 | 0.986748 | 0         |  |
|  | Shiraz-71T | 2262 | 0.986748 | 0         |  |
|  | Shiraz-71T | 2262 | 0.986748 | 0         |  |
|  | Shiraz-71T | 2262 | 0.986748 | 0         |  |
|  | Shiraz-71T | 2262 | 0.986748 | 0         |  |
|  | Shiraz-71T | 2262 | 0.986748 | 0         |  |
|  | Shiraz-71T | 2262 | 0.986748 | 0         |  |
|  | Shiraz-71T | 2262 | 0.986748 | 0         |  |
|  | Shiraz-4T  | 260  | 0        | -0.324128 |  |
|  | Shiraz-4T  | 260  | 0        | -0.324128 |  |
|  | Shiraz-4T  | 260  | 0        | -0.324128 |  |
|  | Shiraz-4T  | 260  | 0        | -0.324128 |  |
|  | Shiraz-4T  | 260  | 0        | -0.324128 |  |
|  | Shiraz-4T  | 260  | 0        | -0.324128 |  |
|  | Shiraz-4T  | 260  | 0        | -0.324128 |  |
|  | Shiraz-4T  | 260  | 0        | -0.324128 |  |
|  | Shiraz-4T  | 260  | 0        | -0.324128 |  |
|  | Shiraz-16T | 294  | 0.655804 | 0         |  |
|  | Shiraz-16T | 294  | 0.655804 | 0         |  |
|  | Shiraz-16T | 294  | 0.655804 | 0         |  |
|  | Shiraz-16T | 294  | 0.655804 | 0         |  |
|  | Shiraz-16T | 294  | 0.655804 | 0         |  |
|  | Shiraz-16T | 294  | 0.655804 | 0         |  |
|  | Shiraz-16T | 294  | 0.655804 | 0         |  |
|  | Shiraz-16T | 294  | 0.655804 | 0         |  |
|  | Shiraz-16T | 294  | 0.655804 | 0         |  |
|  | Shiraz-31T | 345  | 0.103301 | 0         |  |
|  | Shiraz-31T | 345  | 0.103301 | 0         |  |
|  | Shiraz-31T | 345  | 0.103301 | 0         |  |
|  | Shiraz-31T | 345  | 0.103301 | 0         |  |
|  | Shiraz-31T | 345  | 0.103301 | 0         |  |
|  | Shiraz-31T | 345  | 0.103301 | 0         |  |
|  | Shiraz-31T | 345  | 0.103301 | 0         |  |
|  | Shiraz-31T | 345  | 0.103301 | 0         |  |
|  | Shiraz-31T | 345  | 0.103301 | 0         |  |
|  | Shiraz-36T | 431  | 0        | -0.78035  |  |

|  |            |      |          |           |  |
|--|------------|------|----------|-----------|--|
|  | Shiraz-36T | 431  | 0        | -0.78035  |  |
|  | Shiraz-36T | 431  | 0        | -0.78035  |  |
|  | Shiraz-36T | 431  | 0        | -0.78035  |  |
|  | Shiraz-36T | 431  | 0        | -0.78035  |  |
|  | Shiraz-36T | 431  | 0        | -0.78035  |  |
|  | Shiraz-36T | 431  | 0        | -0.78035  |  |
|  | Shiraz-36T | 431  | 0        | -0.78035  |  |
|  | Shiraz-36T | 431  | 0        | -0.78035  |  |
|  | Shiraz-36T | 432  | 0        | -0.6692   |  |
|  | Shiraz-36T | 432  | 0        | -0.6692   |  |
|  | Shiraz-36T | 432  | 0        | -0.6692   |  |
|  | Shiraz-36T | 432  | 0        | -0.6692   |  |
|  | Shiraz-36T | 432  | 0        | -0.6692   |  |
|  | Shiraz-36T | 432  | 0        | -0.6692   |  |
|  | Shiraz-36T | 432  | 0        | -0.6692   |  |
|  | Shiraz-36T | 432  | 0        | -0.6692   |  |
|  | Shiraz-36T | 432  | 0        | -0.6692   |  |
|  | Shiraz-36T | 432  | 0        | -0.6692   |  |
|  | Shiraz-44T | 891  | 0        | -0.954044 |  |
|  | Shiraz-44T | 891  | 0        | -0.954044 |  |
|  | Shiraz-44T | 891  | 0        | -0.954044 |  |
|  | Shiraz-44T | 891  | 0        | -0.954044 |  |
|  | Shiraz-44T | 891  | 0        | -0.954044 |  |
|  | Shiraz-44T | 891  | 0        | -0.954044 |  |
|  | Shiraz-44T | 891  | 0        | -0.954044 |  |
|  | Shiraz-44T | 891  | 0        | -0.954044 |  |
|  | Shiraz-44T | 891  | 0        | -0.954044 |  |
|  | Shiraz-44T | 891  | 0        | -0.954044 |  |
|  | Shiraz-49T | 1166 | 0        | -0.917235 |  |
|  | Shiraz-49T | 1166 | 0        | -0.917235 |  |
|  | Shiraz-49T | 1166 | 0        | -0.917235 |  |
|  | Shiraz-49T | 1166 | 0        | -0.917235 |  |
|  | Shiraz-49T | 1166 | 0        | -0.917235 |  |
|  | Shiraz-49T | 1166 | 0        | -0.917235 |  |
|  | Shiraz-49T | 1166 | 0        | -0.917235 |  |
|  | Shiraz-49T | 1166 | 0        | -0.917235 |  |
|  | Shiraz-49T | 1166 | 0        | -0.917235 |  |
|  | Shiraz-77T | 1282 | 0.213849 | 0         |  |
|  | Shiraz-77T | 1282 | 0.213849 | 0         |  |
|  | Shiraz-77T | 1282 | 0.213849 | 0         |  |
|  | Shiraz-77T | 1282 | 0.213849 | 0         |  |
|  | Shiraz-77T | 1282 | 0.213849 | 0         |  |
|  | Shiraz-77T | 1282 | 0.213849 | 0         |  |
|  | Shiraz-77T | 1282 | 0.213849 | 0         |  |
|  | Shiraz-77T | 1282 | 0.213849 | 0         |  |
|  | Shiraz-77T | 1282 | 0.213849 | 0         |  |
|  | Shiraz-77T | 1282 | 0.213849 | 0         |  |
|  | Shiraz-9T  | 1368 | 0.199713 | 0         |  |
|  | Shiraz-9T  | 1368 | 0.199713 | 0         |  |
|  | Shiraz-9T  | 1368 | 0.199713 | 0         |  |









|  |            |      |          |           |  |
|--|------------|------|----------|-----------|--|
|  | Shiraz-44T | 891  | 0        | -0.954044 |  |
|  | Shiraz-44T | 891  | 0        | -0.954044 |  |
|  | Shiraz-44T | 891  | 0        | -0.954044 |  |
|  | Shiraz-44T | 891  | 0        | -0.954044 |  |
|  | Shiraz-44T | 891  | 0        | -0.954044 |  |
|  | Shiraz-44T | 891  | 0        | -0.954044 |  |
|  | Shiraz-44T | 891  | 0        | -0.954044 |  |
|  | Shiraz-44T | 891  | 0        | -0.954044 |  |
|  | Shiraz-44T | 891  | 0        | -0.954044 |  |
|  | Shiraz-49T | 1166 | 0        | -0.917235 |  |
|  | Shiraz-49T | 1166 | 0        | -0.917235 |  |
|  | Shiraz-49T | 1166 | 0        | -0.917235 |  |
|  | Shiraz-49T | 1166 | 0        | -0.917235 |  |
|  | Shiraz-49T | 1166 | 0        | -0.917235 |  |
|  | Shiraz-49T | 1166 | 0        | -0.917235 |  |
|  | Shiraz-49T | 1166 | 0        | -0.917235 |  |
|  | Shiraz-49T | 1166 | 0        | -0.917235 |  |
|  | Shiraz-49T | 1166 | 0        | -0.917235 |  |
|  | Shiraz-49T | 1166 | 0        | -0.917235 |  |
|  | Shiraz-77T | 1282 | 0.213849 | 0         |  |
|  | Shiraz-77T | 1282 | 0.213849 | 0         |  |
|  | Shiraz-77T | 1282 | 0.213849 | 0         |  |
|  | Shiraz-77T | 1282 | 0.213849 | 0         |  |
|  | Shiraz-77T | 1282 | 0.213849 | 0         |  |
|  | Shiraz-77T | 1282 | 0.213849 | 0         |  |
|  | Shiraz-77T | 1282 | 0.213849 | 0         |  |
|  | Shiraz-77T | 1282 | 0.213849 | 0         |  |
|  | Shiraz-77T | 1282 | 0.213849 | 0         |  |
|  | Shiraz-77T | 1282 | 0.213849 | 0         |  |
|  | Shiraz-9T  | 1368 | 0.199713 | 0         |  |
|  | Shiraz-9T  | 1368 | 0.199713 | 0         |  |
|  | Shiraz-9T  | 1368 | 0.199713 | 0         |  |
|  | Shiraz-9T  | 1368 | 0.199713 | 0         |  |
|  | Shiraz-9T  | 1368 | 0.199713 | 0         |  |
|  | Shiraz-9T  | 1368 | 0.199713 | 0         |  |
|  | Shiraz-9T  | 1368 | 0.199713 | 0         |  |
|  | Shiraz-9T  | 1368 | 0.199713 | 0         |  |
|  | Shiraz-9T  | 1368 | 0.199713 | 0         |  |
|  | Shiraz-9T  | 1368 | 0.199713 | 0         |  |
|  | Shiraz-18T | 1456 | 0.608534 | 0         |  |
|  | Shiraz-18T | 1456 | 0.608534 | 0         |  |
|  | Shiraz-18T | 1456 | 0.608534 | 0         |  |
|  | Shiraz-18T | 1456 | 0.608534 | 0         |  |
|  | Shiraz-18T | 1456 | 0.608534 | 0         |  |
|  | Shiraz-18T | 1456 | 0.608534 | 0         |  |
|  | Shiraz-18T | 1456 | 0.608534 | 0         |  |
|  | Shiraz-18T | 1456 | 0.608534 | 0         |  |
|  | Shiraz-18T | 1456 | 0.608534 | 0         |  |
|  | Shiraz-18T | 1456 | 0.608534 | 0         |  |
|  | Shiraz-22T | 1669 | 0.695915 | 0         |  |
|  | Shiraz-22T | 1669 | 0.695915 | 0         |  |

|  |  |            |      |          |   |  |  |
|--|--|------------|------|----------|---|--|--|
|  |  | Shiraz-22T | 1669 | 0.695915 | 0 |  |  |
|  |  | Shiraz-22T | 1669 | 0.695915 | 0 |  |  |
|  |  | Shiraz-22T | 1669 | 0.695915 | 0 |  |  |
|  |  | Shiraz-22T | 1669 | 0.695915 | 0 |  |  |
|  |  | Shiraz-22T | 1669 | 0.695915 | 0 |  |  |
|  |  | Shiraz-22T | 1669 | 0.695915 | 0 |  |  |
|  |  | Shiraz-22T | 1669 | 0.695915 | 0 |  |  |
|  |  | Shiraz-25T | 1717 | 0.420447 | 0 |  |  |
|  |  | Shiraz-25T | 1717 | 0.420447 | 0 |  |  |
|  |  | Shiraz-25T | 1717 | 0.420447 | 0 |  |  |
|  |  | Shiraz-25T | 1717 | 0.420447 | 0 |  |  |
|  |  | Shiraz-25T | 1717 | 0.420447 | 0 |  |  |
|  |  | Shiraz-25T | 1717 | 0.420447 | 0 |  |  |
|  |  | Shiraz-25T | 1717 | 0.420447 | 0 |  |  |
|  |  | Shiraz-25T | 1717 | 0.420447 | 0 |  |  |
|  |  | Shiraz-25T | 1717 | 0.420447 | 0 |  |  |
|  |  | Shiraz-25T | 1717 | 0.420447 | 0 |  |  |
|  |  | Shiraz-28T | 1760 | 0.538181 | 0 |  |  |
|  |  | Shiraz-28T | 1760 | 0.538181 | 0 |  |  |
|  |  | Shiraz-28T | 1760 | 0.538181 | 0 |  |  |
|  |  | Shiraz-28T | 1760 | 0.538181 | 0 |  |  |
|  |  | Shiraz-28T | 1760 | 0.538181 | 0 |  |  |
|  |  | Shiraz-28T | 1760 | 0.538181 | 0 |  |  |
|  |  | Shiraz-28T | 1760 | 0.538181 | 0 |  |  |
|  |  | Shiraz-28T | 1760 | 0.538181 | 0 |  |  |
|  |  | Shiraz-28T | 1760 | 0.538181 | 0 |  |  |
|  |  | Shiraz-28T | 1760 | 0.538181 | 0 |  |  |
|  |  | Shiraz-29T | 1800 | 0.672527 | 0 |  |  |
|  |  | Shiraz-29T | 1800 | 0.672527 | 0 |  |  |
|  |  | Shiraz-29T | 1800 | 0.672527 | 0 |  |  |
|  |  | Shiraz-29T | 1800 | 0.672527 | 0 |  |  |
|  |  | Shiraz-29T | 1800 | 0.672527 | 0 |  |  |
|  |  | Shiraz-29T | 1800 | 0.672527 | 0 |  |  |
|  |  | Shiraz-29T | 1800 | 0.672527 | 0 |  |  |
|  |  | Shiraz-29T | 1800 | 0.672527 | 0 |  |  |
|  |  | Shiraz-29T | 1800 | 0.672527 | 0 |  |  |
|  |  | Shiraz-32T | 1869 | 0.776805 | 0 |  |  |
|  |  | Shiraz-32T | 1869 | 0.776805 | 0 |  |  |
|  |  | Shiraz-32T | 1869 | 0.776805 | 0 |  |  |
|  |  | Shiraz-32T | 1869 | 0.776805 | 0 |  |  |
|  |  | Shiraz-32T | 1869 | 0.776805 | 0 |  |  |
|  |  | Shiraz-32T | 1869 | 0.776805 | 0 |  |  |
|  |  | Shiraz-32T | 1869 | 0.776805 | 0 |  |  |
|  |  | Shiraz-32T | 1869 | 0.776805 | 0 |  |  |
|  |  | Shiraz-32T | 1869 | 0.776805 | 0 |  |  |
|  |  | Shiraz-32T | 1869 | 0.776805 | 0 |  |  |
|  |  | Shiraz-35T | 1932 | 0.507141 | 0 |  |  |
|  |  | Shiraz-35T | 1932 | 0.507141 | 0 |  |  |
|  |  | Shiraz-35T | 1932 | 0.507141 | 0 |  |  |
|  |  | Shiraz-35T | 1932 | 0.507141 | 0 |  |  |





|  |  |            |      |          |           |  |  |
|--|--|------------|------|----------|-----------|--|--|
|  |  | Shiraz-49T | 1166 | 0        | -0.917235 |  |  |
|  |  | Shiraz-77T | 1282 | 0.213849 | 0         |  |  |
|  |  | Shiraz-77T | 1282 | 0.213849 | 0         |  |  |
|  |  | Shiraz-77T | 1282 | 0.213849 | 0         |  |  |
|  |  | Shiraz-77T | 1282 | 0.213849 | 0         |  |  |
|  |  | Shiraz-77T | 1282 | 0.213849 | 0         |  |  |
|  |  | Shiraz-77T | 1282 | 0.213849 | 0         |  |  |
|  |  | Shiraz-77T | 1282 | 0.213849 | 0         |  |  |
|  |  | Shiraz-77T | 1282 | 0.213849 | 0         |  |  |
|  |  | Shiraz-9T  | 1368 | 0.199713 | 0         |  |  |
|  |  | Shiraz-9T  | 1368 | 0.199713 | 0         |  |  |
|  |  | Shiraz-9T  | 1368 | 0.199713 | 0         |  |  |
|  |  | Shiraz-9T  | 1368 | 0.199713 | 0         |  |  |
|  |  | Shiraz-9T  | 1368 | 0.199713 | 0         |  |  |
|  |  | Shiraz-9T  | 1368 | 0.199713 | 0         |  |  |
|  |  | Shiraz-9T  | 1368 | 0.199713 | 0         |  |  |
|  |  | Shiraz-9T  | 1368 | 0.199713 | 0         |  |  |
|  |  | Shiraz-9T  | 1368 | 0.199713 | 0         |  |  |
|  |  | Shiraz-18T | 1456 | 0.608534 | 0         |  |  |
|  |  | Shiraz-18T | 1456 | 0.608534 | 0         |  |  |
|  |  | Shiraz-18T | 1456 | 0.608534 | 0         |  |  |
|  |  | Shiraz-18T | 1456 | 0.608534 | 0         |  |  |
|  |  | Shiraz-18T | 1456 | 0.608534 | 0         |  |  |
|  |  | Shiraz-18T | 1456 | 0.608534 | 0         |  |  |
|  |  | Shiraz-18T | 1456 | 0.608534 | 0         |  |  |
|  |  | Shiraz-18T | 1456 | 0.608534 | 0         |  |  |
|  |  | Shiraz-18T | 1456 | 0.608534 | 0         |  |  |
|  |  | Shiraz-22T | 1669 | 0.695915 | 0         |  |  |
|  |  | Shiraz-22T | 1669 | 0.695915 | 0         |  |  |
|  |  | Shiraz-22T | 1669 | 0.695915 | 0         |  |  |
|  |  | Shiraz-22T | 1669 | 0.695915 | 0         |  |  |
|  |  | Shiraz-22T | 1669 | 0.695915 | 0         |  |  |
|  |  | Shiraz-22T | 1669 | 0.695915 | 0         |  |  |
|  |  | Shiraz-22T | 1669 | 0.695915 | 0         |  |  |
|  |  | Shiraz-22T | 1669 | 0.695915 | 0         |  |  |
|  |  | Shiraz-22T | 1669 | 0.695915 | 0         |  |  |
|  |  | Shiraz-25T | 1717 | 0.420447 | 0         |  |  |
|  |  | Shiraz-25T | 1717 | 0.420447 | 0         |  |  |
|  |  | Shiraz-25T | 1717 | 0.420447 | 0         |  |  |
|  |  | Shiraz-25T | 1717 | 0.420447 | 0         |  |  |
|  |  | Shiraz-25T | 1717 | 0.420447 | 0         |  |  |
|  |  | Shiraz-25T | 1717 | 0.420447 | 0         |  |  |
|  |  | Shiraz-25T | 1717 | 0.420447 | 0         |  |  |
|  |  | Shiraz-25T | 1717 | 0.420447 | 0         |  |  |
|  |  | Shiraz-25T | 1717 | 0.420447 | 0         |  |  |
|  |  | Shiraz-28T | 1760 | 0.538181 | 0         |  |  |

|  |  |            |      |          |   |  |
|--|--|------------|------|----------|---|--|
|  |  | Shiraz-28T | 1760 | 0.538181 | 0 |  |
|  |  | Shiraz-28T | 1760 | 0.538181 | 0 |  |
|  |  | Shiraz-28T | 1760 | 0.538181 | 0 |  |
|  |  | Shiraz-28T | 1760 | 0.538181 | 0 |  |
|  |  | Shiraz-28T | 1760 | 0.538181 | 0 |  |
|  |  | Shiraz-28T | 1760 | 0.538181 | 0 |  |
|  |  | Shiraz-28T | 1760 | 0.538181 | 0 |  |
|  |  | Shiraz-28T | 1760 | 0.538181 | 0 |  |
|  |  | Shiraz-29T | 1800 | 0.672527 | 0 |  |
|  |  | Shiraz-29T | 1800 | 0.672527 | 0 |  |
|  |  | Shiraz-29T | 1800 | 0.672527 | 0 |  |
|  |  | Shiraz-29T | 1800 | 0.672527 | 0 |  |
|  |  | Shiraz-29T | 1800 | 0.672527 | 0 |  |
|  |  | Shiraz-29T | 1800 | 0.672527 | 0 |  |
|  |  | Shiraz-29T | 1800 | 0.672527 | 0 |  |
|  |  | Shiraz-29T | 1800 | 0.672527 | 0 |  |
|  |  | Shiraz-29T | 1800 | 0.672527 | 0 |  |
|  |  | Shiraz-29T | 1800 | 0.672527 | 0 |  |
|  |  | Shiraz-32T | 1869 | 0.776805 | 0 |  |
|  |  | Shiraz-32T | 1869 | 0.776805 | 0 |  |
|  |  | Shiraz-32T | 1869 | 0.776805 | 0 |  |
|  |  | Shiraz-32T | 1869 | 0.776805 | 0 |  |
|  |  | Shiraz-32T | 1869 | 0.776805 | 0 |  |
|  |  | Shiraz-32T | 1869 | 0.776805 | 0 |  |
|  |  | Shiraz-32T | 1869 | 0.776805 | 0 |  |
|  |  | Shiraz-32T | 1869 | 0.776805 | 0 |  |
|  |  | Shiraz-32T | 1869 | 0.776805 | 0 |  |
|  |  | Shiraz-32T | 1869 | 0.776805 | 0 |  |
|  |  | Shiraz-35T | 1932 | 0.507141 | 0 |  |
|  |  | Shiraz-35T | 1932 | 0.507141 | 0 |  |
|  |  | Shiraz-35T | 1932 | 0.507141 | 0 |  |
|  |  | Shiraz-35T | 1932 | 0.507141 | 0 |  |
|  |  | Shiraz-35T | 1932 | 0.507141 | 0 |  |
|  |  | Shiraz-35T | 1932 | 0.507141 | 0 |  |
|  |  | Shiraz-35T | 1932 | 0.507141 | 0 |  |
|  |  | Shiraz-35T | 1932 | 0.507141 | 0 |  |
|  |  | Shiraz-35T | 1932 | 0.507141 | 0 |  |
|  |  | Shiraz-35T | 1932 | 0.507141 | 0 |  |
|  |  | Shiraz-58T | 2221 | 0.871948 | 0 |  |
|  |  | Shiraz-58T | 2221 | 0.871948 | 0 |  |
|  |  | Shiraz-58T | 2221 | 0.871948 | 0 |  |
|  |  | Shiraz-58T | 2221 | 0.871948 | 0 |  |
|  |  | Shiraz-58T | 2221 | 0.871948 | 0 |  |
|  |  | Shiraz-58T | 2221 | 0.871948 | 0 |  |
|  |  | Shiraz-58T | 2221 | 0.871948 | 0 |  |
|  |  | Shiraz-58T | 2221 | 0.871948 | 0 |  |
|  |  | Shiraz-58T | 2221 | 0.871948 | 0 |  |
|  |  | Shiraz-58T | 2221 | 0.871948 | 0 |  |
|  |  | Shiraz-71T | 2260 | 0.68394  | 0 |  |
|  |  | Shiraz-71T | 2260 | 0.68394  | 0 |  |
|  |  | Shiraz-71T | 2260 | 0.68394  | 0 |  |

|  |  |            |      |          |           |  |  |
|--|--|------------|------|----------|-----------|--|--|
|  |  | Shiraz-71T | 2260 | 0.68394  | 0         |  |  |
|  |  | Shiraz-71T | 2260 | 0.68394  | 0         |  |  |
|  |  | Shiraz-71T | 2260 | 0.68394  | 0         |  |  |
|  |  | Shiraz-71T | 2260 | 0.68394  | 0         |  |  |
|  |  | Shiraz-71T | 2260 | 0.68394  | 0         |  |  |
|  |  | Shiraz-71T | 2260 | 0.68394  | 0         |  |  |
|  |  | Shiraz-71T | 2262 | 0.986748 | 0         |  |  |
|  |  | Shiraz-71T | 2262 | 0.986748 | 0         |  |  |
|  |  | Shiraz-71T | 2262 | 0.986748 | 0         |  |  |
|  |  | Shiraz-71T | 2262 | 0.986748 | 0         |  |  |
|  |  | Shiraz-71T | 2262 | 0.986748 | 0         |  |  |
|  |  | Shiraz-71T | 2262 | 0.986748 | 0         |  |  |
|  |  | Shiraz-71T | 2262 | 0.986748 | 0         |  |  |
|  |  | Shiraz-71T | 2262 | 0.986748 | 0         |  |  |
|  |  | Shiraz-4T  | 260  | 0        | -0.324128 |  |  |
|  |  | Shiraz-4T  | 260  | 0        | -0.324128 |  |  |
|  |  | Shiraz-4T  | 260  | 0        | -0.324128 |  |  |
|  |  | Shiraz-4T  | 260  | 0        | -0.324128 |  |  |
|  |  | Shiraz-4T  | 260  | 0        | -0.324128 |  |  |
|  |  | Shiraz-4T  | 260  | 0        | -0.324128 |  |  |
|  |  | Shiraz-4T  | 260  | 0        | -0.324128 |  |  |
|  |  | Shiraz-4T  | 260  | 0        | -0.324128 |  |  |
|  |  | Shiraz-4T  | 260  | 0        | -0.324128 |  |  |
|  |  | Shiraz-16T | 294  | 0.655804 | 0         |  |  |
|  |  | Shiraz-16T | 294  | 0.655804 | 0         |  |  |
|  |  | Shiraz-16T | 294  | 0.655804 | 0         |  |  |
|  |  | Shiraz-16T | 294  | 0.655804 | 0         |  |  |
|  |  | Shiraz-16T | 294  | 0.655804 | 0         |  |  |
|  |  | Shiraz-16T | 294  | 0.655804 | 0         |  |  |
|  |  | Shiraz-16T | 294  | 0.655804 | 0         |  |  |
|  |  | Shiraz-16T | 294  | 0.655804 | 0         |  |  |
|  |  | Shiraz-16T | 294  | 0.655804 | 0         |  |  |
|  |  | Shiraz-31T | 345  | 0.103301 | 0         |  |  |
|  |  | Shiraz-31T | 345  | 0.103301 | 0         |  |  |
|  |  | Shiraz-31T | 345  | 0.103301 | 0         |  |  |
|  |  | Shiraz-31T | 345  | 0.103301 | 0         |  |  |
|  |  | Shiraz-31T | 345  | 0.103301 | 0         |  |  |
|  |  | Shiraz-31T | 345  | 0.103301 | 0         |  |  |
|  |  | Shiraz-31T | 345  | 0.103301 | 0         |  |  |
|  |  | Shiraz-31T | 345  | 0.103301 | 0         |  |  |
|  |  | Shiraz-31T | 345  | 0.103301 | 0         |  |  |
|  |  | Shiraz-31T | 345  | 0.103301 | 0         |  |  |
|  |  | Shiraz-36T | 431  | 0        | -0.78035  |  |  |
|  |  | Shiraz-36T | 431  | 0        | -0.78035  |  |  |
|  |  | Shiraz-36T | 431  | 0        | -0.78035  |  |  |
|  |  | Shiraz-36T | 431  | 0        | -0.78035  |  |  |
|  |  | Shiraz-36T | 431  | 0        | -0.78035  |  |  |







|        |      |            |      |          |           |  |  |
|--------|------|------------|------|----------|-----------|--|--|
|        |      | Shiraz-32T | 1869 | 0.776805 | 0         |  |  |
|        |      | Shiraz-32T | 1869 | 0.776805 | 0         |  |  |
|        |      | Shiraz-32T | 1869 | 0.776805 | 0         |  |  |
|        |      | Shiraz-32T | 1869 | 0.776805 | 0         |  |  |
|        |      | Shiraz-32T | 1869 | 0.776805 | 0         |  |  |
|        |      | Shiraz-32T | 1869 | 0.776805 | 0         |  |  |
|        |      | Shiraz-32T | 1869 | 0.776805 | 0         |  |  |
|        |      | Shiraz-32T | 1869 | 0.776805 | 0         |  |  |
|        |      | Shiraz-32T | 1869 | 0.776805 | 0         |  |  |
|        |      | Shiraz-35T | 1932 | 0.507141 | 0         |  |  |
|        |      | Shiraz-35T | 1932 | 0.507141 | 0         |  |  |
|        |      | Shiraz-35T | 1932 | 0.507141 | 0         |  |  |
|        |      | Shiraz-35T | 1932 | 0.507141 | 0         |  |  |
|        |      | Shiraz-35T | 1932 | 0.507141 | 0         |  |  |
|        |      | Shiraz-35T | 1932 | 0.507141 | 0         |  |  |
|        |      | Shiraz-35T | 1932 | 0.507141 | 0         |  |  |
|        |      | Shiraz-35T | 1932 | 0.507141 | 0         |  |  |
|        |      | Shiraz-35T | 1932 | 0.507141 | 0         |  |  |
|        |      | Shiraz-35T | 1932 | 0.507141 | 0         |  |  |
|        |      | Shiraz-58T | 2221 | 0.871948 | 0         |  |  |
|        |      | Shiraz-58T | 2221 | 0.871948 | 0         |  |  |
|        |      | Shiraz-58T | 2221 | 0.871948 | 0         |  |  |
|        |      | Shiraz-58T | 2221 | 0.871948 | 0         |  |  |
|        |      | Shiraz-58T | 2221 | 0.871948 | 0         |  |  |
|        |      | Shiraz-58T | 2221 | 0.871948 | 0         |  |  |
|        |      | Shiraz-58T | 2221 | 0.871948 | 0         |  |  |
|        |      | Shiraz-58T | 2221 | 0.871948 | 0         |  |  |
|        |      | Shiraz-58T | 2221 | 0.871948 | 0         |  |  |
|        |      | Shiraz-71T | 2260 | 0.68394  | 0         |  |  |
|        |      | Shiraz-71T | 2260 | 0.68394  | 0         |  |  |
|        |      | Shiraz-71T | 2260 | 0.68394  | 0         |  |  |
|        |      | Shiraz-71T | 2260 | 0.68394  | 0         |  |  |
|        |      | Shiraz-71T | 2260 | 0.68394  | 0         |  |  |
|        |      | Shiraz-71T | 2260 | 0.68394  | 0         |  |  |
|        |      | Shiraz-71T | 2260 | 0.68394  | 0         |  |  |
|        |      | Shiraz-71T | 2260 | 0.68394  | 0         |  |  |
|        |      | Shiraz-71T | 2260 | 0.68394  | 0         |  |  |
|        |      | Shiraz-71T | 2262 | 0.986748 | 0         |  |  |
|        |      | Shiraz-71T | 2262 | 0.986748 | 0         |  |  |
|        |      | Shiraz-71T | 2262 | 0.986748 | 0         |  |  |
|        |      | Shiraz-71T | 2262 | 0.986748 | 0         |  |  |
|        |      | Shiraz-71T | 2262 | 0.986748 | 0         |  |  |
|        |      | Shiraz-71T | 2262 | 0.986748 | 0         |  |  |
|        |      | Shiraz-71T | 2262 | 0.986748 | 0         |  |  |
|        |      | Shiraz-71T | 2262 | 0.986748 | 0         |  |  |
|        |      | Shiraz-71T | 2262 | 0.986748 | 0         |  |  |
| XAGE1D | chrX | Shiraz-4T  | 260  | 0        | -0.324128 |  |  |
|        |      | Shiraz-4T  | 260  | 0        | -0.324128 |  |  |





|  |  |            |      |          |           |  |  |
|--|--|------------|------|----------|-----------|--|--|
|  |  | Shiraz-29T | 1800 | 0.672527 | 0         |  |  |
|  |  | Shiraz-29T | 1800 | 0.672527 | 0         |  |  |
|  |  | Shiraz-32T | 1869 | 0.776805 | 0         |  |  |
|  |  | Shiraz-32T | 1869 | 0.776805 | 0         |  |  |
|  |  | Shiraz-32T | 1869 | 0.776805 | 0         |  |  |
|  |  | Shiraz-32T | 1869 | 0.776805 | 0         |  |  |
|  |  | Shiraz-32T | 1869 | 0.776805 | 0         |  |  |
|  |  | Shiraz-32T | 1869 | 0.776805 | 0         |  |  |
|  |  | Shiraz-32T | 1869 | 0.776805 | 0         |  |  |
|  |  | Shiraz-35T | 1932 | 0.507141 | 0         |  |  |
|  |  | Shiraz-35T | 1932 | 0.507141 | 0         |  |  |
|  |  | Shiraz-35T | 1932 | 0.507141 | 0         |  |  |
|  |  | Shiraz-35T | 1932 | 0.507141 | 0         |  |  |
|  |  | Shiraz-35T | 1932 | 0.507141 | 0         |  |  |
|  |  | Shiraz-35T | 1932 | 0.507141 | 0         |  |  |
|  |  | Shiraz-35T | 1932 | 0.507141 | 0         |  |  |
|  |  | Shiraz-58T | 2221 | 0.871948 | 0         |  |  |
|  |  | Shiraz-58T | 2221 | 0.871948 | 0         |  |  |
|  |  | Shiraz-58T | 2221 | 0.871948 | 0         |  |  |
|  |  | Shiraz-58T | 2221 | 0.871948 | 0         |  |  |
|  |  | Shiraz-58T | 2221 | 0.871948 | 0         |  |  |
|  |  | Shiraz-58T | 2221 | 0.871948 | 0         |  |  |
|  |  | Shiraz-58T | 2221 | 0.871948 | 0         |  |  |
|  |  | Shiraz-71T | 2260 | 0.68394  | 0         |  |  |
|  |  | Shiraz-71T | 2260 | 0.68394  | 0         |  |  |
|  |  | Shiraz-71T | 2260 | 0.68394  | 0         |  |  |
|  |  | Shiraz-71T | 2260 | 0.68394  | 0         |  |  |
|  |  | Shiraz-71T | 2260 | 0.68394  | 0         |  |  |
|  |  | Shiraz-71T | 2260 | 0.68394  | 0         |  |  |
|  |  | Shiraz-71T | 2262 | 0.986748 | 0         |  |  |
|  |  | Shiraz-71T | 2262 | 0.986748 | 0         |  |  |
|  |  | Shiraz-71T | 2262 | 0.986748 | 0         |  |  |
|  |  | Shiraz-71T | 2262 | 0.986748 | 0         |  |  |
|  |  | Shiraz-71T | 2262 | 0.986748 | 0         |  |  |
|  |  | Shiraz-71T | 2262 | 0.986748 | 0         |  |  |
|  |  | Shiraz-71T | 2262 | 0.986748 | 0         |  |  |
|  |  | Shiraz-4T  | 260  | 0        | -0.324128 |  |  |
|  |  | Shiraz-4T  | 260  | 0        | -0.324128 |  |  |
|  |  | Shiraz-4T  | 260  | 0        | -0.324128 |  |  |
|  |  | Shiraz-4T  | 260  | 0        | -0.324128 |  |  |
|  |  | Shiraz-4T  | 260  | 0        | -0.324128 |  |  |
|  |  | Shiraz-4T  | 260  | 0        | -0.324128 |  |  |
|  |  | Shiraz-4T  | 260  | 0        | -0.324128 |  |  |
|  |  | Shiraz-16T | 294  | 0.655804 | 0         |  |  |
|  |  | Shiraz-16T | 294  | 0.655804 | 0         |  |  |
|  |  | Shiraz-16T | 294  | 0.655804 | 0         |  |  |

|  |  |            |      |          |           |  |  |
|--|--|------------|------|----------|-----------|--|--|
|  |  | Shiraz-16T | 294  | 0.655804 | 0         |  |  |
|  |  | Shiraz-16T | 294  | 0.655804 | 0         |  |  |
|  |  | Shiraz-16T | 294  | 0.655804 | 0         |  |  |
|  |  | Shiraz-16T | 294  | 0.655804 | 0         |  |  |
|  |  | Shiraz-31T | 345  | 0.103301 | 0         |  |  |
|  |  | Shiraz-31T | 345  | 0.103301 | 0         |  |  |
|  |  | Shiraz-31T | 345  | 0.103301 | 0         |  |  |
|  |  | Shiraz-31T | 345  | 0.103301 | 0         |  |  |
|  |  | Shiraz-31T | 345  | 0.103301 | 0         |  |  |
|  |  | Shiraz-31T | 345  | 0.103301 | 0         |  |  |
|  |  | Shiraz-31T | 345  | 0.103301 | 0         |  |  |
|  |  | Shiraz-36T | 431  | 0        | -0.78035  |  |  |
|  |  | Shiraz-36T | 431  | 0        | -0.78035  |  |  |
|  |  | Shiraz-36T | 431  | 0        | -0.78035  |  |  |
|  |  | Shiraz-36T | 431  | 0        | -0.78035  |  |  |
|  |  | Shiraz-36T | 431  | 0        | -0.78035  |  |  |
|  |  | Shiraz-36T | 431  | 0        | -0.78035  |  |  |
|  |  | Shiraz-36T | 431  | 0        | -0.78035  |  |  |
|  |  | Shiraz-36T | 431  | 0        | -0.78035  |  |  |
|  |  | Shiraz-36T | 432  | 0        | -0.6692   |  |  |
|  |  | Shiraz-36T | 432  | 0        | -0.6692   |  |  |
|  |  | Shiraz-36T | 432  | 0        | -0.6692   |  |  |
|  |  | Shiraz-36T | 432  | 0        | -0.6692   |  |  |
|  |  | Shiraz-36T | 432  | 0        | -0.6692   |  |  |
|  |  | Shiraz-36T | 432  | 0        | -0.6692   |  |  |
|  |  | Shiraz-36T | 432  | 0        | -0.6692   |  |  |
|  |  | Shiraz-36T | 432  | 0        | -0.6692   |  |  |
|  |  | Shiraz-44T | 891  | 0        | -0.954044 |  |  |
|  |  | Shiraz-44T | 891  | 0        | -0.954044 |  |  |
|  |  | Shiraz-44T | 891  | 0        | -0.954044 |  |  |
|  |  | Shiraz-44T | 891  | 0        | -0.954044 |  |  |
|  |  | Shiraz-44T | 891  | 0        | -0.954044 |  |  |
|  |  | Shiraz-44T | 891  | 0        | -0.954044 |  |  |
|  |  | Shiraz-44T | 891  | 0        | -0.954044 |  |  |
|  |  | Shiraz-49T | 1166 | 0        | -0.917235 |  |  |
|  |  | Shiraz-49T | 1166 | 0        | -0.917235 |  |  |
|  |  | Shiraz-49T | 1166 | 0        | -0.917235 |  |  |
|  |  | Shiraz-49T | 1166 | 0        | -0.917235 |  |  |
|  |  | Shiraz-49T | 1166 | 0        | -0.917235 |  |  |
|  |  | Shiraz-49T | 1166 | 0        | -0.917235 |  |  |
|  |  | Shiraz-49T | 1166 | 0        | -0.917235 |  |  |
|  |  | Shiraz-77T | 1282 | 0.213849 | 0         |  |  |
|  |  | Shiraz-77T | 1282 | 0.213849 | 0         |  |  |
|  |  | Shiraz-77T | 1282 | 0.213849 | 0         |  |  |
|  |  | Shiraz-77T | 1282 | 0.213849 | 0         |  |  |
|  |  | Shiraz-77T | 1282 | 0.213849 | 0         |  |  |
|  |  | Shiraz-77T | 1282 | 0.213849 | 0         |  |  |
|  |  | Shiraz-77T | 1282 | 0.213849 | 0         |  |  |
|  |  | Shiraz-77T | 1282 | 0.213849 | 0         |  |  |
|  |  | Shiraz-9T  | 1368 | 0.199713 | 0         |  |  |





|  |  |            |      |          |           |  |  |
|--|--|------------|------|----------|-----------|--|--|
|  |  | Shiraz-32T | 1869 | 0.776805 | 0         |  |  |
|  |  | Shiraz-35T | 1932 | 0.507141 | 0         |  |  |
|  |  | Shiraz-35T | 1932 | 0.507141 | 0         |  |  |
|  |  | Shiraz-35T | 1932 | 0.507141 | 0         |  |  |
|  |  | Shiraz-35T | 1932 | 0.507141 | 0         |  |  |
|  |  | Shiraz-35T | 1932 | 0.507141 | 0         |  |  |
|  |  | Shiraz-35T | 1932 | 0.507141 | 0         |  |  |
|  |  | Shiraz-35T | 1932 | 0.507141 | 0         |  |  |
|  |  | Shiraz-58T | 2221 | 0.871948 | 0         |  |  |
|  |  | Shiraz-58T | 2221 | 0.871948 | 0         |  |  |
|  |  | Shiraz-58T | 2221 | 0.871948 | 0         |  |  |
|  |  | Shiraz-58T | 2221 | 0.871948 | 0         |  |  |
|  |  | Shiraz-58T | 2221 | 0.871948 | 0         |  |  |
|  |  | Shiraz-58T | 2221 | 0.871948 | 0         |  |  |
|  |  | Shiraz-58T | 2221 | 0.871948 | 0         |  |  |
|  |  | Shiraz-71T | 2260 | 0.68394  | 0         |  |  |
|  |  | Shiraz-71T | 2260 | 0.68394  | 0         |  |  |
|  |  | Shiraz-71T | 2260 | 0.68394  | 0         |  |  |
|  |  | Shiraz-71T | 2260 | 0.68394  | 0         |  |  |
|  |  | Shiraz-71T | 2260 | 0.68394  | 0         |  |  |
|  |  | Shiraz-71T | 2260 | 0.68394  | 0         |  |  |
|  |  | Shiraz-71T | 2260 | 0.68394  | 0         |  |  |
|  |  | Shiraz-71T | 2262 | 0.986748 | 0         |  |  |
|  |  | Shiraz-71T | 2262 | 0.986748 | 0         |  |  |
|  |  | Shiraz-71T | 2262 | 0.986748 | 0         |  |  |
|  |  | Shiraz-71T | 2262 | 0.986748 | 0         |  |  |
|  |  | Shiraz-71T | 2262 | 0.986748 | 0         |  |  |
|  |  | Shiraz-71T | 2262 | 0.986748 | 0         |  |  |
|  |  | Shiraz-71T | 2262 | 0.986748 | 0         |  |  |
|  |  | Shiraz-71T | 2262 | 0.986748 | 0         |  |  |
|  |  | Shiraz-4T  | 260  | 0        | -0.324128 |  |  |
|  |  | Shiraz-4T  | 260  | 0        | -0.324128 |  |  |
|  |  | Shiraz-4T  | 260  | 0        | -0.324128 |  |  |
|  |  | Shiraz-4T  | 260  | 0        | -0.324128 |  |  |
|  |  | Shiraz-4T  | 260  | 0        | -0.324128 |  |  |
|  |  | Shiraz-4T  | 260  | 0        | -0.324128 |  |  |
|  |  | Shiraz-4T  | 260  | 0        | -0.324128 |  |  |
|  |  | Shiraz-16T | 294  | 0.655804 | 0         |  |  |
|  |  | Shiraz-16T | 294  | 0.655804 | 0         |  |  |
|  |  | Shiraz-16T | 294  | 0.655804 | 0         |  |  |
|  |  | Shiraz-16T | 294  | 0.655804 | 0         |  |  |
|  |  | Shiraz-16T | 294  | 0.655804 | 0         |  |  |
|  |  | Shiraz-16T | 294  | 0.655804 | 0         |  |  |
|  |  | Shiraz-16T | 294  | 0.655804 | 0         |  |  |
|  |  | Shiraz-31T | 345  | 0.103301 | 0         |  |  |
|  |  | Shiraz-31T | 345  | 0.103301 | 0         |  |  |
|  |  | Shiraz-31T | 345  | 0.103301 | 0         |  |  |
|  |  | Shiraz-31T | 345  | 0.103301 | 0         |  |  |

|  |            |      |          |           |  |
|--|------------|------|----------|-----------|--|
|  | Shiraz-31T | 345  | 0.103301 | 0         |  |
|  | Shiraz-31T | 345  | 0.103301 | 0         |  |
|  | Shiraz-31T | 345  | 0.103301 | 0         |  |
|  | Shiraz-36T | 431  | 0        | -0.78035  |  |
|  | Shiraz-36T | 431  | 0        | -0.78035  |  |
|  | Shiraz-36T | 431  | 0        | -0.78035  |  |
|  | Shiraz-36T | 431  | 0        | -0.78035  |  |
|  | Shiraz-36T | 431  | 0        | -0.78035  |  |
|  | Shiraz-36T | 431  | 0        | -0.78035  |  |
|  | Shiraz-36T | 432  | 0        | -0.6692   |  |
|  | Shiraz-36T | 432  | 0        | -0.6692   |  |
|  | Shiraz-36T | 432  | 0        | -0.6692   |  |
|  | Shiraz-36T | 432  | 0        | -0.6692   |  |
|  | Shiraz-36T | 432  | 0        | -0.6692   |  |
|  | Shiraz-36T | 432  | 0        | -0.6692   |  |
|  | Shiraz-36T | 432  | 0        | -0.6692   |  |
|  | Shiraz-44T | 891  | 0        | -0.954044 |  |
|  | Shiraz-44T | 891  | 0        | -0.954044 |  |
|  | Shiraz-44T | 891  | 0        | -0.954044 |  |
|  | Shiraz-44T | 891  | 0        | -0.954044 |  |
|  | Shiraz-44T | 891  | 0        | -0.954044 |  |
|  | Shiraz-44T | 891  | 0        | -0.954044 |  |
|  | Shiraz-49T | 1166 | 0        | -0.917235 |  |
|  | Shiraz-49T | 1166 | 0        | -0.917235 |  |
|  | Shiraz-49T | 1166 | 0        | -0.917235 |  |
|  | Shiraz-49T | 1166 | 0        | -0.917235 |  |
|  | Shiraz-49T | 1166 | 0        | -0.917235 |  |
|  | Shiraz-49T | 1166 | 0        | -0.917235 |  |
|  | Shiraz-77T | 1282 | 0.213849 | 0         |  |
|  | Shiraz-77T | 1282 | 0.213849 | 0         |  |
|  | Shiraz-77T | 1282 | 0.213849 | 0         |  |
|  | Shiraz-77T | 1282 | 0.213849 | 0         |  |
|  | Shiraz-77T | 1282 | 0.213849 | 0         |  |
|  | Shiraz-77T | 1282 | 0.213849 | 0         |  |
|  | Shiraz-77T | 1282 | 0.213849 | 0         |  |
|  | Shiraz-9T  | 1368 | 0.199713 | 0         |  |
|  | Shiraz-9T  | 1368 | 0.199713 | 0         |  |
|  | Shiraz-9T  | 1368 | 0.199713 | 0         |  |
|  | Shiraz-9T  | 1368 | 0.199713 | 0         |  |
|  | Shiraz-9T  | 1368 | 0.199713 | 0         |  |
|  | Shiraz-9T  | 1368 | 0.199713 | 0         |  |
|  | Shiraz-18T | 1456 | 0.608534 | 0         |  |
|  | Shiraz-18T | 1456 | 0.608534 | 0         |  |





|  |            |      |          |           |  |
|--|------------|------|----------|-----------|--|
|  | Shiraz-31T | 345  | 0.103301 | 0         |  |
|  | Shiraz-36T | 431  | 0        | -0.78035  |  |
|  | Shiraz-36T | 431  | 0        | -0.78035  |  |
|  | Shiraz-36T | 431  | 0        | -0.78035  |  |
|  | Shiraz-36T | 431  | 0        | -0.78035  |  |
|  | Shiraz-36T | 431  | 0        | -0.78035  |  |
|  | Shiraz-36T | 431  | 0        | -0.78035  |  |
|  | Shiraz-36T | 431  | 0        | -0.78035  |  |
|  | Shiraz-36T | 431  | 0        | -0.78035  |  |
|  | Shiraz-36T | 432  | 0        | -0.6692   |  |
|  | Shiraz-36T | 432  | 0        | -0.6692   |  |
|  | Shiraz-36T | 432  | 0        | -0.6692   |  |
|  | Shiraz-36T | 432  | 0        | -0.6692   |  |
|  | Shiraz-36T | 432  | 0        | -0.6692   |  |
|  | Shiraz-36T | 432  | 0        | -0.6692   |  |
|  | Shiraz-36T | 432  | 0        | -0.6692   |  |
|  | Shiraz-36T | 432  | 0        | -0.6692   |  |
|  | Shiraz-36T | 432  | 0        | -0.6692   |  |
|  | Shiraz-36T | 432  | 0        | -0.6692   |  |
|  | Shiraz-44T | 891  | 0        | -0.954044 |  |
|  | Shiraz-44T | 891  | 0        | -0.954044 |  |
|  | Shiraz-44T | 891  | 0        | -0.954044 |  |
|  | Shiraz-44T | 891  | 0        | -0.954044 |  |
|  | Shiraz-44T | 891  | 0        | -0.954044 |  |
|  | Shiraz-44T | 891  | 0        | -0.954044 |  |
|  | Shiraz-44T | 891  | 0        | -0.954044 |  |
|  | Shiraz-44T | 891  | 0        | -0.954044 |  |
|  | Shiraz-44T | 891  | 0        | -0.954044 |  |
|  | Shiraz-49T | 1166 | 0        | -0.917235 |  |
|  | Shiraz-49T | 1166 | 0        | -0.917235 |  |
|  | Shiraz-49T | 1166 | 0        | -0.917235 |  |
|  | Shiraz-49T | 1166 | 0        | -0.917235 |  |
|  | Shiraz-49T | 1166 | 0        | -0.917235 |  |
|  | Shiraz-49T | 1166 | 0        | -0.917235 |  |
|  | Shiraz-49T | 1166 | 0        | -0.917235 |  |
|  | Shiraz-49T | 1166 | 0        | -0.917235 |  |
|  | Shiraz-49T | 1166 | 0        | -0.917235 |  |
|  | Shiraz-77T | 1282 | 0.213849 | 0         |  |
|  | Shiraz-77T | 1282 | 0.213849 | 0         |  |
|  | Shiraz-77T | 1282 | 0.213849 | 0         |  |
|  | Shiraz-77T | 1282 | 0.213849 | 0         |  |
|  | Shiraz-77T | 1282 | 0.213849 | 0         |  |
|  | Shiraz-77T | 1282 | 0.213849 | 0         |  |
|  | Shiraz-77T | 1282 | 0.213849 | 0         |  |
|  | Shiraz-77T | 1282 | 0.213849 | 0         |  |
|  | Shiraz-77T | 1282 | 0.213849 | 0         |  |
|  | Shiraz-9T  | 1368 | 0.199713 | 0         |  |

|  |  |            |      |          |   |  |  |
|--|--|------------|------|----------|---|--|--|
|  |  | Shiraz-9T  | 1368 | 0.199713 | 0 |  |  |
|  |  | Shiraz-9T  | 1368 | 0.199713 | 0 |  |  |
|  |  | Shiraz-9T  | 1368 | 0.199713 | 0 |  |  |
|  |  | Shiraz-9T  | 1368 | 0.199713 | 0 |  |  |
|  |  | Shiraz-9T  | 1368 | 0.199713 | 0 |  |  |
|  |  | Shiraz-9T  | 1368 | 0.199713 | 0 |  |  |
|  |  | Shiraz-9T  | 1368 | 0.199713 | 0 |  |  |
|  |  | Shiraz-9T  | 1368 | 0.199713 | 0 |  |  |
|  |  | Shiraz-18T | 1456 | 0.608534 | 0 |  |  |
|  |  | Shiraz-18T | 1456 | 0.608534 | 0 |  |  |
|  |  | Shiraz-18T | 1456 | 0.608534 | 0 |  |  |
|  |  | Shiraz-18T | 1456 | 0.608534 | 0 |  |  |
|  |  | Shiraz-18T | 1456 | 0.608534 | 0 |  |  |
|  |  | Shiraz-18T | 1456 | 0.608534 | 0 |  |  |
|  |  | Shiraz-18T | 1456 | 0.608534 | 0 |  |  |
|  |  | Shiraz-18T | 1456 | 0.608534 | 0 |  |  |
|  |  | Shiraz-18T | 1456 | 0.608534 | 0 |  |  |
|  |  | Shiraz-22T | 1669 | 0.695915 | 0 |  |  |
|  |  | Shiraz-22T | 1669 | 0.695915 | 0 |  |  |
|  |  | Shiraz-22T | 1669 | 0.695915 | 0 |  |  |
|  |  | Shiraz-22T | 1669 | 0.695915 | 0 |  |  |
|  |  | Shiraz-22T | 1669 | 0.695915 | 0 |  |  |
|  |  | Shiraz-22T | 1669 | 0.695915 | 0 |  |  |
|  |  | Shiraz-22T | 1669 | 0.695915 | 0 |  |  |
|  |  | Shiraz-22T | 1669 | 0.695915 | 0 |  |  |
|  |  | Shiraz-22T | 1669 | 0.695915 | 0 |  |  |
|  |  | Shiraz-25T | 1717 | 0.420447 | 0 |  |  |
|  |  | Shiraz-25T | 1717 | 0.420447 | 0 |  |  |
|  |  | Shiraz-25T | 1717 | 0.420447 | 0 |  |  |
|  |  | Shiraz-25T | 1717 | 0.420447 | 0 |  |  |
|  |  | Shiraz-25T | 1717 | 0.420447 | 0 |  |  |
|  |  | Shiraz-25T | 1717 | 0.420447 | 0 |  |  |
|  |  | Shiraz-25T | 1717 | 0.420447 | 0 |  |  |
|  |  | Shiraz-25T | 1717 | 0.420447 | 0 |  |  |
|  |  | Shiraz-25T | 1717 | 0.420447 | 0 |  |  |
|  |  | Shiraz-28T | 1760 | 0.538181 | 0 |  |  |
|  |  | Shiraz-28T | 1760 | 0.538181 | 0 |  |  |
|  |  | Shiraz-28T | 1760 | 0.538181 | 0 |  |  |
|  |  | Shiraz-28T | 1760 | 0.538181 | 0 |  |  |
|  |  | Shiraz-28T | 1760 | 0.538181 | 0 |  |  |
|  |  | Shiraz-28T | 1760 | 0.538181 | 0 |  |  |
|  |  | Shiraz-28T | 1760 | 0.538181 | 0 |  |  |
|  |  | Shiraz-28T | 1760 | 0.538181 | 0 |  |  |
|  |  | Shiraz-28T | 1760 | 0.538181 | 0 |  |  |
|  |  | Shiraz-28T | 1760 | 0.538181 | 0 |  |  |
|  |  | Shiraz-29T | 1800 | 0.672527 | 0 |  |  |
|  |  | Shiraz-29T | 1800 | 0.672527 | 0 |  |  |
|  |  | Shiraz-29T | 1800 | 0.672527 | 0 |  |  |









|  |  |            |      |          |   |  |
|--|--|------------|------|----------|---|--|
|  |  | Shiraz-22T | 1669 | 0.695915 | 0 |  |
|  |  | Shiraz-22T | 1669 | 0.695915 | 0 |  |
|  |  | Shiraz-22T | 1669 | 0.695915 | 0 |  |
|  |  | Shiraz-22T | 1669 | 0.695915 | 0 |  |
|  |  | Shiraz-22T | 1669 | 0.695915 | 0 |  |
|  |  | Shiraz-22T | 1669 | 0.695915 | 0 |  |
|  |  | Shiraz-22T | 1669 | 0.695915 | 0 |  |
|  |  | Shiraz-22T | 1669 | 0.695915 | 0 |  |
|  |  | Shiraz-22T | 1669 | 0.695915 | 0 |  |
|  |  | Shiraz-25T | 1717 | 0.420447 | 0 |  |
|  |  | Shiraz-25T | 1717 | 0.420447 | 0 |  |
|  |  | Shiraz-25T | 1717 | 0.420447 | 0 |  |
|  |  | Shiraz-25T | 1717 | 0.420447 | 0 |  |
|  |  | Shiraz-25T | 1717 | 0.420447 | 0 |  |
|  |  | Shiraz-25T | 1717 | 0.420447 | 0 |  |
|  |  | Shiraz-25T | 1717 | 0.420447 | 0 |  |
|  |  | Shiraz-25T | 1717 | 0.420447 | 0 |  |
|  |  | Shiraz-25T | 1717 | 0.420447 | 0 |  |
|  |  | Shiraz-28T | 1760 | 0.538181 | 0 |  |
|  |  | Shiraz-28T | 1760 | 0.538181 | 0 |  |
|  |  | Shiraz-28T | 1760 | 0.538181 | 0 |  |
|  |  | Shiraz-28T | 1760 | 0.538181 | 0 |  |
|  |  | Shiraz-28T | 1760 | 0.538181 | 0 |  |
|  |  | Shiraz-28T | 1760 | 0.538181 | 0 |  |
|  |  | Shiraz-28T | 1760 | 0.538181 | 0 |  |
|  |  | Shiraz-28T | 1760 | 0.538181 | 0 |  |
|  |  | Shiraz-28T | 1760 | 0.538181 | 0 |  |
|  |  | Shiraz-28T | 1760 | 0.538181 | 0 |  |
|  |  | Shiraz-29T | 1800 | 0.672527 | 0 |  |
|  |  | Shiraz-29T | 1800 | 0.672527 | 0 |  |
|  |  | Shiraz-29T | 1800 | 0.672527 | 0 |  |
|  |  | Shiraz-29T | 1800 | 0.672527 | 0 |  |
|  |  | Shiraz-29T | 1800 | 0.672527 | 0 |  |
|  |  | Shiraz-29T | 1800 | 0.672527 | 0 |  |
|  |  | Shiraz-29T | 1800 | 0.672527 | 0 |  |
|  |  | Shiraz-29T | 1800 | 0.672527 | 0 |  |
|  |  | Shiraz-29T | 1800 | 0.672527 | 0 |  |
|  |  | Shiraz-29T | 1800 | 0.672527 | 0 |  |
|  |  | Shiraz-32T | 1869 | 0.776805 | 0 |  |
|  |  | Shiraz-32T | 1869 | 0.776805 | 0 |  |
|  |  | Shiraz-32T | 1869 | 0.776805 | 0 |  |
|  |  | Shiraz-32T | 1869 | 0.776805 | 0 |  |
|  |  | Shiraz-32T | 1869 | 0.776805 | 0 |  |
|  |  | Shiraz-32T | 1869 | 0.776805 | 0 |  |
|  |  | Shiraz-32T | 1869 | 0.776805 | 0 |  |
|  |  | Shiraz-32T | 1869 | 0.776805 | 0 |  |
|  |  | Shiraz-32T | 1869 | 0.776805 | 0 |  |
|  |  | Shiraz-32T | 1869 | 0.776805 | 0 |  |
|  |  | Shiraz-35T | 1932 | 0.507141 | 0 |  |
|  |  | Shiraz-35T | 1932 | 0.507141 | 0 |  |

|  |  |            |      |          |           |  |  |
|--|--|------------|------|----------|-----------|--|--|
|  |  | Shiraz-35T | 1932 | 0.507141 | 0         |  |  |
|  |  | Shiraz-35T | 1932 | 0.507141 | 0         |  |  |
|  |  | Shiraz-35T | 1932 | 0.507141 | 0         |  |  |
|  |  | Shiraz-35T | 1932 | 0.507141 | 0         |  |  |
|  |  | Shiraz-35T | 1932 | 0.507141 | 0         |  |  |
|  |  | Shiraz-35T | 1932 | 0.507141 | 0         |  |  |
|  |  | Shiraz-35T | 1932 | 0.507141 | 0         |  |  |
|  |  | Shiraz-58T | 2221 | 0.871948 | 0         |  |  |
|  |  | Shiraz-58T | 2221 | 0.871948 | 0         |  |  |
|  |  | Shiraz-58T | 2221 | 0.871948 | 0         |  |  |
|  |  | Shiraz-58T | 2221 | 0.871948 | 0         |  |  |
|  |  | Shiraz-58T | 2221 | 0.871948 | 0         |  |  |
|  |  | Shiraz-58T | 2221 | 0.871948 | 0         |  |  |
|  |  | Shiraz-58T | 2221 | 0.871948 | 0         |  |  |
|  |  | Shiraz-58T | 2221 | 0.871948 | 0         |  |  |
|  |  | Shiraz-58T | 2221 | 0.871948 | 0         |  |  |
|  |  | Shiraz-71T | 2260 | 0.68394  | 0         |  |  |
|  |  | Shiraz-71T | 2260 | 0.68394  | 0         |  |  |
|  |  | Shiraz-71T | 2260 | 0.68394  | 0         |  |  |
|  |  | Shiraz-71T | 2260 | 0.68394  | 0         |  |  |
|  |  | Shiraz-71T | 2260 | 0.68394  | 0         |  |  |
|  |  | Shiraz-71T | 2260 | 0.68394  | 0         |  |  |
|  |  | Shiraz-71T | 2260 | 0.68394  | 0         |  |  |
|  |  | Shiraz-71T | 2260 | 0.68394  | 0         |  |  |
|  |  | Shiraz-71T | 2260 | 0.68394  | 0         |  |  |
|  |  | Shiraz-71T | 2260 | 0.68394  | 0         |  |  |
|  |  | Shiraz-71T | 2262 | 0.986748 | 0         |  |  |
|  |  | Shiraz-71T | 2262 | 0.986748 | 0         |  |  |
|  |  | Shiraz-71T | 2262 | 0.986748 | 0         |  |  |
|  |  | Shiraz-71T | 2262 | 0.986748 | 0         |  |  |
|  |  | Shiraz-71T | 2262 | 0.986748 | 0         |  |  |
|  |  | Shiraz-71T | 2262 | 0.986748 | 0         |  |  |
|  |  | Shiraz-71T | 2262 | 0.986748 | 0         |  |  |
|  |  | Shiraz-71T | 2262 | 0.986748 | 0         |  |  |
|  |  | Shiraz-71T | 2262 | 0.986748 | 0         |  |  |
|  |  | Shiraz-4T  | 260  | 0        | -0.324128 |  |  |
|  |  | Shiraz-4T  | 260  | 0        | -0.324128 |  |  |
|  |  | Shiraz-4T  | 260  | 0        | -0.324128 |  |  |
|  |  | Shiraz-4T  | 260  | 0        | -0.324128 |  |  |
|  |  | Shiraz-4T  | 260  | 0        | -0.324128 |  |  |
|  |  | Shiraz-4T  | 260  | 0        | -0.324128 |  |  |
|  |  | Shiraz-4T  | 260  | 0        | -0.324128 |  |  |
|  |  | Shiraz-4T  | 260  | 0        | -0.324128 |  |  |
|  |  | Shiraz-4T  | 260  | 0        | -0.324128 |  |  |
|  |  | Shiraz-4T  | 260  | 0        | -0.324128 |  |  |
|  |  | Shiraz-16T | 294  | 0.655804 | 0         |  |  |
|  |  | Shiraz-16T | 294  | 0.655804 | 0         |  |  |
|  |  | Shiraz-16T | 294  | 0.655804 | 0         |  |  |
|  |  | Shiraz-16T | 294  | 0.655804 | 0         |  |  |





|  |  |            |      |          |   |  |  |
|--|--|------------|------|----------|---|--|--|
|  |  | Shiraz-25T | 1717 | 0.420447 | 0 |  |  |
|  |  | Shiraz-28T | 1760 | 0.538181 | 0 |  |  |
|  |  | Shiraz-28T | 1760 | 0.538181 | 0 |  |  |
|  |  | Shiraz-28T | 1760 | 0.538181 | 0 |  |  |
|  |  | Shiraz-28T | 1760 | 0.538181 | 0 |  |  |
|  |  | Shiraz-28T | 1760 | 0.538181 | 0 |  |  |
|  |  | Shiraz-28T | 1760 | 0.538181 | 0 |  |  |
|  |  | Shiraz-28T | 1760 | 0.538181 | 0 |  |  |
|  |  | Shiraz-28T | 1760 | 0.538181 | 0 |  |  |
|  |  | Shiraz-28T | 1760 | 0.538181 | 0 |  |  |
|  |  | Shiraz-29T | 1800 | 0.672527 | 0 |  |  |
|  |  | Shiraz-29T | 1800 | 0.672527 | 0 |  |  |
|  |  | Shiraz-29T | 1800 | 0.672527 | 0 |  |  |
|  |  | Shiraz-29T | 1800 | 0.672527 | 0 |  |  |
|  |  | Shiraz-29T | 1800 | 0.672527 | 0 |  |  |
|  |  | Shiraz-29T | 1800 | 0.672527 | 0 |  |  |
|  |  | Shiraz-29T | 1800 | 0.672527 | 0 |  |  |
|  |  | Shiraz-29T | 1800 | 0.672527 | 0 |  |  |
|  |  | Shiraz-29T | 1800 | 0.672527 | 0 |  |  |
|  |  | Shiraz-29T | 1800 | 0.672527 | 0 |  |  |
|  |  | Shiraz-32T | 1869 | 0.776805 | 0 |  |  |
|  |  | Shiraz-32T | 1869 | 0.776805 | 0 |  |  |
|  |  | Shiraz-32T | 1869 | 0.776805 | 0 |  |  |
|  |  | Shiraz-32T | 1869 | 0.776805 | 0 |  |  |
|  |  | Shiraz-32T | 1869 | 0.776805 | 0 |  |  |
|  |  | Shiraz-32T | 1869 | 0.776805 | 0 |  |  |
|  |  | Shiraz-32T | 1869 | 0.776805 | 0 |  |  |
|  |  | Shiraz-32T | 1869 | 0.776805 | 0 |  |  |
|  |  | Shiraz-32T | 1869 | 0.776805 | 0 |  |  |
|  |  | Shiraz-35T | 1932 | 0.507141 | 0 |  |  |
|  |  | Shiraz-35T | 1932 | 0.507141 | 0 |  |  |
|  |  | Shiraz-35T | 1932 | 0.507141 | 0 |  |  |
|  |  | Shiraz-35T | 1932 | 0.507141 | 0 |  |  |
|  |  | Shiraz-35T | 1932 | 0.507141 | 0 |  |  |
|  |  | Shiraz-35T | 1932 | 0.507141 | 0 |  |  |
|  |  | Shiraz-35T | 1932 | 0.507141 | 0 |  |  |
|  |  | Shiraz-35T | 1932 | 0.507141 | 0 |  |  |
|  |  | Shiraz-35T | 1932 | 0.507141 | 0 |  |  |
|  |  | Shiraz-35T | 1932 | 0.507141 | 0 |  |  |
|  |  | Shiraz-58T | 2221 | 0.871948 | 0 |  |  |
|  |  | Shiraz-58T | 2221 | 0.871948 | 0 |  |  |
|  |  | Shiraz-58T | 2221 | 0.871948 | 0 |  |  |
|  |  | Shiraz-58T | 2221 | 0.871948 | 0 |  |  |
|  |  | Shiraz-58T | 2221 | 0.871948 | 0 |  |  |
|  |  | Shiraz-58T | 2221 | 0.871948 | 0 |  |  |
|  |  | Shiraz-58T | 2221 | 0.871948 | 0 |  |  |
|  |  | Shiraz-58T | 2221 | 0.871948 | 0 |  |  |
|  |  | Shiraz-58T | 2221 | 0.871948 | 0 |  |  |
|  |  | Shiraz-71T | 2260 | 0.68394  | 0 |  |  |

|       |      |            |      |          |           |  |
|-------|------|------------|------|----------|-----------|--|
|       |      | Shiraz-71T | 2260 | 0.68394  | 0         |  |
|       |      | Shiraz-71T | 2260 | 0.68394  | 0         |  |
|       |      | Shiraz-71T | 2260 | 0.68394  | 0         |  |
|       |      | Shiraz-71T | 2260 | 0.68394  | 0         |  |
|       |      | Shiraz-71T | 2260 | 0.68394  | 0         |  |
|       |      | Shiraz-71T | 2260 | 0.68394  | 0         |  |
|       |      | Shiraz-71T | 2260 | 0.68394  | 0         |  |
|       |      | Shiraz-71T | 2260 | 0.68394  | 0         |  |
|       |      | Shiraz-71T | 2262 | 0.986748 | 0         |  |
|       |      | Shiraz-71T | 2262 | 0.986748 | 0         |  |
|       |      | Shiraz-71T | 2262 | 0.986748 | 0         |  |
|       |      | Shiraz-71T | 2262 | 0.986748 | 0         |  |
|       |      | Shiraz-71T | 2262 | 0.986748 | 0         |  |
|       |      | Shiraz-71T | 2262 | 0.986748 | 0         |  |
|       |      | Shiraz-71T | 2262 | 0.986748 | 0         |  |
|       |      | Shiraz-71T | 2262 | 0.986748 | 0         |  |
|       |      | Shiraz-71T | 2262 | 0.986748 | 0         |  |
| XAGE2 | chrX | Shiraz-4T  | 260  | 0        | -0.324128 |  |
|       |      | Shiraz-4T  | 260  | 0        | -0.324128 |  |
|       |      | Shiraz-16T | 294  | 0.655804 | 0         |  |
|       |      | Shiraz-16T | 294  | 0.655804 | 0         |  |
|       |      | Shiraz-31T | 345  | 0.103301 | 0         |  |
|       |      | Shiraz-31T | 345  | 0.103301 | 0         |  |
|       |      | Shiraz-36T | 431  | 0        | -0.78035  |  |
|       |      | Shiraz-36T | 431  | 0        | -0.78035  |  |
|       |      | Shiraz-36T | 432  | 0        | -0.6692   |  |
|       |      | Shiraz-36T | 432  | 0        | -0.6692   |  |
|       |      | Shiraz-44T | 891  | 0        | -0.954044 |  |
|       |      | Shiraz-44T | 891  | 0        | -0.954044 |  |
|       |      | Shiraz-49T | 1166 | 0        | -0.917235 |  |
|       |      | Shiraz-49T | 1166 | 0        | -0.917235 |  |
|       |      | Shiraz-77T | 1282 | 0.213849 | 0         |  |
|       |      | Shiraz-77T | 1282 | 0.213849 | 0         |  |
|       |      | Shiraz-9T  | 1368 | 0.199713 | 0         |  |
|       |      | Shiraz-9T  | 1368 | 0.199713 | 0         |  |
|       |      | Shiraz-18T | 1456 | 0.608534 | 0         |  |
|       |      | Shiraz-18T | 1456 | 0.608534 | 0         |  |
|       |      | Shiraz-22T | 1669 | 0.695915 | 0         |  |
|       |      | Shiraz-22T | 1669 | 0.695915 | 0         |  |
|       |      | Shiraz-25T | 1717 | 0.420447 | 0         |  |
|       |      | Shiraz-25T | 1717 | 0.420447 | 0         |  |
|       |      | Shiraz-28T | 1760 | 0.538181 | 0         |  |
|       |      | Shiraz-28T | 1760 | 0.538181 | 0         |  |
|       |      | Shiraz-29T | 1800 | 0.672527 | 0         |  |
|       |      | Shiraz-29T | 1800 | 0.672527 | 0         |  |
|       |      | Shiraz-32T | 1869 | 0.776805 | 0         |  |
|       |      | Shiraz-32T | 1869 | 0.776805 | 0         |  |

|  |  |            |      |          |           |  |  |
|--|--|------------|------|----------|-----------|--|--|
|  |  | Shiraz-35T | 1932 | 0.507141 | 0         |  |  |
|  |  | Shiraz-35T | 1932 | 0.507141 | 0         |  |  |
|  |  | Shiraz-58T | 2221 | 0.871948 | 0         |  |  |
|  |  | Shiraz-58T | 2221 | 0.871948 | 0         |  |  |
|  |  | Shiraz-71T | 2260 | 0.68394  | 0         |  |  |
|  |  | Shiraz-71T | 2260 | 0.68394  | 0         |  |  |
|  |  | Shiraz-71T | 2262 | 0.986748 | 0         |  |  |
|  |  | Shiraz-71T | 2262 | 0.986748 | 0         |  |  |
|  |  | Shiraz-4T  | 260  | 0        | -0.324128 |  |  |
|  |  | Shiraz-4T  | 260  | 0        | -0.324128 |  |  |
|  |  | Shiraz-16T | 294  | 0.655804 | 0         |  |  |
|  |  | Shiraz-16T | 294  | 0.655804 | 0         |  |  |
|  |  | Shiraz-31T | 345  | 0.103301 | 0         |  |  |
|  |  | Shiraz-31T | 345  | 0.103301 | 0         |  |  |
|  |  | Shiraz-36T | 431  | 0        | -0.78035  |  |  |
|  |  | Shiraz-36T | 431  | 0        | -0.78035  |  |  |
|  |  | Shiraz-36T | 432  | 0        | -0.6692   |  |  |
|  |  | Shiraz-36T | 432  | 0        | -0.6692   |  |  |
|  |  | Shiraz-44T | 891  | 0        | -0.954044 |  |  |
|  |  | Shiraz-44T | 891  | 0        | -0.954044 |  |  |
|  |  | Shiraz-49T | 1166 | 0        | -0.917235 |  |  |
|  |  | Shiraz-49T | 1166 | 0        | -0.917235 |  |  |
|  |  | Shiraz-77T | 1282 | 0.213849 | 0         |  |  |
|  |  | Shiraz-77T | 1282 | 0.213849 | 0         |  |  |
|  |  | Shiraz-9T  | 1368 | 0.199713 | 0         |  |  |
|  |  | Shiraz-9T  | 1368 | 0.199713 | 0         |  |  |
|  |  | Shiraz-18T | 1456 | 0.608534 | 0         |  |  |
|  |  | Shiraz-18T | 1456 | 0.608534 | 0         |  |  |
|  |  | Shiraz-22T | 1669 | 0.695915 | 0         |  |  |
|  |  | Shiraz-22T | 1669 | 0.695915 | 0         |  |  |
|  |  | Shiraz-25T | 1717 | 0.420447 | 0         |  |  |
|  |  | Shiraz-25T | 1717 | 0.420447 | 0         |  |  |
|  |  | Shiraz-28T | 1760 | 0.538181 | 0         |  |  |
|  |  | Shiraz-28T | 1760 | 0.538181 | 0         |  |  |
|  |  | Shiraz-29T | 1800 | 0.672527 | 0         |  |  |
|  |  | Shiraz-29T | 1800 | 0.672527 | 0         |  |  |
|  |  | Shiraz-32T | 1869 | 0.776805 | 0         |  |  |
|  |  | Shiraz-32T | 1869 | 0.776805 | 0         |  |  |
|  |  | Shiraz-35T | 1932 | 0.507141 | 0         |  |  |
|  |  | Shiraz-35T | 1932 | 0.507141 | 0         |  |  |
|  |  | Shiraz-58T | 2221 | 0.871948 | 0         |  |  |
|  |  | Shiraz-58T | 2221 | 0.871948 | 0         |  |  |
|  |  | Shiraz-71T | 2260 | 0.68394  | 0         |  |  |
|  |  | Shiraz-71T | 2260 | 0.68394  | 0         |  |  |
|  |  | Shiraz-71T | 2262 | 0.986748 | 0         |  |  |
|  |  | Shiraz-71T | 2262 | 0.986748 | 0         |  |  |
|  |  | Shiraz-4T  | 260  | 0        | -0.324128 |  |  |



|        |      |            |      |          |           |  |  |
|--------|------|------------|------|----------|-----------|--|--|
|        |      | Shiraz-4T  | 260  | 0        | -0.324128 |  |  |
|        |      | Shiraz-16T | 294  | 0.655804 | 0         |  |  |
|        |      | Shiraz-16T | 294  | 0.655804 | 0         |  |  |
|        |      | Shiraz-31T | 345  | 0.103301 | 0         |  |  |
|        |      | Shiraz-31T | 345  | 0.103301 | 0         |  |  |
|        |      | Shiraz-36T | 431  | 0        | -0.78035  |  |  |
|        |      | Shiraz-36T | 431  | 0        | -0.78035  |  |  |
|        |      | Shiraz-36T | 432  | 0        | -0.6692   |  |  |
|        |      | Shiraz-36T | 432  | 0        | -0.6692   |  |  |
|        |      | Shiraz-44T | 891  | 0        | -0.954044 |  |  |
|        |      | Shiraz-44T | 891  | 0        | -0.954044 |  |  |
|        |      | Shiraz-49T | 1166 | 0        | -0.917235 |  |  |
|        |      | Shiraz-49T | 1166 | 0        | -0.917235 |  |  |
|        |      | Shiraz-77T | 1282 | 0.213849 | 0         |  |  |
|        |      | Shiraz-77T | 1282 | 0.213849 | 0         |  |  |
|        |      | Shiraz-9T  | 1368 | 0.199713 | 0         |  |  |
|        |      | Shiraz-9T  | 1368 | 0.199713 | 0         |  |  |
|        |      | Shiraz-18T | 1456 | 0.608534 | 0         |  |  |
|        |      | Shiraz-18T | 1456 | 0.608534 | 0         |  |  |
|        |      | Shiraz-22T | 1669 | 0.695915 | 0         |  |  |
|        |      | Shiraz-22T | 1669 | 0.695915 | 0         |  |  |
|        |      | Shiraz-25T | 1717 | 0.420447 | 0         |  |  |
|        |      | Shiraz-25T | 1717 | 0.420447 | 0         |  |  |
|        |      | Shiraz-28T | 1760 | 0.538181 | 0         |  |  |
|        |      | Shiraz-28T | 1760 | 0.538181 | 0         |  |  |
|        |      | Shiraz-29T | 1800 | 0.672527 | 0         |  |  |
|        |      | Shiraz-29T | 1800 | 0.672527 | 0         |  |  |
|        |      | Shiraz-32T | 1869 | 0.776805 | 0         |  |  |
|        |      | Shiraz-32T | 1869 | 0.776805 | 0         |  |  |
|        |      | Shiraz-35T | 1932 | 0.507141 | 0         |  |  |
|        |      | Shiraz-35T | 1932 | 0.507141 | 0         |  |  |
|        |      | Shiraz-58T | 2221 | 0.871948 | 0         |  |  |
|        |      | Shiraz-58T | 2221 | 0.871948 | 0         |  |  |
|        |      | Shiraz-71T | 2260 | 0.68394  | 0         |  |  |
|        |      | Shiraz-71T | 2260 | 0.68394  | 0         |  |  |
|        |      | Shiraz-71T | 2262 | 0.986748 | 0         |  |  |
|        |      | Shiraz-71T | 2262 | 0.986748 | 0         |  |  |
| XAGE2B | chrX | Shiraz-4T  | 260  | 0        | -0.324128 |  |  |
|        |      | Shiraz-4T  | 260  | 0        | -0.324128 |  |  |
|        |      | Shiraz-16T | 294  | 0.655804 | 0         |  |  |
|        |      | Shiraz-16T | 294  | 0.655804 | 0         |  |  |
|        |      | Shiraz-31T | 345  | 0.103301 | 0         |  |  |
|        |      | Shiraz-31T | 345  | 0.103301 | 0         |  |  |
|        |      | Shiraz-36T | 431  | 0        | -0.78035  |  |  |
|        |      | Shiraz-36T | 431  | 0        | -0.78035  |  |  |
|        |      | Shiraz-36T | 432  | 0        | -0.6692   |  |  |
|        |      | Shiraz-36T | 432  | 0        | -0.6692   |  |  |

|  |            |      |          |           |  |
|--|------------|------|----------|-----------|--|
|  | Shiraz-44T | 891  | 0        | -0.954044 |  |
|  | Shiraz-44T | 891  | 0        | -0.954044 |  |
|  | Shiraz-49T | 1166 | 0        | -0.917235 |  |
|  | Shiraz-49T | 1166 | 0        | -0.917235 |  |
|  | Shiraz-77T | 1282 | 0.213849 | 0         |  |
|  | Shiraz-77T | 1282 | 0.213849 | 0         |  |
|  | Shiraz-9T  | 1368 | 0.199713 | 0         |  |
|  | Shiraz-9T  | 1368 | 0.199713 | 0         |  |
|  | Shiraz-18T | 1456 | 0.608534 | 0         |  |
|  | Shiraz-18T | 1456 | 0.608534 | 0         |  |
|  | Shiraz-22T | 1669 | 0.695915 | 0         |  |
|  | Shiraz-22T | 1669 | 0.695915 | 0         |  |
|  | Shiraz-25T | 1717 | 0.420447 | 0         |  |
|  | Shiraz-25T | 1717 | 0.420447 | 0         |  |
|  | Shiraz-28T | 1760 | 0.538181 | 0         |  |
|  | Shiraz-28T | 1760 | 0.538181 | 0         |  |
|  | Shiraz-29T | 1800 | 0.672527 | 0         |  |
|  | Shiraz-29T | 1800 | 0.672527 | 0         |  |
|  | Shiraz-32T | 1869 | 0.776805 | 0         |  |
|  | Shiraz-32T | 1869 | 0.776805 | 0         |  |
|  | Shiraz-35T | 1932 | 0.507141 | 0         |  |
|  | Shiraz-35T | 1932 | 0.507141 | 0         |  |
|  | Shiraz-58T | 2221 | 0.871948 | 0         |  |
|  | Shiraz-58T | 2221 | 0.871948 | 0         |  |
|  | Shiraz-71T | 2260 | 0.68394  | 0         |  |
|  | Shiraz-71T | 2260 | 0.68394  | 0         |  |
|  | Shiraz-71T | 2262 | 0.986748 | 0         |  |
|  | Shiraz-71T | 2262 | 0.986748 | 0         |  |
|  | Shiraz-4T  | 260  | 0        | -0.324128 |  |
|  | Shiraz-4T  | 260  | 0        | -0.324128 |  |
|  | Shiraz-16T | 294  | 0.655804 | 0         |  |
|  | Shiraz-16T | 294  | 0.655804 | 0         |  |
|  | Shiraz-31T | 345  | 0.103301 | 0         |  |
|  | Shiraz-31T | 345  | 0.103301 | 0         |  |
|  | Shiraz-36T | 431  | 0        | -0.78035  |  |
|  | Shiraz-36T | 431  | 0        | -0.78035  |  |
|  | Shiraz-36T | 432  | 0        | -0.6692   |  |
|  | Shiraz-36T | 432  | 0        | -0.6692   |  |
|  | Shiraz-44T | 891  | 0        | -0.954044 |  |
|  | Shiraz-44T | 891  | 0        | -0.954044 |  |
|  | Shiraz-49T | 1166 | 0        | -0.917235 |  |
|  | Shiraz-49T | 1166 | 0        | -0.917235 |  |
|  | Shiraz-77T | 1282 | 0.213849 | 0         |  |
|  | Shiraz-77T | 1282 | 0.213849 | 0         |  |
|  | Shiraz-9T  | 1368 | 0.199713 | 0         |  |
|  | Shiraz-9T  | 1368 | 0.199713 | 0         |  |
|  | Shiraz-18T | 1456 | 0.608534 | 0         |  |

|  |            |      |          |           |  |
|--|------------|------|----------|-----------|--|
|  | Shiraz-18T | 1456 | 0.608534 | 0         |  |
|  | Shiraz-22T | 1669 | 0.695915 | 0         |  |
|  | Shiraz-22T | 1669 | 0.695915 | 0         |  |
|  | Shiraz-25T | 1717 | 0.420447 | 0         |  |
|  | Shiraz-25T | 1717 | 0.420447 | 0         |  |
|  | Shiraz-28T | 1760 | 0.538181 | 0         |  |
|  | Shiraz-28T | 1760 | 0.538181 | 0         |  |
|  | Shiraz-29T | 1800 | 0.672527 | 0         |  |
|  | Shiraz-29T | 1800 | 0.672527 | 0         |  |
|  | Shiraz-32T | 1869 | 0.776805 | 0         |  |
|  | Shiraz-32T | 1869 | 0.776805 | 0         |  |
|  | Shiraz-35T | 1932 | 0.507141 | 0         |  |
|  | Shiraz-35T | 1932 | 0.507141 | 0         |  |
|  | Shiraz-58T | 2221 | 0.871948 | 0         |  |
|  | Shiraz-58T | 2221 | 0.871948 | 0         |  |
|  | Shiraz-71T | 2260 | 0.68394  | 0         |  |
|  | Shiraz-71T | 2260 | 0.68394  | 0         |  |
|  | Shiraz-71T | 2262 | 0.986748 | 0         |  |
|  | Shiraz-71T | 2262 | 0.986748 | 0         |  |
|  | Shiraz-4T  | 260  | 0        | -0.324128 |  |
|  | Shiraz-4T  | 260  | 0        | -0.324128 |  |
|  | Shiraz-16T | 294  | 0.655804 | 0         |  |
|  | Shiraz-16T | 294  | 0.655804 | 0         |  |
|  | Shiraz-31T | 345  | 0.103301 | 0         |  |
|  | Shiraz-31T | 345  | 0.103301 | 0         |  |
|  | Shiraz-36T | 431  | 0        | -0.78035  |  |
|  | Shiraz-36T | 431  | 0        | -0.78035  |  |
|  | Shiraz-36T | 432  | 0        | -0.6692   |  |
|  | Shiraz-36T | 432  | 0        | -0.6692   |  |
|  | Shiraz-44T | 891  | 0        | -0.954044 |  |
|  | Shiraz-44T | 891  | 0        | -0.954044 |  |
|  | Shiraz-49T | 1166 | 0        | -0.917235 |  |
|  | Shiraz-49T | 1166 | 0        | -0.917235 |  |
|  | Shiraz-77T | 1282 | 0.213849 | 0         |  |
|  | Shiraz-77T | 1282 | 0.213849 | 0         |  |
|  | Shiraz-9T  | 1368 | 0.199713 | 0         |  |
|  | Shiraz-9T  | 1368 | 0.199713 | 0         |  |
|  | Shiraz-18T | 1456 | 0.608534 | 0         |  |
|  | Shiraz-18T | 1456 | 0.608534 | 0         |  |
|  | Shiraz-22T | 1669 | 0.695915 | 0         |  |
|  | Shiraz-22T | 1669 | 0.695915 | 0         |  |
|  | Shiraz-25T | 1717 | 0.420447 | 0         |  |
|  | Shiraz-25T | 1717 | 0.420447 | 0         |  |
|  | Shiraz-28T | 1760 | 0.538181 | 0         |  |
|  | Shiraz-28T | 1760 | 0.538181 | 0         |  |
|  | Shiraz-29T | 1800 | 0.672527 | 0         |  |
|  | Shiraz-29T | 1800 | 0.672527 | 0         |  |

|       |      |            |      |          |           |  |  |
|-------|------|------------|------|----------|-----------|--|--|
|       |      | Shiraz-32T | 1869 | 0.776805 | 0         |  |  |
|       |      | Shiraz-32T | 1869 | 0.776805 | 0         |  |  |
|       |      | Shiraz-35T | 1932 | 0.507141 | 0         |  |  |
|       |      | Shiraz-35T | 1932 | 0.507141 | 0         |  |  |
|       |      | Shiraz-58T | 2221 | 0.871948 | 0         |  |  |
|       |      | Shiraz-58T | 2221 | 0.871948 | 0         |  |  |
|       |      | Shiraz-71T | 2260 | 0.68394  | 0         |  |  |
|       |      | Shiraz-71T | 2260 | 0.68394  | 0         |  |  |
|       |      | Shiraz-71T | 2262 | 0.986748 | 0         |  |  |
|       |      | Shiraz-71T | 2262 | 0.986748 | 0         |  |  |
| XAGE3 | chrX | Shiraz-4T  | 260  | 0        | -0.324128 |  |  |
|       |      | Shiraz-4T  | 260  | 0        | -0.324128 |  |  |
|       |      | Shiraz-16T | 294  | 0.655804 | 0         |  |  |
|       |      | Shiraz-16T | 294  | 0.655804 | 0         |  |  |
|       |      | Shiraz-31T | 345  | 0.103301 | 0         |  |  |
|       |      | Shiraz-31T | 345  | 0.103301 | 0         |  |  |
|       |      | Shiraz-36T | 431  | 0        | -0.78035  |  |  |
|       |      | Shiraz-36T | 431  | 0        | -0.78035  |  |  |
|       |      | Shiraz-36T | 432  | 0        | -0.6692   |  |  |
|       |      | Shiraz-36T | 432  | 0        | -0.6692   |  |  |
|       |      | Shiraz-44T | 891  | 0        | -0.954044 |  |  |
|       |      | Shiraz-44T | 891  | 0        | -0.954044 |  |  |
|       |      | Shiraz-44T | 898  | 0        | -0.515218 |  |  |
|       |      | Shiraz-44T | 898  | 0        | -0.515218 |  |  |
|       |      | Shiraz-49T | 1166 | 0        | -0.917235 |  |  |
|       |      | Shiraz-49T | 1166 | 0        | -0.917235 |  |  |
|       |      | Shiraz-77T | 1282 | 0.213849 | 0         |  |  |
|       |      | Shiraz-77T | 1282 | 0.213849 | 0         |  |  |
|       |      | Shiraz-9T  | 1368 | 0.199713 | 0         |  |  |
|       |      | Shiraz-9T  | 1368 | 0.199713 | 0         |  |  |
|       |      | Shiraz-18T | 1456 | 0.608534 | 0         |  |  |
|       |      | Shiraz-18T | 1456 | 0.608534 | 0         |  |  |
|       |      | Shiraz-22T | 1669 | 0.695915 | 0         |  |  |
|       |      | Shiraz-22T | 1669 | 0.695915 | 0         |  |  |
|       |      | Shiraz-25T | 1717 | 0.420447 | 0         |  |  |
|       |      | Shiraz-25T | 1717 | 0.420447 | 0         |  |  |
|       |      | Shiraz-28T | 1760 | 0.538181 | 0         |  |  |
|       |      | Shiraz-28T | 1760 | 0.538181 | 0         |  |  |
|       |      | Shiraz-29T | 1800 | 0.672527 | 0         |  |  |
|       |      | Shiraz-29T | 1800 | 0.672527 | 0         |  |  |
|       |      | Shiraz-32T | 1869 | 0.776805 | 0         |  |  |
|       |      | Shiraz-32T | 1869 | 0.776805 | 0         |  |  |
|       |      | Shiraz-35T | 1932 | 0.507141 | 0         |  |  |
|       |      | Shiraz-35T | 1932 | 0.507141 | 0         |  |  |
|       |      | Shiraz-58T | 2221 | 0.871948 | 0         |  |  |
|       |      | Shiraz-58T | 2221 | 0.871948 | 0         |  |  |
|       |      | Shiraz-71T | 2260 | 0.68394  | 0         |  |  |

|  |            |      |          |           |  |
|--|------------|------|----------|-----------|--|
|  | Shiraz-71T | 2260 | 0.68394  | 0         |  |
|  | Shiraz-71T | 2262 | 0.986748 | 0         |  |
|  | Shiraz-71T | 2262 | 0.986748 | 0         |  |
|  | Shiraz-4T  | 260  | 0        | -0.324128 |  |
|  | Shiraz-4T  | 260  | 0        | -0.324128 |  |
|  | Shiraz-16T | 294  | 0.655804 | 0         |  |
|  | Shiraz-16T | 294  | 0.655804 | 0         |  |
|  | Shiraz-31T | 345  | 0.103301 | 0         |  |
|  | Shiraz-31T | 345  | 0.103301 | 0         |  |
|  | Shiraz-36T | 431  | 0        | -0.78035  |  |
|  | Shiraz-36T | 431  | 0        | -0.78035  |  |
|  | Shiraz-36T | 432  | 0        | -0.6692   |  |
|  | Shiraz-36T | 432  | 0        | -0.6692   |  |
|  | Shiraz-44T | 891  | 0        | -0.954044 |  |
|  | Shiraz-44T | 891  | 0        | -0.954044 |  |
|  | Shiraz-44T | 898  | 0        | -0.515218 |  |
|  | Shiraz-44T | 898  | 0        | -0.515218 |  |
|  | Shiraz-49T | 1166 | 0        | -0.917235 |  |
|  | Shiraz-49T | 1166 | 0        | -0.917235 |  |
|  | Shiraz-77T | 1282 | 0.213849 | 0         |  |
|  | Shiraz-77T | 1282 | 0.213849 | 0         |  |
|  | Shiraz-9T  | 1368 | 0.199713 | 0         |  |
|  | Shiraz-9T  | 1368 | 0.199713 | 0         |  |
|  | Shiraz-18T | 1456 | 0.608534 | 0         |  |
|  | Shiraz-18T | 1456 | 0.608534 | 0         |  |
|  | Shiraz-22T | 1669 | 0.695915 | 0         |  |
|  | Shiraz-22T | 1669 | 0.695915 | 0         |  |
|  | Shiraz-25T | 1717 | 0.420447 | 0         |  |
|  | Shiraz-25T | 1717 | 0.420447 | 0         |  |
|  | Shiraz-28T | 1760 | 0.538181 | 0         |  |
|  | Shiraz-28T | 1760 | 0.538181 | 0         |  |
|  | Shiraz-29T | 1800 | 0.672527 | 0         |  |
|  | Shiraz-29T | 1800 | 0.672527 | 0         |  |
|  | Shiraz-32T | 1869 | 0.776805 | 0         |  |
|  | Shiraz-32T | 1869 | 0.776805 | 0         |  |
|  | Shiraz-35T | 1932 | 0.507141 | 0         |  |
|  | Shiraz-35T | 1932 | 0.507141 | 0         |  |
|  | Shiraz-58T | 2221 | 0.871948 | 0         |  |
|  | Shiraz-58T | 2221 | 0.871948 | 0         |  |
|  | Shiraz-71T | 2260 | 0.68394  | 0         |  |
|  | Shiraz-71T | 2260 | 0.68394  | 0         |  |
|  | Shiraz-71T | 2262 | 0.986748 | 0         |  |
|  | Shiraz-71T | 2262 | 0.986748 | 0         |  |
|  | Shiraz-4T  | 260  | 0        | -0.324128 |  |
|  | Shiraz-4T  | 260  | 0        | -0.324128 |  |
|  | Shiraz-16T | 294  | 0.655804 | 0         |  |
|  | Shiraz-16T | 294  | 0.655804 | 0         |  |

|       |      |            |      |          |           |  |  |
|-------|------|------------|------|----------|-----------|--|--|
|       |      | Shiraz-31T | 345  | 0.103301 | 0         |  |  |
|       |      | Shiraz-31T | 345  | 0.103301 | 0         |  |  |
|       |      | Shiraz-36T | 431  | 0        | -0.78035  |  |  |
|       |      | Shiraz-36T | 431  | 0        | -0.78035  |  |  |
|       |      | Shiraz-36T | 432  | 0        | -0.6692   |  |  |
|       |      | Shiraz-36T | 432  | 0        | -0.6692   |  |  |
|       |      | Shiraz-44T | 891  | 0        | -0.954044 |  |  |
|       |      | Shiraz-44T | 891  | 0        | -0.954044 |  |  |
|       |      | Shiraz-44T | 898  | 0        | -0.515218 |  |  |
|       |      | Shiraz-44T | 898  | 0        | -0.515218 |  |  |
|       |      | Shiraz-49T | 1166 | 0        | -0.917235 |  |  |
|       |      | Shiraz-49T | 1166 | 0        | -0.917235 |  |  |
|       |      | Shiraz-77T | 1282 | 0.213849 | 0         |  |  |
|       |      | Shiraz-77T | 1282 | 0.213849 | 0         |  |  |
|       |      | Shiraz-9T  | 1368 | 0.199713 | 0         |  |  |
|       |      | Shiraz-9T  | 1368 | 0.199713 | 0         |  |  |
|       |      | Shiraz-18T | 1456 | 0.608534 | 0         |  |  |
|       |      | Shiraz-18T | 1456 | 0.608534 | 0         |  |  |
|       |      | Shiraz-22T | 1669 | 0.695915 | 0         |  |  |
|       |      | Shiraz-22T | 1669 | 0.695915 | 0         |  |  |
|       |      | Shiraz-25T | 1717 | 0.420447 | 0         |  |  |
|       |      | Shiraz-25T | 1717 | 0.420447 | 0         |  |  |
|       |      | Shiraz-28T | 1760 | 0.538181 | 0         |  |  |
|       |      | Shiraz-28T | 1760 | 0.538181 | 0         |  |  |
|       |      | Shiraz-29T | 1800 | 0.672527 | 0         |  |  |
|       |      | Shiraz-29T | 1800 | 0.672527 | 0         |  |  |
|       |      | Shiraz-32T | 1869 | 0.776805 | 0         |  |  |
|       |      | Shiraz-32T | 1869 | 0.776805 | 0         |  |  |
|       |      | Shiraz-35T | 1932 | 0.507141 | 0         |  |  |
|       |      | Shiraz-35T | 1932 | 0.507141 | 0         |  |  |
|       |      | Shiraz-58T | 2221 | 0.871948 | 0         |  |  |
|       |      | Shiraz-58T | 2221 | 0.871948 | 0         |  |  |
|       |      | Shiraz-71T | 2260 | 0.68394  | 0         |  |  |
|       |      | Shiraz-71T | 2260 | 0.68394  | 0         |  |  |
|       |      | Shiraz-71T | 2262 | 0.986748 | 0         |  |  |
|       |      | Shiraz-71T | 2262 | 0.986748 | 0         |  |  |
| XAGE5 | chrX | Shiraz-4T  | 260  | 0        | -0.324128 |  |  |
|       |      | Shiraz-16T | 294  | 0.655804 | 0         |  |  |
|       |      | Shiraz-31T | 345  | 0.103301 | 0         |  |  |
|       |      | Shiraz-36T | 431  | 0        | -0.78035  |  |  |
|       |      | Shiraz-36T | 432  | 0        | -0.6692   |  |  |
|       |      | Shiraz-44T | 891  | 0        | -0.954044 |  |  |
|       |      | Shiraz-44T | 898  | 0        | -0.515218 |  |  |
|       |      | Shiraz-49T | 1166 | 0        | -0.917235 |  |  |
|       |      | Shiraz-77T | 1282 | 0.213849 | 0         |  |  |
|       |      | Shiraz-9T  | 1368 | 0.199713 | 0         |  |  |
|       |      | Shiraz-18T | 1456 | 0.608534 | 0         |  |  |

|  |            |      |          |           |  |
|--|------------|------|----------|-----------|--|
|  | Shiraz-22T | 1669 | 0.695915 | 0         |  |
|  | Shiraz-25T | 1717 | 0.420447 | 0         |  |
|  | Shiraz-28T | 1760 | 0.538181 | 0         |  |
|  | Shiraz-29T | 1800 | 0.672527 | 0         |  |
|  | Shiraz-32T | 1869 | 0.776805 | 0         |  |
|  | Shiraz-35T | 1932 | 0.507141 | 0         |  |
|  | Shiraz-58T | 2221 | 0.871948 | 0         |  |
|  | Shiraz-71T | 2260 | 0.68394  | 0         |  |
|  | Shiraz-71T | 2262 | 0.986748 | 0         |  |
|  | Shiraz-4T  | 260  | 0        | -0.324128 |  |
|  | Shiraz-16T | 294  | 0.655804 | 0         |  |
|  | Shiraz-31T | 345  | 0.103301 | 0         |  |
|  | Shiraz-36T | 431  | 0        | -0.78035  |  |
|  | Shiraz-36T | 432  | 0        | -0.6692   |  |
|  | Shiraz-44T | 891  | 0        | -0.954044 |  |
|  | Shiraz-44T | 898  | 0        | -0.515218 |  |
|  | Shiraz-49T | 1166 | 0        | -0.917235 |  |
|  | Shiraz-77T | 1282 | 0.213849 | 0         |  |
|  | Shiraz-9T  | 1368 | 0.199713 | 0         |  |
|  | Shiraz-18T | 1456 | 0.608534 | 0         |  |
|  | Shiraz-22T | 1669 | 0.695915 | 0         |  |
|  | Shiraz-25T | 1717 | 0.420447 | 0         |  |
|  | Shiraz-28T | 1760 | 0.538181 | 0         |  |
|  | Shiraz-29T | 1800 | 0.672527 | 0         |  |
|  | Shiraz-32T | 1869 | 0.776805 | 0         |  |
|  | Shiraz-35T | 1932 | 0.507141 | 0         |  |
|  | Shiraz-58T | 2221 | 0.871948 | 0         |  |
|  | Shiraz-71T | 2260 | 0.68394  | 0         |  |
|  | Shiraz-71T | 2262 | 0.986748 | 0         |  |
|  | Shiraz-4T  | 260  | 0        | -0.324128 |  |
|  | Shiraz-16T | 294  | 0.655804 | 0         |  |
|  | Shiraz-31T | 345  | 0.103301 | 0         |  |
|  | Shiraz-36T | 431  | 0        | -0.78035  |  |
|  | Shiraz-36T | 432  | 0        | -0.6692   |  |
|  | Shiraz-44T | 891  | 0        | -0.954044 |  |
|  | Shiraz-44T | 898  | 0        | -0.515218 |  |
|  | Shiraz-49T | 1166 | 0        | -0.917235 |  |
|  | Shiraz-77T | 1282 | 0.213849 | 0         |  |
|  | Shiraz-9T  | 1368 | 0.199713 | 0         |  |
|  | Shiraz-18T | 1456 | 0.608534 | 0         |  |
|  | Shiraz-22T | 1669 | 0.695915 | 0         |  |
|  | Shiraz-25T | 1717 | 0.420447 | 0         |  |
|  | Shiraz-28T | 1760 | 0.538181 | 0         |  |
|  | Shiraz-29T | 1800 | 0.672527 | 0         |  |
|  | Shiraz-32T | 1869 | 0.776805 | 0         |  |
|  | Shiraz-35T | 1932 | 0.507141 | 0         |  |
|  | Shiraz-58T | 2221 | 0.871948 | 0         |  |

|      |      |            |      |          |           |  |
|------|------|------------|------|----------|-----------|--|
|      |      | Shiraz-71T | 2260 | 0.68394  | 0         |  |
|      |      | Shiraz-71T | 2262 | 0.986748 | 0         |  |
| XIAP | chrX | Shiraz-3T  | 242  | 0        | -0.336434 |  |
|      |      | Shiraz-4T  | 261  | 0        | -0.336249 |  |
|      |      | Shiraz-16T | 295  | 0.591657 | 0         |  |
|      |      | Shiraz-36T | 433  | 0        | -0.803961 |  |
|      |      | Shiraz-44T | 899  | 0        | -1.09697  |  |
|      |      | Shiraz-49T | 1170 | 0        | -0.967436 |  |
|      |      | Shiraz-9T  | 1370 | 0.690073 | 0         |  |
|      |      | Shiraz-18T | 1457 | 0.643204 | 0         |  |
|      |      | Shiraz-22T | 1673 | 0.611783 | 0         |  |
|      |      | Shiraz-25T | 1719 | 0.472955 | 0         |  |
|      |      | Shiraz-28T | 1762 | 0.562311 | 0         |  |
|      |      | Shiraz-29T | 1801 | 0.815343 | 0         |  |
|      |      | Shiraz-32T | 1870 | 0.729766 | 0         |  |
|      |      | Shiraz-35T | 1933 | 0.488535 | 0         |  |
|      |      | Shiraz-58T | 2223 | 0.833364 | 0         |  |
|      |      | Shiraz-71T | 2263 | 0.975531 | 0         |  |
|      |      | Shiraz-3T  | 242  | 0        | -0.336434 |  |
|      |      | Shiraz-4T  | 261  | 0        | -0.336249 |  |
|      |      | Shiraz-16T | 295  | 0.591657 | 0         |  |
|      |      | Shiraz-36T | 433  | 0        | -0.803961 |  |
|      |      | Shiraz-44T | 899  | 0        | -1.09697  |  |
|      |      | Shiraz-49T | 1170 | 0        | -0.967436 |  |
|      |      | Shiraz-9T  | 1370 | 0.690073 | 0         |  |
|      |      | Shiraz-18T | 1457 | 0.643204 | 0         |  |
|      |      | Shiraz-22T | 1673 | 0.611783 | 0         |  |
|      |      | Shiraz-25T | 1719 | 0.472955 | 0         |  |
|      |      | Shiraz-28T | 1762 | 0.562311 | 0         |  |
|      |      | Shiraz-29T | 1801 | 0.815343 | 0         |  |
|      |      | Shiraz-32T | 1870 | 0.729766 | 0         |  |
|      |      | Shiraz-35T | 1933 | 0.488535 | 0         |  |
|      |      | Shiraz-58T | 2223 | 0.833364 | 0         |  |
|      |      | Shiraz-71T | 2263 | 0.975531 | 0         |  |
|      |      | Shiraz-3T  | 242  | 0        | -0.336434 |  |
|      |      | Shiraz-4T  | 261  | 0        | -0.336249 |  |
|      |      | Shiraz-16T | 295  | 0.591657 | 0         |  |
|      |      | Shiraz-36T | 433  | 0        | -0.803961 |  |
|      |      | Shiraz-44T | 899  | 0        | -1.09697  |  |
|      |      | Shiraz-49T | 1170 | 0        | -0.967436 |  |
|      |      | Shiraz-9T  | 1370 | 0.690073 | 0         |  |
|      |      | Shiraz-18T | 1457 | 0.643204 | 0         |  |
|      |      | Shiraz-22T | 1673 | 0.611783 | 0         |  |
|      |      | Shiraz-25T | 1719 | 0.472955 | 0         |  |
|      |      | Shiraz-28T | 1762 | 0.562311 | 0         |  |
|      |      | Shiraz-29T | 1801 | 0.815343 | 0         |  |
|      |      | Shiraz-32T | 1870 | 0.729766 | 0         |  |



|      |      |            |      |          |           |  |
|------|------|------------|------|----------|-----------|--|
|      |      | Shiraz-35T | 1933 | 0.488535 | 0         |  |
|      |      | Shiraz-58T | 2223 | 0.833364 | 0         |  |
|      |      | Shiraz-71T | 2263 | 0.975531 | 0         |  |
| XIST | chrX | Shiraz-3T  | 242  | 0        | -0.336434 |  |
|      |      | Shiraz-4T  | 261  | 0        | -0.336249 |  |
|      |      | Shiraz-16T | 295  | 0.591657 | 0         |  |
|      |      | Shiraz-36T | 433  | 0        | -0.803961 |  |
|      |      | Shiraz-44T | 899  | 0        | -1.09697  |  |
|      |      | Shiraz-49T | 1170 | 0        | -0.967436 |  |
|      |      | Shiraz-18T | 1457 | 0.643204 | 0         |  |
|      |      | Shiraz-22T | 1673 | 0.611783 | 0         |  |
|      |      | Shiraz-25T | 1719 | 0.472955 | 0         |  |
|      |      | Shiraz-28T | 1762 | 0.562311 | 0         |  |
|      |      | Shiraz-29T | 1801 | 0.815343 | 0         |  |
|      |      | Shiraz-32T | 1870 | 0.729766 | 0         |  |
|      |      | Shiraz-35T | 1933 | 0.488535 | 0         |  |
|      |      | Shiraz-58T | 2223 | 0.833364 | 0         |  |
|      |      | Shiraz-71T | 2263 | 0.975531 | 0         |  |
|      |      | Shiraz-3T  | 242  | 0        | -0.336434 |  |
|      |      | Shiraz-4T  | 261  | 0        | -0.336249 |  |
|      |      | Shiraz-16T | 295  | 0.591657 | 0         |  |
|      |      | Shiraz-36T | 433  | 0        | -0.803961 |  |
|      |      | Shiraz-44T | 899  | 0        | -1.09697  |  |
|      |      | Shiraz-49T | 1170 | 0        | -0.967436 |  |
|      |      | Shiraz-18T | 1457 | 0.643204 | 0         |  |
|      |      | Shiraz-22T | 1673 | 0.611783 | 0         |  |
|      |      | Shiraz-25T | 1719 | 0.472955 | 0         |  |
|      |      | Shiraz-28T | 1762 | 0.562311 | 0         |  |
|      |      | Shiraz-29T | 1801 | 0.815343 | 0         |  |
|      |      | Shiraz-32T | 1870 | 0.729766 | 0         |  |
|      |      | Shiraz-35T | 1933 | 0.488535 | 0         |  |
|      |      | Shiraz-58T | 2223 | 0.833364 | 0         |  |
|      |      | Shiraz-71T | 2263 | 0.975531 | 0         |  |
|      |      | Shiraz-3T  | 242  | 0        | -0.336434 |  |
|      |      | Shiraz-4T  | 261  | 0        | -0.336249 |  |
|      |      | Shiraz-16T | 295  | 0.591657 | 0         |  |
|      |      | Shiraz-36T | 433  | 0        | -0.803961 |  |
|      |      | Shiraz-44T | 899  | 0        | -1.09697  |  |
|      |      | Shiraz-49T | 1170 | 0        | -0.967436 |  |
|      |      | Shiraz-18T | 1457 | 0.643204 | 0         |  |
|      |      | Shiraz-22T | 1673 | 0.611783 | 0         |  |
|      |      | Shiraz-25T | 1719 | 0.472955 | 0         |  |
|      |      | Shiraz-28T | 1762 | 0.562311 | 0         |  |
|      |      | Shiraz-29T | 1801 | 0.815343 | 0         |  |
|      |      | Shiraz-32T | 1870 | 0.729766 | 0         |  |
|      |      | Shiraz-35T | 1933 | 0.488535 | 0         |  |
|      |      | Shiraz-58T | 2223 | 0.833364 | 0         |  |

|    |      |            |      |          |           |  |
|----|------|------------|------|----------|-----------|--|
|    |      | Shiraz-71T | 2263 | 0.975531 | 0         |  |
| XK | chrX | Shiraz-3T  | 235  | 0        | -0.28401  |  |
|    |      | Shiraz-4T  | 260  | 0        | -0.324128 |  |
|    |      | Shiraz-16T | 294  | 0.655804 | 0         |  |
|    |      | Shiraz-36T | 431  | 0        | -0.78035  |  |
|    |      | Shiraz-44T | 891  | 0        | -0.954044 |  |
|    |      | Shiraz-49T | 1166 | 0        | -0.917235 |  |
|    |      | Shiraz-49T | 1168 | 0        | -1.073859 |  |
|    |      | Shiraz-9T  | 1368 | 0.199713 | 0         |  |
|    |      | Shiraz-18T | 1455 | 0        | -0.186773 |  |
|    |      | Shiraz-22T | 1669 | 0.695915 | 0         |  |
|    |      | Shiraz-25T | 1717 | 0.420447 | 0         |  |
|    |      | Shiraz-28T | 1760 | 0.538181 | 0         |  |
|    |      | Shiraz-29T | 1800 | 0.672527 | 0         |  |
|    |      | Shiraz-32T | 1869 | 0.776805 | 0         |  |
|    |      | Shiraz-35T | 1932 | 0.507141 | 0         |  |
|    |      | Shiraz-40T | 2051 | 0.098506 | 0         |  |
|    |      | Shiraz-58T | 2221 | 0.871948 | 0         |  |
|    |      | Shiraz-71T | 2260 | 0.68394  | 0         |  |
|    |      | Shiraz-71T | 2261 | 0.508399 | 0         |  |
|    |      | Shiraz-3T  | 235  | 0        | -0.28401  |  |
|    |      | Shiraz-4T  | 260  | 0        | -0.324128 |  |
|    |      | Shiraz-16T | 294  | 0.655804 | 0         |  |
|    |      | Shiraz-36T | 431  | 0        | -0.78035  |  |
|    |      | Shiraz-44T | 891  | 0        | -0.954044 |  |
|    |      | Shiraz-49T | 1166 | 0        | -0.917235 |  |
|    |      | Shiraz-49T | 1168 | 0        | -1.073859 |  |
|    |      | Shiraz-9T  | 1368 | 0.199713 | 0         |  |
|    |      | Shiraz-18T | 1455 | 0        | -0.186773 |  |
|    |      | Shiraz-22T | 1669 | 0.695915 | 0         |  |
|    |      | Shiraz-25T | 1717 | 0.420447 | 0         |  |
|    |      | Shiraz-28T | 1760 | 0.538181 | 0         |  |
|    |      | Shiraz-29T | 1800 | 0.672527 | 0         |  |
|    |      | Shiraz-32T | 1869 | 0.776805 | 0         |  |
|    |      | Shiraz-35T | 1932 | 0.507141 | 0         |  |
|    |      | Shiraz-40T | 2051 | 0.098506 | 0         |  |
|    |      | Shiraz-58T | 2221 | 0.871948 | 0         |  |
|    |      | Shiraz-71T | 2260 | 0.68394  | 0         |  |
|    |      | Shiraz-71T | 2261 | 0.508399 | 0         |  |
|    |      | Shiraz-3T  | 235  | 0        | -0.28401  |  |
|    |      | Shiraz-4T  | 260  | 0        | -0.324128 |  |
|    |      | Shiraz-16T | 294  | 0.655804 | 0         |  |
|    |      | Shiraz-36T | 431  | 0        | -0.78035  |  |
|    |      | Shiraz-44T | 891  | 0        | -0.954044 |  |
|    |      | Shiraz-49T | 1166 | 0        | -0.917235 |  |
|    |      | Shiraz-49T | 1168 | 0        | -1.073859 |  |
|    |      | Shiraz-9T  | 1368 | 0.199713 | 0         |  |

|      |      |            |      |          |           |  |  |
|------|------|------------|------|----------|-----------|--|--|
|      |      | Shiraz-18T | 1455 | 0        | -0.186773 |  |  |
|      |      | Shiraz-22T | 1669 | 0.695915 | 0         |  |  |
|      |      | Shiraz-25T | 1717 | 0.420447 | 0         |  |  |
|      |      | Shiraz-28T | 1760 | 0.538181 | 0         |  |  |
|      |      | Shiraz-29T | 1800 | 0.672527 | 0         |  |  |
|      |      | Shiraz-32T | 1869 | 0.776805 | 0         |  |  |
|      |      | Shiraz-35T | 1932 | 0.507141 | 0         |  |  |
|      |      | Shiraz-40T | 2051 | 0.098506 | 0         |  |  |
|      |      | Shiraz-58T | 2221 | 0.871948 | 0         |  |  |
|      |      | Shiraz-71T | 2260 | 0.68394  | 0         |  |  |
|      |      | Shiraz-71T | 2261 | 0.508399 | 0         |  |  |
| XKRX | chrX | Shiraz-3T  | 242  | 0        | -0.336434 |  |  |
|      |      | Shiraz-4T  | 261  | 0        | -0.336249 |  |  |
|      |      | Shiraz-16T | 295  | 0.591657 | 0         |  |  |
|      |      | Shiraz-36T | 433  | 0        | -0.803961 |  |  |
|      |      | Shiraz-44T | 899  | 0        | -1.09697  |  |  |
|      |      | Shiraz-49T | 1170 | 0        | -0.967436 |  |  |
|      |      | Shiraz-18T | 1457 | 0.643204 | 0         |  |  |
|      |      | Shiraz-22T | 1673 | 0.611783 | 0         |  |  |
|      |      | Shiraz-25T | 1719 | 0.472955 | 0         |  |  |
|      |      | Shiraz-28T | 1762 | 0.562311 | 0         |  |  |
|      |      | Shiraz-29T | 1801 | 0.815343 | 0         |  |  |
|      |      | Shiraz-32T | 1870 | 0.729766 | 0         |  |  |
|      |      | Shiraz-35T | 1933 | 0.488535 | 0         |  |  |
|      |      | Shiraz-58T | 2223 | 0.833364 | 0         |  |  |
|      |      | Shiraz-71T | 2263 | 0.975531 | 0         |  |  |
|      |      | Shiraz-3T  | 242  | 0        | -0.336434 |  |  |
|      |      | Shiraz-4T  | 261  | 0        | -0.336249 |  |  |
|      |      | Shiraz-16T | 295  | 0.591657 | 0         |  |  |
|      |      | Shiraz-36T | 433  | 0        | -0.803961 |  |  |
|      |      | Shiraz-44T | 899  | 0        | -1.09697  |  |  |
|      |      | Shiraz-49T | 1170 | 0        | -0.967436 |  |  |
|      |      | Shiraz-18T | 1457 | 0.643204 | 0         |  |  |
|      |      | Shiraz-22T | 1673 | 0.611783 | 0         |  |  |
|      |      | Shiraz-25T | 1719 | 0.472955 | 0         |  |  |
|      |      | Shiraz-28T | 1762 | 0.562311 | 0         |  |  |
|      |      | Shiraz-29T | 1801 | 0.815343 | 0         |  |  |
|      |      | Shiraz-32T | 1870 | 0.729766 | 0         |  |  |
|      |      | Shiraz-35T | 1933 | 0.488535 | 0         |  |  |
|      |      | Shiraz-58T | 2223 | 0.833364 | 0         |  |  |
|      |      | Shiraz-71T | 2263 | 0.975531 | 0         |  |  |
|      |      | Shiraz-3T  | 242  | 0        | -0.336434 |  |  |
|      |      | Shiraz-4T  | 261  | 0        | -0.336249 |  |  |
|      |      | Shiraz-16T | 295  | 0.591657 | 0         |  |  |
|      |      | Shiraz-36T | 433  | 0        | -0.803961 |  |  |
|      |      | Shiraz-44T | 899  | 0        | -1.09697  |  |  |
|      |      | Shiraz-49T | 1170 | 0        | -0.967436 |  |  |

|         |      |            |      |          |           |  |  |
|---------|------|------------|------|----------|-----------|--|--|
|         |      | Shiraz-18T | 1457 | 0.643204 | 0         |  |  |
|         |      | Shiraz-22T | 1673 | 0.611783 | 0         |  |  |
|         |      | Shiraz-25T | 1719 | 0.472955 | 0         |  |  |
|         |      | Shiraz-28T | 1762 | 0.562311 | 0         |  |  |
|         |      | Shiraz-29T | 1801 | 0.815343 | 0         |  |  |
|         |      | Shiraz-32T | 1870 | 0.729766 | 0         |  |  |
|         |      | Shiraz-35T | 1933 | 0.488535 | 0         |  |  |
|         |      | Shiraz-58T | 2223 | 0.833364 | 0         |  |  |
|         |      | Shiraz-71T | 2263 | 0.975531 | 0         |  |  |
| XPNPEP2 | chrX | Shiraz-3T  | 242  | 0        | -0.336434 |  |  |
|         |      | Shiraz-3T  | 245  | 0.224144 | 0         |  |  |
|         |      | Shiraz-4T  | 261  | 0        | -0.336249 |  |  |
|         |      | Shiraz-16T | 295  | 0.591657 | 0         |  |  |
|         |      | Shiraz-36T | 433  | 0        | -0.803961 |  |  |
|         |      | Shiraz-44T | 899  | 0        | -1.09697  |  |  |
|         |      | Shiraz-44T | 906  | 0        | -0.165692 |  |  |
|         |      | Shiraz-49T | 1170 | 0        | -0.967436 |  |  |
|         |      | Shiraz-9T  | 1370 | 0.690073 | 0         |  |  |
|         |      | Shiraz-18T | 1457 | 0.643204 | 0         |  |  |
|         |      | Shiraz-22T | 1673 | 0.611783 | 0         |  |  |
|         |      | Shiraz-22T | 1677 | 0.789711 | 0         |  |  |
|         |      | Shiraz-25T | 1719 | 0.472955 | 0         |  |  |
|         |      | Shiraz-28T | 1762 | 0.562311 | 0         |  |  |
|         |      | Shiraz-29T | 1801 | 0.815343 | 0         |  |  |
|         |      | Shiraz-32T | 1870 | 0.729766 | 0         |  |  |
|         |      | Shiraz-35T | 1933 | 0.488535 | 0         |  |  |
|         |      | Shiraz-58T | 2223 | 0.833364 | 0         |  |  |
|         |      | Shiraz-71T | 2263 | 0.975531 | 0         |  |  |
|         |      | Shiraz-3T  | 242  | 0        | -0.336434 |  |  |
|         |      | Shiraz-3T  | 245  | 0.224144 | 0         |  |  |
|         |      | Shiraz-4T  | 261  | 0        | -0.336249 |  |  |
|         |      | Shiraz-16T | 295  | 0.591657 | 0         |  |  |
|         |      | Shiraz-36T | 433  | 0        | -0.803961 |  |  |
|         |      | Shiraz-44T | 899  | 0        | -1.09697  |  |  |
|         |      | Shiraz-44T | 906  | 0        | -0.165692 |  |  |
|         |      | Shiraz-49T | 1170 | 0        | -0.967436 |  |  |
|         |      | Shiraz-9T  | 1370 | 0.690073 | 0         |  |  |
|         |      | Shiraz-18T | 1457 | 0.643204 | 0         |  |  |
|         |      | Shiraz-22T | 1673 | 0.611783 | 0         |  |  |
|         |      | Shiraz-22T | 1677 | 0.789711 | 0         |  |  |
|         |      | Shiraz-25T | 1719 | 0.472955 | 0         |  |  |
|         |      | Shiraz-28T | 1762 | 0.562311 | 0         |  |  |
|         |      | Shiraz-29T | 1801 | 0.815343 | 0         |  |  |
|         |      | Shiraz-32T | 1870 | 0.729766 | 0         |  |  |
|         |      | Shiraz-35T | 1933 | 0.488535 | 0         |  |  |
|         |      | Shiraz-58T | 2223 | 0.833364 | 0         |  |  |
|         |      | Shiraz-71T | 2263 | 0.975531 | 0         |  |  |

|       |      |            |      |          |           |  |  |
|-------|------|------------|------|----------|-----------|--|--|
|       |      | Shiraz-3T  | 242  | 0        | -0.336434 |  |  |
|       |      | Shiraz-3T  | 245  | 0.224144 | 0         |  |  |
|       |      | Shiraz-4T  | 261  | 0        | -0.336249 |  |  |
|       |      | Shiraz-16T | 295  | 0.591657 | 0         |  |  |
|       |      | Shiraz-36T | 433  | 0        | -0.803961 |  |  |
|       |      | Shiraz-44T | 899  | 0        | -1.09697  |  |  |
|       |      | Shiraz-44T | 906  | 0        | -0.165692 |  |  |
|       |      | Shiraz-49T | 1170 | 0        | -0.967436 |  |  |
|       |      | Shiraz-9T  | 1370 | 0.690073 | 0         |  |  |
|       |      | Shiraz-18T | 1457 | 0.643204 | 0         |  |  |
|       |      | Shiraz-22T | 1673 | 0.611783 | 0         |  |  |
|       |      | Shiraz-22T | 1677 | 0.789711 | 0         |  |  |
|       |      | Shiraz-25T | 1719 | 0.472955 | 0         |  |  |
|       |      | Shiraz-28T | 1762 | 0.562311 | 0         |  |  |
|       |      | Shiraz-29T | 1801 | 0.815343 | 0         |  |  |
|       |      | Shiraz-32T | 1870 | 0.729766 | 0         |  |  |
|       |      | Shiraz-35T | 1933 | 0.488535 | 0         |  |  |
|       |      | Shiraz-58T | 2223 | 0.833364 | 0         |  |  |
|       |      | Shiraz-71T | 2263 | 0.975531 | 0         |  |  |
| XRCC2 | chr7 | Shiraz-3T  | 90   | 0.219276 | 0         |  |  |
|       |      | Shiraz-3T  | 99   | 0.454766 | 0         |  |  |
|       |      | Shiraz-4T  | 253  | 0.372918 | 0         |  |  |
|       |      | Shiraz-36T | 378  | 0.179558 | 0         |  |  |
|       |      | Shiraz-44T | 646  | 0.471276 | 0         |  |  |
|       |      | Shiraz-44T | 648  | 0.017909 | 0         |  |  |
|       |      | Shiraz-46T | 943  | 0.093799 | 0         |  |  |
|       |      | Shiraz-9T  | 1325 | 0.221899 | 0         |  |  |
|       |      | Shiraz-18T | 1434 | 0.244465 | 0         |  |  |
|       |      | Shiraz-25T | 1698 | 0.21835  | 0         |  |  |
|       |      | Shiraz-28T | 1735 | 0.350744 | 0         |  |  |
|       |      | Shiraz-29T | 1778 | 0.120767 | 0         |  |  |
|       |      | Shiraz-32T | 1833 | 0.551336 | 0         |  |  |
|       |      | Shiraz-38T | 1951 | 0.250891 | 0         |  |  |
|       |      | Shiraz-58T | 2162 | 0.221505 | 0         |  |  |
|       |      | Shiraz-71T | 2238 | 0.603631 | 0         |  |  |
|       |      | Shiraz-3T  | 90   | 0.219276 | 0         |  |  |
|       |      | Shiraz-3T  | 99   | 0.454766 | 0         |  |  |
|       |      | Shiraz-4T  | 253  | 0.372918 | 0         |  |  |
|       |      | Shiraz-36T | 378  | 0.179558 | 0         |  |  |
|       |      | Shiraz-44T | 646  | 0.471276 | 0         |  |  |
|       |      | Shiraz-44T | 648  | 0.017909 | 0         |  |  |
|       |      | Shiraz-46T | 943  | 0.093799 | 0         |  |  |
|       |      | Shiraz-9T  | 1325 | 0.221899 | 0         |  |  |
|       |      | Shiraz-18T | 1434 | 0.244465 | 0         |  |  |
|       |      | Shiraz-25T | 1698 | 0.21835  | 0         |  |  |
|       |      | Shiraz-28T | 1735 | 0.350744 | 0         |  |  |
|       |      | Shiraz-29T | 1778 | 0.120767 | 0         |  |  |

|       |      |            |      |          |           |  |  |
|-------|------|------------|------|----------|-----------|--|--|
|       |      | Shiraz-32T | 1833 | 0.551336 | 0         |  |  |
|       |      | Shiraz-38T | 1951 | 0.250891 | 0         |  |  |
|       |      | Shiraz-58T | 2162 | 0.221505 | 0         |  |  |
|       |      | Shiraz-71T | 2238 | 0.603631 | 0         |  |  |
|       |      | Shiraz-3T  | 90   | 0.219276 | 0         |  |  |
|       |      | Shiraz-3T  | 99   | 0.454766 | 0         |  |  |
|       |      | Shiraz-4T  | 253  | 0.372918 | 0         |  |  |
|       |      | Shiraz-36T | 378  | 0.179558 | 0         |  |  |
|       |      | Shiraz-44T | 646  | 0.471276 | 0         |  |  |
|       |      | Shiraz-44T | 648  | 0.017909 | 0         |  |  |
|       |      | Shiraz-46T | 943  | 0.093799 | 0         |  |  |
|       |      | Shiraz-9T  | 1325 | 0.221899 | 0         |  |  |
|       |      | Shiraz-18T | 1434 | 0.244465 | 0         |  |  |
|       |      | Shiraz-25T | 1698 | 0.21835  | 0         |  |  |
|       |      | Shiraz-28T | 1735 | 0.350744 | 0         |  |  |
|       |      | Shiraz-29T | 1778 | 0.120767 | 0         |  |  |
|       |      | Shiraz-32T | 1833 | 0.551336 | 0         |  |  |
|       |      | Shiraz-38T | 1951 | 0.250891 | 0         |  |  |
|       |      | Shiraz-58T | 2162 | 0.221505 | 0         |  |  |
|       |      | Shiraz-71T | 2238 | 0.603631 | 0         |  |  |
| YIPF6 | chrX | Shiraz-3T  | 241  | 0        | -0.230501 |  |  |
|       |      | Shiraz-4T  | 261  | 0        | -0.336249 |  |  |
|       |      | Shiraz-16T | 295  | 0.591657 | 0         |  |  |
|       |      | Shiraz-36T | 433  | 0        | -0.803961 |  |  |
|       |      | Shiraz-44T | 899  | 0        | -1.09697  |  |  |
|       |      | Shiraz-44T | 900  | 0        | -0.584284 |  |  |
|       |      | Shiraz-49T | 1170 | 0        | -0.967436 |  |  |
|       |      | Shiraz-18T | 1457 | 0.643204 | 0         |  |  |
|       |      | Shiraz-22T | 1673 | 0.611783 | 0         |  |  |
|       |      | Shiraz-22T | 1674 | 0.887899 | 0         |  |  |
|       |      | Shiraz-25T | 1719 | 0.472955 | 0         |  |  |
|       |      | Shiraz-28T | 1762 | 0.562311 | 0         |  |  |
|       |      | Shiraz-29T | 1801 | 0.815343 | 0         |  |  |
|       |      | Shiraz-32T | 1870 | 0.729766 | 0         |  |  |
|       |      | Shiraz-35T | 1933 | 0.488535 | 0         |  |  |
|       |      | Shiraz-58T | 2223 | 0.833364 | 0         |  |  |
|       |      | Shiraz-71T | 2263 | 0.975531 | 0         |  |  |
|       |      | Shiraz-3T  | 241  | 0        | -0.230501 |  |  |
|       |      | Shiraz-4T  | 261  | 0        | -0.336249 |  |  |
|       |      | Shiraz-16T | 295  | 0.591657 | 0         |  |  |
|       |      | Shiraz-36T | 433  | 0        | -0.803961 |  |  |
|       |      | Shiraz-44T | 899  | 0        | -1.09697  |  |  |
|       |      | Shiraz-44T | 900  | 0        | -0.584284 |  |  |
|       |      | Shiraz-49T | 1170 | 0        | -0.967436 |  |  |
|       |      | Shiraz-18T | 1457 | 0.643204 | 0         |  |  |
|       |      | Shiraz-22T | 1673 | 0.611783 | 0         |  |  |
|       |      | Shiraz-22T | 1674 | 0.887899 | 0         |  |  |

|      |      |            |      |          |           |  |  |
|------|------|------------|------|----------|-----------|--|--|
|      |      | Shiraz-25T | 1719 | 0.472955 | 0         |  |  |
|      |      | Shiraz-28T | 1762 | 0.562311 | 0         |  |  |
|      |      | Shiraz-29T | 1801 | 0.815343 | 0         |  |  |
|      |      | Shiraz-32T | 1870 | 0.729766 | 0         |  |  |
|      |      | Shiraz-35T | 1933 | 0.488535 | 0         |  |  |
|      |      | Shiraz-58T | 2223 | 0.833364 | 0         |  |  |
|      |      | Shiraz-71T | 2263 | 0.975531 | 0         |  |  |
|      |      | Shiraz-3T  | 241  | 0        | -0.230501 |  |  |
|      |      | Shiraz-4T  | 261  | 0        | -0.336249 |  |  |
|      |      | Shiraz-16T | 295  | 0.591657 | 0         |  |  |
|      |      | Shiraz-36T | 433  | 0        | -0.803961 |  |  |
|      |      | Shiraz-44T | 899  | 0        | -1.09697  |  |  |
|      |      | Shiraz-44T | 900  | 0        | -0.584284 |  |  |
|      |      | Shiraz-49T | 1170 | 0        | -0.967436 |  |  |
|      |      | Shiraz-18T | 1457 | 0.643204 | 0         |  |  |
|      |      | Shiraz-22T | 1673 | 0.611783 | 0         |  |  |
|      |      | Shiraz-22T | 1674 | 0.887899 | 0         |  |  |
|      |      | Shiraz-25T | 1719 | 0.472955 | 0         |  |  |
|      |      | Shiraz-28T | 1762 | 0.562311 | 0         |  |  |
|      |      | Shiraz-29T | 1801 | 0.815343 | 0         |  |  |
|      |      | Shiraz-32T | 1870 | 0.729766 | 0         |  |  |
|      |      | Shiraz-35T | 1933 | 0.488535 | 0         |  |  |
|      |      | Shiraz-58T | 2223 | 0.833364 | 0         |  |  |
|      |      | Shiraz-71T | 2263 | 0.975531 | 0         |  |  |
| YKT6 | chr7 | Shiraz-3T  | 87   | 0.198593 | 0         |  |  |
|      |      | Shiraz-3T  | 89   | 0.678641 | 0         |  |  |
|      |      | Shiraz-4T  | 252  | 0.192083 | 0         |  |  |
|      |      | Shiraz-36T | 376  | 0.159952 | 0         |  |  |
|      |      | Shiraz-44T | 632  | 0.902944 | 0         |  |  |
|      |      | Shiraz-46T | 942  | 0.069143 | 0         |  |  |
|      |      | Shiraz-77T | 1223 | 0.215647 | 0         |  |  |
|      |      | Shiraz-18T | 1433 | 0.250973 | 0         |  |  |
|      |      | Shiraz-25T | 1697 | 0.21945  | 0         |  |  |
|      |      | Shiraz-28T | 1734 | 0.362882 | 0         |  |  |
|      |      | Shiraz-29T | 1777 | 0.156747 | 0         |  |  |
|      |      | Shiraz-38T | 1950 | 0.265916 | 0         |  |  |
|      |      | Shiraz-71T | 2236 | 0.320072 | 0         |  |  |
|      |      | Shiraz-3T  | 87   | 0.198593 | 0         |  |  |
|      |      | Shiraz-3T  | 89   | 0.678641 | 0         |  |  |
|      |      | Shiraz-4T  | 252  | 0.192083 | 0         |  |  |
|      |      | Shiraz-36T | 376  | 0.159952 | 0         |  |  |
|      |      | Shiraz-44T | 632  | 0.902944 | 0         |  |  |
|      |      | Shiraz-46T | 942  | 0.069143 | 0         |  |  |
|      |      | Shiraz-77T | 1223 | 0.215647 | 0         |  |  |
|      |      | Shiraz-18T | 1433 | 0.250973 | 0         |  |  |
|      |      | Shiraz-25T | 1697 | 0.21945  | 0         |  |  |
|      |      | Shiraz-28T | 1734 | 0.362882 | 0         |  |  |

|       |      |            |      |          |   |  |
|-------|------|------------|------|----------|---|--|
|       |      | Shiraz-29T | 1777 | 0.156747 | 0 |  |
|       |      | Shiraz-38T | 1950 | 0.265916 | 0 |  |
|       |      | Shiraz-71T | 2236 | 0.320072 | 0 |  |
|       |      | Shiraz-3T  | 87   | 0.198593 | 0 |  |
|       |      | Shiraz-3T  | 89   | 0.678641 | 0 |  |
|       |      | Shiraz-4T  | 252  | 0.192083 | 0 |  |
|       |      | Shiraz-36T | 376  | 0.159952 | 0 |  |
|       |      | Shiraz-44T | 632  | 0.902944 | 0 |  |
|       |      | Shiraz-46T | 942  | 0.069143 | 0 |  |
|       |      | Shiraz-77T | 1223 | 0.215647 | 0 |  |
|       |      | Shiraz-18T | 1433 | 0.250973 | 0 |  |
|       |      | Shiraz-25T | 1697 | 0.21945  | 0 |  |
|       |      | Shiraz-28T | 1734 | 0.362882 | 0 |  |
|       |      | Shiraz-29T | 1777 | 0.156747 | 0 |  |
|       |      | Shiraz-38T | 1950 | 0.265916 | 0 |  |
|       |      | Shiraz-71T | 2236 | 0.320072 | 0 |  |
| YWHAG | chr7 | Shiraz-3T  | 90   | 0.219276 | 0 |  |
|       |      | Shiraz-3T  | 92   | 0.817021 | 0 |  |
|       |      | Shiraz-4T  | 253  | 0.372918 | 0 |  |
|       |      | Shiraz-31T | 315  | 0.194054 | 0 |  |
|       |      | Shiraz-36T | 378  | 0.179558 | 0 |  |
|       |      | Shiraz-36T | 379  | 0.322028 | 0 |  |
|       |      | Shiraz-42T | 454  | 0.145717 | 0 |  |
|       |      | Shiraz-44T | 637  | 1.109789 | 0 |  |
|       |      | Shiraz-46T | 943  | 0.093799 | 0 |  |
|       |      | Shiraz-46T | 944  | 0.256008 | 0 |  |
|       |      | Shiraz-47T | 1028 | 0.17896  | 0 |  |
|       |      | Shiraz-49T | 1118 | 0.327789 | 0 |  |
|       |      | Shiraz-77T | 1224 | 0.220539 | 0 |  |
|       |      | Shiraz-9T  | 1323 | 0.655912 | 0 |  |
|       |      | Shiraz-18T | 1434 | 0.244465 | 0 |  |
|       |      | Shiraz-22T | 1548 | 0.237572 | 0 |  |
|       |      | Shiraz-25T | 1698 | 0.21835  | 0 |  |
|       |      | Shiraz-28T | 1735 | 0.350744 | 0 |  |
|       |      | Shiraz-29T | 1778 | 0.120767 | 0 |  |
|       |      | Shiraz-38T | 1951 | 0.250891 | 0 |  |
|       |      | Shiraz-53T | 2078 | 0.287202 | 0 |  |
|       |      | Shiraz-58T | 2158 | 0.33934  | 0 |  |
|       |      | Shiraz-71T | 2238 | 0.603631 | 0 |  |
|       |      | Shiraz-71T | 2239 | 0.310785 | 0 |  |
|       |      | Shiraz-3T  | 90   | 0.219276 | 0 |  |
|       |      | Shiraz-3T  | 92   | 0.817021 | 0 |  |
|       |      | Shiraz-4T  | 253  | 0.372918 | 0 |  |
|       |      | Shiraz-31T | 315  | 0.194054 | 0 |  |
|       |      | Shiraz-36T | 378  | 0.179558 | 0 |  |
|       |      | Shiraz-36T | 379  | 0.322028 | 0 |  |
|       |      | Shiraz-42T | 454  | 0.145717 | 0 |  |



|     |      |            |      |          |           |  |
|-----|------|------------|------|----------|-----------|--|
|     |      | Shiraz-44T | 637  | 1.109789 | 0         |  |
|     |      | Shiraz-46T | 943  | 0.093799 | 0         |  |
|     |      | Shiraz-46T | 944  | 0.256008 | 0         |  |
|     |      | Shiraz-47T | 1028 | 0.17896  | 0         |  |
|     |      | Shiraz-49T | 1118 | 0.327789 | 0         |  |
|     |      | Shiraz-77T | 1224 | 0.220539 | 0         |  |
|     |      | Shiraz-9T  | 1323 | 0.655912 | 0         |  |
|     |      | Shiraz-18T | 1434 | 0.244465 | 0         |  |
|     |      | Shiraz-22T | 1548 | 0.237572 | 0         |  |
|     |      | Shiraz-25T | 1698 | 0.21835  | 0         |  |
|     |      | Shiraz-28T | 1735 | 0.350744 | 0         |  |
|     |      | Shiraz-29T | 1778 | 0.120767 | 0         |  |
|     |      | Shiraz-38T | 1951 | 0.250891 | 0         |  |
|     |      | Shiraz-53T | 2078 | 0.287202 | 0         |  |
|     |      | Shiraz-58T | 2158 | 0.33934  | 0         |  |
|     |      | Shiraz-71T | 2238 | 0.603631 | 0         |  |
|     |      | Shiraz-71T | 2239 | 0.310785 | 0         |  |
|     |      | Shiraz-3T  | 90   | 0.219276 | 0         |  |
|     |      | Shiraz-3T  | 92   | 0.817021 | 0         |  |
|     |      | Shiraz-4T  | 253  | 0.372918 | 0         |  |
|     |      | Shiraz-31T | 315  | 0.194054 | 0         |  |
|     |      | Shiraz-36T | 378  | 0.179558 | 0         |  |
|     |      | Shiraz-36T | 379  | 0.322028 | 0         |  |
|     |      | Shiraz-42T | 454  | 0.145717 | 0         |  |
|     |      | Shiraz-44T | 637  | 1.109789 | 0         |  |
|     |      | Shiraz-46T | 943  | 0.093799 | 0         |  |
|     |      | Shiraz-46T | 944  | 0.256008 | 0         |  |
|     |      | Shiraz-47T | 1028 | 0.17896  | 0         |  |
|     |      | Shiraz-49T | 1118 | 0.327789 | 0         |  |
|     |      | Shiraz-77T | 1224 | 0.220539 | 0         |  |
|     |      | Shiraz-9T  | 1323 | 0.655912 | 0         |  |
|     |      | Shiraz-18T | 1434 | 0.244465 | 0         |  |
|     |      | Shiraz-22T | 1548 | 0.237572 | 0         |  |
|     |      | Shiraz-25T | 1698 | 0.21835  | 0         |  |
|     |      | Shiraz-28T | 1735 | 0.350744 | 0         |  |
|     |      | Shiraz-29T | 1778 | 0.120767 | 0         |  |
|     |      | Shiraz-38T | 1951 | 0.250891 | 0         |  |
|     |      | Shiraz-53T | 2078 | 0.287202 | 0         |  |
|     |      | Shiraz-58T | 2158 | 0.33934  | 0         |  |
|     |      | Shiraz-71T | 2238 | 0.603631 | 0         |  |
|     |      | Shiraz-71T | 2239 | 0.310785 | 0         |  |
| YY2 | chrX | Shiraz-3T  | 235  | 0        | -0.28401  |  |
|     |      | Shiraz-4T  | 260  | 0        | -0.324128 |  |
|     |      | Shiraz-16T | 294  | 0.655804 | 0         |  |
|     |      | Shiraz-36T | 431  | 0        | -0.78035  |  |
|     |      | Shiraz-44T | 891  | 0        | -0.954044 |  |
|     |      | Shiraz-49T | 1166 | 0        | -0.917235 |  |

|  |            |      |          |           |  |
|--|------------|------|----------|-----------|--|
|  | Shiraz-77T | 1281 | 0.136627 | 0         |  |
|  | Shiraz-9T  | 1368 | 0.199713 | 0         |  |
|  | Shiraz-18T | 1455 | 0        | -0.186773 |  |
|  | Shiraz-22T | 1669 | 0.695915 | 0         |  |
|  | Shiraz-25T | 1717 | 0.420447 | 0         |  |
|  | Shiraz-28T | 1760 | 0.538181 | 0         |  |
|  | Shiraz-29T | 1800 | 0.672527 | 0         |  |
|  | Shiraz-32T | 1869 | 0.776805 | 0         |  |
|  | Shiraz-35T | 1932 | 0.507141 | 0         |  |
|  | Shiraz-40T | 2051 | 0.098506 | 0         |  |
|  | Shiraz-58T | 2221 | 0.871948 | 0         |  |
|  | Shiraz-71T | 2260 | 0.68394  | 0         |  |
|  | Shiraz-71T | 2261 | 0.508399 | 0         |  |
|  | Shiraz-3T  | 235  | 0        | -0.28401  |  |
|  | Shiraz-4T  | 260  | 0        | -0.324128 |  |
|  | Shiraz-16T | 294  | 0.655804 | 0         |  |
|  | Shiraz-36T | 431  | 0        | -0.78035  |  |
|  | Shiraz-44T | 891  | 0        | -0.954044 |  |
|  | Shiraz-49T | 1166 | 0        | -0.917235 |  |
|  | Shiraz-77T | 1281 | 0.136627 | 0         |  |
|  | Shiraz-9T  | 1368 | 0.199713 | 0         |  |
|  | Shiraz-18T | 1455 | 0        | -0.186773 |  |
|  | Shiraz-22T | 1669 | 0.695915 | 0         |  |
|  | Shiraz-25T | 1717 | 0.420447 | 0         |  |
|  | Shiraz-28T | 1760 | 0.538181 | 0         |  |
|  | Shiraz-29T | 1800 | 0.672527 | 0         |  |
|  | Shiraz-32T | 1869 | 0.776805 | 0         |  |
|  | Shiraz-35T | 1932 | 0.507141 | 0         |  |
|  | Shiraz-40T | 2051 | 0.098506 | 0         |  |
|  | Shiraz-58T | 2221 | 0.871948 | 0         |  |
|  | Shiraz-71T | 2260 | 0.68394  | 0         |  |
|  | Shiraz-71T | 2261 | 0.508399 | 0         |  |
|  | Shiraz-3T  | 235  | 0        | -0.28401  |  |
|  | Shiraz-4T  | 260  | 0        | -0.324128 |  |
|  | Shiraz-16T | 294  | 0.655804 | 0         |  |
|  | Shiraz-36T | 431  | 0        | -0.78035  |  |
|  | Shiraz-44T | 891  | 0        | -0.954044 |  |
|  | Shiraz-49T | 1166 | 0        | -0.917235 |  |
|  | Shiraz-77T | 1281 | 0.136627 | 0         |  |
|  | Shiraz-9T  | 1368 | 0.199713 | 0         |  |
|  | Shiraz-18T | 1455 | 0        | -0.186773 |  |
|  | Shiraz-22T | 1669 | 0.695915 | 0         |  |
|  | Shiraz-25T | 1717 | 0.420447 | 0         |  |
|  | Shiraz-28T | 1760 | 0.538181 | 0         |  |
|  | Shiraz-29T | 1800 | 0.672527 | 0         |  |
|  | Shiraz-32T | 1869 | 0.776805 | 0         |  |
|  | Shiraz-35T | 1932 | 0.507141 | 0         |  |

|     |      |            |      |          |           |  |
|-----|------|------------|------|----------|-----------|--|
|     |      | Shiraz-40T | 2051 | 0.098506 | 0         |  |
|     |      | Shiraz-58T | 2221 | 0.871948 | 0         |  |
|     |      | Shiraz-71T | 2260 | 0.68394  | 0         |  |
|     |      | Shiraz-71T | 2261 | 0.508399 | 0         |  |
| ZAN | chr7 | Shiraz-3T  | 90   | 0.219276 | 0         |  |
|     |      | Shiraz-3T  | 94   | 0.74735  | 0         |  |
|     |      | Shiraz-4T  | 253  | 0.372918 | 0         |  |
|     |      | Shiraz-31T | 316  | 0.219196 | 0         |  |
|     |      | Shiraz-36T | 378  | 0.179558 | 0         |  |
|     |      | Shiraz-36T | 381  | 0.332628 | 0         |  |
|     |      | Shiraz-44T | 639  | 1.035032 | 0         |  |
|     |      | Shiraz-46T | 943  | 0.093799 | 0         |  |
|     |      | Shiraz-46T | 946  | 0.299835 | 0         |  |
|     |      | Shiraz-47T | 1030 | 0.257728 | 0         |  |
|     |      | Shiraz-49T | 1120 | 0.281656 | 0         |  |
|     |      | Shiraz-77T | 1225 | 0        | -0.117922 |  |
|     |      | Shiraz-77T | 1227 | 0.196445 | 0         |  |
|     |      | Shiraz-9T  | 1324 | 0.679266 | 0         |  |
|     |      | Shiraz-18T | 1434 | 0.244465 | 0         |  |
|     |      | Shiraz-22T | 1549 | 0        | -0.319623 |  |
|     |      | Shiraz-22T | 1551 | 0.324011 | 0         |  |
|     |      | Shiraz-25T | 1698 | 0.21835  | 0         |  |
|     |      | Shiraz-28T | 1735 | 0.350744 | 0         |  |
|     |      | Shiraz-29T | 1778 | 0.120767 | 0         |  |
|     |      | Shiraz-32T | 1833 | 0.551336 | 0         |  |
|     |      | Shiraz-32T | 1834 | 1.485392 | 0         |  |
|     |      | Shiraz-38T | 1951 | 0.250891 | 0         |  |
|     |      | Shiraz-53T | 2078 | 0.287202 | 0         |  |
|     |      | Shiraz-58T | 2160 | 0.399007 | 0         |  |
|     |      | Shiraz-71T | 2238 | 0.603631 | 0         |  |
|     |      | Shiraz-3T  | 90   | 0.219276 | 0         |  |
|     |      | Shiraz-3T  | 94   | 0.74735  | 0         |  |
|     |      | Shiraz-4T  | 253  | 0.372918 | 0         |  |
|     |      | Shiraz-31T | 316  | 0.219196 | 0         |  |
|     |      | Shiraz-36T | 378  | 0.179558 | 0         |  |
|     |      | Shiraz-36T | 381  | 0.332628 | 0         |  |
|     |      | Shiraz-44T | 639  | 1.035032 | 0         |  |
|     |      | Shiraz-46T | 943  | 0.093799 | 0         |  |
|     |      | Shiraz-46T | 946  | 0.299835 | 0         |  |
|     |      | Shiraz-47T | 1030 | 0.257728 | 0         |  |
|     |      | Shiraz-49T | 1120 | 0.281656 | 0         |  |
|     |      | Shiraz-77T | 1225 | 0        | -0.117922 |  |
|     |      | Shiraz-77T | 1227 | 0.196445 | 0         |  |
|     |      | Shiraz-9T  | 1324 | 0.679266 | 0         |  |
|     |      | Shiraz-18T | 1434 | 0.244465 | 0         |  |
|     |      | Shiraz-22T | 1549 | 0        | -0.319623 |  |
|     |      | Shiraz-22T | 1551 | 0.324011 | 0         |  |

|        |      |            |      |          |           |  |
|--------|------|------------|------|----------|-----------|--|
|        |      | Shiraz-25T | 1698 | 0.21835  | 0         |  |
|        |      | Shiraz-28T | 1735 | 0.350744 | 0         |  |
|        |      | Shiraz-29T | 1778 | 0.120767 | 0         |  |
|        |      | Shiraz-32T | 1833 | 0.551336 | 0         |  |
|        |      | Shiraz-32T | 1834 | 1.485392 | 0         |  |
|        |      | Shiraz-38T | 1951 | 0.250891 | 0         |  |
|        |      | Shiraz-53T | 2078 | 0.287202 | 0         |  |
|        |      | Shiraz-58T | 2160 | 0.399007 | 0         |  |
|        |      | Shiraz-71T | 2238 | 0.603631 | 0         |  |
|        |      | Shiraz-3T  | 90   | 0.219276 | 0         |  |
|        |      | Shiraz-3T  | 94   | 0.74735  | 0         |  |
|        |      | Shiraz-4T  | 253  | 0.372918 | 0         |  |
|        |      | Shiraz-31T | 316  | 0.219196 | 0         |  |
|        |      | Shiraz-36T | 378  | 0.179558 | 0         |  |
|        |      | Shiraz-36T | 381  | 0.332628 | 0         |  |
|        |      | Shiraz-44T | 639  | 1.035032 | 0         |  |
|        |      | Shiraz-46T | 943  | 0.093799 | 0         |  |
|        |      | Shiraz-46T | 946  | 0.299835 | 0         |  |
|        |      | Shiraz-47T | 1030 | 0.257728 | 0         |  |
|        |      | Shiraz-49T | 1120 | 0.281656 | 0         |  |
|        |      | Shiraz-77T | 1225 | 0        | -0.117922 |  |
|        |      | Shiraz-77T | 1227 | 0.196445 | 0         |  |
|        |      | Shiraz-9T  | 1324 | 0.679266 | 0         |  |
|        |      | Shiraz-18T | 1434 | 0.244465 | 0         |  |
|        |      | Shiraz-22T | 1549 | 0        | -0.319623 |  |
|        |      | Shiraz-22T | 1551 | 0.324011 | 0         |  |
|        |      | Shiraz-25T | 1698 | 0.21835  | 0         |  |
|        |      | Shiraz-28T | 1735 | 0.350744 | 0         |  |
|        |      | Shiraz-29T | 1778 | 0.120767 | 0         |  |
|        |      | Shiraz-32T | 1833 | 0.551336 | 0         |  |
|        |      | Shiraz-32T | 1834 | 1.485392 | 0         |  |
|        |      | Shiraz-38T | 1951 | 0.250891 | 0         |  |
|        |      | Shiraz-53T | 2078 | 0.287202 | 0         |  |
|        |      | Shiraz-58T | 2160 | 0.399007 | 0         |  |
|        |      | Shiraz-71T | 2238 | 0.603631 | 0         |  |
| ZBTB33 | chrX | Shiraz-3T  | 242  | 0        | -0.336434 |  |
|        |      | Shiraz-3T  | 244  | 0        | -0.023749 |  |
|        |      | Shiraz-4T  | 261  | 0        | -0.336249 |  |
|        |      | Shiraz-16T | 295  | 0.591657 | 0         |  |
|        |      | Shiraz-36T | 433  | 0        | -0.803961 |  |
|        |      | Shiraz-44T | 899  | 0        | -1.09697  |  |
|        |      | Shiraz-44T | 904  | 0        | -0.625526 |  |
|        |      | Shiraz-49T | 1170 | 0        | -0.967436 |  |
|        |      | Shiraz-9T  | 1370 | 0.690073 | 0         |  |
|        |      | Shiraz-18T | 1457 | 0.643204 | 0         |  |
|        |      | Shiraz-22T | 1673 | 0.611783 | 0         |  |
|        |      | Shiraz-25T | 1719 | 0.472955 | 0         |  |

|         |      |            |      |          |           |  |
|---------|------|------------|------|----------|-----------|--|
|         |      | Shiraz-28T | 1762 | 0.562311 | 0         |  |
|         |      | Shiraz-29T | 1801 | 0.815343 | 0         |  |
|         |      | Shiraz-32T | 1870 | 0.729766 | 0         |  |
|         |      | Shiraz-35T | 1933 | 0.488535 | 0         |  |
|         |      | Shiraz-58T | 2223 | 0.833364 | 0         |  |
|         |      | Shiraz-71T | 2263 | 0.975531 | 0         |  |
|         |      | Shiraz-3T  | 242  | 0        | -0.336434 |  |
|         |      | Shiraz-3T  | 244  | 0        | -0.023749 |  |
|         |      | Shiraz-4T  | 261  | 0        | -0.336249 |  |
|         |      | Shiraz-16T | 295  | 0.591657 | 0         |  |
|         |      | Shiraz-36T | 433  | 0        | -0.803961 |  |
|         |      | Shiraz-44T | 899  | 0        | -1.09697  |  |
|         |      | Shiraz-44T | 904  | 0        | -0.625526 |  |
|         |      | Shiraz-49T | 1170 | 0        | -0.967436 |  |
|         |      | Shiraz-9T  | 1370 | 0.690073 | 0         |  |
|         |      | Shiraz-18T | 1457 | 0.643204 | 0         |  |
|         |      | Shiraz-22T | 1673 | 0.611783 | 0         |  |
|         |      | Shiraz-25T | 1719 | 0.472955 | 0         |  |
|         |      | Shiraz-28T | 1762 | 0.562311 | 0         |  |
|         |      | Shiraz-29T | 1801 | 0.815343 | 0         |  |
|         |      | Shiraz-32T | 1870 | 0.729766 | 0         |  |
|         |      | Shiraz-35T | 1933 | 0.488535 | 0         |  |
|         |      | Shiraz-58T | 2223 | 0.833364 | 0         |  |
|         |      | Shiraz-71T | 2263 | 0.975531 | 0         |  |
|         |      | Shiraz-3T  | 242  | 0        | -0.336434 |  |
|         |      | Shiraz-3T  | 244  | 0        | -0.023749 |  |
|         |      | Shiraz-4T  | 261  | 0        | -0.336249 |  |
|         |      | Shiraz-16T | 295  | 0.591657 | 0         |  |
|         |      | Shiraz-36T | 433  | 0        | -0.803961 |  |
|         |      | Shiraz-44T | 899  | 0        | -1.09697  |  |
|         |      | Shiraz-44T | 904  | 0        | -0.625526 |  |
|         |      | Shiraz-49T | 1170 | 0        | -0.967436 |  |
|         |      | Shiraz-9T  | 1370 | 0.690073 | 0         |  |
|         |      | Shiraz-18T | 1457 | 0.643204 | 0         |  |
|         |      | Shiraz-22T | 1673 | 0.611783 | 0         |  |
|         |      | Shiraz-25T | 1719 | 0.472955 | 0         |  |
|         |      | Shiraz-28T | 1762 | 0.562311 | 0         |  |
|         |      | Shiraz-29T | 1801 | 0.815343 | 0         |  |
|         |      | Shiraz-32T | 1870 | 0.729766 | 0         |  |
|         |      | Shiraz-35T | 1933 | 0.488535 | 0         |  |
|         |      | Shiraz-58T | 2223 | 0.833364 | 0         |  |
|         |      | Shiraz-71T | 2263 | 0.975531 | 0         |  |
| ZC3H12B | chrX | Shiraz-3T  | 241  | 0        | -0.230501 |  |
|         |      | Shiraz-4T  | 261  | 0        | -0.336249 |  |
|         |      | Shiraz-16T | 295  | 0.591657 | 0         |  |
|         |      | Shiraz-36T | 433  | 0        | -0.803961 |  |
|         |      | Shiraz-44T | 899  | 0        | -1.09697  |  |

|         |      |            |      |          |           |  |  |
|---------|------|------------|------|----------|-----------|--|--|
|         |      | Shiraz-49T | 1170 | 0        | -0.967436 |  |  |
|         |      | Shiraz-18T | 1457 | 0.643204 | 0         |  |  |
|         |      | Shiraz-22T | 1673 | 0.611783 | 0         |  |  |
|         |      | Shiraz-25T | 1719 | 0.472955 | 0         |  |  |
|         |      | Shiraz-28T | 1762 | 0.562311 | 0         |  |  |
|         |      | Shiraz-29T | 1801 | 0.815343 | 0         |  |  |
|         |      | Shiraz-32T | 1870 | 0.729766 | 0         |  |  |
|         |      | Shiraz-35T | 1933 | 0.488535 | 0         |  |  |
|         |      | Shiraz-58T | 2223 | 0.833364 | 0         |  |  |
|         |      | Shiraz-71T | 2263 | 0.975531 | 0         |  |  |
|         |      | Shiraz-3T  | 241  | 0        | -0.230501 |  |  |
|         |      | Shiraz-4T  | 261  | 0        | -0.336249 |  |  |
|         |      | Shiraz-16T | 295  | 0.591657 | 0         |  |  |
|         |      | Shiraz-36T | 433  | 0        | -0.803961 |  |  |
|         |      | Shiraz-44T | 899  | 0        | -1.09697  |  |  |
|         |      | Shiraz-49T | 1170 | 0        | -0.967436 |  |  |
|         |      | Shiraz-18T | 1457 | 0.643204 | 0         |  |  |
|         |      | Shiraz-22T | 1673 | 0.611783 | 0         |  |  |
|         |      | Shiraz-25T | 1719 | 0.472955 | 0         |  |  |
|         |      | Shiraz-28T | 1762 | 0.562311 | 0         |  |  |
|         |      | Shiraz-29T | 1801 | 0.815343 | 0         |  |  |
|         |      | Shiraz-32T | 1870 | 0.729766 | 0         |  |  |
|         |      | Shiraz-35T | 1933 | 0.488535 | 0         |  |  |
|         |      | Shiraz-58T | 2223 | 0.833364 | 0         |  |  |
|         |      | Shiraz-71T | 2263 | 0.975531 | 0         |  |  |
|         |      | Shiraz-3T  | 241  | 0        | -0.230501 |  |  |
|         |      | Shiraz-4T  | 261  | 0        | -0.336249 |  |  |
|         |      | Shiraz-16T | 295  | 0.591657 | 0         |  |  |
|         |      | Shiraz-36T | 433  | 0        | -0.803961 |  |  |
|         |      | Shiraz-44T | 899  | 0        | -1.09697  |  |  |
|         |      | Shiraz-49T | 1170 | 0        | -0.967436 |  |  |
|         |      | Shiraz-18T | 1457 | 0.643204 | 0         |  |  |
|         |      | Shiraz-22T | 1673 | 0.611783 | 0         |  |  |
|         |      | Shiraz-25T | 1719 | 0.472955 | 0         |  |  |
|         |      | Shiraz-28T | 1762 | 0.562311 | 0         |  |  |
|         |      | Shiraz-29T | 1801 | 0.815343 | 0         |  |  |
|         |      | Shiraz-32T | 1870 | 0.729766 | 0         |  |  |
|         |      | Shiraz-35T | 1933 | 0.488535 | 0         |  |  |
|         |      | Shiraz-58T | 2223 | 0.833364 | 0         |  |  |
|         |      | Shiraz-71T | 2263 | 0.975531 | 0         |  |  |
| ZC3HAV1 | chr7 | Shiraz-3T  | 90   | 0.219276 | 0         |  |  |
|         |      | Shiraz-3T  | 90   | 0.219276 | 0         |  |  |
|         |      | Shiraz-3T  | 97   | 0.496001 | 0         |  |  |
|         |      | Shiraz-3T  | 97   | 0.496001 | 0         |  |  |
|         |      | Shiraz-4T  | 253  | 0.372918 | 0         |  |  |
|         |      | Shiraz-4T  | 253  | 0.372918 | 0         |  |  |
|         |      | Shiraz-31T | 318  | 0.254373 | 0         |  |  |

|  |  |            |      |          |           |  |  |
|--|--|------------|------|----------|-----------|--|--|
|  |  | Shiraz-31T | 318  | 0.254373 | 0         |  |  |
|  |  | Shiraz-36T | 378  | 0.179558 | 0         |  |  |
|  |  | Shiraz-36T | 378  | 0.179558 | 0         |  |  |
|  |  | Shiraz-36T | 383  | 0.374586 | 0         |  |  |
|  |  | Shiraz-36T | 383  | 0.374586 | 0         |  |  |
|  |  | Shiraz-44T | 644  | 0.496536 | 0         |  |  |
|  |  | Shiraz-44T | 644  | 0.496536 | 0         |  |  |
|  |  | Shiraz-46T | 943  | 0.093799 | 0         |  |  |
|  |  | Shiraz-46T | 943  | 0.093799 | 0         |  |  |
|  |  | Shiraz-47T | 1033 | 0.220267 | 0         |  |  |
|  |  | Shiraz-47T | 1033 | 0.220267 | 0         |  |  |
|  |  | Shiraz-77T | 1225 | 0        | -0.117922 |  |  |
|  |  | Shiraz-77T | 1225 | 0        | -0.117922 |  |  |
|  |  | Shiraz-77T | 1230 | 0.149651 | 0         |  |  |
|  |  | Shiraz-77T | 1230 | 0.149651 | 0         |  |  |
|  |  | Shiraz-9T  | 1325 | 0.221899 | 0         |  |  |
|  |  | Shiraz-9T  | 1325 | 0.221899 | 0         |  |  |
|  |  | Shiraz-18T | 1434 | 0.244465 | 0         |  |  |
|  |  | Shiraz-18T | 1434 | 0.244465 | 0         |  |  |
|  |  | Shiraz-25T | 1698 | 0.21835  | 0         |  |  |
|  |  | Shiraz-25T | 1698 | 0.21835  | 0         |  |  |
|  |  | Shiraz-28T | 1735 | 0.350744 | 0         |  |  |
|  |  | Shiraz-28T | 1735 | 0.350744 | 0         |  |  |
|  |  | Shiraz-29T | 1778 | 0.120767 | 0         |  |  |
|  |  | Shiraz-29T | 1778 | 0.120767 | 0         |  |  |
|  |  | Shiraz-32T | 1833 | 0.551336 | 0         |  |  |
|  |  | Shiraz-32T | 1833 | 0.551336 | 0         |  |  |
|  |  | Shiraz-38T | 1951 | 0.250891 | 0         |  |  |
|  |  | Shiraz-38T | 1951 | 0.250891 | 0         |  |  |
|  |  | Shiraz-53T | 2078 | 0.287202 | 0         |  |  |
|  |  | Shiraz-53T | 2078 | 0.287202 | 0         |  |  |
|  |  | Shiraz-58T | 2162 | 0.221505 | 0         |  |  |
|  |  | Shiraz-58T | 2162 | 0.221505 | 0         |  |  |
|  |  | Shiraz-71T | 2238 | 0.603631 | 0         |  |  |
|  |  | Shiraz-71T | 2238 | 0.603631 | 0         |  |  |
|  |  | Shiraz-3T  | 90   | 0.219276 | 0         |  |  |
|  |  | Shiraz-3T  | 90   | 0.219276 | 0         |  |  |
|  |  | Shiraz-3T  | 97   | 0.496001 | 0         |  |  |
|  |  | Shiraz-3T  | 97   | 0.496001 | 0         |  |  |
|  |  | Shiraz-4T  | 253  | 0.372918 | 0         |  |  |
|  |  | Shiraz-4T  | 253  | 0.372918 | 0         |  |  |
|  |  | Shiraz-31T | 318  | 0.254373 | 0         |  |  |
|  |  | Shiraz-31T | 318  | 0.254373 | 0         |  |  |
|  |  | Shiraz-36T | 378  | 0.179558 | 0         |  |  |
|  |  | Shiraz-36T | 378  | 0.179558 | 0         |  |  |
|  |  | Shiraz-36T | 383  | 0.374586 | 0         |  |  |
|  |  | Shiraz-36T | 383  | 0.374586 | 0         |  |  |

|  |            |      |          |           |  |
|--|------------|------|----------|-----------|--|
|  | Shiraz-44T | 644  | 0.496536 | 0         |  |
|  | Shiraz-44T | 644  | 0.496536 | 0         |  |
|  | Shiraz-46T | 943  | 0.093799 | 0         |  |
|  | Shiraz-46T | 943  | 0.093799 | 0         |  |
|  | Shiraz-47T | 1033 | 0.220267 | 0         |  |
|  | Shiraz-47T | 1033 | 0.220267 | 0         |  |
|  | Shiraz-77T | 1225 | 0        | -0.117922 |  |
|  | Shiraz-77T | 1225 | 0        | -0.117922 |  |
|  | Shiraz-77T | 1230 | 0.149651 | 0         |  |
|  | Shiraz-77T | 1230 | 0.149651 | 0         |  |
|  | Shiraz-9T  | 1325 | 0.221899 | 0         |  |
|  | Shiraz-9T  | 1325 | 0.221899 | 0         |  |
|  | Shiraz-18T | 1434 | 0.244465 | 0         |  |
|  | Shiraz-18T | 1434 | 0.244465 | 0         |  |
|  | Shiraz-25T | 1698 | 0.21835  | 0         |  |
|  | Shiraz-25T | 1698 | 0.21835  | 0         |  |
|  | Shiraz-28T | 1735 | 0.350744 | 0         |  |
|  | Shiraz-28T | 1735 | 0.350744 | 0         |  |
|  | Shiraz-29T | 1778 | 0.120767 | 0         |  |
|  | Shiraz-29T | 1778 | 0.120767 | 0         |  |
|  | Shiraz-32T | 1833 | 0.551336 | 0         |  |
|  | Shiraz-32T | 1833 | 0.551336 | 0         |  |
|  | Shiraz-38T | 1951 | 0.250891 | 0         |  |
|  | Shiraz-38T | 1951 | 0.250891 | 0         |  |
|  | Shiraz-53T | 2078 | 0.287202 | 0         |  |
|  | Shiraz-53T | 2078 | 0.287202 | 0         |  |
|  | Shiraz-58T | 2162 | 0.221505 | 0         |  |
|  | Shiraz-58T | 2162 | 0.221505 | 0         |  |
|  | Shiraz-71T | 2238 | 0.603631 | 0         |  |
|  | Shiraz-71T | 2238 | 0.603631 | 0         |  |
|  | Shiraz-3T  | 90   | 0.219276 | 0         |  |
|  | Shiraz-3T  | 90   | 0.219276 | 0         |  |
|  | Shiraz-3T  | 97   | 0.496001 | 0         |  |
|  | Shiraz-3T  | 97   | 0.496001 | 0         |  |
|  | Shiraz-4T  | 253  | 0.372918 | 0         |  |
|  | Shiraz-4T  | 253  | 0.372918 | 0         |  |
|  | Shiraz-31T | 318  | 0.254373 | 0         |  |
|  | Shiraz-31T | 318  | 0.254373 | 0         |  |
|  | Shiraz-36T | 378  | 0.179558 | 0         |  |
|  | Shiraz-36T | 378  | 0.179558 | 0         |  |
|  | Shiraz-36T | 383  | 0.374586 | 0         |  |
|  | Shiraz-36T | 383  | 0.374586 | 0         |  |
|  | Shiraz-44T | 644  | 0.496536 | 0         |  |
|  | Shiraz-44T | 644  | 0.496536 | 0         |  |
|  | Shiraz-46T | 943  | 0.093799 | 0         |  |
|  | Shiraz-46T | 943  | 0.093799 | 0         |  |
|  | Shiraz-47T | 1033 | 0.220267 | 0         |  |



|          |      |            |      |          |           |  |  |
|----------|------|------------|------|----------|-----------|--|--|
|          |      | Shiraz-47T | 1033 | 0.220267 | 0         |  |  |
|          |      | Shiraz-77T | 1225 | 0        | -0.117922 |  |  |
|          |      | Shiraz-77T | 1225 | 0        | -0.117922 |  |  |
|          |      | Shiraz-77T | 1230 | 0.149651 | 0         |  |  |
|          |      | Shiraz-77T | 1230 | 0.149651 | 0         |  |  |
|          |      | Shiraz-9T  | 1325 | 0.221899 | 0         |  |  |
|          |      | Shiraz-9T  | 1325 | 0.221899 | 0         |  |  |
|          |      | Shiraz-18T | 1434 | 0.244465 | 0         |  |  |
|          |      | Shiraz-18T | 1434 | 0.244465 | 0         |  |  |
|          |      | Shiraz-25T | 1698 | 0.21835  | 0         |  |  |
|          |      | Shiraz-25T | 1698 | 0.21835  | 0         |  |  |
|          |      | Shiraz-28T | 1735 | 0.350744 | 0         |  |  |
|          |      | Shiraz-28T | 1735 | 0.350744 | 0         |  |  |
|          |      | Shiraz-29T | 1778 | 0.120767 | 0         |  |  |
|          |      | Shiraz-29T | 1778 | 0.120767 | 0         |  |  |
|          |      | Shiraz-32T | 1833 | 0.551336 | 0         |  |  |
|          |      | Shiraz-32T | 1833 | 0.551336 | 0         |  |  |
|          |      | Shiraz-38T | 1951 | 0.250891 | 0         |  |  |
|          |      | Shiraz-38T | 1951 | 0.250891 | 0         |  |  |
|          |      | Shiraz-53T | 2078 | 0.287202 | 0         |  |  |
|          |      | Shiraz-53T | 2078 | 0.287202 | 0         |  |  |
|          |      | Shiraz-58T | 2162 | 0.221505 | 0         |  |  |
|          |      | Shiraz-58T | 2162 | 0.221505 | 0         |  |  |
|          |      | Shiraz-71T | 2238 | 0.603631 | 0         |  |  |
|          |      | Shiraz-71T | 2238 | 0.603631 | 0         |  |  |
| ZC3HAV1L | chr7 | Shiraz-3T  | 90   | 0.219276 | 0         |  |  |
|          |      | Shiraz-3T  | 97   | 0.496001 | 0         |  |  |
|          |      | Shiraz-4T  | 253  | 0.372918 | 0         |  |  |
|          |      | Shiraz-31T | 318  | 0.254373 | 0         |  |  |
|          |      | Shiraz-36T | 378  | 0.179558 | 0         |  |  |
|          |      | Shiraz-36T | 383  | 0.374586 | 0         |  |  |
|          |      | Shiraz-44T | 644  | 0.496536 | 0         |  |  |
|          |      | Shiraz-46T | 943  | 0.093799 | 0         |  |  |
|          |      | Shiraz-47T | 1033 | 0.220267 | 0         |  |  |
|          |      | Shiraz-77T | 1225 | 0        | -0.117922 |  |  |
|          |      | Shiraz-77T | 1230 | 0.149651 | 0         |  |  |
|          |      | Shiraz-9T  | 1325 | 0.221899 | 0         |  |  |
|          |      | Shiraz-18T | 1434 | 0.244465 | 0         |  |  |
|          |      | Shiraz-25T | 1698 | 0.21835  | 0         |  |  |
|          |      | Shiraz-28T | 1735 | 0.350744 | 0         |  |  |
|          |      | Shiraz-29T | 1778 | 0.120767 | 0         |  |  |
|          |      | Shiraz-32T | 1833 | 0.551336 | 0         |  |  |
|          |      | Shiraz-38T | 1951 | 0.250891 | 0         |  |  |
|          |      | Shiraz-53T | 2078 | 0.287202 | 0         |  |  |
|          |      | Shiraz-58T | 2162 | 0.221505 | 0         |  |  |
|          |      | Shiraz-71T | 2238 | 0.603631 | 0         |  |  |
|          |      | Shiraz-3T  | 90   | 0.219276 | 0         |  |  |

|        |      |            |      |          |           |  |
|--------|------|------------|------|----------|-----------|--|
|        |      | Shiraz-3T  | 97   | 0.496001 | 0         |  |
|        |      | Shiraz-4T  | 253  | 0.372918 | 0         |  |
|        |      | Shiraz-31T | 318  | 0.254373 | 0         |  |
|        |      | Shiraz-36T | 378  | 0.179558 | 0         |  |
|        |      | Shiraz-36T | 383  | 0.374586 | 0         |  |
|        |      | Shiraz-44T | 644  | 0.496536 | 0         |  |
|        |      | Shiraz-46T | 943  | 0.093799 | 0         |  |
|        |      | Shiraz-47T | 1033 | 0.220267 | 0         |  |
|        |      | Shiraz-77T | 1225 | 0        | -0.117922 |  |
|        |      | Shiraz-77T | 1230 | 0.149651 | 0         |  |
|        |      | Shiraz-9T  | 1325 | 0.221899 | 0         |  |
|        |      | Shiraz-18T | 1434 | 0.244465 | 0         |  |
|        |      | Shiraz-25T | 1698 | 0.21835  | 0         |  |
|        |      | Shiraz-28T | 1735 | 0.350744 | 0         |  |
|        |      | Shiraz-29T | 1778 | 0.120767 | 0         |  |
|        |      | Shiraz-32T | 1833 | 0.551336 | 0         |  |
|        |      | Shiraz-38T | 1951 | 0.250891 | 0         |  |
|        |      | Shiraz-53T | 2078 | 0.287202 | 0         |  |
|        |      | Shiraz-58T | 2162 | 0.221505 | 0         |  |
|        |      | Shiraz-71T | 2238 | 0.603631 | 0         |  |
|        |      | Shiraz-3T  | 90   | 0.219276 | 0         |  |
|        |      | Shiraz-3T  | 97   | 0.496001 | 0         |  |
|        |      | Shiraz-4T  | 253  | 0.372918 | 0         |  |
|        |      | Shiraz-31T | 318  | 0.254373 | 0         |  |
|        |      | Shiraz-36T | 378  | 0.179558 | 0         |  |
|        |      | Shiraz-36T | 383  | 0.374586 | 0         |  |
|        |      | Shiraz-44T | 644  | 0.496536 | 0         |  |
|        |      | Shiraz-46T | 943  | 0.093799 | 0         |  |
|        |      | Shiraz-47T | 1033 | 0.220267 | 0         |  |
|        |      | Shiraz-77T | 1225 | 0        | -0.117922 |  |
|        |      | Shiraz-77T | 1230 | 0.149651 | 0         |  |
|        |      | Shiraz-9T  | 1325 | 0.221899 | 0         |  |
|        |      | Shiraz-18T | 1434 | 0.244465 | 0         |  |
|        |      | Shiraz-25T | 1698 | 0.21835  | 0         |  |
|        |      | Shiraz-28T | 1735 | 0.350744 | 0         |  |
|        |      | Shiraz-29T | 1778 | 0.120767 | 0         |  |
|        |      | Shiraz-32T | 1833 | 0.551336 | 0         |  |
|        |      | Shiraz-38T | 1951 | 0.250891 | 0         |  |
|        |      | Shiraz-53T | 2078 | 0.287202 | 0         |  |
|        |      | Shiraz-58T | 2162 | 0.221505 | 0         |  |
|        |      | Shiraz-71T | 2238 | 0.603631 | 0         |  |
| ZC3HC1 | chr7 | Shiraz-3T  | 90   | 0.219276 | 0         |  |
|        |      | Shiraz-3T  | 96   | 0.428308 | 0         |  |
|        |      | Shiraz-4T  | 253  | 0.372918 | 0         |  |
|        |      | Shiraz-31T | 317  | 0.204382 | 0         |  |
|        |      | Shiraz-36T | 378  | 0.179558 | 0         |  |
|        |      | Shiraz-44T | 642  | 0.408617 | 0         |  |

|  |  |            |      |          |           |  |  |
|--|--|------------|------|----------|-----------|--|--|
|  |  | Shiraz-46T | 943  | 0.093799 | 0         |  |  |
|  |  | Shiraz-47T | 1032 | 0.171484 | 0         |  |  |
|  |  | Shiraz-77T | 1225 | 0        | -0.117922 |  |  |
|  |  | Shiraz-77T | 1229 | 0.051661 | 0         |  |  |
|  |  | Shiraz-9T  | 1325 | 0.221899 | 0         |  |  |
|  |  | Shiraz-18T | 1434 | 0.244465 | 0         |  |  |
|  |  | Shiraz-25T | 1698 | 0.21835  | 0         |  |  |
|  |  | Shiraz-28T | 1735 | 0.350744 | 0         |  |  |
|  |  | Shiraz-29T | 1778 | 0.120767 | 0         |  |  |
|  |  | Shiraz-32T | 1833 | 0.551336 | 0         |  |  |
|  |  | Shiraz-38T | 1951 | 0.250891 | 0         |  |  |
|  |  | Shiraz-53T | 2078 | 0.287202 | 0         |  |  |
|  |  | Shiraz-71T | 2238 | 0.603631 | 0         |  |  |
|  |  | Shiraz-3T  | 90   | 0.219276 | 0         |  |  |
|  |  | Shiraz-3T  | 96   | 0.428308 | 0         |  |  |
|  |  | Shiraz-4T  | 253  | 0.372918 | 0         |  |  |
|  |  | Shiraz-31T | 317  | 0.204382 | 0         |  |  |
|  |  | Shiraz-36T | 378  | 0.179558 | 0         |  |  |
|  |  | Shiraz-44T | 642  | 0.408617 | 0         |  |  |
|  |  | Shiraz-46T | 943  | 0.093799 | 0         |  |  |
|  |  | Shiraz-47T | 1032 | 0.171484 | 0         |  |  |
|  |  | Shiraz-77T | 1225 | 0        | -0.117922 |  |  |
|  |  | Shiraz-77T | 1229 | 0.051661 | 0         |  |  |
|  |  | Shiraz-9T  | 1325 | 0.221899 | 0         |  |  |
|  |  | Shiraz-18T | 1434 | 0.244465 | 0         |  |  |
|  |  | Shiraz-25T | 1698 | 0.21835  | 0         |  |  |
|  |  | Shiraz-28T | 1735 | 0.350744 | 0         |  |  |
|  |  | Shiraz-29T | 1778 | 0.120767 | 0         |  |  |
|  |  | Shiraz-32T | 1833 | 0.551336 | 0         |  |  |
|  |  | Shiraz-38T | 1951 | 0.250891 | 0         |  |  |
|  |  | Shiraz-53T | 2078 | 0.287202 | 0         |  |  |
|  |  | Shiraz-71T | 2238 | 0.603631 | 0         |  |  |
|  |  | Shiraz-3T  | 90   | 0.219276 | 0         |  |  |
|  |  | Shiraz-3T  | 96   | 0.428308 | 0         |  |  |
|  |  | Shiraz-4T  | 253  | 0.372918 | 0         |  |  |
|  |  | Shiraz-31T | 317  | 0.204382 | 0         |  |  |
|  |  | Shiraz-36T | 378  | 0.179558 | 0         |  |  |
|  |  | Shiraz-44T | 642  | 0.408617 | 0         |  |  |
|  |  | Shiraz-46T | 943  | 0.093799 | 0         |  |  |
|  |  | Shiraz-47T | 1032 | 0.171484 | 0         |  |  |
|  |  | Shiraz-77T | 1225 | 0        | -0.117922 |  |  |
|  |  | Shiraz-77T | 1229 | 0.051661 | 0         |  |  |
|  |  | Shiraz-9T  | 1325 | 0.221899 | 0         |  |  |
|  |  | Shiraz-18T | 1434 | 0.244465 | 0         |  |  |
|  |  | Shiraz-25T | 1698 | 0.21835  | 0         |  |  |
|  |  | Shiraz-28T | 1735 | 0.350744 | 0         |  |  |
|  |  | Shiraz-29T | 1778 | 0.120767 | 0         |  |  |

|       |      |            |      |          |           |  |
|-------|------|------------|------|----------|-----------|--|
|       |      | Shiraz-32T | 1833 | 0.551336 | 0         |  |
|       |      | Shiraz-38T | 1951 | 0.250891 | 0         |  |
|       |      | Shiraz-53T | 2078 | 0.287202 | 0         |  |
|       |      | Shiraz-71T | 2238 | 0.603631 | 0         |  |
| ZC4H2 | chrX | Shiraz-3T  | 241  | 0        | -0.230501 |  |
|       |      | Shiraz-4T  | 261  | 0        | -0.336249 |  |
|       |      | Shiraz-16T | 295  | 0.591657 | 0         |  |
|       |      | Shiraz-36T | 433  | 0        | -0.803961 |  |
|       |      | Shiraz-44T | 899  | 0        | -1.09697  |  |
|       |      | Shiraz-49T | 1170 | 0        | -0.967436 |  |
|       |      | Shiraz-18T | 1457 | 0.643204 | 0         |  |
|       |      | Shiraz-22T | 1673 | 0.611783 | 0         |  |
|       |      | Shiraz-25T | 1719 | 0.472955 | 0         |  |
|       |      | Shiraz-28T | 1762 | 0.562311 | 0         |  |
|       |      | Shiraz-29T | 1801 | 0.815343 | 0         |  |
|       |      | Shiraz-32T | 1870 | 0.729766 | 0         |  |
|       |      | Shiraz-35T | 1933 | 0.488535 | 0         |  |
|       |      | Shiraz-58T | 2223 | 0.833364 | 0         |  |
|       |      | Shiraz-71T | 2263 | 0.975531 | 0         |  |
|       |      | Shiraz-3T  | 241  | 0        | -0.230501 |  |
|       |      | Shiraz-4T  | 261  | 0        | -0.336249 |  |
|       |      | Shiraz-16T | 295  | 0.591657 | 0         |  |
|       |      | Shiraz-36T | 433  | 0        | -0.803961 |  |
|       |      | Shiraz-44T | 899  | 0        | -1.09697  |  |
|       |      | Shiraz-49T | 1170 | 0        | -0.967436 |  |
|       |      | Shiraz-18T | 1457 | 0.643204 | 0         |  |
|       |      | Shiraz-22T | 1673 | 0.611783 | 0         |  |
|       |      | Shiraz-25T | 1719 | 0.472955 | 0         |  |
|       |      | Shiraz-28T | 1762 | 0.562311 | 0         |  |
|       |      | Shiraz-29T | 1801 | 0.815343 | 0         |  |
|       |      | Shiraz-32T | 1870 | 0.729766 | 0         |  |
|       |      | Shiraz-35T | 1933 | 0.488535 | 0         |  |
|       |      | Shiraz-58T | 2223 | 0.833364 | 0         |  |
|       |      | Shiraz-71T | 2263 | 0.975531 | 0         |  |
|       |      | Shiraz-3T  | 241  | 0        | -0.230501 |  |
|       |      | Shiraz-4T  | 261  | 0        | -0.336249 |  |
|       |      | Shiraz-16T | 295  | 0.591657 | 0         |  |
|       |      | Shiraz-36T | 433  | 0        | -0.803961 |  |
|       |      | Shiraz-44T | 899  | 0        | -1.09697  |  |
|       |      | Shiraz-49T | 1170 | 0        | -0.967436 |  |
|       |      | Shiraz-18T | 1457 | 0.643204 | 0         |  |
|       |      | Shiraz-22T | 1673 | 0.611783 | 0         |  |
|       |      | Shiraz-25T | 1719 | 0.472955 | 0         |  |
|       |      | Shiraz-28T | 1762 | 0.562311 | 0         |  |
|       |      | Shiraz-29T | 1801 | 0.815343 | 0         |  |
|       |      | Shiraz-32T | 1870 | 0.729766 | 0         |  |
|       |      | Shiraz-35T | 1933 | 0.488535 | 0         |  |

|         |      |            |      |          |           |  |
|---------|------|------------|------|----------|-----------|--|
|         |      | Shiraz-58T | 2223 | 0.833364 | 0         |  |
|         |      | Shiraz-71T | 2263 | 0.975531 | 0         |  |
| ZCCHC12 | chrX | Shiraz-3T  | 242  | 0        | -0.336434 |  |
|         |      | Shiraz-3T  | 244  | 0        | -0.023749 |  |
|         |      | Shiraz-4T  | 261  | 0        | -0.336249 |  |
|         |      | Shiraz-16T | 295  | 0.591657 | 0         |  |
|         |      | Shiraz-36T | 433  | 0        | -0.803961 |  |
|         |      | Shiraz-44T | 899  | 0        | -1.09697  |  |
|         |      | Shiraz-44T | 904  | 0        | -0.625526 |  |
|         |      | Shiraz-49T | 1170 | 0        | -0.967436 |  |
|         |      | Shiraz-18T | 1457 | 0.643204 | 0         |  |
|         |      | Shiraz-22T | 1673 | 0.611783 | 0         |  |
|         |      | Shiraz-25T | 1719 | 0.472955 | 0         |  |
|         |      | Shiraz-28T | 1762 | 0.562311 | 0         |  |
|         |      | Shiraz-29T | 1801 | 0.815343 | 0         |  |
|         |      | Shiraz-32T | 1870 | 0.729766 | 0         |  |
|         |      | Shiraz-35T | 1933 | 0.488535 | 0         |  |
|         |      | Shiraz-58T | 2223 | 0.833364 | 0         |  |
|         |      | Shiraz-71T | 2263 | 0.975531 | 0         |  |
|         |      | Shiraz-3T  | 242  | 0        | -0.336434 |  |
|         |      | Shiraz-3T  | 244  | 0        | -0.023749 |  |
|         |      | Shiraz-4T  | 261  | 0        | -0.336249 |  |
|         |      | Shiraz-16T | 295  | 0.591657 | 0         |  |
|         |      | Shiraz-36T | 433  | 0        | -0.803961 |  |
|         |      | Shiraz-44T | 899  | 0        | -1.09697  |  |
|         |      | Shiraz-44T | 904  | 0        | -0.625526 |  |
|         |      | Shiraz-49T | 1170 | 0        | -0.967436 |  |
|         |      | Shiraz-18T | 1457 | 0.643204 | 0         |  |
|         |      | Shiraz-22T | 1673 | 0.611783 | 0         |  |
|         |      | Shiraz-25T | 1719 | 0.472955 | 0         |  |
|         |      | Shiraz-28T | 1762 | 0.562311 | 0         |  |
|         |      | Shiraz-29T | 1801 | 0.815343 | 0         |  |
|         |      | Shiraz-32T | 1870 | 0.729766 | 0         |  |
|         |      | Shiraz-35T | 1933 | 0.488535 | 0         |  |
|         |      | Shiraz-58T | 2223 | 0.833364 | 0         |  |
|         |      | Shiraz-71T | 2263 | 0.975531 | 0         |  |
|         |      | Shiraz-3T  | 242  | 0        | -0.336434 |  |
|         |      | Shiraz-3T  | 244  | 0        | -0.023749 |  |
|         |      | Shiraz-4T  | 261  | 0        | -0.336249 |  |
|         |      | Shiraz-16T | 295  | 0.591657 | 0         |  |
|         |      | Shiraz-36T | 433  | 0        | -0.803961 |  |
|         |      | Shiraz-44T | 899  | 0        | -1.09697  |  |
|         |      | Shiraz-44T | 904  | 0        | -0.625526 |  |
|         |      | Shiraz-49T | 1170 | 0        | -0.967436 |  |
|         |      | Shiraz-18T | 1457 | 0.643204 | 0         |  |
|         |      | Shiraz-22T | 1673 | 0.611783 | 0         |  |
|         |      | Shiraz-25T | 1719 | 0.472955 | 0         |  |

|         |      |            |      |          |           |  |
|---------|------|------------|------|----------|-----------|--|
|         |      | Shiraz-28T | 1762 | 0.562311 | 0         |  |
|         |      | Shiraz-29T | 1801 | 0.815343 | 0         |  |
|         |      | Shiraz-32T | 1870 | 0.729766 | 0         |  |
|         |      | Shiraz-35T | 1933 | 0.488535 | 0         |  |
|         |      | Shiraz-58T | 2223 | 0.833364 | 0         |  |
|         |      | Shiraz-71T | 2263 | 0.975531 | 0         |  |
| ZCCHC13 | chrX | Shiraz-3T  | 242  | 0        | -0.336434 |  |
|         |      | Shiraz-4T  | 261  | 0        | -0.336249 |  |
|         |      | Shiraz-16T | 295  | 0.591657 | 0         |  |
|         |      | Shiraz-36T | 433  | 0        | -0.803961 |  |
|         |      | Shiraz-44T | 899  | 0        | -1.09697  |  |
|         |      | Shiraz-49T | 1170 | 0        | -0.967436 |  |
|         |      | Shiraz-18T | 1457 | 0.643204 | 0         |  |
|         |      | Shiraz-22T | 1673 | 0.611783 | 0         |  |
|         |      | Shiraz-25T | 1719 | 0.472955 | 0         |  |
|         |      | Shiraz-28T | 1762 | 0.562311 | 0         |  |
|         |      | Shiraz-29T | 1801 | 0.815343 | 0         |  |
|         |      | Shiraz-32T | 1870 | 0.729766 | 0         |  |
|         |      | Shiraz-35T | 1933 | 0.488535 | 0         |  |
|         |      | Shiraz-58T | 2223 | 0.833364 | 0         |  |
|         |      | Shiraz-71T | 2263 | 0.975531 | 0         |  |
|         |      | Shiraz-3T  | 242  | 0        | -0.336434 |  |
|         |      | Shiraz-4T  | 261  | 0        | -0.336249 |  |
|         |      | Shiraz-16T | 295  | 0.591657 | 0         |  |
|         |      | Shiraz-36T | 433  | 0        | -0.803961 |  |
|         |      | Shiraz-44T | 899  | 0        | -1.09697  |  |
|         |      | Shiraz-49T | 1170 | 0        | -0.967436 |  |
|         |      | Shiraz-18T | 1457 | 0.643204 | 0         |  |
|         |      | Shiraz-22T | 1673 | 0.611783 | 0         |  |
|         |      | Shiraz-25T | 1719 | 0.472955 | 0         |  |
|         |      | Shiraz-28T | 1762 | 0.562311 | 0         |  |
|         |      | Shiraz-29T | 1801 | 0.815343 | 0         |  |
|         |      | Shiraz-32T | 1870 | 0.729766 | 0         |  |
|         |      | Shiraz-35T | 1933 | 0.488535 | 0         |  |
|         |      | Shiraz-58T | 2223 | 0.833364 | 0         |  |
|         |      | Shiraz-71T | 2263 | 0.975531 | 0         |  |
|         |      | Shiraz-3T  | 242  | 0        | -0.336434 |  |
|         |      | Shiraz-4T  | 261  | 0        | -0.336249 |  |
|         |      | Shiraz-16T | 295  | 0.591657 | 0         |  |
|         |      | Shiraz-36T | 433  | 0        | -0.803961 |  |
|         |      | Shiraz-44T | 899  | 0        | -1.09697  |  |
|         |      | Shiraz-49T | 1170 | 0        | -0.967436 |  |
|         |      | Shiraz-18T | 1457 | 0.643204 | 0         |  |
|         |      | Shiraz-22T | 1673 | 0.611783 | 0         |  |
|         |      | Shiraz-25T | 1719 | 0.472955 | 0         |  |
|         |      | Shiraz-28T | 1762 | 0.562311 | 0         |  |
|         |      | Shiraz-29T | 1801 | 0.815343 | 0         |  |

|         |      |            |      |          |           |  |  |
|---------|------|------------|------|----------|-----------|--|--|
|         |      | Shiraz-32T | 1870 | 0.729766 | 0         |  |  |
|         |      | Shiraz-35T | 1933 | 0.488535 | 0         |  |  |
|         |      | Shiraz-58T | 2223 | 0.833364 | 0         |  |  |
|         |      | Shiraz-71T | 2263 | 0.975531 | 0         |  |  |
| ZCCHC16 | chrX | Shiraz-3T  | 242  | 0        | -0.336434 |  |  |
|         |      | Shiraz-4T  | 261  | 0        | -0.336249 |  |  |
|         |      | Shiraz-16T | 295  | 0.591657 | 0         |  |  |
|         |      | Shiraz-36T | 433  | 0        | -0.803961 |  |  |
|         |      | Shiraz-44T | 899  | 0        | -1.09697  |  |  |
|         |      | Shiraz-49T | 1170 | 0        | -0.967436 |  |  |
|         |      | Shiraz-18T | 1457 | 0.643204 | 0         |  |  |
|         |      | Shiraz-22T | 1673 | 0.611783 | 0         |  |  |
|         |      | Shiraz-25T | 1719 | 0.472955 | 0         |  |  |
|         |      | Shiraz-28T | 1762 | 0.562311 | 0         |  |  |
|         |      | Shiraz-29T | 1801 | 0.815343 | 0         |  |  |
|         |      | Shiraz-32T | 1870 | 0.729766 | 0         |  |  |
|         |      | Shiraz-35T | 1933 | 0.488535 | 0         |  |  |
|         |      | Shiraz-58T | 2223 | 0.833364 | 0         |  |  |
|         |      | Shiraz-71T | 2263 | 0.975531 | 0         |  |  |
|         |      | Shiraz-3T  | 242  | 0        | -0.336434 |  |  |
|         |      | Shiraz-4T  | 261  | 0        | -0.336249 |  |  |
|         |      | Shiraz-16T | 295  | 0.591657 | 0         |  |  |
|         |      | Shiraz-36T | 433  | 0        | -0.803961 |  |  |
|         |      | Shiraz-44T | 899  | 0        | -1.09697  |  |  |
|         |      | Shiraz-49T | 1170 | 0        | -0.967436 |  |  |
|         |      | Shiraz-18T | 1457 | 0.643204 | 0         |  |  |
|         |      | Shiraz-22T | 1673 | 0.611783 | 0         |  |  |
|         |      | Shiraz-25T | 1719 | 0.472955 | 0         |  |  |
|         |      | Shiraz-28T | 1762 | 0.562311 | 0         |  |  |
|         |      | Shiraz-29T | 1801 | 0.815343 | 0         |  |  |
|         |      | Shiraz-32T | 1870 | 0.729766 | 0         |  |  |
|         |      | Shiraz-35T | 1933 | 0.488535 | 0         |  |  |
|         |      | Shiraz-58T | 2223 | 0.833364 | 0         |  |  |
|         |      | Shiraz-71T | 2263 | 0.975531 | 0         |  |  |
|         |      | Shiraz-3T  | 242  | 0        | -0.336434 |  |  |
|         |      | Shiraz-4T  | 261  | 0        | -0.336249 |  |  |
|         |      | Shiraz-16T | 295  | 0.591657 | 0         |  |  |
|         |      | Shiraz-36T | 433  | 0        | -0.803961 |  |  |
|         |      | Shiraz-44T | 899  | 0        | -1.09697  |  |  |
|         |      | Shiraz-49T | 1170 | 0        | -0.967436 |  |  |
|         |      | Shiraz-18T | 1457 | 0.643204 | 0         |  |  |
|         |      | Shiraz-22T | 1673 | 0.611783 | 0         |  |  |
|         |      | Shiraz-25T | 1719 | 0.472955 | 0         |  |  |
|         |      | Shiraz-28T | 1762 | 0.562311 | 0         |  |  |
|         |      | Shiraz-29T | 1801 | 0.815343 | 0         |  |  |
|         |      | Shiraz-32T | 1870 | 0.729766 | 0         |  |  |
|         |      | Shiraz-35T | 1933 | 0.488535 | 0         |  |  |

|         |      |            |      |          |           |  |  |
|---------|------|------------|------|----------|-----------|--|--|
|         |      | Shiraz-58T | 2223 | 0.833364 | 0         |  |  |
|         |      | Shiraz-71T | 2263 | 0.975531 | 0         |  |  |
| ZCCHC18 | chrX | Shiraz-3T  | 242  | 0        | -0.336434 |  |  |
|         |      | Shiraz-4T  | 261  | 0        | -0.336249 |  |  |
|         |      | Shiraz-16T | 295  | 0.591657 | 0         |  |  |
|         |      | Shiraz-36T | 433  | 0        | -0.803961 |  |  |
|         |      | Shiraz-44T | 899  | 0        | -1.09697  |  |  |
|         |      | Shiraz-49T | 1170 | 0        | -0.967436 |  |  |
|         |      | Shiraz-18T | 1457 | 0.643204 | 0         |  |  |
|         |      | Shiraz-22T | 1673 | 0.611783 | 0         |  |  |
|         |      | Shiraz-25T | 1719 | 0.472955 | 0         |  |  |
|         |      | Shiraz-28T | 1762 | 0.562311 | 0         |  |  |
|         |      | Shiraz-29T | 1801 | 0.815343 | 0         |  |  |
|         |      | Shiraz-32T | 1870 | 0.729766 | 0         |  |  |
|         |      | Shiraz-35T | 1933 | 0.488535 | 0         |  |  |
|         |      | Shiraz-58T | 2223 | 0.833364 | 0         |  |  |
|         |      | Shiraz-71T | 2263 | 0.975531 | 0         |  |  |
|         |      | Shiraz-3T  | 242  | 0        | -0.336434 |  |  |
|         |      | Shiraz-4T  | 261  | 0        | -0.336249 |  |  |
|         |      | Shiraz-16T | 295  | 0.591657 | 0         |  |  |
|         |      | Shiraz-36T | 433  | 0        | -0.803961 |  |  |
|         |      | Shiraz-44T | 899  | 0        | -1.09697  |  |  |
|         |      | Shiraz-49T | 1170 | 0        | -0.967436 |  |  |
|         |      | Shiraz-18T | 1457 | 0.643204 | 0         |  |  |
|         |      | Shiraz-22T | 1673 | 0.611783 | 0         |  |  |
|         |      | Shiraz-25T | 1719 | 0.472955 | 0         |  |  |
|         |      | Shiraz-28T | 1762 | 0.562311 | 0         |  |  |
|         |      | Shiraz-29T | 1801 | 0.815343 | 0         |  |  |
|         |      | Shiraz-32T | 1870 | 0.729766 | 0         |  |  |
|         |      | Shiraz-35T | 1933 | 0.488535 | 0         |  |  |
|         |      | Shiraz-58T | 2223 | 0.833364 | 0         |  |  |
|         |      | Shiraz-71T | 2263 | 0.975531 | 0         |  |  |
|         |      | Shiraz-3T  | 242  | 0        | -0.336434 |  |  |
|         |      | Shiraz-4T  | 261  | 0        | -0.336249 |  |  |
|         |      | Shiraz-16T | 295  | 0.591657 | 0         |  |  |
|         |      | Shiraz-36T | 433  | 0        | -0.803961 |  |  |
|         |      | Shiraz-44T | 899  | 0        | -1.09697  |  |  |
|         |      | Shiraz-49T | 1170 | 0        | -0.967436 |  |  |
|         |      | Shiraz-18T | 1457 | 0.643204 | 0         |  |  |
|         |      | Shiraz-22T | 1673 | 0.611783 | 0         |  |  |
|         |      | Shiraz-25T | 1719 | 0.472955 | 0         |  |  |
|         |      | Shiraz-28T | 1762 | 0.562311 | 0         |  |  |
|         |      | Shiraz-29T | 1801 | 0.815343 | 0         |  |  |
|         |      | Shiraz-32T | 1870 | 0.729766 | 0         |  |  |
|         |      | Shiraz-35T | 1933 | 0.488535 | 0         |  |  |
|         |      | Shiraz-58T | 2223 | 0.833364 | 0         |  |  |
|         |      | Shiraz-71T | 2263 | 0.975531 | 0         |  |  |



|        |      |            |      |          |           |  |  |
|--------|------|------------|------|----------|-----------|--|--|
| ZCCHC5 | chrX | Shiraz-3T  | 242  | 0        | -0.336434 |  |  |
|        |      | Shiraz-4T  | 261  | 0        | -0.336249 |  |  |
|        |      | Shiraz-16T | 295  | 0.591657 | 0         |  |  |
|        |      | Shiraz-36T | 433  | 0        | -0.803961 |  |  |
|        |      | Shiraz-44T | 899  | 0        | -1.09697  |  |  |
|        |      | Shiraz-49T | 1170 | 0        | -0.967436 |  |  |
|        |      | Shiraz-18T | 1457 | 0.643204 | 0         |  |  |
|        |      | Shiraz-22T | 1673 | 0.611783 | 0         |  |  |
|        |      | Shiraz-25T | 1719 | 0.472955 | 0         |  |  |
|        |      | Shiraz-28T | 1762 | 0.562311 | 0         |  |  |
|        |      | Shiraz-29T | 1801 | 0.815343 | 0         |  |  |
|        |      | Shiraz-32T | 1870 | 0.729766 | 0         |  |  |
|        |      | Shiraz-35T | 1933 | 0.488535 | 0         |  |  |
|        |      | Shiraz-58T | 2223 | 0.833364 | 0         |  |  |
|        |      | Shiraz-71T | 2263 | 0.975531 | 0         |  |  |
|        |      | Shiraz-3T  | 242  | 0        | -0.336434 |  |  |
|        |      | Shiraz-4T  | 261  | 0        | -0.336249 |  |  |
|        |      | Shiraz-16T | 295  | 0.591657 | 0         |  |  |
|        |      | Shiraz-36T | 433  | 0        | -0.803961 |  |  |
|        |      | Shiraz-44T | 899  | 0        | -1.09697  |  |  |
|        |      | Shiraz-49T | 1170 | 0        | -0.967436 |  |  |
|        |      | Shiraz-18T | 1457 | 0.643204 | 0         |  |  |
|        |      | Shiraz-22T | 1673 | 0.611783 | 0         |  |  |
|        |      | Shiraz-25T | 1719 | 0.472955 | 0         |  |  |
|        |      | Shiraz-28T | 1762 | 0.562311 | 0         |  |  |
|        |      | Shiraz-29T | 1801 | 0.815343 | 0         |  |  |
|        |      | Shiraz-32T | 1870 | 0.729766 | 0         |  |  |
|        |      | Shiraz-35T | 1933 | 0.488535 | 0         |  |  |
|        |      | Shiraz-58T | 2223 | 0.833364 | 0         |  |  |
|        |      | Shiraz-71T | 2263 | 0.975531 | 0         |  |  |
|        |      | Shiraz-3T  | 242  | 0        | -0.336434 |  |  |
|        |      | Shiraz-4T  | 261  | 0        | -0.336249 |  |  |
|        |      | Shiraz-16T | 295  | 0.591657 | 0         |  |  |
|        |      | Shiraz-36T | 433  | 0        | -0.803961 |  |  |
|        |      | Shiraz-44T | 899  | 0        | -1.09697  |  |  |
|        |      | Shiraz-49T | 1170 | 0        | -0.967436 |  |  |
|        |      | Shiraz-18T | 1457 | 0.643204 | 0         |  |  |
|        |      | Shiraz-22T | 1673 | 0.611783 | 0         |  |  |
|        |      | Shiraz-25T | 1719 | 0.472955 | 0         |  |  |
|        |      | Shiraz-28T | 1762 | 0.562311 | 0         |  |  |
|        |      | Shiraz-29T | 1801 | 0.815343 | 0         |  |  |
|        |      | Shiraz-32T | 1870 | 0.729766 | 0         |  |  |
|        |      | Shiraz-35T | 1933 | 0.488535 | 0         |  |  |
|        |      | Shiraz-58T | 2223 | 0.833364 | 0         |  |  |
|        |      | Shiraz-71T | 2263 | 0.975531 | 0         |  |  |
| ZCWPW1 | chr7 | Shiraz-3T  | 90   | 0.219276 | 0         |  |  |
|        |      | Shiraz-3T  | 94   | 0.74735  | 0         |  |  |

|  |  |            |      |          |           |  |  |
|--|--|------------|------|----------|-----------|--|--|
|  |  | Shiraz-4T  | 253  | 0.372918 | 0         |  |  |
|  |  | Shiraz-31T | 316  | 0.219196 | 0         |  |  |
|  |  | Shiraz-36T | 378  | 0.179558 | 0         |  |  |
|  |  | Shiraz-36T | 381  | 0.332628 | 0         |  |  |
|  |  | Shiraz-44T | 639  | 1.035032 | 0         |  |  |
|  |  | Shiraz-46T | 943  | 0.093799 | 0         |  |  |
|  |  | Shiraz-46T | 946  | 0.299835 | 0         |  |  |
|  |  | Shiraz-47T | 1030 | 0.257728 | 0         |  |  |
|  |  | Shiraz-49T | 1120 | 0.281656 | 0         |  |  |
|  |  | Shiraz-77T | 1225 | 0        | -0.117922 |  |  |
|  |  | Shiraz-77T | 1227 | 0.196445 | 0         |  |  |
|  |  | Shiraz-9T  | 1324 | 0.679266 | 0         |  |  |
|  |  | Shiraz-18T | 1434 | 0.244465 | 0         |  |  |
|  |  | Shiraz-22T | 1549 | 0        | -0.319623 |  |  |
|  |  | Shiraz-22T | 1551 | 0.324011 | 0         |  |  |
|  |  | Shiraz-25T | 1698 | 0.21835  | 0         |  |  |
|  |  | Shiraz-28T | 1735 | 0.350744 | 0         |  |  |
|  |  | Shiraz-29T | 1778 | 0.120767 | 0         |  |  |
|  |  | Shiraz-32T | 1833 | 0.551336 | 0         |  |  |
|  |  | Shiraz-32T | 1834 | 1.485392 | 0         |  |  |
|  |  | Shiraz-38T | 1951 | 0.250891 | 0         |  |  |
|  |  | Shiraz-53T | 2078 | 0.287202 | 0         |  |  |
|  |  | Shiraz-58T | 2160 | 0.399007 | 0         |  |  |
|  |  | Shiraz-71T | 2238 | 0.603631 | 0         |  |  |
|  |  | Shiraz-3T  | 90   | 0.219276 | 0         |  |  |
|  |  | Shiraz-3T  | 94   | 0.74735  | 0         |  |  |
|  |  | Shiraz-4T  | 253  | 0.372918 | 0         |  |  |
|  |  | Shiraz-31T | 316  | 0.219196 | 0         |  |  |
|  |  | Shiraz-36T | 378  | 0.179558 | 0         |  |  |
|  |  | Shiraz-36T | 381  | 0.332628 | 0         |  |  |
|  |  | Shiraz-44T | 639  | 1.035032 | 0         |  |  |
|  |  | Shiraz-46T | 943  | 0.093799 | 0         |  |  |
|  |  | Shiraz-46T | 946  | 0.299835 | 0         |  |  |
|  |  | Shiraz-47T | 1030 | 0.257728 | 0         |  |  |
|  |  | Shiraz-49T | 1120 | 0.281656 | 0         |  |  |
|  |  | Shiraz-77T | 1225 | 0        | -0.117922 |  |  |
|  |  | Shiraz-77T | 1227 | 0.196445 | 0         |  |  |
|  |  | Shiraz-9T  | 1324 | 0.679266 | 0         |  |  |
|  |  | Shiraz-18T | 1434 | 0.244465 | 0         |  |  |
|  |  | Shiraz-22T | 1549 | 0        | -0.319623 |  |  |
|  |  | Shiraz-22T | 1551 | 0.324011 | 0         |  |  |
|  |  | Shiraz-25T | 1698 | 0.21835  | 0         |  |  |
|  |  | Shiraz-28T | 1735 | 0.350744 | 0         |  |  |
|  |  | Shiraz-29T | 1778 | 0.120767 | 0         |  |  |
|  |  | Shiraz-32T | 1833 | 0.551336 | 0         |  |  |
|  |  | Shiraz-32T | 1834 | 1.485392 | 0         |  |  |
|  |  | Shiraz-38T | 1951 | 0.250891 | 0         |  |  |

|         |      |            |      |          |           |  |
|---------|------|------------|------|----------|-----------|--|
|         |      | Shiraz-53T | 2078 | 0.287202 | 0         |  |
|         |      | Shiraz-58T | 2160 | 0.399007 | 0         |  |
|         |      | Shiraz-71T | 2238 | 0.603631 | 0         |  |
|         |      | Shiraz-3T  | 90   | 0.219276 | 0         |  |
|         |      | Shiraz-3T  | 94   | 0.74735  | 0         |  |
|         |      | Shiraz-4T  | 253  | 0.372918 | 0         |  |
|         |      | Shiraz-31T | 316  | 0.219196 | 0         |  |
|         |      | Shiraz-36T | 378  | 0.179558 | 0         |  |
|         |      | Shiraz-36T | 381  | 0.332628 | 0         |  |
|         |      | Shiraz-44T | 639  | 1.035032 | 0         |  |
|         |      | Shiraz-46T | 943  | 0.093799 | 0         |  |
|         |      | Shiraz-46T | 946  | 0.299835 | 0         |  |
|         |      | Shiraz-47T | 1030 | 0.257728 | 0         |  |
|         |      | Shiraz-49T | 1120 | 0.281656 | 0         |  |
|         |      | Shiraz-77T | 1225 | 0        | -0.117922 |  |
|         |      | Shiraz-77T | 1227 | 0.196445 | 0         |  |
|         |      | Shiraz-9T  | 1324 | 0.679266 | 0         |  |
|         |      | Shiraz-18T | 1434 | 0.244465 | 0         |  |
|         |      | Shiraz-22T | 1549 | 0        | -0.319623 |  |
|         |      | Shiraz-22T | 1551 | 0.324011 | 0         |  |
|         |      | Shiraz-25T | 1698 | 0.21835  | 0         |  |
|         |      | Shiraz-28T | 1735 | 0.350744 | 0         |  |
|         |      | Shiraz-29T | 1778 | 0.120767 | 0         |  |
|         |      | Shiraz-32T | 1833 | 0.551336 | 0         |  |
|         |      | Shiraz-32T | 1834 | 1.485392 | 0         |  |
|         |      | Shiraz-38T | 1951 | 0.250891 | 0         |  |
|         |      | Shiraz-53T | 2078 | 0.287202 | 0         |  |
|         |      | Shiraz-58T | 2160 | 0.399007 | 0         |  |
|         |      | Shiraz-71T | 2238 | 0.603631 | 0         |  |
| ZDHHC15 | chrX | Shiraz-3T  | 242  | 0        | -0.336434 |  |
|         |      | Shiraz-3T  | 242  | 0        | -0.336434 |  |
|         |      | Shiraz-4T  | 261  | 0        | -0.336249 |  |
|         |      | Shiraz-4T  | 261  | 0        | -0.336249 |  |
|         |      | Shiraz-16T | 295  | 0.591657 | 0         |  |
|         |      | Shiraz-16T | 295  | 0.591657 | 0         |  |
|         |      | Shiraz-36T | 433  | 0        | -0.803961 |  |
|         |      | Shiraz-36T | 433  | 0        | -0.803961 |  |
|         |      | Shiraz-44T | 899  | 0        | -1.09697  |  |
|         |      | Shiraz-44T | 899  | 0        | -1.09697  |  |
|         |      | Shiraz-49T | 1170 | 0        | -0.967436 |  |
|         |      | Shiraz-49T | 1170 | 0        | -0.967436 |  |
|         |      | Shiraz-18T | 1457 | 0.643204 | 0         |  |
|         |      | Shiraz-18T | 1457 | 0.643204 | 0         |  |
|         |      | Shiraz-22T | 1673 | 0.611783 | 0         |  |
|         |      | Shiraz-22T | 1673 | 0.611783 | 0         |  |
|         |      | Shiraz-25T | 1719 | 0.472955 | 0         |  |
|         |      | Shiraz-25T | 1719 | 0.472955 | 0         |  |

|  |  |            |      |          |           |  |  |
|--|--|------------|------|----------|-----------|--|--|
|  |  | Shiraz-28T | 1762 | 0.562311 | 0         |  |  |
|  |  | Shiraz-28T | 1762 | 0.562311 | 0         |  |  |
|  |  | Shiraz-29T | 1801 | 0.815343 | 0         |  |  |
|  |  | Shiraz-29T | 1801 | 0.815343 | 0         |  |  |
|  |  | Shiraz-32T | 1870 | 0.729766 | 0         |  |  |
|  |  | Shiraz-32T | 1870 | 0.729766 | 0         |  |  |
|  |  | Shiraz-35T | 1933 | 0.488535 | 0         |  |  |
|  |  | Shiraz-35T | 1933 | 0.488535 | 0         |  |  |
|  |  | Shiraz-58T | 2223 | 0.833364 | 0         |  |  |
|  |  | Shiraz-58T | 2223 | 0.833364 | 0         |  |  |
|  |  | Shiraz-71T | 2263 | 0.975531 | 0         |  |  |
|  |  | Shiraz-71T | 2263 | 0.975531 | 0         |  |  |
|  |  | Shiraz-3T  | 242  | 0        | -0.336434 |  |  |
|  |  | Shiraz-3T  | 242  | 0        | -0.336434 |  |  |
|  |  | Shiraz-4T  | 261  | 0        | -0.336249 |  |  |
|  |  | Shiraz-4T  | 261  | 0        | -0.336249 |  |  |
|  |  | Shiraz-16T | 295  | 0.591657 | 0         |  |  |
|  |  | Shiraz-16T | 295  | 0.591657 | 0         |  |  |
|  |  | Shiraz-36T | 433  | 0        | -0.803961 |  |  |
|  |  | Shiraz-36T | 433  | 0        | -0.803961 |  |  |
|  |  | Shiraz-44T | 899  | 0        | -1.09697  |  |  |
|  |  | Shiraz-44T | 899  | 0        | -1.09697  |  |  |
|  |  | Shiraz-49T | 1170 | 0        | -0.967436 |  |  |
|  |  | Shiraz-49T | 1170 | 0        | -0.967436 |  |  |
|  |  | Shiraz-18T | 1457 | 0.643204 | 0         |  |  |
|  |  | Shiraz-18T | 1457 | 0.643204 | 0         |  |  |
|  |  | Shiraz-22T | 1673 | 0.611783 | 0         |  |  |
|  |  | Shiraz-22T | 1673 | 0.611783 | 0         |  |  |
|  |  | Shiraz-25T | 1719 | 0.472955 | 0         |  |  |
|  |  | Shiraz-25T | 1719 | 0.472955 | 0         |  |  |
|  |  | Shiraz-28T | 1762 | 0.562311 | 0         |  |  |
|  |  | Shiraz-28T | 1762 | 0.562311 | 0         |  |  |
|  |  | Shiraz-29T | 1801 | 0.815343 | 0         |  |  |
|  |  | Shiraz-29T | 1801 | 0.815343 | 0         |  |  |
|  |  | Shiraz-32T | 1870 | 0.729766 | 0         |  |  |
|  |  | Shiraz-32T | 1870 | 0.729766 | 0         |  |  |
|  |  | Shiraz-35T | 1933 | 0.488535 | 0         |  |  |
|  |  | Shiraz-35T | 1933 | 0.488535 | 0         |  |  |
|  |  | Shiraz-58T | 2223 | 0.833364 | 0         |  |  |
|  |  | Shiraz-58T | 2223 | 0.833364 | 0         |  |  |
|  |  | Shiraz-71T | 2263 | 0.975531 | 0         |  |  |
|  |  | Shiraz-71T | 2263 | 0.975531 | 0         |  |  |
|  |  | Shiraz-3T  | 242  | 0        | -0.336434 |  |  |
|  |  | Shiraz-3T  | 242  | 0        | -0.336434 |  |  |
|  |  | Shiraz-4T  | 261  | 0        | -0.336249 |  |  |
|  |  | Shiraz-4T  | 261  | 0        | -0.336249 |  |  |
|  |  | Shiraz-16T | 295  | 0.591657 | 0         |  |  |

|        |      |            |      |          |           |  |  |
|--------|------|------------|------|----------|-----------|--|--|
|        |      | Shiraz-16T | 295  | 0.591657 | 0         |  |  |
|        |      | Shiraz-36T | 433  | 0        | -0.803961 |  |  |
|        |      | Shiraz-36T | 433  | 0        | -0.803961 |  |  |
|        |      | Shiraz-44T | 899  | 0        | -1.09697  |  |  |
|        |      | Shiraz-44T | 899  | 0        | -1.09697  |  |  |
|        |      | Shiraz-49T | 1170 | 0        | -0.967436 |  |  |
|        |      | Shiraz-49T | 1170 | 0        | -0.967436 |  |  |
|        |      | Shiraz-18T | 1457 | 0.643204 | 0         |  |  |
|        |      | Shiraz-18T | 1457 | 0.643204 | 0         |  |  |
|        |      | Shiraz-22T | 1673 | 0.611783 | 0         |  |  |
|        |      | Shiraz-22T | 1673 | 0.611783 | 0         |  |  |
|        |      | Shiraz-25T | 1719 | 0.472955 | 0         |  |  |
|        |      | Shiraz-25T | 1719 | 0.472955 | 0         |  |  |
|        |      | Shiraz-28T | 1762 | 0.562311 | 0         |  |  |
|        |      | Shiraz-28T | 1762 | 0.562311 | 0         |  |  |
|        |      | Shiraz-29T | 1801 | 0.815343 | 0         |  |  |
|        |      | Shiraz-29T | 1801 | 0.815343 | 0         |  |  |
|        |      | Shiraz-32T | 1870 | 0.729766 | 0         |  |  |
|        |      | Shiraz-32T | 1870 | 0.729766 | 0         |  |  |
|        |      | Shiraz-35T | 1933 | 0.488535 | 0         |  |  |
|        |      | Shiraz-35T | 1933 | 0.488535 | 0         |  |  |
|        |      | Shiraz-58T | 2223 | 0.833364 | 0         |  |  |
|        |      | Shiraz-58T | 2223 | 0.833364 | 0         |  |  |
|        |      | Shiraz-71T | 2263 | 0.975531 | 0         |  |  |
|        |      | Shiraz-71T | 2263 | 0.975531 | 0         |  |  |
| ZDHHC9 | chrX | Shiraz-3T  | 242  | 0        | -0.336434 |  |  |
|        |      | Shiraz-3T  | 242  | 0        | -0.336434 |  |  |
|        |      | Shiraz-3T  | 245  | 0.224144 | 0         |  |  |
|        |      | Shiraz-3T  | 245  | 0.224144 | 0         |  |  |
|        |      | Shiraz-4T  | 261  | 0        | -0.336249 |  |  |
|        |      | Shiraz-4T  | 261  | 0        | -0.336249 |  |  |
|        |      | Shiraz-16T | 295  | 0.591657 | 0         |  |  |
|        |      | Shiraz-16T | 295  | 0.591657 | 0         |  |  |
|        |      | Shiraz-36T | 433  | 0        | -0.803961 |  |  |
|        |      | Shiraz-36T | 433  | 0        | -0.803961 |  |  |
|        |      | Shiraz-44T | 899  | 0        | -1.09697  |  |  |
|        |      | Shiraz-44T | 899  | 0        | -1.09697  |  |  |
|        |      | Shiraz-44T | 906  | 0        | -0.165692 |  |  |
|        |      | Shiraz-44T | 906  | 0        | -0.165692 |  |  |
|        |      | Shiraz-49T | 1170 | 0        | -0.967436 |  |  |
|        |      | Shiraz-49T | 1170 | 0        | -0.967436 |  |  |
|        |      | Shiraz-9T  | 1370 | 0.690073 | 0         |  |  |
|        |      | Shiraz-9T  | 1370 | 0.690073 | 0         |  |  |
|        |      | Shiraz-18T | 1457 | 0.643204 | 0         |  |  |
|        |      | Shiraz-18T | 1457 | 0.643204 | 0         |  |  |
|        |      | Shiraz-22T | 1673 | 0.611783 | 0         |  |  |
|        |      | Shiraz-22T | 1673 | 0.611783 | 0         |  |  |

|  |            |      |          |           |  |
|--|------------|------|----------|-----------|--|
|  | Shiraz-22T | 1677 | 0.789711 | 0         |  |
|  | Shiraz-22T | 1677 | 0.789711 | 0         |  |
|  | Shiraz-25T | 1719 | 0.472955 | 0         |  |
|  | Shiraz-25T | 1719 | 0.472955 | 0         |  |
|  | Shiraz-28T | 1762 | 0.562311 | 0         |  |
|  | Shiraz-28T | 1762 | 0.562311 | 0         |  |
|  | Shiraz-29T | 1801 | 0.815343 | 0         |  |
|  | Shiraz-29T | 1801 | 0.815343 | 0         |  |
|  | Shiraz-32T | 1870 | 0.729766 | 0         |  |
|  | Shiraz-32T | 1870 | 0.729766 | 0         |  |
|  | Shiraz-35T | 1933 | 0.488535 | 0         |  |
|  | Shiraz-35T | 1933 | 0.488535 | 0         |  |
|  | Shiraz-58T | 2223 | 0.833364 | 0         |  |
|  | Shiraz-58T | 2223 | 0.833364 | 0         |  |
|  | Shiraz-71T | 2263 | 0.975531 | 0         |  |
|  | Shiraz-71T | 2263 | 0.975531 | 0         |  |
|  | Shiraz-3T  | 242  | 0        | -0.336434 |  |
|  | Shiraz-3T  | 242  | 0        | -0.336434 |  |
|  | Shiraz-3T  | 245  | 0.224144 | 0         |  |
|  | Shiraz-3T  | 245  | 0.224144 | 0         |  |
|  | Shiraz-4T  | 261  | 0        | -0.336249 |  |
|  | Shiraz-4T  | 261  | 0        | -0.336249 |  |
|  | Shiraz-16T | 295  | 0.591657 | 0         |  |
|  | Shiraz-16T | 295  | 0.591657 | 0         |  |
|  | Shiraz-36T | 433  | 0        | -0.803961 |  |
|  | Shiraz-36T | 433  | 0        | -0.803961 |  |
|  | Shiraz-44T | 899  | 0        | -1.09697  |  |
|  | Shiraz-44T | 899  | 0        | -1.09697  |  |
|  | Shiraz-44T | 906  | 0        | -0.165692 |  |
|  | Shiraz-44T | 906  | 0        | -0.165692 |  |
|  | Shiraz-49T | 1170 | 0        | -0.967436 |  |
|  | Shiraz-49T | 1170 | 0        | -0.967436 |  |
|  | Shiraz-9T  | 1370 | 0.690073 | 0         |  |
|  | Shiraz-9T  | 1370 | 0.690073 | 0         |  |
|  | Shiraz-18T | 1457 | 0.643204 | 0         |  |
|  | Shiraz-18T | 1457 | 0.643204 | 0         |  |
|  | Shiraz-22T | 1673 | 0.611783 | 0         |  |
|  | Shiraz-22T | 1673 | 0.611783 | 0         |  |
|  | Shiraz-22T | 1677 | 0.789711 | 0         |  |
|  | Shiraz-22T | 1677 | 0.789711 | 0         |  |
|  | Shiraz-25T | 1719 | 0.472955 | 0         |  |
|  | Shiraz-25T | 1719 | 0.472955 | 0         |  |
|  | Shiraz-28T | 1762 | 0.562311 | 0         |  |
|  | Shiraz-28T | 1762 | 0.562311 | 0         |  |
|  | Shiraz-29T | 1801 | 0.815343 | 0         |  |
|  | Shiraz-29T | 1801 | 0.815343 | 0         |  |
|  | Shiraz-32T | 1870 | 0.729766 | 0         |  |

|       |      |            |      |          |           |  |
|-------|------|------------|------|----------|-----------|--|
|       |      | Shiraz-32T | 1870 | 0.729766 | 0         |  |
|       |      | Shiraz-35T | 1933 | 0.488535 | 0         |  |
|       |      | Shiraz-35T | 1933 | 0.488535 | 0         |  |
|       |      | Shiraz-58T | 2223 | 0.833364 | 0         |  |
|       |      | Shiraz-58T | 2223 | 0.833364 | 0         |  |
|       |      | Shiraz-71T | 2263 | 0.975531 | 0         |  |
|       |      | Shiraz-71T | 2263 | 0.975531 | 0         |  |
|       |      | Shiraz-3T  | 242  | 0        | -0.336434 |  |
|       |      | Shiraz-3T  | 242  | 0        | -0.336434 |  |
|       |      | Shiraz-3T  | 245  | 0.224144 | 0         |  |
|       |      | Shiraz-3T  | 245  | 0.224144 | 0         |  |
|       |      | Shiraz-4T  | 261  | 0        | -0.336249 |  |
|       |      | Shiraz-4T  | 261  | 0        | -0.336249 |  |
|       |      | Shiraz-16T | 295  | 0.591657 | 0         |  |
|       |      | Shiraz-16T | 295  | 0.591657 | 0         |  |
|       |      | Shiraz-36T | 433  | 0        | -0.803961 |  |
|       |      | Shiraz-36T | 433  | 0        | -0.803961 |  |
|       |      | Shiraz-44T | 899  | 0        | -1.09697  |  |
|       |      | Shiraz-44T | 899  | 0        | -1.09697  |  |
|       |      | Shiraz-44T | 906  | 0        | -0.165692 |  |
|       |      | Shiraz-44T | 906  | 0        | -0.165692 |  |
|       |      | Shiraz-49T | 1170 | 0        | -0.967436 |  |
|       |      | Shiraz-49T | 1170 | 0        | -0.967436 |  |
|       |      | Shiraz-9T  | 1370 | 0.690073 | 0         |  |
|       |      | Shiraz-9T  | 1370 | 0.690073 | 0         |  |
|       |      | Shiraz-18T | 1457 | 0.643204 | 0         |  |
|       |      | Shiraz-18T | 1457 | 0.643204 | 0         |  |
|       |      | Shiraz-22T | 1673 | 0.611783 | 0         |  |
|       |      | Shiraz-22T | 1673 | 0.611783 | 0         |  |
|       |      | Shiraz-22T | 1677 | 0.789711 | 0         |  |
|       |      | Shiraz-22T | 1677 | 0.789711 | 0         |  |
|       |      | Shiraz-25T | 1719 | 0.472955 | 0         |  |
|       |      | Shiraz-25T | 1719 | 0.472955 | 0         |  |
|       |      | Shiraz-28T | 1762 | 0.562311 | 0         |  |
|       |      | Shiraz-28T | 1762 | 0.562311 | 0         |  |
|       |      | Shiraz-29T | 1801 | 0.815343 | 0         |  |
|       |      | Shiraz-29T | 1801 | 0.815343 | 0         |  |
|       |      | Shiraz-32T | 1870 | 0.729766 | 0         |  |
|       |      | Shiraz-32T | 1870 | 0.729766 | 0         |  |
|       |      | Shiraz-35T | 1933 | 0.488535 | 0         |  |
|       |      | Shiraz-35T | 1933 | 0.488535 | 0         |  |
|       |      | Shiraz-58T | 2223 | 0.833364 | 0         |  |
|       |      | Shiraz-58T | 2223 | 0.833364 | 0         |  |
|       |      | Shiraz-71T | 2263 | 0.975531 | 0         |  |
|       |      | Shiraz-71T | 2263 | 0.975531 | 0         |  |
| ZFP92 | chrX | Shiraz-4T  | 261  | 0        | -0.336249 |  |
|       |      | Shiraz-16T | 295  | 0.591657 | 0         |  |

|  |            |      |          |           |  |
|--|------------|------|----------|-----------|--|
|  | Shiraz-36T | 433  | 0        | -0.803961 |  |
|  | Shiraz-42T | 480  | 0        | -0.232915 |  |
|  | Shiraz-49T | 1170 | 0        | -0.967436 |  |
|  | Shiraz-49T | 1173 | 0        | -0.704439 |  |
|  | Shiraz-9T  | 1370 | 0.690073 | 0         |  |
|  | Shiraz-9T  | 1371 | 1.292392 | 0         |  |
|  | Shiraz-18T | 1457 | 0.643204 | 0         |  |
|  | Shiraz-22T | 1673 | 0.611783 | 0         |  |
|  | Shiraz-22T | 1678 | 0.911625 | 0         |  |
|  | Shiraz-25T | 1719 | 0.472955 | 0         |  |
|  | Shiraz-28T | 1762 | 0.562311 | 0         |  |
|  | Shiraz-29T | 1801 | 0.815343 | 0         |  |
|  | Shiraz-32T | 1870 | 0.729766 | 0         |  |
|  | Shiraz-32T | 1872 | 1.504553 | 0         |  |
|  | Shiraz-35T | 1933 | 0.488535 | 0         |  |
|  | Shiraz-53T | 2115 | 0.427728 | 0         |  |
|  | Shiraz-58T | 2223 | 0.833364 | 0         |  |
|  | Shiraz-58T | 2226 | 1.074663 | 0         |  |
|  | Shiraz-71T | 2263 | 0.975531 | 0         |  |
|  | Shiraz-4T  | 261  | 0        | -0.336249 |  |
|  | Shiraz-16T | 295  | 0.591657 | 0         |  |
|  | Shiraz-36T | 433  | 0        | -0.803961 |  |
|  | Shiraz-42T | 480  | 0        | -0.232915 |  |
|  | Shiraz-49T | 1170 | 0        | -0.967436 |  |
|  | Shiraz-49T | 1173 | 0        | -0.704439 |  |
|  | Shiraz-9T  | 1370 | 0.690073 | 0         |  |
|  | Shiraz-9T  | 1371 | 1.292392 | 0         |  |
|  | Shiraz-18T | 1457 | 0.643204 | 0         |  |
|  | Shiraz-22T | 1673 | 0.611783 | 0         |  |
|  | Shiraz-22T | 1678 | 0.911625 | 0         |  |
|  | Shiraz-25T | 1719 | 0.472955 | 0         |  |
|  | Shiraz-28T | 1762 | 0.562311 | 0         |  |
|  | Shiraz-29T | 1801 | 0.815343 | 0         |  |
|  | Shiraz-32T | 1870 | 0.729766 | 0         |  |
|  | Shiraz-32T | 1872 | 1.504553 | 0         |  |
|  | Shiraz-35T | 1933 | 0.488535 | 0         |  |
|  | Shiraz-53T | 2115 | 0.427728 | 0         |  |
|  | Shiraz-58T | 2223 | 0.833364 | 0         |  |
|  | Shiraz-58T | 2226 | 1.074663 | 0         |  |
|  | Shiraz-71T | 2263 | 0.975531 | 0         |  |
|  | Shiraz-4T  | 261  | 0        | -0.336249 |  |
|  | Shiraz-16T | 295  | 0.591657 | 0         |  |
|  | Shiraz-36T | 433  | 0        | -0.803961 |  |
|  | Shiraz-42T | 480  | 0        | -0.232915 |  |
|  | Shiraz-49T | 1170 | 0        | -0.967436 |  |
|  | Shiraz-49T | 1173 | 0        | -0.704439 |  |
|  | Shiraz-9T  | 1370 | 0.690073 | 0         |  |



|     |      |            |      |          |           |  |
|-----|------|------------|------|----------|-----------|--|
|     |      | Shiraz-9T  | 1371 | 1.292392 | 0         |  |
|     |      | Shiraz-18T | 1457 | 0.643204 | 0         |  |
|     |      | Shiraz-22T | 1673 | 0.611783 | 0         |  |
|     |      | Shiraz-22T | 1678 | 0.911625 | 0         |  |
|     |      | Shiraz-25T | 1719 | 0.472955 | 0         |  |
|     |      | Shiraz-28T | 1762 | 0.562311 | 0         |  |
|     |      | Shiraz-29T | 1801 | 0.815343 | 0         |  |
|     |      | Shiraz-32T | 1870 | 0.729766 | 0         |  |
|     |      | Shiraz-32T | 1872 | 1.504553 | 0         |  |
|     |      | Shiraz-35T | 1933 | 0.488535 | 0         |  |
|     |      | Shiraz-53T | 2115 | 0.427728 | 0         |  |
|     |      | Shiraz-58T | 2223 | 0.833364 | 0         |  |
|     |      | Shiraz-58T | 2226 | 1.074663 | 0         |  |
|     |      | Shiraz-71T | 2263 | 0.975531 | 0         |  |
| ZFR | chr5 | Shiraz-4T  | 250  | 0.262252 | 0         |  |
|     |      | Shiraz-16T | 266  | 0.321724 | 0         |  |
|     |      | Shiraz-18T | 1429 | 0        | -0.314125 |  |
|     |      | Shiraz-25T | 1694 | 0.201602 | 0         |  |
|     |      | Shiraz-28T | 1731 | 0.295447 | 0         |  |
|     |      | Shiraz-29T | 1773 | 0.090981 | 0         |  |
|     |      | Shiraz-40T | 2016 | 0.376634 | 0         |  |
|     |      | Shiraz-4T  | 250  | 0.262252 | 0         |  |
|     |      | Shiraz-16T | 266  | 0.321724 | 0         |  |
|     |      | Shiraz-18T | 1429 | 0        | -0.314125 |  |
|     |      | Shiraz-25T | 1694 | 0.201602 | 0         |  |
|     |      | Shiraz-28T | 1731 | 0.295447 | 0         |  |
|     |      | Shiraz-29T | 1773 | 0.090981 | 0         |  |
|     |      | Shiraz-40T | 2016 | 0.376634 | 0         |  |
|     |      | Shiraz-4T  | 250  | 0.262252 | 0         |  |
|     |      | Shiraz-16T | 266  | 0.321724 | 0         |  |
|     |      | Shiraz-18T | 1429 | 0        | -0.314125 |  |
|     |      | Shiraz-25T | 1694 | 0.201602 | 0         |  |
|     |      | Shiraz-28T | 1731 | 0.295447 | 0         |  |
|     |      | Shiraz-29T | 1773 | 0.090981 | 0         |  |
|     |      | Shiraz-40T | 2016 | 0.376634 | 0         |  |
| ZFX | chrX | Shiraz-3T  | 235  | 0        | -0.28401  |  |
|     |      | Shiraz-4T  | 260  | 0        | -0.324128 |  |
|     |      | Shiraz-16T | 294  | 0.655804 | 0         |  |
|     |      | Shiraz-36T | 431  | 0        | -0.78035  |  |
|     |      | Shiraz-44T | 891  | 0        | -0.954044 |  |
|     |      | Shiraz-49T | 1166 | 0        | -0.917235 |  |
|     |      | Shiraz-77T | 1281 | 0.136627 | 0         |  |
|     |      | Shiraz-9T  | 1368 | 0.199713 | 0         |  |
|     |      | Shiraz-18T | 1455 | 0        | -0.186773 |  |
|     |      | Shiraz-22T | 1669 | 0.695915 | 0         |  |
|     |      | Shiraz-25T | 1717 | 0.420447 | 0         |  |
|     |      | Shiraz-28T | 1760 | 0.538181 | 0         |  |

|      |      |            |      |          |           |  |  |
|------|------|------------|------|----------|-----------|--|--|
|      |      | Shiraz-29T | 1800 | 0.672527 | 0         |  |  |
|      |      | Shiraz-32T | 1869 | 0.776805 | 0         |  |  |
|      |      | Shiraz-35T | 1932 | 0.507141 | 0         |  |  |
|      |      | Shiraz-40T | 2051 | 0.098506 | 0         |  |  |
|      |      | Shiraz-58T | 2221 | 0.871948 | 0         |  |  |
|      |      | Shiraz-71T | 2260 | 0.68394  | 0         |  |  |
|      |      | Shiraz-71T | 2261 | 0.508399 | 0         |  |  |
|      |      | Shiraz-3T  | 235  | 0        | -0.28401  |  |  |
|      |      | Shiraz-4T  | 260  | 0        | -0.324128 |  |  |
|      |      | Shiraz-16T | 294  | 0.655804 | 0         |  |  |
|      |      | Shiraz-36T | 431  | 0        | -0.78035  |  |  |
|      |      | Shiraz-44T | 891  | 0        | -0.954044 |  |  |
|      |      | Shiraz-49T | 1166 | 0        | -0.917235 |  |  |
|      |      | Shiraz-77T | 1281 | 0.136627 | 0         |  |  |
|      |      | Shiraz-9T  | 1368 | 0.199713 | 0         |  |  |
|      |      | Shiraz-18T | 1455 | 0        | -0.186773 |  |  |
|      |      | Shiraz-22T | 1669 | 0.695915 | 0         |  |  |
|      |      | Shiraz-25T | 1717 | 0.420447 | 0         |  |  |
|      |      | Shiraz-28T | 1760 | 0.538181 | 0         |  |  |
|      |      | Shiraz-29T | 1800 | 0.672527 | 0         |  |  |
|      |      | Shiraz-32T | 1869 | 0.776805 | 0         |  |  |
|      |      | Shiraz-35T | 1932 | 0.507141 | 0         |  |  |
|      |      | Shiraz-40T | 2051 | 0.098506 | 0         |  |  |
|      |      | Shiraz-58T | 2221 | 0.871948 | 0         |  |  |
|      |      | Shiraz-71T | 2260 | 0.68394  | 0         |  |  |
|      |      | Shiraz-71T | 2261 | 0.508399 | 0         |  |  |
|      |      | Shiraz-3T  | 235  | 0        | -0.28401  |  |  |
|      |      | Shiraz-4T  | 260  | 0        | -0.324128 |  |  |
|      |      | Shiraz-16T | 294  | 0.655804 | 0         |  |  |
|      |      | Shiraz-36T | 431  | 0        | -0.78035  |  |  |
|      |      | Shiraz-44T | 891  | 0        | -0.954044 |  |  |
|      |      | Shiraz-49T | 1166 | 0        | -0.917235 |  |  |
|      |      | Shiraz-77T | 1281 | 0.136627 | 0         |  |  |
|      |      | Shiraz-9T  | 1368 | 0.199713 | 0         |  |  |
|      |      | Shiraz-18T | 1455 | 0        | -0.186773 |  |  |
|      |      | Shiraz-22T | 1669 | 0.695915 | 0         |  |  |
|      |      | Shiraz-25T | 1717 | 0.420447 | 0         |  |  |
|      |      | Shiraz-28T | 1760 | 0.538181 | 0         |  |  |
|      |      | Shiraz-29T | 1800 | 0.672527 | 0         |  |  |
|      |      | Shiraz-32T | 1869 | 0.776805 | 0         |  |  |
|      |      | Shiraz-35T | 1932 | 0.507141 | 0         |  |  |
|      |      | Shiraz-40T | 2051 | 0.098506 | 0         |  |  |
|      |      | Shiraz-58T | 2221 | 0.871948 | 0         |  |  |
|      |      | Shiraz-71T | 2260 | 0.68394  | 0         |  |  |
|      |      | Shiraz-71T | 2261 | 0.508399 | 0         |  |  |
| ZIC3 | chrX | Shiraz-3T  | 242  | 0        | -0.336434 |  |  |
|      |      | Shiraz-4T  | 261  | 0        | -0.336249 |  |  |

|  |            |      |          |           |  |
|--|------------|------|----------|-----------|--|
|  | Shiraz-16T | 295  | 0.591657 | 0         |  |
|  | Shiraz-36T | 433  | 0        | -0.803961 |  |
|  | Shiraz-44T | 899  | 0        | -1.09697  |  |
|  | Shiraz-49T | 1170 | 0        | -0.967436 |  |
|  | Shiraz-9T  | 1370 | 0.690073 | 0         |  |
|  | Shiraz-18T | 1457 | 0.643204 | 0         |  |
|  | Shiraz-22T | 1673 | 0.611783 | 0         |  |
|  | Shiraz-22T | 1677 | 0.789711 | 0         |  |
|  | Shiraz-25T | 1719 | 0.472955 | 0         |  |
|  | Shiraz-28T | 1762 | 0.562311 | 0         |  |
|  | Shiraz-29T | 1801 | 0.815343 | 0         |  |
|  | Shiraz-32T | 1870 | 0.729766 | 0         |  |
|  | Shiraz-35T | 1933 | 0.488535 | 0         |  |
|  | Shiraz-58T | 2223 | 0.833364 | 0         |  |
|  | Shiraz-71T | 2263 | 0.975531 | 0         |  |
|  | Shiraz-3T  | 242  | 0        | -0.336434 |  |
|  | Shiraz-4T  | 261  | 0        | -0.336249 |  |
|  | Shiraz-16T | 295  | 0.591657 | 0         |  |
|  | Shiraz-36T | 433  | 0        | -0.803961 |  |
|  | Shiraz-44T | 899  | 0        | -1.09697  |  |
|  | Shiraz-49T | 1170 | 0        | -0.967436 |  |
|  | Shiraz-9T  | 1370 | 0.690073 | 0         |  |
|  | Shiraz-18T | 1457 | 0.643204 | 0         |  |
|  | Shiraz-22T | 1673 | 0.611783 | 0         |  |
|  | Shiraz-22T | 1677 | 0.789711 | 0         |  |
|  | Shiraz-25T | 1719 | 0.472955 | 0         |  |
|  | Shiraz-28T | 1762 | 0.562311 | 0         |  |
|  | Shiraz-29T | 1801 | 0.815343 | 0         |  |
|  | Shiraz-32T | 1870 | 0.729766 | 0         |  |
|  | Shiraz-35T | 1933 | 0.488535 | 0         |  |
|  | Shiraz-58T | 2223 | 0.833364 | 0         |  |
|  | Shiraz-71T | 2263 | 0.975531 | 0         |  |
|  | Shiraz-3T  | 242  | 0        | -0.336434 |  |
|  | Shiraz-4T  | 261  | 0        | -0.336249 |  |
|  | Shiraz-16T | 295  | 0.591657 | 0         |  |
|  | Shiraz-36T | 433  | 0        | -0.803961 |  |
|  | Shiraz-44T | 899  | 0        | -1.09697  |  |
|  | Shiraz-49T | 1170 | 0        | -0.967436 |  |
|  | Shiraz-9T  | 1370 | 0.690073 | 0         |  |
|  | Shiraz-18T | 1457 | 0.643204 | 0         |  |
|  | Shiraz-22T | 1673 | 0.611783 | 0         |  |
|  | Shiraz-22T | 1677 | 0.789711 | 0         |  |
|  | Shiraz-25T | 1719 | 0.472955 | 0         |  |
|  | Shiraz-28T | 1762 | 0.562311 | 0         |  |
|  | Shiraz-29T | 1801 | 0.815343 | 0         |  |
|  | Shiraz-32T | 1870 | 0.729766 | 0         |  |
|  | Shiraz-35T | 1933 | 0.488535 | 0         |  |

|         |      |            |      |          |           |  |
|---------|------|------------|------|----------|-----------|--|
|         |      | Shiraz-58T | 2223 | 0.833364 | 0         |  |
|         |      | Shiraz-71T | 2263 | 0.975531 | 0         |  |
| ZKSCAN1 | chr7 | Shiraz-3T  | 90   | 0.219276 | 0         |  |
|         |      | Shiraz-3T  | 94   | 0.74735  | 0         |  |
|         |      | Shiraz-4T  | 253  | 0.372918 | 0         |  |
|         |      | Shiraz-31T | 316  | 0.219196 | 0         |  |
|         |      | Shiraz-36T | 378  | 0.179558 | 0         |  |
|         |      | Shiraz-36T | 381  | 0.332628 | 0         |  |
|         |      | Shiraz-44T | 639  | 1.035032 | 0         |  |
|         |      | Shiraz-46T | 943  | 0.093799 | 0         |  |
|         |      | Shiraz-46T | 946  | 0.299835 | 0         |  |
|         |      | Shiraz-47T | 1030 | 0.257728 | 0         |  |
|         |      | Shiraz-49T | 1120 | 0.281656 | 0         |  |
|         |      | Shiraz-77T | 1225 | 0        | -0.117922 |  |
|         |      | Shiraz-77T | 1227 | 0.196445 | 0         |  |
|         |      | Shiraz-9T  | 1324 | 0.679266 | 0         |  |
|         |      | Shiraz-18T | 1434 | 0.244465 | 0         |  |
|         |      | Shiraz-22T | 1549 | 0        | -0.319623 |  |
|         |      | Shiraz-22T | 1551 | 0.324011 | 0         |  |
|         |      | Shiraz-25T | 1698 | 0.21835  | 0         |  |
|         |      | Shiraz-28T | 1735 | 0.350744 | 0         |  |
|         |      | Shiraz-29T | 1778 | 0.120767 | 0         |  |
|         |      | Shiraz-32T | 1833 | 0.551336 | 0         |  |
|         |      | Shiraz-38T | 1951 | 0.250891 | 0         |  |
|         |      | Shiraz-53T | 2078 | 0.287202 | 0         |  |
|         |      | Shiraz-58T | 2160 | 0.399007 | 0         |  |
|         |      | Shiraz-71T | 2238 | 0.603631 | 0         |  |
|         |      | Shiraz-3T  | 90   | 0.219276 | 0         |  |
|         |      | Shiraz-3T  | 94   | 0.74735  | 0         |  |
|         |      | Shiraz-4T  | 253  | 0.372918 | 0         |  |
|         |      | Shiraz-31T | 316  | 0.219196 | 0         |  |
|         |      | Shiraz-36T | 378  | 0.179558 | 0         |  |
|         |      | Shiraz-36T | 381  | 0.332628 | 0         |  |
|         |      | Shiraz-44T | 639  | 1.035032 | 0         |  |
|         |      | Shiraz-46T | 943  | 0.093799 | 0         |  |
|         |      | Shiraz-46T | 946  | 0.299835 | 0         |  |
|         |      | Shiraz-47T | 1030 | 0.257728 | 0         |  |
|         |      | Shiraz-49T | 1120 | 0.281656 | 0         |  |
|         |      | Shiraz-77T | 1225 | 0        | -0.117922 |  |
|         |      | Shiraz-77T | 1227 | 0.196445 | 0         |  |
|         |      | Shiraz-9T  | 1324 | 0.679266 | 0         |  |
|         |      | Shiraz-18T | 1434 | 0.244465 | 0         |  |
|         |      | Shiraz-22T | 1549 | 0        | -0.319623 |  |
|         |      | Shiraz-22T | 1551 | 0.324011 | 0         |  |
|         |      | Shiraz-25T | 1698 | 0.21835  | 0         |  |
|         |      | Shiraz-28T | 1735 | 0.350744 | 0         |  |
|         |      | Shiraz-29T | 1778 | 0.120767 | 0         |  |

|         |      |            |      |          |           |  |  |
|---------|------|------------|------|----------|-----------|--|--|
|         |      | Shiraz-32T | 1833 | 0.551336 | 0         |  |  |
|         |      | Shiraz-38T | 1951 | 0.250891 | 0         |  |  |
|         |      | Shiraz-53T | 2078 | 0.287202 | 0         |  |  |
|         |      | Shiraz-58T | 2160 | 0.399007 | 0         |  |  |
|         |      | Shiraz-71T | 2238 | 0.603631 | 0         |  |  |
|         |      | Shiraz-3T  | 90   | 0.219276 | 0         |  |  |
|         |      | Shiraz-3T  | 94   | 0.74735  | 0         |  |  |
|         |      | Shiraz-4T  | 253  | 0.372918 | 0         |  |  |
|         |      | Shiraz-31T | 316  | 0.219196 | 0         |  |  |
|         |      | Shiraz-36T | 378  | 0.179558 | 0         |  |  |
|         |      | Shiraz-36T | 381  | 0.332628 | 0         |  |  |
|         |      | Shiraz-44T | 639  | 1.035032 | 0         |  |  |
|         |      | Shiraz-46T | 943  | 0.093799 | 0         |  |  |
|         |      | Shiraz-46T | 946  | 0.299835 | 0         |  |  |
|         |      | Shiraz-47T | 1030 | 0.257728 | 0         |  |  |
|         |      | Shiraz-49T | 1120 | 0.281656 | 0         |  |  |
|         |      | Shiraz-77T | 1225 | 0        | -0.117922 |  |  |
|         |      | Shiraz-77T | 1227 | 0.196445 | 0         |  |  |
|         |      | Shiraz-9T  | 1324 | 0.679266 | 0         |  |  |
|         |      | Shiraz-18T | 1434 | 0.244465 | 0         |  |  |
|         |      | Shiraz-22T | 1549 | 0        | -0.319623 |  |  |
|         |      | Shiraz-22T | 1551 | 0.324011 | 0         |  |  |
|         |      | Shiraz-25T | 1698 | 0.21835  | 0         |  |  |
|         |      | Shiraz-28T | 1735 | 0.350744 | 0         |  |  |
|         |      | Shiraz-29T | 1778 | 0.120767 | 0         |  |  |
|         |      | Shiraz-32T | 1833 | 0.551336 | 0         |  |  |
|         |      | Shiraz-38T | 1951 | 0.250891 | 0         |  |  |
|         |      | Shiraz-53T | 2078 | 0.287202 | 0         |  |  |
|         |      | Shiraz-58T | 2160 | 0.399007 | 0         |  |  |
|         |      | Shiraz-71T | 2238 | 0.603631 | 0         |  |  |
| ZKSCAN5 | chr7 | Shiraz-3T  | 90   | 0.219276 | 0         |  |  |
|         |      | Shiraz-3T  | 90   | 0.219276 | 0         |  |  |
|         |      | Shiraz-3T  | 94   | 0.74735  | 0         |  |  |
|         |      | Shiraz-3T  | 94   | 0.74735  | 0         |  |  |
|         |      | Shiraz-4T  | 253  | 0.372918 | 0         |  |  |
|         |      | Shiraz-4T  | 253  | 0.372918 | 0         |  |  |
|         |      | Shiraz-31T | 316  | 0.219196 | 0         |  |  |
|         |      | Shiraz-31T | 316  | 0.219196 | 0         |  |  |
|         |      | Shiraz-36T | 378  | 0.179558 | 0         |  |  |
|         |      | Shiraz-36T | 378  | 0.179558 | 0         |  |  |
|         |      | Shiraz-36T | 381  | 0.332628 | 0         |  |  |
|         |      | Shiraz-36T | 381  | 0.332628 | 0         |  |  |
|         |      | Shiraz-44T | 639  | 1.035032 | 0         |  |  |
|         |      | Shiraz-44T | 639  | 1.035032 | 0         |  |  |
|         |      | Shiraz-44T | 640  | 0.272608 | 0         |  |  |
|         |      | Shiraz-44T | 640  | 0.272608 | 0         |  |  |
|         |      | Shiraz-46T | 943  | 0.093799 | 0         |  |  |

|  |            |      |          |           |  |
|--|------------|------|----------|-----------|--|
|  | Shiraz-46T | 943  | 0.093799 | 0         |  |
|  | Shiraz-46T | 946  | 0.299835 | 0         |  |
|  | Shiraz-46T | 946  | 0.299835 | 0         |  |
|  | Shiraz-47T | 1030 | 0.257728 | 0         |  |
|  | Shiraz-47T | 1030 | 0.257728 | 0         |  |
|  | Shiraz-49T | 1120 | 0.281656 | 0         |  |
|  | Shiraz-49T | 1120 | 0.281656 | 0         |  |
|  | Shiraz-77T | 1225 | 0        | -0.117922 |  |
|  | Shiraz-77T | 1225 | 0        | -0.117922 |  |
|  | Shiraz-77T | 1227 | 0.196445 | 0         |  |
|  | Shiraz-77T | 1227 | 0.196445 | 0         |  |
|  | Shiraz-9T  | 1324 | 0.679266 | 0         |  |
|  | Shiraz-9T  | 1324 | 0.679266 | 0         |  |
|  | Shiraz-18T | 1434 | 0.244465 | 0         |  |
|  | Shiraz-18T | 1434 | 0.244465 | 0         |  |
|  | Shiraz-22T | 1549 | 0        | -0.319623 |  |
|  | Shiraz-22T | 1549 | 0        | -0.319623 |  |
|  | Shiraz-22T | 1551 | 0.324011 | 0         |  |
|  | Shiraz-22T | 1551 | 0.324011 | 0         |  |
|  | Shiraz-25T | 1698 | 0.21835  | 0         |  |
|  | Shiraz-25T | 1698 | 0.21835  | 0         |  |
|  | Shiraz-28T | 1735 | 0.350744 | 0         |  |
|  | Shiraz-28T | 1735 | 0.350744 | 0         |  |
|  | Shiraz-29T | 1778 | 0.120767 | 0         |  |
|  | Shiraz-29T | 1778 | 0.120767 | 0         |  |
|  | Shiraz-32T | 1833 | 0.551336 | 0         |  |
|  | Shiraz-32T | 1833 | 0.551336 | 0         |  |
|  | Shiraz-38T | 1951 | 0.250891 | 0         |  |
|  | Shiraz-38T | 1951 | 0.250891 | 0         |  |
|  | Shiraz-53T | 2078 | 0.287202 | 0         |  |
|  | Shiraz-53T | 2078 | 0.287202 | 0         |  |
|  | Shiraz-71T | 2238 | 0.603631 | 0         |  |
|  | Shiraz-71T | 2238 | 0.603631 | 0         |  |
|  | Shiraz-3T  | 90   | 0.219276 | 0         |  |
|  | Shiraz-3T  | 90   | 0.219276 | 0         |  |
|  | Shiraz-3T  | 94   | 0.74735  | 0         |  |
|  | Shiraz-3T  | 94   | 0.74735  | 0         |  |
|  | Shiraz-4T  | 253  | 0.372918 | 0         |  |
|  | Shiraz-4T  | 253  | 0.372918 | 0         |  |
|  | Shiraz-31T | 316  | 0.219196 | 0         |  |
|  | Shiraz-31T | 316  | 0.219196 | 0         |  |
|  | Shiraz-36T | 378  | 0.179558 | 0         |  |
|  | Shiraz-36T | 378  | 0.179558 | 0         |  |
|  | Shiraz-36T | 381  | 0.332628 | 0         |  |
|  | Shiraz-36T | 381  | 0.332628 | 0         |  |
|  | Shiraz-44T | 639  | 1.035032 | 0         |  |
|  | Shiraz-44T | 639  | 1.035032 | 0         |  |

|  |  |            |      |          |           |  |  |
|--|--|------------|------|----------|-----------|--|--|
|  |  | Shiraz-44T | 640  | 0.272608 | 0         |  |  |
|  |  | Shiraz-44T | 640  | 0.272608 | 0         |  |  |
|  |  | Shiraz-46T | 943  | 0.093799 | 0         |  |  |
|  |  | Shiraz-46T | 943  | 0.093799 | 0         |  |  |
|  |  | Shiraz-46T | 946  | 0.299835 | 0         |  |  |
|  |  | Shiraz-46T | 946  | 0.299835 | 0         |  |  |
|  |  | Shiraz-47T | 1030 | 0.257728 | 0         |  |  |
|  |  | Shiraz-47T | 1030 | 0.257728 | 0         |  |  |
|  |  | Shiraz-49T | 1120 | 0.281656 | 0         |  |  |
|  |  | Shiraz-49T | 1120 | 0.281656 | 0         |  |  |
|  |  | Shiraz-77T | 1225 | 0        | -0.117922 |  |  |
|  |  | Shiraz-77T | 1225 | 0        | -0.117922 |  |  |
|  |  | Shiraz-77T | 1227 | 0.196445 | 0         |  |  |
|  |  | Shiraz-77T | 1227 | 0.196445 | 0         |  |  |
|  |  | Shiraz-9T  | 1324 | 0.679266 | 0         |  |  |
|  |  | Shiraz-9T  | 1324 | 0.679266 | 0         |  |  |
|  |  | Shiraz-18T | 1434 | 0.244465 | 0         |  |  |
|  |  | Shiraz-18T | 1434 | 0.244465 | 0         |  |  |
|  |  | Shiraz-22T | 1549 | 0        | -0.319623 |  |  |
|  |  | Shiraz-22T | 1549 | 0        | -0.319623 |  |  |
|  |  | Shiraz-22T | 1551 | 0.324011 | 0         |  |  |
|  |  | Shiraz-22T | 1551 | 0.324011 | 0         |  |  |
|  |  | Shiraz-25T | 1698 | 0.21835  | 0         |  |  |
|  |  | Shiraz-25T | 1698 | 0.21835  | 0         |  |  |
|  |  | Shiraz-28T | 1735 | 0.350744 | 0         |  |  |
|  |  | Shiraz-28T | 1735 | 0.350744 | 0         |  |  |
|  |  | Shiraz-29T | 1778 | 0.120767 | 0         |  |  |
|  |  | Shiraz-29T | 1778 | 0.120767 | 0         |  |  |
|  |  | Shiraz-32T | 1833 | 0.551336 | 0         |  |  |
|  |  | Shiraz-32T | 1833 | 0.551336 | 0         |  |  |
|  |  | Shiraz-38T | 1951 | 0.250891 | 0         |  |  |
|  |  | Shiraz-38T | 1951 | 0.250891 | 0         |  |  |
|  |  | Shiraz-53T | 2078 | 0.287202 | 0         |  |  |
|  |  | Shiraz-53T | 2078 | 0.287202 | 0         |  |  |
|  |  | Shiraz-71T | 2238 | 0.603631 | 0         |  |  |
|  |  | Shiraz-71T | 2238 | 0.603631 | 0         |  |  |
|  |  | Shiraz-3T  | 90   | 0.219276 | 0         |  |  |
|  |  | Shiraz-3T  | 90   | 0.219276 | 0         |  |  |
|  |  | Shiraz-3T  | 94   | 0.74735  | 0         |  |  |
|  |  | Shiraz-3T  | 94   | 0.74735  | 0         |  |  |
|  |  | Shiraz-4T  | 253  | 0.372918 | 0         |  |  |
|  |  | Shiraz-4T  | 253  | 0.372918 | 0         |  |  |
|  |  | Shiraz-31T | 316  | 0.219196 | 0         |  |  |
|  |  | Shiraz-31T | 316  | 0.219196 | 0         |  |  |
|  |  | Shiraz-36T | 378  | 0.179558 | 0         |  |  |
|  |  | Shiraz-36T | 378  | 0.179558 | 0         |  |  |
|  |  | Shiraz-36T | 381  | 0.332628 | 0         |  |  |

|       |      |            |      |          |           |  |
|-------|------|------------|------|----------|-----------|--|
|       |      | Shiraz-36T | 381  | 0.332628 | 0         |  |
|       |      | Shiraz-44T | 639  | 1.035032 | 0         |  |
|       |      | Shiraz-44T | 639  | 1.035032 | 0         |  |
|       |      | Shiraz-44T | 640  | 0.272608 | 0         |  |
|       |      | Shiraz-44T | 640  | 0.272608 | 0         |  |
|       |      | Shiraz-46T | 943  | 0.093799 | 0         |  |
|       |      | Shiraz-46T | 943  | 0.093799 | 0         |  |
|       |      | Shiraz-46T | 946  | 0.299835 | 0         |  |
|       |      | Shiraz-46T | 946  | 0.299835 | 0         |  |
|       |      | Shiraz-47T | 1030 | 0.257728 | 0         |  |
|       |      | Shiraz-47T | 1030 | 0.257728 | 0         |  |
|       |      | Shiraz-49T | 1120 | 0.281656 | 0         |  |
|       |      | Shiraz-49T | 1120 | 0.281656 | 0         |  |
|       |      | Shiraz-77T | 1225 | 0        | -0.117922 |  |
|       |      | Shiraz-77T | 1225 | 0        | -0.117922 |  |
|       |      | Shiraz-77T | 1227 | 0.196445 | 0         |  |
|       |      | Shiraz-77T | 1227 | 0.196445 | 0         |  |
|       |      | Shiraz-9T  | 1324 | 0.679266 | 0         |  |
|       |      | Shiraz-9T  | 1324 | 0.679266 | 0         |  |
|       |      | Shiraz-18T | 1434 | 0.244465 | 0         |  |
|       |      | Shiraz-18T | 1434 | 0.244465 | 0         |  |
|       |      | Shiraz-22T | 1549 | 0        | -0.319623 |  |
|       |      | Shiraz-22T | 1549 | 0        | -0.319623 |  |
|       |      | Shiraz-22T | 1551 | 0.324011 | 0         |  |
|       |      | Shiraz-22T | 1551 | 0.324011 | 0         |  |
|       |      | Shiraz-25T | 1698 | 0.21835  | 0         |  |
|       |      | Shiraz-25T | 1698 | 0.21835  | 0         |  |
|       |      | Shiraz-28T | 1735 | 0.350744 | 0         |  |
|       |      | Shiraz-28T | 1735 | 0.350744 | 0         |  |
|       |      | Shiraz-29T | 1778 | 0.120767 | 0         |  |
|       |      | Shiraz-29T | 1778 | 0.120767 | 0         |  |
|       |      | Shiraz-32T | 1833 | 0.551336 | 0         |  |
|       |      | Shiraz-32T | 1833 | 0.551336 | 0         |  |
|       |      | Shiraz-38T | 1951 | 0.250891 | 0         |  |
|       |      | Shiraz-38T | 1951 | 0.250891 | 0         |  |
|       |      | Shiraz-53T | 2078 | 0.287202 | 0         |  |
|       |      | Shiraz-53T | 2078 | 0.287202 | 0         |  |
|       |      | Shiraz-71T | 2238 | 0.603631 | 0         |  |
|       |      | Shiraz-71T | 2238 | 0.603631 | 0         |  |
| ZMAT1 | chrX | Shiraz-3T  | 242  | 0        | -0.336434 |  |
|       |      | Shiraz-3T  | 242  | 0        | -0.336434 |  |
|       |      | Shiraz-4T  | 261  | 0        | -0.336249 |  |
|       |      | Shiraz-4T  | 261  | 0        | -0.336249 |  |
|       |      | Shiraz-16T | 295  | 0.591657 | 0         |  |
|       |      | Shiraz-16T | 295  | 0.591657 | 0         |  |
|       |      | Shiraz-36T | 433  | 0        | -0.803961 |  |
|       |      | Shiraz-36T | 433  | 0        | -0.803961 |  |



|  |  |            |      |          |           |  |  |
|--|--|------------|------|----------|-----------|--|--|
|  |  | Shiraz-44T | 899  | 0        | -1.09697  |  |  |
|  |  | Shiraz-44T | 899  | 0        | -1.09697  |  |  |
|  |  | Shiraz-49T | 1170 | 0        | -0.967436 |  |  |
|  |  | Shiraz-49T | 1170 | 0        | -0.967436 |  |  |
|  |  | Shiraz-18T | 1457 | 0.643204 | 0         |  |  |
|  |  | Shiraz-18T | 1457 | 0.643204 | 0         |  |  |
|  |  | Shiraz-22T | 1673 | 0.611783 | 0         |  |  |
|  |  | Shiraz-22T | 1673 | 0.611783 | 0         |  |  |
|  |  | Shiraz-25T | 1719 | 0.472955 | 0         |  |  |
|  |  | Shiraz-25T | 1719 | 0.472955 | 0         |  |  |
|  |  | Shiraz-28T | 1762 | 0.562311 | 0         |  |  |
|  |  | Shiraz-28T | 1762 | 0.562311 | 0         |  |  |
|  |  | Shiraz-29T | 1801 | 0.815343 | 0         |  |  |
|  |  | Shiraz-29T | 1801 | 0.815343 | 0         |  |  |
|  |  | Shiraz-32T | 1870 | 0.729766 | 0         |  |  |
|  |  | Shiraz-32T | 1870 | 0.729766 | 0         |  |  |
|  |  | Shiraz-35T | 1933 | 0.488535 | 0         |  |  |
|  |  | Shiraz-35T | 1933 | 0.488535 | 0         |  |  |
|  |  | Shiraz-58T | 2223 | 0.833364 | 0         |  |  |
|  |  | Shiraz-58T | 2223 | 0.833364 | 0         |  |  |
|  |  | Shiraz-71T | 2263 | 0.975531 | 0         |  |  |
|  |  | Shiraz-71T | 2263 | 0.975531 | 0         |  |  |
|  |  | Shiraz-3T  | 242  | 0        | -0.336434 |  |  |
|  |  | Shiraz-3T  | 242  | 0        | -0.336434 |  |  |
|  |  | Shiraz-4T  | 261  | 0        | -0.336249 |  |  |
|  |  | Shiraz-4T  | 261  | 0        | -0.336249 |  |  |
|  |  | Shiraz-16T | 295  | 0.591657 | 0         |  |  |
|  |  | Shiraz-16T | 295  | 0.591657 | 0         |  |  |
|  |  | Shiraz-36T | 433  | 0        | -0.803961 |  |  |
|  |  | Shiraz-36T | 433  | 0        | -0.803961 |  |  |
|  |  | Shiraz-44T | 899  | 0        | -1.09697  |  |  |
|  |  | Shiraz-44T | 899  | 0        | -1.09697  |  |  |
|  |  | Shiraz-49T | 1170 | 0        | -0.967436 |  |  |
|  |  | Shiraz-49T | 1170 | 0        | -0.967436 |  |  |
|  |  | Shiraz-18T | 1457 | 0.643204 | 0         |  |  |
|  |  | Shiraz-18T | 1457 | 0.643204 | 0         |  |  |
|  |  | Shiraz-22T | 1673 | 0.611783 | 0         |  |  |
|  |  | Shiraz-22T | 1673 | 0.611783 | 0         |  |  |
|  |  | Shiraz-25T | 1719 | 0.472955 | 0         |  |  |
|  |  | Shiraz-25T | 1719 | 0.472955 | 0         |  |  |
|  |  | Shiraz-28T | 1762 | 0.562311 | 0         |  |  |
|  |  | Shiraz-28T | 1762 | 0.562311 | 0         |  |  |
|  |  | Shiraz-29T | 1801 | 0.815343 | 0         |  |  |
|  |  | Shiraz-29T | 1801 | 0.815343 | 0         |  |  |
|  |  | Shiraz-32T | 1870 | 0.729766 | 0         |  |  |
|  |  | Shiraz-32T | 1870 | 0.729766 | 0         |  |  |
|  |  | Shiraz-35T | 1933 | 0.488535 | 0         |  |  |

|       |      |            |      |          |           |  |  |
|-------|------|------------|------|----------|-----------|--|--|
|       |      | Shiraz-35T | 1933 | 0.488535 | 0         |  |  |
|       |      | Shiraz-58T | 2223 | 0.833364 | 0         |  |  |
|       |      | Shiraz-58T | 2223 | 0.833364 | 0         |  |  |
|       |      | Shiraz-71T | 2263 | 0.975531 | 0         |  |  |
|       |      | Shiraz-71T | 2263 | 0.975531 | 0         |  |  |
|       |      | Shiraz-3T  | 242  | 0        | -0.336434 |  |  |
|       |      | Shiraz-3T  | 242  | 0        | -0.336434 |  |  |
|       |      | Shiraz-4T  | 261  | 0        | -0.336249 |  |  |
|       |      | Shiraz-4T  | 261  | 0        | -0.336249 |  |  |
|       |      | Shiraz-16T | 295  | 0.591657 | 0         |  |  |
|       |      | Shiraz-16T | 295  | 0.591657 | 0         |  |  |
|       |      | Shiraz-36T | 433  | 0        | -0.803961 |  |  |
|       |      | Shiraz-36T | 433  | 0        | -0.803961 |  |  |
|       |      | Shiraz-44T | 899  | 0        | -1.09697  |  |  |
|       |      | Shiraz-44T | 899  | 0        | -1.09697  |  |  |
|       |      | Shiraz-49T | 1170 | 0        | -0.967436 |  |  |
|       |      | Shiraz-49T | 1170 | 0        | -0.967436 |  |  |
|       |      | Shiraz-18T | 1457 | 0.643204 | 0         |  |  |
|       |      | Shiraz-18T | 1457 | 0.643204 | 0         |  |  |
|       |      | Shiraz-22T | 1673 | 0.611783 | 0         |  |  |
|       |      | Shiraz-22T | 1673 | 0.611783 | 0         |  |  |
|       |      | Shiraz-25T | 1719 | 0.472955 | 0         |  |  |
|       |      | Shiraz-25T | 1719 | 0.472955 | 0         |  |  |
|       |      | Shiraz-28T | 1762 | 0.562311 | 0         |  |  |
|       |      | Shiraz-28T | 1762 | 0.562311 | 0         |  |  |
|       |      | Shiraz-29T | 1801 | 0.815343 | 0         |  |  |
|       |      | Shiraz-29T | 1801 | 0.815343 | 0         |  |  |
|       |      | Shiraz-32T | 1870 | 0.729766 | 0         |  |  |
|       |      | Shiraz-32T | 1870 | 0.729766 | 0         |  |  |
|       |      | Shiraz-35T | 1933 | 0.488535 | 0         |  |  |
|       |      | Shiraz-35T | 1933 | 0.488535 | 0         |  |  |
|       |      | Shiraz-58T | 2223 | 0.833364 | 0         |  |  |
|       |      | Shiraz-58T | 2223 | 0.833364 | 0         |  |  |
|       |      | Shiraz-71T | 2263 | 0.975531 | 0         |  |  |
|       |      | Shiraz-71T | 2263 | 0.975531 | 0         |  |  |
| ZMIZ2 | chr7 | Shiraz-3T  | 87   | 0.198593 | 0         |  |  |
|       |      | Shiraz-3T  | 87   | 0.198593 | 0         |  |  |
|       |      | Shiraz-3T  | 89   | 0.678641 | 0         |  |  |
|       |      | Shiraz-3T  | 89   | 0.678641 | 0         |  |  |
|       |      | Shiraz-4T  | 252  | 0.192083 | 0         |  |  |
|       |      | Shiraz-4T  | 252  | 0.192083 | 0         |  |  |
|       |      | Shiraz-36T | 376  | 0.159952 | 0         |  |  |
|       |      | Shiraz-36T | 376  | 0.159952 | 0         |  |  |
|       |      | Shiraz-44T | 632  | 0.902944 | 0         |  |  |
|       |      | Shiraz-44T | 632  | 0.902944 | 0         |  |  |
|       |      | Shiraz-46T | 942  | 0.069143 | 0         |  |  |
|       |      | Shiraz-46T | 942  | 0.069143 | 0         |  |  |

|  |  |            |      |          |   |  |  |
|--|--|------------|------|----------|---|--|--|
|  |  | Shiraz-77T | 1223 | 0.215647 | 0 |  |  |
|  |  | Shiraz-77T | 1223 | 0.215647 | 0 |  |  |
|  |  | Shiraz-18T | 1433 | 0.250973 | 0 |  |  |
|  |  | Shiraz-18T | 1433 | 0.250973 | 0 |  |  |
|  |  | Shiraz-25T | 1697 | 0.21945  | 0 |  |  |
|  |  | Shiraz-25T | 1697 | 0.21945  | 0 |  |  |
|  |  | Shiraz-28T | 1734 | 0.362882 | 0 |  |  |
|  |  | Shiraz-28T | 1734 | 0.362882 | 0 |  |  |
|  |  | Shiraz-29T | 1777 | 0.156747 | 0 |  |  |
|  |  | Shiraz-29T | 1777 | 0.156747 | 0 |  |  |
|  |  | Shiraz-38T | 1950 | 0.265916 | 0 |  |  |
|  |  | Shiraz-38T | 1950 | 0.265916 | 0 |  |  |
|  |  | Shiraz-71T | 2236 | 0.320072 | 0 |  |  |
|  |  | Shiraz-71T | 2236 | 0.320072 | 0 |  |  |
|  |  | Shiraz-3T  | 87   | 0.198593 | 0 |  |  |
|  |  | Shiraz-3T  | 87   | 0.198593 | 0 |  |  |
|  |  | Shiraz-3T  | 89   | 0.678641 | 0 |  |  |
|  |  | Shiraz-3T  | 89   | 0.678641 | 0 |  |  |
|  |  | Shiraz-4T  | 252  | 0.192083 | 0 |  |  |
|  |  | Shiraz-4T  | 252  | 0.192083 | 0 |  |  |
|  |  | Shiraz-36T | 376  | 0.159952 | 0 |  |  |
|  |  | Shiraz-36T | 376  | 0.159952 | 0 |  |  |
|  |  | Shiraz-44T | 632  | 0.902944 | 0 |  |  |
|  |  | Shiraz-44T | 632  | 0.902944 | 0 |  |  |
|  |  | Shiraz-46T | 942  | 0.069143 | 0 |  |  |
|  |  | Shiraz-46T | 942  | 0.069143 | 0 |  |  |
|  |  | Shiraz-77T | 1223 | 0.215647 | 0 |  |  |
|  |  | Shiraz-77T | 1223 | 0.215647 | 0 |  |  |
|  |  | Shiraz-18T | 1433 | 0.250973 | 0 |  |  |
|  |  | Shiraz-18T | 1433 | 0.250973 | 0 |  |  |
|  |  | Shiraz-25T | 1697 | 0.21945  | 0 |  |  |
|  |  | Shiraz-25T | 1697 | 0.21945  | 0 |  |  |
|  |  | Shiraz-28T | 1734 | 0.362882 | 0 |  |  |
|  |  | Shiraz-28T | 1734 | 0.362882 | 0 |  |  |
|  |  | Shiraz-29T | 1777 | 0.156747 | 0 |  |  |
|  |  | Shiraz-29T | 1777 | 0.156747 | 0 |  |  |
|  |  | Shiraz-38T | 1950 | 0.265916 | 0 |  |  |
|  |  | Shiraz-38T | 1950 | 0.265916 | 0 |  |  |
|  |  | Shiraz-71T | 2236 | 0.320072 | 0 |  |  |
|  |  | Shiraz-71T | 2236 | 0.320072 | 0 |  |  |
|  |  | Shiraz-3T  | 87   | 0.198593 | 0 |  |  |
|  |  | Shiraz-3T  | 87   | 0.198593 | 0 |  |  |
|  |  | Shiraz-3T  | 89   | 0.678641 | 0 |  |  |
|  |  | Shiraz-3T  | 89   | 0.678641 | 0 |  |  |
|  |  | Shiraz-4T  | 252  | 0.192083 | 0 |  |  |
|  |  | Shiraz-4T  | 252  | 0.192083 | 0 |  |  |
|  |  | Shiraz-36T | 376  | 0.159952 | 0 |  |  |

|       |      |            |      |          |           |  |  |
|-------|------|------------|------|----------|-----------|--|--|
|       |      | Shiraz-36T | 376  | 0.159952 | 0         |  |  |
|       |      | Shiraz-44T | 632  | 0.902944 | 0         |  |  |
|       |      | Shiraz-44T | 632  | 0.902944 | 0         |  |  |
|       |      | Shiraz-46T | 942  | 0.069143 | 0         |  |  |
|       |      | Shiraz-46T | 942  | 0.069143 | 0         |  |  |
|       |      | Shiraz-77T | 1223 | 0.215647 | 0         |  |  |
|       |      | Shiraz-77T | 1223 | 0.215647 | 0         |  |  |
|       |      | Shiraz-18T | 1433 | 0.250973 | 0         |  |  |
|       |      | Shiraz-18T | 1433 | 0.250973 | 0         |  |  |
|       |      | Shiraz-25T | 1697 | 0.21945  | 0         |  |  |
|       |      | Shiraz-25T | 1697 | 0.21945  | 0         |  |  |
|       |      | Shiraz-28T | 1734 | 0.362882 | 0         |  |  |
|       |      | Shiraz-28T | 1734 | 0.362882 | 0         |  |  |
|       |      | Shiraz-29T | 1777 | 0.156747 | 0         |  |  |
|       |      | Shiraz-29T | 1777 | 0.156747 | 0         |  |  |
|       |      | Shiraz-38T | 1950 | 0.265916 | 0         |  |  |
|       |      | Shiraz-38T | 1950 | 0.265916 | 0         |  |  |
|       |      | Shiraz-71T | 2236 | 0.320072 | 0         |  |  |
|       |      | Shiraz-71T | 2236 | 0.320072 | 0         |  |  |
| ZMYM3 | chrX | Shiraz-4T  | 261  | 0        | -0.336249 |  |  |
|       |      | Shiraz-4T  | 261  | 0        | -0.336249 |  |  |
|       |      | Shiraz-16T | 295  | 0.591657 | 0         |  |  |
|       |      | Shiraz-16T | 295  | 0.591657 | 0         |  |  |
|       |      | Shiraz-36T | 433  | 0        | -0.803961 |  |  |
|       |      | Shiraz-36T | 433  | 0        | -0.803961 |  |  |
|       |      | Shiraz-44T | 899  | 0        | -1.09697  |  |  |
|       |      | Shiraz-44T | 899  | 0        | -1.09697  |  |  |
|       |      | Shiraz-44T | 900  | 0        | -0.584284 |  |  |
|       |      | Shiraz-44T | 900  | 0        | -0.584284 |  |  |
|       |      | Shiraz-49T | 1170 | 0        | -0.967436 |  |  |
|       |      | Shiraz-49T | 1170 | 0        | -0.967436 |  |  |
|       |      | Shiraz-49T | 1171 | 0        | -0.612379 |  |  |
|       |      | Shiraz-49T | 1171 | 0        | -0.612379 |  |  |
|       |      | Shiraz-77T | 1283 | 0.296555 | 0         |  |  |
|       |      | Shiraz-77T | 1283 | 0.296555 | 0         |  |  |
|       |      | Shiraz-18T | 1457 | 0.643204 | 0         |  |  |
|       |      | Shiraz-18T | 1457 | 0.643204 | 0         |  |  |
|       |      | Shiraz-22T | 1673 | 0.611783 | 0         |  |  |
|       |      | Shiraz-22T | 1673 | 0.611783 | 0         |  |  |
|       |      | Shiraz-22T | 1674 | 0.887899 | 0         |  |  |
|       |      | Shiraz-22T | 1674 | 0.887899 | 0         |  |  |
|       |      | Shiraz-25T | 1719 | 0.472955 | 0         |  |  |
|       |      | Shiraz-25T | 1719 | 0.472955 | 0         |  |  |
|       |      | Shiraz-28T | 1762 | 0.562311 | 0         |  |  |
|       |      | Shiraz-28T | 1762 | 0.562311 | 0         |  |  |
|       |      | Shiraz-29T | 1801 | 0.815343 | 0         |  |  |
|       |      | Shiraz-29T | 1801 | 0.815343 | 0         |  |  |

|  |  |            |      |          |           |  |  |
|--|--|------------|------|----------|-----------|--|--|
|  |  | Shiraz-32T | 1870 | 0.729766 | 0         |  |  |
|  |  | Shiraz-32T | 1870 | 0.729766 | 0         |  |  |
|  |  | Shiraz-35T | 1933 | 0.488535 | 0         |  |  |
|  |  | Shiraz-35T | 1933 | 0.488535 | 0         |  |  |
|  |  | Shiraz-58T | 2223 | 0.833364 | 0         |  |  |
|  |  | Shiraz-58T | 2223 | 0.833364 | 0         |  |  |
|  |  | Shiraz-58T | 2224 | 1.076575 | 0         |  |  |
|  |  | Shiraz-58T | 2224 | 1.076575 | 0         |  |  |
|  |  | Shiraz-71T | 2263 | 0.975531 | 0         |  |  |
|  |  | Shiraz-71T | 2263 | 0.975531 | 0         |  |  |
|  |  | Shiraz-4T  | 261  | 0        | -0.336249 |  |  |
|  |  | Shiraz-4T  | 261  | 0        | -0.336249 |  |  |
|  |  | Shiraz-16T | 295  | 0.591657 | 0         |  |  |
|  |  | Shiraz-16T | 295  | 0.591657 | 0         |  |  |
|  |  | Shiraz-36T | 433  | 0        | -0.803961 |  |  |
|  |  | Shiraz-36T | 433  | 0        | -0.803961 |  |  |
|  |  | Shiraz-44T | 899  | 0        | -1.09697  |  |  |
|  |  | Shiraz-44T | 899  | 0        | -1.09697  |  |  |
|  |  | Shiraz-44T | 900  | 0        | -0.584284 |  |  |
|  |  | Shiraz-44T | 900  | 0        | -0.584284 |  |  |
|  |  | Shiraz-49T | 1170 | 0        | -0.967436 |  |  |
|  |  | Shiraz-49T | 1170 | 0        | -0.967436 |  |  |
|  |  | Shiraz-49T | 1171 | 0        | -0.612379 |  |  |
|  |  | Shiraz-49T | 1171 | 0        | -0.612379 |  |  |
|  |  | Shiraz-77T | 1283 | 0.296555 | 0         |  |  |
|  |  | Shiraz-77T | 1283 | 0.296555 | 0         |  |  |
|  |  | Shiraz-18T | 1457 | 0.643204 | 0         |  |  |
|  |  | Shiraz-18T | 1457 | 0.643204 | 0         |  |  |
|  |  | Shiraz-22T | 1673 | 0.611783 | 0         |  |  |
|  |  | Shiraz-22T | 1673 | 0.611783 | 0         |  |  |
|  |  | Shiraz-22T | 1674 | 0.887899 | 0         |  |  |
|  |  | Shiraz-22T | 1674 | 0.887899 | 0         |  |  |
|  |  | Shiraz-25T | 1719 | 0.472955 | 0         |  |  |
|  |  | Shiraz-25T | 1719 | 0.472955 | 0         |  |  |
|  |  | Shiraz-28T | 1762 | 0.562311 | 0         |  |  |
|  |  | Shiraz-28T | 1762 | 0.562311 | 0         |  |  |
|  |  | Shiraz-29T | 1801 | 0.815343 | 0         |  |  |
|  |  | Shiraz-29T | 1801 | 0.815343 | 0         |  |  |
|  |  | Shiraz-32T | 1870 | 0.729766 | 0         |  |  |
|  |  | Shiraz-32T | 1870 | 0.729766 | 0         |  |  |
|  |  | Shiraz-35T | 1933 | 0.488535 | 0         |  |  |
|  |  | Shiraz-35T | 1933 | 0.488535 | 0         |  |  |
|  |  | Shiraz-58T | 2223 | 0.833364 | 0         |  |  |
|  |  | Shiraz-58T | 2223 | 0.833364 | 0         |  |  |
|  |  | Shiraz-58T | 2224 | 1.076575 | 0         |  |  |
|  |  | Shiraz-58T | 2224 | 1.076575 | 0         |  |  |
|  |  | Shiraz-71T | 2263 | 0.975531 | 0         |  |  |

|        |      |            |      |          |           |  |  |
|--------|------|------------|------|----------|-----------|--|--|
|        |      | Shiraz-71T | 2263 | 0.975531 | 0         |  |  |
|        |      | Shiraz-4T  | 261  | 0        | -0.336249 |  |  |
|        |      | Shiraz-4T  | 261  | 0        | -0.336249 |  |  |
|        |      | Shiraz-16T | 295  | 0.591657 | 0         |  |  |
|        |      | Shiraz-16T | 295  | 0.591657 | 0         |  |  |
|        |      | Shiraz-36T | 433  | 0        | -0.803961 |  |  |
|        |      | Shiraz-36T | 433  | 0        | -0.803961 |  |  |
|        |      | Shiraz-44T | 899  | 0        | -1.09697  |  |  |
|        |      | Shiraz-44T | 899  | 0        | -1.09697  |  |  |
|        |      | Shiraz-44T | 900  | 0        | -0.584284 |  |  |
|        |      | Shiraz-44T | 900  | 0        | -0.584284 |  |  |
|        |      | Shiraz-49T | 1170 | 0        | -0.967436 |  |  |
|        |      | Shiraz-49T | 1170 | 0        | -0.967436 |  |  |
|        |      | Shiraz-49T | 1171 | 0        | -0.612379 |  |  |
|        |      | Shiraz-49T | 1171 | 0        | -0.612379 |  |  |
|        |      | Shiraz-77T | 1283 | 0.296555 | 0         |  |  |
|        |      | Shiraz-77T | 1283 | 0.296555 | 0         |  |  |
|        |      | Shiraz-18T | 1457 | 0.643204 | 0         |  |  |
|        |      | Shiraz-18T | 1457 | 0.643204 | 0         |  |  |
|        |      | Shiraz-22T | 1673 | 0.611783 | 0         |  |  |
|        |      | Shiraz-22T | 1673 | 0.611783 | 0         |  |  |
|        |      | Shiraz-22T | 1674 | 0.887899 | 0         |  |  |
|        |      | Shiraz-22T | 1674 | 0.887899 | 0         |  |  |
|        |      | Shiraz-25T | 1719 | 0.472955 | 0         |  |  |
|        |      | Shiraz-25T | 1719 | 0.472955 | 0         |  |  |
|        |      | Shiraz-28T | 1762 | 0.562311 | 0         |  |  |
|        |      | Shiraz-28T | 1762 | 0.562311 | 0         |  |  |
|        |      | Shiraz-29T | 1801 | 0.815343 | 0         |  |  |
|        |      | Shiraz-29T | 1801 | 0.815343 | 0         |  |  |
|        |      | Shiraz-32T | 1870 | 0.729766 | 0         |  |  |
|        |      | Shiraz-32T | 1870 | 0.729766 | 0         |  |  |
|        |      | Shiraz-35T | 1933 | 0.488535 | 0         |  |  |
|        |      | Shiraz-35T | 1933 | 0.488535 | 0         |  |  |
|        |      | Shiraz-58T | 2223 | 0.833364 | 0         |  |  |
|        |      | Shiraz-58T | 2223 | 0.833364 | 0         |  |  |
|        |      | Shiraz-58T | 2224 | 1.076575 | 0         |  |  |
|        |      | Shiraz-58T | 2224 | 1.076575 | 0         |  |  |
|        |      | Shiraz-71T | 2263 | 0.975531 | 0         |  |  |
|        |      | Shiraz-71T | 2263 | 0.975531 | 0         |  |  |
| ZNF131 | chr5 | Shiraz-4T  | 250  | 0.262252 | 0         |  |  |
|        |      | Shiraz-16T | 266  | 0.321724 | 0         |  |  |
|        |      | Shiraz-44T | 591  | 0        | -0.233934 |  |  |
|        |      | Shiraz-18T | 1429 | 0        | -0.314125 |  |  |
|        |      | Shiraz-22T | 1522 | 0        | -0.322688 |  |  |
|        |      | Shiraz-25T | 1694 | 0.201602 | 0         |  |  |
|        |      | Shiraz-28T | 1731 | 0.295447 | 0         |  |  |
|        |      | Shiraz-29T | 1773 | 0.090981 | 0         |  |  |

|        |      |            |      |          |           |  |
|--------|------|------------|------|----------|-----------|--|
|        |      | Shiraz-40T | 2016 | 0.376634 | 0         |  |
|        |      | Shiraz-4T  | 250  | 0.262252 | 0         |  |
|        |      | Shiraz-16T | 266  | 0.321724 | 0         |  |
|        |      | Shiraz-44T | 591  | 0        | -0.233934 |  |
|        |      | Shiraz-18T | 1429 | 0        | -0.314125 |  |
|        |      | Shiraz-22T | 1522 | 0        | -0.322688 |  |
|        |      | Shiraz-25T | 1694 | 0.201602 | 0         |  |
|        |      | Shiraz-28T | 1731 | 0.295447 | 0         |  |
|        |      | Shiraz-29T | 1773 | 0.090981 | 0         |  |
|        |      | Shiraz-40T | 2016 | 0.376634 | 0         |  |
|        |      | Shiraz-4T  | 250  | 0.262252 | 0         |  |
|        |      | Shiraz-16T | 266  | 0.321724 | 0         |  |
|        |      | Shiraz-44T | 591  | 0        | -0.233934 |  |
|        |      | Shiraz-18T | 1429 | 0        | -0.314125 |  |
|        |      | Shiraz-22T | 1522 | 0        | -0.322688 |  |
|        |      | Shiraz-25T | 1694 | 0.201602 | 0         |  |
|        |      | Shiraz-28T | 1731 | 0.295447 | 0         |  |
|        |      | Shiraz-29T | 1773 | 0.090981 | 0         |  |
|        |      | Shiraz-40T | 2016 | 0.376634 | 0         |  |
| ZNF157 | chrX | Shiraz-4T  | 260  | 0        | -0.324128 |  |
|        |      | Shiraz-16T | 294  | 0.655804 | 0         |  |
|        |      | Shiraz-31T | 345  | 0.103301 | 0         |  |
|        |      | Shiraz-36T | 431  | 0        | -0.78035  |  |
|        |      | Shiraz-36T | 432  | 0        | -0.6692   |  |
|        |      | Shiraz-44T | 891  | 0        | -0.954044 |  |
|        |      | Shiraz-44T | 896  | 0        | -0.109108 |  |
|        |      | Shiraz-46T | 991  | 0.139564 | 0         |  |
|        |      | Shiraz-47T | 1084 | 0.24185  | 0         |  |
|        |      | Shiraz-49T | 1166 | 0        | -0.917235 |  |
|        |      | Shiraz-49T | 1169 | 0        | -0.583529 |  |
|        |      | Shiraz-77T | 1282 | 0.213849 | 0         |  |
|        |      | Shiraz-9T  | 1368 | 0.199713 | 0         |  |
|        |      | Shiraz-9T  | 1369 | 0.703374 | 0         |  |
|        |      | Shiraz-18T | 1455 | 0        | -0.186773 |  |
|        |      | Shiraz-22T | 1669 | 0.695915 | 0         |  |
|        |      | Shiraz-22T | 1672 | 1.01678  | 0         |  |
|        |      | Shiraz-25T | 1717 | 0.420447 | 0         |  |
|        |      | Shiraz-28T | 1760 | 0.538181 | 0         |  |
|        |      | Shiraz-29T | 1800 | 0.672527 | 0         |  |
|        |      | Shiraz-32T | 1869 | 0.776805 | 0         |  |
|        |      | Shiraz-35T | 1932 | 0.507141 | 0         |  |
|        |      | Shiraz-40T | 2051 | 0.098506 | 0         |  |
|        |      | Shiraz-58T | 2221 | 0.871948 | 0         |  |
|        |      | Shiraz-71T | 2260 | 0.68394  | 0         |  |
|        |      | Shiraz-71T | 2262 | 0.986748 | 0         |  |
|        |      | Shiraz-4T  | 260  | 0        | -0.324128 |  |
|        |      | Shiraz-16T | 294  | 0.655804 | 0         |  |

|  |            |      |          |           |  |
|--|------------|------|----------|-----------|--|
|  | Shiraz-31T | 345  | 0.103301 | 0         |  |
|  | Shiraz-36T | 431  | 0        | -0.78035  |  |
|  | Shiraz-36T | 432  | 0        | -0.6692   |  |
|  | Shiraz-44T | 891  | 0        | -0.954044 |  |
|  | Shiraz-44T | 896  | 0        | -0.109108 |  |
|  | Shiraz-46T | 991  | 0.139564 | 0         |  |
|  | Shiraz-47T | 1084 | 0.24185  | 0         |  |
|  | Shiraz-49T | 1166 | 0        | -0.917235 |  |
|  | Shiraz-49T | 1169 | 0        | -0.583529 |  |
|  | Shiraz-77T | 1282 | 0.213849 | 0         |  |
|  | Shiraz-9T  | 1368 | 0.199713 | 0         |  |
|  | Shiraz-9T  | 1369 | 0.703374 | 0         |  |
|  | Shiraz-18T | 1455 | 0        | -0.186773 |  |
|  | Shiraz-22T | 1669 | 0.695915 | 0         |  |
|  | Shiraz-22T | 1672 | 1.01678  | 0         |  |
|  | Shiraz-25T | 1717 | 0.420447 | 0         |  |
|  | Shiraz-28T | 1760 | 0.538181 | 0         |  |
|  | Shiraz-29T | 1800 | 0.672527 | 0         |  |
|  | Shiraz-32T | 1869 | 0.776805 | 0         |  |
|  | Shiraz-35T | 1932 | 0.507141 | 0         |  |
|  | Shiraz-40T | 2051 | 0.098506 | 0         |  |
|  | Shiraz-58T | 2221 | 0.871948 | 0         |  |
|  | Shiraz-71T | 2260 | 0.68394  | 0         |  |
|  | Shiraz-71T | 2262 | 0.986748 | 0         |  |
|  | Shiraz-4T  | 260  | 0        | -0.324128 |  |
|  | Shiraz-16T | 294  | 0.655804 | 0         |  |
|  | Shiraz-31T | 345  | 0.103301 | 0         |  |
|  | Shiraz-36T | 431  | 0        | -0.78035  |  |
|  | Shiraz-36T | 432  | 0        | -0.6692   |  |
|  | Shiraz-44T | 891  | 0        | -0.954044 |  |
|  | Shiraz-44T | 896  | 0        | -0.109108 |  |
|  | Shiraz-46T | 991  | 0.139564 | 0         |  |
|  | Shiraz-47T | 1084 | 0.24185  | 0         |  |
|  | Shiraz-49T | 1166 | 0        | -0.917235 |  |
|  | Shiraz-49T | 1169 | 0        | -0.583529 |  |
|  | Shiraz-77T | 1282 | 0.213849 | 0         |  |
|  | Shiraz-9T  | 1368 | 0.199713 | 0         |  |
|  | Shiraz-9T  | 1369 | 0.703374 | 0         |  |
|  | Shiraz-18T | 1455 | 0        | -0.186773 |  |
|  | Shiraz-22T | 1669 | 0.695915 | 0         |  |
|  | Shiraz-22T | 1672 | 1.01678  | 0         |  |
|  | Shiraz-25T | 1717 | 0.420447 | 0         |  |
|  | Shiraz-28T | 1760 | 0.538181 | 0         |  |
|  | Shiraz-29T | 1800 | 0.672527 | 0         |  |
|  | Shiraz-32T | 1869 | 0.776805 | 0         |  |
|  | Shiraz-35T | 1932 | 0.507141 | 0         |  |
|  | Shiraz-40T | 2051 | 0.098506 | 0         |  |



|        |      |            |      |          |           |  |
|--------|------|------------|------|----------|-----------|--|
|        |      | Shiraz-58T | 2221 | 0.871948 | 0         |  |
|        |      | Shiraz-71T | 2260 | 0.68394  | 0         |  |
|        |      | Shiraz-71T | 2262 | 0.986748 | 0         |  |
| ZNF182 | chrX | Shiraz-4T  | 260  | 0        | -0.324128 |  |
|        |      | Shiraz-16T | 294  | 0.655804 | 0         |  |
|        |      | Shiraz-31T | 345  | 0.103301 | 0         |  |
|        |      | Shiraz-36T | 431  | 0        | -0.78035  |  |
|        |      | Shiraz-36T | 432  | 0        | -0.6692   |  |
|        |      | Shiraz-44T | 891  | 0        | -0.954044 |  |
|        |      | Shiraz-44T | 896  | 0        | -0.109108 |  |
|        |      | Shiraz-46T | 991  | 0.139564 | 0         |  |
|        |      | Shiraz-47T | 1084 | 0.24185  | 0         |  |
|        |      | Shiraz-49T | 1166 | 0        | -0.917235 |  |
|        |      | Shiraz-49T | 1169 | 0        | -0.583529 |  |
|        |      | Shiraz-77T | 1282 | 0.213849 | 0         |  |
|        |      | Shiraz-9T  | 1368 | 0.199713 | 0         |  |
|        |      | Shiraz-9T  | 1369 | 0.703374 | 0         |  |
|        |      | Shiraz-18T | 1455 | 0        | -0.186773 |  |
|        |      | Shiraz-22T | 1669 | 0.695915 | 0         |  |
|        |      | Shiraz-22T | 1672 | 1.01678  | 0         |  |
|        |      | Shiraz-25T | 1717 | 0.420447 | 0         |  |
|        |      | Shiraz-28T | 1760 | 0.538181 | 0         |  |
|        |      | Shiraz-29T | 1800 | 0.672527 | 0         |  |
|        |      | Shiraz-32T | 1869 | 0.776805 | 0         |  |
|        |      | Shiraz-35T | 1932 | 0.507141 | 0         |  |
|        |      | Shiraz-58T | 2221 | 0.871948 | 0         |  |
|        |      | Shiraz-71T | 2260 | 0.68394  | 0         |  |
|        |      | Shiraz-71T | 2262 | 0.986748 | 0         |  |
|        |      | Shiraz-4T  | 260  | 0        | -0.324128 |  |
|        |      | Shiraz-16T | 294  | 0.655804 | 0         |  |
|        |      | Shiraz-31T | 345  | 0.103301 | 0         |  |
|        |      | Shiraz-36T | 431  | 0        | -0.78035  |  |
|        |      | Shiraz-36T | 432  | 0        | -0.6692   |  |
|        |      | Shiraz-44T | 891  | 0        | -0.954044 |  |
|        |      | Shiraz-44T | 896  | 0        | -0.109108 |  |
|        |      | Shiraz-46T | 991  | 0.139564 | 0         |  |
|        |      | Shiraz-47T | 1084 | 0.24185  | 0         |  |
|        |      | Shiraz-49T | 1166 | 0        | -0.917235 |  |
|        |      | Shiraz-49T | 1169 | 0        | -0.583529 |  |
|        |      | Shiraz-77T | 1282 | 0.213849 | 0         |  |
|        |      | Shiraz-9T  | 1368 | 0.199713 | 0         |  |
|        |      | Shiraz-9T  | 1369 | 0.703374 | 0         |  |
|        |      | Shiraz-18T | 1455 | 0        | -0.186773 |  |
|        |      | Shiraz-22T | 1669 | 0.695915 | 0         |  |
|        |      | Shiraz-22T | 1672 | 1.01678  | 0         |  |
|        |      | Shiraz-25T | 1717 | 0.420447 | 0         |  |
|        |      | Shiraz-28T | 1760 | 0.538181 | 0         |  |

|        |      |            |      |          |           |  |
|--------|------|------------|------|----------|-----------|--|
|        |      | Shiraz-29T | 1800 | 0.672527 | 0         |  |
|        |      | Shiraz-32T | 1869 | 0.776805 | 0         |  |
|        |      | Shiraz-35T | 1932 | 0.507141 | 0         |  |
|        |      | Shiraz-58T | 2221 | 0.871948 | 0         |  |
|        |      | Shiraz-71T | 2260 | 0.68394  | 0         |  |
|        |      | Shiraz-71T | 2262 | 0.986748 | 0         |  |
|        |      | Shiraz-4T  | 260  | 0        | -0.324128 |  |
|        |      | Shiraz-16T | 294  | 0.655804 | 0         |  |
|        |      | Shiraz-31T | 345  | 0.103301 | 0         |  |
|        |      | Shiraz-36T | 431  | 0        | -0.78035  |  |
|        |      | Shiraz-36T | 432  | 0        | -0.6692   |  |
|        |      | Shiraz-44T | 891  | 0        | -0.954044 |  |
|        |      | Shiraz-44T | 896  | 0        | -0.109108 |  |
|        |      | Shiraz-46T | 991  | 0.139564 | 0         |  |
|        |      | Shiraz-47T | 1084 | 0.24185  | 0         |  |
|        |      | Shiraz-49T | 1166 | 0        | -0.917235 |  |
|        |      | Shiraz-49T | 1169 | 0        | -0.583529 |  |
|        |      | Shiraz-77T | 1282 | 0.213849 | 0         |  |
|        |      | Shiraz-9T  | 1368 | 0.199713 | 0         |  |
|        |      | Shiraz-9T  | 1369 | 0.703374 | 0         |  |
|        |      | Shiraz-18T | 1455 | 0        | -0.186773 |  |
|        |      | Shiraz-22T | 1669 | 0.695915 | 0         |  |
|        |      | Shiraz-22T | 1672 | 1.01678  | 0         |  |
|        |      | Shiraz-25T | 1717 | 0.420447 | 0         |  |
|        |      | Shiraz-28T | 1760 | 0.538181 | 0         |  |
|        |      | Shiraz-29T | 1800 | 0.672527 | 0         |  |
|        |      | Shiraz-32T | 1869 | 0.776805 | 0         |  |
|        |      | Shiraz-35T | 1932 | 0.507141 | 0         |  |
|        |      | Shiraz-58T | 2221 | 0.871948 | 0         |  |
|        |      | Shiraz-71T | 2260 | 0.68394  | 0         |  |
|        |      | Shiraz-71T | 2262 | 0.986748 | 0         |  |
| ZNF185 | chrX | Shiraz-4T  | 261  | 0        | -0.336249 |  |
|        |      | Shiraz-16T | 295  | 0.591657 | 0         |  |
|        |      | Shiraz-36T | 433  | 0        | -0.803961 |  |
|        |      | Shiraz-42T | 480  | 0        | -0.232915 |  |
|        |      | Shiraz-49T | 1170 | 0        | -0.967436 |  |
|        |      | Shiraz-9T  | 1370 | 0.690073 | 0         |  |
|        |      | Shiraz-9T  | 1371 | 1.292392 | 0         |  |
|        |      | Shiraz-18T | 1457 | 0.643204 | 0         |  |
|        |      | Shiraz-22T | 1673 | 0.611783 | 0         |  |
|        |      | Shiraz-22T | 1678 | 0.911625 | 0         |  |
|        |      | Shiraz-25T | 1719 | 0.472955 | 0         |  |
|        |      | Shiraz-28T | 1762 | 0.562311 | 0         |  |
|        |      | Shiraz-29T | 1801 | 0.815343 | 0         |  |
|        |      | Shiraz-32T | 1870 | 0.729766 | 0         |  |
|        |      | Shiraz-32T | 1872 | 1.504553 | 0         |  |
|        |      | Shiraz-35T | 1933 | 0.488535 | 0         |  |

|        |      |            |      |          |           |  |
|--------|------|------------|------|----------|-----------|--|
|        |      | Shiraz-53T | 2115 | 0.427728 | 0         |  |
|        |      | Shiraz-58T | 2223 | 0.833364 | 0         |  |
|        |      | Shiraz-58T | 2226 | 1.074663 | 0         |  |
|        |      | Shiraz-71T | 2263 | 0.975531 | 0         |  |
|        |      | Shiraz-4T  | 261  | 0        | -0.336249 |  |
|        |      | Shiraz-16T | 295  | 0.591657 | 0         |  |
|        |      | Shiraz-36T | 433  | 0        | -0.803961 |  |
|        |      | Shiraz-42T | 480  | 0        | -0.232915 |  |
|        |      | Shiraz-49T | 1170 | 0        | -0.967436 |  |
|        |      | Shiraz-9T  | 1370 | 0.690073 | 0         |  |
|        |      | Shiraz-9T  | 1371 | 1.292392 | 0         |  |
|        |      | Shiraz-18T | 1457 | 0.643204 | 0         |  |
|        |      | Shiraz-22T | 1673 | 0.611783 | 0         |  |
|        |      | Shiraz-22T | 1678 | 0.911625 | 0         |  |
|        |      | Shiraz-25T | 1719 | 0.472955 | 0         |  |
|        |      | Shiraz-28T | 1762 | 0.562311 | 0         |  |
|        |      | Shiraz-29T | 1801 | 0.815343 | 0         |  |
|        |      | Shiraz-32T | 1870 | 0.729766 | 0         |  |
|        |      | Shiraz-32T | 1872 | 1.504553 | 0         |  |
|        |      | Shiraz-35T | 1933 | 0.488535 | 0         |  |
|        |      | Shiraz-53T | 2115 | 0.427728 | 0         |  |
|        |      | Shiraz-58T | 2223 | 0.833364 | 0         |  |
|        |      | Shiraz-58T | 2226 | 1.074663 | 0         |  |
|        |      | Shiraz-71T | 2263 | 0.975531 | 0         |  |
|        |      | Shiraz-4T  | 261  | 0        | -0.336249 |  |
|        |      | Shiraz-16T | 295  | 0.591657 | 0         |  |
|        |      | Shiraz-36T | 433  | 0        | -0.803961 |  |
|        |      | Shiraz-42T | 480  | 0        | -0.232915 |  |
|        |      | Shiraz-49T | 1170 | 0        | -0.967436 |  |
|        |      | Shiraz-9T  | 1370 | 0.690073 | 0         |  |
|        |      | Shiraz-9T  | 1371 | 1.292392 | 0         |  |
|        |      | Shiraz-18T | 1457 | 0.643204 | 0         |  |
|        |      | Shiraz-22T | 1673 | 0.611783 | 0         |  |
|        |      | Shiraz-22T | 1678 | 0.911625 | 0         |  |
|        |      | Shiraz-25T | 1719 | 0.472955 | 0         |  |
|        |      | Shiraz-28T | 1762 | 0.562311 | 0         |  |
|        |      | Shiraz-29T | 1801 | 0.815343 | 0         |  |
|        |      | Shiraz-32T | 1870 | 0.729766 | 0         |  |
|        |      | Shiraz-32T | 1872 | 1.504553 | 0         |  |
|        |      | Shiraz-35T | 1933 | 0.488535 | 0         |  |
|        |      | Shiraz-53T | 2115 | 0.427728 | 0         |  |
|        |      | Shiraz-58T | 2223 | 0.833364 | 0         |  |
|        |      | Shiraz-58T | 2226 | 1.074663 | 0         |  |
|        |      | Shiraz-71T | 2263 | 0.975531 | 0         |  |
| ZNF212 | chr7 | Shiraz-3T  | 90   | 0.219276 | 0         |  |
|        |      | Shiraz-3T  | 99   | 0.454766 | 0         |  |
|        |      | Shiraz-4T  | 253  | 0.372918 | 0         |  |

|        |      |            |      |          |           |  |
|--------|------|------------|------|----------|-----------|--|
|        |      | Shiraz-36T | 378  | 0.179558 | 0         |  |
|        |      | Shiraz-44T | 646  | 0.471276 | 0         |  |
|        |      | Shiraz-46T | 943  | 0.093799 | 0         |  |
|        |      | Shiraz-9T  | 1325 | 0.221899 | 0         |  |
|        |      | Shiraz-18T | 1434 | 0.244465 | 0         |  |
|        |      | Shiraz-25T | 1698 | 0.21835  | 0         |  |
|        |      | Shiraz-28T | 1735 | 0.350744 | 0         |  |
|        |      | Shiraz-29T | 1778 | 0.120767 | 0         |  |
|        |      | Shiraz-32T | 1833 | 0.551336 | 0         |  |
|        |      | Shiraz-38T | 1951 | 0.250891 | 0         |  |
|        |      | Shiraz-53T | 2078 | 0.287202 | 0         |  |
|        |      | Shiraz-58T | 2162 | 0.221505 | 0         |  |
|        |      | Shiraz-71T | 2238 | 0.603631 | 0         |  |
|        |      | Shiraz-3T  | 90   | 0.219276 | 0         |  |
|        |      | Shiraz-3T  | 99   | 0.454766 | 0         |  |
|        |      | Shiraz-4T  | 253  | 0.372918 | 0         |  |
|        |      | Shiraz-36T | 378  | 0.179558 | 0         |  |
|        |      | Shiraz-44T | 646  | 0.471276 | 0         |  |
|        |      | Shiraz-46T | 943  | 0.093799 | 0         |  |
|        |      | Shiraz-9T  | 1325 | 0.221899 | 0         |  |
|        |      | Shiraz-18T | 1434 | 0.244465 | 0         |  |
|        |      | Shiraz-25T | 1698 | 0.21835  | 0         |  |
|        |      | Shiraz-28T | 1735 | 0.350744 | 0         |  |
|        |      | Shiraz-29T | 1778 | 0.120767 | 0         |  |
|        |      | Shiraz-32T | 1833 | 0.551336 | 0         |  |
|        |      | Shiraz-38T | 1951 | 0.250891 | 0         |  |
|        |      | Shiraz-53T | 2078 | 0.287202 | 0         |  |
|        |      | Shiraz-58T | 2162 | 0.221505 | 0         |  |
|        |      | Shiraz-71T | 2238 | 0.603631 | 0         |  |
|        |      | Shiraz-3T  | 90   | 0.219276 | 0         |  |
|        |      | Shiraz-3T  | 99   | 0.454766 | 0         |  |
|        |      | Shiraz-4T  | 253  | 0.372918 | 0         |  |
|        |      | Shiraz-36T | 378  | 0.179558 | 0         |  |
|        |      | Shiraz-44T | 646  | 0.471276 | 0         |  |
|        |      | Shiraz-46T | 943  | 0.093799 | 0         |  |
|        |      | Shiraz-9T  | 1325 | 0.221899 | 0         |  |
|        |      | Shiraz-18T | 1434 | 0.244465 | 0         |  |
|        |      | Shiraz-25T | 1698 | 0.21835  | 0         |  |
|        |      | Shiraz-28T | 1735 | 0.350744 | 0         |  |
|        |      | Shiraz-29T | 1778 | 0.120767 | 0         |  |
|        |      | Shiraz-32T | 1833 | 0.551336 | 0         |  |
|        |      | Shiraz-38T | 1951 | 0.250891 | 0         |  |
|        |      | Shiraz-53T | 2078 | 0.287202 | 0         |  |
|        |      | Shiraz-58T | 2162 | 0.221505 | 0         |  |
|        |      | Shiraz-71T | 2238 | 0.603631 | 0         |  |
| ZNF275 | chrX | Shiraz-4T  | 261  | 0        | -0.336249 |  |
|        |      | Shiraz-16T | 295  | 0.591657 | 0         |  |

|  |            |      |          |           |  |
|--|------------|------|----------|-----------|--|
|  | Shiraz-36T | 433  | 0        | -0.803961 |  |
|  | Shiraz-42T | 480  | 0        | -0.232915 |  |
|  | Shiraz-49T | 1170 | 0        | -0.967436 |  |
|  | Shiraz-49T | 1173 | 0        | -0.704439 |  |
|  | Shiraz-9T  | 1370 | 0.690073 | 0         |  |
|  | Shiraz-9T  | 1371 | 1.292392 | 0         |  |
|  | Shiraz-18T | 1457 | 0.643204 | 0         |  |
|  | Shiraz-22T | 1673 | 0.611783 | 0         |  |
|  | Shiraz-22T | 1678 | 0.911625 | 0         |  |
|  | Shiraz-25T | 1719 | 0.472955 | 0         |  |
|  | Shiraz-28T | 1762 | 0.562311 | 0         |  |
|  | Shiraz-29T | 1801 | 0.815343 | 0         |  |
|  | Shiraz-32T | 1870 | 0.729766 | 0         |  |
|  | Shiraz-32T | 1872 | 1.504553 | 0         |  |
|  | Shiraz-35T | 1933 | 0.488535 | 0         |  |
|  | Shiraz-53T | 2115 | 0.427728 | 0         |  |
|  | Shiraz-58T | 2223 | 0.833364 | 0         |  |
|  | Shiraz-58T | 2226 | 1.074663 | 0         |  |
|  | Shiraz-71T | 2263 | 0.975531 | 0         |  |
|  | Shiraz-4T  | 261  | 0        | -0.336249 |  |
|  | Shiraz-16T | 295  | 0.591657 | 0         |  |
|  | Shiraz-36T | 433  | 0        | -0.803961 |  |
|  | Shiraz-42T | 480  | 0        | -0.232915 |  |
|  | Shiraz-49T | 1170 | 0        | -0.967436 |  |
|  | Shiraz-49T | 1173 | 0        | -0.704439 |  |
|  | Shiraz-9T  | 1370 | 0.690073 | 0         |  |
|  | Shiraz-9T  | 1371 | 1.292392 | 0         |  |
|  | Shiraz-18T | 1457 | 0.643204 | 0         |  |
|  | Shiraz-22T | 1673 | 0.611783 | 0         |  |
|  | Shiraz-22T | 1678 | 0.911625 | 0         |  |
|  | Shiraz-25T | 1719 | 0.472955 | 0         |  |
|  | Shiraz-28T | 1762 | 0.562311 | 0         |  |
|  | Shiraz-29T | 1801 | 0.815343 | 0         |  |
|  | Shiraz-32T | 1870 | 0.729766 | 0         |  |
|  | Shiraz-32T | 1872 | 1.504553 | 0         |  |
|  | Shiraz-35T | 1933 | 0.488535 | 0         |  |
|  | Shiraz-53T | 2115 | 0.427728 | 0         |  |
|  | Shiraz-58T | 2223 | 0.833364 | 0         |  |
|  | Shiraz-58T | 2226 | 1.074663 | 0         |  |
|  | Shiraz-71T | 2263 | 0.975531 | 0         |  |
|  | Shiraz-4T  | 261  | 0        | -0.336249 |  |
|  | Shiraz-16T | 295  | 0.591657 | 0         |  |
|  | Shiraz-36T | 433  | 0        | -0.803961 |  |
|  | Shiraz-42T | 480  | 0        | -0.232915 |  |
|  | Shiraz-49T | 1170 | 0        | -0.967436 |  |
|  | Shiraz-49T | 1173 | 0        | -0.704439 |  |
|  | Shiraz-9T  | 1370 | 0.690073 | 0         |  |

|        |      |            |      |          |           |  |
|--------|------|------------|------|----------|-----------|--|
|        |      | Shiraz-9T  | 1371 | 1.292392 | 0         |  |
|        |      | Shiraz-18T | 1457 | 0.643204 | 0         |  |
|        |      | Shiraz-22T | 1673 | 0.611783 | 0         |  |
|        |      | Shiraz-22T | 1678 | 0.911625 | 0         |  |
|        |      | Shiraz-25T | 1719 | 0.472955 | 0         |  |
|        |      | Shiraz-28T | 1762 | 0.562311 | 0         |  |
|        |      | Shiraz-29T | 1801 | 0.815343 | 0         |  |
|        |      | Shiraz-32T | 1870 | 0.729766 | 0         |  |
|        |      | Shiraz-32T | 1872 | 1.504553 | 0         |  |
|        |      | Shiraz-35T | 1933 | 0.488535 | 0         |  |
|        |      | Shiraz-53T | 2115 | 0.427728 | 0         |  |
|        |      | Shiraz-58T | 2223 | 0.833364 | 0         |  |
|        |      | Shiraz-58T | 2226 | 1.074663 | 0         |  |
|        |      | Shiraz-71T | 2263 | 0.975531 | 0         |  |
| ZNF277 | chr7 | Shiraz-3T  | 90   | 0.219276 | 0         |  |
|        |      | Shiraz-3T  | 95   | 0        | -0.077623 |  |
|        |      | Shiraz-4T  | 253  | 0.372918 | 0         |  |
|        |      | Shiraz-36T | 378  | 0.179558 | 0         |  |
|        |      | Shiraz-36T | 382  | 0.081739 | 0         |  |
|        |      | Shiraz-44T | 641  | 0        | -0.477846 |  |
|        |      | Shiraz-46T | 943  | 0.093799 | 0         |  |
|        |      | Shiraz-46T | 947  | 0        | -0.010843 |  |
|        |      | Shiraz-47T | 1031 | 0        | -0.117529 |  |
|        |      | Shiraz-49T | 1121 | 0        | -0.138569 |  |
|        |      | Shiraz-77T | 1225 | 0        | -0.117922 |  |
|        |      | Shiraz-77T | 1228 | 0        | -0.238084 |  |
|        |      | Shiraz-18T | 1434 | 0.244465 | 0         |  |
|        |      | Shiraz-22T | 1549 | 0        | -0.319623 |  |
|        |      | Shiraz-25T | 1698 | 0.21835  | 0         |  |
|        |      | Shiraz-28T | 1735 | 0.350744 | 0         |  |
|        |      | Shiraz-29T | 1778 | 0.120767 | 0         |  |
|        |      | Shiraz-32T | 1833 | 0.551336 | 0         |  |
|        |      | Shiraz-32T | 1835 | 0.092727 | 0         |  |
|        |      | Shiraz-38T | 1951 | 0.250891 | 0         |  |
|        |      | Shiraz-53T | 2078 | 0.287202 | 0         |  |
|        |      | Shiraz-58T | 2161 | 0        | -0.187744 |  |
|        |      | Shiraz-71T | 2238 | 0.603631 | 0         |  |
|        |      | Shiraz-3T  | 90   | 0.219276 | 0         |  |
|        |      | Shiraz-3T  | 95   | 0        | -0.077623 |  |
|        |      | Shiraz-4T  | 253  | 0.372918 | 0         |  |
|        |      | Shiraz-36T | 378  | 0.179558 | 0         |  |
|        |      | Shiraz-36T | 382  | 0.081739 | 0         |  |
|        |      | Shiraz-44T | 641  | 0        | -0.477846 |  |
|        |      | Shiraz-46T | 943  | 0.093799 | 0         |  |
|        |      | Shiraz-46T | 947  | 0        | -0.010843 |  |
|        |      | Shiraz-47T | 1031 | 0        | -0.117529 |  |
|        |      | Shiraz-49T | 1121 | 0        | -0.138569 |  |

|         |      |            |      |          |           |  |  |
|---------|------|------------|------|----------|-----------|--|--|
|         |      | Shiraz-77T | 1225 | 0        | -0.117922 |  |  |
|         |      | Shiraz-77T | 1228 | 0        | -0.238084 |  |  |
|         |      | Shiraz-18T | 1434 | 0.244465 | 0         |  |  |
|         |      | Shiraz-22T | 1549 | 0        | -0.319623 |  |  |
|         |      | Shiraz-25T | 1698 | 0.21835  | 0         |  |  |
|         |      | Shiraz-28T | 1735 | 0.350744 | 0         |  |  |
|         |      | Shiraz-29T | 1778 | 0.120767 | 0         |  |  |
|         |      | Shiraz-32T | 1833 | 0.551336 | 0         |  |  |
|         |      | Shiraz-32T | 1835 | 0.092727 | 0         |  |  |
|         |      | Shiraz-38T | 1951 | 0.250891 | 0         |  |  |
|         |      | Shiraz-53T | 2078 | 0.287202 | 0         |  |  |
|         |      | Shiraz-58T | 2161 | 0        | -0.187744 |  |  |
|         |      | Shiraz-71T | 2238 | 0.603631 | 0         |  |  |
|         |      | Shiraz-3T  | 90   | 0.219276 | 0         |  |  |
|         |      | Shiraz-3T  | 95   | 0        | -0.077623 |  |  |
|         |      | Shiraz-4T  | 253  | 0.372918 | 0         |  |  |
|         |      | Shiraz-36T | 378  | 0.179558 | 0         |  |  |
|         |      | Shiraz-36T | 382  | 0.081739 | 0         |  |  |
|         |      | Shiraz-44T | 641  | 0        | -0.477846 |  |  |
|         |      | Shiraz-46T | 943  | 0.093799 | 0         |  |  |
|         |      | Shiraz-46T | 947  | 0        | -0.010843 |  |  |
|         |      | Shiraz-47T | 1031 | 0        | -0.117529 |  |  |
|         |      | Shiraz-49T | 1121 | 0        | -0.138569 |  |  |
|         |      | Shiraz-77T | 1225 | 0        | -0.117922 |  |  |
|         |      | Shiraz-77T | 1228 | 0        | -0.238084 |  |  |
|         |      | Shiraz-18T | 1434 | 0.244465 | 0         |  |  |
|         |      | Shiraz-22T | 1549 | 0        | -0.319623 |  |  |
|         |      | Shiraz-25T | 1698 | 0.21835  | 0         |  |  |
|         |      | Shiraz-28T | 1735 | 0.350744 | 0         |  |  |
|         |      | Shiraz-29T | 1778 | 0.120767 | 0         |  |  |
|         |      | Shiraz-32T | 1833 | 0.551336 | 0         |  |  |
|         |      | Shiraz-32T | 1835 | 0.092727 | 0         |  |  |
|         |      | Shiraz-38T | 1951 | 0.250891 | 0         |  |  |
|         |      | Shiraz-53T | 2078 | 0.287202 | 0         |  |  |
|         |      | Shiraz-58T | 2161 | 0        | -0.187744 |  |  |
|         |      | Shiraz-71T | 2238 | 0.603631 | 0         |  |  |
| ZNF280C | chrX | Shiraz-3T  | 242  | 0        | -0.336434 |  |  |
|         |      | Shiraz-4T  | 261  | 0        | -0.336249 |  |  |
|         |      | Shiraz-16T | 295  | 0.591657 | 0         |  |  |
|         |      | Shiraz-36T | 433  | 0        | -0.803961 |  |  |
|         |      | Shiraz-44T | 899  | 0        | -1.09697  |  |  |
|         |      | Shiraz-49T | 1170 | 0        | -0.967436 |  |  |
|         |      | Shiraz-9T  | 1370 | 0.690073 | 0         |  |  |
|         |      | Shiraz-18T | 1457 | 0.643204 | 0         |  |  |
|         |      | Shiraz-22T | 1673 | 0.611783 | 0         |  |  |
|         |      | Shiraz-22T | 1677 | 0.789711 | 0         |  |  |
|         |      | Shiraz-25T | 1719 | 0.472955 | 0         |  |  |

|        |      |            |      |          |           |  |  |
|--------|------|------------|------|----------|-----------|--|--|
|        |      | Shiraz-28T | 1762 | 0.562311 | 0         |  |  |
|        |      | Shiraz-29T | 1801 | 0.815343 | 0         |  |  |
|        |      | Shiraz-32T | 1870 | 0.729766 | 0         |  |  |
|        |      | Shiraz-35T | 1933 | 0.488535 | 0         |  |  |
|        |      | Shiraz-58T | 2223 | 0.833364 | 0         |  |  |
|        |      | Shiraz-71T | 2263 | 0.975531 | 0         |  |  |
|        |      | Shiraz-3T  | 242  | 0        | -0.336434 |  |  |
|        |      | Shiraz-4T  | 261  | 0        | -0.336249 |  |  |
|        |      | Shiraz-16T | 295  | 0.591657 | 0         |  |  |
|        |      | Shiraz-36T | 433  | 0        | -0.803961 |  |  |
|        |      | Shiraz-44T | 899  | 0        | -1.09697  |  |  |
|        |      | Shiraz-49T | 1170 | 0        | -0.967436 |  |  |
|        |      | Shiraz-9T  | 1370 | 0.690073 | 0         |  |  |
|        |      | Shiraz-18T | 1457 | 0.643204 | 0         |  |  |
|        |      | Shiraz-22T | 1673 | 0.611783 | 0         |  |  |
|        |      | Shiraz-22T | 1677 | 0.789711 | 0         |  |  |
|        |      | Shiraz-25T | 1719 | 0.472955 | 0         |  |  |
|        |      | Shiraz-28T | 1762 | 0.562311 | 0         |  |  |
|        |      | Shiraz-29T | 1801 | 0.815343 | 0         |  |  |
|        |      | Shiraz-32T | 1870 | 0.729766 | 0         |  |  |
|        |      | Shiraz-35T | 1933 | 0.488535 | 0         |  |  |
|        |      | Shiraz-58T | 2223 | 0.833364 | 0         |  |  |
|        |      | Shiraz-71T | 2263 | 0.975531 | 0         |  |  |
|        |      | Shiraz-3T  | 242  | 0        | -0.336434 |  |  |
|        |      | Shiraz-4T  | 261  | 0        | -0.336249 |  |  |
|        |      | Shiraz-16T | 295  | 0.591657 | 0         |  |  |
|        |      | Shiraz-36T | 433  | 0        | -0.803961 |  |  |
|        |      | Shiraz-44T | 899  | 0        | -1.09697  |  |  |
|        |      | Shiraz-49T | 1170 | 0        | -0.967436 |  |  |
|        |      | Shiraz-9T  | 1370 | 0.690073 | 0         |  |  |
|        |      | Shiraz-18T | 1457 | 0.643204 | 0         |  |  |
|        |      | Shiraz-22T | 1673 | 0.611783 | 0         |  |  |
|        |      | Shiraz-22T | 1677 | 0.789711 | 0         |  |  |
|        |      | Shiraz-25T | 1719 | 0.472955 | 0         |  |  |
|        |      | Shiraz-28T | 1762 | 0.562311 | 0         |  |  |
|        |      | Shiraz-29T | 1801 | 0.815343 | 0         |  |  |
|        |      | Shiraz-32T | 1870 | 0.729766 | 0         |  |  |
|        |      | Shiraz-35T | 1933 | 0.488535 | 0         |  |  |
|        |      | Shiraz-58T | 2223 | 0.833364 | 0         |  |  |
|        |      | Shiraz-71T | 2263 | 0.975531 | 0         |  |  |
| ZNF282 | chr7 | Shiraz-3T  | 90   | 0.219276 | 0         |  |  |
|        |      | Shiraz-3T  | 99   | 0.454766 | 0         |  |  |
|        |      | Shiraz-4T  | 253  | 0.372918 | 0         |  |  |
|        |      | Shiraz-36T | 378  | 0.179558 | 0         |  |  |
|        |      | Shiraz-44T | 646  | 0.471276 | 0         |  |  |
|        |      | Shiraz-46T | 943  | 0.093799 | 0         |  |  |
|        |      | Shiraz-9T  | 1325 | 0.221899 | 0         |  |  |



|      |      |            |      |          |   |  |  |
|------|------|------------|------|----------|---|--|--|
|      |      | Shiraz-18T | 1434 | 0.244465 | 0 |  |  |
|      |      | Shiraz-25T | 1698 | 0.21835  | 0 |  |  |
|      |      | Shiraz-28T | 1735 | 0.350744 | 0 |  |  |
|      |      | Shiraz-29T | 1778 | 0.120767 | 0 |  |  |
|      |      | Shiraz-32T | 1833 | 0.551336 | 0 |  |  |
|      |      | Shiraz-38T | 1951 | 0.250891 | 0 |  |  |
|      |      | Shiraz-53T | 2078 | 0.287202 | 0 |  |  |
|      |      | Shiraz-58T | 2162 | 0.221505 | 0 |  |  |
|      |      | Shiraz-71T | 2238 | 0.603631 | 0 |  |  |
|      |      | Shiraz-3T  | 90   | 0.219276 | 0 |  |  |
|      |      | Shiraz-3T  | 99   | 0.454766 | 0 |  |  |
|      |      | Shiraz-4T  | 253  | 0.372918 | 0 |  |  |
|      |      | Shiraz-36T | 378  | 0.179558 | 0 |  |  |
|      |      | Shiraz-44T | 646  | 0.471276 | 0 |  |  |
|      |      | Shiraz-46T | 943  | 0.093799 | 0 |  |  |
|      |      | Shiraz-9T  | 1325 | 0.221899 | 0 |  |  |
|      |      | Shiraz-18T | 1434 | 0.244465 | 0 |  |  |
|      |      | Shiraz-25T | 1698 | 0.21835  | 0 |  |  |
|      |      | Shiraz-28T | 1735 | 0.350744 | 0 |  |  |
|      |      | Shiraz-29T | 1778 | 0.120767 | 0 |  |  |
|      |      | Shiraz-32T | 1833 | 0.551336 | 0 |  |  |
|      |      | Shiraz-38T | 1951 | 0.250891 | 0 |  |  |
|      |      | Shiraz-53T | 2078 | 0.287202 | 0 |  |  |
|      |      | Shiraz-58T | 2162 | 0.221505 | 0 |  |  |
|      |      | Shiraz-71T | 2238 | 0.603631 | 0 |  |  |
|      |      | Shiraz-3T  | 90   | 0.219276 | 0 |  |  |
|      |      | Shiraz-3T  | 99   | 0.454766 | 0 |  |  |
|      |      | Shiraz-4T  | 253  | 0.372918 | 0 |  |  |
|      |      | Shiraz-36T | 378  | 0.179558 | 0 |  |  |
|      |      | Shiraz-44T | 646  | 0.471276 | 0 |  |  |
|      |      | Shiraz-46T | 943  | 0.093799 | 0 |  |  |
|      |      | Shiraz-9T  | 1325 | 0.221899 | 0 |  |  |
|      |      | Shiraz-18T | 1434 | 0.244465 | 0 |  |  |
|      |      | Shiraz-25T | 1698 | 0.21835  | 0 |  |  |
|      |      | Shiraz-28T | 1735 | 0.350744 | 0 |  |  |
|      |      | Shiraz-29T | 1778 | 0.120767 | 0 |  |  |
|      |      | Shiraz-32T | 1833 | 0.551336 | 0 |  |  |
|      |      | Shiraz-38T | 1951 | 0.250891 | 0 |  |  |
|      |      | Shiraz-53T | 2078 | 0.287202 | 0 |  |  |
|      |      | Shiraz-58T | 2162 | 0.221505 | 0 |  |  |
|      |      | Shiraz-71T | 2238 | 0.603631 | 0 |  |  |
| ZNF3 | chr7 | Shiraz-3T  | 90   | 0.219276 | 0 |  |  |
|      |      | Shiraz-3T  | 90   | 0.219276 | 0 |  |  |
|      |      | Shiraz-3T  | 94   | 0.74735  | 0 |  |  |
|      |      | Shiraz-3T  | 94   | 0.74735  | 0 |  |  |
|      |      | Shiraz-4T  | 253  | 0.372918 | 0 |  |  |
|      |      | Shiraz-4T  | 253  | 0.372918 | 0 |  |  |

|  |            |      |          |           |  |
|--|------------|------|----------|-----------|--|
|  | Shiraz-31T | 316  | 0.219196 | 0         |  |
|  | Shiraz-31T | 316  | 0.219196 | 0         |  |
|  | Shiraz-36T | 378  | 0.179558 | 0         |  |
|  | Shiraz-36T | 378  | 0.179558 | 0         |  |
|  | Shiraz-36T | 381  | 0.332628 | 0         |  |
|  | Shiraz-36T | 381  | 0.332628 | 0         |  |
|  | Shiraz-44T | 639  | 1.035032 | 0         |  |
|  | Shiraz-44T | 639  | 1.035032 | 0         |  |
|  | Shiraz-46T | 943  | 0.093799 | 0         |  |
|  | Shiraz-46T | 943  | 0.093799 | 0         |  |
|  | Shiraz-46T | 946  | 0.299835 | 0         |  |
|  | Shiraz-46T | 946  | 0.299835 | 0         |  |
|  | Shiraz-47T | 1030 | 0.257728 | 0         |  |
|  | Shiraz-47T | 1030 | 0.257728 | 0         |  |
|  | Shiraz-49T | 1120 | 0.281656 | 0         |  |
|  | Shiraz-49T | 1120 | 0.281656 | 0         |  |
|  | Shiraz-77T | 1225 | 0        | -0.117922 |  |
|  | Shiraz-77T | 1225 | 0        | -0.117922 |  |
|  | Shiraz-77T | 1227 | 0.196445 | 0         |  |
|  | Shiraz-77T | 1227 | 0.196445 | 0         |  |
|  | Shiraz-9T  | 1324 | 0.679266 | 0         |  |
|  | Shiraz-9T  | 1324 | 0.679266 | 0         |  |
|  | Shiraz-18T | 1434 | 0.244465 | 0         |  |
|  | Shiraz-18T | 1434 | 0.244465 | 0         |  |
|  | Shiraz-22T | 1549 | 0        | -0.319623 |  |
|  | Shiraz-22T | 1549 | 0        | -0.319623 |  |
|  | Shiraz-22T | 1551 | 0.324011 | 0         |  |
|  | Shiraz-22T | 1551 | 0.324011 | 0         |  |
|  | Shiraz-25T | 1698 | 0.21835  | 0         |  |
|  | Shiraz-25T | 1698 | 0.21835  | 0         |  |
|  | Shiraz-28T | 1735 | 0.350744 | 0         |  |
|  | Shiraz-28T | 1735 | 0.350744 | 0         |  |
|  | Shiraz-29T | 1778 | 0.120767 | 0         |  |
|  | Shiraz-29T | 1778 | 0.120767 | 0         |  |
|  | Shiraz-32T | 1833 | 0.551336 | 0         |  |
|  | Shiraz-32T | 1833 | 0.551336 | 0         |  |
|  | Shiraz-32T | 1834 | 1.485392 | 0         |  |
|  | Shiraz-32T | 1834 | 1.485392 | 0         |  |
|  | Shiraz-38T | 1951 | 0.250891 | 0         |  |
|  | Shiraz-38T | 1951 | 0.250891 | 0         |  |
|  | Shiraz-53T | 2078 | 0.287202 | 0         |  |
|  | Shiraz-53T | 2078 | 0.287202 | 0         |  |
|  | Shiraz-58T | 2160 | 0.399007 | 0         |  |
|  | Shiraz-58T | 2160 | 0.399007 | 0         |  |
|  | Shiraz-71T | 2238 | 0.603631 | 0         |  |
|  | Shiraz-71T | 2238 | 0.603631 | 0         |  |
|  | Shiraz-3T  | 90   | 0.219276 | 0         |  |

|  |            |      |          |           |  |
|--|------------|------|----------|-----------|--|
|  | Shiraz-3T  | 90   | 0.219276 | 0         |  |
|  | Shiraz-3T  | 94   | 0.74735  | 0         |  |
|  | Shiraz-3T  | 94   | 0.74735  | 0         |  |
|  | Shiraz-4T  | 253  | 0.372918 | 0         |  |
|  | Shiraz-4T  | 253  | 0.372918 | 0         |  |
|  | Shiraz-31T | 316  | 0.219196 | 0         |  |
|  | Shiraz-31T | 316  | 0.219196 | 0         |  |
|  | Shiraz-36T | 378  | 0.179558 | 0         |  |
|  | Shiraz-36T | 378  | 0.179558 | 0         |  |
|  | Shiraz-36T | 381  | 0.332628 | 0         |  |
|  | Shiraz-36T | 381  | 0.332628 | 0         |  |
|  | Shiraz-44T | 639  | 1.035032 | 0         |  |
|  | Shiraz-44T | 639  | 1.035032 | 0         |  |
|  | Shiraz-46T | 943  | 0.093799 | 0         |  |
|  | Shiraz-46T | 943  | 0.093799 | 0         |  |
|  | Shiraz-46T | 946  | 0.299835 | 0         |  |
|  | Shiraz-46T | 946  | 0.299835 | 0         |  |
|  | Shiraz-47T | 1030 | 0.257728 | 0         |  |
|  | Shiraz-47T | 1030 | 0.257728 | 0         |  |
|  | Shiraz-49T | 1120 | 0.281656 | 0         |  |
|  | Shiraz-49T | 1120 | 0.281656 | 0         |  |
|  | Shiraz-77T | 1225 | 0        | -0.117922 |  |
|  | Shiraz-77T | 1225 | 0        | -0.117922 |  |
|  | Shiraz-77T | 1227 | 0.196445 | 0         |  |
|  | Shiraz-77T | 1227 | 0.196445 | 0         |  |
|  | Shiraz-9T  | 1324 | 0.679266 | 0         |  |
|  | Shiraz-9T  | 1324 | 0.679266 | 0         |  |
|  | Shiraz-18T | 1434 | 0.244465 | 0         |  |
|  | Shiraz-18T | 1434 | 0.244465 | 0         |  |
|  | Shiraz-22T | 1549 | 0        | -0.319623 |  |
|  | Shiraz-22T | 1549 | 0        | -0.319623 |  |
|  | Shiraz-22T | 1551 | 0.324011 | 0         |  |
|  | Shiraz-22T | 1551 | 0.324011 | 0         |  |
|  | Shiraz-25T | 1698 | 0.21835  | 0         |  |
|  | Shiraz-25T | 1698 | 0.21835  | 0         |  |
|  | Shiraz-28T | 1735 | 0.350744 | 0         |  |
|  | Shiraz-28T | 1735 | 0.350744 | 0         |  |
|  | Shiraz-29T | 1778 | 0.120767 | 0         |  |
|  | Shiraz-29T | 1778 | 0.120767 | 0         |  |
|  | Shiraz-32T | 1833 | 0.551336 | 0         |  |
|  | Shiraz-32T | 1833 | 0.551336 | 0         |  |
|  | Shiraz-32T | 1834 | 1.485392 | 0         |  |
|  | Shiraz-32T | 1834 | 1.485392 | 0         |  |
|  | Shiraz-38T | 1951 | 0.250891 | 0         |  |
|  | Shiraz-38T | 1951 | 0.250891 | 0         |  |
|  | Shiraz-53T | 2078 | 0.287202 | 0         |  |
|  | Shiraz-53T | 2078 | 0.287202 | 0         |  |

|  |            |      |          |           |  |
|--|------------|------|----------|-----------|--|
|  | Shiraz-58T | 2160 | 0.399007 | 0         |  |
|  | Shiraz-58T | 2160 | 0.399007 | 0         |  |
|  | Shiraz-71T | 2238 | 0.603631 | 0         |  |
|  | Shiraz-71T | 2238 | 0.603631 | 0         |  |
|  | Shiraz-3T  | 90   | 0.219276 | 0         |  |
|  | Shiraz-3T  | 90   | 0.219276 | 0         |  |
|  | Shiraz-3T  | 94   | 0.74735  | 0         |  |
|  | Shiraz-3T  | 94   | 0.74735  | 0         |  |
|  | Shiraz-4T  | 253  | 0.372918 | 0         |  |
|  | Shiraz-4T  | 253  | 0.372918 | 0         |  |
|  | Shiraz-31T | 316  | 0.219196 | 0         |  |
|  | Shiraz-31T | 316  | 0.219196 | 0         |  |
|  | Shiraz-36T | 378  | 0.179558 | 0         |  |
|  | Shiraz-36T | 378  | 0.179558 | 0         |  |
|  | Shiraz-36T | 381  | 0.332628 | 0         |  |
|  | Shiraz-36T | 381  | 0.332628 | 0         |  |
|  | Shiraz-44T | 639  | 1.035032 | 0         |  |
|  | Shiraz-44T | 639  | 1.035032 | 0         |  |
|  | Shiraz-46T | 943  | 0.093799 | 0         |  |
|  | Shiraz-46T | 943  | 0.093799 | 0         |  |
|  | Shiraz-46T | 946  | 0.299835 | 0         |  |
|  | Shiraz-46T | 946  | 0.299835 | 0         |  |
|  | Shiraz-47T | 1030 | 0.257728 | 0         |  |
|  | Shiraz-47T | 1030 | 0.257728 | 0         |  |
|  | Shiraz-49T | 1120 | 0.281656 | 0         |  |
|  | Shiraz-49T | 1120 | 0.281656 | 0         |  |
|  | Shiraz-77T | 1225 | 0        | -0.117922 |  |
|  | Shiraz-77T | 1225 | 0        | -0.117922 |  |
|  | Shiraz-77T | 1227 | 0.196445 | 0         |  |
|  | Shiraz-77T | 1227 | 0.196445 | 0         |  |
|  | Shiraz-9T  | 1324 | 0.679266 | 0         |  |
|  | Shiraz-9T  | 1324 | 0.679266 | 0         |  |
|  | Shiraz-18T | 1434 | 0.244465 | 0         |  |
|  | Shiraz-18T | 1434 | 0.244465 | 0         |  |
|  | Shiraz-22T | 1549 | 0        | -0.319623 |  |
|  | Shiraz-22T | 1549 | 0        | -0.319623 |  |
|  | Shiraz-22T | 1551 | 0.324011 | 0         |  |
|  | Shiraz-22T | 1551 | 0.324011 | 0         |  |
|  | Shiraz-25T | 1698 | 0.21835  | 0         |  |
|  | Shiraz-25T | 1698 | 0.21835  | 0         |  |
|  | Shiraz-28T | 1735 | 0.350744 | 0         |  |
|  | Shiraz-28T | 1735 | 0.350744 | 0         |  |
|  | Shiraz-29T | 1778 | 0.120767 | 0         |  |
|  | Shiraz-29T | 1778 | 0.120767 | 0         |  |
|  | Shiraz-32T | 1833 | 0.551336 | 0         |  |
|  | Shiraz-32T | 1833 | 0.551336 | 0         |  |
|  | Shiraz-32T | 1834 | 1.485392 | 0         |  |

|        |      |            |      |          |           |  |
|--------|------|------------|------|----------|-----------|--|
|        |      | Shiraz-32T | 1834 | 1.485392 | 0         |  |
|        |      | Shiraz-38T | 1951 | 0.250891 | 0         |  |
|        |      | Shiraz-38T | 1951 | 0.250891 | 0         |  |
|        |      | Shiraz-53T | 2078 | 0.287202 | 0         |  |
|        |      | Shiraz-53T | 2078 | 0.287202 | 0         |  |
|        |      | Shiraz-58T | 2160 | 0.399007 | 0         |  |
|        |      | Shiraz-58T | 2160 | 0.399007 | 0         |  |
|        |      | Shiraz-71T | 2238 | 0.603631 | 0         |  |
|        |      | Shiraz-71T | 2238 | 0.603631 | 0         |  |
| ZNF394 | chr7 | Shiraz-3T  | 90   | 0.219276 | 0         |  |
|        |      | Shiraz-3T  | 94   | 0.74735  | 0         |  |
|        |      | Shiraz-4T  | 253  | 0.372918 | 0         |  |
|        |      | Shiraz-31T | 316  | 0.219196 | 0         |  |
|        |      | Shiraz-36T | 378  | 0.179558 | 0         |  |
|        |      | Shiraz-36T | 381  | 0.332628 | 0         |  |
|        |      | Shiraz-44T | 639  | 1.035032 | 0         |  |
|        |      | Shiraz-46T | 943  | 0.093799 | 0         |  |
|        |      | Shiraz-46T | 946  | 0.299835 | 0         |  |
|        |      | Shiraz-47T | 1030 | 0.257728 | 0         |  |
|        |      | Shiraz-49T | 1120 | 0.281656 | 0         |  |
|        |      | Shiraz-77T | 1225 | 0        | -0.117922 |  |
|        |      | Shiraz-77T | 1227 | 0.196445 | 0         |  |
|        |      | Shiraz-9T  | 1324 | 0.679266 | 0         |  |
|        |      | Shiraz-18T | 1434 | 0.244465 | 0         |  |
|        |      | Shiraz-22T | 1549 | 0        | -0.319623 |  |
|        |      | Shiraz-22T | 1551 | 0.324011 | 0         |  |
|        |      | Shiraz-25T | 1698 | 0.21835  | 0         |  |
|        |      | Shiraz-28T | 1735 | 0.350744 | 0         |  |
|        |      | Shiraz-29T | 1778 | 0.120767 | 0         |  |
|        |      | Shiraz-32T | 1833 | 0.551336 | 0         |  |
|        |      | Shiraz-38T | 1951 | 0.250891 | 0         |  |
|        |      | Shiraz-53T | 2078 | 0.287202 | 0         |  |
|        |      | Shiraz-71T | 2238 | 0.603631 | 0         |  |
|        |      | Shiraz-3T  | 90   | 0.219276 | 0         |  |
|        |      | Shiraz-3T  | 94   | 0.74735  | 0         |  |
|        |      | Shiraz-4T  | 253  | 0.372918 | 0         |  |
|        |      | Shiraz-31T | 316  | 0.219196 | 0         |  |
|        |      | Shiraz-36T | 378  | 0.179558 | 0         |  |
|        |      | Shiraz-36T | 381  | 0.332628 | 0         |  |
|        |      | Shiraz-44T | 639  | 1.035032 | 0         |  |
|        |      | Shiraz-46T | 943  | 0.093799 | 0         |  |
|        |      | Shiraz-46T | 946  | 0.299835 | 0         |  |
|        |      | Shiraz-47T | 1030 | 0.257728 | 0         |  |
|        |      | Shiraz-49T | 1120 | 0.281656 | 0         |  |
|        |      | Shiraz-77T | 1225 | 0        | -0.117922 |  |
|        |      | Shiraz-77T | 1227 | 0.196445 | 0         |  |
|        |      | Shiraz-9T  | 1324 | 0.679266 | 0         |  |

|        |      |            |      |          |           |  |  |
|--------|------|------------|------|----------|-----------|--|--|
|        |      | Shiraz-18T | 1434 | 0.244465 | 0         |  |  |
|        |      | Shiraz-22T | 1549 | 0        | -0.319623 |  |  |
|        |      | Shiraz-22T | 1551 | 0.324011 | 0         |  |  |
|        |      | Shiraz-25T | 1698 | 0.21835  | 0         |  |  |
|        |      | Shiraz-28T | 1735 | 0.350744 | 0         |  |  |
|        |      | Shiraz-29T | 1778 | 0.120767 | 0         |  |  |
|        |      | Shiraz-32T | 1833 | 0.551336 | 0         |  |  |
|        |      | Shiraz-38T | 1951 | 0.250891 | 0         |  |  |
|        |      | Shiraz-53T | 2078 | 0.287202 | 0         |  |  |
|        |      | Shiraz-71T | 2238 | 0.603631 | 0         |  |  |
|        |      | Shiraz-3T  | 90   | 0.219276 | 0         |  |  |
|        |      | Shiraz-3T  | 94   | 0.74735  | 0         |  |  |
|        |      | Shiraz-4T  | 253  | 0.372918 | 0         |  |  |
|        |      | Shiraz-31T | 316  | 0.219196 | 0         |  |  |
|        |      | Shiraz-36T | 378  | 0.179558 | 0         |  |  |
|        |      | Shiraz-36T | 381  | 0.332628 | 0         |  |  |
|        |      | Shiraz-44T | 639  | 1.035032 | 0         |  |  |
|        |      | Shiraz-46T | 943  | 0.093799 | 0         |  |  |
|        |      | Shiraz-46T | 946  | 0.299835 | 0         |  |  |
|        |      | Shiraz-47T | 1030 | 0.257728 | 0         |  |  |
|        |      | Shiraz-49T | 1120 | 0.281656 | 0         |  |  |
|        |      | Shiraz-77T | 1225 | 0        | -0.117922 |  |  |
|        |      | Shiraz-77T | 1227 | 0.196445 | 0         |  |  |
|        |      | Shiraz-9T  | 1324 | 0.679266 | 0         |  |  |
|        |      | Shiraz-18T | 1434 | 0.244465 | 0         |  |  |
|        |      | Shiraz-22T | 1549 | 0        | -0.319623 |  |  |
|        |      | Shiraz-22T | 1551 | 0.324011 | 0         |  |  |
|        |      | Shiraz-25T | 1698 | 0.21835  | 0         |  |  |
|        |      | Shiraz-28T | 1735 | 0.350744 | 0         |  |  |
|        |      | Shiraz-29T | 1778 | 0.120767 | 0         |  |  |
|        |      | Shiraz-32T | 1833 | 0.551336 | 0         |  |  |
|        |      | Shiraz-38T | 1951 | 0.250891 | 0         |  |  |
|        |      | Shiraz-53T | 2078 | 0.287202 | 0         |  |  |
|        |      | Shiraz-71T | 2238 | 0.603631 | 0         |  |  |
| ZNF398 | chr7 | Shiraz-3T  | 90   | 0.219276 | 0         |  |  |
|        |      | Shiraz-3T  | 90   | 0.219276 | 0         |  |  |
|        |      | Shiraz-3T  | 99   | 0.454766 | 0         |  |  |
|        |      | Shiraz-3T  | 99   | 0.454766 | 0         |  |  |
|        |      | Shiraz-4T  | 253  | 0.372918 | 0         |  |  |
|        |      | Shiraz-4T  | 253  | 0.372918 | 0         |  |  |
|        |      | Shiraz-36T | 378  | 0.179558 | 0         |  |  |
|        |      | Shiraz-36T | 378  | 0.179558 | 0         |  |  |
|        |      | Shiraz-44T | 646  | 0.471276 | 0         |  |  |
|        |      | Shiraz-44T | 646  | 0.471276 | 0         |  |  |
|        |      | Shiraz-46T | 943  | 0.093799 | 0         |  |  |
|        |      | Shiraz-46T | 943  | 0.093799 | 0         |  |  |
|        |      | Shiraz-9T  | 1325 | 0.221899 | 0         |  |  |

|  |  |            |      |          |   |  |  |
|--|--|------------|------|----------|---|--|--|
|  |  | Shiraz-9T  | 1325 | 0.221899 | 0 |  |  |
|  |  | Shiraz-18T | 1434 | 0.244465 | 0 |  |  |
|  |  | Shiraz-18T | 1434 | 0.244465 | 0 |  |  |
|  |  | Shiraz-25T | 1698 | 0.21835  | 0 |  |  |
|  |  | Shiraz-25T | 1698 | 0.21835  | 0 |  |  |
|  |  | Shiraz-28T | 1735 | 0.350744 | 0 |  |  |
|  |  | Shiraz-28T | 1735 | 0.350744 | 0 |  |  |
|  |  | Shiraz-29T | 1778 | 0.120767 | 0 |  |  |
|  |  | Shiraz-29T | 1778 | 0.120767 | 0 |  |  |
|  |  | Shiraz-32T | 1833 | 0.551336 | 0 |  |  |
|  |  | Shiraz-32T | 1833 | 0.551336 | 0 |  |  |
|  |  | Shiraz-38T | 1951 | 0.250891 | 0 |  |  |
|  |  | Shiraz-38T | 1951 | 0.250891 | 0 |  |  |
|  |  | Shiraz-53T | 2078 | 0.287202 | 0 |  |  |
|  |  | Shiraz-53T | 2078 | 0.287202 | 0 |  |  |
|  |  | Shiraz-58T | 2162 | 0.221505 | 0 |  |  |
|  |  | Shiraz-58T | 2162 | 0.221505 | 0 |  |  |
|  |  | Shiraz-71T | 2238 | 0.603631 | 0 |  |  |
|  |  | Shiraz-71T | 2238 | 0.603631 | 0 |  |  |
|  |  | Shiraz-3T  | 90   | 0.219276 | 0 |  |  |
|  |  | Shiraz-3T  | 90   | 0.219276 | 0 |  |  |
|  |  | Shiraz-3T  | 99   | 0.454766 | 0 |  |  |
|  |  | Shiraz-3T  | 99   | 0.454766 | 0 |  |  |
|  |  | Shiraz-4T  | 253  | 0.372918 | 0 |  |  |
|  |  | Shiraz-4T  | 253  | 0.372918 | 0 |  |  |
|  |  | Shiraz-36T | 378  | 0.179558 | 0 |  |  |
|  |  | Shiraz-36T | 378  | 0.179558 | 0 |  |  |
|  |  | Shiraz-44T | 646  | 0.471276 | 0 |  |  |
|  |  | Shiraz-44T | 646  | 0.471276 | 0 |  |  |
|  |  | Shiraz-46T | 943  | 0.093799 | 0 |  |  |
|  |  | Shiraz-46T | 943  | 0.093799 | 0 |  |  |
|  |  | Shiraz-9T  | 1325 | 0.221899 | 0 |  |  |
|  |  | Shiraz-9T  | 1325 | 0.221899 | 0 |  |  |
|  |  | Shiraz-18T | 1434 | 0.244465 | 0 |  |  |
|  |  | Shiraz-18T | 1434 | 0.244465 | 0 |  |  |
|  |  | Shiraz-25T | 1698 | 0.21835  | 0 |  |  |
|  |  | Shiraz-25T | 1698 | 0.21835  | 0 |  |  |
|  |  | Shiraz-28T | 1735 | 0.350744 | 0 |  |  |
|  |  | Shiraz-28T | 1735 | 0.350744 | 0 |  |  |
|  |  | Shiraz-29T | 1778 | 0.120767 | 0 |  |  |
|  |  | Shiraz-29T | 1778 | 0.120767 | 0 |  |  |
|  |  | Shiraz-32T | 1833 | 0.551336 | 0 |  |  |
|  |  | Shiraz-32T | 1833 | 0.551336 | 0 |  |  |
|  |  | Shiraz-38T | 1951 | 0.250891 | 0 |  |  |
|  |  | Shiraz-38T | 1951 | 0.250891 | 0 |  |  |
|  |  | Shiraz-53T | 2078 | 0.287202 | 0 |  |  |
|  |  | Shiraz-53T | 2078 | 0.287202 | 0 |  |  |

|       |      |            |      |          |           |  |  |
|-------|------|------------|------|----------|-----------|--|--|
|       |      | Shiraz-58T | 2162 | 0.221505 | 0         |  |  |
|       |      | Shiraz-58T | 2162 | 0.221505 | 0         |  |  |
|       |      | Shiraz-71T | 2238 | 0.603631 | 0         |  |  |
|       |      | Shiraz-71T | 2238 | 0.603631 | 0         |  |  |
|       |      | Shiraz-3T  | 90   | 0.219276 | 0         |  |  |
|       |      | Shiraz-3T  | 90   | 0.219276 | 0         |  |  |
|       |      | Shiraz-3T  | 99   | 0.454766 | 0         |  |  |
|       |      | Shiraz-3T  | 99   | 0.454766 | 0         |  |  |
|       |      | Shiraz-4T  | 253  | 0.372918 | 0         |  |  |
|       |      | Shiraz-4T  | 253  | 0.372918 | 0         |  |  |
|       |      | Shiraz-36T | 378  | 0.179558 | 0         |  |  |
|       |      | Shiraz-36T | 378  | 0.179558 | 0         |  |  |
|       |      | Shiraz-44T | 646  | 0.471276 | 0         |  |  |
|       |      | Shiraz-44T | 646  | 0.471276 | 0         |  |  |
|       |      | Shiraz-46T | 943  | 0.093799 | 0         |  |  |
|       |      | Shiraz-46T | 943  | 0.093799 | 0         |  |  |
|       |      | Shiraz-9T  | 1325 | 0.221899 | 0         |  |  |
|       |      | Shiraz-9T  | 1325 | 0.221899 | 0         |  |  |
|       |      | Shiraz-18T | 1434 | 0.244465 | 0         |  |  |
|       |      | Shiraz-18T | 1434 | 0.244465 | 0         |  |  |
|       |      | Shiraz-25T | 1698 | 0.21835  | 0         |  |  |
|       |      | Shiraz-25T | 1698 | 0.21835  | 0         |  |  |
|       |      | Shiraz-28T | 1735 | 0.350744 | 0         |  |  |
|       |      | Shiraz-28T | 1735 | 0.350744 | 0         |  |  |
|       |      | Shiraz-29T | 1778 | 0.120767 | 0         |  |  |
|       |      | Shiraz-29T | 1778 | 0.120767 | 0         |  |  |
|       |      | Shiraz-32T | 1833 | 0.551336 | 0         |  |  |
|       |      | Shiraz-32T | 1833 | 0.551336 | 0         |  |  |
|       |      | Shiraz-38T | 1951 | 0.250891 | 0         |  |  |
|       |      | Shiraz-38T | 1951 | 0.250891 | 0         |  |  |
|       |      | Shiraz-53T | 2078 | 0.287202 | 0         |  |  |
|       |      | Shiraz-53T | 2078 | 0.287202 | 0         |  |  |
|       |      | Shiraz-58T | 2162 | 0.221505 | 0         |  |  |
|       |      | Shiraz-58T | 2162 | 0.221505 | 0         |  |  |
|       |      | Shiraz-71T | 2238 | 0.603631 | 0         |  |  |
|       |      | Shiraz-71T | 2238 | 0.603631 | 0         |  |  |
| ZNF41 | chrX | Shiraz-4T  | 260  | 0        | -0.324128 |  |  |
|       |      | Shiraz-16T | 294  | 0.655804 | 0         |  |  |
|       |      | Shiraz-31T | 345  | 0.103301 | 0         |  |  |
|       |      | Shiraz-36T | 431  | 0        | -0.78035  |  |  |
|       |      | Shiraz-36T | 432  | 0        | -0.6692   |  |  |
|       |      | Shiraz-44T | 891  | 0        | -0.954044 |  |  |
|       |      | Shiraz-44T | 896  | 0        | -0.109108 |  |  |
|       |      | Shiraz-46T | 991  | 0.139564 | 0         |  |  |
|       |      | Shiraz-47T | 1084 | 0.24185  | 0         |  |  |
|       |      | Shiraz-49T | 1166 | 0        | -0.917235 |  |  |
|       |      | Shiraz-49T | 1169 | 0        | -0.583529 |  |  |



|  |            |      |          |           |  |
|--|------------|------|----------|-----------|--|
|  | Shiraz-77T | 1282 | 0.213849 | 0         |  |
|  | Shiraz-9T  | 1368 | 0.199713 | 0         |  |
|  | Shiraz-9T  | 1369 | 0.703374 | 0         |  |
|  | Shiraz-18T | 1455 | 0        | -0.186773 |  |
|  | Shiraz-22T | 1669 | 0.695915 | 0         |  |
|  | Shiraz-22T | 1672 | 1.01678  | 0         |  |
|  | Shiraz-25T | 1717 | 0.420447 | 0         |  |
|  | Shiraz-28T | 1760 | 0.538181 | 0         |  |
|  | Shiraz-29T | 1800 | 0.672527 | 0         |  |
|  | Shiraz-32T | 1869 | 0.776805 | 0         |  |
|  | Shiraz-35T | 1932 | 0.507141 | 0         |  |
|  | Shiraz-40T | 2051 | 0.098506 | 0         |  |
|  | Shiraz-58T | 2221 | 0.871948 | 0         |  |
|  | Shiraz-71T | 2260 | 0.68394  | 0         |  |
|  | Shiraz-71T | 2262 | 0.986748 | 0         |  |
|  | Shiraz-4T  | 260  | 0        | -0.324128 |  |
|  | Shiraz-16T | 294  | 0.655804 | 0         |  |
|  | Shiraz-31T | 345  | 0.103301 | 0         |  |
|  | Shiraz-36T | 431  | 0        | -0.78035  |  |
|  | Shiraz-36T | 432  | 0        | -0.6692   |  |
|  | Shiraz-44T | 891  | 0        | -0.954044 |  |
|  | Shiraz-44T | 896  | 0        | -0.109108 |  |
|  | Shiraz-46T | 991  | 0.139564 | 0         |  |
|  | Shiraz-47T | 1084 | 0.24185  | 0         |  |
|  | Shiraz-49T | 1166 | 0        | -0.917235 |  |
|  | Shiraz-49T | 1169 | 0        | -0.583529 |  |
|  | Shiraz-77T | 1282 | 0.213849 | 0         |  |
|  | Shiraz-9T  | 1368 | 0.199713 | 0         |  |
|  | Shiraz-9T  | 1369 | 0.703374 | 0         |  |
|  | Shiraz-18T | 1455 | 0        | -0.186773 |  |
|  | Shiraz-22T | 1669 | 0.695915 | 0         |  |
|  | Shiraz-22T | 1672 | 1.01678  | 0         |  |
|  | Shiraz-25T | 1717 | 0.420447 | 0         |  |
|  | Shiraz-28T | 1760 | 0.538181 | 0         |  |
|  | Shiraz-29T | 1800 | 0.672527 | 0         |  |
|  | Shiraz-32T | 1869 | 0.776805 | 0         |  |
|  | Shiraz-35T | 1932 | 0.507141 | 0         |  |
|  | Shiraz-40T | 2051 | 0.098506 | 0         |  |
|  | Shiraz-58T | 2221 | 0.871948 | 0         |  |
|  | Shiraz-71T | 2260 | 0.68394  | 0         |  |
|  | Shiraz-71T | 2262 | 0.986748 | 0         |  |
|  | Shiraz-4T  | 260  | 0        | -0.324128 |  |
|  | Shiraz-16T | 294  | 0.655804 | 0         |  |
|  | Shiraz-31T | 345  | 0.103301 | 0         |  |
|  | Shiraz-36T | 431  | 0        | -0.78035  |  |
|  | Shiraz-36T | 432  | 0        | -0.6692   |  |
|  | Shiraz-44T | 891  | 0        | -0.954044 |  |

|        |      |            |      |          |           |  |  |
|--------|------|------------|------|----------|-----------|--|--|
|        |      | Shiraz-44T | 896  | 0        | -0.109108 |  |  |
|        |      | Shiraz-46T | 991  | 0.139564 | 0         |  |  |
|        |      | Shiraz-47T | 1084 | 0.24185  | 0         |  |  |
|        |      | Shiraz-49T | 1166 | 0        | -0.917235 |  |  |
|        |      | Shiraz-49T | 1169 | 0        | -0.583529 |  |  |
|        |      | Shiraz-77T | 1282 | 0.213849 | 0         |  |  |
|        |      | Shiraz-9T  | 1368 | 0.199713 | 0         |  |  |
|        |      | Shiraz-9T  | 1369 | 0.703374 | 0         |  |  |
|        |      | Shiraz-18T | 1455 | 0        | -0.186773 |  |  |
|        |      | Shiraz-22T | 1669 | 0.695915 | 0         |  |  |
|        |      | Shiraz-22T | 1672 | 1.01678  | 0         |  |  |
|        |      | Shiraz-25T | 1717 | 0.420447 | 0         |  |  |
|        |      | Shiraz-28T | 1760 | 0.538181 | 0         |  |  |
|        |      | Shiraz-29T | 1800 | 0.672527 | 0         |  |  |
|        |      | Shiraz-32T | 1869 | 0.776805 | 0         |  |  |
|        |      | Shiraz-35T | 1932 | 0.507141 | 0         |  |  |
|        |      | Shiraz-40T | 2051 | 0.098506 | 0         |  |  |
|        |      | Shiraz-58T | 2221 | 0.871948 | 0         |  |  |
|        |      | Shiraz-71T | 2260 | 0.68394  | 0         |  |  |
|        |      | Shiraz-71T | 2262 | 0.986748 | 0         |  |  |
| ZNF425 | chr7 | Shiraz-3T  | 90   | 0.219276 | 0         |  |  |
|        |      | Shiraz-3T  | 99   | 0.454766 | 0         |  |  |
|        |      | Shiraz-4T  | 253  | 0.372918 | 0         |  |  |
|        |      | Shiraz-36T | 378  | 0.179558 | 0         |  |  |
|        |      | Shiraz-44T | 646  | 0.471276 | 0         |  |  |
|        |      | Shiraz-46T | 943  | 0.093799 | 0         |  |  |
|        |      | Shiraz-9T  | 1325 | 0.221899 | 0         |  |  |
|        |      | Shiraz-18T | 1434 | 0.244465 | 0         |  |  |
|        |      | Shiraz-25T | 1698 | 0.21835  | 0         |  |  |
|        |      | Shiraz-28T | 1735 | 0.350744 | 0         |  |  |
|        |      | Shiraz-29T | 1778 | 0.120767 | 0         |  |  |
|        |      | Shiraz-32T | 1833 | 0.551336 | 0         |  |  |
|        |      | Shiraz-38T | 1951 | 0.250891 | 0         |  |  |
|        |      | Shiraz-53T | 2078 | 0.287202 | 0         |  |  |
|        |      | Shiraz-58T | 2162 | 0.221505 | 0         |  |  |
|        |      | Shiraz-71T | 2238 | 0.603631 | 0         |  |  |
|        |      | Shiraz-3T  | 90   | 0.219276 | 0         |  |  |
|        |      | Shiraz-3T  | 99   | 0.454766 | 0         |  |  |
|        |      | Shiraz-4T  | 253  | 0.372918 | 0         |  |  |
|        |      | Shiraz-36T | 378  | 0.179558 | 0         |  |  |
|        |      | Shiraz-44T | 646  | 0.471276 | 0         |  |  |
|        |      | Shiraz-46T | 943  | 0.093799 | 0         |  |  |
|        |      | Shiraz-9T  | 1325 | 0.221899 | 0         |  |  |
|        |      | Shiraz-18T | 1434 | 0.244465 | 0         |  |  |
|        |      | Shiraz-25T | 1698 | 0.21835  | 0         |  |  |
|        |      | Shiraz-28T | 1735 | 0.350744 | 0         |  |  |
|        |      | Shiraz-29T | 1778 | 0.120767 | 0         |  |  |

|        |      |            |      |          |           |  |  |
|--------|------|------------|------|----------|-----------|--|--|
|        |      | Shiraz-32T | 1833 | 0.551336 | 0         |  |  |
|        |      | Shiraz-38T | 1951 | 0.250891 | 0         |  |  |
|        |      | Shiraz-53T | 2078 | 0.287202 | 0         |  |  |
|        |      | Shiraz-58T | 2162 | 0.221505 | 0         |  |  |
|        |      | Shiraz-71T | 2238 | 0.603631 | 0         |  |  |
|        |      | Shiraz-3T  | 90   | 0.219276 | 0         |  |  |
|        |      | Shiraz-3T  | 99   | 0.454766 | 0         |  |  |
|        |      | Shiraz-4T  | 253  | 0.372918 | 0         |  |  |
|        |      | Shiraz-36T | 378  | 0.179558 | 0         |  |  |
|        |      | Shiraz-44T | 646  | 0.471276 | 0         |  |  |
|        |      | Shiraz-46T | 943  | 0.093799 | 0         |  |  |
|        |      | Shiraz-9T  | 1325 | 0.221899 | 0         |  |  |
|        |      | Shiraz-18T | 1434 | 0.244465 | 0         |  |  |
|        |      | Shiraz-25T | 1698 | 0.21835  | 0         |  |  |
|        |      | Shiraz-28T | 1735 | 0.350744 | 0         |  |  |
|        |      | Shiraz-29T | 1778 | 0.120767 | 0         |  |  |
|        |      | Shiraz-32T | 1833 | 0.551336 | 0         |  |  |
|        |      | Shiraz-38T | 1951 | 0.250891 | 0         |  |  |
|        |      | Shiraz-53T | 2078 | 0.287202 | 0         |  |  |
|        |      | Shiraz-58T | 2162 | 0.221505 | 0         |  |  |
|        |      | Shiraz-71T | 2238 | 0.603631 | 0         |  |  |
| ZNF449 | chrX | Shiraz-3T  | 242  | 0        | -0.336434 |  |  |
|        |      | Shiraz-4T  | 261  | 0        | -0.336249 |  |  |
|        |      | Shiraz-16T | 295  | 0.591657 | 0         |  |  |
|        |      | Shiraz-36T | 433  | 0        | -0.803961 |  |  |
|        |      | Shiraz-44T | 899  | 0        | -1.09697  |  |  |
|        |      | Shiraz-49T | 1170 | 0        | -0.967436 |  |  |
|        |      | Shiraz-9T  | 1370 | 0.690073 | 0         |  |  |
|        |      | Shiraz-18T | 1457 | 0.643204 | 0         |  |  |
|        |      | Shiraz-22T | 1673 | 0.611783 | 0         |  |  |
|        |      | Shiraz-22T | 1677 | 0.789711 | 0         |  |  |
|        |      | Shiraz-25T | 1719 | 0.472955 | 0         |  |  |
|        |      | Shiraz-28T | 1762 | 0.562311 | 0         |  |  |
|        |      | Shiraz-29T | 1801 | 0.815343 | 0         |  |  |
|        |      | Shiraz-32T | 1870 | 0.729766 | 0         |  |  |
|        |      | Shiraz-35T | 1933 | 0.488535 | 0         |  |  |
|        |      | Shiraz-58T | 2223 | 0.833364 | 0         |  |  |
|        |      | Shiraz-71T | 2263 | 0.975531 | 0         |  |  |
|        |      | Shiraz-3T  | 242  | 0        | -0.336434 |  |  |
|        |      | Shiraz-4T  | 261  | 0        | -0.336249 |  |  |
|        |      | Shiraz-16T | 295  | 0.591657 | 0         |  |  |
|        |      | Shiraz-36T | 433  | 0        | -0.803961 |  |  |
|        |      | Shiraz-44T | 899  | 0        | -1.09697  |  |  |
|        |      | Shiraz-49T | 1170 | 0        | -0.967436 |  |  |
|        |      | Shiraz-9T  | 1370 | 0.690073 | 0         |  |  |
|        |      | Shiraz-18T | 1457 | 0.643204 | 0         |  |  |
|        |      | Shiraz-22T | 1673 | 0.611783 | 0         |  |  |

|        |      |            |      |          |           |  |
|--------|------|------------|------|----------|-----------|--|
|        |      | Shiraz-22T | 1677 | 0.789711 | 0         |  |
|        |      | Shiraz-25T | 1719 | 0.472955 | 0         |  |
|        |      | Shiraz-28T | 1762 | 0.562311 | 0         |  |
|        |      | Shiraz-29T | 1801 | 0.815343 | 0         |  |
|        |      | Shiraz-32T | 1870 | 0.729766 | 0         |  |
|        |      | Shiraz-35T | 1933 | 0.488535 | 0         |  |
|        |      | Shiraz-58T | 2223 | 0.833364 | 0         |  |
|        |      | Shiraz-71T | 2263 | 0.975531 | 0         |  |
|        |      | Shiraz-3T  | 242  | 0        | -0.336434 |  |
|        |      | Shiraz-4T  | 261  | 0        | -0.336249 |  |
|        |      | Shiraz-16T | 295  | 0.591657 | 0         |  |
|        |      | Shiraz-36T | 433  | 0        | -0.803961 |  |
|        |      | Shiraz-44T | 899  | 0        | -1.09697  |  |
|        |      | Shiraz-49T | 1170 | 0        | -0.967436 |  |
|        |      | Shiraz-9T  | 1370 | 0.690073 | 0         |  |
|        |      | Shiraz-18T | 1457 | 0.643204 | 0         |  |
|        |      | Shiraz-22T | 1673 | 0.611783 | 0         |  |
|        |      | Shiraz-22T | 1677 | 0.789711 | 0         |  |
|        |      | Shiraz-25T | 1719 | 0.472955 | 0         |  |
|        |      | Shiraz-28T | 1762 | 0.562311 | 0         |  |
|        |      | Shiraz-29T | 1801 | 0.815343 | 0         |  |
|        |      | Shiraz-32T | 1870 | 0.729766 | 0         |  |
|        |      | Shiraz-35T | 1933 | 0.488535 | 0         |  |
|        |      | Shiraz-58T | 2223 | 0.833364 | 0         |  |
|        |      | Shiraz-71T | 2263 | 0.975531 | 0         |  |
| ZNF467 | chr7 | Shiraz-3T  | 90   | 0.219276 | 0         |  |
|        |      | Shiraz-3T  | 99   | 0.454766 | 0         |  |
|        |      | Shiraz-4T  | 253  | 0.372918 | 0         |  |
|        |      | Shiraz-36T | 378  | 0.179558 | 0         |  |
|        |      | Shiraz-44T | 646  | 0.471276 | 0         |  |
|        |      | Shiraz-46T | 943  | 0.093799 | 0         |  |
|        |      | Shiraz-9T  | 1325 | 0.221899 | 0         |  |
|        |      | Shiraz-18T | 1434 | 0.244465 | 0         |  |
|        |      | Shiraz-25T | 1698 | 0.21835  | 0         |  |
|        |      | Shiraz-28T | 1735 | 0.350744 | 0         |  |
|        |      | Shiraz-29T | 1778 | 0.120767 | 0         |  |
|        |      | Shiraz-32T | 1833 | 0.551336 | 0         |  |
|        |      | Shiraz-38T | 1951 | 0.250891 | 0         |  |
|        |      | Shiraz-53T | 2078 | 0.287202 | 0         |  |
|        |      | Shiraz-58T | 2162 | 0.221505 | 0         |  |
|        |      | Shiraz-71T | 2238 | 0.603631 | 0         |  |
|        |      | Shiraz-3T  | 90   | 0.219276 | 0         |  |
|        |      | Shiraz-3T  | 99   | 0.454766 | 0         |  |
|        |      | Shiraz-4T  | 253  | 0.372918 | 0         |  |
|        |      | Shiraz-36T | 378  | 0.179558 | 0         |  |
|        |      | Shiraz-44T | 646  | 0.471276 | 0         |  |
|        |      | Shiraz-46T | 943  | 0.093799 | 0         |  |

|        |      |            |      |          |           |  |
|--------|------|------------|------|----------|-----------|--|
|        |      | Shiraz-9T  | 1325 | 0.221899 | 0         |  |
|        |      | Shiraz-18T | 1434 | 0.244465 | 0         |  |
|        |      | Shiraz-25T | 1698 | 0.21835  | 0         |  |
|        |      | Shiraz-28T | 1735 | 0.350744 | 0         |  |
|        |      | Shiraz-29T | 1778 | 0.120767 | 0         |  |
|        |      | Shiraz-32T | 1833 | 0.551336 | 0         |  |
|        |      | Shiraz-38T | 1951 | 0.250891 | 0         |  |
|        |      | Shiraz-53T | 2078 | 0.287202 | 0         |  |
|        |      | Shiraz-58T | 2162 | 0.221505 | 0         |  |
|        |      | Shiraz-71T | 2238 | 0.603631 | 0         |  |
|        |      | Shiraz-3T  | 90   | 0.219276 | 0         |  |
|        |      | Shiraz-3T  | 99   | 0.454766 | 0         |  |
|        |      | Shiraz-4T  | 253  | 0.372918 | 0         |  |
|        |      | Shiraz-36T | 378  | 0.179558 | 0         |  |
|        |      | Shiraz-44T | 646  | 0.471276 | 0         |  |
|        |      | Shiraz-46T | 943  | 0.093799 | 0         |  |
|        |      | Shiraz-9T  | 1325 | 0.221899 | 0         |  |
|        |      | Shiraz-18T | 1434 | 0.244465 | 0         |  |
|        |      | Shiraz-25T | 1698 | 0.21835  | 0         |  |
|        |      | Shiraz-28T | 1735 | 0.350744 | 0         |  |
|        |      | Shiraz-29T | 1778 | 0.120767 | 0         |  |
|        |      | Shiraz-32T | 1833 | 0.551336 | 0         |  |
|        |      | Shiraz-38T | 1951 | 0.250891 | 0         |  |
|        |      | Shiraz-53T | 2078 | 0.287202 | 0         |  |
|        |      | Shiraz-58T | 2162 | 0.221505 | 0         |  |
|        |      | Shiraz-71T | 2238 | 0.603631 | 0         |  |
| ZNF498 | chr7 | Shiraz-3T  | 90   | 0.219276 | 0         |  |
|        |      | Shiraz-3T  | 94   | 0.74735  | 0         |  |
|        |      | Shiraz-4T  | 253  | 0.372918 | 0         |  |
|        |      | Shiraz-31T | 316  | 0.219196 | 0         |  |
|        |      | Shiraz-36T | 378  | 0.179558 | 0         |  |
|        |      | Shiraz-36T | 381  | 0.332628 | 0         |  |
|        |      | Shiraz-44T | 639  | 1.035032 | 0         |  |
|        |      | Shiraz-44T | 640  | 0.272608 | 0         |  |
|        |      | Shiraz-46T | 943  | 0.093799 | 0         |  |
|        |      | Shiraz-46T | 946  | 0.299835 | 0         |  |
|        |      | Shiraz-47T | 1030 | 0.257728 | 0         |  |
|        |      | Shiraz-49T | 1120 | 0.281656 | 0         |  |
|        |      | Shiraz-77T | 1225 | 0        | -0.117922 |  |
|        |      | Shiraz-77T | 1227 | 0.196445 | 0         |  |
|        |      | Shiraz-9T  | 1324 | 0.679266 | 0         |  |
|        |      | Shiraz-18T | 1434 | 0.244465 | 0         |  |
|        |      | Shiraz-22T | 1549 | 0        | -0.319623 |  |
|        |      | Shiraz-22T | 1551 | 0.324011 | 0         |  |
|        |      | Shiraz-25T | 1698 | 0.21835  | 0         |  |
|        |      | Shiraz-28T | 1735 | 0.350744 | 0         |  |
|        |      | Shiraz-29T | 1778 | 0.120767 | 0         |  |

|  |  |            |      |          |           |  |  |
|--|--|------------|------|----------|-----------|--|--|
|  |  | Shiraz-32T | 1833 | 0.551336 | 0         |  |  |
|  |  | Shiraz-38T | 1951 | 0.250891 | 0         |  |  |
|  |  | Shiraz-53T | 2078 | 0.287202 | 0         |  |  |
|  |  | Shiraz-71T | 2238 | 0.603631 | 0         |  |  |
|  |  | Shiraz-3T  | 90   | 0.219276 | 0         |  |  |
|  |  | Shiraz-3T  | 94   | 0.74735  | 0         |  |  |
|  |  | Shiraz-4T  | 253  | 0.372918 | 0         |  |  |
|  |  | Shiraz-31T | 316  | 0.219196 | 0         |  |  |
|  |  | Shiraz-36T | 378  | 0.179558 | 0         |  |  |
|  |  | Shiraz-36T | 381  | 0.332628 | 0         |  |  |
|  |  | Shiraz-44T | 639  | 1.035032 | 0         |  |  |
|  |  | Shiraz-44T | 640  | 0.272608 | 0         |  |  |
|  |  | Shiraz-46T | 943  | 0.093799 | 0         |  |  |
|  |  | Shiraz-46T | 946  | 0.299835 | 0         |  |  |
|  |  | Shiraz-47T | 1030 | 0.257728 | 0         |  |  |
|  |  | Shiraz-49T | 1120 | 0.281656 | 0         |  |  |
|  |  | Shiraz-77T | 1225 | 0        | -0.117922 |  |  |
|  |  | Shiraz-77T | 1227 | 0.196445 | 0         |  |  |
|  |  | Shiraz-9T  | 1324 | 0.679266 | 0         |  |  |
|  |  | Shiraz-18T | 1434 | 0.244465 | 0         |  |  |
|  |  | Shiraz-22T | 1549 | 0        | -0.319623 |  |  |
|  |  | Shiraz-22T | 1551 | 0.324011 | 0         |  |  |
|  |  | Shiraz-25T | 1698 | 0.21835  | 0         |  |  |
|  |  | Shiraz-28T | 1735 | 0.350744 | 0         |  |  |
|  |  | Shiraz-29T | 1778 | 0.120767 | 0         |  |  |
|  |  | Shiraz-32T | 1833 | 0.551336 | 0         |  |  |
|  |  | Shiraz-38T | 1951 | 0.250891 | 0         |  |  |
|  |  | Shiraz-53T | 2078 | 0.287202 | 0         |  |  |
|  |  | Shiraz-71T | 2238 | 0.603631 | 0         |  |  |
|  |  | Shiraz-3T  | 90   | 0.219276 | 0         |  |  |
|  |  | Shiraz-3T  | 94   | 0.74735  | 0         |  |  |
|  |  | Shiraz-4T  | 253  | 0.372918 | 0         |  |  |
|  |  | Shiraz-31T | 316  | 0.219196 | 0         |  |  |
|  |  | Shiraz-36T | 378  | 0.179558 | 0         |  |  |
|  |  | Shiraz-36T | 381  | 0.332628 | 0         |  |  |
|  |  | Shiraz-44T | 639  | 1.035032 | 0         |  |  |
|  |  | Shiraz-44T | 640  | 0.272608 | 0         |  |  |
|  |  | Shiraz-46T | 943  | 0.093799 | 0         |  |  |
|  |  | Shiraz-46T | 946  | 0.299835 | 0         |  |  |
|  |  | Shiraz-47T | 1030 | 0.257728 | 0         |  |  |
|  |  | Shiraz-49T | 1120 | 0.281656 | 0         |  |  |
|  |  | Shiraz-77T | 1225 | 0        | -0.117922 |  |  |
|  |  | Shiraz-77T | 1227 | 0.196445 | 0         |  |  |
|  |  | Shiraz-9T  | 1324 | 0.679266 | 0         |  |  |
|  |  | Shiraz-18T | 1434 | 0.244465 | 0         |  |  |
|  |  | Shiraz-22T | 1549 | 0        | -0.319623 |  |  |
|  |  | Shiraz-22T | 1551 | 0.324011 | 0         |  |  |

|        |      |            |      |          |           |  |
|--------|------|------------|------|----------|-----------|--|
|        |      | Shiraz-25T | 1698 | 0.21835  | 0         |  |
|        |      | Shiraz-28T | 1735 | 0.350744 | 0         |  |
|        |      | Shiraz-29T | 1778 | 0.120767 | 0         |  |
|        |      | Shiraz-32T | 1833 | 0.551336 | 0         |  |
|        |      | Shiraz-38T | 1951 | 0.250891 | 0         |  |
|        |      | Shiraz-53T | 2078 | 0.287202 | 0         |  |
|        |      | Shiraz-71T | 2238 | 0.603631 | 0         |  |
| ZNF630 | chrX | Shiraz-4T  | 260  | 0        | -0.324128 |  |
|        |      | Shiraz-16T | 294  | 0.655804 | 0         |  |
|        |      | Shiraz-31T | 345  | 0.103301 | 0         |  |
|        |      | Shiraz-36T | 431  | 0        | -0.78035  |  |
|        |      | Shiraz-36T | 432  | 0        | -0.6692   |  |
|        |      | Shiraz-44T | 891  | 0        | -0.954044 |  |
|        |      | Shiraz-44T | 896  | 0        | -0.109108 |  |
|        |      | Shiraz-46T | 991  | 0.139564 | 0         |  |
|        |      | Shiraz-47T | 1084 | 0.24185  | 0         |  |
|        |      | Shiraz-49T | 1166 | 0        | -0.917235 |  |
|        |      | Shiraz-49T | 1169 | 0        | -0.583529 |  |
|        |      | Shiraz-77T | 1282 | 0.213849 | 0         |  |
|        |      | Shiraz-9T  | 1368 | 0.199713 | 0         |  |
|        |      | Shiraz-9T  | 1369 | 0.703374 | 0         |  |
|        |      | Shiraz-18T | 1455 | 0        | -0.186773 |  |
|        |      | Shiraz-22T | 1669 | 0.695915 | 0         |  |
|        |      | Shiraz-22T | 1672 | 1.01678  | 0         |  |
|        |      | Shiraz-25T | 1717 | 0.420447 | 0         |  |
|        |      | Shiraz-28T | 1760 | 0.538181 | 0         |  |
|        |      | Shiraz-29T | 1800 | 0.672527 | 0         |  |
|        |      | Shiraz-32T | 1869 | 0.776805 | 0         |  |
|        |      | Shiraz-35T | 1932 | 0.507141 | 0         |  |
|        |      | Shiraz-58T | 2221 | 0.871948 | 0         |  |
|        |      | Shiraz-71T | 2260 | 0.68394  | 0         |  |
|        |      | Shiraz-71T | 2262 | 0.986748 | 0         |  |
|        |      | Shiraz-4T  | 260  | 0        | -0.324128 |  |
|        |      | Shiraz-16T | 294  | 0.655804 | 0         |  |
|        |      | Shiraz-31T | 345  | 0.103301 | 0         |  |
|        |      | Shiraz-36T | 431  | 0        | -0.78035  |  |
|        |      | Shiraz-36T | 432  | 0        | -0.6692   |  |
|        |      | Shiraz-44T | 891  | 0        | -0.954044 |  |
|        |      | Shiraz-44T | 896  | 0        | -0.109108 |  |
|        |      | Shiraz-46T | 991  | 0.139564 | 0         |  |
|        |      | Shiraz-47T | 1084 | 0.24185  | 0         |  |
|        |      | Shiraz-49T | 1166 | 0        | -0.917235 |  |
|        |      | Shiraz-49T | 1169 | 0        | -0.583529 |  |
|        |      | Shiraz-77T | 1282 | 0.213849 | 0         |  |
|        |      | Shiraz-9T  | 1368 | 0.199713 | 0         |  |
|        |      | Shiraz-9T  | 1369 | 0.703374 | 0         |  |
|        |      | Shiraz-18T | 1455 | 0        | -0.186773 |  |

|        |      |            |      |          |           |  |
|--------|------|------------|------|----------|-----------|--|
|        |      | Shiraz-22T | 1669 | 0.695915 | 0         |  |
|        |      | Shiraz-22T | 1672 | 1.01678  | 0         |  |
|        |      | Shiraz-25T | 1717 | 0.420447 | 0         |  |
|        |      | Shiraz-28T | 1760 | 0.538181 | 0         |  |
|        |      | Shiraz-29T | 1800 | 0.672527 | 0         |  |
|        |      | Shiraz-32T | 1869 | 0.776805 | 0         |  |
|        |      | Shiraz-35T | 1932 | 0.507141 | 0         |  |
|        |      | Shiraz-58T | 2221 | 0.871948 | 0         |  |
|        |      | Shiraz-71T | 2260 | 0.68394  | 0         |  |
|        |      | Shiraz-71T | 2262 | 0.986748 | 0         |  |
|        |      | Shiraz-4T  | 260  | 0        | -0.324128 |  |
|        |      | Shiraz-16T | 294  | 0.655804 | 0         |  |
|        |      | Shiraz-31T | 345  | 0.103301 | 0         |  |
|        |      | Shiraz-36T | 431  | 0        | -0.78035  |  |
|        |      | Shiraz-36T | 432  | 0        | -0.6692   |  |
|        |      | Shiraz-44T | 891  | 0        | -0.954044 |  |
|        |      | Shiraz-44T | 896  | 0        | -0.109108 |  |
|        |      | Shiraz-46T | 991  | 0.139564 | 0         |  |
|        |      | Shiraz-47T | 1084 | 0.24185  | 0         |  |
|        |      | Shiraz-49T | 1166 | 0        | -0.917235 |  |
|        |      | Shiraz-49T | 1169 | 0        | -0.583529 |  |
|        |      | Shiraz-77T | 1282 | 0.213849 | 0         |  |
|        |      | Shiraz-9T  | 1368 | 0.199713 | 0         |  |
|        |      | Shiraz-9T  | 1369 | 0.703374 | 0         |  |
|        |      | Shiraz-18T | 1455 | 0        | -0.186773 |  |
|        |      | Shiraz-22T | 1669 | 0.695915 | 0         |  |
|        |      | Shiraz-22T | 1672 | 1.01678  | 0         |  |
|        |      | Shiraz-25T | 1717 | 0.420447 | 0         |  |
|        |      | Shiraz-28T | 1760 | 0.538181 | 0         |  |
|        |      | Shiraz-29T | 1800 | 0.672527 | 0         |  |
|        |      | Shiraz-32T | 1869 | 0.776805 | 0         |  |
|        |      | Shiraz-35T | 1932 | 0.507141 | 0         |  |
|        |      | Shiraz-58T | 2221 | 0.871948 | 0         |  |
|        |      | Shiraz-71T | 2260 | 0.68394  | 0         |  |
|        |      | Shiraz-71T | 2262 | 0.986748 | 0         |  |
| ZNF645 | chrX | Shiraz-3T  | 235  | 0        | -0.28401  |  |
|        |      | Shiraz-4T  | 260  | 0        | -0.324128 |  |
|        |      | Shiraz-16T | 294  | 0.655804 | 0         |  |
|        |      | Shiraz-36T | 431  | 0        | -0.78035  |  |
|        |      | Shiraz-44T | 891  | 0        | -0.954044 |  |
|        |      | Shiraz-49T | 1166 | 0        | -0.917235 |  |
|        |      | Shiraz-77T | 1281 | 0.136627 | 0         |  |
|        |      | Shiraz-9T  | 1368 | 0.199713 | 0         |  |
|        |      | Shiraz-18T | 1455 | 0        | -0.186773 |  |
|        |      | Shiraz-22T | 1669 | 0.695915 | 0         |  |
|        |      | Shiraz-25T | 1717 | 0.420447 | 0         |  |
|        |      | Shiraz-28T | 1760 | 0.538181 | 0         |  |



|        |      |            |      |          |           |  |
|--------|------|------------|------|----------|-----------|--|
|        |      | Shiraz-29T | 1800 | 0.672527 | 0         |  |
|        |      | Shiraz-32T | 1869 | 0.776805 | 0         |  |
|        |      | Shiraz-35T | 1932 | 0.507141 | 0         |  |
|        |      | Shiraz-40T | 2051 | 0.098506 | 0         |  |
|        |      | Shiraz-58T | 2221 | 0.871948 | 0         |  |
|        |      | Shiraz-71T | 2260 | 0.68394  | 0         |  |
|        |      | Shiraz-71T | 2261 | 0.508399 | 0         |  |
|        |      | Shiraz-3T  | 235  | 0        | -0.28401  |  |
|        |      | Shiraz-4T  | 260  | 0        | -0.324128 |  |
|        |      | Shiraz-16T | 294  | 0.655804 | 0         |  |
|        |      | Shiraz-36T | 431  | 0        | -0.78035  |  |
|        |      | Shiraz-44T | 891  | 0        | -0.954044 |  |
|        |      | Shiraz-49T | 1166 | 0        | -0.917235 |  |
|        |      | Shiraz-77T | 1281 | 0.136627 | 0         |  |
|        |      | Shiraz-9T  | 1368 | 0.199713 | 0         |  |
|        |      | Shiraz-18T | 1455 | 0        | -0.186773 |  |
|        |      | Shiraz-22T | 1669 | 0.695915 | 0         |  |
|        |      | Shiraz-25T | 1717 | 0.420447 | 0         |  |
|        |      | Shiraz-28T | 1760 | 0.538181 | 0         |  |
|        |      | Shiraz-29T | 1800 | 0.672527 | 0         |  |
|        |      | Shiraz-32T | 1869 | 0.776805 | 0         |  |
|        |      | Shiraz-35T | 1932 | 0.507141 | 0         |  |
|        |      | Shiraz-40T | 2051 | 0.098506 | 0         |  |
|        |      | Shiraz-58T | 2221 | 0.871948 | 0         |  |
|        |      | Shiraz-71T | 2260 | 0.68394  | 0         |  |
|        |      | Shiraz-71T | 2261 | 0.508399 | 0         |  |
|        |      | Shiraz-3T  | 235  | 0        | -0.28401  |  |
|        |      | Shiraz-4T  | 260  | 0        | -0.324128 |  |
|        |      | Shiraz-16T | 294  | 0.655804 | 0         |  |
|        |      | Shiraz-36T | 431  | 0        | -0.78035  |  |
|        |      | Shiraz-44T | 891  | 0        | -0.954044 |  |
|        |      | Shiraz-49T | 1166 | 0        | -0.917235 |  |
|        |      | Shiraz-77T | 1281 | 0.136627 | 0         |  |
|        |      | Shiraz-9T  | 1368 | 0.199713 | 0         |  |
|        |      | Shiraz-18T | 1455 | 0        | -0.186773 |  |
|        |      | Shiraz-22T | 1669 | 0.695915 | 0         |  |
|        |      | Shiraz-25T | 1717 | 0.420447 | 0         |  |
|        |      | Shiraz-28T | 1760 | 0.538181 | 0         |  |
|        |      | Shiraz-29T | 1800 | 0.672527 | 0         |  |
|        |      | Shiraz-32T | 1869 | 0.776805 | 0         |  |
|        |      | Shiraz-35T | 1932 | 0.507141 | 0         |  |
|        |      | Shiraz-40T | 2051 | 0.098506 | 0         |  |
|        |      | Shiraz-58T | 2221 | 0.871948 | 0         |  |
|        |      | Shiraz-71T | 2260 | 0.68394  | 0         |  |
|        |      | Shiraz-71T | 2261 | 0.508399 | 0         |  |
| ZNF655 | chr7 | Shiraz-3T  | 90   | 0.219276 | 0         |  |
|        |      | Shiraz-3T  | 90   | 0.219276 | 0         |  |

|  |  |            |     |          |   |  |  |
|--|--|------------|-----|----------|---|--|--|
|  |  | Shiraz-3T  | 90  | 0.219276 | 0 |  |  |
|  |  | Shiraz-3T  | 90  | 0.219276 | 0 |  |  |
|  |  | Shiraz-3T  | 90  | 0.219276 | 0 |  |  |
|  |  | Shiraz-3T  | 90  | 0.219276 | 0 |  |  |
|  |  | Shiraz-3T  | 90  | 0.219276 | 0 |  |  |
|  |  | Shiraz-3T  | 90  | 0.219276 | 0 |  |  |
|  |  | Shiraz-3T  | 94  | 0.74735  | 0 |  |  |
|  |  | Shiraz-3T  | 94  | 0.74735  | 0 |  |  |
|  |  | Shiraz-3T  | 94  | 0.74735  | 0 |  |  |
|  |  | Shiraz-3T  | 94  | 0.74735  | 0 |  |  |
|  |  | Shiraz-3T  | 94  | 0.74735  | 0 |  |  |
|  |  | Shiraz-3T  | 94  | 0.74735  | 0 |  |  |
|  |  | Shiraz-3T  | 94  | 0.74735  | 0 |  |  |
|  |  | Shiraz-3T  | 94  | 0.74735  | 0 |  |  |
|  |  | Shiraz-4T  | 253 | 0.372918 | 0 |  |  |
|  |  | Shiraz-4T  | 253 | 0.372918 | 0 |  |  |
|  |  | Shiraz-4T  | 253 | 0.372918 | 0 |  |  |
|  |  | Shiraz-4T  | 253 | 0.372918 | 0 |  |  |
|  |  | Shiraz-4T  | 253 | 0.372918 | 0 |  |  |
|  |  | Shiraz-4T  | 253 | 0.372918 | 0 |  |  |
|  |  | Shiraz-4T  | 253 | 0.372918 | 0 |  |  |
|  |  | Shiraz-4T  | 253 | 0.372918 | 0 |  |  |
|  |  | Shiraz-31T | 316 | 0.219196 | 0 |  |  |
|  |  | Shiraz-31T | 316 | 0.219196 | 0 |  |  |
|  |  | Shiraz-31T | 316 | 0.219196 | 0 |  |  |
|  |  | Shiraz-31T | 316 | 0.219196 | 0 |  |  |
|  |  | Shiraz-31T | 316 | 0.219196 | 0 |  |  |
|  |  | Shiraz-31T | 316 | 0.219196 | 0 |  |  |
|  |  | Shiraz-31T | 316 | 0.219196 | 0 |  |  |
|  |  | Shiraz-31T | 316 | 0.219196 | 0 |  |  |
|  |  | Shiraz-36T | 378 | 0.179558 | 0 |  |  |
|  |  | Shiraz-36T | 378 | 0.179558 | 0 |  |  |
|  |  | Shiraz-36T | 378 | 0.179558 | 0 |  |  |
|  |  | Shiraz-36T | 378 | 0.179558 | 0 |  |  |
|  |  | Shiraz-36T | 378 | 0.179558 | 0 |  |  |
|  |  | Shiraz-36T | 378 | 0.179558 | 0 |  |  |
|  |  | Shiraz-36T | 378 | 0.179558 | 0 |  |  |
|  |  | Shiraz-36T | 378 | 0.179558 | 0 |  |  |
|  |  | Shiraz-36T | 378 | 0.179558 | 0 |  |  |
|  |  | Shiraz-36T | 381 | 0.332628 | 0 |  |  |
|  |  | Shiraz-36T | 381 | 0.332628 | 0 |  |  |
|  |  | Shiraz-36T | 381 | 0.332628 | 0 |  |  |
|  |  | Shiraz-36T | 381 | 0.332628 | 0 |  |  |
|  |  | Shiraz-36T | 381 | 0.332628 | 0 |  |  |
|  |  | Shiraz-36T | 381 | 0.332628 | 0 |  |  |
|  |  | Shiraz-36T | 381 | 0.332628 | 0 |  |  |
|  |  | Shiraz-36T | 381 | 0.332628 | 0 |  |  |
|  |  | Shiraz-36T | 381 | 0.332628 | 0 |  |  |
|  |  | Shiraz-44T | 639 | 1.035032 | 0 |  |  |









|  |  |            |      |          |   |  |  |
|--|--|------------|------|----------|---|--|--|
|  |  | Shiraz-36T | 378  | 0.179558 | 0 |  |  |
|  |  | Shiraz-36T | 378  | 0.179558 | 0 |  |  |
|  |  | Shiraz-36T | 378  | 0.179558 | 0 |  |  |
|  |  | Shiraz-36T | 381  | 0.332628 | 0 |  |  |
|  |  | Shiraz-36T | 381  | 0.332628 | 0 |  |  |
|  |  | Shiraz-36T | 381  | 0.332628 | 0 |  |  |
|  |  | Shiraz-36T | 381  | 0.332628 | 0 |  |  |
|  |  | Shiraz-36T | 381  | 0.332628 | 0 |  |  |
|  |  | Shiraz-36T | 381  | 0.332628 | 0 |  |  |
|  |  | Shiraz-36T | 381  | 0.332628 | 0 |  |  |
|  |  | Shiraz-36T | 381  | 0.332628 | 0 |  |  |
|  |  | Shiraz-44T | 639  | 1.035032 | 0 |  |  |
|  |  | Shiraz-44T | 639  | 1.035032 | 0 |  |  |
|  |  | Shiraz-44T | 639  | 1.035032 | 0 |  |  |
|  |  | Shiraz-44T | 639  | 1.035032 | 0 |  |  |
|  |  | Shiraz-44T | 639  | 1.035032 | 0 |  |  |
|  |  | Shiraz-44T | 639  | 1.035032 | 0 |  |  |
|  |  | Shiraz-44T | 639  | 1.035032 | 0 |  |  |
|  |  | Shiraz-44T | 639  | 1.035032 | 0 |  |  |
|  |  | Shiraz-44T | 639  | 1.035032 | 0 |  |  |
|  |  | Shiraz-44T | 640  | 0.272608 | 0 |  |  |
|  |  | Shiraz-44T | 640  | 0.272608 | 0 |  |  |
|  |  | Shiraz-44T | 640  | 0.272608 | 0 |  |  |
|  |  | Shiraz-44T | 640  | 0.272608 | 0 |  |  |
|  |  | Shiraz-44T | 640  | 0.272608 | 0 |  |  |
|  |  | Shiraz-44T | 640  | 0.272608 | 0 |  |  |
|  |  | Shiraz-44T | 640  | 0.272608 | 0 |  |  |
|  |  | Shiraz-44T | 640  | 0.272608 | 0 |  |  |
|  |  | Shiraz-44T | 640  | 0.272608 | 0 |  |  |
|  |  | Shiraz-46T | 943  | 0.093799 | 0 |  |  |
|  |  | Shiraz-46T | 943  | 0.093799 | 0 |  |  |
|  |  | Shiraz-46T | 943  | 0.093799 | 0 |  |  |
|  |  | Shiraz-46T | 943  | 0.093799 | 0 |  |  |
|  |  | Shiraz-46T | 943  | 0.093799 | 0 |  |  |
|  |  | Shiraz-46T | 943  | 0.093799 | 0 |  |  |
|  |  | Shiraz-46T | 943  | 0.093799 | 0 |  |  |
|  |  | Shiraz-46T | 943  | 0.093799 | 0 |  |  |
|  |  | Shiraz-46T | 943  | 0.093799 | 0 |  |  |
|  |  | Shiraz-46T | 943  | 0.093799 | 0 |  |  |
|  |  | Shiraz-46T | 946  | 0.299835 | 0 |  |  |
|  |  | Shiraz-46T | 946  | 0.299835 | 0 |  |  |
|  |  | Shiraz-46T | 946  | 0.299835 | 0 |  |  |
|  |  | Shiraz-46T | 946  | 0.299835 | 0 |  |  |
|  |  | Shiraz-46T | 946  | 0.299835 | 0 |  |  |
|  |  | Shiraz-46T | 946  | 0.299835 | 0 |  |  |
|  |  | Shiraz-46T | 946  | 0.299835 | 0 |  |  |
|  |  | Shiraz-46T | 946  | 0.299835 | 0 |  |  |
|  |  | Shiraz-46T | 946  | 0.299835 | 0 |  |  |
|  |  | Shiraz-46T | 946  | 0.299835 | 0 |  |  |
|  |  | Shiraz-47T | 1030 | 0.257728 | 0 |  |  |
|  |  | Shiraz-47T | 1030 | 0.257728 | 0 |  |  |
|  |  | Shiraz-47T | 1030 | 0.257728 | 0 |  |  |
|  |  | Shiraz-47T | 1030 | 0.257728 | 0 |  |  |

|  |  |            |      |          |           |  |  |
|--|--|------------|------|----------|-----------|--|--|
|  |  | Shiraz-47T | 1030 | 0.257728 | 0         |  |  |
|  |  | Shiraz-47T | 1030 | 0.257728 | 0         |  |  |
|  |  | Shiraz-47T | 1030 | 0.257728 | 0         |  |  |
|  |  | Shiraz-47T | 1030 | 0.257728 | 0         |  |  |
|  |  | Shiraz-49T | 1120 | 0.281656 | 0         |  |  |
|  |  | Shiraz-49T | 1120 | 0.281656 | 0         |  |  |
|  |  | Shiraz-49T | 1120 | 0.281656 | 0         |  |  |
|  |  | Shiraz-49T | 1120 | 0.281656 | 0         |  |  |
|  |  | Shiraz-49T | 1120 | 0.281656 | 0         |  |  |
|  |  | Shiraz-49T | 1120 | 0.281656 | 0         |  |  |
|  |  | Shiraz-49T | 1120 | 0.281656 | 0         |  |  |
|  |  | Shiraz-49T | 1120 | 0.281656 | 0         |  |  |
|  |  | Shiraz-77T | 1225 | 0        | -0.117922 |  |  |
|  |  | Shiraz-77T | 1225 | 0        | -0.117922 |  |  |
|  |  | Shiraz-77T | 1225 | 0        | -0.117922 |  |  |
|  |  | Shiraz-77T | 1225 | 0        | -0.117922 |  |  |
|  |  | Shiraz-77T | 1225 | 0        | -0.117922 |  |  |
|  |  | Shiraz-77T | 1225 | 0        | -0.117922 |  |  |
|  |  | Shiraz-77T | 1225 | 0        | -0.117922 |  |  |
|  |  | Shiraz-77T | 1225 | 0        | -0.117922 |  |  |
|  |  | Shiraz-77T | 1227 | 0.196445 | 0         |  |  |
|  |  | Shiraz-77T | 1227 | 0.196445 | 0         |  |  |
|  |  | Shiraz-77T | 1227 | 0.196445 | 0         |  |  |
|  |  | Shiraz-77T | 1227 | 0.196445 | 0         |  |  |
|  |  | Shiraz-77T | 1227 | 0.196445 | 0         |  |  |
|  |  | Shiraz-77T | 1227 | 0.196445 | 0         |  |  |
|  |  | Shiraz-77T | 1227 | 0.196445 | 0         |  |  |
|  |  | Shiraz-77T | 1227 | 0.196445 | 0         |  |  |
|  |  | Shiraz-9T  | 1324 | 0.679266 | 0         |  |  |
|  |  | Shiraz-9T  | 1324 | 0.679266 | 0         |  |  |
|  |  | Shiraz-9T  | 1324 | 0.679266 | 0         |  |  |
|  |  | Shiraz-9T  | 1324 | 0.679266 | 0         |  |  |
|  |  | Shiraz-9T  | 1324 | 0.679266 | 0         |  |  |
|  |  | Shiraz-9T  | 1324 | 0.679266 | 0         |  |  |
|  |  | Shiraz-9T  | 1324 | 0.679266 | 0         |  |  |
|  |  | Shiraz-9T  | 1324 | 0.679266 | 0         |  |  |
|  |  | Shiraz-18T | 1434 | 0.244465 | 0         |  |  |
|  |  | Shiraz-18T | 1434 | 0.244465 | 0         |  |  |
|  |  | Shiraz-18T | 1434 | 0.244465 | 0         |  |  |
|  |  | Shiraz-18T | 1434 | 0.244465 | 0         |  |  |
|  |  | Shiraz-18T | 1434 | 0.244465 | 0         |  |  |
|  |  | Shiraz-18T | 1434 | 0.244465 | 0         |  |  |
|  |  | Shiraz-18T | 1434 | 0.244465 | 0         |  |  |
|  |  | Shiraz-18T | 1434 | 0.244465 | 0         |  |  |
|  |  | Shiraz-22T | 1549 | 0        | -0.319623 |  |  |
|  |  | Shiraz-22T | 1549 | 0        | -0.319623 |  |  |
|  |  | Shiraz-22T | 1549 | 0        | -0.319623 |  |  |



|  |            |      |          |           |  |
|--|------------|------|----------|-----------|--|
|  | Shiraz-22T | 1549 | 0        | -0.319623 |  |
|  | Shiraz-22T | 1549 | 0        | -0.319623 |  |
|  | Shiraz-22T | 1549 | 0        | -0.319623 |  |
|  | Shiraz-22T | 1549 | 0        | -0.319623 |  |
|  | Shiraz-22T | 1549 | 0        | -0.319623 |  |
|  | Shiraz-22T | 1551 | 0.324011 | 0         |  |
|  | Shiraz-22T | 1551 | 0.324011 | 0         |  |
|  | Shiraz-22T | 1551 | 0.324011 | 0         |  |
|  | Shiraz-22T | 1551 | 0.324011 | 0         |  |
|  | Shiraz-22T | 1551 | 0.324011 | 0         |  |
|  | Shiraz-22T | 1551 | 0.324011 | 0         |  |
|  | Shiraz-22T | 1551 | 0.324011 | 0         |  |
|  | Shiraz-22T | 1551 | 0.324011 | 0         |  |
|  | Shiraz-25T | 1698 | 0.21835  | 0         |  |
|  | Shiraz-25T | 1698 | 0.21835  | 0         |  |
|  | Shiraz-25T | 1698 | 0.21835  | 0         |  |
|  | Shiraz-25T | 1698 | 0.21835  | 0         |  |
|  | Shiraz-25T | 1698 | 0.21835  | 0         |  |
|  | Shiraz-25T | 1698 | 0.21835  | 0         |  |
|  | Shiraz-25T | 1698 | 0.21835  | 0         |  |
|  | Shiraz-25T | 1698 | 0.21835  | 0         |  |
|  | Shiraz-28T | 1735 | 0.350744 | 0         |  |
|  | Shiraz-28T | 1735 | 0.350744 | 0         |  |
|  | Shiraz-28T | 1735 | 0.350744 | 0         |  |
|  | Shiraz-28T | 1735 | 0.350744 | 0         |  |
|  | Shiraz-28T | 1735 | 0.350744 | 0         |  |
|  | Shiraz-28T | 1735 | 0.350744 | 0         |  |
|  | Shiraz-28T | 1735 | 0.350744 | 0         |  |
|  | Shiraz-28T | 1735 | 0.350744 | 0         |  |
|  | Shiraz-28T | 1735 | 0.350744 | 0         |  |
|  | Shiraz-29T | 1778 | 0.120767 | 0         |  |
|  | Shiraz-29T | 1778 | 0.120767 | 0         |  |
|  | Shiraz-29T | 1778 | 0.120767 | 0         |  |
|  | Shiraz-29T | 1778 | 0.120767 | 0         |  |
|  | Shiraz-29T | 1778 | 0.120767 | 0         |  |
|  | Shiraz-29T | 1778 | 0.120767 | 0         |  |
|  | Shiraz-29T | 1778 | 0.120767 | 0         |  |
|  | Shiraz-29T | 1778 | 0.120767 | 0         |  |
|  | Shiraz-32T | 1833 | 0.551336 | 0         |  |
|  | Shiraz-32T | 1833 | 0.551336 | 0         |  |
|  | Shiraz-32T | 1833 | 0.551336 | 0         |  |
|  | Shiraz-32T | 1833 | 0.551336 | 0         |  |
|  | Shiraz-32T | 1833 | 0.551336 | 0         |  |
|  | Shiraz-32T | 1833 | 0.551336 | 0         |  |
|  | Shiraz-32T | 1833 | 0.551336 | 0         |  |
|  | Shiraz-32T | 1833 | 0.551336 | 0         |  |
|  | Shiraz-38T | 1951 | 0.250891 | 0         |  |
|  | Shiraz-38T | 1951 | 0.250891 | 0         |  |

|  |  |            |      |          |   |  |  |
|--|--|------------|------|----------|---|--|--|
|  |  | Shiraz-38T | 1951 | 0.250891 | 0 |  |  |
|  |  | Shiraz-38T | 1951 | 0.250891 | 0 |  |  |
|  |  | Shiraz-38T | 1951 | 0.250891 | 0 |  |  |
|  |  | Shiraz-38T | 1951 | 0.250891 | 0 |  |  |
|  |  | Shiraz-38T | 1951 | 0.250891 | 0 |  |  |
|  |  | Shiraz-38T | 1951 | 0.250891 | 0 |  |  |
|  |  | Shiraz-53T | 2078 | 0.287202 | 0 |  |  |
|  |  | Shiraz-53T | 2078 | 0.287202 | 0 |  |  |
|  |  | Shiraz-53T | 2078 | 0.287202 | 0 |  |  |
|  |  | Shiraz-53T | 2078 | 0.287202 | 0 |  |  |
|  |  | Shiraz-53T | 2078 | 0.287202 | 0 |  |  |
|  |  | Shiraz-53T | 2078 | 0.287202 | 0 |  |  |
|  |  | Shiraz-53T | 2078 | 0.287202 | 0 |  |  |
|  |  | Shiraz-53T | 2078 | 0.287202 | 0 |  |  |
|  |  | Shiraz-53T | 2078 | 0.287202 | 0 |  |  |
|  |  | Shiraz-71T | 2238 | 0.603631 | 0 |  |  |
|  |  | Shiraz-71T | 2238 | 0.603631 | 0 |  |  |
|  |  | Shiraz-71T | 2238 | 0.603631 | 0 |  |  |
|  |  | Shiraz-71T | 2238 | 0.603631 | 0 |  |  |
|  |  | Shiraz-71T | 2238 | 0.603631 | 0 |  |  |
|  |  | Shiraz-71T | 2238 | 0.603631 | 0 |  |  |
|  |  | Shiraz-71T | 2238 | 0.603631 | 0 |  |  |
|  |  | Shiraz-71T | 2238 | 0.603631 | 0 |  |  |
|  |  | Shiraz-3T  | 90   | 0.219276 | 0 |  |  |
|  |  | Shiraz-3T  | 90   | 0.219276 | 0 |  |  |
|  |  | Shiraz-3T  | 90   | 0.219276 | 0 |  |  |
|  |  | Shiraz-3T  | 90   | 0.219276 | 0 |  |  |
|  |  | Shiraz-3T  | 90   | 0.219276 | 0 |  |  |
|  |  | Shiraz-3T  | 90   | 0.219276 | 0 |  |  |
|  |  | Shiraz-3T  | 90   | 0.219276 | 0 |  |  |
|  |  | Shiraz-3T  | 90   | 0.219276 | 0 |  |  |
|  |  | Shiraz-3T  | 90   | 0.219276 | 0 |  |  |
|  |  | Shiraz-3T  | 94   | 0.74735  | 0 |  |  |
|  |  | Shiraz-3T  | 94   | 0.74735  | 0 |  |  |
|  |  | Shiraz-3T  | 94   | 0.74735  | 0 |  |  |
|  |  | Shiraz-3T  | 94   | 0.74735  | 0 |  |  |
|  |  | Shiraz-3T  | 94   | 0.74735  | 0 |  |  |
|  |  | Shiraz-3T  | 94   | 0.74735  | 0 |  |  |
|  |  | Shiraz-3T  | 94   | 0.74735  | 0 |  |  |
|  |  | Shiraz-3T  | 94   | 0.74735  | 0 |  |  |
|  |  | Shiraz-4T  | 253  | 0.372918 | 0 |  |  |
|  |  | Shiraz-4T  | 253  | 0.372918 | 0 |  |  |
|  |  | Shiraz-4T  | 253  | 0.372918 | 0 |  |  |
|  |  | Shiraz-4T  | 253  | 0.372918 | 0 |  |  |
|  |  | Shiraz-4T  | 253  | 0.372918 | 0 |  |  |
|  |  | Shiraz-4T  | 253  | 0.372918 | 0 |  |  |
|  |  | Shiraz-4T  | 253  | 0.372918 | 0 |  |  |
|  |  | Shiraz-4T  | 253  | 0.372918 | 0 |  |  |
|  |  | Shiraz-4T  | 253  | 0.372918 | 0 |  |  |
|  |  | Shiraz-31T | 316  | 0.219196 | 0 |  |  |





|  |            |      |          |           |  |
|--|------------|------|----------|-----------|--|
|  | Shiraz-9T  | 1324 | 0.679266 | 0         |  |
|  | Shiraz-18T | 1434 | 0.244465 | 0         |  |
|  | Shiraz-18T | 1434 | 0.244465 | 0         |  |
|  | Shiraz-18T | 1434 | 0.244465 | 0         |  |
|  | Shiraz-18T | 1434 | 0.244465 | 0         |  |
|  | Shiraz-18T | 1434 | 0.244465 | 0         |  |
|  | Shiraz-18T | 1434 | 0.244465 | 0         |  |
|  | Shiraz-18T | 1434 | 0.244465 | 0         |  |
|  | Shiraz-18T | 1434 | 0.244465 | 0         |  |
|  | Shiraz-22T | 1549 | 0        | -0.319623 |  |
|  | Shiraz-22T | 1549 | 0        | -0.319623 |  |
|  | Shiraz-22T | 1549 | 0        | -0.319623 |  |
|  | Shiraz-22T | 1549 | 0        | -0.319623 |  |
|  | Shiraz-22T | 1549 | 0        | -0.319623 |  |
|  | Shiraz-22T | 1549 | 0        | -0.319623 |  |
|  | Shiraz-22T | 1549 | 0        | -0.319623 |  |
|  | Shiraz-22T | 1549 | 0        | -0.319623 |  |
|  | Shiraz-22T | 1551 | 0.324011 | 0         |  |
|  | Shiraz-22T | 1551 | 0.324011 | 0         |  |
|  | Shiraz-22T | 1551 | 0.324011 | 0         |  |
|  | Shiraz-22T | 1551 | 0.324011 | 0         |  |
|  | Shiraz-22T | 1551 | 0.324011 | 0         |  |
|  | Shiraz-22T | 1551 | 0.324011 | 0         |  |
|  | Shiraz-22T | 1551 | 0.324011 | 0         |  |
|  | Shiraz-22T | 1551 | 0.324011 | 0         |  |
|  | Shiraz-22T | 1551 | 0.324011 | 0         |  |
|  | Shiraz-25T | 1698 | 0.21835  | 0         |  |
|  | Shiraz-25T | 1698 | 0.21835  | 0         |  |
|  | Shiraz-25T | 1698 | 0.21835  | 0         |  |
|  | Shiraz-25T | 1698 | 0.21835  | 0         |  |
|  | Shiraz-25T | 1698 | 0.21835  | 0         |  |
|  | Shiraz-25T | 1698 | 0.21835  | 0         |  |
|  | Shiraz-25T | 1698 | 0.21835  | 0         |  |
|  | Shiraz-25T | 1698 | 0.21835  | 0         |  |
|  | Shiraz-25T | 1698 | 0.21835  | 0         |  |
|  | Shiraz-28T | 1735 | 0.350744 | 0         |  |
|  | Shiraz-28T | 1735 | 0.350744 | 0         |  |
|  | Shiraz-28T | 1735 | 0.350744 | 0         |  |
|  | Shiraz-28T | 1735 | 0.350744 | 0         |  |
|  | Shiraz-28T | 1735 | 0.350744 | 0         |  |
|  | Shiraz-28T | 1735 | 0.350744 | 0         |  |
|  | Shiraz-28T | 1735 | 0.350744 | 0         |  |
|  | Shiraz-28T | 1735 | 0.350744 | 0         |  |
|  | Shiraz-29T | 1778 | 0.120767 | 0         |  |
|  | Shiraz-29T | 1778 | 0.120767 | 0         |  |
|  | Shiraz-29T | 1778 | 0.120767 | 0         |  |
|  | Shiraz-29T | 1778 | 0.120767 | 0         |  |
|  | Shiraz-29T | 1778 | 0.120767 | 0         |  |

|        |      |            |      |          |           |  |
|--------|------|------------|------|----------|-----------|--|
|        |      | Shiraz-29T | 1778 | 0.120767 | 0         |  |
|        |      | Shiraz-29T | 1778 | 0.120767 | 0         |  |
|        |      | Shiraz-32T | 1833 | 0.551336 | 0         |  |
|        |      | Shiraz-32T | 1833 | 0.551336 | 0         |  |
|        |      | Shiraz-32T | 1833 | 0.551336 | 0         |  |
|        |      | Shiraz-32T | 1833 | 0.551336 | 0         |  |
|        |      | Shiraz-32T | 1833 | 0.551336 | 0         |  |
|        |      | Shiraz-32T | 1833 | 0.551336 | 0         |  |
|        |      | Shiraz-32T | 1833 | 0.551336 | 0         |  |
|        |      | Shiraz-32T | 1833 | 0.551336 | 0         |  |
|        |      | Shiraz-38T | 1951 | 0.250891 | 0         |  |
|        |      | Shiraz-38T | 1951 | 0.250891 | 0         |  |
|        |      | Shiraz-38T | 1951 | 0.250891 | 0         |  |
|        |      | Shiraz-38T | 1951 | 0.250891 | 0         |  |
|        |      | Shiraz-38T | 1951 | 0.250891 | 0         |  |
|        |      | Shiraz-38T | 1951 | 0.250891 | 0         |  |
|        |      | Shiraz-38T | 1951 | 0.250891 | 0         |  |
|        |      | Shiraz-38T | 1951 | 0.250891 | 0         |  |
|        |      | Shiraz-53T | 2078 | 0.287202 | 0         |  |
|        |      | Shiraz-53T | 2078 | 0.287202 | 0         |  |
|        |      | Shiraz-53T | 2078 | 0.287202 | 0         |  |
|        |      | Shiraz-53T | 2078 | 0.287202 | 0         |  |
|        |      | Shiraz-53T | 2078 | 0.287202 | 0         |  |
|        |      | Shiraz-53T | 2078 | 0.287202 | 0         |  |
|        |      | Shiraz-53T | 2078 | 0.287202 | 0         |  |
|        |      | Shiraz-53T | 2078 | 0.287202 | 0         |  |
|        |      | Shiraz-71T | 2238 | 0.603631 | 0         |  |
|        |      | Shiraz-71T | 2238 | 0.603631 | 0         |  |
|        |      | Shiraz-71T | 2238 | 0.603631 | 0         |  |
|        |      | Shiraz-71T | 2238 | 0.603631 | 0         |  |
|        |      | Shiraz-71T | 2238 | 0.603631 | 0         |  |
|        |      | Shiraz-71T | 2238 | 0.603631 | 0         |  |
|        |      | Shiraz-71T | 2238 | 0.603631 | 0         |  |
|        |      | Shiraz-71T | 2238 | 0.603631 | 0         |  |
| ZNF673 | chrX | Shiraz-3T  | 235  | 0        | -0.28401  |  |
|        |      | Shiraz-4T  | 260  | 0        | -0.324128 |  |
|        |      | Shiraz-16T | 294  | 0.655804 | 0         |  |
|        |      | Shiraz-31T | 345  | 0.103301 | 0         |  |
|        |      | Shiraz-36T | 431  | 0        | -0.78035  |  |
|        |      | Shiraz-36T | 432  | 0        | -0.6692   |  |
|        |      | Shiraz-44T | 891  | 0        | -0.954044 |  |
|        |      | Shiraz-46T | 991  | 0.139564 | 0         |  |
|        |      | Shiraz-49T | 1166 | 0        | -0.917235 |  |
|        |      | Shiraz-9T  | 1368 | 0.199713 | 0         |  |
|        |      | Shiraz-18T | 1455 | 0        | -0.186773 |  |
|        |      | Shiraz-22T | 1669 | 0.695915 | 0         |  |
|        |      | Shiraz-25T | 1717 | 0.420447 | 0         |  |

|  |  |            |      |          |           |  |  |
|--|--|------------|------|----------|-----------|--|--|
|  |  | Shiraz-28T | 1760 | 0.538181 | 0         |  |  |
|  |  | Shiraz-29T | 1800 | 0.672527 | 0         |  |  |
|  |  | Shiraz-32T | 1869 | 0.776805 | 0         |  |  |
|  |  | Shiraz-35T | 1932 | 0.507141 | 0         |  |  |
|  |  | Shiraz-40T | 2051 | 0.098506 | 0         |  |  |
|  |  | Shiraz-58T | 2221 | 0.871948 | 0         |  |  |
|  |  | Shiraz-71T | 2260 | 0.68394  | 0         |  |  |
|  |  | Shiraz-71T | 2262 | 0.986748 | 0         |  |  |
|  |  | Shiraz-3T  | 235  | 0        | -0.28401  |  |  |
|  |  | Shiraz-4T  | 260  | 0        | -0.324128 |  |  |
|  |  | Shiraz-16T | 294  | 0.655804 | 0         |  |  |
|  |  | Shiraz-31T | 345  | 0.103301 | 0         |  |  |
|  |  | Shiraz-36T | 431  | 0        | -0.78035  |  |  |
|  |  | Shiraz-36T | 432  | 0        | -0.6692   |  |  |
|  |  | Shiraz-44T | 891  | 0        | -0.954044 |  |  |
|  |  | Shiraz-46T | 991  | 0.139564 | 0         |  |  |
|  |  | Shiraz-49T | 1166 | 0        | -0.917235 |  |  |
|  |  | Shiraz-9T  | 1368 | 0.199713 | 0         |  |  |
|  |  | Shiraz-18T | 1455 | 0        | -0.186773 |  |  |
|  |  | Shiraz-22T | 1669 | 0.695915 | 0         |  |  |
|  |  | Shiraz-25T | 1717 | 0.420447 | 0         |  |  |
|  |  | Shiraz-28T | 1760 | 0.538181 | 0         |  |  |
|  |  | Shiraz-29T | 1800 | 0.672527 | 0         |  |  |
|  |  | Shiraz-32T | 1869 | 0.776805 | 0         |  |  |
|  |  | Shiraz-35T | 1932 | 0.507141 | 0         |  |  |
|  |  | Shiraz-40T | 2051 | 0.098506 | 0         |  |  |
|  |  | Shiraz-58T | 2221 | 0.871948 | 0         |  |  |
|  |  | Shiraz-71T | 2260 | 0.68394  | 0         |  |  |
|  |  | Shiraz-71T | 2262 | 0.986748 | 0         |  |  |
|  |  | Shiraz-3T  | 235  | 0        | -0.28401  |  |  |
|  |  | Shiraz-4T  | 260  | 0        | -0.324128 |  |  |
|  |  | Shiraz-16T | 294  | 0.655804 | 0         |  |  |
|  |  | Shiraz-31T | 345  | 0.103301 | 0         |  |  |
|  |  | Shiraz-36T | 431  | 0        | -0.78035  |  |  |
|  |  | Shiraz-36T | 432  | 0        | -0.6692   |  |  |
|  |  | Shiraz-44T | 891  | 0        | -0.954044 |  |  |
|  |  | Shiraz-46T | 991  | 0.139564 | 0         |  |  |
|  |  | Shiraz-49T | 1166 | 0        | -0.917235 |  |  |
|  |  | Shiraz-9T  | 1368 | 0.199713 | 0         |  |  |
|  |  | Shiraz-18T | 1455 | 0        | -0.186773 |  |  |
|  |  | Shiraz-22T | 1669 | 0.695915 | 0         |  |  |
|  |  | Shiraz-25T | 1717 | 0.420447 | 0         |  |  |
|  |  | Shiraz-28T | 1760 | 0.538181 | 0         |  |  |
|  |  | Shiraz-29T | 1800 | 0.672527 | 0         |  |  |
|  |  | Shiraz-32T | 1869 | 0.776805 | 0         |  |  |
|  |  | Shiraz-35T | 1932 | 0.507141 | 0         |  |  |
|  |  | Shiraz-40T | 2051 | 0.098506 | 0         |  |  |

|        |      |            |      |          |           |  |
|--------|------|------------|------|----------|-----------|--|
|        |      | Shiraz-58T | 2221 | 0.871948 | 0         |  |
|        |      | Shiraz-71T | 2260 | 0.68394  | 0         |  |
|        |      | Shiraz-71T | 2262 | 0.986748 | 0         |  |
| ZNF674 | chrX | Shiraz-3T  | 235  | 0        | -0.28401  |  |
|        |      | Shiraz-4T  | 260  | 0        | -0.324128 |  |
|        |      | Shiraz-16T | 294  | 0.655804 | 0         |  |
|        |      | Shiraz-31T | 345  | 0.103301 | 0         |  |
|        |      | Shiraz-36T | 431  | 0        | -0.78035  |  |
|        |      | Shiraz-36T | 432  | 0        | -0.6692   |  |
|        |      | Shiraz-44T | 891  | 0        | -0.954044 |  |
|        |      | Shiraz-46T | 991  | 0.139564 | 0         |  |
|        |      | Shiraz-49T | 1166 | 0        | -0.917235 |  |
|        |      | Shiraz-77T | 1282 | 0.213849 | 0         |  |
|        |      | Shiraz-9T  | 1368 | 0.199713 | 0         |  |
|        |      | Shiraz-18T | 1455 | 0        | -0.186773 |  |
|        |      | Shiraz-22T | 1669 | 0.695915 | 0         |  |
|        |      | Shiraz-25T | 1717 | 0.420447 | 0         |  |
|        |      | Shiraz-28T | 1760 | 0.538181 | 0         |  |
|        |      | Shiraz-29T | 1800 | 0.672527 | 0         |  |
|        |      | Shiraz-32T | 1869 | 0.776805 | 0         |  |
|        |      | Shiraz-35T | 1932 | 0.507141 | 0         |  |
|        |      | Shiraz-40T | 2051 | 0.098506 | 0         |  |
|        |      | Shiraz-58T | 2221 | 0.871948 | 0         |  |
|        |      | Shiraz-71T | 2260 | 0.68394  | 0         |  |
|        |      | Shiraz-71T | 2262 | 0.986748 | 0         |  |
|        |      | Shiraz-3T  | 235  | 0        | -0.28401  |  |
|        |      | Shiraz-4T  | 260  | 0        | -0.324128 |  |
|        |      | Shiraz-16T | 294  | 0.655804 | 0         |  |
|        |      | Shiraz-31T | 345  | 0.103301 | 0         |  |
|        |      | Shiraz-36T | 431  | 0        | -0.78035  |  |
|        |      | Shiraz-36T | 432  | 0        | -0.6692   |  |
|        |      | Shiraz-44T | 891  | 0        | -0.954044 |  |
|        |      | Shiraz-46T | 991  | 0.139564 | 0         |  |
|        |      | Shiraz-49T | 1166 | 0        | -0.917235 |  |
|        |      | Shiraz-77T | 1282 | 0.213849 | 0         |  |
|        |      | Shiraz-9T  | 1368 | 0.199713 | 0         |  |
|        |      | Shiraz-18T | 1455 | 0        | -0.186773 |  |
|        |      | Shiraz-22T | 1669 | 0.695915 | 0         |  |
|        |      | Shiraz-25T | 1717 | 0.420447 | 0         |  |
|        |      | Shiraz-28T | 1760 | 0.538181 | 0         |  |
|        |      | Shiraz-29T | 1800 | 0.672527 | 0         |  |
|        |      | Shiraz-32T | 1869 | 0.776805 | 0         |  |
|        |      | Shiraz-35T | 1932 | 0.507141 | 0         |  |
|        |      | Shiraz-40T | 2051 | 0.098506 | 0         |  |
|        |      | Shiraz-58T | 2221 | 0.871948 | 0         |  |
|        |      | Shiraz-71T | 2260 | 0.68394  | 0         |  |
|        |      | Shiraz-71T | 2262 | 0.986748 | 0         |  |



|        |      |            |      |          |           |  |  |
|--------|------|------------|------|----------|-----------|--|--|
|        |      | Shiraz-3T  | 235  | 0        | -0.28401  |  |  |
|        |      | Shiraz-4T  | 260  | 0        | -0.324128 |  |  |
|        |      | Shiraz-16T | 294  | 0.655804 | 0         |  |  |
|        |      | Shiraz-31T | 345  | 0.103301 | 0         |  |  |
|        |      | Shiraz-36T | 431  | 0        | -0.78035  |  |  |
|        |      | Shiraz-36T | 432  | 0        | -0.6692   |  |  |
|        |      | Shiraz-44T | 891  | 0        | -0.954044 |  |  |
|        |      | Shiraz-46T | 991  | 0.139564 | 0         |  |  |
|        |      | Shiraz-49T | 1166 | 0        | -0.917235 |  |  |
|        |      | Shiraz-77T | 1282 | 0.213849 | 0         |  |  |
|        |      | Shiraz-9T  | 1368 | 0.199713 | 0         |  |  |
|        |      | Shiraz-18T | 1455 | 0        | -0.186773 |  |  |
|        |      | Shiraz-22T | 1669 | 0.695915 | 0         |  |  |
|        |      | Shiraz-25T | 1717 | 0.420447 | 0         |  |  |
|        |      | Shiraz-28T | 1760 | 0.538181 | 0         |  |  |
|        |      | Shiraz-29T | 1800 | 0.672527 | 0         |  |  |
|        |      | Shiraz-32T | 1869 | 0.776805 | 0         |  |  |
|        |      | Shiraz-35T | 1932 | 0.507141 | 0         |  |  |
|        |      | Shiraz-40T | 2051 | 0.098506 | 0         |  |  |
|        |      | Shiraz-58T | 2221 | 0.871948 | 0         |  |  |
|        |      | Shiraz-71T | 2260 | 0.68394  | 0         |  |  |
|        |      | Shiraz-71T | 2262 | 0.986748 | 0         |  |  |
| ZNF711 | chrX | Shiraz-3T  | 242  | 0        | -0.336434 |  |  |
|        |      | Shiraz-3T  | 243  | 0        | -0.549129 |  |  |
|        |      | Shiraz-4T  | 261  | 0        | -0.336249 |  |  |
|        |      | Shiraz-16T | 295  | 0.591657 | 0         |  |  |
|        |      | Shiraz-31T | 346  | 0        | -0.1527   |  |  |
|        |      | Shiraz-36T | 433  | 0        | -0.803961 |  |  |
|        |      | Shiraz-44T | 899  | 0        | -1.09697  |  |  |
|        |      | Shiraz-44T | 902  | 0        | -1.449824 |  |  |
|        |      | Shiraz-47T | 1085 | 0        | -0.130811 |  |  |
|        |      | Shiraz-49T | 1170 | 0        | -0.967436 |  |  |
|        |      | Shiraz-49T | 1172 | 0        | -1.123219 |  |  |
|        |      | Shiraz-18T | 1457 | 0.643204 | 0         |  |  |
|        |      | Shiraz-22T | 1673 | 0.611783 | 0         |  |  |
|        |      | Shiraz-22T | 1675 | 0.279253 | 0         |  |  |
|        |      | Shiraz-25T | 1719 | 0.472955 | 0         |  |  |
|        |      | Shiraz-28T | 1762 | 0.562311 | 0         |  |  |
|        |      | Shiraz-29T | 1801 | 0.815343 | 0         |  |  |
|        |      | Shiraz-32T | 1870 | 0.729766 | 0         |  |  |
|        |      | Shiraz-32T | 1871 | 0.292679 | 0         |  |  |
|        |      | Shiraz-35T | 1933 | 0.488535 | 0         |  |  |
|        |      | Shiraz-58T | 2223 | 0.833364 | 0         |  |  |
|        |      | Shiraz-58T | 2225 | 0.595784 | 0         |  |  |
|        |      | Shiraz-71T | 2263 | 0.975531 | 0         |  |  |
|        |      | Shiraz-3T  | 242  | 0        | -0.336434 |  |  |
|        |      | Shiraz-3T  | 243  | 0        | -0.549129 |  |  |

|        |      |            |      |          |           |  |  |
|--------|------|------------|------|----------|-----------|--|--|
|        |      | Shiraz-4T  | 261  | 0        | -0.336249 |  |  |
|        |      | Shiraz-16T | 295  | 0.591657 | 0         |  |  |
|        |      | Shiraz-31T | 346  | 0        | -0.1527   |  |  |
|        |      | Shiraz-36T | 433  | 0        | -0.803961 |  |  |
|        |      | Shiraz-44T | 899  | 0        | -1.09697  |  |  |
|        |      | Shiraz-44T | 902  | 0        | -1.449824 |  |  |
|        |      | Shiraz-47T | 1085 | 0        | -0.130811 |  |  |
|        |      | Shiraz-49T | 1170 | 0        | -0.967436 |  |  |
|        |      | Shiraz-49T | 1172 | 0        | -1.123219 |  |  |
|        |      | Shiraz-18T | 1457 | 0.643204 | 0         |  |  |
|        |      | Shiraz-22T | 1673 | 0.611783 | 0         |  |  |
|        |      | Shiraz-22T | 1675 | 0.279253 | 0         |  |  |
|        |      | Shiraz-25T | 1719 | 0.472955 | 0         |  |  |
|        |      | Shiraz-28T | 1762 | 0.562311 | 0         |  |  |
|        |      | Shiraz-29T | 1801 | 0.815343 | 0         |  |  |
|        |      | Shiraz-32T | 1870 | 0.729766 | 0         |  |  |
|        |      | Shiraz-32T | 1871 | 0.292679 | 0         |  |  |
|        |      | Shiraz-35T | 1933 | 0.488535 | 0         |  |  |
|        |      | Shiraz-58T | 2223 | 0.833364 | 0         |  |  |
|        |      | Shiraz-58T | 2225 | 0.595784 | 0         |  |  |
|        |      | Shiraz-71T | 2263 | 0.975531 | 0         |  |  |
|        |      | Shiraz-3T  | 242  | 0        | -0.336434 |  |  |
|        |      | Shiraz-3T  | 243  | 0        | -0.549129 |  |  |
|        |      | Shiraz-4T  | 261  | 0        | -0.336249 |  |  |
|        |      | Shiraz-16T | 295  | 0.591657 | 0         |  |  |
|        |      | Shiraz-31T | 346  | 0        | -0.1527   |  |  |
|        |      | Shiraz-36T | 433  | 0        | -0.803961 |  |  |
|        |      | Shiraz-44T | 899  | 0        | -1.09697  |  |  |
|        |      | Shiraz-44T | 902  | 0        | -1.449824 |  |  |
|        |      | Shiraz-47T | 1085 | 0        | -0.130811 |  |  |
|        |      | Shiraz-49T | 1170 | 0        | -0.967436 |  |  |
|        |      | Shiraz-49T | 1172 | 0        | -1.123219 |  |  |
|        |      | Shiraz-18T | 1457 | 0.643204 | 0         |  |  |
|        |      | Shiraz-22T | 1673 | 0.611783 | 0         |  |  |
|        |      | Shiraz-22T | 1675 | 0.279253 | 0         |  |  |
|        |      | Shiraz-25T | 1719 | 0.472955 | 0         |  |  |
|        |      | Shiraz-28T | 1762 | 0.562311 | 0         |  |  |
|        |      | Shiraz-29T | 1801 | 0.815343 | 0         |  |  |
|        |      | Shiraz-32T | 1870 | 0.729766 | 0         |  |  |
|        |      | Shiraz-32T | 1871 | 0.292679 | 0         |  |  |
|        |      | Shiraz-35T | 1933 | 0.488535 | 0         |  |  |
|        |      | Shiraz-58T | 2223 | 0.833364 | 0         |  |  |
|        |      | Shiraz-58T | 2225 | 0.595784 | 0         |  |  |
|        |      | Shiraz-71T | 2263 | 0.975531 | 0         |  |  |
| ZNF746 | chr7 | Shiraz-3T  | 90   | 0.219276 | 0         |  |  |
|        |      | Shiraz-3T  | 99   | 0.454766 | 0         |  |  |
|        |      | Shiraz-4T  | 253  | 0.372918 | 0         |  |  |

|        |      |            |      |          |           |  |  |
|--------|------|------------|------|----------|-----------|--|--|
|        |      | Shiraz-36T | 378  | 0.179558 | 0         |  |  |
|        |      | Shiraz-44T | 646  | 0.471276 | 0         |  |  |
|        |      | Shiraz-46T | 943  | 0.093799 | 0         |  |  |
|        |      | Shiraz-9T  | 1325 | 0.221899 | 0         |  |  |
|        |      | Shiraz-18T | 1434 | 0.244465 | 0         |  |  |
|        |      | Shiraz-25T | 1698 | 0.21835  | 0         |  |  |
|        |      | Shiraz-28T | 1735 | 0.350744 | 0         |  |  |
|        |      | Shiraz-29T | 1778 | 0.120767 | 0         |  |  |
|        |      | Shiraz-32T | 1833 | 0.551336 | 0         |  |  |
|        |      | Shiraz-38T | 1951 | 0.250891 | 0         |  |  |
|        |      | Shiraz-53T | 2078 | 0.287202 | 0         |  |  |
|        |      | Shiraz-58T | 2162 | 0.221505 | 0         |  |  |
|        |      | Shiraz-71T | 2238 | 0.603631 | 0         |  |  |
|        |      | Shiraz-3T  | 90   | 0.219276 | 0         |  |  |
|        |      | Shiraz-3T  | 99   | 0.454766 | 0         |  |  |
|        |      | Shiraz-4T  | 253  | 0.372918 | 0         |  |  |
|        |      | Shiraz-36T | 378  | 0.179558 | 0         |  |  |
|        |      | Shiraz-44T | 646  | 0.471276 | 0         |  |  |
|        |      | Shiraz-46T | 943  | 0.093799 | 0         |  |  |
|        |      | Shiraz-9T  | 1325 | 0.221899 | 0         |  |  |
|        |      | Shiraz-18T | 1434 | 0.244465 | 0         |  |  |
|        |      | Shiraz-25T | 1698 | 0.21835  | 0         |  |  |
|        |      | Shiraz-28T | 1735 | 0.350744 | 0         |  |  |
|        |      | Shiraz-29T | 1778 | 0.120767 | 0         |  |  |
|        |      | Shiraz-32T | 1833 | 0.551336 | 0         |  |  |
|        |      | Shiraz-38T | 1951 | 0.250891 | 0         |  |  |
|        |      | Shiraz-53T | 2078 | 0.287202 | 0         |  |  |
|        |      | Shiraz-58T | 2162 | 0.221505 | 0         |  |  |
|        |      | Shiraz-71T | 2238 | 0.603631 | 0         |  |  |
|        |      | Shiraz-3T  | 90   | 0.219276 | 0         |  |  |
|        |      | Shiraz-3T  | 99   | 0.454766 | 0         |  |  |
|        |      | Shiraz-4T  | 253  | 0.372918 | 0         |  |  |
|        |      | Shiraz-36T | 378  | 0.179558 | 0         |  |  |
|        |      | Shiraz-44T | 646  | 0.471276 | 0         |  |  |
|        |      | Shiraz-46T | 943  | 0.093799 | 0         |  |  |
|        |      | Shiraz-9T  | 1325 | 0.221899 | 0         |  |  |
|        |      | Shiraz-18T | 1434 | 0.244465 | 0         |  |  |
|        |      | Shiraz-25T | 1698 | 0.21835  | 0         |  |  |
|        |      | Shiraz-28T | 1735 | 0.350744 | 0         |  |  |
|        |      | Shiraz-29T | 1778 | 0.120767 | 0         |  |  |
|        |      | Shiraz-32T | 1833 | 0.551336 | 0         |  |  |
|        |      | Shiraz-38T | 1951 | 0.250891 | 0         |  |  |
|        |      | Shiraz-53T | 2078 | 0.287202 | 0         |  |  |
|        |      | Shiraz-58T | 2162 | 0.221505 | 0         |  |  |
|        |      | Shiraz-71T | 2238 | 0.603631 | 0         |  |  |
| ZNF75D | chrX | Shiraz-3T  | 242  | 0        | -0.336434 |  |  |
|        |      | Shiraz-4T  | 261  | 0        | -0.336249 |  |  |

|  |            |      |          |           |  |
|--|------------|------|----------|-----------|--|
|  | Shiraz-16T | 295  | 0.591657 | 0         |  |
|  | Shiraz-36T | 433  | 0        | -0.803961 |  |
|  | Shiraz-44T | 899  | 0        | -1.09697  |  |
|  | Shiraz-49T | 1170 | 0        | -0.967436 |  |
|  | Shiraz-9T  | 1370 | 0.690073 | 0         |  |
|  | Shiraz-18T | 1457 | 0.643204 | 0         |  |
|  | Shiraz-22T | 1673 | 0.611783 | 0         |  |
|  | Shiraz-22T | 1677 | 0.789711 | 0         |  |
|  | Shiraz-25T | 1719 | 0.472955 | 0         |  |
|  | Shiraz-28T | 1762 | 0.562311 | 0         |  |
|  | Shiraz-29T | 1801 | 0.815343 | 0         |  |
|  | Shiraz-32T | 1870 | 0.729766 | 0         |  |
|  | Shiraz-35T | 1933 | 0.488535 | 0         |  |
|  | Shiraz-58T | 2223 | 0.833364 | 0         |  |
|  | Shiraz-71T | 2263 | 0.975531 | 0         |  |
|  | Shiraz-3T  | 242  | 0        | -0.336434 |  |
|  | Shiraz-4T  | 261  | 0        | -0.336249 |  |
|  | Shiraz-16T | 295  | 0.591657 | 0         |  |
|  | Shiraz-36T | 433  | 0        | -0.803961 |  |
|  | Shiraz-44T | 899  | 0        | -1.09697  |  |
|  | Shiraz-49T | 1170 | 0        | -0.967436 |  |
|  | Shiraz-9T  | 1370 | 0.690073 | 0         |  |
|  | Shiraz-18T | 1457 | 0.643204 | 0         |  |
|  | Shiraz-22T | 1673 | 0.611783 | 0         |  |
|  | Shiraz-22T | 1677 | 0.789711 | 0         |  |
|  | Shiraz-25T | 1719 | 0.472955 | 0         |  |
|  | Shiraz-28T | 1762 | 0.562311 | 0         |  |
|  | Shiraz-29T | 1801 | 0.815343 | 0         |  |
|  | Shiraz-32T | 1870 | 0.729766 | 0         |  |
|  | Shiraz-35T | 1933 | 0.488535 | 0         |  |
|  | Shiraz-58T | 2223 | 0.833364 | 0         |  |
|  | Shiraz-71T | 2263 | 0.975531 | 0         |  |
|  | Shiraz-3T  | 242  | 0        | -0.336434 |  |
|  | Shiraz-4T  | 261  | 0        | -0.336249 |  |
|  | Shiraz-16T | 295  | 0.591657 | 0         |  |
|  | Shiraz-36T | 433  | 0        | -0.803961 |  |
|  | Shiraz-44T | 899  | 0        | -1.09697  |  |
|  | Shiraz-49T | 1170 | 0        | -0.967436 |  |
|  | Shiraz-9T  | 1370 | 0.690073 | 0         |  |
|  | Shiraz-18T | 1457 | 0.643204 | 0         |  |
|  | Shiraz-22T | 1673 | 0.611783 | 0         |  |
|  | Shiraz-22T | 1677 | 0.789711 | 0         |  |
|  | Shiraz-25T | 1719 | 0.472955 | 0         |  |
|  | Shiraz-28T | 1762 | 0.562311 | 0         |  |
|  | Shiraz-29T | 1801 | 0.815343 | 0         |  |
|  | Shiraz-32T | 1870 | 0.729766 | 0         |  |
|  | Shiraz-35T | 1933 | 0.488535 | 0         |  |

|        |      |            |      |          |   |  |
|--------|------|------------|------|----------|---|--|
|        |      | Shiraz-58T | 2223 | 0.833364 | 0 |  |
|        |      | Shiraz-71T | 2263 | 0.975531 | 0 |  |
| ZNF767 | chr7 | Shiraz-3T  | 90   | 0.219276 | 0 |  |
|        |      | Shiraz-3T  | 99   | 0.454766 | 0 |  |
|        |      | Shiraz-4T  | 253  | 0.372918 | 0 |  |
|        |      | Shiraz-36T | 378  | 0.179558 | 0 |  |
|        |      | Shiraz-44T | 646  | 0.471276 | 0 |  |
|        |      | Shiraz-46T | 943  | 0.093799 | 0 |  |
|        |      | Shiraz-9T  | 1325 | 0.221899 | 0 |  |
|        |      | Shiraz-18T | 1434 | 0.244465 | 0 |  |
|        |      | Shiraz-25T | 1698 | 0.21835  | 0 |  |
|        |      | Shiraz-28T | 1735 | 0.350744 | 0 |  |
|        |      | Shiraz-29T | 1778 | 0.120767 | 0 |  |
|        |      | Shiraz-32T | 1833 | 0.551336 | 0 |  |
|        |      | Shiraz-38T | 1951 | 0.250891 | 0 |  |
|        |      | Shiraz-53T | 2078 | 0.287202 | 0 |  |
|        |      | Shiraz-58T | 2162 | 0.221505 | 0 |  |
|        |      | Shiraz-71T | 2238 | 0.603631 | 0 |  |
|        |      | Shiraz-3T  | 90   | 0.219276 | 0 |  |
|        |      | Shiraz-3T  | 99   | 0.454766 | 0 |  |
|        |      | Shiraz-4T  | 253  | 0.372918 | 0 |  |
|        |      | Shiraz-36T | 378  | 0.179558 | 0 |  |
|        |      | Shiraz-44T | 646  | 0.471276 | 0 |  |
|        |      | Shiraz-46T | 943  | 0.093799 | 0 |  |
|        |      | Shiraz-9T  | 1325 | 0.221899 | 0 |  |
|        |      | Shiraz-18T | 1434 | 0.244465 | 0 |  |
|        |      | Shiraz-25T | 1698 | 0.21835  | 0 |  |
|        |      | Shiraz-28T | 1735 | 0.350744 | 0 |  |
|        |      | Shiraz-29T | 1778 | 0.120767 | 0 |  |
|        |      | Shiraz-32T | 1833 | 0.551336 | 0 |  |
|        |      | Shiraz-38T | 1951 | 0.250891 | 0 |  |
|        |      | Shiraz-53T | 2078 | 0.287202 | 0 |  |
|        |      | Shiraz-58T | 2162 | 0.221505 | 0 |  |
|        |      | Shiraz-71T | 2238 | 0.603631 | 0 |  |
|        |      | Shiraz-3T  | 90   | 0.219276 | 0 |  |
|        |      | Shiraz-3T  | 99   | 0.454766 | 0 |  |
|        |      | Shiraz-4T  | 253  | 0.372918 | 0 |  |
|        |      | Shiraz-36T | 378  | 0.179558 | 0 |  |
|        |      | Shiraz-44T | 646  | 0.471276 | 0 |  |
|        |      | Shiraz-46T | 943  | 0.093799 | 0 |  |
|        |      | Shiraz-9T  | 1325 | 0.221899 | 0 |  |
|        |      | Shiraz-18T | 1434 | 0.244465 | 0 |  |
|        |      | Shiraz-25T | 1698 | 0.21835  | 0 |  |
|        |      | Shiraz-28T | 1735 | 0.350744 | 0 |  |
|        |      | Shiraz-29T | 1778 | 0.120767 | 0 |  |
|        |      | Shiraz-32T | 1833 | 0.551336 | 0 |  |
|        |      | Shiraz-38T | 1951 | 0.250891 | 0 |  |

|        |      |            |      |          |   |  |
|--------|------|------------|------|----------|---|--|
|        |      | Shiraz-53T | 2078 | 0.287202 | 0 |  |
|        |      | Shiraz-58T | 2162 | 0.221505 | 0 |  |
|        |      | Shiraz-71T | 2238 | 0.603631 | 0 |  |
| ZNF775 | chr7 | Shiraz-3T  | 90   | 0.219276 | 0 |  |
|        |      | Shiraz-3T  | 99   | 0.454766 | 0 |  |
|        |      | Shiraz-4T  | 253  | 0.372918 | 0 |  |
|        |      | Shiraz-36T | 378  | 0.179558 | 0 |  |
|        |      | Shiraz-44T | 646  | 0.471276 | 0 |  |
|        |      | Shiraz-46T | 943  | 0.093799 | 0 |  |
|        |      | Shiraz-9T  | 1325 | 0.221899 | 0 |  |
|        |      | Shiraz-18T | 1434 | 0.244465 | 0 |  |
|        |      | Shiraz-25T | 1698 | 0.21835  | 0 |  |
|        |      | Shiraz-28T | 1735 | 0.350744 | 0 |  |
|        |      | Shiraz-29T | 1778 | 0.120767 | 0 |  |
|        |      | Shiraz-32T | 1833 | 0.551336 | 0 |  |
|        |      | Shiraz-38T | 1951 | 0.250891 | 0 |  |
|        |      | Shiraz-53T | 2078 | 0.287202 | 0 |  |
|        |      | Shiraz-58T | 2162 | 0.221505 | 0 |  |
|        |      | Shiraz-71T | 2238 | 0.603631 | 0 |  |
|        |      | Shiraz-3T  | 90   | 0.219276 | 0 |  |
|        |      | Shiraz-3T  | 99   | 0.454766 | 0 |  |
|        |      | Shiraz-4T  | 253  | 0.372918 | 0 |  |
|        |      | Shiraz-36T | 378  | 0.179558 | 0 |  |
|        |      | Shiraz-44T | 646  | 0.471276 | 0 |  |
|        |      | Shiraz-46T | 943  | 0.093799 | 0 |  |
|        |      | Shiraz-9T  | 1325 | 0.221899 | 0 |  |
|        |      | Shiraz-18T | 1434 | 0.244465 | 0 |  |
|        |      | Shiraz-25T | 1698 | 0.21835  | 0 |  |
|        |      | Shiraz-28T | 1735 | 0.350744 | 0 |  |
|        |      | Shiraz-29T | 1778 | 0.120767 | 0 |  |
|        |      | Shiraz-32T | 1833 | 0.551336 | 0 |  |
|        |      | Shiraz-38T | 1951 | 0.250891 | 0 |  |
|        |      | Shiraz-53T | 2078 | 0.287202 | 0 |  |
|        |      | Shiraz-58T | 2162 | 0.221505 | 0 |  |
|        |      | Shiraz-71T | 2238 | 0.603631 | 0 |  |
|        |      | Shiraz-3T  | 90   | 0.219276 | 0 |  |
|        |      | Shiraz-3T  | 99   | 0.454766 | 0 |  |
|        |      | Shiraz-4T  | 253  | 0.372918 | 0 |  |
|        |      | Shiraz-36T | 378  | 0.179558 | 0 |  |
|        |      | Shiraz-44T | 646  | 0.471276 | 0 |  |
|        |      | Shiraz-46T | 943  | 0.093799 | 0 |  |
|        |      | Shiraz-9T  | 1325 | 0.221899 | 0 |  |
|        |      | Shiraz-18T | 1434 | 0.244465 | 0 |  |
|        |      | Shiraz-25T | 1698 | 0.21835  | 0 |  |
|        |      | Shiraz-28T | 1735 | 0.350744 | 0 |  |
|        |      | Shiraz-29T | 1778 | 0.120767 | 0 |  |
|        |      | Shiraz-32T | 1833 | 0.551336 | 0 |  |

|        |      |            |      |          |   |  |
|--------|------|------------|------|----------|---|--|
|        |      | Shiraz-38T | 1951 | 0.250891 | 0 |  |
|        |      | Shiraz-53T | 2078 | 0.287202 | 0 |  |
|        |      | Shiraz-58T | 2162 | 0.221505 | 0 |  |
|        |      | Shiraz-71T | 2238 | 0.603631 | 0 |  |
| ZNF777 | chr7 | Shiraz-3T  | 90   | 0.219276 | 0 |  |
|        |      | Shiraz-3T  | 99   | 0.454766 | 0 |  |
|        |      | Shiraz-4T  | 253  | 0.372918 | 0 |  |
|        |      | Shiraz-36T | 378  | 0.179558 | 0 |  |
|        |      | Shiraz-44T | 646  | 0.471276 | 0 |  |
|        |      | Shiraz-46T | 943  | 0.093799 | 0 |  |
|        |      | Shiraz-9T  | 1325 | 0.221899 | 0 |  |
|        |      | Shiraz-18T | 1434 | 0.244465 | 0 |  |
|        |      | Shiraz-25T | 1698 | 0.21835  | 0 |  |
|        |      | Shiraz-28T | 1735 | 0.350744 | 0 |  |
|        |      | Shiraz-29T | 1778 | 0.120767 | 0 |  |
|        |      | Shiraz-32T | 1833 | 0.551336 | 0 |  |
|        |      | Shiraz-38T | 1951 | 0.250891 | 0 |  |
|        |      | Shiraz-53T | 2078 | 0.287202 | 0 |  |
|        |      | Shiraz-58T | 2162 | 0.221505 | 0 |  |
|        |      | Shiraz-71T | 2238 | 0.603631 | 0 |  |
|        |      | Shiraz-3T  | 90   | 0.219276 | 0 |  |
|        |      | Shiraz-3T  | 99   | 0.454766 | 0 |  |
|        |      | Shiraz-4T  | 253  | 0.372918 | 0 |  |
|        |      | Shiraz-36T | 378  | 0.179558 | 0 |  |
|        |      | Shiraz-44T | 646  | 0.471276 | 0 |  |
|        |      | Shiraz-46T | 943  | 0.093799 | 0 |  |
|        |      | Shiraz-9T  | 1325 | 0.221899 | 0 |  |
|        |      | Shiraz-18T | 1434 | 0.244465 | 0 |  |
|        |      | Shiraz-25T | 1698 | 0.21835  | 0 |  |
|        |      | Shiraz-28T | 1735 | 0.350744 | 0 |  |
|        |      | Shiraz-29T | 1778 | 0.120767 | 0 |  |
|        |      | Shiraz-32T | 1833 | 0.551336 | 0 |  |
|        |      | Shiraz-38T | 1951 | 0.250891 | 0 |  |
|        |      | Shiraz-53T | 2078 | 0.287202 | 0 |  |
|        |      | Shiraz-58T | 2162 | 0.221505 | 0 |  |
|        |      | Shiraz-71T | 2238 | 0.603631 | 0 |  |
|        |      | Shiraz-3T  | 90   | 0.219276 | 0 |  |
|        |      | Shiraz-3T  | 99   | 0.454766 | 0 |  |
|        |      | Shiraz-4T  | 253  | 0.372918 | 0 |  |
|        |      | Shiraz-36T | 378  | 0.179558 | 0 |  |
|        |      | Shiraz-44T | 646  | 0.471276 | 0 |  |
|        |      | Shiraz-46T | 943  | 0.093799 | 0 |  |
|        |      | Shiraz-9T  | 1325 | 0.221899 | 0 |  |
|        |      | Shiraz-18T | 1434 | 0.244465 | 0 |  |
|        |      | Shiraz-25T | 1698 | 0.21835  | 0 |  |
|        |      | Shiraz-28T | 1735 | 0.350744 | 0 |  |
|        |      | Shiraz-29T | 1778 | 0.120767 | 0 |  |

|        |      |            |      |          |   |  |  |
|--------|------|------------|------|----------|---|--|--|
|        |      | Shiraz-32T | 1833 | 0.551336 | 0 |  |  |
|        |      | Shiraz-38T | 1951 | 0.250891 | 0 |  |  |
|        |      | Shiraz-53T | 2078 | 0.287202 | 0 |  |  |
|        |      | Shiraz-58T | 2162 | 0.221505 | 0 |  |  |
|        |      | Shiraz-71T | 2238 | 0.603631 | 0 |  |  |
| ZNF783 | chr7 | Shiraz-3T  | 90   | 0.219276 | 0 |  |  |
|        |      | Shiraz-3T  | 90   | 0.219276 | 0 |  |  |
|        |      | Shiraz-3T  | 99   | 0.454766 | 0 |  |  |
|        |      | Shiraz-3T  | 99   | 0.454766 | 0 |  |  |
|        |      | Shiraz-4T  | 253  | 0.372918 | 0 |  |  |
|        |      | Shiraz-4T  | 253  | 0.372918 | 0 |  |  |
|        |      | Shiraz-36T | 378  | 0.179558 | 0 |  |  |
|        |      | Shiraz-36T | 378  | 0.179558 | 0 |  |  |
|        |      | Shiraz-44T | 646  | 0.471276 | 0 |  |  |
|        |      | Shiraz-44T | 646  | 0.471276 | 0 |  |  |
|        |      | Shiraz-46T | 943  | 0.093799 | 0 |  |  |
|        |      | Shiraz-46T | 943  | 0.093799 | 0 |  |  |
|        |      | Shiraz-9T  | 1325 | 0.221899 | 0 |  |  |
|        |      | Shiraz-9T  | 1325 | 0.221899 | 0 |  |  |
|        |      | Shiraz-18T | 1434 | 0.244465 | 0 |  |  |
|        |      | Shiraz-18T | 1434 | 0.244465 | 0 |  |  |
|        |      | Shiraz-25T | 1698 | 0.21835  | 0 |  |  |
|        |      | Shiraz-25T | 1698 | 0.21835  | 0 |  |  |
|        |      | Shiraz-28T | 1735 | 0.350744 | 0 |  |  |
|        |      | Shiraz-28T | 1735 | 0.350744 | 0 |  |  |
|        |      | Shiraz-29T | 1778 | 0.120767 | 0 |  |  |
|        |      | Shiraz-29T | 1778 | 0.120767 | 0 |  |  |
|        |      | Shiraz-32T | 1833 | 0.551336 | 0 |  |  |
|        |      | Shiraz-32T | 1833 | 0.551336 | 0 |  |  |
|        |      | Shiraz-38T | 1951 | 0.250891 | 0 |  |  |
|        |      | Shiraz-38T | 1951 | 0.250891 | 0 |  |  |
|        |      | Shiraz-53T | 2078 | 0.287202 | 0 |  |  |
|        |      | Shiraz-53T | 2078 | 0.287202 | 0 |  |  |
|        |      | Shiraz-58T | 2162 | 0.221505 | 0 |  |  |
|        |      | Shiraz-58T | 2162 | 0.221505 | 0 |  |  |
|        |      | Shiraz-71T | 2238 | 0.603631 | 0 |  |  |
|        |      | Shiraz-71T | 2238 | 0.603631 | 0 |  |  |
|        |      | Shiraz-3T  | 90   | 0.219276 | 0 |  |  |
|        |      | Shiraz-3T  | 90   | 0.219276 | 0 |  |  |
|        |      | Shiraz-3T  | 99   | 0.454766 | 0 |  |  |
|        |      | Shiraz-3T  | 99   | 0.454766 | 0 |  |  |
|        |      | Shiraz-4T  | 253  | 0.372918 | 0 |  |  |
|        |      | Shiraz-4T  | 253  | 0.372918 | 0 |  |  |
|        |      | Shiraz-36T | 378  | 0.179558 | 0 |  |  |
|        |      | Shiraz-36T | 378  | 0.179558 | 0 |  |  |
|        |      | Shiraz-44T | 646  | 0.471276 | 0 |  |  |
|        |      | Shiraz-44T | 646  | 0.471276 | 0 |  |  |



|  |            |      |          |   |  |
|--|------------|------|----------|---|--|
|  | Shiraz-46T | 943  | 0.093799 | 0 |  |
|  | Shiraz-46T | 943  | 0.093799 | 0 |  |
|  | Shiraz-9T  | 1325 | 0.221899 | 0 |  |
|  | Shiraz-9T  | 1325 | 0.221899 | 0 |  |
|  | Shiraz-18T | 1434 | 0.244465 | 0 |  |
|  | Shiraz-18T | 1434 | 0.244465 | 0 |  |
|  | Shiraz-25T | 1698 | 0.21835  | 0 |  |
|  | Shiraz-25T | 1698 | 0.21835  | 0 |  |
|  | Shiraz-28T | 1735 | 0.350744 | 0 |  |
|  | Shiraz-28T | 1735 | 0.350744 | 0 |  |
|  | Shiraz-29T | 1778 | 0.120767 | 0 |  |
|  | Shiraz-29T | 1778 | 0.120767 | 0 |  |
|  | Shiraz-32T | 1833 | 0.551336 | 0 |  |
|  | Shiraz-32T | 1833 | 0.551336 | 0 |  |
|  | Shiraz-38T | 1951 | 0.250891 | 0 |  |
|  | Shiraz-38T | 1951 | 0.250891 | 0 |  |
|  | Shiraz-53T | 2078 | 0.287202 | 0 |  |
|  | Shiraz-53T | 2078 | 0.287202 | 0 |  |
|  | Shiraz-58T | 2162 | 0.221505 | 0 |  |
|  | Shiraz-58T | 2162 | 0.221505 | 0 |  |
|  | Shiraz-71T | 2238 | 0.603631 | 0 |  |
|  | Shiraz-71T | 2238 | 0.603631 | 0 |  |
|  | Shiraz-3T  | 90   | 0.219276 | 0 |  |
|  | Shiraz-3T  | 90   | 0.219276 | 0 |  |
|  | Shiraz-3T  | 99   | 0.454766 | 0 |  |
|  | Shiraz-3T  | 99   | 0.454766 | 0 |  |
|  | Shiraz-4T  | 253  | 0.372918 | 0 |  |
|  | Shiraz-4T  | 253  | 0.372918 | 0 |  |
|  | Shiraz-36T | 378  | 0.179558 | 0 |  |
|  | Shiraz-36T | 378  | 0.179558 | 0 |  |
|  | Shiraz-44T | 646  | 0.471276 | 0 |  |
|  | Shiraz-44T | 646  | 0.471276 | 0 |  |
|  | Shiraz-46T | 943  | 0.093799 | 0 |  |
|  | Shiraz-46T | 943  | 0.093799 | 0 |  |
|  | Shiraz-9T  | 1325 | 0.221899 | 0 |  |
|  | Shiraz-9T  | 1325 | 0.221899 | 0 |  |
|  | Shiraz-18T | 1434 | 0.244465 | 0 |  |
|  | Shiraz-18T | 1434 | 0.244465 | 0 |  |
|  | Shiraz-25T | 1698 | 0.21835  | 0 |  |
|  | Shiraz-25T | 1698 | 0.21835  | 0 |  |
|  | Shiraz-28T | 1735 | 0.350744 | 0 |  |
|  | Shiraz-28T | 1735 | 0.350744 | 0 |  |
|  | Shiraz-29T | 1778 | 0.120767 | 0 |  |
|  | Shiraz-29T | 1778 | 0.120767 | 0 |  |
|  | Shiraz-32T | 1833 | 0.551336 | 0 |  |
|  | Shiraz-32T | 1833 | 0.551336 | 0 |  |
|  | Shiraz-38T | 1951 | 0.250891 | 0 |  |

|        |      |            |      |          |   |  |  |
|--------|------|------------|------|----------|---|--|--|
|        |      | Shiraz-38T | 1951 | 0.250891 | 0 |  |  |
|        |      | Shiraz-53T | 2078 | 0.287202 | 0 |  |  |
|        |      | Shiraz-53T | 2078 | 0.287202 | 0 |  |  |
|        |      | Shiraz-58T | 2162 | 0.221505 | 0 |  |  |
|        |      | Shiraz-58T | 2162 | 0.221505 | 0 |  |  |
|        |      | Shiraz-71T | 2238 | 0.603631 | 0 |  |  |
|        |      | Shiraz-71T | 2238 | 0.603631 | 0 |  |  |
| ZNF786 | chr7 | Shiraz-3T  | 90   | 0.219276 | 0 |  |  |
|        |      | Shiraz-3T  | 99   | 0.454766 | 0 |  |  |
|        |      | Shiraz-4T  | 253  | 0.372918 | 0 |  |  |
|        |      | Shiraz-36T | 378  | 0.179558 | 0 |  |  |
|        |      | Shiraz-44T | 646  | 0.471276 | 0 |  |  |
|        |      | Shiraz-46T | 943  | 0.093799 | 0 |  |  |
|        |      | Shiraz-9T  | 1325 | 0.221899 | 0 |  |  |
|        |      | Shiraz-18T | 1434 | 0.244465 | 0 |  |  |
|        |      | Shiraz-25T | 1698 | 0.21835  | 0 |  |  |
|        |      | Shiraz-28T | 1735 | 0.350744 | 0 |  |  |
|        |      | Shiraz-29T | 1778 | 0.120767 | 0 |  |  |
|        |      | Shiraz-32T | 1833 | 0.551336 | 0 |  |  |
|        |      | Shiraz-38T | 1951 | 0.250891 | 0 |  |  |
|        |      | Shiraz-53T | 2078 | 0.287202 | 0 |  |  |
|        |      | Shiraz-58T | 2162 | 0.221505 | 0 |  |  |
|        |      | Shiraz-71T | 2238 | 0.603631 | 0 |  |  |
|        |      | Shiraz-3T  | 90   | 0.219276 | 0 |  |  |
|        |      | Shiraz-3T  | 99   | 0.454766 | 0 |  |  |
|        |      | Shiraz-4T  | 253  | 0.372918 | 0 |  |  |
|        |      | Shiraz-36T | 378  | 0.179558 | 0 |  |  |
|        |      | Shiraz-44T | 646  | 0.471276 | 0 |  |  |
|        |      | Shiraz-46T | 943  | 0.093799 | 0 |  |  |
|        |      | Shiraz-9T  | 1325 | 0.221899 | 0 |  |  |
|        |      | Shiraz-18T | 1434 | 0.244465 | 0 |  |  |
|        |      | Shiraz-25T | 1698 | 0.21835  | 0 |  |  |
|        |      | Shiraz-28T | 1735 | 0.350744 | 0 |  |  |
|        |      | Shiraz-29T | 1778 | 0.120767 | 0 |  |  |
|        |      | Shiraz-32T | 1833 | 0.551336 | 0 |  |  |
|        |      | Shiraz-38T | 1951 | 0.250891 | 0 |  |  |
|        |      | Shiraz-53T | 2078 | 0.287202 | 0 |  |  |
|        |      | Shiraz-58T | 2162 | 0.221505 | 0 |  |  |
|        |      | Shiraz-71T | 2238 | 0.603631 | 0 |  |  |
|        |      | Shiraz-3T  | 90   | 0.219276 | 0 |  |  |
|        |      | Shiraz-3T  | 99   | 0.454766 | 0 |  |  |
|        |      | Shiraz-4T  | 253  | 0.372918 | 0 |  |  |
|        |      | Shiraz-36T | 378  | 0.179558 | 0 |  |  |
|        |      | Shiraz-44T | 646  | 0.471276 | 0 |  |  |
|        |      | Shiraz-46T | 943  | 0.093799 | 0 |  |  |
|        |      | Shiraz-9T  | 1325 | 0.221899 | 0 |  |  |
|        |      | Shiraz-18T | 1434 | 0.244465 | 0 |  |  |

|        |      |            |      |          |           |  |
|--------|------|------------|------|----------|-----------|--|
|        |      | Shiraz-25T | 1698 | 0.21835  | 0         |  |
|        |      | Shiraz-28T | 1735 | 0.350744 | 0         |  |
|        |      | Shiraz-29T | 1778 | 0.120767 | 0         |  |
|        |      | Shiraz-32T | 1833 | 0.551336 | 0         |  |
|        |      | Shiraz-38T | 1951 | 0.250891 | 0         |  |
|        |      | Shiraz-53T | 2078 | 0.287202 | 0         |  |
|        |      | Shiraz-58T | 2162 | 0.221505 | 0         |  |
|        |      | Shiraz-71T | 2238 | 0.603631 | 0         |  |
| ZNF789 | chr7 | Shiraz-3T  | 90   | 0.219276 | 0         |  |
|        |      | Shiraz-3T  | 90   | 0.219276 | 0         |  |
|        |      | Shiraz-3T  | 94   | 0.74735  | 0         |  |
|        |      | Shiraz-3T  | 94   | 0.74735  | 0         |  |
|        |      | Shiraz-4T  | 253  | 0.372918 | 0         |  |
|        |      | Shiraz-4T  | 253  | 0.372918 | 0         |  |
|        |      | Shiraz-31T | 316  | 0.219196 | 0         |  |
|        |      | Shiraz-31T | 316  | 0.219196 | 0         |  |
|        |      | Shiraz-36T | 378  | 0.179558 | 0         |  |
|        |      | Shiraz-36T | 378  | 0.179558 | 0         |  |
|        |      | Shiraz-36T | 381  | 0.332628 | 0         |  |
|        |      | Shiraz-36T | 381  | 0.332628 | 0         |  |
|        |      | Shiraz-44T | 639  | 1.035032 | 0         |  |
|        |      | Shiraz-44T | 639  | 1.035032 | 0         |  |
|        |      | Shiraz-46T | 943  | 0.093799 | 0         |  |
|        |      | Shiraz-46T | 943  | 0.093799 | 0         |  |
|        |      | Shiraz-46T | 946  | 0.299835 | 0         |  |
|        |      | Shiraz-46T | 946  | 0.299835 | 0         |  |
|        |      | Shiraz-47T | 1030 | 0.257728 | 0         |  |
|        |      | Shiraz-47T | 1030 | 0.257728 | 0         |  |
|        |      | Shiraz-49T | 1120 | 0.281656 | 0         |  |
|        |      | Shiraz-49T | 1120 | 0.281656 | 0         |  |
|        |      | Shiraz-77T | 1225 | 0        | -0.117922 |  |
|        |      | Shiraz-77T | 1225 | 0        | -0.117922 |  |
|        |      | Shiraz-77T | 1227 | 0.196445 | 0         |  |
|        |      | Shiraz-77T | 1227 | 0.196445 | 0         |  |
|        |      | Shiraz-9T  | 1324 | 0.679266 | 0         |  |
|        |      | Shiraz-9T  | 1324 | 0.679266 | 0         |  |
|        |      | Shiraz-18T | 1434 | 0.244465 | 0         |  |
|        |      | Shiraz-18T | 1434 | 0.244465 | 0         |  |
|        |      | Shiraz-22T | 1549 | 0        | -0.319623 |  |
|        |      | Shiraz-22T | 1549 | 0        | -0.319623 |  |
|        |      | Shiraz-22T | 1551 | 0.324011 | 0         |  |
|        |      | Shiraz-22T | 1551 | 0.324011 | 0         |  |
|        |      | Shiraz-25T | 1698 | 0.21835  | 0         |  |
|        |      | Shiraz-25T | 1698 | 0.21835  | 0         |  |
|        |      | Shiraz-28T | 1735 | 0.350744 | 0         |  |
|        |      | Shiraz-28T | 1735 | 0.350744 | 0         |  |
|        |      | Shiraz-29T | 1778 | 0.120767 | 0         |  |

|  |            |      |          |           |  |
|--|------------|------|----------|-----------|--|
|  | Shiraz-29T | 1778 | 0.120767 | 0         |  |
|  | Shiraz-32T | 1833 | 0.551336 | 0         |  |
|  | Shiraz-32T | 1833 | 0.551336 | 0         |  |
|  | Shiraz-38T | 1951 | 0.250891 | 0         |  |
|  | Shiraz-38T | 1951 | 0.250891 | 0         |  |
|  | Shiraz-53T | 2078 | 0.287202 | 0         |  |
|  | Shiraz-53T | 2078 | 0.287202 | 0         |  |
|  | Shiraz-71T | 2238 | 0.603631 | 0         |  |
|  | Shiraz-71T | 2238 | 0.603631 | 0         |  |
|  | Shiraz-3T  | 90   | 0.219276 | 0         |  |
|  | Shiraz-3T  | 90   | 0.219276 | 0         |  |
|  | Shiraz-3T  | 94   | 0.74735  | 0         |  |
|  | Shiraz-3T  | 94   | 0.74735  | 0         |  |
|  | Shiraz-4T  | 253  | 0.372918 | 0         |  |
|  | Shiraz-4T  | 253  | 0.372918 | 0         |  |
|  | Shiraz-31T | 316  | 0.219196 | 0         |  |
|  | Shiraz-31T | 316  | 0.219196 | 0         |  |
|  | Shiraz-36T | 378  | 0.179558 | 0         |  |
|  | Shiraz-36T | 378  | 0.179558 | 0         |  |
|  | Shiraz-36T | 381  | 0.332628 | 0         |  |
|  | Shiraz-36T | 381  | 0.332628 | 0         |  |
|  | Shiraz-44T | 639  | 1.035032 | 0         |  |
|  | Shiraz-44T | 639  | 1.035032 | 0         |  |
|  | Shiraz-46T | 943  | 0.093799 | 0         |  |
|  | Shiraz-46T | 943  | 0.093799 | 0         |  |
|  | Shiraz-46T | 946  | 0.299835 | 0         |  |
|  | Shiraz-46T | 946  | 0.299835 | 0         |  |
|  | Shiraz-47T | 1030 | 0.257728 | 0         |  |
|  | Shiraz-47T | 1030 | 0.257728 | 0         |  |
|  | Shiraz-49T | 1120 | 0.281656 | 0         |  |
|  | Shiraz-49T | 1120 | 0.281656 | 0         |  |
|  | Shiraz-77T | 1225 | 0        | -0.117922 |  |
|  | Shiraz-77T | 1225 | 0        | -0.117922 |  |
|  | Shiraz-77T | 1227 | 0.196445 | 0         |  |
|  | Shiraz-77T | 1227 | 0.196445 | 0         |  |
|  | Shiraz-9T  | 1324 | 0.679266 | 0         |  |
|  | Shiraz-9T  | 1324 | 0.679266 | 0         |  |
|  | Shiraz-18T | 1434 | 0.244465 | 0         |  |
|  | Shiraz-18T | 1434 | 0.244465 | 0         |  |
|  | Shiraz-22T | 1549 | 0        | -0.319623 |  |
|  | Shiraz-22T | 1549 | 0        | -0.319623 |  |
|  | Shiraz-22T | 1551 | 0.324011 | 0         |  |
|  | Shiraz-22T | 1551 | 0.324011 | 0         |  |
|  | Shiraz-25T | 1698 | 0.21835  | 0         |  |
|  | Shiraz-25T | 1698 | 0.21835  | 0         |  |
|  | Shiraz-28T | 1735 | 0.350744 | 0         |  |
|  | Shiraz-28T | 1735 | 0.350744 | 0         |  |

|  |            |      |          |           |  |
|--|------------|------|----------|-----------|--|
|  | Shiraz-29T | 1778 | 0.120767 | 0         |  |
|  | Shiraz-29T | 1778 | 0.120767 | 0         |  |
|  | Shiraz-32T | 1833 | 0.551336 | 0         |  |
|  | Shiraz-32T | 1833 | 0.551336 | 0         |  |
|  | Shiraz-38T | 1951 | 0.250891 | 0         |  |
|  | Shiraz-38T | 1951 | 0.250891 | 0         |  |
|  | Shiraz-53T | 2078 | 0.287202 | 0         |  |
|  | Shiraz-53T | 2078 | 0.287202 | 0         |  |
|  | Shiraz-71T | 2238 | 0.603631 | 0         |  |
|  | Shiraz-71T | 2238 | 0.603631 | 0         |  |
|  | Shiraz-3T  | 90   | 0.219276 | 0         |  |
|  | Shiraz-3T  | 90   | 0.219276 | 0         |  |
|  | Shiraz-3T  | 94   | 0.74735  | 0         |  |
|  | Shiraz-3T  | 94   | 0.74735  | 0         |  |
|  | Shiraz-4T  | 253  | 0.372918 | 0         |  |
|  | Shiraz-4T  | 253  | 0.372918 | 0         |  |
|  | Shiraz-31T | 316  | 0.219196 | 0         |  |
|  | Shiraz-31T | 316  | 0.219196 | 0         |  |
|  | Shiraz-36T | 378  | 0.179558 | 0         |  |
|  | Shiraz-36T | 378  | 0.179558 | 0         |  |
|  | Shiraz-36T | 381  | 0.332628 | 0         |  |
|  | Shiraz-36T | 381  | 0.332628 | 0         |  |
|  | Shiraz-44T | 639  | 1.035032 | 0         |  |
|  | Shiraz-44T | 639  | 1.035032 | 0         |  |
|  | Shiraz-46T | 943  | 0.093799 | 0         |  |
|  | Shiraz-46T | 943  | 0.093799 | 0         |  |
|  | Shiraz-46T | 946  | 0.299835 | 0         |  |
|  | Shiraz-46T | 946  | 0.299835 | 0         |  |
|  | Shiraz-47T | 1030 | 0.257728 | 0         |  |
|  | Shiraz-47T | 1030 | 0.257728 | 0         |  |
|  | Shiraz-49T | 1120 | 0.281656 | 0         |  |
|  | Shiraz-49T | 1120 | 0.281656 | 0         |  |
|  | Shiraz-77T | 1225 | 0        | -0.117922 |  |
|  | Shiraz-77T | 1225 | 0        | -0.117922 |  |
|  | Shiraz-77T | 1227 | 0.196445 | 0         |  |
|  | Shiraz-77T | 1227 | 0.196445 | 0         |  |
|  | Shiraz-9T  | 1324 | 0.679266 | 0         |  |
|  | Shiraz-9T  | 1324 | 0.679266 | 0         |  |
|  | Shiraz-18T | 1434 | 0.244465 | 0         |  |
|  | Shiraz-18T | 1434 | 0.244465 | 0         |  |
|  | Shiraz-22T | 1549 | 0        | -0.319623 |  |
|  | Shiraz-22T | 1549 | 0        | -0.319623 |  |
|  | Shiraz-22T | 1551 | 0.324011 | 0         |  |
|  | Shiraz-22T | 1551 | 0.324011 | 0         |  |
|  | Shiraz-25T | 1698 | 0.21835  | 0         |  |
|  | Shiraz-25T | 1698 | 0.21835  | 0         |  |
|  | Shiraz-28T | 1735 | 0.350744 | 0         |  |

|        |      |            |      |          |           |  |
|--------|------|------------|------|----------|-----------|--|
|        |      | Shiraz-28T | 1735 | 0.350744 | 0         |  |
|        |      | Shiraz-29T | 1778 | 0.120767 | 0         |  |
|        |      | Shiraz-29T | 1778 | 0.120767 | 0         |  |
|        |      | Shiraz-32T | 1833 | 0.551336 | 0         |  |
|        |      | Shiraz-32T | 1833 | 0.551336 | 0         |  |
|        |      | Shiraz-38T | 1951 | 0.250891 | 0         |  |
|        |      | Shiraz-38T | 1951 | 0.250891 | 0         |  |
|        |      | Shiraz-53T | 2078 | 0.287202 | 0         |  |
|        |      | Shiraz-53T | 2078 | 0.287202 | 0         |  |
|        |      | Shiraz-71T | 2238 | 0.603631 | 0         |  |
|        |      | Shiraz-71T | 2238 | 0.603631 | 0         |  |
| ZNF800 | chr7 | Shiraz-3T  | 90   | 0.219276 | 0         |  |
|        |      | Shiraz-3T  | 95   | 0        | -0.077623 |  |
|        |      | Shiraz-4T  | 253  | 0.372918 | 0         |  |
|        |      | Shiraz-36T | 378  | 0.179558 | 0         |  |
|        |      | Shiraz-36T | 382  | 0.081739 | 0         |  |
|        |      | Shiraz-44T | 641  | 0        | -0.477846 |  |
|        |      | Shiraz-46T | 943  | 0.093799 | 0         |  |
|        |      | Shiraz-46T | 947  | 0        | -0.010843 |  |
|        |      | Shiraz-47T | 1031 | 0        | -0.117529 |  |
|        |      | Shiraz-49T | 1121 | 0        | -0.138569 |  |
|        |      | Shiraz-77T | 1225 | 0        | -0.117922 |  |
|        |      | Shiraz-18T | 1434 | 0.244465 | 0         |  |
|        |      | Shiraz-22T | 1549 | 0        | -0.319623 |  |
|        |      | Shiraz-25T | 1698 | 0.21835  | 0         |  |
|        |      | Shiraz-28T | 1735 | 0.350744 | 0         |  |
|        |      | Shiraz-29T | 1778 | 0.120767 | 0         |  |
|        |      | Shiraz-32T | 1833 | 0.551336 | 0         |  |
|        |      | Shiraz-38T | 1951 | 0.250891 | 0         |  |
|        |      | Shiraz-53T | 2078 | 0.287202 | 0         |  |
|        |      | Shiraz-58T | 2161 | 0        | -0.187744 |  |
|        |      | Shiraz-71T | 2238 | 0.603631 | 0         |  |
|        |      | Shiraz-3T  | 90   | 0.219276 | 0         |  |
|        |      | Shiraz-3T  | 95   | 0        | -0.077623 |  |
|        |      | Shiraz-4T  | 253  | 0.372918 | 0         |  |
|        |      | Shiraz-36T | 378  | 0.179558 | 0         |  |
|        |      | Shiraz-36T | 382  | 0.081739 | 0         |  |
|        |      | Shiraz-44T | 641  | 0        | -0.477846 |  |
|        |      | Shiraz-46T | 943  | 0.093799 | 0         |  |
|        |      | Shiraz-46T | 947  | 0        | -0.010843 |  |
|        |      | Shiraz-47T | 1031 | 0        | -0.117529 |  |
|        |      | Shiraz-49T | 1121 | 0        | -0.138569 |  |
|        |      | Shiraz-77T | 1225 | 0        | -0.117922 |  |
|        |      | Shiraz-18T | 1434 | 0.244465 | 0         |  |
|        |      | Shiraz-22T | 1549 | 0        | -0.319623 |  |
|        |      | Shiraz-25T | 1698 | 0.21835  | 0         |  |
|        |      | Shiraz-28T | 1735 | 0.350744 | 0         |  |

|         |      |            |      |          |           |  |  |
|---------|------|------------|------|----------|-----------|--|--|
|         |      | Shiraz-29T | 1778 | 0.120767 | 0         |  |  |
|         |      | Shiraz-32T | 1833 | 0.551336 | 0         |  |  |
|         |      | Shiraz-38T | 1951 | 0.250891 | 0         |  |  |
|         |      | Shiraz-53T | 2078 | 0.287202 | 0         |  |  |
|         |      | Shiraz-58T | 2161 | 0        | -0.187744 |  |  |
|         |      | Shiraz-71T | 2238 | 0.603631 | 0         |  |  |
|         |      | Shiraz-3T  | 90   | 0.219276 | 0         |  |  |
|         |      | Shiraz-3T  | 95   | 0        | -0.077623 |  |  |
|         |      | Shiraz-4T  | 253  | 0.372918 | 0         |  |  |
|         |      | Shiraz-36T | 378  | 0.179558 | 0         |  |  |
|         |      | Shiraz-36T | 382  | 0.081739 | 0         |  |  |
|         |      | Shiraz-44T | 641  | 0        | -0.477846 |  |  |
|         |      | Shiraz-46T | 943  | 0.093799 | 0         |  |  |
|         |      | Shiraz-46T | 947  | 0        | -0.010843 |  |  |
|         |      | Shiraz-47T | 1031 | 0        | -0.117529 |  |  |
|         |      | Shiraz-49T | 1121 | 0        | -0.138569 |  |  |
|         |      | Shiraz-77T | 1225 | 0        | -0.117922 |  |  |
|         |      | Shiraz-18T | 1434 | 0.244465 | 0         |  |  |
|         |      | Shiraz-22T | 1549 | 0        | -0.319623 |  |  |
|         |      | Shiraz-25T | 1698 | 0.21835  | 0         |  |  |
|         |      | Shiraz-28T | 1735 | 0.350744 | 0         |  |  |
|         |      | Shiraz-29T | 1778 | 0.120767 | 0         |  |  |
|         |      | Shiraz-32T | 1833 | 0.551336 | 0         |  |  |
|         |      | Shiraz-38T | 1951 | 0.250891 | 0         |  |  |
|         |      | Shiraz-53T | 2078 | 0.287202 | 0         |  |  |
|         |      | Shiraz-58T | 2161 | 0        | -0.187744 |  |  |
|         |      | Shiraz-71T | 2238 | 0.603631 | 0         |  |  |
| ZNF804B | chr7 | Shiraz-3T  | 90   | 0.219276 | 0         |  |  |
|         |      | Shiraz-3T  | 93   | 0        | -0.058023 |  |  |
|         |      | Shiraz-4T  | 253  | 0.372918 | 0         |  |  |
|         |      | Shiraz-36T | 378  | 0.179558 | 0         |  |  |
|         |      | Shiraz-36T | 380  | 0.083883 | 0         |  |  |
|         |      | Shiraz-44T | 638  | 0        | -0.433476 |  |  |
|         |      | Shiraz-46T | 943  | 0.093799 | 0         |  |  |
|         |      | Shiraz-46T | 945  | 0        | -0.014838 |  |  |
|         |      | Shiraz-47T | 1029 | 0        | -0.096586 |  |  |
|         |      | Shiraz-49T | 1119 | 0        | -0.157331 |  |  |
|         |      | Shiraz-77T | 1225 | 0        | -0.117922 |  |  |
|         |      | Shiraz-77T | 1226 | 0        | -0.233724 |  |  |
|         |      | Shiraz-18T | 1434 | 0.244465 | 0         |  |  |
|         |      | Shiraz-22T | 1549 | 0        | -0.319623 |  |  |
|         |      | Shiraz-22T | 1550 | 0        | -0.577052 |  |  |
|         |      | Shiraz-25T | 1698 | 0.21835  | 0         |  |  |
|         |      | Shiraz-28T | 1735 | 0.350744 | 0         |  |  |
|         |      | Shiraz-29T | 1778 | 0.120767 | 0         |  |  |
|         |      | Shiraz-38T | 1951 | 0.250891 | 0         |  |  |
|         |      | Shiraz-53T | 2078 | 0.287202 | 0         |  |  |

|       |      |            |      |          |           |  |  |
|-------|------|------------|------|----------|-----------|--|--|
|       |      | Shiraz-58T | 2159 | 0        | -0.219521 |  |  |
|       |      | Shiraz-71T | 2238 | 0.603631 | 0         |  |  |
|       |      | Shiraz-3T  | 90   | 0.219276 | 0         |  |  |
|       |      | Shiraz-3T  | 93   | 0        | -0.058023 |  |  |
|       |      | Shiraz-4T  | 253  | 0.372918 | 0         |  |  |
|       |      | Shiraz-36T | 378  | 0.179558 | 0         |  |  |
|       |      | Shiraz-36T | 380  | 0.083883 | 0         |  |  |
|       |      | Shiraz-44T | 638  | 0        | -0.433476 |  |  |
|       |      | Shiraz-46T | 943  | 0.093799 | 0         |  |  |
|       |      | Shiraz-46T | 945  | 0        | -0.014838 |  |  |
|       |      | Shiraz-47T | 1029 | 0        | -0.096586 |  |  |
|       |      | Shiraz-49T | 1119 | 0        | -0.157331 |  |  |
|       |      | Shiraz-77T | 1225 | 0        | -0.117922 |  |  |
|       |      | Shiraz-77T | 1226 | 0        | -0.233724 |  |  |
|       |      | Shiraz-18T | 1434 | 0.244465 | 0         |  |  |
|       |      | Shiraz-22T | 1549 | 0        | -0.319623 |  |  |
|       |      | Shiraz-22T | 1550 | 0        | -0.577052 |  |  |
|       |      | Shiraz-25T | 1698 | 0.21835  | 0         |  |  |
|       |      | Shiraz-28T | 1735 | 0.350744 | 0         |  |  |
|       |      | Shiraz-29T | 1778 | 0.120767 | 0         |  |  |
|       |      | Shiraz-38T | 1951 | 0.250891 | 0         |  |  |
|       |      | Shiraz-53T | 2078 | 0.287202 | 0         |  |  |
|       |      | Shiraz-58T | 2159 | 0        | -0.219521 |  |  |
|       |      | Shiraz-71T | 2238 | 0.603631 | 0         |  |  |
|       |      | Shiraz-3T  | 90   | 0.219276 | 0         |  |  |
|       |      | Shiraz-3T  | 93   | 0        | -0.058023 |  |  |
|       |      | Shiraz-4T  | 253  | 0.372918 | 0         |  |  |
|       |      | Shiraz-36T | 378  | 0.179558 | 0         |  |  |
|       |      | Shiraz-36T | 380  | 0.083883 | 0         |  |  |
|       |      | Shiraz-44T | 638  | 0        | -0.433476 |  |  |
|       |      | Shiraz-46T | 943  | 0.093799 | 0         |  |  |
|       |      | Shiraz-46T | 945  | 0        | -0.014838 |  |  |
|       |      | Shiraz-47T | 1029 | 0        | -0.096586 |  |  |
|       |      | Shiraz-49T | 1119 | 0        | -0.157331 |  |  |
|       |      | Shiraz-77T | 1225 | 0        | -0.117922 |  |  |
|       |      | Shiraz-77T | 1226 | 0        | -0.233724 |  |  |
|       |      | Shiraz-18T | 1434 | 0.244465 | 0         |  |  |
|       |      | Shiraz-22T | 1549 | 0        | -0.319623 |  |  |
|       |      | Shiraz-22T | 1550 | 0        | -0.577052 |  |  |
|       |      | Shiraz-25T | 1698 | 0.21835  | 0         |  |  |
|       |      | Shiraz-28T | 1735 | 0.350744 | 0         |  |  |
|       |      | Shiraz-29T | 1778 | 0.120767 | 0         |  |  |
|       |      | Shiraz-38T | 1951 | 0.250891 | 0         |  |  |
|       |      | Shiraz-53T | 2078 | 0.287202 | 0         |  |  |
|       |      | Shiraz-58T | 2159 | 0        | -0.219521 |  |  |
|       |      | Shiraz-71T | 2238 | 0.603631 | 0         |  |  |
| ZNF81 | chrX | Shiraz-4T  | 260  | 0        | -0.324128 |  |  |



|  |            |      |          |           |  |
|--|------------|------|----------|-----------|--|
|  | Shiraz-16T | 294  | 0.655804 | 0         |  |
|  | Shiraz-31T | 345  | 0.103301 | 0         |  |
|  | Shiraz-36T | 431  | 0        | -0.78035  |  |
|  | Shiraz-36T | 432  | 0        | -0.6692   |  |
|  | Shiraz-44T | 891  | 0        | -0.954044 |  |
|  | Shiraz-44T | 896  | 0        | -0.109108 |  |
|  | Shiraz-46T | 991  | 0.139564 | 0         |  |
|  | Shiraz-47T | 1084 | 0.24185  | 0         |  |
|  | Shiraz-49T | 1166 | 0        | -0.917235 |  |
|  | Shiraz-49T | 1169 | 0        | -0.583529 |  |
|  | Shiraz-77T | 1282 | 0.213849 | 0         |  |
|  | Shiraz-9T  | 1368 | 0.199713 | 0         |  |
|  | Shiraz-9T  | 1369 | 0.703374 | 0         |  |
|  | Shiraz-18T | 1455 | 0        | -0.186773 |  |
|  | Shiraz-22T | 1669 | 0.695915 | 0         |  |
|  | Shiraz-22T | 1672 | 1.01678  | 0         |  |
|  | Shiraz-25T | 1717 | 0.420447 | 0         |  |
|  | Shiraz-28T | 1760 | 0.538181 | 0         |  |
|  | Shiraz-29T | 1800 | 0.672527 | 0         |  |
|  | Shiraz-32T | 1869 | 0.776805 | 0         |  |
|  | Shiraz-35T | 1932 | 0.507141 | 0         |  |
|  | Shiraz-58T | 2221 | 0.871948 | 0         |  |
|  | Shiraz-71T | 2260 | 0.68394  | 0         |  |
|  | Shiraz-71T | 2262 | 0.986748 | 0         |  |
|  | Shiraz-4T  | 260  | 0        | -0.324128 |  |
|  | Shiraz-16T | 294  | 0.655804 | 0         |  |
|  | Shiraz-31T | 345  | 0.103301 | 0         |  |
|  | Shiraz-36T | 431  | 0        | -0.78035  |  |
|  | Shiraz-36T | 432  | 0        | -0.6692   |  |
|  | Shiraz-44T | 891  | 0        | -0.954044 |  |
|  | Shiraz-44T | 896  | 0        | -0.109108 |  |
|  | Shiraz-46T | 991  | 0.139564 | 0         |  |
|  | Shiraz-47T | 1084 | 0.24185  | 0         |  |
|  | Shiraz-49T | 1166 | 0        | -0.917235 |  |
|  | Shiraz-49T | 1169 | 0        | -0.583529 |  |
|  | Shiraz-77T | 1282 | 0.213849 | 0         |  |
|  | Shiraz-9T  | 1368 | 0.199713 | 0         |  |
|  | Shiraz-9T  | 1369 | 0.703374 | 0         |  |
|  | Shiraz-18T | 1455 | 0        | -0.186773 |  |
|  | Shiraz-22T | 1669 | 0.695915 | 0         |  |
|  | Shiraz-22T | 1672 | 1.01678  | 0         |  |
|  | Shiraz-25T | 1717 | 0.420447 | 0         |  |
|  | Shiraz-28T | 1760 | 0.538181 | 0         |  |
|  | Shiraz-29T | 1800 | 0.672527 | 0         |  |
|  | Shiraz-32T | 1869 | 0.776805 | 0         |  |
|  | Shiraz-35T | 1932 | 0.507141 | 0         |  |
|  | Shiraz-58T | 2221 | 0.871948 | 0         |  |

|        |      |            |      |          |           |  |
|--------|------|------------|------|----------|-----------|--|
|        |      | Shiraz-71T | 2260 | 0.68394  | 0         |  |
|        |      | Shiraz-71T | 2262 | 0.986748 | 0         |  |
|        |      | Shiraz-4T  | 260  | 0        | -0.324128 |  |
|        |      | Shiraz-16T | 294  | 0.655804 | 0         |  |
|        |      | Shiraz-31T | 345  | 0.103301 | 0         |  |
|        |      | Shiraz-36T | 431  | 0        | -0.78035  |  |
|        |      | Shiraz-36T | 432  | 0        | -0.6692   |  |
|        |      | Shiraz-44T | 891  | 0        | -0.954044 |  |
|        |      | Shiraz-44T | 896  | 0        | -0.109108 |  |
|        |      | Shiraz-46T | 991  | 0.139564 | 0         |  |
|        |      | Shiraz-47T | 1084 | 0.24185  | 0         |  |
|        |      | Shiraz-49T | 1166 | 0        | -0.917235 |  |
|        |      | Shiraz-49T | 1169 | 0        | -0.583529 |  |
|        |      | Shiraz-77T | 1282 | 0.213849 | 0         |  |
|        |      | Shiraz-9T  | 1368 | 0.199713 | 0         |  |
|        |      | Shiraz-9T  | 1369 | 0.703374 | 0         |  |
|        |      | Shiraz-18T | 1455 | 0        | -0.186773 |  |
|        |      | Shiraz-22T | 1669 | 0.695915 | 0         |  |
|        |      | Shiraz-22T | 1672 | 1.01678  | 0         |  |
|        |      | Shiraz-25T | 1717 | 0.420447 | 0         |  |
|        |      | Shiraz-28T | 1760 | 0.538181 | 0         |  |
|        |      | Shiraz-29T | 1800 | 0.672527 | 0         |  |
|        |      | Shiraz-32T | 1869 | 0.776805 | 0         |  |
|        |      | Shiraz-35T | 1932 | 0.507141 | 0         |  |
|        |      | Shiraz-58T | 2221 | 0.871948 | 0         |  |
|        |      | Shiraz-71T | 2260 | 0.68394  | 0         |  |
|        |      | Shiraz-71T | 2262 | 0.986748 | 0         |  |
| ZNF862 | chr7 | Shiraz-3T  | 90   | 0.219276 | 0         |  |
|        |      | Shiraz-3T  | 99   | 0.454766 | 0         |  |
|        |      | Shiraz-4T  | 253  | 0.372918 | 0         |  |
|        |      | Shiraz-36T | 378  | 0.179558 | 0         |  |
|        |      | Shiraz-44T | 646  | 0.471276 | 0         |  |
|        |      | Shiraz-46T | 943  | 0.093799 | 0         |  |
|        |      | Shiraz-9T  | 1325 | 0.221899 | 0         |  |
|        |      | Shiraz-18T | 1434 | 0.244465 | 0         |  |
|        |      | Shiraz-25T | 1698 | 0.21835  | 0         |  |
|        |      | Shiraz-28T | 1735 | 0.350744 | 0         |  |
|        |      | Shiraz-29T | 1778 | 0.120767 | 0         |  |
|        |      | Shiraz-32T | 1833 | 0.551336 | 0         |  |
|        |      | Shiraz-38T | 1951 | 0.250891 | 0         |  |
|        |      | Shiraz-53T | 2078 | 0.287202 | 0         |  |
|        |      | Shiraz-58T | 2162 | 0.221505 | 0         |  |
|        |      | Shiraz-71T | 2238 | 0.603631 | 0         |  |
|        |      | Shiraz-3T  | 90   | 0.219276 | 0         |  |
|        |      | Shiraz-3T  | 99   | 0.454766 | 0         |  |
|        |      | Shiraz-4T  | 253  | 0.372918 | 0         |  |
|        |      | Shiraz-36T | 378  | 0.179558 | 0         |  |

|        |      |            |      |          |           |  |
|--------|------|------------|------|----------|-----------|--|
|        |      | Shiraz-44T | 646  | 0.471276 | 0         |  |
|        |      | Shiraz-46T | 943  | 0.093799 | 0         |  |
|        |      | Shiraz-9T  | 1325 | 0.221899 | 0         |  |
|        |      | Shiraz-18T | 1434 | 0.244465 | 0         |  |
|        |      | Shiraz-25T | 1698 | 0.21835  | 0         |  |
|        |      | Shiraz-28T | 1735 | 0.350744 | 0         |  |
|        |      | Shiraz-29T | 1778 | 0.120767 | 0         |  |
|        |      | Shiraz-32T | 1833 | 0.551336 | 0         |  |
|        |      | Shiraz-38T | 1951 | 0.250891 | 0         |  |
|        |      | Shiraz-53T | 2078 | 0.287202 | 0         |  |
|        |      | Shiraz-58T | 2162 | 0.221505 | 0         |  |
|        |      | Shiraz-71T | 2238 | 0.603631 | 0         |  |
|        |      | Shiraz-3T  | 90   | 0.219276 | 0         |  |
|        |      | Shiraz-3T  | 99   | 0.454766 | 0         |  |
|        |      | Shiraz-4T  | 253  | 0.372918 | 0         |  |
|        |      | Shiraz-36T | 378  | 0.179558 | 0         |  |
|        |      | Shiraz-44T | 646  | 0.471276 | 0         |  |
|        |      | Shiraz-46T | 943  | 0.093799 | 0         |  |
|        |      | Shiraz-9T  | 1325 | 0.221899 | 0         |  |
|        |      | Shiraz-18T | 1434 | 0.244465 | 0         |  |
|        |      | Shiraz-25T | 1698 | 0.21835  | 0         |  |
|        |      | Shiraz-28T | 1735 | 0.350744 | 0         |  |
|        |      | Shiraz-29T | 1778 | 0.120767 | 0         |  |
|        |      | Shiraz-32T | 1833 | 0.551336 | 0         |  |
|        |      | Shiraz-38T | 1951 | 0.250891 | 0         |  |
|        |      | Shiraz-53T | 2078 | 0.287202 | 0         |  |
|        |      | Shiraz-58T | 2162 | 0.221505 | 0         |  |
|        |      | Shiraz-71T | 2238 | 0.603631 | 0         |  |
| ZNHIT1 | chr7 | Shiraz-3T  | 90   | 0.219276 | 0         |  |
|        |      | Shiraz-3T  | 94   | 0.74735  | 0         |  |
|        |      | Shiraz-4T  | 253  | 0.372918 | 0         |  |
|        |      | Shiraz-31T | 316  | 0.219196 | 0         |  |
|        |      | Shiraz-36T | 378  | 0.179558 | 0         |  |
|        |      | Shiraz-36T | 381  | 0.332628 | 0         |  |
|        |      | Shiraz-44T | 639  | 1.035032 | 0         |  |
|        |      | Shiraz-46T | 943  | 0.093799 | 0         |  |
|        |      | Shiraz-46T | 946  | 0.299835 | 0         |  |
|        |      | Shiraz-47T | 1030 | 0.257728 | 0         |  |
|        |      | Shiraz-49T | 1120 | 0.281656 | 0         |  |
|        |      | Shiraz-77T | 1225 | 0        | -0.117922 |  |
|        |      | Shiraz-77T | 1227 | 0.196445 | 0         |  |
|        |      | Shiraz-9T  | 1324 | 0.679266 | 0         |  |
|        |      | Shiraz-18T | 1434 | 0.244465 | 0         |  |
|        |      | Shiraz-22T | 1549 | 0        | -0.319623 |  |
|        |      | Shiraz-22T | 1551 | 0.324011 | 0         |  |
|        |      | Shiraz-25T | 1698 | 0.21835  | 0         |  |
|        |      | Shiraz-28T | 1735 | 0.350744 | 0         |  |

|  |            |      |          |           |  |
|--|------------|------|----------|-----------|--|
|  | Shiraz-29T | 1778 | 0.120767 | 0         |  |
|  | Shiraz-32T | 1833 | 0.551336 | 0         |  |
|  | Shiraz-32T | 1834 | 1.485392 | 0         |  |
|  | Shiraz-38T | 1951 | 0.250891 | 0         |  |
|  | Shiraz-53T | 2078 | 0.287202 | 0         |  |
|  | Shiraz-58T | 2160 | 0.399007 | 0         |  |
|  | Shiraz-71T | 2238 | 0.603631 | 0         |  |
|  | Shiraz-3T  | 90   | 0.219276 | 0         |  |
|  | Shiraz-3T  | 94   | 0.74735  | 0         |  |
|  | Shiraz-4T  | 253  | 0.372918 | 0         |  |
|  | Shiraz-31T | 316  | 0.219196 | 0         |  |
|  | Shiraz-36T | 378  | 0.179558 | 0         |  |
|  | Shiraz-36T | 381  | 0.332628 | 0         |  |
|  | Shiraz-44T | 639  | 1.035032 | 0         |  |
|  | Shiraz-46T | 943  | 0.093799 | 0         |  |
|  | Shiraz-46T | 946  | 0.299835 | 0         |  |
|  | Shiraz-47T | 1030 | 0.257728 | 0         |  |
|  | Shiraz-49T | 1120 | 0.281656 | 0         |  |
|  | Shiraz-77T | 1225 | 0        | -0.117922 |  |
|  | Shiraz-77T | 1227 | 0.196445 | 0         |  |
|  | Shiraz-9T  | 1324 | 0.679266 | 0         |  |
|  | Shiraz-18T | 1434 | 0.244465 | 0         |  |
|  | Shiraz-22T | 1549 | 0        | -0.319623 |  |
|  | Shiraz-22T | 1551 | 0.324011 | 0         |  |
|  | Shiraz-25T | 1698 | 0.21835  | 0         |  |
|  | Shiraz-28T | 1735 | 0.350744 | 0         |  |
|  | Shiraz-29T | 1778 | 0.120767 | 0         |  |
|  | Shiraz-32T | 1833 | 0.551336 | 0         |  |
|  | Shiraz-32T | 1834 | 1.485392 | 0         |  |
|  | Shiraz-38T | 1951 | 0.250891 | 0         |  |
|  | Shiraz-53T | 2078 | 0.287202 | 0         |  |
|  | Shiraz-58T | 2160 | 0.399007 | 0         |  |
|  | Shiraz-71T | 2238 | 0.603631 | 0         |  |
|  | Shiraz-3T  | 90   | 0.219276 | 0         |  |
|  | Shiraz-3T  | 94   | 0.74735  | 0         |  |
|  | Shiraz-4T  | 253  | 0.372918 | 0         |  |
|  | Shiraz-31T | 316  | 0.219196 | 0         |  |
|  | Shiraz-36T | 378  | 0.179558 | 0         |  |
|  | Shiraz-36T | 381  | 0.332628 | 0         |  |
|  | Shiraz-44T | 639  | 1.035032 | 0         |  |
|  | Shiraz-46T | 943  | 0.093799 | 0         |  |
|  | Shiraz-46T | 946  | 0.299835 | 0         |  |
|  | Shiraz-47T | 1030 | 0.257728 | 0         |  |
|  | Shiraz-49T | 1120 | 0.281656 | 0         |  |
|  | Shiraz-77T | 1225 | 0        | -0.117922 |  |
|  | Shiraz-77T | 1227 | 0.196445 | 0         |  |
|  | Shiraz-9T  | 1324 | 0.679266 | 0         |  |

|       |      |            |      |          |           |  |  |
|-------|------|------------|------|----------|-----------|--|--|
|       |      | Shiraz-18T | 1434 | 0.244465 | 0         |  |  |
|       |      | Shiraz-22T | 1549 | 0        | -0.319623 |  |  |
|       |      | Shiraz-22T | 1551 | 0.324011 | 0         |  |  |
|       |      | Shiraz-25T | 1698 | 0.21835  | 0         |  |  |
|       |      | Shiraz-28T | 1735 | 0.350744 | 0         |  |  |
|       |      | Shiraz-29T | 1778 | 0.120767 | 0         |  |  |
|       |      | Shiraz-32T | 1833 | 0.551336 | 0         |  |  |
|       |      | Shiraz-32T | 1834 | 1.485392 | 0         |  |  |
|       |      | Shiraz-38T | 1951 | 0.250891 | 0         |  |  |
|       |      | Shiraz-53T | 2078 | 0.287202 | 0         |  |  |
|       |      | Shiraz-58T | 2160 | 0.399007 | 0         |  |  |
|       |      | Shiraz-71T | 2238 | 0.603631 | 0         |  |  |
| ZNRF2 | chr7 | Shiraz-3T  | 87   | 0.198593 | 0         |  |  |
|       |      | Shiraz-4T  | 252  | 0.192083 | 0         |  |  |
|       |      | Shiraz-36T | 376  | 0.159952 | 0         |  |  |
|       |      | Shiraz-46T | 942  | 0.069143 | 0         |  |  |
|       |      | Shiraz-18T | 1433 | 0.250973 | 0         |  |  |
|       |      | Shiraz-25T | 1697 | 0.21945  | 0         |  |  |
|       |      | Shiraz-28T | 1734 | 0.362882 | 0         |  |  |
|       |      | Shiraz-29T | 1777 | 0.156747 | 0         |  |  |
|       |      | Shiraz-38T | 1950 | 0.265916 | 0         |  |  |
|       |      | Shiraz-71T | 2236 | 0.320072 | 0         |  |  |
|       |      | Shiraz-3T  | 87   | 0.198593 | 0         |  |  |
|       |      | Shiraz-4T  | 252  | 0.192083 | 0         |  |  |
|       |      | Shiraz-36T | 376  | 0.159952 | 0         |  |  |
|       |      | Shiraz-46T | 942  | 0.069143 | 0         |  |  |
|       |      | Shiraz-18T | 1433 | 0.250973 | 0         |  |  |
|       |      | Shiraz-25T | 1697 | 0.21945  | 0         |  |  |
|       |      | Shiraz-28T | 1734 | 0.362882 | 0         |  |  |
|       |      | Shiraz-29T | 1777 | 0.156747 | 0         |  |  |
|       |      | Shiraz-38T | 1950 | 0.265916 | 0         |  |  |
|       |      | Shiraz-71T | 2236 | 0.320072 | 0         |  |  |
|       |      | Shiraz-3T  | 87   | 0.198593 | 0         |  |  |
|       |      | Shiraz-4T  | 252  | 0.192083 | 0         |  |  |
|       |      | Shiraz-36T | 376  | 0.159952 | 0         |  |  |
|       |      | Shiraz-46T | 942  | 0.069143 | 0         |  |  |
|       |      | Shiraz-18T | 1433 | 0.250973 | 0         |  |  |
|       |      | Shiraz-25T | 1697 | 0.21945  | 0         |  |  |
|       |      | Shiraz-28T | 1734 | 0.362882 | 0         |  |  |
|       |      | Shiraz-29T | 1777 | 0.156747 | 0         |  |  |
|       |      | Shiraz-38T | 1950 | 0.265916 | 0         |  |  |
|       |      | Shiraz-71T | 2236 | 0.320072 | 0         |  |  |
| ZP3   | chr7 | Shiraz-3T  | 90   | 0.219276 | 0         |  |  |
|       |      | Shiraz-3T  | 90   | 0.219276 | 0         |  |  |
|       |      | Shiraz-3T  | 92   | 0.817021 | 0         |  |  |
|       |      | Shiraz-3T  | 92   | 0.817021 | 0         |  |  |
|       |      | Shiraz-4T  | 253  | 0.372918 | 0         |  |  |

|  |  |            |      |          |   |  |
|--|--|------------|------|----------|---|--|
|  |  | Shiraz-4T  | 253  | 0.372918 | 0 |  |
|  |  | Shiraz-31T | 315  | 0.194054 | 0 |  |
|  |  | Shiraz-31T | 315  | 0.194054 | 0 |  |
|  |  | Shiraz-36T | 378  | 0.179558 | 0 |  |
|  |  | Shiraz-36T | 378  | 0.179558 | 0 |  |
|  |  | Shiraz-36T | 379  | 0.322028 | 0 |  |
|  |  | Shiraz-36T | 379  | 0.322028 | 0 |  |
|  |  | Shiraz-42T | 454  | 0.145717 | 0 |  |
|  |  | Shiraz-42T | 454  | 0.145717 | 0 |  |
|  |  | Shiraz-44T | 637  | 1.109789 | 0 |  |
|  |  | Shiraz-44T | 637  | 1.109789 | 0 |  |
|  |  | Shiraz-46T | 943  | 0.093799 | 0 |  |
|  |  | Shiraz-46T | 943  | 0.093799 | 0 |  |
|  |  | Shiraz-46T | 944  | 0.256008 | 0 |  |
|  |  | Shiraz-46T | 944  | 0.256008 | 0 |  |
|  |  | Shiraz-47T | 1028 | 0.17896  | 0 |  |
|  |  | Shiraz-47T | 1028 | 0.17896  | 0 |  |
|  |  | Shiraz-49T | 1118 | 0.327789 | 0 |  |
|  |  | Shiraz-49T | 1118 | 0.327789 | 0 |  |
|  |  | Shiraz-77T | 1224 | 0.220539 | 0 |  |
|  |  | Shiraz-77T | 1224 | 0.220539 | 0 |  |
|  |  | Shiraz-9T  | 1323 | 0.655912 | 0 |  |
|  |  | Shiraz-9T  | 1323 | 0.655912 | 0 |  |
|  |  | Shiraz-18T | 1434 | 0.244465 | 0 |  |
|  |  | Shiraz-18T | 1434 | 0.244465 | 0 |  |
|  |  | Shiraz-22T | 1548 | 0.237572 | 0 |  |
|  |  | Shiraz-22T | 1548 | 0.237572 | 0 |  |
|  |  | Shiraz-25T | 1698 | 0.21835  | 0 |  |
|  |  | Shiraz-25T | 1698 | 0.21835  | 0 |  |
|  |  | Shiraz-28T | 1735 | 0.350744 | 0 |  |
|  |  | Shiraz-28T | 1735 | 0.350744 | 0 |  |
|  |  | Shiraz-29T | 1778 | 0.120767 | 0 |  |
|  |  | Shiraz-29T | 1778 | 0.120767 | 0 |  |
|  |  | Shiraz-38T | 1951 | 0.250891 | 0 |  |
|  |  | Shiraz-38T | 1951 | 0.250891 | 0 |  |
|  |  | Shiraz-53T | 2078 | 0.287202 | 0 |  |
|  |  | Shiraz-53T | 2078 | 0.287202 | 0 |  |
|  |  | Shiraz-58T | 2158 | 0.33934  | 0 |  |
|  |  | Shiraz-58T | 2158 | 0.33934  | 0 |  |
|  |  | Shiraz-71T | 2238 | 0.603631 | 0 |  |
|  |  | Shiraz-71T | 2238 | 0.603631 | 0 |  |
|  |  | Shiraz-71T | 2239 | 0.310785 | 0 |  |
|  |  | Shiraz-71T | 2239 | 0.310785 | 0 |  |
|  |  | Shiraz-3T  | 90   | 0.219276 | 0 |  |
|  |  | Shiraz-3T  | 90   | 0.219276 | 0 |  |
|  |  | Shiraz-3T  | 92   | 0.817021 | 0 |  |
|  |  | Shiraz-3T  | 92   | 0.817021 | 0 |  |

|  |  |            |      |          |   |  |
|--|--|------------|------|----------|---|--|
|  |  | Shiraz-4T  | 253  | 0.372918 | 0 |  |
|  |  | Shiraz-4T  | 253  | 0.372918 | 0 |  |
|  |  | Shiraz-31T | 315  | 0.194054 | 0 |  |
|  |  | Shiraz-31T | 315  | 0.194054 | 0 |  |
|  |  | Shiraz-36T | 378  | 0.179558 | 0 |  |
|  |  | Shiraz-36T | 378  | 0.179558 | 0 |  |
|  |  | Shiraz-36T | 379  | 0.322028 | 0 |  |
|  |  | Shiraz-36T | 379  | 0.322028 | 0 |  |
|  |  | Shiraz-42T | 454  | 0.145717 | 0 |  |
|  |  | Shiraz-42T | 454  | 0.145717 | 0 |  |
|  |  | Shiraz-44T | 637  | 1.109789 | 0 |  |
|  |  | Shiraz-44T | 637  | 1.109789 | 0 |  |
|  |  | Shiraz-46T | 943  | 0.093799 | 0 |  |
|  |  | Shiraz-46T | 943  | 0.093799 | 0 |  |
|  |  | Shiraz-46T | 944  | 0.256008 | 0 |  |
|  |  | Shiraz-46T | 944  | 0.256008 | 0 |  |
|  |  | Shiraz-47T | 1028 | 0.17896  | 0 |  |
|  |  | Shiraz-47T | 1028 | 0.17896  | 0 |  |
|  |  | Shiraz-49T | 1118 | 0.327789 | 0 |  |
|  |  | Shiraz-49T | 1118 | 0.327789 | 0 |  |
|  |  | Shiraz-77T | 1224 | 0.220539 | 0 |  |
|  |  | Shiraz-77T | 1224 | 0.220539 | 0 |  |
|  |  | Shiraz-9T  | 1323 | 0.655912 | 0 |  |
|  |  | Shiraz-9T  | 1323 | 0.655912 | 0 |  |
|  |  | Shiraz-18T | 1434 | 0.244465 | 0 |  |
|  |  | Shiraz-18T | 1434 | 0.244465 | 0 |  |
|  |  | Shiraz-22T | 1548 | 0.237572 | 0 |  |
|  |  | Shiraz-22T | 1548 | 0.237572 | 0 |  |
|  |  | Shiraz-25T | 1698 | 0.21835  | 0 |  |
|  |  | Shiraz-25T | 1698 | 0.21835  | 0 |  |
|  |  | Shiraz-28T | 1735 | 0.350744 | 0 |  |
|  |  | Shiraz-28T | 1735 | 0.350744 | 0 |  |
|  |  | Shiraz-29T | 1778 | 0.120767 | 0 |  |
|  |  | Shiraz-29T | 1778 | 0.120767 | 0 |  |
|  |  | Shiraz-38T | 1951 | 0.250891 | 0 |  |
|  |  | Shiraz-38T | 1951 | 0.250891 | 0 |  |
|  |  | Shiraz-53T | 2078 | 0.287202 | 0 |  |
|  |  | Shiraz-53T | 2078 | 0.287202 | 0 |  |
|  |  | Shiraz-58T | 2158 | 0.33934  | 0 |  |
|  |  | Shiraz-58T | 2158 | 0.33934  | 0 |  |
|  |  | Shiraz-71T | 2238 | 0.603631 | 0 |  |
|  |  | Shiraz-71T | 2238 | 0.603631 | 0 |  |
|  |  | Shiraz-71T | 2239 | 0.310785 | 0 |  |
|  |  | Shiraz-71T | 2239 | 0.310785 | 0 |  |
|  |  | Shiraz-3T  | 90   | 0.219276 | 0 |  |
|  |  | Shiraz-3T  | 90   | 0.219276 | 0 |  |
|  |  | Shiraz-3T  | 92   | 0.817021 | 0 |  |

|      |      |            |      |          |   |  |  |
|------|------|------------|------|----------|---|--|--|
|      |      | Shiraz-3T  | 92   | 0.817021 | 0 |  |  |
|      |      | Shiraz-4T  | 253  | 0.372918 | 0 |  |  |
|      |      | Shiraz-4T  | 253  | 0.372918 | 0 |  |  |
|      |      | Shiraz-31T | 315  | 0.194054 | 0 |  |  |
|      |      | Shiraz-31T | 315  | 0.194054 | 0 |  |  |
|      |      | Shiraz-36T | 378  | 0.179558 | 0 |  |  |
|      |      | Shiraz-36T | 378  | 0.179558 | 0 |  |  |
|      |      | Shiraz-36T | 379  | 0.322028 | 0 |  |  |
|      |      | Shiraz-36T | 379  | 0.322028 | 0 |  |  |
|      |      | Shiraz-42T | 454  | 0.145717 | 0 |  |  |
|      |      | Shiraz-42T | 454  | 0.145717 | 0 |  |  |
|      |      | Shiraz-44T | 637  | 1.109789 | 0 |  |  |
|      |      | Shiraz-44T | 637  | 1.109789 | 0 |  |  |
|      |      | Shiraz-46T | 943  | 0.093799 | 0 |  |  |
|      |      | Shiraz-46T | 943  | 0.093799 | 0 |  |  |
|      |      | Shiraz-46T | 944  | 0.256008 | 0 |  |  |
|      |      | Shiraz-46T | 944  | 0.256008 | 0 |  |  |
|      |      | Shiraz-47T | 1028 | 0.17896  | 0 |  |  |
|      |      | Shiraz-47T | 1028 | 0.17896  | 0 |  |  |
|      |      | Shiraz-49T | 1118 | 0.327789 | 0 |  |  |
|      |      | Shiraz-49T | 1118 | 0.327789 | 0 |  |  |
|      |      | Shiraz-77T | 1224 | 0.220539 | 0 |  |  |
|      |      | Shiraz-77T | 1224 | 0.220539 | 0 |  |  |
|      |      | Shiraz-9T  | 1323 | 0.655912 | 0 |  |  |
|      |      | Shiraz-9T  | 1323 | 0.655912 | 0 |  |  |
|      |      | Shiraz-18T | 1434 | 0.244465 | 0 |  |  |
|      |      | Shiraz-18T | 1434 | 0.244465 | 0 |  |  |
|      |      | Shiraz-22T | 1548 | 0.237572 | 0 |  |  |
|      |      | Shiraz-22T | 1548 | 0.237572 | 0 |  |  |
|      |      | Shiraz-25T | 1698 | 0.21835  | 0 |  |  |
|      |      | Shiraz-25T | 1698 | 0.21835  | 0 |  |  |
|      |      | Shiraz-28T | 1735 | 0.350744 | 0 |  |  |
|      |      | Shiraz-28T | 1735 | 0.350744 | 0 |  |  |
|      |      | Shiraz-29T | 1778 | 0.120767 | 0 |  |  |
|      |      | Shiraz-29T | 1778 | 0.120767 | 0 |  |  |
|      |      | Shiraz-38T | 1951 | 0.250891 | 0 |  |  |
|      |      | Shiraz-38T | 1951 | 0.250891 | 0 |  |  |
|      |      | Shiraz-53T | 2078 | 0.287202 | 0 |  |  |
|      |      | Shiraz-53T | 2078 | 0.287202 | 0 |  |  |
|      |      | Shiraz-58T | 2158 | 0.33934  | 0 |  |  |
|      |      | Shiraz-58T | 2158 | 0.33934  | 0 |  |  |
|      |      | Shiraz-71T | 2238 | 0.603631 | 0 |  |  |
|      |      | Shiraz-71T | 2238 | 0.603631 | 0 |  |  |
|      |      | Shiraz-71T | 2239 | 0.310785 | 0 |  |  |
|      |      | Shiraz-71T | 2239 | 0.310785 | 0 |  |  |
| ZPBP | chr7 | Shiraz-3T  | 87   | 0.198593 | 0 |  |  |
|      |      | Shiraz-4T  | 252  | 0.192083 | 0 |  |  |



|       |      |            |      |          |           |  |  |
|-------|------|------------|------|----------|-----------|--|--|
|       |      | Shiraz-36T | 376  | 0.159952 | 0         |  |  |
|       |      | Shiraz-44T | 633  | 0        | -0.565095 |  |  |
|       |      | Shiraz-46T | 942  | 0.069143 | 0         |  |  |
|       |      | Shiraz-18T | 1433 | 0.250973 | 0         |  |  |
|       |      | Shiraz-22T | 1545 | 0        | -0.473676 |  |  |
|       |      | Shiraz-25T | 1697 | 0.21945  | 0         |  |  |
|       |      | Shiraz-28T | 1734 | 0.362882 | 0         |  |  |
|       |      | Shiraz-29T | 1777 | 0.156747 | 0         |  |  |
|       |      | Shiraz-38T | 1950 | 0.265916 | 0         |  |  |
|       |      | Shiraz-71T | 2236 | 0.320072 | 0         |  |  |
|       |      | Shiraz-3T  | 87   | 0.198593 | 0         |  |  |
|       |      | Shiraz-4T  | 252  | 0.192083 | 0         |  |  |
|       |      | Shiraz-36T | 376  | 0.159952 | 0         |  |  |
|       |      | Shiraz-44T | 633  | 0        | -0.565095 |  |  |
|       |      | Shiraz-46T | 942  | 0.069143 | 0         |  |  |
|       |      | Shiraz-18T | 1433 | 0.250973 | 0         |  |  |
|       |      | Shiraz-22T | 1545 | 0        | -0.473676 |  |  |
|       |      | Shiraz-25T | 1697 | 0.21945  | 0         |  |  |
|       |      | Shiraz-28T | 1734 | 0.362882 | 0         |  |  |
|       |      | Shiraz-29T | 1777 | 0.156747 | 0         |  |  |
|       |      | Shiraz-38T | 1950 | 0.265916 | 0         |  |  |
|       |      | Shiraz-71T | 2236 | 0.320072 | 0         |  |  |
|       |      | Shiraz-3T  | 87   | 0.198593 | 0         |  |  |
|       |      | Shiraz-4T  | 252  | 0.192083 | 0         |  |  |
|       |      | Shiraz-36T | 376  | 0.159952 | 0         |  |  |
|       |      | Shiraz-44T | 633  | 0        | -0.565095 |  |  |
|       |      | Shiraz-46T | 942  | 0.069143 | 0         |  |  |
|       |      | Shiraz-18T | 1433 | 0.250973 | 0         |  |  |
|       |      | Shiraz-22T | 1545 | 0        | -0.473676 |  |  |
|       |      | Shiraz-25T | 1697 | 0.21945  | 0         |  |  |
|       |      | Shiraz-28T | 1734 | 0.362882 | 0         |  |  |
|       |      | Shiraz-29T | 1777 | 0.156747 | 0         |  |  |
|       |      | Shiraz-38T | 1950 | 0.265916 | 0         |  |  |
|       |      | Shiraz-71T | 2236 | 0.320072 | 0         |  |  |
| ZRSR2 | chrX | Shiraz-3T  | 235  | 0        | -0.28401  |  |  |
|       |      | Shiraz-4T  | 260  | 0        | -0.324128 |  |  |
|       |      | Shiraz-16T | 294  | 0.655804 | 0         |  |  |
|       |      | Shiraz-36T | 431  | 0        | -0.78035  |  |  |
|       |      | Shiraz-44T | 891  | 0        | -0.954044 |  |  |
|       |      | Shiraz-49T | 1166 | 0        | -0.917235 |  |  |
|       |      | Shiraz-9T  | 1368 | 0.199713 | 0         |  |  |
|       |      | Shiraz-18T | 1455 | 0        | -0.186773 |  |  |
|       |      | Shiraz-22T | 1669 | 0.695915 | 0         |  |  |
|       |      | Shiraz-25T | 1717 | 0.420447 | 0         |  |  |
|       |      | Shiraz-28T | 1760 | 0.538181 | 0         |  |  |
|       |      | Shiraz-29T | 1800 | 0.672527 | 0         |  |  |
|       |      | Shiraz-32T | 1869 | 0.776805 | 0         |  |  |

|         |      |            |      |          |           |  |  |
|---------|------|------------|------|----------|-----------|--|--|
|         |      | Shiraz-35T | 1932 | 0.507141 | 0         |  |  |
|         |      | Shiraz-40T | 2051 | 0.098506 | 0         |  |  |
|         |      | Shiraz-58T | 2221 | 0.871948 | 0         |  |  |
|         |      | Shiraz-71T | 2260 | 0.68394  | 0         |  |  |
|         |      | Shiraz-71T | 2261 | 0.508399 | 0         |  |  |
|         |      | Shiraz-3T  | 235  | 0        | -0.28401  |  |  |
|         |      | Shiraz-4T  | 260  | 0        | -0.324128 |  |  |
|         |      | Shiraz-16T | 294  | 0.655804 | 0         |  |  |
|         |      | Shiraz-36T | 431  | 0        | -0.78035  |  |  |
|         |      | Shiraz-44T | 891  | 0        | -0.954044 |  |  |
|         |      | Shiraz-49T | 1166 | 0        | -0.917235 |  |  |
|         |      | Shiraz-9T  | 1368 | 0.199713 | 0         |  |  |
|         |      | Shiraz-18T | 1455 | 0        | -0.186773 |  |  |
|         |      | Shiraz-22T | 1669 | 0.695915 | 0         |  |  |
|         |      | Shiraz-25T | 1717 | 0.420447 | 0         |  |  |
|         |      | Shiraz-28T | 1760 | 0.538181 | 0         |  |  |
|         |      | Shiraz-29T | 1800 | 0.672527 | 0         |  |  |
|         |      | Shiraz-32T | 1869 | 0.776805 | 0         |  |  |
|         |      | Shiraz-35T | 1932 | 0.507141 | 0         |  |  |
|         |      | Shiraz-40T | 2051 | 0.098506 | 0         |  |  |
|         |      | Shiraz-58T | 2221 | 0.871948 | 0         |  |  |
|         |      | Shiraz-71T | 2260 | 0.68394  | 0         |  |  |
|         |      | Shiraz-71T | 2261 | 0.508399 | 0         |  |  |
|         |      | Shiraz-3T  | 235  | 0        | -0.28401  |  |  |
|         |      | Shiraz-4T  | 260  | 0        | -0.324128 |  |  |
|         |      | Shiraz-16T | 294  | 0.655804 | 0         |  |  |
|         |      | Shiraz-36T | 431  | 0        | -0.78035  |  |  |
|         |      | Shiraz-44T | 891  | 0        | -0.954044 |  |  |
|         |      | Shiraz-49T | 1166 | 0        | -0.917235 |  |  |
|         |      | Shiraz-9T  | 1368 | 0.199713 | 0         |  |  |
|         |      | Shiraz-18T | 1455 | 0        | -0.186773 |  |  |
|         |      | Shiraz-22T | 1669 | 0.695915 | 0         |  |  |
|         |      | Shiraz-25T | 1717 | 0.420447 | 0         |  |  |
|         |      | Shiraz-28T | 1760 | 0.538181 | 0         |  |  |
|         |      | Shiraz-29T | 1800 | 0.672527 | 0         |  |  |
|         |      | Shiraz-32T | 1869 | 0.776805 | 0         |  |  |
|         |      | Shiraz-35T | 1932 | 0.507141 | 0         |  |  |
|         |      | Shiraz-40T | 2051 | 0.098506 | 0         |  |  |
|         |      | Shiraz-58T | 2221 | 0.871948 | 0         |  |  |
|         |      | Shiraz-71T | 2260 | 0.68394  | 0         |  |  |
|         |      | Shiraz-71T | 2261 | 0.508399 | 0         |  |  |
| ZSCAN21 | chr7 | Shiraz-3T  | 90   | 0.219276 | 0         |  |  |
|         |      | Shiraz-3T  | 94   | 0.74735  | 0         |  |  |
|         |      | Shiraz-4T  | 253  | 0.372918 | 0         |  |  |
|         |      | Shiraz-31T | 316  | 0.219196 | 0         |  |  |
|         |      | Shiraz-36T | 378  | 0.179558 | 0         |  |  |
|         |      | Shiraz-36T | 381  | 0.332628 | 0         |  |  |

|  |            |      |          |           |  |
|--|------------|------|----------|-----------|--|
|  | Shiraz-44T | 639  | 1.035032 | 0         |  |
|  | Shiraz-46T | 943  | 0.093799 | 0         |  |
|  | Shiraz-46T | 946  | 0.299835 | 0         |  |
|  | Shiraz-47T | 1030 | 0.257728 | 0         |  |
|  | Shiraz-49T | 1120 | 0.281656 | 0         |  |
|  | Shiraz-77T | 1225 | 0        | -0.117922 |  |
|  | Shiraz-77T | 1227 | 0.196445 | 0         |  |
|  | Shiraz-9T  | 1324 | 0.679266 | 0         |  |
|  | Shiraz-18T | 1434 | 0.244465 | 0         |  |
|  | Shiraz-22T | 1549 | 0        | -0.319623 |  |
|  | Shiraz-22T | 1551 | 0.324011 | 0         |  |
|  | Shiraz-25T | 1698 | 0.21835  | 0         |  |
|  | Shiraz-28T | 1735 | 0.350744 | 0         |  |
|  | Shiraz-29T | 1778 | 0.120767 | 0         |  |
|  | Shiraz-32T | 1833 | 0.551336 | 0         |  |
|  | Shiraz-32T | 1834 | 1.485392 | 0         |  |
|  | Shiraz-38T | 1951 | 0.250891 | 0         |  |
|  | Shiraz-53T | 2078 | 0.287202 | 0         |  |
|  | Shiraz-58T | 2160 | 0.399007 | 0         |  |
|  | Shiraz-71T | 2238 | 0.603631 | 0         |  |
|  | Shiraz-3T  | 90   | 0.219276 | 0         |  |
|  | Shiraz-3T  | 94   | 0.74735  | 0         |  |
|  | Shiraz-4T  | 253  | 0.372918 | 0         |  |
|  | Shiraz-31T | 316  | 0.219196 | 0         |  |
|  | Shiraz-36T | 378  | 0.179558 | 0         |  |
|  | Shiraz-36T | 381  | 0.332628 | 0         |  |
|  | Shiraz-44T | 639  | 1.035032 | 0         |  |
|  | Shiraz-46T | 943  | 0.093799 | 0         |  |
|  | Shiraz-46T | 946  | 0.299835 | 0         |  |
|  | Shiraz-47T | 1030 | 0.257728 | 0         |  |
|  | Shiraz-49T | 1120 | 0.281656 | 0         |  |
|  | Shiraz-77T | 1225 | 0        | -0.117922 |  |
|  | Shiraz-77T | 1227 | 0.196445 | 0         |  |
|  | Shiraz-9T  | 1324 | 0.679266 | 0         |  |
|  | Shiraz-18T | 1434 | 0.244465 | 0         |  |
|  | Shiraz-22T | 1549 | 0        | -0.319623 |  |
|  | Shiraz-22T | 1551 | 0.324011 | 0         |  |
|  | Shiraz-25T | 1698 | 0.21835  | 0         |  |
|  | Shiraz-28T | 1735 | 0.350744 | 0         |  |
|  | Shiraz-29T | 1778 | 0.120767 | 0         |  |
|  | Shiraz-32T | 1833 | 0.551336 | 0         |  |
|  | Shiraz-32T | 1834 | 1.485392 | 0         |  |
|  | Shiraz-38T | 1951 | 0.250891 | 0         |  |
|  | Shiraz-53T | 2078 | 0.287202 | 0         |  |
|  | Shiraz-58T | 2160 | 0.399007 | 0         |  |
|  | Shiraz-71T | 2238 | 0.603631 | 0         |  |
|  | Shiraz-3T  | 90   | 0.219276 | 0         |  |

|      |      |            |      |          |           |  |  |
|------|------|------------|------|----------|-----------|--|--|
|      |      | Shiraz-3T  | 94   | 0.74735  | 0         |  |  |
|      |      | Shiraz-4T  | 253  | 0.372918 | 0         |  |  |
|      |      | Shiraz-31T | 316  | 0.219196 | 0         |  |  |
|      |      | Shiraz-36T | 378  | 0.179558 | 0         |  |  |
|      |      | Shiraz-36T | 381  | 0.332628 | 0         |  |  |
|      |      | Shiraz-44T | 639  | 1.035032 | 0         |  |  |
|      |      | Shiraz-46T | 943  | 0.093799 | 0         |  |  |
|      |      | Shiraz-46T | 946  | 0.299835 | 0         |  |  |
|      |      | Shiraz-47T | 1030 | 0.257728 | 0         |  |  |
|      |      | Shiraz-49T | 1120 | 0.281656 | 0         |  |  |
|      |      | Shiraz-77T | 1225 | 0        | -0.117922 |  |  |
|      |      | Shiraz-77T | 1227 | 0.196445 | 0         |  |  |
|      |      | Shiraz-9T  | 1324 | 0.679266 | 0         |  |  |
|      |      | Shiraz-18T | 1434 | 0.244465 | 0         |  |  |
|      |      | Shiraz-22T | 1549 | 0        | -0.319623 |  |  |
|      |      | Shiraz-22T | 1551 | 0.324011 | 0         |  |  |
|      |      | Shiraz-25T | 1698 | 0.21835  | 0         |  |  |
|      |      | Shiraz-28T | 1735 | 0.350744 | 0         |  |  |
|      |      | Shiraz-29T | 1778 | 0.120767 | 0         |  |  |
|      |      | Shiraz-32T | 1833 | 0.551336 | 0         |  |  |
|      |      | Shiraz-32T | 1834 | 1.485392 | 0         |  |  |
|      |      | Shiraz-38T | 1951 | 0.250891 | 0         |  |  |
|      |      | Shiraz-53T | 2078 | 0.287202 | 0         |  |  |
|      |      | Shiraz-58T | 2160 | 0.399007 | 0         |  |  |
|      |      | Shiraz-71T | 2238 | 0.603631 | 0         |  |  |
| ZXDA | chrX | Shiraz-3T  | 240  | 0        | -0.346245 |  |  |
|      |      | Shiraz-4T  | 260  | 0        | -0.324128 |  |  |
|      |      | Shiraz-16T | 294  | 0.655804 | 0         |  |  |
|      |      | Shiraz-36T | 431  | 0        | -0.78035  |  |  |
|      |      | Shiraz-44T | 891  | 0        | -0.954044 |  |  |
|      |      | Shiraz-49T | 1166 | 0        | -0.917235 |  |  |
|      |      | Shiraz-18T | 1456 | 0.608534 | 0         |  |  |
|      |      | Shiraz-22T | 1669 | 0.695915 | 0         |  |  |
|      |      | Shiraz-25T | 1717 | 0.420447 | 0         |  |  |
|      |      | Shiraz-28T | 1760 | 0.538181 | 0         |  |  |
|      |      | Shiraz-29T | 1800 | 0.672527 | 0         |  |  |
|      |      | Shiraz-32T | 1869 | 0.776805 | 0         |  |  |
|      |      | Shiraz-35T | 1932 | 0.507141 | 0         |  |  |
|      |      | Shiraz-58T | 2221 | 0.871948 | 0         |  |  |
|      |      | Shiraz-71T | 2260 | 0.68394  | 0         |  |  |
|      |      | Shiraz-71T | 2262 | 0.986748 | 0         |  |  |
|      |      | Shiraz-3T  | 240  | 0        | -0.346245 |  |  |
|      |      | Shiraz-4T  | 260  | 0        | -0.324128 |  |  |
|      |      | Shiraz-16T | 294  | 0.655804 | 0         |  |  |
|      |      | Shiraz-36T | 431  | 0        | -0.78035  |  |  |
|      |      | Shiraz-44T | 891  | 0        | -0.954044 |  |  |
|      |      | Shiraz-49T | 1166 | 0        | -0.917235 |  |  |

|      |      |            |      |          |           |  |  |
|------|------|------------|------|----------|-----------|--|--|
|      |      | Shiraz-18T | 1456 | 0.608534 | 0         |  |  |
|      |      | Shiraz-22T | 1669 | 0.695915 | 0         |  |  |
|      |      | Shiraz-25T | 1717 | 0.420447 | 0         |  |  |
|      |      | Shiraz-28T | 1760 | 0.538181 | 0         |  |  |
|      |      | Shiraz-29T | 1800 | 0.672527 | 0         |  |  |
|      |      | Shiraz-32T | 1869 | 0.776805 | 0         |  |  |
|      |      | Shiraz-35T | 1932 | 0.507141 | 0         |  |  |
|      |      | Shiraz-58T | 2221 | 0.871948 | 0         |  |  |
|      |      | Shiraz-71T | 2260 | 0.68394  | 0         |  |  |
|      |      | Shiraz-71T | 2262 | 0.986748 | 0         |  |  |
|      |      | Shiraz-3T  | 240  | 0        | -0.346245 |  |  |
|      |      | Shiraz-4T  | 260  | 0        | -0.324128 |  |  |
|      |      | Shiraz-16T | 294  | 0.655804 | 0         |  |  |
|      |      | Shiraz-36T | 431  | 0        | -0.78035  |  |  |
|      |      | Shiraz-44T | 891  | 0        | -0.954044 |  |  |
|      |      | Shiraz-49T | 1166 | 0        | -0.917235 |  |  |
|      |      | Shiraz-18T | 1456 | 0.608534 | 0         |  |  |
|      |      | Shiraz-22T | 1669 | 0.695915 | 0         |  |  |
|      |      | Shiraz-25T | 1717 | 0.420447 | 0         |  |  |
|      |      | Shiraz-28T | 1760 | 0.538181 | 0         |  |  |
|      |      | Shiraz-29T | 1800 | 0.672527 | 0         |  |  |
|      |      | Shiraz-32T | 1869 | 0.776805 | 0         |  |  |
|      |      | Shiraz-35T | 1932 | 0.507141 | 0         |  |  |
|      |      | Shiraz-58T | 2221 | 0.871948 | 0         |  |  |
|      |      | Shiraz-71T | 2260 | 0.68394  | 0         |  |  |
|      |      | Shiraz-71T | 2262 | 0.986748 | 0         |  |  |
| ZXDB | chrX | Shiraz-3T  | 240  | 0        | -0.346245 |  |  |
|      |      | Shiraz-4T  | 260  | 0        | -0.324128 |  |  |
|      |      | Shiraz-16T | 294  | 0.655804 | 0         |  |  |
|      |      | Shiraz-36T | 431  | 0        | -0.78035  |  |  |
|      |      | Shiraz-44T | 891  | 0        | -0.954044 |  |  |
|      |      | Shiraz-49T | 1166 | 0        | -0.917235 |  |  |
|      |      | Shiraz-18T | 1456 | 0.608534 | 0         |  |  |
|      |      | Shiraz-22T | 1669 | 0.695915 | 0         |  |  |
|      |      | Shiraz-25T | 1717 | 0.420447 | 0         |  |  |
|      |      | Shiraz-28T | 1760 | 0.538181 | 0         |  |  |
|      |      | Shiraz-29T | 1800 | 0.672527 | 0         |  |  |
|      |      | Shiraz-32T | 1869 | 0.776805 | 0         |  |  |
|      |      | Shiraz-35T | 1932 | 0.507141 | 0         |  |  |
|      |      | Shiraz-58T | 2221 | 0.871948 | 0         |  |  |
|      |      | Shiraz-71T | 2260 | 0.68394  | 0         |  |  |
|      |      | Shiraz-71T | 2262 | 0.986748 | 0         |  |  |
|      |      | Shiraz-3T  | 240  | 0        | -0.346245 |  |  |
|      |      | Shiraz-4T  | 260  | 0        | -0.324128 |  |  |
|      |      | Shiraz-16T | 294  | 0.655804 | 0         |  |  |
|      |      | Shiraz-36T | 431  | 0        | -0.78035  |  |  |
|      |      | Shiraz-44T | 891  | 0        | -0.954044 |  |  |

|     |      |            |      |          |           |  |  |
|-----|------|------------|------|----------|-----------|--|--|
|     |      | Shiraz-49T | 1166 | 0        | -0.917235 |  |  |
|     |      | Shiraz-18T | 1456 | 0.608534 | 0         |  |  |
|     |      | Shiraz-22T | 1669 | 0.695915 | 0         |  |  |
|     |      | Shiraz-25T | 1717 | 0.420447 | 0         |  |  |
|     |      | Shiraz-28T | 1760 | 0.538181 | 0         |  |  |
|     |      | Shiraz-29T | 1800 | 0.672527 | 0         |  |  |
|     |      | Shiraz-32T | 1869 | 0.776805 | 0         |  |  |
|     |      | Shiraz-35T | 1932 | 0.507141 | 0         |  |  |
|     |      | Shiraz-58T | 2221 | 0.871948 | 0         |  |  |
|     |      | Shiraz-71T | 2260 | 0.68394  | 0         |  |  |
|     |      | Shiraz-71T | 2262 | 0.986748 | 0         |  |  |
|     |      | Shiraz-3T  | 240  | 0        | -0.346245 |  |  |
|     |      | Shiraz-4T  | 260  | 0        | -0.324128 |  |  |
|     |      | Shiraz-16T | 294  | 0.655804 | 0         |  |  |
|     |      | Shiraz-36T | 431  | 0        | -0.78035  |  |  |
|     |      | Shiraz-44T | 891  | 0        | -0.954044 |  |  |
|     |      | Shiraz-49T | 1166 | 0        | -0.917235 |  |  |
|     |      | Shiraz-18T | 1456 | 0.608534 | 0         |  |  |
|     |      | Shiraz-22T | 1669 | 0.695915 | 0         |  |  |
|     |      | Shiraz-25T | 1717 | 0.420447 | 0         |  |  |
|     |      | Shiraz-28T | 1760 | 0.538181 | 0         |  |  |
|     |      | Shiraz-29T | 1800 | 0.672527 | 0         |  |  |
|     |      | Shiraz-32T | 1869 | 0.776805 | 0         |  |  |
|     |      | Shiraz-35T | 1932 | 0.507141 | 0         |  |  |
|     |      | Shiraz-58T | 2221 | 0.871948 | 0         |  |  |
|     |      | Shiraz-71T | 2260 | 0.68394  | 0         |  |  |
|     |      | Shiraz-71T | 2262 | 0.986748 | 0         |  |  |
| ZYX | chr7 | Shiraz-3T  | 90   | 0.219276 | 0         |  |  |
|     |      | Shiraz-4T  | 253  | 0.372918 | 0         |  |  |
|     |      | Shiraz-36T | 378  | 0.179558 | 0         |  |  |
|     |      | Shiraz-46T | 943  | 0.093799 | 0         |  |  |
|     |      | Shiraz-77T | 1225 | 0        | -0.117922 |  |  |
|     |      | Shiraz-9T  | 1325 | 0.221899 | 0         |  |  |
|     |      | Shiraz-18T | 1434 | 0.244465 | 0         |  |  |
|     |      | Shiraz-25T | 1698 | 0.21835  | 0         |  |  |
|     |      | Shiraz-28T | 1735 | 0.350744 | 0         |  |  |
|     |      | Shiraz-29T | 1778 | 0.120767 | 0         |  |  |
|     |      | Shiraz-32T | 1833 | 0.551336 | 0         |  |  |
|     |      | Shiraz-38T | 1951 | 0.250891 | 0         |  |  |
|     |      | Shiraz-53T | 2078 | 0.287202 | 0         |  |  |
|     |      | Shiraz-58T | 2162 | 0.221505 | 0         |  |  |
|     |      | Shiraz-71T | 2238 | 0.603631 | 0         |  |  |
|     |      | Shiraz-3T  | 90   | 0.219276 | 0         |  |  |
|     |      | Shiraz-4T  | 253  | 0.372918 | 0         |  |  |
|     |      | Shiraz-36T | 378  | 0.179558 | 0         |  |  |
|     |      | Shiraz-46T | 943  | 0.093799 | 0         |  |  |
|     |      | Shiraz-77T | 1225 | 0        | -0.117922 |  |  |

|  |  |            |      |          |           |  |
|--|--|------------|------|----------|-----------|--|
|  |  | Shiraz-9T  | 1325 | 0.221899 | 0         |  |
|  |  | Shiraz-18T | 1434 | 0.244465 | 0         |  |
|  |  | Shiraz-25T | 1698 | 0.21835  | 0         |  |
|  |  | Shiraz-28T | 1735 | 0.350744 | 0         |  |
|  |  | Shiraz-29T | 1778 | 0.120767 | 0         |  |
|  |  | Shiraz-32T | 1833 | 0.551336 | 0         |  |
|  |  | Shiraz-38T | 1951 | 0.250891 | 0         |  |
|  |  | Shiraz-53T | 2078 | 0.287202 | 0         |  |
|  |  | Shiraz-58T | 2162 | 0.221505 | 0         |  |
|  |  | Shiraz-71T | 2238 | 0.603631 | 0         |  |
|  |  | Shiraz-3T  | 90   | 0.219276 | 0         |  |
|  |  | Shiraz-4T  | 253  | 0.372918 | 0         |  |
|  |  | Shiraz-36T | 378  | 0.179558 | 0         |  |
|  |  | Shiraz-46T | 943  | 0.093799 | 0         |  |
|  |  | Shiraz-77T | 1225 | 0        | -0.117922 |  |
|  |  | Shiraz-9T  | 1325 | 0.221899 | 0         |  |
|  |  | Shiraz-18T | 1434 | 0.244465 | 0         |  |
|  |  | Shiraz-25T | 1698 | 0.21835  | 0         |  |
|  |  | Shiraz-28T | 1735 | 0.350744 | 0         |  |
|  |  | Shiraz-29T | 1778 | 0.120767 | 0         |  |
|  |  | Shiraz-32T | 1833 | 0.551336 | 0         |  |
|  |  | Shiraz-38T | 1951 | 0.250891 | 0         |  |
|  |  | Shiraz-53T | 2078 | 0.287202 | 0         |  |
|  |  | Shiraz-58T | 2162 | 0.221505 | 0         |  |
|  |  | Shiraz-71T | 2238 | 0.603631 | 0         |  |
